# Supplementary material for: Genomic architecture of histone 3 lysine 27 trimethylation during late ovine skeletal muscle development
Source: PubMed Central journal article supplement — Anim Genet. 2014 Mar 27;45(3):427–38. doi: 10.1111/age.12145 (PMC4286725; doi:10.1111/age.12145), 2014-03-27

**Figure S3** Hilbert curve visualisation of chromosome specific H3K27me3 profiles for the foetal and lamb samples

Hilbert curves (Anders 2009) were used to visualise H3K27me3 enrichment across each autosome for the foetal and lamb samples. The pattern of H3K27me3 modification is largely characterised by focal intensities (representing regional modifications). The H3K27me3 enriched regions on autosomes were detected using CisGenome (Ji *et al.* 2008). Images for both the fetal and lamb developmental states are presented for each chromosome.

# Hilbert Visualisation- Chromosome 1

Foetal

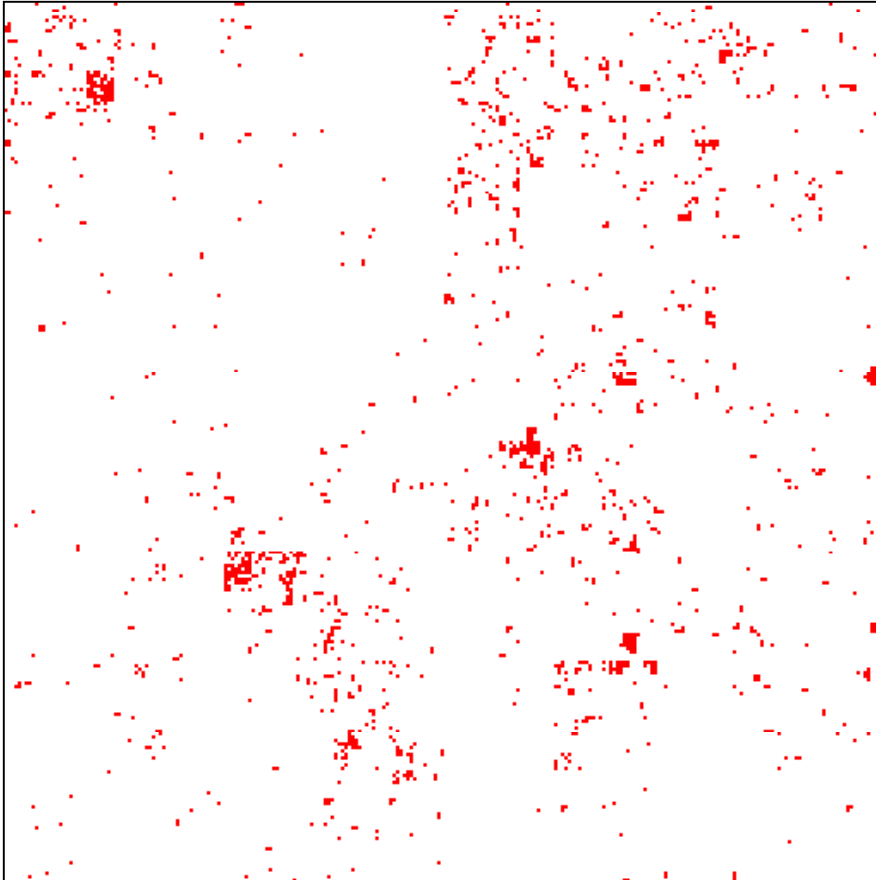

Lamb

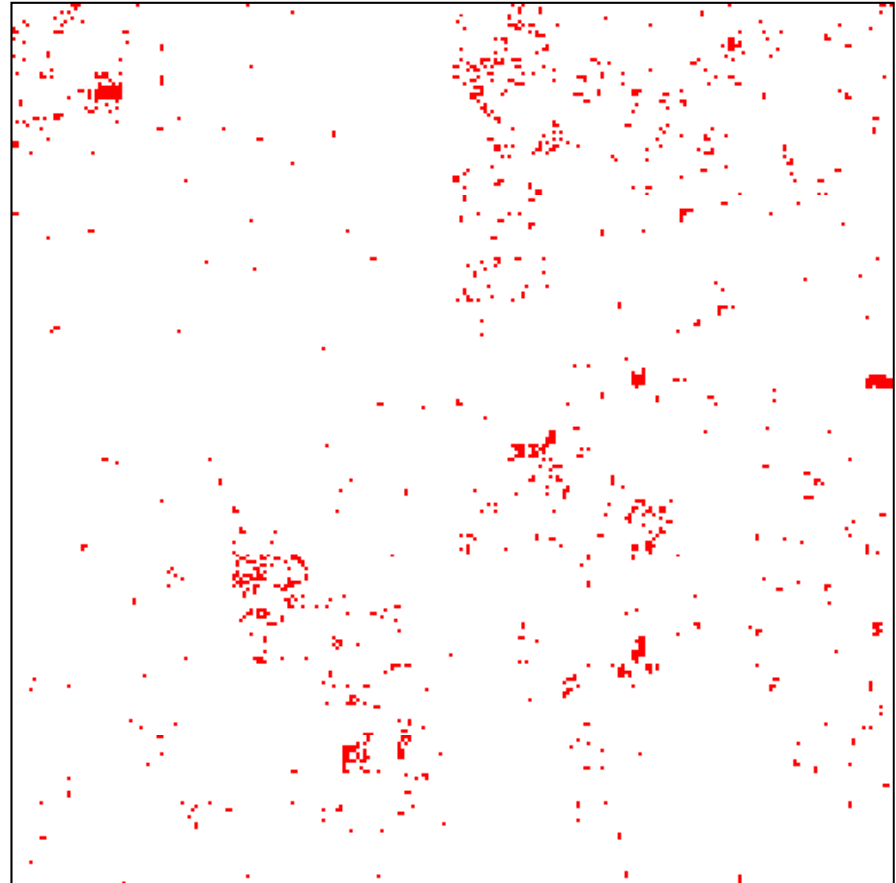

# Hilbert Visualisation- Chromosome 2

Foetal

Lamb

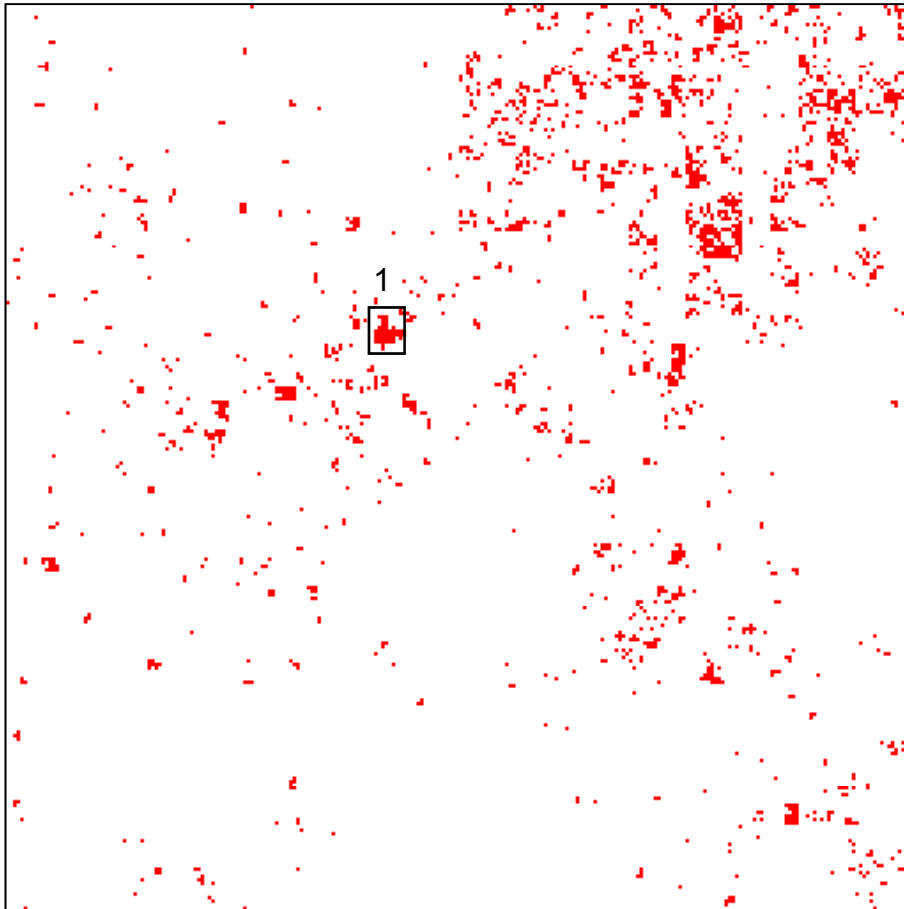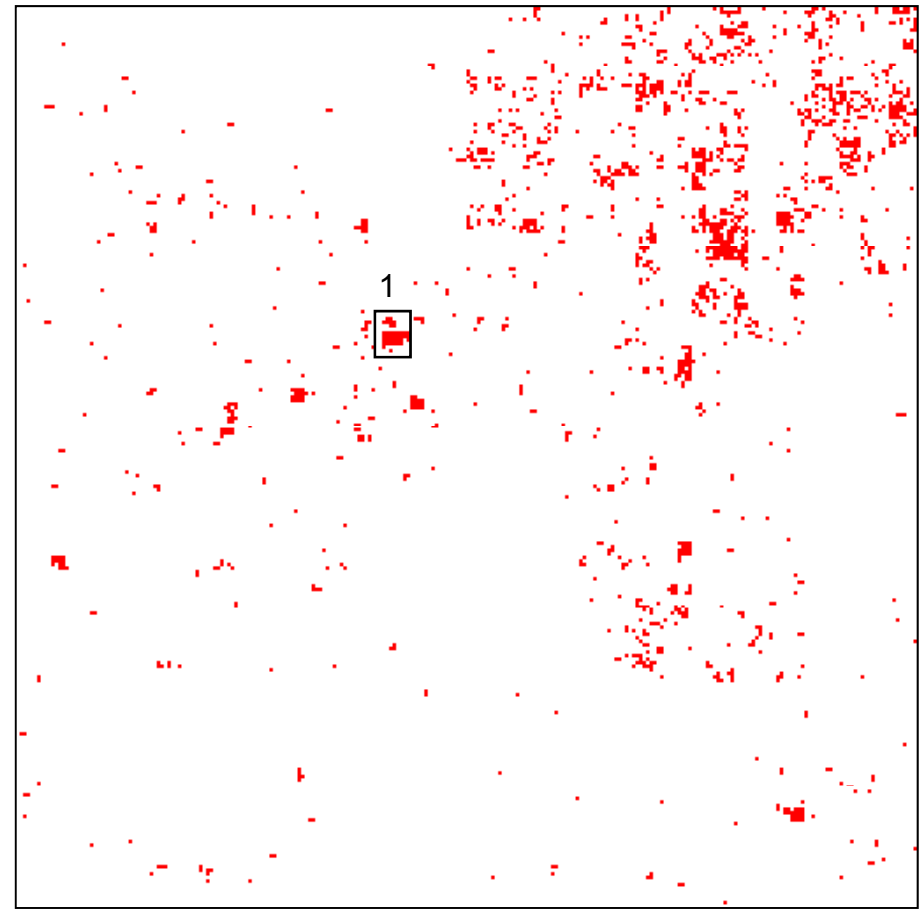

**1HOXD locus**

# Hilbert Visualisation- Chromosome 3

Foetal

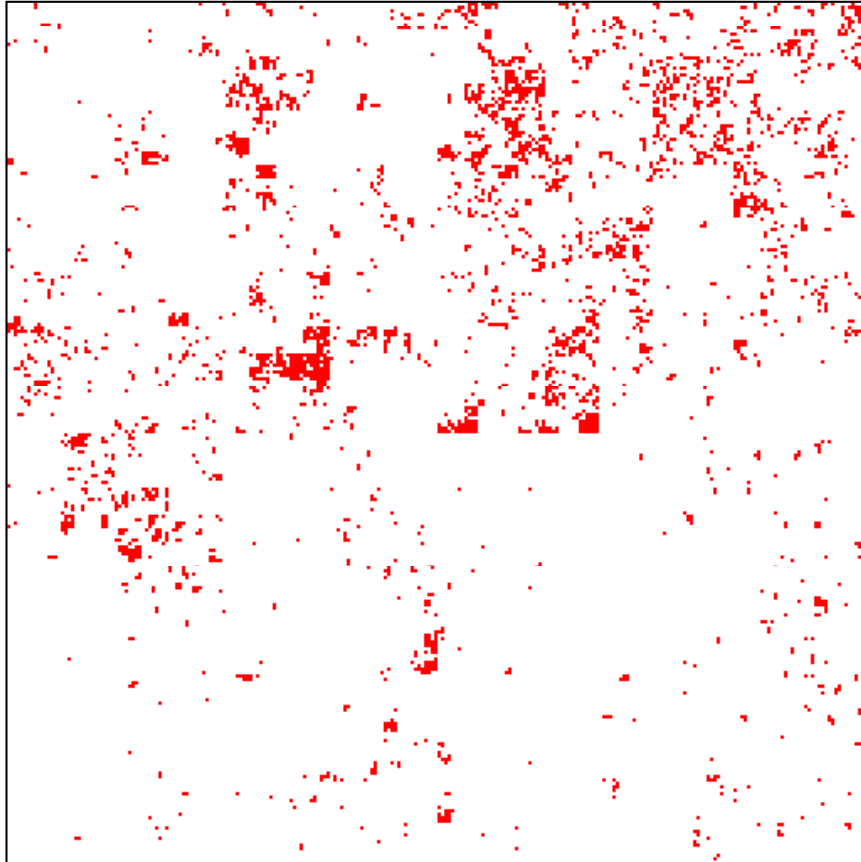

Lamb

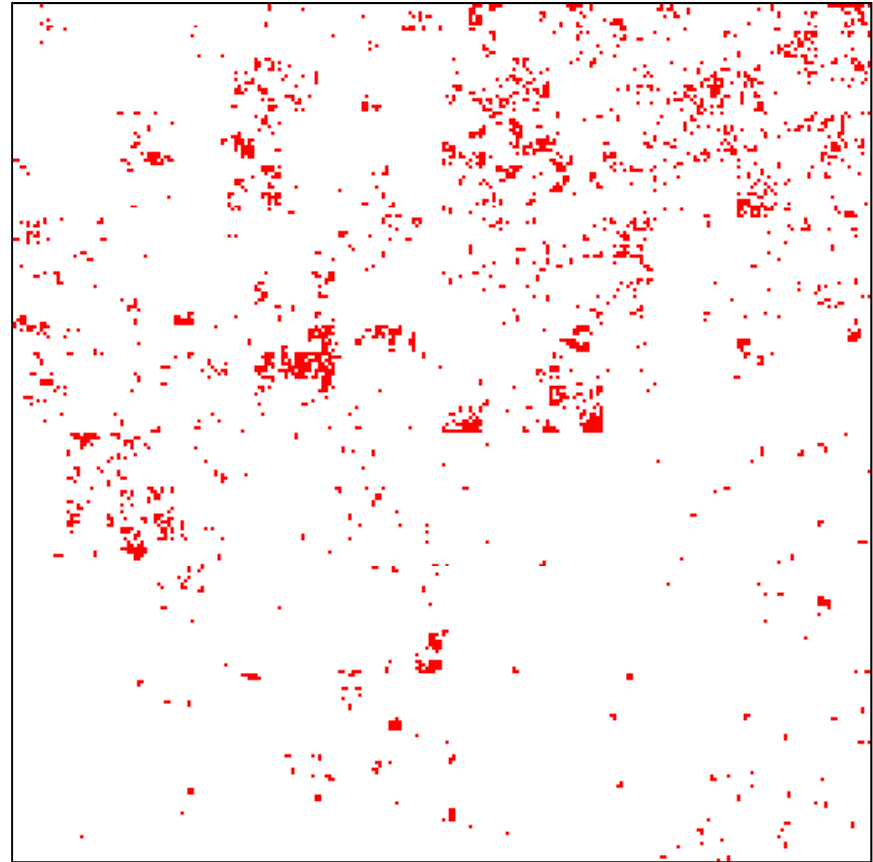

# Hilbert Visualisation- Chromosome 4

Foetal

Lamb

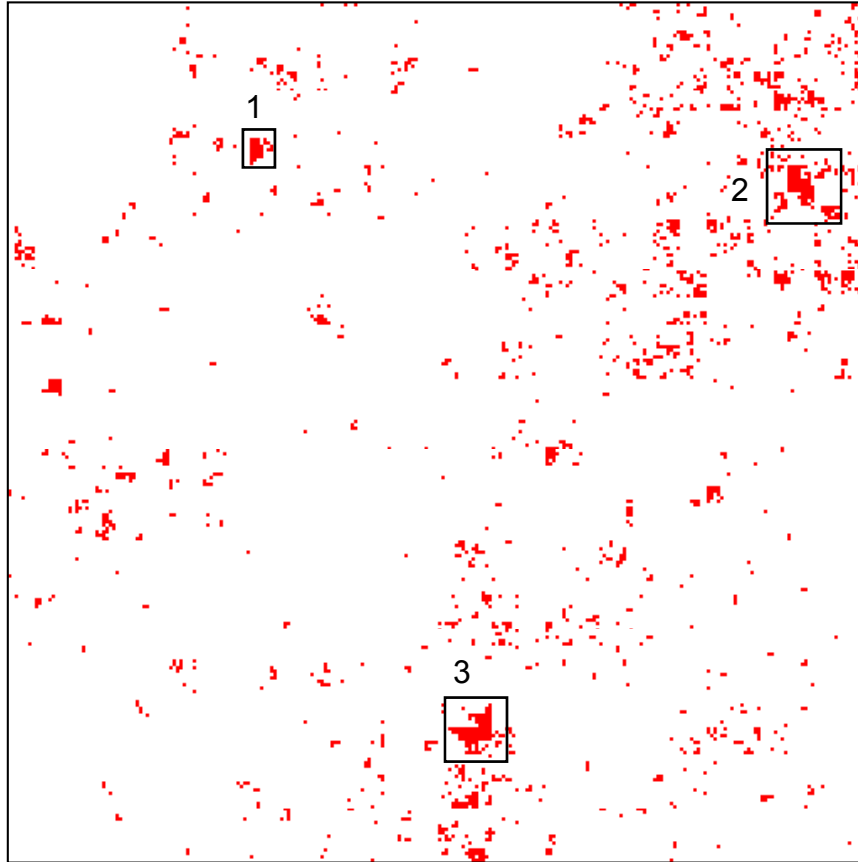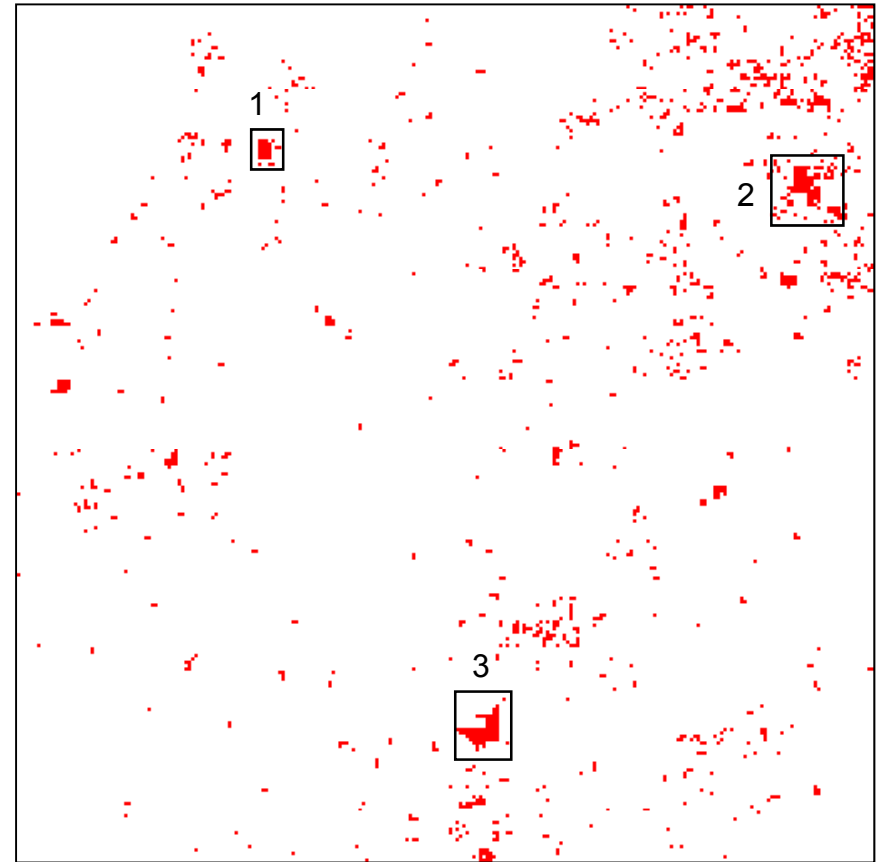

<sup>1</sup>*DLX* loci (*DLX5*, *DLX6*); <sup>2</sup>*EN2*; <sup>3</sup>*HOXA* loci (*HOXA9*, *HOXA10*).

# Hilbert Visualisation- Chromosome 5

Foetal

Lamb

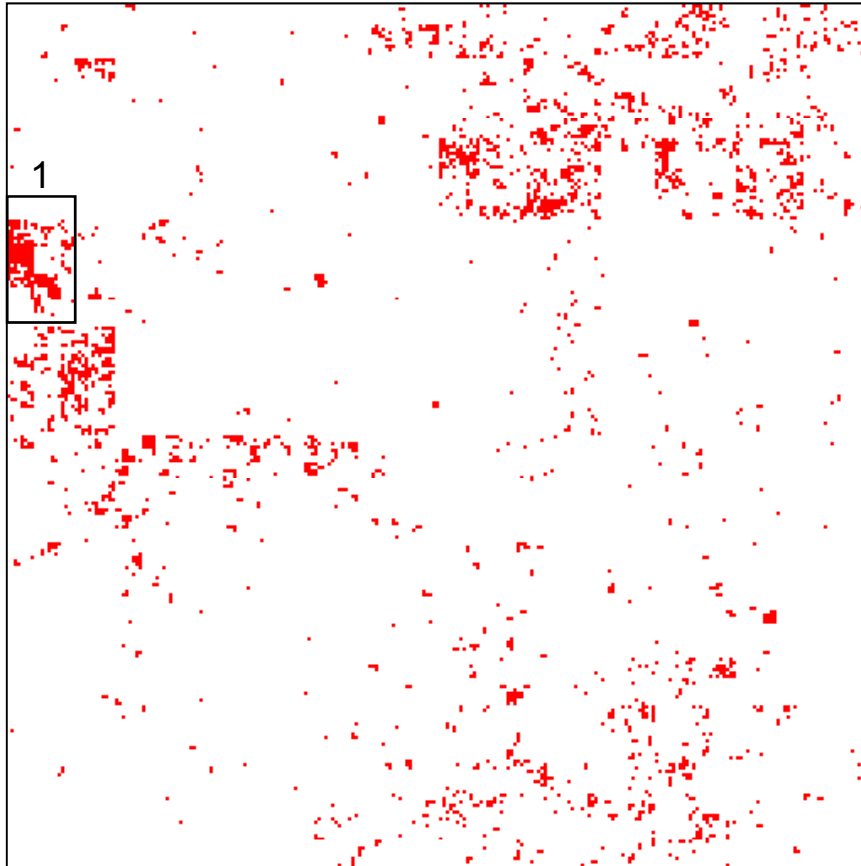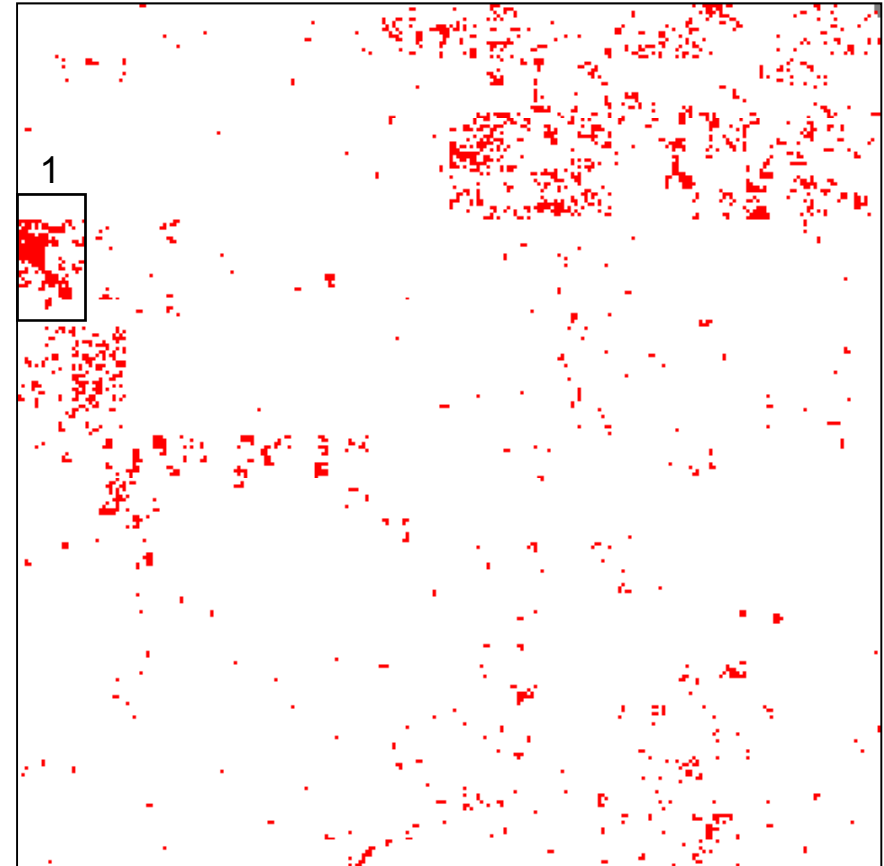

**<sup>1</sup>HOX loci (*HOXC13*, *HOXC4*)**

# Hilbert Visualisation- Chromosome 6

Foetal

Lamb

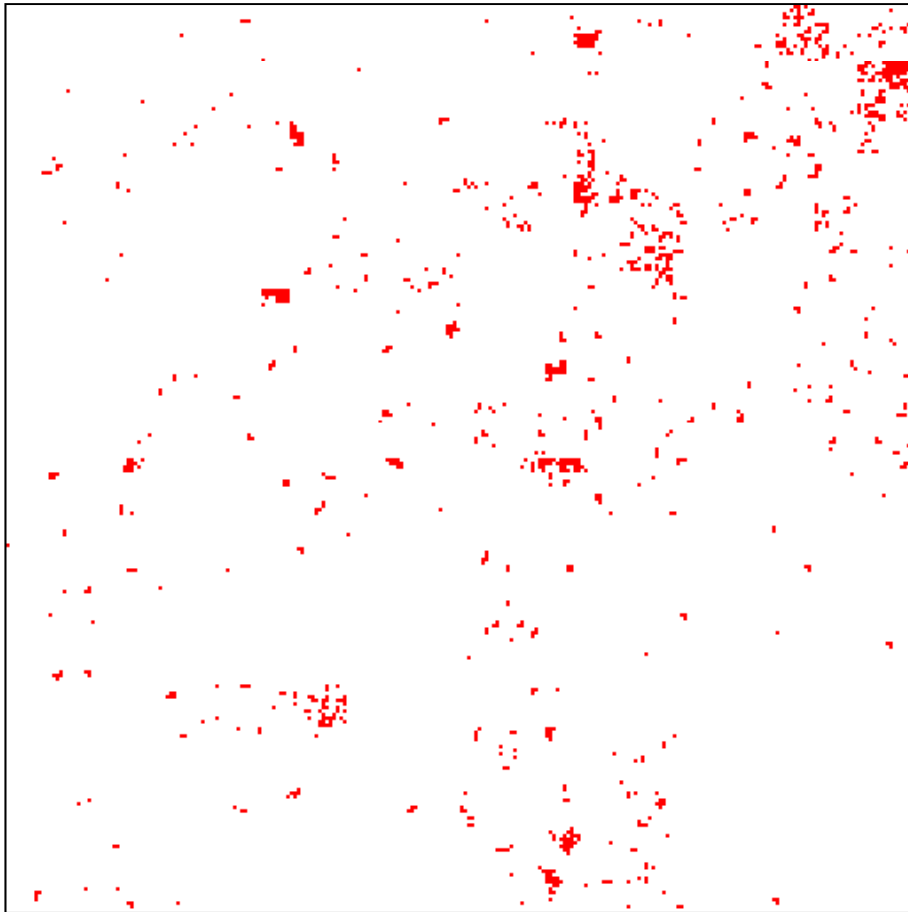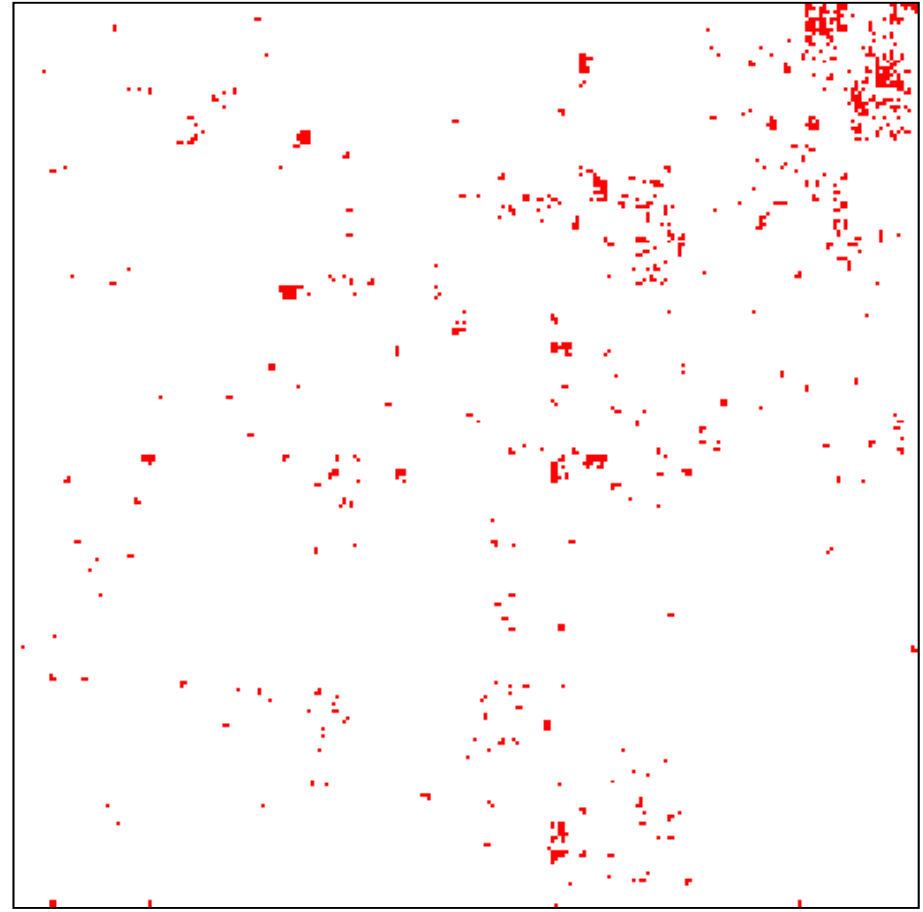

# Hilbert Visualisation- Chromosome 7

Foetal

Lamb

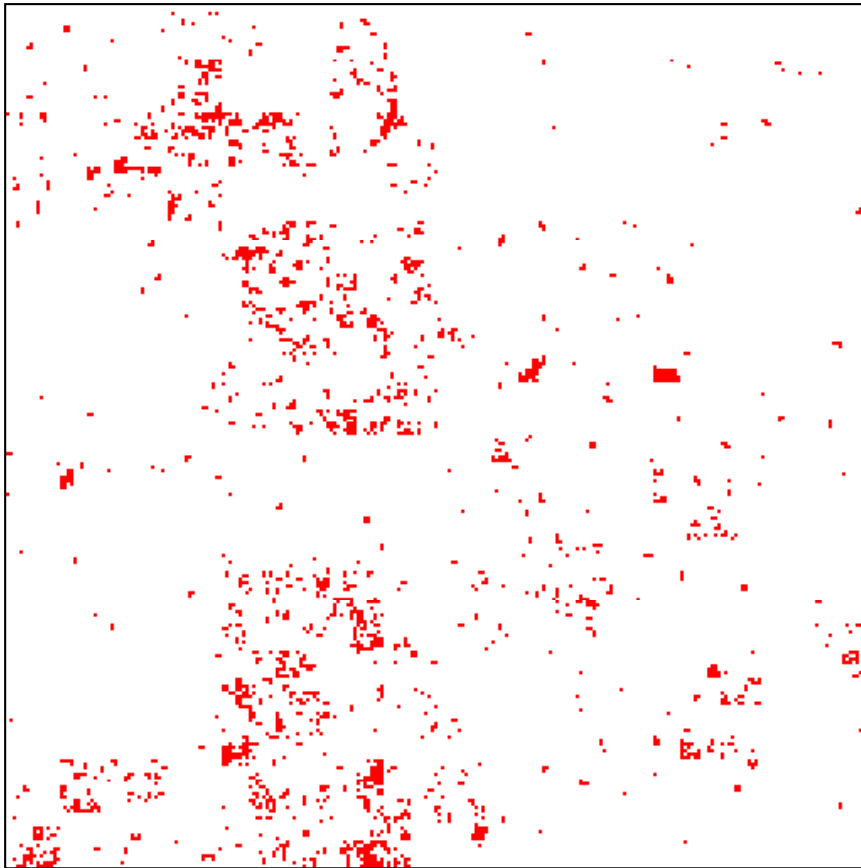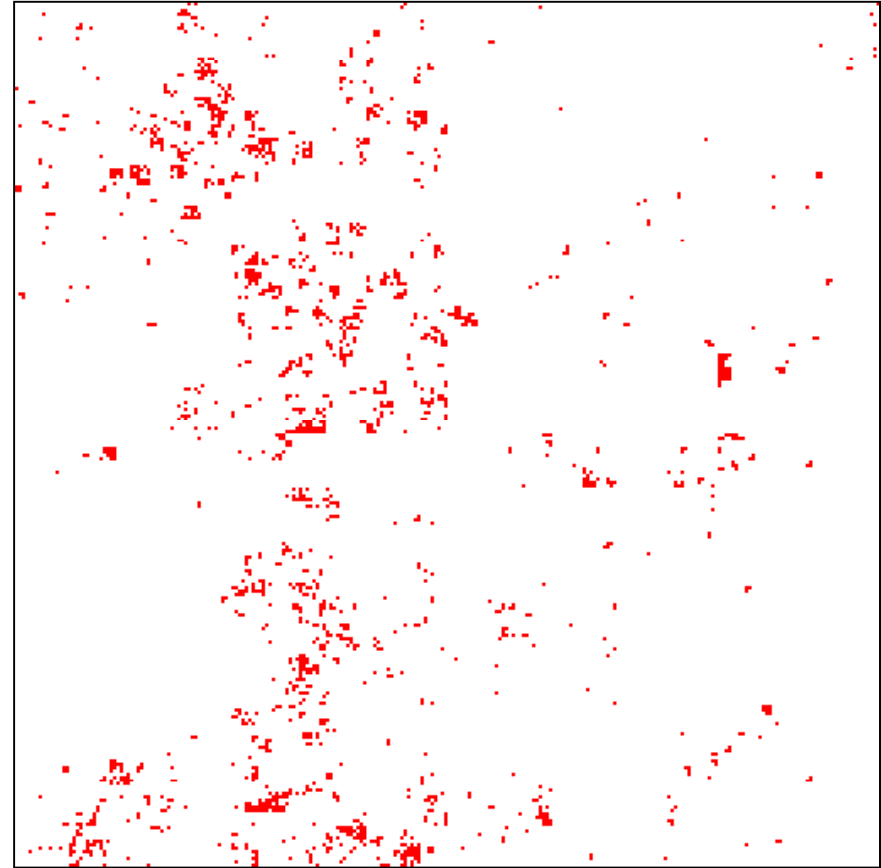



# Hilbert Visualisation- Chromosome 8

Foetal

Lamb

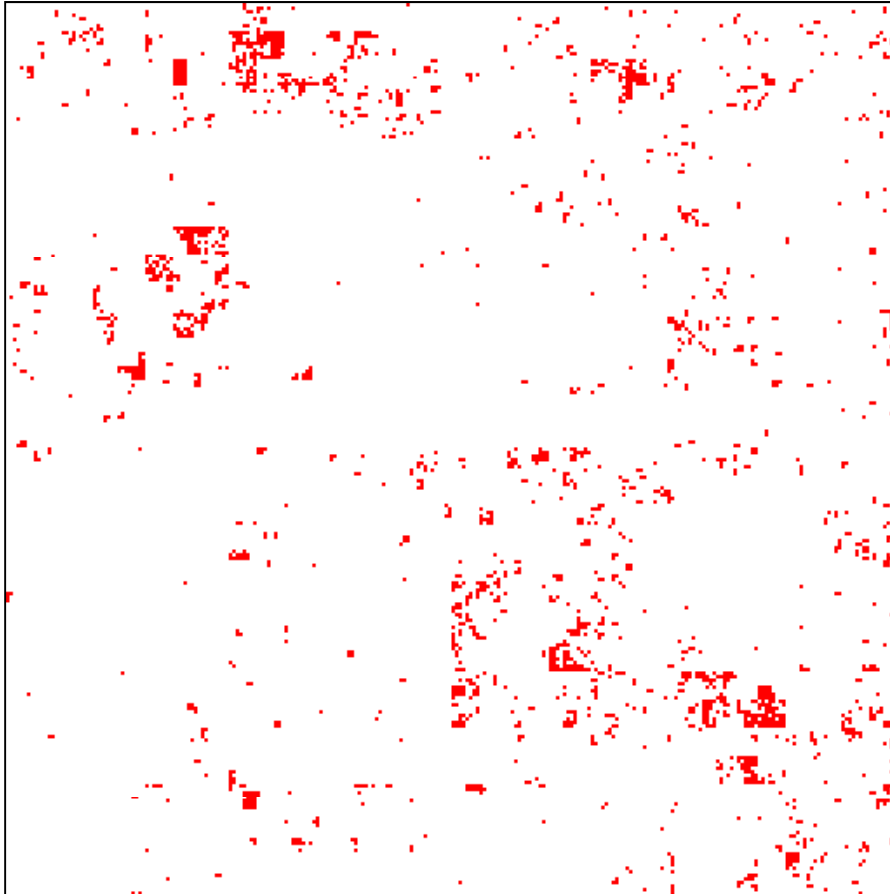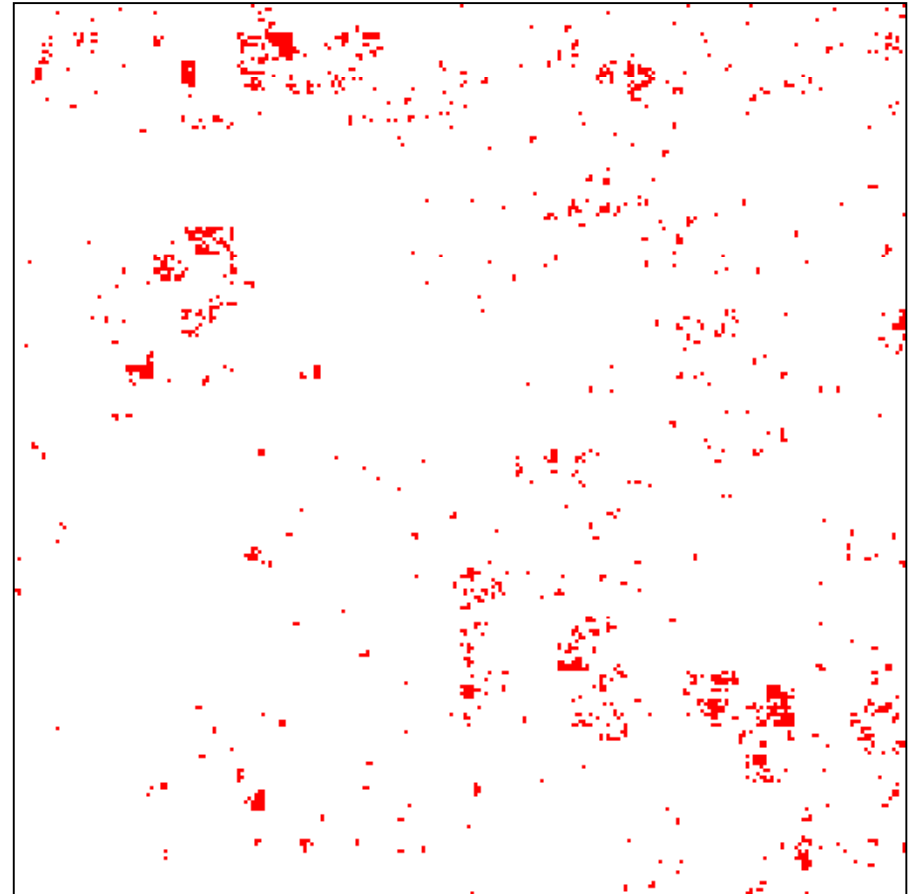

# Hilbert Visualisation- Chromosome 9

Foetal

Lamb

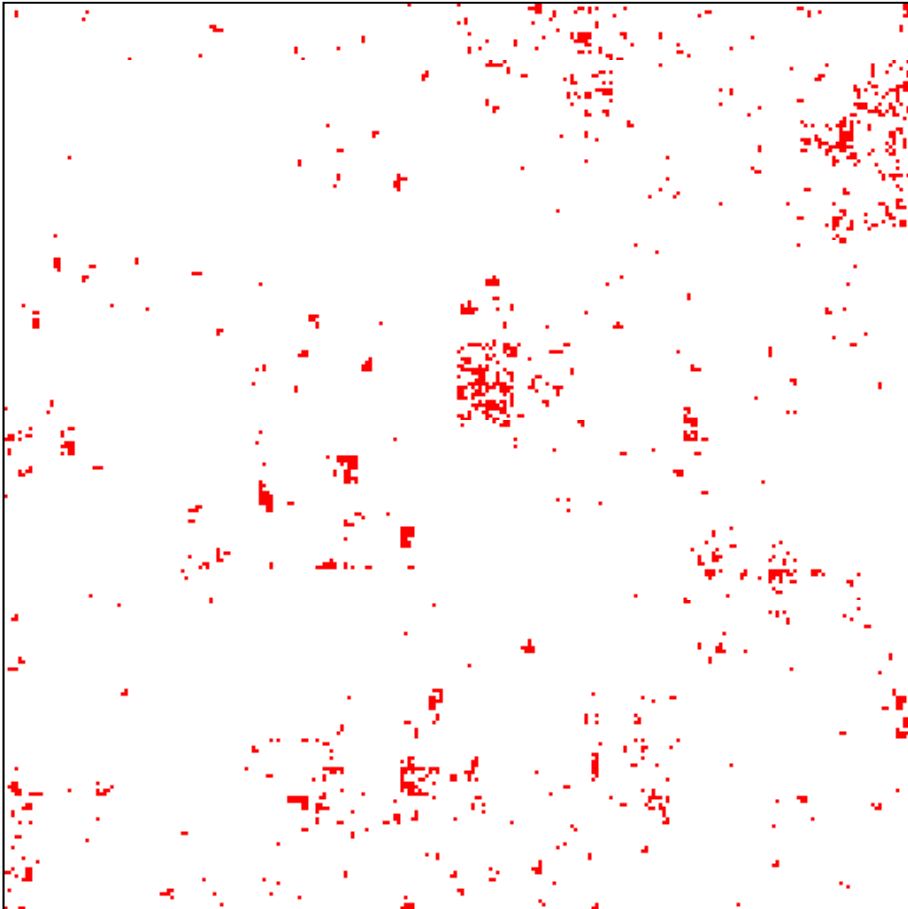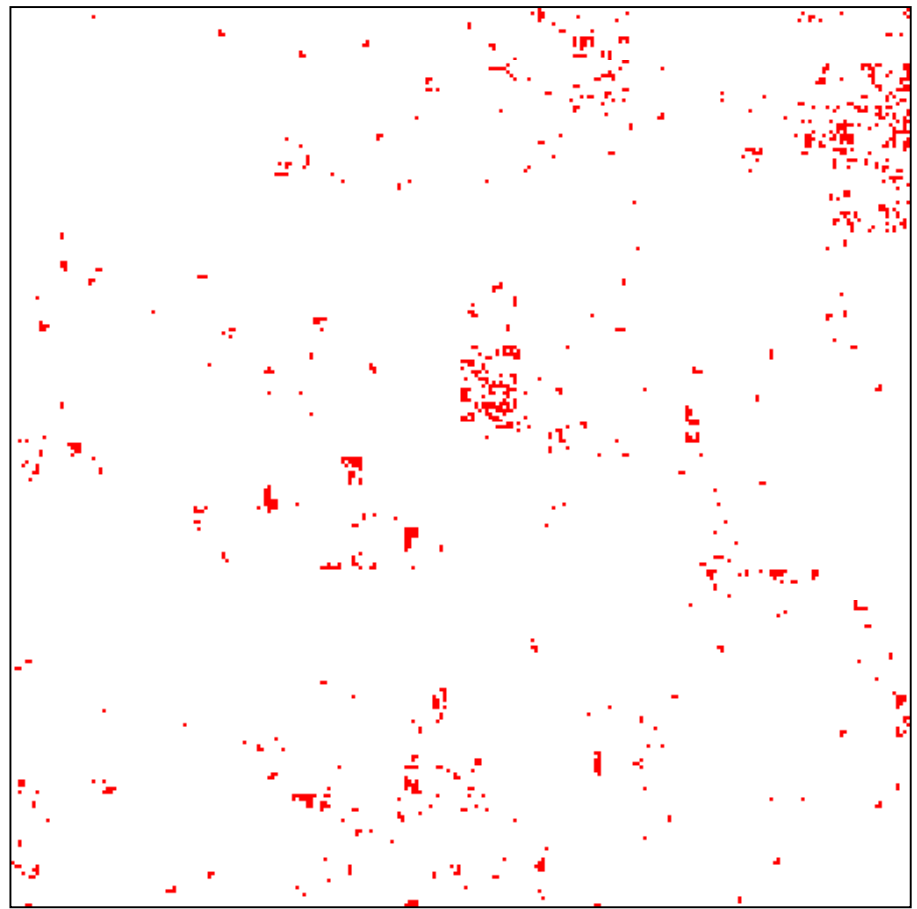

# Hilbert Visualisation- Chromosome 10

Foetal

Lamb

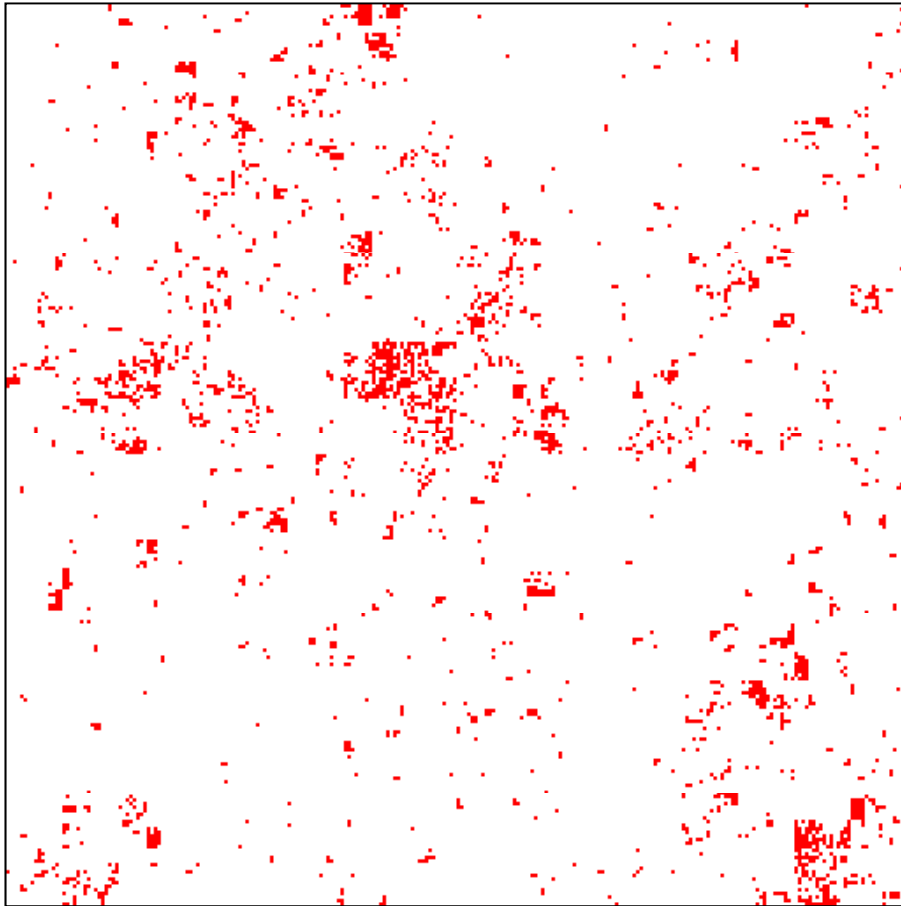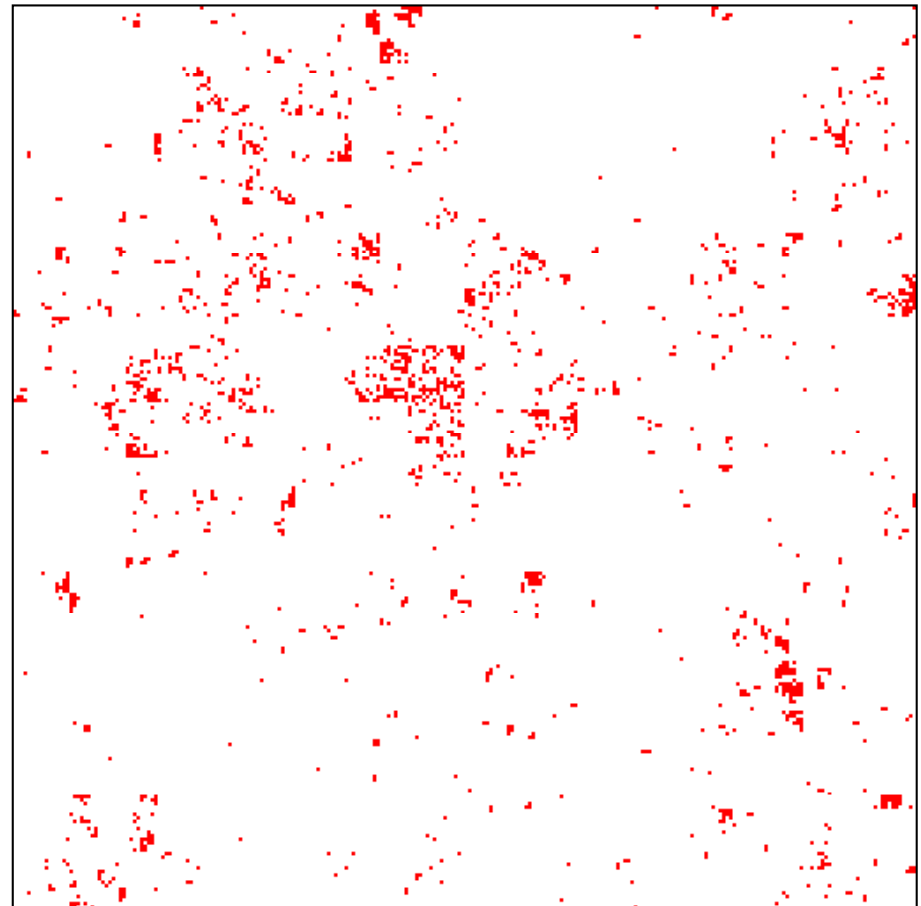

# Hilbert Visualisation- Chromosome 11

Foetal

Lamb

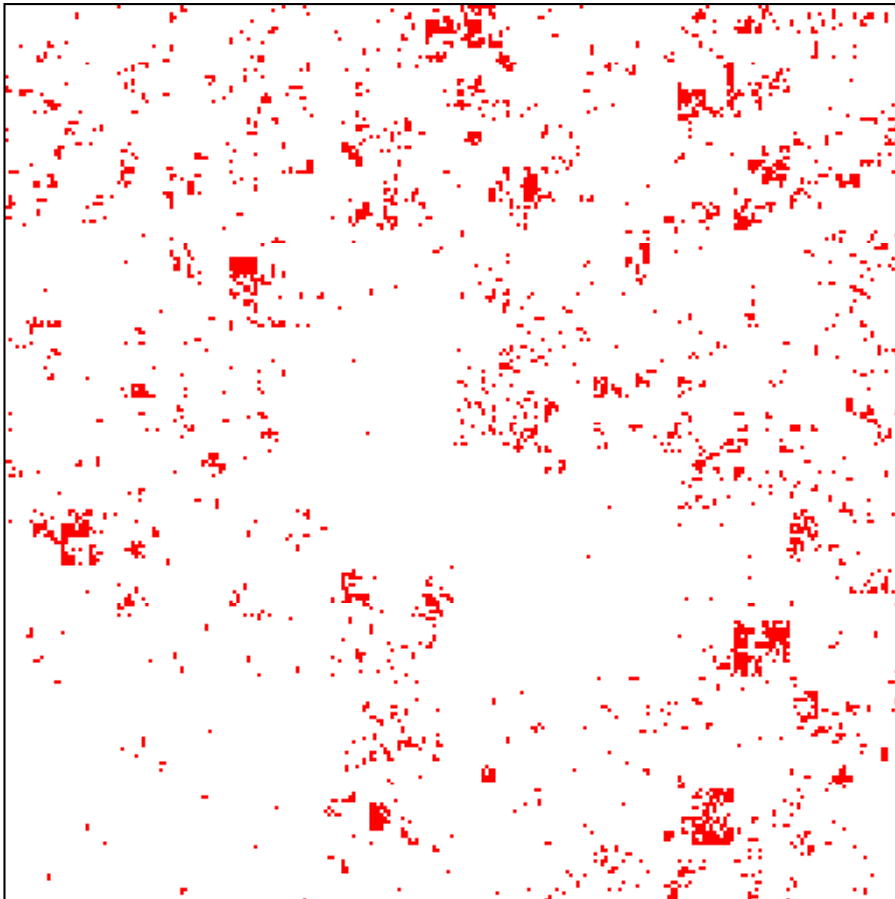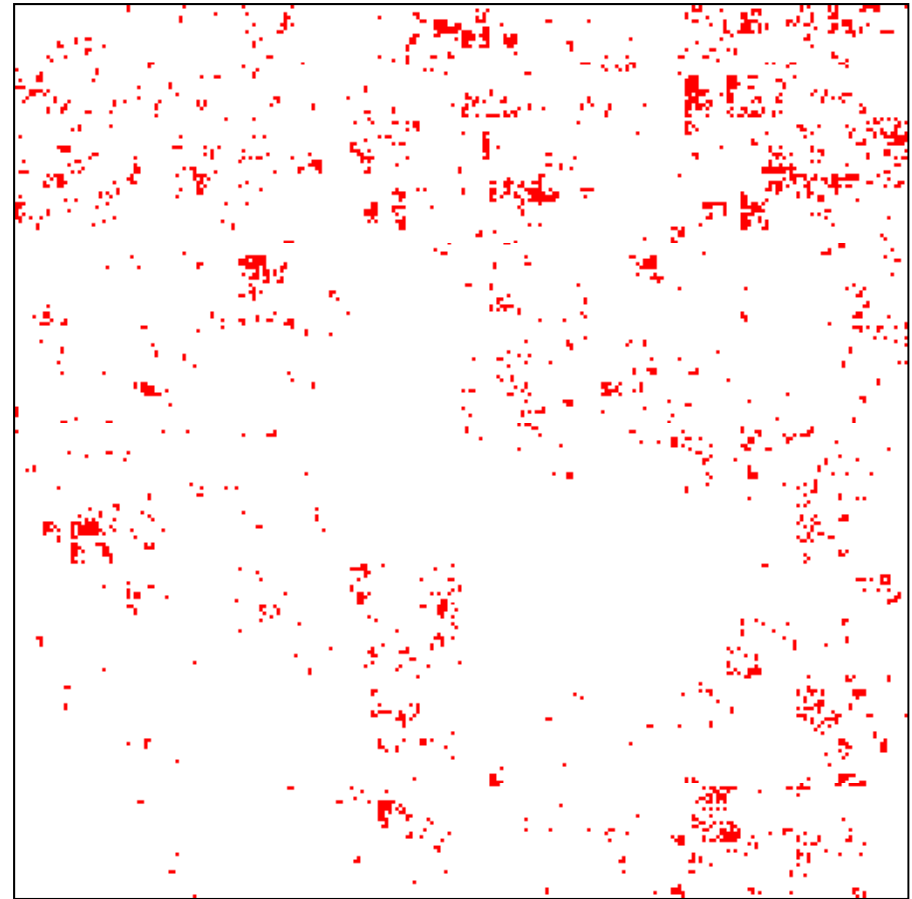

# Hilbert Visualisation- Chromosome 12

Foetal

Lamb

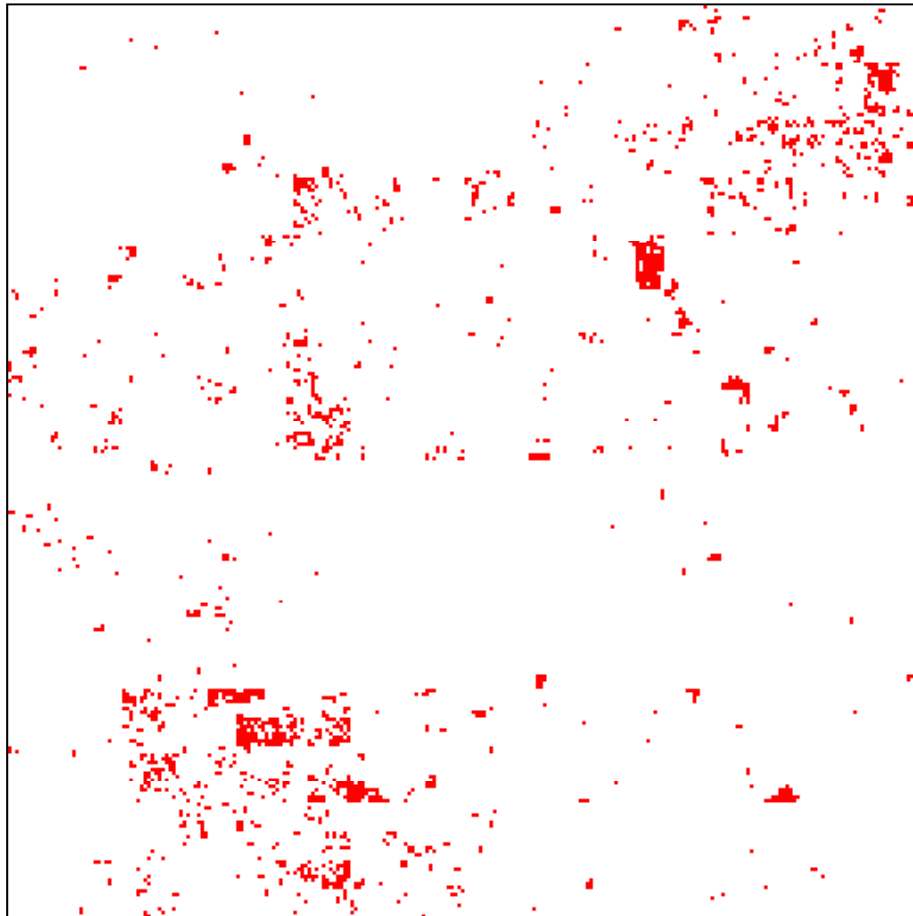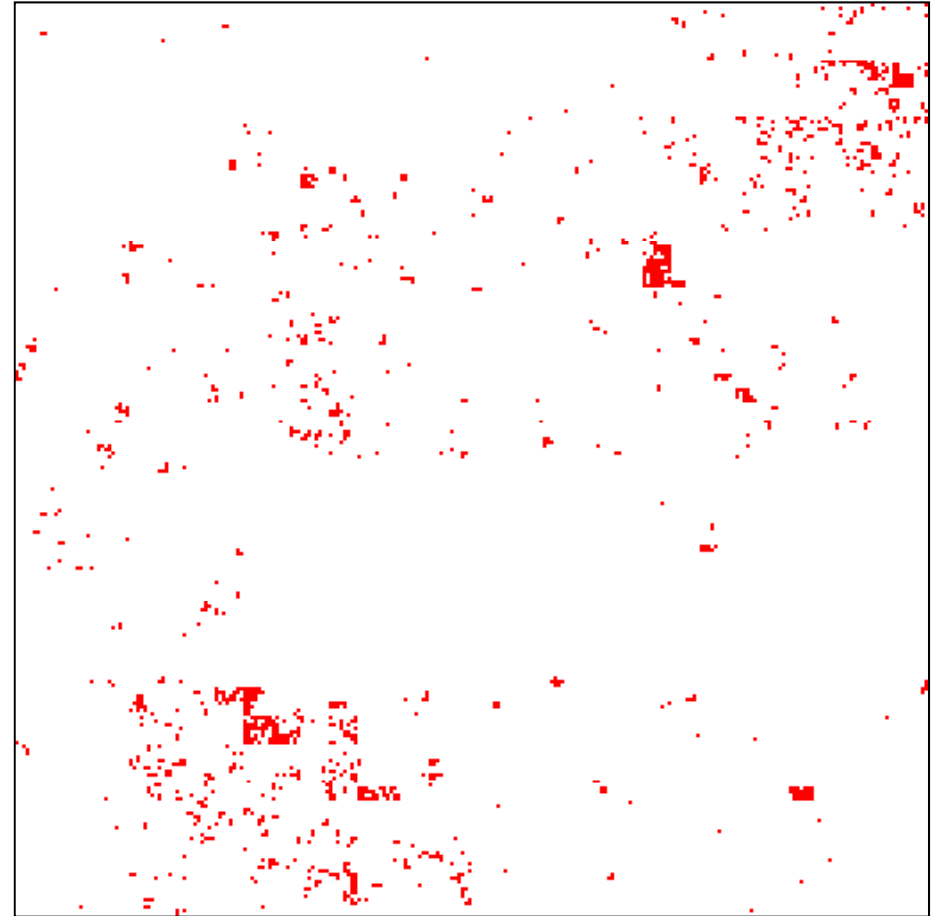

# Hilbert Visualisation- Chromosome 13

Foetal

Lamb

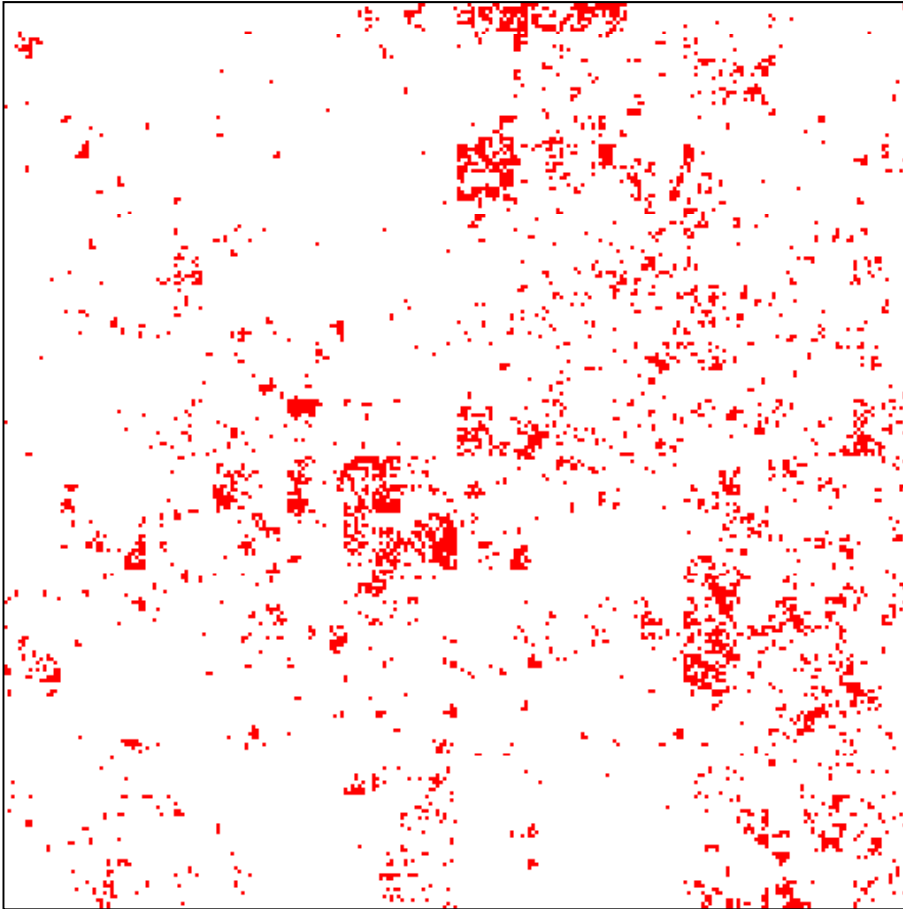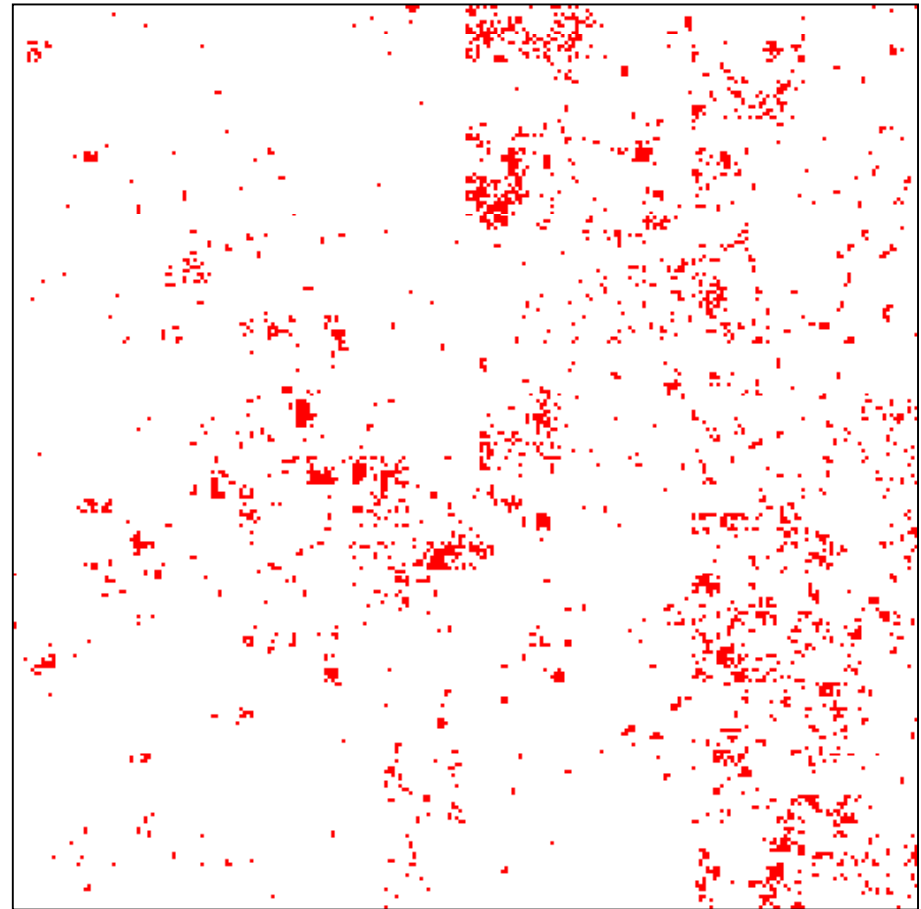

# Hilbert Visualisation- Chromosome 14

Foetal

Lamb

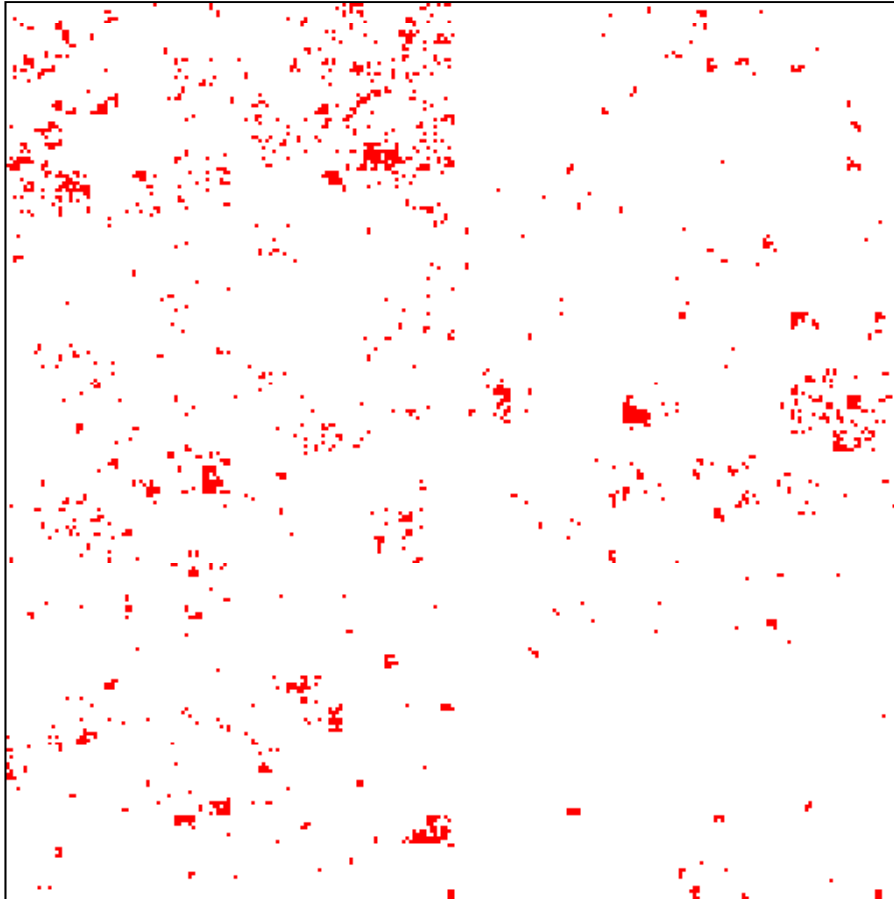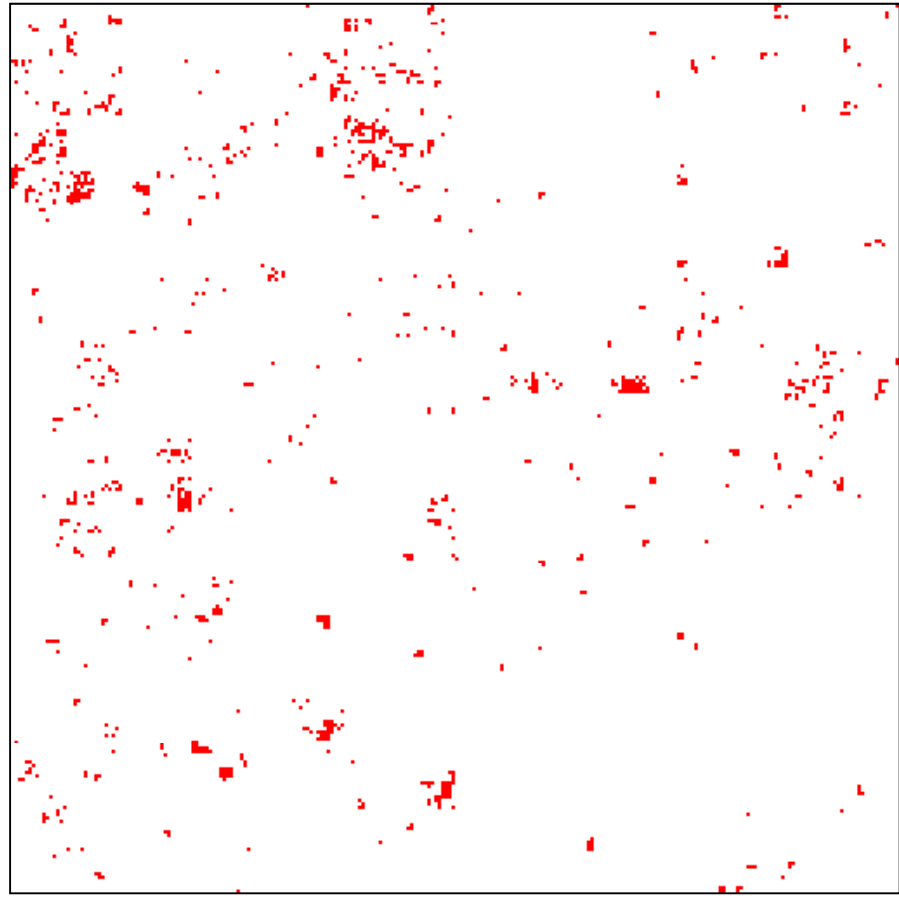

# Hilbert Visualisation- Chromosome 15

Foetal

Lamb

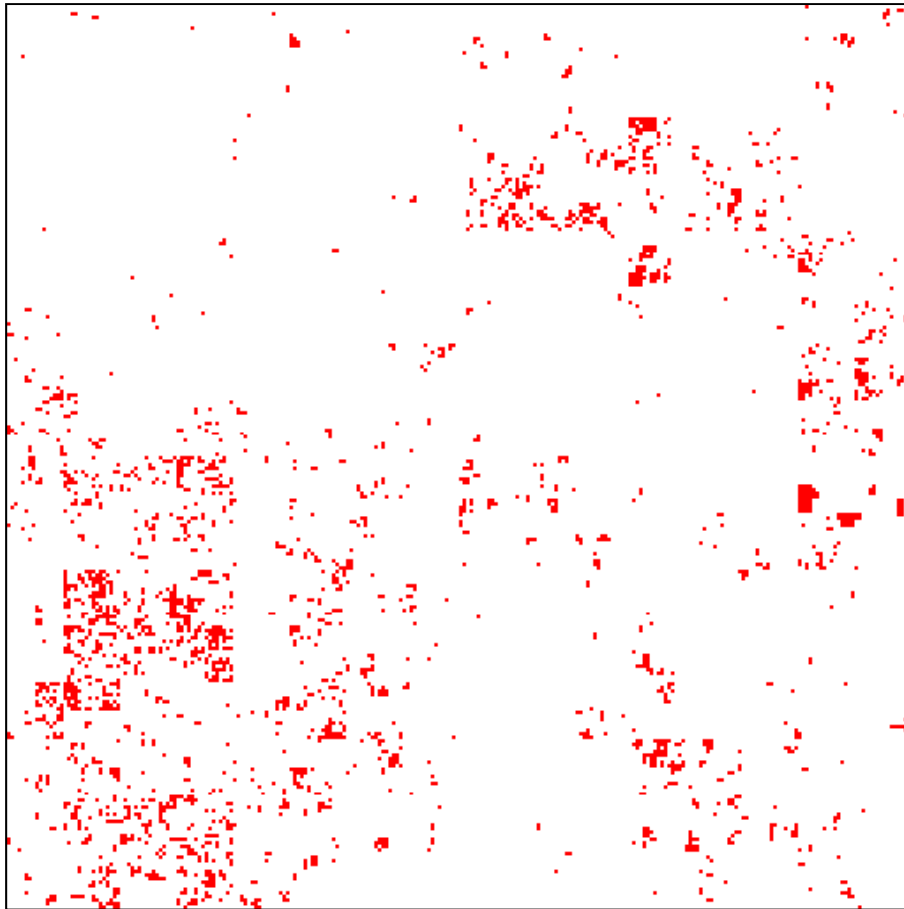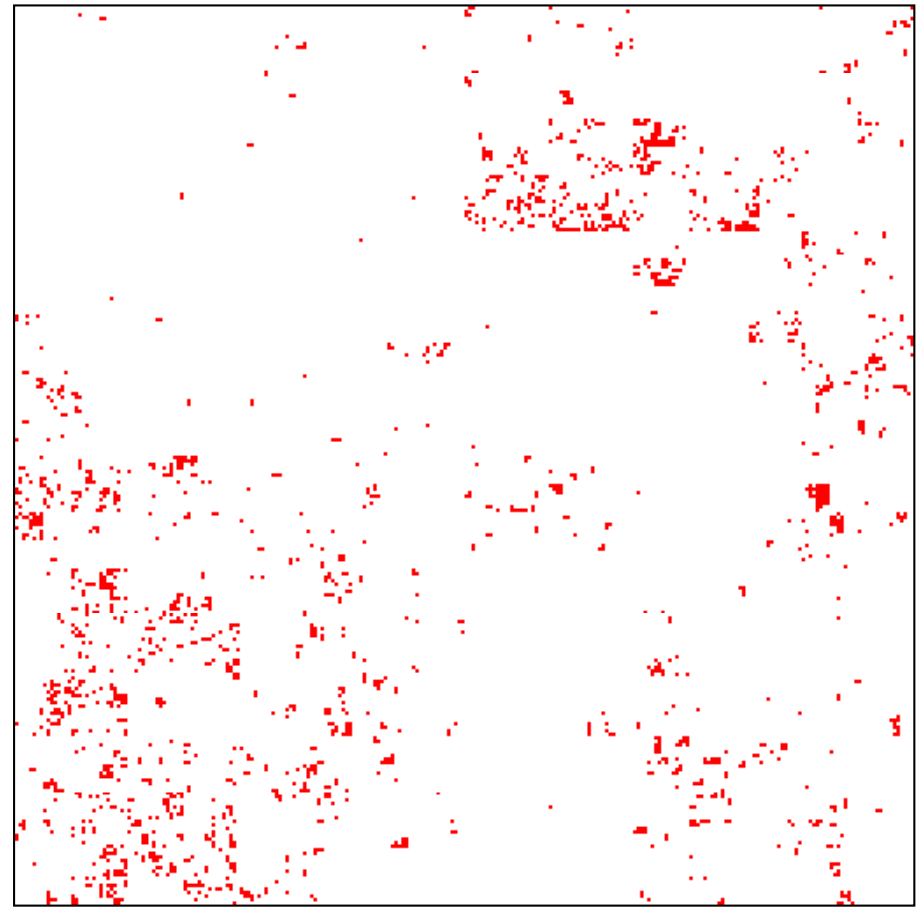



# Hilbert Visualisation- Chromosome 16

Foetal

Lamb

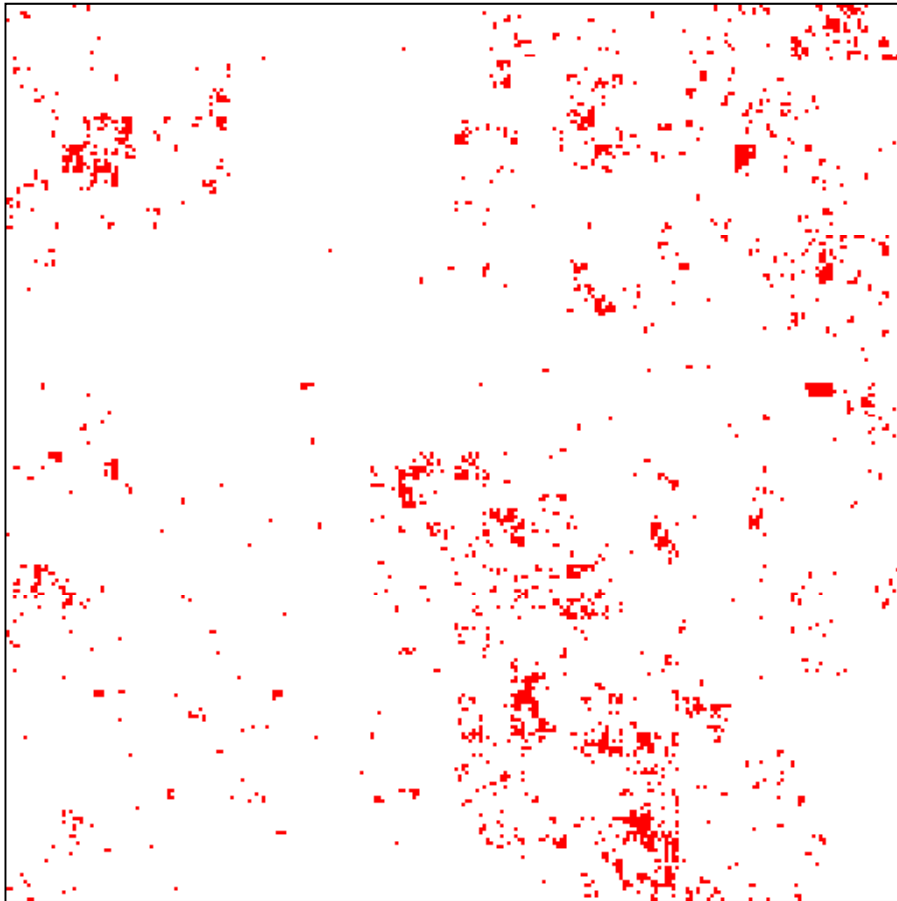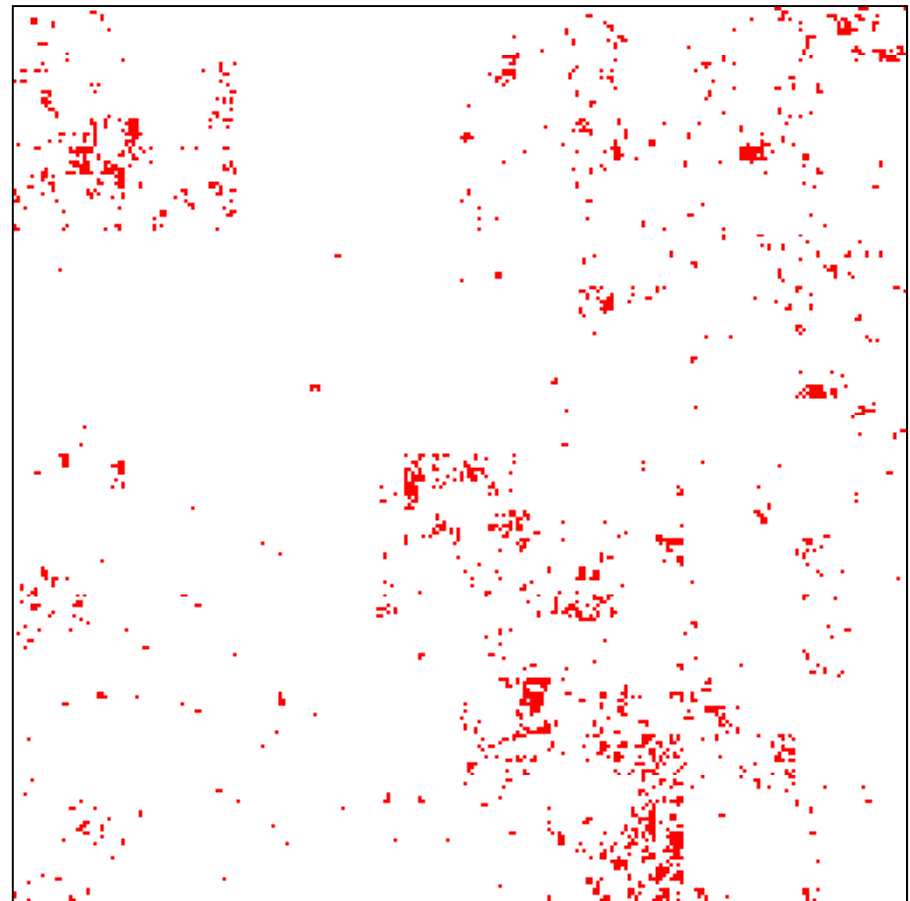

# Hilbert Visualisation- Chromosome 17

Foetal

Lamb

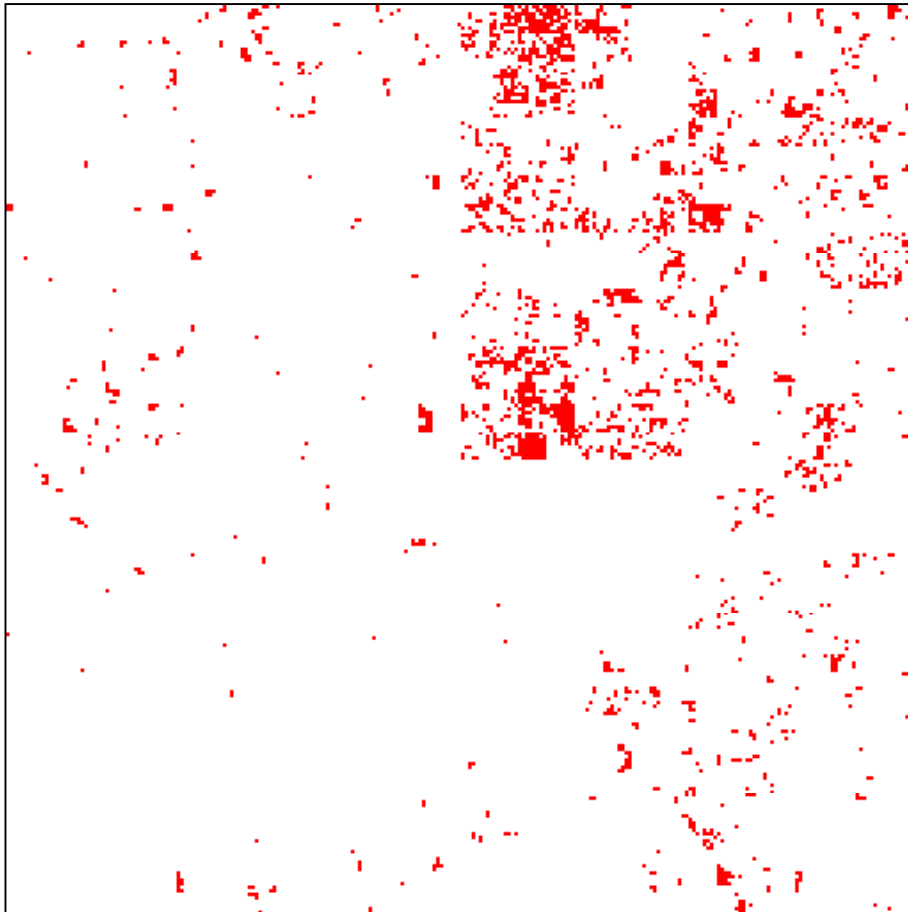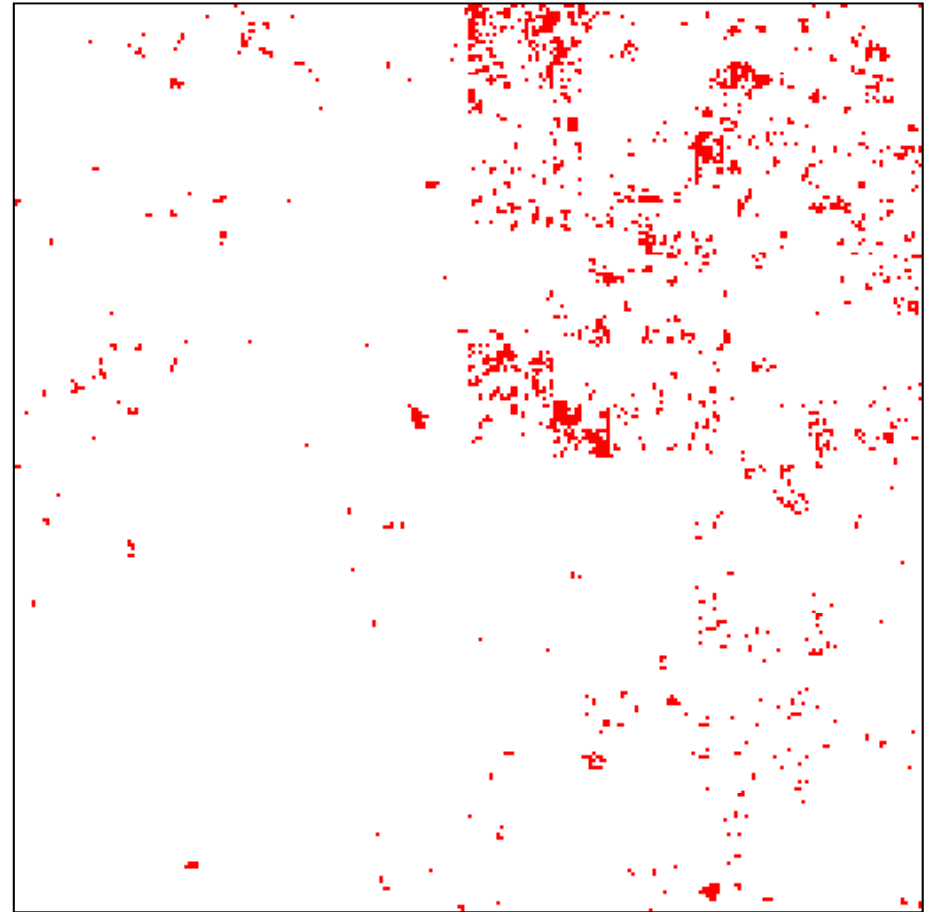

# Hilbert Visualisation- Chromosome 18

Foetal

Lamb

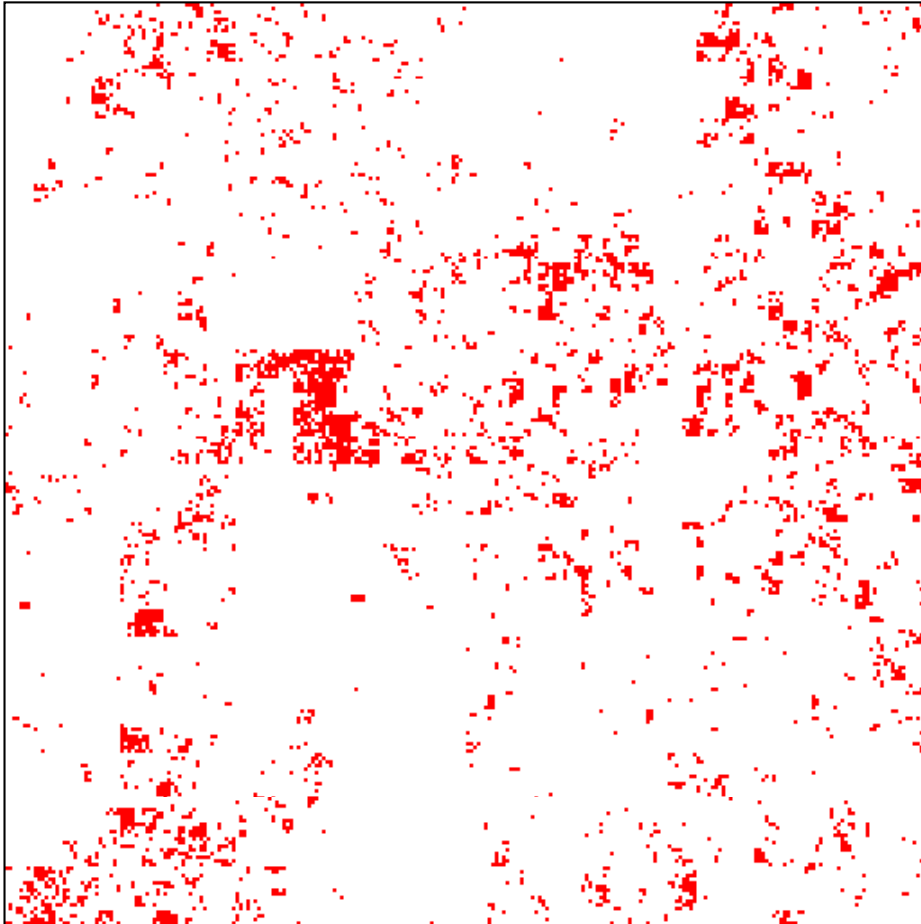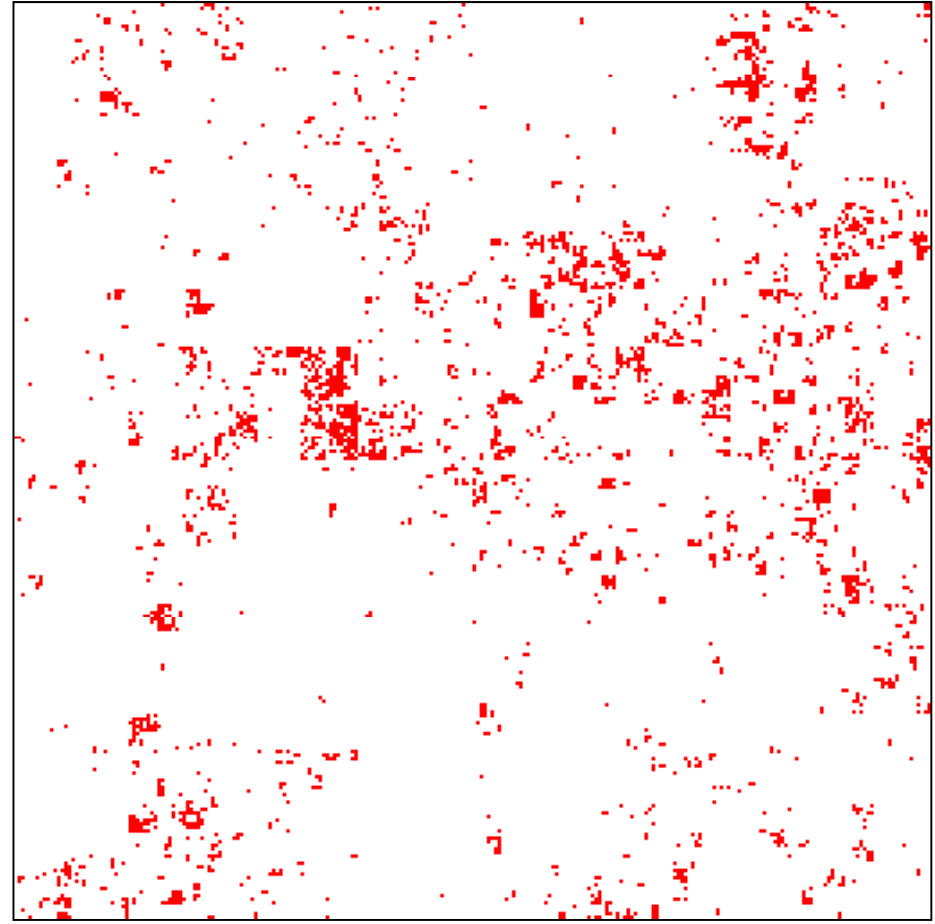

# Hilbert Visualisation- Chromosome 19

Foetal

Lamb

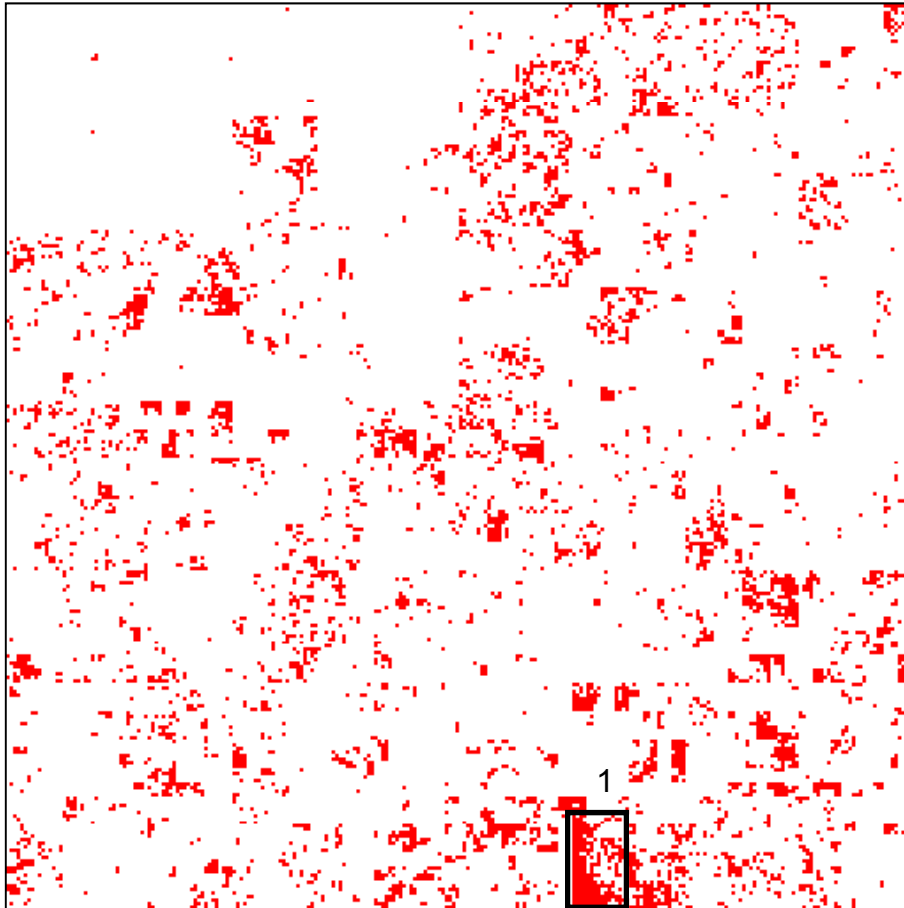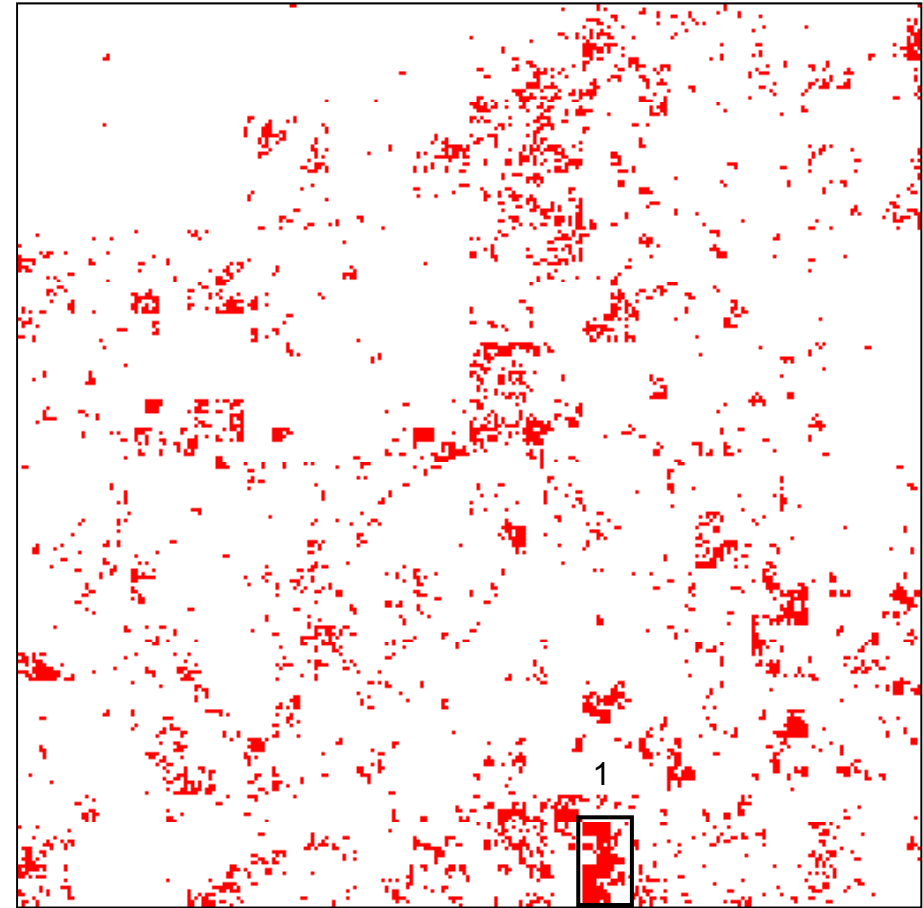

**<sup>1</sup>HOXB loci (HOXB7, HOXB4, HOXB3)**

# Hilbert Visualisation- Chromosome 20

Foetal

Lamb

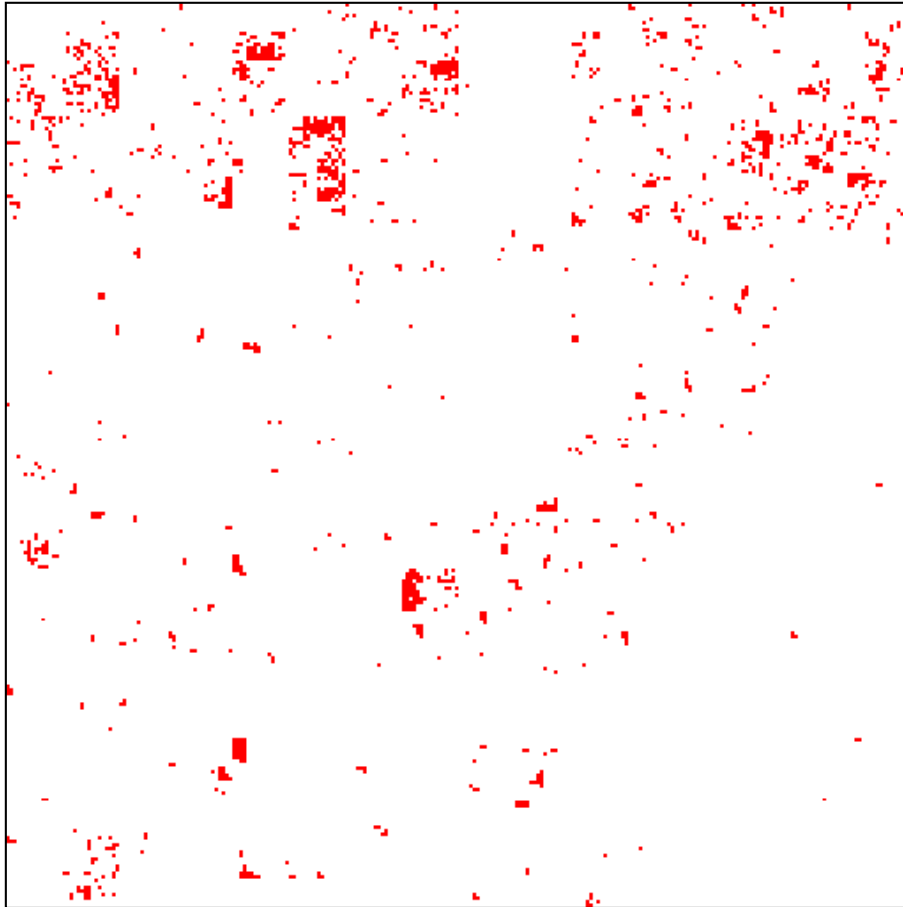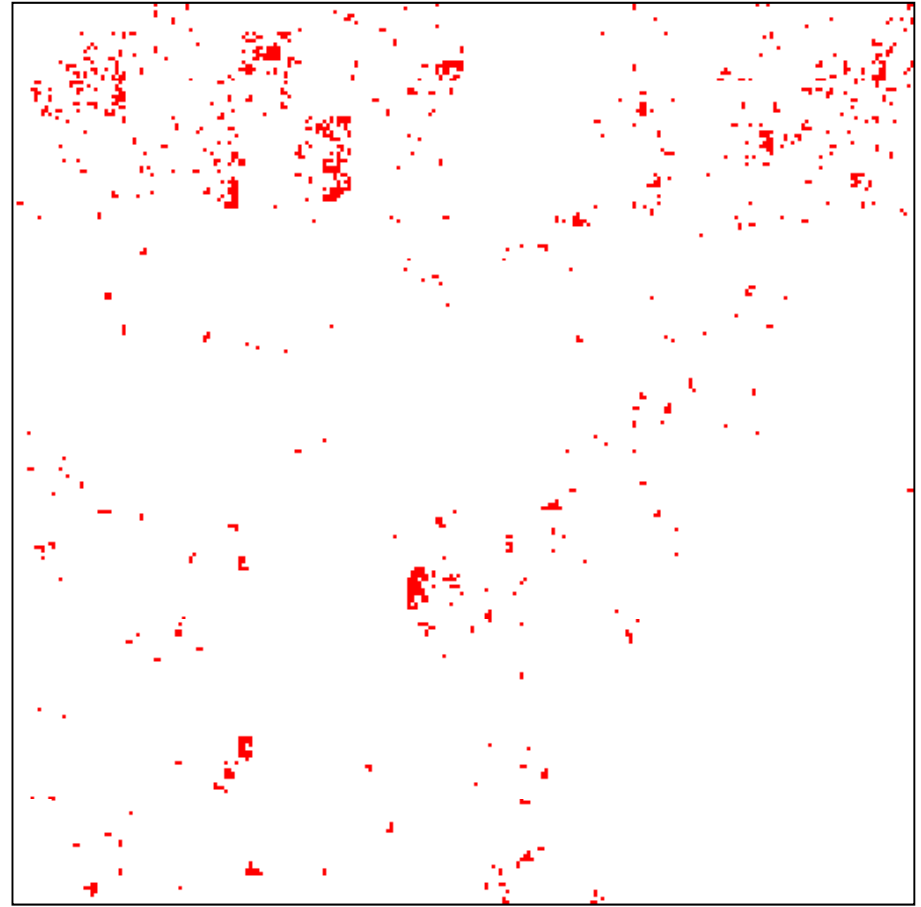

# Hilbert Visualisation- Chromosome 21

Foetal

Lamb

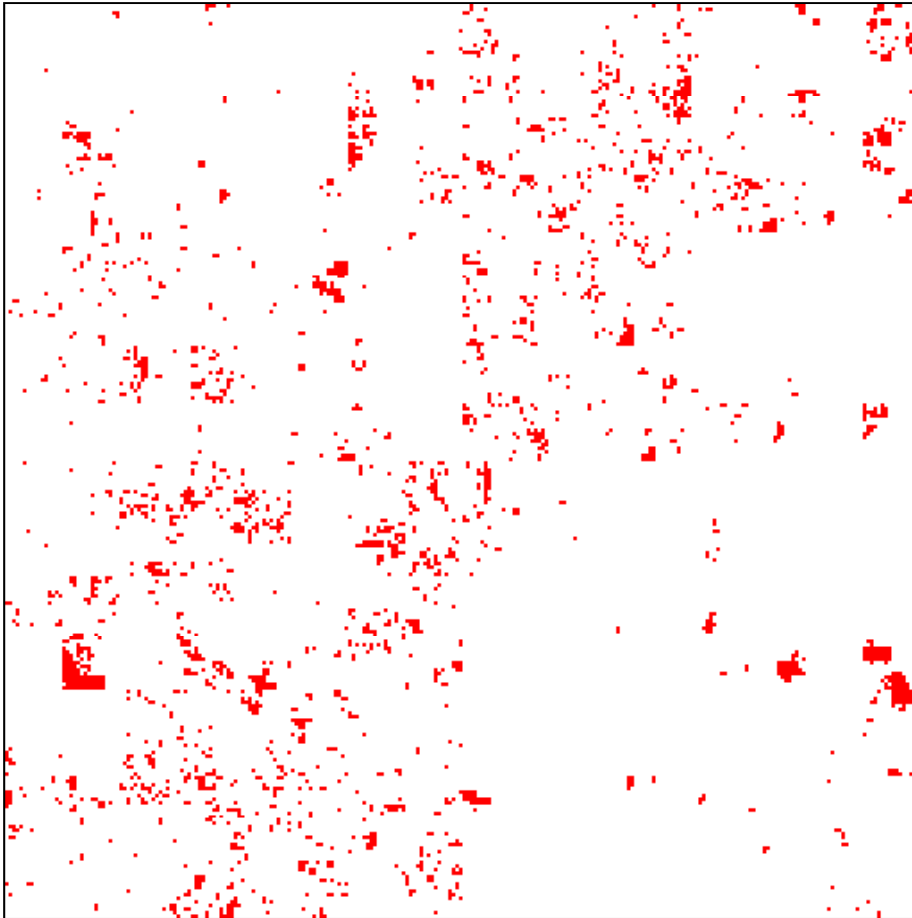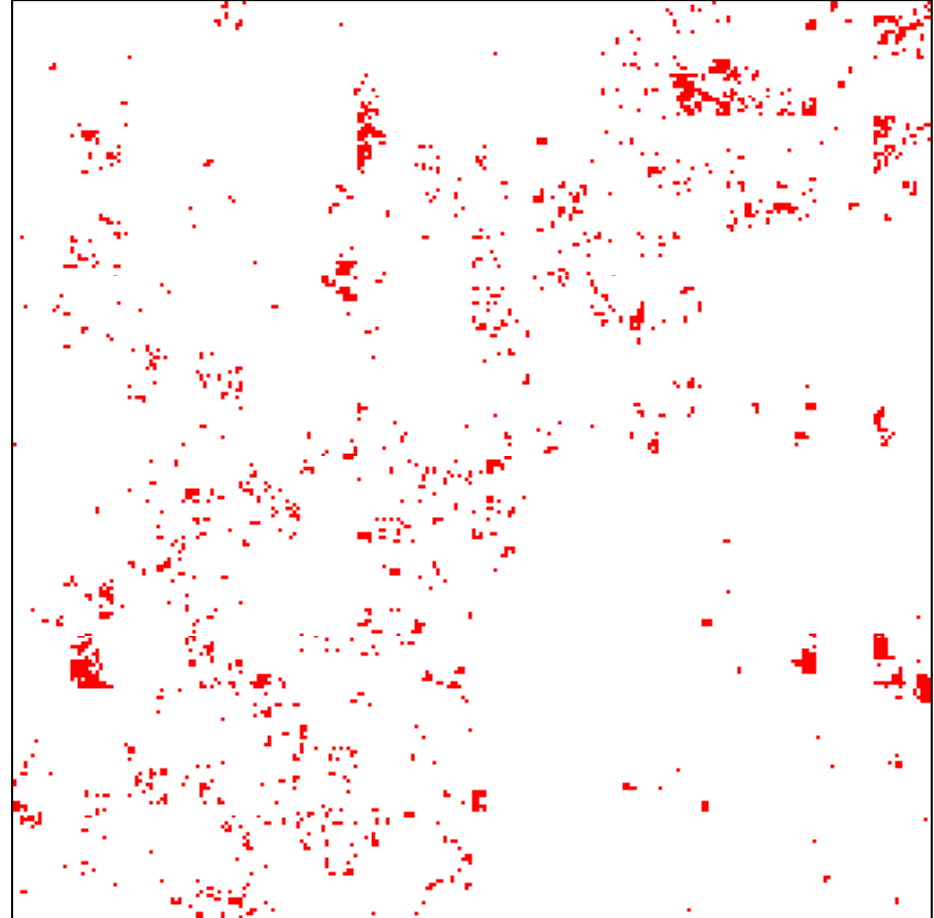

# Hilbert Visualisation- Chromosome 22

Foetal

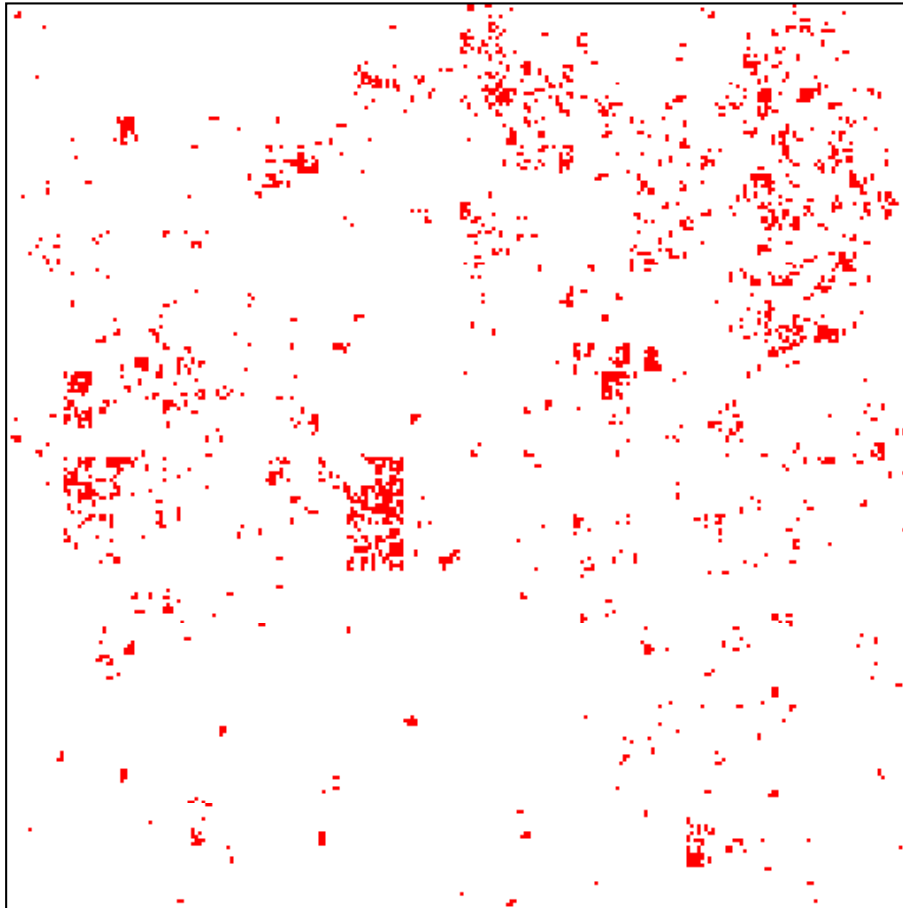

Lamb

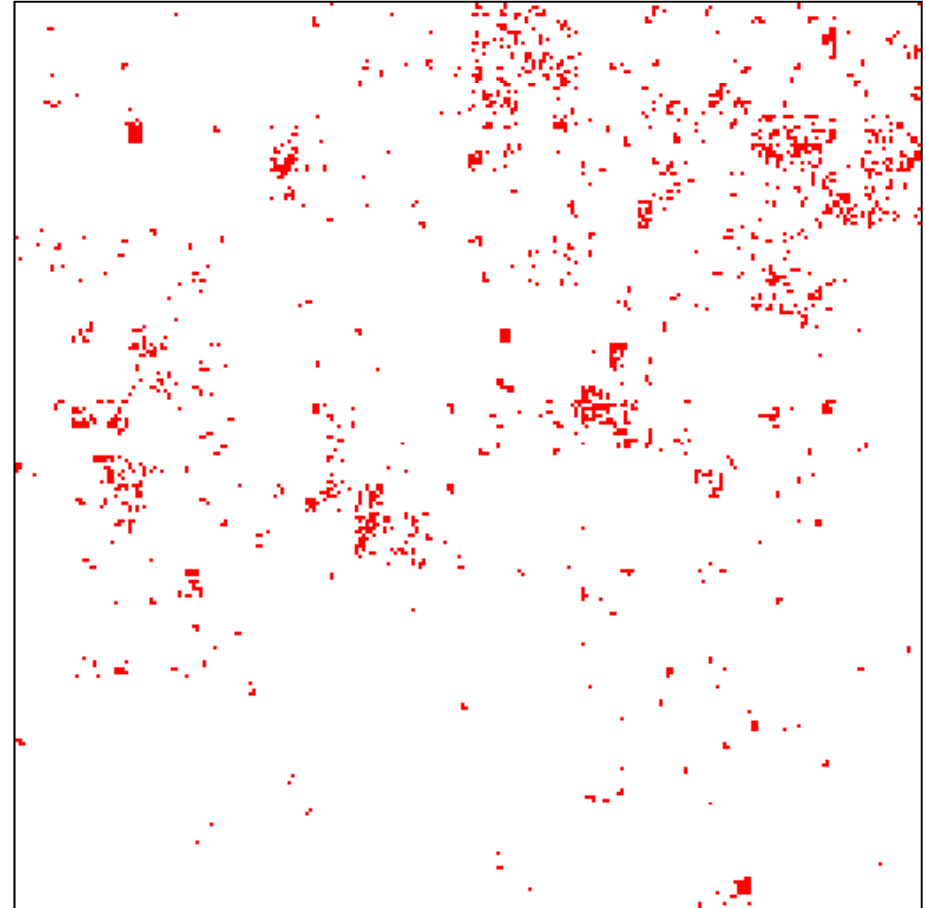

# Hilbert Visualisation- Chromosome 23

Foetal

Lamb

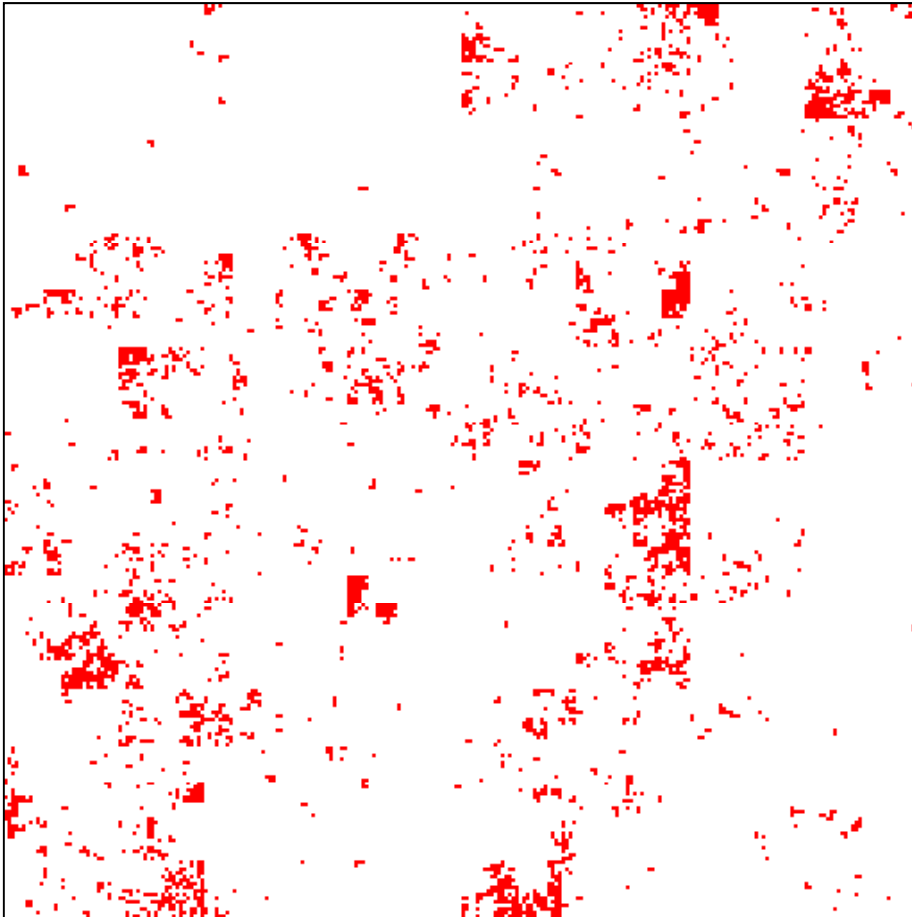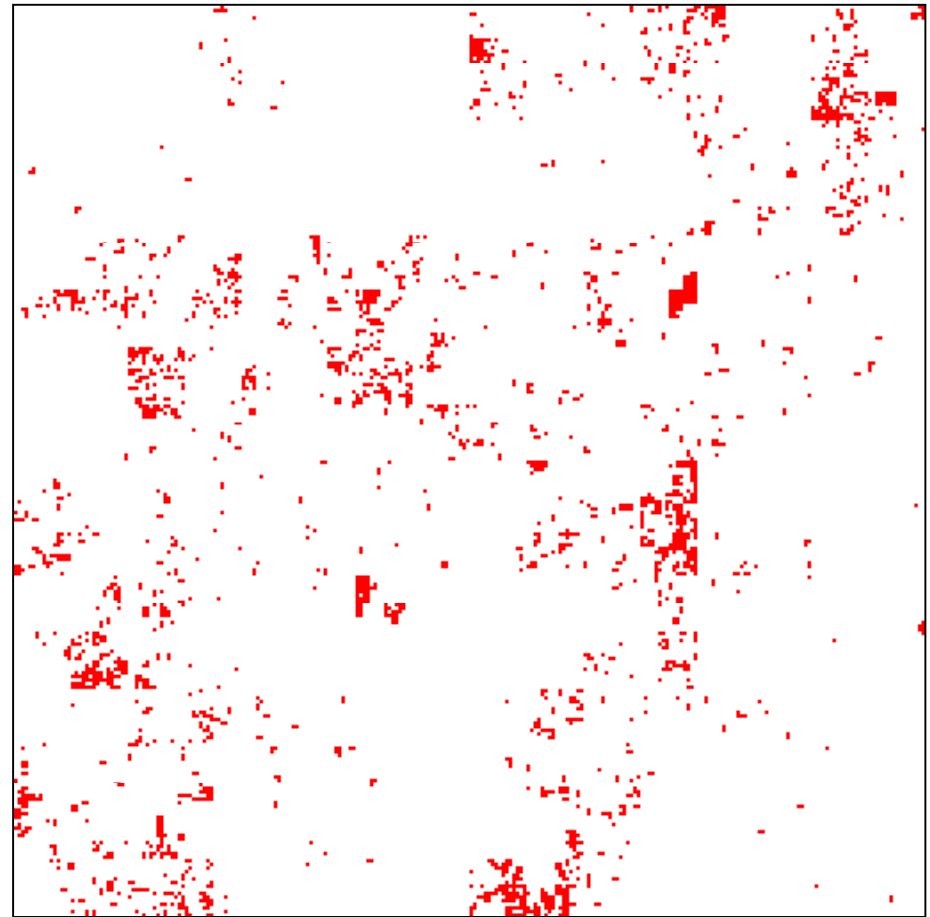



# Hilbert Visualisation- Chromosome 24

Foetal

Lamb

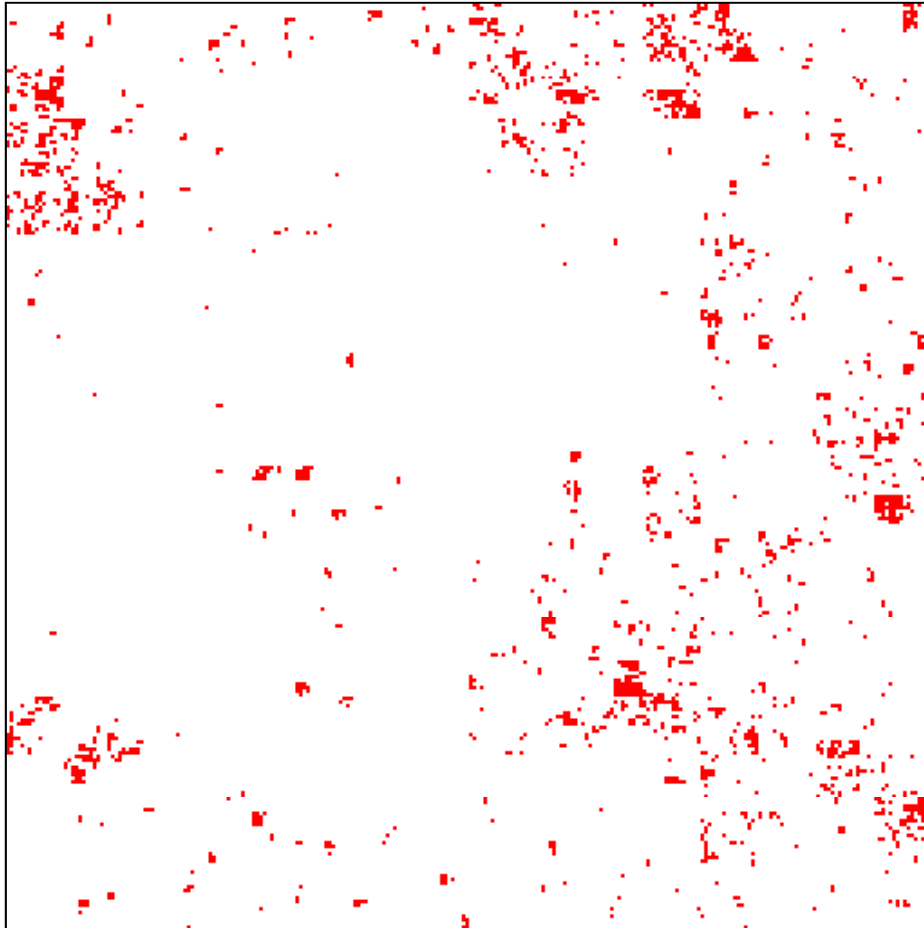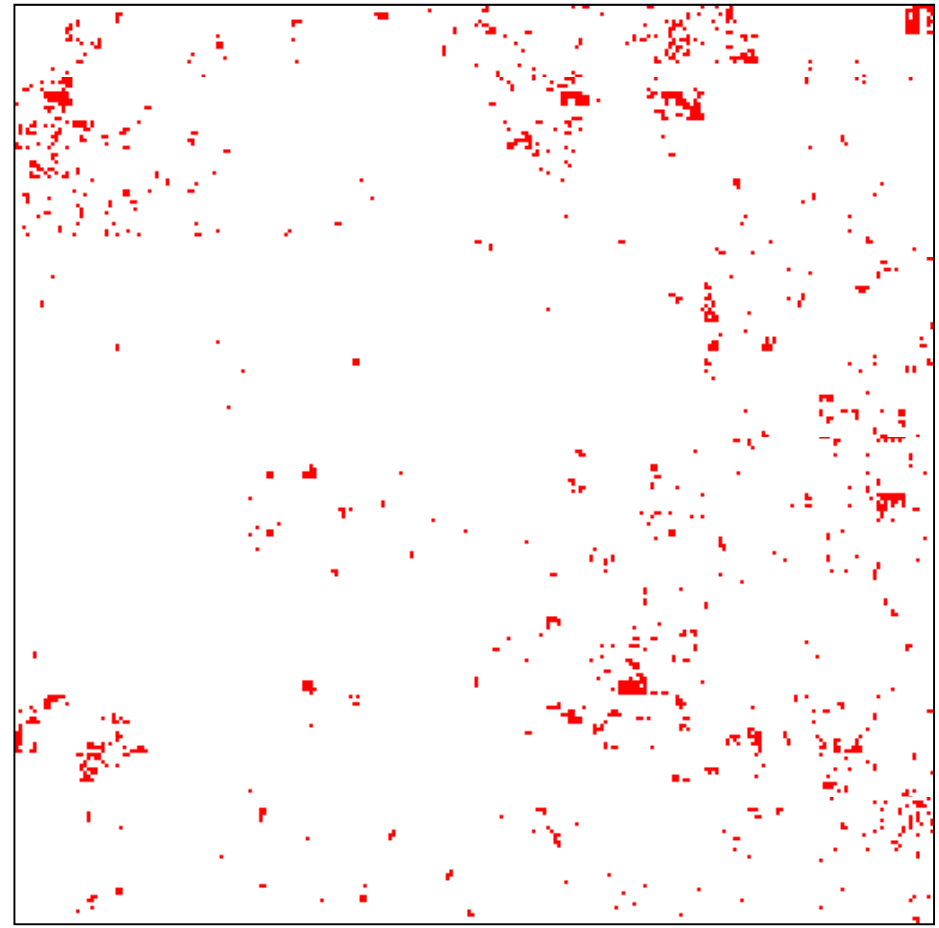

# Hilbert Visualisation- Chromosome 25

Foetal

Lamb

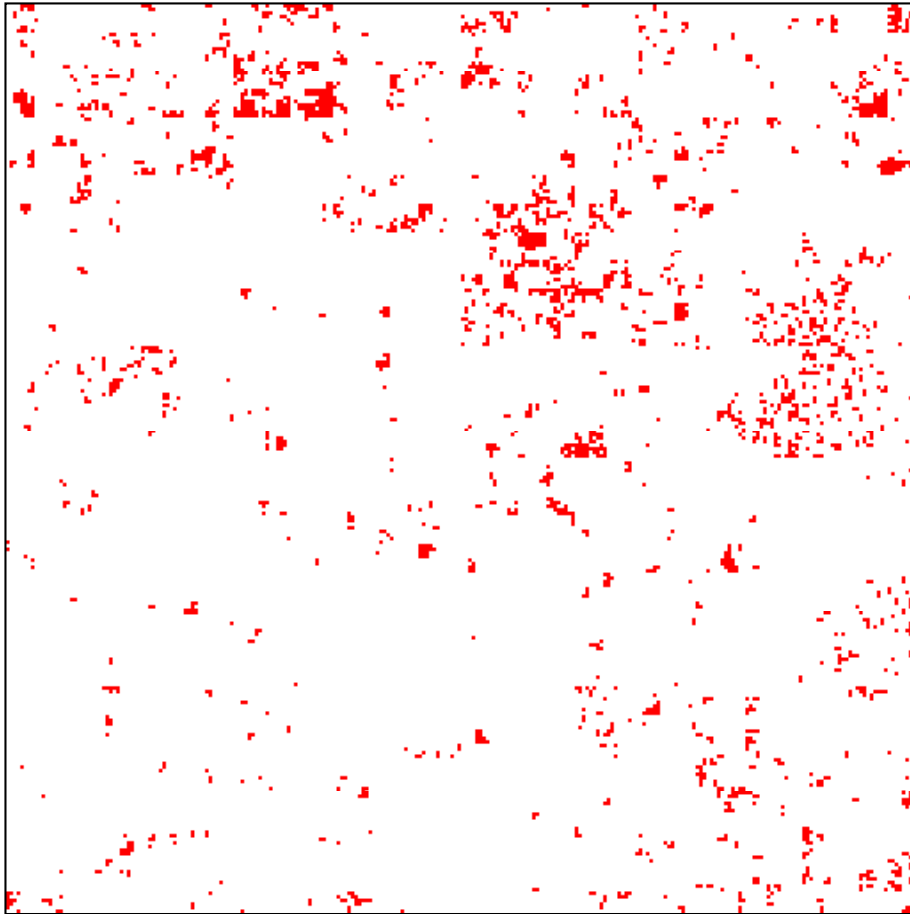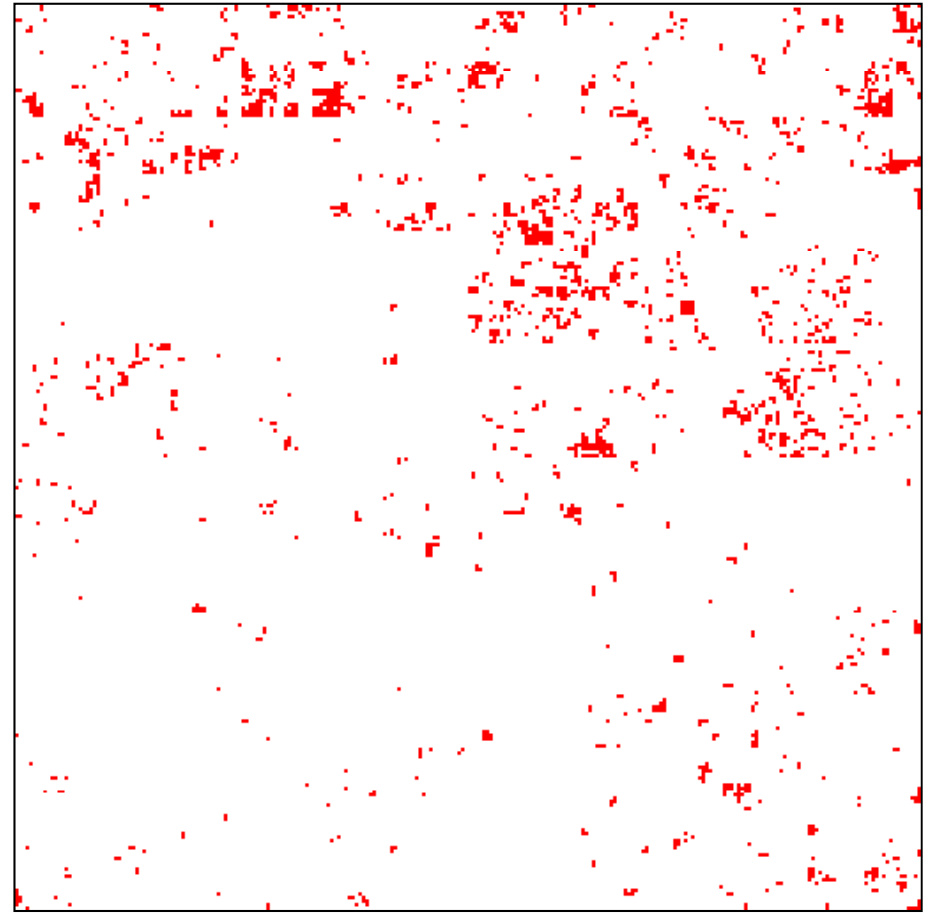

# Hilbert Visualisation- Chromosome 26

Foetal

Lamb

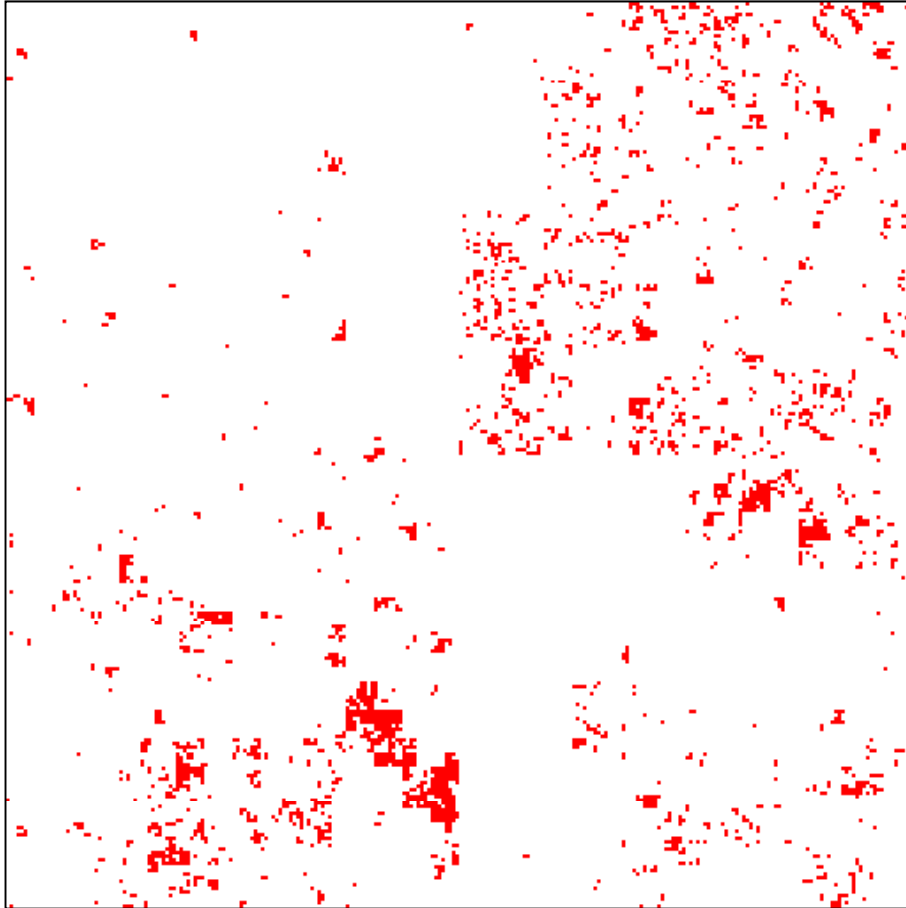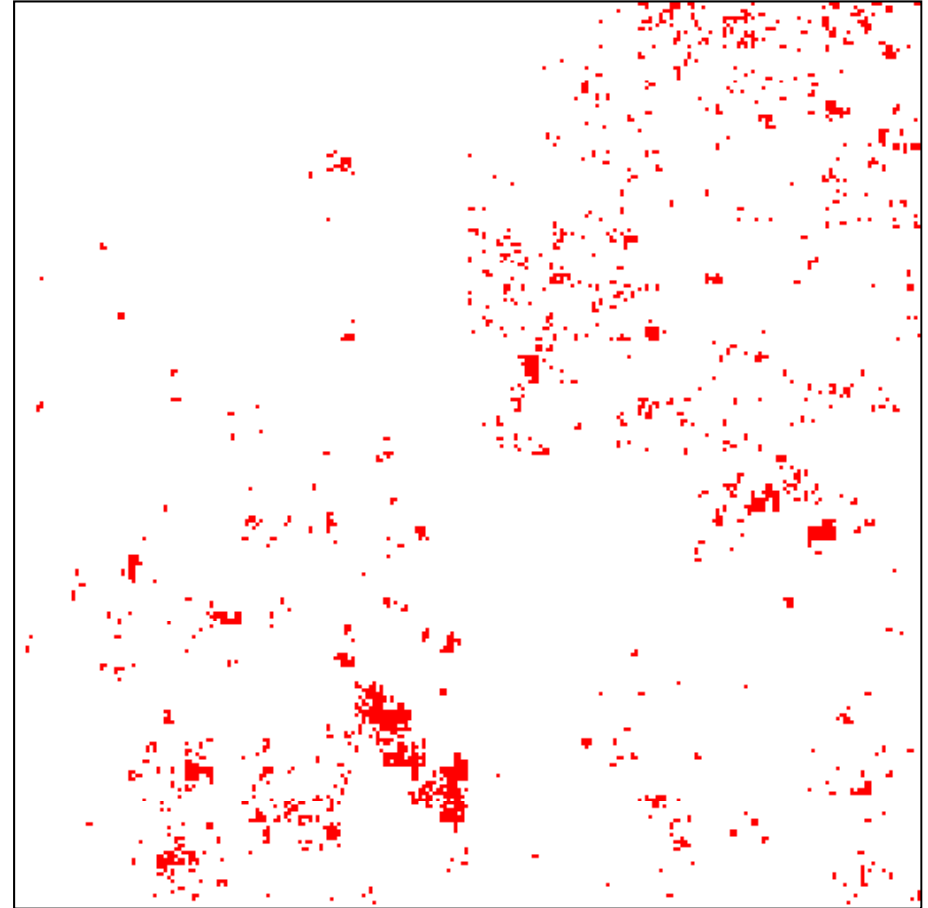

# Hilbert Visualisation- Chromosome 27

Foetal

Lamb

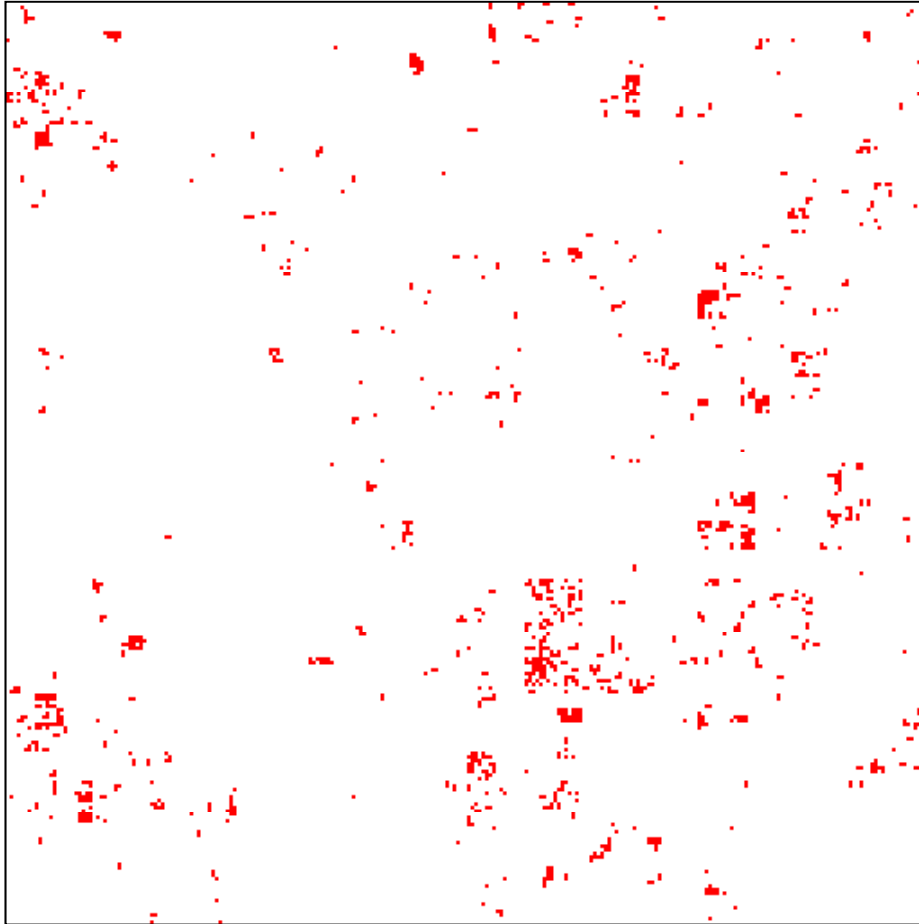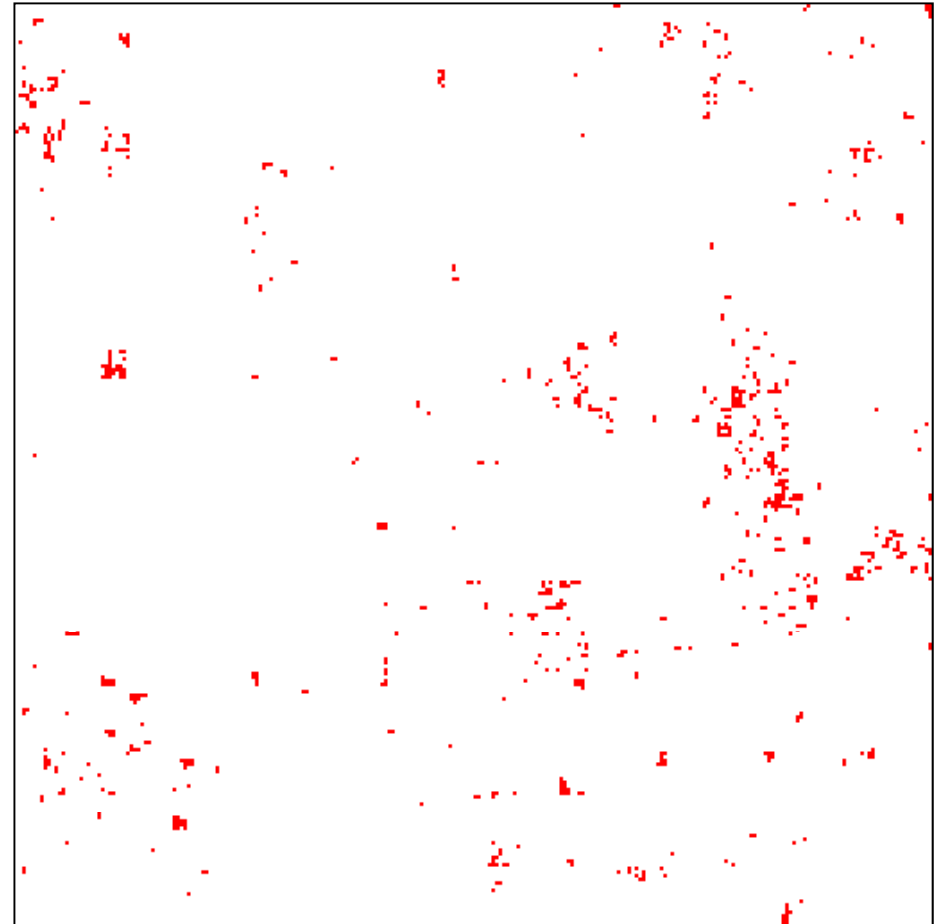

# Hilbert Visualisation- Chromosome 28

Foetal

Lamb

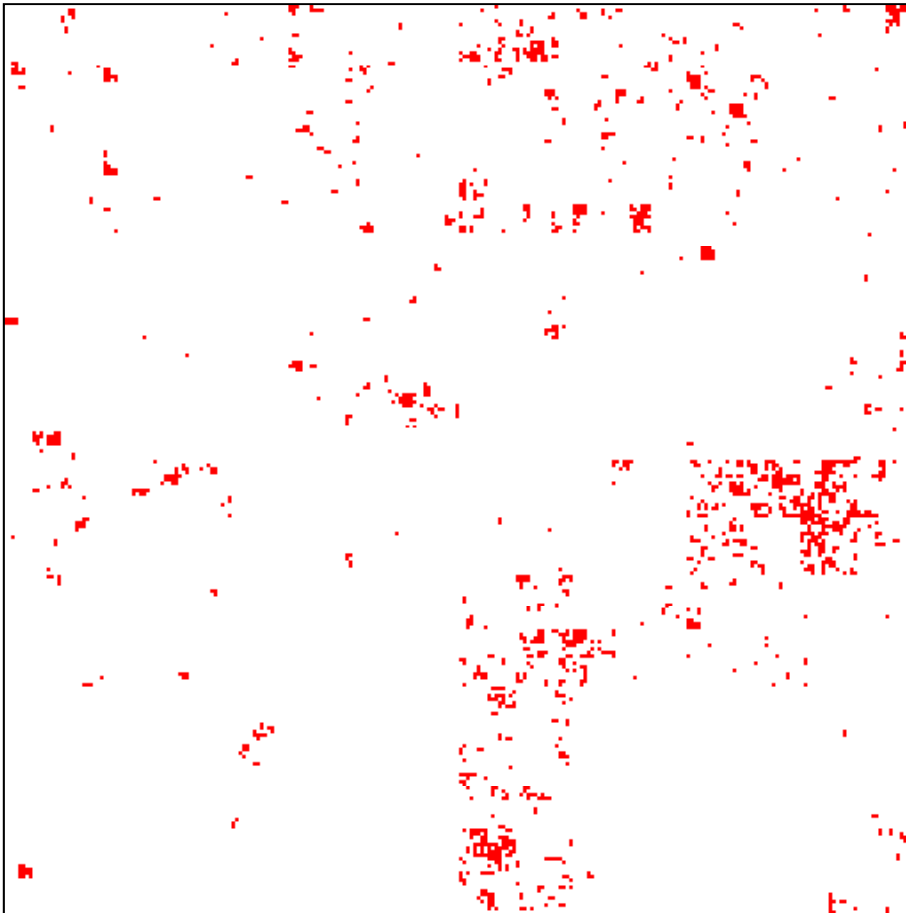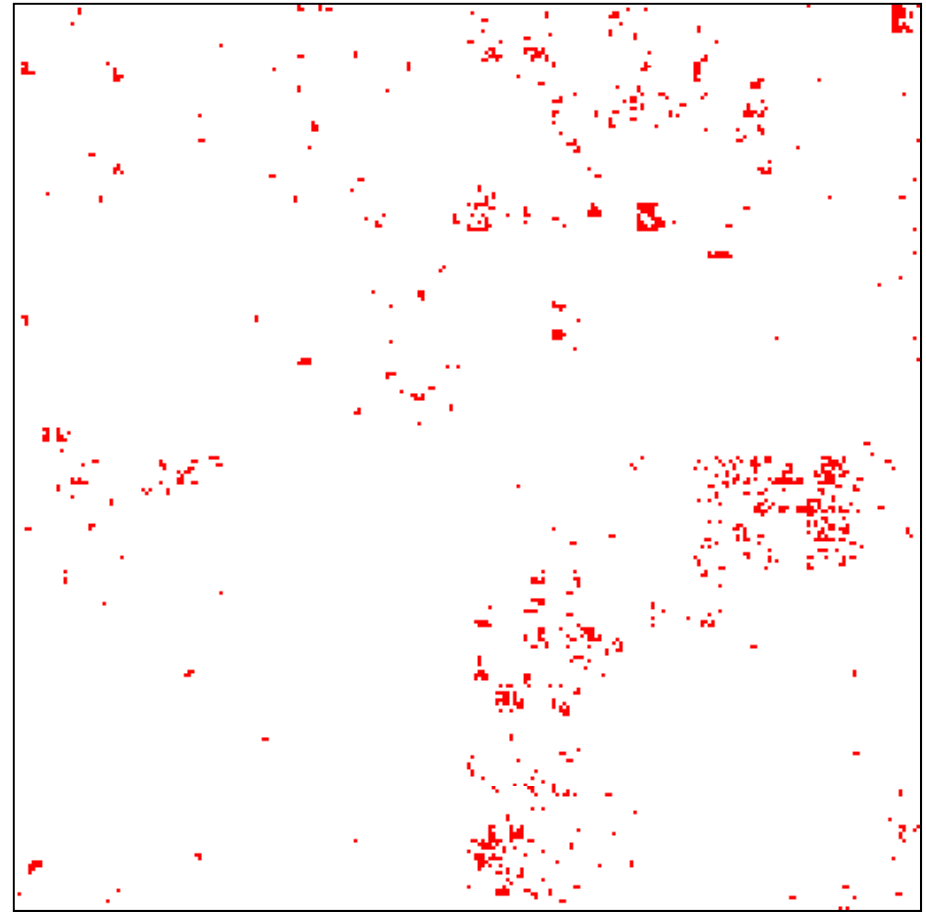

# Hilbert Visualisation- Chromosome 29

Foetal

Lamb

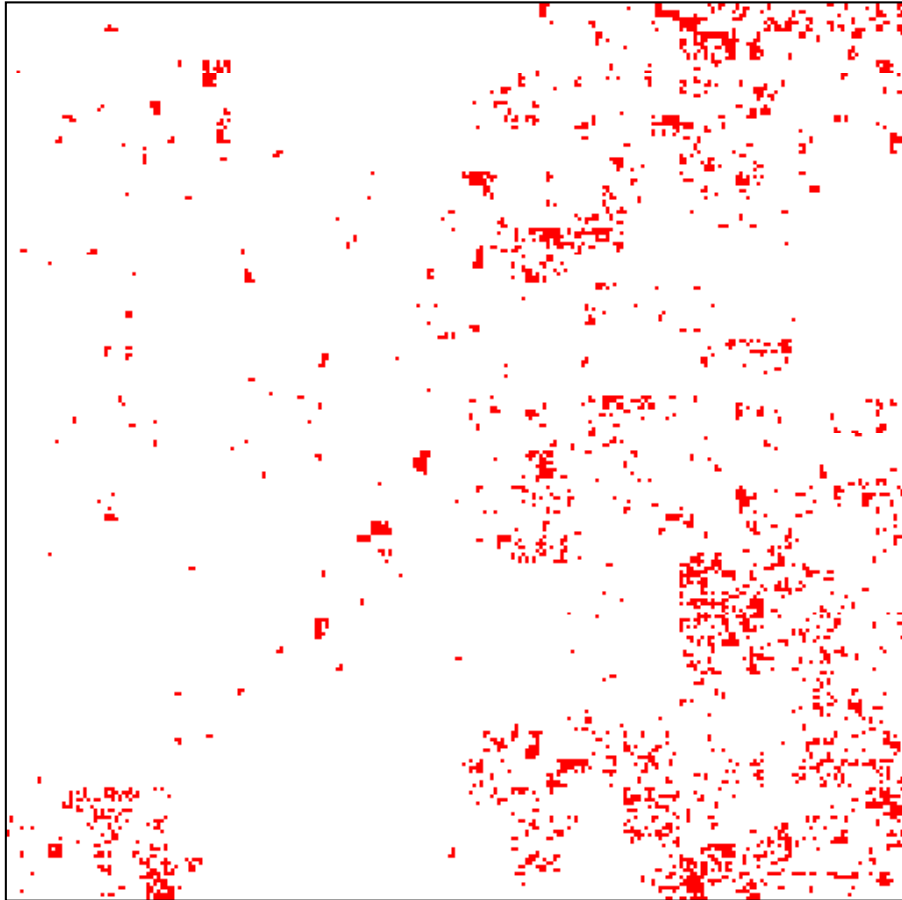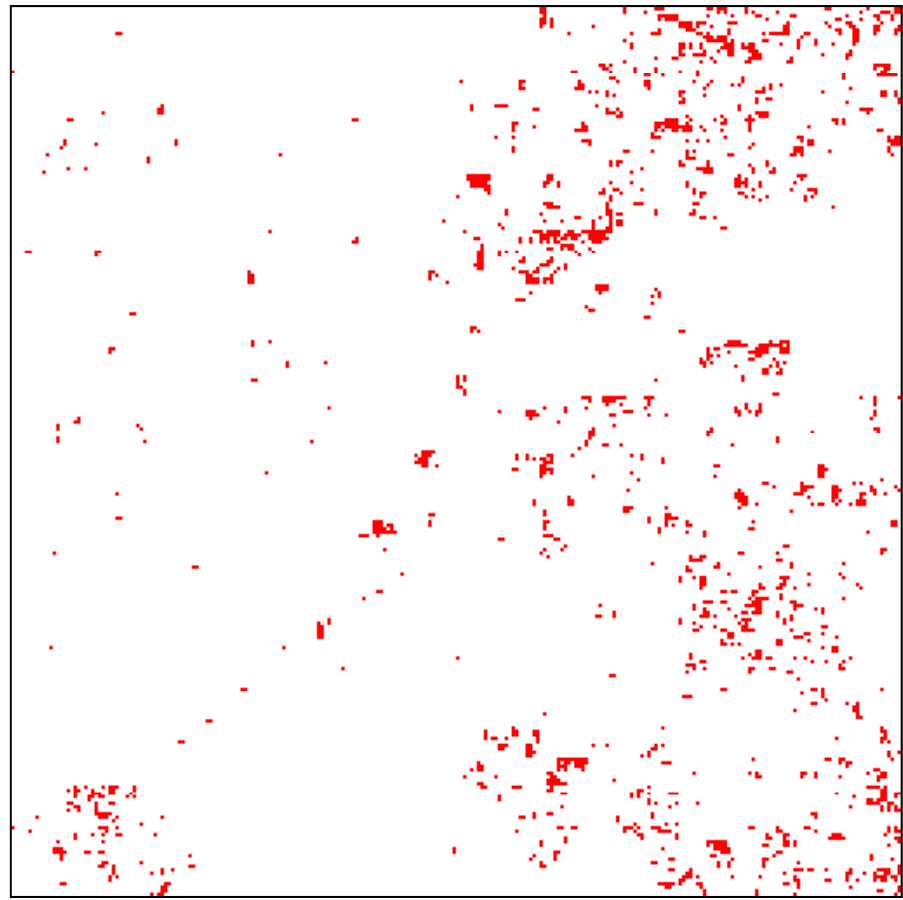

Supplement: age-45-427-s9.pdf [file age-45-427-s9.pdf]
