# Supplementary material for: Genomic architecture of histone 3 lysine 27 trimethylation during late ovine skeletal muscle development
Source: PubMed Central journal article supplement — Anim Genet. 2014 Mar 27;45(3):427–38. doi: 10.1111/age.12145 (PMC4286725; doi:10.1111/age.12145), 2014-03-27

**Figure S1** Mononucleosomal DNA obtained from lamb *longissimus lumborum* muscle

Representative image of mononucleosomal DNA isolated from lamb skeletal muscle. Chromatin was purified from *longissimus lumborum* skeletal muscle and digested with MNase. An aliquot of the resultant soluble chromatin was treated with proteinase K and RNase A. The DNA was extracted and run on a 1.5% agarose gel (Wagschal *et al.* 2007). Lane 1, DNA size standards (Gibco Low DNA Mass Ladder); lane 2, purified nucleosomal DNA; lane 3, DNA size standards (Fermentas Gene Ruler, Ultra low ladder). The size of the nucleosomal DNA (white arrow) was ~ 150 bp. All samples gave essentially the same result.

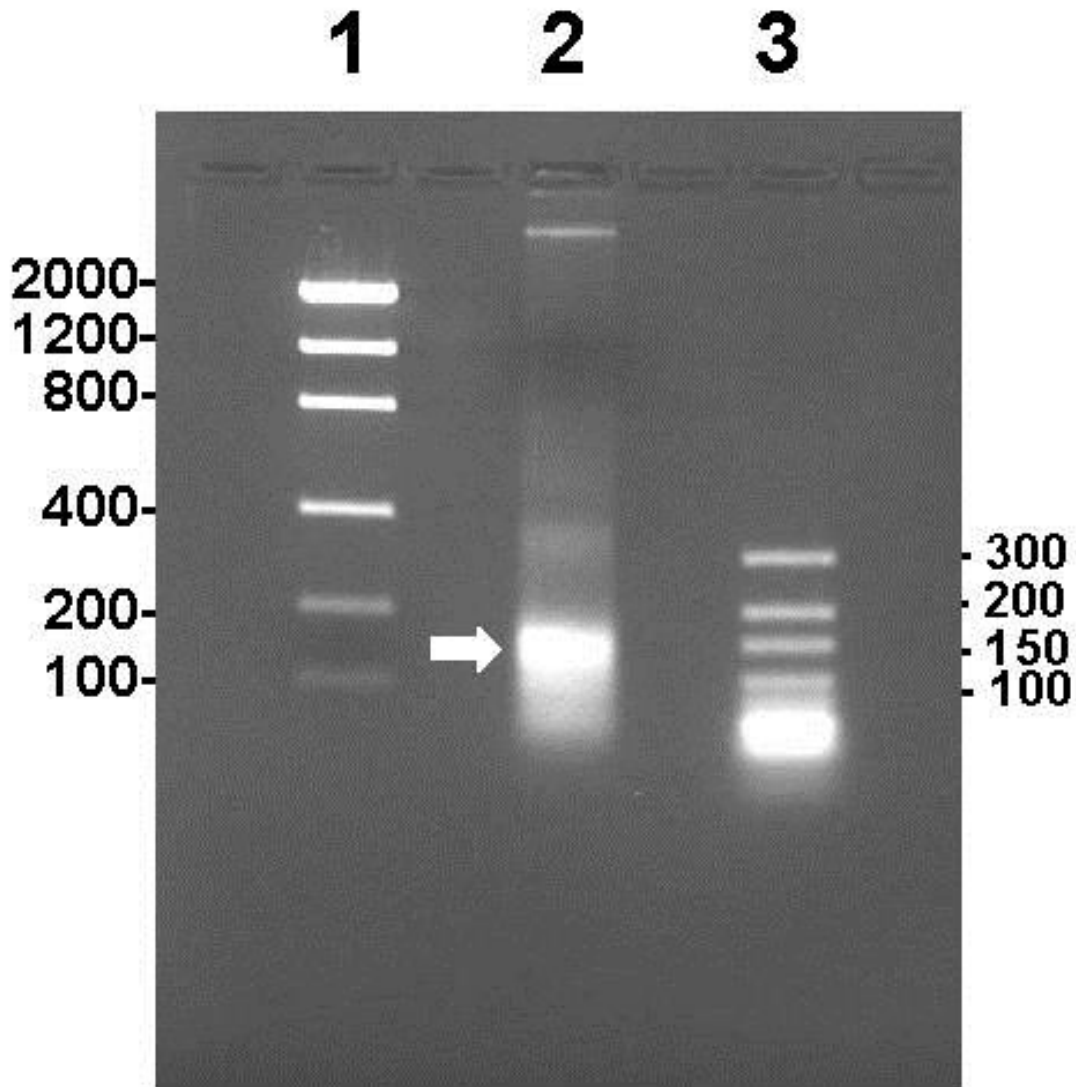

Supplement: age-45-427-s07.pdf [file age-45-427-s07.pdf]
