# Supplementary material for: Genomic architecture of histone 3 lysine 27 trimethylation during late ovine skeletal muscle development
Source: PubMed Central journal article supplement — Anim Genet. 2014 Mar 27;45(3):427–38. doi: 10.1111/age.12145 (PMC4286725; doi:10.1111/age.12145), 2014-03-27
Supplement: age-45-427-s11.pdf [file age-45-427-s11.pdf]

**Table S2** Fetal H3K27me3 peaks

Details of the H3K27me3 peak co-ordinates identified using CisGenome for fetus. The file lists chromosome, peak genomic co-ordinates and peak length.

| Chr. | No.   | Start     | Stop      | Length |
|------|-------|-----------|-----------|--------|
|      | chr20 | 33659689  | 33670247  | 10559  |
|      | chr11 | 98338030  | 98347515  | 9486   |
|      | chr12 | 54248055  | 54252408  | 4354   |
|      | chr3  | 22908106  | 22910627  | 2522   |
|      | chr26 | 43501562  | 43518972  | 17411  |
|      | chr23 | 52611651  | 52618873  | 7223   |
|      | chr3  | 23075366  | 23086923  | 11558  |
|      | chr1  | 87337644  | 87347648  | 10005  |
|      | chr23 | 31317873  | 31322204  | 4332   |
|      | chr12 | 74501044  | 74508644  | 7601   |
|      | chr27 | 35433495  | 35435731  | 2237   |
|      | chr5  | 111687568 | 111689217 | 1650   |
|      | chr21 | 47696301  | 47713614  | 17314  |
|      | chr2  | 21484434  | 21495998  | 11565  |
|      | chr2  | 21469588  | 21484146  | 14559  |
|      | chr3  | 117404892 | 117409260 | 4369   |
|      | chr3  | 22917556  | 22920147  | 2592   |
|      | chr20 | 33670357  | 33681556  | 11200  |
|      | chr7  | 65556987  | 65573460  | 16474  |
|      | chr2  | 21496672  | 21505926  | 9255   |
|      | chr24 | 813239    | 820751    | 7513   |
|      | chr3  | 55951792  | 55980500  | 28709  |
|      | chr1  | 87347709  | 87361374  | 13666  |
|      | chr5  | 28944676  | 28956070  | 11395  |
|      | chr11 | 63292502  | 63309008  | 16507  |
|      | chr20 | 4956450   | 4961543   | 5094   |
|      | chr4  | 71574688  | 71593840  | 19153  |
|      | chr10 | 50625859  | 50643344  | 17486  |
|      | chr9  | 77690839  | 77695466  | 4628   |
|      | chr6  | 63049826  | 63052187  | 2362   |
|      | chr15 | 62383612  | 62409961  | 26350  |
|      | chr22 | 39841299  | 39856542  | 15244  |
|      | chr12 | 54237088  | 54247973  | 10886  |
|      | chr3  | 105912873 | 105921153 | 8281   |
|      | chr23 | 52703960  | 52709678  | 5719   |
|      | chr8  | 24447050  | 24450577  | 3528   |
|      | chr20 | 74777817  | 74781266  | 3450   |
|      | chr4  | 64289160  | 64295740  | 6581   |
|      | chr1  | 132094544 | 132100461 | 5918   |
|      | chr6  | 113384890 | 113390248 | 5359   |
|      | chr2  | 21455302  | 21469046  | 13745  |
|      | chr26 | 44949601  | 44951966  | 2366   |
|      | chr26 | 21867148  | 21878463  | 11316  |
|      | chr1  | 100066607 | 100076124 | 9518   |

|       |           |           |       |
|-------|-----------|-----------|-------|
| chr3  | 8946322   | 8950571   | 4250  |
| chr20 | 8685692   | 8689847   | 4156  |
| chr3  | 88244587  | 88262420  | 17834 |
| chr7  | 52388445  | 52393085  | 4641  |
| chr4  | 30785184  | 30807837  | 22654 |
| chr23 | 27977534  | 27979514  | 1981  |
| chr18 | 22696222  | 22706935  | 10714 |
| chr13 | 40894471  | 40898041  | 3571  |
| chr2  | 36089397  | 36105599  | 16203 |
| chr23 | 49955813  | 49966913  | 11101 |
| chr23 | 31322823  | 31325187  | 2365  |
| chr4  | 121454977 | 121458283 | 3307  |
| chr2  | 128492688 | 128494178 | 1491  |
| chr11 | 28458350  | 28478990  | 20641 |
| chr8  | 55394920  | 55410852  | 15933 |
| chr7  | 89454258  | 89466996  | 12739 |
| chr2  | 23101226  | 23110175  | 8950  |
| chr29 | 37258558  | 37263543  | 4986  |
| chr13 | 72602417  | 72605858  | 3442  |
| chr3  | 123175285 | 123194373 | 19089 |
| chr20 | 4943339   | 4952392   | 9054  |
| chr14 | 22087715  | 22091606  | 3892  |
| chr12 | 84178889  | 84182761  | 3873  |
| chr6  | 14207560  | 14225458  | 17899 |
| chr21 | 48670177  | 48684061  | 13885 |
| chr3  | 74455985  | 74469271  | 13287 |
| chr8  | 45745216  | 45751148  | 5933  |
| chr8  | 23066080  | 23067425  | 1346  |
| chr3  | 55850499  | 55865092  | 14594 |
| chr10 | 8713197   | 8718905   | 5709  |
| chr4  | 121724058 | 121726640 | 2583  |
| chr4  | 14629783  | 14649049  | 19267 |
| chr1  | 133443746 | 133457590 | 13845 |
| chr19 | 37874916  | 37887360  | 12445 |
| chr10 | 66930525  | 66938311  | 7787  |
| chr20 | 33657973  | 33659467  | 1495  |
| chr5  | 75023790  | 75030451  | 6662  |
| chr8  | 89547562  | 89553528  | 5967  |
| chr18 | 34987892  | 34991845  | 3954  |
| chr3  | 26125766  | 26132848  | 7083  |
| chr10 | 8352698   | 8358880   | 6183  |
| chr20 | 33643917  | 33652349  | 8433  |
| chr2  | 25305290  | 25312361  | 7072  |
| chr25 | 3197766   | 3203664   | 5899  |
| chr12 | 84183175  | 84188242  | 5068  |
| chr12 | 36444094  | 36448963  | 4870  |
| chr9  | 52377589  | 52381906  | 4318  |
| chr18 | 12407701  | 12410238  | 2538  |
| chr3  | 54318188  | 54332771  | 14584 |
| chr1  | 123125082 | 123131335 | 6254  |

|       |           |           |       |
|-------|-----------|-----------|-------|
| chr4  | 64224091  | 64227187  | 3097  |
| chr5  | 28909608  | 28944585  | 34978 |
| chr13 | 22901698  | 22917573  | 15876 |
| chr3  | 102651980 | 102667661 | 15682 |
| chr7  | 94406938  | 94419874  | 12937 |
| chr4  | 71565064  | 71574665  | 9602  |
| chr8  | 7592392   | 7601247   | 8856  |
| chr20 | 3181513   | 3189951   | 8439  |
| chr3  | 115101232 | 115107749 | 6518  |
| chr15 | 36293587  | 36299759  | 6173  |
| chr3  | 36021099  | 36024794  | 3696  |
| chr19 | 54277522  | 54290696  | 13175 |
| chr9  | 43804147  | 43811934  | 7788  |
| chr22 | 7224306   | 7231821   | 7516  |
| chr12 | 61821846  | 61827859  | 6014  |
| chr2  | 132428846 | 132433098 | 4253  |
| chr23 | 46412548  | 46416590  | 4043  |
| chr9  | 53326205  | 53336394  | 10190 |
| chr20 | 74011142  | 74019444  | 8303  |
| chr8  | 63951795  | 63959917  | 8123  |
| chr12 | 68230921  | 68234603  | 3683  |
| chr12 | 74516614  | 74530894  | 14281 |
| chr2  | 25295100  | 25305156  | 10057 |
| chr2  | 25287040  | 25295092  | 8053  |
| chr29 | 31975947  | 31981290  | 5344  |
| chr23 | 15832858  | 15836628  | 3771  |
| chr21 | 64509700  | 64512460  | 2761  |
| chr3  | 8960692   | 8963344   | 2653  |
| chr8  | 5773324   | 5792447   | 19124 |
| chr8  | 7566266   | 7578112   | 11847 |
| chr1  | 132084118 | 132094458 | 10341 |
| chr20 | 29954344  | 29964367  | 10024 |
| chr18 | 11567697  | 11575359  | 7663  |
| chr7  | 45675442  | 45681304  | 5863  |
| chr17 | 63314208  | 63319199  | 4992  |
| chr23 | 19327629  | 19331849  | 4221  |
| chr27 | 38664740  | 38667861  | 3122  |
| chr3  | 22655199  | 22657528  | 2330  |
| chr22 | 1932698   | 1951848   | 19151 |
| chr20 | 6597990   | 6614228   | 16239 |
| chr18 | 22079322  | 22084678  | 5357  |
| chr22 | 16287381  | 16292241  | 4861  |
| chr18 | 11579622  | 11584049  | 4428  |
| chr22 | 16292259  | 16296219  | 3961  |
| chr18 | 51026740  | 51028914  | 2175  |
| chr4  | 89762666  | 89777364  | 14699 |
| chr26 | 14894486  | 14904390  | 9905  |
| chr11 | 48679811  | 48689387  | 9577  |
| chr14 | 34076825  | 34085749  | 8925  |
| chr7  | 45666960  | 45674449  | 7490  |

|       |           |           |       |
|-------|-----------|-----------|-------|
| chr3  | 36036478  | 36042243  | 5766  |
| chr12 | 54252472  | 54257916  | 5445  |
| chr16 | 41351624  | 41356964  | 5341  |
| chr3  | 22925786  | 22930309  | 4524  |
| chr21 | 48684386  | 48695583  | 11198 |
| chr10 | 20465898  | 20471873  | 5976  |
| chr4  | 64284505  | 64289104  | 4600  |
| chr10 | 66916483  | 66920239  | 3757  |
| chr11 | 14152205  | 14153601  | 1397  |
| chr13 | 41703719  | 41719589  | 15871 |
| chr9  | 43788433  | 43803791  | 15359 |
| chr21 | 31677398  | 31689787  | 12390 |
| chr10 | 36829794  | 36839066  | 9273  |
| chr11 | 28333121  | 28341427  | 8307  |
| chr8  | 5800528   | 5808697   | 8170  |
| chr21 | 9439820   | 9446038   | 6219  |
| chr8  | 67691701  | 67697214  | 5514  |
| chr11 | 9231332   | 9245436   | 14105 |
| chr11 | 11979098  | 11991425  | 12328 |
| chr6  | 108684750 | 108695779 | 11030 |
| chr9  | 53312361  | 53322150  | 9790  |
| chr26 | 22260894  | 22270066  | 9173  |
| chr6  | 63052490  | 63061496  | 9007  |
| chr24 | 58964750  | 58971785  | 7036  |
| chr4  | 121719702 | 121721252 | 1551  |
| chr23 | 52709695  | 52715722  | 6028  |
| chr9  | 52388373  | 52393007  | 4635  |
| chr15 | 62746796  | 62749994  | 3199  |
| chr3  | 22855393  | 22857926  | 2534  |
| chr2  | 23088571  | 23100907  | 12337 |
| chr11 | 66705093  | 66715346  | 10254 |
| chr9  | 74249964  | 74258563  | 8600  |
| chr9  | 52393008  | 52397705  | 4698  |
| chr26 | 37869907  | 37873768  | 3862  |
| chr12 | 74486656  | 74490506  | 3851  |
| chr3  | 8629728   | 8631342   | 1615  |
| chr20 | 25591420  | 25592445  | 1026  |
| chr5  | 17171729  | 17185711  | 13983 |
| chr5  | 33863011  | 33876450  | 13440 |
| chr11 | 9219306   | 9228722   | 9417  |
| chr24 | 48619421  | 48625989  | 6569  |
| chr21 | 20597323  | 20602542  | 5220  |
| chr11 | 3859088   | 3864069   | 4982  |
| chr28 | 43863535  | 43868284  | 4750  |
| chr24 | 36940393  | 36944576  | 4184  |
| chr16 | 68754559  | 68756793  | 2235  |
| chr2  | 26588529  | 26597586  | 9058  |
| chr14 | 31022211  | 31027916  | 5706  |
| chr2  | 132433733 | 132439081 | 5349  |
| chr3  | 36031661  | 36036477  | 4817  |

|       |               |           |       |
|-------|---------------|-----------|-------|
| chr2  | 72869674      | 72874418  | 4745  |
| chr1  | 111299432     | 111312489 | 13058 |
| chr26 | 37860048      | 37869629  | 9582  |
| chr4  | 121496488     | 121505959 | 9472  |
| chr10 | 88063545      | 88072956  | 9412  |
| chr6  | 63171888      | 63181214  | 9327  |
| chr14 | 66262046      | 66269313  | 7268  |
| chr13 | 40811761      | 40816336  | 4576  |
| chr23 | 31305817      | 31310081  | 4265  |
| chr1  | 82744629      | 82748461  | 3833  |
| chr21 | 39965681      | 39985856  | 20176 |
| chr19 | 38996084      | 39009018  | 12935 |
| chr24 | 802851 811761 | 8911      |       |
| chr4  | 122653026     | 122661755 | 8730  |
| chr8  | 89538972      | 89547177  | 8206  |
| chr13 | 2461210       | 2468202   | 6993  |
| chr4  | 69314050      | 69320020  | 5971  |
| chr21 | 52046507      | 52052316  | 5810  |
| chr4  | 72314940      | 72323691  | 8752  |
| chr15 | 32264388      | 32272596  | 8209  |
| chr11 | 14131371      | 14139163  | 7793  |
| chr1  | 100076895     | 100082985 | 6091  |
| chr6  | 63181224      | 63187030  | 5807  |
| chr19 | 38750063      | 38755836  | 5774  |
| chr23 | 46373219      | 46378166  | 4948  |
| chr16 | 68757031      | 68760343  | 3313  |
| chr3  | 22662658      | 22665338  | 2681  |
| chr12 | 31547684      | 31550034  | 2351  |
| chr4  | 122661977     | 122663999 | 2023  |
| chr16 | 75196205      | 75222904  | 26700 |
| chr7  | 89430935      | 89454250  | 23316 |
| chr4  | 71522144      | 71542117  | 19974 |
| chr8  | 65856961      | 65869785  | 12825 |
| chr2  | 92333435      | 92342389  | 8955  |
| chr19 | 46098985      | 46102593  | 3609  |
| chr29 | 49571460      | 49572629  | 1170  |
| chr20 | 29499895      | 29510457  | 10563 |
| chr18 | 18703300      | 18709859  | 6560  |
| chr7  | 46224838      | 46230346  | 5509  |
| chr13 | 40876916      | 40881571  | 4656  |
| chr9  | 26595176      | 26599807  | 4632  |
| chr3  | 106538783     | 106542082 | 3300  |
| chr12 | 74483772      | 74486633  | 2862  |
| chr11 | 14150238      | 14152142  | 1905  |
| chr9  | 91905433      | 91906670  | 1238  |
| chr19 | 39052902      | 39084135  | 31234 |
| chr6  | 113361705     | 113376832 | 15128 |
| chr26 | 18754486      | 18765737  | 11252 |
| chr19 | 41241153      | 41250077  | 8925  |
| chr21 | 47531071      | 47538917  | 7847  |

|       |           |           |       |
|-------|-----------|-----------|-------|
| chr6  | 63166663  | 63171858  | 5196  |
| chr6  | 103295967 | 103300850 | 4884  |
| chr27 | 22182032  | 22186034  | 4003  |
| chr26 | 22258164  | 22260760  | 2597  |
| chr21 | 18884628  | 18886973  | 2346  |
| chr7  | 45681474  | 45683629  | 2156  |
| chr15 | 6407941   | 6409659   | 1719  |
| chr4  | 14649948  | 14666881  | 16934 |
| chr2  | 111344445 | 111351454 | 7010  |
| chr2  | 111403370 | 111408550 | 5181  |
| chr19 | 13497388  | 13501777  | 4390  |
| chr17 | 7826749   | 7829702   | 2954  |
| chr6  | 69749127  | 69751763  | 2637  |
| chr10 | 58738151  | 58755633  | 17483 |
| chr18 | 11627553  | 11642765  | 15213 |
| chr2  | 26495917  | 26507777  | 11861 |
| chr11 | 10432491  | 10440230  | 7740  |
| chr21 | 59895748  | 59901922  | 6175  |
| chr8  | 6474248   | 6479616   | 5369  |
| chr11 | 96178953  | 96181771  | 2819  |
| chr12 | 9557300   | 9559864   | 2565  |
| chr24 | 60567405  | 60569648  | 2244  |
| chr9  | 90381301  | 90383505  | 2205  |
| chr3  | 22577787  | 22579191  | 1405  |
| chr21 | 47538982  | 47556946  | 17965 |
| chrX  | 72243231  | 72261055  | 17825 |
| chr19 | 12676916  | 12693544  | 16629 |
| chr15 | 62736201  | 62745937  | 9737  |
| chr19 | 10886964  | 10896149  | 9186  |
| chr8  | 46605866  | 46614305  | 8440  |
| chr26 | 34967318  | 34974142  | 6825  |
| chr12 | 32110934  | 32117662  | 6729  |
| chr23 | 52696529  | 52702790  | 6262  |
| chr14 | 29198128  | 29204261  | 6134  |
| chr8  | 10472812  | 10477533  | 4722  |
| chr3  | 23010644  | 23013634  | 2991  |
| chr3  | 55843178  | 55845967  | 2790  |
| chr11 | 12862855  | 12865606  | 2752  |
| chr23 | 23848541  | 23866561  | 18021 |
| chr10 | 71249057  | 71262785  | 13729 |
| chr13 | 40588131  | 40599754  | 11624 |
| chr6  | 32558599  | 32569955  | 11357 |
| chr26 | 14549229  | 14559759  | 10531 |
| chr21 | 20639189  | 20649389  | 10201 |
| chr3  | 29958422  | 29967265  | 8844  |
| chr4  | 121446503 | 121454401 | 7899  |
| chr6  | 113376898 | 113384400 | 7503  |
| chr16 | 46746283  | 46752544  | 6262  |
| chr18 | 23114322  | 23119788  | 5467  |
| chr17 | 26901531  | 26906120  | 4590  |

|       |               |           |       |
|-------|---------------|-----------|-------|
| chr4  | 67700690      | 67705046  | 4357  |
| chr2  | 115114987     | 115118720 | 3734  |
| chr24 | 192163 195211 | 3049      |       |
| chr18 | 48671982      | 48674845  | 2864  |
| chr23 | 53262103      | 53264763  | 2661  |
| chr23 | 23876037      | 23877325  | 1289  |
| chr16 | 59048969      | 59062178  | 13210 |
| chr10 | 71236883      | 71249037  | 12155 |
| chr23 | 46379570      | 46385751  | 6182  |
| chr10 | 8527146       | 8530896   | 3751  |
| chr18 | 11623638      | 11627117  | 3480  |
| chr16 | 40905757      | 40908886  | 3130  |
| chr3  | 115099745     | 115100952 | 1208  |
| chr20 | 29510499      | 29524477  | 13979 |
| chr19 | 39094519      | 39101779  | 7261  |
| chr8  | 67697385      | 67704014  | 6630  |
| chr9  | 51606078      | 51612217  | 6140  |
| chr8  | 15097669      | 15103507  | 5839  |
| chr26 | 43497180      | 43501314  | 4135  |
| chr12 | 84188774      | 84192091  | 3318  |
| chr12 | 74429372      | 74431979  | 2608  |
| chr25 | 37698277      | 37700698  | 2422  |
| chr29 | 44676640      | 44677531  | 892   |
| chr7  | 13286838      | 13298277  | 11440 |
| chr26 | 22810295      | 22817637  | 7343  |
| chr4  | 72744096      | 72748539  | 4444  |
| chr19 | 45827173      | 45831538  | 4366  |
| chr5  | 60131701      | 60135924  | 4224  |
| chr14 | 76890985      | 76894628  | 3644  |
| chr3  | 31675891      | 31679423  | 3533  |
| chr16 | 29424917      | 29428437  | 3521  |
| chr3  | 22624762      | 22627044  | 2283  |
| chr10 | 21663901      | 21665308  | 1408  |
| chr15 | 74500059      | 74516550  | 16492 |
| chr16 | 77487005      | 77494703  | 7699  |
| chr8  | 23026975      | 23033123  | 6149  |
| chr9  | 52408375      | 52414029  | 5655  |
| chr10 | 68226007      | 68230975  | 4969  |
| chr1  | 111295575     | 111299421 | 3847  |
| chr25 | 43520575      | 43524378  | 3804  |
| chr19 | 39851729      | 39855178  | 3450  |
| chr7  | 43756478      | 43758942  | 2465  |
| chr8  | 63914327      | 63915603  | 1277  |
| chr9  | 51612274      | 51629605  | 17332 |
| chr10 | 74706071      | 74719544  | 13474 |
| chr11 | 96172785      | 96178690  | 5906  |
| chr5  | 29207950      | 29212980  | 5031  |
| chr23 | 52602978      | 52607316  | 4339  |
| chr25 | 2989415       | 2992795   | 3381  |
| chr4  | 72753454      | 72756260  | 2807  |

|       |           |           |       |
|-------|-----------|-----------|-------|
| chr18 | 51029906  | 51031421  | 1516  |
| chr9  | 66522590  | 66535457  | 12868 |
| chr3  | 4357734   | 4368453   | 10720 |
| chr23 | 46385908  | 46393670  | 7763  |
| chr10 | 8345191   | 8352667   | 7477  |
| chr5  | 33523106  | 33530581  | 7476  |
| chr5  | 71666509  | 71672917  | 6409  |
| chr9  | 52381940  | 52388290  | 6351  |
| chr1  | 154408673 | 154414929 | 6257  |
| chr11 | 28486041  | 28491897  | 5857  |
| chr9  | 77190093  | 77195576  | 5484  |
| chr18 | 23119794  | 23124280  | 4487  |
| chr26 | 22273597  | 22277662  | 4066  |
| chr19 | 45278578  | 45281926  | 3349  |
| chr22 | 7221530   | 7224113   | 2584  |
| chr4  | 29007364  | 29019982  | 12619 |
| chr21 | 20602652  | 20614468  | 11817 |
| chr4  | 121394270 | 121405048 | 10779 |
| chr13 | 14700441  | 14711180  | 10740 |
| chr19 | 53552817  | 53560078  | 7262  |
| chr23 | 23877326  | 23884521  | 7196  |
| chr5  | 27941269  | 27947950  | 6682  |
| chr7  | 44049301  | 44054775  | 5475  |
| chr10 | 66910807  | 66916238  | 5432  |
| chr19 | 38988981  | 38994002  | 5022  |
| chr28 | 26748014  | 26752926  | 4913  |
| chr2  | 92327775  | 92332477  | 4703  |
| chr16 | 60225330  | 60230002  | 4673  |
| chr11 | 21626401  | 21630909  | 4509  |
| chr12 | 76540475  | 76544775  | 4301  |
| chr22 | 50752460  | 50756733  | 4274  |
| chr7  | 14295325  | 14299058  | 3734  |
| chr9  | 37890910  | 37894456  | 3547  |
| chr8  | 77284754  | 77287641  | 2888  |
| chr4  | 118020459 | 118022867 | 2409  |
| chr13 | 74499293  | 74501299  | 2007  |
| chr12 | 32117673  | 32119385  | 1713  |
| chr4  | 96837197  | 96849720  | 12524 |
| chr26 | 21879162  | 21888813  | 9652  |
| chr5  | 29196299  | 29204072  | 7774  |
| chr14 | 22093796  | 22100111  | 6316  |
| chr13 | 2455841   | 2461077   | 5237  |
| chr25 | 3192130   | 3196510   | 4381  |
| chr8  | 24479978  | 24484281  | 4304  |
| chr2  | 115214383 | 115218413 | 4031  |
| chr20 | 8537540   | 8541292   | 3753  |
| chr7  | 81581165  | 81584661  | 3497  |
| chr19 | 54216524  | 54219710  | 3187  |
| chr6  | 103300985 | 103307351 | 6367  |
| chr24 | 36934374  | 36940355  | 5982  |



|       |           |           |       |
|-------|-----------|-----------|-------|
| chr4  | 98036480  | 98041980  | 5501  |
| chr19 | 41476587  | 41480965  | 4379  |
| chr8  | 7578137   | 7582102   | 3966  |
| chr10 | 103069916 | 103073502 | 3587  |
| chr23 | 15829265  | 15832753  | 3489  |
| chr19 | 40417978  | 40421146  | 3169  |
| chr15 | 62750887  | 62753821  | 2935  |
| chr5  | 120050376 | 120053211 | 2836  |
| chr3  | 22900476  | 22903083  | 2608  |
| chr11 | 98335382  | 98337976  | 2595  |
| chr8  | 108709633 | 108712016 | 2384  |
| chr7  | 16542506  | 16544507  | 2002  |
| chr4  | 122645293 | 122646665 | 1373  |
| chr23 | 27975909  | 27977174  | 1266  |
| chr13 | 41018255  | 41038498  | 20244 |
| chr3  | 105732445 | 105746385 | 13941 |
| chr17 | 63434818  | 63448719  | 13902 |
| chr10 | 32247735  | 32258337  | 10603 |
| chr19 | 39855269  | 39862257  | 6989  |
| chr19 | 13490398  | 13497291  | 6894  |
| chr11 | 28479098  | 28485929  | 6832  |
| chr12 | 74432179  | 74438194  | 6016  |
| chr5  | 71660122  | 71666047  | 5926  |
| chr9  | 77695501  | 77700412  | 4912  |
| chr18 | 11575543  | 11579570  | 4028  |
| chr17 | 47073961  | 47077455  | 3495  |
| chr8  | 74372523  | 74375323  | 2801  |
| chr6  | 67339135  | 67341324  | 2190  |
| chr23 | 27823595  | 27825208  | 1614  |
| chr10 | 32484035  | 32495779  | 11745 |
| chr26 | 18744909  | 18754304  | 9396  |
| chr8  | 5792572   | 5799116   | 6545  |
| chr22 | 14927078  | 14933191  | 6114  |
| chr11 | 14139217  | 14144472  | 5256  |
| chr1  | 1630209   | 1635197   | 4989  |
| chr9  | 24596808  | 24601056  | 4249  |
| chr4  | 47032232  | 47036232  | 4001  |
| chr5  | 33530787  | 33534190  | 3404  |
| chr12 | 74512821  | 74516042  | 3222  |
| chr9  | 74258968  | 74261466  | 2499  |
| chr23 | 48772665  | 48774564  | 1900  |
| chr3  | 22569583  | 22570750  | 1168  |
| chr24 | 58972003  | 58982593  | 10591 |
| chr6  | 72294564  | 72303665  | 9102  |
| chr13 | 23662875  | 23670421  | 7547  |
| chr12 | 19007136  | 19014493  | 7358  |
| chr16 | 44121729  | 44128700  | 6972  |
| chr20 | 38856086  | 38862493  | 6408  |
| chr9  | 92180911  | 92186797  | 5887  |
| chr6  | 103277662 | 103282774 | 5113  |

|       |           |           |       |
|-------|-----------|-----------|-------|
| chr24 | 35325138  | 35329964  | 4827  |
| chr13 | 15167331  | 15171107  | 3777  |
| chr15 | 45866030  | 45869646  | 3617  |
| chr21 | 24496253  | 24499303  | 3051  |
| chr2  | 131201477 | 131204426 | 2950  |
| chr24 | 35322119  | 35324934  | 2816  |
| chr7  | 94386540  | 94388549  | 2010  |
| chr23 | 33462818  | 33464770  | 1953  |
| chr4  | 72732625  | 72734570  | 1946  |
| chr12 | 36454989  | 36456233  | 1245  |
| chr11 | 98334079  | 98335211  | 1133  |
| chr17 | 63467321  | 63489166  | 21846 |
| chr24 | 35309509  | 35321183  | 11675 |
| chr27 | 16699151  | 16706309  | 7159  |
| chr2  | 21506193  | 21513257  | 7065  |
| chr9  | 46016818  | 46022759  | 5942  |
| chr11 | 10447348  | 10452587  | 5240  |
| chr18 | 22070342  | 22075378  | 5037  |
| chr26 | 38230304  | 38235212  | 4909  |
| chr23 | 46408443  | 46412547  | 4105  |
| chr20 | 73285279  | 73288975  | 3697  |
| chr18 | 52789382  | 52792786  | 3405  |
| chr3  | 20500507  | 20503682  | 3176  |
| chr18 | 53011861  | 53014887  | 3027  |
| chr3  | 79687081  | 79689570  | 2490  |
| chr1  | 149232080 | 149234127 | 2048  |
| chr12 | 32924128  | 32925859  | 1732  |
| chr10 | 95114490  | 95116026  | 1537  |
| chr3  | 22677639  | 22678186  | 548   |
| chr26 | 38244531  | 38252263  | 7733  |
| chr8  | 45737625  | 45744878  | 7254  |
| chr13 | 14711317  | 14718289  | 6973  |
| chr13 | 55510802  | 55517199  | 6398  |
| chr21 | 49255728  | 49261929  | 6202  |
| chr3  | 106542172 | 106547821 | 5650  |
| chr29 | 23647246  | 23652872  | 5627  |
| chr23 | 31284349  | 31289695  | 5347  |
| chr6  | 108679867 | 108684722 | 4856  |
| chr3  | 36954654  | 36958798  | 4145  |
| chr11 | 96168826  | 96172652  | 3827  |
| chr12 | 14936306  | 14939882  | 3577  |
| chr5  | 69512746  | 69515969  | 3224  |
| chr10 | 36288293  | 36291348  | 3056  |
| chr12 | 68226012  | 68228523  | 2512  |
| chr19 | 10950868  | 10953068  | 2201  |
| chr26 | 14547005  | 14549151  | 2147  |
| chr15 | 62380315  | 62382255  | 1941  |
| chr19 | 38669295  | 38671140  | 1846  |
| chr21 | 27573272  | 27575091  | 1820  |
| chr23 | 31175957  | 31177426  | 1470  |

|       |               |           |       |
|-------|---------------|-----------|-------|
| chr14 | 22082729      | 22083661  | 933   |
| chr26 | 14885124      | 14894425  | 9302  |
| chr13 | 26209207      | 26217033  | 7827  |
| chr20 | 73276252      | 73282668  | 6417  |
| chr11 | 99194417      | 99200806  | 6390  |
| chr19 | 37851600      | 37857856  | 6257  |
| chr4  | 16839149      | 16844270  | 5122  |
| chr8  | 63946932      | 63951766  | 4835  |
| chr12 | 74479297      | 74483417  | 4121  |
| chr29 | 26773583      | 26777364  | 3782  |
| chr8  | 74375388      | 74378816  | 3429  |
| chr16 | 59045228      | 59048316  | 3089  |
| chr7  | 43751431      | 43754483  | 3053  |
| chr7  | 42929079      | 42931895  | 2817  |
| chr8  | 9352755       | 9355539   | 2785  |
| chr4  | 14666991      | 14669715  | 2725  |
| chr19 | 39913843      | 39916070  | 2228  |
| chr13 | 42605284      | 42607259  | 1976  |
| chr5  | 35467570      | 35468792  | 1223  |
| chr2  | 115084286     | 115097406 | 13121 |
| chr18 | 18693585      | 18702874  | 9290  |
| chr8  | 77271654      | 77280404  | 8751  |
| chr14 | 9197415       | 9204472   | 7058  |
| chr12 | 3676999       | 3682903   | 5905  |
| chr2  | 92342417      | 92347938  | 5522  |
| chr10 | 8339101       | 8344256   | 5156  |
| chr7  | 57588067      | 57592927  | 4861  |
| chr11 | 11623426      | 11627954  | 4529  |
| chr7  | 43766709      | 43771156  | 4448  |
| chr24 | 20551467      | 20555168  | 3702  |
| chr18 | 47768559      | 47772020  | 3462  |
| chr10 | 45521851      | 45525119  | 3269  |
| chr28 | 36449249      | 36452140  | 2892  |
| chr12 | 32104183      | 32106897  | 2715  |
| chr26 | 44947123      | 44949328  | 2206  |
| chr23 | 31160178      | 31162382  | 2205  |
| chr20 | 9169018       | 9171114   | 2097  |
| chr2  | 44184863      | 44186276  | 1414  |
| chr7  | 14819830      | 14821037  | 1208  |
| chr6  | 72185671      | 72202583  | 16913 |
| chr26 | 37884587      | 37894731  | 10145 |
| chr6  | 120803523     | 120810694 | 7172  |
| chr11 | 74460986      | 74467958  | 6973  |
| chr14 | 29204635      | 29211408  | 6774  |
| chr2  | 25280534      | 25286789  | 6256  |
| chr14 | 29050843      | 29056377  | 5535  |
| chr25 | 664777 670056 | 5280      |       |
| chr8  | 7585186       | 7590203   | 5018  |
| chr12 | 46759794      | 46764582  | 4789  |
| chr23 | 27596337      | 27600142  | 3806  |

|       |               |           |       |
|-------|---------------|-----------|-------|
| chr1  | 2165125       | 2168914   | 3790  |
| chr7  | 5202582       | 5206357   | 3776  |
| chr11 | 106005502     | 106009160 | 3659  |
| chr8  | 23063546      | 23066076  | 2531  |
| chr7  | 10311681      | 10314141  | 2461  |
| chr29 | 46665879      | 46667581  | 1703  |
| chr19 | 45282054      | 45283464  | 1411  |
| chr13 | 41657353      | 41665705  | 8353  |
| chr17 | 64178849      | 64186369  | 7521  |
| chr11 | 44971458      | 44977973  | 6516  |
| chr6  | 18477071      | 18483538  | 6468  |
| chr1  | 104689711     | 104695989 | 6279  |
| chr10 | 29538971      | 29543851  | 4881  |
| chr28 | 651628 656255 | 4628      |       |
| chr20 | 43466942      | 43471192  | 4251  |
| chr9  | 25138239      | 25141913  | 3675  |
| chr17 | 19694143      | 19697716  | 3574  |
| chr6  | 69744863      | 69747617  | 2755  |
| chr19 | 12121601      | 12124202  | 2602  |
| chr19 | 39101819      | 39104282  | 2464  |
| chr3  | 22600066      | 22602512  | 2447  |
| chr19 | 45541578      | 45542956  | 1379  |
| chr4  | 110055398     | 110056710 | 1313  |
| chr12 | 36442378      | 36442982  | 605   |
| chr17 | 63278266      | 63289377  | 11112 |
| chr25 | 3182721       | 3191676   | 8956  |
| chr19 | 39085906      | 39094488  | 8583  |
| chr12 | 32024813      | 32033301  | 8489  |
| chr24 | 60607741      | 60615742  | 8002  |
| chr7  | 29479157      | 29487032  | 7876  |
| chr21 | 47611062      | 47618108  | 7047  |
| chr2  | 41322909      | 41328189  | 5281  |
| chr9  | 104926089     | 104930929 | 4841  |
| chr26 | 21840859      | 21845613  | 4755  |
| chr15 | 73769090      | 73773839  | 4750  |
| chr13 | 40883157      | 40887476  | 4320  |
| chr19 | 47371337      | 47375616  | 4280  |
| chr2  | 111326298     | 111330451 | 4154  |
| chr24 | 31247273      | 31251188  | 3916  |
| chr26 | 21863094      | 21866999  | 3906  |
| chr17 | 67105715      | 67109257  | 3543  |
| chr20 | 73817454      | 73820875  | 3422  |
| chr8  | 63975133      | 63978303  | 3171  |
| chr29 | 48890606      | 48893684  | 3079  |
| chr21 | 65210745      | 65213295  | 2551  |
| chr18 | 52755632      | 52757988  | 2357  |
| chr14 | 61207063      | 61209234  | 2172  |
| chr12 | 32088534      | 32090556  | 2023  |
| chr3  | 8818883       | 8820635   | 1753  |
| chr10 | 90283653      | 90291383  | 7731  |

|       |           |           |       |
|-------|-----------|-----------|-------|
| chr29 | 42919998  | 42926198  | 6201  |
| chr13 | 30822532  | 30828122  | 5591  |
| chr26 | 22250857  | 22256414  | 5558  |
| chr18 | 33816631  | 33822146  | 5516  |
| chr29 | 46660094  | 46665538  | 5445  |
| chr23 | 46402838  | 46408257  | 5420  |
| chr29 | 44379555  | 44384185  | 4631  |
| chr8  | 74368269  | 74372488  | 4220  |
| chr7  | 88945956  | 88950076  | 4121  |
| chr1  | 1637147   | 1641217   | 4071  |
| chr3  | 48210171  | 48214232  | 4062  |
| chr15 | 51341474  | 51345360  | 3887  |
| chr12 | 31550192  | 31553848  | 3657  |
| chr7  | 51083926  | 51087531  | 3606  |
| chr19 | 8942247   | 8945788   | 3542  |
| chr14 | 5904964   | 5908343   | 3380  |
| chr7  | 3934375   | 3937725   | 3351  |
| chr5  | 80847255  | 80850441  | 3187  |
| chr7  | 38210647  | 38213704  | 3058  |
| chr18 | 49446681  | 49449364  | 2684  |
| chr14 | 66269388  | 66271457  | 2070  |
| chr15 | 44750984  | 44752977  | 1994  |
| chr3  | 15641352  | 15642987  | 1636  |
| chr23 | 46399460  | 46400599  | 1140  |
| chr2  | 115097416 | 115109925 | 12510 |
| chr14 | 29040856  | 29050792  | 9937  |
| chr23 | 23866620  | 23875907  | 9288  |
| chr13 | 80584019  | 80592445  | 8427  |
| chr7  | 3019201   | 3024703   | 5503  |
| chr22 | 18283960  | 18289071  | 5112  |
| chr8  | 78090913  | 78095877  | 4965  |
| chr9  | 77686398  | 77690802  | 4405  |
| chr24 | 23952776  | 23957094  | 4319  |
| chr23 | 11786340  | 11790559  | 4220  |
| chr22 | 61186272  | 61190467  | 4196  |
| chr28 | 41016926  | 41021021  | 4096  |
| chr19 | 33099640  | 33103471  | 3832  |
| chr9  | 46027406  | 46031015  | 3610  |
| chr16 | 68887407  | 68890918  | 3512  |
| chr23 | 27747408  | 27750106  | 2699  |
| chr11 | 100911368 | 100914006 | 2639  |
| chr23 | 52754437  | 52757019  | 2583  |
| chr29 | 45770869  | 45773307  | 2439  |
| chr21 | 66584000  | 66586276  | 2277  |
| chr12 | 84214618  | 84216146  | 1529  |
| chr19 | 39009146  | 39010573  | 1428  |
| chr12 | 84177482  | 84178783  | 1302  |
| chr25 | 43235776  | 43236896  | 1121  |
| chr29 | 44384338  | 44385439  | 1102  |
| chr17 | 55859164  | 55860030  | 867   |

|       |           |           |       |
|-------|-----------|-----------|-------|
| chr17 | 69747343  | 69748162  | 820   |
| chr18 | 11353152  | 11360210  | 7059  |
| chr13 | 42872381  | 42879432  | 7052  |
| chr8  | 23056566  | 23063415  | 6850  |
| chr9  | 50712354  | 50717943  | 5590  |
| chr10 | 8522232   | 8527056   | 4825  |
| chr3  | 112889897 | 112894600 | 4704  |
| chr21 | 9435375   | 9439670   | 4296  |
| chr4  | 122647426 | 122651526 | 4101  |
| chr6  | 108675750 | 108679808 | 4059  |
| chr14 | 48320315  | 48324216  | 3902  |
| chr1  | 1584406   | 1588229   | 3824  |
| chr29 | 29791777  | 29795537  | 3761  |
| chr7  | 10970393  | 10973679  | 3287  |
| chr3  | 33115526  | 33118745  | 3220  |
| chr3  | 94151021  | 94154233  | 3213  |
| chr11 | 14147263  | 14150068  | 2806  |
| chr22 | 48549289  | 48552005  | 2717  |
| chr24 | 60605005  | 60607612  | 2608  |
| chr4  | 46280998  | 46283344  | 2347  |
| chr7  | 4350296   | 4351798   | 1503  |
| chr29 | 44738438  | 44739629  | 1192  |
| chr7  | 29478010  | 29479044  | 1035  |
| chr17 | 73428643  | 73429334  | 692   |
| chr13 | 41724532  | 41725179  | 648   |
| chr24 | 48630697  | 48636983  | 6287  |
| chrX  | 35193336  | 35199308  | 5973  |
| chr19 | 57054098  | 57059775  | 5678  |
| chr5  | 33321094  | 33326173  | 5080  |
| chr8  | 20937888  | 20942917  | 5030  |
| chr4  | 121464052 | 121469013 | 4962  |
| chr10 | 74682657  | 74687388  | 4732  |
| chr17 | 63298569  | 63302980  | 4412  |
| chr25 | 21761991  | 21766013  | 4023  |
| chr16 | 58551732  | 58555721  | 3990  |
| chr21 | 30790407  | 30794018  | 3612  |
| chr11 | 77861717  | 77865315  | 3599  |
| chr4  | 71552177  | 71555759  | 3583  |
| chr16 | 40884925  | 40888301  | 3377  |
| chr5  | 35468945  | 35471752  | 2808  |
| chr24 | 5107121   | 5109554   | 2434  |
| chr22 | 30571019  | 30573334  | 2316  |
| chr11 | 80554475  | 80556763  | 2289  |
| chr7  | 37398227  | 37400395  | 2169  |
| chr1  | 99692420  | 99694454  | 2035  |
| chr27 | 27691299  | 27693143  | 1845  |
| chr26 | 51192485  | 51194045  | 1561  |
| chr5  | 67666743  | 67667433  | 691   |
| chr11 | 106394879 | 106406160 | 11282 |
| chr19 | 38973990  | 38982405  | 8416  |

|       |           |           |      |
|-------|-----------|-----------|------|
| chr17 | 63289382  | 63297224  | 7843 |
| chr3  | 23031726  | 23037016  | 5291 |
| chr13 | 75539318  | 75543619  | 4302 |
| chr16 | 44303203  | 44307417  | 4215 |
| chr24 | 48614905  | 48618888  | 3984 |
| chr10 | 85923167  | 85927000  | 3834 |
| chr27 | 29598815  | 29602574  | 3760 |
| chr21 | 33067057  | 33070704  | 3648 |
| chr21 | 47692580  | 47696066  | 3487 |
| chr3  | 33823446  | 33826705  | 3260 |
| chr9  | 44916893  | 44919906  | 3014 |
| chr19 | 54274808  | 54277417  | 2610 |
| chr5  | 61475656  | 61477909  | 2254 |
| chr14 | 8183586   | 8185024   | 1439 |
| chr6  | 118505034 | 118506160 | 1127 |
| chr28 | 43861655  | 43862775  | 1121 |
| chr29 | 51948676  | 51949745  | 1070 |
| chr8  | 23067877  | 23068832  | 956  |
| chr4  | 95675829  | 95676346  | 518  |
| chr5  | 60712366  | 60719196  | 6831 |
| chr24 | 44265597  | 44272152  | 6556 |
| chr19 | 38982867  | 38988676  | 5810 |
| chr3  | 105747125 | 105752596 | 5472 |
| chr4  | 123130218 | 123135222 | 5005 |
| chr3  | 114208461 | 114213151 | 4691 |
| chr5  | 60726929  | 60731583  | 4655 |
| chr21 | 20591916  | 20596564  | 4649 |
| chr9  | 74192827  | 74197307  | 4481 |
| chr15 | 62410102  | 62414444  | 4343 |
| chr5  | 33855576  | 33859755  | 4180 |
| chr14 | 67990383  | 67994500  | 4118 |
| chr4  | 15270610  | 15274227  | 3618 |
| chr18 | 13778537  | 13782085  | 3549 |
| chrX  | 10878665  | 10882022  | 3358 |
| chr15 | 41393139  | 41396356  | 3218 |
| chr25 | 39432370  | 39435521  | 3152 |
| chr11 | 14501064  | 14504071  | 3008 |
| chr10 | 7682427   | 7685397   | 2971 |
| chr6  | 101066329 | 101069293 | 2965 |
| chr3  | 105909665 | 105912623 | 2959 |
| chr12 | 9550469   | 9553312   | 2844 |
| chr7  | 3024851   | 3027595   | 2745 |
| chr18 | 52660569  | 52663193  | 2625 |
| chr6  | 72182312  | 72184766  | 2455 |
| chr3  | 99100793  | 99103089  | 2297 |
| chr19 | 38671348  | 38673596  | 2249 |
| chr22 | 61183861  | 61185963  | 2103 |
| chr17 | 7832042   | 7833923   | 1882 |
| chr29 | 38053447  | 38055299  | 1853 |
| chr2  | 134679716 | 134681346 | 1631 |

|       |               |           |      |
|-------|---------------|-----------|------|
| chr26 | 22270122      | 22271628  | 1507 |
| chr26 | 21983132      | 21984539  | 1408 |
| chr19 | 26371634      | 26372875  | 1242 |
| chr12 | 32015734      | 32024802  | 9069 |
| chr12 | 74494376      | 74500989  | 6614 |
| chr10 | 35959747      | 35966152  | 6406 |
| chr18 | 11317236      | 11323615  | 6380 |
| chr19 | 46846936      | 46853215  | 6280 |
| chr18 | 37155918      | 37161877  | 5960 |
| chr4  | 94699663      | 94705125  | 5463 |
| chr3  | 115464944     | 115469909 | 4966 |
| chr9  | 104921074     | 104925863 | 4790 |
| chr23 | 31166925      | 31171649  | 4725 |
| chr8  | 73095855      | 73100553  | 4699 |
| chr11 | 98355023      | 98359480  | 4458 |
| chr13 | 74410258      | 74414120  | 3863 |
| chr18 | 11584794      | 11588528  | 3735 |
| chr7  | 51443865      | 51447483  | 3619 |
| chr5  | 67819563      | 67822784  | 3222 |
| chr11 | 15011072      | 15014278  | 3207 |
| chr19 | 54338425      | 54341252  | 2828 |
| chr17 | 69311984      | 69314732  | 2749 |
| chr19 | 27183535      | 27186101  | 2567 |
| chr2  | 130155261     | 130157196 | 1936 |
| chr17 | 7829822       | 7831754   | 1933 |
| chr3  | 47194151      | 47195742  | 1592 |
| chr16 | 60230013      | 60231602  | 1590 |
| chr11 | 89076794      | 89078380  | 1587 |
| chr16 | 31703053      | 31704364  | 1312 |
| chr23 | 31338743      | 31339963  | 1221 |
| chr23 | 52678826      | 52680000  | 1175 |
| chr1  | 132078080     | 132078980 | 901  |
| chr25 | 434162 434928 | 767       |      |
| chr4  | 121718825     | 121719588 | 764  |
| chr3  | 15409620      | 15416351  | 6732 |
| chr16 | 24764017      | 24769169  | 5153 |
| chr14 | 66276094      | 66281224  | 5131 |
| chr3  | 16895803      | 16900672  | 4870 |
| chr18 | 53873837      | 53878134  | 4298 |
| chr26 | 38240191      | 38244470  | 4280 |
| chr19 | 23139373      | 23143360  | 3988 |
| chr3  | 22486376      | 22490290  | 3915 |
| chr26 | 38236205      | 38240024  | 3820 |
| chr27 | 26741471      | 26745258  | 3788 |
| chr1  | 64865055      | 64868691  | 3637 |
| chr8  | 24491231      | 24494678  | 3448 |
| chr23 | 31116092      | 31119394  | 3303 |
| chr18 | 22814514      | 22817568  | 3055 |
| chr23 | 46370184      | 46373057  | 2874 |
| chr29 | 33706645      | 33708851  | 2207 |



|       |           |           |      |
|-------|-----------|-----------|------|
| chr19 | 46822846  | 46824597  | 1752 |
| chr19 | 52555354  | 52557035  | 1682 |
| chr25 | 43528876  | 43530536  | 1661 |
| chr3  | 113827817 | 113829456 | 1640 |
| chr10 | 104762689 | 104764321 | 1633 |
| chr3  | 22546465  | 22548071  | 1607 |
| chr3  | 15351342  | 15352931  | 1590 |
| chr16 | 38729766  | 38731305  | 1540 |
| chr19 | 39899883  | 39901414  | 1532 |
| chr26 | 21852527  | 21853955  | 1429 |
| chr16 | 31701465  | 31702873  | 1409 |
| chr20 | 33371581  | 33372561  | 981  |
| chr21 | 34632538  | 34641437  | 8900 |
| chr5  | 33877383  | 33886065  | 8683 |
| chr29 | 25558701  | 25565553  | 6853 |
| chr4  | 107992999 | 107999782 | 6784 |
| chr2  | 74322233  | 74328659  | 6427 |
| chr15 | 38529278  | 38535576  | 6299 |
| chr2  | 15369665  | 15375215  | 5551 |
| chr21 | 59890206  | 59895555  | 5350 |
| chr13 | 46210607  | 46215493  | 4887 |
| chr26 | 31334339  | 31338852  | 4514 |
| chr24 | 1948112   | 1952106   | 3995 |
| chr20 | 74771752  | 74775537  | 3786 |
| chr25 | 43531046  | 43534632  | 3587 |
| chr20 | 3178216   | 3181485   | 3270 |
| chr29 | 29795923  | 29799162  | 3240 |
| chr3  | 22461196  | 22464245  | 3050 |
| chr19 | 12124311  | 12127122  | 2812 |
| chr24 | 44248430  | 44251136  | 2707 |
| chr19 | 54271770  | 54274047  | 2278 |
| chr8  | 5809715   | 5811771   | 2057 |
| chr9  | 59369203  | 59371237  | 2035 |
| chr17 | 60880007  | 60882020  | 2014 |
| chr26 | 18765789  | 18767650  | 1862 |
| chr27 | 48381910  | 48383723  | 1814 |
| chr18 | 52826449  | 52827374  | 926  |
| chr6  | 119517840 | 119518656 | 817  |
| chr18 | 63758536  | 63759312  | 777  |
| chr15 | 65645159  | 65653578  | 8420 |
| chr11 | 98347544  | 98354189  | 6646 |
| chr19 | 39112054  | 39118343  | 6290 |
| chr5  | 112136879 | 112142490 | 5612 |
| chr9  | 53307421  | 53312071  | 4651 |
| chr3  | 105460020 | 105464362 | 4343 |
| chr7  | 43740978  | 43745115  | 4138 |
| chr15 | 58025220  | 58029269  | 4050 |
| chr25 | 38757641  | 38761172  | 3532 |
| chr1  | 149419592 | 149422930 | 3339 |
| chr17 | 49389277  | 49392454  | 3178 |

|       |           |           |       |
|-------|-----------|-----------|-------|
| chr20 | 25592826  | 25595987  | 3162  |
| chr26 | 44943781  | 44946779  | 2999  |
| chr11 | 89528773  | 89531717  | 2945  |
| chr13 | 23031826  | 23034612  | 2787  |
| chr8  | 7848925   | 7851650   | 2726  |
| chr2  | 124287178 | 124289865 | 2688  |
| chr2  | 115118811 | 115121386 | 2576  |
| chr16 | 47610340  | 47612650  | 2311  |
| chr7  | 12965391  | 12967652  | 2262  |
| chr24 | 36944612  | 36946822  | 2211  |
| chr10 | 103502690 | 103504834 | 2145  |
| chr9  | 47259183  | 47261262  | 2080  |
| chr23 | 13672770  | 13674743  | 1974  |
| chr14 | 1525667   | 1527549   | 1883  |
| chr23 | 31310190  | 31312071  | 1882  |
| chr1  | 84791407  | 84793176  | 1770  |
| chr7  | 18837013  | 18838700  | 1688  |
| chr7  | 4511184   | 4512854   | 1671  |
| chr19 | 34629360  | 34631029  | 1670  |
| chr24 | 51803668  | 51805087  | 1420  |
| chr15 | 76731237  | 76733930  | 2694  |
| chr4  | 33415849  | 33428802  | 12954 |
| chrX  | 10993174  | 11001934  | 8761  |
| chr3  | 15643031  | 15649897  | 6867  |
| chr26 | 21975671  | 21981974  | 6304  |
| chr4  | 121458328 | 121463976 | 5649  |
| chr12 | 84209252  | 84214346  | 5095  |
| chr14 | 35495937  | 35500807  | 4871  |
| chr12 | 54231548  | 54236263  | 4716  |
| chr12 | 68179402  | 68184113  | 4712  |
| chr19 | 27063306  | 27067823  | 4518  |
| chr19 | 33108027  | 33112508  | 4482  |
| chr4  | 89777537  | 89781643  | 4107  |
| chr9  | 16961086  | 16965156  | 4071  |
| chr1  | 100636104 | 100640032 | 3929  |
| chr9  | 26591061  | 26594977  | 3917  |
| chr21 | 20651049  | 20654789  | 3741  |
| chr13 | 37445623  | 37449266  | 3644  |
| chr11 | 80556862  | 80560399  | 3538  |
| chr21 | 67918104  | 67921615  | 3512  |
| chr8  | 45751477  | 45754910  | 3434  |
| chr16 | 60033670  | 60037096  | 3427  |
| chr7  | 8913064   | 8916477   | 3414  |
| chr13 | 75806334  | 75809650  | 3317  |
| chr11 | 11729622  | 11732592  | 2971  |
| chr5  | 10527671  | 10530474  | 2804  |
| chr13 | 55113076  | 55115603  | 2528  |
| chr3  | 55840647  | 55843138  | 2492  |
| chr13 | 40892074  | 40894177  | 2104  |
| chr21 | 2916507   | 2918560   | 2054  |

|       |               |           |       |
|-------|---------------|-----------|-------|
| chr3  | 15545630      | 15547423  | 1794  |
| chr7  | 14896340      | 14897990  | 1651  |
| chr23 | 28657807      | 28659343  | 1537  |
| chr29 | 49973328      | 49974758  | 1431  |
| chr3  | 22590346      | 22591763  | 1418  |
| chr14 | 26680297      | 26681588  | 1292  |
| chr7  | 46196062      | 46197253  | 1192  |
| chr3  | 22869930      | 22871115  | 1186  |
| chr11 | 9229434       | 9230574   | 1141  |
| chr5  | 29750742      | 29751730  | 989   |
| chr13 | 14689070      | 14699797  | 10728 |
| chr13 | 38264147      | 38270714  | 6568  |
| chr2  | 111300421     | 111305611 | 5191  |
| chr11 | 70711562      | 70716555  | 4994  |
| chr8  | 23488056      | 23492970  | 4915  |
| chr13 | 75518423      | 75523300  | 4878  |
| chr18 | 48674870      | 48678992  | 4123  |
| chr25 | 670251 674353 | 4103      |       |
| chr13 | 59930152      | 59934127  | 3976  |
| chr13 | 61292495      | 61296454  | 3960  |
| chr12 | 70974492      | 70978275  | 3784  |
| chr18 | 45969948      | 45973211  | 3264  |
| chr17 | 69315086      | 69318258  | 3173  |
| chr16 | 45906712      | 45909835  | 3124  |
| chr21 | 65551143      | 65554250  | 3108  |
| chr26 | 22319168      | 22322149  | 2982  |
| chr7  | 71378577      | 71381500  | 2924  |
| chr13 | 59656416      | 59659331  | 2916  |
| chr4  | 65384591      | 65387207  | 2617  |
| chr19 | 45204540      | 45207007  | 2468  |
| chr13 | 42880634      | 42882908  | 2275  |
| chr14 | 67994531      | 67996793  | 2263  |
| chr15 | 74520655      | 74522906  | 2252  |
| chr3  | 105921245     | 105923165 | 1921  |
| chr3  | 105760606     | 105762465 | 1860  |
| chr2  | 131303078     | 131304919 | 1842  |
| chr11 | 100737133     | 100738922 | 1790  |
| chr13 | 59928358      | 59930138  | 1781  |
| chr6  | 109418327     | 109420031 | 1705  |
| chr13 | 78420144      | 78421761  | 1618  |
| chr12 | 81460361      | 81461964  | 1604  |
| chr19 | 56610136      | 56611663  | 1528  |
| chr8  | 23044566      | 23046019  | 1454  |
| chr13 | 74400834      | 74402209  | 1376  |
| chr25 | 37517739      | 37519057  | 1319  |
| chr19 | 38748778      | 38750052  | 1275  |
| chr4  | 123128745     | 123129450 | 706   |
| chr17 | 64186386      | 64196555  | 10170 |
| chr10 | 58755687      | 58762286  | 6600  |
| chr2  | 84790388      | 84795812  | 5425  |

|       |               |           |       |
|-------|---------------|-----------|-------|
| chr18 | 53023233      | 53028110  | 4878  |
| chr25 | 37700836      | 37705529  | 4694  |
| chr4  | 72748540      | 72753186  | 4647  |
| chr23 | 46084003      | 46088099  | 4097  |
| chr4  | 29020381      | 29024412  | 4032  |
| chr22 | 33356080      | 33359966  | 3887  |
| chr14 | 22083787      | 22087662  | 3876  |
| chr11 | 107589164     | 107592936 | 3773  |
| chr4  | 64280734      | 64284485  | 3752  |
| chr21 | 24499915      | 24503277  | 3363  |
| chr4  | 5622456       | 5625507   | 3052  |
| chr20 | 35924548      | 35927542  | 2995  |
| chr25 | 37705794      | 37708710  | 2917  |
| chr22 | 38939039      | 38941900  | 2862  |
| chr9  | 9369746       | 9372556   | 2811  |
| chr10 | 74122617      | 74125382  | 2766  |
| chr10 | 15074129      | 15076816  | 2688  |
| chr25 | 1971420       | 1974095   | 2676  |
| chr11 | 23181542      | 23184195  | 2654  |
| chr7  | 71679489      | 71682027  | 2539  |
| chr23 | 31422617      | 31425145  | 2529  |
| chr8  | 7582356       | 7584878   | 2523  |
| chr12 | 18236709      | 18239206  | 2498  |
| chr3  | 117409321     | 117411639 | 2319  |
| chr3  | 9422135       | 9424414   | 2280  |
| chr26 | 38410410      | 38412676  | 2267  |
| chr3  | 73955787      | 73958017  | 2231  |
| chr19 | 20357852      | 20359951  | 2100  |
| chr20 | 4941257       | 4943333   | 2077  |
| chr24 | 29711613      | 29713660  | 2048  |
| chr8  | 7590206       | 7592152   | 1947  |
| chr19 | 39012524      | 39014339  | 1816  |
| chr12 | 81686872      | 81688678  | 1807  |
| chr19 | 39967514      | 39969241  | 1728  |
| chr16 | 47968795      | 47970496  | 1702  |
| chr16 | 77688392      | 77690078  | 1687  |
| chr13 | 55111378      | 55113034  | 1657  |
| chr18 | 648522 650067 | 1546      |       |
| chr2  | 125487254     | 125488796 | 1543  |
| chr14 | 59389853      | 59391369  | 1517  |
| chr6  | 107495270     | 107496612 | 1343  |
| chr16 | 40908909      | 40910226  | 1318  |
| chr4  | 123977502     | 123978799 | 1298  |
| chr3  | 22700627      | 22701331  | 705   |
| chr13 | 60152802      | 60164672  | 11871 |
| chr20 | 8542647       | 8553156   | 10510 |
| chr22 | 16314028      | 16319892  | 5865  |
| chr13 | 23670429      | 23676232  | 5804  |
| chr7  | 14248877      | 14254498  | 5622  |
| chr21 | 26450575      | 26455826  | 5252  |

|       |           |           |      |
|-------|-----------|-----------|------|
| chr3  | 125628608 | 125633303 | 4696 |
| chr15 | 26888630  | 26893020  | 4391 |
| chr12 | 84173031  | 84177218  | 4188 |
| chr13 | 40887710  | 40891891  | 4182 |
| chr24 | 40809036  | 40813206  | 4171 |
| chr19 | 44171361  | 44175044  | 3684 |
| chr11 | 91374675  | 91377996  | 3322 |
| chr12 | 32198693  | 32201963  | 3271 |
| chr12 | 32085139  | 32088260  | 3122 |
| chr4  | 29053480  | 29056596  | 3117 |
| chr28 | 43744017  | 43747109  | 3093 |
| chr2  | 111330764 | 111333841 | 3078 |
| chr7  | 38313117  | 38316114  | 2998 |
| chr22 | 50591061  | 50593951  | 2891 |
| chr18 | 62672973  | 62675826  | 2854 |
| chr21 | 30787087  | 30789935  | 2849 |
| chr17 | 64361628  | 64364345  | 2718 |
| chr17 | 49443198  | 49445889  | 2692 |
| chr17 | 53515300  | 53517867  | 2568 |
| chr26 | 35195985  | 35198521  | 2537 |
| chr4  | 53163474  | 53165921  | 2448 |
| chr19 | 8510352   | 8512558   | 2207 |
| chr16 | 66330284  | 66332399  | 2116 |
| chr28 | 11378018  | 11380113  | 2096 |
| chr6  | 117843919 | 117845603 | 1685 |
| chr16 | 46911101  | 46912764  | 1664 |
| chr8  | 23072561  | 23074040  | 1480 |
| chr16 | 38731614  | 38733091  | 1478 |
| chr14 | 34073301  | 34074716  | 1416 |
| chr1  | 159082283 | 159083631 | 1349 |
| chr15 | 26893034  | 26894340  | 1307 |
| chr11 | 9247232   | 9248420   | 1189 |
| chr18 | 63526379  | 63527439  | 1061 |
| chr3  | 22556029  | 22556980  | 952  |
| chr3  | 22603209  | 22604090  | 882  |
| chr3  | 8950595   | 8951345   | 751  |
| chr23 | 48766362  | 48772532  | 6171 |
| chr7  | 70504044  | 70509251  | 5208 |
| chr11 | 44959512  | 44964502  | 4991 |
| chr18 | 55582379  | 55587121  | 4743 |
| chr6  | 120797964 | 120802696 | 4733 |
| chr15 | 25661023  | 25665486  | 4464 |
| chr15 | 36591776  | 36596198  | 4423 |
| chr5  | 35294075  | 35298332  | 4258 |
| chr29 | 33699910  | 33704118  | 4209 |
| chr19 | 33103816  | 33108018  | 4203 |
| chr6  | 32570841  | 32574063  | 3223 |
| chr17 | 74553651  | 74556763  | 3113 |
| chr17 | 12581178  | 12584255  | 3078 |
| chr10 | 6922074   | 6925142   | 3069 |

|       |           |           |      |
|-------|-----------|-----------|------|
| chr16 | 77480739  | 77483703  | 2965 |
| chr22 | 50749597  | 50752283  | 2687 |
| chr13 | 76003470  | 76006067  | 2598 |
| chr7  | 46192729  | 46195132  | 2404 |
| chr13 | 74407635  | 74410009  | 2375 |
| chr7  | 14893993  | 14896168  | 2176 |
| chr28 | 15318510  | 15320685  | 2176 |
| chr12 | 70972190  | 70974339  | 2150 |
| chr21 | 22694632  | 22696748  | 2117 |
| chr23 | 28600858  | 28602963  | 2106 |
| chr23 | 7694630   | 7696683   | 2054 |
| chr3  | 105728102 | 105730056 | 1955 |
| chr6  | 74859525  | 74861396  | 1872 |
| chr21 | 11889555  | 11891352  | 1798 |
| chr22 | 12066454  | 12067911  | 1458 |
| chr4  | 50701496  | 50702833  | 1338 |
| chr23 | 48778356  | 48779334  | 979  |
| chr5  | 112656096 | 112657021 | 926  |
| chr27 | 39226468  | 39227307  | 840  |
| chr21 | 64512622  | 64513375  | 754  |
| chrX  | 21080339  | 21088807  | 8469 |
| chr22 | 55756922  | 55762863  | 5942 |
| chr13 | 40806166  | 40811557  | 5392 |
| chr17 | 2898686   | 2904029   | 5344 |
| chr18 | 18663634  | 18668939  | 5306 |
| chr21 | 33821209  | 33826478  | 5270 |
| chr8  | 23046136  | 23051139  | 5004 |
| chr5  | 31259928  | 31264863  | 4936 |
| chr13 | 24026521  | 24031170  | 4650 |
| chr18 | 3883463   | 3888107   | 4645 |
| chr25 | 2984316   | 2988868   | 4553 |
| chr10 | 4380175   | 4384678   | 4504 |
| chr13 | 23637078  | 23641109  | 4032 |
| chr18 | 34637412  | 34641426  | 4015 |
| chr5  | 123166218 | 123169875 | 3658 |
| chrX  | 40425543  | 40429108  | 3566 |
| chr8  | 63910937  | 63914219  | 3283 |
| chr2  | 111408591 | 111411858 | 3268 |
| chr26 | 38227156  | 38230294  | 3139 |
| chr15 | 24023012  | 24026054  | 3043 |
| chr21 | 24229376  | 24232297  | 2922 |
| chr7  | 46234770  | 46237637  | 2868 |
| chr19 | 23166696  | 23169465  | 2770 |
| chr20 | 3190113   | 3192834   | 2722 |
| chr8  | 110722668 | 110725334 | 2667 |
| chr18 | 43459295  | 43461811  | 2517 |
| chr5  | 29255653  | 29258129  | 2477 |
| chr7  | 13484164  | 13486588  | 2425 |
| chr29 | 27289520  | 27291897  | 2378 |
| chr3  | 83724670  | 83726988  | 2319 |

|       |           |           |      |
|-------|-----------|-----------|------|
| chr13 | 60794965  | 60797159  | 2195 |
| chr19 | 16699024  | 16701191  | 2168 |
| chr21 | 9446544   | 9448550   | 2007 |
| chr9  | 47239994  | 47241992  | 1999 |
| chr7  | 14292849  | 14294842  | 1994 |
| chr3  | 113614617 | 113616552 | 1936 |
| chr14 | 62323699  | 62325528  | 1830 |
| chr11 | 100735336 | 100737123 | 1788 |
| chr5  | 116835149 | 116836586 | 1438 |
| chr12 | 9560391   | 9561541   | 1151 |
| chr19 | 30537314  | 30538460  | 1147 |
| chr5  | 60736897  | 60737989  | 1093 |
| chr11 | 14126079  | 14127107  | 1029 |
| chr19 | 47854069  | 47855079  | 1011 |
| chr3  | 15354120  | 15354988  | 869  |
| chr3  | 22865094  | 22865834  | 741  |
| chr4  | 71858433  | 71868206  | 9774 |
| chr18 | 55830973  | 55836445  | 5473 |
| chr7  | 50617812  | 50623195  | 5384 |
| chr8  | 90190289  | 90195615  | 5327 |
| chr11 | 31100951  | 31106106  | 5156 |
| chr11 | 34069710  | 34074535  | 4826 |
| chr15 | 54489982  | 54494661  | 4680 |
| chr15 | 34580148  | 34584738  | 4591 |
| chr10 | 8701026   | 8704826   | 3801 |
| chr2  | 27646564  | 27650356  | 3793 |
| chr14 | 34044850  | 34048442  | 3593 |
| chr6  | 103292276 | 103295780 | 3505 |
| chr26 | 41015222  | 41018523  | 3302 |
| chr23 | 46088282  | 46091506  | 3225 |
| chr1  | 100633077 | 100636093 | 3017 |
| chr19 | 44100691  | 44103592  | 2902 |
| chr16 | 38772359  | 38775007  | 2649 |
| chr13 | 41719651  | 41722122  | 2472 |
| chr16 | 2445187   | 2447546   | 2360 |
| chr23 | 31129247  | 31131604  | 2358 |
| chr23 | 12341457  | 12343780  | 2324 |
| chr13 | 23659846  | 23662122  | 2277 |
| chr4  | 13672084  | 13674294  | 2211 |
| chr8  | 9355859   | 9357907   | 2049 |
| chr17 | 12571079  | 12573066  | 1988 |
| chr23 | 31325239  | 31327144  | 1906 |
| chr11 | 9245478   | 9247228   | 1751 |
| chr7  | 43745262  | 43746931  | 1670 |
| chr17 | 63937816  | 63939380  | 1565 |
| chr17 | 72352207  | 72353753  | 1547 |
| chr7  | 81426153  | 81427691  | 1539 |
| chr3  | 22617088  | 22618626  | 1539 |
| chr14 | 59026267  | 59027282  | 1016 |
| chr13 | 42883217  | 42884020  | 804  |

|       |           |           |      |
|-------|-----------|-----------|------|
| chr20 | 4952856   | 4953424   | 569  |
| chr4  | 121722944 | 121723413 | 470  |
| chr12 | 83824291  | 83829845  | 5555 |
| chr3  | 9181500   | 9186737   | 5238 |
| chr4  | 71682739  | 71687533  | 4795 |
| chr25 | 43513280  | 43517845  | 4566 |
| chr21 | 25084849  | 25089366  | 4518 |
| chr19 | 40427855  | 40432303  | 4449 |
| chr19 | 57302280  | 57306457  | 4178 |
| chr23 | 18412351  | 18416384  | 4034 |
| chr21 | 25973460  | 25977030  | 3571 |
| chr7  | 46467050  | 46470523  | 3474 |
| chr8  | 63657674  | 63661054  | 3381 |
| chrX  | 13631378  | 13634488  | 3111 |
| chr28 | 43740868  | 43743768  | 2901 |
| chr1  | 136905016 | 136907888 | 2873 |
| chr27 | 35429698  | 35432528  | 2831 |
| chr9  | 47242027  | 47244720  | 2694 |
| chr5  | 10729484  | 10732027  | 2544 |
| chr5  | 35464893  | 35467387  | 2495 |
| chr23 | 27979793  | 27982268  | 2476 |
| chr11 | 20450021  | 20452376  | 2356 |
| chr12 | 9553402   | 9555736   | 2335 |
| chr19 | 46897183  | 46899492  | 2310 |
| chr23 | 27799484  | 27801364  | 1881 |
| chr19 | 23712922  | 23714685  | 1764 |
| chr20 | 4953679   | 4955439   | 1761 |
| chr6  | 120641817 | 120643545 | 1729 |
| chr28 | 12377852  | 12379508  | 1657 |
| chr24 | 31252565  | 31254203  | 1639 |
| chr11 | 80560449  | 80562076  | 1628 |
| chr20 | 73282708  | 73284234  | 1527 |
| chr19 | 47277374  | 47278896  | 1523 |
| chr11 | 49404116  | 49405569  | 1454 |
| chr12 | 74477749  | 74479158  | 1410 |
| chr22 | 7556761   | 7558113   | 1353 |
| chr13 | 23641652  | 23642990  | 1339 |
| chr1  | 141990735 | 141991962 | 1228 |
| chr23 | 52753465  | 52754347  | 883  |
| chr20 | 74776346  | 74777210  | 865  |
| chr7  | 10969572  | 10970132  | 561  |
| chr23 | 23747052  | 23754186  | 7135 |
| chr12 | 68234690  | 68241322  | 6633 |
| chr7  | 3710248   | 3716815   | 6568 |
| chr26 | 31866015  | 31872015  | 6001 |
| chr8  | 52920098  | 52925428  | 5331 |
| chr7  | 57583047  | 57588037  | 4991 |
| chr13 | 40533263  | 40538168  | 4906 |
| chr16 | 44155198  | 44159192  | 3995 |
| chr3  | 15659525  | 15663317  | 3793 |



|       |           |           |      |
|-------|-----------|-----------|------|
| chr26 | 23515196  | 23518901  | 3706 |
| chr29 | 48849351  | 48853049  | 3699 |
| chr13 | 61233886  | 61237520  | 3635 |
| chr20 | 6614401   | 6617819   | 3419 |
| chr26 | 12848450  | 12851750  | 3301 |
| chr3  | 35955041  | 35958295  | 3255 |
| chr26 | 18944622  | 18947784  | 3163 |
| chr27 | 17515235  | 17518379  | 3145 |
| chr23 | 11080882  | 11084016  | 3135 |
| chr4  | 95677223  | 95680206  | 2984 |
| chr14 | 2882509   | 2885358   | 2850 |
| chr3  | 106535779 | 106538362 | 2584 |
| chr9  | 90540901  | 90543428  | 2528 |
| chr11 | 107582205 | 107584484 | 2280 |
| chr22 | 50594694  | 50596861  | 2168 |
| chr11 | 106237871 | 106239963 | 2093 |
| chr5  | 10612444  | 10614292  | 1849 |
| chr19 | 40541378  | 40543183  | 1806 |
| chr19 | 38994193  | 38995897  | 1705 |
| chr8  | 8709356   | 8710941   | 1586 |
| chr25 | 3109567   | 3110994   | 1428 |
| chr9  | 24602141  | 24603559  | 1419 |
| chr13 | 31723462  | 31724769  | 1308 |
| chr3  | 8632788   | 8634043   | 1256 |
| chr18 | 13537689  | 13538867  | 1179 |
| chr16 | 2220468   | 2221552   | 1085 |
| chr23 | 28021292  | 28022304  | 1013 |
| chr16 | 46912846  | 46913853  | 1008 |
| chr12 | 84586461  | 84587313  | 853  |
| chr19 | 38739712  | 38748601  | 8890 |
| chrX  | 11007661  | 11015577  | 7917 |
| chr10 | 35812512  | 35818365  | 5854 |
| chr10 | 36373719  | 36379064  | 5346 |
| chr18 | 55846276  | 55851539  | 5264 |
| chr20 | 44895584  | 44900294  | 4711 |
| chr11 | 86243834  | 86248362  | 4529 |
| chr26 | 19026621  | 19030813  | 4193 |
| chr3  | 81165556  | 81169687  | 4132 |
| chr9  | 35465394  | 35469115  | 3722 |
| chr11 | 2141919   | 2145625   | 3707 |
| chr7  | 46237659  | 46241070  | 3412 |
| chr8  | 80176813  | 80180201  | 3389 |
| chr3  | 118165311 | 118168151 | 2841 |
| chr11 | 12866145  | 12868952  | 2808 |
| chr13 | 57572562  | 57575327  | 2766 |
| chr19 | 40433211  | 40435898  | 2688 |
| chr6  | 120773231 | 120775636 | 2406 |
| chr27 | 4193796   | 4196022   | 2227 |
| chr3  | 22923684  | 22925764  | 2081 |
| chr8  | 6472171   | 6474245   | 2075 |

|       |               |           |      |
|-------|---------------|-----------|------|
| chr3  | 36018985      | 36021045  | 2061 |
| chr11 | 104666895     | 104668829 | 1935 |
| chr23 | 23754692      | 23756612  | 1921 |
| chr12 | 46766769      | 46768614  | 1846 |
| chr17 | 72349934      | 72351696  | 1763 |
| chr9  | 53324467      | 53326200  | 1734 |
| chr19 | 27443727      | 27445402  | 1676 |
| chr25 | 37519348      | 37520974  | 1627 |
| chr11 | 89078710      | 89080312  | 1603 |
| chr23 | 49953699      | 49955273  | 1575 |
| chr5  | 88034448      | 88036020  | 1573 |
| chr28 | 11366550      | 11368102  | 1553 |
| chr20 | 66535852      | 66537367  | 1516 |
| chr9  | 72539016      | 72540428  | 1413 |
| chr13 | 14718404      | 14719802  | 1399 |
| chr4  | 117618477     | 117619867 | 1391 |
| chr3  | 127032313     | 127033531 | 1219 |
| chr8  | 77287849      | 77289033  | 1185 |
| chr14 | 67996873      | 67998047  | 1175 |
| chr3  | 22956693      | 22957824  | 1132 |
| chr19 | 19275609      | 19276636  | 1028 |
| chr25 | 37872891      | 37873615  | 725  |
| chr19 | 41234432      | 41240766  | 6335 |
| chr2  | 115110195     | 115114907 | 4713 |
| chr29 | 48736017      | 48740678  | 4662 |
| chr10 | 68233544      | 68238147  | 4604 |
| chr26 | 22182616      | 22187056  | 4441 |
| chr19 | 40517462      | 40521843  | 4382 |
| chr27 | 27686928      | 27691103  | 4176 |
| chr7  | 10948199      | 10951852  | 3654 |
| chr15 | 6404371       | 6407785   | 3415 |
| chr1  | 1626683       | 1630092   | 3410 |
| chr13 | 31725013      | 31728398  | 3386 |
| chr5  | 30927123      | 30930455  | 3333 |
| chr8  | 74382624      | 74385925  | 3302 |
| chr7  | 42475547      | 42478830  | 3284 |
| chr17 | 69748427      | 69751688  | 3262 |
| chr5  | 60733233      | 60736447  | 3215 |
| chr22 | 30573528      | 30576642  | 3115 |
| chr3  | 9140349       | 9143461   | 3113 |
| chr19 | 46853256      | 46856221  | 2966 |
| chr6  | 69751795      | 69754656  | 2862 |
| chr19 | 39969807      | 39972516  | 2710 |
| chr11 | 98964087      | 98966591  | 2505 |
| chr1  | 85897812      | 85900184  | 2373 |
| chr1  | 155294 157626 | 2333      |      |
| chr19 | 18370145      | 18372468  | 2324 |
| chr18 | 51023688      | 51025661  | 1974 |
| chr18 | 47795119      | 47797087  | 1969 |
| chr6  | 118501601     | 118503534 | 1934 |

|       |               |           |      |
|-------|---------------|-----------|------|
| chr3  | 113363350     | 113365245 | 1896 |
| chr11 | 96161643      | 96163233  | 1591 |
| chr4  | 118254151     | 118255697 | 1547 |
| chr3  | 79685678      | 79687006  | 1329 |
| chr19 | 14050739      | 14052054  | 1316 |
| chr23 | 30357028      | 30358342  | 1315 |
| chr8  | 23904380      | 23905622  | 1243 |
| chr23 | 43421549      | 43422768  | 1220 |
| chr22 | 50105392      | 50106350  | 959  |
| chr18 | 50982951      | 50983881  | 931  |
| chr24 | 20769880      | 20770776  | 897  |
| chr15 | 63689039      | 63689834  | 796  |
| chr23 | 31197671      | 31198453  | 783  |
| chr13 | 42879775      | 42880471  | 697  |
| chr19 | 38668574      | 38669229  | 656  |
| chr29 | 50554742      | 50555392  | 651  |
| chr13 | 70031298      | 70038175  | 6878 |
| chr5  | 33765572      | 33771882  | 6311 |
| chr7  | 29487080      | 29492515  | 5436 |
| chr14 | 607979 612750 | 4772      |      |
| chr11 | 28543448      | 28548209  | 4762 |
| chr11 | 104685826     | 104690455 | 4630 |
| chr11 | 109402626     | 109407175 | 4550 |
| chr15 | 73762521      | 73766667  | 4147 |
| chr5  | 88036268      | 88040134  | 3867 |
| chr26 | 7004504       | 7008319   | 3816 |
| chr19 | 39262109      | 39265877  | 3769 |
| chr6  | 30812966      | 30816530  | 3565 |
| chr14 | 39880709      | 39884115  | 3407 |
| chr5  | 52619593      | 52622868  | 3276 |
| chr5  | 28957690      | 28960923  | 3234 |
| chr8  | 80488815      | 80491867  | 3053 |
| chr7  | 43516716      | 43519648  | 2933 |
| chr27 | 47332117      | 47335016  | 2900 |
| chr10 | 89404562      | 89407436  | 2875 |
| chr29 | 35014572      | 35017415  | 2844 |
| chr18 | 53170715      | 53173518  | 2804 |
| chr7  | 42152538      | 42155263  | 2726 |
| chr21 | 66580560      | 66583228  | 2669 |
| chr7  | 29475170      | 29477837  | 2668 |
| chr24 | 60569661      | 60572325  | 2665 |
| chr2  | 125918569     | 125921184 | 2616 |
| chr3  | 23044889      | 23047468  | 2580 |
| chr23 | 30340852      | 30343280  | 2429 |
| chr19 | 40512626      | 40515010  | 2385 |
| chr18 | 53261889      | 53264259  | 2371 |
| chr21 | 64506283      | 64508597  | 2315 |
| chr14 | 34008913      | 34011201  | 2289 |
| chr13 | 73478927      | 73481011  | 2085 |
| chr12 | 23538687      | 23540741  | 2055 |

|       |           |           |      |
|-------|-----------|-----------|------|
| chr17 | 73124111  | 73126164  | 2054 |
| chr13 | 74396701  | 74398747  | 2047 |
| chr15 | 74517489  | 74519534  | 2046 |
| chr10 | 6925452   | 6927442   | 1991 |
| chr23 | 46400879  | 46402826  | 1948 |
| chrX  | 10882433  | 10884357  | 1925 |
| chr3  | 20498006  | 20499927  | 1922 |
| chr10 | 2774782   | 2776701   | 1920 |
| chr27 | 28580522  | 28582382  | 1861 |
| chr22 | 12197950  | 12199762  | 1813 |
| chr1  | 1635226   | 1637014   | 1789 |
| chr19 | 40515122  | 40516888  | 1767 |
| chr1  | 99265657  | 99267423  | 1767 |
| chr5  | 30499872  | 30501621  | 1750 |
| chr7  | 4347437   | 4349166   | 1730 |
| chr25 | 1380382   | 1382058   | 1677 |
| chr19 | 38755865  | 38757481  | 1617 |
| chr10 | 103501016 | 103502608 | 1593 |
| chrX  | 75400241  | 75401828  | 1588 |
| chr4  | 118015058 | 118016549 | 1492 |
| chr7  | 43747082  | 43748550  | 1469 |
| chr24 | 20401672  | 20403079  | 1408 |
| chr22 | 12064741  | 12066147  | 1407 |
| chr25 | 37692322  | 37693670  | 1349 |
| chr3  | 22910764  | 22912049  | 1286 |
| chr18 | 63529468  | 63530739  | 1272 |
| chr12 | 31546348  | 31547539  | 1192 |
| chr5  | 79214800  | 79215965  | 1166 |
| chr19 | 23711941  | 23712803  | 863  |
| chr19 | 38530674  | 38531393  | 720  |
| chr5  | 110917176 | 110917853 | 678  |
| chr1  | 152246257 | 152253415 | 7159 |
| chr23 | 46394588  | 46399457  | 4870 |
| chr13 | 52533670  | 52538401  | 4732 |
| chr6  | 120813555 | 120818190 | 4636 |
| chr7  | 10965176  | 10969552  | 4377 |
| chr5  | 28904305  | 28908370  | 4066 |
| chr2  | 63488887  | 63492711  | 3825 |
| chr23 | 19333434  | 19337062  | 3629 |
| chr13 | 74419744  | 74422958  | 3215 |
| chr18 | 62677909  | 62680995  | 3087 |
| chr23 | 28018265  | 28021283  | 3019 |
| chr23 | 36830269  | 36833237  | 2969 |
| chr2  | 15366027  | 15368966  | 2940 |
| chr20 | 74781372  | 74784224  | 2853 |
| chr6  | 120810704 | 120813533 | 2830 |
| chr11 | 104662792 | 104665610 | 2819 |
| chr18 | 62683192  | 62685966  | 2775 |
| chr18 | 11089952  | 11092707  | 2756 |
| chr4  | 73688026  | 73690667  | 2642 |

|       |           |           |      |
|-------|-----------|-----------|------|
| chr8  | 77281645  | 77284272  | 2628 |
| chr21 | 9476555   | 9479135   | 2581 |
| chr26 | 51189880  | 51192453  | 2574 |
| chr8  | 24691662  | 24694217  | 2556 |
| chr17 | 14835143  | 14837656  | 2514 |
| chr14 | 64001817  | 64004231  | 2415 |
| chr18 | 11377799  | 11380181  | 2383 |
| chr22 | 15014024  | 15016392  | 2369 |
| chr26 | 21801432  | 21803595  | 2164 |
| chr4  | 110045537 | 110047695 | 2159 |
| chr3  | 11531763  | 11533873  | 2111 |
| chr11 | 89685142  | 89687206  | 2065 |
| chr10 | 20462084  | 20464131  | 2048 |
| chr15 | 34284846  | 34286877  | 2032 |
| chr25 | 43517886  | 43519899  | 2014 |
| chr24 | 41575706  | 41577689  | 1984 |
| chr18 | 56633001  | 56634956  | 1956 |
| chr10 | 12132782  | 12134737  | 1956 |
| chr11 | 7369324   | 7371250   | 1927 |
| chr2  | 74780704  | 74782537  | 1834 |
| chr23 | 46416818  | 46418484  | 1667 |
| chr20 | 8683911   | 8685572   | 1662 |
| chr1  | 159084613 | 159086198 | 1586 |
| chr3  | 23041441  | 23043008  | 1568 |
| chr3  | 22471353  | 22472912  | 1560 |
| chr19 | 14297425  | 14298922  | 1498 |
| chr26 | 34965561  | 34966995  | 1435 |
| chr18 | 57608302  | 57609712  | 1411 |
| chr19 | 14049063  | 14050467  | 1405 |
| chr26 | 50752354  | 50753755  | 1402 |
| chr18 | 33644096  | 33645437  | 1342 |
| chr24 | 61113873  | 61115179  | 1307 |
| chr18 | 62686133  | 62687433  | 1301 |
| chr5  | 121628379 | 121629655 | 1277 |
| chr4  | 5625806   | 5627080   | 1275 |
| chr7  | 11034382  | 11035609  | 1228 |
| chr25 | 43205179  | 43206356  | 1178 |
| chr26 | 21984676  | 21985799  | 1124 |
| chr21 | 47722073  | 47723190  | 1118 |
| chr2  | 125488805 | 125489919 | 1115 |
| chr12 | 68229700  | 68230807  | 1108 |
| chr17 | 64196566  | 64197606  | 1041 |
| chr23 | 52715998  | 52717035  | 1038 |
| chr25 | 3108714   | 3109438   | 725  |
| chr15 | 62382478  | 62383097  | 620  |
| chr26 | 22328817  | 22337445  | 8629 |
| chr21 | 9479269   | 9487219   | 7951 |
| chr16 | 19556778  | 19563656  | 6879 |
| chr1  | 152263567 | 152268788 | 5222 |
| chr12 | 34262492  | 34267536  | 5045 |

|       |               |           |      |
|-------|---------------|-----------|------|
| chr3  | 17467503      | 17472333  | 4831 |
| chr17 | 49446989      | 49451691  | 4703 |
| chr2  | 131195780     | 131200363 | 4584 |
| chr24 | 27149066      | 27153318  | 4253 |
| chr29 | 44671538      | 44675750  | 4213 |
| chr25 | 30457291      | 30461396  | 4106 |
| chr9  | 43844691      | 43848661  | 3971 |
| chr1  | 143793743     | 143797549 | 3807 |
| chr28 | 426176 429950 | 3775      |      |
| chr19 | 46719047      | 46722767  | 3721 |
| chr10 | 13030275      | 13033656  | 3382 |
| chr14 | 1583778       | 1587046   | 3269 |
| chr13 | 70040158      | 70043292  | 3135 |
| chr8  | 62042015      | 62044803  | 2789 |
| chr6  | 67341338      | 67344121  | 2784 |
| chr13 | 42607818      | 42610535  | 2718 |
| chr7  | 32281869      | 32284306  | 2438 |
| chr6  | 46667499      | 46669850  | 2352 |
| chr18 | 51048633      | 51050902  | 2270 |
| chr8  | 22647658      | 22649911  | 2254 |
| chr21 | 62447571      | 62449819  | 2249 |
| chr11 | 14144995      | 14147229  | 2235 |
| chr29 | 13602646      | 13604839  | 2194 |
| chr28 | 7555398       | 7557591   | 2194 |
| chr4  | 120186574     | 120188734 | 2161 |
| chr26 | 20731657      | 20733760  | 2104 |
| chr29 | 27292187      | 27294251  | 2065 |
| chr7  | 13482217      | 13484148  | 1932 |
| chr6  | 106817974     | 106819859 | 1886 |
| chr14 | 1578612       | 1580460   | 1849 |
| chr18 | 55851625      | 55853457  | 1833 |
| chr22 | 59850062      | 59851853  | 1792 |
| chr9  | 45692712      | 45694472  | 1761 |
| chr7  | 95942485      | 95944219  | 1735 |
| chr25 | 38761173      | 38762822  | 1650 |
| chr6  | 117847807     | 117849449 | 1643 |
| chr11 | 2388164       | 2389749   | 1586 |
| chr3  | 22669873      | 22671424  | 1552 |
| chr10 | 103073508     | 103075055 | 1548 |
| chr5  | 123170916     | 123172437 | 1522 |
| chr15 | 36573733      | 36575113  | 1381 |
| chr23 | 18452803      | 18454161  | 1359 |
| chr26 | 21846952      | 21848285  | 1334 |
| chr15 | 44753224      | 44754457  | 1234 |
| chr5  | 29213171      | 29214295  | 1125 |
| chr18 | 57610116      | 57611239  | 1124 |
| chr23 | 18410603      | 18411717  | 1115 |
| chr11 | 75411000      | 75412085  | 1086 |
| chr4  | 50699776      | 50700809  | 1034 |
| chr8  | 5808699       | 5809704   | 1006 |

|       |           |           |      |
|-------|-----------|-----------|------|
| chr2  | 131304930 | 131305823 | 894  |
| chr11 | 7545529   | 7546112   | 584  |
| chr2  | 15369078  | 15369655  | 578  |
| chr17 | 72137770  | 72142641  | 4872 |
| chr5  | 88029788  | 88034378  | 4591 |
| chr29 | 44374953  | 44379527  | 4575 |
| chr4  | 105185458 | 105189973 | 4516 |
| chr17 | 3233269   | 3237774   | 4506 |
| chr24 | 53850838  | 53854965  | 4128 |
| chr15 | 38243135  | 38246984  | 3850 |
| chr1  | 144521491 | 144525273 | 3783 |
| chr1  | 67723703  | 67727399  | 3697 |
| chr4  | 6108632   | 6112306   | 3675 |
| chr25 | 14681500  | 14684875  | 3376 |
| chr21 | 47713699  | 47717062  | 3364 |
| chr23 | 52608277  | 52611639  | 3363 |
| chr3  | 31679551  | 31682697  | 3147 |
| chr26 | 31470686  | 31473817  | 3132 |
| chr1  | 154415225 | 154418152 | 2928 |
| chr15 | 63094698  | 63097624  | 2927 |
| chrX  | 10425970  | 10428880  | 2911 |
| chr18 | 33568088  | 33570967  | 2880 |
| chr29 | 49035345  | 49038176  | 2832 |
| chr8  | 112054786 | 112057564 | 2779 |
| chr1  | 96194462  | 96197216  | 2755 |
| chr20 | 38853354  | 38855927  | 2574 |
| chr17 | 12578464  | 12581007  | 2544 |
| chr11 | 103809962 | 103812488 | 2527 |
| chr4  | 123126180 | 123128661 | 2482 |
| chr9  | 76813917  | 76816354  | 2438 |
| chr13 | 82703014  | 82705446  | 2433 |
| chr10 | 86858518  | 86860705  | 2188 |
| chr7  | 50286852  | 50288852  | 2001 |
| chr1  | 87361469  | 87363410  | 1942 |
| chr17 | 12569144  | 12571054  | 1911 |
| chr10 | 70397738  | 70399633  | 1896 |
| chr16 | 23840208  | 23842046  | 1839 |
| chr14 | 39878830  | 39880660  | 1831 |
| chr29 | 51263107  | 51264913  | 1807 |
| chr5  | 123709652 | 123711381 | 1730 |
| chr12 | 34045651  | 34047353  | 1703 |
| chr23 | 27804333  | 27806001  | 1669 |
| chr17 | 66168013  | 66169632  | 1620 |
| chr18 | 13536042  | 13537630  | 1589 |
| chr11 | 11991559  | 11993029  | 1471 |
| chr7  | 65673795  | 65675201  | 1407 |
| chr11 | 89687300  | 89688614  | 1315 |
| chr24 | 47125310  | 47126494  | 1185 |
| chr18 | 64316830  | 64317915  | 1086 |
| chr5  | 31555890  | 31556942  | 1053 |

|       |               |           |      |
|-------|---------------|-----------|------|
| chr18 | 12726926      | 12727904  | 979  |
| chr21 | 64508632      | 64509550  | 919  |
| chr10 | 3519605       | 3520485   | 881  |
| chr9  | 90827813      | 90828636  | 824  |
| chr12 | 54236267      | 54237084  | 818  |
| chr28 | 15321072      | 15321798  | 727  |
| chr1  | 147178445     | 147179068 | 624  |
| chr14 | 42556252      | 42556788  | 537  |
| chr3  | 23043221      | 23043747  | 527  |
| chr29 | 25552734      | 25558663  | 5930 |
| chr16 | 41367949      | 41373131  | 5183 |
| chr3  | 20056519      | 20061338  | 4820 |
| chr19 | 25279652      | 25284449  | 4798 |
| chr11 | 56767488      | 56772284  | 4797 |
| chr3  | 116030391     | 116035130 | 4740 |
| chr29 | 36686436      | 36691055  | 4620 |
| chr16 | 2216102       | 2220347   | 4246 |
| chr14 | 239176 243328 | 4153      |      |
| chrX  | 29566758      | 29570759  | 4002 |
| chr14 | 21774899      | 21778831  | 3933 |
| chr26 | 21854105      | 21857925  | 3821 |
| chr25 | 37982970      | 37986647  | 3678 |
| chr11 | 104911413     | 104915050 | 3638 |
| chr18 | 18684525      | 18687982  | 3458 |
| chr14 | 23433129      | 23436545  | 3417 |
| chr3  | 95079134      | 95082538  | 3405 |
| chr4  | 118016551     | 118019911 | 3361 |
| chr11 | 100920196     | 100923499 | 3304 |
| chr17 | 67109342      | 67112524  | 3183 |
| chr11 | 11704667      | 11707847  | 3181 |
| chr25 | 29068428      | 29071594  | 3167 |
| chrX  | 13626443      | 13629540  | 3098 |
| chr18 | 50666273      | 50669300  | 3028 |
| chr6  | 16257869      | 16260891  | 3023 |
| chr25 | 24849723      | 24852711  | 2989 |
| chr10 | 93066212      | 93069174  | 2963 |
| chr6  | 67958501      | 67961390  | 2890 |
| chr4  | 89781891      | 89784752  | 2862 |
| chr3  | 8150263       | 8153063   | 2801 |
| chr10 | 91109099      | 91111833  | 2735 |
| chr17 | 44038283      | 44040979  | 2697 |
| chr17 | 65959154      | 65961640  | 2487 |
| chr29 | 35600087      | 35602524  | 2438 |
| chr18 | 26254456      | 26256881  | 2426 |
| chr5  | 26713313      | 26715616  | 2304 |
| chrX  | 35199345      | 35201549  | 2205 |
| chr18 | 62023465      | 62025665  | 2201 |
| chr26 | 21799155      | 21801264  | 2110 |
| chr13 | 65414466      | 65416470  | 2005 |
| chr1  | 149724890     | 149726856 | 1967 |



|       |           |           |      |
|-------|-----------|-----------|------|
| chr5  | 123163307 | 123165271 | 1965 |
| chr4  | 90363660  | 90365618  | 1959 |
| chr2  | 128470495 | 128472384 | 1890 |
| chr18 | 51593886  | 51595769  | 1884 |
| chr18 | 62501986  | 62503737  | 1752 |
| chr22 | 12196031  | 12197686  | 1656 |
| chr3  | 105765179 | 105766814 | 1636 |
| chr25 | 2926357   | 2927953   | 1597 |
| chr18 | 50188721  | 50190308  | 1588 |
| chr6  | 92070723  | 92072254  | 1532 |
| chr8  | 78845158  | 78846686  | 1529 |
| chr25 | 26449471  | 26450855  | 1385 |
| chr21 | 27575240  | 27576524  | 1285 |
| chr8  | 45754979  | 45756217  | 1239 |
| chr26 | 19025288  | 19026496  | 1209 |
| chr18 | 45388748  | 45389946  | 1199 |
| chr3  | 22914480  | 22915654  | 1175 |
| chrX  | 23346240  | 23347366  | 1127 |
| chr19 | 6519813   | 6520934   | 1122 |
| chr24 | 25454151  | 25455241  | 1091 |
| chr21 | 20146262  | 20147338  | 1077 |
| chr18 | 62452889  | 62453957  | 1069 |
| chr20 | 5046629   | 5047558   | 930  |
| chrX  | 75397702  | 75398519  | 818  |
| chr7  | 14336489  | 14337289  | 801  |
| chr18 | 51031690  | 51032454  | 765  |
| chr23 | 27595185  | 27595944  | 760  |
| chr13 | 35925677  | 35926419  | 743  |
| chr17 | 70303568  | 70304233  | 666  |
| chr3  | 22697067  | 22697685  | 619  |
| chr1  | 133457637 | 133458196 | 560  |
| chr3  | 22566927  | 22567982  | 1056 |
| chr14 | 23256733  | 23263782  | 7050 |
| chr5  | 33517834  | 33523095  | 5262 |
| chr11 | 44951890  | 44956660  | 4771 |
| chr5  | 38510815  | 38515539  | 4725 |
| chr21 | 56284289  | 56288963  | 4675 |
| chr29 | 6656452   | 6660408   | 3957 |
| chr23 | 28887423  | 28891090  | 3668 |
| chr2  | 130977492 | 130981149 | 3658 |
| chr11 | 75091047  | 75094588  | 3542 |
| chr18 | 51033422  | 51036746  | 3325 |
| chr16 | 67439092  | 67442406  | 3315 |
| chr7  | 81895568  | 81898837  | 3270 |
| chr25 | 38673787  | 38676899  | 3113 |
| chr19 | 15781838  | 15784893  | 3056 |
| chr16 | 46742914  | 46745923  | 3010 |
| chr3  | 4340166   | 4343069   | 2904 |
| chr10 | 59996020  | 59998880  | 2861 |
| chr11 | 9216127   | 9218792   | 2666 |

|       |           |           |      |
|-------|-----------|-----------|------|
| chr6  | 103282838 | 103285459 | 2622 |
| chr7  | 9678460   | 9681044   | 2585 |
| chr18 | 24012108  | 24014582  | 2475 |
| chr21 | 68954764  | 68957193  | 2430 |
| chr10 | 7601896   | 7604312   | 2417 |
| chr23 | 46367390  | 46369770  | 2381 |
| chr3  | 22541986  | 22544345  | 2360 |
| chr24 | 31167945  | 31170296  | 2352 |
| chr13 | 41722166  | 41724513  | 2348 |
| chr23 | 27962586  | 27964902  | 2317 |
| chr24 | 25450070  | 25452316  | 2247 |
| chr18 | 48679295  | 48681538  | 2244 |
| chr1  | 156680036 | 156682217 | 2182 |
| chr21 | 31053112  | 31055204  | 2093 |
| chr11 | 30923559  | 30925626  | 2068 |
| chr9  | 16965229  | 16967251  | 2023 |
| chr21 | 15490277  | 15492292  | 2016 |
| chr18 | 56859885  | 56861841  | 1957 |
| chr6  | 107493193 | 107495091 | 1899 |
| chr22 | 10749519  | 10751404  | 1886 |
| chr19 | 12314116  | 12315911  | 1796 |
| chr15 | 27273260  | 27275051  | 1792 |
| chr4  | 73690784  | 73692519  | 1736 |
| chr19 | 23726930  | 23728526  | 1597 |
| chr25 | 8194799   | 8196384   | 1586 |
| chr21 | 57826009  | 57827564  | 1556 |
| chr17 | 73122463  | 73123928  | 1466 |
| chr5  | 28956262  | 28957683  | 1422 |
| chrX  | 75398817  | 75400196  | 1380 |
| chr2  | 134063383 | 134064717 | 1335 |
| chr13 | 54795825  | 54797090  | 1266 |
| chr19 | 12407704  | 12408956  | 1253 |
| chr23 | 53265874  | 53267077  | 1204 |
| chr13 | 74406427  | 74407627  | 1201 |
| chr16 | 44153954  | 44155149  | 1196 |
| chr22 | 17557062  | 17558205  | 1144 |
| chr18 | 65961564  | 65962677  | 1114 |
| chr11 | 74609027  | 74610131  | 1105 |
| chr2  | 125929524 | 125930619 | 1096 |
| chr25 | 2687556   | 2688646   | 1091 |
| chr17 | 70304247  | 70305200  | 954  |
| chr18 | 51615908  | 51616770  | 863  |
| chr5  | 120118295 | 120119155 | 861  |
| chr27 | 4193027   | 4193767   | 741  |
| chr19 | 41385745  | 41386471  | 727  |
| chr12 | 74508703  | 74509352  | 650  |
| chr2  | 134678035 | 134678631 | 597  |
| chr4  | 95664962  | 95665512  | 551  |
| chr19 | 10940935  | 10949465  | 8531 |
| chr11 | 46740986  | 46746115  | 5130 |

|       |               |           |      |
|-------|---------------|-----------|------|
| chr8  | 76014147      | 76018559  | 4413 |
| chr21 | 66476746      | 66481151  | 4406 |
| chr16 | 44334323      | 44338671  | 4349 |
| chr2  | 134744143     | 134747868 | 3726 |
| chr18 | 23471365      | 23474934  | 3570 |
| chr8  | 9358067       | 9361472   | 3406 |
| chr26 | 21793253      | 21796436  | 3184 |
| chr29 | 51165468      | 51168620  | 3153 |
| chr25 | 36475443      | 36478582  | 3140 |
| chr12 | 58680188      | 58683321  | 3134 |
| chr11 | 1971622       | 1974543   | 2922 |
| chr24 | 60978701      | 60981467  | 2767 |
| chr23 | 17460849      | 17463556  | 2708 |
| chr7  | 15105347      | 15108025  | 2679 |
| chr1  | 84820157      | 84822800  | 2644 |
| chr11 | 76255551      | 76258190  | 2640 |
| chr14 | 21586542      | 21589058  | 2517 |
| chr6  | 69107208      | 69109718  | 2511 |
| chr18 | 39906800      | 39909276  | 2477 |
| chr19 | 37337518      | 37339978  | 2461 |
| chr29 | 33704169      | 33706628  | 2460 |
| chr5  | 52963663      | 52966096  | 2434 |
| chr3  | 116027338     | 116029672 | 2335 |
| chr3  | 8940356       | 8942650   | 2295 |
| chr22 | 24914111      | 24916341  | 2231 |
| chr17 | 66278352      | 66280570  | 2219 |
| chr16 | 47970987      | 47973203  | 2217 |
| chr22 | 45456038      | 45458248  | 2211 |
| chr11 | 106289310     | 106291503 | 2194 |
| chr4  | 98485501      | 98487693  | 2193 |
| chr27 | 301469 303582 | 2114      |      |
| chr13 | 49390718      | 49392781  | 2064 |
| chr4  | 16837057      | 16839085  | 2029 |
| chr26 | 20376082      | 20378098  | 2017 |
| chr3  | 116025181     | 116027174 | 1994 |
| chr10 | 66924552      | 66926402  | 1851 |
| chr13 | 74417210      | 74419029  | 1820 |
| chr17 | 64080126      | 64081793  | 1668 |
| chr4  | 118683084     | 118684716 | 1633 |
| chr3  | 82837472      | 82839046  | 1575 |
| chr8  | 95561680      | 95563247  | 1568 |
| chr5  | 60731591      | 60733128  | 1538 |
| chr19 | 39029846      | 39031355  | 1510 |
| chr7  | 50285088      | 50286550  | 1463 |
| chr11 | 48562826      | 48564277  | 1452 |
| chr3  | 22685844      | 22687250  | 1407 |
| chr16 | 71533999      | 71535366  | 1368 |
| chr26 | 21797140      | 21798503  | 1364 |
| chr18 | 63772763      | 63774119  | 1357 |
| chr13 | 75751518      | 75752822  | 1305 |

|       |               |           |      |
|-------|---------------|-----------|------|
| chrX  | 13634493      | 13635646  | 1154 |
| chr27 | 15766718      | 15767824  | 1107 |
| chr8  | 8438491       | 8439567   | 1077 |
| chr17 | 50983175      | 50984247  | 1073 |
| chr18 | 48686008      | 48687060  | 1053 |
| chr7  | 4349197       | 4350246   | 1050 |
| chr13 | 52672332      | 52673357  | 1026 |
| chr2  | 111325654     | 111326291 | 638  |
| chr29 | 50404412      | 50404909  | 498  |
| chr12 | 36460226      | 36466485  | 6260 |
| chrX  | 11015728      | 11020961  | 5234 |
| chr4  | 116918467     | 116923145 | 4679 |
| chr26 | 22323578      | 22328102  | 4525 |
| chr24 | 835649 839985 | 4337      |      |
| chr19 | 38553442      | 38557712  | 4271 |
| chr25 | 940984 945144 | 4161      |      |
| chr11 | 1300607       | 1304679   | 4073 |
| chr1  | 1641294       | 1645146   | 3853 |
| chr11 | 81749357      | 81753144  | 3788 |
| chr15 | 37554405      | 37558082  | 3678 |
| chr2  | 128593850     | 128597273 | 3424 |
| chr1  | 59068182      | 59071415  | 3234 |
| chr4  | 98482142      | 98485303  | 3162 |
| chr15 | 51345529      | 51348685  | 3157 |
| chr23 | 46111922      | 46115036  | 3115 |
| chr24 | 40612201      | 40615223  | 3023 |
| chr3  | 105680520     | 105683534 | 3015 |
| chr22 | 48108258      | 48111266  | 3009 |
| chr9  | 104999962     | 105002963 | 3002 |
| chr6  | 16264808      | 16267724  | 2917 |
| chr2  | 111341421     | 111344319 | 2899 |
| chr20 | 35134392      | 35137260  | 2869 |
| chr10 | 21973560      | 21976420  | 2861 |
| chr2  | 111244107     | 111246857 | 2751 |
| chr15 | 15536539      | 15539254  | 2716 |
| chr8  | 107678960     | 107681662 | 2703 |
| chr19 | 58226497      | 58229084  | 2588 |
| chr7  | 43722516      | 43725076  | 2561 |
| chr20 | 64883723      | 64886219  | 2497 |
| chr5  | 113256934     | 113259409 | 2476 |
| chr16 | 77483788      | 77486064  | 2277 |
| chr21 | 25348748      | 25350952  | 2205 |
| chr25 | 35603952      | 35606099  | 2148 |
| chr7  | 15103233      | 15105307  | 2075 |
| chr3  | 33327512      | 33329543  | 2032 |
| chr25 | 39141480      | 39143510  | 2031 |
| chr7  | 43754491      | 43756477  | 1987 |
| chr2  | 130448284     | 130450208 | 1925 |
| chr11 | 28646594      | 28648486  | 1893 |
| chr13 | 75564345      | 75566219  | 1875 |

|       |           |           |      |  |
|-------|-----------|-----------|------|--|
| chr23 | 993999    | 995871    | 1873 |  |
| chr28 | 43738523  | 43740381  | 1859 |  |
| chr10 | 70842142  | 70843987  | 1846 |  |
| chr27 | 4191182   | 4193024   | 1843 |  |
| chr16 | 40910383  | 40912203  | 1821 |  |
| chr19 | 32595016  | 32596828  | 1813 |  |
| chr13 | 65070946  | 65072736  | 1791 |  |
| chr2  | 92347946  | 92349690  | 1745 |  |
| chr19 | 46299224  | 46300890  | 1667 |  |
| chrX  | 19989888  | 19991521  | 1634 |  |
| chr12 | 14705634  | 14707253  | 1620 |  |
| chr2  | 65513212  | 65514766  | 1555 |  |
| chr3  | 92503434  | 92504927  | 1494 |  |
| chr18 | 51045261  | 51046749  | 1489 |  |
| chr19 | 26942584  | 26944021  | 1438 |  |
| chr26 | 38894395  | 38895798  | 1404 |  |
| chr6  | 120796290 | 120797689 | 1400 |  |
| chr21 | 56510870  | 56512266  | 1397 |  |
| chr5  | 102223704 | 102224961 | 1258 |  |
| chr26 | 51194053  | 51195302  | 1250 |  |
| chr6  | 118498322 | 118499551 | 1230 |  |
| chr8  | 80221563  | 80222771  | 1209 |  |
| chr15 | 71860661  | 71861854  | 1194 |  |
| chr17 | 67101158  | 67102280  | 1123 |  |
| chr27 | 38663579  | 38664666  | 1088 |  |
| chr18 | 50979458  | 50980418  | 961  |  |
| chr15 | 74516678  | 74517453  | 776  |  |
| chr17 | 15207397  | 15208110  | 714  |  |
| chr19 | 65260017  | 65260691  | 675  |  |
| chr11 | 14127677  | 14128336  | 660  |  |
| chr2  | 126085575 | 126086101 | 527  |  |
| chr3  | 22916571  | 22917092  | 522  |  |
| chr10 | 32476182  | 32482117  | 5936 |  |
| chr20 | 42308647  | 42314190  | 5544 |  |
| chr13 | 55037460  | 55042929  | 5470 |  |
| chr9  | 47245003  | 47249395  | 4393 |  |
| chr26 | 51624962  | 51629119  | 4158 |  |
| chr8  | 72303808  | 72307781  | 3974 |  |
| chr2  | 111259583 | 111262977 | 3395 |  |
| chr12 | 32081886  | 32085126  | 3241 |  |
| chr18 | 650981    | 654041    | 3061 |  |
| chr7  | 10935813  | 10938861  | 3049 |  |
| chr26 | 37958302  | 37961343  | 3042 |  |
| chr18 | 35340154  | 35343076  | 2923 |  |
| chr3  | 125633531 | 125636390 | 2860 |  |
| chr4  | 71546916  | 71549756  | 2841 |  |
| chr17 | 58767955  | 58770716  | 2762 |  |
| chr18 | 56042993  | 56045688  | 2696 |  |
| chr5  | 30485187  | 30487807  | 2621 |  |
| chr4  | 120607347 | 120609753 | 2407 |  |

|       |           |           |      |
|-------|-----------|-----------|------|
| chr23 | 48564395  | 48566779  | 2385 |
| chr16 | 23837075  | 23839344  | 2270 |
| chr29 | 34639064  | 34641284  | 2221 |
| chr3  | 106583037 | 106585163 | 2127 |
| chr25 | 1974103   | 1976227   | 2125 |
| chr19 | 41265072  | 41267189  | 2118 |
| chr7  | 5308656   | 5310753   | 2098 |
| chr20 | 75032266  | 75034291  | 2026 |
| chr25 | 2993031   | 2995034   | 2004 |
| chr8  | 7558463   | 7560279   | 1817 |
| chr13 | 39953352  | 39955163  | 1812 |
| chr8  | 23042602  | 23044372  | 1771 |
| chr28 | 26918832  | 26920508  | 1677 |
| chr24 | 35307730  | 35309399  | 1670 |
| chr4  | 33854364  | 33856027  | 1664 |
| chr18 | 3546504   | 3548150   | 1647 |
| chr15 | 81174124  | 81175766  | 1643 |
| chr18 | 62515740  | 62517346  | 1607 |
| chr7  | 16506198  | 16507774  | 1577 |
| chr18 | 34823844  | 34825404  | 1561 |
| chr28 | 32818896  | 32820415  | 1520 |
| chr3  | 22863432  | 22864950  | 1519 |
| chr12 | 74453841  | 74455327  | 1487 |
| chr9  | 44104466  | 44105890  | 1425 |
| chr16 | 47995000  | 47996401  | 1402 |
| chr10 | 99925216  | 99926612  | 1397 |
| chr19 | 23861421  | 23862746  | 1326 |
| chr21 | 68957286  | 68958593  | 1308 |
| chr22 | 59420920  | 59422114  | 1195 |
| chr8  | 23040367  | 23041555  | 1189 |
| chr25 | 3035045   | 3036209   | 1165 |
| chr29 | 46654996  | 46656159  | 1164 |
| chr18 | 47797093  | 47798235  | 1143 |
| chr15 | 76729995  | 76731126  | 1132 |
| chr29 | 37385209  | 37386308  | 1100 |
| chr7  | 43728094  | 43729184  | 1091 |
| chr26 | 21981984  | 21983046  | 1063 |
| chr16 | 3710513   | 3711360   | 848  |
| chr23 | 27774071  | 27774804  | 734  |
| chr23 | 52681785  | 52682500  | 716  |
| chr25 | 12714905  | 12715593  | 689  |
| chr29 | 48740835  | 48741503  | 669  |
| chr21 | 22693880  | 22694537  | 658  |
| chr3  | 8942758   | 8943413   | 656  |
| chr25 | 37691337  | 37691927  | 591  |
| chr8  | 24229581  | 24230150  | 570  |
| chr12 | 74474619  | 74475174  | 556  |
| chr4  | 71557331  | 71565022  | 7692 |
| chr16 | 20650959  | 20655754  | 4796 |
| chr11 | 90407398  | 90411772  | 4375 |

|       |           |           |      |
|-------|-----------|-----------|------|
| chr3  | 20453034  | 20457193  | 4160 |
| chr18 | 55589536  | 55593629  | 4094 |
| chr7  | 16507908  | 16511567  | 3660 |
| chr28 | 38898302  | 38901950  | 3649 |
| chr9  | 43848693  | 43852309  | 3617 |
| chr18 | 65964422  | 65968019  | 3598 |
| chr2  | 65515214  | 65518786  | 3573 |
| chr10 | 25838106  | 25841578  | 3473 |
| chr19 | 60531148  | 60534567  | 3420 |
| chr13 | 22889945  | 22893319  | 3375 |
| chr7  | 39029339  | 39032320  | 2982 |
| chr23 | 27843249  | 27846191  | 2943 |
| chr19 | 54797093  | 54800034  | 2942 |
| chr5  | 60155801  | 60158634  | 2834 |
| chr16 | 44307451  | 44310249  | 2799 |
| chr6  | 115601720 | 115604453 | 2734 |
| chr18 | 52691691  | 52694422  | 2732 |
| chr13 | 73995338  | 73997874  | 2537 |
| chr10 | 78878056  | 78880565  | 2510 |
| chr15 | 42289500  | 42291975  | 2476 |
| chr19 | 30533692  | 30536112  | 2421 |
| chr5  | 38696330  | 38698739  | 2410 |
| chr13 | 70044764  | 70047120  | 2357 |
| chr13 | 47743961  | 47746297  | 2337 |
| chr24 | 35140372  | 35142694  | 2323 |
| chr15 | 73766813  | 73769079  | 2267 |
| chr11 | 4359347   | 4361609   | 2263 |
| chr15 | 44886849  | 44889093  | 2245 |
| chr2  | 123458152 | 123460394 | 2243 |
| chr8  | 78539113  | 78541328  | 2216 |
| chr8  | 1625974   | 1628181   | 2208 |
| chr7  | 5251970   | 5254157   | 2188 |
| chr29 | 25487678  | 25489805  | 2128 |
| chr5  | 29718168  | 29720196  | 2029 |
| chr19 | 39050876  | 39052832  | 1957 |
| chr5  | 121058690 | 121060631 | 1942 |
| chr25 | 40220432  | 40222369  | 1938 |
| chr15 | 29373295  | 29375227  | 1933 |
| chr25 | 43236918  | 43238841  | 1924 |
| chr9  | 44920046  | 44921967  | 1922 |
| chr14 | 13381877  | 13383797  | 1921 |
| chr22 | 57367186  | 57369077  | 1892 |
| chr3  | 93809915  | 93811792  | 1878 |
| chr10 | 74126043  | 74127842  | 1800 |
| chr13 | 45322250  | 45323984  | 1735 |
| chr21 | 48710966  | 48712690  | 1725 |
| chr11 | 107585449 | 107587158 | 1710 |
| chr12 | 33361852  | 33363556  | 1705 |
| chr5  | 30319276  | 30320978  | 1703 |
| chr5  | 72150621  | 72152217  | 1597 |

|       |           |           |      |
|-------|-----------|-----------|------|
| chr13 | 39955170  | 39956757  | 1588 |
| chr27 | 32882055  | 32883589  | 1535 |
| chr8  | 24719124  | 24720656  | 1533 |
| chr18 | 54232481  | 54234005  | 1525 |
| chr25 | 2982815   | 2984229   | 1415 |
| chr5  | 67822850  | 67824248  | 1399 |
| chr29 | 46230477  | 46231741  | 1265 |
| chr3  | 105447444 | 105448677 | 1234 |
| chr1  | 150072706 | 150073825 | 1120 |
| chr3  | 22894912  | 22896021  | 1110 |
| chr24 | 40611120  | 40612165  | 1046 |
| chr14 | 61209732  | 61210718  | 987  |
| chr22 | 58635921  | 58636890  | 970  |
| chr19 | 10938412  | 10939374  | 963  |
| chr26 | 21861622  | 21862581  | 960  |
| chr25 | 3010491   | 3011366   | 876  |
| chr28 | 11368271  | 11369114  | 844  |
| chr3  | 117412343 | 117413127 | 785  |
| chr3  | 106530923 | 106531703 | 781  |
| chr8  | 24694219  | 24694971  | 753  |
| chr23 | 15884083  | 15884728  | 646  |
| chr3  | 8631860   | 8632432   | 573  |
| chr14 | 21250237  | 21250782  | 546  |
| chr7  | 18717202  | 18717731  | 530  |
| chr4  | 110047706 | 110048232 | 527  |
| chr4  | 123135752 | 123136256 | 505  |
| chr26 | 22203816  | 22210128  | 6313 |
| chr8  | 101700843 | 101705857 | 5015 |
| chr5  | 1093403   | 1098170   | 4768 |
| chr18 | 45979073  | 45983231  | 4159 |
| chr28 | 25133012  | 25137069  | 4058 |
| chr17 | 18377843  | 18381800  | 3958 |
| chr17 | 61283432  | 61287207  | 3776 |
| chr27 | 23638376  | 23642064  | 3689 |
| chr14 | 66272263  | 66275806  | 3544 |
| chr14 | 19968076  | 19971524  | 3449 |
| chr26 | 25507473  | 25510909  | 3437 |
| chr5  | 55578889  | 55582271  | 3383 |
| chr23 | 13592992  | 13596320  | 3329 |
| chr19 | 46879389  | 46882696  | 3308 |
| chr13 | 59925164  | 59928263  | 3100 |
| chr16 | 40881473  | 40884552  | 3080 |
| chr7  | 3963320   | 3966264   | 2945 |
| chr24 | 36027219  | 36030120  | 2902 |
| chr5  | 52920510  | 52923399  | 2890 |
| chr5  | 60307983  | 60310756  | 2774 |
| chr19 | 20340027  | 20342720  | 2694 |
| chrX  | 47480686  | 47483224  | 2539 |
| chr23 | 1302246   | 1304763   | 2518 |
| chr18 | 13572197  | 13574704  | 2508 |



|       |               |           |      |
|-------|---------------|-----------|------|
| chr10 | 2772043       | 2774541   | 2499 |
| chr12 | 51064477      | 51066965  | 2489 |
| chr23 | 31302718      | 31305198  | 2481 |
| chr28 | 34013901      | 34016337  | 2437 |
| chr26 | 50065282      | 50067714  | 2433 |
| chr29 | 45909172      | 45911595  | 2424 |
| chr19 | 18372473      | 18374821  | 2349 |
| chr27 | 4188435       | 4190764   | 2330 |
| chr2  | 76631597      | 76633907  | 2311 |
| chr3  | 15424781      | 15427085  | 2305 |
| chr24 | 40813674      | 40815963  | 2290 |
| chr18 | 63755314      | 63757602  | 2289 |
| chr23 | 30542658      | 30544918  | 2261 |
| chr26 | 24341282      | 24343531  | 2250 |
| chr7  | 50549309      | 50551554  | 2246 |
| chrX  | 54350808      | 54353041  | 2234 |
| chr7  | 11032177      | 11034368  | 2192 |
| chr25 | 827507 829609 | 2103      |      |
| chr25 | 43511171      | 43513254  | 2084 |
| chr18 | 54937661      | 54939733  | 2073 |
| chr26 | 51554265      | 51556307  | 2043 |
| chr22 | 53486927      | 53488940  | 2014 |
| chr23 | 31148060      | 31150064  | 2005 |
| chr29 | 37700668      | 37702589  | 1922 |
| chr18 | 3548239       | 3550146   | 1908 |
| chr6  | 63047871      | 63049773  | 1903 |
| chr3  | 113289530     | 113291416 | 1887 |
| chr23 | 30255566      | 30257371  | 1806 |
| chr16 | 39063441      | 39065178  | 1738 |
| chr22 | 59417499      | 59419212  | 1714 |
| chr16 | 23646826      | 23648530  | 1705 |
| chr10 | 69402541      | 69404241  | 1701 |
| chr14 | 441722 443291 | 1570      |      |
| chr29 | 44677564      | 44679103  | 1540 |
| chr21 | 20148353      | 20149861  | 1509 |
| chr22 | 56289845      | 56291332  | 1488 |
| chr13 | 40881575      | 40883041  | 1467 |
| chr19 | 43965630      | 43967052  | 1423 |
| chr5  | 71658670      | 71660061  | 1392 |
| chr12 | 35065615      | 35067003  | 1389 |
| chr15 | 34283516      | 34284841  | 1326 |
| chr18 | 31841513      | 31842827  | 1315 |
| chr14 | 30836742      | 30838019  | 1278 |
| chr12 | 46765372      | 46766635  | 1264 |
| chr10 | 5234806       | 5236000   | 1195 |
| chr8  | 35971018      | 35972108  | 1091 |
| chr24 | 51581940      | 51583022  | 1083 |
| chr7  | 10057872      | 10058937  | 1066 |
| chr25 | 39204455      | 39205491  | 1037 |
| chr19 | 28998246      | 28999267  | 1022 |

|       |           |           |      |
|-------|-----------|-----------|------|
| chr16 | 48572180  | 48573201  | 1022 |
| chr11 | 105659303 | 105660308 | 1006 |
| chr13 | 10556977  | 10557980  | 1004 |
| chr11 | 2536484   | 2537477   | 994  |
| chr27 | 31456329  | 31457298  | 970  |
| chr13 | 62424172  | 62425130  | 959  |
| chr19 | 40421191  | 40422080  | 890  |
| chr20 | 25590145  | 25591002  | 858  |
| chr1  | 84784452  | 84785228  | 777  |
| chr18 | 47799223  | 47799940  | 718  |
| chr25 | 22141835  | 22142544  | 710  |
| chr8  | 24202279  | 24202949  | 671  |
| chr18 | 52026912  | 52027524  | 613  |
| chr4  | 124244344 | 124244929 | 586  |
| chr2  | 119949425 | 119949996 | 572  |
| chr1  | 134428501 | 134429041 | 541  |
| chr4  | 16845324  | 16850394  | 5071 |
| chr29 | 25945123  | 25949956  | 4834 |
| chr16 | 38942789  | 38947182  | 4394 |
| chr29 | 43168778  | 43172717  | 3940 |
| chr8  | 8712043   | 8715950   | 3908 |
| chr12 | 36417836  | 36421484  | 3649 |
| chr21 | 19201752  | 19205267  | 3516 |
| chr22 | 47858016  | 47861510  | 3495 |
| chr4  | 74073820  | 74077261  | 3442 |
| chr13 | 84225092  | 84228414  | 3323 |
| chr7  | 43759282  | 43762593  | 3312 |
| chr10 | 5340031   | 5343306   | 3276 |
| chr14 | 22100446  | 22103717  | 3272 |
| chr8  | 20910764  | 20913944  | 3181 |
| chr11 | 108405830 | 108408976 | 3147 |
| chr7  | 94359700  | 94362801  | 3102 |
| chr17 | 5057211   | 5060237   | 3027 |
| chr9  | 47256160  | 47259177  | 3018 |
| chr15 | 42602779  | 42605790  | 3012 |
| chr1  | 146735642 | 146738625 | 2984 |
| chr21 | 65547516  | 65550492  | 2977 |
| chr15 | 54028164  | 54031005  | 2842 |
| chr15 | 21054731  | 21057514  | 2784 |
| chr15 | 20035597  | 20038310  | 2714 |
| chr24 | 26731780  | 26734466  | 2687 |
| chr7  | 13405123  | 13407753  | 2631 |
| chr7  | 17095659  | 17098141  | 2483 |
| chr18 | 23601685  | 23604128  | 2444 |
| chr3  | 33827233  | 33829646  | 2414 |
| chr19 | 16701356  | 16703763  | 2408 |
| chr26 | 22200025  | 22202390  | 2366 |
| chr13 | 67394292  | 67396604  | 2313 |
| chr8  | 82099185  | 82101489  | 2305 |
| chr6  | 111010793 | 111013056 | 2264 |

|       |           |           |      |
|-------|-----------|-----------|------|
| chr3  | 48206837  | 48208975  | 2139 |
| chr7  | 5153249   | 5155383   | 2135 |
| chr28 | 46061549  | 46063674  | 2126 |
| chr12 | 32202801  | 32204902  | 2102 |
| chr14 | 64004317  | 64006394  | 2078 |
| chr5  | 35142999  | 35145023  | 2025 |
| chr5  | 75982958  | 75984951  | 1994 |
| chr8  | 45665266  | 45667218  | 1953 |
| chr27 | 15408168  | 15410088  | 1921 |
| chr14 | 34074856  | 34076762  | 1907 |
| chr4  | 52525681  | 52527495  | 1815 |
| chr10 | 29820926  | 29822740  | 1815 |
| chr15 | 75535597  | 75537356  | 1760 |
| chr21 | 28190009  | 28191715  | 1707 |
| chr3  | 47195901  | 47197578  | 1678 |
| chr21 | 67960672  | 67962335  | 1664 |
| chr25 | 24847259  | 24848918  | 1660 |
| chr22 | 56174364  | 56175985  | 1622 |
| chr20 | 66433196  | 66434803  | 1608 |
| chr7  | 10405823  | 10407428  | 1606 |
| chr25 | 2930376   | 2931915   | 1540 |
| chr7  | 4513213   | 4514724   | 1512 |
| chrX  | 59701186  | 59702674  | 1489 |
| chr12 | 81457598  | 81459012  | 1415 |
| chr11 | 11621414  | 11622766  | 1353 |
| chr24 | 60572515  | 60573845  | 1331 |
| chrX  | 31427428  | 31428747  | 1320 |
| chr11 | 103737451 | 103738749 | 1299 |
| chr17 | 73192596  | 73193891  | 1296 |
| chr12 | 68184161  | 68185443  | 1283 |
| chr3  | 92501153  | 92502419  | 1267 |
| chr19 | 46821528  | 46822779  | 1252 |
| chr19 | 20362919  | 20364150  | 1232 |
| chr2  | 123359040 | 123360227 | 1188 |
| chr5  | 125560766 | 125561929 | 1164 |
| chr19 | 18044955  | 18046095  | 1141 |
| chr24 | 23957861  | 23958969  | 1109 |
| chr25 | 27392740  | 27393814  | 1075 |
| chr7  | 95944959  | 95946020  | 1062 |
| chr12 | 22970413  | 22971421  | 1009 |
| chr24 | 30500570  | 30501574  | 1005 |
| chr19 | 8940704   | 8941695   | 992  |
| chr18 | 64339783  | 64340752  | 970  |
| chr24 | 48970736  | 48971668  | 933  |
| chr23 | 28485793  | 28486700  | 908  |
| chr11 | 44957949  | 44958856  | 908  |
| chr14 | 77339756  | 77340654  | 899  |
| chr9  | 100070597 | 100071482 | 886  |
| chr25 | 1923470   | 1924332   | 863  |
| chr3  | 127707634 | 127708255 | 622  |

|       |           |           |      |
|-------|-----------|-----------|------|
| chr13 | 68921215  | 68921793  | 579  |
| chr17 | 69309898  | 69310472  | 575  |
| chr17 | 76007072  | 76007615  | 544  |
| chr24 | 64980240  | 64982003  | 1764 |
| chr16 | 47267243  | 47273705  | 6463 |
| chr12 | 74238491  | 74243912  | 5422 |
| chr12 | 68720373  | 68725255  | 4883 |
| chr8  | 80217000  | 80221533  | 4534 |
| chr24 | 35303266  | 35307569  | 4304 |
| chr4  | 104221642 | 104225881 | 4240 |
| chr7  | 50654491  | 50658673  | 4183 |
| chr19 | 41481476  | 41485335  | 3860 |
| chr17 | 72044178  | 72047992  | 3815 |
| chr6  | 16233283  | 16236812  | 3530 |
| chr4  | 95614494  | 95617829  | 3336 |
| chr22 | 61192923  | 61196148  | 3226 |
| chr11 | 40329404  | 40332492  | 3089 |
| chr18 | 51037116  | 51040194  | 3079 |
| chr3  | 70576051  | 70579014  | 2964 |
| chr1  | 76416792  | 76419650  | 2859 |
| chr2  | 92324718  | 92327441  | 2724 |
| chr26 | 21648657  | 21651259  | 2603 |
| chrX  | 74876101  | 74878679  | 2579 |
| chr19 | 43302989  | 43305551  | 2563 |
| chr9  | 46034381  | 46036929  | 2549 |
| chr21 | 28186546  | 28189011  | 2466 |
| chr11 | 11993699  | 11996084  | 2386 |
| chr4  | 8814186   | 8816487   | 2302 |
| chr1  | 74493796  | 74496033  | 2238 |
| chr28 | 32816386  | 32818602  | 2217 |
| chr25 | 18809608  | 18811712  | 2105 |
| chr7  | 5454934   | 5457010   | 2077 |
| chr5  | 122279477 | 122281547 | 2071 |
| chr11 | 12869833  | 12871854  | 2022 |
| chr10 | 36824280  | 36826289  | 2010 |
| chr7  | 15622175  | 15624183  | 2009 |
| chr7  | 17098380  | 17100337  | 1958 |
| chr8  | 24351894  | 24353728  | 1835 |
| chr18 | 62033504  | 62035288  | 1785 |
| chr18 | 17992557  | 17994338  | 1782 |
| chr6  | 91877697  | 91879459  | 1763 |
| chr7  | 4515224   | 4516970   | 1747 |
| chr29 | 25940707  | 25942447  | 1741 |
| chr22 | 57637403  | 57639124  | 1722 |
| chr24 | 3950729   | 3952443   | 1715 |
| chr23 | 31189215  | 31190900  | 1686 |
| chr10 | 88081136  | 88082810  | 1675 |
| chr9  | 99304753  | 99306414  | 1662 |
| chr4  | 13670458  | 13672073  | 1616 |
| chr9  | 106560327 | 106561914 | 1588 |

|       |           |           |       |
|-------|-----------|-----------|-------|
| chr18 | 51077217  | 51078794  | 1578  |
| chr29 | 48794038  | 48795604  | 1567  |
| chr19 | 46150807  | 46152320  | 1514  |
| chr2  | 137656392 | 137657892 | 1501  |
| chr3  | 105464432 | 105465821 | 1390  |
| chr5  | 114979730 | 114981092 | 1363  |
| chr17 | 72895221  | 72896518  | 1298  |
| chr16 | 44331518  | 44332808  | 1291  |
| chr11 | 49320412  | 49321684  | 1273  |
| chr7  | 42765791  | 42767023  | 1233  |
| chr13 | 14722361  | 14723565  | 1205  |
| chr5  | 68967685  | 68968845  | 1161  |
| chr18 | 57302012  | 57303076  | 1065  |
| chr6  | 16262049  | 16263094  | 1046  |
| chr17 | 55857693  | 55858711  | 1019  |
| chr18 | 42957497  | 42958467  | 971   |
| chr6  | 63165679  | 63166614  | 936   |
| chr3  | 78293593  | 78294522  | 930   |
| chr25 | 3180233   | 3181161   | 929   |
| chr26 | 11337073  | 11337954  | 882   |
| chr22 | 58634164  | 58634991  | 828   |
| chr26 | 51453059  | 51453872  | 814   |
| chr21 | 56512317  | 56513098  | 782   |
| chr8  | 24450664  | 24451442  | 779   |
| chr25 | 39140428  | 39141197  | 770   |
| chr18 | 50715383  | 50716051  | 669   |
| chr8  | 65815445  | 65816076  | 632   |
| chr23 | 27988074  | 27988691  | 618   |
| chr3  | 127030593 | 127031113 | 521   |
| chr2  | 124231666 | 124232173 | 508   |
| chr1  | 87336886  | 87337384  | 499   |
| chr5  | 29750179  | 29750673  | 495   |
| chr11 | 28531718  | 28541974  | 10257 |
| chr21 | 57502831  | 57508499  | 5669  |
| chr19 | 39123069  | 39128489  | 5421  |
| chr11 | 29813236  | 29818638  | 5403  |
| chr13 | 68202320  | 68206329  | 4010  |
| chr5  | 81594965  | 81598788  | 3824  |
| chr29 | 46656182  | 46659999  | 3818  |
| chr10 | 68222287  | 68225987  | 3701  |
| chr18 | 52681864  | 52685487  | 3624  |
| chr7  | 58197909  | 58201388  | 3480  |
| chr19 | 30567851  | 30571294  | 3444  |
| chr17 | 31869878  | 31873198  | 3321  |
| chr22 | 26871132  | 26874378  | 3247  |
| chrX  | 13635902  | 13639019  | 3118  |
| chr23 | 52717117  | 52720217  | 3101  |
| chr28 | 36452370  | 36455442  | 3073  |
| chr6  | 108557627 | 108560671 | 3045  |
| chr11 | 77866376  | 77869364  | 2989  |

|       |               |           |      |
|-------|---------------|-----------|------|
| chr17 | 57627963      | 57630947  | 2985 |
| chr4  | 65381109      | 65384080  | 2972 |
| chr27 | 46946108      | 46948902  | 2795 |
| chr21 | 20232145      | 20234823  | 2679 |
| chr11 | 100871877     | 100874473 | 2597 |
| chr6  | 107496621     | 107499192 | 2572 |
| chr1  | 152255325     | 152257875 | 2551 |
| chr18 | 53015382      | 53017826  | 2445 |
| chr13 | 60960777      | 60963199  | 2423 |
| chr19 | 52420183      | 52422596  | 2414 |
| chr6  | 108856829     | 108859219 | 2391 |
| chr27 | 27693156      | 27695488  | 2333 |
| chr3  | 107736987     | 107739304 | 2318 |
| chr24 | 800127 802431 | 2305      |      |
| chr11 | 1644766       | 1647039   | 2274 |
| chr4  | 122638259     | 122640433 | 2175 |
| chr19 | 47278993      | 47281157  | 2165 |
| chr5  | 117211495     | 117213643 | 2149 |
| chr1  | 145721230     | 145723365 | 2136 |
| chr13 | 40579204      | 40581281  | 2078 |
| chr18 | 56973601      | 56975662  | 2062 |
| chr11 | 98966649      | 98968697  | 2049 |
| chr9  | 90655651      | 90657634  | 1984 |
| chr23 | 30292954      | 30294923  | 1970 |
| chr1  | 87370255      | 87372170  | 1916 |
| chr18 | 52976031      | 52977929  | 1899 |
| chr23 | 11845402      | 11847288  | 1887 |
| chr23 | 15860870      | 15862741  | 1872 |
| chr17 | 69744311      | 69746123  | 1813 |
| chr22 | 59851883      | 59853675  | 1793 |
| chr5  | 20851121      | 20852910  | 1790 |
| chr18 | 4031905       | 4033690   | 1786 |
| chr19 | 54294912      | 54296651  | 1740 |
| chr18 | 24015868      | 24017598  | 1731 |
| chr12 | 68177571      | 68179289  | 1719 |
| chr3  | 106866441     | 106868157 | 1717 |
| chr18 | 62344988      | 62346692  | 1705 |
| chr18 | 54048454      | 54050157  | 1704 |
| chr13 | 21886026      | 21887702  | 1677 |
| chr1  | 158030 159700 | 1671      |      |
| chr20 | 33639638      | 33641301  | 1664 |
| chr17 | 56061801      | 56063460  | 1660 |
| chr6  | 16263106      | 16264714  | 1609 |
| chr13 | 76271792      | 76273367  | 1576 |
| chr10 | 6061935       | 6063507   | 1573 |
| chr2  | 1707141       | 1708704   | 1564 |
| chr7  | 18715627      | 18717183  | 1557 |
| chr7  | 5155398       | 5156871   | 1474 |
| chr8  | 80182217      | 80183683  | 1467 |
| chr29 | 31981324      | 31982728  | 1405 |

|       |           |           |      |
|-------|-----------|-----------|------|
| chr16 | 41356978  | 41358274  | 1297 |
| chr21 | 25346909  | 25348178  | 1270 |
| chr7  | 71377220  | 71378463  | 1244 |
| chr19 | 14996397  | 14997626  | 1230 |
| chr17 | 75934285  | 75935485  | 1201 |
| chr6  | 91926599  | 91927791  | 1193 |
| chr19 | 58732915  | 58734084  | 1170 |
| chr21 | 31055415  | 31056490  | 1076 |
| chr18 | 47500845  | 47501758  | 914  |
| chr25 | 3113294   | 3114155   | 862  |
| chr11 | 104665648 | 104666508 | 861  |
| chr26 | 44383293  | 44384035  | 743  |
| chr13 | 57591115  | 57591777  | 663  |
| chr18 | 3550157   | 3550759   | 603  |
| chr8  | 73525439  | 73525997  | 559  |
| chr2  | 108811549 | 108812086 | 538  |
| chr5  | 7221732   | 7222208   | 477  |
| chr1  | 135531472 | 135531872 | 401  |
| chr8  | 77680634  | 77686069  | 5436 |
| chr24 | 39744331  | 39749570  | 5240 |
| chr23 | 23760773  | 23765221  | 4449 |
| chr17 | 12584357  | 12588507  | 4151 |
| chr13 | 75810209  | 75814200  | 3992 |
| chr7  | 2274877   | 2278562   | 3686 |
| chr19 | 57257924  | 57261281  | 3358 |
| chr5  | 60302582  | 60305885  | 3304 |
| chr1  | 131392933 | 131396070 | 3138 |
| chr19 | 52559255  | 52562382  | 3128 |
| chr7  | 15012317  | 15015419  | 3103 |
| chr12 | 34259348  | 34262374  | 3027 |
| chr24 | 36030694  | 36033707  | 3014 |
| chr5  | 121333513 | 121336496 | 2984 |
| chr6  | 107359802 | 107362704 | 2903 |
| chr13 | 73531566  | 73534295  | 2730 |
| chr11 | 14160125  | 14162789  | 2665 |
| chr24 | 61109207  | 61111834  | 2628 |
| chr25 | 31871252  | 31873802  | 2551 |
| chr10 | 8359489   | 8362037   | 2549 |
| chr28 | 42786592  | 42789125  | 2534 |
| chr17 | 5054481   | 5056960   | 2480 |
| chr8  | 72308229  | 72310688  | 2460 |
| chr12 | 84169901  | 84172312  | 2412 |
| chr14 | 21778929  | 21781306  | 2378 |
| chr13 | 57395615  | 57397992  | 2378 |
| chr21 | 32866197  | 32868562  | 2366 |
| chr18 | 50027570  | 50029909  | 2340 |
| chr21 | 20631573  | 20633903  | 2331 |
| chr20 | 27300492  | 27302801  | 2310 |
| chr9  | 11540266  | 11542536  | 2271 |
| chr2  | 135581660 | 135583751 | 2092 |

|       |           |           |      |
|-------|-----------|-----------|------|
| chr7  | 42536629  | 42538701  | 2073 |
| chr15 | 54026025  | 54028038  | 2014 |
| chr3  | 105762587 | 105764591 | 2005 |
| chr19 | 12405014  | 12406970  | 1957 |
| chr3  | 8814463   | 8816329   | 1867 |
| chr2  | 116696329 | 116698194 | 1866 |
| chr16 | 48313670  | 48315528  | 1859 |
| chrX  | 7891486   | 7893310   | 1825 |
| chr25 | 12710725  | 12712543  | 1819 |
| chr17 | 74489070  | 74490883  | 1814 |
| chr3  | 22503527  | 22505317  | 1791 |
| chr13 | 75437944  | 75439722  | 1779 |
| chr4  | 79039823  | 79041596  | 1774 |
| chr28 | 8227039   | 8228799   | 1761 |
| chr12 | 36415955  | 36417700  | 1746 |
| chr23 | 17190338  | 17192078  | 1741 |
| chr15 | 81153993  | 81155726  | 1734 |
| chr29 | 48038428  | 48040151  | 1724 |
| chr27 | 38909722  | 38911434  | 1713 |
| chr11 | 82905140  | 82906844  | 1705 |
| chr19 | 23859440  | 23861139  | 1700 |
| chr10 | 44053214  | 44054823  | 1610 |
| chr16 | 38564509  | 38566117  | 1609 |
| chr18 | 23619053  | 23620651  | 1599 |
| chr12 | 32109461  | 32110933  | 1473 |
| chr2  | 129887578 | 129889046 | 1469 |
| chr11 | 109762044 | 109763510 | 1467 |
| chr13 | 55036000  | 55037431  | 1432 |
| chr1  | 84793534  | 84794956  | 1423 |
| chr1  | 131396486 | 131397862 | 1377 |
| chr10 | 81589873  | 81591224  | 1352 |
| chr26 | 23485083  | 23486430  | 1348 |
| chr23 | 44401229  | 44402548  | 1320 |
| chr29 | 46031302  | 46032608  | 1307 |
| chr10 | 61471526  | 61472830  | 1305 |
| chr1  | 156678725 | 156680016 | 1292 |
| chr15 | 25665862  | 25667146  | 1285 |
| chr22 | 60361746  | 60362966  | 1221 |
| chr19 | 8470754   | 8471950   | 1197 |
| chr23 | 7427199   | 7428362   | 1164 |
| chr7  | 37566473  | 37567604  | 1132 |
| chr25 | 37986827  | 37987947  | 1121 |
| chr23 | 19807679  | 19808796  | 1118 |
| chr10 | 21090446  | 21091543  | 1098 |
| chr6  | 119066153 | 119067208 | 1056 |
| chr20 | 33700229  | 33701230  | 1002 |
| chr25 | 37871478  | 37872427  | 950  |
| chr5  | 2022327   | 2023254   | 928  |
| chr18 | 63760603  | 63761516  | 914  |
| chr18 | 52977945  | 52978839  | 895  |



|       |           |           |      |
|-------|-----------|-----------|------|
| chr7  | 5048574   | 5049461   | 888  |
| chr3  | 35413989  | 35414863  | 875  |
| chrX  | 59747773  | 59748576  | 804  |
| chr18 | 33955595  | 33956392  | 798  |
| chr3  | 22866318  | 22867064  | 747  |
| chr13 | 46215805  | 46216537  | 733  |
| chr13 | 60164985  | 60165632  | 648  |
| chr5  | 117769973 | 117770615 | 643  |
| chr22 | 50106719  | 50107294  | 576  |
| chr12 | 18236105  | 18236664  | 560  |
| chr25 | 3165968   | 3166522   | 555  |
| chr13 | 64764968  | 64765450  | 483  |
| chr18 | 55839043  | 55844635  | 5593 |
| chr6  | 74545808  | 74550060  | 4253 |
| chr22 | 15400794  | 15404115  | 3322 |
| chr23 | 8285500   | 8288697   | 3198 |
| chr5  | 121397353 | 121400474 | 3122 |
| chr19 | 39848683  | 39851664  | 2982 |
| chr14 | 40040182  | 40043109  | 2928 |
| chr13 | 54761868  | 54764687  | 2820 |
| chr25 | 43239363  | 43242165  | 2803 |
| chr25 | 39429142  | 39431869  | 2728 |
| chr11 | 26235205  | 26237845  | 2641 |
| chr18 | 11549619  | 11552121  | 2503 |
| chr20 | 8606977   | 8609455   | 2479 |
| chr6  | 108672021 | 108674469 | 2449 |
| chr21 | 6550591   | 6552997   | 2407 |
| chr21 | 22398611  | 22400999  | 2389 |
| chr1  | 146779273 | 146781660 | 2388 |
| chr2  | 123022936 | 123025238 | 2303 |
| chr17 | 68169358  | 68171635  | 2278 |
| chr5  | 76158784  | 76161053  | 2270 |
| chr24 | 40806654  | 40808892  | 2239 |
| chr19 | 10896524  | 10898760  | 2237 |
| chr18 | 62454059  | 62456279  | 2221 |
| chr27 | 26792042  | 26794251  | 2210 |
| chr22 | 29662853  | 29664926  | 2074 |
| chr27 | 39223386  | 39225330  | 1945 |
| chr24 | 61115387  | 61117283  | 1897 |
| chr18 | 49546789  | 49548652  | 1864 |
| chr18 | 50840273  | 50842125  | 1853 |
| chr7  | 15439556  | 15441384  | 1829 |
| chr13 | 75566303  | 75568128  | 1826 |
| chr7  | 5244584   | 5246358   | 1775 |
| chr11 | 107246228 | 107247925 | 1698 |
| chr13 | 72606170  | 72607844  | 1675 |
| chrX  | 74878836  | 74880508  | 1673 |
| chr17 | 72988508  | 72990131  | 1624 |
| chr11 | 104915953 | 104917566 | 1614 |
| chr15 | 81397179  | 81398783  | 1605 |

|       |           |           |      |
|-------|-----------|-----------|------|
| chr15 | 28280905  | 28282466  | 1562 |
| chr20 | 60491492  | 60493049  | 1558 |
| chr18 | 53265641  | 53267186  | 1546 |
| chr14 | 52503767  | 52505304  | 1538 |
| chr7  | 5046946   | 5048482   | 1537 |
| chr7  | 15099470  | 15100977  | 1508 |
| chr1  | 110660467 | 110661958 | 1492 |
| chr7  | 18792974  | 18794455  | 1482 |
| chr4  | 117152311 | 117153775 | 1465 |
| chr23 | 19999195  | 20000642  | 1448 |
| chr4  | 110056732 | 110058176 | 1445 |
| chr18 | 53878522  | 53879954  | 1433 |
| chr8  | 61028969  | 61030399  | 1431 |
| chr7  | 14375637  | 14376963  | 1327 |
| chr6  | 108855418 | 108856743 | 1326 |
| chr10 | 75484815  | 75486136  | 1322 |
| chr13 | 6920689   | 6921977   | 1289 |
| chr23 | 15881860  | 15883145  | 1286 |
| chr6  | 19589685  | 19590950  | 1266 |
| chr19 | 28999598  | 29000819  | 1222 |
| chr19 | 27199555  | 27200766  | 1212 |
| chr17 | 76294363  | 76295495  | 1133 |
| chr26 | 50648277  | 50649345  | 1069 |
| chr8  | 28512308  | 28513344  | 1037 |
| chr11 | 102019517 | 102020472 | 956  |
| chr23 | 28829961  | 28830914  | 954  |
| chr21 | 20720262  | 20721202  | 941  |
| chr7  | 18791881  | 18792820  | 940  |
| chr19 | 39084967  | 39085885  | 919  |
| chr19 | 44175379  | 44176285  | 907  |
| chr8  | 24721816  | 24722707  | 892  |
| chr2  | 31565641  | 31566503  | 863  |
| chr17 | 63409565  | 63410407  | 843  |
| chr12 | 36453776  | 36454598  | 823  |
| chr20 | 74019805  | 74020618  | 814  |
| chr4  | 118624405 | 118625216 | 812  |
| chr18 | 55881898  | 55882637  | 740  |
| chr3  | 22913586  | 22914305  | 720  |
| chr10 | 8536968   | 8537646   | 679  |
| chr23 | 10344522  | 10345186  | 665  |
| chr4  | 121442844 | 121443475 | 632  |
| chr3  | 118151722 | 118152317 | 596  |
| chr23 | 11949700  | 11950252  | 553  |
| chr2  | 111602380 | 111606593 | 4214 |
| chrX  | 54353067  | 54356819  | 3753 |
| chr23 | 15993220  | 15996912  | 3693 |
| chr10 | 88367478  | 88370924  | 3447 |
| chr18 | 24584199  | 24587501  | 3303 |
| chr29 | 33710589  | 33713673  | 3085 |
| chr19 | 58167921  | 58170735  | 2815 |

|       |           |           |      |
|-------|-----------|-----------|------|
| chr4  | 6105758   | 6108542   | 2785 |
| chr23 | 8441658   | 8444381   | 2724 |
| chr8  | 74393382  | 74396067  | 2686 |
| chr5  | 10227505  | 10229937  | 2433 |
| chr10 | 88082825  | 88085254  | 2430 |
| chr19 | 44176992  | 44179386  | 2395 |
| chr13 | 80830685  | 80833027  | 2343 |
| chr2  | 101813724 | 101816065 | 2342 |
| chr2  | 124325271 | 124327577 | 2307 |
| chr9  | 99306631  | 99308912  | 2282 |
| chr6  | 84625596  | 84627861  | 2266 |
| chr24 | 50880292  | 50882536  | 2245 |
| chr17 | 52392365  | 52394589  | 2225 |
| chr19 | 58159403  | 58161605  | 2203 |
| chr9  | 93649830  | 93652019  | 2190 |
| chr4  | 122977511 | 122979656 | 2146 |
| chr17 | 66514386  | 66516491  | 2106 |
| chr11 | 49852079  | 49854175  | 2097 |
| chr26 | 18170841  | 18172922  | 2082 |
| chr29 | 49751860  | 49753927  | 2068 |
| chr13 | 60150542  | 60152607  | 2066 |
| chr10 | 36371310  | 36373353  | 2044 |
| chr11 | 21630939  | 21632974  | 2036 |
| chr11 | 49400940  | 49402962  | 2023 |
| chr17 | 60882035  | 60884009  | 1975 |
| chr19 | 14992529  | 14994484  | 1956 |
| chr20 | 75635115  | 75637030  | 1916 |
| chr6  | 12110833  | 12112707  | 1875 |
| chr28 | 25728630  | 25730502  | 1873 |
| chr5  | 29194351  | 29196214  | 1864 |
| chr20 | 6628806   | 6630605   | 1800 |
| chr18 | 56636971  | 56638767  | 1797 |
| chr3  | 115330889 | 115332678 | 1790 |
| chr15 | 80853287  | 80855066  | 1780 |
| chr5  | 71672984  | 71674745  | 1762 |
| chr18 | 14680236  | 14681972  | 1737 |
| chr29 | 29684463  | 29686198  | 1736 |
| chr9  | 106857860 | 106859584 | 1725 |
| chr3  | 37615687  | 37617398  | 1712 |
| chr6  | 120777715 | 120779398 | 1684 |
| chr26 | 39267995  | 39269645  | 1651 |
| chr22 | 56458049  | 56459691  | 1643 |
| chr21 | 20694411  | 20695989  | 1579 |
| chr5  | 30753334  | 30754782  | 1449 |
| chr17 | 66276887  | 66278331  | 1445 |
| chr2  | 42833741  | 42835176  | 1436 |
| chr1  | 84556906  | 84558318  | 1413 |
| chr21 | 27812497  | 27813871  | 1375 |
| chrX  | 59705021  | 59706386  | 1366 |
| chr5  | 33859874  | 33861223  | 1350 |

|       |           |           |      |
|-------|-----------|-----------|------|
| chr10 | 10767508  | 10768857  | 1350 |
| chr18 | 55009592  | 55010939  | 1348 |
| chr15 | 32171375  | 32172709  | 1335 |
| chr22 | 61191598  | 61192902  | 1305 |
| chr26 | 38408290  | 38409587  | 1298 |
| chr14 | 40160212  | 40161457  | 1246 |
| chr28 | 5022424   | 5023665   | 1242 |
| chr2  | 131306078 | 131307292 | 1215 |
| chr4  | 102394879 | 102396041 | 1163 |
| chr25 | 42748444  | 42749599  | 1156 |
| chr23 | 17626845  | 17627986  | 1142 |
| chr17 | 64309233  | 64310353  | 1121 |
| chr5  | 31557196  | 31558306  | 1111 |
| chr22 | 54871888  | 54872992  | 1105 |
| chr24 | 58902927  | 58904022  | 1096 |
| chr13 | 75844059  | 75845139  | 1081 |
| chr29 | 30031829  | 30032908  | 1080 |
| chr23 | 27974408  | 27975433  | 1026 |
| chr16 | 20647867  | 20648892  | 1026 |
| chrX  | 55580869  | 55581892  | 1024 |
| chr6  | 101901648 | 101902656 | 1009 |
| chr4  | 72291298  | 72292302  | 1005 |
| chr2  | 5179825   | 5180800   | 976  |
| chr5  | 116425115 | 116426057 | 943  |
| chr11 | 105200494 | 105201435 | 942  |
| chr17 | 49716855  | 49717770  | 916  |
| chr19 | 30820798  | 30821711  | 914  |
| chr4  | 87709737  | 87710616  | 880  |
| chr15 | 62379330  | 62380204  | 875  |
| chr7  | 16315786  | 16316642  | 857  |
| chr7  | 46233911  | 46234764  | 854  |
| chr18 | 53010985  | 53011837  | 853  |
| chr11 | 106002395 | 106003201 | 807  |
| chr3  | 116496701 | 116497494 | 794  |
| chr17 | 70397060  | 70397795  | 736  |
| chr14 | 59025523  | 59026252  | 730  |
| chr22 | 57616891  | 57617567  | 677  |
| chr18 | 54210258  | 54210905  | 648  |
| chr2  | 20483366  | 20484005  | 640  |
| chr18 | 63769420  | 63769993  | 574  |
| chr25 | 2238823   | 2239391   | 569  |
| chr3  | 22593578  | 22594135  | 558  |
| chr3  | 22490517  | 22491069  | 553  |
| chr24 | 25456938  | 25457440  | 503  |
| chr13 | 68927692  | 68928134  | 443  |
| chr3  | 22627640  | 22628067  | 428  |
| chr2  | 74023209  | 74028928  | 5720 |
| chr4  | 68275134  | 68280494  | 5361 |
| chr5  | 112235225 | 112240178 | 4954 |
| chr7  | 13400760  | 13405016  | 4257 |

|       |               |           |      |
|-------|---------------|-----------|------|
| chr19 | 23161918      | 23165558  | 3641 |
| chr3  | 15771209      | 15774761  | 3553 |
| chr12 | 15334930      | 15338034  | 3105 |
| chr6  | 36503012      | 36506098  | 3087 |
| chr20 | 70568676      | 70571519  | 2844 |
| chrX  | 3012279       | 3015083   | 2805 |
| chr11 | 30920712      | 30923469  | 2758 |
| chr23 | 51445368      | 51448118  | 2751 |
| chr29 | 45768317      | 45770853  | 2537 |
| chr15 | 29180402      | 29182817  | 2416 |
| chr16 | 19553726      | 19556121  | 2396 |
| chr13 | 6924594       | 6926961   | 2368 |
| chr15 | 81399502      | 81401848  | 2347 |
| chr10 | 78656253      | 78658558  | 2306 |
| chr15 | 51660560      | 51662834  | 2275 |
| chr27 | 38667875      | 38670136  | 2262 |
| chr4  | 96131707      | 96133957  | 2251 |
| chr14 | 52283923      | 52286148  | 2226 |
| chr7  | 14898614      | 14900818  | 2205 |
| chr10 | 90929317      | 90931517  | 2201 |
| chr11 | 106254248     | 106256437 | 2190 |
| chr19 | 21698871      | 21701018  | 2148 |
| chr6  | 120770998     | 120773107 | 2110 |
| chr29 | 35602559      | 35604618  | 2060 |
| chr3  | 123173224     | 123175251 | 2028 |
| chr13 | 18898333      | 18900328  | 1996 |
| chr15 | 76432310      | 76434302  | 1993 |
| chr11 | 7202996       | 7204985   | 1990 |
| chr19 | 60239936      | 60241899  | 1964 |
| chr22 | 50725691      | 50727648  | 1958 |
| chr27 | 298437 300391 | 1955      |      |
| chr21 | 20634629      | 20636578  | 1950 |
| chr11 | 30925651      | 30927579  | 1929 |
| chr23 | 17488446      | 17490368  | 1923 |
| chr8  | 72509220      | 72511085  | 1866 |
| chr27 | 26766772      | 26768573  | 1802 |
| chr12 | 9118641       | 9120402   | 1762 |
| chr8  | 86626840      | 86628590  | 1751 |
| chr14 | 27317681      | 27319397  | 1717 |
| chr29 | 6654654       | 6656365   | 1712 |
| chr8  | 8435381       | 8437069   | 1689 |
| chr21 | 68476513      | 68478197  | 1685 |
| chr13 | 64763255      | 64764935  | 1681 |
| chr12 | 68224380      | 68226008  | 1629 |
| chr18 | 53020094      | 53021703  | 1610 |
| chr22 | 16198158      | 16199715  | 1558 |
| chr23 | 15989759      | 15991312  | 1554 |
| chr12 | 32206964      | 32208462  | 1499 |
| chr10 | 8518177       | 8519647   | 1471 |
| chr29 | 44739659      | 44741109  | 1451 |

|       |               |           |      |
|-------|---------------|-----------|------|
| chr28 | 42368508      | 42369958  | 1451 |
| chr4  | 121739005     | 121740445 | 1441 |
| chr17 | 70043089      | 70044529  | 1441 |
| chr25 | 3040356       | 3041794   | 1439 |
| chr2  | 130444539     | 130445967 | 1429 |
| chr4  | 107351261     | 107352660 | 1400 |
| chr3  | 106520180     | 106521567 | 1388 |
| chr3  | 22940667      | 22942020  | 1354 |
| chr3  | 119675108     | 119676429 | 1322 |
| chr3  | 114222217     | 114223518 | 1302 |
| chr2  | 130446541     | 130447820 | 1280 |
| chr13 | 42885084      | 42886311  | 1228 |
| chr12 | 48062514      | 48063726  | 1213 |
| chr9  | 59371334      | 59372529  | 1196 |
| chr29 | 33709072      | 33710231  | 1160 |
| chr5  | 30544239      | 30545397  | 1159 |
| chr23 | 8064098       | 8065249   | 1152 |
| chr8  | 3711935       | 3713035   | 1101 |
| chr8  | 24478683      | 24479756  | 1074 |
| chr8  | 24769105      | 24770169  | 1065 |
| chr1  | 1589058       | 1590094   | 1037 |
| chr19 | 17108907      | 17109933  | 1027 |
| chr25 | 34029022      | 34030045  | 1024 |
| chr18 | 654257 655272 | 1016      |      |
| chr18 | 54951293      | 54952299  | 1007 |
| chr23 | 31340094      | 31341099  | 1006 |
| chr23 | 46378323      | 46379325  | 1003 |
| chr9  | 90315637      | 90316638  | 1002 |
| chr27 | 12073312      | 12074275  | 964  |
| chr4  | 122640565     | 122641474 | 910  |
| chr13 | 74415905      | 74416785  | 881  |
| chr4  | 71521087      | 71521952  | 866  |
| chr18 | 50837182      | 50838027  | 846  |
| chr24 | 60604081      | 60604903  | 823  |
| chr26 | 22277712      | 22278520  | 809  |
| chr23 | 10545605      | 10546379  | 775  |
| chr11 | 104698457     | 104699167 | 711  |
| chr12 | 23537142      | 23537849  | 708  |
| chr15 | 83836771      | 83837470  | 700  |
| chr7  | 15102509      | 15103176  | 668  |
| chr9  | 74218723      | 74219373  | 651  |
| chr18 | 62687497      | 62688113  | 617  |
| chr3  | 22596800      | 22597412  | 613  |
| chr3  | 105764621     | 105765173 | 553  |
| chr29 | 51164234      | 51164780  | 547  |
| chr24 | 63381716      | 63382257  | 542  |
| chr8  | 23952858      | 23953372  | 515  |
| chr11 | 9228796       | 9229302   | 507  |
| chr19 | 21698250      | 21698704  | 455  |
| chr19 | 65221720      | 65225278  | 3559 |

|       |           |           |      |
|-------|-----------|-----------|------|
| chr13 | 22183867  | 22188875  | 5009 |
| chr5  | 112657341 | 112661996 | 4656 |
| chr6  | 16241680  | 16246091  | 4412 |
| chr28 | 25325896  | 25330211  | 4316 |
| chr9  | 86251115  | 86255392  | 4278 |
| chr14 | 54195519  | 54199674  | 4156 |
| chr15 | 74534596  | 74538543  | 3948 |
| chr18 | 62460757  | 62464267  | 3511 |
| chr6  | 99216733  | 99220130  | 3398 |
| chr6  | 16254762  | 16257828  | 3067 |
| chr19 | 39916176  | 39919235  | 3060 |
| chr3  | 18609106  | 18612143  | 3038 |
| chr11 | 106749831 | 106752769 | 2939 |
| chr2  | 126128258 | 126131173 | 2916 |
| chr3  | 71909184  | 71912091  | 2908 |
| chr7  | 45829174  | 45832001  | 2828 |
| chr13 | 54852962  | 54855771  | 2810 |
| chr2  | 138649424 | 138651882 | 2459 |
| chr25 | 3166649   | 3169102   | 2454 |
| chr21 | 66577185  | 66579633  | 2449 |
| chr18 | 22691501  | 22693899  | 2399 |
| chr17 | 47768332  | 47770661  | 2330 |
| chr10 | 90970839  | 90973059  | 2221 |
| chr22 | 32760321  | 32762524  | 2204 |
| chr4  | 122664255 | 122666443 | 2189 |
| chr4  | 117878619 | 117880805 | 2187 |
| chr11 | 77609410  | 77611559  | 2150 |
| chr17 | 51577130  | 51579263  | 2134 |
| chr7  | 10408116  | 10410218  | 2103 |
| chr7  | 14211025  | 14213119  | 2095 |
| chr10 | 8534833   | 8536921   | 2089 |
| chr18 | 45983773  | 45985764  | 1992 |
| chr29 | 45074243  | 45076205  | 1963 |
| chr6  | 37119512  | 37121462  | 1951 |
| chr21 | 62225202  | 62227147  | 1946 |
| chr10 | 35853065  | 35854980  | 1916 |
| chr2  | 99677705  | 99679609  | 1905 |
| chr11 | 47255193  | 47257079  | 1887 |
| chr2  | 134741137 | 134742987 | 1851 |
| chr16 | 46966987  | 46968829  | 1843 |
| chr25 | 37236835  | 37238662  | 1828 |
| chr29 | 25943119  | 25944879  | 1761 |
| chr9  | 76812007  | 76813756  | 1750 |
| chr23 | 20453843  | 20455574  | 1732 |
| chr17 | 12567416  | 12569140  | 1725 |
| chr7  | 10281517  | 10283232  | 1716 |
| chr3  | 118883216 | 118884895 | 1680 |
| chrX  | 12035263  | 12036929  | 1667 |
| chr12 | 74475863  | 74477502  | 1640 |
| chr16 | 38728050  | 38729683  | 1634 |

|       |               |           |      |
|-------|---------------|-----------|------|
| chr13 | 77195043      | 77196670  | 1628 |
| chr19 | 46091985      | 46093537  | 1553 |
| chr21 | 52082743      | 52084294  | 1552 |
| chr4  | 104183916     | 104185455 | 1540 |
| chr18 | 62691200      | 62692720  | 1521 |
| chr1  | 27346869      | 27348375  | 1507 |
| chr14 | 8048670       | 8050171   | 1502 |
| chr11 | 9052985       | 9054475   | 1491 |
| chr10 | 12114768      | 12116238  | 1471 |
| chr2  | 122974679     | 122976146 | 1468 |
| chr24 | 20555416      | 20556881  | 1466 |
| chr18 | 42958868      | 42960333  | 1466 |
| chr5  | 75021656      | 75023063  | 1408 |
| chr21 | 65209144      | 65210514  | 1371 |
| chr22 | 13453986      | 13455345  | 1360 |
| chr16 | 2443197       | 2444530   | 1334 |
| chr24 | 15033130      | 15034411  | 1282 |
| chr11 | 107587168     | 107588429 | 1262 |
| chr28 | 41021569      | 41022811  | 1243 |
| chr12 | 32208708      | 32209942  | 1235 |
| chr16 | 44310364      | 44311587  | 1224 |
| chr21 | 65546201      | 65547412  | 1212 |
| chr24 | 47123524      | 47124723  | 1200 |
| chr7  | 14246303      | 14247490  | 1188 |
| chr11 | 20456147      | 20457326  | 1180 |
| chr19 | 43967058      | 43968230  | 1173 |
| chr18 | 62504870      | 62506030  | 1161 |
| chr15 | 39619969      | 39621120  | 1152 |
| chr14 | 947185 948300 | 1116      |      |
| chr12 | 74441506      | 74442615  | 1110 |
| chr10 | 91111874      | 91112973  | 1100 |
| chr13 | 31722124      | 31723207  | 1084 |
| chr15 | 75531256      | 75532319  | 1064 |
| chr15 | 25583957      | 25584929  | 973  |
| chr23 | 8247591       | 8248557   | 967  |
| chr24 | 5539968       | 5540917   | 950  |
| chr25 | 7030460       | 7031383   | 924  |
| chr2  | 111324672     | 111325592 | 921  |
| chr26 | 22376019      | 22376935  | 917  |
| chr23 | 49952748      | 49953644  | 897  |
| chr23 | 46614461      | 46615354  | 894  |
| chr25 | 22259388      | 22260275  | 888  |
| chr27 | 38908806      | 38909683  | 878  |
| chr2  | 140743188     | 140744061 | 874  |
| chr12 | 36544396      | 36545245  | 850  |
| chr22 | 30059985      | 30060817  | 833  |
| chr14 | 61746953      | 61747782  | 830  |
| chr29 | 50555437      | 50556255  | 819  |
| chr12 | 81459099      | 81459886  | 788  |
| chr1  | 69495130      | 69495870  | 741  |



|       |           |           |      |
|-------|-----------|-----------|------|
| chr5  | 91866223  | 91866959  | 737  |
| chr7  | 13421594  | 13422328  | 735  |
| chr2  | 137658369 | 137659099 | 731  |
| chr10 | 74719859  | 74720575  | 717  |
| chr29 | 50438937  | 50439624  | 688  |
| chr1  | 137999704 | 138000388 | 685  |
| chr29 | 49972099  | 49972781  | 683  |
| chr24 | 5105917   | 5106570   | 654  |
| chr2  | 116699337 | 116699981 | 645  |
| chr22 | 56291541  | 56292176  | 636  |
| chr3  | 114220743 | 114221377 | 635  |
| chr14 | 7851364   | 7851971   | 608  |
| chr19 | 13578212  | 13578785  | 574  |
| chr23 | 52721399  | 52721967  | 569  |
| chrX  | 7353183   | 7353698   | 516  |
| chr7  | 37565846  | 37566350  | 505  |
| chr15 | 34282965  | 34283455  | 491  |
| chr9  | 35564683  | 35569120  | 4438 |
| chr6  | 40947511  | 40951677  | 4167 |
| chr20 | 41246962  | 41250859  | 3898 |
| chr8  | 65071507  | 65075333  | 3827 |
| chr19 | 37857873  | 37861535  | 3663 |
| chr24 | 51577286  | 51580877  | 3592 |
| chr1  | 68446245  | 68449630  | 3386 |
| chr2  | 130428149 | 130431508 | 3360 |
| chr3  | 5538333   | 5541632   | 3300 |
| chr16 | 59062265  | 59065532  | 3268 |
| chr9  | 62315671  | 62318891  | 3221 |
| chr7  | 15096223  | 15099424  | 3202 |
| chr15 | 63690430  | 63693442  | 3013 |
| chr1  | 148009955 | 148012841 | 2887 |
| chr24 | 20398774  | 20401549  | 2776 |
| chr9  | 29830832  | 29833604  | 2773 |
| chr9  | 77683675  | 77686389  | 2715 |
| chr18 | 34825671  | 34828372  | 2702 |
| chr3  | 8943435   | 8945966   | 2532 |
| chr8  | 74365800  | 74368219  | 2420 |
| chr4  | 56784656  | 56787036  | 2381 |
| chr4  | 120078963 | 120081306 | 2344 |
| chr7  | 13544181  | 13546509  | 2329 |
| chr4  | 124322462 | 124324788 | 2327 |
| chr5  | 114981524 | 114983831 | 2308 |
| chr23 | 7393701   | 7395959   | 2259 |
| chrX  | 33514141  | 33516383  | 2243 |
| chr12 | 64734279  | 64736514  | 2236 |
| chr17 | 73809465  | 73811673  | 2209 |
| chr17 | 68367370  | 68369489  | 2120 |
| chr23 | 27771886  | 27773983  | 2098 |
| chr13 | 36762933  | 36765005  | 2073 |
| chr11 | 107593065 | 107595122 | 2058 |

|       |               |           |      |
|-------|---------------|-----------|------|
| chr7  | 11428824      | 11430869  | 2046 |
| chr25 | 3106437       | 3108463   | 2027 |
| chr29 | 33917122      | 33919132  | 2011 |
| chr14 | 22091700      | 22093699  | 2000 |
| chr20 | 27298531      | 27300481  | 1951 |
| chr20 | 8689901       | 8691849   | 1949 |
| chr18 | 36953718      | 36955616  | 1899 |
| chr6  | 61948242      | 61950117  | 1876 |
| chr14 | 72121998      | 72123831  | 1834 |
| chrX  | 78305031      | 78306859  | 1829 |
| chr10 | 103067227     | 103069044 | 1818 |
| chr19 | 44875223      | 44877013  | 1791 |
| chr7  | 42219453      | 42221219  | 1767 |
| chr20 | 4967323       | 4969073   | 1751 |
| chr23 | 15879133      | 15880874  | 1742 |
| chr19 | 55766409      | 55768146  | 1738 |
| chr29 | 49112426      | 49114150  | 1725 |
| chr12 | 68185478      | 68187175  | 1698 |
| chr7  | 42338810      | 42340495  | 1686 |
| chr5  | 111683139     | 111684822 | 1684 |
| chr5  | 43084020      | 43085637  | 1618 |
| chr23 | 15915547      | 15917155  | 1609 |
| chrX  | 60082078      | 60083676  | 1599 |
| chr11 | 74860135      | 74861710  | 1576 |
| chr11 | 98331693      | 98333244  | 1552 |
| chr25 | 3204972       | 3206484   | 1513 |
| chr16 | 3351759       | 3353270   | 1512 |
| chr6  | 92304590      | 92306094  | 1505 |
| chr26 | 25111880      | 25113374  | 1495 |
| chr14 | 32873129      | 32874600  | 1472 |
| chr16 | 67435206      | 67436668  | 1463 |
| chr11 | 100739119     | 100740570 | 1452 |
| chr25 | 27390842      | 27392279  | 1438 |
| chr18 | 50838838      | 50840247  | 1410 |
| chr18 | 11330064      | 11331468  | 1405 |
| chr24 | 31171308      | 31172708  | 1401 |
| chr24 | 5538113       | 5539475   | 1363 |
| chr19 | 39836881      | 39838231  | 1351 |
| chr12 | 9555834       | 9557183   | 1350 |
| chr14 | 42300837      | 42302179  | 1343 |
| chr18 | 11324194      | 11325520  | 1327 |
| chr20 | 4961586       | 4962896   | 1311 |
| chr25 | 2928025       | 2929331   | 1307 |
| chr12 | 53335123      | 53336402  | 1280 |
| chr7  | 477704 478952 | 1249      |      |
| chr8  | 9326790       | 9328016   | 1227 |
| chr23 | 27988721      | 27989944  | 1224 |
| chrX  | 10884492      | 10885708  | 1217 |
| chr9  | 29470671      | 29471887  | 1217 |
| chr14 | 80588008      | 80589222  | 1215 |

|       |               |           |      |
|-------|---------------|-----------|------|
| chr3  | 119912416     | 119913618 | 1203 |
| chr7  | 13408598      | 13409773  | 1176 |
| chr29 | 48896229      | 48897402  | 1174 |
| chr15 | 43590998      | 43592167  | 1170 |
| chr21 | 67773122      | 67774286  | 1165 |
| chr2  | 111338654     | 111339802 | 1149 |
| chr28 | 33862937      | 33864066  | 1130 |
| chr15 | 74640210      | 74641338  | 1129 |
| chr29 | 51966017      | 51967140  | 1124 |
| chr26 | 25511015      | 25512135  | 1121 |
| chr22 | 16414373      | 16415483  | 1111 |
| chr19 | 54800298      | 54801383  | 1086 |
| chr16 | 44120510      | 44121589  | 1080 |
| chr2  | 1709711       | 1710788   | 1078 |
| chr13 | 80652326      | 80653401  | 1076 |
| chr26 | 21806507      | 21807576  | 1070 |
| chr21 | 29696979      | 29698045  | 1067 |
| chr28 | 26746956      | 26748012  | 1057 |
| chr11 | 96164478      | 96165527  | 1050 |
| chr12 | 32123122      | 32124151  | 1030 |
| chr3  | 15547518      | 15548533  | 1016 |
| chr25 | 7029426       | 7030439   | 1014 |
| chr11 | 83225444      | 83226425  | 982  |
| chr13 | 80742421      | 80743399  | 979  |
| chr13 | 55721811      | 55722744  | 934  |
| chr15 | 22221565      | 22222490  | 926  |
| chr26 | 14545630      | 14546492  | 863  |
| chr16 | 77344966      | 77345823  | 858  |
| chr27 | 35428806      | 35429659  | 854  |
| chr10 | 66928225      | 66929042  | 818  |
| chr23 | 17430207      | 17431008  | 802  |
| chrX  | 14643105      | 14643904  | 800  |
| chr18 | 43456403      | 43457198  | 796  |
| chr2  | 49417078      | 49417866  | 789  |
| chr24 | 41578766      | 41579553  | 788  |
| chr19 | 56611681      | 56612396  | 716  |
| chr11 | 49321836      | 49322536  | 701  |
| chr2  | 95918185      | 95918883  | 699  |
| chr8  | 1630366       | 1631043   | 678  |
| chr2  | 49579364      | 49580029  | 666  |
| chr16 | 44153188      | 44153837  | 650  |
| chr6  | 118504345     | 118504970 | 626  |
| chr23 | 20635720      | 20636344  | 625  |
| chr13 | 139948 140570 | 623       |      |
| chr18 | 52792917      | 52793528  | 612  |
| chr27 | 31453089      | 31453662  | 574  |
| chr25 | 4654120       | 4654692   | 573  |
| chr7  | 51088969      | 51089538  | 570  |
| chr7  | 5042757       | 5043307   | 551  |
| chr5  | 32648057      | 32648605  | 549  |

|       |           |           |      |
|-------|-----------|-----------|------|
| chr8  | 67691151  | 67691693  | 543  |
| chr24 | 50879708  | 50880237  | 530  |
| chr5  | 82888522  | 82889029  | 508  |
| chr18 | 33816105  | 33816612  | 508  |
| chr21 | 20596812  | 20597312  | 501  |
| chr18 | 62127775  | 62128219  | 445  |
| chr10 | 92146389  | 92146833  | 445  |
| chr5  | 100126103 | 100131043 | 4941 |
| chr8  | 42205559  | 42209049  | 3491 |
| chr25 | 43201647  | 43204964  | 3318 |
| chr26 | 44952037  | 44955222  | 3186 |
| chr11 | 96165611  | 96168753  | 3143 |
| chr4  | 66691280  | 66694391  | 3112 |
| chr6  | 63390078  | 63393165  | 3088 |
| chr26 | 31473933  | 31476955  | 3023 |
| chr29 | 49711750  | 49714485  | 2736 |
| chr9  | 44101676  | 44104377  | 2702 |
| chr6  | 19591100  | 19593786  | 2687 |
| chr19 | 37334433  | 37337101  | 2669 |
| chr10 | 68472112  | 68474764  | 2653 |
| chr4  | 30809147  | 30811760  | 2614 |
| chr18 | 50834203  | 50836732  | 2530 |
| chrX  | 18948043  | 18950570  | 2528 |
| chr14 | 2887925   | 2890433   | 2509 |
| chr26 | 18177376  | 18179848  | 2473 |
| chr3  | 126952611 | 126955012 | 2402 |
| chr13 | 55371783  | 55374165  | 2383 |
| chrX  | 59691740  | 59694121  | 2382 |
| chr13 | 54470225  | 54472606  | 2382 |
| chr25 | 43231663  | 43234001  | 2339 |
| chr24 | 59293057  | 59295330  | 2274 |
| chr20 | 9171145   | 9173395   | 2251 |
| chr10 | 75553949  | 75556199  | 2251 |
| chr18 | 56534509  | 56536734  | 2226 |
| chr19 | 27377663  | 27379880  | 2218 |
| chr18 | 11085851  | 11088006  | 2156 |
| chr18 | 51590839  | 51592982  | 2144 |
| chr12 | 32107016  | 32109114  | 2099 |
| chr10 | 25843506  | 25845597  | 2092 |
| chr4  | 90365884  | 90367933  | 2050 |
| chr22 | 10169898  | 10171905  | 2008 |
| chr5  | 120548749 | 120550700 | 1952 |
| chr15 | 30159880  | 30161818  | 1939 |
| chr20 | 75668285  | 75670157  | 1873 |
| chr5  | 60387487  | 60389357  | 1871 |
| chr18 | 53880593  | 53882462  | 1870 |
| chr15 | 54271274  | 54273142  | 1869 |
| chr12 | 30953694  | 30955547  | 1854 |
| chr2  | 75599145  | 75600977  | 1833 |
| chr8  | 73100774  | 73102582  | 1809 |

|       |           |           |      |
|-------|-----------|-----------|------|
| chr17 | 49718215  | 49720001  | 1787 |
| chr3  | 74469965  | 74471671  | 1707 |
| chr26 | 50410710  | 50412346  | 1637 |
| chr3  | 35412341  | 35413961  | 1621 |
| chr2  | 115337014 | 115338630 | 1617 |
| chr10 | 29819065  | 29820674  | 1610 |
| chr4  | 121716545 | 121718140 | 1596 |
| chr18 | 11512962  | 11514515  | 1554 |
| chr7  | 96284475  | 96286025  | 1551 |
| chr12 | 34330065  | 34331600  | 1536 |
| chr22 | 39296918  | 39298427  | 1510 |
| chr20 | 8535873   | 8537381   | 1509 |
| chr4  | 75322952  | 75324450  | 1499 |
| chr3  | 105448727 | 105450224 | 1498 |
| chr26 | 37539821  | 37541295  | 1475 |
| chr26 | 37956262  | 37957731  | 1470 |
| chr14 | 52546388  | 52547831  | 1444 |
| chr2  | 95916687  | 95918129  | 1443 |
| chr4  | 71549817  | 71551252  | 1436 |
| chr17 | 63303020  | 63304427  | 1408 |
| chr9  | 106475207 | 106476613 | 1407 |
| chr14 | 57318733  | 57320127  | 1395 |
| chr7  | 39664793  | 39666184  | 1392 |
| chr13 | 15765846  | 15767232  | 1387 |
| chr12 | 84688415  | 84689789  | 1375 |
| chr29 | 49033616  | 49034987  | 1372 |
| chr5  | 120725454 | 120726821 | 1368 |
| chr7  | 59498352  | 59499674  | 1323 |
| chr26 | 22322258  | 22323575  | 1318 |
| chr18 | 11373247  | 11374563  | 1317 |
| chr18 | 50713892  | 50715194  | 1303 |
| chr20 | 75030085  | 75031384  | 1300 |
| chr1  | 155214276 | 155215559 | 1284 |
| chr12 | 84194379  | 84195658  | 1280 |
| chr6  | 103286722 | 103287992 | 1271 |
| chr23 | 10253647  | 10254917  | 1271 |
| chr18 | 56458002  | 56459267  | 1266 |
| chr4  | 118012690 | 118013946 | 1257 |
| chr7  | 14388066  | 14389316  | 1251 |
| chr3  | 15423467  | 15424684  | 1218 |
| chr21 | 58719006  | 58720221  | 1216 |
| chr17 | 37618956  | 37620168  | 1213 |
| chr15 | 36590402  | 36591596  | 1195 |
| chr29 | 1708358   | 1709530   | 1173 |
| chr23 | 31177553  | 31178704  | 1152 |
| chr4  | 121582564 | 121583689 | 1126 |
| chr20 | 25597104  | 25598205  | 1102 |
| chr19 | 31840470  | 31841556  | 1087 |
| chr18 | 48198531  | 48199587  | 1057 |
| chr7  | 42336620  | 42337640  | 1021 |

|       |               |           |      |
|-------|---------------|-----------|------|
| chr11 | 96163400      | 96164413  | 1014 |
| chr5  | 120053398     | 120054381 | 984  |
| chr4  | 98035184      | 98036145  | 962  |
| chr3  | 23037151      | 23038076  | 926  |
| chr12 | 36451655      | 36452577  | 923  |
| chr18 | 11352209      | 11353107  | 899  |
| chr6  | 120775677     | 120776565 | 889  |
| chr4  | 121444408     | 121445294 | 887  |
| chr7  | 18827674      | 18828555  | 882  |
| chr3  | 22667030      | 22667908  | 879  |
| chr21 | 20638265      | 20639107  | 843  |
| chr25 | 1919761       | 1920599   | 839  |
| chr12 | 32103331      | 32104158  | 828  |
| chr18 | 47878521      | 47879347  | 827  |
| chr5  | 121629764     | 121630579 | 816  |
| chr12 | 32013851      | 32014631  | 781  |
| chr7  | 45666193      | 45666956  | 764  |
| chr13 | 73923917      | 73924679  | 763  |
| chr28 | 656272 656963 | 692       |      |
| chr11 | 107588474     | 107589155 | 682  |
| chr20 | 33682491      | 33683162  | 672  |
| chr19 | 14045857      | 14046484  | 628  |
| chr15 | 76734467      | 76735064  | 598  |
| chr10 | 70157146      | 70157742  | 597  |
| chr23 | 45970127      | 45970711  | 585  |
| chr11 | 89531960      | 89532540  | 581  |
| chr25 | 42523552      | 42524124  | 573  |
| chr18 | 62953866      | 62954417  | 552  |
| chr21 | 47526497      | 47527043  | 547  |
| chr18 | 12128819      | 12129359  | 541  |
| chr8  | 24507006      | 24507541  | 536  |
| chr28 | 12380346      | 12380860  | 515  |
| chr22 | 60360387      | 60360892  | 506  |
| chr18 | 39910520      | 39914436  | 3917 |
| chr2  | 139212643     | 139216297 | 3655 |
| chr8  | 9361584       | 9364916   | 3333 |
| chr23 | 8392136       | 8395057   | 2922 |
| chr9  | 35968423      | 35971219  | 2797 |
| chr14 | 33888471      | 33891228  | 2758 |
| chr7  | 3925419       | 3928117   | 2699 |
| chr19 | 27347760      | 27350421  | 2662 |
| chr11 | 28284685      | 28287309  | 2625 |
| chr11 | 74425841      | 74428464  | 2624 |
| chr3  | 54332836      | 54335399  | 2564 |
| chr10 | 8532306       | 8534755   | 2450 |
| chr20 | 33567381      | 33569759  | 2379 |
| chr25 | 43524402      | 43526753  | 2352 |
| chr6  | 103144802     | 103147133 | 2332 |
| chr19 | 47851273      | 47853507  | 2235 |
| chr10 | 70149031      | 70151226  | 2196 |

|       |           |           |      |
|-------|-----------|-----------|------|
| chr13 | 54925374  | 54927553  | 2180 |
| chr5  | 29631096  | 29633245  | 2150 |
| chr21 | 59902050  | 59904173  | 2124 |
| chr23 | 31142280  | 31144372  | 2093 |
| chr11 | 14157940  | 14160024  | 2085 |
| chr3  | 17481048  | 17483122  | 2075 |
| chr7  | 42571847  | 42573909  | 2063 |
| chr9  | 21981665  | 21983723  | 2059 |
| chr15 | 81176720  | 81178770  | 2051 |
| chr10 | 6064364   | 6066406   | 2043 |
| chr22 | 14933195  | 14935222  | 2028 |
| chr21 | 67900641  | 67902625  | 1985 |
| chr11 | 84624977  | 84626948  | 1972 |
| chr13 | 75523360  | 75525329  | 1970 |
| chr12 | 84016102  | 84018040  | 1939 |
| chr18 | 62507371  | 62509250  | 1880 |
| chr19 | 46492007  | 46493848  | 1842 |
| chr10 | 75521741  | 75523558  | 1818 |
| chr25 | 22142552  | 22144353  | 1802 |
| chr13 | 41038737  | 41040522  | 1786 |
| chr15 | 25575852  | 25577570  | 1719 |
| chr15 | 31960811  | 31962510  | 1700 |
| chr13 | 12895563  | 12897245  | 1683 |
| chr4  | 117606377 | 117608050 | 1674 |
| chr17 | 64378453  | 64380115  | 1663 |
| chr1  | 132082297 | 132083952 | 1656 |
| chr1  | 115887210 | 115888840 | 1631 |
| chr1  | 139865041 | 139866666 | 1626 |
| chr19 | 40416276  | 40417888  | 1613 |
| chr12 | 74471130  | 74472742  | 1613 |
| chr4  | 121488163 | 121489754 | 1592 |
| chr13 | 64758542  | 64760124  | 1583 |
| chr10 | 50519395  | 50520974  | 1580 |
| chr4  | 47451673  | 47453251  | 1579 |
| chr16 | 20648957  | 20650526  | 1570 |
| chr4  | 123258835 | 123260368 | 1534 |
| chr1  | 2168933   | 2170462   | 1530 |
| chr9  | 29468727  | 29470228  | 1502 |
| chr9  | 105511761 | 105513225 | 1465 |
| chr19 | 47281201  | 47282652  | 1452 |
| chr24 | 31245386  | 31246830  | 1445 |
| chr20 | 16143453  | 16144897  | 1445 |
| chr19 | 39265934  | 39267343  | 1410 |
| chr6  | 118507754 | 118509156 | 1403 |
| chr29 | 44736868  | 44738265  | 1398 |
| chr11 | 96081360  | 96082730  | 1371 |
| chr22 | 50598474  | 50599827  | 1354 |
| chr23 | 9457405   | 9458744   | 1340 |
| chr25 | 10258853  | 10260185  | 1333 |
| chr9  | 74215700  | 74217031  | 1332 |

|       |               |           |      |
|-------|---------------|-----------|------|
| chr18 | 45846259      | 45847580  | 1322 |
| chr4  | 71545236      | 71546548  | 1313 |
| chr18 | 23612303      | 23613606  | 1304 |
| chr29 | 29686458      | 29687758  | 1301 |
| chr2  | 74783044      | 74784339  | 1296 |
| chr7  | 42539193      | 42540459  | 1267 |
| chr9  | 106558088     | 106559329 | 1242 |
| chr5  | 46372094      | 46373335  | 1242 |
| chr19 | 26944391      | 26945630  | 1240 |
| chr19 | 44877190      | 44878414  | 1225 |
| chr15 | 58029345      | 58030548  | 1204 |
| chr7  | 57581809      | 57582956  | 1148 |
| chr29 | 48895089      | 48896225  | 1137 |
| chr11 | 11632710      | 11633836  | 1127 |
| chrX  | 72241116      | 72242212  | 1097 |
| chr24 | 29710476      | 29711559  | 1084 |
| chr26 | 37628758      | 37629825  | 1068 |
| chr17 | 63311910      | 63312977  | 1068 |
| chr19 | 46717703      | 46718768  | 1066 |
| chr16 | 61646647      | 61647709  | 1063 |
| chr3  | 16894679      | 16895740  | 1062 |
| chr18 | 54817794      | 54818838  | 1045 |
| chr17 | 60187444      | 60188458  | 1015 |
| chr11 | 104888497     | 104889468 | 972  |
| chr4  | 33414819      | 33415784  | 966  |
| chr5  | 50539384      | 50540348  | 965  |
| chr24 | 60981985      | 60982937  | 953  |
| chr3  | 22575196      | 22576145  | 950  |
| chr8  | 28006703      | 28007603  | 901  |
| chr9  | 90450494      | 90451372  | 879  |
| chr7  | 42478866      | 42479738  | 873  |
| chr2  | 6583490       | 6584355   | 866  |
| chr19 | 33098660      | 33099525  | 866  |
| chr12 | 81685994      | 81686852  | 859  |
| chr12 | 73449380      | 73450234  | 855  |
| chr21 | 42374432      | 42375252  | 821  |
| chr18 | 56621863      | 56622671  | 809  |
| chr10 | 74726880      | 74727683  | 804  |
| chr11 | 96399480      | 96400281  | 802  |
| chr11 | 102385230     | 102386029 | 800  |
| chr13 | 67720214      | 67720994  | 781  |
| chr10 | 36842015      | 36842788  | 774  |
| chr8  | 9351304       | 9352061   | 758  |
| chr24 | 187785 188537 | 753       |      |
| chr3  | 106534915     | 106535662 | 748  |
| chr13 | 64762521      | 64763235  | 715  |
| chr12 | 35067476      | 35068184  | 709  |
| chr25 | 3181862       | 3182523   | 662  |
| chr19 | 6522030       | 6522664   | 635  |
| chr12 | 34329203      | 34329796  | 594  |



|       |               |           |      |
|-------|---------------|-----------|------|
| chr13 | 76270686      | 76271275  | 590  |
| chr8  | 82101542      | 82102112  | 571  |
| chr13 | 79687430      | 79687973  | 544  |
| chr16 | 59065786      | 59066317  | 532  |
| chr27 | 26637400      | 26637930  | 531  |
| chr8  | 7601806       | 7602330   | 525  |
| chr23 | 27884345      | 27884858  | 514  |
| chr18 | 49476043      | 49476543  | 501  |
| chr3  | 115624154     | 115624590 | 437  |
| chr16 | 38704253      | 38704688  | 436  |
| chr13 | 70043550      | 70044583  | 1034 |
| chr13 | 26205028      | 26209182  | 4155 |
| chr7  | 70512489      | 70516332  | 3844 |
| chr19 | 43090690      | 43094193  | 3504 |
| chr10 | 50622095      | 50625393  | 3299 |
| chr5  | 114071770     | 114075065 | 3296 |
| chr8  | 56060173      | 56063416  | 3244 |
| chr27 | 30620196      | 30623405  | 3210 |
| chr5  | 29191093      | 29194171  | 3079 |
| chr26 | 15368673      | 15371686  | 3014 |
| chr7  | 16523297      | 16526300  | 3004 |
| chr19 | 10953095      | 10956062  | 2968 |
| chr5  | 125492997     | 125495823 | 2827 |
| chr2  | 114195541     | 114198278 | 2738 |
| chr4  | 51581580      | 51584308  | 2729 |
| chr13 | 49392863      | 49395548  | 2686 |
| chr10 | 5343526       | 5346201   | 2676 |
| chr10 | 21180203      | 21182789  | 2587 |
| chrX  | 18944165      | 18946725  | 2561 |
| chr9  | 42057980      | 42060416  | 2437 |
| chr8  | 20943149      | 20945581  | 2433 |
| chr14 | 52547835      | 52550254  | 2420 |
| chr5  | 13459604      | 13462006  | 2403 |
| chr2  | 74031499      | 74033893  | 2395 |
| chr21 | 61028586      | 61030958  | 2373 |
| chr26 | 41012850      | 41015116  | 2267 |
| chr17 | 53519126      | 53521381  | 2256 |
| chr25 | 29596859      | 29599089  | 2231 |
| chr14 | 958760 960964 | 2205      |      |
| chr11 | 99649875      | 99652067  | 2193 |
| chr10 | 68220065      | 68222245  | 2181 |
| chr19 | 63707115      | 63709289  | 2175 |
| chr8  | 11423019      | 11425191  | 2173 |
| chr25 | 38339857      | 38342002  | 2146 |
| chr17 | 63304842      | 63306985  | 2144 |
| chr3  | 105190649     | 105192790 | 2142 |
| chr20 | 70571884      | 70574023  | 2140 |
| chr2  | 131053585     | 131055665 | 2081 |
| chr13 | 54793410      | 54795485  | 2076 |
| chr17 | 15144811      | 15146841  | 2031 |

|       |           |           |      |
|-------|-----------|-----------|------|
| chr13 | 76273416  | 76275443  | 2028 |
| chr15 | 26895150  | 26897140  | 1991 |
| chr12 | 32175447  | 32177429  | 1983 |
| chr28 | 7557827   | 7559780   | 1954 |
| chr1  | 143791146 | 143793095 | 1950 |
| chr4  | 5385522   | 5387464   | 1943 |
| chr15 | 33492843  | 33494762  | 1920 |
| chr21 | 67399401  | 67401317  | 1917 |
| chr10 | 25033332  | 25035223  | 1892 |
| chr5  | 31558915  | 31560770  | 1856 |
| chr25 | 37192728  | 37194568  | 1841 |
| chr5  | 111685618 | 111687426 | 1809 |
| chr18 | 45641895  | 45643703  | 1809 |
| chr7  | 39027335  | 39029130  | 1796 |
| chr19 | 44076205  | 44077995  | 1791 |
| chr5  | 70037060  | 70038842  | 1783 |
| chr7  | 42228040  | 42229805  | 1766 |
| chr11 | 46007012  | 46008754  | 1743 |
| chr15 | 25573973  | 25575648  | 1676 |
| chr29 | 37639626  | 37641288  | 1663 |
| chr18 | 43153308  | 43154934  | 1627 |
| chr19 | 40677184  | 40678780  | 1597 |
| chr16 | 46843901  | 46845493  | 1593 |
| chr5  | 121400649 | 121402239 | 1591 |
| chr21 | 2914390   | 2915980   | 1591 |
| chr22 | 56172596  | 56174182  | 1587 |
| chr9  | 47053208  | 47054788  | 1581 |
| chr11 | 87964748  | 87966319  | 1572 |
| chr2  | 124290134 | 124291684 | 1551 |
| chrX  | 23613465  | 23615014  | 1550 |
| chr6  | 122258506 | 122260034 | 1529 |
| chr18 | 11376235  | 11377742  | 1508 |
| chr16 | 47967259  | 47968761  | 1503 |
| chr29 | 11353466  | 11354953  | 1488 |
| chr22 | 5344445   | 5345910   | 1466 |
| chr28 | 12328112  | 12329564  | 1453 |
| chr8  | 45667431  | 45668862  | 1432 |
| chr12 | 74455603  | 74457033  | 1431 |
| chr3  | 115016326 | 115017742 | 1417 |
| chr3  | 62930633  | 62932049  | 1417 |
| chr15 | 64195753  | 64197167  | 1415 |
| chr9  | 90379774  | 90381173  | 1400 |
| chr8  | 23025598  | 23026968  | 1371 |
| chr28 | 11376573  | 11377939  | 1367 |
| chr14 | 22074306  | 22075668  | 1363 |
| chr21 | 20919284  | 20920625  | 1342 |
| chr27 | 39221388  | 39222728  | 1341 |
| chr16 | 39603143  | 39604461  | 1319 |
| chr19 | 39374373  | 39375670  | 1298 |
| chr18 | 52649315  | 52650603  | 1289 |

|       |               |           |      |
|-------|---------------|-----------|------|
| chr16 | 50272438      | 50273723  | 1286 |
| chr11 | 90300853      | 90302131  | 1279 |
| chr3  | 102122582     | 102123858 | 1277 |
| chr10 | 84200064      | 84201327  | 1264 |
| chr3  | 22944269      | 22945476  | 1208 |
| chr7  | 4687289       | 4688492   | 1204 |
| chr5  | 60725557      | 60726755  | 1199 |
| chr14 | 77340699      | 77341879  | 1181 |
| chr13 | 38261417      | 38262579  | 1163 |
| chr22 | 56587547      | 56588702  | 1156 |
| chr21 | 24503384      | 24504506  | 1123 |
| chr18 | 24010954      | 24012071  | 1118 |
| chr3  | 33932630      | 33933717  | 1088 |
| chr5  | 35566279      | 35567277  | 999  |
| chr12 | 20090274      | 20091244  | 971  |
| chr26 | 21819190      | 21820152  | 963  |
| chr10 | 74858722      | 74859676  | 955  |
| chr25 | 3008557       | 3009500   | 944  |
| chr11 | 104660926     | 104661867 | 942  |
| chr1  | 84790247      | 84791186  | 940  |
| chr8  | 73909007      | 73909938  | 932  |
| chr23 | 31341411      | 31342330  | 920  |
| chr22 | 38941933      | 38942846  | 914  |
| chr2  | 122973760     | 122974655 | 896  |
| chr8  | 78541371      | 78542257  | 887  |
| chr6  | 108674835     | 108675702 | 868  |
| chr11 | 76364845      | 76365685  | 841  |
| chr7  | 45683641      | 45684479  | 839  |
| chr10 | 32483057      | 32483843  | 787  |
| chr1  | 134449646     | 134450419 | 774  |
| chr17 | 65978404      | 65979170  | 767  |
| chr29 | 48894321      | 48895059  | 739  |
| chr10 | 290696 291427 | 732       |      |
| chr11 | 14130465      | 14131193  | 729  |
| chr24 | 44251178      | 44251885  | 708  |
| chr24 | 41577779      | 41578483  | 705  |
| chr29 | 39029804      | 39030506  | 703  |
| chr17 | 60186527      | 60187223  | 697  |
| chr4  | 121988989     | 121989679 | 691  |
| chr23 | 12345906      | 12346581  | 676  |
| chr3  | 22576744      | 22577415  | 672  |
| chr7  | 59500005      | 59500659  | 655  |
| chr18 | 35069335      | 35069989  | 655  |
| chr12 | 52443071      | 52443682  | 612  |
| chr5  | 121337039     | 121337610 | 572  |
| chr16 | 39602494      | 39603060  | 567  |
| chr3  | 116926830     | 116927388 | 559  |
| chr15 | 22791659      | 22792214  | 556  |
| chr12 | 36450275      | 36450809  | 535  |
| chr2  | 138640181     | 138640710 | 530  |

|       |           |           |      |
|-------|-----------|-----------|------|
| chr7  | 43771176  | 43771685  | 510  |
| chr19 | 47266393  | 47266897  | 505  |
| chr18 | 45978477  | 45978981  | 505  |
| chr16 | 48011985  | 48012469  | 485  |
| chr10 | 6927589   | 6928064   | 476  |
| chr4  | 71868488  | 71873435  | 4948 |
| chr7  | 14230080  | 14233844  | 3765 |
| chr3  | 48202110  | 48205455  | 3346 |
| chr18 | 11588618  | 11591960  | 3343 |
| chr23 | 10396516  | 10399680  | 3165 |
| chr28 | 25137106  | 25140213  | 3108 |
| chr10 | 35480663  | 35483549  | 2887 |
| chr11 | 99188638  | 99191371  | 2734 |
| chr2  | 138642218 | 138644947 | 2730 |
| chr1  | 113585531 | 113588259 | 2729 |
| chr3  | 115096726 | 115099409 | 2684 |
| chr13 | 25500297  | 25502965  | 2669 |
| chr20 | 3175514   | 3178157   | 2644 |
| chr4  | 27845192  | 27847819  | 2628 |
| chr11 | 70708646  | 70711260  | 2615 |
| chr5  | 30489765  | 30492351  | 2587 |
| chr20 | 16812752  | 16815333  | 2582 |
| chr8  | 7563566   | 7566097   | 2532 |
| chr15 | 24669183  | 24671633  | 2451 |
| chr23 | 31072463  | 31074831  | 2369 |
| chr2  | 128835203 | 128837551 | 2349 |
| chr1  | 87363720  | 87366054  | 2335 |
| chr11 | 106406577 | 106408910 | 2334 |
| chr25 | 1506045   | 1508374   | 2330 |
| chr7  | 4352112   | 4354438   | 2327 |
| chr19 | 7828655   | 7830959   | 2305 |
| chr19 | 58190122  | 58192407  | 2286 |
| chr4  | 106660248 | 106662519 | 2272 |
| chr2  | 5180810   | 5183079   | 2270 |
| chr19 | 54443685  | 54445919  | 2235 |
| chr5  | 113261373 | 113263605 | 2233 |
| chr7  | 4685046   | 4687250   | 2205 |
| chr24 | 5103437   | 5105634   | 2198 |
| chr18 | 62688410  | 62690601  | 2192 |
| chr13 | 35968326  | 35970517  | 2192 |
| chr5  | 113253679 | 113255802 | 2124 |
| chr18 | 56618644  | 56620708  | 2065 |
| chr26 | 21838778  | 21840840  | 2063 |
| chr5  | 114242192 | 114244205 | 2014 |
| chr3  | 22620411  | 22622396  | 1986 |
| chr5  | 100131138 | 100133118 | 1981 |
| chr3  | 78290648  | 78292617  | 1970 |
| chr18 | 42164963  | 42166905  | 1943 |
| chr16 | 44356421  | 44358331  | 1911 |
| chr5  | 101469103 | 101471012 | 1910 |

|       |           |           |      |
|-------|-----------|-----------|------|
| chr15 | 64193670  | 64195576  | 1907 |
| chr3  | 22957890  | 22959781  | 1892 |
| chr13 | 75614469  | 75616282  | 1814 |
| chr26 | 51439340  | 51441104  | 1765 |
| chr14 | 80584966  | 80586698  | 1733 |
| chr12 | 32205026  | 32206751  | 1726 |
| chr5  | 116935018 | 116936727 | 1710 |
| chr13 | 41665824  | 41667521  | 1698 |
| chr12 | 32467946  | 32469641  | 1696 |
| chr19 | 58170756  | 58172419  | 1664 |
| chr3  | 8634830   | 8636486   | 1657 |
| chr16 | 45911348  | 45913001  | 1654 |
| chr3  | 15769536  | 15771187  | 1652 |
| chr23 | 11084495  | 11086141  | 1647 |
| chr26 | 17674048  | 17675677  | 1630 |
| chr22 | 32762570  | 32764199  | 1630 |
| chr6  | 17411605  | 17413203  | 1599 |
| chr27 | 17752837  | 17754395  | 1559 |
| chr26 | 51186396  | 51187950  | 1555 |
| chr24 | 25455350  | 25456900  | 1551 |
| chr29 | 30493935  | 30495475  | 1541 |
| chr15 | 64191687  | 64193215  | 1529 |
| chr4  | 117881488 | 117883004 | 1517 |
| chr18 | 45041095  | 45042586  | 1492 |
| chr16 | 44332822  | 44334312  | 1491 |
| chr29 | 25902385  | 25903874  | 1490 |
| chr19 | 8508619   | 8510106   | 1488 |
| chr15 | 32661561  | 32663025  | 1465 |
| chr23 | 30247439  | 30248895  | 1457 |
| chr5  | 60159826  | 60161275  | 1450 |
| chr17 | 63307169  | 63308588  | 1420 |
| chr6  | 119515830 | 119517234 | 1405 |
| chrX  | 46865474  | 46866877  | 1404 |
| chr2  | 119950755 | 119952154 | 1400 |
| chr19 | 21696470  | 21697860  | 1391 |
| chr9  | 9367661   | 9369035   | 1375 |
| chr1  | 132101514 | 132102879 | 1366 |
| chr26 | 20846381  | 20847734  | 1354 |
| chr5  | 26711364  | 26712713  | 1350 |
| chr3  | 116948579 | 116949928 | 1350 |
| chr3  | 22468186  | 22469533  | 1348 |
| chr3  | 15544146  | 15545487  | 1342 |
| chr28 | 5329620   | 5330950   | 1331 |
| chr15 | 64190355  | 64191670  | 1316 |
| chr10 | 8520810   | 8522116   | 1307 |
| chr11 | 23180030  | 23181314  | 1285 |
| chr20 | 62159485  | 62160731  | 1247 |
| chr11 | 14439504  | 14440749  | 1246 |
| chr18 | 62514022  | 62515264  | 1243 |
| chr18 | 62022003  | 62023240  | 1238 |

|       |           |           |      |
|-------|-----------|-----------|------|
| chr17 | 68554311  | 68555544  | 1234 |
| chr13 | 54923987  | 54925214  | 1228 |
| chr13 | 54833482  | 54834702  | 1221 |
| chr29 | 45765581  | 45766786  | 1206 |
| chr5  | 28903096  | 28904297  | 1202 |
| chr25 | 36469917  | 36471097  | 1181 |
| chr21 | 20649752  | 20650917  | 1166 |
| chr22 | 61139072  | 61140223  | 1152 |
| chr4  | 118252974 | 118254113 | 1140 |
| chr23 | 28015249  | 28016385  | 1137 |
| chr3  | 115339370 | 115340500 | 1131 |
| chr22 | 15016519  | 15017620  | 1102 |
| chr15 | 29673492  | 29674567  | 1076 |
| chr18 | 56573594  | 56574655  | 1062 |
| chr26 | 7003392   | 7004449   | 1058 |
| chr8  | 77679562  | 77680608  | 1047 |
| chr6  | 120818250 | 120819231 | 982  |
| chr5  | 76161121  | 76162094  | 974  |
| chr18 | 54194805  | 54195777  | 973  |
| chr17 | 64291926  | 64292888  | 963  |
| chr22 | 60502101  | 60503060  | 960  |
| chr17 | 66129013  | 66129954  | 942  |
| chr18 | 62032506  | 62033427  | 922  |
| chr2  | 140656633 | 140657547 | 915  |
| chrX  | 59710053  | 59710924  | 872  |
| chr4  | 118022983 | 118023853 | 871  |
| chr12 | 36456578  | 36457416  | 839  |
| chr25 | 3172650   | 3173485   | 836  |
| chr3  | 18607580  | 18608389  | 810  |
| chr18 | 54225684  | 54226491  | 808  |
| chr13 | 57575789  | 57576567  | 779  |
| chr26 | 48285130  | 48285901  | 772  |
| chr25 | 3033925   | 3034696   | 772  |
| chrX  | 58769951  | 58770720  | 770  |
| chr3  | 22852627  | 22853396  | 770  |
| chr2  | 140362079 | 140362845 | 767  |
| chr5  | 60307123  | 60307885  | 763  |
| chr16 | 39514508  | 39515248  | 741  |
| chr19 | 39835093  | 39835773  | 681  |
| chr5  | 121055971 | 121056646 | 676  |
| chrX  | 53801412  | 53802081  | 670  |
| chr2  | 26597834  | 26598499  | 666  |
| chr25 | 3038682   | 3039339   | 658  |
| chr19 | 41255665  | 41256314  | 650  |
| chr24 | 59559152  | 59559798  | 647  |
| chr8  | 24490495  | 24491121  | 627  |
| chr5  | 32845864  | 32846480  | 617  |
| chr19 | 56112459  | 56113071  | 613  |
| chr18 | 62746384  | 62746986  | 603  |
| chr19 | 14044565  | 14045164  | 600  |

|       |           |           |      |
|-------|-----------|-----------|------|
| chr5  | 30672802  | 30673396  | 595  |
| chr17 | 70048882  | 70049471  | 590  |
| chr23 | 17419888  | 17420470  | 583  |
| chr21 | 20038402  | 20038975  | 574  |
| chr23 | 18410037  | 18410601  | 565  |
| chr2  | 140658114 | 140658670 | 557  |
| chr12 | 54230635  | 54231171  | 537  |
| chr5  | 71675399  | 71675934  | 536  |
| chrX  | 24605263  | 24605794  | 532  |
| chr1  | 99695048  | 99695578  | 531  |
| chr3  | 114221382 | 114221910 | 529  |
| chrX  | 58771867  | 58772387  | 521  |
| chr4  | 120078415 | 120078932 | 518  |
| chr10 | 85919608  | 85920115  | 508  |
| chr29 | 46520718  | 46521209  | 492  |
| chr19 | 60820948  | 60821375  | 428  |
| chr25 | 12713074  | 12713492  | 419  |
| chr8  | 24657641  | 24658043  | 403  |
| chr5  | 33997786  | 34002647  | 4862 |
| chr27 | 38657469  | 38661340  | 3872 |
| chr18 | 47667973  | 47671814  | 3842 |
| chr7  | 19937244  | 19940402  | 3159 |
| chr21 | 46608817  | 46611967  | 3151 |
| chr27 | 32884228  | 32887292  | 3065 |
| chrX  | 62802850  | 62805857  | 3008 |
| chr1  | 114233076 | 114235999 | 2924 |
| chr7  | 37567988  | 37570879  | 2892 |
| chr26 | 44540059  | 44542922  | 2864 |
| chr18 | 62008764  | 62011591  | 2828 |
| chr7  | 85411987  | 85414803  | 2817 |
| chr14 | 48325077  | 48327766  | 2690 |
| chr19 | 27361232  | 27363904  | 2673 |
| chr19 | 26981919  | 26984583  | 2665 |
| chr22 | 30106074  | 30108717  | 2644 |
| chr18 | 33890540  | 33893150  | 2611 |
| chr23 | 8238539   | 8241101   | 2563 |
| chr5  | 111210922 | 111213423 | 2502 |
| chr19 | 8472002   | 8474453   | 2452 |
| chr13 | 77334438  | 77336870  | 2433 |
| chr14 | 34006550  | 34008863  | 2314 |
| chr17 | 63960627  | 63962919  | 2293 |
| chr19 | 34795518  | 34797784  | 2267 |
| chr8  | 66666841  | 66669076  | 2236 |
| chr23 | 15076873  | 15079094  | 2222 |
| chr11 | 45278305  | 45280502  | 2198 |
| chr29 | 29656480  | 29658675  | 2196 |
| chr21 | 68959717  | 68961912  | 2196 |
| chr2  | 115072154 | 115074256 | 2103 |
| chr15 | 13648359  | 13650422  | 2064 |
| chr14 | 21250986  | 21253044  | 2059 |

|       |           |           |      |
|-------|-----------|-----------|------|
| chr22 | 52227258  | 52229292  | 2035 |
| chr5  | 60445856  | 60447887  | 2032 |
| chr19 | 46824826  | 46826826  | 2001 |
| chr23 | 44431171  | 44433167  | 1997 |
| chr13 | 79919479  | 79921470  | 1992 |
| chr1  | 87377131  | 87379092  | 1962 |
| chr19 | 39978484  | 39980441  | 1958 |
| chr21 | 22691826  | 22693781  | 1956 |
| chr21 | 18882354  | 18884302  | 1949 |
| chr26 | 21768881  | 21770821  | 1941 |
| chr1  | 77994389  | 77996313  | 1925 |
| chr1  | 101587255 | 101589155 | 1901 |
| chr19 | 20793398  | 20795296  | 1899 |
| chr2  | 121894645 | 121896525 | 1881 |
| chrX  | 17127420  | 17129258  | 1839 |
| chr2  | 126965400 | 126967237 | 1838 |
| chr7  | 51488074  | 51489899  | 1826 |
| chr22 | 51418159  | 51419931  | 1773 |
| chr1  | 3091861   | 3093632   | 1772 |
| chr22 | 58436406  | 58438146  | 1741 |
| chr24 | 23159766  | 23161485  | 1720 |
| chr7  | 4509379   | 4511096   | 1718 |
| chr18 | 56443717  | 56445392  | 1676 |
| chr3  | 118879390 | 118881041 | 1652 |
| chr26 | 23483192  | 23484835  | 1644 |
| chr11 | 2537881   | 2539508   | 1628 |
| chr3  | 105959777 | 105961372 | 1596 |
| chrX  | 34889379  | 34890959  | 1581 |
| chr13 | 35924047  | 35925615  | 1569 |
| chr10 | 90926497  | 90928065  | 1569 |
| chr2  | 99676013  | 99677575  | 1563 |
| chr16 | 71665074  | 71666636  | 1563 |
| chr3  | 22965565  | 22967123  | 1559 |
| chr23 | 8066039   | 8067565   | 1527 |
| chr11 | 28331227  | 28332749  | 1523 |
| chr3  | 62688642  | 62690163  | 1522 |
| chr1  | 123139563 | 123141059 | 1497 |
| chr11 | 70697998  | 70699471  | 1474 |
| chr21 | 28326616  | 28328078  | 1463 |
| chr13 | 2454278   | 2455700   | 1423 |
| chr23 | 17418364  | 17419770  | 1407 |
| chr21 | 3046167   | 3047553   | 1387 |
| chr27 | 29597306  | 29598689  | 1384 |
| chr14 | 18683976  | 18685328  | 1353 |
| chr8  | 28007623  | 28008954  | 1332 |
| chr5  | 120048178 | 120049507 | 1330 |
| chr22 | 58632441  | 58633768  | 1328 |
| chr18 | 48012038  | 48013347  | 1310 |
| chrX  | 23347643  | 23348946  | 1304 |
| chr18 | 24008971  | 24010272  | 1302 |



|       |               |           |      |
|-------|---------------|-----------|------|
| chr16 | 77685961      | 77687259  | 1299 |
| chr2  | 140658894     | 140660183 | 1290 |
| chr21 | 6570480       | 6571763   | 1284 |
| chr3  | 115337943     | 115339194 | 1252 |
| chr22 | 59560840      | 59562073  | 1234 |
| chr4  | 121438802     | 121440034 | 1233 |
| chr6  | 74458915      | 74460146  | 1232 |
| chr17 | 69497046      | 69498273  | 1228 |
| chr7  | 5293895       | 5295116   | 1222 |
| chr16 | 47035253      | 47036457  | 1205 |
| chr17 | 64218411      | 64219597  | 1187 |
| chr19 | 15780398      | 15781582  | 1185 |
| chr4  | 34029385      | 34030549  | 1165 |
| chr29 | 47345239      | 47346389  | 1151 |
| chr23 | 30353892      | 30355037  | 1146 |
| chr7  | 50415345      | 50416459  | 1115 |
| chr16 | 77523972      | 77525085  | 1114 |
| chr21 | 25089398      | 25090502  | 1105 |
| chrX  | 75460283      | 75461369  | 1087 |
| chr15 | 37812323      | 37813399  | 1077 |
| chr3  | 116927445     | 116928519 | 1075 |
| chr13 | 74414751      | 74415805  | 1055 |
| chrX  | 14647783      | 14648832  | 1050 |
| chr6  | 40946221      | 40947270  | 1050 |
| chr4  | 46279917      | 46280949  | 1033 |
| chr21 | 20614532      | 20615564  | 1033 |
| chr4  | 72290011      | 72291041  | 1031 |
| chr29 | 39030787      | 39031810  | 1024 |
| chr7  | 12967977      | 12968996  | 1020 |
| chr10 | 5259602       | 5260612   | 1011 |
| chr12 | 18239281      | 18240280  | 1000 |
| chr18 | 53018518      | 53019498  | 981  |
| chr11 | 14121686      | 14122655  | 970  |
| chr24 | 44252071      | 44253033  | 963  |
| chr19 | 27350449      | 27351402  | 954  |
| chr23 | 7064372       | 7065322   | 951  |
| chr19 | 38962573      | 38963521  | 949  |
| chr24 | 5446253       | 5447192   | 940  |
| chr28 | 26917836      | 26918772  | 937  |
| chr9  | 106826204     | 106827130 | 927  |
| chr4  | 106691474     | 106692396 | 923  |
| chr10 | 90291986      | 90292897  | 912  |
| chr23 | 28656685      | 28657584  | 900  |
| chr16 | 47613296      | 47614193  | 898  |
| chr23 | 36833272      | 36834152  | 881  |
| chr3  | 25000799      | 25001646  | 848  |
| chr2  | 26554890      | 26555730  | 841  |
| chr24 | 189295 190121 | 827       |      |
| chr29 | 41705122      | 41705940  | 819  |
| chr5  | 54503472      | 54504289  | 818  |

|       |           |           |      |
|-------|-----------|-----------|------|
| chr10 | 90296502  | 90297318  | 817  |
| chr19 | 43236526  | 43237333  | 808  |
| chr8  | 24477337  | 24478138  | 802  |
| chr26 | 43677853  | 43678640  | 788  |
| chr18 | 64321291  | 64322074  | 784  |
| chr2  | 132780750 | 132781525 | 776  |
| chr16 | 70101006  | 70101733  | 728  |
| chr18 | 10708245  | 10708970  | 726  |
| chr20 | 25588480  | 25589197  | 718  |
| chr19 | 54219934  | 54220648  | 715  |
| chr29 | 48854009  | 48854720  | 712  |
| chr1  | 64868923  | 64869615  | 693  |
| chr18 | 63528380  | 63529053  | 674  |
| chr9  | 72540433  | 72541091  | 659  |
| chr23 | 28684720  | 28685375  | 656  |
| chrX  | 59481177  | 59481825  | 649  |
| chr3  | 8575389   | 8576033   | 645  |
| chr10 | 70399702  | 70400345  | 644  |
| chrX  | 72894075  | 72894708  | 634  |
| chr4  | 98488286  | 98488913  | 628  |
| chr3  | 15382132  | 15382709  | 578  |
| chr17 | 63808363  | 63808932  | 570  |
| chr27 | 26725323  | 26725891  | 569  |
| chr4  | 106594144 | 106594709 | 566  |
| chr2  | 134681394 | 134681958 | 565  |
| chr3  | 22623302  | 22623864  | 563  |
| chr3  | 22627077  | 22627636  | 560  |
| chr22 | 59267819  | 59268370  | 552  |
| chr15 | 29340223  | 29340771  | 549  |
| chr25 | 3204120   | 3204637   | 518  |
| chr8  | 74381036  | 74381493  | 458  |
| chr18 | 54242225  | 54242676  | 452  |
| chr3  | 22872239  | 22872688  | 450  |
| chr8  | 24443750  | 24444195  | 446  |
| chr18 | 63768109  | 63768546  | 438  |
| chr23 | 29076566  | 29079578  | 3013 |
| chr1  | 141897122 | 141897679 | 558  |
| chr6  | 16248612  | 16254689  | 6078 |
| chr21 | 30284058  | 30288313  | 4256 |
| chr16 | 47261841  | 47265763  | 3923 |
| chr18 | 51041324  | 51044971  | 3648 |
| chr19 | 32591586  | 32594777  | 3192 |
| chr21 | 9526079   | 9529262   | 3184 |
| chr10 | 46989512  | 46992682  | 3171 |
| chr23 | 44802195  | 44805353  | 3159 |
| chr14 | 66293138  | 66296227  | 3090 |
| chr8  | 60183643  | 60186652  | 3010 |
| chr11 | 5915398   | 5918267   | 2870 |
| chr8  | 63978304  | 63981135  | 2832 |
| chr19 | 57694384  | 57697056  | 2673 |

|       |               |           |      |
|-------|---------------|-----------|------|
| chrX  | 29571829      | 29574459  | 2631 |
| chr19 | 40456543      | 40459069  | 2527 |
| chr9  | 50722457      | 50724823  | 2367 |
| chr18 | 49481936      | 49484235  | 2300 |
| chr9  | 104930991     | 104933239 | 2249 |
| chr21 | 52059587      | 52061812  | 2226 |
| chr4  | 64296053      | 64298249  | 2197 |
| chr10 | 21110153      | 21112349  | 2197 |
| chr18 | 39774995      | 39777141  | 2147 |
| chr8  | 73093157      | 73095282  | 2126 |
| chr4  | 72795538      | 72797656  | 2119 |
| chr19 | 27197442      | 27199548  | 2107 |
| chr25 | 2886230       | 2888287   | 2058 |
| chr3  | 17478991      | 17481047  | 2057 |
| chrX  | 13650461      | 13652452  | 1992 |
| chr23 | 44101694      | 44103664  | 1971 |
| chr5  | 33853628      | 33855541  | 1914 |
| chr18 | 49261347      | 49263245  | 1899 |
| chr18 | 33814175      | 33816053  | 1879 |
| chr11 | 14230356      | 14232192  | 1837 |
| chr3  | 54808752      | 54810581  | 1830 |
| chr3  | 100242302     | 100244130 | 1829 |
| chr22 | 47862285      | 47864109  | 1825 |
| chr5  | 121337642     | 121339417 | 1776 |
| chr11 | 51886756      | 51888521  | 1766 |
| chr11 | 104894141     | 104895889 | 1749 |
| chr20 | 72725028      | 72726770  | 1743 |
| chr8  | 8108092       | 8109831   | 1740 |
| chr18 | 62498810      | 62500479  | 1670 |
| chr13 | 80745600      | 80747234  | 1635 |
| chr8  | 93696241      | 93697864  | 1624 |
| chr7  | 81253529      | 81255149  | 1621 |
| chr8  | 35969231      | 35970850  | 1620 |
| chrX  | 7351093       | 7352704   | 1612 |
| chr1  | 61275976      | 61277569  | 1594 |
| chr5  | 100124557     | 100126101 | 1545 |
| chr6  | 73624011      | 73625551  | 1541 |
| chr18 | 11315669      | 11317194  | 1526 |
| chr5  | 114244797     | 114246316 | 1520 |
| chr3  | 93581715      | 93583226  | 1512 |
| chr5  | 54504299      | 54505788  | 1490 |
| chr15 | 14579437      | 14580920  | 1484 |
| chr27 | 852090 853569 | 1480      |      |
| chr20 | 74446169      | 74447630  | 1462 |
| chr18 | 43156392      | 43157812  | 1421 |
| chr29 | 37702757      | 37704154  | 1398 |
| chr10 | 3516489       | 3517885   | 1397 |
| chr13 | 84228766      | 84230160  | 1395 |
| chr11 | 103767266     | 103768660 | 1395 |
| chr18 | 18683118      | 18684498  | 1381 |

|       |               |           |      |
|-------|---------------|-----------|------|
| chrX  | 45703973      | 45705338  | 1366 |
| chr16 | 47036691      | 47038053  | 1363 |
| chr25 | 3024911       | 3026263   | 1353 |
| chr4  | 116943541     | 116944887 | 1347 |
| chr7  | 45698622      | 45699961  | 1340 |
| chr20 | 33683181      | 33684512  | 1332 |
| chr25 | 675104 676417 | 1314      |      |
| chr11 | 106004079     | 106005388 | 1310 |
| chr10 | 90216506      | 90217796  | 1291 |
| chr6  | 105466045     | 105467318 | 1274 |
| chr25 | 42029462      | 42030733  | 1272 |
| chr13 | 73920259      | 73921530  | 1272 |
| chr20 | 72733674      | 72734925  | 1252 |
| chr18 | 23608508      | 23609757  | 1250 |
| chr26 | 8943592       | 8944818   | 1227 |
| chr8  | 7560486       | 7561704   | 1219 |
| chr29 | 44748108      | 44749317  | 1210 |
| chr25 | 3171310       | 3172513   | 1204 |
| chr18 | 49491211      | 49492411  | 1201 |
| chrX  | 61301852      | 61303046  | 1195 |
| chr13 | 26035418      | 26036606  | 1189 |
| chr10 | 21665341      | 21666527  | 1187 |
| chr28 | 3539783       | 3540967   | 1185 |
| chr1  | 146929193     | 146930375 | 1183 |
| chr29 | 44766697      | 44767876  | 1180 |
| chr23 | 992344 993521 | 1178      |      |
| chr1  | 5324099       | 5325274   | 1176 |
| chr12 | 84686777      | 84687943  | 1167 |
| chr7  | 39667048      | 39668208  | 1161 |
| chr24 | 40513097      | 40514234  | 1138 |
| chr19 | 38529451      | 38530588  | 1138 |
| chr7  | 3933190       | 3934301   | 1112 |
| chr7  | 43519669      | 43520767  | 1099 |
| chr11 | 77901528      | 77902623  | 1096 |
| chr2  | 73258061      | 73259134  | 1074 |
| chr4  | 71596459      | 71597500  | 1042 |
| chr28 | 41022966      | 41024000  | 1035 |
| chr20 | 6784435       | 6785468   | 1034 |
| chr25 | 38040939      | 38041962  | 1024 |
| chr21 | 20616503      | 20617524  | 1022 |
| chr19 | 38970602      | 38971604  | 1003 |
| chr6  | 103401382     | 103402379 | 998  |
| chr5  | 122486064     | 122487053 | 990  |
| chr23 | 30358425      | 30359413  | 989  |
| chr28 | 25131996      | 25132970  | 975  |
| chr6  | 2244024       | 2244997   | 974  |
| chr26 | 21811529      | 21812481  | 953  |
| chr16 | 40904644      | 40905593  | 950  |
| chr8  | 73339017      | 73339929  | 913  |
| chr17 | 72347603      | 72348508  | 906  |

|       |           |           |     |
|-------|-----------|-----------|-----|
| chr13 | 60753387  | 60754278  | 892 |
| chr15 | 53625739  | 53626621  | 883 |
| chr7  | 11371342  | 11372209  | 868 |
| chr2  | 17539508  | 17540372  | 865 |
| chrX  | 50338344  | 50339205  | 862 |
| chr14 | 59325651  | 59326509  | 859 |
| chr4  | 107354304 | 107355158 | 855 |
| chr20 | 6627920   | 6628774   | 855 |
| chr19 | 41231693  | 41232546  | 854 |
| chr1  | 153896147 | 153896995 | 849 |
| chr14 | 3267915   | 3268759   | 845 |
| chr23 | 9730754   | 9731593   | 840 |
| chr7  | 42487914  | 42488747  | 834 |
| chr3  | 22948476  | 22949302  | 827 |
| chr19 | 26919878  | 26920697  | 820 |
| chr1  | 141993319 | 141994130 | 812 |
| chr25 | 43526828  | 43527634  | 807 |
| chr28 | 25882893  | 25883696  | 804 |
| chr17 | 72719663  | 72720464  | 802 |
| chr13 | 37651265  | 37652064  | 800 |
| chr23 | 15884858  | 15885649  | 792 |
| chr18 | 11088662  | 11089453  | 792 |
| chr8  | 24489503  | 24490290  | 788 |
| chr17 | 64099000  | 64099777  | 778 |
| chr7  | 42764790  | 42765551  | 762 |
| chr9  | 107092346 | 107093094 | 749 |
| chr21 | 20036512  | 20037254  | 743 |
| chr9  | 6680399   | 6681133   | 735 |
| chr29 | 41878585  | 41879317  | 733 |
| chr29 | 47918758  | 47919476  | 719 |
| chr19 | 14042292  | 14043006  | 715 |
| chr10 | 32482192  | 32482903  | 712 |
| chr20 | 73657474  | 73658159  | 686 |
| chr27 | 28578967  | 28579636  | 670 |
| chr20 | 5047605   | 5048273   | 669 |
| chr18 | 52800139  | 52800798  | 660 |
| chr18 | 62743220  | 62743878  | 659 |
| chr10 | 69401802  | 69402450  | 649 |
| chr18 | 39914467  | 39915104  | 638 |
| chrX  | 55243156  | 55243792  | 637 |
| chr26 | 50751544  | 50752171  | 628 |
| chr10 | 83848970  | 83849588  | 619 |
| chr2  | 132707707 | 132708312 | 606 |
| chr29 | 38049262  | 38049860  | 599 |
| chr5  | 111684948 | 111685520 | 573 |
| chr15 | 43592266  | 43592829  | 564 |
| chr22 | 1951921   | 1952481   | 561 |
| chr3  | 65416800  | 65417353  | 554 |
| chr3  | 22665408  | 22665947  | 540 |
| chr8  | 24669450  | 24669979  | 530 |

|       |           |           |      |
|-------|-----------|-----------|------|
| chr1  | 152632078 | 152632584 | 507  |
| chr7  | 40407314  | 40407729  | 416  |
| chr8  | 73323825  | 73324214  | 390  |
| chr13 | 75831777  | 75836144  | 4368 |
| chr11 | 70882495  | 70886409  | 3915 |
| chr1  | 145352446 | 145356325 | 3880 |
| chr27 | 14399849  | 14403120  | 3272 |
| chr24 | 58961437  | 58964701  | 3265 |
| chr20 | 5043419   | 5046525   | 3107 |
| chr14 | 1580610   | 1583652   | 3043 |
| chr3  | 30432576  | 30435526  | 2951 |
| chr17 | 76295876  | 76298817  | 2942 |
| chrX  | 13132961  | 13135852  | 2892 |
| chr12 | 32119406  | 32122231  | 2826 |
| chr5  | 30504093  | 30506877  | 2785 |
| chr4  | 71601633  | 71604400  | 2768 |
| chr9  | 19268321  | 19271023  | 2703 |
| chr6  | 68054802  | 68057489  | 2688 |
| chrX  | 78509199  | 78511765  | 2567 |
| chr18 | 29578629  | 29581078  | 2450 |
| chr7  | 19247357  | 19249798  | 2442 |
| chr18 | 62668075  | 62670458  | 2384 |
| chr18 | 54354448  | 54356811  | 2364 |
| chr18 | 54196359  | 54198688  | 2330 |
| chr6  | 16239054  | 16241369  | 2316 |
| chr23 | 31385134  | 31387425  | 2292 |
| chr28 | 33864848  | 33867072  | 2225 |
| chr19 | 52416522  | 52418731  | 2210 |
| chr1  | 153526562 | 153528737 | 2176 |
| chr17 | 70704106  | 70706250  | 2145 |
| chr5  | 7222313   | 7224429   | 2117 |
| chr5  | 30501947  | 30504049  | 2103 |
| chr15 | 63232900  | 63234989  | 2090 |
| chr8  | 7776633   | 7778703   | 2071 |
| chr29 | 7663159   | 7665171   | 2013 |
| chr5  | 10530780  | 10532771  | 1992 |
| chr5  | 69596595  | 69598567  | 1973 |
| chr6  | 16236942  | 16238904  | 1963 |
| chr19 | 45207121  | 45209082  | 1962 |
| chr23 | 48760525  | 48762470  | 1946 |
| chr4  | 123138767 | 123140662 | 1896 |
| chr4  | 69676846  | 69678720  | 1875 |
| chr17 | 75534027  | 75535897  | 1871 |
| chr2  | 19391455  | 19393321  | 1867 |
| chr3  | 118065548 | 118067404 | 1857 |
| chr11 | 47257195  | 47259048  | 1854 |
| chr6  | 103290325 | 103292172 | 1848 |
| chr4  | 121492185 | 121494026 | 1842 |
| chr15 | 28527052  | 28528884  | 1833 |
| chr24 | 29707545  | 29709375  | 1831 |

|       |           |           |      |
|-------|-----------|-----------|------|
| chr26 | 51592527  | 51594345  | 1819 |
| chr8  | 47601271  | 47603050  | 1780 |
| chr4  | 113659226 | 113660993 | 1768 |
| chr1  | 154402794 | 154404531 | 1738 |
| chr8  | 60187927  | 60189633  | 1707 |
| chr8  | 74336533  | 74338228  | 1696 |
| chr4  | 121726655 | 121728338 | 1684 |
| chr26 | 42172273  | 42173946  | 1674 |
| chr25 | 33247640  | 33249308  | 1669 |
| chr2  | 111336874 | 111338535 | 1662 |
| chr23 | 31690563  | 31692184  | 1622 |
| chr19 | 25415700  | 25417307  | 1608 |
| chr9  | 52374692  | 52376287  | 1596 |
| chr9  | 11537092  | 11538659  | 1568 |
| chr14 | 22080912  | 22082477  | 1566 |
| chr5  | 10537370  | 10538910  | 1541 |
| chr12 | 20087641  | 20089177  | 1537 |
| chr7  | 4988606   | 4990119   | 1514 |
| chr5  | 1091801   | 1093291   | 1491 |
| chr19 | 12332668  | 12334141  | 1474 |
| chr26 | 38252449  | 38253920  | 1472 |
| chr22 | 50589390  | 50590849  | 1460 |
| chr27 | 29101390  | 29102846  | 1457 |
| chr1  | 128116942 | 128118367 | 1426 |
| chr20 | 74769988  | 74771412  | 1425 |
| chr3  | 35891510  | 35892929  | 1420 |
| chr22 | 55396080  | 55397499  | 1420 |
| chr2  | 111676678 | 111678084 | 1407 |
| chr19 | 45540124  | 45541527  | 1404 |
| chr17 | 63308621  | 63310002  | 1382 |
| chr11 | 81176644  | 81177999  | 1356 |
| chr26 | 24338902  | 24340242  | 1341 |
| chr22 | 53955341  | 53956679  | 1339 |
| chr13 | 14720548  | 14721883  | 1336 |
| chr2  | 117721434 | 117722762 | 1329 |
| chr10 | 72205817  | 72207128  | 1312 |
| chr21 | 2035787   | 2037095   | 1309 |
| chr3  | 74452189  | 74453472  | 1284 |
| chr26 | 51531752  | 51533032  | 1281 |
| chrX  | 30000786  | 30002060  | 1275 |
| chr6  | 62537256  | 62538525  | 1270 |
| chr8  | 100263172 | 100264439 | 1268 |
| chr15 | 24008522  | 24009773  | 1252 |
| chr4  | 115952677 | 115953904 | 1228 |
| chr8  | 108654125 | 108655346 | 1222 |
| chr7  | 3733461   | 3734670   | 1210 |
| chr1  | 152258846 | 152260049 | 1204 |
| chr18 | 16528000  | 16529198  | 1199 |
| chr7  | 43771755  | 43772932  | 1178 |
| chr26 | 39257509  | 39258672  | 1164 |

|       |               |           |      |
|-------|---------------|-----------|------|
| chr7  | 10978135      | 10979297  | 1163 |
| chr13 | 28495652      | 28496812  | 1161 |
| chr14 | 945040 946197 | 1158      |      |
| chr19 | 14750999      | 14752148  | 1150 |
| chr15 | 74658467      | 74659607  | 1141 |
| chr8  | 62579626      | 62580760  | 1135 |
| chr25 | 4835467       | 4836597   | 1131 |
| chr22 | 30009356      | 30010485  | 1130 |
| chr8  | 63740339      | 63741462  | 1124 |
| chr13 | 73994079      | 73995189  | 1111 |
| chr6  | 38122601      | 38123705  | 1105 |
| chr10 | 90215355      | 90216455  | 1101 |
| chr1  | 150076900     | 150077991 | 1092 |
| chr9  | 90657955      | 90659033  | 1079 |
| chr7  | 5606590       | 5607657   | 1068 |
| chr16 | 77476752      | 77477816  | 1065 |
| chr23 | 52644915      | 52645953  | 1039 |
| chr17 | 18513732      | 18514764  | 1033 |
| chr11 | 104691001     | 104692026 | 1026 |
| chr18 | 11360403      | 11361427  | 1025 |
| chr2  | 131475119     | 131476137 | 1019 |
| chr19 | 38760996      | 38761999  | 1004 |
| chr22 | 17237854      | 17238852  | 999  |
| chr18 | 56971911      | 56972908  | 998  |
| chr18 | 52686290      | 52687279  | 990  |
| chr7  | 81251793      | 81252780  | 988  |
| chr24 | 34081331      | 34082314  | 984  |
| chr8  | 23041564      | 23042521  | 958  |
| chr21 | 20918081      | 20919032  | 952  |
| chr17 | 68419254      | 68420201  | 948  |
| chr3  | 119673559     | 119674500 | 942  |
| chr13 | 77589883      | 77590822  | 940  |
| chr19 | 26976347      | 26977285  | 939  |
| chr29 | 29681945      | 29682881  | 937  |
| chr1  | 100083250     | 100084180 | 931  |
| chr8  | 23034024      | 23034950  | 927  |
| chr19 | 39359713      | 39360635  | 923  |
| chr1  | 1645251       | 1646170   | 920  |
| chr24 | 2019277       | 2020188   | 912  |
| chr17 | 4155968       | 4156879   | 912  |
| chr18 | 62744765      | 62745672  | 908  |
| chr11 | 56766569      | 56767473  | 905  |
| chr16 | 67442929      | 67443823  | 895  |
| chr25 | 38333575      | 38334460  | 886  |
| chr26 | 18743550      | 18744434  | 885  |
| chr18 | 62681911      | 62682791  | 881  |
| chr5  | 123165328     | 123166207 | 880  |
| chr8  | 74379645      | 74380501  | 857  |
| chr13 | 40989843      | 40990691  | 849  |
| chr3  | 124560005     | 124560838 | 834  |



|       |           |           |     |
|-------|-----------|-----------|-----|
| chr26 | 17920694  | 17921526  | 833 |
| chr3  | 22696197  | 22697025  | 829 |
| chr24 | 20770794  | 20771616  | 823 |
| chr18 | 63752106  | 63752927  | 822 |
| chr3  | 119961549 | 119962361 | 813 |
| chr12 | 32094315  | 32095126  | 812 |
| chr28 | 13490727  | 13491532  | 806 |
| chr5  | 120064962 | 120065764 | 803 |
| chr3  | 22558736  | 22559537  | 802 |
| chr18 | 47860744  | 47861535  | 792 |
| chrX  | 74527454  | 74528239  | 786 |
| chr14 | 1154046   | 1154827   | 782 |
| chr29 | 2685661   | 2686432   | 772 |
| chr4  | 121417348 | 121418110 | 763 |
| chr29 | 41638222  | 41638969  | 748 |
| chr19 | 57593687  | 57594430  | 744 |
| chr8  | 45736573  | 45737312  | 740 |
| chr7  | 46195188  | 46195924  | 737 |
| chr5  | 110918098 | 110918829 | 732 |
| chr14 | 27320377  | 27321092  | 716 |
| chr18 | 56558113  | 56558816  | 704 |
| chr20 | 66532311  | 66533012  | 702 |
| chr29 | 48792428  | 48793118  | 691 |
| chr11 | 44967378  | 44968065  | 688 |
| chrX  | 72574867  | 72575529  | 663 |
| chr8  | 116750938 | 116751590 | 653 |
| chr29 | 37425768  | 37426413  | 646 |
| chr29 | 41880623  | 41881262  | 640 |
| chr3  | 105767122 | 105767757 | 636 |
| chr25 | 8734799   | 8735426   | 628 |
| chr15 | 13639781  | 13640402  | 622 |
| chr6  | 119065327 | 119065933 | 607 |
| chr8  | 46616217  | 46616816  | 600 |
| chr23 | 15888070  | 15888667  | 598 |
| chr6  | 119389428 | 119390023 | 596 |
| chr4  | 71876251  | 71876843  | 593 |
| chr23 | 31403050  | 31403636  | 587 |
| chr18 | 45430945  | 45431527  | 583 |
| chr3  | 116012140 | 116012710 | 571 |
| chrX  | 75939078  | 75939643  | 566 |
| chr19 | 28986751  | 28987299  | 549 |
| chr10 | 70157961  | 70158507  | 547 |
| chr16 | 47528753  | 47529296  | 544 |
| chr14 | 59028160  | 59028691  | 532 |
| chr10 | 45675472  | 45676000  | 529 |
| chr11 | 44958872  | 44959397  | 526 |
| chr17 | 66130005  | 66130510  | 506 |
| chr10 | 36287696  | 36288180  | 485 |
| chr18 | 33813232  | 33813715  | 484 |
| chr23 | 27757085  | 27757564  | 480 |

|       |               |           |      |
|-------|---------------|-----------|------|
| chr18 | 45819819      | 45820296  | 478  |
| chr16 | 67432031      | 67432506  | 476  |
| chr11 | 107557091     | 107557559 | 469  |
| chr18 | 62347765      | 62348225  | 461  |
| chr5  | 536408 536853 | 446       |      |
| chr23 | 48755347      | 48755778  | 432  |
| chr3  | 8824179       | 8824578   | 400  |
| chr2  | 75594969      | 75597021  | 2053 |
| chr12 | 32920521      | 32923466  | 2946 |
| chr8  | 96334720      | 96337388  | 2669 |
| chr7  | 54940599      | 54943188  | 2590 |
| chr8  | 75979214      | 75981516  | 2303 |
| chr11 | 9248921       | 9251192   | 2272 |
| chr11 | 98903085      | 98905330  | 2246 |
| chr11 | 77854205      | 77856284  | 2080 |
| chr4  | 74534769      | 74536828  | 2060 |
| chr9  | 74633973      | 74635908  | 1936 |
| chr3  | 106513574     | 106515410 | 1837 |
| chr3  | 22961708      | 22963518  | 1811 |
| chr24 | 4161350       | 4163117   | 1768 |
| chr8  | 24664625      | 24666388  | 1764 |
| chr19 | 26920711      | 26922417  | 1707 |
| chr22 | 58644684      | 58646216  | 1533 |
| chr12 | 9696250       | 9697770   | 1521 |
| chr20 | 25761700      | 25763219  | 1520 |
| chr6  | 109066856     | 109068343 | 1488 |
| chr8  | 24695233      | 24696653  | 1421 |
| chr8  | 110719620     | 110720994 | 1375 |
| chr17 | 76101246      | 76102553  | 1308 |
| chr7  | 18714213      | 18715515  | 1303 |
| chr8  | 40330799      | 40332058  | 1260 |
| chr24 | 20886281      | 20887491  | 1211 |
| chr18 | 62741367      | 62742439  | 1073 |
| chr20 | 8553539       | 8554568   | 1030 |
| chr1  | 123141988     | 123142971 | 984  |
| chr19 | 14998030      | 14999003  | 974  |
| chr8  | 61900282      | 61901209  | 928  |
| chr23 | 21861619      | 21862521  | 903  |
| chr25 | 4655085       | 4655983   | 899  |
| chr25 | 38834044      | 38834920  | 877  |
| chr25 | 27389836      | 27390709  | 874  |
| chr13 | 35971831      | 35972696  | 866  |
| chr23 | 52602013      | 52602871  | 859  |
| chr3  | 22875035      | 22875875  | 841  |
| chr21 | 68943002      | 68943838  | 837  |
| chr7  | 81425251      | 81426011  | 761  |
| chr16 | 41462625      | 41463346  | 722  |
| chr18 | 61962563      | 61963256  | 694  |
| chr11 | 104915233     | 104915926 | 694  |
| chr11 | 14087530      | 14088218  | 689  |

|       |               |           |      |
|-------|---------------|-----------|------|
| chr3  | 22460166      | 22460813  | 648  |
| chr17 | 64308363      | 64308927  | 565  |
| chr17 | 72764433      | 72764991  | 559  |
| chr23 | 27821882      | 27822426  | 545  |
| chr25 | 2810104       | 2810639   | 536  |
| chr22 | 7220925       | 7221446   | 522  |
| chr6  | 58826055      | 58829774  | 3720 |
| chr5  | 29720480      | 29723557  | 3078 |
| chr10 | 90293671      | 90296407  | 2737 |
| chr25 | 35567427      | 35569910  | 2484 |
| chrX  | 34101643      | 34104060  | 2418 |
| chr18 | 12405147      | 12407443  | 2297 |
| chr18 | 63024444      | 63026661  | 2218 |
| chr15 | 32283206      | 32285226  | 2021 |
| chr13 | 55103761      | 55105712  | 1952 |
| chr13 | 75669470      | 75671372  | 1903 |
| chr17 | 63310050      | 63311773  | 1724 |
| chr8  | 66198954      | 66200655  | 1702 |
| chr24 | 34082620      | 34084293  | 1674 |
| chr23 | 27870079      | 27871734  | 1656 |
| chr8  | 24361867      | 24363504  | 1638 |
| chr18 | 61979372      | 61980892  | 1521 |
| chr29 | 48789435      | 48790888  | 1454 |
| chr25 | 1047296       | 1048699   | 1404 |
| chr8  | 47980787      | 47982149  | 1363 |
| chr21 | 64515321      | 64516439  | 1119 |
| chr3  | 102699353     | 102700467 | 1115 |
| chr19 | 58192954      | 58194051  | 1098 |
| chr19 | 23701038      | 23702125  | 1088 |
| chrX  | 7409487       | 7410553   | 1067 |
| chr1  | 84785297      | 84786294  | 998  |
| chr1  | 110659332     | 110660325 | 994  |
| chr29 | 26782486      | 26783477  | 992  |
| chr22 | 59415509      | 59416448  | 940  |
| chr18 | 11566641      | 11567562  | 922  |
| chr25 | 35673369      | 35674162  | 794  |
| chr6  | 68558534      | 68559218  | 685  |
| chr10 | 8711466       | 8712145   | 680  |
| chr9  | 90611453      | 90612032  | 580  |
| chr3  | 114224710     | 114225274 | 565  |
| chr25 | 43152174      | 43152737  | 564  |
| chr9  | 53323334      | 53323856  | 523  |
| chr24 | 188739 189232 | 494       |      |
| chr23 | 31689912      | 31690386  | 475  |
| chr5  | 10614506      | 10616117  | 1612 |
| chr2  | 94040773      | 94041509  | 737  |
| chr3  | 22672570      | 22673506  | 937  |
| chr19 | 56841715      | 56843783  | 2069 |
| chr25 | 38342124      | 38344188  | 2065 |
| chr1  | 143831740     | 143833649 | 1910 |

|       |           |           |      |
|-------|-----------|-----------|------|
| chr2  | 111255438 | 111257170 | 1733 |
| chr19 | 23724946  | 23726611  | 1666 |
| chr21 | 6545927   | 6547564   | 1638 |
| chr16 | 38708354  | 38709776  | 1423 |
| chr10 | 66929083  | 66930496  | 1414 |
| chr13 | 17313556  | 17314928  | 1373 |
| chr12 | 76054297  | 76055666  | 1370 |
| chr14 | 1524362   | 1525637   | 1276 |
| chr19 | 40974818  | 40976065  | 1248 |
| chrX  | 20103871  | 20105037  | 1167 |
| chr18 | 45390338  | 45391485  | 1148 |
| chr9  | 90358371  | 90359442  | 1072 |
| chr19 | 29016222  | 29017287  | 1066 |
| chrX  | 60078471  | 60079510  | 1040 |
| chr7  | 88944869  | 88945873  | 1005 |
| chrX  | 53528775  | 53529664  | 890  |
| chr23 | 28506563  | 28507423  | 861  |
| chr10 | 12131656  | 12132492  | 837  |
| chr12 | 76538989  | 76539804  | 816  |
| chr26 | 38409591  | 38410392  | 802  |
| chr3  | 22618746  | 22619484  | 739  |
| chr13 | 14719882  | 14720490  | 609  |
| chr19 | 12316067  | 12316573  | 507  |
| chr8  | 73831089  | 73834408  | 3320 |
| chr3  | 113457370 | 113461001 | 3632 |
| chr26 | 22338569  | 22341818  | 3250 |
| chr26 | 37882020  | 37884531  | 2512 |
| chr4  | 99597044  | 99599183  | 2140 |
| chr5  | 113925514 | 113927491 | 1978 |
| chr9  | 91082627  | 91084551  | 1925 |
| chr28 | 43577463  | 43579280  | 1818 |
| chr19 | 7636642   | 7638330   | 1689 |
| chr18 | 52663656  | 52664941  | 1286 |
| chr13 | 54834725  | 54835889  | 1165 |
| chr19 | 23714969  | 23716015  | 1047 |
| chr16 | 13950594  | 13951543  | 950  |
| chr17 | 60188615  | 60189535  | 921  |
| chr8  | 24738304  | 24739220  | 917  |
| chr22 | 7558166   | 7559053   | 888  |
| chr22 | 58439702  | 58440572  | 871  |
| chr6  | 111013133 | 111013995 | 863  |
| chr16 | 2228121   | 2228894   | 774  |
| chr2  | 4929593   | 4930341   | 749  |
| chr18 | 45431567  | 45432199  | 633  |
| chrX  | 59497554  | 59498151  | 598  |
| chr6  | 16261316  | 16261886  | 571  |
| chr2  | 132779689 | 132780218 | 530  |
| chr8  | 47982299  | 47984797  | 2499 |
| chr18 | 29581115  | 29583544  | 2430 |
| chr6  | 16246174  | 16248571  | 2398 |

|       |               |           |      |
|-------|---------------|-----------|------|
| chr7  | 44912109      | 44914312  | 2204 |
| chr23 | 27744235      | 27746429  | 2195 |
| chr1  | 76368734      | 76370888  | 2155 |
| chr17 | 73181986      | 73183849  | 1864 |
| chr18 | 52689972      | 52691588  | 1617 |
| chr7  | 4506812       | 4508285   | 1474 |
| chr14 | 1520991       | 1522446   | 1456 |
| chr12 | 33360245      | 33361636  | 1392 |
| chr18 | 39905487      | 39906782  | 1296 |
| chr13 | 41016821      | 41018061  | 1241 |
| chr1  | 143830493     | 143831684 | 1192 |
| chr17 | 76289885      | 76291056  | 1172 |
| chr7  | 81580004      | 81581031  | 1028 |
| chr21 | 33820048      | 33821051  | 1004 |
| chrX  | 33756604      | 33757593  | 990  |
| chr14 | 22072884      | 22073868  | 985  |
| chr3  | 22632539      | 22633516  | 978  |
| chr9  | 46032179      | 46033101  | 923  |
| chr11 | 98333262      | 98333934  | 673  |
| chr26 | 21845633      | 21846292  | 660  |
| chr22 | 50102527      | 50103186  | 660  |
| chr6  | 75003606      | 75004225  | 620  |
| chr3  | 22671453      | 22672004  | 552  |
| chr4  | 121736867     | 121738970 | 2104 |
| chr3  | 125196890     | 125198900 | 2011 |
| chr7  | 4354444       | 4356240   | 1797 |
| chr11 | 14065243      | 14067020  | 1778 |
| chr26 | 22341949      | 22343454  | 1506 |
| chr3  | 22464390      | 22465623  | 1234 |
| chr29 | 51264921      | 51266153  | 1233 |
| chr29 | 47268968      | 47270194  | 1227 |
| chr6  | 91904936      | 91906113  | 1178 |
| chr4  | 94705140      | 94706268  | 1129 |
| chr27 | 8831428       | 8832482   | 1055 |
| chr5  | 117693493     | 117694486 | 994  |
| chr15 | 81179244      | 81180152  | 909  |
| chr25 | 1922276       | 1923154   | 879  |
| chr24 | 51583072      | 51583896  | 825  |
| chr3  | 22594304      | 22594999  | 696  |
| chr21 | 20916650      | 20917320  | 671  |
| chr9  | 45714553      | 45715156  | 604  |
| chr26 | 25512171      | 25512773  | 603  |
| chr3  | 22933499      | 22934006  | 508  |
| chr13 | 179783 182954 | 3172      |      |
| chr6  | 73192524      | 73195107  | 2584 |
| chr16 | 77342197      | 77344488  | 2292 |
| chr8  | 24748207      | 24750069  | 1863 |
| chr19 | 46103262      | 46104971  | 1710 |
| chr15 | 81172393      | 81173962  | 1570 |
| chr24 | 36557593      | 36558493  | 901  |

|       |               |           |      |
|-------|---------------|-----------|------|
| chr18 | 3551323       | 3552187   | 865  |
| chr4  | 53162619      | 53163458  | 840  |
| chr14 | 29195122      | 29195908  | 787  |
| chr8  | 23955043      | 23955806  | 764  |
| chr19 | 12492361      | 12493114  | 754  |
| chr19 | 39620355      | 39621093  | 739  |
| chr26 | 38235335      | 38235991  | 657  |
| chr3  | 279338 279893 | 556       |      |
| chr18 | 62503892      | 62504442  | 551  |
| chr18 | 63771124      | 63771654  | 531  |
| chr21 | 20147546      | 20148348  | 803  |
| chr25 | 1302456       | 1303813   | 1358 |
| chr18 | 55192648      | 55197255  | 4608 |
| chrX  | 8981620       | 8984790   | 3171 |
| chr16 | 47600601      | 47602572  | 1972 |
| chr20 | 765937 767810 | 1874      |      |
| chrX  | 55577510      | 55579379  | 1870 |
| chr3  | 106531821     | 106533669 | 1849 |
| chr29 | 42917489      | 42919194  | 1706 |
| chr21 | 28324727      | 28326171  | 1445 |
| chr20 | 64881855      | 64883212  | 1358 |
| chr3  | 115689662     | 115690995 | 1334 |
| chr5  | 35567423      | 35568742  | 1320 |
| chr26 | 22256621      | 22257735  | 1115 |
| chr7  | 5039570       | 5040608   | 1039 |
| chr2  | 138652913     | 138653768 | 856  |
| chr8  | 23830914      | 23831740  | 827  |
| chr17 | 57626971      | 57627717  | 747  |
| chr21 | 64505538      | 64506222  | 685  |
| chrX  | 56018303      | 56018939  | 637  |
| chr23 | 10343903      | 10344518  | 616  |
| chr4  | 86558992      | 86559580  | 589  |
| chr3  | 8821760       | 8822328   | 569  |
| chr25 | 44033433      | 44035123  | 1691 |
| chr6  | 120779471     | 120780610 | 1140 |
| chr7  | 46275929      | 46278658  | 2730 |
| chr8  | 70186340      | 70188758  | 2419 |
| chr12 | 24620814      | 24622580  | 1767 |
| chr18 | 62211685      | 62213438  | 1754 |
| chr14 | 57315901      | 57317514  | 1614 |
| chr29 | 43172977      | 43174329  | 1353 |
| chr18 | 53021838      | 53023085  | 1248 |
| chr3  | 126955502     | 126956735 | 1234 |
| chr24 | 63028509      | 63029658  | 1150 |
| chr3  | 22544503      | 22545433  | 931  |
| chr18 | 54317000      | 54317832  | 833  |
| chr13 | 55115625      | 55116373  | 749  |
| chr15 | 83837535      | 83838248  | 714  |
| chr11 | 49405762      | 49406380  | 619  |
| chr4  | 120189954     | 120192114 | 2161 |

|       |           |           |      |
|-------|-----------|-----------|------|
| chr12 | 68222720  | 68224352  | 1633 |
| chr1  | 154418252 | 154419863 | 1612 |
| chr10 | 66908713  | 66910162  | 1450 |
| chr5  | 82080882  | 82082324  | 1443 |
| chr18 | 64319886  | 64321136  | 1251 |
| chr3  | 22683437  | 22684466  | 1030 |
| chr18 | 63754408  | 63755295  | 888  |
| chr25 | 39290537  | 39291309  | 773  |
| chr6  | 115515467 | 115516225 | 759  |
| chr16 | 46966180  | 46966938  | 759  |
| chr6  | 12113058  | 12113797  | 740  |
| chr18 | 47667274  | 47667941  | 668  |
| chr8  | 24215588  | 24216193  | 606  |
| chr23 | 52791937  | 52792827  | 891  |
| chr4  | 53018999  | 53021407  | 2409 |
| chr8  | 73750092  | 73752008  | 1917 |
| chr21 | 18886980  | 18888465  | 1486 |
| chr25 | 2924817   | 2926227   | 1411 |
| chr10 | 8530944   | 8532285   | 1342 |
| chr8  | 24681863  | 24682874  | 1012 |
| chr26 | 7185828   | 7186785   | 958  |
| chr1  | 1617032   | 1617859   | 828  |
| chr3  | 127372825 | 127373627 | 803  |
| chr24 | 34967105  | 34967841  | 737  |
| chr18 | 47500097  | 47500754  | 658  |
| chr20 | 73290169  | 73290768  | 600  |
| chr12 | 74464773  | 74465340  | 568  |
| chr18 | 53559140  | 53560472  | 1333 |
| chr12 | 11446556  | 11448212  | 1657 |
| chr3  | 22571302  | 22572229  | 928  |
| chr13 | 54501259  | 54503578  | 2320 |
| chr14 | 61318643  | 61320576  | 1934 |
| chr23 | 30547291  | 30548782  | 1492 |
| chr14 | 75489654  | 75491108  | 1455 |
| chr18 | 11715201  | 11716610  | 1410 |
| chr8  | 24494747  | 24495905  | 1159 |
| chr7  | 42786590  | 42787496  | 907  |
| chr3  | 23014359  | 23015069  | 711  |
| chr13 | 15172401  | 15173063  | 663  |
| chr2  | 134717307 | 134717945 | 639  |
| chr1  | 109021458 | 109022145 | 688  |
| chr23 | 49952060  | 49952724  | 665  |
| chr21 | 2040019   | 2040564   | 546  |
| chr7  | 13275875  | 13277323  | 1449 |
| chr24 | 44247438  | 44248375  | 938  |
| chr7  | 12985787  | 12986652  | 866  |
| chr8  | 73303074  | 73303635  | 562  |
| chr17 | 75464584  | 75465019  | 436  |
| chr18 | 53030387  | 53031095  | 709  |
| chrX  | 72242435  | 72243214  | 780  |

|       |             |           |      |
|-------|-------------|-----------|------|
| chr8  | 73484364    | 73486239  | 1876 |
| chr14 | 52502719    | 52503715  | 997  |
| chr18 | 11380545    | 11381363  | 819  |
| chr2  | 134740526   | 134741002 | 477  |
| chr24 | 64978834    | 64980004  | 1171 |
| chr25 | 31391 32323 | 933       |      |
| chr3  | 54315973    | 54316745  | 773  |
| chr8  | 89538176    | 89538878  | 703  |
| chr8  | 24711786    | 24713321  | 1536 |
| chr3  | 22648661    | 22649151  | 491  |
| chr8  | 78843033    | 78844824  | 1792 |
| chrX  | 75940859    | 75942070  | 1212 |
| chr28 | 33808201    | 33809340  | 1140 |
| chr3  | 22699417    | 22700532  | 1116 |
| chr16 | 48304361    | 48305078  | 718  |
| chr18 | 54177027    | 54177743  | 717  |
| chr23 | 27982334    | 27982924  | 591  |
| chr25 | 5624 6062   | 439       |      |
| chr13 | 68925410    | 68926530  | 1121 |
| chr19 | 65226014    | 65226686  | 673  |
| chr8  | 23055322    | 23055892  | 571  |
| chr10 | 3518994     | 3519545   | 552  |
| chr5  | 113928085   | 113928557 | 473  |
| chr8  | 73824607    | 73825543  | 937  |
| chr21 | 31690462    | 31691091  | 630  |
| chr29 | 47916376    | 47916999  | 624  |
| chr3  | 74455030    | 74455535  | 506  |
| chr14 | 61324237    | 61325095  | 859  |
| chr16 | 29423644    | 29424405  | 762  |
| chr21 | 52062151    | 52063438  | 1288 |
| chr23 | 45973291    | 45974376  | 1086 |
| chr7  | 19246835    | 19247298  | 464  |
| chr20 | 32403704    | 32404364  | 661  |
| chr11 | 11741783    | 11742237  | 455  |
| chr3  | 8817246     | 8817932   | 687  |
| chr8  | 24495947    | 24496735  | 789  |
| chr8  | 24387638    | 24388258  | 621  |
| chr7  | 1685960     | 1687203   | 1244 |
| chr29 | 44741157    | 44742137  | 981  |
| chr21 | 2061665     | 2062524   | 860  |
| chr14 | 22494521    | 22495407  | 887  |
| chrX  | 45520209    | 45520869  | 661  |
| chr5  | 113703387   | 113704336 | 950  |
| chr21 | 20624617    | 20625198  | 582  |
| chr25 | 44024610    | 44025024  | 415  |
| chr25 | 4623230     | 4623859   | 630  |
| chr8  | 24690618    | 24691175  | 558  |
| chr3  | 127372233   | 127372754 | 522  |
| chr29 | 49305545    | 49306773  | 1229 |
| chr20 | 51121974    | 51122564  | 591  |



|       |             |           |      |
|-------|-------------|-----------|------|
| chr21 | 1927658     | 1928372   | 715  |
| chr9  | 90285945    | 90286612  | 668  |
| chr1  | 6300528     | 6301079   | 552  |
| chr2  | 37672723    | 37673231  | 509  |
| chr22 | 17559086    | 17559872  | 787  |
| chr8  | 73305423    | 73306557  | 1135 |
| chr23 | 27848267    | 27849165  | 899  |
| chr8  | 73755058    | 73756041  | 984  |
| chr8  | 73835477    | 73836265  | 789  |
| chr25 | 72421 72980 | 560       |      |
| chr29 | 48791703    | 48792393  | 691  |
| chr8  | 31091327    | 31091903  | 577  |
| chr19 | 65257954    | 65258483  | 530  |
| chr8  | 73834626    | 73835056  | 431  |
| chr8  | 24316504    | 24317100  | 597  |
| chr15 | 36664109    | 36665101  | 993  |
| chr29 | 49311502    | 49312114  | 613  |
| chr8  | 73823876    | 73824478  | 603  |
| chr8  | 73821448    | 73823090  | 1643 |
| chr8  | 24709476    | 24710692  | 1217 |
| chr8  | 73519472    | 73520003  | 532  |
| chrX  | 8947648     | 8951266   | 3619 |
| chrX  | 8980355     | 8981370   | 1016 |
| chrX  | 8941421     | 8942146   | 726  |
| chr8  | 73327578    | 73328083  | 506  |
| chr8  | 73829453    | 73830301  | 849  |
| chr16 | 28684776    | 28685298  | 523  |
| chr19 | 39119398    | 39123065  | 3668 |
| chr5  | 83344081    | 83346932  | 2852 |
| chr1  | 150069858   | 150072612 | 2755 |
| chr7  | 14364547    | 14367161  | 2615 |
| chr25 | 36486989    | 36489526  | 2538 |
| chr12 | 84252970    | 84255379  | 2410 |
| chrX  | 8146553     | 8148923   | 2371 |
| chr16 | 48311208    | 48313564  | 2357 |
| chr19 | 39109413    | 39111696  | 2284 |
| chr28 | 10781281    | 10783557  | 2277 |
| chr10 | 60554134    | 60556353  | 2220 |
| chr22 | 17429551    | 17431744  | 2194 |
| chr18 | 50980459    | 50982637  | 2179 |
| chrX  | 7894318     | 7896480   | 2163 |
| chr1  | 81427457    | 81429608  | 2152 |
| chr8  | 3713317     | 3715458   | 2142 |
| chr4  | 47453653    | 47455776  | 2124 |
| chr8  | 20932756    | 20934866  | 2111 |
| chr14 | 59528108    | 59530187  | 2080 |
| chr9  | 73510105    | 73512106  | 2002 |
| chr2  | 46204415    | 46206368  | 1954 |
| chr4  | 123136259   | 123138179 | 1921 |
| chr25 | 38044788    | 38046680  | 1893 |

|       |           |           |      |
|-------|-----------|-----------|------|
| chr23 | 31336834  | 31338691  | 1858 |
| chr23 | 17466715  | 17468548  | 1834 |
| chr1  | 147179235 | 147181013 | 1779 |
| chr11 | 63309179  | 63310932  | 1754 |
| chr19 | 12499582  | 12501326  | 1745 |
| chr19 | 46320089  | 46321785  | 1697 |
| chr23 | 15891914  | 15893580  | 1667 |
| chr5  | 120367635 | 120369286 | 1652 |
| chr16 | 61644970  | 61646616  | 1647 |
| chr15 | 58005919  | 58007562  | 1644 |
| chr18 | 11491302  | 11492943  | 1642 |
| chr5  | 29204499  | 29206100  | 1602 |
| chr27 | 41850475  | 41852027  | 1553 |
| chr11 | 77749577  | 77751129  | 1553 |
| chr16 | 66332758  | 66334302  | 1545 |
| chr3  | 15349613  | 15351142  | 1530 |
| chr3  | 4491988   | 4493493   | 1506 |
| chr1  | 97145195  | 97146691  | 1497 |
| chr18 | 47664310  | 47665796  | 1487 |
| chr11 | 98962586  | 98964070  | 1485 |
| chr13 | 82957320  | 82958791  | 1472 |
| chr14 | 35500892  | 35502353  | 1462 |
| chr16 | 39887169  | 39888621  | 1453 |
| chr17 | 21442737  | 21444177  | 1441 |
| chr26 | 47954877  | 47956313  | 1437 |
| chr17 | 75977635  | 75979068  | 1434 |
| chr26 | 21767047  | 21768442  | 1396 |
| chr3  | 110746238 | 110747620 | 1383 |
| chr12 | 36457563  | 36458932  | 1370 |
| chr2  | 136723453 | 136724816 | 1364 |
| chr13 | 37649577  | 37650925  | 1349 |
| chr8  | 24470242  | 24471589  | 1348 |
| chr3  | 86201256  | 86202590  | 1335 |
| chr25 | 7031491   | 7032783   | 1293 |
| chr26 | 23889580  | 23890856  | 1277 |
| chr3  | 22903694  | 22904957  | 1264 |
| chr19 | 25421240  | 25422499  | 1260 |
| chr18 | 48682122  | 48683380  | 1259 |
| chr9  | 35562701  | 35563955  | 1255 |
| chr6  | 22906041  | 22907295  | 1255 |
| chrX  | 10877196  | 10878426  | 1231 |
| chr28 | 4793393   | 4794623   | 1231 |
| chr29 | 49970814  | 49972030  | 1217 |
| chr26 | 48297373  | 48298585  | 1213 |
| chr13 | 80833084  | 80834291  | 1208 |
| chr26 | 11609784  | 11610982  | 1199 |
| chr19 | 39394930  | 39396124  | 1195 |
| chr12 | 11448218  | 11449412  | 1195 |
| chr18 | 4042165   | 4043357   | 1193 |
| chr8  | 66669143  | 66670298  | 1156 |

|       |           |           |      |
|-------|-----------|-----------|------|
| chr16 | 56112910  | 56114057  | 1148 |
| chr21 | 61032023  | 61033161  | 1139 |
| chr29 | 34918951  | 34920078  | 1128 |
| chr18 | 52326426  | 52327547  | 1122 |
| chr24 | 48957307  | 48958420  | 1114 |
| chr4  | 29783086  | 29784196  | 1111 |
| chr25 | 22548616  | 22549724  | 1109 |
| chr11 | 104958167 | 104959274 | 1108 |
| chr3  | 4355486   | 4356590   | 1105 |
| chr2  | 130474260 | 130475363 | 1104 |
| chr1  | 159080968 | 159082070 | 1103 |
| chr18 | 54939780  | 54940856  | 1077 |
| chr18 | 54315373  | 54316448  | 1076 |
| chr5  | 122285295 | 122286360 | 1066 |
| chr23 | 27819580  | 27820636  | 1057 |
| chr17 | 5378584   | 5379639   | 1056 |
| chr11 | 25607901  | 25608940  | 1040 |
| chr6  | 63046745  | 63047772  | 1028 |
| chr20 | 74785113  | 74786126  | 1014 |
| chr15 | 36300571  | 36301575  | 1005 |
| chrX  | 3016574   | 3017573   | 1000 |
| chr13 | 77292262  | 77293260  | 999  |
| chr1  | 123138492 | 123139485 | 994  |
| chr13 | 61167132  | 61168119  | 988  |
| chr5  | 118054924 | 118055906 | 983  |
| chr22 | 59457680  | 59458643  | 964  |
| chr8  | 47600278  | 47601236  | 959  |
| chr2  | 129886382 | 129887319 | 938  |
| chr11 | 3350784   | 3351709   | 926  |
| chr29 | 2682170   | 2683093   | 924  |
| chr11 | 77869610  | 77870529  | 920  |
| chr19 | 30819869  | 30820787  | 919  |
| chr23 | 12337647  | 12338560  | 914  |
| chr10 | 83087436  | 83088346  | 911  |
| chr19 | 39901671  | 39902566  | 896  |
| chr12 | 32169096  | 32169972  | 877  |
| chr23 | 10394458  | 10395328  | 871  |
| chr2  | 132210961 | 132211829 | 869  |
| chr18 | 47798341  | 47799205  | 865  |
| chr26 | 20150419  | 20151282  | 864  |
| chr23 | 51054198  | 51055043  | 846  |
| chr3  | 117402232 | 117403048 | 817  |
| chr15 | 52241758  | 52242574  | 817  |
| chr7  | 37489342  | 37490154  | 813  |
| chr20 | 73658282  | 73659089  | 808  |
| chr25 | 4656091   | 4656896   | 806  |
| chr13 | 77769968  | 77770769  | 802  |
| chr18 | 63524376  | 63525167  | 792  |
| chr11 | 102375987 | 102376765 | 779  |
| chr3  | 123217412 | 123218187 | 776  |

|       |           |           |     |
|-------|-----------|-----------|-----|
| chrX  | 7243809   | 7244581   | 773 |
| chr4  | 68209022  | 68209794  | 773 |
| chr14 | 61306452  | 61307220  | 769 |
| chr4  | 69681124  | 69681877  | 754 |
| chr29 | 48793191  | 48793940  | 750 |
| chr21 | 3044988   | 3045722   | 735 |
| chr14 | 21589601  | 21590322  | 722 |
| chr13 | 74395539  | 74396244  | 706 |
| chr17 | 64065986  | 64066686  | 701 |
| chrX  | 60391599  | 60392295  | 697 |
| chr4  | 122870597 | 122871284 | 688 |
| chr26 | 37627852  | 37628538  | 687 |
| chr13 | 10976026  | 10976703  | 678 |
| chr20 | 73290978  | 73291645  | 668 |
| chr13 | 52655849  | 52656511  | 663 |
| chr19 | 29018224  | 29018875  | 652 |
| chr11 | 98354254  | 98354901  | 648 |
| chr19 | 37930106  | 37930747  | 642 |
| chr8  | 7541045   | 7541678   | 634 |
| chr11 | 74862945  | 74863574  | 630 |
| chr19 | 6517834   | 6518439   | 606 |
| chr15 | 43508650  | 43509229  | 580 |
| chr8  | 23033303  | 23033876  | 574 |
| chr19 | 38931425  | 38931997  | 573 |
| chr12 | 84685135  | 84685694  | 560 |
| chr23 | 49966968  | 49967521  | 554 |
| chr10 | 66921583  | 66922126  | 544 |
| chr5  | 29717585  | 29718122  | 538 |
| chr3  | 36029136  | 36029673  | 538 |
| chr3  | 16953926  | 16954463  | 538 |
| chr10 | 95117262  | 95117785  | 524 |
| chr2  | 111310166 | 111310681 | 516 |
| chr19 | 46653813  | 46654327  | 515 |
| chrX  | 14641008  | 14641520  | 513 |
| chr16 | 72122993  | 72123504  | 512 |
| chr3  | 22861476  | 22861978  | 503 |
| chr4  | 121481086 | 121481587 | 502 |
| chr24 | 31251403  | 31251902  | 500 |
| chr10 | 83773156  | 83773653  | 498 |
| chr10 | 20851640  | 20852134  | 495 |
| chr23 | 36834271  | 36834758  | 488 |
| chr10 | 70143883  | 70144344  | 462 |
| chr23 | 31111583  | 31112036  | 454 |
| chr19 | 45059375  | 45059828  | 454 |
| chr7  | 10056101  | 10056550  | 450 |
| chr7  | 18838807  | 18839252  | 446 |
| chr4  | 98487737  | 98488181  | 445 |
| chr19 | 12491819  | 12492259  | 441 |
| chr23 | 27869546  | 27869983  | 438 |
| chr9  | 87725176  | 87725608  | 433 |

|       |               |           |      |
|-------|---------------|-----------|------|
| chr1  | 51153650      | 51154042  | 393  |
| chr18 | 52796624      | 52799899  | 3276 |
| chr18 | 56577262      | 56580283  | 3022 |
| chr10 | 64971743      | 64974731  | 2989 |
| chr25 | 1063331       | 1066245   | 2915 |
| chr10 | 76397829      | 76400705  | 2877 |
| chr11 | 77611696      | 77614556  | 2861 |
| chr5  | 73071114      | 73073594  | 2481 |
| chr28 | 33882751      | 33885223  | 2473 |
| chr9  | 6677211       | 6679605   | 2395 |
| chr20 | 73575411      | 73577745  | 2335 |
| chr6  | 63810182      | 63812509  | 2328 |
| chr7  | 70509846      | 70512152  | 2307 |
| chr18 | 56530890      | 56533174  | 2285 |
| chr10 | 83519740      | 83522007  | 2268 |
| chr10 | 20453500      | 20455719  | 2220 |
| chr23 | 31171707      | 31173875  | 2169 |
| chr14 | 5908982       | 5911086   | 2105 |
| chr21 | 61629115      | 61631210  | 2096 |
| chr5  | 119143160     | 119145228 | 2069 |
| chr2  | 117718285     | 117720318 | 2034 |
| chr1  | 76553451      | 76555477  | 2027 |
| chr27 | 45274254      | 45276278  | 2025 |
| chr18 | 55593647      | 55595654  | 2008 |
| chr12 | 32193177      | 32195139  | 1963 |
| chr10 | 36844406      | 36846331  | 1926 |
| chr9  | 35463471      | 35465350  | 1880 |
| chr26 | 20125483      | 20127325  | 1843 |
| chr18 | 48379385      | 48381226  | 1842 |
| chr27 | 542924 544756 | 1833      |      |
| chr8  | 79342143      | 79343973  | 1831 |
| chr3  | 106488657     | 106490487 | 1831 |
| chr7  | 95940451      | 95942274  | 1824 |
| chr3  | 87808761      | 87810560  | 1800 |
| chr8  | 91389749      | 91391496  | 1748 |
| chr21 | 18880521      | 18882243  | 1723 |
| chr5  | 32866391      | 32868097  | 1707 |
| chr3  | 126080786     | 126082483 | 1698 |
| chr9  | 105482361     | 105484056 | 1696 |
| chr5  | 30820641      | 30822303  | 1663 |
| chr1  | 99690517      | 99692160  | 1644 |
| chr5  | 28760808      | 28762437  | 1630 |
| chr21 | 67890186      | 67891740  | 1555 |
| chr17 | 73173071      | 73174621  | 1551 |
| chr6  | 109068553     | 109070092 | 1540 |
| chr1  | 88298816      | 88300339  | 1524 |
| chr3  | 97901660      | 97903161  | 1502 |
| chr20 | 8567136       | 8568632   | 1497 |
| chr7  | 10946709      | 10948175  | 1467 |
| chr10 | 29855486      | 29856950  | 1465 |

|       |           |           |      |
|-------|-----------|-----------|------|
| chr21 | 34630788  | 34632248  | 1461 |
| chr25 | 38048302  | 38049748  | 1447 |
| chr17 | 18321034  | 18322479  | 1446 |
| chr20 | 74863561  | 74864997  | 1437 |
| chr19 | 19276898  | 19278330  | 1433 |
| chr23 | 15837309  | 15838713  | 1405 |
| chr13 | 17314967  | 17316352  | 1386 |
| chr6  | 92968518  | 92969897  | 1380 |
| chr5  | 29248770  | 29250128  | 1359 |
| chr29 | 33591521  | 33592858  | 1338 |
| chr17 | 63269318  | 63270649  | 1332 |
| chr17 | 73139119  | 73140446  | 1328 |
| chr11 | 96147185  | 96148511  | 1327 |
| chr11 | 104699770 | 104701068 | 1299 |
| chr7  | 49159569  | 49160866  | 1298 |
| chr25 | 2236406   | 2237676   | 1271 |
| chr4  | 34960984  | 34962249  | 1266 |
| chr19 | 27912302  | 27913565  | 1264 |
| chr19 | 39104635  | 39105897  | 1263 |
| chr22 | 52489789  | 52491027  | 1239 |
| chr26 | 37894839  | 37896075  | 1237 |
| chr19 | 20323361  | 20324593  | 1233 |
| chr17 | 56188076  | 56189305  | 1230 |
| chr16 | 44147756  | 44148985  | 1230 |
| chr18 | 49476796  | 49478000  | 1205 |
| chr4  | 117966987 | 117968175 | 1189 |
| chr14 | 66281306  | 66282491  | 1186 |
| chr18 | 64294274  | 64295452  | 1179 |
| chr10 | 9754470   | 9755625   | 1156 |
| chr12 | 11445394  | 11446547  | 1154 |
| chr4  | 120604455 | 120605605 | 1151 |
| chr21 | 14607427  | 14608573  | 1147 |
| chr23 | 31445943  | 31447085  | 1143 |
| chr10 | 21088720  | 21089848  | 1129 |
| chr18 | 51597821  | 51598948  | 1128 |
| chr7  | 18960624  | 18961745  | 1122 |
| chrX  | 7204528   | 7205646   | 1119 |
| chr19 | 31953319  | 31954435  | 1117 |
| chr18 | 54952404  | 54953506  | 1103 |
| chr29 | 17463058  | 17464148  | 1091 |
| chr4  | 68261712  | 68262799  | 1088 |
| chr11 | 49744105  | 49745185  | 1081 |
| chr15 | 26774168  | 26775238  | 1071 |
| chr2  | 130450270 | 130451336 | 1067 |
| chr27 | 39117785  | 39118835  | 1051 |
| chr5  | 112014619 | 112015639 | 1021 |
| chr7  | 50548109  | 50549116  | 1008 |
| chr12 | 21065050  | 21066057  | 1008 |
| chr11 | 21624576  | 21625563  | 988  |
| chr13 | 42604267  | 42605253  | 987  |

|       |               |           |     |
|-------|---------------|-----------|-----|
| chr18 | 50866077      | 50867048  | 972 |
| chr13 | 22825591      | 22826560  | 970 |
| chr18 | 50978202      | 50979169  | 968 |
| chr14 | 2886935       | 2887895   | 961 |
| chr9  | 100329974     | 100330930 | 957 |
| chr16 | 47128577      | 47129529  | 953 |
| chr7  | 18946667      | 18947614  | 948 |
| chr16 | 34663906      | 34664853  | 948 |
| chr21 | 48669113      | 48670039  | 927 |
| chr15 | 62753824      | 62754749  | 926 |
| chr5  | 30671837      | 30672757  | 921 |
| chr2  | 4930628       | 4931535   | 908 |
| chrX  | 467759 468653 | 895       |     |
| chr4  | 120188829     | 120189713 | 885 |
| chr4  | 121713427     | 121714310 | 884 |
| chr18 | 11548702      | 11549581  | 880 |
| chr17 | 73159367      | 73160238  | 872 |
| chr4  | 69683313      | 69684173  | 861 |
| chr18 | 14364785      | 14365639  | 855 |
| chr21 | 47618193      | 47619045  | 853 |
| chr15 | 81519867      | 81520697  | 831 |
| chr18 | 6979766       | 6980585   | 820 |
| chr15 | 58004326      | 58005124  | 799 |
| chr10 | 90033897      | 90034688  | 792 |
| chr3  | 79684882      | 79685667  | 786 |
| chr23 | 31150423      | 31151195  | 773 |
| chrX  | 62808545      | 62809309  | 765 |
| chr2  | 115707399     | 115708156 | 758 |
| chr21 | 67962379      | 67963135  | 757 |
| chr5  | 111019906     | 111020657 | 752 |
| chr17 | 73951709      | 73952460  | 752 |
| chr9  | 26603642      | 26604391  | 750 |
| chr27 | 45254068      | 45254774  | 707 |
| chr9  | 98823509      | 98824213  | 705 |
| chr11 | 14067253      | 14067954  | 702 |
| chr20 | 70567277      | 70567975  | 699 |
| chr8  | 23074229      | 23074924  | 696 |
| chr12 | 36443125      | 36443815  | 691 |
| chr7  | 16826652      | 16827320  | 669 |
| chr9  | 87772313      | 87772977  | 665 |
| chr6  | 63034680      | 63035337  | 658 |
| chr3  | 33132482      | 33133121  | 640 |
| chr19 | 12336668      | 12337301  | 634 |
| chr24 | 3375047       | 3375677   | 631 |
| chr8  | 23888565      | 23889185  | 621 |
| chr15 | 27279965      | 27280584  | 620 |
| chr23 | 49967626      | 49968242  | 617 |
| chr16 | 46968977      | 46969592  | 616 |
| chr17 | 64377754      | 64378368  | 615 |
| chr15 | 34586844      | 34587458  | 615 |

|       |           |           |      |
|-------|-----------|-----------|------|
| chr19 | 21694899  | 21695507  | 609  |
| chrX  | 20005222  | 20005817  | 596  |
| chr23 | 52678179  | 52678765  | 587  |
| chrX  | 59478929  | 59479514  | 586  |
| chr18 | 52975112  | 52975682  | 571  |
| chr15 | 51736795  | 51737359  | 565  |
| chr19 | 39026189  | 39026742  | 554  |
| chr11 | 75413287  | 75413832  | 546  |
| chr20 | 6618089   | 6618624   | 536  |
| chr7  | 10407534  | 10408065  | 532  |
| chrX  | 37649437  | 37649959  | 523  |
| chr23 | 23765320  | 23765841  | 522  |
| chrX  | 59595473  | 59595991  | 519  |
| chr3  | 62649529  | 62650043  | 515  |
| chr7  | 96286336  | 96286845  | 510  |
| chr2  | 136621934 | 136622439 | 506  |
| chr17 | 31425745  | 31426246  | 502  |
| chr17 | 70050033  | 70050516  | 484  |
| chr21 | 25258162  | 25258632  | 471  |
| chr28 | 42156520  | 42156973  | 454  |
| chr8  | 7555416   | 7555858   | 443  |
| chr18 | 52422644  | 52424249  | 1606 |
| chr3  | 116416745 | 116418261 | 1517 |
| chr17 | 70166716  | 70167677  | 962  |
| chr10 | 25841599  | 25842482  | 884  |
| chr6  | 120327628 | 120328209 | 582  |
| chr7  | 73518299  | 73520753  | 2455 |
| chr25 | 29344644  | 29347068  | 2425 |
| chr18 | 55587329  | 55588951  | 1623 |
| chr3  | 105725849 | 105727405 | 1557 |
| chr5  | 112013406 | 112014432 | 1027 |
| chr9  | 74212231  | 74212898  | 668  |
| chr23 | 27798676  | 27799332  | 657  |
| chr24 | 1952119   | 1952652   | 534  |
| chr23 | 44403379  | 44403904  | 526  |
| chr22 | 20115202  | 20117249  | 2048 |
| chr7  | 5694614   | 5696331   | 1718 |
| chr19 | 45271265  | 45272498  | 1234 |
| chr19 | 13477902  | 13479123  | 1222 |
| chr18 | 64295726  | 64296639  | 914  |
| chr21 | 6567660   | 6568567   | 908  |
| chr16 | 48573503  | 48574248  | 746  |
| chr18 | 62748700  | 62749421  | 722  |
| chr8  | 23940860  | 23941425  | 566  |
| chr7  | 42656991  | 42659096  | 2106 |
| chr19 | 24683960  | 24685723  | 1764 |
| chr4  | 47036356  | 47037944  | 1589 |
| chrX  | 72897307  | 72898876  | 1570 |
| chr5  | 33861503  | 33862954  | 1452 |
| chr4  | 121481738 | 121482905 | 1168 |



|       |               |           |      |
|-------|---------------|-----------|------|
| chr16 | 44132511      | 44133671  | 1161 |
| chr13 | 35970656      | 35971719  | 1064 |
| chr9  | 6681201       | 6682223   | 1023 |
| chr15 | 75532754      | 75533421  | 668  |
| chr1  | 153987 154577 | 591       |      |
| chr3  | 22862975      | 22863374  | 400  |
| chr21 | 27590053      | 27591392  | 1340 |
| chrX  | 60292768      | 60294087  | 1320 |
| chr14 | 76894883      | 76896007  | 1125 |
| chr11 | 14500008      | 14500984  | 977  |
| chr21 | 62223850      | 62224727  | 878  |
| chr6  | 106815737     | 106817971 | 2235 |
| chr21 | 30312793      | 30314580  | 1788 |
| chr22 | 30121318      | 30122677  | 1360 |
| chr23 | 52762345      | 52763695  | 1351 |
| chr20 | 15472124      | 15473125  | 1002 |
| chr17 | 73891594      | 73892487  | 894  |
| chr4  | 82136034      | 82136766  | 733  |
| chr8  | 24721112      | 24721668  | 557  |
| chr16 | 67442416      | 67442926  | 511  |
| chr5  | 117766382     | 117766861 | 480  |
| chr19 | 58958366      | 58958796  | 431  |
| chr18 | 16526210      | 16527867  | 1658 |
| chr18 | 49792446      | 49793599  | 1154 |
| chr13 | 45325970      | 45326859  | 890  |
| chr19 | 27375719      | 27376562  | 844  |
| chr4  | 118689564     | 118690215 | 652  |
| chr1  | 123134757     | 123137049 | 2293 |
| chr5  | 29182896      | 29185139  | 2244 |
| chr27 | 25507 27204   | 1698      |      |
| chr8  | 45663807      | 45665254  | 1448 |
| chr19 | 45128659      | 45129812  | 1154 |
| chr25 | 27393934      | 27394937  | 1004 |
| chr4  | 122967958     | 122968923 | 966  |
| chr29 | 31975143      | 31975895  | 753  |
| chr23 | 19806946      | 19807607  | 662  |
| chr10 | 7685508       | 7686120   | 613  |
| chr3  | 118881481     | 118882004 | 524  |
| chr25 | 13995107      | 13997643  | 2537 |
| chr11 | 100112261     | 100114065 | 1805 |
| chr14 | 26115141      | 26116887  | 1747 |
| chr19 | 12410760      | 12411375  | 616  |
| chr17 | 74612282      | 74614020  | 1739 |
| chr12 | 81926914      | 81928126  | 1213 |
| chr18 | 49474526      | 49475373  | 848  |
| chr18 | 10783955      | 10784678  | 724  |
| chr13 | 76111731      | 76112325  | 595  |
| chr17 | 63416675      | 63417224  | 550  |
| chrX  | 13135904      | 13136814  | 911  |
| chr2  | 74017640      | 74018500  | 861  |

|       |           |           |      |
|-------|-----------|-----------|------|
| chrX  | 87716650  | 87717076  | 427  |
| chr5  | 111689238 | 111690300 | 1063 |
| chr6  | 14204502  | 14205404  | 903  |
| chr6  | 109420072 | 109420958 | 887  |
| chr25 | 275603    | 276171    | 569  |
| chr24 | 826646    | 828147    | 1502 |
| chr8  | 8106994   | 8107801   | 808  |
| chr6  | 120837380 | 120838145 | 766  |
| chr4  | 33879011  | 33880429  | 1419 |
| chr7  | 42785378  | 42785918  | 541  |
| chr13 | 80794692  | 80795289  | 598  |
| chr8  | 73745256  | 73745827  | 572  |
| chr18 | 64293505  | 64294059  | 555  |
| chr24 | 22046280  | 22046809  | 530  |
| chr8  | 108708997 | 108709467 | 471  |
| chr2  | 43863684  | 43864658  | 975  |
| chr2  | 61110759  | 61111581  | 823  |
| chr23 | 31206760  | 31207369  | 610  |
| chr3  | 112903695 | 112904300 | 606  |
| chr10 | 83522195  | 83522743  | 549  |
| chr29 | 43023969  | 43024490  | 522  |
| chr23 | 27881776  | 27882342  | 567  |
| chr3  | 22545671  | 22546249  | 579  |
| chr8  | 73523346  | 73523999  | 654  |
| chr8  | 73847610  | 73848548  | 939  |
| chr8  | 73345597  | 73346065  | 469  |
| chr26 | 31477142  | 31480647  | 3506 |
| chr7  | 3937740   | 3940650   | 2911 |
| chr18 | 11827802  | 11830599  | 2798 |
| chr29 | 49975321  | 49977870  | 2550 |
| chr19 | 48753046  | 48755534  | 2489 |
| chr29 | 34259187  | 34261665  | 2479 |
| chr4  | 72500440  | 72502856  | 2417 |
| chr15 | 43332657  | 43335072  | 2416 |
| chr25 | 38337258  | 38339650  | 2393 |
| chr25 | 35689013  | 35691369  | 2357 |
| chr3  | 116022708 | 116025034 | 2327 |
| chr9  | 14571232  | 14573452  | 2221 |
| chr16 | 44114826  | 44117046  | 2221 |
| chr3  | 15393896  | 15396115  | 2220 |
| chr9  | 92187052  | 92189179  | 2128 |
| chr19 | 45533068  | 45535190  | 2123 |
| chr2  | 132505936 | 132508054 | 2119 |
| chr28 | 34436327  | 34438421  | 2095 |
| chr15 | 24672053  | 24674113  | 2061 |
| chr29 | 21728797  | 21730811  | 2015 |
| chr10 | 5236021   | 5237953   | 1933 |
| chr29 | 17460677  | 17462605  | 1929 |
| chr2  | 37670602  | 37672484  | 1883 |
| chr9  | 50720364  | 50722223  | 1860 |

|       |           |           |      |
|-------|-----------|-----------|------|
| chr19 | 28238077  | 28239887  | 1811 |
| chr29 | 51997149  | 51998921  | 1773 |
| chr16 | 26582635  | 26584388  | 1754 |
| chrX  | 49818707  | 49820454  | 1748 |
| chr5  | 117214363 | 117216089 | 1727 |
| chr18 | 51104221  | 51105945  | 1725 |
| chr13 | 62240837  | 62242555  | 1719 |
| chr24 | 20729536  | 20731235  | 1700 |
| chr19 | 20360593  | 20362274  | 1682 |
| chr15 | 29375611  | 29377231  | 1621 |
| chr5  | 33961688  | 33963301  | 1614 |
| chr9  | 90537600  | 90539200  | 1601 |
| chr18 | 19365978  | 19367567  | 1590 |
| chr5  | 121057057 | 121058643 | 1587 |
| chr29 | 30030155  | 30031738  | 1584 |
| chr8  | 8298007   | 8299576   | 1570 |
| chr1  | 5322480   | 5324044   | 1565 |
| chr13 | 58627836  | 58629395  | 1560 |
| chr3  | 115092075 | 115093633 | 1559 |
| chr19 | 29816789  | 29818342  | 1554 |
| chr19 | 12494060  | 12495593  | 1534 |
| chr13 | 53464662  | 53466195  | 1534 |
| chr2  | 120921848 | 120923377 | 1530 |
| chr4  | 78895949  | 78897455  | 1507 |
| chr6  | 20763706  | 20765204  | 1499 |
| chr21 | 48697976  | 48699474  | 1499 |
| chr15 | 74532927  | 74534413  | 1487 |
| chr23 | 45970844  | 45972325  | 1482 |
| chr24 | 63031952  | 63033415  | 1464 |
| chrX  | 59576448  | 59577890  | 1443 |
| chr20 | 66533578  | 66535019  | 1442 |
| chr8  | 72614946  | 72616363  | 1418 |
| chr23 | 17483964  | 17485356  | 1393 |
| chr24 | 49744236  | 49745618  | 1383 |
| chr13 | 70047446  | 70048825  | 1380 |
| chr12 | 10831341  | 10832718  | 1378 |
| chr16 | 38735343  | 38736716  | 1374 |
| chr2  | 36083027  | 36084396  | 1370 |
| chr19 | 45832239  | 45833605  | 1367 |
| chr24 | 3949314   | 3950675   | 1362 |
| chr20 | 30446521  | 30447877  | 1357 |
| chr12 | 31318515  | 31319856  | 1342 |
| chr8  | 23035951  | 23037285  | 1335 |
| chrX  | 62801365  | 62802693  | 1329 |
| chr19 | 58241683  | 58242996  | 1314 |
| chr3  | 20568549  | 20569850  | 1302 |
| chr21 | 67892158  | 67893455  | 1298 |
| chr7  | 46231944  | 46233232  | 1289 |
| chr3  | 72518396  | 72519683  | 1288 |
| chr23 | 31146078  | 31147353  | 1276 |

|       |           |           |      |
|-------|-----------|-----------|------|
| chr15 | 75533893  | 75535166  | 1274 |
| chr23 | 33461404  | 33462676  | 1273 |
| chr7  | 94385265  | 94386525  | 1261 |
| chr1  | 101589157 | 101590401 | 1245 |
| chr26 | 20855275  | 20856512  | 1238 |
| chr17 | 26900266  | 26901502  | 1237 |
| chr1  | 144317010 | 144318246 | 1237 |
| chr16 | 13951579  | 13952808  | 1230 |
| chr25 | 36479576  | 36480755  | 1180 |
| chr2  | 27651184  | 27652356  | 1173 |
| chr4  | 50703187  | 50704351  | 1165 |
| chr3  | 22476804  | 22477966  | 1163 |
| chr25 | 35552684  | 35553840  | 1157 |
| chr21 | 6523129   | 6524283   | 1155 |
| chr5  | 74693107  | 74694258  | 1152 |
| chr13 | 55116895  | 55118045  | 1151 |
| chr18 | 62030618  | 62031753  | 1136 |
| chr29 | 29683065  | 29684199  | 1135 |
| chr19 | 39267375  | 39268508  | 1134 |
| chr17 | 64141275  | 64142405  | 1131 |
| chr29 | 26777448  | 26778566  | 1119 |
| chr2  | 140756688 | 140757805 | 1118 |
| chr9  | 59366127  | 59367242  | 1116 |
| chr3  | 17321393  | 17322487  | 1095 |
| chr20 | 1137127   | 1138215   | 1089 |
| chr10 | 48391909  | 48392993  | 1085 |
| chr13 | 57584035  | 57585118  | 1084 |
| chr18 | 64342522  | 64343604  | 1083 |
| chr25 | 3271497   | 3272570   | 1074 |
| chr19 | 33096445  | 33097518  | 1074 |
| chr2  | 136521574 | 136522643 | 1070 |
| chr16 | 46842829  | 46843896  | 1068 |
| chr19 | 20324870  | 20325936  | 1067 |
| chr23 | 7260625   | 7261686   | 1062 |
| chr23 | 18747684  | 18748726  | 1043 |
| chr11 | 45743790  | 45744831  | 1042 |
| chr10 | 4180195   | 4181236   | 1042 |
| chr18 | 9503521   | 9504561   | 1041 |
| chr7  | 49142532  | 49143571  | 1040 |
| chr23 | 7692829   | 7693857   | 1029 |
| chr17 | 70278868  | 70279888  | 1021 |
| chr23 | 27094259  | 27095274  | 1016 |
| chr13 | 41670464  | 41671478  | 1015 |
| chr26 | 23486455  | 23487461  | 1007 |
| chr5  | 29187487  | 29188487  | 1001 |
| chr18 | 62012678  | 62013673  | 996  |
| chr29 | 29705190  | 29706181  | 992  |
| chr25 | 38213160  | 38214147  | 988  |
| chr10 | 8362593   | 8363579   | 987  |
| chr15 | 60442701  | 60443684  | 984  |

|       |               |           |     |
|-------|---------------|-----------|-----|
| chr7  | 11372901      | 11373881  | 981 |
| chr3  | 22533729      | 22534705  | 977 |
| chr5  | 51975113      | 51976075  | 963 |
| chr25 | 21513144      | 21514104  | 961 |
| chr9  | 106389776     | 106390725 | 950 |
| chr15 | 51658924      | 51659871  | 948 |
| chr18 | 52974039      | 52974984  | 946 |
| chr7  | 94373411      | 94374353  | 943 |
| chr11 | 106295107     | 106296038 | 932 |
| chr18 | 62006828      | 62007757  | 930 |
| chr6  | 63062822      | 63063746  | 925 |
| chr17 | 70136466      | 70137390  | 925 |
| chr20 | 873960 874883 | 924       |     |
| chr24 | 20771766      | 20772687  | 922 |
| chr10 | 29543902      | 29544822  | 921 |
| chr26 | 18794217      | 18795128  | 912 |
| chr23 | 1766326       | 1767229   | 904 |
| chr5  | 113928693     | 113929586 | 894 |
| chr11 | 77583498      | 77584386  | 889 |
| chr18 | 11326094      | 11326975  | 882 |
| chr10 | 5026018       | 5026896   | 879 |
| chr9  | 35967378      | 35968255  | 878 |
| chr19 | 7544615       | 7545491   | 877 |
| chr17 | 72348870      | 72349743  | 874 |
| chr2  | 138638479     | 138639350 | 872 |
| chr18 | 13539804      | 13540670  | 867 |
| chr18 | 53264660      | 53265524  | 865 |
| chr17 | 70292451      | 70293306  | 856 |
| chr11 | 77670307      | 77671161  | 855 |
| chr18 | 57400002      | 57400854  | 853 |
| chr11 | 70865813      | 70866662  | 850 |
| chr18 | 64318987      | 64319833  | 847 |
| chr21 | 63363301      | 63364143  | 843 |
| chrX  | 53622316      | 53623146  | 831 |
| chr4  | 64279880      | 64280708  | 829 |
| chr21 | 32871274      | 32872099  | 826 |
| chrX  | 8187695       | 8188516   | 822 |
| chr1  | 41780437      | 41781253  | 817 |
| chr15 | 64495356      | 64496161  | 806 |
| chr4  | 77071116      | 77071907  | 792 |
| chr8  | 8717501       | 8718291   | 791 |
| chr9  | 82370060      | 82370846  | 787 |
| chr8  | 8716602       | 8717385   | 784 |
| chr19 | 39980995      | 39981777  | 783 |
| chrX  | 45487515      | 45488294  | 780 |
| chr11 | 46008760      | 46009532  | 773 |
| chr13 | 41701101      | 41701865  | 765 |
| chr3  | 118026794     | 118027554 | 761 |
| chr18 | 11517612      | 11518359  | 748 |
| chr19 | 23782972      | 23783708  | 737 |

|       |               |           |     |
|-------|---------------|-----------|-----|
| chr26 | 21820268      | 21821000  | 733 |
| chr13 | 74399590      | 74400319  | 730 |
| chr4  | 84896859      | 84897585  | 727 |
| chr15 | 64197277      | 64197994  | 718 |
| chr20 | 73302900      | 73303614  | 715 |
| chr21 | 11796410      | 11797122  | 713 |
| chr9  | 104917482     | 104918190 | 709 |
| chr26 | 24340561      | 24341262  | 702 |
| chr4  | 33429037      | 33429736  | 700 |
| chr19 | 39118462      | 39119151  | 690 |
| chr21 | 52052448      | 52053117  | 670 |
| chr17 | 73430270      | 73430930  | 661 |
| chr17 | 66192429      | 66193085  | 657 |
| chr8  | 23493011      | 23493662  | 652 |
| chr25 | 3165251       | 3165895   | 645 |
| chr5  | 38509552      | 38510195  | 644 |
| chr3  | 25000109      | 25000752  | 644 |
| chr23 | 27900403      | 27901036  | 634 |
| chr3  | 127868231     | 127868859 | 629 |
| chr18 | 54969810      | 54970424  | 615 |
| chr2  | 136557789     | 136558401 | 613 |
| chr25 | 758376 758983 | 608       |     |
| chr18 | 53010347      | 53010946  | 600 |
| chr11 | 103739389     | 103739981 | 593 |
| chr23 | 3313689       | 3314277   | 589 |
| chr26 | 21821021      | 21821608  | 588 |
| chr21 | 29199024      | 29199606  | 583 |
| chr10 | 70152110      | 70152692  | 583 |
| chr25 | 3039746       | 3040323   | 578 |
| chr2  | 130471916     | 130472492 | 577 |
| chr19 | 21318944      | 21319519  | 576 |
| chr3  | 127900325     | 127900889 | 565 |
| chr14 | 1522710       | 1523273   | 564 |
| chr12 | 74450230      | 74450787  | 558 |
| chr23 | 15964704      | 15965260  | 557 |
| chr14 | 29197502      | 29198051  | 550 |
| chr2  | 24080032      | 24080568  | 537 |
| chr27 | 15780767      | 15781291  | 525 |
| chr8  | 23039849      | 23040359  | 511 |
| chr5  | 16818052      | 16818560  | 509 |
| chrX  | 75372496      | 75373001  | 506 |
| chr5  | 120054670     | 120055173 | 504 |
| chr19 | 41371561      | 41372061  | 501 |
| chr11 | 103472692     | 103473171 | 480 |
| chr3  | 114207936     | 114208411 | 476 |
| chr3  | 113454441     | 113454914 | 474 |
| chr3  | 15658137      | 15658608  | 472 |
| chr23 | 15828485      | 15828949  | 465 |
| chr19 | 38969342      | 38969801  | 460 |
| chr7  | 50623363      | 50623821  | 459 |

|       |           |           |      |
|-------|-----------|-----------|------|
| chr6  | 122261893 | 122262351 | 459  |
| chr25 | 28065630  | 28066085  | 456  |
| chr2  | 134707611 | 134708066 | 456  |
| chr8  | 93206298  | 93206751  | 454  |
| chr21 | 47719560  | 47720012  | 453  |
| chr25 | 4652653   | 4653103   | 451  |
| chr18 | 6611269   | 6611719   | 451  |
| chr11 | 10452773  | 10453219  | 447  |
| chr7  | 45718726  | 45719167  | 442  |
| chr17 | 75028900  | 75029335  | 436  |
| chr13 | 10975573  | 10976007  | 435  |
| chrX  | 73167201  | 73167630  | 430  |
| chrX  | 21273136  | 21273561  | 426  |
| chr6  | 122260215 | 122260636 | 422  |
| chr7  | 43588008  | 43588411  | 404  |
| chr18 | 54192073  | 54193727  | 1655 |
| chr26 | 51188401  | 51189754  | 1354 |
| chr1  | 159917826 | 159918912 | 1087 |
| chr21 | 22696884  | 22697650  | 767  |
| chr21 | 6564868   | 6565629   | 762  |
| chr14 | 8047258   | 8047894   | 637  |
| chr22 | 47865063  | 47865682  | 620  |
| chr8  | 80993479  | 80995784  | 2306 |
| chr18 | 47501895  | 47502507  | 613  |
| chr7  | 16315219  | 16315770  | 552  |
| chr9  | 75442831  | 75444805  | 1975 |
| chr4  | 13317110  | 13318713  | 1604 |
| chr11 | 38882983  | 38884551  | 1569 |
| chr13 | 45324054  | 45325466  | 1413 |
| chr10 | 12135321  | 12136705  | 1385 |
| chr18 | 3433872   | 3435110   | 1239 |
| chr11 | 100914072 | 100915225 | 1154 |
| chr17 | 64217261  | 64218123  | 863  |
| chr12 | 51063217  | 51064078  | 862  |
| chr22 | 59539858  | 59540562  | 705  |
| chr16 | 2098334   | 2099021   | 688  |
| chr29 | 33606621  | 33607154  | 534  |
| chr18 | 52737918  | 52739828  | 1911 |
| chr18 | 45196254  | 45197611  | 1358 |
| chr7  | 65574645  | 65575685  | 1041 |
| chr23 | 27399909  | 27402406  | 2498 |
| chr3  | 11516362  | 11517906  | 1545 |
| chr3  | 22854037  | 22855267  | 1231 |
| chr13 | 73525293  | 73526423  | 1131 |
| chr14 | 39053566  | 39054477  | 912  |
| chr11 | 12868959  | 12869673  | 715  |
| chr14 | 66282539  | 66284281  | 1743 |
| chr22 | 56603539  | 56605033  | 1495 |
| chr17 | 47081709  | 47082786  | 1078 |
| chr7  | 50416761  | 50417496  | 736  |

|       |               |           |      |
|-------|---------------|-----------|------|
| chr27 | 15768452      | 15769790  | 1339 |
| chr10 | 83079736      | 83080974  | 1239 |
| chr8  | 7608411       | 7609090   | 680  |
| chr12 | 84788862      | 84789494  | 633  |
| chr21 | 9489482       | 9490027   | 546  |
| chr1  | 3349813       | 3351462   | 1650 |
| chr22 | 58433733      | 58435173  | 1441 |
| chr3  | 118024302     | 118025101 | 800  |
| chr13 | 141628 142703 | 1076      |      |
| chr3  | 105759185     | 105759979 | 795  |
| chr18 | 51047159      | 51047776  | 618  |
| chr29 | 29703399      | 29705163  | 1765 |
| chr23 | 28753002      | 28755605  | 2604 |
| chr12 | 35783281      | 35784117  | 837  |
| chr4  | 116944913     | 116945695 | 783  |
| chr3  | 118150537     | 118151212 | 676  |
| chr16 | 51483534      | 51484254  | 721  |
| chr23 | 10340390      | 10340966  | 577  |
| chr29 | 46668815      | 46669382  | 568  |
| chr26 | 21849308      | 21850564  | 1257 |
| chr23 | 28555086      | 28555808  | 723  |
| chr24 | 1323299       | 1323921   | 623  |
| chr18 | 52667729      | 52668462  | 734  |
| chr17 | 64066778      | 64067613  | 836  |
| chr29 | 2527509       | 2528263   | 755  |
| chr22 | 61046390      | 61047093  | 704  |
| chr8  | 7606558       | 7607040   | 483  |
| chrX  | 19886026      | 19886640  | 615  |
| chrX  | 33750912      | 33751305  | 394  |
| chr1  | 970431 970780 | 350       |      |
| chr13 | 54754635      | 54758163  | 3529 |
| chr3  | 18094410      | 18097927  | 3518 |
| chr25 | 43850995      | 43854269  | 3275 |
| chr2  | 111220685     | 111223881 | 3197 |
| chr5  | 29252650      | 29255599  | 2950 |
| chr18 | 23072495      | 23075374  | 2880 |
| chr9  | 25142518      | 25145371  | 2854 |
| chr9  | 56345153      | 56347947  | 2795 |
| chr1  | 67583651      | 67586280  | 2630 |
| chr3  | 115326809     | 115329227 | 2419 |
| chr18 | 11845005      | 11847386  | 2382 |
| chr29 | 33607560      | 33609889  | 2330 |
| chr11 | 14253740      | 14256052  | 2313 |
| chr11 | 66548871      | 66551162  | 2292 |
| chr18 | 25890755      | 25893009  | 2255 |
| chr11 | 104692516     | 104694643 | 2128 |
| chr19 | 44872812      | 44874929  | 2118 |
| chr14 | 67988078      | 67990164  | 2087 |
| chr6  | 69504088      | 69506116  | 2029 |
| chr21 | 20978997      | 20981001  | 2005 |



|       |           |           |      |
|-------|-----------|-----------|------|
| chr9  | 45939531  | 45941504  | 1974 |
| chr4  | 32436013  | 32437929  | 1917 |
| chr11 | 98905533  | 98907442  | 1910 |
| chr19 | 17854156  | 17855954  | 1799 |
| chr13 | 65808595  | 65810388  | 1794 |
| chr9  | 91901748  | 91903533  | 1786 |
| chr7  | 46834643  | 46836415  | 1773 |
| chr19 | 41369566  | 41371332  | 1767 |
| chr29 | 44134892  | 44136637  | 1746 |
| chr23 | 48775834  | 48777568  | 1735 |
| chr11 | 5357400   | 5359128   | 1729 |
| chrX  | 46697258  | 46698984  | 1727 |
| chr2  | 74034023  | 74035732  | 1710 |
| chr1  | 133442036 | 133443741 | 1706 |
| chr15 | 25585054  | 25586742  | 1689 |
| chr4  | 11124472  | 11126159  | 1688 |
| chr22 | 51291276  | 51292933  | 1658 |
| chr8  | 95559078  | 95560709  | 1632 |
| chr17 | 44381866  | 44383494  | 1629 |
| chr14 | 61343476  | 61345096  | 1621 |
| chr20 | 72350437  | 72352050  | 1614 |
| chr18 | 61960793  | 61962400  | 1608 |
| chr5  | 81507494  | 81509100  | 1607 |
| chr7  | 38260621  | 38262219  | 1599 |
| chr4  | 98480454  | 98482048  | 1595 |
| chr1  | 8723182   | 8724769   | 1588 |
| chr11 | 74968171  | 74969746  | 1576 |
| chr8  | 74333463  | 74335016  | 1554 |
| chr7  | 84677945  | 84679496  | 1552 |
| chr23 | 27801604  | 27803151  | 1548 |
| chr15 | 6410924   | 6412470   | 1547 |
| chr11 | 107229486 | 107231027 | 1542 |
| chr27 | 28582434  | 28583972  | 1539 |
| chr18 | 33313278  | 33314802  | 1525 |
| chr29 | 11678067  | 11679581  | 1515 |
| chr19 | 46300948  | 46302436  | 1489 |
| chr5  | 112134177 | 112135660 | 1484 |
| chr17 | 15208119  | 15209597  | 1479 |
| chr5  | 90138756  | 90140227  | 1472 |
| chr1  | 148280381 | 148281821 | 1441 |
| chr13 | 75508950  | 75510365  | 1416 |
| chr15 | 84520732  | 84522145  | 1414 |
| chr13 | 75737025  | 75738427  | 1403 |
| chr15 | 61074953  | 61076353  | 1401 |
| chr14 | 1451668   | 1453064   | 1397 |
| chr18 | 11539922  | 11541310  | 1389 |
| chr16 | 32740795  | 32742181  | 1387 |
| chr10 | 68218661  | 68220032  | 1372 |
| chr13 | 60180988  | 60182354  | 1367 |
| chr4  | 71597772  | 71599121  | 1350 |

|       |           |           |      |
|-------|-----------|-----------|------|
| chr5  | 120505020 | 120506366 | 1347 |
| chr21 | 30352969  | 30354314  | 1346 |
| chr11 | 98907499  | 98908828  | 1330 |
| chr10 | 90969504  | 90970826  | 1323 |
| chr10 | 70411704  | 70413022  | 1319 |
| chr5  | 10725705  | 10727015  | 1311 |
| chr18 | 54222853  | 54224153  | 1301 |
| chr16 | 44358803  | 44360102  | 1300 |
| chr2  | 140744178 | 140745474 | 1297 |
| chr14 | 19971581  | 19972874  | 1294 |
| chr2  | 17537956  | 17539248  | 1293 |
| chr15 | 32663204  | 32664469  | 1266 |
| chr17 | 76319235  | 76320498  | 1264 |
| chr18 | 54079459  | 54080695  | 1237 |
| chr1  | 99118492  | 99119728  | 1237 |
| chr18 | 54828750  | 54829975  | 1226 |
| chr18 | 11817087  | 11818303  | 1217 |
| chr12 | 53571045  | 53572261  | 1217 |
| chr9  | 19637109  | 19638317  | 1209 |
| chr18 | 11591990  | 11593198  | 1209 |
| chr29 | 2537417   | 2538614   | 1198 |
| chr1  | 143789617 | 143790795 | 1179 |
| chr5  | 29633868  | 29635039  | 1172 |
| chr7  | 30482644  | 30483798  | 1155 |
| chr2  | 31563850  | 31564988  | 1139 |
| chr24 | 60574121  | 60575258  | 1138 |
| chr29 | 49110137  | 49111268  | 1132 |
| chr21 | 50110189  | 50111316  | 1128 |
| chr18 | 31843918  | 31845044  | 1127 |
| chr25 | 39410074  | 39411197  | 1124 |
| chr1  | 146782001 | 146783120 | 1120 |
| chr3  | 13654511  | 13655626  | 1116 |
| chr22 | 39295678  | 39296787  | 1110 |
| chr4  | 113657407 | 113658508 | 1102 |
| chr19 | 13488385  | 13489478  | 1094 |
| chr12 | 34044547  | 34045635  | 1089 |
| chr13 | 62875251  | 62876335  | 1085 |
| chr18 | 49528152  | 49529224  | 1073 |
| chr6  | 62052884  | 62053955  | 1072 |
| chr19 | 18437778  | 18438846  | 1069 |
| chr18 | 24342527  | 24343590  | 1064 |
| chr16 | 31704392  | 31705452  | 1061 |
| chr22 | 24916744  | 24917800  | 1057 |
| chr5  | 40128496  | 40129545  | 1050 |
| chr5  | 50540398  | 50541437  | 1040 |
| chr20 | 16598759  | 16599789  | 1031 |
| chr11 | 28501570  | 28502594  | 1025 |
| chr3  | 123243194 | 123244217 | 1024 |
| chr8  | 50707000  | 50708020  | 1021 |
| chr2  | 102428354 | 102429369 | 1016 |

|       |               |           |      |
|-------|---------------|-----------|------|
| chr23 | 8241105       | 8242113   | 1009 |
| chr17 | 66702654      | 66703651  | 998  |
| chr12 | 70970246      | 70971243  | 998  |
| chr28 | 43869051      | 43870044  | 994  |
| chr19 | 51662315      | 51663308  | 994  |
| chr2  | 44186343      | 44187335  | 993  |
| chr13 | 41732977      | 41733960  | 984  |
| chr6  | 107137000     | 107137982 | 983  |
| chr22 | 14943862      | 14944840  | 979  |
| chr19 | 20356825      | 20357803  | 979  |
| chr19 | 60828453      | 60829428  | 976  |
| chr22 | 48553184      | 48554152  | 969  |
| chr26 | 37880911      | 37881876  | 966  |
| chr28 | 430394 431353 | 960       |      |
| chr22 | 55932594      | 55933552  | 959  |
| chr12 | 36286718      | 36287672  | 955  |
| chr11 | 28502863      | 28503814  | 952  |
| chr17 | 63322565      | 63323515  | 951  |
| chr9  | 90543929      | 90544877  | 949  |
| chr16 | 70102350      | 70103295  | 946  |
| chr12 | 80141217      | 80142151  | 935  |
| chr11 | 90296522      | 90297449  | 928  |
| chr24 | 62454341      | 62455258  | 918  |
| chr16 | 13948132      | 13949045  | 914  |
| chr3  | 73958122      | 73959028  | 907  |
| chr17 | 62215442      | 62216335  | 894  |
| chr19 | 8605141       | 8606022   | 882  |
| chr14 | 66260767      | 66261641  | 875  |
| chr12 | 32591105      | 32591973  | 869  |
| chr24 | 61106720      | 61107577  | 858  |
| chr18 | 10835516      | 10836373  | 858  |
| chr9  | 56350977      | 56351828  | 852  |
| chrX  | 13086140      | 13086989  | 850  |
| chr12 | 81462376      | 81463218  | 843  |
| chr9  | 91712864      | 91713697  | 834  |
| chr6  | 118185410     | 118186240 | 831  |
| chr25 | 22683971      | 22684799  | 829  |
| chr1  | 99267492      | 99268320  | 829  |
| chr24 | 51584281      | 51585099  | 819  |
| chr18 | 63026864      | 63027681  | 818  |
| chr6  | 14226497      | 14227313  | 817  |
| chr2  | 134739332     | 134740147 | 816  |
| chr16 | 2120456       | 2121268   | 813  |
| chr20 | 33686719      | 33687524  | 806  |
| chr16 | 68760965      | 68761767  | 803  |
| chr10 | 90024104      | 90024906  | 803  |
| chr5  | 117840283     | 117841081 | 799  |
| chr8  | 35972306      | 35973090  | 785  |
| chr8  | 8297197       | 8297952   | 756  |
| chr3  | 82835893      | 82836642  | 750  |

|       |           |           |     |
|-------|-----------|-----------|-----|
| chr7  | 5243562   | 5244307   | 746 |
| chr28 | 12163958  | 12164694  | 737 |
| chr13 | 73918351  | 73919087  | 737 |
| chr11 | 72626855  | 72627589  | 735 |
| chr18 | 54109472  | 54110202  | 731 |
| chr17 | 68461692  | 68462416  | 725 |
| chr2  | 111263002 | 111263714 | 713 |
| chrX  | 13624694  | 13625404  | 711 |
| chr24 | 1604623   | 1605321   | 699 |
| chr28 | 40396536  | 40397231  | 696 |
| chr11 | 28645866  | 28646559  | 694 |
| chr1  | 87369323  | 87370008  | 686 |
| chr13 | 73885091  | 73885768  | 678 |
| chr19 | 42263365  | 42264041  | 677 |
| chr24 | 2016742   | 2017408   | 667 |
| chr17 | 70160893  | 70161559  | 667 |
| chr5  | 28883128  | 28883790  | 663 |
| chr11 | 107565061 | 107565721 | 661 |
| chr8  | 63915703  | 63916359  | 657 |
| chr23 | 28833743  | 28834397  | 655 |
| chr28 | 25527864  | 25528510  | 647 |
| chr6  | 119067881 | 119068523 | 643 |
| chr13 | 79918717  | 79919358  | 642 |
| chr11 | 104696521 | 104697161 | 641 |
| chr2  | 132441809 | 132442448 | 640 |
| chr29 | 51978724  | 51979362  | 639 |
| chr3  | 56835581  | 56836211  | 631 |
| chr25 | 39212447  | 39213070  | 624 |
| chr3  | 10574827  | 10575446  | 620 |
| chr24 | 60617308  | 60617924  | 617 |
| chr16 | 60224666  | 60225267  | 602 |
| chr2  | 111319971 | 111320571 | 601 |
| chr26 | 22278911  | 22279502  | 592 |
| chrX  | 6503396   | 6503985   | 590 |
| chr2  | 125931934 | 125932519 | 586 |
| chr24 | 40817046  | 40817630  | 585 |
| chr9  | 99935817  | 99936398  | 582 |
| chr8  | 66666238  | 66666812  | 575 |
| chr11 | 70900610  | 70901184  | 575 |
| chr8  | 63986919  | 63987492  | 574 |
| chr21 | 20721823  | 20722395  | 573 |
| chr18 | 50186254  | 50186825  | 572 |
| chr1  | 114237009 | 114237580 | 572 |
| chrX  | 2600689   | 2601256   | 568 |
| chr11 | 100871293 | 100871859 | 567 |
| chr8  | 7851713   | 7852270   | 558 |
| chr11 | 107244674 | 107245229 | 556 |
| chr3  | 116202630 | 116203182 | 553 |
| chr1  | 87373812  | 87374364  | 553 |
| chr14 | 42905616  | 42906162  | 547 |

|       |           |           |      |
|-------|-----------|-----------|------|
| chr15 | 51738311  | 51738844  | 534  |
| chr6  | 120777110 | 120777640 | 531  |
| chr25 | 18133888  | 18134416  | 529  |
| chr18 | 53196032  | 53196559  | 528  |
| chrX  | 78379561  | 78380083  | 523  |
| chrX  | 53961477  | 53961996  | 520  |
| chr15 | 41251439  | 41251956  | 518  |
| chr11 | 10836941  | 10837450  | 510  |
| chr3  | 15664277  | 15664783  | 507  |
| chr19 | 56122325  | 56122830  | 506  |
| chr18 | 25811632  | 25812136  | 505  |
| chr5  | 30512144  | 30512647  | 504  |
| chr23 | 28886883  | 28887385  | 503  |
| chr19 | 39014455  | 39014953  | 499  |
| chr18 | 54970437  | 54970935  | 499  |
| chr16 | 67206180  | 67206674  | 495  |
| chr10 | 83867146  | 83867629  | 484  |
| chrX  | 7776658   | 7777139   | 482  |
| chr4  | 21345195  | 21345676  | 482  |
| chr22 | 56287921  | 56288401  | 481  |
| chr12 | 82292185  | 82292665  | 481  |
| chr11 | 104565741 | 104566219 | 479  |
| chr7  | 52362571  | 52363042  | 472  |
| chr18 | 50456332  | 50456802  | 471  |
| chr20 | 27297838  | 27298307  | 470  |
| chr12 | 10755562  | 10756031  | 470  |
| chr13 | 40871835  | 40872303  | 469  |
| chr19 | 39383149  | 39383614  | 466  |
| chr9  | 75442197  | 75442661  | 465  |
| chr17 | 73194012  | 73194472  | 461  |
| chr28 | 33869546  | 33870000  | 455  |
| chr2  | 128838391 | 128838838 | 448  |
| chr19 | 22565358  | 22565797  | 440  |
| chr3  | 22572412  | 22572846  | 435  |
| chr14 | 59024827  | 59025261  | 435  |
| chr17 | 75559577  | 75560008  | 432  |
| chrX  | 53759286  | 53759712  | 427  |
| chr11 | 77576819  | 77577243  | 425  |
| chr26 | 25113393  | 25113816  | 424  |
| chr17 | 75560214  | 75560636  | 423  |
| chr10 | 44052678  | 44053099  | 422  |
| chrX  | 72261156  | 72261563  | 408  |
| chr20 | 35927774  | 35929766  | 1993 |
| chr18 | 51711677  | 51713013  | 1337 |
| chr14 | 1806815   | 1808062   | 1248 |
| chr4  | 52523607  | 52524805  | 1199 |
| chr8  | 24746159  | 24747210  | 1052 |
| chr17 | 64148316  | 64149121  | 806  |
| chrX  | 13625638  | 13626394  | 757  |
| chr28 | 43862938  | 43863528  | 591  |

|       |               |           |      |
|-------|---------------|-----------|------|
| chr16 | 47598300      | 47600461  | 2162 |
| chr15 | 33142025      | 33143898  | 1874 |
| chr5  | 29250859      | 29252444  | 1586 |
| chr7  | 18437788      | 18439129  | 1342 |
| chr4  | 118623388     | 118624374 | 987  |
| chr9  | 105513653     | 105514378 | 726  |
| chr23 | 31114105      | 31114705  | 601  |
| chr29 | 49312502      | 49312986  | 485  |
| chr1  | 67354888      | 67355323  | 436  |
| chr7  | 19984105      | 19986371  | 2267 |
| chr2  | 115039476     | 115041699 | 2224 |
| chr20 | 41950039      | 41951924  | 1886 |
| chr6  | 111014025     | 111015444 | 1420 |
| chr17 | 75531889      | 75533077  | 1189 |
| chrX  | 46866944      | 46867782  | 839  |
| chr7  | 10939317      | 10940097  | 781  |
| chr23 | 28004529      | 28007669  | 3141 |
| chr13 | 41667607      | 41669578  | 1972 |
| chr4  | 98033174      | 98034964  | 1791 |
| chr25 | 40213967      | 40215333  | 1367 |
| chr26 | 44886745      | 44888544  | 1800 |
| chr16 | 75222919      | 75224472  | 1554 |
| chr23 | 27999665      | 28000971  | 1307 |
| chr21 | 68943851      | 68945030  | 1180 |
| chr19 | 46829607      | 46830759  | 1153 |
| chr26 | 42195688      | 42196745  | 1058 |
| chr1  | 152269060     | 152270011 | 952  |
| chr4  | 89785509      | 89786300  | 792  |
| chr23 | 3309970       | 3311230   | 1261 |
| chr3  | 22898957      | 22899378  | 422  |
| chr24 | 834005 835627 | 1623      |      |
| chr2  | 124233261     | 124234338 | 1078 |
| chr13 | 57592107      | 57592707  | 601  |
| chr13 | 43438738      | 43440810  | 2073 |
| chr9  | 90287848      | 90288848  | 1001 |
| chr24 | 20769157      | 20769698  | 542  |
| chr10 | 16924120      | 16925655  | 1536 |
| chr4  | 110058316     | 110059057 | 742  |
| chr10 | 6188073       | 6188714   | 642  |
| chr26 | 43730557      | 43731112  | 556  |
| chrX  | 7170607       | 7171999   | 1393 |
| chr23 | 27867422      | 27868489  | 1068 |
| chr28 | 34188727      | 34189782  | 1056 |
| chr11 | 68917829      | 68918857  | 1029 |
| chr1  | 128113026     | 128113520 | 495  |
| chr18 | 45973228      | 45974412  | 1185 |
| chr10 | 90282688      | 90283457  | 770  |
| chr21 | 1771840       | 1772261   | 422  |
| chr11 | 100740644     | 100741627 | 984  |
| chrX  | 8943718       | 8944350   | 633  |

|       |           |           |      |
|-------|-----------|-----------|------|
| chr3  | 17477296  | 17478192  | 897  |
| chr27 | 15727064  | 15727673  | 610  |
| chr28 | 46046777  | 46047370  | 594  |
| chr9  | 82554949  | 82556072  | 1124 |
| chr1  | 115601240 | 115602406 | 1167 |
| chr2  | 134717954 | 134719005 | 1052 |
| chr19 | 65226848  | 65227777  | 930  |
| chr18 | 54200083  | 54200693  | 611  |
| chrX  | 8688937   | 8689424   | 488  |
| chr23 | 28652186  | 28652590  | 405  |
| chr7  | 18790668  | 18791458  | 791  |
| chr23 | 17625625  | 17626172  | 548  |
| chr8  | 73785586  | 73786122  | 537  |
| chr25 | 4974786   | 4975146   | 361  |
| chr8  | 73828586  | 73829423  | 838  |
| chr8  | 73866424  | 73867269  | 846  |
| chr12 | 31523850  | 31526065  | 2216 |
| chr7  | 2428271   | 2430063   | 1793 |
| chr5  | 75733105  | 75734543  | 1439 |
| chr5  | 30993127  | 30994527  | 1401 |
| chr6  | 46677707  | 46678962  | 1256 |
| chr4  | 106593329 | 106594114 | 786  |
| chr19 | 59346122  | 59348102  | 1981 |
| chr23 | 31401529  | 31402901  | 1373 |
| chr10 | 14994299  | 14995632  | 1334 |
| chr13 | 54841097  | 54842233  | 1137 |
| chr19 | 25413523  | 25414635  | 1113 |
| chr12 | 32862439  | 32863342  | 904  |
| chr10 | 21112417  | 21113113  | 697  |
| chr17 | 75048604  | 75049084  | 481  |
| chr6  | 73622648  | 73623966  | 1319 |
| chr21 | 69100549  | 69101862  | 1314 |
| chr13 | 14724050  | 14725169  | 1120 |
| chr3  | 108265790 | 108266878 | 1089 |
| chr25 | 8197968   | 8198939   | 972  |
| chr10 | 20472524  | 20473447  | 924  |
| chr19 | 47267071  | 47267937  | 867  |
| chr23 | 27826571  | 27827376  | 806  |
| chr10 | 73958253  | 73960408  | 2156 |
| chr11 | 13924250  | 13925995  | 1746 |
| chr13 | 41701912  | 41703619  | 1708 |
| chr29 | 49710128  | 49711674  | 1547 |
| chr2  | 140364400 | 140365095 | 696  |
| chr19 | 45932412  | 45932887  | 476  |
| chr23 | 18416407  | 18418455  | 2049 |
| chr19 | 38914525  | 38915440  | 916  |
| chr23 | 44430056  | 44430518  | 463  |
| chr5  | 28975549  | 28977593  | 2045 |
| chr26 | 18196845  | 18198400  | 1556 |
| chrX  | 33522283  | 33523615  | 1333 |

|       |               |           |      |
|-------|---------------|-----------|------|
| chr1  | 128584252     | 128585446 | 1195 |
| chr11 | 99191440      | 99192489  | 1050 |
| chr9  | 65834801      | 65835711  | 911  |
| chrX  | 60412571      | 60413454  | 884  |
| chr13 | 10973825      | 10974558  | 734  |
| chrX  | 9716227       | 9716727   | 501  |
| chr3  | 22942155      | 22943815  | 1661 |
| chr19 | 26980018      | 26981361  | 1344 |
| chr18 | 55688234      | 55689468  | 1235 |
| chr18 | 49548925      | 49549876  | 952  |
| chrX  | 59817675      | 59818600  | 926  |
| chrX  | 37499047      | 37499815  | 769  |
| chrX  | 72823341      | 72824087  | 747  |
| chr15 | 54494740      | 54495253  | 514  |
| chr5  | 112132243     | 112134143 | 1901 |
| chr26 | 17673049      | 17673888  | 840  |
| chr23 | 27298464      | 27298973  | 510  |
| chr3  | 113291696     | 113293168 | 1473 |
| chr11 | 91582566      | 91583643  | 1078 |
| chr21 | 9488424       | 9489480   | 1057 |
| chr16 | 46742128      | 46742808  | 681  |
| chr10 | 2777216       | 2777650   | 435  |
| chr28 | 46060576      | 46061337  | 762  |
| chrX  | 55581908      | 55582594  | 687  |
| chr8  | 24683099      | 24684569  | 1471 |
| chr18 | 9804358       | 9805105   | 748  |
| chr6  | 118510051     | 118510797 | 747  |
| chr2  | 27645938      | 27646514  | 577  |
| chr13 | 75532438      | 75533390  | 953  |
| chr23 | 28834491      | 28835509  | 1019 |
| chr17 | 64596692      | 64597497  | 806  |
| chr14 | 7579095       | 7579850   | 756  |
| chr8  | 80216219      | 80216845  | 627  |
| chr29 | 31429577      | 31430066  | 490  |
| chrX  | 20007693      | 20008418  | 726  |
| chr29 | 46195962      | 46196524  | 563  |
| chr8  | 73868346      | 73868939  | 594  |
| chr13 | 140575 141413 | 839       |      |
| chrX  | 19983850      | 19984332  | 483  |
| chr3  | 24655441      | 24656973  | 1533 |
| chrX  | 51879210      | 51882728  | 3519 |
| chr8  | 60189655      | 60193104  | 3450 |
| chr21 | 55793673      | 55796141  | 2469 |
| chr15 | 24558908      | 24561335  | 2428 |
| chr18 | 52878015      | 52880343  | 2329 |
| chr20 | 15473414      | 15475600  | 2187 |
| chr13 | 56353063      | 56355214  | 2152 |
| chr5  | 16815962      | 16817980  | 2019 |
| chr9  | 70495780      | 70497766  | 1987 |
| chr20 | 8570161       | 8572143   | 1983 |



|       |           |           |      |
|-------|-----------|-----------|------|
| chr9  | 86707026  | 86708997  | 1972 |
| chr1  | 74629893  | 74631858  | 1966 |
| chr17 | 70271250  | 70273197  | 1948 |
| chr23 | 27223736  | 27225624  | 1889 |
| chr10 | 25035354  | 25037241  | 1888 |
| chr3  | 26141413  | 26143286  | 1874 |
| chr22 | 16100005  | 16101827  | 1823 |
| chr23 | 19337172  | 19338990  | 1819 |
| chrX  | 72261776  | 72263560  | 1785 |
| chr23 | 15969255  | 15971032  | 1778 |
| chr25 | 29594993  | 29596733  | 1741 |
| chr5  | 51976090  | 51977814  | 1725 |
| chr12 | 31553922  | 31555629  | 1708 |
| chr5  | 60463728  | 60465434  | 1707 |
| chr25 | 27387991  | 27389681  | 1691 |
| chr3  | 35559022  | 35560694  | 1673 |
| chr18 | 53501456  | 53503128  | 1673 |
| chrX  | 31429138  | 31430760  | 1623 |
| chr21 | 66335429  | 66337050  | 1622 |
| chr4  | 95786463  | 95788083  | 1621 |
| chr13 | 54509198  | 54510806  | 1609 |
| chr24 | 59603182  | 59604784  | 1603 |
| chr21 | 64513405  | 64514990  | 1586 |
| chr26 | 51660713  | 51662297  | 1585 |
| chr27 | 44650251  | 44651825  | 1575 |
| chr19 | 22561596  | 22563166  | 1571 |
| chr10 | 53471102  | 53472664  | 1563 |
| chr17 | 68369582  | 68371124  | 1543 |
| chr24 | 31700313  | 31701839  | 1527 |
| chr18 | 34642091  | 34643612  | 1522 |
| chr19 | 27372026  | 27373545  | 1520 |
| chr9  | 91026070  | 91027582  | 1513 |
| chr22 | 55930206  | 55931709  | 1504 |
| chr6  | 30811387  | 30812888  | 1502 |
| chr5  | 117588941 | 117590442 | 1502 |
| chr3  | 8969082   | 8970581   | 1500 |
| chr24 | 48170843  | 48172334  | 1492 |
| chr6  | 118801358 | 118802847 | 1490 |
| chr20 | 66430596  | 66432056  | 1461 |
| chr13 | 54831902  | 54833349  | 1448 |
| chr10 | 88144000  | 88145445  | 1446 |
| chr15 | 55183700  | 55185108  | 1409 |
| chr25 | 42242304  | 42243700  | 1397 |
| chrX  | 59473020  | 59474409  | 1390 |
| chr3  | 74453483  | 74454866  | 1384 |
| chr19 | 57592178  | 57593558  | 1381 |
| chr7  | 45685148  | 45686524  | 1377 |
| chr6  | 63386943  | 63388315  | 1373 |
| chr3  | 4682983   | 4684346   | 1364 |
| chr6  | 121697253 | 121698599 | 1347 |

|       |           |           |      |
|-------|-----------|-----------|------|
| chr22 | 39756069  | 39757413  | 1345 |
| chr8  | 93913022  | 93914365  | 1344 |
| chr12 | 83964780  | 83966117  | 1338 |
| chr2  | 70241123  | 70242458  | 1336 |
| chr4  | 72323734  | 72325056  | 1323 |
| chr3  | 22977114  | 22978434  | 1321 |
| chr11 | 108296829 | 108298143 | 1315 |
| chr3  | 105923250 | 105924561 | 1312 |
| chr1  | 123137149 | 123138446 | 1298 |
| chr8  | 7521279   | 7522572   | 1294 |
| chr25 | 28054180  | 28055473  | 1294 |
| chr12 | 74466281  | 74467573  | 1293 |
| chr18 | 15862463  | 15863748  | 1286 |
| chr18 | 47597249  | 47598518  | 1270 |
| chr27 | 38973984  | 38975228  | 1245 |
| chr10 | 49971900  | 49973137  | 1238 |
| chr25 | 4836605   | 4837840   | 1236 |
| chr23 | 31070788  | 31072003  | 1216 |
| chr18 | 61977795  | 61979006  | 1212 |
| chr18 | 47793807  | 47795010  | 1204 |
| chrX  | 59596605  | 59597804  | 1200 |
| chr22 | 22555524  | 22556721  | 1198 |
| chr17 | 4831468   | 4832665   | 1198 |
| chrX  | 72853550  | 72854745  | 1196 |
| chr24 | 49362415  | 49363607  | 1193 |
| chr2  | 136684361 | 136685543 | 1183 |
| chr24 | 44047257  | 44048436  | 1180 |
| chr7  | 17947513  | 17948687  | 1175 |
| chr1  | 1547129   | 1548289   | 1161 |
| chr1  | 62292312  | 62293468  | 1157 |
| chr18 | 35068139  | 35069294  | 1156 |
| chr5  | 81629317  | 81630467  | 1151 |
| chr5  | 83346980  | 83348129  | 1150 |
| chr10 | 7515195   | 7516344   | 1150 |
| chrX  | 59383378  | 59384526  | 1149 |
| chr3  | 62650168  | 62651316  | 1149 |
| chr19 | 46832460  | 46833608  | 1149 |
| chr2  | 140360275 | 140361418 | 1144 |
| chrX  | 78763071  | 78764191  | 1121 |
| chr17 | 63449670  | 63450786  | 1117 |
| chr13 | 52671183  | 52672298  | 1116 |
| chr11 | 23130025  | 23131134  | 1110 |
| chr3  | 102649670 | 102650778 | 1109 |
| chr23 | 12314405  | 12315512  | 1108 |
| chr19 | 37931537  | 37932634  | 1098 |
| chr6  | 63388345  | 63389439  | 1095 |
| chr19 | 39380052  | 39381144  | 1093 |
| chr13 | 60793778  | 60794870  | 1093 |
| chr20 | 40450375  | 40451463  | 1089 |
| chr18 | 49520973  | 49522044  | 1072 |

|       |           |           |      |
|-------|-----------|-----------|------|
| chr1  | 87374930  | 87375996  | 1067 |
| chr4  | 110116102 | 110117163 | 1062 |
| chr19 | 39011449  | 39012510  | 1062 |
| chrX  | 58728090  | 58729143  | 1054 |
| chrX  | 60395541  | 60396583  | 1043 |
| chr28 | 8225597   | 8226635   | 1039 |
| chr19 | 46149732  | 46150754  | 1023 |
| chr26 | 11338184  | 11339201  | 1018 |
| chr3  | 15181571  | 15182585  | 1015 |
| chr19 | 45833874  | 45834880  | 1007 |
| chr12 | 15863398  | 15864402  | 1005 |
| chr18 | 62692744  | 62693746  | 1003 |
| chr1  | 3090279   | 3091269   | 991  |
| chr21 | 13651964  | 13652943  | 980  |
| chr25 | 3179127   | 3180105   | 979  |
| chrX  | 59431774  | 59432751  | 978  |
| chr20 | 10862694  | 10863669  | 976  |
| chr23 | 48764828  | 48765795  | 968  |
| chr3  | 112902268 | 112903233 | 966  |
| chr11 | 9210483   | 9211446   | 964  |
| chr8  | 63935162  | 63936121  | 960  |
| chr5  | 122816809 | 122817763 | 955  |
| chr29 | 41637067  | 41638016  | 950  |
| chr19 | 33322144  | 33323090  | 947  |
| chr11 | 105989736 | 105990672 | 937  |
| chr21 | 6544793   | 6545727   | 935  |
| chr5  | 113255920 | 113256847 | 928  |
| chr24 | 47126831  | 47127755  | 925  |
| chr9  | 108133362 | 108134284 | 923  |
| chr25 | 37522098  | 37523019  | 922  |
| chr2  | 75593561  | 75594481  | 921  |
| chr2  | 140048432 | 140049345 | 914  |
| chr23 | 45601656  | 45602565  | 910  |
| chr19 | 45825080  | 45825987  | 908  |
| chr8  | 24697176  | 24698072  | 897  |
| chrX  | 7414052   | 7414944   | 893  |
| chr7  | 15654729  | 15655617  | 889  |
| chr19 | 39165516  | 39166404  | 889  |
| chr8  | 62582222  | 62583105  | 884  |
| chr4  | 30808176  | 30809059  | 884  |
| chr11 | 24009121  | 24010001  | 881  |
| chr13 | 75753858  | 75754730  | 873  |
| chr19 | 39362979  | 39363848  | 870  |
| chrX  | 14644011  | 14644874  | 864  |
| chr16 | 2223089   | 2223951   | 863  |
| chr3  | 33822053  | 33822910  | 858  |
| chr19 | 10939542  | 10940391  | 850  |
| chr5  | 120116002 | 120116848 | 847  |
| chr12 | 21067049  | 21067888  | 840  |
| chr7  | 29474233  | 29475066  | 834  |

|       |           |           |     |
|-------|-----------|-----------|-----|
| chr18 | 54198724  | 54199557  | 834 |
| chr12 | 84683056  | 84683885  | 830 |
| chr18 | 55073254  | 55074080  | 827 |
| chr5  | 31264966  | 31265791  | 826 |
| chr19 | 59002518  | 59003343  | 826 |
| chr5  | 68969261  | 68970078  | 818 |
| chr18 | 26283228  | 26284045  | 818 |
| chr16 | 13949692  | 13950504  | 813 |
| chr12 | 84249487  | 84250299  | 813 |
| chr4  | 96130568  | 96131377  | 810 |
| chr6  | 101070910 | 101071718 | 809 |
| chr19 | 33115741  | 33116544  | 804 |
| chr10 | 70163651  | 70164454  | 804 |
| chr4  | 121480250 | 121481041 | 792 |
| chr13 | 74496662  | 74497450  | 789 |
| chr10 | 17547611  | 17548397  | 787 |
| chr5  | 64499931  | 64500714  | 784 |
| chrX  | 34166992  | 34167769  | 778 |
| chr26 | 18492050  | 18492826  | 777 |
| chr13 | 10972575  | 10973349  | 775 |
| chr12 | 23537912  | 23538686  | 775 |
| chr11 | 96401380  | 96402153  | 774 |
| chr19 | 41475606  | 41476373  | 768 |
| chr25 | 28190245  | 28190999  | 755 |
| chr13 | 58266682  | 58267434  | 753 |
| chr19 | 44881642  | 44882391  | 750 |
| chr23 | 28002305  | 28003053  | 749 |
| chr18 | 51715805  | 51716553  | 749 |
| chr19 | 38661440  | 38662185  | 746 |
| chr16 | 38724463  | 38725206  | 744 |
| chr28 | 40383775  | 40384516  | 742 |
| chr16 | 75866856  | 75867588  | 733 |
| chr9  | 45715306  | 45716033  | 728 |
| chr6  | 119557859 | 119558586 | 728 |
| chrX  | 13795225  | 13795946  | 722 |
| chr23 | 27758135  | 27758856  | 722 |
| chr15 | 55635354  | 55636065  | 712 |
| chr26 | 37624849  | 37625559  | 711 |
| chr12 | 84563362  | 84564070  | 709 |
| chrX  | 72264635  | 72265342  | 708 |
| chr4  | 69932204  | 69932910  | 707 |
| chr19 | 62074418  | 62075124  | 707 |
| chrX  | 59574478  | 59575183  | 706 |
| chr26 | 43496280  | 43496985  | 706 |
| chr12 | 32552949  | 32553653  | 705 |
| chr5  | 38515652  | 38516353  | 702 |
| chr20 | 16597762  | 16598463  | 702 |
| chr4  | 72308777  | 72309477  | 701 |
| chr19 | 23863138  | 23863838  | 701 |
| chr21 | 9490179   | 9490878   | 700 |

|       |               |           |     |
|-------|---------------|-----------|-----|
| chr22 | 57977527      | 57978225  | 699 |
| chr5  | 27465952      | 27466648  | 697 |
| chr26 | 50845589      | 50846284  | 696 |
| chr9  | 84270454      | 84271143  | 690 |
| chr7  | 81251089      | 81251777  | 689 |
| chrX  | 50631487      | 50632173  | 687 |
| chr16 | 39601499      | 39602185  | 687 |
| chr10 | 87518561      | 87519246  | 686 |
| chr8  | 23884765      | 23885449  | 685 |
| chr1  | 152262788     | 152263472 | 685 |
| chr26 | 21825918      | 21826599  | 682 |
| chr12 | 14704876      | 14705549  | 674 |
| chr11 | 77745947      | 77746613  | 667 |
| chr21 | 31675150      | 31675814  | 665 |
| chr18 | 56606177      | 56606836  | 660 |
| chr7  | 61014265      | 61014922  | 658 |
| chr15 | 44889716      | 44890366  | 651 |
| chr11 | 40059888      | 40060537  | 650 |
| chrX  | 578316 578957 | 642       |     |
| chr11 | 106253611     | 106254240 | 630 |
| chr17 | 75666973      | 75667592  | 620 |
| chr2  | 130981818     | 130982435 | 618 |
| chr20 | 43472881      | 43473484  | 604 |
| chr5  | 10526815      | 10527417  | 603 |
| chr19 | 24687087      | 24687689  | 603 |
| chr9  | 90477963      | 90478562  | 600 |
| chr10 | 56613703      | 56614301  | 599 |
| chr3  | 118025263     | 118025860 | 598 |
| chr5  | 52966110      | 52966702  | 593 |
| chr13 | 59923521      | 59924113  | 593 |
| chr7  | 17121553      | 17122132  | 580 |
| chr8  | 73910246      | 73910824  | 579 |
| chr4  | 14670428      | 14671004  | 577 |
| chrX  | 8262908       | 8263478   | 571 |
| chrX  | 18950748      | 18951317  | 570 |
| chr15 | 52286768      | 52287336  | 569 |
| chr23 | 31132104      | 31132669  | 566 |
| chr19 | 54335967      | 54336532  | 566 |
| chr29 | 49323563      | 49324125  | 563 |
| chr3  | 8976834       | 8977394   | 561 |
| chr24 | 48613723      | 48614281  | 559 |
| chr13 | 70705986      | 70706539  | 554 |
| chrX  | 78292751      | 78293301  | 551 |
| chrX  | 7338821       | 7339371   | 551 |
| chr22 | 7236415       | 7236964   | 550 |
| chr5  | 64499245      | 64499788  | 544 |
| chr21 | 27122877      | 27123418  | 542 |
| chr13 | 38254274      | 38254814  | 541 |
| chr18 | 11649286      | 11649825  | 540 |
| chr28 | 26791673      | 26792209  | 537 |

|       |               |           |      |
|-------|---------------|-----------|------|
| chr7  | 46573690      | 46574225  | 536  |
| chr7  | 5453735       | 5454270   | 536  |
| chrX  | 72150645      | 72151179  | 535  |
| chr29 | 51266342      | 51266876  | 535  |
| chr16 | 2122339       | 2122873   | 535  |
| chr11 | 101429585     | 101430117 | 533  |
| chr2  | 23111121      | 23111648  | 528  |
| chr11 | 1307205       | 1307732   | 528  |
| chr22 | 12069225      | 12069749  | 525  |
| chrX  | 7422976       | 7423498   | 523  |
| chr22 | 16101831      | 16102352  | 522  |
| chr23 | 28007671      | 28008187  | 517  |
| chr4  | 124453588     | 124454100 | 513  |
| chr7  | 44059531      | 44060041  | 511  |
| chrX  | 6586799       | 6587308   | 510  |
| chr2  | 99656071      | 99656578  | 508  |
| chr1  | 19193800      | 19194307  | 508  |
| chr9  | 100329454     | 100329958 | 505  |
| chr16 | 41337772      | 41338270  | 499  |
| chr27 | 14399069      | 14399566  | 498  |
| chr2  | 135768178     | 135768671 | 494  |
| chr25 | 364376 364865 | 490       |      |
| chr23 | 31447124      | 31447613  | 490  |
| chr23 | 10544878      | 10545361  | 484  |
| chr19 | 40422260      | 40422743  | 484  |
| chrX  | 7350566       | 7351048   | 483  |
| chr16 | 3311107       | 3311580   | 474  |
| chr6  | 118162623     | 118163094 | 472  |
| chrX  | 59677976      | 59678444  | 469  |
| chr26 | 40176111      | 40176579  | 469  |
| chrX  | 35703376      | 35703842  | 467  |
| chr3  | 114299797     | 114300262 | 466  |
| chr17 | 71961158      | 71961622  | 465  |
| chr25 | 39143562      | 39144024  | 463  |
| chr17 | 49437290      | 49437751  | 462  |
| chr2  | 134743065     | 134743520 | 456  |
| chr13 | 40943711      | 40944166  | 456  |
| chr4  | 71608208      | 71608653  | 446  |
| chr29 | 51950060      | 51950501  | 442  |
| chr18 | 23611506      | 23611943  | 438  |
| chr8  | 95959221      | 95959655  | 435  |
| chr26 | 51553501      | 51553917  | 417  |
| chr21 | 22343415      | 22343828  | 414  |
| chr23 | 15912290      | 15912698  | 409  |
| chrX  | 78236973      | 78237380  | 408  |
| chr13 | 77721955      | 77722361  | 407  |
| chr13 | 73027401      | 73027805  | 405  |
| chr21 | 2053521       | 2054111   | 591  |
| chr1  | 156999933     | 157001624 | 1692 |
| chr4  | 71593922      | 71595556  | 1635 |

|       |           |           |      |
|-------|-----------|-----------|------|
| chr18 | 62500504  | 62501855  | 1352 |
| chr22 | 48545677  | 48546976  | 1300 |
| chr22 | 53595040  | 53596255  | 1216 |
| chr19 | 12323566  | 12324701  | 1136 |
| chr13 | 61231117  | 61232192  | 1076 |
| chr3  | 120952609 | 120953439 | 831  |
| chr14 | 59531680  | 59532327  | 648  |
| chr21 | 68942336  | 68942980  | 645  |
| chr19 | 13504503  | 13505048  | 546  |
| chr15 | 24393205  | 24395407  | 2203 |
| chr12 | 14819126  | 14821093  | 1968 |
| chr20 | 73247388  | 73249291  | 1904 |
| chr13 | 75130110  | 75131583  | 1474 |
| chr7  | 19211181  | 19212538  | 1358 |
| chr28 | 5023773   | 5025125   | 1353 |
| chr10 | 21260446  | 21261734  | 1289 |
| chr17 | 66175876  | 66176914  | 1039 |
| chr19 | 12613301  | 12614157  | 857  |
| chrX  | 49242199  | 49243032  | 834  |
| chr16 | 48303350  | 48304103  | 754  |
| chr23 | 28462871  | 28463572  | 702  |
| chr9  | 52414549  | 52415124  | 576  |
| chr13 | 40816354  | 40818663  | 2310 |
| chr2  | 68154837  | 68156658  | 1822 |
| chr2  | 139111581 | 139113099 | 1519 |
| chr1  | 1546203   | 1546996   | 794  |
| chr21 | 64486453  | 64487157  | 705  |
| chr11 | 14156558  | 14157152  | 595  |
| chr27 | 17754801  | 17755390  | 590  |
| chr18 | 11621660  | 11622249  | 590  |
| chr7  | 16551863  | 16553487  | 1625 |
| chr17 | 62320609  | 62322081  | 1473 |
| chr12 | 31994042  | 31995466  | 1425 |
| chr6  | 46495194  | 46496428  | 1235 |
| chr18 | 55829673  | 55830638  | 966  |
| chr11 | 89075431  | 89076139  | 709  |
| chr1  | 82486993  | 82487644  | 652  |
| chr8  | 40303758  | 40305138  | 1381 |
| chr6  | 118652792 | 118653825 | 1034 |
| chr20 | 2013141   | 2014154   | 1014 |
| chr11 | 77721740  | 77722482  | 743  |
| chr8  | 65870188  | 65870927  | 740  |
| chr4  | 33243000  | 33244157  | 1158 |
| chr19 | 26977398  | 26978987  | 1590 |
| chr10 | 70161601  | 70163190  | 1590 |
| chrX  | 72231109  | 72232234  | 1126 |
| chr18 | 65385079  | 65385747  | 669  |
| chrX  | 35506696  | 35507359  | 664  |
| chr29 | 26346646  | 26347297  | 652  |
| chr25 | 4708540   | 4709094   | 555  |

|       |               |           |      |
|-------|---------------|-----------|------|
| chr27 | 35398962      | 35399991  | 1030 |
| chr26 | 18535037      | 18535527  | 491  |
| chr27 | 847225 848427 | 1203      |      |
| chr6  | 84628430      | 84629333  | 904  |
| chr14 | 53419890      | 53420792  | 903  |
| chr7  | 50635568      | 50636141  | 574  |
| chr16 | 41463353      | 41464302  | 950  |
| chr20 | 33637687      | 33639049  | 1363 |
| chr21 | 28673855      | 28674616  | 762  |
| chrX  | 34239234      | 34239918  | 685  |
| chr24 | 43698398      | 43699080  | 683  |
| chr17 | 73210555      | 73211111  | 557  |
| chr15 | 51703119      | 51703900  | 782  |
| chr18 | 53028727      | 53029416  | 690  |
| chr9  | 34929103      | 34929880  | 778  |
| chr18 | 53029620      | 53030337  | 718  |
| chr16 | 68893174      | 68893821  | 648  |
| chr17 | 65981729      | 65982282  | 554  |
| chr22 | 50735085      | 50735572  | 488  |
| chr12 | 58683477      | 58683939  | 463  |
| chr27 | 33441638      | 33442021  | 384  |
| chr1  | 87373245      | 87373765  | 521  |
| chr1  | 68924891      | 68926291  | 1401 |
| chr8  | 73760932      | 73761353  | 422  |
| chr29 | 41710897      | 41711597  | 701  |
| chr8  | 46164493      | 46165366  | 874  |
| chr19 | 46327522      | 46328098  | 577  |
| chr19 | 6523560       | 6524426   | 867  |
| chrX  | 81280035      | 81280596  | 562  |
| chr3  | 114218918     | 114219432 | 515  |
| chr9  | 6046391       | 6046925   | 535  |
| chr18 | 24311319      | 24311846  | 528  |
| chr20 | 67487713      | 67490932  | 3220 |
| chr9  | 59372639      | 59375643  | 3005 |
| chr11 | 75405666      | 75408067  | 2402 |
| chr17 | 48918861      | 48921221  | 2361 |
| chr22 | 46579157      | 46581455  | 2299 |
| chr4  | 31332870      | 31335106  | 2237 |
| chr29 | 38312071      | 38314238  | 2168 |
| chr5  | 122127929     | 122130039 | 2111 |
| chr26 | 42168291      | 42170397  | 2107 |
| chr4  | 121490119     | 121492169 | 2051 |
| chr4  | 69934187      | 69936197  | 2011 |
| chr19 | 39372090      | 39374054  | 1965 |
| chr13 | 77289382      | 77291339  | 1958 |
| chr19 | 61495583      | 61497405  | 1823 |
| chr24 | 60830525      | 60832344  | 1820 |
| chr3  | 33128200      | 33130017  | 1818 |
| chr25 | 7032799       | 7034581   | 1783 |
| chr24 | 48968939      | 48970629  | 1691 |



|       |               |           |      |
|-------|---------------|-----------|------|
| chr18 | 56623025      | 56624679  | 1655 |
| chr21 | 61781002      | 61782617  | 1616 |
| chr12 | 14811858      | 14813453  | 1596 |
| chr26 | 18296533      | 18298107  | 1575 |
| chr14 | 30835027      | 30836598  | 1572 |
| chr21 | 64463509      | 64465079  | 1571 |
| chr13 | 77426238      | 77427803  | 1566 |
| chrX  | 6325424       | 6326965   | 1542 |
| chr6  | 65878298      | 65879828  | 1531 |
| chr23 | 49714004      | 49715514  | 1511 |
| chr4  | 116981782     | 116983277 | 1496 |
| chr2  | 56953049      | 56954535  | 1487 |
| chr16 | 51086050      | 51087531  | 1482 |
| chrX  | 15760475      | 15761913  | 1439 |
| chr23 | 11843959      | 11845393  | 1435 |
| chr14 | 61210760      | 61212191  | 1432 |
| chr1  | 27348430      | 27349834  | 1405 |
| chr11 | 50321939      | 50323339  | 1401 |
| chr4  | 116923147     | 116924544 | 1398 |
| chr13 | 75624229      | 75625625  | 1397 |
| chr13 | 80708496      | 80709889  | 1394 |
| chr15 | 84518195      | 84519587  | 1393 |
| chr4  | 96859925      | 96861309  | 1385 |
| chr3  | 10565564      | 10566948  | 1385 |
| chr7  | 479032 480413 | 1382      |      |
| chr25 | 37773264      | 37774639  | 1376 |
| chr6  | 73191078      | 73192450  | 1373 |
| chr13 | 54985882      | 54987238  | 1357 |
| chr22 | 60005918      | 60007272  | 1355 |
| chrX  | 51039553      | 51040891  | 1339 |
| chr2  | 99656720      | 99658052  | 1333 |
| chr24 | 59571639      | 59572966  | 1328 |
| chr11 | 106000957     | 106002280 | 1324 |
| chr1  | 130511751     | 130513058 | 1308 |
| chr13 | 75537321      | 75538625  | 1305 |
| chr13 | 54835906      | 54837207  | 1302 |
| chr22 | 16901706      | 16903006  | 1301 |
| chr4  | 121415455     | 121416745 | 1291 |
| chr16 | 56105377      | 56106665  | 1289 |
| chr4  | 121236867     | 121238150 | 1284 |
| chr10 | 21662487      | 21663761  | 1275 |
| chr29 | 34261819      | 34263088  | 1270 |
| chr17 | 63489208      | 63490466  | 1259 |
| chr14 | 44635503      | 44636756  | 1254 |
| chr5  | 120503730     | 120504969 | 1240 |
| chr20 | 8752746       | 8753984   | 1239 |
| chr17 | 4833281       | 4834510   | 1230 |
| chr7  | 14335106      | 14336327  | 1222 |
| chr29 | 48795615      | 48796836  | 1222 |
| chr17 | 63321236      | 63322456  | 1221 |

|       |           |           |      |
|-------|-----------|-----------|------|
| chr14 | 22079690  | 22080908  | 1219 |
| chr6  | 119204281 | 119205498 | 1218 |
| chr13 | 40988170  | 40989383  | 1214 |
| chr15 | 75922259  | 75923469  | 1211 |
| chr13 | 62422835  | 62424044  | 1210 |
| chr7  | 45704446  | 45705647  | 1202 |
| chr8  | 24132557  | 24133755  | 1199 |
| chr18 | 11340625  | 11341811  | 1187 |
| chrX  | 10429616  | 10430788  | 1173 |
| chr13 | 55718968  | 55720139  | 1172 |
| chr20 | 73732541  | 73733711  | 1171 |
| chr16 | 59040614  | 59041778  | 1165 |
| chr7  | 43773491  | 43774645  | 1155 |
| chr19 | 26644537  | 26645684  | 1148 |
| chr8  | 109037326 | 109038470 | 1145 |
| chr4  | 43275647  | 43276786  | 1140 |
| chr18 | 35066775  | 35067901  | 1127 |
| chr29 | 17832959  | 17834084  | 1126 |
| chr28 | 7553328   | 7554451   | 1124 |
| chr12 | 31984029  | 31985152  | 1124 |
| chr16 | 77526759  | 77527873  | 1115 |
| chr14 | 23436805  | 23437918  | 1114 |
| chr4  | 48873055  | 48874159  | 1105 |
| chr22 | 58637053  | 58638153  | 1101 |
| chr8  | 89537024  | 89538121  | 1098 |
| chr2  | 124796277 | 124797369 | 1093 |
| chr18 | 11773853  | 11774945  | 1093 |
| chr9  | 105441097 | 105442187 | 1091 |
| chr5  | 73526518  | 73527605  | 1088 |
| chr2  | 116855448 | 116856532 | 1085 |
| chr28 | 42379713  | 42380778  | 1066 |
| chr3  | 111793221 | 111794269 | 1049 |
| chr5  | 125491460 | 125492504 | 1045 |
| chr23 | 30225988  | 30227032  | 1045 |
| chr3  | 122224683 | 122225722 | 1040 |
| chr24 | 31244229  | 31245267  | 1039 |
| chr3  | 95747293  | 95748325  | 1033 |
| chr5  | 112088241 | 112089272 | 1032 |
| chr12 | 10752228  | 10753250  | 1023 |
| chr1  | 159066611 | 159067630 | 1020 |
| chr16 | 47249397  | 47250413  | 1017 |
| chr22 | 7218591   | 7219604   | 1014 |
| chr18 | 48687759  | 48688764  | 1006 |
| chr2  | 74020646  | 74021650  | 1005 |
| chr9  | 106388160 | 106389161 | 1002 |
| chr2  | 125421267 | 125422260 | 994  |
| chr7  | 13111070  | 13112058  | 989  |
| chr29 | 49108483  | 49109464  | 982  |
| chr16 | 2150278   | 2151258   | 981  |
| chr1  | 36232589  | 36233556  | 968  |

|       |               |           |     |
|-------|---------------|-----------|-----|
| chr3  | 113594189     | 113595153 | 965 |
| chr15 | 57278236      | 57279200  | 965 |
| chr21 | 64868708      | 64869670  | 963 |
| chr8  | 110721094     | 110722050 | 957 |
| chr25 | 12713766      | 12714720  | 955 |
| chr16 | 47996625      | 47997577  | 953 |
| chr29 | 51163206      | 51164156  | 951 |
| chr20 | 8610744       | 8611693   | 950 |
| chr13 | 41360454      | 41361402  | 949 |
| chr13 | 66874282      | 66875222  | 941 |
| chr8  | 5812821       | 5813759   | 939 |
| chr18 | 56862521      | 56863458  | 938 |
| chr17 | 556560 557494 | 935       |     |
| chr24 | 43699112      | 43700045  | 934 |
| chr24 | 41893388      | 41894320  | 933 |
| chr23 | 44103711      | 44104639  | 929 |
| chr23 | 48774732      | 48775655  | 924 |
| chr7  | 32284316      | 32285238  | 923 |
| chr22 | 30274273      | 30275189  | 917 |
| chr2  | 135169157     | 135170059 | 903 |
| chr26 | 17896295      | 17897195  | 901 |
| chr3  | 116415774     | 116416672 | 899 |
| chrX  | 59667497      | 59668388  | 892 |
| chr28 | 33870944      | 33871825  | 882 |
| chr2  | 22163415      | 22164292  | 878 |
| chr9  | 78271978      | 78272850  | 873 |
| chr17 | 5060426       | 5061295   | 870 |
| chr11 | 4357466       | 4358335   | 870 |
| chr7  | 17324161      | 17325028  | 868 |
| chr18 | 62740440      | 62741307  | 868 |
| chr16 | 49672895      | 49673761  | 867 |
| chr23 | 28008231      | 28009096  | 866 |
| chr14 | 21782864      | 21783728  | 865 |
| chrX  | 59541948      | 59542809  | 862 |
| chr11 | 107245251     | 107246105 | 855 |
| chr3  | 22654183      | 22655033  | 851 |
| chr3  | 20575125      | 20575972  | 848 |
| chr6  | 121053209     | 121054049 | 841 |
| chrX  | 49813933      | 49814770  | 838 |
| chr2  | 25387586      | 25388420  | 835 |
| chr22 | 56702365      | 56703195  | 831 |
| chr18 | 11710482      | 11711308  | 827 |
| chr12 | 32005242      | 32006067  | 826 |
| chr23 | 18660933      | 18661754  | 822 |
| chr12 | 34269108      | 34269927  | 820 |
| chr14 | 61746034      | 61746847  | 814 |
| chr26 | 48443914      | 48444714  | 801 |
| chr13 | 61507303      | 61508100  | 798 |
| chr22 | 50727662      | 50728457  | 796 |
| chr2  | 135101782     | 135102575 | 794 |

|       |           |           |     |
|-------|-----------|-----------|-----|
| chr11 | 98330884  | 98331675  | 792 |
| chr23 | 51058845  | 51059625  | 781 |
| chr17 | 67941916  | 67942696  | 781 |
| chrX  | 59482993  | 59483770  | 778 |
| chrX  | 41264128  | 41264897  | 770 |
| chr18 | 48365082  | 48365850  | 769 |
| chr13 | 62018601  | 62019369  | 769 |
| chr24 | 41097933  | 41098699  | 767 |
| chr2  | 108809810 | 108810576 | 767 |
| chrX  | 2329337   | 2330102   | 766 |
| chr24 | 59662526  | 59663290  | 765 |
| chr18 | 52694562  | 52695321  | 760 |
| chr26 | 22271766  | 22272523  | 758 |
| chrX  | 60286576  | 60287325  | 750 |
| chr23 | 30219316  | 30220064  | 749 |
| chr20 | 33699324  | 33700072  | 749 |
| chr7  | 5307284   | 5308030   | 747 |
| chr3  | 116387177 | 116387921 | 745 |
| chr9  | 83793111  | 83793853  | 743 |
| chr21 | 45203758  | 45204500  | 743 |
| chr12 | 18240580  | 18241322  | 743 |
| chr15 | 62559269  | 62560009  | 741 |
| chr8  | 85439828  | 85440567  | 740 |
| chr11 | 70874687  | 70875423  | 737 |
| chr3  | 23030591  | 23031326  | 736 |
| chr14 | 66292241  | 66292976  | 736 |
| chr15 | 25506442  | 25507176  | 735 |
| chrX  | 7407527   | 7408260   | 734 |
| chr8  | 50708110  | 50708839  | 730 |
| chr8  | 1631932   | 1632656   | 725 |
| chr8  | 95563337  | 95564055  | 719 |
| chr13 | 75823466  | 75824184  | 719 |
| chr1  | 76416019  | 76416736  | 718 |
| chr24 | 1937320   | 1938035   | 716 |
| chr9  | 105014462 | 105015176 | 715 |
| chr22 | 30111034  | 30111746  | 713 |
| chr7  | 46197302  | 46198009  | 708 |
| chr19 | 59465141  | 59465846  | 706 |
| chr13 | 59934423  | 59935122  | 700 |
| chr19 | 38603546  | 38604244  | 699 |
| chr22 | 7233996   | 7234690   | 695 |
| chr13 | 73917661  | 73918349  | 689 |
| chrX  | 34185634  | 34186320  | 687 |
| chr3  | 113475203 | 113475889 | 687 |
| chrX  | 17129282  | 17129966  | 685 |
| chr2  | 73259599  | 73260280  | 682 |
| chr1  | 149329449 | 149330127 | 679 |
| chr8  | 63936287  | 63936964  | 678 |
| chr3  | 113616553 | 113617228 | 676 |
| chr11 | 106351750 | 106352424 | 675 |

|       |           |           |     |
|-------|-----------|-----------|-----|
| chr4  | 121445359 | 121446030 | 672 |
| chrX  | 21596763  | 21597428  | 666 |
| chr23 | 42466611  | 42467275  | 665 |
| chr16 | 67211084  | 67211743  | 660 |
| chr20 | 8692649   | 8693302   | 654 |
| chr23 | 18744531  | 18745183  | 653 |
| chr18 | 22856412  | 22857063  | 652 |
| chr18 | 20246376  | 20247024  | 649 |
| chr25 | 2689484   | 2690131   | 648 |
| chr18 | 53237969  | 53238608  | 640 |
| chr16 | 48785580  | 48786216  | 637 |
| chr5  | 114984293 | 114984927 | 635 |
| chr2  | 136722799 | 136723433 | 635 |
| chr11 | 81414722  | 81415356  | 635 |
| chr18 | 62458504  | 62459136  | 633 |
| chr14 | 20760035  | 20760667  | 633 |
| chr29 | 17458504  | 17459134  | 631 |
| chr19 | 14924310  | 14924938  | 629 |
| chr11 | 70848815  | 70849443  | 629 |
| chr16 | 1787905   | 1788531   | 627 |
| chr24 | 65014213  | 65014838  | 626 |
| chr3  | 10572973  | 10573596  | 624 |
| chr5  | 117217860 | 117218482 | 623 |
| chr6  | 42771113  | 42771733  | 621 |
| chr19 | 44612513  | 44613131  | 619 |
| chr18 | 62948669  | 62949284  | 616 |
| chr11 | 51888877  | 51889489  | 613 |
| chr4  | 21345813  | 21346423  | 611 |
| chr18 | 53173657  | 53174264  | 608 |
| chr4  | 71551357  | 71551963  | 607 |
| chr19 | 6522727   | 6523330   | 604 |
| chr23 | 28014634  | 28015236  | 603 |
| chr17 | 64903461  | 64904061  | 601 |
| chr13 | 43328661  | 43329253  | 593 |
| chr13 | 17073634  | 17074223  | 590 |
| chr18 | 56825556  | 56826143  | 588 |
| chr3  | 116949967 | 116950552 | 586 |
| chr7  | 14169714  | 14170294  | 581 |
| chr24 | 61118062  | 61118639  | 578 |
| chr7  | 10973981  | 10974557  | 577 |
| chr3  | 111488354 | 111488930 | 577 |
| chr4  | 16844570  | 16845139  | 570 |
| chr3  | 107739865 | 107740433 | 569 |
| chr11 | 77782269  | 77782833  | 565 |
| chrX  | 8242565   | 8243124   | 560 |
| chr15 | 24011050  | 24011608  | 559 |
| chr29 | 48875140  | 48875697  | 558 |
| chr18 | 52973457  | 52974014  | 558 |
| chr14 | 52854176  | 52854725  | 550 |
| chrX  | 50093011  | 50093559  | 549 |

|       |           |           |     |
|-------|-----------|-----------|-----|
| chr18 | 62954534  | 62955081  | 548 |
| chr4  | 87711295  | 87711832  | 538 |
| chrX  | 57147401  | 57147936  | 536 |
| chrX  | 20596084  | 20596619  | 536 |
| chr5  | 29000349  | 29000880  | 532 |
| chr18 | 56777538  | 56778066  | 529 |
| chr7  | 57593771  | 57594297  | 527 |
| chr28 | 35630658  | 35631183  | 526 |
| chr11 | 7547321   | 7547846   | 526 |
| chr26 | 43832355  | 43832876  | 522 |
| chr12 | 32012583  | 32013103  | 521 |
| chr23 | 15082854  | 15083371  | 518 |
| chr11 | 106749256 | 106749769 | 514 |
| chr6  | 121050165 | 121050673 | 509 |
| chr26 | 20933876  | 20934384  | 509 |
| chr22 | 61190528  | 61191035  | 508 |
| chr11 | 28548848  | 28549352  | 505 |
| chr24 | 36557002  | 36557503  | 502 |
| chr2  | 124798444 | 124798945 | 502 |
| chr6  | 63157524  | 63158020  | 497 |
| chr18 | 56639661  | 56640155  | 495 |
| chr7  | 45717721  | 45718213  | 493 |
| chr21 | 67772312  | 67772802  | 491 |
| chr18 | 64268313  | 64268802  | 490 |
| chr11 | 77649191  | 77649677  | 487 |
| chr15 | 28282792  | 28283277  | 486 |
| chr11 | 91558306  | 91558784  | 479 |
| chr27 | 14739825  | 14740302  | 478 |
| chr19 | 58674211  | 58674688  | 478 |
| chr10 | 16893689  | 16894165  | 477 |
| chr4  | 69213597  | 69214070  | 474 |
| chr11 | 12862373  | 12862846  | 474 |
| chrX  | 6334025   | 6334496   | 472 |
| chr8  | 51934281  | 51934747  | 467 |
| chr23 | 46083125  | 46083577  | 453 |
| chr2  | 26495140  | 26495592  | 453 |
| chr17 | 64332758  | 64333210  | 453 |
| chr21 | 22612068  | 22612519  | 452 |
| chr25 | 40242437  | 40242887  | 451 |
| chr26 | 37957770  | 37958217  | 448 |
| chr9  | 87170288  | 87170731  | 444 |
| chr25 | 8750731   | 8751173   | 443 |
| chr24 | 48607899  | 48608337  | 439 |
| chr15 | 75256039  | 75256472  | 434 |
| chrX  | 9903581   | 9904013   | 433 |
| chr5  | 113164397 | 113164823 | 427 |
| chr16 | 39516081  | 39516498  | 418 |
| chr10 | 20843681  | 20844098  | 418 |
| chr21 | 68025566  | 68025974  | 409 |
| chrX  | 58897317  | 58897718  | 402 |

|       |               |           |      |
|-------|---------------|-----------|------|
| chr10 | 24177812      | 24178186  | 375  |
| chr8  | 73836410      | 73837185  | 776  |
| chr8  | 24350586      | 24351479  | 894  |
| chr8  | 23825371      | 23825850  | 480  |
| chr2  | 3596099       | 3596665   | 567  |
| chr29 | 49324514      | 49325274  | 761  |
| chrX  | 8985824       | 8986453   | 630  |
| chr17 | 70025814      | 70027207  | 1394 |
| chr29 | 26877763      | 26879006  | 1244 |
| chr11 | 14092330      | 14093513  | 1184 |
| chr18 | 50187698      | 50188709  | 1012 |
| chr20 | 74020772      | 74021766  | 995  |
| chr21 | 33819151      | 33819948  | 798  |
| chr27 | 21559605      | 21560293  | 689  |
| chr4  | 72555668      | 72556297  | 630  |
| chrX  | 59703026      | 59703621  | 596  |
| chr7  | 43763150      | 43763731  | 582  |
| chr9  | 105443223     | 105443791 | 569  |
| chr19 | 60742781      | 60744055  | 1275 |
| chr21 | 47529131      | 47530096  | 966  |
| chr18 | 9803259       | 9804099   | 841  |
| chr25 | 39390341      | 39391148  | 808  |
| chr25 | 459971 460516 | 546       |      |
| chr7  | 46230521      | 46231898  | 1378 |
| chr4  | 33880965      | 33882078  | 1114 |
| chr5  | 10654237      | 10655335  | 1099 |
| chr2  | 49578328      | 49579343  | 1016 |
| chr2  | 24964797      | 24965676  | 880  |
| chr10 | 46190311      | 46191168  | 858  |
| chr3  | 89887969      | 89888807  | 839  |
| chr18 | 56599295      | 56599969  | 675  |
| chr10 | 8344584       | 8345065   | 482  |
| chr6  | 63063776      | 63065071  | 1296 |
| chr17 | 18512878      | 18513649  | 772  |
| chr3  | 113465399     | 113465996 | 598  |
| chr6  | 108667890     | 108668446 | 557  |
| chr28 | 42372801      | 42373353  | 553  |
| chr4  | 121469442     | 121471176 | 1735 |
| chr7  | 80368497      | 80369875  | 1379 |
| chr19 | 58332151      | 58333497  | 1347 |
| chrX  | 72688415      | 72689736  | 1322 |
| chr11 | 81753151      | 81754396  | 1246 |
| chr10 | 99928461      | 99929696  | 1236 |
| chr19 | 20354539      | 20355573  | 1035 |
| chr21 | 69097322      | 69098154  | 833  |
| chr3  | 17475776      | 17476471  | 696  |
| chr23 | 15080043      | 15081692  | 1650 |
| chr7  | 66722029      | 66723664  | 1636 |
| chr18 | 1192441       | 1193728   | 1288 |
| chr29 | 30636781      | 30637792  | 1012 |

|       |               |           |      |
|-------|---------------|-----------|------|
| chr24 | 48588223      | 48589061  | 839  |
| chr19 | 51905604      | 51906769  | 1166 |
| chr19 | 27359008      | 27360020  | 1013 |
| chr5  | 30484336      | 30485147  | 812  |
| chr10 | 70142540      | 70143652  | 1113 |
| chr13 | 38287244      | 38287943  | 700  |
| chr5  | 116335652     | 116336102 | 451  |
| chrX  | 59409111      | 59410140  | 1030 |
| chr1  | 144387497     | 144388179 | 683  |
| chr19 | 12332004      | 12332611  | 608  |
| chr18 | 54775839      | 54776333  | 495  |
| chr3  | 15666660      | 15667767  | 1108 |
| chr23 | 20453195      | 20453689  | 495  |
| chr10 | 17067591      | 17068324  | 734  |
| chr16 | 61647792      | 61648374  | 583  |
| chr11 | 77860909      | 77861637  | 729  |
| chrX  | 66444076      | 66444596  | 521  |
| chr12 | 31995864      | 31996417  | 554  |
| chr26 | 34964699      | 34965395  | 697  |
| chr11 | 70915511      | 70916141  | 631  |
| chr7  | 476931 477517 | 587       |      |
| chr23 | 20000947      | 20001488  | 542  |
| chr23 | 15891112      | 15891600  | 489  |
| chr4  | 98808127      | 98808606  | 480  |
| chr12 | 34268007      | 34268475  | 469  |
| chr13 | 40587527      | 40587988  | 462  |
| chrX  | 81333773      | 81334180  | 408  |
| chr17 | 15638925      | 15639323  | 399  |
| chr26 | 10508475      | 10508857  | 383  |
| chr3  | 117304480     | 117306938 | 2459 |
| chr23 | 15971094      | 15973485  | 2392 |
| chr4  | 121405936     | 121408144 | 2209 |
| chr7  | 38175053      | 38177160  | 2108 |
| chr9  | 67496415      | 67498319  | 1905 |
| chr27 | 30511507      | 30513403  | 1897 |
| chr23 | 18680299      | 18682175  | 1877 |
| chr21 | 9492341       | 9494171   | 1831 |
| chr8  | 63926422      | 63928242  | 1821 |
| chr11 | 70861966      | 70863781  | 1816 |
| chr21 | 47524583      | 47526374  | 1792 |
| chr21 | 9521480       | 9523270   | 1791 |
| chr1  | 71573774      | 71575531  | 1758 |
| chr13 | 58269226      | 58270948  | 1723 |
| chr4  | 123141689     | 123143298 | 1610 |
| chr7  | 11035763      | 11037359  | 1597 |
| chr7  | 13112877      | 13114469  | 1593 |
| chr20 | 8754981       | 8756539   | 1559 |
| chr25 | 23438737      | 23440290  | 1554 |
| chr19 | 8938916       | 8940464   | 1549 |
| chr18 | 11538242      | 11539776  | 1535 |



|       |           |           |      |
|-------|-----------|-----------|------|
| chr26 | 50067915  | 50069424  | 1510 |
| chr24 | 43682559  | 43684066  | 1508 |
| chr3  | 123219766 | 123221267 | 1502 |
| chr19 | 26928212  | 26929672  | 1461 |
| chr26 | 28145007  | 28146458  | 1452 |
| chr13 | 22917663  | 22919108  | 1446 |
| chr19 | 56316460  | 56317904  | 1445 |
| chr12 | 64660300  | 64661738  | 1439 |
| chrX  | 8946186   | 8947617   | 1432 |
| chr18 | 6608061   | 6609492   | 1432 |
| chr10 | 51447497  | 51448922  | 1426 |
| chr3  | 111660339 | 111661756 | 1418 |
| chr25 | 3036854   | 3038271   | 1418 |
| chr1  | 128259699 | 128261106 | 1408 |
| chr18 | 51102674  | 51104077  | 1404 |
| chr5  | 60314869  | 60316257  | 1389 |
| chr18 | 43457831  | 43459208  | 1378 |
| chr18 | 54940915  | 54942284  | 1370 |
| chr3  | 106502135 | 106503498 | 1364 |
| chr19 | 59377831  | 59379191  | 1361 |
| chr29 | 47917220  | 47918577  | 1358 |
| chr13 | 21889030  | 21890369  | 1340 |
| chr1  | 137873660 | 137874997 | 1338 |
| chr4  | 121383701 | 121385036 | 1336 |
| chr28 | 34019050  | 34020384  | 1335 |
| chr3  | 114922018 | 114923348 | 1331 |
| chr20 | 74519769  | 74521093  | 1325 |
| chr29 | 31555621  | 31556942  | 1322 |
| chr10 | 17158149  | 17159467  | 1319 |
| chr10 | 90281240  | 90282555  | 1316 |
| chr10 | 10765996  | 10767308  | 1313 |
| chrX  | 10599557  | 10600854  | 1298 |
| chr25 | 37779707  | 37780990  | 1284 |
| chr11 | 80562080  | 80563349  | 1270 |
| chr4  | 101414267 | 101415521 | 1255 |
| chr5  | 29751755  | 29753007  | 1253 |
| chr3  | 39117215  | 39118460  | 1246 |
| chr12 | 74451643  | 74452881  | 1239 |
| chr3  | 122052380 | 122053613 | 1234 |
| chr17 | 68666792  | 68668023  | 1232 |
| chr2  | 74029477  | 74030707  | 1231 |
| chr4  | 69737404  | 69738628  | 1225 |
| chr23 | 16522431  | 16523655  | 1225 |
| chr15 | 64478067  | 64479291  | 1225 |
| chr23 | 31444440  | 31445659  | 1220 |
| chrX  | 7717037   | 7718253   | 1217 |
| chr20 | 19812508  | 19813724  | 1217 |
| chrX  | 74482056  | 74483267  | 1212 |
| chr7  | 94358305  | 94359516  | 1212 |
| chr11 | 100280531 | 100281738 | 1208 |

|       |           |           |      |
|-------|-----------|-----------|------|
| chr18 | 11992583  | 11993785  | 1203 |
| chrX  | 54380933  | 54382125  | 1193 |
| chr4  | 79041832  | 79043024  | 1193 |
| chr7  | 52394910  | 52396091  | 1182 |
| chr7  | 14486907  | 14488083  | 1177 |
| chr5  | 27938899  | 27940063  | 1165 |
| chrX  | 59748995  | 59750158  | 1164 |
| chr2  | 111235482 | 111236641 | 1160 |
| chr9  | 26599862  | 26601020  | 1159 |
| chr18 | 45300531  | 45301685  | 1155 |
| chrX  | 35202206  | 35203358  | 1153 |
| chr15 | 84535014  | 84536165  | 1152 |
| chr29 | 35214107  | 35215254  | 1148 |
| chr23 | 10252403  | 10253548  | 1146 |
| chr14 | 6708935   | 6710069   | 1135 |
| chr7  | 43764052  | 43765185  | 1134 |
| chr3  | 115495227 | 115496360 | 1134 |
| chr19 | 25994903  | 25996036  | 1134 |
| chr19 | 63704095  | 63705225  | 1131 |
| chr25 | 40216629  | 40217758  | 1130 |
| chr10 | 20464660  | 20465775  | 1116 |
| chr13 | 58882639  | 58883750  | 1112 |
| chr10 | 70416058  | 70417169  | 1112 |
| chr4  | 90367988  | 90369095  | 1108 |
| chr29 | 1556939   | 1558041   | 1103 |
| chr10 | 68231820  | 68232920  | 1101 |
| chr14 | 34088866  | 34089964  | 1099 |
| chr29 | 2534758   | 2535840   | 1083 |
| chr10 | 15077109  | 15078176  | 1068 |
| chr21 | 34360932  | 34361994  | 1063 |
| chr2  | 70239484  | 70240542  | 1059 |
| chr13 | 70029608  | 70030663  | 1056 |
| chr22 | 16415809  | 16416860  | 1052 |
| chr3  | 11534289  | 11535335  | 1047 |
| chr25 | 28068650  | 28069694  | 1045 |
| chr29 | 44563560  | 44564597  | 1038 |
| chr7  | 37467707  | 37468741  | 1035 |
| chr5  | 28902044  | 28903073  | 1030 |
| chr12 | 81825575  | 81826602  | 1028 |
| chr19 | 64764313  | 64765338  | 1026 |
| chr29 | 2419717   | 2420739   | 1023 |
| chr3  | 105591592 | 105592609 | 1018 |
| chr24 | 61107900  | 61108915  | 1016 |
| chr2  | 132504770 | 132505783 | 1014 |
| chr12 | 83818792  | 83819803  | 1012 |
| chr4  | 5382046   | 5383054   | 1009 |
| chr7  | 20813040  | 20814035  | 996  |
| chr28 | 42171685  | 42172678  | 994  |
| chr3  | 31683248  | 31684240  | 993  |
| chr3  | 22465661  | 22466652  | 992  |

|       |               |           |     |
|-------|---------------|-----------|-----|
| chr28 | 33725237      | 33726225  | 989 |
| chr18 | 18571288      | 18572274  | 987 |
| chr25 | 40240243      | 40241228  | 986 |
| chr6  | 107134659     | 107135641 | 983 |
| chr17 | 4154596       | 4155576   | 981 |
| chrX  | 23160663      | 23161642  | 980 |
| chrX  | 11002356      | 11003334  | 979 |
| chr9  | 91238833      | 91239797  | 965 |
| chr6  | 119360721     | 119361685 | 965 |
| chr5  | 28961637      | 28962599  | 963 |
| chrX  | 72836961      | 72837922  | 962 |
| chr8  | 60194506      | 60195465  | 960 |
| chr23 | 27859961      | 27860920  | 960 |
| chr20 | 70574156      | 70575113  | 958 |
| chr5  | 61495693      | 61496643  | 951 |
| chr3  | 113237858     | 113238808 | 951 |
| chr23 | 15798953      | 15799900  | 948 |
| chr11 | 103309128     | 103310074 | 947 |
| chr17 | 12573076      | 12574020  | 945 |
| chr22 | 50597166      | 50598103  | 938 |
| chr5  | 122828588     | 122829520 | 933 |
| chr23 | 10551018      | 10551948  | 931 |
| chr4  | 5616681       | 5617604   | 924 |
| chr1  | 1788160       | 1789083   | 924 |
| chr12 | 83966430      | 83967345  | 916 |
| chr2  | 25684318      | 25685232  | 915 |
| chr3  | 22473045      | 22473957  | 913 |
| chr12 | 84587351      | 84588259  | 909 |
| chr15 | 62565690      | 62566597  | 908 |
| chr5  | 110918859     | 110919761 | 903 |
| chr21 | 1926294       | 1927194   | 901 |
| chr13 | 75814650      | 75815549  | 900 |
| chr21 | 24416835      | 24417729  | 895 |
| chr10 | 16859139      | 16860032  | 894 |
| chrX  | 73461935      | 73462822  | 888 |
| chr21 | 47718156      | 47719038  | 883 |
| chr5  | 81603571      | 81604444  | 874 |
| chr10 | 103505374     | 103506247 | 874 |
| chr11 | 105386815     | 105387674 | 860 |
| chr17 | 74567159      | 74568009  | 851 |
| chr16 | 68753101      | 68753949  | 849 |
| chr23 | 36834934      | 36835780  | 847 |
| chr14 | 826843 827686 | 844       |     |
| chr14 | 67847162      | 67848002  | 841 |
| chr7  | 13396715      | 13397543  | 829 |
| chr1  | 100065683     | 100066509 | 827 |
| chr25 | 43855072      | 43855893  | 822 |
| chr29 | 48704810      | 48705628  | 819 |
| chr3  | 45696323      | 45697140  | 818 |
| chr11 | 11045418      | 11046225  | 808 |

|       |           |           |     |
|-------|-----------|-----------|-----|
| chr18 | 11642950  | 11643754  | 805 |
| chr19 | 12334146  | 12334947  | 802 |
| chr3  | 110818492 | 110819291 | 800 |
| chr25 | 44018450  | 44019241  | 792 |
| chr10 | 81698255  | 81699044  | 790 |
| chrX  | 78469324  | 78470112  | 789 |
| chr29 | 51776442  | 51777229  | 788 |
| chr21 | 67398221  | 67399008  | 788 |
| chr20 | 21201809  | 21202593  | 785 |
| chr23 | 8463052   | 8463835   | 784 |
| chr11 | 70886498  | 70887278  | 781 |
| chr24 | 36034025  | 36034804  | 780 |
| chrX  | 58451280  | 58452054  | 775 |
| chr13 | 62782844  | 62783617  | 774 |
| chr3  | 123628220 | 123628992 | 773 |
| chr3  | 99106628  | 99107394  | 767 |
| chr15 | 45858357  | 45859123  | 767 |
| chr24 | 49742119  | 49742883  | 765 |
| chr1  | 148009162 | 148009925 | 764 |
| chr17 | 65965553  | 65966315  | 763 |
| chr19 | 19745437  | 19746196  | 760 |
| chr25 | 37870606  | 37871362  | 757 |
| chr21 | 47717382  | 47718137  | 756 |
| chrX  | 78307150  | 78307904  | 755 |
| chr5  | 29185178  | 29185932  | 755 |
| chr12 | 31320167  | 31320919  | 753 |
| chr17 | 6995732   | 6996483   | 752 |
| chr19 | 39207010  | 39207754  | 745 |
| chr25 | 22884086  | 22884828  | 743 |
| chr18 | 18420448  | 18421190  | 743 |
| chr12 | 14940707  | 14941445  | 739 |
| chr23 | 19869882  | 19870616  | 735 |
| chr19 | 52476701  | 52477434  | 734 |
| chr19 | 38969846  | 38970579  | 734 |
| chr1  | 114236249 | 114236979 | 731 |
| chr15 | 42516862  | 42517588  | 727 |
| chr5  | 29731762  | 29732475  | 714 |
| chr29 | 17870908  | 17871621  | 714 |
| chr21 | 34764083  | 34764795  | 713 |
| chr14 | 66271466  | 66272176  | 711 |
| chr2  | 123020547 | 123021256 | 710 |
| chr8  | 80997000  | 80997708  | 709 |
| chr7  | 43720943  | 43721646  | 704 |
| chr14 | 1925047   | 1925750   | 704 |
| chr9  | 52401144  | 52401846  | 703 |
| chr25 | 29367827  | 29368525  | 699 |
| chr10 | 32258481  | 32259178  | 698 |
| chr3  | 56836222  | 56836918  | 697 |
| chrX  | 7885947   | 7886642   | 696 |
| chr7  | 10964428  | 10965121  | 694 |

|       |           |           |     |
|-------|-----------|-----------|-----|
| chr3  | 106547858 | 106548551 | 694 |
| chr23 | 31342716  | 31343408  | 693 |
| chrX  | 75411780  | 75412471  | 692 |
| chr10 | 72664836  | 72665524  | 689 |
| chr10 | 6928208   | 6928895   | 688 |
| chrX  | 45523742  | 45524425  | 684 |
| chr18 | 10782674  | 10783347  | 674 |
| chr8  | 28514201  | 28514870  | 670 |
| chr16 | 40611988  | 40612656  | 669 |
| chr8  | 45756548  | 45757213  | 666 |
| chr16 | 68891022  | 68891687  | 666 |
| chr11 | 77731514  | 77732175  | 662 |
| chrX  | 5460020   | 5460680   | 661 |
| chr10 | 83559205  | 83559855  | 651 |
| chr5  | 10610059  | 10610705  | 647 |
| chr15 | 81171699  | 81172342  | 644 |
| chr18 | 53169788  | 53170429  | 642 |
| chr19 | 38833909  | 38834547  | 639 |
| chr3  | 22568000  | 22568633  | 634 |
| chr23 | 17464155  | 17464786  | 632 |
| chr8  | 8307187   | 8307816   | 630 |
| chr18 | 51718940  | 51719564  | 625 |
| chr29 | 34638241  | 34638864  | 624 |
| chr18 | 62464653  | 62465275  | 623 |
| chrX  | 7050231   | 7050852   | 622 |
| chrX  | 8307636   | 8308254   | 619 |
| chr16 | 47324578  | 47325194  | 617 |
| chrX  | 59502326  | 59502939  | 614 |
| chrX  | 9241855   | 9242463   | 609 |
| chr11 | 70838748  | 70839356  | 609 |
| chrX  | 47651756  | 47652361  | 606 |
| chr22 | 30090557  | 30091162  | 606 |
| chr21 | 60706176  | 60706773  | 598 |
| chr19 | 44882441  | 44883036  | 596 |
| chr10 | 70055865  | 70056460  | 596 |
| chr23 | 53267136  | 53267730  | 595 |
| chr3  | 23072950  | 23073539  | 590 |
| chr8  | 63656765  | 63657353  | 589 |
| chr19 | 34628415  | 34628998  | 584 |
| chr29 | 36692733  | 36693315  | 583 |
| chr2  | 117708281 | 117708862 | 582 |
| chr13 | 68208088  | 68208668  | 581 |
| chrX  | 7584319   | 7584897   | 579 |
| chr3  | 127181614 | 127182192 | 579 |
| chr9  | 90276244  | 90276820  | 577 |
| chr8  | 108789320 | 108789896 | 577 |
| chr18 | 49546191  | 49546762  | 572 |
| chrX  | 50320473  | 50321043  | 571 |
| chr19 | 41213365  | 41213935  | 571 |
| chr19 | 39506571  | 39507140  | 570 |

|       |           |           |     |
|-------|-----------|-----------|-----|
| chr5  | 117584027 | 117584590 | 564 |
| chr21 | 58720512  | 58721071  | 560 |
| chr29 | 27218631  | 27219184  | 554 |
| chr20 | 8605401   | 8605953   | 553 |
| chrX  | 50755530  | 50756078  | 549 |
| chr18 | 34828400  | 34828946  | 547 |
| chr29 | 49754017  | 49754557  | 541 |
| chrX  | 21676224  | 21676763  | 540 |
| chr26 | 50845028  | 50845567  | 540 |
| chr18 | 52824778  | 52825315  | 538 |
| chrX  | 12004103  | 12004639  | 537 |
| chr26 | 18511342  | 18511871  | 530 |
| chr11 | 100910405 | 100910933 | 529 |
| chrX  | 60433056  | 60433583  | 528 |
| chr17 | 76299969  | 76300492  | 524 |
| chr11 | 28330310  | 28330832  | 523 |
| chr15 | 36665445  | 36665965  | 521 |
| chr19 | 39559480  | 39559998  | 519 |
| chr23 | 44404529  | 44405044  | 516 |
| chr13 | 62250012  | 62250527  | 516 |
| chr29 | 48791164  | 48791677  | 514 |
| chr19 | 58732289  | 58732802  | 514 |
| chr3  | 10564995  | 10565503  | 509 |
| chr1  | 2164126   | 2164634   | 509 |
| chr10 | 20926189  | 20926694  | 506 |
| chr19 | 40432380  | 40432880  | 501 |
| chr18 | 64316028  | 64316528  | 501 |
| chr1  | 1554125   | 1554625   | 501 |
| chr12 | 10754487  | 10754986  | 500 |
| chr21 | 11892271  | 11892769  | 499 |
| chr18 | 53267673  | 53268171  | 499 |
| chr14 | 27317141  | 27317638  | 498 |
| chr22 | 50586815  | 50587305  | 491 |
| chrX  | 37718853  | 37719342  | 490 |
| chrX  | 7423504   | 7423992   | 489 |
| chr7  | 19833679  | 19834167  | 489 |
| chr19 | 33093585  | 33094073  | 489 |
| chr14 | 29190937  | 29191425  | 489 |
| chrX  | 7790678   | 7791165   | 488 |
| chr6  | 101072114 | 101072600 | 487 |
| chr10 | 15073288  | 15073771  | 484 |
| chrX  | 7599483   | 7599964   | 482 |
| chr29 | 23646584  | 23647061  | 478 |
| chr25 | 37697745  | 37698221  | 477 |
| chr10 | 87170203  | 87170679  | 477 |
| chr2  | 134064751 | 134065223 | 473 |
| chr12 | 22986581  | 22987047  | 467 |
| chr6  | 115902515 | 115902979 | 465 |
| chr18 | 52979741  | 52980203  | 463 |
| chr4  | 110048318 | 110048775 | 458 |

|       |           |           |      |
|-------|-----------|-----------|------|
| chr14 | 59023880  | 59024337  | 458  |
| chr17 | 55862139  | 55862594  | 456  |
| chr2  | 76634581  | 76635033  | 453  |
| chr10 | 61473863  | 61474314  | 452  |
| chrX  | 30454423  | 30454870  | 448  |
| chr20 | 5048307   | 5048754   | 448  |
| chr9  | 44922176  | 44922622  | 447  |
| chr21 | 28323883  | 28324325  | 443  |
| chr26 | 51589759  | 51590199  | 441  |
| chr16 | 68804851  | 68805289  | 439  |
| chr23 | 7397445   | 7397881   | 437  |
| chr10 | 36841552  | 36841988  | 437  |
| chr9  | 62432675  | 62433108  | 434  |
| chr3  | 22920157  | 22920589  | 433  |
| chr21 | 25971968  | 25972399  | 432  |
| chr18 | 53311616  | 53312047  | 432  |
| chr21 | 2769834   | 2770261   | 428  |
| chr18 | 1521079   | 1521506   | 428  |
| chr23 | 19626624  | 19627050  | 427  |
| chr14 | 34011242  | 34011667  | 426  |
| chrX  | 58731062  | 58731486  | 425  |
| chr8  | 24164169  | 24164590  | 422  |
| chr3  | 22892373  | 22892790  | 418  |
| chr25 | 11084702  | 11085118  | 417  |
| chrX  | 72940886  | 72941301  | 416  |
| chr23 | 17499853  | 17500262  | 410  |
| chr18 | 50322984  | 50323390  | 407  |
| chr5  | 57074829  | 57075234  | 406  |
| chr23 | 19865900  | 19866305  | 406  |
| chr18 | 11797314  | 11797712  | 399  |
| chr9  | 87734641  | 87735033  | 393  |
| chr5  | 116836613 | 116837336 | 724  |
| chr21 | 2770908   | 2771549   | 642  |
| chr25 | 44037112  | 44038056  | 945  |
| chr25 | 3042771   | 3043726   | 956  |
| chrX  | 8954911   | 8955337   | 427  |
| chr7  | 96287532  | 96288238  | 707  |
| chr29 | 49303807  | 49304235  | 429  |
| chr28 | 46065822  | 46066588  | 767  |
| chr25 | 2981684   | 2982353   | 670  |
| chr7  | 52393186  | 52394376  | 1191 |
| chrX  | 7152912   | 7153442   | 531  |
| chrX  | 24551980  | 24552532  | 553  |
| chrX  | 33721704  | 33722210  | 507  |
| chr24 | 64977138  | 64977756  | 619  |
| chr9  | 90476008  | 90477206  | 1199 |
| chr1  | 153886762 | 153887546 | 785  |
| chr7  | 38154441  | 38154991  | 551  |
| chr15 | 23294677  | 23295103  | 427  |
| chrX  | 8942481   | 8943314   | 834  |

|       |           |           |      |
|-------|-----------|-----------|------|
| chr3  | 26133414  | 26135629  | 2216 |
| chr23 | 49915347  | 49917231  | 1885 |
| chr15 | 13637479  | 13639082  | 1604 |
| chr1  | 1583028   | 1583993   | 966  |
| chr2  | 124799247 | 124800096 | 850  |
| chr24 | 20362576  | 20363362  | 787  |
| chr10 | 21261817  | 21262537  | 721  |
| chr6  | 121762875 | 121763492 | 618  |
| chr29 | 33577875  | 33578361  | 487  |
| chr4  | 121721351 | 121721807 | 457  |
| chr11 | 4355503   | 4357380   | 1878 |
| chr23 | 15840571  | 15842198  | 1628 |
| chr19 | 17674556  | 17676000  | 1445 |
| chr10 | 17119184  | 17120579  | 1396 |
| chr8  | 114247322 | 114248695 | 1374 |
| chr21 | 65213479  | 65214666  | 1188 |
| chr11 | 90405795  | 90406920  | 1126 |
| chr10 | 49968753  | 49969822  | 1070 |
| chrX  | 72239522  | 72240567  | 1046 |
| chr13 | 73534353  | 73535365  | 1013 |
| chr23 | 52666350  | 52668070  | 1721 |
| chrX  | 7521655   | 7522886   | 1232 |
| chr29 | 51004316  | 51005543  | 1228 |
| chr16 | 2900185   | 2901221   | 1037 |
| chr9  | 104972151 | 104973130 | 980  |
| chr5  | 114076257 | 114077169 | 913  |
| chr11 | 72625962  | 72626743  | 782  |
| chr3  | 22867122  | 22867541  | 420  |
| chr29 | 47271738  | 47273115  | 1378 |
| chr11 | 70888390  | 70889340  | 951  |
| chr22 | 45454590  | 45455395  | 806  |
| chr9  | 87835806  | 87836297  | 492  |
| chr13 | 10977014  | 10977479  | 466  |
| chr11 | 28649130  | 28650787  | 1658 |
| chrX  | 83027506  | 83028921  | 1416 |
| chr14 | 25072258  | 25073514  | 1257 |
| chr10 | 74723214  | 74724246  | 1033 |
| chrX  | 19752056  | 19752958  | 903  |
| chr22 | 13123898  | 13124753  | 856  |
| chr18 | 62952873  | 62953568  | 696  |
| chr19 | 31841759  | 31842413  | 655  |
| chrX  | 10727418  | 10728001  | 584  |
| chr17 | 68553690  | 68554207  | 518  |
| chr21 | 59887313  | 59888788  | 1476 |
| chr4  | 116933522 | 116934848 | 1327 |
| chr1  | 123075532 | 123076467 | 936  |
| chr17 | 75034315  | 75035170  | 856  |
| chr23 | 17490469  | 17491264  | 796  |
| chr23 | 7697517   | 7697956   | 440  |
| chr12 | 84671357  | 84672703  | 1347 |



|       |               |           |      |
|-------|---------------|-----------|------|
| chr9  | 90317171      | 90318288  | 1118 |
| chr13 | 52673490      | 52674393  | 904  |
| chr20 | 653499 654343 | 845       |      |
| chr11 | 77605278      | 77606065  | 788  |
| chr8  | 24445333      | 24446106  | 774  |
| chr18 | 3552257       | 3552762   | 506  |
| chrX  | 8941062       | 8941419   | 358  |
| chr29 | 48788231      | 48789238  | 1008 |
| chr17 | 52484083      | 52484634  | 552  |
| chr23 | 23746573      | 23747037  | 465  |
| chr15 | 43593477      | 43594121  | 645  |
| chrX  | 16949848      | 16950249  | 402  |
| chr20 | 45416945      | 45418512  | 1568 |
| chr19 | 41250288      | 41251179  | 892  |
| chr19 | 38760167      | 38760983  | 817  |
| chr5  | 28874133      | 28874579  | 447  |
| chr1  | 96193466      | 96194357  | 892  |
| chr5  | 28385724      | 28386981  | 1258 |
| chr22 | 56292337      | 56293431  | 1095 |
| chrX  | 3197373       | 3197955   | 583  |
| chr20 | 74097149      | 74098188  | 1040 |
| chr10 | 76058185      | 76059199  | 1015 |
| chr11 | 107159698     | 107160534 | 837  |
| chr5  | 30321105      | 30321880  | 776  |
| chr11 | 107584669     | 107585350 | 682  |
| chrX  | 59504705      | 59505324  | 620  |
| chr29 | 2529276       | 2529888   | 613  |
| chr13 | 57621599      | 57622161  | 563  |
| chr12 | 74462292      | 74462834  | 543  |
| chr8  | 93710604      | 93711115  | 512  |
| chrX  | 58762742      | 58763235  | 494  |
| chr21 | 20631044      | 20631507  | 464  |
| chrX  | 47398423      | 47398827  | 405  |
| chr6  | 5797719       | 5798061   | 343  |
| chr18 | 24304446      | 24304852  | 407  |
| chr19 | 46095162      | 46098465  | 3304 |
| chr23 | 15870768      | 15873355  | 2588 |
| chr13 | 55461143      | 55463611  | 2469 |
| chr29 | 33571822      | 33574177  | 2356 |
| chr6  | 96162080      | 96164338  | 2259 |
| chr14 | 25850480      | 25852624  | 2145 |
| chr8  | 62505182      | 62507205  | 2024 |
| chr24 | 30501785      | 30503801  | 2017 |
| chrX  | 31381600      | 31383578  | 1979 |
| chr13 | 75841979      | 75843957  | 1979 |
| chr2  | 136614062     | 136615988 | 1927 |
| chr15 | 81158571      | 81160495  | 1925 |
| chr5  | 81503652      | 81505423  | 1772 |
| chr2  | 122971841     | 122973603 | 1763 |
| chr1  | 102177152     | 102178858 | 1707 |

|       |           |           |      |
|-------|-----------|-----------|------|
| chr7  | 46190951  | 46192653  | 1703 |
| chr22 | 56177257  | 56178920  | 1664 |
| chr11 | 47259266  | 47260849  | 1584 |
| chr5  | 120389997 | 120391577 | 1581 |
| chr11 | 87962990  | 87964558  | 1569 |
| chr26 | 22306388  | 22307955  | 1568 |
| chr18 | 57326494  | 57328061  | 1568 |
| chr14 | 42554505  | 42556047  | 1543 |
| chr6  | 63812520  | 63814044  | 1525 |
| chr20 | 73402991  | 73404495  | 1505 |
| chr18 | 50469726  | 50471229  | 1504 |
| chr19 | 39107716  | 39109209  | 1494 |
| chr17 | 58841450  | 58842923  | 1474 |
| chr13 | 72862565  | 72864038  | 1474 |
| chr3  | 26124210  | 26125668  | 1459 |
| chr13 | 29295507  | 29296938  | 1432 |
| chr19 | 14240741  | 14242167  | 1427 |
| chr9  | 90397373  | 90398797  | 1425 |
| chr8  | 60310482  | 60311898  | 1417 |
| chr24 | 49131550  | 49132959  | 1410 |
| chr25 | 14962612  | 14964014  | 1403 |
| chr10 | 16860209  | 16861601  | 1393 |
| chr16 | 47603707  | 47605092  | 1386 |
| chr25 | 44021760  | 44023132  | 1373 |
| chr15 | 24391785  | 24393147  | 1363 |
| chr5  | 94237328  | 94238686  | 1359 |
| chr15 | 43340425  | 43341778  | 1354 |
| chr5  | 51887676  | 51889019  | 1344 |
| chr21 | 64516473  | 64517810  | 1338 |
| chr2  | 111655884 | 111657220 | 1337 |
| chr18 | 57034445  | 57035776  | 1332 |
| chrX  | 73342811  | 73344133  | 1323 |
| chr19 | 42259002  | 42260321  | 1320 |
| chr5  | 108579551 | 108580862 | 1312 |
| chr13 | 54499079  | 54500368  | 1290 |
| chr27 | 35367445  | 35368732  | 1288 |
| chr17 | 73177434  | 73178721  | 1288 |
| chr19 | 47275725  | 47277003  | 1279 |
| chr11 | 56739939  | 56741207  | 1269 |
| chr15 | 33476730  | 33477997  | 1268 |
| chr21 | 31089139  | 31090394  | 1256 |
| chr18 | 22694927  | 22696182  | 1256 |
| chr3  | 22930842  | 22932095  | 1254 |
| chr3  | 125625934 | 125627163 | 1230 |
| chr17 | 70112635  | 70113862  | 1228 |
| chr9  | 9372649   | 9373868   | 1220 |
| chr1  | 152261163 | 152262375 | 1213 |
| chr25 | 2078196   | 2079400   | 1205 |
| chr17 | 66703880  | 66705074  | 1195 |
| chrX  | 22429085  | 22430276  | 1192 |

|       |           |           |      |
|-------|-----------|-----------|------|
| chr1  | 19194440  | 19195628  | 1189 |
| chr8  | 93139465  | 93140649  | 1185 |
| chr11 | 91382258  | 91383441  | 1184 |
| chr26 | 49302162  | 49303339  | 1178 |
| chr10 | 25849085  | 25850255  | 1171 |
| chr20 | 30951937  | 30953103  | 1167 |
| chrX  | 13648690  | 13649843  | 1154 |
| chr23 | 10558535  | 10559680  | 1146 |
| chrX  | 36652088  | 36653232  | 1145 |
| chr10 | 8363714   | 8364852   | 1139 |
| chr5  | 30497907  | 30499043  | 1137 |
| chr3  | 113407503 | 113408637 | 1135 |
| chr24 | 21961970  | 21963092  | 1123 |
| chrX  | 23349831  | 23350952  | 1122 |
| chr19 | 60795206  | 60796322  | 1117 |
| chrX  | 56932552  | 56933667  | 1116 |
| chr11 | 28530564  | 28531679  | 1116 |
| chr24 | 42713356  | 42714470  | 1115 |
| chrX  | 31914770  | 31915883  | 1114 |
| chr19 | 10900003  | 10901107  | 1105 |
| chr8  | 8718611   | 8719713   | 1103 |
| chr3  | 113979326 | 113980416 | 1091 |
| chr2  | 134302226 | 134303314 | 1089 |
| chr16 | 32739246  | 32740333  | 1088 |
| chr7  | 42149919  | 42151005  | 1087 |
| chr5  | 26684493  | 26685577  | 1085 |
| chr8  | 25274151  | 25275229  | 1079 |
| chr14 | 39050434  | 39051512  | 1079 |
| chrX  | 50627539  | 50628606  | 1068 |
| chr12 | 36424346  | 36425407  | 1062 |
| chr2  | 124973106 | 124974163 | 1058 |
| chr2  | 111412023 | 111413078 | 1056 |
| chr17 | 12566242  | 12567293  | 1052 |
| chr1  | 68416141  | 68417192  | 1052 |
| chr17 | 58972182  | 58973229  | 1048 |
| chr5  | 29944702  | 29945742  | 1041 |
| chr13 | 31719372  | 31720410  | 1039 |
| chrX  | 21218397  | 21219426  | 1030 |
| chr5  | 11953696  | 11954723  | 1028 |
| chr19 | 39129807  | 39130831  | 1025 |
| chr10 | 11650732  | 11651753  | 1022 |
| chr16 | 2197025   | 2198039   | 1015 |
| chr6  | 103402420 | 103403431 | 1012 |
| chr7  | 10056623  | 10057633  | 1011 |
| chr17 | 66174650  | 66175653  | 1004 |
| chr18 | 9701262   | 9702264   | 1003 |
| chr2  | 134755568 | 134756568 | 1001 |
| chr18 | 55008162  | 55009161  | 1000 |
| chr17 | 70100438  | 70101435  | 998  |
| chr19 | 46838970  | 46839966  | 997  |

|       |               |           |     |
|-------|---------------|-----------|-----|
| chr2  | 42836030      | 42837025  | 996 |
| chr11 | 75095571      | 75096565  | 995 |
| chr18 | 56626403      | 56627394  | 992 |
| chr29 | 41711636      | 41712623  | 988 |
| chr18 | 56904069      | 56905054  | 986 |
| chr5  | 116837480     | 116838461 | 982 |
| chr18 | 64326608      | 64327584  | 977 |
| chr14 | 3500989       | 3501961   | 973 |
| chr3  | 115336944     | 115337915 | 972 |
| chrX  | 37330573      | 37331534  | 962 |
| chr10 | 53472718      | 53473677  | 960 |
| chr25 | 37200519      | 37201470  | 952 |
| chr29 | 46271531      | 46272481  | 951 |
| chr3  | 85365236      | 85366181  | 946 |
| chrX  | 7913419       | 7914358   | 940 |
| chr4  | 106678321     | 106679259 | 939 |
| chrX  | 23155930      | 23156867  | 938 |
| chrX  | 47376574      | 47377509  | 936 |
| chr26 | 51659631      | 51660566  | 936 |
| chr17 | 37620617      | 37621551  | 935 |
| chr11 | 77634344      | 77635276  | 933 |
| chr1  | 132110474     | 132111406 | 933 |
| chr3  | 88605672      | 88606603  | 932 |
| chr2  | 139202742     | 139203671 | 930 |
| chr18 | 13534453      | 13535379  | 927 |
| chr3  | 17472378      | 17473292  | 915 |
| chrX  | 72781866      | 72782766  | 901 |
| chr14 | 961314 962213 | 900       |     |
| chrX  | 74260862      | 74261759  | 898 |
| chr28 | 33812109      | 33813006  | 898 |
| chr8  | 108707838     | 108708719 | 882 |
| chr19 | 20326020      | 20326900  | 881 |
| chr18 | 62747574      | 62748454  | 881 |
| chr22 | 54217472      | 54218347  | 876 |
| chrX  | 47644636      | 47645510  | 875 |
| chr7  | 46153385      | 46154255  | 871 |
| chr25 | 18132905      | 18133775  | 871 |
| chrX  | 59761690      | 59762558  | 869 |
| chr22 | 61196525      | 61197388  | 864 |
| chr19 | 59355196      | 59356059  | 864 |
| chr12 | 32097922      | 32098780  | 859 |
| chr12 | 28972113      | 28972970  | 858 |
| chr12 | 74530931      | 74531787  | 857 |
| chr27 | 15410310      | 15411165  | 856 |
| chr10 | 43844058      | 43844908  | 851 |
| chrX  | 53623550      | 53624398  | 849 |
| chr5  | 31669917      | 31670761  | 845 |
| chrX  | 53812503      | 53813346  | 844 |
| chr7  | 52386847      | 52387690  | 844 |
| chr29 | 37072780      | 37073623  | 844 |

|       |               |           |     |
|-------|---------------|-----------|-----|
| chr20 | 4955481       | 4956323   | 843 |
| chr25 | 651443 652278 | 836       |     |
| chr17 | 26906818      | 26907653  | 836 |
| chr7  | 43729253      | 43730081  | 829 |
| chr3  | 22644920      | 22645746  | 827 |
| chrX  | 65743074      | 65743890  | 817 |
| chr17 | 63419171      | 63419986  | 816 |
| chr13 | 76002083      | 76002897  | 815 |
| chr13 | 38257259      | 38258069  | 811 |
| chrX  | 7408542       | 7409351   | 810 |
| chr15 | 31957985      | 31958793  | 809 |
| chr11 | 100909199     | 100910004 | 806 |
| chrX  | 353946 354750 | 805       |     |
| chr23 | 14952763      | 14953566  | 804 |
| chr18 | 23617977      | 23618777  | 801 |
| chr13 | 68920136      | 68920936  | 801 |
| chr4  | 82135004      | 82135800  | 797 |
| chrX  | 59261201      | 59261994  | 794 |
| chr18 | 11519268      | 11520060  | 793 |
| chr7  | 15656196      | 15656987  | 792 |
| chr13 | 56350380      | 56351169  | 790 |
| chrX  | 13526008      | 13526796  | 789 |
| chr27 | 33468421      | 33469209  | 789 |
| chr6  | 16269735      | 16270520  | 786 |
| chr28 | 11380867      | 11381652  | 786 |
| chrX  | 50287101      | 50287883  | 783 |
| chr4  | 124312088     | 124312870 | 783 |
| chr23 | 49712787      | 49713565  | 779 |
| chr14 | 1383853       | 1384631   | 779 |
| chr10 | 72663983      | 72664759  | 777 |
| chr20 | 38405933      | 38406705  | 773 |
| chr7  | 65599125      | 65599896  | 772 |
| chr23 | 20002801      | 20003569  | 769 |
| chrX  | 59540715      | 59541471  | 757 |
| chr19 | 54442084      | 54442840  | 757 |
| chr23 | 15859956      | 15860701  | 746 |
| chr23 | 11475116      | 11475861  | 746 |
| chr4  | 70709797      | 70710540  | 744 |
| chr15 | 73741331      | 73742074  | 744 |
| chr20 | 33569975      | 33570714  | 740 |
| chr20 | 8679794       | 8680533   | 740 |
| chr2  | 21880753      | 21881485  | 733 |
| chr23 | 8791444       | 8792175   | 732 |
| chr18 | 12137144      | 12137871  | 728 |
| chr17 | 61075593      | 61076320  | 728 |
| chr4  | 120806462     | 120807188 | 727 |
| chr19 | 37958057      | 37958781  | 725 |
| chr6  | 16232088      | 16232809  | 722 |
| chr23 | 52742844      | 52743564  | 721 |
| chr13 | 57576606      | 57577324  | 719 |

|       |               |           |     |
|-------|---------------|-----------|-----|
| chr5  | 112240321     | 112241037 | 717 |
| chr18 | 22710946      | 22711661  | 716 |
| chr12 | 74438441      | 74439156  | 716 |
| chr19 | 58323388      | 58324101  | 714 |
| chr17 | 66169670      | 66170381  | 712 |
| chr25 | 2235603       | 2236311   | 709 |
| chr7  | 89429627      | 89430333  | 707 |
| chr20 | 73684701      | 73685404  | 704 |
| chr28 | 3477094       | 3477796   | 703 |
| chr11 | 2264565       | 2265266   | 702 |
| chr10 | 83089661      | 83090362  | 702 |
| chr23 | 43420469      | 43421168  | 700 |
| chr22 | 2840937       | 2841633   | 697 |
| chr17 | 65962369      | 65963065  | 697 |
| chr9  | 44923312      | 44924004  | 693 |
| chrX  | 7438235       | 7438924   | 690 |
| chr4  | 6112427       | 6113115   | 689 |
| chr24 | 5445521       | 5446208   | 688 |
| chr8  | 10170067      | 10170753  | 687 |
| chr19 | 56840865      | 56841549  | 685 |
| chr18 | 56445470      | 56446152  | 683 |
| chr7  | 5116386       | 5117067   | 682 |
| chr19 | 41474647      | 41475322  | 676 |
| chr11 | 109597621     | 109598294 | 674 |
| chr13 | 15165928      | 15166600  | 673 |
| chr2  | 73257026      | 73257697  | 672 |
| chr19 | 46896472      | 46897141  | 670 |
| chr27 | 846553 847221 | 669       |     |
| chr17 | 67031498      | 67032165  | 668 |
| chr20 | 70120893      | 70121559  | 667 |
| chr15 | 51833878      | 51834544  | 667 |
| chrX  | 73246093      | 73246758  | 666 |
| chr15 | 51708034      | 51708695  | 662 |
| chr4  | 67832583      | 67833241  | 659 |
| chr18 | 12435126      | 12435778  | 653 |
| chrX  | 74592441      | 74593089  | 649 |
| chr5  | 88755542      | 88756190  | 649 |
| chr9  | 26601067      | 26601714  | 648 |
| chr23 | 52725870      | 52726516  | 647 |
| chr15 | 51709255      | 51709900  | 646 |
| chr3  | 119963136     | 119963778 | 643 |
| chr19 | 61126564      | 61127205  | 642 |
| chr10 | 17068453      | 17069092  | 640 |
| chr23 | 31335198      | 31335832  | 635 |
| chr18 | 23596317      | 23596943  | 627 |
| chr12 | 74538208      | 74538834  | 627 |
| chr19 | 22563650      | 22564274  | 625 |
| chr3  | 123169028     | 123169650 | 623 |
| chr23 | 49940625      | 49941241  | 617 |
| chr19 | 34623586      | 34624202  | 617 |

|       |               |           |     |
|-------|---------------|-----------|-----|
| chr11 | 77872323      | 77872939  | 617 |
| chrX  | 59762917      | 59763531  | 615 |
| chr8  | 86629782      | 86630392  | 611 |
| chr26 | 50843389      | 50843997  | 609 |
| chr25 | 22260386      | 22260994  | 609 |
| chr22 | 60251314      | 60251922  | 609 |
| chr16 | 40912206      | 40912814  | 609 |
| chr15 | 22219253      | 22219859  | 607 |
| chr7  | 1884818       | 1885420   | 603 |
| chr16 | 2436087       | 2436689   | 603 |
| chr14 | 29196596      | 29197198  | 603 |
| chr16 | 48103341      | 48103941  | 601 |
| chr2  | 124972449     | 124973046 | 598 |
| chr23 | 27821063      | 27821658  | 596 |
| chr22 | 47854625      | 47855214  | 590 |
| chr2  | 115043760     | 115044349 | 590 |
| chr3  | 17483662      | 17484250  | 589 |
| chr22 | 36553876      | 36554464  | 589 |
| chr2  | 65511886      | 65512471  | 586 |
| chr11 | 49322569      | 49323154  | 586 |
| chr3  | 55837080      | 55837664  | 585 |
| chr25 | 2995187       | 2995771   | 585 |
| chr1  | 132079054     | 132079638 | 585 |
| chrX  | 5752877       | 5753456   | 580 |
| chr2  | 36079464      | 36080042  | 579 |
| chr8  | 58217655      | 58218226  | 572 |
| chr18 | 655311 655882 | 572       |     |
| chr25 | 3111552       | 3112116   | 565 |
| chr3  | 125700192     | 125700753 | 562 |
| chr3  | 9404815       | 9405375   | 561 |
| chr16 | 48277714      | 48278274  | 561 |
| chr21 | 6569911       | 6570468   | 558 |
| chr5  | 70673284      | 70673840  | 557 |
| chr23 | 10393803      | 10394358  | 556 |
| chr10 | 12062039      | 12062592  | 554 |
| chr19 | 56128869      | 56129421  | 553 |
| chr3  | 106521662     | 106522212 | 551 |
| chr11 | 77865355      | 77865904  | 550 |
| chr6  | 120782188     | 120782736 | 549 |
| chr12 | 30826411      | 30826959  | 549 |
| chr10 | 70844277      | 70844825  | 549 |
| chr21 | 67013562      | 67014108  | 547 |
| chr5  | 28974064      | 28974609  | 546 |
| chr4  | 97855223      | 97855766  | 544 |
| chr15 | 22809323      | 22809864  | 542 |
| chr7  | 5607985       | 5608522   | 538 |
| chrX  | 78580836      | 78581368  | 533 |
| chr1  | 3093725       | 3094256   | 532 |
| chr9  | 27112387      | 27112915  | 529 |
| chr11 | 105387874     | 105388401 | 528 |

|       |           |           |     |
|-------|-----------|-----------|-----|
| chr11 | 45280674  | 45281197  | 524 |
| chr11 | 28507359  | 28507881  | 523 |
| chr17 | 69819182  | 69819702  | 521 |
| chr3  | 81169698  | 81170215  | 518 |
| chr24 | 60977332  | 60977848  | 517 |
| chr3  | 35993055  | 35993570  | 516 |
| chr15 | 24397886  | 24398400  | 515 |
| chr11 | 70701119  | 70701632  | 514 |
| chr17 | 75035610  | 75036122  | 513 |
| chr17 | 59603873  | 59604384  | 512 |
| chr18 | 18669616  | 18670124  | 509 |
| chr26 | 48679702  | 48680207  | 506 |
| chr23 | 28486747  | 28487252  | 506 |
| chr10 | 83081382  | 83081886  | 505 |
| chr3  | 116342718 | 116343221 | 504 |
| chr14 | 9195342   | 9195844   | 503 |
| chr21 | 27810769  | 27811270  | 502 |
| chr19 | 17858810  | 17859311  | 502 |
| chr14 | 31004974  | 31005474  | 501 |
| chr8  | 57671077  | 57671576  | 500 |
| chr27 | 46987268  | 46987767  | 500 |
| chr2  | 76633924  | 76634422  | 499 |
| chr13 | 57592721  | 57593217  | 497 |
| chr23 | 7696742   | 7697235   | 494 |
| chrX  | 6496305   | 6496797   | 493 |
| chr7  | 2064492   | 2064984   | 493 |
| chrX  | 29565154  | 29565645  | 492 |
| chr11 | 14178421  | 14178910  | 490 |
| chr13 | 77297498  | 77297984  | 487 |
| chr13 | 38420987  | 38421471  | 485 |
| chr3  | 2493913   | 2494396   | 484 |
| chr19 | 29814270  | 29814750  | 481 |
| chr4  | 122641864 | 122642341 | 478 |
| chr11 | 100474534 | 100475009 | 476 |
| chr27 | 31452401  | 31452875  | 475 |
| chr3  | 119660795 | 119661268 | 474 |
| chr1  | 1579864   | 1580337   | 474 |
| chr25 | 3827957   | 3828429   | 473 |
| chr2  | 91076683  | 91077154  | 472 |
| chr15 | 81382044  | 81382515  | 472 |
| chr8  | 63802940  | 63803408  | 469 |
| chr12 | 11449474  | 11449941  | 468 |
| chr15 | 24596566  | 24597031  | 466 |
| chrX  | 66931059  | 66931523  | 465 |
| chr23 | 10546660  | 10547123  | 464 |
| chr14 | 26679531  | 26679994  | 464 |
| chrX  | 2425616   | 2426078   | 463 |
| chr29 | 46201114  | 46201576  | 463 |
| chr11 | 1974911   | 1975373   | 463 |
| chr10 | 81678192  | 81678653  | 462 |



|       |               |           |     |
|-------|---------------|-----------|-----|
| chr16 | 48305361      | 48305821  | 461 |
| chr8  | 23908908      | 23909366  | 459 |
| chr15 | 24197901      | 24198359  | 459 |
| chrX  | 12030268      | 12030725  | 458 |
| chr10 | 70092193      | 70092649  | 457 |
| chrX  | 65711890      | 65712345  | 456 |
| chrX  | 7446556       | 7447011   | 456 |
| chr8  | 7410378       | 7410830   | 453 |
| chr15 | 28130461      | 28130913  | 453 |
| chr13 | 58281539      | 58281990  | 452 |
| chr18 | 63705004      | 63705454  | 451 |
| chrX  | 74613899      | 74614348  | 450 |
| chr23 | 15889427      | 15889875  | 449 |
| chr13 | 37687256      | 37687704  | 449 |
| chr18 | 35075612      | 35076059  | 448 |
| chr21 | 20667077      | 20667522  | 446 |
| chr26 | 31480798      | 31481242  | 445 |
| chr18 | 64296904      | 64297347  | 444 |
| chr11 | 66557651      | 66558091  | 441 |
| chr28 | 33810427      | 33810863  | 437 |
| chr5  | 70659779      | 70660214  | 436 |
| chrX  | 31527676      | 31528110  | 435 |
| chr1  | 144143908     | 144144342 | 435 |
| chr6  | 103307401     | 103307834 | 434 |
| chr3  | 95078453      | 95078886  | 434 |
| chr4  | 82131373      | 82131805  | 433 |
| chr27 | 44652644      | 44653076  | 433 |
| chrX  | 57210784      | 57211215  | 432 |
| chr4  | 95650323      | 95650754  | 432 |
| chr19 | 13503254      | 13503684  | 431 |
| chr18 | 53014894      | 53015324  | 431 |
| chr1  | 75718424      | 75718854  | 431 |
| chr13 | 23641216      | 23641645  | 430 |
| chrX  | 75613096      | 75613523  | 428 |
| chr11 | 21641187      | 21641614  | 428 |
| chr11 | 10522047      | 10522474  | 428 |
| chr14 | 858188 858614 | 427       |     |
| chr9  | 106194467     | 106194892 | 426 |
| chr19 | 18376195      | 18376618  | 424 |
| chr8  | 7602477       | 7602897   | 421 |
| chr5  | 112653124     | 112653543 | 420 |
| chr10 | 61473166      | 61473583  | 418 |
| chr24 | 60566877      | 60567293  | 417 |
| chr28 | 15321906      | 15322321  | 416 |
| chr23 | 31147522      | 31147937  | 416 |
| chr19 | 39261466      | 39261881  | 416 |
| chr18 | 11415693      | 11416108  | 416 |
| chr10 | 83847446      | 83847860  | 415 |
| chr4  | 89762072      | 89762485  | 414 |
| chr5  | 69596144      | 69596553  | 410 |

|       |               |           |      |
|-------|---------------|-----------|------|
| chr21 | 13612636      | 13613045  | 410  |
| chr15 | 75379989      | 75380398  | 410  |
| chrX  | 56140124      | 56140532  | 409  |
| chrX  | 66636864      | 66637270  | 407  |
| chr17 | 68600319      | 68600723  | 405  |
| chr10 | 3515885       | 3516287   | 403  |
| chr23 | 10540080      | 10540481  | 402  |
| chr19 | 41130353      | 41130753  | 401  |
| chr23 | 28506020      | 28506408  | 389  |
| chr5  | 30489370      | 30489738  | 369  |
| chr25 | 4007239       | 4008420   | 1182 |
| chr3  | 409386 410372 | 987       |      |
| chrX  | 86241101      | 86242030  | 930  |
| chr4  | 117153863     | 117154560 | 698  |
| chr5  | 35463333      | 35464098  | 766  |
| chr20 | 43471255      | 43472451  | 1197 |
| chr13 | 74403521      | 74404527  | 1007 |
| chr22 | 11609575      | 11610349  | 775  |
| chr10 | 8248019       | 8248551   | 533  |
| chr23 | 28484054      | 28485442  | 1389 |
| chr1  | 33445185      | 33445757  | 573  |
| chr12 | 6157096       | 6157507   | 412  |
| chr12 | 32124490      | 32125980  | 1491 |
| chr3  | 31675054      | 31675859  | 806  |
| chr23 | 27986612      | 27987836  | 1225 |
| chr8  | 63945470      | 63946136  | 667  |
| chr3  | 127374033     | 127374671 | 639  |
| chr8  | 73514499      | 73514984  | 486  |
| chr16 | 70452685      | 70453087  | 403  |
| chr17 | 50798582      | 50798992  | 411  |
| chr6  | 115605088     | 115605562 | 475  |
| chr8  | 23836222      | 23836642  | 421  |
| chr7  | 19883438      | 19885499  | 2062 |
| chr29 | 2683150       | 2685010   | 1861 |
| chr16 | 58556830      | 58558527  | 1698 |
| chrX  | 7417401       | 7418839   | 1439 |
| chr6  | 121048862     | 121050134 | 1273 |
| chr19 | 12501578      | 12502842  | 1265 |
| chr10 | 74921107      | 74922113  | 1007 |
| chr17 | 12577366      | 12578349  | 984  |
| chr21 | 55792647      | 55793580  | 934  |
| chr7  | 5044664       | 5045441   | 778  |
| chr15 | 74522997      | 74523756  | 760  |
| chrX  | 77675249      | 77675944  | 696  |
| chr23 | 8242206       | 8242856   | 651  |
| chr9  | 104918429     | 104919058 | 630  |
| chr15 | 43504010      | 43504440  | 431  |
| chrX  | 42819973      | 42821483  | 1511 |
| chr6  | 57815289      | 57816715  | 1427 |
| chrX  | 76762768      | 76764104  | 1337 |

|       |           |           |      |
|-------|-----------|-----------|------|
| chr7  | 13419943  | 13421165  | 1223 |
| chr25 | 40431388  | 40432381  | 994  |
| chr3  | 114202333 | 114203308 | 976  |
| chr4  | 89352987  | 89353842  | 856  |
| chr17 | 70492351  | 70493123  | 773  |
| chr18 | 13557682  | 13558421  | 740  |
| chr11 | 14504873  | 14505483  | 611  |
| chr1  | 32933579  | 32934175  | 597  |
| chr16 | 77390452  | 77390984  | 533  |
| chr9  | 87835348  | 87835755  | 408  |
| chr18 | 42955799  | 42957355  | 1557 |
| chr2  | 132164408 | 132165508 | 1101 |
| chr6  | 121592517 | 121593567 | 1051 |
| chr25 | 42244371  | 42245303  | 933  |
| chr23 | 49968296  | 49969026  | 731  |
| chr13 | 82706209  | 82706834  | 626  |
| chr13 | 70229452  | 70229894  | 443  |
| chr9  | 9369113   | 9369548   | 436  |
| chr5  | 120496089 | 120497690 | 1602 |
| chr17 | 67112678  | 67114192  | 1515 |
| chr4  | 123979576 | 123981008 | 1433 |
| chr25 | 38564215  | 38565609  | 1395 |
| chr13 | 6923169   | 6924236   | 1068 |
| chr2  | 134689511 | 134690546 | 1036 |
| chr1  | 84587437  | 84588418  | 982  |
| chrX  | 59379738  | 59380392  | 655  |
| chr23 | 18067174  | 18067677  | 504  |
| chrX  | 78772657  | 78773124  | 468  |
| chr2  | 49580181  | 49581418  | 1238 |
| chr19 | 51425650  | 51426875  | 1226 |
| chr19 | 64761866  | 64763090  | 1225 |
| chr8  | 10298245  | 10299468  | 1224 |
| chr11 | 104701321 | 104702510 | 1190 |
| chr24 | 61122480  | 61123445  | 966  |
| chr22 | 59419536  | 59420466  | 931  |
| chr3  | 106868198 | 106869038 | 841  |
| chr22 | 60571370  | 60572190  | 821  |
| chr21 | 20615578  | 20616388  | 811  |
| chr25 | 3169169   | 3169856   | 688  |
| chr29 | 26348710  | 26349380  | 671  |
| chr12 | 83401327  | 83401852  | 526  |
| chr9  | 63423892  | 63425159  | 1268 |
| chrX  | 72862573  | 72863733  | 1161 |
| chr7  | 44058441  | 44059478  | 1038 |
| chr5  | 32915355  | 32916380  | 1026 |
| chr17 | 53514331  | 53515166  | 836  |
| chr3  | 118864701 | 118866556 | 1856 |
| chr20 | 75496060  | 75496891  | 832  |
| chr9  | 90451499  | 90452253  | 755  |
| chr23 | 30528873  | 30529483  | 611  |

|       |           |           |      |
|-------|-----------|-----------|------|
| chr11 | 90298926  | 90299476  | 551  |
| chr18 | 24014597  | 24015655  | 1059 |
| chrX  | 7425854   | 7426868   | 1015 |
| chr21 | 13980906  | 13981681  | 776  |
| chr5  | 12282702  | 12283246  | 545  |
| chr11 | 25652324  | 25653993  | 1670 |
| chr23 | 28535359  | 28536776  | 1418 |
| chr10 | 8544175   | 8545199   | 1025 |
| chr18 | 55212255  | 55213148  | 894  |
| chr21 | 2016501   | 2017042   | 542  |
| chr7  | 45110102  | 45110624  | 523  |
| chr3  | 114213248 | 114214551 | 1304 |
| chrX  | 60138467  | 60139524  | 1058 |
| chr21 | 59064145  | 59064848  | 704  |
| chrX  | 50756915  | 50757426  | 512  |
| chr13 | 67392470  | 67393487  | 1018 |
| chrX  | 19991887  | 19992782  | 896  |
| chr3  | 124563489 | 124563957 | 469  |
| chr13 | 73998756  | 73999747  | 992  |
| chr1  | 152254664 | 152255214 | 551  |
| chr29 | 43025534  | 43026418  | 885  |
| chrX  | 58743514  | 58744378  | 865  |
| chrX  | 72451230  | 72451695  | 466  |
| chr5  | 30307596  | 30308412  | 817  |
| chr4  | 106677656 | 106678319 | 664  |
| chr18 | 12448650  | 12449265  | 616  |
| chr15 | 28528943  | 28529506  | 564  |
| chr18 | 56816488  | 56817025  | 538  |
| chr23 | 31192338  | 31192841  | 504  |
| chr25 | 28067579  | 28068040  | 462  |
| chrX  | 60195438  | 60195876  | 439  |
| chr13 | 57575335  | 57575770  | 436  |
| chr19 | 38918339  | 38918770  | 432  |
| chr13 | 63437193  | 63437608  | 416  |
| chr1  | 135146537 | 135146907 | 371  |
| chr21 | 31008540  | 31010452  | 1913 |
| chr8  | 24214796  | 24215504  | 709  |
| chr21 | 52033900  | 52034304  | 405  |
| chr8  | 73814540  | 73814937  | 398  |
| chr8  | 73881735  | 73882708  | 974  |
| chr6  | 18483573  | 18485967  | 2395 |
| chr5  | 115153895 | 115156059 | 2165 |
| chr2  | 111334233 | 111336314 | 2082 |
| chr11 | 44949733  | 44951804  | 2072 |
| chr5  | 28762482  | 28764529  | 2048 |
| chr4  | 72553639  | 72555626  | 1988 |
| chr1  | 101590407 | 101592376 | 1970 |
| chr16 | 47973272  | 47975227  | 1956 |
| chr29 | 49569431  | 49571330  | 1900 |
| chr2  | 111389572 | 111391357 | 1786 |

|       |           |           |      |
|-------|-----------|-----------|------|
| chr13 | 47742046  | 47743819  | 1774 |
| chr2  | 115037520 | 115039264 | 1745 |
| chr5  | 114977987 | 114979717 | 1731 |
| chrX  | 11021992  | 11023712  | 1721 |
| chr9  | 107090560 | 107092278 | 1719 |
| chr9  | 45923093  | 45924786  | 1694 |
| chr5  | 10787904  | 10789576  | 1673 |
| chr27 | 35439804  | 35441443  | 1640 |
| chr18 | 56600830  | 56602469  | 1640 |
| chrX  | 60472504  | 60474139  | 1636 |
| chr25 | 10599223  | 10600846  | 1624 |
| chr1  | 84782429  | 84784034  | 1606 |
| chr8  | 29195614  | 29197213  | 1600 |
| chr19 | 39396319  | 39397918  | 1600 |
| chr11 | 28341962  | 28343556  | 1595 |
| chr9  | 37889109  | 37890673  | 1565 |
| chr2  | 123356939 | 123358496 | 1558 |
| chr11 | 104960085 | 104961634 | 1550 |
| chr10 | 74861712  | 74863258  | 1547 |
| chr20 | 73274474  | 73275998  | 1525 |
| chr9  | 90229094  | 90230610  | 1517 |
| chr12 | 84206942  | 84208431  | 1490 |
| chr2  | 111258074 | 111259548 | 1475 |
| chr22 | 48547604  | 48549077  | 1474 |
| chr14 | 64335917  | 64337377  | 1461 |
| chr2  | 24078173  | 24079625  | 1453 |
| chr22 | 30014894  | 30016341  | 1448 |
| chr2  | 139180361 | 139181761 | 1401 |
| chr25 | 40201117  | 40202506  | 1390 |
| chr2  | 36085994  | 36087382  | 1389 |
| chr16 | 2350374   | 2351756   | 1383 |
| chr19 | 45126619  | 45127962  | 1344 |
| chr22 | 30084813  | 30086152  | 1340 |
| chr21 | 20628848  | 20630183  | 1336 |
| chr19 | 33118091  | 33119394  | 1304 |
| chr2  | 138648084 | 138649378 | 1295 |
| chrX  | 7649961   | 7651245   | 1285 |
| chr4  | 11126507  | 11127788  | 1282 |
| chr11 | 71594063  | 71595344  | 1282 |
| chr6  | 120790369 | 120791639 | 1271 |
| chr22 | 59848545  | 59849815  | 1271 |
| chr26 | 21968560  | 21969821  | 1262 |
| chr7  | 10045652  | 10046906  | 1255 |
| chr7  | 37576174  | 37577425  | 1252 |
| chr6  | 69743540  | 69744788  | 1249 |
| chr24 | 20763763  | 20765010  | 1248 |
| chr4  | 122983199 | 122984440 | 1242 |
| chr10 | 60000080  | 60001319  | 1240 |
| chr6  | 107500254 | 107501492 | 1239 |
| chr5  | 112591764 | 112593002 | 1239 |

|       |           |           |      |
|-------|-----------|-----------|------|
| chr21 | 11888171  | 11889403  | 1233 |
| chr20 | 66350328  | 66351555  | 1228 |
| chr19 | 17676192  | 17677416  | 1225 |
| chr22 | 13455406  | 13456602  | 1197 |
| chrX  | 6581914   | 6583108   | 1195 |
| chr4  | 118163466 | 118164659 | 1194 |
| chr4  | 71513289  | 71514478  | 1190 |
| chr4  | 115954257 | 115955444 | 1188 |
| chr28 | 33806526  | 33807707  | 1182 |
| chr23 | 17464858  | 17466035  | 1178 |
| chr18 | 3704223   | 3705399   | 1177 |
| chr29 | 51851643  | 51852804  | 1162 |
| chr18 | 18136919  | 18138080  | 1162 |
| chr15 | 81382691  | 81383850  | 1160 |
| chr26 | 37542135  | 37543292  | 1158 |
| chr16 | 59043805  | 59044962  | 1158 |
| chr26 | 47413568  | 47414718  | 1151 |
| chr26 | 18175682  | 18176829  | 1148 |
| chr25 | 3384397   | 3385537   | 1141 |
| chr24 | 22274203  | 22275340  | 1138 |
| chr29 | 37481025  | 37482157  | 1133 |
| chr6  | 119358763 | 119359892 | 1130 |
| chr24 | 26266031  | 26267158  | 1128 |
| chr15 | 36412060  | 36413182  | 1123 |
| chr17 | 75289557  | 75290674  | 1118 |
| chr15 | 28667294  | 28668408  | 1115 |
| chr11 | 21643879  | 21644986  | 1108 |
| chr20 | 27305745  | 27306848  | 1104 |
| chr17 | 49132741  | 49133841  | 1101 |
| chr15 | 73757266  | 73758364  | 1099 |
| chr18 | 11366910  | 11368005  | 1096 |
| chr18 | 50310416  | 50311510  | 1095 |
| chr23 | 13671667  | 13672758  | 1092 |
| chr6  | 94811568  | 94812657  | 1090 |
| chrX  | 77673433  | 77674515  | 1083 |
| chr1  | 82743332  | 82744414  | 1083 |
| chr7  | 64577370  | 64578450  | 1081 |
| chr29 | 26779214  | 26780294  | 1081 |
| chrX  | 8155929   | 8157003   | 1075 |
| chr21 | 64272433  | 64273504  | 1072 |
| chr20 | 33685440  | 33686510  | 1071 |
| chr16 | 2229235   | 2230304   | 1070 |
| chr12 | 69694026  | 69695090  | 1065 |
| chr22 | 18282737  | 18283799  | 1063 |
| chr26 | 48444896  | 48445944  | 1049 |
| chr16 | 47602580  | 47603624  | 1045 |
| chr13 | 54984164  | 54985201  | 1038 |
| chr15 | 28529509  | 28530540  | 1032 |
| chr8  | 80180660  | 80181687  | 1028 |
| chr10 | 70840194  | 70841209  | 1016 |

|       |               |           |      |
|-------|---------------|-----------|------|
| chr2  | 105792839     | 105793849 | 1011 |
| chr3  | 15665055      | 15666060  | 1006 |
| chrX  | 74764396      | 74765396  | 1001 |
| chr8  | 73438705      | 73439696  | 992  |
| chr1  | 109484495     | 109485484 | 990  |
| chr17 | 70505994      | 70506979  | 986  |
| chr12 | 82748213      | 82749195  | 983  |
| chr17 | 70105467      | 70106448  | 982  |
| chr18 | 38354405      | 38355383  | 979  |
| chr19 | 60826129      | 60827103  | 975  |
| chr7  | 93974012      | 93974984  | 973  |
| chr17 | 64311132      | 64312104  | 973  |
| chr3  | 105755633     | 105756596 | 964  |
| chr10 | 70166273      | 70167235  | 963  |
| chrX  | 80713871      | 80714832  | 962  |
| chr19 | 46328465      | 46329425  | 961  |
| chr19 | 39397965      | 39398925  | 961  |
| chr20 | 16815410      | 16816366  | 957  |
| chr27 | 848545 849495 | 951       |      |
| chr22 | 57370025      | 57370968  | 944  |
| chr12 | 81688832      | 81689773  | 942  |
| chr25 | 40819739      | 40820677  | 939  |
| chr22 | 30226714      | 30227646  | 933  |
| chr8  | 73439827      | 73440757  | 931  |
| chr9  | 106853751     | 106854678 | 928  |
| chr5  | 111690920     | 111691844 | 925  |
| chr5  | 88754023      | 88754947  | 925  |
| chr23 | 7652748       | 7653669   | 922  |
| chr17 | 4683376       | 4684296   | 921  |
| chr28 | 3478820       | 3479737   | 918  |
| chr19 | 56315026      | 56315937  | 912  |
| chr5  | 103816381     | 103817290 | 910  |
| chrX  | 52895622      | 52896530  | 909  |
| chr3  | 106579936     | 106580842 | 907  |
| chr3  | 124097372     | 124098273 | 902  |
| chr12 | 82199208      | 82200105  | 898  |
| chr5  | 7220543       | 7221438   | 896  |
| chr13 | 80712983      | 80713871  | 889  |
| chr6  | 51516644      | 51517527  | 884  |
| chr10 | 74121168      | 74122049  | 882  |
| chrX  | 19854456      | 19855335  | 880  |
| chr4  | 64277365      | 64278241  | 877  |
| chrX  | 48036546      | 48037419  | 874  |
| chr3  | 115470153     | 115471026 | 874  |
| chr13 | 77287215      | 77288087  | 873  |
| chr10 | 21949491      | 21950362  | 872  |
| chr21 | 61785166      | 61786035  | 870  |
| chr11 | 70907193      | 70908062  | 870  |
| chr16 | 44384010      | 44384877  | 868  |
| chr7  | 52229517      | 52230383  | 867  |

|       |           |           |     |
|-------|-----------|-----------|-----|
| chr2  | 117720448 | 117721313 | 866 |
| chrX  | 46700111  | 46700971  | 861 |
| chr23 | 15855109  | 15855968  | 860 |
| chr15 | 64006717  | 64007576  | 860 |
| chr6  | 79723247  | 79724104  | 858 |
| chrX  | 49532432  | 49533282  | 851 |
| chr19 | 39017122  | 39017972  | 851 |
| chr22 | 20117453  | 20118291  | 839 |
| chrX  | 72138211  | 72139044  | 834 |
| chrX  | 7597661   | 7598493   | 833 |
| chrX  | 7413132   | 7413960   | 829 |
| chr28 | 26753514  | 26754342  | 829 |
| chr10 | 5247530   | 5248357   | 828 |
| chrX  | 31558940  | 31559766  | 827 |
| chr19 | 20339188  | 20340010  | 823 |
| chr29 | 41879380  | 41880200  | 821 |
| chr18 | 52853531  | 52854351  | 821 |
| chrX  | 49244751  | 49245569  | 819 |
| chr17 | 63935227  | 63936045  | 819 |
| chr23 | 12344103  | 12344912  | 810 |
| chr5  | 79213822  | 79214629  | 808 |
| chr11 | 77207754  | 77208560  | 807 |
| chr17 | 64290071  | 64290875  | 805 |
| chr7  | 30266464  | 30267267  | 804 |
| chr2  | 72874700  | 72875500  | 801 |
| chr4  | 79048787  | 79049584  | 798 |
| chr17 | 63410766  | 63411562  | 797 |
| chr25 | 44031421  | 44032214  | 794 |
| chr3  | 127795168 | 127795960 | 793 |
| chr14 | 23432298  | 23433089  | 792 |
| chr17 | 64114566  | 64115356  | 791 |
| chr2  | 139851354 | 139852139 | 786 |
| chr16 | 59042961  | 59043743  | 783 |
| chr22 | 60010938  | 60011717  | 780 |
| chr17 | 76316091  | 76316869  | 779 |
| chr11 | 21005599  | 21006374  | 776 |
| chr5  | 75534096  | 75534870  | 775 |
| chr6  | 107100095 | 107100868 | 774 |
| chr19 | 39243724  | 39244493  | 770 |
| chr14 | 67999109  | 67999877  | 769 |
| chr16 | 74118672  | 74119437  | 766 |
| chr19 | 26919078  | 26919842  | 765 |
| chr19 | 7308778   | 7309542   | 765 |
| chr7  | 48172310  | 48173071  | 762 |
| chr29 | 51834453  | 51835214  | 762 |
| chr19 | 60410874  | 60411633  | 760 |
| chr10 | 45525879  | 45526637  | 759 |
| chr20 | 8609590   | 8610347   | 758 |
| chr13 | 40098795  | 40099549  | 755 |
| chr17 | 66193137  | 66193881  | 745 |



|       |           |           |     |
|-------|-----------|-----------|-----|
| chr23 | 31115130  | 31115871  | 742 |
| chr19 | 59412786  | 59413526  | 741 |
| chr5  | 33772304  | 33773041  | 738 |
| chr17 | 15959277  | 15960014  | 738 |
| chr14 | 1577087   | 1577824   | 738 |
| chr8  | 24726130  | 24726861  | 732 |
| chr11 | 10522833  | 10523561  | 729 |
| chrX  | 59490439  | 59491159  | 721 |
| chrX  | 73171712  | 73172430  | 719 |
| chr7  | 46543861  | 46544575  | 715 |
| chr20 | 66435037  | 66435751  | 715 |
| chr19 | 12132351  | 12133064  | 714 |
| chr7  | 96598113  | 96598823  | 711 |
| chr20 | 6597267   | 6597977   | 711 |
| chr19 | 45836121  | 45836831  | 711 |
| chr15 | 24191097  | 24191805  | 709 |
| chr29 | 31508117  | 31508824  | 708 |
| chr4  | 99599360  | 99600065  | 706 |
| chr10 | 70510710  | 70511414  | 705 |
| chr28 | 25263021  | 25263723  | 703 |
| chr24 | 20885464  | 20886165  | 702 |
| chr20 | 25764776  | 25765475  | 700 |
| chr11 | 103735614 | 103736313 | 700 |
| chr7  | 45695195  | 45695893  | 699 |
| chr4  | 106087921 | 106088617 | 697 |
| chr19 | 7773420   | 7774116   | 697 |
| chr22 | 48307396  | 48308091  | 696 |
| chr11 | 104885609 | 104886302 | 694 |
| chr23 | 27873157  | 27873849  | 693 |
| chr4  | 71516824  | 71517514  | 691 |
| chr22 | 16196455  | 16197143  | 689 |
| chr8  | 64533977  | 64534660  | 684 |
| chr23 | 31442865  | 31443548  | 684 |
| chr18 | 51611665  | 51612347  | 683 |
| chr25 | 33485323  | 33486004  | 682 |
| chr12 | 52443814  | 52444495  | 682 |
| chr5  | 81602873  | 81603553  | 681 |
| chr18 | 13538949  | 13539629  | 681 |
| chr8  | 87109901  | 87110579  | 679 |
| chr13 | 40347639  | 40348317  | 679 |
| chr11 | 70865062  | 70865738  | 677 |
| chr29 | 41721989  | 41722664  | 676 |
| chr24 | 60557092  | 60557766  | 675 |
| chr23 | 27825696  | 27826369  | 674 |
| chr2  | 110556447 | 110557118 | 672 |
| chr5  | 91522868  | 91523538  | 671 |
| chr23 | 11785636  | 11786303  | 668 |
| chrX  | 10146140  | 10146804  | 665 |
| chr23 | 15085790  | 15086451  | 662 |
| chr15 | 51611346  | 51612007  | 662 |

|       |               |           |     |
|-------|---------------|-----------|-----|
| chr3  | 24597191      | 24597851  | 661 |
| chr16 | 39586366      | 39587026  | 661 |
| chr27 | 17056070      | 17056729  | 660 |
| chr3  | 115093764     | 115094422 | 659 |
| chr14 | 3499683       | 3500340   | 658 |
| chr8  | 8304573       | 8305226   | 654 |
| chr18 | 56795428      | 56796081  | 654 |
| chr17 | 72710879      | 72711532  | 654 |
| chr25 | 37734031      | 37734683  | 653 |
| chr26 | 51629167      | 51629818  | 652 |
| chr17 | 63108275      | 63108924  | 650 |
| chr16 | 77721540      | 77722189  | 650 |
| chr3  | 115987100     | 115987747 | 648 |
| chr24 | 44049820      | 44050465  | 646 |
| chr18 | 50716915      | 50717560  | 646 |
| chr19 | 27383882      | 27384526  | 645 |
| chr2  | 111657476     | 111658116 | 641 |
| chr18 | 56538221      | 56538860  | 640 |
| chr18 | 12392167      | 12392802  | 636 |
| chr9  | 90605106      | 90605739  | 634 |
| chr7  | 15688024      | 15688657  | 634 |
| chrX  | 66713237      | 66713868  | 632 |
| chrX  | 65754032      | 65754662  | 631 |
| chr25 | 39871649      | 39872278  | 630 |
| chr17 | 59295092      | 59295720  | 629 |
| chr23 | 1767256       | 1767881   | 626 |
| chr19 | 8563951       | 8564572   | 622 |
| chrX  | 11024758      | 11025378  | 621 |
| chr12 | 53572433      | 53573052  | 620 |
| chr27 | 6069122       | 6069737   | 616 |
| chr2  | 124306220     | 124306835 | 616 |
| chr24 | 23957176      | 23957789  | 614 |
| chr10 | 75484086      | 75484699  | 614 |
| chrX  | 77198585      | 77199195  | 611 |
| chr11 | 51886095      | 51886705  | 611 |
| chr17 | 63404134      | 63404743  | 610 |
| chr15 | 51737623      | 51738232  | 610 |
| chr2  | 126365298     | 126365904 | 607 |
| chr10 | 69182857      | 69183463  | 607 |
| chrX  | 29566032      | 29566635  | 604 |
| chr5  | 122308198     | 122308800 | 603 |
| chr1  | 74588510      | 74589111  | 602 |
| chr7  | 16319036      | 16319635  | 600 |
| chr16 | 816960 817557 | 598       |     |
| chr7  | 94375721      | 94376312  | 592 |
| chr19 | 39357523      | 39358114  | 592 |
| chr21 | 56513711      | 56514299  | 589 |
| chr2  | 131854421     | 131855009 | 589 |
| chr14 | 67998496      | 67999084  | 589 |
| chrX  | 21307123      | 21307710  | 588 |

|       |           |           |     |
|-------|-----------|-----------|-----|
| chrX  | 54792897  | 54793481  | 585 |
| chr23 | 19332819  | 19333403  | 585 |
| chr13 | 59703981  | 59704562  | 582 |
| chr17 | 5377885   | 5378465   | 581 |
| chr21 | 20623140  | 20623719  | 580 |
| chr23 | 52726992  | 52727570  | 579 |
| chr2  | 127814188 | 127814763 | 576 |
| chr3  | 115483580 | 115484153 | 574 |
| chr3  | 111939223 | 111939796 | 574 |
| chr22 | 30057441  | 30058014  | 574 |
| chr26 | 51196655  | 51197227  | 573 |
| chr16 | 48866663  | 48867231  | 569 |
| chr25 | 4621553   | 4622120   | 568 |
| chr29 | 38047342  | 38047905  | 564 |
| chr11 | 99192512  | 99193074  | 563 |
| chrX  | 13815921  | 13816482  | 562 |
| chr19 | 27917202  | 27917763  | 562 |
| chr11 | 48676311  | 48676871  | 561 |
| chr3  | 22657529  | 22658085  | 557 |
| chr3  | 22932766  | 22933319  | 554 |
| chr2  | 76294457  | 76295010  | 554 |
| chr13 | 60431592  | 60432144  | 553 |
| chrX  | 30702435  | 30702986  | 552 |
| chr29 | 31418384  | 31418935  | 552 |
| chr26 | 31466301  | 31466852  | 552 |
| chr19 | 23721800  | 23722351  | 552 |
| chrX  | 8200658   | 8201206   | 549 |
| chr4  | 117149862 | 117150410 | 549 |
| chrX  | 9974764   | 9975308   | 545 |
| chr23 | 8284522   | 8285066   | 545 |
| chr15 | 38240903  | 38241444  | 542 |
| chr10 | 90238003  | 90238543  | 541 |
| chr12 | 52442238  | 52442777  | 540 |
| chr4  | 121471744 | 121472282 | 539 |
| chr16 | 51485064  | 51485602  | 539 |
| chr4  | 72297146  | 72297683  | 538 |
| chr5  | 76865592  | 76866125  | 534 |
| chr12 | 31982471  | 31983004  | 534 |
| chr13 | 70239258  | 70239790  | 533 |
| chr23 | 31173936  | 31174466  | 531 |
| chr29 | 50556296  | 50556822  | 527 |
| chr2  | 136396881 | 136397404 | 524 |
| chr16 | 67152722  | 67153243  | 522 |
| chr4  | 124363474 | 124363992 | 519 |
| chr4  | 119333522 | 119334038 | 517 |
| chr10 | 70402184  | 70402698  | 515 |
| chrX  | 66612048  | 66612561  | 514 |
| chrX  | 8056120   | 8056633   | 514 |
| chr7  | 46242688  | 46243200  | 513 |
| chr16 | 2531028   | 2531539   | 512 |

|       |           |           |     |
|-------|-----------|-----------|-----|
| chr6  | 14205445  | 14205955  | 511 |
| chr10 | 20941282  | 20941789  | 508 |
| chr25 | 29340485  | 29340991  | 507 |
| chrX  | 5720410   | 5720915   | 506 |
| chrX  | 7588630   | 7589134   | 505 |
| chr21 | 64820597  | 64821101  | 505 |
| chr13 | 41003914  | 41004418  | 505 |
| chr9  | 19266609  | 19267111  | 503 |
| chr13 | 54550344  | 54550846  | 503 |
| chr11 | 70707763  | 70708264  | 502 |
| chr10 | 70173301  | 70173801  | 501 |
| chr14 | 7847525   | 7848024   | 500 |
| chr12 | 82705890  | 82706386  | 497 |
| chr25 | 43229242  | 43229736  | 495 |
| chr11 | 77744430  | 77744924  | 495 |
| chr13 | 60752806  | 60753299  | 494 |
| chr27 | 41847958  | 41848450  | 493 |
| chr17 | 63411586  | 63412077  | 492 |
| chr24 | 40816121  | 40816611  | 491 |
| chrX  | 47260048  | 47260536  | 489 |
| chr19 | 38310794  | 38311280  | 487 |
| chr10 | 16922976  | 16923462  | 487 |
| chr4  | 52524896  | 52525381  | 486 |
| chr25 | 27309531  | 27310016  | 486 |
| chr1  | 132080099 | 132080584 | 486 |
| chr29 | 49482666  | 49483145  | 480 |
| chr10 | 21438037  | 21438516  | 480 |
| chrX  | 6618193   | 6618671   | 479 |
| chr28 | 12429475  | 12429953  | 479 |
| chr19 | 44153490  | 44153967  | 478 |
| chr19 | 23166115  | 23166592  | 478 |
| chr25 | 2079424   | 2079900   | 477 |
| chr2  | 36084649  | 36085125  | 477 |
| chr2  | 41314631  | 41315106  | 476 |
| chr9  | 12245387  | 12245861  | 475 |
| chr5  | 54506845  | 54507319  | 475 |
| chr19 | 42040820  | 42041293  | 474 |
| chr19 | 7545724   | 7546197   | 474 |
| chr8  | 9350811   | 9351281   | 471 |
| chr27 | 35831670  | 35832140  | 471 |
| chr26 | 22291270  | 22291740  | 471 |
| chrX  | 65108463  | 65108932  | 470 |
| chr12 | 70598441  | 70598910  | 470 |
| chrX  | 72599868  | 72600336  | 469 |
| chr5  | 7224560   | 7225028   | 469 |
| chr2  | 25386880  | 25387345  | 466 |
| chr14 | 48319738  | 48320203  | 466 |
| chr24 | 48608356  | 48608820  | 465 |
| chr6  | 107359229 | 107359691 | 463 |
| chr3  | 106556467 | 106556927 | 461 |

|       |           |           |     |
|-------|-----------|-----------|-----|
| chr3  | 111219679 | 111220137 | 459 |
| chr15 | 25596816  | 25597274  | 459 |
| chr7  | 51087976  | 51088433  | 458 |
| chr21 | 6553159   | 6553616   | 458 |
| chr19 | 6520962   | 6521417   | 456 |
| chr26 | 39229688  | 39230141  | 454 |
| chrX  | 33513446  | 33513898  | 453 |
| chr19 | 54641309  | 54641759  | 451 |
| chr9  | 106551912 | 106552361 | 450 |
| chr2  | 111324062 | 111324510 | 449 |
| chr28 | 26086708  | 26087155  | 448 |
| chr10 | 17104771  | 17105217  | 447 |
| chr1  | 1136420   | 1136865   | 446 |
| chr21 | 11887687  | 11888131  | 445 |
| chr19 | 17673212  | 17673653  | 442 |
| chr16 | 41350813  | 41351254  | 442 |
| chr27 | 15726500  | 15726940  | 441 |
| chr23 | 43151013  | 43151453  | 441 |
| chr13 | 75970580  | 75971020  | 441 |
| chr29 | 48886338  | 48886777  | 440 |
| chr19 | 27205116  | 27205555  | 440 |
| chrX  | 5777043   | 5777481   | 439 |
| chrX  | 8201426   | 8201860   | 435 |
| chr18 | 22707724  | 22708158  | 435 |
| chr13 | 75805805  | 75806238  | 434 |
| chr16 | 42145033  | 42145465  | 433 |
| chr11 | 46006033  | 46006464  | 432 |
| chr7  | 10822968  | 10823396  | 429 |
| chr8  | 108216677 | 108217102 | 426 |
| chr4  | 33211850  | 33212275  | 426 |
| chrX  | 21593357  | 21593781  | 425 |
| chr14 | 79855685  | 79856109  | 425 |
| chr6  | 92073083  | 92073505  | 423 |
| chrX  | 78770843  | 78771264  | 422 |
| chr14 | 80590177  | 80590597  | 421 |
| chr24 | 59360433  | 59360852  | 420 |
| chr23 | 45980132  | 45980550  | 419 |
| chr21 | 56671619  | 56672036  | 418 |
| chr1  | 61313670  | 61314087  | 418 |
| chrX  | 61850013  | 61850428  | 416 |
| chrX  | 61370107  | 61370521  | 415 |
| chr5  | 28908898  | 28909312  | 415 |
| chr3  | 22915875  | 22916289  | 415 |
| chr3  | 22906096  | 22906510  | 415 |
| chr12 | 76056978  | 76057391  | 414 |
| chr1  | 131399110 | 131399522 | 413 |
| chr22 | 52236332  | 52236743  | 412 |
| chrX  | 19819453  | 19819863  | 411 |
| chrX  | 18713680  | 18714090  | 411 |
| chr2  | 74028961  | 74029371  | 411 |

|       |           |           |      |
|-------|-----------|-----------|------|
| chr19 | 65237659  | 65238068  | 410  |
| chr17 | 70270498  | 70270907  | 410  |
| chr8  | 108773269 | 108773677 | 409  |
| chr19 | 23970751  | 23971158  | 408  |
| chr17 | 58386589  | 58386995  | 407  |
| chr10 | 17428744  | 17429144  | 401  |
| chr29 | 48853112  | 48853511  | 400  |
| chr3  | 116463118 | 116463516 | 399  |
| chrX  | 78560105  | 78560500  | 396  |
| chr1  | 2718801   | 2719195   | 395  |
| chr5  | 125563003 | 125563391 | 389  |
| chr17 | 64335083  | 64335469  | 387  |
| chr13 | 37669264  | 37669621  | 358  |
| chr10 | 2405966   | 2407730   | 1765 |
| chr8  | 73855581  | 73856476  | 896  |
| chr18 | 45641079  | 45641806  | 728  |
| chr17 | 55832490  | 55833026  | 537  |
| chr7  | 42217276  | 42219405  | 2130 |
| chr6  | 42769121  | 42770966  | 1846 |
| chr20 | 8757051   | 8758762   | 1712 |
| chr22 | 10947879  | 10949342  | 1464 |
| chr23 | 28011921  | 28013279  | 1359 |
| chrX  | 73157421  | 73158637  | 1217 |
| chr14 | 31498593  | 31499797  | 1205 |
| chr19 | 38757996  | 38759148  | 1153 |
| chr21 | 42442258  | 42443127  | 870  |
| chr28 | 40395079  | 40395904  | 826  |
| chr23 | 27989949  | 27990771  | 823  |
| chr11 | 49406452  | 49407093  | 642  |
| chrX  | 53798796  | 53799425  | 630  |
| chr28 | 8228817   | 8229430   | 614  |
| chr17 | 63959744  | 63960328  | 585  |
| chr2  | 36088401  | 36088961  | 561  |
| chr4  | 90996197  | 90997243  | 1047 |
| chr13 | 59360585  | 59361571  | 987  |
| chr18 | 61959519  | 61960468  | 950  |
| chrX  | 21592400  | 21593303  | 904  |
| chrX  | 59591618  | 59592494  | 877  |
| chr25 | 38265319  | 38266156  | 838  |
| chr17 | 68555679  | 68556417  | 739  |
| chr28 | 41335106  | 41335792  | 687  |
| chrX  | 60525166  | 60525834  | 669  |
| chr21 | 20590583  | 20591251  | 669  |
| chr13 | 75674061  | 75674637  | 577  |
| chr14 | 39051590  | 39052161  | 572  |
| chr7  | 14367257  | 14367805  | 549  |
| chr19 | 45222429  | 45222954  | 526  |
| chr6  | 16260910  | 16261314  | 405  |
| chr8  | 65248522  | 65250360  | 1839 |
| chr14 | 26116901  | 26118233  | 1333 |

|       |               |           |      |
|-------|---------------|-----------|------|
| chr4  | 33244163      | 33245458  | 1296 |
| chr10 | 70153617      | 70154505  | 889  |
| chr23 | 21860679      | 21861505  | 827  |
| chr1  | 139866785     | 139867607 | 823  |
| chr13 | 2586127       | 2586768   | 642  |
| chrX  | 84794444      | 84795003  | 560  |
| chrX  | 58892306      | 58892860  | 555  |
| chr19 | 46119973      | 46120496  | 524  |
| chr17 | 31317578      | 31318006  | 429  |
| chr2  | 131193144     | 131195186 | 2043 |
| chr6  | 38121029      | 38122416  | 1388 |
| chr18 | 17988822      | 17989717  | 896  |
| chr5  | 116937017     | 116937603 | 587  |
| chr17 | 50984536      | 50985114  | 579  |
| chr1  | 68923368      | 68923910  | 543  |
| chr17 | 72720945      | 72721461  | 517  |
| chr12 | 31387109      | 31388247  | 1139 |
| chr8  | 24713466      | 24714448  | 983  |
| chrX  | 77007160      | 77008038  | 879  |
| chr22 | 30083808      | 30084686  | 879  |
| chr29 | 36802624      | 36803482  | 859  |
| chr2  | 24731174      | 24731957  | 784  |
| chrX  | 53762164      | 53762921  | 758  |
| chr5  | 60305939      | 60306668  | 730  |
| chr16 | 72121482      | 72122191  | 710  |
| chr28 | 3538772       | 3539473   | 702  |
| chr25 | 479093 479778 | 686       |      |
| chr16 | 2438391       | 2438917   | 527  |
| chrX  | 6279458       | 6279966   | 509  |
| chrX  | 7484048       | 7485519   | 1472 |
| chr11 | 106393008     | 106394138 | 1131 |
| chr3  | 35490820      | 35491748  | 929  |
| chr3  | 15673374      | 15673857  | 484  |
| chr23 | 18818469      | 18819267  | 799  |
| chr29 | 2536157       | 2536949   | 793  |
| chr11 | 74969938      | 74970680  | 743  |
| chr12 | 79077765      | 79078367  | 603  |
| chr3  | 8817991       | 8818575   | 585  |
| chr13 | 77393560      | 77394088  | 529  |
| chr14 | 29191754      | 29192281  | 528  |
| chr3  | 116419290     | 116419793 | 504  |
| chr2  | 115122981     | 115124062 | 1082 |
| chr29 | 33798995      | 33799928  | 934  |
| chrX  | 20000601      | 20001516  | 916  |
| chrX  | 63061757      | 63062460  | 704  |
| chr19 | 37957326      | 37957952  | 627  |
| chr18 | 56607895      | 56608519  | 625  |
| chr19 | 37873357      | 37874914  | 1558 |
| chr19 | 46900469      | 46901318  | 850  |
| chrX  | 21443501      | 21444318  | 818  |

|       |               |           |      |
|-------|---------------|-----------|------|
| chr12 | 84255508      | 84256306  | 799  |
| chrX  | 9712192       | 9713133   | 942  |
| chr13 | 10974706      | 10975545  | 840  |
| chr4  | 121715704     | 121716505 | 802  |
| chr13 | 77730603      | 77731252  | 650  |
| chr10 | 89506974      | 89507565  | 592  |
| chr7  | 50403421      | 50403959  | 539  |
| chr3  | 106533678     | 106534511 | 834  |
| chr27 | 26746041      | 26746508  | 468  |
| chr25 | 11560146      | 11560608  | 463  |
| chr2  | 22167650      | 22168490  | 841  |
| chrX  | 45520877      | 45521448  | 572  |
| chr13 | 40858384      | 40858948  | 565  |
| chr16 | 44151358      | 44151897  | 540  |
| chrX  | 63193150      | 63193678  | 529  |
| chr10 | 36287081      | 36287605  | 525  |
| chr12 | 3683614       | 3684133   | 520  |
| chrX  | 8638786       | 8639286   | 501  |
| chr19 | 40656553      | 40657008  | 456  |
| chr12 | 14807207      | 14807661  | 455  |
| chrX  | 74529793      | 74530236  | 444  |
| chr7  | 18436707      | 18437129  | 423  |
| chr21 | 52039454      | 52039855  | 402  |
| chr19 | 23728578      | 23730565  | 1988 |
| chr25 | 35512672      | 35513398  | 727  |
| chr8  | 73731930      | 73732574  | 645  |
| chr20 | 65532644      | 65533087  | 444  |
| chr11 | 10453301      | 10454042  | 742  |
| chr24 | 1585482       | 1586286   | 805  |
| chr16 | 2466809       | 2467587   | 779  |
| chr7  | 5385472       | 5386109   | 638  |
| chr19 | 39376234      | 39377188  | 955  |
| chr4  | 110054732     | 110055246 | 515  |
| chr16 | 44128764      | 44129549  | 786  |
| chr25 | 38264238      | 38264718  | 481  |
| chr2  | 393447 394302 | 856       |      |
| chr6  | 119120109     | 119120869 | 761  |
| chr29 | 48888749      | 48890492  | 1744 |
| chr4  | 4596074       | 4596962   | 889  |
| chr12 | 20091252      | 20091874  | 623  |
| chr3  | 110399872     | 110401600 | 1729 |
| chr23 | 7694030       | 7694603   | 574  |
| chr3  | 127869341     | 127869878 | 538  |
| chrX  | 53742278      | 53742929  | 652  |
| chrX  | 51882781      | 51883289  | 509  |
| chr13 | 76474211      | 76475437  | 1227 |
| chr19 | 17106064      | 17106621  | 558  |
| chr21 | 25180077      | 25180545  | 469  |
| chr13 | 37686194      | 37687254  | 1061 |
| chr28 | 33871908      | 33872519  | 612  |



|       |           |           |      |
|-------|-----------|-----------|------|
| chr22 | 30104520  | 30105349  | 830  |
| chr28 | 42170868  | 42171656  | 789  |
| chr19 | 12131636  | 12132229  | 594  |
| chr11 | 98366370  | 98366820  | 451  |
| chr13 | 75664759  | 75665794  | 1036 |
| chr3  | 22548249  | 22549211  | 963  |
| chr16 | 24625947  | 24626433  | 487  |
| chr8  | 73731534  | 73731921  | 388  |
| chrX  | 8943390   | 8943716   | 327  |
| chrX  | 59588930  | 59591483  | 2554 |
| chr9  | 67285947  | 67288375  | 2429 |
| chr2  | 134752295 | 134754663 | 2369 |
| chr3  | 117293023 | 117295374 | 2352 |
| chr11 | 49407111  | 49409239  | 2129 |
| chr23 | 51287203  | 51289298  | 2096 |
| chr21 | 47621376  | 47623387  | 2012 |
| chr26 | 18181310  | 18183302  | 1993 |
| chrX  | 59456396  | 59458379  | 1984 |
| chr23 | 31108162  | 31110087  | 1926 |
| chrX  | 9096101   | 9097975   | 1875 |
| chr6  | 121764876 | 121766747 | 1872 |
| chr22 | 17494924  | 17496640  | 1717 |
| chr15 | 58023489  | 58025200  | 1712 |
| chr21 | 34362016  | 34363716  | 1701 |
| chr3  | 124564176 | 124565842 | 1667 |
| chr15 | 31333046  | 31334705  | 1660 |
| chr18 | 22158158  | 22159797  | 1640 |
| chr18 | 55197466  | 55199049  | 1584 |
| chr11 | 105984659 | 105986207 | 1549 |
| chr7  | 97194478  | 97195994  | 1517 |
| chr19 | 11828424  | 11829940  | 1517 |
| chr13 | 59661836  | 59663346  | 1511 |
| chr16 | 38775050  | 38776556  | 1507 |
| chr12 | 84322138  | 84323636  | 1499 |
| chr16 | 47198669  | 47200164  | 1496 |
| chr16 | 47273865  | 47275355  | 1491 |
| chr14 | 61334875  | 61336357  | 1483 |
| chr5  | 71636578  | 71638046  | 1469 |
| chr24 | 20363698  | 20365158  | 1461 |
| chr3  | 116383783 | 116385241 | 1459 |
| chr28 | 5331022   | 5332457   | 1436 |
| chr10 | 79257333  | 79258762  | 1430 |
| chr10 | 72465956  | 72467370  | 1415 |
| chr14 | 40093838  | 40095226  | 1389 |
| chr18 | 23298467  | 23299844  | 1378 |
| chr8  | 45760723  | 45762090  | 1368 |
| chr3  | 114206015 | 114207377 | 1363 |
| chr29 | 36466165  | 36467527  | 1363 |
| chr20 | 13793450  | 13794786  | 1337 |
| chr16 | 47686120  | 47687453  | 1334 |

|       |           |           |      |
|-------|-----------|-----------|------|
| chr19 | 39361492  | 39362820  | 1329 |
| chr10 | 77486667  | 77487995  | 1329 |
| chr18 | 11674045  | 11675371  | 1327 |
| chr13 | 57414756  | 57416082  | 1327 |
| chr19 | 50705978  | 50707302  | 1325 |
| chr7  | 10172107  | 10173430  | 1324 |
| chr1  | 159079391 | 159080713 | 1323 |
| chr19 | 39032124  | 39033421  | 1298 |
| chr19 | 14068271  | 14069566  | 1296 |
| chr2  | 132443412 | 132444685 | 1274 |
| chr20 | 4903700   | 4904970   | 1271 |
| chr19 | 39151031  | 39152299  | 1269 |
| chr13 | 61480191  | 61481458  | 1268 |
| chr15 | 25505118  | 25506383  | 1266 |
| chr18 | 56654984  | 56656245  | 1262 |
| chrX  | 71781385  | 71782643  | 1259 |
| chr6  | 46673006  | 46674264  | 1259 |
| chr29 | 31483627  | 31484883  | 1257 |
| chr18 | 33698958  | 33700214  | 1257 |
| chr21 | 64462242  | 64463491  | 1250 |
| chr8  | 1632695   | 1633932   | 1238 |
| chr19 | 27095406  | 27096633  | 1228 |
| chr12 | 36285175  | 36286399  | 1225 |
| chr16 | 2258020   | 2259239   | 1220 |
| chrX  | 34097742  | 34098946  | 1205 |
| chr17 | 7834090   | 7835288   | 1199 |
| chr13 | 54430042  | 54431227  | 1186 |
| chr11 | 106070809 | 106071993 | 1185 |
| chrX  | 67038299  | 67039473  | 1175 |
| chr18 | 62987252  | 62988419  | 1168 |
| chr8  | 63928900  | 63930064  | 1165 |
| chr25 | 26316328  | 26317491  | 1164 |
| chr25 | 38565631  | 38566793  | 1163 |
| chr22 | 30118570  | 30119731  | 1162 |
| chrX  | 7419576   | 7420726   | 1151 |
| chr19 | 46152383  | 46153532  | 1150 |
| chr5  | 76863918  | 76865060  | 1143 |
| chrX  | 59584954  | 59586094  | 1141 |
| chr9  | 41640165  | 41641299  | 1135 |
| chr29 | 23652917  | 23654051  | 1135 |
| chr19 | 36369199  | 36370333  | 1135 |
| chr24 | 21964740  | 21965873  | 1134 |
| chr3  | 35991876  | 35993008  | 1133 |
| chr10 | 19415401  | 19416532  | 1132 |
| chr15 | 25320097  | 25321226  | 1130 |
| chr3  | 33134175  | 33135293  | 1119 |
| chr29 | 44666639  | 44667754  | 1116 |
| chr9  | 108136883 | 108137988 | 1106 |
| chr20 | 33697072  | 33698164  | 1093 |
| chr29 | 48372961  | 48374046  | 1086 |

|       |           |           |      |
|-------|-----------|-----------|------|
| chr2  | 115121746 | 115122830 | 1085 |
| chr13 | 80741304  | 80742387  | 1084 |
| chr6  | 45441826  | 45442907  | 1082 |
| chrX  | 59703669  | 59704749  | 1081 |
| chr12 | 36283302  | 36284381  | 1080 |
| chr23 | 45576134  | 45577212  | 1079 |
| chr10 | 17787366  | 17788433  | 1068 |
| chr5  | 69516081  | 69517147  | 1067 |
| chr8  | 8300079   | 8301140   | 1062 |
| chrX  | 72235664  | 72236723  | 1060 |
| chr19 | 14085665  | 14086720  | 1056 |
| chr2  | 15364802  | 15365856  | 1055 |
| chrX  | 31680309  | 31681360  | 1052 |
| chr25 | 1920690   | 1921741   | 1052 |
| chrX  | 12523909  | 12524959  | 1051 |
| chr16 | 48802004  | 48803053  | 1050 |
| chr18 | 3897388   | 3898436   | 1049 |
| chr26 | 21803700  | 21804747  | 1048 |
| chrX  | 30903321  | 30904365  | 1045 |
| chr5  | 1098433   | 1099473   | 1041 |
| chr22 | 36555058  | 36556097  | 1040 |
| chrX  | 72719059  | 72720090  | 1032 |
| chr22 | 16382005  | 16383036  | 1032 |
| chr10 | 14990751  | 14991779  | 1029 |
| chrX  | 7519639   | 7520665   | 1027 |
| chr3  | 55847942  | 55848965  | 1024 |
| chr25 | 38755592  | 38756615  | 1024 |
| chrX  | 74767821  | 74768841  | 1021 |
| chrX  | 36532371  | 36533387  | 1017 |
| chr19 | 56100909  | 56101923  | 1015 |
| chr5  | 60376811  | 60377821  | 1011 |
| chr16 | 68884061  | 68885071  | 1011 |
| chr16 | 56103957  | 56104967  | 1011 |
| chr11 | 11976916  | 11977923  | 1008 |
| chr4  | 33877711  | 33878715  | 1005 |
| chr23 | 51052508  | 51053512  | 1005 |
| chr10 | 66797588  | 66798592  | 1005 |
| chr7  | 2535618   | 2536620   | 1003 |
| chr23 | 19628518  | 19629517  | 1000 |
| chr21 | 33924554  | 33925553  | 1000 |
| chr8  | 105589603 | 105590601 | 999  |
| chr17 | 64201271  | 64202269  | 999  |
| chr23 | 9738875   | 9739871   | 997  |
| chr13 | 59683516  | 59684508  | 993  |
| chr25 | 1053153   | 1054142   | 990  |
| chr15 | 84469182  | 84470167  | 986  |
| chr2  | 99791136  | 99792115  | 980  |
| chr18 | 11495475  | 11496454  | 980  |
| chr18 | 17990881  | 17991858  | 978  |
| chr6  | 92970797  | 92971772  | 976  |

|       |           |           |     |
|-------|-----------|-----------|-----|
| chr4  | 121238644 | 121239617 | 974 |
| chrX  | 19277077  | 19278048  | 972 |
| chr29 | 29772285  | 29773255  | 971 |
| chr20 | 32404424  | 32405390  | 967 |
| chrX  | 21579856  | 21580821  | 966 |
| chr29 | 44670211  | 44671170  | 960 |
| chr17 | 74565927  | 74566882  | 956 |
| chr17 | 66512840  | 66513795  | 956 |
| chr13 | 34885104  | 34886057  | 954 |
| chrX  | 19982474  | 19983426  | 953 |
| chr4  | 72668628  | 72669580  | 953 |
| chr11 | 99187061  | 99188012  | 952 |
| chrX  | 55689951  | 55690889  | 939 |
| chr26 | 22247936  | 22248874  | 939 |
| chr5  | 112135859 | 112136794 | 936 |
| chr23 | 27811965  | 27812899  | 935 |
| chr21 | 61783103  | 61784032  | 930 |
| chr4  | 121561511 | 121562439 | 929 |
| chr9  | 104524280 | 104525203 | 924 |
| chr24 | 45161933  | 45162856  | 924 |
| chr23 | 27882482  | 27883399  | 918 |
| chr15 | 28968309  | 28969226  | 918 |
| chr10 | 70027891  | 70028807  | 917 |
| chrX  | 78507304  | 78508218  | 915 |
| chr8  | 76254021  | 76254934  | 914 |
| chr28 | 34011049  | 34011962  | 914 |
| chr17 | 62170739  | 62171640  | 902 |
| chr8  | 5811829   | 5812729   | 901 |
| chr10 | 71234814  | 71235713  | 900 |
| chr10 | 36025589  | 36026488  | 900 |
| chr23 | 11079280  | 11080176  | 897 |
| chr23 | 18745783  | 18746672  | 890 |
| chr11 | 49851122  | 49852011  | 890 |
| chrX  | 12175261  | 12176145  | 885 |
| chr22 | 29669001  | 29669881  | 881 |
| chr3  | 105908349 | 105909226 | 878 |
| chr10 | 74857812  | 74858688  | 877 |
| chr10 | 16616821  | 16617697  | 877 |
| chr9  | 52376669  | 52377544  | 876 |
| chr5  | 32921438  | 32922312  | 875 |
| chr2  | 139237898 | 139238772 | 875 |
| chrX  | 7049299   | 7050171   | 873 |
| chr1  | 74584715  | 74585587  | 873 |
| chr4  | 97714434  | 97715303  | 870 |
| chr21 | 30288950  | 30289815  | 866 |
| chr29 | 34884573  | 34885435  | 863 |
| chr7  | 4346547   | 4347408   | 862 |
| chr2  | 95411434  | 95412294  | 861 |
| chr5  | 29026160  | 29027019  | 860 |
| chr11 | 108389734 | 108390593 | 860 |

|       |               |           |     |
|-------|---------------|-----------|-----|
| chr5  | 118451148     | 118452005 | 858 |
| chr3  | 107735402     | 107736254 | 853 |
| chr24 | 60619371      | 60620215  | 845 |
| chr3  | 105924682     | 105925525 | 844 |
| chr7  | 5239206       | 5240046   | 841 |
| chr17 | 64042751      | 64043591  | 841 |
| chr18 | 11844112      | 11844951  | 840 |
| chr11 | 77722514      | 77723353  | 840 |
| chr5  | 35462220      | 35463058  | 839 |
| chr19 | 63611793      | 63612630  | 838 |
| chrX  | 12913329      | 12914162  | 834 |
| chr19 | 44463082      | 44463913  | 832 |
| chr5  | 70639632      | 70640461  | 830 |
| chrX  | 72845548      | 72846371  | 824 |
| chrX  | 21699772      | 21700595  | 824 |
| chr4  | 117753881     | 117754704 | 824 |
| chrX  | 62906975      | 62907796  | 822 |
| chr3  | 26123332      | 26124152  | 821 |
| chr14 | 34067846      | 34068664  | 819 |
| chr13 | 54842386      | 54843203  | 818 |
| chr18 | 56885880      | 56886696  | 817 |
| chr18 | 65957526      | 65958341  | 816 |
| chr20 | 769434 770247 | 814       |     |
| chr26 | 18187546      | 18188358  | 813 |
| chrX  | 10431856      | 10432666  | 811 |
| chr28 | 40382130      | 40382939  | 810 |
| chr18 | 47879366      | 47880175  | 810 |
| chr9  | 77305210      | 77306014  | 805 |
| chr3  | 106555451     | 106556255 | 805 |
| chr25 | 42522305      | 42523109  | 805 |
| chr19 | 39164021      | 39164823  | 803 |
| chr19 | 58883167      | 58883968  | 802 |
| chr27 | 1496255       | 1497055   | 801 |
| chr16 | 69752458      | 69753257  | 800 |
| chrX  | 7622622       | 7623420   | 799 |
| chr13 | 51462082      | 51462880  | 799 |
| chr29 | 33680369      | 33681165  | 797 |
| chr2  | 138633636     | 138634432 | 797 |
| chr7  | 46175990      | 46176785  | 796 |
| chr15 | 64203099      | 64203894  | 796 |
| chr15 | 25592112      | 25592907  | 796 |
| chr11 | 108383300     | 108384093 | 794 |
| chr24 | 59425255      | 59426047  | 793 |
| chr23 | 19627197      | 19627987  | 791 |
| chr5  | 10532777      | 10533563  | 787 |
| chr11 | 11161423      | 11162207  | 785 |
| chrX  | 74598113      | 74598895  | 783 |
| chr9  | 104996979     | 104997761 | 783 |
| chr8  | 73939348      | 73940127  | 780 |
| chr29 | 34892499      | 34893277  | 779 |

|       |           |           |     |
|-------|-----------|-----------|-----|
| chr14 | 34072168  | 34072946  | 779 |
| chr3  | 22491599  | 22492373  | 775 |
| chr19 | 59292475  | 59293248  | 774 |
| chr3  | 22687593  | 22688365  | 773 |
| chr17 | 61270143  | 61270914  | 772 |
| chrX  | 59323369  | 59324137  | 769 |
| chr18 | 53885505  | 53886271  | 767 |
| chrX  | 18482687  | 18483449  | 763 |
| chr8  | 116753689 | 116754448 | 760 |
| chr12 | 36434413  | 36435172  | 760 |
| chrX  | 47169407  | 47170162  | 756 |
| chrX  | 12262977  | 12263731  | 755 |
| chr3  | 85953093  | 85953847  | 755 |
| chr4  | 104694380 | 104695129 | 750 |
| chrX  | 8312258   | 8313003   | 746 |
| chr19 | 60410067  | 60410812  | 746 |
| chr17 | 73185854  | 73186599  | 746 |
| chr22 | 14918103  | 14918847  | 745 |
| chr18 | 9805315   | 9806058   | 744 |
| chr23 | 52737521  | 52738261  | 741 |
| chr2  | 44184062  | 44184800  | 739 |
| chrX  | 7384319   | 7385053   | 735 |
| chrX  | 48119471  | 48120202  | 732 |
| chr23 | 23847782  | 23848513  | 732 |
| chr11 | 77653818  | 77654548  | 731 |
| chr3  | 22586794  | 22587523  | 730 |
| chr16 | 23645690  | 23646419  | 730 |
| chrX  | 59444784  | 59445512  | 729 |
| chr4  | 68262869  | 68263596  | 728 |
| chr19 | 38534896  | 38535623  | 728 |
| chr13 | 41075658  | 41076384  | 727 |
| chr12 | 53338647  | 53339373  | 727 |
| chr19 | 24360711  | 24361435  | 725 |
| chr2  | 130293675 | 130294397 | 723 |
| chr16 | 23850397  | 23851118  | 722 |
| chr19 | 27917894  | 27918614  | 721 |
| chr19 | 12337583  | 12338303  | 721 |
| chr11 | 11978245  | 11978964  | 720 |
| chr11 | 31053877  | 31054595  | 719 |
| chrX  | 21366512  | 21367229  | 718 |
| chr24 | 34683864  | 34684581  | 718 |
| chr3  | 127375172 | 127375887 | 716 |
| chr19 | 31617347  | 31618062  | 716 |
| chr4  | 71544337  | 71545050  | 714 |
| chr19 | 61216403  | 61217115  | 713 |
| chr28 | 33664842  | 33665553  | 712 |
| chr2  | 24730406  | 24731117  | 712 |
| chr18 | 33212830  | 33213539  | 710 |
| chrX  | 53037740  | 53038448  | 709 |
| chrX  | 7468151   | 7468859   | 709 |

|       |           |           |     |
|-------|-----------|-----------|-----|
| chr23 | 13039348  | 13040050  | 703 |
| chr18 | 11327407  | 11328109  | 703 |
| chrX  | 77674527  | 77675228  | 702 |
| chr4  | 56787507  | 56788208  | 702 |
| chr18 | 55012082  | 55012783  | 702 |
| chr28 | 26920797  | 26921496  | 700 |
| chrX  | 21248002  | 21248698  | 697 |
| chr21 | 6544061   | 6544757   | 697 |
| chr18 | 47598521  | 47599217  | 697 |
| chr16 | 38733968  | 38734664  | 697 |
| chr25 | 3269549   | 3270239   | 691 |
| chr13 | 80149431  | 80150118  | 688 |
| chr9  | 47012733  | 47013419  | 687 |
| chr27 | 29596539  | 29597225  | 687 |
| chr26 | 22337746  | 22338428  | 683 |
| chr10 | 70109289  | 70109971  | 683 |
| chr23 | 19998502  | 19999183  | 682 |
| chr10 | 74851720  | 74852401  | 682 |
| chrX  | 23158288  | 23158967  | 680 |
| chr24 | 44347359  | 44348038  | 680 |
| chr9  | 90539524  | 90540202  | 679 |
| chrX  | 9988933   | 9989609   | 677 |
| chrX  | 72729637  | 72730312  | 676 |
| chr16 | 43316072  | 43316746  | 675 |
| chr25 | 29600666  | 29601336  | 671 |
| chr28 | 1262447   | 1263114   | 668 |
| chr25 | 6792080   | 6792747   | 668 |
| chr11 | 91373342  | 91374008  | 667 |
| chrX  | 18999024  | 18999689  | 666 |
| chr8  | 23487076  | 23487740  | 665 |
| chr8  | 6762949   | 6763612   | 664 |
| chr4  | 95661711  | 95662374  | 664 |
| chr2  | 74700044  | 74700706  | 663 |
| chr14 | 48324366  | 48325027  | 662 |
| chr3  | 127888844 | 127889504 | 661 |
| chrX  | 72820577  | 72821233  | 657 |
| chr4  | 72502868  | 72503524  | 657 |
| chr3  | 125636535 | 125637189 | 655 |
| chr29 | 14872669  | 14873323  | 655 |
| chr26 | 21809176  | 21809828  | 653 |
| chr4  | 120606232 | 120606882 | 651 |
| chr23 | 10548952  | 10549600  | 649 |
| chr13 | 66805814  | 66806462  | 649 |
| chr11 | 77754488  | 77755136  | 649 |
| chr7  | 15310241  | 15310888  | 648 |
| chr25 | 29430838  | 29431485  | 648 |
| chr7  | 73521664  | 73522309  | 646 |
| chr22 | 55394084  | 55394728  | 645 |
| chr23 | 48762907  | 48763550  | 644 |
| chr13 | 77240904  | 77241547  | 644 |

|       |               |           |     |
|-------|---------------|-----------|-----|
| chrX  | 23159063      | 23159704  | 642 |
| chrX  | 78687789      | 78688429  | 641 |
| chr3  | 105116749     | 105117389 | 641 |
| chr23 | 27780604      | 27781243  | 640 |
| chr14 | 62327375      | 62328014  | 640 |
| chrX  | 46403232      | 46403870  | 639 |
| chr6  | 16268533      | 16269171  | 639 |
| chr3  | 17393524      | 17394161  | 638 |
| chr19 | 64765870      | 64766507  | 638 |
| chr23 | 7250850       | 7251486   | 637 |
| chr29 | 44765708      | 44766343  | 636 |
| chrX  | 8188517       | 8189149   | 633 |
| chrX  | 72900060      | 72900691  | 632 |
| chrX  | 37647921      | 37648552  | 632 |
| chr5  | 30488265      | 30488896  | 632 |
| chr27 | 300482 301109 | 628       |     |
| chr22 | 17558286      | 17558912  | 627 |
| chr2  | 136610630     | 136611255 | 626 |
| chr28 | 33809480      | 33810103  | 624 |
| chr2  | 74011023      | 74011646  | 624 |
| chr3  | 113461213     | 113461835 | 623 |
| chr26 | 41885706      | 41886327  | 622 |
| chr14 | 1913810       | 1914431   | 622 |
| chr1  | 64869620      | 64870240  | 621 |
| chr13 | 65413772      | 65414384  | 613 |
| chr5  | 122829551     | 122830162 | 612 |
| chr18 | 62127162      | 62127773  | 612 |
| chr12 | 70978614      | 70979224  | 611 |
| chr17 | 49388666      | 49389275  | 610 |
| chrX  | 49536553      | 49537161  | 609 |
| chrX  | 74531367      | 74531971  | 605 |
| chrX  | 36536115      | 36536719  | 605 |
| chr22 | 50765849      | 50766450  | 602 |
| chr2  | 24074958      | 24075557  | 600 |
| chrX  | 50657597      | 50658195  | 599 |
| chr2  | 92322362      | 92322959  | 598 |
| chr7  | 42195525      | 42196120  | 596 |
| chr4  | 33053379      | 33053974  | 596 |
| chr23 | 19326126      | 19326721  | 596 |
| chr16 | 2437743       | 2438338   | 596 |
| chrX  | 59813373      | 59813967  | 595 |
| chr25 | 36688891      | 36689484  | 594 |
| chr2  | 134906638     | 134907231 | 594 |
| chrX  | 20654726      | 20655316  | 591 |
| chr29 | 51964344      | 51964934  | 591 |
| chrX  | 59474761      | 59475350  | 590 |
| chrX  | 7701330       | 7701916   | 587 |
| chr19 | 45058262      | 45058848  | 587 |
| chr13 | 62242819      | 62243405  | 587 |
| chr9  | 46026760      | 46027345  | 586 |



|       |           |           |     |
|-------|-----------|-----------|-----|
| chr18 | 63770393  | 63770977  | 585 |
| chrX  | 34238616  | 34239196  | 581 |
| chr12 | 32222450  | 32223029  | 580 |
| chr17 | 56063537  | 56064115  | 579 |
| chr18 | 45292576  | 45293153  | 578 |
| chr19 | 56015295  | 56015871  | 577 |
| chr18 | 56826729  | 56827305  | 577 |
| chr19 | 21319950  | 21320525  | 576 |
| chr13 | 62417018  | 62417593  | 576 |
| chr7  | 19669954  | 19670528  | 575 |
| chr5  | 50541729  | 50542303  | 575 |
| chr12 | 36430947  | 36431519  | 573 |
| chr8  | 63916476  | 63917046  | 571 |
| chr5  | 1091161   | 1091731   | 571 |
| chrX  | 78701368  | 78701937  | 570 |
| chr27 | 15411699  | 15412266  | 568 |
| chr25 | 26710418  | 26710985  | 568 |
| chr7  | 42490138  | 42490703  | 566 |
| chr7  | 45123647  | 45124211  | 565 |
| chr11 | 77578466  | 77579030  | 565 |
| chr23 | 10555845  | 10556407  | 563 |
| chr23 | 18477588  | 18478149  | 562 |
| chr18 | 11725307  | 11725868  | 562 |
| chr13 | 46431946  | 46432507  | 562 |
| chr7  | 14821073  | 14821632  | 560 |
| chr20 | 74082535  | 74083094  | 560 |
| chr6  | 119071775 | 119072330 | 556 |
| chr18 | 57300957  | 57301512  | 556 |
| chr17 | 54292183  | 54292738  | 556 |
| chr19 | 55482200  | 55482752  | 553 |
| chr15 | 24004419  | 24004971  | 553 |
| chr10 | 41872315  | 41872867  | 553 |
| chr8  | 5815297   | 5815848   | 552 |
| chr2  | 132706388 | 132706938 | 551 |
| chr13 | 61481886  | 61482435  | 550 |
| chr19 | 40531265  | 40531813  | 549 |
| chr18 | 11212985  | 11213533  | 549 |
| chr11 | 93767967  | 93768515  | 549 |
| chrX  | 22434988  | 22435535  | 548 |
| chrX  | 53627948  | 53628494  | 547 |
| chr5  | 28900551  | 28901097  | 547 |
| chr11 | 99688633  | 99689179  | 547 |
| chrX  | 36342092  | 36342636  | 545 |
| chr9  | 106001189 | 106001733 | 545 |
| chrX  | 50272548  | 50273091  | 544 |
| chrX  | 31432730  | 31433272  | 543 |
| chr12 | 34271445  | 34271987  | 543 |
| chr19 | 44299226  | 44299766  | 541 |
| chr2  | 99655220  | 99655759  | 540 |
| chr20 | 70150947  | 70151485  | 539 |

|       |           |           |     |
|-------|-----------|-----------|-----|
| chr17 | 72353777  | 72354313  | 537 |
| chr19 | 23685406  | 23685941  | 536 |
| chr14 | 1636534   | 1637069   | 536 |
| chr13 | 52656719  | 52657253  | 535 |
| chr25 | 42028760  | 42029292  | 533 |
| chr19 | 45919435  | 45919966  | 532 |
| chrX  | 39070961  | 39071491  | 531 |
| chr19 | 17107785  | 17108315  | 531 |
| chr23 | 49969948  | 49970477  | 530 |
| chr23 | 48777728  | 48778257  | 530 |
| chr24 | 33494901  | 33495429  | 529 |
| chr13 | 9940310   | 9940834   | 525 |
| chr24 | 59565163  | 59565685  | 523 |
| chr4  | 69679310  | 69679831  | 522 |
| chr12 | 32260460  | 32260980  | 521 |
| chrX  | 20403609  | 20404128  | 520 |
| chrX  | 13648103  | 13648622  | 520 |
| chr19 | 39417527  | 39418046  | 520 |
| chr12 | 11471887  | 11472406  | 520 |
| chr6  | 107136200 | 107136718 | 519 |
| chr19 | 56088786  | 56089304  | 519 |
| chr26 | 23487463  | 23487978  | 516 |
| chr22 | 16195869  | 16196383  | 515 |
| chr3  | 127431072 | 127431584 | 513 |
| chr26 | 49900762  | 49901272  | 511 |
| chr22 | 22554548  | 22555057  | 510 |
| chr25 | 3219971   | 3220478   | 508 |
| chr24 | 60591205  | 60591712  | 508 |
| chr18 | 64340869  | 64341376  | 508 |
| chr15 | 31970638  | 31971145  | 508 |
| chr9  | 87771704  | 87772210  | 507 |
| chr8  | 24453519  | 24454025  | 507 |
| chr26 | 20933343  | 20933848  | 506 |
| chr12 | 24622925  | 24623429  | 505 |
| chr18 | 11673099  | 11673600  | 502 |
| chr14 | 59273355  | 59273856  | 502 |
| chr11 | 85332234  | 85332735  | 502 |
| chr3  | 125637661 | 125638161 | 501 |
| chr3  | 104475209 | 104475709 | 501 |
| chrX  | 37328733  | 37329232  | 500 |
| chr4  | 52523083  | 52523581  | 499 |
| chr19 | 17115445  | 17115941  | 497 |
| chr2  | 134960418 | 134960913 | 496 |
| chr18 | 47672193  | 47672687  | 495 |
| chr11 | 92684140  | 92684633  | 494 |
| chr18 | 49475488  | 49475979  | 492 |
| chr2  | 132439183 | 132439673 | 491 |
| chr19 | 38781076  | 38781566  | 491 |
| chr12 | 32161485  | 32161975  | 491 |
| chr22 | 55943572  | 55944061  | 490 |

|       |               |           |     |
|-------|---------------|-----------|-----|
| chr19 | 32818162      | 32818651  | 490 |
| chr6  | 94810633      | 94811121  | 489 |
| chrX  | 51672011      | 51672497  | 487 |
| chr13 | 41393352      | 41393836  | 485 |
| chr10 | 8539090       | 8539574   | 485 |
| chrX  | 8535859       | 8536339   | 481 |
| chr21 | 6543112       | 6543592   | 481 |
| chrX  | 58216259      | 58216738  | 480 |
| chr19 | 58447504      | 58447983  | 480 |
| chr21 | 68940954      | 68941432  | 479 |
| chr2  | 111851898     | 111852376 | 479 |
| chr14 | 3492843       | 3493317   | 475 |
| chr10 | 74863300      | 74863774  | 475 |
| chr19 | 58229576      | 58230049  | 474 |
| chr24 | 1154832       | 1155303   | 472 |
| chr13 | 75783895      | 75784366  | 472 |
| chr11 | 91581242      | 91581713  | 472 |
| chr13 | 59581089      | 59581559  | 471 |
| chr25 | 8705648       | 8706117   | 470 |
| chr28 | 34081046      | 34081514  | 469 |
| chr11 | 89081871      | 89082339  | 469 |
| chr10 | 16925702      | 16926170  | 469 |
| chr3  | 22550154      | 22550619  | 466 |
| chr24 | 5568050       | 5568515   | 466 |
| chr23 | 51911216      | 51911681  | 466 |
| chr17 | 73430947      | 73431412  | 466 |
| chr9  | 90396155      | 90396619  | 465 |
| chrX  | 68357407      | 68357870  | 464 |
| chr7  | 19214007      | 19214470  | 464 |
| chr26 | 18818807      | 18819270  | 464 |
| chrX  | 58778050      | 58778512  | 463 |
| chr16 | 72120642      | 72121103  | 462 |
| chr22 | 12071078      | 12071537  | 460 |
| chr27 | 853582 854040 |           | 459 |
| chr11 | 10297957      | 10298415  | 459 |
| chr3  | 62648928      | 62649385  | 458 |
| chr27 | 20822910      | 20823367  | 458 |
| chr20 | 770525 770982 |           | 458 |
| chr14 | 7627468       | 7627925   | 458 |
| chr5  | 29138854      | 29139310  | 457 |
| chr2  | 135080681     | 135081136 | 456 |
| chr15 | 27276032      | 27276487  | 456 |
| chr13 | 43322894      | 43323349  | 456 |
| chrX  | 8218538       | 8218991   | 454 |
| chr20 | 714718 715170 |           | 453 |
| chr18 | 11368845      | 11369297  | 453 |
| chr7  | 13277914      | 13278365  | 452 |
| chr2  | 124974723     | 124975174 | 452 |
| chr13 | 76175650      | 76176100  | 451 |
| chrX  | 20024470      | 20024919  | 450 |

|       |               |           |     |
|-------|---------------|-----------|-----|
| chr22 | 30199167      | 30199616  | 450 |
| chrX  | 59581971      | 59582419  | 449 |
| chr11 | 106256445     | 106256893 | 449 |
| chr6  | 118827995     | 118828442 | 448 |
| chr19 | 60740318      | 60740765  | 448 |
| chr23 | 44400506      | 44400952  | 447 |
| chrX  | 65006589      | 65007034  | 446 |
| chr19 | 39355178      | 39355623  | 446 |
| chr13 | 26059808      | 26060253  | 446 |
| chr12 | 73380253      | 73380698  | 446 |
| chr2  | 99659199      | 99659643  | 445 |
| chr19 | 22339291      | 22339735  | 445 |
| chr13 | 43419480      | 43419924  | 445 |
| chr13 | 14688500      | 14688944  | 445 |
| chr11 | 51854870      | 51855314  | 445 |
| chrX  | 34124013      | 34124456  | 444 |
| chr7  | 19246147      | 19246590  | 444 |
| chr5  | 117768917     | 117769360 | 444 |
| chr2  | 23110253      | 23110696  | 444 |
| chr17 | 64208909      | 64209352  | 444 |
| chr10 | 14080755      | 14081198  | 444 |
| chr5  | 71674952      | 71675394  | 443 |
| chr4  | 64276477      | 64276919  | 443 |
| chr23 | 17483036      | 17483477  | 442 |
| chr11 | 107232253     | 107232694 | 442 |
| chr3  | 17476691      | 17477131  | 441 |
| chr25 | 2739072       | 2739512   | 441 |
| chr18 | 51032722      | 51033162  | 441 |
| chrX  | 59412258      | 59412696  | 439 |
| chr18 | 23242798      | 23243236  | 439 |
| chrX  | 37980057      | 37980493  | 437 |
| chrX  | 31958619      | 31959055  | 437 |
| chrX  | 19027762      | 19028198  | 437 |
| chr29 | 897018 897454 | 437       |     |
| chr10 | 25836416      | 25836852  | 437 |
| chrX  | 72793907      | 72794339  | 433 |
| chr23 | 8249710       | 8250141   | 432 |
| chr28 | 34018010      | 34018438  | 429 |
| chr19 | 61750976      | 61751403  | 428 |
| chr18 | 50176579      | 50177006  | 428 |
| chrX  | 56948720      | 56949146  | 427 |
| chr3  | 83728190      | 83728615  | 426 |
| chr18 | 14362652      | 14363077  | 426 |
| chrX  | 75940129      | 75940553  | 425 |
| chrX  | 70857346      | 70857770  | 425 |
| chr18 | 54961704      | 54962128  | 425 |
| chr17 | 63277650      | 63278074  | 425 |
| chr13 | 41053492      | 41053915  | 424 |
| chr7  | 15760780      | 15761202  | 423 |
| chr6  | 119403555     | 119403976 | 422 |

|       |           |           |      |
|-------|-----------|-----------|------|
| chr3  | 126841059 | 126841480 | 422  |
| chr5  | 111238057 | 111238477 | 421  |
| chr13 | 59655914  | 59656333  | 420  |
| chr15 | 74519554  | 74519972  | 419  |
| chr15 | 30412213  | 30412631  | 419  |
| chr1  | 123074151 | 123074569 | 419  |
| chr11 | 104662252 | 104662668 | 417  |
| chr11 | 21623526  | 21623942  | 417  |
| chr23 | 19331863  | 19332278  | 416  |
| chr18 | 33643639  | 33644054  | 416  |
| chrX  | 49282072  | 49282485  | 414  |
| chr13 | 57583328  | 57583741  | 414  |
| chr15 | 74447615  | 74448026  | 412  |
| chr6  | 121018328 | 121018738 | 411  |
| chr15 | 39537267  | 39537675  | 409  |
| chr13 | 70347212  | 70347618  | 407  |
| chrX  | 50810079  | 50810484  | 406  |
| chr20 | 73246927  | 73247331  | 405  |
| chr21 | 24366308  | 24366711  | 404  |
| chrX  | 8141319   | 8141721   | 403  |
| chr24 | 1216890   | 1217292   | 403  |
| chr11 | 74970829  | 74971231  | 403  |
| chrX  | 64509135  | 64509536  | 402  |
| chr18 | 57301566  | 57301967  | 402  |
| chr10 | 70155933  | 70156334  | 402  |
| chr18 | 6025014   | 6025414   | 401  |
| chrX  | 58717961  | 58718360  | 400  |
| chr22 | 59974842  | 59975241  | 400  |
| chrX  | 24574670  | 24575068  | 399  |
| chr23 | 31174546  | 31174944  | 399  |
| chr12 | 44610297  | 44610695  | 399  |
| chr10 | 12119042  | 12119440  | 399  |
| chr3  | 121668682 | 121669079 | 398  |
| chr22 | 47889798  | 47890195  | 398  |
| chr24 | 60747157  | 60747553  | 397  |
| chr12 | 14948097  | 14948492  | 396  |
| chr18 | 24326716  | 24327104  | 389  |
| chr18 | 24334479  | 24334865  | 387  |
| chr13 | 63405468  | 63405854  | 387  |
| chr3  | 29967555  | 29967926  | 372  |
| chr13 | 77336916  | 77337263  | 348  |
| chr21 | 2033470   | 2034359   | 890  |
| chr6  | 22488967  | 22489389  | 423  |
| chr7  | 49977326  | 49979326  | 2001 |
| chr19 | 14071626  | 14073111  | 1486 |
| chr11 | 14180130  | 14181327  | 1198 |
| chr26 | 44034046  | 44035197  | 1152 |
| chr2  | 139211518 | 139212583 | 1066 |
| chr1  | 84818952  | 84820005  | 1054 |
| chr7  | 5113912   | 5114845   | 934  |

|       |               |           |      |
|-------|---------------|-----------|------|
| chr6  | 67337903      | 67338830  | 928  |
| chr5  | 27467643      | 27468508  | 866  |
| chr24 | 11509148      | 11509967  | 820  |
| chr2  | 105795113     | 105795873 | 761  |
| chr18 | 38804368      | 38805088  | 721  |
| chr6  | 118184576     | 118185289 | 714  |
| chrX  | 72891411      | 72892068  | 658  |
| chr3  | 116295145     | 116295797 | 653  |
| chrX  | 21243161      | 21243812  | 652  |
| chr21 | 61641986      | 61642591  | 606  |
| chr1  | 45803966      | 45804535  | 570  |
| chr4  | 124451751     | 124452307 | 557  |
| chr20 | 652570 653107 | 538       |      |
| chrX  | 58920432      | 58920875  | 444  |
| chr23 | 18457207      | 18457644  | 438  |
| chrX  | 48193264      | 48193680  | 417  |
| chr5  | 30850380      | 30851891  | 1512 |
| chr2  | 134066115     | 134067462 | 1348 |
| chr19 | 21317624      | 21318911  | 1288 |
| chr11 | 103739983     | 103741061 | 1079 |
| chr26 | 21973748      | 21974772  | 1025 |
| chr6  | 30816626      | 30817615  | 990  |
| chr13 | 75631020      | 75632005  | 986  |
| chr8  | 57992427      | 57993410  | 984  |
| chr10 | 72207185      | 72208149  | 965  |
| chr13 | 39958249      | 39959139  | 891  |
| chr12 | 17229277      | 17229910  | 634  |
| chr18 | 11263762      | 11264274  | 513  |
| chr20 | 861118 861623 | 506       |      |
| chr17 | 70397840      | 70398325  | 486  |
| chr24 | 60781949      | 60782347  | 399  |
| chr28 | 33816808      | 33818006  | 1199 |
| chr13 | 70292817      | 70293998  | 1182 |
| chr28 | 33766496      | 33767410  | 915  |
| chr23 | 27886207      | 27887078  | 872  |
| chr23 | 27822788      | 27823557  | 770  |
| chr14 | 39052267      | 39052993  | 727  |
| chr19 | 27374181      | 27374892  | 712  |
| chr8  | 24752482      | 24753114  | 633  |
| chr13 | 68926786      | 68927399  | 614  |
| chrX  | 8462287       | 8462897   | 611  |
| chr13 | 57590492      | 57591098  | 607  |
| chr18 | 9703949       | 9704528   | 580  |
| chrX  | 11088387      | 11088883  | 497  |
| chrX  | 21938712      | 21939152  | 441  |
| chrX  | 53712260      | 53712667  | 408  |
| chr10 | 20937304      | 20938654  | 1351 |
| chr10 | 22290568      | 22291799  | 1232 |
| chr5  | 117218500     | 117219692 | 1193 |
| chrX  | 21242213      | 21243089  | 877  |

|       |               |           |      |
|-------|---------------|-----------|------|
| chrX  | 87715747      | 87716605  | 859  |
| chr3  | 111642930     | 111643712 | 783  |
| chr12 | 36414731      | 36415502  | 772  |
| chr13 | 66683512      | 66684053  | 542  |
| chr2  | 95147599      | 95148106  | 508  |
| chr14 | 946437 946903 | 467       |      |
| chr17 | 69201898      | 69203185  | 1288 |
| chr1  | 84538830      | 84539736  | 907  |
| chr4  | 95663471      | 95664366  | 896  |
| chr19 | 53551948      | 53552756  | 809  |
| chr20 | 6783710       | 6784427   | 718  |
| chr7  | 60981214      | 60981852  | 639  |
| chr5  | 71714252      | 71714752  | 501  |
| chr22 | 45452136      | 45452631  | 496  |
| chr15 | 43592874      | 43593343  | 470  |
| chr17 | 72765556      | 72767082  | 1527 |
| chr3  | 111185072     | 111186507 | 1436 |
| chr2  | 136612687     | 136613847 | 1161 |
| chr12 | 83849428      | 83850514  | 1087 |
| chr17 | 68459291      | 68460321  | 1031 |
| chr10 | 69181065      | 69182076  | 1012 |
| chr19 | 21744436      | 21745349  | 914  |
| chr25 | 39324978      | 39325491  | 514  |
| chrX  | 8165342       | 8165847   | 506  |
| chr10 | 8558544       | 8559006   | 463  |
| chrX  | 35203395      | 35204279  | 885  |
| chrX  | 50710048      | 50710700  | 653  |
| chr18 | 7670020       | 7670570   | 551  |
| chr22 | 58742927      | 58743463  | 537  |
| chr11 | 77577545      | 77578461  | 917  |
| chr4  | 32535005      | 32535543  | 539  |
| chr12 | 83790133      | 83790620  | 488  |
| chr3  | 127794111     | 127794552 | 442  |
| chrX  | 61828261      | 61829023  | 763  |
| chr27 | 26356630      | 26357211  | 582  |
| chr15 | 38390691      | 38391236  | 546  |
| chr24 | 65017477      | 65017977  | 501  |
| chr8  | 24171021      | 24171564  | 544  |
| chr25 | 40898355      | 40899220  | 866  |
| chrX  | 21367448      | 21368066  | 619  |
| chrX  | 60394493      | 60395072  | 580  |
| chrX  | 73205468      | 73205991  | 524  |
| chr23 | 8482097       | 8482811   | 715  |
| chr20 | 6759273       | 6760032   | 760  |
| chrX  | 11006695      | 11007301  | 607  |
| chr8  | 24497708      | 24498230  | 523  |
| chr18 | 63505957      | 63506463  | 507  |
| chr22 | 50908378      | 50908880  | 503  |
| chr21 | 63276790      | 63277251  | 462  |
| chr9  | 66933186      | 66933609  | 424  |

|       |           |           |      |
|-------|-----------|-----------|------|
| chr16 | 40870704  | 40871120  | 417  |
| chr1  | 81735863  | 81736273  | 411  |
| chrX  | 8984802   | 8985613   | 812  |
| chr3  | 126944530 | 126945549 | 1020 |
| chr8  | 73842084  | 73842623  | 540  |
| chr8  | 24398724  | 24399822  | 1099 |
| chr17 | 32107385  | 32107777  | 393  |
| chr12 | 76566722  | 76567293  | 572  |
| chr21 | 52065117  | 52066035  | 919  |
| chrX  | 8939202   | 8940348   | 1147 |
| chr8  | 73520955  | 73521486  | 532  |
| chr29 | 49306788  | 49307334  | 547  |
| chr10 | 3528358   | 3529368   | 1011 |
| chrX  | 7530599   | 7533195   | 2597 |
| chr3  | 110744148 | 110746230 | 2083 |
| chrX  | 7448878   | 7450899   | 2022 |
| chrX  | 2327109   | 2329060   | 1952 |
| chr18 | 22085413  | 22087159  | 1747 |
| chrX  | 7512860   | 7514601   | 1742 |
| chr1  | 111312500 | 111314226 | 1727 |
| chr22 | 16296455  | 16298180  | 1726 |
| chr19 | 14074803  | 14076527  | 1725 |
| chr28 | 36455576  | 36457294  | 1719 |
| chr3  | 22474026  | 22475725  | 1700 |
| chr3  | 121925582 | 121927256 | 1675 |
| chr5  | 115152219 | 115153880 | 1662 |
| chr25 | 43484377  | 43485996  | 1620 |
| chr5  | 33963353  | 33964932  | 1580 |
| chr13 | 57580211  | 57581788  | 1578 |
| chrX  | 12081892  | 12083463  | 1572 |
| chr13 | 41770284  | 41771829  | 1546 |
| chr22 | 30074773  | 30076314  | 1542 |
| chr2  | 35503075  | 35504610  | 1536 |
| chr4  | 98887672  | 98889200  | 1529 |
| chr3  | 105456608 | 105458132 | 1525 |
| chr19 | 26949614  | 26951136  | 1523 |
| chr11 | 28553660  | 28555177  | 1518 |
| chr28 | 40397232  | 40398743  | 1512 |
| chr8  | 24441203  | 24442711  | 1509 |
| chr9  | 108134326 | 108135833 | 1508 |
| chr7  | 23843962  | 23845431  | 1470 |
| chr3  | 105730062 | 105731501 | 1440 |
| chr11 | 97744274  | 97745700  | 1427 |
| chr17 | 62072742  | 62074152  | 1411 |
| chrX  | 7084353   | 7085757   | 1405 |
| chr21 | 47521832  | 47523227  | 1396 |
| chr27 | 14741457  | 14742832  | 1376 |
| chr15 | 43437500  | 43438864  | 1365 |
| chr21 | 6482695   | 6484054   | 1360 |
| chr26 | 20730262  | 20731616  | 1355 |



|       |           |           |      |
|-------|-----------|-----------|------|
| chr28 | 6846413   | 6847762   | 1350 |
| chr19 | 41868699  | 41870046  | 1348 |
| chr4  | 5387811   | 5389155   | 1345 |
| chr19 | 23159835  | 23161179  | 1345 |
| chr17 | 67309701  | 67311042  | 1342 |
| chr4  | 33882511  | 33883836  | 1326 |
| chr25 | 37696317  | 37697636  | 1320 |
| chr29 | 34257265  | 34258574  | 1310 |
| chrX  | 49790145  | 49791452  | 1308 |
| chr25 | 40197575  | 40198873  | 1299 |
| chr18 | 18710332  | 18711628  | 1297 |
| chr18 | 33825321  | 33826610  | 1290 |
| chr13 | 66018524  | 66019813  | 1290 |
| chr15 | 25623705  | 25624993  | 1289 |
| chr1  | 146603916 | 146605187 | 1272 |
| chr14 | 22075740  | 22077004  | 1265 |
| chr10 | 35890623  | 35891887  | 1265 |
| chr18 | 52859870  | 52861128  | 1259 |
| chr14 | 5911313   | 5912569   | 1257 |
| chr7  | 45705697  | 45706951  | 1255 |
| chr11 | 21642134  | 21643387  | 1254 |
| chr17 | 64104355  | 64105601  | 1247 |
| chr16 | 2264019   | 2265265   | 1247 |
| chr7  | 70502356  | 70503594  | 1239 |
| chr29 | 48810014  | 48811246  | 1233 |
| chr13 | 15174288  | 15175514  | 1227 |
| chr7  | 39668239  | 39669462  | 1224 |
| chr23 | 38505115  | 38506337  | 1223 |
| chr15 | 28632415  | 28633637  | 1223 |
| chr20 | 75795101  | 75796322  | 1222 |
| chr8  | 108772017 | 108773234 | 1218 |
| chr16 | 47038084  | 47039297  | 1214 |
| chr8  | 7542402   | 7543611   | 1210 |
| chr9  | 90596272  | 90597468  | 1197 |
| chr19 | 39364281  | 39365476  | 1196 |
| chr14 | 66255216  | 66256406  | 1191 |
| chrX  | 7553099   | 7554265   | 1167 |
| chr22 | 44487409  | 44488568  | 1160 |
| chr18 | 48684715  | 48685872  | 1158 |
| chr10 | 7186079   | 7187233   | 1155 |
| chr10 | 74704213  | 74705366  | 1154 |
| chr21 | 64480878  | 64482028  | 1151 |
| chr17 | 72332926  | 72334075  | 1150 |
| chr11 | 48689600  | 48690749  | 1150 |
| chr10 | 76056698  | 76057841  | 1144 |
| chr17 | 64330944  | 64332084  | 1141 |
| chr4  | 64222638  | 64223773  | 1136 |
| chr13 | 77724330  | 77725464  | 1135 |
| chr21 | 20637034  | 20638167  | 1134 |
| chr2  | 19393328  | 19394453  | 1126 |

|       |           |           |      |
|-------|-----------|-----------|------|
| chr6  | 121699426 | 121700549 | 1124 |
| chr29 | 33588154  | 33589277  | 1124 |
| chr16 | 47123548  | 47124664  | 1117 |
| chr2  | 23944607  | 23945722  | 1116 |
| chr17 | 4753569   | 4754680   | 1112 |
| chr10 | 46987850  | 46988955  | 1106 |
| chr29 | 46678271  | 46679374  | 1104 |
| chr3  | 116164669 | 116165771 | 1103 |
| chrX  | 78375993  | 78377094  | 1102 |
| chr19 | 171110763 | 17111863  | 1101 |
| chr18 | 57615617  | 57616714  | 1098 |
| chr17 | 70102629  | 70103713  | 1085 |
| chr15 | 42307233  | 42308312  | 1080 |
| chr9  | 106393949 | 106395023 | 1075 |
| chr25 | 15314802  | 15315876  | 1075 |
| chr15 | 28525858  | 28526930  | 1073 |
| chr29 | 33610042  | 33611112  | 1071 |
| chr18 | 23112997  | 23114064  | 1068 |
| chr7  | 25667833  | 25668894  | 1062 |
| chr15 | 5861308   | 5862369   | 1062 |
| chr19 | 40423035  | 40424095  | 1061 |
| chr1  | 147251924 | 147252974 | 1051 |
| chrX  | 36641096  | 36642143  | 1048 |
| chr7  | 38572954  | 38573999  | 1046 |
| chr1  | 141988849 | 141989894 | 1046 |
| chr13 | 75691762  | 75692802  | 1041 |
| chr15 | 81155872  | 81156908  | 1037 |
| chr6  | 109417163 | 109418195 | 1033 |
| chr12 | 69084787  | 69085813  | 1027 |
| chr26 | 48707867  | 48708892  | 1026 |
| chr14 | 7831240   | 7832264   | 1025 |
| chr17 | 63491598  | 63492618  | 1021 |
| chrX  | 49333103  | 49334122  | 1020 |
| chrX  | 7941900   | 7942918   | 1019 |
| chr19 | 26929800  | 26930816  | 1017 |
| chr4  | 121494076 | 121495090 | 1015 |
| chr11 | 72627794  | 72628805  | 1012 |
| chrX  | 7591480   | 7592489   | 1010 |
| chr2  | 105794017 | 105795025 | 1009 |
| chr8  | 43601595  | 43602602  | 1008 |
| chr7  | 42283568  | 42284571  | 1004 |
| chr3  | 105172232 | 105173235 | 1004 |
| chr16 | 20639660  | 20640662  | 1003 |
| chr15 | 51657484  | 51658485  | 1002 |
| chr7  | 15621110  | 15622108  | 999  |
| chr5  | 30475748  | 30476745  | 998  |
| chr24 | 1721351   | 1722348   | 998  |
| chr29 | 47915376  | 47916370  | 995  |
| chr3  | 111426915 | 111427906 | 992  |
| chr26 | 41920564  | 41921549  | 986  |

|       |           |           |     |
|-------|-----------|-----------|-----|
| chrX  | 21205979  | 21206961  | 983 |
| chr26 | 18189410  | 18190392  | 983 |
| chr27 | 40755262  | 40756242  | 981 |
| chr10 | 60361095  | 60362071  | 977 |
| chr13 | 37661811  | 37662784  | 974 |
| chrX  | 8088477   | 8089449   | 973 |
| chr19 | 33095471  | 33096443  | 973 |
| chr13 | 23658692  | 23659656  | 965 |
| chr20 | 3204686   | 3205649   | 964 |
| chr6  | 67998698  | 67999660  | 963 |
| chr1  | 1663213   | 1664171   | 959 |
| chr24 | 60593633  | 60594585  | 953 |
| chr19 | 14991426  | 14992377  | 952 |
| chr13 | 58278836  | 58279787  | 952 |
| chr10 | 20932527  | 20933478  | 952 |
| chr28 | 26984358  | 26985305  | 948 |
| chr2  | 138694654 | 138695598 | 945 |
| chr10 | 7513500   | 7514440   | 941 |
| chr26 | 42178625  | 42179563  | 939 |
| chr20 | 32401906  | 32402843  | 938 |
| chrX  | 59477979  | 59478909  | 931 |
| chr15 | 73725771  | 73726699  | 929 |
| chr12 | 84585201  | 84586129  | 929 |
| chr11 | 91381003  | 91381931  | 929 |
| chr13 | 79994450  | 79995374  | 925 |
| chr22 | 56466551  | 56467474  | 924 |
| chr10 | 20474949  | 20475872  | 924 |
| chr2  | 135090047 | 135090968 | 922 |
| chr5  | 111205275 | 111206194 | 920 |
| chr13 | 41774802  | 41775713  | 912 |
| chr2  | 131147834 | 131148744 | 911 |
| chr17 | 73893327  | 73894235  | 909 |
| chr22 | 30375938  | 30376843  | 906 |
| chr29 | 23641243  | 23642146  | 904 |
| chr18 | 18055056  | 18055957  | 902 |
| chr3  | 102121682 | 102122581 | 900 |
| chr27 | 38661636  | 38662532  | 897 |
| chr18 | 34060948  | 34061844  | 897 |
| chr19 | 12133083  | 12133975  | 893 |
| chr26 | 21791867  | 21792758  | 892 |
| chr10 | 20895877  | 20896767  | 891 |
| chr18 | 3644842   | 3645728   | 887 |
| chr9  | 16960196  | 16961081  | 886 |
| chr3  | 55846234  | 55847119  | 886 |
| chr29 | 13601314  | 13602199  | 886 |
| chr27 | 45270158  | 45271041  | 884 |
| chr27 | 26895541  | 26896424  | 884 |
| chr17 | 47357393  | 47358276  | 884 |
| chr5  | 76995403  | 76996282  | 880 |
| chr3  | 9138927   | 9139806   | 880 |

|       |           |           |     |
|-------|-----------|-----------|-----|
| chr3  | 54316793  | 54317669  | 877 |
| chr11 | 104884209 | 104885081 | 873 |
| chr2  | 110030968 | 110031838 | 871 |
| chr18 | 11976011  | 11976881  | 871 |
| chr19 | 32596979  | 32597848  | 870 |
| chrX  | 56025113  | 56025980  | 868 |
| chr27 | 8830535   | 8831399   | 865 |
| chr19 | 39015022  | 39015880  | 859 |
| chr3  | 33133197  | 33134051  | 855 |
| chr13 | 62410328  | 62411176  | 849 |
| chrX  | 56047566  | 56048413  | 848 |
| chr7  | 20478322  | 20479167  | 846 |
| chr8  | 82098268  | 82099110  | 843 |
| chr5  | 10536481  | 10537322  | 842 |
| chrX  | 6640617   | 6641457   | 841 |
| chr20 | 60493835  | 60494674  | 840 |
| chrX  | 55551979  | 55552817  | 839 |
| chr19 | 29813344  | 29814180  | 837 |
| chr15 | 74586385  | 74587221  | 837 |
| chr23 | 8413162   | 8413997   | 836 |
| chr4  | 121409503 | 121410337 | 835 |
| chr8  | 73253708  | 73254540  | 833 |
| chrX  | 56858724  | 56859555  | 832 |
| chr4  | 71606640  | 71607468  | 829 |
| chr25 | 2681354   | 2682182   | 829 |
| chr25 | 4003946   | 4004771   | 826 |
| chr5  | 60170574  | 60171396  | 823 |
| chr9  | 105880081 | 105880902 | 822 |
| chr20 | 71869173  | 71869993  | 821 |
| chr11 | 14498314  | 14499133  | 820 |
| chr7  | 46222500  | 46223318  | 819 |
| chr23 | 51913827  | 51914645  | 819 |
| chr18 | 12394943  | 12395761  | 819 |
| chr3  | 116497497 | 116498314 | 818 |
| chr15 | 76027866  | 76028682  | 817 |
| chr23 | 7382309   | 7383123   | 815 |
| chr24 | 41888913  | 41889723  | 811 |
| chr7  | 52204644  | 52205453  | 810 |
| chr4  | 122175894 | 122176696 | 803 |
| chr2  | 128592546 | 128593348 | 803 |
| chrX  | 73175369  | 73176169  | 801 |
| chr23 | 27398003  | 27398802  | 800 |
| chr20 | 13795617  | 13796415  | 799 |
| chr28 | 26921866  | 26922660  | 795 |
| chr29 | 44768510  | 44769303  | 794 |
| chr29 | 46392704  | 46393496  | 793 |
| chr19 | 58672897  | 58673689  | 793 |
| chr13 | 70943656  | 70944447  | 792 |
| chr19 | 14238566  | 14239356  | 791 |
| chr18 | 11780696  | 11781485  | 790 |

|       |           |           |     |
|-------|-----------|-----------|-----|
| chr13 | 75437117  | 75437906  | 790 |
| chr25 | 2080996   | 2081784   | 789 |
| chr10 | 8484827   | 8485614   | 788 |
| chr26 | 37622572  | 37623358  | 787 |
| chrX  | 7516884   | 7517669   | 786 |
| chr18 | 10211859  | 10212644  | 786 |
| chr13 | 75533747  | 75534530  | 784 |
| chr8  | 24666625  | 24667407  | 783 |
| chr29 | 47336013  | 47336794  | 782 |
| chr7  | 19207660  | 19208440  | 781 |
| chrX  | 7164969   | 7165748   | 780 |
| chr13 | 6627519   | 6628298   | 780 |
| chr29 | 36949553  | 36950330  | 778 |
| chr11 | 4938016   | 4938793   | 778 |
| chr14 | 26119767  | 26120542  | 776 |
| chr8  | 65755142  | 65755916  | 775 |
| chr5  | 111332592 | 111333365 | 774 |
| chr19 | 12398461  | 12399234  | 774 |
| chr13 | 78422990  | 78423760  | 771 |
| chr17 | 66009848  | 66010615  | 768 |
| chr18 | 11220770  | 11221536  | 767 |
| chr11 | 101006139 | 101006904 | 766 |
| chr19 | 27370921  | 27371683  | 763 |
| chrX  | 72936836  | 72937593  | 758 |
| chr19 | 58563120  | 58563875  | 756 |
| chr19 | 44883082  | 44883837  | 756 |
| chrX  | 36903645  | 36904399  | 755 |
| chr27 | 15330225  | 15330978  | 754 |
| chr14 | 31015011  | 31015764  | 754 |
| chr17 | 47096347  | 47097098  | 752 |
| chr2  | 25314036  | 25314786  | 751 |
| chrX  | 20288062  | 20288809  | 748 |
| chr1  | 134429050 | 134429796 | 747 |
| chr4  | 46283560  | 46284304  | 745 |
| chr19 | 29459217  | 29459961  | 745 |
| chr20 | 62158527  | 62159269  | 743 |
| chr10 | 84202611  | 84203353  | 743 |
| chr18 | 21956499  | 21957240  | 742 |
| chr2  | 138641394 | 138642134 | 741 |
| chr21 | 1775590   | 1776328   | 739 |
| chr16 | 2134230   | 2134968   | 739 |
| chr14 | 21396581  | 21397319  | 739 |
| chrX  | 47273991  | 47274728  | 738 |
| chr13 | 77299611  | 77300348  | 738 |
| chr11 | 81433682  | 81434417  | 736 |
| chr4  | 73476220  | 73476954  | 735 |
| chr18 | 52325633  | 52326367  | 735 |
| chr13 | 76473328  | 76474060  | 733 |
| chr29 | 49307390  | 49308121  | 732 |
| chr13 | 2519226   | 2519957   | 732 |

|       |           |           |     |
|-------|-----------|-----------|-----|
| chr17 | 64373072  | 64373802  | 731 |
| chr7  | 88950341  | 88951070  | 730 |
| chr7  | 14254747  | 14255475  | 729 |
| chrX  | 54939716  | 54940443  | 728 |
| chr19 | 45383317  | 45384042  | 726 |
| chr11 | 9213230   | 9213950   | 721 |
| chr13 | 73526749  | 73527468  | 720 |
| chrX  | 59568057  | 59568775  | 719 |
| chr22 | 13124755  | 13125473  | 719 |
| chr7  | 5599636   | 5600353   | 718 |
| chr2  | 21388659  | 21389374  | 716 |
| chr5  | 12941124  | 12941836  | 713 |
| chr22 | 30278852  | 30279564  | 713 |
| chr17 | 72755326  | 72756038  | 713 |
| chr7  | 9681114   | 9681825   | 712 |
| chr28 | 34013087  | 34013798  | 712 |
| chrX  | 53471277  | 53471986  | 710 |
| chr18 | 42963335  | 42964043  | 709 |
| chr26 | 43079433  | 43080138  | 706 |
| chrX  | 76030075  | 76030779  | 705 |
| chr5  | 31795123  | 31795827  | 705 |
| chr19 | 41218410  | 41219113  | 704 |
| chr11 | 70955639  | 70956342  | 704 |
| chr20 | 25760849  | 25761549  | 701 |
| chr8  | 65872031  | 65872730  | 700 |
| chr26 | 39266973  | 39267672  | 700 |
| chr19 | 38552205  | 38552904  | 700 |
| chr4  | 123028501 | 123029198 | 698 |
| chrX  | 50860124  | 50860820  | 697 |
| chr10 | 22347233  | 22347929  | 697 |
| chr5  | 17185756  | 17186449  | 694 |
| chr19 | 24686372  | 24687065  | 694 |
| chr5  | 60316267  | 60316957  | 691 |
| chrX  | 8644148   | 8644836   | 689 |
| chrX  | 37486583  | 37487269  | 687 |
| chr13 | 60191219  | 60191902  | 684 |
| chr19 | 45203717  | 45204399  | 683 |
| chr17 | 57626183  | 57626865  | 683 |
| chr12 | 9549554   | 9550235   | 682 |
| chr24 | 59039101  | 59039780  | 680 |
| chr6  | 120819313 | 120819991 | 679 |
| chr6  | 106986452 | 106987130 | 679 |
| chr22 | 30112775  | 30113451  | 677 |
| chr1  | 69548665  | 69549341  | 677 |
| chr19 | 7271121   | 7271796   | 676 |
| chrX  | 59105589  | 59106261  | 673 |
| chr17 | 72964954  | 72965626  | 673 |
| chr8  | 7557433   | 7558103   | 671 |
| chr5  | 28836497  | 28837166  | 670 |
| chr3  | 71912275  | 71912943  | 669 |

|       |           |           |     |
|-------|-----------|-----------|-----|
| chr23 | 10553900  | 10554568  | 669 |
| chr3  | 115018035 | 115018702 | 668 |
| chr27 | 35432698  | 35433363  | 666 |
| chr11 | 75409479  | 75410144  | 666 |
| chrX  | 20341370  | 20342033  | 664 |
| chr12 | 34280099  | 34280761  | 663 |
| chr26 | 45749722  | 45750383  | 662 |
| chr13 | 41736057  | 41736718  | 662 |
| chr12 | 84169056  | 84169717  | 662 |
| chr3  | 123627349 | 123628009 | 661 |
| chr27 | 48380810  | 48381470  | 661 |
| chrX  | 20924263  | 20924918  | 656 |
| chrX  | 31036385  | 31037038  | 654 |
| chr20 | 73295070  | 73295720  | 651 |
| chr10 | 16426329  | 16426979  | 651 |
| chr3  | 123903497 | 123904144 | 648 |
| chr24 | 48609466  | 48610113  | 648 |
| chr18 | 51595838  | 51596483  | 646 |
| chr16 | 71804305  | 71804950  | 646 |
| chr3  | 77662681  | 77663325  | 645 |
| chrX  | 6713480   | 6714122   | 643 |
| chr23 | 41817126  | 41817768  | 643 |
| chr26 | 22021441  | 22022081  | 641 |
| chr21 | 2794845   | 2795485   | 641 |
| chr10 | 17085911  | 17086551  | 641 |
| chr26 | 51658904  | 51659541  | 638 |
| chr23 | 31152773  | 31153409  | 637 |
| chr16 | 42869552  | 42870187  | 636 |
| chr8  | 63937792  | 63938426  | 635 |
| chr29 | 46936407  | 46937041  | 635 |
| chr29 | 27018481  | 27019114  | 634 |
| chr9  | 63422656  | 63423286  | 631 |
| chr3  | 105183959 | 105184589 | 631 |
| chr22 | 30120508  | 30121137  | 630 |
| chrX  | 19274480  | 19275107  | 628 |
| chrX  | 9977658   | 9978285   | 628 |
| chr18 | 11800431  | 11801058  | 628 |
| chr23 | 8462255   | 8462881   | 627 |
| chr10 | 88062354  | 88062980  | 627 |
| chr7  | 71375366  | 71375988  | 623 |
| chr4  | 71599719  | 71600341  | 623 |
| chr13 | 77207631  | 77208252  | 622 |
| chr18 | 11758924  | 11759543  | 620 |
| chr29 | 35012089  | 35012706  | 618 |
| chr13 | 75702273  | 75702890  | 618 |
| chrX  | 78304360  | 78304974  | 615 |
| chr21 | 63097587  | 63098200  | 614 |
| chr11 | 81374637  | 81375250  | 614 |
| chr2  | 126963598 | 126964210 | 613 |
| chr22 | 30351891  | 30352502  | 612 |

|       |           |           |     |
|-------|-----------|-----------|-----|
| chr4  | 14669724  | 14670334  | 611 |
| chr23 | 40626286  | 40626891  | 606 |
| chr15 | 61073942  | 61074547  | 606 |
| chrX  | 58730043  | 58730647  | 605 |
| chr5  | 113245945 | 113246548 | 604 |
| chr19 | 46856298  | 46856900  | 603 |
| chr15 | 30621045  | 30621647  | 603 |
| chrX  | 59413047  | 59413647  | 601 |
| chr17 | 69746500  | 69747100  | 601 |
| chr17 | 62213785  | 62214385  | 601 |
| chr7  | 45708788  | 45709386  | 599 |
| chr18 | 62744081  | 62744679  | 599 |
| chr13 | 48304718  | 48305315  | 598 |
| chr9  | 52977532  | 52978128  | 597 |
| chr13 | 52919517  | 52920112  | 596 |
| chr7  | 57581185  | 57581779  | 595 |
| chr17 | 75885224  | 75885818  | 595 |
| chr29 | 38283813  | 38284406  | 594 |
| chr3  | 99103793  | 99104384  | 592 |
| chrX  | 37349974  | 37350563  | 590 |
| chr6  | 108665278 | 108665867 | 590 |
| chr17 | 49446387  | 49446976  | 590 |
| chr15 | 24544928  | 24545517  | 590 |
| chrX  | 2598647   | 2599235   | 589 |
| chr19 | 64051375  | 64051961  | 587 |
| chr7  | 14243810  | 14244394  | 585 |
| chr5  | 113916773 | 113917357 | 585 |
| chrX  | 8556204   | 8556787   | 584 |
| chr13 | 40581316  | 40581897  | 582 |
| chr7  | 13112280  | 13112858  | 579 |
| chr12 | 83968619  | 83969197  | 579 |
| chr8  | 87111919  | 87112495  | 577 |
| chrX  | 36239148  | 36239723  | 576 |
| chr13 | 41699227  | 41699801  | 575 |
| chr18 | 53558387  | 53558960  | 574 |
| chr6  | 70887439  | 70888011  | 573 |
| chr9  | 74198242  | 74198813  | 572 |
| chr3  | 15396832  | 15397403  | 572 |
| chr2  | 75639775  | 75640346  | 572 |
| chr18 | 33213760  | 33214331  | 572 |
| chr18 | 64314835  | 64315405  | 571 |
| chr4  | 121550647 | 121551216 | 570 |
| chrX  | 7819235   | 7819803   | 569 |
| chr10 | 45674729  | 45675297  | 569 |
| chrX  | 7186020   | 7186587   | 568 |
| chr25 | 29071611  | 29072177  | 567 |
| chr13 | 77296622  | 77297188  | 567 |
| chr25 | 28577084  | 28577649  | 566 |
| chr16 | 77624184  | 77624746  | 563 |
| chr13 | 58895380  | 58895942  | 563 |



|       |           |           |     |
|-------|-----------|-----------|-----|
| chrX  | 13406774  | 13407335  | 562 |
| chr9  | 107571530 | 107572091 | 562 |
| chrX  | 20735222  | 20735781  | 560 |
| chr3  | 22494151  | 22494709  | 559 |
| chrX  | 65614973  | 65615530  | 558 |
| chr18 | 38344934  | 38345491  | 558 |
| chr15 | 32738818  | 32739375  | 558 |
| chr21 | 56289028  | 56289584  | 557 |
| chr11 | 100917132 | 100917688 | 557 |
| chr11 | 77871716  | 77872271  | 556 |
| chr27 | 29099158  | 29099712  | 555 |
| chrX  | 37489594  | 37490145  | 552 |
| chr15 | 31959639  | 31960190  | 552 |
| chr8  | 24678643  | 24679191  | 549 |
| chr20 | 73288991  | 73289539  | 549 |
| chr14 | 16507918  | 16508466  | 549 |
| chr5  | 118052473 | 118053020 | 548 |
| chr18 | 11369501  | 11370045  | 545 |
| chr10 | 16766957  | 16767501  | 545 |
| chr6  | 117245941 | 117246484 | 544 |
| chr5  | 60448030  | 60448573  | 544 |
| chr22 | 44345984  | 44346526  | 543 |
| chr18 | 56863891  | 56864432  | 542 |
| chr24 | 61064204  | 61064744  | 541 |
| chrX  | 21033355  | 21033894  | 540 |
| chrX  | 60374894  | 60375431  | 538 |
| chrX  | 7651457   | 7651992   | 536 |
| chr9  | 46024684  | 46025218  | 535 |
| chr2  | 66195041  | 66195575  | 535 |
| chr19 | 39360697  | 39361231  | 535 |
| chr15 | 8622415   | 8622949   | 535 |
| chr22 | 59270045  | 59270578  | 534 |
| chr13 | 26036784  | 26037317  | 534 |
| chrX  | 54494104  | 54494636  | 533 |
| chr29 | 25942509  | 25943041  | 533 |
| chr27 | 22181491  | 22182023  | 533 |
| chr22 | 48664063  | 48664595  | 533 |
| chr29 | 41692814  | 41693345  | 532 |
| chrX  | 65168473  | 65169003  | 531 |
| chr11 | 104705466 | 104705996 | 531 |
| chr10 | 20471875  | 20472405  | 531 |
| chrX  | 55963477  | 55964005  | 529 |
| chrX  | 30593409  | 30593935  | 527 |
| chr20 | 73446776  | 73447301  | 526 |
| chr14 | 63521822  | 63522347  | 526 |
| chrX  | 12180701  | 12181225  | 525 |
| chr26 | 22281477  | 22282001  | 525 |
| chr18 | 11343840  | 11344363  | 524 |
| chr17 | 63332932  | 63333455  | 524 |
| chrX  | 72334803  | 72335325  | 523 |

|       |           |           |     |
|-------|-----------|-----------|-----|
| chr2  | 75830923  | 75831445  | 523 |
| chr16 | 48448894  | 48449415  | 522 |
| chr18 | 64267148  | 64267667  | 520 |
| chr1  | 58950975  | 58951494  | 520 |
| chr29 | 2506017   | 2506534   | 518 |
| chr18 | 33567384  | 33567901  | 518 |
| chr5  | 27937256  | 27937772  | 517 |
| chr29 | 29943851  | 29944367  | 517 |
| chr24 | 40393766  | 40394282  | 517 |
| chr13 | 54824776  | 54825292  | 517 |
| chr7  | 42787563  | 42788078  | 516 |
| chr19 | 30533146  | 30533660  | 515 |
| chr11 | 98306526  | 98307040  | 515 |
| chr10 | 17154586  | 17155100  | 515 |
| chrX  | 56679797  | 56680310  | 514 |
| chr1  | 152097004 | 152097517 | 514 |
| chr29 | 29687877  | 29688389  | 513 |
| chr2  | 124458037 | 124458549 | 513 |
| chr19 | 41922229  | 41922741  | 513 |
| chrX  | 74874169  | 74874678  | 510 |
| chr7  | 3924262   | 3924771   | 510 |
| chr4  | 107343660 | 107344168 | 509 |
| chr17 | 64124468  | 64124976  | 509 |
| chr3  | 105458374 | 105458881 | 508 |
| chr22 | 12201435  | 12201942  | 508 |
| chr15 | 24850180  | 24850687  | 508 |
| chr2  | 26977580  | 26978086  | 507 |
| chr10 | 90968860  | 90969366  | 507 |
| chr2  | 135580175 | 135580680 | 506 |
| chr16 | 67149381  | 67149885  | 505 |
| chr15 | 75662204  | 75662708  | 505 |
| chr15 | 25203709  | 25204212  | 504 |
| chr29 | 51766048  | 51766550  | 503 |
| chr2  | 135098133 | 135098635 | 503 |
| chr19 | 25410904  | 25411406  | 503 |
| chr22 | 56093869  | 56094370  | 502 |
| chr21 | 6524478   | 6524978   | 501 |
| chrX  | 38302651  | 38303150  | 500 |
| chrX  | 58735458  | 58735956  | 499 |
| chr8  | 65871473  | 65871971  | 499 |
| chr24 | 59424618  | 59425116  | 499 |
| chr23 | 17466047  | 17466545  | 499 |
| chr13 | 67397412  | 67397909  | 498 |
| chr5  | 80850634  | 80851130  | 497 |
| chr15 | 62735080  | 62735576  | 497 |
| chrX  | 40695434  | 40695929  | 496 |
| chr5  | 32844536  | 32845030  | 495 |
| chr25 | 1976392   | 1976883   | 492 |
| chrX  | 57145306  | 57145796  | 491 |
| chrX  | 2610234   | 2610724   | 491 |

|       |           |           |     |
|-------|-----------|-----------|-----|
| chr21 | 20914845  | 20915335  | 491 |
| chr19 | 21631691  | 21632181  | 491 |
| chr17 | 18322686  | 18323174  | 489 |
| chr11 | 68591055  | 68591542  | 488 |
| chr22 | 30078881  | 30079366  | 486 |
| chr24 | 43932670  | 43933154  | 485 |
| chr24 | 2018160   | 2018644   | 485 |
| chr23 | 19795998  | 19796481  | 484 |
| chr22 | 60366079  | 60366559  | 481 |
| chr18 | 47530393  | 47530873  | 481 |
| chr27 | 26656653  | 26657132  | 480 |
| chr2  | 136970803 | 136971282 | 480 |
| chr17 | 70112077  | 70112556  | 480 |
| chrX  | 55810377  | 55810855  | 479 |
| chr7  | 46244719  | 46245197  | 479 |
| chr20 | 25598842  | 25599320  | 479 |
| chr13 | 77800079  | 77800557  | 479 |
| chr12 | 70599734  | 70600212  | 479 |
| chr12 | 37022433  | 37022911  | 479 |
| chrX  | 6889764   | 6890241   | 478 |
| chr5  | 30178276  | 30178753  | 478 |
| chr17 | 70269831  | 70270307  | 477 |
| chrX  | 63231664  | 63232139  | 476 |
| chr24 | 60115303  | 60115778  | 476 |
| chr8  | 43600484  | 43600958  | 475 |
| chr19 | 37636318  | 37636792  | 475 |
| chr17 | 59054697  | 59055171  | 475 |
| chr9  | 100071785 | 100072257 | 473 |
| chr26 | 48284591  | 48285063  | 473 |
| chr17 | 18377364  | 18377836  | 473 |
| chrX  | 40781437  | 40781908  | 472 |
| chr29 | 37018597  | 37019068  | 472 |
| chr24 | 60582408  | 60582879  | 472 |
| chr19 | 18310465  | 18310936  | 472 |
| chr7  | 4972949   | 4973419   | 471 |
| chr4  | 10795964  | 10796434  | 471 |
| chr14 | 34066360  | 34066830  | 471 |
| chr25 | 38406789  | 38407258  | 470 |
| chr19 | 58691322  | 58691791  | 470 |
| chr13 | 41547607  | 41548076  | 470 |
| chrX  | 62873620  | 62874087  | 468 |
| chrX  | 55706070  | 55706537  | 468 |
| chr12 | 74453113  | 74453580  | 468 |
| chr11 | 47112525  | 47112992  | 468 |
| chr8  | 107626924 | 107627390 | 467 |
| chr19 | 46882698  | 46883164  | 467 |
| chr11 | 4337912   | 4338378   | 467 |
| chrX  | 63022270  | 63022735  | 466 |
| chrX  | 37262245  | 37262710  | 466 |
| chr18 | 62699132  | 62699597  | 466 |

|       |           |           |     |
|-------|-----------|-----------|-----|
| chr18 | 45433142  | 45433607  | 466 |
| chr10 | 19862707  | 19863172  | 466 |
| chrX  | 49818025  | 49818489  | 465 |
| chr18 | 22737465  | 22737929  | 465 |
| chr16 | 47236065  | 47236529  | 465 |
| chr11 | 90402949  | 90403413  | 465 |
| chrX  | 6665059   | 6665522   | 464 |
| chr9  | 10985830  | 10986293  | 464 |
| chr28 | 26078462  | 26078925  | 464 |
| chr21 | 47626718  | 47627180  | 463 |
| chr2  | 140741413 | 140741875 | 463 |
| chr12 | 85333311  | 85333773  | 463 |
| chrX  | 7102208   | 7102669   | 462 |
| chr7  | 7324489   | 7324949   | 461 |
| chr13 | 77260829  | 77261289  | 461 |
| chr6  | 111016262 | 111016721 | 460 |
| chr19 | 14245114  | 14245572  | 459 |
| chr4  | 121483732 | 121484189 | 458 |
| chr10 | 20464194  | 20464651  | 458 |
| chrX  | 11434803  | 11435259  | 457 |
| chr7  | 14489906  | 14490362  | 457 |
| chr13 | 41351507  | 41351963  | 457 |
| chrX  | 7505016   | 7505471   | 456 |
| chr6  | 107135660 | 107136114 | 455 |
| chr5  | 91867229  | 91867683  | 455 |
| chr5  | 52961099  | 52961553  | 455 |
| chr16 | 77687417  | 77687871  | 455 |
| chr7  | 18179989  | 18180440  | 452 |
| chr26 | 19824377  | 19824828  | 452 |
| chr5  | 34016329  | 34016779  | 451 |
| chr20 | 74925145  | 74925595  | 451 |
| chrX  | 35183469  | 35183918  | 450 |
| chr5  | 122636591 | 122637040 | 450 |
| chr8  | 3711448   | 3711895   | 448 |
| chr16 | 47997818  | 47998265  | 448 |
| chr12 | 82550057  | 82550504  | 448 |
| chr15 | 64643208  | 64643654  | 447 |
| chrX  | 30458489  | 30458934  | 446 |
| chr7  | 13269273  | 13269718  | 446 |
| chr3  | 22560386  | 22560830  | 445 |
| chr3  | 127045301 | 127045744 | 444 |
| chr18 | 18688563  | 18689006  | 444 |
| chr7  | 37875262  | 37875704  | 443 |
| chr10 | 70185272  | 70185714  | 443 |
| chr7  | 42466977  | 42467418  | 442 |
| chr2  | 127974960 | 127975400 | 441 |
| chr28 | 11895970  | 11896409  | 440 |
| chr11 | 14125621  | 14126060  | 440 |
| chr9  | 98742947  | 98743385  | 439 |
| chr3  | 111791488 | 111791926 | 439 |

|       |               |           |     |
|-------|---------------|-----------|-----|
| chrX  | 55286025      | 55286462  | 438 |
| chr9  | 90602618      | 90603055  | 438 |
| chr19 | 60827287      | 60827724  | 438 |
| chr16 | 68892700      | 68893137  | 438 |
| chr13 | 60797203      | 60797638  | 436 |
| chr28 | 26468292      | 26468726  | 435 |
| chr27 | 1497529       | 1497963   | 435 |
| chr14 | 7629289       | 7629723   | 435 |
| chr13 | 55311447      | 55311880  | 434 |
| chr12 | 84681322      | 84681755  | 434 |
| chr11 | 77575375      | 77575808  | 434 |
| chrX  | 23036259      | 23036690  | 432 |
| chrX  | 20645004      | 20645435  | 432 |
| chr1  | 123087385     | 123087816 | 432 |
| chrX  | 73267823      | 73268253  | 431 |
| chr25 | 43520143      | 43520573  | 431 |
| chr19 | 61705468      | 61705898  | 431 |
| chr13 | 14721888      | 14722318  | 431 |
| chr18 | 36955640      | 36956069  | 430 |
| chr16 | 38779632      | 38780061  | 430 |
| chr26 | 51527699      | 51528127  | 429 |
| chr2  | 124322698     | 124323126 | 429 |
| chrX  | 74588269      | 74588696  | 428 |
| chr19 | 32707649      | 32708076  | 428 |
| chrX  | 49216407      | 49216833  | 427 |
| chr9  | 33733608      | 33734034  | 427 |
| chr22 | 57618641      | 57619067  | 427 |
| chr18 | 7380075       | 7380501   | 427 |
| chr10 | 70024346      | 70024772  | 427 |
| chr10 | 20844643      | 20845069  | 427 |
| chr10 | 10771172      | 10771598  | 427 |
| chr3  | 98140916      | 98141341  | 426 |
| chr22 | 22555073      | 22555498  | 426 |
| chr4  | 118231227     | 118231651 | 425 |
| chr3  | 22642746      | 22643170  | 425 |
| chr26 | 18793083      | 18793507  | 425 |
| chr2  | 25313147      | 25313571  | 425 |
| chr10 | 70119467      | 70119891  | 425 |
| chr29 | 2680775       | 2681198   | 424 |
| chr2  | 138647632     | 138648055 | 424 |
| chr17 | 70230801      | 70231224  | 424 |
| chrX  | 19671828      | 19672250  | 423 |
| chrX  | 13844729      | 13845151  | 423 |
| chr25 | 760749 761171 | 423       |     |
| chr10 | 15007567      | 15007989  | 423 |
| chrX  | 6600293       | 6600714   | 422 |
| chr19 | 59172910      | 59173331  | 422 |
| chrX  | 74488611      | 74489031  | 421 |
| chrX  | 18374484      | 18374904  | 421 |
| chr15 | 24662276      | 24662696  | 421 |

|       |           |           |     |
|-------|-----------|-----------|-----|
| chr26 | 48522132  | 48522551  | 420 |
| chr19 | 56128259  | 56128677  | 419 |
| chr26 | 34937626  | 34938043  | 418 |
| chr15 | 36263349  | 36263766  | 418 |
| chr5  | 61801846  | 61802262  | 417 |
| chr3  | 23071714  | 23072130  | 417 |
| chr15 | 25554085  | 25554501  | 417 |
| chr13 | 77660333  | 77660749  | 417 |
| chrX  | 72670768  | 72671183  | 416 |
| chr11 | 98359482  | 98359897  | 416 |
| chrX  | 61170098  | 61170512  | 415 |
| chr7  | 39032356  | 39032770  | 415 |
| chr19 | 47273656  | 47274070  | 415 |
| chr18 | 41058159  | 41058573  | 415 |
| chr13 | 65030800  | 65031214  | 415 |
| chr7  | 70611574  | 70611987  | 414 |
| chr6  | 115513441 | 115513854 | 414 |
| chr9  | 66536140  | 66536552  | 413 |
| chr9  | 26981075  | 26981487  | 413 |
| chr29 | 26579963  | 26580375  | 413 |
| chr24 | 1768243   | 1768654   | 412 |
| chr23 | 16521376  | 16521787  | 412 |
| chr16 | 41373157  | 41373568  | 412 |
| chr8  | 112058827 | 112059237 | 411 |
| chr4  | 101669904 | 101670313 | 410 |
| chr4  | 72504046  | 72504455  | 410 |
| chr18 | 63699975  | 63700384  | 410 |
| chr29 | 31718996  | 31719404  | 409 |
| chr26 | 51491315  | 51491723  | 409 |
| chr17 | 75561863  | 75562271  | 409 |
| chr16 | 47296070  | 47296478  | 409 |
| chr21 | 6566865   | 6567272   | 408 |
| chr18 | 50915041  | 50915448  | 408 |
| chr18 | 24588011  | 24588418  | 408 |
| chr18 | 23644901  | 23645308  | 408 |
| chr13 | 59583846  | 59584253  | 408 |
| chr7  | 14933333  | 14933739  | 407 |
| chr5  | 112900089 | 112900495 | 407 |
| chr8  | 24437572  | 24437976  | 405 |
| chr8  | 8716058   | 8716462   | 405 |
| chr17 | 19216275  | 19216679  | 405 |
| chr13 | 35581078  | 35581482  | 405 |
| chr19 | 58229101  | 58229504  | 404 |
| chr16 | 39515603  | 39516006  | 404 |
| chr13 | 69902022  | 69902425  | 404 |
| chr27 | 27944179  | 27944581  | 403 |
| chr24 | 59406989  | 59407391  | 403 |
| chrX  | 33720921  | 33721321  | 401 |
| chr5  | 8968109   | 8968509   | 401 |
| chr2  | 131205345 | 131205745 | 401 |

|       |               |           |      |
|-------|---------------|-----------|------|
| chr12 | 74465752      | 74466152  | 401  |
| chr21 | 21278425      | 21278824  | 400  |
| chr2  | 138693600     | 138693999 | 400  |
| chr4  | 13675752      | 13676150  | 399  |
| chr2  | 29494800      | 29495198  | 399  |
| chr19 | 15288882      | 15289280  | 399  |
| chr18 | 51040437      | 51040835  | 399  |
| chr18 | 23572941      | 23573339  | 399  |
| chr18 | 18573028      | 18573426  | 399  |
| chr18 | 11755949      | 11756347  | 399  |
| chr15 | 75645181      | 75645579  | 399  |
| chr15 | 30352209      | 30352607  | 399  |
| chr13 | 77759592      | 77759990  | 399  |
| chr13 | 77757171      | 77757569  | 399  |
| chr29 | 49304608      | 49305002  | 395  |
| chr3  | 117296797     | 117297190 | 394  |
| chr27 | 36026341      | 36026727  | 387  |
| chr7  | 43725099      | 43725484  | 386  |
| chrX  | 61608841      | 61609225  | 385  |
| chr4  | 96836410      | 96836789  | 380  |
| chrX  | 10418190      | 10418568  | 379  |
| chr28 | 46064105      | 46064480  | 376  |
| chrX  | 21208989      | 21209360  | 372  |
| chr24 | 461230 461598 | 369       |      |
| chr25 | 34418361      | 34418726  | 366  |
| chr13 | 63512757      | 63513119  | 363  |
| chrX  | 56400698      | 56401046  | 349  |
| chr16 | 60194995      | 60195335  | 341  |
| chr25 | 14688382      | 14688713  | 332  |
| chr17 | 64614116      | 64614434  | 319  |
| chr11 | 2765736       | 2766275   | 540  |
| chr26 | 21851902      | 21852502  | 601  |
| chr21 | 42443768      | 42445037  | 1270 |
| chr5  | 112010807     | 112011608 | 802  |
| chr23 | 52724560      | 52725297  | 738  |
| chr8  | 24393769      | 24394188  | 420  |
| chr7  | 17307035      | 17307699  | 665  |
| chr7  | 8842405       | 8843096   | 692  |
| chr23 | 27806594      | 27807150  | 557  |
| chr10 | 42634015      | 42634473  | 459  |
| chr20 | 45569148      | 45569547  | 400  |
| chr8  | 24656497      | 24657147  | 651  |
| chr26 | 22243829      | 22245377  | 1549 |
| chr4  | 64278379      | 64279826  | 1448 |
| chr19 | 7638697       | 7639909   | 1213 |
| chr10 | 79255534      | 79256741  | 1208 |
| chr28 | 46053842      | 46054814  | 973  |
| chr17 | 75029620      | 75030580  | 961  |
| chrX  | 59582530      | 59583486  | 957  |
| chr5  | 120423896     | 120424834 | 939  |

|       |           |           |      |
|-------|-----------|-----------|------|
| chr17 | 63408595  | 63409431  | 837  |
| chr22 | 32927044  | 32927862  | 819  |
| chr21 | 9491411   | 9492228   | 818  |
| chrX  | 13575693  | 13576509  | 817  |
| chrX  | 72230016  | 72230788  | 773  |
| chr18 | 11754468  | 11755201  | 734  |
| chr12 | 53334230  | 53334932  | 703  |
| chr16 | 68885098  | 68885643  | 546  |
| chr22 | 56317522  | 56318065  | 544  |
| chrX  | 78768495  | 78769021  | 527  |
| chr18 | 55070730  | 55071196  | 467  |
| chr16 | 58167415  | 58167877  | 463  |
| chr18 | 56592798  | 56593256  | 459  |
| chrX  | 19993354  | 19994591  | 1238 |
| chr25 | 39289258  | 39290493  | 1236 |
| chr5  | 30991857  | 30993066  | 1210 |
| chr10 | 81588395  | 81589584  | 1190 |
| chr13 | 75671985  | 75673124  | 1140 |
| chr2  | 123350996 | 123352000 | 1005 |
| chr28 | 3480937   | 3481820   | 884  |
| chr24 | 1182369   | 1183185   | 817  |
| chr26 | 49489027  | 49489836  | 810  |
| chr21 | 22395419  | 22396208  | 790  |
| chr21 | 6520523   | 6521309   | 787  |
| chr5  | 17170635  | 17171394  | 760  |
| chr5  | 116334116 | 116334866 | 751  |
| chr3  | 121341742 | 121342443 | 702  |
| chr3  | 35958451  | 35959045  | 595  |
| chr19 | 51899256  | 51899844  | 589  |
| chrX  | 75890825  | 75891386  | 562  |
| chr18 | 7381019   | 7381562   | 544  |
| chr8  | 63941381  | 63941837  | 457  |
| chrX  | 36650266  | 36652079  | 1814 |
| chr9  | 105444063 | 105445387 | 1325 |
| chr28 | 12376434  | 12377727  | 1294 |
| chr29 | 45627532  | 45628744  | 1213 |
| chrX  | 37772985  | 37774131  | 1147 |
| chr3  | 108368481 | 108369606 | 1126 |
| chr10 | 70169412  | 70170294  | 883  |
| chr16 | 39513270  | 39514103  | 834  |
| chr19 | 54334830  | 54335656  | 827  |
| chr4  | 121239629 | 121240445 | 817  |
| chr18 | 38355562  | 38356196  | 635  |
| chr29 | 41680514  | 41681132  | 619  |
| chr18 | 38530447  | 38531010  | 564  |
| chr12 | 36543605  | 36544149  | 545  |
| chr16 | 60231875  | 60232409  | 535  |
| chr23 | 27839158  | 27839657  | 500  |
| chr16 | 1594309   | 1594807   | 499  |
| chr3  | 35334006  | 35334503  | 498  |



|       |           |           |      |
|-------|-----------|-----------|------|
| chr1  | 113584915 | 113585394 | 480  |
| chr14 | 21253711  | 21254187  | 477  |
| chr12 | 36838011  | 36838469  | 459  |
| chr22 | 60501514  | 60501969  | 456  |
| chr26 | 35199869  | 35201100  | 1232 |
| chr19 | 44158020  | 44158887  | 868  |
| chrX  | 53811208  | 53811823  | 616  |
| chr11 | 70874044  | 70874631  | 588  |
| chr14 | 66253287  | 66253841  | 555  |
| chr12 | 14932846  | 14933393  | 548  |
| chr24 | 20395528  | 20396053  | 526  |
| chr7  | 51487522  | 51488019  | 498  |
| chr9  | 67495693  | 67496170  | 478  |
| chr2  | 124305750 | 124306196 | 447  |
| chr19 | 47856142  | 47857577  | 1436 |
| chr11 | 81409944  | 81410806  | 863  |
| chr15 | 29462398  | 29463158  | 761  |
| chr8  | 109038630 | 109039348 | 719  |
| chr9  | 43787724  | 43788391  | 668  |
| chrX  | 74268995  | 74269648  | 654  |
| chr1  | 150073860 | 150074511 | 652  |
| chr5  | 28483936  | 28484577  | 642  |
| chr20 | 24026682  | 24027282  | 601  |
| chr27 | 14398339  | 14398812  | 474  |
| chr19 | 47284450  | 47284917  | 468  |
| chrX  | 57075830  | 57076294  | 465  |
| chr5  | 110948058 | 110948485 | 428  |
| chrX  | 78310909  | 78312206  | 1298 |
| chr5  | 33566561  | 33567635  | 1075 |
| chr17 | 73037616  | 73038444  | 829  |
| chr20 | 19409244  | 19410024  | 781  |
| chr22 | 30044054  | 30044646  | 593  |
| chrX  | 13652641  | 13653151  | 511  |
| chr3  | 34798758  | 34799896  | 1139 |
| chrX  | 50220058  | 50221051  | 994  |
| chr10 | 8708459   | 8709148   | 690  |
| chr10 | 67037708  | 67038253  | 546  |
| chrX  | 64068437  | 64068906  | 470  |
| chrX  | 21213280  | 21213739  | 460  |
| chr25 | 3181381   | 3181781   | 401  |
| chr13 | 77682905  | 77684216  | 1312 |
| chrX  | 53589621  | 53590445  | 825  |
| chr20 | 4969304   | 4969837   | 534  |
| chrX  | 50665133  | 50666011  | 879  |
| chr9  | 90388598  | 90389135  | 538  |
| chr2  | 5178639   | 5179137   | 499  |
| chr26 | 34983667  | 34984064  | 398  |
| chr8  | 73866027  | 73866417  | 391  |
| chr23 | 27818867  | 27819496  | 630  |
| chrX  | 35189413  | 35189934  | 522  |

|       |           |           |      |
|-------|-----------|-----------|------|
| chr10 | 88202045  | 88202545  | 501  |
| chr7  | 17946407  | 17947078  | 672  |
| chr5  | 117770682 | 117771244 | 563  |
| chr13 | 26305466  | 26305969  | 504  |
| chr15 | 13522725  | 13523399  | 675  |
| chr12 | 74265421  | 74266090  | 670  |
| chr5  | 30318592  | 30319183  | 592  |
| chr10 | 5248371   | 5248934   | 564  |
| chrX  | 7641424   | 7641932   | 509  |
| chr5  | 124935498 | 124935995 | 498  |
| chr11 | 86248429  | 86248917  | 489  |
| chrX  | 58766877  | 58767360  | 484  |
| chrX  | 44818343  | 44818818  | 476  |
| chr3  | 95078005  | 95078451  | 447  |
| chr8  | 73724513  | 73724953  | 441  |
| chr25 | 36688440  | 36688876  | 437  |
| chrX  | 53836623  | 53837047  | 425  |
| chr4  | 123011422 | 123011845 | 424  |
| chr7  | 80370041  | 80370460  | 420  |
| chr22 | 54259398  | 54259809  | 412  |
| chr19 | 51906892  | 51907302  | 411  |
| chr18 | 39774252  | 39774653  | 402  |
| chr26 | 38226058  | 38226453  | 396  |
| chr8  | 73344683  | 73344996  | 314  |
| chr8  | 73504242  | 73504911  | 670  |
| chr8  | 24201258  | 24201704  | 447  |
| chr8  | 73867636  | 73868280  | 645  |
| chr8  | 73529266  | 73530131  | 866  |
| chr8  | 73335200  | 73335928  | 729  |
| chr22 | 14919413  | 14921673  | 2261 |
| chr23 | 19339773  | 19341751  | 1979 |
| chr21 | 10793473  | 10795420  | 1948 |
| chr5  | 35472104  | 35474039  | 1936 |
| chr4  | 71873638  | 71875509  | 1872 |
| chrX  | 59579764  | 59581596  | 1833 |
| chr22 | 30382937  | 30384709  | 1773 |
| chr29 | 51269834  | 51271586  | 1753 |
| chr3  | 114451253 | 114452977 | 1725 |
| chr18 | 62956960  | 62958657  | 1698 |
| chr2  | 125927226 | 125928905 | 1680 |
| chr19 | 46325635  | 46327314  | 1680 |
| chr19 | 43633277  | 43634914  | 1638 |
| chr5  | 88040163  | 88041772  | 1610 |
| chr19 | 12497948  | 12499547  | 1600 |
| chr14 | 1385764   | 1387342   | 1579 |
| chr9  | 63289350  | 63290926  | 1577 |
| chrX  | 21609119  | 21610693  | 1575 |
| chr10 | 74852708  | 74854278  | 1571 |
| chr20 | 6830017   | 6831586   | 1570 |
| chr23 | 11791221  | 11792740  | 1520 |

|       |           |           |      |
|-------|-----------|-----------|------|
| chr19 | 39832803  | 39834322  | 1520 |
| chr10 | 71263631  | 71265131  | 1501 |
| chr28 | 34321202  | 34322673  | 1472 |
| chr6  | 37117998  | 37119463  | 1466 |
| chr29 | 34917483  | 34918947  | 1465 |
| chr2  | 26586184  | 26587643  | 1460 |
| chr23 | 46274527  | 46275981  | 1455 |
| chr16 | 39604509  | 39605917  | 1409 |
| chr12 | 74458501  | 74459895  | 1395 |
| chr6  | 118803283 | 118804669 | 1387 |
| chr29 | 51850240  | 51851622  | 1383 |
| chr15 | 34590876  | 34592257  | 1382 |
| chrX  | 49812455  | 49813834  | 1380 |
| chr11 | 96398103  | 96399478  | 1376 |
| chr3  | 45694281  | 45695627  | 1347 |
| chr3  | 125193771 | 125195116 | 1346 |
| chr2  | 30964525  | 30965867  | 1343 |
| chr29 | 26764798  | 26766139  | 1342 |
| chr7  | 51485770  | 51487106  | 1337 |
| chr26 | 20859893  | 20861227  | 1335 |
| chr26 | 17153509  | 17154839  | 1331 |
| chr4  | 87711851  | 87713154  | 1304 |
| chr18 | 62510339  | 62511635  | 1297 |
| chr2  | 74009040  | 74010335  | 1296 |
| chrX  | 53588321  | 53589612  | 1292 |
| chr7  | 42747395  | 42748686  | 1292 |
| chr23 | 27781374  | 27782662  | 1289 |
| chr10 | 49973151  | 49974430  | 1280 |
| chr12 | 84192225  | 84193502  | 1278 |
| chr19 | 60529876  | 60531134  | 1259 |
| chr9  | 92179652  | 92180908  | 1257 |
| chr6  | 24031461  | 24032714  | 1254 |
| chr23 | 15093230  | 15094479  | 1250 |
| chr14 | 21784395  | 21785640  | 1246 |
| chr7  | 44950379  | 44951621  | 1243 |
| chr3  | 93808073  | 93809314  | 1242 |
| chr9  | 77682265  | 77683504  | 1240 |
| chr21 | 64146490  | 64147716  | 1227 |
| chr11 | 70859160  | 70860375  | 1216 |
| chr2  | 116503623 | 116504833 | 1211 |
| chr6  | 109595907 | 109597114 | 1208 |
| chr7  | 71682628  | 71683834  | 1207 |
| chr5  | 30556707  | 30557912  | 1206 |
| chr5  | 60169353  | 60170550  | 1198 |
| chr8  | 77289331  | 77290520  | 1190 |
| chr26 | 23492970  | 23494154  | 1185 |
| chr25 | 37566124  | 37567304  | 1181 |
| chr16 | 2195226   | 2196401   | 1176 |
| chr8  | 72533311  | 72534482  | 1172 |
| chr26 | 38896101  | 38897271  | 1171 |

|       |           |           |      |
|-------|-----------|-----------|------|
| chr19 | 40841518  | 40842688  | 1171 |
| chr25 | 22547260  | 22548424  | 1165 |
| chr2  | 99792618  | 99793777  | 1160 |
| chr18 | 62378815  | 62379973  | 1159 |
| chr11 | 71887534  | 71888681  | 1148 |
| chr17 | 63432821  | 63433965  | 1145 |
| chr6  | 118655143 | 118656282 | 1140 |
| chr18 | 11841228  | 11842364  | 1137 |
| chr21 | 45202626  | 45203756  | 1131 |
| chr25 | 3236865   | 3237992   | 1128 |
| chr13 | 77223683  | 77224806  | 1124 |
| chr28 | 10780109  | 10781227  | 1119 |
| chr21 | 49303017  | 49304135  | 1119 |
| chr13 | 75128777  | 75129889  | 1113 |
| chrX  | 58720813  | 58721920  | 1108 |
| chr13 | 59817176  | 59818283  | 1108 |
| chrX  | 30235272  | 30236377  | 1106 |
| chr3  | 110217131 | 110218234 | 1104 |
| chr1  | 146928047 | 146929146 | 1100 |
| chr2  | 92320812  | 92321897  | 1086 |
| chr14 | 41573760  | 41574843  | 1084 |
| chr18 | 42167330  | 42168411  | 1082 |
| chr10 | 71266327  | 71267403  | 1077 |
| chr25 | 38096043  | 38097113  | 1071 |
| chr24 | 35092093  | 35093159  | 1067 |
| chr22 | 22083934  | 22084996  | 1063 |
| chr3  | 119299584 | 119300644 | 1061 |
| chr1  | 100640063 | 100641122 | 1060 |
| chr19 | 7628216   | 7629267   | 1052 |
| chr16 | 2569405   | 2570454   | 1050 |
| chrX  | 72814037  | 72815085  | 1049 |
| chr25 | 37873992  | 37875039  | 1048 |
| chr9  | 106386687 | 106387732 | 1046 |
| chr14 | 5912578   | 5913623   | 1046 |
| chrX  | 54694670  | 54695710  | 1041 |
| chr1  | 132075444 | 132076482 | 1039 |
| chr13 | 54922779  | 54923814  | 1036 |
| chr23 | 31281174  | 31282208  | 1035 |
| chr12 | 84309578  | 84310610  | 1033 |
| chr15 | 65653612  | 65654635  | 1024 |
| chr19 | 21742076  | 21743094  | 1019 |
| chr20 | 29964531  | 29965548  | 1018 |
| chr16 | 47296558  | 47297563  | 1006 |
| chr10 | 36597885  | 36598890  | 1006 |
| chr3  | 33015441  | 33016445  | 1005 |
| chr15 | 63097686  | 63098690  | 1005 |
| chr13 | 61168267  | 61169271  | 1005 |
| chr13 | 75752840  | 75753842  | 1003 |
| chr1  | 123083341 | 123084338 | 998  |
| chrX  | 58739348  | 58740343  | 996  |

|       |           |           |     |
|-------|-----------|-----------|-----|
| chrX  | 49297255  | 49298244  | 990 |
| chr5  | 117581225 | 117582212 | 988 |
| chr23 | 30148982  | 30149959  | 978 |
| chr8  | 45669859  | 45670834  | 976 |
| chr18 | 18661879  | 18662853  | 975 |
| chr1  | 123088985 | 123089959 | 975 |
| chr13 | 75836776  | 75837749  | 974 |
| chr22 | 47856647  | 47857617  | 971 |
| chr5  | 76196734  | 76197698  | 965 |
| chr19 | 45918228  | 45919189  | 962 |
| chr10 | 20473775  | 20474734  | 960 |
| chr22 | 30096824  | 30097781  | 958 |
| chr10 | 20916912  | 20917868  | 957 |
| chr6  | 12633022  | 12633975  | 954 |
| chr13 | 41041703  | 41042656  | 954 |
| chr19 | 14245661  | 14246612  | 952 |
| chr24 | 34965651  | 34966600  | 950 |
| chr4  | 33430438  | 33431376  | 939 |
| chr7  | 12969707  | 12970644  | 938 |
| chr25 | 37273016  | 37273950  | 935 |
| chr1  | 123093968 | 123094899 | 932 |
| chrX  | 57836195  | 57837125  | 931 |
| chrX  | 10302097  | 10303026  | 930 |
| chr7  | 14363133  | 14364059  | 927 |
| chr6  | 107093206 | 107094132 | 927 |
| chr5  | 28375336  | 28376261  | 926 |
| chr19 | 45060043  | 45060965  | 923 |
| chr22 | 50747802  | 50748719  | 918 |
| chr1  | 133337053 | 133337970 | 918 |
| chr7  | 45120696  | 45121612  | 917 |
| chr2  | 29976009  | 29976924  | 916 |
| chr23 | 23756845  | 23757759  | 915 |
| chrX  | 29564039  | 29564951  | 913 |
| chr4  | 123257864 | 123258776 | 913 |
| chr19 | 27384788  | 27385700  | 913 |
| chr2  | 125917557 | 125918468 | 912 |
| chr11 | 28492227  | 28493137  | 911 |
| chr2  | 134946975 | 134947884 | 910 |
| chr7  | 19668508  | 19669414  | 907 |
| chr18 | 53310162  | 53311068  | 907 |
| chr13 | 35572361  | 35573267  | 907 |
| chr17 | 2823463   | 2824368   | 906 |
| chr27 | 26467497  | 26468401  | 905 |
| chr19 | 17913769  | 17914668  | 900 |
| chr13 | 45470007  | 45470906  | 900 |
| chr13 | 75996774  | 75997672  | 899 |
| chr19 | 59319253  | 59320150  | 898 |
| chr18 | 22714394  | 22715290  | 897 |
| chr29 | 37383411  | 37384291  | 881 |
| chr9  | 77714166  | 77715045  | 880 |

|       |           |           |     |
|-------|-----------|-----------|-----|
| chr15 | 32261741  | 32262618  | 878 |
| chr2  | 134683285 | 134684161 | 877 |
| chrX  | 8300108   | 8300981   | 874 |
| chr5  | 111710210 | 111711083 | 874 |
| chr15 | 22806692  | 22807564  | 873 |
| chr3  | 113475910 | 113476779 | 870 |
| chrX  | 59411227  | 59412093  | 867 |
| chr6  | 2242452   | 2243316   | 865 |
| chr27 | 35837191  | 35838049  | 859 |
| chr15 | 74657435  | 74658293  | 859 |
| chr8  | 29351116  | 29351972  | 857 |
| chr13 | 55508645  | 55509501  | 857 |
| chr4  | 118230241 | 118231094 | 854 |
| chr3  | 26122368  | 26123220  | 853 |
| chr19 | 46859573  | 46860423  | 851 |
| chr18 | 22709147  | 22709997  | 851 |
| chr9  | 104827518 | 104828366 | 849 |
| chr5  | 28377043  | 28377888  | 846 |
| chrX  | 50779173  | 50780014  | 842 |
| chr16 | 44084987  | 44085827  | 841 |
| chr25 | 29386160  | 29386998  | 839 |
| chr13 | 38869348  | 38870183  | 836 |
| chr13 | 70064566  | 70065398  | 833 |
| chrX  | 65004196  | 65005024  | 829 |
| chr2  | 115054774 | 115055601 | 828 |
| chr18 | 52688209  | 52689035  | 827 |
| chr14 | 2890435   | 2891261   | 827 |
| chr1  | 8722299   | 8723124   | 826 |
| chr3  | 123461035 | 123461857 | 823 |
| chr18 | 11839192  | 11840013  | 822 |
| chr25 | 12709347  | 12710167  | 821 |
| chr1  | 144146192 | 144147011 | 820 |
| chr13 | 42011524  | 42012342  | 819 |
| chr24 | 50878762  | 50879576  | 815 |
| chr4  | 117842019 | 117842832 | 814 |
| chr19 | 39106618  | 39107429  | 812 |
| chr6  | 92457108  | 92457918  | 811 |
| chr18 | 7639587   | 7640396   | 810 |
| chr28 | 42401493  | 42402301  | 809 |
| chrX  | 21441366  | 21442172  | 807 |
| chr4  | 121562743 | 121563544 | 802 |
| chrX  | 56677396  | 56678194  | 799 |
| chr3  | 115691394 | 115692188 | 795 |
| chr10 | 70384915  | 70385708  | 794 |
| chr1  | 83009261  | 83010053  | 793 |
| chr23 | 15095047  | 15095838  | 792 |
| chrX  | 59418371  | 59419158  | 788 |
| chrX  | 19612565  | 19613352  | 788 |
| chr7  | 10024821  | 10025608  | 788 |
| chr11 | 109774776 | 109775563 | 788 |

|       |           |           |     |
|-------|-----------|-----------|-----|
| chr23 | 10542231  | 10543017  | 787 |
| chr22 | 30041867  | 30042648  | 782 |
| chr19 | 55979016  | 55979794  | 779 |
| chr8  | 23895930  | 23896704  | 775 |
| chr29 | 31618491  | 31619261  | 771 |
| chr19 | 56106647  | 56107417  | 771 |
| chr19 | 47283500  | 47284270  | 771 |
| chr27 | 41852592  | 41853361  | 770 |
| chr19 | 20402347  | 20403114  | 768 |
| chr17 | 56189314  | 56190080  | 767 |
| chr15 | 30276365  | 30277131  | 767 |
| chr17 | 70330295  | 70331059  | 765 |
| chr10 | 45673387  | 45674151  | 765 |
| chr18 | 52666688  | 52667451  | 764 |
| chr3  | 105753710 | 105754472 | 763 |
| chr26 | 45750621  | 45751383  | 763 |
| chr13 | 23676240  | 23677002  | 763 |
| chr8  | 78500629  | 78501390  | 762 |
| chr1  | 132832266 | 132833026 | 761 |
| chr21 | 65720296  | 65721055  | 760 |
| chr2  | 132698954 | 132699711 | 758 |
| chr1  | 121486656 | 121487412 | 757 |
| chr3  | 123944558 | 123945312 | 755 |
| chr3  | 109787006 | 109787759 | 754 |
| chr25 | 18808677  | 18809430  | 754 |
| chr25 | 3003861   | 3004613   | 753 |
| chr22 | 59672128  | 59672878  | 751 |
| chr13 | 79189152  | 79189901  | 750 |
| chr4  | 72735213  | 72735959  | 747 |
| chr26 | 14544761  | 14545507  | 747 |
| chr15 | 73743020  | 73743765  | 746 |
| chr17 | 63264385  | 63265126  | 742 |
| chr11 | 101004606 | 101005345 | 740 |
| chr8  | 62580811  | 62581546  | 736 |
| chr14 | 7833886   | 7834618   | 733 |
| chr5  | 122836858 | 122837588 | 731 |
| chr27 | 45256141  | 45256870  | 730 |
| chr17 | 63035262  | 63035985  | 724 |
| chrX  | 7523073   | 7523794   | 722 |
| chr26 | 22248921  | 22249641  | 721 |
| chr16 | 2223976   | 2224695   | 720 |
| chr22 | 16421345  | 16422062  | 718 |
| chr11 | 103807535 | 103808252 | 718 |
| chrX  | 77005944  | 77006660  | 717 |
| chr6  | 120784714 | 120785429 | 716 |
| chr16 | 19493529  | 19494244  | 716 |
| chr11 | 105999824 | 106000539 | 716 |
| chrX  | 61379603  | 61380317  | 715 |
| chrX  | 21670706  | 21671420  | 715 |
| chr9  | 62314879  | 62315590  | 712 |

|       |           |           |     |
|-------|-----------|-----------|-----|
| chr6  | 63036173  | 63036884  | 712 |
| chr21 | 13940999  | 13941709  | 711 |
| chrX  | 32448176  | 32448878  | 703 |
| chr7  | 43045558  | 43046260  | 703 |
| chr26 | 21622872  | 21623574  | 703 |
| chrX  | 55441167  | 55441868  | 702 |
| chr29 | 13600480  | 13601179  | 700 |
| chr8  | 108643140 | 108643838 | 699 |
| chrX  | 7643009   | 7643706   | 698 |
| chrX  | 30394387  | 30395083  | 697 |
| chr3  | 126083861 | 126084557 | 697 |
| chr12 | 83829969  | 83830665  | 697 |
| chr29 | 26783660  | 26784355  | 696 |
| chr22 | 39836454  | 39837149  | 696 |
| chr13 | 77765466  | 77766161  | 696 |
| chr3  | 102722655 | 102723349 | 695 |
| chr22 | 10168985  | 10169678  | 694 |
| chr19 | 59106122  | 59106814  | 693 |
| chr15 | 75338729  | 75339421  | 693 |
| chr17 | 62506848  | 62507539  | 692 |
| chr13 | 73992967  | 73993657  | 691 |
| chr12 | 71802982  | 71803672  | 691 |
| chr3  | 116230544 | 116231233 | 690 |
| chr11 | 13059244  | 13059931  | 688 |
| chrX  | 50209044  | 50209730  | 687 |
| chr8  | 35968513  | 35969199  | 687 |
| chr19 | 46329542  | 46330226  | 685 |
| chr3  | 23070634  | 23071313  | 680 |
| chr3  | 15667776  | 15668452  | 677 |
| chr10 | 7516862   | 7517538   | 677 |
| chrX  | 19364403  | 19365078  | 676 |
| chr3  | 111669348 | 111670023 | 676 |
| chr18 | 61964277  | 61964952  | 676 |
| chr5  | 35292019  | 35292690  | 672 |
| chr3  | 33657468  | 33658139  | 672 |
| chr22 | 44325311  | 44325981  | 671 |
| chr24 | 61121064  | 61121733  | 670 |
| chr5  | 72176639  | 72177307  | 669 |
| chr18 | 51709990  | 51710658  | 669 |
| chr18 | 1831546   | 1832213   | 668 |
| chr15 | 53626743  | 53627410  | 668 |
| chr18 | 17362584  | 17363250  | 667 |
| chr23 | 27841990  | 27842654  | 665 |
| chr22 | 50766456  | 50767120  | 665 |
| chr14 | 7844514   | 7845177   | 664 |
| chrX  | 67037451  | 67038113  | 663 |
| chrX  | 2614757   | 2615417   | 661 |
| chr8  | 74335590  | 74336250  | 661 |
| chr14 | 57315151  | 57315811  | 661 |
| chrX  | 13551119  | 13551778  | 660 |



|       |               |           |     |
|-------|---------------|-----------|-----|
| chr26 | 31333375      | 31334034  | 660 |
| chr20 | 8604519       | 8605178   | 660 |
| chr2  | 124966966     | 124967623 | 658 |
| chr11 | 70914397      | 70915054  | 658 |
| chr10 | 13034468      | 13035125  | 658 |
| chr15 | 38242234      | 38242889  | 656 |
| chr19 | 47282804      | 47283458  | 655 |
| chr15 | 22879490      | 22880141  | 652 |
| chr12 | 84032679      | 84033328  | 650 |
| chrX  | 18582729      | 18583377  | 649 |
| chr18 | 12451351      | 12451998  | 648 |
| chr10 | 86857331      | 86857978  | 648 |
| chr10 | 13028604      | 13029250  | 647 |
| chr21 | 13902246      | 13902891  | 646 |
| chr29 | 33919419      | 33920063  | 645 |
| chr21 | 69102759      | 69103402  | 644 |
| chr12 | 76057598      | 76058241  | 644 |
| chrX  | 2313729       | 2314371   | 643 |
| chr24 | 1322165       | 1322807   | 643 |
| chr16 | 40613322      | 40613964  | 643 |
| chr7  | 13399100      | 13399740  | 641 |
| chr8  | 45735047      | 45735686  | 640 |
| chr8  | 7810726       | 7811364   | 639 |
| chr18 | 22338683      | 22339320  | 638 |
| chrX  | 59313792      | 59314428  | 637 |
| chr11 | 100518450     | 100519086 | 637 |
| chr19 | 34392539      | 34393174  | 636 |
| chr23 | 49716133      | 49716766  | 634 |
| chr16 | 67443986      | 67444619  | 634 |
| chr7  | 13100219      | 13100851  | 633 |
| chr13 | 75661211      | 75661843  | 633 |
| chr7  | 14169069      | 14169700  | 632 |
| chr28 | 4794638       | 4795269   | 632 |
| chr25 | 37524779      | 37525410  | 632 |
| chr4  | 121405090     | 121405719 | 630 |
| chr9  | 90826539      | 90827166  | 628 |
| chrX  | 34576978      | 34577604  | 627 |
| chr3  | 13479970      | 13480594  | 625 |
| chr24 | 895467 896091 | 625       |     |
| chr10 | 5261225       | 5261849   | 625 |
| chr29 | 44488449      | 44489072  | 624 |
| chr21 | 62446839      | 62447461  | 623 |
| chr21 | 24809703      | 24810325  | 623 |
| chrX  | 75005249      | 75005869  | 621 |
| chr7  | 16319942      | 16320562  | 621 |
| chr5  | 28893799      | 28894419  | 621 |
| chr25 | 42204261      | 42204881  | 621 |
| chr8  | 63906267      | 63906886  | 620 |
| chr18 | 10212847      | 10213465  | 619 |
| chr23 | 30290302      | 30290917  | 616 |

|       |           |           |     |
|-------|-----------|-----------|-----|
| chr12 | 68217502  | 68218117  | 616 |
| chr15 | 74528281  | 74528893  | 613 |
| chr25 | 28599718  | 28600329  | 612 |
| chr11 | 14094681  | 14095292  | 612 |
| chr11 | 109507061 | 109507669 | 609 |
| chrX  | 72830208  | 72830814  | 607 |
| chr19 | 52477961  | 52478567  | 607 |
| chr18 | 10945401  | 10946005  | 605 |
| chr17 | 5347607   | 5348211   | 605 |
| chrX  | 21700768  | 21701369  | 602 |
| chr1  | 23004527  | 23005128  | 602 |
| chr21 | 11795717  | 11796317  | 601 |
| chr11 | 99200853  | 99201452  | 600 |
| chrX  | 33516480  | 33517077  | 598 |
| chr6  | 59069891  | 59070486  | 596 |
| chr29 | 18230204  | 18230798  | 595 |
| chr23 | 44421627  | 44422221  | 595 |
| chr18 | 18692918  | 18693510  | 593 |
| chr23 | 18659870  | 18660460  | 591 |
| chr2  | 134961538 | 134962128 | 591 |
| chr7  | 61014961  | 61015550  | 590 |
| chr17 | 75536009  | 75536596  | 588 |
| chr13 | 61505855  | 61506442  | 588 |
| chr7  | 66723706  | 66724292  | 587 |
| chr29 | 27308536  | 27309120  | 585 |
| chr2  | 126892291 | 126892875 | 585 |
| chrX  | 8117503   | 8118086   | 584 |
| chr8  | 108660476 | 108661059 | 584 |
| chr16 | 2135820   | 2136403   | 584 |
| chrX  | 78611221  | 78611801  | 581 |
| chr13 | 57623824  | 57624404  | 581 |
| chr11 | 77741125  | 77741705  | 581 |
| chrX  | 11174580  | 11175158  | 579 |
| chr6  | 20761248  | 20761826  | 579 |
| chr18 | 54225059  | 54225636  | 578 |
| chr13 | 80712228  | 80712805  | 578 |
| chr7  | 80882009  | 80882585  | 577 |
| chrX  | 50878993  | 50879567  | 575 |
| chr16 | 38705991  | 38706565  | 575 |
| chr7  | 93968682  | 93969255  | 574 |
| chr18 | 1194628   | 1195201   | 574 |
| chr3  | 25718266  | 25718837  | 572 |
| chrX  | 74608478  | 74609048  | 571 |
| chrX  | 62587761  | 62588331  | 571 |
| chrX  | 9495324   | 9495894   | 571 |
| chrX  | 54971519  | 54972088  | 570 |
| chrX  | 35591671  | 35592240  | 570 |
| chr19 | 30821750  | 30822319  | 570 |
| chr25 | 29594019  | 29594587  | 569 |
| chr12 | 74244979  | 74245547  | 569 |

|       |               |           |     |
|-------|---------------|-----------|-----|
| chr11 | 28344465      | 28345032  | 568 |
| chr19 | 60825270      | 60825836  | 567 |
| chr19 | 29770685      | 29771251  | 567 |
| chr17 | 57695469      | 57696035  | 567 |
| chr15 | 64492276      | 64492841  | 566 |
| chr10 | 21977036      | 21977601  | 566 |
| chr11 | 305458 306022 | 565       |     |
| chr21 | 34017810      | 34018373  | 564 |
| chr17 | 68633362      | 68633923  | 562 |
| chr15 | 24005723      | 24006284  | 562 |
| chr15 | 15539995      | 15540556  | 562 |
| chr13 | 41191715      | 41192276  | 562 |
| chrX  | 37305962      | 37306521  | 560 |
| chr21 | 68958605      | 68959163  | 559 |
| chr18 | 56581102      | 56581660  | 559 |
| chr11 | 9214042       | 9214600   | 559 |
| chr18 | 45968790      | 45969347  | 558 |
| chrX  | 73357288      | 73357844  | 557 |
| chr29 | 44562820      | 44563374  | 555 |
| chr23 | 34998024      | 34998577  | 554 |
| chr22 | 30351267      | 30351820  | 554 |
| chr16 | 39584766      | 39585319  | 554 |
| chrX  | 19470063      | 19470615  | 553 |
| chr2  | 132209761     | 132210313 | 553 |
| chr7  | 45094849      | 45095399  | 551 |
| chr3  | 105937876     | 105938426 | 551 |
| chr15 | 33518459      | 33519007  | 549 |
| chr9  | 35892211      | 35892757  | 547 |
| chr8  | 63942598      | 63943144  | 547 |
| chr21 | 66405875      | 66406421  | 547 |
| chr6  | 106985496     | 106986041 | 546 |
| chrX  | 72096548      | 72097092  | 545 |
| chr23 | 19798341      | 19798884  | 544 |
| chr21 | 62073748      | 62074291  | 544 |
| chr13 | 24025605      | 24026147  | 543 |
| chr3  | 15176472      | 15177013  | 542 |
| chr16 | 77501304      | 77501844  | 541 |
| chr26 | 17154875      | 17155414  | 540 |
| chr19 | 40455912      | 40456451  | 540 |
| chr5  | 28796607      | 28797145  | 539 |
| chr14 | 59270646      | 59271184  | 539 |
| chrX  | 360046 360583 | 538       |     |
| chr29 | 38052422      | 38052959  | 538 |
| chrX  | 7496561       | 7497097   | 537 |
| chr26 | 37633193      | 37633729  | 537 |
| chr16 | 68517250      | 68517786  | 537 |
| chr3  | 4236236       | 4236770   | 535 |
| chr14 | 36743093      | 36743627  | 535 |
| chr17 | 73209518      | 73210051  | 534 |
| chr14 | 210645 211178 | 534       |     |

|       |           |           |     |
|-------|-----------|-----------|-----|
| chr24 | 31170742  | 31171274  | 533 |
| chr19 | 56470513  | 56471045  | 533 |
| chrX  | 56869143  | 56869674  | 532 |
| chrX  | 8676569   | 8677099   | 531 |
| chr8  | 73761541  | 73762071  | 531 |
| chr7  | 45694064  | 45694594  | 531 |
| chrX  | 21035862  | 21036391  | 530 |
| chr25 | 42245689  | 42246218  | 530 |
| chr19 | 38764924  | 38765453  | 530 |
| chr3  | 86199267  | 86199795  | 529 |
| chr17 | 74485883  | 74486410  | 528 |
| chr13 | 38868313  | 38868840  | 528 |
| chrX  | 55209476  | 55210001  | 526 |
| chr7  | 17489141  | 17489666  | 526 |
| chr22 | 33355439  | 33355964  | 526 |
| chr15 | 24010521  | 24011046  | 526 |
| chr12 | 32003253  | 32003778  | 526 |
| chr13 | 59582937  | 59583461  | 525 |
| chrX  | 75409288  | 75409810  | 523 |
| chr28 | 42173400  | 42173921  | 522 |
| chr19 | 20364236  | 20364757  | 522 |
| chrX  | 78429817  | 78430337  | 521 |
| chr7  | 46162730  | 46163250  | 521 |
| chr12 | 74475288  | 74475808  | 521 |
| chrX  | 78237419  | 78237938  | 520 |
| chr8  | 7609123   | 7609642   | 520 |
| chr23 | 27903816  | 27904335  | 520 |
| chrX  | 73353334  | 73353851  | 518 |
| chr17 | 70019766  | 70020283  | 518 |
| chrX  | 72892625  | 72893141  | 517 |
| chr4  | 107353748 | 107354264 | 517 |
| chr3  | 127429835 | 127430351 | 517 |
| chr18 | 62457610  | 62458126  | 517 |
| chr10 | 20486233  | 20486749  | 517 |
| chrX  | 72867513  | 72868027  | 515 |
| chrX  | 56075678  | 56076192  | 515 |
| chrX  | 12956760  | 12957273  | 514 |
| chr4  | 56782700  | 56783213  | 514 |
| chr27 | 26974332  | 26974844  | 513 |
| chr19 | 47348551  | 47349063  | 513 |
| chr13 | 60441768  | 60442279  | 512 |
| chr11 | 11743025  | 11743536  | 512 |
| chr5  | 29099499  | 29100009  | 511 |
| chr15 | 52800375  | 52800885  | 511 |
| chr15 | 29339158  | 29339667  | 510 |
| chr21 | 62450241  | 62450749  | 509 |
| chr3  | 52882018  | 52882525  | 508 |
| chr18 | 47861694  | 47862200  | 507 |
| chrX  | 50317723  | 50318228  | 506 |
| chrX  | 8039784   | 8040289   | 506 |

|       |           |           |     |
|-------|-----------|-----------|-----|
| chrX  | 6416696   | 6417201   | 506 |
| chr22 | 60771171  | 60771675  | 505 |
| chrX  | 10978887  | 10979390  | 504 |
| chr7  | 10955839  | 10956342  | 504 |
| chr23 | 7716164   | 7716667   | 504 |
| chr13 | 42870094  | 42870597  | 504 |
| chr11 | 74428740  | 74429243  | 504 |
| chr8  | 77124804  | 77125306  | 503 |
| chr19 | 13486244  | 13486746  | 503 |
| chrX  | 58749922  | 58750423  | 502 |
| chr23 | 15827972  | 15828472  | 501 |
| chrX  | 12277993  | 12278491  | 499 |
| chr19 | 39349459  | 39349957  | 499 |
| chr18 | 54224169  | 54224667  | 499 |
| chrX  | 62761462  | 62761959  | 498 |
| chrX  | 21483463  | 21483960  | 498 |
| chr4  | 33740287  | 33740782  | 496 |
| chr13 | 23034620  | 23035115  | 496 |
| chr4  | 30811765  | 30812259  | 495 |
| chr3  | 106003840 | 106004334 | 495 |
| chr28 | 25882065  | 25882558  | 494 |
| chrX  | 6318126   | 6318618   | 493 |
| chr17 | 49129519  | 49130011  | 493 |
| chr15 | 64493264  | 64493756  | 493 |
| chr11 | 104475324 | 104475816 | 493 |
| chr10 | 8719651   | 8720143   | 493 |
| chrX  | 5990426   | 5990917   | 492 |
| chr13 | 80761708  | 80762199  | 492 |
| chr4  | 71875600  | 71876089  | 490 |
| chrX  | 10885909  | 10886397  | 489 |
| chr9  | 66935413  | 66935900  | 488 |
| chr3  | 16893921  | 16894408  | 488 |
| chr12 | 34277669  | 34278156  | 488 |
| chrX  | 51010553  | 51011039  | 487 |
| chrX  | 12708081  | 12708567  | 487 |
| chr5  | 111385308 | 111385794 | 487 |
| chr21 | 34173723  | 34174209  | 487 |
| chr3  | 119674552 | 119675037 | 486 |
| chr23 | 10529129  | 10529614  | 486 |
| chr7  | 79735383  | 79735867  | 485 |
| chrX  | 35673052  | 35673535  | 484 |
| chr15 | 75703808  | 75704291  | 484 |
| chrX  | 53902849  | 53903330  | 482 |
| chr3  | 26121184  | 26121665  | 482 |
| chr18 | 43457334  | 43457815  | 482 |
| chr13 | 57585436  | 57585917  | 482 |
| chr13 | 57385916  | 57386397  | 482 |
| chr18 | 11723390  | 11723870  | 481 |
| chr17 | 15958204  | 15958684  | 481 |
| chrX  | 78408463  | 78408942  | 480 |

|       |           |           |     |
|-------|-----------|-----------|-----|
| chr23 | 52668347  | 52668826  | 480 |
| chr23 | 18575619  | 18576098  | 480 |
| chr21 | 11900948  | 11901427  | 480 |
| chr19 | 56657998  | 56658476  | 479 |
| chrX  | 6252149   | 6252626   | 478 |
| chr2  | 111356648 | 111357125 | 478 |
| chr8  | 65529171  | 65529647  | 477 |
| chr3  | 106581917 | 106582393 | 477 |
| chr17 | 47097968  | 47098444  | 477 |
| chr13 | 76111251  | 76111727  | 477 |
| chr7  | 50475734  | 50476209  | 476 |
| chr19 | 58645555  | 58646030  | 476 |
| chr18 | 22766228  | 22766702  | 475 |
| chrX  | 53436329  | 53436802  | 474 |
| chr6  | 73625896  | 73626369  | 474 |
| chr5  | 34065874  | 34066347  | 474 |
| chr17 | 64290901  | 64291374  | 474 |
| chr17 | 64221061  | 64221534  | 474 |
| chr6  | 2227729   | 2228201   | 473 |
| chr5  | 10540625  | 10541097  | 473 |
| chr19 | 51673575  | 51674047  | 473 |
| chr18 | 33809858  | 33810330  | 473 |
| chrX  | 10432923  | 10433394  | 472 |
| chr19 | 39389882  | 39390353  | 472 |
| chr12 | 30496717  | 30497188  | 472 |
| chr8  | 77293818  | 77294288  | 471 |
| chr2  | 99665571  | 99666041  | 471 |
| chr18 | 22120631  | 22121101  | 471 |
| chr15 | 6409831   | 6410301   | 471 |
| chr8  | 104195241 | 104195710 | 470 |
| chr23 | 18757241  | 18757710  | 470 |
| chr21 | 59819152  | 59819621  | 470 |
| chr20 | 73660833  | 73661302  | 470 |
| chr2  | 136621336 | 136621805 | 470 |
| chr17 | 74756883  | 74757351  | 469 |
| chr10 | 16882191  | 16882659  | 469 |
| chr14 | 77343979  | 77344446  | 468 |
| chrX  | 55774623  | 55775089  | 467 |
| chrX  | 19283222  | 19283688  | 467 |
| chrX  | 11830447  | 11830913  | 467 |
| chr6  | 51516021  | 51516487  | 467 |
| chr27 | 27436997  | 27437463  | 467 |
| chr23 | 27396652  | 27397116  | 465 |
| chr2  | 123753727 | 123754191 | 465 |
| chr18 | 54313143  | 54313607  | 465 |
| chrX  | 35095290  | 35095752  | 463 |
| chr28 | 15317998  | 15318460  | 463 |
| chr11 | 70887726  | 70888188  | 463 |
| chr10 | 103066247 | 103066709 | 463 |
| chr22 | 10171988  | 10172449  | 462 |

|       |               |           |     |
|-------|---------------|-----------|-----|
| chr20 | 59996825      | 59997286  | 462 |
| chrX  | 7000198       | 7000658   | 461 |
| chr7  | 19208841      | 19209301  | 461 |
| chr26 | 22015998      | 22016458  | 461 |
| chr23 | 33345640      | 33346100  | 461 |
| chrX  | 6485929       | 6486388   | 460 |
| chrX  | 78604237      | 78604695  | 459 |
| chrX  | 20216898      | 20217356  | 459 |
| chr21 | 64273566      | 64274024  | 459 |
| chr16 | 23842563      | 23843021  | 459 |
| chr29 | 44747516      | 44747972  | 457 |
| chr27 | 35441759      | 35442215  | 457 |
| chr24 | 35091635      | 35092091  | 457 |
| chr11 | 107556173     | 107556629 | 457 |
| chr5  | 119147050     | 119147505 | 456 |
| chr15 | 30342688      | 30343143  | 456 |
| chr14 | 22787419      | 22787874  | 456 |
| chr29 | 48178892      | 48179346  | 455 |
| chr19 | 39323360      | 39323812  | 453 |
| chr18 | 22147808      | 22148260  | 453 |
| chr16 | 49482543      | 49482995  | 453 |
| chr11 | 2535767       | 2536219   | 453 |
| chrX  | 19475677      | 19476128  | 452 |
| chr4  | 122871685     | 122872136 | 452 |
| chr4  | 72287164      | 72287615  | 452 |
| chr10 | 8516169       | 8516619   | 451 |
| chr21 | 57577887      | 57578336  | 450 |
| chrX  | 75257573      | 75258021  | 449 |
| chr6  | 113360771     | 113361219 | 449 |
| chr24 | 23684733      | 23685181  | 449 |
| chr19 | 30847421      | 30847869  | 449 |
| chrX  | 68632283      | 68632730  | 448 |
| chr27 | 768028 768474 | 447       |     |
| chr26 | 18731329      | 18731775  | 447 |
| chr22 | 30092623      | 30093069  | 447 |
| chr19 | 11169098      | 11169544  | 447 |
| chrX  | 64858110      | 64858555  | 446 |
| chr7  | 14382809      | 14383254  | 446 |
| chr18 | 12726396      | 12726841  | 446 |
| chr7  | 18789752      | 18790196  | 445 |
| chr5  | 29142949      | 29143392  | 444 |
| chr20 | 3203125       | 3203568   | 444 |
| chr19 | 46724284      | 46724727  | 444 |
| chr18 | 11987465      | 11987908  | 444 |
| chr15 | 29289702      | 29290145  | 444 |
| chr13 | 75441034      | 75441477  | 444 |
| chr13 | 22880617      | 22881060  | 444 |
| chr12 | 37023233      | 37023676  | 444 |
| chr29 | 37161993      | 37162435  | 443 |
| chr27 | 33461904      | 33462346  | 443 |

|       |           |           |     |
|-------|-----------|-----------|-----|
| chr25 | 1057258   | 1057700   | 443 |
| chr2  | 72869125  | 72869567  | 443 |
| chrX  | 74443263  | 74443704  | 442 |
| chrX  | 22595719  | 22596159  | 441 |
| chr9  | 99935134  | 99935573  | 440 |
| chr9  | 14567854  | 14568293  | 440 |
| chr28 | 33466963  | 33467402  | 440 |
| chr17 | 57224373  | 57224812  | 440 |
| chr10 | 70085513  | 70085952  | 440 |
| chr9  | 19642437  | 19642875  | 439 |
| chr4  | 95789825  | 95790263  | 439 |
| chr3  | 106586182 | 106586620 | 439 |
| chr20 | 1278389   | 1278825   | 437 |
| chr21 | 24356712  | 24357147  | 436 |
| chr11 | 92468312  | 92468747  | 436 |
| chr5  | 85409174  | 85409608  | 435 |
| chr23 | 27393863  | 27394297  | 435 |
| chr18 | 1193809   | 1194243   | 435 |
| chr13 | 60751979  | 60752413  | 435 |
| chrX  | 59751316  | 59751749  | 434 |
| chrX  | 34433476  | 34433909  | 434 |
| chr18 | 55011522  | 55011955  | 434 |
| chr29 | 42919564  | 42919996  | 433 |
| chr26 | 18192996  | 18193428  | 433 |
| chr18 | 63531042  | 63531474  | 433 |
| chr14 | 34049683  | 34050115  | 433 |
| chr8  | 10477547  | 10477978  | 432 |
| chr22 | 30295928  | 30296359  | 432 |
| chr19 | 65262207  | 65262638  | 432 |
| chr12 | 20903010  | 20903441  | 432 |
| chrX  | 21089009  | 21089439  | 431 |
| chrX  | 31943819  | 31944248  | 430 |
| chr10 | 32475540  | 32475969  | 430 |
| chr10 | 17115932  | 17116361  | 430 |
| chr25 | 28055550  | 28055978  | 429 |
| chrX  | 87715029  | 87715456  | 428 |
| chrX  | 72927203  | 72927630  | 428 |
| chrX  | 44957328  | 44957755  | 428 |
| chr13 | 14951564  | 14951991  | 428 |
| chr7  | 73522418  | 73522844  | 427 |
| chr4  | 121547980 | 121548406 | 427 |
| chr18 | 62347101  | 62347527  | 427 |
| chr13 | 65729401  | 65729827  | 427 |
| chrX  | 65136406  | 65136831  | 426 |
| chrX  | 58749211  | 58749636  | 426 |
| chrX  | 34143041  | 34143466  | 426 |
| chr29 | 26764174  | 26764599  | 426 |
| chr2  | 110783631 | 110784055 | 425 |
| chrX  | 63127850  | 63128272  | 423 |
| chrX  | 34374402  | 34374824  | 423 |



|       |           |           |     |
|-------|-----------|-----------|-----|
| chr5  | 26685934  | 26686356  | 423 |
| chr22 | 55756370  | 55756792  | 423 |
| chr11 | 94194734  | 94195156  | 423 |
| chr1  | 153227511 | 153227933 | 423 |
| chr1  | 75096496  | 75096918  | 423 |
| chrX  | 58740374  | 58740795  | 422 |
| chr1  | 9073153   | 9073574   | 422 |
| chr24 | 40261188  | 40261608  | 421 |
| chr16 | 26155484  | 26155904  | 421 |
| chrX  | 59486158  | 59486577  | 420 |
| chrX  | 36911891  | 36912310  | 420 |
| chr9  | 90645230  | 90645649  | 420 |
| chr8  | 8549402   | 8549821   | 420 |
| chr7  | 13423096  | 13423515  | 420 |
| chr16 | 42978645  | 42979064  | 420 |
| chrX  | 2632944   | 2633362   | 419 |
| chr6  | 107328995 | 107329413 | 419 |
| chr27 | 38968417  | 38968835  | 419 |
| chr26 | 34960982  | 34961400  | 419 |
| chr19 | 60797999  | 60798417  | 419 |
| chr11 | 24011067  | 24011485  | 419 |
| chrX  | 80856776  | 80857193  | 418 |
| chrX  | 9973760   | 9974177   | 418 |
| chrX  | 7588093   | 7588510   | 418 |
| chrX  | 7570653   | 7571070   | 418 |
| chr3  | 114627714 | 114628131 | 418 |
| chr22 | 29670399  | 29670816  | 418 |
| chrX  | 70973741  | 70974157  | 417 |
| chr22 | 30040215  | 30040631  | 417 |
| chr2  | 111264735 | 111265151 | 417 |
| chr10 | 70144746  | 70145162  | 417 |
| chr9  | 90305686  | 90306101  | 416 |
| chr5  | 28985658  | 28986073  | 416 |
| chr17 | 73181516  | 73181931  | 416 |
| chr12 | 31979725  | 31980140  | 416 |
| chr10 | 45527281  | 45527696  | 416 |
| chrX  | 48870277  | 48870691  | 415 |
| chr25 | 38770592  | 38771006  | 415 |
| chr2  | 140048005 | 140048419 | 415 |
| chr5  | 79233365  | 79233778  | 414 |
| chr2  | 124234652 | 124235065 | 414 |
| chr18 | 9709765   | 9710178   | 414 |
| chrX  | 76697516  | 76697928  | 413 |
| chr23 | 13423296  | 13423708  | 413 |
| chr2  | 74269798  | 74270210  | 413 |
| chr5  | 29159700  | 29160111  | 412 |
| chr27 | 34732385  | 34732796  | 412 |
| chr18 | 11034314  | 11034725  | 412 |
| chr5  | 35146561  | 35146971  | 411 |
| chr4  | 124306294 | 124306704 | 411 |

|       |               |           |     |
|-------|---------------|-----------|-----|
| chr26 | 43248554      | 43248964  | 411 |
| chr23 | 52751011      | 52751421  | 411 |
| chr14 | 6953860       | 6954270   | 411 |
| chr11 | 77633116      | 77633526  | 411 |
| chr11 | 46195562      | 46195972  | 411 |
| chr3  | 22920834      | 22921243  | 410 |
| chr21 | 31689960      | 31690369  | 410 |
| chr5  | 65747651      | 65748058  | 408 |
| chr3  | 33131806      | 33132213  | 408 |
| chr23 | 27399462      | 27399869  | 408 |
| chr10 | 75556810      | 75557217  | 408 |
| chrX  | 58455516      | 58455922  | 407 |
| chrX  | 20419412      | 20419818  | 407 |
| chr8  | 59317426      | 59317832  | 407 |
| chr8  | 24751028      | 24751434  | 407 |
| chr24 | 48972117      | 48972523  | 407 |
| chr18 | 51076210      | 51076616  | 407 |
| chr18 | 45430189      | 45430595  | 407 |
| chr10 | 88337110      | 88337516  | 407 |
| chr7  | 10356861      | 10357266  | 406 |
| chr5  | 28698293      | 28698698  | 406 |
| chr19 | 56113337      | 56113742  | 406 |
| chr11 | 105623577     | 105623982 | 406 |
| chrX  | 839048 839452 | 405       |     |
| chr4  | 95662923      | 95663327  | 405 |
| chr5  | 122578732     | 122579135 | 404 |
| chr23 | 52672705      | 52673108  | 404 |
| chrX  | 62426884      | 62427286  | 403 |
| chr1  | 153228143     | 153228545 | 403 |
| chr9  | 87747481      | 87747882  | 402 |
| chr8  | 102262561     | 102262962 | 402 |
| chr3  | 73959785      | 73960186  | 402 |
| chr29 | 46201732      | 46202133  | 402 |
| chr23 | 25121270      | 25121671  | 402 |
| chr2  | 137659102     | 137659503 | 402 |
| chr19 | 16215395      | 16215796  | 402 |
| chr16 | 29020652      | 29021053  | 402 |
| chrX  | 7620325       | 7620725   | 401 |
| chr2  | 136616262     | 136616662 | 401 |
| chr2  | 89370321      | 89370721  | 401 |
| chr22 | 30594469      | 30594868  | 400 |
| chr2  | 139210262     | 139210661 | 400 |
| chr15 | 22937741      | 22938140  | 400 |
| chr11 | 88350441      | 88350840  | 400 |
| chr11 | 9218836       | 9219235   | 400 |
| chrX  | 84804770      | 84805168  | 399 |
| chrX  | 55255441      | 55255839  | 399 |
| chrX  | 45686166      | 45686564  | 399 |
| chr6  | 46694898      | 46695296  | 399 |
| chr5  | 115824205     | 115824603 | 399 |

|       |               |           |      |
|-------|---------------|-----------|------|
| chr5  | 72150108      | 72150506  | 399  |
| chr4  | 124326507     | 124326905 | 399  |
| chr26 | 39251350      | 39251748  | 399  |
| chr20 | 8756651       | 8757049   | 399  |
| chr2  | 131314022     | 131314420 | 399  |
| chr16 | 44339140      | 44339538  | 399  |
| chr15 | 83918607      | 83919005  | 399  |
| chr15 | 45787555      | 45787953  | 399  |
| chr13 | 77325329      | 77325727  | 399  |
| chr13 | 17759105      | 17759503  | 399  |
| chr13 | 139102 139500 | 399       |      |
| chr12 | 82151748      | 82152146  | 399  |
| chr10 | 90932090      | 90932488  | 399  |
| chrX  | 65596283      | 65596680  | 398  |
| chrX  | 81185212      | 81185607  | 396  |
| chrX  | 17962 18357   | 396       |      |
| chr17 | 69209137      | 69209527  | 391  |
| chr25 | 44031015      | 44031403  | 389  |
| chr8  | 23943672      | 23944058  | 387  |
| chr11 | 75623183      | 75623568  | 386  |
| chr4  | 121964490     | 121964873 | 384  |
| chr20 | 73106224      | 73106607  | 384  |
| chr5  | 122832617     | 122832999 | 383  |
| chr13 | 54211473      | 54211855  | 383  |
| chr10 | 89498144      | 89498524  | 381  |
| chr24 | 40398151      | 40398530  | 380  |
| chr4  | 65395956      | 65396333  | 378  |
| chr8  | 65732816      | 65733192  | 377  |
| chrX  | 8826824       | 8827198   | 375  |
| chr5  | 60920968      | 60921341  | 374  |
| chr19 | 37862746      | 37863115  | 370  |
| chr16 | 56112555      | 56112897  | 343  |
| chrX  | 75468711      | 75469048  | 338  |
| chr23 | 27764927      | 27765261  | 335  |
| chrX  | 10922284      | 10922592  | 309  |
| chrX  | 3373521       | 3373824   | 304  |
| chrX  | 75459813      | 75460107  | 295  |
| chr18 | 24337313      | 24337600  | 288  |
| chr25 | 79184 79439   | 256       |      |
| chr3  | 127038812     | 127039063 | 252  |
| chrX  | 44944905      | 44945294  | 390  |
| chrX  | 47654361      | 47654899  | 539  |
| chr25 | 40219450      | 40219933  | 484  |
| chr8  | 24161642      | 24162040  | 399  |
| chr16 | 58426605      | 58427932  | 1328 |
| chr18 | 11348223      | 11349010  | 788  |
| chr21 | 64518931      | 64519494  | 564  |
| chr4  | 98031158      | 98031605  | 448  |
| chr8  | 109031632     | 109032806 | 1175 |
| chr25 | 36484928      | 36485778  | 851  |

|       |               |           |      |
|-------|---------------|-----------|------|
| chrX  | 59437832      | 59438536  | 705  |
| chr6  | 34431693      | 34432287  | 595  |
| chr29 | 34740157      | 34741100  | 944  |
| chrX  | 55254400      | 55255080  | 681  |
| chr19 | 51925184      | 51925782  | 599  |
| chr22 | 50870243      | 50870874  | 632  |
| chr13 | 64036912      | 64037335  | 424  |
| chr13 | 37759915      | 37760323  | 409  |
| chr24 | 2383463       | 2383844   | 382  |
| chr9  | 87745089      | 87745488  | 400  |
| chrX  | 35523751      | 35524149  | 399  |
| chr8  | 73840712      | 73841084  | 373  |
| chr5  | 79088601      | 79090931  | 2331 |
| chr1  | 61277708      | 61278991  | 1284 |
| chr29 | 26766193      | 26767315  | 1123 |
| chr13 | 62414080      | 62415165  | 1086 |
| chr14 | 7824633       | 7825628   | 996  |
| chr26 | 47993779      | 47994652  | 874  |
| chr11 | 7548095       | 7548896   | 802  |
| chr25 | 20256942      | 20257665  | 724  |
| chr7  | 108571791     | 108572482 | 692  |
| chr10 | 36021717      | 36022383  | 667  |
| chr11 | 70890026      | 70890583  | 558  |
| chr29 | 46654435      | 46654979  | 545  |
| chr18 | 43157985      | 43158524  | 540  |
| chr17 | 64582096      | 64582603  | 508  |
| chr1  | 136910656     | 136911163 | 508  |
| chr16 | 47606280      | 47606770  | 491  |
| chr18 | 50716374      | 50716824  | 451  |
| chr23 | 22774888      | 22775334  | 447  |
| chr28 | 42733991      | 42734418  | 428  |
| chr16 | 22454986      | 22455387  | 402  |
| chr7  | 37390069      | 37393145  | 3077 |
| chr5  | 28383441      | 28385178  | 1738 |
| chrX  | 6447196       | 6448345   | 1150 |
| chrX  | 21075998      | 21077139  | 1142 |
| chr24 | 43681606      | 43682437  | 832  |
| chr4  | 27844249      | 27845023  | 775  |
| chrX  | 45696119      | 45696851  | 733  |
| chr3  | 30163079      | 30163808  | 730  |
| chr17 | 63275522      | 63276250  | 729  |
| chr14 | 31030793      | 31031501  | 709  |
| chr15 | 22884243      | 22884848  | 606  |
| chr17 | 70396050      | 70396621  | 572  |
| chrX  | 55599695      | 55600227  | 533  |
| chr5  | 35565560      | 35566059  | 500  |
| chr13 | 70062832      | 70063268  | 437  |
| chr17 | 64312316      | 64312749  | 434  |
| chr27 | 653796 654221 | 426       |      |
| chr28 | 34433708      | 34435881  | 2174 |

|       |               |           |      |
|-------|---------------|-----------|------|
| chr25 | 36458525      | 36459772  | 1248 |
| chr24 | 20394411      | 20395333  | 923  |
| chr18 | 62035888      | 62036741  | 854  |
| chrX  | 59583639      | 59584466  | 828  |
| chr16 | 955373 956196 | 824       |      |
| chr17 | 48684696      | 48685487  | 792  |
| chr18 | 18732482      | 18733269  | 788  |
| chr2  | 138636544     | 138637314 | 771  |
| chr1  | 137741717     | 137742456 | 740  |
| chr8  | 9297361       | 9298093   | 733  |
| chr5  | 81718180      | 81718911  | 732  |
| chrX  | 21537470      | 21538178  | 709  |
| chr19 | 41372431      | 41373128  | 698  |
| chr7  | 46214497      | 46215158  | 662  |
| chr29 | 51724294      | 51724953  | 660  |
| chr19 | 58957291      | 58957934  | 644  |
| chr19 | 58225059      | 58225702  | 644  |
| chr23 | 43152220      | 43152862  | 643  |
| chr6  | 2226514       | 2227077   | 564  |
| chr6  | 72179834      | 72180390  | 557  |
| chr2  | 134638989     | 134639532 | 544  |
| chr4  | 64275344      | 64275876  | 533  |
| chrX  | 48693972      | 48694493  | 522  |
| chr26 | 33261616      | 33262072  | 457  |
| chr20 | 8534850       | 8535297   | 448  |
| chr15 | 26894693      | 26895130  | 438  |
| chr18 | 12410441      | 12411270  | 830  |
| chrX  | 59391384      | 59392211  | 828  |
| chr7  | 50414414      | 50415091  | 678  |
| chr15 | 29833765      | 29834315  | 551  |
| chrX  | 74348015      | 74348538  | 524  |
| chr7  | 89427552      | 89428052  | 501  |
| chrX  | 49845358      | 49846360  | 1003 |
| chr3  | 102958710     | 102959608 | 899  |
| chr3  | 3441469       | 3442284   | 816  |
| chr29 | 46681042      | 46681661  | 620  |
| chr8  | 63933136      | 63933620  | 485  |
| chr20 | 70918262      | 70918738  | 477  |
| chr3  | 111901843     | 111902263 | 421  |
| chr22 | 57378095      | 57379005  | 911  |
| chr7  | 42151042      | 42151600  | 559  |
| chr29 | 44568556      | 44568979  | 424  |
| chr5  | 85861501      | 85861899  | 399  |
| chr15 | 25789083      | 25790106  | 1024 |
| chr13 | 36767082      | 36767870  | 789  |
| chr16 | 2899401       | 2900147   | 747  |
| chr10 | 17409371      | 17410042  | 672  |
| chr23 | 52642497      | 52643133  | 637  |
| chr23 | 45974623      | 45975154  | 532  |
| chrX  | 33543938      | 33544394  | 457  |

|       |           |           |      |
|-------|-----------|-----------|------|
| chr4  | 116980782 | 116981781 | 1000 |
| chrX  | 55995614  | 55996456  | 843  |
| chr7  | 5398181   | 5398813   | 633  |
| chr5  | 35281487  | 35282107  | 621  |
| chr9  | 19636509  | 19637042  | 534  |
| chrX  | 65076733  | 65077169  | 437  |
| chr15 | 22218599  | 22219217  | 619  |
| chr5  | 120451584 | 120452195 | 612  |
| chr22 | 7235468   | 7236034   | 567  |
| chr5  | 30323257  | 30323722  | 466  |
| chr2  | 116701279 | 116701961 | 683  |
| chr29 | 44545350  | 44545974  | 625  |
| chrX  | 73469092  | 73469511  | 420  |
| chrX  | 60474152  | 60475623  | 1472 |
| chr2  | 40158742  | 40159651  | 910  |
| chrX  | 59436403  | 59437241  | 839  |
| chr9  | 90356255  | 90356958  | 704  |
| chr19 | 23678719  | 23679411  | 693  |
| chr19 | 65245812  | 65246461  | 650  |
| chr16 | 2151454   | 2152090   | 637  |
| chr20 | 25148639  | 25149211  | 573  |
| chr10 | 88073107  | 88073677  | 571  |
| chrX  | 21059547  | 21060079  | 533  |
| chr19 | 56014597  | 56015103  | 507  |
| chr20 | 72430136  | 72430618  | 483  |
| chr12 | 20799658  | 20800140  | 483  |
| chr24 | 35333102  | 35333582  | 481  |
| chr11 | 32258185  | 32258659  | 475  |
| chrX  | 8081040   | 8081505   | 466  |
| chr14 | 64006607  | 64007060  | 454  |
| chr6  | 119519294 | 119519745 | 452  |
| chrX  | 58731515  | 58731965  | 451  |
| chr11 | 103458658 | 103459090 | 433  |
| chr19 | 47375692  | 47376122  | 431  |
| chrX  | 10676610  | 10677034  | 425  |
| chr7  | 15685190  | 15685606  | 417  |
| chr13 | 60457900  | 60458310  | 411  |
| chr20 | 74661519  | 74661924  | 406  |
| chr5  | 79211640  | 79212042  | 403  |
| chr13 | 45502986  | 45503384  | 399  |
| chr4  | 110044376 | 110044770 | 395  |
| chr21 | 1791844   | 1792525   | 682  |
| chr8  | 24508989  | 24509666  | 678  |
| chr8  | 73332640  | 73333191  | 552  |
| chr23 | 28599857  | 28600629  | 773  |
| chr3  | 105466107 | 105466691 | 585  |
| chr21 | 2026320   | 2026887   | 568  |
| chr29 | 38856995  | 38857720  | 726  |
| chr24 | 27093219  | 27094378  | 1160 |
| chr7  | 10974689  | 10975462  | 774  |

|       |           |           |      |
|-------|-----------|-----------|------|
| chrX  | 56070135  | 56070475  | 341  |
| chr25 | 1251341   | 1252372   | 1032 |
| chrX  | 53629383  | 53630336  | 954  |
| chr4  | 124173050 | 124173465 | 416  |
| chr29 | 34642141  | 34643688  | 1548 |
| chr18 | 57603835  | 57604548  | 714  |
| chr9  | 52092755  | 52093851  | 1097 |
| chr24 | 1719113   | 1720253   | 1141 |
| chr8  | 7841177   | 7842192   | 1016 |
| chr4  | 118687873 | 118688655 | 783  |
| chr22 | 57336720  | 57337318  | 599  |
| chr21 | 64485648  | 64486407  | 760  |
| chr23 | 13674866  | 13675680  | 815  |
| chrX  | 19984994  | 19985586  | 593  |
| chr4  | 124386410 | 124386826 | 417  |
| chr21 | 1924046   | 1924445   | 400  |
| chr29 | 17239293  | 17239691  | 399  |
| chrX  | 59494811  | 59497124  | 2314 |
| chrX  | 58725979  | 58727948  | 1970 |
| chr19 | 19357809  | 19359708  | 1900 |
| chrX  | 7375415   | 7377296   | 1882 |
| chr3  | 123244548 | 123246401 | 1854 |
| chr19 | 58730420  | 58732237  | 1818 |
| chr22 | 9612689   | 9614410   | 1722 |
| chr29 | 37122234  | 37123851  | 1618 |
| chr4  | 72301379  | 72302979  | 1601 |
| chrX  | 53599711  | 53601286  | 1576 |
| chr20 | 8768367   | 8769913   | 1547 |
| chr19 | 60775850  | 60777385  | 1536 |
| chr7  | 39025347  | 39026854  | 1508 |
| chr19 | 59004358  | 59005832  | 1475 |
| chr20 | 3206692   | 3208093   | 1402 |
| chr9  | 90686914  | 90688294  | 1381 |
| chrX  | 59516766  | 59518144  | 1379 |
| chr11 | 100733516 | 100734881 | 1366 |
| chr7  | 16316847  | 16318174  | 1328 |
| chrX  | 2331541   | 2332857   | 1317 |
| chr4  | 72300049  | 72301364  | 1316 |
| chr28 | 23936643  | 23937958  | 1316 |
| chr12 | 32925927  | 32927232  | 1306 |
| chr18 | 47862395  | 47863697  | 1303 |
| chr19 | 23143641  | 23144938  | 1298 |
| chr11 | 9214612   | 9215903   | 1292 |
| chr29 | 46029692  | 46030976  | 1285 |
| chrX  | 75442746  | 75444027  | 1282 |
| chrX  | 59524198  | 59525471  | 1274 |
| chr4  | 121495193 | 121496452 | 1260 |
| chr3  | 29976566  | 29977824  | 1259 |
| chr25 | 3212916   | 3214172   | 1257 |
| chr21 | 27591464  | 27592720  | 1257 |

|       |           |           |      |
|-------|-----------|-----------|------|
| chrX  | 7731265   | 7732512   | 1248 |
| chr23 | 46092602  | 46093849  | 1248 |
| chr22 | 58643339  | 58644586  | 1248 |
| chr20 | 1275362   | 1276603   | 1242 |
| chr5  | 112016020 | 112017259 | 1240 |
| chr16 | 61266100  | 61267326  | 1227 |
| chr11 | 70871907  | 70873130  | 1224 |
| chr3  | 121340377 | 121341597 | 1221 |
| chr2  | 101175356 | 101176572 | 1217 |
| chr20 | 19401672  | 19402881  | 1210 |
| chr18 | 56819691  | 56820895  | 1205 |
| chr7  | 15125083  | 15126275  | 1193 |
| chr11 | 44966123  | 44967315  | 1193 |
| chr11 | 46171668  | 46172859  | 1192 |
| chrX  | 80878434  | 80879616  | 1183 |
| chrX  | 7079635   | 7080817   | 1183 |
| chr2  | 26493161  | 26494341  | 1181 |
| chrX  | 58733638  | 58734812  | 1175 |
| chrX  | 2562347   | 2563515   | 1169 |
| chrX  | 2440096   | 2441262   | 1167 |
| chr23 | 8558991   | 8560154   | 1164 |
| chr1  | 84795132  | 84796294  | 1163 |
| chr26 | 22196943  | 22198104  | 1162 |
| chr2  | 134756900 | 134758057 | 1158 |
| chr5  | 29150764  | 29151916  | 1153 |
| chrX  | 72491027  | 72492173  | 1147 |
| chr23 | 52792976  | 52794120  | 1145 |
| chr2  | 32643739  | 32644878  | 1140 |
| chrX  | 8057375   | 8058510   | 1136 |
| chr11 | 90421306  | 90422439  | 1134 |
| chr13 | 75720106  | 75721238  | 1133 |
| chrX  | 44938048  | 44939176  | 1129 |
| chr24 | 1040990   | 1042114   | 1125 |
| chr5  | 73527953  | 73529076  | 1124 |
| chr14 | 61325971  | 61327094  | 1124 |
| chr24 | 44425620  | 44426742  | 1123 |
| chrX  | 6901779   | 6902899   | 1121 |
| chr27 | 14742857  | 14743977  | 1121 |
| chr6  | 18470444  | 18471562  | 1119 |
| chr9  | 77195613  | 77196729  | 1117 |
| chr17 | 69887386  | 69888502  | 1117 |
| chr12 | 34855067  | 34856183  | 1117 |
| chr3  | 121430630 | 121431744 | 1115 |
| chr17 | 76320908  | 76322022  | 1115 |
| chr17 | 56064172  | 56065285  | 1114 |
| chrX  | 7389362   | 7390462   | 1101 |
| chr10 | 70083427  | 70084526  | 1100 |
| chr9  | 107093146 | 107094235 | 1090 |
| chr22 | 55392830  | 55393916  | 1087 |
| chr25 | 31394243  | 31395327  | 1085 |



|       |           |           |      |
|-------|-----------|-----------|------|
| chr15 | 27446124  | 27447208  | 1085 |
| chr8  | 91551476  | 91552556  | 1081 |
| chr12 | 22967560  | 22968635  | 1076 |
| chr5  | 122133171 | 122134245 | 1075 |
| chr24 | 61119754  | 61120828  | 1075 |
| chr20 | 59997899  | 59998973  | 1075 |
| chr19 | 29771391  | 29772465  | 1075 |
| chr2  | 111224219 | 111225287 | 1069 |
| chr29 | 44664928  | 44665992  | 1065 |
| chr8  | 45757251  | 45758309  | 1059 |
| chrX  | 13834908  | 13835963  | 1056 |
| chr3  | 102124155 | 102125208 | 1054 |
| chr4  | 33856595  | 33857646  | 1052 |
| chr5  | 115310961 | 115312011 | 1051 |
| chr12 | 37023731  | 37024776  | 1046 |
| chr8  | 61901371  | 61902414  | 1044 |
| chrX  | 50637022  | 50638063  | 1042 |
| chr13 | 57579057  | 57580098  | 1042 |
| chr10 | 74865033  | 74866072  | 1040 |
| chr15 | 29173539  | 29174574  | 1036 |
| chr12 | 32174277  | 32175306  | 1030 |
| chr5  | 80745934  | 80746957  | 1024 |
| chrX  | 11026623  | 11027645  | 1023 |
| chrX  | 6895427   | 6896449   | 1023 |
| chrX  | 50693642  | 50694662  | 1021 |
| chr10 | 86862968  | 86863983  | 1016 |
| chrX  | 21132083  | 21133096  | 1014 |
| chr14 | 3486441   | 3487453   | 1013 |
| chr24 | 56403359  | 56404368  | 1010 |
| chr25 | 38562943  | 38563950  | 1008 |
| chr27 | 42246156  | 42247161  | 1006 |
| chr2  | 125911618 | 125912621 | 1004 |
| chr24 | 1591437   | 1592439   | 1003 |
| chr22 | 16418313  | 16419315  | 1003 |
| chr19 | 46722829  | 46723829  | 1001 |
| chr8  | 23051226  | 23052218  | 993  |
| chr17 | 5018669   | 5019661   | 993  |
| chr5  | 46572165  | 46573156  | 992  |
| chr28 | 26771831  | 26772822  | 992  |
| chr3  | 111485311 | 111486298 | 988  |
| chr3  | 93811821  | 93812806  | 986  |
| chr11 | 30035345  | 30036330  | 986  |
| chr27 | 46976504  | 46977488  | 985  |
| chr13 | 40606488  | 40607472  | 985  |
| chr11 | 77714693  | 77715675  | 983  |
| chrX  | 62810744  | 62811725  | 982  |
| chr4  | 27848352  | 27849332  | 981  |
| chr23 | 20637263  | 20638239  | 977  |
| chr24 | 27091156  | 27092131  | 976  |
| chr16 | 71133373  | 71134348  | 976  |

|       |           |           |     |
|-------|-----------|-----------|-----|
| chr16 | 2023471   | 2024442   | 972 |
| chr6  | 103405423 | 103406390 | 968 |
| chr18 | 11362689  | 11363655  | 967 |
| chr8  | 108714688 | 108715645 | 958 |
| chr4  | 121549439 | 121550392 | 954 |
| chr16 | 2467692   | 2468643   | 952 |
| chr6  | 92060024  | 92060974  | 951 |
| chr24 | 43679249  | 43680199  | 951 |
| chr21 | 27811365  | 27812315  | 951 |
| chr4  | 49609405  | 49610354  | 950 |
| chr8  | 76003414  | 76004361  | 948 |
| chr2  | 125489922 | 125490867 | 946 |
| chr15 | 64641011  | 64641949  | 939 |
| chr5  | 118256467 | 118257399 | 933 |
| chr20 | 35929957  | 35930888  | 932 |
| chr6  | 20765795  | 20766722  | 928 |
| chr13 | 57527304  | 57528230  | 927 |
| chr14 | 61328635  | 61329558  | 924 |
| chr7  | 70727029  | 70727951  | 923 |
| chr9  | 75445120  | 75446040  | 921 |
| chr10 | 7962757   | 7963677   | 921 |
| chrX  | 75907869  | 75908788  | 920 |
| chr9  | 52415617  | 52416534  | 918 |
| chr19 | 37938291  | 37939207  | 917 |
| chr8  | 74332221  | 74333136  | 916 |
| chr19 | 8247804   | 8248717   | 914 |
| chr4  | 123496634 | 123497544 | 911 |
| chr28 | 42367071  | 42367981  | 911 |
| chrX  | 50004994  | 50005901  | 908 |
| chr11 | 44957011  | 44957917  | 907 |
| chr29 | 44662516  | 44663421  | 906 |
| chr13 | 58894288  | 58895193  | 906 |
| chr2  | 5365780   | 5366684   | 905 |
| chr26 | 22198349  | 22199252  | 904 |
| chr3  | 15639490  | 15640390  | 901 |
| chr20 | 59411199  | 59412099  | 901 |
| chr5  | 74675755  | 74676654  | 900 |
| chr7  | 5145560   | 5146457   | 898 |
| chr21 | 69088870  | 69089767  | 898 |
| chr21 | 20722609  | 20723505  | 897 |
| chr8  | 85922939  | 85923834  | 896 |
| chr17 | 63325298  | 63326190  | 893 |
| chr3  | 20570701  | 20571592  | 892 |
| chr18 | 12040587  | 12041477  | 891 |
| chrX  | 50552889  | 50553777  | 889 |
| chr19 | 38600687  | 38601575  | 889 |
| chrX  | 55496272  | 55497159  | 888 |
| chr16 | 39522230  | 39523116  | 887 |
| chr25 | 8461014   | 8461898   | 885 |
| chr2  | 5369924   | 5370806   | 883 |

|       |               |           |     |
|-------|---------------|-----------|-----|
| chr3  | 108267690     | 108268567 | 878 |
| chr5  | 30384465      | 30385341  | 877 |
| chr12 | 46758804      | 46759678  | 875 |
| chr13 | 39959731      | 39960602  | 872 |
| chr7  | 5043320       | 5044182   | 863 |
| chr3  | 109739932     | 109740794 | 863 |
| chrX  | 59549146      | 59550007  | 862 |
| chr29 | 18824282      | 18825143  | 862 |
| chr18 | 11718081      | 11718942  | 862 |
| chr13 | 60149151      | 60150012  | 862 |
| chrX  | 50305461      | 50306321  | 861 |
| chr20 | 785223 786082 | 860       |     |
| chr3  | 106552058     | 106552916 | 859 |
| chrX  | 49837441      | 49838297  | 857 |
| chrX  | 9676901       | 9677754   | 854 |
| chr4  | 75322079      | 75322929  | 851 |
| chr3  | 114929351     | 114930197 | 847 |
| chr18 | 31845292      | 31846138  | 847 |
| chr10 | 969892 970737 | 846       |     |
| chr19 | 26370720      | 26371563  | 844 |
| chrX  | 53651556      | 53652396  | 841 |
| chr5  | 79236563      | 79237403  | 841 |
| chr29 | 49969856      | 49970696  | 841 |
| chr1  | 74999539      | 75000377  | 839 |
| chr7  | 10825394      | 10826230  | 837 |
| chr18 | 64433299      | 64434132  | 834 |
| chr13 | 75773291      | 75774124  | 834 |
| chr13 | 77327020      | 77327852  | 833 |
| chrX  | 76080541      | 76081372  | 832 |
| chr1  | 123085704     | 123086534 | 831 |
| chr12 | 9121669       | 9122498   | 830 |
| chr19 | 55784292      | 55785120  | 829 |
| chr1  | 123097852     | 123098680 | 829 |
| chrX  | 20898252      | 20899078  | 827 |
| chr24 | 36555988      | 36556814  | 827 |
| chr11 | 77733395      | 77734219  | 825 |
| chr29 | 41677723      | 41678546  | 824 |
| chr18 | 56985428      | 56986251  | 824 |
| chr19 | 44879475      | 44880295  | 821 |
| chr17 | 76316927      | 76317747  | 821 |
| chrX  | 48874605      | 48875424  | 820 |
| chr23 | 19677841      | 19678659  | 819 |
| chr25 | 37732042      | 37732859  | 818 |
| chr15 | 24428345      | 24429162  | 818 |
| chr7  | 45765965      | 45766777  | 813 |
| chr5  | 120508125     | 120508937 | 813 |
| chr15 | 76724046      | 76724857  | 812 |
| chr1  | 68415027      | 68415836  | 810 |
| chrX  | 19337514      | 19338321  | 808 |
| chr15 | 5862811       | 5863618   | 808 |

|       |           |           |     |
|-------|-----------|-----------|-----|
| chr18 | 23470409  | 23471215  | 807 |
| chr16 | 48278851  | 48279656  | 806 |
| chr3  | 88242434  | 88243238  | 805 |
| chr29 | 30806994  | 30807797  | 804 |
| chr25 | 3011720   | 3012523   | 804 |
| chr7  | 94374805  | 94375607  | 803 |
| chr7  | 4933083   | 4933883   | 801 |
| chr18 | 48452358  | 48453158  | 801 |
| chr18 | 11649868  | 11650668  | 801 |
| chr8  | 108759143 | 108759941 | 799 |
| chr19 | 56574218  | 56575016  | 799 |
| chr13 | 57578185  | 57578983  | 799 |
| chr12 | 10759773  | 10760570  | 798 |
| chr19 | 11827527  | 11828323  | 797 |
| chr10 | 17069658  | 17070452  | 795 |
| chr7  | 15356582  | 15357374  | 793 |
| chr17 | 63276635  | 63277426  | 792 |
| chr25 | 4008521   | 4009311   | 791 |
| chr10 | 12129966  | 12130755  | 790 |
| chr2  | 99663928  | 99664716  | 789 |
| chr10 | 8709718   | 8710502   | 785 |
| chr6  | 118510819 | 118511601 | 783 |
| chr16 | 44466755  | 44467536  | 782 |
| chr19 | 63558208  | 63558987  | 780 |
| chr11 | 7825573   | 7826351   | 779 |
| chrX  | 30964782  | 30965559  | 778 |
| chrX  | 61538177  | 61538953  | 777 |
| chr26 | 38359230  | 38360005  | 776 |
| chr21 | 61787139  | 61787914  | 776 |
| chr1  | 82485902  | 82486677  | 776 |
| chr25 | 4006319   | 4007093   | 775 |
| chr15 | 26672127  | 26672900  | 774 |
| chr24 | 58895813  | 58896585  | 773 |
| chr5  | 29710913  | 29711684  | 772 |
| chr21 | 6485308   | 6486079   | 772 |
| chrX  | 50792240  | 50793006  | 767 |
| chr21 | 60375767  | 60376532  | 766 |
| chrX  | 75456256  | 75457019  | 764 |
| chr7  | 50546228  | 50546991  | 764 |
| chrX  | 12533151  | 12533913  | 763 |
| chr8  | 116752663 | 116753424 | 762 |
| chr8  | 61902665  | 61903425  | 761 |
| chr3  | 22501069  | 22501829  | 761 |
| chr22 | 30304493  | 30305253  | 761 |
| chr3  | 119659780 | 119660536 | 757 |
| chrX  | 8106871   | 8107625   | 755 |
| chrX  | 19814244  | 19814997  | 754 |
| chr4  | 119335994 | 119336747 | 754 |
| chr15 | 22792253  | 22793006  | 754 |
| chr19 | 56003639  | 56004391  | 753 |

|       |           |           |     |
|-------|-----------|-----------|-----|
| chr18 | 23604203  | 23604955  | 753 |
| chr19 | 37340751  | 37341501  | 751 |
| chr16 | 44117091  | 44117838  | 748 |
| chr4  | 72736208  | 72736954  | 747 |
| chr16 | 47225377  | 47226123  | 747 |
| chr15 | 75662851  | 75663596  | 746 |
| chrX  | 75454923  | 75455667  | 745 |
| chr1  | 87366440  | 87367184  | 745 |
| chr19 | 21863440  | 21864183  | 744 |
| chr17 | 68420643  | 68421386  | 744 |
| chr16 | 48788068  | 48788811  | 744 |
| chr16 | 21668696  | 21669439  | 744 |
| chrX  | 41232993  | 41233734  | 742 |
| chr7  | 46198150  | 46198891  | 742 |
| chr23 | 13408337  | 13409078  | 742 |
| chr19 | 39044727  | 39045468  | 742 |
| chrX  | 7186795   | 7187534   | 740 |
| chr5  | 12283276  | 12284015  | 740 |
| chr2  | 108725859 | 108726598 | 740 |
| chr10 | 57345838  | 57346576  | 739 |
| chrX  | 30196318  | 30197055  | 738 |
| chr26 | 20123290  | 20124027  | 738 |
| chr24 | 43700133  | 43700870  | 738 |
| chr8  | 23494111  | 23494846  | 736 |
| chr22 | 48235201  | 48235936  | 736 |
| chr2  | 99790038  | 99790773  | 736 |
| chr13 | 61225232  | 61225967  | 736 |
| chr15 | 51710455  | 51711189  | 735 |
| chr19 | 23723833  | 23724566  | 734 |
| chr3  | 119960058 | 119960790 | 733 |
| chrX  | 72783001  | 72783732  | 732 |
| chr26 | 17916171  | 17916902  | 732 |
| chr21 | 5983421   | 5984152   | 732 |
| chr2  | 49415486  | 49416217  | 732 |
| chrX  | 8237213   | 8237943   | 731 |
| chr21 | 67916352  | 67917081  | 730 |
| chr2  | 140046161 | 140046890 | 730 |
| chr6  | 109421288 | 109422016 | 729 |
| chr10 | 70202051  | 70202779  | 729 |
| chr16 | 62077311  | 62078037  | 727 |
| chr19 | 39170737  | 39171462  | 726 |
| chr25 | 3104965   | 3105689   | 725 |
| chr23 | 31332232  | 31332956  | 725 |
| chrX  | 72464033  | 72464756  | 724 |
| chr3  | 86203061  | 86203784  | 724 |
| chr25 | 43537502  | 43538224  | 723 |
| chr18 | 26256966  | 26257687  | 722 |
| chrX  | 21693575  | 21694295  | 721 |
| chr6  | 63159320  | 63160039  | 720 |
| chr21 | 18874831  | 18875550  | 720 |

|       |           |           |     |
|-------|-----------|-----------|-----|
| chr2  | 132427992 | 132428711 | 720 |
| chrX  | 55340691  | 55341407  | 717 |
| chr3  | 102697220 | 102697935 | 716 |
| chrX  | 36534812  | 36535526  | 715 |
| chr12 | 32172077  | 32172790  | 714 |
| chr5  | 72155049  | 72155761  | 713 |
| chr26 | 51562797  | 51563509  | 713 |
| chr18 | 49489699  | 49490411  | 713 |
| chr18 | 4966654   | 4967366   | 713 |
| chr29 | 45912290  | 45913001  | 712 |
| chr25 | 37709416  | 37710126  | 711 |
| chr23 | 23846581  | 23847291  | 711 |
| chr26 | 41456702  | 41457411  | 710 |
| chr29 | 17872057  | 17872765  | 709 |
| chr19 | 44154491  | 44155199  | 709 |
| chrX  | 21826886  | 21827592  | 707 |
| chr15 | 81157036  | 81157742  | 707 |
| chrX  | 48725511  | 48726216  | 706 |
| chr1  | 144318267 | 144318972 | 706 |
| chrX  | 78608364  | 78609067  | 704 |
| chr18 | 11283765  | 11284468  | 704 |
| chr14 | 5536470   | 5537171   | 702 |
| chr10 | 81603274  | 81603974  | 701 |
| chr2  | 128844008 | 128844707 | 700 |
| chr7  | 71405315  | 71406013  | 699 |
| chr8  | 41428452  | 41429149  | 698 |
| chrX  | 6671665   | 6672361   | 697 |
| chr25 | 15311313  | 15312006  | 694 |
| chr1  | 74492806  | 74493496  | 691 |
| chr8  | 65726339  | 65727028  | 690 |
| chr3  | 123461913 | 123462602 | 690 |
| chr22 | 58642244  | 58642933  | 690 |
| chr18 | 55017113  | 55017801  | 689 |
| chrX  | 6826068   | 6826755   | 688 |
| chr17 | 69244522  | 69245207  | 686 |
| chr18 | 31840182  | 31840866  | 685 |
| chr16 | 47061135  | 47061818  | 684 |
| chr21 | 28321892  | 28322573  | 682 |
| chr20 | 73404616  | 73405297  | 682 |
| chr12 | 83822965  | 83823646  | 682 |
| chrX  | 6894293   | 6894973   | 681 |
| chr8  | 40329905  | 40330585  | 681 |
| chr29 | 37324708  | 37325388  | 681 |
| chr22 | 30023808  | 30024488  | 681 |
| chr2  | 110555433 | 110556113 | 681 |
| chr24 | 2831225   | 2831904   | 680 |
| chr3  | 125544101 | 125544779 | 679 |
| chrX  | 7557254   | 7557929   | 676 |
| chr2  | 21541537  | 21542212  | 676 |
| chr17 | 70122297  | 70122972  | 676 |

|       |               |           |     |
|-------|---------------|-----------|-----|
| chr12 | 14989472      | 14990147  | 676 |
| chr10 | 104874262     | 104874937 | 676 |
| chr7  | 50614597      | 50615270  | 674 |
| chr23 | 15139443      | 15140115  | 673 |
| chrX  | 7910535       | 7911206   | 672 |
| chr17 | 72731853      | 72732524  | 672 |
| chr13 | 17543683      | 17544354  | 672 |
| chr25 | 2240748       | 2241418   | 671 |
| chr12 | 34257877      | 34258547  | 671 |
| chr6  | 100069442     | 100070109 | 668 |
| chr5  | 60161598      | 60162265  | 668 |
| chr13 | 37692353      | 37693019  | 667 |
| chr22 | 53331937      | 53332602  | 666 |
| chr11 | 104654240     | 104654905 | 666 |
| chr1  | 74180847      | 74181512  | 666 |
| chr8  | 831459 832123 | 665       |     |
| chr17 | 73169771      | 73170435  | 665 |
| chr22 | 48107388      | 48108051  | 664 |
| chrX  | 79479011      | 79479673  | 663 |
| chrX  | 37958184      | 37958846  | 663 |
| chr2  | 99675306      | 99675968  | 663 |
| chr9  | 33773805      | 33774466  | 662 |
| chr18 | 54191252      | 54191913  | 662 |
| chr12 | 32518872      | 32519532  | 661 |
| chr18 | 25474704      | 25475363  | 660 |
| chrX  | 6629845       | 6630502   | 658 |
| chrX  | 60516961      | 60517617  | 657 |
| chr2  | 84789438      | 84790094  | 657 |
| chrX  | 50537671      | 50538325  | 655 |
| chr17 | 61288120      | 61288774  | 655 |
| chrX  | 9668667       | 9669320   | 654 |
| chr8  | 86625792      | 86626445  | 654 |
| chr19 | 13580576      | 13581229  | 654 |
| chr3  | 120951203     | 120951855 | 653 |
| chr11 | 14078789      | 14079441  | 653 |
| chr11 | 48564780      | 48565430  | 651 |
| chr16 | 48824122      | 48824771  | 650 |
| chrX  | 59389999      | 59390647  | 649 |
| chr21 | 30314738      | 30315386  | 649 |
| chrX  | 7400840       | 7401487   | 648 |
| chr22 | 55397536      | 55398183  | 648 |
| chr10 | 75552985      | 75553632  | 648 |
| chrX  | 65773658      | 65774304  | 647 |
| chr29 | 34840424      | 34841070  | 647 |
| chr26 | 18200470      | 18201116  | 647 |
| chr23 | 16002571      | 16003217  | 647 |
| chr7  | 50637304      | 50637948  | 645 |
| chr25 | 11590317      | 11590960  | 644 |
| chr21 | 61671492      | 61672135  | 644 |
| chr18 | 62027287      | 62027929  | 643 |

|       |           |           |     |
|-------|-----------|-----------|-----|
| chr29 | 45913256  | 45913897  | 642 |
| chr7  | 18503896  | 18504536  | 641 |
| chr6  | 46659764  | 46660404  | 641 |
| chrX  | 77675997  | 77676636  | 640 |
| chrX  | 36338045  | 36338684  | 640 |
| chr5  | 33320418  | 33321053  | 636 |
| chr11 | 91581830  | 91582465  | 636 |
| chr19 | 54514503  | 54515137  | 635 |
| chr9  | 62431613  | 62432246  | 634 |
| chr16 | 41586825  | 41587456  | 632 |
| chr12 | 32601564  | 32602195  | 632 |
| chr11 | 98372651  | 98373282  | 632 |
| chrX  | 8484714   | 8485342   | 629 |
| chr9  | 19416286  | 19416914  | 629 |
| chr3  | 39115745  | 39116373  | 629 |
| chrX  | 73681106  | 73681733  | 628 |
| chr4  | 36672744  | 36673371  | 628 |
| chr17 | 72715215  | 72715842  | 628 |
| chr15 | 25278660  | 25279286  | 627 |
| chr3  | 111813495 | 111814120 | 626 |
| chr21 | 22721995  | 22722620  | 626 |
| chr18 | 54176017  | 54176641  | 625 |
| chr2  | 131671573 | 131672196 | 624 |
| chr10 | 66861958  | 66862581  | 624 |
| chr23 | 9725417   | 9726039   | 623 |
| chr11 | 10488468  | 10489090  | 623 |
| chrX  | 21194074  | 21194695  | 622 |
| chr16 | 38850179  | 38850799  | 621 |
| chr28 | 34179634  | 34180253  | 620 |
| chr16 | 42870544  | 42871163  | 620 |
| chr29 | 45908501  | 45909119  | 619 |
| chr19 | 7635821   | 7636439   | 619 |
| chr3  | 106585345 | 106585961 | 617 |
| chr11 | 9336490   | 9337106   | 617 |
| chr18 | 56607237  | 56607852  | 616 |
| chr8  | 62046700  | 62047314  | 615 |
| chr12 | 34272046  | 34272660  | 615 |
| chr23 | 49948148  | 49948761  | 614 |
| chr2  | 115075064 | 115075677 | 614 |
| chrX  | 61298452  | 61299064  | 613 |
| chr19 | 54296809  | 54297421  | 613 |
| chr17 | 57439999  | 57440610  | 612 |
| chr16 | 44159345  | 44159956  | 612 |
| chr20 | 23691915  | 23692525  | 611 |
| chr20 | 19403732  | 19404342  | 611 |
| chr3  | 106518206 | 106518815 | 610 |
| chr1  | 100053506 | 100054115 | 610 |
| chr5  | 33942573  | 33943181  | 609 |
| chr3  | 123170635 | 123171243 | 609 |
| chr11 | 10771926  | 10772534  | 609 |



|       |           |           |     |
|-------|-----------|-----------|-----|
| chr16 | 67203990  | 67204597  | 608 |
| chr10 | 35845264  | 35845871  | 608 |
| chr20 | 66432351  | 66432957  | 607 |
| chr15 | 24189704  | 24190310  | 607 |
| chrX  | 8090739   | 8091344   | 606 |
| chr22 | 58433105  | 58433708  | 604 |
| chr17 | 4149815   | 4150418   | 604 |
| chr13 | 40557959  | 40558561  | 603 |
| chr1  | 144147945 | 144148546 | 602 |
| chrX  | 75853631  | 75854231  | 601 |
| chr3  | 8574596   | 8575196   | 601 |
| chr16 | 72181184  | 72181784  | 601 |
| chr11 | 81452748  | 81453348  | 601 |
| chrX  | 6478394   | 6478993   | 600 |
| chr4  | 98031989  | 98032585  | 597 |
| chr10 | 70244486  | 70245082  | 597 |
| chrX  | 9043660   | 9044255   | 596 |
| chr10 | 20969392  | 20969987  | 596 |
| chrX  | 73351414  | 73352007  | 594 |
| chr18 | 16524100  | 16524693  | 594 |
| chr2  | 10072795  | 10073387  | 593 |
| chr5  | 30190763  | 30191353  | 591 |
| chr19 | 23984517  | 23985107  | 591 |
| chr3  | 15786302  | 15786891  | 590 |
| chr19 | 26372928  | 26373516  | 589 |
| chr18 | 1520000   | 1520587   | 588 |
| chr13 | 41671658  | 41672244  | 587 |
| chr5  | 111334101 | 111334686 | 586 |
| chr3  | 57049015  | 57049600  | 586 |
| chr23 | 8790528   | 8791113   | 586 |
| chr13 | 59644696  | 59645281  | 586 |
| chr10 | 74722441  | 74723026  | 586 |
| chrX  | 49774848  | 49775432  | 585 |
| chr21 | 28189043  | 28189627  | 585 |
| chr21 | 57824985  | 57825567  | 583 |
| chr13 | 66682356  | 66682938  | 583 |
| chr8  | 108713725 | 108714306 | 582 |
| chr8  | 6470972   | 6471552   | 581 |
| chrX  | 47483254  | 47483833  | 580 |
| chr23 | 27600762  | 27601340  | 579 |
| chr13 | 26189247  | 26189825  | 579 |
| chr22 | 10748663  | 10749240  | 578 |
| chr1  | 82748925  | 82749502  | 578 |
| chr9  | 99832474  | 99833050  | 577 |
| chr7  | 48983481  | 48984056  | 576 |
| chr23 | 7030359   | 7030934   | 576 |
| chr16 | 40569424  | 40569999  | 576 |
| chrX  | 59454358  | 59454932  | 575 |
| chr7  | 5175964   | 5176538   | 575 |
| chr26 | 22317458  | 22318032  | 575 |

|       |               |           |     |
|-------|---------------|-----------|-----|
| chrX  | 8397458       | 8398030   | 573 |
| chr20 | 66430015      | 66430587  | 573 |
| chrX  | 63658047      | 63658618  | 572 |
| chr8  | 63943378      | 63943949  | 572 |
| chr6  | 63187226      | 63187797  | 572 |
| chrX  | 7420871       | 7421441   | 571 |
| chr5  | 71657210      | 71657779  | 570 |
| chr21 | 24233514      | 24234083  | 570 |
| chr29 | 26543754      | 26544322  | 569 |
| chrX  | 75093157      | 75093723  | 567 |
| chrX  | 57146172      | 57146738  | 567 |
| chr15 | 52814355      | 52814921  | 567 |
| chrX  | 370206 370771 | 566       |     |
| chr21 | 47720242      | 47720807  | 566 |
| chr12 | 48059676      | 48060241  | 566 |
| chrX  | 29538470      | 29539034  | 565 |
| chr18 | 56558860      | 56559424  | 565 |
| chr12 | 14725735      | 14726299  | 565 |
| chr2  | 23946374      | 23946936  | 563 |
| chr16 | 2188173       | 2188735   | 563 |
| chr26 | 51550581      | 51551142  | 562 |
| chr13 | 30143390      | 30143950  | 561 |
| chrX  | 59443638      | 59444197  | 560 |
| chr12 | 32466620      | 32467178  | 559 |
| chrX  | 7169104       | 7169660   | 557 |
| chr7  | 71367919      | 71368475  | 557 |
| chr13 | 77734616      | 77735171  | 556 |
| chr25 | 34192919      | 34193472  | 554 |
| chr10 | 17496570      | 17497123  | 554 |
| chrX  | 68791981      | 68792533  | 553 |
| chr7  | 10961747      | 10962299  | 553 |
| chr10 | 88036646      | 88037198  | 553 |
| chrX  | 47875457      | 47876008  | 552 |
| chr23 | 35215711      | 35216262  | 552 |
| chrX  | 72207604      | 72208154  | 551 |
| chr21 | 29801347      | 29801897  | 551 |
| chr3  | 25719008      | 25719557  | 550 |
| chr2  | 111844912     | 111845461 | 550 |
| chr11 | 77713828      | 77714377  | 550 |
| chr17 | 67960050      | 67960598  | 549 |
| chr14 | 2881529       | 2882077   | 549 |
| chr3  | 27912034      | 27912581  | 548 |
| chr2  | 134682722     | 134683269 | 548 |
| chr24 | 1607398       | 1607944   | 547 |
| chr11 | 105625303     | 105625849 | 547 |
| chr11 | 103459140     | 103459685 | 546 |
| chr19 | 18041715      | 18042259  | 545 |
| chrX  | 64990594      | 64991137  | 544 |
| chr8  | 6471608       | 6472151   | 544 |
| chr7  | 46188862      | 46189405  | 544 |

|       |           |           |     |
|-------|-----------|-----------|-----|
| chr18 | 4074895   | 4075438   | 544 |
| chr8  | 26042792  | 26043334  | 543 |
| chr19 | 42828497  | 42829039  | 543 |
| chrX  | 79360851  | 79361392  | 542 |
| chr14 | 8005410   | 8005951   | 542 |
| chr11 | 105245556 | 105246097 | 542 |
| chr12 | 20798962  | 20799501  | 540 |
| chrX  | 12166080  | 12166618  | 539 |
| chr27 | 26739486  | 26740024  | 539 |
| chr19 | 31919954  | 31920492  | 539 |
| chr11 | 77857688  | 77858226  | 539 |
| chr23 | 15909526  | 15910063  | 538 |
| chr2  | 131830457 | 131830994 | 538 |
| chrX  | 56171244  | 56171780  | 537 |
| chr19 | 29000977  | 29001513  | 537 |
| chr11 | 24011633  | 24012168  | 536 |
| chr1  | 147251296 | 147251830 | 535 |
| chr16 | 42898123  | 42898656  | 534 |
| chr22 | 48547072  | 48547602  | 531 |
| chr7  | 81255993  | 81256522  | 530 |
| chr16 | 1593779   | 1594307   | 529 |
| chr22 | 30241345  | 30241871  | 527 |
| chrX  | 78820914  | 78821439  | 526 |
| chr22 | 5343455   | 5343980   | 526 |
| chr13 | 36245515  | 36246040  | 526 |
| chr12 | 81302420  | 81302945  | 526 |
| chrX  | 72264028  | 72264552  | 525 |
| chrX  | 13136961  | 13137485  | 525 |
| chr17 | 76008042  | 76008565  | 524 |
| chr11 | 76363747  | 76364270  | 524 |
| chr29 | 50310413  | 50310935  | 523 |
| chr23 | 14944760  | 14945282  | 523 |
| chr18 | 13841904  | 13842426  | 523 |
| chr22 | 58442010  | 58442531  | 522 |
| chr19 | 45825988  | 45826509  | 522 |
| chr18 | 11762890  | 11763410  | 521 |
| chrX  | 1608926   | 1609445   | 520 |
| chr4  | 90997525  | 90998044  | 520 |
| chr23 | 32686299  | 32686818  | 520 |
| chr2  | 35502356  | 35502875  | 520 |
| chr1  | 152360716 | 152361235 | 520 |
| chr9  | 77576896  | 77577414  | 519 |
| chr12 | 84323860  | 84324378  | 519 |
| chr7  | 42492605  | 42493122  | 518 |
| chr28 | 33801437  | 33801953  | 517 |
| chr19 | 38849369  | 38849885  | 517 |
| chrX  | 33546596  | 33547111  | 516 |
| chr25 | 37275269  | 37275784  | 516 |
| chr2  | 111383444 | 111383959 | 516 |
| chr19 | 44347090  | 44347605  | 516 |

|       |           |           |     |
|-------|-----------|-----------|-----|
| chrX  | 74297758  | 74298272  | 515 |
| chr23 | 11843350  | 11843864  | 515 |
| chrX  | 19083022  | 19083535  | 514 |
| chr25 | 37775006  | 37775519  | 514 |
| chr19 | 59344417  | 59344930  | 514 |
| chrX  | 74337747  | 74338259  | 513 |
| chr9  | 19415738  | 19416249  | 512 |
| chr20 | 73648807  | 73649318  | 512 |
| chr16 | 75617122  | 75617632  | 511 |
| chrX  | 50316094  | 50316603  | 510 |
| chr29 | 31558385  | 31558894  | 510 |
| chr1  | 145651829 | 145652338 | 510 |
| chr23 | 30540200  | 30540708  | 509 |
| chrX  | 8703157   | 8703664   | 508 |
| chr8  | 73878726  | 73879233  | 508 |
| chr26 | 42178031  | 42178538  | 508 |
| chr11 | 28551689  | 28552195  | 507 |
| chr1  | 84670896  | 84671402  | 507 |
| chrX  | 34194872  | 34195377  | 506 |
| chr3  | 22510545  | 22511050  | 506 |
| chr23 | 48558030  | 48558535  | 506 |
| chr10 | 78880641  | 78881146  | 506 |
| chr1  | 145350156 | 145350661 | 506 |
| chrX  | 18943659  | 18944163  | 505 |
| chr19 | 23045372  | 23045876  | 505 |
| chrX  | 31246050  | 31246552  | 503 |
| chr5  | 60317062  | 60317564  | 503 |
| chr27 | 35438481  | 35438983  | 503 |
| chr27 | 15414208  | 15414710  | 503 |
| chr19 | 40415670  | 40416172  | 503 |
| chr19 | 13507731  | 13508233  | 503 |
| chrX  | 62986667  | 62987168  | 502 |
| chr7  | 73167783  | 73168284  | 502 |
| chr3  | 20431844  | 20432345  | 502 |
| chr9  | 100332408 | 100332908 | 501 |
| chr6  | 68000371  | 68000871  | 501 |
| chr18 | 50984381  | 50984881  | 501 |
| chr1  | 123103192 | 123103692 | 501 |
| chrX  | 36681063  | 36681562  | 500 |
| chrX  | 6720511   | 6721010   | 500 |
| chr4  | 64268325  | 64268824  | 500 |
| chr19 | 33090414  | 33090911  | 498 |
| chr19 | 14246818  | 14247315  | 498 |
| chr26 | 51590443  | 51590939  | 497 |
| chr23 | 30545160  | 30545656  | 497 |
| chr29 | 51860426  | 51860918  | 493 |
| chr25 | 4639069   | 4639561   | 493 |
| chr19 | 7867438   | 7867929   | 492 |
| chr16 | 42898829  | 42899320  | 492 |
| chr15 | 75245035  | 75245525  | 491 |

|       |               |           |     |
|-------|---------------|-----------|-----|
| chr13 | 38271470      | 38271960  | 491 |
| chr11 | 21633043      | 21633533  | 491 |
| chrX  | 53616265      | 53616754  | 490 |
| chrX  | 410858 411347 | 490       |     |
| chr5  | 121347469     | 121347958 | 490 |
| chr23 | 11676754      | 11677243  | 490 |
| chr2  | 95412328      | 95412817  | 490 |
| chr16 | 72122469      | 72122958  | 490 |
| chr13 | 41049304      | 41049793  | 490 |
| chr16 | 59827014      | 59827501  | 488 |
| chr19 | 32822563      | 32823049  | 487 |
| chr16 | 39597820      | 39598306  | 487 |
| chrX  | 78246764      | 78247249  | 486 |
| chr7  | 70804094      | 70804579  | 486 |
| chr27 | 39231110      | 39231595  | 486 |
| chr20 | 62665092      | 62665577  | 486 |
| chr19 | 39846253      | 39846738  | 486 |
| chr18 | 25051656      | 25052141  | 486 |
| chr10 | 66634639      | 66635124  | 486 |
| chrX  | 49272864      | 49273348  | 485 |
| chrX  | 18884915      | 18885399  | 485 |
| chr24 | 1725715       | 1726199   | 485 |
| chr13 | 41492591      | 41493075  | 485 |
| chrX  | 8552982       | 8553465   | 484 |
| chr27 | 38697242      | 38697725  | 484 |
| chr25 | 4643273       | 4643756   | 484 |
| chr13 | 41638481      | 41638964  | 484 |
| chrX  | 75554349      | 75554831  | 483 |
| chr27 | 48049353      | 48049835  | 483 |
| chr11 | 98323042      | 98323524  | 483 |
| chr19 | 46105814      | 46106295  | 482 |
| chr15 | 64197995      | 64198476  | 482 |
| chr10 | 17428101      | 17428582  | 482 |
| chr5  | 27466765      | 27467245  | 481 |
| chr27 | 39093589      | 39094069  | 481 |
| chr2  | 75598655      | 75599135  | 481 |
| chr10 | 16852772      | 16853252  | 481 |
| chrX  | 78601251      | 78601730  | 480 |
| chrX  | 50865337      | 50865816  | 480 |
| chr8  | 60301742      | 60302221  | 480 |
| chr5  | 52962132      | 52962611  | 480 |
| chrX  | 7509678       | 7510156   | 479 |
| chr6  | 118513084     | 118513562 | 479 |
| chr26 | 43481560      | 43482038  | 479 |
| chr5  | 111204711     | 111205188 | 478 |
| chrX  | 60393257      | 60393733  | 477 |
| chrX  | 50616532      | 50617008  | 477 |
| chr9  | 90609331      | 90609807  | 477 |
| chr2  | 136396277     | 136396753 | 477 |
| chrX  | 59257422      | 59257897  | 476 |

|       |           |           |     |
|-------|-----------|-----------|-----|
| chrX  | 45162482  | 45162957  | 476 |
| chrX  | 18406522  | 18406997  | 476 |
| chr19 | 46094001  | 46094476  | 476 |
| chr4  | 64301359  | 64301833  | 475 |
| chr23 | 52722108  | 52722582  | 475 |
| chr2  | 125905689 | 125906163 | 475 |
| chrX  | 45492651  | 45493124  | 474 |
| chr27 | 36343897  | 36344370  | 474 |
| chr23 | 52767021  | 52767494  | 474 |
| chr13 | 66725091  | 66725564  | 474 |
| chr11 | 2565854   | 2566327   | 474 |
| chrX  | 35683432  | 35683904  | 473 |
| chr4  | 122671162 | 122671634 | 473 |
| chr22 | 26870357  | 26870829  | 473 |
| chr5  | 10728367  | 10728838  | 472 |
| chr3  | 112382772 | 112383243 | 472 |
| chr29 | 29881705  | 29882176  | 472 |
| chrX  | 58235065  | 58235535  | 471 |
| chr21 | 32843031  | 32843501  | 471 |
| chrX  | 11119764  | 11120232  | 469 |
| chr7  | 61738538  | 61739006  | 469 |
| chr5  | 120372577 | 120373045 | 469 |
| chr10 | 103075117 | 103075585 | 469 |
| chrX  | 50294176  | 50294643  | 468 |
| chrX  | 8036507   | 8036974   | 468 |
| chr18 | 8074577   | 8075044   | 468 |
| chr12 | 24516909  | 24517376  | 468 |
| chr3  | 105404643 | 105405108 | 466 |
| chr9  | 70973321  | 70973785  | 465 |
| chr5  | 111020736 | 111021199 | 464 |
| chrX  | 34111909  | 34112371  | 463 |
| chr3  | 125627188 | 125627650 | 463 |
| chr26 | 28143095  | 28143557  | 463 |
| chr16 | 3312681   | 3313143   | 463 |
| chr7  | 50342388  | 50342849  | 462 |
| chr11 | 27978966  | 27979426  | 461 |
| chr7  | 38184349  | 38184808  | 460 |
| chr29 | 29777570  | 29778029  | 460 |
| chr28 | 41325903  | 41326362  | 460 |
| chr25 | 40370439  | 40370898  | 460 |
| chr19 | 20338450  | 20338909  | 460 |
| chr18 | 56491280  | 56491739  | 460 |
| chr13 | 38360762  | 38361221  | 460 |
| chrX  | 47639937  | 47640395  | 459 |
| chrX  | 33622453  | 33622910  | 458 |
| chr7  | 48984369  | 48984826  | 458 |
| chr25 | 27960591  | 27961048  | 458 |
| chr24 | 1747788   | 1748245   | 458 |
| chr19 | 19412282  | 19412739  | 458 |
| chrX  | 21055077  | 21055533  | 457 |

|       |           |           |     |
|-------|-----------|-----------|-----|
| chr9  | 106827182 | 106827638 | 457 |
| chr6  | 62052264  | 62052720  | 457 |
| chr21 | 47728723  | 47729179  | 457 |
| chr12 | 34326604  | 34327060  | 457 |
| chr11 | 70700056  | 70700512  | 457 |
| chr11 | 26233166  | 26233622  | 457 |
| chrX  | 64522525  | 64522980  | 456 |
| chr13 | 43467446  | 43467901  | 456 |
| chr29 | 2503623   | 2504077   | 455 |
| chr2  | 123755083 | 123755537 | 455 |
| chr15 | 29996810  | 29997264  | 455 |
| chr11 | 106281244 | 106281698 | 455 |
| chrX  | 54933993  | 54934446  | 454 |
| chrX  | 54107825  | 54108278  | 454 |
| chrX  | 10813799  | 10814252  | 454 |
| chr6  | 103404734 | 103405187 | 454 |
| chr5  | 111332061 | 111332514 | 454 |
| chr23 | 49631380  | 49631833  | 454 |
| chrX  | 61623071  | 61623523  | 453 |
| chr20 | 8618149   | 8618601   | 453 |
| chr16 | 75655240  | 75655692  | 453 |
| chr7  | 29495178  | 29495629  | 452 |
| chr17 | 66840400  | 66840851  | 452 |
| chr13 | 28533438  | 28533889  | 452 |
| chr7  | 4339869   | 4340319   | 451 |
| chr25 | 35217904  | 35218354  | 451 |
| chr20 | 29498887  | 29499337  | 451 |
| chr19 | 14243564  | 14244014  | 451 |
| chr17 | 31869250  | 31869700  | 451 |
| chr8  | 73820670  | 73821119  | 450 |
| chr19 | 12508424  | 12508873  | 450 |
| chr18 | 25049188  | 25049637  | 450 |
| chr3  | 4343098   | 4343546   | 449 |
| chrX  | 59459974  | 59460421  | 448 |
| chr5  | 91163975  | 91164422  | 448 |
| chr19 | 21664972  | 21665419  | 448 |
| chrX  | 6741055   | 6741501   | 447 |
| chr3  | 56654044  | 56654490  | 447 |
| chr3  | 56439751  | 56440197  | 447 |
| chr29 | 26685080  | 26685526  | 447 |
| chr18 | 51301278  | 51301724  | 447 |
| chr15 | 16057287  | 16057733  | 447 |
| chr13 | 6922499   | 6922945   | 447 |
| chr12 | 48061381  | 48061827  | 447 |
| chrX  | 61243741  | 61244186  | 446 |
| chr21 | 60218037  | 60218482  | 446 |
| chr20 | 59410143  | 59410588  | 446 |
| chr19 | 39911983  | 39912428  | 446 |
| chr24 | 26265349  | 26265793  | 445 |
| chr19 | 39496202  | 39496646  | 445 |

|       |               |           |     |
|-------|---------------|-----------|-----|
| chr13 | 75749603      | 75750047  | 445 |
| chr13 | 61483070      | 61483514  | 445 |
| chrX  | 72881457      | 72881900  | 444 |
| chr7  | 5397449       | 5397892   | 444 |
| chr5  | 118054426     | 118054869 | 444 |
| chr3  | 113825260     | 113825703 | 444 |
| chr23 | 31206301      | 31206743  | 443 |
| chr18 | 64522510      | 64522952  | 443 |
| chr14 | 68002862      | 68003304  | 443 |
| chr8  | 60303225      | 60303666  | 442 |
| chr3  | 15403495      | 15403936  | 442 |
| chr15 | 29292425      | 29292866  | 442 |
| chr11 | 48677025      | 48677466  | 442 |
| chr6  | 74545053      | 74545493  | 441 |
| chr29 | 31659038      | 31659478  | 441 |
| chr19 | 41465896      | 41466336  | 441 |
| chr29 | 51863894      | 51864333  | 440 |
| chr18 | 63808501      | 63808940  | 440 |
| chr16 | 2125011       | 2125450   | 440 |
| chr11 | 105661261     | 105661700 | 440 |
| chrX  | 78324799      | 78325237  | 439 |
| chrX  | 30613886      | 30614324  | 439 |
| chrX  | 9625707       | 9626145   | 439 |
| chrX  | 6176331       | 6176769   | 439 |
| chr23 | 28010956      | 28011394  | 439 |
| chr3  | 117316439     | 117316876 | 438 |
| chr17 | 56096567      | 56097004  | 438 |
| chr13 | 60023604      | 60024040  | 437 |
| chr1  | 76414345      | 76414781  | 437 |
| chr16 | 42586008      | 42586443  | 436 |
| chr26 | 3127293       | 3127727   | 435 |
| chr22 | 34225378      | 34225812  | 435 |
| chrX  | 59697768      | 59698201  | 434 |
| chrX  | 12100028      | 12100461  | 434 |
| chrX  | 817389 817822 | 434       |     |
| chr6  | 120728212     | 120728645 | 434 |
| chr5  | 122134513     | 122134946 | 434 |
| chr2  | 130972806     | 130973239 | 434 |
| chr10 | 15069253      | 15069686  | 434 |
| chrX  | 34185174      | 34185606  | 433 |
| chr27 | 35443701      | 35444133  | 433 |
| chr21 | 20144953      | 20145385  | 433 |
| chr11 | 109509568     | 109510000 | 433 |
| chr4  | 51574794      | 51575225  | 432 |
| chr26 | 21838168      | 21838599  | 432 |
| chr21 | 59904429      | 59904860  | 432 |
| chr10 | 53279016      | 53279447  | 432 |
| chrX  | 75199624      | 75200054  | 431 |
| chr5  | 68961096      | 68961526  | 431 |
| chr11 | 100280091     | 100280521 | 431 |



|       |               |           |     |
|-------|---------------|-----------|-----|
| chrX  | 80182422      | 80182851  | 430 |
| chr18 | 39931698      | 39932127  | 430 |
| chr14 | 61323430      | 61323859  | 430 |
| chr14 | 9204560       | 9204989   | 430 |
| chrX  | 65336582      | 65337010  | 429 |
| chrX  | 59158926      | 59159354  | 429 |
| chr6  | 70182334      | 70182762  | 429 |
| chr25 | 8764965       | 8765393   | 429 |
| chr19 | 26956098      | 26956526  | 429 |
| chr13 | 75531458      | 75531886  | 429 |
| chr13 | 6612336       | 6612764   | 429 |
| chr5  | 115063630     | 115064057 | 428 |
| chr3  | 21972708      | 21973135  | 428 |
| chr25 | 10400418      | 10400845  | 428 |
| chr11 | 108385675     | 108386102 | 428 |
| chr11 | 30553085      | 30553512  | 428 |
| chr5  | 32848074      | 32848500  | 427 |
| chr3  | 123251505     | 123251931 | 427 |
| chr17 | 70172367      | 70172793  | 427 |
| chrX  | 8051699       | 8052124   | 426 |
| chr28 | 34081877      | 34082302  | 426 |
| chr18 | 13149831      | 13150256  | 426 |
| chr10 | 61475733      | 61476158  | 426 |
| chrX  | 59420239      | 59420663  | 425 |
| chr9  | 47261287      | 47261711  | 425 |
| chr8  | 63989257      | 63989681  | 425 |
| chr5  | 111709743     | 111710167 | 425 |
| chr3  | 124891335     | 124891759 | 425 |
| chr19 | 30799137      | 30799561  | 425 |
| chr18 | 647445 647869 | 425       | 425 |
| chr11 | 107560788     | 107561212 | 425 |
| chr7  | 50551718      | 50552141  | 424 |
| chr3  | 29978629      | 29979052  | 424 |
| chr21 | 6438011       | 6438434   | 424 |
| chr17 | 66510844      | 66511267  | 424 |
| chr16 | 48804660      | 48805083  | 424 |
| chr10 | 22290009      | 22290432  | 424 |
| chr1  | 149418752     | 149419175 | 424 |
| chrX  | 9162502       | 9162924   | 423 |
| chr8  | 109032960     | 109033382 | 423 |
| chr3  | 22561982      | 22562404  | 423 |
| chr2  | 24726606      | 24727028  | 423 |
| chr18 | 22149613      | 22150035  | 423 |
| chrX  | 49301582      | 49302003  | 422 |
| chr8  | 20914006      | 20914427  | 422 |
| chr7  | 19209756      | 19210177  | 422 |
| chr7  | 5079784       | 5080205   | 422 |
| chr3  | 113112086     | 113112507 | 422 |
| chr26 | 31339337      | 31339758  | 422 |
| chrX  | 10636517      | 10636937  | 421 |

|       |           |           |     |
|-------|-----------|-----------|-----|
| chr7  | 96601087  | 96601507  | 421 |
| chr5  | 122282924 | 122283344 | 421 |
| chr2  | 134725199 | 134725619 | 421 |
| chr16 | 23843821  | 23844241  | 421 |
| chrX  | 21831495  | 21831914  | 420 |
| chrX  | 20891352  | 20891771  | 420 |
| chr7  | 45827510  | 45827929  | 420 |
| chr7  | 38401125  | 38401544  | 420 |
| chr23 | 15857362  | 15857781  | 420 |
| chr16 | 23849463  | 23849882  | 420 |
| chrX  | 63998003  | 63998421  | 419 |
| chr6  | 120838287 | 120838705 | 419 |
| chr3  | 127254195 | 127254613 | 419 |
| chr27 | 28110963  | 28111381  | 419 |
| chr16 | 39526433  | 39526851  | 419 |
| chrX  | 20074790  | 20075207  | 418 |
| chrX  | 10671141  | 10671558  | 418 |
| chr3  | 111478853 | 111479270 | 418 |
| chr2  | 131206702 | 131207119 | 418 |
| chr19 | 49333311  | 49333728  | 418 |
| chr19 | 38967318  | 38967735  | 418 |
| chr17 | 73169166  | 73169583  | 418 |
| chrX  | 60435975  | 60436391  | 417 |
| chrX  | 2625104   | 2625520   | 417 |
| chr8  | 73763855  | 73764271  | 417 |
| chr5  | 61478264  | 61478680  | 417 |
| chr29 | 37051900  | 37052316  | 417 |
| chr21 | 68797557  | 68797973  | 417 |
| chr12 | 32007081  | 32007497  | 417 |
| chr1  | 152360182 | 152360598 | 417 |
| chrX  | 72537477  | 72537892  | 416 |
| chrX  | 66601297  | 66601712  | 416 |
| chrX  | 63024385  | 63024800  | 416 |
| chr3  | 115108089 | 115108504 | 416 |
| chr29 | 49568594  | 49569009  | 416 |
| chr18 | 7669329   | 7669744   | 416 |
| chr15 | 25441269  | 25441684  | 416 |
| chrX  | 76002889  | 76003303  | 415 |
| chr7  | 42515851  | 42516265  | 415 |
| chr20 | 8488765   | 8489179   | 415 |
| chrX  | 60288708  | 60289121  | 414 |
| chrX  | 21249426  | 21249839  | 414 |
| chrX  | 19318817  | 19319230  | 414 |
| chr8  | 110908868 | 110909281 | 414 |
| chr7  | 38191027  | 38191440  | 414 |
| chr3  | 125205152 | 125205565 | 414 |
| chr3  | 15179665  | 15180078  | 414 |
| chr22 | 30305458  | 30305871  | 414 |
| chr21 | 47619265  | 47619678  | 414 |
| chr18 | 63703686  | 63704099  | 414 |

|       |               |           |     |
|-------|---------------|-----------|-----|
| chr13 | 57776291      | 57776704  | 414 |
| chr10 | 69523928      | 69524341  | 414 |
| chrX  | 61784644      | 61785056  | 413 |
| chrX  | 10709354      | 10709766  | 413 |
| chr7  | 76988498      | 76988910  | 413 |
| chr7  | 5454389       | 5454801   | 413 |
| chr4  | 66690814      | 66691226  | 413 |
| chr24 | 41712499      | 41712911  | 413 |
| chr22 | 30114864      | 30115276  | 413 |
| chr2  | 99265126      | 99265538  | 413 |
| chr9  | 62429444      | 62429855  | 412 |
| chr10 | 95573308      | 95573719  | 412 |
| chrX  | 19986807      | 19987217  | 411 |
| chr9  | 87743459      | 87743869  | 411 |
| chr4  | 68018668      | 68019078  | 411 |
| chr28 | 650707 651117 | 411       |     |
| chr17 | 37617870      | 37618280  | 411 |
| chr15 | 25325661      | 25326071  | 411 |
| chr1  | 68858201      | 68858611  | 411 |
| chrX  | 66932305      | 66932714  | 410 |
| chrX  | 21595572      | 21595981  | 410 |
| chr7  | 38188407      | 38188816  | 410 |
| chr4  | 118685811     | 118686220 | 410 |
| chr19 | 16730263      | 16730672  | 410 |
| chr16 | 42668079      | 42668488  | 410 |
| chr13 | 49837690      | 49838099  | 410 |
| chr10 | 83517521      | 83517930  | 410 |
| chrX  | 10724945      | 10725353  | 409 |
| chr23 | 47572768      | 47573176  | 409 |
| chrX  | 77221522      | 77221929  | 408 |
| chrX  | 54378585      | 54378992  | 408 |
| chr7  | 51402971      | 51403378  | 408 |
| chr7  | 5152084       | 5152491   | 408 |
| chr17 | 49452062      | 49452469  | 408 |
| chr10 | 59999515      | 59999922  | 408 |
| chrX  | 78590573      | 78590979  | 407 |
| chr6  | 14231224      | 14231630  | 407 |
| chr5  | 10194397      | 10194803  | 407 |
| chr29 | 29776206      | 29776612  | 407 |
| chr18 | 4008136       | 4008542   | 407 |
| chr9  | 37894517      | 37894922  | 406 |
| chr8  | 55412850      | 55413255  | 406 |
| chr3  | 116926414     | 116926819 | 406 |
| chr13 | 25902840      | 25903245  | 406 |
| chrX  | 64572310      | 64572714  | 405 |
| chr8  | 24708051      | 24708455  | 405 |
| chr3  | 15640486      | 15640890  | 405 |
| chr25 | 37567440      | 37567844  | 405 |
| chr19 | 24329719      | 24330123  | 405 |
| chr11 | 101891750     | 101892154 | 405 |

|       |           |           |     |
|-------|-----------|-----------|-----|
| chrX  | 78412022  | 78412425  | 404 |
| chr3  | 116144409 | 116144812 | 404 |
| chr23 | 44833139  | 44833542  | 404 |
| chr21 | 25205938  | 25206341  | 404 |
| chr16 | 69746806  | 69747209  | 404 |
| chrX  | 63211859  | 63212261  | 403 |
| chr5  | 113949533 | 113949935 | 403 |
| chr24 | 43706940  | 43707342  | 403 |
| chr13 | 29293211  | 29293613  | 403 |
| chr11 | 70779372  | 70779774  | 403 |
| chr10 | 5262242   | 5262644   | 403 |
| chr8  | 73527409  | 73527809  | 401 |
| chr3  | 122047340 | 122047740 | 401 |
| chr3  | 27918436  | 27918836  | 401 |
| chr24 | 48591418  | 48591818  | 401 |
| chr2  | 23988397  | 23988797  | 401 |
| chr19 | 54441398  | 54441798  | 401 |
| chr19 | 23752864  | 23753264  | 401 |
| chr18 | 53557591  | 53557991  | 401 |
| chr16 | 70095546  | 70095946  | 401 |
| chr13 | 61203933  | 61204333  | 401 |
| chr13 | 42892535  | 42892935  | 401 |
| chrX  | 74816901  | 74817300  | 400 |
| chr7  | 36635457  | 36635856  | 400 |
| chr3  | 22540724  | 22541123  | 400 |
| chr25 | 29599168  | 29599567  | 400 |
| chr13 | 73518705  | 73519104  | 400 |
| chrX  | 73367455  | 73367853  | 399 |
| chrX  | 66669341  | 66669739  | 399 |
| chrX  | 61676717  | 61677115  | 399 |
| chrX  | 55219873  | 55220271  | 399 |
| chrX  | 50828649  | 50829047  | 399 |
| chrX  | 22384172  | 22384570  | 399 |
| chr9  | 104993990 | 104994388 | 399 |
| chr7  | 19198916  | 19199314  | 399 |
| chr7  | 5399032   | 5399430   | 399 |
| chr6  | 72181273  | 72181671  | 399 |
| chr5  | 113200084 | 113200482 | 399 |
| chr5  | 112964642 | 112965040 | 399 |
| chr5  | 74694280  | 74694678  | 399 |
| chr5  | 74082635  | 74083033  | 399 |
| chr5  | 71713517  | 71713915  | 399 |
| chr5  | 29141134  | 29141532  | 399 |
| chr4  | 106592683 | 106593081 | 399 |
| chr4  | 97935175  | 97935573  | 399 |
| chr4  | 10825381  | 10825779  | 399 |
| chr3  | 127062528 | 127062926 | 399 |
| chr3  | 123682725 | 123683123 | 399 |
| chr3  | 122105013 | 122105411 | 399 |
| chr3  | 97879470  | 97879868  | 399 |

|       |               |           |     |
|-------|---------------|-----------|-----|
| chr3  | 26133001      | 26133399  | 399 |
| chr29 | 51267953      | 51268351  | 399 |
| chr29 | 30770781      | 30771179  | 399 |
| chr26 | 50840914      | 50841312  | 399 |
| chr25 | 29855862      | 29856260  | 399 |
| chr25 | 30071 30469   | 399       |     |
| chr24 | 61121831      | 61122229  | 399 |
| chr23 | 7653797       | 7654195   | 399 |
| chr22 | 58438817      | 58439215  | 399 |
| chr22 | 30163389      | 30163787  | 399 |
| chr21 | 64274333      | 64274731  | 399 |
| chr21 | 17592039      | 17592437  | 399 |
| chr2  | 138497640     | 138498038 | 399 |
| chr2  | 74329487      | 74329885  | 399 |
| chr19 | 24249745      | 24250143  | 399 |
| chr18 | 65184772      | 65185170  | 399 |
| chr18 | 62670474      | 62670872  | 399 |
| chr17 | 69817869      | 69818267  | 399 |
| chr17 | 68091625      | 68092023  | 399 |
| chr17 | 56317786      | 56318184  | 399 |
| chr16 | 44986264      | 44986662  | 399 |
| chr15 | 81016873      | 81017271  | 399 |
| chr15 | 44830812      | 44831210  | 399 |
| chr15 | 25380115      | 25380513  | 399 |
| chr15 | 11853116      | 11853514  | 399 |
| chr11 | 110096584     | 110096982 | 399 |
| chr11 | 14129554      | 14129952  | 399 |
| chr1  | 154781 155179 | 399       |     |
| chrX  | 68653151      | 68653548  | 398 |
| chr29 | 43420605      | 43421002  | 398 |
| chr25 | 33493822      | 33494219  | 398 |
| chr24 | 58769296      | 58769693  | 398 |
| chr19 | 7753260       | 7753657   | 398 |
| chr18 | 51590411      | 51590808  | 398 |
| chr13 | 40246782      | 40247179  | 398 |
| chr13 | 3941099       | 3941496   | 398 |
| chrX  | 59189383      | 59189779  | 397 |
| chrX  | 5710519       | 5710915   | 397 |
| chr9  | 63541007      | 63541403  | 397 |
| chr13 | 61157497      | 61157893  | 397 |
| chrX  | 316704 317099 | 396       |     |
| chr5  | 60483847      | 60484242  | 396 |
| chr4  | 124325074     | 124325469 | 396 |
| chr18 | 35339056      | 35339451  | 396 |
| chr13 | 55374304      | 55374698  | 395 |
| chrX  | 21287018      | 21287411  | 394 |
| chr19 | 59205229      | 59205622  | 394 |
| chr18 | 49494802      | 49495195  | 394 |
| chrX  | 74323481      | 74323873  | 393 |
| chrX  | 33760530      | 33760922  | 393 |

|       |               |           |      |
|-------|---------------|-----------|------|
| chr8  | 8105486       | 8105878   | 393  |
| chr7  | 17978386      | 17978778  | 393  |
| chrX  | 21650688      | 21651079  | 392  |
| chr7  | 59963400      | 59963791  | 392  |
| chrX  | 50498809      | 50499199  | 391  |
| chr5  | 10525996      | 10526386  | 391  |
| chr24 | 60754224      | 60754614  | 391  |
| chrX  | 50880040      | 50880429  | 390  |
| chr10 | 70035195      | 70035584  | 390  |
| chr23 | 10522869      | 10523255  | 387  |
| chr3  | 9188676       | 9189060   | 385  |
| chr2  | 123360827     | 123361211 | 385  |
| chr19 | 7835165       | 7835549   | 385  |
| chr9  | 104943191     | 104943574 | 384  |
| chr19 | 38934794      | 38935176  | 383  |
| chrX  | 72498831      | 72499212  | 382  |
| chr10 | 44055301      | 44055682  | 382  |
| chr5  | 118455862     | 118456242 | 381  |
| chrX  | 22538644      | 22539021  | 378  |
| chr3  | 20112853      | 20113230  | 378  |
| chr18 | 48792428      | 48792804  | 377  |
| chr26 | 44891225      | 44891600  | 376  |
| chr19 | 24048707      | 24049080  | 374  |
| chr1  | 75095704      | 75096075  | 372  |
| chr4  | 69682720      | 69683089  | 370  |
| chr24 | 49772471      | 49772840  | 370  |
| chr16 | 47095830      | 47096198  | 369  |
| chrX  | 21689385      | 21689751  | 367  |
| chr14 | 67999924      | 68000289  | 366  |
| chr12 | 32563404      | 32563765  | 362  |
| chr8  | 73409774      | 73410134  | 361  |
| chr3  | 44849023      | 44849380  | 358  |
| chr3  | 22519539      | 22519895  | 357  |
| chr16 | 47966890      | 47967243  | 354  |
| chrX  | 20900589      | 20900940  | 352  |
| chr1  | 149743927     | 149744278 | 352  |
| chr29 | 44979134      | 44979481  | 348  |
| chr15 | 15736681      | 15737018  | 338  |
| chr1  | 166472 166809 | 338       |      |
| chr9  | 90474210      | 90474546  | 337  |
| chr18 | 24309367      | 24309693  | 327  |
| chr29 | 47268643      | 47268966  | 324  |
| chr13 | 63508448      | 63508757  | 310  |
| chr13 | 69926630      | 69926936  | 307  |
| chr8  | 73877094      | 73877392  | 299  |
| chr12 | 85333017      | 85333309  | 293  |
| chr5  | 92998695      | 92998985  | 291  |
| chr16 | 46960767      | 46961050  | 284  |
| chr8  | 24428106      | 24428385  | 280  |
| chr23 | 22775517      | 22777003  | 1487 |

|       |               |           |      |
|-------|---------------|-----------|------|
| chr19 | 22335698      | 22336927  | 1230 |
| chrX  | 59475479      | 59476606  | 1128 |
| chr3  | 116021160     | 116022206 | 1047 |
| chr10 | 87481315      | 87482338  | 1024 |
| chr14 | 66256528      | 66257451  | 924  |
| chr10 | 29854444      | 29855351  | 908  |
| chr19 | 46857558      | 46858425  | 868  |
| chr6  | 18485969      | 18486791  | 823  |
| chr6  | 41997190      | 41997981  | 792  |
| chr23 | 7398110       | 7398839   | 730  |
| chrX  | 21007702      | 21008358  | 657  |
| chrX  | 58779171      | 58779770  | 600  |
| chr8  | 108758216     | 108758767 | 552  |
| chr18 | 64275126      | 64275651  | 526  |
| chr17 | 74839273      | 74839789  | 517  |
| chr3  | 127813259     | 127813753 | 495  |
| chr16 | 2121329       | 2121792   | 464  |
| chr27 | 731475 731902 | 428       |      |
| chr16 | 19556365      | 19556775  | 411  |
| chr5  | 80747050      | 80748429  | 1380 |
| chr1  | 107885375     | 107886538 | 1164 |
| chr6  | 108670482     | 108671643 | 1162 |
| chr26 | 19741752      | 19742853  | 1102 |
| chr22 | 53953962      | 53955016  | 1055 |
| chr19 | 15131938      | 15132917  | 980  |
| chrX  | 45510384      | 45511327  | 944  |
| chr26 | 44122211      | 44123129  | 919  |
| chrX  | 65690400      | 65691305  | 906  |
| chr15 | 64496447      | 64497328  | 882  |
| chr15 | 28054051      | 28054920  | 870  |
| chr3  | 23038393      | 23039247  | 855  |
| chr29 | 41855211      | 41856046  | 836  |
| chr20 | 66551622      | 66552453  | 832  |
| chr10 | 88350112      | 88350933  | 822  |
| chr13 | 70707071      | 70707878  | 808  |
| chr15 | 55179688      | 55180415  | 728  |
| chr19 | 12303236      | 12303885  | 650  |
| chr7  | 51646114      | 51646685  | 572  |
| chr25 | 363137 363663 | 527       |      |
| chrX  | 8166920       | 8167445   | 526  |
| chr13 | 78423829      | 78424354  | 526  |
| chr3  | 15651114      | 15651631  | 518  |
| chr5  | 81495708      | 81496218  | 511  |
| chr13 | 46210107      | 46210573  | 467  |
| chr10 | 18767464      | 18767900  | 437  |
| chr22 | 15045633      | 15046067  | 435  |
| chr11 | 70916551      | 70916969  | 419  |
| chr4  | 124195900     | 124196312 | 413  |
| chrX  | 13793020      | 13794663  | 1644 |
| chr21 | 32898551      | 32899652  | 1102 |

|       |               |           |      |
|-------|---------------|-----------|------|
| chr17 | 70097013      | 70097975  | 963  |
| chr29 | 48777678      | 48778487  | 810  |
| chr12 | 32011502      | 32012249  | 748  |
| chr26 | 51557254      | 51557995  | 742  |
| chr7  | 50543447      | 50544067  | 621  |
| chr29 | 34890474      | 34891090  | 617  |
| chr1  | 123094935     | 123095546 | 612  |
| chr17 | 63313489      | 63314090  | 602  |
| chr13 | 59860680      | 59861260  | 581  |
| chr15 | 51638466      | 51639035  | 570  |
| chr5  | 31267459      | 31267986  | 528  |
| chr10 | 20852184      | 20852706  | 523  |
| chr13 | 53171541      | 53172025  | 485  |
| chr17 | 70274180      | 70274605  | 426  |
| chr11 | 46063694      | 46064110  | 417  |
| chr11 | 11547013      | 11547418  | 406  |
| chr1  | 74523798      | 74525504  | 1707 |
| chr5  | 112011852     | 112013302 | 1451 |
| chr4  | 71609873      | 71611169  | 1297 |
| chr10 | 2771519       | 2772030   | 512  |
| chr7  | 51645603      | 51646096  | 494  |
| chr12 | 84952851      | 84953322  | 472  |
| chr22 | 30026023      | 30026471  | 449  |
| chrX  | 55994734      | 55995177  | 444  |
| chrX  | 49212027      | 49213083  | 1057 |
| chrX  | 6502090       | 6503077   | 988  |
| chr29 | 31974395      | 31975086  | 692  |
| chr7  | 17131072      | 17131709  | 638  |
| chr13 | 63428080      | 63428691  | 612  |
| chr14 | 209955 210505 | 551       |      |
| chrX  | 78541867      | 78542357  | 491  |
| chr16 | 60224082      | 60224565  | 484  |
| chr14 | 40116718      | 40117190  | 473  |
| chrX  | 350364 350801 | 438       |      |
| chrX  | 9480259       | 9480667   | 409  |
| chr11 | 108408979     | 108409378 | 400  |
| chr6  | 120783533     | 120784371 | 839  |
| chr11 | 70873216      | 70874035  | 820  |
| chr17 | 62020787      | 62021573  | 787  |
| chr18 | 24332187      | 24332895  | 709  |
| chr1  | 3094262       | 3094877   | 616  |
| chr15 | 73716791      | 73717316  | 526  |
| chr3  | 15396131      | 15396638  | 508  |
| chr26 | 18948954      | 18949429  | 476  |
| chr11 | 106748693     | 106749141 | 449  |
| chr6  | 115901158     | 115902155 | 998  |
| chrX  | 24576006      | 24576830  | 825  |
| chr3  | 84504912      | 84505678  | 767  |
| chr15 | 38527372      | 38528119  | 748  |
| chr11 | 98323536      | 98324247  | 712  |



|       |           |           |     |
|-------|-----------|-----------|-----|
| chr28 | 15323073  | 15323724  | 652 |
| chr21 | 58579353  | 58579933  | 581 |
| chr17 | 69212928  | 69213486  | 559 |
| chr5  | 116732500 | 116733045 | 546 |
| chr22 | 53596620  | 53597148  | 529 |
| chr25 | 35563300  | 35563777  | 478 |
| chrX  | 61353149  | 61353489  | 341 |
| chr13 | 15767245  | 15768024  | 780 |
| chrX  | 50393935  | 50394647  | 713 |
| chr10 | 70052943  | 70053599  | 657 |
| chr28 | 26764381  | 26764921  | 541 |
| chr13 | 73908868  | 73909355  | 488 |
| chrX  | 40996595  | 40997051  | 457 |
| chr17 | 56011555  | 56012429  | 875 |
| chr21 | 64863589  | 64864384  | 796 |
| chr12 | 32543368  | 32543931  | 564 |
| chr7  | 19898635  | 19899152  | 518 |
| chr29 | 26546988  | 26547406  | 419 |
| chr8  | 42398668  | 42399554  | 887 |
| chr3  | 22896075  | 22896733  | 659 |
| chr19 | 38557714  | 38558292  | 579 |
| chr9  | 106514454 | 106515029 | 576 |
| chr21 | 6563748   | 6564323   | 576 |
| chrX  | 74636105  | 74636653  | 549 |
| chrX  | 8265197   | 8265745   | 549 |
| chr14 | 63512396  | 63512942  | 547 |
| chr23 | 34950077  | 34950619  | 543 |
| chrX  | 2347289   | 2347798   | 510 |
| chr22 | 43773305  | 43773791  | 487 |
| chr16 | 40900182  | 40900648  | 467 |
| chr7  | 38682111  | 38682576  | 466 |
| chr25 | 22546492  | 22546955  | 464 |
| chr12 | 15334383  | 15334820  | 438 |
| chr7  | 84420649  | 84421085  | 437 |
| chr18 | 50031294  | 50031729  | 436 |
| chr18 | 11799522  | 11799957  | 436 |
| chrX  | 50672573  | 50672995  | 423 |
| chr1  | 101566343 | 101566755 | 413 |
| chr29 | 49313315  | 49313724  | 410 |
| chrX  | 59668861  | 59669268  | 408 |
| chr8  | 73408745  | 73409149  | 405 |
| chr3  | 17446552  | 17446956  | 405 |
| chr25 | 34422283  | 34422685  | 403 |
| chr8  | 11525953  | 11526351  | 399 |
| chr13 | 37748432  | 37748830  | 399 |
| chr18 | 24308890  | 24309281  | 392 |
| chr13 | 63384219  | 63384607  | 389 |
| chr9  | 20070176  | 20070561  | 386 |
| chr27 | 26461173  | 26461534  | 362 |
| chr11 | 41134164  | 41134514  | 351 |

|       |           |           |      |
|-------|-----------|-----------|------|
| chr21 | 58997877  | 58998207  | 331  |
| chr22 | 58568534  | 58568946  | 413  |
| chr8  | 24416661  | 24417041  | 381  |
| chrX  | 55576174  | 55576926  | 753  |
| chr26 | 8706393   | 8707155   | 763  |
| chr8  | 24440359  | 24441127  | 769  |
| chr22 | 17580577  | 17581279  | 703  |
| chr8  | 73794932  | 73795508  | 577  |
| chr29 | 40608463  | 40608886  | 424  |
| chr13 | 63478603  | 63478990  | 388  |
| chr8  | 73727907  | 73728255  | 349  |
| chr8  | 73795796  | 73796566  | 771  |
| chr8  | 24170294  | 24170837  | 544  |
| chr8  | 73783108  | 73783670  | 563  |
| chr16 | 21271692  | 21272103  | 412  |
| chr8  | 73488109  | 73488717  | 609  |
| chrX  | 6590119   | 6591129   | 1011 |
| chr9  | 91903680  | 91904600  | 921  |
| chr15 | 40950893  | 40951582  | 690  |
| chr16 | 41447632  | 41448144  | 513  |
| chr29 | 30495480  | 30496563  | 1084 |
| chr7  | 15232956  | 15233955  | 1000 |
| chr18 | 25345494  | 25346030  | 537  |
| chr18 | 56778075  | 56779183  | 1109 |
| chr29 | 1558550   | 1559557   | 1008 |
| chr8  | 76252249  | 76253223  | 975  |
| chr19 | 42260323  | 42260791  | 469  |
| chr23 | 27777709  | 27778279  | 571  |
| chr22 | 20486654  | 20487035  | 382  |
| chrX  | 20092358  | 20092771  | 414  |
| chr29 | 49325712  | 49326119  | 408  |
| chr12 | 32872299  | 32872799  | 501  |
| chr9  | 98749532  | 98749929  | 398  |
| chr7  | 51604588  | 51605292  | 705  |
| chr3  | 15966507  | 15967059  | 553  |
| chr10 | 25763861  | 25764360  | 500  |
| chr3  | 89543642  | 89546370  | 2729 |
| chr16 | 47550112  | 47552627  | 2516 |
| chr3  | 105193553 | 105195858 | 2306 |
| chr12 | 84607380  | 84609448  | 2069 |
| chr21 | 25235653  | 25237671  | 2019 |
| chr22 | 60419279  | 60421103  | 1825 |
| chr14 | 53420935  | 53422690  | 1756 |
| chr16 | 51087535  | 51089185  | 1651 |
| chr7  | 40315040  | 40316667  | 1628 |
| chr21 | 64503920  | 64505530  | 1611 |
| chr4  | 27032914  | 27034516  | 1603 |
| chrX  | 7213841   | 7215423   | 1583 |
| chrX  | 75463584  | 75465164  | 1581 |
| chr5  | 43085895  | 43087475  | 1581 |

|       |           |           |      |
|-------|-----------|-----------|------|
| chr23 | 18797969  | 18799538  | 1570 |
| chrX  | 49820725  | 49822233  | 1509 |
| chr23 | 10345320  | 10346821  | 1502 |
| chr11 | 74207890  | 74209374  | 1485 |
| chr29 | 18194397  | 18195879  | 1483 |
| chrX  | 8730135   | 8731609   | 1475 |
| chr23 | 11847408  | 11848876  | 1469 |
| chr17 | 73441289  | 73442754  | 1466 |
| chr19 | 59465851  | 59467292  | 1442 |
| chr8  | 44140792  | 44142219  | 1428 |
| chr25 | 1924560   | 1925980   | 1421 |
| chr18 | 12159654  | 12161073  | 1420 |
| chr17 | 59295783  | 59297200  | 1418 |
| chr9  | 46015271  | 46016664  | 1394 |
| chr11 | 66554968  | 66556361  | 1394 |
| chr25 | 37646440  | 37647827  | 1388 |
| chr19 | 23973249  | 23974622  | 1374 |
| chrX  | 62918418  | 62919781  | 1364 |
| chrX  | 72721893  | 72723249  | 1357 |
| chrX  | 45488455  | 45489791  | 1337 |
| chr25 | 37516285  | 37517615  | 1331 |
| chr3  | 123196312 | 123197607 | 1296 |
| chrX  | 59602288  | 59603578  | 1291 |
| chr9  | 100066508 | 100067791 | 1284 |
| chr20 | 22299657  | 22300937  | 1281 |
| chr21 | 29879140  | 29880415  | 1276 |
| chr15 | 74614828  | 74616094  | 1267 |
| chr18 | 40273213  | 40274477  | 1265 |
| chr9  | 90234720  | 90235983  | 1264 |
| chr2  | 26980345  | 26981607  | 1263 |
| chr10 | 7925695   | 7926956   | 1262 |
| chr19 | 7547485   | 7548743   | 1259 |
| chr6  | 69747832  | 69749088  | 1257 |
| chr9  | 72541185  | 72542430  | 1246 |
| chr15 | 13928050  | 13929293  | 1244 |
| chr29 | 36691221  | 36692461  | 1241 |
| chr15 | 22220190  | 22221425  | 1236 |
| chr1  | 87367632  | 87368867  | 1236 |
| chr15 | 74145149  | 74146381  | 1233 |
| chr12 | 32159173  | 32160402  | 1230 |
| chr16 | 39885185  | 39886408  | 1224 |
| chr11 | 77645641  | 77646854  | 1214 |
| chr16 | 48800467  | 48801674  | 1208 |
| chr21 | 6463251   | 6464457   | 1207 |
| chr26 | 43676528  | 43677733  | 1206 |
| chr18 | 11767861  | 11769066  | 1206 |
| chrX  | 20075643  | 20076844  | 1202 |
| chr11 | 77760625  | 77761825  | 1201 |
| chr6  | 118163199 | 118164378 | 1180 |
| chr20 | 33566000  | 33567175  | 1176 |

|       |           |           |      |
|-------|-----------|-----------|------|
| chr28 | 33493933  | 33495106  | 1174 |
| chr28 | 25493810  | 25494965  | 1156 |
| chr5  | 81601545  | 81602691  | 1147 |
| chr24 | 40608967  | 40610112  | 1146 |
| chr26 | 22179018  | 22180161  | 1144 |
| chr10 | 53468893  | 53470036  | 1144 |
| chr25 | 10600941  | 10602074  | 1134 |
| chr23 | 8463976   | 8465106   | 1131 |
| chr24 | 1199290   | 1200418   | 1129 |
| chr17 | 61282301  | 61283419  | 1119 |
| chr19 | 10937240  | 10938357  | 1118 |
| chr9  | 100049074 | 100050186 | 1113 |
| chr26 | 3126160   | 3127270   | 1111 |
| chr13 | 75659283  | 75660384  | 1102 |
| chr19 | 43637119  | 43638219  | 1101 |
| chr23 | 18065777  | 18066874  | 1098 |
| chr18 | 11698136  | 11699226  | 1091 |
| chr26 | 41538755  | 41539844  | 1090 |
| chr4  | 121420548 | 121421635 | 1088 |
| chr6  | 63164480  | 63165566  | 1087 |
| chr5  | 72152514  | 72153596  | 1083 |
| chr10 | 29537662  | 29538744  | 1083 |
| chr14 | 31019801  | 31020876  | 1076 |
| chr10 | 74847305  | 74848380  | 1076 |
| chr13 | 54550935  | 54551999  | 1065 |
| chrX  | 51649218  | 51650277  | 1060 |
| chr23 | 8289880   | 8290937   | 1058 |
| chr13 | 75668363  | 75669420  | 1058 |
| chr14 | 77342827  | 77343881  | 1055 |
| chrX  | 72269525  | 72270576  | 1052 |
| chr10 | 14999756  | 15000806  | 1051 |
| chr2  | 132439776 | 132440822 | 1047 |
| chr18 | 11801262  | 11802306  | 1045 |
| chr23 | 13407175  | 13408218  | 1044 |
| chr3  | 22532682  | 22533719  | 1038 |
| chr18 | 47693300  | 47694337  | 1038 |
| chr10 | 60556836  | 60557865  | 1030 |
| chr2  | 4928434   | 4929454   | 1021 |
| chrX  | 21862128  | 21863147  | 1020 |
| chr5  | 1176752   | 1177770   | 1019 |
| chr29 | 10041284  | 10042302  | 1019 |
| chr27 | 45279137  | 45280150  | 1014 |
| chr19 | 43191786  | 43192798  | 1013 |
| chr19 | 22564344  | 22565356  | 1013 |
| chrX  | 56723073  | 56724084  | 1012 |
| chr15 | 13523458  | 13524469  | 1012 |
| chr19 | 41262931  | 41263941  | 1011 |
| chr25 | 31840903  | 31841912  | 1010 |
| chrX  | 8431064   | 8432072   | 1009 |
| chr2  | 131473802 | 131474810 | 1009 |

|       |           |           |      |
|-------|-----------|-----------|------|
| chrX  | 12101440  | 12102447  | 1008 |
| chr4  | 74867181  | 74868186  | 1006 |
| chrX  | 34648427  | 34649425  | 999  |
| chr3  | 121883432 | 121884424 | 993  |
| chr3  | 111356164 | 111357156 | 993  |
| chr12 | 74463081  | 74464072  | 992  |
| chr22 | 50852067  | 50853056  | 990  |
| chrX  | 20366922  | 20367903  | 982  |
| chrX  | 34160474  | 34161452  | 979  |
| chr28 | 12327086  | 12328063  | 978  |
| chrX  | 73344134  | 73345109  | 976  |
| chrX  | 47466550  | 47467521  | 972  |
| chr23 | 18808168  | 18809136  | 969  |
| chr17 | 69879620  | 69880587  | 968  |
| chr22 | 58684860  | 58685826  | 967  |
| chr17 | 70406433  | 70407398  | 966  |
| chr13 | 14956381  | 14957344  | 964  |
| chr3  | 123673913 | 123674875 | 963  |
| chr7  | 51661570  | 51662525  | 956  |
| chrX  | 73487016  | 73487970  | 955  |
| chrX  | 72265964  | 72266916  | 953  |
| chr26 | 43954921  | 43955867  | 947  |
| chr3  | 24597910  | 24598855  | 946  |
| chr25 | 40404399  | 40405344  | 946  |
| chr18 | 45299370  | 45300315  | 946  |
| chr17 | 73117806  | 73118748  | 943  |
| chr23 | 27857072  | 27858004  | 933  |
| chr20 | 71867493  | 71868424  | 932  |
| chr4  | 121393212 | 121394141 | 930  |
| chr24 | 1374149   | 1375078   | 930  |
| chr3  | 55865585  | 55866513  | 929  |
| chr20 | 4902685   | 4903613   | 929  |
| chr9  | 90600591  | 90601518  | 928  |
| chr8  | 73109773  | 73110696  | 924  |
| chr19 | 45835167  | 45836090  | 924  |
| chrX  | 79852577  | 79853499  | 923  |
| chr10 | 3522064   | 3522986   | 923  |
| chr23 | 8260601   | 8261518   | 918  |
| chr22 | 29698075  | 29698991  | 917  |
| chr24 | 35139287  | 35140201  | 915  |
| chrX  | 7138936   | 7139848   | 913  |
| chr23 | 8326590   | 8327501   | 912  |
| chr19 | 45732483  | 45733393  | 911  |
| chr18 | 54047475  | 54048381  | 907  |
| chr14 | 57320235  | 57321139  | 905  |
| chrX  | 17131032  | 17131933  | 902  |
| chr7  | 19283356  | 19284255  | 900  |
| chr12 | 32148511  | 32149410  | 900  |
| chr3  | 22492982  | 22493878  | 897  |
| chr8  | 5817894   | 5818788   | 895  |

|       |           |           |     |
|-------|-----------|-----------|-----|
| chr10 | 17006709  | 17007601  | 893 |
| chr2  | 124304262 | 124305153 | 892 |
| chr2  | 111248358 | 111249244 | 887 |
| chrX  | 8236210   | 8237094   | 885 |
| chr18 | 55452688  | 55453571  | 884 |
| chr18 | 54815096  | 54815978  | 883 |
| chr10 | 70414466  | 70415347  | 882 |
| chr7  | 66720736  | 66721616  | 881 |
| chr16 | 41363649  | 41364529  | 881 |
| chr13 | 59660546  | 59661421  | 876 |
| chr26 | 48683020  | 48683894  | 875 |
| chr23 | 27901432  | 27902306  | 875 |
| chr16 | 47994047  | 47994920  | 874 |
| chr5  | 30047276  | 30048148  | 873 |
| chr2  | 139316550 | 139317422 | 873 |
| chrX  | 21584179  | 21585050  | 872 |
| chr6  | 106946041 | 106946912 | 872 |
| chr20 | 73291782  | 73292653  | 872 |
| chr16 | 67215351  | 67216221  | 871 |
| chr24 | 24720446  | 24721315  | 870 |
| chr25 | 1918606   | 1919474   | 869 |
| chr20 | 6832485   | 6833351   | 867 |
| chr17 | 70030945  | 70031811  | 867 |
| chr11 | 82844144  | 82845010  | 867 |
| chrX  | 30642285  | 30643148  | 864 |
| chr24 | 1217480   | 1218342   | 863 |
| chrX  | 49838684  | 49839545  | 862 |
| chr2  | 26455413  | 26456272  | 860 |
| chr13 | 77731305  | 77732161  | 857 |
| chr20 | 74736829  | 74737684  | 856 |
| chr19 | 56549273  | 56550127  | 855 |
| chr7  | 45250418  | 45251271  | 854 |
| chr7  | 18842093  | 18842945  | 853 |
| chr3  | 36839904  | 36840756  | 853 |
| chr15 | 25564430  | 25565281  | 852 |
| chr18 | 11488248  | 11489098  | 851 |
| chr6  | 69105841  | 69106688  | 848 |
| chr19 | 54337174  | 54338020  | 847 |
| chr22 | 60363003  | 60363848  | 846 |
| chrX  | 13639232  | 13640072  | 841 |
| chr3  | 122286576 | 122287415 | 840 |
| chr13 | 37659816  | 37660655  | 840 |
| chr7  | 19218563  | 19219401  | 839 |
| chr3  | 113476854 | 113477692 | 839 |
| chr16 | 3711537   | 3712375   | 839 |
| chr7  | 42499756  | 42500591  | 836 |
| chr10 | 67101474  | 67102308  | 835 |
| chr3  | 123623337 | 123624169 | 833 |
| chr9  | 77671578  | 77672409  | 832 |
| chr8  | 72613953  | 72614784  | 832 |

|       |           |           |     |
|-------|-----------|-----------|-----|
| chrX  | 7183050   | 7183878   | 829 |
| chr3  | 22890118  | 22890946  | 829 |
| chr3  | 116166138 | 116166965 | 828 |
| chr7  | 17132228  | 17133053  | 826 |
| chr18 | 11796225  | 11797050  | 826 |
| chr13 | 75694268  | 75695092  | 825 |
| chr8  | 59308936  | 59309756  | 821 |
| chr4  | 122667000 | 122667819 | 820 |
| chr18 | 9806072   | 9806890   | 819 |
| chr17 | 63939486  | 63940304  | 819 |
| chr17 | 72897632  | 72898449  | 818 |
| chr20 | 22410850  | 22411666  | 817 |
| chr25 | 1055811   | 1056626   | 816 |
| chr18 | 35343154  | 35343967  | 814 |
| chr15 | 75257158  | 75257971  | 814 |
| chr8  | 61897671  | 61898482  | 812 |
| chr29 | 33077642  | 33078453  | 812 |
| chr3  | 33808681  | 33809490  | 810 |
| chr18 | 13574777  | 13575586  | 810 |
| chr19 | 39558155  | 39558959  | 805 |
| chr17 | 65966387  | 65967191  | 805 |
| chrX  | 8910412   | 8911215   | 804 |
| chr16 | 61521946  | 61522749  | 804 |
| chr7  | 19221115  | 19221917  | 803 |
| chr16 | 34183308  | 34184110  | 803 |
| chr23 | 30684481  | 30685282  | 802 |
| chrX  | 8553718   | 8554516   | 799 |
| chr4  | 118626301 | 118627099 | 799 |
| chr21 | 52053180  | 52053978  | 799 |
| chr26 | 8709010   | 8709806   | 797 |
| chr4  | 47450378  | 47451173  | 796 |
| chr13 | 77655569  | 77656363  | 795 |
| chr11 | 83221601  | 83222395  | 795 |
| chr7  | 10824397  | 10825189  | 793 |
| chr3  | 106517039 | 106517827 | 789 |
| chrX  | 50492234  | 50493020  | 787 |
| chr7  | 1885422   | 1886207   | 786 |
| chr17 | 49521979  | 49522764  | 786 |
| chr22 | 30261357  | 30262141  | 785 |
| chr13 | 35961956  | 35962740  | 785 |
| chr15 | 25634824  | 25635607  | 784 |
| chr12 | 14752462  | 14753245  | 784 |
| chr16 | 47260889  | 47261671  | 783 |
| chr2  | 124232466 | 124233245 | 780 |
| chrX  | 59449694  | 59450470  | 777 |
| chrX  | 40696020  | 40696795  | 776 |
| chr4  | 123014735 | 123015510 | 776 |
| chr22 | 9611421   | 9612192   | 772 |
| chr18 | 11423510  | 11424281  | 772 |
| chr18 | 55019175  | 55019944  | 770 |

|       |           |           |     |
|-------|-----------|-----------|-----|
| chrX  | 78503655  | 78504422  | 768 |
| chr3  | 125199474 | 125200240 | 767 |
| chr3  | 46955296  | 46956062  | 767 |
| chr27 | 27697746  | 27698512  | 767 |
| chr15 | 22321568  | 22322334  | 767 |
| chr12 | 15433222  | 15433988  | 767 |
| chr10 | 16927379  | 16928145  | 767 |
| chr8  | 108775320 | 108776084 | 765 |
| chr5  | 111682285 | 111683049 | 765 |
| chr11 | 77870910  | 77871674  | 765 |
| chr19 | 26946317  | 26947080  | 764 |
| chr18 | 56877323  | 56878085  | 763 |
| chr22 | 5686214   | 5686975   | 762 |
| chrX  | 35599994  | 35600754  | 761 |
| chr5  | 120502290 | 120503049 | 760 |
| chr5  | 60385312  | 60386070  | 759 |
| chr28 | 14102128  | 14102885  | 758 |
| chr24 | 59558143  | 59558900  | 758 |
| chr12 | 22969560  | 22970316  | 757 |
| chr3  | 85366530  | 85367285  | 756 |
| chr29 | 9235634   | 9236388   | 755 |
| chr13 | 60432835  | 60433589  | 755 |
| chr10 | 88054842  | 88055596  | 755 |
| chr21 | 61628220  | 61628973  | 754 |
| chr11 | 2262768   | 2263521   | 754 |
| chr6  | 106832789 | 106833541 | 753 |
| chr12 | 84217091  | 84217843  | 753 |
| chr29 | 18198881  | 18199632  | 752 |
| chr19 | 56560500  | 56561251  | 752 |
| chr3  | 23074168  | 23074917  | 750 |
| chr15 | 29746371  | 29747120  | 750 |
| chr5  | 111292391 | 111293139 | 749 |
| chr12 | 84233254  | 84234001  | 748 |
| chr23 | 15965366  | 15966112  | 747 |
| chr19 | 12317746  | 12318491  | 746 |
| chrX  | 8170039   | 8170783   | 745 |
| chr3  | 26144701  | 26145445  | 745 |
| chr2  | 99674467  | 99675211  | 745 |
| chrX  | 69077531  | 69078274  | 744 |
| chr11 | 77843123  | 77843863  | 741 |
| chrX  | 8555049   | 8555788   | 740 |
| chr26 | 35199122  | 35199861  | 740 |
| chr7  | 17323404  | 17324142  | 739 |
| chr5  | 60890094  | 60890832  | 739 |
| chr28 | 42534036  | 42534774  | 739 |
| chrX  | 39028258  | 39028995  | 738 |
| chr19 | 60132327  | 60133064  | 738 |
| chr27 | 39227582  | 39228318  | 737 |
| chr21 | 32841324  | 32842060  | 737 |
| chr16 | 40566404  | 40567139  | 736 |



|       |               |           |     |
|-------|---------------|-----------|-----|
| chr21 | 13683103      | 13683837  | 735 |
| chr16 | 67445469      | 67446203  | 735 |
| chr6  | 121869235     | 121869967 | 733 |
| chr19 | 37864304      | 37865036  | 733 |
| chrX  | 857927 858658 | 732       |     |
| chr21 | 24358571      | 24359302  | 732 |
| chr3  | 125707573     | 125708303 | 731 |
| chr18 | 11370290      | 11371019  | 730 |
| chr15 | 39999388      | 40000117  | 730 |
| chr21 | 34629808      | 34630536  | 729 |
| chrX  | 55206821      | 55207548  | 728 |
| chr20 | 33206309      | 33207036  | 728 |
| chr17 | 47086376      | 47087103  | 728 |
| chrX  | 11475919      | 11476644  | 726 |
| chr22 | 50745027      | 50745751  | 725 |
| chr17 | 70524324      | 70525047  | 724 |
| chrX  | 6400255       | 6400976   | 722 |
| chr18 | 12122077      | 12122797  | 721 |
| chr16 | 23644496      | 23645216  | 721 |
| chr11 | 2386938       | 2387658   | 721 |
| chr13 | 68897204      | 68897923  | 720 |
| chr8  | 65076723      | 65077440  | 718 |
| chr18 | 54209349      | 54210066  | 718 |
| chr7  | 42181054      | 42181770  | 717 |
| chr26 | 17853312      | 17854028  | 717 |
| chr16 | 77486217      | 77486933  | 717 |
| chrX  | 56940546      | 56941260  | 715 |
| chr8  | 26041613      | 26042327  | 715 |
| chr19 | 23561435      | 23562149  | 715 |
| chr16 | 75226182      | 75226896  | 715 |
| chr10 | 57346726      | 57347439  | 714 |
| chr14 | 30885507      | 30886219  | 713 |
| chr27 | 44653894      | 44654605  | 712 |
| chr17 | 15955301      | 15956012  | 712 |
| chr8  | 74073367      | 74074077  | 711 |
| chr29 | 33586421      | 33587131  | 711 |
| chr11 | 49410723      | 49411433  | 711 |
| chr18 | 22931731      | 22932440  | 710 |
| chr10 | 16744102      | 16744811  | 710 |
| chrX  | 7640698       | 7641406   | 709 |
| chr28 | 33870209      | 33870917  | 709 |
| chr22 | 58441199      | 58441907  | 709 |
| chrX  | 10960538      | 10961245  | 708 |
| chr25 | 4707707       | 4708413   | 707 |
| chr13 | 80404565      | 80405271  | 707 |
| chr9  | 26758604      | 26759309  | 706 |
| chrX  | 6723134       | 6723837   | 704 |
| chr23 | 17162068      | 17162771  | 704 |
| chr3  | 10572080      | 10572780  | 701 |
| chr15 | 29669707      | 29670407  | 701 |

|       |               |           |     |
|-------|---------------|-----------|-----|
| chr10 | 53278214      | 53278914  | 701 |
| chrX  | 59594295      | 59594994  | 700 |
| chr13 | 59434945      | 59435644  | 700 |
| chr13 | 58265767      | 58266466  | 700 |
| chr1  | 82887009      | 82887708  | 700 |
| chr18 | 62213527      | 62214225  | 699 |
| chr7  | 46158521      | 46159218  | 698 |
| chr20 | 27303156      | 27303853  | 698 |
| chr11 | 10298427      | 10299124  | 698 |
| chr29 | 44749542      | 44750237  | 696 |
| chr18 | 53195258      | 53195953  | 696 |
| chr1  | 68926994      | 68927687  | 694 |
| chr25 | 40239473      | 40240164  | 692 |
| chr23 | 43311430      | 43312121  | 692 |
| chr5  | 76198472      | 76199162  | 691 |
| chr25 | 40217765      | 40218455  | 691 |
| chr11 | 93644380      | 93645070  | 691 |
| chr8  | 64535183      | 64535872  | 690 |
| chr22 | 56468238      | 56468927  | 690 |
| chr14 | 63510018      | 63510707  | 690 |
| chr18 | 11695767      | 11696455  | 689 |
| chr23 | 7455407       | 7456094   | 688 |
| chr18 | 53273291      | 53273978  | 688 |
| chr9  | 90293288      | 90293972  | 685 |
| chr15 | 24194666      | 24195350  | 685 |
| chr29 | 896078 896761 | 684       |     |
| chr18 | 12134194      | 12134877  | 684 |
| chr18 | 33655112      | 33655794  | 683 |
| chr16 | 77310375      | 77311057  | 683 |
| chrX  | 7401685       | 7402366   | 682 |
| chr22 | 55861658      | 55862339  | 682 |
| chr4  | 72728516      | 72729196  | 681 |
| chr2  | 99671210      | 99671890  | 681 |
| chr19 | 24688528      | 24689207  | 680 |
| chrX  | 19021176      | 19021854  | 679 |
| chr28 | 4792059       | 4792737   | 679 |
| chr13 | 60022086      | 60022762  | 677 |
| chr13 | 73436641      | 73437314  | 674 |
| chr25 | 2801281       | 2801952   | 672 |
| chr19 | 39459382      | 39460053  | 672 |
| chr29 | 46011865      | 46012535  | 671 |
| chr26 | 44577564      | 44578233  | 670 |
| chrX  | 65070686      | 65071354  | 669 |
| chr12 | 32950407      | 32951075  | 669 |
| chr5  | 122831827     | 122832494 | 668 |
| chr12 | 32192508      | 32193175  | 668 |
| chr25 | 22261575      | 22262240  | 666 |
| chr18 | 23154384      | 23155048  | 665 |
| chrX  | 75877381      | 75878044  | 664 |
| chr29 | 37104941      | 37105604  | 664 |

|       |               |           |     |
|-------|---------------|-----------|-----|
| chr20 | 74957544      | 74958205  | 662 |
| chr19 | 58162719      | 58163380  | 662 |
| chr26 | 17889454      | 17890114  | 661 |
| chr21 | 13901035      | 13901695  | 661 |
| chr25 | 40828851      | 40829510  | 660 |
| chrX  | 21197150      | 21197808  | 659 |
| chrX  | 36446955      | 36447612  | 658 |
| chr22 | 56607334      | 56607991  | 658 |
| chr21 | 31662160      | 31662817  | 658 |
| chrX  | 21204321      | 21204977  | 657 |
| chr4  | 98890879      | 98891535  | 657 |
| chr20 | 627570 628226 | 657       |     |
| chr2  | 139322269     | 139322925 | 657 |
| chr18 | 44052592      | 44053248  | 657 |
| chr11 | 104282598     | 104283254 | 657 |
| chr9  | 105771048     | 105771703 | 656 |
| chr11 | 81348636      | 81349290  | 655 |
| chr13 | 77746912      | 77747565  | 654 |
| chrX  | 77745171      | 77745823  | 653 |
| chr14 | 5904307       | 5904959   | 653 |
| chrX  | 18372557      | 18373208  | 652 |
| chr21 | 32954141      | 32954792  | 652 |
| chr25 | 29427453      | 29428103  | 651 |
| chr18 | 11802978      | 11803628  | 651 |
| chr11 | 2263856       | 2264505   | 650 |
| chr23 | 7063163       | 7063810   | 648 |
| chr14 | 9206226       | 9206873   | 648 |
| chr13 | 34814116      | 34814763  | 648 |
| chr9  | 45713484      | 45714130  | 647 |
| chr13 | 41539448      | 41540094  | 647 |
| chr13 | 56027788      | 56028433  | 646 |
| chr9  | 90824743      | 90825387  | 645 |
| chr5  | 80240658      | 80241302  | 645 |
| chr18 | 39920180      | 39920824  | 645 |
| chr11 | 82897396      | 82898040  | 645 |
| chr7  | 14368598      | 14369241  | 644 |
| chrX  | 48020967      | 48021609  | 643 |
| chr23 | 11366100      | 11366742  | 643 |
| chr5  | 101585876     | 101586517 | 642 |
| chr2  | 140618029     | 140618670 | 642 |
| chr2  | 128464723     | 128465363 | 641 |
| chr18 | 45992775      | 45993415  | 641 |
| chr1  | 128115207     | 128115847 | 641 |
| chr3  | 8747745       | 8748384   | 640 |
| chr19 | 56569372      | 56570011  | 640 |
| chr11 | 100742418     | 100743057 | 640 |
| chr10 | 35480004      | 35480641  | 638 |
| chrX  | 29973610      | 29974246  | 637 |
| chr21 | 13654959      | 13655595  | 637 |
| chr17 | 70048237      | 70048873  | 637 |

|       |           |           |     |
|-------|-----------|-----------|-----|
| chr23 | 9456734   | 9457369   | 636 |
| chr11 | 104489552 | 104490187 | 636 |
| chrX  | 78749319  | 78749953  | 635 |
| chr4  | 107201387 | 107202021 | 635 |
| chrX  | 61388711  | 61389344  | 634 |
| chr9  | 90408770  | 90409403  | 634 |
| chr29 | 12614871  | 12615504  | 634 |
| chr11 | 70893143  | 70893775  | 633 |
| chr3  | 33017109  | 33017740  | 632 |
| chr23 | 27761645  | 27762276  | 632 |
| chr12 | 83400655  | 83401285  | 631 |
| chr17 | 15144059  | 15144688  | 630 |
| chr10 | 86288595  | 86289224  | 630 |
| chrX  | 19829933  | 19830561  | 629 |
| chr29 | 31626773  | 31627401  | 629 |
| chr12 | 28978815  | 28979443  | 629 |
| chr15 | 51634566  | 51635193  | 628 |
| chrX  | 15695009  | 15695635  | 627 |
| chr7  | 18552536  | 18553162  | 627 |
| chr23 | 31154588  | 31155214  | 627 |
| chr22 | 32758673  | 32759298  | 626 |
| chr17 | 60887291  | 60887916  | 626 |
| chr14 | 61305429  | 61306053  | 625 |
| chr14 | 40047150  | 40047774  | 625 |
| chr22 | 59422503  | 59423126  | 624 |
| chr12 | 68175954  | 68176577  | 624 |
| chr19 | 61500872  | 61501493  | 622 |
| chr15 | 26788230  | 26788851  | 622 |
| chr11 | 106236094 | 106236714 | 621 |
| chrX  | 50700233  | 50700852  | 620 |
| chr21 | 61840439  | 61841058  | 620 |
| chr19 | 21743495  | 21744114  | 620 |
| chr17 | 65981109  | 65981728  | 620 |
| chrX  | 72831886  | 72832504  | 619 |
| chr20 | 5042526   | 5043143   | 618 |
| chrX  | 58753035  | 58753650  | 616 |
| chr21 | 69095693  | 69096308  | 616 |
| chr13 | 55507999  | 55508614  | 616 |
| chr1  | 150078093 | 150078708 | 616 |
| chr23 | 42397531  | 42398145  | 615 |
| chr19 | 59095323  | 59095937  | 615 |
| chr18 | 14681991  | 14682605  | 615 |
| chr16 | 44302481  | 44303095  | 615 |
| chr13 | 35579224  | 35579838  | 615 |
| chr3  | 56538384  | 56538997  | 614 |
| chr19 | 32590576  | 32591189  | 614 |
| chr10 | 74920331  | 74920943  | 613 |
| chrX  | 6981936   | 6982547   | 612 |
| chr3  | 71420739  | 71421350  | 612 |
| chr20 | 8563861   | 8564472   | 612 |

|       |               |           |     |
|-------|---------------|-----------|-----|
| chr18 | 52758539      | 52759150  | 612 |
| chr1  | 8745400       | 8746009   | 610 |
| chr10 | 12872293      | 12872901  | 609 |
| chr8  | 65409642      | 65410249  | 608 |
| chr26 | 37875507      | 37876114  | 608 |
| chr6  | 121870093     | 121870699 | 607 |
| chr19 | 62001527      | 62002133  | 607 |
| chr18 | 49478539      | 49479144  | 606 |
| chr17 | 72392215      | 72392820  | 606 |
| chr11 | 44964699      | 44965303  | 605 |
| chr5  | 10611647      | 10612250  | 604 |
| chr15 | 13592082      | 13592685  | 604 |
| chr18 | 9383409       | 9384011   | 603 |
| chr16 | 38983714      | 38984316  | 603 |
| chr26 | 42127532      | 42128133  | 602 |
| chr7  | 5115413       | 5116013   | 601 |
| chr26 | 22801053      | 22801653  | 601 |
| chr2  | 41313920      | 41314520  | 601 |
| chr17 | 67964897      | 67965497  | 601 |
| chr10 | 8699740       | 8700340   | 601 |
| chr7  | 44047295      | 44047894  | 600 |
| chr3  | 113076561     | 113077159 | 599 |
| chr22 | 59676412      | 59677010  | 599 |
| chr13 | 80636741      | 80637339  | 599 |
| chr11 | 21623953      | 21624551  | 599 |
| chrX  | 59259607      | 59260204  | 598 |
| chrX  | 9245530       | 9246127   | 598 |
| chr18 | 707041 707638 |           | 598 |
| chr3  | 106550444     | 106551040 | 597 |
| chr20 | 649408 650004 |           | 597 |
| chr19 | 39105903      | 39106499  | 597 |
| chr11 | 96395500      | 96396096  | 597 |
| chrX  | 67755486      | 67756081  | 596 |
| chr4  | 117617733     | 117618327 | 595 |
| chr22 | 39831915      | 39832505  | 591 |
| chr2  | 119950130     | 119950720 | 591 |
| chr13 | 42410083      | 42410673  | 591 |
| chr18 | 10833522      | 10834111  | 590 |
| chr17 | 68600728      | 68601317  | 590 |
| chr10 | 11413752      | 11414341  | 590 |
| chrX  | 7618064       | 7618651   | 588 |
| chr29 | 1788909       | 1789495   | 587 |
| chr13 | 65070127      | 65070713  | 587 |
| chr10 | 19634020      | 19634606  | 587 |
| chrX  | 45685108      | 45685693  | 586 |
| chr25 | 39261284      | 39261869  | 586 |
| chr18 | 64322211      | 64322795  | 585 |
| chr9  | 90610455      | 90611038  | 584 |
| chr24 | 1722418       | 1723001   | 584 |
| chr13 | 41546022      | 41546604  | 583 |

|       |           |           |     |
|-------|-----------|-----------|-----|
| chr11 | 105649730 | 105650312 | 583 |
| chr5  | 30151084  | 30151665  | 582 |
| chr7  | 45100276  | 45100856  | 581 |
| chrX  | 75815425  | 75816004  | 580 |
| chr29 | 34381919  | 34382498  | 580 |
| chr22 | 50601221  | 50601800  | 580 |
| chr22 | 60654111  | 60654689  | 579 |
| chr6  | 120866867 | 120867444 | 578 |
| chrX  | 62549720  | 62550296  | 577 |
| chr11 | 29137113  | 29137689  | 577 |
| chr6  | 121783152 | 121783727 | 576 |
| chr4  | 53161446  | 53162021  | 576 |
| chr8  | 73752808  | 73753382  | 575 |
| chr25 | 34532979  | 34533553  | 575 |
| chr23 | 27297879  | 27298453  | 575 |
| chr2  | 136896636 | 136897210 | 575 |
| chr18 | 11368036  | 11368610  | 575 |
| chr17 | 62210712  | 62211286  | 575 |
| chr5  | 116334868 | 116335440 | 573 |
| chr17 | 69852495  | 69853067  | 573 |
| chr1  | 100630639 | 100631211 | 573 |
| chrX  | 48196410  | 48196981  | 572 |
| chr18 | 11283175  | 11283746  | 572 |
| chrX  | 49352516  | 49353086  | 571 |
| chr1  | 74731626  | 74732196  | 571 |
| chr6  | 118652109 | 118652677 | 569 |
| chr3  | 105458930 | 105459498 | 569 |
| chr13 | 59997590  | 59998158  | 569 |
| chr3  | 36952273  | 36952840  | 568 |
| chr3  | 30435731  | 30436298  | 568 |
| chr29 | 48797019  | 48797586  | 568 |
| chr12 | 19774581  | 19775148  | 568 |
| chrX  | 78648298  | 78648864  | 567 |
| chr22 | 50780817  | 50781383  | 567 |
| chrX  | 78427224  | 78427789  | 566 |
| chr24 | 64990039  | 64990604  | 566 |
| chr21 | 5982848   | 5983413   | 566 |
| chr13 | 23636415  | 23636980  | 566 |
| chr11 | 77785400  | 77785965  | 566 |
| chrX  | 8354675   | 8355239   | 565 |
| chrX  | 61303062  | 61303625  | 564 |
| chr16 | 70167316  | 70167879  | 564 |
| chr17 | 63106477  | 63107039  | 563 |
| chrX  | 77115187  | 77115748  | 562 |
| chr16 | 41448387  | 41448948  | 562 |
| chr2  | 26841897  | 26842457  | 561 |
| chr14 | 1978455   | 1979015   | 561 |
| chrX  | 59504059  | 59504618  | 560 |
| chrX  | 21329624  | 21330183  | 560 |
| chrX  | 7439163   | 7439722   | 560 |

|       |               |           |     |
|-------|---------------|-----------|-----|
| chr19 | 43135846      | 43136405  | 560 |
| chr17 | 63497955      | 63498514  | 560 |
| chrX  | 62465080      | 62465638  | 559 |
| chr14 | 79857742      | 79858300  | 559 |
| chrX  | 441096 441653 | 558       |     |
| chr22 | 16355087      | 16355644  | 558 |
| chr11 | 70857179      | 70857736  | 558 |
| chrX  | 65641783      | 65642339  | 557 |
| chrX  | 21889785      | 21890340  | 556 |
| chr12 | 20795240      | 20795795  | 556 |
| chr7  | 42928168      | 42928722  | 555 |
| chr6  | 118656818     | 118657372 | 555 |
| chrX  | 50539016      | 50539569  | 554 |
| chr11 | 105976024     | 105976577 | 554 |
| chrX  | 75908972      | 75909523  | 552 |
| chr6  | 73198986      | 73199536  | 551 |
| chr25 | 34342381      | 34342931  | 551 |
| chr23 | 16042049      | 16042599  | 551 |
| chr2  | 140624167     | 140624717 | 551 |
| chr4  | 110811223     | 110811772 | 550 |
| chr3  | 114924373     | 114924922 | 550 |
| chr20 | 29965573      | 29966122  | 550 |
| chrX  | 55304425      | 55304973  | 549 |
| chr17 | 18510731      | 18511279  | 549 |
| chr14 | 21253109      | 21253657  | 549 |
| chrX  | 45491615      | 45492162  | 548 |
| chr3  | 34796077      | 34796624  | 548 |
| chr26 | 18295922      | 18296469  | 548 |
| chr19 | 59170323      | 59170870  | 548 |
| chr6  | 119556907     | 119557453 | 547 |
| chr17 | 49127331      | 49127876  | 546 |
| chr16 | 77720033      | 77720578  | 546 |
| chr9  | 77701051      | 77701595  | 545 |
| chr4  | 91483549      | 91484093  | 545 |
| chr3  | 16929093      | 16929637  | 545 |
| chrX  | 71436361      | 71436904  | 544 |
| chrX  | 55408240      | 55408783  | 544 |
| chr24 | 60870209      | 60870752  | 544 |
| chr2  | 132445222     | 132445765 | 544 |
| chr29 | 46272753      | 46273295  | 543 |
| chr19 | 42307411      | 42307953  | 543 |
| chr14 | 41734501      | 41735043  | 543 |
| chr5  | 71676432      | 71676973  | 542 |
| chr17 | 69751770      | 69752311  | 542 |
| chrX  | 2926475       | 2927015   | 541 |
| chr26 | 44757857      | 44758397  | 541 |
| chrX  | 58472155      | 58472694  | 540 |
| chr20 | 8754299       | 8754838   | 540 |
| chr11 | 84106670      | 84107209  | 540 |
| chrX  | 59384907      | 59385445  | 539 |

|       |               |           |     |
|-------|---------------|-----------|-----|
| chr7  | 46199956      | 46200494  | 539 |
| chr18 | 50190417      | 50190955  | 539 |
| chr25 | 38097543      | 38098080  | 538 |
| chr5  | 29959830      | 29960366  | 537 |
| chr26 | 45309579      | 45310115  | 537 |
| chr24 | 59589181      | 59589717  | 537 |
| chr13 | 76561860      | 76562396  | 537 |
| chr13 | 59705787      | 59706323  | 537 |
| chr15 | 62556917      | 62557452  | 536 |
| chr13 | 40830005      | 40830540  | 536 |
| chr12 | 17315307      | 17315842  | 536 |
| chrX  | 22431319      | 22431853  | 535 |
| chr9  | 52975860      | 52976394  | 535 |
| chr16 | 77707284      | 77707818  | 535 |
| chr11 | 13165059      | 13165593  | 535 |
| chr4  | 121392244     | 121392777 | 534 |
| chr25 | 23190743      | 23191274  | 532 |
| chr19 | 56477259      | 56477790  | 532 |
| chr17 | 73184900      | 73185431  | 532 |
| chrX  | 37458840      | 37459370  | 531 |
| chr1  | 144517682     | 144518212 | 531 |
| chr18 | 11840680      | 11841209  | 530 |
| chrX  | 53983755      | 53984283  | 529 |
| chr7  | 5386425       | 5386953   | 529 |
| chr20 | 6627083       | 6627611   | 529 |
| chrX  | 46622098      | 46622624  | 527 |
| chr13 | 52090394      | 52090920  | 527 |
| chr11 | 77745007      | 77745532  | 526 |
| chrX  | 19877302      | 19877826  | 525 |
| chr29 | 17815643      | 17816167  | 525 |
| chr16 | 68517906      | 68518430  | 525 |
| chr8  | 861407 861929 | 523       |     |
| chr11 | 20497525      | 20498047  | 523 |
| chrX  | 12535871      | 12536391  | 521 |
| chr23 | 52652367      | 52652887  | 521 |
| chr2  | 122887110     | 122887630 | 521 |
| chr3  | 30725410      | 30725929  | 520 |
| chr11 | 89050193      | 89050712  | 520 |
| chr9  | 52406529      | 52407047  | 519 |
| chr19 | 39902642      | 39903160  | 519 |
| chr11 | 254244 254762 | 519       |     |
| chr23 | 45985931      | 45986448  | 518 |
| chr17 | 69727182      | 69727699  | 518 |
| chrX  | 65424626      | 65425142  | 517 |
| chrX  | 12528509      | 12529025  | 517 |
| chr5  | 31229146      | 31229662  | 517 |
| chr26 | 5869680       | 5870196   | 517 |
| chr21 | 32944046      | 32944562  | 517 |
| chr20 | 73270252      | 73270768  | 517 |
| chrX  | 7012188       | 7012703   | 516 |



|       |           |           |     |
|-------|-----------|-----------|-----|
| chr26 | 23520774  | 23521289  | 516 |
| chr21 | 68914682  | 68915197  | 516 |
| chr12 | 31593625  | 31594140  | 516 |
| chr26 | 20241457  | 20241971  | 515 |
| chr25 | 2026993   | 2027507   | 515 |
| chr21 | 27441511  | 27442025  | 515 |
| chr21 | 20230297  | 20230811  | 515 |
| chr10 | 16885308  | 16885822  | 515 |
| chr19 | 12127310  | 12127823  | 514 |
| chr13 | 59763511  | 59764024  | 514 |
| chr15 | 70502056  | 70502568  | 513 |
| chrX  | 2410642   | 2411153   | 512 |
| chr5  | 115049970 | 115050481 | 512 |
| chr3  | 123221801 | 123222312 | 512 |
| chr13 | 41136314  | 41136825  | 512 |
| chr13 | 40538231  | 40538742  | 512 |
| chr17 | 76292813  | 76293323  | 511 |
| chr11 | 108409490 | 108410000 | 511 |
| chrX  | 59665899  | 59666408  | 510 |
| chrX  | 35793121  | 35793630  | 510 |
| chrX  | 7503624   | 7504133   | 510 |
| chr23 | 15932903  | 15933412  | 510 |
| chrX  | 63037236  | 63037744  | 509 |
| chrX  | 55017089  | 55017597  | 509 |
| chr29 | 42907297  | 42907805  | 509 |
| chr13 | 75683306  | 75683814  | 509 |
| chr3  | 22669198  | 22669705  | 508 |
| chr29 | 47914451  | 47914958  | 508 |
| chrX  | 21936689  | 21937195  | 507 |
| chr4  | 69320618  | 69321124  | 507 |
| chr16 | 77318767  | 77319273  | 507 |
| chr3  | 111896941 | 111897446 | 506 |
| chr23 | 44425722  | 44426227  | 506 |
| chr11 | 81407442  | 81407947  | 506 |
| chrX  | 3716484   | 3716988   | 505 |
| chr22 | 48926725  | 48927229  | 505 |
| chrX  | 50954279  | 50954782  | 504 |
| chr21 | 69055213  | 69055716  | 504 |
| chr29 | 46521224  | 46521726  | 503 |
| chr28 | 41024074  | 41024576  | 503 |
| chr24 | 22047467  | 22047969  | 503 |
| chr3  | 106515896 | 106516397 | 502 |
| chr2  | 92317467  | 92317967  | 501 |
| chr18 | 11686160  | 11686660  | 501 |
| chrX  | 75268272  | 75268771  | 500 |
| chrX  | 68206883  | 68207382  | 500 |
| chr5  | 32846714  | 32847213  | 500 |
| chrX  | 12262241  | 12262739  | 499 |
| chr3  | 115095248 | 115095746 | 499 |
| chr29 | 36735097  | 36735595  | 499 |

|       |           |           |     |
|-------|-----------|-----------|-----|
| chr19 | 41233121  | 41233619  | 499 |
| chr24 | 40263012  | 40263509  | 498 |
| chr9  | 70494499  | 70494995  | 497 |
| chr23 | 7424245   | 7424741   | 497 |
| chr19 | 43235524  | 43236020  | 497 |
| chr1  | 113625471 | 113625967 | 497 |
| chrX  | 50649155  | 50649650  | 496 |
| chr27 | 38623625  | 38624120  | 496 |
| chr19 | 44176437  | 44176932  | 496 |
| chr19 | 15894250  | 15894745  | 496 |
| chr15 | 24961616  | 24962111  | 496 |
| chr11 | 12872731  | 12873226  | 496 |
| chrX  | 50216053  | 50216547  | 495 |
| chr5  | 79192275  | 79192769  | 495 |
| chr29 | 25565927  | 25566421  | 495 |
| chrX  | 78589932  | 78590425  | 494 |
| chrX  | 65487085  | 65487578  | 494 |
| chrX  | 78302664  | 78303156  | 493 |
| chr3  | 125627946 | 125628438 | 493 |
| chr15 | 27278814  | 27279306  | 493 |
| chr25 | 1304944   | 1305435   | 492 |
| chr12 | 82212786  | 82213277  | 492 |
| chr1  | 75100285  | 75100776  | 492 |
| chr18 | 57612161  | 57612651  | 491 |
| chr13 | 29036109  | 29036599  | 491 |
| chr1  | 85641181  | 85641671  | 491 |
| chrX  | 63051715  | 63052204  | 490 |
| chrX  | 37620637  | 37621126  | 490 |
| chrX  | 18733691  | 18734180  | 490 |
| chr5  | 71539212  | 71539701  | 490 |
| chr24 | 41781111  | 41781600  | 490 |
| chr19 | 47265291  | 47265780  | 490 |
| chr18 | 53550206  | 53550695  | 490 |
| chrX  | 65003310  | 65003798  | 489 |
| chrX  | 54227992  | 54228480  | 489 |
| chr3  | 119483841 | 119484329 | 489 |
| chr18 | 50853140  | 50853628  | 489 |
| chrX  | 50843944  | 50844431  | 488 |
| chr7  | 71373903  | 71374390  | 488 |
| chr19 | 32700747  | 32701234  | 488 |
| chr17 | 53518484  | 53518971  | 488 |
| chrX  | 7807633   | 7808119   | 487 |
| chr9  | 66038923  | 66039408  | 486 |
| chr3  | 15181061  | 15181546  | 486 |
| chr20 | 70568111  | 70568596  | 486 |
| chr12 | 32091096  | 32091581  | 486 |
| chr10 | 84416670  | 84417155  | 486 |
| chr3  | 119960889 | 119961373 | 485 |
| chr15 | 28276031  | 28276515  | 485 |
| chrX  | 60045879  | 60046362  | 484 |

|       |           |           |     |
|-------|-----------|-----------|-----|
| chr10 | 16427111  | 16427594  | 484 |
| chrX  | 35680598  | 35681080  | 483 |
| chrX  | 62579591  | 62580072  | 482 |
| chrX  | 61172695  | 61173176  | 482 |
| chr5  | 114240850 | 114241331 | 482 |
| chr26 | 49307010  | 49307491  | 482 |
| chr23 | 27875249  | 27875730  | 482 |
| chrX  | 22567711  | 22568191  | 481 |
| chr8  | 74380531  | 74381011  | 481 |
| chr17 | 72653784  | 72654264  | 481 |
| chr1  | 152631579 | 152632059 | 481 |
| chr1  | 84687029  | 84687509  | 481 |
| chr7  | 81255166  | 81255645  | 480 |
| chr19 | 49637993  | 49638472  | 480 |
| chr17 | 56049094  | 56049573  | 480 |
| chr15 | 25732982  | 25733460  | 479 |
| chrX  | 21166422  | 21166898  | 477 |
| chrX  | 19394651  | 19395127  | 477 |
| chr14 | 6951889   | 6952365   | 477 |
| chr1  | 137871853 | 137872329 | 477 |
| chrX  | 59313099  | 59313574  | 476 |
| chr29 | 35158134  | 35158609  | 476 |
| chr27 | 28119092  | 28119567  | 476 |
| chr22 | 33360155  | 33360630  | 476 |
| chr13 | 80581197  | 80581672  | 476 |
| chrX  | 72153506  | 72153980  | 475 |
| chr6  | 63069345  | 63069819  | 475 |
| chr25 | 4635063   | 4635537   | 475 |
| chr5  | 28994872  | 28995345  | 474 |
| chr26 | 11608298  | 11608771  | 474 |
| chr18 | 54553169  | 54553642  | 474 |
| chr17 | 68400645  | 68401118  | 474 |
| chr13 | 66020380  | 66020853  | 474 |
| chr24 | 60823711  | 60824183  | 473 |
| chr21 | 7145500   | 7145972   | 473 |
| chr19 | 59345613  | 59346085  | 473 |
| chr15 | 55636716  | 55637188  | 473 |
| chrX  | 19462410  | 19462881  | 472 |
| chr5  | 81496270  | 81496741  | 472 |
| chr15 | 29671607  | 29672078  | 472 |
| chr1  | 144386964 | 144387435 | 472 |
| chr4  | 71879131  | 71879601  | 471 |
| chr3  | 118067740 | 118068210 | 471 |
| chr23 | 31127556  | 31128026  | 471 |
| chr2  | 134969559 | 134970029 | 471 |
| chr2  | 54403932  | 54404402  | 471 |
| chr10 | 7183476   | 7183946   | 471 |
| chr1  | 132012948 | 132013418 | 471 |
| chr9  | 100221080 | 100221549 | 470 |
| chr27 | 44652169  | 44652638  | 470 |

|       |           |           |     |
|-------|-----------|-----------|-----|
| chr17 | 61075113  | 61075582  | 470 |
| chr16 | 47514355  | 47514824  | 470 |
| chrX  | 75760432  | 75760900  | 469 |
| chrX  | 59326726  | 59327194  | 469 |
| chrX  | 7777707   | 7778175   | 469 |
| chr23 | 32785011  | 32785479  | 469 |
| chr19 | 7532906   | 7533374   | 469 |
| chr14 | 7861577   | 7862045   | 469 |
| chr29 | 36953831  | 36954298  | 468 |
| chr18 | 4850974   | 4851441   | 468 |
| chrX  | 21059056  | 21059522  | 467 |
| chr29 | 33594740  | 33595206  | 467 |
| chr19 | 41961827  | 41962293  | 467 |
| chrX  | 7905065   | 7905530   | 466 |
| chr7  | 61016559  | 61017024  | 466 |
| chr5  | 30157497  | 30157962  | 466 |
| chr2  | 136618207 | 136618672 | 466 |
| chr19 | 46472953  | 46473418  | 466 |
| chr14 | 62328276  | 62328741  | 466 |
| chr5  | 26715680  | 26716144  | 465 |
| chr11 | 90413112  | 90413576  | 465 |
| chrX  | 7396111   | 7396574   | 464 |
| chr7  | 38221770  | 38222233  | 464 |
| chr18 | 50724246  | 50724709  | 464 |
| chr12 | 82829679  | 82830142  | 464 |
| chr10 | 74721526  | 74721989  | 464 |
| chrX  | 73488183  | 73488645  | 463 |
| chrX  | 58742863  | 58743325  | 463 |
| chr19 | 13510872  | 13511334  | 463 |
| chr8  | 65921402  | 65921863  | 462 |
| chr6  | 122166263 | 122166724 | 462 |
| chr3  | 121835199 | 121835660 | 462 |
| chr29 | 49107416  | 49107877  | 462 |
| chrX  | 20471150  | 20471610  | 461 |
| chr18 | 48374689  | 48375149  | 461 |
| chrX  | 57832619  | 57833078  | 460 |
| chrX  | 34070380  | 34070839  | 460 |
| chrX  | 58758891  | 58759349  | 459 |
| chrX  | 50715073  | 50715531  | 459 |
| chr9  | 67285146  | 67285604  | 459 |
| chr28 | 40378615  | 40379073  | 459 |
| chrX  | 47641415  | 47641872  | 458 |
| chr28 | 11375872  | 11376329  | 458 |
| chr19 | 7546496   | 7546953   | 458 |
| chr14 | 61132435  | 61132892  | 458 |
| chr14 | 21774383  | 21774840  | 458 |
| chrX  | 40424732  | 40425188  | 457 |
| chrX  | 7336526   | 7336982   | 457 |
| chr26 | 22296646  | 22297102  | 457 |
| chr11 | 49596675  | 49597131  | 457 |

|       |           |           |     |
|-------|-----------|-----------|-----|
| chrX  | 80401494  | 80401949  | 456 |
| chr2  | 21515571  | 21516026  | 456 |
| chr8  | 7607708   | 7608162   | 455 |
| chr5  | 10432262  | 10432716  | 455 |
| chr3  | 122341901 | 122342355 | 455 |
| chr26 | 51591986  | 51592440  | 455 |
| chr18 | 47701681  | 47702135  | 455 |
| chr16 | 2256579   | 2257033   | 455 |
| chr11 | 100685877 | 100686331 | 455 |
| chr2  | 134080606 | 134081059 | 454 |
| chr18 | 53239114  | 53239567  | 454 |
| chr16 | 47208474  | 47208927  | 454 |
| chr15 | 70502905  | 70503358  | 454 |
| chr13 | 23646769  | 23647222  | 454 |
| chrX  | 73194899  | 73195351  | 453 |
| chrX  | 13798539  | 13798991  | 453 |
| chr2  | 24719276  | 24719728  | 453 |
| chr18 | 56814744  | 56815196  | 453 |
| chr15 | 54489493  | 54489945  | 453 |
| chr11 | 28493709  | 28494161  | 453 |
| chrX  | 71042337  | 71042788  | 452 |
| chrX  | 59376002  | 59376453  | 452 |
| chrX  | 37439703  | 37440154  | 452 |
| chrX  | 34412542  | 34412993  | 452 |
| chrX  | 31218963  | 31219414  | 452 |
| chr24 | 60826181  | 60826632  | 452 |
| chr24 | 1576882   | 1577333   | 452 |
| chr22 | 30197530  | 30197981  | 452 |
| chr20 | 70810868  | 70811319  | 452 |
| chr19 | 54365761  | 54366212  | 452 |
| chr18 | 49959100  | 49959551  | 452 |
| chr10 | 61474726  | 61475177  | 452 |
| chr5  | 81509102  | 81509552  | 451 |
| chr3  | 123676863 | 123677313 | 451 |
| chr25 | 2076778   | 2077228   | 451 |
| chrX  | 65255582  | 65256031  | 450 |
| chrX  | 50754893  | 50755342  | 450 |
| chr6  | 121059830 | 121060279 | 450 |
| chr2  | 68154351  | 68154800  | 450 |
| chrX  | 72499400  | 72499848  | 449 |
| chrX  | 47771527  | 47771975  | 449 |
| chrX  | 20540305  | 20540753  | 449 |
| chrX  | 9290303   | 9290751   | 449 |
| chr22 | 50032000  | 50032448  | 449 |
| chr19 | 46706572  | 46707020  | 449 |
| chr17 | 63412305  | 63412753  | 449 |
| chrX  | 56911318  | 56911765  | 448 |
| chr7  | 4519601   | 4520048   | 448 |
| chr26 | 22808411  | 22808858  | 448 |
| chr23 | 32871915  | 32872362  | 448 |

|       |           |           |     |
|-------|-----------|-----------|-----|
| chr2  | 21517942  | 21518389  | 448 |
| chr17 | 70177212  | 70177659  | 448 |
| chr13 | 76198675  | 76199122  | 448 |
| chr28 | 26916760  | 26917206  | 447 |
| chr26 | 34246731  | 34247177  | 447 |
| chr13 | 60704988  | 60705434  | 447 |
| chr12 | 84144001  | 84144447  | 447 |
| chrX  | 21202622  | 21203067  | 446 |
| chrX  | 8079996   | 8080441   | 446 |
| chr29 | 34916705  | 34917150  | 446 |
| chr27 | 26468707  | 26469152  | 446 |
| chr26 | 42230644  | 42231089  | 446 |
| chr21 | 20664061  | 20664506  | 446 |
| chr19 | 39175856  | 39176301  | 446 |
| chr7  | 50545182  | 50545626  | 445 |
| chr4  | 117966400 | 117966844 | 445 |
| chr22 | 54392114  | 54392558  | 445 |
| chr21 | 47523331  | 47523775  | 445 |
| chr21 | 6556719   | 6557163   | 445 |
| chr16 | 74044229  | 74044673  | 445 |
| chr12 | 82310804  | 82311248  | 445 |
| chr11 | 90303685  | 90304129  | 445 |
| chr24 | 5109763   | 5110206   | 444 |
| chr2  | 131274328 | 131274771 | 444 |
| chrX  | 76081594  | 76082036  | 443 |
| chrX  | 13663182  | 13663624  | 443 |
| chr17 | 70165938  | 70166380  | 443 |
| chrX  | 58767655  | 58768096  | 442 |
| chr9  | 98298878  | 98299319  | 442 |
| chr3  | 127658308 | 127658749 | 442 |
| chr19 | 61873758  | 61874199  | 442 |
| chr16 | 41469093  | 41469534  | 442 |
| chr12 | 74563548  | 74563989  | 442 |
| chr1  | 131392247 | 131392688 | 442 |
| chr8  | 27064962  | 27065402  | 441 |
| chr13 | 57582787  | 57583227  | 441 |
| chr11 | 11703592  | 11704032  | 441 |
| chr6  | 46687559  | 46687998  | 440 |
| chr5  | 30199131  | 30199570  | 440 |
| chr23 | 30531337  | 30531776  | 440 |
| chr13 | 77401366  | 77401805  | 440 |
| chrX  | 58827902  | 58828340  | 439 |
| chr3  | 22912834  | 22913272  | 439 |
| chr28 | 42169900  | 42170338  | 439 |
| chr28 | 34176469  | 34176907  | 439 |
| chr19 | 17857777  | 17858215  | 439 |
| chr13 | 59438397  | 59438835  | 439 |
| chr6  | 122429286 | 122429723 | 438 |
| chr25 | 30979067  | 30979504  | 438 |
| chrX  | 78493811  | 78494247  | 437 |

|       |               |           |     |
|-------|---------------|-----------|-----|
| chr4  | 123046123     | 123046559 | 437 |
| chr26 | 22280742      | 22281178  | 437 |
| chr24 | 187281 187717 | 437       |     |
| chr13 | 43418787      | 43419223  | 437 |
| chr12 | 34070704      | 34071140  | 437 |
| chr9  | 22764054      | 22764489  | 436 |
| chr4  | 79048343      | 79048778  | 436 |
| chr26 | 37938294      | 37938729  | 436 |
| chr18 | 10781965      | 10782400  | 436 |
| chr11 | 14168865      | 14169300  | 436 |
| chrX  | 65113385      | 65113819  | 435 |
| chrX  | 62717503      | 62717937  | 435 |
| chr5  | 29128380      | 29128814  | 435 |
| chr24 | 1216346       | 1216780   | 435 |
| chr12 | 32605306      | 32605740  | 435 |
| chr7  | 20624077      | 20624510  | 434 |
| chr11 | 81756660      | 81757093  | 434 |
| chrX  | 75998155      | 75998587  | 433 |
| chrX  | 35624776      | 35625208  | 433 |
| chr3  | 11562889      | 11563321  | 433 |
| chrX  | 50416500      | 50416931  | 432 |
| chrX  | 49787524      | 49787955  | 432 |
| chr24 | 58904780      | 58905211  | 432 |
| chr17 | 68404774      | 68405205  | 432 |
| chrX  | 53269214      | 53269644  | 431 |
| chr21 | 34024947      | 34025377  | 431 |
| chr2  | 131255649     | 131256079 | 431 |
| chr14 | 61570730      | 61571160  | 431 |
| chrX  | 71712420      | 71712849  | 430 |
| chrX  | 19123773      | 19124202  | 430 |
| chr15 | 24514067      | 24514496  | 430 |
| chrX  | 57141472      | 57141900  | 429 |
| chr3  | 123903021     | 123903449 | 429 |
| chr28 | 33800580      | 33801008  | 429 |
| chr27 | 46069907      | 46070335  | 429 |
| chr2  | 25683770      | 25684198  | 429 |
| chrX  | 6681539       | 6681966   | 428 |
| chr4  | 43279504      | 43279931  | 428 |
| chr22 | 56468954      | 56469381  | 428 |
| chr13 | 28534094      | 28534521  | 428 |
| chrX  | 65634374      | 65634800  | 427 |
| chr4  | 66657332      | 66657758  | 427 |
| chr21 | 57974388      | 57974814  | 427 |
| chr16 | 43025036      | 43025462  | 427 |
| chr14 | 13383828      | 13384254  | 427 |
| chrX  | 70821130      | 70821555  | 426 |
| chrX  | 54100903      | 54101328  | 426 |
| chr7  | 62386430      | 62386855  | 426 |
| chr3  | 116422561     | 116422986 | 426 |
| chr26 | 21888897      | 21889322  | 426 |

|       |           |           |     |
|-------|-----------|-----------|-----|
| chrX  | 12041350  | 12041774  | 425 |
| chr29 | 33414106  | 33414530  | 425 |
| chr13 | 70211401  | 70211825  | 425 |
| chr11 | 100422357 | 100422781 | 425 |
| chrX  | 60434322  | 60434745  | 424 |
| chrX  | 60372945  | 60373368  | 424 |
| chrX  | 53602089  | 53602512  | 424 |
| chrX  | 36901332  | 36901755  | 424 |
| chr19 | 46779401  | 46779824  | 424 |
| chr18 | 33630487  | 33630910  | 424 |
| chr17 | 63396893  | 63397316  | 424 |
| chr17 | 12588795  | 12589218  | 424 |
| chr13 | 40824418  | 40824841  | 424 |
| chr11 | 47280100  | 47280523  | 424 |
| chr5  | 108712017 | 108712439 | 423 |
| chr28 | 41334370  | 41334792  | 423 |
| chr27 | 4196117   | 4196539   | 423 |
| chr24 | 1593235   | 1593657   | 423 |
| chr20 | 75496985  | 75497407  | 423 |
| chr2  | 130295711 | 130296133 | 423 |
| chr19 | 10886357  | 10886779  | 423 |
| chr13 | 77201050  | 77201472  | 423 |
| chr13 | 41222550  | 41222972  | 423 |
| chr6  | 118829386 | 118829807 | 422 |
| chr3  | 105722265 | 105722686 | 422 |
| chr23 | 18065327  | 18065748  | 422 |
| chr15 | 44885488  | 44885909  | 422 |
| chr24 | 40817861  | 40818281  | 421 |
| chr23 | 32685778  | 32686198  | 421 |
| chr17 | 69499909  | 69500329  | 421 |
| chr14 | 8174396   | 8174816   | 421 |
| chrX  | 54339817  | 54340236  | 420 |
| chr5  | 121346366 | 121346785 | 420 |
| chr29 | 18323176  | 18323595  | 420 |
| chr25 | 40888627  | 40889046  | 420 |
| chr11 | 100884199 | 100884618 | 420 |
| chrX  | 12979631  | 12980049  | 419 |
| chr9  | 91904827  | 91905245  | 419 |
| chr5  | 75018517  | 75018935  | 419 |
| chr5  | 31351663  | 31352081  | 419 |
| chr3  | 15178173  | 15178591  | 419 |
| chr18 | 45845425  | 45845843  | 419 |
| chr11 | 66561106  | 66561524  | 419 |
| chrX  | 74495035  | 74495452  | 418 |
| chrX  | 6583344   | 6583761   | 418 |
| chr5  | 113266374 | 113266791 | 418 |
| chr25 | 22685069  | 22685486  | 418 |
| chr14 | 43698827  | 43699244  | 418 |
| chr13 | 59391662  | 59392079  | 418 |
| chr23 | 52651453  | 52651869  | 417 |



|       |           |           |     |
|-------|-----------|-----------|-----|
| chr22 | 48239887  | 48240303  | 417 |
| chr2  | 23187777  | 23188193  | 417 |
| chr19 | 13489492  | 13489908  | 417 |
| chr18 | 48345577  | 48345993  | 417 |
| chrX  | 3157270   | 3157685   | 416 |
| chr7  | 14489182  | 14489597  | 416 |
| chr26 | 20981685  | 20982100  | 416 |
| chr23 | 38014456  | 38014871  | 416 |
| chr23 | 17573581  | 17573996  | 416 |
| chr19 | 39282311  | 39282726  | 416 |
| chr18 | 54348882  | 54349297  | 416 |
| chr13 | 70284162  | 70284577  | 416 |
| chr9  | 37888421  | 37888835  | 415 |
| chr25 | 44055152  | 44055566  | 415 |
| chr21 | 20003808  | 20004222  | 415 |
| chrX  | 71842753  | 71843166  | 414 |
| chr8  | 114967190 | 114967603 | 414 |
| chr5  | 32914755  | 32915168  | 414 |
| chr4  | 106973486 | 106973899 | 414 |
| chr28 | 41788255  | 41788668  | 414 |
| chr26 | 5889044   | 5889457   | 414 |
| chr19 | 42457767  | 42458180  | 414 |
| chr16 | 2122900   | 2123313   | 414 |
| chr1  | 149231282 | 149231695 | 414 |
| chr7  | 15620145  | 15620557  | 413 |
| chr23 | 31198603  | 31199015  | 413 |
| chr18 | 38537765  | 38538177  | 413 |
| chr11 | 28548278  | 28548690  | 413 |
| chrX  | 30927553  | 30927964  | 412 |
| chr9  | 26589356  | 26589767  | 412 |
| chr7  | 2536931   | 2537342   | 412 |
| chr5  | 46574388  | 46574799  | 412 |
| chr29 | 37071586  | 37071997  | 412 |
| chr15 | 53902059  | 53902470  | 412 |
| chr1  | 67586360  | 67586771  | 412 |
| chr5  | 60374433  | 60374843  | 411 |
| chr3  | 110664620 | 110665030 | 411 |
| chr21 | 33077596  | 33078006  | 411 |
| chr19 | 58714003  | 58714413  | 411 |
| chr18 | 62025713  | 62026123  | 411 |
| chr10 | 35958753  | 35959163  | 411 |
| chr8  | 46166343  | 46166752  | 410 |
| chr8  | 10471222  | 10471631  | 410 |
| chr8  | 1625198   | 1625607   | 410 |
| chr29 | 47346871  | 47347280  | 410 |
| chr23 | 31140153  | 31140562  | 410 |
| chr17 | 64109718  | 64110127  | 410 |
| chr11 | 106003342 | 106003751 | 410 |
| chr10 | 36369468  | 36369877  | 410 |
| chrX  | 72610895  | 72611303  | 409 |

|       |               |           |     |
|-------|---------------|-----------|-----|
| chrX  | 72325834      | 72326242  | 409 |
| chrX  | 63966590      | 63966998  | 409 |
| chr3  | 127883083     | 127883491 | 409 |
| chr19 | 39555693      | 39556101  | 409 |
| chr15 | 73311393      | 73311801  | 409 |
| chr13 | 40586866      | 40587274  | 409 |
| chr1  | 74555771      | 74556179  | 409 |
| chrX  | 73361818      | 73362225  | 408 |
| chr5  | 60373753      | 60374160  | 408 |
| chr4  | 121485883     | 121486290 | 408 |
| chr24 | 40515759      | 40516166  | 408 |
| chr23 | 17499056      | 17499463  | 408 |
| chr22 | 57373617      | 57374024  | 408 |
| chr18 | 52828943      | 52829350  | 408 |
| chr18 | 22726959      | 22727366  | 408 |
| chr14 | 34051787      | 34052194  | 408 |
| chr11 | 106240624     | 106241031 | 408 |
| chrX  | 10130680      | 10131086  | 407 |
| chr3  | 55849868      | 55850274  | 407 |
| chr26 | 44382860      | 44383266  | 407 |
| chr21 | 6557343       | 6557749   | 407 |
| chr12 | 32170977      | 32171383  | 407 |
| chrX  | 30829770      | 30830175  | 406 |
| chr29 | 9518467       | 9518872   | 406 |
| chr25 | 34028344      | 34028749  | 406 |
| chr15 | 75661628      | 75662033  | 406 |
| chr10 | 104828324     | 104828729 | 406 |
| chrX  | 77464314      | 77464718  | 405 |
| chrX  | 72872905      | 72873309  | 405 |
| chrX  | 22599096      | 22599500  | 405 |
| chrX  | 7221787       | 7222191   | 405 |
| chr29 | 49534297      | 49534701  | 405 |
| chr25 | 28068048      | 28068452  | 405 |
| chr23 | 31443557      | 31443961  | 405 |
| chr23 | 19614443      | 19614847  | 405 |
| chr17 | 70456908      | 70457312  | 405 |
| chrX  | 55224484      | 55224887  | 404 |
| chrX  | 45734930      | 45735333  | 404 |
| chr9  | 84269847      | 84270250  | 404 |
| chr4  | 14628080      | 14628483  | 404 |
| chr3  | 35481317      | 35481720  | 404 |
| chr18 | 49925628      | 49926031  | 404 |
| chr15 | 63686852      | 63687255  | 404 |
| chr14 | 1947890       | 1948293   | 404 |
| chr10 | 59976234      | 59976637  | 404 |
| chrX  | 62587208      | 62587610  | 403 |
| chrX  | 713529 713931 | 403       |     |
| chr9  | 70966196      | 70966598  | 403 |
| chr5  | 113622698     | 113623100 | 403 |
| chr29 | 37063414      | 37063816  | 403 |

|       |           |           |     |
|-------|-----------|-----------|-----|
| chr21 | 57465254  | 57465656  | 403 |
| chr2  | 123712306 | 123712708 | 403 |
| chr19 | 46697690  | 46698092  | 403 |
| chr19 | 23099767  | 23100169  | 403 |
| chr18 | 11753967  | 11754369  | 403 |
| chr15 | 83916450  | 83916852  | 403 |
| chr13 | 41221582  | 41221984  | 403 |
| chr13 | 33317873  | 33318275  | 403 |
| chr8  | 87110622  | 87111023  | 402 |
| chr6  | 107499838 | 107500239 | 402 |
| chr6  | 4027087   | 4027488   | 402 |
| chr3  | 22234033  | 22234434  | 402 |
| chr21 | 67770214  | 67770615  | 402 |
| chr19 | 44156622  | 44157023  | 402 |
| chr19 | 38667136  | 38667537  | 402 |
| chr17 | 66529621  | 66530022  | 402 |
| chr10 | 90261279  | 90261680  | 402 |
| chr10 | 70351348  | 70351749  | 402 |
| chrX  | 75045367  | 75045767  | 401 |
| chrX  | 65769695  | 65770095  | 401 |
| chr29 | 51164977  | 51165377  | 401 |
| chr20 | 35137310  | 35137710  | 401 |
| chr18 | 22693950  | 22694350  | 401 |
| chr17 | 69814746  | 69815146  | 401 |
| chr15 | 24411690  | 24412090  | 401 |
| chr13 | 75513263  | 75513663  | 401 |
| chr13 | 25181238  | 25181638  | 401 |
| chr11 | 107181190 | 107181590 | 401 |
| chrX  | 21215618  | 21216017  | 400 |
| chrX  | 8266949   | 8267348   | 400 |
| chrX  | 8206749   | 8207148   | 400 |
| chr6  | 57814600  | 57814999  | 400 |
| chr4  | 95804154  | 95804553  | 400 |
| chr3  | 110218849 | 110219248 | 400 |
| chr3  | 24596748  | 24597147  | 400 |
| chr24 | 59418881  | 59419280  | 400 |
| chr19 | 39049378  | 39049777  | 400 |
| chr19 | 23778835  | 23779234  | 400 |
| chr18 | 11264614  | 11265013  | 400 |
| chr15 | 74655702  | 74656101  | 400 |
| chr13 | 40495450  | 40495849  | 400 |
| chrX  | 79828684  | 79829082  | 399 |
| chrX  | 75968425  | 75968823  | 399 |
| chrX  | 74459899  | 74460297  | 399 |
| chrX  | 65537365  | 65537763  | 399 |
| chrX  | 65082118  | 65082516  | 399 |
| chrX  | 65012045  | 65012443  | 399 |
| chrX  | 61843863  | 61844261  | 399 |
| chrX  | 61301419  | 61301817  | 399 |
| chrX  | 60267241  | 60267639  | 399 |

|       |           |           |     |
|-------|-----------|-----------|-----|
| chrX  | 56865655  | 56866053  | 399 |
| chrX  | 56399523  | 56399921  | 399 |
| chrX  | 55153102  | 55153500  | 399 |
| chrX  | 53896050  | 53896448  | 399 |
| chrX  | 53835345  | 53835743  | 399 |
| chrX  | 53470739  | 53471137  | 399 |
| chrX  | 47164469  | 47164867  | 399 |
| chrX  | 45598525  | 45598923  | 399 |
| chrX  | 19097476  | 19097874  | 399 |
| chrX  | 13727855  | 13728253  | 399 |
| chr9  | 59379326  | 59379724  | 399 |
| chr8  | 24444246  | 24444644  | 399 |
| chr7  | 4499442   | 4499840   | 399 |
| chr5  | 118358401 | 118358799 | 399 |
| chr5  | 112785250 | 112785648 | 399 |
| chr5  | 82889832  | 82890230  | 399 |
| chr5  | 79240714  | 79241112  | 399 |
| chr5  | 70638710  | 70639108  | 399 |
| chr5  | 28347216  | 28347614  | 399 |
| chr5  | 10727831  | 10728229  | 399 |
| chr4  | 117999418 | 117999816 | 399 |
| chr3  | 123672746 | 123673144 | 399 |
| chr3  | 119661450 | 119661848 | 399 |
| chr3  | 115762484 | 115762882 | 399 |
| chr3  | 110732667 | 110733065 | 399 |
| chr3  | 24445865  | 24446263  | 399 |
| chr3  | 22650976  | 22651374  | 399 |
| chr29 | 51824808  | 51825206  | 399 |
| chr29 | 48893704  | 48894102  | 399 |
| chr29 | 48846334  | 48846732  | 399 |
| chr29 | 34911218  | 34911616  | 399 |
| chr29 | 34888084  | 34888482  | 399 |
| chr29 | 31856094  | 31856492  | 399 |
| chr28 | 34026294  | 34026692  | 399 |
| chr27 | 29128305  | 29128703  | 399 |
| chr26 | 38528765  | 38529163  | 399 |
| chr26 | 38285467  | 38285865  | 399 |
| chr25 | 34506659  | 34507057  | 399 |
| chr25 | 15314398  | 15314796  | 399 |
| chr24 | 58646474  | 58646872  | 399 |
| chr24 | 48555944  | 48556342  | 399 |
| chr24 | 29709794  | 29710192  | 399 |
| chr24 | 3948569   | 3948967   | 399 |
| chr23 | 43082046  | 43082444  | 399 |
| chr23 | 15949101  | 15949499  | 399 |
| chr23 | 15788886  | 15789284  | 399 |
| chr22 | 7560404   | 7560802   | 399 |
| chr21 | 67763760  | 67764158  | 399 |
| chr21 | 65545254  | 65545652  | 399 |
| chr21 | 64453013  | 64453411  | 399 |

|       |               |           |     |
|-------|---------------|-----------|-----|
| chr21 | 27789942      | 27790340  | 399 |
| chr21 | 26297407      | 26297805  | 399 |
| chr21 | 13651430      | 13651828  | 399 |
| chr20 | 74777318      | 74777716  | 399 |
| chr20 | 74445643      | 74446041  | 399 |
| chr20 | 1214335       | 1214733   | 399 |
| chr2  | 139113456     | 139113854 | 399 |
| chr2  | 139111010     | 139111408 | 399 |
| chr2  | 30963998      | 30964396  | 399 |
| chr19 | 11081383      | 11081781  | 399 |
| chr18 | 56784860      | 56785258  | 399 |
| chr18 | 51076671      | 51077069  | 399 |
| chr18 | 34822638      | 34823036  | 399 |
| chr18 | 24345258      | 24345656  | 399 |
| chr18 | 23611103      | 23611501  | 399 |
| chr18 | 19010760      | 19011158  | 399 |
| chr18 | 11647706      | 11648104  | 399 |
| chr18 | 11252673      | 11253071  | 399 |
| chr17 | 47356110      | 47356508  | 399 |
| chr16 | 75232392      | 75232790  | 399 |
| chr16 | 60776342      | 60776740  | 399 |
| chr16 | 47043213      | 47043611  | 399 |
| chr15 | 75266289      | 75266687  | 399 |
| chr14 | 52502240      | 52502638  | 399 |
| chr14 | 32874910      | 32875308  | 399 |
| chr14 | 7633440       | 7633838   | 399 |
| chr13 | 77419415      | 77419813  | 399 |
| chr13 | 59823313      | 59823711  | 399 |
| chr13 | 42465556      | 42465954  | 399 |
| chr13 | 35342801      | 35343199  | 399 |
| chr12 | 9120415       | 9120813   | 399 |
| chr11 | 77559033      | 77559431  | 399 |
| chr11 | 66546091      | 66546489  | 399 |
| chr11 | 63318696      | 63319094  | 399 |
| chr11 | 23134688      | 23135086  | 399 |
| chr11 | 5356797       | 5357195   | 399 |
| chr10 | 85895231      | 85895629  | 399 |
| chr10 | 17018189      | 17018587  | 399 |
| chr10 | 5303852       | 5304250   | 399 |
| chr1  | 63804633      | 63805031  | 399 |
| chrX  | 19336972      | 19337369  | 398 |
| chr28 | 33466488      | 33466885  | 398 |
| chr20 | 679655 680052 |           | 398 |
| chr18 | 48775537      | 48775934  | 398 |
| chr15 | 34282041      | 34282438  | 398 |
| chrX  | 20295487      | 20295883  | 397 |
| chr7  | 50476516      | 50476912  | 397 |
| chr5  | 33565534      | 33565930  | 397 |
| chr27 | 856606 857002 |           | 397 |
| chr24 | 60940690      | 60941086  | 397 |

|       |           |           |     |
|-------|-----------|-----------|-----|
| chr23 | 15875150  | 15875546  | 397 |
| chr21 | 20009014  | 20009410  | 397 |
| chr18 | 49810735  | 49811131  | 397 |
| chr11 | 102858310 | 102858706 | 397 |
| chr10 | 17631540  | 17631936  | 397 |
| chrX  | 13523518  | 13523913  | 396 |
| chr4  | 101662339 | 101662734 | 396 |
| chr19 | 42339413  | 42339808  | 396 |
| chr17 | 56096087  | 56096482  | 396 |
| chrX  | 80411328  | 80411722  | 395 |
| chrX  | 21041837  | 21042231  | 395 |
| chrX  | 7210597   | 7210991   | 395 |
| chr25 | 3386353   | 3386747   | 395 |
| chr13 | 58632265  | 58632659  | 395 |
| chr10 | 33927515  | 33927909  | 395 |
| chr10 | 32471696  | 32472090  | 395 |
| chr7  | 60990281  | 60990674  | 394 |
| chr6  | 108666164 | 108666557 | 394 |
| chr19 | 46144730  | 46145123  | 394 |
| chr8  | 82914524  | 82914916  | 393 |
| chr14 | 16509750  | 16510142  | 393 |
| chrX  | 54690480  | 54690871  | 392 |
| chr21 | 28965614  | 28966005  | 392 |
| chr17 | 70073763  | 70074154  | 392 |
| chr15 | 29020953  | 29021344  | 392 |
| chr21 | 20149876  | 20150266  | 391 |
| chr19 | 58351827  | 58352217  | 391 |
| chr19 | 38833382  | 38833772  | 391 |
| chrX  | 30237559  | 30237948  | 390 |
| chrX  | 8222525   | 8222914   | 390 |
| chr23 | 17509844  | 17510233  | 390 |
| chrX  | 5159170   | 5159558   | 389 |
| chr11 | 100901342 | 100901730 | 389 |
| chrX  | 21053017  | 21053404  | 388 |
| chrX  | 20760436  | 20760823  | 388 |
| chr3  | 36958837  | 36959224  | 388 |
| chr2  | 128438635 | 128439022 | 388 |
| chr4  | 117039449 | 117039835 | 387 |
| chr4  | 8811655   | 8812041   | 387 |
| chr3  | 126943159 | 126943545 | 387 |
| chr28 | 11381781  | 11382167  | 387 |
| chr24 | 31243777  | 31244162  | 386 |
| chr21 | 16050556  | 16050940  | 385 |
| chr21 | 60376625  | 60377008  | 384 |
| chr12 | 61893601  | 61893984  | 384 |
| chr12 | 20089314  | 20089697  | 384 |
| chr12 | 17227362  | 17227745  | 384 |
| chr3  | 113408889 | 113409271 | 383 |
| chr21 | 27141000  | 27141382  | 383 |
| chrX  | 20458597  | 20458978  | 382 |

|       |           |           |     |
|-------|-----------|-----------|-----|
| chr27 | 45271124  | 45271505  | 382 |
| chr19 | 59409975  | 59410356  | 382 |
| chrX  | 75196931  | 75197311  | 381 |
| chr21 | 60695157  | 60695533  | 377 |
| chr26 | 5698520   | 5698895   | 376 |
| chr1  | 152253423 | 152253797 | 375 |
| chr24 | 46847575  | 46847948  | 374 |
| chr3  | 99339725  | 99340097  | 373 |
| chr25 | 3059230   | 3059602   | 373 |
| chr26 | 37097224  | 37097594  | 371 |
| chr12 | 33834775  | 33835145  | 371 |
| chr3  | 105401225 | 105401594 | 370 |
| chr25 | 40053451  | 40053820  | 370 |
| chr18 | 23607502  | 23607871  | 370 |
| chrX  | 9610273   | 9610640   | 368 |
| chrX  | 41089447  | 41089813  | 367 |
| chr6  | 120829762 | 120830128 | 367 |
| chr10 | 90925662  | 90926028  | 367 |
| chr13 | 58626950  | 58627314  | 365 |
| chr3  | 55985455  | 55985818  | 364 |
| chr23 | 18676682  | 18677045  | 364 |
| chr21 | 28165823  | 28166185  | 363 |
| chr12 | 31027772  | 31028133  | 362 |
| chr5  | 46371251  | 46371610  | 360 |
| chr15 | 32664601  | 32664958  | 358 |
| chrX  | 60139658  | 60140014  | 357 |
| chr8  | 24232212  | 24232568  | 357 |
| chr5  | 31270252  | 31270608  | 357 |
| chr29 | 2416236   | 2416592   | 357 |
| chr18 | 51536405  | 51536760  | 356 |
| chr14 | 7852608   | 7852963   | 356 |
| chr13 | 55081190  | 55081542  | 353 |
| chr22 | 30361606  | 30361957  | 352 |
| chr11 | 47420095  | 47420445  | 351 |
| chr20 | 8309298   | 8309647   | 350 |
| chr13 | 77595078  | 77595426  | 349 |
| chr9  | 78766737  | 78767084  | 348 |
| chr13 | 40918937  | 40919284  | 348 |
| chr3  | 113981502 | 113981843 | 342 |
| chrX  | 55994302  | 55994642  | 341 |
| chr13 | 70030880  | 70031219  | 340 |
| chr1  | 50453726  | 50454065  | 340 |
| chr29 | 31634613  | 31634950  | 338 |
| chr24 | 43565407  | 43565744  | 338 |
| chr7  | 51605425  | 51605758  | 334 |
| chr19 | 42974073  | 42974406  | 334 |
| chr2  | 131749657 | 131749985 | 329 |
| chr26 | 12198758  | 12199084  | 327 |
| chr11 | 70856736  | 70857057  | 322 |
| chr9  | 106840221 | 106840539 | 319 |

|       |           |           |      |
|-------|-----------|-----------|------|
| chr16 | 71567535  | 71567852  | 318  |
| chr2  | 127214810 | 127215126 | 317  |
| chr10 | 17005756  | 17006069  | 314  |
| chr21 | 24895950  | 24896262  | 313  |
| chrX  | 51672571  | 51672881  | 311  |
| chr23 | 50741251  | 50741561  | 311  |
| chrX  | 6601625   | 6601932   | 308  |
| chrX  | 2416552   | 2416858   | 307  |
| chr19 | 14988747  | 14989049  | 303  |
| chr6  | 59146370  | 59146670  | 301  |
| chr23 | 28537436  | 28537732  | 297  |
| chrX  | 53626954  | 53627247  | 294  |
| chr19 | 19830829  | 19831119  | 291  |
| chr11 | 104287692 | 104289472 | 1781 |
| chr23 | 18435251  | 18436555  | 1305 |
| chr4  | 123292305 | 123293496 | 1192 |
| chr19 | 61731023  | 61732201  | 1179 |
| chr18 | 11977011  | 11978131  | 1121 |
| chr11 | 9466745   | 9467848   | 1104 |
| chr19 | 54309410  | 54310442  | 1033 |
| chr3  | 30431541  | 30432568  | 1028 |
| chr13 | 23423424  | 23424384  | 961  |
| chr9  | 95326501  | 95327406  | 906  |
| chr16 | 64453113  | 64453933  | 821  |
| chr16 | 26258425  | 26259196  | 772  |
| chr18 | 11709457  | 11710227  | 771  |
| chrX  | 6252629   | 6253383   | 755  |
| chr17 | 51575988  | 51576703  | 716  |
| chr14 | 22068696  | 22069403  | 708  |
| chr7  | 15624580  | 15625285  | 706  |
| chr6  | 120768896 | 120769584 | 689  |
| chrX  | 45511498  | 45512139  | 642  |
| chr19 | 20792300  | 20792921  | 622  |
| chr4  | 79194784  | 79195389  | 606  |
| chr24 | 60773607  | 60774206  | 600  |
| chr23 | 7429537   | 7430124   | 588  |
| chr1  | 2721095   | 2721678   | 584  |
| chr21 | 34196879  | 34197461  | 583  |
| chrX  | 19835709  | 19836273  | 565  |
| chr3  | 112889303 | 112889860 | 558  |
| chr29 | 43026599  | 43027154  | 556  |
| chrX  | 75501418  | 75501950  | 533  |
| chr16 | 23835770  | 23836293  | 524  |
| chrX  | 30967745  | 30968255  | 511  |
| chr5  | 26682164  | 26682663  | 500  |
| chr1  | 1653591   | 1654072   | 482  |
| chr23 | 10348118  | 10348576  | 459  |
| chrX  | 75792125  | 75792581  | 457  |
| chr5  | 121060699 | 121061154 | 456  |
| chr23 | 43153424  | 43153869  | 446  |



|       |           |           |      |
|-------|-----------|-----------|------|
| chr13 | 40277653  | 40278065  | 413  |
| chr19 | 7310370   | 7310778   | 409  |
| chr6  | 119556184 | 119556591 | 408  |
| chr19 | 28473256  | 28473655  | 400  |
| chr17 | 72726799  | 72727196  | 398  |
| chr28 | 34012446  | 34012810  | 365  |
| chr3  | 62452508  | 62453778  | 1271 |
| chr2  | 74016204  | 74017208  | 1005 |
| chr18 | 56631510  | 56632503  | 994  |
| chr7  | 4714380   | 4715372   | 993  |
| chr17 | 34342692  | 34343606  | 915  |
| chrX  | 59312190  | 59313079  | 890  |
| chrX  | 22425184  | 22426036  | 853  |
| chr7  | 37370858  | 37371610  | 753  |
| chr16 | 44113880  | 44114629  | 750  |
| chr24 | 40510789  | 40511523  | 735  |
| chr17 | 15956478  | 15957193  | 716  |
| chr12 | 68760908  | 68761616  | 709  |
| chr5  | 85403997  | 85404692  | 696  |
| chrX  | 37478370  | 37479050  | 681  |
| chr29 | 51168745  | 51169357  | 613  |
| chr18 | 49793940  | 49794506  | 567  |
| chrX  | 56023069  | 56023618  | 550  |
| chr15 | 81398903  | 81399429  | 527  |
| chr15 | 26681133  | 26681649  | 517  |
| chrX  | 73182238  | 73182747  | 510  |
| chr28 | 46050358  | 46050840  | 483  |
| chrX  | 59553490  | 59553955  | 466  |
| chr19 | 39912922  | 39913351  | 430  |
| chrX  | 11635400  | 11635816  | 417  |
| chr16 | 2119588   | 2120000   | 413  |
| chr26 | 21603641  | 21604052  | 412  |
| chr11 | 96240420  | 96240818  | 399  |
| chr22 | 50777474  | 50779128  | 1655 |
| chr1  | 82163252  | 82164472  | 1221 |
| chr6  | 113358592 | 113359723 | 1132 |
| chrX  | 74467646  | 74468766  | 1121 |
| chr23 | 13689268  | 13690294  | 1027 |
| chr18 | 22154954  | 22155946  | 993  |
| chr11 | 14496771  | 14497706  | 936  |
| chr18 | 41056583  | 41057434  | 852  |
| chr3  | 72519939  | 72520765  | 827  |
| chr25 | 34194930  | 34195746  | 817  |
| chr17 | 60878866  | 60879620  | 755  |
| chr10 | 20927481  | 20928214  | 734  |
| chr22 | 54125981  | 54126706  | 726  |
| chr4  | 82137087  | 82137788  | 702  |
| chr19 | 42214956  | 42215612  | 657  |
| chr4  | 110131425 | 110132052 | 628  |
| chr21 | 20004285  | 20004902  | 618  |

|       |           |           |      |
|-------|-----------|-----------|------|
| chrX  | 20074183  | 20074776  | 594  |
| chr26 | 21823115  | 21823704  | 590  |
| chr26 | 7012356   | 7012941   | 586  |
| chr1  | 84789542  | 84790082  | 541  |
| chr15 | 25588810  | 25589340  | 531  |
| chr11 | 44970817  | 44971304  | 488  |
| chr23 | 10579079  | 10579532  | 454  |
| chr18 | 45820330  | 45820754  | 425  |
| chr8  | 77311572  | 77311987  | 416  |
| chr5  | 35280973  | 35281353  | 381  |
| chr21 | 28905234  | 28906918  | 1685 |
| chr7  | 4496238   | 4497519   | 1282 |
| chr5  | 108826107 | 108827161 | 1055 |
| chr2  | 15376618  | 15377318  | 701  |
| chr15 | 27447402  | 27448083  | 682  |
| chrX  | 74638920  | 74639538  | 619  |
| chrX  | 35494081  | 35494689  | 609  |
| chr16 | 38733096  | 38733632  | 537  |
| chr8  | 7711181   | 7711693   | 513  |
| chr21 | 56283702  | 56284161  | 460  |
| chr24 | 50991734  | 50992184  | 451  |
| chrX  | 59592579  | 59593008  | 430  |
| chr17 | 63330005  | 63330434  | 430  |
| chrX  | 13709719  | 13710123  | 405  |
| chr1  | 100632039 | 100633075 | 1037 |
| chr10 | 81676609  | 81677642  | 1034 |
| chr13 | 40496116  | 40496953  | 838  |
| chrX  | 6717556   | 6718305   | 750  |
| chr26 | 43973876  | 43974622  | 747  |
| chr17 | 57759732  | 57760463  | 732  |
| chrX  | 56072752  | 56073461  | 710  |
| chr17 | 56187221  | 56187909  | 689  |
| chr18 | 14684660  | 14685215  | 556  |
| chr18 | 51612560  | 51613057  | 498  |
| chr23 | 43151644  | 43152123  | 480  |
| chr4  | 118009389 | 118009848 | 460  |
| chr19 | 12408995  | 12409435  | 441  |
| chr21 | 9494560   | 9494919   | 360  |
| chrX  | 34035756  | 34036770  | 1015 |
| chr19 | 43968403  | 43969251  | 849  |
| chrX  | 22463239  | 22463871  | 633  |
| chrX  | 60077859  | 60078469  | 611  |
| chr27 | 33421666  | 33422265  | 600  |
| chr28 | 46059802  | 46060382  | 581  |
| chr18 | 62506040  | 62506616  | 577  |
| chrX  | 48083444  | 48083937  | 494  |
| chrX  | 80807338  | 80807815  | 478  |
| chrX  | 5826721   | 5827186   | 466  |
| chrX  | 21052489  | 21052899  | 411  |
| chr11 | 105648123 | 105648520 | 398  |

|       |           |           |     |
|-------|-----------|-----------|-----|
| chr2  | 111341015 | 111341408 | 394 |
| chr24 | 40668514  | 40668890  | 377 |
| chr5  | 29024884  | 29025673  | 790 |
| chrX  | 54374891  | 54375573  | 683 |
| chr8  | 74348693  | 74349335  | 643 |
| chr13 | 75821836  | 75822456  | 621 |
| chr29 | 35014093  | 35014536  | 444 |
| chr19 | 38964449  | 38964883  | 435 |
| chr23 | 19915085  | 19915512  | 428 |
| chr27 | 15764302  | 15764711  | 410 |
| chr19 | 65247744  | 65248353  | 610 |
| chr17 | 63271395  | 63271885  | 491 |
| chr7  | 43762599  | 43763084  | 486 |
| chr19 | 15971183  | 15971665  | 483 |
| chrX  | 59681950  | 59682425  | 476 |
| chr7  | 13415802  | 13416246  | 445 |
| chr3  | 22484912  | 22485347  | 436 |
| chr8  | 116783026 | 116783442 | 417 |
| chrX  | 33584990  | 33585402  | 413 |
| chr2  | 5157437   | 5157836   | 400 |
| chr15 | 28823803  | 28824696  | 894 |
| chr25 | 37867925  | 37868595  | 671 |
| chr22 | 30086164  | 30086753  | 590 |
| chr13 | 75705396  | 75705982  | 587 |
| chrX  | 7884887   | 7885471   | 585 |
| chr11 | 74470992  | 74471571  | 580 |
| chr12 | 32498567  | 32499135  | 569 |
| chr19 | 65215091  | 65215642  | 552 |
| chr7  | 19501469  | 19502005  | 537 |
| chrX  | 60396947  | 60397482  | 536 |
| chr22 | 16328885  | 16329412  | 528 |
| chr29 | 36952030  | 36952552  | 523 |
| chrX  | 60007717  | 60008238  | 522 |
| chr23 | 15082032  | 15082549  | 518 |
| chr8  | 24758672  | 24759182  | 511 |
| chr18 | 54784181  | 54784667  | 487 |
| chrX  | 9707635   | 9708103   | 469 |
| chr12 | 68429180  | 68429646  | 467 |
| chr15 | 64006236  | 64006701  | 466 |
| chrX  | 22566076  | 22566540  | 465 |
| chr21 | 33826532  | 33826995  | 464 |
| chr16 | 75194425  | 75194886  | 462 |
| chr3  | 33105116  | 33105567  | 452 |
| chr20 | 16145276  | 16145723  | 448 |
| chrX  | 2547969   | 2548412   | 444 |
| chr17 | 73001369  | 73001811  | 443 |
| chrX  | 66182945  | 66183385  | 441 |
| chr17 | 70039743  | 70040178  | 436 |
| chr29 | 33626745  | 33627177  | 433 |
| chr29 | 37484780  | 37485211  | 432 |

|       |               |           |      |
|-------|---------------|-----------|------|
| chr19 | 40538635      | 40539064  | 430  |
| chr11 | 13148812      | 13149233  | 422  |
| chrX  | 69648005      | 69648423  | 419  |
| chr18 | 56277837      | 56278254  | 418  |
| chr13 | 75646146      | 75646562  | 417  |
| chrX  | 11970039      | 11970454  | 416  |
| chr24 | 1110415       | 1110821   | 407  |
| chr21 | 2034401       | 2034806   | 406  |
| chr15 | 45863976      | 45864380  | 405  |
| chr10 | 50522409      | 50522813  | 405  |
| chr24 | 34702842      | 34703244  | 403  |
| chr24 | 1040528       | 1040929   | 402  |
| chr10 | 89984036      | 89984434  | 399  |
| chr18 | 49951046      | 49951443  | 398  |
| chr13 | 73022889      | 73023286  | 398  |
| chr17 | 63465397      | 63465790  | 394  |
| chrX  | 11647476      | 11647858  | 383  |
| chr21 | 28185622      | 28185989  | 368  |
| chr1  | 154620617     | 154620967 | 351  |
| chr8  | 73759497      | 73759843  | 347  |
| chrX  | 75969577      | 75969912  | 336  |
| chr9  | 503870 504190 | 321       |      |
| chr17 | 70173433      | 70174198  | 766  |
| chr17 | 74491481      | 74491928  | 448  |
| chr8  | 73776758      | 73777155  | 398  |
| chr2  | 19644850      | 19645244  | 395  |
| chr13 | 37893731      | 37894090  | 360  |
| chrX  | 7549170       | 7550282   | 1113 |
| chr8  | 73794226      | 73794821  | 596  |
| chr19 | 19122933      | 19123407  | 475  |
| chr13 | 122573 123202 | 630       |      |
| chr11 | 83253249      | 83254496  | 1248 |
| chrX  | 77495059      | 77495987  | 929  |
| chr17 | 64202392      | 64203093  | 702  |
| chr18 | 16751278      | 16752062  | 785  |
| chr11 | 96083236      | 96084010  | 775  |
| chr24 | 787833 788393 | 561       |      |
| chr9  | 106062454     | 106062958 | 505  |
| chr9  | 35461662      | 35462145  | 484  |
| chr24 | 61105603      | 61106067  | 465  |
| chr22 | 47888328      | 47889739  | 1412 |
| chr24 | 1954340       | 1955242   | 903  |
| chr24 | 60984813      | 60985657  | 845  |
| chr13 | 77412911      | 77413691  | 781  |
| chr23 | 27809082      | 27809562  | 481  |
| chr5  | 8966508       | 8967533   | 1026 |
| chr7  | 19971546      | 19972210  | 665  |
| chrX  | 7411991       | 7412607   | 617  |
| chr1  | 45790849      | 45791331  | 483  |
| chr19 | 11018369      | 11018943  | 575  |

|       |           |           |      |
|-------|-----------|-----------|------|
| chr4  | 118625220 | 118625785 | 566  |
| chr3  | 126956737 | 126957159 | 423  |
| chr1  | 145694135 | 145695300 | 1166 |
| chr10 | 88046863  | 88047267  | 405  |
| chr8  | 73792137  | 73793213  | 1077 |
| chrX  | 14645496  | 14646165  | 670  |
| chr2  | 46206965  | 46207577  | 613  |
| chrX  | 50238693  | 50239003  | 311  |
| chr13 | 70284762  | 70285198  | 437  |
| chr29 | 38284906  | 38285668  | 763  |
| chr4  | 72303150  | 72303573  | 424  |
| chr18 | 23642775  | 23643219  | 445  |
| chr4  | 33759963  | 33760345  | 383  |
| chr3  | 126945674 | 126946053 | 380  |
| chr8  | 73743826  | 73744195  | 370  |
| chr13 | 58395515  | 58395911  | 397  |
| chr20 | 5858335   | 5858683   | 349  |
| chr8  | 24392011  | 24392420  | 410  |
| chr27 | 11601944  | 11602337  | 394  |
| chr23 | 31193386  | 31194901  | 1516 |
| chr3  | 61485530  | 61486900  | 1371 |
| chr3  | 22643364  | 22644644  | 1281 |
| chr17 | 66178763  | 66179885  | 1123 |
| chr11 | 9427941   | 9429047   | 1107 |
| chr10 | 36826950  | 36828050  | 1101 |
| chr25 | 3160717   | 3161814   | 1098 |
| chr13 | 26303751  | 26304748  | 998  |
| chr4  | 98747017  | 98747886  | 870  |
| chr18 | 11847562  | 11848431  | 870  |
| chr5  | 91480943  | 91481764  | 822  |
| chr2  | 74321403  | 74322204  | 802  |
| chr29 | 2520950   | 2521749   | 800  |
| chr1  | 153868917 | 153869696 | 780  |
| chr17 | 69495672  | 69496413  | 742  |
| chr9  | 44451780  | 44452498  | 719  |
| chr22 | 61141260  | 61141964  | 705  |
| chr25 | 1950245   | 1950940   | 696  |
| chr14 | 31007367  | 31008060  | 694  |
| chr2  | 5177815   | 5178505   | 691  |
| chrX  | 59928822  | 59929490  | 669  |
| chr3  | 34800172  | 34800831  | 660  |
| chr21 | 65207986  | 65208638  | 653  |
| chr4  | 98597760  | 98598403  | 644  |
| chr20 | 29497985  | 29498626  | 642  |
| chr21 | 60860519  | 60861148  | 630  |
| chrX  | 21377747  | 21378369  | 623  |
| chr25 | 29121867  | 29122489  | 623  |
| chr9  | 105814585 | 105815205 | 621  |
| chr12 | 9573164   | 9573709   | 546  |
| chrX  | 13524194  | 13524709  | 516  |

|       |           |           |      |
|-------|-----------|-----------|------|
| chrX  | 50175581  | 50176094  | 514  |
| chr21 | 5982150   | 5982652   | 503  |
| chr12 | 82657312  | 82657793  | 482  |
| chr6  | 59068938  | 59069408  | 471  |
| chr6  | 22907712  | 22908164  | 453  |
| chr13 | 20024521  | 20024970  | 450  |
| chr14 | 79851158  | 79851583  | 426  |
| chr13 | 77331011  | 77331436  | 426  |
| chr18 | 54323332  | 54323746  | 415  |
| chr28 | 33879969  | 33881086  | 1118 |
| chr11 | 9211703   | 9212774   | 1072 |
| chr15 | 27091266  | 27092270  | 1005 |
| chrX  | 7538354   | 7539227   | 874  |
| chr5  | 100998765 | 100999633 | 869  |
| chr8  | 102279204 | 102280047 | 844  |
| chr7  | 43730187  | 43731029  | 843  |
| chr11 | 110148081 | 110148918 | 838  |
| chr17 | 64063116  | 64063945  | 830  |
| chr25 | 3238889   | 3239681   | 793  |
| chr19 | 29001757  | 29002530  | 774  |
| chr6  | 99405009  | 99405755  | 747  |
| chr11 | 4354546   | 4355257   | 712  |
| chr29 | 29655712  | 29656376  | 665  |
| chrX  | 48860036  | 48860693  | 658  |
| chrX  | 50646243  | 50646885  | 643  |
| chr16 | 2190096   | 2190720   | 625  |
| chr23 | 43423792  | 43424407  | 616  |
| chr2  | 135594634 | 135595249 | 616  |
| chrX  | 75486776  | 75487374  | 599  |
| chr1  | 69545665  | 69546262  | 598  |
| chr3  | 23072341  | 23072922  | 582  |
| chrX  | 19826200  | 19826753  | 554  |
| chrX  | 18939343  | 18939896  | 554  |
| chr14 | 61219927  | 61220455  | 529  |
| chr12 | 83971618  | 83972116  | 499  |
| chrX  | 31683971  | 31684463  | 493  |
| chr5  | 117518365 | 117518849 | 485  |
| chrX  | 53380615  | 53381098  | 484  |
| chr17 | 69208366  | 69208836  | 471  |
| chr21 | 20684109  | 20684578  | 470  |
| chr28 | 35239511  | 35239973  | 463  |
| chrX  | 56267721  | 56268179  | 459  |
| chr14 | 42907282  | 42907739  | 458  |
| chr18 | 43461813  | 43462263  | 451  |
| chr29 | 31543734  | 31544172  | 439  |
| chr9  | 65835811  | 65836228  | 418  |
| chr28 | 34136092  | 34136505  | 414  |
| chr11 | 103757162 | 103757575 | 414  |
| chr10 | 19485620  | 19486023  | 404  |
| chr22 | 5341984   | 5342381   | 398  |

|       |           |           |      |
|-------|-----------|-----------|------|
| chr19 | 42551667  | 42552025  | 359  |
| chrX  | 61591797  | 61593146  | 1350 |
| chr18 | 63523127  | 63524333  | 1207 |
| chr26 | 22014264  | 22015321  | 1058 |
| chr5  | 10732433  | 10733417  | 985  |
| chr23 | 10541035  | 10542012  | 978  |
| chr23 | 9732204   | 9733114   | 911  |
| chr9  | 14573546  | 14574454  | 909  |
| chr18 | 11834584  | 11835490  | 907  |
| chr3  | 123679333 | 123680157 | 825  |
| chr19 | 34052585  | 34053359  | 775  |
| chr3  | 114205278 | 114206006 | 729  |
| chr15 | 62415215  | 62415900  | 686  |
| chr6  | 46496694  | 46497377  | 684  |
| chr28 | 33811372  | 33812015  | 644  |
| chr23 | 7177472   | 7178096   | 625  |
| chr1  | 132109731 | 132110329 | 599  |
| chr22 | 56278532  | 56279111  | 580  |
| chr4  | 31608519  | 31609084  | 566  |
| chrX  | 12103769  | 12104321  | 553  |
| chr21 | 6554099   | 6554644   | 546  |
| chr2  | 135728690 | 135729206 | 517  |
| chr19 | 8935180   | 8935679   | 500  |
| chr15 | 25479018  | 25479516  | 499  |
| chr22 | 30099733  | 30100222  | 490  |
| chr3  | 18093876  | 18094357  | 482  |
| chr13 | 40338456  | 40338918  | 463  |
| chr18 | 22115651  | 22116083  | 433  |
| chr3  | 86982990  | 86983421  | 432  |
| chr13 | 64230576  | 64230998  | 423  |
| chr5  | 30158357  | 30158762  | 406  |
| chr13 | 35599220  | 35599623  | 404  |
| chrX  | 59743467  | 59743861  | 395  |
| chr13 | 22919954  | 22920338  | 385  |
| chr8  | 74325191  | 74325513  | 323  |
| chr17 | 73134230  | 73135326  | 1097 |
| chrX  | 8165914   | 8166812   | 899  |
| chr28 | 42336691  | 42337488  | 798  |
| chr10 | 17103331  | 17104128  | 798  |
| chrX  | 49108647  | 49109437  | 791  |
| chr27 | 35946765  | 35947514  | 750  |
| chr8  | 106262992 | 106263699 | 708  |
| chr28 | 33915678  | 33916367  | 690  |
| chr22 | 30358517  | 30359168  | 652  |
| chrX  | 21585316  | 21585920  | 605  |
| chr16 | 3709404   | 3709971   | 568  |
| chr8  | 9365591   | 9366146   | 556  |
| chrX  | 21139050  | 21139562  | 513  |
| chr13 | 40562018  | 40562524  | 507  |
| chr10 | 70000471  | 70000976  | 506  |

|       |           |           |      |
|-------|-----------|-----------|------|
| chr3  | 121833152 | 121833650 | 499  |
| chrX  | 7558287   | 7558778   | 492  |
| chrX  | 34081124  | 34081602  | 479  |
| chr27 | 26974941  | 26975409  | 469  |
| chrX  | 55332351  | 55332813  | 463  |
| chr19 | 41397927  | 41398389  | 463  |
| chr24 | 40398560  | 40399018  | 459  |
| chr18 | 3777050   | 3777502   | 453  |
| chr2  | 136397726 | 136398159 | 434  |
| chr4  | 82130214  | 82130643  | 430  |
| chr18 | 63584093  | 63584511  | 419  |
| chr13 | 61486082  | 61486498  | 417  |
| chr14 | 3154164   | 3154572   | 409  |
| chrX  | 28100972  | 28101370  | 399  |
| chr7  | 18469284  | 18469682  | 399  |
| chr25 | 30115849  | 30116247  | 399  |
| chrX  | 73292833  | 73293229  | 397  |
| chr12 | 31612004  | 31613089  | 1086 |
| chr3  | 116332225 | 116333161 | 937  |
| chr19 | 14058632  | 14059462  | 831  |
| chrX  | 61742092  | 61742847  | 756  |
| chr21 | 67963243  | 67963996  | 754  |
| chr13 | 70236193  | 70236891  | 699  |
| chr7  | 37550031  | 37550724  | 694  |
| chr7  | 49011199  | 49011823  | 625  |
| chr5  | 26716518  | 26717140  | 623  |
| chr7  | 29493841  | 29494457  | 617  |
| chr17 | 61074451  | 61075060  | 610  |
| chr19 | 52563477  | 52564071  | 595  |
| chr2  | 140049474 | 140050050 | 577  |
| chr5  | 28965250  | 28965791  | 542  |
| chr11 | 100758693 | 100759226 | 534  |
| chrX  | 8097936   | 8098466   | 531  |
| chr9  | 74273490  | 74274019  | 530  |
| chrX  | 19959081  | 19959598  | 518  |
| chr20 | 74227846  | 74228357  | 512  |
| chr7  | 50631255  | 50631746  | 492  |
| chr17 | 70399170  | 70399639  | 470  |
| chr13 | 55280892  | 55281353  | 462  |
| chr4  | 106595347 | 106595802 | 456  |
| chr3  | 106548709 | 106549159 | 451  |
| chr3  | 105444536 | 105444984 | 449  |
| chrX  | 20277736  | 20278136  | 401  |
| chrX  | 19776677  | 19777065  | 389  |
| chr8  | 1344801   | 1345732   | 932  |
| chr18 | 53306230  | 53307116  | 887  |
| chrX  | 72268152  | 72269027  | 876  |
| chrX  | 6452577   | 6453331   | 755  |
| chr12 | 9449903   | 9450625   | 723  |
| chr18 | 24333576  | 24334283  | 708  |



|       |           |           |      |
|-------|-----------|-----------|------|
| chr13 | 41700389  | 41701091  | 703  |
| chrX  | 49351340  | 49352009  | 670  |
| chrX  | 49533556  | 49534126  | 571  |
| chr17 | 74557645  | 74558166  | 522  |
| chr23 | 49947381  | 49947831  | 451  |
| chr11 | 90355751  | 90356193  | 443  |
| chrX  | 75884790  | 75885225  | 436  |
| chrX  | 59216210  | 59216637  | 428  |
| chr3  | 121544250 | 121544648 | 399  |
| chr18 | 11676083  | 11677260  | 1178 |
| chr17 | 70405296  | 70406051  | 756  |
| chr20 | 75058586  | 75059143  | 558  |
| chr10 | 69994407  | 69994948  | 542  |
| chr5  | 1133831   | 1134368   | 538  |
| chr17 | 76299323  | 76299853  | 531  |
| chr8  | 108715881 | 108716398 | 518  |
| chr23 | 28296320  | 28296814  | 495  |
| chr4  | 124423436 | 124423924 | 489  |
| chr13 | 40975601  | 40976083  | 483  |
| chrX  | 23582673  | 23583146  | 474  |
| chr2  | 136424156 | 136424605 | 450  |
| chr18 | 25810770  | 25811219  | 450  |
| chr10 | 48122506  | 48122935  | 430  |
| chr10 | 25837329  | 25837753  | 425  |
| chr19 | 30575273  | 30575980  | 708  |
| chr28 | 33682442  | 33683134  | 693  |
| chr16 | 39587262  | 39587828  | 567  |
| chr14 | 34044099  | 34044632  | 534  |
| chrX  | 55666557  | 55667085  | 529  |
| chr19 | 29457786  | 29458312  | 527  |
| chr22 | 7233356   | 7233863   | 508  |
| chrX  | 20303363  | 20303842  | 480  |
| chr3  | 17461189  | 17461663  | 475  |
| chr10 | 5255843   | 5256315   | 473  |
| chr11 | 100885728 | 100886198 | 471  |
| chr13 | 60148076  | 60149024  | 949  |
| chr13 | 55524855  | 55525736  | 882  |
| chr1  | 123090529 | 123091313 | 785  |
| chr3  | 105115419 | 105116176 | 758  |
| chrX  | 50595629  | 50596320  | 692  |
| chr13 | 38254846  | 38255501  | 656  |
| chr18 | 26257697  | 26258315  | 619  |
| chr5  | 29911743  | 29912335  | 593  |
| chr10 | 89407865  | 89408446  | 582  |
| chrX  | 7601429   | 7601992   | 564  |
| chr14 | 29626543  | 29627101  | 559  |
| chr1  | 85642046  | 85642602  | 557  |
| chr8  | 80488125  | 80488672  | 548  |
| chrX  | 50764594  | 50765136  | 543  |
| chr8  | 73735933  | 73736472  | 540  |

|       |               |           |     |
|-------|---------------|-----------|-----|
| chr13 | 73439638      | 73440170  | 533 |
| chrX  | 9650269       | 9650793   | 525 |
| chrX  | 9686946       | 9687447   | 502 |
| chrX  | 9042914       | 9043407   | 494 |
| chr23 | 52809785      | 52810273  | 489 |
| chrX  | 8702669       | 8703153   | 485 |
| chr16 | 39810689      | 39811169  | 481 |
| chr29 | 34913713      | 34914192  | 480 |
| chrX  | 60477115      | 60477590  | 476 |
| chrX  | 72195795      | 72196269  | 475 |
| chr21 | 62075462      | 62075935  | 474 |
| chr11 | 70686724      | 70687197  | 474 |
| chrX  | 67048823      | 67049290  | 468 |
| chr18 | 11305135      | 11305592  | 458 |
| chrX  | 73862206      | 73862658  | 453 |
| chr6  | 115644938     | 115645386 | 449 |
| chrX  | 8064369       | 8064815   | 447 |
| chrX  | 75824259      | 75824701  | 443 |
| chrX  | 2349135       | 2349572   | 438 |
| chr16 | 71120732      | 71121168  | 437 |
| chr10 | 21135486      | 21135921  | 436 |
| chr26 | 17560962      | 17561395  | 434 |
| chr10 | 103337518     | 103337949 | 432 |
| chr16 | 72158505      | 72158929  | 425 |
| chr3  | 8664996       | 8665418   | 423 |
| chrX  | 67171101      | 67171521  | 421 |
| chr7  | 52414450      | 52414870  | 421 |
| chr26 | 44240754      | 44241173  | 420 |
| chr3  | 25799293      | 25799710  | 418 |
| chr17 | 63107353      | 63107769  | 417 |
| chrX  | 20636374      | 20636788  | 415 |
| chr29 | 17873124      | 17873536  | 413 |
| chr6  | 92969993      | 92970401  | 409 |
| chr1  | 77798420      | 77798824  | 405 |
| chr18 | 51226333      | 51226736  | 404 |
| chr15 | 74611554      | 74611957  | 404 |
| chrX  | 72794912      | 72795312  | 401 |
| chr24 | 53854975      | 53855375  | 401 |
| chr5  | 79212228      | 79212626  | 399 |
| chr16 | 11432693      | 11433089  | 397 |
| chr10 | 83517942      | 83518333  | 392 |
| chrX  | 50192332      | 50192722  | 391 |
| chr23 | 52734771      | 52735160  | 390 |
| chrX  | 65096192      | 65096578  | 387 |
| chr10 | 68843305      | 68843684  | 380 |
| chr8  | 24131470      | 24131848  | 379 |
| chr22 | 55944353      | 55944718  | 366 |
| chr5  | 112065642     | 112065986 | 345 |
| chr13 | 127039 127376 | 338       |     |
| chr29 | 40887666      | 40888001  | 336 |

|       |               |           |      |
|-------|---------------|-----------|------|
| chr9  | 87765457      | 87765743  | 287  |
| chr8  | 24138758      | 24139037  | 280  |
| chr18 | 13894566      | 13894817  | 252  |
| chr12 | 37155942      | 37156175  | 234  |
| chr8  | 15982771      | 15982999  | 229  |
| chr8  | 73477053      | 73477718  | 666  |
| chr25 | 408748 409147 | 400       |      |
| chr10 | 11651782      | 11652509  | 728  |
| chr18 | 55224372      | 55224947  | 576  |
| chr8  | 73876562      | 73876976  | 415  |
| chr10 | 8565593       | 8565991   | 399  |
| chr13 | 36768305      | 36770289  | 1985 |
| chrX  | 8065045       | 8066756   | 1712 |
| chr13 | 41495432      | 41497118  | 1687 |
| chr15 | 54176586      | 54178175  | 1590 |
| chr5  | 116683454     | 116685020 | 1567 |
| chr23 | 28031958      | 28033471  | 1514 |
| chrX  | 22427484      | 22428966  | 1483 |
| chrX  | 8145096       | 8146525   | 1430 |
| chr4  | 30782454      | 30783852  | 1399 |
| chr11 | 100954322     | 100955693 | 1372 |
| chr29 | 48775402      | 48776763  | 1362 |
| chr3  | 15784779      | 15786135  | 1357 |
| chrX  | 50799336      | 50800690  | 1355 |
| chr11 | 70637479      | 70638832  | 1354 |
| chrX  | 56084639      | 56085991  | 1353 |
| chr24 | 59346401      | 59347728  | 1328 |
| chr3  | 36664077      | 36665394  | 1318 |
| chr13 | 68500578      | 68501890  | 1313 |
| chrX  | 10936023      | 10937310  | 1288 |
| chr9  | 78231538      | 78232812  | 1275 |
| chr1  | 68922056      | 68923303  | 1248 |
| chr2  | 123021448     | 123022693 | 1246 |
| chr3  | 98036524      | 98037768  | 1245 |
| chr6  | 116831629     | 116832852 | 1224 |
| chr27 | 14404037      | 14405252  | 1216 |
| chr15 | 64487700      | 64488915  | 1216 |
| chr7  | 14816465      | 14817677  | 1213 |
| chr5  | 123680880     | 123682083 | 1204 |
| chr17 | 70002815      | 70004017  | 1203 |
| chr10 | 16999283      | 17000481  | 1199 |
| chr24 | 29706344      | 29707535  | 1192 |
| chr17 | 72763133      | 72764324  | 1192 |
| chrX  | 8220207       | 8221392   | 1186 |
| chr1  | 159241384     | 159242556 | 1173 |
| chr8  | 66200849      | 66202020  | 1172 |
| chr5  | 68966506      | 68967676  | 1171 |
| chr3  | 111644208     | 111645373 | 1166 |
| chr4  | 106658349     | 106659508 | 1160 |
| chr12 | 29803817      | 29804971  | 1155 |

|       |           |           |      |
|-------|-----------|-----------|------|
| chrX  | 74874707  | 74875856  | 1150 |
| chr10 | 50620123  | 50621270  | 1148 |
| chr29 | 35173231  | 35174376  | 1146 |
| chr2  | 74019332  | 74020471  | 1140 |
| chr18 | 13150320  | 13151458  | 1139 |
| chr3  | 25607749  | 25608865  | 1117 |
| chr4  | 119251076 | 119252191 | 1116 |
| chr15 | 62376948  | 62378060  | 1113 |
| chr2  | 132173948 | 132175051 | 1104 |
| chr10 | 70417809  | 70418907  | 1099 |
| chr25 | 39191211  | 39192306  | 1096 |
| chr3  | 123171757 | 123172848 | 1092 |
| chr14 | 1071280   | 1072362   | 1083 |
| chrX  | 21661661  | 21662740  | 1080 |
| chr8  | 112475299 | 112476378 | 1080 |
| chr4  | 123094400 | 123095475 | 1076 |
| chr26 | 48670388  | 48671460  | 1073 |
| chr13 | 41192378  | 41193446  | 1069 |
| chrX  | 49354019  | 49355081  | 1063 |
| chrX  | 19638786  | 19639841  | 1056 |
| chr13 | 56364233  | 56365286  | 1054 |
| chr29 | 50588680  | 50589729  | 1050 |
| chr23 | 17666940  | 17667986  | 1047 |
| chr19 | 13480182  | 13481223  | 1042 |
| chr2  | 75980899  | 75981938  | 1040 |
| chr17 | 57699681  | 57700716  | 1036 |
| chr14 | 8185030   | 8186065   | 1036 |
| chr10 | 70213762  | 70214796  | 1035 |
| chr3  | 15183349  | 15184380  | 1032 |
| chrX  | 77004701  | 77005731  | 1031 |
| chr19 | 57300760  | 57301774  | 1015 |
| chr28 | 1261297   | 1262308   | 1012 |
| chr11 | 81446016  | 81447027  | 1012 |
| chrX  | 11027692  | 11028700  | 1009 |
| chrX  | 50747554  | 50748559  | 1006 |
| chr19 | 38770401  | 38771403  | 1003 |
| chr23 | 15968250  | 15969251  | 1002 |
| chr19 | 45836863  | 45837858  | 996  |
| chr17 | 56088163  | 56089153  | 991  |
| chrX  | 9986820   | 9987809   | 990  |
| chr14 | 1449421   | 1450400   | 980  |
| chr15 | 51740282  | 51741256  | 975  |
| chr21 | 67771197  | 67772170  | 974  |
| chr12 | 82629676  | 82630648  | 973  |
| chr7  | 14244948  | 14245916  | 969  |
| chr3  | 127182395 | 127183363 | 969  |
| chr8  | 59313726  | 59314692  | 967  |
| chr22 | 58435372  | 58436338  | 967  |
| chr21 | 34197844  | 34198809  | 966  |
| chr2  | 131308730 | 131309695 | 966  |

|       |           |           |     |
|-------|-----------|-----------|-----|
| chr29 | 38858012  | 38858976  | 965 |
| chr10 | 99922564  | 99923527  | 964 |
| chr29 | 51005927  | 51006889  | 963 |
| chr25 | 4837904   | 4838863   | 960 |
| chr23 | 7065327   | 7066283   | 957 |
| chrX  | 62497604  | 62498559  | 956 |
| chr4  | 123019369 | 123020322 | 954 |
| chr12 | 14821152  | 14822102  | 951 |
| chr15 | 64491321  | 64492270  | 950 |
| chr19 | 41391898  | 41392845  | 948 |
| chr16 | 46741029  | 46741976  | 948 |
| chr11 | 28639608  | 28640554  | 947 |
| chr7  | 15124114  | 15125059  | 946 |
| chr19 | 60502571  | 60503516  | 946 |
| chr18 | 56625254  | 56626194  | 941 |
| chrX  | 21696645  | 21697581  | 937 |
| chr22 | 30070636  | 30071571  | 936 |
| chr12 | 83938786  | 83939720  | 935 |
| chr14 | 8180890   | 8181823   | 934 |
| chrX  | 59276039  | 59276969  | 931 |
| chr17 | 75936401  | 75937330  | 930 |
| chr10 | 8575694   | 8576621   | 928 |
| chr23 | 40626911  | 40627836  | 926 |
| chr1  | 128121318 | 128122242 | 925 |
| chr18 | 18419503  | 18420424  | 922 |
| chr6  | 118799580 | 118800500 | 921 |
| chr18 | 11350466  | 11351386  | 921 |
| chrX  | 57094640  | 57095558  | 919 |
| chr10 | 17065754  | 17066671  | 918 |
| chr18 | 48515378  | 48516292  | 915 |
| chr9  | 106486393 | 106487306 | 914 |
| chr7  | 13253944  | 13254856  | 913 |
| chr22 | 59993269  | 59994180  | 912 |
| chr2  | 83587208  | 83588117  | 910 |
| chr8  | 64926289  | 64927194  | 906 |
| chr5  | 30836878  | 30837783  | 906 |
| chr11 | 12873228  | 12874133  | 906 |
| chr7  | 57625364  | 57626266  | 903 |
| chr19 | 39322399  | 39323301  | 903 |
| chr2  | 25316167  | 25317068  | 902 |
| chr18 | 11823780  | 11824681  | 902 |
| chr10 | 45520211  | 45521112  | 902 |
| chr1  | 141992022 | 141992923 | 902 |
| chr4  | 96835467  | 96836366  | 900 |
| chr10 | 35630332  | 35631230  | 899 |
| chr4  | 123023427 | 123024324 | 898 |
| chr19 | 18377034  | 18377930  | 897 |
| chr26 | 17994409  | 17995304  | 896 |
| chr20 | 33368694  | 33369589  | 896 |
| chr20 | 71443231  | 71444123  | 893 |

|       |           |           |     |
|-------|-----------|-----------|-----|
| chr18 | 9708827   | 9709719   | 893 |
| chr8  | 72310966  | 72311855  | 890 |
| chr17 | 73035547  | 73036436  | 890 |
| chr16 | 23865605  | 23866493  | 889 |
| chr22 | 48245674  | 48246561  | 888 |
| chr3  | 22658884  | 22659770  | 887 |
| chr19 | 41937563  | 41938449  | 887 |
| chr10 | 12895705  | 12896591  | 887 |
| chr13 | 22824631  | 22825516  | 886 |
| chr27 | 26469189  | 26470073  | 885 |
| chr21 | 13649500  | 13650383  | 884 |
| chr16 | 48010693  | 48011575  | 883 |
| chr21 | 66206061  | 66206941  | 881 |
| chr10 | 35781285  | 35782162  | 878 |
| chrX  | 18414347  | 18415223  | 877 |
| chr23 | 32686864  | 32687740  | 877 |
| chr15 | 75538415  | 75539290  | 876 |
| chrX  | 2575903   | 2576777   | 875 |
| chr15 | 41250020  | 41250893  | 874 |
| chr9  | 106856792 | 106857664 | 873 |
| chr27 | 39119007  | 39119878  | 872 |
| chr11 | 44987841  | 44988710  | 870 |
| chr11 | 16112530  | 16113397  | 868 |
| chr17 | 70299725  | 70300591  | 867 |
| chrX  | 2546785   | 2547650   | 866 |
| chrX  | 21681248  | 21682112  | 865 |
| chr27 | 15331093  | 15331957  | 865 |
| chr7  | 15598885  | 15599748  | 864 |
| chr12 | 14707599  | 14708462  | 864 |
| chr1  | 74617187  | 74618050  | 864 |
| chrX  | 2637624   | 2638485   | 862 |
| chr10 | 74850757  | 74851618  | 862 |
| chr15 | 37152009  | 37152868  | 860 |
| chrX  | 49314276  | 49315133  | 858 |
| chrX  | 35586779  | 35587634  | 856 |
| chr5  | 28892354  | 28893209  | 856 |
| chr22 | 56562484  | 56563337  | 854 |
| chr3  | 121629469 | 121630320 | 852 |
| chr19 | 37863291  | 37864142  | 852 |
| chr29 | 48854800  | 48855650  | 851 |
| chr25 | 3422976   | 3423823   | 848 |
| chr2  | 111853704 | 111854551 | 848 |
| chr18 | 53031307  | 53032152  | 846 |
| chr25 | 21766027  | 21766871  | 845 |
| chr14 | 61744536  | 61745380  | 845 |
| chr3  | 9424499   | 9425342   | 844 |
| chr2  | 99683205  | 99684048  | 844 |
| chrX  | 73470419  | 73471261  | 843 |
| chr18 | 56187231  | 56188070  | 840 |
| chr17 | 64198028  | 64198867  | 840 |

|       |           |           |     |
|-------|-----------|-----------|-----|
| chr15 | 24942513  | 24943352  | 840 |
| chr7  | 45665224  | 45666056  | 833 |
| chr18 | 34058548  | 34059380  | 833 |
| chr13 | 75563344  | 75564176  | 833 |
| chr8  | 85876963  | 85877794  | 832 |
| chr10 | 43557515  | 43558346  | 832 |
| chr22 | 50789732  | 50790560  | 829 |
| chr16 | 31819881  | 31820709  | 829 |
| chr19 | 14086827  | 14087654  | 828 |
| chr11 | 70792467  | 70793292  | 826 |
| chr26 | 37097944  | 37098768  | 825 |
| chr7  | 37571504  | 37572326  | 823 |
| chr14 | 61304501  | 61305323  | 823 |
| chr28 | 30518181  | 30519002  | 822 |
| chr27 | 15412630  | 15413451  | 822 |
| chr17 | 72728776  | 72729597  | 822 |
| chr26 | 38193983  | 38194803  | 821 |
| chr2  | 36082158  | 36082978  | 821 |
| chr8  | 60300623  | 60301442  | 820 |
| chr24 | 36025588  | 36026407  | 820 |
| chr2  | 99664728  | 99665547  | 820 |
| chr15 | 74931433  | 74932252  | 820 |
| chr19 | 56661857  | 56662675  | 819 |
| chr7  | 44487846  | 44488662  | 817 |
| chr18 | 11979725  | 11980541  | 817 |
| chr5  | 111541816 | 111542631 | 816 |
| chr11 | 6426849   | 6427664   | 816 |
| chr12 | 82293362  | 82294174  | 813 |
| chr17 | 66157374  | 66158185  | 812 |
| chr5  | 2020726   | 2021535   | 810 |
| chrX  | 59274456  | 59275264  | 809 |
| chr5  | 121061839 | 121062647 | 809 |
| chr23 | 9460319   | 9461127   | 809 |
| chr1  | 1568072   | 1568880   | 809 |
| chr7  | 46241289  | 46242094  | 806 |
| chr23 | 31448468  | 31449273  | 806 |
| chr9  | 34927937  | 34928740  | 804 |
| chr6  | 121050750 | 121051549 | 800 |
| chr3  | 8972923   | 8973722   | 800 |
| chr14 | 57314217  | 57315016  | 800 |
| chr10 | 83836308  | 83837107  | 800 |
| chrX  | 65766006  | 65766803  | 798 |
| chr26 | 43874315  | 43875112  | 798 |
| chrX  | 54689678  | 54690474  | 797 |
| chr9  | 105060241 | 105061037 | 797 |
| chr7  | 65555635  | 65556431  | 797 |
| chr29 | 9232859   | 9233655   | 797 |
| chr28 | 33495430  | 33496225  | 796 |
| chr18 | 23155126  | 23155920  | 795 |
| chr11 | 11976000  | 11976794  | 795 |

|       |           |           |     |
|-------|-----------|-----------|-----|
| chr4  | 122967109 | 122967902 | 794 |
| chr24 | 61730313  | 61731106  | 794 |
| chr5  | 30838050  | 30838842  | 793 |
| chr11 | 2288099   | 2288891   | 793 |
| chrX  | 72430524  | 72431315  | 792 |
| chr8  | 1622225   | 1623016   | 792 |
| chr3  | 126842656 | 126843446 | 791 |
| chr15 | 75512840  | 75513630  | 791 |
| chr21 | 56289842  | 56290631  | 790 |
| chr16 | 38528742  | 38529531  | 790 |
| chrX  | 59405451  | 59406239  | 789 |
| chr3  | 22565518  | 22566306  | 789 |
| chr26 | 17561497  | 17562285  | 789 |
| chr2  | 135598923 | 135599710 | 788 |
| chr18 | 52653930  | 52654716  | 787 |
| chr16 | 55224446  | 55225232  | 787 |
| chr23 | 18409152  | 18409934  | 783 |
| chr4  | 71595646  | 71596426  | 781 |
| chrX  | 70828416  | 70829195  | 780 |
| chr10 | 5232950   | 5233729   | 780 |
| chr6  | 113356723 | 113357501 | 779 |
| chr3  | 51913111  | 51913886  | 776 |
| chr14 | 40161677  | 40162452  | 776 |
| chr14 | 36737936  | 36738710  | 775 |
| chrX  | 64954774  | 64955546  | 773 |
| chr3  | 35786860  | 35787632  | 773 |
| chr26 | 31469335  | 31470107  | 773 |
| chrX  | 72977478  | 72978249  | 772 |
| chr7  | 20056790  | 20057561  | 772 |
| chr26 | 37543550  | 37544321  | 772 |
| chr26 | 22386219  | 22386990  | 772 |
| chr4  | 117399342 | 117400112 | 771 |
| chrX  | 51672883  | 51673652  | 770 |
| chrX  | 50652001  | 50652768  | 768 |
| chr26 | 17919850  | 17920615  | 766 |
| chr18 | 50865255  | 50866020  | 766 |
| chr2  | 74008160  | 74008923  | 764 |
| chr16 | 3670092   | 3670855   | 764 |
| chr17 | 75668380  | 75669142  | 763 |
| chr11 | 77730662  | 77731424  | 763 |
| chr11 | 40332509  | 40333268  | 760 |
| chr11 | 74757229  | 74757987  | 759 |
| chr4  | 117150693 | 117151450 | 758 |
| chr23 | 8246577   | 8247333   | 757 |
| chr19 | 62148238  | 62148990  | 753 |
| chrX  | 8831001   | 8831752   | 752 |
| chr6  | 72202809  | 72203559  | 751 |
| chr2  | 131575481 | 131576231 | 751 |
| chr6  | 20759385  | 20760134  | 750 |
| chr23 | 31101072  | 31101821  | 750 |



|       |           |           |     |
|-------|-----------|-----------|-----|
| chr20 | 44229845  | 44230593  | 749 |
| chr19 | 56498837  | 56499584  | 748 |
| chrX  | 50901224  | 50901969  | 746 |
| chr3  | 35890632  | 35891377  | 746 |
| chr14 | 33893458  | 33894202  | 745 |
| chr11 | 48702511  | 48703255  | 745 |
| chr25 | 28189492  | 28190235  | 744 |
| chr3  | 115353989 | 115354731 | 743 |
| chr28 | 25140347  | 25141088  | 742 |
| chrX  | 19276161  | 19276900  | 740 |
| chr28 | 43736301  | 43737040  | 740 |
| chr10 | 70568803  | 70569542  | 740 |
| chrX  | 10136797  | 10137535  | 739 |
| chr16 | 47120593  | 47121331  | 739 |
| chr10 | 33930125  | 33930862  | 738 |
| chr19 | 18367736  | 18368470  | 735 |
| chr11 | 47287651  | 47288385  | 735 |
| chrX  | 55205477  | 55206210  | 734 |
| chr6  | 2228837   | 2229570   | 734 |
| chr19 | 19139923  | 19140656  | 734 |
| chr18 | 50916622  | 50917355  | 734 |
| chr18 | 55305476  | 55306207  | 732 |
| chr5  | 30605049  | 30605779  | 731 |
| chrX  | 61758681  | 61759410  | 730 |
| chr19 | 39388727  | 39389456  | 730 |
| chr19 | 29124034  | 29124763  | 730 |
| chrX  | 20120787  | 20121515  | 729 |
| chr8  | 7616637   | 7617365   | 729 |
| chr18 | 45166399  | 45167127  | 729 |
| chr16 | 47115337  | 47116064  | 728 |
| chr10 | 16921164  | 16921891  | 728 |
| chr8  | 78695756  | 78696482  | 727 |
| chr23 | 11033031  | 11033757  | 727 |
| chr20 | 6681162   | 6681888   | 727 |
| chr18 | 6606051   | 6606777   | 727 |
| chr29 | 42399311  | 42400034  | 724 |
| chr10 | 4545305   | 4546026   | 722 |
| chr7  | 81428306  | 81429026  | 721 |
| chr13 | 46218148  | 46218868  | 721 |
| chr13 | 2967368   | 2968087   | 720 |
| chr16 | 71111352  | 71112070  | 719 |
| chr24 | 1731836   | 1732553   | 718 |
| chr9  | 106562064 | 106562780 | 717 |
| chrX  | 66784601  | 66785316  | 716 |
| chr5  | 72177645  | 72178360  | 716 |
| chr7  | 19372783  | 19373497  | 715 |
| chr7  | 15441560  | 15442274  | 715 |
| chr10 | 19423332  | 19424046  | 715 |
| chr25 | 34281197  | 34281910  | 714 |
| chr23 | 10556466  | 10557179  | 714 |

|       |           |           |     |
|-------|-----------|-----------|-----|
| chr18 | 62701697  | 62702410  | 714 |
| chr19 | 54802065  | 54802776  | 712 |
| chr9  | 92189877  | 92190586  | 710 |
| chr5  | 115159757 | 115160466 | 710 |
| chr26 | 38268535  | 38269244  | 710 |
| chr3  | 8805866   | 8806573   | 708 |
| chr2  | 121893902 | 121894609 | 708 |
| chr15 | 25572694  | 25573400  | 707 |
| chr10 | 5346904   | 5347610   | 707 |
| chrX  | 38980397  | 38981102  | 706 |
| chrX  | 35738108  | 35738813  | 706 |
| chr8  | 63661481  | 63662186  | 706 |
| chr25 | 4618104   | 4618808   | 705 |
| chr19 | 27914456  | 27915159  | 704 |
| chr5  | 112050912 | 112051613 | 702 |
| chr20 | 27304684  | 27305385  | 702 |
| chrX  | 19804988  | 19805688  | 701 |
| chrX  | 78371020  | 78371719  | 700 |
| chrX  | 55509193  | 55509892  | 700 |
| chr4  | 43939307  | 43940006  | 700 |
| chr25 | 44025248  | 44025947  | 700 |
| chr24 | 60266007  | 60266705  | 699 |
| chrX  | 80276025  | 80276722  | 698 |
| chrX  | 57839373  | 57840070  | 698 |
| chrX  | 6458831   | 6459528   | 698 |
| chr21 | 33827831  | 33828526  | 696 |
| chr7  | 50547044  | 50547738  | 695 |
| chr8  | 114249308 | 114250001 | 694 |
| chr4  | 67946208  | 67946900  | 693 |
| chr3  | 8577406   | 8578098   | 693 |
| chr14 | 52286889  | 52287581  | 693 |
| chr12 | 76631907  | 76632599  | 693 |
| chr4  | 34015667  | 34016358  | 692 |
| chr11 | 100689747 | 100690438 | 692 |
| chr9  | 63404806  | 63405496  | 691 |
| chr15 | 71861867  | 71862557  | 691 |
| chr12 | 82904585  | 82905275  | 691 |
| chr3  | 51567549  | 51568237  | 689 |
| chr16 | 61650179  | 61650866  | 688 |
| chrX  | 34132823  | 34133509  | 687 |
| chr7  | 10641643  | 10642329  | 687 |
| chr3  | 114930314 | 114931000 | 687 |
| chr11 | 77562839  | 77563525  | 687 |
| chr22 | 50889670  | 50890355  | 686 |
| chr10 | 4983059   | 4983744   | 686 |
| chrX  | 31610160  | 31610844  | 685 |
| chr29 | 23645617  | 23646301  | 685 |
| chr14 | 6528307   | 6528991   | 685 |
| chrX  | 53738221  | 53738904  | 684 |
| chrX  | 31670800  | 31671483  | 684 |

|       |               |           |     |
|-------|---------------|-----------|-----|
| chr25 | 30461556      | 30462239  | 684 |
| chr1  | 1131093       | 1131776   | 684 |
| chrX  | 34130374      | 34131056  | 683 |
| chr3  | 33130975      | 33131657  | 683 |
| chr26 | 37675169      | 37675851  | 683 |
| chr22 | 56467539      | 56468220  | 682 |
| chrX  | 80842242      | 80842921  | 680 |
| chrX  | 33748522      | 33749199  | 678 |
| chr7  | 42403270      | 42403947  | 678 |
| chrX  | 60476257      | 60476933  | 677 |
| chrX  | 30697739      | 30698415  | 677 |
| chrX  | 61675610      | 61676285  | 676 |
| chrX  | 39062788      | 39063463  | 676 |
| chr10 | 12660078      | 12660753  | 676 |
| chrX  | 48014028      | 48014702  | 675 |
| chr16 | 48000004      | 48000678  | 675 |
| chr11 | 70696658      | 70697332  | 675 |
| chr5  | 113702527     | 113703200 | 674 |
| chr3  | 3440791       | 3441464   | 674 |
| chr11 | 49324651      | 49325324  | 674 |
| chr7  | 60120738      | 60121410  | 673 |
| chr3  | 9187618       | 9188290   | 673 |
| chr26 | 31376540      | 31377211  | 672 |
| chr9  | 64804087      | 64804757  | 671 |
| chr19 | 54270698      | 54271368  | 671 |
| chr19 | 39353888      | 39354558  | 671 |
| chr18 | 4045824       | 4046492   | 669 |
| chrX  | 19876450      | 19877117  | 668 |
| chr28 | 25880908      | 25881575  | 668 |
| chr9  | 29465999      | 29466665  | 667 |
| chr8  | 93080730      | 93081396  | 667 |
| chr10 | 70151300      | 70151966  | 667 |
| chr6  | 72039681      | 72040346  | 666 |
| chr19 | 56102275      | 56102940  | 666 |
| chr5  | 122287365     | 122288028 | 664 |
| chr22 | 59413743      | 59414406  | 664 |
| chr10 | 17303431      | 17304094  | 664 |
| chrX  | 78602460      | 78603122  | 663 |
| chr27 | 26761953      | 26762615  | 663 |
| chr11 | 77575923      | 77576585  | 663 |
| chrX  | 369186 369846 | 661       |     |
| chr4  | 72298953      | 72299613  | 661 |
| chr23 | 27783689      | 27784349  | 661 |
| chrX  | 75478189      | 75478848  | 660 |
| chrX  | 35490550      | 35491209  | 660 |
| chr13 | 67139981      | 67140640  | 660 |
| chrX  | 50945690      | 50946348  | 659 |
| chrX  | 59598914      | 59599571  | 658 |
| chr27 | 26903180      | 26903837  | 658 |
| chr13 | 60385777      | 60386434  | 658 |

|       |           |           |     |
|-------|-----------|-----------|-----|
| chrX  | 5866004   | 5866660   | 657 |
| chr7  | 43515897  | 43516552  | 656 |
| chr4  | 117877541 | 117878196 | 656 |
| chrX  | 62998279  | 62998933  | 655 |
| chr19 | 23047113  | 23047767  | 655 |
| chr11 | 77655430  | 77656084  | 655 |
| chr6  | 120764341 | 120764994 | 654 |
| chr4  | 121711880 | 121712533 | 654 |
| chr19 | 7763802   | 7764455   | 654 |
| chr23 | 10550135  | 10550787  | 653 |
| chr17 | 66869070  | 66869722  | 653 |
| chr5  | 121314357 | 121315008 | 652 |
| chr26 | 50064620  | 50065271  | 652 |
| chr26 | 49303359  | 49304010  | 652 |
| chr12 | 34401858  | 34402509  | 652 |
| chr11 | 70840790  | 70841441  | 652 |
| chr19 | 55746353  | 55747003  | 651 |
| chr3  | 64490872  | 64491521  | 650 |
| chr27 | 26769263  | 26769912  | 650 |
| chrX  | 18433999  | 18434647  | 649 |
| chr18 | 53234900  | 53235547  | 648 |
| chr24 | 35330139  | 35330785  | 647 |
| chr16 | 44149149  | 44149795  | 647 |
| chr8  | 20932096  | 20932741  | 646 |
| chr3  | 122126034 | 122126679 | 646 |
| chr17 | 72986965  | 72987610  | 646 |
| chr10 | 74860293  | 74860938  | 646 |
| chrX  | 54101890  | 54102534  | 645 |
| chr5  | 120397748 | 120398392 | 645 |
| chr19 | 39847873  | 39848517  | 645 |
| chr25 | 29298789  | 29299432  | 644 |
| chr28 | 1263885   | 1264527   | 643 |
| chrX  | 75743524  | 75744165  | 642 |
| chrX  | 66609937  | 66610578  | 642 |
| chr13 | 67721181  | 67721821  | 641 |
| chrX  | 54422941  | 54423580  | 640 |
| chr24 | 1709617   | 1710256   | 640 |
| chr18 | 46874732  | 46875371  | 640 |
| chr27 | 45266658  | 45267296  | 639 |
| chr6  | 31699428  | 31700065  | 638 |
| chr18 | 56771592  | 56772229  | 638 |
| chr7  | 44910753  | 44911389  | 637 |
| chr17 | 57624116  | 57624752  | 637 |
| chr15 | 26786240  | 26786876  | 637 |
| chr10 | 32259891  | 32260527  | 637 |
| chrX  | 19432569  | 19433204  | 636 |
| chr15 | 29131157  | 29131791  | 635 |
| chrX  | 73339001  | 73339634  | 634 |
| chr3  | 116951009 | 116951642 | 634 |
| chr14 | 1926704   | 1927337   | 634 |

|       |               |           |     |
|-------|---------------|-----------|-----|
| chr10 | 3529437       | 3530069   | 633 |
| chrX  | 74871114      | 74871745  | 632 |
| chr27 | 27700497      | 27701128  | 632 |
| chr19 | 29123104      | 29123734  | 631 |
| chr17 | 54293035      | 54293665  | 631 |
| chr24 | 60565203      | 60565832  | 630 |
| chr16 | 64452421      | 64453050  | 630 |
| chrX  | 6594108       | 6594736   | 629 |
| chr5  | 31554549      | 31555177  | 629 |
| chr3  | 119275780     | 119276408 | 629 |
| chr29 | 41712999      | 41713627  | 629 |
| chr14 | 6983982       | 6984610   | 629 |
| chr4  | 72034986      | 72035613  | 628 |
| chr1  | 74634595      | 74635222  | 628 |
| chrX  | 20352295      | 20352921  | 627 |
| chr28 | 1265339       | 1265965   | 627 |
| chr25 | 22581225      | 22581851  | 627 |
| chr12 | 34332291      | 34332916  | 626 |
| chr3  | 35792335      | 35792959  | 625 |
| chr3  | 115464191     | 115464813 | 623 |
| chr18 | 54208503      | 54209125  | 623 |
| chrX  | 20463319      | 20463940  | 622 |
| chr13 | 77721160      | 77721781  | 622 |
| chrX  | 8195370       | 8195990   | 621 |
| chrX  | 449867 450487 | 621       |     |
| chr7  | 46084165      | 46084785  | 621 |
| chr5  | 113196436     | 113197056 | 621 |
| chr19 | 39527378      | 39527998  | 621 |
| chr14 | 1384797       | 1385417   | 621 |
| chr29 | 33688778      | 33689397  | 620 |
| chrX  | 34021840      | 34022458  | 619 |
| chr25 | 652501 653119 | 619       |     |
| chrX  | 11151446      | 11152063  | 618 |
| chrX  | 68269336      | 68269952  | 617 |
| chr28 | 42524675      | 42525291  | 617 |
| chr29 | 38380715      | 38381330  | 616 |
| chr19 | 27062497      | 27063112  | 616 |
| chr19 | 21717256      | 21717871  | 616 |
| chr11 | 104476012     | 104476627 | 616 |
| chrX  | 30699095      | 30699709  | 615 |
| chr5  | 1182538       | 1183152   | 615 |
| chrX  | 59386051      | 59386664  | 614 |
| chr9  | 83790813      | 83791426  | 614 |
| chr3  | 105771316     | 105771929 | 614 |
| chr20 | 71870022      | 71870634  | 613 |
| chr17 | 48921225      | 48921837  | 613 |
| chr16 | 59039806      | 59040418  | 613 |
| chr3  | 51911997      | 51912608  | 612 |
| chr28 | 26790889      | 26791500  | 612 |
| chr23 | 28900013      | 28900624  | 612 |

|       |           |           |     |
|-------|-----------|-----------|-----|
| chr23 | 8063215   | 8063826   | 612 |
| chrX  | 50195654  | 50196264  | 611 |
| chrX  | 30137489  | 30138098  | 610 |
| chr7  | 51856962  | 51857571  | 610 |
| chr28 | 26074758  | 26075365  | 608 |
| chr10 | 36368648  | 36369255  | 608 |
| chr11 | 77739779  | 77740385  | 607 |
| chrX  | 7585990   | 7586595   | 606 |
| chr7  | 4343850   | 4344455   | 606 |
| chr4  | 110811784 | 110812389 | 606 |
| chr7  | 46174673  | 46175277  | 605 |
| chr13 | 52958049  | 52958653  | 605 |
| chr7  | 50343669  | 50344272  | 604 |
| chr26 | 47956318  | 47956921  | 604 |
| chr18 | 11487448  | 11488051  | 604 |
| chr11 | 100726752 | 100727355 | 604 |
| chr1  | 1550111   | 1550712   | 602 |
| chrX  | 11033802  | 11034402  | 601 |
| chr18 | 56663550  | 56664150  | 601 |
| chr16 | 48786480  | 48787080  | 601 |
| chr25 | 37778554  | 37779153  | 600 |
| chr19 | 58333681  | 58334279  | 599 |
| chr5  | 112780541 | 112781138 | 598 |
| chr4  | 69933547  | 69934144  | 598 |
| chr3  | 22475812  | 22476409  | 598 |
| chr12 | 78816445  | 78817042  | 598 |
| chr11 | 70779945  | 70780542  | 598 |
| chr9  | 100065566 | 100066162 | 597 |
| chr14 | 7800968   | 7801564   | 597 |
| chrX  | 50512133  | 50512728  | 596 |
| chr29 | 45906570  | 45907165  | 596 |
| chr24 | 60828754  | 60829349  | 596 |
| chrX  | 50512946  | 50513539  | 594 |
| chr15 | 64494503  | 64495096  | 594 |
| chr1  | 84686346  | 84686939  | 594 |
| chr23 | 30530106  | 30530698  | 593 |
| chr19 | 60705547  | 60706138  | 592 |
| chr10 | 17446525  | 17447116  | 592 |
| chr5  | 71714935  | 71715525  | 591 |
| chr20 | 65531075  | 65531665  | 591 |
| chrX  | 47654926  | 47655515  | 590 |
| chrX  | 13005103  | 13005692  | 590 |
| chr29 | 45766928  | 45767517  | 590 |
| chr19 | 26666365  | 26666954  | 590 |
| chr19 | 14065134  | 14065723  | 590 |
| chr11 | 104961869 | 104962457 | 589 |
| chr13 | 68923107  | 68923693  | 587 |
| chrX  | 7013032   | 7013617   | 586 |
| chr2  | 114194950 | 114195535 | 586 |
| chrX  | 6909305   | 6909889   | 585 |

|       |               |           |     |
|-------|---------------|-----------|-----|
| chr15 | 24540327      | 24540911  | 585 |
| chr3  | 104480939     | 104481522 | 584 |
| chr29 | 51862366      | 51862949  | 584 |
| chrX  | 74528260      | 74528842  | 583 |
| chr2  | 116702972     | 116703554 | 583 |
| chr19 | 35054455      | 35055037  | 583 |
| chr17 | 73428034      | 73428615  | 582 |
| chrX  | 35592843      | 35593423  | 581 |
| chr20 | 6595110       | 6595690   | 581 |
| chr2  | 99345724      | 99346304  | 581 |
| chr17 | 70044653      | 70045233  | 581 |
| chr16 | 2102721       | 2103301   | 581 |
| chr13 | 41736874      | 41737454  | 581 |
| chr11 | 9466113       | 9466693   | 581 |
| chr10 | 8712513       | 8713093   | 581 |
| chr1  | 68921390      | 68921970  | 581 |
| chr8  | 91550722      | 91551299  | 578 |
| chr29 | 49052416      | 49052993  | 578 |
| chr7  | 46576231      | 46576807  | 577 |
| chr24 | 41099060      | 41099636  | 577 |
| chr18 | 35131416      | 35131992  | 577 |
| chr17 | 41482345      | 41482921  | 577 |
| chr15 | 26757951      | 26758527  | 577 |
| chrX  | 75937400      | 75937975  | 576 |
| chr5  | 111021877     | 111022452 | 576 |
| chrX  | 53885363      | 53885937  | 575 |
| chr23 | 18847680      | 18848254  | 575 |
| chr14 | 36738866      | 36739440  | 575 |
| chrX  | 59398116      | 59398689  | 574 |
| chr8  | 76021114      | 76021686  | 573 |
| chrX  | 75442012      | 75442583  | 572 |
| chrX  | 36319542      | 36320113  | 572 |
| chr5  | 52959324      | 52959895  | 572 |
| chr22 | 46581691      | 46582262  | 572 |
| chr21 | 58717396      | 58717967  | 572 |
| chr13 | 59869484      | 59870054  | 571 |
| chr11 | 14226910      | 14227480  | 571 |
| chrX  | 77700023      | 77700592  | 570 |
| chrX  | 35653449      | 35654018  | 570 |
| chr8  | 78838859      | 78839428  | 570 |
| chr24 | 40805896      | 40806465  | 570 |
| chr15 | 73760073      | 73760642  | 570 |
| chr10 | 967842 968411 | 570       |     |
| chr20 | 704466 705033 | 568       |     |
| chr19 | 39365675      | 39366242  | 568 |
| chrX  | 47335824      | 47336389  | 566 |
| chr25 | 35557995      | 35558560  | 566 |
| chr16 | 72180595      | 72181160  | 566 |
| chr2  | 49762407      | 49762971  | 565 |
| chr13 | 21986411      | 21986975  | 565 |

|       |           |           |     |
|-------|-----------|-----------|-----|
| chrX  | 74640549  | 74641112  | 564 |
| chr5  | 30673491  | 30674054  | 564 |
| chr29 | 48938915  | 48939478  | 564 |
| chr18 | 11228623  | 11229186  | 564 |
| chr15 | 41242967  | 41243530  | 564 |
| chr3  | 119677227 | 119677789 | 563 |
| chr3  | 115091500 | 115092062 | 563 |
| chr24 | 44045524  | 44046086  | 563 |
| chr19 | 30408617  | 30409179  | 563 |
| chr10 | 70167377  | 70167939  | 563 |
| chr5  | 119902189 | 119902750 | 562 |
| chr19 | 33124776  | 33125337  | 562 |
| chr11 | 109776266 | 109776827 | 562 |
| chrX  | 74926308  | 74926868  | 561 |
| chr21 | 64502825  | 64503385  | 561 |
| chr20 | 74053872  | 74054432  | 561 |
| chr2  | 134694673 | 134695233 | 561 |
| chr17 | 64283450  | 64284010  | 561 |
| chr28 | 33932470  | 33933029  | 560 |
| chr24 | 33782024  | 33782583  | 560 |
| chr24 | 20397577  | 20398136  | 560 |
| chr17 | 73189040  | 73189599  | 560 |
| chr3  | 121643436 | 121643994 | 559 |
| chr15 | 26720876  | 26721434  | 559 |
| chr4  | 79304331  | 79304888  | 558 |
| chr16 | 23635470  | 23636027  | 558 |
| chr7  | 45693322  | 45693878  | 557 |
| chr19 | 39834348  | 39834904  | 557 |
| chr18 | 54968691  | 54969247  | 557 |
| chr19 | 28206943  | 28207498  | 556 |
| chrX  | 56376411  | 56376965  | 555 |
| chr21 | 33019530  | 33020084  | 555 |
| chr7  | 44074746  | 44075299  | 554 |
| chr2  | 128155247 | 128155800 | 554 |
| chrX  | 22585441  | 22585992  | 552 |
| chr23 | 27778672  | 27779223  | 552 |
| chr16 | 44150777  | 44151328  | 552 |
| chrX  | 10992032  | 10992582  | 551 |
| chr9  | 36073013  | 36073563  | 551 |
| chr20 | 8612025   | 8612575   | 551 |
| chr2  | 138656757 | 138657307 | 551 |
| chr17 | 69489125  | 69489675  | 551 |
| chrX  | 54511820  | 54512369  | 550 |
| chr20 | 8388347   | 8388896   | 550 |
| chr17 | 68556461  | 68557010  | 550 |
| chr12 | 84216228  | 84216777  | 550 |
| chr4  | 98830292  | 98830840  | 549 |
| chr7  | 17970362  | 17970909  | 548 |
| chr23 | 52454259  | 52454806  | 548 |
| chr17 | 69491632  | 69492179  | 548 |



|       |           |           |     |
|-------|-----------|-----------|-----|
| chr11 | 103636836 | 103637383 | 548 |
| chrX  | 21048936  | 21049482  | 547 |
| chr21 | 11887104  | 11887650  | 547 |
| chr15 | 30055364  | 30055910  | 547 |
| chrX  | 80815240  | 80815785  | 546 |
| chrX  | 8718856   | 8719401   | 546 |
| chr3  | 118028240 | 118028785 | 546 |
| chr29 | 48885401  | 48885946  | 546 |
| chr21 | 31013114  | 31013659  | 546 |
| chr13 | 2520320   | 2520865   | 546 |
| chr19 | 39449032  | 39449576  | 545 |
| chr12 | 31967242  | 31967786  | 545 |
| chr10 | 36600791  | 36601335  | 545 |
| chrX  | 50036203  | 50036746  | 544 |
| chr3  | 30436786  | 30437329  | 544 |
| chr29 | 36839714  | 36840257  | 544 |
| chr8  | 28511559  | 28512101  | 543 |
| chrX  | 54347238  | 54347779  | 542 |
| chrX  | 8338462   | 8339003   | 542 |
| chrX  | 7653236   | 7653777   | 542 |
| chr2  | 61111752  | 61112293  | 542 |
| chr19 | 54435070  | 54435611  | 542 |
| chr8  | 63930351  | 63930891  | 541 |
| chr5  | 29095620  | 29096160  | 541 |
| chr25 | 29112441  | 29112981  | 541 |
| chr13 | 67399460  | 67400000  | 541 |
| chr11 | 70860535  | 70861075  | 541 |
| chrX  | 37435165  | 37435703  | 539 |
| chr6  | 105976863 | 105977401 | 539 |
| chr3  | 98224220  | 98224758  | 539 |
| chr3  | 20573988  | 20574526  | 539 |
| chr22 | 52826881  | 52827419  | 539 |
| chr2  | 126028065 | 126028603 | 539 |
| chr14 | 40044082  | 40044620  | 539 |
| chr22 | 29771956  | 29772493  | 538 |
| chr15 | 55179028  | 55179565  | 538 |
| chr5  | 114240032 | 114240568 | 537 |
| chr25 | 36457817  | 36458353  | 537 |
| chr18 | 45990608  | 45991144  | 537 |
| chr11 | 87909480  | 87910016  | 537 |
| chr29 | 33689512  | 33690047  | 536 |
| chr2  | 23188375  | 23188910  | 536 |
| chr11 | 77666093  | 77666628  | 536 |
| chr23 | 52681024  | 52681558  | 535 |
| chr17 | 70280441  | 70280975  | 535 |
| chr7  | 5041880   | 5042413   | 534 |
| chr15 | 51656718  | 51657251  | 534 |
| chr10 | 8538482   | 8539013   | 532 |
| chr23 | 44101117  | 44101647  | 531 |
| chr2  | 136971353 | 136971882 | 530 |

|       |           |           |     |
|-------|-----------|-----------|-----|
| chr18 | 1832223   | 1832752   | 530 |
| chr22 | 59637481  | 59638009  | 529 |
| chr16 | 1595113   | 1595641   | 529 |
| chr12 | 32147648  | 32148176  | 529 |
| chrX  | 2543517   | 2544044   | 528 |
| chr27 | 26548498  | 26549025  | 528 |
| chr26 | 34311278  | 34311805  | 528 |
| chr13 | 59921028  | 59921555  | 528 |
| chrX  | 6355562   | 6356088   | 527 |
| chr27 | 35398233  | 35398759  | 527 |
| chr17 | 70336041  | 70336567  | 527 |
| chrX  | 80096942  | 80097467  | 526 |
| chrX  | 53421060  | 53421585  | 526 |
| chr3  | 102668486 | 102669011 | 526 |
| chrX  | 55406488  | 55407012  | 525 |
| chr18 | 11818310  | 11818834  | 525 |
| chrX  | 64019320  | 64019843  | 524 |
| chr24 | 33929725  | 33930248  | 524 |
| chr13 | 46219475  | 46219998  | 524 |
| chr22 | 30262283  | 30262805  | 523 |
| chr22 | 30031160  | 30031682  | 523 |
| chr13 | 72601303  | 72601825  | 523 |
| chr7  | 17490108  | 17490629  | 522 |
| chrX  | 39201477  | 39201997  | 521 |
| chr5  | 28287096  | 28287616  | 521 |
| chr2  | 92456967  | 92457487  | 521 |
| chr10 | 7511788   | 7512308   | 521 |
| chrX  | 60060451  | 60060970  | 520 |
| chrX  | 30143380  | 30143899  | 520 |
| chr18 | 6610234   | 6610753   | 520 |
| chr15 | 24398524  | 24399043  | 520 |
| chr26 | 41325556  | 41326073  | 518 |
| chr23 | 28856523  | 28857040  | 518 |
| chr19 | 55744152  | 55744669  | 518 |
| chrX  | 22442228  | 22442744  | 517 |
| chr26 | 18185478  | 18185994  | 517 |
| chr18 | 11786721  | 11787237  | 517 |
| chr15 | 76617566  | 76618081  | 516 |
| chr25 | 36450290  | 36450804  | 515 |
| chr1  | 74589575  | 74590089  | 515 |
| chrX  | 10711962  | 10712473  | 512 |
| chr25 | 4619556   | 4620067   | 512 |
| chr23 | 52741052  | 52741563  | 512 |
| chr13 | 29975912  | 29976423  | 512 |
| chrX  | 66933724  | 66934234  | 511 |
| chr12 | 36423440  | 36423950  | 511 |
| chr7  | 37388752  | 37389261  | 510 |
| chr25 | 29123581  | 29124090  | 510 |
| chr21 | 34172389  | 34172898  | 510 |
| chr13 | 57622755  | 57623264  | 510 |

|       |               |           |     |
|-------|---------------|-----------|-----|
| chrX  | 49103154      | 49103662  | 509 |
| chr27 | 23987737      | 23988245  | 509 |
| chr11 | 106242530     | 106243038 | 509 |
| chrX  | 73244255      | 73244762  | 508 |
| chr8  | 27066650      | 27067157  | 508 |
| chr7  | 3973552       | 3974059   | 508 |
| chr12 | 48061865      | 48062372  | 508 |
| chrX  | 8159666       | 8160172   | 507 |
| chr9  | 33772650      | 33773156  | 507 |
| chr5  | 81502977      | 81503483  | 507 |
| chr13 | 40332108      | 40332614  | 507 |
| chr11 | 81425023      | 81425529  | 507 |
| chr20 | 4972324       | 4972829   | 506 |
| chrX  | 31951461      | 31951965  | 505 |
| chr18 | 49713587      | 49714091  | 505 |
| chrX  | 79776800      | 79777303  | 504 |
| chrX  | 34018024      | 34018527  | 504 |
| chr8  | 9350257       | 9350760   | 504 |
| chr21 | 67061421      | 67061924  | 504 |
| chr19 | 37924820      | 37925323  | 504 |
| chrX  | 64517160      | 64517662  | 503 |
| chr7  | 80366741      | 80367243  | 503 |
| chr27 | 297837 298339 |           | 503 |
| chr14 | 7795729       | 7796231   | 503 |
| chr7  | 59962741      | 59963242  | 502 |
| chr3  | 116404593     | 116405094 | 502 |
| chr27 | 15765812      | 15766313  | 502 |
| chr25 | 2538525       | 2539026   | 502 |
| chr15 | 33495334      | 33495835  | 502 |
| chr18 | 7088345       | 7088845   | 501 |
| chrX  | 65065815      | 65066314  | 500 |
| chr23 | 27786517      | 27787016  | 500 |
| chr19 | 59295070      | 59295569  | 500 |
| chrX  | 62495887      | 62496385  | 499 |
| chrX  | 7616030       | 7616528   | 499 |
| chr8  | 61041741      | 61042239  | 499 |
| chr26 | 18493809      | 18494307  | 499 |
| chr12 | 76555356      | 76555854  | 499 |
| chrX  | 72905984      | 72906481  | 498 |
| chrX  | 58744529      | 58745026  | 498 |
| chrX  | 3879364       | 3879861   | 498 |
| chr7  | 50364623      | 50365120  | 498 |
| chr14 | 1139509       | 1140006   | 498 |
| chrX  | 10582008      | 10582504  | 497 |
| chrX  | 9666301       | 9666797   | 497 |
| chr29 | 26759903      | 26760399  | 497 |
| chr16 | 2916689       | 2917185   | 497 |
| chr6  | 8015943       | 8016438   | 496 |
| chr23 | 11967847      | 11968342  | 496 |
| chrX  | 38382810      | 38383304  | 495 |

|       |               |           |     |
|-------|---------------|-----------|-----|
| chr19 | 13506583      | 13507077  | 495 |
| chr18 | 3647301       | 3647795   | 495 |
| chrX  | 78576327      | 78576820  | 494 |
| chr8  | 106653588     | 106654081 | 494 |
| chr5  | 35298371      | 35298864  | 494 |
| chr2  | 127667031     | 127667524 | 494 |
| chr16 | 31705788      | 31706281  | 494 |
| chr13 | 17562554      | 17563047  | 494 |
| chr10 | 104761695     | 104762188 | 494 |
| chr3  | 9187068       | 9187560   | 493 |
| chr2  | 123015982     | 123016474 | 493 |
| chr17 | 76006522      | 76007014  | 493 |
| chrX  | 78575120      | 78575611  | 492 |
| chr19 | 44078407      | 44078898  | 492 |
| chrX  | 6448935       | 6449425   | 491 |
| chr19 | 12409505      | 12409995  | 491 |
| chr29 | 18236976      | 18237465  | 490 |
| chr23 | 10493714      | 10494203  | 490 |
| chr18 | 62443443      | 62443932  | 490 |
| chr18 | 45512862      | 45513351  | 490 |
| chr13 | 41740320      | 41740808  | 489 |
| chr7  | 10841100      | 10841587  | 488 |
| chr24 | 48576759      | 48577246  | 488 |
| chr14 | 42302583      | 42303070  | 488 |
| chr14 | 59027579      | 59028065  | 487 |
| chr3  | 15422144      | 15422629  | 486 |
| chr19 | 28185019      | 28185504  | 486 |
| chrX  | 74447915      | 74448399  | 485 |
| chr5  | 73069551      | 73070035  | 485 |
| chrX  | 18826296      | 18826779  | 484 |
| chrX  | 10003107      | 10003590  | 484 |
| chr29 | 31791380      | 31791863  | 484 |
| chr14 | 34085986      | 34086469  | 484 |
| chr13 | 57398165      | 57398648  | 484 |
| chrX  | 73899439      | 73899921  | 483 |
| chrX  | 54590550      | 54591032  | 483 |
| chrX  | 9937345       | 9937827   | 483 |
| chr19 | 34053841      | 34054323  | 483 |
| chrX  | 743603 744084 |           | 482 |
| chr16 | 2099685       | 2100166   | 482 |
| chrX  | 21620886      | 21621366  | 481 |
| chrX  | 18885739      | 18886219  | 481 |
| chr6  | 120973115     | 120973595 | 481 |
| chr5  | 120513485     | 120513965 | 481 |
| chrX  | 78771486      | 78771965  | 480 |
| chrX  | 50577901      | 50578380  | 480 |
| chr7  | 94376578      | 94377057  | 480 |
| chr18 | 13143898      | 13144377  | 480 |
| chr26 | 22210565      | 22211042  | 478 |
| chr19 | 38773711      | 38774188  | 478 |

|       |           |           |     |
|-------|-----------|-----------|-----|
| chrX  | 69258740  | 69259216  | 477 |
| chr6  | 101073059 | 101073535 | 477 |
| chr23 | 48783491  | 48783967  | 477 |
| chr2  | 15393562  | 15394038  | 477 |
| chr13 | 77535005  | 77535481  | 477 |
| chr13 | 59849512  | 59849988  | 477 |
| chr10 | 84203930  | 84204406  | 477 |
| chr11 | 89067167  | 89067642  | 476 |
| chrX  | 64840598  | 64841072  | 475 |
| chrX  | 2351007   | 2351481   | 475 |
| chr17 | 62508015  | 62508489  | 475 |
| chrX  | 48017005  | 48017478  | 474 |
| chr7  | 21161353  | 21161826  | 474 |
| chr4  | 71493728  | 71494201  | 474 |
| chr25 | 4620895   | 4621368   | 474 |
| chrX  | 78537177  | 78537649  | 473 |
| chrX  | 13521979  | 13522450  | 472 |
| chr5  | 36609345  | 36609816  | 472 |
| chr25 | 15269869  | 15270340  | 472 |
| chrX  | 57102158  | 57102628  | 471 |
| chr3  | 7824034   | 7824504   | 471 |
| chr26 | 48571526  | 48571996  | 471 |
| chr23 | 14796310  | 14796780  | 471 |
| chr21 | 33925642  | 33926112  | 471 |
| chr18 | 3632623   | 3633093   | 471 |
| chr23 | 18633836  | 18634305  | 470 |
| chr2  | 75597571  | 75598040  | 470 |
| chr11 | 70853656  | 70854125  | 470 |
| chrX  | 61250452  | 61250920  | 469 |
| chr12 | 24623687  | 24624155  | 469 |
| chr10 | 103506373 | 103506841 | 469 |
| chrX  | 8179032   | 8179499   | 468 |
| chrX  | 80174304  | 80174770  | 467 |
| chr15 | 64476256  | 64476722  | 467 |
| chr12 | 31985272  | 31985738  | 467 |
| chr11 | 77780742  | 77781208  | 467 |
| chrX  | 78479865  | 78480330  | 466 |
| chrX  | 75504932  | 75505396  | 465 |
| chrX  | 61533434  | 61533898  | 465 |
| chrX  | 6376199   | 6376663   | 465 |
| chr5  | 31553460  | 31553924  | 465 |
| chr4  | 4597632   | 4598096   | 465 |
| chr3  | 121785364 | 121785828 | 465 |
| chr25 | 34399614  | 34400078  | 465 |
| chr19 | 23965983  | 23966447  | 465 |
| chr18 | 11227828  | 11228292  | 465 |
| chrX  | 55871239  | 55871702  | 464 |
| chrX  | 2256416   | 2256879   | 464 |
| chr5  | 113253032 | 113253495 | 464 |
| chr23 | 15818814  | 15819277  | 464 |

|       |           |           |     |
|-------|-----------|-----------|-----|
| chr17 | 69742367  | 69742830  | 464 |
| chrX  | 30632461  | 30632923  | 463 |
| chrX  | 20121582  | 20122044  | 463 |
| chr5  | 85309406  | 85309868  | 463 |
| chr21 | 24491412  | 24491874  | 463 |
| chr20 | 19399912  | 19400374  | 463 |
| chr10 | 88366264  | 88366726  | 463 |
| chrX  | 37591525  | 37591986  | 462 |
| chr7  | 45699977  | 45700438  | 462 |
| chr29 | 38046398  | 38046859  | 462 |
| chr19 | 59460491  | 59460952  | 462 |
| chr19 | 57834050  | 57834511  | 462 |
| chr1  | 152632820 | 152633281 | 462 |
| chrX  | 7637738   | 7638198   | 461 |
| chr25 | 30117065  | 30117525  | 461 |
| chr24 | 51440420  | 51440880  | 461 |
| chr2  | 46203656  | 46204116  | 461 |
| chrX  | 34024604  | 34025063  | 460 |
| chrX  | 2326034   | 2326493   | 460 |
| chr3  | 126909042 | 126909501 | 460 |
| chr20 | 19403253  | 19403712  | 460 |
| chr11 | 77584922  | 77585381  | 460 |
| chr26 | 24337929  | 24338387  | 459 |
| chr20 | 33690404  | 33690862  | 459 |
| chrX  | 74884325  | 74884782  | 458 |
| chrX  | 65801254  | 65801711  | 458 |
| chrX  | 17104301  | 17104758  | 458 |
| chrX  | 9989617   | 9990074   | 458 |
| chr7  | 10962339  | 10962795  | 457 |
| chr5  | 122620435 | 122620891 | 457 |
| chr18 | 23103215  | 23103671  | 457 |
| chr16 | 41438329  | 41438785  | 457 |
| chr13 | 73625183  | 73625639  | 457 |
| chr4  | 30778499  | 30778954  | 456 |
| chr3  | 105718064 | 105718519 | 456 |
| chr14 | 22788057  | 22788512  | 456 |
| chrX  | 21679746  | 21680200  | 455 |
| chr26 | 21825294  | 21825748  | 455 |
| chr4  | 99058867  | 99059320  | 454 |
| chr22 | 47833076  | 47833529  | 454 |
| chrX  | 59152373  | 59152825  | 453 |
| chrX  | 21669813  | 21670265  | 453 |
| chr3  | 105590754 | 105591206 | 453 |
| chr22 | 59563125  | 59563577  | 453 |
| chr22 | 59107979  | 59108430  | 452 |
| chr22 | 16404536  | 16404987  | 452 |
| chr22 | 15992519  | 15992970  | 452 |
| chr17 | 72893845  | 72894296  | 452 |
| chr17 | 72694581  | 72695032  | 452 |
| chrX  | 58793934  | 58794384  | 451 |

|       |           |           |     |
|-------|-----------|-----------|-----|
| chrX  | 9669372   | 9669822   | 451 |
| chr5  | 121739007 | 121739457 | 451 |
| chr22 | 59677617  | 59678067  | 451 |
| chr11 | 10248919  | 10249369  | 451 |
| chr1  | 147245805 | 147246255 | 451 |
| chr21 | 62460702  | 62461151  | 450 |
| chr15 | 75762256  | 75762705  | 450 |
| chrX  | 74806488  | 74806936  | 449 |
| chr7  | 39080908  | 39081356  | 449 |
| chr13 | 40100897  | 40101345  | 449 |
| chr4  | 63304869  | 63305316  | 448 |
| chrX  | 54551205  | 54551651  | 447 |
| chr22 | 30372354  | 30372800  | 447 |
| chr2  | 135116211 | 135116657 | 447 |
| chr18 | 52876989  | 52877435  | 447 |
| chrX  | 21578108  | 21578553  | 446 |
| chr2  | 132411593 | 132412038 | 446 |
| chr12 | 15173818  | 15174263  | 446 |
| chrX  | 61169522  | 61169966  | 445 |
| chr8  | 112474780 | 112475224 | 445 |
| chr27 | 27699964  | 27700408  | 445 |
| chr19 | 39420078  | 39420522  | 445 |
| chr13 | 76110121  | 76110565  | 445 |
| chrX  | 65898514  | 65898957  | 444 |
| chrX  | 11975568  | 11976011  | 444 |
| chrX  | 7202686   | 7203129   | 444 |
| chr28 | 42355685  | 42356128  | 444 |
| chr18 | 11494299  | 11494742  | 444 |
| chr10 | 35811752  | 35812195  | 444 |
| chr19 | 10817221  | 10817663  | 443 |
| chr13 | 75804369  | 75804811  | 443 |
| chr12 | 32927285  | 32927727  | 443 |
| chrX  | 76105800  | 76106241  | 442 |
| chr8  | 9365072   | 9365513   | 442 |
| chr5  | 111692186 | 111692627 | 442 |
| chr20 | 3205705   | 3206146   | 442 |
| chr19 | 52477455  | 52477896  | 442 |
| chr15 | 30158506  | 30158947  | 442 |
| chr13 | 78028823  | 78029264  | 442 |
| chrX  | 58562188  | 58562628  | 441 |
| chr10 | 19863597  | 19864037  | 441 |
| chrX  | 6266253   | 6266692   | 440 |
| chr25 | 14760459  | 14760898  | 440 |
| chr24 | 49364137  | 49364576  | 440 |
| chr16 | 38942295  | 38942734  | 440 |
| chrX  | 13346000  | 13346438  | 439 |
| chrX  | 8248075   | 8248513   | 439 |
| chr25 | 8765924   | 8766362   | 439 |
| chr18 | 11776659  | 11777097  | 439 |
| chr18 | 11480609  | 11481047  | 439 |

|       |           |           |     |
|-------|-----------|-----------|-----|
| chr1  | 98992966  | 98993404  | 439 |
| chr24 | 36725798  | 36726235  | 438 |
| chr18 | 52685618  | 52686055  | 438 |
| chr10 | 16909487  | 16909924  | 438 |
| chrX  | 72117666  | 72118102  | 437 |
| chrX  | 56231547  | 56231983  | 437 |
| chrX  | 21787902  | 21788338  | 437 |
| chr7  | 44001476  | 44001912  | 437 |
| chr18 | 55018380  | 55018816  | 437 |
| chr15 | 75215720  | 75216156  | 437 |
| chr14 | 7834698   | 7835134   | 437 |
| chr10 | 88270167  | 88270603  | 437 |
| chrX  | 78382741  | 78383176  | 436 |
| chrX  | 65589885  | 65590320  | 436 |
| chr5  | 29247740  | 29248175  | 436 |
| chr3  | 116421606 | 116422041 | 436 |
| chr25 | 42633802  | 42634237  | 436 |
| chr16 | 2022647   | 2023082   | 436 |
| chr13 | 74502837  | 74503272  | 436 |
| chr10 | 87163057  | 87163492  | 436 |
| chrX  | 63844565  | 63844999  | 435 |
| chrX  | 7710385   | 7710819   | 435 |
| chr5  | 124756757 | 124757191 | 435 |
| chr3  | 16044382  | 16044816  | 435 |
| chr2  | 135170088 | 135170522 | 435 |
| chr18 | 11333237  | 11333671  | 435 |
| chrX  | 75426878  | 75427311  | 434 |
| chrX  | 64800626  | 64801059  | 434 |
| chrX  | 6240571   | 6241004   | 434 |
| chr23 | 32688185  | 32688618  | 434 |
| chr23 | 7830229   | 7830662   | 434 |
| chr2  | 111254562 | 111254995 | 434 |
| chr16 | 44089868  | 44090301  | 434 |
| chr13 | 60188501  | 60188934  | 434 |
| chr13 | 25185126  | 25185559  | 434 |
| chrX  | 53000182  | 53000614  | 433 |
| chr7  | 50543008  | 50543440  | 433 |
| chr20 | 74096684  | 74097116  | 433 |
| chr9  | 90523416  | 90523847  | 432 |
| chr6  | 121018742 | 121019173 | 432 |
| chr4  | 90995690  | 90996121  | 432 |
| chr20 | 74516594  | 74517025  | 432 |
| chr16 | 2199472   | 2199903   | 432 |
| chr13 | 76587254  | 76587685  | 432 |
| chr13 | 22835577  | 22836008  | 432 |
| chrX  | 56401786  | 56402216  | 431 |
| chrX  | 49996771  | 49997201  | 431 |
| chrX  | 21860828  | 21861258  | 431 |
| chr9  | 93207364  | 93207794  | 431 |
| chr22 | 59414419  | 59414849  | 431 |



|       |               |           |     |
|-------|---------------|-----------|-----|
| chr21 | 47724411      | 47724841  | 431 |
| chr18 | 55192112      | 55192542  | 431 |
| chr13 | 75760190      | 75760620  | 431 |
| chrX  | 45336131      | 45336560  | 430 |
| chrX  | 30596038      | 30596467  | 430 |
| chr26 | 34962913      | 34963342  | 430 |
| chr2  | 111651768     | 111652197 | 430 |
| chr17 | 70278036      | 70278465  | 430 |
| chr12 | 20084898      | 20085327  | 430 |
| chrX  | 18333223      | 18333651  | 429 |
| chr15 | 75574434      | 75574862  | 429 |
| chr14 | 957611 958039 |           | 429 |
| chr10 | 8695947       | 8696375   | 429 |
| chrX  | 50754023      | 50754450  | 428 |
| chrX  | 50704055      | 50704482  | 428 |
| chr8  | 65916456      | 65916883  | 428 |
| chr6  | 121061703     | 121062130 | 428 |
| chr22 | 30108914      | 30109341  | 428 |
| chr21 | 5972978       | 5973405   | 428 |
| chr19 | 53976089      | 53976516  | 428 |
| chr18 | 13726523      | 13726950  | 428 |
| chr17 | 64099884      | 64100311  | 428 |
| chr11 | 28451419      | 28451846  | 428 |
| chrX  | 75882989      | 75883415  | 427 |
| chrX  | 52815475      | 52815901  | 427 |
| chrX  | 49769853      | 49770279  | 427 |
| chrX  | 21144023      | 21144449  | 427 |
| chr24 | 61088514      | 61088940  | 427 |
| chr23 | 30423621      | 30424047  | 427 |
| chr19 | 56604754      | 56605180  | 427 |
| chr16 | 48697386      | 48697812  | 427 |
| chr13 | 35960908      | 35961334  | 427 |
| chr11 | 70716667      | 70717093  | 427 |
| chr1  | 159078325     | 159078751 | 427 |
| chrX  | 56730429      | 56730854  | 426 |
| chr25 | 43683031      | 43683456  | 426 |
| chr13 | 73536754      | 73537179  | 426 |
| chrX  | 64304956      | 64305380  | 425 |
| chr26 | 21811077      | 21811501  | 425 |
| chr14 | 66284663      | 66285087  | 425 |
| chr14 | 7843992       | 7844416   | 425 |
| chrX  | 65134327      | 65134750  | 424 |
| chrX  | 38373058      | 38373481  | 424 |
| chrX  | 19875187      | 19875610  | 424 |
| chr8  | 60103387      | 60103810  | 424 |
| chr5  | 111335037     | 111335460 | 424 |
| chr4  | 85020651      | 85021074  | 424 |
| chr29 | 34863121      | 34863544  | 424 |
| chr29 | 25904762      | 25905185  | 424 |
| chr24 | 23162824      | 23163247  | 424 |

|       |           |           |     |
|-------|-----------|-----------|-----|
| chr23 | 15948041  | 15948464  | 424 |
| chr22 | 57205585  | 57206008  | 424 |
| chr12 | 15274862  | 15275285  | 424 |
| chr26 | 39260352  | 39260774  | 423 |
| chr21 | 24233009  | 24233431  | 423 |
| chr14 | 67529080  | 67529502  | 423 |
| chr13 | 55523811  | 55524233  | 423 |
| chr8  | 9352083   | 9352504   | 422 |
| chr21 | 13643352  | 13643773  | 422 |
| chr16 | 44291698  | 44292119  | 422 |
| chr16 | 42588084  | 42588505  | 422 |
| chrX  | 50598715  | 50599135  | 421 |
| chrX  | 20708637  | 20709057  | 421 |
| chr18 | 51733904  | 51734324  | 421 |
| chr17 | 70334314  | 70334734  | 421 |
| chr17 | 56554282  | 56554702  | 421 |
| chr16 | 47118516  | 47118936  | 421 |
| chrX  | 75409838  | 75410257  | 420 |
| chrX  | 13817379  | 13817798  | 420 |
| chr7  | 94381251  | 94381670  | 420 |
| chr5  | 113184949 | 113185368 | 420 |
| chr25 | 29599608  | 29600027  | 420 |
| chr23 | 31382157  | 31382576  | 420 |
| chr19 | 56314375  | 56314794  | 420 |
| chr19 | 13442944  | 13443363  | 420 |
| chr12 | 32537333  | 32537752  | 420 |
| chr11 | 14504431  | 14504850  | 420 |
| chrX  | 30403885  | 30404303  | 419 |
| chrX  | 10895847  | 10896265  | 419 |
| chr5  | 111184165 | 111184583 | 419 |
| chr5  | 28875511  | 28875929  | 419 |
| chr25 | 34431491  | 34431909  | 419 |
| chr12 | 9699455   | 9699873   | 419 |
| chrX  | 65572352  | 65572769  | 418 |
| chr8  | 1292097   | 1292514   | 418 |
| chr7  | 19182189  | 19182606  | 418 |
| chr5  | 84676168  | 84676585  | 418 |
| chr2  | 21562908  | 21563325  | 418 |
| chr18 | 23594352  | 23594769  | 418 |
| chr13 | 67376779  | 67377196  | 418 |
| chr13 | 40527991  | 40528408  | 418 |
| chr11 | 13923774  | 13924191  | 418 |
| chr7  | 16512256  | 16512672  | 417 |
| chr5  | 120241619 | 120242035 | 417 |
| chr4  | 121419643 | 121420059 | 417 |
| chr22 | 30059519  | 30059935  | 417 |
| chr22 | 30045529  | 30045945  | 417 |
| chr16 | 40571023  | 40571439  | 417 |
| chr11 | 77657629  | 77658045  | 417 |
| chr3  | 35627089  | 35627504  | 416 |

|       |               |           |     |
|-------|---------------|-----------|-----|
| chr23 | 18761395      | 18761810  | 416 |
| chr23 | 10617624      | 10618039  | 416 |
| chr18 | 43426557      | 43426972  | 416 |
| chr18 | 11311996      | 11312411  | 416 |
| chr1  | 88380805      | 88381220  | 416 |
| chr9  | 105993666     | 105994080 | 415 |
| chr29 | 17681060      | 17681474  | 415 |
| chr23 | 28788618      | 28789032  | 415 |
| chr19 | 23990803      | 23991217  | 415 |
| chr12 | 83818252      | 83818666  | 415 |
| chr11 | 13715745      | 13716159  | 415 |
| chr1  | 84822934      | 84823348  | 415 |
| chrX  | 64156423      | 64156836  | 414 |
| chrX  | 54927699      | 54928112  | 414 |
| chrX  | 7593398       | 7593811   | 414 |
| chrX  | 5989766       | 5990179   | 414 |
| chr25 | 39399203      | 39399616  | 414 |
| chr25 | 4005376       | 4005789   | 414 |
| chr19 | 39324165      | 39324578  | 414 |
| chr18 | 56605670      | 56606083  | 414 |
| chr1  | 99117994      | 99118407  | 414 |
| chr5  | 35290409      | 35290821  | 413 |
| chr29 | 37295997      | 37296409  | 413 |
| chr26 | 37627250      | 37627662  | 413 |
| chr20 | 19410349      | 19410761  | 413 |
| chr2  | 99788787      | 99789199  | 413 |
| chr18 | 22340137      | 22340549  | 413 |
| chr18 | 11826526      | 11826938  | 413 |
| chr15 | 29799479      | 29799891  | 413 |
| chr11 | 77662556      | 77662968  | 413 |
| chr11 | 6426430       | 6426842   | 413 |
| chrX  | 54518271      | 54518682  | 412 |
| chrX  | 7818045       | 7818456   | 412 |
| chr29 | 36617856      | 36618267  | 412 |
| chr18 | 57606929      | 57607340  | 412 |
| chr12 | 75428196      | 75428607  | 412 |
| chrX  | 18984825      | 18985235  | 411 |
| chrX  | 2636464       | 2636874   | 411 |
| chr9  | 50711773      | 50712183  | 411 |
| chr8  | 56066238      | 56066648  | 411 |
| chr27 | 15373518      | 15373928  | 411 |
| chr26 | 43465750      | 43466160  | 411 |
| chr11 | 105991165     | 105991575 | 411 |
| chr10 | 70071866      | 70072276  | 411 |
| chr10 | 32247122      | 32247532  | 411 |
| chrX  | 21597851      | 21598260  | 410 |
| chr20 | 529111 529520 | 410       |     |
| chr15 | 27136901      | 27137310  | 410 |
| chr14 | 33891453      | 33891862  | 410 |
| chr11 | 90390097      | 90390506  | 410 |

|       |               |           |     |
|-------|---------------|-----------|-----|
| chr10 | 16943517      | 16943926  | 410 |
| chrX  | 59498251      | 59498659  | 409 |
| chrX  | 13886113      | 13886521  | 409 |
| chr3  | 33486388      | 33486796  | 409 |
| chr3  | 9069802       | 9070210   | 409 |
| chr12 | 74244047      | 74244455  | 409 |
| chr10 | 88201538      | 88201946  | 409 |
| chrX  | 74357536      | 74357943  | 408 |
| chrX  | 13210238      | 13210645  | 408 |
| chrX  | 12259865      | 12260272  | 408 |
| chrX  | 9663319       | 9663726   | 408 |
| chr8  | 116705904     | 116706311 | 408 |
| chr5  | 111754605     | 111755012 | 408 |
| chr23 | 52600956      | 52601363  | 408 |
| chr23 | 17406858      | 17407265  | 408 |
| chr18 | 35139006      | 35139413  | 408 |
| chr16 | 77266365      | 77266772  | 408 |
| chr16 | 51298297      | 51298704  | 408 |
| chr16 | 38723762      | 38724169  | 408 |
| chr11 | 70934379      | 70934786  | 408 |
| chr1  | 1662786       | 1663193   | 408 |
| chrX  | 79859954      | 79860360  | 407 |
| chrX  | 2881915       | 2882321   | 407 |
| chr7  | 45251348      | 45251754  | 407 |
| chr3  | 116037125     | 116037531 | 407 |
| chr27 | 27012406      | 27012812  | 407 |
| chr19 | 38968686      | 38969092  | 407 |
| chr10 | 88168050      | 88168456  | 407 |
| chrX  | 48879377      | 48879782  | 406 |
| chrX  | 30108591      | 30108996  | 406 |
| chr3  | 70575297      | 70575702  | 406 |
| chr26 | 20857213      | 20857618  | 406 |
| chr20 | 74484320      | 74484725  | 406 |
| chr19 | 43094517      | 43094922  | 406 |
| chr18 | 18670927      | 18671332  | 406 |
| chr1  | 1659381       | 1659786   | 406 |
| chr8  | 23038459      | 23038863  | 405 |
| chr29 | 37620347      | 37620751  | 405 |
| chr24 | 49017062      | 49017466  | 405 |
| chr23 | 32680121      | 32680525  | 405 |
| chr19 | 14350753      | 14351157  | 405 |
| chrX  | 78347905      | 78348308  | 404 |
| chrX  | 61892402      | 61892805  | 404 |
| chr4  | 5380848       | 5381251   | 404 |
| chr3  | 120557708     | 120558111 | 404 |
| chr26 | 35195539      | 35195942  | 404 |
| chr20 | 640020 640423 | 404       |     |
| chr2  | 117705744     | 117706147 | 404 |
| chr13 | 75086033      | 75086436  | 404 |
| chr10 | 12746885      | 12747288  | 404 |

|       |           |           |     |
|-------|-----------|-----------|-----|
| chrX  | 21538494  | 21538896  | 403 |
| chrX  | 6270265   | 6270667   | 403 |
| chr9  | 100077673 | 100078075 | 403 |
| chr8  | 103491119 | 103491521 | 403 |
| chr8  | 65915073  | 65915475  | 403 |
| chr7  | 43047887  | 43048289  | 403 |
| chr4  | 98831169  | 98831571  | 403 |
| chr4  | 79201422  | 79201824  | 403 |
| chr3  | 115763457 | 115763859 | 403 |
| chr3  | 56437038  | 56437440  | 403 |
| chr22 | 54873855  | 54874257  | 403 |
| chr21 | 59029539  | 59029941  | 403 |
| chr19 | 39259599  | 39260001  | 403 |
| chr19 | 39163351  | 39163753  | 403 |
| chr18 | 10277028  | 10277430  | 403 |
| chr14 | 23499027  | 23499429  | 403 |
| chr11 | 106307960 | 106308362 | 403 |
| chr11 | 92472550  | 92472952  | 403 |
| chr11 | 77746757  | 77747159  | 403 |
| chr10 | 31222663  | 31223065  | 403 |
| chr1  | 74091679  | 74092081  | 403 |
| chrX  | 60084408  | 60084809  | 402 |
| chrX  | 53721812  | 53722213  | 402 |
| chrX  | 35789255  | 35789656  | 402 |
| chrX  | 22247452  | 22247853  | 402 |
| chr7  | 17983646  | 17984047  | 402 |
| chr4  | 107350566 | 107350967 | 402 |
| chr4  | 76854387  | 76854788  | 402 |
| chr3  | 36655422  | 36655823  | 402 |
| chr27 | 31318200  | 31318601  | 402 |
| chr19 | 38928853  | 38929254  | 402 |
| chr16 | 48864701  | 48865102  | 402 |
| chr13 | 60125413  | 60125814  | 402 |
| chr12 | 32528052  | 32528453  | 402 |
| chr11 | 100743146 | 100743547 | 402 |
| chr11 | 77654840  | 77655241  | 402 |
| chrX  | 58677012  | 58677412  | 401 |
| chrX  | 55253154  | 55253554  | 401 |
| chr7  | 19375138  | 19375538  | 401 |
| chr5  | 46373443  | 46373843  | 401 |
| chr10 | 70238841  | 70239241  | 401 |
| chr10 | 21076546  | 21076946  | 401 |
| chr1  | 85043201  | 85043601  | 401 |
| chrX  | 48704771  | 48705170  | 400 |
| chr5  | 121634735 | 121635134 | 400 |
| chr26 | 41861730  | 41862129  | 400 |
| chr24 | 60594643  | 60595042  | 400 |
| chr24 | 33488368  | 33488767  | 400 |
| chr21 | 34480370  | 34480769  | 400 |
| chr21 | 23010201  | 23010600  | 400 |

|       |           |           |     |
|-------|-----------|-----------|-----|
| chr19 | 40523867  | 40524266  | 400 |
| chr19 | 7642122   | 7642521   | 400 |
| chr18 | 13545391  | 13545790  | 400 |
| chr15 | 23743712  | 23744111  | 400 |
| chr11 | 77589451  | 77589850  | 400 |
| chrX  | 78625091  | 78625489  | 399 |
| chrX  | 78123386  | 78123784  | 399 |
| chrX  | 77202364  | 77202762  | 399 |
| chrX  | 75919128  | 75919526  | 399 |
| chrX  | 75691428  | 75691826  | 399 |
| chrX  | 74689638  | 74690036  | 399 |
| chrX  | 74575991  | 74576389  | 399 |
| chrX  | 74540416  | 74540814  | 399 |
| chrX  | 74312458  | 74312856  | 399 |
| chrX  | 73159325  | 73159723  | 399 |
| chrX  | 70860558  | 70860956  | 399 |
| chrX  | 62999758  | 63000156  | 399 |
| chrX  | 59410505  | 59410903  | 399 |
| chrX  | 55071169  | 55071567  | 399 |
| chrX  | 50863327  | 50863725  | 399 |
| chrX  | 50335981  | 50336379  | 399 |
| chrX  | 48690575  | 48690973  | 399 |
| chrX  | 36844108  | 36844506  | 399 |
| chrX  | 36318278  | 36318676  | 399 |
| chrX  | 36264682  | 36265080  | 399 |
| chrX  | 36112101  | 36112499  | 399 |
| chrX  | 35675777  | 35676175  | 399 |
| chrX  | 23616663  | 23617061  | 399 |
| chrX  | 21183208  | 21183606  | 399 |
| chrX  | 20749094  | 20749492  | 399 |
| chrX  | 20592827  | 20593225  | 399 |
| chrX  | 17109673  | 17110071  | 399 |
| chrX  | 11429506  | 11429904  | 399 |
| chrX  | 10677893  | 10678291  | 399 |
| chrX  | 10065739  | 10066137  | 399 |
| chrX  | 9672045   | 9672443   | 399 |
| chrX  | 8086358   | 8086756   | 399 |
| chrX  | 8043674   | 8044072   | 399 |
| chrX  | 7617538   | 7617936   | 399 |
| chrX  | 6730794   | 6731192   | 399 |
| chrX  | 6591449   | 6591847   | 399 |
| chrX  | 6513652   | 6514050   | 399 |
| chrX  | 6494026   | 6494424   | 399 |
| chrX  | 6428062   | 6428460   | 399 |
| chr9  | 106393242 | 106393640 | 399 |
| chr9  | 87762098  | 87762496  | 399 |
| chr8  | 108645888 | 108646286 | 399 |
| chr8  | 77124167  | 77124565  | 399 |
| chr8  | 73110780  | 73111178  | 399 |
| chr8  | 65856405  | 65856803  | 399 |

|       |           |           |     |
|-------|-----------|-----------|-----|
| chr8  | 65060161  | 65060559  | 399 |
| chr8  | 64947774  | 64948172  | 399 |
| chr8  | 64933707  | 64934105  | 399 |
| chr8  | 63990265  | 63990663  | 399 |
| chr8  | 61040658  | 61041056  | 399 |
| chr8  | 24706123  | 24706521  | 399 |
| chr8  | 24355472  | 24355870  | 399 |
| chr8  | 7679820   | 7680218   | 399 |
| chr8  | 4559577   | 4559975   | 399 |
| chr7  | 93976833  | 93977231  | 399 |
| chr7  | 48173154  | 48173552  | 399 |
| chr7  | 38317461  | 38317859  | 399 |
| chr7  | 37137262  | 37137660  | 399 |
| chr7  | 18718257  | 18718655  | 399 |
| chr7  | 15027344  | 15027742  | 399 |
| chr7  | 10310202  | 10310600  | 399 |
| chr6  | 120931812 | 120932210 | 399 |
| chr6  | 90622418  | 90622816  | 399 |
| chr6  | 69244442  | 69244840  | 399 |
| chr6  | 38113774  | 38114172  | 399 |
| chr5  | 116333322 | 116333720 | 399 |
| chr5  | 113827933 | 113828331 | 399 |
| chr5  | 112518804 | 112519202 | 399 |
| chr5  | 28748520  | 28748918  | 399 |
| chr5  | 27940159  | 27940557  | 399 |
| chr4  | 122985142 | 122985540 | 399 |
| chr4  | 122677553 | 122677951 | 399 |
| chr4  | 99056135  | 99056533  | 399 |
| chr4  | 95666387  | 95666785  | 399 |
| chr3  | 92255105  | 92255503  | 399 |
| chr3  | 36845917  | 36846315  | 399 |
| chr3  | 22893397  | 22893795  | 399 |
| chr3  | 22679188  | 22679586  | 399 |
| chr3  | 20518603  | 20519001  | 399 |
| chr29 | 38046920  | 38047318  | 399 |
| chr29 | 18186359  | 18186757  | 399 |
| chr29 | 2523014   | 2523412   | 399 |
| chr28 | 33376996  | 33377394  | 399 |
| chr28 | 25217475  | 25217873  | 399 |
| chr27 | 15375842  | 15376240  | 399 |
| chr26 | 51556322  | 51556720  | 399 |
| chr26 | 47957461  | 47957859  | 399 |
| chr26 | 35957163  | 35957561  | 399 |
| chr25 | 44035131  | 44035529  | 399 |
| chr25 | 43230690  | 43231088  | 399 |
| chr25 | 36480897  | 36481295  | 399 |
| chr25 | 33439912  | 33440310  | 399 |
| chr25 | 31777614  | 31778012  | 399 |
| chr25 | 2811498   | 2811896   | 399 |
| chr24 | 14769970  | 14770368  | 399 |

|       |           |           |     |
|-------|-----------|-----------|-----|
| chr24 | 870881    | 871279    | 399 |
| chr23 | 51688423  | 51688821  | 399 |
| chr23 | 44424520  | 44424918  | 399 |
| chr23 | 31185627  | 31186025  | 399 |
| chr23 | 28750119  | 28750517  | 399 |
| chr23 | 16040997  | 16041395  | 399 |
| chr23 | 15798001  | 15798399  | 399 |
| chr23 | 10530062  | 10530460  | 399 |
| chr22 | 12199827  | 12200225  | 399 |
| chr22 | 5708297   | 5708695   | 399 |
| chr21 | 66588632  | 66589030  | 399 |
| chr21 | 61663024  | 61663422  | 399 |
| chr21 | 58234531  | 58234929  | 399 |
| chr21 | 56667705  | 56668103  | 399 |
| chr21 | 16476334  | 16476732  | 399 |
| chr21 | 10843513  | 10843911  | 399 |
| chr21 | 2145131   | 2145529   | 399 |
| chr21 | 1774161   | 1774559   | 399 |
| chr20 | 73272961  | 73273359  | 399 |
| chr2  | 140756187 | 140756585 | 399 |
| chr2  | 135016231 | 135016629 | 399 |
| chr2  | 133645357 | 133645755 | 399 |
| chr2  | 132330339 | 132330737 | 399 |
| chr2  | 132022322 | 132022720 | 399 |
| chr2  | 68394293  | 68394691  | 399 |
| chr2  | 26509035  | 26509433  | 399 |
| chr2  | 5050713   | 5051111   | 399 |
| chr19 | 65236992  | 65237390  | 399 |
| chr19 | 60238655  | 60239053  | 399 |
| chr19 | 59076580  | 59076978  | 399 |
| chr19 | 56478395  | 56478793  | 399 |
| chr19 | 49339578  | 49339976  | 399 |
| chr19 | 43169702  | 43170100  | 399 |
| chr19 | 41253941  | 41254339  | 399 |
| chr19 | 39245995  | 39246393  | 399 |
| chr19 | 34119609  | 34120007  | 399 |
| chr19 | 25545351  | 25545749  | 399 |
| chr19 | 13970643  | 13971041  | 399 |
| chr19 | 7873444   | 7873842   | 399 |
| chr19 | 7864754   | 7865152   | 399 |
| chr19 | 7767588   | 7767986   | 399 |
| chr19 | 7298877   | 7299275   | 399 |
| chr18 | 64299838  | 64300236  | 399 |
| chr18 | 64279271  | 64279669  | 399 |
| chr18 | 54080736  | 54081134  | 399 |
| chr18 | 44675241  | 44675639  | 399 |
| chr18 | 42250220  | 42250618  | 399 |
| chr18 | 39849331  | 39849729  | 399 |
| chr18 | 24594484  | 24594882  | 399 |
| chr18 | 22822490  | 22822888  | 399 |



|       |               |           |     |
|-------|---------------|-----------|-----|
| chr18 | 11507924      | 11508322  | 399 |
| chr18 | 8051883       | 8052281   | 399 |
| chr18 | 7089886       | 7090284   | 399 |
| chr17 | 66694961      | 66695359  | 399 |
| chr17 | 63500991      | 63501389  | 399 |
| chr17 | 63451099      | 63451497  | 399 |
| chr17 | 56810589      | 56810987  | 399 |
| chr17 | 15209612      | 15210010  | 399 |
| chr16 | 72306139      | 72306537  | 399 |
| chr16 | 48864086      | 48864484  | 399 |
| chr15 | 73740727      | 73741125  | 399 |
| chr15 | 39923053      | 39923451  | 399 |
| chr15 | 29290280      | 29290678  | 399 |
| chr15 | 13641762      | 13642160  | 399 |
| chr14 | 6776234       | 6776632   | 399 |
| chr13 | 39968756      | 39969154  | 399 |
| chr13 | 28978599      | 28978997  | 399 |
| chr13 | 15764965      | 15765363  | 399 |
| chr12 | 82702766      | 82703164  | 399 |
| chr12 | 82290714      | 82291112  | 399 |
| chr12 | 20879633      | 20880031  | 399 |
| chr11 | 105660476     | 105660874 | 399 |
| chr11 | 103033733     | 103034131 | 399 |
| chr11 | 98292381      | 98292779  | 399 |
| chr11 | 91950281      | 91950679  | 399 |
| chr11 | 90364906      | 90365304  | 399 |
| chr11 | 85421408      | 85421806  | 399 |
| chr11 | 81347730      | 81348128  | 399 |
| chr11 | 7777278       | 7777676   | 399 |
| chr11 | 75408291      | 75408689  | 399 |
| chr11 | 70881338      | 70881736  | 399 |
| chr11 | 40060554      | 40060952  | 399 |
| chr10 | 83091223      | 83091621  | 399 |
| chr10 | 70104114      | 70104512  | 399 |
| chr10 | 36750612      | 36751010  | 399 |
| chr10 | 28841192      | 28841590  | 399 |
| chr10 | 26060723      | 26061121  | 399 |
| chr10 | 21410093      | 21410491  | 399 |
| chr10 | 10487099      | 10487497  | 399 |
| chr1  | 104022815     | 104023213 | 399 |
| chr1  | 74521558      | 74521956  | 399 |
| chr1  | 43945082      | 43945480  | 399 |
| chrX  | 74626996      | 74627393  | 398 |
| chrX  | 72086297      | 72086694  | 398 |
| chrX  | 36500249      | 36500646  | 398 |
| chrX  | 9450930       | 9451327   | 398 |
| chrX  | 2240077       | 2240474   | 398 |
| chrX  | 321965 322362 | 398       |     |
| chr8  | 45736134      | 45736531  | 398 |
| chr7  | 49135877      | 49136274  | 398 |

|       |               |           |     |
|-------|---------------|-----------|-----|
| chr6  | 45445614      | 45446011  | 398 |
| chr5  | 73236319      | 73236716  | 398 |
| chr26 | 43494892      | 43495289  | 398 |
| chr25 | 40227297      | 40227694  | 398 |
| chr25 | 34084929      | 34085326  | 398 |
| chr24 | 1396065       | 1396462   | 398 |
| chr21 | 21156884      | 21157281  | 398 |
| chr2  | 127973765     | 127974162 | 398 |
| chr19 | 39414152      | 39414549  | 398 |
| chr16 | 47181348      | 47181745  | 398 |
| chr11 | 77619551      | 77619948  | 398 |
| chr11 | 48806170      | 48806567  | 398 |
| chr10 | 20846242      | 20846639  | 398 |
| chr10 | 17293352      | 17293749  | 398 |
| chrX  | 5703564       | 5703960   | 397 |
| chr9  | 90387207      | 90387603  | 397 |
| chr6  | 112244111     | 112244507 | 397 |
| chr6  | 106797194     | 106797590 | 397 |
| chr5  | 108926392     | 108926788 | 397 |
| chr4  | 33740858      | 33741254  | 397 |
| chr29 | 36893444      | 36893840  | 397 |
| chr29 | 10125178      | 10125574  | 397 |
| chr24 | 464099 464495 |           | 397 |
| chr23 | 29014230      | 29014626  | 397 |
| chr22 | 55937961      | 55938357  | 397 |
| chr22 | 18374404      | 18374800  | 397 |
| chr21 | 34148857      | 34149253  | 397 |
| chr19 | 23782519      | 23782915  | 397 |
| chr18 | 18720613      | 18721009  | 397 |
| chr15 | 25297717      | 25298113  | 397 |
| chr12 | 32229502      | 32229898  | 397 |
| chr1  | 136901364     | 136901760 | 397 |
| chrX  | 48653163      | 48653558  | 396 |
| chrX  | 45133358      | 45133753  | 396 |
| chrX  | 32925273      | 32925668  | 396 |
| chrX  | 20646898      | 20647293  | 396 |
| chr9  | 90631658      | 90632053  | 396 |
| chr3  | 121353876     | 121354271 | 396 |
| chr29 | 33606187      | 33606582  | 396 |
| chr23 | 11458872      | 11459267  | 396 |
| chr22 | 50908906      | 50909301  | 396 |
| chr21 | 13645159      | 13645554  | 396 |
| chr19 | 48704938      | 48705333  | 396 |
| chr19 | 26188059      | 26188454  | 396 |
| chr18 | 4064977       | 4065372   | 396 |
| chr16 | 45938460      | 45938855  | 396 |
| chr13 | 77390192      | 77390587  | 396 |
| chr11 | 77825823      | 77826218  | 396 |
| chrX  | 73484157      | 73484551  | 395 |
| chrX  | 35638261      | 35638655  | 395 |

|       |               |           |     |
|-------|---------------|-----------|-----|
| chr20 | 72913071      | 72913465  | 395 |
| chr2  | 115338743     | 115339137 | 395 |
| chr19 | 38831925      | 38832319  | 395 |
| chr19 | 23098014      | 23098408  | 395 |
| chr13 | 76277500      | 76277894  | 395 |
| chr13 | 40060853      | 40061247  | 395 |
| chr11 | 70786610      | 70787004  | 395 |
| chrX  | 59666586      | 59666979  | 394 |
| chrX  | 32589009      | 32589402  | 394 |
| chrX  | 13716805      | 13717198  | 394 |
| chr26 | 48900504      | 48900897  | 394 |
| chr2  | 139933081     | 139933474 | 394 |
| chr19 | 39268533      | 39268926  | 394 |
| chr18 | 45293485      | 45293878  | 394 |
| chr18 | 11717370      | 11717763  | 394 |
| chr17 | 64927204      | 64927597  | 394 |
| chr15 | 74653616      | 74654009  | 394 |
| chr13 | 65981728      | 65982121  | 394 |
| chr13 | 23646092      | 23646485  | 394 |
| chr1  | 76216695      | 76217088  | 394 |
| chrX  | 75186203      | 75186595  | 393 |
| chrX  | 52713979      | 52714371  | 393 |
| chrX  | 13618563      | 13618955  | 393 |
| chr8  | 108814108     | 108814500 | 393 |
| chr7  | 16546662      | 16547054  | 393 |
| chr5  | 117843886     | 117844278 | 393 |
| chr23 | 993581 993973 | 393       |     |
| chr2  | 41328227      | 41328619  | 393 |
| chr18 | 44089173      | 44089565  | 393 |
| chr17 | 69332527      | 69332919  | 393 |
| chr16 | 47998328      | 47998720  | 393 |
| chr16 | 2413416       | 2413808   | 393 |
| chr15 | 63693981      | 63694373  | 393 |
| chr11 | 100325590     | 100325982 | 393 |
| chr11 | 49399972      | 49400364  | 393 |
| chr10 | 48280718      | 48281110  | 393 |
| chrX  | 68605220      | 68605611  | 392 |
| chr7  | 42192009      | 42192400  | 392 |
| chr6  | 67998196      | 67998587  | 392 |
| chr24 | 20564771      | 20565162  | 392 |
| chr2  | 49761778      | 49762169  | 392 |
| chr19 | 41402214      | 41402605  | 392 |
| chr17 | 63463850      | 63464241  | 392 |
| chr15 | 23561446      | 23561837  | 392 |
| chr14 | 17666774      | 17667165  | 392 |
| chrX  | 54283191      | 54283581  | 391 |
| chrX  | 12987988      | 12988378  | 391 |
| chr5  | 29753076      | 29753466  | 391 |
| chr4  | 69967623      | 69968013  | 391 |
| chr25 | 37708715      | 37709105  | 391 |

|       |               |           |     |
|-------|---------------|-----------|-----|
| chr21 | 12352473      | 12352863  | 391 |
| chr20 | 6832094       | 6832484   | 391 |
| chr19 | 57834574      | 57834964  | 391 |
| chr18 | 63470604      | 63470994  | 391 |
| chr17 | 63494475      | 63494865  | 391 |
| chr13 | 60167798      | 60168188  | 391 |
| chr12 | 37017484      | 37017874  | 391 |
| chrX  | 17103040      | 17103429  | 390 |
| chrX  | 2537241       | 2537630   | 390 |
| chr5  | 115282113     | 115282502 | 390 |
| chr5  | 70009519      | 70009908  | 390 |
| chr26 | 22247132      | 22247521  | 390 |
| chr25 | 39319995      | 39320384  | 390 |
| chr23 | 11051709      | 11052098  | 390 |
| chr20 | 773276 773665 | 390       |     |
| chr19 | 18369271      | 18369660  | 390 |
| chr16 | 75335876      | 75336265  | 390 |
| chr10 | 53068559      | 53068948  | 390 |
| chr10 | 24177278      | 24177667  | 390 |
| chrX  | 74777593      | 74777981  | 389 |
| chrX  | 55623216      | 55623604  | 389 |
| chrX  | 18998591      | 18998979  | 389 |
| chr8  | 9348866       | 9349254   | 389 |
| chr8  | 7409337       | 7409725   | 389 |
| chr7  | 50367333      | 50367721  | 389 |
| chr24 | 1575572       | 1575960   | 389 |
| chr15 | 24435462      | 24435850  | 389 |
| chr11 | 106059487     | 106059875 | 389 |
| chr5  | 33575625      | 33576012  | 388 |
| chr18 | 49474028      | 49474415  | 388 |
| chr11 | 9300740       | 9301127   | 388 |
| chr1  | 1582343       | 1582730   | 388 |
| chrX  | 50831690      | 50832076  | 387 |
| chrX  | 34508184      | 34508570  | 387 |
| chrX  | 6727509       | 6727895   | 387 |
| chrX  | 2852596       | 2852982   | 387 |
| chr3  | 15548899      | 15549285  | 387 |
| chr3  | 15355304      | 15355690  | 387 |
| chr27 | 7945884       | 7946270   | 387 |
| chr24 | 60795867      | 60796253  | 387 |
| chr18 | 49928759      | 49929145  | 387 |
| chr18 | 33889529      | 33889915  | 387 |
| chr11 | 109496990     | 109497376 | 387 |
| chrX  | 34599144      | 34599529  | 386 |
| chrX  | 13910639      | 13911024  | 386 |
| chr3  | 105684013     | 105684398 | 386 |
| chr18 | 56530460      | 56530845  | 386 |
| chr10 | 89397989      | 89398374  | 386 |
| chrX  | 65110693      | 65111077  | 385 |
| chr8  | 53716203      | 53716587  | 385 |

|       |               |           |     |
|-------|---------------|-----------|-----|
| chr26 | 50650762      | 50651146  | 385 |
| chr25 | 39435901      | 39436285  | 385 |
| chr19 | 43148484      | 43148868  | 385 |
| chr18 | 11453808      | 11454192  | 385 |
| chr15 | 56052394      | 56052778  | 385 |
| chr10 | 90479211      | 90479595  | 385 |
| chr10 | 52230971      | 52231355  | 385 |
| chrX  | 77493541      | 77493924  | 384 |
| chrX  | 21365375      | 21365758  | 384 |
| chr7  | 94430870      | 94431253  | 384 |
| chr6  | 72309571      | 72309954  | 384 |
| chr29 | 49439271      | 49439654  | 384 |
| chr20 | 859744 860127 | 384       |     |
| chr11 | 28436586      | 28436969  | 384 |
| chr1  | 74497476      | 74497859  | 384 |
| chrX  | 73348590      | 73348972  | 383 |
| chrX  | 66193416      | 66193798  | 383 |
| chrX  | 41258753      | 41259135  | 383 |
| chrX  | 22051641      | 22052023  | 383 |
| chrX  | 2501459       | 2501841   | 383 |
| chr4  | 118056847     | 118057229 | 383 |
| chr23 | 36245995      | 36246377  | 383 |
| chr2  | 115706730     | 115707112 | 383 |
| chr18 | 64264548      | 64264930  | 383 |
| chrX  | 71045791      | 71046172  | 382 |
| chr3  | 115778905     | 115779286 | 382 |
| chr17 | 70198928      | 70199309  | 382 |
| chr15 | 51607944      | 51608325  | 382 |
| chr14 | 22105504      | 22105885  | 382 |
| chr12 | 32430503      | 32430884  | 382 |
| chr11 | 104922945     | 104923326 | 382 |
| chr3  | 123633060     | 123633440 | 381 |
| chr21 | 56239824      | 56240204  | 381 |
| chr17 | 63690853      | 63691233  | 381 |
| chr17 | 44381458      | 44381838  | 381 |
| chr16 | 26563871      | 26564251  | 381 |
| chr4  | 117254002     | 117254381 | 380 |
| chr23 | 13626434      | 13626813  | 380 |
| chr2  | 134893169     | 134893548 | 380 |
| chr2  | 24965809      | 24966188  | 380 |
| chr12 | 14751890      | 14752269  | 380 |
| chrX  | 72954176      | 72954554  | 379 |
| chr25 | 3112758       | 3113136   | 379 |
| chr19 | 45054947      | 45055325  | 379 |
| chrX  | 30923416      | 30923793  | 378 |
| chr8  | 108653394     | 108653771 | 378 |
| chr19 | 39011002      | 39011379  | 378 |
| chr10 | 10999117      | 10999494  | 378 |
| chrX  | 60520042      | 60520418  | 377 |
| chrX  | 2542588       | 2542964   | 377 |

|       |           |           |     |
|-------|-----------|-----------|-----|
| chr11 | 70857768  | 70858144  | 377 |
| chrX  | 8021299   | 8021674   | 376 |
| chr17 | 75010189  | 75010564  | 376 |
| chr10 | 42625751  | 42626126  | 376 |
| chrX  | 55807716  | 55808090  | 375 |
| chr7  | 45821098  | 45821472  | 375 |
| chr5  | 81799102  | 81799476  | 375 |
| chr3  | 109752015 | 109752389 | 375 |
| chr21 | 61780602  | 61780976  | 375 |
| chr15 | 75240487  | 75240861  | 375 |
| chr11 | 106376872 | 106377246 | 375 |
| chrX  | 8109505   | 8109878   | 374 |
| chr20 | 61663384  | 61663757  | 374 |
| chr18 | 49450594  | 49450967  | 374 |
| chr13 | 70210706  | 70211079  | 374 |
| chr8  | 109087385 | 109087757 | 373 |
| chr26 | 41018630  | 41019002  | 373 |
| chr23 | 7621895   | 7622267   | 373 |
| chrX  | 13189915  | 13190286  | 372 |
| chr26 | 46325561  | 46325932  | 372 |
| chr10 | 15231884  | 15232255  | 372 |
| chr1  | 130450679 | 130451050 | 372 |
| chrX  | 84910380  | 84910750  | 371 |
| chr23 | 27217241  | 27217611  | 371 |
| chr19 | 37518962  | 37519332  | 371 |
| chr8  | 5342572   | 5342941   | 370 |
| chr4  | 68217319  | 68217688  | 370 |
| chr24 | 20731485  | 20731854  | 370 |
| chr2  | 110555011 | 110555380 | 370 |
| chr18 | 45637544  | 45637913  | 370 |
| chr12 | 14255813  | 14256182  | 370 |
| chr29 | 39035144  | 39035512  | 369 |
| chr28 | 30874791  | 30875159  | 369 |
| chr13 | 16964803  | 16965171  | 369 |
| chr1  | 82986609  | 82986977  | 369 |
| chr9  | 87166443  | 87166810  | 368 |
| chr29 | 36842070  | 36842437  | 368 |
| chr18 | 51015159  | 51015526  | 368 |
| chr13 | 80099848  | 80100214  | 367 |
| chr11 | 106237480 | 106237846 | 367 |
| chrX  | 13342962  | 13343327  | 366 |
| chr9  | 90524898  | 90525263  | 366 |
| chr26 | 22315788  | 22316153  | 366 |
| chr1  | 69496707  | 69497072  | 366 |
| chrX  | 62927836  | 62928200  | 365 |
| chrX  | 31379974  | 31380338  | 365 |
| chr9  | 106454356 | 106454720 | 365 |
| chr5  | 33573754  | 33574118  | 365 |
| chr27 | 15411272  | 15411636  | 365 |
| chr1  | 62291544  | 62291908  | 365 |

|       |           |           |     |
|-------|-----------|-----------|-----|
| chr5  | 112046219 | 112046582 | 364 |
| chrX  | 80862801  | 80863163  | 363 |
| chr8  | 9329812   | 9330174   | 363 |
| chr10 | 81609397  | 81609759  | 363 |
| chrX  | 21552978  | 21553339  | 362 |
| chr25 | 2797227   | 2797588   | 362 |
| chr15 | 62416986  | 62417347  | 362 |
| chr13 | 15138721  | 15139082  | 362 |
| chr1  | 67727459  | 67727820  | 362 |
| chr13 | 41689424  | 41689784  | 361 |
| chr10 | 8330066   | 8330426   | 361 |
| chr26 | 44852975  | 44853334  | 360 |
| chrX  | 60142117  | 60142475  | 359 |
| chrX  | 20407375  | 20407733  | 359 |
| chrX  | 7457333   | 7457691   | 359 |
| chr23 | 46423435  | 46423793  | 359 |
| chr22 | 14935253  | 14935611  | 359 |
| chr14 | 1572523   | 1572881   | 359 |
| chrX  | 2626235   | 2626592   | 358 |
| chr7  | 42180695  | 42181052  | 358 |
| chrX  | 20650366  | 20650722  | 357 |
| chrX  | 13097611  | 13097966  | 356 |
| chrX  | 19674317  | 19674671  | 355 |
| chrX  | 8350704   | 8351058   | 355 |
| chr3  | 115471048 | 115471401 | 354 |
| chr7  | 39695709  | 39696061  | 353 |
| chrX  | 74284035  | 74284385  | 351 |
| chr4  | 115867165 | 115867515 | 351 |
| chr25 | 14036635  | 14036984  | 350 |
| chr13 | 59988245  | 59988594  | 350 |
| chr12 | 11450441  | 11450790  | 350 |
| chr11 | 70806887  | 70807235  | 349 |
| chrX  | 36314031  | 36314377  | 347 |
| chrX  | 49294172  | 49294516  | 345 |
| chr4  | 32424425  | 32424769  | 345 |
| chr24 | 40392907  | 40393251  | 345 |
| chr12 | 10235016  | 10235360  | 345 |
| chr11 | 46765716  | 46766060  | 345 |
| chr19 | 51685609  | 51685952  | 344 |
| chr3  | 127851789 | 127852131 | 343 |
| chr16 | 58579032  | 58579374  | 343 |
| chr14 | 25071458  | 25071800  | 343 |
| chrX  | 6677482   | 6677823   | 342 |
| chr5  | 60903009  | 60903350  | 342 |
| chr11 | 84532313  | 84532651  | 339 |
| chrX  | 22596489  | 22596826  | 338 |
| chr24 | 1593791   | 1594128   | 338 |
| chr25 | 3149036   | 3149372   | 337 |
| chrX  | 52816552  | 52816886  | 335 |
| chr15 | 30625096  | 30625429  | 334 |

|       |               |           |     |
|-------|---------------|-----------|-----|
| chr10 | 10824771      | 10825104  | 334 |
| chrX  | 65349269      | 65349601  | 333 |
| chrX  | 53447993      | 53448325  | 333 |
| chr5  | 104518033     | 104518365 | 333 |
| chr23 | 41684422      | 41684752  | 331 |
| chr10 | 88176115      | 88176443  | 329 |
| chr10 | 20147289      | 20147617  | 329 |
| chr13 | 74505618      | 74505945  | 328 |
| chr21 | 68939810      | 68940135  | 326 |
| chrX  | 76095168      | 76095492  | 325 |
| chr4  | 4560454       | 4560777   | 324 |
| chr26 | 18768525      | 18768847  | 323 |
| chrX  | 75482092      | 75482413  | 322 |
| chr19 | 30351640      | 30351961  | 322 |
| chr13 | 80740670      | 80740991  | 322 |
| chr21 | 364072 364392 | 321       |     |
| chrX  | 39073760      | 39074078  | 319 |
| chrX  | 57311851      | 57312167  | 317 |
| chr19 | 23690077      | 23690393  | 317 |
| chr13 | 79688074      | 79688390  | 317 |
| chr28 | 45216327      | 45216641  | 315 |
| chr18 | 23561973      | 23562284  | 312 |
| chr5  | 118266319     | 118266626 | 308 |
| chr27 | 34704368      | 34704674  | 307 |
| chr19 | 61467476      | 61467780  | 305 |
| chrX  | 73373984      | 73374284  | 301 |
| chr6  | 119517446     | 119517745 | 300 |
| chr13 | 41344683      | 41344982  | 300 |
| chr16 | 55226028      | 55226322  | 295 |
| chr23 | 53034316      | 53034609  | 294 |
| chr19 | 63611495      | 63611784  | 290 |
| chr22 | 16334456      | 16334744  | 289 |
| chr3  | 17450485      | 17450770  | 286 |
| chr17 | 64118888      | 64119173  | 286 |
| chr27 | 44510576      | 44510855  | 280 |
| chr5  | 111690470     | 111690741 | 272 |
| chr14 | 1150332       | 1150598   | 267 |
| chr26 | 33872581      | 33872846  | 266 |
| chrX  | 7541699       | 7541958   | 260 |
| chr1  | 23004276      | 23004525  | 250 |
| chr19 | 31843263      | 31844169  | 907 |
| chr2  | 111339987     | 111340792 | 806 |
| chr21 | 61620812      | 61621796  | 985 |
| chr11 | 31054734      | 31055463  | 730 |
| chr1  | 74628324      | 74628796  | 473 |
| chr19 | 38313606      | 38314081  | 476 |
| chr10 | 88366734      | 88367319  | 586 |
| chr28 | 32884563      | 32885023  | 461 |
| chr4  | 72288814      | 72289686  | 873 |
| chr8  | 24226097      | 24226762  | 666 |



|       |               |           |      |
|-------|---------------|-----------|------|
| chr15 | 25594301      | 25594924  | 624  |
| chr22 | 48243989      | 48244496  | 508  |
| chr19 | 58979723      | 58980463  | 741  |
| chr9  | 35973870      | 35974342  | 473  |
| chr7  | 46243202      | 46243725  | 524  |
| chr22 | 43771271      | 43771728  | 458  |
| chr16 | 71113854      | 71114254  | 401  |
| chr25 | 3104482       | 3104959   | 478  |
| chr21 | 1855236       | 1855818   | 583  |
| chr5  | 80283796      | 80284365  | 570  |
| chr9  | 50719200      | 50719625  | 426  |
| chr11 | 303819 304241 | 423       |      |
| chr17 | 70383670      | 70384091  | 422  |
| chr22 | 37558347      | 37558745  | 399  |
| chr24 | 1779326       | 1779674   | 349  |
| chr18 | 24347591      | 24347875  | 285  |
| chr8  | 73925573      | 73925825  | 253  |
| chr1  | 85142259      | 85142501  | 243  |
| chrX  | 81273401      | 81274484  | 1084 |
| chr8  | 73858440      | 73858918  | 479  |
| chr24 | 47061772      | 47062176  | 405  |
| chr2  | 49566488      | 49567032  | 545  |
| chrX  | 61626151      | 61626549  | 399  |
| chr3  | 24793600      | 24793972  | 373  |
| chr3  | 66665672      | 66666187  | 516  |
| chr13 | 37690054      | 37691577  | 1524 |
| chr6  | 90623399      | 90624679  | 1281 |
| chrX  | 12037727      | 12038892  | 1166 |
| chrX  | 75632499      | 75633618  | 1120 |
| chr8  | 55411134      | 55412204  | 1071 |
| chr4  | 79771463      | 79772364  | 902  |
| chr13 | 61222444      | 61223279  | 836  |
| chr5  | 120452232     | 120453017 | 786  |
| chrX  | 10442422      | 10443178  | 757  |
| chr10 | 16926282      | 16927027  | 746  |
| chrX  | 17125470      | 17126213  | 744  |
| chr11 | 108005092     | 108005803 | 712  |
| chr13 | 75785967      | 75786664  | 698  |
| chr13 | 59659494      | 59660189  | 696  |
| chr14 | 79849797      | 79850459  | 663  |
| chr5  | 117221842     | 117222481 | 640  |
| chr2  | 134659811     | 134660445 | 635  |
| chrX  | 55491041      | 55491674  | 634  |
| chrX  | 8796403       | 8797018   | 616  |
| chr18 | 23124423      | 23125033  | 611  |
| chr21 | 61643033      | 61643630  | 598  |
| chr12 | 15864834      | 15865419  | 586  |
| chr15 | 30336094      | 30336671  | 578  |
| chrX  | 13352742      | 13353312  | 571  |
| chr22 | 52235317      | 52235887  | 571  |

|       |               |           |      |
|-------|---------------|-----------|------|
| chr13 | 77293499      | 77294066  | 568  |
| chr22 | 44332337      | 44332902  | 566  |
| chr24 | 20863588      | 20864152  | 565  |
| chr16 | 67147599      | 67148161  | 563  |
| chr11 | 101430199     | 101430761 | 563  |
| chr17 | 66496863      | 66497424  | 562  |
| chr25 | 34390699      | 34391247  | 549  |
| chr12 | 32127626      | 32128171  | 546  |
| chr4  | 65388016      | 65388555  | 540  |
| chr24 | 1184686       | 1185220   | 535  |
| chr20 | 71866795      | 71867299  | 505  |
| chr14 | 243442 243930 | 489       |      |
| chr11 | 9051748       | 9052217   | 470  |
| chr5  | 76839197      | 76839663  | 467  |
| chr5  | 117279315     | 117279780 | 466  |
| chr7  | 19831997      | 19832451  | 455  |
| chr29 | 31972623      | 31973070  | 448  |
| chr10 | 5027270       | 5027717   | 448  |
| chr11 | 70704167      | 70704611  | 445  |
| chr8  | 77271121      | 77271562  | 442  |
| chr11 | 91383861      | 91384298  | 438  |
| chr23 | 18820902      | 18821338  | 437  |
| chr19 | 7607048       | 7607471   | 424  |
| chr26 | 17904044      | 17904463  | 420  |
| chr18 | 50516079      | 50516497  | 419  |
| chr26 | 18196076      | 18196488  | 413  |
| chrX  | 13463051      | 13463462  | 412  |
| chr16 | 60780258      | 60780665  | 408  |
| chrX  | 74355779      | 74356177  | 399  |
| chr16 | 77690122      | 77690516  | 395  |
| chr21 | 9487459       | 9487842   | 384  |
| chr22 | 48667767      | 48668148  | 382  |
| chr17 | 70117514      | 70117895  | 382  |
| chr23 | 52665741      | 52666120  | 380  |
| chr3  | 35828802      | 35829140  | 339  |
| chr26 | 38926984      | 38928141  | 1158 |
| chr19 | 12397279      | 12398418  | 1140 |
| chr9  | 8178658       | 8179704   | 1047 |
| chrX  | 12102776      | 12103768  | 993  |
| chr26 | 42148938      | 42149926  | 989  |
| chrX  | 66639295      | 66640274  | 980  |
| chr19 | 56023588      | 56024564  | 977  |
| chrX  | 47642184      | 47643105  | 922  |
| chr7  | 38262268      | 38263134  | 867  |
| chr2  | 125422726     | 125423590 | 865  |
| chr17 | 66151905      | 66152765  | 861  |
| chr16 | 50274821      | 50275650  | 830  |
| chr5  | 30309601      | 30310395  | 795  |
| chr2  | 123019749     | 123020536 | 788  |
| chr4  | 95582803      | 95583534  | 732  |

|       |           |           |      |
|-------|-----------|-----------|------|
| chrX  | 7082219   | 7082931   | 713  |
| chr24 | 20396285  | 20396966  | 682  |
| chr19 | 29017483  | 29018164  | 682  |
| chr4  | 99596204  | 99596877  | 674  |
| chr13 | 77679136  | 77679805  | 670  |
| chr23 | 30288994  | 30289648  | 655  |
| chr22 | 7556030   | 7556679   | 650  |
| chr8  | 7391654   | 7392300   | 647  |
| chr29 | 33590510  | 33591136  | 627  |
| chr19 | 18047334  | 18047942  | 609  |
| chr3  | 109788104 | 109788705 | 602  |
| chr11 | 93759991  | 93760577  | 587  |
| chr11 | 7544875   | 7545457   | 583  |
| chr2  | 134749326 | 134749881 | 556  |
| chr16 | 23839529  | 23840060  | 532  |
| chrX  | 72939842  | 72940360  | 519  |
| chr6  | 120723705 | 120724218 | 514  |
| chr17 | 66935187  | 66935659  | 473  |
| chrX  | 6900243   | 6900704   | 462  |
| chrX  | 78678645  | 78679080  | 436  |
| chrX  | 22518242  | 22518661  | 420  |
| chr29 | 36901183  | 36901597  | 415  |
| chrX  | 11031093  | 11031504  | 412  |
| chr18 | 57398774  | 57399177  | 404  |
| chr19 | 65241813  | 65242212  | 400  |
| chr16 | 47266787  | 47267185  | 399  |
| chr15 | 64512736  | 64513134  | 399  |
| chr14 | 15477025  | 15477423  | 399  |
| chr5  | 124996870 | 124997254 | 385  |
| chr21 | 30794471  | 30794836  | 366  |
| chr2  | 130104205 | 130104567 | 363  |
| chr18 | 53326107  | 53326467  | 361  |
| chr29 | 9077223   | 9077577   | 355  |
| chr9  | 8644972   | 8646531   | 1560 |
| chr4  | 121735236 | 121736608 | 1373 |
| chr27 | 5681034   | 5681986   | 953  |
| chr8  | 24472423  | 24473300  | 878  |
| chr13 | 75632865  | 75633717  | 853  |
| chr7  | 45732558  | 45733373  | 816  |
| chr20 | 66531177  | 66531870  | 694  |
| chr5  | 124803437 | 124804106 | 670  |
| chrX  | 8258649   | 8259312   | 664  |
| chrX  | 7183974   | 7184634   | 661  |
| chr27 | 26790553  | 26791211  | 659  |
| chr10 | 99924487  | 99925117  | 631  |
| chr17 | 68316440  | 68317047  | 608  |
| chr9  | 105013292 | 105013875 | 584  |
| chr13 | 40986893  | 40987451  | 559  |
| chr19 | 12611595  | 12612124  | 530  |
| chr28 | 23934976  | 23935492  | 517  |

|       |               |           |      |
|-------|---------------|-----------|------|
| chr7  | 4928203       | 4928711   | 509  |
| chr19 | 58409018      | 58409526  | 509  |
| chr1  | 83010573      | 83011079  | 507  |
| chr28 | 26985908      | 26986409  | 502  |
| chr21 | 6482153       | 6482626   | 474  |
| chrX  | 56087624      | 56088092  | 469  |
| chr11 | 49731048      | 49731515  | 468  |
| chr19 | 40508914      | 40509372  | 459  |
| chr27 | 45280980      | 45281432  | 453  |
| chr12 | 85024230      | 85024671  | 442  |
| chrX  | 73298863      | 73299295  | 433  |
| chr17 | 70162864      | 70163293  | 430  |
| chr9  | 47011959      | 47012384  | 426  |
| chr7  | 46575128      | 46575553  | 426  |
| chr18 | 12163723      | 12164146  | 424  |
| chrX  | 73349661      | 73350068  | 408  |
| chr25 | 28053141      | 28053536  | 396  |
| chr29 | 42901562      | 42901954  | 393  |
| chr11 | 76259486      | 76259855  | 370  |
| chr2  | 19195085      | 19195338  | 254  |
| chr16 | 46991850      | 46992852  | 1003 |
| chr7  | 96497892      | 96498867  | 976  |
| chr18 | 11714233      | 11715120  | 888  |
| chr16 | 47607317      | 47608198  | 882  |
| chr16 | 2531668       | 2532455   | 788  |
| chr5  | 113920386     | 113921171 | 786  |
| chrX  | 7621675       | 7622440   | 766  |
| chr17 | 63323593      | 63324340  | 748  |
| chr11 | 77579351      | 77580089  | 739  |
| chrX  | 62472917      | 62473629  | 713  |
| chr10 | 53476990      | 53477658  | 669  |
| chr13 | 77339284      | 77339947  | 664  |
| chr29 | 51861704      | 51862365  | 662  |
| chr19 | 41390882      | 41391543  | 662  |
| chr7  | 71318696      | 71319355  | 660  |
| chrX  | 60393744      | 60394381  | 638  |
| chr19 | 7641386       | 7642015   | 630  |
| chr4  | 72032770      | 72033330  | 561  |
| chr5  | 119902813     | 119903350 | 538  |
| chr23 | 52812344      | 52812870  | 527  |
| chr5  | 113828677     | 113829196 | 520  |
| chr25 | 40421536      | 40422043  | 508  |
| chr24 | 59048244      | 59048715  | 472  |
| chr14 | 606723 607190 | 468       |      |
| chr21 | 20145738      | 20146181  | 444  |
| chrX  | 9191413       | 9191841   | 429  |
| chr19 | 30693357      | 30693783  | 427  |
| chr15 | 22809877      | 22810302  | 426  |
| chr24 | 1563092       | 1563516   | 425  |
| chr23 | 28595415      | 28595818  | 404  |

|       |           |           |      |
|-------|-----------|-----------|------|
| chr2  | 135164102 | 135164484 | 383  |
| chrX  | 7378035   | 7379074   | 1040 |
| chrX  | 60431474  | 60432489  | 1016 |
| chrX  | 50490041  | 50491046  | 1006 |
| chr3  | 123641958 | 123642837 | 880  |
| chr16 | 41445556  | 41446434  | 879  |
| chr29 | 33922841  | 33923627  | 787  |
| chr13 | 77585833  | 77586607  | 775  |
| chr19 | 51927444  | 51928192  | 749  |
| chr9  | 91900394  | 91901141  | 748  |
| chr19 | 41259480  | 41260175  | 696  |
| chr22 | 56704143  | 56704830  | 688  |
| chr10 | 16988098  | 16988757  | 660  |
| chr24 | 20556898  | 20557553  | 656  |
| chr2  | 108767348 | 108767984 | 637  |
| chr13 | 41015940  | 41016494  | 555  |
| chr25 | 8603348   | 8603883   | 536  |
| chr29 | 44590310  | 44590840  | 531  |
| chr24 | 22045404  | 22045866  | 463  |
| chr17 | 67082299  | 67082757  | 459  |
| chrX  | 31592544  | 31592988  | 445  |
| chr19 | 47365550  | 47365973  | 424  |
| chrX  | 74684048  | 74684467  | 420  |
| chr7  | 18687106  | 18687516  | 411  |
| chr19 | 27986392  | 27986792  | 401  |
| chr5  | 71666072  | 71666470  | 399  |
| chr17 | 49143704  | 49144095  | 392  |
| chr6  | 59496998  | 59497351  | 354  |
| chr26 | 49212677  | 49213430  | 754  |
| chrX  | 7646535   | 7647264   | 730  |
| chr4  | 121413288 | 121414002 | 715  |
| chr18 | 11835895  | 11836604  | 710  |
| chr28 | 41179409  | 41180021  | 613  |
| chrX  | 54787212  | 54787809  | 598  |
| chr19 | 12403684  | 12404273  | 590  |
| chr5  | 35300423  | 35301002  | 580  |
| chr24 | 64998728  | 64999293  | 566  |
| chr16 | 48792205  | 48792732  | 528  |
| chr28 | 42392465  | 42392970  | 506  |
| chrX  | 20057566  | 20058066  | 501  |
| chr13 | 79688678  | 79689172  | 495  |
| chrX  | 73987583  | 73988062  | 480  |
| chr15 | 27464574  | 27465052  | 479  |
| chrX  | 80778124  | 80778589  | 466  |
| chr7  | 52384877  | 52385333  | 457  |
| chrX  | 19146740  | 19147192  | 453  |
| chr29 | 36166081  | 36166512  | 432  |
| chr29 | 35446535  | 35446966  | 432  |
| chr18 | 19363970  | 19364390  | 421  |
| chr3  | 111641068 | 111641476 | 409  |

|       |               |           |     |
|-------|---------------|-----------|-----|
| chrX  | 19521879      | 19522266  | 388 |
| chr8  | 61835557      | 61835940  | 384 |
| chr19 | 59356133      | 59356514  | 382 |
| chr9  | 45938577      | 45939445  | 869 |
| chr10 | 15071582      | 15072402  | 821 |
| chr19 | 443616 444300 | 685       |     |
| chr13 | 41758918      | 41759563  | 646 |
| chrX  | 78634261      | 78634876  | 616 |
| chr13 | 77392511      | 77393076  | 566 |
| chr23 | 28897373      | 28897900  | 528 |
| chr25 | 3063158       | 3063678   | 521 |
| chr7  | 44087127      | 44087612  | 486 |
| chr5  | 28870093      | 28870553  | 461 |
| chr21 | 29698324      | 29698768  | 445 |
| chr15 | 81216706      | 81217150  | 445 |
| chr13 | 42901361      | 42901803  | 443 |
| chr11 | 28499942      | 28500365  | 424 |
| chr21 | 48667254      | 48667676  | 423 |
| chr17 | 63517101      | 63517516  | 416 |
| chr20 | 4969842       | 4970244   | 403 |
| chr14 | 16837117      | 16837343  | 227 |
| chr29 | 35443075      | 35443806  | 732 |
| chr10 | 70133990      | 70134652  | 663 |
| chr2  | 125902689     | 125903335 | 647 |
| chr2  | 140742461     | 140743093 | 633 |
| chr19 | 34060797      | 34061421  | 625 |
| chr7  | 11031310      | 11031891  | 582 |
| chr29 | 37096056      | 37096634  | 579 |
| chr19 | 14621680      | 14622218  | 539 |
| chrX  | 19741394      | 19741927  | 534 |
| chrX  | 53743767      | 53744291  | 525 |
| chr29 | 44133591      | 44134110  | 520 |
| chrX  | 75903261      | 75903777  | 517 |
| chrX  | 31882259      | 31882770  | 512 |
| chr18 | 49512804      | 49513307  | 504 |
| chr15 | 20473434      | 20473937  | 504 |
| chrX  | 19873995      | 19874497  | 503 |
| chr11 | 76363192      | 76363693  | 502 |
| chr19 | 19119244      | 19119742  | 499 |
| chr19 | 59083320      | 59083809  | 490 |
| chr2  | 25367103      | 25367577  | 475 |
| chr18 | 11646317      | 11646790  | 474 |
| chr8  | 116913544     | 116914014 | 471 |
| chr18 | 62021534      | 62022000  | 467 |
| chrX  | 73362763      | 73363223  | 461 |
| chr7  | 44305550      | 44306010  | 461 |
| chr22 | 16357793      | 16358252  | 460 |
| chr17 | 73036504      | 73036952  | 449 |
| chr25 | 8710561       | 8711004   | 444 |
| chr17 | 70232043      | 70232480  | 438 |

|       |           |           |     |
|-------|-----------|-----------|-----|
| chr8  | 108331504 | 108331938 | 435 |
| chrX  | 54801835  | 54802264  | 430 |
| chr7  | 71388899  | 71389326  | 428 |
| chr9  | 90282281  | 90282707  | 427 |
| chr8  | 23898286  | 23898711  | 426 |
| chr8  | 7609645   | 7610069   | 425 |
| chr12 | 9121096   | 9121518   | 423 |
| chr1  | 75716952  | 75717374  | 423 |
| chr2  | 27990787  | 27991208  | 422 |
| chr21 | 24822387  | 24822807  | 421 |
| chrX  | 6994271   | 6994689   | 419 |
| chr8  | 23052993  | 23053410  | 418 |
| chrX  | 17147535  | 17147951  | 417 |
| chr15 | 29895811  | 29896227  | 417 |
| chr1  | 83508661  | 83509075  | 415 |
| chr13 | 76094152  | 76094561  | 410 |
| chrX  | 56739909  | 56740316  | 408 |
| chr27 | 17828769  | 17829175  | 407 |
| chr18 | 11805264  | 11805670  | 407 |
| chrX  | 59388561  | 59388966  | 406 |
| chrX  | 18047846  | 18048248  | 403 |
| chr21 | 33072438  | 33072840  | 403 |
| chr8  | 58377254  | 58377655  | 402 |
| chr3  | 31684821  | 31685222  | 402 |
| chr17 | 72897107  | 72897508  | 402 |
| chrX  | 56019709  | 56020108  | 400 |
| chr5  | 113915761 | 113916160 | 400 |
| chr24 | 1731055   | 1731454   | 400 |
| chrX  | 33760983  | 33761381  | 399 |
| chrX  | 9664403   | 9664801   | 399 |
| chrX  | 8482318   | 8482716   | 399 |
| chr8  | 23879417  | 23879815  | 399 |
| chr7  | 19833047  | 19833445  | 399 |
| chr3  | 78172692  | 78173090  | 399 |
| chr21 | 34415342  | 34415740  | 399 |
| chr13 | 77760073  | 77760471  | 399 |
| chr12 | 80325947  | 80326345  | 399 |
| chr10 | 20985982  | 20986379  | 398 |
| chr22 | 48248693  | 48249087  | 395 |
| chr18 | 53311076  | 53311468  | 393 |
| chr13 | 63499243  | 63499632  | 390 |
| chr24 | 1692625   | 1693012   | 388 |
| chrX  | 20495260  | 20495645  | 386 |
| chr17 | 67950358  | 67950741  | 384 |
| chr22 | 12194884  | 12195266  | 383 |
| chrX  | 47643284  | 47643647  | 364 |
| chrX  | 19344470  | 19344830  | 361 |
| chr24 | 26734847  | 26735206  | 360 |
| chr15 | 42515538  | 42515890  | 353 |
| chrX  | 5524001   | 5524349   | 349 |

|       |           |           |      |
|-------|-----------|-----------|------|
| chr10 | 43846397  | 43846744  | 348  |
| chr4  | 124442556 | 124442902 | 347  |
| chr16 | 64278784  | 64279129  | 346  |
| chr13 | 55109020  | 55109365  | 346  |
| chr8  | 24199998  | 24200324  | 327  |
| chr13 | 63458777  | 63459064  | 288  |
| chrX  | 6475342   | 6476120   | 779  |
| chr15 | 24193042  | 24193799  | 758  |
| chr13 | 63494074  | 63494780  | 707  |
| chr11 | 104897169 | 104897743 | 575  |
| chr5  | 81600030  | 81600588  | 559  |
| chr12 | 31542580  | 31543056  | 477  |
| chr24 | 61106189  | 61106640  | 452  |
| chr4  | 116913286 | 116913719 | 434  |
| chr21 | 20630236  | 20630685  | 450  |
| chr6  | 41664396  | 41665578  | 1183 |
| chr10 | 17530650  | 17531171  | 522  |
| chr23 | 46393931  | 46394388  | 458  |
| chrX  | 62828567  | 62829709  | 1143 |
| chr17 | 47356763  | 47357286  | 524  |
| chr23 | 17577171  | 17578103  | 933  |
| chr7  | 24214818  | 24215710  | 893  |
| chr8  | 10961934  | 10962785  | 852  |
| chr23 | 51444171  | 51444695  | 525  |
| chrX  | 40997313  | 40998259  | 947  |
| chr7  | 8911939   | 8912694   | 756  |
| chr17 | 70008397  | 70009037  | 641  |
| chr8  | 23887357  | 23887842  | 486  |
| chrX  | 24586116  | 24586582  | 467  |
| chr4  | 71556100  | 71556544  | 445  |
| chr15 | 36292788  | 36293125  | 338  |
| chrX  | 56089531  | 56090598  | 1068 |
| chrX  | 5845063   | 5845527   | 465  |
| chr3  | 22592669  | 22593077  | 409  |
| chr11 | 1975695   | 1976313   | 619  |
| chr10 | 17952581  | 17952944  | 364  |
| chr24 | 59039893  | 59040300  | 408  |
| chrX  | 8100235   | 8100547   | 313  |
| chr19 | 26968104  | 26968601  | 498  |
| chr18 | 24324375  | 24324696  | 322  |
| chr19 | 27542786  | 27543317  | 532  |
| chr2  | 21881666  | 21882119  | 454  |
| chr13 | 77365343  | 77365763  | 421  |
| chrX  | 68322663  | 68323080  | 418  |
| chr8  | 73312282  | 73312696  | 415  |
| chr8  | 24213613  | 24214026  | 414  |
| chrX  | 10131825  | 10132223  | 399  |
| chr8  | 73524186  | 73524556  | 371  |
| chr3  | 116369933 | 116370291 | 359  |
| chrX  | 18408964  | 18409317  | 354  |



|       |           |           |      |
|-------|-----------|-----------|------|
| chr13 | 59661423  | 59661765  | 343  |
| chr4  | 124446514 | 124446930 | 417  |
| chr1  | 95088399  | 95088797  | 399  |
| chr1  | 109582336 | 109582738 | 403  |
| chr21 | 52074359  | 52074565  | 207  |
| chr13 | 38259292  | 38261326  | 2035 |
| chr25 | 40198879  | 40200897  | 2019 |
| chr18 | 11778907  | 11780405  | 1499 |
| chr25 | 43803606  | 43805084  | 1479 |
| chr19 | 21722375  | 21723831  | 1457 |
| chr2  | 24076696  | 24078132  | 1437 |
| chr2  | 41315508  | 41316884  | 1377 |
| chr17 | 70098058  | 70099419  | 1362 |
| chr15 | 75510253  | 75511579  | 1327 |
| chr2  | 31566571  | 31567888  | 1318 |
| chr12 | 82558636  | 82559950  | 1315 |
| chrX  | 74259353  | 74260662  | 1310 |
| chr16 | 29021079  | 29022381  | 1303 |
| chrX  | 49288849  | 49290141  | 1293 |
| chr7  | 94419907  | 94421184  | 1278 |
| chr2  | 23111731  | 23113008  | 1278 |
| chr2  | 92323354  | 92324618  | 1265 |
| chr2  | 139239241 | 139240479 | 1239 |
| chr16 | 75224835  | 75226073  | 1239 |
| chr1  | 123122668 | 123123897 | 1230 |
| chr23 | 31182361  | 31183587  | 1227 |
| chr25 | 3163863   | 3165087   | 1225 |
| chr11 | 70843503  | 70844724  | 1222 |
| chrX  | 83025316  | 83026493  | 1178 |
| chr11 | 1305314   | 1306469   | 1156 |
| chr29 | 29917508  | 29918661  | 1154 |
| chr5  | 113249170 | 113250316 | 1147 |
| chrX  | 56328428  | 56329567  | 1140 |
| chr5  | 78866718  | 78867855  | 1138 |
| chrX  | 60145540  | 60146663  | 1124 |
| chr18 | 45991276  | 45992394  | 1119 |
| chr17 | 71730166  | 71731280  | 1115 |
| chr12 | 61820733  | 61821841  | 1109 |
| chr22 | 30072957  | 30074056  | 1100 |
| chr13 | 39801562  | 39802661  | 1100 |
| chr3  | 48205492  | 48206583  | 1092 |
| chr28 | 42377025  | 42378114  | 1090 |
| chr2  | 24864949  | 24866033  | 1085 |
| chrX  | 74465222  | 74466305  | 1084 |
| chr19 | 60759744  | 60760816  | 1073 |
| chr21 | 33926159  | 33927229  | 1071 |
| chr5  | 29130382  | 29131451  | 1070 |
| chr1  | 74706131  | 74707198  | 1068 |
| chr28 | 33804650  | 33805711  | 1062 |
| chrX  | 75264947  | 75265997  | 1051 |

|       |           |           |      |
|-------|-----------|-----------|------|
| chrX  | 57129996  | 57131041  | 1046 |
| chr7  | 50346840  | 50347880  | 1041 |
| chr18 | 20248750  | 20249785  | 1036 |
| chr26 | 17921717  | 17922750  | 1034 |
| chr19 | 12399245  | 12400277  | 1033 |
| chr3  | 127255133 | 127256159 | 1027 |
| chrX  | 9659108   | 9660130   | 1023 |
| chr24 | 40386215  | 40387235  | 1021 |
| chr7  | 5226064   | 5227082   | 1019 |
| chr14 | 72120914  | 72121932  | 1019 |
| chr22 | 15233351  | 15234362  | 1012 |
| chr18 | 18914545  | 18915554  | 1010 |
| chr3  | 111183252 | 111184254 | 1003 |
| chr2  | 79729323  | 79730325  | 1003 |
| chr13 | 77197184  | 77198186  | 1003 |
| chr22 | 30063964  | 30064961  | 998  |
| chr17 | 41485897  | 41486891  | 995  |
| chr28 | 42734774  | 42735764  | 991  |
| chr7  | 44486282  | 44487271  | 990  |
| chr9  | 10498370  | 10499356  | 987  |
| chr15 | 22200558  | 22201544  | 987  |
| chr18 | 48453343  | 48454328  | 986  |
| chr29 | 35442083  | 35443065  | 983  |
| chr25 | 7028430   | 7029410   | 981  |
| chr26 | 20290546  | 20291520  | 975  |
| chr9  | 108127885 | 108128852 | 968  |
| chr1  | 87376059  | 87377026  | 968  |
| chr20 | 8801519   | 8802484   | 966  |
| chr19 | 8858425   | 8859387   | 963  |
| chr23 | 15853123  | 15854079  | 957  |
| chr15 | 20864520  | 20865476  | 957  |
| chr19 | 55764884  | 55765838  | 955  |
| chr13 | 77262559  | 77263511  | 953  |
| chr10 | 70137309  | 70138257  | 949  |
| chr13 | 59968902  | 59969848  | 947  |
| chr5  | 112009684 | 112010627 | 944  |
| chr6  | 109422457 | 109423399 | 943  |
| chr19 | 37634683  | 37635623  | 941  |
| chr3  | 73954537  | 73955476  | 940  |
| chr29 | 18200714  | 18201649  | 936  |
| chr18 | 56536856  | 56537791  | 936  |
| chr5  | 76998343  | 76999276  | 934  |
| chrX  | 35868488  | 35869419  | 932  |
| chrX  | 36343224  | 36344146  | 923  |
| chrX  | 53768011  | 53768931  | 921  |
| chrX  | 59811083  | 59811998  | 916  |
| chr7  | 80881070  | 80881985  | 916  |
| chr26 | 23488442  | 23489357  | 916  |
| chrX  | 5342538   | 5343452   | 915  |
| chrX  | 6744864   | 6745776   | 913  |

|       |           |           |     |
|-------|-----------|-----------|-----|
| chr5  | 111326884 | 111327796 | 913 |
| chr23 | 7251844   | 7252753   | 910 |
| chrX  | 30465111  | 30466016  | 906 |
| chr17 | 70708131  | 70709036  | 906 |
| chr23 | 46091668  | 46092570  | 903 |
| chr25 | 33497870  | 33498770  | 901 |
| chrX  | 50656280  | 50657179  | 900 |
| chr15 | 25683210  | 25684109  | 900 |
| chr19 | 7769860   | 7770752   | 893 |
| chr2  | 75979451  | 75980340  | 890 |
| chr28 | 25141172  | 25142058  | 887 |
| chr13 | 60958127  | 60959010  | 884 |
| chr3  | 28923554  | 28924436  | 883 |
| chr7  | 37378662  | 37379543  | 882 |
| chr20 | 72735354  | 72736234  | 881 |
| chr20 | 29524550  | 29525429  | 880 |
| chr4  | 106595812 | 106596686 | 875 |
| chrX  | 36657678  | 36658551  | 874 |
| chrX  | 10417139  | 10418009  | 871 |
| chr20 | 8715621   | 8716488   | 868 |
| chr4  | 28614115  | 28614980  | 866 |
| chr16 | 74121358  | 74122221  | 864 |
| chr1  | 69353053  | 69353916  | 864 |
| chr7  | 10823444  | 10824304  | 861 |
| chr26 | 18490382  | 18491242  | 861 |
| chrX  | 54721064  | 54721923  | 860 |
| chr29 | 51840901  | 51841759  | 859 |
| chr18 | 11738844  | 11739700  | 857 |
| chr13 | 11410464  | 11411316  | 853 |
| chr11 | 68918966  | 68919818  | 853 |
| chr13 | 59120361  | 59121212  | 852 |
| chr12 | 32560045  | 32560896  | 852 |
| chrX  | 38985076  | 38985925  | 850 |
| chrX  | 67878934  | 67879782  | 849 |
| chr26 | 51451077  | 51451923  | 847 |
| chr26 | 18246462  | 18247308  | 847 |
| chr13 | 80637341  | 80638186  | 846 |
| chr11 | 107559797 | 107560642 | 846 |
| chr21 | 28682765  | 28683608  | 844 |
| chr13 | 14725198  | 14726041  | 844 |
| chr3  | 115985964 | 115986806 | 843 |
| chr20 | 3174645   | 3175486   | 842 |
| chrX  | 48197544  | 48198384  | 841 |
| chr3  | 105163908 | 105164748 | 841 |
| chr22 | 30164532  | 30165370  | 839 |
| chr7  | 42918874  | 42919711  | 838 |
| chr6  | 14206630  | 14207466  | 837 |
| chr16 | 2232388   | 2233224   | 837 |
| chr23 | 15992049  | 15992884  | 836 |
| chr11 | 106243490 | 106244325 | 836 |

|       |           |           |     |
|-------|-----------|-----------|-----|
| chrX  | 50875947  | 50876781  | 835 |
| chr29 | 37265943  | 37266777  | 835 |
| chrX  | 22589861  | 22590694  | 834 |
| chr2  | 5045533   | 5046366   | 834 |
| chr1  | 44930558  | 44931391  | 834 |
| chr20 | 1042123   | 1042955   | 833 |
| chr3  | 116928554 | 116929385 | 832 |
| chr4  | 67947323  | 67948152  | 830 |
| chr15 | 71859718  | 71860547  | 830 |
| chr11 | 4336725   | 4337554   | 830 |
| chr28 | 41777804  | 41778631  | 828 |
| chr14 | 66254167  | 66254994  | 828 |
| chr2  | 95919358  | 95920184  | 827 |
| chr13 | 45321344  | 45322170  | 827 |
| chrX  | 8837096   | 8837919   | 824 |
| chr2  | 75776928  | 75777751  | 824 |
| chr19 | 46142870  | 46143693  | 824 |
| chr5  | 30512682  | 30513504  | 823 |
| chr5  | 120688906 | 120689725 | 820 |
| chr25 | 3159828   | 3160647   | 820 |
| chr19 | 39039030  | 39039849  | 820 |
| chr2  | 101176628 | 101177444 | 817 |
| chr29 | 47369256  | 47370071  | 816 |
| chr2  | 15375364  | 15376178  | 815 |
| chr17 | 66823223  | 66824036  | 814 |
| chr26 | 34286679  | 34287491  | 813 |
| chr16 | 23864749  | 23865561  | 813 |
| chr5  | 88028527  | 88029338  | 812 |
| chr26 | 20978052  | 20978863  | 812 |
| chr15 | 62724576  | 62725386  | 811 |
| chr12 | 74546618  | 74547427  | 810 |
| chrX  | 19999309  | 20000117  | 809 |
| chr17 | 66853599  | 66854405  | 807 |
| chr18 | 11760451  | 11761256  | 806 |
| chr14 | 59388714  | 59389519  | 806 |
| chr24 | 33786481  | 33787285  | 805 |
| chr15 | 24441091  | 24441894  | 804 |
| chrX  | 64829918  | 64830718  | 801 |
| chr8  | 27052295  | 27053095  | 801 |
| chr10 | 14982379  | 14983179  | 801 |
| chr26 | 51526817  | 51527616  | 800 |
| chr22 | 14940241  | 14941040  | 800 |
| chr5  | 29181869  | 29182667  | 799 |
| chr23 | 11015637  | 11016435  | 799 |
| chr29 | 49256401  | 49257198  | 798 |
| chr25 | 28601040  | 28601835  | 796 |
| chr2  | 135727219 | 135728014 | 796 |
| chr16 | 77720679  | 77721474  | 796 |
| chr18 | 56457192  | 56457986  | 795 |
| chr17 | 70110945  | 70111739  | 795 |

|       |           |           |     |
|-------|-----------|-----------|-----|
| chr17 | 57620339  | 57621133  | 795 |
| chr9  | 26943772  | 26944564  | 793 |
| chr4  | 117840061 | 117840851 | 791 |
| chr11 | 99762756  | 99763546  | 791 |
| chr19 | 56572331  | 56573120  | 790 |
| chr3  | 33075509  | 33076297  | 789 |
| chr23 | 15869919  | 15870702  | 784 |
| chr15 | 25446793  | 25447576  | 784 |
| chr10 | 5253104   | 5253885   | 782 |
| chr14 | 7848961   | 7849741   | 781 |
| chr3  | 8792213   | 8792992   | 780 |
| chr13 | 59358562  | 59359341  | 780 |
| chrX  | 5709099   | 5709876   | 778 |
| chrX  | 50202393  | 50203168  | 776 |
| chr23 | 52735214  | 52735987  | 774 |
| chrX  | 72929196  | 72929968  | 773 |
| chr28 | 12325608  | 12326377  | 770 |
| chr25 | 40821166  | 40821935  | 770 |
| chr28 | 11334278  | 11335046  | 769 |
| chr3  | 4339292   | 4340059   | 768 |
| chr20 | 75113638  | 75114405  | 768 |
| chr13 | 55380733  | 55381499  | 767 |
| chr25 | 40900571  | 40901336  | 766 |
| chr10 | 22348622  | 22349387  | 766 |
| chrX  | 78579421  | 78580185  | 765 |
| chr16 | 46783066  | 46783829  | 764 |
| chr2  | 130871826 | 130872587 | 762 |
| chr7  | 81900788  | 81901548  | 761 |
| chr17 | 62212685  | 62213445  | 761 |
| chr19 | 56509912  | 56510671  | 760 |
| chr20 | 25150067  | 25150825  | 759 |
| chr10 | 51449589  | 51450347  | 759 |
| chr15 | 64639446  | 64640202  | 757 |
| chrX  | 2627396   | 2628151   | 756 |
| chr8  | 93914843  | 93915597  | 755 |
| chr24 | 20765083  | 20765837  | 755 |
| chr20 | 6594222   | 6594976   | 755 |
| chr2  | 36087488  | 36088242  | 755 |
| chr13 | 77748955  | 77749709  | 755 |
| chr11 | 81768435  | 81769189  | 755 |
| chr27 | 26641935  | 26642688  | 754 |
| chr20 | 19377260  | 19378013  | 754 |
| chr11 | 72755847  | 72756599  | 753 |
| chr15 | 42601889  | 42602638  | 750 |
| chr13 | 79071177  | 79071926  | 750 |
| chr26 | 21759776  | 21760522  | 747 |
| chr13 | 52531053  | 52531799  | 747 |
| chrX  | 34125952  | 34126697  | 746 |
| chrX  | 8699919   | 8700663   | 745 |
| chr4  | 107488994 | 107489738 | 745 |

|       |           |           |     |
|-------|-----------|-----------|-----|
| chr11 | 14242046  | 14242787  | 742 |
| chr10 | 25041580  | 25042321  | 742 |
| chr5  | 30799099  | 30799839  | 741 |
| chr16 | 40880731  | 40881470  | 740 |
| chr10 | 16920139  | 16920878  | 740 |
| chr3  | 110147001 | 110147739 | 739 |
| chr5  | 125490544 | 125491281 | 738 |
| chr26 | 22249767  | 22250504  | 738 |
| chr15 | 73824435  | 73825172  | 738 |
| chr7  | 5257549   | 5258285   | 737 |
| chr20 | 28006544  | 28007280  | 737 |
| chr18 | 43227824  | 43228560  | 737 |
| chr2  | 74030755  | 74031490  | 736 |
| chr19 | 39454398  | 39455133  | 736 |
| chr8  | 76013027  | 76013761  | 735 |
| chr23 | 31113258  | 31113992  | 735 |
| chr21 | 42441288  | 42442022  | 735 |
| chr17 | 48917841  | 48918575  | 735 |
| chrX  | 30696115  | 30696848  | 734 |
| chr19 | 45147225  | 45147957  | 733 |
| chr19 | 13539668  | 13540400  | 733 |
| chr18 | 11263017  | 11263749  | 733 |
| chr11 | 40058966  | 40059698  | 733 |
| chr23 | 31407852  | 31408583  | 732 |
| chr2  | 127191620 | 127192351 | 732 |
| chr19 | 26914910  | 26915641  | 732 |
| chr22 | 10751837  | 10752567  | 731 |
| chr9  | 99934399  | 99935128  | 730 |
| chr4  | 121521974 | 121522702 | 729 |
| chr16 | 47127837  | 47128565  | 729 |
| chrX  | 74814075  | 74814801  | 727 |
| chr5  | 1144900   | 1145625   | 726 |
| chr17 | 69277316  | 69278040  | 725 |
| chrX  | 75181485  | 75182208  | 724 |
| chr27 | 27684399  | 27685122  | 724 |
| chr15 | 62378238  | 62378961  | 724 |
| chr24 | 59016864  | 59017585  | 722 |
| chr17 | 64064406  | 64065127  | 722 |
| chr8  | 65813649  | 65814369  | 721 |
| chr10 | 68428120  | 68428840  | 721 |
| chr5  | 68970637  | 68971356  | 720 |
| chr24 | 63033951  | 63034669  | 719 |
| chrX  | 61885615  | 61886332  | 718 |
| chr28 | 43737097  | 43737814  | 718 |
| chrX  | 66715011  | 66715727  | 717 |
| chrX  | 7355357   | 7356073   | 717 |
| chr8  | 74323814  | 74324530  | 717 |
| chr19 | 47850283  | 47850999  | 717 |
| chr13 | 80146440  | 80147156  | 717 |
| chr19 | 58959048  | 58959763  | 716 |

|       |               |           |     |
|-------|---------------|-----------|-----|
| chr14 | 1453811       | 1454526   | 716 |
| chr12 | 35329557      | 35330272  | 716 |
| chr11 | 70867585      | 70868299  | 715 |
| chrX  | 11600219      | 11600930  | 712 |
| chrX  | 6595183       | 6595894   | 712 |
| chr3  | 15802364      | 15803075  | 712 |
| chrX  | 65570511      | 65571221  | 711 |
| chr5  | 30446545      | 30447251  | 707 |
| chr19 | 41542710      | 41543416  | 707 |
| chr3  | 24594043      | 24594746  | 704 |
| chr19 | 13430810      | 13431513  | 704 |
| chrX  | 59587119      | 59587821  | 703 |
| chrX  | 7822354       | 7823056   | 703 |
| chrX  | 365948 366650 | 703       |     |
| chr22 | 30166909      | 30167611  | 703 |
| chrX  | 75687244      | 75687945  | 702 |
| chr3  | 95748711      | 95749412  | 702 |
| chr29 | 26521881      | 26522581  | 701 |
| chr13 | 66136351      | 66137049  | 699 |
| chr3  | 86668913      | 86669610  | 698 |
| chr28 | 33798549      | 33799246  | 698 |
| chr20 | 19814214      | 19814911  | 698 |
| chr19 | 14057261      | 14057957  | 697 |
| chr13 | 40498788      | 40499484  | 697 |
| chr11 | 5913903       | 5914599   | 697 |
| chr26 | 42177144      | 42177839  | 696 |
| chr26 | 14976445      | 14977140  | 696 |
| chr13 | 70066314      | 70067009  | 696 |
| chr4  | 28578790      | 28579484  | 695 |
| chr13 | 73910995      | 73911689  | 695 |
| chrX  | 8223486       | 8224179   | 694 |
| chr3  | 116010267     | 116010960 | 694 |
| chr10 | 16984557      | 16985250  | 694 |
| chr9  | 104940185     | 104940877 | 693 |
| chr16 | 41529790      | 41530482  | 693 |
| chr13 | 68206989      | 68207681  | 693 |
| chr8  | 8576819       | 8577510   | 692 |
| chr14 | 34069235      | 34069926  | 692 |
| chrX  | 8827214       | 8827904   | 691 |
| chr21 | 22396673      | 22397362  | 690 |
| chr3  | 21934754      | 21935442  | 689 |
| chr20 | 73257031      | 73257719  | 689 |
| chr25 | 41267728      | 41268415  | 688 |
| chr11 | 109777021     | 109777708 | 688 |
| chr11 | 96071944      | 96072631  | 688 |
| chr26 | 51195870      | 51196555  | 686 |
| chr20 | 27805518      | 27806202  | 685 |
| chr20 | 6620999       | 6621683   | 685 |
| chr18 | 56818873      | 56819557  | 685 |
| chr27 | 26726311      | 26726994  | 684 |

|       |               |           |     |
|-------|---------------|-----------|-----|
| chr22 | 7192043       | 7192726   | 684 |
| chr11 | 48656651      | 48657334  | 684 |
| chrX  | 53272827      | 53273509  | 683 |
| chr2  | 131031700     | 131032382 | 683 |
| chr16 | 2221566       | 2222248   | 683 |
| chrX  | 21565273      | 21565953  | 681 |
| chrX  | 532445 533123 | 679       |     |
| chr7  | 14683614      | 14684292  | 679 |
| chr13 | 57577463      | 57578141  | 679 |
| chrX  | 30926626      | 30927302  | 677 |
| chrX  | 9158860       | 9159536   | 677 |
| chr14 | 42906349      | 42907024  | 676 |
| chr12 | 74426448      | 74427123  | 676 |
| chrX  | 74524476      | 74525150  | 675 |
| chrX  | 36152968      | 36153641  | 674 |
| chr28 | 33537746      | 33538419  | 674 |
| chr3  | 16835387      | 16836059  | 673 |
| chr16 | 46128203      | 46128875  | 673 |
| chr8  | 10813360      | 10814031  | 672 |
| chr4  | 98042538      | 98043209  | 672 |
| chr16 | 77691505      | 77692176  | 672 |
| chr22 | 14974596      | 14975266  | 671 |
| chr19 | 45538491      | 45539161  | 671 |
| chr18 | 62693778      | 62694448  | 671 |
| chrX  | 7720818       | 7721487   | 670 |
| chr19 | 17083409      | 17084078  | 670 |
| chrX  | 6729355       | 6730023   | 669 |
| chr23 | 2540635       | 2541302   | 668 |
| chr13 | 59587164      | 59587831  | 668 |
| chr10 | 19612693      | 19613360  | 668 |
| chrX  | 19203246      | 19203912  | 667 |
| chr18 | 55836555      | 55837221  | 667 |
| chr14 | 6416697       | 6417363   | 667 |
| chrX  | 36670876      | 36671541  | 666 |
| chr3  | 113593430     | 113594095 | 666 |
| chr19 | 41214762      | 41215427  | 666 |
| chr18 | 22723804      | 22724469  | 666 |
| chr23 | 45644878      | 45645542  | 665 |
| chr22 | 60249072      | 60249736  | 665 |
| chr22 | 55495791      | 55496455  | 665 |
| chr10 | 95572640      | 95573304  | 665 |
| chr10 | 83322721      | 83323384  | 664 |
| chr24 | 58647360      | 58648021  | 662 |
| chr22 | 14939057      | 14939718  | 662 |
| chr13 | 51460833      | 51461494  | 662 |
| chr14 | 61588641      | 61589299  | 659 |
| chr28 | 43868373      | 43869030  | 658 |
| chrX  | 59669324      | 59669980  | 657 |
| chr26 | 18704250      | 18704906  | 657 |
| chr21 | 59889494      | 59890150  | 657 |



|       |           |           |     |
|-------|-----------|-----------|-----|
| chr18 | 34054736  | 34055392  | 657 |
| chr17 | 74840602  | 74841258  | 657 |
| chr13 | 17734043  | 17734699  | 657 |
| chr2  | 15652914  | 15653569  | 656 |
| chrX  | 2616075   | 2616729   | 655 |
| chrX  | 20375689  | 20376341  | 653 |
| chr18 | 54943465  | 54944117  | 653 |
| chr16 | 48447509  | 48448161  | 653 |
| chr11 | 98360959  | 98361611  | 653 |
| chr10 | 71124662  | 71125314  | 653 |
| chrX  | 37724535  | 37725186  | 652 |
| chr19 | 43137521  | 43138172  | 652 |
| chrX  | 9709420   | 9710070   | 651 |
| chr21 | 48668299  | 48668949  | 651 |
| chr10 | 53912134  | 53912783  | 650 |
| chrX  | 59477175  | 59477823  | 649 |
| chr8  | 10302163  | 10302811  | 649 |
| chr22 | 59903154  | 59903802  | 649 |
| chr14 | 61748232  | 61748880  | 649 |
| chr13 | 67075919  | 67076566  | 648 |
| chr10 | 70400424  | 70401071  | 648 |
| chr7  | 18835687  | 18836333  | 647 |
| chr21 | 65544046  | 65544692  | 647 |
| chr2  | 135099745 | 135100391 | 647 |
| chr11 | 91839697  | 91840343  | 647 |
| chr27 | 15329468  | 15330113  | 646 |
| chr13 | 67457097  | 67457742  | 646 |
| chr13 | 46216857  | 46217502  | 646 |
| chr14 | 58449129  | 58449773  | 645 |
| chr5  | 38517414  | 38518057  | 644 |
| chr22 | 17239046  | 17239689  | 644 |
| chr19 | 43464788  | 43465431  | 644 |
| chr19 | 38311921  | 38312564  | 644 |
| chr1  | 81474626  | 81475269  | 644 |
| chr24 | 1735678   | 1736320   | 643 |
| chr19 | 45539443  | 45540084  | 642 |
| chr19 | 30528853  | 30529494  | 642 |
| chr13 | 53209491  | 53210132  | 642 |
| chrX  | 13131486  | 13132126  | 641 |
| chr19 | 45003231  | 45003871  | 641 |
| chr15 | 24027510  | 24028150  | 641 |
| chr29 | 48178109  | 48178748  | 640 |
| chr19 | 27265220  | 27265859  | 640 |
| chr13 | 59538266  | 59538905  | 640 |
| chr13 | 22881822  | 22882461  | 640 |
| chr1  | 82889294  | 82889932  | 639 |
| chrX  | 73290532  | 73291169  | 638 |
| chr25 | 2961916   | 2962553   | 638 |
| chr6  | 120345899 | 120346535 | 637 |
| chr29 | 41467486  | 41468122  | 637 |

|       |           |           |     |
|-------|-----------|-----------|-----|
| chr23 | 3254827   | 3255463   | 637 |
| chr15 | 23914051  | 23914687  | 637 |
| chr11 | 100679103 | 100679739 | 637 |
| chrX  | 21606206  | 21606840  | 635 |
| chr18 | 4867303   | 4867937   | 635 |
| chr18 | 24018466  | 24019099  | 634 |
| chr17 | 57698562  | 57699195  | 634 |
| chr7  | 79736101  | 79736732  | 632 |
| chr22 | 21970140  | 21970771  | 632 |
| chr19 | 46120726  | 46121357  | 632 |
| chr11 | 105668443 | 105669074 | 632 |
| chrX  | 73005668  | 73006298  | 631 |
| chr7  | 38207376  | 38208005  | 630 |
| chr5  | 117631506 | 117632135 | 630 |
| chr2  | 137655113 | 137655742 | 630 |
| chr18 | 35074603  | 35075232  | 630 |
| chrX  | 13801070  | 13801698  | 629 |
| chr9  | 104896068 | 104896696 | 629 |
| chr9  | 45946611  | 45947239  | 629 |
| chr17 | 56474014  | 56474642  | 629 |
| chr14 | 31503239  | 31503867  | 629 |
| chrX  | 75458283  | 75458910  | 628 |
| chr2  | 99345000  | 99345627  | 628 |
| chr1  | 152095801 | 152096428 | 628 |
| chr11 | 3864272   | 3864898   | 627 |
| chrX  | 7649334   | 7649959   | 626 |
| chr18 | 34050274  | 34050899  | 626 |
| chrX  | 20679100  | 20679724  | 625 |
| chr18 | 52802405  | 52803029  | 625 |
| chr20 | 4979203   | 4979826   | 624 |
| chrX  | 33759856  | 33760478  | 623 |
| chrX  | 65472374  | 65472995  | 622 |
| chr13 | 6780909   | 6781530   | 622 |
| chr21 | 10861947  | 10862567  | 621 |
| chr18 | 11516886  | 11517506  | 621 |
| chr16 | 47186434  | 47187054  | 621 |
| chr10 | 21906905  | 21907525  | 621 |
| chr24 | 1936509   | 1937128   | 620 |
| chr15 | 73830097  | 73830716  | 620 |
| chr1  | 1622951   | 1623570   | 620 |
| chr15 | 23994699  | 23995317  | 619 |
| chr4  | 92165367  | 92165984  | 618 |
| chr3  | 121435211 | 121435828 | 618 |
| chr23 | 52744367  | 52744984  | 618 |
| chr17 | 65983586  | 65984203  | 618 |
| chr18 | 11226116  | 11226732  | 617 |
| chr4  | 111788486 | 111789101 | 616 |
| chr11 | 100743789 | 100744404 | 616 |
| chr23 | 28800848  | 28801462  | 615 |
| chrX  | 65508324  | 65508935  | 612 |

|       |           |           |     |
|-------|-----------|-----------|-----|
| chr20 | 4965408   | 4966019   | 612 |
| chr19 | 44751158  | 44751769  | 612 |
| chr12 | 18233514  | 18234125  | 612 |
| chrX  | 8039096   | 8039706   | 611 |
| chr5  | 120387615 | 120388225 | 611 |
| chr15 | 19971148  | 19971757  | 610 |
| chr5  | 28718688  | 28719296  | 609 |
| chr25 | 27586448  | 27587056  | 609 |
| chrX  | 7781003   | 7781610   | 608 |
| chr8  | 77296229  | 77296836  | 608 |
| chr20 | 73872058  | 73872664  | 607 |
| chr18 | 11724469  | 11725075  | 607 |
| chr24 | 4209147   | 4209752   | 606 |
| chr19 | 22882477  | 22883082  | 606 |
| chr15 | 74526688  | 74527293  | 606 |
| chr15 | 44747839  | 44748444  | 606 |
| chr13 | 59417059  | 59417664  | 606 |
| chr3  | 26140800  | 26141404  | 605 |
| chr28 | 25089041  | 25089645  | 605 |
| chr26 | 43779433  | 43780037  | 605 |
| chr29 | 1709858   | 1710461   | 604 |
| chr14 | 1828791   | 1829393   | 603 |
| chrX  | 59462193  | 59462794  | 602 |
| chr5  | 106251706 | 106252307 | 602 |
| chr26 | 34282658  | 34283259  | 602 |
| chr18 | 63579844  | 63580445  | 602 |
| chr1  | 68932620  | 68933221  | 602 |
| chr19 | 42261532  | 42262132  | 601 |
| chr13 | 40875856  | 40876456  | 601 |
| chr19 | 22837221  | 22837819  | 599 |
| chr3  | 122131243 | 122131840 | 598 |
| chr2  | 132391446 | 132392043 | 598 |
| chr2  | 114994979 | 114995576 | 598 |
| chr17 | 18509909  | 18510506  | 598 |
| chr11 | 30931082  | 30931677  | 596 |
| chr10 | 45528945  | 45529540  | 596 |
| chrX  | 7141702   | 7142296   | 595 |
| chr21 | 25256611  | 25257205  | 595 |
| chr18 | 22217618  | 22218212  | 595 |
| chr15 | 54033973  | 54034567  | 595 |
| chr12 | 20031178  | 20031772  | 595 |
| chr3  | 11560937  | 11561530  | 594 |
| chr13 | 81653192  | 81653785  | 594 |
| chrX  | 49951572  | 49952164  | 593 |
| chr26 | 19857411  | 19858003  | 593 |
| chrX  | 75924669  | 75925260  | 592 |
| chrX  | 21531066  | 21531657  | 592 |
| chr29 | 37704708  | 37705299  | 592 |
| chrX  | 64925564  | 64926154  | 591 |
| chr19 | 29814845  | 29815435  | 591 |

|       |           |           |     |
|-------|-----------|-----------|-----|
| chrX  | 61339135  | 61339724  | 590 |
| chrX  | 49815266  | 49815855  | 590 |
| chrX  | 21827609  | 21828196  | 588 |
| chr25 | 14680843  | 14681430  | 588 |
| chr10 | 95572000  | 95572587  | 588 |
| chrX  | 50415255  | 50415841  | 587 |
| chr5  | 122348981 | 122349567 | 587 |
| chr4  | 72039661  | 72040247  | 587 |
| chr28 | 26812365  | 26812951  | 587 |
| chr21 | 9434755   | 9435341   | 587 |
| chr20 | 3251149   | 3251735   | 587 |
| chr18 | 11214523  | 11215109  | 587 |
| chrX  | 37502563  | 37503148  | 586 |
| chr29 | 31508853  | 31509438  | 586 |
| chrX  | 59485563  | 59486147  | 585 |
| chr2  | 131033364 | 131033948 | 585 |
| chr13 | 70063507  | 70064091  | 585 |
| chrX  | 54506558  | 54507141  | 584 |
| chrX  | 12529366  | 12529949  | 584 |
| chr8  | 45663004  | 45663587  | 584 |
| chr7  | 5404188   | 5404771   | 584 |
| chr22 | 16352655  | 16353237  | 583 |
| chr8  | 5772663   | 5773244   | 582 |
| chr29 | 51690526  | 51691107  | 582 |
| chr22 | 50789101  | 50789682  | 582 |
| chrX  | 50037109  | 50037689  | 581 |
| chrX  | 6898268   | 6898847   | 580 |
| chr16 | 77450243  | 77450822  | 580 |
| chrX  | 30576481  | 30577059  | 579 |
| chr25 | 37988459  | 37989036  | 578 |
| chr23 | 10570849  | 10571426  | 578 |
| chrX  | 65899265  | 65899841  | 577 |
| chr15 | 20034536  | 20035111  | 576 |
| chr11 | 96182279  | 96182854  | 576 |
| chr15 | 24029202  | 24029776  | 575 |
| chrX  | 19708472  | 19709045  | 574 |
| chr5  | 29146900  | 29147473  | 574 |
| chr26 | 50638047  | 50638620  | 574 |
| chr2  | 134906040 | 134906613 | 574 |
| chr19 | 27094797  | 27095370  | 574 |
| chr18 | 54229796  | 54230369  | 574 |
| chr6  | 91876398  | 91876970  | 573 |
| chr8  | 62581641  | 62582212  | 572 |
| chr5  | 113789251 | 113789822 | 572 |
| chr13 | 77750938  | 77751509  | 572 |
| chr11 | 81436309  | 81436880  | 572 |
| chr11 | 70706767  | 70707338  | 572 |
| chrX  | 7719200   | 7719770   | 571 |
| chr8  | 47123438  | 47124008  | 571 |
| chr2  | 131315156 | 131315725 | 570 |

|       |           |           |     |
|-------|-----------|-----------|-----|
| chr17 | 68351373  | 68351942  | 570 |
| chrX  | 72132904  | 72133471  | 568 |
| chrX  | 71374790  | 71375357  | 568 |
| chr9  | 87741518  | 87742085  | 568 |
| chr28 | 46055993  | 46056560  | 568 |
| chr23 | 13671068  | 13671635  | 568 |
| chr20 | 8745513   | 8746080   | 568 |
| chr19 | 60741537  | 60742104  | 568 |
| chr11 | 62713517  | 62714084  | 568 |
| chr7  | 10979338  | 10979904  | 567 |
| chr5  | 112977000 | 112977566 | 567 |
| chrX  | 36908048  | 36908612  | 565 |
| chrX  | 6699170   | 6699734   | 565 |
| chr3  | 15782909  | 15783473  | 565 |
| chr23 | 15888687  | 15889251  | 565 |
| chr18 | 22088159  | 22088723  | 565 |
| chrX  | 55150521  | 55151084  | 564 |
| chrX  | 13788766  | 13789329  | 564 |
| chr28 | 33673831  | 33674394  | 564 |
| chr24 | 49772972  | 49773535  | 564 |
| chrX  | 38982691  | 38983253  | 563 |
| chrX  | 20130143  | 20130705  | 563 |
| chr25 | 33129310  | 33129872  | 563 |
| chr1  | 50435826  | 50436388  | 563 |
| chrX  | 73352156  | 73352717  | 562 |
| chrX  | 20920158  | 20920719  | 562 |
| chr19 | 54168119  | 54168680  | 562 |
| chr5  | 10784518  | 10785078  | 561 |
| chr4  | 33246567  | 33247127  | 561 |
| chr21 | 28333014  | 28333574  | 561 |
| chr4  | 95904331  | 95904890  | 560 |
| chr18 | 56817059  | 56817618  | 560 |
| chr14 | 7788236   | 7788795   | 560 |
| chr11 | 70764923  | 70765482  | 560 |
| chr7  | 10283265  | 10283823  | 559 |
| chr26 | 34278833  | 34279391  | 559 |
| chr23 | 10991545  | 10992103  | 559 |
| chr22 | 50869206  | 50869764  | 559 |
| chr19 | 22422014  | 22422572  | 559 |
| chr18 | 53548850  | 53549408  | 559 |
| chr18 | 18053220  | 18053778  | 559 |
| chr24 | 20354622  | 20355179  | 558 |
| chr17 | 72142650  | 72143206  | 557 |
| chrX  | 72392029  | 72392584  | 556 |
| chr27 | 14744177  | 14744732  | 556 |
| chr23 | 15887264  | 15887819  | 556 |
| chr2  | 128834479 | 128835034 | 556 |
| chr12 | 68176793  | 68177348  | 556 |
| chr1  | 144648222 | 144648777 | 556 |
| chrX  | 74253329  | 74253883  | 555 |

|       |           |           |     |
|-------|-----------|-----------|-----|
| chr2  | 131299336 | 131299890 | 555 |
| chr13 | 34811670  | 34812224  | 555 |
| chr3  | 124562546 | 124563099 | 554 |
| chr13 | 30829149  | 30829702  | 554 |
| chr10 | 70373242  | 70373795  | 554 |
| chr11 | 80153195  | 80153747  | 553 |
| chrX  | 10711253  | 10711803  | 551 |
| chr17 | 68732464  | 68733014  | 551 |
| chr5  | 29087606  | 29088155  | 550 |
| chr18 | 7219645   | 7220194   | 550 |
| chr11 | 23138115  | 23138664  | 550 |
| chr19 | 59368327  | 59368874  | 548 |
| chr18 | 62947816  | 62948363  | 548 |
| chr15 | 23583991  | 23584538  | 548 |
| chr18 | 52243596  | 52244142  | 547 |
| chr19 | 26947112  | 26947657  | 546 |
| chr5  | 29999251  | 29999795  | 545 |
| chr5  | 29134556  | 29135100  | 545 |
| chr4  | 6105151   | 6105695   | 545 |
| chr3  | 116360704 | 116361247 | 544 |
| chr22 | 15041601  | 15042144  | 544 |
| chr16 | 77520351  | 77520893  | 543 |
| chr14 | 64789463  | 64790005  | 543 |
| chrX  | 64955607  | 64956148  | 542 |
| chr15 | 26763211  | 26763752  | 542 |
| chr11 | 101643602 | 101644143 | 542 |
| chr20 | 43693922  | 43694461  | 540 |
| chr19 | 41403559  | 41404098  | 540 |
| chr7  | 10055561  | 10056099  | 539 |
| chr26 | 43071982  | 43072520  | 539 |
| chr2  | 26612482  | 26613020  | 539 |
| chr18 | 11741420  | 11741958  | 539 |
| chrX  | 18485707  | 18486244  | 538 |
| chr29 | 37075171  | 37075708  | 538 |
| chr28 | 25883822  | 25884359  | 538 |
| chr18 | 52753492  | 52754029  | 538 |
| chr17 | 70042550  | 70043087  | 538 |
| chr14 | 22116337  | 22116874  | 538 |
| chr14 | 6973748   | 6974285   | 538 |
| chr10 | 25027725  | 25028262  | 538 |
| chrX  | 65326125  | 65326660  | 536 |
| chrX  | 12438277  | 12438812  | 536 |
| chr16 | 77528661  | 77529196  | 536 |
| chrX  | 60905918  | 60906452  | 535 |
| chrX  | 37715052  | 37715586  | 535 |
| chr23 | 51055336  | 51055870  | 535 |
| chrX  | 19494679  | 19495212  | 534 |
| chrX  | 2876978   | 2877511   | 534 |
| chr11 | 77781273  | 77781806  | 534 |
| chr5  | 124681676 | 124682208 | 533 |

|       |           |           |     |
|-------|-----------|-----------|-----|
| chr3  | 127899774 | 127900306 | 533 |
| chr29 | 35599158  | 35599690  | 533 |
| chr26 | 39256905  | 39257437  | 533 |
| chr4  | 64228170  | 64228701  | 532 |
| chr13 | 73365242  | 73365773  | 532 |
| chr11 | 81630262  | 81630793  | 532 |
| chrX  | 2411383   | 2411913   | 531 |
| chr29 | 44736316  | 44736846  | 531 |
| chr22 | 43773860  | 43774390  | 531 |
| chrX  | 59414531  | 59415060  | 530 |
| chrX  | 55834233  | 55834762  | 530 |
| chr22 | 59457108  | 59457637  | 530 |
| chr21 | 34204246  | 34204775  | 530 |
| chr21 | 27576887  | 27577416  | 530 |
| chr19 | 6724423   | 6724952   | 530 |
| chr13 | 66964075  | 66964603  | 529 |
| chr11 | 39501150  | 39501678  | 529 |
| chrX  | 61488994  | 61489521  | 528 |
| chrX  | 53797177  | 53797704  | 528 |
| chrX  | 13724876  | 13725403  | 528 |
| chr14 | 7267400   | 7267927   | 528 |
| chr1  | 70493705  | 70494232  | 528 |
| chrX  | 78119516  | 78120042  | 527 |
| chr5  | 60817614  | 60818140  | 527 |
| chr19 | 13638176  | 13638702  | 527 |
| chr5  | 112980392 | 112980917 | 526 |
| chr5  | 111833395 | 111833920 | 526 |
| chr26 | 51441616  | 51442141  | 526 |
| chr21 | 61033546  | 61034071  | 526 |
| chr29 | 45774309  | 45774833  | 525 |
| chr21 | 33928362  | 33928886  | 525 |
| chr17 | 70273654  | 70274178  | 525 |
| chr17 | 63818879  | 63819403  | 525 |
| chr17 | 62214532  | 62215056  | 525 |
| chrX  | 50166569  | 50167092  | 524 |
| chr6  | 119359947 | 119360470 | 524 |
| chr29 | 27288182  | 27288705  | 524 |
| chr2  | 139182221 | 139182744 | 524 |
| chr11 | 49595457  | 49595980  | 524 |
| chr18 | 10943020  | 10943542  | 523 |
| chr16 | 70101758  | 70102279  | 522 |
| chrX  | 65177398  | 65177918  | 521 |
| chr4  | 121507841 | 121508360 | 520 |
| chr4  | 30784092  | 30784611  | 520 |
| chr19 | 50636427  | 50636946  | 520 |
| chrX  | 50826002  | 50826520  | 519 |
| chr7  | 19295050  | 19295568  | 519 |
| chr23 | 30289699  | 30290217  | 519 |
| chr19 | 23063693  | 23064211  | 519 |
| chr15 | 73740207  | 73740725  | 519 |

|       |               |           |     |
|-------|---------------|-----------|-----|
| chr1  | 158506273     | 158506791 | 519 |
| chrX  | 10717215      | 10717732  | 518 |
| chr7  | 19300535      | 19301052  | 518 |
| chr13 | 22151026      | 22151543  | 518 |
| chr19 | 7626585       | 7627101   | 517 |
| chr16 | 40889498      | 40890014  | 517 |
| chrX  | 20274704      | 20275219  | 516 |
| chrX  | 8455486       | 8456001   | 516 |
| chr22 | 18538259      | 18538774  | 516 |
| chr15 | 32668320      | 32668835  | 516 |
| chr14 | 834994 835509 | 516       |     |
| chrX  | 75870111      | 75870625  | 515 |
| chr4  | 121522868     | 121523382 | 515 |
| chr3  | 123194913     | 123195427 | 515 |
| chrX  | 56601139      | 56601652  | 514 |
| chrX  | 19378859      | 19379372  | 514 |
| chr8  | 5769216       | 5769729   | 514 |
| chr5  | 114233260     | 114233773 | 514 |
| chr4  | 66896819      | 66897332  | 514 |
| chrX  | 77219962      | 77220474  | 513 |
| chr4  | 99263391      | 99263903  | 513 |
| chr13 | 70206502      | 70207014  | 513 |
| chr5  | 78910641      | 78911152  | 512 |
| chr23 | 49801049      | 49801560  | 512 |
| chr17 | 67940777      | 67941288  | 512 |
| chr14 | 80589660      | 80590171  | 512 |
| chrX  | 33983859      | 33984369  | 511 |
| chr25 | 44026219      | 44026729  | 511 |
| chr22 | 30278004      | 30278514  | 511 |
| chr20 | 22742388      | 22742898  | 511 |
| chr20 | 706104 706614 | 511       |     |
| chr29 | 33556972      | 33557481  | 510 |
| chr23 | 15878211      | 15878720  | 510 |
| chr17 | 11546751      | 11547260  | 510 |
| chr12 | 70600259      | 70600768  | 510 |
| chr3  | 126556640     | 126557148 | 509 |
| chr22 | 45249313      | 45249821  | 509 |
| chr2  | 134734094     | 134734602 | 509 |
| chr15 | 36413813      | 36414321  | 509 |
| chr13 | 61129999      | 61130507  | 509 |
| chr14 | 61204085      | 61204592  | 508 |
| chr12 | 74543328      | 74543835  | 508 |
| chr5  | 119359717     | 119360223 | 507 |
| chr23 | 12346735      | 12347240  | 506 |
| chr13 | 43467980      | 43468485  | 506 |
| chr6  | 121070648     | 121071151 | 504 |
| chr29 | 44374340      | 44374843  | 504 |
| chrX  | 65805494      | 65805996  | 503 |
| chr7  | 39670115      | 39670617  | 503 |
| chr26 | 41019454      | 41019956  | 503 |



|       |           |           |     |
|-------|-----------|-----------|-----|
| chr13 | 57391915  | 57392417  | 503 |
| chr10 | 74854351  | 74854853  | 503 |
| chr10 | 11001859  | 11002361  | 503 |
| chr1  | 3347924   | 3348426   | 503 |
| chrX  | 18478948  | 18479449  | 502 |
| chrX  | 2488342   | 2488843   | 502 |
| chr19 | 29438598  | 29439099  | 502 |
| chr26 | 43679863  | 43680363  | 501 |
| chr26 | 37776732  | 37777232  | 501 |
| chr18 | 62533248  | 62533748  | 501 |
| chr12 | 76537497  | 76537997  | 501 |
| chrX  | 57139527  | 57140026  | 500 |
| chrX  | 50704694  | 50705193  | 500 |
| chr4  | 118007274 | 118007773 | 500 |
| chr25 | 34379220  | 34379719  | 500 |
| chr17 | 73120975  | 73121474  | 500 |
| chr11 | 68920872  | 68921371  | 500 |
| chr3  | 105168167 | 105168665 | 499 |
| chr29 | 36693335  | 36693833  | 499 |
| chrX  | 72935680  | 72936177  | 498 |
| chrX  | 54770210  | 54770707  | 498 |
| chr5  | 26683595  | 26684092  | 498 |
| chr21 | 15489655  | 15490152  | 498 |
| chr20 | 74515242  | 74515739  | 498 |
| chr18 | 57312167  | 57312664  | 498 |
| chr18 | 22148695  | 22149192  | 498 |
| chr16 | 58556208  | 58556705  | 498 |
| chr11 | 74470422  | 74470919  | 498 |
| chr1  | 144012927 | 144013424 | 498 |
| chr6  | 120933780 | 120934276 | 497 |
| chr24 | 60576701  | 60577197  | 497 |
| chrX  | 7813769   | 7814264   | 496 |
| chr23 | 49941279  | 49941774  | 496 |
| chr18 | 63027854  | 63028349  | 496 |
| chr16 | 39810151  | 39810646  | 496 |
| chrX  | 8422185   | 8422679   | 495 |
| chr5  | 72154149  | 72154643  | 495 |
| chr1  | 1682808   | 1683302   | 495 |
| chrX  | 55022466  | 55022959  | 494 |
| chr29 | 12465336  | 12465829  | 494 |
| chr19 | 45057396  | 45057889  | 494 |
| chr10 | 77489287  | 77489780  | 494 |
| chr5  | 72149412  | 72149904  | 493 |
| chr13 | 45329296  | 45329788  | 493 |
| chrX  | 19994637  | 19995128  | 492 |
| chrX  | 2149393   | 2149884   | 492 |
| chr8  | 93136666  | 93137157  | 492 |
| chr29 | 33798098  | 33798589  | 492 |
| chr21 | 60865547  | 60866038  | 492 |
| chrX  | 50634495  | 50634985  | 491 |

|       |           |           |     |
|-------|-----------|-----------|-----|
| chrX  | 50392853  | 50393343  | 491 |
| chrX  | 14651137  | 14651627  | 491 |
| chrX  | 14639549  | 14640039  | 491 |
| chr29 | 42397769  | 42398259  | 491 |
| chr25 | 16504507  | 16504997  | 491 |
| chr22 | 59967559  | 59968049  | 491 |
| chr19 | 63501126  | 63501616  | 491 |
| chr17 | 12576848  | 12577338  | 491 |
| chr11 | 66208790  | 66209280  | 491 |
| chrX  | 66234773  | 66235262  | 490 |
| chr25 | 4742174   | 4742663   | 490 |
| chr19 | 39356640  | 39357129  | 490 |
| chr16 | 47239135  | 47239624  | 490 |
| chr4  | 73447153  | 73447641  | 489 |
| chr23 | 31199150  | 31199638  | 489 |
| chr21 | 29878305  | 29878793  | 489 |
| chr19 | 45144191  | 45144679  | 489 |
| chr1  | 85900304  | 85900792  | 489 |
| chr23 | 18160780  | 18161267  | 488 |
| chr23 | 17485388  | 17485875  | 488 |
| chr5  | 124884815 | 124885301 | 487 |
| chr3  | 121706468 | 121706954 | 487 |
| chr29 | 11677454  | 11677940  | 487 |
| chr24 | 59437107  | 59437593  | 487 |
| chr20 | 8556719   | 8557205   | 487 |
| chr20 | 2534410   | 2534896   | 487 |
| chr17 | 75470202  | 75470688  | 487 |
| chrX  | 36184700  | 36185185  | 486 |
| chrX  | 6504335   | 6504820   | 486 |
| chr2  | 72850534  | 72851018  | 485 |
| chr10 | 59648375  | 59648859  | 485 |
| chrX  | 2893422   | 2893905   | 484 |
| chr19 | 57257384  | 57257867  | 484 |
| chrX  | 50841893  | 50842375  | 483 |
| chr8  | 73088412  | 73088894  | 483 |
| chr20 | 3203901   | 3204383   | 483 |
| chr11 | 14495970  | 14496452  | 483 |
| chrX  | 34601681  | 34602162  | 482 |
| chr7  | 18848591  | 18849072  | 482 |
| chr22 | 52729148  | 52729629  | 482 |
| chr13 | 60427671  | 60428152  | 482 |
| chr10 | 74724642  | 74725123  | 482 |
| chr10 | 35780770  | 35781251  | 482 |
| chrX  | 76002123  | 76002603  | 481 |
| chrX  | 6664525   | 6665005   | 481 |
| chr3  | 35824667  | 35825147  | 481 |
| chr15 | 31969571  | 31970051  | 481 |
| chr19 | 16167836  | 16168315  | 480 |
| chrX  | 20056616  | 20057094  | 479 |
| chr15 | 41322583  | 41323061  | 479 |

|       |               |           |     |
|-------|---------------|-----------|-----|
| chr23 | 11932729      | 11933206  | 478 |
| chr21 | 59731724      | 59732201  | 478 |
| chr21 | 47721526      | 47722003  | 478 |
| chr19 | 16707883      | 16708360  | 478 |
| chr17 | 46605966      | 46606443  | 478 |
| chrX  | 65593600      | 65594076  | 477 |
| chrX  | 13617800      | 13618276  | 477 |
| chr29 | 44561558      | 44562034  | 477 |
| chr16 | 47187192      | 47187668  | 477 |
| chrX  | 75481012      | 75481487  | 476 |
| chrX  | 61019674      | 61020149  | 476 |
| chrX  | 37590448      | 37590923  | 476 |
| chrX  | 59152947      | 59153421  | 475 |
| chr29 | 45200353      | 45200827  | 475 |
| chrX  | 52921171      | 52921644  | 474 |
| chr3  | 39118634      | 39119107  | 474 |
| chr27 | 39091689      | 39092162  | 474 |
| chr22 | 30098998      | 30099471  | 474 |
| chr21 | 13653001      | 13653474  | 474 |
| chr13 | 58621080      | 58621553  | 474 |
| chrX  | 65240968      | 65241440  | 473 |
| chr8  | 92873430      | 92873902  | 473 |
| chrX  | 48697048      | 48697519  | 472 |
| chrX  | 44521599      | 44522070  | 472 |
| chr2  | 134940221     | 134940692 | 472 |
| chr19 | 60459792      | 60460263  | 472 |
| chr12 | 83598843      | 83599314  | 472 |
| chr18 | 64307316      | 64307786  | 471 |
| chr17 | 68999000      | 68999470  | 471 |
| chr5  | 60917932      | 60918401  | 470 |
| chr17 | 59191085      | 59191554  | 470 |
| chr16 | 44118139      | 44118608  | 470 |
| chr10 | 72901926      | 72902395  | 470 |
| chrX  | 8651775       | 8652243   | 469 |
| chr28 | 414212 414680 | 469       |     |
| chr25 | 6791526       | 6791994   | 469 |
| chrX  | 34721346      | 34721813  | 468 |
| chrX  | 18887433      | 18887900  | 468 |
| chr3  | 105752959     | 105753426 | 468 |
| chr2  | 124814353     | 124814820 | 468 |
| chr15 | 13629900      | 13630367  | 468 |
| chrX  | 21665319      | 21665785  | 467 |
| chr3  | 111486708     | 111487174 | 467 |
| chr29 | 45855097      | 45855563  | 467 |
| chr21 | 47524017      | 47524483  | 467 |
| chr13 | 30828376      | 30828842  | 467 |
| chr1  | 2327339       | 2327805   | 467 |
| chrX  | 58829767      | 58830232  | 466 |
| chr18 | 24315207      | 24315672  | 466 |
| chr17 | 70310735      | 70311200  | 466 |

|       |           |           |     |
|-------|-----------|-----------|-----|
| chrX  | 58490463  | 58490927  | 465 |
| chr5  | 32837763  | 32838227  | 465 |
| chr10 | 70248305  | 70248769  | 465 |
| chr10 | 17457801  | 17458265  | 465 |
| chr10 | 17003938  | 17004402  | 465 |
| chrX  | 20334168  | 20334631  | 464 |
| chr3  | 22598258  | 22598721  | 464 |
| chr26 | 50847264  | 50847727  | 464 |
| chr25 | 30622716  | 30623179  | 464 |
| chr23 | 9737509   | 9737972   | 464 |
| chr13 | 64204636  | 64205099  | 464 |
| chr13 | 59666124  | 59666587  | 464 |
| chr11 | 21005093  | 21005555  | 463 |
| chr5  | 21813848  | 21814309  | 462 |
| chr2  | 111357331 | 111357792 | 462 |
| chr19 | 49645137  | 49645598  | 462 |
| chr15 | 74564655  | 74565116  | 462 |
| chrX  | 72505020  | 72505480  | 461 |
| chrX  | 35191576  | 35192036  | 461 |
| chr25 | 2973622   | 2974082   | 461 |
| chr27 | 15763669  | 15764128  | 460 |
| chr24 | 5537483   | 5537942   | 460 |
| chr19 | 41213961  | 41214420  | 460 |
| chr15 | 21299550  | 21300009  | 460 |
| chr11 | 81395131  | 81395590  | 460 |
| chrX  | 63085485  | 63085943  | 459 |
| chrX  | 20019519  | 20019977  | 459 |
| chr19 | 39347630  | 39348088  | 459 |
| chr18 | 34225289  | 34225747  | 459 |
| chrX  | 62814754  | 62815211  | 458 |
| chr29 | 48839884  | 48840341  | 458 |
| chr26 | 48547237  | 48547694  | 458 |
| chr2  | 129306541 | 129306998 | 458 |
| chr15 | 33494829  | 33495286  | 458 |
| chr13 | 77598404  | 77598861  | 458 |
| chr13 | 74398952  | 74399409  | 458 |
| chrX  | 75324160  | 75324616  | 457 |
| chr5  | 125699753 | 125700209 | 457 |
| chr23 | 45975818  | 45976274  | 457 |
| chr2  | 129247763 | 129248219 | 457 |
| chr17 | 71962779  | 71963235  | 457 |
| chr14 | 58209361  | 58209817  | 457 |
| chr13 | 60773321  | 60773777  | 457 |
| chr10 | 17667440  | 17667896  | 457 |
| chrX  | 20271112  | 20271567  | 456 |
| chr9  | 63068434  | 63068889  | 456 |
| chr20 | 61259769  | 61260224  | 456 |
| chr17 | 75560950  | 75561405  | 456 |
| chr15 | 80885952  | 80886407  | 456 |
| chrX  | 74644782  | 74645236  | 455 |

|       |               |           |     |
|-------|---------------|-----------|-----|
| chrX  | 55363159      | 55363613  | 455 |
| chr18 | 1195437       | 1195891   | 455 |
| chrX  | 60545284      | 60545737  | 454 |
| chr6  | 74440479      | 74440932  | 454 |
| chr5  | 73288062      | 73288515  | 454 |
| chr17 | 76102899      | 76103352  | 454 |
| chr17 | 69205405      | 69205858  | 454 |
| chrX  | 35670291      | 35670743  | 453 |
| chr17 | 74556799      | 74557251  | 453 |
| chrX  | 50812121      | 50812571  | 451 |
| chrX  | 30396640      | 30397090  | 451 |
| chrX  | 22586172      | 22586622  | 451 |
| chr5  | 116924406     | 116924856 | 451 |
| chr26 | 44792862      | 44793312  | 451 |
| chr12 | 84788166      | 84788616  | 451 |
| chrX  | 75912453      | 75912902  | 450 |
| chrX  | 8327338       | 8327787   | 450 |
| chr8  | 93711841      | 93712290  | 450 |
| chr8  | 11420706      | 11421155  | 450 |
| chr21 | 28902569      | 28903018  | 450 |
| chr11 | 103756589     | 103757038 | 450 |
| chrX  | 54363653      | 54364101  | 449 |
| chrX  | 34143951      | 34144399  | 449 |
| chrX  | 12128793      | 12129241  | 449 |
| chr7  | 99227484      | 99227932  | 449 |
| chr5  | 112092666     | 112093114 | 449 |
| chr11 | 70848143      | 70848591  | 449 |
| chrX  | 53886155      | 53886602  | 448 |
| chr7  | 4935039       | 4935486   | 448 |
| chr29 | 37361961      | 37362408  | 448 |
| chr25 | 676483 676930 |           | 448 |
| chr2  | 111247816     | 111248263 | 448 |
| chr19 | 45556875      | 45557322  | 448 |
| chr19 | 20360142      | 20360589  | 448 |
| chr17 | 59251248      | 59251695  | 448 |
| chr17 | 18506675      | 18507122  | 448 |
| chr10 | 21437403      | 21437850  | 448 |
| chr26 | 21796527      | 21796973  | 447 |
| chr19 | 41219115      | 41219561  | 447 |
| chr19 | 24296721      | 24297167  | 447 |
| chr17 | 49442567      | 49443013  | 447 |
| chrX  | 77941905      | 77942350  | 446 |
| chrX  | 20399526      | 20399971  | 446 |
| chr8  | 59312586      | 59313031  | 446 |
| chr7  | 16545684      | 16546129  | 446 |
| chr7  | 12727163      | 12727608  | 446 |
| chr7  | 9073297       | 9073742   | 446 |
| chr13 | 67064540      | 67064985  | 446 |
| chrX  | 65757207      | 65757651  | 445 |
| chr15 | 62417829      | 62418273  | 445 |

|       |               |           |     |
|-------|---------------|-----------|-----|
| chr13 | 59839606      | 59840050  | 445 |
| chrX  | 55629511      | 55629954  | 444 |
| chr8  | 80296371      | 80296814  | 444 |
| chr23 | 42978497      | 42978940  | 444 |
| chr21 | 31665758      | 31666201  | 444 |
| chr13 | 77394543      | 77394986  | 444 |
| chrX  | 64772171      | 64772613  | 443 |
| chrX  | 46225001      | 46225443  | 443 |
| chrX  | 7778875       | 7779317   | 443 |
| chr9  | 90594604      | 90595046  | 443 |
| chr7  | 96287037      | 96287479  | 443 |
| chr16 | 72289893      | 72290335  | 443 |
| chrX  | 37457207      | 37457648  | 442 |
| chrX  | 2552383       | 2552824   | 442 |
| chr5  | 30282973      | 30283414  | 442 |
| chr3  | 7801112       | 7801553   | 442 |
| chr29 | 35355044      | 35355485  | 442 |
| chr25 | 38414019      | 38414460  | 442 |
| chr2  | 126084548     | 126084989 | 442 |
| chr19 | 13460572      | 13461013  | 442 |
| chr14 | 34071223      | 34071664  | 442 |
| chr13 | 61339101      | 61339542  | 442 |
| chr1  | 148003426     | 148003867 | 442 |
| chr1  | 145856166     | 145856607 | 442 |
| chrX  | 71878614      | 71879054  | 441 |
| chr7  | 50576737      | 50577177  | 441 |
| chr7  | 42507425      | 42507865  | 441 |
| chr28 | 12527006      | 12527446  | 441 |
| chr19 | 17153565      | 17154005  | 441 |
| chrX  | 7500397       | 7500836   | 440 |
| chr7  | 48175014      | 48175453  | 440 |
| chr3  | 105718626     | 105719065 | 440 |
| chr10 | 17036094      | 17036533  | 440 |
| chrX  | 77075469      | 77075907  | 439 |
| chr7  | 44949908      | 44950346  | 439 |
| chr21 | 13922251      | 13922689  | 439 |
| chr10 | 49251725      | 49252163  | 439 |
| chrX  | 75852720      | 75853157  | 438 |
| chrX  | 2497976       | 2498413   | 438 |
| chr26 | 45854841      | 45855278  | 438 |
| chr24 | 26202475      | 26202912  | 438 |
| chr19 | 41474142      | 41474579  | 438 |
| chr11 | 14034783      | 14035220  | 438 |
| chrX  | 80051384      | 80051820  | 437 |
| chrX  | 8133851       | 8134287   | 437 |
| chrX  | 784703 785139 | 437       |     |
| chr25 | 36449587      | 36450023  | 437 |
| chr25 | 34570082      | 34570518  | 437 |
| chr2  | 132249592     | 132250028 | 437 |
| chr11 | 98305098      | 98305534  | 437 |

|       |               |           |     |
|-------|---------------|-----------|-----|
| chrX  | 50668298      | 50668733  | 436 |
| chrX  | 45568080      | 45568515  | 436 |
| chr9  | 26942274      | 26942709  | 436 |
| chr24 | 61005992      | 61006427  | 436 |
| chr19 | 39352563      | 39352998  | 436 |
| chr14 | 61321341      | 61321776  | 436 |
| chr13 | 60757880      | 60758315  | 436 |
| chr11 | 11722959      | 11723394  | 436 |
| chrX  | 65000949      | 65001383  | 435 |
| chrX  | 59433833      | 59434267  | 435 |
| chrX  | 46205810      | 46206244  | 435 |
| chr8  | 93140941      | 93141375  | 435 |
| chr5  | 112952590     | 112953024 | 435 |
| chr5  | 29708444      | 29708878  | 435 |
| chr18 | 53871319      | 53871753  | 435 |
| chr18 | 14679093      | 14679527  | 435 |
| chr17 | 69433567      | 69434001  | 435 |
| chrX  | 80854639      | 80855072  | 434 |
| chr29 | 49508179      | 49508612  | 434 |
| chr25 | 35481009      | 35481442  | 434 |
| chr23 | 27954998      | 27955431  | 434 |
| chr23 | 27859324      | 27859757  | 434 |
| chr23 | 16116029      | 16116462  | 434 |
| chr18 | 22758051      | 22758484  | 434 |
| chr18 | 472953 473386 | 434       | 434 |
| chr15 | 25360832      | 25361265  | 434 |
| chr12 | 64659773      | 64660206  | 434 |
| chr11 | 70921400      | 70921833  | 434 |
| chr10 | 17106937      | 17107370  | 434 |
| chr11 | 9055367       | 9055799   | 433 |
| chr25 | 22577886      | 22578317  | 432 |
| chr23 | 43288840      | 43289271  | 432 |
| chr19 | 12490873      | 12491304  | 432 |
| chr18 | 53327258      | 53327689  | 432 |
| chr10 | 5301716       | 5302147   | 432 |
| chr4  | 123029864     | 123030294 | 431 |
| chr4  | 68282265      | 68282695  | 431 |
| chr2  | 140359312     | 140359742 | 431 |
| chr19 | 56097621      | 56098051  | 431 |
| chr15 | 24456860      | 24457290  | 431 |
| chr14 | 61327924      | 61328354  | 431 |
| chr1  | 87332777      | 87333207  | 431 |
| chrX  | 38999290      | 38999719  | 430 |
| chrX  | 6716131       | 6716560   | 430 |
| chr4  | 95551740      | 95552169  | 430 |
| chr29 | 23564818      | 23565247  | 430 |
| chr19 | 38945134      | 38945563  | 430 |
| chr14 | 31918544      | 31918973  | 430 |
| chrX  | 62726324      | 62726752  | 429 |
| chrX  | 59118384      | 59118812  | 429 |

|       |           |           |     |
|-------|-----------|-----------|-----|
| chrX  | 58893604  | 58894032  | 429 |
| chrX  | 55887454  | 55887882  | 429 |
| chrX  | 6455486   | 6455914   | 429 |
| chr8  | 108836116 | 108836544 | 429 |
| chr7  | 17487519  | 17487947  | 429 |
| chr6  | 99221721  | 99222149  | 429 |
| chr29 | 44700718  | 44701146  | 429 |
| chr27 | 26475051  | 26475479  | 429 |
| chr19 | 45000006  | 45000434  | 429 |
| chr18 | 18675929  | 18676357  | 429 |
| chrX  | 78393174  | 78393601  | 428 |
| chrX  | 72281890  | 72282317  | 428 |
| chrX  | 31558364  | 31558791  | 428 |
| chr18 | 56602885  | 56603312  | 428 |
| chr10 | 45282523  | 45282950  | 428 |
| chrX  | 63191005  | 63191431  | 427 |
| chrX  | 59433347  | 59433773  | 427 |
| chrX  | 35660594  | 35661020  | 427 |
| chrX  | 10980817  | 10981243  | 427 |
| chr7  | 16832841  | 16833267  | 427 |
| chr19 | 54802784  | 54803210  | 427 |
| chr13 | 40098167  | 40098593  | 427 |
| chrX  | 72750445  | 72750870  | 426 |
| chr9  | 90979043  | 90979468  | 426 |
| chr8  | 7847725   | 7848150   | 426 |
| chr29 | 49483183  | 49483608  | 426 |
| chr21 | 68144561  | 68144986  | 426 |
| chr19 | 30848553  | 30848978  | 426 |
| chr18 | 11495046  | 11495471  | 426 |
| chr16 | 47282686  | 47283111  | 426 |
| chr23 | 7789770   | 7790194   | 425 |
| chr18 | 45511789  | 45512213  | 425 |
| chr16 | 26794242  | 26794666  | 425 |
| chr1  | 146783884 | 146784308 | 425 |
| chr3  | 118887278 | 118887701 | 424 |
| chr3  | 16929862  | 16930285  | 424 |
| chr22 | 49579993  | 49580416  | 424 |
| chr19 | 46883710  | 46884133  | 424 |
| chr19 | 37888493  | 37888916  | 424 |
| chr19 | 25419353  | 25419776  | 424 |
| chr19 | 14052208  | 14052631  | 424 |
| chr14 | 36742644  | 36743067  | 424 |
| chr13 | 57621112  | 57621535  | 424 |
| chrX  | 64435694  | 64436116  | 423 |
| chrX  | 50306981  | 50307403  | 423 |
| chrX  | 50249394  | 50249816  | 423 |
| chrX  | 8409637   | 8410059   | 423 |
| chr20 | 6582510   | 6582932   | 423 |
| chr2  | 21540136  | 21540558  | 423 |
| chr12 | 20910384  | 20910806  | 423 |



|       |           |           |     |
|-------|-----------|-----------|-----|
| chr10 | 8555670   | 8556092   | 423 |
| chrX  | 30200729  | 30201150  | 422 |
| chrX  | 9268994   | 9269415   | 422 |
| chr5  | 28887372  | 28887793  | 422 |
| chr3  | 105906538 | 105906959 | 422 |
| chr24 | 58921171  | 58921592  | 422 |
| chr24 | 42583539  | 42583960  | 422 |
| chr23 | 7861525   | 7861946   | 422 |
| chr10 | 25548048  | 25548469  | 422 |
| chr1  | 82867289  | 82867710  | 422 |
| chrX  | 50445118  | 50445538  | 421 |
| chr9  | 74264487  | 74264907  | 421 |
| chr4  | 79047205  | 79047625  | 421 |
| chr23 | 49546751  | 49547171  | 421 |
| chr18 | 52793696  | 52794116  | 421 |
| chr15 | 30623692  | 30624112  | 421 |
| chr15 | 20491875  | 20492295  | 421 |
| chr13 | 68214182  | 68214602  | 421 |
| chrX  | 33747219  | 33747638  | 420 |
| chr6  | 107122041 | 107122460 | 420 |
| chr29 | 46651789  | 46652208  | 420 |
| chr29 | 44565294  | 44565713  | 420 |
| chr23 | 10649627  | 10650046  | 420 |
| chr21 | 61120931  | 61121350  | 420 |
| chr18 | 9733395   | 9733814   | 420 |
| chr17 | 69250883  | 69251302  | 420 |
| chr14 | 6950355   | 6950774   | 420 |
| chr5  | 72148485  | 72148903  | 419 |
| chr3  | 105185383 | 105185801 | 419 |
| chr25 | 41166838  | 41167256  | 419 |
| chr18 | 62613356  | 62613774  | 419 |
| chr12 | 34006915  | 34007333  | 419 |
| chrX  | 9804065   | 9804482   | 418 |
| chr8  | 43598274  | 43598691  | 418 |
| chr6  | 119388748 | 119389165 | 418 |
| chr6  | 46612148  | 46612565  | 418 |
| chr4  | 72734776  | 72735193  | 418 |
| chr25 | 11264184  | 11264601  | 418 |
| chr24 | 60986441  | 60986858  | 418 |
| chr19 | 58234609  | 58235026  | 418 |
| chr19 | 27443248  | 27443665  | 418 |
| chr16 | 44090549  | 44090966  | 418 |
| chr15 | 36303417  | 36303834  | 418 |
| chr1  | 74526369  | 74526786  | 418 |
| chrX  | 61394303  | 61394719  | 417 |
| chr7  | 42227355  | 42227771  | 417 |
| chr3  | 121943059 | 121943475 | 417 |
| chr13 | 17738872  | 17739288  | 417 |
| chrX  | 55721282  | 55721697  | 416 |
| chr8  | 104242106 | 104242521 | 416 |

|       |           |           |     |
|-------|-----------|-----------|-----|
| chr4  | 66895124  | 66895539  | 416 |
| chr25 | 39325886  | 39326301  | 416 |
| chr12 | 14818603  | 14819018  | 416 |
| chrX  | 72366587  | 72367001  | 415 |
| chrX  | 56604816  | 56605230  | 415 |
| chrX  | 55041587  | 55042001  | 415 |
| chr7  | 13454387  | 13454801  | 415 |
| chr5  | 30336203  | 30336617  | 415 |
| chr3  | 54808248  | 54808662  | 415 |
| chr3  | 17484317  | 17484731  | 415 |
| chr27 | 27685738  | 27686152  | 415 |
| chr19 | 13473741  | 13474155  | 415 |
| chr14 | 25849613  | 25850027  | 415 |
| chrX  | 18457008  | 18457421  | 414 |
| chr8  | 5310274   | 5310687   | 414 |
| chr3  | 77661647  | 77662060  | 414 |
| chr27 | 35942858  | 35943271  | 414 |
| chr26 | 22199548  | 22199961  | 414 |
| chr24 | 59385936  | 59386349  | 414 |
| chr20 | 4966799   | 4967212   | 414 |
| chr19 | 29998457  | 29998870  | 414 |
| chrX  | 8077932   | 8078344   | 413 |
| chrX  | 7426912   | 7427324   | 413 |
| chr25 | 27870703  | 27871115  | 413 |
| chr23 | 16002017  | 16002429  | 413 |
| chr22 | 56469783  | 56470195  | 413 |
| chr19 | 43175572  | 43175984  | 413 |
| chr11 | 106244640 | 106245052 | 413 |
| chr10 | 8568983   | 8569395   | 413 |
| chr5  | 120064203 | 120064614 | 412 |
| chr3  | 123358650 | 123359061 | 412 |
| chr27 | 28579651  | 28580062  | 412 |
| chr22 | 1930610   | 1931021   | 412 |
| chr2  | 25669034  | 25669445  | 412 |
| chr18 | 1571474   | 1571885   | 412 |
| chr15 | 26755208  | 26755619  | 412 |
| chr14 | 61129105  | 61129516  | 412 |
| chrX  | 75900807  | 75901217  | 411 |
| chr4  | 98041994  | 98042404  | 411 |
| chr24 | 44176234  | 44176644  | 411 |
| chr22 | 61473731  | 61474141  | 411 |
| chr21 | 31674100  | 31674510  | 411 |
| chr21 | 13904826  | 13905236  | 411 |
| chr19 | 17344617  | 17345027  | 411 |
| chr18 | 18689741  | 18690151  | 411 |
| chr18 | 12444126  | 12444536  | 411 |
| chrX  | 62625125  | 62625534  | 410 |
| chrX  | 53669981  | 53670390  | 410 |
| chrX  | 46210280  | 46210689  | 410 |
| chrX  | 12161532  | 12161941  | 410 |

|       |               |           |     |
|-------|---------------|-----------|-----|
| chr9  | 74199633      | 74200042  | 410 |
| chr8  | 23023689      | 23024098  | 410 |
| chr5  | 35293347      | 35293756  | 410 |
| chr4  | 99035300      | 99035709  | 410 |
| chr29 | 48741831      | 48742240  | 410 |
| chr23 | 18607981      | 18608390  | 410 |
| chr18 | 12053585      | 12053994  | 410 |
| chr17 | 47084572      | 47084981  | 410 |
| chr16 | 43043533      | 43043942  | 410 |
| chr10 | 66811601      | 66812010  | 410 |
| chrX  | 54619585      | 54619993  | 409 |
| chr9  | 59367271      | 59367679  | 409 |
| chr6  | 121736728     | 121737136 | 409 |
| chr3  | 126910235     | 126910643 | 409 |
| chr23 | 16040327      | 16040735  | 409 |
| chr22 | 54871338      | 54871746  | 409 |
| chr16 | 39510492      | 39510900  | 409 |
| chr16 | 23823833      | 23824241  | 409 |
| chr15 | 39042008      | 39042416  | 409 |
| chr10 | 8692024       | 8692432   | 409 |
| chr1  | 68926306      | 68926714  | 409 |
| chrX  | 78588462      | 78588869  | 408 |
| chr8  | 90740104      | 90740511  | 408 |
| chr7  | 5694063       | 5694470   | 408 |
| chr6  | 93295857      | 93296264  | 408 |
| chr4  | 71543171      | 71543578  | 408 |
| chr29 | 31527336      | 31527743  | 408 |
| chr16 | 68907456      | 68907863  | 408 |
| chrX  | 36334992      | 36335398  | 407 |
| chrX  | 821804 822210 | 407       |     |
| chr5  | 29265949      | 29266355  | 407 |
| chr3  | 117279418     | 117279824 | 407 |
| chr24 | 49364603      | 49365009  | 407 |
| chr10 | 52999869      | 53000275  | 407 |
| chrX  | 21872152      | 21872557  | 406 |
| chrX  | 20378969      | 20379374  | 406 |
| chrX  | 19810037      | 19810442  | 406 |
| chr22 | 60364353      | 60364758  | 406 |
| chr19 | 39268946      | 39269351  | 406 |
| chr18 | 8336601       | 8337006   | 406 |
| chr16 | 68105999      | 68106404  | 406 |
| chr16 | 44698202      | 44698607  | 406 |
| chr13 | 35958418      | 35958823  | 406 |
| chr11 | 84864372      | 84864777  | 406 |
| chr1  | 159068622     | 159069027 | 406 |
| chr1  | 2171156       | 2171561   | 406 |
| chrX  | 78519358      | 78519762  | 405 |
| chrX  | 72740001      | 72740405  | 405 |
| chrX  | 6614366       | 6614770   | 405 |
| chr6  | 108415750     | 108416154 | 405 |

|       |           |           |     |
|-------|-----------|-----------|-----|
| chr3  | 89872366  | 89872770  | 405 |
| chr23 | 16857433  | 16857837  | 405 |
| chr22 | 26875786  | 26876190  | 405 |
| chr13 | 77597687  | 77598091  | 405 |
| chrX  | 82780811  | 82781214  | 404 |
| chrX  | 50426415  | 50426818  | 404 |
| chr8  | 106893597 | 106894000 | 404 |
| chr7  | 13395239  | 13395642  | 404 |
| chr5  | 29633444  | 29633847  | 404 |
| chr5  | 1183275   | 1183678   | 404 |
| chr3  | 127005695 | 127006098 | 404 |
| chr3  | 97867327  | 97867730  | 404 |
| chr29 | 34998119  | 34998522  | 404 |
| chr26 | 34365831  | 34366234  | 404 |
| chr22 | 10775725  | 10776128  | 404 |
| chr20 | 25730032  | 25730435  | 404 |
| chr19 | 23138784  | 23139187  | 404 |
| chr17 | 75472075  | 75472478  | 404 |
| chr17 | 70390488  | 70390891  | 404 |
| chr17 | 69250099  | 69250502  | 404 |
| chr16 | 44928852  | 44929255  | 404 |
| chr10 | 90022946  | 90023349  | 404 |
| chrX  | 53587235  | 53587637  | 403 |
| chrX  | 32741682  | 32742084  | 403 |
| chrX  | 21039054  | 21039456  | 403 |
| chrX  | 21008553  | 21008955  | 403 |
| chrX  | 9704693   | 9705095   | 403 |
| chr9  | 66159120  | 66159522  | 403 |
| chr8  | 63934163  | 63934565  | 403 |
| chr5  | 114082599 | 114083001 | 403 |
| chr3  | 22632132  | 22632534  | 403 |
| chr26 | 48562057  | 48562459  | 403 |
| chr26 | 41248966  | 41249368  | 403 |
| chr24 | 49123130  | 49123532  | 403 |
| chr24 | 1381990   | 1382392   | 403 |
| chr22 | 59842572  | 59842974  | 403 |
| chr2  | 127814895 | 127815297 | 403 |
| chr19 | 33361007  | 33361409  | 403 |
| chr16 | 71117741  | 71118143  | 403 |
| chr16 | 44339610  | 44340012  | 403 |
| chr15 | 32302364  | 32302766  | 403 |
| chr13 | 40979681  | 40980083  | 403 |
| chr10 | 29536892  | 29537294  | 403 |
| chrX  | 49388821  | 49389222  | 402 |
| chr8  | 24508159  | 24508560  | 402 |
| chr7  | 5186599   | 5187000   | 402 |
| chr23 | 28035801  | 28036202  | 402 |
| chr22 | 48414219  | 48414620  | 402 |
| chr22 | 7526275   | 7526676   | 402 |
| chr20 | 73327554  | 73327955  | 402 |

|       |               |           |     |
|-------|---------------|-----------|-----|
| chr19 | 7646514       | 7646915   | 402 |
| chr18 | 4105325       | 4105726   | 402 |
| chr16 | 77390048      | 77390449  | 402 |
| chr15 | 40628221      | 40628622  | 402 |
| chr13 | 74347058      | 74347459  | 402 |
| chr13 | 41413780      | 41414181  | 402 |
| chr11 | 77736430      | 77736831  | 402 |
| chrX  | 73371791      | 73372191  | 401 |
| chr29 | 37026486      | 37026886  | 401 |
| chr25 | 18120577      | 18120977  | 401 |
| chr25 | 662785 663185 | 401       |     |
| chr21 | 68940193      | 68940593  | 401 |
| chr19 | 33321201      | 33321601  | 401 |
| chr17 | 75044710      | 75045110  | 401 |
| chr15 | 24494926      | 24495326  | 401 |
| chr14 | 59391529      | 59391929  | 401 |
| chrX  | 48707821      | 48708220  | 400 |
| chrX  | 37705501      | 37705900  | 400 |
| chrX  | 10141065      | 10141464  | 400 |
| chr8  | 86629325      | 86629724  | 400 |
| chr5  | 73176563      | 73176962  | 400 |
| chr29 | 41687420      | 41687819  | 400 |
| chr21 | 34199055      | 34199454  | 400 |
| chr2  | 139485874     | 139486273 | 400 |
| chr2  | 135005814     | 135006213 | 400 |
| chr2  | 121935748     | 121936147 | 400 |
| chr2  | 26553802      | 26554201  | 400 |
| chr19 | 59343848      | 59344247  | 400 |
| chr19 | 12330868      | 12331267  | 400 |
| chr19 | 7629439       | 7629838   | 400 |
| chr18 | 4846761       | 4847160   | 400 |
| chr11 | 102247355     | 102247754 | 400 |
| chr11 | 29136049      | 29136448  | 400 |
| chr10 | 75521267      | 75521666  | 400 |
| chrX  | 78467323      | 78467721  | 399 |
| chrX  | 78186128      | 78186526  | 399 |
| chrX  | 74470126      | 74470524  | 399 |
| chrX  | 73606871      | 73607269  | 399 |
| chrX  | 72772303      | 72772701  | 399 |
| chrX  | 72472325      | 72472723  | 399 |
| chrX  | 71840731      | 71841129  | 399 |
| chrX  | 63130932      | 63131330  | 399 |
| chrX  | 63106679      | 63107077  | 399 |
| chrX  | 61660175      | 61660573  | 399 |
| chrX  | 60064067      | 60064465  | 399 |
| chrX  | 60050914      | 60051312  | 399 |
| chrX  | 59211481      | 59211879  | 399 |
| chrX  | 58196545      | 58196943  | 399 |
| chrX  | 55838661      | 55839059  | 399 |
| chrX  | 55554515      | 55554913  | 399 |

|      |           |           |     |
|------|-----------|-----------|-----|
| chrX | 55505564  | 55505962  | 399 |
| chrX | 55442631  | 55443029  | 399 |
| chrX | 53276266  | 53276664  | 399 |
| chrX | 48073632  | 48074030  | 399 |
| chrX | 47341110  | 47341508  | 399 |
| chrX | 46576697  | 46577095  | 399 |
| chrX | 46496657  | 46497055  | 399 |
| chrX | 46204873  | 46205271  | 399 |
| chrX | 44655432  | 44655830  | 399 |
| chrX | 37989244  | 37989642  | 399 |
| chrX | 36439235  | 36439633  | 399 |
| chrX | 35992566  | 35992964  | 399 |
| chrX | 35816367  | 35816765  | 399 |
| chrX | 35751501  | 35751899  | 399 |
| chrX | 32450734  | 32451132  | 399 |
| chrX | 30643521  | 30643919  | 399 |
| chrX | 30600747  | 30601145  | 399 |
| chrX | 22497123  | 22497521  | 399 |
| chrX | 21001983  | 21002381  | 399 |
| chrX | 20931815  | 20932213  | 399 |
| chrX | 20881350  | 20881748  | 399 |
| chrX | 20425992  | 20426390  | 399 |
| chrX | 19507984  | 19508382  | 399 |
| chrX | 19491619  | 19492017  | 399 |
| chrX | 19423722  | 19424120  | 399 |
| chrX | 13545632  | 13546030  | 399 |
| chrX | 13172438  | 13172836  | 399 |
| chrX | 9987939   | 9988337   | 399 |
| chrX | 9932272   | 9932670   | 399 |
| chrX | 8170821   | 8171219   | 399 |
| chrX | 8052927   | 8053325   | 399 |
| chrX | 7884484   | 7884882   | 399 |
| chrX | 7497209   | 7497607   | 399 |
| chrX | 6323425   | 6323823   | 399 |
| chrX | 2628907   | 2629305   | 399 |
| chrX | 2513793   | 2514191   | 399 |
| chrX | 2368849   | 2369247   | 399 |
| chrX | 428184    | 428582    | 399 |
| chr9 | 76811506  | 76811904  | 399 |
| chr8 | 103778588 | 103778986 | 399 |
| chr8 | 78852863  | 78853261  | 399 |
| chr8 | 64534726  | 64535124  | 399 |
| chr8 | 61064334  | 61064732  | 399 |
| chr8 | 24141853  | 24142251  | 399 |
| chr8 | 7791436   | 7791834   | 399 |
| chr8 | 5374913   | 5375311   | 399 |
| chr7 | 51082665  | 51083063  | 399 |
| chr7 | 46203922  | 46204320  | 399 |
| chr7 | 45692625  | 45693023  | 399 |
| chr7 | 42659651  | 42660049  | 399 |

|       |           |           |     |
|-------|-----------|-----------|-----|
| chr7  | 18387336  | 18387734  | 399 |
| chr7  | 13119877  | 13120275  | 399 |
| chr6  | 103277199 | 103277597 | 399 |
| chr6  | 5556682   | 5557080   | 399 |
| chr5  | 125562500 | 125562898 | 399 |
| chr5  | 122815414 | 122815812 | 399 |
| chr5  | 111820316 | 111820714 | 399 |
| chr5  | 110916515 | 110916913 | 399 |
| chr5  | 35292925  | 35293323  | 399 |
| chr5  | 29716392  | 29716790  | 399 |
| chr5  | 29006314  | 29006712  | 399 |
| chr5  | 28694659  | 28695057  | 399 |
| chr5  | 28501580  | 28501978  | 399 |
| chr4  | 121718298 | 121718696 | 399 |
| chr4  | 98500671  | 98501069  | 399 |
| chr4  | 79087707  | 79088105  | 399 |
| chr4  | 13669493  | 13669891  | 399 |
| chr3  | 121850765 | 121851163 | 399 |
| chr3  | 120024039 | 120024437 | 399 |
| chr3  | 116208523 | 116208921 | 399 |
| chr3  | 116120335 | 116120733 | 399 |
| chr3  | 115963640 | 115964038 | 399 |
| chr3  | 105436037 | 105436435 | 399 |
| chr3  | 30162446  | 30162844  | 399 |
| chr3  | 10567625  | 10568023  | 399 |
| chr29 | 49507617  | 49508015  | 399 |
| chr29 | 47920440  | 47920838  | 399 |
| chr29 | 44732693  | 44733091  | 399 |
| chr29 | 34298035  | 34298433  | 399 |
| chr29 | 33920237  | 33920635  | 399 |
| chr29 | 26485473  | 26485871  | 399 |
| chr29 | 17465915  | 17466313  | 399 |
| chr29 | 17464177  | 17464575  | 399 |
| chr28 | 36457321  | 36457719  | 399 |
| chr28 | 25106774  | 25107172  | 399 |
| chr28 | 14098757  | 14099155  | 399 |
| chr27 | 46212145  | 46212543  | 399 |
| chr27 | 35372320  | 35372718  | 399 |
| chr26 | 50659759  | 50660157  | 399 |
| chr26 | 44861455  | 44861853  | 399 |
| chr26 | 39215209  | 39215607  | 399 |
| chr26 | 39005022  | 39005420  | 399 |
| chr26 | 38218543  | 38218941  | 399 |
| chr26 | 37896905  | 37897303  | 399 |
| chr26 | 18186977  | 18187375  | 399 |
| chr25 | 43510558  | 43510956  | 399 |
| chr25 | 39412578  | 39412976  | 399 |
| chr25 | 29422372  | 29422770  | 399 |
| chr25 | 3081340   | 3081738   | 399 |
| chr25 | 2028190   | 2028588   | 399 |

|       |               |           |     |
|-------|---------------|-----------|-----|
| chr24 | 58768838      | 58769236  | 399 |
| chr23 | 46767958      | 46768356  | 399 |
| chr23 | 45984999      | 45985397  | 399 |
| chr23 | 27803254      | 27803652  | 399 |
| chr23 | 15947062      | 15947460  | 399 |
| chr23 | 15917723      | 15918121  | 399 |
| chr23 | 14689221      | 14689619  | 399 |
| chr22 | 60570539      | 60570937  | 399 |
| chr22 | 58469128      | 58469526  | 399 |
| chr22 | 56032485      | 56032883  | 399 |
| chr22 | 48624492      | 48624890  | 399 |
| chr22 | 48324722      | 48325120  | 399 |
| chr22 | 15958520      | 15958918  | 399 |
| chr21 | 67765137      | 67765535  | 399 |
| chr21 | 63364463      | 63364861  | 399 |
| chr21 | 61661418      | 61661816  | 399 |
| chr21 | 60714968      | 60715366  | 399 |
| chr21 | 34478301      | 34478699  | 399 |
| chr21 | 24490821      | 24491219  | 399 |
| chr21 | 20839234      | 20839632  | 399 |
| chr21 | 20195037      | 20195435  | 399 |
| chr21 | 9518434       | 9518832   | 399 |
| chr20 | 73473018      | 73473416  | 399 |
| chr20 | 60159866      | 60160264  | 399 |
| chr20 | 8606017       | 8606415   | 399 |
| chr20 | 4577175       | 4577573   | 399 |
| chr20 | 527703 528101 | 399       |     |
| chr2  | 134560858     | 134561256 | 399 |
| chr2  | 131603394     | 131603792 | 399 |
| chr2  | 92359366      | 92359764  | 399 |
| chr19 | 49658546      | 49658944  | 399 |
| chr19 | 45089686      | 45090084  | 399 |
| chr19 | 43190500      | 43190898  | 399 |
| chr19 | 42388397      | 42388795  | 399 |
| chr19 | 39416521      | 39416919  | 399 |
| chr19 | 39353043      | 39353441  | 399 |
| chr19 | 38602617      | 38603015  | 399 |
| chr19 | 37869559      | 37869957  | 399 |
| chr19 | 34392055      | 34392453  | 399 |
| chr19 | 34143420      | 34143818  | 399 |
| chr19 | 27364393      | 27364791  | 399 |
| chr19 | 14990236      | 14990634  | 399 |
| chr18 | 56831229      | 56831627  | 399 |
| chr18 | 55306232      | 55306630  | 399 |
| chr18 | 49508609      | 49509007  | 399 |
| chr18 | 29578027      | 29578425  | 399 |
| chr18 | 22694380      | 22694778  | 399 |
| chr18 | 22332921      | 22333319  | 399 |
| chr18 | 18052180      | 18052578  | 399 |
| chr18 | 13145692      | 13146090  | 399 |



|       |           |           |     |
|-------|-----------|-----------|-----|
| chr18 | 9698764   | 9699162   | 399 |
| chr18 | 4039211   | 4039609   | 399 |
| chr18 | 3441969   | 3442367   | 399 |
| chr18 | 656928    | 657326    | 399 |
| chr17 | 73453606  | 73454004  | 399 |
| chr17 | 72688900  | 72689298  | 399 |
| chr17 | 70109414  | 70109812  | 399 |
| chr17 | 68350264  | 68350662  | 399 |
| chr17 | 66536598  | 66536996  | 399 |
| chr17 | 64904125  | 64904523  | 399 |
| chr16 | 77531066  | 77531464  | 399 |
| chr16 | 43604559  | 43604957  | 399 |
| chr16 | 40610386  | 40610784  | 399 |
| chr15 | 63092709  | 63093107  | 399 |
| chr15 | 51702567  | 51702965  | 399 |
| chr15 | 38544829  | 38545227  | 399 |
| chr15 | 32683071  | 32683469  | 399 |
| chr14 | 29625566  | 29625964  | 399 |
| chr14 | 27989203  | 27989601  | 399 |
| chr14 | 7810896   | 7811294   | 399 |
| chr13 | 77723474  | 77723872  | 399 |
| chr13 | 74495993  | 74496391  | 399 |
| chr13 | 58906526  | 58906924  | 399 |
| chr13 | 57622266  | 57622664  | 399 |
| chr13 | 45883944  | 45884342  | 399 |
| chr13 | 36872995  | 36873393  | 399 |
| chr13 | 32108201  | 32108599  | 399 |
| chr13 | 24031194  | 24031592  | 399 |
| chr12 | 82020690  | 82021088  | 399 |
| chr12 | 80138959  | 80139357  | 399 |
| chr12 | 31981886  | 31982284  | 399 |
| chr12 | 31615267  | 31615665  | 399 |
| chr12 | 30827265  | 30827663  | 399 |
| chr12 | 30510575  | 30510973  | 399 |
| chr11 | 109765861 | 109766259 | 399 |
| chr11 | 104290319 | 104290717 | 399 |
| chr11 | 103813431 | 103813829 | 399 |
| chr11 | 77846771  | 77847169  | 399 |
| chr11 | 77744022  | 77744420  | 399 |
| chr11 | 77574255  | 77574653  | 399 |
| chr11 | 49409563  | 49409961  | 399 |
| chr11 | 47361296  | 47361694  | 399 |
| chr11 | 29820672  | 29821070  | 399 |
| chr11 | 11245783  | 11246181  | 399 |
| chr11 | 9096517   | 9096915   | 399 |
| chr10 | 88143601  | 88143999  | 399 |
| chr10 | 75552545  | 75552943  | 399 |
| chr10 | 70047636  | 70048034  | 399 |
| chr10 | 35846019  | 35846417  | 399 |
| chr10 | 32246357  | 32246755  | 399 |

|       |           |           |     |
|-------|-----------|-----------|-----|
| chr10 | 21688007  | 21688405  | 399 |
| chr10 | 3172417   | 3172815   | 399 |
| chr1  | 148282383 | 148282781 | 399 |
| chr1  | 75097253  | 75097651  | 399 |
| chr1  | 74873657  | 74874055  | 399 |
| chrX  | 67126703  | 67127100  | 398 |
| chrX  | 50960473  | 50960870  | 398 |
| chrX  | 49768533  | 49768930  | 398 |
| chrX  | 21645724  | 21646121  | 398 |
| chrX  | 11074212  | 11074609  | 398 |
| chrX  | 2589355   | 2589752   | 398 |
| chr7  | 57678588  | 57678985  | 398 |
| chr5  | 117492834 | 117493231 | 398 |
| chr5  | 30229547  | 30229944  | 398 |
| chr4  | 79047691  | 79048088  | 398 |
| chr29 | 46256777  | 46257174  | 398 |
| chr29 | 44980738  | 44981135  | 398 |
| chr25 | 29111974  | 29112371  | 398 |
| chr24 | 48626326  | 48626723  | 398 |
| chr23 | 18765698  | 18766095  | 398 |
| chr2  | 111649999 | 111650396 | 398 |
| chr19 | 37887857  | 37888254  | 398 |
| chr19 | 33323309  | 33323706  | 398 |
| chr19 | 25504534  | 25504931  | 398 |
| chr18 | 11196223  | 11196620  | 398 |
| chr17 | 70457832  | 70458229  | 398 |
| chr15 | 29702404  | 29702801  | 398 |
| chr12 | 70601000  | 70601397  | 398 |
| chr11 | 98480403  | 98480800  | 398 |
| chr11 | 93711503  | 93711900  | 398 |
| chrX  | 49318417  | 49318813  | 397 |
| chr7  | 19986645  | 19987041  | 397 |
| chr6  | 107499226 | 107499622 | 397 |
| chr5  | 122830462 | 122830858 | 397 |
| chr5  | 121344718 | 121345114 | 397 |
| chr5  | 113922610 | 113923006 | 397 |
| chr3  | 35504437  | 35504833  | 397 |
| chr29 | 34966210  | 34966606  | 397 |
| chr25 | 33094883  | 33095279  | 397 |
| chr2  | 125915785 | 125916181 | 397 |
| chr19 | 30818429  | 30818825  | 397 |
| chr19 | 28255410  | 28255806  | 397 |
| chr19 | 16894124  | 16894520  | 397 |
| chr18 | 62006334  | 62006730  | 397 |
| chr18 | 42523565  | 42523961  | 397 |
| chr17 | 70104442  | 70104838  | 397 |
| chr16 | 3304709   | 3305105   | 397 |
| chr13 | 69617845  | 69618241  | 397 |
| chr13 | 55149557  | 55149953  | 397 |
| chr12 | 85023391  | 85023787  | 397 |

|       |               |           |     |
|-------|---------------|-----------|-----|
| chr11 | 14153716      | 14154112  | 397 |
| chr10 | 21979089      | 21979485  | 397 |
| chrX  | 65423139      | 65423534  | 396 |
| chrX  | 56202438      | 56202833  | 396 |
| chrX  | 46868340      | 46868735  | 396 |
| chrX  | 31077285      | 31077680  | 396 |
| chr9  | 105836600     | 105836995 | 396 |
| chr9  | 100213514     | 100213909 | 396 |
| chr9  | 19636094      | 19636489  | 396 |
| chr8  | 23053916      | 23054311  | 396 |
| chr7  | 57550831      | 57551226  | 396 |
| chr4  | 71876845      | 71877240  | 396 |
| chr29 | 10085765      | 10086160  | 396 |
| chr27 | 27193432      | 27193827  | 396 |
| chr26 | 22381461      | 22381856  | 396 |
| chr25 | 37459873      | 37460268  | 396 |
| chr24 | 49508337      | 49508732  | 396 |
| chr23 | 10648562      | 10648957  | 396 |
| chr23 | 10495727      | 10496122  | 396 |
| chr21 | 19200100      | 19200495  | 396 |
| chr19 | 16410262      | 16410657  | 396 |
| chr19 | 7623619       | 7624014   | 396 |
| chr18 | 44053347      | 44053742  | 396 |
| chr18 | 37983568      | 37983963  | 396 |
| chr17 | 62168123      | 62168518  | 396 |
| chr12 | 68760365      | 68760760  | 396 |
| chr10 | 99316971      | 99317366  | 396 |
| chr1  | 45764669      | 45765064  | 396 |
| chrX  | 48148000      | 48148394  | 395 |
| chrX  | 19397404      | 19397798  | 395 |
| chrX  | 437510 437904 | 395       |     |
| chr7  | 18243104      | 18243498  | 395 |
| chr3  | 20416468      | 20416862  | 395 |
| chr29 | 41628820      | 41629214  | 395 |
| chr24 | 59100808      | 59101202  | 395 |
| chr23 | 17416844      | 17417238  | 395 |
| chr2  | 75597171      | 75597565  | 395 |
| chr19 | 56571438      | 56571832  | 395 |
| chr17 | 4845703       | 4846097   | 395 |
| chr16 | 72303535      | 72303929  | 395 |
| chr15 | 34587524      | 34587918  | 395 |
| chr15 | 25221564      | 25221958  | 395 |
| chr14 | 9002038       | 9002432   | 395 |
| chr13 | 71232425      | 71232819  | 395 |
| chr13 | 41057522      | 41057916  | 395 |
| chr13 | 39806180      | 39806574  | 395 |
| chr11 | 89062172      | 89062566  | 395 |
| chr10 | 70178699      | 70179093  | 395 |
| chr1  | 68910345      | 68910739  | 395 |
| chrX  | 77028118      | 77028511  | 394 |

|       |             |           |     |
|-------|-------------|-----------|-----|
| chrX  | 68445613    | 68446006  | 394 |
| chrX  | 65651991    | 65652384  | 394 |
| chrX  | 57044229    | 57044622  | 394 |
| chrX  | 55784624    | 55785017  | 394 |
| chrX  | 52755757    | 52756150  | 394 |
| chrX  | 50461429    | 50461822  | 394 |
| chrX  | 20595513    | 20595906  | 394 |
| chrX  | 18988832    | 18989225  | 394 |
| chrX  | 8655693     | 8656086   | 394 |
| chr9  | 105511335   | 105511728 | 394 |
| chr5  | 29181026    | 29181419  | 394 |
| chr28 | 33781495    | 33781888  | 394 |
| chr26 | 18232342    | 18232735  | 394 |
| chr22 | 13376132    | 13376525  | 394 |
| chr20 | 74249554    | 74249947  | 394 |
| chr20 | 8770156     | 8770549   | 394 |
| chr19 | 58979282    | 58979675  | 394 |
| chr19 | 17085167    | 17085560  | 394 |
| chr18 | 52827480    | 52827873  | 394 |
| chr17 | 74307183    | 74307576  | 394 |
| chr17 | 54829063    | 54829456  | 394 |
| chr13 | 59811177    | 59811570  | 394 |
| chr12 | 85330496    | 85330889  | 394 |
| chr1  | 151961697   | 151962090 | 394 |
| chrX  | 73463255    | 73463647  | 393 |
| chrX  | 59273603    | 59273995  | 393 |
| chrX  | 50303691    | 50304083  | 393 |
| chrX  | 37776178    | 37776570  | 393 |
| chrX  | 30879441    | 30879833  | 393 |
| chrX  | 2336531     | 2336923   | 393 |
| chrX  | 86239 86631 | 393       |     |
| chr7  | 3695189     | 3695581   | 393 |
| chr24 | 43600257    | 43600649  | 393 |
| chr23 | 15910750    | 15911142  | 393 |
| chr21 | 25954696    | 25955088  | 393 |
| chr20 | 25589437    | 25589829  | 393 |
| chr19 | 60269195    | 60269587  | 393 |
| chr19 | 37563870    | 37564262  | 393 |
| chr19 | 36659108    | 36659500  | 393 |
| chr19 | 29752868    | 29753260  | 393 |
| chr18 | 3699356     | 3699748   | 393 |
| chr16 | 47998891    | 47999283  | 393 |
| chr15 | 64179880    | 64180272  | 393 |
| chr14 | 14664695    | 14665087  | 393 |
| chr13 | 57533356    | 57533748  | 393 |
| chrX  | 37487563    | 37487954  | 392 |
| chrX  | 7927374     | 7927765   | 392 |
| chrX  | 7613293     | 7613684   | 392 |
| chr9  | 51887003    | 51887394  | 392 |
| chr7  | 50638683    | 50639074  | 392 |

|       |           |           |     |
|-------|-----------|-----------|-----|
| chr5  | 118327496 | 118327887 | 392 |
| chr29 | 49111312  | 49111703  | 392 |
| chr28 | 41061648  | 41062039  | 392 |
| chr25 | 30551527  | 30551918  | 392 |
| chr23 | 51057190  | 51057581  | 392 |
| chr22 | 1472384   | 1472775   | 392 |
| chr2  | 115021220 | 115021611 | 392 |
| chr2  | 41329382  | 41329773  | 392 |
| chrX  | 15769197  | 15769587  | 391 |
| chr7  | 14382000  | 14382390  | 391 |
| chr5  | 121244706 | 121245096 | 391 |
| chr3  | 121209987 | 121210377 | 391 |
| chr27 | 15764857  | 15765247  | 391 |
| chr24 | 60847500  | 60847890  | 391 |
| chr19 | 49788862  | 49789252  | 391 |
| chr18 | 56537830  | 56538220  | 391 |
| chr15 | 55825307  | 55825697  | 391 |
| chr13 | 56018681  | 56019071  | 391 |
| chr4  | 14627095  | 14627484  | 390 |
| chr27 | 34730822  | 34731211  | 390 |
| chr25 | 22885848  | 22886237  | 390 |
| chr24 | 59948306  | 59948695  | 390 |
| chr23 | 27610342  | 27610731  | 390 |
| chr22 | 50055323  | 50055712  | 390 |
| chr21 | 68013734  | 68014123  | 390 |
| chr2  | 92745321  | 92745710  | 390 |
| chr19 | 14062210  | 14062599  | 390 |
| chr18 | 39623114  | 39623503  | 390 |
| chr14 | 22853109  | 22853498  | 390 |
| chr13 | 41630524  | 41630913  | 390 |
| chrX  | 67595598  | 67595986  | 389 |
| chrX  | 53044663  | 53045051  | 389 |
| chrX  | 9104840   | 9105228   | 389 |
| chr9  | 33349729  | 33350117  | 389 |
| chr8  | 6481727   | 6482115   | 389 |
| chr6  | 93923366  | 93923754  | 389 |
| chr5  | 119908912 | 119909300 | 389 |
| chr5  | 29025693  | 29026081  | 389 |
| chr28 | 6754998   | 6755386   | 389 |
| chr21 | 55797086  | 55797474  | 389 |
| chr2  | 139303081 | 139303469 | 389 |
| chr19 | 61735805  | 61736193  | 389 |
| chr18 | 47878057  | 47878445  | 389 |
| chr12 | 31993591  | 31993979  | 389 |
| chrX  | 62837369  | 62837756  | 388 |
| chrX  | 58371611  | 58371998  | 388 |
| chrX  | 7896563   | 7896950   | 388 |
| chr7  | 50429566  | 50429953  | 388 |
| chr7  | 44910070  | 44910457  | 388 |
| chr26 | 20283581  | 20283968  | 388 |

|       |           |           |     |
|-------|-----------|-----------|-----|
| chr25 | 38255406  | 38255793  | 388 |
| chr25 | 33474494  | 33474881  | 388 |
| chr22 | 48664881  | 48665268  | 388 |
| chr21 | 67774497  | 67774884  | 388 |
| chr21 | 6484740   | 6485127   | 388 |
| chr2  | 139080070 | 139080457 | 388 |
| chr2  | 54409286  | 54409673  | 388 |
| chr19 | 60389904  | 60390291  | 388 |
| chr18 | 22084775  | 22085162  | 388 |
| chr15 | 26674767  | 26675154  | 388 |
| chr12 | 14880666  | 14881053  | 388 |
| chr11 | 32979213  | 32979600  | 388 |
| chrX  | 50253044  | 50253430  | 387 |
| chrX  | 7224666   | 7225052   | 387 |
| chr7  | 38378245  | 38378631  | 387 |
| chr5  | 64789569  | 64789955  | 387 |
| chr4  | 123088526 | 123088912 | 387 |
| chr26 | 45637112  | 45637498  | 387 |
| chr19 | 30817580  | 30817966  | 387 |
| chrX  | 34543434  | 34543819  | 386 |
| chrX  | 32007426  | 32007811  | 386 |
| chr9  | 90318969  | 90319354  | 386 |
| chr5  | 30369499  | 30369884  | 386 |
| chr26 | 42197289  | 42197674  | 386 |
| chr26 | 5874303   | 5874688   | 386 |
| chr2  | 108723622 | 108724007 | 386 |
| chr19 | 38738106  | 38738491  | 386 |
| chr18 | 56861909  | 56862294  | 386 |
| chr18 | 18732075  | 18732460  | 386 |
| chr14 | 23298171  | 23298556  | 386 |
| chr12 | 32128993  | 32129378  | 386 |
| chr8  | 85441459  | 85441843  | 385 |
| chr7  | 46202722  | 46203106  | 385 |
| chr23 | 45556449  | 45556833  | 385 |
| chr23 | 31294922  | 31295306  | 385 |
| chr2  | 132441045 | 132441429 | 385 |
| chr2  | 111220174 | 111220558 | 385 |
| chr2  | 17536735  | 17537119  | 385 |
| chr19 | 54443132  | 54443516  | 385 |
| chr18 | 56662571  | 56662955  | 385 |
| chr18 | 24363982  | 24364366  | 385 |
| chr11 | 47281293  | 47281677  | 385 |
| chr10 | 54912226  | 54912610  | 385 |
| chr1  | 123085216 | 123085600 | 385 |
| chr1  | 99824515  | 99824899  | 385 |
| chrX  | 36637157  | 36637540  | 384 |
| chrX  | 20475252  | 20475635  | 384 |
| chr3  | 115623050 | 115623433 | 384 |
| chr3  | 11537521  | 11537904  | 384 |
| chr23 | 35217860  | 35218243  | 384 |

|       |           |           |     |
|-------|-----------|-----------|-----|
| chr21 | 68799128  | 68799511  | 384 |
| chr19 | 32451926  | 32452309  | 384 |
| chr17 | 70382537  | 70382920  | 384 |
| chr12 | 31592894  | 31593277  | 384 |
| chrX  | 72363897  | 72364279  | 383 |
| chrX  | 34100702  | 34101084  | 383 |
| chrX  | 30260181  | 30260563  | 383 |
| chr7  | 59209605  | 59209987  | 383 |
| chr7  | 14337320  | 14337702  | 383 |
| chr5  | 112424320 | 112424702 | 383 |
| chr4  | 123516567 | 123516949 | 383 |
| chr26 | 41885175  | 41885557  | 383 |
| chr25 | 39431968  | 39432350  | 383 |
| chr24 | 60821563  | 60821945  | 383 |
| chr21 | 20698557  | 20698939  | 383 |
| chr19 | 12496916  | 12497298  | 383 |
| chr17 | 57854301  | 57854683  | 383 |
| chr15 | 38249994  | 38250376  | 383 |
| chrX  | 39253138  | 39253519  | 382 |
| chrX  | 12489630  | 12490011  | 382 |
| chrX  | 7706660   | 7707041   | 382 |
| chr9  | 98514591  | 98514972  | 382 |
| chr9  | 77562443  | 77562824  | 382 |
| chr3  | 99441537  | 99441918  | 382 |
| chr26 | 20300910  | 20301291  | 382 |
| chr21 | 61310140  | 61310521  | 382 |
| chr21 | 8875629   | 8876010   | 382 |
| chr2  | 105796937 | 105797318 | 382 |
| chr18 | 11421510  | 11421891  | 382 |
| chr14 | 64534729  | 64535110  | 382 |
| chr11 | 11975461  | 11975842  | 382 |
| chr1  | 84556221  | 84556602  | 382 |
| chrX  | 51865344  | 51865724  | 381 |
| chrX  | 30727276  | 30727656  | 381 |
| chr7  | 19243757  | 19244137  | 381 |
| chr29 | 46922938  | 46923318  | 381 |
| chr28 | 25290256  | 25290636  | 381 |
| chr27 | 26056315  | 26056695  | 381 |
| chr23 | 14260140  | 14260520  | 381 |
| chr18 | 48031358  | 48031738  | 381 |
| chr1  | 107886994 | 107887374 | 381 |
| chrX  | 56886371  | 56886750  | 380 |
| chrX  | 30575069  | 30575448  | 380 |
| chrX  | 11103165  | 11103544  | 380 |
| chr9  | 26604829  | 26605208  | 380 |
| chr3  | 121028502 | 121028881 | 380 |
| chr3  | 4349332   | 4349711   | 380 |
| chr26 | 46939227  | 46939606  | 380 |
| chr26 | 42108513  | 42108892  | 380 |
| chr24 | 44283024  | 44283403  | 380 |

|       |               |           |     |
|-------|---------------|-----------|-----|
| chr23 | 19349126      | 19349505  | 380 |
| chr18 | 22264308      | 22264687  | 380 |
| chr15 | 22217748      | 22218127  | 380 |
| chr10 | 52673268      | 52673647  | 380 |
| chr6  | 62538755      | 62539133  | 379 |
| chr3  | 115329914     | 115330292 | 379 |
| chr29 | 26520899      | 26521277  | 379 |
| chr21 | 9834425       | 9834803   | 379 |
| chr18 | 62701117      | 62701495  | 379 |
| chr18 | 56669537      | 56669915  | 379 |
| chr11 | 77856434      | 77856812  | 379 |
| chr11 | 48670175      | 48670553  | 379 |
| chrX  | 74816031      | 74816408  | 378 |
| chrX  | 54368516      | 54368893  | 378 |
| chrX  | 33982123      | 33982500  | 378 |
| chr6  | 63188364      | 63188741  | 378 |
| chr4  | 63977988      | 63978365  | 378 |
| chr28 | 40387414      | 40387791  | 378 |
| chr26 | 18495221      | 18495598  | 378 |
| chr2  | 130398263     | 130398640 | 378 |
| chr19 | 37903509      | 37903886  | 378 |
| chr19 | 26126490      | 26126867  | 378 |
| chr14 | 607209 607586 | 378       |     |
| chr10 | 90306030      | 90306407  | 378 |
| chr1  | 72570862      | 72571239  | 378 |
| chrX  | 54308006      | 54308382  | 377 |
| chrX  | 22684068      | 22684444  | 377 |
| chrX  | 20505286      | 20505662  | 377 |
| chrX  | 15757665      | 15758041  | 377 |
| chrX  | 7619723       | 7620099   | 377 |
| chrX  | 3015965       | 3016341   | 377 |
| chr3  | 381074 381450 | 377       |     |
| chr28 | 11814565      | 11814941  | 377 |
| chr26 | 44115188      | 44115564  | 377 |
| chr20 | 1354792       | 1355168   | 377 |
| chr2  | 123457702     | 123458078 | 377 |
| chr2  | 32477890      | 32478266  | 377 |
| chr13 | 55722920      | 55723296  | 377 |
| chr11 | 46706322      | 46706698  | 377 |
| chr10 | 48122065      | 48122441  | 377 |
| chr10 | 6061038       | 6061414   | 377 |
| chr7  | 44508762      | 44509137  | 376 |
| chr25 | 35671076      | 35671451  | 376 |
| chr22 | 17587266      | 17587641  | 376 |
| chr21 | 24401387      | 24401762  | 376 |
| chr2  | 134758949     | 134759324 | 376 |
| chr2  | 131307352     | 131307727 | 376 |
| chr13 | 66713855      | 66714230  | 376 |
| chrX  | 75741295      | 75741669  | 375 |
| chrX  | 19170801      | 19171175  | 375 |



|       |           |           |     |
|-------|-----------|-----------|-----|
| chr7  | 76999878  | 77000252  | 375 |
| chr7  | 66724551  | 66724925  | 375 |
| chr4  | 118167688 | 118168062 | 375 |
| chr3  | 115693720 | 115694094 | 375 |
| chr19 | 14263398  | 14263772  | 375 |
| chr18 | 11736167  | 11736541  | 375 |
| chr18 | 11388180  | 11388554  | 375 |
| chr15 | 37581403  | 37581777  | 375 |
| chr13 | 60386717  | 60387091  | 375 |
| chr11 | 77643628  | 77644002  | 375 |
| chrX  | 65044819  | 65045192  | 374 |
| chrX  | 6659927   | 6660300   | 374 |
| chr7  | 42466433  | 42466806  | 374 |
| chr5  | 30990402  | 30990775  | 374 |
| chr3  | 26143824  | 26144197  | 374 |
| chr2  | 132163583 | 132163956 | 374 |
| chr2  | 34673089  | 34673462  | 374 |
| chr19 | 47274471  | 47274844  | 374 |
| chr19 | 11169860  | 11170233  | 374 |
| chr13 | 80593774  | 80594147  | 374 |
| chr1  | 1706788   | 1707161   | 374 |
| chrX  | 73250430  | 73250802  | 373 |
| chrX  | 9363976   | 9364348   | 373 |
| chr3  | 100447388 | 100447760 | 373 |
| chr23 | 11864872  | 11865244  | 373 |
| chr19 | 56471051  | 56471423  | 373 |
| chr19 | 50039063  | 50039435  | 373 |
| chr15 | 53627539  | 53627911  | 373 |
| chr13 | 62133581  | 62133953  | 373 |
| chrX  | 49750552  | 49750923  | 372 |
| chrX  | 21601643  | 21602014  | 372 |
| chrX  | 7454878   | 7455249   | 372 |
| chr3  | 111735338 | 111735709 | 372 |
| chr2  | 139155284 | 139155655 | 372 |
| chr18 | 16525830  | 16526201  | 372 |
| chrX  | 79777860  | 79778230  | 371 |
| chrX  | 66521547  | 66521917  | 371 |
| chr8  | 24162768  | 24163138  | 371 |
| chr4  | 68387578  | 68387948  | 371 |
| chr29 | 49794036  | 49794406  | 371 |
| chr29 | 37108547  | 37108917  | 371 |
| chr23 | 11766370  | 11766740  | 371 |
| chr6  | 63099678  | 63100047  | 370 |
| chr6  | 17694585  | 17694954  | 370 |
| chr5  | 29097501  | 29097870  | 370 |
| chr3  | 127858466 | 127858835 | 370 |
| chr3  | 20576591  | 20576960  | 370 |
| chr24 | 60560677  | 60561046  | 370 |
| chr21 | 2794460   | 2794829   | 370 |
| chr14 | 61155956  | 61156325  | 370 |

|       |             |           |     |
|-------|-------------|-----------|-----|
| chr13 | 15412418    | 15412787  | 370 |
| chr1  | 154500044   | 154500413 | 370 |
| chrX  | 47701082    | 47701450  | 369 |
| chr6  | 120793269   | 120793637 | 369 |
| chr3  | 111220185   | 111220553 | 369 |
| chr3  | 22956243    | 22956611  | 369 |
| chr2  | 131145926   | 131146294 | 369 |
| chr18 | 62214871    | 62215239  | 369 |
| chr15 | 29674735    | 29675103  | 369 |
| chr13 | 60211737    | 60212105  | 369 |
| chr7  | 43049835    | 43050202  | 368 |
| chr4  | 72741816    | 72742183  | 368 |
| chr4  | 72714705    | 72715072  | 368 |
| chr2  | 74011867    | 74012234  | 368 |
| chr19 | 38120504    | 38120871  | 368 |
| chr15 | 24661623    | 24661990  | 368 |
| chr14 | 34098579    | 34098946  | 368 |
| chr12 | 30951209    | 30951576  | 368 |
| chrX  | 56023638    | 56024004  | 367 |
| chr7  | 5039011     | 5039377   | 367 |
| chr4  | 72328092    | 72328458  | 367 |
| chr29 | 46346984    | 46347350  | 367 |
| chr29 | 31426881    | 31427247  | 367 |
| chr23 | 28507600    | 28507966  | 367 |
| chr11 | 19916597    | 19916963  | 367 |
| chr1  | 75091303    | 75091669  | 367 |
| chr7  | 46167297    | 46167662  | 366 |
| chr7  | 3526589     | 3526954   | 366 |
| chr26 | 72287 72652 | 366       |     |
| chr25 | 37380255    | 37380620  | 366 |
| chr24 | 1072397     | 1072762   | 366 |
| chr21 | 57722672    | 57723037  | 366 |
| chr18 | 11947115    | 11947480  | 366 |
| chr18 | 11646910    | 11647275  | 366 |
| chr17 | 69784962    | 69785327  | 366 |
| chr1  | 158500955   | 158501320 | 366 |
| chr21 | 31659287    | 31659651  | 365 |
| chr19 | 38636332    | 38636696  | 365 |
| chr12 | 84035702    | 84036066  | 365 |
| chrX  | 71789177    | 71789540  | 364 |
| chrX  | 6632748     | 6633111   | 364 |
| chr6  | 121842659   | 121843022 | 364 |
| chr3  | 127373636   | 127373999 | 364 |
| chr23 | 18614646    | 18615009  | 364 |
| chr21 | 67967999    | 67968362  | 364 |
| chr21 | 6547935     | 6548298   | 364 |
| chr2  | 111235108   | 111235471 | 364 |
| chr18 | 6274887     | 6275250   | 364 |
| chrX  | 48691927    | 48692289  | 363 |
| chr5  | 91869171    | 91869533  | 363 |

|       |           |           |     |
|-------|-----------|-----------|-----|
| chr5  | 60917102  | 60917464  | 363 |
| chr25 | 40219983  | 40220345  | 363 |
| chr21 | 20926581  | 20926943  | 363 |
| chr2  | 127985568 | 127985930 | 363 |
| chr13 | 77325894  | 77326256  | 363 |
| chr11 | 76373821  | 76374183  | 363 |
| chrX  | 64991613  | 64991974  | 362 |
| chrX  | 64810227  | 64810588  | 362 |
| chrX  | 12083607  | 12083968  | 362 |
| chrX  | 7932289   | 7932650   | 362 |
| chr5  | 30464324  | 30464685  | 362 |
| chr3  | 119911243 | 119911604 | 362 |
| chr25 | 42207069  | 42207430  | 362 |
| chr23 | 8071661   | 8072022   | 362 |
| chr13 | 38770820  | 38771181  | 362 |
| chr12 | 17825366  | 17825727  | 362 |
| chrX  | 18742262  | 18742622  | 361 |
| chr3  | 111650474 | 111650834 | 361 |
| chr29 | 36479199  | 36479559  | 361 |
| chr18 | 58716325  | 58716685  | 361 |
| chr13 | 61291980  | 61292340  | 361 |
| chr24 | 1956824   | 1957183   | 360 |
| chr15 | 29700576  | 29700935  | 360 |
| chr10 | 8512033   | 8512392   | 360 |
| chrX  | 80993530  | 80993888  | 359 |
| chr8  | 60174140  | 60174498  | 359 |
| chr5  | 117195927 | 117196285 | 359 |
| chr13 | 69923944  | 69924302  | 359 |
| chr12 | 36410668  | 36411026  | 359 |
| chrX  | 20280874  | 20281231  | 358 |
| chr8  | 60302712  | 60303069  | 358 |
| chr10 | 17418277  | 17418634  | 358 |
| chr10 | 8505514   | 8505871   | 358 |
| chr18 | 25673802  | 25674158  | 357 |
| chr11 | 106301192 | 106301547 | 356 |
| chr8  | 24275181  | 24275535  | 355 |
| chr7  | 19191690  | 19192044  | 355 |
| chr4  | 121483296 | 121483650 | 355 |
| chr29 | 49044015  | 49044369  | 355 |
| chr29 | 35591201  | 35591555  | 355 |
| chr26 | 43040368  | 43040722  | 355 |
| chr26 | 40176691  | 40177045  | 355 |
| chr24 | 58983368  | 58983722  | 355 |
| chr2  | 129203542 | 129203896 | 355 |
| chr1  | 1612462   | 1612816   | 355 |
| chrX  | 37617051  | 37617404  | 354 |
| chr9  | 90545949  | 90546302  | 354 |
| chrX  | 74757404  | 74757756  | 353 |
| chr8  | 82097914  | 82098266  | 353 |
| chr29 | 17646318  | 17646670  | 353 |

|       |           |           |     |
|-------|-----------|-----------|-----|
| chr22 | 12471137  | 12471489  | 353 |
| chr21 | 35334411  | 35334763  | 353 |
| chr18 | 13893581  | 13893933  | 353 |
| chr17 | 60297408  | 60297760  | 353 |
| chrX  | 64669515  | 64669866  | 352 |
| chr15 | 40729254  | 40729605  | 352 |
| chr11 | 100984288 | 100984639 | 352 |
| chr10 | 70835080  | 70835431  | 352 |
| chr7  | 13050361  | 13050711  | 351 |
| chr23 | 17493523  | 17493873  | 351 |
| chr11 | 104882538 | 104882888 | 351 |
| chr8  | 48464369  | 48464718  | 350 |
| chr8  | 24136353  | 24136702  | 350 |
| chr3  | 119463286 | 119463635 | 350 |
| chr26 | 41858867  | 41859216  | 350 |
| chr19 | 23970333  | 23970682  | 350 |
| chr18 | 45391780  | 45392129  | 350 |
| chr11 | 100882389 | 100882738 | 350 |
| chrX  | 33850198  | 33850546  | 349 |
| chrX  | 20728659  | 20729007  | 349 |
| chr8  | 60298137  | 60298485  | 349 |
| chr3  | 116392335 | 116392683 | 349 |
| chr3  | 34793384  | 34793732  | 349 |
| chr26 | 39273121  | 39273469  | 349 |
| chr26 | 12852246  | 12852594  | 349 |
| chr19 | 7542442   | 7542790   | 349 |
| chr17 | 61076362  | 61076710  | 349 |
| chrX  | 75438774  | 75439121  | 348 |
| chrX  | 19757204  | 19757550  | 347 |
| chrX  | 2994251   | 2994597   | 347 |
| chr6  | 51513526  | 51513872  | 347 |
| chr26 | 21774368  | 21774714  | 347 |
| chrX  | 7814935   | 7815280   | 346 |
| chr22 | 48407942  | 48408287  | 346 |
| chr19 | 11089778  | 11090123  | 346 |
| chr13 | 75616368  | 75616713  | 346 |
| chr8  | 23936448  | 23936792  | 345 |
| chr13 | 67134662  | 67135006  | 345 |
| chr10 | 12757510  | 12757854  | 345 |
| chr3  | 116335972 | 116336315 | 344 |
| chr1  | 142505363 | 142505706 | 344 |
| chr7  | 5513826   | 5514167   | 342 |
| chr15 | 24397319  | 24397660  | 342 |
| chr9  | 105996672 | 105997012 | 341 |
| chr4  | 110054311 | 110054651 | 341 |
| chr27 | 46944166  | 46944506  | 341 |
| chr13 | 59985920  | 59986260  | 341 |
| chr28 | 46053399  | 46053738  | 340 |
| chr2  | 139206198 | 139206537 | 340 |
| chr19 | 37773085  | 37773424  | 340 |

|       |               |           |     |
|-------|---------------|-----------|-----|
| chrX  | 74096787      | 74097125  | 339 |
| chrX  | 724609 724947 |           | 339 |
| chr25 | 29148719      | 29149057  | 339 |
| chr8  | 27618246      | 27618583  | 338 |
| chr3  | 123683354     | 123683691 | 338 |
| chr12 | 10235412      | 10235749  | 338 |
| chr11 | 11244831      | 11245167  | 337 |
| chr10 | 17004622      | 17004957  | 336 |
| chrX  | 75911756      | 75912090  | 335 |
| chr16 | 1598782       | 1599116   | 335 |
| chr11 | 92576292      | 92576626  | 335 |
| chrX  | 6479013       | 6479346   | 334 |
| chr25 | 2342836       | 2343168   | 333 |
| chr18 | 10991469      | 10991801  | 333 |
| chr8  | 24747342      | 24747673  | 332 |
| chr28 | 41180342      | 41180673  | 332 |
| chr22 | 57296713      | 57297044  | 332 |
| chr21 | 5990801       | 5991132   | 332 |
| chr18 | 23499858      | 23500189  | 332 |
| chr15 | 21203185      | 21203516  | 332 |
| chr8  | 10467886      | 10468216  | 331 |
| chrX  | 21534864      | 21535193  | 330 |
| chr26 | 19839445      | 19839774  | 330 |
| chr21 | 63279084      | 63279413  | 330 |
| chrX  | 60903581      | 60903909  | 329 |
| chr23 | 16520535      | 16520863  | 329 |
| chrX  | 80264646      | 80264973  | 328 |
| chr19 | 42682653      | 42682980  | 328 |
| chr4  | 72249131      | 72249457  | 327 |
| chr22 | 49720332      | 49720658  | 327 |
| chr14 | 6351608       | 6351934   | 327 |
| chr10 | 79260812      | 79261137  | 326 |
| chr2  | 132721521     | 132721844 | 324 |
| chr11 | 8473151       | 8473473   | 323 |
| chrX  | 9362371       | 9362692   | 322 |
| chr5  | 80137051      | 80137372  | 322 |
| chr27 | 35354128      | 35354449  | 322 |
| chr18 | 11967464      | 11967785  | 322 |
| chr18 | 6369004       | 6369325   | 322 |
| chr10 | 35957574      | 35957895  | 322 |
| chr3  | 22898470      | 22898790  | 321 |
| chr16 | 41498974      | 41499293  | 320 |
| chr19 | 14070364      | 14070682  | 319 |
| chrX  | 57058817      | 57059134  | 318 |
| chr17 | 62258993      | 62259310  | 318 |
| chr19 | 22360750      | 22361065  | 316 |
| chr15 | 29254593      | 29254908  | 316 |
| chr27 | 845476 845790 |           | 315 |
| chr25 | 35675364      | 35675678  | 315 |
| chr15 | 22437390      | 22437703  | 314 |

|       |               |           |      |
|-------|---------------|-----------|------|
| chrX  | 41110683      | 41110995  | 313  |
| chr11 | 13922729      | 13923041  | 313  |
| chr21 | 60377090      | 60377401  | 312  |
| chrX  | 66248813      | 66249123  | 311  |
| chr21 | 20712466      | 20712776  | 311  |
| chr5  | 29635107      | 29635416  | 310  |
| chrX  | 56904060      | 56904367  | 308  |
| chr19 | 21396506      | 21396813  | 308  |
| chr21 | 6489427       | 6489732   | 306  |
| chr20 | 8617271       | 8617576   | 306  |
| chr3  | 115941916     | 115942220 | 305  |
| chr11 | 77659018      | 77659321  | 304  |
| chr22 | 50734556      | 50734858  | 303  |
| chrX  | 6988779       | 6989080   | 302  |
| chr3  | 121403133     | 121403434 | 302  |
| chr22 | 2762680       | 2762981   | 302  |
| chr2  | 92358729      | 92359030  | 302  |
| chrX  | 72850138      | 72850438  | 301  |
| chr23 | 14748525      | 14748825  | 301  |
| chr2  | 43864659      | 43864958  | 300  |
| chrX  | 13614722      | 13615018  | 297  |
| chr2  | 136729402     | 136729698 | 297  |
| chrX  | 34518758      | 34519053  | 296  |
| chr24 | 20563273      | 20563568  | 296  |
| chr9  | 25130745      | 25131039  | 295  |
| chr26 | 23074726      | 23075020  | 295  |
| chr21 | 56496634      | 56496927  | 294  |
| chr18 | 12607977      | 12608268  | 292  |
| chr14 | 7789082       | 7789373   | 292  |
| chr10 | 58762491      | 58762782  | 292  |
| chrX  | 65676842      | 65677132  | 291  |
| chr27 | 39097107      | 39097397  | 291  |
| chr17 | 69781073      | 69781359  | 287  |
| chr23 | 19933999      | 19934282  | 284  |
| chr15 | 75585751      | 75586033  | 283  |
| chrX  | 72489103      | 72489384  | 282  |
| chrX  | 30193093      | 30193372  | 280  |
| chr25 | 30509036      | 30509312  | 277  |
| chr7  | 43697566      | 43697835  | 270  |
| chr18 | 6951404       | 6951669   | 266  |
| chr23 | 32784264      | 32784528  | 265  |
| chrX  | 20103245      | 20103504  | 260  |
| chr23 | 27985774      | 27986318  | 545  |
| chr13 | 156500 157215 | 716       |      |
| chr26 | 22272663      | 22273288  | 626  |
| chr7  | 51332669      | 51333051  | 383  |
| chr24 | 64972545      | 64972972  | 428  |
| chr18 | 58395056      | 58395641  | 586  |
| chr10 | 42298212      | 42298605  | 394  |
| chr8  | 7555869       | 7557336   | 1468 |

|       |               |           |      |
|-------|---------------|-----------|------|
| chr11 | 70849529      | 70850927  | 1399 |
| chr24 | 20853361      | 20854608  | 1248 |
| chr19 | 18039738      | 18040966  | 1229 |
| chr26 | 44120902      | 44122109  | 1208 |
| chr8  | 7781454       | 7782618   | 1165 |
| chr5  | 112233132     | 112234279 | 1148 |
| chr13 | 3371754       | 3372724   | 971  |
| chr16 | 39471277      | 39472242  | 966  |
| chr20 | 711560 712484 | 925       |      |
| chr8  | 90738520      | 90739441  | 922  |
| chr11 | 4361920       | 4362834   | 915  |
| chr26 | 11611306      | 11612208  | 903  |
| chr5  | 119903352     | 119904248 | 897  |
| chr4  | 34474499      | 34475388  | 890  |
| chr9  | 10496408      | 10497256  | 849  |
| chr27 | 28194298      | 28195126  | 829  |
| chr12 | 14803899      | 14804634  | 736  |
| chr16 | 41527122      | 41527843  | 722  |
| chrX  | 59277724      | 59278443  | 720  |
| chr3  | 106865690     | 106866394 | 705  |
| chrX  | 32449815      | 32450508  | 694  |
| chr22 | 30338004      | 30338682  | 679  |
| chr25 | 756973 757580 | 608       |      |
| chr11 | 81434960      | 81435564  | 605  |
| chr19 | 39499630      | 39500229  | 600  |
| chr8  | 65854827      | 65855425  | 599  |
| chr5  | 32848789      | 32849355  | 567  |
| chrX  | 34033232      | 34033783  | 552  |
| chr5  | 122278832     | 122279383 | 552  |
| chr1  | 69354045      | 69354593  | 549  |
| chr29 | 35013171      | 35013715  | 545  |
| chrX  | 12089413      | 12089954  | 542  |
| chr16 | 48307129      | 48307664  | 536  |
| chr22 | 50868395      | 50868926  | 532  |
| chr8  | 23826473      | 23827003  | 531  |
| chr11 | 97742938      | 97743452  | 515  |
| chr2  | 34673906      | 34674417  | 512  |
| chr10 | 74922548      | 74923059  | 512  |
| chr27 | 31454203      | 31454713  | 511  |
| chr5  | 30572215      | 30572724  | 510  |
| chr5  | 1090419       | 1090921   | 503  |
| chr11 | 77723449      | 77723949  | 501  |
| chr9  | 14570028      | 14570527  | 500  |
| chr8  | 40332659      | 40333157  | 499  |
| chrX  | 9345806       | 9346303   | 498  |
| chr1  | 1695013       | 1695510   | 498  |
| chr7  | 45828487      | 45828978  | 492  |
| chrX  | 48061207      | 48061696  | 490  |
| chr13 | 79711434      | 79711915  | 482  |
| chr3  | 117311084     | 117311563 | 480  |

|       |               |           |      |
|-------|---------------|-----------|------|
| chr7  | 37875880      | 37876351  | 472  |
| chrX  | 19322480      | 19322940  | 461  |
| chr29 | 31675541      | 31675993  | 453  |
| chr15 | 341806 342255 | 450       |      |
| chr19 | 26669260      | 26669707  | 448  |
| chr10 | 70308306      | 70308751  | 446  |
| chr8  | 24711247      | 24711691  | 445  |
| chr5  | 117580661     | 117581088 | 428  |
| chr12 | 84015546      | 84015971  | 426  |
| chr11 | 75083927      | 75084349  | 423  |
| chr23 | 17668014      | 17668435  | 422  |
| chrX  | 10224843      | 10225263  | 421  |
| chr10 | 90322346      | 90322766  | 421  |
| chr18 | 22724811      | 22725227  | 417  |
| chr23 | 12347687      | 12348092  | 406  |
| chrX  | 8454786       | 8455189   | 404  |
| chr7  | 15312098      | 15312497  | 400  |
| chr1  | 83013412      | 83013811  | 400  |
| chr21 | 25002587      | 25002985  | 399  |
| chr4  | 98564016      | 98564413  | 398  |
| chr18 | 13782249      | 13782641  | 393  |
| chr22 | 30240657      | 30241046  | 390  |
| chr25 | 37533134      | 37533503  | 370  |
| chr3  | 8727534       | 8727880   | 347  |
| chrX  | 59499085      | 59500818  | 1734 |
| chr21 | 47527052      | 47528491  | 1440 |
| chr18 | 48628569      | 48629770  | 1202 |
| chrX  | 39127209      | 39128326  | 1118 |
| chr18 | 56776417      | 56777451  | 1035 |
| chr23 | 48366164      | 48367177  | 1014 |
| chr18 | 25471208      | 25472156  | 949  |
| chrX  | 50186519      | 50187437  | 919  |
| chr20 | 66429009      | 66429924  | 916  |
| chr12 | 34325134      | 34325980  | 847  |
| chrX  | 59434293      | 59435106  | 814  |
| chr19 | 46147132      | 46147944  | 813  |
| chrX  | 34123096      | 34123899  | 804  |
| chrX  | 7583259       | 7584048   | 790  |
| chrX  | 42818406      | 42819157  | 752  |
| chr4  | 124365251     | 124365995 | 745  |
| chr29 | 34263464      | 34264192  | 729  |
| chr1  | 151601875     | 151602601 | 727  |
| chrX  | 61612470      | 61613193  | 724  |
| chrX  | 6750379       | 6751093   | 715  |
| chrX  | 50874600      | 50875306  | 707  |
| chr20 | 8771830       | 8772512   | 683  |
| chr26 | 49314021      | 49314700  | 680  |
| chrX  | 72314679      | 72315328  | 650  |
| chr20 | 73647390      | 73648035  | 646  |
| chr3  | 9155324       | 9155957   | 634  |



|       |           |           |      |
|-------|-----------|-----------|------|
| chr4  | 66895561  | 66896180  | 620  |
| chr13 | 14439736  | 14440336  | 601  |
| chr22 | 6471604   | 6472188   | 585  |
| chrX  | 7464310   | 7464884   | 575  |
| chr2  | 137660538 | 137661108 | 571  |
| chr18 | 50474329  | 50474899  | 571  |
| chr20 | 33688459  | 33689022  | 564  |
| chrX  | 59435589  | 59436116  | 528  |
| chrX  | 7810581   | 7811096   | 516  |
| chrX  | 47645767  | 47646281  | 515  |
| chr11 | 70844759  | 70845272  | 514  |
| chr16 | 23803948  | 23804458  | 511  |
| chr5  | 30163404  | 30163907  | 504  |
| chrX  | 12275632  | 12276127  | 496  |
| chrX  | 59277206  | 59277700  | 495  |
| chr19 | 16698068  | 16698555  | 488  |
| chrX  | 51883316  | 51883799  | 484  |
| chr21 | 67985639  | 67986119  | 481  |
| chr28 | 33954512  | 33954983  | 472  |
| chr26 | 48470672  | 48471136  | 465  |
| chr11 | 76394468  | 76394904  | 437  |
| chr3  | 116353647 | 116354075 | 429  |
| chr8  | 86965061  | 86965485  | 425  |
| chr20 | 33611559  | 33611982  | 424  |
| chr26 | 21784044  | 21784465  | 422  |
| chr23 | 7714756   | 7715177   | 422  |
| chr15 | 24466101  | 24466518  | 418  |
| chr23 | 43425531  | 43425941  | 411  |
| chr15 | 25102450  | 25102859  | 410  |
| chr10 | 21113231  | 21113632  | 402  |
| chr28 | 33897131  | 33897529  | 399  |
| chr18 | 26155629  | 26156027  | 399  |
| chr10 | 5248936   | 5249334   | 399  |
| chr3  | 115021702 | 115022098 | 397  |
| chr5  | 32935506  | 32935896  | 391  |
| chr1  | 3835900   | 3836288   | 389  |
| chr29 | 46680547  | 46680927  | 381  |
| chr13 | 74458501  | 74458870  | 370  |
| chrX  | 49832199  | 49833499  | 1301 |
| chr25 | 27224507  | 27225617  | 1111 |
| chr1  | 136909442 | 136910396 | 955  |
| chrX  | 50866122  | 50867071  | 950  |
| chr21 | 20696141  | 20697044  | 904  |
| chr3  | 101085531 | 101086424 | 894  |
| chrX  | 62830049  | 62830905  | 857  |
| chrX  | 49840146  | 49840945  | 800  |
| chr19 | 39269456  | 39270190  | 735  |
| chr19 | 39242374  | 39243081  | 708  |
| chr15 | 73742320  | 73742997  | 678  |
| chrX  | 8107627   | 8108300   | 674  |

|       |               |           |      |
|-------|---------------|-----------|------|
| chrX  | 59674645      | 59675310  | 666  |
| chr8  | 105587768     | 105588425 | 658  |
| chr15 | 25587785      | 25588441  | 657  |
| chr18 | 11937996      | 11938632  | 637  |
| chr24 | 5536764       | 5537391   | 628  |
| chr19 | 21663895      | 21664472  | 578  |
| chrX  | 6581055       | 6581580   | 526  |
| chr5  | 114077171     | 114077690 | 520  |
| chr28 | 34055714      | 34056222  | 509  |
| chr24 | 60070979      | 60071487  | 509  |
| chr24 | 829987 830464 | 478       |      |
| chr14 | 63518118      | 63518590  | 473  |
| chr9  | 90732359      | 90732830  | 472  |
| chr14 | 27842267      | 27842737  | 471  |
| chr18 | 17922416      | 17922883  | 468  |
| chr11 | 77659323      | 77659788  | 466  |
| chr13 | 30138116      | 30138579  | 464  |
| chr14 | 42557200      | 42557661  | 462  |
| chr18 | 53324947      | 53325405  | 459  |
| chr18 | 41055457      | 41055915  | 459  |
| chr6  | 120941976     | 120942424 | 449  |
| chr18 | 25317880      | 25318328  | 449  |
| chrX  | 6592881       | 6593325   | 445  |
| chrX  | 33751576      | 33752016  | 441  |
| chr19 | 52552999      | 52553438  | 440  |
| chr13 | 57587097      | 57587532  | 436  |
| chrX  | 70920554      | 70920970  | 417  |
| chrX  | 37364799      | 37365215  | 417  |
| chr16 | 39588788      | 39589192  | 405  |
| chrX  | 59724539      | 59724937  | 399  |
| chr2  | 134920301     | 134920699 | 399  |
| chr18 | 65740303      | 65740701  | 399  |
| chr11 | 77791523      | 77791921  | 399  |
| chr3  | 105693466     | 105693857 | 392  |
| chr9  | 104799815     | 104800204 | 390  |
| chr26 | 18697201      | 18697585  | 385  |
| chr25 | 35662795      | 35663172  | 378  |
| chr13 | 55545819      | 55546176  | 358  |
| chr1  | 68449976      | 68450303  | 328  |
| chr19 | 20387328      | 20388535  | 1208 |
| chr27 | 5682384       | 5683317   | 934  |
| chrX  | 74549356      | 74550239  | 884  |
| chrX  | 55437182      | 55437952  | 771  |
| chr4  | 48872058      | 48872819  | 762  |
| chr29 | 17879203      | 17879954  | 752  |
| chr15 | 25635661      | 25636397  | 737  |
| chr9  | 76789481      | 76790187  | 707  |
| chrX  | 55608183      | 55608814  | 632  |
| chr3  | 106492275     | 106492893 | 619  |
| chr13 | 67102410      | 67103007  | 598  |

|       |           |           |      |
|-------|-----------|-----------|------|
| chrX  | 55247914  | 55248490  | 577  |
| chr19 | 37633389  | 37633952  | 564  |
| chr4  | 15274905  | 15275432  | 528  |
| chr21 | 32870090  | 32870597  | 508  |
| chr4  | 67944835  | 67945340  | 506  |
| chr11 | 9427154   | 9427653   | 500  |
| chrX  | 74790759  | 74791254  | 496  |
| chr29 | 37258059  | 37258524  | 466  |
| chr24 | 2035740   | 2036203   | 464  |
| chr4  | 121486333 | 121486792 | 460  |
| chrX  | 50323864  | 50324315  | 452  |
| chr3  | 117292377 | 117292825 | 449  |
| chr13 | 84230226  | 84230671  | 446  |
| chrX  | 12112593  | 12113036  | 444  |
| chr10 | 12129299  | 12129723  | 425  |
| chr19 | 56115393  | 56115813  | 421  |
| chr22 | 58658134  | 58658546  | 413  |
| chr8  | 74338926  | 74339326  | 401  |
| chr19 | 38534352  | 38534750  | 399  |
| chr15 | 22808331  | 22808729  | 399  |
| chr23 | 49674373  | 49674766  | 394  |
| chr2  | 49031507  | 49031898  | 392  |
| chr21 | 64265326  | 64265674  | 349  |
| chr3  | 119705347 | 119706085 | 739  |
| chr26 | 21970261  | 21970857  | 597  |
| chrX  | 49270727  | 49271317  | 591  |
| chr11 | 48678011  | 48678578  | 568  |
| chrX  | 50267546  | 50268110  | 565  |
| chr13 | 77419858  | 77420405  | 548  |
| chr17 | 63762682  | 63763198  | 517  |
| chr18 | 49951832  | 49952337  | 506  |
| chrX  | 11040634  | 11041134  | 501  |
| chr4  | 64243150  | 64243641  | 492  |
| chr11 | 77762850  | 77763338  | 489  |
| chr7  | 14373635  | 14374119  | 485  |
| chr10 | 36286158  | 36286631  | 474  |
| chr20 | 59356631  | 59357070  | 440  |
| chr8  | 105126181 | 105126616 | 436  |
| chr12 | 20800210  | 20800636  | 427  |
| chrX  | 48876883  | 48877302  | 420  |
| chr10 | 79338727  | 79339138  | 412  |
| chr17 | 63407963  | 63408365  | 403  |
| chr5  | 112431537 | 112431938 | 402  |
| chr17 | 68534363  | 68534761  | 399  |
| chr20 | 27296195  | 27296587  | 393  |
| chr19 | 47357522  | 47357889  | 368  |
| chrX  | 6987602   | 6987953   | 352  |
| chrX  | 61382672  | 61382972  | 301  |
| chr17 | 74324577  | 74326047  | 1471 |
| chr20 | 3173772   | 3174626   | 855  |

|       |               |           |      |
|-------|---------------|-----------|------|
| chr29 | 29948488      | 29949267  | 780  |
| chr28 | 11370747      | 11371431  | 685  |
| chrX  | 413393 413998 | 606       |      |
| chr29 | 36958665      | 36959231  | 567  |
| chrX  | 75457095      | 75457653  | 559  |
| chr3  | 10570209      | 10570762  | 554  |
| chr25 | 35488184      | 35488726  | 543  |
| chr13 | 68060830      | 68061370  | 541  |
| chr15 | 42519637      | 42520170  | 534  |
| chr24 | 64985703      | 64986233  | 531  |
| chrX  | 60574419      | 60574941  | 523  |
| chr18 | 56945204      | 56945725  | 522  |
| chr1  | 1616189       | 1616672   | 484  |
| chr21 | 47691901      | 47692370  | 470  |
| chr21 | 57756855      | 57757317  | 463  |
| chr3  | 99892370      | 99892810  | 441  |
| chr11 | 80258091      | 80258529  | 439  |
| chrX  | 30971170      | 30971600  | 431  |
| chrX  | 6289715       | 6290143   | 429  |
| chr17 | 75045852      | 75046276  | 425  |
| chr18 | 53517123      | 53517545  | 423  |
| chr23 | 49759669      | 49760081  | 413  |
| chrX  | 72926149      | 72926557  | 409  |
| chr15 | 25279401      | 25279807  | 407  |
| chrX  | 20985266      | 20985664  | 399  |
| chr8  | 73888169      | 73888499  | 331  |
| chr22 | 198121 198446 | 326       |      |
| chr11 | 104908341     | 104908661 | 321  |
| chr29 | 2523766       | 2524805   | 1040 |
| chrX  | 75425293      | 75426028  | 736  |
| chr17 | 73180387      | 73181098  | 712  |
| chr16 | 39523675      | 39524354  | 680  |
| chr20 | 59409083      | 59409733  | 651  |
| chrX  | 21703637      | 21704279  | 643  |
| chr13 | 75788034      | 75788664  | 631  |
| chrX  | 16950510      | 16951139  | 630  |
| chrX  | 19485234      | 19485860  | 627  |
| chr3  | 115775774     | 115776392 | 619  |
| chr17 | 4293139       | 4293755   | 617  |
| chr3  | 88606993      | 88607605  | 613  |
| chr2  | 26838163      | 26838773  | 611  |
| chr19 | 38315297      | 38315903  | 607  |
| chrX  | 34226985      | 34227583  | 599  |
| chrX  | 22438912      | 22439482  | 571  |
| chr14 | 7357558       | 7358119   | 562  |
| chr17 | 69815543      | 69816065  | 523  |
| chr3  | 22502594      | 22503097  | 504  |
| chr8  | 24467430      | 24467928  | 499  |
| chr18 | 11730412      | 11730903  | 492  |
| chr15 | 33583064      | 33583545  | 482  |

|       |           |           |     |
|-------|-----------|-----------|-----|
| chr16 | 65520394  | 65520872  | 479 |
| chr7  | 64918011  | 64918487  | 477 |
| chrX  | 9150421   | 9150884   | 464 |
| chr15 | 45865173  | 45865636  | 464 |
| chr22 | 30046471  | 30046932  | 462 |
| chr3  | 116513335 | 116513795 | 461 |
| chr19 | 57688559  | 57689016  | 458 |
| chr17 | 62275195  | 62275650  | 456 |
| chr4  | 32273739  | 32274193  | 455 |
| chr18 | 56885378  | 56885828  | 451 |
| chr20 | 3192955   | 3193401   | 447 |
| chr25 | 37973767  | 37974210  | 444 |
| chrX  | 10216516  | 10216955  | 440 |
| chrX  | 9105371   | 9105810   | 440 |
| chr7  | 15594270  | 15594709  | 440 |
| chr16 | 60223482  | 60223916  | 435 |
| chrX  | 74928825  | 74929258  | 434 |
| chr18 | 18583133  | 18583561  | 429 |
| chr11 | 77584440  | 77584867  | 428 |
| chr22 | 56448318  | 56448741  | 424 |
| chr8  | 85440776  | 85441198  | 423 |
| chr11 | 106030262 | 106030684 | 423 |
| chr3  | 116011656 | 116012076 | 421 |
| chrX  | 74547492  | 74547911  | 420 |
| chrX  | 20196682  | 20197100  | 419 |
| chr9  | 99936632  | 99937049  | 418 |
| chr19 | 26275516  | 26275931  | 416 |
| chr8  | 73865523  | 73865937  | 415 |
| chr15 | 30052453  | 30052866  | 414 |
| chr19 | 41549069  | 41549481  | 413 |
| chrX  | 71721380  | 71721787  | 408 |
| chr22 | 47856218  | 47856625  | 408 |
| chr23 | 27872747  | 27873153  | 407 |
| chr4  | 85021076  | 85021481  | 406 |
| chr29 | 13332443  | 13332848  | 406 |
| chr11 | 100685094 | 100685498 | 405 |
| chrX  | 78616843  | 78617245  | 403 |
| chr8  | 78498119  | 78498518  | 400 |
| chr19 | 42540950  | 42541349  | 400 |
| chr17 | 4291811   | 4292210   | 400 |
| chrX  | 62740700  | 62741098  | 399 |
| chrX  | 61742944  | 61743342  | 399 |
| chrX  | 59190311  | 59190709  | 399 |
| chrX  | 53650061  | 53650459  | 399 |
| chr7  | 52829239  | 52829637  | 399 |
| chr25 | 41644140  | 41644538  | 399 |
| chr24 | 1212947   | 1213345   | 399 |
| chr19 | 27915907  | 27916305  | 399 |
| chr16 | 42871433  | 42871831  | 399 |
| chrX  | 19998800  | 19999197  | 398 |

|       |           |           |     |
|-------|-----------|-----------|-----|
| chr1  | 74226979  | 74227376  | 398 |
| chr3  | 123357161 | 123357557 | 397 |
| chr15 | 74883710  | 74884105  | 396 |
| chr11 | 7020573   | 7020967   | 395 |
| chr5  | 1102152   | 1102545   | 394 |
| chr16 | 48574256  | 48574645  | 390 |
| chr11 | 66704528  | 66704917  | 390 |
| chr17 | 69319400  | 69319788  | 389 |
| chr8  | 65344803  | 65345190  | 388 |
| chr9  | 86848852  | 86849237  | 386 |
| chr11 | 28549567  | 28549950  | 384 |
| chr5  | 104096707 | 104097089 | 383 |
| chr21 | 57715449  | 57715831  | 383 |
| chr10 | 26171089  | 26171465  | 377 |
| chr5  | 80744359  | 80744733  | 375 |
| chr28 | 26763464  | 26763836  | 373 |
| chr19 | 27911859  | 27912231  | 373 |
| chr18 | 24359142  | 24359512  | 371 |
| chr6  | 92304150  | 92304516  | 367 |
| chr16 | 48787118  | 48787484  | 367 |
| chr1  | 146776311 | 146776672 | 362 |
| chr12 | 66634945  | 66635301  | 357 |
| chrX  | 61711728  | 61712081  | 354 |
| chr13 | 37672936  | 37673286  | 351 |
| chr8  | 78683885  | 78684233  | 349 |
| chr13 | 60451449  | 60451796  | 348 |
| chrX  | 36321455  | 36321793  | 339 |
| chr10 | 70570322  | 70570648  | 327 |
| chrX  | 6344398   | 6344712   | 315 |
| chr5  | 28855401  | 28855712  | 312 |
| chrX  | 57159329  | 57159635  | 307 |
| chr5  | 96691831  | 96692135  | 305 |
| chr8  | 73811911  | 73812206  | 296 |
| chrX  | 57141102  | 57141395  | 294 |
| chrX  | 81345807  | 81346094  | 288 |
| chr17 | 59297378  | 59297650  | 273 |
| chr23 | 28056001  | 28056232  | 232 |
| chr24 | 64988162  | 64988389  | 228 |
| chr2  | 21685773  | 21686268  | 496 |
| chr8  | 73532378  | 73532749  | 372 |
| chr6  | 74347323  | 74347757  | 435 |
| chr8  | 73878091  | 73878474  | 384 |
| chr11 | 70936679  | 70937540  | 862 |
| chr29 | 50554040  | 50554630  | 591 |
| chr8  | 63757049  | 63757548  | 500 |
| chr23 | 19626071  | 19626539  | 469 |
| chr19 | 45223455  | 45223895  | 441 |
| chr16 | 48448446  | 48448852  | 407 |
| chrX  | 20011431  | 20012398  | 968 |
| chr4  | 51761560  | 51762402  | 843 |

|       |           |           |      |
|-------|-----------|-----------|------|
| chr17 | 64333634  | 64334393  | 760  |
| chr18 | 11825109  | 11825835  | 727  |
| chr26 | 23494177  | 23494718  | 542  |
| chr7  | 14490423  | 14490933  | 511  |
| chrX  | 9247070   | 9247787   | 718  |
| chr25 | 30900939  | 30901616  | 678  |
| chrX  | 78726229  | 78726800  | 572  |
| chr11 | 108084866 | 108085340 | 475  |
| chr11 | 100874815 | 100875143 | 329  |
| chr3  | 99891477  | 99891973  | 497  |
| chrX  | 6267761   | 6268230   | 470  |
| chr1  | 68920533  | 68921345  | 813  |
| chr16 | 42144205  | 42144966  | 762  |
| chr10 | 25843046  | 25843484  | 439  |
| chr2  | 88727541  | 88727939  | 399  |
| chr8  | 73329369  | 73329742  | 374  |
| chr2  | 66165559  | 66165919  | 361  |
| chr13 | 41494655  | 41495208  | 554  |
| chrX  | 8752264   | 8752667   | 404  |
| chr18 | 23108031  | 23108414  | 384  |
| chrX  | 7501595   | 7502152   | 558  |
| chr18 | 24346134  | 24346688  | 555  |
| chr19 | 39133344  | 39133826  | 483  |
| chr24 | 1445731   | 1446069   | 339  |
| chr18 | 11763463  | 11764364  | 902  |
| chr1  | 152260373 | 152261043 | 671  |
| chr10 | 17136263  | 17136861  | 599  |
| chr29 | 50405192  | 50405617  | 426  |
| chr8  | 73476039  | 73476563  | 525  |
| chr8  | 73727218  | 73727683  | 466  |
| chr12 | 84032235  | 84032677  | 443  |
| chr16 | 39597286  | 39597718  | 433  |
| chrX  | 1536285   | 1536708   | 424  |
| chr13 | 67165781  | 67166201  | 421  |
| chr29 | 36733374  | 36733772  | 399  |
| chr13 | 74497735  | 74498127  | 393  |
| chr29 | 33716260  | 33716651  | 392  |
| chr8  | 99337406  | 99337789  | 384  |
| chr1  | 84817730  | 84818095  | 366  |
| chrX  | 35507424  | 35507785  | 362  |
| chr18 | 24323330  | 24323639  | 310  |
| chr18 | 49931030  | 49931307  | 278  |
| chr8  | 73813152  | 73813852  | 701  |
| chr8  | 24394470  | 24394934  | 465  |
| chr2  | 99037806  | 99039277  | 1472 |
| chr11 | 104588637 | 104590094 | 1458 |
| chr11 | 106068737 | 106070118 | 1382 |
| chr13 | 82708137  | 82709495  | 1359 |
| chr10 | 7600461   | 7601807   | 1347 |
| chr14 | 63510790  | 63512098  | 1309 |

|       |               |           |      |
|-------|---------------|-----------|------|
| chr10 | 3527056       | 3528356   | 1301 |
| chr3  | 116381636     | 116382934 | 1299 |
| chr7  | 51389215      | 51390511  | 1297 |
| chr9  | 91907257      | 91908514  | 1258 |
| chr11 | 9328492       | 9329748   | 1257 |
| chr18 | 11305951      | 11307204  | 1254 |
| chr23 | 15804698      | 15805950  | 1253 |
| chr16 | 47687504      | 47688752  | 1249 |
| chr9  | 66206399      | 66207626  | 1228 |
| chr7  | 5464978       | 5466203   | 1226 |
| chr1  | 1580503       | 1581725   | 1223 |
| chrX  | 6366424       | 6367639   | 1216 |
| chr10 | 17385887      | 17387097  | 1211 |
| chrX  | 2374371       | 2375565   | 1195 |
| chr3  | 106565215     | 106566399 | 1185 |
| chr13 | 40904978      | 40906158  | 1181 |
| chr29 | 26772359      | 26773538  | 1180 |
| chr29 | 288057 289229 | 1173      |      |
| chr22 | 54124829      | 54125978  | 1150 |
| chr1  | 137998285     | 137999422 | 1138 |
| chr9  | 41874381      | 41875499  | 1119 |
| chr3  | 105123304     | 105124422 | 1119 |
| chrX  | 57128186      | 57129302  | 1117 |
| chr11 | 70898886      | 70899999  | 1114 |
| chrX  | 59479709      | 59480818  | 1110 |
| chr14 | 36739480      | 36740571  | 1092 |
| chr10 | 74919014      | 74920104  | 1091 |
| chr10 | 77483787      | 77484873  | 1087 |
| chr10 | 83865261      | 83866333  | 1073 |
| chr26 | 44229439      | 44230508  | 1070 |
| chr24 | 41095420      | 41096489  | 1070 |
| chrX  | 47477260      | 47478320  | 1061 |
| chr8  | 108214337     | 108215390 | 1054 |
| chr12 | 49194055      | 49195104  | 1050 |
| chr10 | 20934053      | 20935100  | 1048 |
| chrX  | 7488294       | 7489335   | 1042 |
| chr14 | 61307476      | 61308513  | 1038 |
| chr5  | 117590476     | 117591502 | 1027 |
| chr19 | 60829728      | 60830751  | 1024 |
| chr14 | 7510414       | 7511437   | 1024 |
| chr22 | 32963647      | 32964662  | 1016 |
| chr1  | 115602457     | 115603469 | 1013 |
| chr5  | 125425577     | 125426587 | 1011 |
| chr25 | 1252561       | 1253564   | 1004 |
| chrX  | 75007689      | 75008686  | 998  |
| chrX  | 6497731       | 6498724   | 994  |
| chr7  | 10952340      | 10953321  | 982  |
| chr3  | 97877818      | 97878797  | 980  |
| chrX  | 852646 853620 | 975       |      |
| chr22 | 30133025      | 30133995  | 971  |



|       |           |           |     |
|-------|-----------|-----------|-----|
| chr19 | 41398688  | 41399658  | 971 |
| chr21 | 15966535  | 15967498  | 964 |
| chr5  | 67824341  | 67825300  | 960 |
| chr4  | 121728709 | 121729668 | 960 |
| chr19 | 41257028  | 41257984  | 957 |
| chr22 | 15001068  | 15002023  | 956 |
| chrX  | 58736971  | 58737925  | 955 |
| chr29 | 38855925  | 38856879  | 955 |
| chr19 | 37564563  | 37565515  | 953 |
| chr18 | 25478194  | 25479146  | 953 |
| chr11 | 100281789 | 100282738 | 950 |
| chr9  | 100310195 | 100311142 | 948 |
| chr19 | 17670689  | 17671631  | 943 |
| chrX  | 35187728  | 35188669  | 942 |
| chr12 | 68759402  | 68760340  | 939 |
| chrX  | 58102423  | 58103355  | 933 |
| chr7  | 15696762  | 15697694  | 933 |
| chr23 | 28530778  | 28531703  | 926 |
| chr19 | 55481168  | 55482092  | 925 |
| chr9  | 51629628  | 51630550  | 923 |
| chr6  | 73763561  | 73764482  | 922 |
| chr11 | 104656535 | 104657454 | 920 |
| chr12 | 20075693  | 20076610  | 918 |
| chrX  | 50225679  | 50226592  | 914 |
| chrX  | 8149801   | 8150714   | 914 |
| chr21 | 56281149  | 56282060  | 912 |
| chr2  | 134675637 | 134676547 | 911 |
| chrX  | 36362420  | 36363328  | 909 |
| chrX  | 54345953  | 54346856  | 904 |
| chr29 | 36280489  | 36281392  | 904 |
| chr8  | 74402283  | 74403185  | 903 |
| chrX  | 21138020  | 21138916  | 897 |
| chr5  | 1103325   | 1104218   | 894 |
| chrX  | 34595666  | 34596558  | 893 |
| chr2  | 126029940 | 126030832 | 893 |
| chr13 | 74012701  | 74013592  | 892 |
| chr27 | 35404272  | 35405161  | 890 |
| chrX  | 75754872  | 75755758  | 887 |
| chr11 | 70842047  | 70842933  | 887 |
| chr2  | 110784531 | 110785413 | 883 |
| chr21 | 18476335  | 18477216  | 882 |
| chr22 | 48418600  | 48419480  | 881 |
| chr7  | 15108714  | 15109593  | 880 |
| chrX  | 3714057   | 3714934   | 878 |
| chr5  | 81501780  | 81502656  | 877 |
| chr5  | 30896116  | 30896992  | 877 |
| chr7  | 51660681  | 51661556  | 876 |
| chr19 | 46147994  | 46148869  | 876 |
| chr19 | 59357974  | 59358848  | 875 |
| chr20 | 763846    | 764719    | 874 |

|       |           |           |     |
|-------|-----------|-----------|-----|
| chr16 | 47608251  | 47609122  | 872 |
| chr16 | 38769535  | 38770406  | 872 |
| chr13 | 70227486  | 70228355  | 870 |
| chr26 | 47953810  | 47954678  | 869 |
| chrX  | 7180434   | 7181300   | 867 |
| chr2  | 135094120 | 135094986 | 867 |
| chr18 | 5264037   | 5264902   | 866 |
| chrX  | 10124258  | 10125122  | 865 |
| chr13 | 28494771  | 28495635  | 865 |
| chr10 | 46992757  | 46993620  | 864 |
| chr12 | 9449014   | 9449876   | 863 |
| chr7  | 45249529  | 45250390  | 862 |
| chrX  | 65036313  | 65037171  | 859 |
| chrX  | 20638755  | 20639612  | 858 |
| chr10 | 75523842  | 75524699  | 858 |
| chr22 | 30066897  | 30067751  | 855 |
| chr17 | 63415791  | 63416645  | 855 |
| chrX  | 73375658  | 73376509  | 852 |
| chr3  | 8807128   | 8807977   | 850 |
| chr13 | 70220840  | 70221687  | 848 |
| chr13 | 59690253  | 59691099  | 847 |
| chr24 | 43702391  | 43703236  | 846 |
| chrX  | 21734962  | 21735805  | 844 |
| chr5  | 111326001 | 111326844 | 844 |
| chr24 | 20837313  | 20838148  | 836 |
| chr2  | 135593621 | 135594456 | 836 |
| chr5  | 122485140 | 122485974 | 835 |
| chr20 | 19400830  | 19401664  | 835 |
| chr24 | 33783497  | 33784329  | 833 |
| chrX  | 53884338  | 53885169  | 832 |
| chr16 | 3307618   | 3308449   | 832 |
| chr10 | 74725428  | 74726258  | 831 |
| chr22 | 39298462  | 39299291  | 830 |
| chrX  | 62693356  | 62694184  | 829 |
| chrX  | 78723727  | 78724554  | 828 |
| chr3  | 71118513  | 71119340  | 828 |
| chr19 | 47177843  | 47178670  | 828 |
| chrX  | 50683776  | 50684598  | 823 |
| chr8  | 108781974 | 108782795 | 822 |
| chr14 | 1925839   | 1926658   | 820 |
| chr7  | 81899094  | 81899912  | 819 |
| chr22 | 44340452  | 44341269  | 818 |
| chrX  | 34563068  | 34563884  | 817 |
| chr13 | 14687662  | 14688478  | 817 |
| chr3  | 121812303 | 121813118 | 816 |
| chr26 | 49003107  | 49003922  | 816 |
| chrX  | 34613111  | 34613925  | 815 |
| chr5  | 60711538  | 60712352  | 815 |
| chr28 | 34186582  | 34187396  | 815 |
| chr24 | 52838499  | 52839313  | 815 |

|       |           |           |     |
|-------|-----------|-----------|-----|
| chr13 | 75746840  | 75747653  | 814 |
| chr10 | 95116327  | 95117139  | 813 |
| chrX  | 34089547  | 34090357  | 811 |
| chr4  | 11127857  | 11128667  | 811 |
| chrX  | 73297730  | 73298539  | 810 |
| chrX  | 71841569  | 71842372  | 804 |
| chr2  | 111299609 | 111300412 | 804 |
| chr2  | 140046892 | 140047694 | 803 |
| chr29 | 41468480  | 41469279  | 800 |
| chrX  | 10311352  | 10312149  | 798 |
| chrX  | 50396602  | 50397398  | 797 |
| chr19 | 57740201  | 57740997  | 797 |
| chr9  | 10499437  | 10500230  | 794 |
| chr3  | 116951977 | 116952770 | 794 |
| chr18 | 23112163  | 23112956  | 794 |
| chr18 | 11447718  | 11448511  | 794 |
| chrX  | 36668325  | 36669116  | 792 |
| chr15 | 57277443  | 57278234  | 792 |
| chr5  | 111213470 | 111214260 | 791 |
| chr10 | 10723991  | 10724781  | 791 |
| chrX  | 9070648   | 9071435   | 788 |
| chr7  | 94356933  | 94357720  | 788 |
| chrX  | 66638449  | 66639235  | 787 |
| chrX  | 59374474  | 59375260  | 787 |
| chr11 | 106369381 | 106370165 | 785 |
| chr8  | 9328555   | 9329337   | 783 |
| chr10 | 7924347   | 7925129   | 783 |
| chr29 | 46241888  | 46242669  | 782 |
| chr17 | 70027344  | 70028125  | 782 |
| chr3  | 36930630  | 36931408  | 779 |
| chr2  | 111438457 | 111439234 | 778 |
| chr19 | 34009582  | 34010359  | 778 |
| chrX  | 78673606  | 78674382  | 777 |
| chr2  | 130987018 | 130987794 | 777 |
| chrX  | 9135025   | 9135800   | 776 |
| chr15 | 41396691  | 41397466  | 776 |
| chrX  | 73400169  | 73400942  | 774 |
| chrX  | 63075458  | 63076231  | 774 |
| chr3  | 22557858  | 22558630  | 773 |
| chr17 | 74605034  | 74605806  | 773 |
| chr13 | 80078584  | 80079354  | 771 |
| chr10 | 17788567  | 17789337  | 771 |
| chr3  | 114231934 | 114232703 | 770 |
| chrX  | 66668509  | 66669277  | 769 |
| chr5  | 80748462  | 80749229  | 768 |
| chr29 | 33574782  | 33575549  | 768 |
| chr17 | 72711945  | 72712712  | 768 |
| chrX  | 50701230  | 50701996  | 767 |
| chrX  | 21571613  | 21572379  | 767 |
| chr4  | 69211683  | 69212449  | 767 |

|       |           |           |     |
|-------|-----------|-----------|-----|
| chr21 | 48927971  | 48928737  | 767 |
| chr16 | 46780634  | 46781400  | 767 |
| chrX  | 75198745  | 75199510  | 766 |
| chr29 | 2530774   | 2531539   | 766 |
| chr24 | 41574681  | 41575446  | 766 |
| chr22 | 51343527  | 51344292  | 766 |
| chr18 | 9655458   | 9656223   | 766 |
| chr22 | 48763305  | 48764068  | 764 |
| chrX  | 19673553  | 19674315  | 763 |
| chr17 | 56144699  | 56145460  | 762 |
| chr3  | 16911008  | 16911768  | 761 |
| chr24 | 1479365   | 1480125   | 761 |
| chr2  | 120921067 | 120921827 | 761 |
| chr15 | 25445729  | 25446489  | 761 |
| chr12 | 34328176  | 34328935  | 760 |
| chr11 | 77720808  | 77721566  | 759 |
| chrX  | 55841568  | 55842325  | 758 |
| chr2  | 136622447 | 136623203 | 757 |
| chr19 | 44897968  | 44898724  | 757 |
| chr19 | 35057319  | 35058075  | 757 |
| chr28 | 33931590  | 33932345  | 756 |
| chr16 | 2125553   | 2126306   | 754 |
| chr4  | 36670172  | 36670924  | 753 |
| chr3  | 8725179   | 8725930   | 752 |
| chr23 | 28001531  | 28002281  | 751 |
| chr7  | 50474528  | 50475277  | 750 |
| chrX  | 6695530   | 6696278   | 749 |
| chr7  | 5466223   | 5466971   | 749 |
| chr21 | 13647522  | 13648269  | 748 |
| chrX  | 78199627  | 78200371  | 745 |
| chr18 | 64343657  | 64344401  | 745 |
| chr6  | 63191668  | 63192411  | 744 |
| chr25 | 43227926  | 43228669  | 744 |
| chr20 | 73937649  | 73938392  | 744 |
| chr19 | 13436440  | 13437183  | 744 |
| chr18 | 4036676   | 4037419   | 744 |
| chr10 | 16863155  | 16863897  | 743 |
| chr21 | 7148496   | 7149236   | 741 |
| chr15 | 15816774  | 15817514  | 741 |
| chr11 | 77206911  | 77207651  | 741 |
| chr13 | 75962528  | 75963267  | 740 |
| chr11 | 30756830  | 30757569  | 740 |
| chr3  | 4353910   | 4354648   | 739 |
| chrX  | 74304619  | 74305356  | 738 |
| chr4  | 99360783  | 99361520  | 738 |
| chr4  | 72798200  | 72798937  | 738 |
| chr23 | 44428704  | 44429441  | 738 |
| chr25 | 22885034  | 22885770  | 737 |
| chr7  | 45662992  | 45663727  | 736 |
| chr22 | 30371039  | 30371774  | 736 |

|       |           |           |     |
|-------|-----------|-----------|-----|
| chrX  | 75861569  | 75862303  | 735 |
| chr8  | 9349481   | 9350215   | 735 |
| chrX  | 6420415   | 6421148   | 734 |
| chr19 | 27235025  | 27235758  | 734 |
| chrX  | 10958703  | 10959435  | 733 |
| chr7  | 60989332  | 60990064  | 733 |
| chr25 | 38288504  | 38289236  | 733 |
| chr14 | 17587345  | 17588076  | 732 |
| chr10 | 102975399 | 102976130 | 732 |
| chrX  | 75717869  | 75718599  | 731 |
| chr17 | 49438238  | 49438967  | 730 |
| chrX  | 50599183  | 50599911  | 729 |
| chrX  | 36082437  | 36083165  | 729 |
| chr17 | 2168626   | 2169354   | 729 |
| chr21 | 32889276  | 32890003  | 728 |
| chr1  | 110662522 | 110663248 | 727 |
| chr3  | 105154728 | 105155453 | 726 |
| chr2  | 134736731 | 134737456 | 726 |
| chr17 | 73211190  | 73211915  | 726 |
| chr29 | 37257274  | 37257998  | 725 |
| chr18 | 43452927  | 43453651  | 725 |
| chrX  | 30986388  | 30987111  | 724 |
| chr29 | 37224876  | 37225599  | 724 |
| chr24 | 58638628  | 58639351  | 724 |
| chr26 | 37775240  | 37775962  | 723 |
| chr10 | 5253890   | 5254612   | 723 |
| chrX  | 37477504  | 37478225  | 722 |
| chrX  | 7729970   | 7730691   | 722 |
| chr28 | 26772971  | 26773692  | 722 |
| chr15 | 64263793  | 64264514  | 722 |
| chr29 | 41856052  | 41856772  | 721 |
| chr19 | 8513639   | 8514359   | 721 |
| chr13 | 56596865  | 56597585  | 721 |
| chr10 | 90307107  | 90307827  | 721 |
| chr8  | 7605290   | 7606009   | 720 |
| chrX  | 50705307  | 50706025  | 719 |
| chrX  | 877084    | 877802    | 719 |
| chr5  | 32923609  | 32924327  | 719 |
| chrX  | 75666428  | 75667145  | 718 |
| chr22 | 30143151  | 30143868  | 718 |
| chr26 | 31513647  | 31514362  | 716 |
| chr25 | 36446248  | 36446963  | 716 |
| chr5  | 113948263 | 113948977 | 715 |
| chrX  | 72413055  | 72413768  | 714 |
| chr24 | 60596904  | 60597617  | 714 |
| chr15 | 23912663  | 23913374  | 712 |
| chrX  | 56856766  | 56857473  | 708 |
| chrX  | 6718377   | 6719084   | 708 |
| chr25 | 36593928  | 36594634  | 707 |
| chr23 | 18814947  | 18815653  | 707 |

|       |               |           |     |
|-------|---------------|-----------|-----|
| chr2  | 130806936     | 130807642 | 707 |
| chr19 | 47233330      | 47234036  | 707 |
| chr2  | 108765854     | 108766559 | 706 |
| chrX  | 80949915      | 80950618  | 704 |
| chrX  | 50250288      | 50250991  | 704 |
| chr8  | 65075520      | 65076222  | 703 |
| chr2  | 132202986     | 132203688 | 703 |
| chrX  | 50489087      | 50489788  | 702 |
| chr9  | 43787016      | 43787717  | 702 |
| chr26 | 21763578      | 21764279  | 702 |
| chr5  | 30305377      | 30306077  | 701 |
| chr13 | 65742925      | 65743625  | 701 |
| chr10 | 90527701      | 90528400  | 700 |
| chr27 | 44653145      | 44653843  | 699 |
| chr25 | 759151 759849 |           | 699 |
| chr11 | 77897669      | 77898367  | 699 |
| chr19 | 26922718      | 26923415  | 698 |
| chr16 | 1720440       | 1721137   | 698 |
| chrX  | 74778590      | 74779285  | 696 |
| chr5  | 117527600     | 117528294 | 695 |
| chr12 | 11888850      | 11889544  | 695 |
| chr10 | 12829771      | 12830465  | 695 |
| chr2  | 135124425     | 135125118 | 694 |
| chrX  | 54790443      | 54791135  | 693 |
| chr19 | 17106831      | 17107523  | 693 |
| chrX  | 60430594      | 60431285  | 692 |
| chr25 | 29152502      | 29153192  | 691 |
| chr10 | 8550341       | 8551031   | 691 |
| chr23 | 33138543      | 33139232  | 690 |
| chr17 | 66158229      | 66158918  | 690 |
| chr10 | 49967571      | 49968259  | 689 |
| chrX  | 61386565      | 61387252  | 688 |
| chr8  | 85315707      | 85316394  | 688 |
| chr13 | 61296745      | 61297431  | 687 |
| chrX  | 9661467       | 9662152   | 686 |
| chr22 | 48668530      | 48669215  | 686 |
| chr2  | 131024079     | 131024763 | 685 |
| chr19 | 33127134      | 33127818  | 685 |
| chr18 | 11704161      | 11704845  | 685 |
| chr13 | 77792361      | 77793045  | 685 |
| chr8  | 88617514      | 88618197  | 684 |
| chr25 | 43494973      | 43495656  | 684 |
| chr13 | 40820555      | 40821238  | 684 |
| chrX  | 76996487      | 76997169  | 683 |
| chr23 | 48735047      | 48735729  | 683 |
| chr18 | 656031 656713 |           | 683 |
| chr10 | 21116244      | 21116926  | 683 |
| chr4  | 5615580       | 5616260   | 681 |
| chrX  | 57650030      | 57650707  | 678 |
| chrX  | 50659165      | 50659842  | 678 |

|       |           |           |     |
|-------|-----------|-----------|-----|
| chrX  | 21536235  | 21536912  | 678 |
| chr7  | 14734089  | 14734766  | 678 |
| chr19 | 39510854  | 39511531  | 678 |
| chr16 | 3644516   | 3645193   | 678 |
| chr10 | 10578262  | 10578939  | 678 |
| chr3  | 73931185  | 73931860  | 676 |
| chr29 | 26770241  | 26770916  | 676 |
| chr25 | 42042076  | 42042751  | 676 |
| chr24 | 42587757  | 42588432  | 676 |
| chr10 | 25848080  | 25848755  | 676 |
| chr18 | 50665387  | 50666061  | 675 |
| chr11 | 103736471 | 103737145 | 675 |
| chrX  | 19861069  | 19861742  | 674 |
| chr7  | 51381566  | 51382239  | 674 |
| chr14 | 22033558  | 22034231  | 674 |
| chr3  | 26146808  | 26147479  | 672 |
| chr19 | 23679427  | 23680098  | 672 |
| chr10 | 70167985  | 70168656  | 672 |
| chr9  | 53371696  | 53372366  | 671 |
| chr29 | 18192439  | 18193109  | 671 |
| chr25 | 34297587  | 34298257  | 671 |
| chr5  | 28868130  | 28868799  | 670 |
| chr3  | 62932415  | 62933081  | 667 |
| chr21 | 49253253  | 49253919  | 667 |
| chrX  | 56020168  | 56020833  | 666 |
| chrX  | 19747648  | 19748313  | 666 |
| chrX  | 75819841  | 75820505  | 665 |
| chr26 | 22217440  | 22218104  | 665 |
| chr17 | 49149501  | 49150165  | 665 |
| chr15 | 64521388  | 64522052  | 665 |
| chr12 | 82705000  | 82705664  | 665 |
| chr17 | 72730895  | 72731558  | 664 |
| chrX  | 50179163  | 50179825  | 663 |
| chrX  | 21673782  | 21674444  | 663 |
| chr14 | 6068246   | 6068908   | 663 |
| chrX  | 51492925  | 51493586  | 662 |
| chr4  | 123261491 | 123262152 | 662 |
| chr4  | 39492710  | 39493371  | 662 |
| chr5  | 118453480 | 118454140 | 661 |
| chr4  | 95472908  | 95473568  | 661 |
| chr16 | 71095627  | 71096287  | 661 |
| chr4  | 123274567 | 123275226 | 660 |
| chrX  | 34567085  | 34567742  | 658 |
| chr2  | 61108553  | 61109210  | 658 |
| chr15 | 76615954  | 76616611  | 658 |
| chr15 | 26898856  | 26899513  | 658 |
| chr18 | 50857056  | 50857712  | 657 |
| chr14 | 63522817  | 63523473  | 657 |
| chr23 | 10347432  | 10348086  | 655 |
| chr19 | 46793518  | 46794172  | 655 |

|       |           |           |     |
|-------|-----------|-----------|-----|
| chrX  | 18677185  | 18677838  | 654 |
| chr18 | 45038305  | 45038958  | 654 |
| chr10 | 90292984  | 90293637  | 654 |
| chr2  | 138839248 | 138839900 | 653 |
| chr1  | 75094984  | 75095636  | 653 |
| chrX  | 47879970  | 47880621  | 652 |
| chr19 | 63525470  | 63526119  | 650 |
| chr1  | 74665596  | 74666245  | 650 |
| chrX  | 38956424  | 38957072  | 649 |
| chrX  | 23362171  | 23362819  | 649 |
| chr7  | 38400245  | 38400893  | 649 |
| chr19 | 33439680  | 33440328  | 649 |
| chr16 | 46690168  | 46690816  | 649 |
| chr14 | 3008715   | 3009363   | 649 |
| chrX  | 8083926   | 8084573   | 648 |
| chr4  | 84895645  | 84896292  | 648 |
| chr22 | 49159746  | 49160393  | 648 |
| chr11 | 11732705  | 11733352  | 648 |
| chrX  | 64523914  | 64524560  | 647 |
| chrX  | 19333822  | 19334468  | 647 |
| chr9  | 90547772  | 90548418  | 647 |
| chr20 | 21011758  | 21012404  | 647 |
| chr10 | 20856667  | 20857312  | 646 |
| chr11 | 1195801   | 1196445   | 645 |
| chrX  | 30399115  | 30399758  | 644 |
| chr8  | 59315915  | 59316558  | 644 |
| chr27 | 40786280  | 40786923  | 644 |
| chr26 | 41460290  | 41460933  | 644 |
| chr11 | 100902288 | 100902931 | 644 |
| chr10 | 16886991  | 16887634  | 644 |
| chrX  | 49817147  | 49817789  | 643 |
| chr23 | 19339049  | 19339691  | 643 |
| chr22 | 16276876  | 16277518  | 643 |
| chrX  | 11435785  | 11436426  | 642 |
| chr3  | 8749125   | 8749765   | 641 |
| chr20 | 74034007  | 74034647  | 641 |
| chr14 | 1135745   | 1136385   | 641 |
| chrX  | 8179615   | 8180254   | 640 |
| chr1  | 108512225 | 108512864 | 640 |
| chr3  | 105414243 | 105414881 | 639 |
| chr12 | 82841504  | 82842142  | 639 |
| chr10 | 3531691   | 3532328   | 638 |
| chr1  | 101565220 | 101565857 | 638 |
| chr1  | 82929996  | 82930633  | 638 |
| chr4  | 105184792 | 105185428 | 637 |
| chr22 | 14988384  | 14989019  | 636 |
| chr26 | 20184905  | 20185539  | 635 |
| chr2  | 139148760 | 139149394 | 635 |
| chrX  | 2334168   | 2334801   | 634 |
| chr7  | 45707256  | 45707888  | 633 |



|       |           |           |     |
|-------|-----------|-----------|-----|
| chr23 | 28003112  | 28003744  | 633 |
| chr23 | 27872085  | 27872717  | 633 |
| chr27 | 27695851  | 27696482  | 632 |
| chr23 | 8560640   | 8561271   | 632 |
| chr19 | 39378787  | 39379418  | 632 |
| chrX  | 2504752   | 2505380   | 629 |
| chr17 | 12574937  | 12575565  | 629 |
| chrX  | 6570473   | 6571100   | 628 |
| chr6  | 121820730 | 121821357 | 628 |
| chr29 | 31613608  | 31614235  | 628 |
| chr18 | 12343811  | 12344438  | 628 |
| chr17 | 66440118  | 66440745  | 628 |
| chr15 | 29103201  | 29103828  | 628 |
| chr23 | 13604949  | 13605575  | 627 |
| chr2  | 27650505  | 27651131  | 627 |
| chr12 | 84680482  | 84681107  | 626 |
| chrX  | 74825112  | 74825736  | 625 |
| chrX  | 56187227  | 56187851  | 625 |
| chr3  | 98115169  | 98115793  | 625 |
| chr17 | 70253694  | 70254318  | 625 |
| chr17 | 56316636  | 56317260  | 625 |
| chr13 | 74347712  | 74348336  | 625 |
| chr26 | 47997382  | 47998005  | 624 |
| chr10 | 16905346  | 16905968  | 623 |
| chr6  | 118644720 | 118645341 | 622 |
| chrX  | 45439287  | 45439907  | 621 |
| chr9  | 74636013  | 74636633  | 621 |
| chr2  | 48912189  | 48912809  | 621 |
| chr18 | 54357803  | 54358423  | 621 |
| chr17 | 57756128  | 57756748  | 621 |
| chr10 | 66637389  | 66638009  | 621 |
| chr25 | 29293116  | 29293735  | 620 |
| chr25 | 26730581  | 26731199  | 619 |
| chr23 | 21575719  | 21576337  | 619 |
| chr19 | 22340552  | 22341170  | 619 |
| chr18 | 9648521   | 9649139   | 619 |
| chr1  | 100065009 | 100065627 | 619 |
| chr6  | 37185072  | 37185689  | 618 |
| chr25 | 2707323   | 2707940   | 618 |
| chr4  | 71511830  | 71512446  | 617 |
| chr29 | 48836674  | 48837290  | 617 |
| chr19 | 37870846  | 37871462  | 617 |
| chr15 | 23213279  | 23213895  | 617 |
| chrX  | 54274099  | 54274714  | 616 |
| chr19 | 60818412  | 60819027  | 616 |
| chr19 | 27983898  | 27984513  | 616 |
| chr10 | 25546654  | 25547269  | 616 |
| chrX  | 30002257  | 30002871  | 615 |
| chr22 | 60224071  | 60224685  | 615 |
| chr15 | 24193823  | 24194437  | 615 |

|       |               |           |     |
|-------|---------------|-----------|-----|
| chr6  | 121052404     | 121053017 | 614 |
| chr6  | 63090540      | 63091153  | 614 |
| chr19 | 56103070      | 56103683  | 614 |
| chrX  | 61602150      | 61602762  | 613 |
| chr7  | 17945789      | 17946400  | 612 |
| chr23 | 13511353      | 13511963  | 611 |
| chr21 | 64472971      | 64473581  | 611 |
| chrX  | 55471121      | 55471730  | 610 |
| chrX  | 21603265      | 21603874  | 610 |
| chr4  | 71515014      | 71515623  | 610 |
| chr24 | 60595877      | 60596486  | 610 |
| chr17 | 70072446      | 70073055  | 610 |
| chr16 | 75096380      | 75096989  | 610 |
| chr20 | 8803676       | 8804284   | 609 |
| chrX  | 53337564      | 53338171  | 608 |
| chr2  | 99035855      | 99036462  | 608 |
| chr2  | 92318403      | 92319010  | 608 |
| chr11 | 77764983      | 77765590  | 608 |
| chrX  | 61299751      | 61300357  | 607 |
| chr29 | 18191278      | 18191884  | 607 |
| chr26 | 22353856      | 22354462  | 607 |
| chr2  | 126964634     | 126965240 | 607 |
| chr17 | 47399646      | 47400252  | 607 |
| chrX  | 37338439      | 37339043  | 605 |
| chr4  | 102396071     | 102396675 | 605 |
| chr2  | 131171435     | 131172039 | 605 |
| chr2  | 102427687     | 102428291 | 605 |
| chr13 | 14686523      | 14687127  | 605 |
| chrX  | 11041696      | 11042299  | 604 |
| chr7  | 71317904      | 71318507  | 604 |
| chr13 | 36766458      | 36767061  | 604 |
| chr10 | 50518078      | 50518681  | 604 |
| chrX  | 79068901      | 79069503  | 603 |
| chr26 | 38360271      | 38360873  | 603 |
| chr16 | 44329999      | 44330600  | 602 |
| chr15 | 24050520      | 24051121  | 602 |
| chr3  | 11531106      | 11531706  | 601 |
| chr23 | 27234247      | 27234847  | 601 |
| chr19 | 14054079      | 14054679  | 601 |
| chr18 | 55013453      | 55014053  | 601 |
| chr13 | 77388310      | 77388910  | 601 |
| chrX  | 38975877      | 38976476  | 600 |
| chr28 | 26785799      | 26786398  | 600 |
| chr27 | 851108 851707 | 600       |     |
| chr19 | 21741382      | 21741981  | 600 |
| chr9  | 87726566      | 87727164  | 599 |
| chr3  | 109419232     | 109419830 | 599 |
| chr19 | 17672310      | 17672908  | 599 |
| chr3  | 111646384     | 111646981 | 598 |
| chr21 | 23652187      | 23652784  | 598 |

|       |               |           |     |
|-------|---------------|-----------|-----|
| chr11 | 81455295      | 81455892  | 598 |
| chr3  | 4684638       | 4685234   | 597 |
| chr19 | 46323025      | 46323621  | 597 |
| chr26 | 21805091      | 21805686  | 596 |
| chr17 | 73138405      | 73139000  | 596 |
| chr22 | 12070052      | 12070646  | 595 |
| chr18 | 53197067      | 53197661  | 595 |
| chr10 | 5246348       | 5246942   | 595 |
| chr25 | 38935436      | 38936029  | 594 |
| chr23 | 18789088      | 18789681  | 594 |
| chr2  | 134661703     | 134662296 | 594 |
| chr18 | 64318003      | 64318596  | 594 |
| chrX  | 62785029      | 62785621  | 593 |
| chrX  | 55020917      | 55021509  | 593 |
| chr7  | 29473505      | 29474097  | 593 |
| chr4  | 89353924      | 89354516  | 593 |
| chr4  | 34962500      | 34963092  | 593 |
| chr19 | 60820172      | 60820764  | 593 |
| chr19 | 26645733      | 26646325  | 593 |
| chr18 | 23635686      | 23636277  | 592 |
| chr25 | 43553472      | 43554062  | 591 |
| chr5  | 38507536      | 38508125  | 590 |
| chr4  | 95999501      | 96000090  | 590 |
| chr17 | 54293709      | 54294298  | 590 |
| chrX  | 53995266      | 53995854  | 589 |
| chrX  | 359239 359827 | 589       |     |
| chr3  | 10564278      | 10564866  | 589 |
| chr22 | 30129139      | 30129727  | 589 |
| chrX  | 13941338      | 13941925  | 588 |
| chr2  | 136634628     | 136635215 | 588 |
| chr17 | 59011111      | 59011698  | 588 |
| chr14 | 61608199      | 61608786  | 588 |
| chr11 | 45277529      | 45278116  | 588 |
| chrX  | 50292993      | 50293579  | 587 |
| chrX  | 2586923       | 2587509   | 587 |
| chr9  | 11538796      | 11539382  | 587 |
| chr23 | 10579567      | 10580153  | 587 |
| chr20 | 60226323      | 60226909  | 587 |
| chr7  | 17083319      | 17083904  | 586 |
| chrX  | 75225487      | 75226071  | 585 |
| chrX  | 6297813       | 6298397   | 585 |
| chr9  | 104913211     | 104913795 | 585 |
| chr9  | 91084829      | 91085413  | 585 |
| chr27 | 34878872      | 34879456  | 585 |
| chrX  | 38988839      | 38989422  | 584 |
| chr5  | 31229728      | 31230311  | 584 |
| chr5  | 23512761      | 23513344  | 584 |
| chr29 | 18184270      | 18184853  | 584 |
| chr19 | 25417370      | 25417953  | 584 |
| chr17 | 62071767      | 62072350  | 584 |

|       |           |           |     |
|-------|-----------|-----------|-----|
| chr10 | 74864401  | 74864984  | 584 |
| chr24 | 59292399  | 59292981  | 583 |
| chrX  | 75056346  | 75056927  | 582 |
| chrX  | 56863266  | 56863847  | 582 |
| chr6  | 61951725  | 61952306  | 582 |
| chr4  | 71604578  | 71605159  | 582 |
| chrX  | 41233976  | 41234556  | 581 |
| chr20 | 33684627  | 33685207  | 581 |
| chr15 | 42288817  | 42289397  | 581 |
| chrX  | 65244999  | 65245578  | 580 |
| chrX  | 56930199  | 56930778  | 580 |
| chr5  | 120359544 | 120360123 | 580 |
| chr22 | 11640319  | 11640898  | 580 |
| chr8  | 77310705  | 77311282  | 578 |
| chr23 | 49740764  | 49741341  | 578 |
| chr22 | 61478700  | 61479277  | 578 |
| chr23 | 52687663  | 52688239  | 577 |
| chrX  | 58049401  | 58049976  | 576 |
| chrX  | 56218684  | 56219259  | 576 |
| chr11 | 16113545  | 16114120  | 576 |
| chrX  | 50815573  | 50816147  | 575 |
| chrX  | 34069615  | 34070189  | 575 |
| chr6  | 118798956 | 118799530 | 575 |
| chr25 | 28191089  | 28191663  | 575 |
| chrX  | 47258452  | 47259025  | 574 |
| chr23 | 35043578  | 35044151  | 574 |
| chr17 | 4755243   | 4755816   | 574 |
| chr28 | 3553416   | 3553988   | 573 |
| chr21 | 13941810  | 13942382  | 573 |
| chr1  | 153879745 | 153880317 | 573 |
| chrX  | 47609156  | 47609727  | 572 |
| chrX  | 37593330  | 37593901  | 572 |
| chr7  | 5157718   | 5158289   | 572 |
| chr28 | 41325270  | 41325841  | 572 |
| chr21 | 27586687  | 27587258  | 572 |
| chr17 | 70523236  | 70523807  | 572 |
| chr13 | 75657063  | 75657634  | 572 |
| chr10 | 86469777  | 86470348  | 572 |
| chr3  | 30009240  | 30009810  | 571 |
| chr29 | 17464917  | 17465487  | 571 |
| chr14 | 28746558  | 28747128  | 571 |
| chr23 | 31137981  | 31138550  | 570 |
| chr11 | 104477902 | 104478471 | 570 |
| chr5  | 121457258 | 121457826 | 569 |
| chr10 | 4890774   | 4891342   | 569 |
| chrX  | 63251627  | 63252194  | 568 |
| chrX  | 38981226  | 38981793  | 568 |
| chr19 | 39910212  | 39910779  | 568 |
| chrX  | 80195840  | 80196406  | 567 |
| chr8  | 272352    | 272918    | 567 |

|       |           |           |     |
|-------|-----------|-----------|-----|
| chr21 | 47297471  | 47298037  | 567 |
| chr19 | 44160058  | 44160624  | 567 |
| chr9  | 98097798  | 98098363  | 566 |
| chr3  | 113977521 | 113978086 | 566 |
| chr26 | 37874297  | 37874862  | 566 |
| chr23 | 17626175  | 17626740  | 566 |
| chr21 | 22397439  | 22398004  | 566 |
| chrX  | 5349864   | 5350428   | 565 |
| chr23 | 9993408   | 9993972   | 565 |
| chr19 | 46791091  | 46791655  | 565 |
| chrX  | 59304198  | 59304761  | 564 |
| chr8  | 93695623  | 93696186  | 564 |
| chr17 | 63385270  | 63385833  | 564 |
| chr14 | 59326526  | 59327089  | 564 |
| chrX  | 20342693  | 20343255  | 563 |
| chrX  | 19442337  | 19442899  | 563 |
| chrX  | 2305382   | 2305944   | 563 |
| chr7  | 15011608  | 15012170  | 563 |
| chr18 | 4277642   | 4278204   | 563 |
| chr10 | 70309298  | 70309860  | 563 |
| chrX  | 14336495  | 14337056  | 562 |
| chr29 | 45791603  | 45792164  | 562 |
| chr27 | 45269347  | 45269908  | 562 |
| chr13 | 73887881  | 73888442  | 562 |
| chr13 | 59372091  | 59372652  | 562 |
| chrX  | 35566655  | 35567215  | 561 |
| chrX  | 6721022   | 6721582   | 561 |
| chr4  | 32396832  | 32397392  | 561 |
| chr29 | 37482255  | 37482815  | 561 |
| chr23 | 18575000  | 18575560  | 561 |
| chr2  | 139959456 | 139960016 | 561 |
| chr17 | 46056048  | 46056608  | 561 |
| chr13 | 59999008  | 59999568  | 561 |
| chrX  | 21523005  | 21523564  | 560 |
| chr5  | 38695598  | 38696156  | 559 |
| chrX  | 65263603  | 65264160  | 558 |
| chrX  | 19041782  | 19042339  | 558 |
| chrX  | 50334524  | 50335080  | 557 |
| chr9  | 35569430  | 35569986  | 557 |
| chr8  | 24392919  | 24393474  | 556 |
| chr15 | 32616239  | 32616794  | 556 |
| chr13 | 40951004  | 40951559  | 556 |
| chr3  | 78294595  | 78295149  | 555 |
| chr26 | 31325480  | 31326034  | 555 |
| chr19 | 45027336  | 45027890  | 555 |
| chr13 | 75702937  | 75703491  | 555 |
| chrX  | 78779893  | 78780446  | 554 |
| chrX  | 8139100   | 8139653   | 554 |
| chr22 | 30125480  | 30126033  | 554 |
| chr10 | 8486383   | 8486936   | 554 |

|       |               |           |     |
|-------|---------------|-----------|-----|
| chr29 | 18204868      | 18205420  | 553 |
| chrX  | 53371592      | 53372143  | 552 |
| chrX  | 30810795      | 30811346  | 552 |
| chr16 | 77448483      | 77449034  | 552 |
| chr1  | 74606688      | 74607239  | 552 |
| chr3  | 113515391     | 113515941 | 551 |
| chr23 | 43252725      | 43253275  | 551 |
| chr11 | 103660247     | 103660797 | 551 |
| chrX  | 69152094      | 69152643  | 550 |
| chr8  | 64992919      | 64993468  | 550 |
| chr24 | 40261749      | 40262298  | 550 |
| chr23 | 14829814      | 14830363  | 550 |
| chrX  | 76068626      | 76069174  | 549 |
| chr8  | 5374363       | 5374911   | 549 |
| chr3  | 123344367     | 123344915 | 549 |
| chr11 | 91372017      | 91372565  | 549 |
| chrX  | 46136604      | 46137151  | 548 |
| chrX  | 8148978       | 8149525   | 548 |
| chrX  | 798058 798605 | 548       |     |
| chrX  | 78529887      | 78530433  | 547 |
| chr2  | 110782601     | 110783147 | 547 |
| chr19 | 16191045      | 16191591  | 547 |
| chr13 | 77223040      | 77223586  | 547 |
| chr13 | 59892181      | 59892727  | 547 |
| chr11 | 70801987      | 70802533  | 547 |
| chr28 | 11380143      | 11380688  | 546 |
| chr21 | 48710388      | 48710933  | 546 |
| chr15 | 29183581      | 29184126  | 546 |
| chr14 | 1416251       | 1416796   | 546 |
| chr13 | 77242230      | 77242775  | 546 |
| chr13 | 17716808      | 17717353  | 546 |
| chrX  | 31317143      | 31317687  | 545 |
| chr9  | 86848178      | 86848722  | 545 |
| chr24 | 49784852      | 49785396  | 545 |
| chr18 | 51610024      | 51610568  | 545 |
| chr26 | 51561009      | 51561552  | 544 |
| chr26 | 48667583      | 48668126  | 544 |
| chr16 | 41446568      | 41447111  | 544 |
| chrX  | 31908704      | 31909246  | 543 |
| chr5  | 118438083     | 118438625 | 543 |
| chr4  | 122956650     | 122957192 | 543 |
| chr18 | 62702433      | 62702975  | 543 |
| chr12 | 83288291      | 83288833  | 543 |
| chrX  | 19851741      | 19852282  | 542 |
| chrX  | 5055830       | 5056371   | 542 |
| chr7  | 57577154      | 57577695  | 542 |
| chr5  | 30437187      | 30437728  | 542 |
| chr23 | 23760078      | 23760619  | 542 |
| chr2  | 26599947      | 26600488  | 542 |
| chr8  | 93167849      | 93168388  | 540 |

|       |           |           |     |
|-------|-----------|-----------|-----|
| chr12 | 68241614  | 68242153  | 540 |
| chr11 | 71108628  | 71109167  | 540 |
| chrX  | 64498687  | 64499225  | 539 |
| chr18 | 26052504  | 26053042  | 539 |
| chrX  | 20433638  | 20434175  | 538 |
| chr16 | 2699510   | 2700047   | 538 |
| chr11 | 104883024 | 104883561 | 538 |
| chr29 | 2512424   | 2512960   | 537 |
| chr22 | 59240455  | 59240991  | 537 |
| chr16 | 44131354  | 44131890  | 537 |
| chr15 | 76434379  | 76434915  | 537 |
| chr13 | 41334487  | 41335023  | 537 |
| chrX  | 66751080  | 66751615  | 536 |
| chr24 | 48628511  | 48629046  | 536 |
| chr2  | 135641377 | 135641912 | 536 |
| chrX  | 61790802  | 61791336  | 535 |
| chr21 | 20691398  | 20691932  | 535 |
| chr21 | 18889404  | 18889938  | 535 |
| chr15 | 25571863  | 25572397  | 535 |
| chr12 | 83937997  | 83938531  | 535 |
| chr18 | 14429778  | 14430311  | 534 |
| chr6  | 106947833 | 106948365 | 533 |
| chr4  | 123032397 | 123032929 | 533 |
| chr29 | 37004931  | 37005463  | 533 |
| chr24 | 60265125  | 60265657  | 533 |
| chr24 | 38129475  | 38130007  | 533 |
| chr13 | 77716677  | 77717209  | 533 |
| chrX  | 61600011  | 61600542  | 532 |
| chrX  | 38994523  | 38995054  | 532 |
| chr29 | 33611201  | 33611732  | 532 |
| chr19 | 60390960  | 60391491  | 532 |
| chr28 | 33621551  | 33622081  | 531 |
| chr19 | 20305760  | 20306290  | 531 |
| chr11 | 46170876  | 46171406  | 531 |
| chr10 | 83086862  | 83087392  | 531 |
| chrX  | 78546333  | 78546862  | 530 |
| chrX  | 35617295  | 35617824  | 530 |
| chrX  | 7137780   | 7138309   | 530 |
| chrX  | 10595170  | 10595698  | 529 |
| chr8  | 74361631  | 74362159  | 529 |
| chr24 | 26541127  | 26541655  | 529 |
| chr14 | 64390097  | 64390625  | 529 |
| chr11 | 48807054  | 48807582  | 529 |
| chr10 | 83082087  | 83082615  | 529 |
| chrX  | 22587196  | 22587723  | 528 |
| chrX  | 20695216  | 20695742  | 527 |
| chr7  | 76983797  | 76984323  | 527 |
| chr5  | 115051217 | 115051743 | 527 |
| chr29 | 7662611   | 7663137   | 527 |
| chr18 | 62986238  | 62986764  | 527 |

|       |               |           |     |
|-------|---------------|-----------|-----|
| chr10 | 52921230      | 52921756  | 527 |
| chr1  | 68830643      | 68831169  | 527 |
| chr4  | 72552976      | 72553501  | 526 |
| chr28 | 34322718      | 34323243  | 526 |
| chr19 | 15905987      | 15906512  | 526 |
| chr17 | 63491004      | 63491529  | 526 |
| chr13 | 26304817      | 26305342  | 526 |
| chr8  | 8328681       | 8329205   | 525 |
| chr11 | 11622781      | 11623305  | 525 |
| chrX  | 21833876      | 21834399  | 524 |
| chr29 | 32518193      | 32518716  | 524 |
| chrX  | 30940492      | 30941014  | 523 |
| chr8  | 838053 838575 |           | 523 |
| chr4  | 95671312      | 95671834  | 523 |
| chr28 | 26788231      | 26788753  | 523 |
| chr16 | 74123244      | 74123766  | 523 |
| chr10 | 17427191      | 17427712  | 522 |
| chr7  | 84422001      | 84422521  | 521 |
| chr7  | 13048628      | 13049148  | 521 |
| chr18 | 45040459      | 45040979  | 521 |
| chr18 | 18916352      | 18916872  | 521 |
| chrX  | 8078547       | 8079066   | 520 |
| chr4  | 123252278     | 123252797 | 520 |
| chr3  | 117315597     | 117316116 | 520 |
| chr26 | 22314712      | 22315231  | 520 |
| chr24 | 11510839      | 11511358  | 520 |
| chr23 | 15138213      | 15138732  | 520 |
| chr17 | 63033170      | 63033689  | 520 |
| chr13 | 61223628      | 61224147  | 520 |
| chr12 | 32549958      | 32550477  | 520 |
| chr1  | 78593070      | 78593589  | 520 |
| chrX  | 50197090      | 50197608  | 519 |
| chrX  | 7887212       | 7887730   | 519 |
| chr7  | 6526721       | 6527239   | 519 |
| chr28 | 45892291      | 45892809  | 519 |
| chr24 | 60616717      | 60617235  | 519 |
| chr23 | 27947693      | 27948211  | 519 |
| chr21 | 62214167      | 62214685  | 519 |
| chr18 | 4955914       | 4956432   | 519 |
| chr10 | 70130738      | 70131256  | 519 |
| chr10 | 48393331      | 48393849  | 519 |
| chrX  | 71901515      | 71902032  | 518 |
| chrX  | 58732353      | 58732870  | 518 |
| chrX  | 54770737      | 54771254  | 518 |
| chrX  | 2865459       | 2865976   | 518 |
| chr6  | 90166755      | 90167272  | 518 |
| chr5  | 38516589      | 38517106  | 518 |
| chr28 | 34017399      | 34017916  | 518 |
| chr22 | 30110147      | 30110664  | 518 |
| chr21 | 20693058      | 20693575  | 518 |



|       |               |           |     |
|-------|---------------|-----------|-----|
| chr15 | 24990109      | 24990626  | 518 |
| chr13 | 79895476      | 79895993  | 518 |
| chrX  | 72695584      | 72696100  | 517 |
| chr9  | 43893719      | 43894235  | 517 |
| chr7  | 5608971       | 5609487   | 517 |
| chr4  | 82137971      | 82138487  | 517 |
| chr25 | 4639965       | 4640481   | 517 |
| chrX  | 56105080      | 56105595  | 516 |
| chr29 | 48839073      | 48839588  | 516 |
| chr19 | 59003451      | 59003966  | 516 |
| chr19 | 39132248      | 39132763  | 516 |
| chr14 | 957024 957539 | 516       |     |
| chrX  | 64512863      | 64513377  | 515 |
| chrX  | 36042236      | 36042750  | 515 |
| chrX  | 8481653       | 8482167   | 515 |
| chrX  | 458211 458725 | 515       |     |
| chr7  | 37574980      | 37575494  | 515 |
| chr5  | 118480164     | 118480678 | 515 |
| chr29 | 42392838      | 42393352  | 515 |
| chr28 | 41786459      | 41786973  | 515 |
| chr19 | 56507211      | 56507725  | 515 |
| chr18 | 52014441      | 52014955  | 515 |
| chr17 | 73616974      | 73617488  | 515 |
| chrX  | 49209990      | 49210503  | 514 |
| chr9  | 83795032      | 83795545  | 514 |
| chr23 | 49972576      | 49973089  | 514 |
| chr22 | 30333795      | 30334308  | 514 |
| chr2  | 124284955     | 124285468 | 514 |
| chr19 | 45818718      | 45819231  | 514 |
| chrX  | 50317020      | 50317532  | 513 |
| chrX  | 5305744       | 5306256   | 513 |
| chr7  | 52387777      | 52388289  | 513 |
| chr10 | 13029489      | 13030001  | 513 |
| chrX  | 62826060      | 62826571  | 512 |
| chr4  | 38537087      | 38537598  | 512 |
| chr14 | 612777 613288 | 512       |     |
| chr1  | 151601109     | 151601620 | 512 |
| chr5  | 112127060     | 112127570 | 511 |
| chr3  | 16743265      | 16743775  | 511 |
| chr29 | 37087767      | 37088277  | 511 |
| chr19 | 16216155      | 16216665  | 511 |
| chr18 | 52230113      | 52230623  | 511 |
| chr7  | 81900171      | 81900680  | 510 |
| chr24 | 58801215      | 58801724  | 510 |
| chr2  | 21879480      | 21879989  | 510 |
| chr11 | 48703696      | 48704205  | 510 |
| chr11 | 98504356      | 98504864  | 509 |
| chr11 | 5632412       | 5632920   | 509 |
| chr10 | 19613620      | 19614128  | 509 |
| chr25 | 1504274       | 1504781   | 508 |

|       |           |           |     |
|-------|-----------|-----------|-----|
| chr19 | 29706569  | 29707076  | 508 |
| chr10 | 12113731  | 12114238  | 508 |
| chrX  | 72555508  | 72556014  | 507 |
| chrX  | 53501941  | 53502447  | 507 |
| chr8  | 116708228 | 116708734 | 507 |
| chr22 | 14942848  | 14943354  | 507 |
| chr21 | 59023763  | 59024269  | 507 |
| chr20 | 73339700  | 73340206  | 507 |
| chr19 | 41466684  | 41467190  | 507 |
| chr19 | 23748270  | 23748776  | 507 |
| chr11 | 91805477  | 91805983  | 507 |
| chr5  | 30362834  | 30363339  | 506 |
| chr24 | 43638523  | 43639028  | 506 |
| chr17 | 70410151  | 70410656  | 506 |
| chr10 | 53069102  | 53069607  | 506 |
| chr22 | 50603471  | 50603975  | 505 |
| chr15 | 43335727  | 43336231  | 505 |
| chr4  | 105168682 | 105169185 | 504 |
| chr3  | 126994985 | 126995488 | 504 |
| chr18 | 54226715  | 54227218  | 504 |
| chr13 | 42255649  | 42256152  | 504 |
| chrX  | 31609010  | 31609512  | 503 |
| chr2  | 136975712 | 136976214 | 503 |
| chr2  | 75694965  | 75695467  | 503 |
| chrX  | 35509553  | 35510054  | 502 |
| chr7  | 70784383  | 70784884  | 502 |
| chr29 | 17466351  | 17466852  | 502 |
| chr22 | 60038775  | 60039276  | 502 |
| chr15 | 26725413  | 26725914  | 502 |
| chr14 | 63520846  | 63521347  | 502 |
| chr13 | 52089121  | 52089622  | 502 |
| chr11 | 2557766   | 2558267   | 502 |
| chr21 | 33968964  | 33969464  | 501 |
| chr18 | 58865145  | 58865645  | 501 |
| chr16 | 48014363  | 48014863  | 501 |
| chr15 | 64204426  | 64204926  | 501 |
| chrX  | 55798930  | 55799429  | 500 |
| chr11 | 90414859  | 90415358  | 500 |
| chr2  | 26769405  | 26769903  | 499 |
| chr12 | 15276104  | 15276602  | 499 |
| chr4  | 104739312 | 104739809 | 498 |
| chr15 | 22880903  | 22881400  | 498 |
| chrX  | 56939768  | 56940264  | 497 |
| chr20 | 38862596  | 38863092  | 497 |
| chr8  | 65877680  | 65878175  | 496 |
| chr24 | 58645294  | 58645789  | 496 |
| chr18 | 64250939  | 64251434  | 496 |
| chr25 | 37770408  | 37770902  | 495 |
| chr25 | 30110264  | 30110758  | 495 |
| chr2  | 139389953 | 139390447 | 495 |

|       |           |           |     |
|-------|-----------|-----------|-----|
| chr17 | 62936740  | 62937234  | 495 |
| chr14 | 7578268   | 7578762   | 495 |
| chr7  | 19222541  | 19223034  | 494 |
| chr7  | 59963989  | 59964481  | 493 |
| chr7  | 37511152  | 37511644  | 493 |
| chr29 | 49599825  | 49600317  | 493 |
| chr28 | 33469523  | 33470015  | 493 |
| chr26 | 21647823  | 21648315  | 493 |
| chrX  | 20208119  | 20208610  | 492 |
| chr6  | 68559255  | 68559745  | 491 |
| chr25 | 33406267  | 33406757  | 491 |
| chr19 | 38848518  | 38849008  | 491 |
| chrX  | 35638989  | 35639478  | 490 |
| chr3  | 8755927   | 8756416   | 490 |
| chr13 | 46342689  | 46343178  | 490 |
| chrX  | 57334332  | 57334820  | 489 |
| chrX  | 8221510   | 8221998   | 489 |
| chr5  | 118412479 | 118412967 | 489 |
| chr24 | 15035239  | 15035727  | 489 |
| chr18 | 61977026  | 61977514  | 489 |
| chr16 | 24763402  | 24763890  | 489 |
| chr15 | 26785703  | 26786191  | 489 |
| chr14 | 38758336  | 38758824  | 489 |
| chrX  | 12525975  | 12526462  | 488 |
| chr25 | 34564875  | 34565362  | 488 |
| chr15 | 25595321  | 25595808  | 488 |
| chr14 | 22034396  | 22034883  | 488 |
| chrX  | 61785477  | 61785963  | 487 |
| chr28 | 26413785  | 26414271  | 487 |
| chr23 | 52278958  | 52279444  | 487 |
| chr22 | 16413334  | 16413820  | 487 |
| chr14 | 14673088  | 14673574  | 487 |
| chr12 | 82018942  | 82019428  | 487 |
| chr13 | 67457782  | 67458267  | 486 |
| chr24 | 1109900   | 1110384   | 485 |
| chr19 | 7771627   | 7772111   | 485 |
| chr18 | 48522068  | 48522552  | 485 |
| chr17 | 70476535  | 70477019  | 485 |
| chr13 | 77754193  | 77754677  | 485 |
| chrX  | 50883829  | 50884312  | 484 |
| chrX  | 7890650   | 7891133   | 484 |
| chr29 | 41704218  | 41704701  | 484 |
| chrX  | 6466430   | 6466912   | 483 |
| chr5  | 28848364  | 28848846  | 483 |
| chr18 | 22922010  | 22922492  | 483 |
| chr15 | 33144211  | 33144693  | 483 |
| chr11 | 74458070  | 74458552  | 483 |
| chr10 | 35782339  | 35782821  | 483 |
| chr6  | 121022410 | 121022891 | 482 |
| chr2  | 91078550  | 91079031  | 482 |

|       |           |           |     |
|-------|-----------|-----------|-----|
| chr19 | 21407710  | 21408191  | 482 |
| chr25 | 29343888  | 29344368  | 481 |
| chr25 | 3041820   | 3042300   | 481 |
| chr18 | 48798039  | 48798519  | 481 |
| chr13 | 61803959  | 61804439  | 481 |
| chrX  | 69171282  | 69171761  | 480 |
| chrX  | 6736388   | 6736867   | 480 |
| chr8  | 7711721   | 7712200   | 480 |
| chr24 | 1764911   | 1765390   | 480 |
| chr13 | 75952537  | 75953016  | 480 |
| chr13 | 75667451  | 75667930  | 480 |
| chr11 | 81431391  | 81431870  | 480 |
| chr25 | 39527050  | 39527528  | 479 |
| chr22 | 14936068  | 14936546  | 479 |
| chr20 | 28005992  | 28006470  | 479 |
| chr19 | 44594868  | 44595346  | 479 |
| chr13 | 41407832  | 41408310  | 479 |
| chr7  | 46431006  | 46431483  | 478 |
| chr4  | 107353195 | 107353672 | 478 |
| chr10 | 16974787  | 16975264  | 478 |
| chrX  | 50819659  | 50820135  | 477 |
| chrX  | 21579199  | 21579675  | 477 |
| chr6  | 108590886 | 108591362 | 477 |
| chr3  | 111188158 | 111188634 | 477 |
| chr11 | 81098955  | 81099431  | 477 |
| chrX  | 87043268  | 87043743  | 476 |
| chrX  | 37316356  | 37316830  | 475 |
| chrX  | 31180552  | 31181026  | 475 |
| chrX  | 6324782   | 6325256   | 475 |
| chr18 | 45548912  | 45549386  | 475 |
| chr13 | 58335847  | 58336321  | 475 |
| chrX  | 83023662  | 83024135  | 474 |
| chrX  | 78380976  | 78381449  | 474 |
| chrX  | 21553917  | 21554390  | 474 |
| chr2  | 129307042 | 129307515 | 474 |
| chr19 | 60264216  | 60264689  | 474 |
| chr11 | 28497251  | 28497724  | 474 |
| chr8  | 85438396  | 85438868  | 473 |
| chr21 | 18517313  | 18517785  | 473 |
| chr19 | 59320437  | 59320909  | 473 |
| chr4  | 5120403   | 5120874   | 472 |
| chr2  | 99035358  | 99035829  | 472 |
| chr8  | 1623794   | 1624264   | 471 |
| chr16 | 54302565  | 54303035  | 471 |
| chrX  | 75441455  | 75441924  | 470 |
| chrX  | 21079782  | 21080251  | 470 |
| chr7  | 45809625  | 45810094  | 470 |
| chr10 | 70124571  | 70125040  | 470 |
| chr10 | 45678877  | 45679346  | 470 |
| chrX  | 78631790  | 78632258  | 469 |

|       |               |           |     |
|-------|---------------|-----------|-----|
| chrX  | 9292884       | 9293352   | 469 |
| chr22 | 54089808      | 54090276  | 469 |
| chr19 | 39415215      | 39415683  | 469 |
| chr12 | 31166526      | 31166994  | 469 |
| chrX  | 60279917      | 60280384  | 468 |
| chr1  | 82906106      | 82906573  | 468 |
| chr19 | 39167427      | 39167893  | 467 |
| chr18 | 49992477      | 49992943  | 467 |
| chrX  | 7395293       | 7395758   | 466 |
| chr2  | 36081453      | 36081918  | 466 |
| chr18 | 26252707      | 26253172  | 466 |
| chr17 | 64284122      | 64284587  | 466 |
| chr15 | 26652930      | 26653395  | 466 |
| chr7  | 65214027      | 65214491  | 465 |
| chr22 | 59412167      | 59412631  | 465 |
| chr17 | 57758770      | 57759234  | 465 |
| chr21 | 58723311      | 58723774  | 464 |
| chr11 | 89022731      | 89023194  | 464 |
| chrX  | 77512865      | 77513327  | 463 |
| chrX  | 377352 377814 | 463       |     |
| chr19 | 46707543      | 46708005  | 463 |
| chr19 | 14752480      | 14752942  | 463 |
| chr18 | 56892222      | 56892684  | 463 |
| chr5  | 115062967     | 115063428 | 462 |
| chr3  | 33575780      | 33576241  | 462 |
| chr21 | 13798194      | 13798655  | 462 |
| chr13 | 59887222      | 59887683  | 462 |
| chrX  | 31381065      | 31381525  | 461 |
| chrX  | 21356638      | 21357098  | 461 |
| chr8  | 110763478     | 110763938 | 461 |
| chr5  | 122127439     | 122127899 | 461 |
| chr23 | 10469626      | 10470086  | 461 |
| chr14 | 7030725       | 7031185   | 461 |
| chr10 | 17697757      | 17698217  | 461 |
| chr1  | 123100674     | 123101134 | 461 |
| chr29 | 37424854      | 37425313  | 460 |
| chr29 | 37074660      | 37075119  | 460 |
| chr22 | 56553756      | 56554215  | 460 |
| chr17 | 48684234      | 48684693  | 460 |
| chrX  | 15870273      | 15870731  | 459 |
| chrX  | 7554337       | 7554795   | 459 |
| chrX  | 2263222       | 2263680   | 459 |
| chr26 | 44477828      | 44478286  | 459 |
| chrX  | 9451864       | 9452321   | 458 |
| chr15 | 25323484      | 25323941  | 458 |
| chr10 | 4386059       | 4386516   | 458 |
| chrX  | 19381035      | 19381491  | 457 |
| chr23 | 11047176      | 11047632  | 457 |
| chr13 | 77788581      | 77789037  | 457 |
| chrX  | 11261126      | 11261581  | 456 |

|       |           |           |     |
|-------|-----------|-----------|-----|
| chr9  | 6682369   | 6682824   | 456 |
| chr7  | 3573087   | 3573542   | 456 |
| chr3  | 111912039 | 111912494 | 456 |
| chr13 | 76363056  | 76363511  | 456 |
| chrX  | 50423569  | 50424023  | 455 |
| chrX  | 12040552  | 12041006  | 455 |
| chrX  | 10075743  | 10076197  | 455 |
| chr6  | 121672097 | 121672551 | 455 |
| chr5  | 120057517 | 120057971 | 455 |
| chr2  | 128468884 | 128469338 | 455 |
| chr9  | 90410897  | 90411350  | 454 |
| chr24 | 59438461  | 59438914  | 454 |
| chrX  | 54975072  | 54975524  | 453 |
| chr5  | 122358226 | 122358678 | 453 |
| chr29 | 37091965  | 37092417  | 453 |
| chr26 | 43926650  | 43927102  | 453 |
| chr24 | 58730348  | 58730800  | 453 |
| chr24 | 44253035  | 44253487  | 453 |
| chr24 | 36365493  | 36365945  | 453 |
| chr14 | 7807649   | 7808101   | 453 |
| chrX  | 64860293  | 64860744  | 452 |
| chrX  | 50712038  | 50712489  | 452 |
| chrX  | 8441066   | 8441517   | 452 |
| chr27 | 35357692  | 35358143  | 452 |
| chr13 | 41054990  | 41055441  | 452 |
| chr10 | 15086020  | 15086471  | 452 |
| chr9  | 45427277  | 45427727  | 451 |
| chr8  | 24505552  | 24506002  | 451 |
| chr7  | 20479229  | 20479679  | 451 |
| chr4  | 121747400 | 121747850 | 451 |
| chr3  | 127556992 | 127557442 | 451 |
| chr3  | 120572577 | 120573027 | 451 |
| chr11 | 80983492  | 80983942  | 451 |
| chrX  | 73428247  | 73428696  | 450 |
| chr9  | 47249688  | 47250137  | 450 |
| chr6  | 118161898 | 118162347 | 450 |
| chr13 | 52936214  | 52936663  | 450 |
| chrX  | 50584400  | 50584848  | 449 |
| chr8  | 7522940   | 7523388   | 449 |
| chr3  | 124922394 | 124922842 | 449 |
| chr3  | 24595740  | 24596188  | 449 |
| chr23 | 37852685  | 37853133  | 449 |
| chr22 | 30124977  | 30125425  | 449 |
| chr16 | 39588071  | 39588519  | 449 |
| chrX  | 31627556  | 31628003  | 448 |
| chr8  | 105588611 | 105589058 | 448 |
| chr7  | 61082300  | 61082747  | 448 |
| chr24 | 44642751  | 44643198  | 448 |
| chr2  | 139209367 | 139209814 | 448 |
| chrX  | 48020509  | 48020955  | 447 |

|       |           |           |     |
|-------|-----------|-----------|-----|
| chr28 | 43579287  | 43579733  | 447 |
| chr17 | 69088160  | 69088606  | 447 |
| chr11 | 28504074  | 28504520  | 447 |
| chrX  | 49555530  | 49555975  | 446 |
| chr3  | 115329353 | 115329798 | 446 |
| chr29 | 46519439  | 46519884  | 446 |
| chr29 | 30805977  | 30806422  | 446 |
| chr29 | 6137743   | 6138188   | 446 |
| chr1  | 74591547  | 74591992  | 446 |
| chrX  | 11162422  | 11162866  | 445 |
| chr3  | 110743665 | 110744109 | 445 |
| chr24 | 49053197  | 49053641  | 445 |
| chr14 | 21756631  | 21757075  | 445 |
| chrX  | 73477364  | 73477807  | 444 |
| chrX  | 12864836  | 12865279  | 444 |
| chr14 | 13986867  | 13987310  | 444 |
| chr12 | 30886828  | 30887271  | 444 |
| chr3  | 123466283 | 123466725 | 443 |
| chr2  | 26583920  | 26584362  | 443 |
| chr18 | 3882967   | 3883409   | 443 |
| chr11 | 14078181  | 14078623  | 443 |
| chrX  | 61395218  | 61395659  | 442 |
| chrX  | 21992812  | 21993253  | 442 |
| chr27 | 33470085  | 33470526  | 442 |
| chr22 | 59541300  | 59541741  | 442 |
| chr12 | 81823890  | 81824331  | 442 |
| chrX  | 19699665  | 19700105  | 441 |
| chr2  | 134662374 | 134662814 | 441 |
| chr19 | 61618075  | 61618515  | 441 |
| chr19 | 41547264  | 41547704  | 441 |
| chr18 | 62699978  | 62700418  | 441 |
| chr9  | 106554727 | 106555166 | 440 |
| chr4  | 95836830  | 95837269  | 440 |
| chr25 | 40900106  | 40900545  | 440 |
| chrX  | 31956936  | 31957374  | 439 |
| chr29 | 48900986  | 48901424  | 439 |
| chr2  | 74012662  | 74013100  | 439 |
| chr14 | 59272553  | 59272991  | 439 |
| chr13 | 75637264  | 75637702  | 439 |
| chr12 | 81975303  | 81975741  | 439 |
| chrX  | 50777250  | 50777687  | 438 |
| chr3  | 123577856 | 123578293 | 438 |
| chr18 | 49935879  | 49936316  | 438 |
| chr12 | 32173507  | 32173944  | 438 |
| chr26 | 51534883  | 51535319  | 437 |
| chr26 | 18943715  | 18944151  | 437 |
| chr23 | 28931624  | 28932060  | 437 |
| chr2  | 134690976 | 134691412 | 437 |
| chr29 | 27814471  | 27814906  | 436 |
| chr25 | 8734181   | 8734616   | 436 |

|       |           |           |     |
|-------|-----------|-----------|-----|
| chr22 | 44856510  | 44856945  | 436 |
| chr21 | 20182406  | 20182841  | 436 |
| chr12 | 17150223  | 17150658  | 436 |
| chrX  | 44999472  | 44999906  | 435 |
| chr24 | 51801129  | 51801563  | 435 |
| chr15 | 29161630  | 29162064  | 435 |
| chr13 | 42866538  | 42866972  | 435 |
| chrX  | 56097919  | 56098352  | 434 |
| chrX  | 53985396  | 53985829  | 434 |
| chrX  | 20988010  | 20988443  | 434 |
| chr8  | 110908253 | 110908686 | 434 |
| chr3  | 115984101 | 115984534 | 434 |
| chr16 | 48822446  | 48822879  | 434 |
| chr13 | 38865731  | 38866164  | 434 |
| chr10 | 36912322  | 36912755  | 434 |
| chr1  | 74862038  | 74862471  | 434 |
| chrX  | 78389375  | 78389807  | 433 |
| chrX  | 34646712  | 34647144  | 433 |
| chr5  | 51621344  | 51621776  | 433 |
| chr29 | 35237209  | 35237641  | 433 |
| chr2  | 128366259 | 128366691 | 433 |
| chrX  | 72870408  | 72870839  | 432 |
| chrX  | 55733273  | 55733704  | 432 |
| chrX  | 21994518  | 21994949  | 432 |
| chrX  | 12138777  | 12139208  | 432 |
| chrX  | 6711364   | 6711795   | 432 |
| chr16 | 75656204  | 75656635  | 432 |
| chr13 | 55502545  | 55502976  | 432 |
| chrX  | 72826518  | 72826948  | 431 |
| chrX  | 11029362  | 11029792  | 431 |
| chr3  | 7825513   | 7825943   | 431 |
| chr19 | 6504183   | 6504613   | 431 |
| chr18 | 64331898  | 64332328  | 431 |
| chr18 | 4065973   | 4066403   | 431 |
| chrX  | 55214805  | 55215234  | 430 |
| chr5  | 113422488 | 113422917 | 430 |
| chr3  | 120558231 | 120558660 | 430 |
| chr22 | 56076448  | 56076877  | 430 |
| chr17 | 64062353  | 64062782  | 430 |
| chr11 | 96381579  | 96382008  | 430 |
| chr6  | 46459661  | 46460089  | 429 |
| chr29 | 33570269  | 33570697  | 429 |
| chr25 | 33010302  | 33010730  | 429 |
| chr19 | 59032488  | 59032916  | 429 |
| chr18 | 11559694  | 11560122  | 429 |
| chr13 | 73854557  | 73854985  | 429 |
| chr10 | 17538473  | 17538901  | 429 |
| chrX  | 13802766  | 13803193  | 428 |
| chr23 | 30360411  | 30360838  | 428 |
| chr9  | 104470594 | 104471020 | 427 |



|       |           |           |     |
|-------|-----------|-----------|-----|
| chr7  | 44048298  | 44048724  | 427 |
| chr3  | 26121794  | 26122220  | 427 |
| chr23 | 52636966  | 52637392  | 427 |
| chr2  | 24952038  | 24952464  | 427 |
| chr19 | 42265050  | 42265476  | 427 |
| chr17 | 66504173  | 66504599  | 427 |
| chr16 | 19106328  | 19106754  | 427 |
| chrX  | 8026024   | 8026449   | 426 |
| chr9  | 100209457 | 100209882 | 426 |
| chr17 | 66513887  | 66514312  | 426 |
| chr17 | 56089328  | 56089753  | 426 |
| chr14 | 77339261  | 77339686  | 426 |
| chrX  | 78191433  | 78191857  | 425 |
| chrX  | 63475999  | 63476423  | 425 |
| chrX  | 55019206  | 55019630  | 425 |
| chr6  | 59497897  | 59498321  | 425 |
| chr29 | 23782764  | 23783188  | 425 |
| chr24 | 2017485   | 2017909   | 425 |
| chr22 | 48661983  | 48662407  | 425 |
| chr16 | 71136297  | 71136721  | 425 |
| chr15 | 73715631  | 73716055  | 425 |
| chrX  | 72196819  | 72197242  | 424 |
| chrX  | 60081559  | 60081982  | 424 |
| chr8  | 61139956  | 61140379  | 424 |
| chr7  | 46223571  | 46223994  | 424 |
| chr20 | 66454739  | 66455162  | 424 |
| chr19 | 26665905  | 26666328  | 424 |
| chr19 | 23054647  | 23055070  | 424 |
| chr18 | 56459540  | 56459963  | 424 |
| chr1  | 71640814  | 71641237  | 424 |
| chrX  | 2451201   | 2451623   | 423 |
| chr8  | 74071915  | 74072337  | 423 |
| chr24 | 48599927  | 48600349  | 423 |
| chr23 | 31205760  | 31206182  | 423 |
| chr22 | 2841879   | 2842301   | 423 |
| chr2  | 75566724  | 75567146  | 423 |
| chr10 | 66552856  | 66553278  | 423 |
| chrX  | 49984149  | 49984570  | 422 |
| chr7  | 46959550  | 46959971  | 422 |
| chr26 | 41545961  | 41546382  | 422 |
| chr22 | 16299683  | 16300104  | 422 |
| chr19 | 22565835  | 22566256  | 422 |
| chrX  | 19308735  | 19309155  | 421 |
| chr5  | 120066199 | 120066619 | 421 |
| chr3  | 30280150  | 30280570  | 421 |
| chr26 | 48626051  | 48626471  | 421 |
| chr23 | 15296934  | 15297354  | 421 |
| chr14 | 7230212   | 7230632   | 421 |
| chr10 | 70101831  | 70102251  | 421 |
| chr10 | 59995444  | 59995864  | 421 |

|       |               |           |     |
|-------|---------------|-----------|-----|
| chrX  | 59151505      | 59151924  | 420 |
| chr7  | 43059510      | 43059929  | 420 |
| chr6  | 68612414      | 68612833  | 420 |
| chr3  | 117342028     | 117342447 | 420 |
| chr23 | 15941743      | 15942162  | 420 |
| chr18 | 658376 658795 | 420       |     |
| chr13 | 57376366      | 57376785  | 420 |
| chr12 | 10236118      | 10236537  | 420 |
| chrX  | 10732517      | 10732935  | 419 |
| chrX  | 9077014       | 9077432   | 419 |
| chrX  | 2611300       | 2611718   | 419 |
| chr7  | 13422358      | 13422776  | 419 |
| chr21 | 33512362      | 33512780  | 419 |
| chr1  | 115600497     | 115600915 | 419 |
| chrX  | 60262690      | 60263107  | 418 |
| chrX  | 8360644       | 8361061   | 418 |
| chr23 | 32684877      | 32685294  | 418 |
| chr21 | 30649087      | 30649504  | 418 |
| chr19 | 23100284      | 23100701  | 418 |
| chr18 | 22092564      | 22092981  | 418 |
| chr16 | 47614211      | 47614628  | 418 |
| chr15 | 73714946      | 73715363  | 418 |
| chrX  | 24400429      | 24400845  | 417 |
| chrX  | 19867417      | 19867833  | 417 |
| chr26 | 34891551      | 34891967  | 417 |
| chr22 | 48341939      | 48342355  | 417 |
| chr2  | 135723224     | 135723640 | 417 |
| chr11 | 102843777     | 102844193 | 417 |
| chr1  | 152245737     | 152246153 | 417 |
| chr5  | 111322240     | 111322655 | 416 |
| chr27 | 29100739      | 29101154  | 416 |
| chr2  | 130753251     | 130753666 | 416 |
| chr11 | 7827233       | 7827648   | 416 |
| chrX  | 9945966       | 9946380   | 415 |
| chr9  | 16959767      | 16960181  | 415 |
| chr7  | 85415254      | 85415668  | 415 |
| chr5  | 1099993       | 1100407   | 415 |
| chr4  | 6113348       | 6113762   | 415 |
| chr3  | 22525794      | 22526208  | 415 |
| chr29 | 41930602      | 41931016  | 415 |
| chr25 | 40420936      | 40421350  | 415 |
| chr24 | 20727483      | 20727897  | 415 |
| chr2  | 136624521     | 136624935 | 415 |
| chr12 | 33258113      | 33258527  | 415 |
| chr1  | 102174698     | 102175112 | 415 |
| chrX  | 74534534      | 74534947  | 414 |
| chr5  | 111833991     | 111834404 | 414 |
| chr24 | 33789438      | 33789851  | 414 |
| chr19 | 58322942      | 58323355  | 414 |
| chrX  | 76065621      | 76066033  | 413 |

|       |               |           |     |
|-------|---------------|-----------|-----|
| chrX  | 56638853      | 56639265  | 413 |
| chr6  | 121806994     | 121807406 | 413 |
| chr5  | 125157575     | 125157987 | 413 |
| chr4  | 29006519      | 29006931  | 413 |
| chr29 | 44981537      | 44981949  | 413 |
| chr29 | 37124303      | 37124715  | 413 |
| chr27 | 26962894      | 26963306  | 413 |
| chr2  | 135174252     | 135174664 | 413 |
| chr19 | 44157413      | 44157825  | 413 |
| chr19 | 19273406      | 19273818  | 413 |
| chr15 | 81519162      | 81519574  | 413 |
| chr15 | 81031362      | 81031774  | 413 |
| chr14 | 68004995      | 68005407  | 413 |
| chr13 | 67403117      | 67403529  | 413 |
| chr11 | 81373912      | 81374324  | 413 |
| chr10 | 16737958      | 16738370  | 413 |
| chrX  | 34756451      | 34756862  | 412 |
| chr9  | 75441784      | 75442195  | 412 |
| chr6  | 120844644     | 120845055 | 412 |
| chr25 | 34514770      | 34515181  | 412 |
| chr19 | 60911478      | 60911889  | 412 |
| chr17 | 66530194      | 66530605  | 412 |
| chr13 | 75908421      | 75908832  | 412 |
| chr1  | 72376767      | 72377178  | 412 |
| chr1  | 475447 475858 |           | 412 |
| chr2  | 136724927     | 136725337 | 411 |
| chr13 | 70981964      | 70982374  | 411 |
| chr5  | 29958436      | 29958845  | 410 |
| chr5  | 1131228       | 1131637   | 410 |
| chr25 | 14734330      | 14734739  | 410 |
| chr21 | 16669163      | 16669572  | 410 |
| chr19 | 40413573      | 40413982  | 410 |
| chr15 | 61080165      | 61080574  | 410 |
| chr13 | 73535370      | 73535779  | 410 |
| chr12 | 32865278      | 32865687  | 410 |
| chr10 | 49970436      | 49970845  | 410 |
| chrX  | 80719996      | 80720404  | 409 |
| chrX  | 65438631      | 65439039  | 409 |
| chrX  | 50622296      | 50622704  | 409 |
| chr8  | 5299010       | 5299418   | 409 |
| chr28 | 33993303      | 33993711  | 409 |
| chr25 | 37850655      | 37851063  | 409 |
| chrX  | 37484414      | 37484821  | 408 |
| chrX  | 33064861      | 33065268  | 408 |
| chrX  | 19451065      | 19451472  | 408 |
| chr8  | 8311647       | 8312054   | 408 |
| chr7  | 13223926      | 13224333  | 408 |
| chr29 | 42930316      | 42930723  | 408 |
| chr19 | 40460512      | 40460919  | 408 |
| chr19 | 37333803      | 37334210  | 408 |

|       |           |           |     |
|-------|-----------|-----------|-----|
| chrX  | 77460831  | 77461237  | 407 |
| chrX  | 65244011  | 65244417  | 407 |
| chrX  | 34094587  | 34094993  | 407 |
| chrX  | 8009536   | 8009942   | 407 |
| chr8  | 20909956  | 20910362  | 407 |
| chr4  | 47456697  | 47457103  | 407 |
| chr22 | 16411284  | 16411690  | 407 |
| chr2  | 136577486 | 136577892 | 407 |
| chr2  | 5371641   | 5372047   | 407 |
| chr19 | 16207500  | 16207906  | 407 |
| chr18 | 11077462  | 11077868  | 407 |
| chr18 | 7382642   | 7383048   | 407 |
| chrX  | 8138620   | 8139025   | 406 |
| chrX  | 7094692   | 7095097   | 406 |
| chr4  | 98899975  | 98900380  | 406 |
| chr29 | 44504900  | 44505305  | 406 |
| chr29 | 39033503  | 39033908  | 406 |
| chr2  | 125922235 | 125922640 | 406 |
| chr13 | 56092484  | 56092889  | 406 |
| chr10 | 70215604  | 70216009  | 406 |
| chrX  | 57500930  | 57501334  | 405 |
| chrX  | 54349758  | 54350162  | 405 |
| chrX  | 19058728  | 19059132  | 405 |
| chrX  | 6577086   | 6577490   | 405 |
| chr3  | 99438817  | 99439221  | 405 |
| chr3  | 33932141  | 33932545  | 405 |
| chr25 | 3964954   | 3965358   | 405 |
| chr20 | 74858194  | 74858598  | 405 |
| chr18 | 11347176  | 11347580  | 405 |
| chr17 | 70051572  | 70051976  | 405 |
| chr14 | 8217686   | 8218090   | 405 |
| chr11 | 98426585  | 98426989  | 405 |
| chr10 | 16769652  | 16770056  | 405 |
| chrX  | 72653111  | 72653514  | 404 |
| chrX  | 9966134   | 9966537   | 404 |
| chr8  | 80296930  | 80297333  | 404 |
| chr29 | 31789123  | 31789526  | 404 |
| chr26 | 43865009  | 43865412  | 404 |
| chr26 | 20893479  | 20893882  | 404 |
| chr20 | 4971722   | 4972125   | 404 |
| chr2  | 99691337  | 99691740  | 404 |
| chr19 | 23863963  | 23864366  | 404 |
| chrX  | 78214978  | 78215380  | 403 |
| chrX  | 13619308  | 13619710  | 403 |
| chr26 | 37625591  | 37625993  | 403 |
| chr26 | 8705812   | 8706214   | 403 |
| chr25 | 9958265   | 9958667   | 403 |
| chr23 | 42887849  | 42888251  | 403 |
| chr19 | 63630649  | 63631051  | 403 |
| chr19 | 38569245  | 38569647  | 403 |

|       |           |           |     |
|-------|-----------|-----------|-----|
| chr11 | 81420305  | 81420707  | 403 |
| chrX  | 75922519  | 75922920  | 402 |
| chrX  | 2494287   | 2494688   | 402 |
| chr6  | 74996912  | 74997313  | 402 |
| chr4  | 98827317  | 98827718  | 402 |
| chr3  | 56434184  | 56434585  | 402 |
| chr26 | 51487052  | 51487453  | 402 |
| chr24 | 40512575  | 40512976  | 402 |
| chr2  | 37514627  | 37515028  | 402 |
| chr10 | 5260738   | 5261139   | 402 |
| chr1  | 1617952   | 1618353   | 402 |
| chrX  | 7971194   | 7971594   | 401 |
| chr8  | 9328071   | 9328471   | 401 |
| chr29 | 51795367  | 51795767  | 401 |
| chr29 | 25552134  | 25552534  | 401 |
| chr27 | 39116076  | 39116476  | 401 |
| chr25 | 2972391   | 2972791   | 401 |
| chr23 | 3209456   | 3209856   | 401 |
| chr18 | 3631993   | 3632393   | 401 |
| chr13 | 74557384  | 74557784  | 401 |
| chr11 | 68761130  | 68761530  | 401 |
| chr10 | 17429800  | 17430200  | 401 |
| chr1  | 83275806  | 83276206  | 401 |
| chrX  | 61054773  | 61055172  | 400 |
| chrX  | 21078641  | 21079040  | 400 |
| chrX  | 20253904  | 20254303  | 400 |
| chrX  | 7912926   | 7913325   | 400 |
| chr9  | 51603602  | 51604001  | 400 |
| chr8  | 72177472  | 72177871  | 400 |
| chr6  | 113394503 | 113394902 | 400 |
| chr4  | 121410349 | 121410748 | 400 |
| chr28 | 33543816  | 33544215  | 400 |
| chr28 | 5025132   | 5025531   | 400 |
| chr24 | 59037841  | 59038240  | 400 |
| chr23 | 19320047  | 19320446  | 400 |
| chr23 | 14749250  | 14749649  | 400 |
| chr21 | 61027396  | 61027795  | 400 |
| chr19 | 29456644  | 29457043  | 400 |
| chr19 | 24360039  | 24360438  | 400 |
| chr16 | 71131681  | 71132080  | 400 |
| chr13 | 68728021  | 68728420  | 400 |
| chr11 | 77587972  | 77588371  | 400 |
| chr10 | 86515740  | 86516139  | 400 |
| chr10 | 15071158  | 15071557  | 400 |
| chr1  | 133460647 | 133461046 | 400 |
| chrX  | 80082368  | 80082766  | 399 |
| chrX  | 75555611  | 75556009  | 399 |
| chrX  | 74428761  | 74429159  | 399 |
| chrX  | 73418408  | 73418806  | 399 |
| chrX  | 72808595  | 72808993  | 399 |

|      |          |          |     |
|------|----------|----------|-----|
| chrX | 64949768 | 64950166 | 399 |
| chrX | 64914354 | 64914752 | 399 |
| chrX | 64835711 | 64836109 | 399 |
| chrX | 64796958 | 64797356 | 399 |
| chrX | 63039878 | 63040276 | 399 |
| chrX | 63010727 | 63011125 | 399 |
| chrX | 62535977 | 62536375 | 399 |
| chrX | 60518570 | 60518968 | 399 |
| chrX | 59717469 | 59717867 | 399 |
| chrX | 59460486 | 59460884 | 399 |
| chrX | 59349615 | 59350013 | 399 |
| chrX | 58675396 | 58675794 | 399 |
| chrX | 58378748 | 58379146 | 399 |
| chrX | 55962475 | 55962873 | 399 |
| chrX | 54139424 | 54139822 | 399 |
| chrX | 50600118 | 50600516 | 399 |
| chrX | 50224244 | 50224642 | 399 |
| chrX | 50190597 | 50190995 | 399 |
| chrX | 49241493 | 49241891 | 399 |
| chrX | 48448271 | 48448669 | 399 |
| chrX | 48184604 | 48185002 | 399 |
| chrX | 47466104 | 47466502 | 399 |
| chrX | 38970541 | 38970939 | 399 |
| chrX | 36346615 | 36347013 | 399 |
| chrX | 32657291 | 32657689 | 399 |
| chrX | 29506568 | 29506966 | 399 |
| chrX | 28215287 | 28215685 | 399 |
| chrX | 23361374 | 23361772 | 399 |
| chrX | 22437629 | 22438027 | 399 |
| chrX | 21605069 | 21605467 | 399 |
| chrX | 21315727 | 21316125 | 399 |
| chrX | 21203421 | 21203819 | 399 |
| chrX | 21146075 | 21146473 | 399 |
| chrX | 19802851 | 19803249 | 399 |
| chrX | 19538931 | 19539329 | 399 |
| chrX | 19466434 | 19466832 | 399 |
| chrX | 17551350 | 17551748 | 399 |
| chrX | 13837726 | 13838124 | 399 |
| chrX | 13836193 | 13836591 | 399 |
| chrX | 12405311 | 12405709 | 399 |
| chrX | 11879279 | 11879677 | 399 |
| chrX | 10060706 | 10061104 | 399 |
| chrX | 9855043  | 9855441  | 399 |
| chrX | 9775264  | 9775662  | 399 |
| chrX | 8575020  | 8575418  | 399 |
| chrX | 8424690  | 8425088  | 399 |
| chrX | 8393282  | 8393680  | 399 |
| chrX | 7606861  | 7607259  | 399 |
| chrX | 7604970  | 7605368  | 399 |
| chrX | 2508311  | 2508709  | 399 |

|       |           |           |     |
|-------|-----------|-----------|-----|
| chr9  | 106083519 | 106083917 | 399 |
| chr9  | 100979623 | 100980021 | 399 |
| chr9  | 90505904  | 90506302  | 399 |
| chr9  | 77744690  | 77745088  | 399 |
| chr9  | 33735186  | 33735584  | 399 |
| chr8  | 106656389 | 106656787 | 399 |
| chr8  | 74074843  | 74075241  | 399 |
| chr8  | 65292773  | 65293171  | 399 |
| chr7  | 71370534  | 71370932  | 399 |
| chr7  | 45688354  | 45688752  | 399 |
| chr7  | 44909584  | 44909982  | 399 |
| chr7  | 29356347  | 29356745  | 399 |
| chr7  | 13218779  | 13219177  | 399 |
| chr7  | 5254745   | 5255143   | 399 |
| chr6  | 120793877 | 120794275 | 399 |
| chr6  | 119064608 | 119065006 | 399 |
| chr6  | 91928572  | 91928970  | 399 |
| chr6  | 63032961  | 63033359  | 399 |
| chr6  | 17968936  | 17969334  | 399 |
| chr5  | 120095961 | 120096359 | 399 |
| chr5  | 112254680 | 112255078 | 399 |
| chr5  | 111346050 | 111346448 | 399 |
| chr5  | 79087539  | 79087937  | 399 |
| chr5  | 50536938  | 50537336  | 399 |
| chr5  | 32843181  | 32843579  | 399 |
| chr5  | 30344401  | 30344799  | 399 |
| chr4  | 123717591 | 123717989 | 399 |
| chr4  | 121080310 | 121080708 | 399 |
| chr4  | 73042344  | 73042742  | 399 |
| chr4  | 67831102  | 67831500  | 399 |
| chr4  | 54417374  | 54417772  | 399 |
| chr4  | 50705101  | 50705499  | 399 |
| chr3  | 125203370 | 125203768 | 399 |
| chr3  | 123229570 | 123229968 | 399 |
| chr3  | 116388423 | 116388821 | 399 |
| chr3  | 116037917 | 116038315 | 399 |
| chr3  | 115493349 | 115493747 | 399 |
| chr3  | 111888481 | 111888879 | 399 |
| chr3  | 105188257 | 105188655 | 399 |
| chr3  | 17451293  | 17451691  | 399 |
| chr3  | 8964666   | 8965064   | 399 |
| chr3  | 4350503   | 4350901   | 399 |
| chr29 | 51833518  | 51833916  | 399 |
| chr29 | 38677905  | 38678303  | 399 |
| chr29 | 37105756  | 37106154  | 399 |
| chr29 | 34939903  | 34940301  | 399 |
| chr29 | 33800427  | 33800825  | 399 |
| chr29 | 30134174  | 30134572  | 399 |
| chr29 | 11352731  | 11353129  | 399 |
| chr29 | 7320732   | 7321130   | 399 |

|       |           |           |     |
|-------|-----------|-----------|-----|
| chr28 | 33892506  | 33892904  | 399 |
| chr28 | 33796800  | 33797198  | 399 |
| chr28 | 26756999  | 26757397  | 399 |
| chr28 | 26151192  | 26151590  | 399 |
| chr28 | 10784309  | 10784707  | 399 |
| chr28 | 3553014   | 3553412   | 399 |
| chr27 | 39092262  | 39092660  | 399 |
| chr26 | 44799924  | 44800322  | 399 |
| chr26 | 40337068  | 40337466  | 399 |
| chr26 | 20848351  | 20848749  | 399 |
| chr26 | 18837897  | 18838295  | 399 |
| chr26 | 18201292  | 18201690  | 399 |
| chr26 | 14196357  | 14196755  | 399 |
| chr24 | 50240676  | 50241074  | 399 |
| chr24 | 35332660  | 35333058  | 399 |
| chr24 | 27094696  | 27095094  | 399 |
| chr24 | 20562034  | 20562432  | 399 |
| chr24 | 1930422   | 1930820   | 399 |
| chr23 | 35042932  | 35043330  | 399 |
| chr23 | 19341907  | 19342305  | 399 |
| chr23 | 18785668  | 18786066  | 399 |
| chr23 | 17487220  | 17487618  | 399 |
| chr23 | 17468617  | 17469015  | 399 |
| chr23 | 15018703  | 15019101  | 399 |
| chr23 | 11086397  | 11086795  | 399 |
| chr23 | 11078018  | 11078416  | 399 |
| chr23 | 10009125  | 10009523  | 399 |
| chr23 | 3257703   | 3258101   | 399 |
| chr22 | 56285146  | 56285544  | 399 |
| chr22 | 50733991  | 50734389  | 399 |
| chr22 | 39620289  | 39620687  | 399 |
| chr22 | 30592558  | 30592956  | 399 |
| chr22 | 30070225  | 30070623  | 399 |
| chr22 | 30026682  | 30027080  | 399 |
| chr22 | 12461730  | 12462128  | 399 |
| chr21 | 69118080  | 69118478  | 399 |
| chr21 | 64275518  | 64275916  | 399 |
| chr20 | 60490774  | 60491172  | 399 |
| chr20 | 8652440   | 8652838   | 399 |
| chr20 | 5094284   | 5094682   | 399 |
| chr2  | 139411012 | 139411410 | 399 |
| chr2  | 136635218 | 136635616 | 399 |
| chr2  | 134716174 | 134716572 | 399 |
| chr2  | 134710967 | 134711365 | 399 |
| chr2  | 111681851 | 111682249 | 399 |
| chr2  | 111643309 | 111643707 | 399 |
| chr2  | 111247332 | 111247730 | 399 |
| chr2  | 110299865 | 110300263 | 399 |
| chr2  | 22161482  | 22161880  | 399 |
| chr19 | 61330353  | 61330751  | 399 |



|       |          |          |     |
|-------|----------|----------|-----|
| chr19 | 61217396 | 61217794 | 399 |
| chr19 | 60694262 | 60694660 | 399 |
| chr19 | 56493153 | 56493551 | 399 |
| chr19 | 54197938 | 54198336 | 399 |
| chr19 | 49316117 | 49316515 | 399 |
| chr19 | 45210582 | 45210980 | 399 |
| chr19 | 44872348 | 44872746 | 399 |
| chr19 | 42258459 | 42258857 | 399 |
| chr19 | 39375788 | 39376186 | 399 |
| chr19 | 34062722 | 34063120 | 399 |
| chr19 | 33594575 | 33594973 | 399 |
| chr19 | 31279673 | 31280071 | 399 |
| chr19 | 27159724 | 27160122 | 399 |
| chr19 | 25493838 | 25494236 | 399 |
| chr19 | 12609587 | 12609985 | 399 |
| chr18 | 64312922 | 64313320 | 399 |
| chr18 | 64255496 | 64255894 | 399 |
| chr18 | 53494119 | 53494517 | 399 |
| chr18 | 48683826 | 48684224 | 399 |
| chr18 | 39490314 | 39490712 | 399 |
| chr18 | 37220656 | 37221054 | 399 |
| chr18 | 34885072 | 34885470 | 399 |
| chr18 | 22765795 | 22766193 | 399 |
| chr18 | 21960829 | 21961227 | 399 |
| chr18 | 12449272 | 12449670 | 399 |
| chr18 | 11775593 | 11775991 | 399 |
| chr18 | 11696624 | 11697022 | 399 |
| chr18 | 11593532 | 11593930 | 399 |
| chr17 | 73565446 | 73565844 | 399 |
| chr17 | 72938905 | 72939303 | 399 |
| chr17 | 72132659 | 72133057 | 399 |
| chr17 | 70407629 | 70408027 | 399 |
| chr17 | 69502489 | 69502887 | 399 |
| chr17 | 66191672 | 66192070 | 399 |
| chr17 | 63464255 | 63464653 | 399 |
| chr17 | 63000610 | 63001008 | 399 |
| chr17 | 60546758 | 60547156 | 399 |
| chr17 | 53543078 | 53543476 | 399 |
| chr16 | 59037449 | 59037847 | 399 |
| chr16 | 55225480 | 55225878 | 399 |
| chr16 | 44119964 | 44120362 | 399 |
| chr16 | 2222455  | 2222853  | 399 |
| chr15 | 63685771 | 63686169 | 399 |
| chr15 | 27455687 | 27456085 | 399 |
| chr15 | 27370658 | 27371056 | 399 |
| chr15 | 26683602 | 26684000 | 399 |
| chr15 | 25248962 | 25249360 | 399 |
| chr15 | 24966164 | 24966562 | 399 |
| chr15 | 13636676 | 13637074 | 399 |
| chr15 | 8620862  | 8621260  | 399 |

|       |           |           |     |
|-------|-----------|-----------|-----|
| chr14 | 66247409  | 66247807  | 399 |
| chr14 | 63998504  | 63998902  | 399 |
| chr14 | 62788506  | 62788904  | 399 |
| chr14 | 9284347   | 9284745   | 399 |
| chr14 | 7768826   | 7769224   | 399 |
| chr13 | 78402324  | 78402722  | 399 |
| chr13 | 77407288  | 77407686  | 399 |
| chr13 | 75798295  | 75798693  | 399 |
| chr13 | 75632216  | 75632614  | 399 |
| chr13 | 74030055  | 74030453  | 399 |
| chr13 | 70281475  | 70281873  | 399 |
| chr13 | 65416511  | 65416909  | 399 |
| chr13 | 52668097  | 52668495  | 399 |
| chr13 | 41350565  | 41350963  | 399 |
| chr13 | 40949352  | 40949750  | 399 |
| chr13 | 40056195  | 40056593  | 399 |
| chr13 | 37638816  | 37639214  | 399 |
| chr13 | 29289988  | 29290386  | 399 |
| chr13 | 23621344  | 23621742  | 399 |
| chr13 | 18901180  | 18901578  | 399 |
| chr12 | 84833410  | 84833808  | 399 |
| chr12 | 76059180  | 76059578  | 399 |
| chr12 | 74303392  | 74303790  | 399 |
| chr12 | 54226677  | 54227075  | 399 |
| chr12 | 34236407  | 34236805  | 399 |
| chr12 | 10751824  | 10752222  | 399 |
| chr11 | 105947172 | 105947570 | 399 |
| chr11 | 104898187 | 104898585 | 399 |
| chr11 | 81395946  | 81396344  | 399 |
| chr11 | 81375738  | 81376136  | 399 |
| chr11 | 77558008  | 77558406  | 399 |
| chr11 | 71099838  | 71100236  | 399 |
| chr11 | 66180301  | 66180699  | 399 |
| chr11 | 30932269  | 30932667  | 399 |
| chr11 | 29819557  | 29819955  | 399 |
| chr11 | 9190435   | 9190833   | 399 |
| chr11 | 7072400   | 7072798   | 399 |
| chr10 | 90932701  | 90933099  | 399 |
| chr10 | 70567765  | 70568163  | 399 |
| chr10 | 36549135  | 36549533  | 399 |
| chr10 | 35616105  | 35616503  | 399 |
| chr10 | 32260806  | 32261204  | 399 |
| chr1  | 146177543 | 146177941 | 399 |
| chr1  | 82164693  | 82165091  | 399 |
| chr1  | 74717815  | 74718213  | 399 |
| chr1  | 1614282   | 1614680   | 399 |
| chrX  | 73897078  | 73897475  | 398 |
| chrX  | 62708513  | 62708910  | 398 |
| chrX  | 45709257  | 45709654  | 398 |
| chrX  | 45592963  | 45593360  | 398 |

|       |           |           |     |
|-------|-----------|-----------|-----|
| chrX  | 34069195  | 34069592  | 398 |
| chrX  | 19395676  | 19396073  | 398 |
| chrX  | 12094673  | 12095070  | 398 |
| chr8  | 72617227  | 72617624  | 398 |
| chr8  | 24673205  | 24673602  | 398 |
| chr8  | 23828633  | 23829030  | 398 |
| chr7  | 13286293  | 13286690  | 398 |
| chr7  | 9133387   | 9133784   | 398 |
| chr6  | 14650743  | 14651140  | 398 |
| chr4  | 96130046  | 96130443  | 398 |
| chr3  | 35266802  | 35267199  | 398 |
| chr3  | 23091849  | 23092246  | 398 |
| chr3  | 22899476  | 22899873  | 398 |
| chr26 | 42109423  | 42109820  | 398 |
| chr26 | 37965871  | 37966268  | 398 |
| chr26 | 37580402  | 37580799  | 398 |
| chr26 | 21782983  | 21783380  | 398 |
| chr22 | 58525572  | 58525969  | 398 |
| chr21 | 64487432  | 64487829  | 398 |
| chr2  | 37515567  | 37515964  | 398 |
| chr19 | 64689554  | 64689951  | 398 |
| chr19 | 21740062  | 21740459  | 398 |
| chr19 | 6868223   | 6868620   | 398 |
| chr18 | 63761887  | 63762284  | 398 |
| chr18 | 55275559  | 55275956  | 398 |
| chr17 | 64335522  | 64335919  | 398 |
| chr17 | 41321643  | 41322040  | 398 |
| chr15 | 31958796  | 31959193  | 398 |
| chr15 | 22303745  | 22304142  | 398 |
| chr15 | 20939504  | 20939901  | 398 |
| chr13 | 60217129  | 60217526  | 398 |
| chr12 | 84953350  | 84953747  | 398 |
| chr11 | 75412269  | 75412666  | 398 |
| chr11 | 21007201  | 21007598  | 398 |
| chr10 | 89508673  | 89509070  | 398 |
| chr10 | 74682229  | 74682626  | 398 |
| chrX  | 78569866  | 78570262  | 397 |
| chrX  | 56877919  | 56878315  | 397 |
| chrX  | 35040142  | 35040538  | 397 |
| chrX  | 10007450  | 10007846  | 397 |
| chr9  | 106580153 | 106580549 | 397 |
| chr7  | 57595004  | 57595400  | 397 |
| chr6  | 16230864  | 16231260  | 397 |
| chr5  | 52787069  | 52787465  | 397 |
| chr4  | 64155423  | 64155819  | 397 |
| chr3  | 118164446 | 118164842 | 397 |
| chr3  | 56448852  | 56449248  | 397 |
| chr3  | 25729907  | 25730303  | 397 |
| chr27 | 28088527  | 28088923  | 397 |
| chr27 | 844695    | 845091    | 397 |

|       |           |           |     |
|-------|-----------|-----------|-----|
| chr26 | 22375549  | 22375945  | 397 |
| chr24 | 1372607   | 1373003   | 397 |
| chr22 | 10751410  | 10751806  | 397 |
| chr2  | 111252985 | 111253381 | 397 |
| chr19 | 57307018  | 57307414  | 397 |
| chr19 | 39162007  | 39162403  | 397 |
| chr19 | 25240466  | 25240862  | 397 |
| chr19 | 21602896  | 21603292  | 397 |
| chr18 | 18804956  | 18805352  | 397 |
| chr18 | 4025157   | 4025553   | 397 |
| chr16 | 44424996  | 44425392  | 397 |
| chr15 | 25459931  | 25460327  | 397 |
| chr12 | 36411833  | 36412229  | 397 |
| chr11 | 108430586 | 108430982 | 397 |
| chr10 | 71760591  | 71760987  | 397 |
| chr10 | 7594244   | 7594640   | 397 |
| chr1  | 41778119  | 41778515  | 397 |
| chrX  | 65793701  | 65794096  | 396 |
| chrX  | 62749469  | 62749864  | 396 |
| chrX  | 59252575  | 59252970  | 396 |
| chrX  | 46876624  | 46877019  | 396 |
| chrX  | 41259508  | 41259903  | 396 |
| chrX  | 18960715  | 18961110  | 396 |
| chrX  | 11908666  | 11909061  | 396 |
| chrX  | 8177618   | 8178013   | 396 |
| chr9  | 66536931  | 66537326  | 396 |
| chr9  | 8878051   | 8878446   | 396 |
| chr7  | 60979579  | 60979974  | 396 |
| chr7  | 16547231  | 16547626  | 396 |
| chr3  | 115772063 | 115772458 | 396 |
| chr3  | 24999113  | 24999508  | 396 |
| chr28 | 33666116  | 33666511  | 396 |
| chr26 | 51591434  | 51591829  | 396 |
| chr23 | 45978074  | 45978469  | 396 |
| chr22 | 30593317  | 30593712  | 396 |
| chr22 | 30422309  | 30422704  | 396 |
| chr20 | 7005521   | 7005916   | 396 |
| chr2  | 26509440  | 26509835  | 396 |
| chr2  | 21543103  | 21543498  | 396 |
| chr19 | 12511576  | 12511971  | 396 |
| chr17 | 74071318  | 74071713  | 396 |
| chr17 | 70395145  | 70395540  | 396 |
| chr16 | 59048421  | 59048816  | 396 |
| chr13 | 58978527  | 58978922  | 396 |
| chr12 | 74535146  | 74535541  | 396 |
| chr11 | 103307960 | 103308355 | 396 |
| chr1  | 146927627 | 146928022 | 396 |
| chrX  | 60296119  | 60296513  | 395 |
| chrX  | 21157085  | 21157479  | 395 |
| chrX  | 20705732  | 20706126  | 395 |

|       |           |           |     |
|-------|-----------|-----------|-----|
| chrX  | 20180998  | 20181392  | 395 |
| chrX  | 9050344   | 9050738   | 395 |
| chr8  | 103964622 | 103965016 | 395 |
| chr8  | 72534996  | 72535390  | 395 |
| chr5  | 74595862  | 74596256  | 395 |
| chr5  | 51974659  | 51975053  | 395 |
| chr3  | 16743801  | 16744195  | 395 |
| chr3  | 7791232   | 7791626   | 395 |
| chr29 | 49511010  | 49511404  | 395 |
| chr24 | 35302620  | 35303014  | 395 |
| chr2  | 132698412 | 132698806 | 395 |
| chr19 | 45742224  | 45742618  | 395 |
| chr18 | 54173627  | 54174021  | 395 |
| chr17 | 72356290  | 72356684  | 395 |
| chr17 | 37618516  | 37618910  | 395 |
| chr16 | 48094768  | 48095162  | 395 |
| chr15 | 51658487  | 51658881  | 395 |
| chr15 | 25688815  | 25689209  | 395 |
| chr14 | 12371099  | 12371493  | 395 |
| chr12 | 32224409  | 32224803  | 395 |
| chr12 | 31517641  | 31518035  | 395 |
| chr12 | 23495514  | 23495908  | 395 |
| chr11 | 77759376  | 77759770  | 395 |
| chr11 | 3887845   | 3888239   | 395 |
| chr10 | 86408593  | 86408987  | 395 |
| chr1  | 120028077 | 120028471 | 395 |
| chr1  | 75037756  | 75038150  | 395 |
| chrX  | 66928907  | 66929300  | 394 |
| chrX  | 63008261  | 63008654  | 394 |
| chrX  | 19271351  | 19271744  | 394 |
| chrX  | 3407536   | 3407929   | 394 |
| chr9  | 74210704  | 74211097  | 394 |
| chr6  | 46697991  | 46698384  | 394 |
| chr6  | 23969732  | 23970125  | 394 |
| chr5  | 10655358  | 10655751  | 394 |
| chr29 | 37423588  | 37423981  | 394 |
| chr26 | 45841533  | 45841926  | 394 |
| chr26 | 21859358  | 21859751  | 394 |
| chr25 | 31875696  | 31876089  | 394 |
| chr23 | 44817033  | 44817426  | 394 |
| chr21 | 63428345  | 63428738  | 394 |
| chr2  | 28700963  | 28701356  | 394 |
| chr18 | 11188812  | 11189205  | 394 |
| chr17 | 65662717  | 65663110  | 394 |
| chr17 | 64027962  | 64028355  | 394 |
| chr16 | 68447105  | 68447498  | 394 |
| chr15 | 51614516  | 51614909  | 394 |
| chr11 | 4939805   | 4940198   | 394 |
| chr10 | 88332118  | 88332511  | 394 |
| chr10 | 48389284  | 48389677  | 394 |

|       |               |           |     |
|-------|---------------|-----------|-----|
| chr1  | 99835876      | 99836269  | 394 |
| chrX  | 58732896      | 58733288  | 393 |
| chrX  | 53833135      | 53833527  | 393 |
| chrX  | 35592450      | 35592842  | 393 |
| chr9  | 107597185     | 107597577 | 393 |
| chr7  | 19834899      | 19835291  | 393 |
| chr4  | 119332563     | 119332955 | 393 |
| chr4  | 102005264     | 102005656 | 393 |
| chr3  | 15353002      | 15353394  | 393 |
| chr29 | 29688562      | 29688954  | 393 |
| chr28 | 42810952      | 42811344  | 393 |
| chr27 | 1913435       | 1913827   | 393 |
| chr25 | 21770461      | 21770853  | 393 |
| chr24 | 60730642      | 60731034  | 393 |
| chr23 | 26995514      | 26995906  | 393 |
| chr22 | 56381796      | 56382188  | 393 |
| chr21 | 30703953      | 30704345  | 393 |
| chr2  | 132723690     | 132724082 | 393 |
| chr2  | 130796765     | 130797157 | 393 |
| chr2  | 110528485     | 110528877 | 393 |
| chr2  | 25317512      | 25317904  | 393 |
| chr19 | 28232263      | 28232655  | 393 |
| chr18 | 56618224      | 56618616  | 393 |
| chr18 | 11393068      | 11393460  | 393 |
| chr18 | 10709755      | 10710147  | 393 |
| chr17 | 68603760      | 68604152  | 393 |
| chr17 | 63327578      | 63327970  | 393 |
| chr14 | 34053422      | 34053814  | 393 |
| chr13 | 41695213      | 41695605  | 393 |
| chr13 | 40717682      | 40718074  | 393 |
| chr13 | 34474075      | 34474467  | 393 |
| chr12 | 79975275      | 79975667  | 393 |
| chr12 | 53119210      | 53119602  | 393 |
| chr12 | 10757663      | 10758055  | 393 |
| chr11 | 15010413      | 15010805  | 393 |
| chr11 | 2540247       | 2540639   | 393 |
| chr1  | 85900889      | 85901281  | 393 |
| chr1  | 43895495      | 43895887  | 393 |
| chrX  | 64521544      | 64521935  | 392 |
| chrX  | 54976503      | 54976894  | 392 |
| chrX  | 31268660      | 31269051  | 392 |
| chrX  | 9052036       | 9052427   | 392 |
| chr7  | 15434504      | 15434895  | 392 |
| chr5  | 112120235     | 112120626 | 392 |
| chr5  | 75030960      | 75031351  | 392 |
| chr4  | 123026131     | 123026522 | 392 |
| chr3  | 13458381      | 13458772  | 392 |
| chr28 | 186346 186737 | 392       |     |
| chr26 | 39597378      | 39597769  | 392 |
| chr19 | 45167965      | 45168356  | 392 |

|       |           |           |     |
|-------|-----------|-----------|-----|
| chr18 | 31842984  | 31843375  | 392 |
| chr17 | 55443587  | 55443978  | 392 |
| chr16 | 38567604  | 38567995  | 392 |
| chr15 | 62532163  | 62532554  | 392 |
| chr15 | 26720246  | 26720637  | 392 |
| chr15 | 25021368  | 25021759  | 392 |
| chr13 | 57774123  | 57774514  | 392 |
| chr11 | 4338505   | 4338896   | 392 |
| chr10 | 21109453  | 21109844  | 392 |
| chrX  | 76044906  | 76045296  | 391 |
| chrX  | 75013896  | 75014286  | 391 |
| chrX  | 22550845  | 22551235  | 391 |
| chrX  | 10963832  | 10964222  | 391 |
| chrX  | 2383377   | 2383767   | 391 |
| chr7  | 50697114  | 50697504  | 391 |
| chr7  | 18412015  | 18412405  | 391 |
| chr6  | 32704210  | 32704600  | 391 |
| chr29 | 9099674   | 9100064   | 391 |
| chr26 | 39293362  | 39293752  | 391 |
| chr23 | 18667735  | 18668125  | 391 |
| chr22 | 60324325  | 60324715  | 391 |
| chr21 | 47530266  | 47530656  | 391 |
| chr2  | 140767761 | 140768151 | 391 |
| chr2  | 134715161 | 134715551 | 391 |
| chr2  | 26484148  | 26484538  | 391 |
| chr19 | 61930543  | 61930933  | 391 |
| chr19 | 24685747  | 24686137  | 391 |
| chr19 | 10237675  | 10238065  | 391 |
| chr18 | 32409802  | 32410192  | 391 |
| chr17 | 73216813  | 73217203  | 391 |
| chr17 | 69736132  | 69736522  | 391 |
| chr17 | 69079828  | 69080218  | 391 |
| chr13 | 68911295  | 68911685  | 391 |
| chr13 | 42867660  | 42868050  | 391 |
| chr12 | 32882711  | 32883101  | 391 |
| chr12 | 22971807  | 22972197  | 391 |
| chrX  | 80863325  | 80863714  | 390 |
| chrX  | 65118963  | 65119352  | 390 |
| chrX  | 64264656  | 64265045  | 390 |
| chrX  | 54702619  | 54703008  | 390 |
| chrX  | 49954795  | 49955184  | 390 |
| chrX  | 24439535  | 24439924  | 390 |
| chrX  | 8987315   | 8987704   | 390 |
| chr8  | 9600192   | 9600581   | 390 |
| chr7  | 15496746  | 15497135  | 390 |
| chr29 | 37621557  | 37621946  | 390 |
| chr29 | 37478525  | 37478914  | 390 |
| chr28 | 34034683  | 34035072  | 390 |
| chr28 | 27000855  | 27001244  | 390 |
| chr23 | 42464496  | 42464885  | 390 |

|       |           |           |     |
|-------|-----------|-----------|-----|
| chr23 | 18580628  | 18581017  | 390 |
| chr21 | 64024775  | 64025164  | 390 |
| chr2  | 134678800 | 134679189 | 390 |
| chr19 | 39831395  | 39831784  | 390 |
| chr18 | 62518047  | 62518436  | 390 |
| chr18 | 5667433   | 5667822   | 390 |
| chr16 | 33278384  | 33278773  | 390 |
| chr13 | 60124363  | 60124752  | 390 |
| chr11 | 108296376 | 108296765 | 390 |
| chrX  | 61310896  | 61311284  | 389 |
| chrX  | 50855179  | 50855567  | 389 |
| chrX  | 45486906  | 45487294  | 389 |
| chrX  | 14326125  | 14326513  | 389 |
| chrX  | 6477109   | 6477497   | 389 |
| chr9  | 90685639  | 90686027  | 389 |
| chr8  | 85439407  | 85439795  | 389 |
| chr8  | 65408305  | 65408693  | 389 |
| chr7  | 19302686  | 19303074  | 389 |
| chr6  | 113031043 | 113031431 | 389 |
| chr6  | 74997747  | 74998135  | 389 |
| chr29 | 30680394  | 30680782  | 389 |
| chr28 | 17355364  | 17355752  | 389 |
| chr26 | 49124068  | 49124456  | 389 |
| chr24 | 1734757   | 1735145   | 389 |
| chr24 | 1031814   | 1032202   | 389 |
| chr21 | 68984563  | 68984951  | 389 |
| chr21 | 13646674  | 13647062  | 389 |
| chr2  | 26840592  | 26840980  | 389 |
| chr2  | 24941979  | 24942367  | 389 |
| chr19 | 60765559  | 60765947  | 389 |
| chr19 | 40424643  | 40425031  | 389 |
| chr19 | 39435022  | 39435410  | 389 |
| chr16 | 39091224  | 39091612  | 389 |
| chr13 | 77331958  | 77332346  | 389 |
| chr12 | 73792729  | 73793117  | 389 |
| chr1  | 132231483 | 132231871 | 389 |
| chr1  | 73157471  | 73157859  | 389 |
| chrX  | 78822546  | 78822933  | 388 |
| chrX  | 65943991  | 65944378  | 388 |
| chrX  | 62668001  | 62668388  | 388 |
| chrX  | 50447661  | 50448048  | 388 |
| chrX  | 50315565  | 50315952  | 388 |
| chrX  | 49751533  | 49751920  | 388 |
| chrX  | 18381732  | 18382119  | 388 |
| chrX  | 12423322  | 12423709  | 388 |
| chrX  | 9654820   | 9655207   | 388 |
| chr8  | 65530579  | 65530966  | 388 |
| chr5  | 68966012  | 68966399  | 388 |
| chr3  | 105720216 | 105720603 | 388 |
| chr3  | 33329980  | 33330367  | 388 |



|       |               |           |     |
|-------|---------------|-----------|-----|
| chr29 | 48897564      | 48897951  | 388 |
| chr29 | 35649460      | 35649847  | 388 |
| chr26 | 39255970      | 39256357  | 388 |
| chr22 | 55389051      | 55389438  | 388 |
| chr22 | 47995999      | 47996386  | 388 |
| chr22 | 13372938      | 13373325  | 388 |
| chr20 | 70900047      | 70900434  | 388 |
| chr20 | 19815825      | 19816212  | 388 |
| chr2  | 138662856     | 138663243 | 388 |
| chr19 | 58610446      | 58610833  | 388 |
| chr18 | 56442534      | 56442921  | 388 |
| chr18 | 4092736       | 4093123   | 388 |
| chr17 | 66894631      | 66895018  | 388 |
| chr17 | 44037760      | 44038147  | 388 |
| chr14 | 21782187      | 21782574  | 388 |
| chr13 | 67101975      | 67102362  | 388 |
| chr13 | 59543405      | 59543792  | 388 |
| chr12 | 29803322      | 29803709  | 388 |
| chr11 | 105968810     | 105969197 | 388 |
| chr10 | 58736086      | 58736473  | 388 |
| chr10 | 16914322      | 16914709  | 388 |
| chrX  | 65087699      | 65088085  | 387 |
| chrX  | 35759791      | 35760177  | 387 |
| chrX  | 9660698       | 9661084   | 387 |
| chrX  | 7140599       | 7140985   | 387 |
| chr9  | 29467161      | 29467547  | 387 |
| chr8  | 63876070      | 63876456  | 387 |
| chr7  | 46415586      | 46415972  | 387 |
| chr7  | 19832526      | 19832912  | 387 |
| chr4  | 118712667     | 118713053 | 387 |
| chr4  | 99603392      | 99603778  | 387 |
| chr29 | 33794792      | 33795178  | 387 |
| chr28 | 33704387      | 33704773  | 387 |
| chr27 | 655727 656113 | 387       |     |
| chr22 | 44839508      | 44839894  | 387 |
| chr22 | 44326927      | 44327313  | 387 |
| chr21 | 64477651      | 64478037  | 387 |
| chr2  | 111234712     | 111235098 | 387 |
| chr19 | 45821865      | 45822251  | 387 |
| chr19 | 44893171      | 44893557  | 387 |
| chr19 | 15277742      | 15278128  | 387 |
| chr16 | 47097422      | 47097808  | 387 |
| chr13 | 70097119      | 70097505  | 387 |
| chr13 | 58630814      | 58631200  | 387 |
| chrX  | 55647724      | 55648109  | 386 |
| chrX  | 49841395      | 49841780  | 386 |
| chrX  | 20061125      | 20061510  | 386 |
| chrX  | 10098566      | 10098951  | 386 |
| chr7  | 37564626      | 37565011  | 386 |
| chr6  | 14202892      | 14203277  | 386 |

|       |               |           |     |
|-------|---------------|-----------|-----|
| chr5  | 120488188     | 120488573 | 386 |
| chr4  | 121976261     | 121976646 | 386 |
| chr29 | 38829286      | 38829671  | 386 |
| chr28 | 41277931      | 41278316  | 386 |
| chr27 | 38705537      | 38705922  | 386 |
| chr26 | 48163679      | 48164064  | 386 |
| chr26 | 43267188      | 43267573  | 386 |
| chr26 | 20147892      | 20148277  | 386 |
| chr25 | 27885541      | 27885926  | 386 |
| chr23 | 31700216      | 31700601  | 386 |
| chr2  | 134959798     | 134960183 | 386 |
| chr2  | 134951212     | 134951597 | 386 |
| chr2  | 21389527      | 21389912  | 386 |
| chr19 | 46658534      | 46658919  | 386 |
| chr19 | 25412845      | 25413230  | 386 |
| chr17 | 72135470      | 72135855  | 386 |
| chr16 | 38274615      | 38275000  | 386 |
| chr15 | 51738914      | 51739299  | 386 |
| chr11 | 69091603      | 69091988  | 386 |
| chr11 | 31113308      | 31113693  | 386 |
| chr10 | 16964099      | 16964484  | 386 |
| chrX  | 62813593      | 62813977  | 385 |
| chrX  | 61892940      | 61893324  | 385 |
| chrX  | 61591299      | 61591683  | 385 |
| chrX  | 36284323      | 36284707  | 385 |
| chrX  | 27799016      | 27799400  | 385 |
| chrX  | 23035098      | 23035482  | 385 |
| chrX  | 13555322      | 13555706  | 385 |
| chrX  | 8159245       | 8159629   | 385 |
| chr8  | 45662205      | 45662589  | 385 |
| chr3  | 111632371     | 111632755 | 385 |
| chr28 | 785181 785565 | 385       |     |
| chr26 | 43495689      | 43496073  | 385 |
| chr25 | 34354062      | 34354446  | 385 |
| chr23 | 46363271      | 46363655  | 385 |
| chr23 | 18668211      | 18668595  | 385 |
| chr19 | 32887228      | 32887612  | 385 |
| chr19 | 22332643      | 22333027  | 385 |
| chr19 | 12584636      | 12585020  | 385 |
| chr18 | 40048046      | 40048430  | 385 |
| chr13 | 30139009      | 30139393  | 385 |
| chr12 | 84217851      | 84218235  | 385 |
| chr10 | 90291520      | 90291904  | 385 |
| chr10 | 36552512      | 36552896  | 385 |
| chrX  | 75914719      | 75915102  | 384 |
| chrX  | 50441843      | 50442226  | 384 |
| chrX  | 49531912      | 49532295  | 384 |
| chrX  | 32012211      | 32012594  | 384 |
| chrX  | 30936026      | 30936409  | 384 |
| chrX  | 30003399      | 30003782  | 384 |

|       |               |           |     |
|-------|---------------|-----------|-----|
| chrX  | 15797161      | 15797544  | 384 |
| chr9  | 67282067      | 67282450  | 384 |
| chr9  | 45666104      | 45666487  | 384 |
| chr8  | 60315262      | 60315645  | 384 |
| chr7  | 50554173      | 50554556  | 384 |
| chr5  | 76727513      | 76727896  | 384 |
| chr4  | 120081354     | 120081737 | 384 |
| chr4  | 34322606      | 34322989  | 384 |
| chr29 | 17991367      | 17991750  | 384 |
| chr26 | 20282233      | 20282616  | 384 |
| chr23 | 19799396      | 19799779  | 384 |
| chr22 | 7194112       | 7194495   | 384 |
| chr2  | 132208915     | 132209298 | 384 |
| chr18 | 52825743      | 52826126  | 384 |
| chr16 | 60216657      | 60217040  | 384 |
| chr16 | 39595305      | 39595688  | 384 |
| chr13 | 62018162      | 62018545  | 384 |
| chr11 | 3774676       | 3775059   | 384 |
| chrX  | 50743029      | 50743411  | 383 |
| chrX  | 41133186      | 41133568  | 383 |
| chrX  | 23516508      | 23516890  | 383 |
| chrX  | 7920409       | 7920791   | 383 |
| chr9  | 83790210      | 83790592  | 383 |
| chr5  | 112537246     | 112537628 | 383 |
| chr3  | 106571961     | 106572343 | 383 |
| chr3  | 34007888      | 34008270  | 383 |
| chr29 | 45767792      | 45768174  | 383 |
| chr29 | 37163800      | 37164182  | 383 |
| chr29 | 549128 549510 |           | 383 |
| chr28 | 43845972      | 43846354  | 383 |
| chr28 | 34048229      | 34048611  | 383 |
| chr27 | 1342845       | 1343227   | 383 |
| chr24 | 23683845      | 23684227  | 383 |
| chr21 | 34777202      | 34777584  | 383 |
| chr21 | 30651141      | 30651523  | 383 |
| chr2  | 110786347     | 110786729 | 383 |
| chr2  | 21686643      | 21687025  | 383 |
| chr19 | 61747525      | 61747907  | 383 |
| chr19 | 47860770      | 47861152  | 383 |
| chr19 | 42247287      | 42247669  | 383 |
| chr17 | 70222057      | 70222439  | 383 |
| chr17 | 47771057      | 47771439  | 383 |
| chr10 | 16844401      | 16844783  | 383 |
| chrX  | 59401733      | 59402114  | 382 |
| chrX  | 5601747       | 5602128   | 382 |
| chr7  | 71226146      | 71226527  | 382 |
| chr7  | 46219031      | 46219412  | 382 |
| chr5  | 124682333     | 124682714 | 382 |
| chr4  | 95999112      | 95999493  | 382 |
| chr3  | 111895166     | 111895547 | 382 |

|       |           |           |     |
|-------|-----------|-----------|-----|
| chr29 | 33717539  | 33717920  | 382 |
| chr28 | 32931905  | 32932286  | 382 |
| chr28 | 7549054   | 7549435   | 382 |
| chr25 | 38399621  | 38400002  | 382 |
| chr23 | 48336627  | 48337008  | 382 |
| chr21 | 56672052  | 56672433  | 382 |
| chr21 | 35430860  | 35431241  | 382 |
| chr2  | 134898379 | 134898760 | 382 |
| chr2  | 115339172 | 115339553 | 382 |
| chr19 | 39383720  | 39384101  | 382 |
| chr19 | 16111503  | 16111884  | 382 |
| chr13 | 56497518  | 56497899  | 382 |
| chr13 | 40569750  | 40570131  | 382 |
| chr12 | 34272679  | 34273060  | 382 |
| chr11 | 108460022 | 108460403 | 382 |
| chr11 | 91249702  | 91250083  | 382 |
| chr1  | 149735609 | 149735990 | 382 |
| chr1  | 146461300 | 146461681 | 382 |
| chrX  | 75461654  | 75462034  | 381 |
| chrX  | 74281336  | 74281716  | 381 |
| chrX  | 71772573  | 71772953  | 381 |
| chrX  | 71336266  | 71336646  | 381 |
| chrX  | 62839467  | 62839847  | 381 |
| chrX  | 53608766  | 53609146  | 381 |
| chrX  | 12905444  | 12905824  | 381 |
| chrX  | 6419444   | 6419824   | 381 |
| chrX  | 2524831   | 2525211   | 381 |
| chr8  | 112077504 | 112077884 | 381 |
| chr8  | 53713254  | 53713634  | 381 |
| chr6  | 72303817  | 72304197  | 381 |
| chr5  | 125061228 | 125061608 | 381 |
| chr3  | 115412492 | 115412872 | 381 |
| chr3  | 31685946  | 31686326  | 381 |
| chr28 | 25880039  | 25880419  | 381 |
| chr26 | 17854097  | 17854477  | 381 |
| chr25 | 37491326  | 37491706  | 381 |
| chr23 | 13036839  | 13037219  | 381 |
| chr23 | 10530991  | 10531371  | 381 |
| chr21 | 69170207  | 69170587  | 381 |
| chr2  | 76622514  | 76622894  | 381 |
| chr19 | 23962973  | 23963353  | 381 |
| chr19 | 22341741  | 22342121  | 381 |
| chr18 | 52666277  | 52666657  | 381 |
| chr17 | 62055604  | 62055984  | 381 |
| chr15 | 73826192  | 73826572  | 381 |
| chr15 | 64489621  | 64490001  | 381 |
| chr15 | 24462531  | 24462911  | 381 |
| chr15 | 22950558  | 22950938  | 381 |
| chr13 | 60730789  | 60731169  | 381 |
| chr12 | 31437172  | 31437552  | 381 |

|       |           |           |     |
|-------|-----------|-----------|-----|
| chr11 | 77751210  | 77751590  | 381 |
| chr11 | 10751443  | 10751823  | 381 |
| chrX  | 20712813  | 20713192  | 380 |
| chrX  | 13658354  | 13658733  | 380 |
| chrX  | 11960721  | 11961100  | 380 |
| chrX  | 9270637   | 9271016   | 380 |
| chr4  | 123041444 | 123041823 | 380 |
| chr4  | 99348099  | 99348478  | 380 |
| chr28 | 11609199  | 11609578  | 380 |
| chr23 | 31395287  | 31395666  | 380 |
| chr22 | 48414787  | 48415166  | 380 |
| chr21 | 63330148  | 63330527  | 380 |
| chr2  | 139371574 | 139371953 | 380 |
| chr2  | 138655081 | 138655460 | 380 |
| chr2  | 136395691 | 136396070 | 380 |
| chr19 | 45213871  | 45214250  | 380 |
| chr19 | 41231227  | 41231606  | 380 |
| chr18 | 62612702  | 62613081  | 380 |
| chr17 | 64107614  | 64107993  | 380 |
| chr16 | 42585048  | 42585427  | 380 |
| chr14 | 1806434   | 1806813   | 380 |
| chr13 | 79070230  | 79070609  | 380 |
| chr13 | 55089219  | 55089598  | 380 |
| chr13 | 53656211  | 53656590  | 380 |
| chr13 | 41634393  | 41634772  | 380 |
| chr13 | 40313168  | 40313547  | 380 |
| chr12 | 32868323  | 32868702  | 380 |
| chrX  | 75921070  | 75921448  | 379 |
| chrX  | 70697614  | 70697992  | 379 |
| chrX  | 50337913  | 50338291  | 379 |
| chrX  | 46908163  | 46908541  | 379 |
| chrX  | 20926834  | 20927212  | 379 |
| chrX  | 20762507  | 20762885  | 379 |
| chrX  | 7561058   | 7561436   | 379 |
| chrX  | 6710404   | 6710782   | 379 |
| chr9  | 34931500  | 34931878  | 379 |
| chr8  | 72071097  | 72071475  | 379 |
| chr7  | 71388419  | 71388797  | 379 |
| chr6  | 108821636 | 108822014 | 379 |
| chr3  | 33051238  | 33051616  | 379 |
| chr3  | 17555133  | 17555511  | 379 |
| chr28 | 33400173  | 33400551  | 379 |
| chr25 | 21393482  | 21393860  | 379 |
| chr24 | 60618193  | 60618571  | 379 |
| chr22 | 49565071  | 49565449  | 379 |
| chr22 | 15039854  | 15040232  | 379 |
| chr21 | 64491087  | 64491465  | 379 |
| chr18 | 62509842  | 62510220  | 379 |
| chr14 | 76285069  | 76285447  | 379 |
| chr12 | 84324389  | 84324767  | 379 |

|       |               |           |     |
|-------|---------------|-----------|-----|
| chr11 | 105992586     | 105992964 | 379 |
| chr11 | 28550886      | 28551264  | 379 |
| chr10 | 74863826      | 74864204  | 379 |
| chr10 | 70263386      | 70263764  | 379 |
| chr10 | 58870114      | 58870492  | 379 |
| chrX  | 77256044      | 77256421  | 378 |
| chrX  | 54246994      | 54247371  | 378 |
| chrX  | 41316290      | 41316667  | 378 |
| chrX  | 8229386       | 8229763   | 378 |
| chr4  | 123145543     | 123145920 | 378 |
| chr3  | 35818060      | 35818437  | 378 |
| chr29 | 9238710       | 9239087   | 378 |
| chr28 | 26741935      | 26742312  | 378 |
| chr27 | 38516950      | 38517327  | 378 |
| chr25 | 8212646       | 8213023   | 378 |
| chr21 | 19208944      | 19209321  | 378 |
| chr18 | 54826864      | 54827241  | 378 |
| chr18 | 32444057      | 32444434  | 378 |
| chr15 | 420645 421022 | 378       |     |
| chr13 | 59682003      | 59682380  | 378 |
| chr12 | 84193892      | 84194269  | 378 |
| chrX  | 78616284      | 78616660  | 377 |
| chrX  | 77952364      | 77952740  | 377 |
| chrX  | 76036516      | 76036892  | 377 |
| chrX  | 65756042      | 65756418  | 377 |
| chrX  | 18734491      | 18734867  | 377 |
| chrX  | 2366732       | 2367108   | 377 |
| chr5  | 111693221     | 111693597 | 377 |
| chr5  | 30676628      | 30677004  | 377 |
| chr5  | 11955012      | 11955388  | 377 |
| chr3  | 116048579     | 116048955 | 377 |
| chr26 | 18735298      | 18735674  | 377 |
| chr25 | 36471320      | 36471696  | 377 |
| chr24 | 49799889      | 49800265  | 377 |
| chr24 | 48974991      | 48975367  | 377 |
| chr23 | 31391533      | 31391909  | 377 |
| chr23 | 10488650      | 10489026  | 377 |
| chr22 | 60225842      | 60226218  | 377 |
| chr21 | 30861688      | 30862064  | 377 |
| chr20 | 8712264       | 8712640   | 377 |
| chr2  | 108888966     | 108889342 | 377 |
| chr18 | 57038248      | 57038624  | 377 |
| chr18 | 4300662       | 4301038   | 377 |
| chr17 | 70064718      | 70065094  | 377 |
| chr15 | 75647152      | 75647528  | 377 |
| chr13 | 81676539      | 81676915  | 377 |
| chr13 | 45474939      | 45475315  | 377 |
| chr10 | 60775903      | 60776279  | 377 |
| chr1  | 459289 459665 | 377       |     |
| chrX  | 21829925      | 21830300  | 376 |

|       |               |           |     |
|-------|---------------|-----------|-----|
| chr5  | 117632208     | 117632583 | 376 |
| chr28 | 25373155      | 25373530  | 376 |
| chr23 | 10425475      | 10425850  | 376 |
| chr22 | 29343138      | 29343513  | 376 |
| chr13 | 73622307      | 73622682  | 376 |
| chr12 | 21137042      | 21137417  | 376 |
| chr11 | 49348735      | 49349110  | 376 |
| chr11 | 48694767      | 48695142  | 376 |
| chr10 | 81699290      | 81699665  | 376 |
| chr10 | 35631812      | 35632187  | 376 |
| chr10 | 10727442      | 10727817  | 376 |
| chrX  | 46410051      | 46410425  | 375 |
| chrX  | 36356523      | 36356897  | 375 |
| chrX  | 29606636      | 29607010  | 375 |
| chrX  | 22532512      | 22532886  | 375 |
| chrX  | 20557832      | 20558206  | 375 |
| chr25 | 37228076      | 37228450  | 375 |
| chr25 | 27223785      | 27224159  | 375 |
| chr25 | 3021114       | 3021488   | 375 |
| chr20 | 650227 650601 |           | 375 |
| chr19 | 56465943      | 56466317  | 375 |
| chr19 | 44364746      | 44365120  | 375 |
| chr19 | 33475791      | 33476165  | 375 |
| chr17 | 65661834      | 65662208  | 375 |
| chr16 | 71585392      | 71585766  | 375 |
| chr11 | 70684062      | 70684436  | 375 |
| chr1  | 133044688     | 133045062 | 375 |
| chrX  | 66610910      | 66611283  | 374 |
| chrX  | 49285195      | 49285568  | 374 |
| chr9  | 106615108     | 106615481 | 374 |
| chr8  | 108762764     | 108763137 | 374 |
| chr27 | 34787286      | 34787659  | 374 |
| chr19 | 54395316      | 54395689  | 374 |
| chr16 | 71132174      | 71132547  | 374 |
| chr11 | 66179657      | 66180030  | 374 |
| chr11 | 10763805      | 10764178  | 374 |
| chrX  | 870948 871320 |           | 373 |
| chr9  | 8177813       | 8178185   | 373 |
| chr4  | 107355456     | 107355828 | 373 |
| chr3  | 94520522      | 94520894  | 373 |
| chr29 | 33118645      | 33119017  | 373 |
| chr29 | 2412406       | 2412778   | 373 |
| chr28 | 43883987      | 43884359  | 373 |
| chr23 | 15890424      | 15890796  | 373 |
| chr22 | 52234665      | 52235037  | 373 |
| chr22 | 48375194      | 48375566  | 373 |
| chr20 | 1385597       | 1385969   | 373 |
| chr19 | 31493187      | 31493559  | 373 |
| chr19 | 21858926      | 21859298  | 373 |
| chr18 | 61966680      | 61967052  | 373 |

|       |           |           |     |
|-------|-----------|-----------|-----|
| chr14 | 30839007  | 30839379  | 373 |
| chr13 | 17072473  | 17072845  | 373 |
| chr12 | 33981939  | 33982311  | 373 |
| chrX  | 78713857  | 78714228  | 372 |
| chrX  | 61751171  | 61751542  | 372 |
| chrX  | 61540043  | 61540414  | 372 |
| chrX  | 23613020  | 23613391  | 372 |
| chrX  | 9432054   | 9432425   | 372 |
| chrX  | 7540351   | 7540722   | 372 |
| chr8  | 108687435 | 108687806 | 372 |
| chr7  | 42340592  | 42340963  | 372 |
| chr26 | 42223976  | 42224347  | 372 |
| chr26 | 23075737  | 23076108  | 372 |
| chr26 | 20192941  | 20193312  | 372 |
| chr24 | 2320196   | 2320567   | 372 |
| chr23 | 46286330  | 46286701  | 372 |
| chr11 | 14154872  | 14155243  | 372 |
| chrX  | 28361086  | 28361456  | 371 |
| chrX  | 21823945  | 21824315  | 371 |
| chrX  | 8842562   | 8842932   | 371 |
| chr8  | 24485789  | 24486159  | 371 |
| chr7  | 42842643  | 42843013  | 371 |
| chr5  | 118118954 | 118119324 | 371 |
| chr3  | 111486300 | 111486670 | 371 |
| chr3  | 94149963  | 94150333  | 371 |
| chr29 | 31861586  | 31861956  | 371 |
| chr22 | 56298410  | 56298780  | 371 |
| chr22 | 49566167  | 49566537  | 371 |
| chr22 | 11121582  | 11121952  | 371 |
| chr21 | 13999856  | 14000226  | 371 |
| chr19 | 18364491  | 18364861  | 371 |
| chr18 | 49471090  | 49471460  | 371 |
| chr18 | 49362206  | 49362576  | 371 |
| chr15 | 29666795  | 29667165  | 371 |
| chr14 | 14779516  | 14779886  | 371 |
| chr13 | 40542759  | 40543129  | 371 |
| chr12 | 31997205  | 31997575  | 371 |
| chr10 | 74128581  | 74128951  | 371 |
| chrX  | 18962571  | 18962940  | 370 |
| chrX  | 6415997   | 6416366   | 370 |
| chrX  | 6394452   | 6394821   | 370 |
| chrX  | 4488171   | 4488540   | 370 |
| chr5  | 125206011 | 125206380 | 370 |
| chr27 | 27017199  | 27017568  | 370 |
| chr22 | 43943798  | 43944167  | 370 |
| chr2  | 79728257  | 79728626  | 370 |
| chr14 | 8684981   | 8685350   | 370 |
| chr13 | 81676128  | 81676497  | 370 |
| chr13 | 41055478  | 41055847  | 370 |
| chr12 | 32499385  | 32499754  | 370 |



|       |           |           |     |
|-------|-----------|-----------|-----|
| chrX  | 79490453  | 79490821  | 369 |
| chrX  | 72796835  | 72797203  | 369 |
| chrX  | 48202190  | 48202558  | 369 |
| chrX  | 7868684   | 7869052   | 369 |
| chr8  | 110722142 | 110722510 | 369 |
| chr3  | 30005451  | 30005819  | 369 |
| chr3  | 16082909  | 16083277  | 369 |
| chr27 | 15309561  | 15309929  | 369 |
| chr22 | 54251911  | 54252279  | 369 |
| chr21 | 22723064  | 22723432  | 369 |
| chr20 | 74285952  | 74286320  | 369 |
| chr19 | 60715174  | 60715542  | 369 |
| chr19 | 38839679  | 38840047  | 369 |
| chr17 | 70083989  | 70084357  | 369 |
| chr17 | 67221511  | 67221879  | 369 |
| chr15 | 31876302  | 31876670  | 369 |
| chr12 | 32099534  | 32099902  | 369 |
| chr25 | 5689666   | 5690033   | 368 |
| chr19 | 39415861  | 39416228  | 368 |
| chr11 | 98455463  | 98455830  | 368 |
| chr10 | 88150622  | 88150989  | 368 |
| chr1  | 59605144  | 59605511  | 368 |
| chrX  | 70839077  | 70839443  | 367 |
| chrX  | 19489656  | 19490022  | 367 |
| chrX  | 8794193   | 8794559   | 367 |
| chr7  | 50570727  | 50571093  | 367 |
| chr7  | 43704084  | 43704450  | 367 |
| chr6  | 12632652  | 12633018  | 367 |
| chr5  | 120388320 | 120388686 | 367 |
| chr3  | 125202691 | 125203057 | 367 |
| chr3  | 114368531 | 114368897 | 367 |
| chr19 | 41261989  | 41262355  | 367 |
| chr18 | 16601067  | 16601433  | 367 |
| chr17 | 67057141  | 67057507  | 367 |
| chr17 | 66512312  | 66512678  | 367 |
| chr17 | 63937120  | 63937486  | 367 |
| chr16 | 39886655  | 39887021  | 367 |
| chr13 | 59895697  | 59896063  | 367 |
| chr12 | 33100146  | 33100512  | 367 |
| chr12 | 32640322  | 32640688  | 367 |
| chr12 | 15274035  | 15274401  | 367 |
| chr10 | 8338267   | 8338633   | 367 |
| chrX  | 30926145  | 30926510  | 366 |
| chrX  | 30236982  | 30237347  | 366 |
| chrX  | 5351398   | 5351763   | 366 |
| chr9  | 90448993  | 90449358  | 366 |
| chr9  | 75441074  | 75441439  | 366 |
| chr5  | 30930930  | 30931295  | 366 |
| chr3  | 112710205 | 112710570 | 366 |
| chr3  | 17489793  | 17490158  | 366 |

|       |           |           |     |
|-------|-----------|-----------|-----|
| chr21 | 39986917  | 39987282  | 366 |
| chr14 | 8080927   | 8081292   | 366 |
| chr13 | 76202713  | 76203078  | 366 |
| chr12 | 74426037  | 74426402  | 366 |
| chr10 | 11012334  | 11012699  | 366 |
| chrX  | 34605306  | 34605670  | 365 |
| chr8  | 65246384  | 65246748  | 365 |
| chr6  | 108709873 | 108710237 | 365 |
| chr3  | 105476972 | 105477336 | 365 |
| chr26 | 22382882  | 22383246  | 365 |
| chr24 | 1360417   | 1360781   | 365 |
| chr19 | 37032484  | 37032848  | 365 |
| chr14 | 7871210   | 7871574   | 365 |
| chr1  | 153870161 | 153870525 | 365 |
| chrX  | 17360210  | 17360573  | 364 |
| chrX  | 8442010   | 8442373   | 364 |
| chr9  | 45935003  | 45935366  | 364 |
| chr7  | 14359182  | 14359545  | 364 |
| chr5  | 28378051  | 28378414  | 364 |
| chr27 | 38983909  | 38984272  | 364 |
| chr26 | 35006981  | 35007344  | 364 |
| chr19 | 58391213  | 58391576  | 364 |
| chr16 | 59415444  | 59415807  | 364 |
| chr16 | 46740455  | 46740818  | 364 |
| chr12 | 32866760  | 32867123  | 364 |
| chr12 | 32523134  | 32523497  | 364 |
| chrX  | 34864675  | 34865037  | 363 |
| chrX  | 31507918  | 31508280  | 363 |
| chrX  | 25323512  | 25323874  | 363 |
| chrX  | 19195925  | 19196287  | 363 |
| chrX  | 6642394   | 6642756   | 363 |
| chr8  | 103490748 | 103491110 | 363 |
| chr7  | 62236975  | 62237337  | 363 |
| chr7  | 54938434  | 54938796  | 363 |
| chr5  | 122300570 | 122300932 | 363 |
| chr5  | 30849993  | 30850355  | 363 |
| chr3  | 4405799   | 4406161   | 363 |
| chr29 | 51261852  | 51262214  | 363 |
| chr23 | 16521932  | 16522294  | 363 |
| chr23 | 11334458  | 11334820  | 363 |
| chr21 | 11668311  | 11668673  | 363 |
| chr19 | 39501813  | 39502175  | 363 |
| chr13 | 54510889  | 54511251  | 363 |
| chr1  | 123104798 | 123105160 | 363 |
| chrX  | 74762232  | 74762593  | 362 |
| chrX  | 62742366  | 62742727  | 362 |
| chrX  | 44931219  | 44931580  | 362 |
| chrX  | 8186417   | 8186778   | 362 |
| chrX  | 8140520   | 8140881   | 362 |
| chr3  | 15942655  | 15943016  | 362 |

|       |           |           |     |
|-------|-----------|-----------|-----|
| chr24 | 60776436  | 60776797  | 362 |
| chr2  | 121547748 | 121548109 | 362 |
| chr2  | 75560489  | 75560850  | 362 |
| chr19 | 22341172  | 22341533  | 362 |
| chr18 | 7086317   | 7086678   | 362 |
| chr17 | 69501084  | 69501445  | 362 |
| chr15 | 76023527  | 76023888  | 362 |
| chr15 | 25809622  | 25809983  | 362 |
| chr13 | 41767949  | 41768310  | 362 |
| chr11 | 49399023  | 49399384  | 362 |
| chr11 | 31099190  | 31099551  | 362 |
| chrX  | 65187701  | 65188061  | 361 |
| chrX  | 64719150  | 64719510  | 361 |
| chrX  | 24584878  | 24585238  | 361 |
| chr8  | 65931476  | 65931836  | 361 |
| chr5  | 74672084  | 74672444  | 361 |
| chr24 | 33282394  | 33282754  | 361 |
| chr22 | 47929593  | 47929953  | 361 |
| chr21 | 29356386  | 29356746  | 361 |
| chr19 | 62525968  | 62526328  | 361 |
| chr18 | 35070164  | 35070524  | 361 |
| chr17 | 69778771  | 69779131  | 361 |
| chr12 | 84406998  | 84407358  | 361 |
| chr11 | 70905523  | 70905883  | 361 |
| chr10 | 18334251  | 18334611  | 361 |
| chrX  | 73479302  | 73479661  | 360 |
| chrX  | 9508230   | 9508589   | 360 |
| chr6  | 121828023 | 121828382 | 360 |
| chr4  | 71504333  | 71504692  | 360 |
| chr3  | 115757784 | 115758143 | 360 |
| chr21 | 26564575  | 26564934  | 360 |
| chr19 | 47324355  | 47324714  | 360 |
| chr18 | 56858981  | 56859340  | 360 |
| chr17 | 52162801  | 52163160  | 360 |
| chr13 | 52662733  | 52663092  | 360 |
| chr6  | 92459358  | 92459716  | 359 |
| chr5  | 30197911  | 30198269  | 359 |
| chr20 | 8626041   | 8626399   | 359 |
| chr2  | 138772535 | 138772893 | 359 |
| chr19 | 56640244  | 56640602  | 359 |
| chr19 | 39166693  | 39167051  | 359 |
| chr11 | 82826256  | 82826614  | 359 |
| chr11 | 70813424  | 70813782  | 359 |
| chr11 | 14108576  | 14108934  | 359 |
| chr11 | 11680144  | 11680502  | 359 |
| chr1  | 85635951  | 85636309  | 359 |
| chrX  | 74586959  | 74587316  | 358 |
| chrX  | 72385136  | 72385493  | 358 |
| chrX  | 20137865  | 20138222  | 358 |
| chrX  | 12375687  | 12376044  | 358 |

|       |           |           |     |
|-------|-----------|-----------|-----|
| chrX  | 6724007   | 6724364   | 358 |
| chr8  | 7804411   | 7804768   | 358 |
| chr7  | 51382378  | 51382735  | 358 |
| chr7  | 19927835  | 19928192  | 358 |
| chr5  | 30593308  | 30593665  | 358 |
| chr29 | 48887365  | 48887722  | 358 |
| chr29 | 26758973  | 26759330  | 358 |
| chr28 | 11738163  | 11738520  | 358 |
| chr2  | 136720404 | 136720761 | 358 |
| chr2  | 115057041 | 115057398 | 358 |
| chr2  | 37674048  | 37674405  | 358 |
| chr1  | 74632671  | 74633028  | 358 |
| chr6  | 21853228  | 21853584  | 357 |
| chr3  | 113456625 | 113456981 | 357 |
| chr23 | 48617536  | 48617892  | 357 |
| chr2  | 21392929  | 21393285  | 357 |
| chr19 | 54445939  | 54446295  | 357 |
| chr19 | 46115561  | 46115917  | 357 |
| chr18 | 11192814  | 11193170  | 357 |
| chr10 | 20458756  | 20459112  | 357 |
| chrX  | 61870812  | 61871167  | 356 |
| chrX  | 59810295  | 59810650  | 356 |
| chrX  | 6182610   | 6182965   | 356 |
| chr7  | 45119430  | 45119785  | 356 |
| chr7  | 17089944  | 17090299  | 356 |
| chr6  | 120747596 | 120747951 | 356 |
| chr5  | 81688901  | 81689256  | 356 |
| chr29 | 51170019  | 51170374  | 356 |
| chr24 | 1399880   | 1400235   | 356 |
| chr22 | 38256143  | 38256498  | 356 |
| chr21 | 68915333  | 68915688  | 356 |
| chr21 | 66587244  | 66587599  | 356 |
| chr17 | 58975003  | 58975358  | 356 |
| chr12 | 14652922  | 14653277  | 356 |
| chr10 | 20635501  | 20635856  | 356 |
| chrX  | 73355441  | 73355795  | 355 |
| chrX  | 64596002  | 64596356  | 355 |
| chrX  | 54783693  | 54784047  | 355 |
| chrX  | 48675502  | 48675856  | 355 |
| chrX  | 47995179  | 47995533  | 355 |
| chrX  | 20265663  | 20266017  | 355 |
| chr3  | 126889614 | 126889968 | 355 |
| chr23 | 31383024  | 31383378  | 355 |
| chr20 | 75581136  | 75581490  | 355 |
| chr2  | 123361297 | 123361651 | 355 |
| chr17 | 70350391  | 70350745  | 355 |
| chr1  | 9064714   | 9065068   | 355 |
| chrX  | 35610831  | 35611184  | 354 |
| chrX  | 30966318  | 30966671  | 354 |
| chr26 | 15712683  | 15713036  | 354 |

|       |           |           |     |
|-------|-----------|-----------|-----|
| chr18 | 54861981  | 54862334  | 354 |
| chr18 | 6786166   | 6786519   | 354 |
| chr14 | 52544714  | 52545067  | 354 |
| chr10 | 66636129  | 66636482  | 354 |
| chrX  | 74714324  | 74714676  | 353 |
| chr5  | 122707168 | 122707520 | 353 |
| chr5  | 29148519  | 29148871  | 353 |
| chr24 | 64638247  | 64638599  | 353 |
| chr18 | 48484432  | 48484784  | 353 |
| chr17 | 64046779  | 64047131  | 353 |
| chr16 | 75113283  | 75113635  | 353 |
| chrX  | 54773849  | 54774200  | 352 |
| chr5  | 122043490 | 122043841 | 352 |
| chr5  | 115898875 | 115899226 | 352 |
| chr5  | 111758956 | 111759307 | 352 |
| chr20 | 38843461  | 38843812  | 352 |
| chr20 | 8679094   | 8679445   | 352 |
| chr19 | 7766977   | 7767328   | 352 |
| chr18 | 12622041  | 12622392  | 352 |
| chr14 | 6869654   | 6870005   | 352 |
| chr13 | 40818916  | 40819267  | 352 |
| chr11 | 81378468  | 81378819  | 352 |
| chr10 | 17229322  | 17229673  | 352 |
| chr10 | 16847122  | 16847473  | 352 |
| chrX  | 71245113  | 71245463  | 351 |
| chrX  | 19843405  | 19843755  | 351 |
| chr4  | 117149406 | 117149756 | 351 |
| chr29 | 33714210  | 33714560  | 351 |
| chr22 | 56312634  | 56312984  | 351 |
| chr22 | 39856664  | 39857014  | 351 |
| chr2  | 114974118 | 114974468 | 351 |
| chr19 | 61536615  | 61536965  | 351 |
| chr18 | 49791528  | 49791878  | 351 |
| chr10 | 21850046  | 21850396  | 351 |
| chr10 | 20931947  | 20932297  | 351 |
| chrX  | 74376550  | 74376899  | 350 |
| chrX  | 20687398  | 20687747  | 350 |
| chrX  | 8337707   | 8338056   | 350 |
| chr8  | 24427684  | 24428033  | 350 |
| chr7  | 51851771  | 51852120  | 350 |
| chr5  | 61055469  | 61055818  | 350 |
| chr3  | 98128759  | 98129108  | 350 |
| chr25 | 18642578  | 18642927  | 350 |
| chr24 | 60578218  | 60578567  | 350 |
| chr18 | 62985536  | 62985885  | 350 |
| chr15 | 25485910  | 25486259  | 350 |
| chr15 | 24722042  | 24722391  | 350 |
| chr12 | 31728858  | 31729207  | 350 |
| chr11 | 100894076 | 100894425 | 350 |
| chrX  | 33171498  | 33171846  | 349 |

|       |           |           |     |
|-------|-----------|-----------|-----|
| chr4  | 96836838  | 96837186  | 349 |
| chr29 | 26754358  | 26754706  | 349 |
| chr22 | 48402714  | 48403062  | 349 |
| chr19 | 27303234  | 27303582  | 349 |
| chrX  | 12040163  | 12040510  | 348 |
| chr8  | 109044644 | 109044991 | 348 |
| chr29 | 36988263  | 36988610  | 348 |
| chr28 | 40386099  | 40386446  | 348 |
| chr27 | 33464087  | 33464434  | 348 |
| chr24 | 44272984  | 44273331  | 348 |
| chr19 | 51427171  | 51427518  | 348 |
| chr19 | 44464114  | 44464461  | 348 |
| chr19 | 37573374  | 37573721  | 348 |
| chr11 | 97661911  | 97662258  | 348 |
| chrX  | 66408719  | 66409065  | 347 |
| chrX  | 6573595   | 6573941   | 347 |
| chr3  | 22513818  | 22514164  | 347 |
| chr26 | 39134519  | 39134865  | 347 |
| chr25 | 35119658  | 35120004  | 347 |
| chr25 | 24852749  | 24853095  | 347 |
| chr23 | 42588688  | 42589034  | 347 |
| chr19 | 46810469  | 46810815  | 347 |
| chr19 | 30849432  | 30849778  | 347 |
| chr13 | 55507484  | 55507830  | 347 |
| chr11 | 46176141  | 46176487  | 347 |
| chr10 | 36309678  | 36310024  | 347 |
| chr10 | 17812252  | 17812598  | 347 |
| chrX  | 45964088  | 45964433  | 346 |
| chr8  | 100264734 | 100265079 | 346 |
| chr23 | 18732687  | 18733032  | 346 |
| chr2  | 132493172 | 132493517 | 346 |
| chr19 | 11630997  | 11631342  | 346 |
| chr12 | 31272558  | 31272903  | 346 |
| chr10 | 20484019  | 20484364  | 346 |
| chrX  | 70324830  | 70325174  | 345 |
| chr4  | 72265830  | 72266174  | 345 |
| chr4  | 33241388  | 33241732  | 345 |
| chr23 | 51963130  | 51963474  | 345 |
| chr21 | 67969649  | 67969993  | 345 |
| chr18 | 12152774  | 12153118  | 345 |
| chr16 | 2697948   | 2698292   | 345 |
| chr13 | 80033182  | 80033526  | 345 |
| chr13 | 39803273  | 39803617  | 345 |
| chrX  | 61008534  | 61008877  | 344 |
| chrX  | 53509444  | 53509787  | 344 |
| chrX  | 34681944  | 34682287  | 344 |
| chr6  | 61952563  | 61952906  | 344 |
| chr21 | 69172762  | 69173105  | 344 |
| chr2  | 49564598  | 49564941  | 344 |
| chr18 | 47800011  | 47800354  | 344 |

|       |           |           |     |
|-------|-----------|-----------|-----|
| chr18 | 12042594  | 12042937  | 344 |
| chr16 | 77525905  | 77526248  | 344 |
| chr15 | 32230742  | 32231085  | 344 |
| chr12 | 81683349  | 81683692  | 344 |
| chrX  | 31759147  | 31759489  | 343 |
| chr8  | 104099593 | 104099935 | 343 |
| chr8  | 63824694  | 63825036  | 343 |
| chr23 | 25072889  | 25073231  | 343 |
| chr19 | 54510402  | 54510744  | 343 |
| chr19 | 21321077  | 21321419  | 343 |
| chr10 | 20967650  | 20967992  | 343 |
| chr3  | 110323236 | 110323577 | 342 |
| chr19 | 25334579  | 25334920  | 342 |
| chr16 | 67799775  | 67800116  | 342 |
| chrX  | 51083140  | 51083480  | 341 |
| chrX  | 21559933  | 21560273  | 341 |
| chr28 | 25497523  | 25497863  | 341 |
| chr26 | 31242545  | 31242885  | 341 |
| chr23 | 11767507  | 11767847  | 341 |
| chrX  | 75006777  | 75007116  | 340 |
| chrX  | 11024043  | 11024382  | 340 |
| chr28 | 42174638  | 42174977  | 340 |
| chr26 | 48329523  | 48329862  | 340 |
| chr26 | 44384901  | 44385240  | 340 |
| chr23 | 17487941  | 17488280  | 340 |
| chr22 | 59675835  | 59676174  | 340 |
| chr21 | 13936037  | 13936376  | 340 |
| chr15 | 73775175  | 73775514  | 340 |
| chr7  | 5177539   | 5177877   | 339 |
| chr4  | 69224113  | 69224451  | 339 |
| chr24 | 1737642   | 1737980   | 339 |
| chr20 | 35137923  | 35138261  | 339 |
| chr20 | 6663400   | 6663738   | 339 |
| chrX  | 65570076  | 65570413  | 338 |
| chr18 | 12375255  | 12375592  | 338 |
| chr15 | 36572541  | 36572878  | 338 |
| chr10 | 28951518  | 28951855  | 338 |
| chrX  | 30680277  | 30680613  | 337 |
| chr7  | 97440748  | 97441084  | 337 |
| chr5  | 30397529  | 30397865  | 337 |
| chr3  | 106522602 | 106522938 | 337 |
| chr29 | 42393520  | 42393856  | 337 |
| chr27 | 17238424  | 17238760  | 337 |
| chr25 | 37240663  | 37240999  | 337 |
| chr24 | 58851300  | 58851636  | 337 |
| chr23 | 45888190  | 45888526  | 337 |
| chr22 | 45458483  | 45458819  | 337 |
| chr21 | 58556504  | 58556840  | 337 |
| chr15 | 51622477  | 51622813  | 337 |
| chrX  | 21591730  | 21592065  | 336 |

|       |               |           |     |
|-------|---------------|-----------|-----|
| chr5  | 30991158      | 30991493  | 336 |
| chr26 | 42082634      | 42082969  | 336 |
| chr21 | 59886387      | 59886722  | 336 |
| chr15 | 33719855      | 33720190  | 336 |
| chr10 | 20843196      | 20843531  | 336 |
| chrX  | 50670968      | 50671302  | 335 |
| chrX  | 38943952      | 38944286  | 335 |
| chr9  | 100308420     | 100308754 | 335 |
| chr26 | 14608176      | 14608510  | 335 |
| chr24 | 20550811      | 20551145  | 335 |
| chr23 | 8795591       | 8795925   | 335 |
| chr19 | 45040481      | 45040815  | 335 |
| chr10 | 19487757      | 19488091  | 335 |
| chrX  | 20563313      | 20563646  | 334 |
| chrX  | 19029502      | 19029835  | 334 |
| chr7  | 18830540      | 18830873  | 334 |
| chr27 | 47670526      | 47670859  | 334 |
| chr26 | 49195489      | 49195822  | 334 |
| chr24 | 41819359      | 41819692  | 334 |
| chr19 | 30824209      | 30824542  | 334 |
| chr17 | 70175116      | 70175449  | 334 |
| chr1  | 148210424     | 148210757 | 334 |
| chrX  | 10265342      | 10265674  | 333 |
| chr28 | 33450678      | 33451010  | 333 |
| chr28 | 26843582      | 26843914  | 333 |
| chr25 | 26729495      | 26729827  | 333 |
| chr25 | 8736370       | 8736702   | 333 |
| chr3  | 106869224     | 106869555 | 332 |
| chr25 | 29850491      | 29850822  | 332 |
| chr10 | 90480060      | 90480391  | 332 |
| chrX  | 70983175      | 70983505  | 331 |
| chrX  | 67202174      | 67202504  | 331 |
| chr3  | 51607917      | 51608247  | 331 |
| chr21 | 61672346      | 61672676  | 331 |
| chr19 | 19360031      | 19360361  | 331 |
| chr15 | 74691889      | 74692219  | 331 |
| chr13 | 61263820      | 61264150  | 331 |
| chr1  | 120027700     | 120028030 | 331 |
| chrX  | 22470546      | 22470875  | 330 |
| chrX  | 419237 419566 | 330       |     |
| chr15 | 25563943      | 25564272  | 330 |
| chrX  | 792820 793148 | 329       |     |
| chr6  | 72288288      | 72288615  | 328 |
| chr23 | 17629151      | 17629478  | 328 |
| chrX  | 54098623      | 54098949  | 327 |
| chr6  | 32574789      | 32575115  | 327 |
| chr28 | 33915162      | 33915488  | 327 |
| chr2  | 75982824      | 75983150  | 327 |
| chr19 | 29448538      | 29448864  | 327 |
| chr1  | 59654558      | 59654884  | 327 |



|       |           |           |     |
|-------|-----------|-----------|-----|
| chr7  | 12982390  | 12982715  | 326 |
| chr3  | 30012523  | 30012848  | 326 |
| chr18 | 11361861  | 11362186  | 326 |
| chr16 | 29293354  | 29293679  | 326 |
| chr13 | 77591796  | 77592121  | 326 |
| chr13 | 60755418  | 60755743  | 326 |
| chr1  | 84304369  | 84304694  | 326 |
| chrX  | 19045406  | 19045730  | 325 |
| chr18 | 42031708  | 42032032  | 325 |
| chr13 | 41823130  | 41823454  | 325 |
| chr11 | 85079531  | 85079855  | 325 |
| chr10 | 16960184  | 16960508  | 325 |
| chrX  | 75203211  | 75203534  | 324 |
| chrX  | 19457981  | 19458304  | 324 |
| chr3  | 127254796 | 127255119 | 324 |
| chr29 | 51777386  | 51777709  | 324 |
| chr19 | 43253277  | 43253600  | 324 |
| chr17 | 64079668  | 64079991  | 324 |
| chr10 | 70510182  | 70510505  | 324 |
| chrX  | 46404542  | 46404864  | 323 |
| chr5  | 12505154  | 12505476  | 323 |
| chr11 | 77837221  | 77837543  | 323 |
| chr26 | 43466756  | 43467077  | 322 |
| chr22 | 44132929  | 44133250  | 322 |
| chr2  | 137100565 | 137100886 | 322 |
| chr18 | 48516669  | 48516990  | 322 |
| chr17 | 30267149  | 30267470  | 322 |
| chr10 | 26224503  | 26224824  | 322 |
| chrX  | 59388142  | 59388462  | 321 |
| chr8  | 86968699  | 86969019  | 321 |
| chr23 | 52724213  | 52724533  | 321 |
| chr22 | 5681503   | 5681823   | 321 |
| chr17 | 63428358  | 63428678  | 321 |
| chr11 | 74455005  | 74455325  | 321 |
| chr10 | 81652220  | 81652540  | 321 |
| chr5  | 104000408 | 104000727 | 320 |
| chr1  | 82908577  | 82908896  | 320 |
| chrX  | 5748092   | 5748410   | 319 |
| chr3  | 15650111  | 15650429  | 319 |
| chr3  | 105154328 | 105154645 | 318 |
| chr16 | 2260520   | 2260837   | 318 |
| chr13 | 63502503  | 63502820  | 318 |
| chr12 | 9117891   | 9118208   | 318 |
| chr5  | 121096511 | 121096827 | 317 |
| chr5  | 111319572 | 111319888 | 317 |
| chr24 | 46905063  | 46905379  | 317 |
| chr12 | 9544242   | 9544558   | 317 |
| chrX  | 55435379  | 55435694  | 316 |
| chrX  | 6668507   | 6668822   | 316 |
| chr20 | 74769223  | 74769538  | 316 |

|       |               |           |     |
|-------|---------------|-----------|-----|
| chr12 | 24430145      | 24430460  | 316 |
| chrX  | 29714735      | 29715049  | 315 |
| chr5  | 60383768      | 60384082  | 315 |
| chr23 | 28502304      | 28502618  | 315 |
| chr16 | 66271410      | 66271724  | 315 |
| chr14 | 69384163      | 69384477  | 315 |
| chrX  | 50491531      | 50491844  | 314 |
| chr3  | 11515813      | 11516126  | 314 |
| chr25 | 28874027      | 28874340  | 314 |
| chr13 | 75739192      | 75739505  | 314 |
| chr13 | 71426884      | 71427197  | 314 |
| chrX  | 57802297      | 57802609  | 313 |
| chr6  | 63983883      | 63984195  | 313 |
| chr4  | 68414550      | 68414862  | 313 |
| chr2  | 132632355     | 132632667 | 313 |
| chr18 | 22102594      | 22102906  | 313 |
| chr18 | 636335 636647 | 313       |     |
| chr8  | 86962167      | 86962478  | 312 |
| chr4  | 117252576     | 117252887 | 312 |
| chr23 | 46885601      | 46885912  | 312 |
| chr21 | 49304717      | 49305028  | 312 |
| chr19 | 18365535      | 18365846  | 312 |
| chr18 | 11082633      | 11082943  | 311 |
| chr10 | 85930684      | 85930993  | 310 |
| chr8  | 116771252     | 116771560 | 309 |
| chr5  | 30348521      | 30348829  | 309 |
| chr22 | 56158021      | 56158329  | 309 |
| chr15 | 25332304      | 25332612  | 309 |
| chr11 | 92240115      | 92240423  | 309 |
| chr10 | 70817953      | 70818261  | 309 |
| chr3  | 35526402      | 35526709  | 308 |
| chrX  | 75995134      | 75995440  | 307 |
| chrX  | 58871679      | 58871985  | 307 |
| chrX  | 39194926      | 39195232  | 307 |
| chr5  | 112918619     | 112918925 | 307 |
| chr21 | 55207712      | 55208018  | 307 |
| chr17 | 70267149      | 70267455  | 307 |
| chrX  | 20023451      | 20023756  | 306 |
| chr3  | 116138170     | 116138475 | 306 |
| chr28 | 34059172      | 34059477  | 306 |
| chr28 | 26417929      | 26418234  | 306 |
| chrX  | 74442287      | 74442591  | 305 |
| chr8  | 87136727      | 87137030  | 304 |
| chr26 | 21782250      | 21782553  | 304 |
| chr21 | 14021069      | 14021372  | 304 |
| chrX  | 59737901      | 59738203  | 303 |
| chrX  | 20715443      | 20715745  | 303 |
| chr3  | 123248251     | 123248553 | 303 |
| chr11 | 70912602      | 70912904  | 303 |
| chr10 | 70846806      | 70847108  | 303 |

|       |           |           |     |
|-------|-----------|-----------|-----|
| chrX  | 19043990  | 19044291  | 302 |
| chr5  | 121254585 | 121254886 | 302 |
| chr19 | 43969559  | 43969860  | 302 |
| chr11 | 103771499 | 103771800 | 302 |
| chr27 | 27147353  | 27147653  | 301 |
| chr24 | 43647236  | 43647536  | 301 |
| chr21 | 19705120  | 19705420  | 301 |
| chr19 | 19125647  | 19125947  | 301 |
| chr13 | 61909598  | 61909898  | 301 |
| chr29 | 51680586  | 51680885  | 300 |
| chr7  | 45163422  | 45163720  | 299 |
| chr28 | 33721531  | 33721829  | 299 |
| chr16 | 48728099  | 48728397  | 299 |
| chrX  | 9152952   | 9153249   | 298 |
| chr20 | 7062325   | 7062622   | 298 |
| chr18 | 62742737  | 62743034  | 298 |
| chr17 | 70067642  | 70067939  | 298 |
| chr6  | 117560200 | 117560496 | 297 |
| chr17 | 58463936  | 58464232  | 297 |
| chr11 | 81445138  | 81445434  | 297 |
| chr18 | 11489984  | 11490279  | 296 |
| chrX  | 78625990  | 78626284  | 295 |
| chr29 | 42430125  | 42430419  | 295 |
| chr26 | 21824518  | 21824812  | 295 |
| chr26 | 15809061  | 15809355  | 295 |
| chr11 | 70773911  | 70774205  | 295 |
| chrX  | 35773666  | 35773959  | 294 |
| chr8  | 78090139  | 78090432  | 294 |
| chr29 | 37062619  | 37062912  | 294 |
| chr22 | 50614105  | 50614398  | 294 |
| chr2  | 131004391 | 131004684 | 294 |
| chr11 | 83218900  | 83219193  | 294 |
| chr2  | 130746957 | 130747249 | 293 |
| chrX  | 52809931  | 52810222  | 292 |
| chr3  | 111186619 | 111186910 | 292 |
| chr23 | 52452419  | 52452710  | 292 |
| chr16 | 47951359  | 47951650  | 292 |
| chr13 | 75785472  | 75785763  | 292 |
| chr13 | 37675782  | 37676073  | 292 |
| chr5  | 10533655  | 10533945  | 291 |
| chr19 | 16066463  | 16066753  | 291 |
| chr13 | 28552289  | 28552579  | 291 |
| chr12 | 10833410  | 10833700  | 291 |
| chrX  | 2800498   | 2800787   | 290 |
| chr4  | 78897780  | 78898069  | 290 |
| chr16 | 13949232  | 13949521  | 290 |
| chr25 | 37644434  | 37644722  | 289 |
| chr24 | 48960404  | 48960692  | 289 |
| chr18 | 45645080  | 45645368  | 289 |
| chrX  | 6906969   | 6907255   | 287 |

|       |           |           |     |
|-------|-----------|-----------|-----|
| chr13 | 45374124  | 45374410  | 287 |
| chr17 | 36854545  | 36854830  | 286 |
| chr13 | 80039653  | 80039938  | 286 |
| chr13 | 63384609  | 63384894  | 286 |
| chr9  | 41638315  | 41638599  | 285 |
| chr3  | 15631958  | 15632242  | 285 |
| chr19 | 63924432  | 63924716  | 285 |
| chr14 | 6759643   | 6759927   | 285 |
| chr13 | 77620156  | 77620440  | 285 |
| chr23 | 27840261  | 27840544  | 284 |
| chr4  | 68021784  | 68022066  | 283 |
| chrX  | 59447887  | 59448168  | 282 |
| chr21 | 25082984  | 25083265  | 282 |
| chr17 | 70550480  | 70550761  | 282 |
| chrX  | 32423487  | 32423767  | 281 |
| chr5  | 114246942 | 114247222 | 281 |
| chr11 | 82831186  | 82831466  | 281 |
| chr10 | 71465636  | 71465916  | 281 |
| chr10 | 17303056  | 17303335  | 280 |
| chr3  | 110743329 | 110743607 | 279 |
| chr4  | 67942908  | 67943185  | 278 |
| chr3  | 113381893 | 113382170 | 278 |
| chr18 | 63766536  | 63766813  | 278 |
| chr24 | 4208716   | 4208991   | 276 |
| chr19 | 56885599  | 56885873  | 275 |
| chr4  | 80099348  | 80099619  | 272 |
| chr28 | 26593606  | 26593877  | 272 |
| chr7  | 44061862  | 44062132  | 271 |
| chr26 | 22305853  | 22306123  | 271 |
| chr1  | 99002440  | 99002710  | 271 |
| chr15 | 51307830  | 51308099  | 270 |
| chrX  | 18364503  | 18364770  | 268 |
| chr2  | 130114734 | 130115001 | 268 |
| chr19 | 30175366  | 30175633  | 268 |
| chr13 | 61224949  | 61225215  | 267 |
| chr15 | 53939721  | 53939986  | 266 |
| chr1  | 85044531  | 85044796  | 266 |
| chr10 | 99191513  | 99191777  | 265 |
| chr20 | 39684688  | 39684951  | 264 |
| chr14 | 66383950  | 66384213  | 264 |
| chr4  | 124189597 | 124189858 | 262 |
| chr28 | 42136433  | 42136693  | 261 |
| chrX  | 78627969  | 78628228  | 260 |
| chr26 | 42265521  | 42265780  | 260 |
| chr25 | 3033526   | 3033784   | 259 |
| chr3  | 36026820  | 36027077  | 258 |
| chr13 | 26167483  | 26167738  | 256 |
| chr5  | 94652312  | 94652566  | 255 |
| chr25 | 43550155  | 43550409  | 255 |
| chrX  | 58059773  | 58060026  | 254 |

|       |               |           |      |
|-------|---------------|-----------|------|
| chr8  | 24326860      | 24327113  | 254  |
| chr7  | 42920670      | 42920923  | 254  |
| chr16 | 71112292      | 71112543  | 252  |
| chr3  | 116119244     | 116119492 | 249  |
| chr25 | 40232796      | 40233042  | 247  |
| chr3  | 44158279      | 44158523  | 245  |
| chr12 | 24955677      | 24955919  | 243  |
| chr11 | 105644403     | 105644639 | 237  |
| chrX  | 5840814       | 5841047   | 234  |
| chr10 | 73058526      | 73058748  | 223  |
| chrX  | 16945660      | 16946134  | 475  |
| chr8  | 23934065      | 23934418  | 354  |
| chr1  | 108535870     | 108536266 | 397  |
| chrX  | 24107548      | 24108579  | 1032 |
| chr27 | 656931 657903 | 973       |      |
| chr21 | 5975904       | 5976862   | 959  |
| chrX  | 75999146      | 76000101  | 956  |
| chr26 | 50062015      | 50062944  | 930  |
| chr29 | 49122300      | 49123216  | 917  |
| chr3  | 35788191      | 35789096  | 906  |
| chr21 | 33071337      | 33072229  | 893  |
| chr16 | 2441526       | 2442417   | 892  |
| chr19 | 40539786      | 40540663  | 878  |
| chr19 | 12319537      | 12320407  | 871  |
| chr13 | 53214211      | 53215039  | 829  |
| chr5  | 11225685      | 11226495  | 811  |
| chr12 | 14932006      | 14932794  | 789  |
| chr26 | 37623909      | 37624696  | 788  |
| chrX  | 18941433      | 18942215  | 783  |
| chrX  | 50818664      | 50819445  | 782  |
| chr13 | 78081303      | 78082083  | 781  |
| chr2  | 21544475      | 21545249  | 775  |
| chr10 | 36291411      | 36292138  | 728  |
| chr2  | 74018555      | 74019281  | 727  |
| chr13 | 59829564      | 59830284  | 721  |
| chrX  | 61670801      | 61671507  | 707  |
| chr1  | 2294218       | 2294911   | 694  |
| chr12 | 73450473      | 73451159  | 687  |
| chr29 | 44707044      | 44707716  | 673  |
| chr8  | 86974395      | 86975056  | 662  |
| chrX  | 61244349      | 61245000  | 652  |
| chr19 | 10935711      | 10936344  | 634  |
| chr21 | 24360568      | 24361197  | 630  |
| chr1  | 68445565      | 68446191  | 627  |
| chr25 | 23562123      | 23562738  | 616  |
| chr19 | 56456442      | 56457056  | 615  |
| chr14 | 77341899      | 77342509  | 611  |
| chr13 | 40974813      | 40975422  | 610  |
| chr15 | 75526524      | 75527129  | 606  |
| chr12 | 34010714      | 34011319  | 606  |

|       |               |           |     |
|-------|---------------|-----------|-----|
| chr5  | 33562129      | 33562733  | 605 |
| chrX  | 59258242      | 59258842  | 601 |
| chr6  | 105588694     | 105589294 | 601 |
| chrX  | 78332974      | 78333566  | 593 |
| chr13 | 36765236      | 36765826  | 591 |
| chr19 | 58161621      | 58162199  | 579 |
| chr11 | 106075982     | 106076548 | 567 |
| chrX  | 78777528      | 78778083  | 556 |
| chr5  | 67818530      | 67819080  | 551 |
| chrX  | 48108971      | 48109515  | 545 |
| chr8  | 64685104      | 64685643  | 540 |
| chrX  | 72848509      | 72849043  | 535 |
| chr7  | 16318176      | 16318695  | 520 |
| chrX  | 68294723      | 68295234  | 512 |
| chr8  | 61154727      | 61155236  | 510 |
| chr19 | 14235755      | 14236255  | 501 |
| chrX  | 20418296      | 20418784  | 489 |
| chr7  | 57324612      | 57325098  | 487 |
| chrX  | 47904579      | 47905063  | 485 |
| chr22 | 30028112      | 30028594  | 483 |
| chr11 | 104971109     | 104971588 | 480 |
| chr10 | 85928298      | 85928767  | 470 |
| chr29 | 287393 287859 | 467       |     |
| chrX  | 8132190       | 8132652   | 463 |
| chr9  | 19266131      | 19266580  | 450 |
| chr10 | 17449819      | 17450266  | 448 |
| chrX  | 19282159      | 19282605  | 447 |
| chr26 | 20950860      | 20951304  | 445 |
| chrX  | 50273463      | 50273903  | 441 |
| chr16 | 47121399      | 47121837  | 439 |
| chr22 | 30396262      | 30396693  | 432 |
| chr26 | 41431320      | 41431750  | 431 |
| chr13 | 40059073      | 40059489  | 417 |
| chr11 | 44985980      | 44986388  | 409 |
| chr15 | 65644557      | 65644963  | 407 |
| chrX  | 65568449      | 65568854  | 406 |
| chr7  | 14372627      | 14373032  | 406 |
| chr9  | 52414040      | 52414444  | 405 |
| chr18 | 22726361      | 22726763  | 403 |
| chr17 | 74485271      | 74485673  | 403 |
| chr1  | 147244911     | 147245312 | 402 |
| chrX  | 74780122      | 74780522  | 401 |
| chrX  | 44530572      | 44530970  | 399 |
| chrX  | 39794924      | 39795322  | 399 |
| chrX  | 32702607      | 32703005  | 399 |
| chr13 | 75526611      | 75527009  | 399 |
| chr13 | 60401352      | 60401750  | 399 |
| chr5  | 88045841      | 88046231  | 391 |
| chrX  | 56060120      | 56060506  | 387 |
| chr18 | 11750399      | 11750783  | 385 |

|       |               |           |      |
|-------|---------------|-----------|------|
| chr23 | 11350101      | 11350477  | 377  |
| chr11 | 90305349      | 90305707  | 359  |
| chr14 | 1631744       | 1632101   | 358  |
| chr9  | 45428955      | 45429305  | 351  |
| chr13 | 38868917      | 38869264  | 348  |
| chr13 | 77258707      | 77259049  | 343  |
| chr21 | 57962129      | 57962462  | 334  |
| chr23 | 27860938      | 27861258  | 321  |
| chr15 | 30054577      | 30054885  | 309  |
| chrX  | 56251887      | 56253209  | 1323 |
| chr23 | 38544559      | 38545506  | 948  |
| chrX  | 53472019      | 53472935  | 917  |
| chr14 | 9443956       | 9444872   | 917  |
| chr19 | 27528733      | 27529641  | 909  |
| chrX  | 9714153       | 9715039   | 887  |
| chr11 | 25646291      | 25647136  | 846  |
| chrX  | 57143625      | 57144442  | 818  |
| chr29 | 48811910      | 48812727  | 818  |
| chrX  | 76032408      | 76033199  | 792  |
| chr18 | 11374740      | 11375522  | 783  |
| chr1  | 128139238     | 128139967 | 730  |
| chr22 | 51293058      | 51293745  | 688  |
| chr29 | 26545320      | 26545997  | 678  |
| chrX  | 65088283      | 65088938  | 656  |
| chr15 | 52824103      | 52824756  | 654  |
| chr3  | 29977856      | 29978508  | 653  |
| chrX  | 36658795      | 36659443  | 649  |
| chr3  | 33821315      | 33821945  | 631  |
| chr20 | 74024557      | 74025177  | 621  |
| chr23 | 46420641      | 46421252  | 612  |
| chr1  | 123076507     | 123077109 | 603  |
| chr10 | 88146242      | 88146839  | 598  |
| chr7  | 13100998      | 13101592  | 595  |
| chr10 | 20878432      | 20879012  | 581  |
| chr21 | 22689283      | 22689851  | 569  |
| chr18 | 64338542      | 64339110  | 569  |
| chr11 | 74468358      | 74468925  | 568  |
| chr11 | 110098267     | 110098832 | 566  |
| chrX  | 849650 850210 | 561       |      |
| chr13 | 37633212      | 37633771  | 560  |
| chr13 | 70197950      | 70198506  | 557  |
| chr22 | 50781836      | 50782391  | 556  |
| chr15 | 54495374      | 54495929  | 556  |
| chr5  | 50850066      | 50850620  | 555  |
| chr13 | 35973540      | 35974090  | 551  |
| chr5  | 112241198     | 112241736 | 539  |
| chr7  | 10168036      | 10168569  | 534  |
| chr13 | 59589575      | 59590092  | 518  |
| chr13 | 54840404      | 54840919  | 516  |
| chrX  | 36128923      | 36129428  | 506  |

|       |           |           |      |
|-------|-----------|-----------|------|
| chr27 | 26721158  | 26721659  | 502  |
| chrX  | 50269617  | 50270100  | 484  |
| chr6  | 120782798 | 120783271 | 474  |
| chr10 | 89185889  | 89186360  | 472  |
| chr19 | 21714195  | 21714664  | 470  |
| chr21 | 29880470  | 29880935  | 466  |
| chr15 | 75527282  | 75527730  | 449  |
| chr10 | 89219152  | 89219592  | 441  |
| chr12 | 32592013  | 32592444  | 432  |
| chrX  | 21565986  | 21566416  | 431  |
| chrX  | 59500824  | 59501250  | 427  |
| chr14 | 22067446  | 22067865  | 420  |
| chr6  | 23674038  | 23674451  | 414  |
| chr18 | 8203852   | 8204262   | 411  |
| chr24 | 21963272  | 21963679  | 408  |
| chr11 | 102843206 | 102843612 | 407  |
| chr3  | 111631168 | 111631572 | 405  |
| chr26 | 25514554  | 25514956  | 403  |
| chrX  | 19678224  | 19678622  | 399  |
| chrX  | 11321553  | 11321951  | 399  |
| chr2  | 131069731 | 131070129 | 399  |
| chr19 | 38560349  | 38560747  | 399  |
| chr25 | 44015095  | 44015492  | 398  |
| chr2  | 131764049 | 131764446 | 398  |
| chr19 | 59463414  | 59463807  | 394  |
| chr29 | 47335476  | 47335866  | 391  |
| chr26 | 5861222   | 5861610   | 389  |
| chrX  | 9358203   | 9358583   | 381  |
| chr26 | 19740157  | 19740535  | 379  |
| chr17 | 67033325  | 67033701  | 377  |
| chr16 | 41433021  | 41433385  | 365  |
| chr12 | 77021915  | 77022264  | 350  |
| chr24 | 58648158  | 58648502  | 345  |
| chr14 | 79950969  | 79951306  | 338  |
| chrX  | 8238782   | 8239118   | 337  |
| chr18 | 59653042  | 59653369  | 328  |
| chr17 | 72700575  | 72701888  | 1314 |
| chr8  | 8721770   | 8722991   | 1222 |
| chr3  | 8965817   | 8966853   | 1037 |
| chr21 | 47625665  | 47626696  | 1032 |
| chrX  | 21622110  | 21622941  | 832  |
| chr8  | 7780614   | 7781435   | 822  |
| chr4  | 99601907  | 99602700  | 794  |
| chr1  | 152257877 | 152258634 | 758  |
| chr2  | 135167832 | 135168584 | 753  |
| chr4  | 99003967  | 99004710  | 744  |
| chrX  | 75681366  | 75682037  | 672  |
| chr29 | 36733981  | 36734635  | 655  |
| chrX  | 50617064  | 50617666  | 603  |
| chrX  | 11161816  | 11162408  | 593  |



|       |           |           |     |
|-------|-----------|-----------|-----|
| chr4  | 77370493  | 77371081  | 589 |
| chr25 | 24016180  | 24016739  | 560 |
| chr1  | 136904435 | 136904976 | 542 |
| chr10 | 102675378 | 102675912 | 535 |
| chr8  | 73515945  | 73516477  | 533 |
| chr2  | 139446302 | 139446833 | 532 |
| chrX  | 50433069  | 50433588  | 520 |
| chr27 | 26960393  | 26960902  | 510 |
| chrX  | 73574750  | 73575256  | 507 |
| chr18 | 63753204  | 63753710  | 507 |
| chr22 | 16303282  | 16303787  | 506 |
| chr18 | 62014641  | 62015141  | 501 |
| chr18 | 62028715  | 62029212  | 498 |
| chr24 | 60694563  | 60695053  | 491 |
| chr23 | 52648155  | 52648641  | 487 |
| chr5  | 122362920 | 122363401 | 482 |
| chr13 | 43448921  | 43449397  | 477 |
| chr15 | 25734074  | 25734543  | 470 |
| chr11 | 100732571 | 100733040 | 470 |
| chr18 | 40046433  | 40046899  | 467 |
| chr18 | 56875541  | 56876004  | 464 |
| chr29 | 46679490  | 46679945  | 456 |
| chr7  | 37388224  | 37388677  | 454 |
| chr15 | 24442167  | 24442619  | 453 |
| chr17 | 68004887  | 68005337  | 451 |
| chr7  | 88622719  | 88623165  | 447 |
| chrX  | 75539175  | 75539618  | 444 |
| chr4  | 121390996 | 121391438 | 443 |
| chr3  | 110979835 | 110980275 | 441 |
| chr29 | 34893507  | 34893942  | 436 |
| chr13 | 71284384  | 71284816  | 433 |
| chrX  | 78544149  | 78544576  | 428 |
| chr12 | 30503301  | 30503726  | 426 |
| chr15 | 73837324  | 73837740  | 417 |
| chr13 | 61224235  | 61224651  | 417 |
| chrX  | 65573060  | 65573464  | 405 |
| chrX  | 18959685  | 18960083  | 399 |
| chrX  | 12178508  | 12178906  | 399 |
| chr24 | 44243948  | 44244341  | 394 |
| chr15 | 22896981  | 22897373  | 393 |
| chrX  | 21668449  | 21668839  | 391 |
| chrX  | 2622065   | 2622452   | 388 |
| chr18 | 50609418  | 50609804  | 387 |
| chr5  | 12284025  | 12284401  | 377 |
| chr13 | 40060123  | 40060489  | 367 |
| chr2  | 115082664 | 115083010 | 347 |
| chrX  | 2347836   | 2348176   | 341 |
| chr2  | 138570913 | 138571238 | 326 |
| chr10 | 20849810  | 20850124  | 315 |
| chr2  | 97469269  | 97469525  | 257 |

|       |           |           |     |
|-------|-----------|-----------|-----|
| chrX  | 72116372  | 72117340  | 969 |
| chrX  | 31949813  | 31950677  | 865 |
| chr16 | 47126798  | 47127574  | 777 |
| chr14 | 7846409   | 7847133   | 725 |
| chr3  | 20578742  | 20579431  | 690 |
| chr2  | 135588912 | 135589564 | 653 |
| chr5  | 80743254  | 80743904  | 651 |
| chrX  | 50434382  | 50435019  | 638 |
| chr7  | 45781120  | 45781748  | 629 |
| chr20 | 73385506  | 73386131  | 626 |
| chr18 | 11381424  | 11382038  | 615 |
| chr12 | 84256908  | 84257521  | 614 |
| chrX  | 35755057  | 35755659  | 603 |
| chr19 | 15914115  | 15914712  | 598 |
| chrX  | 49238902  | 49239489  | 588 |
| chr16 | 50350761  | 50351344  | 584 |
| chr13 | 35603678  | 35604209  | 532 |
| chr11 | 100918089 | 100918609 | 521 |
| chr5  | 30459757  | 30460272  | 516 |
| chr16 | 47523993  | 47524504  | 512 |
| chr15 | 55351723  | 55352232  | 510 |
| chr16 | 75233798  | 75234301  | 504 |
| chr24 | 4163485   | 4163987   | 503 |
| chr5  | 10535616  | 10536112  | 497 |
| chr29 | 36847338  | 36847821  | 484 |
| chr29 | 44463996  | 44464475  | 480 |
| chr2  | 126951854 | 126952324 | 471 |
| chrX  | 71879314  | 71879776  | 463 |
| chr15 | 73832432  | 73832889  | 458 |
| chr11 | 90415584  | 90416041  | 458 |
| chr17 | 70418776  | 70419220  | 445 |
| chr7  | 3717815   | 3718258   | 444 |
| chr29 | 29791264  | 29791707  | 444 |
| chr22 | 58365073  | 58365507  | 435 |
| chrX  | 19396347  | 19396774  | 428 |
| chr18 | 47215916  | 47216341  | 426 |
| chr29 | 26471951  | 26472371  | 421 |
| chrX  | 72442184  | 72442601  | 418 |
| chrX  | 36421171  | 36421585  | 415 |
| chr17 | 49506949  | 49507363  | 415 |
| chr19 | 37872891  | 37873293  | 403 |
| chr7  | 2534716   | 2535114   | 399 |
| chr18 | 65770800  | 65771198  | 399 |
| chr11 | 104909925 | 104910323 | 399 |
| chr1  | 123095860 | 123096258 | 399 |
| chr2  | 123352252 | 123352648 | 397 |
| chr10 | 16777180  | 16777576  | 397 |
| chr19 | 38971691  | 38972080  | 390 |
| chr15 | 1849707   | 1850082   | 376 |
| chr18 | 24345730  | 24346098  | 369 |

|       |           |           |      |
|-------|-----------|-----------|------|
| chr18 | 51614192  | 51614558  | 367  |
| chr7  | 18791467  | 18791761  | 295  |
| chr28 | 30874516  | 30874785  | 270  |
| chr2  | 131307853 | 131308601 | 749  |
| chr6  | 69506540  | 69507129  | 590  |
| chr4  | 123140828 | 123141402 | 575  |
| chr14 | 7821699   | 7822270   | 572  |
| chrX  | 53075921  | 53076488  | 568  |
| chr6  | 121071742 | 121072274 | 533  |
| chr20 | 72723709  | 72724234  | 526  |
| chr3  | 35952730  | 35953254  | 525  |
| chr23 | 17423497  | 17424004  | 508  |
| chr15 | 51349351  | 51349858  | 508  |
| chr13 | 63772816  | 63773299  | 484  |
| chr11 | 28450535  | 28451010  | 476  |
| chr10 | 16821851  | 16822315  | 465  |
| chr3  | 113425490 | 113425944 | 455  |
| chr10 | 51445236  | 51445681  | 446  |
| chr29 | 2532939   | 2533376   | 438  |
| chr4  | 106693297 | 106693733 | 437  |
| chr25 | 2240209   | 2240631   | 423  |
| chrX  | 35730233  | 35730643  | 411  |
| chr14 | 38360372  | 38360780  | 409  |
| chr8  | 29372954  | 29373352  | 399  |
| chr23 | 49728549  | 49728927  | 379  |
| chr13 | 74498254  | 74498625  | 372  |
| chrX  | 7521259   | 7521622   | 364  |
| chr7  | 70715826  | 70716188  | 363  |
| chr1  | 160625281 | 160625497 | 217  |
| chr18 | 11215646  | 11216798  | 1153 |
| chr12 | 74428103  | 74428823  | 721  |
| chr6  | 120922485 | 120923197 | 713  |
| chr2  | 125921490 | 125922197 | 708  |
| chr17 | 63803965  | 63804623  | 659  |
| chr18 | 49977971  | 49978617  | 647  |
| chr2  | 121897304 | 121897941 | 638  |
| chrX  | 75755940  | 75756570  | 631  |
| chr1  | 8720739   | 8721364   | 626  |
| chr5  | 46086751  | 46087366  | 616  |
| chrX  | 55310802  | 55311416  | 615  |
| chr13 | 41599606  | 41600211  | 606  |
| chr16 | 44130371  | 44130964  | 594  |
| chrX  | 58761520  | 58762109  | 590  |
| chrX  | 50853551  | 50854137  | 587  |
| chrX  | 21608499  | 21609052  | 554  |
| chr19 | 20366304  | 20366856  | 553  |
| chr10 | 12120276  | 12120825  | 550  |
| chr20 | 43240300  | 43240848  | 549  |
| chr17 | 4294297   | 4294844   | 548  |
| chr17 | 70255182  | 70255725  | 544  |

|       |           |           |     |
|-------|-----------|-----------|-----|
| chr19 | 13434470  | 13435012  | 543 |
| chrX  | 9615656   | 9616192   | 537 |
| chrX  | 61044364  | 61044897  | 534 |
| chr13 | 37676890  | 37677421  | 532 |
| chr19 | 8474639   | 8475160   | 522 |
| chr20 | 44901133  | 44901651  | 519 |
| chr11 | 28542640  | 28543157  | 518 |
| chr11 | 102422329 | 102422844 | 516 |
| chr19 | 56488830  | 56489337  | 508 |
| chrX  | 8765581   | 8766075   | 495 |
| chrX  | 9624530   | 9625023   | 494 |
| chrX  | 6281258   | 6281751   | 494 |
| chr19 | 8512881   | 8513369   | 489 |
| chr18 | 2354508   | 2354988   | 481 |
| chr10 | 17622786  | 17623265  | 480 |
| chrX  | 54512970  | 54513446  | 477 |
| chr8  | 11308989  | 11309465  | 477 |
| chr18 | 43451346  | 43451817  | 472 |
| chrX  | 18971263  | 18971731  | 469 |
| chr11 | 66566675  | 66567143  | 469 |
| chrX  | 22435804  | 22436270  | 467 |
| chr25 | 3272659   | 3273124   | 466 |
| chrX  | 59601251  | 59601714  | 464 |
| chr27 | 26903903  | 26904362  | 460 |
| chr18 | 53884242  | 53884695  | 454 |
| chrX  | 9710443   | 9710894   | 452 |
| chr11 | 77523998  | 77524446  | 449 |
| chr5  | 111290939 | 111291384 | 446 |
| chr4  | 72556341  | 72556784  | 444 |
| chr22 | 30371904  | 30372345  | 442 |
| chrX  | 55210276  | 55210715  | 440 |
| chr9  | 30842943  | 30843381  | 439 |
| chr8  | 85925757  | 85926195  | 439 |
| chr13 | 66672444  | 66672880  | 437 |
| chrX  | 7428811   | 7429245   | 435 |
| chrX  | 13058350  | 13058781  | 432 |
| chrX  | 48089311  | 48089741  | 431 |
| chrX  | 76680539  | 76680968  | 430 |
| chrX  | 57419225  | 57419654  | 430 |
| chrX  | 53039938  | 53040367  | 430 |
| chrX  | 1394234   | 1394657   | 424 |
| chr20 | 8613624   | 8614047   | 424 |
| chr16 | 48204072  | 48204490  | 419 |
| chr11 | 10774088  | 10774501  | 414 |
| chr7  | 5201635   | 5202045   | 411 |
| chr8  | 24388529  | 24388938  | 410 |
| chr29 | 2681539   | 2681948   | 410 |
| chr13 | 59962823  | 59963232  | 410 |
| chr11 | 2802886   | 2803295   | 410 |
| chr8  | 7801619   | 7802026   | 408 |

|       |           |           |     |
|-------|-----------|-----------|-----|
| chr21 | 64453434  | 64453841  | 408 |
| chr20 | 72734931  | 72735338  | 408 |
| chr4  | 51585355  | 51585761  | 407 |
| chr29 | 42227763  | 42228168  | 406 |
| chr3  | 15666095  | 15666499  | 405 |
| chr29 | 37098781  | 37099185  | 405 |
| chr25 | 3104020   | 3104423   | 404 |
| chrX  | 78692407  | 78692809  | 403 |
| chrX  | 8248689   | 8249091   | 403 |
| chr9  | 45921777  | 45922179  | 403 |
| chr3  | 56435164  | 56435566  | 403 |
| chr23 | 28855680  | 28856080  | 401 |
| chrX  | 62912792  | 62913191  | 400 |
| chrX  | 13647578  | 13647977  | 400 |
| chrX  | 7434199   | 7434598   | 400 |
| chr18 | 49976744  | 49977143  | 400 |
| chr14 | 13998789  | 13999188  | 400 |
| chr11 | 75103610  | 75104009  | 400 |
| chrX  | 55652690  | 55653088  | 399 |
| chrX  | 53672170  | 53672568  | 399 |
| chr9  | 100490494 | 100490892 | 399 |
| chr8  | 7427022   | 7427420   | 399 |
| chr7  | 57327912  | 57328310  | 399 |
| chr7  | 48173849  | 48174247  | 399 |
| chr7  | 42525144  | 42525542  | 399 |
| chr7  | 42186819  | 42187217  | 399 |
| chr5  | 123481204 | 123481602 | 399 |
| chr5  | 30358123  | 30358521  | 399 |
| chr5  | 10656199  | 10656597  | 399 |
| chr5  | 10616409  | 10616807  | 399 |
| chr29 | 17819230  | 17819628  | 399 |
| chr24 | 46937480  | 46937878  | 399 |
| chr24 | 33797669  | 33798067  | 399 |
| chr23 | 42471995  | 42472393  | 399 |
| chr18 | 4454511   | 4454909   | 399 |
| chr13 | 23657378  | 23657776  | 399 |
| chr10 | 17528547  | 17528945  | 399 |
| chr1  | 114361384 | 114361782 | 399 |
| chr14 | 7994899   | 7995296   | 398 |
| chr8  | 73284786  | 73285182  | 397 |
| chr22 | 29918967  | 29919361  | 395 |
| chr18 | 52801317  | 52801711  | 395 |
| chr2  | 125485486 | 125485879 | 394 |
| chr19 | 13691508  | 13691900  | 393 |
| chr19 | 39241713  | 39242104  | 392 |
| chr10 | 29473354  | 29473745  | 392 |
| chrX  | 50889771  | 50890161  | 391 |
| chr8  | 45733787  | 45734177  | 391 |
| chr23 | 48785661  | 48786046  | 386 |
| chr24 | 65016399  | 65016783  | 385 |

|       |           |           |     |
|-------|-----------|-----------|-----|
| chr23 | 15777868  | 15778250  | 383 |
| chrX  | 76690841  | 76691221  | 381 |
| chrX  | 19583356  | 19583736  | 381 |
| chrX  | 63039227  | 63039604  | 378 |
| chr25 | 35539623  | 35540000  | 378 |
| chr19 | 11022473  | 11022847  | 375 |
| chrX  | 33849795  | 33850167  | 373 |
| chr13 | 58973069  | 58973440  | 372 |
| chr5  | 30284047  | 30284417  | 371 |
| chr22 | 56668919  | 56669288  | 370 |
| chr12 | 10241339  | 10241708  | 370 |
| chrX  | 74866300  | 74866668  | 369 |
| chrX  | 8940416   | 8940784   | 369 |
| chr29 | 43652836  | 43653202  | 367 |
| chr13 | 71197636  | 71198002  | 367 |
| chr3  | 120765975 | 120766339 | 365 |
| chr27 | 7450370   | 7450733   | 364 |
| chr5  | 114234100 | 114234461 | 362 |
| chr16 | 2369257   | 2369618   | 362 |
| chrX  | 40767154  | 40767510  | 357 |
| chrX  | 58741445  | 58741800  | 356 |
| chr26 | 22377602  | 22377957  | 356 |
| chr15 | 29041377  | 29041731  | 355 |
| chrX  | 77757896  | 77758248  | 353 |
| chr15 | 26729777  | 26730128  | 352 |
| chr23 | 7420442   | 7420792   | 351 |
| chrX  | 75897821  | 75898168  | 348 |
| chr19 | 19226015  | 19226361  | 347 |
| chr7  | 19928215  | 19928559  | 345 |
| chr20 | 39786776  | 39787117  | 342 |
| chr13 | 41693049  | 41693388  | 340 |
| chr21 | 66560652  | 66560983  | 332 |
| chrX  | 48652552  | 48652874  | 323 |
| chr14 | 19303120  | 19303439  | 320 |
| chr24 | 58646156  | 58646465  | 310 |
| chrX  | 55128896  | 55129204  | 309 |
| chr1  | 72355578  | 72355877  | 300 |
| chr19 | 54710911  | 54711204  | 294 |
| chr21 | 34238732  | 34239021  | 290 |
| chrX  | 33752917  | 33753204  | 288 |
| chr18 | 24321109  | 24321393  | 285 |
| chr11 | 8209310   | 8209586   | 277 |
| chrX  | 59352875  | 59353147  | 273 |
| chr11 | 2539560   | 2539832   | 273 |
| chr12 | 84964824  | 84965091  | 268 |
| chr8  | 24364905  | 24365158  | 254 |
| chr11 | 43494261  | 43494511  | 251 |
| chr5  | 112382001 | 112382242 | 242 |
| chr1  | 7340134   | 7340361   | 228 |
| chr18 | 56666905  | 56667654  | 750 |

|       |               |           |      |
|-------|---------------|-----------|------|
| chr2  | 131200466     | 131201284 | 819  |
| chr28 | 25330506      | 25331054  | 549  |
| chr8  | 73842728      | 73843000  | 273  |
| chr26 | 49509484      | 49509695  | 212  |
| chr2  | 32726838      | 32728150  | 1313 |
| chrX  | 33754207      | 33755430  | 1224 |
| chrX  | 65131561      | 65132688  | 1128 |
| chrX  | 74600874      | 74601489  | 616  |
| chrX  | 74497994      | 74498551  | 558  |
| chr1  | 147616257     | 147616723 | 467  |
| chr16 | 2438938       | 2439393   | 456  |
| chrX  | 65437390      | 65437765  | 376  |
| chr15 | 33728604      | 33729773  | 1170 |
| chr11 | 77747313      | 77748118  | 806  |
| chr22 | 30315722      | 30316381  | 660  |
| chrX  | 50508038      | 50508594  | 557  |
| chr5  | 70636860      | 70637359  | 500  |
| chr18 | 11689725      | 11690151  | 427  |
| chr5  | 112593113     | 112594054 | 942  |
| chr12 | 31314541      | 31315332  | 792  |
| chr16 | 60037784      | 60038530  | 747  |
| chr3  | 35996700      | 35997279  | 580  |
| chr25 | 35215730      | 35216305  | 576  |
| chr5  | 111324140     | 111324633 | 494  |
| chr12 | 24475671      | 24476125  | 455  |
| chrX  | 61844841      | 61845811  | 971  |
| chr7  | 3035045       | 3035881   | 837  |
| chr5  | 121632875     | 121633531 | 657  |
| chr26 | 9745175       | 9745745   | 571  |
| chr1  | 85656512      | 85657039  | 528  |
| chrX  | 50758372      | 50759306  | 935  |
| chr22 | 23092585      | 23093225  | 641  |
| chr25 | 274760 275381 | 622       |      |
| chr10 | 20922267      | 20922784  | 518  |
| chrX  | 12106842      | 12107409  | 568  |
| chr1  | 153882248     | 153882805 | 558  |
| chr25 | 27878437      | 27878915  | 479  |
| chr8  | 24397419      | 24397963  | 545  |
| chr6  | 46674806      | 46675239  | 434  |
| chr1  | 73146372      | 73146732  | 361  |
| chr4  | 124387398     | 124387746 | 349  |
| chr23 | 10619339      | 10619737  | 399  |
| chr13 | 28496814      | 28497190  | 377  |
| chr1  | 132222949     | 132223398 | 450  |
| chr10 | 102380181     | 102380602 | 422  |
| chrX  | 34541439      | 34541789  | 351  |
| chrX  | 76855903      | 76856619  | 717  |
| chrX  | 20020850      | 20021499  | 650  |
| chr11 | 100883541     | 100884033 | 493  |
| chr13 | 66873723      | 66874180  | 458  |

|       |           |           |      |
|-------|-----------|-----------|------|
| chr8  | 73522465  | 73522918  | 454  |
| chr4  | 124448666 | 124449064 | 399  |
| chr21 | 24120420  | 24120818  | 399  |
| chr7  | 11588581  | 11588974  | 394  |
| chrX  | 33724465  | 33724855  | 391  |
| chr3  | 127878171 | 127878539 | 369  |
| chr23 | 35273389  | 35273729  | 341  |
| chr4  | 120743573 | 120743846 | 274  |
| chr1  | 132751333 | 132751567 | 235  |
| chr15 | 59415247  | 59415460  | 214  |
| chr8  | 73826409  | 73826959  | 551  |
| chr18 | 51527340  | 51527738  | 399  |
| chr8  | 73827340  | 73827999  | 660  |
| chr9  | 90475630  | 90475959  | 330  |
| chr3  | 35933077  | 35933472  | 396  |
| chr13 | 57587921  | 57589398  | 1478 |
| chr18 | 11478322  | 11479733  | 1412 |
| chr11 | 82902470  | 82903783  | 1314 |
| chr12 | 31991063  | 31992361  | 1299 |
| chrX  | 55270020  | 55271269  | 1250 |
| chr5  | 120388762 | 120389946 | 1185 |
| chr10 | 16869368  | 16870507  | 1140 |
| chr19 | 46771712  | 46772845  | 1134 |
| chrX  | 20081196  | 20082317  | 1122 |
| chrX  | 58745143  | 58746249  | 1107 |
| chr1  | 37557755  | 37558842  | 1088 |
| chr10 | 50557225  | 50558309  | 1085 |
| chrX  | 72776849  | 72777927  | 1079 |
| chr10 | 87161326  | 87162397  | 1072 |
| chr16 | 2458066   | 2459136   | 1071 |
| chr11 | 81418867  | 81419932  | 1066 |
| chr21 | 33970898  | 33971961  | 1064 |
| chrX  | 74583739  | 74584801  | 1063 |
| chrX  | 49770843  | 49771893  | 1051 |
| chr27 | 26470864  | 26471903  | 1040 |
| chrX  | 34124516  | 34125554  | 1039 |
| chrX  | 2364864   | 2365885   | 1022 |
| chr7  | 11202507  | 11203528  | 1022 |
| chr19 | 23699516  | 23700537  | 1022 |
| chr10 | 70132017  | 70133038  | 1022 |
| chr19 | 49636593  | 49637609  | 1017 |
| chr18 | 11943779  | 11944794  | 1016 |
| chr18 | 23600541  | 23601552  | 1012 |
| chr5  | 60389439  | 60390449  | 1011 |
| chr22 | 56077489  | 56078499  | 1011 |
| chrX  | 50534818  | 50535825  | 1008 |
| chr26 | 18225258  | 18226262  | 1005 |
| chrX  | 45563254  | 45564256  | 1003 |
| chrX  | 34584496  | 34585498  | 1003 |
| chr16 | 58545268  | 58546268  | 1001 |



|       |               |           |     |
|-------|---------------|-----------|-----|
| chrX  | 574708 575707 | 1000      |     |
| chr1  | 1623597       | 1624594   | 998 |
| chr18 | 50551771      | 50552762  | 992 |
| chr21 | 25083624      | 25084613  | 990 |
| chr18 | 51413443      | 51414421  | 979 |
| chr19 | 38301539      | 38302514  | 976 |
| chr7  | 8919029       | 8920003   | 975 |
| chr19 | 44801962      | 44802935  | 974 |
| chrX  | 21089480      | 21090452  | 973 |
| chr8  | 65245153      | 65246122  | 970 |
| chrX  | 7339424       | 7340392   | 969 |
| chr3  | 20439621      | 20440587  | 967 |
| chrX  | 20001872      | 20002837  | 966 |
| chr11 | 28644136      | 28645093  | 958 |
| chrX  | 46690592      | 46691547  | 956 |
| chrX  | 49809655      | 49810604  | 950 |
| chrX  | 34615251      | 34616200  | 950 |
| chr8  | 1290205       | 1291154   | 950 |
| chr24 | 1613917       | 1614866   | 950 |
| chr5  | 111294595     | 111295543 | 949 |
| chr5  | 117194943     | 117195887 | 945 |
| chr10 | 8336970       | 8337912   | 943 |
| chrX  | 36835815      | 36836754  | 940 |
| chrX  | 78609793      | 78610722  | 930 |
| chrX  | 76828053      | 76828978  | 926 |
| chr28 | 44518634      | 44519559  | 926 |
| chr15 | 24561401      | 24562325  | 925 |
| chr26 | 17917198      | 17918119  | 922 |
| chrX  | 80866002      | 80866922  | 921 |
| chr16 | 38725786      | 38726706  | 921 |
| chrX  | 65075419      | 65076338  | 920 |
| chr24 | 20563603      | 20564520  | 918 |
| chrX  | 8060710       | 8061618   | 909 |
| chrX  | 62291092      | 62291998  | 907 |
| chr19 | 12443345      | 12444248  | 904 |
| chr17 | 51516996      | 51517899  | 904 |
| chr11 | 68440900      | 68441801  | 902 |
| chr29 | 38055379      | 38056274  | 896 |
| chrX  | 362758 363647 | 890       |     |
| chrX  | 82570283      | 82571169  | 887 |
| chr15 | 32667012      | 32667896  | 885 |
| chr3  | 122048785     | 122049667 | 883 |
| chr2  | 130776536     | 130777417 | 882 |
| chr12 | 36421795      | 36422671  | 877 |
| chr3  | 123234223     | 123235098 | 876 |
| chr15 | 29999080      | 29999954  | 875 |
| chrX  | 19742729      | 19743599  | 871 |
| chr17 | 5383707       | 5384574   | 868 |
| chr11 | 3886611       | 3887478   | 868 |
| chrX  | 19862689      | 19863555  | 867 |

|       |           |           |     |
|-------|-----------|-----------|-----|
| chr18 | 12142261  | 12143127  | 867 |
| chrX  | 55673298  | 55674160  | 863 |
| chr3  | 123578971 | 123579833 | 863 |
| chr20 | 25596184  | 25597045  | 862 |
| chr19 | 63732139  | 63732999  | 861 |
| chr17 | 68305882  | 68306742  | 861 |
| chr16 | 19552640  | 19553500  | 861 |
| chr26 | 22316520  | 22317379  | 860 |
| chr2  | 133923986 | 133924841 | 856 |
| chr1  | 128138229 | 128139081 | 853 |
| chr24 | 45136367  | 45137217  | 851 |
| chr29 | 35302103  | 35302951  | 849 |
| chr12 | 83967722  | 83968569  | 848 |
| chr29 | 34960764  | 34961609  | 846 |
| chr13 | 26217207  | 26218050  | 844 |
| chr24 | 48586832  | 48587674  | 843 |
| chrX  | 57134627  | 57135467  | 841 |
| chrX  | 2478532   | 2479370   | 839 |
| chr19 | 58335109  | 58335943  | 835 |
| chrX  | 59398898  | 59399731  | 834 |
| chrX  | 54872164  | 54872993  | 830 |
| chr29 | 17692071  | 17692900  | 830 |
| chrX  | 77490833  | 77491661  | 829 |
| chr9  | 65833320  | 65834147  | 828 |
| chr19 | 23746383  | 23747210  | 828 |
| chr16 | 39448875  | 39449702  | 828 |
| chr11 | 100887538 | 100888359 | 822 |
| chrX  | 75690488  | 75691308  | 821 |
| chr8  | 7539495   | 7540315   | 821 |
| chr15 | 54487916  | 54488736  | 821 |
| chr15 | 25633970  | 25634790  | 821 |
| chr10 | 36370488  | 36371304  | 817 |
| chr7  | 4345454   | 4346269   | 816 |
| chr8  | 15103533  | 15104347  | 815 |
| chr11 | 99185919  | 99186733  | 815 |
| chr5  | 115824609 | 115825422 | 814 |
| chr15 | 75268020  | 75268832  | 813 |
| chr23 | 48759636  | 48760446  | 811 |
| chrX  | 72718246  | 72719054  | 809 |
| chr11 | 6427932   | 6428740   | 809 |
| chr7  | 42773450  | 42774256  | 807 |
| chr2  | 111767649 | 111768455 | 807 |
| chr2  | 25182046  | 25182851  | 806 |
| chr5  | 80619067  | 80619870  | 804 |
| chrX  | 79858879  | 79859681  | 803 |
| chr17 | 61002268  | 61003068  | 801 |
| chrX  | 56521545  | 56522344  | 800 |
| chr24 | 60977887  | 60978685  | 799 |
| chrX  | 17123473  | 17124269  | 797 |
| chr11 | 106359686 | 106360482 | 797 |

|       |           |           |     |
|-------|-----------|-----------|-----|
| chr14 | 63513655  | 63514446  | 792 |
| chr11 | 77715736  | 77716527  | 792 |
| chrX  | 74320173  | 74320963  | 791 |
| chr24 | 60855574  | 60856364  | 791 |
| chr14 | 36736586  | 36737376  | 791 |
| chr16 | 2262097   | 2262886   | 790 |
| chr1  | 123141068 | 123141854 | 787 |
| chr3  | 16673554  | 16674339  | 786 |
| chr28 | 41324138  | 41324922  | 785 |
| chr18 | 11520522  | 11521302  | 781 |
| chrX  | 6236667   | 6237446   | 780 |
| chr20 | 73734157  | 73734936  | 780 |
| chr20 | 767900    | 768678    | 779 |
| chr2  | 21543521  | 21544299  | 779 |
| chr19 | 42700549  | 42701327  | 779 |
| chr18 | 45986435  | 45987212  | 778 |
| chr1  | 62293775  | 62294549  | 775 |
| chr4  | 121472333 | 121473106 | 774 |
| chr6  | 120934326 | 120935097 | 772 |
| chr18 | 37162073  | 37162844  | 772 |
| chrX  | 36634245  | 36635015  | 771 |
| chrX  | 10424910  | 10425680  | 771 |
| chr16 | 2456002   | 2456772   | 771 |
| chr20 | 70927989  | 70928758  | 770 |
| chr2  | 75592649  | 75593418  | 770 |
| chr17 | 70123684  | 70124452  | 769 |
| chrX  | 11579755  | 11580522  | 768 |
| chr12 | 84165990  | 84166756  | 767 |
| chr19 | 52554348  | 52555112  | 765 |
| chrX  | 73356507  | 73357270  | 764 |
| chrX  | 37730996  | 37731759  | 764 |
| chr10 | 62960777  | 62961539  | 763 |
| chrX  | 63003384  | 63004144  | 761 |
| chr13 | 41624144  | 41624904  | 761 |
| chrX  | 50464964  | 50465723  | 760 |
| chr11 | 97660028  | 97660787  | 760 |
| chr1  | 123106627 | 123107386 | 760 |
| chr11 | 105388454 | 105389212 | 759 |
| chr5  | 117526165 | 117526922 | 758 |
| chr14 | 6956365   | 6957121   | 757 |
| chr3  | 26151038  | 26151793  | 756 |
| chr9  | 106555947 | 106556701 | 755 |
| chrX  | 50654268  | 50655021  | 754 |
| chr7  | 61120693  | 61121445  | 753 |
| chrX  | 20633350  | 20634101  | 752 |
| chr14 | 1635763   | 1636512   | 750 |
| chrX  | 21561879  | 21562625  | 747 |
| chr27 | 26757341  | 26758087  | 747 |
| chr23 | 30088130  | 30088876  | 747 |
| chr8  | 108761979 | 108762723 | 745 |

|       |               |           |     |
|-------|---------------|-----------|-----|
| chr17 | 67102425      | 67103167  | 743 |
| chr5  | 120412522     | 120413263 | 742 |
| chr29 | 35597917      | 35598658  | 742 |
| chr19 | 12304166      | 12304907  | 742 |
| chr21 | 56521345      | 56522084  | 740 |
| chr19 | 65143158      | 65143896  | 739 |
| chr18 | 20247029      | 20247767  | 739 |
| chr1  | 153894051     | 153894789 | 739 |
| chrX  | 75895739      | 75896476  | 738 |
| chr4  | 25136523      | 25137257  | 735 |
| chr26 | 22211191      | 22211925  | 735 |
| chr12 | 14674547      | 14675281  | 735 |
| chrX  | 7852622       | 7853355   | 734 |
| chr24 | 768356 769089 | 734       |     |
| chr15 | 29756256      | 29756989  | 734 |
| chr14 | 7755442       | 7756175   | 734 |
| chr5  | 60312885      | 60313616  | 732 |
| chr5  | 113189881     | 113190611 | 731 |
| chr19 | 31635064      | 31635793  | 730 |
| chr18 | 56557180      | 56557909  | 730 |
| chrX  | 59760832      | 59761560  | 729 |
| chr4  | 70481022      | 70481749  | 728 |
| chr29 | 48845572      | 48846299  | 728 |
| chr18 | 56883070      | 56883797  | 728 |
| chr24 | 35301402      | 35302128  | 727 |
| chr12 | 32178233      | 32178959  | 727 |
| chr9  | 108130157     | 108130882 | 726 |
| chr16 | 45939051      | 45939776  | 726 |
| chr13 | 70228714      | 70229439  | 726 |
| chrX  | 63272782      | 63273506  | 725 |
| chrX  | 8087584       | 8088307   | 724 |
| chr13 | 57774792      | 57775515  | 724 |
| chr8  | 104240402     | 104241124 | 723 |
| chr15 | 28633820      | 28634541  | 722 |
| chr15 | 74146694      | 74147414  | 721 |
| chr11 | 77571097      | 77571817  | 721 |
| chr8  | 108771126     | 108771845 | 720 |
| chr23 | 31145179      | 31145898  | 720 |
| chr1  | 128118641     | 128119360 | 720 |
| chr3  | 25816339      | 25817057  | 719 |
| chrX  | 20368519      | 20369236  | 718 |
| chr18 | 25545866      | 25546581  | 716 |
| chr15 | 58022635      | 58023350  | 716 |
| chr11 | 28638575      | 28639290  | 716 |
| chr2  | 75977939      | 75978653  | 715 |
| chr25 | 22686150      | 22686862  | 713 |
| chrX  | 78116876      | 78117587  | 712 |
| chr10 | 88270725      | 88271436  | 712 |
| chr7  | 4520324       | 4521034   | 711 |
| chr19 | 64688418      | 64689128  | 711 |

|       |           |           |     |
|-------|-----------|-----------|-----|
| chr23 | 17491576  | 17492284  | 709 |
| chr23 | 15963819  | 15964527  | 709 |
| chr22 | 29667017  | 29667725  | 709 |
| chr11 | 100903892 | 100904600 | 709 |
| chr5  | 27465054  | 27465761  | 708 |
| chr22 | 5698216   | 5698923   | 708 |
| chr14 | 1417462   | 1418168   | 707 |
| chrX  | 35598467  | 35599172  | 706 |
| chrX  | 30172286  | 30172991  | 706 |
| chr19 | 47269299  | 47270003  | 705 |
| chr1  | 87372420  | 87373124  | 705 |
| chrX  | 56884305  | 56885008  | 704 |
| chr4  | 71608655  | 71609358  | 704 |
| chrX  | 78779175  | 78779876  | 702 |
| chr3  | 15799431  | 15800132  | 702 |
| chr18 | 22238815  | 22239516  | 702 |
| chr11 | 49411898  | 49412599  | 702 |
| chr15 | 64498975  | 64499675  | 701 |
| chr11 | 23128574  | 23129274  | 701 |
| chrX  | 2420228   | 2420927   | 700 |
| chr10 | 69180225  | 69180923  | 699 |
| chr24 | 59296085  | 59296781  | 697 |
| chr11 | 80564130  | 80564826  | 697 |
| chr20 | 73322816  | 73323511  | 696 |
| chr14 | 7799766   | 7800461   | 696 |
| chrX  | 75470338  | 75471032  | 695 |
| chr4  | 79773187  | 79773881  | 695 |
| chrX  | 8480939   | 8481632   | 694 |
| chr15 | 42513730  | 42514423  | 694 |
| chrX  | 50440813  | 50441505  | 693 |
| chr10 | 36336656  | 36337347  | 692 |
| chr17 | 73174732  | 73175422  | 691 |
| chr17 | 64869057  | 64869747  | 691 |
| chr11 | 5360095   | 5360785   | 691 |
| chr4  | 85445273  | 85445961  | 689 |
| chr23 | 24544687  | 24545375  | 689 |
| chr4  | 52528048  | 52528735  | 688 |
| chr19 | 39321204  | 39321891  | 688 |
| chrX  | 60133263  | 60133949  | 687 |
| chr20 | 16812064  | 16812750  | 687 |
| chr14 | 7501872   | 7502558   | 687 |
| chr23 | 27092998  | 27093683  | 686 |
| chr2  | 128452580 | 128453265 | 686 |
| chr13 | 75646564  | 75647249  | 686 |
| chr8  | 65170946  | 65171630  | 685 |
| chr19 | 40426456  | 40427140  | 685 |
| chr3  | 35995985  | 35996665  | 681 |
| chr3  | 30690838  | 30691518  | 681 |
| chr29 | 18195909  | 18196589  | 681 |
| chr25 | 37974749  | 37975429  | 681 |

|       |           |           |     |
|-------|-----------|-----------|-----|
| chr2  | 15377387  | 15378067  | 681 |
| chr3  | 120950512 | 120951191 | 680 |
| chr26 | 23510553  | 23511232  | 680 |
| chr18 | 4830600   | 4831279   | 680 |
| chr12 | 30499142  | 30499821  | 680 |
| chr29 | 38850967  | 38851645  | 679 |
| chr10 | 83847998  | 83848676  | 679 |
| chrX  | 7456612   | 7457289   | 678 |
| chr18 | 53871916  | 53872592  | 677 |
| chr11 | 70855133  | 70855809  | 677 |
| chr7  | 17085195  | 17085870  | 676 |
| chr11 | 48721781  | 48722456  | 676 |
| chrX  | 72103224  | 72103898  | 675 |
| chr5  | 111221015 | 111221689 | 675 |
| chr20 | 8592087   | 8592761   | 675 |
| chr6  | 92458220  | 92458892  | 673 |
| chr5  | 121211297 | 121211968 | 672 |
| chr27 | 34789273  | 34789944  | 672 |
| chr19 | 46491282  | 46491953  | 672 |
| chr21 | 9433989   | 9434659   | 671 |
| chr11 | 10530181  | 10530850  | 670 |
| chrX  | 21205095  | 21205763  | 669 |
| chrX  | 8115233   | 8115900   | 668 |
| chrX  | 78677735  | 78678401  | 667 |
| chrX  | 21149948  | 21150614  | 667 |
| chrX  | 34524267  | 34524932  | 666 |
| chr5  | 29027402  | 29028067  | 666 |
| chr25 | 8196659   | 8197324   | 666 |
| chr3  | 101086513 | 101087177 | 665 |
| chr18 | 25812574  | 25813238  | 665 |
| chr13 | 82343999  | 82344663  | 665 |
| chr19 | 18036900  | 18037563  | 664 |
| chrX  | 21177711  | 21178373  | 663 |
| chr22 | 17556147  | 17556809  | 663 |
| chr25 | 2077534   | 2078195   | 662 |
| chrX  | 30284098  | 30284758  | 661 |
| chr3  | 20516895  | 20517555  | 661 |
| chr2  | 130417702 | 130418362 | 661 |
| chr29 | 33893925  | 33894584  | 660 |
| chr25 | 1332853   | 1333512   | 660 |
| chr3  | 15353451  | 15354109  | 659 |
| chr22 | 30148640  | 30149298  | 659 |
| chrX  | 73159743  | 73160400  | 658 |
| chrX  | 10126717  | 10127374  | 658 |
| chr23 | 50664320  | 50664977  | 658 |
| chr11 | 70694266  | 70694923  | 658 |
| chrX  | 50260166  | 50260822  | 657 |
| chrX  | 51573259  | 51573914  | 656 |
| chr7  | 45122320  | 45122975  | 656 |
| chr25 | 35674445  | 35675100  | 656 |

|       |               |           |     |
|-------|---------------|-----------|-----|
| chr24 | 44375589      | 44376244  | 656 |
| chr22 | 7220095       | 7220750   | 656 |
| chrX  | 59673332      | 59673986  | 655 |
| chrX  | 55598172      | 55598826  | 655 |
| chr23 | 18576226      | 18576880  | 655 |
| chrX  | 46559384      | 46560037  | 654 |
| chrX  | 9449959       | 9450612   | 654 |
| chr20 | 6595897       | 6596550   | 654 |
| chr15 | 75704456      | 75705109  | 654 |
| chr29 | 35017560      | 35018212  | 653 |
| chr22 | 59537315      | 59537967  | 653 |
| chr3  | 121477861     | 121478512 | 652 |
| chr26 | 38221871      | 38222522  | 652 |
| chr3  | 105466830     | 105467480 | 651 |
| chr3  | 35489883      | 35490533  | 651 |
| chr26 | 38413428      | 38414078  | 651 |
| chr17 | 64020786      | 64021436  | 651 |
| chr11 | 70918521      | 70919171  | 651 |
| chr17 | 57664012      | 57664661  | 650 |
| chr1  | 74496089      | 74496738  | 650 |
| chrX  | 542495 543143 | 649       |     |
| chrX  | 56860532      | 56861179  | 648 |
| chrX  | 55400317      | 55400964  | 648 |
| chr5  | 28890066      | 28890713  | 648 |
| chr1  | 99815764      | 99816411  | 648 |
| chr23 | 31102357      | 31103002  | 646 |
| chr2  | 139934838     | 139935483 | 646 |
| chr14 | 3411906       | 3412551   | 646 |
| chrX  | 75459167      | 75459811  | 645 |
| chrX  | 47932916      | 47933560  | 645 |
| chr24 | 43297848      | 43298492  | 645 |
| chr4  | 123207851     | 123208494 | 644 |
| chr25 | 36440393      | 36441036  | 644 |
| chr19 | 58655105      | 58655748  | 644 |
| chrX  | 75828954      | 75829596  | 643 |
| chr2  | 136730051     | 136730693 | 643 |
| chr11 | 28343571      | 28344213  | 643 |
| chr20 | 7013387       | 7014027   | 641 |
| chr2  | 21387986      | 21388626  | 641 |
| chr19 | 59441418      | 59442058  | 641 |
| chrX  | 74614912      | 74615551  | 640 |
| chr16 | 38377415      | 38378054  | 640 |
| chr20 | 6785750       | 6786388   | 639 |
| chrX  | 8186813       | 8187450   | 638 |
| chr7  | 79734481      | 79735118  | 638 |
| chr25 | 36473476      | 36474113  | 638 |
| chr18 | 7381906       | 7382543   | 638 |
| chr24 | 58938088      | 58938724  | 637 |
| chr23 | 7846403       | 7847039   | 637 |
| chr19 | 46703393      | 46704029  | 637 |

|       |               |           |     |
|-------|---------------|-----------|-----|
| chr17 | 64586459      | 64587094  | 636 |
| chr15 | 23582579      | 23583214  | 636 |
| chr13 | 75839460      | 75840095  | 636 |
| chrX  | 10715848      | 10716482  | 635 |
| chr4  | 99453394      | 99454028  | 635 |
| chr3  | 22932120      | 22932754  | 635 |
| chr21 | 33976583      | 33977217  | 635 |
| chrX  | 65789808      | 65790441  | 634 |
| chrX  | 20199508      | 20200141  | 634 |
| chr14 | 29189902      | 29190535  | 634 |
| chr7  | 81252807      | 81253439  | 633 |
| chr29 | 34767934      | 34768566  | 633 |
| chr5  | 114247247     | 114247878 | 632 |
| chr4  | 116690202     | 116690833 | 632 |
| chr17 | 70260760      | 70261391  | 632 |
| chr10 | 12254009      | 12254640  | 632 |
| chrX  | 63232464      | 63233094  | 631 |
| chrX  | 53275116      | 53275746  | 631 |
| chr7  | 46160423      | 46161053  | 631 |
| chr20 | 71441629      | 71442258  | 630 |
| chr1  | 72346337      | 72346966  | 630 |
| chr2  | 139481425     | 139482053 | 629 |
| chr2  | 136725881     | 136726509 | 629 |
| chr18 | 18662867      | 18663495  | 629 |
| chr15 | 73773863      | 73774491  | 629 |
| chr16 | 39739510      | 39740137  | 628 |
| chr18 | 22496280      | 22496906  | 627 |
| chr16 | 19105193      | 19105819  | 627 |
| chrX  | 34040452      | 34041077  | 626 |
| chrX  | 7096861       | 7097486   | 626 |
| chr7  | 93959726      | 93960351  | 626 |
| chr13 | 77408358      | 77408983  | 626 |
| chrX  | 13669358      | 13669982  | 625 |
| chrX  | 12270622      | 12271246  | 625 |
| chr9  | 104824046     | 104824670 | 625 |
| chr28 | 41182155      | 41182779  | 625 |
| chr22 | 15995896      | 15996520  | 625 |
| chr20 | 914290 914914 | 625       |     |
| chr2  | 92610558      | 92611182  | 625 |
| chr19 | 56077741      | 56078365  | 625 |
| chr13 | 77234054      | 77234678  | 625 |
| chrX  | 19886909      | 19887532  | 624 |
| chr21 | 13900389      | 13901012  | 624 |
| chrX  | 56181991      | 56182613  | 623 |
| chrX  | 49594725      | 49595347  | 623 |
| chrX  | 9981989       | 9982611   | 623 |
| chr3  | 110219281     | 110219903 | 623 |
| chr13 | 41617876      | 41618498  | 623 |
| chr12 | 9161130       | 9161752   | 623 |
| chr1  | 50454654      | 50455276  | 623 |



|       |           |           |     |
|-------|-----------|-----------|-----|
| chrX  | 622221    | 622842    | 622 |
| chr19 | 12322565  | 12323186  | 622 |
| chr13 | 59893383  | 59894004  | 622 |
| chr2  | 127972188 | 127972808 | 621 |
| chrX  | 63100872  | 63101491  | 620 |
| chr26 | 21971772  | 21972391  | 620 |
| chr2  | 139278590 | 139279209 | 620 |
| chr18 | 18718091  | 18718710  | 620 |
| chr17 | 70120830  | 70121449  | 620 |
| chrX  | 65799780  | 65800398  | 619 |
| chrX  | 65093397  | 65094015  | 619 |
| chrX  | 61395708  | 61396325  | 618 |
| chr5  | 28756265  | 28756882  | 618 |
| chrX  | 50199390  | 50200006  | 617 |
| chr29 | 36750620  | 36751236  | 617 |
| chr21 | 60107887  | 60108503  | 617 |
| chr2  | 127743426 | 127744042 | 617 |
| chrX  | 72540994  | 72541609  | 616 |
| chrX  | 59465305  | 59465920  | 616 |
| chr20 | 6138295   | 6138910   | 616 |
| chr18 | 12432831  | 12433446  | 616 |
| chr28 | 34119440  | 34120054  | 615 |
| chr28 | 34054378  | 34054992  | 615 |
| chr26 | 22348555  | 22349169  | 615 |
| chr12 | 74427452  | 74428066  | 615 |
| chr3  | 55868687  | 55869300  | 614 |
| chr12 | 68410267  | 68410880  | 614 |
| chr10 | 74114379  | 74114992  | 614 |
| chrX  | 54782561  | 54783173  | 613 |
| chrX  | 50387050  | 50387661  | 612 |
| chr15 | 54179443  | 54180054  | 612 |
| chr9  | 99301482  | 99302092  | 611 |
| chr15 | 75324430  | 75325040  | 611 |
| chr9  | 83793969  | 83794578  | 610 |
| chr24 | 48912893  | 48913502  | 610 |
| chr17 | 70309990  | 70310599  | 610 |
| chr16 | 51299867  | 51300476  | 610 |
| chrX  | 48157637  | 48158245  | 609 |
| chr8  | 79344508  | 79345116  | 609 |
| chr4  | 121432023 | 121432631 | 609 |
| chr2  | 136632112 | 136632720 | 609 |
| chr13 | 77733872  | 77734480  | 609 |
| chr11 | 20424516  | 20425124  | 609 |
| chr13 | 77697417  | 77698024  | 608 |
| chrX  | 78309024  | 78309630  | 607 |
| chr23 | 8792922   | 8793528   | 607 |
| chr21 | 66575703  | 66576309  | 607 |
| chrX  | 78382010  | 78382615  | 606 |
| chrX  | 59413762  | 59414367  | 606 |
| chr22 | 56288549  | 56289154  | 606 |

|       |           |           |     |
|-------|-----------|-----------|-----|
| chr19 | 8468681   | 8469286   | 606 |
| chr29 | 30521306  | 30521910  | 605 |
| chr26 | 21974889  | 21975493  | 605 |
| chr12 | 34512918  | 34513522  | 605 |
| chrX  | 50548417  | 50549020  | 604 |
| chr8  | 23035294  | 23035897  | 604 |
| chr4  | 38776540  | 38777143  | 604 |
| chr17 | 70083276  | 70083879  | 604 |
| chrX  | 2594546   | 2595148   | 603 |
| chr24 | 25341584  | 25342185  | 602 |
| chr21 | 9524565   | 9525166   | 602 |
| chr19 | 10933850  | 10934451  | 602 |
| chrX  | 56591943  | 56592543  | 601 |
| chr4  | 4597004   | 4597604   | 601 |
| chr3  | 10713769  | 10714369  | 601 |
| chr14 | 36735092  | 36735692  | 601 |
| chr14 | 26644895  | 26645495  | 601 |
| chrX  | 22605819  | 22606418  | 600 |
| chrX  | 6905298   | 6905897   | 600 |
| chr19 | 39327156  | 39327755  | 600 |
| chr13 | 59804991  | 59805590  | 600 |
| chr11 | 80336283  | 80336882  | 600 |
| chrX  | 38224542  | 38225140  | 599 |
| chr19 | 29439907  | 29440505  | 599 |
| chr22 | 48771944  | 48772541  | 598 |
| chr23 | 31404806  | 31405402  | 597 |
| chr17 | 66857151  | 66857747  | 597 |
| chr18 | 47596579  | 47597174  | 596 |
| chr14 | 61180677  | 61181272  | 596 |
| chrX  | 44930054  | 44930648  | 595 |
| chr23 | 27587705  | 27588299  | 595 |
| chr7  | 37541320  | 37541913  | 594 |
| chr5  | 120370745 | 120371338 | 594 |
| chr22 | 7232308   | 7232901   | 594 |
| chr11 | 14107956  | 14108549  | 594 |
| chrX  | 75233818  | 75234410  | 593 |
| chrX  | 20426721  | 20427313  | 593 |
| chr7  | 42224623  | 42225215  | 593 |
| chr9  | 105462111 | 105462702 | 592 |
| chr3  | 119156579 | 119157170 | 592 |
| chr18 | 57313362  | 57313953  | 592 |
| chr10 | 20973277  | 20973867  | 591 |
| chrX  | 15756769  | 15757358  | 590 |
| chr3  | 116163079 | 116163668 | 590 |
| chr23 | 18817790  | 18818379  | 590 |
| chr14 | 76168936  | 76169525  | 590 |
| chr7  | 50365417  | 50366005  | 589 |
| chr26 | 48474817  | 48475405  | 589 |
| chr23 | 8440287   | 8440875   | 589 |
| chrX  | 36673790  | 36674377  | 588 |

|       |           |           |     |
|-------|-----------|-----------|-----|
| chr21 | 34641808  | 34642395  | 588 |
| chrX  | 20270360  | 20270946  | 587 |
| chr26 | 20853922  | 20854508  | 587 |
| chr5  | 74686666  | 74687251  | 586 |
| chr28 | 26602423  | 26603008  | 586 |
| chr25 | 3381488   | 3382073   | 586 |
| chr23 | 11348292  | 11348877  | 586 |
| chr2  | 123710733 | 123711318 | 586 |
| chr13 | 70224423  | 70225007  | 585 |
| chrX  | 29776582  | 29777165  | 584 |
| chr29 | 2436046   | 2436629   | 584 |
| chr21 | 27373867  | 27374450  | 584 |
| chr18 | 12004271  | 12004854  | 584 |
| chrX  | 57281830  | 57282412  | 583 |
| chrX  | 13061696  | 13062278  | 583 |
| chr26 | 18169867  | 18170449  | 583 |
| chr18 | 64313660  | 64314242  | 583 |
| chrX  | 8626737   | 8627318   | 582 |
| chr18 | 11990732  | 11991313  | 582 |
| chr1  | 10211918  | 10212499  | 582 |
| chrX  | 54870297  | 54870877  | 581 |
| chr5  | 28780626  | 28781206  | 581 |
| chrX  | 47901724  | 47902303  | 580 |
| chr21 | 64585998  | 64586577  | 580 |
| chr10 | 66762890  | 66763468  | 579 |
| chrX  | 35499558  | 35500135  | 578 |
| chr5  | 125343291 | 125343868 | 578 |
| chr5  | 80744965  | 80745542  | 578 |
| chr26 | 18191295  | 18191872  | 578 |
| chr18 | 47075260  | 47075837  | 578 |
| chr29 | 18769134  | 18769710  | 577 |
| chr25 | 4636250   | 4636826   | 577 |
| chr11 | 28495534  | 28496110  | 577 |
| chrX  | 55215270  | 55215845  | 576 |
| chrX  | 21266736  | 21267311  | 576 |
| chr7  | 13548406  | 13548981  | 576 |
| chr5  | 85405126  | 85405701  | 576 |
| chr4  | 123626092 | 123626667 | 576 |
| chrX  | 59722677  | 59723251  | 575 |
| chr17 | 66143829  | 66144403  | 575 |
| chr7  | 51686562  | 51687135  | 574 |
| chr5  | 81798281  | 81798854  | 574 |
| chr4  | 34960261  | 34960834  | 574 |
| chrX  | 21589623  | 21590195  | 573 |
| chr9  | 24141900  | 24142472  | 573 |
| chr4  | 5621558   | 5622130   | 573 |
| chr23 | 28058781  | 28059353  | 573 |
| chrX  | 53938151  | 53938722  | 572 |
| chr29 | 36899983  | 36900554  | 572 |
| chr28 | 190985    | 191556    | 572 |

|       |               |           |     |
|-------|---------------|-----------|-----|
| chr26 | 48624325      | 48624896  | 572 |
| chr18 | 4050088       | 4050659   | 572 |
| chrX  | 45841334      | 45841904  | 571 |
| chrX  | 21274360      | 21274930  | 571 |
| chr29 | 13597402      | 13597972  | 571 |
| chr25 | 35475099      | 35475669  | 571 |
| chr23 | 27739171      | 27739741  | 571 |
| chr16 | 67151653      | 67152223  | 571 |
| chr12 | 48060702      | 48061272  | 571 |
| chr6  | 16267957      | 16268526  | 570 |
| chr29 | 33601799      | 33602368  | 570 |
| chr23 | 8297493       | 8298062   | 570 |
| chr18 | 11522430      | 11522999  | 570 |
| chrX  | 65333294      | 65333862  | 569 |
| chr9  | 100361659     | 100362227 | 569 |
| chr3  | 113239616     | 113240184 | 569 |
| chr24 | 1196706       | 1197274   | 569 |
| chr23 | 30246845      | 30247413  | 569 |
| chr18 | 55206698      | 55207266  | 569 |
| chr17 | 70115100      | 70115668  | 569 |
| chrX  | 61749389      | 61749956  | 568 |
| chrX  | 30661839      | 30662406  | 568 |
| chr25 | 43535185      | 43535752  | 568 |
| chr18 | 52117966      | 52118533  | 568 |
| chr17 | 72723888      | 72724455  | 568 |
| chrX  | 53628741      | 53629307  | 567 |
| chrX  | 22613629      | 22614195  | 567 |
| chrX  | 20930449      | 20931015  | 567 |
| chr26 | 48442639      | 48443205  | 567 |
| chrX  | 66500849      | 66501414  | 566 |
| chr3  | 125638380     | 125638945 | 566 |
| chr15 | 55182265      | 55182830  | 566 |
| chr12 | 31968376      | 31968941  | 566 |
| chr10 | 17417522      | 17418087  | 566 |
| chrX  | 58718730      | 58719294  | 565 |
| chr8  | 24486444      | 24487008  | 565 |
| chr21 | 18879506      | 18880070  | 565 |
| chr16 | 38723094      | 38723658  | 565 |
| chr11 | 84962929      | 84963493  | 565 |
| chr8  | 29193505      | 29194068  | 564 |
| chr8  | 24461011      | 24461574  | 564 |
| chrX  | 7771458       | 7772020   | 563 |
| chr20 | 8681005       | 8681567   | 563 |
| chr13 | 56351196      | 56351758  | 563 |
| chrX  | 857102 857663 | 562       |     |
| chr3  | 111670824     | 111671385 | 562 |
| chr2  | 132392612     | 132393172 | 561 |
| chr18 | 2866167       | 2866727   | 561 |
| chr10 | 17408165      | 17408725  | 561 |
| chrX  | 59198824      | 59199383  | 560 |

|       |           |           |     |
|-------|-----------|-----------|-----|
| chrX  | 21533952  | 21534511  | 560 |
| chr4  | 98831694  | 98832253  | 560 |
| chr4  | 120933714 | 120934272 | 559 |
| chr27 | 46979820  | 46980378  | 559 |
| chr21 | 9475592   | 9476150   | 559 |
| chrX  | 58097439  | 58097996  | 558 |
| chrX  | 51653145  | 51653702  | 558 |
| chr26 | 50842569  | 50843126  | 558 |
| chr18 | 12017535  | 12018092  | 558 |
| chr13 | 61874842  | 61875399  | 558 |
| chr13 | 54930540  | 54931097  | 558 |
| chr1  | 141722264 | 141722821 | 558 |
| chr3  | 113468618 | 113469174 | 557 |
| chr23 | 13664690  | 13665246  | 557 |
| chr18 | 17439338  | 17439894  | 557 |
| chrX  | 75776095  | 75776650  | 556 |
| chrX  | 64859607  | 64860162  | 556 |
| chr3  | 11546889  | 11547444  | 556 |
| chr24 | 41744466  | 41745021  | 556 |
| chr2  | 21538919  | 21539474  | 556 |
| chr19 | 40455280  | 40455835  | 556 |
| chrX  | 78299998  | 78300552  | 555 |
| chrX  | 72556757  | 72557311  | 555 |
| chr24 | 41779930  | 41780484  | 555 |
| chr20 | 72730862  | 72731416  | 555 |
| chr15 | 75298658  | 75299212  | 555 |
| chr11 | 77546589  | 77547143  | 555 |
| chr10 | 25039603  | 25040157  | 555 |
| chr25 | 40842392  | 40842945  | 554 |
| chr10 | 95118370  | 95118923  | 554 |
| chr28 | 3477933   | 3478485   | 553 |
| chr1  | 114232250 | 114232802 | 553 |
| chrX  | 75780363  | 75780914  | 552 |
| chrX  | 56880430  | 56880981  | 552 |
| chr3  | 35664690  | 35665241  | 552 |
| chr25 | 35697692  | 35698243  | 552 |
| chr2  | 26560291  | 26560842  | 552 |
| chr11 | 105994367 | 105994918 | 552 |
| chr11 | 100688940 | 100689491 | 552 |
| chr4  | 79773944  | 79774494  | 551 |
| chr22 | 15046828  | 15047378  | 551 |
| chrX  | 7392403   | 7392952   | 550 |
| chr18 | 23153742  | 23154291  | 550 |
| chr4  | 11130493  | 11131041  | 549 |
| chr29 | 34906307  | 34906855  | 549 |
| chr23 | 49660601  | 49661149  | 549 |
| chr23 | 9786119   | 9786667   | 549 |
| chr16 | 68519414  | 68519962  | 549 |
| chr1  | 109023477 | 109024025 | 549 |
| chr7  | 45832061  | 45832608  | 548 |

|       |           |           |     |
|-------|-----------|-----------|-----|
| chr6  | 17413521  | 17414068  | 548 |
| chrX  | 55023226  | 55023772  | 547 |
| chrX  | 22430559  | 22431105  | 547 |
| chr7  | 32285446  | 32285992  | 547 |
| chr3  | 105684513 | 105685059 | 547 |
| chr11 | 48641389  | 48641935  | 547 |
| chrX  | 22568362  | 22568907  | 546 |
| chr19 | 34634393  | 34634938  | 546 |
| chr18 | 56874448  | 56874993  | 546 |
| chr15 | 24509114  | 24509659  | 546 |
| chr1  | 67355459  | 67356004  | 546 |
| chrX  | 65342041  | 65342585  | 545 |
| chr5  | 112087573 | 112088117 | 545 |
| chr4  | 97851589  | 97852133  | 545 |
| chr23 | 29080823  | 29081367  | 545 |
| chr11 | 70771827  | 70772371  | 545 |
| chr3  | 123352898 | 123353441 | 544 |
| chr20 | 59408150  | 59408693  | 544 |
| chr18 | 18671439  | 18671982  | 544 |
| chr21 | 63230113  | 63230655  | 543 |
| chr7  | 3974077   | 3974618   | 542 |
| chr20 | 35923572  | 35924113  | 542 |
| chr13 | 14684377  | 14684918  | 542 |
| chrX  | 58456080  | 58456620  | 541 |
| chrX  | 9500310   | 9500850   | 541 |
| chr3  | 33842177  | 33842717  | 541 |
| chr29 | 44989016  | 44989556  | 541 |
| chr26 | 22382190  | 22382730  | 541 |
| chr17 | 54766930  | 54767470  | 541 |
| chr23 | 10523422  | 10523961  | 540 |
| chr12 | 9417330   | 9417869   | 540 |
| chr8  | 24219039  | 24219577  | 539 |
| chr22 | 23091687  | 23092225  | 539 |
| chr18 | 18039856  | 18040394  | 539 |
| chr12 | 81715547  | 81716085  | 539 |
| chr1  | 144145614 | 144146152 | 539 |
| chrX  | 11175377  | 11175914  | 538 |
| chr5  | 29003005  | 29003542  | 538 |
| chr5  | 28771581  | 28772118  | 538 |
| chr12 | 74447973  | 74448510  | 538 |
| chr29 | 47971298  | 47971834  | 537 |
| chr26 | 25111280  | 25111816  | 537 |
| chr24 | 34497469  | 34498005  | 537 |
| chr2  | 130443508 | 130444044 | 537 |
| chr19 | 51897588  | 51898124  | 537 |
| chrX  | 20177718  | 20178253  | 536 |
| chr3  | 127221811 | 127222346 | 536 |
| chr26 | 48432837  | 48433372  | 536 |
| chrX  | 50861204  | 50861738  | 535 |
| chrX  | 36390929  | 36391463  | 535 |

|       |               |           |     |
|-------|---------------|-----------|-----|
| chrX  | 7833692       | 7834226   | 535 |
| chr5  | 112953025     | 112953559 | 535 |
| chr4  | 118688958     | 118689492 | 535 |
| chr21 | 59728094      | 59728628  | 535 |
| chr12 | 64659147      | 64659681  | 535 |
| chrX  | 33511112      | 33511645  | 534 |
| chrX  | 8021676       | 8022209   | 534 |
| chr3  | 127819744     | 127820277 | 534 |
| chr25 | 43435408      | 43435941  | 534 |
| chr18 | 11787271      | 11787804  | 534 |
| chr17 | 70400480      | 70401013  | 534 |
| chr14 | 852502 853035 | 534       |     |
| chrX  | 6724421       | 6724953   | 533 |
| chr5  | 54502846      | 54503378  | 533 |
| chr25 | 37793341      | 37793873  | 533 |
| chr23 | 52004819      | 52005351  | 533 |
| chr15 | 76431360      | 76431892  | 533 |
| chr12 | 32261074      | 32261606  | 533 |
| chrX  | 78593925      | 78594456  | 532 |
| chrX  | 75765069      | 75765600  | 532 |
| chr7  | 45749171      | 45749702  | 532 |
| chr26 | 50501772      | 50502303  | 532 |
| chrX  | 8151481       | 8152011   | 531 |
| chrX  | 2545228       | 2545758   | 531 |
| chr25 | 7035108       | 7035638   | 531 |
| chr19 | 24042421      | 24042951  | 531 |
| chr12 | 3685572       | 3686102   | 531 |
| chrX  | 70882981      | 70883510  | 530 |
| chr23 | 17482483      | 17483011  | 529 |
| chr13 | 75545194      | 75545722  | 529 |
| chr9  | 26938560      | 26939087  | 528 |
| chr29 | 23783726      | 23784253  | 528 |
| chr28 | 23936080      | 23936607  | 528 |
| chrX  | 50035225      | 50035751  | 527 |
| chr2  | 111351998     | 111352524 | 527 |
| chr18 | 24316058      | 24316584  | 527 |
| chr21 | 6958271       | 6958796   | 526 |
| chr19 | 41405237      | 41405762  | 526 |
| chr15 | 42321476      | 42322001  | 526 |
| chr3  | 35989900      | 35990424  | 525 |
| chr19 | 24266324      | 24266848  | 525 |
| chr19 | 20344696      | 20345220  | 525 |
| chr19 | 20343568      | 20344092  | 525 |
| chr1  | 47180090      | 47180614  | 525 |
| chrX  | 9047831       | 9048354   | 524 |
| chr29 | 44498196      | 44498719  | 524 |
| chr29 | 31541111      | 31541634  | 524 |
| chr26 | 44798761      | 44799284  | 524 |
| chr18 | 35140292      | 35140815  | 524 |
| chrX  | 9700720       | 9701242   | 523 |

|       |           |           |     |
|-------|-----------|-----------|-----|
| chr29 | 48814105  | 48814627  | 523 |
| chr27 | 29127493  | 29128015  | 523 |
| chr26 | 48480555  | 48481076  | 522 |
| chr13 | 63500373  | 63500894  | 522 |
| chr12 | 33980754  | 33981275  | 522 |
| chrX  | 30128102  | 30128622  | 521 |
| chr26 | 37096490  | 37097010  | 521 |
| chr16 | 39530757  | 39531277  | 521 |
| chr13 | 41678897  | 41679417  | 521 |
| chr11 | 2934555   | 2935075   | 521 |
| chrX  | 53379123  | 53379642  | 520 |
| chrX  | 22539447  | 22539966  | 520 |
| chrX  | 8063168   | 8063687   | 520 |
| chrX  | 5307164   | 5307683   | 520 |
| chr9  | 106495047 | 106495566 | 520 |
| chr17 | 72940377  | 72940896  | 520 |
| chr13 | 40342878  | 40343397  | 520 |
| chr10 | 16865215  | 16865733  | 519 |
| chrX  | 71116677  | 71117194  | 518 |
| chrX  | 56105960  | 56106477  | 518 |
| chr7  | 5242241   | 5242758   | 518 |
| chr26 | 18185999  | 18186516  | 518 |
| chr22 | 48540680  | 48541197  | 518 |
| chr18 | 11759807  | 11760324  | 518 |
| chr18 | 5995063   | 5995580   | 518 |
| chr18 | 5978130   | 5978647   | 518 |
| chr14 | 61584328  | 61584845  | 518 |
| chr27 | 45278169  | 45278685  | 517 |
| chr19 | 34061920  | 34062436  | 517 |
| chr16 | 44330653  | 44331168  | 516 |
| chrX  | 22619261  | 22619775  | 515 |
| chrX  | 8585521   | 8586035   | 515 |
| chr3  | 97900417  | 97900931  | 515 |
| chrX  | 75505690  | 75506203  | 514 |
| chr5  | 112145808 | 112146321 | 514 |
| chr4  | 106657585 | 106658098 | 514 |
| chr29 | 31718350  | 31718863  | 514 |
| chr26 | 39829119  | 39829632  | 514 |
| chr24 | 43701555  | 43702068  | 514 |
| chr28 | 42362910  | 42363422  | 513 |
| chr23 | 42711209  | 42711721  | 513 |
| chr15 | 21202669  | 21203181  | 513 |
| chrX  | 77399423  | 77399934  | 512 |
| chrX  | 9158022   | 9158533   | 512 |
| chr29 | 34583526  | 34584036  | 511 |
| chr25 | 2962882   | 2963392   | 511 |
| chrX  | 30811378  | 30811887  | 510 |
| chrX  | 22592173  | 22592682  | 510 |
| chr5  | 112091074 | 112091583 | 510 |
| chr22 | 61221948  | 61222457  | 510 |



|       |           |           |     |
|-------|-----------|-----------|-----|
| chr21 | 47591696  | 47592205  | 510 |
| chr18 | 47692076  | 47692585  | 510 |
| chr1  | 113588688 | 113589197 | 510 |
| chrX  | 65072029  | 65072537  | 509 |
| chrX  | 21161225  | 21161733  | 509 |
| chr7  | 19370931  | 19371439  | 509 |
| chr26 | 22237860  | 22238368  | 509 |
| chr18 | 22048976  | 22049484  | 509 |
| chr14 | 61560345  | 61560853  | 509 |
| chr13 | 79645291  | 79645799  | 509 |
| chrX  | 44901267  | 44901774  | 508 |
| chrX  | 16826223  | 16826730  | 508 |
| chr25 | 28047358  | 28047865  | 508 |
| chr18 | 56591060  | 56591567  | 508 |
| chr26 | 46917678  | 46918184  | 507 |
| chr16 | 77709157  | 77709663  | 507 |
| chr10 | 16934551  | 16935057  | 507 |
| chrX  | 55359993  | 55360498  | 506 |
| chrX  | 21463312  | 21463817  | 506 |
| chr8  | 8593196   | 8593701   | 506 |
| chr5  | 1147071   | 1147576   | 506 |
| chr19 | 46652427  | 46652932  | 506 |
| chr19 | 8563260   | 8563765   | 506 |
| chr13 | 77385171  | 77385676  | 506 |
| chrX  | 21318424  | 21318928  | 505 |
| chr22 | 16422113  | 16422617  | 505 |
| chr12 | 34307481  | 34307985  | 505 |
| chr1  | 2494475   | 2494979   | 505 |
| chrX  | 80403673  | 80404176  | 504 |
| chr26 | 43464768  | 43465271  | 504 |
| chr21 | 59448533  | 59449036  | 504 |
| chr13 | 59924295  | 59924798  | 504 |
| chrX  | 34095011  | 34095513  | 503 |
| chr5  | 28998525  | 28999027  | 503 |
| chr4  | 98891739  | 98892241  | 503 |
| chr24 | 40394746  | 40395248  | 503 |
| chr14 | 66260072  | 66260574  | 503 |
| chr10 | 17237313  | 17237815  | 503 |
| chr5  | 28888344  | 28888845  | 502 |
| chr28 | 14097643  | 14098144  | 502 |
| chr23 | 49909445  | 49909946  | 502 |
| chr2  | 108449778 | 108450279 | 502 |
| chr13 | 40983760  | 40984261  | 502 |
| chr22 | 52847808  | 52848308  | 501 |
| chr19 | 12514399  | 12514899  | 501 |
| chr18 | 47530958  | 47531458  | 501 |
| chr18 | 11820324  | 11820824  | 501 |
| chr13 | 77657595  | 77658095  | 501 |
| chrX  | 35613900  | 35614399  | 500 |
| chr7  | 50689441  | 50689940  | 500 |

|       |           |           |     |
|-------|-----------|-----------|-----|
| chr28 | 33628921  | 33629420  | 500 |
| chr2  | 23945852  | 23946351  | 500 |
| chr1  | 154689572 | 154690071 | 500 |
| chr22 | 7573772   | 7574270   | 499 |
| chr11 | 64704970  | 64705468  | 499 |
| chr10 | 86856414  | 86856912  | 499 |
| chr1  | 132080662 | 132081160 | 499 |
| chrX  | 36851727  | 36852223  | 497 |
| chrX  | 6084979   | 6085475   | 497 |
| chr13 | 84224542  | 84225038  | 497 |
| chr12 | 74308083  | 74308579  | 497 |
| chrX  | 80056149  | 80056644  | 496 |
| chrX  | 62496437  | 62496932  | 496 |
| chrX  | 35802732  | 35803227  | 496 |
| chr24 | 58983920  | 58984415  | 496 |
| chr24 | 48575010  | 48575505  | 496 |
| chr2  | 139412762 | 139413257 | 496 |
| chr3  | 104479441 | 104479935 | 495 |
| chr16 | 71114485  | 71114979  | 495 |
| chr25 | 33519285  | 33519778  | 494 |
| chrX  | 48076281  | 48076773  | 493 |
| chr21 | 19180234  | 19180726  | 493 |
| chr19 | 47357975  | 47358467  | 493 |
| chr15 | 28937550  | 28938042  | 493 |
| chr11 | 77860041  | 77860533  | 493 |
| chr10 | 16919469  | 16919961  | 493 |
| chr26 | 17897297  | 17897788  | 492 |
| chr19 | 59002025  | 59002516  | 492 |
| chr12 | 31302086  | 31302577  | 492 |
| chr10 | 17106265  | 17106756  | 492 |
| chr19 | 46820961  | 46821451  | 491 |
| chr19 | 14055143  | 14055633  | 491 |
| chr18 | 11084707  | 11085197  | 491 |
| chr29 | 36474757  | 36475246  | 490 |
| chr26 | 51197547  | 51198036  | 490 |
| chr25 | 37975472  | 37975961  | 490 |
| chr21 | 57596640  | 57597129  | 490 |
| chr21 | 34300781  | 34301270  | 490 |
| chr15 | 30120343  | 30120832  | 490 |
| chr13 | 29294657  | 29295146  | 490 |
| chrX  | 73150937  | 73151424  | 488 |
| chrX  | 34445954  | 34446441  | 488 |
| chrX  | 29629937  | 29630424  | 488 |
| chr17 | 70007474  | 70007961  | 488 |
| chr14 | 30899654  | 30900141  | 488 |
| chr13 | 77155861  | 77156348  | 488 |
| chr12 | 74460316  | 74460803  | 488 |
| chrX  | 45702991  | 45703477  | 487 |
| chrX  | 21745939  | 21746425  | 487 |
| chr3  | 27377312  | 27377798  | 487 |

|       |           |           |     |
|-------|-----------|-----------|-----|
| chr9  | 52423713  | 52424198  | 486 |
| chr6  | 42768445  | 42768930  | 486 |
| chr5  | 30754934  | 30755419  | 486 |
| chr19 | 39909677  | 39910162  | 486 |
| chr11 | 10698213  | 10698698  | 486 |
| chr10 | 36367826  | 36368311  | 486 |
| chrX  | 47171232  | 47171716  | 485 |
| chr3  | 114300346 | 114300830 | 485 |
| chr4  | 29056626  | 29057109  | 484 |
| chr3  | 107734665 | 107735148 | 484 |
| chr24 | 51779685  | 51780168  | 484 |
| chr17 | 63724670  | 63725153  | 484 |
| chr14 | 28748353  | 28748836  | 484 |
| chr13 | 57618421  | 57618904  | 484 |
| chr12 | 21569232  | 21569715  | 484 |
| chr1  | 114957048 | 114957531 | 484 |
| chrX  | 58444533  | 58445015  | 483 |
| chrX  | 13711470  | 13711952  | 483 |
| chr26 | 43025165  | 43025647  | 483 |
| chr15 | 29853319  | 29853801  | 483 |
| chrX  | 64854086  | 64854567  | 482 |
| chrX  | 50718809  | 50719290  | 482 |
| chrX  | 35164682  | 35165163  | 482 |
| chrX  | 8698473   | 8698954   | 482 |
| chr18 | 11791112  | 11791593  | 482 |
| chr17 | 64154021  | 64154502  | 482 |
| chrX  | 37653980  | 37654460  | 481 |
| chrX  | 22007987  | 22008467  | 481 |
| chr9  | 90432787  | 90433267  | 481 |
| chr29 | 17986456  | 17986936  | 481 |
| chr21 | 46612309  | 46612789  | 481 |
| chr7  | 42489222  | 42489701  | 480 |
| chr29 | 44567997  | 44568476  | 480 |
| chr23 | 48601423  | 48601902  | 480 |
| chr21 | 42445991  | 42446470  | 480 |
| chr2  | 99682001  | 99682480  | 480 |
| chrX  | 21526606  | 21527084  | 479 |
| chr8  | 72315851  | 72316329  | 479 |
| chr2  | 139216637 | 139217115 | 479 |
| chr4  | 72726045  | 72726522  | 478 |
| chr8  | 108407131 | 108407607 | 477 |
| chr23 | 28902108  | 28902584  | 477 |
| chr29 | 34549227  | 34549702  | 476 |
| chr24 | 49786762  | 49787237  | 476 |
| chr15 | 28274770  | 28275245  | 476 |
| chr12 | 34327239  | 34327714  | 476 |
| chrX  | 8208777   | 8209251   | 475 |
| chr26 | 44539195  | 44539669  | 475 |
| chr12 | 30550150  | 30550624  | 475 |
| chr10 | 78655712  | 78656186  | 475 |

|       |           |           |     |
|-------|-----------|-----------|-----|
| chr7  | 18839695  | 18840168  | 474 |
| chr3  | 112874437 | 112874910 | 474 |
| chr19 | 28309197  | 28309670  | 474 |
| chr18 | 48197984  | 48198457  | 474 |
| chr13 | 63227749  | 63228222  | 474 |
| chr23 | 11474539  | 11475011  | 473 |
| chr12 | 33588217  | 33588689  | 473 |
| chr10 | 10601210  | 10601682  | 473 |
| chrX  | 5778357   | 5778828   | 472 |
| chrX  | 2146173   | 2146644   | 472 |
| chr18 | 56735837  | 56736308  | 472 |
| chrX  | 38234834  | 38235304  | 471 |
| chr29 | 37089889  | 37090359  | 471 |
| chr2  | 134334229 | 134334699 | 471 |
| chr19 | 59277154  | 59277624  | 471 |
| chr13 | 80710062  | 80710532  | 471 |
| chr29 | 34255068  | 34255537  | 470 |
| chr26 | 34313763  | 34314232  | 470 |
| chr17 | 69223462  | 69223931  | 470 |
| chr12 | 34401155  | 34401624  | 470 |
| chrX  | 6163961   | 6164429   | 469 |
| chr18 | 26120240  | 26120708  | 469 |
| chr9  | 45098700  | 45099167  | 468 |
| chr8  | 65924783  | 65925250  | 468 |
| chr15 | 75720573  | 75721040  | 468 |
| chrX  | 73361202  | 73361668  | 467 |
| chrX  | 35182873  | 35183339  | 467 |
| chrX  | 21268499  | 21268965  | 467 |
| chr7  | 3975370   | 3975836   | 467 |
| chr27 | 29094843  | 29095309  | 467 |
| chr26 | 21626492  | 21626958  | 467 |
| chr21 | 59910046  | 59910512  | 467 |
| chr2  | 131853922 | 131854388 | 467 |
| chr22 | 30023072  | 30023537  | 466 |
| chrX  | 6510250   | 6510714   | 465 |
| chr29 | 51271649  | 51272113  | 465 |
| chr29 | 38838149  | 38838613  | 465 |
| chr7  | 50528428  | 50528891  | 464 |
| chr3  | 121927539 | 121928002 | 464 |
| chr23 | 49936283  | 49936746  | 464 |
| chr23 | 10486411  | 10486874  | 464 |
| chr18 | 52833523  | 52833986  | 464 |
| chr11 | 77718452  | 77718915  | 464 |
| chr10 | 11856743  | 11857206  | 464 |
| chrX  | 67035547  | 67036009  | 463 |
| chrX  | 65171578  | 65172040  | 463 |
| chr25 | 37201572  | 37202034  | 463 |
| chr23 | 30253353  | 30253815  | 463 |
| chr22 | 13416073  | 13416535  | 463 |
| chr19 | 60759018  | 60759480  | 463 |

|       |               |           |     |
|-------|---------------|-----------|-----|
| chr15 | 75216840      | 75217302  | 463 |
| chr10 | 83768826      | 83769288  | 463 |
| chrX  | 61840444      | 61840905  | 462 |
| chr25 | 3965396       | 3965857   | 462 |
| chr18 | 12125591      | 12126052  | 462 |
| chrX  | 34369541      | 34370001  | 461 |
| chr23 | 28295615      | 28296075  | 461 |
| chr22 | 57976608      | 57977068  | 461 |
| chr17 | 64160897      | 64161357  | 461 |
| chr16 | 59068982      | 59069442  | 461 |
| chr11 | 34216663      | 34217123  | 461 |
| chr1  | 74703048      | 74703508  | 461 |
| chr9  | 62313313      | 62313772  | 460 |
| chr6  | 32703700      | 32704158  | 459 |
| chr5  | 113502777     | 113503235 | 459 |
| chr5  | 80765526      | 80765984  | 459 |
| chr3  | 121421518     | 121421976 | 459 |
| chr18 | 755382 755840 |           | 459 |
| chrX  | 6471551       | 6472008   | 458 |
| chr3  | 22616028      | 22616485  | 458 |
| chr21 | 22401792      | 22402249  | 458 |
| chr2  | 132702097     | 132702554 | 458 |
| chr17 | 70133975      | 70134432  | 458 |
| chr16 | 47062635      | 47063092  | 458 |
| chr18 | 1830934       | 1831390   | 457 |
| chrX  | 53387298      | 53387753  | 456 |
| chrX  | 7908214       | 7908669   | 456 |
| chrX  | 521113 521568 |           | 456 |
| chr29 | 50249872      | 50250327  | 456 |
| chrX  | 62588576      | 62589030  | 455 |
| chrX  | 56950616      | 56951070  | 455 |
| chrX  | 36374285      | 36374739  | 455 |
| chrX  | 21001452      | 21001906  | 455 |
| chr11 | 77787209      | 77787663  | 455 |
| chrX  | 61318706      | 61319159  | 454 |
| chrX  | 31681363      | 31681816  | 454 |
| chrX  | 7021092       | 7021545   | 454 |
| chr4  | 70711009      | 70711462  | 454 |
| chr23 | 44488423      | 44488876  | 454 |
| chr18 | 4918532       | 4918985   | 454 |
| chr12 | 20905318      | 20905771  | 454 |
| chr1  | 53744542      | 53744995  | 454 |
| chrX  | 49792060      | 49792512  | 453 |
| chr13 | 55464771      | 55465223  | 453 |
| chr11 | 13157671      | 13158123  | 453 |
| chrX  | 30376497      | 30376948  | 452 |
| chr5  | 113195771     | 113196222 | 452 |
| chr5  | 110703532     | 110703983 | 452 |
| chr4  | 71599162      | 71599613  | 452 |
| chr11 | 81606844      | 81607295  | 452 |

|       |           |           |     |
|-------|-----------|-----------|-----|
| chr3  | 121390338 | 121390788 | 451 |
| chr25 | 10628640  | 10629090  | 451 |
| chr25 | 3012644   | 3013094   | 451 |
| chr18 | 11436697  | 11437147  | 451 |
| chr10 | 16833268  | 16833718  | 451 |
| chr7  | 15355881  | 15356330  | 450 |
| chr27 | 28092186  | 28092635  | 450 |
| chr19 | 57594924  | 57595373  | 450 |
| chr14 | 52853575  | 52854024  | 450 |
| chrX  | 22730921  | 22731369  | 449 |
| chrX  | 8082099   | 8082547   | 449 |
| chr9  | 100069521 | 100069969 | 449 |
| chr5  | 111378709 | 111379157 | 449 |
| chr25 | 34280641  | 34281089  | 449 |
| chr10 | 74867465  | 74867913  | 449 |
| chrX  | 20643970  | 20644417  | 448 |
| chr29 | 33154938  | 33155385  | 448 |
| chr23 | 31393342  | 31393789  | 448 |
| chr19 | 43635400  | 43635847  | 448 |
| chr16 | 37847192  | 37847639  | 448 |
| chrX  | 54977855  | 54978300  | 446 |
| chrX  | 50945120  | 50945565  | 446 |
| chrX  | 7014395   | 7014840   | 446 |
| chr4  | 116556745 | 116557190 | 446 |
| chr27 | 28123699  | 28124144  | 446 |
| chr14 | 14021188  | 14021633  | 446 |
| chr10 | 53262446  | 53262891  | 446 |
| chrX  | 59767275  | 59767719  | 445 |
| chr3  | 4487684   | 4488128   | 445 |
| chr28 | 42852596  | 42853040  | 445 |
| chr23 | 20456431  | 20456875  | 445 |
| chr22 | 48292470  | 48292914  | 445 |
| chr19 | 10878021  | 10878465  | 445 |
| chr18 | 26284659  | 26285103  | 445 |
| chrX  | 59442014  | 59442457  | 444 |
| chrX  | 7431235   | 7431678   | 444 |
| chrX  | 6322919   | 6323362   | 444 |
| chr9  | 90979549  | 90979992  | 444 |
| chr26 | 50504419  | 50504862  | 444 |
| chr21 | 2038110   | 2038553   | 444 |
| chr19 | 40864156  | 40864599  | 444 |
| chr13 | 57516959  | 57517402  | 444 |
| chr1  | 147302463 | 147302906 | 444 |
| chrX  | 51327077  | 51327519  | 443 |
| chrX  | 16004256  | 16004698  | 443 |
| chr15 | 34198783  | 34199225  | 443 |
| chr13 | 17672955  | 17673397  | 443 |
| chr11 | 96182912  | 96183354  | 443 |
| chrX  | 62547983  | 62548424  | 442 |
| chrX  | 35585719  | 35586160  | 442 |

|       |           |           |     |
|-------|-----------|-----------|-----|
| chr8  | 7411700   | 7412141   | 442 |
| chr3  | 111658569 | 111659010 | 442 |
| chrX  | 74762931  | 74763371  | 441 |
| chr25 | 43471418  | 43471858  | 441 |
| chr25 | 39211220  | 39211660  | 441 |
| chr2  | 127631975 | 127632415 | 441 |
| chr19 | 39531611  | 39532051  | 441 |
| chr19 | 10899403  | 10899843  | 441 |
| chr17 | 69494309  | 69494749  | 441 |
| chr24 | 40664521  | 40664960  | 440 |
| chr15 | 73776234  | 73776673  | 440 |
| chr14 | 52852680  | 52853119  | 440 |
| chr11 | 98291562  | 98292001  | 440 |
| chr10 | 17606239  | 17606678  | 440 |
| chrX  | 78377168  | 78377606  | 439 |
| chrX  | 72328488  | 72328926  | 439 |
| chrX  | 50188273  | 50188711  | 439 |
| chrX  | 13407483  | 13407921  | 439 |
| chr5  | 30513533  | 30513971  | 439 |
| chr4  | 72308001  | 72308439  | 439 |
| chr3  | 111255518 | 111255956 | 439 |
| chr23 | 49569079  | 49569517  | 439 |
| chr20 | 73174545  | 73174983  | 439 |
| chr15 | 64189901  | 64190339  | 439 |
| chrX  | 54640055  | 54640492  | 438 |
| chr7  | 19300015  | 19300452  | 438 |
| chr5  | 123177233 | 123177670 | 438 |
| chr5  | 72615451  | 72615888  | 438 |
| chr26 | 43152064  | 43152501  | 438 |
| chrX  | 60068045  | 60068481  | 437 |
| chr21 | 27672483  | 27672919  | 437 |
| chr16 | 41437399  | 41437835  | 437 |
| chrX  | 68628227  | 68628662  | 436 |
| chrX  | 20339393  | 20339828  | 436 |
| chrX  | 17812488  | 17812923  | 436 |
| chr7  | 5158605   | 5159040   | 436 |
| chr12 | 30498312  | 30498747  | 436 |
| chr11 | 91559792  | 91560227  | 436 |
| chrX  | 59389115  | 59389549  | 435 |
| chrX  | 5747181   | 5747615   | 435 |
| chr23 | 15763309  | 15763743  | 435 |
| chrX  | 36280092  | 36280525  | 434 |
| chrX  | 21045676  | 21046109  | 434 |
| chr8  | 109039400 | 109039833 | 434 |
| chr3  | 92500370  | 92500803  | 434 |
| chr3  | 20511493  | 20511926  | 434 |
| chr29 | 26781186  | 26781619  | 434 |
| chr24 | 48556952  | 48557385  | 434 |
| chr23 | 30224555  | 30224988  | 434 |
| chr21 | 31662987  | 31663420  | 434 |

|       |           |           |     |
|-------|-----------|-----------|-----|
| chrX  | 48025261  | 48025693  | 433 |
| chr8  | 65343393  | 65343825  | 433 |
| chr8  | 60193114  | 60193546  | 433 |
| chr3  | 121577901 | 121578333 | 433 |
| chr22 | 53331380  | 53331812  | 433 |
| chr20 | 25763758  | 25764190  | 433 |
| chr17 | 18372204  | 18372636  | 433 |
| chr16 | 38184407  | 38184839  | 433 |
| chr14 | 66291474  | 66291906  | 433 |
| chr10 | 14992779  | 14993211  | 433 |
| chrX  | 66969556  | 66969987  | 432 |
| chrX  | 2432261   | 2432692   | 432 |
| chr5  | 29749296  | 29749727  | 432 |
| chr2  | 74776969  | 74777400  | 432 |
| chr11 | 45281320  | 45281751  | 432 |
| chrX  | 54089188  | 54089618  | 431 |
| chr7  | 5409224   | 5409654   | 431 |
| chr25 | 29074831  | 29075261  | 431 |
| chr22 | 50785640  | 50786070  | 431 |
| chr18 | 45387772  | 45388202  | 431 |
| chrX  | 58808997  | 58809426  | 430 |
| chrX  | 50198151  | 50198580  | 430 |
| chrX  | 49324587  | 49325016  | 430 |
| chr28 | 33954999  | 33955428  | 430 |
| chr23 | 52723379  | 52723808  | 430 |
| chr15 | 51612041  | 51612470  | 430 |
| chrX  | 72834478  | 72834906  | 429 |
| chrX  | 55284710  | 55285138  | 429 |
| chr5  | 10789712  | 10790140  | 429 |
| chr4  | 99477298  | 99477726  | 429 |
| chr14 | 30832058  | 30832486  | 429 |
| chr11 | 108410349 | 108410777 | 429 |
| chr10 | 88968527  | 88968955  | 429 |
| chr8  | 107678319 | 107678746 | 428 |
| chr28 | 33873831  | 33874258  | 428 |
| chr27 | 26901562  | 26901989  | 428 |
| chr24 | 50882801  | 50883228  | 428 |
| chr14 | 42904102  | 42904529  | 428 |
| chr10 | 86407855  | 86408282  | 428 |
| chr1  | 1651055   | 1651482   | 428 |
| chrX  | 21225697  | 21226123  | 427 |
| chrX  | 19449235  | 19449661  | 427 |
| chr5  | 30083525  | 30083951  | 427 |
| chr4  | 67944335  | 67944761  | 427 |
| chr4  | 49606287  | 49606713  | 427 |
| chr24 | 35464521  | 35464947  | 427 |
| chr18 | 45343927  | 45344353  | 427 |
| chr16 | 46780055  | 46780481  | 427 |
| chr15 | 28940567  | 28940993  | 427 |
| chr13 | 57608999  | 57609425  | 427 |



|       |           |           |     |
|-------|-----------|-----------|-----|
| chrX  | 74528878  | 74529303  | 426 |
| chr4  | 14691095  | 14691520  | 426 |
| chr26 | 14978570  | 14978995  | 426 |
| chr19 | 46098485  | 46098910  | 426 |
| chr16 | 47328409  | 47328834  | 426 |
| chrX  | 61023013  | 61023437  | 425 |
| chr19 | 8470209   | 8470633   | 425 |
| chr18 | 22769433  | 22769857  | 425 |
| chr18 | 11084081  | 11084505  | 425 |
| chr16 | 44382316  | 44382740  | 425 |
| chr1  | 123074855 | 123075279 | 425 |
| chrX  | 49776713  | 49777136  | 424 |
| chrX  | 31961569  | 31961992  | 424 |
| chr8  | 108760035 | 108760458 | 424 |
| chr5  | 122132663 | 122133086 | 424 |
| chr18 | 56611960  | 56612383  | 424 |
| chr13 | 41625845  | 41626268  | 424 |
| chr1  | 1621955   | 1622378   | 424 |
| chrX  | 13583946  | 13584368  | 423 |
| chrX  | 13223244  | 13223666  | 423 |
| chr3  | 62651338  | 62651760  | 423 |
| chr28 | 25112330  | 25112752  | 423 |
| chr20 | 8487598   | 8488020   | 423 |
| chr19 | 56603668  | 56604090  | 423 |
| chr18 | 35133780  | 35134202  | 423 |
| chr17 | 44293758  | 44294180  | 423 |
| chr14 | 34093401  | 34093823  | 423 |
| chr13 | 60210633  | 60211055  | 423 |
| chrX  | 48698403  | 48698824  | 422 |
| chrX  | 7809634   | 7810055   | 422 |
| chrX  | 2619813   | 2620234   | 422 |
| chr5  | 118455249 | 118455670 | 422 |
| chr4  | 99474769  | 99475190  | 422 |
| chr3  | 99106051  | 99106472  | 422 |
| chr21 | 25216644  | 25217065  | 422 |
| chr11 | 109642404 | 109642825 | 422 |
| chrX  | 80192990  | 80193410  | 421 |
| chrX  | 73178257  | 73178677  | 421 |
| chrX  | 55493217  | 55493637  | 421 |
| chr5  | 112194745 | 112195165 | 421 |
| chr3  | 122399736 | 122400156 | 421 |
| chr22 | 23091163  | 23091583  | 421 |
| chr19 | 39497657  | 39498077  | 421 |
| chr19 | 17097314  | 17097734  | 421 |
| chr13 | 74506382  | 74506802  | 421 |
| chr11 | 102423872 | 102424292 | 421 |
| chr4  | 68283037  | 68283456  | 420 |
| chr23 | 10255056  | 10255475  | 420 |
| chr22 | 30374533  | 30374952  | 420 |
| chr17 | 75728614  | 75729033  | 420 |

|       |           |           |     |
|-------|-----------|-----------|-----|
| chr11 | 70556877  | 70557296  | 420 |
| chr21 | 56045451  | 56045869  | 419 |
| chr17 | 70225196  | 70225614  | 419 |
| chr12 | 31303246  | 31303664  | 419 |
| chr11 | 70868910  | 70869328  | 419 |
| chr1  | 123077143 | 123077561 | 419 |
| chrX  | 74752199  | 74752616  | 418 |
| chr5  | 60482990  | 60483407  | 418 |
| chr25 | 28049274  | 28049691  | 418 |
| chr22 | 26874548  | 26874965  | 418 |
| chr12 | 74306271  | 74306688  | 418 |
| chrX  | 48701661  | 48702077  | 417 |
| chrX  | 12861238  | 12861654  | 417 |
| chr29 | 44675999  | 44676415  | 417 |
| chr25 | 34924546  | 34924962  | 417 |
| chr23 | 19797130  | 19797546  | 417 |
| chr21 | 20943125  | 20943541  | 417 |
| chr19 | 41415322  | 41415738  | 417 |
| chr16 | 67449567  | 67449983  | 417 |
| chrX  | 50295822  | 50296237  | 416 |
| chrX  | 49271912  | 49272327  | 416 |
| chrX  | 20923382  | 20923797  | 416 |
| chr23 | 33524309  | 33524724  | 416 |
| chr22 | 60436825  | 60437240  | 416 |
| chr22 | 53992043  | 53992458  | 416 |
| chr16 | 71135435  | 71135850  | 416 |
| chrX  | 47656195  | 47656609  | 415 |
| chr9  | 105998085 | 105998499 | 415 |
| chr8  | 108627278 | 108627692 | 415 |
| chr7  | 14656374  | 14656788  | 415 |
| chr22 | 22039120  | 22039534  | 415 |
| chr2  | 92732816  | 92733230  | 415 |
| chr16 | 43279419  | 43279833  | 415 |
| chr15 | 28923033  | 28923447  | 415 |
| chrX  | 1488603   | 1489016   | 414 |
| chr7  | 15311653  | 15312066  | 414 |
| chr28 | 33893647  | 33894060  | 414 |
| chr26 | 43263353  | 43263766  | 414 |
| chr25 | 37783646  | 37784059  | 414 |
| chr11 | 14037302  | 14037715  | 414 |
| chrX  | 78486142  | 78486554  | 413 |
| chr3  | 87808292  | 87808704  | 413 |
| chr29 | 33930063  | 33930475  | 413 |
| chr27 | 41849667  | 41850079  | 413 |
| chr26 | 48338546  | 48338958  | 413 |
| chr11 | 70925684  | 70926096  | 413 |
| chrX  | 58386287  | 58386698  | 412 |
| chrX  | 19822815  | 19823226  | 412 |
| chrX  | 7902419   | 7902830   | 412 |
| chr27 | 26765265  | 26765676  | 412 |

|       |           |           |     |
|-------|-----------|-----------|-----|
| chr2  | 10069886  | 10070297  | 412 |
| chr19 | 36417866  | 36418277  | 412 |
| chr18 | 9527050   | 9527461   | 412 |
| chr13 | 58893210  | 58893621  | 412 |
| chrX  | 66921888  | 66922298  | 411 |
| chr8  | 8301220   | 8301630   | 411 |
| chr22 | 44126720  | 44127130  | 411 |
| chr17 | 47400761  | 47401171  | 411 |
| chr10 | 21933251  | 21933661  | 411 |
| chrX  | 86240622  | 86241031  | 410 |
| chrX  | 54966380  | 54966789  | 410 |
| chrX  | 53349542  | 53349951  | 410 |
| chrX  | 50676862  | 50677271  | 410 |
| chrX  | 49978012  | 49978421  | 410 |
| chrX  | 41260965  | 41261374  | 410 |
| chrX  | 12267530  | 12267939  | 410 |
| chr4  | 39494181  | 39494590  | 410 |
| chr3  | 118863730 | 118864139 | 410 |
| chr3  | 23020739  | 23021148  | 410 |
| chr2  | 119948833 | 119949242 | 410 |
| chr2  | 101517563 | 101517972 | 410 |
| chr19 | 17130384  | 17130793  | 410 |
| chr17 | 64078170  | 64078579  | 410 |
| chr13 | 52666503  | 52666912  | 410 |
| chr12 | 31318080  | 31318489  | 410 |
| chrX  | 50407415  | 50407823  | 409 |
| chrX  | 49075461  | 49075869  | 409 |
| chr26 | 33873959  | 33874367  | 409 |
| chr19 | 23856362  | 23856770  | 409 |
| chr18 | 42493936  | 42494344  | 409 |
| chr17 | 42744326  | 42744734  | 409 |
| chr13 | 22150588  | 22150996  | 409 |
| chrX  | 76005402  | 76005809  | 408 |
| chrX  | 74240268  | 74240675  | 408 |
| chr5  | 113124320 | 113124727 | 408 |
| chr5  | 30755752  | 30756159  | 408 |
| chr26 | 21960677  | 21961084  | 408 |
| chr22 | 14980227  | 14980634  | 408 |
| chr21 | 64450702  | 64451109  | 408 |
| chr2  | 74784488  | 74784895  | 408 |
| chr15 | 24932676  | 24933083  | 408 |
| chr14 | 36737500  | 36737907  | 408 |
| chr12 | 73448878  | 73449285  | 408 |
| chr12 | 53331406  | 53331813  | 408 |
| chr10 | 103065124 | 103065531 | 408 |
| chrX  | 27146960  | 27147366  | 407 |
| chrX  | 7118862   | 7119268   | 407 |
| chr8  | 8567151   | 8567557   | 407 |
| chr26 | 22203354  | 22203760  | 407 |
| chr23 | 19864604  | 19865010  | 407 |

|       |           |           |     |
|-------|-----------|-----------|-----|
| chr19 | 37544050  | 37544456  | 407 |
| chr13 | 75226867  | 75227273  | 407 |
| chr13 | 59909707  | 59910113  | 407 |
| chrX  | 50491070  | 50491475  | 406 |
| chr5  | 95941417  | 95941822  | 406 |
| chr3  | 24428980  | 24429385  | 406 |
| chr25 | 34400930  | 34401335  | 406 |
| chr23 | 47369191  | 47369596  | 406 |
| chr19 | 23757510  | 23757915  | 406 |
| chr15 | 29910150  | 29910555  | 406 |
| chr11 | 14206573  | 14206978  | 406 |
| chrX  | 56870617  | 56871021  | 405 |
| chrX  | 21678767  | 21679171  | 405 |
| chr4  | 32181395  | 32181799  | 405 |
| chr18 | 22504562  | 22504966  | 405 |
| chr18 | 18490440  | 18490844  | 405 |
| chr11 | 77767649  | 77768053  | 405 |
| chrX  | 51668755  | 51669158  | 404 |
| chr25 | 29398541  | 29398944  | 404 |
| chr2  | 111306057 | 111306460 | 404 |
| chr17 | 74553018  | 74553421  | 404 |
| chr17 | 57745918  | 57746321  | 404 |
| chr13 | 77368526  | 77368929  | 404 |
| chr12 | 15265804  | 15266207  | 404 |
| chrX  | 54711823  | 54712225  | 403 |
| chrX  | 50847579  | 50847981  | 403 |
| chr21 | 30834910  | 30835312  | 403 |
| chr18 | 48365964  | 48366366  | 403 |
| chr15 | 32258853  | 32259255  | 403 |
| chr12 | 24862662  | 24863064  | 403 |
| chr22 | 60432216  | 60432617  | 402 |
| chr17 | 70712950  | 70713351  | 402 |
| chr17 | 49387848  | 49388249  | 402 |
| chr13 | 58278182  | 58278583  | 402 |
| chr10 | 25896509  | 25896910  | 402 |
| chrX  | 76846985  | 76847385  | 401 |
| chrX  | 34043795  | 34044195  | 401 |
| chrX  | 10448121  | 10448521  | 401 |
| chr7  | 37378222  | 37378622  | 401 |
| chr5  | 60373186  | 60373586  | 401 |
| chr3  | 116341698 | 116342098 | 401 |
| chr27 | 41855411  | 41855811  | 401 |
| chr26 | 15714123  | 15714523  | 401 |
| chr25 | 8738052   | 8738452   | 401 |
| chr19 | 20795312  | 20795712  | 401 |
| chr13 | 59921781  | 59922181  | 401 |
| chr10 | 15002128  | 15002528  | 401 |
| chr10 | 5255002   | 5255402   | 401 |
| chrX  | 54788881  | 54789280  | 400 |
| chrX  | 10328161  | 10328560  | 400 |

|       |           |           |     |
|-------|-----------|-----------|-----|
| chr3  | 121720657 | 121721056 | 400 |
| chr29 | 33570936  | 33571335  | 400 |
| chr23 | 18761880  | 18762279  | 400 |
| chr2  | 127089974 | 127090373 | 400 |
| chr19 | 41417270  | 41417669  | 400 |
| chr15 | 24590178  | 24590577  | 400 |
| chr13 | 61495867  | 61496266  | 400 |
| chr12 | 31613500  | 31613899  | 400 |
| chr10 | 17105258  | 17105657  | 400 |
| chrX  | 80347782  | 80348180  | 399 |
| chrX  | 80218381  | 80218779  | 399 |
| chrX  | 78584837  | 78585235  | 399 |
| chrX  | 78560899  | 78561297  | 399 |
| chrX  | 78435769  | 78436167  | 399 |
| chrX  | 78396157  | 78396555  | 399 |
| chrX  | 76076457  | 76076855  | 399 |
| chrX  | 75927449  | 75927847  | 399 |
| chrX  | 74680755  | 74681153  | 399 |
| chrX  | 74503860  | 74504258  | 399 |
| chrX  | 74317947  | 74318345  | 399 |
| chrX  | 72873630  | 72874028  | 399 |
| chrX  | 72611655  | 72612053  | 399 |
| chrX  | 72290699  | 72291097  | 399 |
| chrX  | 71932203  | 71932601  | 399 |
| chrX  | 68617079  | 68617477  | 399 |
| chrX  | 66674273  | 66674671  | 399 |
| chrX  | 65998466  | 65998864  | 399 |
| chrX  | 65601990  | 65602388  | 399 |
| chrX  | 62692313  | 62692711  | 399 |
| chrX  | 59448523  | 59448921  | 399 |
| chrX  | 58388327  | 58388725  | 399 |
| chrX  | 56747942  | 56748340  | 399 |
| chrX  | 56514401  | 56514799  | 399 |
| chrX  | 55463340  | 55463738  | 399 |
| chrX  | 54692082  | 54692480  | 399 |
| chrX  | 52961552  | 52961950  | 399 |
| chrX  | 51674039  | 51674437  | 399 |
| chrX  | 49997950  | 49998348  | 399 |
| chrX  | 49776288  | 49776686  | 399 |
| chrX  | 48162943  | 48163341  | 399 |
| chrX  | 47170166  | 47170564  | 399 |
| chrX  | 44812411  | 44812809  | 399 |
| chrX  | 38990232  | 38990630  | 399 |
| chrX  | 36727993  | 36728391  | 399 |
| chrX  | 36281593  | 36281991  | 399 |
| chrX  | 34627194  | 34627592  | 399 |
| chrX  | 34254116  | 34254514  | 399 |
| chrX  | 33529994  | 33530392  | 399 |
| chrX  | 33017873  | 33018271  | 399 |
| chrX  | 31073584  | 31073982  | 399 |

|      |           |           |     |
|------|-----------|-----------|-----|
| chrX | 21747338  | 21747736  | 399 |
| chrX | 10421261  | 10421659  | 399 |
| chrX | 10198282  | 10198680  | 399 |
| chrX | 9727247   | 9727645   | 399 |
| chrX | 8499891   | 8500289   | 399 |
| chrX | 6372908   | 6373306   | 399 |
| chrX | 6356761   | 6357159   | 399 |
| chrX | 2853638   | 2854036   | 399 |
| chrX | 2622958   | 2623356   | 399 |
| chrX | 2242944   | 2243342   | 399 |
| chr9 | 106532609 | 106533007 | 399 |
| chr9 | 105911176 | 105911574 | 399 |
| chr9 | 105315633 | 105316031 | 399 |
| chr9 | 99972107  | 99972505  | 399 |
| chr9 | 99449501  | 99449899  | 399 |
| chr9 | 90291046  | 90291444  | 399 |
| chr8 | 112059308 | 112059706 | 399 |
| chr8 | 105562047 | 105562445 | 399 |
| chr8 | 78832071  | 78832469  | 399 |
| chr8 | 70674775  | 70675173  | 399 |
| chr8 | 65250760  | 65251158  | 399 |
| chr8 | 27382276  | 27382674  | 399 |
| chr8 | 25950413  | 25950811  | 399 |
| chr8 | 23075474  | 23075872  | 399 |
| chr8 | 8723151   | 8723549   | 399 |
| chr8 | 7652216   | 7652614   | 399 |
| chr7 | 59505317  | 59505715  | 399 |
| chr7 | 19172203  | 19172601  | 399 |
| chr7 | 15592813  | 15593211  | 399 |
| chr7 | 10604875  | 10605273  | 399 |
| chr7 | 5632223   | 5632621   | 399 |
| chr6 | 118511709 | 118512107 | 399 |
| chr6 | 73548750  | 73549148  | 399 |
| chr5 | 125293603 | 125294001 | 399 |
| chr5 | 124803024 | 124803422 | 399 |
| chr5 | 122610199 | 122610597 | 399 |
| chr5 | 122599818 | 122600216 | 399 |
| chr5 | 117841955 | 117842353 | 399 |
| chr5 | 117283991 | 117284389 | 399 |
| chr5 | 73950965  | 73951363  | 399 |
| chr5 | 33514675  | 33515073  | 399 |
| chr5 | 30573058  | 30573456  | 399 |
| chr5 | 17187078  | 17187476  | 399 |
| chr4 | 124182010 | 124182408 | 399 |
| chr4 | 118012211 | 118012609 | 399 |
| chr4 | 105190853 | 105191251 | 399 |
| chr4 | 95585811  | 95586209  | 399 |
| chr4 | 47031196  | 47031594  | 399 |
| chr4 | 13355968  | 13356366  | 399 |
| chr3 | 126888932 | 126889330 | 399 |

|       |           |           |     |
|-------|-----------|-----------|-----|
| chr3  | 125717498 | 125717896 | 399 |
| chr3  | 125364076 | 125364474 | 399 |
| chr3  | 123680260 | 123680658 | 399 |
| chr3  | 121908866 | 121909264 | 399 |
| chr3  | 116167980 | 116168378 | 399 |
| chr3  | 104562427 | 104562825 | 399 |
| chr3  | 55838706  | 55839104  | 399 |
| chr3  | 51568553  | 51568951  | 399 |
| chr3  | 35821455  | 35821853  | 399 |
| chr3  | 16739598  | 16739996  | 399 |
| chr3  | 10574318  | 10574716  | 399 |
| chr29 | 51976646  | 51977044  | 399 |
| chr29 | 51146974  | 51147372  | 399 |
| chr29 | 48041082  | 48041480  | 399 |
| chr29 | 42761200  | 42761598  | 399 |
| chr29 | 37222683  | 37223081  | 399 |
| chr29 | 36738063  | 36738461  | 399 |
| chr29 | 31676763  | 31677161  | 399 |
| chr29 | 26660680  | 26661078  | 399 |
| chr29 | 26464932  | 26465330  | 399 |
| chr29 | 18101533  | 18101931  | 399 |
| chr29 | 13618923  | 13619321  | 399 |
| chr28 | 42393076  | 42393474  | 399 |
| chr28 | 34063979  | 34064377  | 399 |
| chr27 | 31457620  | 31458018  | 399 |
| chr27 | 8318039   | 8318437   | 399 |
| chr26 | 50373962  | 50374360  | 399 |
| chr26 | 35028101  | 35028499  | 399 |
| chr26 | 34963492  | 34963890  | 399 |
| chr26 | 34310504  | 34310902  | 399 |
| chr26 | 22180975  | 22181373  | 399 |
| chr26 | 11609310  | 11609708  | 399 |
| chr25 | 43534651  | 43535049  | 399 |
| chr25 | 38167366  | 38167764  | 399 |
| chr25 | 37576430  | 37576828  | 399 |
| chr25 | 37523475  | 37523873  | 399 |
| chr25 | 34492101  | 34492499  | 399 |
| chr25 | 29937036  | 29937434  | 399 |
| chr25 | 21607103  | 21607501  | 399 |
| chr25 | 14679613  | 14680011  | 399 |
| chr25 | 11582569  | 11582967  | 399 |
| chr25 | 5070707   | 5071105   | 399 |
| chr24 | 61066875  | 61067273  | 399 |
| chr24 | 59049095  | 59049493  | 399 |
| chr24 | 51838321  | 51838719  | 399 |
| chr24 | 40515336  | 40515734  | 399 |
| chr24 | 25459058  | 25459456  | 399 |
| chr24 | 1202883   | 1203281   | 399 |
| chr24 | 1128633   | 1129031   | 399 |
| chr23 | 52694347  | 52694745  | 399 |

|       |           |           |     |
|-------|-----------|-----------|-----|
| chr23 | 28659344  | 28659742  | 399 |
| chr23 | 28001086  | 28001484  | 399 |
| chr23 | 27899769  | 27900167  | 399 |
| chr23 | 27233638  | 27234036  | 399 |
| chr23 | 25100694  | 25101092  | 399 |
| chr23 | 18466372  | 18466770  | 399 |
| chr23 | 15842430  | 15842828  | 399 |
| chr23 | 11969928  | 11970326  | 399 |
| chr22 | 61474357  | 61474755  | 399 |
| chr22 | 60010091  | 60010489  | 399 |
| chr22 | 57203698  | 57204096  | 399 |
| chr22 | 48348710  | 48349108  | 399 |
| chr22 | 26874979  | 26875377  | 399 |
| chr22 | 16139864  | 16140262  | 399 |
| chr22 | 12206205  | 12206603  | 399 |
| chr21 | 67404539  | 67404937  | 399 |
| chr21 | 59530482  | 59530880  | 399 |
| chr21 | 47562719  | 47563117  | 399 |
| chr21 | 34427385  | 34427783  | 399 |
| chr21 | 20033878  | 20034276  | 399 |
| chr21 | 18553231  | 18553629  | 399 |
| chr21 | 13647069  | 13647467  | 399 |
| chr21 | 6985869   | 6986267   | 399 |
| chr21 | 6459500   | 6459898   | 399 |
| chr21 | 3300526   | 3300924   | 399 |
| chr20 | 74801808  | 74802206  | 399 |
| chr20 | 72560829  | 72561227  | 399 |
| chr20 | 70665966  | 70666364  | 399 |
| chr20 | 70122393  | 70122791  | 399 |
| chr20 | 60495080  | 60495478  | 399 |
| chr20 | 39907440  | 39907838  | 399 |
| chr20 | 8641916   | 8642314   | 399 |
| chr2  | 139409932 | 139410330 | 399 |
| chr2  | 139169225 | 139169623 | 399 |
| chr2  | 138637372 | 138637770 | 399 |
| chr2  | 135134096 | 135134494 | 399 |
| chr2  | 134980659 | 134981057 | 399 |
| chr2  | 132509163 | 132509561 | 399 |
| chr2  | 132421279 | 132421677 | 399 |
| chr2  | 131472133 | 131472531 | 399 |
| chr2  | 119952194 | 119952592 | 399 |
| chr2  | 75694259  | 75694657  | 399 |
| chr19 | 58408466  | 58408864  | 399 |
| chr19 | 46859043  | 46859441  | 399 |
| chr19 | 41934987  | 41935385  | 399 |
| chr19 | 41324640  | 41325038  | 399 |
| chr19 | 40506830  | 40507228  | 399 |
| chr19 | 38619686  | 38620084  | 399 |
| chr19 | 20392953  | 20393351  | 399 |
| chr19 | 14067091  | 14067489  | 399 |



|       |          |          |     |
|-------|----------|----------|-----|
| chr19 | 13467808 | 13468206 | 399 |
| chr19 | 12611002 | 12611400 | 399 |
| chr18 | 63584601 | 63584999 | 399 |
| chr18 | 56673059 | 56673457 | 399 |
| chr18 | 55029330 | 55029728 | 399 |
| chr18 | 52785511 | 52785909 | 399 |
| chr18 | 45546674 | 45547072 | 399 |
| chr18 | 22691003 | 22691401 | 399 |
| chr18 | 12813629 | 12814027 | 399 |
| chr18 | 11963030 | 11963428 | 399 |
| chr18 | 9504741  | 9505139  | 399 |
| chr18 | 3644357  | 3644755  | 399 |
| chr17 | 74041649 | 74042047 | 399 |
| chr17 | 72716933 | 72717331 | 399 |
| chr17 | 70489720 | 70490118 | 399 |
| chr17 | 70328124 | 70328522 | 399 |
| chr17 | 67054046 | 67054444 | 399 |
| chr17 | 66841215 | 66841613 | 399 |
| chr17 | 62718397 | 62718795 | 399 |
| chr17 | 60189554 | 60189952 | 399 |
| chr17 | 56143444 | 56143842 | 399 |
| chr16 | 68513983 | 68514381 | 399 |
| chr16 | 60032491 | 60032889 | 399 |
| chr16 | 53961794 | 53962192 | 399 |
| chr16 | 47062027 | 47062425 | 399 |
| chr16 | 42562880 | 42563278 | 399 |
| chr16 | 37853833 | 37854231 | 399 |
| chr16 | 23799603 | 23800001 | 399 |
| chr16 | 2468849  | 2469247  | 399 |
| chr16 | 2451609  | 2452007  | 399 |
| chr16 | 2426051  | 2426449  | 399 |
| chr15 | 76025797 | 76026195 | 399 |
| chr15 | 62730883 | 62731281 | 399 |
| chr15 | 37564133 | 37564531 | 399 |
| chr15 | 36414733 | 36415131 | 399 |
| chr15 | 29463542 | 29463940 | 399 |
| chr15 | 28666200 | 28666598 | 399 |
| chr15 | 27243126 | 27243524 | 399 |
| chr15 | 24406024 | 24406422 | 399 |
| chr14 | 76287092 | 76287490 | 399 |
| chr14 | 62322422 | 62322820 | 399 |
| chr14 | 59023446 | 59023844 | 399 |
| chr14 | 34065716 | 34066114 | 399 |
| chr14 | 6359527  | 6359925  | 399 |
| chr13 | 80007046 | 80007444 | 399 |
| chr13 | 77715750 | 77716148 | 399 |
| chr13 | 77311293 | 77311691 | 399 |
| chr13 | 77285170 | 77285568 | 399 |
| chr13 | 70026356 | 70026754 | 399 |
| chr13 | 69214934 | 69215332 | 399 |

|       |           |           |     |
|-------|-----------|-----------|-----|
| chr13 | 62034934  | 62035332  | 399 |
| chr13 | 61505271  | 61505669  | 399 |
| chr13 | 60000764  | 60001162  | 399 |
| chr13 | 58473747  | 58474145  | 399 |
| chr13 | 55548475  | 55548873  | 399 |
| chr13 | 53693787  | 53694185  | 399 |
| chr13 | 35928933  | 35929331  | 399 |
| chr13 | 21891066  | 21891464  | 399 |
| chr12 | 34040063  | 34040461  | 399 |
| chr12 | 20028565  | 20028963  | 399 |
| chr11 | 106316299 | 106316697 | 399 |
| chr11 | 105657826 | 105658224 | 399 |
| chr11 | 103741680 | 103742078 | 399 |
| chr11 | 100901810 | 100902208 | 399 |
| chr11 | 100476203 | 100476601 | 399 |
| chr11 | 81605648  | 81606046  | 399 |
| chr11 | 77900577  | 77900975  | 399 |
| chr11 | 77572050  | 77572448  | 399 |
| chr11 | 75030180  | 75030578  | 399 |
| chr11 | 72750219  | 72750617  | 399 |
| chr11 | 2256367   | 2256765   | 399 |
| chr10 | 92073893  | 92074291  | 399 |
| chr10 | 90422492  | 90422890  | 399 |
| chr10 | 89188675  | 89189073  | 399 |
| chr10 | 83321031  | 83321429  | 399 |
| chr10 | 78881157  | 78881555  | 399 |
| chr10 | 70138534  | 70138932  | 399 |
| chr10 | 49252322  | 49252720  | 399 |
| chr10 | 17093418  | 17093816  | 399 |
| chr10 | 16970850  | 16971248  | 399 |
| chr10 | 8571148   | 8571546   | 399 |
| chr10 | 7741159   | 7741557   | 399 |
| chr1  | 147947793 | 147948191 | 399 |
| chr1  | 144520300 | 144520698 | 399 |
| chr1  | 100059695 | 100060093 | 399 |
| chr1  | 83146507  | 83146905  | 399 |
| chr1  | 76555870  | 76556268  | 399 |
| chr1  | 69471363  | 69471761  | 399 |
| chr1  | 68845441  | 68845839  | 399 |
| chrX  | 81329914  | 81330311  | 398 |
| chrX  | 78769978  | 78770375  | 398 |
| chrX  | 75448449  | 75448846  | 398 |
| chrX  | 74095592  | 74095989  | 398 |
| chrX  | 63074628  | 63075025  | 398 |
| chrX  | 59744116  | 59744513  | 398 |
| chrX  | 34832442  | 34832839  | 398 |
| chrX  | 7322694   | 7323091   | 398 |
| chrX  | 5781037   | 5781434   | 398 |
| chr9  | 106860577 | 106860974 | 398 |
| chr7  | 15346311  | 15346708  | 398 |

|       |               |           |     |
|-------|---------------|-----------|-----|
| chr7  | 14488234      | 14488631  | 398 |
| chr7  | 10284601      | 10284998  | 398 |
| chr5  | 80011373      | 80011770  | 398 |
| chr5  | 30082866      | 30083263  | 398 |
| chr3  | 8814026       | 8814423   | 398 |
| chr29 | 41853736      | 41854133  | 398 |
| chr29 | 37029849      | 37030246  | 398 |
| chr29 | 33554450      | 33554847  | 398 |
| chr29 | 2526508       | 2526905   | 398 |
| chr27 | 28180808      | 28181205  | 398 |
| chr25 | 42027666      | 42028063  | 398 |
| chr25 | 15352825      | 15353222  | 398 |
| chr25 | 653886 654283 | 398       |     |
| chr22 | 48761701      | 48762098  | 398 |
| chr22 | 5673460       | 5673857   | 398 |
| chr21 | 31128037      | 31128434  | 398 |
| chr20 | 826859 827256 | 398       |     |
| chr2  | 140768180     | 140768577 | 398 |
| chr19 | 39420870      | 39421267  | 398 |
| chr19 | 29998997      | 29999394  | 398 |
| chr19 | 24061532      | 24061929  | 398 |
| chr18 | 56671812      | 56672209  | 398 |
| chr18 | 4080008       | 4080405   | 398 |
| chr17 | 75558517      | 75558914  | 398 |
| chr17 | 63713975      | 63714372  | 398 |
| chr17 | 4150827       | 4151224   | 398 |
| chr15 | 25262034      | 25262431  | 398 |
| chr15 | 24440558      | 24440955  | 398 |
| chr14 | 34730225      | 34730622  | 398 |
| chr14 | 19303579      | 19303976  | 398 |
| chr13 | 77311744      | 77312141  | 398 |
| chr13 | 63493533      | 63493930  | 398 |
| chr13 | 59951668      | 59952065  | 398 |
| chr13 | 23035802      | 23036199  | 398 |
| chr11 | 84874130      | 84874527  | 398 |
| chr11 | 77628718      | 77629115  | 398 |
| chr10 | 90033401      | 90033798  | 398 |
| chr10 | 20134029      | 20134426  | 398 |
| chr1  | 144420863     | 144421260 | 398 |
| chr1  | 132013880     | 132014277 | 398 |
| chr1  | 123093485     | 123093882 | 398 |
| chrX  | 78176441      | 78176837  | 397 |
| chrX  | 77733352      | 77733748  | 397 |
| chrX  | 69151190      | 69151586  | 397 |
| chrX  | 60388296      | 60388692  | 397 |
| chrX  | 52899103      | 52899499  | 397 |
| chrX  | 50102101      | 50102497  | 397 |
| chrX  | 34544726      | 34545122  | 397 |
| chrX  | 34282021      | 34282417  | 397 |
| chrX  | 18543330      | 18543726  | 397 |

|       |           |           |     |
|-------|-----------|-----------|-----|
| chrX  | 11436740  | 11437136  | 397 |
| chrX  | 8067649   | 8068045   | 397 |
| chr9  | 90810938  | 90811334  | 397 |
| chr4  | 123093737 | 123094133 | 397 |
| chr4  | 123021821 | 123022217 | 397 |
| chr4  | 118540110 | 118540506 | 397 |
| chr28 | 8199048   | 8199444   | 397 |
| chr25 | 4619007   | 4619403   | 397 |
| chr24 | 44374618  | 44375014  | 397 |
| chr23 | 42802506  | 42802902  | 397 |
| chr23 | 18602443  | 18602839  | 397 |
| chr22 | 61137551  | 61137947  | 397 |
| chr22 | 16444070  | 16444466  | 397 |
| chr19 | 55998432  | 55998828  | 397 |
| chr18 | 39606425  | 39606821  | 397 |
| chr18 | 12056511  | 12056907  | 397 |
| chr15 | 62757799  | 62758195  | 397 |
| chr14 | 52282963  | 52283359  | 397 |
| chr14 | 1490944   | 1491340   | 397 |
| chr13 | 30830949  | 30831345  | 397 |
| chr11 | 77619082  | 77619478  | 397 |
| chr10 | 90520059  | 90520455  | 397 |
| chr10 | 67734519  | 67734915  | 397 |
| chr1  | 102176725 | 102177121 | 397 |
| chrX  | 74891592  | 74891987  | 396 |
| chrX  | 72499878  | 72500273  | 396 |
| chrX  | 62764101  | 62764496  | 396 |
| chrX  | 61699689  | 61700084  | 396 |
| chrX  | 50625203  | 50625598  | 396 |
| chrX  | 49294716  | 49295111  | 396 |
| chrX  | 30158716  | 30159111  | 396 |
| chr8  | 74379040  | 74379435  | 396 |
| chr8  | 24667550  | 24667945  | 396 |
| chr7  | 46562030  | 46562425  | 396 |
| chr5  | 111258601 | 111258996 | 396 |
| chr5  | 28824747  | 28825142  | 396 |
| chr3  | 125093882 | 125094277 | 396 |
| chr3  | 13633312  | 13633707  | 396 |
| chr27 | 15772270  | 15772665  | 396 |
| chr26 | 20981051  | 20981446  | 396 |
| chr25 | 43243324  | 43243719  | 396 |
| chr25 | 35411294  | 35411689  | 396 |
| chr25 | 34515343  | 34515738  | 396 |
| chr24 | 39749698  | 39750093  | 396 |
| chr22 | 50742686  | 50743081  | 396 |
| chr22 | 30296693  | 30297088  | 396 |
| chr21 | 34813298  | 34813693  | 396 |
| chr21 | 25179668  | 25180063  | 396 |
| chr20 | 6630988   | 6631383   | 396 |
| chr19 | 33258237  | 33258632  | 396 |

|       |               |           |     |
|-------|---------------|-----------|-----|
| chr19 | 22361903      | 22362298  | 396 |
| chr19 | 7615782       | 7616177   | 396 |
| chr16 | 2700422       | 2700817   | 396 |
| chr15 | 64840556      | 64840951  | 396 |
| chr14 | 40082179      | 40082574  | 396 |
| chr14 | 32872418      | 32872813  | 396 |
| chr13 | 59793643      | 59794038  | 396 |
| chr13 | 46419024      | 46419419  | 396 |
| chr12 | 36425450      | 36425845  | 396 |
| chr11 | 90388985      | 90389380  | 396 |
| chr10 | 83323642      | 83324037  | 396 |
| chr10 | 8558005       | 8558400   | 396 |
| chr1  | 144038335     | 144038730 | 396 |
| chr1  | 123118277     | 123118672 | 396 |
| chrX  | 86235269      | 86235663  | 395 |
| chrX  | 71792395      | 71792789  | 395 |
| chrX  | 61296577      | 61296971  | 395 |
| chrX  | 45776572      | 45776966  | 395 |
| chrX  | 40486522      | 40486916  | 395 |
| chrX  | 21828321      | 21828715  | 395 |
| chrX  | 623114 623508 | 395       |     |
| chr9  | 90706945      | 90707339  | 395 |
| chr8  | 73350882      | 73351276  | 395 |
| chr5  | 60973177      | 60973571  | 395 |
| chr3  | 127794600     | 127794994 | 395 |
| chr3  | 86051021      | 86051415  | 395 |
| chr29 | 31523978      | 31524372  | 395 |
| chr27 | 15381538      | 15381932  | 395 |
| chr24 | 39743885      | 39744279  | 395 |
| chr23 | 52453730      | 52454124  | 395 |
| chr22 | 59985319      | 59985713  | 395 |
| chr22 | 50107493      | 50107887  | 395 |
| chr22 | 32678608      | 32679002  | 395 |
| chr22 | 16252967      | 16253361  | 395 |
| chr20 | 64588416      | 64588810  | 395 |
| chr20 | 45412870      | 45413264  | 395 |
| chr2  | 129204057     | 129204451 | 395 |
| chr19 | 23768187      | 23768581  | 395 |
| chr19 | 17225411      | 17225805  | 395 |
| chr17 | 73143126      | 73143520  | 395 |
| chr16 | 59067647      | 59068041  | 395 |
| chr15 | 51685488      | 51685882  | 395 |
| chr15 | 51663612      | 51664006  | 395 |
| chr15 | 51562339      | 51562733  | 395 |
| chr13 | 77147128      | 77147522  | 395 |
| chr13 | 28521258      | 28521652  | 395 |
| chr12 | 73408956      | 73409350  | 395 |
| chr12 | 14732484      | 14732878  | 395 |
| chr11 | 100697695     | 100698089 | 395 |
| chr11 | 71058368      | 71058762  | 395 |

|       |           |           |     |
|-------|-----------|-----------|-----|
| chr10 | 52931788  | 52932182  | 395 |
| chrX  | 77545681  | 77546074  | 394 |
| chrX  | 71996487  | 71996880  | 394 |
| chrX  | 57133512  | 57133905  | 394 |
| chrX  | 53994304  | 53994697  | 394 |
| chrX  | 37641891  | 37642284  | 394 |
| chrX  | 23408852  | 23409245  | 394 |
| chrX  | 11955992  | 11956385  | 394 |
| chrX  | 10705578  | 10705971  | 394 |
| chrX  | 9047280   | 9047673   | 394 |
| chrX  | 5969052   | 5969445   | 394 |
| chr7  | 46159902  | 46160295  | 394 |
| chr6  | 108750078 | 108750471 | 394 |
| chr5  | 111019427 | 111019820 | 394 |
| chr5  | 51825616  | 51826009  | 394 |
| chr4  | 104226009 | 104226402 | 394 |
| chr26 | 42893843  | 42894236  | 394 |
| chr24 | 46906722  | 46907115  | 394 |
| chr24 | 1133953   | 1134346   | 394 |
| chr22 | 61140671  | 61141064  | 394 |
| chr22 | 50794598  | 50794991  | 394 |
| chr22 | 39769937  | 39770330  | 394 |
| chr20 | 73299777  | 73300170  | 394 |
| chr19 | 40507674  | 40508067  | 394 |
| chr18 | 54830214  | 54830607  | 394 |
| chr18 | 50003672  | 50004065  | 394 |
| chr16 | 42979248  | 42979641  | 394 |
| chr13 | 67178959  | 67179352  | 394 |
| chr12 | 84400856  | 84401249  | 394 |
| chr11 | 106380892 | 106381285 | 394 |
| chr11 | 83226740  | 83227133  | 394 |
| chr11 | 79860291  | 79860684  | 394 |
| chr10 | 4178567   | 4178960   | 394 |
| chr1  | 1591067   | 1591460   | 394 |
| chrX  | 79758262  | 79758654  | 393 |
| chrX  | 77481025  | 77481417  | 393 |
| chrX  | 72714590  | 72714982  | 393 |
| chrX  | 61463064  | 61463456  | 393 |
| chrX  | 56021553  | 56021945  | 393 |
| chrX  | 37423866  | 37424258  | 393 |
| chrX  | 11112016  | 11112408  | 393 |
| chrX  | 8046684   | 8047076   | 393 |
| chr9  | 24046781  | 24047173  | 393 |
| chr8  | 73489623  | 73490015  | 393 |
| chr7  | 71368815  | 71369207  | 393 |
| chr5  | 73284213  | 73284605  | 393 |
| chr3  | 114363996 | 114364388 | 393 |
| chr27 | 26886829  | 26887221  | 393 |
| chr26 | 20186288  | 20186680  | 393 |
| chr25 | 36654641  | 36655033  | 393 |

|       |               |           |     |
|-------|---------------|-----------|-----|
| chr25 | 27716946      | 27717338  | 393 |
| chr25 | 2815025       | 2815417   | 393 |
| chr23 | 14491960      | 14492352  | 393 |
| chr22 | 16435488      | 16435880  | 393 |
| chr20 | 636038 636430 | 393       |     |
| chr2  | 54397851      | 54398243  | 393 |
| chr19 | 63923894      | 63924286  | 393 |
| chr19 | 37925459      | 37925851  | 393 |
| chr19 | 7820776       | 7821168   | 393 |
| chr17 | 72695810      | 72696202  | 393 |
| chr17 | 69406902      | 69407294  | 393 |
| chr17 | 60297954      | 60298346  | 393 |
| chr16 | 75654649      | 75655041  | 393 |
| chr16 | 47180338      | 47180730  | 393 |
| chr15 | 25558758      | 25559150  | 393 |
| chr14 | 72314198      | 72314590  | 393 |
| chr13 | 40056730      | 40057122  | 393 |
| chr11 | 105653486     | 105653878 | 393 |
| chr11 | 89575513      | 89575905  | 393 |
| chr10 | 70403224      | 70403616  | 393 |
| chr10 | 16982960      | 16983352  | 393 |
| chrX  | 87026123      | 87026514  | 392 |
| chrX  | 78564912      | 78565303  | 392 |
| chrX  | 78522762      | 78523153  | 392 |
| chrX  | 68769659      | 68770050  | 392 |
| chrX  | 65186648      | 65187039  | 392 |
| chrX  | 54348752      | 54349143  | 392 |
| chrX  | 49341438      | 49341829  | 392 |
| chrX  | 14651672      | 14652063  | 392 |
| chrX  | 7516480       | 7516871   | 392 |
| chr9  | 62314328      | 62314719  | 392 |
| chr8  | 85380335      | 85380726  | 392 |
| chr8  | 65388740      | 65389131  | 392 |
| chr8  | 24681376      | 24681767  | 392 |
| chr7  | 13098719      | 13099110  | 392 |
| chr5  | 110784035     | 110784426 | 392 |
| chr29 | 49114793      | 49115184  | 392 |
| chr27 | 28121700      | 28122091  | 392 |
| chr26 | 38996091      | 38996482  | 392 |
| chr23 | 18184695      | 18185086  | 392 |
| chr21 | 47474031      | 47474422  | 392 |
| chr20 | 8493432       | 8493823   | 392 |
| chr2  | 134772453     | 134772844 | 392 |
| chr19 | 24259021      | 24259412  | 392 |
| chr18 | 16737572      | 16737963  | 392 |
| chr17 | 70331283      | 70331674  | 392 |
| chr16 | 3633622       | 3634013   | 392 |
| chr16 | 2127943       | 2128334   | 392 |
| chr14 | 61441625      | 61442016  | 392 |
| chr13 | 66020855      | 66021246  | 392 |

|       |           |           |     |
|-------|-----------|-----------|-----|
| chr13 | 23030998  | 23031389  | 392 |
| chr11 | 109767424 | 109767815 | 392 |
| chrX  | 65753090  | 65753480  | 391 |
| chrX  | 53964201  | 53964591  | 391 |
| chrX  | 45803966  | 45804356  | 391 |
| chrX  | 31153506  | 31153896  | 391 |
| chrX  | 29891052  | 29891442  | 391 |
| chrX  | 20741221  | 20741611  | 391 |
| chrX  | 8242102   | 8242492   | 391 |
| chrX  | 2384008   | 2384398   | 391 |
| chr8  | 82926860  | 82927250  | 391 |
| chr4  | 118228185 | 118228575 | 391 |
| chr4  | 49021215  | 49021605  | 391 |
| chr3  | 22496637  | 22497027  | 391 |
| chr26 | 49448339  | 49448729  | 391 |
| chr26 | 34398824  | 34399214  | 391 |
| chr25 | 34397871  | 34398261  | 391 |
| chr24 | 59297853  | 59298243  | 391 |
| chr23 | 49591223  | 49591613  | 391 |
| chr20 | 73405602  | 73405992  | 391 |
| chr20 | 71150005  | 71150395  | 391 |
| chr2  | 26587706  | 26588096  | 391 |
| chr19 | 38850178  | 38850568  | 391 |
| chr19 | 20342865  | 20343255  | 391 |
| chr18 | 55053212  | 55053602  | 391 |
| chr18 | 42245473  | 42245863  | 391 |
| chr18 | 35070721  | 35071111  | 391 |
| chr17 | 70220213  | 70220603  | 391 |
| chr14 | 61331803  | 61332193  | 391 |
| chr14 | 5914119   | 5914509   | 391 |
| chr13 | 41096214  | 41096604  | 391 |
| chr11 | 77652990  | 77653380  | 391 |
| chr11 | 28456481  | 28456871  | 391 |
| chr1  | 72570084  | 72570474  | 391 |
| chr1  | 61279196  | 61279586  | 391 |
| chrX  | 77524522  | 77524911  | 390 |
| chrX  | 76060224  | 76060613  | 390 |
| chrX  | 75734963  | 75735352  | 390 |
| chrX  | 72573531  | 72573920  | 390 |
| chrX  | 49773871  | 49774260  | 390 |
| chrX  | 35859397  | 35859786  | 390 |
| chrX  | 21072865  | 21073254  | 390 |
| chrX  | 15746856  | 15747245  | 390 |
| chrX  | 8315316   | 8315705   | 390 |
| chr7  | 46834166  | 46834555  | 390 |
| chr7  | 45099551  | 45099940  | 390 |
| chr7  | 37876830  | 37877219  | 390 |
| chr7  | 5399549   | 5399938   | 390 |
| chr5  | 26709599  | 26709988  | 390 |
| chr3  | 127033698 | 127034087 | 390 |



|       |               |           |     |
|-------|---------------|-----------|-----|
| chr3  | 72521680      | 72522069  | 390 |
| chr3  | 36028398      | 36028787  | 390 |
| chr3  | 35690661      | 35691050  | 390 |
| chr29 | 33928843      | 33929232  | 390 |
| chr28 | 33821825      | 33822214  | 390 |
| chr25 | 35116377      | 35116766  | 390 |
| chr25 | 3386926       | 3387315   | 390 |
| chr21 | 61482789      | 61483178  | 390 |
| chr21 | 5848610       | 5848999   | 390 |
| chr20 | 468695 469084 | 390       |     |
| chr2  | 75641514      | 75641903  | 390 |
| chr19 | 60239524      | 60239913  | 390 |
| chr19 | 59430552      | 59430941  | 390 |
| chr19 | 40974356      | 40974745  | 390 |
| chr19 | 23779915      | 23780304  | 390 |
| chr19 | 11004264      | 11004653  | 390 |
| chr18 | 56580573      | 56580962  | 390 |
| chr17 | 73176886      | 73177275  | 390 |
| chr16 | 51085105      | 51085494  | 390 |
| chr15 | 39522332      | 39522721  | 390 |
| chr13 | 62293085      | 62293474  | 390 |
| chr13 | 41757258      | 41757647  | 390 |
| chr11 | 13716525      | 13716914  | 390 |
| chr10 | 17311575      | 17311964  | 390 |
| chr10 | 16742397      | 16742786  | 390 |
| chr10 | 8246723       | 8247112   | 390 |
| chr1  | 118644986     | 118645375 | 390 |
| chr1  | 62290406      | 62290795  | 390 |
| chrX  | 72684376      | 72684764  | 389 |
| chrX  | 64690058      | 64690446  | 389 |
| chrX  | 61750286      | 61750674  | 389 |
| chrX  | 61411836      | 61412224  | 389 |
| chrX  | 55119704      | 55120092  | 389 |
| chrX  | 54787932      | 54788320  | 389 |
| chrX  | 36205705      | 36206093  | 389 |
| chrX  | 20918773      | 20919161  | 389 |
| chr9  | 108129601     | 108129989 | 389 |
| chr8  | 5914432       | 5914820   | 389 |
| chr6  | 107329453     | 107329841 | 389 |
| chr6  | 16271227      | 16271615  | 389 |
| chr3  | 111659121     | 111659509 | 389 |
| chr3  | 34043536      | 34043924  | 389 |
| chr3  | 26140193      | 26140581  | 389 |
| chr3  | 23625745      | 23626133  | 389 |
| chr3  | 22550949      | 22551337  | 389 |
| chr29 | 50223919      | 50224307  | 389 |
| chr27 | 21419901      | 21420289  | 389 |
| chr25 | 24846347      | 24846735  | 389 |
| chr23 | 13660441      | 13660829  | 389 |
| chr22 | 50732475      | 50732863  | 389 |

|       |           |           |     |
|-------|-----------|-----------|-----|
| chr22 | 48787616  | 48788004  | 389 |
| chr22 | 16564854  | 16565242  | 389 |
| chr22 | 13861070  | 13861458  | 389 |
| chr22 | 12371185  | 12371573  | 389 |
| chr21 | 59869184  | 59869572  | 389 |
| chr21 | 34013206  | 34013594  | 389 |
| chr21 | 15588513  | 15588901  | 389 |
| chr21 | 13799721  | 13800109  | 389 |
| chr19 | 55930967  | 55931355  | 389 |
| chr19 | 54759735  | 54760123  | 389 |
| chr19 | 42079131  | 42079519  | 389 |
| chr19 | 17111993  | 17112381  | 389 |
| chr18 | 11807407  | 11807795  | 389 |
| chr14 | 18683311  | 18683699  | 389 |
| chr13 | 65808205  | 65808593  | 389 |
| chr13 | 38165962  | 38166350  | 389 |
| chr12 | 74237822  | 74238210  | 389 |
| chr11 | 81384537  | 81384925  | 389 |
| chr11 | 47906376  | 47906764  | 389 |
| chr11 | 10332707  | 10333095  | 389 |
| chr11 | 7073582   | 7073970   | 389 |
| chrX  | 64663754  | 64664141  | 388 |
| chrX  | 62698404  | 62698791  | 388 |
| chrX  | 56879637  | 56880024  | 388 |
| chrX  | 54984326  | 54984713  | 388 |
| chrX  | 20716677  | 20717064  | 388 |
| chrX  | 9890664   | 9891051   | 388 |
| chr9  | 106790223 | 106790610 | 388 |
| chr8  | 24485008  | 24485395  | 388 |
| chr7  | 14485886  | 14486273  | 388 |
| chr7  | 5255361   | 5255748   | 388 |
| chr6  | 70181944  | 70182331  | 388 |
| chr5  | 35291060  | 35291447  | 388 |
| chr4  | 97085606  | 97085993  | 388 |
| chr3  | 35503228  | 35503615  | 388 |
| chr26 | 45306398  | 45306785  | 388 |
| chr25 | 40829727  | 40830114  | 388 |
| chr25 | 15308507  | 15308894  | 388 |
| chr22 | 59961931  | 59962318  | 388 |
| chr22 | 49598098  | 49598485  | 388 |
| chr20 | 65531766  | 65532153  | 388 |
| chr19 | 36663252  | 36663639  | 388 |
| chr19 | 32316663  | 32317050  | 388 |
| chr19 | 20345631  | 20346018  | 388 |
| chr19 | 13509197  | 13509584  | 388 |
| chr18 | 63510363  | 63510750  | 388 |
| chr17 | 72762740  | 72763127  | 388 |
| chr16 | 77325073  | 77325460  | 388 |
| chr16 | 19563658  | 19564045  | 388 |
| chr15 | 75312336  | 75312723  | 388 |

|       |           |           |     |
|-------|-----------|-----------|-----|
| chr15 | 57580192  | 57580579  | 388 |
| chr13 | 41120614  | 41121001  | 388 |
| chr12 | 35756043  | 35756430  | 388 |
| chr12 | 31280341  | 31280728  | 388 |
| chr11 | 90302503  | 90302890  | 388 |
| chr11 | 28553217  | 28553604  | 388 |
| chr1  | 46106831  | 46107218  | 388 |
| chrX  | 74728669  | 74729055  | 387 |
| chrX  | 63302482  | 63302868  | 387 |
| chrX  | 59670464  | 59670850  | 387 |
| chr9  | 77723559  | 77723945  | 387 |
| chr9  | 46011074  | 46011460  | 387 |
| chr8  | 63805299  | 63805685  | 387 |
| chr8  | 61845124  | 61845510  | 387 |
| chr6  | 46685180  | 46685566  | 387 |
| chr5  | 116702267 | 116702653 | 387 |
| chr5  | 102834042 | 102834428 | 387 |
| chr5  | 28482885  | 28483271  | 387 |
| chr3  | 116187687 | 116188073 | 387 |
| chr3  | 105158665 | 105159051 | 387 |
| chr27 | 28116345  | 28116731  | 387 |
| chr26 | 51533724  | 51534110  | 387 |
| chr26 | 43597089  | 43597475  | 387 |
| chr26 | 22229199  | 22229585  | 387 |
| chr25 | 35402173  | 35402559  | 387 |
| chr25 | 28176212  | 28176598  | 387 |
| chr23 | 7716790   | 7717176   | 387 |
| chr2  | 119912584 | 119912970 | 387 |
| chr19 | 60615534  | 60615920  | 387 |
| chr19 | 47065066  | 47065452  | 387 |
| chr18 | 55829198  | 55829584  | 387 |
| chr13 | 65349842  | 65350228  | 387 |
| chr13 | 62876918  | 62877304  | 387 |
| chr12 | 81928206  | 81928592  | 387 |
| chr12 | 36277200  | 36277586  | 387 |
| chr11 | 96400413  | 96400799  | 387 |
| chr11 | 1304713   | 1305099   | 387 |
| chr10 | 70038195  | 70038581  | 387 |
| chrX  | 73486431  | 73486816  | 386 |
| chrX  | 71822157  | 71822542  | 386 |
| chrX  | 9475796   | 9476181   | 386 |
| chr7  | 73164566  | 73164951  | 386 |
| chr7  | 10205728  | 10206113  | 386 |
| chr6  | 102163472 | 102163857 | 386 |
| chr5  | 119383849 | 119384234 | 386 |
| chr5  | 112079390 | 112079775 | 386 |
| chr5  | 112048393 | 112048778 | 386 |
| chr5  | 74865465  | 74865850  | 386 |
| chr5  | 1149239   | 1149624   | 386 |
| chr29 | 23564001  | 23564386  | 386 |

|       |           |           |     |
|-------|-----------|-----------|-----|
| chr26 | 22808903  | 22809288  | 386 |
| chr2  | 139165825 | 139166210 | 386 |
| chr19 | 40505307  | 40505692  | 386 |
| chr19 | 13435456  | 13435841  | 386 |
| chr18 | 56869496  | 56869881  | 386 |
| chr18 | 18738327  | 18738712  | 386 |
| chr18 | 18516058  | 18516443  | 386 |
| chr18 | 9647559   | 9647944   | 386 |
| chr17 | 69290316  | 69290701  | 386 |
| chr15 | 23214222  | 23214607  | 386 |
| chr13 | 40953537  | 40953922  | 386 |
| chr12 | 82751534  | 82751919  | 386 |
| chr11 | 80341619  | 80342004  | 386 |
| chr11 | 77630795  | 77631180  | 386 |
| chr10 | 70080747  | 70081132  | 386 |
| chrX  | 78346373  | 78346757  | 385 |
| chrX  | 54309483  | 54309867  | 385 |
| chrX  | 48004213  | 48004597  | 385 |
| chrX  | 39736789  | 39737173  | 385 |
| chrX  | 34564099  | 34564483  | 385 |
| chrX  | 18326084  | 18326468  | 385 |
| chrX  | 12078008  | 12078392  | 385 |
| chr5  | 113328592 | 113328976 | 385 |
| chr4  | 68259127  | 68259511  | 385 |
| chr3  | 114099573 | 114099957 | 385 |
| chr29 | 48274635  | 48275019  | 385 |
| chr29 | 29702896  | 29703280  | 385 |
| chr27 | 7573321   | 7573705   | 385 |
| chr26 | 14614058  | 14614442  | 385 |
| chr25 | 3047104   | 3047488   | 385 |
| chr24 | 58733788  | 58734172  | 385 |
| chr23 | 46093852  | 46094236  | 385 |
| chr23 | 15956228  | 15956612  | 385 |
| chr21 | 60421875  | 60422259  | 385 |
| chr19 | 44895854  | 44896238  | 385 |
| chr19 | 41427868  | 41428252  | 385 |
| chr19 | 33583809  | 33584193  | 385 |
| chr19 | 13970161  | 13970545  | 385 |
| chr18 | 21996932  | 21997316  | 385 |
| chr18 | 11775175  | 11775559  | 385 |
| chr15 | 65581170  | 65581554  | 385 |
| chr15 | 61280209  | 61280593  | 385 |
| chr15 | 51536339  | 51536723  | 385 |
| chr15 | 39828033  | 39828417  | 385 |
| chr14 | 9143013   | 9143397   | 385 |
| chr14 | 621421    | 621805    | 385 |
| chr13 | 73907775  | 73908159  | 385 |
| chr13 | 70003414  | 70003798  | 385 |
| chr13 | 38832403  | 38832787  | 385 |
| chr12 | 20077762  | 20078146  | 385 |

|       |           |           |     |
|-------|-----------|-----------|-----|
| chr11 | 70973916  | 70974300  | 385 |
| chr10 | 88483053  | 88483437  | 385 |
| chr10 | 16975959  | 16976343  | 385 |
| chrX  | 66607016  | 66607399  | 384 |
| chrX  | 59208845  | 59209228  | 384 |
| chrX  | 55223025  | 55223408  | 384 |
| chrX  | 37887108  | 37887491  | 384 |
| chrX  | 36238403  | 36238786  | 384 |
| chrX  | 19099033  | 19099416  | 384 |
| chrX  | 10095961  | 10096344  | 384 |
| chr5  | 113198913 | 113199296 | 384 |
| chr3  | 127775048 | 127775431 | 384 |
| chr3  | 115865870 | 115866253 | 384 |
| chr3  | 114949333 | 114949716 | 384 |
| chr3  | 111892625 | 111893008 | 384 |
| chr3  | 109728746 | 109729129 | 384 |
| chr29 | 38057157  | 38057540  | 384 |
| chr29 | 34559717  | 34560100  | 384 |
| chr24 | 59385408  | 59385791  | 384 |
| chr24 | 33487917  | 33488300  | 384 |
| chr23 | 49939756  | 49940139  | 384 |
| chr23 | 13602800  | 13603183  | 384 |
| chr22 | 50606127  | 50606510  | 384 |
| chr2  | 123753308 | 123753691 | 384 |
| chr2  | 117711279 | 117711662 | 384 |
| chr19 | 61204008  | 61204391  | 384 |
| chr19 | 60968321  | 60968704  | 384 |
| chr19 | 59349435  | 59349818  | 384 |
| chr18 | 51619029  | 51619412  | 384 |
| chr17 | 49442082  | 49442465  | 384 |
| chr13 | 60435496  | 60435879  | 384 |
| chr13 | 59664658  | 59665041  | 384 |
| chr13 | 40970434  | 40970817  | 384 |
| chr13 | 35817913  | 35818296  | 384 |
| chrX  | 62540819  | 62541201  | 383 |
| chrX  | 49272412  | 49272794  | 383 |
| chrX  | 35998132  | 35998514  | 383 |
| chrX  | 21572752  | 21573134  | 383 |
| chr9  | 66717615  | 66717997  | 383 |
| chr8  | 74328064  | 74328446  | 383 |
| chr8  | 63944083  | 63944465  | 383 |
| chr7  | 3699622   | 3700004   | 383 |
| chr6  | 94911145  | 94911527  | 383 |
| chr5  | 122355722 | 122356104 | 383 |
| chr5  | 33887435  | 33887817  | 383 |
| chr4  | 106928630 | 106929012 | 383 |
| chr4  | 95595722  | 95596104  | 383 |
| chr28 | 27561042  | 27561424  | 383 |
| chr26 | 44682209  | 44682591  | 383 |
| chr26 | 18494349  | 18494731  | 383 |

|       |           |           |     |
|-------|-----------|-----------|-----|
| chr21 | 67769327  | 67769709  | 383 |
| chr18 | 56231185  | 56231567  | 383 |
| chr16 | 60220317  | 60220699  | 383 |
| chr16 | 47197976  | 47198358  | 383 |
| chr15 | 62758279  | 62758661  | 383 |
| chr15 | 24651825  | 24652207  | 383 |
| chr13 | 41119969  | 41120351  | 383 |
| chr13 | 40958652  | 40959034  | 383 |
| chr12 | 76538455  | 76538837  | 383 |
| chr11 | 105967536 | 105967918 | 383 |
| chr11 | 72584525  | 72584907  | 383 |
| chr11 | 70720887  | 70721269  | 383 |
| chr11 | 20973632  | 20974014  | 383 |
| chr10 | 80446688  | 80447070  | 383 |
| chrX  | 72391529  | 72391910  | 382 |
| chrX  | 64004521  | 64004902  | 382 |
| chrX  | 63462763  | 63463144  | 382 |
| chrX  | 63077282  | 63077663  | 382 |
| chrX  | 45887992  | 45888373  | 382 |
| chr4  | 121471178 | 121471559 | 382 |
| chr3  | 126088343 | 126088724 | 382 |
| chr3  | 62177581  | 62177962  | 382 |
| chr29 | 37241257  | 37241638  | 382 |
| chr28 | 26786671  | 26787052  | 382 |
| chr26 | 42966046  | 42966427  | 382 |
| chr26 | 19932091  | 19932472  | 382 |
| chr25 | 42212068  | 42212449  | 382 |
| chr22 | 56033318  | 56033699  | 382 |
| chr22 | 30408023  | 30408404  | 382 |
| chr22 | 17554922  | 17555303  | 382 |
| chr21 | 64438661  | 64439042  | 382 |
| chr2  | 101912255 | 101912636 | 382 |
| chr19 | 64726496  | 64726877  | 382 |
| chr19 | 29462101  | 29462482  | 382 |
| chr16 | 46120070  | 46120451  | 382 |
| chr14 | 61213783  | 61214164  | 382 |
| chr14 | 26682737  | 26683118  | 382 |
| chr14 | 8050685   | 8051066   | 382 |
| chr14 | 7371767   | 7372148   | 382 |
| chr13 | 55990690  | 55991071  | 382 |
| chr11 | 98900793  | 98901174  | 382 |
| chr10 | 102675928 | 102676309 | 382 |
| chr10 | 21688449  | 21688830  | 382 |
| chrX  | 80161328  | 80161708  | 381 |
| chrX  | 74661397  | 74661777  | 381 |
| chrX  | 71685117  | 71685497  | 381 |
| chrX  | 71212893  | 71213273  | 381 |
| chrX  | 62748229  | 62748609  | 381 |
| chrX  | 51041564  | 51041944  | 381 |
| chrX  | 50173289  | 50173669  | 381 |

|       |           |           |     |
|-------|-----------|-----------|-----|
| chrX  | 34722387  | 34722767  | 381 |
| chrX  | 34256468  | 34256848  | 381 |
| chrX  | 34071527  | 34071907  | 381 |
| chrX  | 21056959  | 21057339  | 381 |
| chrX  | 13938578  | 13938958  | 381 |
| chrX  | 8321631   | 8322011   | 381 |
| chrX  | 6728872   | 6729252   | 381 |
| chr7  | 50690289  | 50690669  | 381 |
| chr6  | 121876404 | 121876784 | 381 |
| chr5  | 120153085 | 120153465 | 381 |
| chr3  | 111895879 | 111896259 | 381 |
| chr29 | 37102889  | 37103269  | 381 |
| chr26 | 38206652  | 38207032  | 381 |
| chr26 | 22286346  | 22286726  | 381 |
| chr26 | 5871095   | 5871475   | 381 |
| chr23 | 10816271  | 10816651  | 381 |
| chr21 | 22398131  | 22398511  | 381 |
| chr2  | 99693232  | 99693612  | 381 |
| chr19 | 46856944  | 46857324  | 381 |
| chr18 | 55209883  | 55210263  | 381 |
| chr18 | 18733963  | 18734343  | 381 |
| chr18 | 12128429  | 12128809  | 381 |
| chr17 | 57624924  | 57625304  | 381 |
| chr16 | 67458197  | 67458577  | 381 |
| chr15 | 22895396  | 22895776  | 381 |
| chr14 | 34091808  | 34092188  | 381 |
| chr13 | 63301020  | 63301400  | 381 |
| chr12 | 58684717  | 58685097  | 381 |
| chr11 | 106264110 | 106264490 | 381 |
| chr10 | 35665692  | 35666072  | 381 |
| chr10 | 25248117  | 25248497  | 381 |
| chrX  | 81003359  | 81003738  | 380 |
| chrX  | 72032373  | 72032752  | 380 |
| chrX  | 50442476  | 50442855  | 380 |
| chrX  | 49238295  | 49238674  | 380 |
| chrX  | 46689513  | 46689892  | 380 |
| chrX  | 40295967  | 40296346  | 380 |
| chrX  | 31524273  | 31524652  | 380 |
| chrX  | 21941380  | 21941759  | 380 |
| chrX  | 12351917  | 12352296  | 380 |
| chrX  | 10029114  | 10029493  | 380 |
| chr7  | 42223126  | 42223505  | 380 |
| chr7  | 4913381   | 4913760   | 380 |
| chr7  | 4518201   | 4518580   | 380 |
| chr6  | 101075533 | 101075912 | 380 |
| chr6  | 93980850  | 93981229  | 380 |
| chr5  | 124725002 | 124725381 | 380 |
| chr4  | 45571044  | 45571423  | 380 |
| chr27 | 4187912   | 4188291   | 380 |
| chr25 | 43431764  | 43432143  | 380 |

|       |           |           |     |
|-------|-----------|-----------|-----|
| chr25 | 33808268  | 33808647  | 380 |
| chr23 | 46361381  | 46361760  | 380 |
| chr22 | 30061665  | 30062044  | 380 |
| chr21 | 69098629  | 69099008  | 380 |
| chr2  | 132212803 | 132213182 | 380 |
| chr2  | 130477621 | 130478000 | 380 |
| chr2  | 21521970  | 21522349  | 380 |
| chr19 | 7791913   | 7792292   | 380 |
| chr18 | 33356238  | 33356617  | 380 |
| chr17 | 63799870  | 63800249  | 380 |
| chr12 | 75110996  | 75111375  | 380 |
| chr10 | 70140593  | 70140972  | 380 |
| chr10 | 50566090  | 50566469  | 380 |
| chrX  | 71628943  | 71629321  | 379 |
| chrX  | 68334410  | 68334788  | 379 |
| chrX  | 63209355  | 63209733  | 379 |
| chrX  | 62162595  | 62162973  | 379 |
| chrX  | 38988181  | 38988559  | 379 |
| chrX  | 18921757  | 18922135  | 379 |
| chrX  | 7628546   | 7628924   | 379 |
| chr9  | 90294819  | 90295197  | 379 |
| chr8  | 44139504  | 44139882  | 379 |
| chr6  | 115762825 | 115763203 | 379 |
| chr6  | 94983272  | 94983650  | 379 |
| chr6  | 37117124  | 37117502  | 379 |
| chr5  | 102090771 | 102091149 | 379 |
| chr4  | 14692760  | 14693138  | 379 |
| chr29 | 33739015  | 33739393  | 379 |
| chr28 | 43995675  | 43996053  | 379 |
| chr28 | 34177019  | 34177397  | 379 |
| chr27 | 17519364  | 17519742  | 379 |
| chr22 | 29669943  | 29670321  | 379 |
| chr21 | 13901769  | 13902147  | 379 |
| chr2  | 135740953 | 135741331 | 379 |
| chr2  | 4931848   | 4932226   | 379 |
| chr19 | 60775371  | 60775749  | 379 |
| chr19 | 30401387  | 30401765  | 379 |
| chr13 | 62421405  | 62421783  | 379 |
| chr12 | 76524796  | 76525174  | 379 |
| chr11 | 101022139 | 101022517 | 379 |
| chrX  | 63956170  | 63956547  | 378 |
| chrX  | 54421422  | 54421799  | 378 |
| chrX  | 53625500  | 53625877  | 378 |
| chrX  | 48070662  | 48071039  | 378 |
| chrX  | 45334457  | 45334834  | 378 |
| chrX  | 22507225  | 22507602  | 378 |
| chrX  | 17211867  | 17212244  | 378 |
| chrX  | 6271549   | 6271926   | 378 |
| chr8  | 57989598  | 57989975  | 378 |
| chr7  | 17398981  | 17399358  | 378 |



|       |           |           |     |
|-------|-----------|-----------|-----|
| chr5  | 121255109 | 121255486 | 378 |
| chr5  | 112018022 | 112018399 | 378 |
| chr3  | 116002337 | 116002714 | 378 |
| chr29 | 18205665  | 18206042  | 378 |
| chr28 | 25288713  | 25289090  | 378 |
| chr26 | 45851065  | 45851442  | 378 |
| chr26 | 45315692  | 45316069  | 378 |
| chr25 | 34082441  | 34082818  | 378 |
| chr24 | 48590723  | 48591100  | 378 |
| chr23 | 15844112  | 15844489  | 378 |
| chr2  | 94900062  | 94900439  | 378 |
| chr2  | 87447286  | 87447663  | 378 |
| chr18 | 64536265  | 64536642  | 378 |
| chr18 | 11584174  | 11584551  | 378 |
| chr18 | 4956802   | 4957179   | 378 |
| chr17 | 69882704  | 69883081  | 378 |
| chr17 | 68168404  | 68168781  | 378 |
| chr16 | 73343903  | 73344280  | 378 |
| chr12 | 9695108   | 9695485   | 378 |
| chr11 | 75029435  | 75029812  | 378 |
| chr11 | 28506630  | 28507007  | 378 |
| chr1  | 153526167 | 153526544 | 378 |
| chrX  | 77080913  | 77081289  | 377 |
| chrX  | 72318935  | 72319311  | 377 |
| chrX  | 29781727  | 29782103  | 377 |
| chrX  | 22444075  | 22444451  | 377 |
| chrX  | 18273102  | 18273478  | 377 |
| chrX  | 12519845  | 12520221  | 377 |
| chr8  | 96331537  | 96331913  | 377 |
| chr8  | 73109057  | 73109433  | 377 |
| chr5  | 35355778  | 35356154  | 377 |
| chr5  | 29005458  | 29005834  | 377 |
| chr3  | 26152037  | 26152413  | 377 |
| chr29 | 37265457  | 37265833  | 377 |
| chr28 | 25690696  | 25691072  | 377 |
| chr26 | 40602730  | 40603106  | 377 |
| chr25 | 43507883  | 43508259  | 377 |
| chr25 | 37451475  | 37451851  | 377 |
| chr24 | 47888925  | 47889301  | 377 |
| chr23 | 14995438  | 14995814  | 377 |
| chr23 | 13597702  | 13598078  | 377 |
| chr21 | 64571122  | 64571498  | 377 |
| chr20 | 70809157  | 70809533  | 377 |
| chr20 | 5577067   | 5577443   | 377 |
| chr19 | 46705638  | 46706014  | 377 |
| chr19 | 37513355  | 37513731  | 377 |
| chr19 | 24402380  | 24402756  | 377 |
| chr18 | 24363445  | 24363821  | 377 |
| chr18 | 12156293  | 12156669  | 377 |
| chr15 | 64001732  | 64002108  | 377 |

|       |          |          |     |
|-------|----------|----------|-----|
| chr15 | 33155551 | 33155927 | 377 |
| chr13 | 60427000 | 60427376 | 377 |
| chr13 | 60038136 | 60038512 | 377 |
| chr13 | 38826775 | 38827151 | 377 |
| chr12 | 14998366 | 14998742 | 377 |
| chr1  | 72415327 | 72415703 | 377 |
| chr1  | 68824645 | 68825021 | 377 |
| chrX  | 80953136 | 80953511 | 376 |
| chrX  | 65751795 | 65752170 | 376 |
| chrX  | 64700196 | 64700571 | 376 |
| chrX  | 58774656 | 58775031 | 376 |
| chrX  | 37322914 | 37323289 | 376 |
| chrX  | 34120935 | 34121310 | 376 |
| chrX  | 20151419 | 20151794 | 376 |
| chrX  | 15824253 | 15824628 | 376 |
| chrX  | 2400798  | 2401173  | 376 |
| chr8  | 10468495 | 10468870 | 376 |
| chr7  | 38210178 | 38210553 | 376 |
| chr7  | 14167271 | 14167646 | 376 |
| chr5  | 28879391 | 28879766 | 376 |
| chr5  | 1100493  | 1100868  | 376 |
| chr29 | 44731763 | 44732138 | 376 |
| chr29 | 33810139 | 33810514 | 376 |
| chr26 | 14456455 | 14456830 | 376 |
| chr25 | 33799361 | 33799736 | 376 |
| chr25 | 1284574  | 1284949  | 376 |
| chr23 | 40506801 | 40507176 | 376 |
| chr22 | 49535864 | 49536239 | 376 |
| chr2  | 93536454 | 93536829 | 376 |
| chr19 | 26926423 | 26926798 | 376 |
| chr17 | 63104681 | 63105056 | 376 |
| chr14 | 30799938 | 30800313 | 376 |
| chr12 | 72412501 | 72412876 | 376 |
| chr11 | 14754908 | 14755283 | 376 |
| chr10 | 52225587 | 52225962 | 376 |
| chr10 | 12823196 | 12823571 | 376 |
| chr10 | 549753   | 550128   | 376 |
| chrX  | 62683980 | 62684354 | 375 |
| chrX  | 59711952 | 59712326 | 375 |
| chrX  | 40020624 | 40020998 | 375 |
| chrX  | 32891308 | 32891682 | 375 |
| chrX  | 20012605 | 20012979 | 375 |
| chrX  | 8016122  | 8016496  | 375 |
| chrX  | 5586497  | 5586871  | 375 |
| chr9  | 16968118 | 16968492 | 375 |
| chr6  | 18061684 | 18062058 | 375 |
| chr29 | 45763571 | 45763945 | 375 |
| chr26 | 42272012 | 42272386 | 375 |
| chr24 | 62441623 | 62441997 | 375 |
| chr24 | 53856688 | 53857062 | 375 |

|       |           |           |     |
|-------|-----------|-----------|-----|
| chr24 | 1674189   | 1674563   | 375 |
| chr23 | 18643985  | 18644359  | 375 |
| chr22 | 12415786  | 12416160  | 375 |
| chr2  | 134534695 | 134535069 | 375 |
| chr19 | 47177062  | 47177436  | 375 |
| chr19 | 43081217  | 43081591  | 375 |
| chr19 | 12600727  | 12601101  | 375 |
| chr17 | 64102425  | 64102799  | 375 |
| chr12 | 31681923  | 31682297  | 375 |
| chr11 | 28287901  | 28288275  | 375 |
| chr10 | 58764139  | 58764513  | 375 |
| chrX  | 56501369  | 56501742  | 374 |
| chrX  | 15749009  | 15749382  | 374 |
| chr9  | 106764844 | 106765217 | 374 |
| chr7  | 38163668  | 38164041  | 374 |
| chr3  | 79689868  | 79690241  | 374 |
| chr29 | 44550219  | 44550592  | 374 |
| chr29 | 17984629  | 17985002  | 374 |
| chr28 | 34435888  | 34436261  | 374 |
| chr28 | 33611434  | 33611807  | 374 |
| chr27 | 28097810  | 28098183  | 374 |
| chr25 | 33266839  | 33267212  | 374 |
| chr25 | 28175367  | 28175740  | 374 |
| chr23 | 18663860  | 18664233  | 374 |
| chr19 | 60730207  | 60730580  | 374 |
| chr19 | 58432312  | 58432685  | 374 |
| chr19 | 32888726  | 32889099  | 374 |
| chr19 | 21320656  | 21321029  | 374 |
| chr18 | 23172772  | 23173145  | 374 |
| chr17 | 47358283  | 47358656  | 374 |
| chr13 | 40510641  | 40511014  | 374 |
| chr13 | 15359204  | 15359577  | 374 |
| chr12 | 34365522  | 34365895  | 374 |
| chr11 | 14263440  | 14263813  | 374 |
| chr10 | 7560957   | 7561330   | 374 |
| chrX  | 75187945  | 75188317  | 373 |
| chrX  | 74446701  | 74447073  | 373 |
| chrX  | 50016154  | 50016526  | 373 |
| chrX  | 6996900   | 6997272   | 373 |
| chrX  | 2475254   | 2475626   | 373 |
| chr9  | 75437773  | 75438145  | 373 |
| chr9  | 41637340  | 41637712  | 373 |
| chr8  | 65731278  | 65731650  | 373 |
| chr8  | 45657556  | 45657928  | 373 |
| chr8  | 23829843  | 23830215  | 373 |
| chr7  | 94364787  | 94365159  | 373 |
| chr7  | 13543791  | 13544163  | 373 |
| chr5  | 76230299  | 76230671  | 373 |
| chr5  | 30159049  | 30159421  | 373 |
| chr5  | 295846    | 296218    | 373 |

|       |           |           |     |
|-------|-----------|-----------|-----|
| chr29 | 36816070  | 36816442  | 373 |
| chr28 | 38903069  | 38903441  | 373 |
| chr25 | 30569654  | 30570026  | 373 |
| chr20 | 23692720  | 23693092  | 373 |
| chr18 | 58819807  | 58820179  | 373 |
| chr18 | 33132673  | 33133045  | 373 |
| chr18 | 22725983  | 22726355  | 373 |
| chr17 | 68357375  | 68357747  | 373 |
| chr15 | 75266959  | 75267331  | 373 |
| chr15 | 29184822  | 29185194  | 373 |
| chr15 | 24640125  | 24640497  | 373 |
| chr15 | 23063719  | 23064091  | 373 |
| chr13 | 60166063  | 60166435  | 373 |
| chr13 | 54985204  | 54985576  | 373 |
| chr13 | 41745729  | 41746101  | 373 |
| chr11 | 81377966  | 81378338  | 373 |
| chr11 | 77770021  | 77770393  | 373 |
| chr11 | 74454538  | 74454910  | 373 |
| chr10 | 17230789  | 17231161  | 373 |
| chr1  | 119738485 | 119738857 | 373 |
| chr1  | 74695339  | 74695711  | 373 |
| chrX  | 77105648  | 77106019  | 372 |
| chrX  | 73393063  | 73393434  | 372 |
| chrX  | 70347534  | 70347905  | 372 |
| chrX  | 34085567  | 34085938  | 372 |
| chrX  | 7363754   | 7364125   | 372 |
| chrX  | 2866051   | 2866422   | 372 |
| chr9  | 106536546 | 106536917 | 372 |
| chr8  | 74339340  | 74339711  | 372 |
| chr8  | 64979232  | 64979603  | 372 |
| chr6  | 108474070 | 108474441 | 372 |
| chr5  | 120720429 | 120720800 | 372 |
| chr5  | 30345129  | 30345500  | 372 |
| chr4  | 118539446 | 118539817 | 372 |
| chr3  | 122055989 | 122056360 | 372 |
| chr29 | 17794017  | 17794388  | 372 |
| chr24 | 44255963  | 44256334  | 372 |
| chr21 | 19092713  | 19093084  | 372 |
| chr20 | 75667779  | 75668150  | 372 |
| chr2  | 135624290 | 135624661 | 372 |
| chr19 | 58174962  | 58175333  | 372 |
| chr19 | 37703772  | 37704143  | 372 |
| chr19 | 13743055  | 13743426  | 372 |
| chr17 | 75048181  | 75048552  | 372 |
| chr13 | 52091191  | 52091562  | 372 |
| chr12 | 74461454  | 74461825  | 372 |
| chr1  | 67736693  | 67737064  | 372 |
| chrX  | 73434666  | 73435036  | 371 |
| chrX  | 55771936  | 55772306  | 371 |
| chrX  | 36283704  | 36284074  | 371 |

|       |           |           |     |
|-------|-----------|-----------|-----|
| chrX  | 35794241  | 35794611  | 371 |
| chrX  | 20876611  | 20876981  | 371 |
| chr7  | 50355814  | 50356184  | 371 |
| chr4  | 80432968  | 80433338  | 371 |
| chr4  | 8867854   | 8868224   | 371 |
| chr29 | 46517756  | 46518126  | 371 |
| chr29 | 2571295   | 2571665   | 371 |
| chr25 | 29111248  | 29111618  | 371 |
| chr24 | 45967810  | 45968180  | 371 |
| chr20 | 75075193  | 75075563  | 371 |
| chr19 | 63484325  | 63484695  | 371 |
| chr19 | 29651440  | 29651810  | 371 |
| chr18 | 45517621  | 45517991  | 371 |
| chr18 | 12546504  | 12546874  | 371 |
| chr17 | 72754164  | 72754534  | 371 |
| chr17 | 69385335  | 69385705  | 371 |
| chr16 | 47934595  | 47934965  | 371 |
| chr12 | 82620612  | 82620982  | 371 |
| chr11 | 70894878  | 70895248  | 371 |
| chr10 | 90705474  | 90705844  | 371 |
| chr10 | 70139952  | 70140322  | 371 |
| chr1  | 123099402 | 123099772 | 371 |
| chrX  | 72846970  | 72847339  | 370 |
| chrX  | 33752255  | 33752624  | 370 |
| chrX  | 30123546  | 30123915  | 370 |
| chrX  | 21525302  | 21525671  | 370 |
| chrX  | 12566820  | 12567189  | 370 |
| chrX  | 8171235   | 8171604   | 370 |
| chr8  | 85349408  | 85349777  | 370 |
| chr8  | 72670579  | 72670948  | 370 |
| chr8  | 67704778  | 67705147  | 370 |
| chr5  | 121200984 | 121201353 | 370 |
| chr5  | 70639167  | 70639536  | 370 |
| chr4  | 75325469  | 75325838  | 370 |
| chr4  | 28581892  | 28582261  | 370 |
| chr26 | 22374021  | 22374390  | 370 |
| chr26 | 20854651  | 20855020  | 370 |
| chr25 | 40222887  | 40223256  | 370 |
| chr25 | 36473051  | 36473420  | 370 |
| chr23 | 42932531  | 42932900  | 370 |
| chr23 | 30347277  | 30347646  | 370 |
| chr23 | 27883456  | 27883825  | 370 |
| chr22 | 61815585  | 61815954  | 370 |
| chr22 | 30264654  | 30265023  | 370 |
| chr20 | 19965575  | 19965944  | 370 |
| chr2  | 129268265 | 129268634 | 370 |
| chr19 | 40465100  | 40465469  | 370 |
| chr18 | 4279697   | 4280066   | 370 |
| chr17 | 47771906  | 47772275  | 370 |
| chr16 | 38557557  | 38557926  | 370 |

|       |           |           |     |
|-------|-----------|-----------|-----|
| chr15 | 28619961  | 28620330  | 370 |
| chr14 | 4068132   | 4068501   | 370 |
| chr13 | 56349233  | 56349602  | 370 |
| chr12 | 15253189  | 15253558  | 370 |
| chr11 | 70644409  | 70644778  | 370 |
| chr10 | 52649200  | 52649569  | 370 |
| chr10 | 33931231  | 33931600  | 370 |
| chr1  | 141281657 | 141282026 | 370 |
| chrX  | 81938094  | 81938462  | 369 |
| chrX  | 74597087  | 74597455  | 369 |
| chrX  | 72474612  | 72474980  | 369 |
| chrX  | 65517251  | 65517619  | 369 |
| chrX  | 55257810  | 55258178  | 369 |
| chrX  | 50185189  | 50185557  | 369 |
| chrX  | 39034442  | 39034810  | 369 |
| chrX  | 20349617  | 20349985  | 369 |
| chrX  | 15894161  | 15894529  | 369 |
| chrX  | 11852718  | 11853086  | 369 |
| chr9  | 78186118  | 78186486  | 369 |
| chr8  | 79341762  | 79342130  | 369 |
| chr7  | 19994687  | 19995055  | 369 |
| chr5  | 122022007 | 122022375 | 369 |
| chr5  | 30677023  | 30677391  | 369 |
| chr4  | 27032468  | 27032836  | 369 |
| chr29 | 44499609  | 44499977  | 369 |
| chr28 | 32825605  | 32825973  | 369 |
| chr27 | 21886884  | 21887252  | 369 |
| chr26 | 18370405  | 18370773  | 369 |
| chr23 | 32896076  | 32896444  | 369 |
| chr22 | 55390078  | 55390446  | 369 |
| chr21 | 64485127  | 64485495  | 369 |
| chr21 | 6481078   | 6481446   | 369 |
| chr2  | 124975322 | 124975690 | 369 |
| chr2  | 92466537  | 92466905  | 369 |
| chr19 | 46473813  | 46474181  | 369 |
| chr19 | 39356113  | 39356481  | 369 |
| chr18 | 38529924  | 38530292  | 369 |
| chr18 | 33210621  | 33210989  | 369 |
| chr17 | 60885888  | 60886256  | 369 |
| chr13 | 35536919  | 35537287  | 369 |
| chr11 | 90370101  | 90370469  | 369 |
| chr10 | 71085027  | 71085395  | 369 |
| chrX  | 80918916  | 80919283  | 368 |
| chrX  | 80788701  | 80789068  | 368 |
| chrX  | 61136348  | 61136715  | 368 |
| chrX  | 51038730  | 51039097  | 368 |
| chrX  | 46875669  | 46876036  | 368 |
| chrX  | 19033515  | 19033882  | 368 |
| chr9  | 104826316 | 104826683 | 368 |
| chr27 | 15599295  | 15599662  | 368 |

|       |               |           |     |
|-------|---------------|-----------|-----|
| chr26 | 43444507      | 43444874  | 368 |
| chr26 | 18295049      | 18295416  | 368 |
| chr23 | 27600356      | 27600723  | 368 |
| chr23 | 15840181      | 15840548  | 368 |
| chr22 | 55763702      | 55764069  | 368 |
| chr22 | 48238298      | 48238665  | 368 |
| chr20 | 919417 919784 | 368       |     |
| chr2  | 132658095     | 132658462 | 368 |
| chr19 | 61958129      | 61958496  | 368 |
| chr18 | 64350523      | 64350890  | 368 |
| chr18 | 45845002      | 45845369  | 368 |
| chr18 | 18452945      | 18453312  | 368 |
| chr18 | 11966490      | 11966857  | 368 |
| chr17 | 67059325      | 67059692  | 368 |
| chr17 | 5347045       | 5347412   | 368 |
| chr16 | 41064004      | 41064371  | 368 |
| chr14 | 6979572       | 6979939   | 368 |
| chr12 | 69034065      | 69034432  | 368 |
| chr1  | 148204056     | 148204423 | 368 |
| chrX  | 61383351      | 61383717  | 367 |
| chrX  | 61346100      | 61346466  | 367 |
| chrX  | 55888867      | 55889233  | 367 |
| chrX  | 54018238      | 54018604  | 367 |
| chrX  | 49459274      | 49459640  | 367 |
| chrX  | 33510134      | 33510500  | 367 |
| chrX  | 19004146      | 19004512  | 367 |
| chrX  | 18771882      | 18772248  | 367 |
| chrX  | 12915222      | 12915588  | 367 |
| chrX  | 4356221       | 4356587   | 367 |
| chr9  | 99937201      | 99937567  | 367 |
| chr9  | 35935292      | 35935658  | 367 |
| chr7  | 14729612      | 14729978  | 367 |
| chr5  | 117771253     | 117771619 | 367 |
| chr5  | 33931562      | 33931928  | 367 |
| chr4  | 123979048     | 123979414 | 367 |
| chr3  | 116249154     | 116249520 | 367 |
| chr3  | 62933454      | 62933820  | 367 |
| chr3  | 35660429      | 35660795  | 367 |
| chr29 | 36721603      | 36721969  | 367 |
| chr28 | 5332937       | 5333303   | 367 |
| chr24 | 24724062      | 24724428  | 367 |
| chr23 | 44996087      | 44996453  | 367 |
| chr22 | 16219488      | 16219854  | 367 |
| chr22 | 10764312      | 10764678  | 367 |
| chr20 | 584102 584468 | 367       |     |
| chr2  | 85088498      | 85088864  | 367 |
| chr19 | 27068155      | 27068521  | 367 |
| chr17 | 72660587      | 72660953  | 367 |
| chr17 | 58887422      | 58887788  | 367 |
| chr15 | 31962709      | 31963075  | 367 |

|       |               |           |     |
|-------|---------------|-----------|-----|
| chr13 | 59100087      | 59100453  | 367 |
| chr11 | 47896440      | 47896806  | 367 |
| chr10 | 74868283      | 74868649  | 367 |
| chr10 | 20983709      | 20984075  | 367 |
| chrX  | 48057618      | 48057983  | 366 |
| chrX  | 21836686      | 21837051  | 366 |
| chrX  | 6953101       | 6953466   | 366 |
| chrX  | 406998 407363 | 366       |     |
| chr9  | 90419104      | 90419469  | 366 |
| chr9  | 74217948      | 74218313  | 366 |
| chr7  | 80866072      | 80866437  | 366 |
| chr25 | 28512688      | 28513053  | 366 |
| chr24 | 58937683      | 58938048  | 366 |
| chr23 | 49941785      | 49942150  | 366 |
| chr23 | 18682213      | 18682578  | 366 |
| chr19 | 54931958      | 54932323  | 366 |
| chr16 | 26859055      | 26859420  | 366 |
| chr12 | 9162649       | 9163014   | 366 |
| chr11 | 70727773      | 70728138  | 366 |
| chr11 | 44768056      | 44768421  | 366 |
| chr11 | 10490481      | 10490846  | 366 |
| chr10 | 90911699      | 90912064  | 366 |
| chrX  | 73194149      | 73194513  | 365 |
| chrX  | 62720659      | 62721023  | 365 |
| chrX  | 13623458      | 13623822  | 365 |
| chrX  | 12168164      | 12168528  | 365 |
| chrX  | 2342258       | 2342622   | 365 |
| chr8  | 110901433     | 110901797 | 365 |
| chr7  | 46406920      | 46407284  | 365 |
| chr29 | 29689774      | 29690138  | 365 |
| chr29 | 17822107      | 17822471  | 365 |
| chr29 | 7853128       | 7853492   | 365 |
| chr28 | 44575274      | 44575638  | 365 |
| chr27 | 15773587      | 15773951  | 365 |
| chr2  | 134535336     | 134535700 | 365 |
| chr19 | 17118766      | 17119130  | 365 |
| chr19 | 14914156      | 14914520  | 365 |
| chr19 | 13686711      | 13687075  | 365 |
| chr18 | 46815989      | 46816353  | 365 |
| chr16 | 17698970      | 17699334  | 365 |
| chr15 | 24867597      | 24867961  | 365 |
| chr14 | 59535567      | 59535931  | 365 |
| chr14 | 6373883       | 6374247   | 365 |
| chr14 | 1726707       | 1727071   | 365 |
| chr1  | 132102981     | 132103345 | 365 |
| chrX  | 75610191      | 75610554  | 364 |
| chrX  | 75211688      | 75212051  | 364 |
| chrX  | 66318886      | 66319249  | 364 |
| chrX  | 63128854      | 63129217  | 364 |
| chrX  | 58292093      | 58292456  | 364 |



|       |           |           |     |
|-------|-----------|-----------|-----|
| chrX  | 6332008   | 6332371   | 364 |
| chr9  | 53371304  | 53371667  | 364 |
| chr6  | 70888865  | 70889228  | 364 |
| chr4  | 121408807 | 121409170 | 364 |
| chr4  | 116868550 | 116868913 | 364 |
| chr4  | 8700775   | 8701138   | 364 |
| chr3  | 122141027 | 122141390 | 364 |
| chr29 | 38852653  | 38853016  | 364 |
| chr26 | 44073772  | 44074135  | 364 |
| chr26 | 39629301  | 39629664  | 364 |
| chr25 | 33892857  | 33893220  | 364 |
| chr24 | 41573511  | 41573874  | 364 |
| chr24 | 40779451  | 40779814  | 364 |
| chr23 | 27762991  | 27763354  | 364 |
| chr22 | 58684095  | 58684458  | 364 |
| chr2  | 134891078 | 134891441 | 364 |
| chr19 | 45537490  | 45537853  | 364 |
| chr19 | 40662807  | 40663170  | 364 |
| chr19 | 21747363  | 21747726  | 364 |
| chr11 | 70563926  | 70564289  | 364 |
| chr10 | 15138343  | 15138706  | 364 |
| chr1  | 1471720   | 1472083   | 364 |
| chrX  | 53444203  | 53444565  | 363 |
| chrX  | 37055818  | 37056180  | 363 |
| chrX  | 31774407  | 31774769  | 363 |
| chrX  | 21594800  | 21595162  | 363 |
| chrX  | 5608937   | 5609299   | 363 |
| chr9  | 105726420 | 105726782 | 363 |
| chr4  | 84620538  | 84620900  | 363 |
| chr3  | 35491928  | 35492290  | 363 |
| chr29 | 44641797  | 44642159  | 363 |
| chr29 | 18179318  | 18179680  | 363 |
| chr26 | 48902950  | 48903312  | 363 |
| chr24 | 48611650  | 48612012  | 363 |
| chr23 | 18489148  | 18489510  | 363 |
| chr21 | 61652755  | 61653117  | 363 |
| chr19 | 60801706  | 60802068  | 363 |
| chr18 | 51079561  | 51079923  | 363 |
| chr18 | 41382536  | 41382898  | 363 |
| chr17 | 66748218  | 66748580  | 363 |
| chr17 | 64076488  | 64076850  | 363 |
| chr16 | 44874115  | 44874477  | 363 |
| chr15 | 74656936  | 74657298  | 363 |
| chr15 | 31165225  | 31165587  | 363 |
| chr13 | 63473801  | 63474163  | 363 |
| chr13 | 23678229  | 23678591  | 363 |
| chr12 | 24513115  | 24513477  | 363 |
| chr11 | 74916948  | 74917310  | 363 |
| chr1  | 76557437  | 76557799  | 363 |
| chr1  | 74674431  | 74674793  | 363 |

|       |               |           |     |
|-------|---------------|-----------|-----|
| chrX  | 73188401      | 73188762  | 362 |
| chrX  | 61854048      | 61854409  | 362 |
| chrX  | 50397593      | 50397954  | 362 |
| chrX  | 36371503      | 36371864  | 362 |
| chrX  | 19208432      | 19208793  | 362 |
| chrX  | 17320753      | 17321114  | 362 |
| chr8  | 105570687     | 105571048 | 362 |
| chr5  | 73062020      | 73062381  | 362 |
| chr3  | 112715840     | 112716201 | 362 |
| chr3  | 31705276      | 31705637  | 362 |
| chr25 | 33224397      | 33224758  | 362 |
| chr2  | 130994862     | 130995223 | 362 |
| chr2  | 129705850     | 129706211 | 362 |
| chr18 | 48866498      | 48866859  | 362 |
| chr18 | 24322588      | 24322949  | 362 |
| chr18 | 22157795      | 22158156  | 362 |
| chr18 | 11816134      | 11816495  | 362 |
| chr18 | 5109086       | 5109447   | 362 |
| chr17 | 73195727      | 73196088  | 362 |
| chr15 | 30967729      | 30968090  | 362 |
| chr14 | 72173586      | 72173947  | 362 |
| chr14 | 60065933      | 60066294  | 362 |
| chr14 | 6360701       | 6361062   | 362 |
| chr13 | 74419049      | 74419410  | 362 |
| chr12 | 74582221      | 74582582  | 362 |
| chr11 | 13060122      | 13060483  | 362 |
| chr10 | 67918515      | 67918876  | 362 |
| chr1  | 146412684     | 146413045 | 362 |
| chrX  | 29724249      | 29724609  | 361 |
| chrX  | 15649042      | 15649402  | 361 |
| chr9  | 10500341      | 10500701  | 361 |
| chr6  | 67997515      | 67997875  | 361 |
| chr3  | 92498949      | 92499309  | 361 |
| chr23 | 49148476      | 49148836  | 361 |
| chr21 | 27292225      | 27292585  | 361 |
| chr20 | 33366081      | 33366441  | 361 |
| chr2  | 127777412     | 127777772 | 361 |
| chr19 | 59343010      | 59343370  | 361 |
| chr19 | 38772150      | 38772510  | 361 |
| chr18 | 647040 647400 | 361       |     |
| chr17 | 63463233      | 63463593  | 361 |
| chr17 | 63092055      | 63092415  | 361 |
| chr17 | 58766435      | 58766795  | 361 |
| chr14 | 70854436      | 70854796  | 361 |
| chr11 | 65319707      | 65320067  | 361 |
| chr10 | 35959266      | 35959626  | 361 |
| chr10 | 9770565       | 9770925   | 361 |
| chrX  | 59192771      | 59193130  | 360 |
| chrX  | 53634193      | 53634552  | 360 |
| chrX  | 53138353      | 53138712  | 360 |

|       |           |           |     |
|-------|-----------|-----------|-----|
| chrX  | 35453327  | 35453686  | 360 |
| chrX  | 34031579  | 34031938  | 360 |
| chrX  | 7700639   | 7700998   | 360 |
| chrX  | 461651    | 462010    | 360 |
| chr9  | 52827419  | 52827778  | 360 |
| chr7  | 45684528  | 45684887  | 360 |
| chr6  | 46497404  | 46497763  | 360 |
| chr5  | 112434647 | 112435006 | 360 |
| chr26 | 21609398  | 21609757  | 360 |
| chr20 | 73406228  | 73406587  | 360 |
| chr2  | 111551600 | 111551959 | 360 |
| chr19 | 39456513  | 39456872  | 360 |
| chr19 | 29838121  | 29838480  | 360 |
| chr18 | 23105136  | 23105495  | 360 |
| chr18 | 4303798   | 4304157   | 360 |
| chr17 | 57680279  | 57680638  | 360 |
| chr17 | 48208263  | 48208622  | 360 |
| chr15 | 53381372  | 53381731  | 360 |
| chr13 | 59691566  | 59691925  | 360 |
| chr13 | 52664474  | 52664833  | 360 |
| chr13 | 40103364  | 40103723  | 360 |
| chr11 | 84531413  | 84531772  | 360 |
| chr11 | 19832288  | 19832647  | 360 |
| chr1  | 75044734  | 75045093  | 360 |
| chr1  | 1739819   | 1740178   | 360 |
| chrX  | 54786499  | 54786857  | 359 |
| chrX  | 19861929  | 19862287  | 359 |
| chrX  | 7419159   | 7419517   | 359 |
| chr9  | 100312358 | 100312716 | 359 |
| chr7  | 46951122  | 46951480  | 359 |
| chr7  | 18947721  | 18948079  | 359 |
| chr7  | 17834954  | 17835312  | 359 |
| chr29 | 48819341  | 48819699  | 359 |
| chr29 | 36424125  | 36424483  | 359 |
| chr26 | 51195399  | 51195757  | 359 |
| chr26 | 43080264  | 43080622  | 359 |
| chr26 | 37595381  | 37595739  | 359 |
| chr25 | 2271057   | 2271415   | 359 |
| chr24 | 40263964  | 40264322  | 359 |
| chr23 | 19693247  | 19693605  | 359 |
| chr21 | 33981691  | 33982049  | 359 |
| chr2  | 131754250 | 131754608 | 359 |
| chr19 | 60839121  | 60839479  | 359 |
| chr19 | 60817328  | 60817686  | 359 |
| chr19 | 38119980  | 38120338  | 359 |
| chr19 | 33129751  | 33130109  | 359 |
| chr15 | 36291458  | 36291816  | 359 |
| chr15 | 24205702  | 24206060  | 359 |
| chr13 | 77661256  | 77661614  | 359 |
| chr10 | 4843992   | 4844350   | 359 |

|       |               |           |     |
|-------|---------------|-----------|-----|
| chr1  | 57314245      | 57314603  | 359 |
| chrX  | 65591673      | 65592030  | 358 |
| chrX  | 20501232      | 20501589  | 358 |
| chrX  | 10102123      | 10102480  | 358 |
| chrX  | 8048357       | 8048714   | 358 |
| chrX  | 403469 403826 | 358       |     |
| chr9  | 87764579      | 87764936  | 358 |
| chr9  | 45690346      | 45690703  | 358 |
| chr6  | 122432357     | 122432714 | 358 |
| chr6  | 121761144     | 121761501 | 358 |
| chr5  | 81479556      | 81479913  | 358 |
| chr5  | 79800191      | 79800548  | 358 |
| chr5  | 30189401      | 30189758  | 358 |
| chr4  | 97957149      | 97957506  | 358 |
| chr3  | 117713170     | 117713527 | 358 |
| chr28 | 12425443      | 12425800  | 358 |
| chr24 | 47128629      | 47128986  | 358 |
| chr24 | 1938880       | 1939237   | 358 |
| chr22 | 48247576      | 48247933  | 358 |
| chr22 | 48229443      | 48229800  | 358 |
| chr21 | 64045804      | 64046161  | 358 |
| chr2  | 115209628     | 115209985 | 358 |
| chr2  | 110143665     | 110144022 | 358 |
| chr19 | 30529571      | 30529928  | 358 |
| chr18 | 49940899      | 49941256  | 358 |
| chr17 | 62370465      | 62370822  | 358 |
| chr16 | 58578666      | 58579023  | 358 |
| chr15 | 22400323      | 22400680  | 358 |
| chr12 | 83820297      | 83820654  | 358 |
| chr11 | 80211423      | 80211780  | 358 |
| chr11 | 21614429      | 21614786  | 358 |
| chrX  | 51896023      | 51896379  | 357 |
| chrX  | 20125241      | 20125597  | 357 |
| chr8  | 7619722       | 7620078   | 357 |
| chr4  | 69932912      | 69933268  | 357 |
| chr29 | 35288249      | 35288605  | 357 |
| chr24 | 45137332      | 45137688  | 357 |
| chr23 | 45586397      | 45586753  | 357 |
| chr22 | 13536517      | 13536873  | 357 |
| chr21 | 19213682      | 19214038  | 357 |
| chr21 | 18445814      | 18446170  | 357 |
| chr21 | 6469260       | 6469616   | 357 |
| chr20 | 8566774       | 8567130   | 357 |
| chr19 | 47201155      | 47201511  | 357 |
| chr18 | 52678001      | 52678357  | 357 |
| chr17 | 49439042      | 49439398  | 357 |
| chr16 | 2898432       | 2898788   | 357 |
| chr15 | 24911923      | 24912279  | 357 |
| chr14 | 8522554       | 8522910   | 357 |
| chr14 | 7761147       | 7761503   | 357 |

|       |           |           |     |
|-------|-----------|-----------|-----|
| chr14 | 1905106   | 1905462   | 357 |
| chr13 | 78417195  | 78417551  | 357 |
| chr13 | 41352082  | 41352438  | 357 |
| chr12 | 32195329  | 32195685  | 357 |
| chr11 | 11759460  | 11759816  | 357 |
| chrX  | 80268476  | 80268831  | 356 |
| chrX  | 71768038  | 71768393  | 356 |
| chrX  | 54278751  | 54279106  | 356 |
| chrX  | 50389221  | 50389576  | 356 |
| chrX  | 27823303  | 27823658  | 356 |
| chrX  | 21327394  | 21327749  | 356 |
| chrX  | 12288693  | 12289048  | 356 |
| chr29 | 49795418  | 49795773  | 356 |
| chr21 | 58292615  | 58292970  | 356 |
| chr21 | 31489393  | 31489748  | 356 |
| chr2  | 132843717 | 132844072 | 356 |
| chr18 | 55306942  | 55307297  | 356 |
| chr18 | 50208890  | 50209245  | 356 |
| chr15 | 32275632  | 32275987  | 356 |
| chr13 | 35927722  | 35928077  | 356 |
| chr11 | 82906959  | 82907314  | 356 |
| chr11 | 50941425  | 50941780  | 356 |
| chrX  | 78301904  | 78302258  | 355 |
| chrX  | 50590007  | 50590361  | 355 |
| chrX  | 50423194  | 50423548  | 355 |
| chr8  | 108781245 | 108781599 | 355 |
| chr5  | 76803784  | 76804138  | 355 |
| chr4  | 123251309 | 123251663 | 355 |
| chr3  | 20509476  | 20509830  | 355 |
| chr29 | 37121660  | 37122014  | 355 |
| chr29 | 17734210  | 17734564  | 355 |
| chr25 | 29075582  | 29075936  | 355 |
| chr23 | 28061809  | 28062163  | 355 |
| chr21 | 24359578  | 24359932  | 355 |
| chr19 | 45135508  | 45135862  | 355 |
| chr19 | 45104864  | 45105218  | 355 |
| chr19 | 40535822  | 40536176  | 355 |
| chr15 | 62560464  | 62560818  | 355 |
| chr13 | 80743460  | 80743814  | 355 |
| chr13 | 62781600  | 62781954  | 355 |
| chr13 | 59701936  | 59702290  | 355 |
| chr13 | 41769928  | 41770282  | 355 |
| chr12 | 25037960  | 25038314  | 355 |
| chr11 | 100884950 | 100885304 | 355 |
| chr11 | 21803488  | 21803842  | 355 |
| chrX  | 73170428  | 73170781  | 354 |
| chrX  | 47722894  | 47723247  | 354 |
| chrX  | 13849283  | 13849636  | 354 |
| chr5  | 28829668  | 28830021  | 354 |
| chr3  | 77666006  | 77666359  | 354 |

|       |           |           |     |
|-------|-----------|-----------|-----|
| chr29 | 30663126  | 30663479  | 354 |
| chr27 | 46068083  | 46068436  | 354 |
| chr23 | 33468265  | 33468618  | 354 |
| chr23 | 15270949  | 15271302  | 354 |
| chr22 | 30275526  | 30275879  | 354 |
| chr22 | 12071813  | 12072166  | 354 |
| chr20 | 4443446   | 4443799   | 354 |
| chr20 | 1141703   | 1142056   | 354 |
| chr2  | 25279077  | 25279430  | 354 |
| chr19 | 39377278  | 39377631  | 354 |
| chr19 | 21693237  | 21693590  | 354 |
| chr16 | 2248544   | 2248897   | 354 |
| chr15 | 24206501  | 24206854  | 354 |
| chr14 | 62354930  | 62355283  | 354 |
| chr14 | 33279894  | 33280247  | 354 |
| chr11 | 68604252  | 68604605  | 354 |
| chr11 | 14424563  | 14424916  | 354 |
| chr10 | 79480891  | 79481244  | 354 |
| chrX  | 78053248  | 78053600  | 353 |
| chrX  | 54591735  | 54592087  | 353 |
| chrX  | 20385491  | 20385843  | 353 |
| chr9  | 24603585  | 24603937  | 353 |
| chr7  | 42526895  | 42527247  | 353 |
| chr28 | 30806408  | 30806760  | 353 |
| chr28 | 26220543  | 26220895  | 353 |
| chr27 | 38712202  | 38712554  | 353 |
| chr24 | 36553678  | 36554030  | 353 |
| chr23 | 8428981   | 8429333   | 353 |
| chr22 | 14951519  | 14951871  | 353 |
| chr22 | 7527208   | 7527560   | 353 |
| chr21 | 65672843  | 65673195  | 353 |
| chr21 | 29696589  | 29696941  | 353 |
| chr21 | 26802048  | 26802400  | 353 |
| chr21 | 7799704   | 7800056   | 353 |
| chr20 | 72152036  | 72152388  | 353 |
| chr19 | 32582205  | 32582557  | 353 |
| chr19 | 13484100  | 13484452  | 353 |
| chr18 | 51046778  | 51047130  | 353 |
| chr18 | 51025787  | 51026139  | 353 |
| chr18 | 33890159  | 33890511  | 353 |
| chr18 | 11824723  | 11825075  | 353 |
| chr16 | 69673816  | 69674168  | 353 |
| chr16 | 41447150  | 41447502  | 353 |
| chr16 | 40890851  | 40891203  | 353 |
| chr15 | 29823578  | 29823930  | 353 |
| chr12 | 31174065  | 31174417  | 353 |
| chr12 | 31142152  | 31142504  | 353 |
| chr11 | 70966711  | 70967063  | 353 |
| chr10 | 86653504  | 86653856  | 353 |
| chr1  | 113556917 | 113557269 | 353 |

|       |               |           |     |
|-------|---------------|-----------|-----|
| chrX  | 65759742      | 65760093  | 352 |
| chrX  | 50698952      | 50699303  | 352 |
| chrX  | 40461181      | 40461532  | 352 |
| chrX  | 31156959      | 31157310  | 352 |
| chrX  | 20022781      | 20023132  | 352 |
| chrX  | 7374883       | 7375234   | 352 |
| chrX  | 6186557       | 6186908   | 352 |
| chrX  | 2516459       | 2516810   | 352 |
| chr5  | 35474057      | 35474408  | 352 |
| chr3  | 22564987      | 22565338  | 352 |
| chr3  | 11561624      | 11561975  | 352 |
| chr29 | 39225238      | 39225589  | 352 |
| chr28 | 33569177      | 33569528  | 352 |
| chr25 | 33598561      | 33598912  | 352 |
| chr25 | 28478482      | 28478833  | 352 |
| chr24 | 59445237      | 59445588  | 352 |
| chr22 | 59802323      | 59802674  | 352 |
| chr22 | 53980748      | 53981099  | 352 |
| chr2  | 132212097     | 132212448 | 352 |
| chr19 | 30530540      | 30530891  | 352 |
| chr19 | 6577189       | 6577540   | 352 |
| chr18 | 23617375      | 23617726  | 352 |
| chr17 | 72770689      | 72771040  | 352 |
| chrX  | 943237 943587 | 351       |     |
| chr9  | 74293638      | 74293988  | 351 |
| chr9  | 66931530      | 66931880  | 351 |
| chr8  | 23897923      | 23898273  | 351 |
| chr7  | 43676124      | 43676474  | 351 |
| chr5  | 120853009     | 120853359 | 351 |
| chr5  | 118253400     | 118253750 | 351 |
| chr4  | 79271475      | 79271825  | 351 |
| chr28 | 40381569      | 40381919  | 351 |
| chr25 | 24015333      | 24015683  | 351 |
| chr22 | 14063347      | 14063697  | 351 |
| chr21 | 16059603      | 16059953  | 351 |
| chr2  | 131539198     | 131539548 | 351 |
| chr18 | 54967326      | 54967676  | 351 |
| chr18 | 22056748      | 22057098  | 351 |
| chr18 | 10839021      | 10839371  | 351 |
| chr15 | 65564826      | 65565176  | 351 |
| chr14 | 67135 67485   | 351       |     |
| chr13 | 65273495      | 65273845  | 351 |
| chr12 | 17168249      | 17168599  | 351 |
| chr11 | 107009665     | 107010015 | 351 |
| chr11 | 11045063      | 11045413  | 351 |
| chr1  | 110671700     | 110672050 | 351 |
| chr1  | 1470357       | 1470707   | 351 |
| chrX  | 68420706      | 68421055  | 350 |
| chrX  | 51711872      | 51712221  | 350 |
| chrX  | 19522846      | 19523195  | 350 |

|       |           |           |     |
|-------|-----------|-----------|-----|
| chrX  | 9136315   | 9136664   | 350 |
| chr9  | 65840219  | 65840568  | 350 |
| chr7  | 48981515  | 48981864  | 350 |
| chr4  | 120933323 | 120933672 | 350 |
| chr29 | 46235955  | 46236304  | 350 |
| chr28 | 26056547  | 26056896  | 350 |
| chr22 | 43632445  | 43632794  | 350 |
| chr22 | 10947454  | 10947803  | 350 |
| chr2  | 73044742  | 73045091  | 350 |
| chr19 | 46698967  | 46699316  | 350 |
| chr18 | 43832203  | 43832552  | 350 |
| chr16 | 77623745  | 77624094  | 350 |
| chr15 | 24033800  | 24034149  | 350 |
| chr13 | 56433202  | 56433551  | 350 |
| chr11 | 100882843 | 100883192 | 350 |
| chr11 | 62704640  | 62704989  | 350 |
| chr11 | 9339230   | 9339579   | 350 |
| chr10 | 88036231  | 88036580  | 350 |
| chrX  | 46231607  | 46231955  | 349 |
| chrX  | 35803875  | 35804223  | 349 |
| chrX  | 9672728   | 9673076   | 349 |
| chr4  | 106978144 | 106978492 | 349 |
| chr4  | 106592217 | 106592565 | 349 |
| chr4  | 9140589   | 9140937   | 349 |
| chr3  | 30331558  | 30331906  | 349 |
| chr29 | 45789082  | 45789430  | 349 |
| chr2  | 139226296 | 139226644 | 349 |
| chr2  | 20944264  | 20944612  | 349 |
| chr19 | 58421661  | 58422009  | 349 |
| chr19 | 13554726  | 13555074  | 349 |
| chr16 | 58574980  | 58575328  | 349 |
| chr14 | 5500148   | 5500496   | 349 |
| chr12 | 14806612  | 14806960  | 349 |
| chr11 | 47292024  | 47292372  | 349 |
| chrX  | 37725490  | 37725837  | 348 |
| chrX  | 30400824  | 30401171  | 348 |
| chrX  | 6161637   | 6161984   | 348 |
| chr9  | 34924820  | 34925167  | 348 |
| chr9  | 11535812  | 11536159  | 348 |
| chr8  | 8440802   | 8441149   | 348 |
| chr6  | 46571236  | 46571583  | 348 |
| chr5  | 28871568  | 28871915  | 348 |
| chr4  | 123357529 | 123357876 | 348 |
| chr3  | 117227100 | 117227447 | 348 |
| chr25 | 1301497   | 1301844   | 348 |
| chr24 | 60716760  | 60717107  | 348 |
| chr21 | 68478855  | 68479202  | 348 |
| chr20 | 72731462  | 72731809  | 348 |
| chr20 | 5082534   | 5082881   | 348 |
| chr19 | 40459147  | 40459494  | 348 |



|       |           |           |     |
|-------|-----------|-----------|-----|
| chr18 | 3127576   | 3127923   | 348 |
| chr17 | 57702603  | 57702950  | 348 |
| chr15 | 65669930  | 65670277  | 348 |
| chr13 | 77170957  | 77171304  | 348 |
| chr12 | 17982589  | 17982936  | 348 |
| chr10 | 21070718  | 21071065  | 348 |
| chr1  | 144332011 | 144332358 | 348 |
| chr1  | 112145881 | 112146228 | 348 |
| chrX  | 21524763  | 21525109  | 347 |
| chrX  | 6488032   | 6488378   | 347 |
| chrX  | 2571646   | 2571992   | 347 |
| chr9  | 62312774  | 62313120  | 347 |
| chr7  | 44621439  | 44621785  | 347 |
| chr3  | 35638165  | 35638511  | 347 |
| chr22 | 59521231  | 59521577  | 347 |
| chr20 | 30447879  | 30448225  | 347 |
| chr19 | 46771230  | 46771576  | 347 |
| chr19 | 27211185  | 27211531  | 347 |
| chr15 | 23911174  | 23911520  | 347 |
| chr14 | 66286132  | 66286478  | 347 |
| chr12 | 84206320  | 84206666  | 347 |
| chr12 | 20778923  | 20779269  | 347 |
| chr11 | 20427899  | 20428245  | 347 |
| chr10 | 74590637  | 74590983  | 347 |
| chrX  | 71588048  | 71588393  | 346 |
| chrX  | 15079723  | 15080068  | 346 |
| chr8  | 104099161 | 104099506 | 346 |
| chr8  | 89535836  | 89536181  | 346 |
| chr6  | 121012977 | 121013322 | 346 |
| chr3  | 118065034 | 118065379 | 346 |
| chr26 | 33916572  | 33916917  | 346 |
| chr25 | 37491822  | 37492167  | 346 |
| chr2  | 131839671 | 131840016 | 346 |
| chr2  | 74330241  | 74330586  | 346 |
| chr19 | 29793821  | 29794166  | 346 |
| chr17 | 60572286  | 60572631  | 346 |
| chr14 | 61205038  | 61205383  | 346 |
| chr14 | 5442173   | 5442518   | 346 |
| chr13 | 40904590  | 40904935  | 346 |
| chr13 | 25745555  | 25745900  | 346 |
| chr12 | 15864410  | 15864755  | 346 |
| chr10 | 71295725  | 71296070  | 346 |
| chr1  | 75048050  | 75048395  | 346 |
| chrX  | 62996431  | 62996775  | 345 |
| chrX  | 21971134  | 21971478  | 345 |
| chrX  | 19055347  | 19055691  | 345 |
| chrX  | 15701153  | 15701497  | 345 |
| chr9  | 43786203  | 43786547  | 345 |
| chr8  | 116715277 | 116715621 | 345 |
| chr7  | 37393815  | 37394159  | 345 |

|       |           |           |     |
|-------|-----------|-----------|-----|
| chr7  | 24216191  | 24216535  | 345 |
| chr28 | 33616180  | 33616524  | 345 |
| chr27 | 26551503  | 26551847  | 345 |
| chr23 | 46357240  | 46357584  | 345 |
| chr19 | 47205781  | 47206125  | 345 |
| chr19 | 30364286  | 30364630  | 345 |
| chr16 | 23834084  | 23834428  | 345 |
| chr15 | 23404793  | 23405137  | 345 |
| chr13 | 41214777  | 41215121  | 345 |
| chrX  | 20060273  | 20060616  | 344 |
| chr4  | 110132322 | 110132665 | 344 |
| chr21 | 26839543  | 26839886  | 344 |
| chr2  | 110067493 | 110067836 | 344 |
| chr18 | 56378252  | 56378595  | 344 |
| chr18 | 11552690  | 11553033  | 344 |
| chr15 | 24636895  | 24637238  | 344 |
| chr14 | 42786412  | 42786755  | 344 |
| chr13 | 76564192  | 76564535  | 344 |
| chrX  | 36720375  | 36720717  | 343 |
| chrX  | 19149396  | 19149738  | 343 |
| chr9  | 104893166 | 104893508 | 343 |
| chr8  | 7612740   | 7613082   | 343 |
| chr5  | 17186670  | 17187012  | 343 |
| chr3  | 116954345 | 116954687 | 343 |
| chr3  | 116914214 | 116914556 | 343 |
| chr29 | 48887962  | 48888304  | 343 |
| chr29 | 39119785  | 39120127  | 343 |
| chr28 | 11835600  | 11835942  | 343 |
| chr22 | 54390253  | 54390595  | 343 |
| chr2  | 125931525 | 125931867 | 343 |
| chr15 | 81677003  | 81677345  | 343 |
| chr15 | 29337482  | 29337824  | 343 |
| chr14 | 7802555   | 7802897   | 343 |
| chr13 | 35966801  | 35967143  | 343 |
| chr13 | 28477545  | 28477887  | 343 |
| chr11 | 28457398  | 28457740  | 343 |
| chr10 | 89235532  | 89235874  | 343 |
| chrX  | 5878559   | 5878900   | 342 |
| chr7  | 61737382  | 61737723  | 342 |
| chr6  | 108754744 | 108755085 | 342 |
| chr6  | 61945991  | 61946332  | 342 |
| chr5  | 61494957  | 61495298  | 342 |
| chr3  | 13478856  | 13479197  | 342 |
| chr29 | 36302515  | 36302856  | 342 |
| chr29 | 34321995  | 34322336  | 342 |
| chr29 | 26762383  | 26762724  | 342 |
| chr22 | 30205300  | 30205641  | 342 |
| chr21 | 22724026  | 22724367  | 342 |
| chr20 | 73790843  | 73791184  | 342 |
| chr18 | 52689148  | 52689489  | 342 |

|       |               |           |     |
|-------|---------------|-----------|-----|
| chr14 | 80378029      | 80378370  | 342 |
| chr13 | 23613246      | 23613587  | 342 |
| chr10 | 88179464      | 88179805  | 342 |
| chr1  | 153170572     | 153170913 | 342 |
| chrX  | 75862793      | 75863133  | 341 |
| chrX  | 56573842      | 56574182  | 341 |
| chrX  | 9993032       | 9993372   | 341 |
| chr7  | 42925621      | 42925961  | 341 |
| chr3  | 127881651     | 127881991 | 341 |
| chr3  | 123637334     | 123637674 | 341 |
| chr3  | 105273133     | 105273473 | 341 |
| chr25 | 39322096      | 39322436  | 341 |
| chr19 | 39320352      | 39320692  | 341 |
| chr18 | 6200716       | 6201056   | 341 |
| chr17 | 73055762      | 73056102  | 341 |
| chr16 | 59319986      | 59320326  | 341 |
| chr16 | 1616389       | 1616729   | 341 |
| chr15 | 52289690      | 52290030  | 341 |
| chr13 | 75749070      | 75749410  | 341 |
| chr11 | 28653440      | 28653780  | 341 |
| chr11 | 14227504      | 14227844  | 341 |
| chr10 | 15026062      | 15026402  | 341 |
| chrX  | 34549085      | 34549424  | 340 |
| chrX  | 1570205       | 1570544   | 340 |
| chr8  | 110912208     | 110912547 | 340 |
| chr6  | 115505780     | 115506119 | 340 |
| chr3  | 116391286     | 116391625 | 340 |
| chr28 | 22553690      | 22554029  | 340 |
| chr15 | 52240743      | 52241082  | 340 |
| chr12 | 29577839      | 29578178  | 340 |
| chr12 | 14704428      | 14704767  | 340 |
| chr10 | 20821901      | 20822240  | 340 |
| chrX  | 75897421      | 75897759  | 339 |
| chrX  | 74814895      | 74815233  | 339 |
| chrX  | 10172985      | 10173323  | 339 |
| chrX  | 7518301       | 7518639   | 339 |
| chr8  | 90195621      | 90195959  | 339 |
| chr7  | 19503337      | 19503675  | 339 |
| chr4  | 7516048       | 7516386   | 339 |
| chr3  | 106501245     | 106501583 | 339 |
| chr25 | 8460256       | 8460594   | 339 |
| chr24 | 60719765      | 60720103  | 339 |
| chr23 | 43445143      | 43445481  | 339 |
| chr23 | 33026566      | 33026904  | 339 |
| chr19 | 61642740      | 61643078  | 339 |
| chr19 | 13787920      | 13788258  | 339 |
| chr15 | 24192698      | 24193036  | 339 |
| chr14 | 853432 853770 | 339       |     |
| chr13 | 65941584      | 65941922  | 339 |
| chr13 | 57284434      | 57284772  | 339 |

|       |               |           |     |
|-------|---------------|-----------|-----|
| chr11 | 103765573     | 103765911 | 339 |
| chr11 | 77773838      | 77774176  | 339 |
| chr10 | 74870731      | 74871069  | 339 |
| chr1  | 121752177     | 121752515 | 339 |
| chr1  | 82833113      | 82833451  | 339 |
| chr1  | 74704461      | 74704799  | 339 |
| chrX  | 5741379       | 5741716   | 338 |
| chr8  | 77579970      | 77580307  | 338 |
| chr5  | 111703508     | 111703845 | 338 |
| chr5  | 30421406      | 30421743  | 338 |
| chr3  | 22409763      | 22410100  | 338 |
| chr29 | 36994018      | 36994355  | 338 |
| chr27 | 855900 856237 | 338       |     |
| chr23 | 43387137      | 43387474  | 338 |
| chr23 | 14257823      | 14258160  | 338 |
| chr20 | 2270509       | 2270846   | 338 |
| chr19 | 59369006      | 59369343  | 338 |
| chr19 | 54618967      | 54619304  | 338 |
| chr19 | 44152975      | 44153312  | 338 |
| chr18 | 11827097      | 11827434  | 338 |
| chr16 | 71803957      | 71804294  | 338 |
| chr16 | 47227000      | 47227337  | 338 |
| chr15 | 26789922      | 26790259  | 338 |
| chr11 | 70906849      | 70907186  | 338 |
| chr1  | 74997412      | 74997749  | 338 |
| chrX  | 80111193      | 80111529  | 337 |
| chrX  | 79075908      | 79076244  | 337 |
| chrX  | 75626822      | 75627158  | 337 |
| chrX  | 59546076      | 59546412  | 337 |
| chrX  | 47625406      | 47625742  | 337 |
| chr7  | 42188507      | 42188843  | 337 |
| chr4  | 38541964      | 38542300  | 337 |
| chr3  | 116142862     | 116143198 | 337 |
| chr26 | 20129223      | 20129559  | 337 |
| chr25 | 3804833       | 3805169   | 337 |
| chr23 | 10613677      | 10614013  | 337 |
| chr2  | 123887276     | 123887612 | 337 |
| chr2  | 120272220     | 120272556 | 337 |
| chr19 | 30852406      | 30852742  | 337 |
| chr17 | 72986432      | 72986768  | 337 |
| chr17 | 18512287      | 18512623  | 337 |
| chr15 | 30049964      | 30050300  | 337 |
| chr15 | 22810310      | 22810646  | 337 |
| chr13 | 69860198      | 69860534  | 337 |
| chr1  | 2387548       | 2387884   | 337 |
| chrX  | 64168183      | 64168518  | 336 |
| chrX  | 31359945      | 31360280  | 336 |
| chrX  | 30962038      | 30962373  | 336 |
| chrX  | 11187245      | 11187580  | 336 |
| chr28 | 1266674       | 1267009   | 336 |

|       |           |           |     |
|-------|-----------|-----------|-----|
| chr23 | 10552515  | 10552850  | 336 |
| chr19 | 39255289  | 39255624  | 336 |
| chr16 | 46989207  | 46989542  | 336 |
| chrX  | 73189299  | 73189633  | 335 |
| chrX  | 57046018  | 57046352  | 335 |
| chrX  | 54629007  | 54629341  | 335 |
| chrX  | 11583899  | 11584233  | 335 |
| chr8  | 61837784  | 61838118  | 335 |
| chr7  | 42463466  | 42463800  | 335 |
| chr23 | 43057122  | 43057456  | 335 |
| chr22 | 46514147  | 46514481  | 335 |
| chr21 | 64503566  | 64503900  | 335 |
| chr2  | 100910874 | 100911208 | 335 |
| chr15 | 73398305  | 73398639  | 335 |
| chr15 | 25790737  | 25791071  | 335 |
| chr12 | 14990258  | 14990592  | 335 |
| chrX  | 80319459  | 80319792  | 334 |
| chrX  | 49765182  | 49765515  | 334 |
| chrX  | 29949659  | 29949992  | 334 |
| chr8  | 86979521  | 86979854  | 334 |
| chr7  | 1849672   | 1850005   | 334 |
| chr6  | 46646892  | 46647225  | 334 |
| chr3  | 55910149  | 55910482  | 334 |
| chr29 | 45911710  | 45912043  | 334 |
| chr29 | 31898348  | 31898681  | 334 |
| chr26 | 37094539  | 37094872  | 334 |
| chr25 | 39199090  | 39199423  | 334 |
| chr21 | 55799074  | 55799407  | 334 |
| chr19 | 48695224  | 48695557  | 334 |
| chr18 | 53569043  | 53569376  | 334 |
| chr16 | 38689680  | 38690013  | 334 |
| chr15 | 63663000  | 63663333  | 334 |
| chr13 | 60138708  | 60139041  | 334 |
| chrX  | 72409672  | 72410004  | 333 |
| chrX  | 2331174   | 2331506   | 333 |
| chr7  | 14369713  | 14370045  | 333 |
| chr6  | 59498418  | 59498750  | 333 |
| chr5  | 125217160 | 125217492 | 333 |
| chr5  | 60345437  | 60345769  | 333 |
| chr29 | 37569314  | 37569646  | 333 |
| chr26 | 49213949  | 49214281  | 333 |
| chr26 | 41569431  | 41569763  | 333 |
| chr26 | 18714480  | 18714812  | 333 |
| chr20 | 25533867  | 25534199  | 333 |
| chr19 | 61806105  | 61806437  | 333 |
| chr18 | 11446486  | 11446818  | 333 |
| chr15 | 26637951  | 26638283  | 333 |
| chr13 | 75630447  | 75630779  | 333 |
| chr11 | 62713158  | 62713490  | 333 |
| chrX  | 39422052  | 39422383  | 332 |

|       |           |           |     |
|-------|-----------|-----------|-----|
| chrX  | 38973327  | 38973658  | 332 |
| chrX  | 27203490  | 27203821  | 332 |
| chr7  | 50558287  | 50558618  | 332 |
| chr7  | 43971297  | 43971628  | 332 |
| chr6  | 92460400  | 92460731  | 332 |
| chr3  | 109864489 | 109864820 | 332 |
| chr25 | 33094469  | 33094800  | 332 |
| chr21 | 66460581  | 66460912  | 332 |
| chr19 | 29780259  | 29780590  | 332 |
| chr18 | 11345005  | 11345336  | 332 |
| chr18 | 5297163   | 5297494   | 332 |
| chr17 | 4832743   | 4833074   | 332 |
| chr16 | 49522873  | 49523204  | 332 |
| chr14 | 25073536  | 25073867  | 332 |
| chr13 | 39799129  | 39799460  | 332 |
| chr12 | 32259986  | 32260317  | 332 |
| chr10 | 16828511  | 16828842  | 332 |
| chrX  | 80348457  | 80348787  | 331 |
| chrX  | 60300589  | 60300919  | 331 |
| chrX  | 6688150   | 6688480   | 331 |
| chrX  | 2218755   | 2219085   | 331 |
| chr29 | 41936061  | 41936391  | 331 |
| chr19 | 41925582  | 41925912  | 331 |
| chr10 | 33270484  | 33270814  | 331 |
| chrX  | 83359833  | 83360162  | 330 |
| chrX  | 48153203  | 48153532  | 330 |
| chrX  | 47272364  | 47272693  | 330 |
| chrX  | 34512238  | 34512567  | 330 |
| chrX  | 34029057  | 34029386  | 330 |
| chrX  | 19269970  | 19270299  | 330 |
| chrX  | 18373607  | 18373936  | 330 |
| chr6  | 63385652  | 63385981  | 330 |
| chr3  | 121373217 | 121373546 | 330 |
| chr3  | 109850844 | 109851173 | 330 |
| chr29 | 33582658  | 33582987  | 330 |
| chr29 | 30134667  | 30134996  | 330 |
| chr27 | 28460384  | 28460713  | 330 |
| chr17 | 70702031  | 70702360  | 330 |
| chr11 | 75155236  | 75155565  | 330 |
| chr1  | 99260419  | 99260748  | 330 |
| chrX  | 81934382  | 81934710  | 329 |
| chrX  | 77300219  | 77300547  | 329 |
| chrX  | 22410989  | 22411317  | 329 |
| chrX  | 6708465   | 6708793   | 329 |
| chr9  | 106442348 | 106442676 | 329 |
| chr4  | 71606017  | 71606345  | 329 |
| chr3  | 20582719  | 20583047  | 329 |
| chr26 | 38435438  | 38435766  | 329 |
| chr24 | 43634495  | 43634823  | 329 |
| chr17 | 64140413  | 64140741  | 329 |

|       |           |           |     |
|-------|-----------|-----------|-----|
| chr13 | 40275459  | 40275787  | 329 |
| chr12 | 36415580  | 36415908  | 329 |
| chr11 | 92530919  | 92531247  | 329 |
| chr11 | 14957387  | 14957715  | 329 |
| chr10 | 16881673  | 16882001  | 329 |
| chr1  | 88301439  | 88301767  | 329 |
| chrX  | 67991626  | 67991953  | 328 |
| chrX  | 35545045  | 35545372  | 328 |
| chr5  | 113102422 | 113102749 | 328 |
| chr5  | 28901270  | 28901597  | 328 |
| chr4  | 89786843  | 89787170  | 328 |
| chr29 | 31549303  | 31549630  | 328 |
| chr21 | 22515136  | 22515463  | 328 |
| chr20 | 59414329  | 59414656  | 328 |
| chr19 | 39965982  | 39966309  | 328 |
| chr18 | 65131868  | 65132195  | 328 |
| chr17 | 70108094  | 70108421  | 328 |
| chr13 | 75970179  | 75970506  | 328 |
| chr11 | 82159619  | 82159946  | 328 |
| chr11 | 28448815  | 28449142  | 328 |
| chrX  | 62493180  | 62493506  | 327 |
| chr8  | 108753095 | 108753421 | 327 |
| chr5  | 112103252 | 112103578 | 327 |
| chr3  | 33606058  | 33606384  | 327 |
| chr29 | 49714725  | 49715051  | 327 |
| chr29 | 44564747  | 44565073  | 327 |
| chr26 | 43485694  | 43486020  | 327 |
| chr26 | 22178558  | 22178884  | 327 |
| chr23 | 19862933  | 19863259  | 327 |
| chr21 | 69168698  | 69169024  | 327 |
| chr21 | 20636618  | 20636944  | 327 |
| chr19 | 58878516  | 58878842  | 327 |
| chr19 | 54866644  | 54866970  | 327 |
| chr19 | 31855512  | 31855838  | 327 |
| chr18 | 54348477  | 54348803  | 327 |
| chr13 | 36244058  | 36244384  | 327 |
| chr12 | 32171694  | 32172020  | 327 |
| chrX  | 72333719  | 72334044  | 326 |
| chrX  | 50217589  | 50217914  | 326 |
| chr8  | 24359218  | 24359543  | 326 |
| chr7  | 10283979  | 10284304  | 326 |
| chr3  | 121761439 | 121761764 | 326 |
| chr25 | 34261984  | 34262309  | 326 |
| chr20 | 1121960   | 1122285   | 326 |
| chr2  | 130158212 | 130158537 | 326 |
| chr16 | 69858030  | 69858355  | 326 |
| chr13 | 41015050  | 41015375  | 326 |
| chr11 | 23199152  | 23199477  | 326 |
| chr11 | 2558282   | 2558607   | 326 |
| chrX  | 39201045  | 39201369  | 325 |

|       |           |           |     |
|-------|-----------|-----------|-----|
| chrX  | 34088809  | 34089133  | 325 |
| chrX  | 29401600  | 29401924  | 325 |
| chrX  | 20751627  | 20751951  | 325 |
| chr5  | 112898486 | 112898810 | 325 |
| chr3  | 99360108  | 99360432  | 325 |
| chr25 | 2392275   | 2392599   | 325 |
| chr23 | 52669439  | 52669763  | 325 |
| chr23 | 51999521  | 51999845  | 325 |
| chr11 | 104704933 | 104705257 | 325 |
| chr1  | 22674190  | 22674514  | 325 |
| chrX  | 36911315  | 36911638  | 324 |
| chrX  | 36853771  | 36854094  | 324 |
| chr9  | 90218692  | 90219015  | 324 |
| chr25 | 43538652  | 43538975  | 324 |
| chr2  | 49032075  | 49032398  | 324 |
| chr18 | 23208940  | 23209263  | 324 |
| chr18 | 7113299   | 7113622   | 324 |
| chr15 | 34197781  | 34198104  | 324 |
| chrX  | 53294472  | 53294794  | 323 |
| chr21 | 33982944  | 33983266  | 323 |
| chr2  | 74698333  | 74698655  | 323 |
| chr19 | 39329943  | 39330265  | 323 |
| chr18 | 9764609   | 9764931   | 323 |
| chr13 | 57625502  | 57625824  | 323 |
| chr13 | 41546726  | 41547048  | 323 |
| chr10 | 75482775  | 75483097  | 323 |
| chr10 | 16950719  | 16951041  | 323 |
| chrX  | 51010087  | 51010408  | 322 |
| chr3  | 123655380 | 123655701 | 322 |
| chr28 | 33980684  | 33981005  | 322 |
| chr19 | 39526906  | 39527227  | 322 |
| chr19 | 37922895  | 37923216  | 322 |
| chr19 | 12592470  | 12592791  | 322 |
| chr13 | 77660804  | 77661125  | 322 |
| chr13 | 77529555  | 77529876  | 322 |
| chr13 | 66979938  | 66980259  | 322 |
| chr13 | 53069998  | 53070319  | 322 |
| chr11 | 82686272  | 82686593  | 322 |
| chr1  | 111314287 | 111314608 | 322 |
| chrX  | 72936219  | 72936539  | 321 |
| chrX  | 62819116  | 62819436  | 321 |
| chrX  | 51850537  | 51850857  | 321 |
| chr5  | 85400502  | 85400822  | 321 |
| chr29 | 34587046  | 34587366  | 321 |
| chr25 | 36456784  | 36457104  | 321 |
| chr24 | 60072187  | 60072507  | 321 |
| chr21 | 60992043  | 60992363  | 321 |
| chr19 | 38610109  | 38610429  | 321 |
| chr11 | 98455021  | 98455341  | 321 |
| chr10 | 15926717  | 15927037  | 321 |



|       |           |           |     |
|-------|-----------|-----------|-----|
| chrX  | 78464732  | 78465051  | 320 |
| chrX  | 75821928  | 75822247  | 320 |
| chrX  | 56575999  | 56576318  | 320 |
| chrX  | 17316137  | 17316456  | 320 |
| chr9  | 107037206 | 107037525 | 320 |
| chr7  | 60389735  | 60390054  | 320 |
| chr6  | 75520983  | 75521302  | 320 |
| chr29 | 36057860  | 36058179  | 320 |
| chr29 | 33564195  | 33564514  | 320 |
| chr27 | 45276819  | 45277138  | 320 |
| chr25 | 40417228  | 40417547  | 320 |
| chr25 | 18811714  | 18812033  | 320 |
| chr22 | 56308212  | 56308531  | 320 |
| chr22 | 12049420  | 12049739  | 320 |
| chr2  | 5197383   | 5197702   | 320 |
| chr14 | 10299534  | 10299853  | 320 |
| chr13 | 17766134  | 17766453  | 320 |
| chr12 | 33041147  | 33041466  | 320 |
| chr10 | 74120847  | 74121166  | 320 |
| chrX  | 66281422  | 66281740  | 319 |
| chrX  | 30142064  | 30142382  | 319 |
| chr7  | 37465954  | 37466272  | 319 |
| chr22 | 30034264  | 30034582  | 319 |
| chr21 | 34174309  | 34174627  | 319 |
| chr18 | 47767421  | 47767739  | 319 |
| chr18 | 22068832  | 22069150  | 319 |
| chr18 | 13189920  | 13190238  | 319 |
| chr11 | 104703355 | 104703673 | 319 |
| chrX  | 6689242   | 6689559   | 318 |
| chr8  | 58239161  | 58239478  | 318 |
| chr7  | 10410928  | 10411245  | 318 |
| chr27 | 7941917   | 7942234   | 318 |
| chr25 | 2437198   | 2437515   | 318 |
| chr24 | 59435485  | 59435802  | 318 |
| chr23 | 15939783  | 15940100  | 318 |
| chr11 | 28809624  | 28809941  | 318 |
| chrX  | 54693092  | 54693408  | 317 |
| chrX  | 11985633  | 11985949  | 317 |
| chr28 | 33667071  | 33667387  | 317 |
| chr24 | 20882237  | 20882553  | 317 |
| chr21 | 59834747  | 59835063  | 317 |
| chr19 | 15814861  | 15815177  | 317 |
| chr15 | 62420944  | 62421260  | 317 |
| chr13 | 59970863  | 59971179  | 317 |
| chr11 | 44956693  | 44957009  | 317 |
| chrX  | 69341115  | 69341430  | 316 |
| chrX  | 61175032  | 61175347  | 316 |
| chrX  | 54443035  | 54443350  | 316 |
| chrX  | 7347892   | 7348207   | 316 |
| chr7  | 70793878  | 70794193  | 316 |

|       |           |           |     |
|-------|-----------|-----------|-----|
| chr6  | 105979184 | 105979499 | 316 |
| chr13 | 60179197  | 60179512  | 316 |
| chr12 | 32876260  | 32876575  | 316 |
| chrX  | 73286022  | 73286336  | 315 |
| chr7  | 23843143  | 23843457  | 315 |
| chr6  | 92307021  | 92307335  | 315 |
| chr5  | 113160437 | 113160751 | 315 |
| chr5  | 103252640 | 103252954 | 315 |
| chr25 | 33636269  | 33636583  | 315 |
| chr23 | 31103177  | 31103491  | 315 |
| chr23 | 10992681  | 10992995  | 315 |
| chr17 | 69535350  | 69535664  | 315 |
| chr12 | 72574405  | 72574719  | 315 |
| chr11 | 25847236  | 25847550  | 315 |
| chrX  | 50389657  | 50389970  | 314 |
| chrX  | 30970821  | 30971134  | 314 |
| chr7  | 5438566   | 5438879   | 314 |
| chr4  | 99476031  | 99476344  | 314 |
| chr2  | 89371041  | 89371354  | 314 |
| chr15 | 29134099  | 29134412  | 314 |
| chr15 | 22733201  | 22733514  | 314 |
| chr10 | 52921758  | 52922071  | 314 |
| chrX  | 65064039  | 65064351  | 313 |
| chrX  | 62911237  | 62911549  | 313 |
| chrX  | 46411593  | 46411905  | 313 |
| chr6  | 120621363 | 120621675 | 313 |
| chr5  | 30385942  | 30386254  | 313 |
| chr4  | 123027984 | 123028296 | 313 |
| chr3  | 126084702 | 126085014 | 313 |
| chr29 | 38311188  | 38311500  | 313 |
| chr2  | 93699628  | 93699940  | 313 |
| chr12 | 32948648  | 32948960  | 313 |
| chr1  | 160709892 | 160710204 | 313 |
| chr1  | 18427109  | 18427421  | 313 |
| chr3  | 127045963 | 127046274 | 312 |
| chr2  | 99663426  | 99663737  | 312 |
| chr19 | 47857914  | 47858225  | 312 |
| chrX  | 68369081  | 68369391  | 311 |
| chrX  | 6900706   | 6901016   | 311 |
| chr5  | 111717374 | 111717684 | 311 |
| chr4  | 72041011  | 72041321  | 311 |
| chr28 | 33469203  | 33469513  | 311 |
| chr26 | 14674845  | 14675155  | 311 |
| chr2  | 139232828 | 139233138 | 311 |
| chr19 | 21695659  | 21695969  | 311 |
| chr17 | 72770192  | 72770502  | 311 |
| chr17 | 69074734  | 69075044  | 311 |
| chr13 | 63511292  | 63511602  | 311 |
| chr12 | 84834036  | 84834346  | 311 |
| chr11 | 103313155 | 103313465 | 311 |

|       |           |           |     |
|-------|-----------|-----------|-----|
| chrX  | 61232728  | 61233037  | 310 |
| chr8  | 45762200  | 45762509  | 310 |
| chr5  | 80749537  | 80749846  | 310 |
| chr23 | 30344891  | 30345200  | 310 |
| chr21 | 19716312  | 19716621  | 310 |
| chr17 | 41481913  | 41482222  | 310 |
| chr14 | 61217104  | 61217413  | 310 |
| chr13 | 77318671  | 77318980  | 310 |
| chrX  | 73275932  | 73276240  | 309 |
| chrX  | 66666749  | 66667057  | 309 |
| chr7  | 46527043  | 46527351  | 309 |
| chr7  | 19199934  | 19200242  | 309 |
| chr20 | 25148260  | 25148568  | 309 |
| chr19 | 39149413  | 39149721  | 309 |
| chr18 | 12182806  | 12183114  | 309 |
| chr16 | 38983334  | 38983642  | 309 |
| chr14 | 31017994  | 31018302  | 309 |
| chr5  | 79210419  | 79210726  | 308 |
| chr5  | 10226362  | 10226669  | 308 |
| chr27 | 15841645  | 15841952  | 308 |
| chr21 | 20622258  | 20622565  | 308 |
| chr21 | 18484004  | 18484311  | 308 |
| chr20 | 8604106   | 8604413   | 308 |
| chr13 | 59590982  | 59591289  | 308 |
| chrX  | 54764911  | 54765217  | 307 |
| chr8  | 25949466  | 25949772  | 307 |
| chr4  | 96874431  | 96874737  | 307 |
| chr3  | 10567293  | 10567599  | 307 |
| chr29 | 36896539  | 36896845  | 307 |
| chr21 | 33968562  | 33968868  | 307 |
| chr19 | 37342913  | 37343219  | 307 |
| chr19 | 22447250  | 22447556  | 307 |
| chr18 | 22855419  | 22855725  | 307 |
| chrX  | 39058847  | 39059152  | 306 |
| chrX  | 20136065  | 20136370  | 306 |
| chrX  | 9985579   | 9985884   | 306 |
| chrX  | 6991208   | 6991513   | 306 |
| chr9  | 63607003  | 63607308  | 306 |
| chr24 | 32835393  | 32835698  | 306 |
| chr22 | 16679675  | 16679980  | 306 |
| chrX  | 72278755  | 72279059  | 305 |
| chr5  | 80288490  | 80288794  | 305 |
| chr4  | 32419932  | 32420236  | 305 |
| chr3  | 119273934 | 119274238 | 305 |
| chr3  | 4368613   | 4368917   | 305 |
| chr15 | 13014378  | 13014682  | 305 |
| chr10 | 35902996  | 35903300  | 305 |
| chr1  | 151469965 | 151470269 | 305 |
| chrX  | 65943661  | 65943964  | 304 |
| chrX  | 47643790  | 47644093  | 304 |

|       |               |           |     |
|-------|---------------|-----------|-----|
| chrX  | 5280547       | 5280850   | 304 |
| chr5  | 113189569     | 113189872 | 304 |
| chr24 | 60538961      | 60539264  | 304 |
| chr23 | 38452985      | 38453288  | 304 |
| chr20 | 1356302       | 1356605   | 304 |
| chr19 | 44871429      | 44871732  | 304 |
| chr15 | 34280879      | 34281182  | 304 |
| chr13 | 75648557      | 75648860  | 304 |
| chr11 | 93834553      | 93834856  | 304 |
| chr10 | 90529544      | 90529847  | 304 |
| chr1  | 133026965     | 133027268 | 304 |
| chrX  | 54960559      | 54960861  | 303 |
| chr9  | 106176717     | 106177019 | 303 |
| chr7  | 37394308      | 37394610  | 303 |
| chr5  | 30196437      | 30196739  | 303 |
| chr3  | 127901931     | 127902233 | 303 |
| chr26 | 18170533      | 18170835  | 303 |
| chr25 | 34437383      | 34437685  | 303 |
| chr21 | 11886255      | 11886557  | 303 |
| chr15 | 23171946      | 23172248  | 303 |
| chrX  | 54969936      | 54970237  | 302 |
| chr22 | 30288730      | 30289031  | 302 |
| chr2  | 135074994     | 135075295 | 302 |
| chr16 | 58425116      | 58425417  | 302 |
| chrX  | 60521022      | 60521322  | 301 |
| chrX  | 35605750      | 35606050  | 301 |
| chrX  | 30616386      | 30616686  | 301 |
| chrX  | 30402109      | 30402409  | 301 |
| chrX  | 12346796      | 12347096  | 301 |
| chr21 | 66333101      | 66333401  | 301 |
| chr20 | 500225 500525 | 301       |     |
| chr19 | 20355793      | 20356093  | 301 |
| chr10 | 36545900      | 36546200  | 301 |
| chr10 | 21348898      | 21349198  | 301 |
| chrX  | 76999531      | 76999830  | 300 |
| chrX  | 11922934      | 11923233  | 300 |
| chr3  | 120360083     | 120360382 | 300 |
| chr23 | 19843354      | 19843653  | 300 |
| chr22 | 30155547      | 30155846  | 300 |
| chr20 | 73377817      | 73378116  | 300 |
| chr19 | 28820508      | 28820807  | 300 |
| chr19 | 13488024      | 13488323  | 300 |
| chr18 | 57400947      | 57401246  | 300 |
| chr13 | 76277974      | 76278273  | 300 |
| chr12 | 9547793       | 9548092   | 300 |
| chr11 | 14211345      | 14211644  | 300 |
| chr10 | 25269834      | 25270133  | 300 |
| chr10 | 20897545      | 20897844  | 300 |
| chr9  | 43844071      | 43844369  | 299 |
| chr8  | 77174338      | 77174636  | 299 |

|       |           |           |     |
|-------|-----------|-----------|-----|
| chr17 | 72682779  | 72683077  | 299 |
| chrX  | 55563691  | 55563988  | 298 |
| chrX  | 30166880  | 30167177  | 298 |
| chr27 | 15757686  | 15757983  | 298 |
| chr16 | 47198370  | 47198667  | 298 |
| chr13 | 58897212  | 58897509  | 298 |
| chr13 | 57416427  | 57416724  | 298 |
| chr11 | 47546343  | 47546640  | 298 |
| chr10 | 90943394  | 90943691  | 298 |
| chr10 | 2771195   | 2771492   | 298 |
| chr6  | 120842701 | 120842997 | 297 |
| chr3  | 115461645 | 115461941 | 297 |
| chr28 | 35284755  | 35285051  | 297 |
| chr19 | 55509576  | 55509872  | 297 |
| chr18 | 54097676  | 54097972  | 297 |
| chr29 | 37678699  | 37678994  | 296 |
| chr27 | 34830292  | 34830587  | 296 |
| chr19 | 58408026  | 58408321  | 296 |
| chr15 | 63883308  | 63883603  | 296 |
| chr12 | 32871118  | 32871413  | 296 |
| chr12 | 15334034  | 15334329  | 296 |
| chr10 | 16864647  | 16864942  | 296 |
| chrX  | 77183164  | 77183458  | 295 |
| chrX  | 54388435  | 54388729  | 295 |
| chrX  | 18846342  | 18846636  | 295 |
| chr21 | 27985544  | 27985838  | 295 |
| chr11 | 11546338  | 11546632  | 295 |
| chr10 | 17565335  | 17565629  | 295 |
| chr4  | 72211658  | 72211951  | 294 |
| chr3  | 33790373  | 33790666  | 294 |
| chr19 | 10918037  | 10918330  | 294 |
| chrX  | 12206535  | 12206827  | 293 |
| chr8  | 23965303  | 23965595  | 293 |
| chr25 | 39385519  | 39385811  | 293 |
| chr19 | 58329012  | 58329304  | 293 |
| chr15 | 29176302  | 29176594  | 293 |
| chr13 | 63495215  | 63495507  | 293 |
| chr11 | 98948236  | 98948528  | 293 |
| chr11 | 66394708  | 66395000  | 293 |
| chrX  | 74890780  | 74891071  | 292 |
| chrX  | 47379646  | 47379937  | 292 |
| chr7  | 18150868  | 18151159  | 292 |
| chr5  | 111215377 | 111215668 | 292 |
| chr22 | 36554588  | 36554879  | 292 |
| chr19 | 20404435  | 20404726  | 292 |
| chr13 | 41762887  | 41763178  | 292 |
| chr1  | 100644090 | 100644381 | 292 |
| chr1  | 82871808  | 82872099  | 292 |
| chrX  | 77461298  | 77461588  | 291 |
| chrX  | 34110968  | 34111258  | 291 |

|       |             |           |     |
|-------|-------------|-----------|-----|
| chrX  | 30638799    | 30639089  | 291 |
| chr7  | 2896321     | 2896611   | 291 |
| chr25 | 37191927    | 37192217  | 291 |
| chr22 | 56022434    | 56022724  | 291 |
| chr17 | 65989686    | 65989976  | 291 |
| chr14 | 53319 53609 | 291       |     |
| chr12 | 82768838    | 82769128  | 291 |
| chrX  | 30849274    | 30849563  | 290 |
| chr5  | 31563242    | 31563531  | 290 |
| chr29 | 51169512    | 51169801  | 290 |
| chr21 | 64264851    | 64265140  | 290 |
| chr1  | 127951247   | 127951536 | 290 |
| chrX  | 19032146    | 19032434  | 289 |
| chr5  | 52923797    | 52924085  | 289 |
| chr3  | 110674609   | 110674897 | 289 |
| chr24 | 58131361    | 58131649  | 289 |
| chr23 | 25511380    | 25511668  | 289 |
| chr19 | 37931149    | 37931437  | 289 |
| chr18 | 55687809    | 55688097  | 289 |
| chrX  | 50859538    | 50859825  | 288 |
| chr21 | 14077210    | 14077497  | 288 |
| chr2  | 22170048    | 22170335  | 288 |
| chrX  | 46731068    | 46731354  | 287 |
| chr5  | 114239584   | 114239870 | 287 |
| chr25 | 27213390    | 27213676  | 287 |
| chr22 | 48314114    | 48314400  | 287 |
| chr21 | 66282039    | 66282325  | 287 |
| chr12 | 9694727     | 9695013   | 287 |
| chr10 | 52745399    | 52745685  | 287 |
| chrX  | 13828421    | 13828706  | 286 |
| chrX  | 12505427    | 12505712  | 286 |
| chr9  | 77563286    | 77563571  | 286 |
| chr8  | 65748243    | 65748528  | 286 |
| chr7  | 10642554    | 10642839  | 286 |
| chr29 | 41333007    | 41333292  | 286 |
| chr26 | 21822289    | 21822574  | 286 |
| chr19 | 19112003    | 19112288  | 286 |
| chr13 | 69981621    | 69981906  | 286 |
| chr13 | 35222294    | 35222579  | 286 |
| chr12 | 14726940    | 14727225  | 286 |
| chr5  | 46029733    | 46030017  | 285 |
| chr2  | 134062437   | 134062721 | 285 |
| chrX  | 75484084    | 75484367  | 284 |
| chrX  | 60902677    | 60902960  | 284 |
| chrX  | 54684885    | 54685168  | 284 |
| chrX  | 54393450    | 54393733  | 284 |
| chr5  | 32924329    | 32924612  | 284 |
| chr4  | 101711691   | 101711974 | 284 |
| chr20 | 56697977    | 56698260  | 284 |
| chr19 | 30424738    | 30425021  | 284 |

|       |           |           |     |
|-------|-----------|-----------|-----|
| chr11 | 14260348  | 14260631  | 284 |
| chr1  | 66663488  | 66663771  | 284 |
| chr19 | 38876873  | 38877155  | 283 |
| chrX  | 20289071  | 20289352  | 282 |
| chr7  | 13076278  | 13076559  | 282 |
| chr21 | 48705534  | 48705815  | 282 |
| chr12 | 76554356  | 76554637  | 282 |
| chrX  | 72812948  | 72813228  | 281 |
| chrX  | 8385195   | 8385475   | 281 |
| chr25 | 33990455  | 33990735  | 281 |
| chr21 | 60478226  | 60478506  | 281 |
| chr10 | 21427693  | 21427973  | 281 |
| chr1  | 99694477  | 99694757  | 281 |
| chrX  | 50409357  | 50409636  | 280 |
| chrX  | 1479672   | 1479951   | 280 |
| chr7  | 38577076  | 38577355  | 280 |
| chr20 | 19063931  | 19064210  | 280 |
| chr19 | 62985413  | 62985692  | 280 |
| chr17 | 56079996  | 56080275  | 280 |
| chr15 | 75648755  | 75649034  | 280 |
| chrX  | 10959689  | 10959967  | 279 |
| chr8  | 10300195  | 10300473  | 279 |
| chr17 | 49396810  | 49397088  | 279 |
| chr16 | 38521302  | 38521580  | 279 |
| chr10 | 7687877   | 7688155   | 279 |
| chrX  | 15573807  | 15574084  | 278 |
| chr5  | 114122847 | 114123124 | 278 |
| chr16 | 23867255  | 23867532  | 278 |
| chr11 | 100693566 | 100693843 | 278 |
| chr11 | 91539988  | 91540265  | 278 |
| chrX  | 30234577  | 30234853  | 277 |
| chrX  | 11438788  | 11439064  | 277 |
| chr2  | 92352763  | 92353039  | 277 |
| chr18 | 12430010  | 12430286  | 277 |
| chr18 | 11788015  | 11788291  | 277 |
| chr16 | 74048051  | 74048327  | 277 |
| chr12 | 17690136  | 17690412  | 277 |
| chr10 | 20930980  | 20931256  | 277 |
| chrX  | 2587546   | 2587821   | 276 |
| chr21 | 32987750  | 32988025  | 276 |
| chr14 | 59995402  | 59995677  | 276 |
| chr12 | 33358827  | 33359102  | 276 |
| chr3  | 121834746 | 121835020 | 275 |
| chr21 | 67061097  | 67061371  | 275 |
| chr19 | 60461531  | 60461805  | 275 |
| chr12 | 69400149  | 69400423  | 275 |
| chrX  | 53627549  | 53627822  | 274 |
| chr9  | 26589042  | 26589315  | 274 |
| chr8  | 114970972 | 114971245 | 274 |
| chr25 | 36489777  | 36490050  | 274 |

|       |           |           |     |
|-------|-----------|-----------|-----|
| chr2  | 124836368 | 124836641 | 274 |
| chr19 | 63177886  | 63178159  | 274 |
| chr19 | 59105837  | 59106110  | 274 |
| chr19 | 22119784  | 22120057  | 274 |
| chr15 | 25542197  | 25542470  | 274 |
| chrX  | 20100487  | 20100759  | 273 |
| chr5  | 80136654  | 80136926  | 273 |
| chr21 | 27717178  | 27717450  | 273 |
| chr18 | 24007649  | 24007921  | 273 |
| chrX  | 60272701  | 60272972  | 272 |
| chrX  | 6458072   | 6458343   | 272 |
| chr26 | 21805688  | 21805959  | 272 |
| chr25 | 26514649  | 26514920  | 272 |
| chr21 | 60372828  | 60373099  | 272 |
| chrX  | 83550423  | 83550693  | 271 |
| chr14 | 12683160  | 12683430  | 271 |
| chr6  | 20333846  | 20334115  | 270 |
| chr26 | 21773209  | 21773478  | 270 |
| chr23 | 14931881  | 14932150  | 270 |
| chr19 | 54933664  | 54933933  | 270 |
| chr18 | 51190884  | 51191153  | 270 |
| chrX  | 20332004  | 20332272  | 269 |
| chr3  | 99332441  | 99332709  | 269 |
| chr25 | 4739268   | 4739536   | 269 |
| chr18 | 24337673  | 24337941  | 269 |
| chr13 | 59629803  | 59630071  | 269 |
| chrX  | 73207995  | 73208262  | 268 |
| chr11 | 77587524  | 77587791  | 268 |
| chrX  | 74593625  | 74593891  | 267 |
| chr25 | 4761117   | 4761383   | 267 |
| chr24 | 1371676   | 1371942   | 267 |
| chr11 | 109510044 | 109510310 | 267 |
| chr8  | 80183722  | 80183987  | 266 |
| chr24 | 44054469  | 44054734  | 266 |
| chr10 | 8302386   | 8302651   | 266 |
| chrX  | 54623897  | 54624161  | 265 |
| chr4  | 118014754 | 118015018 | 265 |
| chr23 | 17628303  | 17628567  | 265 |
| chr21 | 25757102  | 25757366  | 265 |
| chr13 | 59582214  | 59582478  | 265 |
| chr11 | 104936485 | 104936749 | 265 |
| chr10 | 45890146  | 45890410  | 265 |
| chrX  | 55275673  | 55275936  | 264 |
| chr7  | 81068983  | 81069246  | 264 |
| chr5  | 28859652  | 28859915  | 264 |
| chr20 | 70159260  | 70159523  | 264 |
| chr5  | 112049597 | 112049859 | 263 |
| chr25 | 22112226  | 22112488  | 263 |
| chr27 | 27024323  | 27024584  | 262 |
| chr2  | 99680231  | 99680492  | 262 |



|       |           |           |     |
|-------|-----------|-----------|-----|
| chr5  | 115157824 | 115158084 | 261 |
| chr8  | 93001925  | 93002184  | 260 |
| chr23 | 27868906  | 27869165  | 260 |
| chr18 | 11695459  | 11695718  | 260 |
| chrX  | 81286245  | 81286502  | 258 |
| chr29 | 30021890  | 30022147  | 258 |
| chrX  | 31847813  | 31848069  | 257 |
| chrX  | 10821416  | 10821672  | 257 |
| chr25 | 21511475  | 21511731  | 257 |
| chr18 | 6401660   | 6401916   | 257 |
| chr17 | 6504352   | 6504608   | 257 |
| chr13 | 26640979  | 26641235  | 257 |
| chrX  | 10061284  | 10061539  | 256 |
| chr9  | 90339497  | 90339752  | 256 |
| chr3  | 88263105  | 88263360  | 256 |
| chr3  | 33955488  | 33955743  | 256 |
| chr24 | 13339682  | 13339937  | 256 |
| chr1  | 153888811 | 153889066 | 256 |
| chr21 | 46547971  | 46548225  | 255 |
| chr26 | 39145641  | 39145894  | 254 |
| chr19 | 24389424  | 24389677  | 254 |
| chrX  | 16931483  | 16931735  | 253 |
| chr8  | 76443646  | 76443898  | 253 |
| chr8  | 73324622  | 73324874  | 253 |
| chr5  | 123885284 | 123885536 | 253 |
| chr19 | 39259020  | 39259272  | 253 |
| chr18 | 48014811  | 48015063  | 253 |
| chr13 | 41257172  | 41257424  | 253 |
| chr11 | 45934427  | 45934679  | 253 |
| chrX  | 6495828   | 6496079   | 252 |
| chr7  | 74961711  | 74961962  | 252 |
| chr7  | 18713904  | 18714155  | 252 |
| chr3  | 123411548 | 123411799 | 252 |
| chr1  | 152593005 | 152593256 | 252 |
| chr13 | 77233749  | 77233999  | 251 |
| chr10 | 74856607  | 74856856  | 250 |
| chr6  | 1393282   | 1393530   | 249 |
| chr19 | 18311100  | 18311348  | 249 |
| chr20 | 10246280  | 10246527  | 248 |
| chr13 | 77259782  | 77260029  | 248 |
| chr17 | 59192287  | 59192532  | 246 |
| chr15 | 25725858  | 25726103  | 246 |
| chr11 | 9327690   | 9327935   | 246 |
| chr29 | 31549982  | 31550226  | 245 |
| chrX  | 75828326  | 75828569  | 244 |
| chrX  | 31035542  | 31035785  | 244 |
| chr13 | 65275908  | 65276151  | 244 |
| chr7  | 4556378   | 4556620   | 243 |
| chr4  | 67698964  | 67699206  | 243 |
| chrX  | 50177916  | 50178157  | 242 |

|       |               |           |     |
|-------|---------------|-----------|-----|
| chrX  | 8217501       | 8217741   | 241 |
| chr24 | 64992995      | 64993235  | 241 |
| chr13 | 70214239      | 70214479  | 241 |
| chr19 | 26310267      | 26310505  | 239 |
| chr26 | 32234557      | 32234794  | 238 |
| chrX  | 46509247      | 46509483  | 237 |
| chr4  | 110810985     | 110811221 | 237 |
| chr18 | 22349786      | 22350022  | 237 |
| chr23 | 8244875       | 8245110   | 236 |
| chrX  | 20016746      | 20016980  | 235 |
| chr26 | 22239298      | 22239532  | 235 |
| chr2  | 134905695     | 134905929 | 235 |
| chrX  | 75974188      | 75974419  | 232 |
| chr28 | 26985652      | 26985883  | 232 |
| chr29 | 51700791      | 51701020  | 230 |
| chr22 | 48296562      | 48296791  | 230 |
| chr16 | 44451341      | 44451569  | 229 |
| chr12 | 23534929      | 23535154  | 226 |
| chr10 | 88205420      | 88205645  | 226 |
| chrX  | 21337351      | 21337575  | 225 |
| chr8  | 62359581      | 62359801  | 221 |
| chr26 | 44124201      | 44124419  | 219 |
| chr25 | 42637584      | 42637800  | 217 |
| chr10 | 69109824      | 69110036  | 213 |
| chr5  | 53612636      | 53612838  | 203 |
| chr10 | 106286806     | 106287005 | 200 |
| chr5  | 30323736      | 30324334  | 599 |
| chr18 | 24304854      | 24305278  | 425 |
| chr18 | 48781300      | 48781809  | 510 |
| chr1  | 153885169     | 153885707 | 539 |
| chr12 | 55395343      | 55395553  | 211 |
| chr17 | 64595751      | 64596484  | 734 |
| chr2  | 134711863     | 134712466 | 604 |
| chr10 | 59322026      | 59322347  | 322 |
| chr17 | 127344 127628 | 285       |     |
| chr8  | 23933090      | 23933492  | 403 |
| chr5  | 73099313      | 73099743  | 431 |
| chr8  | 73531709      | 73532073  | 365 |
| chr21 | 1776715       | 1777264   | 550 |
| chr6  | 84126174      | 84126538  | 365 |
| chr7  | 192407 192669 | 263       |     |
| chr23 | 31900472      | 31901399  | 928 |
| chrX  | 20711922      | 20712797  | 876 |
| chr13 | 28497490      | 28498364  | 875 |
| chr17 | 5000382       | 5001215   | 834 |
| chr2  | 136382988     | 136383809 | 822 |
| chr13 | 75998866      | 75999676  | 811 |
| chr3  | 121387764     | 121388566 | 803 |
| chr1  | 109022276     | 109023076 | 801 |
| chrX  | 53653286      | 53654082  | 797 |

|       |               |           |     |
|-------|---------------|-----------|-----|
| chr10 | 104760665     | 104761433 | 769 |
| chr16 | 44930888      | 44931648  | 761 |
| chrX  | 72291363      | 72292117  | 755 |
| chrX  | 20425200      | 20425941  | 742 |
| chr26 | 18173262      | 18173977  | 716 |
| chr13 | 77280831      | 77281545  | 715 |
| chr25 | 39873917      | 39874629  | 713 |
| chr1  | 76552543      | 76553249  | 707 |
| chr21 | 21154072      | 21154768  | 697 |
| chrX  | 75851143      | 75851836  | 694 |
| chr17 | 76293611      | 76294291  | 681 |
| chr20 | 843017 843683 | 667       |     |
| chr11 | 77589869      | 77590511  | 643 |
| chr28 | 42371774      | 42372397  | 624 |
| chr11 | 103730601     | 103731223 | 623 |
| chr6  | 74858669      | 74859281  | 613 |
| chr7  | 50091049      | 50091643  | 595 |
| chr15 | 24637795      | 24638386  | 592 |
| chr13 | 80829850      | 80830438  | 589 |
| chr28 | 44520326      | 44520911  | 586 |
| chrX  | 37322329      | 37322899  | 571 |
| chr3  | 98389544      | 98390102  | 559 |
| chrX  | 59427989      | 59428518  | 530 |
| chr14 | 75491368      | 75491897  | 530 |
| chr3  | 8760712       | 8761233   | 522 |
| chr18 | 56666057      | 56666578  | 522 |
| chrX  | 21576934      | 21577443  | 510 |
| chr11 | 70687324      | 70687833  | 510 |
| chr12 | 34472763      | 34473268  | 506 |
| chr3  | 22652565      | 22653069  | 505 |
| chr28 | 33724211      | 33724712  | 502 |
| chr13 | 72847843      | 72848343  | 501 |
| chr14 | 1455425       | 1455922   | 498 |
| chr12 | 35107639      | 35108132  | 494 |
| chr20 | 3208107       | 3208598   | 492 |
| chr18 | 53120584      | 53121065  | 482 |
| chrX  | 48431101      | 48431581  | 481 |
| chr13 | 37624552      | 37625032  | 481 |
| chr15 | 73744055      | 73744529  | 475 |
| chr8  | 24471613      | 24472085  | 473 |
| chr7  | 3717190       | 3717658   | 469 |
| chrX  | 74679494      | 74679958  | 465 |
| chr18 | 56796604      | 56797063  | 460 |
| chr10 | 61470900      | 61471359  | 460 |
| chrX  | 12279071      | 12279528  | 458 |
| chr1  | 68854015      | 68854471  | 457 |
| chr14 | 19608644      | 19609097  | 454 |
| chr7  | 14371385      | 14371833  | 449 |
| chr1  | 82903788      | 82904235  | 448 |
| chr2  | 26584975      | 26585417  | 443 |

|       |           |           |      |
|-------|-----------|-----------|------|
| chrX  | 54323477  | 54323918  | 442  |
| chrX  | 13234903  | 13235344  | 442  |
| chr29 | 49592285  | 49592726  | 442  |
| chr23 | 27769029  | 27769466  | 438  |
| chr29 | 37160843  | 37161276  | 434  |
| chrX  | 50505111  | 50505543  | 433  |
| chrX  | 13665780  | 13666211  | 432  |
| chr12 | 9476271   | 9476700   | 430  |
| chr18 | 65322454  | 65322881  | 428  |
| chr19 | 10816757  | 10817183  | 427  |
| chr4  | 67833335  | 67833760  | 426  |
| chr12 | 29828125  | 29828549  | 425  |
| chrX  | 75723723  | 75724143  | 421  |
| chr8  | 60196858  | 60197271  | 414  |
| chr13 | 65724844  | 65725256  | 413  |
| chr9  | 98822436  | 98822841  | 406  |
| chrX  | 74150635  | 74151038  | 404  |
| chrX  | 6331183   | 6331586   | 404  |
| chr1  | 132111972 | 132112375 | 404  |
| chr3  | 13627211  | 13627611  | 401  |
| chr26 | 7008445   | 7008843   | 399  |
| chr2  | 136631175 | 136631573 | 399  |
| chr2  | 130426873 | 130427271 | 399  |
| chr19 | 22331272  | 22331670  | 399  |
| chr18 | 48794882  | 48795280  | 399  |
| chr13 | 15999783  | 16000181  | 399  |
| chr10 | 12116705  | 12117103  | 399  |
| chr17 | 73199826  | 73200223  | 398  |
| chr8  | 25617116  | 25617507  | 392  |
| chr11 | 104479344 | 104479734 | 391  |
| chr24 | 20365370  | 20365759  | 390  |
| chr15 | 61078988  | 61079373  | 386  |
| chr5  | 119374134 | 119374514 | 381  |
| chr26 | 44958088  | 44958467  | 380  |
| chrX  | 55929868  | 55930245  | 378  |
| chr18 | 57299957  | 57300325  | 369  |
| chrX  | 20015167  | 20015533  | 367  |
| chr9  | 79063166  | 79063528  | 363  |
| chr13 | 60441379  | 60441733  | 355  |
| chr4  | 28856057  | 28856410  | 354  |
| chrX  | 18373938  | 18374287  | 350  |
| chrX  | 19049826  | 19050161  | 336  |
| chr9  | 90330746  | 90331080  | 335  |
| chr1  | 82987176  | 82987505  | 330  |
| chr10 | 86760568  | 86760848  | 281  |
| chr14 | 1396585   | 1396861   | 277  |
| chr2  | 31209420  | 31209690  | 271  |
| chr11 | 104199158 | 104199417 | 260  |
| chr18 | 38358534  | 38360008  | 1475 |
| chrX  | 22426125  | 22427087  | 963  |

|       |           |           |     |
|-------|-----------|-----------|-----|
| chr24 | 59585261  | 59586212  | 952 |
| chr18 | 33214624  | 33215524  | 901 |
| chrX  | 59455265  | 59456052  | 788 |
| chr13 | 80714573  | 80715312  | 740 |
| chr1  | 118837858 | 118838585 | 728 |
| chr24 | 31166107  | 31166832  | 726 |
| chr20 | 70959487  | 70960207  | 721 |
| chrX  | 49767355  | 49768043  | 689 |
| chr11 | 77172921  | 77173601  | 681 |
| chrX  | 50398604  | 50399273  | 670 |
| chrX  | 78766416  | 78767083  | 668 |
| chr19 | 51904389  | 51905047  | 659 |
| chr25 | 30117533  | 30118179  | 647 |
| chr29 | 47307067  | 47307707  | 641 |
| chrX  | 54146728  | 54147359  | 632 |
| chr19 | 46698141  | 46698755  | 615 |
| chr22 | 16356078  | 16356684  | 607 |
| chrX  | 47441806  | 47442409  | 604 |
| chr3  | 22532069  | 22532672  | 604 |
| chr5  | 74677368  | 74677967  | 600 |
| chr18 | 64309225  | 64309803  | 579 |
| chr16 | 75656652  | 75657203  | 552 |
| chr1  | 88300375  | 88300915  | 541 |
| chrX  | 65870888  | 65871409  | 522 |
| chrX  | 65469849  | 65470363  | 515 |
| chr15 | 39635036  | 39635549  | 514 |
| chr20 | 67091458  | 67091960  | 503 |
| chr22 | 48418064  | 48418546  | 483 |
| chr26 | 15003702  | 15004183  | 482 |
| chr13 | 43329637  | 43330118  | 482 |
| chrX  | 20921966  | 20922443  | 478 |
| chr14 | 63515973  | 63516447  | 475 |
| chr14 | 7829134   | 7829608   | 475 |
| chr8  | 65814528  | 65815001  | 474 |
| chr7  | 10821615  | 10822082  | 468 |
| chr20 | 73645811  | 73646277  | 467 |
| chr24 | 51806682  | 51807147  | 466 |
| chr26 | 22216357  | 22216821  | 465 |
| chr6  | 101415502 | 101415963 | 462 |
| chr3  | 117718599 | 117719054 | 456 |
| chr2  | 41322389  | 41322843  | 455 |
| chr23 | 42398171  | 42398622  | 452 |
| chr29 | 31615721  | 31616171  | 451 |
| chr17 | 72357913  | 72358361  | 449 |
| chr19 | 27266206  | 27266653  | 448 |
| chr19 | 40675996  | 40676437  | 442 |
| chr3  | 30420703  | 30421140  | 438 |
| chr5  | 117842767 | 117843195 | 429 |
| chrX  | 78598123  | 78598547  | 425 |
| chr9  | 12243695  | 12244118  | 424 |

|       |           |           |     |
|-------|-----------|-----------|-----|
| chr15 | 62612429  | 62612852  | 424 |
| chrX  | 65069193  | 65069614  | 422 |
| chr28 | 38895555  | 38895976  | 422 |
| chr5  | 123162537 | 123162954 | 418 |
| chr5  | 28699492  | 28699904  | 413 |
| chr15 | 55352277  | 55352683  | 407 |
| chrX  | 36669808  | 36670212  | 405 |
| chr16 | 67429596  | 67430000  | 405 |
| chr13 | 34811131  | 34811530  | 400 |
| chrX  | 57647538  | 57647936  | 399 |
| chrX  | 55275271  | 55275669  | 399 |
| chr28 | 12426031  | 12426429  | 399 |
| chr28 | 7523422   | 7523820   | 399 |
| chr25 | 43854325  | 43854723  | 399 |
| chr2  | 26580871  | 26581269  | 399 |
| chr12 | 36542556  | 36542954  | 399 |
| chr12 | 36459748  | 36460146  | 399 |
| chr11 | 50943926  | 50944324  | 399 |
| chr4  | 97891953  | 97892349  | 397 |
| chr19 | 29949994  | 29950387  | 394 |
| chr5  | 29920671  | 29921063  | 393 |
| chr9  | 104826927 | 104827316 | 390 |
| chr29 | 36963788  | 36964176  | 389 |
| chr5  | 12504021  | 12504408  | 388 |
| chr19 | 50637154  | 50637541  | 388 |
| chr11 | 51950068  | 51950454  | 387 |
| chrX  | 46687179  | 46687561  | 383 |
| chr4  | 98595615  | 98595996  | 382 |
| chrX  | 11602907  | 11603286  | 380 |
| chr29 | 34636357  | 34636734  | 378 |
| chr19 | 51688747  | 51689122  | 376 |
| chr5  | 30322085  | 30322459  | 375 |
| chr5  | 30495558  | 30495931  | 374 |
| chrX  | 59331095  | 59331467  | 373 |
| chrX  | 80204389  | 80204758  | 370 |
| chr2  | 128207937 | 128208297 | 361 |
| chr13 | 60529247  | 60529606  | 360 |
| chr11 | 98314298  | 98314653  | 356 |
| chrX  | 53810168  | 53810522  | 355 |
| chr22 | 9091 9443 | 353       |     |
| chr19 | 17255298  | 17255643  | 346 |
| chr23 | 28060026  | 28060360  | 335 |
| chrX  | 51669875  | 51670202  | 328 |
| chr13 | 59803722  | 59804024  | 303 |
| chr1  | 85641709  | 85641999  | 291 |
| chr10 | 67043880  | 67044152  | 273 |
| chr2  | 92319051  | 92319993  | 943 |
| chrX  | 11163281  | 11164212  | 932 |
| chrX  | 21573381  | 21574288  | 908 |
| chrX  | 20304069  | 20304948  | 880 |

|       |           |           |     |
|-------|-----------|-----------|-----|
| chr13 | 39967289  | 39968159  | 871 |
| chrX  | 72513122  | 72513915  | 794 |
| chr25 | 36586122  | 36586893  | 772 |
| chr11 | 77738926  | 77739694  | 769 |
| chr19 | 39525479  | 39526227  | 749 |
| chr7  | 15625314  | 15625992  | 679 |
| chr23 | 28053672  | 28054336  | 665 |
| chr4  | 117400249 | 117400911 | 663 |
| chr12 | 32135994  | 32136645  | 652 |
| chr1  | 129980500 | 129981129 | 630 |
| chrX  | 47240930  | 47241534  | 605 |
| chr9  | 77659190  | 77659783  | 594 |
| chr10 | 78659440  | 78660027  | 588 |
| chrX  | 12258447  | 12259027  | 581 |
| chrX  | 48077568  | 48078134  | 567 |
| chr23 | 15858624  | 15859189  | 566 |
| chr13 | 38866296  | 38866861  | 566 |
| chr16 | 74124057  | 74124620  | 564 |
| chr15 | 53624181  | 53624736  | 556 |
| chrX  | 78692907  | 78693459  | 553 |
| chrX  | 6140532   | 6141076   | 545 |
| chr3  | 98294838  | 98295367  | 530 |
| chr23 | 34997497  | 34998008  | 512 |
| chrX  | 75003154  | 75003662  | 509 |
| chr25 | 28968246  | 28968748  | 503 |
| chr18 | 55663629  | 55664128  | 500 |
| chrX  | 12345210  | 12345705  | 496 |
| chrX  | 73257888  | 73258381  | 494 |
| chrX  | 62955857  | 62956343  | 487 |
| chr29 | 2509390   | 2509867   | 478 |
| chr19 | 20521791  | 20522263  | 473 |
| chr15 | 24945013  | 24945483  | 471 |
| chr14 | 62325827  | 62326292  | 466 |
| chr11 | 13143526  | 13143986  | 461 |
| chrX  | 72846399  | 72846858  | 460 |
| chr24 | 40387280  | 40387728  | 449 |
| chr6  | 98306427  | 98306872  | 446 |
| chrX  | 57154000  | 57154444  | 445 |
| chr29 | 2532273   | 2532716   | 444 |
| chr12 | 84166984  | 84167427  | 444 |
| chr26 | 42071423  | 42071865  | 443 |
| chr2  | 108247434 | 108247869 | 436 |
| chrX  | 81002618  | 81003052  | 435 |
| chr11 | 21619996  | 21620428  | 433 |
| chr11 | 77893788  | 77894217  | 430 |
| chr5  | 125071320 | 125071745 | 426 |
| chrX  | 7490551   | 7490973   | 423 |
| chr25 | 33498905  | 33499326  | 422 |
| chr26 | 38125543  | 38125960  | 418 |
| chr3  | 106589098 | 106589508 | 411 |

|       |           |           |     |
|-------|-----------|-----------|-----|
| chr13 | 23477888  | 23478296  | 409 |
| chr8  | 74364509  | 74364907  | 399 |
| chr19 | 56514896  | 56515294  | 399 |
| chr19 | 47107788  | 47108186  | 399 |
| chr18 | 18692127  | 18692525  | 399 |
| chr18 | 12450024  | 12450422  | 399 |
| chr17 | 26908684  | 26909082  | 399 |
| chr15 | 25565970  | 25566368  | 399 |
| chr13 | 17752364  | 17752762  | 399 |
| chr10 | 45679987  | 45680385  | 399 |
| chrX  | 55885708  | 55886089  | 382 |
| chrX  | 19984597  | 19984977  | 381 |
| chr26 | 20861350  | 20861729  | 380 |
| chrX  | 20706425  | 20706796  | 372 |
| chr22 | 6471163   | 6471534   | 372 |
| chr22 | 30153783  | 30154143  | 361 |
| chr13 | 82060434  | 82060724  | 291 |
| chr15 | 36308542  | 36308824  | 283 |
| chr15 | 57434070  | 57434316  | 247 |
| chrX  | 59483973  | 59484927  | 955 |
| chr19 | 26979214  | 26979993  | 780 |
| chr23 | 49929455  | 49930202  | 748 |
| chr7  | 46251459  | 46252186  | 728 |
| chrX  | 9996671   | 9997320   | 650 |
| chr28 | 34177722  | 34178317  | 596 |
| chr14 | 22071577  | 22072153  | 577 |
| chr19 | 60838243  | 60838804  | 562 |
| chr14 | 42306331  | 42306886  | 556 |
| chr24 | 43691458  | 43692010  | 553 |
| chrX  | 50982028  | 50982573  | 546 |
| chrX  | 55015949  | 55016487  | 539 |
| chr9  | 90395547  | 90396085  | 539 |
| chr29 | 26879133  | 26879669  | 537 |
| chrX  | 79872974  | 79873502  | 529 |
| chr20 | 73271381  | 73271906  | 526 |
| chrX  | 20028369  | 20028891  | 523 |
| chrX  | 19888153  | 19888675  | 523 |
| chr1  | 74622182  | 74622697  | 516 |
| chr15 | 27267069  | 27267579  | 511 |
| chr2  | 132425209 | 132425695 | 487 |
| chr1  | 22673380  | 22673856  | 477 |
| chr5  | 33319618  | 33320086  | 469 |
| chr26 | 38129191  | 38129658  | 468 |
| chr13 | 42623671  | 42624131  | 461 |
| chrX  | 58214022  | 58214473  | 452 |
| chrX  | 18963243  | 18963692  | 450 |
| chr18 | 53872918  | 53873366  | 449 |
| chrX  | 9141786   | 9142224   | 439 |
| chrX  | 50436091  | 50436528  | 438 |
| chr3  | 17997422  | 17997856  | 435 |



|       |               |           |     |
|-------|---------------|-----------|-----|
| chr9  | 77307943      | 77308372  | 430 |
| chr4  | 5601439       | 5601858   | 420 |
| chr22 | 29920096      | 29920512  | 417 |
| chr25 | 8600913       | 8601323   | 411 |
| chrX  | 75195480      | 75195883  | 404 |
| chr3  | 22859544      | 22859947  | 404 |
| chrX  | 22569647      | 22570049  | 403 |
| chr4  | 32394551      | 32394952  | 402 |
| chrX  | 62940782      | 62941180  | 399 |
| chr3  | 115094489     | 115094887 | 399 |
| chr14 | 31037137      | 31037528  | 392 |
| chr1  | 74582371      | 74582762  | 392 |
| chr23 | 18468406      | 18468796  | 391 |
| chr24 | 58492245      | 58492634  | 390 |
| chr3  | 93749858      | 93750245  | 388 |
| chr15 | 51659883      | 51660269  | 387 |
| chrX  | 8677234       | 8677619   | 386 |
| chr26 | 42897005      | 42897390  | 386 |
| chr18 | 36966207      | 36966592  | 386 |
| chr6  | 18296377      | 18296758  | 382 |
| chr8  | 114966637     | 114967014 | 378 |
| chr19 | 22336980      | 22337357  | 378 |
| chr11 | 82904024      | 82904367  | 344 |
| chr10 | 70003335      | 70003667  | 333 |
| chrX  | 77196282      | 77196600  | 319 |
| chr11 | 105929161     | 105929950 | 790 |
| chrX  | 49379022      | 49379760  | 739 |
| chr19 | 39348704      | 39349395  | 692 |
| chr18 | 51414807      | 51415484  | 678 |
| chrX  | 48702521      | 48703165  | 645 |
| chrX  | 49239505      | 49240139  | 635 |
| chr7  | 42222044      | 42222678  | 635 |
| chr3  | 56436393      | 56437025  | 633 |
| chr18 | 57605043      | 57605658  | 616 |
| chrX  | 50092222      | 50092835  | 614 |
| chr3  | 8761335       | 8761946   | 612 |
| chr1  | 7448693       | 7449291   | 599 |
| chr7  | 42225230      | 42225822  | 593 |
| chr18 | 62511637      | 62512229  | 593 |
| chr19 | 59187204      | 59187795  | 592 |
| chr2  | 131058142     | 131058729 | 588 |
| chr15 | 419694 420272 | 579       |     |
| chr28 | 33642495      | 33643066  | 572 |
| chr13 | 59935463      | 59936021  | 559 |
| chrX  | 10949932      | 10950484  | 553 |
| chr12 | 31467410      | 31467957  | 548 |
| chr10 | 80154017      | 80154548  | 532 |
| chr19 | 23781619      | 23782146  | 528 |
| chr8  | 24739484      | 24740010  | 527 |
| chr9  | 106768234     | 106768753 | 520 |

|       |           |           |     |
|-------|-----------|-----------|-----|
| chr17 | 53521638  | 53522143  | 506 |
| chr5  | 78902153  | 78902655  | 503 |
| chr24 | 38472970  | 38473467  | 498 |
| chr10 | 88080353  | 88080848  | 496 |
| chr7  | 42012824  | 42013318  | 495 |
| chr21 | 59028268  | 59028761  | 494 |
| chr13 | 49389456  | 49389947  | 492 |
| chrX  | 49829827  | 49830312  | 486 |
| chrX  | 35550643  | 35551123  | 481 |
| chr10 | 81591258  | 81591737  | 480 |
| chrX  | 55362064  | 55362526  | 463 |
| chrX  | 30997685  | 30998142  | 458 |
| chr1  | 153891823 | 153892280 | 458 |
| chr21 | 47620432  | 47620887  | 456 |
| chr22 | 46576249  | 46576700  | 452 |
| chr7  | 96600588  | 96601037  | 450 |
| chr2  | 131310292 | 131310731 | 440 |
| chr5  | 111202141 | 111202579 | 439 |
| chr11 | 52377057  | 52377490  | 434 |
| chr13 | 63390936  | 63391368  | 433 |
| chr25 | 38049843  | 38050268  | 426 |
| chr23 | 18687319  | 18687742  | 424 |
| chr18 | 11806244  | 11806667  | 424 |
| chr28 | 40379198  | 40379620  | 423 |
| chr11 | 104567900 | 104568322 | 423 |
| chr10 | 66552410  | 66552831  | 422 |
| chr4  | 120192341 | 120192761 | 421 |
| chr19 | 58346191  | 58346610  | 420 |
| chr20 | 38777711  | 38778127  | 417 |
| chr29 | 49323135  | 49323549  | 415 |
| chr29 | 34920087  | 34920501  | 415 |
| chr3  | 104554492 | 104554904 | 413 |
| chr6  | 46695595  | 46696006  | 412 |
| chr6  | 107047699 | 107048109 | 411 |
| chr25 | 38400865  | 38401275  | 411 |
| chr12 | 80140038  | 80140448  | 411 |
| chr8  | 93143471  | 93143880  | 410 |
| chr19 | 22838252  | 22838661  | 410 |
| chrX  | 73444428  | 73444836  | 409 |
| chrX  | 59447327  | 59447735  | 409 |
| chr9  | 87773116  | 87773523  | 408 |
| chr18 | 4095622   | 4096028   | 407 |
| chr11 | 75090412  | 75090817  | 406 |
| chr3  | 121240577 | 121240980 | 404 |
| chrX  | 73288387  | 73288789  | 403 |
| chr2  | 10071051  | 10071453  | 403 |
| chr3  | 11561977  | 11562378  | 402 |
| chr19 | 46711133  | 46711534  | 402 |
| chrX  | 11527470  | 11527869  | 400 |
| chr28 | 26474787  | 26475186  | 400 |

|       |               |           |     |
|-------|---------------|-----------|-----|
| chr21 | 33092184      | 33092583  | 400 |
| chr14 | 34034690      | 34035089  | 400 |
| chrX  | 75971758      | 75972156  | 399 |
| chrX  | 70004393      | 70004791  | 399 |
| chrX  | 44902661      | 44903059  | 399 |
| chrX  | 21463922      | 21464320  | 399 |
| chrX  | 20623603      | 20624001  | 399 |
| chrX  | 20335007      | 20335405  | 399 |
| chrX  | 6608082       | 6608480   | 399 |
| chr8  | 78854535      | 78854933  | 399 |
| chr8  | 24319401      | 24319799  | 399 |
| chr5  | 30507752      | 30508150  | 399 |
| chr28 | 38897902      | 38898300  | 399 |
| chr26 | 22318334      | 22318732  | 399 |
| chr21 | 52040926      | 52041324  | 399 |
| chr18 | 45643726      | 45644124  | 399 |
| chr18 | 11753561      | 11753959  | 399 |
| chr17 | 60569847      | 60570245  | 399 |
| chr14 | 67970261      | 67970659  | 399 |
| chr14 | 22790729      | 22791127  | 399 |
| chr13 | 39963092      | 39963490  | 399 |
| chr13 | 37157856      | 37158254  | 399 |
| chr13 | 15175806      | 15176204  | 399 |
| chr10 | 17136897      | 17137295  | 399 |
| chr9  | 98961161      | 98961558  | 398 |
| chr29 | 29918675      | 29919072  | 398 |
| chr23 | 52808269      | 52808666  | 398 |
| chr23 | 30518396      | 30518793  | 398 |
| chr19 | 56064360      | 56064756  | 397 |
| chr13 | 60465522      | 60465917  | 396 |
| chr13 | 21891728      | 21892123  | 396 |
| chr19 | 61709712      | 61710106  | 395 |
| chrX  | 53984554      | 53984945  | 392 |
| chrX  | 56398081      | 56398471  | 391 |
| chr17 | 68401621      | 68402011  | 391 |
| chr19 | 44885396      | 44885785  | 390 |
| chr14 | 1578017       | 1578405   | 389 |
| chr23 | 43255048      | 43255435  | 388 |
| chr17 | 49439564      | 49439950  | 387 |
| chrX  | 9153628       | 9154013   | 386 |
| chr19 | 12496511      | 12496896  | 386 |
| chr17 | 21444589      | 21444974  | 386 |
| chr26 | 42228543      | 42228927  | 385 |
| chr13 | 70708799      | 70709181  | 383 |
| chr10 | 25245222      | 25245604  | 383 |
| chr27 | 732031 732412 | 382       |     |
| chr22 | 21969074      | 21969455  | 382 |
| chr11 | 70864021      | 70864402  | 382 |
| chr3  | 123633966     | 123634345 | 380 |
| chr21 | 32873180      | 32873559  | 380 |

|       |           |           |     |
|-------|-----------|-----------|-----|
| chr13 | 53463513  | 53463892  | 380 |
| chrX  | 65026750  | 65027128  | 379 |
| chr20 | 38522227  | 38522604  | 378 |
| chr26 | 12847760  | 12848136  | 377 |
| chr24 | 40338511  | 40338884  | 374 |
| chr23 | 18734384  | 18734757  | 374 |
| chr13 | 77735645  | 77736017  | 373 |
| chr24 | 64484009  | 64484380  | 372 |
| chr13 | 77685931  | 77686301  | 371 |
| chr7  | 19228396  | 19228765  | 370 |
| chr18 | 51523406  | 51523774  | 369 |
| chr4  | 68261112  | 68261478  | 367 |
| chrX  | 37651160  | 37651525  | 366 |
| chrX  | 8369627   | 8369992   | 366 |
| chr8  | 74151047  | 74151411  | 365 |
| chr19 | 25613782  | 25614145  | 364 |
| chr17 | 63499115  | 63499476  | 362 |
| chr12 | 82709163  | 82709523  | 361 |
| chrX  | 56274307  | 56274665  | 359 |
| chrX  | 47640584  | 47640942  | 359 |
| chrX  | 14044633  | 14044991  | 359 |
| chr19 | 39616599  | 39616957  | 359 |
| chr8  | 74539402  | 74539759  | 358 |
| chr3  | 105418130 | 105418487 | 358 |
| chr23 | 15911831  | 15912188  | 358 |
| chr8  | 24507564  | 24507920  | 357 |
| chr4  | 124421368 | 124421723 | 356 |
| chr28 | 26861708  | 26862062  | 355 |
| chr12 | 82659737  | 82660089  | 353 |
| chr19 | 45710902  | 45711252  | 351 |
| chr27 | 15537284  | 15537632  | 349 |
| chr2  | 127573766 | 127574113 | 348 |
| chr13 | 41929218  | 41929565  | 348 |
| chr17 | 16989360  | 16989705  | 346 |
| chrX  | 60276534  | 60276878  | 345 |
| chrX  | 12252997  | 12253340  | 344 |
| chr14 | 19607910  | 19608253  | 344 |
| chr8  | 10363487  | 10363828  | 342 |
| chr3  | 113371247 | 113371586 | 340 |
| chr8  | 73880958  | 73881296  | 339 |
| chr10 | 25894953  | 25895287  | 335 |
| chr11 | 81371505  | 81371837  | 333 |
| chr18 | 58679405  | 58679733  | 329 |
| chr5  | 112942116 | 112942443 | 328 |
| chr25 | 27258071  | 27258397  | 327 |
| chr19 | 26667809  | 26668129  | 321 |
| chr13 | 67719626  | 67719942  | 317 |
| chr28 | 33251343  | 33251658  | 316 |
| chr4  | 69219393  | 69219707  | 315 |
| chr10 | 80500440  | 80500747  | 308 |

|       |               |           |     |
|-------|---------------|-----------|-----|
| chrX  | 78815796      | 78816102  | 307 |
| chr18 | 54041443      | 54041748  | 306 |
| chr9  | 90225790      | 90226094  | 305 |
| chrX  | 55964968      | 55965270  | 303 |
| chrX  | 50193954      | 50194256  | 303 |
| chr29 | 48704464      | 48704761  | 298 |
| chr8  | 73280282      | 73280567  | 286 |
| chr4  | 72190284      | 72190569  | 286 |
| chr19 | 39838599      | 39838877  | 279 |
| chrX  | 78468520      | 78468794  | 275 |
| chrX  | 73187378      | 73187650  | 273 |
| chr19 | 31755051      | 31755323  | 273 |
| chr5  | 74685690      | 74685961  | 272 |
| chr21 | 2031654       | 2031922   | 269 |
| chr8  | 69618443      | 69618706  | 264 |
| chr26 | 49223478      | 49223734  | 257 |
| chr19 | 40535345      | 40535600  | 256 |
| chr18 | 24306400      | 24306649  | 250 |
| chrX  | 18967388      | 18967628  | 241 |
| chr19 | 43005844      | 43006084  | 241 |
| chr8  | 108657024     | 108657254 | 231 |
| chr11 | 100953960     | 100954190 | 231 |
| chr8  | 73819959      | 73820414  | 456 |
| chr21 | 52085785      | 52086346  | 562 |
| chr3  | 32474763      | 32475150  | 388 |
| chr13 | 153720 153951 | 232       |     |
| chr1  | 153895140     | 153896129 | 990 |
| chr8  | 73308743      | 73309130  | 388 |
| chr25 | 14644 15046   | 403       |     |
| chr3  | 17473730      | 17474250  | 521 |
| chr17 | 70102149      | 70102591  | 443 |
| chr4  | 71611251      | 71611687  | 437 |
| chr8  | 22855995      | 22856426  | 432 |
| chr7  | 59961878      | 59962525  | 648 |
| chr17 | 68371187      | 68371830  | 644 |
| chr11 | 100870042     | 100870684 | 643 |
| chr17 | 62596130      | 62596760  | 631 |
| chr13 | 55542550      | 55543016  | 467 |
| chrX  | 6993132       | 6993596   | 465 |
| chr19 | 10806172      | 10806631  | 460 |
| chr24 | 1736369       | 1737146   | 778 |
| chrX  | 12079844      | 12080334  | 491 |
| chr18 | 64339215      | 64339685  | 471 |
| chr23 | 13597231      | 13597682  | 452 |
| chrX  | 21634343      | 21634747  | 405 |
| chr11 | 100734969     | 100735316 | 348 |
| chr17 | 63507712      | 63508440  | 729 |
| chr26 | 50955528      | 50956018  | 491 |
| chrX  | 45483967      | 45484421  | 455 |
| chr13 | 70351846      | 70352312  | 467 |

|       |           |           |      |
|-------|-----------|-----------|------|
| chrX  | 22854755  | 22855170  | 416  |
| chr8  | 3866725   | 3867121   | 397  |
| chr3  | 116415337 | 116415665 | 329  |
| chrX  | 18966855  | 18967174  | 320  |
| chr13 | 12525314  | 12525659  | 346  |
| chr26 | 21771203  | 21771864  | 662  |
| chr11 | 49398067  | 49398566  | 500  |
| chr29 | 50441582  | 50441939  | 358  |
| chr1  | 141952408 | 141952655 | 248  |
| chr4  | 94707625  | 94707963  | 339  |
| chrX  | 61362298  | 61362847  | 550  |
| chr10 | 70406470  | 70407008  | 539  |
| chr29 | 24951310  | 24951822  | 513  |
| chrX  | 20677436  | 20677863  | 428  |
| chr5  | 30488937  | 30489351  | 415  |
| chr4  | 123125594 | 123126005 | 412  |
| chrX  | 54891174  | 54891572  | 399  |
| chr8  | 73307129  | 73307527  | 399  |
| chr11 | 7683407   | 7683805   | 399  |
| chr9  | 35966908  | 35967302  | 395  |
| chr11 | 97543222  | 97543616  | 395  |
| chr21 | 46877970  | 46878359  | 390  |
| chr18 | 24331118  | 24331469  | 352  |
| chr8  | 79390948  | 79391297  | 350  |
| chr3  | 8372031   | 8372366   | 336  |
| chr8  | 73843911  | 73844242  | 332  |
| chr8  | 24395668  | 24395999  | 332  |
| chr13 | 60528903  | 60529229  | 327  |
| chr4  | 32537536  | 32537853  | 318  |
| chrX  | 55651408  | 55651722  | 315  |
| chr9  | 16530623  | 16530883  | 261  |
| chr13 | 27164477  | 27164696  | 220  |
| chr13 | 63460361  | 63460938  | 578  |
| chr1  | 44697876  | 44698238  | 363  |
| chr21 | 1778464   | 1778816   | 353  |
| chr8  | 73837712  | 73838133  | 422  |
| chr25 | 38836689  | 38837232  | 544  |
| chr17 | 9965483   | 9966032   | 550  |
| chr3  | 22497466  | 22498856  | 1391 |
| chr25 | 40223906  | 40224779  | 874  |
| chr5  | 112234326 | 112235086 | 761  |
| chr3  | 35415044  | 35415703  | 660  |
| chrX  | 20102592  | 20103223  | 632  |
| chr5  | 32843996  | 32844498  | 503  |
| chr1  | 1553705   | 1554105   | 401  |
| chr12 | 32129922  | 32130319  | 398  |
| chr7  | 16521940  | 16522817  | 878  |
| chr3  | 15435945  | 15436708  | 764  |
| chr8  | 24736481  | 24737102  | 622  |
| chr10 | 81587781  | 81588389  | 609  |

|       |           |           |     |
|-------|-----------|-----------|-----|
| chr9  | 90635212  | 90635799  | 588 |
| chr16 | 29422533  | 29423046  | 514 |
| chr24 | 46537576  | 46538070  | 495 |
| chr6  | 121051602 | 121052389 | 788 |
| chr19 | 41267197  | 41267819  | 623 |
| chr15 | 23913446  | 23914049  | 604 |
| chr26 | 5873439   | 5873967   | 529 |
| chr2  | 17533736  | 17534225  | 490 |
| chr2  | 4912907   | 4913369   | 463 |
| chr22 | 60223444  | 60224035  | 592 |
| chrX  | 78724861  | 78725301  | 441 |
| chr2  | 134692428 | 134692830 | 403 |
| chr10 | 83576956  | 83577734  | 779 |
| chr5  | 51891425  | 51892123  | 699 |
| chr3  | 114586468 | 114586970 | 503 |
| chr14 | 26132513  | 26132939  | 427 |
| chr23 | 27403865  | 27404253  | 389 |
| chr24 | 64984605  | 64985171  | 567 |
| chr3  | 105165268 | 105165832 | 565 |
| chr3  | 123642846 | 123643249 | 404 |
| chrX  | 36685514  | 36685875  | 362 |
| chr19 | 59703838  | 59704198  | 361 |
| chr19 | 65247417  | 65247742  | 326 |
| chr1  | 141690887 | 141691202 | 316 |
| chrX  | 62807496  | 62808289  | 794 |
| chr14 | 58448242  | 58448798  | 557 |
| chr11 | 100923531 | 100924018 | 488 |
| chrX  | 72901015  | 72901443  | 429 |
| chr1  | 1731812   | 1732210   | 399 |
| chr24 | 61729070  | 61729463  | 394 |
| chr6  | 120607502 | 120607888 | 387 |
| chr18 | 50499249  | 50499628  | 380 |
| chr8  | 7709668   | 7710039   | 372 |
| chrX  | 74383558  | 74383919  | 362 |
| chr5  | 108224714 | 108224925 | 212 |
| chr18 | 11554655  | 11555316  | 662 |
| chr18 | 24748093  | 24748548  | 456 |
| chr21 | 33088194  | 33088626  | 433 |
| chr7  | 33300334  | 33300729  | 396 |
| chr2  | 124797458 | 124797852 | 395 |
| chr2  | 134682152 | 134682537 | 386 |
| chr13 | 21978371  | 21978738  | 368 |
| chr1  | 44269709  | 44270061  | 353 |
| chr19 | 20401183  | 20401856  | 674 |
| chr5  | 10230036  | 10230586  | 551 |
| chr3  | 121431746 | 121432233 | 488 |
| chr2  | 76631014  | 76631472  | 459 |
| chr10 | 20897041  | 20897494  | 454 |
| chr23 | 18733705  | 18734121  | 417 |
| chr13 | 59354267  | 59354666  | 400 |

|       |               |           |      |
|-------|---------------|-----------|------|
| chr19 | 62236662      | 62237060  | 399  |
| chrX  | 61383719      | 61384114  | 396  |
| chr1  | 76420978      | 76421373  | 396  |
| chrX  | 72234387      | 72234774  | 388  |
| chrX  | 7605574       | 7605959   | 386  |
| chr16 | 33482747      | 33483128  | 382  |
| chr29 | 9517748       | 9518126   | 379  |
| chr10 | 89396152      | 89396526  | 375  |
| chr18 | 24335684      | 24336056  | 373  |
| chr5  | 30346271      | 30346632  | 362  |
| chr17 | 48809554      | 48809911  | 358  |
| chr23 | 42976520      | 42976873  | 354  |
| chr11 | 77784217      | 77784570  | 354  |
| chr19 | 18242296      | 18242643  | 348  |
| chr6  | 109907913     | 109908202 | 290  |
| chr11 | 104882242     | 104882531 | 290  |
| chr27 | 36113979      | 36114240  | 262  |
| chr13 | 125615 125838 | 224       |      |
| chr19 | 23720793      | 23721015  | 223  |
| chr20 | 4058357       | 4058566   | 210  |
| chr10 | 42746791      | 42746992  | 202  |
| chr8  | 73498475      | 73498986  | 512  |
| chrX  | 45554473      | 45554824  | 352  |
| chr1  | 131679684     | 131680208 | 525  |
| chr4  | 99694226      | 99694499  | 274  |
| chr17 | 49139850      | 49140345  | 496  |
| chr18 | 10303909      | 10304541  | 633  |
| chrX  | 17488859      | 17489245  | 387  |
| chr11 | 78493848      | 78494238  | 391  |
| chr11 | 74429694      | 74430151  | 458  |
| chr8  | 73307746      | 73308136  | 391  |
| chr18 | 58676032      | 58676307  | 276  |
| chr19 | 19139166      | 19139505  | 340  |
| chr7  | 190777 191129 | 353       |      |
| chr8  | 73326783      | 73327030  | 248  |
| chr21 | 47605770      | 47607368  | 1599 |
| chr19 | 40463743      | 40464922  | 1180 |
| chr2  | 115083139     | 115084268 | 1130 |
| chr3  | 9272211       | 9273311   | 1101 |
| chr9  | 108132051     | 108133146 | 1096 |
| chr3  | 35492690      | 35493781  | 1092 |
| chrX  | 65010855      | 65011923  | 1069 |
| chr10 | 78881723      | 78882785  | 1063 |
| chr9  | 105889220     | 105890268 | 1049 |
| chr15 | 41397821      | 41398868  | 1048 |
| chr13 | 41693989      | 41695008  | 1020 |
| chr7  | 70782298      | 70783311  | 1014 |
| chr13 | 40101457      | 40102466  | 1010 |
| chr13 | 70709435      | 70710442  | 1008 |
| chr11 | 71886478      | 71887485  | 1008 |



|       |           |           |      |
|-------|-----------|-----------|------|
| chr29 | 2510354   | 2511358   | 1005 |
| chr18 | 12412402  | 12413398  | 997  |
| chr16 | 47505275  | 47506265  | 991  |
| chr16 | 47951741  | 47952718  | 978  |
| chr24 | 20728238  | 20729213  | 976  |
| chr2  | 74779675  | 74780650  | 976  |
| chr15 | 64799138  | 64800112  | 975  |
| chr19 | 52043051  | 52044023  | 973  |
| chr1  | 76551566  | 76552538  | 973  |
| chr7  | 45697357  | 45698328  | 972  |
| chr23 | 10538404  | 10539370  | 967  |
| chr18 | 53122032  | 53122997  | 966  |
| chr11 | 105986416 | 105987357 | 942  |
| chr6  | 36895225  | 36896163  | 939  |
| chr2  | 139482825 | 139483760 | 936  |
| chr6  | 59500705  | 59501638  | 934  |
| chr22 | 22552230  | 22553159  | 930  |
| chrX  | 35622403  | 35623327  | 925  |
| chr4  | 121721880 | 121722804 | 925  |
| chr28 | 34094288  | 34095212  | 925  |
| chr11 | 105995726 | 105996643 | 918  |
| chrX  | 13612140  | 13613056  | 917  |
| chr16 | 47039401  | 47040316  | 916  |
| chrX  | 13381144  | 13382053  | 910  |
| chr7  | 14291766  | 14292662  | 897  |
| chr10 | 83867871  | 83868766  | 896  |
| chrX  | 20730236  | 20731130  | 895  |
| chr3  | 102120701 | 102121594 | 894  |
| chr15 | 75327435  | 75328327  | 893  |
| chr2  | 75590933  | 75591821  | 889  |
| chr25 | 3402403   | 3403286   | 884  |
| chr18 | 49949328  | 49950211  | 884  |
| chrX  | 34093610  | 34094488  | 879  |
| chr3  | 94154567  | 94155445  | 879  |
| chrX  | 19339268  | 19340142  | 875  |
| chr11 | 20487752  | 20488618  | 867  |
| chr8  | 53289798  | 53290660  | 863  |
| chrX  | 55583185  | 55584045  | 861  |
| chr8  | 108755467 | 108756326 | 860  |
| chr7  | 14360804  | 14361662  | 859  |
| chr19 | 13556534  | 13557392  | 859  |
| chr10 | 70177585  | 70178439  | 855  |
| chrX  | 20874517  | 20875367  | 851  |
| chr21 | 34018565  | 34019411  | 847  |
| chr17 | 69881405  | 69882251  | 847  |
| chr23 | 33136112  | 33136956  | 845  |
| chr15 | 39998544  | 39999386  | 843  |
| chr15 | 37580431  | 37581273  | 843  |
| chr15 | 19798691  | 19799531  | 841  |
| chr15 | 73761536  | 73762375  | 840  |

|       |               |           |     |
|-------|---------------|-----------|-----|
| chr15 | 33480147      | 33480986  | 840 |
| chr4  | 98892810      | 98893647  | 838 |
| chr19 | 37987613      | 37988450  | 838 |
| chrX  | 75405444      | 75406277  | 834 |
| chr10 | 8706737       | 8707569   | 833 |
| chr24 | 33219600      | 33220430  | 831 |
| chr11 | 81451143      | 81451968  | 826 |
| chrX  | 12243459      | 12244282  | 824 |
| chr18 | 45536062      | 45536885  | 824 |
| chr3  | 106558152     | 106558974 | 823 |
| chr11 | 44981478      | 44982300  | 823 |
| chr14 | 872211 873031 | 821       |     |
| chr11 | 52301389      | 52302209  | 821 |
| chr11 | 2564746       | 2565563   | 818 |
| chr16 | 73869730      | 73870543  | 814 |
| chrX  | 6115132       | 6115943   | 812 |
| chr3  | 20760812      | 20761623  | 812 |
| chrX  | 49305142      | 49305949  | 808 |
| chrX  | 80173123      | 80173926  | 804 |
| chrX  | 48712217      | 48713019  | 803 |
| chr21 | 20674742      | 20675542  | 801 |
| chrX  | 2550470       | 2551269   | 800 |
| chrX  | 78644922      | 78645719  | 798 |
| chr12 | 21066221      | 21067013  | 793 |
| chrX  | 49778375      | 49779165  | 791 |
| chrX  | 21568526      | 21569314  | 789 |
| chr8  | 63907661      | 63908449  | 789 |
| chr17 | 57694293      | 57695081  | 789 |
| chr8  | 75885994      | 75886780  | 787 |
| chrX  | 21934412      | 21935197  | 786 |
| chr7  | 19381416      | 19382199  | 784 |
| chr13 | 64376457      | 64377237  | 781 |
| chr5  | 117588134     | 117588913 | 780 |
| chrX  | 5168804       | 5169582   | 779 |
| chr3  | 105189217     | 105189994 | 778 |
| chr5  | 61555435      | 61556211  | 777 |
| chrX  | 75915485      | 75916260  | 776 |
| chr9  | 77304315      | 77305090  | 776 |
| chrX  | 59472239      | 59473011  | 773 |
| chrX  | 49326623      | 49327393  | 771 |
| chr29 | 17459851      | 17460621  | 771 |
| chr19 | 52041740      | 52042509  | 770 |
| chrX  | 13806008      | 13806776  | 769 |
| chr15 | 29208804      | 29209572  | 769 |
| chrX  | 30152088      | 30152855  | 768 |
| chr19 | 54559234      | 54560001  | 768 |
| chr19 | 15004252      | 15005018  | 767 |
| chrX  | 64815543      | 64816307  | 765 |
| chrX  | 72461497      | 72462257  | 761 |
| chrX  | 19030470      | 19031227  | 758 |

|       |           |           |     |
|-------|-----------|-----------|-----|
| chr26 | 50496243  | 50497000  | 758 |
| chr17 | 75976263  | 75977020  | 758 |
| chrX  | 7188357   | 7189111   | 755 |
| chr5  | 45205378  | 45206131  | 754 |
| chr21 | 58722104  | 58722856  | 753 |
| chr13 | 77245198  | 77245950  | 753 |
| chr13 | 41777299  | 41778050  | 752 |
| chr21 | 34764953  | 34765701  | 749 |
| chrX  | 64260851  | 64261598  | 748 |
| chr21 | 67978812  | 67979559  | 748 |
| chr18 | 22152650  | 22153396  | 747 |
| chrX  | 56604043  | 56604787  | 745 |
| chr13 | 15989500  | 15990243  | 744 |
| chrX  | 11986995  | 11987737  | 743 |
| chr8  | 6480111   | 6480852   | 742 |
| chrX  | 33792041  | 33792780  | 740 |
| chr10 | 71232750  | 71233487  | 738 |
| chrX  | 20660912  | 20661647  | 736 |
| chr19 | 25996355  | 25997090  | 736 |
| chrX  | 9651898   | 9652631   | 734 |
| chr21 | 18528100  | 18528831  | 732 |
| chr18 | 11066198  | 11066929  | 732 |
| chr5  | 30931442  | 30932172  | 731 |
| chrX  | 20069559  | 20070284  | 726 |
| chr19 | 14239827  | 14240551  | 725 |
| chr8  | 60399078  | 60399801  | 724 |
| chr26 | 42112149  | 42112871  | 723 |
| chr19 | 18375056  | 18375778  | 723 |
| chrX  | 6454374   | 6455095   | 722 |
| chr16 | 71116590  | 71117310  | 721 |
| chrX  | 20061612  | 20062331  | 720 |
| chr7  | 57164588  | 57165307  | 720 |
| chrX  | 31598164  | 31598882  | 719 |
| chr25 | 37693862  | 37694580  | 719 |
| chr9  | 14568894  | 14569609  | 716 |
| chr21 | 56495549  | 56496264  | 716 |
| chrX  | 9243749   | 9244463   | 715 |
| chr8  | 20945697  | 20946410  | 714 |
| chrX  | 11085820  | 11086531  | 712 |
| chr3  | 20448050  | 20448761  | 712 |
| chr24 | 1611265   | 1611976   | 712 |
| chr10 | 20984338  | 20985049  | 712 |
| chr21 | 18486442  | 18487152  | 711 |
| chr19 | 39257464  | 39258174  | 711 |
| chrX  | 34239959  | 34240668  | 710 |
| chr9  | 100978460 | 100979169 | 710 |
| chr2  | 26556893  | 26557600  | 708 |
| chrX  | 50907598  | 50908304  | 707 |
| chrX  | 2198370   | 2199076   | 707 |
| chr16 | 49835568  | 49836272  | 705 |

|       |           |           |     |
|-------|-----------|-----------|-----|
| chrX  | 69212957  | 69213660  | 704 |
| chr14 | 34094434  | 34095137  | 704 |
| chrX  | 10973631  | 10974333  | 703 |
| chr9  | 89173263  | 89173965  | 703 |
| chr17 | 66193986  | 66194688  | 703 |
| chr19 | 41222104  | 41222805  | 702 |
| chrX  | 62687990  | 62688690  | 701 |
| chr3  | 121891883 | 121892583 | 701 |
| chr10 | 74857033  | 74857733  | 701 |
| chr7  | 8916881   | 8917580   | 700 |
| chr3  | 26150311  | 26151010  | 700 |
| chr8  | 112060312 | 112061009 | 698 |
| chrX  | 67072939  | 67073635  | 697 |
| chr26 | 46280245  | 46280941  | 697 |
| chr22 | 30448834  | 30449530  | 697 |
| chr2  | 111317463 | 111318159 | 697 |
| chr22 | 56642438  | 56643133  | 696 |
| chr16 | 58165082  | 58165777  | 696 |
| chr10 | 86852814  | 86853509  | 696 |
| chr22 | 37806272  | 37806965  | 694 |
| chr7  | 3922988   | 3923680   | 693 |
| chr23 | 40505952  | 40506644  | 693 |
| chr21 | 68475765  | 68476457  | 693 |
| chr11 | 105385966 | 105386657 | 692 |
| chr22 | 23093245  | 23093934  | 690 |
| chr22 | 16002445  | 16003132  | 688 |
| chrX  | 13677399  | 13678084  | 686 |
| chr9  | 100063917 | 100064602 | 686 |
| chrX  | 31552952  | 31553636  | 685 |
| chr29 | 48834654  | 48835338  | 685 |
| chr26 | 20127722  | 20128406  | 685 |
| chr10 | 8697365   | 8698049   | 685 |
| chr15 | 25700195  | 25700878  | 684 |
| chr13 | 77596118  | 77596800  | 683 |
| chr12 | 9563714   | 9564396   | 683 |
| chr10 | 52232420  | 52233102  | 683 |
| chrX  | 74563850  | 74564531  | 682 |
| chrX  | 30682793  | 30683473  | 681 |
| chr26 | 21765604  | 21766284  | 681 |
| chr26 | 20180330  | 20181009  | 680 |
| chr23 | 30359549  | 30360228  | 680 |
| chr16 | 57020615  | 57021294  | 680 |
| chrX  | 51883912  | 51884590  | 679 |
| chr4  | 123024681 | 123025359 | 679 |
| chr22 | 54216548  | 54217226  | 679 |
| chr9  | 65810851  | 65811527  | 677 |
| chr14 | 1927389   | 1928065   | 677 |
| chr10 | 14984059  | 14984735  | 677 |
| chr4  | 98519614  | 98520289  | 676 |
| chr3  | 34796989  | 34797664  | 676 |

|       |           |           |     |
|-------|-----------|-----------|-----|
| chr18 | 56628626  | 56629301  | 676 |
| chr17 | 15954063  | 15954738  | 676 |
| chrX  | 66258135  | 66258809  | 675 |
| chr21 | 65568738  | 65569412  | 675 |
| chr18 | 24319095  | 24319768  | 674 |
| chr18 | 11372180  | 11372853  | 674 |
| chr17 | 66449524  | 66450197  | 674 |
| chr17 | 31318306  | 31318979  | 674 |
| chrX  | 20266995  | 20267666  | 672 |
| chr4  | 97719334  | 97720005  | 672 |
| chr10 | 16726056  | 16726727  | 672 |
| chr1  | 110667347 | 110668018 | 672 |
| chrX  | 78449397  | 78450067  | 671 |
| chrX  | 11092590  | 11093260  | 671 |
| chr24 | 2345506   | 2346176   | 671 |
| chr8  | 93063328  | 93063997  | 670 |
| chr18 | 43369681  | 43370349  | 669 |
| chr17 | 63196363  | 63197031  | 669 |
| chr4  | 71508841  | 71509508  | 668 |
| chr8  | 60305973  | 60306639  | 667 |
| chr25 | 33468817  | 33469483  | 667 |
| chr19 | 60460680  | 60461346  | 667 |
| chr10 | 70205451  | 70206117  | 667 |
| chr1  | 70492125  | 70492790  | 666 |
| chrX  | 61687573  | 61688237  | 665 |
| chrX  | 20346123  | 20346787  | 665 |
| chr24 | 1934263   | 1934927   | 665 |
| chrX  | 35736389  | 35737052  | 664 |
| chr8  | 74328480  | 74329143  | 664 |
| chr18 | 15858550  | 15859213  | 664 |
| chr1  | 74627402  | 74628065  | 664 |
| chrX  | 64465290  | 64465952  | 663 |
| chrX  | 62824870  | 62825532  | 663 |
| chr24 | 1947137   | 1947798   | 662 |
| chr23 | 11963835  | 11964496  | 662 |
| chr1  | 75718964  | 75719625  | 662 |
| chr14 | 26471361  | 26472021  | 661 |
| chr29 | 33547814  | 33548473  | 660 |
| chr28 | 33780543  | 33781202  | 660 |
| chr22 | 60055642  | 60056300  | 659 |
| chr14 | 68000878  | 68001536  | 659 |
| chrX  | 75008731  | 75009388  | 658 |
| chrX  | 9667717   | 9668374   | 658 |
| chr17 | 66849102  | 66849759  | 658 |
| chr25 | 27878994  | 27879650  | 657 |
| chr19 | 54933962  | 54934618  | 657 |
| chr17 | 70114242  | 70114897  | 656 |
| chrX  | 50550980  | 50551634  | 655 |
| chr8  | 108652521 | 108653175 | 655 |
| chr25 | 37242635  | 37243289  | 655 |

|       |           |           |     |
|-------|-----------|-----------|-----|
| chr2  | 130774646 | 130775300 | 655 |
| chr15 | 32272867  | 32273521  | 655 |
| chr10 | 70020995  | 70021648  | 654 |
| chr18 | 45640319  | 45640971  | 653 |
| chrX  | 2323947   | 2324598   | 652 |
| chrX  | 8666757   | 8667407   | 651 |
| chr5  | 60318174  | 60318824  | 651 |
| chr26 | 23087699  | 23088349  | 651 |
| chrX  | 78439722  | 78440371  | 650 |
| chrX  | 30455580  | 30456229  | 650 |
| chr28 | 34050351  | 34050999  | 649 |
| chr22 | 16325310  | 16325958  | 649 |
| chrX  | 8118447   | 8119094   | 648 |
| chr17 | 70313778  | 70314424  | 647 |
| chr16 | 77323108  | 77323754  | 647 |
| chr25 | 36474234  | 36474877  | 644 |
| chrX  | 50229578  | 50230220  | 643 |
| chr23 | 15049220  | 15049862  | 643 |
| chr4  | 123976397 | 123977038 | 642 |
| chrX  | 22436405  | 22437045  | 641 |
| chr23 | 48567209  | 48567849  | 641 |
| chr22 | 7192923   | 7193563   | 641 |
| chr5  | 114986508 | 114987147 | 640 |
| chrX  | 13800125  | 13800763  | 639 |
| chr7  | 84419539  | 84420177  | 639 |
| chr11 | 9208553   | 9209191   | 639 |
| chrX  | 44899998  | 44900635  | 638 |
| chr19 | 14236644  | 14237281  | 638 |
| chr14 | 1621815   | 1622452   | 638 |
| chr4  | 95584110  | 95584746  | 637 |
| chr26 | 37626287  | 37626923  | 637 |
| chr22 | 16320464  | 16321100  | 637 |
| chr19 | 59375279  | 59375915  | 637 |
| chrX  | 9416327   | 9416962   | 636 |
| chr8  | 63909115  | 63909750  | 636 |
| chr5  | 30465939  | 30466574  | 636 |
| chr3  | 115408023 | 115408658 | 636 |
| chr23 | 8416376   | 8417011   | 636 |
| chr2  | 85642747  | 85643382  | 636 |
| chr11 | 77600542  | 77601177  | 636 |
| chr23 | 18679014  | 18679648  | 635 |
| chr20 | 1276747   | 1277381   | 635 |
| chr18 | 53493083  | 53493717  | 635 |
| chr7  | 52361897  | 52362530  | 634 |
| chr6  | 119387356 | 119387989 | 634 |
| chrX  | 72766806  | 72767438  | 633 |
| chrX  | 21567720  | 21568352  | 633 |
| chr22 | 56286993  | 56287625  | 633 |
| chr11 | 76476396  | 76477027  | 632 |
| chrX  | 66934248  | 66934878  | 631 |

|       |           |           |     |
|-------|-----------|-----------|-----|
| chrX  | 19812569  | 19813199  | 631 |
| chr21 | 29678211  | 29678841  | 631 |
| chr14 | 9370744   | 9371374   | 631 |
| chr10 | 70239560  | 70240190  | 631 |
| chrX  | 20429371  | 20430000  | 630 |
| chr19 | 59803822  | 59804451  | 630 |
| chr16 | 2407727   | 2408355   | 629 |
| chrX  | 6672887   | 6673514   | 628 |
| chr7  | 18826738  | 18827365  | 628 |
| chr4  | 95070126  | 95070753  | 628 |
| chr23 | 49890980  | 49891606  | 627 |
| chr12 | 32126618  | 32127244  | 627 |
| chrX  | 37604600  | 37605225  | 626 |
| chr18 | 12638269  | 12638894  | 626 |
| chr11 | 10361185  | 10361810  | 626 |
| chrX  | 30968784  | 30969408  | 625 |
| chr8  | 65191193  | 65191817  | 625 |
| chr17 | 68463892  | 68464516  | 625 |
| chr17 | 63936086  | 63936710  | 625 |
| chr13 | 3370616   | 3371240   | 625 |
| chr9  | 64805566  | 64806189  | 624 |
| chr5  | 30466853  | 30467476  | 624 |
| chr22 | 16347541  | 16348164  | 624 |
| chr21 | 66576400  | 66577023  | 624 |
| chr2  | 121936209 | 121936832 | 624 |
| chrX  | 56033571  | 56034192  | 622 |
| chrX  | 11875014  | 11875635  | 622 |
| chr19 | 36370388  | 36371009  | 622 |
| chr13 | 55120506  | 55121127  | 622 |
| chrX  | 7393825   | 7394444   | 620 |
| chr10 | 14980254  | 14980873  | 620 |
| chr25 | 3028664   | 3029282   | 619 |
| chr2  | 95139740  | 95140358  | 619 |
| chrX  | 53280493  | 53281110  | 618 |
| chr29 | 24350974  | 24351591  | 618 |
| chr17 | 70388135  | 70388752  | 618 |
| chrX  | 72828096  | 72828712  | 617 |
| chrX  | 72536623  | 72537239  | 617 |
| chr8  | 108754215 | 108754831 | 617 |
| chr21 | 9474858   | 9475474   | 617 |
| chr7  | 5150616   | 5151231   | 616 |
| chr19 | 30342996  | 30343611  | 616 |
| chr10 | 32470261  | 32470876  | 616 |
| chrX  | 2330517   | 2331131   | 615 |
| chr10 | 74849939  | 74850553  | 615 |
| chr29 | 7857793   | 7858406   | 614 |
| chr17 | 74037734  | 74038347  | 614 |
| chrX  | 7770242   | 7770854   | 613 |
| chr2  | 56951716  | 56952328  | 613 |
| chr15 | 27092581  | 27093193  | 613 |

|       |           |           |     |
|-------|-----------|-----------|-----|
| chr1  | 99689700  | 99690312  | 613 |
| chrX  | 80880685  | 80881296  | 612 |
| chr23 | 8816231   | 8816842   | 612 |
| chr2  | 15378838  | 15379449  | 612 |
| chrX  | 9713244   | 9713854   | 611 |
| chr3  | 113595313 | 113595923 | 611 |
| chr28 | 33451487  | 33452097  | 611 |
| chr1  | 1560271   | 1560881   | 611 |
| chrX  | 75669341  | 75669950  | 610 |
| chr24 | 36932504  | 36933113  | 610 |
| chr20 | 70647277  | 70647886  | 610 |
| chr5  | 52623001  | 52623609  | 609 |
| chr11 | 44944943  | 44945551  | 609 |
| chr1  | 132660215 | 132660823 | 609 |
| chr1  | 66667593  | 66668201  | 609 |
| chr2  | 140007552 | 140008158 | 607 |
| chr18 | 51022105  | 51022711  | 607 |
| chr15 | 32250884  | 32251490  | 607 |
| chr13 | 42887900  | 42888506  | 607 |
| chr10 | 16942833  | 16943439  | 607 |
| chr17 | 68408397  | 68409002  | 606 |
| chr15 | 43337631  | 43338236  | 606 |
| chrX  | 62806150  | 62806754  | 605 |
| chr3  | 123195648 | 123196251 | 604 |
| chr24 | 60837173  | 60837776  | 604 |
| chr19 | 58823892  | 58824495  | 604 |
| chr15 | 22324176  | 22324779  | 604 |
| chrX  | 50453959  | 50454561  | 603 |
| chr5  | 30193809  | 30194411  | 603 |
| chr21 | 64480002  | 64480604  | 603 |
| chrX  | 72876107  | 72876708  | 602 |
| chr5  | 38530033  | 38530634  | 602 |
| chr28 | 33364478  | 33365079  | 602 |
| chr15 | 60444790  | 60445391  | 602 |
| chr3  | 115481881 | 115482481 | 601 |
| chr23 | 46019466  | 46020066  | 601 |
| chr15 | 62755148  | 62755747  | 600 |
| chrX  | 7792706   | 7793304   | 599 |
| chr25 | 29404993  | 29405591  | 599 |
| chr21 | 62450834  | 62451432  | 599 |
| chr8  | 28006032  | 28006629  | 598 |
| chr7  | 23340981  | 23341578  | 598 |
| chr10 | 87168402  | 87168999  | 598 |
| chr26 | 51536973  | 51537569  | 597 |
| chr16 | 61280226  | 61280822  | 597 |
| chr15 | 23091018  | 23091614  | 597 |
| chrX  | 20903466  | 20904061  | 596 |
| chr14 | 16507205  | 16507800  | 596 |
| chr13 | 75995243  | 75995838  | 596 |
| chr19 | 46827109  | 46827703  | 595 |



|       |           |           |     |
|-------|-----------|-----------|-----|
| chr9  | 90812452  | 90813045  | 594 |
| chr6  | 22239319  | 22239912  | 594 |
| chr3  | 106568429 | 106569022 | 594 |
| chr3  | 33121169  | 33121762  | 594 |
| chr24 | 40395257  | 40395850  | 594 |
| chr2  | 40159769  | 40160362  | 594 |
| chrX  | 75843988  | 75844580  | 593 |
| chr13 | 62416314  | 62416906  | 593 |
| chr18 | 50985727  | 50986318  | 592 |
| chr13 | 41677191  | 41677782  | 592 |
| chrX  | 45135740  | 45136330  | 591 |
| chrX  | 37441222  | 37441812  | 591 |
| chr9  | 106667081 | 106667671 | 591 |
| chr29 | 44686807  | 44687397  | 591 |
| chr22 | 12947310  | 12947900  | 591 |
| chrX  | 56193442  | 56194031  | 590 |
| chr11 | 81756054  | 81756643  | 590 |
| chr9  | 104828378 | 104828966 | 589 |
| chr22 | 50600215  | 50600803  | 589 |
| chrX  | 75901640  | 75902227  | 588 |
| chr21 | 28890176  | 28890763  | 588 |
| chr16 | 72302302  | 72302889  | 588 |
| chrX  | 56272751  | 56273337  | 587 |
| chr7  | 15051762  | 15052348  | 587 |
| chr6  | 46684381  | 46684967  | 587 |
| chr2  | 99682530  | 99683116  | 587 |
| chr11 | 28549961  | 28550547  | 587 |
| chr1  | 74522904  | 74523490  | 587 |
| chr5  | 116893303 | 116893888 | 586 |
| chr26 | 23522237  | 23522822  | 586 |
| chr16 | 68782598  | 68783183  | 586 |
| chrX  | 36671963  | 36672547  | 585 |
| chrX  | 36347391  | 36347975  | 585 |
| chr4  | 82133148  | 82133732  | 585 |
| chr4  | 79776529  | 79777113  | 585 |
| chr13 | 41611138  | 41611722  | 585 |
| chrX  | 49286658  | 49287241  | 584 |
| chrX  | 20427361  | 20427944  | 584 |
| chr3  | 113455126 | 113455709 | 584 |
| chr25 | 39389543  | 39390126  | 584 |
| chr2  | 22160739  | 22161322  | 584 |
| chr15 | 39621151  | 39621734  | 584 |
| chr12 | 74535775  | 74536358  | 584 |
| chrX  | 78801732  | 78802314  | 583 |
| chr22 | 49578397  | 49578979  | 583 |
| chrX  | 12419037  | 12419618  | 582 |
| chr26 | 20378649  | 20379230  | 582 |
| chr25 | 3089240   | 3089821   | 582 |
| chr13 | 75690196  | 75690777  | 582 |
| chrX  | 6992537   | 6993117   | 581 |

|       |           |           |     |
|-------|-----------|-----------|-----|
| chr25 | 31859342  | 31859922  | 581 |
| chr25 | 3403376   | 3403956   | 581 |
| chr19 | 46876581  | 46877161  | 581 |
| chrX  | 77951735  | 77952314  | 580 |
| chr8  | 65923856  | 65924435  | 580 |
| chr13 | 62434906  | 62435485  | 580 |
| chr25 | 38676942  | 38677520  | 579 |
| chr20 | 6722874   | 6723452   | 579 |
| chrX  | 18967695  | 18968272  | 578 |
| chr7  | 70802762  | 70803339  | 578 |
| chr7  | 50483528  | 50484105  | 578 |
| chr19 | 17808730  | 17809307  | 578 |
| chr18 | 18051399  | 18051976  | 578 |
| chrX  | 6268322   | 6268898   | 577 |
| chr3  | 116320287 | 116320863 | 577 |
| chr3  | 16043778  | 16044354  | 577 |
| chr25 | 10575280  | 10575856  | 577 |
| chr24 | 20545335  | 20545911  | 577 |
| chr22 | 59809928  | 59810504  | 577 |
| chr10 | 20931357  | 20931933  | 577 |
| chr1  | 84908270  | 84908846  | 577 |
| chrX  | 78508417  | 78508992  | 576 |
| chrX  | 49350647  | 49351222  | 576 |
| chr5  | 10622441  | 10623016  | 576 |
| chr21 | 46607990  | 46608565  | 576 |
| chr16 | 41358691  | 41359266  | 576 |
| chr18 | 43367286  | 43367860  | 575 |
| chrX  | 75533594  | 75534167  | 574 |
| chrX  | 61794070  | 61794643  | 574 |
| chrX  | 35723963  | 35724536  | 574 |
| chr4  | 46277974  | 46278547  | 574 |
| chr28 | 30519545  | 30520118  | 574 |
| chrX  | 55900975  | 55901547  | 573 |
| chr7  | 16287564  | 16288136  | 573 |
| chr28 | 26076996  | 26077568  | 573 |
| chr25 | 3009721   | 3010293   | 573 |
| chr23 | 8508404   | 8508976   | 573 |
| chr17 | 61011377  | 61011949  | 573 |
| chrX  | 6423391   | 6423962   | 572 |
| chr7  | 50632456  | 50633027  | 572 |
| chr26 | 22343612  | 22344183  | 572 |
| chr24 | 35158251  | 35158822  | 572 |
| chr10 | 17701874  | 17702445  | 572 |
| chr10 | 17138761  | 17139332  | 572 |
| chrX  | 72921634  | 72922204  | 571 |
| chrX  | 9041592   | 9042162   | 571 |
| chr19 | 45087587  | 45088157  | 571 |
| chr19 | 42832345  | 42832915  | 571 |
| chr16 | 42669329  | 42669899  | 571 |
| chr12 | 19014582  | 19015152  | 571 |

|       |           |           |     |
|-------|-----------|-----------|-----|
| chr5  | 111705815 | 111706384 | 570 |
| chr23 | 28797339  | 28797908  | 570 |
| chr1  | 2719996   | 2720564   | 569 |
| chr4  | 95001553  | 95002120  | 568 |
| chr3  | 127252775 | 127253342 | 568 |
| chr22 | 7238849   | 7239416   | 568 |
| chr19 | 63580051  | 63580618  | 568 |
| chr17 | 72709216  | 72709783  | 568 |
| chr17 | 70135765  | 70136332  | 568 |
| chr29 | 12464252  | 12464818  | 567 |
| chr26 | 42150287  | 42150853  | 567 |
| chr10 | 70075008  | 70075574  | 567 |
| chr1  | 74894111  | 74894677  | 567 |
| chr25 | 35558995  | 35559560  | 566 |
| chrX  | 75876002  | 75876566  | 565 |
| chr26 | 20374938  | 20375502  | 565 |
| chrX  | 58784291  | 58784854  | 564 |
| chr27 | 35506549  | 35507112  | 564 |
| chr12 | 32603824  | 32604387  | 564 |
| chr12 | 9698406   | 9698969   | 564 |
| chr3  | 121622702 | 121623264 | 563 |
| chr29 | 37358864  | 37359426  | 563 |
| chr17 | 69501607  | 69502169  | 563 |
| chrX  | 49336714  | 49337275  | 562 |
| chr20 | 33372563  | 33373124  | 562 |
| chr19 | 46894988  | 46895549  | 562 |
| chr2  | 130473553 | 130474113 | 561 |
| chr13 | 40600093  | 40600653  | 561 |
| chrX  | 75892010  | 75892569  | 560 |
| chrX  | 50086869  | 50087427  | 559 |
| chrX  | 8804659   | 8805217   | 559 |
| chrX  | 3155152   | 3155710   | 559 |
| chr5  | 32920705  | 32921263  | 559 |
| chr17 | 66165627  | 66166185  | 559 |
| chr13 | 66949839  | 66950397  | 559 |
| chr6  | 108652507 | 108653064 | 558 |
| chr6  | 63984406  | 63984963  | 558 |
| chr4  | 117767250 | 117767807 | 558 |
| chr2  | 127631169 | 127631726 | 558 |
| chr4  | 117839195 | 117839751 | 557 |
| chr22 | 60404754  | 60405310  | 557 |
| chr18 | 49927817  | 49928373  | 557 |
| chr18 | 22336686  | 22337242  | 557 |
| chr10 | 59922547  | 59923103  | 557 |
| chr5  | 61056199  | 61056754  | 556 |
| chr29 | 45907573  | 45908128  | 556 |
| chr23 | 52911347  | 52911902  | 556 |
| chr21 | 66408258  | 66408813  | 556 |
| chr11 | 20945534  | 20946089  | 556 |
| chr10 | 26016067  | 26016622  | 556 |

|       |               |           |     |
|-------|---------------|-----------|-----|
| chrX  | 36378200      | 36378754  | 555 |
| chr3  | 99104980      | 99105534  | 555 |
| chr27 | 40803001      | 40803555  | 555 |
| chr22 | 59515727      | 59516281  | 555 |
| chr21 | 26456234      | 26456788  | 555 |
| chr3  | 35990764      | 35991317  | 554 |
| chr23 | 28529974      | 28530527  | 554 |
| chrX  | 6427213       | 6427765   | 553 |
| chr28 | 33868569      | 33869120  | 552 |
| chr27 | 664357 664908 | 552       |     |
| chr20 | 66663748      | 66664299  | 552 |
| chr15 | 25323959      | 25324510  | 552 |
| chrX  | 63076260      | 63076810  | 551 |
| chrX  | 49318872      | 49319422  | 551 |
| chrX  | 37455542      | 37456092  | 551 |
| chr21 | 3047621       | 3048171   | 551 |
| chr19 | 56608683      | 56609233  | 551 |
| chr19 | 22330657      | 22331207  | 551 |
| chr18 | 1543652       | 1544202   | 551 |
| chr15 | 25343157      | 25343707  | 551 |
| chrX  | 72607736      | 72608285  | 550 |
| chrX  | 11081300      | 11081849  | 550 |
| chr9  | 45941673      | 45942222  | 550 |
| chr19 | 39129080      | 39129629  | 550 |
| chr19 | 23055144      | 23055693  | 550 |
| chr18 | 22216916      | 22217465  | 550 |
| chr13 | 41501052      | 41501601  | 550 |
| chrX  | 50231356      | 50231904  | 549 |
| chr7  | 5200979       | 5201527   | 549 |
| chr4  | 121411138     | 121411686 | 549 |
| chr3  | 35959987      | 35960535  | 549 |
| chr19 | 39593814      | 39594362  | 549 |
| chr14 | 61743587      | 61744135  | 549 |
| chr14 | 21263298      | 21263846  | 549 |
| chrX  | 59282317      | 59282864  | 548 |
| chrX  | 55465754      | 55466301  | 548 |
| chrX  | 23161868      | 23162415  | 548 |
| chr3  | 15434577      | 15435124  | 548 |
| chr26 | 43831600      | 43832147  | 548 |
| chrX  | 83029800      | 83030346  | 547 |
| chrX  | 74765996      | 74766542  | 547 |
| chr9  | 74263730      | 74264276  | 547 |
| chr7  | 45778814      | 45779360  | 547 |
| chr3  | 8755343       | 8755889   | 547 |
| chr29 | 36279437      | 36279983  | 547 |
| chr19 | 56595284      | 56595830  | 547 |
| chr16 | 2281661       | 2282207   | 547 |
| chr13 | 41684451      | 41684997  | 547 |
| chr21 | 62459206      | 62459751  | 546 |
| chr19 | 44160874      | 44161419  | 546 |

|       |               |           |     |
|-------|---------------|-----------|-----|
| chrX  | 64837072      | 64837616  | 545 |
| chr22 | 50790563      | 50791107  | 545 |
| chr17 | 76176323      | 76176867  | 545 |
| chr13 | 52532442      | 52532986  | 545 |
| chrX  | 7569186       | 7569729   | 544 |
| chrX  | 41238303      | 41238845  | 543 |
| chr28 | 40399634      | 40400176  | 543 |
| chr26 | 45308766      | 45309308  | 543 |
| chr15 | 38519562      | 38520104  | 543 |
| chr13 | 67396773      | 67397315  | 543 |
| chrX  | 75738384      | 75738925  | 542 |
| chr25 | 39144183      | 39144724  | 542 |
| chr25 | 8722367       | 8722908   | 542 |
| chr25 | 5689100       | 5689641   | 542 |
| chr2  | 126707913     | 126708454 | 542 |
| chr19 | 59062373      | 59062914  | 542 |
| chr10 | 81674149      | 81674690  | 542 |
| chrX  | 31545849      | 31546389  | 541 |
| chr18 | 54950187      | 54950727  | 541 |
| chr18 | 12779474      | 12780014  | 541 |
| chr17 | 70276313      | 70276853  | 541 |
| chrX  | 10189567      | 10190106  | 540 |
| chr6  | 106981555     | 106982094 | 540 |
| chr8  | 45733247      | 45733785  | 539 |
| chr11 | 100421331     | 100421869 | 539 |
| chr26 | 50069707      | 50070244  | 538 |
| chr18 | 45644139      | 45644676  | 538 |
| chr18 | 26130435      | 26130972  | 538 |
| chr16 | 47122975      | 47123512  | 538 |
| chr14 | 899024 899561 | 538       |     |
| chr8  | 95560818      | 95561354  | 537 |
| chr23 | 15039067      | 15039603  | 537 |
| chr18 | 24592157      | 24592693  | 537 |
| chrX  | 78617470      | 78618005  | 536 |
| chrX  | 54100308      | 54100843  | 536 |
| chrX  | 21191175      | 21191710  | 536 |
| chr7  | 94430257      | 94430792  | 536 |
| chr4  | 71617342      | 71617877  | 536 |
| chr29 | 37254564      | 37255099  | 536 |
| chr22 | 61471594      | 61472129  | 536 |
| chr19 | 45184203      | 45184738  | 536 |
| chr18 | 11040665      | 11041200  | 536 |
| chr3  | 106316939     | 106317473 | 535 |
| chr29 | 44595812      | 44596346  | 535 |
| chr28 | 40390473      | 40391007  | 535 |
| chrX  | 64030761      | 64031294  | 534 |
| chrX  | 55601733      | 55602266  | 534 |
| chrX  | 29984303      | 29984836  | 534 |
| chr8  | 73341024      | 73341557  | 534 |
| chr5  | 28758138      | 28758671  | 534 |

|       |           |           |     |
|-------|-----------|-----------|-----|
| chrX  | 54655853  | 54656385  | 533 |
| chrX  | 20261940  | 20262472  | 533 |
| chr28 | 33989033  | 33989565  | 533 |
| chr22 | 12204321  | 12204853  | 533 |
| chr2  | 130123745 | 130124277 | 533 |
| chr19 | 52570264  | 52570796  | 533 |
| chr14 | 31497483  | 31498015  | 533 |
| chr10 | 36759713  | 36760245  | 533 |
| chrX  | 78606716  | 78607247  | 532 |
| chr6  | 45974620  | 45975151  | 532 |
| chr29 | 34635766  | 34636297  | 532 |
| chr27 | 26474499  | 26475030  | 532 |
| chr12 | 48067071  | 48067602  | 532 |
| chr11 | 104886624 | 104887155 | 532 |
| chrX  | 58074341  | 58074871  | 531 |
| chr16 | 60294296  | 60294826  | 531 |
| chr22 | 14989812  | 14990341  | 530 |
| chr19 | 60990146  | 60990675  | 530 |
| chr17 | 70706952  | 70707481  | 530 |
| chrX  | 56275074  | 56275602  | 529 |
| chrX  | 12065339  | 12065867  | 529 |
| chr5  | 33569519  | 33570047  | 529 |
| chr19 | 61454967  | 61455495  | 529 |
| chr19 | 38234741  | 38235269  | 529 |
| chr18 | 4081074   | 4081602   | 529 |
| chr16 | 3640696   | 3641224   | 529 |
| chrX  | 12530094  | 12530621  | 528 |
| chr2  | 22166653  | 22167180  | 528 |
| chr18 | 11747599  | 11748126  | 528 |
| chr13 | 77229965  | 77230492  | 528 |
| chr13 | 59436119  | 59436646  | 528 |
| chrX  | 76031670  | 76032196  | 527 |
| chrX  | 59342395  | 59342921  | 527 |
| chrX  | 5784558   | 5785084   | 527 |
| chr3  | 44989579  | 44990105  | 527 |
| chr23 | 28917059  | 28917585  | 527 |
| chrX  | 36191582  | 36192107  | 526 |
| chrX  | 6235784   | 6236309   | 526 |
| chr26 | 42183552  | 42184077  | 526 |
| chr23 | 8263169   | 8263693   | 525 |
| chr16 | 47999397  | 47999921  | 525 |
| chr14 | 23290643  | 23291167  | 525 |
| chr10 | 70070481  | 70071005  | 525 |
| chrX  | 22465057  | 22465580  | 524 |
| chr7  | 71263244  | 71263766  | 523 |
| chr4  | 98521046  | 98521568  | 523 |
| chr3  | 120697650 | 120698172 | 523 |
| chr2  | 130467978 | 130468500 | 523 |
| chrX  | 427299    | 427820    | 522 |
| chr7  | 81249345  | 81249866  | 522 |

|       |           |           |     |
|-------|-----------|-----------|-----|
| chr19 | 16809478  | 16809999  | 522 |
| chr15 | 56043866  | 56044387  | 522 |
| chr13 | 75792334  | 75792855  | 522 |
| chrX  | 58826573  | 58827093  | 521 |
| chr8  | 65411030  | 65411550  | 521 |
| chr27 | 12072657  | 12073177  | 521 |
| chr25 | 1504928   | 1505448   | 521 |
| chr21 | 9138956   | 9139476   | 521 |
| chrX  | 10893591  | 10894110  | 520 |
| chr6  | 14205985  | 14206504  | 520 |
| chr24 | 58770824  | 58771343  | 520 |
| chr13 | 61842682  | 61843201  | 520 |
| chr19 | 19746827  | 19747345  | 519 |
| chr12 | 81689852  | 81690370  | 519 |
| chrX  | 20321141  | 20321657  | 517 |
| chr27 | 35915671  | 35916187  | 517 |
| chr13 | 37660750  | 37661266  | 517 |
| chrX  | 19480938  | 19481453  | 516 |
| chrX  | 10309482  | 10309997  | 516 |
| chr17 | 28615759  | 28616274  | 516 |
| chr13 | 17737545  | 17738060  | 516 |
| chrX  | 20090125  | 20090639  | 515 |
| chr26 | 17905279  | 17905793  | 515 |
| chr17 | 14648130  | 14648644  | 515 |
| chr15 | 51733627  | 51734141  | 515 |
| chr10 | 57345196  | 57345710  | 515 |
| chr1  | 154620095 | 154620609 | 515 |
| chr5  | 113245408 | 113245921 | 514 |
| chr26 | 23078246  | 23078759  | 514 |
| chr18 | 13137632  | 13138145  | 514 |
| chr6  | 2245151   | 2245663   | 513 |
| chr2  | 134707022 | 134707534 | 513 |
| chrX  | 33067328  | 33067839  | 512 |
| chr20 | 8714081   | 8714592   | 512 |
| chr12 | 44610747  | 44611258  | 512 |
| chr8  | 93142874  | 93143384  | 511 |
| chr23 | 15187787  | 15188297  | 511 |
| chr10 | 17153556  | 17154066  | 511 |
| chrX  | 20530589  | 20531098  | 510 |
| chr7  | 54939979  | 54940488  | 510 |
| chr7  | 19219420  | 19219928  | 509 |
| chr6  | 112660271 | 112660779 | 509 |
| chr23 | 18457838  | 18458346  | 509 |
| chr21 | 18762498  | 18763006  | 509 |
| chr17 | 63113418  | 63113926  | 509 |
| chr13 | 41688647  | 41689155  | 509 |
| chr12 | 82550576  | 82551084  | 509 |
| chr1  | 154400153 | 154400661 | 509 |
| chrX  | 6491207   | 6491714   | 508 |
| chr25 | 8732145   | 8732652   | 508 |

|       |               |           |     |
|-------|---------------|-----------|-----|
| chr18 | 22298591      | 22299098  | 508 |
| chr13 | 79685181      | 79685688  | 508 |
| chr5  | 120099900     | 120100406 | 507 |
| chr3  | 102960014     | 102960520 | 507 |
| chr19 | 29997372      | 29997878  | 507 |
| chr11 | 77647072      | 77647578  | 507 |
| chrX  | 6418428       | 6418933   | 506 |
| chr4  | 71502409      | 71502914  | 506 |
| chr4  | 32173469      | 32173974  | 506 |
| chrX  | 61694493      | 61694997  | 505 |
| chrX  | 46871061      | 46871565  | 505 |
| chr9  | 78273081      | 78273585  | 505 |
| chr8  | 65389506      | 65390010  | 505 |
| chr28 | 25160772      | 25161276  | 505 |
| chr23 | 32684320      | 32684824  | 505 |
| chr19 | 31958454      | 31958958  | 505 |
| chr16 | 77494713      | 77495217  | 505 |
| chrX  | 65211320      | 65211823  | 504 |
| chr29 | 31642481      | 31642984  | 504 |
| chr24 | 46716548      | 46717051  | 504 |
| chr22 | 47833679      | 47834182  | 504 |
| chr19 | 37892391      | 37892894  | 504 |
| chr11 | 91386527      | 91387030  | 504 |
| chrX  | 50816386      | 50816888  | 503 |
| chrX  | 7362165       | 7362667   | 503 |
| chr20 | 8530865       | 8531367   | 503 |
| chrX  | 50210204      | 50210705  | 502 |
| chrX  | 7784641       | 7785142   | 502 |
| chr3  | 106804101     | 106804602 | 502 |
| chr20 | 5118549       | 5119050   | 502 |
| chr2  | 75826713      | 75827214  | 502 |
| chr19 | 27240996      | 27241497  | 502 |
| chr19 | 17109966      | 17110467  | 502 |
| chr16 | 47018639      | 47019140  | 502 |
| chr15 | 64198807      | 64199308  | 502 |
| chr10 | 36898430      | 36898931  | 502 |
| chrX  | 72915422      | 72915922  | 501 |
| chr22 | 56030981      | 56031481  | 501 |
| chr18 | 11837374      | 11837874  | 501 |
| chr17 | 57687425      | 57687925  | 501 |
| chr11 | 74993020      | 74993520  | 501 |
| chr1  | 74736842      | 74737342  | 501 |
| chrX  | 358600 359099 | 500       |     |
| chr3  | 110756013     | 110756512 | 500 |
| chr3  | 30437707      | 30438206  | 500 |
| chr28 | 43930055      | 43930554  | 500 |
| chr25 | 42632687      | 42633186  | 500 |
| chr24 | 60820878      | 60821377  | 500 |
| chr23 | 48191186      | 48191685  | 500 |
| chr7  | 43514814      | 43515312  | 499 |



|       |           |           |     |
|-------|-----------|-----------|-----|
| chr7  | 19970701  | 19971199  | 499 |
| chr13 | 80405315  | 80405813  | 499 |
| chr13 | 77421831  | 77422329  | 499 |
| chr5  | 71192763  | 71193260  | 498 |
| chr26 | 44444824  | 44445321  | 498 |
| chr26 | 42174096  | 42174593  | 498 |
| chr26 | 34193835  | 34194332  | 498 |
| chr23 | 28045546  | 28046043  | 498 |
| chr19 | 46654770  | 46655267  | 498 |
| chr7  | 37536161  | 37536657  | 497 |
| chr29 | 38853582  | 38854078  | 497 |
| chr19 | 46653301  | 46653797  | 497 |
| chr19 | 39325359  | 39325855  | 497 |
| chr19 | 23170407  | 23170903  | 497 |
| chr5  | 73529703  | 73530198  | 496 |
| chr5  | 29957104  | 29957599  | 496 |
| chrX  | 49985108  | 49985602  | 495 |
| chr4  | 96000501  | 96000995  | 495 |
| chr17 | 64347790  | 64348284  | 495 |
| chr11 | 100890536 | 100891030 | 495 |
| chr8  | 114788494 | 114788987 | 494 |
| chr21 | 34190898  | 34191391  | 494 |
| chr17 | 67891825  | 67892318  | 494 |
| chr16 | 1105100   | 1105593   | 494 |
| chr15 | 65657126  | 65657619  | 494 |
| chr13 | 62354908  | 62355401  | 494 |
| chr13 | 59539266  | 59539759  | 494 |
| chr13 | 40903439  | 40903932  | 494 |
| chr9  | 104800500 | 104800992 | 493 |
| chr25 | 38042962  | 38043454  | 493 |
| chr16 | 48827295  | 48827787  | 493 |
| chr10 | 70275022  | 70275514  | 493 |
| chrX  | 76881914  | 76882405  | 492 |
| chrX  | 50014178  | 50014669  | 492 |
| chrX  | 2611814   | 2612305   | 492 |
| chr4  | 113661076 | 113661567 | 492 |
| chr26 | 48681034  | 48681525  | 492 |
| chr23 | 15987604  | 15988095  | 492 |
| chr19 | 46094620  | 46095111  | 492 |
| chr18 | 23163723  | 23164214  | 492 |
| chr6  | 7717292   | 7717782   | 491 |
| chr29 | 35429793  | 35430283  | 491 |
| chr29 | 33057943  | 33058432  | 490 |
| chr18 | 34062471  | 34062960  | 490 |
| chrX  | 51651253  | 51651741  | 489 |
| chrX  | 19531972  | 19532460  | 489 |
| chr7  | 60998822  | 60999310  | 489 |
| chrX  | 49235766  | 49236253  | 488 |
| chr5  | 116336661 | 116337148 | 488 |
| chr5  | 30291054  | 30291541  | 488 |

|       |           |           |     |
|-------|-----------|-----------|-----|
| chr4  | 95069612  | 95070099  | 488 |
| chr17 | 66541056  | 66541543  | 488 |
| chr11 | 14094051  | 14094538  | 488 |
| chr8  | 8580369   | 8580854   | 486 |
| chr27 | 584414    | 584899    | 486 |
| chr26 | 51535516  | 51536001  | 486 |
| chr26 | 44173282  | 44173767  | 486 |
| chr10 | 43843498  | 43843983  | 486 |
| chrX  | 54271920  | 54272404  | 485 |
| chr4  | 115870333 | 115870817 | 485 |
| chr29 | 33696465  | 33696949  | 485 |
| chr18 | 5519449   | 5519933   | 485 |
| chr12 | 30769749  | 30770233  | 485 |
| chrX  | 74207221  | 74207704  | 484 |
| chrX  | 21428038  | 21428521  | 484 |
| chr5  | 82887882  | 82888365  | 484 |
| chr18 | 14679666  | 14680149  | 484 |
| chr12 | 3684505   | 3684988   | 484 |
| chr7  | 42843567  | 42844049  | 483 |
| chr6  | 74020141  | 74020623  | 483 |
| chr5  | 117270908 | 117271390 | 483 |
| chr21 | 64482109  | 64482591  | 483 |
| chr19 | 44998163  | 44998645  | 483 |
| chr17 | 49393814  | 49394296  | 483 |
| chr13 | 39800432  | 39800914  | 483 |
| chr1  | 158749008 | 158749490 | 483 |
| chrX  | 58771208  | 58771689  | 482 |
| chr8  | 86960972  | 86961453  | 482 |
| chr3  | 125576206 | 125576687 | 482 |
| chr29 | 30774752  | 30775233  | 482 |
| chr19 | 7141280   | 7141761   | 482 |
| chrX  | 13055292  | 13055772  | 481 |
| chr19 | 60277337  | 60277817  | 481 |
| chr19 | 40917162  | 40917642  | 481 |
| chr18 | 35062686  | 35063166  | 481 |
| chr13 | 41731665  | 41732145  | 481 |
| chr10 | 74697481  | 74697961  | 481 |
| chrX  | 57144552  | 57145031  | 480 |
| chr19 | 13503960  | 13504439  | 480 |
| chr17 | 15058529  | 15059008  | 480 |
| chr11 | 21625900  | 21626379  | 480 |
| chr8  | 10560354  | 10560832  | 479 |
| chr7  | 15434917  | 15435395  | 479 |
| chr3  | 78292619  | 78293097  | 479 |
| chr3  | 11544934  | 11545412  | 479 |
| chr26 | 23891485  | 23891963  | 479 |
| chr18 | 13558788  | 13559266  | 479 |
| chr1  | 47180686  | 47181164  | 479 |
| chr5  | 51817081  | 51817558  | 478 |
| chr4  | 118538946 | 118539423 | 478 |

|       |           |           |     |
|-------|-----------|-----------|-----|
| chr23 | 52598154  | 52598631  | 478 |
| chr8  | 74323213  | 74323689  | 477 |
| chr8  | 7739340   | 7739816   | 477 |
| chr24 | 1590559   | 1591035   | 477 |
| chr18 | 22069489  | 22069965  | 477 |
| chrX  | 75635751  | 75636226  | 476 |
| chrX  | 61809379  | 61809854  | 476 |
| chrX  | 57292517  | 57292992  | 476 |
| chrX  | 49309451  | 49309926  | 476 |
| chr29 | 35287772  | 35288247  | 476 |
| chr29 | 12614191  | 12614666  | 476 |
| chrX  | 66215032  | 66215506  | 475 |
| chrX  | 29942776  | 29943250  | 475 |
| chr19 | 39422352  | 39422826  | 475 |
| chr14 | 63513032  | 63513506  | 475 |
| chr10 | 15045373  | 15045847  | 475 |
| chrX  | 24606025  | 24606498  | 474 |
| chr28 | 7862150   | 7862623   | 474 |
| chr2  | 139305143 | 139305616 | 474 |
| chr14 | 3606967   | 3607440   | 474 |
| chrX  | 72373828  | 72374300  | 473 |
| chrX  | 29881546  | 29882018  | 473 |
| chr19 | 54167026  | 54167498  | 473 |
| chr17 | 67962069  | 67962541  | 473 |
| chr11 | 109508882 | 109509354 | 473 |
| chrX  | 61292875  | 61293346  | 472 |
| chr7  | 45701676  | 45702147  | 472 |
| chr13 | 34936896  | 34937367  | 472 |
| chr13 | 22900861  | 22901332  | 472 |
| chr6  | 121024726 | 121025196 | 471 |
| chr5  | 79241669  | 79242139  | 471 |
| chr14 | 22036594  | 22037064  | 471 |
| chrX  | 73480174  | 73480643  | 470 |
| chrX  | 19103730  | 19104199  | 470 |
| chr19 | 60823245  | 60823714  | 470 |
| chr15 | 25590263  | 25590732  | 470 |
| chr14 | 1073380   | 1073849   | 470 |
| chr19 | 23569789  | 23570257  | 469 |
| chr11 | 72826295  | 72826763  | 469 |
| chrX  | 72112841  | 72113308  | 468 |
| chr8  | 53713669  | 53714136  | 468 |
| chr5  | 113204133 | 113204600 | 468 |
| chr26 | 41886432  | 41886899  | 468 |
| chr17 | 70392948  | 70393415  | 468 |
| chr16 | 70103529  | 70103996  | 468 |
| chrX  | 80820426  | 80820892  | 467 |
| chr3  | 36030897  | 36031363  | 467 |
| chr21 | 21081247  | 21081713  | 467 |
| chr2  | 138732455 | 138732921 | 467 |
| chr19 | 39377788  | 39378254  | 467 |

|       |           |           |     |
|-------|-----------|-----------|-----|
| chr19 | 20386826  | 20387292  | 467 |
| chr19 | 13578860  | 13579326  | 467 |
| chr15 | 64167274  | 64167740  | 467 |
| chrX  | 63380169  | 63380634  | 466 |
| chr9  | 100070070 | 100070535 | 466 |
| chr14 | 42303780  | 42304245  | 466 |
| chr14 | 1576059   | 1576524   | 466 |
| chr26 | 12853915  | 12854379  | 465 |
| chr17 | 66751358  | 66751822  | 465 |
| chr21 | 5975006   | 5975469   | 464 |
| chr12 | 32648221  | 32648684  | 464 |
| chr2  | 128016550 | 128017012 | 463 |
| chr18 | 49950334  | 49950796  | 463 |
| chr17 | 70305208  | 70305670  | 463 |
| chr17 | 6911379   | 6911841   | 463 |
| chr15 | 22796383  | 22796845  | 463 |
| chr12 | 20022552  | 20023014  | 463 |
| chr1  | 8721679   | 8722141   | 463 |
| chrX  | 73448658  | 73449119  | 462 |
| chrX  | 60196777  | 60197238  | 462 |
| chr8  | 62462550  | 62463011  | 462 |
| chr7  | 15102045  | 15102506  | 462 |
| chr5  | 38530953  | 38531414  | 462 |
| chr13 | 59418980  | 59419441  | 462 |
| chr13 | 37675101  | 37675562  | 462 |
| chrX  | 27274122  | 27274582  | 461 |
| chrX  | 10441826  | 10442286  | 461 |
| chr2  | 10069053  | 10069513  | 461 |
| chrX  | 48708838  | 48709297  | 460 |
| chr5  | 120376475 | 120376934 | 460 |
| chr19 | 21617737  | 21618196  | 460 |
| chrX  | 72143624  | 72144082  | 459 |
| chr8  | 86624960  | 86625418  | 459 |
| chr5  | 112275602 | 112276060 | 459 |
| chr5  | 64694389  | 64694847  | 459 |
| chr22 | 30131989  | 30132447  | 459 |
| chr17 | 18385984  | 18386442  | 459 |
| chr26 | 44930523  | 44930980  | 458 |
| chr23 | 20053239  | 20053696  | 458 |
| chr11 | 70847256  | 70847713  | 458 |
| chr4  | 68210078  | 68210534  | 457 |
| chr3  | 115708278 | 115708734 | 457 |
| chr29 | 44017871  | 44018327  | 457 |
| chr18 | 11732538  | 11732994  | 457 |
| chr17 | 63462247  | 63462703  | 457 |
| chr11 | 109688863 | 109689319 | 457 |
| chrX  | 54293559  | 54294014  | 456 |
| chrX  | 37306572  | 37307027  | 456 |
| chrX  | 30368995  | 30369450  | 456 |
| chr3  | 115673705 | 115674160 | 456 |

|       |           |           |     |
|-------|-----------|-----------|-----|
| chr19 | 13581345  | 13581800  | 456 |
| chr11 | 70920390  | 70920845  | 456 |
| chr4  | 72722927  | 72723381  | 455 |
| chr18 | 10837550  | 10838004  | 455 |
| chr15 | 74933046  | 74933500  | 455 |
| chr2  | 99034197  | 99034650  | 454 |
| chr11 | 19835472  | 19835925  | 454 |
| chr17 | 52394602  | 52395054  | 453 |
| chr17 | 19698394  | 19698846  | 453 |
| chr8  | 74360947  | 74361398  | 452 |
| chr5  | 113240364 | 113240815 | 452 |
| chr20 | 62727823  | 62728274  | 452 |
| chr18 | 49484913  | 49485364  | 452 |
| chr10 | 84203420  | 84203871  | 452 |
| chrX  | 58617258  | 58617708  | 451 |
| chr10 | 70015880  | 70016330  | 451 |
| chr1  | 71640248  | 71640698  | 451 |
| chrX  | 72141667  | 72142116  | 450 |
| chrX  | 53959565  | 53960014  | 450 |
| chr8  | 24397995  | 24398444  | 450 |
| chr24 | 60783196  | 60783645  | 450 |
| chr23 | 28011470  | 28011919  | 450 |
| chrX  | 9979427   | 9979875   | 449 |
| chr9  | 35462972  | 35463420  | 449 |
| chr27 | 14396475  | 14396923  | 449 |
| chr21 | 13649050  | 13649498  | 449 |
| chrX  | 35999750  | 36000197  | 448 |
| chr21 | 31417966  | 31418413  | 448 |
| chr21 | 27267594  | 27268041  | 448 |
| chr19 | 14067803  | 14068250  | 448 |
| chr18 | 26258317  | 26258764  | 448 |
| chrX  | 79855492  | 79855938  | 447 |
| chrX  | 58074944  | 58075390  | 447 |
| chr2  | 93753877  | 93754323  | 447 |
| chrX  | 8769360   | 8769805   | 446 |
| chr15 | 32216705  | 32217150  | 446 |
| chr10 | 68216904  | 68217349  | 446 |
| chr1  | 1530442   | 1530887   | 446 |
| chrX  | 35800068  | 35800512  | 445 |
| chrX  | 11469786  | 11470230  | 445 |
| chr6  | 109071990 | 109072434 | 445 |
| chr19 | 51849373  | 51849817  | 445 |
| chr10 | 76400828  | 76401272  | 445 |
| chrX  | 58609339  | 58609782  | 444 |
| chr7  | 71408499  | 71408942  | 444 |
| chr26 | 21827521  | 21827964  | 444 |
| chrX  | 64054182  | 64054624  | 443 |
| chrX  | 20126634  | 20127075  | 442 |
| chr5  | 28862254  | 28862695  | 442 |
| chr24 | 22913413  | 22913854  | 442 |

|       |           |           |     |
|-------|-----------|-----------|-----|
| chr20 | 3193474   | 3193915   | 442 |
| chr22 | 13578845  | 13579285  | 441 |
| chr18 | 24019749  | 24020189  | 441 |
| chr23 | 7423226   | 7423665   | 440 |
| chr22 | 30590427  | 30590866  | 440 |
| chr18 | 54936388  | 54936827  | 440 |
| chrX  | 8639335   | 8639773   | 439 |
| chr26 | 18183987  | 18184425  | 439 |
| chr21 | 6515703   | 6516141   | 439 |
| chr2  | 131838739 | 131839177 | 439 |
| chr16 | 2435160   | 2435598   | 439 |
| chr10 | 70413347  | 70413785  | 439 |
| chrX  | 72931658  | 72932095  | 438 |
| chr3  | 115757295 | 115757732 | 438 |
| chr29 | 37419842  | 37420279  | 438 |
| chr26 | 25054795  | 25055232  | 438 |
| chrX  | 59950923  | 59951359  | 437 |
| chrX  | 21570567  | 21571003  | 437 |
| chr25 | 29291622  | 29292058  | 437 |
| chr23 | 44091900  | 44092336  | 437 |
| chr18 | 39904658  | 39905094  | 437 |
| chr5  | 30182667  | 30183102  | 436 |
| chr26 | 42893258  | 42893693  | 436 |
| chr19 | 37955963  | 37956398  | 436 |
| chr13 | 70222928  | 70223363  | 436 |
| chrX  | 5480795   | 5481229   | 435 |
| chr3  | 125658486 | 125658920 | 435 |
| chr3  | 30933251  | 30933685  | 435 |
| chr19 | 60548447  | 60548881  | 435 |
| chr19 | 39439092  | 39439526  | 435 |
| chr16 | 2215666   | 2216100   | 435 |
| chr15 | 25524235  | 25524669  | 435 |
| chrX  | 54931297  | 54931730  | 434 |
| chrX  | 50862500  | 50862933  | 434 |
| chr8  | 108757007 | 108757440 | 434 |
| chr24 | 20403204  | 20403637  | 434 |
| chr22 | 18378723  | 18379156  | 434 |
| chr2  | 123752148 | 123752581 | 434 |
| chr16 | 38563347  | 38563780  | 434 |
| chr13 | 75695515  | 75695948  | 434 |
| chr12 | 35064780  | 35065213  | 434 |
| chr8  | 1629517   | 1629949   | 433 |
| chrX  | 65144190  | 65144621  | 432 |
| chrX  | 46209088  | 46209519  | 432 |
| chrX  | 12276574  | 12277005  | 432 |
| chr8  | 108817238 | 108817669 | 432 |
| chr1  | 74525528  | 74525959  | 432 |
| chrX  | 13129449  | 13129879  | 431 |
| chrX  | 11403741  | 11404171  | 431 |
| chr3  | 26154613  | 26155043  | 431 |

|       |               |           |     |
|-------|---------------|-----------|-----|
| chr24 | 43629773      | 43630203  | 431 |
| chr10 | 12708314      | 12708744  | 431 |
| chrX  | 8647050       | 8647479   | 430 |
| chrX  | 8193178       | 8193607   | 430 |
| chr5  | 111832711     | 111833140 | 430 |
| chr3  | 115490164     | 115490593 | 430 |
| chr26 | 44384434      | 44384863  | 430 |
| chr13 | 75721577      | 75722006  | 430 |
| chr3  | 123400249     | 123400677 | 429 |
| chr22 | 59107233      | 59107661  | 429 |
| chr15 | 24662732      | 24663160  | 429 |
| chr11 | 91579621      | 91580049  | 429 |
| chrX  | 29534997      | 29535424  | 428 |
| chr19 | 27937901      | 27938328  | 428 |
| chr13 | 42404354      | 42404781  | 428 |
| chrX  | 72730383      | 72730809  | 427 |
| chrX  | 64541066      | 64541492  | 427 |
| chrX  | 29571000      | 29571426  | 427 |
| chrX  | 21866199      | 21866625  | 427 |
| chr4  | 123208744     | 123209170 | 427 |
| chr3  | 122124414     | 122124840 | 427 |
| chr29 | 33067211      | 33067637  | 427 |
| chr28 | 25437590      | 25438016  | 427 |
| chr13 | 70956248      | 70956674  | 427 |
| chr13 | 63496025      | 63496451  | 427 |
| chrX  | 78446210      | 78446635  | 426 |
| chrX  | 76063634      | 76064059  | 426 |
| chr22 | 54314305      | 54314730  | 426 |
| chr21 | 20588458      | 20588883  | 426 |
| chr17 | 18625469      | 18625894  | 426 |
| chr16 | 73245903      | 73246328  | 426 |
| chr14 | 14011891      | 14012316  | 426 |
| chr1  | 82928009      | 82928434  | 426 |
| chr19 | 30577188      | 30577612  | 425 |
| chr18 | 51638133      | 51638557  | 425 |
| chr15 | 34282451      | 34282875  | 425 |
| chr13 | 77741864      | 77742288  | 425 |
| chrX  | 55027489      | 55027912  | 424 |
| chrX  | 361686 362109 | 424       |     |
| chr9  | 74262091      | 74262514  | 424 |
| chr26 | 37903382      | 37903805  | 424 |
| chrX  | 50850189      | 50850611  | 423 |
| chr7  | 45691598      | 45692020  | 423 |
| chr29 | 31914563      | 31914985  | 423 |
| chr19 | 45200590      | 45201012  | 423 |
| chr18 | 51509447      | 51509869  | 423 |
| chr13 | 77309854      | 77310276  | 423 |
| chr13 | 52984651      | 52985073  | 423 |
| chr9  | 90688591      | 90689012  | 422 |
| chr7  | 17943581      | 17944002  | 422 |

|       |               |           |     |
|-------|---------------|-----------|-----|
| chr26 | 42996438      | 42996859  | 422 |
| chr17 | 60185847      | 60186268  | 422 |
| chr13 | 70705205      | 70705626  | 422 |
| chr11 | 106072123     | 106072544 | 422 |
| chr11 | 85338249      | 85338670  | 422 |
| chrX  | 55307256      | 55307676  | 421 |
| chrX  | 21693080      | 21693500  | 421 |
| chr3  | 2556350       | 2556770   | 421 |
| chr29 | 36576389      | 36576809  | 421 |
| chr22 | 24919123      | 24919543  | 421 |
| chr5  | 46575020      | 46575439  | 420 |
| chr27 | 16698656      | 16699075  | 420 |
| chr27 | 15268929      | 15269348  | 420 |
| chr22 | 56555430      | 56555849  | 420 |
| chr22 | 14958047      | 14958466  | 420 |
| chr21 | 6521618       | 6522037   | 420 |
| chr2  | 111321856     | 111322275 | 420 |
| chr18 | 10474166      | 10474585  | 420 |
| chr17 | 73161826      | 73162245  | 420 |
| chr15 | 30048613      | 30049032  | 420 |
| chrX  | 7720053       | 7720471   | 419 |
| chr4  | 39494649      | 39495067  | 419 |
| chr26 | 17923143      | 17923560  | 418 |
| chr26 | 15367684      | 15368101  | 418 |
| chr24 | 59582893      | 59583310  | 418 |
| chr23 | 42982976      | 42983393  | 418 |
| chr21 | 39986401      | 39986818  | 418 |
| chr20 | 8569091       | 8569508   | 418 |
| chr17 | 63492752      | 63493169  | 418 |
| chr10 | 89415739      | 89416156  | 418 |
| chrX  | 12012658      | 12013074  | 417 |
| chrX  | 7654858       | 7655274   | 417 |
| chrX  | 21364088      | 21364503  | 416 |
| chrX  | 7614853       | 7615268   | 416 |
| chr22 | 45459698      | 45460113  | 416 |
| chr20 | 29526075      | 29526490  | 416 |
| chr10 | 22153285      | 22153700  | 416 |
| chrX  | 62883576      | 62883990  | 415 |
| chr24 | 44246045      | 44246459  | 415 |
| chr23 | 30360919      | 30361333  | 415 |
| chr18 | 5228196       | 5228610   | 415 |
| chr16 | 23832308      | 23832722  | 415 |
| chrX  | 54362505      | 54362918  | 414 |
| chrX  | 5630243       | 5630656   | 414 |
| chrX  | 759812 760225 |           | 414 |
| chr25 | 43242518      | 43242931  | 414 |
| chr16 | 42872029      | 42872442  | 414 |
| chrX  | 61052988      | 61053400  | 413 |
| chrX  | 58757484      | 58757896  | 413 |
| chrX  | 39001142      | 39001554  | 413 |



|       |               |           |     |
|-------|---------------|-----------|-----|
| chrX  | 20660367      | 20660779  | 413 |
| chrX  | 11993485      | 11993897  | 413 |
| chr8  | 60182482      | 60182894  | 413 |
| chr27 | 26635159      | 26635571  | 413 |
| chr12 | 83969637      | 83970049  | 413 |
| chr24 | 58756223      | 58756634  | 412 |
| chr11 | 26124898      | 26125309  | 412 |
| chr1  | 156726764     | 156727175 | 412 |
| chr9  | 105011982     | 105012392 | 411 |
| chr8  | 116004571     | 116004981 | 411 |
| chr8  | 73737277      | 73737687  | 411 |
| chr3  | 109660068     | 109660478 | 411 |
| chr27 | 855352 855762 | 411       |     |
| chr23 | 49574506      | 49574916  | 411 |
| chr23 | 41424600      | 41425010  | 411 |
| chr20 | 39747486      | 39747896  | 411 |
| chr2  | 115026862     | 115027272 | 411 |
| chr19 | 54154979      | 54155389  | 411 |
| chr19 | 47273082      | 47273492  | 411 |
| chrX  | 72785691      | 72786100  | 410 |
| chr5  | 29131868      | 29132277  | 410 |
| chr23 | 10595904      | 10596313  | 410 |
| chr22 | 59538983      | 59539392  | 410 |
| chr19 | 39840988      | 39841397  | 410 |
| chr18 | 56944609      | 56945018  | 410 |
| chr13 | 77302530      | 77302939  | 410 |
| chr11 | 89373907      | 89374316  | 410 |
| chr11 | 77911074      | 77911483  | 410 |
| chrX  | 38188036      | 38188444  | 409 |
| chrX  | 19228359      | 19228767  | 409 |
| chrX  | 72547493      | 72547900  | 408 |
| chr13 | 75800493      | 75800900  | 408 |
| chr1  | 82162088      | 82162495  | 408 |
| chr6  | 62535607      | 62536013  | 407 |
| chr3  | 121589704     | 121590110 | 407 |
| chr21 | 25981847      | 25982253  | 407 |
| chr21 | 20163279      | 20163685  | 407 |
| chr17 | 67103679      | 67104085  | 407 |
| chr13 | 62778851      | 62779257  | 407 |
| chr13 | 26301423      | 26301829  | 407 |
| chr11 | 77816743      | 77817149  | 407 |
| chrX  | 56325785      | 56326190  | 406 |
| chr29 | 50311053      | 50311458  | 406 |
| chr29 | 48786802      | 48787207  | 406 |
| chr23 | 27904535      | 27904940  | 406 |
| chr20 | 30950815      | 30951220  | 406 |
| chr18 | 3649929       | 3650334   | 406 |
| chr13 | 52088606      | 52089011  | 406 |
| chr11 | 49854919      | 49855324  | 406 |
| chr11 | 28637945      | 28638350  | 406 |

|       |           |           |     |
|-------|-----------|-----------|-----|
| chr8  | 65855987  | 65856391  | 405 |
| chr27 | 4187079   | 4187483   | 405 |
| chr23 | 10655463  | 10655867  | 405 |
| chr19 | 39368459  | 39368863  | 405 |
| chr18 | 23935273  | 23935677  | 405 |
| chr17 | 66875400  | 66875804  | 405 |
| chr14 | 32936825  | 32937229  | 405 |
| chr1  | 63805693  | 63806097  | 405 |
| chrX  | 75049973  | 75050376  | 404 |
| chrX  | 57046956  | 57047359  | 404 |
| chrX  | 50830057  | 50830460  | 404 |
| chr8  | 24662898  | 24663301  | 404 |
| chr8  | 7391230   | 7391633   | 404 |
| chr4  | 47455830  | 47456233  | 404 |
| chr21 | 64482625  | 64483028  | 404 |
| chr19 | 47377470  | 47377873  | 404 |
| chr16 | 67216346  | 67216749  | 404 |
| chr4  | 106927597 | 106927999 | 403 |
| chr29 | 35604746  | 35605148  | 403 |
| chr23 | 20261540  | 20261942  | 403 |
| chr20 | 8614571   | 8614973   | 403 |
| chr19 | 43139274  | 43139676  | 403 |
| chr13 | 66723436  | 66723838  | 403 |
| chr13 | 56028460  | 56028862  | 403 |
| chr13 | 42397728  | 42398130  | 403 |
| chrX  | 9912311   | 9912712   | 402 |
| chr8  | 61657432  | 61657833  | 402 |
| chr7  | 44085057  | 44085458  | 402 |
| chr28 | 25500193  | 25500594  | 402 |
| chr28 | 13723850  | 13724251  | 402 |
| chr26 | 48329976  | 48330377  | 402 |
| chr26 | 19897344  | 19897745  | 402 |
| chr25 | 33391656  | 33392057  | 402 |
| chr21 | 18781481  | 18781882  | 402 |
| chr13 | 58631773  | 58632174  | 402 |
| chr11 | 103659745 | 103660146 | 402 |
| chrX  | 50213952  | 50214352  | 401 |
| chr23 | 29090159  | 29090559  | 401 |
| chr21 | 69000682  | 69001082  | 401 |
| chr19 | 21202603  | 21203003  | 401 |
| chr18 | 55200383  | 55200783  | 401 |
| chr18 | 2255992   | 2256392   | 401 |
| chr16 | 1553064   | 1553464   | 401 |
| chr15 | 49871443  | 49871843  | 401 |
| chr15 | 25477597  | 25477997  | 401 |
| chr10 | 14152256  | 14152656  | 401 |
| chr28 | 34018465  | 34018864  | 400 |
| chr20 | 38403289  | 38403688  | 400 |
| chr2  | 131597737 | 131598136 | 400 |
| chr19 | 58568662  | 58569061  | 400 |

|       |          |          |     |
|-------|----------|----------|-----|
| chr11 | 14176567 | 14176966 | 400 |
| chrX  | 80222771 | 80223169 | 399 |
| chrX  | 80069410 | 80069808 | 399 |
| chrX  | 78104041 | 78104439 | 399 |
| chrX  | 77002307 | 77002705 | 399 |
| chrX  | 75024880 | 75025278 | 399 |
| chrX  | 75006357 | 75006755 | 399 |
| chrX  | 74626410 | 74626808 | 399 |
| chrX  | 74333090 | 74333488 | 399 |
| chrX  | 73399384 | 73399782 | 399 |
| chrX  | 72313733 | 72314131 | 399 |
| chrX  | 64996470 | 64996868 | 399 |
| chrX  | 63894579 | 63894977 | 399 |
| chrX  | 63270355 | 63270753 | 399 |
| chrX  | 58100443 | 58100841 | 399 |
| chrX  | 57136206 | 57136604 | 399 |
| chrX  | 56612072 | 56612470 | 399 |
| chrX  | 52797877 | 52798275 | 399 |
| chrX  | 50189924 | 50190322 | 399 |
| chrX  | 49367679 | 49368077 | 399 |
| chrX  | 46242792 | 46243190 | 399 |
| chrX  | 40736869 | 40737267 | 399 |
| chrX  | 37483341 | 37483739 | 399 |
| chrX  | 36443247 | 36443645 | 399 |
| chrX  | 36147111 | 36147509 | 399 |
| chrX  | 33728305 | 33728703 | 399 |
| chrX  | 30733377 | 30733775 | 399 |
| chrX  | 29615455 | 29615853 | 399 |
| chrX  | 28334633 | 28335031 | 399 |
| chrX  | 22551948 | 22552346 | 399 |
| chrX  | 21495312 | 21495710 | 399 |
| chrX  | 21182210 | 21182608 | 399 |
| chrX  | 21040459 | 21040857 | 399 |
| chrX  | 20498653 | 20499051 | 399 |
| chrX  | 20493130 | 20493528 | 399 |
| chrX  | 19717885 | 19718283 | 399 |
| chrX  | 19706764 | 19707162 | 399 |
| chrX  | 19474341 | 19474739 | 399 |
| chrX  | 19348569 | 19348967 | 399 |
| chrX  | 18956816 | 18957214 | 399 |
| chrX  | 16642827 | 16643225 | 399 |
| chrX  | 13530147 | 13530545 | 399 |
| chrX  | 11426160 | 11426558 | 399 |
| chrX  | 11279575 | 11279973 | 399 |
| chrX  | 7590473  | 7590871  | 399 |
| chrX  | 6599207  | 6599605  | 399 |
| chrX  | 6267192  | 6267590  | 399 |
| chrX  | 5746542  | 5746940  | 399 |
| chrX  | 2110318  | 2110716  | 399 |
| chrX  | 599799   | 600197   | 399 |

|       |           |           |     |
|-------|-----------|-----------|-----|
| chr9  | 99297495  | 99297893  | 399 |
| chr9  | 46023401  | 46023799  | 399 |
| chr9  | 27111948  | 27112346  | 399 |
| chr8  | 108749021 | 108749419 | 399 |
| chr8  | 85924947  | 85925345  | 399 |
| chr8  | 80493426  | 80493824  | 399 |
| chr8  | 73328836  | 73329234  | 399 |
| chr8  | 73170992  | 73171390  | 399 |
| chr8  | 63946470  | 63946868  | 399 |
| chr8  | 50335949  | 50336347  | 399 |
| chr8  | 46614972  | 46615370  | 399 |
| chr8  | 7857512   | 7857910   | 399 |
| chr8  | 7114690   | 7115088   | 399 |
| chr7  | 4927378   | 4927776   | 399 |
| chr7  | 3634384   | 3634782   | 399 |
| chr6  | 121695895 | 121696293 | 399 |
| chr6  | 72291197  | 72291595  | 399 |
| chr6  | 47378257  | 47378655  | 399 |
| chr6  | 46581514  | 46581912  | 399 |
| chr5  | 120418482 | 120418880 | 399 |
| chr5  | 118452910 | 118453308 | 399 |
| chr5  | 113193360 | 113193758 | 399 |
| chr5  | 79213192  | 79213590  | 399 |
| chr5  | 61478894  | 61479292  | 399 |
| chr5  | 30358898  | 30359296  | 399 |
| chr4  | 121429926 | 121430324 | 399 |
| chr4  | 99001346  | 99001744  | 399 |
| chr4  | 72803968  | 72804366  | 399 |
| chr4  | 72551925  | 72552323  | 399 |
| chr4  | 71349881  | 71350279  | 399 |
| chr4  | 49614863  | 49615261  | 399 |
| chr4  | 38533524  | 38533922  | 399 |
| chr3  | 123594592 | 123594990 | 399 |
| chr3  | 116163737 | 116164135 | 399 |
| chr3  | 111481587 | 111481985 | 399 |
| chr3  | 108388644 | 108389042 | 399 |
| chr3  | 105628366 | 105628764 | 399 |
| chr3  | 105185962 | 105186360 | 399 |
| chr3  | 105132168 | 105132566 | 399 |
| chr3  | 104563072 | 104563470 | 399 |
| chr3  | 22519933  | 22520331  | 399 |
| chr3  | 20489031  | 20489429  | 399 |
| chr3  | 15658971  | 15659369  | 399 |
| chr29 | 49114221  | 49114619  | 399 |
| chr29 | 47238195  | 47238593  | 399 |
| chr29 | 46681758  | 46682156  | 399 |
| chr29 | 38048810  | 38049208  | 399 |
| chr29 | 37620989  | 37621387  | 399 |
| chr29 | 35300476  | 35300874  | 399 |
| chr29 | 32291868  | 32292266  | 399 |

|       |               |          |     |
|-------|---------------|----------|-----|
| chr29 | 30029624      | 30030022 | 399 |
| chr29 | 17985331      | 17985729 | 399 |
| chr29 | 289306 289704 |          | 399 |
| chr28 | 42378167      | 42378565 | 399 |
| chr28 | 34221905      | 34222303 | 399 |
| chr28 | 33993735      | 33994133 | 399 |
| chr28 | 32815957      | 32816355 | 399 |
| chr28 | 25438671      | 25439069 | 399 |
| chr27 | 46957496      | 46957894 | 399 |
| chr27 | 35833716      | 35834114 | 399 |
| chr27 | 26466254      | 26466652 | 399 |
| chr27 | 21089597      | 21089995 | 399 |
| chr27 | 17534624      | 17535022 | 399 |
| chr27 | 732477 732875 |          | 399 |
| chr26 | 50490154      | 50490552 | 399 |
| chr26 | 46279177      | 46279575 | 399 |
| chr26 | 41726074      | 41726472 | 399 |
| chr26 | 37539096      | 37539494 | 399 |
| chr26 | 7011314       | 7011712  | 399 |
| chr25 | 38861676      | 38862074 | 399 |
| chr25 | 34336896      | 34337294 | 399 |
| chr25 | 34283773      | 34284171 | 399 |
| chr25 | 31840214      | 31840612 | 399 |
| chr25 | 29369702      | 29370100 | 399 |
| chr25 | 2929482       | 2929880  | 399 |
| chr24 | 64982098      | 64982496 | 399 |
| chr24 | 59280251      | 59280649 | 399 |
| chr24 | 58982840      | 58983238 | 399 |
| chr24 | 58958454      | 58958852 | 399 |
| chr24 | 33502690      | 33503088 | 399 |
| chr24 | 20895075      | 20895473 | 399 |
| chr24 | 20358700      | 20359098 | 399 |
| chr24 | 1141542       | 1141940  | 399 |
| chr23 | 50051044      | 50051442 | 399 |
| chr23 | 49661725      | 49662123 | 399 |
| chr23 | 46422999      | 46423397 | 399 |
| chr23 | 30245544      | 30245942 | 399 |
| chr23 | 26158107      | 26158505 | 399 |
| chr23 | 18670175      | 18670573 | 399 |
| chr23 | 18327800      | 18328198 | 399 |
| chr23 | 7702250       | 7702648  | 399 |
| chr22 | 54313901      | 54314299 | 399 |
| chr22 | 50962458      | 50962856 | 399 |
| chr22 | 32759706      | 32760104 | 399 |
| chr22 | 30317026      | 30317424 | 399 |
| chr22 | 7539975       | 7540373  | 399 |
| chr22 | 5671158       | 5671556  | 399 |
| chr21 | 64445321      | 64445719 | 399 |
| chr21 | 18778748      | 18779146 | 399 |
| chr21 | 9529619       | 9530017  | 399 |

|       |               |           |     |
|-------|---------------|-----------|-----|
| chr20 | 74522389      | 74522787  | 399 |
| chr20 | 74035133      | 74035531  | 399 |
| chr20 | 73729533      | 73729931  | 399 |
| chr20 | 70123282      | 70123680  | 399 |
| chr20 | 8696940       | 8697338   | 399 |
| chr20 | 701845 702243 | 399       |     |
| chr2  | 140623722     | 140624120 | 399 |
| chr2  | 135599719     | 135600117 | 399 |
| chr2  | 128584128     | 128584526 | 399 |
| chr2  | 110526624     | 110527022 | 399 |
| chr2  | 75827215      | 75827613  | 399 |
| chr2  | 72849914      | 72850312  | 399 |
| chr2  | 64506894      | 64507292  | 399 |
| chr2  | 392764 393162 | 399       |     |
| chr19 | 61725718      | 61726116  | 399 |
| chr19 | 60704385      | 60704783  | 399 |
| chr19 | 59315184      | 59315582  | 399 |
| chr19 | 59069458      | 59069856  | 399 |
| chr19 | 42243259      | 42243657  | 399 |
| chr19 | 39905114      | 39905512  | 399 |
| chr19 | 35805093      | 35805491  | 399 |
| chr19 | 31842691      | 31843089  | 399 |
| chr19 | 27442591      | 27442989  | 399 |
| chr19 | 26337238      | 26337636  | 399 |
| chr19 | 25081717      | 25082115  | 399 |
| chr19 | 23137489      | 23137887  | 399 |
| chr19 | 10794036      | 10794434  | 399 |
| chr18 | 49514539      | 49514937  | 399 |
| chr18 | 45977156      | 45977554  | 399 |
| chr18 | 45660630      | 45661028  | 399 |
| chr18 | 25334296      | 25334694  | 399 |
| chr18 | 22754798      | 22755196  | 399 |
| chr18 | 22471078      | 22471476  | 399 |
| chr18 | 22408479      | 22408877  | 399 |
| chr18 | 18714656      | 18715054  | 399 |
| chr18 | 13555497      | 13555895  | 399 |
| chr18 | 12153389      | 12153787  | 399 |
| chr18 | 9698040       | 9698438   | 399 |
| chr17 | 64684506      | 64684904  | 399 |
| chr17 | 63324779      | 63325177  | 399 |
| chr17 | 57663562      | 57663960  | 399 |
| chr17 | 53523802      | 53524200  | 399 |
| chr17 | 53479097      | 53479495  | 399 |
| chr16 | 47530551      | 47530949  | 399 |
| chr16 | 46784097      | 46784495  | 399 |
| chr16 | 44146175      | 44146573  | 399 |
| chr15 | 81765818      | 81766216  | 399 |
| chr15 | 64505438      | 64505836  | 399 |
| chr15 | 32259442      | 32259840  | 399 |
| chr15 | 31166386      | 31166784  | 399 |

|       |               |           |     |
|-------|---------------|-----------|-----|
| chr15 | 30075120      | 30075518  | 399 |
| chr15 | 22786316      | 22786714  | 399 |
| chr14 | 54194541      | 54194939  | 399 |
| chr14 | 30839450      | 30839848  | 399 |
| chr14 | 22991462      | 22991860  | 399 |
| chr14 | 852051 852449 | 399       |     |
| chr13 | 79905948      | 79906346  | 399 |
| chr13 | 75704592      | 75704990  | 399 |
| chr13 | 74566906      | 74567304  | 399 |
| chr13 | 71230178      | 71230576  | 399 |
| chr13 | 70973320      | 70973718  | 399 |
| chr13 | 70213481      | 70213879  | 399 |
| chr13 | 69622425      | 69622823  | 399 |
| chr13 | 68514213      | 68514611  | 399 |
| chr13 | 63486742      | 63487140  | 399 |
| chr13 | 62802440      | 62802838  | 399 |
| chr13 | 60703629      | 60704027  | 399 |
| chr13 | 59990157      | 59990555  | 399 |
| chr13 | 55509876      | 55510274  | 399 |
| chr13 | 54387437      | 54387835  | 399 |
| chr13 | 42407358      | 42407756  | 399 |
| chr13 | 40823424      | 40823822  | 399 |
| chr13 | 37661314      | 37661712  | 399 |
| chr13 | 23885816      | 23886214  | 399 |
| chr12 | 83594277      | 83594675  | 399 |
| chr12 | 82561709      | 82562107  | 399 |
| chr12 | 74570461      | 74570859  | 399 |
| chr12 | 33046225      | 33046623  | 399 |
| chr12 | 32211770      | 32212168  | 399 |
| chr12 | 18245572      | 18245970  | 399 |
| chr11 | 106409053     | 106409451 | 399 |
| chr11 | 106252081     | 106252479 | 399 |
| chr11 | 106072554     | 106072952 | 399 |
| chr11 | 104519546     | 104519944 | 399 |
| chr11 | 100915404     | 100915802 | 399 |
| chr11 | 93797464      | 93797862  | 399 |
| chr11 | 74451302      | 74451700  | 399 |
| chr11 | 74438577      | 74438975  | 399 |
| chr11 | 70802748      | 70803146  | 399 |
| chr11 | 66178458      | 66178856  | 399 |
| chr11 | 56772964      | 56773362  | 399 |
| chr11 | 32257186      | 32257584  | 399 |
| chr11 | 13923229      | 13923627  | 399 |
| chr11 | 13060712      | 13061110  | 399 |
| chr11 | 9742533       | 9742931   | 399 |
| chr11 | 7826368       | 7826766   | 399 |
| chr10 | 74926374      | 74926772  | 399 |
| chr10 | 74849005      | 74849403  | 399 |
| chr10 | 70199089      | 70199487  | 399 |
| chr10 | 69097095      | 69097493  | 399 |

|       |           |           |     |
|-------|-----------|-----------|-----|
| chr10 | 68198018  | 68198416  | 399 |
| chr10 | 58677709  | 58678107  | 399 |
| chr10 | 40528453  | 40528851  | 399 |
| chr10 | 10764472  | 10764870  | 399 |
| chr10 | 8312839   | 8313237   | 399 |
| chr1  | 138631945 | 138632343 | 399 |
| chr1  | 99893215  | 99893613  | 399 |
| chr1  | 33301669  | 33302067  | 399 |
| chrX  | 55758673  | 55759070  | 398 |
| chrX  | 55753299  | 55753696  | 398 |
| chrX  | 55196949  | 55197346  | 398 |
| chrX  | 53043688  | 53044085  | 398 |
| chrX  | 35049692  | 35050089  | 398 |
| chrX  | 33995770  | 33996167  | 398 |
| chrX  | 12980054  | 12980451  | 398 |
| chrX  | 7457835   | 7458232   | 398 |
| chrX  | 5459597   | 5459994   | 398 |
| chr9  | 16969342  | 16969739  | 398 |
| chr8  | 8305470   | 8305867   | 398 |
| chr7  | 70790312  | 70790709  | 398 |
| chr5  | 54507621  | 54508018  | 398 |
| chr5  | 30244997  | 30245394  | 398 |
| chr4  | 116931608 | 116932005 | 398 |
| chr4  | 94999584  | 94999981  | 398 |
| chr3  | 121660619 | 121661016 | 398 |
| chr3  | 112904353 | 112904750 | 398 |
| chr3  | 98036023  | 98036420  | 398 |
| chr23 | 18794451  | 18794848  | 398 |
| chr22 | 55792061  | 55792458  | 398 |
| chr2  | 132785290 | 132785687 | 398 |
| chr2  | 132427255 | 132427652 | 398 |
| chr2  | 130976367 | 130976764 | 398 |
| chr2  | 61109379  | 61109776  | 398 |
| chr19 | 45731394  | 45731791  | 398 |
| chr19 | 44367514  | 44367911  | 398 |
| chr19 | 16042791  | 16043188  | 398 |
| chr18 | 7810533   | 7810930   | 398 |
| chr17 | 68422226  | 68422623  | 398 |
| chr16 | 60775894  | 60776291  | 398 |
| chr16 | 38941712  | 38942109  | 398 |
| chr15 | 64503853  | 64504250  | 398 |
| chr15 | 64186443  | 64186840  | 398 |
| chr15 | 51833461  | 51833858  | 398 |
| chr15 | 42518930  | 42519327  | 398 |
| chr15 | 31287891  | 31288288  | 398 |
| chr15 | 26878521  | 26878918  | 398 |
| chr15 | 25061256  | 25061653  | 398 |
| chr14 | 22115307  | 22115704  | 398 |
| chr12 | 15302122  | 15302519  | 398 |
| chr11 | 49370734  | 49371131  | 398 |



|       |               |           |     |
|-------|---------------|-----------|-----|
| chr11 | 12000477      | 12000874  | 398 |
| chr10 | 88662125      | 88662522  | 398 |
| chr10 | 69178269      | 69178666  | 398 |
| chr1  | 129981190     | 129981587 | 398 |
| chrX  | 76068156      | 76068552  | 397 |
| chrX  | 72853136      | 72853532  | 397 |
| chrX  | 49924305      | 49924701  | 397 |
| chrX  | 9058868       | 9059264   | 397 |
| chr9  | 70970459      | 70970855  | 397 |
| chr7  | 4490427       | 4490823   | 397 |
| chr6  | 122419760     | 122420156 | 397 |
| chr6  | 119377139     | 119377535 | 397 |
| chr5  | 29259139      | 29259535  | 397 |
| chr26 | 39311291      | 39311687  | 397 |
| chr26 | 20191973      | 20192369  | 397 |
| chr24 | 34761429      | 34761825  | 397 |
| chr24 | 20384639      | 20385035  | 397 |
| chr24 | 829067 829463 | 397       |     |
| chr23 | 16041405      | 16041801  | 397 |
| chr21 | 7014393       | 7014789   | 397 |
| chr2  | 135088663     | 135089059 | 397 |
| chr2  | 3379593       | 3379989   | 397 |
| chr19 | 24155970      | 24156366  | 397 |
| chr18 | 11823226      | 11823622  | 397 |
| chr17 | 72769539      | 72769935  | 397 |
| chr17 | 72336987      | 72337383  | 397 |
| chr17 | 70610355      | 70610751  | 397 |
| chr17 | 69724214      | 69724610  | 397 |
| chr17 | 68520677      | 68521073  | 397 |
| chr17 | 67035772      | 67036168  | 397 |
| chr16 | 77610890      | 77611286  | 397 |
| chr16 | 2138572       | 2138968   | 397 |
| chr15 | 81212444      | 81212840  | 397 |
| chr13 | 11296412      | 11296808  | 397 |
| chr11 | 75624995      | 75625391  | 397 |
| chr11 | 21002459      | 21002855  | 397 |
| chr1  | 110593915     | 110594311 | 397 |
| chr1  | 100631642     | 100632038 | 397 |
| chrX  | 72336826      | 72337221  | 396 |
| chrX  | 61715669      | 61716064  | 396 |
| chrX  | 54996971      | 54997366  | 396 |
| chrX  | 37507091      | 37507486  | 396 |
| chrX  | 35190563      | 35190958  | 396 |
| chrX  | 21039845      | 21040240  | 396 |
| chrX  | 6329501       | 6329896   | 396 |
| chr8  | 110619300     | 110619695 | 396 |
| chr8  | 8334527       | 8334922   | 396 |
| chr5  | 115691958     | 115692353 | 396 |
| chr4  | 98501090      | 98501485  | 396 |
| chr4  | 14627517      | 14627912  | 396 |

|       |               |           |     |
|-------|---------------|-----------|-----|
| chr29 | 34635081      | 34635476  | 396 |
| chr28 | 42888845      | 42889240  | 396 |
| chr27 | 42244887      | 42245282  | 396 |
| chr25 | 2484537       | 2484932   | 396 |
| chr24 | 50885050      | 50885445  | 396 |
| chr24 | 44147332      | 44147727  | 396 |
| chr24 | 1528913       | 1529308   | 396 |
| chr23 | 18811813      | 18812208  | 396 |
| chr22 | 52898592      | 52898987  | 396 |
| chr2  | 116508291     | 116508686 | 396 |
| chr19 | 13468844      | 13469239  | 396 |
| chr18 | 54664969      | 54665364  | 396 |
| chr17 | 63145575      | 63145970  | 396 |
| chr14 | 841123 841518 | 396       |     |
| chr13 | 75739658      | 75740053  | 396 |
| chr11 | 26125412      | 26125807  | 396 |
| chr10 | 104765056     | 104765451 | 396 |
| chr10 | 83070587      | 83070982  | 396 |
| chrX  | 74414172      | 74414566  | 395 |
| chrX  | 72907955      | 72908349  | 395 |
| chrX  | 71940844      | 71941238  | 395 |
| chrX  | 71037141      | 71037535  | 395 |
| chrX  | 60287657      | 60288051  | 395 |
| chrX  | 59764668      | 59765062  | 395 |
| chrX  | 58457288      | 58457682  | 395 |
| chrX  | 56736005      | 56736399  | 395 |
| chrX  | 35674068      | 35674462  | 395 |
| chrX  | 34892350      | 34892744  | 395 |
| chrX  | 31624317      | 31624711  | 395 |
| chrX  | 20337070      | 20337464  | 395 |
| chrX  | 13544174      | 13544568  | 395 |
| chrX  | 9419977       | 9420371   | 395 |
| chrX  | 9366102       | 9366496   | 395 |
| chrX  | 7217186       | 7217580   | 395 |
| chr8  | 63909882      | 63910276  | 395 |
| chr6  | 121029303     | 121029697 | 395 |
| chr5  | 74388795      | 74389189  | 395 |
| chr3  | 123342042     | 123342436 | 395 |
| chr28 | 33379052      | 33379446  | 395 |
| chr27 | 34566345      | 34566739  | 395 |
| chr26 | 39108199      | 39108593  | 395 |
| chr26 | 81042 81436   | 395       |     |
| chr24 | 58899611      | 58900005  | 395 |
| chr21 | 33985358      | 33985752  | 395 |
| chr19 | 42262159      | 42262553  | 395 |
| chr19 | 39016164      | 39016558  | 395 |
| chr18 | 55248123      | 55248517  | 395 |
| chr17 | 76322059      | 76322453  | 395 |
| chr17 | 72833274      | 72833668  | 395 |
| chr17 | 65969029      | 65969423  | 395 |

|       |           |           |     |
|-------|-----------|-----------|-----|
| chr16 | 40609429  | 40609823  | 395 |
| chr16 | 39334527  | 39334921  | 395 |
| chr14 | 1949826   | 1950220   | 395 |
| chr13 | 74390383  | 74390777  | 395 |
| chr13 | 54758216  | 54758610  | 395 |
| chr13 | 41645353  | 41645747  | 395 |
| chr1  | 74677438  | 74677832  | 395 |
| chr1  | 1597697   | 1598091   | 395 |
| chrX  | 80988292  | 80988685  | 394 |
| chrX  | 72809166  | 72809559  | 394 |
| chrX  | 68761431  | 68761824  | 394 |
| chrX  | 65528487  | 65528880  | 394 |
| chrX  | 53082012  | 53082405  | 394 |
| chrX  | 38201315  | 38201708  | 394 |
| chrX  | 36902827  | 36903220  | 394 |
| chrX  | 31433511  | 31433904  | 394 |
| chrX  | 22144435  | 22144828  | 394 |
| chrX  | 19453428  | 19453821  | 394 |
| chr8  | 70804236  | 70804629  | 394 |
| chr7  | 80998262  | 80998655  | 394 |
| chr7  | 70772020  | 70772413  | 394 |
| chr6  | 122176076 | 122176469 | 394 |
| chr5  | 119916340 | 119916733 | 394 |
| chr5  | 79799520  | 79799913  | 394 |
| chr5  | 60989691  | 60990084  | 394 |
| chr3  | 125201625 | 125202018 | 394 |
| chr3  | 121920921 | 121921314 | 394 |
| chr3  | 17447034  | 17447427  | 394 |
| chr3  | 16083869  | 16084262  | 394 |
| chr29 | 48708414  | 48708807  | 394 |
| chr29 | 33979544  | 33979937  | 394 |
| chr28 | 33886795  | 33887188  | 394 |
| chr26 | 39280621  | 39281014  | 394 |
| chr26 | 25512823  | 25513216  | 394 |
| chr26 | 18129997  | 18130390  | 394 |
| chr26 | 11344215  | 11344608  | 394 |
| chr24 | 20860803  | 20861196  | 394 |
| chr22 | 50014870  | 50015263  | 394 |
| chr19 | 63497815  | 63498208  | 394 |
| chr19 | 58334664  | 58335057  | 394 |
| chr19 | 41561174  | 41561567  | 394 |
| chr19 | 13542455  | 13542848  | 394 |
| chr18 | 56614070  | 56614463  | 394 |
| chr17 | 70398393  | 70398786  | 394 |
| chr17 | 67969368  | 67969761  | 394 |
| chr16 | 47605712  | 47606105  | 394 |
| chr16 | 39841021  | 39841414  | 394 |
| chr16 | 1316095   | 1316488   | 394 |
| chr15 | 81170952  | 81171345  | 394 |
| chr14 | 63515334  | 63515727  | 394 |

|       |               |           |     |
|-------|---------------|-----------|-----|
| chr13 | 80018356      | 80018749  | 394 |
| chr13 | 70188541      | 70188934  | 394 |
| chr13 | 23753707      | 23754100  | 394 |
| chr12 | 74546139      | 74546532  | 394 |
| chr11 | 100698274     | 100698667 | 394 |
| chr10 | 89501314      | 89501707  | 394 |
| chr10 | 58800072      | 58800465  | 394 |
| chr10 | 55432692      | 55433085  | 394 |
| chr1  | 59067753      | 59068146  | 394 |
| chrX  | 75039442      | 75039834  | 393 |
| chrX  | 63034083      | 63034475  | 393 |
| chrX  | 62934729      | 62935121  | 393 |
| chrX  | 34562590      | 34562982  | 393 |
| chrX  | 22576965      | 22577357  | 393 |
| chrX  | 13659439      | 13659831  | 393 |
| chr9  | 100056688     | 100057080 | 393 |
| chr9  | 66943571      | 66943963  | 393 |
| chr8  | 87337863      | 87338255  | 393 |
| chr8  | 3710973       | 3711365   | 393 |
| chr6  | 113352862     | 113353254 | 393 |
| chr5  | 30386568      | 30386960  | 393 |
| chr4  | 13667105      | 13667497  | 393 |
| chr29 | 46303867      | 46304259  | 393 |
| chr29 | 34560982      | 34561374  | 393 |
| chr27 | 850435 850827 | 393       |     |
| chr25 | 26708625      | 26709017  | 393 |
| chr23 | 50764299      | 50764691  | 393 |
| chr23 | 13041316      | 13041708  | 393 |
| chr22 | 56294366      | 56294758  | 393 |
| chr22 | 50047121      | 50047513  | 393 |
| chr22 | 46279891      | 46280283  | 393 |
| chr22 | 30294894      | 30295286  | 393 |
| chr22 | 30151621      | 30152013  | 393 |
| chr22 | 13576904      | 13577296  | 393 |
| chr21 | 34529477      | 34529869  | 393 |
| chr21 | 1848566       | 1848958   | 393 |
| chr20 | 33367228      | 33367620  | 393 |
| chr20 | 19492616      | 19493008  | 393 |
| chr20 | 615204 615596 | 393       |     |
| chr2  | 99792214      | 99792606  | 393 |
| chr2  | 93352483      | 93352875  | 393 |
| chr2  | 64205397      | 64205789  | 393 |
| chr19 | 41566108      | 41566500  | 393 |
| chr19 | 40502801      | 40503193  | 393 |
| chr19 | 38953396      | 38953788  | 393 |
| chr19 | 444993 445385 | 393       |     |
| chr18 | 56609016      | 56609408  | 393 |
| chr18 | 18094370      | 18094762  | 393 |
| chr18 | 13545803      | 13546195  | 393 |
| chr17 | 70332274      | 70332666  | 393 |

|       |               |           |     |
|-------|---------------|-----------|-----|
| chr16 | 23637687      | 23638079  | 393 |
| chr16 | 11480047      | 11480439  | 393 |
| chr15 | 75265026      | 75265418  | 393 |
| chr15 | 63230458      | 63230850  | 393 |
| chr13 | 75978284      | 75978676  | 393 |
| chr13 | 75758909      | 75759301  | 393 |
| chr13 | 55007149      | 55007541  | 393 |
| chr12 | 9476738       | 9477130   | 393 |
| chr11 | 106016256     | 106016648 | 393 |
| chr11 | 65070534      | 65070926  | 393 |
| chr11 | 14106753      | 14107145  | 393 |
| chr11 | 3876190       | 3876582   | 393 |
| chr10 | 19489148      | 19489540  | 393 |
| chr1  | 1708440       | 1708832   | 393 |
| chrX  | 75367160      | 75367551  | 392 |
| chrX  | 72898895      | 72899286  | 392 |
| chrX  | 72441351      | 72441742  | 392 |
| chrX  | 71464169      | 71464560  | 392 |
| chrX  | 38234081      | 38234472  | 392 |
| chrX  | 36304143      | 36304534  | 392 |
| chrX  | 22572633      | 22573024  | 392 |
| chr8  | 87201324      | 87201715  | 392 |
| chr7  | 42204126      | 42204517  | 392 |
| chr5  | 64882556      | 64882947  | 392 |
| chr3  | 123666489     | 123666880 | 392 |
| chr28 | 40757788      | 40758179  | 392 |
| chr26 | 44529183      | 44529574  | 392 |
| chr25 | 33528119      | 33528510  | 392 |
| chr24 | 60976672      | 60977063  | 392 |
| chr23 | 17412923      | 17413314  | 392 |
| chr22 | 16396734      | 16397125  | 392 |
| chr2  | 73260626      | 73261017  | 392 |
| chr19 | 42704910      | 42705301  | 392 |
| chr18 | 23560790      | 23561181  | 392 |
| chr15 | 36577099      | 36577490  | 392 |
| chr15 | 30053808      | 30054199  | 392 |
| chr13 | 76184297      | 76184688  | 392 |
| chr13 | 67403936      | 67404327  | 392 |
| chr13 | 59709584      | 59709975  | 392 |
| chr13 | 41331373      | 41331764  | 392 |
| chr13 | 3372988       | 3373379   | 392 |
| chr11 | 68047475      | 68047866  | 392 |
| chr1  | 378059 378450 | 392       |     |
| chrX  | 57051848      | 57052238  | 391 |
| chrX  | 56190221      | 56190611  | 391 |
| chrX  | 39148618      | 39149008  | 391 |
| chrX  | 39138315      | 39138705  | 391 |
| chrX  | 7608171       | 7608561   | 391 |
| chr8  | 108719192     | 108719582 | 391 |
| chr7  | 18711331      | 18711721  | 391 |

|       |               |           |     |
|-------|---------------|-----------|-----|
| chr7  | 8918165       | 8918555   | 391 |
| chr6  | 74454120      | 74454510  | 391 |
| chr5  | 118511268     | 118511658 | 391 |
| chr3  | 83062071      | 83062461  | 391 |
| chr29 | 35105726      | 35106116  | 391 |
| chr26 | 33227955      | 33228345  | 391 |
| chr24 | 35365115      | 35365505  | 391 |
| chr23 | 49258959      | 49259349  | 391 |
| chr23 | 28621858      | 28622248  | 391 |
| chr22 | 55755594      | 55755984  | 391 |
| chr22 | 54678934      | 54679324  | 391 |
| chr22 | 30001140      | 30001530  | 391 |
| chr22 | 29227746      | 29228136  | 391 |
| chr21 | 32956156      | 32956546  | 391 |
| chr21 | 24392267      | 24392657  | 391 |
| chr20 | 815569 815959 | 391       |     |
| chr2  | 138674822     | 138675212 | 391 |
| chr2  | 134894248     | 134894638 | 391 |
| chr19 | 46845997      | 46846387  | 391 |
| chr19 | 44871867      | 44872257  | 391 |
| chr19 | 30571365      | 30571755  | 391 |
| chr16 | 43012251      | 43012641  | 391 |
| chr15 | 24463273      | 24463663  | 391 |
| chr13 | 59044900      | 59045290  | 391 |
| chr13 | 41212017      | 41212407  | 391 |
| chr11 | 28434705      | 28435095  | 391 |
| chr10 | 81626174      | 81626564  | 391 |
| chrX  | 72592018      | 72592407  | 390 |
| chrX  | 54063323      | 54063712  | 390 |
| chrX  | 52812799      | 52813188  | 390 |
| chrX  | 47882142      | 47882531  | 390 |
| chrX  | 20202447      | 20202836  | 390 |
| chrX  | 13297108      | 13297497  | 390 |
| chrX  | 10487456      | 10487845  | 390 |
| chrX  | 5798006       | 5798395   | 390 |
| chr7  | 51417033      | 51417422  | 390 |
| chr5  | 120415554     | 120415943 | 390 |
| chr5  | 90614417      | 90614806  | 390 |
| chr4  | 92000802      | 92001191  | 390 |
| chr3  | 123746806     | 123747195 | 390 |
| chr29 | 51713953      | 51714342  | 390 |
| chr24 | 34700631      | 34701020  | 390 |
| chr24 | 1605327       | 1605716   | 390 |
| chr23 | 41844282      | 41844671  | 390 |
| chr23 | 35001947      | 35002336  | 390 |
| chr22 | 7123158       | 7123547   | 390 |
| chr21 | 32966964      | 32967353  | 390 |
| chr17 | 75092431      | 75092820  | 390 |
| chr17 | 49635590      | 49635979  | 390 |
| chr15 | 41102870      | 41103259  | 390 |

|       |           |           |     |
|-------|-----------|-----------|-----|
| chr15 | 32258385  | 32258774  | 390 |
| chr13 | 77664497  | 77664886  | 390 |
| chr13 | 68547114  | 68547503  | 390 |
| chr13 | 66137431  | 66137820  | 390 |
| chr13 | 59187448  | 59187837  | 390 |
| chr12 | 31544194  | 31544583  | 390 |
| chr11 | 99202980  | 99203369  | 390 |
| chr10 | 5262903   | 5263292   | 390 |
| chr1  | 133335924 | 133336313 | 390 |
| chrX  | 70854089  | 70854477  | 389 |
| chrX  | 68137612  | 68138000  | 389 |
| chrX  | 40457322  | 40457710  | 389 |
| chrX  | 38342821  | 38343209  | 389 |
| chrX  | 37513696  | 37514084  | 389 |
| chrX  | 36636034  | 36636422  | 389 |
| chrX  | 31960288  | 31960676  | 389 |
| chr9  | 105315202 | 105315590 | 389 |
| chr7  | 65573515  | 65573903  | 389 |
| chr7  | 42767336  | 42767724  | 389 |
| chr5  | 114083239 | 114083627 | 389 |
| chr5  | 112021726 | 112022114 | 389 |
| chr3  | 114364635 | 114365023 | 389 |
| chr29 | 44500204  | 44500592  | 389 |
| chr26 | 19937759  | 19938147  | 389 |
| chr25 | 43491181  | 43491569  | 389 |
| chr25 | 39436542  | 39436930  | 389 |
| chr25 | 38043902  | 38044290  | 389 |
| chr25 | 35474159  | 35474547  | 389 |
| chr24 | 20562444  | 20562832  | 389 |
| chr23 | 49119779  | 49120167  | 389 |
| chr22 | 61191138  | 61191526  | 389 |
| chr22 | 48261767  | 48262155  | 389 |
| chr21 | 24355229  | 24355617  | 389 |
| chr2  | 138645656 | 138646044 | 389 |
| chr2  | 54402407  | 54402795  | 389 |
| chr19 | 57831450  | 57831838  | 389 |
| chr19 | 44180586  | 44180974  | 389 |
| chr19 | 39421522  | 39421910  | 389 |
| chr19 | 38948616  | 38949004  | 389 |
| chr19 | 27352447  | 27352835  | 389 |
| chr16 | 38776564  | 38776952  | 389 |
| chr15 | 22808734  | 22809122  | 389 |
| chr14 | 6843242   | 6843630   | 389 |
| chr13 | 70216059  | 70216447  | 389 |
| chr12 | 31544624  | 31545012  | 389 |
| chr12 | 15304630  | 15305018  | 389 |
| chr11 | 98372188  | 98372576  | 389 |
| chr11 | 76474753  | 76475141  | 389 |
| chr1  | 157210438 | 157210826 | 389 |
| chr1  | 99192284  | 99192672  | 389 |

|       |           |           |     |
|-------|-----------|-----------|-----|
| chr1  | 68823806  | 68824194  | 389 |
| chrX  | 77419162  | 77419549  | 388 |
| chrX  | 65900987  | 65901374  | 388 |
| chrX  | 65513539  | 65513926  | 388 |
| chrX  | 65059115  | 65059502  | 388 |
| chrX  | 56576677  | 56577064  | 388 |
| chrX  | 53746346  | 53746733  | 388 |
| chrX  | 48407063  | 48407450  | 388 |
| chrX  | 9461181   | 9461568   | 388 |
| chrX  | 7177499   | 7177886   | 388 |
| chr9  | 100488558 | 100488945 | 388 |
| chr8  | 74331336  | 74331723  | 388 |
| chr8  | 61024774  | 61025161  | 388 |
| chr7  | 14338126  | 14338513  | 388 |
| chr5  | 120401060 | 120401447 | 388 |
| chr4  | 71879955  | 71880342  | 388 |
| chr3  | 33122214  | 33122601  | 388 |
| chr29 | 46302201  | 46302588  | 388 |
| chr29 | 45773732  | 45774119  | 388 |
| chr29 | 36977035  | 36977422  | 388 |
| chr28 | 33996357  | 33996744  | 388 |
| chr26 | 48613166  | 48613553  | 388 |
| chr26 | 48162893  | 48163280  | 388 |
| chr24 | 65015074  | 65015461  | 388 |
| chr24 | 58790611  | 58790998  | 388 |
| chr24 | 44046375  | 44046762  | 388 |
| chr22 | 6472341   | 6472728   | 388 |
| chr20 | 73574520  | 73574907  | 388 |
| chr2  | 90526510  | 90526897  | 388 |
| chr19 | 60085967  | 60086354  | 388 |
| chr19 | 40466544  | 40466931  | 388 |
| chr19 | 25279092  | 25279479  | 388 |
| chr18 | 12630135  | 12630522  | 388 |
| chr18 | 11078310  | 11078697  | 388 |
| chr17 | 69118087  | 69118474  | 388 |
| chr17 | 64043979  | 64044366  | 388 |
| chr16 | 62774613  | 62775000  | 388 |
| chr15 | 83926893  | 83927280  | 388 |
| chr15 | 64480863  | 64481250  | 388 |
| chr15 | 26728106  | 26728493  | 388 |
| chr13 | 75750767  | 75751154  | 388 |
| chr13 | 65413263  | 65413650  | 388 |
| chr13 | 58902904  | 58903291  | 388 |
| chr13 | 54760540  | 54760927  | 388 |
| chr13 | 41732359  | 41732746  | 388 |
| chr13 | 40334979  | 40335366  | 388 |
| chr12 | 22969014  | 22969401  | 388 |
| chr12 | 3685074   | 3685461   | 388 |
| chr10 | 47390556  | 47390943  | 388 |
| chr1  | 131770748 | 131771135 | 388 |



|       |               |           |     |
|-------|---------------|-----------|-----|
| chr1  | 42946060      | 42946447  | 388 |
| chrX  | 73411111      | 73411497  | 387 |
| chrX  | 54493160      | 54493546  | 387 |
| chrX  | 30386441      | 30386827  | 387 |
| chrX  | 21050269      | 21050655  | 387 |
| chrX  | 18829265      | 18829651  | 387 |
| chrX  | 13075430      | 13075816  | 387 |
| chrX  | 13051119      | 13051505  | 387 |
| chrX  | 7785256       | 7785642   | 387 |
| chrX  | 7550708       | 7551094   | 387 |
| chr9  | 26941530      | 26941916  | 387 |
| chr7  | 45103069      | 45103455  | 387 |
| chr7  | 20132911      | 20133297  | 387 |
| chr7  | 16504854      | 16505240  | 387 |
| chr6  | 120737526     | 120737912 | 387 |
| chr5  | 64788288      | 64788674  | 387 |
| chr4  | 118228674     | 118229060 | 387 |
| chr4  | 107488541     | 107488927 | 387 |
| chr4  | 106523918     | 106524304 | 387 |
| chr4  | 99595176      | 99595562  | 387 |
| chr3  | 109745736     | 109746122 | 387 |
| chr3  | 33487630      | 33488016  | 387 |
| chr29 | 30489259      | 30489645  | 387 |
| chr28 | 33896606      | 33896992  | 387 |
| chr28 | 26412179      | 26412565  | 387 |
| chr28 | 185150 185536 |           | 387 |
| chr24 | 35370722      | 35371108  | 387 |
| chr23 | 49743723      | 49744109  | 387 |
| chr23 | 49334213      | 49334599  | 387 |
| chr23 | 26065172      | 26065558  | 387 |
| chr22 | 61198738      | 61199124  | 387 |
| chr22 | 30198061      | 30198447  | 387 |
| chr20 | 4925811       | 4926197   | 387 |
| chr19 | 57693688      | 57694074  | 387 |
| chr17 | 68437977      | 68438363  | 387 |
| chr17 | 64210468      | 64210854  | 387 |
| chr17 | 58831826      | 58832212  | 387 |
| chr16 | 28951839      | 28952225  | 387 |
| chr11 | 104909421     | 104909807 | 387 |
| chr11 | 77652484      | 77652870  | 387 |
| chr11 | 28498853      | 28499239  | 387 |
| chr10 | 70394021      | 70394407  | 387 |
| chr1  | 123112378     | 123112764 | 387 |
| chr1  | 100088708     | 100089094 | 387 |
| chr1  | 74998671      | 74999057  | 387 |
| chr1  | 68892982      | 68893368  | 387 |
| chr1  | 1595159       | 1595545   | 387 |
| chrX  | 87663489      | 87663874  | 386 |
| chrX  | 78574729      | 78575114  | 386 |
| chrX  | 62721075      | 62721460  | 386 |

|       |           |           |     |
|-------|-----------|-----------|-----|
| chrX  | 51664743  | 51665128  | 386 |
| chrX  | 47959595  | 47959980  | 386 |
| chrX  | 814671    | 815056    | 386 |
| chr8  | 59306322  | 59306707  | 386 |
| chr7  | 18844909  | 18845294  | 386 |
| chr5  | 121243400 | 121243785 | 386 |
| chr4  | 106684290 | 106684675 | 386 |
| chr4  | 72801940  | 72802325  | 386 |
| chr4  | 68235235  | 68235620  | 386 |
| chr4  | 8817000   | 8817385   | 386 |
| chr3  | 116495740 | 116496125 | 386 |
| chr29 | 18193674  | 18194059  | 386 |
| chr28 | 42784886  | 42785271  | 386 |
| chr27 | 4901857   | 4902242   | 386 |
| chr26 | 38371226  | 38371611  | 386 |
| chr25 | 33518120  | 33518505  | 386 |
| chr23 | 51592676  | 51593061  | 386 |
| chr20 | 73572678  | 73573063  | 386 |
| chr20 | 8597765   | 8598150   | 386 |
| chr2  | 132177313 | 132177698 | 386 |
| chr19 | 48739554  | 48739939  | 386 |
| chr17 | 53934087  | 53934472  | 386 |
| chr16 | 48189317  | 48189702  | 386 |
| chr15 | 74543289  | 74543674  | 386 |
| chr14 | 23334816  | 23335201  | 386 |
| chr13 | 56432603  | 56432988  | 386 |
| chr12 | 64640432  | 64640817  | 386 |
| chr11 | 77742536  | 77742921  | 386 |
| chr10 | 17019599  | 17019984  | 386 |
| chrX  | 68589820  | 68590204  | 385 |
| chrX  | 24563924  | 24564308  | 385 |
| chrX  | 20541805  | 20542189  | 385 |
| chrX  | 12290214  | 12290598  | 385 |
| chr7  | 42802253  | 42802637  | 385 |
| chr5  | 8968725   | 8969109   | 385 |
| chr3  | 115977732 | 115978116 | 385 |
| chr29 | 33740105  | 33740489  | 385 |
| chr28 | 26343490  | 26343874  | 385 |
| chr27 | 34873830  | 34874214  | 385 |
| chr25 | 29060623  | 29061007  | 385 |
| chr23 | 51681374  | 51681758  | 385 |
| chr23 | 45804562  | 45804946  | 385 |
| chr21 | 39985971  | 39986355  | 385 |
| chr20 | 8812836   | 8813220   | 385 |
| chr19 | 61793293  | 61793677  | 385 |
| chr19 | 40662340  | 40662724  | 385 |
| chr19 | 19439807  | 19440191  | 385 |
| chr18 | 54313744  | 54314128  | 385 |
| chr18 | 43777684  | 43778068  | 385 |
| chr17 | 57693546  | 57693930  | 385 |

|       |           |           |     |
|-------|-----------|-----------|-----|
| chr17 | 5465554   | 5465938   | 385 |
| chr15 | 42998901  | 42999285  | 385 |
| chr14 | 42138317  | 42138701  | 385 |
| chr13 | 69805856  | 69806240  | 385 |
| chr12 | 82140365  | 82140749  | 385 |
| chr11 | 104487550 | 104487934 | 385 |
| chr11 | 28635527  | 28635911  | 385 |
| chr11 | 14093582  | 14093966  | 385 |
| chr10 | 60550061  | 60550445  | 385 |
| chr10 | 21848232  | 21848616  | 385 |
| chrX  | 64288407  | 64288790  | 384 |
| chrX  | 56882393  | 56882776  | 384 |
| chrX  | 10052064  | 10052447  | 384 |
| chrX  | 1894493   | 1894876   | 384 |
| chr9  | 50719971  | 50720354  | 384 |
| chr8  | 66198055  | 66198438  | 384 |
| chr7  | 5306787   | 5307170   | 384 |
| chr5  | 30216719  | 30217102  | 384 |
| chr4  | 72037485  | 72037868  | 384 |
| chr3  | 11536686  | 11537069  | 384 |
| chr29 | 44501965  | 44502348  | 384 |
| chr28 | 33638560  | 33638943  | 384 |
| chr28 | 7319482   | 7319865   | 384 |
| chr27 | 26483727  | 26484110  | 384 |
| chr26 | 38997613  | 38997996  | 384 |
| chr23 | 43135595  | 43135978  | 384 |
| chr2  | 124309660 | 124310043 | 384 |
| chr2  | 24062034  | 24062417  | 384 |
| chr19 | 37703031  | 37703414  | 384 |
| chr19 | 25211982  | 25212365  | 384 |
| chr19 | 13678915  | 13679298  | 384 |
| chr18 | 54183729  | 54184112  | 384 |
| chr18 | 46956208  | 46956591  | 384 |
| chr18 | 23110792  | 23111175  | 384 |
| chr18 | 20755204  | 20755587  | 384 |
| chr17 | 73198813  | 73199196  | 384 |
| chr17 | 69890157  | 69890540  | 384 |
| chr13 | 75831138  | 75831521  | 384 |
| chr13 | 69889927  | 69890310  | 384 |
| chr13 | 22148741  | 22149124  | 384 |
| chr12 | 84686231  | 84686614  | 384 |
| chr12 | 74448581  | 74448964  | 384 |
| chr11 | 80173639  | 80174022  | 384 |
| chr11 | 3286317   | 3286700   | 384 |
| chr10 | 7641489   | 7641872   | 384 |
| chrX  | 80188237  | 80188619  | 383 |
| chrX  | 78568257  | 78568639  | 383 |
| chrX  | 73723415  | 73723797  | 383 |
| chrX  | 71856681  | 71857063  | 383 |
| chrX  | 68037908  | 68038290  | 383 |

|       |               |           |     |
|-------|---------------|-----------|-----|
| chrX  | 39012306      | 39012688  | 383 |
| chrX  | 36626062      | 36626444  | 383 |
| chrX  | 29466393      | 29466775  | 383 |
| chrX  | 20094452      | 20094834  | 383 |
| chrX  | 8069461       | 8069843   | 383 |
| chrX  | 6436746       | 6437128   | 383 |
| chr9  | 104969185     | 104969567 | 383 |
| chr3  | 121433701     | 121434083 | 383 |
| chr3  | 115482883     | 115483265 | 383 |
| chr3  | 113365323     | 113365705 | 383 |
| chr3  | 30453093      | 30453475  | 383 |
| chr3  | 10583547      | 10583929  | 383 |
| chr25 | 1901603       | 1901985   | 383 |
| chr23 | 48600620      | 48601002  | 383 |
| chr21 | 61310934      | 61311316  | 383 |
| chr2  | 138680445     | 138680827 | 383 |
| chr2  | 111323014     | 111323396 | 383 |
| chr2  | 100066164     | 100066546 | 383 |
| chr2  | 25279788      | 25280170  | 383 |
| chr19 | 56063934      | 56064316  | 383 |
| chr19 | 41322419      | 41322801  | 383 |
| chr19 | 14084897      | 14085279  | 383 |
| chr19 | 7649965       | 7650347   | 383 |
| chr18 | 11959826      | 11960208  | 383 |
| chr16 | 34264 34646   | 383       |     |
| chr14 | 21232816      | 21233198  | 383 |
| chr13 | 75534596      | 75534978  | 383 |
| chr13 | 53906459      | 53906841  | 383 |
| chr11 | 100114150     | 100114532 | 383 |
| chr1  | 160446074     | 160446456 | 383 |
| chr1  | 147114173     | 147114555 | 383 |
| chrX  | 75769531      | 75769912  | 382 |
| chrX  | 72726691      | 72727072  | 382 |
| chrX  | 69299300      | 69299681  | 382 |
| chrX  | 68595476      | 68595857  | 382 |
| chrX  | 65097282      | 65097663  | 382 |
| chrX  | 53621220      | 53621601  | 382 |
| chrX  | 45185721      | 45186102  | 382 |
| chrX  | 35606369      | 35606750  | 382 |
| chrX  | 8672815       | 8673196   | 382 |
| chrX  | 7152279       | 7152660   | 382 |
| chrX  | 371477 371858 | 382       |     |
| chr8  | 80079811      | 80080192  | 382 |
| chr8  | 62046009      | 62046390  | 382 |
| chr7  | 80578377      | 80578758  | 382 |
| chr5  | 118428201     | 118428582 | 382 |
| chr3  | 127440420     | 127440801 | 382 |
| chr3  | 16822739      | 16823120  | 382 |
| chr3  | 15789996      | 15790377  | 382 |
| chr29 | 39157737      | 39158118  | 382 |

|       |               |           |     |
|-------|---------------|-----------|-----|
| chr26 | 49152287      | 49152668  | 382 |
| chr26 | 14561348      | 14561729  | 382 |
| chr25 | 29426880      | 29427261  | 382 |
| chr24 | 44127724      | 44128105  | 382 |
| chr23 | 16001298      | 16001679  | 382 |
| chr21 | 33973002      | 33973383  | 382 |
| chr18 | 64535865      | 64536246  | 382 |
| chr18 | 55208279      | 55208660  | 382 |
| chr18 | 32954332      | 32954713  | 382 |
| chr13 | 54498574      | 54498955  | 382 |
| chr13 | 41344277      | 41344658  | 382 |
| chr13 | 22882935      | 22883316  | 382 |
| chr11 | 98477968      | 98478349  | 382 |
| chr1  | 97144520      | 97144901  | 382 |
| chr1  | 1536283       | 1536664   | 382 |
| chr1  | 486630 487011 |           | 382 |
| chrX  | 10371712      | 10372092  | 381 |
| chr9  | 90448098      | 90448478  | 381 |
| chr5  | 119917367     | 119917747 | 381 |
| chr3  | 110979164     | 110979544 | 381 |
| chr3  | 36661340      | 36661720  | 381 |
| chr3  | 31671538      | 31671918  | 381 |
| chr3  | 25719780      | 25720160  | 381 |
| chr29 | 37092992      | 37093372  | 381 |
| chr25 | 21037834      | 21038214  | 381 |
| chr24 | 2549003       | 2549383   | 381 |
| chr23 | 19643395      | 19643775  | 381 |
| chr22 | 36607756      | 36608136  | 381 |
| chr2  | 15376183      | 15376563  | 381 |
| chr19 | 57985314      | 57985694  | 381 |
| chr19 | 8247327       | 8247707   | 381 |
| chr17 | 75521141      | 75521521  | 381 |
| chr17 | 63109074      | 63109454  | 381 |
| chr16 | 68772462      | 68772842  | 381 |
| chr16 | 55679460      | 55679840  | 381 |
| chr15 | 38240426      | 38240806  | 381 |
| chr13 | 70049056      | 70049436  | 381 |
| chr12 | 84208573      | 84208953  | 381 |
| chr11 | 92973609      | 92973989  | 381 |
| chr11 | 82846462      | 82846842  | 381 |
| chr11 | 74533901      | 74534281  | 381 |
| chr1  | 123088590     | 123088970 | 381 |
| chrX  | 73340297      | 73340676  | 380 |
| chrX  | 44939943      | 44940322  | 380 |
| chrX  | 21127280      | 21127659  | 380 |
| chrX  | 19599187      | 19599566  | 380 |
| chrX  | 10077794      | 10078173  | 380 |
| chrX  | 8435776       | 8436155   | 380 |
| chrX  | 7421467       | 7421846   | 380 |
| chrX  | 5487681       | 5488060   | 380 |

|       |           |           |     |
|-------|-----------|-----------|-----|
| chr8  | 24662141  | 24662520  | 380 |
| chr5  | 53824488  | 53824867  | 380 |
| chr5  | 28960925  | 28961304  | 380 |
| chr3  | 34801047  | 34801426  | 380 |
| chr3  | 25814386  | 25814765  | 380 |
| chr3  | 23043755  | 23044134  | 380 |
| chr29 | 49439766  | 49440145  | 380 |
| chr25 | 1092730   | 1093109   | 380 |
| chr23 | 15397727  | 15398106  | 380 |
| chr22 | 30276890  | 30277269  | 380 |
| chr21 | 32967682  | 32968061  | 380 |
| chr21 | 25978373  | 25978752  | 380 |
| chr20 | 11511624  | 11512003  | 380 |
| chr2  | 115055648 | 115056027 | 380 |
| chr2  | 54403346  | 54403725  | 380 |
| chr19 | 60242106  | 60242485  | 380 |
| chr19 | 54364384  | 54364763  | 380 |
| chr18 | 34052704  | 34053083  | 380 |
| chr18 | 9763764   | 9764143   | 380 |
| chr17 | 70609418  | 70609797  | 380 |
| chr17 | 62103233  | 62103612  | 380 |
| chr16 | 26561524  | 26561903  | 380 |
| chr16 | 2349308   | 2349687   | 380 |
| chr15 | 55810181  | 55810560  | 380 |
| chr13 | 69656838  | 69657217  | 380 |
| chr13 | 59666675  | 59667054  | 380 |
| chr12 | 32532915  | 32533294  | 380 |
| chr11 | 100880253 | 100880632 | 380 |
| chr10 | 87171069  | 87171448  | 380 |
| chr10 | 79143534  | 79143913  | 380 |
| chr10 | 14991885  | 14992264  | 380 |
| chrX  | 71424571  | 71424949  | 379 |
| chrX  | 65735235  | 65735613  | 379 |
| chrX  | 62526454  | 62526832  | 379 |
| chrX  | 58418875  | 58419253  | 379 |
| chrX  | 33985683  | 33986061  | 379 |
| chrX  | 24585344  | 24585722  | 379 |
| chrX  | 23035622  | 23036000  | 379 |
| chrX  | 6700941   | 6701319   | 379 |
| chrX  | 2428899   | 2429277   | 379 |
| chr8  | 72336503  | 72336881  | 379 |
| chr8  | 7660378   | 7660756   | 379 |
| chr3  | 124089647 | 124090025 | 379 |
| chr29 | 49512806  | 49513184  | 379 |
| chr29 | 37317190  | 37317568  | 379 |
| chr29 | 35449311  | 35449689  | 379 |
| chr28 | 41050584  | 41050962  | 379 |
| chr26 | 48426386  | 48426764  | 379 |
| chr26 | 13447688  | 13448066  | 379 |
| chr25 | 15310097  | 15310475  | 379 |

|       |           |           |     |
|-------|-----------|-----------|-----|
| chr21 | 59304750  | 59305128  | 379 |
| chr21 | 22722631  | 22723009  | 379 |
| chr20 | 73711230  | 73711608  | 379 |
| chr2  | 123349984 | 123350362 | 379 |
| chr2  | 1866311   | 1866689   | 379 |
| chr19 | 63631157  | 63631535  | 379 |
| chr19 | 23165647  | 23166025  | 379 |
| chr19 | 7821840   | 7822218   | 379 |
| chr18 | 32851592  | 32851970  | 379 |
| chr18 | 29577263  | 29577641  | 379 |
| chr17 | 68315963  | 68316341  | 379 |
| chr16 | 67446788  | 67447166  | 379 |
| chr16 | 43900206  | 43900584  | 379 |
| chr16 | 23655178  | 23655556  | 379 |
| chr15 | 81386027  | 81386405  | 379 |
| chr14 | 21589181  | 21589559  | 379 |
| chr1  | 146651376 | 146651754 | 379 |
| chr1  | 74974370  | 74974748  | 379 |
| chr1  | 67356098  | 67356476  | 379 |
| chrX  | 78914706  | 78915083  | 378 |
| chrX  | 78480408  | 78480785  | 378 |
| chrX  | 63054089  | 63054466  | 378 |
| chrX  | 61622624  | 61623001  | 378 |
| chrX  | 52920583  | 52920960  | 378 |
| chrX  | 30000053  | 30000430  | 378 |
| chrX  | 29726843  | 29727220  | 378 |
| chrX  | 19448340  | 19448717  | 378 |
| chr9  | 105865764 | 105866141 | 378 |
| chr7  | 46124995  | 46125372  | 378 |
| chr7  | 13222951  | 13223328  | 378 |
| chr5  | 112557289 | 112557666 | 378 |
| chr4  | 121554040 | 121554417 | 378 |
| chr3  | 22410607  | 22410984  | 378 |
| chr29 | 41851004  | 41851381  | 378 |
| chr29 | 29933584  | 29933961  | 378 |
| chr28 | 25102874  | 25103251  | 378 |
| chr27 | 21887764  | 21888141  | 378 |
| chr24 | 51023333  | 51023710  | 378 |
| chr23 | 14752829  | 14753206  | 378 |
| chr22 | 48359332  | 48359709  | 378 |
| chr21 | 69040389  | 69040766  | 378 |
| chr20 | 41953804  | 41954181  | 378 |
| chr2  | 111781853 | 111782230 | 378 |
| chr19 | 64373553  | 64373930  | 378 |
| chr19 | 64026824  | 64027201  | 378 |
| chr18 | 62543296  | 62543673  | 378 |
| chr18 | 55202304  | 55202681  | 378 |
| chr18 | 47220326  | 47220703  | 378 |
| chr18 | 34923233  | 34923610  | 378 |
| chr18 | 3440474   | 3440851   | 378 |

|       |           |           |     |
|-------|-----------|-----------|-----|
| chr17 | 5382206   | 5382583   | 378 |
| chr16 | 69741551  | 69741928  | 378 |
| chr15 | 64486841  | 64487218  | 378 |
| chr14 | 29076592  | 29076969  | 378 |
| chr13 | 43642568  | 43642945  | 378 |
| chr13 | 41164687  | 41165064  | 378 |
| chr12 | 21981477  | 21981854  | 378 |
| chr11 | 100204191 | 100204568 | 378 |
| chr11 | 45283201  | 45283578  | 378 |
| chr1  | 145994328 | 145994705 | 378 |
| chr1  | 145700520 | 145700897 | 378 |
| chr1  | 84670265  | 84670642  | 378 |
| chrX  | 75657410  | 75657786  | 377 |
| chrX  | 72792756  | 72793132  | 377 |
| chrX  | 66237719  | 66238095  | 377 |
| chrX  | 54871452  | 54871828  | 377 |
| chrX  | 39024863  | 39025239  | 377 |
| chr9  | 45946173  | 45946549  | 377 |
| chr8  | 1649557   | 1649933   | 377 |
| chr7  | 94305896  | 94306272  | 377 |
| chr7  | 43916108  | 43916484  | 377 |
| chr7  | 18730400  | 18730776  | 377 |
| chr6  | 121081480 | 121081856 | 377 |
| chr6  | 120803006 | 120803382 | 377 |
| chr4  | 104724273 | 104724649 | 377 |
| chr3  | 115475362 | 115475738 | 377 |
| chr3  | 105680132 | 105680508 | 377 |
| chr29 | 37323358  | 37323734  | 377 |
| chr27 | 33466397  | 33466773  | 377 |
| chr26 | 49599311  | 49599687  | 377 |
| chr25 | 2690246   | 2690622   | 377 |
| chr23 | 31398407  | 31398783  | 377 |
| chr22 | 58377735  | 58378111  | 377 |
| chr22 | 50775986  | 50776362  | 377 |
| chr21 | 29129599  | 29129975  | 377 |
| chr20 | 73713288  | 73713664  | 377 |
| chr2  | 131150663 | 131151039 | 377 |
| chr2  | 115067739 | 115068115 | 377 |
| chr18 | 53126355  | 53126731  | 377 |
| chr18 | 52298249  | 52298625  | 377 |
| chr17 | 68315240  | 68315616  | 377 |
| chr17 | 64871244  | 64871620  | 377 |
| chr16 | 77609780  | 77610156  | 377 |
| chr16 | 2265269   | 2265645   | 377 |
| chr15 | 61078436  | 61078812  | 377 |
| chr12 | 79961221  | 79961597  | 377 |
| chr10 | 17389501  | 17389877  | 377 |
| chr10 | 11814569  | 11814945  | 377 |
| chr10 | 4181255   | 4181631   | 377 |
| chr1  | 61279721  | 61280097  | 377 |



|       |           |           |     |
|-------|-----------|-----------|-----|
| chrX  | 79829255  | 79829630  | 376 |
| chrX  | 73988135  | 73988510  | 376 |
| chrX  | 56596341  | 56596716  | 376 |
| chrX  | 54588861  | 54589236  | 376 |
| chrX  | 53042363  | 53042738  | 376 |
| chrX  | 38993471  | 38993846  | 376 |
| chrX  | 20176759  | 20177134  | 376 |
| chr9  | 90821336  | 90821711  | 376 |
| chr7  | 42266561  | 42266936  | 376 |
| chr6  | 115607045 | 115607420 | 376 |
| chr5  | 76370910  | 76371285  | 376 |
| chr3  | 121798663 | 121799038 | 376 |
| chr3  | 98322721  | 98323096  | 376 |
| chr28 | 42353428  | 42353803  | 376 |
| chr28 | 34053909  | 34054284  | 376 |
| chr27 | 28099378  | 28099753  | 376 |
| chr27 | 26814400  | 26814775  | 376 |
| chr26 | 49306167  | 49306542  | 376 |
| chr23 | 48459049  | 48459424  | 376 |
| chr23 | 30542145  | 30542520  | 376 |
| chr21 | 28323186  | 28323561  | 376 |
| chr21 | 15232496  | 15232871  | 376 |
| chr2  | 22504724  | 22505099  | 376 |
| chr19 | 32598358  | 32598733  | 376 |
| chr19 | 7777073   | 7777448   | 376 |
| chr19 | 4704373   | 4704748   | 376 |
| chr18 | 11811341  | 11811716  | 376 |
| chr16 | 71455179  | 71455554  | 376 |
| chr16 | 48695844  | 48696219  | 376 |
| chr16 | 38799291  | 38799666  | 376 |
| chr16 | 38561852  | 38562227  | 376 |
| chr15 | 26605468  | 26605843  | 376 |
| chr13 | 59585738  | 59586113  | 376 |
| chr12 | 53338243  | 53338618  | 376 |
| chr11 | 104318378 | 104318753 | 376 |
| chr11 | 22064380  | 22064755  | 376 |
| chr10 | 70290176  | 70290551  | 376 |
| chr10 | 21934264  | 21934639  | 376 |
| chr10 | 20595446  | 20595821  | 376 |
| chr10 | 16725447  | 16725822  | 376 |
| chrX  | 49094789  | 49095163  | 375 |
| chrX  | 37934228  | 37934602  | 375 |
| chrX  | 32573619  | 32573993  | 375 |
| chrX  | 10431202  | 10431576  | 375 |
| chrX  | 10148514  | 10148888  | 375 |
| chrX  | 8883584   | 8883958   | 375 |
| chrX  | 5655757   | 5656131   | 375 |
| chrX  | 5061173   | 5061547   | 375 |
| chr9  | 86846983  | 86847357  | 375 |
| chr9  | 43859719  | 43860093  | 375 |

|       |           |           |     |
|-------|-----------|-----------|-----|
| chr9  | 34929882  | 34930256  | 375 |
| chr8  | 24389221  | 24389595  | 375 |
| chr5  | 120377495 | 120377869 | 375 |
| chr4  | 123975697 | 123976071 | 375 |
| chr4  | 106688527 | 106688901 | 375 |
| chr4  | 95674497  | 95674871  | 375 |
| chr3  | 9068528   | 9068902   | 375 |
| chr24 | 35908717  | 35909091  | 375 |
| chr23 | 42480696  | 42481070  | 375 |
| chr23 | 32705471  | 32705845  | 375 |
| chr22 | 48376244  | 48376618  | 375 |
| chr20 | 20842062  | 20842436  | 375 |
| chr19 | 53971046  | 53971420  | 375 |
| chr19 | 46841536  | 46841910  | 375 |
| chr19 | 45056510  | 45056884  | 375 |
| chr19 | 39964166  | 39964540  | 375 |
| chr18 | 55202824  | 55203198  | 375 |
| chr18 | 51102298  | 51102672  | 375 |
| chr17 | 47432478  | 47432852  | 375 |
| chr16 | 40899461  | 40899835  | 375 |
| chr15 | 28941071  | 28941445  | 375 |
| chr15 | 26719590  | 26719964  | 375 |
| chr15 | 22813415  | 22813789  | 375 |
| chr15 | 22530736  | 22531110  | 375 |
| chr14 | 62355811  | 62356185  | 375 |
| chr14 | 9692731   | 9693105   | 375 |
| chr13 | 84059861  | 84060235  | 375 |
| chr12 | 75122174  | 75122548  | 375 |
| chr12 | 30579099  | 30579473  | 375 |
| chr11 | 66258935  | 66259309  | 375 |
| chr11 | 9353722   | 9354096   | 375 |
| chr10 | 32496116  | 32496490  | 375 |
| chr10 | 20059228  | 20059602  | 375 |
| chr10 | 12977898  | 12978272  | 375 |
| chr1  | 152270014 | 152270388 | 375 |
| chr1  | 1720735   | 1721109   | 375 |
| chrX  | 64665132  | 64665505  | 374 |
| chrX  | 62532337  | 62532710  | 374 |
| chrX  | 50867263  | 50867636  | 374 |
| chrX  | 45482667  | 45483040  | 374 |
| chrX  | 24588570  | 24588943  | 374 |
| chr7  | 14330326  | 14330699  | 374 |
| chr7  | 13408187  | 13408560  | 374 |
| chr5  | 121655647 | 121656020 | 374 |
| chr5  | 29990258  | 29990631  | 374 |
| chr5  | 10791435  | 10791808  | 374 |
| chr4  | 121960755 | 121961128 | 374 |
| chr4  | 30812441  | 30812814  | 374 |
| chr3  | 123933111 | 123933484 | 374 |
| chr3  | 123849269 | 123849642 | 374 |

|       |           |           |     |
|-------|-----------|-----------|-----|
| chr29 | 30508460  | 30508833  | 374 |
| chr28 | 26784754  | 26785127  | 374 |
| chr27 | 39228600  | 39228973  | 374 |
| chr24 | 42582643  | 42583016  | 374 |
| chr24 | 36026581  | 36026954  | 374 |
| chr24 | 29704307  | 29704680  | 374 |
| chr23 | 45762900  | 45763273  | 374 |
| chr23 | 28851741  | 28852114  | 374 |
| chr23 | 15150415  | 15150788  | 374 |
| chr23 | 11036802  | 11037175  | 374 |
| chr21 | 56282921  | 56283294  | 374 |
| chr20 | 73542608  | 73542981  | 374 |
| chr2  | 135760688 | 135761061 | 374 |
| chr2  | 49191088  | 49191461  | 374 |
| chr19 | 49661019  | 49661392  | 374 |
| chr19 | 45562789  | 45563162  | 374 |
| chr17 | 73194581  | 73194954  | 374 |
| chr15 | 62598428  | 62598801  | 374 |
| chr13 | 14687230  | 14687603  | 374 |
| chr11 | 71633913  | 71634286  | 374 |
| chr10 | 92701587  | 92701960  | 374 |
| chr10 | 70841540  | 70841913  | 374 |
| chr10 | 19593861  | 19594234  | 374 |
| chr10 | 13416082  | 13416455  | 374 |
| chr1  | 10139377  | 10139750  | 374 |
| chrX  | 79001281  | 79001653  | 373 |
| chrX  | 74324520  | 74324892  | 373 |
| chrX  | 66402291  | 66402663  | 373 |
| chrX  | 55777471  | 55777843  | 373 |
| chrX  | 16774892  | 16775264  | 373 |
| chrX  | 8113782   | 8114154   | 373 |
| chrX  | 7778185   | 7778557   | 373 |
| chr9  | 19793079  | 19793451  | 373 |
| chr8  | 25586540  | 25586912  | 373 |
| chr7  | 25668959  | 25669331  | 373 |
| chr5  | 108825640 | 108826012 | 373 |
| chr5  | 80719916  | 80720288  | 373 |
| chr5  | 74416075  | 74416447  | 373 |
| chr4  | 101633330 | 101633702 | 373 |
| chr3  | 119389803 | 119390175 | 373 |
| chr29 | 49764688  | 49765060  | 373 |
| chr29 | 45775965  | 45776337  | 373 |
| chr29 | 39159158  | 39159530  | 373 |
| chr29 | 36811485  | 36811857  | 373 |
| chr26 | 18206069  | 18206441  | 373 |
| chr25 | 40356378  | 40356750  | 373 |
| chr24 | 60840790  | 60841162  | 373 |
| chr23 | 30549654  | 30550026  | 373 |
| chr23 | 7018261   | 7018633   | 373 |
| chr22 | 60570026  | 60570398  | 373 |

|       |           |           |     |
|-------|-----------|-----------|-----|
| chr22 | 58629523  | 58629895  | 373 |
| chr22 | 54429877  | 54430249  | 373 |
| chr22 | 1952552   | 1952924   | 373 |
| chr21 | 46559237  | 46559609  | 373 |
| chr21 | 28328574  | 28328946  | 373 |
| chr21 | 25470768  | 25471140  | 373 |
| chr2  | 21523962  | 21524334  | 373 |
| chr19 | 39676137  | 39676509  | 373 |
| chr19 | 7632846   | 7633218   | 373 |
| chr18 | 61965550  | 61965922  | 373 |
| chr18 | 18672272  | 18672644  | 373 |
| chr17 | 70090932  | 70091304  | 373 |
| chr17 | 69889467  | 69889839  | 373 |
| chr16 | 48277339  | 48277711  | 373 |
| chr15 | 29341158  | 29341530  | 373 |
| chr13 | 34865223  | 34865595  | 373 |
| chr11 | 106077146 | 106077518 | 373 |
| chr11 | 44937117  | 44937489  | 373 |
| chr11 | 3371028   | 3371400   | 373 |
| chr11 | 2569005   | 2569377   | 373 |
| chr10 | 103695304 | 103695676 | 373 |
| chr10 | 70845445  | 70845817  | 373 |
| chr1  | 123144299 | 123144671 | 373 |
| chr1  | 73132321  | 73132693  | 373 |
| chrX  | 71202309  | 71202680  | 372 |
| chrX  | 70048715  | 70049086  | 372 |
| chrX  | 66923509  | 66923880  | 372 |
| chrX  | 48000936  | 48001307  | 372 |
| chrX  | 37684825  | 37685196  | 372 |
| chrX  | 36671554  | 36671925  | 372 |
| chrX  | 21631441  | 21631812  | 372 |
| chrX  | 15900429  | 15900800  | 372 |
| chrX  | 4316431   | 4316802   | 372 |
| chr9  | 90597672  | 90598043  | 372 |
| chr8  | 27048998  | 27049369  | 372 |
| chr7  | 38399624  | 38399995  | 372 |
| chr7  | 18368556  | 18368927  | 372 |
| chr5  | 122834041 | 122834412 | 372 |
| chr5  | 122612468 | 122612839 | 372 |
| chr5  | 74617169  | 74617540  | 372 |
| chr3  | 113451857 | 113452228 | 372 |
| chr3  | 36846745  | 36847116  | 372 |
| chr29 | 34971747  | 34972118  | 372 |
| chr28 | 34042636  | 34043007  | 372 |
| chr27 | 26882872  | 26883243  | 372 |
| chr26 | 48498455  | 48498826  | 372 |
| chr26 | 45337626  | 45337997  | 372 |
| chr24 | 43693761  | 43694132  | 372 |
| chr19 | 63503404  | 63503775  | 372 |
| chr18 | 43462380  | 43462751  | 372 |

|       |               |           |     |
|-------|---------------|-----------|-----|
| chr15 | 75675119      | 75675490  | 372 |
| chr13 | 61315859      | 61316230  | 372 |
| chr13 | 9940851       | 9941222   | 372 |
| chr12 | 80917178      | 80917549  | 372 |
| chr11 | 10784264      | 10784635  | 372 |
| chr10 | 25256170      | 25256541  | 372 |
| chr10 | 8614294       | 8614665   | 372 |
| chr1  | 76218034      | 76218405  | 372 |
| chr1  | 75000748      | 75001119  | 372 |
| chrX  | 75812005      | 75812375  | 371 |
| chrX  | 75424356      | 75424726  | 371 |
| chrX  | 55481424      | 55481794  | 371 |
| chrX  | 50251635      | 50252005  | 371 |
| chrX  | 45576270      | 45576640  | 371 |
| chrX  | 36642972      | 36643342  | 371 |
| chrX  | 11434058      | 11434428  | 371 |
| chrX  | 6268903       | 6269273   | 371 |
| chr9  | 66946738      | 66947108  | 371 |
| chr9  | 19638476      | 19638846  | 371 |
| chr8  | 64927796      | 64928166  | 371 |
| chr7  | 76981909      | 76982279  | 371 |
| chr4  | 65380606      | 65380976  | 371 |
| chr4  | 32182163      | 32182533  | 371 |
| chr3  | 121009588     | 121009958 | 371 |
| chr3  | 114991329     | 114991699 | 371 |
| chr3  | 30511511      | 30511881  | 371 |
| chr28 | 30523037      | 30523407  | 371 |
| chr27 | 15749797      | 15750167  | 371 |
| chr22 | 61212518      | 61212888  | 371 |
| chr22 | 30226139      | 30226509  | 371 |
| chr21 | 10868267      | 10868637  | 371 |
| chr20 | 8663766       | 8664136   | 371 |
| chr19 | 50177787      | 50178157  | 371 |
| chr19 | 45930301      | 45930671  | 371 |
| chr19 | 45532353      | 45532723  | 371 |
| chr19 | 20326938      | 20327308  | 371 |
| chr18 | 57352711      | 57353081  | 371 |
| chr18 | 53516078      | 53516448  | 371 |
| chr18 | 43063639      | 43064009  | 371 |
| chr18 | 22757150      | 22757520  | 371 |
| chr18 | 11307324      | 11307694  | 371 |
| chr18 | 3882361       | 3882731   | 371 |
| chr17 | 66838920      | 66839290  | 371 |
| chr16 | 962210 962580 | 371       |     |
| chr15 | 26864592      | 26864962  | 371 |
| chr13 | 62411187      | 62411557  | 371 |
| chr13 | 60434933      | 60435303  | 371 |
| chr13 | 15171108      | 15171478  | 371 |
| chr11 | 105004719     | 105005089 | 371 |
| chr11 | 104993945     | 104994315 | 371 |

|       |           |           |     |
|-------|-----------|-----------|-----|
| chr1  | 82949240  | 82949610  | 371 |
| chrX  | 78546879  | 78547248  | 370 |
| chrX  | 75374709  | 75375078  | 370 |
| chrX  | 59387581  | 59387950  | 370 |
| chrX  | 12362415  | 12362784  | 370 |
| chrX  | 2507441   | 2507810   | 370 |
| chr9  | 90357156  | 90357525  | 370 |
| chr8  | 26043736  | 26044105  | 370 |
| chr7  | 38253155  | 38253524  | 370 |
| chr6  | 37351438  | 37351807  | 370 |
| chr5  | 125764591 | 125764960 | 370 |
| chr3  | 114764880 | 114765249 | 370 |
| chr3  | 56401071  | 56401440  | 370 |
| chr3  | 15177576  | 15177945  | 370 |
| chr3  | 4477501   | 4477870   | 370 |
| chr29 | 49736855  | 49737224  | 370 |
| chr29 | 33562519  | 33562888  | 370 |
| chr29 | 31619467  | 31619836  | 370 |
| chr27 | 39090402  | 39090771  | 370 |
| chr26 | 45745996  | 45746365  | 370 |
| chr23 | 31392160  | 31392529  | 370 |
| chr23 | 15797626  | 15797995  | 370 |
| chr22 | 30301554  | 30301923  | 370 |
| chr21 | 63200000  | 63200369  | 370 |
| chr19 | 44601376  | 44601745  | 370 |
| chr19 | 44301410  | 44301779  | 370 |
| chr19 | 39206323  | 39206692  | 370 |
| chr18 | 23264324  | 23264693  | 370 |
| chr18 | 21940144  | 21940513  | 370 |
| chr17 | 70392280  | 70392649  | 370 |
| chr16 | 56103024  | 56103393  | 370 |
| chr16 | 47474665  | 47475034  | 370 |
| chr16 | 23553865  | 23554234  | 370 |
| chr16 | 3310464   | 3310833   | 370 |
| chr15 | 25069824  | 25070193  | 370 |
| chr14 | 66244827  | 66245196  | 370 |
| chr14 | 441266    | 441635    | 370 |
| chr13 | 82956580  | 82956949  | 370 |
| chr13 | 43616904  | 43617273  | 370 |
| chr11 | 70791323  | 70791692  | 370 |
| chr10 | 5256897   | 5257266   | 370 |
| chr1  | 151346818 | 151347187 | 370 |
| chrX  | 49831226  | 49831594  | 369 |
| chrX  | 2557133   | 2557501   | 369 |
| chr7  | 15434124  | 15434492  | 369 |
| chr29 | 25551039  | 25551407  | 369 |
| chr28 | 34052483  | 34052851  | 369 |
| chr22 | 23842669  | 23843037  | 369 |
| chr21 | 46606533  | 46606901  | 369 |
| chr20 | 19378898  | 19379266  | 369 |

|       |           |           |     |
|-------|-----------|-----------|-----|
| chr2  | 127027208 | 127027576 | 369 |
| chr2  | 36275493  | 36275861  | 369 |
| chr19 | 46616027  | 46616395  | 369 |
| chr19 | 33186999  | 33187367  | 369 |
| chr18 | 55094408  | 55094776  | 369 |
| chr18 | 22708312  | 22708680  | 369 |
| chr18 | 11755507  | 11755875  | 369 |
| chr15 | 73827448  | 73827816  | 369 |
| chr14 | 8332321   | 8332689   | 369 |
| chr11 | 56741335  | 56741703  | 369 |
| chr1  | 87065114  | 87065482  | 369 |
| chr1  | 2495265   | 2495633   | 369 |
| chrX  | 65377783  | 65378150  | 368 |
| chrX  | 37704606  | 37704973  | 368 |
| chrX  | 37630082  | 37630449  | 368 |
| chrX  | 36737299  | 36737666  | 368 |
| chrX  | 19248076  | 19248443  | 368 |
| chrX  | 16887056  | 16887423  | 368 |
| chrX  | 7453020   | 7453387   | 368 |
| chr7  | 45734014  | 45734381  | 368 |
| chr5  | 111840462 | 111840829 | 368 |
| chr5  | 29180356  | 29180723  | 368 |
| chr4  | 50697782  | 50698149  | 368 |
| chr3  | 120986772 | 120987139 | 368 |
| chr3  | 23022985  | 23023352  | 368 |
| chr29 | 37944176  | 37944543  | 368 |
| chr25 | 30495917  | 30496284  | 368 |
| chr23 | 27392991  | 27393358  | 368 |
| chr23 | 15781711  | 15782078  | 368 |
| chr23 | 15276960  | 15277327  | 368 |
| chr21 | 63322398  | 63322765  | 368 |
| chr21 | 13108043  | 13108410  | 368 |
| chr2  | 108501328 | 108501695 | 368 |
| chr19 | 39520877  | 39521244  | 368 |
| chr19 | 11055759  | 11056126  | 368 |
| chr18 | 11814872  | 11815239  | 368 |
| chr16 | 42584270  | 42584637  | 368 |
| chr15 | 29230513  | 29230880  | 368 |
| chr14 | 79849097  | 79849464  | 368 |
| chr14 | 8476889   | 8477256   | 368 |
| chr13 | 68924929  | 68925296  | 368 |
| chr11 | 7552239   | 7552606   | 368 |
| chr1  | 1282691   | 1283058   | 368 |
| chrX  | 61329913  | 61330279  | 367 |
| chrX  | 58868268  | 58868634  | 367 |
| chrX  | 50583783  | 50584149  | 367 |
| chrX  | 47721857  | 47722223  | 367 |
| chrX  | 13839552  | 13839918  | 367 |
| chrX  | 6894975   | 6895341   | 367 |
| chrX  | 3018555   | 3018921   | 367 |

|       |           |           |     |
|-------|-----------|-----------|-----|
| chr8  | 24439343  | 24439709  | 367 |
| chr8  | 9375402   | 9375768   | 367 |
| chr8  | 1629974   | 1630340   | 367 |
| chr4  | 121266032 | 121266398 | 367 |
| chr4  | 98873966  | 98874332  | 367 |
| chr3  | 118151330 | 118151696 | 367 |
| chr28 | 24833366  | 24833732  | 367 |
| chr26 | 48434127  | 48434493  | 367 |
| chr25 | 36493132  | 36493498  | 367 |
| chr25 | 20133606  | 20133972  | 367 |
| chr24 | 40356613  | 40356979  | 367 |
| chr23 | 53261616  | 53261982  | 367 |
| chr23 | 8555296   | 8555662   | 367 |
| chr2  | 135023595 | 135023961 | 367 |
| chr18 | 54619231  | 54619597  | 367 |
| chr15 | 55637797  | 55638163  | 367 |
| chr13 | 46287133  | 46287499  | 367 |
| chr13 | 45327186  | 45327552  | 367 |
| chr13 | 35222981  | 35223347  | 367 |
| chr11 | 106315529 | 106315895 | 367 |
| chrX  | 77492087  | 77492452  | 366 |
| chrX  | 58291522  | 58291887  | 366 |
| chrX  | 55615646  | 55616011  | 366 |
| chrX  | 53387909  | 53388274  | 366 |
| chrX  | 22461022  | 22461387  | 366 |
| chrX  | 10569555  | 10569920  | 366 |
| chrX  | 2989955   | 2990320   | 366 |
| chr9  | 91926624  | 91926989  | 366 |
| chr9  | 77680958  | 77681323  | 366 |
| chr7  | 5633338   | 5633703   | 366 |
| chr5  | 60375240  | 60375605  | 366 |
| chr5  | 1177975   | 1178340   | 366 |
| chr4  | 38536610  | 38536975  | 366 |
| chr3  | 121837816 | 121838181 | 366 |
| chr3  | 98212030  | 98212395  | 366 |
| chr3  | 52181330  | 52181695  | 366 |
| chr29 | 48934946  | 48935311  | 366 |
| chr29 | 36950706  | 36951071  | 366 |
| chr26 | 45986868  | 45987233  | 366 |
| chr25 | 5094304   | 5094669   | 366 |
| chr24 | 1584610   | 1584975   | 366 |
| chr22 | 12279996  | 12280361  | 366 |
| chr21 | 62665607  | 62665972  | 366 |
| chr20 | 2547037   | 2547402   | 366 |
| chr2  | 19390934  | 19391299  | 366 |
| chr19 | 42044832  | 42045197  | 366 |
| chr19 | 39824503  | 39824868  | 366 |
| chr19 | 38300755  | 38301120  | 366 |
| chr19 | 28472324  | 28472689  | 366 |
| chr19 | 15275601  | 15275966  | 366 |



|       |           |           |     |
|-------|-----------|-----------|-----|
| chr19 | 12474850  | 12475215  | 366 |
| chr18 | 55216669  | 55217034  | 366 |
| chr17 | 64059955  | 64060320  | 366 |
| chr17 | 59456007  | 59456372  | 366 |
| chr15 | 41299396  | 41299761  | 366 |
| chr11 | 99208216  | 99208581  | 366 |
| chr11 | 49418227  | 49418592  | 366 |
| chr10 | 29535256  | 29535621  | 366 |
| chr1  | 153432610 | 153432975 | 366 |
| chrX  | 78186662  | 78187026  | 365 |
| chrX  | 75023669  | 75024033  | 365 |
| chrX  | 62383823  | 62384187  | 365 |
| chrX  | 30829383  | 30829747  | 365 |
| chrX  | 12039238  | 12039602  | 365 |
| chrX  | 8582259   | 8582623   | 365 |
| chrX  | 7464974   | 7465338   | 365 |
| chrX  | 4214803   | 4215167   | 365 |
| chr8  | 109043517 | 109043881 | 365 |
| chr6  | 63011100  | 63011464  | 365 |
| chr5  | 110919994 | 110920358 | 365 |
| chr4  | 123335409 | 123335773 | 365 |
| chr4  | 97716026  | 97716390  | 365 |
| chr3  | 111912777 | 111913141 | 365 |
| chr3  | 110314241 | 110314605 | 365 |
| chr3  | 23065883  | 23066247  | 365 |
| chr29 | 31828328  | 31828692  | 365 |
| chr29 | 25485818  | 25486182  | 365 |
| chr29 | 17844948  | 17845312  | 365 |
| chr28 | 34515518  | 34515882  | 365 |
| chr27 | 47630746  | 47631110  | 365 |
| chr27 | 28112787  | 28113151  | 365 |
| chr26 | 44619139  | 44619503  | 365 |
| chr25 | 33384463  | 33384827  | 365 |
| chr24 | 35359073  | 35359437  | 365 |
| chr24 | 1132085   | 1132449   | 365 |
| chr23 | 31414204  | 31414568  | 365 |
| chr23 | 12376473  | 12376837  | 365 |
| chr21 | 27264793  | 27265157  | 365 |
| chr21 | 18857782  | 18858146  | 365 |
| chr2  | 115080677 | 115081041 | 365 |
| chr2  | 21394421  | 21394785  | 365 |
| chr19 | 37333254  | 37333618  | 365 |
| chr18 | 42970116  | 42970480  | 365 |
| chr18 | 3831258   | 3831622   | 365 |
| chr17 | 64351004  | 64351368  | 365 |
| chr15 | 22878901  | 22879265  | 365 |
| chr13 | 21888095  | 21888459  | 365 |
| chr13 | 18360425  | 18360789  | 365 |
| chr12 | 74532229  | 74532593  | 365 |
| chr11 | 109846654 | 109847018 | 365 |

|       |               |           |     |
|-------|---------------|-----------|-----|
| chr10 | 90156584      | 90156948  | 365 |
| chr10 | 36601343      | 36601707  | 365 |
| chr1  | 69470353      | 69470717  | 365 |
| chrX  | 76667286      | 76667649  | 364 |
| chrX  | 72778013      | 72778376  | 364 |
| chrX  | 61343180      | 61343543  | 364 |
| chrX  | 60269577      | 60269940  | 364 |
| chrX  | 49375106      | 49375469  | 364 |
| chrX  | 46239853      | 46240216  | 364 |
| chrX  | 38095498      | 38095861  | 364 |
| chrX  | 37594097      | 37594460  | 364 |
| chrX  | 35646125      | 35646488  | 364 |
| chrX  | 34491258      | 34491621  | 364 |
| chrX  | 20113693      | 20114056  | 364 |
| chrX  | 9790372       | 9790735   | 364 |
| chrX  | 6643383       | 6643746   | 364 |
| chrX  | 6577779       | 6578142   | 364 |
| chrX  | 2357788       | 2358151   | 364 |
| chr5  | 121644222     | 121644585 | 364 |
| chr5  | 112054046     | 112054409 | 364 |
| chr5  | 81687613      | 81687976  | 364 |
| chr4  | 49904674      | 49905037  | 364 |
| chr4  | 8851628       | 8851991   | 364 |
| chr3  | 119963791     | 119964154 | 364 |
| chr3  | 116117841     | 116118204 | 364 |
| chr3  | 108909998     | 108910361 | 364 |
| chr29 | 33532463      | 33532826  | 364 |
| chr29 | 30828074      | 30828437  | 364 |
| chr26 | 17983250      | 17983613  | 364 |
| chr26 | 15005150      | 15005513  | 364 |
| chr25 | 41541156      | 41541519  | 364 |
| chr25 | 11559535      | 11559898  | 364 |
| chr24 | 60590194      | 60590557  | 364 |
| chr24 | 43634891      | 43635254  | 364 |
| chr24 | 40320858      | 40321221  | 364 |
| chr23 | 51940653      | 51941016  | 364 |
| chr23 | 48791407      | 48791770  | 364 |
| chr21 | 20981266      | 20981629  | 364 |
| chr20 | 710077 710440 | 364       | 364 |
| chr2  | 26456418      | 26456781  | 364 |
| chr19 | 37518230      | 37518593  | 364 |
| chr19 | 15289351      | 15289714  | 364 |
| chr18 | 11300492      | 11300855  | 364 |
| chr18 | 7243978       | 7244341   | 364 |
| chr17 | 47087939      | 47088302  | 364 |
| chr16 | 47559450      | 47559813  | 364 |
| chr14 | 30834252      | 30834615  | 364 |
| chr14 | 29186765      | 29187128  | 364 |
| chr13 | 75128107      | 75128470  | 364 |
| chr13 | 48547033      | 48547396  | 364 |

|       |           |           |     |
|-------|-----------|-----------|-----|
| chr13 | 40343916  | 40344279  | 364 |
| chr13 | 24032507  | 24032870  | 364 |
| chr12 | 9695501   | 9695864   | 364 |
| chr11 | 70908882  | 70909245  | 364 |
| chr11 | 28511121  | 28511484  | 364 |
| chr1  | 145979753 | 145980116 | 364 |
| chr1  | 71577800  | 71578163  | 364 |
| chrX  | 75720511  | 75720873  | 363 |
| chrX  | 75423728  | 75424090  | 363 |
| chrX  | 62843664  | 62844026  | 363 |
| chrX  | 48401465  | 48401827  | 363 |
| chrX  | 19642752  | 19643114  | 363 |
| chrX  | 19345824  | 19346186  | 363 |
| chr7  | 13300165  | 13300527  | 363 |
| chr6  | 99678479  | 99678841  | 363 |
| chr5  | 118092796 | 118093158 | 363 |
| chr5  | 72179199  | 72179561  | 363 |
| chr4  | 121960185 | 121960547 | 363 |
| chr3  | 107316828 | 107317190 | 363 |
| chr27 | 39909099  | 39909461  | 363 |
| chr26 | 22247540  | 22247902  | 363 |
| chr26 | 22227144  | 22227506  | 363 |
| chr25 | 38330066  | 38330428  | 363 |
| chr24 | 61104023  | 61104385  | 363 |
| chr24 | 43705230  | 43705592  | 363 |
| chr23 | 27856442  | 27856804  | 363 |
| chr23 | 14793685  | 14794047  | 363 |
| chr22 | 59501005  | 59501367  | 363 |
| chr22 | 56058030  | 56058392  | 363 |
| chr22 | 39798968  | 39799330  | 363 |
| chr22 | 30353153  | 30353515  | 363 |
| chr2  | 132401988 | 132402350 | 363 |
| chr2  | 115058372 | 115058734 | 363 |
| chr2  | 68158775  | 68159137  | 363 |
| chr19 | 46716385  | 46716747  | 363 |
| chr19 | 42257085  | 42257447  | 363 |
| chr19 | 38549270  | 38549632  | 363 |
| chr19 | 35215312  | 35215674  | 363 |
| chr19 | 14262341  | 14262703  | 363 |
| chr18 | 49446153  | 49446515  | 363 |
| chr18 | 48799199  | 48799561  | 363 |
| chr18 | 23630539  | 23630901  | 363 |
| chr17 | 68787733  | 68788095  | 363 |
| chr17 | 62149338  | 62149700  | 363 |
| chr16 | 41366333  | 41366695  | 363 |
| chr15 | 25569409  | 25569771  | 363 |
| chr13 | 77300610  | 77300972  | 363 |
| chr13 | 59654914  | 59655276  | 363 |
| chr13 | 15171491  | 15171853  | 363 |
| chr1  | 83114718  | 83115080  | 363 |

|       |           |           |     |
|-------|-----------|-----------|-----|
| chr1  | 74893500  | 74893862  | 363 |
| chrX  | 75697877  | 75698238  | 362 |
| chrX  | 61042158  | 61042519  | 362 |
| chrX  | 60065707  | 60066068  | 362 |
| chrX  | 42822613  | 42822974  | 362 |
| chrX  | 20152477  | 20152838  | 362 |
| chrX  | 10103536  | 10103897  | 362 |
| chr8  | 102801378 | 102801739 | 362 |
| chr8  | 78481595  | 78481956  | 362 |
| chr8  | 27051415  | 27051776  | 362 |
| chr7  | 57679232  | 57679593  | 362 |
| chr7  | 46199113  | 46199474  | 362 |
| chr7  | 13072351  | 13072712  | 362 |
| chr6  | 17967731  | 17968092  | 362 |
| chr4  | 71556590  | 71556951  | 362 |
| chr3  | 126996485 | 126996846 | 362 |
| chr3  | 105624101 | 105624462 | 362 |
| chr3  | 28892618  | 28892979  | 362 |
| chr29 | 41681933  | 41682294  | 362 |
| chr29 | 35212009  | 35212370  | 362 |
| chr29 | 2069243   | 2069604   | 362 |
| chr28 | 26090151  | 26090512  | 362 |
| chr28 | 24772872  | 24773233  | 362 |
| chr26 | 23079088  | 23079449  | 362 |
| chr26 | 20892720  | 20893081  | 362 |
| chr25 | 3425322   | 3425683   | 362 |
| chr23 | 43026601  | 43026962  | 362 |
| chr23 | 9031846   | 9032207   | 362 |
| chr22 | 60434928  | 60435289  | 362 |
| chr22 | 56158420  | 56158781  | 362 |
| chr22 | 15283437  | 15283798  | 362 |
| chr2  | 46206553  | 46206914  | 362 |
| chr2  | 39345286  | 39345647  | 362 |
| chr19 | 58425985  | 58426346  | 362 |
| chr19 | 56129667  | 56130028  | 362 |
| chr18 | 36956647  | 36957008  | 362 |
| chr16 | 67728790  | 67729151  | 362 |
| chr16 | 39607056  | 39607417  | 362 |
| chr15 | 75739893  | 75740254  | 362 |
| chr12 | 83928433  | 83928794  | 362 |
| chr12 | 34009898  | 34010259  | 362 |
| chr10 | 86857992  | 86858353  | 362 |
| chr10 | 71265552  | 71265913  | 362 |
| chr10 | 66521892  | 66522253  | 362 |
| chr1  | 144589785 | 144590146 | 362 |
| chrX  | 82906392  | 82906752  | 361 |
| chrX  | 72108498  | 72108858  | 361 |
| chrX  | 71775229  | 71775589  | 361 |
| chrX  | 68112987  | 68113347  | 361 |
| chrX  | 37613680  | 37614040  | 361 |

|       |           |           |     |
|-------|-----------|-----------|-----|
| chrX  | 21484877  | 21485237  | 361 |
| chrX  | 18647088  | 18647448  | 361 |
| chrX  | 12339768  | 12340128  | 361 |
| chr9  | 90608656  | 90609016  | 361 |
| chr8  | 112158227 | 112158587 | 361 |
| chr7  | 42665168  | 42665528  | 361 |
| chr5  | 91865794  | 91866154  | 361 |
| chr4  | 33213159  | 33213519  | 361 |
| chr3  | 105437001 | 105437361 | 361 |
| chr29 | 31470259  | 31470619  | 361 |
| chr25 | 40889388  | 40889748  | 361 |
| chr24 | 26538308  | 26538668  | 361 |
| chr24 | 20700996  | 20701356  | 361 |
| chr23 | 51981186  | 51981546  | 361 |
| chr23 | 15025822  | 15026182  | 361 |
| chr21 | 36911619  | 36911979  | 361 |
| chr2  | 136576824 | 136577184 | 361 |
| chr19 | 54864046  | 54864406  | 361 |
| chr18 | 51714063  | 51714423  | 361 |
| chr18 | 3920384   | 3920744   | 361 |
| chr17 | 53522249  | 53522609  | 361 |
| chr16 | 29873615  | 29873975  | 361 |
| chr15 | 65612776  | 65613136  | 361 |
| chr15 | 27230933  | 27231293  | 361 |
| chr14 | 7087034   | 7087394   | 361 |
| chr13 | 77621396  | 77621756  | 361 |
| chr13 | 75817513  | 75817873  | 361 |
| chr12 | 82864605  | 82864965  | 361 |
| chr11 | 106012746 | 106013106 | 361 |
| chr11 | 105927897 | 105928257 | 361 |
| chr11 | 93320184  | 93320544  | 361 |
| chr10 | 70113041  | 70113401  | 361 |
| chr1  | 68099065  | 68099425  | 361 |
| chrX  | 50880431  | 50880790  | 360 |
| chrX  | 50766303  | 50766662  | 360 |
| chrX  | 37644758  | 37645117  | 360 |
| chrX  | 31952107  | 31952466  | 360 |
| chr9  | 105513235 | 105513594 | 360 |
| chr9  | 90821764  | 90822123  | 360 |
| chr8  | 65873360  | 65873719  | 360 |
| chr3  | 116203478 | 116203837 | 360 |
| chr27 | 35830862  | 35831221  | 360 |
| chr26 | 34435564  | 34435923  | 360 |
| chr25 | 39379060  | 39379419  | 360 |
| chr25 | 30323393  | 30323752  | 360 |
| chr22 | 30341721  | 30342080  | 360 |
| chr22 | 16671016  | 16671375  | 360 |
| chr21 | 68962184  | 68962543  | 360 |
| chr21 | 63913453  | 63913812  | 360 |
| chr2  | 128004427 | 128004786 | 360 |

|       |           |           |     |
|-------|-----------|-----------|-----|
| chr2  | 115079859 | 115080218 | 360 |
| chr18 | 53305403  | 53305762  | 360 |
| chr18 | 23610234  | 23610593  | 360 |
| chr14 | 75101514  | 75101873  | 360 |
| chr14 | 28069751  | 28070110  | 360 |
| chr13 | 75228582  | 75228941  | 360 |
| chr13 | 63378981  | 63379340  | 360 |
| chr13 | 40099908  | 40100267  | 360 |
| chr12 | 84141272  | 84141631  | 360 |
| chr12 | 81690733  | 81691092  | 360 |
| chr12 | 74268450  | 74268809  | 360 |
| chr12 | 34324192  | 34324551  | 360 |
| chr11 | 98321598  | 98321957  | 360 |
| chr11 | 67490551  | 67490910  | 360 |
| chr11 | 11628052  | 11628411  | 360 |
| chrX  | 75779234  | 75779592  | 359 |
| chrX  | 71305812  | 71306170  | 359 |
| chrX  | 64643413  | 64643771  | 359 |
| chrX  | 62924326  | 62924684  | 359 |
| chrX  | 59769981  | 59770339  | 359 |
| chrX  | 7934937   | 7935295   | 359 |
| chrX  | 2353618   | 2353976   | 359 |
| chr9  | 41502304  | 41502662  | 359 |
| chr8  | 47337774  | 47338132  | 359 |
| chr7  | 19185273  | 19185631  | 359 |
| chr4  | 90362231  | 90362589  | 359 |
| chr4  | 46407379  | 46407737  | 359 |
| chr3  | 126029842 | 126030200 | 359 |
| chr3  | 105069240 | 105069598 | 359 |
| chr3  | 26145651  | 26146009  | 359 |
| chr29 | 31611755  | 31612113  | 359 |
| chr26 | 25114487  | 25114845  | 359 |
| chr25 | 39260889  | 39261247  | 359 |
| chr23 | 18779071  | 18779429  | 359 |
| chr23 | 8326200   | 8326558   | 359 |
| chr22 | 54056330  | 54056688  | 359 |
| chr21 | 61045036  | 61045394  | 359 |
| chr21 | 33980821  | 33981179  | 359 |
| chr21 | 28930934  | 28931292  | 359 |
| chr20 | 26295319  | 26295677  | 359 |
| chr19 | 37891601  | 37891959  | 359 |
| chr19 | 23735590  | 23735948  | 359 |
| chr19 | 14983710  | 14984068  | 359 |
| chr18 | 62700752  | 62701110  | 359 |
| chr17 | 63402041  | 63402399  | 359 |
| chr16 | 73819269  | 73819627  | 359 |
| chr16 | 72155672  | 72156030  | 359 |
| chr15 | 22377641  | 22377999  | 359 |
| chr11 | 106077696 | 106078054 | 359 |
| chrX  | 77181505  | 77181862  | 358 |

|       |           |           |     |
|-------|-----------|-----------|-----|
| chrX  | 74470779  | 74471136  | 358 |
| chrX  | 71712888  | 71713245  | 358 |
| chrX  | 71524826  | 71525183  | 358 |
| chrX  | 66613667  | 66614024  | 358 |
| chrX  | 58418157  | 58418514  | 358 |
| chrX  | 44820385  | 44820742  | 358 |
| chrX  | 37269335  | 37269692  | 358 |
| chrX  | 20282187  | 20282544  | 358 |
| chrX  | 14864224  | 14864581  | 358 |
| chrX  | 7329545   | 7329902   | 358 |
| chrX  | 6903400   | 6903757   | 358 |
| chr9  | 67217365  | 67217722  | 358 |
| chr8  | 45671724  | 45672081  | 358 |
| chr6  | 16203282  | 16203639  | 358 |
| chr5  | 30148857  | 30149214  | 358 |
| chr5  | 29096705  | 29097062  | 358 |
| chr4  | 121391483 | 121391840 | 358 |
| chr4  | 33215197  | 33215554  | 358 |
| chr3  | 20428367  | 20428724  | 358 |
| chr27 | 8834923   | 8835280   | 358 |
| chr26 | 20943005  | 20943362  | 358 |
| chr25 | 39328765  | 39329122  | 358 |
| chr25 | 23560255  | 23560612  | 358 |
| chr25 | 4640616   | 4640973   | 358 |
| chr23 | 42462093  | 42462450  | 358 |
| chr21 | 64819742  | 64820099  | 358 |
| chr21 | 26471929  | 26472286  | 358 |
| chr21 | 25176999  | 25177356  | 358 |
| chr20 | 70139352  | 70139709  | 358 |
| chr2  | 111858164 | 111858521 | 358 |
| chr19 | 51688235  | 51688592  | 358 |
| chr19 | 22373363  | 22373720  | 358 |
| chr18 | 56668680  | 56669037  | 358 |
| chr15 | 27697525  | 27697882  | 358 |
| chr15 | 26727109  | 26727466  | 358 |
| chr14 | 66289421  | 66289778  | 358 |
| chr14 | 7763221   | 7763578   | 358 |
| chr13 | 57515474  | 57515831  | 358 |
| chr13 | 52928706  | 52929063  | 358 |
| chr13 | 43539538  | 43539895  | 358 |
| chr12 | 83901903  | 83902260  | 358 |
| chr12 | 34245879  | 34246236  | 358 |
| chr10 | 8334942   | 8335299   | 358 |
| chr1  | 69524402  | 69524759  | 358 |
| chr1  | 1652596   | 1652953   | 358 |
| chrX  | 78918873  | 78919229  | 357 |
| chrX  | 55438373  | 55438729  | 357 |
| chrX  | 37453759  | 37454115  | 357 |
| chr8  | 8324781   | 8325137   | 357 |
| chr8  | 273293    | 273649    | 357 |

|       |           |           |     |
|-------|-----------|-----------|-----|
| chr7  | 10996265  | 10996621  | 357 |
| chr6  | 120821177 | 120821533 | 357 |
| chr5  | 120380557 | 120380913 | 357 |
| chr5  | 118532267 | 118532623 | 357 |
| chr3  | 121224663 | 121225019 | 357 |
| chr3  | 121127463 | 121127819 | 357 |
| chr3  | 9404004   | 9404360   | 357 |
| chr3  | 8748648   | 8749004   | 357 |
| chr29 | 2501214   | 2501570   | 357 |
| chr28 | 45842775  | 45843131  | 357 |
| chr28 | 33938952  | 33939308  | 357 |
| chr27 | 26840795  | 26841151  | 357 |
| chr22 | 52843755  | 52844111  | 357 |
| chr22 | 14962332  | 14962688  | 357 |
| chr21 | 63308488  | 63308844  | 357 |
| chr21 | 9530420   | 9530776   | 357 |
| chr20 | 41952916  | 41953272  | 357 |
| chr19 | 8243861   | 8244217   | 357 |
| chr18 | 45836706  | 45837062  | 357 |
| chr17 | 74040707  | 74041063  | 357 |
| chr17 | 67882167  | 67882523  | 357 |
| chr16 | 47265900  | 47266256  | 357 |
| chr15 | 81143986  | 81144342  | 357 |
| chr14 | 77329453  | 77329809  | 357 |
| chr13 | 80573296  | 80573652  | 357 |
| chr13 | 77267275  | 77267631  | 357 |
| chr12 | 84263639  | 84263995  | 357 |
| chr12 | 29583543  | 29583899  | 357 |
| chr11 | 10836544  | 10836900  | 357 |
| chrX  | 74582654  | 74583009  | 356 |
| chrX  | 48450652  | 48451007  | 356 |
| chrX  | 21379111  | 21379466  | 356 |
| chrX  | 8273505   | 8273860   | 356 |
| chrX  | 7912515   | 7912870   | 356 |
| chr8  | 9294101   | 9294456   | 356 |
| chr4  | 14649529  | 14649884  | 356 |
| chr3  | 113478131 | 113478486 | 356 |
| chr3  | 104598201 | 104598556 | 356 |
| chr3  | 26147697  | 26148052  | 356 |
| chr29 | 32549167  | 32549522  | 356 |
| chr27 | 27036352  | 27036707  | 356 |
| chr27 | 21560566  | 21560921  | 356 |
| chr27 | 6209288   | 6209643   | 356 |
| chr25 | 36484289  | 36484644  | 356 |
| chr24 | 44112945  | 44113300  | 356 |
| chr22 | 55942550  | 55942905  | 356 |
| chr19 | 58424910  | 58425265  | 356 |
| chr19 | 43254769  | 43255124  | 356 |
| chr19 | 7651292   | 7651647   | 356 |
| chr18 | 49486325  | 49486680  | 356 |



|       |           |           |     |
|-------|-----------|-----------|-----|
| chr17 | 57838187  | 57838542  | 356 |
| chr15 | 29127265  | 29127620  | 356 |
| chr13 | 40932017  | 40932372  | 356 |
| chr12 | 82087708  | 82088063  | 356 |
| chr12 | 30548883  | 30549238  | 356 |
| chr12 | 21706913  | 21707268  | 356 |
| chr11 | 72701640  | 72701995  | 356 |
| chr10 | 16766106  | 16766461  | 356 |
| chr1  | 154744962 | 154745317 | 356 |
| chrX  | 74606794  | 74607148  | 355 |
| chrX  | 67200182  | 67200536  | 355 |
| chrX  | 21090683  | 21091037  | 355 |
| chr9  | 105141264 | 105141618 | 355 |
| chr8  | 48465426  | 48465780  | 355 |
| chr8  | 45793307  | 45793661  | 355 |
| chr5  | 79960818  | 79961172  | 355 |
| chr5  | 60299439  | 60299793  | 355 |
| chr5  | 31570785  | 31571139  | 355 |
| chr4  | 33882084  | 33882438  | 355 |
| chr3  | 22651594  | 22651948  | 355 |
| chr29 | 31486191  | 31486545  | 355 |
| chr29 | 30522744  | 30523098  | 355 |
| chr27 | 30515404  | 30515758  | 355 |
| chr27 | 26786848  | 26787202  | 355 |
| chr26 | 43121050  | 43121404  | 355 |
| chr24 | 60941498  | 60941852  | 355 |
| chr21 | 69016568  | 69016922  | 355 |
| chr20 | 42136621  | 42136975  | 355 |
| chr19 | 61578278  | 61578632  | 355 |
| chr19 | 51930051  | 51930405  | 355 |
| chr19 | 26667366  | 26667720  | 355 |
| chr19 | 25491622  | 25491976  | 355 |
| chr17 | 63534873  | 63535227  | 355 |
| chr16 | 59071274  | 59071628  | 355 |
| chr14 | 21945198  | 21945552  | 355 |
| chr13 | 62873558  | 62873912  | 355 |
| chr12 | 74567925  | 74568279  | 355 |
| chr11 | 91671747  | 91672101  | 355 |
| chr11 | 65071595  | 65071949  | 355 |
| chr1  | 137820571 | 137820925 | 355 |
| chrX  | 78518586  | 78518939  | 354 |
| chrX  | 72559993  | 72560346  | 354 |
| chrX  | 63038829  | 63039182  | 354 |
| chrX  | 29999698  | 30000051  | 354 |
| chrX  | 21164233  | 21164586  | 354 |
| chrX  | 18636419  | 18636772  | 354 |
| chrX  | 6565640   | 6565993   | 354 |
| chrX  | 4056316   | 4056669   | 354 |
| chr5  | 111441916 | 111442269 | 354 |
| chr5  | 104517655 | 104518008 | 354 |

|       |           |           |     |
|-------|-----------|-----------|-----|
| chr5  | 70577019  | 70577372  | 354 |
| chr5  | 33926810  | 33927163  | 354 |
| chr4  | 72232182  | 72232535  | 354 |
| chr3  | 123454006 | 123454359 | 354 |
| chr3  | 33837421  | 33837774  | 354 |
| chr29 | 31973425  | 31973778  | 354 |
| chr25 | 34041315  | 34041668  | 354 |
| chr24 | 1334293   | 1334646   | 354 |
| chr23 | 49801726  | 49802079  | 354 |
| chr22 | 59109825  | 59110178  | 354 |
| chr22 | 58428936  | 58429289  | 354 |
| chr20 | 70958334  | 70958687  | 354 |
| chr19 | 10934996  | 10935349  | 354 |
| chr17 | 69421821  | 69422174  | 354 |
| chr17 | 69220514  | 69220867  | 354 |
| chr17 | 66711746  | 66712099  | 354 |
| chr16 | 71425310  | 71425663  | 354 |
| chr16 | 47326037  | 47326390  | 354 |
| chr13 | 67076708  | 67077061  | 354 |
| chr13 | 35196304  | 35196657  | 354 |
| chr12 | 31056636  | 31056989  | 354 |
| chr10 | 68231440  | 68231793  | 354 |
| chr1  | 151456561 | 151456914 | 354 |
| chrX  | 66437665  | 66438017  | 353 |
| chrX  | 56368862  | 56369214  | 353 |
| chrX  | 39112371  | 39112723  | 353 |
| chrX  | 33847748  | 33848100  | 353 |
| chrX  | 19469357  | 19469709  | 353 |
| chrX  | 18964766  | 18965118  | 353 |
| chr9  | 63427703  | 63428055  | 353 |
| chr5  | 118440964 | 118441316 | 353 |
| chr5  | 26056794  | 26057146  | 353 |
| chr3  | 108154640 | 108154992 | 353 |
| chr3  | 105613705 | 105614057 | 353 |
| chr3  | 62850404  | 62850756  | 353 |
| chr3  | 33052936  | 33053288  | 353 |
| chr24 | 44097521  | 44097873  | 353 |
| chr23 | 44445985  | 44446337  | 353 |
| chr23 | 15069088  | 15069440  | 353 |
| chr22 | 14926203  | 14926555  | 353 |
| chr21 | 61313510  | 61313862  | 353 |
| chr20 | 35922359  | 35922711  | 353 |
| chr19 | 63517692  | 63518044  | 353 |
| chr19 | 54449674  | 54450026  | 353 |
| chr19 | 39492681  | 39493033  | 353 |
| chr19 | 33595108  | 33595460  | 353 |
| chr17 | 66448783  | 66449135  | 353 |
| chr16 | 61135064  | 61135416  | 353 |
| chr15 | 42606384  | 42606736  | 353 |
| chr14 | 7140448   | 7140800   | 353 |

|       |               |           |     |
|-------|---------------|-----------|-----|
| chr13 | 58973490      | 58973842  | 353 |
| chr13 | 45328690      | 45329042  | 353 |
| chr13 | 37654965      | 37655317  | 353 |
| chr13 | 2968951       | 2969303   | 353 |
| chr11 | 104902167     | 104902519 | 353 |
| chr11 | 77663990      | 77664342  | 353 |
| chr10 | 75560699      | 75561051  | 353 |
| chr10 | 68491996      | 68492348  | 353 |
| chr1  | 609947 610299 | 353       |     |
| chrX  | 38278136      | 38278487  | 352 |
| chrX  | 30922502      | 30922853  | 352 |
| chrX  | 19371636      | 19371987  | 352 |
| chrX  | 13196002      | 13196353  | 352 |
| chr8  | 55329366      | 55329717  | 352 |
| chr6  | 66118752      | 66119103  | 352 |
| chr4  | 28603958      | 28604309  | 352 |
| chr4  | 5619036       | 5619387   | 352 |
| chr3  | 105248954     | 105249305 | 352 |
| chr3  | 36665515      | 36665866  | 352 |
| chr29 | 34899931      | 34900282  | 352 |
| chr29 | 34230745      | 34231096  | 352 |
| chr29 | 31631177      | 31631528  | 352 |
| chr26 | 21765209      | 21765560  | 352 |
| chr21 | 18131323      | 18131674  | 352 |
| chr2  | 117737803     | 117738154 | 352 |
| chr19 | 39862352      | 39862703  | 352 |
| chr18 | 39964110      | 39964461  | 352 |
| chr18 | 32414428      | 32414779  | 352 |
| chr17 | 76301916      | 76302267  | 352 |
| chr17 | 62507605      | 62507956  | 352 |
| chr16 | 61036925      | 61037276  | 352 |
| chr16 | 48790421      | 48790772  | 352 |
| chr16 | 29424444      | 29424795  | 352 |
| chr15 | 33581927      | 33582278  | 352 |
| chr15 | 30198376      | 30198727  | 352 |
| chr15 | 29664265      | 29664616  | 352 |
| chr12 | 29826336      | 29826687  | 352 |
| chr12 | 9074947       | 9075298   | 352 |
| chr10 | 75524886      | 75525237  | 352 |
| chr10 | 8569903       | 8570254   | 352 |
| chr1  | 82819022      | 82819373  | 352 |
| chrX  | 72433478      | 72433828  | 351 |
| chrX  | 65025562      | 65025912  | 351 |
| chrX  | 62543600      | 62543950  | 351 |
| chrX  | 61843162      | 61843512  | 351 |
| chrX  | 55219208      | 55219558  | 351 |
| chrX  | 52991414      | 52991764  | 351 |
| chrX  | 47579529      | 47579879  | 351 |
| chrX  | 38983666      | 38984016  | 351 |
| chrX  | 20469903      | 20470253  | 351 |

|       |           |           |     |
|-------|-----------|-----------|-----|
| chrX  | 19392061  | 19392411  | 351 |
| chrX  | 13004238  | 13004588  | 351 |
| chrX  | 8907547   | 8907897   | 351 |
| chrX  | 8597018   | 8597368   | 351 |
| chr9  | 102720074 | 102720424 | 351 |
| chr8  | 45791902  | 45792252  | 351 |
| chr5  | 1125107   | 1125457   | 351 |
| chr4  | 79284883  | 79285233  | 351 |
| chr4  | 69270616  | 69270966  | 351 |
| chr3  | 113365767 | 113366117 | 351 |
| chr3  | 105451713 | 105452063 | 351 |
| chr3  | 30466374  | 30466724  | 351 |
| chr19 | 60824840  | 60825190  | 351 |
| chr19 | 42532408  | 42532758  | 351 |
| chr19 | 29758870  | 29759220  | 351 |
| chr18 | 45340511  | 45340861  | 351 |
| chr17 | 68403832  | 68404182  | 351 |
| chr17 | 53316613  | 53316963  | 351 |
| chr17 | 47085718  | 47086068  | 351 |
| chr17 | 5470822   | 5471172   | 351 |
| chr14 | 67979859  | 67980209  | 351 |
| chr13 | 57633353  | 57633703  | 351 |
| chr13 | 53610571  | 53610921  | 351 |
| chr11 | 4199524   | 4199874   | 351 |
| chr10 | 86509574  | 86509924  | 351 |
| chr10 | 74693111  | 74693461  | 351 |
| chr1  | 1529947   | 1530297   | 351 |
| chrX  | 72896182  | 72896531  | 350 |
| chrX  | 56591344  | 56591693  | 350 |
| chrX  | 54720400  | 54720749  | 350 |
| chr8  | 58240908  | 58241257  | 350 |
| chr8  | 47120891  | 47121240  | 350 |
| chr4  | 107120784 | 107121133 | 350 |
| chr4  | 21344757  | 21345106  | 350 |
| chr29 | 46683250  | 46683599  | 350 |
| chr29 | 37196301  | 37196650  | 350 |
| chr27 | 35356442  | 35356791  | 350 |
| chr26 | 39272044  | 39272393  | 350 |
| chr23 | 15873566  | 15873915  | 350 |
| chr23 | 7858493   | 7858842   | 350 |
| chr22 | 16221067  | 16221416  | 350 |
| chr21 | 20680140  | 20680489  | 350 |
| chr20 | 8624584   | 8624933   | 350 |
| chr2  | 111232153 | 111232502 | 350 |
| chr2  | 110521504 | 110521853 | 350 |
| chr17 | 69499154  | 69499503  | 350 |
| chr17 | 48146265  | 48146614  | 350 |
| chr16 | 2247694   | 2248043   | 350 |
| chr15 | 29843532  | 29843881  | 350 |
| chr13 | 26218147  | 26218496  | 350 |

|       |           |           |     |
|-------|-----------|-----------|-----|
| chr12 | 31050735  | 31051084  | 350 |
| chr11 | 84910880  | 84911229  | 350 |
| chr10 | 81896539  | 81896888  | 350 |
| chr10 | 79843071  | 79843420  | 350 |
| chrX  | 77094926  | 77095274  | 349 |
| chrX  | 72238900  | 72239248  | 349 |
| chrX  | 60883490  | 60883838  | 349 |
| chrX  | 50603422  | 50603770  | 349 |
| chrX  | 47876407  | 47876755  | 349 |
| chrX  | 37622628  | 37622976  | 349 |
| chrX  | 35521407  | 35521755  | 349 |
| chrX  | 31679764  | 31680112  | 349 |
| chrX  | 24401737  | 24402085  | 349 |
| chrX  | 19448781  | 19449129  | 349 |
| chrX  | 2486089   | 2486437   | 349 |
| chr8  | 91553519  | 91553867  | 349 |
| chr7  | 50633450  | 50633798  | 349 |
| chr7  | 38205777  | 38206125  | 349 |
| chr6  | 118822008 | 118822356 | 349 |
| chr5  | 125620991 | 125621339 | 349 |
| chr5  | 114970486 | 114970834 | 349 |
| chr4  | 118289097 | 118289445 | 349 |
| chr4  | 8718651   | 8718999   | 349 |
| chr3  | 88607751  | 88608099  | 349 |
| chr28 | 3060576   | 3060924   | 349 |
| chr25 | 8609083   | 8609431   | 349 |
| chr24 | 49259663  | 49260011  | 349 |
| chr23 | 28920857  | 28921205  | 349 |
| chr22 | 48410801  | 48411149  | 349 |
| chr21 | 58809915  | 58810263  | 349 |
| chr20 | 2618935   | 2619283   | 349 |
| chr19 | 25242747  | 25243095  | 349 |
| chr18 | 56630428  | 56630776  | 349 |
| chr18 | 55799893  | 55800241  | 349 |
| chr15 | 52812411  | 52812759  | 349 |
| chr14 | 65127648  | 65127996  | 349 |
| chr14 | 9597097   | 9597445   | 349 |
| chr13 | 41284938  | 41285286  | 349 |
| chr12 | 10238023  | 10238371  | 349 |
| chr10 | 31221969  | 31222317  | 349 |
| chr10 | 17454017  | 17454365  | 349 |
| chr10 | 5229703   | 5230051   | 349 |
| chr10 | 3482932   | 3483280   | 349 |
| chr1  | 76373495  | 76373843  | 349 |
| chrX  | 55745474  | 55745821  | 348 |
| chrX  | 48815415  | 48815762  | 348 |
| chrX  | 48199139  | 48199486  | 348 |
| chrX  | 21156681  | 21157028  | 348 |
| chrX  | 20562350  | 20562697  | 348 |
| chrX  | 8110816   | 8111163   | 348 |

|       |           |           |     |
|-------|-----------|-----------|-----|
| chrX  | 1195995   | 1196342   | 348 |
| chr9  | 62616762  | 62617109  | 348 |
| chr8  | 45762732  | 45763079  | 348 |
| chr5  | 1134959   | 1135306   | 348 |
| chr4  | 97851056  | 97851403  | 348 |
| chr3  | 113371616 | 113371963 | 348 |
| chr3  | 15201539  | 15201886  | 348 |
| chr29 | 46673761  | 46674108  | 348 |
| chr26 | 22017558  | 22017905  | 348 |
| chr25 | 39211900  | 39212247  | 348 |
| chr23 | 10343060  | 10343407  | 348 |
| chr21 | 61646649  | 61646996  | 348 |
| chr19 | 59376088  | 59376435  | 348 |
| chr19 | 46319459  | 46319806  | 348 |
| chr19 | 38568575  | 38568922  | 348 |
| chr18 | 56912857  | 56913204  | 348 |
| chr16 | 47898526  | 47898873  | 348 |
| chrX  | 78388621  | 78388967  | 347 |
| chrX  | 59389579  | 59389925  | 347 |
| chrX  | 56263168  | 56263514  | 347 |
| chrX  | 29726285  | 29726631  | 347 |
| chrX  | 22374423  | 22374769  | 347 |
| chrX  | 19071305  | 19071651  | 347 |
| chrX  | 7224129   | 7224475   | 347 |
| chrX  | 5458331   | 5458677   | 347 |
| chr7  | 91307370  | 91307716  | 347 |
| chr5  | 114080665 | 114081011 | 347 |
| chr4  | 72287676  | 72288022  | 347 |
| chr4  | 52529287  | 52529633  | 347 |
| chr3  | 115491172 | 115491518 | 347 |
| chr3  | 105247922 | 105248268 | 347 |
| chr3  | 23355277  | 23355623  | 347 |
| chr28 | 25347368  | 25347714  | 347 |
| chr26 | 39133272  | 39133618  | 347 |
| chr22 | 61111663  | 61112009  | 347 |
| chr20 | 33540567  | 33540913  | 347 |
| chr19 | 59406844  | 59407190  | 347 |
| chr19 | 40440732  | 40441078  | 347 |
| chr18 | 25752204  | 25752550  | 347 |
| chr17 | 67228175  | 67228521  | 347 |
| chr15 | 25179045  | 25179391  | 347 |
| chr14 | 6374252   | 6374598   | 347 |
| chr13 | 77189071  | 77189417  | 347 |
| chr13 | 75644333  | 75644679  | 347 |
| chr12 | 17991609  | 17991955  | 347 |
| chr11 | 106076706 | 106077052 | 347 |
| chr11 | 46676443  | 46676789  | 347 |
| chr11 | 46675903  | 46676249  | 347 |
| chr10 | 70568205  | 70568551  | 347 |
| chr10 | 46979089  | 46979435  | 347 |

|       |           |           |     |
|-------|-----------|-----------|-----|
| chr10 | 25852936  | 25853282  | 347 |
| chr1  | 145693595 | 145693941 | 347 |
| chr1  | 82388629  | 82388975  | 347 |
| chrX  | 78493121  | 78493466  | 346 |
| chrX  | 75661402  | 75661747  | 346 |
| chrX  | 72397996  | 72398341  | 346 |
| chrX  | 62336083  | 62336428  | 346 |
| chrX  | 54878689  | 54879034  | 346 |
| chrX  | 37507537  | 37507882  | 346 |
| chrX  | 19879199  | 19879544  | 346 |
| chrX  | 18160608  | 18160953  | 346 |
| chrX  | 15761963  | 15762308  | 346 |
| chrX  | 11158239  | 11158584  | 346 |
| chr9  | 99638331  | 99638676  | 346 |
| chr9  | 95002542  | 95002887  | 346 |
| chr9  | 35998671  | 35999016  | 346 |
| chr8  | 24439712  | 24440057  | 346 |
| chr28 | 43337504  | 43337849  | 346 |
| chr28 | 41746736  | 41747081  | 346 |
| chr26 | 43959864  | 43960209  | 346 |
| chr26 | 14659063  | 14659408  | 346 |
| chr23 | 38095324  | 38095669  | 346 |
| chr21 | 33085646  | 33085991  | 346 |
| chr21 | 20865358  | 20865703  | 346 |
| chr21 | 19213302  | 19213647  | 346 |
| chr20 | 19965014  | 19965359  | 346 |
| chr19 | 64726097  | 64726442  | 346 |
| chr19 | 27264075  | 27264420  | 346 |
| chr19 | 25518195  | 25518540  | 346 |
| chr18 | 11351552  | 11351897  | 346 |
| chr17 | 69174991  | 69175336  | 346 |
| chr16 | 43618663  | 43619008  | 346 |
| chr15 | 26721457  | 26721802  | 346 |
| chr15 | 24492313  | 24492658  | 346 |
| chr14 | 7779554   | 7779899   | 346 |
| chr13 | 36771345  | 36771690  | 346 |
| chr12 | 20024166  | 20024511  | 346 |
| chr12 | 10832854  | 10833199  | 346 |
| chr11 | 107533829 | 107534174 | 346 |
| chr11 | 14330832  | 14331177  | 346 |
| chr10 | 68426145  | 68426490  | 346 |
| chrX  | 75439855  | 75440199  | 345 |
| chrX  | 45683504  | 45683848  | 345 |
| chrX  | 33939426  | 33939770  | 345 |
| chrX  | 17323989  | 17324333  | 345 |
| chrX  | 11155737  | 11156081  | 345 |
| chrX  | 8912195   | 8912539   | 345 |
| chrX  | 2519245   | 2519589   | 345 |
| chr7  | 19936127  | 19936471  | 345 |
| chr7  | 4914206   | 4914550   | 345 |

|       |               |           |     |
|-------|---------------|-----------|-----|
| chr5  | 76290159      | 76290503  | 345 |
| chr3  | 22888423      | 22888767  | 345 |
| chr27 | 15400742      | 15401086  | 345 |
| chr26 | 35198602      | 35198946  | 345 |
| chr26 | 34974155      | 34974499  | 345 |
| chr25 | 44043137      | 44043481  | 345 |
| chr25 | 37729938      | 37730282  | 345 |
| chr24 | 25453322      | 25453666  | 345 |
| chr23 | 30338267      | 30338611  | 345 |
| chr22 | 51034691      | 51035035  | 345 |
| chr22 | 29903306      | 29903650  | 345 |
| chr22 | 7269824       | 7270168   | 345 |
| chr20 | 25532512      | 25532856  | 345 |
| chr20 | 2740058       | 2740402   | 345 |
| chr2  | 132355486     | 132355830 | 345 |
| chr19 | 60506007      | 60506351  | 345 |
| chr19 | 54269117      | 54269461  | 345 |
| chr19 | 45232754      | 45233098  | 345 |
| chr19 | 41393204      | 41393548  | 345 |
| chr19 | 23965545      | 23965889  | 345 |
| chr18 | 45488205      | 45488549  | 345 |
| chr18 | 39477491      | 39477835  | 345 |
| chr18 | 33822284      | 33822628  | 345 |
| chr16 | 37844123      | 37844467  | 345 |
| chr16 | 526265 526609 | 345       | 345 |
| chr15 | 38517540      | 38517884  | 345 |
| chr14 | 7218575       | 7218919   | 345 |
| chr13 | 68896599      | 68896943  | 345 |
| chr13 | 60454158      | 60454502  | 345 |
| chr13 | 15985184      | 15985528  | 345 |
| chr11 | 91457771      | 91458115  | 345 |
| chr11 | 14085950      | 14086294  | 345 |
| chr10 | 85784434      | 85784778  | 345 |
| chr10 | 12942957      | 12943301  | 345 |
| chrX  | 77142288      | 77142631  | 344 |
| chrX  | 74765398      | 74765741  | 344 |
| chrX  | 57060381      | 57060724  | 344 |
| chrX  | 50619847      | 50620190  | 344 |
| chrX  | 38960124      | 38960467  | 344 |
| chrX  | 36442235      | 36442578  | 344 |
| chrX  | 34039403      | 34039746  | 344 |
| chrX  | 7823790       | 7824133   | 344 |
| chr9  | 105847174     | 105847517 | 344 |
| chr9  | 45718548      | 45718891  | 344 |
| chr7  | 70536369      | 70536712  | 344 |
| chr7  | 50041014      | 50041357  | 344 |
| chr5  | 120465685     | 120466028 | 344 |
| chr4  | 98022331      | 98022674  | 344 |
| chr3  | 23620486      | 23620829  | 344 |
| chr3  | 3442941       | 3443284   | 344 |



|       |           |           |     |
|-------|-----------|-----------|-----|
| chr29 | 38310635  | 38310978  | 344 |
| chr28 | 34507763  | 34508106  | 344 |
| chr24 | 42598582  | 42598925  | 344 |
| chr23 | 42916699  | 42917042  | 344 |
| chr23 | 38083433  | 38083776  | 344 |
| chr22 | 48234405  | 48234748  | 344 |
| chr22 | 29693344  | 29693687  | 344 |
| chr22 | 10949368  | 10949711  | 344 |
| chr21 | 31141007  | 31141350  | 344 |
| chr20 | 70123814  | 70124157  | 344 |
| chr19 | 33457917  | 33458260  | 344 |
| chr19 | 30423396  | 30423739  | 344 |
| chr19 | 23942435  | 23942778  | 344 |
| chr18 | 17968293  | 17968636  | 344 |
| chr18 | 12635529  | 12635872  | 344 |
| chr17 | 63595629  | 63595972  | 344 |
| chr14 | 7402951   | 7403294   | 344 |
| chr13 | 75693718  | 75694061  | 344 |
| chr13 | 55378136  | 55378479  | 344 |
| chr11 | 70717994  | 70718337  | 344 |
| chr10 | 73949440  | 73949783  | 344 |
| chr1  | 75050080  | 75050423  | 344 |
| chrX  | 36351035  | 36351377  | 343 |
| chrX  | 34592540  | 34592882  | 343 |
| chrX  | 2508793   | 2509135   | 343 |
| chr6  | 106928540 | 106928882 | 343 |
| chr3  | 70580253  | 70580595  | 343 |
| chr3  | 24595050  | 24595392  | 343 |
| chr3  | 15408903  | 15409245  | 343 |
| chr25 | 21760601  | 21760943  | 343 |
| chr25 | 8764541   | 8764883   | 343 |
| chr24 | 60987256  | 60987598  | 343 |
| chr22 | 39826816  | 39827158  | 343 |
| chr22 | 39799608  | 39799950  | 343 |
| chr21 | 64484769  | 64485111  | 343 |
| chr21 | 20231677  | 20232019  | 343 |
| chr19 | 59461838  | 59462180  | 343 |
| chr19 | 54638314  | 54638656  | 343 |
| chr19 | 40444999  | 40445341  | 343 |
| chr19 | 27094325  | 27094667  | 343 |
| chr19 | 7612422   | 7612764   | 343 |
| chr18 | 63514473  | 63514815  | 343 |
| chr18 | 22857422  | 22857764  | 343 |
| chr16 | 65519672  | 65520014  | 343 |
| chr15 | 31462062  | 31462404  | 343 |
| chr15 | 24412521  | 24412863  | 343 |
| chr13 | 77771163  | 77771505  | 343 |
| chr13 | 60222607  | 60222949  | 343 |
| chr13 | 45519780  | 45520122  | 343 |
| chr13 | 41645780  | 41646122  | 343 |

|       |           |           |     |
|-------|-----------|-----------|-----|
| chr11 | 108125226 | 108125568 | 343 |
| chr11 | 100907192 | 100907534 | 343 |
| chr10 | 70419125  | 70419467  | 343 |
| chr10 | 17253938  | 17254280  | 343 |
| chr10 | 16972066  | 16972408  | 343 |
| chr1  | 128257883 | 128258225 | 343 |
| chrX  | 69525450  | 69525791  | 342 |
| chrX  | 46189087  | 46189428  | 342 |
| chrX  | 44972812  | 44973153  | 342 |
| chrX  | 7220994   | 7221335   | 342 |
| chr8  | 65301362  | 65301703  | 342 |
| chr5  | 28884318  | 28884659  | 342 |
| chr4  | 31332433  | 31332774  | 342 |
| chr3  | 33845021  | 33845362  | 342 |
| chr3  | 8165696   | 8166037   | 342 |
| chr29 | 48932940  | 48933281  | 342 |
| chr29 | 36952731  | 36953072  | 342 |
| chr28 | 26766667  | 26767008  | 342 |
| chr26 | 14884727  | 14885068  | 342 |
| chr25 | 28512335  | 28512676  | 342 |
| chr23 | 51944286  | 51944627  | 342 |
| chr21 | 30310306  | 30310647  | 342 |
| chr20 | 73018718  | 73019059  | 342 |
| chr20 | 8513955   | 8514296   | 342 |
| chr2  | 130780708 | 130781049 | 342 |
| chr2  | 110620057 | 110620398 | 342 |
| chr19 | 39542302  | 39542643  | 342 |
| chr19 | 39258200  | 39258541  | 342 |
| chr19 | 14351861  | 14352202  | 342 |
| chr18 | 22183132  | 22183473  | 342 |
| chr11 | 82701933  | 82702274  | 342 |
| chr11 | 66360638  | 66360979  | 342 |
| chr10 | 72490460  | 72490801  | 342 |
| chr10 | 25973826  | 25974167  | 342 |
| chr1  | 142287546 | 142287887 | 342 |
| chrX  | 80233555  | 80233895  | 341 |
| chrX  | 74240929  | 74241269  | 341 |
| chrX  | 71591422  | 71591762  | 341 |
| chrX  | 64749268  | 64749608  | 341 |
| chrX  | 54978503  | 54978843  | 341 |
| chrX  | 24200448  | 24200788  | 341 |
| chr8  | 45731856  | 45732196  | 341 |
| chr6  | 92456501  | 92456841  | 341 |
| chr6  | 74996440  | 74996780  | 341 |
| chr28 | 26080040  | 26080380  | 341 |
| chr26 | 47847856  | 47848196  | 341 |
| chr23 | 30546635  | 30546975  | 341 |
| chr21 | 24524713  | 24525053  | 341 |
| chr2  | 126915004 | 126915344 | 341 |
| chr2  | 93542335  | 93542675  | 341 |

|       |           |           |     |
|-------|-----------|-----------|-----|
| chr2  | 91064753  | 91065093  | 341 |
| chr2  | 22505773  | 22506113  | 341 |
| chr19 | 52505195  | 52505535  | 341 |
| chr19 | 47320056  | 47320396  | 341 |
| chr19 | 34557267  | 34557607  | 341 |
| chr18 | 55481550  | 55481890  | 341 |
| chr18 | 32786582  | 32786922  | 341 |
| chr18 | 3597977   | 3598317   | 341 |
| chr17 | 60544890  | 60545230  | 341 |
| chr16 | 71400522  | 71400862  | 341 |
| chr15 | 80814324  | 80814664  | 341 |
| chr13 | 43421560  | 43421900  | 341 |
| chr11 | 81418195  | 81418535  | 341 |
| chr11 | 66232096  | 66232436  | 341 |
| chr10 | 13416575  | 13416915  | 341 |
| chrX  | 66119934  | 66120273  | 340 |
| chrX  | 59913785  | 59914124  | 340 |
| chrX  | 37691802  | 37692141  | 340 |
| chrX  | 13839057  | 13839396  | 340 |
| chrX  | 11864964  | 11865303  | 340 |
| chrX  | 6371914   | 6372253   | 340 |
| chr9  | 39976930  | 39977269  | 340 |
| chr7  | 42341564  | 42341903  | 340 |
| chr5  | 103604381 | 103604720 | 340 |
| chr4  | 54418643  | 54418982  | 340 |
| chr3  | 8982484   | 8982823   | 340 |
| chr29 | 26665102  | 26665441  | 340 |
| chr29 | 26488736  | 26489075  | 340 |
| chr29 | 9234241   | 9234580   | 340 |
| chr27 | 35402204  | 35402543  | 340 |
| chr26 | 33899406  | 33899745  | 340 |
| chr25 | 39214761  | 39215100  | 340 |
| chr24 | 44346499  | 44346838  | 340 |
| chr24 | 35423210  | 35423549  | 340 |
| chr24 | 1482133   | 1482472   | 340 |
| chr23 | 18662434  | 18662773  | 340 |
| chr20 | 29499381  | 29499720  | 340 |
| chr2  | 128100668 | 128101007 | 340 |
| chr2  | 26766328  | 26766667  | 340 |
| chr19 | 33300534  | 33300873  | 340 |
| chr19 | 8086004   | 8086343   | 340 |
| chr18 | 35339703  | 35340042  | 340 |
| chr15 | 64497427  | 64497766  | 340 |
| chr11 | 77618111  | 77618450  | 340 |
| chr11 | 7211608   | 7211947   | 340 |
| chr1  | 120027277 | 120027616 | 340 |
| chrX  | 65709906  | 65710244  | 339 |
| chrX  | 60451698  | 60452036  | 339 |
| chrX  | 34108021  | 34108359  | 339 |
| chrX  | 19278117  | 19278455  | 339 |

|       |               |           |     |
|-------|---------------|-----------|-----|
| chrX  | 18750809      | 18751147  | 339 |
| chrX  | 2812921       | 2813259   | 339 |
| chrX  | 884672 885010 | 339       |     |
| chr9  | 46008092      | 46008430  | 339 |
| chr8  | 77270781      | 77271119  | 339 |
| chr8  | 66775018      | 66775356  | 339 |
| chr8  | 65181715      | 65182053  | 339 |
| chr4  | 33413813      | 33414151  | 339 |
| chr3  | 121604648     | 121604986 | 339 |
| chr3  | 115895458     | 115895796 | 339 |
| chr3  | 108430466     | 108430804 | 339 |
| chr3  | 15211073      | 15211411  | 339 |
| chr29 | 29693149      | 29693487  | 339 |
| chr26 | 25192145      | 25192483  | 339 |
| chr23 | 49808626      | 49808964  | 339 |
| chr23 | 46048131      | 46048469  | 339 |
| chr22 | 28705512      | 28705850  | 339 |
| chr21 | 27020225      | 27020563  | 339 |
| chr2  | 135048918     | 135049256 | 339 |
| chr19 | 54869057      | 54869395  | 339 |
| chr19 | 45714306      | 45714644  | 339 |
| chr19 | 39835987      | 39836325  | 339 |
| chr18 | 47212231      | 47212569  | 339 |
| chr17 | 63116550      | 63116888  | 339 |
| chr16 | 48571646      | 48571984  | 339 |
| chr14 | 8186238       | 8186576   | 339 |
| chr13 | 55717426      | 55717764  | 339 |
| chr11 | 104901506     | 104901844 | 339 |
| chrX  | 59667144      | 59667481  | 338 |
| chrX  | 55411613      | 55411950  | 338 |
| chrX  | 47280049      | 47280386  | 338 |
| chrX  | 34457563      | 34457900  | 338 |
| chrX  | 31954041      | 31954378  | 338 |
| chr8  | 64992158      | 64992495  | 338 |
| chr7  | 89651709      | 89652046  | 338 |
| chr7  | 19969046      | 19969383  | 338 |
| chr4  | 115868282     | 115868619 | 338 |
| chr4  | 32381335      | 32381672  | 338 |
| chr3  | 115929281     | 115929618 | 338 |
| chr3  | 22122232      | 22122569  | 338 |
| chr29 | 33801670      | 33802007  | 338 |
| chr29 | 33678724      | 33679061  | 338 |
| chr28 | 7527065       | 7527402   | 338 |
| chr24 | 60840313      | 60840650  | 338 |
| chr24 | 60260794      | 60261131  | 338 |
| chr24 | 43571433      | 43571770  | 338 |
| chr24 | 34042244      | 34042581  | 338 |
| chr23 | 8503787       | 8504124   | 338 |
| chr22 | 30062063      | 30062400  | 338 |
| chr2  | 95160092      | 95160429  | 338 |

|       |               |           |     |
|-------|---------------|-----------|-----|
| chr2  | 93988542      | 93988879  | 338 |
| chr19 | 64359974      | 64360311  | 338 |
| chr19 | 19742145      | 19742482  | 338 |
| chr18 | 54334425      | 54334762  | 338 |
| chr18 | 26287952      | 26288289  | 338 |
| chr13 | 78309398      | 78309735  | 338 |
| chr13 | 47223730      | 47224067  | 338 |
| chr13 | 46284033      | 46284370  | 338 |
| chr13 | 40908283      | 40908620  | 338 |
| chr10 | 90025473      | 90025810  | 338 |
| chr10 | 4843326       | 4843663   | 338 |
| chr1  | 154709454     | 154709791 | 338 |
| chrX  | 54446925      | 54447261  | 337 |
| chrX  | 20293827      | 20294163  | 337 |
| chrX  | 5631584       | 5631920   | 337 |
| chr8  | 60326227      | 60326563  | 337 |
| chr7  | 50253005      | 50253341  | 337 |
| chr6  | 14201573      | 14201909  | 337 |
| chr5  | 112143732     | 112144068 | 337 |
| chr3  | 121903997     | 121904333 | 337 |
| chr25 | 21512551      | 21512887  | 337 |
| chr24 | 59300753      | 59301089  | 337 |
| chr24 | 46848312      | 46848648  | 337 |
| chr24 | 3406894       | 3407230   | 337 |
| chr23 | 11484619      | 11484955  | 337 |
| chr22 | 39827325      | 39827661  | 337 |
| chr22 | 15004966      | 15005302  | 337 |
| chr21 | 48696686      | 48697022  | 337 |
| chr2  | 126980909     | 126981245 | 337 |
| chr19 | 60747498      | 60747834  | 337 |
| chr19 | 54293759      | 54294095  | 337 |
| chr19 | 28007597      | 28007933  | 337 |
| chr17 | 49522891      | 49523227  | 337 |
| chr15 | 75329056      | 75329392  | 337 |
| chr15 | 61364962      | 61365298  | 337 |
| chr15 | 25470525      | 25470861  | 337 |
| chr12 | 32923741      | 32924077  | 337 |
| chr12 | 19721162      | 19721498  | 337 |
| chr11 | 77841450      | 77841786  | 337 |
| chr10 | 80441936      | 80442272  | 337 |
| chr1  | 183596 183932 | 337       |     |
| chrX  | 65092197      | 65092532  | 336 |
| chrX  | 59280456      | 59280791  | 336 |
| chrX  | 35574548      | 35574883  | 336 |
| chrX  | 22395363      | 22395698  | 336 |
| chr7  | 76987615      | 76987950  | 336 |
| chr7  | 15594747      | 15595082  | 336 |
| chr6  | 121828655     | 121828990 | 336 |
| chr5  | 60831674      | 60832009  | 336 |
| chr5  | 31308552      | 31308887  | 336 |

|       |           |           |     |
|-------|-----------|-----------|-----|
| chr5  | 31122512  | 31122847  | 336 |
| chr3  | 100446755 | 100447090 | 336 |
| chr29 | 37252765  | 37253100  | 336 |
| chr29 | 25901005  | 25901340  | 336 |
| chr28 | 42110486  | 42110821  | 336 |
| chr28 | 7168439   | 7168774   | 336 |
| chr27 | 28093726  | 28094061  | 336 |
| chr26 | 37845593  | 37845928  | 336 |
| chr25 | 37282663  | 37282998  | 336 |
| chr22 | 56706060  | 56706395  | 336 |
| chr22 | 55366792  | 55367127  | 336 |
| chr20 | 67198980  | 67199315  | 336 |
| chr2  | 111460506 | 111460841 | 336 |
| chr19 | 7297035   | 7297370   | 336 |
| chr17 | 70132210  | 70132545  | 336 |
| chr17 | 69953463  | 69953798  | 336 |
| chr17 | 67228684  | 67229019  | 336 |
| chr17 | 31865753  | 31866088  | 336 |
| chr14 | 2886549   | 2886884   | 336 |
| chr13 | 72243322  | 72243657  | 336 |
| chr11 | 101019815 | 101020150 | 336 |
| chr11 | 90402101  | 90402436  | 336 |
| chr11 | 71102676  | 71103011  | 336 |
| chr10 | 53468119  | 53468454  | 336 |
| chrX  | 80131981  | 80132315  | 335 |
| chrX  | 62952918  | 62953252  | 335 |
| chrX  | 50691390  | 50691724  | 335 |
| chrX  | 39032625  | 39032959  | 335 |
| chrX  | 4129059   | 4129393   | 335 |
| chr8  | 74412399  | 74412733  | 335 |
| chr7  | 46945491  | 46945825  | 335 |
| chr6  | 51518253  | 51518587  | 335 |
| chr3  | 114531848 | 114532182 | 335 |
| chr3  | 33508854  | 33509188  | 335 |
| chr3  | 8797010   | 8797344   | 335 |
| chr29 | 34993527  | 34993861  | 335 |
| chr26 | 44759475  | 44759809  | 335 |
| chr25 | 42743918  | 42744252  | 335 |
| chr22 | 16903744  | 16904078  | 335 |
| chr22 | 5660104   | 5660438   | 335 |
| chr21 | 63075960  | 63076294  | 335 |
| chr20 | 74160985  | 74161319  | 335 |
| chr19 | 41378618  | 41378952  | 335 |
| chr18 | 11645480  | 11645814  | 335 |
| chr17 | 49050196  | 49050530  | 335 |
| chr17 | 14648732  | 14649066  | 335 |
| chr13 | 17770485  | 17770819  | 335 |
| chr11 | 10768431  | 10768765  | 335 |
| chrX  | 78698624  | 78698957  | 334 |
| chrX  | 78349283  | 78349616  | 334 |

|       |           |           |     |
|-------|-----------|-----------|-----|
| chrX  | 75529487  | 75529820  | 334 |
| chrX  | 62518718  | 62519051  | 334 |
| chrX  | 22014609  | 22014942  | 334 |
| chrX  | 21246137  | 21246470  | 334 |
| chrX  | 13241028  | 13241361  | 334 |
| chrX  | 7515280   | 7515613   | 334 |
| chr9  | 93207936  | 93208269  | 334 |
| chr8  | 88616832  | 88617165  | 334 |
| chr7  | 59956488  | 59956821  | 334 |
| chr7  | 17086004  | 17086337  | 334 |
| chr6  | 32557788  | 32558121  | 334 |
| chr5  | 33964935  | 33965268  | 334 |
| chr3  | 114946142 | 114946475 | 334 |
| chr3  | 110138779 | 110139112 | 334 |
| chr3  | 85954180  | 85954513  | 334 |
| chr3  | 33326645  | 33326978  | 334 |
| chr24 | 51439244  | 51439577  | 334 |
| chr24 | 46844295  | 46844628  | 334 |
| chr22 | 29697063  | 29697396  | 334 |
| chr22 | 18388895  | 18389228  | 334 |
| chr22 | 10769152  | 10769485  | 334 |
| chr18 | 52829862  | 52830195  | 334 |
| chr18 | 50469086  | 50469419  | 334 |
| chr18 | 12340676  | 12341009  | 334 |
| chr18 | 11690799  | 11691132  | 334 |
| chr17 | 73027994  | 73028327  | 334 |
| chr16 | 77525362  | 77525695  | 334 |
| chr13 | 73024272  | 73024605  | 334 |
| chr13 | 66681414  | 66681747  | 334 |
| chr13 | 60452329  | 60452662  | 334 |
| chr13 | 34812873  | 34813206  | 334 |
| chr12 | 72453174  | 72453507  | 334 |
| chr11 | 2828434   | 2828767   | 334 |
| chr1  | 114956476 | 114956809 | 334 |
| chrX  | 75913147  | 75913479  | 333 |
| chrX  | 46079773  | 46080105  | 333 |
| chrX  | 24544746  | 24545078  | 333 |
| chrX  | 20269700  | 20270032  | 333 |
| chrX  | 8423177   | 8423509   | 333 |
| chr7  | 44896336  | 44896668  | 333 |
| chr4  | 71612861  | 71613193  | 333 |
| chr3  | 117314676 | 117315008 | 333 |
| chr3  | 104552063 | 104552395 | 333 |
| chr3  | 15390624  | 15390956  | 333 |
| chr29 | 37186294  | 37186626  | 333 |
| chr29 | 2415502   | 2415834   | 333 |
| chr24 | 45033476  | 45033808  | 333 |
| chr23 | 51988566  | 51988898  | 333 |
| chr23 | 43255494  | 43255826  | 333 |
| chr23 | 18809785  | 18810117  | 333 |

|       |           |           |     |
|-------|-----------|-----------|-----|
| chr22 | 48407444  | 48407776  | 333 |
| chr22 | 14973753  | 14974085  | 333 |
| chr21 | 64451372  | 64451704  | 333 |
| chr21 | 26100369  | 26100701  | 333 |
| chr2  | 127201760 | 127202092 | 333 |
| chr2  | 124285742 | 124286074 | 333 |
| chr2  | 118897607 | 118897939 | 333 |
| chr19 | 39331246  | 39331578  | 333 |
| chr19 | 32765100  | 32765432  | 333 |
| chr19 | 24269861  | 24270193  | 333 |
| chr18 | 54204079  | 54204411  | 333 |
| chr18 | 49489334  | 49489666  | 333 |
| chr18 | 49472305  | 49472637  | 333 |
| chr17 | 72655041  | 72655373  | 333 |
| chr17 | 60286280  | 60286612  | 333 |
| chr16 | 72287674  | 72288006  | 333 |
| chr14 | 9141907   | 9142239   | 333 |
| chr13 | 77372359  | 77372691  | 333 |
| chr13 | 18311346  | 18311678  | 333 |
| chr12 | 31379264  | 31379596  | 333 |
| chr10 | 68501503  | 68501835  | 333 |
| chr10 | 36608546  | 36608878  | 333 |
| chr1  | 156919862 | 156920194 | 333 |
| chr1  | 141725934 | 141726266 | 333 |
| chrX  | 75362197  | 75362528  | 332 |
| chrX  | 65638969  | 65639300  | 332 |
| chrX  | 65335419  | 65335750  | 332 |
| chrX  | 50213481  | 50213812  | 332 |
| chrX  | 19093054  | 19093385  | 332 |
| chr8  | 89579514  | 89579845  | 332 |
| chr6  | 18486972  | 18487303  | 332 |
| chr6  | 7715210   | 7715541   | 332 |
| chr5  | 88047862  | 88048193  | 332 |
| chr5  | 29095182  | 29095513  | 332 |
| chr4  | 108000113 | 108000444 | 332 |
| chr4  | 79922638  | 79922969  | 332 |
| chr4  | 68019884  | 68020215  | 332 |
| chr3  | 111395423 | 111395754 | 332 |
| chr3  | 108417841 | 108418172 | 332 |
| chr3  | 28272618  | 28272949  | 332 |
| chr29 | 38057546  | 38057877  | 332 |
| chr27 | 45273623  | 45273954  | 332 |
| chr27 | 26969178  | 26969509  | 332 |
| chr26 | 8708178   | 8708509   | 332 |
| chr25 | 15738301  | 15738632  | 332 |
| chr24 | 1221816   | 1222147   | 332 |
| chr23 | 53258399  | 53258730  | 332 |
| chr21 | 21319501  | 21319832  | 332 |
| chr2  | 140352784 | 140353115 | 332 |
| chr18 | 61976148  | 61976479  | 332 |



|       |               |           |     |
|-------|---------------|-----------|-----|
| chr18 | 43064779      | 43065110  | 332 |
| chr17 | 70156197      | 70156528  | 332 |
| chr15 | 54530127      | 54530458  | 332 |
| chr15 | 54480185      | 54480516  | 332 |
| chr12 | 74442967      | 74443298  | 332 |
| chr11 | 100953333     | 100953664 | 332 |
| chr11 | 92467007      | 92467338  | 332 |
| chr11 | 72585036      | 72585367  | 332 |
| chr10 | 16671511      | 16671842  | 332 |
| chr10 | 8512483       | 8512814   | 332 |
| chr1  | 74731019      | 74731350  | 332 |
| chrX  | 30916164      | 30916494  | 331 |
| chrX  | 19402452      | 19402782  | 331 |
| chrX  | 10195885      | 10196215  | 331 |
| chr5  | 80725802      | 80726132  | 331 |
| chr4  | 123202245     | 123202575 | 331 |
| chr4  | 108664527     | 108664857 | 331 |
| chr4  | 98729022      | 98729352  | 331 |
| chr28 | 3555987       | 3556317   | 331 |
| chr27 | 3657576       | 3657906   | 331 |
| chr26 | 37672810      | 37673140  | 331 |
| chr21 | 64157184      | 64157514  | 331 |
| chr19 | 64761192      | 64761522  | 331 |
| chr19 | 32886728      | 32887058  | 331 |
| chr18 | 64168178      | 64168508  | 331 |
| chr18 | 39278752      | 39279082  | 331 |
| chr18 | 11527796      | 11528126  | 331 |
| chr16 | 44742017      | 44742347  | 331 |
| chr16 | 310110 310440 | 331       |     |
| chr15 | 23194177      | 23194507  | 331 |
| chr13 | 77670223      | 77670553  | 331 |
| chr13 | 60446227      | 60446557  | 331 |
| chr13 | 58367328      | 58367658  | 331 |
| chr13 | 34863541      | 34863871  | 331 |
| chr12 | 76058458      | 76058788  | 331 |
| chr12 | 70949552      | 70949882  | 331 |
| chr12 | 64639157      | 64639487  | 331 |
| chr12 | 35364559      | 35364889  | 331 |
| chr11 | 94089688      | 94090018  | 331 |
| chr11 | 47409120      | 47409450  | 331 |
| chrX  | 32026562      | 32026891  | 330 |
| chr8  | 62584462      | 62584791  | 330 |
| chr8  | 60105077      | 60105406  | 330 |
| chr7  | 20663504      | 20663833  | 330 |
| chr5  | 80883425      | 80883754  | 330 |
| chr5  | 1167449       | 1167778   | 330 |
| chr3  | 111540193     | 111540522 | 330 |
| chr3  | 1390358       | 1390687   | 330 |
| chr29 | 37103414      | 37103743  | 330 |
| chr26 | 20485152      | 20485481  | 330 |

|       |           |           |     |
|-------|-----------|-----------|-----|
| chr23 | 27876730  | 27877059  | 330 |
| chr21 | 57892539  | 57892868  | 330 |
| chr21 | 24584151  | 24584480  | 330 |
| chr20 | 74033051  | 74033380  | 330 |
| chr20 | 8748797   | 8749126   | 330 |
| chr19 | 17146544  | 17146873  | 330 |
| chr18 | 62012256  | 62012585  | 330 |
| chr18 | 18682660  | 18682989  | 330 |
| chr17 | 76291272  | 76291601  | 330 |
| chr16 | 56987220  | 56987549  | 330 |
| chr15 | 75629083  | 75629412  | 330 |
| chr14 | 61217449  | 61217778  | 330 |
| chr12 | 81266979  | 81267308  | 330 |
| chr10 | 21459724  | 21460053  | 330 |
| chrX  | 74193774  | 74194102  | 329 |
| chrX  | 44958584  | 44958912  | 329 |
| chrX  | 37376111  | 37376439  | 329 |
| chrX  | 10708107  | 10708435  | 329 |
| chr8  | 79367466  | 79367794  | 329 |
| chr8  | 23834145  | 23834473  | 329 |
| chr5  | 124758114 | 124758442 | 329 |
| chr5  | 122707963 | 122708291 | 329 |
| chr4  | 123625748 | 123626076 | 329 |
| chr4  | 28598752  | 28599080  | 329 |
| chr3  | 123897255 | 123897583 | 329 |
| chr3  | 118023884 | 118024212 | 329 |
| chr3  | 99210794  | 99211122  | 329 |
| chr29 | 48775041  | 48775369  | 329 |
| chr29 | 18064484  | 18064812  | 329 |
| chr28 | 41450638  | 41450966  | 329 |
| chr24 | 49208822  | 49209150  | 329 |
| chr22 | 15385729  | 15386057  | 329 |
| chr19 | 51903053  | 51903381  | 329 |
| chr13 | 62412559  | 62412887  | 329 |
| chr13 | 60023234  | 60023562  | 329 |
| chr11 | 84954548  | 84954876  | 329 |
| chr11 | 73305804  | 73306132  | 329 |
| chrX  | 68960664  | 68960991  | 328 |
| chrX  | 66435029  | 66435356  | 328 |
| chrX  | 34875755  | 34876082  | 328 |
| chrX  | 28499717  | 28500044  | 328 |
| chrX  | 13804283  | 13804610  | 328 |
| chrX  | 10310009  | 10310336  | 328 |
| chrX  | 6992077   | 6992404   | 328 |
| chrX  | 2450827   | 2451154   | 328 |
| chr8  | 60134302  | 60134629  | 328 |
| chr6  | 121796572 | 121796899 | 328 |
| chr4  | 118010496 | 118010823 | 328 |
| chr3  | 108762056 | 108762383 | 328 |
| chr3  | 36152608  | 36152935  | 328 |

|       |               |           |     |
|-------|---------------|-----------|-----|
| chr26 | 51372787      | 51373114  | 328 |
| chr25 | 38318314      | 38318641  | 328 |
| chr24 | 64481872      | 64482199  | 328 |
| chr23 | 27791556      | 27791883  | 328 |
| chr23 | 15529188      | 15529515  | 328 |
| chr19 | 31864964      | 31865291  | 328 |
| chr18 | 46068100      | 46068427  | 328 |
| chr18 | 21920093      | 21920420  | 328 |
| chr17 | 58898050      | 58898377  | 328 |
| chr16 | 50332158      | 50332485  | 328 |
| chr16 | 44292591      | 44292918  | 328 |
| chr14 | 1817160       | 1817487   | 328 |
| chr13 | 65688284      | 65688611  | 328 |
| chrX  | 61354575      | 61354901  | 327 |
| chrX  | 35805360      | 35805686  | 327 |
| chrX  | 13837360      | 13837686  | 327 |
| chrX  | 13384173      | 13384499  | 327 |
| chrX  | 10169590      | 10169916  | 327 |
| chr8  | 62255715      | 62256041  | 327 |
| chr7  | 2966499       | 2966825   | 327 |
| chr4  | 66657829      | 66658155  | 327 |
| chr29 | 31412265      | 31412591  | 327 |
| chr25 | 33601483      | 33601809  | 327 |
| chr23 | 11892723      | 11893049  | 327 |
| chr22 | 32928572      | 32928898  | 327 |
| chr2  | 130751947     | 130752273 | 327 |
| chr2  | 110131236     | 110131562 | 327 |
| chr19 | 54558553      | 54558879  | 327 |
| chr19 | 44179901      | 44180227  | 327 |
| chr18 | 11770818      | 11771144  | 327 |
| chr18 | 682755 683081 | 327       |     |
| chr15 | 25562553      | 25562879  | 327 |
| chr14 | 14663685      | 14664011  | 327 |
| chr14 | 1952193       | 1952519   | 327 |
| chr12 | 66635869      | 66636195  | 327 |
| chr12 | 14939994      | 14940320  | 327 |
| chrX  | 51742587      | 51742912  | 326 |
| chrX  | 49220070      | 49220395  | 326 |
| chrX  | 34651799      | 34652124  | 326 |
| chrX  | 8934707       | 8935032   | 326 |
| chrX  | 6692434       | 6692759   | 326 |
| chr8  | 687814 688139 | 326       |     |
| chr7  | 45709402      | 45709727  | 326 |
| chr7  | 42789022      | 42789347  | 326 |
| chr7  | 13101731      | 13102056  | 326 |
| chr5  | 118411107     | 118411432 | 326 |
| chr5  | 31561989      | 31562314  | 326 |
| chr4  | 97888361      | 97888686  | 326 |
| chr29 | 45200848      | 45201173  | 326 |
| chr27 | 5682007       | 5682332   | 326 |

|       |               |           |     |
|-------|---------------|-----------|-----|
| chr24 | 40364073      | 40364398  | 326 |
| chr2  | 131302013     | 131302338 | 326 |
| chr15 | 33662115      | 33662440  | 326 |
| chr15 | 25328722      | 25329047  | 326 |
| chr13 | 80705470      | 80705795  | 326 |
| chr11 | 70896804      | 70897129  | 326 |
| chr10 | 13368693      | 13369018  | 326 |
| chr1  | 84306586      | 84306911  | 326 |
| chr1  | 59353112      | 59353437  | 326 |
| chrX  | 64541860      | 64542184  | 325 |
| chrX  | 35589190      | 35589514  | 325 |
| chrX  | 8440425       | 8440749   | 325 |
| chrX  | 6090692       | 6091016   | 325 |
| chr5  | 120563864     | 120564188 | 325 |
| chr4  | 123538113     | 123538437 | 325 |
| chr4  | 123015714     | 123016038 | 325 |
| chr4  | 81968276      | 81968600  | 325 |
| chr3  | 19716580      | 19716904  | 325 |
| chr3  | 8754821       | 8755145   | 325 |
| chr29 | 17694706      | 17695030  | 325 |
| chr27 | 48724491      | 48724815  | 325 |
| chr22 | 44659811      | 44660135  | 325 |
| chr2  | 93755503      | 93755827  | 325 |
| chr18 | 41057539      | 41057863  | 325 |
| chr17 | 55886346      | 55886670  | 325 |
| chr16 | 49381656      | 49381980  | 325 |
| chr15 | 28590842      | 28591166  | 325 |
| chr10 | 102925408     | 102925732 | 325 |
| chr10 | 70033332      | 70033656  | 325 |
| chr10 | 19612346      | 19612670  | 325 |
| chr1  | 133440639     | 133440963 | 325 |
| chrX  | 75659775      | 75660098  | 324 |
| chrX  | 62154977      | 62155300  | 324 |
| chr7  | 43975519      | 43975842  | 324 |
| chr5  | 118437703     | 118438026 | 324 |
| chr4  | 9764188       | 9764511   | 324 |
| chr3  | 35492294      | 35492617  | 324 |
| chr28 | 13221075      | 13221398  | 324 |
| chr25 | 34094359      | 34094682  | 324 |
| chr25 | 826358 826681 | 324       |     |
| chr23 | 19671039      | 19671362  | 324 |
| chr23 | 18608618      | 18608941  | 324 |
| chr23 | 10484989      | 10485312  | 324 |
| chr22 | 60073991      | 60074314  | 324 |
| chr21 | 33987910      | 33988233  | 324 |
| chr21 | 33086927      | 33087250  | 324 |
| chr2  | 73259210      | 73259533  | 324 |
| chr19 | 16060535      | 16060858  | 324 |
| chr18 | 56640362      | 56640685  | 324 |
| chr17 | 64581209      | 64581532  | 324 |

|       |               |           |     |
|-------|---------------|-----------|-----|
| chr17 | 63460497      | 63460820  | 324 |
| chr17 | 62569678      | 62570001  | 324 |
| chr16 | 77646413      | 77646736  | 324 |
| chr16 | 75095805      | 75096128  | 324 |
| chr16 | 47527944      | 47528267  | 324 |
| chr15 | 22315779      | 22316102  | 324 |
| chr13 | 40539010      | 40539333  | 324 |
| chr12 | 31583020      | 31583343  | 324 |
| chr11 | 49378647      | 49378970  | 324 |
| chr10 | 69100923      | 69101246  | 324 |
| chr10 | 35892395      | 35892718  | 324 |
| chr10 | 21945702      | 21946025  | 324 |
| chrX  | 75628116      | 75628438  | 323 |
| chrX  | 63090432      | 63090754  | 323 |
| chrX  | 50576366      | 50576688  | 323 |
| chr9  | 90742257      | 90742579  | 323 |
| chr8  | 73095381      | 73095703  | 323 |
| chr4  | 64417834      | 64418156  | 323 |
| chr3  | 104557618     | 104557940 | 323 |
| chr29 | 31528202      | 31528524  | 323 |
| chr29 | 17841548      | 17841870  | 323 |
| chr26 | 43892022      | 43892344  | 323 |
| chr23 | 43149513      | 43149835  | 323 |
| chr23 | 17004079      | 17004401  | 323 |
| chr20 | 3254126       | 3254448   | 323 |
| chr2  | 136717663     | 136717985 | 323 |
| chr2  | 134607558     | 134607880 | 323 |
| chr19 | 22837843      | 22838165  | 323 |
| chr15 | 25481401      | 25481723  | 323 |
| chr12 | 34868186      | 34868508  | 323 |
| chr12 | 9510942       | 9511264   | 323 |
| chr10 | 7613632       | 7613954   | 323 |
| chr10 | 2769713       | 2770035   | 323 |
| chrX  | 80226732      | 80227053  | 322 |
| chrX  | 63662753      | 63663074  | 322 |
| chrX  | 49494786      | 49495107  | 322 |
| chrX  | 19262385      | 19262706  | 322 |
| chrX  | 16199291      | 16199612  | 322 |
| chrX  | 903664 903985 | 322       |     |
| chr7  | 52367717      | 52368038  | 322 |
| chr7  | 49844250      | 49844571  | 322 |
| chr5  | 120047717     | 120048038 | 322 |
| chr4  | 95824724      | 95825045  | 322 |
| chr28 | 40455850      | 40456171  | 322 |
| chr27 | 23992932      | 23993253  | 322 |
| chr26 | 44063068      | 44063389  | 322 |
| chr24 | 58651039      | 58651360  | 322 |
| chr24 | 58639437      | 58639758  | 322 |
| chr23 | 29557918      | 29558239  | 322 |
| chr22 | 60077658      | 60077979  | 322 |

|       |               |           |     |
|-------|---------------|-----------|-----|
| chr22 | 56865612      | 56865933  | 322 |
| chr21 | 19276251      | 19276572  | 322 |
| chr2  | 115024389     | 115024710 | 322 |
| chr2  | 75549555      | 75549876  | 322 |
| chr19 | 58853033      | 58853354  | 322 |
| chr15 | 28571048      | 28571369  | 322 |
| chr15 | 21186624      | 21186945  | 322 |
| chr14 | 7451533       | 7451854   | 322 |
| chr13 | 38253782      | 38254103  | 322 |
| chr10 | 16667731      | 16668052  | 322 |
| chr1  | 118647993     | 118648314 | 322 |
| chrX  | 55639215      | 55639535  | 321 |
| chrX  | 39196428      | 39196748  | 321 |
| chrX  | 6579347       | 6579667   | 321 |
| chr9  | 106323153     | 106323473 | 321 |
| chr9  | 99973362      | 99973682  | 321 |
| chr8  | 65172428      | 65172748  | 321 |
| chr5  | 111698625     | 111698945 | 321 |
| chr4  | 7576732       | 7577052   | 321 |
| chr3  | 123667075     | 123667395 | 321 |
| chr3  | 116237888     | 116238208 | 321 |
| chr3  | 35781822      | 35782142  | 321 |
| chr3  | 4325254       | 4325574   | 321 |
| chr27 | 17751473      | 17751793  | 321 |
| chr27 | 731135 731455 | 321       | 321 |
| chr24 | 58895485      | 58895805  | 321 |
| chr24 | 49477881      | 49478201  | 321 |
| chr23 | 42630476      | 42630796  | 321 |
| chr23 | 29024870      | 29025190  | 321 |
| chr23 | 19916628      | 19916948  | 321 |
| chr22 | 56601429      | 56601749  | 321 |
| chr19 | 54875905      | 54876225  | 321 |
| chr18 | 54222259      | 54222579  | 321 |
| chr17 | 65973187      | 65973507  | 321 |
| chr15 | 6686980       | 6687300   | 321 |
| chr14 | 1069192       | 1069512   | 321 |
| chr13 | 58587900      | 58588220  | 321 |
| chr13 | 41046739      | 41047059  | 321 |
| chr11 | 87731269      | 87731589  | 321 |
| chr11 | 83255579      | 83255899  | 321 |
| chr11 | 68440235      | 68440555  | 321 |
| chr11 | 26156988      | 26157308  | 321 |
| chr11 | 9291687       | 9292007   | 321 |
| chr10 | 32259245      | 32259565  | 321 |
| chr1  | 1551614       | 1551934   | 321 |
| chrX  | 74486820      | 74487139  | 320 |
| chrX  | 30611327      | 30611646  | 320 |
| chrX  | 9733202       | 9733521   | 320 |
| chr7  | 59504528      | 59504847  | 320 |
| chr7  | 57578243      | 57578562  | 320 |

|       |           |           |     |
|-------|-----------|-----------|-----|
| chr5  | 118391047 | 118391366 | 320 |
| chr5  | 112180024 | 112180343 | 320 |
| chr4  | 72314519  | 72314838  | 320 |
| chr3  | 22903317  | 22903636  | 320 |
| chr24 | 60772925  | 60773244  | 320 |
| chr24 | 34701454  | 34701773  | 320 |
| chr24 | 1720358   | 1720677   | 320 |
| chr21 | 5786630   | 5786949   | 320 |
| chr2  | 138637865 | 138638184 | 320 |
| chr2  | 138570496 | 138570815 | 320 |
| chr2  | 130776009 | 130776328 | 320 |
| chr19 | 21777964  | 21778283  | 320 |
| chr18 | 23238102  | 23238421  | 320 |
| chr16 | 44361227  | 44361546  | 320 |
| chr15 | 74531609  | 74531928  | 320 |
| chr14 | 13989476  | 13989795  | 320 |
| chr13 | 78425544  | 78425863  | 320 |
| chr13 | 57372821  | 57373140  | 320 |
| chr13 | 43641831  | 43642150  | 320 |
| chr11 | 106381318 | 106381637 | 320 |
| chr10 | 10779494  | 10779813  | 320 |
| chrX  | 83086593  | 83086911  | 319 |
| chrX  | 82955641  | 82955959  | 319 |
| chrX  | 77937859  | 77938177  | 319 |
| chrX  | 30242150  | 30242468  | 319 |
| chrX  | 18701110  | 18701428  | 319 |
| chrX  | 13640678  | 13640996  | 319 |
| chr9  | 105871845 | 105872163 | 319 |
| chr8  | 60183299  | 60183617  | 319 |
| chr6  | 106794501 | 106794819 | 319 |
| chr3  | 116346705 | 116347023 | 319 |
| chr26 | 37906175  | 37906493  | 319 |
| chr25 | 27959373  | 27959691  | 319 |
| chr24 | 1575061   | 1575379   | 319 |
| chr22 | 61453907  | 61454225  | 319 |
| chr21 | 13944372  | 13944690  | 319 |
| chr20 | 73565158  | 73565476  | 319 |
| chr20 | 33498931  | 33499249  | 319 |
| chr2  | 117744603 | 117744921 | 319 |
| chr19 | 63951263  | 63951581  | 319 |
| chr16 | 77578000  | 77578318  | 319 |
| chr13 | 37157261  | 37157579  | 319 |
| chr12 | 31545754  | 31546072  | 319 |
| chr11 | 72314133  | 72314451  | 319 |
| chr10 | 83641327  | 83641645  | 319 |
| chr1  | 45626312  | 45626630  | 319 |
| chrX  | 37495964  | 37496281  | 318 |
| chrX  | 19032800  | 19033117  | 318 |
| chrX  | 18667342  | 18667659  | 318 |
| chrX  | 8249585   | 8249902   | 318 |

|       |           |           |     |
|-------|-----------|-----------|-----|
| chrX  | 2502445   | 2502762   | 318 |
| chr9  | 33350343  | 33350660  | 318 |
| chr4  | 121020769 | 121021086 | 318 |
| chr4  | 99062754  | 99063071  | 318 |
| chr4  | 79194458  | 79194775  | 318 |
| chr4  | 72049196  | 72049513  | 318 |
| chr4  | 26477714  | 26478031  | 318 |
| chr29 | 38340693  | 38341010  | 318 |
| chr27 | 14686952  | 14687269  | 318 |
| chr25 | 38552105  | 38552422  | 318 |
| chr24 | 40797719  | 40798036  | 318 |
| chr23 | 42388579  | 42388896  | 318 |
| chr23 | 19770030  | 19770347  | 318 |
| chr22 | 29665564  | 29665881  | 318 |
| chr20 | 29953820  | 29954137  | 318 |
| chr2  | 27312733  | 27313050  | 318 |
| chr19 | 61508636  | 61508953  | 318 |
| chr19 | 29874654  | 29874971  | 318 |
| chr17 | 65920813  | 65921130  | 318 |
| chr14 | 1095770   | 1096087   | 318 |
| chr13 | 75436552  | 75436869  | 318 |
| chr13 | 58490626  | 58490943  | 318 |
| chr13 | 46094286  | 46094603  | 318 |
| chr11 | 25735690  | 25736007  | 318 |
| chrX  | 73383845  | 73384161  | 317 |
| chrX  | 68649642  | 68649958  | 317 |
| chrX  | 29563525  | 29563841  | 317 |
| chrX  | 21886069  | 21886385  | 317 |
| chrX  | 21591412  | 21591728  | 317 |
| chrX  | 9707294   | 9707610   | 317 |
| chr8  | 114056602 | 114056918 | 317 |
| chr7  | 5432222   | 5432538   | 317 |
| chr3  | 15407678  | 15407994  | 317 |
| chr26 | 44438506  | 44438822  | 317 |
| chr22 | 61196172  | 61196488  | 317 |
| chr21 | 59746386  | 59746702  | 317 |
| chr19 | 54751080  | 54751396  | 317 |
| chr19 | 29663514  | 29663830  | 317 |
| chr18 | 39476764  | 39477080  | 317 |
| chr16 | 70098196  | 70098512  | 317 |
| chr13 | 40583558  | 40583874  | 317 |
| chr13 | 33302958  | 33303274  | 317 |
| chr11 | 106246179 | 106246495 | 317 |
| chr11 | 89503633  | 89503949  | 317 |
| chr11 | 65293738  | 65294054  | 317 |
| chr1  | 8745055   | 8745371   | 317 |
| chrX  | 49814949  | 49815264  | 316 |
| chrX  | 8322880   | 8323195   | 316 |
| chr8  | 93176623  | 93176938  | 316 |
| chr5  | 76730720  | 76731035  | 316 |



|       |               |           |     |
|-------|---------------|-----------|-----|
| chr29 | 41857863      | 41858178  | 316 |
| chr26 | 43993485      | 43993800  | 316 |
| chr26 | 38463934      | 38464249  | 316 |
| chr26 | 25514059      | 25514374  | 316 |
| chr21 | 20683468      | 20683783  | 316 |
| chr2  | 111610209     | 111610524 | 316 |
| chr18 | 22486977      | 22487292  | 316 |
| chr17 | 68557106      | 68557421  | 316 |
| chr15 | 31866802      | 31867117  | 316 |
| chr13 | 77172968      | 77173283  | 316 |
| chr11 | 28648713      | 28649028  | 316 |
| chr11 | 3304902       | 3305217   | 316 |
| chr10 | 36839579      | 36839894  | 316 |
| chr10 | 3514133       | 3514448   | 316 |
| chrX  | 50485828      | 50486142  | 315 |
| chrX  | 38302188      | 38302502  | 315 |
| chrX  | 30973808      | 30974122  | 315 |
| chrX  | 30400387      | 30400701  | 315 |
| chrX  | 15889415      | 15889729  | 315 |
| chrX  | 10725705      | 10726019  | 315 |
| chrX  | 5847117       | 5847431   | 315 |
| chrX  | 170680 170994 | 315       |     |
| chr9  | 41644618      | 41644932  | 315 |
| chr6  | 40945896      | 40946210  | 315 |
| chr5  | 117533036     | 117533350 | 315 |
| chr26 | 48425366      | 48425680  | 315 |
| chr26 | 48361037      | 48361351  | 315 |
| chr24 | 58863643      | 58863957  | 315 |
| chr24 | 33796042      | 33796356  | 315 |
| chr23 | 51938121      | 51938435  | 315 |
| chr22 | 11740237      | 11740551  | 315 |
| chr20 | 536233 536547 | 315       |     |
| chr2  | 122257583     | 122257897 | 315 |
| chr2  | 73032580      | 73032894  | 315 |
| chr2  | 21391384      | 21391698  | 315 |
| chr19 | 61474671      | 61474985  | 315 |
| chr19 | 54377185      | 54377499  | 315 |
| chr18 | 51637131      | 51637445  | 315 |
| chr18 | 25784200      | 25784514  | 315 |
| chr17 | 74380036      | 74380350  | 315 |
| chr17 | 63040283      | 63040597  | 315 |
| chr17 | 18503590      | 18503904  | 315 |
| chr15 | 75640763      | 75641077  | 315 |
| chr1  | 74535419      | 74535733  | 315 |
| chrX  | 68105938      | 68106251  | 314 |
| chrX  | 55787392      | 55787705  | 314 |
| chrX  | 55281144      | 55281457  | 314 |
| chr9  | 98751347      | 98751660  | 314 |
| chr8  | 24737972      | 24738285  | 314 |
| chr6  | 63154675      | 63154988  | 314 |

|       |           |           |     |
|-------|-----------|-----------|-----|
| chr29 | 33968229  | 33968542  | 314 |
| chr28 | 25261295  | 25261608  | 314 |
| chr27 | 35343584  | 35343897  | 314 |
| chr25 | 37488882  | 37489195  | 314 |
| chr23 | 15531740  | 15532053  | 314 |
| chr21 | 34240332  | 34240645  | 314 |
| chr21 | 24365048  | 24365361  | 314 |
| chr21 | 13983944  | 13984257  | 314 |
| chr18 | 43603664  | 43603977  | 314 |
| chr18 | 32416543  | 32416856  | 314 |
| chr16 | 71139014  | 71139327  | 314 |
| chr15 | 36370888  | 36371201  | 314 |
| chr13 | 41918180  | 41918493  | 314 |
| chr11 | 92623704  | 92624017  | 314 |
| chr11 | 74203621  | 74203934  | 314 |
| chr10 | 17116591  | 17116904  | 314 |
| chr1  | 153880629 | 153880942 | 314 |
| chr1  | 135873666 | 135873979 | 314 |
| chrX  | 78065796  | 78066108  | 313 |
| chrX  | 76039008  | 76039320  | 313 |
| chrX  | 69325406  | 69325718  | 313 |
| chrX  | 65509401  | 65509713  | 313 |
| chrX  | 55606202  | 55606514  | 313 |
| chrX  | 19038615  | 19038927  | 313 |
| chrX  | 7817554   | 7817866   | 313 |
| chr8  | 63802551  | 63802863  | 313 |
| chr7  | 46290652  | 46290964  | 313 |
| chr7  | 45828027  | 45828339  | 313 |
| chr5  | 120167811 | 120168123 | 313 |
| chr3  | 126942350 | 126942662 | 313 |
| chr3  | 99111406  | 99111718  | 313 |
| chr27 | 35412860  | 35413172  | 313 |
| chr2  | 126974229 | 126974541 | 313 |
| chr19 | 31212620  | 31212932  | 313 |
| chr19 | 13857885  | 13858197  | 313 |
| chr13 | 70214709  | 70215021  | 313 |
| chr13 | 6779388   | 6779700   | 313 |
| chr12 | 83971220  | 83971532  | 313 |
| chr12 | 33742780  | 33743092  | 313 |
| chr11 | 46759377  | 46759689  | 313 |
| chr1  | 146291708 | 146292020 | 313 |
| chrX  | 78599518  | 78599829  | 312 |
| chrX  | 34644111  | 34644422  | 312 |
| chrX  | 20391924  | 20392235  | 312 |
| chrX  | 13263729  | 13264040  | 312 |
| chrX  | 3710546   | 3710857   | 312 |
| chr7  | 50634602  | 50634913  | 312 |
| chr7  | 13423650  | 13423961  | 312 |
| chr28 | 11383287  | 11383598  | 312 |
| chr26 | 41463474  | 41463785  | 312 |

|       |               |           |     |
|-------|---------------|-----------|-----|
| chr23 | 15876731      | 15877042  | 312 |
| chr23 | 13663905      | 13664216  | 312 |
| chr22 | 30345033      | 30345344  | 312 |
| chr21 | 16022458      | 16022769  | 312 |
| chr2  | 131150257     | 131150568 | 312 |
| chr2  | 20892018      | 20892329  | 312 |
| chr19 | 61891278      | 61891589  | 312 |
| chr18 | 42161668      | 42161979  | 312 |
| chr17 | 70295237      | 70295548  | 312 |
| chr16 | 50269874      | 50270185  | 312 |
| chr15 | 26897653      | 26897964  | 312 |
| chr15 | 24006671      | 24006982  | 312 |
| chr14 | 6415336       | 6415647   | 312 |
| chr13 | 53826358      | 53826669  | 312 |
| chr12 | 34068893      | 34069204  | 312 |
| chr11 | 108122632     | 108122943 | 312 |
| chr11 | 100333490     | 100333801 | 312 |
| chr11 | 72322946      | 72323257  | 312 |
| chr11 | 44939245      | 44939556  | 312 |
| chr11 | 31133428      | 31133739  | 312 |
| chrX  | 77439675      | 77439985  | 311 |
| chrX  | 72953847      | 72954157  | 311 |
| chrX  | 13675842      | 13676152  | 311 |
| chrX  | 13650084      | 13650394  | 311 |
| chr9  | 105770536     | 105770846 | 311 |
| chr3  | 115928091     | 115928401 | 311 |
| chr3  | 108368137     | 108368447 | 311 |
| chr29 | 33519048      | 33519358  | 311 |
| chr29 | 18825346      | 18825656  | 311 |
| chr26 | 22279681      | 22279991  | 311 |
| chr24 | 927707 928017 | 311       |     |
| chr23 | 25155045      | 25155355  | 311 |
| chr23 | 8863105       | 8863415   | 311 |
| chr2  | 115213739     | 115214049 | 311 |
| chr19 | 21618498      | 21618808  | 311 |
| chr17 | 70517550      | 70517860  | 311 |
| chr17 | 63394225      | 63394535  | 311 |
| chr17 | 49709425      | 49709735  | 311 |
| chr15 | 25685438      | 25685748  | 311 |
| chr10 | 70252412      | 70252722  | 311 |
| chr10 | 69680742      | 69681052  | 311 |
| chrX  | 65085474      | 65085783  | 310 |
| chrX  | 33128066      | 33128375  | 310 |
| chrX  | 8445421       | 8445730   | 310 |
| chrX  | 6617761       | 6618070   | 310 |
| chr9  | 51208568      | 51208877  | 310 |
| chr4  | 98877316      | 98877625  | 310 |
| chr4  | 71490051      | 71490360  | 310 |
| chr3  | 21900194      | 21900503  | 310 |
| chr26 | 48289263      | 48289572  | 310 |

|       |               |           |     |
|-------|---------------|-----------|-----|
| chr23 | 9728406       | 9728715   | 310 |
| chr22 | 54041863      | 54042172  | 310 |
| chr22 | 14128077      | 14128386  | 310 |
| chr22 | 1909735       | 1910044   | 310 |
| chr2  | 131003873     | 131004182 | 310 |
| chr16 | 48804224      | 48804533  | 310 |
| chr14 | 5735817       | 5736126   | 310 |
| chr13 | 61846606      | 61846915  | 310 |
| chr12 | 32534851      | 32535160  | 310 |
| chr12 | 31277051      | 31277360  | 310 |
| chr12 | 15496384      | 15496693  | 310 |
| chr11 | 92486994      | 92487303  | 310 |
| chr1  | 81688938      | 81689247  | 310 |
| chrX  | 79504861      | 79505169  | 309 |
| chrX  | 12527485      | 12527793  | 309 |
| chrX  | 2563719       | 2564027   | 309 |
| chr8  | 89579004      | 89579312  | 309 |
| chr3  | 118878021     | 118878329 | 309 |
| chr25 | 28441290      | 28441598  | 309 |
| chr25 | 2539692       | 2540000   | 309 |
| chr24 | 60579295      | 60579603  | 309 |
| chr24 | 43659115      | 43659423  | 309 |
| chr23 | 48762474      | 48762782  | 309 |
| chr23 | 11324979      | 11325287  | 309 |
| chr22 | 32824440      | 32824748  | 309 |
| chr20 | 72682130      | 72682438  | 309 |
| chr18 | 22099330      | 22099638  | 309 |
| chr13 | 78698294      | 78698602  | 309 |
| chr13 | 59950939      | 59951247  | 309 |
| chr13 | 45330728      | 45331036  | 309 |
| chr13 | 17786797      | 17787105  | 309 |
| chr11 | 34847865      | 34848173  | 309 |
| chr10 | 31223772      | 31224080  | 309 |
| chr1  | 82241346      | 82241654  | 309 |
| chrX  | 78885737      | 78886044  | 308 |
| chrX  | 73316177      | 73316484  | 308 |
| chrX  | 61744723      | 61745030  | 308 |
| chrX  | 61531407      | 61531714  | 308 |
| chrX  | 53372331      | 53372638  | 308 |
| chrX  | 7184745       | 7185052   | 308 |
| chrX  | 7041350       | 7041657   | 308 |
| chrX  | 224457 224764 | 308       | 308 |
| chr7  | 33937377      | 33937684  | 308 |
| chr7  | 15015550      | 15015857  | 308 |
| chr5  | 73105646      | 73105953  | 308 |
| chr28 | 26788944      | 26789251  | 308 |
| chr26 | 48674059      | 48674366  | 308 |
| chr26 | 33847017      | 33847324  | 308 |
| chr19 | 41216174      | 41216481  | 308 |
| chr19 | 13666184      | 13666491  | 308 |

|       |           |           |     |
|-------|-----------|-----------|-----|
| chr17 | 73890581  | 73890888  | 308 |
| chr11 | 93643453  | 93643760  | 308 |
| chr10 | 16795098  | 16795405  | 308 |
| chr1  | 82412310  | 82412617  | 308 |
| chrX  | 73195619  | 73195925  | 307 |
| chrX  | 72126259  | 72126565  | 307 |
| chrX  | 9864593   | 9864899   | 307 |
| chrX  | 8573241   | 8573547   | 307 |
| chrX  | 7636516   | 7636822   | 307 |
| chr9  | 26587530  | 26587836  | 307 |
| chr8  | 10995807  | 10996113  | 307 |
| chr5  | 75853342  | 75853648  | 307 |
| chr3  | 99147563  | 99147869  | 307 |
| chr25 | 7034699   | 7035005   | 307 |
| chr21 | 24521940  | 24522246  | 307 |
| chr20 | 8763040   | 8763346   | 307 |
| chr2  | 112200934 | 112201240 | 307 |
| chr19 | 59314802  | 59315108  | 307 |
| chr15 | 45821256  | 45821562  | 307 |
| chr15 | 30367216  | 30367522  | 307 |
| chr13 | 59833402  | 59833708  | 307 |
| chr13 | 35565131  | 35565437  | 307 |
| chr10 | 22479853  | 22480159  | 307 |
| chr1  | 139097341 | 139097647 | 307 |
| chrX  | 80921148  | 80921453  | 306 |
| chrX  | 79233220  | 79233525  | 306 |
| chrX  | 76854192  | 76854497  | 306 |
| chrX  | 59360364  | 59360669  | 306 |
| chrX  | 47161152  | 47161457  | 306 |
| chr8  | 7659971   | 7660276   | 306 |
| chr7  | 43252409  | 43252714  | 306 |
| chr6  | 63160171  | 63160476  | 306 |
| chr3  | 105276885 | 105277190 | 306 |
| chr25 | 1896759   | 1897064   | 306 |
| chr23 | 15959506  | 15959811  | 306 |
| chr2  | 138951589 | 138951894 | 306 |
| chr13 | 59818949  | 59819254  | 306 |
| chr12 | 82562985  | 82563290  | 306 |
| chr12 | 32209951  | 32210256  | 306 |
| chrX  | 56029481  | 56029785  | 305 |
| chr9  | 65810512  | 65810816  | 305 |
| chr4  | 63965310  | 63965614  | 305 |
| chr3  | 125581947 | 125582251 | 305 |
| chr3  | 110214814 | 110215118 | 305 |
| chr3  | 35652301  | 35652605  | 305 |
| chr29 | 31993989  | 31994293  | 305 |
| chr27 | 8296941   | 8297245   | 305 |
| chr26 | 47015444  | 47015748  | 305 |
| chr19 | 61549235  | 61549539  | 305 |
| chr19 | 38318982  | 38319286  | 305 |

|       |               |           |     |
|-------|---------------|-----------|-----|
| chr19 | 37937865      | 37938169  | 305 |
| chr18 | 11981664      | 11981968  | 305 |
| chr16 | 74806996      | 74807300  | 305 |
| chr16 | 60782228      | 60782532  | 305 |
| chr16 | 48702080      | 48702384  | 305 |
| chr16 | 44381089      | 44381393  | 305 |
| chr15 | 17587809      | 17588113  | 305 |
| chr11 | 7028235       | 7028539   | 305 |
| chr10 | 83084312      | 83084616  | 305 |
| chrX  | 80390617      | 80390920  | 304 |
| chrX  | 62552447      | 62552750  | 304 |
| chrX  | 45595843      | 45596146  | 304 |
| chrX  | 20397552      | 20397855  | 304 |
| chrX  | 8435439       | 8435742   | 304 |
| chrX  | 7215451       | 7215754   | 304 |
| chrX  | 2466922       | 2467225   | 304 |
| chr9  | 90603925      | 90604228  | 304 |
| chr8  | 74347577      | 74347880  | 304 |
| chr7  | 9628152       | 9628455   | 304 |
| chr5  | 111678179     | 111678482 | 304 |
| chr5  | 33926054      | 33926357  | 304 |
| chr4  | 115728680     | 115728983 | 304 |
| chr3  | 125900533     | 125900836 | 304 |
| chr3  | 123199544     | 123199847 | 304 |
| chr3  | 52150849      | 52151152  | 304 |
| chr3  | 36030583      | 36030886  | 304 |
| chr3  | 17557817      | 17558120  | 304 |
| chr26 | 44247847      | 44248150  | 304 |
| chr25 | 146609 146912 | 304       |     |
| chr23 | 45999316      | 45999619  | 304 |
| chr22 | 42570428      | 42570731  | 304 |
| chr22 | 30102292      | 30102595  | 304 |
| chr21 | 65554386      | 65554689  | 304 |
| chr21 | 19083062      | 19083365  | 304 |
| chr19 | 61749394      | 61749697  | 304 |
| chr19 | 41397266      | 41397569  | 304 |
| chr18 | 43563851      | 43564154  | 304 |
| chr16 | 68770491      | 68770794  | 304 |
| chr16 | 48729593      | 48729896  | 304 |
| chr14 | 6928605       | 6928908   | 304 |
| chr13 | 66854541      | 66854844  | 304 |
| chr13 | 41128837      | 41129140  | 304 |
| chr11 | 100369315     | 100369618 | 304 |
| chr11 | 70811421      | 70811724  | 304 |
| chr10 | 90924797      | 90925100  | 304 |
| chr10 | 70196958      | 70197261  | 304 |
| chrX  | 74602766      | 74603068  | 303 |
| chrX  | 71820428      | 71820730  | 303 |
| chrX  | 5718414       | 5718716   | 303 |
| chr8  | 108706944     | 108707246 | 303 |

|       |           |           |     |
|-------|-----------|-----------|-----|
| chr5  | 122772813 | 122773115 | 303 |
| chr5  | 36378945  | 36379247  | 303 |
| chr5  | 30401084  | 30401386  | 303 |
| chr3  | 9159144   | 9159446   | 303 |
| chr24 | 58686808  | 58687110  | 303 |
| chr2  | 126030834 | 126031136 | 303 |
| chr18 | 9744263   | 9744565   | 303 |
| chr17 | 73111968  | 73112270  | 303 |
| chr17 | 56060824  | 56061126  | 303 |
| chr15 | 28132116  | 28132418  | 303 |
| chr13 | 22597672  | 22597974  | 303 |
| chr12 | 84232411  | 84232713  | 303 |
| chrX  | 53894846  | 53895147  | 302 |
| chrX  | 38180884  | 38181185  | 302 |
| chrX  | 20899264  | 20899565  | 302 |
| chr8  | 90740674  | 90740975  | 302 |
| chr8  | 82881891  | 82882192  | 302 |
| chr8  | 23820045  | 23820346  | 302 |
| chr5  | 74754485  | 74754786  | 302 |
| chr24 | 46842971  | 46843272  | 302 |
| chr21 | 57750348  | 57750649  | 302 |
| chr21 | 55563403  | 55563704  | 302 |
| chr20 | 62765570  | 62765871  | 302 |
| chr19 | 26004712  | 26005013  | 302 |
| chr18 | 23590682  | 23590983  | 302 |
| chr18 | 22103747  | 22104048  | 302 |
| chr16 | 44712124  | 44712425  | 302 |
| chr15 | 31974502  | 31974803  | 302 |
| chr14 | 76288257  | 76288558  | 302 |
| chr13 | 76205862  | 76206163  | 302 |
| chr10 | 90201388  | 90201689  | 302 |
| chr10 | 83093586  | 83093887  | 302 |
| chr10 | 25340747  | 25341048  | 302 |
| chr10 | 22407334  | 22407635  | 302 |
| chr10 | 17405995  | 17406296  | 302 |
| chr1  | 145717881 | 145718182 | 302 |
| chrX  | 12114248  | 12114548  | 301 |
| chrX  | 6710987   | 6711287   | 301 |
| chr9  | 35469225  | 35469525  | 301 |
| chr8  | 80078984  | 80079284  | 301 |
| chr8  | 23908482  | 23908782  | 301 |
| chr6  | 108501345 | 108501645 | 301 |
| chr6  | 99405797  | 99406097  | 301 |
| chr4  | 39495403  | 39495703  | 301 |
| chr29 | 49045761  | 49046061  | 301 |
| chr29 | 45776389  | 45776689  | 301 |
| chr28 | 25901945  | 25902245  | 301 |
| chr26 | 43228922  | 43229222  | 301 |
| chr26 | 34498141  | 34498441  | 301 |
| chr26 | 18732364  | 18732664  | 301 |

|       |               |           |     |
|-------|---------------|-----------|-----|
| chr24 | 61113001      | 61113301  | 301 |
| chr22 | 47925802      | 47926102  | 301 |
| chr21 | 19804154      | 19804454  | 301 |
| chr18 | 53573523      | 53573823  | 301 |
| chr18 | 52863450      | 52863750  | 301 |
| chr18 | 45985938      | 45986238  | 301 |
| chr17 | 63181115      | 63181415  | 301 |
| chr16 | 58483802      | 58484102  | 301 |
| chr15 | 51605052      | 51605352  | 301 |
| chr15 | 20746784      | 20747084  | 301 |
| chr1  | 45536905      | 45537205  | 301 |
| chrX  | 75670773      | 75671072  | 300 |
| chrX  | 75214575      | 75214874  | 300 |
| chrX  | 68910894      | 68911193  | 300 |
| chrX  | 19427522      | 19427821  | 300 |
| chr9  | 38246238      | 38246537  | 300 |
| chr8  | 78692993      | 78693292  | 300 |
| chr7  | 60385079      | 60385378  | 300 |
| chr7  | 17476968      | 17477267  | 300 |
| chr6  | 92069811      | 92070110  | 300 |
| chr3  | 110736086     | 110736385 | 300 |
| chr29 | 45579253      | 45579552  | 300 |
| chr29 | 30810695      | 30810994  | 300 |
| chr28 | 26790449      | 26790748  | 300 |
| chr28 | 13492678      | 13492977  | 300 |
| chr25 | 38166675      | 38166974  | 300 |
| chr22 | 14987585      | 14987884  | 300 |
| chr21 | 2919181       | 2919480   | 300 |
| chr2  | 136659104     | 136659403 | 300 |
| chr2  | 91081115      | 91081414  | 300 |
| chr19 | 42044505      | 42044804  | 300 |
| chr13 | 64213160      | 64213459  | 300 |
| chr12 | 32467227      | 32467526  | 300 |
| chr10 | 35770781      | 35771080  | 300 |
| chrX  | 80840842      | 80841140  | 299 |
| chrX  | 74816571      | 74816869  | 299 |
| chrX  | 57691336      | 57691634  | 299 |
| chrX  | 47804839      | 47805137  | 299 |
| chrX  | 9245220       | 9245518   | 299 |
| chrX  | 7811815       | 7812113   | 299 |
| chr9  | 104523534     | 104523832 | 299 |
| chr8  | 72601638      | 72601936  | 299 |
| chr7  | 37397332      | 37397630  | 299 |
| chr4  | 10818672      | 10818970  | 299 |
| chr28 | 25202287      | 25202585  | 299 |
| chr28 | 4261606       | 4261904   | 299 |
| chr27 | 40937360      | 40937658  | 299 |
| chr27 | 661025 661323 |           | 299 |
| chr25 | 37215515      | 37215813  | 299 |
| chr23 | 10528754      | 10529052  | 299 |



|       |               |           |     |
|-------|---------------|-----------|-----|
| chr22 | 60021840      | 60022138  | 299 |
| chr21 | 16049881      | 16050179  | 299 |
| chr20 | 760134 760432 |           | 299 |
| chr19 | 17857167      | 17857465  | 299 |
| chr16 | 75400753      | 75401051  | 299 |
| chr15 | 36051272      | 36051570  | 299 |
| chr14 | 61786013      | 61786311  | 299 |
| chr13 | 54792249      | 54792547  | 299 |
| chr10 | 70176951      | 70177249  | 299 |
| chr10 | 52234119      | 52234417  | 299 |
| chr10 | 20489383      | 20489681  | 299 |
| chrX  | 6443557       | 6443854   | 298 |
| chr29 | 34996868      | 34997165  | 298 |
| chr28 | 42254990      | 42255287  | 298 |
| chr28 | 25309109      | 25309406  | 298 |
| chr27 | 37919742      | 37920039  | 298 |
| chr27 | 17749995      | 17750292  | 298 |
| chr24 | 40240878      | 40241175  | 298 |
| chr23 | 51909094      | 51909391  | 298 |
| chr23 | 28065649      | 28065946  | 298 |
| chr22 | 30408555      | 30408852  | 298 |
| chr21 | 64280993      | 64281290  | 298 |
| chr21 | 31010972      | 31011269  | 298 |
| chr20 | 23693614      | 23693911  | 298 |
| chr2  | 26491599      | 26491896  | 298 |
| chr19 | 32175792      | 32176089  | 298 |
| chr18 | 41804304      | 41804601  | 298 |
| chr18 | 6125289       | 6125586   | 298 |
| chr14 | 61308947      | 61309244  | 298 |
| chr13 | 30820870      | 30821167  | 298 |
| chrX  | 65403025      | 65403321  | 297 |
| chrX  | 46701017      | 46701313  | 297 |
| chrX  | 13148692      | 13148988  | 297 |
| chrX  | 5687405       | 5687701   | 297 |
| chrX  | 978482 978778 |           | 297 |
| chr8  | 86975578      | 86975874  | 297 |
| chr8  | 65830284      | 65830580  | 297 |
| chr7  | 4148946       | 4149242   | 297 |
| chr5  | 116927695     | 116927991 | 297 |
| chr5  | 30893937      | 30894233  | 297 |
| chr26 | 37844341      | 37844637  | 297 |
| chr23 | 27304589      | 27304885  | 297 |
| chr22 | 59656442      | 59656738  | 297 |
| chr22 | 58442641      | 58442937  | 297 |
| chr21 | 6558377       | 6558673   | 297 |
| chr2  | 131602015     | 131602311 | 297 |
| chr19 | 16144079      | 16144375  | 297 |
| chr17 | 70168943      | 70169239  | 297 |
| chr15 | 22966031      | 22966327  | 297 |
| chr11 | 48330792      | 48331088  | 297 |

|       |           |           |     |
|-------|-----------|-----------|-----|
| chrX  | 62942010  | 62942305  | 296 |
| chrX  | 44927129  | 44927424  | 296 |
| chrX  | 7102689   | 7102984   | 296 |
| chr9  | 66048713  | 66049008  | 296 |
| chr7  | 47114828  | 47115123  | 296 |
| chr6  | 45444136  | 45444431  | 296 |
| chr5  | 74691291  | 74691586  | 296 |
| chr3  | 118068607 | 118068902 | 296 |
| chr3  | 106513086 | 106513381 | 296 |
| chr27 | 17520233  | 17520528  | 296 |
| chr26 | 48336461  | 48336756  | 296 |
| chr26 | 43182480  | 43182775  | 296 |
| chr26 | 43035230  | 43035525  | 296 |
| chr24 | 19823137  | 19823432  | 296 |
| chr23 | 26156796  | 26157091  | 296 |
| chr21 | 66133370  | 66133665  | 296 |
| chr21 | 18900721  | 18901016  | 296 |
| chr20 | 23694183  | 23694478  | 296 |
| chr14 | 22116895  | 22117190  | 296 |
| chrX  | 75943822  | 75944116  | 295 |
| chrX  | 68627736  | 68628030  | 295 |
| chrX  | 56741979  | 56742273  | 295 |
| chr7  | 5461862   | 5462156   | 295 |
| chr6  | 107331362 | 107331656 | 295 |
| chr6  | 45976456  | 45976750  | 295 |
| chr5  | 28803908  | 28804202  | 295 |
| chr5  | 6077599   | 6077893   | 295 |
| chr3  | 33086976  | 33087270  | 295 |
| chr29 | 37093596  | 37093890  | 295 |
| chr27 | 16706894  | 16707188  | 295 |
| chr22 | 30420880  | 30421174  | 295 |
| chr2  | 126699327 | 126699621 | 295 |
| chr18 | 50266720  | 50267014  | 295 |
| chr18 | 10687119  | 10687413  | 295 |
| chr17 | 62290927  | 62291221  | 295 |
| chr13 | 18451451  | 18451745  | 295 |
| chr12 | 19671642  | 19671936  | 295 |
| chr11 | 28316762  | 28317056  | 295 |
| chr10 | 36014842  | 36015136  | 295 |
| chr10 | 33925395  | 33925689  | 295 |
| chr1  | 1526346   | 1526640   | 295 |
| chrX  | 74476372  | 74476665  | 294 |
| chrX  | 72763312  | 72763605  | 294 |
| chrX  | 21228104  | 21228397  | 294 |
| chr7  | 17944058  | 17944351  | 294 |
| chr6  | 109073651 | 109073944 | 294 |
| chr6  | 62536254  | 62536547  | 294 |
| chr29 | 51768088  | 51768381  | 294 |
| chr29 | 35234896  | 35235189  | 294 |
| chr29 | 26723113  | 26723406  | 294 |

|       |               |           |     |
|-------|---------------|-----------|-----|
| chr23 | 18592079      | 18592372  | 294 |
| chr21 | 39997729      | 39998022  | 294 |
| chr20 | 5085622       | 5085915   | 294 |
| chr2  | 130441992     | 130442285 | 294 |
| chr2  | 40814594      | 40814887  | 294 |
| chr18 | 39978868      | 39979161  | 294 |
| chr18 | 33813716      | 33814009  | 294 |
| chr17 | 63943763      | 63944056  | 294 |
| chr17 | 57810233      | 57810526  | 294 |
| chr14 | 76284262      | 76284555  | 294 |
| chr13 | 60963550      | 60963843  | 294 |
| chr13 | 41610353      | 41610646  | 294 |
| chr12 | 84232946      | 84233239  | 294 |
| chr1  | 47521108      | 47521401  | 294 |
| chrX  | 78523907      | 78524199  | 293 |
| chrX  | 19519365      | 19519657  | 293 |
| chr7  | 9601214       | 9601506   | 293 |
| chr5  | 29748715      | 29749007  | 293 |
| chr26 | 48498963      | 48499255  | 293 |
| chr25 | 28578274      | 28578566  | 293 |
| chr20 | 8599420       | 8599712   | 293 |
| chr20 | 695790 696082 | 293       |     |
| chr19 | 61621655      | 61621947  | 293 |
| chr19 | 26106842      | 26107134  | 293 |
| chr18 | 22281138      | 22281430  | 293 |
| chr17 | 75723068      | 75723360  | 293 |
| chr15 | 19972346      | 19972638  | 293 |
| chr10 | 9753842       | 9754134   | 293 |
| chr1  | 72415706      | 72415998  | 293 |
| chrX  | 80091442      | 80091733  | 292 |
| chrX  | 73398306      | 73398597  | 292 |
| chrX  | 38209374      | 38209665  | 292 |
| chrX  | 34580661      | 34580952  | 292 |
| chrX  | 2426080       | 2426371   | 292 |
| chr9  | 45965066      | 45965357  | 292 |
| chr5  | 118177688     | 118177979 | 292 |
| chr5  | 35625170      | 35625461  | 292 |
| chr3  | 117270150     | 117270441 | 292 |
| chr24 | 41895841      | 41896132  | 292 |
| chr22 | 48005780      | 48006071  | 292 |
| chr2  | 28701675      | 28701966  | 292 |
| chr19 | 19141283      | 19141574  | 292 |
| chr19 | 15961707      | 15961998  | 292 |
| chr18 | 63787345      | 63787636  | 292 |
| chr18 | 10710204      | 10710495  | 292 |
| chr17 | 64198973      | 64199264  | 292 |
| chr16 | 60234070      | 60234361  | 292 |
| chr11 | 93775852      | 93776143  | 292 |
| chr1  | 113807908     | 113808199 | 292 |
| chr1  | 100623979     | 100624270 | 292 |

|       |           |           |     |
|-------|-----------|-----------|-----|
| chrX  | 74098789  | 74099079  | 291 |
| chrX  | 72725852  | 72726142  | 291 |
| chrX  | 52960664  | 52960954  | 291 |
| chr9  | 66943253  | 66943543  | 291 |
| chr8  | 10854444  | 10854734  | 291 |
| chr7  | 16644058  | 16644348  | 291 |
| chr6  | 115536174 | 115536464 | 291 |
| chr25 | 4817607   | 4817897   | 291 |
| chr21 | 69015289  | 69015579  | 291 |
| chr21 | 47732993  | 47733283  | 291 |
| chr20 | 67487282  | 67487572  | 291 |
| chr18 | 18054036  | 18054326  | 291 |
| chr15 | 34579631  | 34579921  | 291 |
| chr15 | 25678180  | 25678470  | 291 |
| chr14 | 75938918  | 75939208  | 291 |
| chr12 | 30545984  | 30546274  | 291 |
| chr1  | 140874059 | 140874349 | 291 |
| chrX  | 75883780  | 75884069  | 290 |
| chrX  | 67803152  | 67803441  | 290 |
| chrX  | 54699157  | 54699446  | 290 |
| chr9  | 52398990  | 52399279  | 290 |
| chr8  | 73730580  | 73730869  | 290 |
| chr7  | 109701943 | 109702232 | 290 |
| chr2  | 23189392  | 23189681  | 290 |
| chr18 | 22438642  | 22438931  | 290 |
| chr15 | 64513879  | 64514168  | 290 |
| chr14 | 7842464   | 7842753   | 290 |
| chr13 | 73531035  | 73531324  | 290 |
| chr13 | 37444688  | 37444977  | 290 |
| chr10 | 71486868  | 71487157  | 290 |
| chrX  | 19834321  | 19834609  | 289 |
| chrX  | 19479410  | 19479698  | 289 |
| chrX  | 7507363   | 7507651   | 289 |
| chr8  | 47609613  | 47609901  | 289 |
| chr5  | 116680163 | 116680451 | 289 |
| chr5  | 112404930 | 112405218 | 289 |
| chr5  | 72173045  | 72173333  | 289 |
| chr4  | 121287043 | 121287331 | 289 |
| chr3  | 121866940 | 121867228 | 289 |
| chr3  | 117321049 | 117321337 | 289 |
| chr25 | 35540319  | 35540607  | 289 |
| chr21 | 34845732  | 34846020  | 289 |
| chr19 | 60390297  | 60390585  | 289 |
| chr19 | 46726940  | 46727228  | 289 |
| chr19 | 38125574  | 38125862  | 289 |
| chr19 | 32566576  | 32566864  | 289 |
| chr19 | 26369291  | 26369579  | 289 |
| chr19 | 14630312  | 14630600  | 289 |
| chr17 | 14534394  | 14534682  | 289 |
| chr13 | 60046284  | 60046572  | 289 |

|       |               |           |     |
|-------|---------------|-----------|-----|
| chr11 | 88159668      | 88159956  | 289 |
| chrX  | 6540512       | 6540799   | 288 |
| chrX  | 426023 426310 |           | 288 |
| chr5  | 80714151      | 80714438  | 288 |
| chr4  | 99039124      | 99039411  | 288 |
| chr28 | 26415344      | 26415631  | 288 |
| chr26 | 31347847      | 31348134  | 288 |
| chr23 | 8065558       | 8065845   | 288 |
| chr22 | 59423881      | 59424168  | 288 |
| chr22 | 50609962      | 50610249  | 288 |
| chr22 | 5684516       | 5684803   | 288 |
| chr20 | 11108128      | 11108415  | 288 |
| chr18 | 3433227       | 3433514   | 288 |
| chr12 | 13646837      | 13647124  | 288 |
| chr10 | 66939609      | 66939896  | 288 |
| chrX  | 78487476      | 78487762  | 287 |
| chrX  | 38431309      | 38431595  | 287 |
| chr8  | 62584135      | 62584421  | 287 |
| chr7  | 38476006      | 38476292  | 287 |
| chr6  | 109904251     | 109904537 | 287 |
| chr4  | 66460431      | 66460717  | 287 |
| chr3  | 115626693     | 115626979 | 287 |
| chr3  | 31112142      | 31112428  | 287 |
| chr24 | 1682210       | 1682496   | 287 |
| chr20 | 8721373       | 8721659   | 287 |
| chr19 | 37515682      | 37515968  | 287 |
| chr17 | 59051841      | 59052127  | 287 |
| chr16 | 68895934      | 68896220  | 287 |
| chr12 | 30807646      | 30807932  | 287 |
| chr11 | 56739464      | 56739750  | 287 |
| chrX  | 80444462      | 80444747  | 286 |
| chrX  | 63195335      | 63195620  | 286 |
| chrX  | 59302619      | 59302904  | 286 |
| chr7  | 46473254      | 46473539  | 286 |
| chr7  | 15591434      | 15591719  | 286 |
| chr29 | 17867431      | 17867716  | 286 |
| chr21 | 19836338      | 19836623  | 286 |
| chr19 | 45809674      | 45809959  | 286 |
| chr19 | 17917410      | 17917695  | 286 |
| chr15 | 54275726      | 54276011  | 286 |
| chr14 | 30868592      | 30868877  | 286 |
| chr13 | 75799302      | 75799587  | 286 |
| chr10 | 90973098      | 90973383  | 286 |
| chrX  | 73444130      | 73444414  | 285 |
| chrX  | 20296666      | 20296950  | 285 |
| chrX  | 11636372      | 11636656  | 285 |
| chr9  | 98743992      | 98744276  | 285 |
| chr6  | 120971391     | 120971675 | 285 |
| chr6  | 59283939      | 59284223  | 285 |
| chr3  | 116000559     | 116000843 | 285 |

|       |           |           |     |
|-------|-----------|-----------|-----|
| chr25 | 26711050  | 26711334  | 285 |
| chr24 | 13105671  | 13105955  | 285 |
| chr22 | 59572721  | 59573005  | 285 |
| chr18 | 12030971  | 12031255  | 285 |
| chr12 | 14255498  | 14255782  | 285 |
| chrX  | 20919187  | 20919470  | 284 |
| chrX  | 5745831   | 5746114   | 284 |
| chr9  | 105141631 | 105141914 | 284 |
| chr9  | 104906935 | 104907218 | 284 |
| chr8  | 93196089  | 93196372  | 284 |
| chr24 | 43681250  | 43681533  | 284 |
| chr2  | 66424182  | 66424465  | 284 |
| chr19 | 58884203  | 58884486  | 284 |
| chr18 | 43797858  | 43798141  | 284 |
| chr18 | 11347919  | 11348202  | 284 |
| chr17 | 69281914  | 69282197  | 284 |
| chrX  | 56564231  | 56564513  | 283 |
| chr4  | 123275758 | 123276040 | 283 |
| chr3  | 45693811  | 45694093  | 283 |
| chr25 | 27722508  | 27722790  | 283 |
| chr25 | 10522423  | 10522705  | 283 |
| chr24 | 58920212  | 58920494  | 283 |
| chr2  | 136625067 | 136625349 | 283 |
| chr19 | 12506395  | 12506677  | 283 |
| chr17 | 70135130  | 70135412  | 283 |
| chr15 | 38332874  | 38333156  | 283 |
| chr15 | 22987410  | 22987692  | 283 |
| chr15 | 16009808  | 16010090  | 283 |
| chr13 | 60436184  | 60436466  | 283 |
| chr10 | 68043149  | 68043431  | 283 |
| chrX  | 74098043  | 74098324  | 282 |
| chrX  | 10667280  | 10667561  | 282 |
| chrX  | 7073889   | 7074170   | 282 |
| chr28 | 42850242  | 42850523  | 282 |
| chr24 | 50260301  | 50260582  | 282 |
| chr20 | 34682837  | 34683118  | 282 |
| chr19 | 32891619  | 32891900  | 282 |
| chr19 | 20333056  | 20333337  | 282 |
| chr16 | 47684261  | 47684542  | 282 |
| chr14 | 21768354  | 21768635  | 282 |
| chr14 | 21034529  | 21034810  | 282 |
| chr10 | 20193924  | 20194205  | 282 |
| chrX  | 20282629  | 20282909  | 281 |
| chr8  | 27280540  | 27280820  | 281 |
| chr7  | 45165614  | 45165894  | 281 |
| chr4  | 118696825 | 118697105 | 281 |
| chr3  | 11536365  | 11536645  | 281 |
| chr27 | 27850491  | 27850771  | 281 |
| chr25 | 37803660  | 37803940  | 281 |
| chr24 | 1202193   | 1202473   | 281 |

|       |           |           |     |
|-------|-----------|-----------|-----|
| chr24 | 900575    | 900855    | 281 |
| chr23 | 27884000  | 27884280  | 281 |
| chr18 | 17909060  | 17909340  | 281 |
| chr17 | 61303696  | 61303976  | 281 |
| chr14 | 16701737  | 16702017  | 281 |
| chr14 | 8426720   | 8427000   | 281 |
| chr13 | 45328343  | 45328623  | 281 |
| chr11 | 10378484  | 10378764  | 281 |
| chrX  | 50709036  | 50709315  | 280 |
| chrX  | 22612704  | 22612983  | 280 |
| chrX  | 12034982  | 12035261  | 280 |
| chrX  | 8576513   | 8576792   | 280 |
| chr8  | 45766613  | 45766892  | 280 |
| chr5  | 72148965  | 72149244  | 280 |
| chr5  | 1146612   | 1146891   | 280 |
| chr3  | 124086991 | 124087270 | 280 |
| chr18 | 54794037  | 54794316  | 280 |
| chr16 | 47496941  | 47497220  | 280 |
| chr15 | 30027922  | 30028201  | 280 |
| chr10 | 83569429  | 83569708  | 280 |
| chr10 | 20198284  | 20198563  | 280 |
| chr1  | 67587486  | 67587765  | 280 |
| chrX  | 44618866  | 44619144  | 279 |
| chrX  | 18715391  | 18715669  | 279 |
| chrX  | 8216571   | 8216849   | 279 |
| chr6  | 108587446 | 108587724 | 279 |
| chr5  | 111899908 | 111900186 | 279 |
| chr4  | 98633456  | 98633734  | 279 |
| chr29 | 27167081  | 27167359  | 279 |
| chr27 | 26714823  | 26715101  | 279 |
| chr26 | 14979383  | 14979661  | 279 |
| chr22 | 59963011  | 59963289  | 279 |
| chr21 | 26592453  | 26592731  | 279 |
| chr19 | 49649367  | 49649645  | 279 |
| chr18 | 54959496  | 54959774  | 279 |
| chr15 | 26671298  | 26671576  | 279 |
| chr14 | 22033125  | 22033403  | 279 |
| chr14 | 7821240   | 7821518   | 279 |
| chr13 | 41758041  | 41758319  | 279 |
| chr12 | 31316282  | 31316560  | 279 |
| chr11 | 90413693  | 90413971  | 279 |
| chr10 | 20900404  | 20900682  | 279 |
| chrX  | 62832785  | 62833062  | 278 |
| chrX  | 49534423  | 49534700  | 278 |
| chrX  | 48861319  | 48861596  | 278 |
| chrX  | 10184149  | 10184426  | 278 |
| chr9  | 90457936  | 90458213  | 278 |
| chr4  | 106674379 | 106674656 | 278 |
| chr28 | 11893843  | 11894120  | 278 |
| chr26 | 34698924  | 34699201  | 278 |

|       |               |           |     |
|-------|---------------|-----------|-----|
| chr19 | 15786942      | 15787219  | 278 |
| chr15 | 25525169      | 25525446  | 278 |
| chr14 | 59324351      | 59324628  | 278 |
| chr5  | 297661 297937 | 277       |     |
| chr27 | 34643237      | 34643513  | 277 |
| chr24 | 43888089      | 43888365  | 277 |
| chr22 | 16328161      | 16328437  | 277 |
| chr19 | 45256608      | 45256884  | 277 |
| chr18 | 43603155      | 43603431  | 277 |
| chr18 | 12307574      | 12307850  | 277 |
| chr11 | 44933807      | 44934083  | 277 |
| chr1  | 75059505      | 75059781  | 277 |
| chrX  | 76121924      | 76122199  | 276 |
| chrX  | 50439824      | 50440099  | 276 |
| chrX  | 50261984      | 50262259  | 276 |
| chrX  | 16438013      | 16438288  | 276 |
| chrX  | 11974625      | 11974900  | 276 |
| chr7  | 43765313      | 43765588  | 276 |
| chr5  | 115542035     | 115542310 | 276 |
| chr3  | 115026804     | 115027079 | 276 |
| chr19 | 37268115      | 37268390  | 276 |
| chr18 | 6179997       | 6180272   | 276 |
| chr15 | 44222082      | 44222357  | 276 |
| chr15 | 39634335      | 39634610  | 276 |
| chr15 | 30004027      | 30004302  | 276 |
| chrX  | 12435825      | 12436099  | 275 |
| chr8  | 49633617      | 49633891  | 275 |
| chr7  | 42226734      | 42227008  | 275 |
| chr5  | 111215795     | 111216069 | 275 |
| chr5  | 31242725      | 31242999  | 275 |
| chr29 | 32093956      | 32094230  | 275 |
| chr29 | 26349802      | 26350076  | 275 |
| chr20 | 1085257       | 1085531   | 275 |
| chr2  | 136728545     | 136728819 | 275 |
| chr19 | 46487434      | 46487708  | 275 |
| chr19 | 11002309      | 11002583  | 275 |
| chr11 | 84831400      | 84831674  | 275 |
| chr10 | 84414383      | 84414657  | 275 |
| chrX  | 21836197      | 21836470  | 274 |
| chrX  | 18486827      | 18487100  | 274 |
| chr7  | 84679532      | 84679805  | 274 |
| chr23 | 18684003      | 18684276  | 274 |
| chr21 | 34177129      | 34177402  | 274 |
| chr2  | 136424615     | 136424888 | 274 |
| chr10 | 4842054       | 4842327   | 274 |
| chrX  | 56682800      | 56683072  | 273 |
| chrX  | 13181562      | 13181834  | 273 |
| chr9  | 106324327     | 106324599 | 273 |
| chr3  | 112521285     | 112521557 | 273 |
| chr26 | 44931816      | 44932088  | 273 |



|       |           |           |     |
|-------|-----------|-----------|-----|
| chr23 | 19955415  | 19955687  | 273 |
| chr23 | 7698745   | 7699017   | 273 |
| chr21 | 62219237  | 62219509  | 273 |
| chr19 | 41228234  | 41228506  | 273 |
| chr16 | 42930792  | 42931064  | 273 |
| chr13 | 37536409  | 37536681  | 273 |
| chrX  | 71283709  | 71283980  | 272 |
| chrX  | 33520762  | 33521033  | 272 |
| chrX  | 10081405  | 10081676  | 272 |
| chrX  | 2883275   | 2883546   | 272 |
| chr7  | 17129532  | 17129803  | 272 |
| chr7  | 5298036   | 5298307   | 272 |
| chr6  | 20763365  | 20763636  | 272 |
| chr4  | 109555884 | 109556155 | 272 |
| chr24 | 51909696  | 51909967  | 272 |
| chr23 | 48147400  | 48147671  | 272 |
| chr23 | 28821545  | 28821816  | 272 |
| chr19 | 54331367  | 54331638  | 272 |
| chr19 | 15797408  | 15797679  | 272 |
| chr15 | 32274603  | 32274874  | 272 |
| chr13 | 66880732  | 66881003  | 272 |
| chr11 | 38884746  | 38885017  | 272 |
| chrX  | 12481412  | 12481682  | 271 |
| chr7  | 19290139  | 19290409  | 271 |
| chr5  | 111329392 | 111329662 | 271 |
| chr4  | 101637252 | 101637522 | 271 |
| chr29 | 35369596  | 35369866  | 271 |
| chr29 | 34753699  | 34753969  | 271 |
| chr27 | 1339090   | 1339360   | 271 |
| chr24 | 46305105  | 46305375  | 271 |
| chr23 | 10454347  | 10454617  | 271 |
| chr10 | 20170059  | 20170329  | 271 |
| chrX  | 54151786  | 54152055  | 270 |
| chr7  | 16101955  | 16102224  | 270 |
| chr5  | 110791836 | 110792105 | 270 |
| chr24 | 58939507  | 58939776  | 270 |
| chr23 | 19663378  | 19663647  | 270 |
| chr21 | 45302990  | 45303259  | 270 |
| chr18 | 12147972  | 12148241  | 270 |
| chr16 | 2188926   | 2189195   | 270 |
| chr15 | 32982722  | 32982991  | 270 |
| chrX  | 59145658  | 59145926  | 269 |
| chr8  | 110951810 | 110952078 | 269 |
| chr3  | 33330617  | 33330885  | 269 |
| chr3  | 27767811  | 27768079  | 269 |
| chr27 | 35436179  | 35436447  | 269 |
| chr26 | 44455683  | 44455951  | 269 |
| chr21 | 33939203  | 33939471  | 269 |
| chr21 | 20656389  | 20656657  | 269 |
| chr19 | 33584746  | 33585014  | 269 |

|       |           |           |     |
|-------|-----------|-----------|-----|
| chr17 | 62615408  | 62615676  | 269 |
| chr16 | 75282317  | 75282585  | 269 |
| chr15 | 39535805  | 39536073  | 269 |
| chr13 | 63092293  | 63092561  | 269 |
| chr11 | 104883801 | 104884069 | 269 |
| chr11 | 82916273  | 82916541  | 269 |
| chr11 | 1367823   | 1368091   | 269 |
| chrX  | 19390999  | 19391266  | 268 |
| chr3  | 116475302 | 116475569 | 268 |
| chr27 | 1338600   | 1338867   | 268 |
| chrX  | 73625085  | 73625351  | 267 |
| chrX  | 12010247  | 12010513  | 267 |
| chrX  | 7086816   | 7087082   | 267 |
| chrX  | 6609702   | 6609968   | 267 |
| chrX  | 2506329   | 2506595   | 267 |
| chr8  | 65965568  | 65965834  | 267 |
| chr5  | 88044090  | 88044356  | 267 |
| chr3  | 8756453   | 8756719   | 267 |
| chr29 | 43364525  | 43364791  | 267 |
| chr22 | 60027193  | 60027459  | 267 |
| chr18 | 1544326   | 1544592   | 267 |
| chr16 | 68981241  | 68981507  | 267 |
| chr13 | 77793169  | 77793435  | 267 |
| chr3  | 116153713 | 116153978 | 266 |
| chr28 | 33818064  | 33818329  | 266 |
| chr25 | 39208381  | 39208646  | 266 |
| chr23 | 44104702  | 44104967  | 266 |
| chr21 | 20900331  | 20900596  | 266 |
| chr2  | 121936901 | 121937166 | 266 |
| chr13 | 77577759  | 77578024  | 266 |
| chr13 | 65278096  | 65278361  | 266 |
| chrX  | 53758846  | 53759110  | 265 |
| chrX  | 21429634  | 21429898  | 265 |
| chr3  | 123668688 | 123668952 | 265 |
| chr24 | 58630277  | 58630541  | 265 |
| chr19 | 39845923  | 39846187  | 265 |
| chr18 | 11622326  | 11622590  | 265 |
| chr18 | 9802869   | 9803133   | 265 |
| chr17 | 18371796  | 18372060  | 265 |
| chr13 | 67075609  | 67075873  | 265 |
| chr11 | 70561782  | 70562046  | 265 |
| chr1  | 3129585   | 3129849   | 265 |
| chrX  | 78258527  | 78258790  | 264 |
| chr6  | 18014056  | 18014319  | 264 |
| chr29 | 17896082  | 17896345  | 264 |
| chr23 | 51825296  | 51825559  | 264 |
| chr19 | 19272064  | 19272327  | 264 |
| chr18 | 3254759   | 3255022   | 264 |
| chr12 | 82786456  | 82786719  | 264 |
| chr10 | 70525480  | 70525743  | 264 |

|       |           |           |     |
|-------|-----------|-----------|-----|
| chrX  | 74576820  | 74577082  | 263 |
| chrX  | 65575283  | 65575545  | 263 |
| chrX  | 6649548   | 6649810   | 263 |
| chr8  | 73879517  | 73879779  | 263 |
| chr26 | 43024019  | 43024281  | 263 |
| chr23 | 51910812  | 51911074  | 263 |
| chr23 | 11935041  | 11935303  | 263 |
| chr21 | 20901838  | 20902100  | 263 |
| chr2  | 140061470 | 140061732 | 263 |
| chr17 | 54316162  | 54316424  | 263 |
| chr12 | 73773805  | 73774067  | 263 |
| chr11 | 105600494 | 105600756 | 263 |
| chrX  | 56903074  | 56903335  | 262 |
| chr9  | 106533934 | 106534195 | 262 |
| chr9  | 90394340  | 90394601  | 262 |
| chr26 | 23514896  | 23515157  | 262 |
| chr19 | 37887361  | 37887622  | 262 |
| chr18 | 65858151  | 65858412  | 262 |
| chr11 | 46761398  | 46761659  | 262 |
| chr10 | 17494865  | 17495126  | 262 |
| chr1  | 145382012 | 145382273 | 262 |
| chr1  | 2390546   | 2390807   | 262 |
| chr7  | 89467996  | 89468256  | 261 |
| chr25 | 37971122  | 37971382  | 261 |
| chr23 | 15087648  | 15087908  | 261 |
| chr22 | 10752624  | 10752884  | 261 |
| chr19 | 47239982  | 47240242  | 261 |
| chr18 | 48839810  | 48840070  | 261 |
| chr16 | 75996925  | 75997185  | 261 |
| chr15 | 75256474  | 75256734  | 261 |
| chr15 | 32686563  | 32686823  | 261 |
| chrX  | 34712994  | 34713253  | 260 |
| chrX  | 8913344   | 8913603   | 260 |
| chrX  | 8041512   | 8041771   | 260 |
| chrX  | 7173795   | 7174054   | 260 |
| chr3  | 121921322 | 121921581 | 260 |
| chr26 | 20925116  | 20925375  | 260 |
| chr23 | 27798081  | 27798340  | 260 |
| chr21 | 67976877  | 67977136  | 260 |
| chr21 | 67403019  | 67403278  | 260 |
| chr2  | 140738745 | 140739004 | 260 |
| chr19 | 39953354  | 39953613  | 260 |
| chr13 | 54066231  | 54066490  | 260 |
| chr13 | 45473405  | 45473664  | 260 |
| chrX  | 60194461  | 60194719  | 259 |
| chr4  | 81967868  | 81968126  | 259 |
| chr4  | 5618471   | 5618729   | 259 |
| chr29 | 18216072  | 18216330  | 259 |
| chr25 | 34408756  | 34409014  | 259 |
| chr24 | 1425903   | 1426161   | 259 |

|       |           |           |     |
|-------|-----------|-----------|-----|
| chr23 | 27095928  | 27096186  | 259 |
| chr23 | 18469029  | 18469287  | 259 |
| chr11 | 88456329  | 88456587  | 259 |
| chr1  | 100643771 | 100644029 | 259 |
| chrX  | 50289396  | 50289653  | 258 |
| chrX  | 7350279   | 7350536   | 258 |
| chr9  | 35965858  | 35966115  | 258 |
| chr7  | 27360836  | 27361093  | 258 |
| chr4  | 123217653 | 123217910 | 258 |
| chr3  | 101754227 | 101754484 | 258 |
| chr29 | 33194231  | 33194488  | 258 |
| chr2  | 139355095 | 139355352 | 258 |
| chr2  | 111671948 | 111672205 | 258 |
| chr18 | 63028762  | 63029019  | 258 |
| chr18 | 55419938  | 55420195  | 258 |
| chr13 | 35651992  | 35652249  | 258 |
| chr12 | 18234597  | 18234854  | 258 |
| chr10 | 35635881  | 35636138  | 258 |
| chrX  | 72121921  | 72122177  | 257 |
| chrX  | 8437271   | 8437527   | 257 |
| chr6  | 118805107 | 118805363 | 257 |
| chr5  | 29214688  | 29214944  | 257 |
| chr24 | 43908453  | 43908709  | 257 |
| chr23 | 35074783  | 35075039  | 257 |
| chr20 | 1116470   | 1116726   | 257 |
| chr19 | 62947905  | 62948161  | 257 |
| chr19 | 45268595  | 45268851  | 257 |
| chr19 | 23092367  | 23092623  | 257 |
| chr17 | 70078779  | 70079035  | 257 |
| chr17 | 30057037  | 30057293  | 257 |
| chr13 | 58276721  | 58276977  | 257 |
| chrX  | 5807015   | 5807270   | 256 |
| chr26 | 44545207  | 44545462  | 256 |
| chr25 | 16505232  | 16505487  | 256 |
| chr17 | 63375358  | 63375613  | 256 |
| chr13 | 59414378  | 59414633  | 256 |
| chrX  | 64577047  | 64577301  | 255 |
| chr8  | 27427000  | 27427254  | 255 |
| chr3  | 127009582 | 127009836 | 255 |
| chr18 | 56920753  | 56921007  | 255 |
| chr15 | 76445849  | 76446103  | 255 |
| chr13 | 54472612  | 54472866  | 255 |
| chr29 | 45780309  | 45780562  | 254 |
| chr29 | 38057993  | 38058246  | 254 |
| chr22 | 53953447  | 53953700  | 254 |
| chr13 | 22158575  | 22158828  | 254 |
| chr1  | 74708734  | 74708987  | 254 |
| chr1  | 45799855  | 45800108  | 254 |
| chrX  | 7877489   | 7877741   | 253 |
| chr9  | 106214388 | 106214640 | 253 |

|       |           |           |     |
|-------|-----------|-----------|-----|
| chr4  | 8640740   | 8640992   | 253 |
| chr25 | 40371590  | 40371842  | 253 |
| chr22 | 57642227  | 57642479  | 253 |
| chr18 | 21958183  | 21958435  | 253 |
| chr15 | 84536320  | 84536572  | 253 |
| chr14 | 5729383   | 5729635   | 253 |
| chrX  | 50003057  | 50003308  | 252 |
| chr22 | 57366835  | 57367086  | 252 |
| chr20 | 74696549  | 74696800  | 252 |
| chr2  | 135730636 | 135730887 | 252 |
| chr19 | 34629050  | 34629301  | 252 |
| chr19 | 33624758  | 33625009  | 252 |
| chr18 | 62681521  | 62681772  | 252 |
| chr15 | 75286447  | 75286698  | 252 |
| chrX  | 59735423  | 59735673  | 251 |
| chrX  | 58713467  | 58713717  | 251 |
| chr18 | 56376604  | 56376854  | 251 |
| chrX  | 65394990  | 65395239  | 250 |
| chr8  | 62401512  | 62401761  | 250 |
| chr7  | 44042440  | 44042689  | 250 |
| chr5  | 84496128  | 84496377  | 250 |
| chr4  | 83338788  | 83339037  | 250 |
| chr3  | 113382995 | 113383244 | 250 |
| chr24 | 35351759  | 35352008  | 250 |
| chr2  | 116857404 | 116857653 | 250 |
| chr19 | 16349575  | 16349824  | 250 |
| chr16 | 42930370  | 42930619  | 250 |
| chr11 | 77971003  | 77971252  | 250 |
| chr5  | 91521734  | 91521982  | 249 |
| chr22 | 12063140  | 12063388  | 249 |
| chr18 | 63749014  | 63749262  | 249 |
| chr18 | 63701830  | 63702078  | 249 |
| chr10 | 88073680  | 88073928  | 249 |
| chr10 | 19583463  | 19583711  | 249 |
| chr8  | 69615224  | 69615471  | 248 |
| chr29 | 31857762  | 31858009  | 248 |
| chr11 | 71076251  | 71076498  | 248 |
| chrX  | 80965491  | 80965737  | 247 |
| chr26 | 20192398  | 20192644  | 247 |
| chr2  | 125420121 | 125420367 | 247 |
| chr13 | 42585160  | 42585406  | 247 |
| chrX  | 30703189  | 30703434  | 246 |
| chrX  | 6726204   | 6726449   | 246 |
| chr7  | 10838335  | 10838580  | 246 |
| chr21 | 44298340  | 44298585  | 246 |
| chr19 | 20375900  | 20376145  | 246 |
| chr15 | 39561644  | 39561889  | 246 |
| chr14 | 7608427   | 7608672   | 246 |
| chr12 | 20848154  | 20848399  | 246 |
| chr1  | 118199423 | 118199668 | 246 |

|       |           |           |     |
|-------|-----------|-----------|-----|
| chrX  | 36085070  | 36085314  | 245 |
| chr23 | 26988985  | 26989229  | 245 |
| chr23 | 11346070  | 11346314  | 245 |
| chr22 | 30373739  | 30373983  | 245 |
| chr14 | 75158441  | 75158685  | 245 |
| chrX  | 73540455  | 73540698  | 244 |
| chr5  | 113205448 | 113205691 | 244 |
| chr4  | 124387010 | 124387253 | 244 |
| chr29 | 38677602  | 38677845  | 244 |
| chr22 | 12371590  | 12371833  | 244 |
| chr2  | 112896427 | 112896670 | 244 |
| chr18 | 11509197  | 11509440  | 244 |
| chrX  | 80889032  | 80889274  | 243 |
| chr5  | 73140516  | 73140758  | 243 |
| chr27 | 46461796  | 46462038  | 243 |
| chr16 | 47964769  | 47965011  | 243 |
| chr13 | 41521227  | 41521469  | 243 |
| chr1  | 30160438  | 30160680  | 243 |
| chr5  | 75732157  | 75732398  | 242 |
| chr19 | 45276384  | 45276625  | 242 |
| chr16 | 44380116  | 44380357  | 242 |
| chr15 | 51537414  | 51537655  | 242 |
| chr13 | 26903912  | 26904153  | 242 |
| chr11 | 76358625  | 76358866  | 242 |
| chr9  | 105314514 | 105314754 | 241 |
| chr5  | 28691499  | 28691739  | 241 |
| chr3  | 35674334  | 35674574  | 241 |
| chr26 | 39101288  | 39101528  | 241 |
| chr18 | 38803057  | 38803297  | 241 |
| chr11 | 48526718  | 48526958  | 241 |
| chr19 | 16719307  | 16719545  | 239 |
| chr29 | 29942472  | 29942709  | 238 |
| chr23 | 34947278  | 34947515  | 238 |
| chr19 | 37543283  | 37543520  | 238 |
| chr12 | 31164191  | 31164428  | 238 |
| chr9  | 106143612 | 106143848 | 237 |
| chr7  | 46463280  | 46463516  | 237 |
| chr7  | 44047923  | 44048159  | 237 |
| chr6  | 22907327  | 22907563  | 237 |
| chr25 | 21661171  | 21661407  | 237 |
| chr23 | 9993137   | 9993373   | 237 |
| chr20 | 38852631  | 38852867  | 237 |
| chr19 | 47200082  | 47200318  | 237 |
| chr18 | 24588583  | 24588819  | 237 |
| chr13 | 42890308  | 42890544  | 237 |
| chr13 | 40713318  | 40713554  | 237 |
| chrX  | 48499400  | 48499635  | 236 |
| chr15 | 24557439  | 24557674  | 236 |
| chr11 | 11635159  | 11635394  | 236 |
| chr4  | 122123002 | 122123236 | 235 |

|       |               |           |     |
|-------|---------------|-----------|-----|
| chr26 | 48744427      | 48744661  | 235 |
| chr18 | 18559473      | 18559707  | 235 |
| chrX  | 10949227      | 10949460  | 234 |
| chr22 | 7117448       | 7117681   | 234 |
| chr4  | 124449428     | 124449660 | 233 |
| chr27 | 35441445      | 35441677  | 233 |
| chr20 | 74545530      | 74545762  | 233 |
| chr15 | 36190890      | 36191122  | 233 |
| chr12 | 31987733      | 31987965  | 233 |
| chr3  | 122224414     | 122224645 | 232 |
| chrX  | 79477546      | 79477776  | 231 |
| chr29 | 34955403      | 34955633  | 231 |
| chr17 | 5392439       | 5392669   | 231 |
| chrX  | 72022022      | 72022251  | 230 |
| chr5  | 77000010      | 77000239  | 230 |
| chr18 | 50588687      | 50588916  | 230 |
| chr7  | 46279421      | 46279649  | 229 |
| chr5  | 125843386     | 125843614 | 229 |
| chr20 | 8533795       | 8534023   | 229 |
| chr7  | 47242792      | 47243019  | 228 |
| chr13 | 75785129      | 75785356  | 228 |
| chr7  | 10171848      | 10172074  | 227 |
| chr18 | 57294581      | 57294807  | 227 |
| chr10 | 6069092       | 6069318   | 227 |
| chr15 | 62572193      | 62572418  | 226 |
| chr10 | 83543424      | 83543649  | 226 |
| chr1  | 81734371      | 81734595  | 225 |
| chr2  | 125277201     | 125277424 | 224 |
| chr11 | 12903719      | 12903942  | 224 |
| chr29 | 36693965      | 36694187  | 223 |
| chrX  | 922730 922951 | 222       |     |
| chr21 | 27767391      | 27767612  | 222 |
| chr13 | 71286941      | 71287162  | 222 |
| chr13 | 75647366      | 75647586  | 221 |
| chrX  | 5871580       | 5871799   | 220 |
| chr8  | 108838903     | 108839122 | 220 |
| chr26 | 15737997      | 15738216  | 220 |
| chrX  | 64871888      | 64872106  | 219 |
| chrX  | 64303159      | 64303377  | 219 |
| chr15 | 27460764      | 27460981  | 218 |
| chr12 | 83195816      | 83196032  | 217 |
| chrX  | 34682605      | 34682820  | 216 |
| chr9  | 90429597      | 90429812  | 216 |
| chr29 | 36877477      | 36877692  | 216 |
| chrX  | 19970597      | 19970810  | 214 |
| chr13 | 70184635      | 70184847  | 213 |
| chr10 | 53733748      | 53733959  | 212 |
| chr5  | 113130007     | 113130214 | 208 |
| chr15 | 37878520      | 37878727  | 208 |
| chr19 | 7754824       | 7755028   | 205 |

|       |               |           |      |
|-------|---------------|-----------|------|
| chr11 | 29169818      | 29170019  | 202  |
| chr2  | 138655484     | 138656576 | 1093 |
| chr18 | 33708360      | 33709345  | 986  |
| chr14 | 825485 826410 | 926       |      |
| chr19 | 14043664      | 14044528  | 865  |
| chr6  | 120900594     | 120901432 | 839  |
| chr10 | 74855786      | 74856605  | 820  |
| chrX  | 54707247      | 54708021  | 775  |
| chr15 | 39648423      | 39649192  | 770  |
| chr5  | 1178928       | 1179677   | 750  |
| chr10 | 8365745       | 8366486   | 742  |
| chr24 | 44281122      | 44281857  | 736  |
| chr13 | 57433829      | 57434549  | 721  |
| chrX  | 34134392      | 34135110  | 719  |
| chrX  | 66667100      | 66667811  | 712  |
| chr9  | 90604306      | 90605017  | 712  |
| chr19 | 39241000      | 39241705  | 706  |
| chr27 | 45255044      | 45255736  | 693  |
| chrX  | 36816155      | 36816840  | 686  |
| chr20 | 4937091       | 4937772   | 682  |
| chr13 | 77733076      | 77733752  | 677  |
| chrX  | 50821105      | 50821765  | 661  |
| chr22 | 56250551      | 56251195  | 645  |
| chrX  | 9911368       | 9912011   | 644  |
| chr18 | 39580219      | 39580850  | 632  |
| chrX  | 35619266      | 35619894  | 629  |
| chr22 | 59342835      | 59343462  | 628  |
| chr18 | 11331545      | 11332169  | 625  |
| chr11 | 14333418      | 14334042  | 625  |
| chr21 | 5891267       | 5891886   | 620  |
| chr5  | 76859296      | 76859906  | 611  |
| chr7  | 42404154      | 42404761  | 608  |
| chr16 | 42142862      | 42143465  | 604  |
| chr10 | 20898604      | 20899197  | 594  |
| chr15 | 52324138      | 52324720  | 583  |
| chrX  | 53991457      | 53992038  | 582  |
| chrX  | 50541254      | 50541834  | 581  |
| chrX  | 17124316      | 17124887  | 572  |
| chr21 | 10000801      | 10001371  | 571  |
| chrX  | 12034400      | 12034968  | 569  |
| chr19 | 57036637      | 57037172  | 536  |
| chrX  | 80225196      | 80225716  | 521  |
| chr2  | 136937617     | 136938131 | 515  |
| chr17 | 20187736      | 20188248  | 513  |
| chr5  | 69511487      | 69511998  | 512  |
| chr14 | 8241924       | 8242422   | 499  |
| chr3  | 9406323       | 9406819   | 497  |
| chr1  | 101586452     | 101586947 | 496  |
| chr14 | 22992371      | 22992865  | 495  |
| chr11 | 72845744      | 72846229  | 486  |



|       |               |           |     |
|-------|---------------|-----------|-----|
| chrX  | 55588429      | 55588909  | 481 |
| chr25 | 650937 651417 | 481       |     |
| chr16 | 72214000      | 72214480  | 481 |
| chr5  | 118295030     | 118295505 | 476 |
| chrX  | 13799033      | 13799505  | 473 |
| chrX  | 75030379      | 75030839  | 461 |
| chr3  | 117290477     | 117290933 | 457 |
| chrX  | 74536337      | 74536792  | 456 |
| chr6  | 120930862     | 120931312 | 451 |
| chr27 | 663715 664163 | 449       |     |
| chr29 | 45076959      | 45077401  | 443 |
| chr19 | 47242181      | 47242623  | 443 |
| chr22 | 30364042      | 30364474  | 433 |
| chr14 | 40046027      | 40046457  | 431 |
| chr17 | 70070662      | 70071087  | 426 |
| chr10 | 70156484      | 70156909  | 426 |
| chr20 | 64881282      | 64881706  | 425 |
| chr3  | 120772934     | 120773356 | 423 |
| chr27 | 38975544      | 38975965  | 422 |
| chr13 | 41387325      | 41387744  | 420 |
| chrX  | 6327161       | 6327579   | 419 |
| chr18 | 52681130      | 52681548  | 419 |
| chr25 | 15555146      | 15555563  | 418 |
| chr17 | 72662573      | 72662990  | 418 |
| chrX  | 7783035       | 7783444   | 410 |
| chr21 | 69086971      | 69087380  | 410 |
| chr2  | 131583385     | 131583793 | 409 |
| chr12 | 68242376      | 68242781  | 406 |
| chr29 | 50110485      | 50110887  | 403 |
| chr9  | 108129078     | 108129476 | 399 |
| chr9  | 90355209      | 90355607  | 399 |
| chr8  | 60416706      | 60417104  | 399 |
| chr29 | 2687414       | 2687812   | 399 |
| chr28 | 44236425      | 44236823  | 399 |
| chr26 | 20968397      | 20968795  | 399 |
| chr24 | 61069641      | 61070039  | 399 |
| chr19 | 60330364      | 60330762  | 399 |
| chr19 | 7203136       | 7203534   | 399 |
| chr18 | 23599605      | 23600003  | 399 |
| chr16 | 77499220      | 77499618  | 399 |
| chr13 | 40578501      | 40578899  | 399 |
| chr12 | 80059017      | 80059415  | 399 |
| chr1  | 138023204     | 138023602 | 399 |
| chr22 | 18358249      | 18358645  | 397 |
| chr10 | 20872996      | 20873392  | 397 |
| chr20 | 38408268      | 38408663  | 396 |
| chr14 | 60001785      | 60002178  | 394 |
| chr27 | 15344344      | 15344736  | 393 |
| chr18 | 50850831      | 50851223  | 393 |
| chr10 | 89418241      | 89418629  | 389 |

|       |           |           |      |
|-------|-----------|-----------|------|
| chr3  | 4326957   | 4327344   | 388  |
| chr26 | 43034429  | 43034816  | 388  |
| chr19 | 21681531  | 21681917  | 387  |
| chr25 | 1902704   | 1903089   | 386  |
| chr8  | 73894492  | 73894875  | 384  |
| chr28 | 41788886  | 41789269  | 384  |
| chr19 | 41233887  | 41234270  | 384  |
| chr12 | 36277725  | 36278108  | 384  |
| chr3  | 105186412 | 105186793 | 382  |
| chrX  | 13231618  | 13231998  | 381  |
| chrX  | 58213444  | 58213822  | 379  |
| chr7  | 89425842  | 89426220  | 379  |
| chrX  | 45732678  | 45733054  | 377  |
| chr20 | 4986886   | 4987262   | 377  |
| chr20 | 8677560   | 8677934   | 375  |
| chr16 | 44867412  | 44867786  | 375  |
| chr17 | 68287553  | 68287926  | 374  |
| chr19 | 12566628  | 12567000  | 373  |
| chr16 | 45906277  | 45906649  | 373  |
| chr22 | 7551525   | 7551895   | 371  |
| chrX  | 20186344  | 20186713  | 370  |
| chr23 | 18003136  | 18003505  | 370  |
| chr13 | 41349694  | 41350063  | 370  |
| chr13 | 40832184  | 40832550  | 367  |
| chr2  | 131853551 | 131853916 | 366  |
| chrX  | 9485570   | 9485933   | 364  |
| chrX  | 2412252   | 2412615   | 364  |
| chrX  | 49992958  | 49993320  | 363  |
| chr7  | 42190581  | 42190943  | 363  |
| chr18 | 64524547  | 64524909  | 363  |
| chrX  | 7712540   | 7712900   | 361  |
| chr22 | 50257634  | 50257989  | 356  |
| chr19 | 44298123  | 44298478  | 356  |
| chr16 | 20656182  | 20656534  | 353  |
| chr13 | 38917112  | 38917457  | 346  |
| chr29 | 49636542  | 49636886  | 345  |
| chr2  | 76389534  | 76389874  | 341  |
| chrX  | 36973383  | 36973690  | 308  |
| chrX  | 6647853   | 6648157   | 305  |
| chr23 | 28434846  | 28435145  | 300  |
| chr22 | 45455407  | 45455705  | 299  |
| chr10 | 85576940  | 85578173  | 1234 |
| chr17 | 73440402  | 73441287  | 886  |
| chr24 | 35211744  | 35212605  | 862  |
| chr2  | 26979264  | 26980107  | 844  |
| chr25 | 34395383  | 34396120  | 738  |
| chr4  | 32179725  | 32180435  | 711  |
| chrX  | 8784658   | 8785363   | 706  |
| chr17 | 70324688  | 70325370  | 683  |
| chrX  | 50685312  | 50685981  | 670  |

|       |           |           |     |
|-------|-----------|-----------|-----|
| chr6  | 113359831 | 113360500 | 670 |
| chr23 | 9459331   | 9459994   | 664 |
| chr18 | 11749576  | 11750239  | 664 |
| chrX  | 9912969   | 9913628   | 660 |
| chr3  | 106580845 | 106581489 | 645 |
| chr16 | 34508062  | 34508700  | 639 |
| chr12 | 82667465  | 82668100  | 636 |
| chr5  | 120113967 | 120114601 | 635 |
| chr5  | 60371762  | 60372342  | 581 |
| chr9  | 85771382  | 85771961  | 580 |
| chr6  | 106922763 | 106923337 | 575 |
| chrX  | 10093330  | 10093902  | 573 |
| chrX  | 20428062  | 20428629  | 568 |
| chr3  | 15765779  | 15766336  | 558 |
| chr4  | 110112900 | 110113450 | 551 |
| chrX  | 80867537  | 80868082  | 546 |
| chr10 | 17031703  | 17032241  | 539 |
| chrX  | 56326905  | 56327442  | 538 |
| chr28 | 26775408  | 26775943  | 536 |
| chr10 | 12717539  | 12718065  | 527 |
| chrX  | 75860977  | 75861497  | 521 |
| chr7  | 42730114  | 42730632  | 519 |
| chr9  | 106833622 | 106834133 | 512 |
| chr7  | 51089933  | 51090442  | 510 |
| chr1  | 157220610 | 157221118 | 509 |
| chr18 | 56921365  | 56921865  | 501 |
| chrX  | 20013388  | 20013884  | 497 |
| chr19 | 11013870  | 11014359  | 490 |
| chr10 | 90543638  | 90544117  | 480 |
| chr20 | 34683459  | 34683932  | 474 |
| chr2  | 130441311 | 130441770 | 460 |
| chr20 | 8705241   | 8705689   | 449 |
| chr15 | 33147247  | 33147694  | 448 |
| chrX  | 72127383  | 72127828  | 446 |
| chr29 | 2528762   | 2529206   | 445 |
| chr11 | 20458224  | 20458667  | 444 |
| chr10 | 71263156  | 71263598  | 443 |
| chr7  | 5256113   | 5256553   | 441 |
| chr11 | 76364292  | 76364730  | 439 |
| chrX  | 20300423  | 20300857  | 435 |
| chr12 | 54229052  | 54229485  | 434 |
| chr11 | 104586466 | 104586895 | 430 |
| chrX  | 78506422  | 78506843  | 422 |
| chrX  | 74635263  | 74635683  | 421 |
| chrX  | 24572286  | 24572706  | 421 |
| chr24 | 20366029  | 20366449  | 421 |
| chr20 | 74054990  | 74055410  | 421 |
| chrX  | 20491898  | 20492317  | 420 |
| chr13 | 34798491  | 34798910  | 420 |
| chr23 | 8395578   | 8395994   | 417 |

|       |           |           |     |
|-------|-----------|-----------|-----|
| chr12 | 32160499  | 32160915  | 417 |
| chrX  | 69954756  | 69955169  | 414 |
| chrX  | 21595991  | 21596398  | 408 |
| chrX  | 74460750  | 74461151  | 402 |
| chr16 | 76997513  | 76997912  | 400 |
| chrX  | 54708314  | 54708712  | 399 |
| chrX  | 9658557   | 9658955   | 399 |
| chr5  | 111342587 | 111342985 | 399 |
| chr5  | 28983798  | 28984196  | 399 |
| chr4  | 99724767  | 99725165  | 399 |
| chr4  | 29024440  | 29024838  | 399 |
| chr3  | 89870797  | 89871195  | 399 |
| chr3  | 35649681  | 35650079  | 399 |
| chr24 | 51884857  | 51885255  | 399 |
| chr24 | 50889424  | 50889822  | 399 |
| chr15 | 45861737  | 45862135  | 399 |
| chrX  | 74311646  | 74312041  | 396 |
| chr25 | 42209798  | 42210192  | 395 |
| chr19 | 26005386  | 26005779  | 394 |
| chrX  | 29584430  | 29584822  | 393 |
| chrX  | 72604482  | 72604871  | 390 |
| chr18 | 62982750  | 62983138  | 389 |
| chr17 | 74604062  | 74604449  | 388 |
| chr8  | 74381833  | 74382219  | 387 |
| chr21 | 1979557   | 1979943   | 387 |
| chr8  | 64976607  | 64976992  | 386 |
| chrX  | 9645104   | 9645487   | 384 |
| chrX  | 6254753   | 6255136   | 384 |
| chrX  | 7862730   | 7863111   | 382 |
| chr2  | 21519074  | 21519455  | 382 |
| chrX  | 75472579  | 75472959  | 381 |
| chr13 | 35491238  | 35491618  | 381 |
| chrX  | 49815896  | 49816275  | 380 |
| chr10 | 58769839  | 58770215  | 377 |
| chr11 | 47881636  | 47882011  | 376 |
| chr27 | 41969991  | 41970352  | 362 |
| chr18 | 4075633   | 4075993   | 361 |
| chr10 | 36031989  | 36032345  | 357 |
| chr18 | 50555452  | 50555807  | 356 |
| chr10 | 58736914  | 58737263  | 350 |
| chr7  | 14377299  | 14377647  | 349 |
| chr22 | 51114651  | 51114999  | 349 |
| chr7  | 3973192   | 3973536   | 345 |
| chr19 | 56463997  | 56464338  | 342 |
| chr29 | 37336688  | 37337027  | 340 |
| chr11 | 70801540  | 70801876  | 337 |
| chr17 | 30254264  | 30254595  | 332 |
| chr21 | 27583668  | 27583998  | 331 |
| chrX  | 21490318  | 21490646  | 329 |
| chr5  | 30183543  | 30183871  | 329 |

|       |           |           |     |
|-------|-----------|-----------|-----|
| chr4  | 66658188  | 66658514  | 327 |
| chr23 | 11968506  | 11968805  | 300 |
| chr24 | 60208386  | 60208635  | 250 |
| chr25 | 37694758  | 37695715  | 958 |
| chrX  | 61847733  | 61848536  | 804 |
| chr19 | 56105772  | 56106474  | 703 |
| chrX  | 59438672  | 59439364  | 693 |
| chr12 | 80140455  | 80141136  | 682 |
| chr4  | 26381312  | 26381983  | 672 |
| chr3  | 118885921 | 118886588 | 668 |
| chrX  | 55259160  | 55259811  | 652 |
| chr20 | 8322980   | 8323616   | 637 |
| chrX  | 54700276  | 54700891  | 616 |
| chr2  | 75591938  | 75592547  | 610 |
| chr18 | 41055965  | 41056553  | 589 |
| chr8  | 78696483  | 78697053  | 571 |
| chr1  | 74692545  | 74693106  | 562 |
| chr20 | 5048913   | 5049464   | 552 |
| chr16 | 47275778  | 47276327  | 550 |
| chr9  | 63426049  | 63426592  | 544 |
| chrX  | 58093425  | 58093956  | 532 |
| chrX  | 61293351  | 61293874  | 524 |
| chr1  | 149441595 | 149442113 | 519 |
| chr25 | 36482585  | 36483096  | 512 |
| chr2  | 108809046 | 108809554 | 509 |
| chrX  | 82343998  | 82344504  | 507 |
| chr26 | 14904890  | 14905382  | 493 |
| chrX  | 12887603  | 12888093  | 491 |
| chr4  | 95661170  | 95661659  | 490 |
| chr17 | 70247097  | 70247586  | 490 |
| chr26 | 49094743  | 49095225  | 483 |
| chr29 | 38741850  | 38742317  | 468 |
| chr28 | 33291262  | 33291727  | 466 |
| chr13 | 70944523  | 70944981  | 459 |
| chrX  | 11998607  | 11999059  | 453 |
| chr18 | 33654424  | 33654875  | 452 |
| chr23 | 48676263  | 48676708  | 446 |
| chr11 | 100749985 | 100750429 | 445 |
| chrX  | 22558799  | 22559236  | 438 |
| chrX  | 48647391  | 48647823  | 433 |
| chrX  | 38987728  | 38988160  | 433 |
| chr17 | 63504703  | 63505129  | 427 |
| chr15 | 25439030  | 25439452  | 423 |
| chr6  | 74570648  | 74571066  | 419 |
| chr7  | 50284471  | 50284888  | 418 |
| chr12 | 31614675  | 31615092  | 418 |
| chr16 | 68902190  | 68902599  | 410 |
| chr11 | 89069070  | 89069479  | 410 |
| chr3  | 9110851   | 9111259   | 409 |
| chrX  | 8372413   | 8372818   | 406 |

|       |               |           |     |
|-------|---------------|-----------|-----|
| chr5  | 29149309      | 29149707  | 399 |
| chr5  | 29140571      | 29140969  | 399 |
| chr3  | 17295312      | 17295710  | 399 |
| chr23 | 13661615      | 13662013  | 399 |
| chr22 | 1961198       | 1961596   | 399 |
| chr18 | 12034268      | 12034666  | 399 |
| chr3  | 115085003     | 115085400 | 398 |
| chr26 | 42900588      | 42900981  | 394 |
| chr1  | 123106143     | 123106536 | 394 |
| chrX  | 37410491      | 37410883  | 393 |
| chr13 | 55370439      | 55370831  | 393 |
| chr18 | 37897482      | 37897873  | 392 |
| chr4  | 72737490      | 72737880  | 391 |
| chr23 | 27235167      | 27235557  | 391 |
| chr15 | 77435520      | 77435909  | 390 |
| chrX  | 55373049      | 55373437  | 389 |
| chr16 | 38924840      | 38925225  | 386 |
| chr10 | 61384467      | 61384851  | 385 |
| chr22 | 13453467      | 13453849  | 383 |
| chr26 | 18300155      | 18300535  | 381 |
| chr25 | 33587463      | 33587843  | 381 |
| chr10 | 66775644      | 66776024  | 381 |
| chr22 | 7055523       | 7055902   | 380 |
| chr10 | 90541444      | 90541818  | 375 |
| chrX  | 64756702      | 64757075  | 374 |
| chr2  | 119578401     | 119578774 | 374 |
| chr10 | 88061927      | 88062298  | 372 |
| chr19 | 23054058      | 23054428  | 371 |
| chr8  | 65731806      | 65732173  | 368 |
| chr19 | 24361624      | 24361979  | 356 |
| chr4  | 119252208     | 119252562 | 355 |
| chr13 | 60978681      | 60979029  | 349 |
| chrX  | 74633203      | 74633541  | 339 |
| chr4  | 30781192      | 30781530  | 339 |
| chr10 | 5451845       | 5452180   | 336 |
| chr2  | 102429945     | 102430276 | 332 |
| chr11 | 28504923      | 28505243  | 321 |
| chr23 | 28540165      | 28540483  | 319 |
| chrX  | 71039822      | 71040131  | 310 |
| chr4  | 99270954      | 99271248  | 295 |
| chrX  | 368275 369048 | 774       |     |
| chrX  | 55433504      | 55434245  | 742 |
| chr25 | 37231148      | 37231789  | 642 |
| chr7  | 19882760      | 19883382  | 623 |
| chr17 | 44179545      | 44180167  | 623 |
| chr18 | 23216585      | 23217205  | 621 |
| chr17 | 46057823      | 46058439  | 617 |
| chr14 | 34067232      | 34067844  | 613 |
| chr11 | 49327277      | 49327878  | 602 |
| chr16 | 58322552      | 58323151  | 600 |

|       |           |           |     |
|-------|-----------|-----------|-----|
| chr22 | 14049262  | 14049855  | 594 |
| chr24 | 43305536  | 43306125  | 590 |
| chr11 | 11620038  | 11620613  | 576 |
| chr23 | 12375849  | 12376422  | 574 |
| chr25 | 10929574  | 10930146  | 573 |
| chrX  | 19660629  | 19661189  | 561 |
| chr7  | 57165828  | 57166385  | 558 |
| chrX  | 34188650  | 34189199  | 550 |
| chr25 | 37689443  | 37689983  | 541 |
| chr25 | 38335164  | 38335703  | 540 |
| chr24 | 3374318   | 3374857   | 540 |
| chr11 | 81754522  | 81755048  | 527 |
| chrX  | 48710035  | 48710560  | 526 |
| chr23 | 35046310  | 35046828  | 519 |
| chr26 | 48624947  | 48625451  | 505 |
| chr11 | 49844465  | 49844958  | 494 |
| chr26 | 44238057  | 44238549  | 493 |
| chr25 | 8735494   | 8735981   | 488 |
| chr15 | 24510049  | 24510536  | 488 |
| chrX  | 56895854  | 56896338  | 485 |
| chrX  | 55438967  | 55439449  | 483 |
| chr7  | 18072038  | 18072519  | 482 |
| chr25 | 21906963  | 21907444  | 482 |
| chr12 | 14805915  | 14806396  | 482 |
| chr7  | 19670653  | 19671127  | 475 |
| chr24 | 48585716  | 48586190  | 475 |
| chr21 | 44301562  | 44302034  | 473 |
| chrX  | 48095408  | 48095878  | 471 |
| chr26 | 22360992  | 22361459  | 468 |
| chr18 | 11729909  | 11730374  | 466 |
| chr25 | 37645727  | 37646191  | 465 |
| chr12 | 37025457  | 37025919  | 463 |
| chr3  | 106519497 | 106519954 | 458 |
| chr19 | 38858881  | 38859338  | 458 |
| chr23 | 8244318   | 8244774   | 457 |
| chrX  | 61617467  | 61617919  | 453 |
| chr10 | 24990983  | 24991428  | 446 |
| chr13 | 70248408  | 70248852  | 445 |
| chr19 | 30094990  | 30095433  | 444 |
| chr21 | 34002872  | 34003314  | 443 |
| chrX  | 65492825  | 65493265  | 441 |
| chr15 | 81088107  | 81088547  | 441 |
| chr7  | 19671380  | 19671818  | 439 |
| chr27 | 32807964  | 32808402  | 439 |
| chr26 | 50516318  | 50516755  | 438 |
| chr19 | 20836838  | 20837274  | 437 |
| chrX  | 78122923  | 78123356  | 434 |
| chr16 | 2137597   | 2138030   | 434 |
| chrX  | 63062746  | 63063178  | 433 |
| chr14 | 19607448  | 19607880  | 433 |

|       |           |           |     |
|-------|-----------|-----------|-----|
| chrX  | 579000    | 579431    | 432 |
| chr15 | 62532826  | 62533257  | 432 |
| chr11 | 91584111  | 91584542  | 432 |
| chrX  | 46192223  | 46192652  | 430 |
| chr17 | 19214386  | 19214814  | 429 |
| chrX  | 20349993  | 20350419  | 427 |
| chr3  | 30011922  | 30012348  | 427 |
| chr13 | 65810581  | 65811007  | 427 |
| chr19 | 39358627  | 39359052  | 426 |
| chr13 | 57656147  | 57656572  | 426 |
| chr5  | 113129263 | 113129687 | 425 |
| chrX  | 13286814  | 13287237  | 424 |
| chr11 | 66232547  | 66232969  | 423 |
| chr23 | 13691872  | 13692288  | 417 |
| chr19 | 39155454  | 39155870  | 417 |
| chr26 | 34975375  | 34975790  | 416 |
| chr15 | 21216038  | 21216451  | 414 |
| chr4  | 8844978   | 8845390   | 413 |
| chr7  | 3033103   | 3033512   | 410 |
| chr16 | 26857406  | 26857815  | 410 |
| chr7  | 50553640  | 50554048  | 409 |
| chr25 | 22579540  | 22579948  | 409 |
| chr13 | 40275920  | 40276327  | 408 |
| chrX  | 37339443  | 37339848  | 406 |
| chrX  | 29974440  | 29974844  | 405 |
| chr27 | 33472207  | 33472611  | 405 |
| chr25 | 3027379   | 3027783   | 405 |
| chr4  | 72552369  | 72552772  | 404 |
| chr26 | 22378624  | 22379027  | 404 |
| chr15 | 74587716  | 74588119  | 404 |
| chr3  | 112380728 | 112381130 | 403 |
| chr10 | 70134963  | 70135365  | 403 |
| chrX  | 8117046   | 8117446   | 401 |
| chr3  | 109001684 | 109002084 | 401 |
| chr18 | 12051963  | 12052363  | 401 |
| chr11 | 1647157   | 1647557   | 401 |
| chrX  | 54015865  | 54016264  | 400 |
| chr4  | 95688727  | 95689126  | 400 |
| chrX  | 73833634  | 73834032  | 399 |
| chrX  | 73004201  | 73004599  | 399 |
| chrX  | 49312031  | 49312429  | 399 |
| chrX  | 37409497  | 37409895  | 399 |
| chrX  | 31693585  | 31693983  | 399 |
| chr9  | 100172575 | 100172973 | 399 |
| chr6  | 99215924  | 99216322  | 399 |
| chr5  | 29635901  | 29636299  | 399 |
| chr5  | 29246708  | 29247106  | 399 |
| chr4  | 38531100  | 38531498  | 399 |
| chr29 | 37064578  | 37064976  | 399 |
| chr29 | 35045742  | 35046140  | 399 |



|       |               |           |     |
|-------|---------------|-----------|-----|
| chr26 | 18736256      | 18736654  | 399 |
| chr26 | 14574329      | 14574727  | 399 |
| chr22 | 32650355      | 32650753  | 399 |
| chr22 | 12928062      | 12928460  | 399 |
| chr21 | 20026357      | 20026755  | 399 |
| chr20 | 70340837      | 70341235  | 399 |
| chr2  | 127192777     | 127193175 | 399 |
| chr19 | 38769744      | 38770142  | 399 |
| chr19 | 22885220      | 22885618  | 399 |
| chr18 | 49880707      | 49881105  | 399 |
| chr18 | 693514 693912 |           | 399 |
| chr17 | 70058063      | 70058461  | 399 |
| chr16 | 43316981      | 43317379  | 399 |
| chr13 | 27692017      | 27692415  | 399 |
| chr11 | 77636814      | 77637212  | 399 |
| chr11 | 21622306      | 21622704  | 399 |
| chr10 | 49966604      | 49967002  | 399 |
| chr1  | 123103760     | 123104158 | 399 |
| chr8  | 80167628      | 80168025  | 398 |
| chr26 | 21813864      | 21814261  | 398 |
| chr26 | 18821247      | 18821644  | 398 |
| chrX  | 72226903      | 72227299  | 397 |
| chr7  | 19220255      | 19220651  | 397 |
| chr2  | 26559392      | 26559788  | 397 |
| chr4  | 101715180     | 101715575 | 396 |
| chr23 | 18862422      | 18862817  | 396 |
| chr19 | 61399905      | 61400300  | 396 |
| chr1  | 82620180      | 82620575  | 396 |
| chrX  | 74214340      | 74214734  | 395 |
| chr25 | 10913866      | 10914260  | 395 |
| chr23 | 28898543      | 28898937  | 395 |
| chr12 | 45142547      | 45142941  | 395 |
| chr16 | 41482628      | 41483020  | 393 |
| chr28 | 33836778      | 33837169  | 392 |
| chr24 | 60586028      | 60586418  | 391 |
| chr22 | 60492316      | 60492706  | 391 |
| chr12 | 82618557      | 82618947  | 391 |
| chr4  | 68019139      | 68019528  | 390 |
| chr15 | 24518969      | 24519358  | 390 |
| chr11 | 77582726      | 77583115  | 390 |
| chrX  | 68572871      | 68573259  | 389 |
| chrX  | 66329553      | 66329941  | 389 |
| chr6  | 117914160     | 117914548 | 389 |
| chr4  | 121055585     | 121055973 | 389 |
| chr11 | 98426131      | 98426519  | 389 |
| chrX  | 55708770      | 55709156  | 387 |
| chr3  | 22596352      | 22596738  | 387 |
| chr16 | 46387438      | 46387824  | 387 |
| chr5  | 121800536     | 121800921 | 386 |
| chr22 | 13544478      | 13544863  | 386 |

|       |           |           |     |
|-------|-----------|-----------|-----|
| chr13 | 78080643  | 78081028  | 386 |
| chr13 | 59827596  | 59827981  | 386 |
| chrX  | 6657782   | 6658166   | 385 |
| chr3  | 121380884 | 121381267 | 384 |
| chr6  | 14228114  | 14228496  | 383 |
| chr4  | 117155105 | 117155487 | 383 |
| chr17 | 30250132  | 30250514  | 383 |
| chr15 | 25587119  | 25587501  | 383 |
| chrX  | 75440741  | 75441122  | 382 |
| chr13 | 36874054  | 36874435  | 382 |
| chrX  | 21702903  | 21703283  | 381 |
| chr27 | 15389526  | 15389906  | 381 |
| chr12 | 14974981  | 14975361  | 381 |
| chrX  | 80784156  | 80784534  | 379 |
| chrX  | 20338113  | 20338491  | 379 |
| chr6  | 32702582  | 32702960  | 379 |
| chr3  | 126994135 | 126994513 | 379 |
| chr23 | 7255548   | 7255926   | 379 |
| chr11 | 3486367   | 3486745   | 379 |
| chrX  | 58799924  | 58800301  | 378 |
| chrX  | 8071143   | 8071520   | 378 |
| chr19 | 20376238  | 20376615  | 378 |
| chr5  | 113621583 | 113621959 | 377 |
| chr27 | 28090183  | 28090559  | 377 |
| chr13 | 40108405  | 40108781  | 377 |
| chr1  | 74676377  | 74676753  | 377 |
| chrX  | 73007463  | 73007838  | 376 |
| chr18 | 49794825  | 49795200  | 376 |
| chr5  | 120119328 | 120119702 | 375 |
| chr29 | 31717831  | 31718205  | 375 |
| chrX  | 72738697  | 72739070  | 374 |
| chr8  | 73891237  | 73891610  | 374 |
| chr12 | 30531703  | 30532076  | 374 |
| chr10 | 67102367  | 67102740  | 374 |
| chrX  | 75904436  | 75904808  | 373 |
| chr3  | 123255097 | 123255469 | 373 |
| chr29 | 35149991  | 35150363  | 373 |
| chr21 | 13778932  | 13779304  | 373 |
| chrX  | 34105394  | 34105765  | 372 |
| chr25 | 27151043  | 27151414  | 372 |
| chrX  | 36242178  | 36242548  | 371 |
| chr15 | 25220673  | 25221043  | 371 |
| chrX  | 80856387  | 80856756  | 370 |
| chrX  | 59450712  | 59451081  | 370 |
| chrX  | 35389075  | 35389444  | 370 |
| chr4  | 79260670  | 79261039  | 370 |
| chr10 | 93069214  | 93069583  | 370 |
| chr10 | 70179898  | 70180267  | 370 |
| chr16 | 73775940  | 73776308  | 369 |
| chr27 | 32883837  | 32884203  | 367 |

|       |               |           |     |
|-------|---------------|-----------|-----|
| chr19 | 56570676      | 56571042  | 367 |
| chr15 | 19971878      | 19972244  | 367 |
| chr11 | 6310105       | 6310471   | 367 |
| chr13 | 37668885      | 37669250  | 366 |
| chrX  | 73294496      | 73294860  | 365 |
| chr19 | 43636634      | 43636998  | 365 |
| chr12 | 31997680      | 31998044  | 365 |
| chr11 | 11996333      | 11996697  | 365 |
| chr3  | 120767036     | 120767398 | 363 |
| chr27 | 1499098       | 1499460   | 363 |
| chr23 | 28466659      | 28467021  | 363 |
| chr16 | 2280820       | 2281182   | 363 |
| chrX  | 52922878      | 52923239  | 362 |
| chr17 | 47100183      | 47100544  | 362 |
| chr3  | 8617663       | 8618023   | 361 |
| chr22 | 56302212      | 56302571  | 360 |
| chr19 | 40435928      | 40436287  | 360 |
| chr6  | 47379240      | 47379598  | 359 |
| chr3  | 22861116      | 22861474  | 359 |
| chr28 | 34091411      | 34091769  | 359 |
| chrX  | 21610879      | 21611236  | 358 |
| chr11 | 80166902      | 80167259  | 358 |
| chr11 | 62311503      | 62311860  | 358 |
| chr10 | 8698867       | 8699224   | 358 |
| chrX  | 72606463      | 72606819  | 357 |
| chr11 | 74915761      | 74916117  | 357 |
| chr10 | 72663350      | 72663706  | 357 |
| chr6  | 122524543     | 122524898 | 356 |
| chrX  | 33729536      | 33729890  | 355 |
| chr5  | 118093974     | 118094328 | 355 |
| chr3  | 35263266      | 35263620  | 355 |
| chr18 | 50471233      | 50471587  | 355 |
| chrX  | 7209104       | 7209457   | 354 |
| chr13 | 40577923      | 40578276  | 354 |
| chrX  | 18998054      | 18998406  | 353 |
| chr29 | 2526991       | 2527343   | 353 |
| chr21 | 7071605       | 7071957   | 353 |
| chr18 | 22153601      | 22153953  | 353 |
| chr15 | 24002543      | 24002895  | 353 |
| chr14 | 59523291      | 59523641  | 351 |
| chrX  | 6907314       | 6907663   | 350 |
| chr19 | 30530020      | 30530368  | 349 |
| chr5  | 123478728     | 123479075 | 348 |
| chr14 | 211303 211650 | 348       |     |
| chr8  | 859479 859825 | 347       |     |
| chr10 | 70094136      | 70094481  | 346 |
| chr5  | 29154626      | 29154970  | 345 |
| chr11 | 17299406      | 17299750  | 345 |
| chr1  | 74584035      | 74584378  | 344 |
| chrX  | 58072527      | 58072868  | 342 |

|       |           |           |     |
|-------|-----------|-----------|-----|
| chr15 | 37843684  | 37844024  | 341 |
| chrX  | 59305000  | 59305339  | 340 |
| chrX  | 18413820  | 18414157  | 338 |
| chr7  | 18789370  | 18789707  | 338 |
| chr24 | 51773777  | 51774114  | 338 |
| chr3  | 62209928  | 62210263  | 336 |
| chr28 | 33753847  | 33754182  | 336 |
| chr19 | 60912293  | 60912628  | 336 |
| chr19 | 14649435  | 14649770  | 336 |
| chr6  | 121844924 | 121845258 | 335 |
| chr26 | 48533050  | 48533384  | 335 |
| chr12 | 24627712  | 24628044  | 333 |
| chr1  | 153863715 | 153864046 | 332 |
| chr18 | 51507274  | 51507604  | 331 |
| chr22 | 15005502  | 15005830  | 329 |
| chr13 | 28511747  | 28512075  | 329 |
| chrX  | 56495077  | 56495404  | 328 |
| chr21 | 33051321  | 33051646  | 326 |
| chr13 | 67398703  | 67399028  | 326 |
| chrX  | 21051182  | 21051506  | 325 |
| chr10 | 70405674  | 70405997  | 324 |
| chrX  | 18768202  | 18768519  | 318 |
| chr2  | 131573614 | 131573931 | 318 |
| chr8  | 108652205 | 108652519 | 315 |
| chr9  | 45096604  | 45096917  | 314 |
| chr3  | 24429414  | 24429727  | 314 |
| chr13 | 63491515  | 63491826  | 312 |
| chr22 | 14921881  | 14922189  | 309 |
| chr23 | 48754682  | 48754988  | 307 |
| chrX  | 60543675  | 60543980  | 306 |
| chr19 | 10282597  | 10282901  | 305 |
| chr1  | 154401325 | 154401629 | 305 |
| chr7  | 19226064  | 19226367  | 304 |
| chr10 | 23487611  | 23487914  | 304 |
| chr1  | 129524531 | 129524833 | 303 |
| chr27 | 30514430  | 30514731  | 302 |
| chr21 | 33927349  | 33927650  | 302 |
| chr6  | 46663493  | 46663793  | 301 |
| chrX  | 64434099  | 64434398  | 300 |
| chr27 | 36414623  | 36414922  | 300 |
| chrX  | 24604665  | 24604960  | 296 |
| chr29 | 49262646  | 49262941  | 296 |
| chr18 | 23575246  | 23575541  | 296 |
| chr8  | 23942739  | 23943033  | 295 |
| chr2  | 134750604 | 134750897 | 294 |
| chr12 | 77033509  | 77033802  | 294 |
| chr28 | 26758875  | 26759167  | 293 |
| chr17 | 72703234  | 72703525  | 292 |
| chr23 | 27846551  | 27846840  | 290 |
| chr10 | 91028502  | 91028790  | 289 |

|       |               |           |      |
|-------|---------------|-----------|------|
| chr19 | 23754192      | 23754477  | 286  |
| chr11 | 8485730       | 8486015   | 286  |
| chr11 | 31100466      | 31100748  | 283  |
| chrX  | 64830796      | 64831077  | 282  |
| chr24 | 40405503      | 40405784  | 282  |
| chr6  | 100540341     | 100540620 | 280  |
| chr13 | 63428957      | 63429235  | 279  |
| chr8  | 108672815     | 108673092 | 278  |
| chr18 | 50292650      | 50292926  | 277  |
| chrX  | 50239350      | 50239625  | 276  |
| chr10 | 67101196      | 67101470  | 275  |
| chr23 | 35001196      | 35001469  | 274  |
| chrX  | 30618953      | 30619223  | 271  |
| chr8  | 73344998      | 73345267  | 270  |
| chrX  | 51530249      | 51530517  | 269  |
| chrX  | 29529420      | 29529685  | 266  |
| chr9  | 90477561      | 90477826  | 266  |
| chr20 | 75728329      | 75728594  | 266  |
| chr18 | 49123089      | 49123347  | 259  |
| chrX  | 58733292      | 58733549  | 258  |
| chr7  | 16329945      | 16330202  | 258  |
| chr11 | 75076647      | 75076904  | 258  |
| chrX  | 10954265      | 10954521  | 257  |
| chr16 | 60861531      | 60861786  | 256  |
| chr1  | 118473838     | 118474088 | 251  |
| chr10 | 1333098       | 1333344   | 247  |
| chr13 | 75797127      | 75797366  | 240  |
| chr16 | 25983119      | 25983347  | 229  |
| chr25 | 30462599      | 30462826  | 228  |
| chr19 | 54261028      | 54261252  | 225  |
| chr8  | 73725736      | 73725959  | 224  |
| chr4  | 80433340      | 80433562  | 223  |
| chr18 | 13897315      | 13897532  | 218  |
| chr8  | 73848683      | 73849038  | 356  |
| chrX  | 17480517      | 17480900  | 384  |
| chr8  | 73845761      | 73846311  | 551  |
| chr3  | 127650454     | 127650972 | 519  |
| chr1  | 67133908      | 67134246  | 339  |
| chr29 | 49129944      | 49130349  | 406  |
| chr8  | 73840308      | 73840633  | 326  |
| chr25 | 468357 468624 | 268       |      |
| chr8  | 66695339      | 66695573  | 235  |
| chr13 | 63502861      | 63503092  | 232  |
| chr8  | 76256167      | 76256676  | 510  |
| chrX  | 50971392      | 50971784  | 393  |
| chr2  | 55227696      | 55228094  | 399  |
| chr11 | 32331323      | 32331952  | 630  |
| chrX  | 49982634      | 49983737  | 1104 |
| chr15 | 30621730      | 30622767  | 1038 |
| chr19 | 11004869      | 11005787  | 919  |

|       |               |           |     |
|-------|---------------|-----------|-----|
| chr27 | 26780242      | 26781074  | 833 |
| chr8  | 108766055     | 108766843 | 789 |
| chr1  | 144812208     | 144812991 | 784 |
| chrX  | 50647050      | 50647820  | 771 |
| chr22 | 56294969      | 56295726  | 758 |
| chr7  | 64578458      | 64579199  | 742 |
| chr8  | 29197494      | 29198197  | 704 |
| chrX  | 72469050      | 72469752  | 703 |
| chrX  | 50285130      | 50285821  | 692 |
| chr16 | 956337 957014 | 678       |     |
| chr13 | 60103194      | 60103871  | 678 |
| chr4  | 79660141      | 79660814  | 674 |
| chr28 | 42376259      | 42376925  | 667 |
| chr26 | 42264714      | 42265380  | 667 |
| chr18 | 57601561      | 57602227  | 667 |
| chr13 | 58279953      | 58280619  | 667 |
| chrX  | 50044518      | 50045148  | 631 |
| chr6  | 73793947      | 73794574  | 628 |
| chr13 | 30140761      | 30141386  | 626 |
| chrX  | 21157613      | 21158229  | 617 |
| chrX  | 34725613      | 34726228  | 616 |
| chr26 | 46280984      | 46281595  | 612 |
| chr10 | 88642611      | 88643222  | 612 |
| chrX  | 50765326      | 50765928  | 603 |
| chr3  | 35951945      | 35952546  | 602 |
| chr13 | 60774346      | 60774945  | 600 |
| chrX  | 8586677       | 8587273   | 597 |
| chr11 | 49318503      | 49319089  | 587 |
| chr5  | 117220628     | 117221212 | 585 |
| chr23 | 40624117      | 40624699  | 583 |
| chr17 | 74039208      | 74039784  | 577 |
| chr16 | 39495455      | 39496026  | 572 |
| chr18 | 45529004      | 45529574  | 571 |
| chr1  | 149739526     | 149740094 | 569 |
| chr11 | 80358295      | 80358858  | 564 |
| chr12 | 54229889      | 54230451  | 563 |
| chr3  | 123216822     | 123217383 | 562 |
| chrX  | 8207395       | 8207951   | 557 |
| chr22 | 16298372      | 16298922  | 551 |
| chr10 | 86889626      | 86890175  | 550 |
| chr15 | 24964097      | 24964643  | 547 |
| chr17 | 48812758      | 48813301  | 544 |
| chr18 | 11937421      | 11937953  | 533 |
| chrX  | 7429331       | 7429862   | 532 |
| chr5  | 112218852     | 112219379 | 528 |
| chr11 | 81432620      | 81433146  | 527 |
| chr7  | 70726290      | 70726814  | 525 |
| chrX  | 2632248       | 2632771   | 524 |
| chr3  | 121624016     | 121624537 | 522 |
| chr15 | 25022832      | 25023353  | 522 |

|       |           |           |     |
|-------|-----------|-----------|-----|
| chr2  | 128450798 | 128451318 | 521 |
| chr7  | 5040817   | 5041335   | 519 |
| chr4  | 121523903 | 121524419 | 517 |
| chrX  | 8152149   | 8152664   | 516 |
| chr16 | 50270387  | 50270899  | 513 |
| chr11 | 91806937  | 91807446  | 510 |
| chrX  | 10721953  | 10722457  | 505 |
| chrX  | 6579686   | 6580190   | 505 |
| chr16 | 38706622  | 38707125  | 504 |
| chrX  | 72112308  | 72112806  | 499 |
| chr19 | 21745627  | 21746124  | 498 |
| chrX  | 3373996   | 3374486   | 491 |
| chrX  | 69904158  | 69904645  | 488 |
| chr17 | 74603070  | 74603554  | 485 |
| chr7  | 71366449  | 71366932  | 484 |
| chr15 | 23193653  | 23194136  | 484 |
| chr19 | 61904195  | 61904676  | 482 |
| chr5  | 60449208  | 60449687  | 480 |
| chr1  | 87334713  | 87335187  | 475 |
| chr28 | 14098272  | 14098743  | 472 |
| chr20 | 1063705   | 1064173   | 469 |
| chr27 | 26881299  | 26881766  | 468 |
| chr13 | 45468258  | 45468725  | 468 |
| chrX  | 8437719   | 8438185   | 467 |
| chr19 | 59126031  | 59126497  | 467 |
| chr29 | 37068698  | 37069163  | 466 |
| chr13 | 35438904  | 35439368  | 465 |
| chr21 | 64817474  | 64817937  | 464 |
| chr12 | 34236848  | 34237310  | 463 |
| chr1  | 74735382  | 74735841  | 460 |
| chr13 | 41091745  | 41092203  | 459 |
| chr18 | 52680583  | 52681040  | 458 |
| chr4  | 120630037 | 120630491 | 455 |
| chrX  | 8533950   | 8534401   | 452 |
| chr5  | 112909022 | 112909470 | 449 |
| chr8  | 115806565 | 115807010 | 446 |
| chr14 | 62326484  | 62326926  | 443 |
| chrX  | 6662127   | 6662567   | 441 |
| chr5  | 124885915 | 124886355 | 441 |
| chr23 | 42921180  | 42921618  | 439 |
| chr5  | 29150226  | 29150663  | 438 |
| chr1  | 118652354 | 118652791 | 438 |
| chr2  | 138692513 | 138692948 | 436 |
| chrX  | 54691225  | 54691658  | 434 |
| chr8  | 61839946  | 61840374  | 429 |
| chr18 | 22771665  | 22772093  | 429 |
| chr1  | 100826197 | 100826624 | 428 |
| chr2  | 119947928 | 119948353 | 426 |
| chr8  | 7696576   | 7696999   | 424 |
| chr3  | 121852936 | 121853357 | 422 |

|       |           |           |     |
|-------|-----------|-----------|-----|
| chr28 | 3482076   | 3482497   | 422 |
| chr17 | 56555316  | 56555732  | 417 |
| chr17 | 67100384  | 67100799  | 416 |
| chr17 | 46056800  | 46057213  | 414 |
| chr20 | 6833608   | 6834017   | 410 |
| chr23 | 53021851  | 53022257  | 407 |
| chr22 | 1965570   | 1965973   | 404 |
| chr10 | 59600943  | 59601344  | 402 |
| chr22 | 59502182  | 59502582  | 401 |
| chr18 | 40047386  | 40047786  | 401 |
| chrX  | 58579599  | 58579997  | 399 |
| chrX  | 53891629  | 53892027  | 399 |
| chrX  | 31419501  | 31419899  | 399 |
| chrX  | 11149076  | 11149474  | 399 |
| chr7  | 12984491  | 12984889  | 399 |
| chr4  | 68022707  | 68023105  | 399 |
| chr3  | 104552468 | 104552866 | 399 |
| chr26 | 45794829  | 45795227  | 399 |
| chr23 | 52834011  | 52834409  | 399 |
| chr23 | 23745962  | 23746360  | 399 |
| chr2  | 5072453   | 5072851   | 399 |
| chr19 | 47379208  | 47379606  | 399 |
| chr19 | 30572854  | 30573252  | 399 |
| chr17 | 69221532  | 69221930  | 399 |
| chr16 | 44169783  | 44170181  | 399 |
| chr15 | 29379437  | 29379835  | 399 |
| chr13 | 60384789  | 60385187  | 399 |
| chr13 | 10980274  | 10980672  | 399 |
| chr10 | 70566412  | 70566810  | 399 |
| chr8  | 24488328  | 24488724  | 397 |
| chr29 | 17795943  | 17796339  | 397 |
| chr22 | 42628216  | 42628610  | 395 |
| chr12 | 9693634   | 9694027   | 394 |
| chr10 | 87101897  | 87102290  | 394 |
| chr23 | 10907688  | 10908080  | 393 |
| chrX  | 74591885  | 74592276  | 392 |
| chr24 | 1124374   | 1124765   | 392 |
| chr19 | 60827739  | 60828130  | 392 |
| chr3  | 84521046  | 84521436  | 391 |
| chr15 | 26772036  | 26772426  | 391 |
| chr25 | 40369847  | 40370235  | 389 |
| chr10 | 90280658  | 90281046  | 389 |
| chr3  | 124621481 | 124621868 | 388 |
| chrX  | 22439554  | 22439940  | 387 |
| chr23 | 38094719  | 38095105  | 387 |
| chr15 | 24407046  | 24407432  | 387 |
| chr25 | 8680021   | 8680406   | 386 |
| chr29 | 26540232  | 26540615  | 384 |
| chr29 | 42987013  | 42987395  | 383 |
| chr23 | 19937416  | 19937798  | 383 |



|       |           |           |     |
|-------|-----------|-----------|-----|
| chr16 | 56111816  | 56112197  | 382 |
| chr19 | 19235568  | 19235948  | 381 |
| chr15 | 24399896  | 24400276  | 381 |
| chr17 | 69401314  | 69401693  | 380 |
| chr22 | 12064359  | 12064736  | 378 |
| chr15 | 74939880  | 74940257  | 378 |
| chrX  | 57692864  | 57693240  | 377 |
| chrX  | 7396600   | 7396975   | 376 |
| chr4  | 110059086 | 110059460 | 375 |
| chr7  | 19244624  | 19244997  | 374 |
| chr4  | 122723623 | 122723996 | 374 |
| chrX  | 44726609  | 44726980  | 372 |
| chr26 | 43910308  | 43910678  | 371 |
| chr24 | 34923373  | 34923743  | 371 |
| chrX  | 2458710   | 2459078   | 369 |
| chr20 | 74720370  | 74720737  | 368 |
| chr8  | 23831797  | 23832162  | 366 |
| chr5  | 79199085  | 79199449  | 365 |
| chr26 | 42181120  | 42181484  | 365 |
| chr25 | 2799472   | 2799836   | 365 |
| chrX  | 16983215  | 16983578  | 364 |
| chr20 | 20843116  | 20843479  | 364 |
| chr19 | 59415046  | 59415409  | 364 |
| chr3  | 105160927 | 105161288 | 362 |
| chrX  | 58413320  | 58413680  | 361 |
| chr6  | 106991184 | 106991543 | 360 |
| chr15 | 81305787  | 81306146  | 360 |
| chr13 | 77677019  | 77677378  | 360 |
| chr18 | 50617641  | 50617998  | 358 |
| chr10 | 52941419  | 52941776  | 358 |
| chr4  | 7377715   | 7378071   | 357 |
| chr18 | 56675148  | 56675504  | 357 |
| chr7  | 62250443  | 62250798  | 356 |
| chr23 | 7380700   | 7381055   | 356 |
| chrX  | 61881674  | 61882028  | 355 |
| chr17 | 72686753  | 72687105  | 353 |
| chrX  | 13833869  | 13834218  | 350 |
| chr23 | 42453880  | 42454229  | 350 |
| chr24 | 35244518  | 35244866  | 349 |
| chrX  | 56286350  | 56286694  | 345 |
| chr2  | 75565255  | 75565597  | 343 |
| chrX  | 64812291  | 64812630  | 340 |
| chr27 | 17519757  | 17520096  | 340 |
| chr20 | 24959491  | 24959830  | 340 |
| chrX  | 64084092  | 64084428  | 337 |
| chrX  | 9732465   | 9732800   | 336 |
| chr7  | 45694743  | 45695078  | 336 |
| chr3  | 15767825  | 15768160  | 336 |
| chr21 | 27032729  | 27033064  | 336 |
| chrX  | 75095158  | 75095489  | 332 |

|       |           |           |     |
|-------|-----------|-----------|-----|
| chr14 | 1975545   | 1975876   | 332 |
| chrX  | 60436399  | 60436728  | 330 |
| chr18 | 11502180  | 11502508  | 329 |
| chr10 | 17529688  | 17530012  | 325 |
| chr7  | 51443408  | 51443730  | 323 |
| chr1  | 88301843  | 88302163  | 321 |
| chr24 | 33500122  | 33500441  | 320 |
| chr10 | 84199425  | 84199744  | 320 |
| chr18 | 22108598  | 22108913  | 316 |
| chrX  | 12354288  | 12354601  | 314 |
| chr23 | 42889890  | 42890202  | 313 |
| chr29 | 46923712  | 46924009  | 298 |
| chr21 | 25618364  | 25618658  | 295 |
| chr6  | 121079378 | 121079661 | 284 |
| chrX  | 75625410  | 75625676  | 267 |
| chr9  | 106515031 | 106515292 | 262 |
| chr17 | 69438130  | 69438389  | 260 |
| chr8  | 78842801  | 78843028  | 228 |
| chr11 | 10523683  | 10524591  | 909 |
| chr5  | 28759376  | 28760226  | 851 |
| chr3  | 17294387  | 17295234  | 848 |
| chr7  | 43048357  | 43049167  | 811 |
| chr19 | 12120054  | 12120863  | 810 |
| chr7  | 29492708  | 29493470  | 763 |
| chrX  | 6501015   | 6501770   | 756 |
| chrX  | 10448995  | 10449736  | 742 |
| chrX  | 30668915  | 30669648  | 734 |
| chr12 | 22050630  | 22051353  | 724 |
| chr3  | 114217583 | 114218305 | 723 |
| chr29 | 18182636  | 18183351  | 716 |
| chr17 | 68410109  | 68410807  | 699 |
| chr24 | 33501476  | 33502164  | 689 |
| chr28 | 34009078  | 34009748  | 671 |
| chr18 | 9828142   | 9828809   | 668 |
| chrX  | 63031111  | 63031777  | 667 |
| chrX  | 57209997  | 57210661  | 665 |
| chr3  | 121373572 | 121374236 | 665 |
| chr9  | 105425541 | 105426189 | 649 |
| chr3  | 111186912 | 111187554 | 643 |
| chr19 | 60229117  | 60229752  | 636 |
| chr5  | 80281967  | 80282596  | 630 |
| chr23 | 10516036  | 10516656  | 621 |
| chrX  | 6398739   | 6399343   | 605 |
| chr11 | 28315342  | 28315944  | 603 |
| chr7  | 8843542   | 8844135   | 594 |
| chr21 | 56279551  | 56280143  | 593 |
| chr11 | 10524953  | 10525535  | 583 |
| chrX  | 20010801  | 20011374  | 574 |
| chrX  | 50014809  | 50015381  | 573 |
| chr22 | 45453923  | 45454493  | 571 |

|       |               |           |     |
|-------|---------------|-----------|-----|
| chr8  | 72328851      | 72329412  | 562 |
| chr26 | 48842486      | 48843047  | 562 |
| chr3  | 105724533     | 105725090 | 558 |
| chr3  | 33830511      | 33831062  | 552 |
| chr9  | 52811392      | 52811932  | 541 |
| chr13 | 76204122      | 76204658  | 537 |
| chr26 | 46862467      | 46862999  | 533 |
| chr24 | 62456921      | 62457442  | 522 |
| chr20 | 4931683       | 4932204   | 522 |
| chr29 | 34900290      | 34900799  | 510 |
| chr23 | 13411177      | 13411686  | 510 |
| chr18 | 17965130      | 17965638  | 509 |
| chr10 | 77486116      | 77486624  | 509 |
| chr23 | 19908735      | 19909241  | 507 |
| chrX  | 60267651      | 60268148  | 498 |
| chr19 | 46787809      | 46788306  | 498 |
| chr19 | 37632623      | 37633119  | 497 |
| chr13 | 52940898      | 52941390  | 493 |
| chr13 | 39959160      | 39959652  | 493 |
| chrX  | 36508752      | 36509241  | 490 |
| chr8  | 63901150      | 63901632  | 483 |
| chr19 | 27304166      | 27304647  | 482 |
| chrX  | 78765234      | 78765712  | 479 |
| chr3  | 36953898      | 36954373  | 476 |
| chr22 | 54317319      | 54317794  | 476 |
| chr11 | 14332943      | 14333416  | 474 |
| chr27 | 27919677      | 27920146  | 470 |
| chrX  | 36363735      | 36364202  | 468 |
| chr10 | 70019447      | 70019910  | 464 |
| chr13 | 41012297      | 41012748  | 452 |
| chrX  | 39624167      | 39624617  | 451 |
| chr13 | 59914461      | 59914911  | 451 |
| chrX  | 8175463       | 8175910   | 448 |
| chrX  | 2520726       | 2521173   | 448 |
| chr25 | 40407599      | 40408039  | 441 |
| chr3  | 120773609     | 120774045 | 437 |
| chrX  | 80711651      | 80712085  | 435 |
| chr17 | 558088 558515 | 428       |     |
| chr26 | 22385726      | 22386147  | 422 |
| chr19 | 47178974      | 47179393  | 420 |
| chr17 | 59010680      | 59011096  | 417 |
| chr10 | 16907771      | 16908185  | 415 |
| chr28 | 23932266      | 23932677  | 412 |
| chr17 | 70011302      | 70011710  | 409 |
| chr14 | 40504388      | 40504787  | 400 |
| chrX  | 17367795      | 17368193  | 399 |
| chr4  | 119682158     | 119682556 | 399 |
| chr4  | 46286254      | 46286652  | 399 |
| chr3  | 22991294      | 22991692  | 399 |
| chr29 | 36811861      | 36812259  | 399 |

|       |           |           |     |
|-------|-----------|-----------|-----|
| chr26 | 21757412  | 21757810  | 399 |
| chr2  | 123016784 | 123017182 | 399 |
| chr19 | 44749835  | 44750233  | 399 |
| chr15 | 29840839  | 29841237  | 399 |
| chr15 | 21196786  | 21197184  | 399 |
| chr12 | 11216746  | 11217144  | 399 |
| chr2  | 134677202 | 134677599 | 398 |
| chr19 | 13485743  | 13486139  | 397 |
| chr15 | 38451883  | 38452276  | 394 |
| chr24 | 8048124   | 8048516   | 393 |
| chr19 | 26265970  | 26266362  | 393 |
| chrX  | 46690144  | 46690533  | 390 |
| chr22 | 30007953  | 30008341  | 389 |
| chr15 | 32600602  | 32600990  | 389 |
| chr6  | 99406869  | 99407256  | 388 |
| chr18 | 56328911  | 56329298  | 388 |
| chr13 | 40340927  | 40341314  | 388 |
| chr11 | 90420421  | 90420808  | 388 |
| chr14 | 14654515  | 14654900  | 386 |
| chr14 | 6210124   | 6210509   | 386 |
| chrX  | 8491922   | 8492306   | 385 |
| chr2  | 132473156 | 132473540 | 385 |
| chr9  | 52828837  | 52829220  | 384 |
| chr2  | 4714339   | 4714720   | 382 |
| chr19 | 59305408  | 59305789  | 382 |
| chrX  | 64001726  | 64002106  | 381 |
| chrX  | 9671662   | 9672041   | 380 |
| chr11 | 28665507  | 28665885  | 379 |
| chr19 | 60415423  | 60415797  | 375 |
| chr16 | 38940925  | 38941299  | 375 |
| chr26 | 20240708  | 20241081  | 374 |
| chr1  | 2322025   | 2322398   | 374 |
| chr3  | 111615462 | 111615834 | 373 |
| chr23 | 15848764  | 15849136  | 373 |
| chr20 | 33367878  | 33368250  | 373 |
| chr3  | 15654454  | 15654825  | 372 |
| chr18 | 47212696  | 47213067  | 372 |
| chr19 | 52553721  | 52554090  | 370 |
| chr19 | 56463397  | 56463765  | 369 |
| chrX  | 57140635  | 57141002  | 368 |
| chrX  | 60256412  | 60256778  | 367 |
| chr3  | 15177175  | 15177541  | 367 |
| chr19 | 57048358  | 57048719  | 362 |
| chr11 | 80262014  | 80262372  | 359 |
| chrX  | 80811350  | 80811706  | 357 |
| chr21 | 58792777  | 58793133  | 357 |
| chr2  | 92132672  | 92133027  | 356 |
| chr3  | 8676785   | 8677139   | 355 |
| chrX  | 54703267  | 54703620  | 354 |
| chr22 | 29999948  | 30000301  | 354 |

|       |           |           |      |
|-------|-----------|-----------|------|
| chr14 | 7850819   | 7851172   | 354  |
| chr12 | 82665212  | 82665565  | 354  |
| chr28 | 12471770  | 12472122  | 353  |
| chrX  | 20140992  | 20141342  | 351  |
| chr4  | 13127890  | 13128239  | 350  |
| chr15 | 64514777  | 64515124  | 348  |
| chr14 | 2045421   | 2045765   | 345  |
| chrX  | 30624017  | 30624360  | 344  |
| chr19 | 46815035  | 46815377  | 343  |
| chr23 | 8391560   | 8391901   | 342  |
| chr6  | 109422018 | 109422356 | 339  |
| chr19 | 14854797  | 14855133  | 337  |
| chr1  | 74666800  | 74667135  | 336  |
| chrX  | 60005235  | 60005569  | 335  |
| chrX  | 54091960  | 54092291  | 332  |
| chr18 | 11738241  | 11738564  | 324  |
| chr29 | 49985288  | 49985610  | 323  |
| chr22 | 12369389  | 12369711  | 323  |
| chr18 | 11382690  | 11383004  | 315  |
| chr4  | 117609141 | 117609454 | 314  |
| chr9  | 90540287  | 90540593  | 307  |
| chr19 | 27906677  | 27906973  | 297  |
| chr1  | 74227600  | 74227893  | 294  |
| chr5  | 80134853  | 80135145  | 293  |
| chrX  | 19150813  | 19151099  | 287  |
| chr13 | 61840565  | 61840844  | 280  |
| chr16 | 68515543  | 68515820  | 278  |
| chr24 | 2832024   | 2832300   | 277  |
| chrX  | 72024725  | 72024990  | 266  |
| chr11 | 77660117  | 77660379  | 263  |
| chr8  | 65452722  | 65452973  | 252  |
| chr7  | 38516405  | 38517409  | 1005 |
| chr12 | 31978328  | 31979177  | 850  |
| chr24 | 48956281  | 48957071  | 791  |
| chr4  | 21339426  | 21340194  | 769  |
| chr28 | 27163302  | 27164033  | 732  |
| chr5  | 60130582  | 60131209  | 628  |
| chr19 | 46142084  | 46142702  | 619  |
| chrX  | 50506573  | 50507179  | 607  |
| chr3  | 122228646 | 122229252 | 607  |
| chr1  | 100644740 | 100645339 | 600  |
| chr23 | 28538616  | 28539213  | 598  |
| chr13 | 74334036  | 74334626  | 591  |
| chrX  | 2334921   | 2335479   | 559  |
| chr13 | 59786010  | 59786567  | 558  |
| chr24 | 1615281   | 1615837   | 557  |
| chrX  | 19866224  | 19866776  | 553  |
| chr24 | 60954126  | 60954677  | 552  |
| chr1  | 141995159 | 141995704 | 546  |
| chr11 | 74862328  | 74862867  | 540  |

|       |           |           |     |
|-------|-----------|-----------|-----|
| chr13 | 61856584  | 61857120  | 537 |
| chr18 | 25472338  | 25472873  | 536 |
| chr3  | 8757533   | 8758062   | 530 |
| chr16 | 39060726  | 39061253  | 528 |
| chr5  | 118152136 | 118152648 | 513 |
| chr15 | 8621264   | 8621758   | 495 |
| chrX  | 6463481   | 6463973   | 493 |
| chr11 | 104289776 | 104290265 | 490 |
| chrX  | 12087741  | 12088220  | 480 |
| chr1  | 123107920 | 123108396 | 477 |
| chr24 | 51559931  | 51560402  | 472 |
| chr19 | 56078390  | 56078860  | 471 |
| chr20 | 33702638  | 33703102  | 465 |
| chr18 | 25344923  | 25345378  | 456 |
| chr29 | 36992998  | 36993447  | 450 |
| chr10 | 86383170  | 86383619  | 450 |
| chr7  | 23846045  | 23846488  | 444 |
| chrX  | 11174085  | 11174526  | 442 |
| chr3  | 102649093 | 102649531 | 439 |
| chr18 | 51079080  | 51079513  | 434 |
| chr28 | 7863527   | 7863959   | 433 |
| chr21 | 57727953  | 57728385  | 433 |
| chr25 | 33613020  | 33613448  | 429 |
| chr17 | 76103511  | 76103937  | 427 |
| chr28 | 33746218  | 33746642  | 425 |
| chr19 | 36321102  | 36321525  | 424 |
| chr8  | 24118467  | 24118889  | 423 |
| chrX  | 47449503  | 47449923  | 421 |
| chr23 | 18807597  | 18808015  | 419 |
| chr16 | 39473512  | 39473930  | 419 |
| chr7  | 89651151  | 89651558  | 408 |
| chr3  | 108367618 | 108368025 | 408 |
| chr26 | 34279431  | 34279836  | 406 |
| chr12 | 75177848  | 75178250  | 403 |
| chr2  | 136576198 | 136576599 | 402 |
| chrX  | 30581703  | 30582101  | 399 |
| chr3  | 119679372 | 119679770 | 399 |
| chr27 | 34785201  | 34785599  | 399 |
| chr13 | 80639166  | 80639564  | 399 |
| chrX  | 22509107  | 22509504  | 398 |
| chr1  | 74590658  | 74591054  | 397 |
| chrX  | 21319059  | 21319453  | 395 |
| chr29 | 51861284  | 51861678  | 395 |
| chr15 | 75291330  | 75291724  | 395 |
| chr21 | 26826722  | 26827115  | 394 |
| chr2  | 134964836 | 134965229 | 394 |
| chr12 | 18241873  | 18242266  | 394 |
| chrX  | 50878543  | 50878935  | 393 |
| chrX  | 37501990  | 37502382  | 393 |
| chr29 | 37425354  | 37425746  | 393 |

|       |           |           |     |
|-------|-----------|-----------|-----|
| chrX  | 47801941  | 47802332  | 392 |
| chr17 | 4154204   | 4154595   | 392 |
| chr18 | 11955846  | 11956236  | 391 |
| chr25 | 37202895  | 37203282  | 388 |
| chr7  | 95132710  | 95133096  | 387 |
| chrX  | 63056038  | 63056422  | 385 |
| chrX  | 59119045  | 59119428  | 384 |
| chrX  | 9991910   | 9992293   | 384 |
| chrX  | 69318450  | 69318832  | 383 |
| chrX  | 59220815  | 59221197  | 383 |
| chr3  | 110317381 | 110317763 | 383 |
| chr2  | 15395988  | 15396370  | 383 |
| chrX  | 22615797  | 22616178  | 382 |
| chr19 | 30453088  | 30453468  | 381 |
| chr17 | 66839978  | 66840358  | 381 |
| chr14 | 67982782  | 67983161  | 380 |
| chr6  | 90621982  | 90622360  | 379 |
| chr18 | 48367168  | 48367546  | 379 |
| chr1  | 27346397  | 27346775  | 379 |
| chr16 | 23863784  | 23864161  | 378 |
| chr10 | 21007763  | 21008140  | 378 |
| chr13 | 64190886  | 64191262  | 377 |
| chrX  | 53045758  | 53046132  | 375 |
| chrX  | 9748756   | 9749130   | 375 |
| chr11 | 76360519  | 76360892  | 374 |
| chr2  | 134751192 | 134751564 | 373 |
| chr17 | 41590951  | 41591323  | 373 |
| chr12 | 74566840  | 74567210  | 371 |
| chr5  | 108445015 | 108445384 | 370 |
| chr23 | 3210005   | 3210374   | 370 |
| chr4  | 118671552 | 118671919 | 368 |
| chr22 | 55286939  | 55287304  | 366 |
| chr4  | 99476645  | 99477009  | 365 |
| chrX  | 78057912  | 78058275  | 364 |
| chrX  | 57331793  | 57332156  | 364 |
| chr18 | 53568653  | 53569016  | 364 |
| chr18 | 64342131  | 64342493  | 363 |
| chr10 | 70125057  | 70125417  | 361 |
| chr24 | 1436792   | 1437151   | 360 |
| chrX  | 75035193  | 75035549  | 357 |
| chr3  | 118027646 | 118028002 | 357 |
| chrX  | 31044700  | 31045054  | 355 |
| chr5  | 26054776  | 26055129  | 354 |
| chr17 | 66451349  | 66451701  | 353 |
| chr3  | 119273584 | 119273932 | 349 |
| chr26 | 42005824  | 42006171  | 348 |
| chr17 | 74563758  | 74564102  | 345 |
| chr8  | 23052363  | 23052705  | 343 |
| chrX  | 74713810  | 74714151  | 342 |
| chr19 | 65234954  | 65235294  | 341 |

|       |               |           |     |
|-------|---------------|-----------|-----|
| chr13 | 41411565      | 41411903  | 339 |
| chr19 | 49660155      | 49660492  | 338 |
| chr9  | 45716531      | 45716867  | 337 |
| chr8  | 74533682      | 74534018  | 337 |
| chr1  | 74516257      | 74516592  | 336 |
| chrX  | 66869439      | 66869773  | 335 |
| chrX  | 75820945      | 75821273  | 329 |
| chr8  | 27381266      | 27381585  | 320 |
| chr17 | 72886908      | 72887227  | 320 |
| chr1  | 145695456     | 145695775 | 320 |
| chr12 | 84222022      | 84222339  | 318 |
| chr10 | 71089081      | 71089394  | 314 |
| chr13 | 41227873      | 41228184  | 312 |
| chrX  | 60566619      | 60566929  | 311 |
| chr24 | 39454082      | 39454390  | 309 |
| chrX  | 61692194      | 61692493  | 300 |
| chrX  | 67880193      | 67880481  | 289 |
| chr11 | 74469298      | 74469585  | 288 |
| chr23 | 11458582      | 11458868  | 287 |
| chrX  | 39023887      | 39024166  | 280 |
| chr22 | 7249572       | 7249849   | 278 |
| chr20 | 7062988       | 7063255   | 268 |
| chr19 | 42397136      | 42397392  | 257 |
| chr18 | 9836861       | 9837111   | 251 |
| chr20 | 499715 499946 | 232       |     |
| chrX  | 60581631      | 60582435  | 805 |
| chr15 | 51655884      | 51656574  | 691 |
| chr24 | 49177470      | 49178148  | 679 |
| chr15 | 29188750      | 29189421  | 672 |
| chr21 | 9448718       | 9449371   | 654 |
| chrX  | 72734178      | 72734817  | 640 |
| chrX  | 75896777      | 75897361  | 585 |
| chr26 | 39259653      | 39260234  | 582 |
| chr24 | 8045291       | 8045863   | 573 |
| chr19 | 59302746      | 59303299  | 554 |
| chr23 | 19290662      | 19291212  | 551 |
| chr18 | 12180064      | 12180611  | 548 |
| chr21 | 30785786      | 30786332  | 547 |
| chrX  | 65148554      | 65149098  | 545 |
| chr18 | 51292238      | 51292778  | 541 |
| chr10 | 70255764      | 70256304  | 541 |
| chrX  | 20014033      | 20014572  | 540 |
| chr5  | 94856115      | 94856653  | 539 |
| chr22 | 16432630      | 16433168  | 539 |
| chr18 | 24323641      | 24324179  | 539 |
| chrX  | 9069246       | 9069780   | 535 |
| chrX  | 34022479      | 34023003  | 525 |
| chr13 | 15166680      | 15167201  | 522 |
| chr17 | 69359422      | 69359935  | 514 |
| chr12 | 82535602      | 82536108  | 507 |



|       |               |           |     |
|-------|---------------|-----------|-----|
| chr3  | 20510088      | 20510593  | 506 |
| chr13 | 63499663      | 63500156  | 494 |
| chr13 | 60430863      | 60431354  | 492 |
| chrX  | 37497943      | 37498432  | 490 |
| chr13 | 52663541      | 52664029  | 489 |
| chr28 | 46066868      | 46067350  | 483 |
| chr17 | 70077471      | 70077950  | 480 |
| chrX  | 37503571      | 37504046  | 476 |
| chr13 | 43328090      | 43328564  | 475 |
| chr19 | 54801391      | 54801846  | 456 |
| chr3  | 116914616     | 116915070 | 455 |
| chr21 | 20035720      | 20036172  | 453 |
| chr12 | 3676214       | 3676665   | 452 |
| chrX  | 23710557      | 23711004  | 448 |
| chr11 | 69293518      | 69293965  | 448 |
| chr7  | 50660542      | 50660988  | 447 |
| chr26 | 48901298      | 48901744  | 447 |
| chr11 | 87910817      | 87911259  | 443 |
| chrX  | 74725155      | 74725596  | 442 |
| chr25 | 3235627       | 3236068   | 442 |
| chr3  | 111930732     | 111931171 | 440 |
| chr16 | 26433866      | 26434305  | 440 |
| chr10 | 17151313      | 17151751  | 439 |
| chr25 | 21768737      | 21769174  | 438 |
| chrX  | 78628319      | 78628755  | 437 |
| chrX  | 49791509      | 49791943  | 435 |
| chr29 | 30496684      | 30497118  | 435 |
| chr18 | 11688421      | 11688853  | 433 |
| chr10 | 24674313      | 24674741  | 429 |
| chrX  | 50848390      | 50848814  | 425 |
| chr4  | 121442174     | 121442596 | 423 |
| chr16 | 38734914      | 38735334  | 421 |
| chr11 | 11634602      | 11635022  | 421 |
| chrX  | 7558880       | 7559299   | 420 |
| chr23 | 12356143      | 12356562  | 420 |
| chr18 | 11820826      | 11821245  | 420 |
| chr19 | 43016981      | 43017399  | 419 |
| chr19 | 23132013      | 23132431  | 419 |
| chrX  | 75305647      | 75306064  | 418 |
| chr5  | 111676501     | 111676918 | 418 |
| chr4  | 68259969      | 68260385  | 417 |
| chr15 | 45859180      | 45859594  | 415 |
| chrX  | 50233841      | 50234254  | 414 |
| chrX  | 347175 347588 | 414       |     |
| chrX  | 65945636      | 65946047  | 412 |
| chrX  | 55467874      | 55468285  | 412 |
| chr9  | 106832240     | 106832651 | 412 |
| chrX  | 74706053      | 74706463  | 411 |
| chrX  | 55239010      | 55239420  | 411 |
| chrX  | 37501433      | 37501843  | 411 |

|       |           |           |     |
|-------|-----------|-----------|-----|
| chr19 | 25085313  | 25085723  | 411 |
| chr19 | 40443432  | 40443840  | 409 |
| chr2  | 74015513  | 74015920  | 408 |
| chr1  | 1615702   | 1616106   | 405 |
| chr2  | 135084009 | 135084412 | 404 |
| chrX  | 54767801  | 54768203  | 403 |
| chrX  | 22440862  | 22441264  | 403 |
| chrX  | 50457046  | 50457446  | 401 |
| chr19 | 13688801  | 13689201  | 401 |
| chr26 | 42238291  | 42238690  | 400 |
| chrX  | 75215977  | 75216375  | 399 |
| chrX  | 72810843  | 72811241  | 399 |
| chrX  | 13001330  | 13001728  | 399 |
| chrX  | 11250409  | 11250807  | 399 |
| chrX  | 10875764  | 10876162  | 399 |
| chr9  | 45426644  | 45427042  | 399 |
| chr5  | 30347779  | 30348177  | 399 |
| chr3  | 22518693  | 22519091  | 399 |
| chr28 | 7562005   | 7562403   | 399 |
| chr26 | 13191175  | 13191573  | 399 |
| chr25 | 3382811   | 3383209   | 399 |
| chr25 | 2537305   | 2537703   | 399 |
| chr22 | 56437877  | 56438275  | 399 |
| chr21 | 23987604  | 23988002  | 399 |
| chr21 | 15192667  | 15193065  | 399 |
| chr2  | 36271956  | 36272354  | 399 |
| chr19 | 63734199  | 63734597  | 399 |
| chr19 | 37865102  | 37865500  | 399 |
| chr19 | 19440714  | 19441112  | 399 |
| chr17 | 70508346  | 70508744  | 399 |
| chr17 | 69471313  | 69471711  | 399 |
| chr17 | 69220922  | 69221320  | 399 |
| chr16 | 38717691  | 38718089  | 399 |
| chr15 | 33141047  | 33141445  | 399 |
| chr11 | 103315019 | 103315417 | 399 |
| chr11 | 66544903  | 66545301  | 399 |
| chr1  | 43885466  | 43885864  | 399 |
| chr7  | 20623597  | 20623994  | 398 |
| chr5  | 28764811  | 28765208  | 398 |
| chr25 | 38046699  | 38047096  | 398 |
| chr15 | 26741982  | 26742379  | 398 |
| chrX  | 69277837  | 69278233  | 397 |
| chrX  | 48060641  | 48061037  | 397 |
| chrX  | 7103029   | 7103425   | 397 |
| chr11 | 89378594  | 89378990  | 397 |
| chrX  | 65979272  | 65979667  | 396 |
| chr2  | 131253133 | 131253528 | 396 |
| chr18 | 33707861  | 33708256  | 396 |
| chr10 | 25967668  | 25968063  | 396 |
| chrX  | 76077661  | 76078055  | 395 |

|       |               |           |     |
|-------|---------------|-----------|-----|
| chr5  | 112191982     | 112192376 | 395 |
| chr25 | 39170086      | 39170480  | 395 |
| chr23 | 10490563      | 10490957  | 395 |
| chr19 | 44179482      | 44179876  | 395 |
| chr18 | 50849423      | 50849817  | 395 |
| chr15 | 28665396      | 28665790  | 395 |
| chr1  | 115926649     | 115927043 | 395 |
| chr23 | 52647113      | 52647506  | 394 |
| chrX  | 60112732      | 60113124  | 393 |
| chrX  | 3001064       | 3001456   | 393 |
| chr3  | 15417245      | 15417637  | 393 |
| chr26 | 44848375      | 44848767  | 393 |
| chr25 | 36460943      | 36461335  | 393 |
| chr2  | 138849757     | 138850149 | 393 |
| chr25 | 30877411      | 30877801  | 391 |
| chr6  | 119070511     | 119070900 | 390 |
| chr29 | 26302245      | 26302634  | 390 |
| chr24 | 35157504      | 35157893  | 390 |
| chr8  | 116774518     | 116774906 | 389 |
| chr5  | 64743273      | 64743661  | 389 |
| chr3  | 35789287      | 35789675  | 389 |
| chr29 | 44603047      | 44603435  | 389 |
| chr27 | 767122 767510 | 389       |     |
| chr22 | 59847613      | 59848001  | 389 |
| chr21 | 23391895      | 23392283  | 389 |
| chr2  | 131053191     | 131053579 | 389 |
| chr2  | 111367184     | 111367572 | 389 |
| chr19 | 46811344      | 46811732  | 389 |
| chr19 | 37889791      | 37890179  | 389 |
| chr13 | 52670024      | 52670412  | 389 |
| chrX  | 81275829      | 81276216  | 388 |
| chr19 | 29773065      | 29773452  | 388 |
| chr11 | 107240919     | 107241306 | 388 |
| chrX  | 20115109      | 20115495  | 387 |
| chr11 | 104474586     | 104474972 | 387 |
| chr11 | 37640668      | 37641054  | 387 |
| chr24 | 43605591      | 43605976  | 386 |
| chr13 | 80582817      | 80583202  | 386 |
| chr13 | 60697313      | 60697698  | 386 |
| chr12 | 40606148      | 40606533  | 386 |
| chr11 | 11620845      | 11621230  | 386 |
| chr28 | 46051691      | 46052075  | 385 |
| chr21 | 34498251      | 34498635  | 385 |
| chr19 | 30722648      | 30723032  | 385 |
| chr14 | 61285810      | 61286194  | 385 |
| chr21 | 24803843      | 24804226  | 384 |
| chr12 | 84219895      | 84220278  | 384 |
| chrX  | 50531218      | 50531600  | 383 |
| chrX  | 36862737      | 36863119  | 383 |
| chr4  | 32430905      | 32431287  | 383 |

|       |           |           |     |
|-------|-----------|-----------|-----|
| chr15 | 70504375  | 70504757  | 383 |
| chr25 | 11473336  | 1147717   | 382 |
| chr18 | 50998628  | 50999009  | 382 |
| chr15 | 63723708  | 63724089  | 382 |
| chr15 | 36251346  | 36251727  | 382 |
| chr11 | 75104345  | 75104726  | 382 |
| chr3  | 61484925  | 61485305  | 381 |
| chr26 | 22304529  | 22304909  | 381 |
| chr21 | 47296794  | 47297174  | 381 |
| chr17 | 62152953  | 62153333  | 381 |
| chr11 | 70939048  | 70939428  | 381 |
| chr11 | 29823107  | 29823486  | 380 |
| chr8  | 80486536  | 80486913  | 378 |
| chr23 | 30528462  | 30528839  | 378 |
| chr13 | 52970145  | 52970522  | 378 |
| chr2  | 97469573  | 97469949  | 377 |
| chr11 | 30936845  | 30937221  | 377 |
| chrX  | 50840018  | 50840393  | 376 |
| chrX  | 21677307  | 21677682  | 376 |
| chrX  | 2834476   | 2834851   | 376 |
| chr3  | 25815947  | 25816322  | 376 |
| chr19 | 41459595  | 41459970  | 376 |
| chrX  | 21500140  | 21500514  | 375 |
| chrX  | 15629435  | 15629809  | 375 |
| chr13 | 77358400  | 77358774  | 375 |
| chr26 | 33841712  | 33842085  | 374 |
| chrX  | 55628434  | 55628806  | 373 |
| chr2  | 123751268 | 123751640 | 373 |
| chr11 | 100479075 | 100479447 | 373 |
| chrX  | 80917270  | 80917641  | 372 |
| chr20 | 2451216   | 2451587   | 372 |
| chr1  | 84911527  | 84911898  | 372 |
| chr6  | 16232906  | 16233276  | 371 |
| chr21 | 62229699  | 62230069  | 371 |
| chr21 | 26457258  | 26457628  | 371 |
| chr17 | 74092025  | 74092395  | 371 |
| chrX  | 48106508  | 48106877  | 370 |
| chr7  | 42525550  | 42525919  | 370 |
| chr4  | 43940013  | 43940382  | 370 |
| chr25 | 20263403  | 20263772  | 370 |
| chr23 | 52286048  | 52286417  | 370 |
| chr12 | 32565250  | 32565619  | 370 |
| chr10 | 89409278  | 89409647  | 370 |
| chr10 | 45680447  | 45680816  | 370 |
| chr5  | 28873444  | 28873812  | 369 |
| chrX  | 12131973  | 12132340  | 368 |
| chr5  | 111321349 | 111321716 | 368 |
| chr25 | 44036184  | 44036551  | 368 |
| chr11 | 14120241  | 14120608  | 368 |
| chrX  | 52919511  | 52919877  | 367 |

|       |               |           |     |
|-------|---------------|-----------|-----|
| chrX  | 19494299      | 19494665  | 367 |
| chr5  | 115510332     | 115510698 | 367 |
| chr25 | 656708 657074 | 367       |     |
| chr7  | 46283357      | 46283722  | 366 |
| chr24 | 1757365       | 1757730   | 366 |
| chr25 | 39312422      | 39312786  | 365 |
| chr18 | 12143817      | 12144181  | 365 |
| chrX  | 50815159      | 50815522  | 364 |
| chrX  | 64071715      | 64072077  | 363 |
| chr4  | 96243214      | 96243576  | 363 |
| chr26 | 39156612      | 39156974  | 363 |
| chr18 | 9491657       | 9492019   | 363 |
| chr14 | 8676927       | 8677289   | 363 |
| chrX  | 63084600      | 63084961  | 362 |
| chrX  | 60925082      | 60925443  | 362 |
| chr21 | 24993425      | 24993786  | 362 |
| chrX  | 75444628      | 75444988  | 361 |
| chr26 | 41717644      | 41718004  | 361 |
| chr17 | 53477274      | 53477634  | 361 |
| chr10 | 10989576      | 10989936  | 361 |
| chrX  | 5572376       | 5572735   | 360 |
| chr3  | 22511221      | 22511580  | 360 |
| chr21 | 21083748      | 21084107  | 360 |
| chr12 | 32539633      | 32539992  | 360 |
| chr11 | 98424956      | 98425315  | 360 |
| chr11 | 80344165      | 80344524  | 360 |
| chr29 | 34328514      | 34328872  | 359 |
| chr29 | 17876292      | 17876650  | 359 |
| chr27 | 27686473      | 27686831  | 359 |
| chr25 | 36445465      | 36445823  | 359 |
| chr23 | 13669941      | 13670299  | 359 |
| chr23 | 11331672      | 11332030  | 359 |
| chr2  | 92442518      | 92442876  | 359 |
| chr17 | 60181759      | 60182117  | 359 |
| chrX  | 19731635      | 19731992  | 358 |
| chr3  | 95744224      | 95744581  | 358 |
| chr23 | 17499472      | 17499829  | 358 |
| chr19 | 19746362      | 19746719  | 358 |
| chr15 | 38250537      | 38250892  | 356 |
| chrX  | 18339853      | 18340207  | 355 |
| chr23 | 15175602      | 15175956  | 355 |
| chr18 | 50717877      | 50718231  | 355 |
| chr18 | 12118122      | 12118476  | 355 |
| chr13 | 26188685      | 26189039  | 355 |
| chrX  | 20100761      | 20101114  | 354 |
| chr5  | 80247235      | 80247588  | 354 |
| chr11 | 9206171       | 9206524   | 354 |
| chr1  | 137872746     | 137873099 | 354 |
| chrX  | 54622593      | 54622945  | 353 |
| chrX  | 48707259      | 48707611  | 353 |

|       |           |           |     |
|-------|-----------|-----------|-----|
| chr25 | 37952895  | 37953247  | 353 |
| chr22 | 60444036  | 60444388  | 353 |
| chr16 | 49484142  | 49484494  | 353 |
| chrX  | 38084033  | 38084384  | 352 |
| chrX  | 715016    | 715367    | 352 |
| chr15 | 74546983  | 74547334  | 352 |
| chr29 | 42953444  | 42953794  | 351 |
| chrX  | 18943231  | 18943580  | 350 |
| chr15 | 33729791  | 33730140  | 350 |
| chr26 | 22352058  | 22352406  | 349 |
| chr24 | 1487990   | 1488338   | 349 |
| chrX  | 36675855  | 36676202  | 348 |
| chr18 | 20250462  | 20250809  | 348 |
| chr10 | 19479928  | 19480275  | 348 |
| chrX  | 63205583  | 63205929  | 347 |
| chr5  | 81611408  | 81611754  | 347 |
| chr3  | 24966759  | 24967105  | 347 |
| chr22 | 60532392  | 60532738  | 347 |
| chr21 | 20724460  | 20724805  | 346 |
| chr16 | 48809466  | 48809811  | 346 |
| chr16 | 38714694  | 38715039  | 346 |
| chrX  | 40605434  | 40605778  | 345 |
| chr7  | 33643425  | 33643769  | 345 |
| chr15 | 25593483  | 25593827  | 345 |
| chrX  | 72735264  | 72735607  | 344 |
| chr3  | 127432552 | 127432895 | 344 |
| chr29 | 26771619  | 26771962  | 344 |
| chr10 | 17484679  | 17485022  | 344 |
| chrX  | 72548702  | 72549044  | 343 |
| chr4  | 37694680  | 37695022  | 343 |
| chr11 | 72715180  | 72715522  | 343 |
| chrX  | 34595321  | 34595662  | 342 |
| chrX  | 45167515  | 45167855  | 341 |
| chrX  | 38094252  | 38094592  | 341 |
| chr3  | 125754967 | 125755307 | 341 |
| chr18 | 39462597  | 39462937  | 341 |
| chr16 | 23746329  | 23746669  | 341 |
| chr13 | 67154305  | 67154645  | 341 |
| chr10 | 23151937  | 23152277  | 341 |
| chr6  | 46675439  | 46675778  | 340 |
| chr21 | 57568520  | 57568857  | 338 |
| chr10 | 17528990  | 17529327  | 338 |
| chr28 | 32829578  | 32829914  | 337 |
| chr19 | 30520271  | 30520607  | 337 |
| chr11 | 8976619   | 8976955   | 337 |
| chr20 | 8767401   | 8767736   | 336 |
| chr19 | 60407643  | 60407978  | 336 |
| chr13 | 69692241  | 69692576  | 336 |
| chr22 | 16323237  | 16323571  | 335 |
| chr3  | 36663535  | 36663868  | 334 |

|       |           |           |     |
|-------|-----------|-----------|-----|
| chr22 | 16344770  | 16345103  | 334 |
| chr15 | 38543199  | 38543532  | 334 |
| chrX  | 63997606  | 63997938  | 333 |
| chrX  | 60163407  | 60163739  | 333 |
| chr29 | 45078919  | 45079251  | 333 |
| chr23 | 17500616  | 17500947  | 332 |
| chr19 | 64350831  | 64351162  | 332 |
| chr12 | 32197374  | 32197705  | 332 |
| chrX  | 78558122  | 78558452  | 331 |
| chr2  | 111385503 | 111385833 | 331 |
| chr23 | 7430848   | 7431177   | 330 |
| chr5  | 12281189  | 12281517  | 329 |
| chr3  | 105129313 | 105129641 | 329 |
| chr17 | 75140131  | 75140459  | 329 |
| chrX  | 8443138   | 8443465   | 328 |
| chrX  | 18917312  | 18917638  | 327 |
| chr17 | 70237295  | 70237621  | 327 |
| chr1  | 82840609  | 82840935  | 327 |
| chr3  | 10593906  | 10594231  | 326 |
| chr21 | 24809285  | 24809610  | 326 |
| chr10 | 17232136  | 17232461  | 326 |
| chr26 | 17854541  | 17854865  | 325 |
| chr3  | 99227403  | 99227726  | 324 |
| chrX  | 53374894  | 53375216  | 323 |
| chr19 | 57818319  | 57818641  | 323 |
| chr12 | 74449419  | 74449741  | 323 |
| chr1  | 74917802  | 74918124  | 323 |
| chrX  | 34785604  | 34785925  | 322 |
| chr3  | 119155910 | 119156231 | 322 |
| chr28 | 40391441  | 40391762  | 322 |
| chr16 | 54303300  | 54303621  | 322 |
| chr10 | 36338528  | 36338849  | 322 |
| chrX  | 54633889  | 54634209  | 321 |
| chrX  | 48116520  | 48116837  | 318 |
| chr10 | 84515550  | 84515867  | 318 |
| chr10 | 70148707  | 70149024  | 318 |
| chrX  | 11468750  | 11469066  | 317 |
| chr19 | 38379129  | 38379445  | 317 |
| chr21 | 24909654  | 24909966  | 313 |
| chr12 | 20049850  | 20050162  | 313 |
| chr19 | 25827083  | 25827394  | 312 |
| chr13 | 47305910  | 47306221  | 312 |
| chrX  | 73349349  | 73349659  | 311 |
| chr11 | 14112101  | 14112411  | 311 |
| chr26 | 21810233  | 21810542  | 310 |
| chr18 | 22342315  | 22342624  | 310 |
| chr16 | 47200250  | 47200559  | 310 |
| chr9  | 66535720  | 66536028  | 309 |
| chr24 | 20404013  | 20404321  | 309 |
| chr16 | 60033055  | 60033363  | 309 |

|       |           |           |     |
|-------|-----------|-----------|-----|
| chr3  | 113827410 | 113827717 | 308 |
| chr29 | 2531963   | 2532270   | 308 |
| chr12 | 33343362  | 33343669  | 308 |
| chr9  | 43843223  | 43843529  | 307 |
| chr5  | 121339886 | 121340192 | 307 |
| chr7  | 19295762  | 19296067  | 306 |
| chr12 | 36278110  | 36278415  | 306 |
| chr20 | 6781568   | 6781870   | 303 |
| chr18 | 48790292  | 48790594  | 303 |
| chrX  | 72693688  | 72693989  | 302 |
| chrX  | 48727085  | 48727386  | 302 |
| chr9  | 44100877  | 44101178  | 302 |
| chr8  | 73734730  | 73735031  | 302 |
| chr3  | 111487192 | 111487493 | 302 |
| chr9  | 72675110  | 72675409  | 300 |
| chr20 | 6173364   | 6173663   | 300 |
| chr11 | 100868649 | 100868947 | 299 |
| chrX  | 49287357  | 49287654  | 298 |
| chrX  | 55500984  | 55501280  | 297 |
| chr25 | 39376807  | 39377103  | 297 |
| chr15 | 24444842  | 24445138  | 297 |
| chr7  | 59684331  | 59684625  | 295 |
| chr3  | 115694860 | 115695154 | 295 |
| chrX  | 60195125  | 60195418  | 294 |
| chrX  | 12285150  | 12285443  | 294 |
| chrX  | 34762592  | 34762884  | 293 |
| chr8  | 91391504  | 91391795  | 292 |
| chr13 | 58969761  | 58970052  | 292 |
| chr28 | 34673698  | 34673988  | 291 |
| chr5  | 93544543  | 93544832  | 290 |
| chrX  | 78383783  | 78384071  | 289 |
| chr3  | 99397372  | 99397660  | 289 |
| chr26 | 8707160   | 8707448   | 289 |
| chr8  | 7780319   | 7780606   | 288 |
| chr3  | 104560610 | 104560897 | 288 |
| chr24 | 49587983  | 49588270  | 288 |
| chr6  | 106857043 | 106857329 | 287 |
| chr15 | 26670066  | 26670352  | 287 |
| chr27 | 21891953  | 21892238  | 286 |
| chr21 | 59018940  | 59019225  | 286 |
| chr12 | 32562369  | 32562654  | 286 |
| chr5  | 82116933  | 82117217  | 285 |
| chr11 | 21970464  | 21970747  | 284 |
| chr25 | 3178417   | 3178697   | 281 |
| chr13 | 82644610  | 82644888  | 279 |
| chr5  | 28383096  | 28383373  | 278 |
| chr21 | 34481291  | 34481568  | 278 |
| chr18 | 48865301  | 48865578  | 278 |
| chr17 | 31300659  | 31300936  | 278 |
| chr5  | 75732649  | 75732925  | 277 |



|       |           |           |     |
|-------|-----------|-----------|-----|
| chr14 | 8131255   | 8131531   | 277 |
| chrX  | 19530031  | 19530306  | 276 |
| chrX  | 8185034   | 8185309   | 276 |
| chrX  | 12917833  | 12918107  | 275 |
| chr9  | 29836557  | 29836831  | 275 |
| chr4  | 32384902  | 32385176  | 275 |
| chr29 | 44924968  | 44925241  | 274 |
| chr3  | 105283710 | 105283982 | 273 |
| chr15 | 24541515  | 24541786  | 272 |
| chr18 | 48784247  | 48784517  | 271 |
| chrX  | 7997185   | 7997454   | 270 |
| chr24 | 49523719  | 49523987  | 269 |
| chr19 | 65241374  | 65241642  | 269 |
| chr10 | 49250895  | 49251163  | 269 |
| chr16 | 47592159  | 47592426  | 268 |
| chr15 | 55185113  | 55185380  | 268 |
| chr10 | 17161481  | 17161748  | 268 |
| chr1  | 145750949 | 145751216 | 268 |
| chr22 | 30143879  | 30144145  | 267 |
| chr19 | 26287818  | 26288083  | 266 |
| chr3  | 87313974  | 87314238  | 265 |
| chr20 | 8678330   | 8678594   | 265 |
| chrX  | 29715172  | 29715435  | 264 |
| chr19 | 11003360  | 11003623  | 264 |
| chrX  | 54768987  | 54769248  | 262 |
| chrX  | 9057705   | 9057966   | 262 |
| chr2  | 138973670 | 138973931 | 262 |
| chr26 | 37983757  | 37984017  | 261 |
| chr1  | 153228600 | 153228860 | 261 |
| chr3  | 20573580  | 20573839  | 260 |
| chr14 | 42140696  | 42140955  | 260 |
| chrX  | 70887957  | 70888215  | 259 |
| chr8  | 24162126  | 24162383  | 258 |
| chr10 | 55399967  | 55400224  | 258 |
| chrX  | 22437209  | 22437465  | 257 |
| chrX  | 46259669  | 46259924  | 256 |
| chr24 | 43845406  | 43845661  | 256 |
| chr13 | 3064906   | 3065161   | 256 |
| chr9  | 74408986  | 74409240  | 255 |
| chr11 | 109538661 | 109538914 | 254 |
| chr18 | 9809078   | 9809330   | 253 |
| chr4  | 72803646  | 72803897  | 252 |
| chr7  | 89468542  | 89468790  | 249 |
| chr1  | 63806103  | 63806351  | 249 |
| chr7  | 3940797   | 3941044   | 248 |
| chr15 | 27903781  | 27904026  | 246 |
| chr10 | 53000450  | 53000694  | 245 |
| chr18 | 22242176  | 22242416  | 241 |
| chr8  | 73407605  | 73407844  | 240 |
| chr15 | 24910973  | 24911212  | 240 |

|       |               |          |      |
|-------|---------------|----------|------|
| chr5  | 76860731      | 76860968 | 238  |
| chrX  | 50239678      | 50239912 | 235  |
| chr10 | 89399435      | 89399669 | 235  |
| chrX  | 80239123      | 80239356 | 234  |
| chr19 | 46835274      | 46835507 | 234  |
| chr13 | 49829023      | 49829256 | 234  |
| chrX  | 9151952       | 9152184  | 233  |
| chr21 | 30166589      | 30166820 | 232  |
| chr18 | 37218722      | 37218953 | 232  |
| chr13 | 43822095      | 43822325 | 231  |
| chr25 | 3080596       | 3080819  | 224  |
| chr23 | 30340551      | 30340769 | 219  |
| chr27 | 15267935      | 15268151 | 217  |
| chr22 | 52237064      | 52237279 | 216  |
| chrX  | 59387361      | 59387575 | 215  |
| chr22 | 7408430       | 7408644  | 215  |
| chr23 | 28812960      | 28813166 | 207  |
| chr8  | 23944147      | 23944352 | 206  |
| chr14 | 60732485      | 60732690 | 206  |
| chr7  | 24283239      | 24283439 | 201  |
| chr1  | 45605492      | 45605829 | 338  |
| chr8  | 73749284      | 73749651 | 368  |
| chrX  | 59299366      | 59300522 | 1157 |
| chr12 | 68718489      | 68719537 | 1049 |
| chrX  | 36659486      | 36660521 | 1036 |
| chrX  | 49291349      | 49292366 | 1018 |
| chr24 | 61051138      | 61052119 | 982  |
| chr5  | 29125509      | 29126480 | 972  |
| chr24 | 1204680       | 1205650  | 971  |
| chr28 | 34155662      | 34156624 | 963  |
| chr15 | 43341940      | 43342894 | 955  |
| chrX  | 54144676      | 54145618 | 943  |
| chr4  | 69222782      | 69223715 | 934  |
| chr18 | 33826623      | 33827552 | 930  |
| chr21 | 20627771      | 20628697 | 927  |
| chr20 | 66336077      | 66337001 | 925  |
| chr22 | 56496085      | 56496989 | 905  |
| chr4  | 50760361      | 50761259 | 899  |
| chr11 | 88926746      | 88927637 | 892  |
| chrX  | 73364655      | 73365542 | 888  |
| chr23 | 31151466      | 31152334 | 869  |
| chr18 | 55455502      | 55456370 | 869  |
| chr5  | 32922586      | 32923453 | 868  |
| chr19 | 12282031      | 12282896 | 866  |
| chr23 | 10592045      | 10592908 | 864  |
| chrX  | 60004230      | 60005084 | 855  |
| chr18 | 376938 377787 | 850      |      |
| chr16 | 2237691       | 2238540  | 850  |
| chrX  | 78736967      | 78737783 | 817  |
| chr19 | 58387894      | 58388707 | 814  |

|       |           |           |     |
|-------|-----------|-----------|-----|
| chr5  | 29142080  | 29142891  | 812 |
| chrX  | 50436611  | 50437421  | 811 |
| chr20 | 33551498  | 33552308  | 811 |
| chr3  | 31628106  | 31628909  | 804 |
| chrX  | 19823646  | 19824445  | 800 |
| chrX  | 71468251  | 71469049  | 799 |
| chr21 | 64453899  | 64454697  | 799 |
| chr18 | 11685136  | 11685932  | 797 |
| chrX  | 78497116  | 78497910  | 795 |
| chr2  | 108812356 | 108813150 | 795 |
| chr19 | 52858250  | 52859044  | 795 |
| chrX  | 60132439  | 60133231  | 793 |
| chr25 | 42203432  | 42204224  | 793 |
| chr23 | 9739945   | 9740729   | 785 |
| chrX  | 77192361  | 77193143  | 783 |
| chrX  | 20589539  | 20590317  | 779 |
| chrX  | 13336335  | 13337112  | 778 |
| chr2  | 132497048 | 132497821 | 774 |
| chr5  | 112583542 | 112584314 | 773 |
| chr3  | 15402211  | 15402980  | 770 |
| chr22 | 46578306  | 46579075  | 770 |
| chr16 | 38770940  | 38771708  | 769 |
| chrX  | 50289832  | 50290599  | 768 |
| chr5  | 114055877 | 114056643 | 767 |
| chrX  | 54143813  | 54144576  | 764 |
| chrX  | 20875791  | 20876547  | 757 |
| chr4  | 28607192  | 28607944  | 753 |
| chr19 | 60243622  | 60244372  | 751 |
| chrX  | 7911647   | 7912396   | 750 |
| chr12 | 76745982  | 76746728  | 747 |
| chr13 | 60440483  | 60441226  | 744 |
| chr18 | 3692038   | 3692779   | 742 |
| chr17 | 58385554  | 58386295  | 742 |
| chr18 | 23591927  | 23592662  | 736 |
| chr29 | 50606630  | 50607364  | 735 |
| chr29 | 33935166  | 33935900  | 735 |
| chr20 | 1296167   | 1296900   | 734 |
| chrX  | 21943012  | 21943739  | 728 |
| chr4  | 16875497  | 16876224  | 728 |
| chr29 | 38286950  | 38287677  | 728 |
| chr5  | 113235641 | 113236366 | 726 |
| chr13 | 40994089  | 40994813  | 725 |
| chrX  | 63546718  | 63547439  | 722 |
| chr19 | 60405403  | 60406124  | 722 |
| chr10 | 70055006  | 70055726  | 721 |
| chr12 | 46769375  | 46770093  | 719 |
| chr6  | 13977623  | 13978340  | 718 |
| chr16 | 60232458  | 60233175  | 718 |
| chrX  | 9861323   | 9862039   | 717 |
| chr2  | 111233578 | 111234294 | 717 |

|       |               |           |     |
|-------|---------------|-----------|-----|
| chr4  | 95902765      | 95903480  | 716 |
| chr1  | 68919562      | 68920277  | 716 |
| chrX  | 76089361      | 76090075  | 715 |
| chr3  | 33842884      | 33843597  | 714 |
| chr28 | 30797085      | 30797797  | 713 |
| chrX  | 63192224      | 63192934  | 711 |
| chr9  | 34925242      | 34925952  | 711 |
| chr29 | 44699857      | 44700565  | 709 |
| chr17 | 70074654      | 70075362  | 709 |
| chr11 | 70702898      | 70703605  | 708 |
| chr18 | 47994659      | 47995365  | 707 |
| chr3  | 22608913      | 22609618  | 706 |
| chrX  | 61853293      | 61853996  | 704 |
| chr9  | 31070843      | 31071546  | 704 |
| chr24 | 1753934       | 1754636   | 703 |
| chr25 | 33317671      | 33318371  | 701 |
| chr24 | 830693 831393 | 701       |     |
| chr1  | 68860701      | 68861401  | 701 |
| chrX  | 56867452      | 56868150  | 699 |
| chrX  | 7179577       | 7180275   | 699 |
| chr3  | 22517909      | 22518607  | 699 |
| chr13 | 77663418      | 77664115  | 698 |
| chr10 | 70002603      | 70003300  | 698 |
| chr25 | 42635146      | 42635841  | 696 |
| chr23 | 19874996      | 19875690  | 695 |
| chr17 | 70557642      | 70558336  | 695 |
| chr21 | 26827261      | 26827954  | 694 |
| chrX  | 56897723      | 56898415  | 693 |
| chrX  | 8427783       | 8428475   | 693 |
| chr11 | 86242638      | 86243326  | 689 |
| chr19 | 54452775      | 54453460  | 686 |
| chr5  | 122286648     | 122287332 | 685 |
| chrX  | 75768299      | 75768982  | 684 |
| chrX  | 5323639       | 5324322   | 684 |
| chr1  | 144520797     | 144521480 | 684 |
| chrX  | 50827018      | 50827700  | 683 |
| chrX  | 72554235      | 72554915  | 681 |
| chr11 | 77552801      | 77553480  | 680 |
| chrX  | 2470452       | 2471130   | 679 |
| chr9  | 22765927      | 22766605  | 679 |
| chr28 | 34105057      | 34105735  | 679 |
| chr7  | 38213857      | 38214532  | 676 |
| chr26 | 48497591      | 48498265  | 675 |
| chr17 | 26906122      | 26906796  | 675 |
| chr17 | 69869602      | 69870275  | 674 |
| chr23 | 15966413      | 15967085  | 673 |
| chrX  | 13223751      | 13224422  | 672 |
| chrX  | 31246803      | 31247472  | 670 |
| chrX  | 16893887      | 16894556  | 670 |
| chr14 | 7871584       | 7872253   | 670 |

|       |           |           |     |
|-------|-----------|-----------|-----|
| chr12 | 83830776  | 83831445  | 670 |
| chrX  | 72073736  | 72074404  | 669 |
| chr6  | 46098476  | 46099144  | 669 |
| chr16 | 77625786  | 77626454  | 669 |
| chr27 | 29345995  | 29346662  | 668 |
| chr7  | 15110445  | 15111110  | 666 |
| chr26 | 15715039  | 15715702  | 664 |
| chr19 | 53939882  | 53940545  | 664 |
| chr11 | 106350204 | 106350867 | 664 |
| chrX  | 37437046  | 37437708  | 663 |
| chr19 | 27530382  | 27531044  | 663 |
| chrX  | 22598151  | 22598812  | 662 |
| chr17 | 62117767  | 62118427  | 661 |
| chr2  | 14082161  | 14082820  | 660 |
| chr5  | 120046486 | 120047141 | 656 |
| chr4  | 28580908  | 28581563  | 656 |
| chr4  | 32853946  | 32854600  | 655 |
| chr29 | 44680001  | 44680654  | 654 |
| chr23 | 10622220  | 10622873  | 654 |
| chrX  | 6602134   | 6602786   | 653 |
| chr26 | 44395769  | 44396421  | 653 |
| chr25 | 34460701  | 34461352  | 652 |
| chr11 | 102424917 | 102425568 | 652 |
| chrX  | 46696493  | 46697143  | 651 |
| chr1  | 84337973  | 84338623  | 651 |
| chr29 | 33823208  | 33823857  | 650 |
| chr22 | 50615639  | 50616287  | 649 |
| chr16 | 2096958   | 2097604   | 647 |
| chr13 | 57362297  | 57362941  | 645 |
| chr5  | 117272437 | 117273080 | 644 |
| chr13 | 80710544  | 80711187  | 644 |
| chrX  | 62674853  | 62675495  | 643 |
| chrX  | 20753518  | 20754160  | 643 |
| chr24 | 35162989  | 35163631  | 643 |
| chrX  | 20336012  | 20336653  | 642 |
| chr28 | 33874516  | 33875156  | 641 |
| chr2  | 126962376 | 126963016 | 641 |
| chr1  | 75085535  | 75086174  | 640 |
| chrX  | 19319331  | 19319967  | 637 |
| chr19 | 49340033  | 49340669  | 637 |
| chr11 | 73312365  | 73313001  | 637 |
| chr26 | 15710286  | 15710921  | 636 |
| chr20 | 45424048  | 45424683  | 636 |
| chr26 | 18169217  | 18169849  | 633 |
| chr17 | 62211433  | 62212065  | 633 |
| chr11 | 90358535  | 90359167  | 633 |
| chrX  | 7181354   | 7181985   | 632 |
| chrX  | 7065792   | 7066423   | 632 |
| chr28 | 12165876  | 12166507  | 632 |
| chr19 | 30526022  | 30526653  | 632 |

|       |           |           |     |
|-------|-----------|-----------|-----|
| chrX  | 39136652  | 39137282  | 631 |
| chr13 | 53411845  | 53412474  | 630 |
| chrX  | 80459440  | 80460068  | 629 |
| chrX  | 30148572  | 30149200  | 629 |
| chr5  | 102224994 | 102225619 | 626 |
| chr3  | 30932623  | 30933248  | 626 |
| chr28 | 33782720  | 33783345  | 626 |
| chr23 | 31394043  | 31394668  | 626 |
| chrX  | 56871426  | 56872050  | 625 |
| chr21 | 30283059  | 30283683  | 625 |
| chr29 | 26476001  | 26476624  | 624 |
| chr1  | 145745671 | 145746293 | 623 |
| chrX  | 69058779  | 69059400  | 622 |
| chr2  | 139153982 | 139154603 | 622 |
| chr3  | 54362081  | 54362700  | 620 |
| chr13 | 59616068  | 59616687  | 620 |
| chr10 | 86570912  | 86571531  | 620 |
| chr22 | 30002936  | 30003552  | 617 |
| chr19 | 41550192  | 41550808  | 617 |
| chr21 | 31636045  | 31636659  | 615 |
| chr13 | 62020415  | 62021027  | 613 |
| chr13 | 22149604  | 22150216  | 613 |
| chr28 | 34674655  | 34675266  | 612 |
| chr10 | 17006098  | 17006707  | 610 |
| chr5  | 118545556 | 118546164 | 609 |
| chr2  | 20762997  | 20763605  | 609 |
| chr8  | 73092280  | 73092887  | 608 |
| chr8  | 45764303  | 45764910  | 608 |
| chr5  | 30517619  | 30518225  | 607 |
| chr25 | 40906384  | 40906990  | 607 |
| chr20 | 8584663   | 8585269   | 607 |
| chr20 | 8387644   | 8388250   | 607 |
| chrX  | 66463427  | 66464031  | 605 |
| chr7  | 51692983  | 51693586  | 604 |
| chr18 | 11566022  | 11566624  | 603 |
| chr14 | 1917240   | 1917842   | 603 |
| chr5  | 91868357  | 91868958  | 602 |
| chrX  | 72871224  | 72871824  | 601 |
| chr18 | 22764800  | 22765400  | 601 |
| chr25 | 39446292  | 39446891  | 600 |
| chr23 | 38504425  | 38505022  | 598 |
| chr10 | 80621984  | 80622581  | 598 |
| chr13 | 79917763  | 79918359  | 597 |
| chr15 | 24026752  | 24027347  | 596 |
| chr3  | 8571215   | 8571809   | 595 |
| chr2  | 132426314 | 132426908 | 595 |
| chrX  | 63058823  | 63059416  | 594 |
| chr27 | 38976027  | 38976620  | 594 |
| chr25 | 35509970  | 35510563  | 594 |
| chr4  | 5383542   | 5384134   | 593 |

|       |           |           |     |
|-------|-----------|-----------|-----|
| chr29 | 47919639  | 47920231  | 593 |
| chrX  | 78489405  | 78489996  | 592 |
| chr13 | 63411175  | 63411766  | 592 |
| chr24 | 61089042  | 61089632  | 591 |
| chr8  | 64688575  | 64689164  | 590 |
| chr26 | 37901117  | 37901706  | 590 |
| chr17 | 72733214  | 72733803  | 590 |
| chrX  | 54361377  | 54361965  | 589 |
| chrX  | 50410224  | 50410812  | 589 |
| chrX  | 20726036  | 20726623  | 588 |
| chr23 | 48192795  | 48193381  | 587 |
| chr3  | 125583877 | 125584462 | 586 |
| chr24 | 60695136  | 60695720  | 585 |
| chr16 | 44372114  | 44372698  | 585 |
| chr13 | 29977122  | 29977706  | 585 |
| chrX  | 61294223  | 61294806  | 584 |
| chrX  | 8126101   | 8126683   | 583 |
| chr19 | 44819887  | 44820469  | 583 |
| chr22 | 48244626  | 48245207  | 582 |
| chr16 | 74191521  | 74192102  | 582 |
| chr15 | 27278154  | 27278735  | 582 |
| chr12 | 33215957  | 33216538  | 582 |
| chr1  | 132658988 | 132659569 | 582 |
| chrX  | 10058962  | 10059542  | 581 |
| chr7  | 70810423  | 70811003  | 581 |
| chr27 | 26623521  | 26624101  | 581 |
| chr22 | 32585723  | 32586303  | 581 |
| chr10 | 16842968  | 16843548  | 581 |
| chr3  | 111280835 | 111281414 | 580 |
| chr19 | 26280085  | 26280664  | 580 |
| chr11 | 48811653  | 48812232  | 580 |
| chr7  | 89473536  | 89474114  | 579 |
| chrX  | 35803256  | 35803832  | 577 |
| chr18 | 53333335  | 53333911  | 577 |
| chr18 | 2256512   | 2257088   | 577 |
| chr17 | 14832451  | 14833027  | 577 |
| chr10 | 66619117  | 66619693  | 577 |
| chr10 | 16994423  | 16994999  | 577 |
| chrX  | 49982012  | 49982587  | 576 |
| chr5  | 76080086  | 76080661  | 576 |
| chr18 | 11965306  | 11965881  | 576 |
| chr12 | 32604408  | 32604983  | 576 |
| chr7  | 50544294  | 50544867  | 574 |
| chr25 | 33267323  | 33267896  | 574 |
| chr22 | 16412326  | 16412899  | 574 |
| chr20 | 67503991  | 67504564  | 574 |
| chr27 | 28104556  | 28105128  | 573 |
| chr17 | 68418104  | 68418676  | 573 |
| chr10 | 36840897  | 36841469  | 573 |
| chr14 | 61160928  | 61161499  | 572 |

|       |           |           |     |
|-------|-----------|-----------|-----|
| chr12 | 31999077  | 31999647  | 571 |
| chr10 | 70526588  | 70527158  | 571 |
| chr1  | 145719766 | 145720336 | 571 |
| chrX  | 73363280  | 73363849  | 570 |
| chr22 | 44855035  | 44855604  | 570 |
| chr27 | 28193054  | 28193622  | 569 |
| chr24 | 59426482  | 59427050  | 569 |
| chr21 | 13636120  | 13636688  | 569 |
| chr16 | 47609684  | 47610252  | 569 |
| chr15 | 51666947  | 51667515  | 569 |
| chr13 | 82662904  | 82663472  | 569 |
| chr10 | 20484880  | 20485448  | 569 |
| chrX  | 7571266   | 7571833   | 568 |
| chr9  | 98833990  | 98834557  | 568 |
| chr18 | 63582833  | 63583400  | 568 |
| chrX  | 62746934  | 62747500  | 567 |
| chr13 | 57392886  | 57393452  | 567 |
| chr13 | 41412579  | 41413145  | 567 |
| chr13 | 40080441  | 40081007  | 567 |
| chr9  | 92189182  | 92189747  | 566 |
| chr27 | 35369771  | 35370336  | 566 |
| chr26 | 20135327  | 20135892  | 566 |
| chr3  | 23087795  | 23088359  | 565 |
| chr29 | 23784282  | 23784846  | 565 |
| chrX  | 35571216  | 35571779  | 564 |
| chr6  | 106930989 | 106931552 | 564 |
| chrX  | 75946713  | 75947275  | 563 |
| chr3  | 31731791  | 31732353  | 563 |
| chr25 | 34384262  | 34384824  | 563 |
| chrX  | 65260688  | 65261249  | 562 |
| chr24 | 64988455  | 64989016  | 562 |
| chr22 | 60011737  | 60012298  | 562 |
| chr19 | 44998989  | 44999550  | 562 |
| chr15 | 24247390  | 24247951  | 562 |
| chrX  | 59539177  | 59539737  | 561 |
| chrX  | 55621142  | 55621702  | 561 |
| chr26 | 49153497  | 49154056  | 560 |
| chr17 | 66166757  | 66167316  | 560 |
| chr16 | 47215509  | 47216068  | 560 |
| chr21 | 33987340  | 33987898  | 559 |
| chrX  | 31789263  | 31789820  | 558 |
| chr4  | 74517662  | 74518219  | 558 |
| chr22 | 16410491  | 16411048  | 558 |
| chrX  | 50458396  | 50458952  | 557 |
| chr3  | 115015734 | 115016290 | 557 |
| chr16 | 2268249   | 2268805   | 557 |
| chrX  | 75842840  | 75843395  | 556 |
| chr7  | 17979923  | 17980478  | 556 |
| chr13 | 62249287  | 62249842  | 556 |
| chr11 | 105980391 | 105980946 | 556 |



|       |           |           |     |
|-------|-----------|-----------|-----|
| chr1  | 81765973  | 81766528  | 556 |
| chrX  | 10447334  | 10447888  | 555 |
| chr19 | 27159020  | 27159574  | 555 |
| chr17 | 73151213  | 73151767  | 555 |
| chr13 | 79710855  | 79711409  | 555 |
| chr11 | 28510175  | 28510729  | 555 |
| chrX  | 66930020  | 66930573  | 554 |
| chrX  | 8172033   | 8172585   | 553 |
| chrX  | 6287278   | 6287830   | 553 |
| chr3  | 111652493 | 111653045 | 553 |
| chr20 | 38863289  | 38863841  | 553 |
| chr26 | 38406905  | 38407456  | 552 |
| chr25 | 39424436  | 39424987  | 552 |
| chr19 | 46769822  | 46770373  | 552 |
| chr18 | 52329392  | 52329943  | 552 |
| chr13 | 75634241  | 75634792  | 552 |
| chrX  | 73448019  | 73448569  | 551 |
| chrX  | 73275240  | 73275790  | 551 |
| chr19 | 53560808  | 53561358  | 551 |
| chr14 | 1832968   | 1833518   | 551 |
| chr11 | 106263051 | 106263601 | 551 |
| chr11 | 77554526  | 77555076  | 551 |
| chrX  | 76064073  | 76064622  | 550 |
| chrX  | 18418062  | 18418611  | 550 |
| chrX  | 73409178  | 73409726  | 549 |
| chrX  | 65248532  | 65249080  | 549 |
| chrX  | 65111262  | 65111810  | 549 |
| chrX  | 13993152  | 13993700  | 549 |
| chrX  | 13283566  | 13284114  | 549 |
| chr7  | 71319927  | 71320475  | 549 |
| chr6  | 92072495  | 92073043  | 549 |
| chr4  | 64072224  | 64072772  | 549 |
| chr3  | 111482853 | 111483401 | 549 |
| chr21 | 20618707  | 20619255  | 549 |
| chr2  | 131681423 | 131681971 | 549 |
| chr14 | 40507649  | 40508197  | 549 |
| chr5  | 113158476 | 113159023 | 548 |
| chr15 | 39855524  | 39856071  | 548 |
| chr11 | 70772922  | 70773469  | 548 |
| chr5  | 29207367  | 29207913  | 547 |
| chr25 | 29369020  | 29369566  | 547 |
| chr23 | 18814016  | 18814562  | 547 |
| chr17 | 64153301  | 64153847  | 547 |
| chr13 | 73029788  | 73030334  | 547 |
| chrX  | 20384792  | 20385337  | 546 |
| chr28 | 15324417  | 15324962  | 546 |
| chr2  | 72854527  | 72855072  | 546 |
| chrX  | 38991875  | 38992419  | 545 |
| chr3  | 9197774   | 9198318   | 545 |
| chr18 | 39489742  | 39490286  | 545 |

|       |           |           |     |
|-------|-----------|-----------|-----|
| chr16 | 59710653  | 59711197  | 545 |
| chr14 | 68004056  | 68004600  | 545 |
| chr13 | 41355407  | 41355951  | 545 |
| chr10 | 59600391  | 59600935  | 545 |
| chr8  | 25275458  | 25276001  | 544 |
| chr5  | 61474912  | 61475455  | 544 |
| chrX  | 53662426  | 53662968  | 543 |
| chrX  | 49213404  | 49213946  | 543 |
| chr8  | 61121887  | 61122429  | 543 |
| chr3  | 105118430 | 105118972 | 543 |
| chr19 | 56108159  | 56108701  | 543 |
| chr16 | 2254493   | 2255035   | 543 |
| chrX  | 63009337  | 63009878  | 542 |
| chrX  | 50228441  | 50228982  | 542 |
| chrX  | 6563787   | 6564328   | 542 |
| chr7  | 4990998   | 4991539   | 542 |
| chr24 | 60800075  | 60800616  | 542 |
| chr21 | 34643226  | 34643767  | 542 |
| chr18 | 11825911  | 11826452  | 542 |
| chr15 | 23831359  | 23831900  | 542 |
| chr12 | 76052951  | 76053492  | 542 |
| chr3  | 74469359  | 74469899  | 541 |
| chr24 | 59411397  | 59411937  | 541 |
| chr23 | 8461049   | 8461589   | 541 |
| chrX  | 78947804  | 78948343  | 540 |
| chrX  | 53475152  | 53475691  | 540 |
| chr9  | 35851955  | 35852494  | 540 |
| chr3  | 124040875 | 124041414 | 540 |
| chr3  | 105485669 | 105486208 | 540 |
| chr22 | 39857109  | 39857648  | 540 |
| chr12 | 83767153  | 83767692  | 540 |
| chr13 | 41364408  | 41364946  | 539 |
| chr10 | 33927932  | 33928470  | 539 |
| chrX  | 20485218  | 20485755  | 538 |
| chr6  | 70183086  | 70183623  | 538 |
| chr26 | 49109492  | 49110029  | 538 |
| chr7  | 12987481  | 12988017  | 537 |
| chr4  | 95680865  | 95681401  | 537 |
| chr27 | 43918260  | 43918796  | 537 |
| chr23 | 28764979  | 28765515  | 537 |
| chr21 | 67971993  | 67972529  | 537 |
| chr18 | 22300512  | 22301048  | 537 |
| chr14 | 66251196  | 66251732  | 537 |
| chrX  | 6612119   | 6612654   | 536 |
| chrX  | 21560363  | 21560897  | 535 |
| chr6  | 63156827  | 63157361  | 535 |
| chr18 | 50852419  | 50852953  | 535 |
| chrX  | 34071951  | 34072484  | 534 |
| chrX  | 20194978  | 20195511  | 534 |
| chr13 | 55408427  | 55408960  | 534 |

|       |               |           |     |
|-------|---------------|-----------|-----|
| chrX  | 36329789      | 36330321  | 533 |
| chr8  | 78828138      | 78828670  | 533 |
| chr19 | 36442117      | 36442648  | 532 |
| chr16 | 43441556      | 43442087  | 532 |
| chr28 | 44519588      | 44520118  | 531 |
| chr17 | 51000753      | 51001283  | 531 |
| chr10 | 48277190      | 48277720  | 531 |
| chrX  | 72229400      | 72229929  | 530 |
| chrX  | 6395538       | 6396067   | 530 |
| chrX  | 57142719      | 57143247  | 529 |
| chrX  | 8130204       | 8130732   | 529 |
| chr10 | 17639992      | 17640520  | 529 |
| chrX  | 77201626      | 77202153  | 528 |
| chr5  | 60918558      | 60919085  | 528 |
| chr3  | 114928452     | 114928979 | 528 |
| chr19 | 16141525      | 16142052  | 528 |
| chrX  | 8331394       | 8331920   | 527 |
| chrX  | 867035 867561 | 527       |     |
| chr18 | 6634847       | 6635373   | 527 |
| chr15 | 75559764      | 75560290  | 527 |
| chrX  | 44937407      | 44937932  | 526 |
| chr12 | 34041735      | 34042260  | 526 |
| chr1  | 10169514      | 10170039  | 526 |
| chr3  | 93583860      | 93584384  | 525 |
| chr2  | 127782459     | 127782982 | 524 |
| chr15 | 25658859      | 25659382  | 524 |
| chrX  | 34519087      | 34519609  | 523 |
| chr8  | 78693680      | 78694202  | 523 |
| chr8  | 7650116       | 7650638   | 523 |
| chr25 | 40367572      | 40368094  | 523 |
| chr21 | 5989292       | 5989814   | 523 |
| chr17 | 70011821      | 70012343  | 523 |
| chr15 | 26651832      | 26652354  | 523 |
| chr4  | 117751794     | 117752315 | 522 |
| chr25 | 41426813      | 41427334  | 522 |
| chr23 | 44430539      | 44431060  | 522 |
| chrX  | 69258084      | 69258604  | 521 |
| chr22 | 43914833      | 43915353  | 521 |
| chr16 | 48791183      | 48791703  | 521 |
| chr1  | 149248508     | 149249028 | 521 |
| chrX  | 71763300      | 71763819  | 520 |
| chr20 | 8764699       | 8765218   | 520 |
| chr19 | 42029028      | 42029547  | 520 |
| chr18 | 50587617      | 50588136  | 520 |
| chrX  | 87728616      | 87729134  | 519 |
| chrX  | 35560581      | 35561099  | 519 |
| chr7  | 94372763      | 94373281  | 519 |
| chr4  | 68274432      | 68274950  | 519 |
| chr3  | 21986794      | 21987312  | 519 |
| chr20 | 33364215      | 33364733  | 519 |

|       |           |           |     |
|-------|-----------|-----------|-----|
| chr20 | 66428130  | 66428647  | 518 |
| chr14 | 22069577  | 22070094  | 518 |
| chrX  | 38069269  | 38069785  | 517 |
| chrX  | 13231082  | 13231598  | 517 |
| chr6  | 91645380  | 91645896  | 517 |
| chr24 | 63496444  | 63496960  | 517 |
| chr15 | 28871060  | 28871576  | 517 |
| chr15 | 27932836  | 27933352  | 517 |
| chr12 | 14931143  | 14931659  | 517 |
| chrX  | 37363901  | 37364416  | 516 |
| chr17 | 63940514  | 63941029  | 516 |
| chrX  | 73385645  | 73386159  | 515 |
| chrX  | 11574507  | 11575021  | 515 |
| chr21 | 14749541  | 14750055  | 515 |
| chr20 | 8389249   | 8389763   | 515 |
| chr19 | 41229830  | 41230344  | 515 |
| chr13 | 59437023  | 59437537  | 515 |
| chrX  | 50496776  | 50497289  | 514 |
| chr7  | 75400278  | 75400791  | 514 |
| chr6  | 61950200  | 61950713  | 514 |
| chr19 | 39841711  | 39842224  | 514 |
| chrX  | 75746628  | 75747140  | 513 |
| chrX  | 55685522  | 55686034  | 513 |
| chrX  | 11314329  | 11314841  | 513 |
| chr22 | 7286821   | 7287333   | 513 |
| chr14 | 61511881  | 61512393  | 513 |
| chr12 | 82578541  | 82579053  | 513 |
| chr10 | 70394809  | 70395321  | 513 |
| chrX  | 55401513  | 55402024  | 512 |
| chrX  | 21633706  | 21634217  | 512 |
| chrX  | 8678052   | 8678562   | 511 |
| chr5  | 33564766  | 33565276  | 511 |
| chr2  | 124794010 | 124794520 | 511 |
| chrX  | 74822163  | 74822672  | 510 |
| chr16 | 19104327  | 19104836  | 510 |
| chrX  | 6056796   | 6057304   | 509 |
| chr5  | 86514997  | 86515505  | 509 |
| chr28 | 33996893  | 33997401  | 509 |
| chr24 | 33933308  | 33933816  | 509 |
| chr10 | 6564900   | 6565408   | 509 |
| chrX  | 34023508  | 34024015  | 508 |
| chr25 | 18132213  | 18132720  | 508 |
| chr20 | 8578780   | 8579287   | 508 |
| chr13 | 80653947  | 80654454  | 508 |
| chr6  | 121771646 | 121772152 | 507 |
| chr4  | 118288013 | 118288519 | 507 |
| chr4  | 106090200 | 106090706 | 507 |
| chr28 | 27052376  | 27052882  | 507 |
| chr27 | 15332963  | 15333469  | 507 |
| chr13 | 74327752  | 74328258  | 507 |

|       |           |           |     |
|-------|-----------|-----------|-----|
| chrX  | 50692787  | 50693292  | 506 |
| chrX  | 34048053  | 34048558  | 506 |
| chr28 | 42483266  | 42483771  | 506 |
| chr28 | 33641606  | 33642111  | 506 |
| chrX  | 65194623  | 65195127  | 505 |
| chrX  | 21527248  | 21527752  | 505 |
| chr26 | 20285013  | 20285517  | 505 |
| chr22 | 52804236  | 52804740  | 505 |
| chr2  | 132173148 | 132173652 | 505 |
| chr19 | 63181737  | 63182241  | 505 |
| chr4  | 72327045  | 72327548  | 504 |
| chr17 | 14833166  | 14833669  | 504 |
| chr16 | 70104794  | 70105297  | 504 |
| chr11 | 92474170  | 92474673  | 504 |
| chrX  | 20430125  | 20430627  | 503 |
| chr10 | 22292121  | 22292623  | 503 |
| chrX  | 63141376  | 63141877  | 502 |
| chrX  | 59586412  | 59586913  | 502 |
| chrX  | 19414669  | 19415170  | 502 |
| chrX  | 7324186   | 7324686   | 501 |
| chr28 | 23937959  | 23938459  | 501 |
| chr25 | 14947594  | 14948094  | 501 |
| chrX  | 63696117  | 63696616  | 500 |
| chrX  | 38205237  | 38205736  | 500 |
| chr24 | 59864981  | 59865480  | 500 |
| chr18 | 47499195  | 47499694  | 500 |
| chr18 | 45638350  | 45638849  | 500 |
| chrX  | 74251571  | 74252069  | 499 |
| chrX  | 34026248  | 34026746  | 499 |
| chr5  | 116685074 | 116685572 | 499 |
| chr3  | 15421304  | 15421802  | 499 |
| chr1  | 99827542  | 99828040  | 499 |
| chrX  | 36538548  | 36539045  | 498 |
| chr7  | 10959865  | 10960362  | 498 |
| chr5  | 30373777  | 30374274  | 498 |
| chr20 | 33691976  | 33692473  | 498 |
| chr26 | 38254187  | 38254683  | 497 |
| chr11 | 49342690  | 49343186  | 497 |
| chr19 | 39245040  | 39245535  | 496 |
| chr19 | 27915273  | 27915768  | 496 |
| chr15 | 64825551  | 64826046  | 496 |
| chrX  | 73391286  | 73391780  | 495 |
| chrX  | 2635152   | 2635646   | 495 |
| chr25 | 29295791  | 29296285  | 495 |
| chr21 | 34451338  | 34451832  | 495 |
| chr18 | 49511868  | 49512362  | 495 |
| chr12 | 30981401  | 30981895  | 495 |
| chrX  | 51674571  | 51675064  | 494 |
| chrX  | 71721805  | 71722297  | 493 |
| chr5  | 120463861 | 120464353 | 493 |

|       |               |           |     |
|-------|---------------|-----------|-----|
| chr5  | 111983201     | 111983693 | 493 |
| chr13 | 79893600      | 79894092  | 493 |
| chr10 | 21091913      | 21092405  | 493 |
| chr9  | 91913425      | 91913916  | 492 |
| chr8  | 73740656      | 73741147  | 492 |
| chr3  | 109762039     | 109762530 | 492 |
| chr25 | 38925084      | 38925575  | 492 |
| chr25 | 22110318      | 22110809  | 492 |
| chr23 | 20636575      | 20637066  | 492 |
| chr18 | 41815610      | 41816101  | 492 |
| chr16 | 46965103      | 46965594  | 492 |
| chrX  | 53756572      | 53757062  | 491 |
| chrX  | 36654295      | 36654785  | 491 |
| chr14 | 79854641      | 79855131  | 491 |
| chr12 | 32213262      | 32213752  | 491 |
| chrX  | 65802867      | 65803356  | 490 |
| chrX  | 50400681      | 50401170  | 490 |
| chr9  | 90537056      | 90537545  | 490 |
| chr6  | 32701896      | 32702385  | 490 |
| chr3  | 55986118      | 55986607  | 490 |
| chr2  | 19394689      | 19395178  | 490 |
| chr16 | 47040455      | 47040944  | 490 |
| chr29 | 48938208      | 48938696  | 489 |
| chr24 | 22046811      | 22047299  | 489 |
| chr19 | 38311340      | 38311828  | 489 |
| chr18 | 50862483      | 50862971  | 489 |
| chr13 | 40582502      | 40582990  | 489 |
| chr8  | 106891861     | 106892348 | 488 |
| chr3  | 105772263     | 105772750 | 488 |
| chr23 | 51935891      | 51936378  | 488 |
| chr20 | 708174 708661 |           | 488 |
| chr17 | 60884588      | 60885075  | 488 |
| chr11 | 28501081      | 28501568  | 488 |
| chrX  | 61619375      | 61619861  | 487 |
| chr8  | 63938464      | 63938950  | 487 |
| chr6  | 116899300     | 116899786 | 487 |
| chr5  | 121251430     | 121251916 | 487 |
| chr3  | 22693032      | 22693518  | 487 |
| chr25 | 40051189      | 40051675  | 487 |
| chr11 | 47117627      | 47118113  | 487 |
| chr22 | 58629029      | 58629514  | 486 |
| chr21 | 57481889      | 57482374  | 486 |
| chr19 | 38599958      | 38600443  | 486 |
| chr17 | 70175775      | 70176260  | 486 |
| chr1  | 108213194     | 108213679 | 486 |
| chr27 | 26944007      | 26944491  | 485 |
| chr3  | 115434113     | 115434596 | 484 |
| chr19 | 16914173      | 16914656  | 484 |
| chr13 | 57306456      | 57306939  | 484 |
| chr27 | 1461888       | 1462370   | 483 |

|       |           |           |     |
|-------|-----------|-----------|-----|
| chr24 | 49741411  | 49741893  | 483 |
| chr22 | 56092045  | 56092527  | 483 |
| chr18 | 41054655  | 41055137  | 483 |
| chr13 | 61824331  | 61824813  | 483 |
| chrX  | 63305498  | 63305979  | 482 |
| chr7  | 45011917  | 45012398  | 482 |
| chr3  | 112300710 | 112301191 | 482 |
| chr26 | 34950286  | 34950767  | 482 |
| chr2  | 134462554 | 134463035 | 482 |
| chr18 | 19010223  | 19010704  | 482 |
| chr17 | 67904104  | 67904585  | 482 |
| chr15 | 54031024  | 54031505  | 482 |
| chr15 | 41120317  | 41120798  | 482 |
| chr29 | 49115405  | 49115885  | 481 |
| chr23 | 20056120  | 20056600  | 481 |
| chr11 | 66334011  | 66334491  | 481 |
| chr5  | 125560268 | 125560747 | 480 |
| chr3  | 123671613 | 123672092 | 480 |
| chr3  | 99104442  | 99104921  | 480 |
| chr23 | 49877584  | 49878062  | 479 |
| chr18 | 61998030  | 61998508  | 479 |
| chr15 | 32125669  | 32126147  | 479 |
| chr15 | 25596122  | 25596600  | 479 |
| chr12 | 84257687  | 84258165  | 479 |
| chr14 | 1948984   | 1949461   | 478 |
| chr10 | 15011197  | 15011674  | 478 |
| chr4  | 96074596  | 96075072  | 477 |
| chr26 | 22408563  | 22409039  | 477 |
| chr18 | 47859685  | 47860161  | 477 |
| chr18 | 32582135  | 32582611  | 477 |
| chrX  | 58926964  | 58927439  | 476 |
| chrX  | 20692896  | 20693371  | 476 |
| chr22 | 30332773  | 30333248  | 476 |
| chr18 | 52101578  | 52102053  | 476 |
| chrX  | 31178971  | 31179445  | 475 |
| chr23 | 10495187  | 10495661  | 475 |
| chr1  | 145821140 | 145821614 | 475 |
| chrX  | 73397277  | 73397750  | 474 |
| chrX  | 8127350   | 8127823   | 474 |
| chr26 | 17897809  | 17898282  | 474 |
| chr22 | 59843796  | 59844269  | 474 |
| chr17 | 68737276  | 68737749  | 474 |
| chrX  | 75606129  | 75606601  | 473 |
| chrX  | 2423851   | 2424323   | 473 |
| chrX  | 2352519   | 2352991   | 473 |
| chr26 | 42131093  | 42131565  | 473 |
| chr19 | 35053274  | 35053746  | 473 |
| chr18 | 8053294   | 8053766   | 473 |
| chr12 | 75436422  | 75436894  | 473 |
| chr5  | 28806188  | 28806659  | 472 |

|       |               |           |     |
|-------|---------------|-----------|-----|
| chr3  | 123667780     | 123668251 | 472 |
| chr25 | 657321 657792 | 472       |     |
| chr24 | 48605922      | 48606393  | 472 |
| chr20 | 74517219      | 74517690  | 472 |
| chr18 | 18022949      | 18023420  | 472 |
| chr2  | 135584567     | 135585037 | 471 |
| chr2  | 126441890     | 126442360 | 471 |
| chr13 | 25903349      | 25903819  | 471 |
| chrX  | 53958868      | 53959337  | 470 |
| chrX  | 18142245      | 18142714  | 470 |
| chr29 | 36614494      | 36614963  | 470 |
| chr20 | 6686987       | 6687455   | 469 |
| chr10 | 103687510     | 103687978 | 469 |
| chr10 | 19488244      | 19488712  | 469 |
| chr18 | 26167389      | 26167856  | 468 |
| chr17 | 66821104      | 66821571  | 468 |
| chr13 | 29977800      | 29978267  | 468 |
| chr11 | 100482324     | 100482791 | 468 |
| chr10 | 7187594       | 7188061   | 468 |
| chr8  | 62463433      | 62463899  | 467 |
| chr17 | 11546229      | 11546695  | 467 |
| chr11 | 72624598      | 72625064  | 467 |
| chrX  | 444882 445347 | 466       |     |
| chr4  | 121288669     | 121289134 | 466 |
| chr21 | 64155497      | 64155962  | 466 |
| chr18 | 4345632       | 4346097   | 466 |
| chr17 | 69842584      | 69843049  | 466 |
| chr26 | 42165258      | 42165722  | 465 |
| chr2  | 131309743     | 131310207 | 465 |
| chr5  | 30186151      | 30186614  | 464 |
| chr3  | 123267010     | 123267473 | 464 |
| chr29 | 2522305       | 2522768   | 464 |
| chr8  | 93117332      | 93117794  | 463 |
| chr13 | 41497365      | 41497827  | 463 |
| chr12 | 76055761      | 76056223  | 463 |
| chr10 | 86840793      | 86841255  | 463 |
| chr5  | 121332459     | 121332920 | 462 |
| chr21 | 57514065      | 57514526  | 462 |
| chr14 | 9445303       | 9445764   | 462 |
| chr29 | 37360936      | 37361396  | 461 |
| chr28 | 41330478      | 41330938  | 461 |
| chr22 | 12397779      | 12398239  | 461 |
| chrX  | 18484742      | 18485201  | 460 |
| chr7  | 45125188      | 45125647  | 460 |
| chr11 | 93810813      | 93811272  | 460 |
| chrX  | 61447387      | 61447845  | 459 |
| chrX  | 31586170      | 31586628  | 459 |
| chr22 | 30494774      | 30495232  | 459 |
| chrX  | 71689894      | 71690351  | 458 |
| chr9  | 87748154      | 87748611  | 458 |



|       |               |           |     |
|-------|---------------|-----------|-----|
| chr5  | 113141228     | 113141685 | 458 |
| chr26 | 43441240      | 43441697  | 458 |
| chrX  | 55065465      | 55065921  | 457 |
| chrX  | 21317337      | 21317793  | 457 |
| chr5  | 30021992      | 30022448  | 457 |
| chr3  | 20523205      | 20523661  | 457 |
| chrX  | 74818278      | 74818733  | 456 |
| chr27 | 39089877      | 39090332  | 456 |
| chr24 | 34510175      | 34510630  | 456 |
| chr19 | 46117120      | 46117575  | 456 |
| chr11 | 81196045      | 81196500  | 456 |
| chr24 | 60587447      | 60587901  | 455 |
| chr21 | 31051273      | 31051726  | 454 |
| chr19 | 40530656      | 40531109  | 454 |
| chrX  | 11164451      | 11164903  | 453 |
| chr6  | 120490072     | 120490524 | 453 |
| chr5  | 85406972      | 85407424  | 453 |
| chr19 | 30064819      | 30065271  | 453 |
| chr9  | 21980507      | 21980958  | 452 |
| chr28 | 33691431      | 33691882  | 452 |
| chr26 | 19863381      | 19863832  | 452 |
| chr23 | 52453135      | 52453586  | 452 |
| chr18 | 37162929      | 37163380  | 452 |
| chr15 | 22328551      | 22329002  | 452 |
| chrX  | 9105973       | 9106423   | 451 |
| chr26 | 42116230      | 42116680  | 451 |
| chr22 | 59790775      | 59791225  | 451 |
| chr11 | 80138612      | 80139062  | 451 |
| chr10 | 8335473       | 8335922   | 450 |
| chrX  | 78344911      | 78345359  | 449 |
| chrX  | 50402264      | 50402711  | 448 |
| chr27 | 26731754      | 26732201  | 448 |
| chrX  | 36159122      | 36159568  | 447 |
| chrX  | 6328973       | 6329419   | 447 |
| chrX  | 358150 358596 |           | 447 |
| chr5  | 120415954     | 120416400 | 447 |
| chr2  | 125914586     | 125915032 | 447 |
| chr1  | 76372264      | 76372710  | 447 |
| chrX  | 20209840      | 20210285  | 446 |
| chr5  | 117265056     | 117265501 | 446 |
| chr2  | 108605447     | 108605892 | 446 |
| chr16 | 2360909       | 2361354   | 446 |
| chr22 | 39464232      | 39464676  | 445 |
| chrX  | 50618786      | 50619229  | 444 |
| chr9  | 87752097      | 87752540  | 444 |
| chr4  | 16796311      | 16796754  | 444 |
| chr29 | 7665630       | 7666073   | 444 |
| chrX  | 19258546      | 19258988  | 443 |
| chrX  | 2554946       | 2555388   | 443 |
| chr16 | 47197515      | 47197957  | 443 |

|       |               |           |     |
|-------|---------------|-----------|-----|
| chr15 | 43343093      | 43343535  | 443 |
| chr13 | 16136362      | 16136804  | 443 |
| chr11 | 84642314      | 84642756  | 443 |
| chr5  | 30338678      | 30339119  | 442 |
| chr24 | 48933389      | 48933830  | 442 |
| chrX  | 68426248      | 68426688  | 441 |
| chrX  | 30963114      | 30963554  | 441 |
| chr6  | 120602021     | 120602461 | 441 |
| chr5  | 118050857     | 118051297 | 441 |
| chr29 | 31913954      | 31914394  | 441 |
| chr21 | 365594 366034 | 441       |     |
| chr13 | 52347510      | 52347949  | 440 |
| chrX  | 37606441      | 37606879  | 439 |
| chr17 | 72703640      | 72704078  | 439 |
| chr17 | 62169844      | 62170282  | 439 |
| chr13 | 72724903      | 72725341  | 439 |
| chr11 | 64831573      | 64832011  | 439 |
| chrX  | 35590595      | 35591032  | 438 |
| chrX  | 7451380       | 7451817   | 438 |
| chr23 | 19938959      | 19939396  | 438 |
| chr17 | 73037147      | 73037584  | 438 |
| chr10 | 21136409      | 21136845  | 437 |
| chr1  | 154619511     | 154619947 | 437 |
| chr29 | 2243805       | 2244240   | 436 |
| chr24 | 5569343       | 5569778   | 436 |
| chr13 | 40102660      | 40103095  | 436 |
| chr5  | 116552525     | 116552959 | 435 |
| chr26 | 14922387      | 14922821  | 435 |
| chr25 | 38033447      | 38033881  | 435 |
| chr13 | 37640605      | 37641039  | 435 |
| chr11 | 83787780      | 83788214  | 435 |
| chr11 | 2566941       | 2567375   | 435 |
| chrX  | 35879797      | 35880230  | 434 |
| chr6  | 72332926      | 72333359  | 434 |
| chr27 | 40715328      | 40715761  | 434 |
| chr15 | 65655862      | 65656295  | 434 |
| chr8  | 94529895      | 94530327  | 433 |
| chr2  | 139304703     | 139305135 | 433 |
| chr13 | 41698261      | 41698693  | 433 |
| chrX  | 38244558      | 38244989  | 432 |
| chrX  | 36516462      | 36516893  | 432 |
| chrX  | 12427201      | 12427632  | 432 |
| chr17 | 72713416      | 72713847  | 432 |
| chr16 | 39599124      | 39599555  | 432 |
| chr23 | 18158717      | 18159147  | 431 |
| chr11 | 98930241      | 98930671  | 431 |
| chrX  | 11705242      | 11705671  | 430 |
| chrX  | 6477960       | 6478389   | 430 |
| chrX  | 60555613      | 60556041  | 429 |
| chr3  | 109846716     | 109847144 | 429 |

|       |           |           |     |
|-------|-----------|-----------|-----|
| chr21 | 11893053  | 11893481  | 429 |
| chr17 | 49144803  | 49145231  | 429 |
| chr16 | 57109686  | 57110114  | 429 |
| chr16 | 2214819   | 2215247   | 429 |
| chr13 | 76561278  | 76561706  | 429 |
| chrX  | 80427720  | 80428147  | 428 |
| chr9  | 41739954  | 41740381  | 428 |
| chrX  | 51690686  | 51691112  | 427 |
| chrX  | 24401217  | 24401643  | 427 |
| chr20 | 8742113   | 8742539   | 427 |
| chr14 | 61356352  | 61356778  | 427 |
| chr13 | 75968537  | 75968963  | 427 |
| chrX  | 75990260  | 75990685  | 426 |
| chrX  | 2039572   | 2039997   | 426 |
| chr3  | 105928399 | 105928824 | 426 |
| chr18 | 51000720  | 51001145  | 426 |
| chrX  | 65546844  | 65547268  | 425 |
| chr5  | 113918239 | 113918663 | 425 |
| chr18 | 9500723   | 9501147   | 425 |
| chr16 | 71131139  | 71131563  | 425 |
| chrX  | 56759073  | 56759496  | 424 |
| chr7  | 50545638  | 50546061  | 424 |
| chr5  | 120400056 | 120400479 | 424 |
| chr19 | 6503416   | 6503839   | 424 |
| chr18 | 20250001  | 20250424  | 424 |
| chr8  | 24505018  | 24505440  | 423 |
| chr15 | 64188615  | 64189037  | 423 |
| chr12 | 36449085  | 36449507  | 423 |
| chr8  | 55413270  | 55413691  | 422 |
| chr25 | 37690587  | 37691008  | 422 |
| chr16 | 2452062   | 2452483   | 422 |
| chr1  | 147088507 | 147088928 | 422 |
| chr1  | 74568115  | 74568536  | 422 |
| chr25 | 33601820  | 33602240  | 421 |
| chr22 | 56293889  | 56294309  | 421 |
| chr19 | 61774747  | 61775167  | 421 |
| chr10 | 86182603  | 86183023  | 421 |
| chr18 | 56083109  | 56083528  | 420 |
| chr15 | 39499150  | 39499569  | 420 |
| chrX  | 75053361  | 75053779  | 419 |
| chr4  | 14676423  | 14676840  | 418 |
| chr21 | 28627803  | 28628220  | 418 |
| chr17 | 69071982  | 69072399  | 418 |
| chrX  | 18685402  | 18685818  | 417 |
| chr5  | 29823364  | 29823780  | 417 |
| chr15 | 27282257  | 27282673  | 417 |
| chr13 | 60177296  | 60177712  | 417 |
| chr12 | 31486877  | 31487293  | 417 |
| chr11 | 108421611 | 108422027 | 417 |
| chrX  | 50221370  | 50221785  | 416 |

|       |           |           |     |
|-------|-----------|-----------|-----|
| chr27 | 40801805  | 40802220  | 416 |
| chr2  | 65528289  | 65528704  | 416 |
| chr1  | 1553259   | 1553674   | 416 |
| chrX  | 75639536  | 75639950  | 415 |
| chr8  | 65410553  | 65410967  | 415 |
| chr4  | 79202362  | 79202776  | 415 |
| chr24 | 43697435  | 43697849  | 415 |
| chr23 | 51444728  | 51445142  | 415 |
| chrX  | 34602209  | 34602622  | 414 |
| chr8  | 77233496  | 77233909  | 414 |
| chr2  | 117706754 | 117707167 | 414 |
| chr18 | 25760734  | 25761147  | 414 |
| chr13 | 69264899  | 69265312  | 414 |
| chrX  | 51204135  | 51204547  | 413 |
| chrX  | 2633765   | 2634176   | 412 |
| chr21 | 64524445  | 64524856  | 412 |
| chrX  | 72878836  | 72879246  | 411 |
| chr21 | 32120486  | 32120896  | 411 |
| chr14 | 7806229   | 7806639   | 411 |
| chr11 | 109702159 | 109702569 | 411 |
| chrX  | 6714244   | 6714653   | 410 |
| chr3  | 36042809  | 36043218  | 410 |
| chr19 | 46831447  | 46831856  | 410 |
| chr13 | 65098809  | 65099218  | 410 |
| chr3  | 33814729  | 33815137  | 409 |
| chr26 | 44455991  | 44456399  | 409 |
| chr23 | 52764837  | 52765245  | 409 |
| chr13 | 60176417  | 60176825  | 409 |
| chr7  | 45744358  | 45744765  | 408 |
| chr23 | 10348866  | 10349273  | 408 |
| chrX  | 2426579   | 2426985   | 407 |
| chr5  | 26671915  | 26672321  | 407 |
| chr18 | 37024124  | 37024530  | 407 |
| chr12 | 20027498  | 20027904  | 407 |
| chr1  | 75059027  | 75059433  | 407 |
| chrX  | 48406303  | 48406708  | 406 |
| chrX  | 9946963   | 9947367   | 405 |
| chrX  | 9155338   | 9155742   | 405 |
| chr8  | 45765717  | 45766121  | 405 |
| chr23 | 31278194  | 31278598  | 405 |
| chrX  | 8782911   | 8783314   | 404 |
| chr4  | 95667280  | 95667683  | 404 |
| chr27 | 26053538  | 26053941  | 404 |
| chrX  | 7811188   | 7811590   | 403 |
| chr19 | 42959029  | 42959431  | 403 |
| chr17 | 59139686  | 59140088  | 403 |
| chr16 | 60292998  | 60293400  | 403 |
| chrX  | 78697339  | 78697740  | 402 |
| chrX  | 73425650  | 73426051  | 402 |
| chr29 | 36739041  | 36739442  | 402 |

|       |           |           |     |
|-------|-----------|-----------|-----|
| chr18 | 63694238  | 63694639  | 402 |
| chr1  | 152270980 | 152271380 | 401 |
| chr9  | 33349296  | 33349695  | 400 |
| chr8  | 77312396  | 77312795  | 400 |
| chr26 | 51493979  | 51494378  | 400 |
| chr17 | 58954542  | 58954941  | 400 |
| chrX  | 80061347  | 80061745  | 399 |
| chrX  | 78840386  | 78840784  | 399 |
| chrX  | 77494409  | 77494807  | 399 |
| chrX  | 75311588  | 75311986  | 399 |
| chrX  | 75003827  | 75004225  | 399 |
| chrX  | 73965662  | 73966060  | 399 |
| chrX  | 72062894  | 72063292  | 399 |
| chrX  | 66845688  | 66846086  | 399 |
| chrX  | 65246072  | 65246470  | 399 |
| chrX  | 61715077  | 61715475  | 399 |
| chrX  | 59715182  | 59715580  | 399 |
| chrX  | 55639747  | 55640145  | 399 |
| chrX  | 50875308  | 50875706  | 399 |
| chrX  | 50469423  | 50469821  | 399 |
| chrX  | 50090727  | 50091125  | 399 |
| chrX  | 49298803  | 49299201  | 399 |
| chrX  | 44656077  | 44656475  | 399 |
| chrX  | 39023063  | 39023461  | 399 |
| chrX  | 38793697  | 38794095  | 399 |
| chrX  | 37652769  | 37653167  | 399 |
| chrX  | 37589525  | 37589923  | 399 |
| chrX  | 37518219  | 37518617  | 399 |
| chrX  | 37432565  | 37432963  | 399 |
| chrX  | 36897067  | 36897465  | 399 |
| chrX  | 36328629  | 36329027  | 399 |
| chrX  | 35205164  | 35205562  | 399 |
| chrX  | 34720242  | 34720640  | 399 |
| chrX  | 34434574  | 34434972  | 399 |
| chrX  | 32332857  | 32333255  | 399 |
| chrX  | 31221148  | 31221546  | 399 |
| chrX  | 30674544  | 30674942  | 399 |
| chrX  | 22401736  | 22402134  | 399 |
| chrX  | 21444864  | 21445262  | 399 |
| chrX  | 21031914  | 21032312  | 399 |
| chrX  | 20690192  | 20690590  | 399 |
| chrX  | 20428658  | 20429056  | 399 |
| chrX  | 17092202  | 17092600  | 399 |
| chrX  | 12534374  | 12534772  | 399 |
| chrX  | 12085600  | 12085998  | 399 |
| chrX  | 11999370  | 11999768  | 399 |
| chrX  | 9636187   | 9636585   | 399 |
| chrX  | 6631744   | 6632142   | 399 |
| chrX  | 731369    | 731767    | 399 |
| chr9  | 99397247  | 99397645  | 399 |

|       |               |           |     |
|-------|---------------|-----------|-----|
| chr9  | 66154071      | 66154469  | 399 |
| chr8  | 116698473     | 116698871 | 399 |
| chr8  | 95558307      | 95558705  | 399 |
| chr8  | 74533153      | 74533551  | 399 |
| chr8  | 9441504       | 9441902   | 399 |
| chr8  | 7426342       | 7426740   | 399 |
| chr8  | 863844 864242 | 399       |     |
| chr7  | 109700138     | 109700536 | 399 |
| chr7  | 97336739      | 97337137  | 399 |
| chr7  | 42774621      | 42775019  | 399 |
| chr7  | 42422029      | 42422427  | 399 |
| chr7  | 17978811      | 17979209  | 399 |
| chr7  | 15653855      | 15654253  | 399 |
| chr7  | 5185517       | 5185915   | 399 |
| chr7  | 4331911       | 4332309   | 399 |
| chr6  | 121868776     | 121869174 | 399 |
| chr6  | 108529508     | 108529906 | 399 |
| chr6  | 63161193      | 63161591  | 399 |
| chr6  | 20762819      | 20763217  | 399 |
| chr5  | 112194012     | 112194410 | 399 |
| chr5  | 81478867      | 81479265  | 399 |
| chr5  | 76795366      | 76795764  | 399 |
| chr5  | 60145093      | 60145491  | 399 |
| chr5  | 32865947      | 32866345  | 399 |
| chr5  | 29128967      | 29129365  | 399 |
| chr5  | 1143512       | 1143910   | 399 |
| chr4  | 122605587     | 122605985 | 399 |
| chr4  | 121863138     | 121863536 | 399 |
| chr4  | 43938797      | 43939195  | 399 |
| chr3  | 105479232     | 105479630 | 399 |
| chr3  | 35594378      | 35594776  | 399 |
| chr3  | 33466177      | 33466575  | 399 |
| chr3  | 32946975      | 32947373  | 399 |
| chr3  | 30219423      | 30219821  | 399 |
| chr3  | 22694098      | 22694496  | 399 |
| chr3  | 15130043      | 15130441  | 399 |
| chr29 | 35630076      | 35630474  | 399 |
| chr29 | 33494846      | 33495244  | 399 |
| chr28 | 33533043      | 33533441  | 399 |
| chr28 | 33390586      | 33390984  | 399 |
| chr28 | 30866352      | 30866750  | 399 |
| chr27 | 48048814      | 48049212  | 399 |
| chr27 | 41566652      | 41567050  | 399 |
| chr26 | 48366159      | 48366557  | 399 |
| chr26 | 45852912      | 45853310  | 399 |
| chr26 | 40177806      | 40178204  | 399 |
| chr26 | 37897672      | 37898070  | 399 |
| chr26 | 33087277      | 33087675  | 399 |
| chr26 | 25513399      | 25513797  | 399 |
| chr26 | 19853617      | 19854015  | 399 |

|       |           |           |     |
|-------|-----------|-----------|-----|
| chr25 | 29607768  | 29608166  | 399 |
| chr24 | 61123500  | 61123898  | 399 |
| chr24 | 59417859  | 59418257  | 399 |
| chr24 | 58897211  | 58897609  | 399 |
| chr23 | 48744041  | 48744439  | 399 |
| chr23 | 46070293  | 46070691  | 399 |
| chr23 | 45586875  | 45587273  | 399 |
| chr23 | 31439084  | 31439482  | 399 |
| chr23 | 31275404  | 31275802  | 399 |
| chr23 | 18792217  | 18792615  | 399 |
| chr23 | 17497454  | 17497852  | 399 |
| chr23 | 10971562  | 10971960  | 399 |
| chr23 | 8425755   | 8426153   | 399 |
| chr23 | 5748231   | 5748629   | 399 |
| chr22 | 61197746  | 61198144  | 399 |
| chr22 | 59427622  | 59428020  | 399 |
| chr22 | 44866093  | 44866491  | 399 |
| chr22 | 30205839  | 30206237  | 399 |
| chr21 | 13800577  | 13800975  | 399 |
| chr21 | 2037449   | 2037847   | 399 |
| chr20 | 39748131  | 39748529  | 399 |
| chr20 | 8710818   | 8711216   | 399 |
| chr20 | 4907118   | 4907516   | 399 |
| chr2  | 139285429 | 139285827 | 399 |
| chr2  | 134695405 | 134695803 | 399 |
| chr2  | 118370558 | 118370956 | 399 |
| chr2  | 75555846  | 75556244  | 399 |
| chr19 | 64084548  | 64084946  | 399 |
| chr19 | 55907011  | 55907409  | 399 |
| chr19 | 46779892  | 46780290  | 399 |
| chr19 | 44353785  | 44354183  | 399 |
| chr19 | 41934327  | 41934725  | 399 |
| chr19 | 25081185  | 25081583  | 399 |
| chr19 | 21905295  | 21905693  | 399 |
| chr19 | 21724699  | 21725097  | 399 |
| chr19 | 17545682  | 17546080  | 399 |
| chr19 | 13479538  | 13479936  | 399 |
| chr19 | 13396032  | 13396430  | 399 |
| chr18 | 56864691  | 56865089  | 399 |
| chr18 | 43181022  | 43181420  | 399 |
| chr18 | 38750681  | 38751079  | 399 |
| chr18 | 23071977  | 23072375  | 399 |
| chr18 | 17986008  | 17986406  | 399 |
| chr18 | 11716735  | 11717133  | 399 |
| chr18 | 10269643  | 10270041  | 399 |
| chr17 | 75525129  | 75525527  | 399 |
| chr17 | 70009962  | 70010360  | 399 |
| chr17 | 69318398  | 69318796  | 399 |
| chr17 | 57692741  | 57693139  | 399 |
| chr17 | 21441665  | 21442063  | 399 |

|       |           |           |     |
|-------|-----------|-----------|-----|
| chr16 | 69932854  | 69933252  | 399 |
| chr16 | 60236236  | 60236634  | 399 |
| chr16 | 45950785  | 45951183  | 399 |
| chr16 | 28952485  | 28952883  | 399 |
| chr15 | 76724905  | 76725303  | 399 |
| chr15 | 75573929  | 75574327  | 399 |
| chr15 | 75518699  | 75519097  | 399 |
| chr15 | 61076367  | 61076765  | 399 |
| chr15 | 61060041  | 61060439  | 399 |
| chr15 | 25558343  | 25558741  | 399 |
| chr15 | 25332800  | 25333198  | 399 |
| chr15 | 24683505  | 24683903  | 399 |
| chr15 | 24421517  | 24421915  | 399 |
| chr15 | 20033811  | 20034209  | 399 |
| chr14 | 64790191  | 64790589  | 399 |
| chr14 | 59325163  | 59325561  | 399 |
| chr14 | 31032867  | 31033265  | 399 |
| chr14 | 8425750   | 8426148   | 399 |
| chr13 | 77678402  | 77678800  | 399 |
| chr13 | 77235602  | 77236000  | 399 |
| chr13 | 62340986  | 62341384  | 399 |
| chr13 | 59643691  | 59644089  | 399 |
| chr13 | 58280620  | 58281018  | 399 |
| chr13 | 57370215  | 57370613  | 399 |
| chr13 | 53055904  | 53056302  | 399 |
| chr13 | 41957730  | 41958128  | 399 |
| chr13 | 41357783  | 41358181  | 399 |
| chr13 | 40872952  | 40873350  | 399 |
| chr13 | 27864121  | 27864519  | 399 |
| chr12 | 84444645  | 84445043  | 399 |
| chr12 | 84168019  | 84168417  | 399 |
| chr12 | 34292335  | 34292733  | 399 |
| chr12 | 20079026  | 20079424  | 399 |
| chr12 | 15247450  | 15247848  | 399 |
| chr11 | 109402197 | 109402595 | 399 |
| chr11 | 96396859  | 96397257  | 399 |
| chr11 | 77817839  | 77818237  | 399 |
| chr11 | 70841472  | 70841870  | 399 |
| chr11 | 70659930  | 70660328  | 399 |
| chr11 | 49237412  | 49237810  | 399 |
| chr11 | 21646584  | 21646982  | 399 |
| chr11 | 21621284  | 21621682  | 399 |
| chr10 | 95574791  | 95575189  | 399 |
| chr10 | 84376812  | 84377210  | 399 |
| chr10 | 70095306  | 70095704  | 399 |
| chr10 | 29536348  | 29536746  | 399 |
| chr10 | 20869966  | 20870364  | 399 |
| chr10 | 16817478  | 16817876  | 399 |
| chr1  | 144386447 | 144386845 | 399 |
| chr1  | 144122444 | 144122842 | 399 |



|       |           |           |     |
|-------|-----------|-----------|-----|
| chr1  | 129681974 | 129682372 | 399 |
| chr1  | 82875033  | 82875431  | 399 |
| chrX  | 73480692  | 73481089  | 398 |
| chrX  | 69345311  | 69345708  | 398 |
| chrX  | 59150109  | 59150506  | 398 |
| chrX  | 54784086  | 54784483  | 398 |
| chrX  | 30695716  | 30696113  | 398 |
| chrX  | 7769743   | 7770140   | 398 |
| chr9  | 77350002  | 77350399  | 398 |
| chr8  | 65530152  | 65530549  | 398 |
| chr8  | 61030727  | 61031124  | 398 |
| chr7  | 50636384  | 50636781  | 398 |
| chr7  | 43284878  | 43285275  | 398 |
| chr6  | 46787388  | 46787785  | 398 |
| chr5  | 30137394  | 30137791  | 398 |
| chr3  | 124053059 | 124053456 | 398 |
| chr3  | 120345261 | 120345658 | 398 |
| chr3  | 115494180 | 115494577 | 398 |
| chr3  | 22688366  | 22688763  | 398 |
| chr29 | 51786369  | 51786766  | 398 |
| chr29 | 48848287  | 48848684  | 398 |
| chr26 | 48366590  | 48366987  | 398 |
| chr26 | 44241821  | 44242218  | 398 |
| chr25 | 34083131  | 34083528  | 398 |
| chr24 | 60881888  | 60882285  | 398 |
| chr24 | 41587241  | 41587638  | 398 |
| chr23 | 18044986  | 18045383  | 398 |
| chr22 | 5525283   | 5525680   | 398 |
| chr2  | 135176550 | 135176947 | 398 |
| chr2  | 67371223  | 67371620  | 398 |
| chr2  | 34672528  | 34672925  | 398 |
| chr19 | 52750125  | 52750522  | 398 |
| chr18 | 57328603  | 57329000  | 398 |
| chr18 | 53506370  | 53506767  | 398 |
| chr18 | 34892177  | 34892574  | 398 |
| chr17 | 69207570  | 69207967  | 398 |
| chr17 | 47778226  | 47778623  | 398 |
| chr16 | 44715835  | 44716232  | 398 |
| chr15 | 25340602  | 25340999  | 398 |
| chr13 | 80660609  | 80661006  | 398 |
| chr13 | 41040723  | 41041120  | 398 |
| chr12 | 17976040  | 17976437  | 398 |
| chr11 | 106245281 | 106245678 | 398 |
| chr11 | 103760062 | 103760459 | 398 |
| chr10 | 93990242  | 93990639  | 398 |
| chr10 | 83077761  | 83078158  | 398 |
| chr10 | 66921051  | 66921448  | 398 |
| chr10 | 16938475  | 16938872  | 398 |
| chr1  | 133459010 | 133459407 | 398 |
| chrX  | 66920753  | 66921149  | 397 |

|       |           |           |     |
|-------|-----------|-----------|-----|
| chrX  | 51675901  | 51676297  | 397 |
| chrX  | 48504239  | 48504635  | 397 |
| chr7  | 73521201  | 73521597  | 397 |
| chr5  | 30426346  | 30426742  | 397 |
| chr5  | 30179022  | 30179418  | 397 |
| chr4  | 98746432  | 98746828  | 397 |
| chr3  | 62732654  | 62733050  | 397 |
| chr29 | 39072048  | 39072444  | 397 |
| chr28 | 45131979  | 45132375  | 397 |
| chr26 | 44683829  | 44684225  | 397 |
| chr25 | 39322505  | 39322901  | 397 |
| chr19 | 17853147  | 17853543  | 397 |
| chr19 | 14066550  | 14066946  | 397 |
| chr18 | 24002269  | 24002665  | 397 |
| chr17 | 70309439  | 70309835  | 397 |
| chr15 | 33495860  | 33496256  | 397 |
| chr15 | 30286796  | 30287192  | 397 |
| chr13 | 58893859  | 58894255  | 397 |
| chr11 | 100690840 | 100691236 | 397 |
| chr10 | 106206007 | 106206403 | 397 |
| chrX  | 65148028  | 65148423  | 396 |
| chrX  | 59747070  | 59747465  | 396 |
| chrX  | 50446453  | 50446848  | 396 |
| chrX  | 44904645  | 44905040  | 396 |
| chrX  | 39081304  | 39081699  | 396 |
| chrX  | 38032720  | 38033115  | 396 |
| chrX  | 13624242  | 13624637  | 396 |
| chr9  | 63066944  | 63067339  | 396 |
| chr8  | 76761208  | 76761603  | 396 |
| chr5  | 122821949 | 122822344 | 396 |
| chr5  | 121657945 | 121658340 | 396 |
| chr5  | 116939987 | 116940382 | 396 |
| chr4  | 14628970  | 14629365  | 396 |
| chr3  | 26139766  | 26140161  | 396 |
| chr29 | 37238608  | 37239003  | 396 |
| chr28 | 1263172   | 1263567   | 396 |
| chr27 | 30702874  | 30703269  | 396 |
| chr25 | 37659468  | 37659863  | 396 |
| chr23 | 46363681  | 46364076  | 396 |
| chr22 | 30777949  | 30778344  | 396 |
| chr20 | 73256298  | 73256693  | 396 |
| chr20 | 1124197   | 1124592   | 396 |
| chr2  | 132038319 | 132038714 | 396 |
| chr18 | 3579340   | 3579735   | 396 |
| chr17 | 5016989   | 5017384   | 396 |
| chr16 | 75862195  | 75862590  | 396 |
| chr13 | 75741930  | 75742325  | 396 |
| chr11 | 106014875 | 106015270 | 396 |
| chr10 | 66895914  | 66896309  | 396 |
| chrX  | 78816632  | 78817026  | 395 |

|       |           |           |     |
|-------|-----------|-----------|-----|
| chrX  | 76518866  | 76519260  | 395 |
| chrX  | 61751705  | 61752099  | 395 |
| chrX  | 60069063  | 60069457  | 395 |
| chrX  | 46913507  | 46913901  | 395 |
| chrX  | 37313702  | 37314096  | 395 |
| chrX  | 22496223  | 22496617  | 395 |
| chr9  | 24460472  | 24460866  | 395 |
| chr8  | 108792220 | 108792614 | 395 |
| chr8  | 104104613 | 104105007 | 395 |
| chr7  | 44954861  | 44955255  | 395 |
| chr5  | 113095215 | 113095609 | 395 |
| chr5  | 32919795  | 32920189  | 395 |
| chr4  | 99475237  | 99475631  | 395 |
| chr3  | 36805130  | 36805524  | 395 |
| chr29 | 48826946  | 48827340  | 395 |
| chr29 | 27019624  | 27020018  | 395 |
| chr27 | 39787856  | 39788250  | 395 |
| chr22 | 48786422  | 48786816  | 395 |
| chr21 | 57149207  | 57149601  | 395 |
| chr21 | 21334111  | 21334505  | 395 |
| chr2  | 130807815 | 130808209 | 395 |
| chr19 | 42262599  | 42262993  | 395 |
| chr19 | 19134940  | 19135334  | 395 |
| chr18 | 22299742  | 22300136  | 395 |
| chr18 | 22162080  | 22162474  | 395 |
| chr17 | 62216768  | 62217162  | 395 |
| chr17 | 60050849  | 60051243  | 395 |
| chr16 | 73688821  | 73689215  | 395 |
| chr16 | 42211440  | 42211834  | 395 |
| chr15 | 62603263  | 62603657  | 395 |
| chr15 | 53258004  | 53258398  | 395 |
| chr15 | 25622937  | 25623331  | 395 |
| chr12 | 20779473  | 20779867  | 395 |
| chr12 | 14797693  | 14798087  | 395 |
| chr11 | 89047459  | 89047853  | 395 |
| chr11 | 87962124  | 87962518  | 395 |
| chr11 | 85359503  | 85359897  | 395 |
| chr11 | 7200655   | 7201049   | 395 |
| chr1  | 152087211 | 152087605 | 395 |
| chrX  | 58487441  | 58487834  | 394 |
| chrX  | 50494995  | 50495388  | 394 |
| chrX  | 48153708  | 48154101  | 394 |
| chrX  | 45430579  | 45430972  | 394 |
| chrX  | 39132421  | 39132814  | 394 |
| chrX  | 5751255   | 5751648   | 394 |
| chr8  | 73405966  | 73406359  | 394 |
| chr5  | 76878499  | 76878892  | 394 |
| chr4  | 98549417  | 98549810  | 394 |
| chr4  | 76855702  | 76856095  | 394 |
| chr3  | 116149701 | 116150094 | 394 |

|       |               |           |     |
|-------|---------------|-----------|-----|
| chr3  | 114238426     | 114238819 | 394 |
| chr24 | 40615647      | 40616040  | 394 |
| chr24 | 20396981      | 20397374  | 394 |
| chr22 | 44493749      | 44494142  | 394 |
| chr20 | 75034638      | 75035031  | 394 |
| chr20 | 5034976       | 5035369   | 394 |
| chr19 | 43095186      | 43095579  | 394 |
| chr19 | 23680800      | 23681193  | 394 |
| chr18 | 64314306      | 64314699  | 394 |
| chr18 | 52164190      | 52164583  | 394 |
| chr18 | 33812522      | 33812915  | 394 |
| chr18 | 4851685       | 4852078   | 394 |
| chr13 | 59773902      | 59774295  | 394 |
| chr13 | 41625096      | 41625489  | 394 |
| chr12 | 74443510      | 74443903  | 394 |
| chr12 | 32196011      | 32196404  | 394 |
| chr12 | 17228343      | 17228736  | 394 |
| chr11 | 105638919     | 105639312 | 394 |
| chr11 | 103473467     | 103473860 | 394 |
| chr10 | 971495 971888 | 394       |     |
| chr1  | 74989266      | 74989659  | 394 |
| chrX  | 65858974      | 65859366  | 393 |
| chrX  | 50695508      | 50695900  | 393 |
| chr7  | 18720391      | 18720783  | 393 |
| chr6  | 102328624     | 102329016 | 393 |
| chr5  | 125456428     | 125456820 | 393 |
| chr4  | 123029458     | 123029850 | 393 |
| chr4  | 74538885      | 74539277  | 393 |
| chr4  | 33431540      | 33431932  | 393 |
| chr28 | 42365001      | 42365393  | 393 |
| chr24 | 35388072      | 35388464  | 393 |
| chr23 | 28599089      | 28599481  | 393 |
| chr23 | 18622472      | 18622864  | 393 |
| chr19 | 46487937      | 46488329  | 393 |
| chr19 | 38769269      | 38769661  | 393 |
| chr19 | 12283584      | 12283976  | 393 |
| chr18 | 11751018      | 11751410  | 393 |
| chr16 | 68729343      | 68729735  | 393 |
| chr15 | 77442862      | 77443254  | 393 |
| chr15 | 25582150      | 25582542  | 393 |
| chr14 | 7843392       | 7843784   | 393 |
| chr13 | 77794321      | 77794713  | 393 |
| chr13 | 60053966      | 60054358  | 393 |
| chr11 | 74972455      | 74972847  | 393 |
| chr11 | 20427063      | 20427455  | 393 |
| chrX  | 72954698      | 72955089  | 392 |
| chrX  | 69910752      | 69911143  | 392 |
| chrX  | 9315010       | 9315401   | 392 |
| chr9  | 106025103     | 106025494 | 392 |
| chr9  | 26568881      | 26569272  | 392 |

|       |           |           |     |
|-------|-----------|-----------|-----|
| chr8  | 110865516 | 110865907 | 392 |
| chr7  | 17075894  | 17076285  | 392 |
| chr5  | 121632465 | 121632856 | 392 |
| chr5  | 90131402  | 90131793  | 392 |
| chr4  | 117763469 | 117763860 | 392 |
| chr4  | 115737792 | 115738183 | 392 |
| chr4  | 107548657 | 107549048 | 392 |
| chr27 | 46980926  | 46981317  | 392 |
| chr26 | 44123182  | 44123573  | 392 |
| chr26 | 14917277  | 14917668  | 392 |
| chr26 | 12853429  | 12853820  | 392 |
| chr24 | 64978314  | 64978705  | 392 |
| chr23 | 33469862  | 33470253  | 392 |
| chr21 | 69013472  | 69013863  | 392 |
| chr20 | 44472048  | 44472439  | 392 |
| chr19 | 63510601  | 63510992  | 392 |
| chr19 | 38373557  | 38373948  | 392 |
| chr19 | 33320316  | 33320707  | 392 |
| chr18 | 56486861  | 56487252  | 392 |
| chr16 | 60235745  | 60236136  | 392 |
| chr16 | 47119323  | 47119714  | 392 |
| chr14 | 20968906  | 20969297  | 392 |
| chr13 | 69911149  | 69911540  | 392 |
| chr13 | 58629728  | 58630119  | 392 |
| chr11 | 10441621  | 10442012  | 392 |
| chr10 | 99921025  | 99921416  | 392 |
| chr10 | 67105415  | 67105806  | 392 |
| chr10 | 25833236  | 25833627  | 392 |
| chr1  | 152359362 | 152359753 | 392 |
| chrX  | 72267360  | 72267750  | 391 |
| chrX  | 62320014  | 62320404  | 391 |
| chrX  | 60559459  | 60559849  | 391 |
| chrX  | 12535233  | 12535623  | 391 |
| chr9  | 69981369  | 69981759  | 391 |
| chr8  | 80884297  | 80884687  | 391 |
| chr8  | 26976125  | 26976515  | 391 |
| chr7  | 10168916  | 10169306  | 391 |
| chr6  | 120457807 | 120458197 | 391 |
| chr6  | 71158361  | 71158751  | 391 |
| chr5  | 113234987 | 113235377 | 391 |
| chr5  | 74687779  | 74688169  | 391 |
| chr5  | 29147696  | 29148086  | 391 |
| chr4  | 123025670 | 123026060 | 391 |
| chr4  | 79452659  | 79453049  | 391 |
| chr3  | 116120759 | 116121149 | 391 |
| chr3  | 114524484 | 114524874 | 391 |
| chr29 | 33908595  | 33908985  | 391 |
| chr29 | 29919213  | 29919603  | 391 |
| chr26 | 19855592  | 19855982  | 391 |
| chr24 | 20884038  | 20884428  | 391 |

|       |           |           |     |
|-------|-----------|-----------|-----|
| chr23 | 52675630  | 52676020  | 391 |
| chr23 | 51987659  | 51988049  | 391 |
| chr23 | 8428086   | 8428476   | 391 |
| chr2  | 132423411 | 132423801 | 391 |
| chr19 | 65254438  | 65254828  | 391 |
| chr19 | 54310885  | 54311275  | 391 |
| chr19 | 41870461  | 41870851  | 391 |
| chr19 | 39249206  | 39249596  | 391 |
| chr19 | 31271649  | 31272039  | 391 |
| chr17 | 70176448  | 70176838  | 391 |
| chr15 | 20868139  | 20868529  | 391 |
| chr13 | 70062426  | 70062816  | 391 |
| chr13 | 41685040  | 41685430  | 391 |
| chr12 | 15286631  | 15287021  | 391 |
| chr11 | 106247980 | 106248370 | 391 |
| chr11 | 103749699 | 103750089 | 391 |
| chr10 | 103499821 | 103500211 | 391 |
| chr1  | 152271515 | 152271905 | 391 |
| chrX  | 75881537  | 75881926  | 390 |
| chrX  | 75188625  | 75189014  | 390 |
| chrX  | 66617873  | 66618262  | 390 |
| chrX  | 53740760  | 53741149  | 390 |
| chrX  | 34021233  | 34021622  | 390 |
| chrX  | 33624732  | 33625121  | 390 |
| chrX  | 9951299   | 9951688   | 390 |
| chrX  | 9428142   | 9428531   | 390 |
| chrX  | 5473130   | 5473519   | 390 |
| chr6  | 118161433 | 118161822 | 390 |
| chr6  | 108718338 | 108718727 | 390 |
| chr5  | 26682809  | 26683198  | 390 |
| chr4  | 123280047 | 123280436 | 390 |
| chr4  | 65399651  | 65400040  | 390 |
| chr3  | 33087481  | 33087870  | 390 |
| chr29 | 36739904  | 36740293  | 390 |
| chr28 | 33750449  | 33750838  | 390 |
| chr27 | 38444390  | 38444779  | 390 |
| chr22 | 52447046  | 52447435  | 390 |
| chr21 | 34522987  | 34523376  | 390 |
| chr19 | 64758842  | 64759231  | 390 |
| chr18 | 42207008  | 42207397  | 390 |
| chr18 | 3714661   | 3715050   | 390 |
| chr17 | 70314436  | 70314825  | 390 |
| chr17 | 14834168  | 14834557  | 390 |
| chr16 | 34175316  | 34175705  | 390 |
| chr15 | 23745540  | 23745929  | 390 |
| chr13 | 77288217  | 77288606  | 390 |
| chr13 | 22900364  | 22900753  | 390 |
| chr12 | 70979569  | 70979958  | 390 |
| chr11 | 100446691 | 100447080 | 390 |
| chr11 | 77712230  | 77712619  | 390 |

|       |           |           |     |
|-------|-----------|-----------|-----|
| chrX  | 73160921  | 73161309  | 389 |
| chrX  | 61475200  | 61475588  | 389 |
| chrX  | 36900649  | 36901037  | 389 |
| chrX  | 6650947   | 6651335   | 389 |
| chrX  | 1603666   | 1604054   | 389 |
| chr4  | 98887116  | 98887504  | 389 |
| chr4  | 10674919  | 10675307  | 389 |
| chr3  | 120953795 | 120954183 | 389 |
| chr3  | 118029445 | 118029833 | 389 |
| chr29 | 30810097  | 30810485  | 389 |
| chr29 | 30470404  | 30470792  | 389 |
| chr29 | 13599847  | 13600235  | 389 |
| chr24 | 31398156  | 31398544  | 389 |
| chr22 | 16327720  | 16328108  | 389 |
| chr20 | 59642152  | 59642540  | 389 |
| chr20 | 33636912  | 33637300  | 389 |
| chr2  | 127179708 | 127180096 | 389 |
| chr19 | 20347725  | 20348113  | 389 |
| chr17 | 48725319  | 48725707  | 389 |
| chr15 | 51717380  | 51717768  | 389 |
| chr13 | 77273427  | 77273815  | 389 |
| chr13 | 62782409  | 62782797  | 389 |
| chr11 | 104600231 | 104600619 | 389 |
| chr11 | 104564536 | 104564924 | 389 |
| chr11 | 92158820  | 92159208  | 389 |
| chr10 | 35999441  | 35999829  | 389 |
| chr1  | 74623883  | 74624271  | 389 |
| chrX  | 66207717  | 66208104  | 388 |
| chrX  | 59463352  | 59463739  | 388 |
| chrX  | 55402251  | 55402638  | 388 |
| chr7  | 14755721  | 14756108  | 388 |
| chr6  | 46154839  | 46155226  | 388 |
| chr5  | 121402812 | 121403199 | 388 |
| chr5  | 26736704  | 26737091  | 388 |
| chr4  | 81965191  | 81965578  | 388 |
| chr3  | 4235749   | 4236136   | 388 |
| chr29 | 38362460  | 38362847  | 388 |
| chr28 | 26578919  | 26579306  | 388 |
| chr27 | 1363845   | 1364232   | 388 |
| chr22 | 47832095  | 47832482  | 388 |
| chr22 | 11753034  | 11753421  | 388 |
| chr19 | 47199551  | 47199938  | 388 |
| chr19 | 13530031  | 13530418  | 388 |
| chr18 | 17907383  | 17907770  | 388 |
| chr18 | 12097812  | 12098199  | 388 |
| chr16 | 73353107  | 73353494  | 388 |
| chr13 | 75657635  | 75658022  | 388 |
| chr11 | 74890509  | 74890896  | 388 |
| chrX  | 78367999  | 78368385  | 387 |
| chrX  | 65771230  | 65771616  | 387 |

|       |           |           |     |
|-------|-----------|-----------|-----|
| chrX  | 60837099  | 60837485  | 387 |
| chrX  | 58460335  | 58460721  | 387 |
| chrX  | 50547685  | 50548071  | 387 |
| chrX  | 11033108  | 11033494  | 387 |
| chrX  | 3009135   | 3009521   | 387 |
| chr9  | 41247735  | 41248121  | 387 |
| chr8  | 108628353 | 108628739 | 387 |
| chr7  | 43735595  | 43735981  | 387 |
| chr7  | 3694223   | 3694609   | 387 |
| chr3  | 121885697 | 121886083 | 387 |
| chr3  | 99347088  | 99347474  | 387 |
| chr28 | 33986870  | 33987256  | 387 |
| chr26 | 48161125  | 48161511  | 387 |
| chr26 | 41864529  | 41864915  | 387 |
| chr26 | 15371701  | 15372087  | 387 |
| chr26 | 12868194  | 12868580  | 387 |
| chr25 | 8749624   | 8750010   | 387 |
| chr23 | 15118904  | 15119290  | 387 |
| chr2  | 56954554  | 56954940  | 387 |
| chr19 | 59750819  | 59751205  | 387 |
| chr19 | 42530721  | 42531107  | 387 |
| chr19 | 24652101  | 24652487  | 387 |
| chr18 | 50853710  | 50854096  | 387 |
| chr18 | 49723361  | 49723747  | 387 |
| chr18 | 45497327  | 45497713  | 387 |
| chr18 | 40117209  | 40117595  | 387 |
| chr18 | 33142675  | 33143061  | 387 |
| chr18 | 11765006  | 11765392  | 387 |
| chr17 | 47494155  | 47494541  | 387 |
| chr13 | 41323529  | 41323915  | 387 |
| chrX  | 80105249  | 80105634  | 386 |
| chrX  | 75585961  | 75586346  | 386 |
| chrX  | 73496347  | 73496732  | 386 |
| chrX  | 56169559  | 56169944  | 386 |
| chrX  | 54469515  | 54469900  | 386 |
| chrX  | 49278332  | 49278717  | 386 |
| chrX  | 44997082  | 44997467  | 386 |
| chrX  | 38591135  | 38591520  | 386 |
| chrX  | 37436520  | 37436905  | 386 |
| chr9  | 84354581  | 84354966  | 386 |
| chr8  | 78688588  | 78688973  | 386 |
| chr8  | 63942118  | 63942503  | 386 |
| chr5  | 79196945  | 79197330  | 386 |
| chr3  | 104536702 | 104537087 | 386 |
| chr29 | 48700650  | 48701035  | 386 |
| chr29 | 43442522  | 43442907  | 386 |
| chr25 | 33486166  | 33486551  | 386 |
| chr25 | 830617    | 831002    | 386 |
| chr24 | 35331538  | 35331923  | 386 |
| chr24 | 33790152  | 33790537  | 386 |



|       |             |           |     |
|-------|-------------|-----------|-----|
| chr23 | 15030334    | 15030719  | 386 |
| chr2  | 99662498    | 99662883  | 386 |
| chr19 | 63749317    | 63749702  | 386 |
| chr19 | 22038920    | 22039305  | 386 |
| chr17 | 62020110    | 62020495  | 386 |
| chr13 | 74028391    | 74028776  | 386 |
| chr12 | 35784708    | 35785093  | 386 |
| chr11 | 105658832   | 105659217 | 386 |
| chr1  | 146922729   | 146923114 | 386 |
| chrX  | 54839113    | 54839497  | 385 |
| chrX  | 39052732    | 39053116  | 385 |
| chrX  | 36913877    | 36914261  | 385 |
| chrX  | 35796822    | 35797206  | 385 |
| chrX  | 30858757    | 30859141  | 385 |
| chrX  | 13836653    | 13837037  | 385 |
| chrX  | 8028053     | 8028437   | 385 |
| chrX  | 7203167     | 7203551   | 385 |
| chrX  | 39541 39925 | 385       |     |
| chr7  | 14179869    | 14180253  | 385 |
| chr4  | 98069848    | 98070232  | 385 |
| chr3  | 119298787   | 119299171 | 385 |
| chr3  | 109767175   | 109767559 | 385 |
| chr23 | 19990957    | 19991341  | 385 |
| chr2  | 116753481   | 116753865 | 385 |
| chr19 | 13433409    | 13433793  | 385 |
| chr18 | 50618455    | 50618839  | 385 |
| chr17 | 68553013    | 68553397  | 385 |
| chr16 | 62912178    | 62912562  | 385 |
| chr15 | 74660387    | 74660771  | 385 |
| chr15 | 23611473    | 23611857  | 385 |
| chr14 | 52543868    | 52544252  | 385 |
| chr14 | 4057545     | 4057929   | 385 |
| chr14 | 1649777     | 1650161   | 385 |
| chr12 | 84809818    | 84810202  | 385 |
| chr11 | 104695467   | 104695851 | 385 |
| chr11 | 28012693    | 28013077  | 385 |
| chr11 | 7785175     | 7785559   | 385 |
| chr10 | 17558770    | 17559154  | 385 |
| chrX  | 72603420    | 72603803  | 384 |
| chrX  | 66939097    | 66939480  | 384 |
| chrX  | 57175483    | 57175866  | 384 |
| chrX  | 47405087    | 47405470  | 384 |
| chrX  | 47350038    | 47350421  | 384 |
| chrX  | 37812988    | 37813371  | 384 |
| chrX  | 35656761    | 35657144  | 384 |
| chrX  | 12526805    | 12527188  | 384 |
| chrX  | 2466318     | 2466701   | 384 |
| chr8  | 65182093    | 65182476  | 384 |
| chr7  | 19181517    | 19181900  | 384 |
| chr7  | 4718673     | 4719056   | 384 |

|       |           |           |     |
|-------|-----------|-----------|-----|
| chr5  | 28391980  | 28392363  | 384 |
| chr5  | 10191342  | 10191725  | 384 |
| chr4  | 70479713  | 70480096  | 384 |
| chr4  | 14625511  | 14625894  | 384 |
| chr29 | 33926610  | 33926993  | 384 |
| chr26 | 21771938  | 21772321  | 384 |
| chr24 | 35358546  | 35358929  | 384 |
| chr23 | 15517958  | 15518341  | 384 |
| chr23 | 10030379  | 10030762  | 384 |
| chr21 | 24921910  | 24922293  | 384 |
| chr2  | 135864314 | 135864697 | 384 |
| chr19 | 39318675  | 39319058  | 384 |
| chr18 | 11335324  | 11335707  | 384 |
| chr16 | 44425956  | 44426339  | 384 |
| chr15 | 75219715  | 75220098  | 384 |
| chr13 | 43479234  | 43479617  | 384 |
| chr12 | 31153905  | 31154288  | 384 |
| chr10 | 70131539  | 70131922  | 384 |
| chrX  | 75847488  | 75847870  | 383 |
| chrX  | 61021791  | 61022173  | 383 |
| chrX  | 59289673  | 59290055  | 383 |
| chrX  | 50288410  | 50288792  | 383 |
| chrX  | 12673551  | 12673933  | 383 |
| chrX  | 8416480   | 8416862   | 383 |
| chr8  | 86894001  | 86894383  | 383 |
| chr8  | 61064812  | 61065194  | 383 |
| chr7  | 89426306  | 89426688  | 383 |
| chr7  | 71685149  | 71685531  | 383 |
| chr7  | 50473481  | 50473863  | 383 |
| chr5  | 117773369 | 117773751 | 383 |
| chr4  | 63306740  | 63307122  | 383 |
| chr4  | 28597928  | 28598310  | 383 |
| chr4  | 6104662   | 6105044   | 383 |
| chr3  | 13660200  | 13660582  | 383 |
| chr28 | 45350992  | 45351374  | 383 |
| chr28 | 36448079  | 36448461  | 383 |
| chr28 | 33894613  | 33894995  | 383 |
| chr26 | 18808401  | 18808783  | 383 |
| chr23 | 23082756  | 23083138  | 383 |
| chr23 | 15854604  | 15854986  | 383 |
| chr22 | 60252751  | 60253133  | 383 |
| chr22 | 38943040  | 38943422  | 383 |
| chr21 | 63962706  | 63963088  | 383 |
| chr20 | 21953740  | 21954122  | 383 |
| chr2  | 6582528   | 6582910   | 383 |
| chr19 | 53963996  | 53964378  | 383 |
| chr19 | 53560101  | 53560483  | 383 |
| chr19 | 30304581  | 30304963  | 383 |
| chr18 | 32947920  | 32948302  | 383 |
| chr18 | 24639443  | 24639825  | 383 |

|       |               |           |     |
|-------|---------------|-----------|-----|
| chr17 | 75134631      | 75135013  | 383 |
| chr16 | 47591116      | 47591498  | 383 |
| chr14 | 18686509      | 18686891  | 383 |
| chr13 | 6981279       | 6981661   | 383 |
| chr11 | 84830622      | 84831004  | 383 |
| chr1  | 82888312      | 82888694  | 383 |
| chr1  | 74556870      | 74557252  | 383 |
| chrX  | 81019097      | 81019478  | 382 |
| chrX  | 66145174      | 66145555  | 382 |
| chrX  | 49974758      | 49975139  | 382 |
| chrX  | 47804059      | 47804440  | 382 |
| chrX  | 9978368       | 9978749   | 382 |
| chrX  | 8651265       | 8651646   | 382 |
| chr7  | 80958853      | 80959234  | 382 |
| chr4  | 121476594     | 121476975 | 382 |
| chr3  | 105166549     | 105166930 | 382 |
| chr3  | 98239622      | 98240003  | 382 |
| chr28 | 26844361      | 26844742  | 382 |
| chr28 | 424780 425161 | 382       |     |
| chr27 | 48383929      | 48384310  | 382 |
| chr26 | 49200191      | 49200572  | 382 |
| chr26 | 32844503      | 32844884  | 382 |
| chr25 | 29423077      | 29423458  | 382 |
| chr25 | 27604327      | 27604708  | 382 |
| chr25 | 27308321      | 27308702  | 382 |
| chr24 | 65003457      | 65003838  | 382 |
| chr24 | 64976689      | 64977070  | 382 |
| chr24 | 24718901      | 24719282  | 382 |
| chr22 | 32926570      | 32926951  | 382 |
| chr21 | 31661082      | 31661463  | 382 |
| chr2  | 138900861     | 138901242 | 382 |
| chr2  | 124797992     | 124798373 | 382 |
| chr19 | 64715009      | 64715390  | 382 |
| chr19 | 56066745      | 56067126  | 382 |
| chr19 | 39387487      | 39387868  | 382 |
| chr19 | 39169000      | 39169381  | 382 |
| chr18 | 11265015      | 11265396  | 382 |
| chr17 | 75140638      | 75141019  | 382 |
| chr17 | 63565593      | 63565974  | 382 |
| chr16 | 71664663      | 71665044  | 382 |
| chr15 | 39618670      | 39619051  | 382 |
| chr15 | 30081893      | 30082274  | 382 |
| chr15 | 29326983      | 29327364  | 382 |
| chr13 | 76000871      | 76001252  | 382 |
| chr13 | 61216074      | 61216455  | 382 |
| chr13 | 58281156      | 58281537  | 382 |
| chr11 | 91255525      | 91255906  | 382 |
| chr11 | 71617369      | 71617750  | 382 |
| chr11 | 67488162      | 67488543  | 382 |
| chr11 | 9165006       | 9165387   | 382 |

|       |           |           |     |
|-------|-----------|-----------|-----|
| chr10 | 89486320  | 89486701  | 382 |
| chr10 | 67025739  | 67026120  | 382 |
| chr10 | 32473750  | 32474131  | 382 |
| chrX  | 63193842  | 63194222  | 381 |
| chrX  | 49793848  | 49794228  | 381 |
| chrX  | 18477422  | 18477802  | 381 |
| chrX  | 18179737  | 18180117  | 381 |
| chr5  | 113707051 | 113707431 | 381 |
| chr5  | 29960870  | 29961250  | 381 |
| chr4  | 71542726  | 71543106  | 381 |
| chr3  | 115771678 | 115772058 | 381 |
| chr3  | 35970284  | 35970664  | 381 |
| chr29 | 49459747  | 49460127  | 381 |
| chr26 | 48927786  | 48928166  | 381 |
| chr26 | 20903917  | 20904297  | 381 |
| chr25 | 3111042   | 3111422   | 381 |
| chr24 | 33801878  | 33802258  | 381 |
| chr23 | 52663540  | 52663920  | 381 |
| chr22 | 43943389  | 43943769  | 381 |
| chr21 | 30794852  | 30795232  | 381 |
| chr21 | 26808128  | 26808508  | 381 |
| chr20 | 44894751  | 44895131  | 381 |
| chr19 | 41505007  | 41505387  | 381 |
| chr19 | 24211558  | 24211938  | 381 |
| chr18 | 62404381  | 62404761  | 381 |
| chr18 | 54954662  | 54955042  | 381 |
| chr18 | 12057429  | 12057809  | 381 |
| chr18 | 11677839  | 11678219  | 381 |
| chr17 | 68052392  | 68052772  | 381 |
| chr17 | 66935778  | 66936158  | 381 |
| chr17 | 48317453  | 48317833  | 381 |
| chr16 | 56128011  | 56128391  | 381 |
| chr16 | 46961566  | 46961946  | 381 |
| chr15 | 29784166  | 29784546  | 381 |
| chr15 | 20021111  | 20021491  | 381 |
| chr14 | 39888197  | 39888577  | 381 |
| chr14 | 31634069  | 31634449  | 381 |
| chr13 | 54038553  | 54038933  | 381 |
| chr13 | 41730632  | 41731012  | 381 |
| chr13 | 41372914  | 41373294  | 381 |
| chr11 | 106320541 | 106320921 | 381 |
| chr11 | 72756626  | 72757006  | 381 |
| chr11 | 70975554  | 70975934  | 381 |
| chr10 | 83835562  | 83835942  | 381 |
| chrX  | 71633009  | 71633388  | 380 |
| chrX  | 68312028  | 68312407  | 380 |
| chrX  | 62544069  | 62544448  | 380 |
| chrX  | 56577077  | 56577456  | 380 |
| chrX  | 55775660  | 55776039  | 380 |
| chrX  | 28404151  | 28404530  | 380 |

|       |           |           |     |
|-------|-----------|-----------|-----|
| chrX  | 20315903  | 20316282  | 380 |
| chrX  | 19256591  | 19256970  | 380 |
| chrX  | 9249147   | 9249526   | 380 |
| chrX  | 8804219   | 8804598   | 380 |
| chr9  | 105510475 | 105510854 | 380 |
| chr9  | 52407082  | 52407461  | 380 |
| chr8  | 10304623  | 10305002  | 380 |
| chr8  | 7694479   | 7694858   | 380 |
| chr7  | 68616999  | 68617378  | 380 |
| chr6  | 115900563 | 115900942 | 380 |
| chr6  | 46711715  | 46712094  | 380 |
| chr5  | 73638981  | 73639360  | 380 |
| chr4  | 121822850 | 121823229 | 380 |
| chr4  | 107300438 | 107300817 | 380 |
| chr29 | 33808020  | 33808399  | 380 |
| chr29 | 9039700   | 9040079   | 380 |
| chr28 | 27188967  | 27189346  | 380 |
| chr27 | 47652221  | 47652600  | 380 |
| chr27 | 34734757  | 34735136  | 380 |
| chr26 | 49253112  | 49253491  | 380 |
| chr26 | 41633383  | 41633762  | 380 |
| chr25 | 27263600  | 27263979  | 380 |
| chr25 | 26730162  | 26730541  | 380 |
| chr23 | 14926761  | 14927140  | 380 |
| chr23 | 11046729  | 11047108  | 380 |
| chr21 | 64429894  | 64430273  | 380 |
| chr19 | 39411258  | 39411637  | 380 |
| chr18 | 49490436  | 49490815  | 380 |
| chr18 | 12008538  | 12008917  | 380 |
| chr17 | 67056049  | 67056428  | 380 |
| chr14 | 22491368  | 22491747  | 380 |
| chr13 | 72619950  | 72620329  | 380 |
| chr13 | 62243426  | 62243805  | 380 |
| chr13 | 6794280   | 6794659   | 380 |
| chr11 | 66567816  | 66568195  | 380 |
| chr11 | 46739805  | 46740184  | 380 |
| chr11 | 10122619  | 10122998  | 380 |
| chr10 | 60552851  | 60553230  | 380 |
| chrX  | 82935695  | 82936073  | 379 |
| chrX  | 78848179  | 78848557  | 379 |
| chrX  | 78633470  | 78633848  | 379 |
| chrX  | 76029687  | 76030065  | 379 |
| chrX  | 72272889  | 72273267  | 379 |
| chrX  | 67052170  | 67052548  | 379 |
| chrX  | 52044878  | 52045256  | 379 |
| chrX  | 24397970  | 24398348  | 379 |
| chrX  | 13824896  | 13825274  | 379 |
| chrX  | 8417365   | 8417743   | 379 |
| chr8  | 88726094  | 88726472  | 379 |
| chr7  | 46492625  | 46493003  | 379 |

|       |               |           |     |
|-------|---------------|-----------|-----|
| chr7  | 29540648      | 29541026  | 379 |
| chr7  | 16835905      | 16836283  | 379 |
| chr5  | 112576892     | 112577270 | 379 |
| chr3  | 22595135      | 22595513  | 379 |
| chr29 | 34926028      | 34926406  | 379 |
| chr29 | 33560848      | 33561226  | 379 |
| chr26 | 51529659      | 51530037  | 379 |
| chr26 | 42515566      | 42515944  | 379 |
| chr26 | 18736677      | 18737055  | 379 |
| chr24 | 60767838      | 60768216  | 379 |
| chr22 | 29906506      | 29906884  | 379 |
| chr20 | 536578 536956 |           | 379 |
| chr2  | 135165405     | 135165783 | 379 |
| chr19 | 59127941      | 59128319  | 379 |
| chr19 | 54632290      | 54632668  | 379 |
| chr17 | 69754226      | 69754604  | 379 |
| chr17 | 69076032      | 69076410  | 379 |
| chr15 | 63093622      | 63094000  | 379 |
| chr13 | 77692995      | 77693373  | 379 |
| chr13 | 65030318      | 65030696  | 379 |
| chr13 | 22881363      | 22881741  | 379 |
| chr11 | 80338105      | 80338483  | 379 |
| chr11 | 44943975      | 44944353  | 379 |
| chr11 | 29804737      | 29805115  | 379 |
| chr10 | 69177306      | 69177684  | 379 |
| chrX  | 74933665      | 74934042  | 378 |
| chrX  | 72638514      | 72638891  | 378 |
| chrX  | 67001672      | 67002049  | 378 |
| chrX  | 58481458      | 58481835  | 378 |
| chrX  | 57320578      | 57320955  | 378 |
| chrX  | 9160270       | 9160647   | 378 |
| chrX  | 7774275       | 7774652   | 378 |
| chrX  | 2253866       | 2254243   | 378 |
| chrX  | 375717 376094 |           | 378 |
| chr9  | 107558934     | 107559311 | 378 |
| chr9  | 8646861       | 8647238   | 378 |
| chr8  | 63944645      | 63945022  | 378 |
| chr8  | 10897892      | 10898269  | 378 |
| chr7  | 17308276      | 17308653  | 378 |
| chr7  | 14931886      | 14932263  | 378 |
| chr7  | 5200050       | 5200427   | 378 |
| chr3  | 4519829       | 4520206   | 378 |
| chr29 | 46934522      | 46934899  | 378 |
| chr28 | 11374769      | 11375146  | 378 |
| chr27 | 26667687      | 26668064  | 378 |
| chr26 | 39205116      | 39205493  | 378 |
| chr23 | 51315939      | 51316316  | 378 |
| chr23 | 28560168      | 28560545  | 378 |
| chr22 | 59406159      | 59406536  | 378 |
| chr22 | 11027366      | 11027743  | 378 |

|       |           |           |     |
|-------|-----------|-----------|-----|
| chr21 | 62989779  | 62990156  | 378 |
| chr21 | 28192118  | 28192495  | 378 |
| chr21 | 27761529  | 27761906  | 378 |
| chr21 | 25187514  | 25187891  | 378 |
| chr2  | 26770354  | 26770731  | 378 |
| chr2  | 1496601   | 1496978   | 378 |
| chr19 | 28009574  | 28009951  | 378 |
| chr19 | 23780581  | 23780958  | 378 |
| chr19 | 10964044  | 10964421  | 378 |
| chr18 | 4016205   | 4016582   | 378 |
| chr14 | 6389655   | 6390032   | 378 |
| chr12 | 82828653  | 82829030  | 378 |
| chr10 | 85779261  | 85779638  | 378 |
| chr10 | 11770551  | 11770928  | 378 |
| chr10 | 8334150   | 8334527   | 378 |
| chr1  | 113562064 | 113562441 | 378 |
| chrX  | 79355995  | 79356371  | 377 |
| chrX  | 75420060  | 75420436  | 377 |
| chrX  | 73468523  | 73468899  | 377 |
| chrX  | 73409973  | 73410349  | 377 |
| chrX  | 63886646  | 63887022  | 377 |
| chrX  | 51492501  | 51492877  | 377 |
| chrX  | 47957699  | 47958075  | 377 |
| chrX  | 35753224  | 35753600  | 377 |
| chrX  | 12078690  | 12079066  | 377 |
| chrX  | 2544761   | 2545137   | 377 |
| chrX  | 2398642   | 2399018   | 377 |
| chr8  | 35974047  | 35974423  | 377 |
| chr8  | 1624513   | 1624889   | 377 |
| chr4  | 123254644 | 123255020 | 377 |
| chr3  | 119676816 | 119677192 | 377 |
| chr29 | 17634700  | 17635076  | 377 |
| chr26 | 50670234  | 50670610  | 377 |
| chr26 | 48881485  | 48881861  | 377 |
| chr25 | 28272767  | 28273143  | 377 |
| chr24 | 59062454  | 59062830  | 377 |
| chr23 | 48782155  | 48782531  | 377 |
| chr22 | 7547269   | 7547645   | 377 |
| chr21 | 20978054  | 20978430  | 377 |
| chr2  | 136629253 | 136629629 | 377 |
| chr2  | 111216413 | 111216789 | 377 |
| chr19 | 16776784  | 16777160  | 377 |
| chr18 | 53238682  | 53239058  | 377 |
| chr17 | 68565571  | 68565947  | 377 |
| chr15 | 33519496  | 33519872  | 377 |
| chr15 | 29858921  | 29859297  | 377 |
| chr13 | 62934198  | 62934574  | 377 |
| chr11 | 3850381   | 3850757   | 377 |
| chr1  | 150078939 | 150079315 | 377 |
| chrX  | 80295532  | 80295907  | 376 |

|       |               |           |     |
|-------|---------------|-----------|-----|
| chrX  | 71752790      | 71753165  | 376 |
| chrX  | 64567668      | 64568043  | 376 |
| chrX  | 34152429      | 34152804  | 376 |
| chrX  | 31020768      | 31021143  | 376 |
| chrX  | 30617453      | 30617828  | 376 |
| chrX  | 10769814      | 10770189  | 376 |
| chrX  | 27774 28149   | 376       |     |
| chr8  | 116750270     | 116750645 | 376 |
| chr8  | 111915864     | 111916239 | 376 |
| chr6  | 121070025     | 121070400 | 376 |
| chr6  | 120789150     | 120789525 | 376 |
| chr5  | 125751565     | 125751940 | 376 |
| chr5  | 28833428      | 28833803  | 376 |
| chr29 | 34914329      | 34914704  | 376 |
| chr28 | 25215789      | 25216164  | 376 |
| chr26 | 21599421      | 21599796  | 376 |
| chr24 | 33810185      | 33810560  | 376 |
| chr23 | 10251966      | 10252341  | 376 |
| chr20 | 75115056      | 75115431  | 376 |
| chr20 | 60224069      | 60224444  | 376 |
| chr19 | 41396141      | 41396516  | 376 |
| chr18 | 54112510      | 54112885  | 376 |
| chr18 | 53492526      | 53492901  | 376 |
| chr18 | 51635422      | 51635797  | 376 |
| chr18 | 11138445      | 11138820  | 376 |
| chr16 | 49483442      | 49483817  | 376 |
| chr16 | 46983557      | 46983932  | 376 |
| chr15 | 64207075      | 64207450  | 376 |
| chr10 | 83518480      | 83518855  | 376 |
| chrX  | 71199588      | 71199962  | 375 |
| chrX  | 65751275      | 65751649  | 375 |
| chrX  | 61448224      | 61448598  | 375 |
| chrX  | 55029140      | 55029514  | 375 |
| chrX  | 46365669      | 46366043  | 375 |
| chrX  | 36279476      | 36279850  | 375 |
| chrX  | 22622270      | 22622644  | 375 |
| chrX  | 22093990      | 22094364  | 375 |
| chrX  | 19777201      | 19777575  | 375 |
| chrX  | 2493012       | 2493386   | 375 |
| chrX  | 785668 786042 | 375       |     |
| chr7  | 38751233      | 38751607  | 375 |
| chr5  | 50608179      | 50608553  | 375 |
| chr4  | 5507243       | 5507617   | 375 |
| chr3  | 124091520     | 124091894 | 375 |
| chr27 | 21557662      | 21558036  | 375 |
| chr26 | 44175445      | 44175819  | 375 |
| chr24 | 59568883      | 59569257  | 375 |
| chr24 | 48428550      | 48428924  | 375 |
| chr24 | 41590747      | 41591121  | 375 |
| chr23 | 15092439      | 15092813  | 375 |



|       |           |           |     |
|-------|-----------|-----------|-----|
| chr23 | 7652106   | 7652480   | 375 |
| chr22 | 55767044  | 55767418  | 375 |
| chr21 | 6955206   | 6955580   | 375 |
| chr20 | 44894064  | 44894438  | 375 |
| chr19 | 58678894  | 58679268  | 375 |
| chr19 | 40507298  | 40507672  | 375 |
| chr19 | 14242578  | 14242952  | 375 |
| chr13 | 77374268  | 77374642  | 375 |
| chr13 | 75535550  | 75535924  | 375 |
| chr13 | 70245957  | 70246331  | 375 |
| chr13 | 65143557  | 65143931  | 375 |
| chr12 | 15003420  | 15003794  | 375 |
| chr11 | 90391127  | 90391501  | 375 |
| chr11 | 2261900   | 2262274   | 375 |
| chrX  | 80730354  | 80730727  | 374 |
| chrX  | 77137865  | 77138238  | 374 |
| chrX  | 72265540  | 72265913  | 374 |
| chrX  | 69909799  | 69910172  | 374 |
| chrX  | 66042121  | 66042494  | 374 |
| chrX  | 64915324  | 64915697  | 374 |
| chrX  | 61885135  | 61885508  | 374 |
| chrX  | 46359841  | 46360214  | 374 |
| chrX  | 38944723  | 38945096  | 374 |
| chrX  | 21604470  | 21604843  | 374 |
| chrX  | 20917621  | 20917994  | 374 |
| chrX  | 20268883  | 20269256  | 374 |
| chrX  | 19419708  | 19420081  | 374 |
| chrX  | 18970259  | 18970632  | 374 |
| chrX  | 18782414  | 18782787  | 374 |
| chrX  | 5500822   | 5501195   | 374 |
| chr9  | 104772251 | 104772624 | 374 |
| chr9  | 77566411  | 77566784  | 374 |
| chr7  | 9131111   | 9131484   | 374 |
| chr6  | 120581244 | 120581617 | 374 |
| chr6  | 115607726 | 115608099 | 374 |
| chr4  | 116917793 | 116918166 | 374 |
| chr4  | 38561035  | 38561408  | 374 |
| chr3  | 111791089 | 111791462 | 374 |
| chr3  | 8760271   | 8760644   | 374 |
| chr27 | 26728213  | 26728586  | 374 |
| chr25 | 5071783   | 5072156   | 374 |
| chr22 | 48429105  | 48429478  | 374 |
| chr2  | 92354472  | 92354845  | 374 |
| chr19 | 41545871  | 41546244  | 374 |
| chr19 | 32559508  | 32559881  | 374 |
| chr19 | 23839605  | 23839978  | 374 |
| chr19 | 7244567   | 7244940   | 374 |
| chr18 | 33658891  | 33659264  | 374 |
| chr18 | 32925987  | 32926360  | 374 |
| chr18 | 24003059  | 24003432  | 374 |

|       |           |           |     |
|-------|-----------|-----------|-----|
| chr18 | 22054280  | 22054653  | 374 |
| chr17 | 70338444  | 70338817  | 374 |
| chr15 | 62734694  | 62735067  | 374 |
| chr13 | 77676586  | 77676959  | 374 |
| chr13 | 28554304  | 28554677  | 374 |
| chr11 | 100903466 | 100903839 | 374 |
| chr11 | 83224834  | 83225207  | 374 |
| chr10 | 17657036  | 17657409  | 374 |
| chrX  | 66459249  | 66459621  | 373 |
| chrX  | 64885868  | 64886240  | 373 |
| chrX  | 58722136  | 58722508  | 373 |
| chrX  | 20197255  | 20197627  | 373 |
| chrX  | 19751276  | 19751648  | 373 |
| chr9  | 104976669 | 104977041 | 373 |
| chr6  | 71686184  | 71686556  | 373 |
| chr5  | 113068694 | 113069066 | 373 |
| chr29 | 25901617  | 25901989  | 373 |
| chr27 | 34874534  | 34874906  | 373 |
| chr25 | 1141298   | 1141670   | 373 |
| chr24 | 20836436  | 20836808  | 373 |
| chr23 | 27806014  | 27806386  | 373 |
| chr23 | 15946411  | 15946783  | 373 |
| chr23 | 15075027  | 15075399  | 373 |
| chr23 | 11848937  | 11849309  | 373 |
| chr22 | 52884320  | 52884692  | 373 |
| chr21 | 31110194  | 31110566  | 373 |
| chr21 | 14510759  | 14511131  | 373 |
| chr2  | 24082475  | 24082847  | 373 |
| chr19 | 60163286  | 60163658  | 373 |
| chr19 | 40774609  | 40774981  | 373 |
| chr19 | 17344117  | 17344489  | 373 |
| chr18 | 38583967  | 38584339  | 373 |
| chr18 | 12088634  | 12089006  | 373 |
| chr18 | 7808326   | 7808698   | 373 |
| chr16 | 48183889  | 48184261  | 373 |
| chr16 | 47605173  | 47605545  | 373 |
| chr15 | 26785134  | 26785506  | 373 |
| chr14 | 22994074  | 22994446  | 373 |
| chr14 | 9554546   | 9554918   | 373 |
| chr14 | 8677295   | 8677667   | 373 |
| chr13 | 41774102  | 41774474  | 373 |
| chr13 | 41279650  | 41280022  | 373 |
| chr11 | 107355557 | 107355929 | 373 |
| chr11 | 77793391  | 77793763  | 373 |
| chr11 | 74964080  | 74964452  | 373 |
| chr10 | 70433023  | 70433395  | 373 |
| chr10 | 58775896  | 58776268  | 373 |
| chrX  | 78597582  | 78597953  | 372 |
| chrX  | 50185869  | 50186240  | 372 |
| chrX  | 46232005  | 46232376  | 372 |

|       |               |           |     |
|-------|---------------|-----------|-----|
| chrX  | 36437649      | 36438020  | 372 |
| chrX  | 34063943      | 34064314  | 372 |
| chrX  | 32816216      | 32816587  | 372 |
| chrX  | 19998252      | 19998623  | 372 |
| chrX  | 17158262      | 17158633  | 372 |
| chrX  | 16961500      | 16961871  | 372 |
| chrX  | 6373930       | 6374301   | 372 |
| chrX  | 714100 714471 |           | 372 |
| chr8  | 85513920      | 85514291  | 372 |
| chr8  | 45765070      | 45765441  | 372 |
| chr5  | 29144390      | 29144761  | 372 |
| chr3  | 121460891     | 121461262 | 372 |
| chr3  | 20580302      | 20580673  | 372 |
| chr28 | 25442815      | 25443186  | 372 |
| chr28 | 25111187      | 25111558  | 372 |
| chr26 | 44234022      | 44234393  | 372 |
| chr25 | 41227795      | 41228166  | 372 |
| chr25 | 37494370      | 37494741  | 372 |
| chr24 | 60997279      | 60997650  | 372 |
| chr24 | 49365243      | 49365614  | 372 |
| chr23 | 49767835      | 49768206  | 372 |
| chr23 | 44565407      | 44565778  | 372 |
| chr23 | 11456200      | 11456571  | 372 |
| chr23 | 10554609      | 10554980  | 372 |
| chr21 | 31692236      | 31692607  | 372 |
| chr2  | 43865817      | 43866188  | 372 |
| chr19 | 63557034      | 63557405  | 372 |
| chr19 | 51922667      | 51923038  | 372 |
| chr19 | 47320577      | 47320948  | 372 |
| chr19 | 39938053      | 39938424  | 372 |
| chr17 | 70156549      | 70156920  | 372 |
| chr16 | 75230951      | 75231322  | 372 |
| chr16 | 59042425      | 59042796  | 372 |
| chr16 | 39526931      | 39527302  | 372 |
| chr15 | 74877361      | 74877732  | 372 |
| chr15 | 58005128      | 58005499  | 372 |
| chr11 | 26234251      | 26234622  | 372 |
| chr10 | 103510213     | 103510584 | 372 |
| chr10 | 83568536      | 83568907  | 372 |
| chr10 | 66549406      | 66549777  | 372 |
| chr10 | 17584935      | 17585306  | 372 |
| chr1  | 123116285     | 123116656 | 372 |
| chrX  | 78513293      | 78513663  | 371 |
| chrX  | 76057939      | 76058309  | 371 |
| chrX  | 72421259      | 72421629  | 371 |
| chrX  | 60942465      | 60942835  | 371 |
| chrX  | 50394954      | 50395324  | 371 |
| chrX  | 39035612      | 39035982  | 371 |
| chrX  | 33731382      | 33731752  | 371 |
| chrX  | 30605606      | 30605976  | 371 |

|       |           |           |     |
|-------|-----------|-----------|-----|
| chrX  | 18427523  | 18427893  | 371 |
| chrX  | 813340    | 813710    | 371 |
| chrX  | 703733    | 704103    | 371 |
| chr9  | 104998320 | 104998690 | 371 |
| chr9  | 92178265  | 92178635  | 371 |
| chr8  | 73940240  | 73940610  | 371 |
| chr8  | 8310667   | 8311037   | 371 |
| chr7  | 19498375  | 19498745  | 371 |
| chr5  | 121510636 | 121511006 | 371 |
| chr5  | 116332377 | 116332747 | 371 |
| chr5  | 35266635  | 35267005  | 371 |
| chr29 | 44594596  | 44594966  | 371 |
| chr29 | 30808529  | 30808899  | 371 |
| chr28 | 33511931  | 33512301  | 371 |
| chr28 | 33356814  | 33357184  | 371 |
| chr27 | 38393907  | 38394277  | 371 |
| chr25 | 27871177  | 27871547  | 371 |
| chr24 | 60688493  | 60688863  | 371 |
| chr23 | 51022328  | 51022698  | 371 |
| chr23 | 32069589  | 32069959  | 371 |
| chr23 | 27837170  | 27837540  | 371 |
| chr2  | 135101410 | 135101780 | 371 |
| chr2  | 121545374 | 121545744 | 371 |
| chr2  | 49581863  | 49582233  | 371 |
| chr19 | 63748404  | 63748774  | 371 |
| chr19 | 54357320  | 54357690  | 371 |
| chr19 | 46773066  | 46773436  | 371 |
| chr19 | 45056132  | 45056502  | 371 |
| chr19 | 40436332  | 40436702  | 371 |
| chr19 | 29541282  | 29541652  | 371 |
| chr18 | 11554231  | 11554601  | 371 |
| chr18 | 8367511   | 8367881   | 371 |
| chr18 | 3584934   | 3585304   | 371 |
| chr17 | 63119200  | 63119570  | 371 |
| chr16 | 74049182  | 74049552  | 371 |
| chr16 | 67444835  | 67445205  | 371 |
| chr15 | 45818766  | 45819136  | 371 |
| chr15 | 24191928  | 24192298  | 371 |
| chr15 | 23621215  | 23621585  | 371 |
| chr14 | 6751800   | 6752170   | 371 |
| chr13 | 80705850  | 80706220  | 371 |
| chr12 | 35080546  | 35080916  | 371 |
| chr11 | 92119579  | 92119949  | 371 |
| chr11 | 81511267  | 81511637  | 371 |
| chr11 | 77547654  | 77548024  | 371 |
| chr10 | 86487576  | 86487946  | 371 |
| chr1  | 145831456 | 145831826 | 371 |
| chr1  | 64862979  | 64863349  | 371 |
| chrX  | 78423846  | 78424215  | 370 |
| chrX  | 75727736  | 75728105  | 370 |

|       |           |           |     |
|-------|-----------|-----------|-----|
| chrX  | 53893360  | 53893729  | 370 |
| chrX  | 35672175  | 35672544  | 370 |
| chrX  | 34503100  | 34503469  | 370 |
| chrX  | 19562215  | 19562584  | 370 |
| chrX  | 11655360  | 11655729  | 370 |
| chrX  | 10224219  | 10224588  | 370 |
| chrX  | 7201665   | 7202034   | 370 |
| chr8  | 93177036  | 93177405  | 370 |
| chr8  | 7732173   | 7732542   | 370 |
| chr6  | 63463065  | 63463434  | 370 |
| chr5  | 72156659  | 72157028  | 370 |
| chr3  | 111795097 | 111795466 | 370 |
| chr3  | 105531990 | 105532359 | 370 |
| chr3  | 36849862  | 36850231  | 370 |
| chr29 | 34839083  | 34839452  | 370 |
| chr26 | 24238469  | 24238838  | 370 |
| chr25 | 22263333  | 22263702  | 370 |
| chr24 | 65018721  | 65019090  | 370 |
| chr21 | 11955229  | 11955598  | 370 |
| chr2  | 75240183  | 75240552  | 370 |
| chr19 | 31916609  | 31916978  | 370 |
| chr19 | 10815618  | 10815987  | 370 |
| chr18 | 21966446  | 21966815  | 370 |
| chr17 | 72899221  | 72899590  | 370 |
| chr17 | 70300777  | 70301146  | 370 |
| chr17 | 4207909   | 4208278   | 370 |
| chr16 | 59837667  | 59838036  | 370 |
| chr14 | 22789876  | 22790245  | 370 |
| chr14 | 9715441   | 9715810   | 370 |
| chr13 | 61482658  | 61483027  | 370 |
| chr12 | 83801694  | 83802063  | 370 |
| chr12 | 10238857  | 10239226  | 370 |
| chr11 | 101015773 | 101016142 | 370 |
| chr11 | 81561360  | 81561729  | 370 |
| chr10 | 105018053 | 105018422 | 370 |
| chr10 | 88042436  | 88042805  | 370 |
| chr10 | 40038633  | 40039002  | 370 |
| chr10 | 7746828   | 7747197   | 370 |
| chrX  | 78414309  | 78414677  | 369 |
| chrX  | 64718007  | 64718375  | 369 |
| chrX  | 50651086  | 50651454  | 369 |
| chrX  | 44934450  | 44934818  | 369 |
| chrX  | 33546132  | 33546500  | 369 |
| chrX  | 21569464  | 21569832  | 369 |
| chrX  | 21198945  | 21199313  | 369 |
| chrX  | 15778867  | 15779235  | 369 |
| chrX  | 12907428  | 12907796  | 369 |
| chrX  | 8880607   | 8880975   | 369 |
| chr9  | 106380045 | 106380413 | 369 |
| chr8  | 80055716  | 80056084  | 369 |

|       |           |           |     |
|-------|-----------|-----------|-----|
| chr7  | 94550962  | 94551330  | 369 |
| chr5  | 33566077  | 33566445  | 369 |
| chr5  | 29723588  | 29723956  | 369 |
| chr4  | 116863147 | 116863515 | 369 |
| chr3  | 123964262 | 123964630 | 369 |
| chr3  | 119296765 | 119297133 | 369 |
| chr3  | 109386646 | 109387014 | 369 |
| chr3  | 36192980  | 36193348  | 369 |
| chr29 | 48617674  | 48618042  | 369 |
| chr29 | 36278616  | 36278984  | 369 |
| chr27 | 38698801  | 38699169  | 369 |
| chr27 | 21892405  | 21892773  | 369 |
| chr26 | 44036699  | 44037067  | 369 |
| chr25 | 2821463   | 2821831   | 369 |
| chr23 | 49946687  | 49947055  | 369 |
| chr23 | 48755827  | 48756195  | 369 |
| chr23 | 28033531  | 28033899  | 369 |
| chr23 | 10468276  | 10468644  | 369 |
| chr20 | 38851684  | 38852052  | 369 |
| chr2  | 135012968 | 135013336 | 369 |
| chr18 | 25484463  | 25484831  | 369 |
| chr18 | 18010363  | 18010731  | 369 |
| chr18 | 11340028  | 11340396  | 369 |
| chr15 | 41134190  | 41134558  | 369 |
| chr12 | 84564551  | 84564919  | 369 |
| chr12 | 14990683  | 14991051  | 369 |
| chr11 | 14256937  | 14257305  | 369 |
| chr10 | 83078634  | 83079002  | 369 |
| chr10 | 66897615  | 66897983  | 369 |
| chr1  | 85639313  | 85639681  | 369 |
| chrX  | 75619133  | 75619500  | 368 |
| chrX  | 74459140  | 74459507  | 368 |
| chrX  | 72764107  | 72764474  | 368 |
| chrX  | 50766727  | 50767094  | 368 |
| chrX  | 45824079  | 45824446  | 368 |
| chrX  | 38384052  | 38384419  | 368 |
| chrX  | 32404592  | 32404959  | 368 |
| chrX  | 31347307  | 31347674  | 368 |
| chrX  | 31265463  | 31265830  | 368 |
| chrX  | 12561400  | 12561767  | 368 |
| chrX  | 2842253   | 2842620   | 368 |
| chr6  | 122523126 | 122523493 | 368 |
| chr6  | 68873059  | 68873426  | 368 |
| chr5  | 122708300 | 122708667 | 368 |
| chr5  | 120377010 | 120377377 | 368 |
| chr5  | 81656825  | 81657192  | 368 |
| chr5  | 60725152  | 60725519  | 368 |
| chr5  | 30370285  | 30370652  | 368 |
| chr3  | 33412067  | 33412434  | 368 |
| chr29 | 51996769  | 51997136  | 368 |

|       |               |           |     |
|-------|---------------|-----------|-----|
| chr29 | 45788247      | 45788614  | 368 |
| chr29 | 31057512      | 31057879  | 368 |
| chr25 | 38379148      | 38379515  | 368 |
| chr25 | 37252949      | 37253316  | 368 |
| chr25 | 34190249      | 34190616  | 368 |
| chr25 | 26614496      | 26614863  | 368 |
| chr24 | 46754154      | 46754521  | 368 |
| chr23 | 11932288      | 11932655  | 368 |
| chr22 | 60780520      | 60780887  | 368 |
| chr22 | 38134271      | 38134638  | 368 |
| chr21 | 20034998      | 20035365  | 368 |
| chr20 | 73447323      | 73447690  | 368 |
| chr2  | 132166684     | 132167051 | 368 |
| chr2  | 36271159      | 36271526  | 368 |
| chr19 | 29831888      | 29832255  | 368 |
| chr19 | 12512881      | 12513248  | 368 |
| chr18 | 62471005      | 62471372  | 368 |
| chr18 | 34053385      | 34053752  | 368 |
| chr18 | 18158378      | 18158745  | 368 |
| chr18 | 11838529      | 11838896  | 368 |
| chr17 | 66216239      | 66216606  | 368 |
| chr16 | 41348995      | 41349362  | 368 |
| chr15 | 42516139      | 42516506  | 368 |
| chr13 | 55118647      | 55119014  | 368 |
| chr13 | 38729647      | 38730014  | 368 |
| chr10 | 16880699      | 16881066  | 368 |
| chr1  | 76371157      | 76371524  | 368 |
| chrX  | 71607333      | 71607699  | 367 |
| chrX  | 49385915      | 49386281  | 367 |
| chrX  | 37685978      | 37686344  | 367 |
| chrX  | 36112641      | 36113007  | 367 |
| chrX  | 31186342      | 31186708  | 367 |
| chrX  | 22442980      | 22443346  | 367 |
| chrX  | 2732299       | 2732665   | 367 |
| chrX  | 850296 850662 | 367       |     |
| chr8  | 65804559      | 65804925  | 367 |
| chr8  | 61781345      | 61781711  | 367 |
| chr7  | 52382943      | 52383309  | 367 |
| chr5  | 118055968     | 118056334 | 367 |
| chr26 | 42141674      | 42142040  | 367 |
| chr26 | 39153451      | 39153817  | 367 |
| chr26 | 34194585      | 34194951  | 367 |
| chr25 | 37857525      | 37857891  | 367 |
| chr21 | 65538576      | 65538942  | 367 |
| chr2  | 127843932     | 127844298 | 367 |
| chr19 | 59418998      | 59419364  | 367 |
| chr19 | 25519566      | 25519932  | 367 |
| chr18 | 45989402      | 45989768  | 367 |
| chr18 | 6609673       | 6610039   | 367 |
| chr18 | 650585 650951 | 367       |     |

|       |               |           |     |
|-------|---------------|-----------|-----|
| chr16 | 59709024      | 59709390  | 367 |
| chr16 | 44467617      | 44467983  | 367 |
| chr14 | 9724766       | 9725132   | 367 |
| chr14 | 829074 829440 | 367       |     |
| chr13 | 76107907      | 76108273  | 367 |
| chr12 | 30570944      | 30571310  | 367 |
| chr12 | 11453190      | 11453556  | 367 |
| chr11 | 77873023      | 77873389  | 367 |
| chr11 | 77607663      | 77608029  | 367 |
| chr11 | 66567174      | 66567540  | 367 |
| chr10 | 51843979      | 51844345  | 367 |
| chrX  | 75742081      | 75742446  | 366 |
| chrX  | 72840281      | 72840646  | 366 |
| chrX  | 72271257      | 72271622  | 366 |
| chrX  | 31426731      | 31427096  | 366 |
| chrX  | 30928376      | 30928741  | 366 |
| chrX  | 21280626      | 21280991  | 366 |
| chrX  | 19130136      | 19130501  | 366 |
| chrX  | 17489867      | 17490232  | 366 |
| chrX  | 10873276      | 10873641  | 366 |
| chrX  | 5332008       | 5332373   | 366 |
| chrX  | 2710738       | 2711103   | 366 |
| chr9  | 73512843      | 73513208  | 366 |
| chr7  | 60980828      | 60981193  | 366 |
| chr7  | 42515355      | 42515720  | 366 |
| chr7  | 19900474      | 19900839  | 366 |
| chr7  | 10020487      | 10020852  | 366 |
| chr6  | 119390114     | 119390479 | 366 |
| chr6  | 106599785     | 106600150 | 366 |
| chr5  | 112955666     | 112956031 | 366 |
| chr4  | 120803602     | 120803967 | 366 |
| chr4  | 106675337     | 106675702 | 366 |
| chr3  | 115678200     | 115678565 | 366 |
| chr25 | 35884783      | 35885148  | 366 |
| chr25 | 29081095      | 29081460  | 366 |
| chr24 | 35386979      | 35387344  | 366 |
| chr23 | 30361426      | 30361791  | 366 |
| chr23 | 18825576      | 18825941  | 366 |
| chr2  | 134917671     | 134918036 | 366 |
| chr19 | 61954765      | 61955130  | 366 |
| chr19 | 46788316      | 46788681  | 366 |
| chr18 | 33252457      | 33252822  | 366 |
| chr18 | 4278778       | 4279143   | 366 |
| chr17 | 70322231      | 70322596  | 366 |
| chr17 | 66874797      | 66875162  | 366 |
| chr17 | 54357658      | 54358023  | 366 |
| chr16 | 72203606      | 72203971  | 366 |
| chr16 | 47950716      | 47951081  | 366 |
| chr16 | 47666972      | 47667337  | 366 |
| chr16 | 13946847      | 13947212  | 366 |



|       |           |           |     |
|-------|-----------|-----------|-----|
| chr15 | 38323946  | 38324311  | 366 |
| chr15 | 27119213  | 27119578  | 366 |
| chr13 | 67103201  | 67103566  | 366 |
| chr13 | 60189118  | 60189483  | 366 |
| chr12 | 35582809  | 35583174  | 366 |
| chr11 | 92616437  | 92616802  | 366 |
| chr11 | 83790000  | 83790365  | 366 |
| chr11 | 81912490  | 81912855  | 366 |
| chr10 | 16871383  | 16871748  | 366 |
| chrX  | 80865433  | 80865797  | 365 |
| chrX  | 72526100  | 72526464  | 365 |
| chrX  | 71728362  | 71728726  | 365 |
| chrX  | 69172559  | 69172923  | 365 |
| chrX  | 66847347  | 66847711  | 365 |
| chrX  | 31823484  | 31823848  | 365 |
| chrX  | 19669336  | 19669700  | 365 |
| chrX  | 11218270  | 11218634  | 365 |
| chrX  | 9650847   | 9651211   | 365 |
| chrX  | 5214778   | 5215142   | 365 |
| chr8  | 17090513  | 17090877  | 365 |
| chr5  | 112308461 | 112308825 | 365 |
| chr5  | 31074309  | 31074673  | 365 |
| chr4  | 96096229  | 96096593  | 365 |
| chr3  | 115818612 | 115818976 | 365 |
| chr3  | 108814249 | 108814613 | 365 |
| chr26 | 48288839  | 48289203  | 365 |
| chr24 | 60566297  | 60566661  | 365 |
| chr23 | 28579713  | 28580077  | 365 |
| chr21 | 61350471  | 61350835  | 365 |
| chr21 | 47624501  | 47624865  | 365 |
| chr21 | 15452728  | 15453092  | 365 |
| chr19 | 33761002  | 33761366  | 365 |
| chr19 | 21316902  | 21317266  | 365 |
| chr19 | 15887396  | 15887760  | 365 |
| chr18 | 62210915  | 62211279  | 365 |
| chr18 | 56884634  | 56884998  | 365 |
| chr18 | 48727081  | 48727445  | 365 |
| chr18 | 39575424  | 39575788  | 365 |
| chr18 | 12628039  | 12628403  | 365 |
| chr15 | 51672932  | 51673296  | 365 |
| chr13 | 61278174  | 61278538  | 365 |
| chr13 | 53323151  | 53323515  | 365 |
| chr12 | 14900758  | 14901122  | 365 |
| chr10 | 21933774  | 21934138  | 365 |
| chr1  | 138000390 | 138000754 | 365 |
| chrX  | 58607318  | 58607681  | 364 |
| chrX  | 48718206  | 48718569  | 364 |
| chrX  | 47999933  | 48000296  | 364 |
| chrX  | 42817886  | 42818249  | 364 |
| chrX  | 34835500  | 34835863  | 364 |

|       |           |           |     |
|-------|-----------|-----------|-----|
| chrX  | 29547195  | 29547558  | 364 |
| chrX  | 11067418  | 11067781  | 364 |
| chrX  | 8486220   | 8486583   | 364 |
| chrX  | 8083437   | 8083800   | 364 |
| chrX  | 5748518   | 5748881   | 364 |
| chr8  | 82102302  | 82102665  | 364 |
| chr7  | 77000752  | 77001115  | 364 |
| chr7  | 50636800  | 50637163  | 364 |
| chr5  | 72178721  | 72179084  | 364 |
| chr5  | 54785273  | 54785636  | 364 |
| chr4  | 110123047 | 110123410 | 364 |
| chr3  | 121790419 | 121790782 | 364 |
| chr3  | 121358680 | 121359043 | 364 |
| chr3  | 121275951 | 121276314 | 364 |
| chr3  | 104637494 | 104637857 | 364 |
| chr27 | 26698913  | 26699276  | 364 |
| chr27 | 4186060   | 4186423   | 364 |
| chr25 | 33335667  | 33336030  | 364 |
| chr23 | 48364925  | 48365288  | 364 |
| chr21 | 28704983  | 28705346  | 364 |
| chr2  | 140006624 | 140006987 | 364 |
| chr2  | 132354825 | 132355188 | 364 |
| chr2  | 128159040 | 128159403 | 364 |
| chr2  | 24075887  | 24076250  | 364 |
| chr19 | 59405788  | 59406151  | 364 |
| chr19 | 56594077  | 56594440  | 364 |
| chr19 | 27783006  | 27783369  | 364 |
| chr15 | 45586704  | 45587067  | 364 |
| chr15 | 35395854  | 35396217  | 364 |
| chr15 | 25379447  | 25379810  | 364 |
| chr13 | 60715774  | 60716137  | 364 |
| chr13 | 57259753  | 57260116  | 364 |
| chr11 | 4201618   | 4201981   | 364 |
| chr10 | 83868905  | 83869268  | 364 |
| chr1  | 153875963 | 153876326 | 364 |
| chr1  | 123131723 | 123132086 | 364 |
| chrX  | 55630091  | 55630453  | 363 |
| chrX  | 55364387  | 55364749  | 363 |
| chrX  | 50295401  | 50295763  | 363 |
| chrX  | 48717112  | 48717474  | 363 |
| chrX  | 39150200  | 39150562  | 363 |
| chrX  | 19564427  | 19564789  | 363 |
| chrX  | 8211604   | 8211966   | 363 |
| chrX  | 3695011   | 3695373   | 363 |
| chr9  | 92053010  | 92053372  | 363 |
| chr7  | 37150357  | 37150719  | 363 |
| chr6  | 121020075 | 121020437 | 363 |
| chr6  | 108659793 | 108660155 | 363 |
| chr5  | 104021468 | 104021830 | 363 |
| chr4  | 68280573  | 68280935  | 363 |

|       |               |           |     |
|-------|---------------|-----------|-----|
| chr3  | 127885778     | 127886140 | 363 |
| chr3  | 115054112     | 115054474 | 363 |
| chr3  | 104597607     | 104597969 | 363 |
| chr3  | 48221755      | 48222117  | 363 |
| chr29 | 37099212      | 37099574  | 363 |
| chr29 | 29652988      | 29653350  | 363 |
| chr28 | 42374613      | 42374975  | 363 |
| chr27 | 31075375      | 31075737  | 363 |
| chr26 | 19923386      | 19923748  | 363 |
| chr25 | 28145553      | 28145915  | 363 |
| chr24 | 50993756      | 50994118  | 363 |
| chr24 | 1100744       | 1101106   | 363 |
| chr23 | 43804004      | 43804366  | 363 |
| chr23 | 19991980      | 19992342  | 363 |
| chr22 | 56099377      | 56099739  | 363 |
| chr22 | 48309098      | 48309460  | 363 |
| chr20 | 17980382      | 17980744  | 363 |
| chr2  | 114193784     | 114194146 | 363 |
| chr2  | 35504641      | 35505003  | 363 |
| chr19 | 19284726      | 19285088  | 363 |
| chr18 | 56668181      | 56668543  | 363 |
| chr18 | 54212220      | 54212582  | 363 |
| chr18 | 40327671      | 40328033  | 363 |
| chr18 | 34855989      | 34856351  | 363 |
| chr18 | 4009109       | 4009471   | 363 |
| chr17 | 62092508      | 62092870  | 363 |
| chr17 | 60546306      | 60546668  | 363 |
| chr16 | 58981452      | 58981814  | 363 |
| chr16 | 23637181      | 23637543  | 363 |
| chr14 | 26128792      | 26129154  | 363 |
| chr11 | 84106073      | 84106435  | 363 |
| chrX  | 83651468      | 83651829  | 362 |
| chrX  | 58221995      | 58222356  | 362 |
| chrX  | 48872241      | 48872602  | 362 |
| chrX  | 37335396      | 37335757  | 362 |
| chrX  | 36543752      | 36544113  | 362 |
| chrX  | 20167854      | 20168215  | 362 |
| chrX  | 8795718       | 8796079   | 362 |
| chrX  | 8646243       | 8646604   | 362 |
| chrX  | 8298112       | 8298473   | 362 |
| chrX  | 7609771       | 7610132   | 362 |
| chrX  | 2931208       | 2931569   | 362 |
| chrX  | 716587 716948 | 362       |     |
| chr9  | 99480957      | 99481318  | 362 |
| chr8  | 110933615     | 110933976 | 362 |
| chr8  | 60120459      | 60120820  | 362 |
| chr7  | 14413197      | 14413558  | 362 |
| chr7  | 13372243      | 13372604  | 362 |
| chr7  | 5242960       | 5243321   | 362 |
| chr5  | 121343385     | 121343746 | 362 |

|       |           |           |     |
|-------|-----------|-----------|-----|
| chr5  | 119389788 | 119390149 | 362 |
| chr5  | 97540886  | 97541247  | 362 |
| chr5  | 84253698  | 84254059  | 362 |
| chr4  | 117253265 | 117253626 | 362 |
| chr3  | 116915517 | 116915878 | 362 |
| chr26 | 51228725  | 51229086  | 362 |
| chr26 | 32069717  | 32070078  | 362 |
| chr26 | 20849034  | 20849395  | 362 |
| chr26 | 14589176  | 14589537  | 362 |
| chr25 | 37524260  | 37524621  | 362 |
| chr25 | 35396965  | 35397326  | 362 |
| chr25 | 27574685  | 27575046  | 362 |
| chr25 | 27555932  | 27556293  | 362 |
| chr24 | 60857282  | 60857643  | 362 |
| chr22 | 10742827  | 10743188  | 362 |
| chr2  | 139303526 | 139303887 | 362 |
| chr2  | 131852892 | 131853253 | 362 |
| chr18 | 38306047  | 38306408  | 362 |
| chr18 | 35126057  | 35126418  | 362 |
| chr17 | 70567424  | 70567785  | 362 |
| chr17 | 67323842  | 67324203  | 362 |
| chr17 | 66180073  | 66180434  | 362 |
| chr16 | 77521156  | 77521517  | 362 |
| chr16 | 40932274  | 40932635  | 362 |
| chr14 | 30976914  | 30977275  | 362 |
| chr14 | 19307898  | 19308259  | 362 |
| chr14 | 7766555   | 7766916   | 362 |
| chr14 | 6099415   | 6099776   | 362 |
| chr13 | 70098998  | 70099359  | 362 |
| chr13 | 63506300  | 63506661  | 362 |
| chr11 | 31114906  | 31115267  | 362 |
| chr1  | 74103183  | 74103544  | 362 |
| chrX  | 73253844  | 73254204  | 361 |
| chrX  | 64772634  | 64772994  | 361 |
| chrX  | 64442778  | 64443138  | 361 |
| chrX  | 49385013  | 49385373  | 361 |
| chrX  | 11905227  | 11905587  | 361 |
| chr7  | 38518744  | 38519104  | 361 |
| chr7  | 5238070   | 5238430   | 361 |
| chr5  | 33516567  | 33516927  | 361 |
| chr4  | 121963955 | 121964315 | 361 |
| chr4  | 96578145  | 96578505  | 361 |
| chr4  | 90995037  | 90995397  | 361 |
| chr4  | 7577661   | 7578021   | 361 |
| chr3  | 105647398 | 105647758 | 361 |
| chr3  | 105015314 | 105015674 | 361 |
| chr3  | 102126351 | 102126711 | 361 |
| chr3  | 51181408  | 51181768  | 361 |
| chr26 | 41642058  | 41642418  | 361 |
| chr24 | 43703575  | 43703935  | 361 |

|       |           |           |     |
|-------|-----------|-----------|-----|
| chr24 | 20912482  | 20912842  | 361 |
| chr22 | 59854482  | 59854842  | 361 |
| chr22 | 29775415  | 29775775  | 361 |
| chr22 | 12088608  | 12088968  | 361 |
| chr21 | 34540858  | 34541218  | 361 |
| chr21 | 6531036   | 6531396   | 361 |
| chr2  | 133040102 | 133040462 | 361 |
| chr19 | 55996073  | 55996433  | 361 |
| chr19 | 19885134  | 19885494  | 361 |
| chr18 | 47132563  | 47132923  | 361 |
| chr18 | 10057350  | 10057710  | 361 |
| chr18 | 2245051   | 2245411   | 361 |
| chr17 | 73121515  | 73121875  | 361 |
| chr17 | 70265948  | 70266308  | 361 |
| chr17 | 68565209  | 68565569  | 361 |
| chr15 | 26850909  | 26851269  | 361 |
| chr12 | 34270513  | 34270873  | 361 |
| chr11 | 47986970  | 47987330  | 361 |
| chr11 | 9362566   | 9362926   | 361 |
| chr10 | 88178383  | 88178743  | 361 |
| chr1  | 137900150 | 137900510 | 361 |
| chrX  | 78596322  | 78596681  | 360 |
| chrX  | 69096238  | 69096597  | 360 |
| chrX  | 66670509  | 66670868  | 360 |
| chrX  | 57803116  | 57803475  | 360 |
| chrX  | 47298560  | 47298919  | 360 |
| chrX  | 34253000  | 34253359  | 360 |
| chrX  | 8920572   | 8920931   | 360 |
| chr7  | 15684619  | 15684978  | 360 |
| chr6  | 90620967  | 90621326  | 360 |
| chr5  | 76305989  | 76306348  | 360 |
| chr5  | 28825701  | 28826060  | 360 |
| chr3  | 117211383 | 117211742 | 360 |
| chr3  | 115785226 | 115785585 | 360 |
| chr3  | 95749535  | 95749894  | 360 |
| chr3  | 80366890  | 80367249  | 360 |
| chr29 | 48833379  | 48833738  | 360 |
| chr28 | 33703326  | 33703685  | 360 |
| chr26 | 43588187  | 43588546  | 360 |
| chr26 | 31988776  | 31989135  | 360 |
| chr25 | 33496930  | 33497289  | 360 |
| chr25 | 30849073  | 30849432  | 360 |
| chr23 | 27590762  | 27591121  | 360 |
| chr23 | 18062146  | 18062505  | 360 |
| chr23 | 9462334   | 9462693   | 360 |
| chr21 | 49263879  | 49264238  | 360 |
| chr21 | 7144953   | 7145312   | 360 |
| chr19 | 59690261  | 59690620  | 360 |
| chr19 | 14895680  | 14896039  | 360 |
| chr18 | 50559841  | 50560200  | 360 |

|       |           |           |     |
|-------|-----------|-----------|-----|
| chr18 | 6774703   | 6775062   | 360 |
| chr16 | 41358289  | 41358648  | 360 |
| chr14 | 59436522  | 59436881  | 360 |
| chr14 | 53423067  | 53423426  | 360 |
| chr12 | 14732120  | 14732479  | 360 |
| chr10 | 103694264 | 103694623 | 360 |
| chr10 | 89505768  | 89506127  | 360 |
| chr10 | 79482913  | 79483272  | 360 |
| chr10 | 70019914  | 70020273  | 360 |
| chr10 | 17393118  | 17393477  | 360 |
| chrX  | 77721978  | 77722336  | 359 |
| chrX  | 64842123  | 64842481  | 359 |
| chrX  | 37457798  | 37458156  | 359 |
| chrX  | 36793183  | 36793541  | 359 |
| chrX  | 27731096  | 27731454  | 359 |
| chrX  | 24111138  | 24111496  | 359 |
| chrX  | 19302711  | 19303069  | 359 |
| chrX  | 18820270  | 18820628  | 359 |
| chrX  | 5798567   | 5798925   | 359 |
| chrX  | 3057898   | 3058256   | 359 |
| chr7  | 42521404  | 42521762  | 359 |
| chr5  | 111379922 | 111380280 | 359 |
| chr5  | 79197871  | 79198229  | 359 |
| chr5  | 41487217  | 41487575  | 359 |
| chr29 | 27309633  | 27309991  | 359 |
| chr27 | 26918344  | 26918702  | 359 |
| chr26 | 44318202  | 44318560  | 359 |
| chr26 | 37907008  | 37907366  | 359 |
| chr26 | 19864137  | 19864495  | 359 |
| chr25 | 40096183  | 40096541  | 359 |
| chr23 | 48793990  | 48794348  | 359 |
| chr22 | 59517301  | 59517659  | 359 |
| chr21 | 60816598  | 60816956  | 359 |
| chr21 | 45544485  | 45544843  | 359 |
| chr21 | 34000561  | 34000919  | 359 |
| chr21 | 19205975  | 19206333  | 359 |
| chr20 | 19446706  | 19447064  | 359 |
| chr2  | 91075016  | 91075374  | 359 |
| chr19 | 39427161  | 39427519  | 359 |
| chr16 | 67553358  | 67553716  | 359 |
| chr16 | 47255118  | 47255476  | 359 |
| chr16 | 32744455  | 32744813  | 359 |
| chr15 | 30085796  | 30086154  | 359 |
| chr15 | 25313772  | 25314130  | 359 |
| chr14 | 40037789  | 40038147  | 359 |
| chr13 | 59537873  | 59538231  | 359 |
| chr12 | 19823891  | 19824249  | 359 |
| chr11 | 25616280  | 25616638  | 359 |
| chr10 | 17691817  | 17692175  | 359 |
| chrX  | 61378252  | 61378609  | 358 |

|       |           |           |     |
|-------|-----------|-----------|-----|
| chrX  | 60858179  | 60858536  | 358 |
| chrX  | 58807230  | 58807587  | 358 |
| chrX  | 35682218  | 35682575  | 358 |
| chrX  | 34155361  | 34155718  | 358 |
| chrX  | 20348572  | 20348929  | 358 |
| chrX  | 12416599  | 12416956  | 358 |
| chr9  | 87802778  | 87803135  | 358 |
| chr8  | 82096985  | 82097342  | 358 |
| chr8  | 78542894  | 78543251  | 358 |
| chr7  | 80922796  | 80923153  | 358 |
| chr6  | 116125916 | 116126273 | 358 |
| chr5  | 79794914  | 79795271  | 358 |
| chr4  | 69267719  | 69268076  | 358 |
| chr3  | 116492685 | 116493042 | 358 |
| chr29 | 31430198  | 31430555  | 358 |
| chr29 | 17459160  | 17459517  | 358 |
| chr28 | 46050851  | 46051208  | 358 |
| chr26 | 44899639  | 44899996  | 358 |
| chr25 | 37313152  | 37313509  | 358 |
| chr25 | 28640411  | 28640768  | 358 |
| chr24 | 60767135  | 60767492  | 358 |
| chr23 | 27279921  | 27280278  | 358 |
| chr23 | 11835072  | 11835429  | 358 |
| chr22 | 48669555  | 48669912  | 358 |
| chr22 | 30364590  | 30364947  | 358 |
| chr21 | 31196999  | 31197356  | 358 |
| chr19 | 17546657  | 17547014  | 358 |
| chr18 | 16438927  | 16439284  | 358 |
| chr17 | 45926135  | 45926492  | 358 |
| chr16 | 43626729  | 43627086  | 358 |
| chr16 | 41502054  | 41502411  | 358 |
| chr15 | 23866563  | 23866920  | 358 |
| chr13 | 80147845  | 80148202  | 358 |
| chr13 | 70050377  | 70050734  | 358 |
| chr13 | 35471333  | 35471690  | 358 |
| chr13 | 35023619  | 35023976  | 358 |
| chr12 | 82670751  | 82671108  | 358 |
| chr12 | 34513559  | 34513916  | 358 |
| chr12 | 9589442   | 9589799   | 358 |
| chr11 | 6049732   | 6050089   | 358 |
| chr11 | 1650064   | 1650421   | 358 |
| chr11 | 1612045   | 1612402   | 358 |
| chr1  | 151573000 | 151573357 | 358 |
| chr1  | 75103368  | 75103725  | 358 |
| chrX  | 59297768  | 59298124  | 357 |
| chrX  | 57054715  | 57055071  | 357 |
| chrX  | 54370621  | 54370977  | 357 |
| chrX  | 53440781  | 53441137  | 357 |
| chrX  | 50852212  | 50852568  | 357 |
| chrX  | 34798572  | 34798928  | 357 |

|       |           |           |     |
|-------|-----------|-----------|-----|
| chrX  | 33985165  | 33985521  | 357 |
| chrX  | 33071591  | 33071947  | 357 |
| chr9  | 91895214  | 91895570  | 357 |
| chr7  | 77105094  | 77105450  | 357 |
| chr7  | 51076322  | 51076678  | 357 |
| chr6  | 120346557 | 120346913 | 357 |
| chr5  | 122067461 | 122067817 | 357 |
| chr5  | 84251923  | 84252279  | 357 |
| chr4  | 52522561  | 52522917  | 357 |
| chr4  | 33761228  | 33761584  | 357 |
| chr3  | 117279052 | 117279408 | 357 |
| chr3  | 115709215 | 115709571 | 357 |
| chr3  | 16745157  | 16745513  | 357 |
| chr29 | 48842571  | 48842927  | 357 |
| chr29 | 38043664  | 38044020  | 357 |
| chr29 | 17655564  | 17655920  | 357 |
| chr25 | 43682356  | 43682712  | 357 |
| chr25 | 22575622  | 22575978  | 357 |
| chr23 | 15057846  | 15058202  | 357 |
| chr22 | 10747966  | 10748322  | 357 |
| chr21 | 27951928  | 27952284  | 357 |
| chr2  | 132178149 | 132178505 | 357 |
| chr2  | 92737612  | 92737968  | 357 |
| chr18 | 62026406  | 62026762  | 357 |
| chr18 | 16517620  | 16517976  | 357 |
| chr16 | 77337351  | 77337707  | 357 |
| chr15 | 29790405  | 29790761  | 357 |
| chr15 | 26721825  | 26722181  | 357 |
| chr13 | 66883437  | 66883793  | 357 |
| chr11 | 6962482   | 6962838   | 357 |
| chr10 | 28952496  | 28952852  | 357 |
| chrX  | 81004008  | 81004363  | 356 |
| chrX  | 78384856  | 78385211  | 356 |
| chrX  | 50632609  | 50632964  | 356 |
| chrX  | 21006931  | 21007286  | 356 |
| chrX  | 7727879   | 7728234   | 356 |
| chr9  | 105775367 | 105775722 | 356 |
| chr8  | 67027173  | 67027528  | 356 |
| chr8  | 44143872  | 44144227  | 356 |
| chr7  | 10742786  | 10743141  | 356 |
| chr5  | 62113846  | 62114201  | 356 |
| chr5  | 29926219  | 29926574  | 356 |
| chr3  | 123470518 | 123470873 | 356 |
| chr3  | 77667051  | 77667406  | 356 |
| chr29 | 47358373  | 47358728  | 356 |
| chr24 | 59092586  | 59092941  | 356 |
| chr24 | 41457752  | 41458107  | 356 |
| chr21 | 29536543  | 29536898  | 356 |
| chr20 | 1076273   | 1076628   | 356 |
| chr2  | 127787028 | 127787383 | 356 |



|       |           |           |     |
|-------|-----------|-----------|-----|
| chr19 | 61382487  | 61382842  | 356 |
| chr19 | 45555744  | 45556099  | 356 |
| chr19 | 38587590  | 38587945  | 356 |
| chr19 | 8099908   | 8100263   | 356 |
| chr18 | 23488684  | 23489039  | 356 |
| chr18 | 18455545  | 18455900  | 356 |
| chr17 | 73984903  | 73985258  | 356 |
| chr17 | 64916518  | 64916873  | 356 |
| chr16 | 77338281  | 77338636  | 356 |
| chr16 | 60340292  | 60340647  | 356 |
| chr15 | 83254104  | 83254459  | 356 |
| chr14 | 59426267  | 59426622  | 356 |
| chr13 | 67078099  | 67078454  | 356 |
| chr12 | 70969280  | 70969635  | 356 |
| chr12 | 14924771  | 14925126  | 356 |
| chr11 | 106876469 | 106876824 | 356 |
| chr10 | 66815535  | 66815890  | 356 |
| chrX  | 78471839  | 78472193  | 355 |
| chrX  | 75747599  | 75747953  | 355 |
| chrX  | 9544390   | 9544744   | 355 |
| chr8  | 99809769  | 99810123  | 355 |
| chr8  | 59312171  | 59312525  | 355 |
| chr6  | 118297418 | 118297772 | 355 |
| chr5  | 113096377 | 113096731 | 355 |
| chr4  | 26382155  | 26382509  | 355 |
| chr3  | 85364321  | 85364675  | 355 |
| chr29 | 51701836  | 51702190  | 355 |
| chr29 | 49263654  | 49264008  | 355 |
| chr26 | 48364640  | 48364994  | 355 |
| chr25 | 43552224  | 43552578  | 355 |
| chr25 | 33632400  | 33632754  | 355 |
| chr25 | 31393848  | 31394202  | 355 |
| chr25 | 12477346  | 12477700  | 355 |
| chr23 | 38502697  | 38503051  | 355 |
| chr22 | 30192478  | 30192832  | 355 |
| chr21 | 25571147  | 25571501  | 355 |
| chr21 | 2058486   | 2058840   | 355 |
| chr19 | 61737802  | 61738156  | 355 |
| chr19 | 38323863  | 38324217  | 355 |
| chr18 | 64656653  | 64657007  | 355 |
| chr18 | 56882514  | 56882868  | 355 |
| chr17 | 62380401  | 62380755  | 355 |
| chr17 | 49716386  | 49716740  | 355 |
| chr14 | 30807540  | 30807894  | 355 |
| chr14 | 6747965   | 6748319   | 355 |
| chr13 | 60775812  | 60776166  | 355 |
| chr13 | 59816585  | 59816939  | 355 |
| chr13 | 36211003  | 36211357  | 355 |
| chr12 | 34012452  | 34012806  | 355 |
| chr11 | 84961185  | 84961539  | 355 |

|       |           |           |     |
|-------|-----------|-----------|-----|
| chr1  | 82913163  | 82913517  | 355 |
| chrX  | 63294931  | 63295284  | 354 |
| chrX  | 50271788  | 50272141  | 354 |
| chrX  | 49613769  | 49614122  | 354 |
| chrX  | 47651278  | 47651631  | 354 |
| chrX  | 45335266  | 45335619  | 354 |
| chrX  | 21564839  | 21565192  | 354 |
| chrX  | 20472118  | 20472471  | 354 |
| chrX  | 12218071  | 12218424  | 354 |
| chr9  | 74197418  | 74197771  | 354 |
| chr5  | 113947642 | 113947995 | 354 |
| chr5  | 60894038  | 60894391  | 354 |
| chr5  | 29244268  | 29244621  | 354 |
| chr4  | 80028908  | 80029261  | 354 |
| chr4  | 72738491  | 72738844  | 354 |
| chr3  | 87651566  | 87651919  | 354 |
| chr28 | 12324600  | 12324953  | 354 |
| chr26 | 14929155  | 14929508  | 354 |
| chr23 | 32703229  | 32703582  | 354 |
| chr23 | 17498422  | 17498775  | 354 |
| chr23 | 8410140   | 8410493   | 354 |
| chr22 | 14922546  | 14922899  | 354 |
| chr21 | 68031347  | 68031700  | 354 |
| chr21 | 30312110  | 30312463  | 354 |
| chr19 | 54297755  | 54298108  | 354 |
| chr18 | 51719985  | 51720338  | 354 |
| chr16 | 60361319  | 60361672  | 354 |
| chr16 | 46638879  | 46639232  | 354 |
| chr16 | 38836790  | 38837143  | 354 |
| chr16 | 32742905  | 32743258  | 354 |
| chr14 | 54260654  | 54261007  | 354 |
| chr14 | 1977165   | 1977518   | 354 |
| chr13 | 41163589  | 41163942  | 354 |
| chr10 | 86165779  | 86166132  | 354 |
| chr10 | 11001503  | 11001856  | 354 |
| chr1  | 99825386  | 99825739  | 354 |
| chrX  | 65064628  | 65064980  | 353 |
| chrX  | 63281296  | 63281648  | 353 |
| chrX  | 62823280  | 62823632  | 353 |
| chrX  | 61247195  | 61247547  | 353 |
| chrX  | 56928670  | 56929022  | 353 |
| chrX  | 50286664  | 50287016  | 353 |
| chrX  | 40701991  | 40702343  | 353 |
| chrX  | 38474230  | 38474582  | 353 |
| chrX  | 38011855  | 38012207  | 353 |
| chrX  | 5860792   | 5861144   | 353 |
| chr9  | 77722956  | 77723308  | 353 |
| chr9  | 52288584  | 52288936  | 353 |
| chr8  | 7770698   | 7771050   | 353 |
| chr5  | 29958080  | 29958432  | 353 |

|       |           |           |     |
|-------|-----------|-----------|-----|
| chr3  | 86198820  | 86199172  | 353 |
| chr3  | 8983362   | 8983714   | 353 |
| chr28 | 42107760  | 42108112  | 353 |
| chr27 | 45434600  | 45434952  | 353 |
| chr27 | 34699131  | 34699483  | 353 |
| chr27 | 17457672  | 17458024  | 353 |
| chr26 | 22211959  | 22212311  | 353 |
| chr25 | 37810803  | 37811155  | 353 |
| chr24 | 40825062  | 40825414  | 353 |
| chr23 | 11017036  | 11017388  | 353 |
| chr23 | 10521067  | 10521419  | 353 |
| chr23 | 7255106   | 7255458   | 353 |
| chr21 | 45201858  | 45202210  | 353 |
| chr21 | 23252730  | 23253082  | 353 |
| chr21 | 19685954  | 19686306  | 353 |
| chr2  | 94778668  | 94779020  | 353 |
| chr19 | 45557835  | 45558187  | 353 |
| chr19 | 29720022  | 29720374  | 353 |
| chr18 | 48336590  | 48336942  | 353 |
| chr18 | 12183315  | 12183667  | 353 |
| chr18 | 1505069   | 1505421   | 353 |
| chr17 | 72336418  | 72336770  | 353 |
| chr16 | 74043464  | 74043816  | 353 |
| chr16 | 60821639  | 60821991  | 353 |
| chr16 | 47935136  | 47935488  | 353 |
| chr16 | 47470255  | 47470607  | 353 |
| chr15 | 75539774  | 75540126  | 353 |
| chr14 | 34583971  | 34584323  | 353 |
| chr13 | 39696455  | 39696807  | 353 |
| chr13 | 25503190  | 25503542  | 353 |
| chr13 | 13597200  | 13597552  | 353 |
| chr10 | 90158074  | 90158426  | 353 |
| chr10 | 19584592  | 19584944  | 353 |
| chr1  | 137997901 | 137998253 | 353 |
| chr1  | 69350778  | 69351130  | 353 |
| chrX  | 72501539  | 72501890  | 352 |
| chrX  | 67063828  | 67064179  | 352 |
| chrX  | 54475856  | 54476207  | 352 |
| chrX  | 18502169  | 18502520  | 352 |
| chrX  | 13970726  | 13971077  | 352 |
| chrX  | 3923779   | 3924130   | 352 |
| chr9  | 106777000 | 106777351 | 352 |
| chr9  | 24603947  | 24604298  | 352 |
| chr8  | 74297513  | 74297864  | 352 |
| chr6  | 102281947 | 102282298 | 352 |
| chr5  | 32868838  | 32869189  | 352 |
| chr4  | 123251671 | 123252022 | 352 |
| chr3  | 119642872 | 119643223 | 352 |
| chr29 | 44589372  | 44589723  | 352 |
| chr29 | 33773190  | 33773541  | 352 |

|       |           |           |     |
|-------|-----------|-----------|-----|
| chr27 | 47610726  | 47611077  | 352 |
| chr24 | 48691902  | 48692253  | 352 |
| chr24 | 41733748  | 41734099  | 352 |
| chr23 | 49790247  | 49790598  | 352 |
| chr23 | 42363293  | 42363644  | 352 |
| chr23 | 11076953  | 11077304  | 352 |
| chr20 | 5219209   | 5219560   | 352 |
| chr19 | 46110893  | 46111244  | 352 |
| chr19 | 44968506  | 44968857  | 352 |
| chr19 | 33847643  | 33847994  | 352 |
| chr19 | 24199777  | 24200128  | 352 |
| chr18 | 65891054  | 65891405  | 352 |
| chr18 | 64298969  | 64299320  | 352 |
| chr18 | 11141335  | 11141686  | 352 |
| chr18 | 362914    | 363265    | 352 |
| chr17 | 66742846  | 66743197  | 352 |
| chr17 | 64115450  | 64115801  | 352 |
| chr17 | 56126728  | 56127079  | 352 |
| chr17 | 47449255  | 47449606  | 352 |
| chr16 | 74047615  | 74047966  | 352 |
| chr16 | 69825690  | 69826041  | 352 |
| chr15 | 33499100  | 33499451  | 352 |
| chr15 | 25318192  | 25318543  | 352 |
| chr13 | 61781066  | 61781417  | 352 |
| chr13 | 41287625  | 41287976  | 352 |
| chr12 | 82581912  | 82582263  | 352 |
| chr12 | 69015090  | 69015441  | 352 |
| chr11 | 74210403  | 74210754  | 352 |
| chr11 | 70854690  | 70855041  | 352 |
| chr10 | 79254992  | 79255343  | 352 |
| chr10 | 21377403  | 21377754  | 352 |
| chr10 | 20965489  | 20965840  | 352 |
| chrX  | 79017862  | 79018212  | 351 |
| chrX  | 74315952  | 74316302  | 351 |
| chrX  | 65140579  | 65140929  | 351 |
| chrX  | 62233628  | 62233978  | 351 |
| chrX  | 57146994  | 57147344  | 351 |
| chrX  | 47463469  | 47463819  | 351 |
| chrX  | 34559232  | 34559582  | 351 |
| chrX  | 13611712  | 13612062  | 351 |
| chrX  | 9816697   | 9817047   | 351 |
| chr5  | 72550756  | 72551106  | 351 |
| chr3  | 121128228 | 121128578 | 351 |
| chr3  | 105552695 | 105553045 | 351 |
| chr3  | 105336019 | 105336369 | 351 |
| chr29 | 35107261  | 35107611  | 351 |
| chr26 | 38472645  | 38472995  | 351 |
| chr26 | 18487684  | 18488034  | 351 |
| chr25 | 35515284  | 35515634  | 351 |
| chr25 | 4657398   | 4657748   | 351 |

|       |               |           |     |
|-------|---------------|-----------|-----|
| chr24 | 59417327      | 59417677  | 351 |
| chr24 | 43692630      | 43692980  | 351 |
| chr24 | 1207598       | 1207948   | 351 |
| chr22 | 13536044      | 13536394  | 351 |
| chr21 | 69094808      | 69095158  | 351 |
| chr20 | 41251064      | 41251414  | 351 |
| chr2  | 139209899     | 139210249 | 351 |
| chr2  | 134672993     | 134673343 | 351 |
| chr2  | 23186717      | 23187067  | 351 |
| chr19 | 24689665      | 24690015  | 351 |
| chr18 | 22023095      | 22023445  | 351 |
| chr17 | 70432001      | 70432351  | 351 |
| chr17 | 57632052      | 57632402  | 351 |
| chr16 | 73802676      | 73803026  | 351 |
| chr16 | 73347757      | 73348107  | 351 |
| chr16 | 50348582      | 50348932  | 351 |
| chr15 | 36253454      | 36253804  | 351 |
| chr15 | 32254970      | 32255320  | 351 |
| chr13 | 78421812      | 78422162  | 351 |
| chr13 | 75645758      | 75646108  | 351 |
| chr12 | 9262200       | 9262550   | 351 |
| chr11 | 96133198      | 96133548  | 351 |
| chr10 | 90436405      | 90436755  | 351 |
| chr10 | 72157438      | 72157788  | 351 |
| chr10 | 19576157      | 19576507  | 351 |
| chr1  | 152633731     | 152634081 | 351 |
| chr1  | 101592829     | 101593179 | 351 |
| chrX  | 78622339      | 78622688  | 350 |
| chrX  | 71852771      | 71853120  | 350 |
| chrX  | 46496291      | 46496640  | 350 |
| chrX  | 34723914      | 34724263  | 350 |
| chrX  | 20140628      | 20140977  | 350 |
| chrX  | 9267669       | 9268018   | 350 |
| chrX  | 2432747       | 2433096   | 350 |
| chrX  | 360793 361142 | 350       |     |
| chr9  | 45937824      | 45938173  | 350 |
| chr8  | 81400338      | 81400687  | 350 |
| chr8  | 7621334       | 7621683   | 350 |
| chr7  | 38373081      | 38373430  | 350 |
| chr7  | 5241487       | 5241836   | 350 |
| chr6  | 109908268     | 109908617 | 350 |
| chr5  | 122639891     | 122640240 | 350 |
| chr4  | 121440443     | 121440792 | 350 |
| chr3  | 126210495     | 126210844 | 350 |
| chr3  | 123465845     | 123466194 | 350 |
| chr29 | 49508995      | 49509344  | 350 |
| chr29 | 37113821      | 37114170  | 350 |
| chr29 | 9076778       | 9077127   | 350 |
| chr28 | 33656020      | 33656369  | 350 |
| chr27 | 15367641      | 15367990  | 350 |

|       |           |           |     |
|-------|-----------|-----------|-----|
| chr21 | 27349640  | 27349989  | 350 |
| chr19 | 14583176  | 14583525  | 350 |
| chr18 | 56047135  | 56047484  | 350 |
| chr18 | 11836983  | 11837332  | 350 |
| chr15 | 76424177  | 76424526  | 350 |
| chr15 | 52287436  | 52287785  | 350 |
| chr14 | 22104594  | 22104943  | 350 |
| chr13 | 63491094  | 63491443  | 350 |
| chr13 | 59694742  | 59695091  | 350 |
| chr13 | 35043425  | 35043774  | 350 |
| chr13 | 29294232  | 29294581  | 350 |
| chr13 | 2521034   | 2521383   | 350 |
| chr12 | 33980135  | 33980484  | 350 |
| chr11 | 99776420  | 99776769  | 350 |
| chr11 | 70919681  | 70920030  | 350 |
| chr11 | 1381944   | 1382293   | 350 |
| chr10 | 90152077  | 90152426  | 350 |
| chr10 | 86159754  | 86160103  | 350 |
| chr10 | 74923143  | 74923492  | 350 |
| chr10 | 19634699  | 19635048  | 350 |
| chr10 | 6670572   | 6670921   | 350 |
| chr1  | 145749219 | 145749568 | 350 |
| chrX  | 77998921  | 77999269  | 349 |
| chrX  | 62756901  | 62757249  | 349 |
| chrX  | 50899162  | 50899510  | 349 |
| chrX  | 47635496  | 47635844  | 349 |
| chrX  | 38374164  | 38374512  | 349 |
| chrX  | 35544663  | 35545011  | 349 |
| chrX  | 7416804   | 7417152   | 349 |
| chrX  | 6434124   | 6434472   | 349 |
| chr8  | 111892648 | 111892996 | 349 |
| chr8  | 10481784  | 10482132  | 349 |
| chr7  | 18410520  | 18410868  | 349 |
| chr5  | 119400441 | 119400789 | 349 |
| chr28 | 33886016  | 33886364  | 349 |
| chr26 | 41010385  | 41010733  | 349 |
| chr25 | 23559339  | 23559687  | 349 |
| chr24 | 43616006  | 43616354  | 349 |
| chr22 | 39871665  | 39872013  | 349 |
| chr17 | 63197265  | 63197613  | 349 |
| chr16 | 77500917  | 77501265  | 349 |
| chr16 | 46479827  | 46480175  | 349 |
| chr16 | 2437312   | 2437660   | 349 |
| chr13 | 58598345  | 58598693  | 349 |
| chr13 | 57376795  | 57377143  | 349 |
| chr11 | 8871354   | 8871702   | 349 |
| chr10 | 17395173  | 17395521  | 349 |
| chrX  | 77748761  | 77749108  | 348 |
| chrX  | 63248715  | 63249062  | 348 |
| chrX  | 45186280  | 45186627  | 348 |

|       |           |           |     |
|-------|-----------|-----------|-----|
| chrX  | 37610508  | 37610855  | 348 |
| chrX  | 32655971  | 32656318  | 348 |
| chrX  | 32011844  | 32012191  | 348 |
| chrX  | 20491086  | 20491433  | 348 |
| chrX  | 13942032  | 13942379  | 348 |
| chr8  | 79083606  | 79083953  | 348 |
| chr8  | 27070491  | 27070838  | 348 |
| chr7  | 70519787  | 70520134  | 348 |
| chr7  | 69525983  | 69526330  | 348 |
| chr7  | 65600513  | 65600860  | 348 |
| chr7  | 38564801  | 38565148  | 348 |
| chr6  | 119362568 | 119362915 | 348 |
| chr5  | 122283783 | 122284130 | 348 |
| chr5  | 121627431 | 121627778 | 348 |
| chr5  | 113239945 | 113240292 | 348 |
| chr5  | 111241660 | 111242007 | 348 |
| chr5  | 29717178  | 29717525  | 348 |
| chr29 | 36304686  | 36305033  | 348 |
| chr29 | 31476077  | 31476424  | 348 |
| chr28 | 35244766  | 35245113  | 348 |
| chr28 | 26466051  | 26466398  | 348 |
| chr26 | 11336723  | 11337070  | 348 |
| chr25 | 31828205  | 31828552  | 348 |
| chr25 | 18649401  | 18649748  | 348 |
| chr24 | 58650688  | 58651035  | 348 |
| chr23 | 27838731  | 27839078  | 348 |
| chr20 | 61820263  | 61820610  | 348 |
| chr2  | 140616727 | 140617074 | 348 |
| chr19 | 12318779  | 12319126  | 348 |
| chr19 | 10805820  | 10806167  | 348 |
| chr18 | 54630363  | 54630710  | 348 |
| chr18 | 42618976  | 42619323  | 348 |
| chr18 | 17995039  | 17995386  | 348 |
| chr18 | 5061598   | 5061945   | 348 |
| chr17 | 56074074  | 56074421  | 348 |
| chr15 | 42678328  | 42678675  | 348 |
| chr15 | 28828167  | 28828514  | 348 |
| chr13 | 80747582  | 80747929  | 348 |
| chr13 | 77769589  | 77769936  | 348 |
| chr12 | 31998221  | 31998568  | 348 |
| chr11 | 109549010 | 109549357 | 348 |
| chr11 | 100255936 | 100256283 | 348 |
| chr11 | 47075108  | 47075455  | 348 |
| chr11 | 11707850  | 11708197  | 348 |
| chrX  | 65891837  | 65892183  | 347 |
| chrX  | 65806832  | 65807178  | 347 |
| chrX  | 65616421  | 65616767  | 347 |
| chrX  | 60264004  | 60264350  | 347 |
| chrX  | 57067284  | 57067630  | 347 |
| chrX  | 34037194  | 34037540  | 347 |

|       |               |           |     |
|-------|---------------|-----------|-----|
| chrX  | 21611943      | 21612289  | 347 |
| chrX  | 17124936      | 17125282  | 347 |
| chrX  | 10600989      | 10601335  | 347 |
| chrX  | 1482295       | 1482641   | 347 |
| chr8  | 89423049      | 89423395  | 347 |
| chr7  | 71313748      | 71314094  | 347 |
| chr7  | 52337628      | 52337974  | 347 |
| chr7  | 42775477      | 42775823  | 347 |
| chr5  | 112941150     | 112941496 | 347 |
| chr5  | 75090875      | 75091221  | 347 |
| chr5  | 61049415      | 61049761  | 347 |
| chr4  | 66695573      | 66695919  | 347 |
| chr28 | 27112497      | 27112843  | 347 |
| chr27 | 26619390      | 26619736  | 347 |
| chr27 | 665293 665639 | 347       |     |
| chr26 | 44445642      | 44445988  | 347 |
| chr26 | 19854558      | 19854904  | 347 |
| chr24 | 44265245      | 44265591  | 347 |
| chr24 | 35137824      | 35138170  | 347 |
| chr22 | 48666344      | 48666690  | 347 |
| chr21 | 60694718      | 60695064  | 347 |
| chr20 | 526749 527095 | 347       |     |
| chr19 | 54429262      | 54429608  | 347 |
| chr19 | 42048453      | 42048799  | 347 |
| chr18 | 23387244      | 23387590  | 347 |
| chr17 | 59029426      | 59029772  | 347 |
| chr13 | 35964608      | 35964954  | 347 |
| chr13 | 34819623      | 34819969  | 347 |
| chr12 | 31270946      | 31271292  | 347 |
| chr11 | 83222415      | 83222761  | 347 |
| chr11 | 31178046      | 31178392  | 347 |
| chr11 | 2566360       | 2566706   | 347 |
| chrX  | 72380016      | 72380361  | 346 |
| chrX  | 65419244      | 65419589  | 346 |
| chrX  | 65244431      | 65244776  | 346 |
| chrX  | 64514579      | 64514924  | 346 |
| chrX  | 62976539      | 62976884  | 346 |
| chrX  | 50626063      | 50626408  | 346 |
| chrX  | 37612200      | 37612545  | 346 |
| chrX  | 31249908      | 31250253  | 346 |
| chrX  | 31062062      | 31062407  | 346 |
| chrX  | 21702359      | 21702704  | 346 |
| chrX  | 21531658      | 21532003  | 346 |
| chrX  | 13667994      | 13668339  | 346 |
| chrX  | 8738210       | 8738555   | 346 |
| chr8  | 87338954      | 87339299  | 346 |
| chr8  | 62044958      | 62045303  | 346 |
| chr8  | 7612225       | 7612570   | 346 |
| chr7  | 5052559       | 5052904   | 346 |
| chr5  | 122657637     | 122657982 | 346 |



|       |               |           |     |
|-------|---------------|-----------|-----|
| chr5  | 117521350     | 117521695 | 346 |
| chr5  | 114985119     | 114985464 | 346 |
| chr5  | 89925742      | 89926087  | 346 |
| chr5  | 60477618      | 60477963  | 346 |
| chr3  | 105125443     | 105125788 | 346 |
| chr3  | 105117550     | 105117895 | 346 |
| chr3  | 23665725      | 23666070  | 346 |
| chr3  | 22619865      | 22620210  | 346 |
| chr3  | 20053677      | 20054022  | 346 |
| chr3  | 17448321      | 17448666  | 346 |
| chr29 | 34910855      | 34911200  | 346 |
| chr28 | 33525782      | 33526127  | 346 |
| chr27 | 47535146      | 47535491  | 346 |
| chr27 | 33462574      | 33462919  | 346 |
| chr27 | 26355895      | 26356240  | 346 |
| chr26 | 32056001      | 32056346  | 346 |
| chr25 | 33792861      | 33793206  | 346 |
| chr25 | 10602818      | 10603163  | 346 |
| chr25 | 3080875       | 3081220   | 346 |
| chr24 | 59364267      | 59364612  | 346 |
| chr24 | 51576313      | 51576658  | 346 |
| chr24 | 350742 351087 | 346       |     |
| chr23 | 13679233      | 13679578  | 346 |
| chr22 | 60171749      | 60172094  | 346 |
| chr22 | 60017550      | 60017895  | 346 |
| chr20 | 66150237      | 66150582  | 346 |
| chr2  | 118284380     | 118284725 | 346 |
| chr17 | 68022426      | 68022771  | 346 |
| chr16 | 47145640      | 47145985  | 346 |
| chr16 | 45124328      | 45124673  | 346 |
| chr16 | 44700506      | 44700851  | 346 |
| chr15 | 17340569      | 17340914  | 346 |
| chr15 | 15908725      | 15909070  | 346 |
| chr12 | 11263069      | 11263414  | 346 |
| chr11 | 31096295      | 31096640  | 346 |
| chr10 | 23108467      | 23108812  | 346 |
| chrX  | 62290678      | 62291022  | 345 |
| chrX  | 56754016      | 56754360  | 345 |
| chrX  | 49808980      | 49809324  | 345 |
| chrX  | 38323905      | 38324249  | 345 |
| chrX  | 21272594      | 21272938  | 345 |
| chrX  | 6986440       | 6986784   | 345 |
| chr8  | 61852343      | 61852687  | 345 |
| chr8  | 28510667      | 28511011  | 345 |
| chr7  | 49159075      | 49159419  | 345 |
| chr6  | 120741513     | 120741857 | 345 |
| chr4  | 91269388      | 91269732  | 345 |
| chr4  | 78925745      | 78926089  | 345 |
| chr3  | 126930621     | 126930965 | 345 |
| chr3  | 116318041     | 116318385 | 345 |

|       |           |           |     |
|-------|-----------|-----------|-----|
| chr3  | 105473151 | 105473495 | 345 |
| chr3  | 35565010  | 35565354  | 345 |
| chr3  | 30412714  | 30413058  | 345 |
| chr29 | 34243305  | 34243649  | 345 |
| chr28 | 42199995  | 42200339  | 345 |
| chr28 | 4278740   | 4279084   | 345 |
| chr27 | 39115696  | 39116040  | 345 |
| chr26 | 34988817  | 34989161  | 345 |
| chr26 | 31503605  | 31503949  | 345 |
| chr25 | 34568645  | 34568989  | 345 |
| chr25 | 6794100   | 6794444   | 345 |
| chr24 | 60764180  | 60764524  | 345 |
| chr24 | 50877926  | 50878270  | 345 |
| chr24 | 40453018  | 40453362  | 345 |
| chr23 | 31144831  | 31145175  | 345 |
| chr22 | 32627215  | 32627559  | 345 |
| chr20 | 25755891  | 25756235  | 345 |
| chr2  | 127844673 | 127845017 | 345 |
| chr19 | 37815471  | 37815815  | 345 |
| chr18 | 50663391  | 50663735  | 345 |
| chr17 | 59154802  | 59155146  | 345 |
| chr16 | 42148498  | 42148842  | 345 |
| chr16 | 39473108  | 39473452  | 345 |
| chr15 | 22251309  | 22251653  | 345 |
| chr12 | 58679721  | 58680065  | 345 |
| chr12 | 34318306  | 34318650  | 345 |
| chr12 | 31532561  | 31532905  | 345 |
| chr11 | 34846464  | 34846808  | 345 |
| chr11 | 20280587  | 20280931  | 345 |
| chr10 | 52233163  | 52233507  | 345 |
| chr1  | 109487573 | 109487917 | 345 |
| chrX  | 78632927  | 78633270  | 344 |
| chrX  | 78343755  | 78344098  | 344 |
| chrX  | 75942298  | 75942641  | 344 |
| chrX  | 72396006  | 72396349  | 344 |
| chrX  | 70082386  | 70082729  | 344 |
| chrX  | 64750739  | 64751082  | 344 |
| chrX  | 61361878  | 61362221  | 344 |
| chrX  | 57188069  | 57188412  | 344 |
| chrX  | 50856982  | 50857325  | 344 |
| chrX  | 50042946  | 50043289  | 344 |
| chrX  | 39561215  | 39561558  | 344 |
| chrX  | 36834218  | 36834561  | 344 |
| chrX  | 31248811  | 31249154  | 344 |
| chrX  | 31074522  | 31074865  | 344 |
| chrX  | 21301984  | 21302327  | 344 |
| chrX  | 20547450  | 20547793  | 344 |
| chrX  | 20211386  | 20211729  | 344 |
| chrX  | 11495498  | 11495841  | 344 |
| chrX  | 1990321   | 1990664   | 344 |

|       |           |           |     |
|-------|-----------|-----------|-----|
| chr9  | 106473756 | 106474099 | 344 |
| chr9  | 98127907  | 98128250  | 344 |
| chr7  | 19199564  | 19199907  | 344 |
| chr5  | 111242597 | 111242940 | 344 |
| chr5  | 110705561 | 110705904 | 344 |
| chr5  | 78868094  | 78868437  | 344 |
| chr5  | 52961641  | 52961984  | 344 |
| chr5  | 37124729  | 37125072  | 344 |
| chr4  | 28588763  | 28589106  | 344 |
| chr3  | 46954492  | 46954835  | 344 |
| chr27 | 47610117  | 47610460  | 344 |
| chr26 | 48678452  | 48678795  | 344 |
| chr26 | 47983092  | 47983435  | 344 |
| chr26 | 41547792  | 41548135  | 344 |
| chr25 | 35509582  | 35509925  | 344 |
| chr25 | 33250899  | 33251242  | 344 |
| chr24 | 40216830  | 40217173  | 344 |
| chr23 | 18770455  | 18770798  | 344 |
| chr22 | 12345962  | 12346305  | 344 |
| chr22 | 11335948  | 11336291  | 344 |
| chr21 | 66687972  | 66688315  | 344 |
| chr21 | 58560756  | 58561099  | 344 |
| chr21 | 47670817  | 47671160  | 344 |
| chr20 | 6636487   | 6636830   | 344 |
| chr2  | 94198799  | 94199142  | 344 |
| chr18 | 56553810  | 56554153  | 344 |
| chr18 | 7933085   | 7933428   | 344 |
| chr17 | 7821423   | 7821766   | 344 |
| chr16 | 59409169  | 59409512  | 344 |
| chr13 | 80698696  | 80699039  | 344 |
| chr13 | 57484065  | 57484408  | 344 |
| chr13 | 53967897  | 53968240  | 344 |
| chr13 | 41617266  | 41617609  | 344 |
| chr11 | 109703754 | 109704097 | 344 |
| chr11 | 81408756  | 81409099  | 344 |
| chr10 | 86179441  | 86179784  | 344 |
| chr10 | 7185397   | 7185740   | 344 |
| chr1  | 158444100 | 158444443 | 344 |
| chr1  | 151347548 | 151347891 | 344 |
| chrX  | 80233077  | 80233419  | 343 |
| chrX  | 76824378  | 76824720  | 343 |
| chrX  | 70547093  | 70547435  | 343 |
| chrX  | 65903177  | 65903519  | 343 |
| chrX  | 62623945  | 62624287  | 343 |
| chrX  | 61043156  | 61043498  | 343 |
| chrX  | 59345971  | 59346313  | 343 |
| chrX  | 45019992  | 45020334  | 343 |
| chrX  | 13747711  | 13748053  | 343 |
| chrX  | 12013555  | 12013897  | 343 |
| chrX  | 10281857  | 10282199  | 343 |

|       |           |           |     |
|-------|-----------|-----------|-----|
| chr9  | 74209599  | 74209941  | 343 |
| chr9  | 65601454  | 65601796  | 343 |
| chr7  | 51395075  | 51395417  | 343 |
| chr6  | 107046992 | 107047334 | 343 |
| chr3  | 116069506 | 116069848 | 343 |
| chr29 | 44133082  | 44133424  | 343 |
| chr28 | 26761980  | 26762322  | 343 |
| chr27 | 37052264  | 37052606  | 343 |
| chr26 | 17156018  | 17156360  | 343 |
| chr24 | 22913866  | 22914208  | 343 |
| chr23 | 19388537  | 19388879  | 343 |
| chr23 | 16524929  | 16525271  | 343 |
| chr22 | 59874763  | 59875105  | 343 |
| chr21 | 64357216  | 64357558  | 343 |
| chr2  | 129889483 | 129889825 | 343 |
| chr2  | 126699623 | 126699965 | 343 |
| chr18 | 49110377  | 49110719  | 343 |
| chr18 | 47211279  | 47211621  | 343 |
| chr18 | 37022691  | 37023033  | 343 |
| chr17 | 55874013  | 55874355  | 343 |
| chr16 | 75927669  | 75928011  | 343 |
| chr15 | 23744850  | 23745192  | 343 |
| chr13 | 14943356  | 14943698  | 343 |
| chr12 | 74408929  | 74409271  | 343 |
| chr12 | 68172864  | 68173206  | 343 |
| chr11 | 103751933 | 103752275 | 343 |
| chr11 | 87908497  | 87908839  | 343 |
| chr11 | 84965210  | 84965552  | 343 |
| chr1  | 154430953 | 154431295 | 343 |
| chrX  | 79440431  | 79440772  | 342 |
| chrX  | 73004860  | 73005201  | 342 |
| chrX  | 72612264  | 72612605  | 342 |
| chrX  | 58777049  | 58777390  | 342 |
| chrX  | 35187236  | 35187577  | 342 |
| chrX  | 34556466  | 34556807  | 342 |
| chrX  | 30564883  | 30565224  | 342 |
| chrX  | 24426530  | 24426871  | 342 |
| chrX  | 19749061  | 19749402  | 342 |
| chrX  | 19396913  | 19397254  | 342 |
| chrX  | 2630045   | 2630386   | 342 |
| chrX  | 2624486   | 2624827   | 342 |
| chr9  | 106834907 | 106835248 | 342 |
| chr8  | 57673271  | 57673612  | 342 |
| chr8  | 9295662   | 9296003   | 342 |
| chr7  | 50382716  | 50383057  | 342 |
| chr6  | 102278123 | 102278464 | 342 |
| chr5  | 121239251 | 121239592 | 342 |
| chr5  | 28701623  | 28701964  | 342 |
| chr3  | 115991338 | 115991679 | 342 |
| chr3  | 44908176  | 44908517  | 342 |

|       |           |           |     |
|-------|-----------|-----------|-----|
| chr29 | 34874980  | 34875321  | 342 |
| chr27 | 34644624  | 34644965  | 342 |
| chr27 | 34345208  | 34345549  | 342 |
| chr25 | 37959754  | 37960095  | 342 |
| chr24 | 61112506  | 61112847  | 342 |
| chr24 | 60834684  | 60835025  | 342 |
| chr24 | 1006022   | 1006363   | 342 |
| chr22 | 50594259  | 50594600  | 342 |
| chr20 | 15475718  | 15476059  | 342 |
| chr20 | 6167825   | 6168166   | 342 |
| chr19 | 15133912  | 15134253  | 342 |
| chr19 | 13548657  | 13548998  | 342 |
| chr18 | 56186695  | 56187036  | 342 |
| chr18 | 43365477  | 43365818  | 342 |
| chr18 | 34886853  | 34887194  | 342 |
| chr18 | 26122708  | 26123049  | 342 |
| chr16 | 44692082  | 44692423  | 342 |
| chr16 | 40919530  | 40919871  | 342 |
| chr15 | 32650252  | 32650593  | 342 |
| chr15 | 29151018  | 29151359  | 342 |
| chr15 | 25261623  | 25261964  | 342 |
| chr15 | 20655389  | 20655730  | 342 |
| chr13 | 70282216  | 70282557  | 342 |
| chr13 | 55375445  | 55375786  | 342 |
| chr13 | 40906759  | 40907100  | 342 |
| chr12 | 34273575  | 34273916  | 342 |
| chr12 | 33982942  | 33983283  | 342 |
| chr11 | 91644271  | 91644612  | 342 |
| chr11 | 23189664  | 23190005  | 342 |
| chr10 | 93423866  | 93424207  | 342 |
| chr1  | 68514469  | 68514810  | 342 |
| chrX  | 87670451  | 87670791  | 341 |
| chrX  | 80717690  | 80718030  | 341 |
| chrX  | 77114595  | 77114935  | 341 |
| chrX  | 56904821  | 56905161  | 341 |
| chrX  | 56164661  | 56165001  | 341 |
| chrX  | 44676618  | 44676958  | 341 |
| chrX  | 37615812  | 37616152  | 341 |
| chrX  | 36694938  | 36695278  | 341 |
| chrX  | 36131237  | 36131577  | 341 |
| chrX  | 19079723  | 19080063  | 341 |
| chrX  | 11470888  | 11471228  | 341 |
| chrX  | 8047845   | 8048185   | 341 |
| chrX  | 4309826   | 4310166   | 341 |
| chr9  | 90606151  | 90606491  | 341 |
| chr9  | 45430274  | 45430614  | 341 |
| chr8  | 59308488  | 59308828  | 341 |
| chr7  | 5450814   | 5451154   | 341 |
| chr6  | 121692591 | 121692931 | 341 |
| chr6  | 46449426  | 46449766  | 341 |

|       |           |           |     |
|-------|-----------|-----------|-----|
| chr5  | 10193143  | 10193483  | 341 |
| chr4  | 98473785  | 98474125  | 341 |
| chr3  | 124492210 | 124492550 | 341 |
| chr3  | 114796647 | 114796987 | 341 |
| chr3  | 87537715  | 87538055  | 341 |
| chr3  | 13626370  | 13626710  | 341 |
| chr29 | 51848691  | 51849031  | 341 |
| chr29 | 5568792   | 5569132   | 341 |
| chr26 | 41813434  | 41813774  | 341 |
| chr26 | 39651265  | 39651605  | 341 |
| chr26 | 28146514  | 28146854  | 341 |
| chr25 | 29059875  | 29060215  | 341 |
| chr24 | 43601535  | 43601875  | 341 |
| chr24 | 34030939  | 34031279  | 341 |
| chr21 | 66467757  | 66468097  | 341 |
| chr21 | 11885911  | 11886251  | 341 |
| chr2  | 140758042 | 140758382 | 341 |
| chr2  | 100037475 | 100037815 | 341 |
| chr18 | 52788386  | 52788726  | 341 |
| chr14 | 54195133  | 54195473  | 341 |
| chr13 | 77659328  | 77659668  | 341 |
| chr13 | 76169629  | 76169969  | 341 |
| chr13 | 56349629  | 56349969  | 341 |
| chr13 | 54989912  | 54990252  | 341 |
| chr13 | 6948815   | 6949155   | 341 |
| chr12 | 83800179  | 83800519  | 341 |
| chr12 | 74406163  | 74406503  | 341 |
| chr11 | 99811381  | 99811721  | 341 |
| chr11 | 1755222   | 1755562   | 341 |
| chr10 | 21817858  | 21818198  | 341 |
| chr1  | 74610023  | 74610363  | 341 |
| chrX  | 64130743  | 64131082  | 340 |
| chrX  | 30830361  | 30830700  | 340 |
| chrX  | 27357514  | 27357853  | 340 |
| chrX  | 21036523  | 21036862  | 340 |
| chr7  | 4344606   | 4344945   | 340 |
| chr6  | 108586753 | 108587092 | 340 |
| chr4  | 108688986 | 108689325 | 340 |
| chr3  | 113237316 | 113237655 | 340 |
| chr3  | 33470703  | 33471042  | 340 |
| chr3  | 8733973   | 8734312   | 340 |
| chr29 | 35150572  | 35150911  | 340 |
| chr29 | 34278519  | 34278858  | 340 |
| chr29 | 31860874  | 31861213  | 340 |
| chr29 | 31627603  | 31627942  | 340 |
| chr29 | 19543057  | 19543396  | 340 |
| chr29 | 18261885  | 18262224  | 340 |
| chr26 | 44228065  | 44228404  | 340 |
| chr25 | 40047674  | 40048013  | 340 |
| chr25 | 34366677  | 34367016  | 340 |

|       |           |           |     |
|-------|-----------|-----------|-----|
| chr25 | 10618932  | 10619271  | 340 |
| chr23 | 49662262  | 49662601  | 340 |
| chr20 | 38407561  | 38407900  | 340 |
| chr20 | 1138545   | 1138884   | 340 |
| chr18 | 3820730   | 3821069   | 340 |
| chr17 | 70081017  | 70081356  | 340 |
| chr17 | 66887188  | 66887527  | 340 |
| chr17 | 63036111  | 63036450  | 340 |
| chr16 | 61262492  | 61262831  | 340 |
| chr15 | 30451496  | 30451835  | 340 |
| chr15 | 30282747  | 30283086  | 340 |
| chr11 | 100881029 | 100881368 | 340 |
| chr11 | 98307726  | 98308065  | 340 |
| chr11 | 93008027  | 93008366  | 340 |
| chr11 | 84448903  | 84449242  | 340 |
| chr11 | 81441775  | 81442114  | 340 |
| chr10 | 74702688  | 74703027  | 340 |
| chr10 | 20161560  | 20161899  | 340 |
| chrX  | 79001773  | 79002111  | 339 |
| chrX  | 77190240  | 77190578  | 339 |
| chrX  | 64851154  | 64851492  | 339 |
| chrX  | 57699174  | 57699512  | 339 |
| chrX  | 10800689  | 10801027  | 339 |
| chrX  | 9833180   | 9833518   | 339 |
| chrX  | 8413426   | 8413764   | 339 |
| chrX  | 5474170   | 5474508   | 339 |
| chr8  | 64992551  | 64992889  | 339 |
| chr7  | 24212887  | 24213225  | 339 |
| chr7  | 5086851   | 5087189   | 339 |
| chr5  | 61052997  | 61053335  | 339 |
| chr4  | 79284541  | 79284879  | 339 |
| chr3  | 112512875 | 112513213 | 339 |
| chr29 | 46022305  | 46022643  | 339 |
| chr27 | 35354666  | 35355004  | 339 |
| chr26 | 18162885  | 18163223  | 339 |
| chr25 | 33342560  | 33342898  | 339 |
| chr24 | 48582866  | 48583204  | 339 |
| chr22 | 58681987  | 58682325  | 339 |
| chr22 | 55956351  | 55956689  | 339 |
| chr22 | 11049097  | 11049435  | 339 |
| chr21 | 26782550  | 26782888  | 339 |
| chr21 | 24460502  | 24460840  | 339 |
| chr2  | 131269242 | 131269580 | 339 |
| chr2  | 111375717 | 111376055 | 339 |
| chr19 | 56550379  | 56550717  | 339 |
| chr19 | 40905724  | 40906062  | 339 |
| chr18 | 39853438  | 39853776  | 339 |
| chr16 | 40493724  | 40494062  | 339 |
| chr15 | 34594834  | 34595172  | 339 |
| chr15 | 25485333  | 25485671  | 339 |

|       |           |           |     |
|-------|-----------|-----------|-----|
| chr15 | 25344205  | 25344543  | 339 |
| chr13 | 73364267  | 73364605  | 339 |
| chr13 | 60697906  | 60698244  | 339 |
| chr13 | 41628405  | 41628743  | 339 |
| chr12 | 24626147  | 24626485  | 339 |
| chr11 | 81798798  | 81799136  | 339 |
| chr11 | 77524461  | 77524799  | 339 |
| chr11 | 50901547  | 50901885  | 339 |
| chr11 | 47907824  | 47908162  | 339 |
| chr10 | 17023281  | 17023619  | 339 |
| chr10 | 8489643   | 8489981   | 339 |
| chrX  | 75659387  | 75659724  | 338 |
| chrX  | 67047431  | 67047768  | 338 |
| chrX  | 55592775  | 55593112  | 338 |
| chrX  | 52616261  | 52616598  | 338 |
| chrX  | 48187517  | 48187854  | 338 |
| chrX  | 21844854  | 21845191  | 338 |
| chrX  | 9909458   | 9909795   | 338 |
| chrX  | 7460579   | 7460916   | 338 |
| chrX  | 1892445   | 1892782   | 338 |
| chr9  | 91924609  | 91924946  | 338 |
| chr8  | 54762637  | 54762974  | 338 |
| chr8  | 7622294   | 7622631   | 338 |
| chr7  | 42210803  | 42211140  | 338 |
| chr5  | 76863116  | 76863453  | 338 |
| chr5  | 33968426  | 33968763  | 338 |
| chr5  | 29153322  | 29153659  | 338 |
| chr4  | 121473271 | 121473608 | 338 |
| chr3  | 110758301 | 110758638 | 338 |
| chr3  | 52181838  | 52182175  | 338 |
| chr3  | 29694081  | 29694418  | 338 |
| chr3  | 20760149  | 20760486  | 338 |
| chr3  | 15185497  | 15185834  | 338 |
| chr27 | 7275684   | 7276021   | 338 |
| chr26 | 37636135  | 37636472  | 338 |
| chr26 | 34961402  | 34961739  | 338 |
| chr25 | 37565609  | 37565946  | 338 |
| chr25 | 34379943  | 34380280  | 338 |
| chr22 | 56421114  | 56421451  | 338 |
| chr22 | 5621479   | 5621816   | 338 |
| chr21 | 66174286  | 66174623  | 338 |
| chr21 | 28659780  | 28660117  | 338 |
| chr19 | 46647944  | 46648281  | 338 |
| chr19 | 29699997  | 29700334  | 338 |
| chr19 | 27934414  | 27934751  | 338 |
| chr18 | 42223188  | 42223525  | 338 |
| chr18 | 39974150  | 39974487  | 338 |
| chr18 | 22535165  | 22535502  | 338 |
| chr18 | 11386188  | 11386525  | 338 |
| chr17 | 68173151  | 68173488  | 338 |



|       |           |           |     |
|-------|-----------|-----------|-----|
| chr16 | 73138909  | 73139246  | 338 |
| chr16 | 58581333  | 58581670  | 338 |
| chr16 | 47703633  | 47703970  | 338 |
| chr16 | 38948166  | 38948503  | 338 |
| chr16 | 23930646  | 23930983  | 338 |
| chr15 | 75721358  | 75721695  | 338 |
| chr15 | 54024524  | 54024861  | 338 |
| chr15 | 53290140  | 53290477  | 338 |
| chr15 | 22318822  | 22319159  | 338 |
| chr13 | 79887576  | 79887913  | 338 |
| chr13 | 66825073  | 66825410  | 338 |
| chr13 | 35975231  | 35975568  | 338 |
| chr12 | 72576201  | 72576538  | 338 |
| chr10 | 77482820  | 77483157  | 338 |
| chr10 | 59977966  | 59978303  | 338 |
| chr10 | 52934097  | 52934434  | 338 |
| chr10 | 26928544  | 26928881  | 338 |
| chr1  | 123102159 | 123102496 | 338 |
| chr1  | 84504039  | 84504376  | 338 |
| chrX  | 55697632  | 55697968  | 337 |
| chrX  | 20381911  | 20382247  | 337 |
| chrX  | 11976749  | 11977085  | 337 |
| chrX  | 9074523   | 9074859   | 337 |
| chrX  | 6263556   | 6263892   | 337 |
| chrX  | 2349632   | 2349968   | 337 |
| chr8  | 63992489  | 63992825  | 337 |
| chr5  | 74401728  | 74402064  | 337 |
| chr3  | 99100193  | 99100529  | 337 |
| chr3  | 31674450  | 31674786  | 337 |
| chr29 | 50047949  | 50048285  | 337 |
| chr29 | 33921794  | 33922130  | 337 |
| chr29 | 17880756  | 17881092  | 337 |
| chr28 | 42852074  | 42852410  | 337 |
| chr26 | 46284643  | 46284979  | 337 |
| chr26 | 45863789  | 45864125  | 337 |
| chr24 | 50302789  | 50303125  | 337 |
| chr24 | 49179443  | 49179779  | 337 |
| chr24 | 1156254   | 1156590   | 337 |
| chr23 | 30208743  | 30209079  | 337 |
| chr22 | 48112297  | 48112633  | 337 |
| chr21 | 57534770  | 57535106  | 337 |
| chr2  | 130149133 | 130149469 | 337 |
| chr19 | 38678771  | 38679107  | 337 |
| chr18 | 56490483  | 56490819  | 337 |
| chr18 | 52206815  | 52207151  | 337 |
| chr18 | 39495274  | 39495610  | 337 |
| chr16 | 41503274  | 41503610  | 337 |
| chr16 | 1105893   | 1106229   | 337 |
| chr15 | 25591775  | 25592111  | 337 |
| chr14 | 8682413   | 8682749   | 337 |

|       |               |           |     |
|-------|---------------|-----------|-----|
| chr14 | 2045908       | 2046244   | 337 |
| chr13 | 62778476      | 62778812  | 337 |
| chr13 | 32103660      | 32103996  | 337 |
| chr13 | 28917495      | 28917831  | 337 |
| chr1  | 147276399     | 147276735 | 337 |
| chr1  | 82389207      | 82389543  | 337 |
| chr1  | 35821783      | 35822119  | 337 |
| chrX  | 75839779      | 75840114  | 336 |
| chrX  | 64464674      | 64465009  | 336 |
| chrX  | 57148577      | 57148912  | 336 |
| chrX  | 551749 552084 | 336       |     |
| chr9  | 78355294      | 78355629  | 336 |
| chr8  | 108828428     | 108828763 | 336 |
| chr8  | 99777645      | 99777980  | 336 |
| chr8  | 72281071      | 72281406  | 336 |
| chr8  | 70453226      | 70453561  | 336 |
| chr8  | 62463983      | 62464318  | 336 |
| chr8  | 23252026      | 23252361  | 336 |
| chr7  | 5318341       | 5318676   | 336 |
| chr6  | 106944684     | 106945019 | 336 |
| chr6  | 99220232      | 99220567  | 336 |
| chr5  | 122689345     | 122689680 | 336 |
| chr4  | 79082869      | 79083204  | 336 |
| chr4  | 53160699      | 53161034  | 336 |
| chr3  | 115786019     | 115786354 | 336 |
| chr3  | 93809383      | 93809718  | 336 |
| chr3  | 30511125      | 30511460  | 336 |
| chr29 | 25521371      | 25521706  | 336 |
| chr29 | 18221274      | 18221609  | 336 |
| chr29 | 17591407      | 17591742  | 336 |
| chr28 | 34096085      | 34096420  | 336 |
| chr27 | 26907462      | 26907797  | 336 |
| chr26 | 20937647      | 20937982  | 336 |
| chr25 | 27894984      | 27895319  | 336 |
| chr25 | 21902009      | 21902344  | 336 |
| chr25 | 10547521      | 10547856  | 336 |
| chr24 | 1462301       | 1462636   | 336 |
| chr22 | 50587469      | 50587804  | 336 |
| chr20 | 8707176       | 8707511   | 336 |
| chr18 | 62958891      | 62959226  | 336 |
| chr18 | 56555148      | 56555483  | 336 |
| chr18 | 22336071      | 22336406  | 336 |
| chr13 | 59446863      | 59447198  | 336 |
| chr12 | 82017077      | 82017412  | 336 |
| chr11 | 95256289      | 95256624  | 336 |
| chr11 | 91106217      | 91106552  | 336 |
| chr11 | 4935565       | 4935900   | 336 |
| chrX  | 69606928      | 69607262  | 335 |
| chrX  | 61392266      | 61392600  | 335 |
| chrX  | 50613669      | 50614003  | 335 |

|       |               |           |     |
|-------|---------------|-----------|-----|
| chrX  | 47166089      | 47166423  | 335 |
| chrX  | 36223070      | 36223404  | 335 |
| chrX  | 31947165      | 31947499  | 335 |
| chrX  | 1478541       | 1478875   | 335 |
| chr9  | 91089314      | 91089648  | 335 |
| chr9  | 75323551      | 75323885  | 335 |
| chr9  | 64337771      | 64338105  | 335 |
| chr8  | 109036421     | 109036755 | 335 |
| chr8  | 47568606      | 47568940  | 335 |
| chr6  | 37117545      | 37117879  | 335 |
| chr5  | 125563654     | 125563988 | 335 |
| chr5  | 113128652     | 113128986 | 335 |
| chr5  | 78479051      | 78479385  | 335 |
| chr5  | 73169170      | 73169504  | 335 |
| chr4  | 72025502      | 72025836  | 335 |
| chr3  | 53812326      | 53812660  | 335 |
| chr3  | 35564020      | 35564354  | 335 |
| chr29 | 27691167      | 27691501  | 335 |
| chr29 | 27309204      | 27309538  | 335 |
| chr27 | 822639 822973 | 335       |     |
| chr23 | 28777191      | 28777525  | 335 |
| chr22 | 30019471      | 30019805  | 335 |
| chr21 | 13906212      | 13906546  | 335 |
| chr20 | 623550 623884 | 335       |     |
| chr2  | 110531619     | 110531953 | 335 |
| chr19 | 63535758      | 63536092  | 335 |
| chr19 | 26945792      | 26946126  | 335 |
| chr17 | 68134338      | 68134672  | 335 |
| chr17 | 64540029      | 64540363  | 335 |
| chr17 | 59015401      | 59015735  | 335 |
| chr17 | 18507910      | 18508244  | 335 |
| chr16 | 73199812      | 73200146  | 335 |
| chr15 | 22915367      | 22915701  | 335 |
| chr14 | 63487672      | 63488006  | 335 |
| chr13 | 78066840      | 78067174  | 335 |
| chr10 | 23487992      | 23488326  | 335 |
| chr10 | 21409570      | 21409904  | 335 |
| chrX  | 71674020      | 71674353  | 334 |
| chrX  | 65087073      | 65087406  | 334 |
| chrX  | 53764902      | 53765235  | 334 |
| chrX  | 19885439      | 19885772  | 334 |
| chrX  | 18468056      | 18468389  | 334 |
| chrX  | 12354661      | 12354994  | 334 |
| chrX  | 4728836       | 4729169   | 334 |
| chr8  | 10360961      | 10361294  | 334 |
| chr7  | 89471385      | 89471718  | 334 |
| chr7  | 80793467      | 80793800  | 334 |
| chr7  | 43535043      | 43535376  | 334 |
| chr5  | 120447896     | 120448229 | 334 |
| chr5  | 119145801     | 119146134 | 334 |

|       |               |           |     |
|-------|---------------|-----------|-----|
| chr4  | 77335302      | 77335635  | 334 |
| chr4  | 33238899      | 33239232  | 334 |
| chr3  | 30560561      | 30560894  | 334 |
| chr3  | 19691673      | 19692006  | 334 |
| chr29 | 46925422      | 46925755  | 334 |
| chr28 | 4354966       | 4355299   | 334 |
| chr25 | 39869455      | 39869788  | 334 |
| chr25 | 8697093       | 8697426   | 334 |
| chr24 | 59440141      | 59440474  | 334 |
| chr24 | 1200834       | 1201167   | 334 |
| chr20 | 805991 806324 | 334       |     |
| chr2  | 125896281     | 125896614 | 334 |
| chr19 | 56649108      | 56649441  | 334 |
| chr19 | 49644711      | 49645044  | 334 |
| chr17 | 66819808      | 66820141  | 334 |
| chr16 | 47980078      | 47980411  | 334 |
| chr14 | 67845916      | 67846249  | 334 |
| chr14 | 8112010       | 8112343   | 334 |
| chr14 | 6206632       | 6206965   | 334 |
| chr13 | 82591392      | 82591725  | 334 |
| chr12 | 75198393      | 75198726  | 334 |
| chr11 | 103766932     | 103767265 | 334 |
| chr11 | 87690831      | 87691164  | 334 |
| chr10 | 25854086      | 25854419  | 334 |
| chr10 | 17152983      | 17153316  | 334 |
| chrX  | 86997865      | 86998197  | 333 |
| chrX  | 78342487      | 78342819  | 333 |
| chrX  | 75695081      | 75695413  | 333 |
| chrX  | 62335312      | 62335644  | 333 |
| chrX  | 59708731      | 59709063  | 333 |
| chrX  | 59463752      | 59464084  | 333 |
| chrX  | 54507524      | 54507856  | 333 |
| chrX  | 49074944      | 49075276  | 333 |
| chrX  | 39197317      | 39197649  | 333 |
| chrX  | 19243776      | 19244108  | 333 |
| chrX  | 18982285      | 18982617  | 333 |
| chrX  | 8612649       | 8612981   | 333 |
| chr9  | 78270409      | 78270741  | 333 |
| chr7  | 7239017       | 7239349   | 333 |
| chr6  | 74452973      | 74453305  | 333 |
| chr6  | 22242058      | 22242390  | 333 |
| chr5  | 30325121      | 30325453  | 333 |
| chr4  | 116924644     | 116924976 | 333 |
| chr3  | 121951986     | 121952318 | 333 |
| chr3  | 111043529     | 111043861 | 333 |
| chr3  | 25128779      | 25129111  | 333 |
| chr29 | 48799003      | 48799335  | 333 |
| chr29 | 36281891      | 36282223  | 333 |
| chr29 | 35596660      | 35596992  | 333 |
| chr26 | 43489511      | 43489843  | 333 |

|       |               |           |     |
|-------|---------------|-----------|-----|
| chr26 | 37094063      | 37094395  | 333 |
| chr26 | 34944726      | 34945058  | 333 |
| chr25 | 16157737      | 16158069  | 333 |
| chr24 | 778138 778470 |           | 333 |
| chr23 | 44441944      | 44442276  | 333 |
| chr23 | 15773629      | 15773961  | 333 |
| chr22 | 34224348      | 34224680  | 333 |
| chr22 | 5685754       | 5686086   | 333 |
| chr21 | 63327699      | 63328031  | 333 |
| chr2  | 136982372     | 136982704 | 333 |
| chr19 | 37958832      | 37959164  | 333 |
| chr19 | 24258432      | 24258764  | 333 |
| chr19 | 22331778      | 22332110  | 333 |
| chr18 | 32935759      | 32936091  | 333 |
| chr18 | 23066915      | 23067247  | 333 |
| chr17 | 68819125      | 68819457  | 333 |
| chr16 | 60379081      | 60379413  | 333 |
| chr15 | 77784395      | 77784727  | 333 |
| chr15 | 75860049      | 75860381  | 333 |
| chr15 | 25433796      | 25434128  | 333 |
| chr14 | 2057774       | 2058106   | 333 |
| chr13 | 58602262      | 58602594  | 333 |
| chr12 | 70983894      | 70984226  | 333 |
| chr12 | 32911841      | 32912173  | 333 |
| chr11 | 77748707      | 77749039  | 333 |
| chr11 | 75114846      | 75115178  | 333 |
| chr11 | 47360586      | 47360918  | 333 |
| chr11 | 14332274      | 14332606  | 333 |
| chr11 | 7280864       | 7281196   | 333 |
| chrX  | 80873186      | 80873517  | 332 |
| chrX  | 74028715      | 74029046  | 332 |
| chrX  | 64301753      | 64302084  | 332 |
| chrX  | 59823240      | 59823571  | 332 |
| chrX  | 34705911      | 34706242  | 332 |
| chrX  | 20988665      | 20988996  | 332 |
| chr9  | 106835409     | 106835740 | 332 |
| chr7  | 44060758      | 44061089  | 332 |
| chr6  | 94945884      | 94946215  | 332 |
| chr5  | 35113816      | 35114147  | 332 |
| chr5  | 1144278       | 1144609   | 332 |
| chr4  | 96682196      | 96682527  | 332 |
| chr29 | 49703737      | 49704068  | 332 |
| chr29 | 31588887      | 31589218  | 332 |
| chr28 | 26859442      | 26859773  | 332 |
| chr26 | 18724966      | 18725297  | 332 |
| chr25 | 3114189       | 3114520   | 332 |
| chr24 | 1162217       | 1162548   | 332 |
| chr23 | 23892749      | 23893080  | 332 |
| chr23 | 15957190      | 15957521  | 332 |
| chr22 | 41297273      | 41297604  | 332 |

|       |           |           |     |
|-------|-----------|-----------|-----|
| chr21 | 66415270  | 66415601  | 332 |
| chr21 | 60176340  | 60176671  | 332 |
| chr20 | 8559088   | 8559419   | 332 |
| chr2  | 134910028 | 134910359 | 332 |
| chr2  | 131236855 | 131237186 | 332 |
| chr2  | 111647985 | 111648316 | 332 |
| chr2  | 20775290  | 20775621  | 332 |
| chr19 | 42702173  | 42702504  | 332 |
| chr19 | 15790899  | 15791230  | 332 |
| chr18 | 12591622  | 12591953  | 332 |
| chr17 | 66529264  | 66529595  | 332 |
| chr16 | 77540013  | 77540344  | 332 |
| chr16 | 47278891  | 47279222  | 332 |
| chr15 | 63092216  | 63092547  | 332 |
| chr15 | 29818642  | 29818973  | 332 |
| chr14 | 30395550  | 30395881  | 332 |
| chr14 | 1954927   | 1955258   | 332 |
| chr13 | 67893666  | 67893997  | 332 |
| chr12 | 9658057   | 9658388   | 332 |
| chr11 | 84320677  | 84321008  | 332 |
| chr11 | 82674557  | 82674888  | 332 |
| chr11 | 28512141  | 28512472  | 332 |
| chr10 | 8620449   | 8620780   | 332 |
| chrX  | 65057790  | 65058120  | 331 |
| chrX  | 64069221  | 64069551  | 331 |
| chrX  | 63252344  | 63252674  | 331 |
| chrX  | 63230248  | 63230578  | 331 |
| chrX  | 50653615  | 50653945  | 331 |
| chrX  | 35697362  | 35697692  | 331 |
| chrX  | 35491611  | 35491941  | 331 |
| chrX  | 34614892  | 34615222  | 331 |
| chrX  | 31775073  | 31775403  | 331 |
| chrX  | 11972623  | 11972953  | 331 |
| chrX  | 9929620   | 9929950   | 331 |
| chrX  | 6658750   | 6659080   | 331 |
| chrX  | 6615427   | 6615757   | 331 |
| chr8  | 106662885 | 106663215 | 331 |
| chr6  | 121264884 | 121265214 | 331 |
| chr6  | 107455408 | 107455738 | 331 |
| chr4  | 72330448  | 72330778  | 331 |
| chr4  | 71878309  | 71878639  | 331 |
| chr3  | 123982815 | 123983145 | 331 |
| chr3  | 116517655 | 116517985 | 331 |
| chr3  | 114963687 | 114964017 | 331 |
| chr3  | 105400789 | 105401119 | 331 |
| chr3  | 74450393  | 74450723  | 331 |
| chr28 | 31860478  | 31860808  | 331 |
| chr28 | 25498455  | 25498785  | 331 |
| chr27 | 27415427  | 27415757  | 331 |
| chr25 | 36160126  | 36160456  | 331 |

|       |           |           |     |
|-------|-----------|-----------|-----|
| chr24 | 32849035  | 32849365  | 331 |
| chr24 | 22911776  | 22912106  | 331 |
| chr22 | 59145985  | 59146315  | 331 |
| chr22 | 58444596  | 58444926  | 331 |
| chr22 | 5681051   | 5681381   | 331 |
| chr21 | 47473184  | 47473514  | 331 |
| chr21 | 28346904  | 28347234  | 331 |
| chr20 | 39744763  | 39745093  | 331 |
| chr2  | 126112969 | 126113299 | 331 |
| chr2  | 1497927   | 1498257   | 331 |
| chr19 | 45277766  | 45278096  | 331 |
| chr19 | 17114793  | 17115123  | 331 |
| chr18 | 11951775  | 11952105  | 331 |
| chr18 | 1505954   | 1506284   | 331 |
| chr17 | 70039298  | 70039628  | 331 |
| chr17 | 64288324  | 64288654  | 331 |
| chr15 | 81381312  | 81381642  | 331 |
| chr15 | 75763617  | 75763947  | 331 |
| chr12 | 29718045  | 29718375  | 331 |
| chr11 | 14110149  | 14110479  | 331 |
| chr11 | 2804409   | 2804739   | 331 |
| chr10 | 21687495  | 21687825  | 331 |
| chrX  | 55338792  | 55339121  | 330 |
| chrX  | 37479140  | 37479469  | 330 |
| chrX  | 20598252  | 20598581  | 330 |
| chrX  | 19876120  | 19876449  | 330 |
| chrX  | 13350250  | 13350579  | 330 |
| chrX  | 9801836   | 9802165   | 330 |
| chrX  | 9057286   | 9057615   | 330 |
| chr8  | 87503266  | 87503595  | 330 |
| chr7  | 89467146  | 89467475  | 330 |
| chr3  | 10698732  | 10699061  | 330 |
| chr29 | 36339780  | 36340109  | 330 |
| chr29 | 33900421  | 33900750  | 330 |
| chr28 | 42341843  | 42342172  | 330 |
| chr23 | 51686373  | 51686702  | 330 |
| chr22 | 58638768  | 58639097  | 330 |
| chr22 | 23842260  | 23842589  | 330 |
| chr21 | 64439231  | 64439560  | 330 |
| chr21 | 25230687  | 25231016  | 330 |
| chr18 | 13557163  | 13557492  | 330 |
| chr16 | 41347988  | 41348317  | 330 |
| chr15 | 54649022  | 54649351  | 330 |
| chr15 | 24621150  | 24621479  | 330 |
| chr14 | 67846766  | 67847095  | 330 |
| chr13 | 65395227  | 65395556  | 330 |
| chr13 | 56461009  | 56461338  | 330 |
| chr13 | 23656912  | 23657241  | 330 |
| chr13 | 22824237  | 22824566  | 330 |
| chr12 | 36327403  | 36327732  | 330 |

|       |           |           |     |
|-------|-----------|-----------|-----|
| chr11 | 77743037  | 77743366  | 330 |
| chr11 | 76407138  | 76407467  | 330 |
| chr10 | 90933289  | 90933618  | 330 |
| chr10 | 12852769  | 12853098  | 330 |
| chrX  | 81118284  | 81118612  | 329 |
| chrX  | 70190012  | 70190340  | 329 |
| chrX  | 62460140  | 62460468  | 329 |
| chrX  | 48793981  | 48794309  | 329 |
| chrX  | 36843267  | 36843595  | 329 |
| chrX  | 10412491  | 10412819  | 329 |
| chrX  | 2588015   | 2588343   | 329 |
| chr8  | 78502581  | 78502909  | 329 |
| chr7  | 9602265   | 9602593   | 329 |
| chr6  | 69754907  | 69755235  | 329 |
| chr6  | 46513198  | 46513526  | 329 |
| chr5  | 65552850  | 65553178  | 329 |
| chr5  | 10201503  | 10201831  | 329 |
| chr4  | 118722120 | 118722448 | 329 |
| chr4  | 118229879 | 118230207 | 329 |
| chr28 | 42178228  | 42178556  | 329 |
| chr27 | 35934793  | 35935121  | 329 |
| chr25 | 35560951  | 35561279  | 329 |
| chr24 | 61135538  | 61135866  | 329 |
| chr23 | 17828800  | 17829128  | 329 |
| chr20 | 75035048  | 75035376  | 329 |
| chr2  | 111320937 | 111321265 | 329 |
| chr19 | 55994983  | 55995311  | 329 |
| chr19 | 27096688  | 27097016  | 329 |
| chr18 | 56876833  | 56877161  | 329 |
| chr18 | 39515526  | 39515854  | 329 |
| chr18 | 13154805  | 13155133  | 329 |
| chr18 | 3667899   | 3668227   | 329 |
| chr17 | 72687235  | 72687563  | 329 |
| chr17 | 70298735  | 70299063  | 329 |
| chr17 | 62506029  | 62506357  | 329 |
| chr15 | 75600555  | 75600883  | 329 |
| chr15 | 24722639  | 24722967  | 329 |
| chr15 | 24528081  | 24528409  | 329 |
| chr15 | 24440220  | 24440548  | 329 |
| chr14 | 22060884  | 22061212  | 329 |
| chr13 | 55366908  | 55367236  | 329 |
| chr13 | 54444777  | 54445105  | 329 |
| chr13 | 41008722  | 41009050  | 329 |
| chr12 | 9030195   | 9030523   | 329 |
| chr11 | 98324721  | 98325049  | 329 |
| chr11 | 89021448  | 89021776  | 329 |
| chr11 | 65294794  | 65295122  | 329 |
| chr11 | 48673411  | 48673739  | 329 |
| chr10 | 95124183  | 95124511  | 329 |
| chr10 | 88204289  | 88204617  | 329 |



|       |           |           |     |
|-------|-----------|-----------|-----|
| chr10 | 71176215  | 71176543  | 329 |
| chr10 | 35479585  | 35479913  | 329 |
| chr1  | 73141869  | 73142197  | 329 |
| chrX  | 74797307  | 74797634  | 328 |
| chrX  | 73945388  | 73945715  | 328 |
| chrX  | 54232001  | 54232328  | 328 |
| chrX  | 47391958  | 47392285  | 328 |
| chrX  | 44729413  | 44729740  | 328 |
| chrX  | 37687362  | 37687689  | 328 |
| chrX  | 19694947  | 19695274  | 328 |
| chrX  | 17339937  | 17340264  | 328 |
| chrX  | 2855259   | 2855586   | 328 |
| chr8  | 114248699 | 114249026 | 328 |
| chr7  | 51487161  | 51487488  | 328 |
| chr5  | 117221325 | 117221652 | 328 |
| chr5  | 29989272  | 29989599  | 328 |
| chr4  | 98577715  | 98578042  | 328 |
| chr4  | 98121107  | 98121434  | 328 |
| chr4  | 49029070  | 49029397  | 328 |
| chr4  | 13315568  | 13315895  | 328 |
| chr3  | 111812684 | 111813011 | 328 |
| chr29 | 46221033  | 46221360  | 328 |
| chr23 | 27299738  | 27300065  | 328 |
| chr23 | 23745557  | 23745884  | 328 |
| chr2  | 126086176 | 126086503 | 328 |
| chr2  | 111724615 | 111724942 | 328 |
| chr19 | 57563794  | 57564121  | 328 |
| chr19 | 12512046  | 12512373  | 328 |
| chr18 | 5277654   | 5277981   | 328 |
| chr16 | 47643592  | 47643919  | 328 |
| chr16 | 47140841  | 47141168  | 328 |
| chr16 | 2439750   | 2440077   | 328 |
| chr15 | 74472111  | 74472438  | 328 |
| chr13 | 79067079  | 79067406  | 328 |
| chr13 | 74376162  | 74376489  | 328 |
| chr13 | 59195355  | 59195682  | 328 |
| chr12 | 14734191  | 14734518  | 328 |
| chr11 | 92888434  | 92888761  | 328 |
| chr11 | 92622860  | 92623187  | 328 |
| chr11 | 66127146  | 66127473  | 328 |
| chr11 | 14194839  | 14195166  | 328 |
| chr10 | 88372942  | 88373269  | 328 |
| chrX  | 72850968  | 72851294  | 327 |
| chrX  | 46865058  | 46865384  | 327 |
| chrX  | 21825357  | 21825683  | 327 |
| chrX  | 20292190  | 20292516  | 327 |
| chrX  | 19262994  | 19263320  | 327 |
| chrX  | 17116038  | 17116364  | 327 |
| chrX  | 13185705  | 13186031  | 327 |
| chrX  | 7741386   | 7741712   | 327 |

|       |             |           |     |
|-------|-------------|-----------|-----|
| chr9  | 94456870    | 94457196  | 327 |
| chr7  | 46427873    | 46428199  | 327 |
| chr5  | 81657758    | 81658084  | 327 |
| chr5  | 64789036    | 64789362  | 327 |
| chr3  | 120634304   | 120634630 | 327 |
| chr3  | 111888958   | 111889284 | 327 |
| chr3  | 15427224    | 15427550  | 327 |
| chr29 | 35951008    | 35951334  | 327 |
| chr27 | 40758127    | 40758453  | 327 |
| chr27 | 26621624    | 26621950  | 327 |
| chr26 | 38584354    | 38584680  | 327 |
| chr23 | 27232439    | 27232765  | 327 |
| chr21 | 47557483    | 47557809  | 327 |
| chr21 | 6527786     | 6528112   | 327 |
| chr2  | 131540460   | 131540786 | 327 |
| chr2  | 119911251   | 119911577 | 327 |
| chr19 | 61177682    | 61178008  | 327 |
| chr19 | 53960403    | 53960729  | 327 |
| chr18 | 56363396    | 56363722  | 327 |
| chr17 | 62991868    | 62992194  | 327 |
| chr14 | 22198096    | 22198422  | 327 |
| chr14 | 22066421    | 22066747  | 327 |
| chr14 | 57782 58108 | 327       |     |
| chr13 | 58264410    | 58264736  | 327 |
| chr11 | 91895840    | 91896166  | 327 |
| chr11 | 9203760     | 9204086   | 327 |
| chr10 | 53470349    | 53470675  | 327 |
| chr1  | 152358941   | 152359267 | 327 |
| chr1  | 152212053   | 152212379 | 327 |
| chrX  | 68204421    | 68204746  | 326 |
| chrX  | 65709300    | 65709625  | 326 |
| chrX  | 53336662    | 53336987  | 326 |
| chrX  | 50008212    | 50008537  | 326 |
| chr9  | 100918671   | 100918996 | 326 |
| chr7  | 94009320    | 94009645  | 326 |
| chr6  | 108746139   | 108746464 | 326 |
| chr6  | 22236641    | 22236966  | 326 |
| chr5  | 115038235   | 115038560 | 326 |
| chr5  | 52549745    | 52550070  | 326 |
| chr5  | 35291450    | 35291775  | 326 |
| chr5  | 30798412    | 30798737  | 326 |
| chr4  | 120997214   | 120997539 | 326 |
| chr3  | 4476838     | 4477163   | 326 |
| chr29 | 29694026    | 29694351  | 326 |
| chr28 | 17379245    | 17379570  | 326 |
| chr27 | 1473309     | 1473634   | 326 |
| chr26 | 41865520    | 41865845  | 326 |
| chr25 | 30444517    | 30444842  | 326 |
| chr23 | 17515527    | 17515852  | 326 |
| chr22 | 12326107    | 12326432  | 326 |

|       |               |           |     |
|-------|---------------|-----------|-----|
| chr20 | 60982666      | 60982991  | 326 |
| chr2  | 129708809     | 129709134 | 326 |
| chr2  | 90501656      | 90501981  | 326 |
| chr19 | 59298497      | 59298822  | 326 |
| chr19 | 56582199      | 56582524  | 326 |
| chr19 | 27868646      | 27868971  | 326 |
| chr19 | 18380253      | 18380578  | 326 |
| chr18 | 13285267      | 13285592  | 326 |
| chr15 | 42679822      | 42680147  | 326 |
| chr14 | 21794103      | 21794428  | 326 |
| chr14 | 21170387      | 21170712  | 326 |
| chr13 | 77780223      | 77780548  | 326 |
| chr13 | 36241633      | 36241958  | 326 |
| chr11 | 74238192      | 74238517  | 326 |
| chr10 | 70032944      | 70033269  | 326 |
| chrX  | 79454237      | 79454561  | 325 |
| chrX  | 73284085      | 73284409  | 325 |
| chrX  | 58107712      | 58108036  | 325 |
| chrX  | 55043065      | 55043389  | 325 |
| chrX  | 37466962      | 37467286  | 325 |
| chrX  | 9092175       | 9092499   | 325 |
| chrX  | 660716 661040 | 325       |     |
| chr9  | 10984762      | 10985086  | 325 |
| chr8  | 64949641      | 64949965  | 325 |
| chr8  | 661134 661458 | 325       |     |
| chr7  | 19064823      | 19065147  | 325 |
| chr5  | 70036614      | 70036938  | 325 |
| chr5  | 30654377      | 30654701  | 325 |
| chr5  | 30418834      | 30419158  | 325 |
| chr5  | 29925545      | 29925869  | 325 |
| chr5  | 28770732      | 28771056  | 325 |
| chr4  | 122683782     | 122684106 | 325 |
| chr4  | 72211975      | 72212299  | 325 |
| chr4  | 69680752      | 69681076  | 325 |
| chr3  | 111792787     | 111793111 | 325 |
| chr29 | 35516786      | 35517110  | 325 |
| chr27 | 45612590      | 45612914  | 325 |
| chr27 | 26820682      | 26821006  | 325 |
| chr26 | 22238374      | 22238698  | 325 |
| chr25 | 37782051      | 37782375  | 325 |
| chr25 | 27553428      | 27553752  | 325 |
| chr25 | 2966197       | 2966521   | 325 |
| chr24 | 36649196      | 36649520  | 325 |
| chr24 | 20828776      | 20829100  | 325 |
| chr23 | 19621234      | 19621558  | 325 |
| chr22 | 29776430      | 29776754  | 325 |
| chr21 | 64241792      | 64242116  | 325 |
| chr21 | 63410785      | 63411109  | 325 |
| chr20 | 6590991       | 6591315   | 325 |
| chr2  | 33697973      | 33698297  | 325 |

|       |           |           |     |
|-------|-----------|-----------|-----|
| chr19 | 60514743  | 60515067  | 325 |
| chr19 | 444586    | 444910    | 325 |
| chr18 | 22218217  | 22218541  | 325 |
| chr18 | 11974023  | 11974347  | 325 |
| chr18 | 3141544   | 3141868   | 325 |
| chr16 | 36618752  | 36619076  | 325 |
| chr15 | 83928605  | 83928929  | 325 |
| chr15 | 39502128  | 39502452  | 325 |
| chr15 | 33331162  | 33331486  | 325 |
| chr14 | 13073485  | 13073809  | 325 |
| chr13 | 59581852  | 59582176  | 325 |
| chr11 | 71122610  | 71122934  | 325 |
| chr1  | 118651314 | 118651638 | 325 |
| chrX  | 71729404  | 71729727  | 324 |
| chrX  | 60050110  | 60050433  | 324 |
| chrX  | 36279048  | 36279371  | 324 |
| chrX  | 34025420  | 34025743  | 324 |
| chrX  | 32998773  | 32999096  | 324 |
| chrX  | 7364952   | 7365275   | 324 |
| chr9  | 90269134  | 90269457  | 324 |
| chr8  | 7814668   | 7814991   | 324 |
| chr6  | 121017547 | 121017870 | 324 |
| chr5  | 122842710 | 122843033 | 324 |
| chr5  | 112123491 | 112123814 | 324 |
| chr3  | 124885810 | 124886133 | 324 |
| chr3  | 108264472 | 108264795 | 324 |
| chr3  | 22459448  | 22459771  | 324 |
| chr29 | 44484914  | 44485237  | 324 |
| chr29 | 17793189  | 17793512  | 324 |
| chr28 | 25527402  | 25527725  | 324 |
| chr27 | 38685386  | 38685709  | 324 |
| chr26 | 45665353  | 45665676  | 324 |
| chr26 | 38422901  | 38423224  | 324 |
| chr25 | 33383912  | 33384235  | 324 |
| chr24 | 61087604  | 61087927  | 324 |
| chr22 | 57376469  | 57376792  | 324 |
| chr22 | 54675214  | 54675537  | 324 |
| chr22 | 46208171  | 46208494  | 324 |
| chr21 | 57518088  | 57518411  | 324 |
| chr21 | 56033151  | 56033474  | 324 |
| chr21 | 20194012  | 20194335  | 324 |
| chr20 | 41246323  | 41246646  | 324 |
| chr2  | 92351050  | 92351373  | 324 |
| chr19 | 64338232  | 64338555  | 324 |
| chr19 | 43005519  | 43005842  | 324 |
| chr18 | 23160196  | 23160519  | 324 |
| chr18 | 12000623  | 12000946  | 324 |
| chr17 | 63461518  | 63461841  | 324 |
| chr17 | 5307292   | 5307615   | 324 |
| chr16 | 51414372  | 51414695  | 324 |

|       |           |           |     |
|-------|-----------|-----------|-----|
| chr15 | 29338518  | 29338841  | 324 |
| chr15 | 29061012  | 29061335  | 324 |
| chr15 | 26861580  | 26861903  | 324 |
| chr15 | 13619501  | 13619824  | 324 |
| chr14 | 79860557  | 79860880  | 324 |
| chr13 | 73711091  | 73711414  | 324 |
| chr13 | 63408094  | 63408417  | 324 |
| chr13 | 60093723  | 60094046  | 324 |
| chr13 | 40348581  | 40348904  | 324 |
| chr11 | 77720284  | 77720607  | 324 |
| chr11 | 13920735  | 13921058  | 324 |
| chr11 | 10835096  | 10835419  | 324 |
| chr11 | 2255704   | 2256027   | 324 |
| chr10 | 80628048  | 80628371  | 324 |
| chr10 | 66811158  | 66811481  | 324 |
| chrX  | 80622300  | 80622622  | 323 |
| chrX  | 80357546  | 80357868  | 323 |
| chrX  | 72818433  | 72818755  | 323 |
| chrX  | 66443274  | 66443596  | 323 |
| chrX  | 19387468  | 19387790  | 323 |
| chrX  | 9654483   | 9654805   | 323 |
| chrX  | 8178218   | 8178540   | 323 |
| chrX  | 2253395   | 2253717   | 323 |
| chr9  | 66519445  | 66519767  | 323 |
| chr8  | 65818965  | 65819287  | 323 |
| chr8  | 9343037   | 9343359   | 323 |
| chr8  | 7844064   | 7844386   | 323 |
| chr7  | 15589908  | 15590230  | 323 |
| chr7  | 5435773   | 5436095   | 323 |
| chr7  | 3924906   | 3925228   | 323 |
| chr5  | 111024184 | 111024506 | 323 |
| chr5  | 28986157  | 28986479  | 323 |
| chr4  | 120599100 | 120599422 | 323 |
| chr3  | 121372522 | 121372844 | 323 |
| chr29 | 36462288  | 36462610  | 323 |
| chr29 | 26635816  | 26636138  | 323 |
| chr29 | 11676981  | 11677303  | 323 |
| chr27 | 34417911  | 34418233  | 323 |
| chr26 | 22242008  | 22242330  | 323 |
| chr26 | 18202299  | 18202621  | 323 |
| chr25 | 35473226  | 35473548  | 323 |
| chr24 | 58609548  | 58609870  | 323 |
| chr24 | 45807057  | 45807379  | 323 |
| chr24 | 40514470  | 40514792  | 323 |
| chr23 | 48364189  | 48364511  | 323 |
| chr22 | 61053880  | 61054202  | 323 |
| chr22 | 56597955  | 56598277  | 323 |
| chr20 | 38406989  | 38407311  | 323 |
| chr20 | 8765351   | 8765673   | 323 |
| chr2  | 132393783 | 132394105 | 323 |

|       |               |           |     |
|-------|---------------|-----------|-----|
| chr19 | 55988300      | 55988622  | 323 |
| chr18 | 61963428      | 61963750  | 323 |
| chr18 | 52859136      | 52859458  | 323 |
| chr18 | 52026343      | 52026665  | 323 |
| chr18 | 38803845      | 38804167  | 323 |
| chr18 | 11082949      | 11083271  | 323 |
| chr17 | 69808722      | 69809044  | 323 |
| chr16 | 24036195      | 24036517  | 323 |
| chr15 | 31957170      | 31957492  | 323 |
| chr14 | 127383 127705 | 323       |     |
| chr13 | 71557163      | 71557485  | 323 |
| chr13 | 25183974      | 25184296  | 323 |
| chr12 | 82012327      | 82012649  | 323 |
| chr12 | 32440562      | 32440884  | 323 |
| chr11 | 92483436      | 92483758  | 323 |
| chr11 | 91250632      | 91250954  | 323 |
| chr11 | 29883304      | 29883626  | 323 |
| chr10 | 90203288      | 90203610  | 323 |
| chr10 | 84198944      | 84199266  | 323 |
| chr10 | 81722398      | 81722720  | 323 |
| chrX  | 78661212      | 78661533  | 322 |
| chrX  | 70494263      | 70494584  | 322 |
| chrX  | 60413530      | 60413851  | 322 |
| chrX  | 54810494      | 54810815  | 322 |
| chrX  | 36823989      | 36824310  | 322 |
| chrX  | 27283233      | 27283554  | 322 |
| chrX  | 21067192      | 21067513  | 322 |
| chrX  | 16980771      | 16981092  | 322 |
| chrX  | 398374 398695 | 322       |     |
| chr9  | 99701249      | 99701570  | 322 |
| chr8  | 80214333      | 80214654  | 322 |
| chr7  | 48564474      | 48564795  | 322 |
| chr7  | 38259035      | 38259356  | 322 |
| chr6  | 120836731     | 120837052 | 322 |
| chr5  | 78722344      | 78722665  | 322 |
| chr5  | 28835937      | 28836258  | 322 |
| chr4  | 11129976      | 11130297  | 322 |
| chr3  | 115413234     | 115413555 | 322 |
| chr3  | 114554899     | 114555220 | 322 |
| chr29 | 44658576      | 44658897  | 322 |
| chr29 | 36233957      | 36234278  | 322 |
| chr29 | 2504748       | 2505069   | 322 |
| chr28 | 42344485      | 42344806  | 322 |
| chr27 | 26668386      | 26668707  | 322 |
| chr26 | 34953474      | 34953795  | 322 |
| chr26 | 21592156      | 21592477  | 322 |
| chr24 | 48596769      | 48597090  | 322 |
| chr24 | 1865975       | 1866296   | 322 |
| chr23 | 38533265      | 38533586  | 322 |
| chr22 | 54239770      | 54240091  | 322 |

|       |           |           |     |
|-------|-----------|-----------|-----|
| chr21 | 24493650  | 24493971  | 322 |
| chr2  | 110183576 | 110183897 | 322 |
| chr19 | 45920293  | 45920614  | 322 |
| chr18 | 35071557  | 35071878  | 322 |
| chr18 | 22921428  | 22921749  | 322 |
| chr18 | 18505080  | 18505401  | 322 |
| chr17 | 70505048  | 70505369  | 322 |
| chr17 | 68397827  | 68398148  | 322 |
| chr17 | 68234768  | 68235089  | 322 |
| chr17 | 62434766  | 62435087  | 322 |
| chr15 | 24602646  | 24602967  | 322 |
| chr15 | 21207011  | 21207332  | 322 |
| chr14 | 1935755   | 1936076   | 322 |
| chr13 | 79385085  | 79385406  | 322 |
| chr13 | 66950887  | 66951208  | 322 |
| chr13 | 65853312  | 65853633  | 322 |
| chr13 | 59601678  | 59601999  | 322 |
| chr10 | 99834967  | 99835288  | 322 |
| chr1  | 157330738 | 157331059 | 322 |
| chrX  | 79807470  | 79807790  | 321 |
| chrX  | 65661804  | 65662124  | 321 |
| chrX  | 7640225   | 7640545   | 321 |
| chrX  | 5163915   | 5164235   | 321 |
| chr8  | 73082453  | 73082773  | 321 |
| chr7  | 30484179  | 30484499  | 321 |
| chr6  | 46685599  | 46685919  | 321 |
| chr5  | 121499424 | 121499744 | 321 |
| chr5  | 51630035  | 51630355  | 321 |
| chr5  | 30511777  | 30512097  | 321 |
| chr4  | 19464886  | 19465206  | 321 |
| chr3  | 115788068 | 115788388 | 321 |
| chr29 | 50032725  | 50033045  | 321 |
| chr29 | 33623931  | 33624251  | 321 |
| chr28 | 33987804  | 33988124  | 321 |
| chr26 | 43478779  | 43479099  | 321 |
| chr26 | 41451499  | 41451819  | 321 |
| chr26 | 20934546  | 20934866  | 321 |
| chr25 | 43238866  | 43239186  | 321 |
| chr24 | 40663954  | 40664274  | 321 |
| chr23 | 31290283  | 31290603  | 321 |
| chr22 | 59791427  | 59791747  | 321 |
| chr21 | 9531292   | 9531612   | 321 |
| chr21 | 6573820   | 6574140   | 321 |
| chr2  | 138634683 | 138635003 | 321 |
| chr2  | 111354378 | 111354698 | 321 |
| chr19 | 14921763  | 14922083  | 321 |
| chr18 | 22669574  | 22669894  | 321 |
| chr17 | 63518608  | 63518928  | 321 |
| chr17 | 62219242  | 62219562  | 321 |
| chr16 | 23680619  | 23680939  | 321 |

|       |           |           |     |
|-------|-----------|-----------|-----|
| chr15 | 75259500  | 75259820  | 321 |
| chr14 | 6403042   | 6403362   | 321 |
| chr13 | 69700529  | 69700849  | 321 |
| chr13 | 40967064  | 40967384  | 321 |
| chr13 | 10555195  | 10555515  | 321 |
| chr11 | 76383667  | 76383987  | 321 |
| chr11 | 70701681  | 70702001  | 321 |
| chr10 | 95569675  | 95569995  | 321 |
| chr10 | 50521028  | 50521348  | 321 |
| chr1  | 158510166 | 158510486 | 321 |
| chrX  | 50760899  | 50761218  | 320 |
| chrX  | 46705131  | 46705450  | 320 |
| chrX  | 34791922  | 34792241  | 320 |
| chrX  | 34731335  | 34731654  | 320 |
| chrX  | 30838185  | 30838504  | 320 |
| chrX  | 8658024   | 8658343   | 320 |
| chr9  | 65780562  | 65780881  | 320 |
| chr9  | 47255297  | 47255616  | 320 |
| chr9  | 11539875  | 11540194  | 320 |
| chr9  | 11536343  | 11536662  | 320 |
| chr7  | 71385278  | 71385597  | 320 |
| chr5  | 118439155 | 118439474 | 320 |
| chr5  | 70034948  | 70035267  | 320 |
| chr4  | 98812342  | 98812661  | 320 |
| chr4  | 96133996  | 96134315  | 320 |
| chr4  | 71542185  | 71542504  | 320 |
| chr3  | 121761066 | 121761385 | 320 |
| chr3  | 111217384 | 111217703 | 320 |
| chr3  | 33489464  | 33489783  | 320 |
| chr29 | 31915923  | 31916242  | 320 |
| chr27 | 34873091  | 34873410  | 320 |
| chr26 | 44037839  | 44038158  | 320 |
| chr25 | 37499670  | 37499989  | 320 |
| chr22 | 36053868  | 36054187  | 320 |
| chr22 | 30345941  | 30346260  | 320 |
| chr21 | 44300028  | 44300347  | 320 |
| chr21 | 27115060  | 27115379  | 320 |
| chr20 | 73644566  | 73644885  | 320 |
| chr2  | 135834711 | 135835030 | 320 |
| chr2  | 31568024  | 31568343  | 320 |
| chr19 | 58598424  | 58598743  | 320 |
| chr18 | 54828249  | 54828568  | 320 |
| chr18 | 48881290  | 48881609  | 320 |
| chr17 | 72718999  | 72719318  | 320 |
| chr16 | 68107133  | 68107452  | 320 |
| chr15 | 81056049  | 81056368  | 320 |
| chr15 | 30084185  | 30084504  | 320 |
| chr14 | 13379686  | 13380005  | 320 |
| chr13 | 57655304  | 57655623  | 320 |
| chr13 | 56358549  | 56358868  | 320 |



|       |               |           |     |
|-------|---------------|-----------|-----|
| chr13 | 49390121      | 49390440  | 320 |
| chr12 | 20032315      | 20032634  | 320 |
| chr11 | 28643795      | 28644114  | 320 |
| chr10 | 59868069      | 59868388  | 320 |
| chr1  | 82242295      | 82242614  | 320 |
| chrX  | 71303156      | 71303474  | 319 |
| chrX  | 54498613      | 54498931  | 319 |
| chrX  | 45103290      | 45103608  | 319 |
| chrX  | 34560697      | 34561015  | 319 |
| chrX  | 33759351      | 33759669  | 319 |
| chrX  | 30703900      | 30704218  | 319 |
| chrX  | 21057497      | 21057815  | 319 |
| chrX  | 15754277      | 15754595  | 319 |
| chrX  | 11599363      | 11599681  | 319 |
| chrX  | 9623874       | 9624192   | 319 |
| chr8  | 80608311      | 80608629  | 319 |
| chr7  | 91307953      | 91308271  | 319 |
| chr7  | 51916790      | 51917108  | 319 |
| chr5  | 32842528      | 32842846  | 319 |
| chr5  | 31667469      | 31667787  | 319 |
| chr3  | 89888916      | 89889234  | 319 |
| chr29 | 33677933      | 33678251  | 319 |
| chr29 | 26556317      | 26556635  | 319 |
| chr26 | 44069597      | 44069915  | 319 |
| chr25 | 4830847       | 4831165   | 319 |
| chr24 | 35668001      | 35668319  | 319 |
| chr23 | 33470990      | 33471308  | 319 |
| chr20 | 5038639       | 5038957   | 319 |
| chr20 | 577072 577390 | 319       |     |
| chr2  | 65525976      | 65526294  | 319 |
| chr19 | 27501202      | 27501520  | 319 |
| chr19 | 21746558      | 21746876  | 319 |
| chr18 | 19375261      | 19375579  | 319 |
| chr18 | 14429383      | 14429701  | 319 |
| chr16 | 46469801      | 46470119  | 319 |
| chr14 | 61788961      | 61789279  | 319 |
| chr14 | 57321490      | 57321808  | 319 |
| chr13 | 79710037      | 79710355  | 319 |
| chr12 | 33625559      | 33625877  | 319 |
| chr11 | 103817900     | 103818218 | 319 |
| chr11 | 85348772      | 85349090  | 319 |
| chr11 | 82899048      | 82899366  | 319 |
| chr10 | 66629872      | 66630190  | 319 |
| chr10 | 17394366      | 17394684  | 319 |
| chr10 | 7187234       | 7187552   | 319 |
| chr1  | 108604897     | 108605215 | 319 |
| chrX  | 72751506      | 72751823  | 318 |
| chrX  | 50219508      | 50219825  | 318 |
| chrX  | 48691547      | 48691864  | 318 |
| chrX  | 31218641      | 31218958  | 318 |

|       |               |           |     |
|-------|---------------|-----------|-----|
| chrX  | 21555553      | 21555870  | 318 |
| chrX  | 8650002       | 8650319   | 318 |
| chrX  | 867815 868132 |           | 318 |
| chr8  | 108651122     | 108651439 | 318 |
| chr8  | 25606013      | 25606330  | 318 |
| chr7  | 16526766      | 16527083  | 318 |
| chr7  | 13050032      | 13050349  | 318 |
| chr6  | 46646129      | 46646446  | 318 |
| chr5  | 118328281     | 118328598 | 318 |
| chr5  | 78898303      | 78898620  | 318 |
| chr4  | 96830694      | 96831011  | 318 |
| chr4  | 94706516      | 94706833  | 318 |
| chr4  | 52528855      | 52529172  | 318 |
| chr3  | 52152876      | 52153193  | 318 |
| chr3  | 27352349      | 27352666  | 318 |
| chr27 | 28137495      | 28137812  | 318 |
| chr26 | 44890551      | 44890868  | 318 |
| chr26 | 20245368      | 20245685  | 318 |
| chr26 | 18791331      | 18791648  | 318 |
| chr25 | 40818632      | 40818949  | 318 |
| chr23 | 40639951      | 40640268  | 318 |
| chr23 | 31271431      | 31271748  | 318 |
| chr23 | 8481082       | 8481399   | 318 |
| chr21 | 22356228      | 22356545  | 318 |
| chr2  | 134751655     | 134751972 | 318 |
| chr19 | 55487543      | 55487860  | 318 |
| chr19 | 17218653      | 17218970  | 318 |
| chr18 | 43380334      | 43380651  | 318 |
| chr18 | 34887206      | 34887523  | 318 |
| chr18 | 3600936       | 3601253   | 318 |
| chr17 | 57759399      | 57759716  | 318 |
| chr17 | 57301180      | 57301497  | 318 |
| chr17 | 49458715      | 49459032  | 318 |
| chr17 | 19216891      | 19217208  | 318 |
| chr15 | 29750385      | 29750702  | 318 |
| chr15 | 25447727      | 25448044  | 318 |
| chr15 | 24719195      | 24719512  | 318 |
| chr15 | 24607970      | 24608287  | 318 |
| chr13 | 26231566      | 26231883  | 318 |
| chr11 | 76299641      | 76299958  | 318 |
| chr11 | 12001749      | 12002066  | 318 |
| chr11 | 7205165       | 7205482   | 318 |
| chr10 | 89397628      | 89397945  | 318 |
| chr10 | 16996533      | 16996850  | 318 |
| chrX  | 79076312      | 79076628  | 317 |
| chrX  | 60407730      | 60408046  | 317 |
| chrX  | 50038585      | 50038901  | 317 |
| chrX  | 45504568      | 45504884  | 317 |
| chrX  | 29989135      | 29989451  | 317 |
| chrX  | 6027517       | 6027833   | 317 |

|       |           |           |     |
|-------|-----------|-----------|-----|
| chrX  | 629747    | 630063    | 317 |
| chr8  | 116774028 | 116774344 | 317 |
| chr8  | 74537355  | 74537671  | 317 |
| chr8  | 60104171  | 60104487  | 317 |
| chr7  | 16521336  | 16521652  | 317 |
| chr5  | 122359904 | 122360220 | 317 |
| chr5  | 28381779  | 28382095  | 317 |
| chr4  | 75325861  | 75326177  | 317 |
| chr4  | 28588070  | 28588386  | 317 |
| chr3  | 127790864 | 127791180 | 317 |
| chr3  | 124918743 | 124919059 | 317 |
| chr3  | 120953465 | 120953781 | 317 |
| chr3  | 36045434  | 36045750  | 317 |
| chr29 | 35228327  | 35228643  | 317 |
| chr29 | 31726393  | 31726709  | 317 |
| chr26 | 42227851  | 42228167  | 317 |
| chr26 | 18770726  | 18771042  | 317 |
| chr25 | 35696960  | 35697276  | 317 |
| chr25 | 33524490  | 33524806  | 317 |
| chr22 | 56281941  | 56282257  | 317 |
| chr21 | 64168846  | 64169162  | 317 |
| chr21 | 64146126  | 64146442  | 317 |
| chr21 | 34173087  | 34173403  | 317 |
| chr21 | 9494925   | 9495241   | 317 |
| chr19 | 59027379  | 59027695  | 317 |
| chr19 | 58982586  | 58982902  | 317 |
| chr19 | 47376161  | 47376477  | 317 |
| chr19 | 47319316  | 47319632  | 317 |
| chr19 | 43138231  | 43138547  | 317 |
| chr19 | 16146229  | 16146545  | 317 |
| chr18 | 41258430  | 41258746  | 317 |
| chr18 | 11804001  | 11804317  | 317 |
| chr17 | 49145314  | 49145630  | 317 |
| chr17 | 18463383  | 18463699  | 317 |
| chr15 | 24936150  | 24936466  | 317 |
| chr15 | 20468726  | 20469042  | 317 |
| chr14 | 34060028  | 34060344  | 317 |
| chr13 | 71068674  | 71068990  | 317 |
| chr13 | 66876989  | 66877305  | 317 |
| chr13 | 58892169  | 58892485  | 317 |
| chr11 | 103348973 | 103349289 | 317 |
| chr1  | 82170399  | 82170715  | 317 |
| chrX  | 78167688  | 78168003  | 316 |
| chrX  | 61279995  | 61280310  | 316 |
| chrX  | 35594735  | 35595050  | 316 |
| chrX  | 31887889  | 31888204  | 316 |
| chrX  | 29787296  | 29787611  | 316 |
| chrX  | 13819233  | 13819548  | 316 |
| chr9  | 24457694  | 24458009  | 316 |
| chr8  | 110879114 | 110879429 | 316 |

|       |               |           |     |
|-------|---------------|-----------|-----|
| chr7  | 70807712      | 70808027  | 316 |
| chr5  | 33567917      | 33568232  | 316 |
| chr5  | 30315158      | 30315473  | 316 |
| chr4  | 107553493     | 107553808 | 316 |
| chr4  | 79038789      | 79039104  | 316 |
| chr3  | 115683939     | 115684254 | 316 |
| chr3  | 79684287      | 79684602  | 316 |
| chr3  | 55839466      | 55839781  | 316 |
| chr3  | 4710165       | 4710480   | 316 |
| chr29 | 48847194      | 48847509  | 316 |
| chr29 | 34238423      | 34238738  | 316 |
| chr29 | 30488199      | 30488514  | 316 |
| chr28 | 25299260      | 25299575  | 316 |
| chr25 | 42046224      | 42046539  | 316 |
| chr24 | 3894501       | 3894816   | 316 |
| chr23 | 42934031      | 42934346  | 316 |
| chr20 | 665794 666109 | 316       |     |
| chr2  | 140731988     | 140732303 | 316 |
| chr19 | 42267122      | 42267437  | 316 |
| chr19 | 39862954      | 39863269  | 316 |
| chr17 | 68033885      | 68034200  | 316 |
| chr17 | 57696128      | 57696443  | 316 |
| chr16 | 2693042       | 2693357   | 316 |
| chr13 | 58624627      | 58624942  | 316 |
| chr11 | 44934651      | 44934966  | 316 |
| chr11 | 23484295      | 23484610  | 316 |
| chr10 | 57344605      | 57344920  | 316 |
| chr10 | 53344674      | 53344989  | 316 |
| chr1  | 74179818      | 74180133  | 316 |
| chrX  | 87043821      | 87044135  | 315 |
| chrX  | 77225300      | 77225614  | 315 |
| chrX  | 66517490      | 66517804  | 315 |
| chrX  | 20276235      | 20276549  | 315 |
| chrX  | 10506016      | 10506330  | 315 |
| chrX  | 5261072       | 5261386   | 315 |
| chr8  | 87505740      | 87506054  | 315 |
| chr7  | 108569359     | 108569673 | 315 |
| chr6  | 108610381     | 108610695 | 315 |
| chr5  | 111257177     | 111257491 | 315 |
| chr5  | 81355627      | 81355941  | 315 |
| chr4  | 119252821     | 119253135 | 315 |
| chr3  | 88226833      | 88227147  | 315 |
| chr3  | 25131817      | 25132131  | 315 |
| chr26 | 34292206      | 34292520  | 315 |
| chr26 | 11400239      | 11400553  | 315 |
| chr25 | 28060206      | 28060520  | 315 |
| chr25 | 14737749      | 14738063  | 315 |
| chr25 | 2373684       | 2373998   | 315 |
| chr24 | 25962801      | 25963115  | 315 |
| chr23 | 27965688      | 27966002  | 315 |

|       |          |          |     |
|-------|----------|----------|-----|
| chr22 | 30097991 | 30098305 | 315 |
| chr20 | 37250468 | 37250782 | 315 |
| chr20 | 6213375  | 6213689  | 315 |
| chr2  | 75549239 | 75549553 | 315 |
| chr2  | 21840716 | 21841030 | 315 |
| chr2  | 15394349 | 15394663 | 315 |
| chr17 | 63103003 | 63103317 | 315 |
| chr17 | 62831879 | 62832193 | 315 |
| chr17 | 60949922 | 60950236 | 315 |
| chr16 | 75884802 | 75885116 | 315 |
| chr15 | 58003819 | 58004133 | 315 |
| chr15 | 29080293 | 29080607 | 315 |
| chr15 | 25419743 | 25420057 | 315 |
| chr11 | 67718873 | 67719187 | 315 |
| chr11 | 32235853 | 32236167 | 315 |
| chr11 | 28449556 | 28449870 | 315 |
| chr11 | 10636369 | 10636683 | 315 |
| chr10 | 90854245 | 90854559 | 315 |
| chr1  | 8940293  | 8940607  | 315 |
| chrX  | 75670317 | 75670630 | 314 |
| chrX  | 74708801 | 74709114 | 314 |
| chrX  | 64024048 | 64024361 | 314 |
| chrX  | 55809815 | 55810128 | 314 |
| chrX  | 44913827 | 44914140 | 314 |
| chrX  | 35599611 | 35599924 | 314 |
| chrX  | 19472207 | 19472520 | 314 |
| chrX  | 2337034  | 2337347  | 314 |
| chr9  | 16958518 | 16958831 | 314 |
| chr7  | 13328974 | 13329287 | 314 |
| chr29 | 44978785 | 44979098 | 314 |
| chr29 | 35069981 | 35070294 | 314 |
| chr29 | 17984314 | 17984627 | 314 |
| chr28 | 46056595 | 46056908 | 314 |
| chr28 | 34737436 | 34737749 | 314 |
| chr27 | 47577199 | 47577512 | 314 |
| chr27 | 45215658 | 45215971 | 314 |
| chr26 | 38216134 | 38216447 | 314 |
| chr24 | 61166045 | 61166358 | 314 |
| chr23 | 8474843  | 8475156  | 314 |
| chr22 | 56667736 | 56668049 | 314 |
| chr22 | 50252083 | 50252396 | 314 |
| chr21 | 47629351 | 47629664 | 314 |
| chr19 | 60809897 | 60810210 | 314 |
| chr19 | 59073156 | 59073469 | 314 |
| chr18 | 12155931 | 12156244 | 314 |
| chr18 | 12085657 | 12085970 | 314 |
| chr16 | 74045962 | 74046275 | 314 |
| chr16 | 59826054 | 59826367 | 314 |
| chr15 | 64871304 | 64871617 | 314 |
| chr11 | 74973921 | 74974234 | 314 |

|       |           |           |     |
|-------|-----------|-----------|-----|
| chr11 | 71462903  | 71463216  | 314 |
| chr11 | 49377280  | 49377593  | 314 |
| chr11 | 3355079   | 3355392   | 314 |
| chrX  | 62406471  | 62406783  | 313 |
| chrX  | 58440693  | 58441005  | 313 |
| chrX  | 50955682  | 50955994  | 313 |
| chrX  | 11735144  | 11735456  | 313 |
| chrX  | 11187913  | 11188225  | 313 |
| chrX  | 8018486   | 8018798   | 313 |
| chr8  | 8536840   | 8537152   | 313 |
| chr8  | 7520877   | 7521189   | 313 |
| chr7  | 71369693  | 71370005  | 313 |
| chr7  | 65236448  | 65236760  | 313 |
| chr7  | 46126565  | 46126877  | 313 |
| chr7  | 38206245  | 38206557  | 313 |
| chr6  | 106820377 | 106820689 | 313 |
| chr5  | 94653928  | 94654240  | 313 |
| chr5  | 29258196  | 29258508  | 313 |
| chr4  | 119679274 | 119679586 | 313 |
| chr4  | 104183131 | 104183443 | 313 |
| chr3  | 115694523 | 115694835 | 313 |
| chr3  | 108726847 | 108727159 | 313 |
| chr3  | 30460008  | 30460320  | 313 |
| chr28 | 40374346  | 40374658  | 313 |
| chr28 | 30766256  | 30766568  | 313 |
| chr28 | 6751292   | 6751604   | 313 |
| chr26 | 49109110  | 49109422  | 313 |
| chr23 | 13514462  | 13514774  | 313 |
| chr22 | 57726799  | 57727111  | 313 |
| chr22 | 48436696  | 48437008  | 313 |
| chr21 | 58820374  | 58820686  | 313 |
| chr21 | 34196561  | 34196873  | 313 |
| chr2  | 114903219 | 114903531 | 313 |
| chr19 | 61723939  | 61724251  | 313 |
| chr19 | 59251122  | 59251434  | 313 |
| chr19 | 39140697  | 39141009  | 313 |
| chr18 | 63759883  | 63760195  | 313 |
| chr18 | 24098860  | 24099172  | 313 |
| chr17 | 69518367  | 69518679  | 313 |
| chr15 | 75940296  | 75940608  | 313 |
| chr14 | 9210153   | 9210465   | 313 |
| chr13 | 75783406  | 75783718  | 313 |
| chr13 | 64614318  | 64614630  | 313 |
| chr13 | 57625951  | 57626263  | 313 |
| chr11 | 106314285 | 106314597 | 313 |
| chr11 | 81385804  | 81386116  | 313 |
| chr11 | 77558632  | 77558944  | 313 |
| chr10 | 74125671  | 74125983  | 313 |
| chr10 | 25257320  | 25257632  | 313 |
| chrX  | 56184382  | 56184693  | 312 |

|       |           |           |     |
|-------|-----------|-----------|-----|
| chrX  | 49108178  | 49108489  | 312 |
| chrX  | 35646654  | 35646965  | 312 |
| chrX  | 35644361  | 35644672  | 312 |
| chrX  | 1895736   | 1896047   | 312 |
| chr9  | 90609815  | 90610126  | 312 |
| chr8  | 85463341  | 85463652  | 312 |
| chr8  | 80607804  | 80608115  | 312 |
| chr7  | 81069486  | 81069797  | 312 |
| chr7  | 71556040  | 71556351  | 312 |
| chr6  | 109072784 | 109073095 | 312 |
| chr6  | 107492804 | 107493115 | 312 |
| chr5  | 125030341 | 125030652 | 312 |
| chr5  | 122610861 | 122611172 | 312 |
| chr5  | 28757085  | 28757396  | 312 |
| chr4  | 122982241 | 122982552 | 312 |
| chr3  | 94648046  | 94648357  | 312 |
| chr3  | 74846767  | 74847078  | 312 |
| chr29 | 17944800  | 17945111  | 312 |
| chr28 | 43941971  | 43942282  | 312 |
| chr28 | 4654598   | 4654909   | 312 |
| chr26 | 22287185  | 22287496  | 312 |
| chr24 | 36917502  | 36917813  | 312 |
| chr2  | 115076386 | 115076697 | 312 |
| chr2  | 75908057  | 75908368  | 312 |
| chr2  | 25786891  | 25787202  | 312 |
| chr19 | 45384551  | 45384862  | 312 |
| chr19 | 39540403  | 39540714  | 312 |
| chr19 | 38720388  | 38720699  | 312 |
| chr18 | 24320625  | 24320936  | 312 |
| chr18 | 18715756  | 18716067  | 312 |
| chr17 | 67961158  | 67961469  | 312 |
| chr17 | 62074609  | 62074920  | 312 |
| chr17 | 47401822  | 47402133  | 312 |
| chr14 | 61322157  | 61322468  | 312 |
| chr14 | 31602059  | 31602370  | 312 |
| chr10 | 99390680  | 99390991  | 312 |
| chr10 | 50643554  | 50643865  | 312 |
| chr10 | 42693351  | 42693662  | 312 |
| chr1  | 97147118  | 97147429  | 312 |
| chr1  | 77992786  | 77993097  | 312 |
| chrX  | 74354464  | 74354774  | 311 |
| chrX  | 72317729  | 72318039  | 311 |
| chrX  | 64651574  | 64651884  | 311 |
| chrX  | 63280378  | 63280688  | 311 |
| chrX  | 55486112  | 55486422  | 311 |
| chrX  | 21527984  | 21528294  | 311 |
| chrX  | 10195087  | 10195397  | 311 |
| chrX  | 7779861   | 7780171   | 311 |
| chr9  | 26768925  | 26769235  | 311 |
| chr7  | 44758304  | 44758614  | 311 |

|       |           |           |     |
|-------|-----------|-----------|-----|
| chr7  | 43963793  | 43964103  | 311 |
| chr7  | 18841451  | 18841761  | 311 |
| chr7  | 11237202  | 11237512  | 311 |
| chr7  | 3677157   | 3677467   | 311 |
| chr5  | 60376499  | 60376809  | 311 |
| chr4  | 95067359  | 95067669  | 311 |
| chr3  | 70480319  | 70480629  | 311 |
| chr26 | 43091325  | 43091635  | 311 |
| chr23 | 18474946  | 18475256  | 311 |
| chr23 | 16519118  | 16519428  | 311 |
| chr23 | 15028517  | 15028827  | 311 |
| chr23 | 10501101  | 10501411  | 311 |
| chr21 | 20659398  | 20659708  | 311 |
| chr2  | 22295352  | 22295662  | 311 |
| chr18 | 48255998  | 48256308  | 311 |
| chr18 | 23125611  | 23125921  | 311 |
| chr16 | 38539211  | 38539521  | 311 |
| chr15 | 53259064  | 53259374  | 311 |
| chr13 | 73870388  | 73870698  | 311 |
| chr13 | 40983036  | 40983346  | 311 |
| chr11 | 44990781  | 44991091  | 311 |
| chr11 | 14117127  | 14117437  | 311 |
| chr10 | 85790214  | 85790524  | 311 |
| chr10 | 71126067  | 71126377  | 311 |
| chr10 | 70404659  | 70404969  | 311 |
| chr1  | 99259354  | 99259664  | 311 |
| chrX  | 73359869  | 73360178  | 310 |
| chrX  | 72540486  | 72540795  | 310 |
| chrX  | 65636351  | 65636660  | 310 |
| chrX  | 50579326  | 50579635  | 310 |
| chrX  | 49977491  | 49977800  | 310 |
| chrX  | 21295526  | 21295835  | 310 |
| chrX  | 18162221  | 18162530  | 310 |
| chrX  | 11475253  | 11475562  | 310 |
| chrX  | 10479295  | 10479604  | 310 |
| chrX  | 5652421   | 5652730   | 310 |
| chr8  | 116228211 | 116228520 | 310 |
| chr8  | 73738095  | 73738404  | 310 |
| chr8  | 23485685  | 23485994  | 310 |
| chr6  | 119515305 | 119515614 | 310 |
| chr5  | 112888734 | 112889043 | 310 |
| chr5  | 60902635  | 60902944  | 310 |
| chr5  | 5155030   | 5155339   | 310 |
| chr4  | 106087338 | 106087647 | 310 |
| chr4  | 98898615  | 98898924  | 310 |
| chr4  | 72565617  | 72565926  | 310 |
| chr3  | 115492983 | 115493292 | 310 |
| chr3  | 35449182  | 35449491  | 310 |
| chr28 | 43848371  | 43848680  | 310 |
| chr28 | 11835280  | 11835589  | 310 |



|       |               |           |     |
|-------|---------------|-----------|-----|
| chr25 | 31852418      | 31852727  | 310 |
| chr23 | 48784708      | 48785017  | 310 |
| chr22 | 57199150      | 57199459  | 310 |
| chr22 | 52749257      | 52749566  | 310 |
| chr21 | 30790095      | 30790404  | 310 |
| chr20 | 73685935      | 73686244  | 310 |
| chr20 | 66541699      | 66542008  | 310 |
| chr20 | 1379745       | 1380054   | 310 |
| chr2  | 108769048     | 108769357 | 310 |
| chr2  | 23205317      | 23205626  | 310 |
| chr19 | 31490444      | 31490753  | 310 |
| chr19 | 21771877      | 21772186  | 310 |
| chr18 | 45535695      | 45536004  | 310 |
| chr18 | 10221243      | 10221552  | 310 |
| chr16 | 58228303      | 58228612  | 310 |
| chr13 | 70175192      | 70175501  | 310 |
| chr13 | 53363895      | 53364204  | 310 |
| chr13 | 28959418      | 28959727  | 310 |
| chr12 | 32426131      | 32426440  | 310 |
| chr11 | 108005988     | 108006297 | 310 |
| chr11 | 104491560     | 104491869 | 310 |
| chr11 | 81393341      | 81393650  | 310 |
| chr10 | 50563821      | 50564130  | 310 |
| chr1  | 76558181      | 76558490  | 310 |
| chrX  | 61514251      | 61514559  | 309 |
| chrX  | 59040738      | 59041046  | 309 |
| chrX  | 56181616      | 56181924  | 309 |
| chrX  | 47960335      | 47960643  | 309 |
| chrX  | 40484775      | 40485083  | 309 |
| chrX  | 10708496      | 10708804  | 309 |
| chrX  | 6490491       | 6490799   | 309 |
| chr5  | 120551350     | 120551658 | 309 |
| chr5  | 77754949      | 77755257  | 309 |
| chr4  | 118617663     | 118617971 | 309 |
| chr3  | 121819199     | 121819507 | 309 |
| chr3  | 112288072     | 112288380 | 309 |
| chr29 | 30809318      | 30809626  | 309 |
| chr27 | 767718 768026 | 309       |     |
| chr23 | 49708543      | 49708851  | 309 |
| chr23 | 10501719      | 10502027  | 309 |
| chr23 | 8057747       | 8058055   | 309 |
| chr22 | 56694790      | 56695098  | 309 |
| chr22 | 55876939      | 55877247  | 309 |
| chr22 | 50603133      | 50603441  | 309 |
| chr22 | 30349612      | 30349920  | 309 |
| chr21 | 34650725      | 34651033  | 309 |
| chr21 | 19977975      | 19978283  | 309 |
| chr2  | 124966656     | 124966964 | 309 |
| chr19 | 15100551      | 15100859  | 309 |
| chr18 | 52645891      | 52646199  | 309 |

|       |               |           |     |
|-------|---------------|-----------|-----|
| chr18 | 39976830      | 39977138  | 309 |
| chr18 | 24010491      | 24010799  | 309 |
| chr17 | 65070540      | 65070848  | 309 |
| chr15 | 78262240      | 78262548  | 309 |
| chr15 | 73840618      | 73840926  | 309 |
| chr15 | 62418985      | 62419293  | 309 |
| chr13 | 66565853      | 66566161  | 309 |
| chr13 | 66069948      | 66070256  | 309 |
| chr13 | 52920564      | 52920872  | 309 |
| chr13 | 38906336      | 38906644  | 309 |
| chr12 | 48065434      | 48065742  | 309 |
| chr1  | 146963538     | 146963846 | 309 |
| chrX  | 54974718      | 54975025  | 308 |
| chrX  | 54736590      | 54736897  | 308 |
| chrX  | 49538305      | 49538612  | 308 |
| chrX  | 38467439      | 38467746  | 308 |
| chrX  | 35593951      | 35594258  | 308 |
| chrX  | 34467840      | 34468147  | 308 |
| chrX  | 33473841      | 33474148  | 308 |
| chrX  | 20079929      | 20080236  | 308 |
| chrX  | 12257573      | 12257880  | 308 |
| chrX  | 10049546      | 10049853  | 308 |
| chrX  | 5408227       | 5408534   | 308 |
| chr8  | 5386995       | 5387302   | 308 |
| chr7  | 51396087      | 51396394  | 308 |
| chr4  | 96859554      | 96859861  | 308 |
| chr3  | 121884910     | 121885217 | 308 |
| chr3  | 120049859     | 120050166 | 308 |
| chr29 | 35377698      | 35378005  | 308 |
| chr29 | 31982829      | 31983136  | 308 |
| chr25 | 11258068      | 11258375  | 308 |
| chr25 | 1970504       | 1970811   | 308 |
| chr24 | 872438 872745 |           | 308 |
| chr23 | 48754373      | 48754680  | 308 |
| chr23 | 18773208      | 18773515  | 308 |
| chr22 | 60056667      | 60056974  | 308 |
| chr22 | 56666397      | 56666704  | 308 |
| chr21 | 33085081      | 33085388  | 308 |
| chr20 | 73249389      | 73249696  | 308 |
| chr19 | 54454276      | 54454583  | 308 |
| chr19 | 44893680      | 44893987  | 308 |
| chr18 | 23510121      | 23510428  | 308 |
| chr18 | 20760682      | 20760989  | 308 |
| chr17 | 67044586      | 67044893  | 308 |
| chr16 | 53844932      | 53845239  | 308 |
| chr16 | 46638555      | 46638862  | 308 |
| chr16 | 40943838      | 40944145  | 308 |
| chr15 | 37734602      | 37734909  | 308 |
| chr13 | 61149157      | 61149464  | 308 |
| chr12 | 33049767      | 33050074  | 308 |

|       |           |           |     |
|-------|-----------|-----------|-----|
| chr12 | 10234471  | 10234778  | 308 |
| chr11 | 5634094   | 5634401   | 308 |
| chr10 | 90464790  | 90465097  | 308 |
| chr10 | 87160960  | 87161267  | 308 |
| chr10 | 16849877  | 16850184  | 308 |
| chrX  | 75888756  | 75889062  | 307 |
| chrX  | 75445703  | 75446009  | 307 |
| chrX  | 70328654  | 70328960  | 307 |
| chrX  | 58976419  | 58976725  | 307 |
| chrX  | 55464860  | 55465166  | 307 |
| chrX  | 49299702  | 49300008  | 307 |
| chrX  | 36316488  | 36316794  | 307 |
| chrX  | 35051472  | 35051778  | 307 |
| chrX  | 29723853  | 29724159  | 307 |
| chrX  | 2132037   | 2132343   | 307 |
| chrX  | 878170    | 878476    | 307 |
| chr6  | 72333846  | 72334152  | 307 |
| chr3  | 123275326 | 123275632 | 307 |
| chr3  | 115080015 | 115080321 | 307 |
| chr3  | 112509232 | 112509538 | 307 |
| chr29 | 50607831  | 50608137  | 307 |
| chr29 | 32159347  | 32159653  | 307 |
| chr29 | 29904783  | 29905089  | 307 |
| chr27 | 15857526  | 15857832  | 307 |
| chr24 | 1483906   | 1484212   | 307 |
| chr23 | 7598348   | 7598654   | 307 |
| chr22 | 61479694  | 61480000  | 307 |
| chr21 | 20591507  | 20591813  | 307 |
| chr20 | 67491595  | 67491901  | 307 |
| chr2  | 131183358 | 131183664 | 307 |
| chr19 | 58703555  | 58703861  | 307 |
| chr19 | 37778159  | 37778465  | 307 |
| chr18 | 4243209   | 4243515   | 307 |
| chr16 | 62273342  | 62273648  | 307 |
| chr14 | 7715702   | 7716008   | 307 |
| chr13 | 40293700  | 40294006  | 307 |
| chr12 | 9504622   | 9504928   | 307 |
| chr11 | 98326376  | 98326682  | 307 |
| chr11 | 96135051  | 96135357  | 307 |
| chr10 | 74699720  | 74700026  | 307 |
| chr10 | 67728192  | 67728498  | 307 |
| chr10 | 20947684  | 20947990  | 307 |
| chr1  | 75971648  | 75971954  | 307 |
| chrX  | 64628225  | 64628530  | 306 |
| chrX  | 55066453  | 55066758  | 306 |
| chrX  | 37619850  | 37620155  | 306 |
| chrX  | 21436866  | 21437171  | 306 |
| chrX  | 20231331  | 20231636  | 306 |
| chrX  | 8520353   | 8520658   | 306 |
| chrX  | 8351275   | 8351580   | 306 |

|       |               |           |     |
|-------|---------------|-----------|-----|
| chrX  | 8210951       | 8211256   | 306 |
| chrX  | 852127 852432 | 306       |     |
| chr8  | 108793789     | 108794094 | 306 |
| chr5  | 122821180     | 122821485 | 306 |
| chr3  | 115652653     | 115652958 | 306 |
| chr3  | 113514602     | 113514907 | 306 |
| chr3  | 22528689      | 22528994  | 306 |
| chr26 | 18203919      | 18204224  | 306 |
| chr25 | 21029774      | 21030079  | 306 |
| chr24 | 50098526      | 50098831  | 306 |
| chr21 | 24847592      | 24847897  | 306 |
| chr2  | 135638381     | 135638686 | 306 |
| chr2  | 131207279     | 131207584 | 306 |
| chr19 | 54569091      | 54569396  | 306 |
| chr19 | 25241433      | 25241738  | 306 |
| chr19 | 21315993      | 21316298  | 306 |
| chr19 | 9259028       | 9259333   | 306 |
| chr17 | 73126248      | 73126553  | 306 |
| chr17 | 63989330      | 63989635  | 306 |
| chr16 | 70131165      | 70131470  | 306 |
| chr16 | 67344806      | 67345111  | 306 |
| chr16 | 23957121      | 23957426  | 306 |
| chr15 | 36665106      | 36665411  | 306 |
| chr14 | 68705780      | 68706085  | 306 |
| chr13 | 77737157      | 77737462  | 306 |
| chr13 | 70089510      | 70089815  | 306 |
| chr13 | 58474328      | 58474633  | 306 |
| chr13 | 57398775      | 57399080  | 306 |
| chr11 | 81423722      | 81424027  | 306 |
| chr11 | 77650723      | 77651028  | 306 |
| chr11 | 29843556      | 29843861  | 306 |
| chr10 | 70141533      | 70141838  | 306 |
| chr1  | 71578247      | 71578552  | 306 |
| chrX  | 68289982      | 68290286  | 305 |
| chrX  | 64073172      | 64073476  | 305 |
| chrX  | 46526028      | 46526332  | 305 |
| chrX  | 37432020      | 37432324  | 305 |
| chrX  | 22096545      | 22096849  | 305 |
| chrX  | 21279146      | 21279450  | 305 |
| chrX  | 19679765      | 19680069  | 305 |
| chrX  | 13818354      | 13818658  | 305 |
| chrX  | 6374654       | 6374958   | 305 |
| chr9  | 93431891      | 93432195  | 305 |
| chr9  | 29836124      | 29836428  | 305 |
| chr8  | 115113651     | 115113955 | 305 |
| chr8  | 63836794      | 63837098  | 305 |
| chr7  | 50587090      | 50587394  | 305 |
| chr7  | 18414552      | 18414856  | 305 |
| chr4  | 98489578      | 98489882  | 305 |
| chr3  | 105087186     | 105087490 | 305 |

|       |           |           |     |
|-------|-----------|-----------|-----|
| chr29 | 43071023  | 43071327  | 305 |
| chr28 | 33383199  | 33383503  | 305 |
| chr26 | 41809845  | 41810149  | 305 |
| chr26 | 33161724  | 33162028  | 305 |
| chr26 | 22031213  | 22031517  | 305 |
| chr24 | 44278828  | 44279132  | 305 |
| chr23 | 49930466  | 49930770  | 305 |
| chr22 | 30149910  | 30150214  | 305 |
| chr21 | 62323970  | 62324274  | 305 |
| chr21 | 34364289  | 34364593  | 305 |
| chr21 | 21152895  | 21153199  | 305 |
| chr20 | 72235248  | 72235552  | 305 |
| chr20 | 8391598   | 8391902   | 305 |
| chr2  | 92608475  | 92608779  | 305 |
| chr19 | 62154881  | 62155185  | 305 |
| chr19 | 58405413  | 58405717  | 305 |
| chr19 | 39846922  | 39847226  | 305 |
| chr18 | 25476308  | 25476612  | 305 |
| chr18 | 22718132  | 22718436  | 305 |
| chr17 | 58767177  | 58767481  | 305 |
| chr17 | 57633262  | 57633566  | 305 |
| chr15 | 75921883  | 75922187  | 305 |
| chr15 | 65014163  | 65014467  | 305 |
| chr15 | 25651649  | 25651953  | 305 |
| chr13 | 22154653  | 22154957  | 305 |
| chr12 | 81928654  | 81928958  | 305 |
| chr12 | 80842512  | 80842816  | 305 |
| chr11 | 9206948   | 9207252   | 305 |
| chr10 | 44051838  | 44052142  | 305 |
| chr10 | 29857541  | 29857845  | 305 |
| chr10 | 8556560   | 8556864   | 305 |
| chr10 | 6913806   | 6914110   | 305 |
| chr1  | 159077796 | 159078100 | 305 |
| chr1  | 74528242  | 74528546  | 305 |
| chrX  | 78811973  | 78812276  | 304 |
| chrX  | 73250862  | 73251165  | 304 |
| chrX  | 72444308  | 72444611  | 304 |
| chrX  | 69210603  | 69210906  | 304 |
| chrX  | 65585726  | 65586029  | 304 |
| chrX  | 37492271  | 37492574  | 304 |
| chrX  | 35734519  | 35734822  | 304 |
| chrX  | 33629803  | 33630106  | 304 |
| chrX  | 20680480  | 20680783  | 304 |
| chrX  | 6138802   | 6139105   | 304 |
| chr8  | 73437344  | 73437647  | 304 |
| chr8  | 24226779  | 24227082  | 304 |
| chr8  | 7638207   | 7638510   | 304 |
| chr6  | 120886643 | 120886946 | 304 |
| chr5  | 82890839  | 82891142  | 304 |
| chr5  | 29744056  | 29744359  | 304 |

|       |           |           |     |
|-------|-----------|-----------|-----|
| chr4  | 121940796 | 121941099 | 304 |
| chr4  | 97987419  | 97987722  | 304 |
| chr3  | 126851577 | 126851880 | 304 |
| chr3  | 30332631  | 30332934  | 304 |
| chr29 | 49241543  | 49241846  | 304 |
| chr27 | 26852965  | 26853268  | 304 |
| chr26 | 50842047  | 50842350  | 304 |
| chr26 | 18725742  | 18726045  | 304 |
| chr26 | 14559954  | 14560257  | 304 |
| chr25 | 30672745  | 30673048  | 304 |
| chr25 | 29366971  | 29367274  | 304 |
| chr24 | 59047905  | 59048208  | 304 |
| chr20 | 66538462  | 66538765  | 304 |
| chr20 | 22298266  | 22298569  | 304 |
| chr2  | 93353099  | 93353402  | 304 |
| chr2  | 66037972  | 66038275  | 304 |
| chr19 | 21590950  | 21591253  | 304 |
| chr18 | 22301337  | 22301640  | 304 |
| chr18 | 11661877  | 11662180  | 304 |
| chr16 | 75865535  | 75865838  | 304 |
| chr16 | 72159163  | 72159466  | 304 |
| chr14 | 1836398   | 1836701   | 304 |
| chr13 | 66889131  | 66889434  | 304 |
| chr13 | 59208692  | 59208995  | 304 |
| chr11 | 108323688 | 108323991 | 304 |
| chr11 | 104195077 | 104195380 | 304 |
| chr11 | 90286279  | 90286582  | 304 |
| chr11 | 77607341  | 77607644  | 304 |
| chr11 | 72047526  | 72047829  | 304 |
| chr11 | 24012821  | 24013124  | 304 |
| chr1  | 149484683 | 149484986 | 304 |
| chrX  | 62408161  | 62408463  | 303 |
| chrX  | 36286381  | 36286683  | 303 |
| chrX  | 18449785  | 18450087  | 303 |
| chrX  | 9706949   | 9707251   | 303 |
| chrX  | 870026    | 870328    | 303 |
| chrX  | 279978    | 280280    | 303 |
| chr8  | 60811787  | 60812089  | 303 |
| chr7  | 50617490  | 50617792  | 303 |
| chr7  | 43737172  | 43737474  | 303 |
| chr7  | 19064068  | 19064370  | 303 |
| chr29 | 46933936  | 46934238  | 303 |
| chr29 | 37236514  | 37236816  | 303 |
| chr25 | 37195065  | 37195367  | 303 |
| chr25 | 33632759  | 33633061  | 303 |
| chr24 | 44128528  | 44128830  | 303 |
| chr24 | 41892969  | 41893271  | 303 |
| chr24 | 1134965   | 1135267   | 303 |
| chr22 | 60063223  | 60063525  | 303 |
| chr2  | 135960756 | 135961058 | 303 |

|       |               |           |     |
|-------|---------------|-----------|-----|
| chr2  | 124957459     | 124957761 | 303 |
| chr2  | 122999320     | 122999622 | 303 |
| chr2  | 111845849     | 111846151 | 303 |
| chr2  | 25820220      | 25820522  | 303 |
| chr19 | 60836352      | 60836654  | 303 |
| chr17 | 66868405      | 66868707  | 303 |
| chr15 | 81782528      | 81782830  | 303 |
| chr15 | 74941741      | 74942043  | 303 |
| chr14 | 7369957       | 7370259   | 303 |
| chr13 | 77387975      | 77388277  | 303 |
| chr13 | 41196432      | 41196734  | 303 |
| chr13 | 40925840      | 40926142  | 303 |
| chr13 | 17302935      | 17303237  | 303 |
| chr12 | 34232288      | 34232590  | 303 |
| chr11 | 14036089      | 14036391  | 303 |
| chrX  | 50640614      | 50640915  | 302 |
| chrX  | 32635655      | 32635956  | 302 |
| chrX  | 28426326      | 28426627  | 302 |
| chr9  | 100047660     | 100047961 | 302 |
| chr5  | 116950857     | 116951158 | 302 |
| chr5  | 82889115      | 82889416  | 302 |
| chr5  | 51815774      | 51816075  | 302 |
| chr5  | 30393132      | 30393433  | 302 |
| chr4  | 69629501      | 69629802  | 302 |
| chr29 | 51247116      | 51247417  | 302 |
| chr29 | 37198971      | 37199272  | 302 |
| chr25 | 42078245      | 42078546  | 302 |
| chr24 | 61379962      | 61380263  | 302 |
| chr22 | 12466858      | 12467159  | 302 |
| chr20 | 75040910      | 75041211  | 302 |
| chr19 | 62555396      | 62555697  | 302 |
| chr19 | 39543541      | 39543842  | 302 |
| chr19 | 38771479      | 38771780  | 302 |
| chr19 | 16231385      | 16231686  | 302 |
| chr18 | 45549675      | 45549976  | 302 |
| chr18 | 23535741      | 23536042  | 302 |
| chr17 | 57709527      | 57709828  | 302 |
| chr15 | 75743093      | 75743394  | 302 |
| chr15 | 52215473      | 52215774  | 302 |
| chr15 | 26772679      | 26772980  | 302 |
| chr14 | 854270 854571 |           | 302 |
| chr13 | 70142052      | 70142353  | 302 |
| chr11 | 96125231      | 96125532  | 302 |
| chr11 | 74273162      | 74273463  | 302 |
| chr11 | 66208266      | 66208567  | 302 |
| chr10 | 73573221      | 73573522  | 302 |
| chr10 | 17601042      | 17601343  | 302 |
| chr1  | 151119470     | 151119771 | 302 |
| chrX  | 65747497      | 65747797  | 301 |
| chrX  | 59416795      | 59417095  | 301 |

|       |           |           |     |
|-------|-----------|-----------|-----|
| chrX  | 38319582  | 38319882  | 301 |
| chrX  | 9839879   | 9840179   | 301 |
| chrX  | 9488998   | 9489298   | 301 |
| chrX  | 6362591   | 6362891   | 301 |
| chr9  | 100078788 | 100079088 | 301 |
| chr8  | 114930848 | 114931148 | 301 |
| chr8  | 65187723  | 65188023  | 301 |
| chr7  | 48170980  | 48171280  | 301 |
| chr7  | 5064480   | 5064780   | 301 |
| chr5  | 120506526 | 120506826 | 301 |
| chr5  | 112889514 | 112889814 | 301 |
| chr5  | 111335581 | 111335881 | 301 |
| chr4  | 97715371  | 97715671  | 301 |
| chr3  | 122357285 | 122357585 | 301 |
| chr28 | 26798625  | 26798925  | 301 |
| chr28 | 26453612  | 26453912  | 301 |
| chr27 | 15820854  | 15821154  | 301 |
| chr26 | 42166029  | 42166329  | 301 |
| chr24 | 43837731  | 43838031  | 301 |
| chr24 | 40355445  | 40355745  | 301 |
| chr23 | 43005847  | 43006147  | 301 |
| chr23 | 13628944  | 13629244  | 301 |
| chr21 | 34807827  | 34808127  | 301 |
| chr21 | 30354629  | 30354929  | 301 |
| chr21 | 18932454  | 18932754  | 301 |
| chr20 | 27295700  | 27296000  | 301 |
| chr2  | 129309356 | 129309656 | 301 |
| chr19 | 44151371  | 44151671  | 301 |
| chr19 | 11003923  | 11004223  | 301 |
| chr18 | 6994380   | 6994680   | 301 |
| chr17 | 68568671  | 68568971  | 301 |
| chr16 | 68907935  | 68908235  | 301 |
| chr16 | 47216330  | 47216630  | 301 |
| chr14 | 75704904  | 75705204  | 301 |
| chr13 | 53118615  | 53118915  | 301 |
| chr13 | 41958943  | 41959243  | 301 |
| chr11 | 91477769  | 91478069  | 301 |
| chr11 | 30034686  | 30034986  | 301 |
| chr10 | 69998397  | 69998697  | 301 |
| chrX  | 77511972  | 77512271  | 300 |
| chrX  | 74823379  | 74823678  | 300 |
| chrX  | 64332007  | 64332306  | 300 |
| chrX  | 59521624  | 59521923  | 300 |
| chrX  | 54142992  | 54143291  | 300 |
| chrX  | 22510722  | 22511021  | 300 |
| chrX  | 1933271   | 1933570   | 300 |
| chr9  | 100231002 | 100231301 | 300 |
| chr9  | 82369677  | 82369976  | 300 |
| chr9  | 62595129  | 62595428  | 300 |
| chr8  | 77652014  | 77652313  | 300 |



|       |           |           |     |
|-------|-----------|-----------|-----|
| chr8  | 8115810   | 8116109   | 300 |
| chr5  | 80639098  | 80639397  | 300 |
| chr5  | 32836866  | 32837165  | 300 |
| chr5  | 10396296  | 10396595  | 300 |
| chr4  | 68423751  | 68424050  | 300 |
| chr3  | 109669073 | 109669372 | 300 |
| chr27 | 28214961  | 28215260  | 300 |
| chr26 | 49046522  | 49046821  | 300 |
| chr26 | 34266905  | 34267204  | 300 |
| chr24 | 35667365  | 35667664  | 300 |
| chr23 | 31429804  | 31430103  | 300 |
| chr23 | 991163    | 991462    | 300 |
| chr22 | 56535042  | 56535341  | 300 |
| chr21 | 6486297   | 6486596   | 300 |
| chr2  | 117704255 | 117704554 | 300 |
| chr17 | 63146276  | 63146575  | 300 |
| chr15 | 39985406  | 39985705  | 300 |
| chr13 | 77753310  | 77753609  | 300 |
| chr13 | 63248513  | 63248812  | 300 |
| chr11 | 105984349 | 105984648 | 300 |
| chr11 | 13921869  | 13922168  | 300 |
| chr10 | 66776776  | 66777075  | 300 |
| chr1  | 78036820  | 78037119  | 300 |
| chr1  | 2454559   | 2454858   | 300 |
| chrX  | 75590010  | 75590308  | 299 |
| chrX  | 74087793  | 74088091  | 299 |
| chrX  | 71581155  | 71581453  | 299 |
| chrX  | 68824632  | 68824930  | 299 |
| chrX  | 56100249  | 56100547  | 299 |
| chrX  | 31211013  | 31211311  | 299 |
| chrX  | 6510809   | 6511107   | 299 |
| chrX  | 3071375   | 3071673   | 299 |
| chr8  | 78849306  | 78849604  | 299 |
| chr8  | 64531277  | 64531575  | 299 |
| chr7  | 85411668  | 85411966  | 299 |
| chr7  | 4934159   | 4934457   | 299 |
| chr6  | 121019607 | 121019905 | 299 |
| chr5  | 30341876  | 30342174  | 299 |
| chr4  | 119338063 | 119338361 | 299 |
| chr29 | 38878890  | 38879188  | 299 |
| chr29 | 31599513  | 31599811  | 299 |
| chr29 | 31548908  | 31549206  | 299 |
| chr28 | 34174875  | 34175173  | 299 |
| chr24 | 52098177  | 52098475  | 299 |
| chr22 | 26876436  | 26876734  | 299 |
| chr21 | 63365151  | 63365449  | 299 |
| chr21 | 57896046  | 57896344  | 299 |
| chr2  | 134467315 | 134467613 | 299 |
| chr2  | 131752097 | 131752395 | 299 |
| chr2  | 126972387 | 126972685 | 299 |

|       |               |           |     |
|-------|---------------|-----------|-----|
| chr19 | 38559858      | 38560156  | 299 |
| chr18 | 55210275      | 55210573  | 299 |
| chr17 | 67973132      | 67973430  | 299 |
| chr17 | 5399320       | 5399618   | 299 |
| chr17 | 4828290       | 4828588   | 299 |
| chr16 | 68760554      | 68760852  | 299 |
| chr15 | 24562594      | 24562892  | 299 |
| chr14 | 6014293       | 6014591   | 299 |
| chr13 | 78079838      | 78080136  | 299 |
| chr13 | 57666317      | 57666615  | 299 |
| chr13 | 56224734      | 56225032  | 299 |
| chr13 | 34941843      | 34942141  | 299 |
| chr11 | 96821472      | 96821770  | 299 |
| chr11 | 92246581      | 92246879  | 299 |
| chr11 | 78240531      | 78240829  | 299 |
| chr11 | 21663120      | 21663418  | 299 |
| chr11 | 9424242       | 9424540   | 299 |
| chr10 | 104783334     | 104783632 | 299 |
| chr10 | 70262900      | 70263198  | 299 |
| chr10 | 16757345      | 16757643  | 299 |
| chr1  | 149490508     | 149490806 | 299 |
| chrX  | 75876786      | 75877083  | 298 |
| chrX  | 62848183      | 62848480  | 298 |
| chrX  | 55336536      | 55336833  | 298 |
| chrX  | 33517162      | 33517459  | 298 |
| chrX  | 19325303      | 19325600  | 298 |
| chrX  | 6336766       | 6337063   | 298 |
| chr9  | 90707708      | 90708005  | 298 |
| chr8  | 108681356     | 108681653 | 298 |
| chr8  | 65757591      | 65757888  | 298 |
| chr8  | 861950 862247 | 298       |     |
| chr7  | 93976456      | 93976753  | 298 |
| chr7  | 76989606      | 76989903  | 298 |
| chr7  | 38894630      | 38894927  | 298 |
| chr5  | 116336137     | 116336434 | 298 |
| chr5  | 115213756     | 115214053 | 298 |
| chr4  | 95605844      | 95606141  | 298 |
| chr3  | 113431331     | 113431628 | 298 |
| chr29 | 48884464      | 48884761  | 298 |
| chr29 | 46194173      | 46194470  | 298 |
| chr29 | 17632789      | 17633086  | 298 |
| chr28 | 8229663       | 8229960   | 298 |
| chr24 | 58618773      | 58619070  | 298 |
| chr23 | 41421158      | 41421455  | 298 |
| chr23 | 8250173       | 8250470   | 298 |
| chr22 | 14986322      | 14986619  | 298 |
| chr21 | 28135353      | 28135650  | 298 |
| chr2  | 130388428     | 130388725 | 298 |
| chr2  | 112128920     | 112129217 | 298 |
| chr19 | 25455747      | 25456044  | 298 |

|       |               |           |     |
|-------|---------------|-----------|-----|
| chr19 | 15980452      | 15980749  | 298 |
| chr18 | 62037960      | 62038257  | 298 |
| chr18 | 23518607      | 23518904  | 298 |
| chr17 | 61677615      | 61677912  | 298 |
| chr16 | 1106344       | 1106641   | 298 |
| chr13 | 74015334      | 74015631  | 298 |
| chr13 | 22954255      | 22954552  | 298 |
| chr11 | 107195243     | 107195540 | 298 |
| chr11 | 74213599      | 74213896  | 298 |
| chr10 | 36752940      | 36753237  | 298 |
| chr10 | 17822930      | 17823227  | 298 |
| chrX  | 86237272      | 86237568  | 297 |
| chrX  | 58108874      | 58109170  | 297 |
| chrX  | 20410566      | 20410862  | 297 |
| chrX  | 13196586      | 13196882  | 297 |
| chrX  | 2521855       | 2522151   | 297 |
| chrX  | 1246897       | 1247193   | 297 |
| chrX  | 602781 603077 | 297       |     |
| chr8  | 65926214      | 65926510  | 297 |
| chr6  | 109388666     | 109388962 | 297 |
| chr6  | 45443091      | 45443387  | 297 |
| chr5  | 121199614     | 121199910 | 297 |
| chr5  | 115156501     | 115156797 | 297 |
| chr5  | 113158051     | 113158347 | 297 |
| chr3  | 36900139      | 36900435  | 297 |
| chr29 | 46389427      | 46389723  | 297 |
| chr29 | 36899618      | 36899914  | 297 |
| chr28 | 26344714      | 26345010  | 297 |
| chr28 | 4974879       | 4975175   | 297 |
| chr27 | 35948707      | 35949003  | 297 |
| chr25 | 3203777       | 3204073   | 297 |
| chr24 | 22275542      | 22275838  | 297 |
| chr22 | 57361311      | 57361607  | 297 |
| chr2  | 115025171     | 115025467 | 297 |
| chr2  | 102336477     | 102336773 | 297 |
| chr19 | 58978146      | 58978442  | 297 |
| chr19 | 29443900      | 29444196  | 297 |
| chr19 | 27191014      | 27191310  | 297 |
| chr18 | 22236237      | 22236533  | 297 |
| chr17 | 73216477      | 73216773  | 297 |
| chr16 | 48799334      | 48799630  | 297 |
| chr15 | 20038744      | 20039040  | 297 |
| chr14 | 63498495      | 63498791  | 297 |
| chr13 | 41696200      | 41696496  | 297 |
| chr12 | 30564479      | 30564775  | 297 |
| chr11 | 81249620      | 81249916  | 297 |
| chr10 | 14990213      | 14990509  | 297 |
| chr10 | 5263368       | 5263664   | 297 |
| chr1  | 158546381     | 158546677 | 297 |
| chr1  | 150975078     | 150975374 | 297 |

|       |           |           |     |
|-------|-----------|-----------|-----|
| chr1  | 147323476 | 147323772 | 297 |
| chr1  | 82898332  | 82898628  | 297 |
| chr1  | 1658513   | 1658809   | 297 |
| chrX  | 72956044  | 72956339  | 296 |
| chrX  | 54122459  | 54122754  | 296 |
| chrX  | 44763648  | 44763943  | 296 |
| chrX  | 20291045  | 20291340  | 296 |
| chrX  | 19633175  | 19633470  | 296 |
| chrX  | 17292319  | 17292614  | 296 |
| chrX  | 8126750   | 8127045   | 296 |
| chr9  | 52419199  | 52419494  | 296 |
| chr8  | 516580    | 516875    | 296 |
| chr7  | 46401963  | 46402258  | 296 |
| chr5  | 115214783 | 115215078 | 296 |
| chr5  | 10193710  | 10194005  | 296 |
| chr5  | 1069586   | 1069881   | 296 |
| chr4  | 66896360  | 66896655  | 296 |
| chr3  | 111348096 | 111348391 | 296 |
| chr3  | 89206252  | 89206547  | 296 |
| chr29 | 48868600  | 48868895  | 296 |
| chr29 | 13653845  | 13654140  | 296 |
| chr27 | 14405582  | 14405877  | 296 |
| chr25 | 3275364   | 3275659   | 296 |
| chr23 | 46439635  | 46439930  | 296 |
| chr23 | 15703581  | 15703876  | 296 |
| chr22 | 50731185  | 50731480  | 296 |
| chr22 | 45625632  | 45625927  | 296 |
| chr22 | 39824854  | 39825149  | 296 |
| chr20 | 74032251  | 74032546  | 296 |
| chr20 | 73376404  | 73376699  | 296 |
| chr2  | 140715122 | 140715417 | 296 |
| chr19 | 61604383  | 61604678  | 296 |
| chr18 | 35065874  | 35066169  | 296 |
| chr18 | 11684490  | 11684785  | 296 |
| chr18 | 9966503   | 9966798   | 296 |
| chr17 | 72720625  | 72720920  | 296 |
| chr17 | 72334707  | 72335002  | 296 |
| chr16 | 48565726  | 48566021  | 296 |
| chr16 | 47247461  | 47247756  | 296 |
| chr14 | 66300058  | 66300353  | 296 |
| chr13 | 41385865  | 41386160  | 296 |
| chr11 | 91492656  | 91492951  | 296 |
| chr11 | 3879887   | 3880182   | 296 |
| chr1  | 23193403  | 23193698  | 296 |
| chrX  | 74572914  | 74573208  | 295 |
| chrX  | 64798776  | 64799070  | 295 |
| chrX  | 57147994  | 57148288  | 295 |
| chrX  | 54519417  | 54519711  | 295 |
| chrX  | 53669251  | 53669545  | 295 |
| chrX  | 8106178   | 8106472   | 295 |

|       |           |           |     |
|-------|-----------|-----------|-----|
| chrX  | 6121588   | 6121882   | 295 |
| chr6  | 13896733  | 13897027  | 295 |
| chr4  | 117799696 | 117799990 | 295 |
| chr4  | 29004607  | 29004901  | 295 |
| chr29 | 38855456  | 38855750  | 295 |
| chr28 | 34137518  | 34137812  | 295 |
| chr26 | 17554031  | 17554325  | 295 |
| chr25 | 40885275  | 40885569  | 295 |
| chr24 | 26735943  | 26736237  | 295 |
| chr23 | 49659929  | 49660223  | 295 |
| chr23 | 44520854  | 44521148  | 295 |
| chr23 | 2540018   | 2540312   | 295 |
| chr22 | 55852651  | 55852945  | 295 |
| chr22 | 30423139  | 30423433  | 295 |
| chr2  | 131560862 | 131561156 | 295 |
| chr2  | 68414598  | 68414892  | 295 |
| chr2  | 24525270  | 24525564  | 295 |
| chr19 | 59123397  | 59123691  | 295 |
| chr19 | 27387287  | 27387581  | 295 |
| chr19 | 26346748  | 26347042  | 295 |
| chr18 | 52832393  | 52832687  | 295 |
| chr18 | 48349988  | 48350282  | 295 |
| chr18 | 12133642  | 12133936  | 295 |
| chr17 | 64215178  | 64215472  | 295 |
| chr16 | 47203289  | 47203583  | 295 |
| chr16 | 39503467  | 39503761  | 295 |
| chr15 | 64561260  | 64561554  | 295 |
| chr13 | 74007548  | 74007842  | 295 |
| chr13 | 70972481  | 70972775  | 295 |
| chr13 | 63526795  | 63527089  | 295 |
| chr13 | 59394607  | 59394901  | 295 |
| chr12 | 33038137  | 33038431  | 295 |
| chr1  | 85940845  | 85941139  | 295 |
| chrX  | 78104907  | 78105200  | 294 |
| chrX  | 69414964  | 69415257  | 294 |
| chrX  | 65624888  | 65625181  | 294 |
| chrX  | 59151993  | 59152286  | 294 |
| chrX  | 47449071  | 47449364  | 294 |
| chrX  | 45009537  | 45009830  | 294 |
| chrX  | 31542612  | 31542905  | 294 |
| chrX  | 30286961  | 30287254  | 294 |
| chrX  | 15619361  | 15619654  | 294 |
| chrX  | 11024384  | 11024677  | 294 |
| chrX  | 6558334   | 6558627   | 294 |
| chrX  | 1127195   | 1127488   | 294 |
| chr8  | 109437218 | 109437511 | 294 |
| chr7  | 60993793  | 60994086  | 294 |
| chr5  | 121257174 | 121257467 | 294 |
| chr5  | 72900016  | 72900309  | 294 |
| chr3  | 62178760  | 62179053  | 294 |

|       |           |           |     |
|-------|-----------|-----------|-----|
| chr3  | 35951650  | 35951943  | 294 |
| chr29 | 36713149  | 36713442  | 294 |
| chr29 | 36460470  | 36460763  | 294 |
| chr27 | 35387578  | 35387871  | 294 |
| chr27 | 28117268  | 28117561  | 294 |
| chr26 | 37857412  | 37857705  | 294 |
| chr26 | 22295273  | 22295566  | 294 |
| chr25 | 39423103  | 39423396  | 294 |
| chr25 | 34473065  | 34473358  | 294 |
| chr23 | 50908479  | 50908772  | 294 |
| chr23 | 31606762  | 31607055  | 294 |
| chr23 | 5747038   | 5747331   | 294 |
| chr22 | 29910775  | 29911068  | 294 |
| chr19 | 25427591  | 25427884  | 294 |
| chr18 | 62681080  | 62681373  | 294 |
| chr18 | 11785667  | 11785960  | 294 |
| chr17 | 63052973  | 63053266  | 294 |
| chr17 | 56961084  | 56961377  | 294 |
| chr17 | 47388529  | 47388822  | 294 |
| chr16 | 57017351  | 57017644  | 294 |
| chr16 | 1865850   | 1866143   | 294 |
| chr15 | 60445526  | 60445819  | 294 |
| chr13 | 73076534  | 73076827  | 294 |
| chr13 | 59990867  | 59991160  | 294 |
| chr13 | 46098757  | 46099050  | 294 |
| chr11 | 70675915  | 70676208  | 294 |
| chr10 | 70022846  | 70023139  | 294 |
| chrX  | 72918885  | 72919177  | 293 |
| chrX  | 68466979  | 68467271  | 293 |
| chrX  | 64082958  | 64083250  | 293 |
| chrX  | 59777387  | 59777679  | 293 |
| chrX  | 58987426  | 58987718  | 293 |
| chrX  | 56493356  | 56493648  | 293 |
| chrX  | 56402240  | 56402532  | 293 |
| chrX  | 36095937  | 36096229  | 293 |
| chrX  | 20627767  | 20628059  | 293 |
| chrX  | 18786450  | 18786742  | 293 |
| chrX  | 3817654   | 3817946   | 293 |
| chr9  | 87777795  | 87778087  | 293 |
| chr9  | 43981551  | 43981843  | 293 |
| chr3  | 121583508 | 121583800 | 293 |
| chr3  | 121428383 | 121428675 | 293 |
| chr3  | 95077353  | 95077645  | 293 |
| chr3  | 36897701  | 36897993  | 293 |
| chr29 | 34841272  | 34841564  | 293 |
| chr29 | 25902058  | 25902350  | 293 |
| chr29 | 17864736  | 17865028  | 293 |
| chr27 | 35428454  | 35428746  | 293 |
| chr24 | 33780490  | 33780782  | 293 |
| chr24 | 1652987   | 1653279   | 293 |

|       |               |           |     |
|-------|---------------|-----------|-----|
| chr21 | 28931508      | 28931800  | 293 |
| chr20 | 73271063      | 73271355  | 293 |
| chr20 | 70894822      | 70895114  | 293 |
| chr2  | 75952558      | 75952850  | 293 |
| chr19 | 20353737      | 20354029  | 293 |
| chr18 | 62055598      | 62055890  | 293 |
| chr17 | 68534781      | 68535073  | 293 |
| chr17 | 63750547      | 63750839  | 293 |
| chr17 | 49163729      | 49164021  | 293 |
| chr17 | 47354349      | 47354641  | 293 |
| chr15 | 24552962      | 24553254  | 293 |
| chr14 | 1902937       | 1903229   | 293 |
| chr13 | 73385621      | 73385913  | 293 |
| chr13 | 66678601      | 66678893  | 293 |
| chr13 | 37856823      | 37857115  | 293 |
| chr13 | 25913192      | 25913484  | 293 |
| chr11 | 83219369      | 83219661  | 293 |
| chr1  | 141485026     | 141485318 | 293 |
| chr1  | 82368346      | 82368638  | 293 |
| chr1  | 376816 377108 |           | 293 |
| chrX  | 78713532      | 78713823  | 292 |
| chrX  | 75462131      | 75462422  | 292 |
| chrX  | 67911597      | 67911888  | 292 |
| chrX  | 65561544      | 65561835  | 292 |
| chrX  | 65126505      | 65126796  | 292 |
| chrX  | 58443223      | 58443514  | 292 |
| chrX  | 54688755      | 54689046  | 292 |
| chrX  | 37494457      | 37494748  | 292 |
| chrX  | 35725088      | 35725379  | 292 |
| chrX  | 35566041      | 35566332  | 292 |
| chrX  | 11329277      | 11329568  | 292 |
| chrX  | 6001754       | 6002045   | 292 |
| chrX  | 362369 362660 |           | 292 |
| chr7  | 44003311      | 44003602  | 292 |
| chr5  | 121631041     | 121631332 | 292 |
| chr5  | 12504410      | 12504701  | 292 |
| chr28 | 45122044      | 45122335  | 292 |
| chr28 | 34028517      | 34028808  | 292 |
| chr26 | 43051774      | 43052065  | 292 |
| chr26 | 42166526      | 42166817  | 292 |
| chr25 | 37695721      | 37696012  | 292 |
| chr25 | 28274642      | 28274933  | 292 |
| chr25 | 5067775       | 5068066   | 292 |
| chr23 | 28038036      | 28038327  | 292 |
| chr23 | 13084168      | 13084459  | 292 |
| chr22 | 15006523      | 15006814  | 292 |
| chr21 | 26439627      | 26439918  | 292 |
| chr21 | 4299653       | 4299944   | 292 |
| chr17 | 68662012      | 68662303  | 292 |
| chr17 | 66751927      | 66752218  | 292 |

|       |           |           |     |
|-------|-----------|-----------|-----|
| chr16 | 23765398  | 23765689  | 292 |
| chr16 | 20655770  | 20656061  | 292 |
| chr15 | 23047895  | 23048186  | 292 |
| chr14 | 31504813  | 31505104  | 292 |
| chr11 | 21645028  | 21645319  | 292 |
| chr11 | 11631152  | 11631443  | 292 |
| chr10 | 68476814  | 68477105  | 292 |
| chrX  | 78120747  | 78121037  | 291 |
| chrX  | 9747048   | 9747338   | 291 |
| chr8  | 78487633  | 78487923  | 291 |
| chr7  | 71314657  | 71314947  | 291 |
| chr7  | 10415563  | 10415853  | 291 |
| chr6  | 115486463 | 115486753 | 291 |
| chr5  | 112059886 | 112060176 | 291 |
| chr3  | 127851361 | 127851651 | 291 |
| chr3  | 104964101 | 104964391 | 291 |
| chr3  | 97867834  | 97868124  | 291 |
| chr3  | 24999636  | 24999926  | 291 |
| chr29 | 33546599  | 33546889  | 291 |
| chr29 | 31719972  | 31720262  | 291 |
| chr25 | 26402528  | 26402818  | 291 |
| chr24 | 33120366  | 33120656  | 291 |
| chr20 | 8461904   | 8462194   | 291 |
| chr2  | 131060338 | 131060628 | 291 |
| chr2  | 21515227  | 21515517  | 291 |
| chr19 | 56100123  | 56100413  | 291 |
| chr19 | 54793107  | 54793397  | 291 |
| chr19 | 39284335  | 39284625  | 291 |
| chr19 | 34572680  | 34572970  | 291 |
| chr18 | 55307299  | 55307589  | 291 |
| chr15 | 52808887  | 52809177  | 291 |
| chr15 | 36312007  | 36312297  | 291 |
| chr15 | 24192345  | 24192635  | 291 |
| chr14 | 61279432  | 61279722  | 291 |
| chr13 | 57399635  | 57399925  | 291 |
| chr13 | 15883503  | 15883793  | 291 |
| chr10 | 37308158  | 37308448  | 291 |
| chr10 | 17118333  | 17118623  | 291 |
| chrX  | 78570758  | 78571047  | 290 |
| chrX  | 78351377  | 78351666  | 290 |
| chrX  | 75593169  | 75593458  | 290 |
| chrX  | 73190709  | 73190998  | 290 |
| chrX  | 69510912  | 69511201  | 290 |
| chrX  | 66898018  | 66898307  | 290 |
| chrX  | 58368999  | 58369288  | 290 |
| chrX  | 44994693  | 44994982  | 290 |
| chrX  | 39172412  | 39172701  | 290 |
| chrX  | 35597876  | 35598165  | 290 |
| chrX  | 30671113  | 30671402  | 290 |
| chrX  | 19612119  | 19612408  | 290 |



|       |               |           |     |
|-------|---------------|-----------|-----|
| chrX  | 16330727      | 16331016  | 290 |
| chrX  | 10481738      | 10482027  | 290 |
| chrX  | 10092605      | 10092894  | 290 |
| chrX  | 9748436       | 9748725   | 290 |
| chr9  | 106497236     | 106497525 | 290 |
| chr8  | 7833606       | 7833895   | 290 |
| chr7  | 71288451      | 71288740  | 290 |
| chr5  | 75966259      | 75966548  | 290 |
| chr4  | 121000942     | 121001231 | 290 |
| chr3  | 15571106      | 15571395  | 290 |
| chr29 | 44708653      | 44708942  | 290 |
| chr28 | 42250084      | 42250373  | 290 |
| chr28 | 26716600      | 26716889  | 290 |
| chr27 | 35859153      | 35859442  | 290 |
| chr26 | 48940511      | 48940800  | 290 |
| chr25 | 39241235      | 39241524  | 290 |
| chr25 | 34376962      | 34377251  | 290 |
| chr25 | 1443211       | 1443500   | 290 |
| chr22 | 54621407      | 54621696  | 290 |
| chr2  | 130427732     | 130428021 | 290 |
| chr19 | 42372536      | 42372825  | 290 |
| chr19 | 38682296      | 38682585  | 290 |
| chr18 | 23263508      | 23263797  | 290 |
| chr14 | 26695331      | 26695620  | 290 |
| chr13 | 77304498      | 77304787  | 290 |
| chr13 | 14658500      | 14658789  | 290 |
| chr11 | 106275856     | 106276145 | 290 |
| chr11 | 88855563      | 88855852  | 290 |
| chr11 | 80674620      | 80674909  | 290 |
| chr10 | 25606185      | 25606474  | 290 |
| chr10 | 12902069      | 12902358  | 290 |
| chr1  | 82488317      | 82488606  | 290 |
| chrX  | 75828004      | 75828292  | 289 |
| chrX  | 59330240      | 59330528  | 289 |
| chrX  | 41261982      | 41262270  | 289 |
| chrX  | 34433076      | 34433364  | 289 |
| chrX  | 28221852      | 28222140  | 289 |
| chrX  | 20617018      | 20617306  | 289 |
| chrX  | 518764 519052 |           | 289 |
| chr9  | 42060604      | 42060892  | 289 |
| chr8  | 72133214      | 72133502  | 289 |
| chr8  | 65843770      | 65844058  | 289 |
| chr8  | 23907705      | 23907993  | 289 |
| chr7  | 61124490      | 61124778  | 289 |
| chr7  | 10961002      | 10961290  | 289 |
| chr6  | 63068765      | 63069053  | 289 |
| chr3  | 121385191     | 121385479 | 289 |
| chr29 | 49046721      | 49047009  | 289 |
| chr29 | 31064206      | 31064494  | 289 |
| chr26 | 38122043      | 38122331  | 289 |

|       |           |           |     |
|-------|-----------|-----------|-----|
| chr26 | 15690137  | 15690425  | 289 |
| chr25 | 36145244  | 36145532  | 289 |
| chr23 | 43001540  | 43001828  | 289 |
| chr22 | 17429206  | 17429494  | 289 |
| chr2  | 140754190 | 140754478 | 289 |
| chr2  | 139490408 | 139490696 | 289 |
| chr2  | 139203704 | 139203992 | 289 |
| chr2  | 135141758 | 135142046 | 289 |
| chr19 | 56449280  | 56449568  | 289 |
| chr19 | 56099104  | 56099392  | 289 |
| chr19 | 39483127  | 39483415  | 289 |
| chr19 | 38630875  | 38631163  | 289 |
| chr15 | 14239386  | 14239674  | 289 |
| chr13 | 55713817  | 55714105  | 289 |
| chr13 | 42613792  | 42614080  | 289 |
| chr12 | 35333022  | 35333310  | 289 |
| chr12 | 14868431  | 14868719  | 289 |
| chr11 | 10447050  | 10447338  | 289 |
| chr10 | 85810713  | 85811001  | 289 |
| chr10 | 17626953  | 17627241  | 289 |
| chr10 | 17144506  | 17144794  | 289 |
| chr10 | 17005133  | 17005421  | 289 |
| chr1  | 83832541  | 83832829  | 289 |
| chr1  | 58647121  | 58647409  | 289 |
| chr1  | 58572220  | 58572508  | 289 |
| chr1  | 1468652   | 1468940   | 289 |
| chrX  | 82908026  | 82908313  | 288 |
| chrX  | 71866491  | 71866778  | 288 |
| chrX  | 65871479  | 65871766  | 288 |
| chrX  | 60054960  | 60055247  | 288 |
| chrX  | 55772462  | 55772749  | 288 |
| chrX  | 55477476  | 55477763  | 288 |
| chr8  | 78694730  | 78695017  | 288 |
| chr7  | 19287829  | 19288116  | 288 |
| chr7  | 19183618  | 19183905  | 288 |
| chr6  | 117561447 | 117561734 | 288 |
| chr6  | 109651353 | 109651640 | 288 |
| chr3  | 117231375 | 117231662 | 288 |
| chr3  | 15631669  | 15631956  | 288 |
| chr29 | 18210098  | 18210385  | 288 |
| chr28 | 42930861  | 42931148  | 288 |
| chr27 | 34976063  | 34976350  | 288 |
| chr26 | 42990254  | 42990541  | 288 |
| chr26 | 22215100  | 22215387  | 288 |
| chr24 | 46286556  | 46286843  | 288 |
| chr23 | 53270004  | 53270291  | 288 |
| chr23 | 19907545  | 19907832  | 288 |
| chr22 | 58740179  | 58740466  | 288 |
| chr21 | 66165580  | 66165867  | 288 |
| chr21 | 65550770  | 65551057  | 288 |

|       |           |           |     |
|-------|-----------|-----------|-----|
| chr21 | 23539306  | 23539593  | 288 |
| chr19 | 29098120  | 29098407  | 288 |
| chr16 | 63005907  | 63006194  | 288 |
| chr15 | 74527707  | 74527994  | 288 |
| chr14 | 59083185  | 59083472  | 288 |
| chr14 | 31032511  | 31032798  | 288 |
| chr13 | 73442103  | 73442390  | 288 |
| chr13 | 54856497  | 54856784  | 288 |
| chr11 | 105625941 | 105626228 | 288 |
| chr11 | 90312853  | 90313140  | 288 |
| chr11 | 77644965  | 77645252  | 288 |
| chr11 | 70935919  | 70936206  | 288 |
| chr1  | 143793411 | 143793698 | 288 |
| chrX  | 77946953  | 77947239  | 287 |
| chrX  | 75895083  | 75895369  | 287 |
| chrX  | 73295449  | 73295735  | 287 |
| chrX  | 55488538  | 55488824  | 287 |
| chrX  | 35698475  | 35698761  | 287 |
| chrX  | 35625834  | 35626120  | 287 |
| chr9  | 105438907 | 105439193 | 287 |
| chr9  | 34913907  | 34914193  | 287 |
| chr7  | 38254528  | 38254814  | 287 |
| chr4  | 118376152 | 118376438 | 287 |
| chr4  | 116859498 | 116859784 | 287 |
| chr4  | 106964672 | 106964958 | 287 |
| chr3  | 55949645  | 55949931  | 287 |
| chr29 | 31525449  | 31525735  | 287 |
| chr26 | 21788904  | 21789190  | 287 |
| chr25 | 30501948  | 30502234  | 287 |
| chr25 | 4637756   | 4638042   | 287 |
| chr24 | 1473314   | 1473600   | 287 |
| chr23 | 42793602  | 42793888  | 287 |
| chr23 | 27405083  | 27405369  | 287 |
| chr23 | 8382224   | 8382510   | 287 |
| chr22 | 52231839  | 52232125  | 287 |
| chr2  | 129307989 | 129308275 | 287 |
| chr2  | 75571831  | 75572117  | 287 |
| chr18 | 13137318  | 13137604  | 287 |
| chr18 | 3441368   | 3441654   | 287 |
| chr17 | 69726467  | 69726753  | 287 |
| chr17 | 57693984  | 57694270  | 287 |
| chr15 | 40075627  | 40075913  | 287 |
| chr15 | 31956866  | 31957152  | 287 |
| chr13 | 70347658  | 70347944  | 287 |
| chr13 | 59663407  | 59663693  | 287 |
| chr12 | 32180535  | 32180821  | 287 |
| chr12 | 22241308  | 22241594  | 287 |
| chr11 | 104892867 | 104893153 | 287 |
| chr10 | 14123856  | 14124142  | 287 |
| chr1  | 141659917 | 141660203 | 287 |

|       |           |           |     |
|-------|-----------|-----------|-----|
| chr1  | 84672200  | 84672486  | 287 |
| chr1  | 82876225  | 82876511  | 287 |
| chrX  | 80952789  | 80953074  | 286 |
| chrX  | 79835020  | 79835305  | 286 |
| chrX  | 72797305  | 72797590  | 286 |
| chrX  | 69575080  | 69575365  | 286 |
| chrX  | 64853001  | 64853286  | 286 |
| chrX  | 55788734  | 55789019  | 286 |
| chrX  | 32008648  | 32008933  | 286 |
| chrX  | 17122249  | 17122534  | 286 |
| chrX  | 13879836  | 13880121  | 286 |
| chr9  | 56350647  | 56350932  | 286 |
| chr7  | 42661635  | 42661920  | 286 |
| chr5  | 123004975 | 123005260 | 286 |
| chr5  | 50537469  | 50537754  | 286 |
| chr28 | 33908962  | 33909247  | 286 |
| chr27 | 26747630  | 26747915  | 286 |
| chr26 | 22619633  | 22619918  | 286 |
| chr25 | 35471938  | 35472223  | 286 |
| chr24 | 51458677  | 51458962  | 286 |
| chr23 | 31302116  | 31302401  | 286 |
| chr22 | 22087182  | 22087467  | 286 |
| chr2  | 21541066  | 21541351  | 286 |
| chr16 | 60217738  | 60218023  | 286 |
| chr16 | 50804857  | 50805142  | 286 |
| chr16 | 48671240  | 48671525  | 286 |
| chr15 | 74641390  | 74641675  | 286 |
| chr15 | 56059138  | 56059423  | 286 |
| chr14 | 34043329  | 34043614  | 286 |
| chr11 | 7070083   | 7070368   | 286 |
| chr10 | 8673049   | 8673334   | 286 |
| chr1  | 83099090  | 83099375  | 286 |
| chrX  | 81535417  | 81535701  | 285 |
| chrX  | 80278218  | 80278502  | 285 |
| chrX  | 73578569  | 73578853  | 285 |
| chrX  | 68883735  | 68884019  | 285 |
| chrX  | 61850824  | 61851108  | 285 |
| chrX  | 47577915  | 47578199  | 285 |
| chrX  | 8024278   | 8024562   | 285 |
| chrX  | 3127498   | 3127782   | 285 |
| chr8  | 107706081 | 107706365 | 285 |
| chr8  | 76018992  | 76019276  | 285 |
| chr7  | 38777235  | 38777519  | 285 |
| chr7  | 13541434  | 13541718  | 285 |
| chr5  | 115849222 | 115849506 | 285 |
| chr5  | 29144070  | 29144354  | 285 |
| chr4  | 72033729  | 72034013  | 285 |
| chr3  | 111662431 | 111662715 | 285 |
| chr3  | 33123818  | 33124102  | 285 |
| chr29 | 48900700  | 48900984  | 285 |

|       |           |           |     |
|-------|-----------|-----------|-----|
| chr29 | 36304357  | 36304641  | 285 |
| chr29 | 33607257  | 33607541  | 285 |
| chr27 | 6128945   | 6129229   | 285 |
| chr25 | 15246847  | 15247131  | 285 |
| chr24 | 40236960  | 40237244  | 285 |
| chr23 | 30518912  | 30519196  | 285 |
| chr23 | 18679863  | 18680147  | 285 |
| chr22 | 10952349  | 10952633  | 285 |
| chr21 | 34352179  | 34352463  | 285 |
| chr2  | 116505678 | 116505962 | 285 |
| chr18 | 56543227  | 56543511  | 285 |
| chr18 | 23490905  | 23491189  | 285 |
| chr17 | 70375171  | 70375455  | 285 |
| chr17 | 67969066  | 67969350  | 285 |
| chr13 | 57306009  | 57306293  | 285 |
| chr13 | 41044168  | 41044452  | 285 |
| chr13 | 14949803  | 14950087  | 285 |
| chr12 | 14730375  | 14730659  | 285 |
| chr11 | 107158347 | 107158631 | 285 |
| chr11 | 100975197 | 100975481 | 285 |
| chr11 | 13165595  | 13165879  | 285 |
| chr10 | 84384703  | 84384987  | 285 |
| chr10 | 20908271  | 20908555  | 285 |
| chrX  | 77660837  | 77661120  | 284 |
| chrX  | 60916180  | 60916463  | 284 |
| chrX  | 51688529  | 51688812  | 284 |
| chrX  | 50894107  | 50894390  | 284 |
| chrX  | 50885570  | 50885853  | 284 |
| chrX  | 14638243  | 14638526  | 284 |
| chrX  | 7337355   | 7337638   | 284 |
| chrX  | 4294622   | 4294905   | 284 |
| chrX  | 2129876   | 2130159   | 284 |
| chr8  | 62912751  | 62913034  | 284 |
| chr7  | 66503545  | 66503828  | 284 |
| chr29 | 29694353  | 29694636  | 284 |
| chr29 | 18212422  | 18212705  | 284 |
| chr26 | 44091285  | 44091568  | 284 |
| chr26 | 41546414  | 41546697  | 284 |
| chr24 | 60636610  | 60636893  | 284 |
| chr23 | 31112649  | 31112932  | 284 |
| chr21 | 57558738  | 57559021  | 284 |
| chr21 | 25587204  | 25587487  | 284 |
| chr2  | 74702459  | 74702742  | 284 |
| chr19 | 37774433  | 37774716  | 284 |
| chr19 | 27913959  | 27914242  | 284 |
| chr18 | 63942691  | 63942974  | 284 |
| chr18 | 22155966  | 22156249  | 284 |
| chr18 | 11557743  | 11558026  | 284 |
| chr17 | 70389133  | 70389416  | 284 |
| chr17 | 68808746  | 68809029  | 284 |

|       |               |           |     |
|-------|---------------|-----------|-----|
| chr17 | 57686434      | 57686717  | 284 |
| chr16 | 77533922      | 77534205  | 284 |
| chr16 | 817657 817940 | 284       |     |
| chr14 | 13958176      | 13958459  | 284 |
| chr14 | 1885189       | 1885472   | 284 |
| chr13 | 76266087      | 76266370  | 284 |
| chr12 | 68719880      | 68720163  | 284 |
| chr11 | 89088361      | 89088644  | 284 |
| chr10 | 88172935      | 88173218  | 284 |
| chrX  | 77518781      | 77519063  | 283 |
| chrX  | 71466789      | 71467071  | 283 |
| chrX  | 55971298      | 55971580  | 283 |
| chrX  | 37342716      | 37342998  | 283 |
| chrX  | 2265953       | 2266235   | 283 |
| chr9  | 104803089     | 104803371 | 283 |
| chr9  | 100020520     | 100020802 | 283 |
| chr9  | 78228493      | 78228775  | 283 |
| chr9  | 35402866      | 35403148  | 283 |
| chr7  | 71365092      | 71365374  | 283 |
| chr6  | 46522413      | 46522695  | 283 |
| chr5  | 58137872      | 58138154  | 283 |
| chr3  | 11537936      | 11538218  | 283 |
| chr29 | 44566021      | 44566303  | 283 |
| chr29 | 33589478      | 33589760  | 283 |
| chr29 | 33357455      | 33357737  | 283 |
| chr29 | 23645242      | 23645524  | 283 |
| chr27 | 26875047      | 26875329  | 283 |
| chr26 | 49259083      | 49259365  | 283 |
| chr26 | 43860257      | 43860539  | 283 |
| chr24 | 48913700      | 48913982  | 283 |
| chr24 | 34166207      | 34166489  | 283 |
| chr24 | 33975617      | 33975899  | 283 |
| chr24 | 25341287      | 25341569  | 283 |
| chr23 | 52805567      | 52805849  | 283 |
| chr23 | 17669098      | 17669380  | 283 |
| chr2  | 123752584     | 123752866 | 283 |
| chr19 | 28771181      | 28771463  | 283 |
| chr19 | 24416203      | 24416485  | 283 |
| chr17 | 73214258      | 73214540  | 283 |
| chr17 | 73190649      | 73190931  | 283 |
| chr15 | 74601547      | 74601829  | 283 |
| chr15 | 42302421      | 42302703  | 283 |
| chr15 | 26706938      | 26707220  | 283 |
| chr14 | 19700294      | 19700576  | 283 |
| chr13 | 41060763      | 41061045  | 283 |
| chr13 | 22834317      | 22834599  | 283 |
| chr13 | 17736946      | 17737228  | 283 |
| chr12 | 22982432      | 22982714  | 283 |
| chr12 | 10020999      | 10021281  | 283 |
| chr11 | 10367762      | 10368044  | 283 |

|       |               |           |     |
|-------|---------------|-----------|-----|
| chr10 | 89374697      | 89374979  | 283 |
| chr10 | 28840162      | 28840444  | 283 |
| chr10 | 16852188      | 16852470  | 283 |
| chr1  | 109020873     | 109021155 | 283 |
| chr1  | 74658169      | 74658451  | 283 |
| chr1  | 69079843      | 69080125  | 283 |
| chrX  | 79057938      | 79058219  | 282 |
| chrX  | 63418173      | 63418454  | 282 |
| chrX  | 62674016      | 62674297  | 282 |
| chrX  | 61298073      | 61298354  | 282 |
| chrX  | 35142185      | 35142466  | 282 |
| chrX  | 30617915      | 30618196  | 282 |
| chrX  | 19447984      | 19448265  | 282 |
| chrX  | 8086785       | 8087066   | 282 |
| chrX  | 5849866       | 5850147   | 282 |
| chr9  | 86921116      | 86921397  | 282 |
| chr8  | 40373902      | 40374183  | 282 |
| chr8  | 40332299      | 40332580  | 282 |
| chr7  | 43375754      | 43376035  | 282 |
| chr7  | 42260973      | 42261254  | 282 |
| chr3  | 33084164      | 33084445  | 282 |
| chr29 | 17672867      | 17673148  | 282 |
| chr27 | 658075 658356 | 282       |     |
| chr26 | 21123339      | 21123620  | 282 |
| chr26 | 18176934      | 18177215  | 282 |
| chr25 | 2052170       | 2052451   | 282 |
| chr24 | 48562336      | 48562617  | 282 |
| chr23 | 53007191      | 53007472  | 282 |
| chr22 | 59531393      | 59531674  | 282 |
| chr22 | 39578541      | 39578822  | 282 |
| chr21 | 22617151      | 22617432  | 282 |
| chr2  | 132041162     | 132041443 | 282 |
| chr2  | 131602900     | 131603181 | 282 |
| chr2  | 101517280     | 101517561 | 282 |
| chr19 | 19128316      | 19128597  | 282 |
| chr18 | 39893843      | 39894124  | 282 |
| chr16 | 59072538      | 59072819  | 282 |
| chr15 | 74604637      | 74604918  | 282 |
| chr14 | 16163966      | 16164247  | 282 |
| chr13 | 75618063      | 75618344  | 282 |
| chr13 | 55460432      | 55460713  | 282 |
| chr11 | 77627962      | 77628243  | 282 |
| chr11 | 74610670      | 74610951  | 282 |
| chr10 | 83571098      | 83571379  | 282 |
| chrX  | 39031527      | 39031807  | 281 |
| chrX  | 36450212      | 36450492  | 281 |
| chrX  | 12149516      | 12149796  | 281 |
| chr8  | 92261296      | 92261576  | 281 |
| chr8  | 41054913      | 41055193  | 281 |
| chr8  | 27074222      | 27074502  | 281 |

|       |               |           |     |
|-------|---------------|-----------|-----|
| chr7  | 52248708      | 52248988  | 281 |
| chr7  | 17480161      | 17480441  | 281 |
| chr7  | 15436846      | 15437126  | 281 |
| chr5  | 122349862     | 122350142 | 281 |
| chr5  | 29121751      | 29122031  | 281 |
| chr5  | 27977245      | 27977525  | 281 |
| chr4  | 99062173      | 99062453  | 281 |
| chr4  | 67405552      | 67405832  | 281 |
| chr3  | 20433545      | 20433825  | 281 |
| chr29 | 43441809      | 43442089  | 281 |
| chr29 | 17979825      | 17980105  | 281 |
| chr29 | 10284300      | 10284580  | 281 |
| chr28 | 7608728       | 7609008   | 281 |
| chr27 | 14410025      | 14410305  | 281 |
| chr27 | 964511 964791 | 281       |     |
| chr26 | 24745359      | 24745639  | 281 |
| chr25 | 30896936      | 30897216  | 281 |
| chr25 | 23139227      | 23139507  | 281 |
| chr24 | 55753332      | 55753612  | 281 |
| chr24 | 40328831      | 40329111  | 281 |
| chr23 | 49676795      | 49677075  | 281 |
| chr23 | 15914269      | 15914549  | 281 |
| chr21 | 15229962      | 15230242  | 281 |
| chr19 | 29885573      | 29885853  | 281 |
| chr18 | 39489099      | 39489379  | 281 |
| chr18 | 39231669      | 39231949  | 281 |
| chr18 | 34054127      | 34054407  | 281 |
| chr17 | 68168989      | 68169269  | 281 |
| chr15 | 64199927      | 64200207  | 281 |
| chr15 | 36261908      | 36262188  | 281 |
| chr15 | 29041096      | 29041376  | 281 |
| chr14 | 30904591      | 30904871  | 281 |
| chr14 | 8106118       | 8106398   | 281 |
| chr13 | 59018143      | 59018423  | 281 |
| chr12 | 83903118      | 83903398  | 281 |
| chr12 | 33271013      | 33271293  | 281 |
| chr12 | 32626811      | 32627091  | 281 |
| chr11 | 100282740     | 100283020 | 281 |
| chr11 | 87907433      | 87907713  | 281 |
| chr11 | 82831740      | 82832020  | 281 |
| chrX  | 65633436      | 65633715  | 280 |
| chrX  | 37334996      | 37335275  | 280 |
| chrX  | 10668576      | 10668855  | 280 |
| chrX  | 8140112       | 8140391   | 280 |
| chrX  | 7158163       | 7158442   | 280 |
| chr7  | 52218818      | 52219097  | 280 |
| chr7  | 10026632      | 10026911  | 280 |
| chr6  | 63189073      | 63189352  | 280 |
| chr3  | 111734003     | 111734282 | 280 |
| chr3  | 31743434      | 31743713  | 280 |



|       |               |           |     |
|-------|---------------|-----------|-----|
| chr3  | 30440793      | 30441072  | 280 |
| chr28 | 1265042       | 1265321   | 280 |
| chr27 | 4198109       | 4198388   | 280 |
| chr23 | 28111656      | 28111935  | 280 |
| chr23 | 18640788      | 18641067  | 280 |
| chr21 | 14618375      | 14618654  | 280 |
| chr2  | 116934653     | 116934932 | 280 |
| chr2  | 108886153     | 108886432 | 280 |
| chr19 | 47243466      | 47243745  | 280 |
| chr19 | 33958833      | 33959112  | 280 |
| chr18 | 54673003      | 54673282  | 280 |
| chr18 | 50987878      | 50988157  | 280 |
| chr18 | 23574321      | 23574600  | 280 |
| chr18 | 23524389      | 23524668  | 280 |
| chr18 | 4919591       | 4919870   | 280 |
| chr15 | 24617764      | 24618043  | 280 |
| chr13 | 76251733      | 76252012  | 280 |
| chr13 | 73478181      | 73478460  | 280 |
| chr13 | 42483631      | 42483910  | 280 |
| chr12 | 70969873      | 70970152  | 280 |
| chr1  | 130513432     | 130513711 | 280 |
| chr1  | 61364864      | 61365143  | 280 |
| chrX  | 78589510      | 78589788  | 279 |
| chrX  | 75556319      | 75556597  | 279 |
| chrX  | 70415251      | 70415529  | 279 |
| chrX  | 55403173      | 55403451  | 279 |
| chrX  | 29524156      | 29524434  | 279 |
| chr9  | 44910412      | 44910690  | 279 |
| chr8  | 7802415       | 7802693   | 279 |
| chr7  | 48983201      | 48983479  | 279 |
| chr7  | 14163916      | 14164194  | 279 |
| chr6  | 71945559      | 71945837  | 279 |
| chr3  | 115089741     | 115090019 | 279 |
| chr3  | 106578834     | 106579112 | 279 |
| chr3  | 105656438     | 105656716 | 279 |
| chr3  | 102963413     | 102963691 | 279 |
| chr25 | 43536408      | 43536686  | 279 |
| chr25 | 33180758      | 33181036  | 279 |
| chr23 | 51971132      | 51971410  | 279 |
| chr23 | 7428952       | 7429230   | 279 |
| chr22 | 52838350      | 52838628  | 279 |
| chr20 | 838703 838981 |           | 279 |
| chr2  | 131851715     | 131851993 | 279 |
| chr19 | 44614535      | 44614813  | 279 |
| chr19 | 35269484      | 35269762  | 279 |
| chr19 | 34595118      | 34595396  | 279 |
| chr19 | 30751918      | 30752196  | 279 |
| chr17 | 48683597      | 48683875  | 279 |
| chr16 | 73888238      | 73888516  | 279 |
| chr16 | 38510230      | 38510508  | 279 |

|       |           |           |     |
|-------|-----------|-----------|-----|
| chr15 | 52799338  | 52799616  | 279 |
| chr14 | 36741026  | 36741304  | 279 |
| chr14 | 7606285   | 7606563   | 279 |
| chr11 | 91799052  | 91799330  | 279 |
| chr11 | 66229994  | 66230272  | 279 |
| chr10 | 15034632  | 15034910  | 279 |
| chr1  | 82898733  | 82899011  | 279 |
| chrX  | 72277436  | 72277713  | 278 |
| chrX  | 66236765  | 66237042  | 278 |
| chrX  | 55211422  | 55211699  | 278 |
| chrX  | 54339340  | 54339617  | 278 |
| chrX  | 37387274  | 37387551  | 278 |
| chrX  | 20404717  | 20404994  | 278 |
| chrX  | 10174641  | 10174918  | 278 |
| chr8  | 108774753 | 108775030 | 278 |
| chr8  | 42213405  | 42213682  | 278 |
| chr8  | 10810903  | 10811180  | 278 |
| chr7  | 42784486  | 42784763  | 278 |
| chr7  | 16768615  | 16768892  | 278 |
| chr7  | 15655678  | 15655955  | 278 |
| chr4  | 107301282 | 107301559 | 278 |
| chr3  | 123302337 | 123302614 | 278 |
| chr3  | 116953419 | 116953696 | 278 |
| chr26 | 44050664  | 44050941  | 278 |
| chr25 | 35480210  | 35480487  | 278 |
| chr21 | 20668368  | 20668645  | 278 |
| chr2  | 135601790 | 135602067 | 278 |
| chr2  | 134435937 | 134436214 | 278 |
| chr19 | 62222952  | 62223229  | 278 |
| chr19 | 12503504  | 12503781  | 278 |
| chr18 | 46585149  | 46585426  | 278 |
| chr16 | 43905522  | 43905799  | 278 |
| chr13 | 65109172  | 65109449  | 278 |
| chr13 | 54097565  | 54097842  | 278 |
| chr11 | 29135077  | 29135354  | 278 |
| chr11 | 9207908   | 9208185   | 278 |
| chr10 | 68427364  | 68427641  | 278 |
| chr10 | 36258642  | 36258919  | 278 |
| chr1  | 154240760 | 154241037 | 278 |
| chr1  | 146922272 | 146922549 | 278 |
| chr1  | 123091688 | 123091965 | 278 |
| chr1  | 64842980  | 64843257  | 278 |
| chrX  | 74269719  | 74269995  | 277 |
| chrX  | 73864859  | 73865135  | 277 |
| chrX  | 55587589  | 55587865  | 277 |
| chrX  | 49067821  | 49068097  | 277 |
| chr8  | 74390236  | 74390512  | 277 |
| chr5  | 1183699   | 1183975   | 277 |
| chr4  | 70711490  | 70711766  | 277 |
| chr4  | 33235782  | 33236058  | 277 |

|       |           |           |     |
|-------|-----------|-----------|-----|
| chr3  | 124584250 | 124584526 | 277 |
| chr3  | 121008523 | 121008799 | 277 |
| chr3  | 85724107  | 85724383  | 277 |
| chr3  | 50282690  | 50282966  | 277 |
| chr3  | 15183071  | 15183347  | 277 |
| chr26 | 50354880  | 50355156  | 277 |
| chr26 | 38186697  | 38186973  | 277 |
| chr25 | 35372670  | 35372946  | 277 |
| chr25 | 34380885  | 34381161  | 277 |
| chr23 | 34996701  | 34996977  | 277 |
| chr22 | 50445506  | 50445782  | 277 |
| chr22 | 26870058  | 26870334  | 277 |
| chr20 | 9161825   | 9162101   | 277 |
| chr20 | 8397169   | 8397445   | 277 |
| chr2  | 18611813  | 18612089  | 277 |
| chr19 | 47352810  | 47353086  | 277 |
| chr19 | 38615301  | 38615577  | 277 |
| chr18 | 11481487  | 11481763  | 277 |
| chr17 | 57796844  | 57797120  | 277 |
| chr17 | 6489566   | 6489842   | 277 |
| chr15 | 23131834  | 23132110  | 277 |
| chr14 | 27316654  | 27316930  | 277 |
| chr13 | 79541115  | 79541391  | 277 |
| chr13 | 41763187  | 41763463  | 277 |
| chr12 | 70956934  | 70957210  | 277 |
| chr12 | 11444212  | 11444488  | 277 |
| chr11 | 108420604 | 108420880 | 277 |
| chr11 | 81392032  | 81392308  | 277 |
| chr11 | 71470783  | 71471059  | 277 |
| chr10 | 17149429  | 17149705  | 277 |
| chr1  | 47178539  | 47178815  | 277 |
| chrX  | 62426079  | 62426354  | 276 |
| chrX  | 21181194  | 21181469  | 276 |
| chrX  | 7870934   | 7871209   | 276 |
| chrX  | 7506182   | 7506457   | 276 |
| chrX  | 6132769   | 6133044   | 276 |
| chr8  | 77458558  | 77458833  | 276 |
| chr8  | 41428009  | 41428284  | 276 |
| chr7  | 45014294  | 45014569  | 276 |
| chr6  | 34428573  | 34428848  | 276 |
| chr5  | 124961228 | 124961503 | 276 |
| chr5  | 122613609 | 122613884 | 276 |
| chr5  | 30510162  | 30510437  | 276 |
| chr4  | 123023005 | 123023280 | 276 |
| chr4  | 122980468 | 122980743 | 276 |
| chr4  | 8870574   | 8870849   | 276 |
| chr3  | 123346219 | 123346494 | 276 |
| chr3  | 99917439  | 99917714  | 276 |
| chr3  | 8750326   | 8750601   | 276 |
| chr29 | 49040087  | 49040362  | 276 |

|       |           |           |     |
|-------|-----------|-----------|-----|
| chr29 | 9239243   | 9239518   | 276 |
| chr28 | 7264372   | 7264647   | 276 |
| chr27 | 27428500  | 27428775  | 276 |
| chr26 | 50497093  | 50497368  | 276 |
| chr23 | 45972401  | 45972676  | 276 |
| chr21 | 11667432  | 11667707  | 276 |
| chr2  | 132759535 | 132759810 | 276 |
| chr2  | 121835618 | 121835893 | 276 |
| chr2  | 74144030  | 74144305  | 276 |
| chr18 | 62751686  | 62751961  | 276 |
| chr17 | 57703659  | 57703934  | 276 |
| chr17 | 50982410  | 50982685  | 276 |
| chr17 | 31876804  | 31877079  | 276 |
| chr14 | 42189226  | 42189501  | 276 |
| chr14 | 30271456  | 30271731  | 276 |
| chr13 | 72244855  | 72245130  | 276 |
| chr13 | 23837646  | 23837921  | 276 |
| chr13 | 11414207  | 11414482  | 276 |
| chr11 | 46631162  | 46631437  | 276 |
| chr10 | 70824637  | 70824912  | 276 |
| chrX  | 59468229  | 59468503  | 275 |
| chrX  | 58628259  | 58628533  | 275 |
| chrX  | 56751036  | 56751310  | 275 |
| chrX  | 48048263  | 48048537  | 275 |
| chrX  | 38036191  | 38036465  | 275 |
| chrX  | 20925999  | 20926273  | 275 |
| chrX  | 19020883  | 19021157  | 275 |
| chrX  | 12497314  | 12497588  | 275 |
| chr6  | 18377119  | 18377393  | 275 |
| chr5  | 38508719  | 38508993  | 275 |
| chr3  | 114231166 | 114231440 | 275 |
| chr28 | 33681304  | 33681578  | 275 |
| chr26 | 38436468  | 38436742  | 275 |
| chr26 | 21629941  | 21630215  | 275 |
| chr26 | 20944560  | 20944834  | 275 |
| chr25 | 33393564  | 33393838  | 275 |
| chr25 | 26596381  | 26596655  | 275 |
| chr24 | 27090292  | 27090566  | 275 |
| chr23 | 49893527  | 49893801  | 275 |
| chr23 | 44093317  | 44093591  | 275 |
| chr22 | 59565225  | 59565499  | 275 |
| chr20 | 74917923  | 74918197  | 275 |
| chr2  | 136637109 | 136637383 | 275 |
| chr15 | 26764570  | 26764844  | 275 |
| chr14 | 16637958  | 16638232  | 275 |
| chr13 | 79044005  | 79044279  | 275 |
| chr11 | 104891450 | 104891724 | 275 |
| chr11 | 82843591  | 82843865  | 275 |
| chr11 | 74211592  | 74211866  | 275 |
| chr10 | 68282304  | 68282578  | 275 |

|       |           |           |     |
|-------|-----------|-----------|-----|
| chrX  | 77548048  | 77548321  | 274 |
| chrX  | 69879560  | 69879833  | 274 |
| chrX  | 64141454  | 64141727  | 274 |
| chrX  | 35888836  | 35889109  | 274 |
| chrX  | 8448030   | 8448303   | 274 |
| chrX  | 8446249   | 8446522   | 274 |
| chrX  | 3625906   | 3626179   | 274 |
| chr5  | 55499095  | 55499368  | 274 |
| chr4  | 73475814  | 73476087  | 274 |
| chr29 | 37158162  | 37158435  | 274 |
| chr29 | 31778426  | 31778699  | 274 |
| chr28 | 34432820  | 34433093  | 274 |
| chr27 | 34831471  | 34831744  | 274 |
| chr24 | 48943892  | 48944165  | 274 |
| chr23 | 19990273  | 19990546  | 274 |
| chr23 | 18665275  | 18665548  | 274 |
| chr22 | 30025743  | 30026016  | 274 |
| chr22 | 22097691  | 22097964  | 274 |
| chr21 | 58571078  | 58571351  | 274 |
| chr20 | 45413303  | 45413576  | 274 |
| chr2  | 15384142  | 15384415  | 274 |
| chr19 | 36322957  | 36323230  | 274 |
| chr19 | 21634916  | 21635189  | 274 |
| chr18 | 23109572  | 23109845  | 274 |
| chr17 | 74516677  | 74516950  | 274 |
| chr17 | 68736892  | 68737165  | 274 |
| chr17 | 63695955  | 63696228  | 274 |
| chr16 | 71202636  | 71202909  | 274 |
| chr16 | 54224818  | 54225091  | 274 |
| chr16 | 40878970  | 40879243  | 274 |
| chr15 | 74526389  | 74526662  | 274 |
| chr15 | 36416643  | 36416916  | 274 |
| chr15 | 24546799  | 24547072  | 274 |
| chr13 | 75778271  | 75778544  | 274 |
| chr11 | 11248904  | 11249177  | 274 |
| chr11 | 10376634  | 10376907  | 274 |
| chr10 | 25029639  | 25029912  | 274 |
| chr10 | 17122252  | 17122525  | 274 |
| chrX  | 80816818  | 80817090  | 273 |
| chrX  | 79872000  | 79872272  | 273 |
| chrX  | 63046201  | 63046473  | 273 |
| chrX  | 61503620  | 61503892  | 273 |
| chrX  | 61062141  | 61062413  | 273 |
| chrX  | 32402297  | 32402569  | 273 |
| chrX  | 27238328  | 27238600  | 273 |
| chr8  | 65941151  | 65941423  | 273 |
| chr5  | 111694807 | 111695079 | 273 |
| chr3  | 120806149 | 120806421 | 273 |
| chr3  | 117404610 | 117404882 | 273 |
| chr29 | 31606693  | 31606965  | 273 |

|       |           |           |     |
|-------|-----------|-----------|-----|
| chr28 | 41299489  | 41299761  | 273 |
| chr28 | 35003427  | 35003699  | 273 |
| chr27 | 1341577   | 1341849   | 273 |
| chr26 | 37964304  | 37964576  | 273 |
| chr26 | 16004334  | 16004606  | 273 |
| chr25 | 31861044  | 31861316  | 273 |
| chr24 | 8048862   | 8049134   | 273 |
| chr24 | 1578243   | 1578515   | 273 |
| chr23 | 30218803  | 30219075  | 273 |
| chr23 | 19803917  | 19804189  | 273 |
| chr22 | 15966736  | 15967008  | 273 |
| chr20 | 4998064   | 4998336   | 273 |
| chr20 | 502034    | 502306    | 273 |
| chr19 | 57826978  | 57827250  | 273 |
| chr19 | 45558653  | 45558925  | 273 |
| chr19 | 39464727  | 39464999  | 273 |
| chr19 | 30396981  | 30397253  | 273 |
| chr18 | 6787064   | 6787336   | 273 |
| chr17 | 18377001  | 18377273  | 273 |
| chr16 | 2224840   | 2225112   | 273 |
| chr13 | 40723641  | 40723913  | 273 |
| chr13 | 23653140  | 23653412  | 273 |
| chr11 | 80362493  | 80362765  | 273 |
| chr11 | 77859653  | 77859925  | 273 |
| chr10 | 70255024  | 70255296  | 273 |
| chr1  | 72571272  | 72571544  | 273 |
| chrX  | 69101695  | 69101966  | 272 |
| chrX  | 62691519  | 62691790  | 272 |
| chrX  | 53455662  | 53455933  | 272 |
| chr8  | 108212460 | 108212731 | 272 |
| chr5  | 118443541 | 118443812 | 272 |
| chr5  | 112056072 | 112056343 | 272 |
| chr5  | 88757301  | 88757572  | 272 |
| chr4  | 99570403  | 99570674  | 272 |
| chr4  | 99000039  | 99000310  | 272 |
| chr3  | 122241035 | 122241306 | 272 |
| chr3  | 34007032  | 34007303  | 272 |
| chr3  | 13648046  | 13648317  | 272 |
| chr29 | 26598135  | 26598406  | 272 |
| chr29 | 18213268  | 18213539  | 272 |
| chr28 | 41787490  | 41787761  | 272 |
| chr26 | 44404650  | 44404921  | 272 |
| chr25 | 37690314  | 37690585  | 272 |
| chr24 | 58629853  | 58630124  | 272 |
| chr2  | 36074543  | 36074814  | 272 |
| chr19 | 16010908  | 16011179  | 272 |
| chr19 | 6749682   | 6749953   | 272 |
| chr18 | 11957701  | 11957972  | 272 |
| chr18 | 3255982   | 3256253   | 272 |
| chr16 | 54684861  | 54685132  | 272 |

|       |           |           |     |
|-------|-----------|-----------|-----|
| chr16 | 3681913   | 3682184   | 272 |
| chr10 | 88199321  | 88199592  | 272 |
| chr1  | 146735328 | 146735599 | 272 |
| chr1  | 72913667  | 72913938  | 272 |
| chr1  | 37557351  | 37557622  | 272 |
| chrX  | 78550118  | 78550388  | 271 |
| chrX  | 54324052  | 54324322  | 271 |
| chrX  | 34114555  | 34114825  | 271 |
| chrX  | 30584329  | 30584599  | 271 |
| chrX  | 9319082   | 9319352   | 271 |
| chr9  | 77203598  | 77203868  | 271 |
| chr8  | 63628544  | 63628814  | 271 |
| chr7  | 52415105  | 52415375  | 271 |
| chr28 | 4289186   | 4289456   | 271 |
| chr27 | 28937812  | 28938082  | 271 |
| chr26 | 20858592  | 20858862  | 271 |
| chr26 | 18788664  | 18788934  | 271 |
| chr25 | 10598920  | 10599190  | 271 |
| chr25 | 10401246  | 10401516  | 271 |
| chr24 | 60959088  | 60959358  | 271 |
| chr23 | 15013079  | 15013349  | 271 |
| chr22 | 50774840  | 50775110  | 271 |
| chr20 | 19369248  | 19369518  | 271 |
| chr18 | 55011121  | 55011391  | 271 |
| chr18 | 47692863  | 47693133  | 271 |
| chr18 | 26123488  | 26123758  | 271 |
| chr18 | 23004715  | 23004985  | 271 |
| chr17 | 72760678  | 72760948  | 271 |
| chr17 | 68304931  | 68305201  | 271 |
| chr17 | 63963261  | 63963531  | 271 |
| chr15 | 83838275  | 83838545  | 271 |
| chr15 | 74652701  | 74652971  | 271 |
| chr15 | 60443948  | 60444218  | 271 |
| chr14 | 3446170   | 3446440   | 271 |
| chr13 | 59315310  | 59315580  | 271 |
| chr13 | 35580425  | 35580695  | 271 |
| chr11 | 47277197  | 47277467  | 271 |
| chr10 | 86160474  | 86160744  | 271 |
| chr10 | 8287078   | 8287348   | 271 |
| chr1  | 84505124  | 84505394  | 271 |
| chrX  | 69002863  | 69003132  | 270 |
| chrX  | 64181524  | 64181793  | 270 |
| chrX  | 36673036  | 36673305  | 270 |
| chrX  | 30470833  | 30471102  | 270 |
| chrX  | 9622982   | 9623251   | 270 |
| chr9  | 74205880  | 74206149  | 270 |
| chr5  | 125238879 | 125239148 | 270 |
| chr4  | 95593209  | 95593478  | 270 |
| chr29 | 26771144  | 26771413  | 270 |
| chr26 | 48841723  | 48841992  | 270 |

|       |           |           |     |
|-------|-----------|-----------|-----|
| chr26 | 21826979  | 21827248  | 270 |
| chr25 | 16556984  | 16557253  | 270 |
| chr24 | 48767811  | 48768080  | 270 |
| chr21 | 58737844  | 58738113  | 270 |
| chr21 | 27881496  | 27881765  | 270 |
| chr20 | 33548048  | 33548317  | 270 |
| chr20 | 6533099   | 6533368   | 270 |
| chr19 | 50169975  | 50170244  | 270 |
| chr19 | 24122587  | 24122856  | 270 |
| chr19 | 13561360  | 13561629  | 270 |
| chr18 | 22858776  | 22859045  | 270 |
| chr18 | 6603817   | 6604086   | 270 |
| chr16 | 24022977  | 24023246  | 270 |
| chr15 | 21059591  | 21059860  | 270 |
| chr13 | 71966993  | 71967262  | 270 |
| chr12 | 35761949  | 35762218  | 270 |
| chr11 | 74442258  | 74442527  | 270 |
| chr10 | 90198306  | 90198575  | 270 |
| chr1  | 68889128  | 68889397  | 270 |
| chr1  | 67932662  | 67932931  | 270 |
| chr1  | 67784499  | 67784768  | 270 |
| chrX  | 50791805  | 50792073  | 269 |
| chrX  | 48737325  | 48737593  | 269 |
| chrX  | 32900378  | 32900646  | 269 |
| chrX  | 20471630  | 20471898  | 269 |
| chrX  | 20350562  | 20350830  | 269 |
| chr9  | 90599241  | 90599509  | 269 |
| chr9  | 71024997  | 71025265  | 269 |
| chr9  | 52941957  | 52942225  | 269 |
| chr8  | 60181297  | 60181565  | 269 |
| chr6  | 65880617  | 65880885  | 269 |
| chr3  | 121494572 | 121494840 | 269 |
| chr3  | 56842796  | 56843064  | 269 |
| chr3  | 55883091  | 55883359  | 269 |
| chr29 | 18308940  | 18309208  | 269 |
| chr26 | 20653731  | 20653999  | 269 |
| chr25 | 33317311  | 33317579  | 269 |
| chr25 | 10399664  | 10399932  | 269 |
| chr24 | 41595819  | 41596087  | 269 |
| chr24 | 14767815  | 14768083  | 269 |
| chr23 | 43303965  | 43304233  | 269 |
| chr23 | 15017805  | 15018073  | 269 |
| chr22 | 23094398  | 23094666  | 269 |
| chr21 | 67923591  | 67923859  | 269 |
| chr19 | 38370546  | 38370814  | 269 |
| chr18 | 59013920  | 59014188  | 269 |
| chr18 | 51275205  | 51275473  | 269 |
| chr17 | 56122074  | 56122342  | 269 |
| chr16 | 56968395  | 56968663  | 269 |
| chr15 | 29997588  | 29997856  | 269 |



|       |           |           |     |
|-------|-----------|-----------|-----|
| chr15 | 22805318  | 22805586  | 269 |
| chr13 | 41374570  | 41374838  | 269 |
| chr10 | 102999296 | 102999564 | 269 |
| chr1  | 69351402  | 69351670  | 269 |
| chrX  | 77507517  | 77507784  | 268 |
| chrX  | 67040164  | 67040431  | 268 |
| chrX  | 61281618  | 61281885  | 268 |
| chrX  | 53897123  | 53897390  | 268 |
| chrX  | 45827618  | 45827885  | 268 |
| chrX  | 34461896  | 34462163  | 268 |
| chrX  | 29756246  | 29756513  | 268 |
| chrX  | 19368821  | 19369088  | 268 |
| chrX  | 19283768  | 19284035  | 268 |
| chrX  | 11028891  | 11029158  | 268 |
| chrX  | 9484910   | 9485177   | 268 |
| chrX  | 8464824   | 8465091   | 268 |
| chr8  | 59302096  | 59302363  | 268 |
| chr7  | 18666244  | 18666511  | 268 |
| chr6  | 108745456 | 108745723 | 268 |
| chr5  | 33204172  | 33204439  | 268 |
| chr4  | 116560061 | 116560328 | 268 |
| chr4  | 8717627   | 8717894   | 268 |
| chr28 | 41210203  | 41210470  | 268 |
| chr22 | 54485450  | 54485717  | 268 |
| chr2  | 115332742 | 115333009 | 268 |
| chr19 | 58338136  | 58338403  | 268 |
| chr19 | 40789761  | 40790028  | 268 |
| chr19 | 23063129  | 23063396  | 268 |
| chr18 | 51606883  | 51607150  | 268 |
| chr18 | 48752938  | 48753205  | 268 |
| chr18 | 24003811  | 24004078  | 268 |
| chr18 | 18528791  | 18529058  | 268 |
| chr17 | 73911561  | 73911828  | 268 |
| chr16 | 59653787  | 59654054  | 268 |
| chr16 | 47053911  | 47054178  | 268 |
| chr15 | 22849967  | 22850234  | 268 |
| chr13 | 75371405  | 75371672  | 268 |
| chr13 | 35656138  | 35656405  | 268 |
| chr13 | 27643728  | 27643995  | 268 |
| chr13 | 15099001  | 15099268  | 268 |
| chr11 | 77644585  | 77644852  | 268 |
| chr11 | 47171647  | 47171914  | 268 |
| chrX  | 80217456  | 80217722  | 267 |
| chrX  | 61290729  | 61290995  | 267 |
| chrX  | 54656558  | 54656824  | 267 |
| chrX  | 51241173  | 51241439  | 267 |
| chr7  | 5319216   | 5319482   | 267 |
| chr5  | 28415987  | 28416253  | 267 |
| chr4  | 43938088  | 43938354  | 267 |
| chr3  | 121940740 | 121941006 | 267 |

|       |           |           |     |
|-------|-----------|-----------|-----|
| chr3  | 113389669 | 113389935 | 267 |
| chr29 | 35217512  | 35217778  | 267 |
| chr29 | 26353890  | 26354156  | 267 |
| chr26 | 39594450  | 39594716  | 267 |
| chr26 | 25507201  | 25507467  | 267 |
| chr24 | 1201169   | 1201435   | 267 |
| chr23 | 9461684   | 9461950   | 267 |
| chr22 | 40118668  | 40118934  | 267 |
| chr21 | 26471599  | 26471865  | 267 |
| chr19 | 47855153  | 47855419  | 267 |
| chr19 | 7792970   | 7793236   | 267 |
| chr18 | 12341067  | 12341333  | 267 |
| chr17 | 62935495  | 62935761  | 267 |
| chr17 | 42387149  | 42387415  | 267 |
| chr17 | 6527383   | 6527649   | 267 |
| chr16 | 41260688  | 41260954  | 267 |
| chr12 | 31279387  | 31279653  | 267 |
| chr11 | 9207611   | 9207877   | 267 |
| chr10 | 70313421  | 70313687  | 267 |
| chr10 | 20883128  | 20883394  | 267 |
| chr10 | 10233221  | 10233487  | 267 |
| chr1  | 68452324  | 68452590  | 267 |
| chrX  | 70632614  | 70632879  | 266 |
| chrX  | 57744180  | 57744445  | 266 |
| chrX  | 35753776  | 35754041  | 266 |
| chrX  | 20662916  | 20663181  | 266 |
| chrX  | 9805726   | 9805991   | 266 |
| chrX  | 9226294   | 9226559   | 266 |
| chrX  | 7629177   | 7629442   | 266 |
| chr9  | 104973233 | 104973498 | 266 |
| chr6  | 13978399  | 13978664  | 266 |
| chr4  | 121824337 | 121824602 | 266 |
| chr4  | 99726416  | 99726681  | 266 |
| chr4  | 99299624  | 99299889  | 266 |
| chr4  | 16853113  | 16853378  | 266 |
| chr29 | 47385433  | 47385698  | 266 |
| chr28 | 27166595  | 27166860  | 266 |
| chr25 | 3162651   | 3162916   | 266 |
| chr23 | 19777387  | 19777652  | 266 |
| chr22 | 48112023  | 48112288  | 266 |
| chr22 | 13867566  | 13867831  | 266 |
| chr21 | 62179148  | 62179413  | 266 |
| chr2  | 131167244 | 131167509 | 266 |
| chr2  | 111243541 | 111243806 | 266 |
| chr19 | 27531826  | 27532091  | 266 |
| chr17 | 69424219  | 69424484  | 266 |
| chr16 | 48202113  | 48202378  | 266 |
| chr15 | 22544172  | 22544437  | 266 |
| chr14 | 30867539  | 30867804  | 266 |
| chr13 | 59695469  | 59695734  | 266 |

|       |           |           |     |
|-------|-----------|-----------|-----|
| chr12 | 9569277   | 9569542   | 266 |
| chr10 | 70114024  | 70114289  | 266 |
| chrX  | 58222500  | 58222764  | 265 |
| chrX  | 51055621  | 51055885  | 265 |
| chrX  | 18330619  | 18330883  | 265 |
| chrX  | 10500570  | 10500834  | 265 |
| chrX  | 582413    | 582677    | 265 |
| chr8  | 73184735  | 73184999  | 265 |
| chr3  | 31909283  | 31909547  | 265 |
| chr26 | 44929116  | 44929380  | 265 |
| chr21 | 28093304  | 28093568  | 265 |
| chr2  | 134722606 | 134722870 | 265 |
| chr2  | 94771332  | 94771596  | 265 |
| chr19 | 29305039  | 29305303  | 265 |
| chr19 | 19272953  | 19273217  | 265 |
| chr18 | 11380273  | 11380537  | 265 |
| chr17 | 53391072  | 53391336  | 265 |
| chr11 | 74758004  | 74758268  | 265 |
| chr11 | 31193065  | 31193329  | 265 |
| chr10 | 83068536  | 83068800  | 265 |
| chr1  | 101390888 | 101391152 | 265 |
| chrX  | 51481815  | 51482078  | 264 |
| chrX  | 21231868  | 21232131  | 264 |
| chr8  | 72183552  | 72183815  | 264 |
| chr6  | 106983734 | 106983997 | 264 |
| chr6  | 106829658 | 106829921 | 264 |
| chr5  | 76200146  | 76200409  | 264 |
| chr5  | 28396478  | 28396741  | 264 |
| chr3  | 114528698 | 114528961 | 264 |
| chr29 | 28387841  | 28388104  | 264 |
| chr25 | 36592902  | 36593165  | 264 |
| chr25 | 3979595   | 3979858   | 264 |
| chr24 | 1640311   | 1640574   | 264 |
| chr21 | 28177047  | 28177310  | 264 |
| chr20 | 18488956  | 18489219  | 264 |
| chr2  | 127514280 | 127514543 | 264 |
| chr2  | 113897676 | 113897939 | 264 |
| chr2  | 25312547  | 25312810  | 264 |
| chr19 | 55944054  | 55944317  | 264 |
| chr19 | 54846021  | 54846284  | 264 |
| chr19 | 46877456  | 46877719  | 264 |
| chr19 | 27060025  | 27060288  | 264 |
| chr17 | 75291233  | 75291496  | 264 |
| chr15 | 29209639  | 29209902  | 264 |
| chr13 | 30843043  | 30843306  | 264 |
| chr11 | 99185349  | 99185612  | 264 |
| chr10 | 103017147 | 103017410 | 264 |
| chr10 | 85918909  | 85919172  | 264 |
| chr1  | 74604611  | 74604874  | 264 |
| chrX  | 69880540  | 69880802  | 263 |

|       |           |           |     |
|-------|-----------|-----------|-----|
| chrX  | 50604135  | 50604397  | 263 |
| chrX  | 21042484  | 21042746  | 263 |
| chrX  | 9160694   | 9160956   | 263 |
| chr9  | 99098316  | 99098578  | 263 |
| chr8  | 60401195  | 60401457  | 263 |
| chr8  | 25609884  | 25610146  | 263 |
| chr7  | 42342616  | 42342878  | 263 |
| chr5  | 95942023  | 95942285  | 263 |
| chr5  | 28689064  | 28689326  | 263 |
| chr4  | 78849330  | 78849592  | 263 |
| chr25 | 29412143  | 29412405  | 263 |
| chr23 | 9717715   | 9717977   | 263 |
| chr22 | 60193843  | 60194105  | 263 |
| chr21 | 23940069  | 23940331  | 263 |
| chr19 | 38923005  | 38923267  | 263 |
| chr19 | 15158371  | 15158633  | 263 |
| chr16 | 37865497  | 37865759  | 263 |
| chr15 | 26766012  | 26766274  | 263 |
| chr12 | 33102069  | 33102331  | 263 |
| chr11 | 96126411  | 96126673  | 263 |
| chr11 | 70880138  | 70880400  | 263 |
| chr11 | 70769108  | 70769370  | 263 |
| chrX  | 2566402   | 2566663   | 262 |
| chr8  | 5343029   | 5343290   | 262 |
| chr5  | 123002615 | 123002876 | 262 |
| chr5  | 30933415  | 30933676  | 262 |
| chr4  | 28581588  | 28581849  | 262 |
| chr3  | 121501775 | 121502036 | 262 |
| chr29 | 34381074  | 34381335  | 262 |
| chr29 | 33092090  | 33092351  | 262 |
| chr28 | 27135300  | 27135561  | 262 |
| chr27 | 15367196  | 15367457  | 262 |
| chr25 | 37241258  | 37241519  | 262 |
| chr23 | 40590899  | 40591160  | 262 |
| chr23 | 28843353  | 28843614  | 262 |
| chr22 | 55857662  | 55857923  | 262 |
| chr22 | 48227980  | 48228241  | 262 |
| chr2  | 110553873 | 110554134 | 262 |
| chr17 | 72704804  | 72705065  | 262 |
| chr16 | 60340667  | 60340928  | 262 |
| chr16 | 47275513  | 47275774  | 262 |
| chr15 | 60441233  | 60441494  | 262 |
| chr14 | 31611446  | 31611707  | 262 |
| chr13 | 77284288  | 77284549  | 262 |
| chr12 | 83789838  | 83790099  | 262 |
| chr12 | 49596461  | 49596722  | 262 |
| chr10 | 71515625  | 71515886  | 262 |
| chr10 | 36002424  | 36002685  | 262 |
| chr1  | 1570445   | 1570706   | 262 |
| chrX  | 78216392  | 78216652  | 261 |

|       |           |           |     |
|-------|-----------|-----------|-----|
| chrX  | 34131129  | 34131389  | 261 |
| chrX  | 7158779   | 7159039   | 261 |
| chr8  | 115875751 | 115876011 | 261 |
| chr8  | 79973618  | 79973878  | 261 |
| chr8  | 63991664  | 63991924  | 261 |
| chr7  | 20716251  | 20716511  | 261 |
| chr7  | 15677885  | 15678145  | 261 |
| chr6  | 108579181 | 108579441 | 261 |
| chr5  | 80299246  | 80299506  | 261 |
| chr5  | 32913561  | 32913821  | 261 |
| chr5  | 28886234  | 28886494  | 261 |
| chr3  | 123341700 | 123341960 | 261 |
| chr3  | 53775927  | 53776187  | 261 |
| chr3  | 15553273  | 15553533  | 261 |
| chr29 | 49624916  | 49625176  | 261 |
| chr25 | 21403408  | 21403668  | 261 |
| chr25 | 8597744   | 8598004   | 261 |
| chr23 | 44388288  | 44388548  | 261 |
| chr23 | 18832367  | 18832627  | 261 |
| chr23 | 15487664  | 15487924  | 261 |
| chr23 | 10351590  | 10351850  | 261 |
| chr22 | 57639999  | 57640259  | 261 |
| chr21 | 19218081  | 19218341  | 261 |
| chr20 | 3816483   | 3816743   | 261 |
| chr2  | 135171536 | 135171796 | 261 |
| chr19 | 35077644  | 35077904  | 261 |
| chr19 | 12326499  | 12326759  | 261 |
| chr18 | 65324567  | 65324827  | 261 |
| chr18 | 57315547  | 57315807  | 261 |
| chr18 | 45165728  | 45165988  | 261 |
| chr18 | 18716459  | 18716719  | 261 |
| chr17 | 4157336   | 4157596   | 261 |
| chr15 | 64500005  | 64500265  | 261 |
| chr14 | 62123733  | 62123993  | 261 |
| chr13 | 40992578  | 40992838  | 261 |
| chr13 | 10965672  | 10965932  | 261 |
| chr12 | 76053882  | 76054142  | 261 |
| chr11 | 28652330  | 28652590  | 261 |
| chr11 | 13418509  | 13418769  | 261 |
| chr10 | 53074670  | 53074930  | 261 |
| chr10 | 50521880  | 50522140  | 261 |
| chr1  | 123115036 | 123115296 | 261 |
| chrX  | 75563074  | 75563333  | 260 |
| chrX  | 39190400  | 39190659  | 260 |
| chrX  | 19759391  | 19759650  | 260 |
| chr9  | 100277417 | 100277676 | 260 |
| chr8  | 42399628  | 42399887  | 260 |
| chr7  | 65596761  | 65597020  | 260 |
| chr7  | 45708307  | 45708566  | 260 |
| chr7  | 10610332  | 10610591  | 260 |

|       |           |           |     |
|-------|-----------|-----------|-----|
| chr6  | 120912908 | 120913167 | 260 |
| chr6  | 107120211 | 107120470 | 260 |
| chr4  | 97850722  | 97850981  | 260 |
| chr3  | 115623612 | 115623871 | 260 |
| chr3  | 58753961  | 58754220  | 260 |
| chr3  | 30255164  | 30255423  | 260 |
| chr29 | 26874865  | 26875124  | 260 |
| chr24 | 64999426  | 64999685  | 260 |
| chr24 | 26530699  | 26530958  | 260 |
| chr23 | 25144478  | 25144737  | 260 |
| chr21 | 28680973  | 28681232  | 260 |
| chr19 | 57030991  | 57031250  | 260 |
| chr16 | 1551457   | 1551716   | 260 |
| chr15 | 22973829  | 22974088  | 260 |
| chr14 | 75707935  | 75708194  | 260 |
| chr14 | 44813463  | 44813722  | 260 |
| chr13 | 68911803  | 68912062  | 260 |
| chr13 | 41152805  | 41153064  | 260 |
| chr12 | 76388785  | 76389044  | 260 |
| chr10 | 93039624  | 93039883  | 260 |
| chr10 | 18013772  | 18014031  | 260 |
| chr1  | 146930613 | 146930872 | 260 |
| chrX  | 75500135  | 75500393  | 259 |
| chrX  | 61320586  | 61320844  | 259 |
| chrX  | 39026021  | 39026279  | 259 |
| chrX  | 34539113  | 34539371  | 259 |
| chrX  | 30536188  | 30536446  | 259 |
| chrX  | 19841668  | 19841926  | 259 |
| chrX  | 19415619  | 19415877  | 259 |
| chrX  | 11830117  | 11830375  | 259 |
| chr7  | 21219640  | 21219898  | 259 |
| chr7  | 16106193  | 16106451  | 259 |
| chr6  | 18790601  | 18790859  | 259 |
| chr5  | 120427610 | 120427868 | 259 |
| chr5  | 74697088  | 74697346  | 259 |
| chr5  | 28830812  | 28831070  | 259 |
| chr3  | 35539022  | 35539280  | 259 |
| chr3  | 31638436  | 31638694  | 259 |
| chr29 | 18177491  | 18177749  | 259 |
| chr28 | 10779764  | 10780022  | 259 |
| chr25 | 28313015  | 28313273  | 259 |
| chr23 | 27742193  | 27742451  | 259 |
| chr23 | 18408630  | 18408888  | 259 |
| chr21 | 18913698  | 18913956  | 259 |
| chr20 | 72266368  | 72266626  | 259 |
| chr20 | 38852359  | 38852617  | 259 |
| chr20 | 7676660   | 7676918   | 259 |
| chr14 | 5581116   | 5581374   | 259 |
| chr13 | 77695329  | 77695587  | 259 |
| chr13 | 28363472  | 28363730  | 259 |

|       |           |           |     |
|-------|-----------|-----------|-----|
| chr11 | 75732440  | 75732698  | 259 |
| chr10 | 89190369  | 89190627  | 259 |
| chrX  | 66990827  | 66991084  | 258 |
| chrX  | 52994528  | 52994785  | 258 |
| chrX  | 21682209  | 21682466  | 258 |
| chrX  | 19681478  | 19681735  | 258 |
| chr7  | 13110534  | 13110791  | 258 |
| chr5  | 113919608 | 113919865 | 258 |
| chr4  | 121431174 | 121431431 | 258 |
| chr29 | 27216156  | 27216413  | 258 |
| chr24 | 4164038   | 4164295   | 258 |
| chr23 | 28827212  | 28827469  | 258 |
| chr22 | 53957870  | 53958127  | 258 |
| chr22 | 16257071  | 16257328  | 258 |
| chr21 | 30299901  | 30300158  | 258 |
| chr21 | 27133275  | 27133532  | 258 |
| chr2  | 128283564 | 128283821 | 258 |
| chr2  | 128041845 | 128042102 | 258 |
| chr2  | 114841234 | 114841491 | 258 |
| chr19 | 56595948  | 56596205  | 258 |
| chr19 | 39161057  | 39161314  | 258 |
| chr18 | 49946907  | 49947164  | 258 |
| chr18 | 23241025  | 23241282  | 258 |
| chr17 | 64113324  | 64113581  | 258 |
| chr15 | 22789332  | 22789589  | 258 |
| chr13 | 62781235  | 62781492  | 258 |
| chr13 | 35507576  | 35507833  | 258 |
| chr11 | 30754214  | 30754471  | 258 |
| chr11 | 13273852  | 13274109  | 258 |
| chr1  | 83535752  | 83536009  | 258 |
| chrX  | 79075063  | 79075319  | 257 |
| chrX  | 77014624  | 77014880  | 257 |
| chrX  | 73151808  | 73152064  | 257 |
| chrX  | 56256528  | 56256784  | 257 |
| chrX  | 5712853   | 5713109   | 257 |
| chr8  | 110903380 | 110903636 | 257 |
| chr7  | 51343589  | 51343845  | 257 |
| chr6  | 63098446  | 63098702  | 257 |
| chr3  | 52142037  | 52142293  | 257 |
| chr3  | 28925122  | 28925378  | 257 |
| chr28 | 26976064  | 26976320  | 257 |
| chr28 | 12453704  | 12453960  | 257 |
| chr27 | 40770770  | 40771026  | 257 |
| chr27 | 39917638  | 39917894  | 257 |
| chr26 | 46938370  | 46938626  | 257 |
| chr24 | 60757635  | 60757891  | 257 |
| chr24 | 44139785  | 44140041  | 257 |
| chr23 | 27885873  | 27886129  | 257 |
| chr23 | 16502168  | 16502424  | 257 |
| chr21 | 66421474  | 66421730  | 257 |

|       |               |           |     |
|-------|---------------|-----------|-----|
| chr20 | 74031239      | 74031495  | 257 |
| chr20 | 37571377      | 37571633  | 257 |
| chr20 | 927582 927838 | 257       |     |
| chr2  | 119579128     | 119579384 | 257 |
| chr2  | 111322479     | 111322735 | 257 |
| chr18 | 55267006      | 55267262  | 257 |
| chr18 | 11521693      | 11521949  | 257 |
| chr17 | 65975051      | 65975307  | 257 |
| chr17 | 59003658      | 59003914  | 257 |
| chr13 | 58970203      | 58970459  | 257 |
| chr12 | 14221946      | 14222202  | 257 |
| chr11 | 65322433      | 65322689  | 257 |
| chr11 | 5919257       | 5919513   | 257 |
| chr10 | 85159632      | 85159888  | 257 |
| chr10 | 28952072      | 28952328  | 257 |
| chr1  | 68855698      | 68855954  | 257 |
| chrX  | 72511731      | 72511986  | 256 |
| chrX  | 72233802      | 72234057  | 256 |
| chrX  | 71579763      | 71580018  | 256 |
| chrX  | 51047837      | 51048092  | 256 |
| chrX  | 46943997      | 46944252  | 256 |
| chrX  | 13845658      | 13845913  | 256 |
| chrX  | 6995084       | 6995339   | 256 |
| chr4  | 84334996      | 84335251  | 256 |
| chr3  | 108332291     | 108332546 | 256 |
| chr29 | 37264683      | 37264938  | 256 |
| chr25 | 37305485      | 37305740  | 256 |
| chr25 | 758063 758318 | 256       |     |
| chr23 | 15875950      | 15876205  | 256 |
| chr22 | 41513676      | 41513931  | 256 |
| chr21 | 18471392      | 18471647  | 256 |
| chr19 | 59043524      | 59043779  | 256 |
| chr17 | 74015730      | 74015985  | 256 |
| chr17 | 53302059      | 53302314  | 256 |
| chr16 | 68437057      | 68437312  | 256 |
| chr16 | 54493817      | 54494072  | 256 |
| chr16 | 45913379      | 45913634  | 256 |
| chr15 | 64229487      | 64229742  | 256 |
| chr13 | 40549072      | 40549327  | 256 |
| chr13 | 40321449      | 40321704  | 256 |
| chr10 | 70133161      | 70133416  | 256 |
| chr10 | 22092426      | 22092681  | 256 |
| chr1  | 82484597      | 82484852  | 256 |
| chrX  | 71590164      | 71590418  | 255 |
| chrX  | 69082357      | 69082611  | 255 |
| chrX  | 61391525      | 61391779  | 255 |
| chrX  | 49316807      | 49317061  | 255 |
| chrX  | 10811617      | 10811871  | 255 |
| chrX  | 6701348       | 6701602   | 255 |
| chr9  | 99701676      | 99701930  | 255 |



|       |           |           |     |
|-------|-----------|-----------|-----|
| chr8  | 60316559  | 60316813  | 255 |
| chr7  | 65237927  | 65238181  | 255 |
| chr7  | 18369852  | 18370106  | 255 |
| chr4  | 69259770  | 69260024  | 255 |
| chr3  | 63048280  | 63048534  | 255 |
| chr28 | 22637713  | 22637967  | 255 |
| chr25 | 27973110  | 27973364  | 255 |
| chr23 | 18828902  | 18829156  | 255 |
| chr23 | 14745968  | 14746222  | 255 |
| chr22 | 44836193  | 44836447  | 255 |
| chr2  | 129910600 | 129910854 | 255 |
| chr19 | 65244629  | 65244883  | 255 |
| chr19 | 39530612  | 39530866  | 255 |
| chr17 | 63377506  | 63377760  | 255 |
| chr13 | 78418125  | 78418379  | 255 |
| chr13 | 75676053  | 75676307  | 255 |
| chr11 | 74239133  | 74239387  | 255 |
| chr10 | 43031612  | 43031866  | 255 |
| chr10 | 27522769  | 27523023  | 255 |
| chr1  | 153163763 | 153164017 | 255 |
| chrX  | 86236750  | 86237003  | 254 |
| chrX  | 79004970  | 79005223  | 254 |
| chrX  | 75641197  | 75641450  | 254 |
| chrX  | 49522657  | 49522910  | 254 |
| chrX  | 39203496  | 39203749  | 254 |
| chrX  | 18916806  | 18917059  | 254 |
| chr9  | 106386360 | 106386613 | 254 |
| chr9  | 29835529  | 29835782  | 254 |
| chr8  | 80068856  | 80069109  | 254 |
| chr5  | 75167305  | 75167558  | 254 |
| chr3  | 30207193  | 30207446  | 254 |
| chr3  | 22584084  | 22584337  | 254 |
| chr3  | 8974184   | 8974437   | 254 |
| chr28 | 33937594  | 33937847  | 254 |
| chr23 | 42768252  | 42768505  | 254 |
| chr22 | 10764686  | 10764939  | 254 |
| chr2  | 130472611 | 130472864 | 254 |
| chr2  | 99788430  | 99788683  | 254 |
| chr19 | 12604479  | 12604732  | 254 |
| chr18 | 14685479  | 14685732  | 254 |
| chr17 | 70391149  | 70391402  | 254 |
| chr16 | 77345948  | 77346201  | 254 |
| chr15 | 29990098  | 29990351  | 254 |
| chr14 | 68030804  | 68031057  | 254 |
| chr14 | 1142849   | 1143102   | 254 |
| chr11 | 106292012 | 106292265 | 254 |
| chr11 | 104597235 | 104597488 | 254 |
| chr11 | 77770912  | 77771165  | 254 |
| chr8  | 109044269 | 109044521 | 253 |
| chr8  | 102177615 | 102177867 | 253 |

|       |           |           |     |
|-------|-----------|-----------|-----|
| chr7  | 37490241  | 37490493  | 253 |
| chr6  | 47369279  | 47369531  | 253 |
| chr5  | 33886566  | 33886818  | 253 |
| chr3  | 120639102 | 120639354 | 253 |
| chr3  | 88593431  | 88593683  | 253 |
| chr3  | 30219996  | 30220248  | 253 |
| chr29 | 30501146  | 30501398  | 253 |
| chr26 | 8942707   | 8942959   | 253 |
| chr2  | 135728115 | 135728367 | 253 |
| chr2  | 135041095 | 135041347 | 253 |
| chr2  | 24159750  | 24160002  | 253 |
| chr19 | 46445499  | 46445751  | 253 |
| chr18 | 50717567  | 50717819  | 253 |
| chr18 | 18056161  | 18056413  | 253 |
| chr18 | 4301686   | 4301938   | 253 |
| chr17 | 70703096  | 70703348  | 253 |
| chr15 | 11852359  | 11852611  | 253 |
| chr14 | 1539967   | 1540219   | 253 |
| chr13 | 8496089   | 8496341   | 253 |
| chr12 | 23536735  | 23536987  | 253 |
| chr11 | 88927837  | 88928089  | 253 |
| chr11 | 81441521  | 81441773  | 253 |
| chr11 | 4301165   | 4301417   | 253 |
| chr1  | 148008796 | 148009048 | 253 |
| chr1  | 68804617  | 68804869  | 253 |
| chrX  | 71240223  | 71240474  | 252 |
| chrX  | 40923818  | 40924069  | 252 |
| chrX  | 17248000  | 17248251  | 252 |
| chrX  | 10415994  | 10416245  | 252 |
| chrX  | 10058108  | 10058359  | 252 |
| chrX  | 7977119   | 7977370   | 252 |
| chrX  | 6409650   | 6409901   | 252 |
| chr8  | 73884479  | 73884730  | 252 |
| chr8  | 65335002  | 65335253  | 252 |
| chr4  | 72993908  | 72994159  | 252 |
| chr4  | 28505273  | 28505524  | 252 |
| chr4  | 9754059   | 9754310   | 252 |
| chr3  | 8728432   | 8728683   | 252 |
| chr29 | 49105293  | 49105544  | 252 |
| chr26 | 48521160  | 48521411  | 252 |
| chr26 | 46360139  | 46360390  | 252 |
| chr25 | 35698249  | 35698500  | 252 |
| chr23 | 38453315  | 38453566  | 252 |
| chr23 | 15293509  | 15293760  | 252 |
| chr23 | 13774761  | 13775012  | 252 |
| chr2  | 126730921 | 126731172 | 252 |
| chr2  | 1871117   | 1871368   | 252 |
| chr19 | 47378300  | 47378551  | 252 |
| chr19 | 27934048  | 27934299  | 252 |
| chr18 | 12789354  | 12789605  | 252 |

|       |           |           |     |
|-------|-----------|-----------|-----|
| chr15 | 74584515  | 74584766  | 252 |
| chr14 | 19441626  | 19441877  | 252 |
| chr13 | 34817849  | 34818100  | 252 |
| chr11 | 23344050  | 23344301  | 252 |
| chr10 | 103762847 | 103763098 | 252 |
| chr10 | 57497045  | 57497296  | 252 |
| chrX  | 79236852  | 79237102  | 251 |
| chrX  | 51753712  | 51753962  | 251 |
| chrX  | 41177353  | 41177603  | 251 |
| chrX  | 22409195  | 22409445  | 251 |
| chrX  | 8128353   | 8128603   | 251 |
| chr4  | 124279433 | 124279683 | 251 |
| chr4  | 80842174  | 80842424  | 251 |
| chr4  | 69297821  | 69298071  | 251 |
| chr3  | 71118204  | 71118454  | 251 |
| chr29 | 51704274  | 51704524  | 251 |
| chr29 | 50398076  | 50398326  | 251 |
| chr29 | 31971299  | 31971549  | 251 |
| chr29 | 26518335  | 26518585  | 251 |
| chr28 | 33811043  | 33811293  | 251 |
| chr23 | 48160530  | 48160780  | 251 |
| chr23 | 18582919  | 18583169  | 251 |
| chr2  | 131206166 | 131206416 | 251 |
| chr2  | 92643432  | 92643682  | 251 |
| chr2  | 76394714  | 76394964  | 251 |
| chr18 | 37222119  | 37222369  | 251 |
| chr16 | 48865316  | 48865566  | 251 |
| chr14 | 61503442  | 61503692  | 251 |
| chr13 | 59174846  | 59175096  | 251 |
| chr13 | 35378225  | 35378475  | 251 |
| chrX  | 83022033  | 83022282  | 250 |
| chrX  | 64500278  | 64500527  | 250 |
| chrX  | 53829909  | 53830158  | 250 |
| chrX  | 21180677  | 21180926  | 250 |
| chrX  | 20393202  | 20393451  | 250 |
| chrX  | 18680888  | 18681137  | 250 |
| chr5  | 76862582  | 76862831  | 250 |
| chr3  | 99566196  | 99566445  | 250 |
| chr27 | 38672368  | 38672617  | 250 |
| chr26 | 42049639  | 42049888  | 250 |
| chr24 | 49216435  | 49216684  | 250 |
| chr23 | 15934833  | 15935082  | 250 |
| chr2  | 27976861  | 27977110  | 250 |
| chr19 | 18172098  | 18172347  | 250 |
| chr19 | 8061923   | 8062172   | 250 |
| chr19 | 1991823   | 1992072   | 250 |
| chr18 | 3736627   | 3736876   | 250 |
| chr15 | 25653183  | 25653432  | 250 |
| chr11 | 91499628  | 91499877  | 250 |
| chr11 | 28329860  | 28330109  | 250 |

|       |               |           |     |
|-------|---------------|-----------|-----|
| chr10 | 54580096      | 54580345  | 250 |
| chr1  | 128813005     | 128813254 | 250 |
| chr1  | 81485355      | 81485604  | 250 |
| chr1  | 74710161      | 74710410  | 250 |
| chr1  | 69463826      | 69464075  | 250 |
| chrX  | 76806569      | 76806817  | 249 |
| chrX  | 74921296      | 74921544  | 249 |
| chrX  | 72986614      | 72986862  | 249 |
| chrX  | 59676245      | 59676493  | 249 |
| chrX  | 56024847      | 56025095  | 249 |
| chrX  | 54623060      | 54623308  | 249 |
| chrX  | 50292053      | 50292301  | 249 |
| chrX  | 19335477      | 19335725  | 249 |
| chrX  | 7581221       | 7581469   | 249 |
| chr9  | 51604005      | 51604253  | 249 |
| chr8  | 116890861     | 116891109 | 249 |
| chr8  | 45662621      | 45662869  | 249 |
| chr8  | 22978934      | 22979182  | 249 |
| chr7  | 38571862      | 38572110  | 249 |
| chr6  | 109598790     | 109599038 | 249 |
| chr6  | 41516355      | 41516603  | 249 |
| chr4  | 98832842      | 98833090  | 249 |
| chr4  | 53661586      | 53661834  | 249 |
| chr3  | 105153131     | 105153379 | 249 |
| chr3  | 22580026      | 22580274  | 249 |
| chr29 | 48773604      | 48773852  | 249 |
| chr29 | 44612176      | 44612424  | 249 |
| chr29 | 44527650      | 44527898  | 249 |
| chr29 | 31762449      | 31762697  | 249 |
| chr29 | 18247919      | 18248167  | 249 |
| chr24 | 191822 192070 |           | 249 |
| chr21 | 67909107      | 67909355  | 249 |
| chr21 | 63374192      | 63374440  | 249 |
| chr21 | 28991275      | 28991523  | 249 |
| chr2  | 22300578      | 22300826  | 249 |
| chr19 | 58980819      | 58981067  | 249 |
| chr19 | 49386698      | 49386946  | 249 |
| chr19 | 45821253      | 45821501  | 249 |
| chr18 | 18627264      | 18627512  | 249 |
| chr16 | 51485731      | 51485979  | 249 |
| chr15 | 33769677      | 33769925  | 249 |
| chr15 | 15912796      | 15913044  | 249 |
| chr14 | 26484525      | 26484773  | 249 |
| chr13 | 79903377      | 79903625  | 249 |
| chr1  | 82445374      | 82445622  | 249 |
| chrX  | 64935042      | 64935289  | 248 |
| chrX  | 50709576      | 50709823  | 248 |
| chrX  | 29405223      | 29405470  | 248 |
| chr9  | 46721442      | 46721689  | 248 |
| chr8  | 92288763      | 92289010  | 248 |

|       |               |           |     |
|-------|---------------|-----------|-----|
| chr8  | 57990876      | 57991123  | 248 |
| chr6  | 120618118     | 120618365 | 248 |
| chr4  | 16824337      | 16824584  | 248 |
| chr3  | 33555555      | 33555802  | 248 |
| chr3  | 25566604      | 25566851  | 248 |
| chr29 | 44693323      | 44693570  | 248 |
| chr25 | 39334469      | 39334716  | 248 |
| chr25 | 37814615      | 37814862  | 248 |
| chr23 | 10533638      | 10533885  | 248 |
| chr22 | 30276029      | 30276276  | 248 |
| chr21 | 62169183      | 62169430  | 248 |
| chr20 | 73663474      | 73663721  | 248 |
| chr19 | 61302942      | 61303189  | 248 |
| chr19 | 27236226      | 27236473  | 248 |
| chr19 | 22420511      | 22420758  | 248 |
| chr18 | 54114249      | 54114496  | 248 |
| chr17 | 18386500      | 18386747  | 248 |
| chr16 | 23638624      | 23638871  | 248 |
| chr15 | 18150618      | 18150865  | 248 |
| chr13 | 63229207      | 63229454  | 248 |
| chr13 | 62777740      | 62777987  | 248 |
| chr12 | 33294071      | 33294318  | 248 |
| chrX  | 71825938      | 71826184  | 247 |
| chrX  | 68296810      | 68297056  | 247 |
| chrX  | 63140507      | 63140753  | 247 |
| chrX  | 57924108      | 57924354  | 247 |
| chrX  | 50390281      | 50390527  | 247 |
| chrX  | 33975868      | 33976114  | 247 |
| chrX  | 959910 960156 | 247       | 247 |
| chr8  | 77564754      | 77565000  | 247 |
| chr6  | 57817594      | 57817840  | 247 |
| chr3  | 122138166     | 122138412 | 247 |
| chr3  | 113469813     | 113470059 | 247 |
| chr3  | 31639115      | 31639361  | 247 |
| chr29 | 51234747      | 51234993  | 247 |
| chr29 | 38976042      | 38976288  | 247 |
| chr29 | 17938115      | 17938361  | 247 |
| chr26 | 31502664      | 31502910  | 247 |
| chr25 | 38771036      | 38771282  | 247 |
| chr24 | 1754694       | 1754940   | 247 |
| chr23 | 31184622      | 31184868  | 247 |
| chr21 | 62416747      | 62416993  | 247 |
| chr20 | 66663058      | 66663304  | 247 |
| chr2  | 140353568     | 140353814 | 247 |
| chr2  | 99085004      | 99085250  | 247 |
| chr19 | 13685401      | 13685647  | 247 |
| chr18 | 22778270      | 22778516  | 247 |
| chr16 | 47025964      | 47026210  | 247 |
| chr16 | 38555347      | 38555593  | 247 |
| chr15 | 75972739      | 75972985  | 247 |

|       |           |           |     |
|-------|-----------|-----------|-----|
| chr12 | 9359709   | 9359955   | 247 |
| chr10 | 25863680  | 25863926  | 247 |
| chr1  | 74922199  | 74922445  | 247 |
| chrX  | 74589385  | 74589630  | 246 |
| chrX  | 54810142  | 54810387  | 246 |
| chrX  | 38083225  | 38083470  | 246 |
| chrX  | 2599299   | 2599544   | 246 |
| chr8  | 73853868  | 73854113  | 246 |
| chr8  | 66597217  | 66597462  | 246 |
| chr7  | 111042384 | 111042629 | 246 |
| chr7  | 58395615  | 58395860  | 246 |
| chr4  | 42327320  | 42327565  | 246 |
| chr3  | 99564021  | 99564266  | 246 |
| chr29 | 37294973  | 37295218  | 246 |
| chr28 | 26762495  | 26762740  | 246 |
| chr26 | 43831351  | 43831596  | 246 |
| chr22 | 59504577  | 59504822  | 246 |
| chr22 | 54055323  | 54055568  | 246 |
| chr22 | 21975604  | 21975849  | 246 |
| chr20 | 8606641   | 8606886   | 246 |
| chr20 | 8518799   | 8519044   | 246 |
| chr2  | 93513326  | 93513571  | 246 |
| chr19 | 60270300  | 60270545  | 246 |
| chr19 | 56609279  | 56609524  | 246 |
| chr19 | 41264770  | 41265015  | 246 |
| chr18 | 49952588  | 49952833  | 246 |
| chr18 | 23916747  | 23916992  | 246 |
| chr16 | 77333323  | 77333568  | 246 |
| chr13 | 74402485  | 74402730  | 246 |
| chr11 | 108324530 | 108324775 | 246 |
| chr10 | 60568458  | 60568703  | 246 |
| chrX  | 79318135  | 79318379  | 245 |
| chrX  | 29534008  | 29534252  | 245 |
| chrX  | 13275024  | 13275268  | 245 |
| chr8  | 90434962  | 90435206  | 245 |
| chr8  | 56912873  | 56913117  | 245 |
| chr7  | 15331755  | 15331999  | 245 |
| chr5  | 124682758 | 124683002 | 245 |
| chr3  | 35502287  | 35502531  | 245 |
| chr3  | 31652052  | 31652296  | 245 |
| chr28 | 34079247  | 34079491  | 245 |
| chr28 | 25316094  | 25316338  | 245 |
| chr24 | 50303680  | 50303924  | 245 |
| chr22 | 59425457  | 59425701  | 245 |
| chr22 | 40406033  | 40406277  | 245 |
| chr21 | 55988551  | 55988795  | 245 |
| chr21 | 27952299  | 27952543  | 245 |
| chr20 | 72947754  | 72947998  | 245 |
| chr19 | 58653881  | 58654125  | 245 |
| chr19 | 23055709  | 23055953  | 245 |

|       |           |           |     |
|-------|-----------|-----------|-----|
| chr19 | 7774932   | 7775176   | 245 |
| chr18 | 26281896  | 26282140  | 245 |
| chr17 | 68636006  | 68636250  | 245 |
| chr15 | 16101478  | 16101722  | 245 |
| chr14 | 14937049  | 14937293  | 245 |
| chr13 | 59832081  | 59832325  | 245 |
| chr13 | 40865762  | 40866006  | 245 |
| chr13 | 25185673  | 25185917  | 245 |
| chr12 | 32567098  | 32567342  | 245 |
| chr11 | 98365449  | 98365693  | 245 |
| chr11 | 20992307  | 20992551  | 245 |
| chr10 | 6599394   | 6599638   | 245 |
| chr1  | 150226378 | 150226622 | 245 |
| chrX  | 78145786  | 78146029  | 244 |
| chrX  | 62470769  | 62471012  | 244 |
| chrX  | 54230836  | 54231079  | 244 |
| chrX  | 20711382  | 20711625  | 244 |
| chr9  | 28638840  | 28639083  | 244 |
| chr7  | 17429123  | 17429366  | 244 |
| chr5  | 81593856  | 81594099  | 244 |
| chr26 | 21850921  | 21851164  | 244 |
| chr25 | 40319064  | 40319307  | 244 |
| chr23 | 46100734  | 46100977  | 244 |
| chr20 | 8535627   | 8535870   | 244 |
| chr2  | 137202353 | 137202596 | 244 |
| chr19 | 45559528  | 45559771  | 244 |
| chr19 | 16987669  | 16987912  | 244 |
| chr19 | 12294715  | 12294958  | 244 |
| chr18 | 45711118  | 45711361  | 244 |
| chr18 | 22341579  | 22341822  | 244 |
| chr15 | 29340832  | 29341075  | 244 |
| chr13 | 54831562  | 54831805  | 244 |
| chr13 | 41390513  | 41390756  | 244 |
| chr12 | 33357202  | 33357445  | 244 |
| chr11 | 70876059  | 70876302  | 244 |
| chr10 | 4337007   | 4337250   | 244 |
| chrX  | 81254891  | 81255133  | 243 |
| chrX  | 60575310  | 60575552  | 243 |
| chrX  | 21779984  | 21780226  | 243 |
| chrX  | 3389210   | 3389452   | 243 |
| chr9  | 106463584 | 106463826 | 243 |
| chr6  | 76406304  | 76406546  | 243 |
| chr5  | 30989993  | 30990235  | 243 |
| chr27 | 45643747  | 45643989  | 243 |
| chr22 | 55947779  | 55948021  | 243 |
| chr2  | 132202647 | 132202889 | 243 |
| chr18 | 34849590  | 34849832  | 243 |
| chr18 | 7335250   | 7335492   | 243 |
| chr17 | 56037196  | 56037438  | 243 |
| chr15 | 29880115  | 29880357  | 243 |

|       |           |           |     |
|-------|-----------|-----------|-----|
| chr13 | 35927335  | 35927577  | 243 |
| chr12 | 84672874  | 84673116  | 243 |
| chrX  | 79037700  | 79037941  | 242 |
| chrX  | 66638037  | 66638278  | 242 |
| chrX  | 12510999  | 12511240  | 242 |
| chr9  | 45992720  | 45992961  | 242 |
| chr8  | 108815722 | 108815963 | 242 |
| chr8  | 94323636  | 94323877  | 242 |
| chr8  | 24395002  | 24395243  | 242 |
| chr8  | 24342380  | 24342621  | 242 |
| chr4  | 5548697   | 5548938   | 242 |
| chr28 | 33284239  | 33284480  | 242 |
| chr26 | 23823166  | 23823407  | 242 |
| chr23 | 48746291  | 48746532  | 242 |
| chr23 | 14968246  | 14968487  | 242 |
| chr2  | 131037234 | 131037475 | 242 |
| chr2  | 75826179  | 75826420  | 242 |
| chr19 | 42217480  | 42217721  | 242 |
| chr19 | 37194917  | 37195158  | 242 |
| chr17 | 58832309  | 58832550  | 242 |
| chr16 | 46026042  | 46026283  | 242 |
| chr13 | 76214996  | 76215237  | 242 |
| chr12 | 76629847  | 76630088  | 242 |
| chr10 | 63992046  | 63992287  | 242 |
| chr10 | 47391681  | 47391922  | 242 |
| chr10 | 24181160  | 24181401  | 242 |
| chr1  | 82916163  | 82916404  | 242 |
| chrX  | 46487838  | 46488078  | 241 |
| chr8  | 63733052  | 63733292  | 241 |
| chr5  | 111893791 | 111894031 | 241 |
| chr5  | 76725703  | 76725943  | 241 |
| chr5  | 30650980  | 30651220  | 241 |
| chr3  | 123885556 | 123885796 | 241 |
| chr27 | 26769914  | 26770154  | 241 |
| chr23 | 48806864  | 48807104  | 241 |
| chr23 | 18666026  | 18666266  | 241 |
| chr20 | 4940695   | 4940935   | 241 |
| chr17 | 69738578  | 69738818  | 241 |
| chr16 | 38938443  | 38938683  | 241 |
| chr15 | 27023477  | 27023717  | 241 |
| chr14 | 1626378   | 1626618   | 241 |
| chr1  | 151701493 | 151701733 | 241 |
| chr1  | 1594125   | 1594365   | 241 |
| chrX  | 19817502  | 19817741  | 240 |
| chrX  | 8243237   | 8243476   | 240 |
| chr8  | 108798610 | 108798849 | 240 |
| chr6  | 59067781  | 59068020  | 240 |
| chr3  | 25906980  | 25907219  | 240 |
| chr3  | 22642447  | 22642686  | 240 |
| chr3  | 15968012  | 15968251  | 240 |



|       |           |           |     |
|-------|-----------|-----------|-----|
| chr21 | 57476841  | 57477080  | 240 |
| chr21 | 20058200  | 20058439  | 240 |
| chr2  | 134959080 | 134959319 | 240 |
| chr19 | 27981706  | 27981945  | 240 |
| chr14 | 1912565   | 1912804   | 240 |
| chr13 | 77578760  | 77578999  | 240 |
| chr13 | 63507204  | 63507443  | 240 |
| chr13 | 59829066  | 59829305  | 240 |
| chr12 | 66633599  | 66633838  | 240 |
| chr11 | 81434605  | 81434844  | 240 |
| chr10 | 68077647  | 68077886  | 240 |
| chr10 | 10744108  | 10744347  | 240 |
| chrX  | 53047125  | 53047363  | 239 |
| chrX  | 39059462  | 39059700  | 239 |
| chrX  | 32992631  | 32992869  | 239 |
| chrX  | 32015820  | 32016058  | 239 |
| chr9  | 62319635  | 62319873  | 239 |
| chr8  | 25940610  | 25940848  | 239 |
| chr25 | 44051399  | 44051637  | 239 |
| chr24 | 48556559  | 48556797  | 239 |
| chr13 | 69029140  | 69029378  | 239 |
| chr13 | 40546182  | 40546420  | 239 |
| chr12 | 31607563  | 31607801  | 239 |
| chr11 | 102418949 | 102419187 | 239 |
| chrX  | 54972493  | 54972730  | 238 |
| chrX  | 20754808  | 20755045  | 238 |
| chrX  | 9930030   | 9930267   | 238 |
| chr8  | 73780433  | 73780670  | 238 |
| chr5  | 33166776  | 33167013  | 238 |
| chr4  | 115951667 | 115951904 | 238 |
| chr3  | 33331136  | 33331373  | 238 |
| chr23 | 28818726  | 28818963  | 238 |
| chr23 | 8243079   | 8243316   | 238 |
| chr22 | 48237823  | 48238060  | 238 |
| chr19 | 40543216  | 40543453  | 238 |
| chr18 | 42247487  | 42247724  | 238 |
| chr16 | 67496182  | 67496419  | 238 |
| chr13 | 35089541  | 35089778  | 238 |
| chr11 | 70722714  | 70722951  | 238 |
| chr10 | 74284642  | 74284879  | 238 |
| chr10 | 12110883  | 12111120  | 238 |
| chrX  | 9095630   | 9095866   | 237 |
| chrX  | 5295171   | 5295407   | 237 |
| chr8  | 60124669  | 60124905  | 237 |
| chr4  | 38534058  | 38534294  | 237 |
| chr3  | 84523594  | 84523830  | 237 |
| chr28 | 41326397  | 41326633  | 237 |
| chr24 | 64997597  | 64997833  | 237 |
| chr23 | 18191574  | 18191810  | 237 |
| chr2  | 121548813 | 121549049 | 237 |

|       |           |           |     |
|-------|-----------|-----------|-----|
| chr19 | 33972457  | 33972693  | 237 |
| chr19 | 24245652  | 24245888  | 237 |
| chr18 | 63022352  | 63022588  | 237 |
| chr18 | 25298809  | 25299045  | 237 |
| chr18 | 23986426  | 23986662  | 237 |
| chr17 | 48727672  | 48727908  | 237 |
| chr15 | 23132193  | 23132429  | 237 |
| chr12 | 31377695  | 31377931  | 237 |
| chr10 | 17147193  | 17147429  | 237 |
| chrX  | 80879744  | 80879979  | 236 |
| chrX  | 54852843  | 54853078  | 236 |
| chrX  | 19154014  | 19154249  | 236 |
| chr7  | 48986114  | 48986349  | 236 |
| chr7  | 46552590  | 46552825  | 236 |
| chr7  | 38669097  | 38669332  | 236 |
| chr6  | 121893804 | 121894039 | 236 |
| chr5  | 111695355 | 111695590 | 236 |
| chr4  | 82129594  | 82129829  | 236 |
| chr3  | 17486094  | 17486329  | 236 |
| chr2  | 135052476 | 135052711 | 236 |
| chr19 | 41399857  | 41400092  | 236 |
| chr17 | 74091380  | 74091615  | 236 |
| chr15 | 25295390  | 25295625  | 236 |
| chr15 | 22263838  | 22264073  | 236 |
| chr14 | 3711763   | 3711998   | 236 |
| chrX  | 12053572  | 12053806  | 235 |
| chr6  | 94978356  | 94978590  | 235 |
| chr3  | 106611496 | 106611730 | 235 |
| chr3  | 106529473 | 106529707 | 235 |
| chr26 | 44326370  | 44326604  | 235 |
| chr21 | 62221267  | 62221501  | 235 |
| chr2  | 139317664 | 139317898 | 235 |
| chr2  | 126027130 | 126027364 | 235 |
| chr19 | 54168936  | 54169170  | 235 |
| chr19 | 23127801  | 23128035  | 235 |
| chr15 | 31167002  | 31167236  | 235 |
| chr13 | 52934673  | 52934907  | 235 |
| chr11 | 100228610 | 100228844 | 235 |
| chr11 | 91709334  | 91709568  | 235 |
| chr10 | 17146380  | 17146614  | 235 |
| chrX  | 72100390  | 72100623  | 234 |
| chrX  | 30256937  | 30257170  | 234 |
| chr9  | 89411425  | 89411658  | 234 |
| chr9  | 87744530  | 87744763  | 234 |
| chr6  | 118184109 | 118184342 | 234 |
| chr4  | 121287667 | 121287900 | 234 |
| chr26 | 41802357  | 41802590  | 234 |
| chr26 | 38915209  | 38915442  | 234 |
| chr26 | 20144953  | 20145186  | 234 |
| chr21 | 64483461  | 64483694  | 234 |

|       |           |           |     |
|-------|-----------|-----------|-----|
| chr21 | 19211566  | 19211799  | 234 |
| chr16 | 47510892  | 47511125  | 234 |
| chr13 | 71425996  | 71426229  | 234 |
| chr11 | 80540774  | 80541007  | 234 |
| chrX  | 50302185  | 50302417  | 233 |
| chr7  | 46233257  | 46233489  | 233 |
| chr29 | 42371914  | 42372146  | 233 |
| chr29 | 36537413  | 36537645  | 233 |
| chr28 | 30798798  | 30799030  | 233 |
| chr26 | 41252134  | 41252366  | 233 |
| chr25 | 37857154  | 37857386  | 233 |
| chr25 | 27722815  | 27723047  | 233 |
| chr23 | 15978311  | 15978543  | 233 |
| chr22 | 59599697  | 59599929  | 233 |
| chr21 | 59913522  | 59913754  | 233 |
| chr16 | 2704528   | 2704760   | 233 |
| chr15 | 39508838  | 39509070  | 233 |
| chr14 | 22067934  | 22068166  | 233 |
| chr13 | 14686231  | 14686463  | 233 |
| chrX  | 53625135  | 53625366  | 232 |
| chrX  | 30981055  | 30981286  | 232 |
| chr8  | 87075221  | 87075452  | 232 |
| chr5  | 121388428 | 121388659 | 232 |
| chr28 | 186090    | 186321    | 232 |
| chr23 | 41451966  | 41452197  | 232 |
| chr23 | 28062524  | 28062755  | 232 |
| chr23 | 27973543  | 27973774  | 232 |
| chr21 | 61342929  | 61343160  | 232 |
| chr21 | 20666288  | 20666519  | 232 |
| chr19 | 56477847  | 56478078  | 232 |
| chr19 | 25538233  | 25538464  | 232 |
| chr19 | 23742388  | 23742619  | 232 |
| chr19 | 14749968  | 14750199  | 232 |
| chr18 | 56738074  | 56738305  | 232 |
| chr16 | 29018954  | 29019185  | 232 |
| chr11 | 107233941 | 107234172 | 232 |
| chr11 | 13057250  | 13057481  | 232 |
| chr1  | 150934974 | 150935205 | 232 |
| chrX  | 72165352  | 72165582  | 231 |
| chrX  | 65639661  | 65639891  | 231 |
| chrX  | 31883139  | 31883369  | 231 |
| chr7  | 57325395  | 57325625  | 231 |
| chr5  | 10618717  | 10618947  | 231 |
| chr23 | 42967126  | 42967356  | 231 |
| chr21 | 66333437  | 66333667  | 231 |
| chr19 | 40834916  | 40835146  | 231 |
| chr16 | 44424568  | 44424798  | 231 |
| chr13 | 59381485  | 59381715  | 231 |
| chr5  | 80851369  | 80851598  | 230 |
| chr5  | 38499754  | 38499983  | 230 |

|       |           |           |     |
|-------|-----------|-----------|-----|
| chr3  | 15381184  | 15381413  | 230 |
| chr29 | 33777082  | 33777311  | 230 |
| chr22 | 56109453  | 56109682  | 230 |
| chr19 | 59387904  | 59388133  | 230 |
| chr13 | 76241553  | 76241782  | 230 |
| chr13 | 28746288  | 28746517  | 230 |
| chr11 | 89389631  | 89389860  | 230 |
| chrX  | 80995686  | 80995914  | 229 |
| chrX  | 64386615  | 64386843  | 229 |
| chr7  | 43700046  | 43700274  | 229 |
| chr4  | 33856142  | 33856370  | 229 |
| chr26 | 14573275  | 14573503  | 229 |
| chr22 | 56087404  | 56087632  | 229 |
| chr22 | 53958896  | 53959124  | 229 |
| chr19 | 20367732  | 20367960  | 229 |
| chr13 | 73992089  | 73992317  | 229 |
| chr10 | 17318255  | 17318483  | 229 |
| chr3  | 116147577 | 116147804 | 228 |
| chr3  | 110216783 | 110217010 | 228 |
| chr27 | 45433900  | 45434127  | 228 |
| chr25 | 34462341  | 34462568  | 228 |
| chr19 | 11817253  | 11817480  | 228 |
| chr16 | 39499006  | 39499233  | 228 |
| chr15 | 25484454  | 25484681  | 228 |
| chr12 | 36432081  | 36432308  | 228 |
| chr11 | 108118166 | 108118393 | 228 |
| chr10 | 83531838  | 83532065  | 228 |
| chr10 | 25582371  | 25582598  | 228 |
| chr3  | 34666811  | 34667037  | 227 |
| chr29 | 49129197  | 49129423  | 227 |
| chr26 | 23490432  | 23490658  | 227 |
| chr23 | 28167740  | 28167966  | 227 |
| chr18 | 11807067  | 11807293  | 227 |
| chr17 | 68423193  | 68423419  | 227 |
| chr16 | 47292329  | 47292555  | 227 |
| chr13 | 79697187  | 79697413  | 227 |
| chr13 | 76460702  | 76460928  | 227 |
| chr13 | 73569011  | 73569237  | 227 |
| chr11 | 4192454   | 4192680   | 227 |
| chr1  | 68848649  | 68848875  | 227 |
| chrX  | 53782131  | 53782356  | 226 |
| chrX  | 47441388  | 47441613  | 226 |
| chr7  | 37397068  | 37397293  | 226 |
| chr5  | 124733553 | 124733778 | 226 |
| chr3  | 47876789  | 47877014  | 226 |
| chr23 | 52826719  | 52826944  | 226 |
| chr15 | 64283528  | 64283753  | 226 |
| chr15 | 63694443  | 63694668  | 226 |
| chr14 | 19612385  | 19612610  | 226 |
| chr10 | 89364629  | 89364854  | 226 |

|       |           |           |     |
|-------|-----------|-----------|-----|
| chr1  | 100649235 | 100649460 | 226 |
| chrX  | 53039252  | 53039476  | 225 |
| chrX  | 17119237  | 17119461  | 225 |
| chrX  | 7947869   | 7948093   | 225 |
| chr8  | 7624413   | 7624637   | 225 |
| chr4  | 107346522 | 107346746 | 225 |
| chr4  | 95725246  | 95725470  | 225 |
| chr28 | 24752989  | 24753213  | 225 |
| chr23 | 14816735  | 14816959  | 225 |
| chr19 | 58734104  | 58734328  | 225 |
| chr18 | 56733157  | 56733381  | 225 |
| chr13 | 67101694  | 67101918  | 225 |
| chr13 | 59693449  | 59693673  | 225 |
| chr12 | 31610455  | 31610679  | 225 |
| chr11 | 100999635 | 100999859 | 225 |
| chrX  | 13662303  | 13662526  | 224 |
| chr7  | 50661266  | 50661489  | 224 |
| chr24 | 62456291  | 62456514  | 224 |
| chr21 | 28712124  | 28712347  | 224 |
| chr19 | 61203428  | 61203651  | 224 |
| chr17 | 66170791  | 66171014  | 224 |
| chrX  | 16935700  | 16935922  | 223 |
| chr5  | 115508996 | 115509218 | 223 |
| chr3  | 43207016  | 43207238  | 223 |
| chr28 | 41349219  | 41349441  | 223 |
| chr27 | 15403416  | 15403638  | 223 |
| chr24 | 49739353  | 49739575  | 223 |
| chr23 | 43443862  | 43444084  | 223 |
| chr22 | 48220011  | 48220233  | 223 |
| chrX  | 63065123  | 63065344  | 222 |
| chr20 | 71127041  | 71127262  | 222 |
| chr18 | 12002588  | 12002809  | 222 |
| chr15 | 84470759  | 84470980  | 222 |
| chr15 | 29668430  | 29668651  | 222 |
| chr15 | 22590422  | 22590643  | 222 |
| chr5  | 31269007  | 31269227  | 221 |
| chr23 | 46160944  | 46161164  | 221 |
| chr21 | 57388063  | 57388283  | 221 |
| chr2  | 136683495 | 136683715 | 221 |
| chr19 | 61279120  | 61279340  | 221 |
| chr13 | 75626146  | 75626366  | 221 |
| chrX  | 75444274  | 75444493  | 220 |
| chrX  | 62879961  | 62880180  | 220 |
| chrX  | 35498134  | 35498353  | 220 |
| chr5  | 80846677  | 80846896  | 220 |
| chr3  | 94323953  | 94324172  | 220 |
| chr29 | 36947255  | 36947474  | 220 |
| chr28 | 34154993  | 34155212  | 220 |
| chr26 | 44401341  | 44401560  | 220 |
| chr17 | 69878936  | 69879155  | 220 |

|       |           |           |      |
|-------|-----------|-----------|------|
| chrX  | 4368984   | 4369202   | 219  |
| chr2  | 135157887 | 135158105 | 219  |
| chr2  | 75556396  | 75556614  | 219  |
| chr19 | 54654319  | 54654537  | 219  |
| chr18 | 17839559  | 17839777  | 219  |
| chr17 | 74757876  | 74758094  | 219  |
| chr15 | 29175676  | 29175894  | 219  |
| chr13 | 31955463  | 31955681  | 219  |
| chrX  | 73272917  | 73273134  | 218  |
| chr9  | 56351899  | 56352116  | 218  |
| chrX  | 18470588  | 18470804  | 217  |
| chrX  | 9985885   | 9986101   | 217  |
| chr29 | 49528223  | 49528438  | 216  |
| chr1  | 131387019 | 131387234 | 216  |
| chr26 | 45960452  | 45960666  | 215  |
| chr26 | 43099890  | 43100104  | 215  |
| chr23 | 46115526  | 46115740  | 215  |
| chr19 | 39020823  | 39021037  | 215  |
| chr16 | 47384975  | 47385189  | 215  |
| chr7  | 43740763  | 43740976  | 214  |
| chr27 | 26682592  | 26682805  | 214  |
| chr19 | 16993370  | 16993583  | 214  |
| chr10 | 60925647  | 60925860  | 214  |
| chrX  | 11831014  | 11831226  | 213  |
| chr5  | 111141619 | 111141831 | 213  |
| chr3  | 15380227  | 15380439  | 213  |
| chr25 | 27378848  | 27379060  | 213  |
| chr10 | 86521160  | 86521372  | 213  |
| chr27 | 41972815  | 41973026  | 212  |
| chr17 | 60580954  | 60581165  | 212  |
| chr15 | 25023806  | 25024017  | 212  |
| chr15 | 21809583  | 21809794  | 212  |
| chr13 | 59819299  | 59819510  | 212  |
| chrX  | 46878302  | 46878511  | 210  |
| chrX  | 8080443   | 8080652   | 210  |
| chr10 | 36563043  | 36563252  | 210  |
| chrX  | 29553513  | 29553721  | 209  |
| chr23 | 12915254  | 12915462  | 209  |
| chr16 | 44934039  | 44934247  | 209  |
| chr3  | 123983544 | 123983751 | 208  |
| chr29 | 36975787  | 36975994  | 208  |
| chr29 | 17688155  | 17688362  | 208  |
| chr19 | 19740765  | 19740972  | 208  |
| chr13 | 65145226  | 65145433  | 208  |
| chr2  | 124292182 | 124292388 | 207  |
| chrX  | 64871634  | 64871839  | 206  |
| chr16 | 55230655  | 55230860  | 206  |
| chr15 | 64475128  | 64475332  | 205  |
| chr13 | 42483912  | 42484114  | 203  |
| chrX  | 33999541  | 34000800  | 1260 |

|       |               |           |     |
|-------|---------------|-----------|-----|
| chr19 | 58944029      | 58944774  | 746 |
| chrX  | 50322146      | 50322665  | 520 |
| chr4  | 53165923      | 53166427  | 505 |
| chr3  | 116146588     | 116147042 | 455 |
| chrX  | 62847694      | 62848121  | 428 |
| chr17 | 56068542      | 56068953  | 412 |
| chr19 | 63956147      | 63956547  | 401 |
| chr19 | 37939535      | 37939858  | 324 |
| chr16 | 2917241       | 2917900   | 660 |
| chr21 | 20040130      | 20040714  | 585 |
| chrX  | 361144 361666 | 523       |     |
| chr14 | 1637353       | 1637850   | 498 |
| chr1  | 84781942      | 84782421  | 480 |
| chr1  | 149427445     | 149427915 | 471 |
| chr24 | 49092954      | 49093423  | 470 |
| chr22 | 49605252      | 49605719  | 468 |
| chr21 | 26472487      | 26472951  | 465 |
| chr9  | 65813488      | 65813944  | 457 |
| chr13 | 38648013      | 38648380  | 368 |
| chr5  | 112901245     | 112901594 | 350 |
| chrX  | 31431228      | 31431669  | 442 |
| chrX  | 9706425       | 9706834   | 410 |
| chr19 | 61751411      | 61751809  | 399 |
| chrX  | 65060607      | 65061000  | 394 |
| chrX  | 46206487      | 46206879  | 393 |
| chr8  | 10187585      | 10187954  | 370 |
| chr11 | 71540779      | 71541144  | 366 |
| chr20 | 529703 530058 | 356       |     |
| chr7  | 43731031      | 43731625  | 595 |
| chr7  | 5195817       | 5196340   | 524 |
| chr2  | 134714531     | 134715039 | 509 |
| chr15 | 42084254      | 42084718  | 465 |
| chr19 | 21728199      | 21728658  | 460 |
| chrX  | 45684218      | 45684664  | 447 |
| chrX  | 78335471      | 78335869  | 399 |
| chr21 | 64868150      | 64868548  | 399 |
| chr18 | 8336205       | 8336591   | 387 |
| chrX  | 39532843      | 39533121  | 279 |
| chr2  | 135102917     | 135103315 | 399 |
| chr12 | 14926872      | 14927231  | 360 |
| chr17 | 62575800      | 62576125  | 326 |
| chrX  | 50635120      | 50635580  | 461 |
| chr8  | 61837138      | 61837588  | 451 |
| chr10 | 28950971      | 28951399  | 429 |
| chrX  | 59820565      | 59820974  | 410 |
| chr8  | 65720286      | 65720694  | 409 |
| chr19 | 64723365      | 64723755  | 391 |
| chrX  | 76806916      | 76807303  | 388 |
| chrX  | 61906232      | 61906610  | 379 |
| chrX  | 49204466      | 49204844  | 379 |

|       |           |           |     |
|-------|-----------|-----------|-----|
| chr20 | 4973505   | 4973878   | 374 |
| chr23 | 46613748  | 46614113  | 366 |
| chr19 | 37926450  | 37926815  | 366 |
| chr18 | 57315809  | 57316157  | 349 |
| chr1  | 152040619 | 152040963 | 345 |
| chr11 | 77606978  | 77607314  | 337 |
| chr21 | 33924082  | 33924409  | 328 |
| chr11 | 70845468  | 70845786  | 319 |
| chr12 | 52803152  | 52803455  | 304 |
| chr13 | 63668208  | 63668509  | 302 |
| chr11 | 76920259  | 76920539  | 281 |
| chr1  | 2719197   | 2719461   | 265 |
| chr6  | 105663081 | 105663333 | 253 |
| chr10 | 16073920  | 16074146  | 227 |
| chr16 | 70464116  | 70464338  | 223 |
| chr10 | 42746441  | 42746788  | 348 |
| chr8  | 73776304  | 73776599  | 296 |
| chr9  | 13833672  | 13834049  | 378 |
| chr21 | 52079918  | 52080316  | 399 |
| chrX  | 17809982  | 17810189  | 208 |
| chr8  | 73846425  | 73846888  | 464 |
| chr24 | 8159616   | 8159867   | 252 |
| chr10 | 27513257  | 27513642  | 386 |
| chr4  | 108054497 | 108054873 | 377 |
| chr8  | 73854874  | 73855252  | 379 |
| chr12 | 59347791  | 59348021  | 231 |
| chr8  | 23935107  | 23935533  | 427 |
| chrX  | 70861707  | 70862123  | 417 |
| chrX  | 60423134  | 60423496  | 363 |
| chr9  | 90269908  | 90270266  | 359 |
| chr21 | 11886572  | 11886917  | 346 |
| chrX  | 56080567  | 56080861  | 295 |
| chr1  | 1836615   | 1836873   | 259 |
| chr21 | 55796179  | 55796392  | 214 |
| chr16 | 21151562  | 21151761  | 200 |
| chr1  | 118198558 | 118199258 | 701 |
| chr29 | 31517414  | 31518068  | 655 |
| chr1  | 1567400   | 1568031   | 632 |
| chr10 | 89408564  | 89409184  | 621 |
| chr18 | 22213122  | 22213670  | 549 |
| chr14 | 3607591   | 3608081   | 491 |
| chr24 | 41780560  | 41781011  | 452 |
| chr13 | 77225572  | 77226020  | 449 |
| chr29 | 31974074  | 31974390  | 317 |
| chr10 | 52337877  | 52338171  | 295 |
| chr18 | 62750028  | 62750831  | 804 |
| chr19 | 12400809  | 12401340  | 532 |
| chrX  | 17204952  | 17205461  | 510 |
| chr8  | 73865043  | 73865490  | 448 |
| chr17 | 64204887  | 64205296  | 410 |



|       |               |           |     |
|-------|---------------|-----------|-----|
| chr25 | 1253568       | 1253972   | 405 |
| chr26 | 15680188      | 15680585  | 398 |
| chr6  | 46708093      | 46708462  | 370 |
| chr13 | 73887426      | 73887753  | 328 |
| chrX  | 44931667      | 44931980  | 314 |
| chr11 | 74863757      | 74864411  | 655 |
| chr28 | 26781212      | 26781796  | 585 |
| chrX  | 19749404      | 19749946  | 543 |
| chr5  | 60448592      | 60449132  | 541 |
| chrX  | 10931808      | 10932341  | 534 |
| chrX  | 76774951      | 76775462  | 512 |
| chrX  | 75778745      | 75779174  | 430 |
| chr3  | 22561249      | 22561652  | 404 |
| chrX  | 71937727      | 71938128  | 402 |
| chr10 | 22334059      | 22334457  | 399 |
| chr3  | 116392785     | 116393173 | 389 |
| chrX  | 53889979      | 53890360  | 382 |
| chr21 | 61654861      | 61655241  | 381 |
| chr22 | 32676745      | 32677256  | 512 |
| chrX  | 34164835      | 34165275  | 441 |
| chr7  | 19373803      | 19374178  | 376 |
| chrX  | 57043867      | 57044227  | 361 |
| chr27 | 5499221       | 5499796   | 576 |
| chr21 | 20142499      | 20143071  | 573 |
| chr21 | 68032393      | 68032937  | 545 |
| chrX  | 47276591      | 47277066  | 476 |
| chr11 | 100204645     | 100205073 | 429 |
| chr4  | 110808627     | 110809050 | 424 |
| chr6  | 115596395     | 115596802 | 408 |
| chrX  | 50816969      | 50817374  | 406 |
| chr26 | 50638707      | 50639105  | 399 |
| chr13 | 42868317      | 42868715  | 399 |
| chr21 | 27278106      | 27278496  | 391 |
| chr18 | 63807997      | 63808355  | 359 |
| chr8  | 73891954      | 73892266  | 313 |
| chr9  | 90477251      | 90477504  | 254 |
| chr2  | 136899727     | 136900274 | 548 |
| chr13 | 77690010      | 77690521  | 512 |
| chr13 | 137597 138104 | 508       |     |
| chr17 | 73208856      | 73209302  | 447 |
| chr21 | 34762417      | 34762822  | 406 |
| chr23 | 28491111      | 28491490  | 380 |
| chr11 | 105993547     | 105993925 | 379 |
| chr18 | 40197324      | 40197699  | 376 |
| chr19 | 63550908      | 63551281  | 374 |
| chr1  | 138021932     | 138022300 | 369 |
| chrX  | 46292644      | 46293011  | 368 |
| chr29 | 49771102      | 49771467  | 366 |
| chrX  | 55156915      | 55157269  | 355 |
| chrX  | 36215625      | 36215979  | 355 |

|       |               |           |     |
|-------|---------------|-----------|-----|
| chrX  | 54180483      | 54180831  | 349 |
| chr3  | 105957557     | 105957898 | 342 |
| chr25 | 13376700      | 13377039  | 340 |
| chr26 | 12491340      | 12491678  | 339 |
| chr25 | 33482524      | 33482862  | 339 |
| chr6  | 45680728      | 45681064  | 337 |
| chr2  | 110558808     | 110559143 | 336 |
| chr17 | 41487878      | 41488213  | 336 |
| chrX  | 37483784      | 37484118  | 335 |
| chrX  | 50032458      | 50032789  | 332 |
| chr9  | 83791973      | 83792300  | 328 |
| chrX  | 351205 351531 | 327       |     |
| chr2  | 21584819      | 21585142  | 324 |
| chr16 | 48202884      | 48203203  | 320 |
| chr19 | 19128774      | 19129085  | 312 |
| chr23 | 31128127      | 31128429  | 303 |
| chr22 | 30074070      | 30074368  | 299 |
| chr18 | 51156188      | 51156482  | 295 |
| chrX  | 50191543      | 50191828  | 286 |
| chr17 | 54460896      | 54461181  | 286 |
| chrX  | 7411707       | 7411988   | 282 |
| chr3  | 121905085     | 121905365 | 281 |
| chr17 | 70433344      | 70433603  | 260 |
| chr1  | 60678528      | 60678779  | 252 |
| chr8  | 73812258      | 73812507  | 250 |
| chr5  | 91865490      | 91865736  | 247 |
| chr8  | 73840060      | 73840299  | 240 |
| chr12 | 9041522       | 9041748   | 227 |
| chr3  | 409159 409384 | 226       |     |
| chr21 | 27719411      | 27719632  | 222 |
| chr25 | 385503 385719 | 217       |     |
| chr5  | 7618963       | 7619165   | 203 |
| chr3  | 40491103      | 40491508  | 406 |
| chrX  | 54768692      | 54768982  | 291 |
| chr8  | 23941801      | 23942166  | 366 |
| chr24 | 61544093      | 61545026  | 934 |
| chr18 | 12122809      | 12123738  | 930 |
| chr24 | 31396393      | 31397311  | 919 |
| chr17 | 49720111      | 49721020  | 910 |
| chr4  | 34473111      | 34473901  | 791 |
| chrX  | 30934040      | 30934826  | 787 |
| chr8  | 41429450      | 41430235  | 786 |
| chr22 | 7285185       | 7285933   | 749 |
| chr5  | 33572101      | 33572831  | 731 |
| chr12 | 32100428      | 32101153  | 726 |
| chr7  | 3017578       | 3018290   | 713 |
| chr14 | 21590574      | 21591283  | 710 |
| chrX  | 12504380      | 12505085  | 706 |
| chr15 | 25590787      | 25591475  | 689 |
| chr10 | 105014290     | 105014973 | 684 |

|       |               |           |     |
|-------|---------------|-----------|-----|
| chr19 | 39897845      | 39898527  | 683 |
| chr2  | 130982658     | 130983333 | 676 |
| chrX  | 71470311      | 71470971  | 661 |
| chr22 | 11748069      | 11748727  | 659 |
| chr19 | 45148227      | 45148882  | 656 |
| chrX  | 4313485       | 4314136   | 652 |
| chr5  | 29636310      | 29636961  | 652 |
| chr8  | 5818848       | 5819494   | 647 |
| chr5  | 60444203      | 60444837  | 635 |
| chrX  | 55625417      | 55626043  | 627 |
| chrX  | 30562905      | 30563522  | 618 |
| chr11 | 77550763      | 77551378  | 616 |
| chrX  | 62614703      | 62615309  | 607 |
| chr7  | 60990717      | 60991322  | 606 |
| chr13 | 41058684      | 41059287  | 604 |
| chr3  | 106551183     | 106551777 | 595 |
| chr23 | 26280177      | 26280771  | 595 |
| chr17 | 56120663      | 56121251  | 589 |
| chrX  | 5165702       | 5166289   | 588 |
| chr9  | 91085418      | 91086005  | 588 |
| chr26 | 46279612      | 46280195  | 584 |
| chrX  | 37597722      | 37598296  | 575 |
| chr24 | 5339762       | 5340332   | 571 |
| chr18 | 54792231      | 54792801  | 571 |
| chr11 | 70781640      | 70782210  | 571 |
| chrX  | 48088314      | 48088882  | 569 |
| chr4  | 121059935     | 121060502 | 568 |
| chr19 | 39838879      | 39839442  | 564 |
| chr16 | 44152294      | 44152854  | 561 |
| chr23 | 31454271      | 31454830  | 560 |
| chr14 | 3487616       | 3488175   | 560 |
| chrX  | 55229684      | 55230239  | 556 |
| chrX  | 75013218      | 75013771  | 554 |
| chr21 | 22393586      | 22394138  | 553 |
| chrX  | 56859565      | 56860116  | 552 |
| chr3  | 116418262     | 116418813 | 552 |
| chr7  | 42282040      | 42282589  | 550 |
| chrX  | 50037701      | 50038248  | 548 |
| chr14 | 7797941       | 7798486   | 546 |
| chrX  | 10214348      | 10214889  | 542 |
| chrX  | 20910505      | 20911045  | 541 |
| chr2  | 124976505     | 124977044 | 540 |
| chr20 | 75726937      | 75727473  | 537 |
| chr27 | 297036 297571 | 536       |     |
| chr15 | 37584743      | 37585278  | 536 |
| chrX  | 50271181      | 50271709  | 529 |
| chr13 | 59719753      | 59720281  | 529 |
| chr3  | 105959158     | 105959684 | 527 |
| chr23 | 8248925       | 8249451   | 527 |
| chr14 | 8091201       | 8091724   | 524 |

|       |           |           |     |
|-------|-----------|-----------|-----|
| chr2  | 26555924  | 26556445  | 522 |
| chr14 | 1492249   | 1492770   | 522 |
| chr18 | 46299383  | 46299901  | 519 |
| chrX  | 31679211  | 31679728  | 518 |
| chr3  | 116016827 | 116017344 | 518 |
| chrX  | 7130766   | 7131278   | 513 |
| chrX  | 54930742  | 54931253  | 512 |
| chr6  | 118659524 | 118660033 | 510 |
| chr28 | 33276404  | 33276911  | 508 |
| chr19 | 21597525  | 21598028  | 504 |
| chrX  | 13540713  | 13541209  | 497 |
| chr22 | 59507930  | 59508426  | 497 |
| chr22 | 48413046  | 48413539  | 494 |
| chrX  | 58500218  | 58500707  | 490 |
| chr10 | 16908381  | 16908869  | 489 |
| chr19 | 64765340  | 64765826  | 487 |
| chr23 | 11931378  | 11931861  | 484 |
| chr25 | 34022056  | 34022538  | 483 |
| chr27 | 47626910  | 47627386  | 477 |
| chr3  | 106500601 | 106501076 | 476 |
| chr21 | 13592553  | 13593025  | 473 |
| chrX  | 36337399  | 36337870  | 472 |
| chrX  | 19524717  | 19525184  | 468 |
| chrX  | 19205554  | 19206019  | 466 |
| chr5  | 78721526  | 78721985  | 460 |
| chr26 | 15004203  | 15004662  | 460 |
| chr25 | 28600404  | 28600858  | 455 |
| chr22 | 56377765  | 56378219  | 455 |
| chr16 | 44105423  | 44105875  | 453 |
| chrX  | 55453780  | 55454230  | 451 |
| chr7  | 45703894  | 45704338  | 445 |
| chr10 | 49252829  | 49253273  | 445 |
| chrX  | 54143354  | 54143795  | 442 |
| chr6  | 45440730  | 45441171  | 442 |
| chr5  | 60916487  | 60916927  | 441 |
| chr13 | 17766519  | 17766958  | 440 |
| chrX  | 36729208  | 36729639  | 432 |
| chrX  | 50090189  | 50090619  | 431 |
| chr11 | 90401484  | 90401914  | 431 |
| chrX  | 75479134  | 75479561  | 428 |
| chr23 | 8253840   | 8254267   | 428 |
| chr21 | 24393919  | 24394346  | 428 |
| chr10 | 12131017  | 12131440  | 424 |
| chr9  | 76687756  | 76688178  | 423 |
| chrX  | 80060277  | 80060690  | 414 |
| chr25 | 38334712  | 38335124  | 413 |
| chr18 | 16578220  | 16578629  | 410 |
| chrX  | 73419515  | 73419921  | 407 |
| chr19 | 25086718  | 25087123  | 406 |
| chr7  | 45663746  | 45664149  | 404 |

|       |           |           |     |
|-------|-----------|-----------|-----|
| chr10 | 16765254  | 16765657  | 404 |
| chrX  | 74697720  | 74698118  | 399 |
| chrX  | 54658930  | 54659328  | 399 |
| chrX  | 48000360  | 48000758  | 399 |
| chrX  | 34139702  | 34140100  | 399 |
| chr5  | 112663531 | 112663929 | 399 |
| chr3  | 122054608 | 122055006 | 399 |
| chr3  | 30222891  | 30223289  | 399 |
| chr29 | 46921998  | 46922396  | 399 |
| chr24 | 35299892  | 35300290  | 399 |
| chr23 | 19779220  | 19779618  | 399 |
| chr19 | 32736194  | 32736592  | 399 |
| chr16 | 46653130  | 46653528  | 399 |
| chr15 | 15822015  | 15822413  | 399 |
| chr13 | 43446546  | 43446944  | 399 |
| chr29 | 35584511  | 35584907  | 397 |
| chr23 | 45598164  | 45598560  | 397 |
| chr3  | 110315243 | 110315638 | 396 |
| chr2  | 21012634  | 21013029  | 396 |
| chr15 | 44832401  | 44832796  | 396 |
| chrX  | 64566854  | 64567247  | 394 |
| chrX  | 50444100  | 50444493  | 394 |
| chr5  | 26708474  | 26708867  | 394 |
| chr23 | 27771291  | 27771684  | 394 |
| chrX  | 56888904  | 56889296  | 393 |
| chr9  | 62430395  | 62430786  | 392 |
| chr3  | 112873858 | 112874248 | 391 |
| chr5  | 75156437  | 75156826  | 390 |
| chrX  | 72951495  | 72951883  | 389 |
| chr21 | 13629235  | 13629623  | 389 |
| chr15 | 30409946  | 30410334  | 389 |
| chr13 | 77729810  | 77730198  | 389 |
| chr13 | 63432284  | 63432672  | 389 |
| chr3  | 22964860  | 22965247  | 388 |
| chr2  | 75590442  | 75590829  | 388 |
| chr10 | 89416417  | 89416804  | 388 |
| chrX  | 22594233  | 22594619  | 387 |
| chr8  | 65836925  | 65837311  | 387 |
| chr8  | 58378695  | 58379080  | 386 |
| chr16 | 43447072  | 43447457  | 386 |
| chr10 | 71287670  | 71288055  | 386 |
| chr26 | 22313099  | 22313483  | 385 |
| chrX  | 47357172  | 47357555  | 384 |
| chrX  | 5486701   | 5487084   | 384 |
| chr2  | 127173219 | 127173602 | 384 |
| chrX  | 13354149  | 13354531  | 383 |
| chrX  | 68972312  | 68972693  | 382 |
| chrX  | 34554220  | 34554601  | 382 |
| chrX  | 65000118  | 65000498  | 381 |
| chrX  | 30672223  | 30672603  | 381 |

|       |               |           |     |
|-------|---------------|-----------|-----|
| chr17 | 63375703      | 63376083  | 381 |
| chrX  | 37592308      | 37592687  | 380 |
| chrX  | 20610265      | 20610644  | 380 |
| chr4  | 50852698      | 50853077  | 380 |
| chr3  | 104960041     | 104960420 | 380 |
| chrX  | 65560543      | 65560920  | 378 |
| chr26 | 41860507      | 41860884  | 378 |
| chr13 | 40291168      | 40291545  | 378 |
| chrX  | 45485055      | 45485431  | 377 |
| chr22 | 48245226      | 48245602  | 377 |
| chr22 | 30098565      | 30098941  | 377 |
| chrX  | 12062020      | 12062395  | 376 |
| chr19 | 29818696      | 29819071  | 376 |
| chr19 | 22467512      | 22467887  | 376 |
| chr13 | 70091274      | 70091648  | 375 |
| chr12 | 35574358      | 35574731  | 374 |
| chr10 | 74574333      | 74574705  | 373 |
| chr22 | 49547199      | 49547570  | 372 |
| chr2  | 134889844     | 134890215 | 372 |
| chr3  | 17830867      | 17831237  | 371 |
| chr18 | 63775659      | 63776028  | 370 |
| chrX  | 13055922      | 13056290  | 369 |
| chr26 | 48434712      | 48435080  | 369 |
| chrX  | 63027859      | 63028226  | 368 |
| chr23 | 42731300      | 42731667  | 368 |
| chr23 | 20262579      | 20262946  | 368 |
| chr19 | 61995302      | 61995669  | 368 |
| chr24 | 43680643      | 43681009  | 367 |
| chr5  | 79216741      | 79217106  | 366 |
| chr29 | 37239082      | 37239447  | 366 |
| chr29 | 35188219      | 35188584  | 366 |
| chrX  | 75587672      | 75588036  | 365 |
| chr8  | 65232329      | 65232693  | 365 |
| chr14 | 7789522       | 7789886   | 365 |
| chr24 | 44010873      | 44011235  | 363 |
| chr14 | 61259177      | 61259539  | 363 |
| chr10 | 17231733      | 17232095  | 363 |
| chrX  | 9747544       | 9747905   | 362 |
| chr18 | 45661921      | 45662282  | 362 |
| chrX  | 65229574      | 65229934  | 361 |
| chrX  | 14641695      | 14642055  | 361 |
| chrX  | 10120358      | 10120718  | 361 |
| chr28 | 11900010      | 11900370  | 361 |
| chr18 | 23380853      | 23381212  | 360 |
| chr11 | 74209515      | 74209874  | 360 |
| chr19 | 14060972      | 14061330  | 359 |
| chr13 | 54759020      | 54759378  | 359 |
| chr12 | 64824677      | 64825034  | 358 |
| chr7  | 14677347      | 14677703  | 357 |
| chr27 | 817204 817560 | 357       |     |

|       |               |           |     |
|-------|---------------|-----------|-----|
| chrX  | 62953425      | 62953780  | 356 |
| chr24 | 40330413      | 40330768  | 356 |
| chr14 | 871270 871625 | 356       |     |
| chr7  | 4505331       | 4505685   | 355 |
| chrX  | 36241725      | 36242078  | 354 |
| chrX  | 9499668       | 9500021   | 354 |
| chr3  | 98236253      | 98236606  | 354 |
| chr22 | 13535080      | 13535433  | 354 |
| chr17 | 49153275      | 49153628  | 354 |
| chr13 | 22150233      | 22150586  | 354 |
| chr7  | 52280716      | 52281068  | 353 |
| chr2  | 132707109     | 132707461 | 353 |
| chr14 | 60691157      | 60691509  | 353 |
| chrX  | 75929211      | 75929562  | 352 |
| chrX  | 57600483      | 57600834  | 352 |
| chr23 | 38607698      | 38608049  | 352 |
| chr25 | 37260288      | 37260638  | 351 |
| chr13 | 49834781      | 49835131  | 351 |
| chr8  | 108761571     | 108761920 | 350 |
| chrX  | 19640921      | 19641269  | 349 |
| chr10 | 8719118       | 8719465   | 348 |
| chr17 | 48916234      | 48916580  | 347 |
| chrX  | 44939358      | 44939703  | 346 |
| chr4  | 96867970      | 96868315  | 346 |
| chr13 | 54095688      | 54096033  | 346 |
| chrX  | 50667843      | 50668186  | 344 |
| chr13 | 6783932       | 6784275   | 344 |
| chr11 | 28421704      | 28422046  | 343 |
| chrX  | 51058199      | 51058540  | 342 |
| chrX  | 13605038      | 13605379  | 342 |
| chr29 | 44735327      | 44735668  | 342 |
| chr5  | 113139555     | 113139894 | 340 |
| chr17 | 67104450      | 67104788  | 339 |
| chrX  | 9901395       | 9901732   | 338 |
| chr29 | 38810759      | 38811096  | 338 |
| chr2  | 136649746     | 136650083 | 338 |
| chr20 | 33692721      | 33693057  | 337 |
| chrX  | 61582176      | 61582511  | 336 |
| chr6  | 72740899      | 72741232  | 334 |
| chr18 | 12003690      | 12004023  | 334 |
| chr12 | 13404481      | 13404813  | 333 |
| chr29 | 2505288       | 2505618   | 331 |
| chrX  | 21686638      | 21686967  | 330 |
| chr29 | 31537961      | 31538289  | 329 |
| chr19 | 59326236      | 59326564  | 329 |
| chr21 | 29046024      | 29046351  | 328 |
| chr28 | 35515907      | 35516233  | 327 |
| chr23 | 10588197      | 10588522  | 326 |
| chrX  | 19464003      | 19464326  | 324 |
| chr19 | 15873545      | 15873868  | 324 |

|       |           |           |     |
|-------|-----------|-----------|-----|
| chr10 | 8557068   | 8557391   | 324 |
| chr13 | 40874329  | 40874649  | 321 |
| chr21 | 47298600  | 47298916  | 317 |
| chr17 | 54526057  | 54526373  | 317 |
| chrX  | 71055866  | 71056179  | 314 |
| chrX  | 61727060  | 61727373  | 314 |
| chr18 | 55208985  | 55209298  | 314 |
| chr13 | 37645716  | 37646029  | 314 |
| chr5  | 30046200  | 30046512  | 313 |
| chr16 | 3717376   | 3717684   | 309 |
| chrX  | 61023511  | 61023816  | 306 |
| chrX  | 31238128  | 31238433  | 306 |
| chr13 | 73891800  | 73892104  | 305 |
| chr29 | 37045358  | 37045660  | 303 |
| chrX  | 6890368   | 6890669   | 302 |
| chr23 | 29015754  | 29016054  | 301 |
| chrX  | 7814403   | 7814702   | 300 |
| chr21 | 1773473   | 1773772   | 300 |
| chr5  | 29171549  | 29171846  | 298 |
| chr4  | 116946121 | 116946417 | 297 |
| chr27 | 26954623  | 26954919  | 297 |
| chr8  | 65360885  | 65361176  | 292 |
| chr7  | 50529322  | 50529613  | 292 |
| chr16 | 47235648  | 47235938  | 291 |
| chr17 | 68537233  | 68537520  | 288 |
| chr16 | 39470517  | 39470801  | 285 |
| chr18 | 53329791  | 53330071  | 281 |
| chr13 | 41598156  | 41598433  | 278 |
| chr21 | 68036363  | 68036638  | 276 |
| chr28 | 11359639  | 11359894  | 256 |
| chr21 | 56990943  | 56991196  | 254 |
| chrX  | 9610023   | 9610271   | 249 |
| chr20 | 65048724  | 65048966  | 243 |
| chr21 | 25636490  | 25636716  | 227 |
| chr9  | 47798228  | 47798450  | 223 |
| chrX  | 57137455  | 57138401  | 947 |
| chr2  | 125901479 | 125902329 | 851 |
| chr5  | 12281951  | 12282681  | 731 |
| chr23 | 27906073  | 27906777  | 705 |
| chrX  | 51861728  | 51862421  | 694 |
| chr19 | 49646055  | 49646710  | 656 |
| chr12 | 32212335  | 32212974  | 640 |
| chr4  | 32392407  | 32393038  | 632 |
| chr15 | 63722149  | 63722768  | 620 |
| chrX  | 30233905  | 30234516  | 612 |
| chr19 | 38614284  | 38614895  | 612 |
| chr14 | 34727263  | 34727865  | 603 |
| chr23 | 18632502  | 18633100  | 599 |
| chrX  | 22535281  | 22535870  | 590 |
| chr2  | 26454634  | 26455217  | 584 |



|       |           |           |     |
|-------|-----------|-----------|-----|
| chr18 | 7106845   | 7107396   | 552 |
| chrX  | 34787509  | 34788056  | 548 |
| chrX  | 78720312  | 78720854  | 543 |
| chr24 | 48905294  | 48905836  | 543 |
| chr4  | 84323390  | 84323928  | 539 |
| chr11 | 100951887 | 100952424 | 538 |
| chr8  | 72524056  | 72524587  | 532 |
| chr4  | 5389992   | 5390521   | 530 |
| chrX  | 49085567  | 49086095  | 529 |
| chr16 | 70105835  | 70106363  | 529 |
| chr7  | 38457550  | 38458073  | 524 |
| chr15 | 24495420  | 24495942  | 523 |
| chr2  | 139223123 | 139223638 | 516 |
| chr18 | 11643832  | 11644345  | 514 |
| chrX  | 7774951   | 7775461   | 511 |
| chr5  | 114069473 | 114069983 | 511 |
| chr26 | 48446596  | 48447106  | 511 |
| chrX  | 30604504  | 30605008  | 505 |
| chrX  | 74727503  | 74728006  | 504 |
| chr22 | 56051508  | 56052010  | 503 |
| chr2  | 49414889  | 49415385  | 497 |
| chr13 | 77755003  | 77755496  | 494 |
| chrX  | 8370405   | 8370897   | 493 |
| chrX  | 60937588  | 60938077  | 490 |
| chr8  | 64490349  | 64490825  | 477 |
| chr13 | 60704178  | 60704652  | 475 |
| chr5  | 35301005  | 35301475  | 471 |
| chr3  | 121421994 | 121422458 | 465 |
| chr7  | 10611087  | 10611548  | 462 |
| chrX  | 50545767  | 50546224  | 458 |
| chrX  | 6983758   | 6984213   | 456 |
| chr26 | 34299611  | 34300066  | 456 |
| chr18 | 17347545  | 17347997  | 453 |
| chr8  | 87336952  | 87337401  | 450 |
| chrX  | 38301738  | 38302186  | 449 |
| chrX  | 72788163  | 72788606  | 444 |
| chr12 | 81467400  | 81467843  | 444 |
| chr11 | 77656567  | 77657010  | 444 |
| chr29 | 48701668  | 48702110  | 443 |
| chr19 | 27370424  | 27370861  | 438 |
| chr2  | 115079130 | 115079562 | 433 |
| chr1  | 123121985 | 123122416 | 432 |
| chr5  | 122821497 | 122821925 | 429 |
| chrX  | 50542506  | 50542932  | 427 |
| chrX  | 19875630  | 19876056  | 427 |
| chr8  | 108816511 | 108816936 | 426 |
| chr5  | 67818025  | 67818447  | 423 |
| chr23 | 38087114  | 38087535  | 422 |
| chr26 | 21625453  | 21625869  | 417 |
| chr11 | 71593473  | 71593889  | 417 |

|       |           |           |     |
|-------|-----------|-----------|-----|
| chrX  | 59775465  | 59775880  | 416 |
| chr29 | 31507437  | 31507849  | 413 |
| chr5  | 28995966  | 28996376  | 411 |
| chr19 | 49383436  | 49383840  | 405 |
| chr15 | 56125513  | 56125917  | 405 |
| chrX  | 35440333  | 35440736  | 404 |
| chrX  | 19443120  | 19443520  | 401 |
| chrX  | 77205362  | 77205760  | 399 |
| chr9  | 36003704  | 36004102  | 399 |
| chr3  | 35826909  | 35827307  | 399 |
| chr22 | 8271836   | 8272234   | 399 |
| chr2  | 135163347 | 135163745 | 399 |
| chr16 | 67212527  | 67212925  | 399 |
| chr16 | 38558328  | 38558726  | 399 |
| chr15 | 81402065  | 81402463  | 399 |
| chr13 | 41606318  | 41606716  | 399 |
| chrX  | 8051229   | 8051626   | 398 |
| chr4  | 121287961 | 121288358 | 398 |
| chr27 | 30514765  | 30515162  | 398 |
| chr22 | 59677018  | 59677415  | 398 |
| chr20 | 5902508   | 5902905   | 398 |
| chr19 | 41545122  | 41545519  | 398 |
| chr3  | 15404817  | 15405213  | 397 |
| chr9  | 41554431  | 41554825  | 395 |
| chr6  | 105465442 | 105465836 | 395 |
| chr11 | 74456130  | 74456524  | 395 |
| chr15 | 73777741  | 73778134  | 394 |
| chr24 | 36025179  | 36025571  | 393 |
| chr11 | 9253029   | 9253421   | 393 |
| chr11 | 1320124   | 1320516   | 393 |
| chr7  | 71317279  | 71317670  | 392 |
| chr11 | 81555305  | 81555696  | 392 |
| chr11 | 21620617  | 21621008  | 392 |
| chrX  | 76856876  | 76857266  | 391 |
| chr5  | 121241840 | 121242230 | 391 |
| chr3  | 36884358  | 36884748  | 391 |
| chr25 | 39876242  | 39876631  | 390 |
| chr17 | 63601925  | 63602314  | 390 |
| chr10 | 20877282  | 20877671  | 390 |
| chrX  | 65902672  | 65903060  | 389 |
| chr29 | 18310175  | 18310563  | 389 |
| chr27 | 45610136  | 45610524  | 389 |
| chr25 | 34357955  | 34358343  | 389 |
| chr11 | 98920177  | 98920565  | 389 |
| chr24 | 46856000  | 46856386  | 387 |
| chr22 | 54408898  | 54409284  | 387 |
| chr11 | 10692438  | 10692824  | 387 |
| chr25 | 22541191  | 22541576  | 386 |
| chr24 | 64992322  | 64992707  | 386 |
| chr24 | 33495686  | 33496071  | 386 |

|       |           |           |     |
|-------|-----------|-----------|-----|
| chr23 | 3311551   | 3311936   | 386 |
| chr19 | 51924635  | 51925020  | 386 |
| chrX  | 66888528  | 66888912  | 385 |
| chr25 | 33518608  | 33518991  | 384 |
| chr10 | 10749656  | 10750039  | 384 |
| chr24 | 39742944  | 39743326  | 383 |
| chr23 | 19630083  | 19630465  | 383 |
| chr21 | 6484074   | 6484456   | 383 |
| chr12 | 31644012  | 31644394  | 383 |
| chr4  | 121085400 | 121085781 | 382 |
| chr2  | 134389510 | 134389891 | 382 |
| chr10 | 103014282 | 103014663 | 382 |
| chr21 | 55540304  | 55540684  | 381 |
| chr20 | 71361510  | 71361890  | 381 |
| chr16 | 47976796  | 47977176  | 381 |
| chr13 | 59062443  | 59062823  | 381 |
| chr2  | 134100983 | 134101362 | 380 |
| chr17 | 1567377   | 1567755   | 379 |
| chr2  | 12229360  | 12229737  | 378 |
| chr11 | 56738980  | 56739357  | 378 |
| chr22 | 14944995  | 14945371  | 377 |
| chr13 | 55110996  | 55111372  | 377 |
| chr7  | 38203949  | 38204324  | 376 |
| chrX  | 74526396  | 74526770  | 375 |
| chrX  | 50702177  | 50702551  | 375 |
| chr20 | 8521090   | 8521464   | 375 |
| chr13 | 53154043  | 53154417  | 375 |
| chr11 | 44707241  | 44707615  | 375 |
| chrX  | 75480264  | 75480637  | 374 |
| chr13 | 61822354  | 61822725  | 372 |
| chr13 | 55465958  | 55466329  | 372 |
| chrX  | 11426657  | 11427027  | 371 |
| chr25 | 33473971  | 33474341  | 371 |
| chrX  | 78312848  | 78313217  | 370 |
| chrX  | 32427542  | 32427911  | 370 |
| chr18 | 51157328  | 51157697  | 370 |
| chr12 | 77192231  | 77192600  | 370 |
| chr23 | 10346959  | 10347327  | 369 |
| chr19 | 61542265  | 61542633  | 369 |
| chr1  | 123120889 | 123121257 | 369 |
| chr16 | 3469973   | 3470340   | 368 |
| chrX  | 73978172  | 73978538  | 367 |
| chrX  | 72709646  | 72710012  | 367 |
| chr26 | 44931084  | 44931449  | 366 |
| chr25 | 42070831  | 42071196  | 366 |
| chr29 | 26515472  | 26515836  | 365 |
| chr22 | 30142143  | 30142507  | 365 |
| chrX  | 80152730  | 80153093  | 364 |
| chr24 | 58894425  | 58894788  | 364 |
| chr18 | 62029354  | 62029717  | 364 |

|       |               |           |     |
|-------|---------------|-----------|-----|
| chr8  | 116712658     | 116713020 | 363 |
| chr14 | 80378677      | 80379039  | 363 |
| chrX  | 54589717      | 54590078  | 362 |
| chrX  | 15617046      | 15617405  | 360 |
| chr25 | 36453843      | 36454202  | 360 |
| chr19 | 44161849      | 44162207  | 359 |
| chr3  | 55585717      | 55586074  | 358 |
| chr26 | 23488012      | 23488369  | 358 |
| chr24 | 185062 185419 | 358       |     |
| chr19 | 7224035       | 7224392   | 358 |
| chrX  | 84795927      | 84796283  | 357 |
| chr26 | 20318369      | 20318725  | 357 |
| chr5  | 28863542      | 28863897  | 356 |
| chr26 | 38208215      | 38208569  | 355 |
| chr2  | 16508887      | 16509240  | 354 |
| chr12 | 82745875      | 82746228  | 354 |
| chr23 | 45876679      | 45877031  | 353 |
| chr8  | 10884537      | 10884887  | 351 |
| chr23 | 28830982      | 28831332  | 351 |
| chr2  | 75985894      | 75986244  | 351 |
| chr22 | 30363370      | 30363719  | 350 |
| chr10 | 58728267      | 58728616  | 350 |
| chrX  | 8349064       | 8349412   | 349 |
| chr4  | 79090956      | 79091304  | 349 |
| chrX  | 71123546      | 71123893  | 348 |
| chr24 | 65000188      | 65000532  | 345 |
| chr14 | 63514798      | 63515142  | 345 |
| chr8  | 63988686      | 63989029  | 344 |
| chr3  | 123542947     | 123543290 | 344 |
| chrX  | 2401190       | 2401532   | 343 |
| chr2  | 94799858      | 94800197  | 340 |
| chr19 | 33474187      | 33474525  | 339 |
| chr1  | 123091982     | 123092319 | 338 |
| chrX  | 3760371       | 3760707   | 337 |
| chrX  | 8271378       | 8271709   | 332 |
| chr7  | 8920016       | 8920346   | 331 |
| chr7  | 16544909      | 16545238  | 330 |
| chr28 | 34027567      | 34027894  | 328 |
| chr3  | 8806591       | 8806916   | 326 |
| chr16 | 61163317      | 61163642  | 326 |
| chr15 | 51697862      | 51698187  | 326 |
| chr27 | 606109 606432 | 324       |     |
| chr19 | 56041506      | 56041829  | 324 |
| chr29 | 18258484      | 18258806  | 323 |
| chrX  | 64303390      | 64303711  | 322 |
| chrX  | 19834834      | 19835153  | 320 |
| chr20 | 41389135      | 41389454  | 320 |
| chr7  | 57332748      | 57333066  | 319 |
| chr2  | 115069404     | 115069721 | 318 |
| chrX  | 60882119      | 60882435  | 317 |

|       |               |           |     |
|-------|---------------|-----------|-----|
| chr18 | 5263551       | 5263866   | 316 |
| chrX  | 20299526      | 20299840  | 315 |
| chr15 | 28939475      | 28939787  | 313 |
| chr13 | 59104669      | 59104980  | 312 |
| chr9  | 64593584      | 64593894  | 311 |
| chrX  | 36055241      | 36055550  | 310 |
| chr5  | 125118652     | 125118956 | 305 |
| chr1  | 159077170     | 159077472 | 303 |
| chr15 | 76435754      | 76436052  | 299 |
| chr7  | 37387876      | 37388172  | 297 |
| chr1  | 146459621     | 146459917 | 297 |
| chr9  | 35533491      | 35533785  | 295 |
| chr8  | 60110052      | 60110339  | 288 |
| chr29 | 36417176      | 36417463  | 288 |
| chr2  | 64583354      | 64583639  | 286 |
| chr5  | 115087772     | 115088054 | 283 |
| chrX  | 49281741      | 49282022  | 282 |
| chr16 | 75232053      | 75232331  | 279 |
| chr21 | 6398622       | 6398895   | 274 |
| chr18 | 48798878      | 48799150  | 273 |
| chr11 | 105624687     | 105624959 | 273 |
| chrX  | 75740304      | 75740574  | 271 |
| chr18 | 18923224      | 18923494  | 271 |
| chr3  | 99889327      | 99889594  | 268 |
| chr23 | 53016682      | 53016948  | 267 |
| chrX  | 78721032      | 78721293  | 262 |
| chr6  | 121009033     | 121009292 | 260 |
| chr13 | 34943212      | 34943470  | 259 |
| chr2  | 98859253      | 98859509  | 257 |
| chr3  | 22495005      | 22495257  | 253 |
| chrX  | 59378551      | 59378797  | 247 |
| chrX  | 63987123      | 63987926  | 804 |
| chr11 | 49412677      | 49413436  | 760 |
| chrX  | 30602209      | 30602960  | 752 |
| chr27 | 15159915      | 15160642  | 728 |
| chr17 | 72729838      | 72730564  | 727 |
| chr1  | 1545475       | 1546150   | 676 |
| chr18 | 11772572      | 11773244  | 673 |
| chrX  | 72275086      | 72275738  | 653 |
| chr21 | 20685919      | 20686540  | 622 |
| chrX  | 45338509      | 45339113  | 605 |
| chr24 | 185456 186038 | 583       |     |
| chr3  | 115014889     | 115015467 | 579 |
| chr1  | 82901876      | 82902449  | 574 |
| chrX  | 75629252      | 75629821  | 570 |
| chr16 | 46986997      | 46987564  | 568 |
| chr19 | 15798920      | 15799481  | 562 |
| chr19 | 54270020      | 54270575  | 556 |
| chr2  | 130877844     | 130878398 | 555 |
| chr20 | 13810088      | 13810637  | 550 |

|       |               |           |     |
|-------|---------------|-----------|-----|
| chr10 | 99923916      | 99924459  | 544 |
| chrX  | 4314245       | 4314777   | 533 |
| chr20 | 775991 776521 | 531       |     |
| chr26 | 38255711      | 38256233  | 523 |
| chr9  | 100062981     | 100063499 | 519 |
| chrX  | 65141057      | 65141574  | 518 |
| chrX  | 65102507      | 65103020  | 514 |
| chr15 | 74694304      | 74694815  | 512 |
| chr4  | 30314779      | 30315281  | 503 |
| chr19 | 55782425      | 55782924  | 500 |
| chr22 | 59636740      | 59637238  | 499 |
| chr8  | 24500771      | 24501267  | 497 |
| chr2  | 111416199     | 111416692 | 494 |
| chr20 | 648665 649150 | 486       |     |
| chr1  | 82839296      | 82839778  | 483 |
| chr11 | 77834053      | 77834529  | 477 |
| chr4  | 72712189      | 72712664  | 476 |
| chr5  | 117308010     | 117308484 | 475 |
| chr13 | 55149965      | 55150437  | 473 |
| chr5  | 114237640     | 114238106 | 467 |
| chr24 | 48959728      | 48960194  | 467 |
| chr18 | 39916073      | 39916539  | 467 |
| chr17 | 30266643      | 30267109  | 467 |
| chr2  | 138657674     | 138658139 | 466 |
| chr22 | 30078146      | 30078607  | 462 |
| chr23 | 51057647      | 51058106  | 460 |
| chr2  | 116857758     | 116858217 | 460 |
| chr17 | 3367344       | 3367800   | 457 |
| chr4  | 67941910      | 67942365  | 456 |
| chr13 | 69266772      | 69267227  | 456 |
| chr6  | 121814782     | 121815235 | 454 |
| chrX  | 18586894      | 18587345  | 452 |
| chr18 | 13547158      | 13547609  | 452 |
| chr21 | 22724553      | 22725003  | 451 |
| chr20 | 8744248       | 8744696   | 449 |
| chr4  | 33760699      | 33761145  | 447 |
| chrX  | 59816194      | 59816636  | 443 |
| chr3  | 97899348      | 97899785  | 438 |
| chrX  | 54356939      | 54357373  | 435 |
| chr8  | 80998189      | 80998623  | 435 |
| chr19 | 27528123      | 27528554  | 432 |
| chr22 | 48555440      | 48555869  | 430 |
| chr4  | 121474293     | 121474717 | 425 |
| chr10 | 90667407      | 90667830  | 424 |
| chrX  | 11247868      | 11248289  | 422 |
| chr18 | 18050304      | 18050725  | 422 |
| chr24 | 1716120       | 1716540   | 421 |
| chr2  | 111358149     | 111358567 | 419 |
| chr10 | 19512221      | 19512637  | 417 |
| chr8  | 61836668      | 61837083  | 416 |

|       |               |           |     |
|-------|---------------|-----------|-----|
| chr26 | 39258707      | 39259122  | 416 |
| chr11 | 104985566     | 104985981 | 416 |
| chr18 | 7887742       | 7888154   | 413 |
| chr18 | 23607940      | 23608347  | 408 |
| chr18 | 46050306      | 46050709  | 404 |
| chr13 | 77417320      | 77417723  | 404 |
| chr11 | 70691093      | 70691496  | 404 |
| chrX  | 9427728       | 9428129   | 402 |
| chrX  | 8403232       | 8403632   | 401 |
| chr13 | 61227337      | 61227736  | 400 |
| chrX  | 80964899      | 80965297  | 399 |
| chrX  | 61851587      | 61851985  | 399 |
| chrX  | 20003361      | 20003759  | 399 |
| chrX  | 19842042      | 19842440  | 399 |
| chr9  | 90660029      | 90660427  | 399 |
| chr8  | 443852 444250 | 399       |     |
| chr5  | 111876253     | 111876651 | 399 |
| chr5  | 37334343      | 37334741  | 399 |
| chr5  | 30425731      | 30426129  | 399 |
| chr4  | 101710734     | 101711132 | 399 |
| chr3  | 39116775      | 39117173  | 399 |
| chr29 | 37073917      | 37074315  | 399 |
| chr26 | 21987094      | 21987492  | 399 |
| chr24 | 26201376      | 26201774  | 399 |
| chr22 | 58622123      | 58622521  | 399 |
| chr22 | 50014432      | 50014830  | 399 |
| chr2  | 136508229     | 136508627 | 399 |
| chr2  | 129215212     | 129215610 | 399 |
| chr19 | 65244031      | 65244429  | 399 |
| chr18 | 51618598      | 51618996  | 399 |
| chr18 | 17923126      | 17923524  | 399 |
| chr18 | 9512032       | 9512430   | 399 |
| chr18 | 4802334       | 4802732   | 399 |
| chr17 | 68542299      | 68542697  | 399 |
| chr15 | 31338394      | 31338792  | 399 |
| chr14 | 61783326      | 61783724  | 399 |
| chr14 | 61572478      | 61572876  | 399 |
| chr13 | 41692461      | 41692859  | 399 |
| chr12 | 32218777      | 32219175  | 399 |
| chr12 | 32213768      | 32214166  | 399 |
| chr11 | 48675299      | 48675697  | 399 |
| chr11 | 10431883      | 10432281  | 399 |
| chr10 | 25563352      | 25563750  | 399 |
| chrX  | 17410357      | 17410754  | 398 |
| chrX  | 2551599       | 2551996   | 398 |
| chr4  | 71614890      | 71615287  | 398 |
| chr28 | 25727712      | 25728109  | 398 |
| chr19 | 56454837      | 56455234  | 398 |
| chr17 | 6380296       | 6380693   | 398 |
| chr12 | 81799747      | 81800144  | 398 |

|       |           |           |     |
|-------|-----------|-----------|-----|
| chrX  | 75491372  | 75491768  | 397 |
| chr6  | 17315943  | 17316339  | 397 |
| chr27 | 45284056  | 45284452  | 397 |
| chr2  | 75601005  | 75601401  | 397 |
| chr18 | 24019210  | 24019606  | 397 |
| chrX  | 20473918  | 20474313  | 396 |
| chr9  | 53342551  | 53342946  | 396 |
| chr13 | 77342138  | 77342533  | 396 |
| chr10 | 83319771  | 83320166  | 396 |
| chr8  | 65934637  | 65935031  | 395 |
| chr5  | 30809615  | 30810009  | 395 |
| chr23 | 7788818   | 7789212   | 395 |
| chr9  | 45961978  | 45962371  | 394 |
| chr9  | 42891557  | 42891950  | 394 |
| chr3  | 22512726  | 22513119  | 394 |
| chr18 | 38676142  | 38676535  | 394 |
| chr17 | 22796111  | 22796504  | 394 |
| chrX  | 75466515  | 75466907  | 393 |
| chrX  | 30906452  | 30906844  | 393 |
| chr26 | 18190698  | 18191090  | 393 |
| chr23 | 19670543  | 19670935  | 393 |
| chr17 | 66754040  | 66754432  | 393 |
| chr17 | 63406396  | 63406788  | 393 |
| chrX  | 53363687  | 53364078  | 392 |
| chrX  | 10941651  | 10942042  | 392 |
| chr9  | 90314073  | 90314464  | 392 |
| chr8  | 28323591  | 28323982  | 392 |
| chr26 | 23858367  | 23858758  | 392 |
| chr8  | 27382890  | 27383280  | 391 |
| chr4  | 123293497 | 123293887 | 391 |
| chr3  | 26158340  | 26158730  | 391 |
| chr27 | 39922550  | 39922940  | 391 |
| chr21 | 47520404  | 47520794  | 391 |
| chr18 | 38351111  | 38351501  | 391 |
| chrX  | 31941061  | 31941450  | 390 |
| chr20 | 74705105  | 74705494  | 390 |
| chr11 | 11742605  | 11742994  | 390 |
| chrX  | 73237377  | 73237765  | 389 |
| chr29 | 33599275  | 33599663  | 389 |
| chr24 | 26200096  | 26200484  | 389 |
| chr15 | 21856713  | 21857101  | 389 |
| chr13 | 41389410  | 41389798  | 389 |
| chr10 | 80297324  | 80297712  | 389 |
| chr2  | 130784342 | 130784729 | 388 |
| chrX  | 78695420  | 78695806  | 387 |
| chrX  | 56201503  | 56201889  | 387 |
| chrX  | 11457931  | 11458317  | 387 |
| chr5  | 113252545 | 113252931 | 387 |
| chr15 | 30280396  | 30280782  | 387 |
| chr11 | 10442720  | 10443106  | 387 |



|       |           |           |     |
|-------|-----------|-----------|-----|
| chr10 | 67034952  | 67035338  | 387 |
| chrX  | 7576511   | 7576896   | 386 |
| chrX  | 7066460   | 7066845   | 386 |
| chr7  | 5258604   | 5258989   | 386 |
| chr29 | 31559414  | 31559799  | 386 |
| chr28 | 27562008  | 27562393  | 386 |
| chr23 | 21131718  | 21132103  | 386 |
| chr19 | 30270577  | 30270962  | 386 |
| chr16 | 38185251  | 38185636  | 386 |
| chr13 | 72598944  | 72599329  | 386 |
| chr12 | 9252406   | 9252791   | 386 |
| chrX  | 77036261  | 77036645  | 385 |
| chrX  | 20597699  | 20598083  | 385 |
| chrX  | 19347872  | 19348256  | 385 |
| chr9  | 27031683  | 27032067  | 385 |
| chr29 | 36905878  | 36906262  | 385 |
| chr20 | 24027731  | 24028115  | 385 |
| chr12 | 74533110  | 74533494  | 385 |
| chr1  | 36787277  | 36787661  | 385 |
| chr18 | 18037064  | 18037446  | 383 |
| chr18 | 5108298   | 5108680   | 383 |
| chr16 | 20657579  | 20657961  | 383 |
| chr11 | 76376486  | 76376868  | 383 |
| chrX  | 60934181  | 60934562  | 382 |
| chr3  | 33125137  | 33125518  | 382 |
| chr26 | 43602295  | 43602676  | 382 |
| chr22 | 46582851  | 46583232  | 382 |
| chr19 | 45275967  | 45276348  | 382 |
| chr17 | 54770726  | 54771107  | 382 |
| chrX  | 63459419  | 63459799  | 381 |
| chrX  | 52756201  | 52756581  | 381 |
| chr28 | 46071504  | 46071884  | 381 |
| chr17 | 2170137   | 2170517   | 381 |
| chr16 | 47252199  | 47252579  | 381 |
| chr12 | 83601838  | 83602218  | 381 |
| chr11 | 14170199  | 14170579  | 381 |
| chr10 | 7604673   | 7605053   | 381 |
| chr25 | 43536001  | 43536380  | 380 |
| chr19 | 10986967  | 10987346  | 380 |
| chr15 | 51590357  | 51590736  | 380 |
| chr10 | 35672027  | 35672406  | 380 |
| chrX  | 7175835   | 7176213   | 379 |
| chr4  | 121486922 | 121487300 | 379 |
| chr4  | 121438019 | 121438397 | 379 |
| chr22 | 30111789  | 30112167  | 379 |
| chr19 | 54656811  | 54657189  | 379 |
| chr17 | 64305168  | 64305546  | 379 |
| chrX  | 72100647  | 72101024  | 378 |
| chrX  | 60157301  | 60157678  | 378 |
| chrX  | 30997028  | 30997405  | 378 |

|       |               |           |     |
|-------|---------------|-----------|-----|
| chr7  | 18709796      | 18710173  | 378 |
| chr4  | 110060874     | 110061251 | 378 |
| chr29 | 36927852      | 36928229  | 378 |
| chr19 | 57047904      | 57048281  | 378 |
| chr16 | 47948063      | 47948440  | 378 |
| chr16 | 3303471       | 3303848   | 378 |
| chr10 | 70348731      | 70349108  | 378 |
| chrX  | 62685966      | 62686342  | 377 |
| chrX  | 47900005      | 47900381  | 377 |
| chr19 | 41264134      | 41264510  | 377 |
| chrX  | 48650180      | 48650555  | 376 |
| chr29 | 34971125      | 34971500  | 376 |
| chr26 | 34285790      | 34286165  | 376 |
| chr18 | 657475 657850 | 376       |     |
| chr11 | 105965469     | 105965844 | 376 |
| chr7  | 42664257      | 42664631  | 375 |
| chr5  | 113286072     | 113286446 | 375 |
| chr3  | 122366475     | 122366849 | 375 |
| chr3  | 104964567     | 104964941 | 375 |
| chr24 | 48173041      | 48173415  | 375 |
| chr24 | 34684730      | 34685104  | 375 |
| chr2  | 130750383     | 130750757 | 375 |
| chr10 | 60552171      | 60552545  | 375 |
| chrX  | 66495277      | 66495650  | 374 |
| chrX  | 10234688      | 10235061  | 374 |
| chr7  | 3030957       | 3031330   | 374 |
| chr17 | 62359253      | 62359626  | 374 |
| chr8  | 865021 865393 | 373       |     |
| chr29 | 33690822      | 33691194  | 373 |
| chr24 | 60600318      | 60600690  | 373 |
| chr21 | 59322262      | 59322634  | 373 |
| chr17 | 68563508      | 68563880  | 373 |
| chr11 | 24010226      | 24010598  | 373 |
| chrX  | 62276217      | 62276588  | 372 |
| chr27 | 46060176      | 46060547  | 372 |
| chr2  | 135022474     | 135022845 | 372 |
| chr5  | 121557217     | 121557587 | 371 |
| chr26 | 49160927      | 49161297  | 371 |
| chr26 | 42995872      | 42996242  | 371 |
| chr25 | 28855798      | 28856168  | 371 |
| chr21 | 5989859       | 5990229   | 371 |
| chr18 | 32555822      | 32556192  | 371 |
| chr23 | 28656145      | 28656514  | 370 |
| chr19 | 16778136      | 16778505  | 370 |
| chr15 | 24616728      | 24617097  | 370 |
| chr10 | 74557769      | 74558138  | 370 |
| chrX  | 6713018       | 6713386   | 369 |
| chr21 | 25185599      | 25185967  | 369 |
| chr1  | 43787513      | 43787881  | 369 |
| chr3  | 37394882      | 37395249  | 368 |

|       |           |           |     |
|-------|-----------|-----------|-----|
| chr1  | 113937779 | 113938146 | 368 |
| chrX  | 22584586  | 22584952  | 367 |
| chrX  | 18155408  | 18155774  | 367 |
| chrX  | 9764463   | 9764829   | 367 |
| chr9  | 62615671  | 62616037  | 367 |
| chr9  | 53372450  | 53372816  | 367 |
| chr5  | 49274921  | 49275287  | 367 |
| chr22 | 16355681  | 16356047  | 367 |
| chr19 | 25492069  | 25492435  | 367 |
| chr16 | 41498606  | 41498972  | 367 |
| chr10 | 35825161  | 35825527  | 367 |
| chr21 | 33119597  | 33119962  | 366 |
| chr10 | 70524581  | 70524946  | 366 |
| chr2  | 93592010  | 93592374  | 365 |
| chr16 | 2021579   | 2021943   | 365 |
| chrX  | 78512912  | 78513275  | 364 |
| chr6  | 107127821 | 107128184 | 364 |
| chr5  | 28747544  | 28747907  | 364 |
| chr22 | 50783744  | 50784106  | 363 |
| chr18 | 13140003  | 13140365  | 363 |
| chr15 | 66487178  | 66487540  | 363 |
| chr8  | 6763933   | 6764294   | 362 |
| chr3  | 4685245   | 4685606   | 362 |
| chr19 | 60727594  | 60727955  | 362 |
| chr19 | 38598649  | 38599010  | 362 |
| chrX  | 48715416  | 48715776  | 361 |
| chrX  | 22561210  | 22561570  | 361 |
| chrX  | 20647732  | 20648092  | 361 |
| chrX  | 6747274   | 6747634   | 361 |
| chr6  | 51517538  | 51517898  | 361 |
| chr21 | 34421918  | 34422278  | 361 |
| chr20 | 3250646   | 3251006   | 361 |
| chrX  | 53937756  | 53938115  | 360 |
| chrX  | 50193001  | 50193360  | 360 |
| chrX  | 10861991  | 10862350  | 360 |
| chr4  | 69219755  | 69220114  | 360 |
| chr25 | 42123727  | 42124086  | 360 |
| chr24 | 59582347  | 59582706  | 360 |
| chr2  | 136889122 | 136889481 | 360 |
| chr13 | 59794967  | 59795326  | 360 |
| chr4  | 13320160  | 13320518  | 359 |
| chr16 | 48834512  | 48834870  | 359 |
| chrX  | 6683076   | 6683433   | 358 |
| chr5  | 78887714  | 78888071  | 358 |
| chr3  | 118824950 | 118825307 | 358 |
| chr3  | 104858931 | 104859288 | 358 |
| chr2  | 127175097 | 127175454 | 358 |
| chr19 | 54315144  | 54315501  | 358 |
| chr19 | 45931534  | 45931891  | 358 |
| chr19 | 40835284  | 40835641  | 358 |

|       |               |           |     |
|-------|---------------|-----------|-----|
| chr18 | 635467 635824 | 358       |     |
| chrX  | 48067563      | 48067919  | 357 |
| chr9  | 41634058      | 41634414  | 357 |
| chr8  | 60397516      | 60397872  | 357 |
| chr22 | 16224545      | 16224901  | 357 |
| chr21 | 48957144      | 48957500  | 357 |
| chr13 | 58600787      | 58601143  | 357 |
| chr8  | 104192210     | 104192565 | 356 |
| chr8  | 79344132      | 79344487  | 356 |
| chr2  | 25389223      | 25389578  | 356 |
| chr10 | 13027852      | 13028207  | 356 |
| chrX  | 14344467      | 14344821  | 355 |
| chr29 | 34425599      | 34425953  | 355 |
| chrX  | 11102774      | 11103127  | 354 |
| chr29 | 34996082      | 34996435  | 354 |
| chr22 | 41735665      | 41736018  | 354 |
| chrX  | 19663304      | 19663656  | 353 |
| chr28 | 33624237      | 33624589  | 353 |
| chrX  | 21870257      | 21870608  | 352 |
| chr27 | 33470995      | 33471346  | 352 |
| chr26 | 21987949      | 21988300  | 352 |
| chr21 | 2018995       | 2019346   | 352 |
| chr5  | 113133393     | 113133743 | 351 |
| chr29 | 27034356      | 27034706  | 351 |
| chr2  | 100015595     | 100015945 | 351 |
| chr11 | 47287235      | 47287585  | 351 |
| chrX  | 56126609      | 56126958  | 350 |
| chr8  | 539044 539393 | 350       |     |
| chr6  | 106600758     | 106601107 | 350 |
| chr22 | 56220235      | 56220584  | 350 |
| chr19 | 29734839      | 29735188  | 350 |
| chr15 | 22868026      | 22868375  | 350 |
| chr12 | 32888174      | 32888523  | 350 |
| chrX  | 72362893      | 72363241  | 349 |
| chr8  | 67704023      | 67704371  | 349 |
| chr27 | 8835416       | 8835764   | 349 |
| chr13 | 59726322      | 59726670  | 349 |
| chrX  | 249718 250065 | 348       |     |
| chr9  | 51630700      | 51631047  | 348 |
| chr7  | 18728378      | 18728725  | 348 |
| chr17 | 57631256      | 57631603  | 348 |
| chr13 | 43422758      | 43423105  | 348 |
| chrX  | 60154069      | 60154415  | 347 |
| chr9  | 90798571      | 90798917  | 347 |
| chr4  | 123275399     | 123275745 | 347 |
| chr2  | 26479372      | 26479718  | 347 |
| chrX  | 65071457      | 65071802  | 346 |
| chr4  | 100240348     | 100240693 | 346 |
| chr29 | 36823075      | 36823420  | 346 |
| chr18 | 9865843       | 9866188   | 346 |

|       |           |           |     |
|-------|-----------|-----------|-----|
| chr11 | 72223841  | 72224186  | 346 |
| chrX  | 55274492  | 55274836  | 345 |
| chr5  | 111160275 | 111160619 | 345 |
| chr3  | 99351244  | 99351588  | 345 |
| chr22 | 59867085  | 59867428  | 344 |
| chr22 | 7570179   | 7570522   | 344 |
| chr13 | 59910126  | 59910469  | 344 |
| chr13 | 41738253  | 41738596  | 344 |
| chr1  | 96192625  | 96192968  | 344 |
| chr1  | 4589110   | 4589453   | 344 |
| chr6  | 46150141  | 46150483  | 343 |
| chr5  | 78578566  | 78578908  | 343 |
| chr3  | 97853915  | 97854257  | 343 |
| chr25 | 3091249   | 3091591   | 343 |
| chr21 | 32907493  | 32907835  | 343 |
| chr1  | 99777406  | 99777748  | 343 |
| chrX  | 75602077  | 75602418  | 342 |
| chrX  | 69952934  | 69953275  | 342 |
| chr7  | 44778847  | 44779188  | 342 |
| chr22 | 12397023  | 12397364  | 342 |
| chr15 | 74542934  | 74543275  | 342 |
| chr15 | 70503367  | 70503708  | 342 |
| chr11 | 77551419  | 77551760  | 342 |
| chrX  | 39075813  | 39076153  | 341 |
| chr28 | 5025552   | 5025892   | 341 |
| chr2  | 138639450 | 138639790 | 341 |
| chrX  | 12288352  | 12288691  | 340 |
| chr29 | 44755164  | 44755503  | 340 |
| chr24 | 49775696  | 49776035  | 340 |
| chrX  | 29901511  | 29901849  | 339 |
| chr7  | 46463810  | 46464148  | 339 |
| chr5  | 117841275 | 117841613 | 339 |
| chr26 | 39815136  | 39815474  | 339 |
| chr16 | 68781967  | 68782305  | 339 |
| chrX  | 39051586  | 39051923  | 338 |
| chr26 | 18704908  | 18705245  | 338 |
| chr16 | 43315207  | 43315544  | 338 |
| chrX  | 72720285  | 72720621  | 337 |
| chrX  | 5865659   | 5865995   | 337 |
| chr9  | 8157066   | 8157402   | 337 |
| chr3  | 127751414 | 127751750 | 337 |
| chr3  | 123366907 | 123367243 | 337 |
| chr2  | 134945068 | 134945404 | 337 |
| chr15 | 52368252  | 52368588  | 337 |
| chr10 | 103064140 | 103064476 | 337 |
| chr4  | 68271886  | 68272221  | 336 |
| chr3  | 116121527 | 116121862 | 336 |
| chr1  | 149778254 | 149778589 | 336 |
| chrX  | 71011621  | 71011955  | 335 |
| chrX  | 66281827  | 66282161  | 335 |

|       |           |           |     |
|-------|-----------|-----------|-----|
| chrX  | 65153067  | 65153401  | 335 |
| chr8  | 29353121  | 29353455  | 335 |
| chr6  | 107329876 | 107330210 | 335 |
| chr18 | 21961384  | 21961718  | 335 |
| chr18 | 19554002  | 19554336  | 335 |
| chr16 | 2263091   | 2263425   | 335 |
| chr15 | 33720216  | 33720550  | 335 |
| chr11 | 7542409   | 7542743   | 335 |
| chrX  | 34138888  | 34139221  | 334 |
| chr25 | 34455912  | 34456245  | 334 |
| chr3  | 121236623 | 121236955 | 333 |
| chr3  | 111743026 | 111743358 | 333 |
| chr29 | 17708992  | 17709324  | 333 |
| chr26 | 42175633  | 42175965  | 333 |
| chr22 | 38546367  | 38546699  | 333 |
| chr19 | 58646130  | 58646462  | 333 |
| chr14 | 61216403  | 61216735  | 333 |
| chr29 | 32187861  | 32188192  | 332 |
| chr29 | 23330615  | 23330946  | 332 |
| chr20 | 25687035  | 25687366  | 332 |
| chr18 | 62946627  | 62946958  | 332 |
| chr7  | 51403773  | 51404103  | 331 |
| chr21 | 61772198  | 61772528  | 331 |
| chr17 | 70324136  | 70324466  | 331 |
| chr17 | 69235006  | 69235336  | 331 |
| chrX  | 21014494  | 21014823  | 330 |
| chr8  | 63875605  | 63875934  | 330 |
| chr4  | 71622906  | 71623235  | 330 |
| chr15 | 25592946  | 25593275  | 330 |
| chrX  | 8256310   | 8256638   | 329 |
| chr29 | 2525006   | 2525334   | 329 |
| chr21 | 15319152  | 15319480  | 329 |
| chr15 | 25559576  | 25559904  | 329 |
| chr13 | 65142255  | 65142583  | 329 |
| chrX  | 54284980  | 54285307  | 328 |
| chr8  | 73843078  | 73843405  | 328 |
| chr24 | 15147738  | 15148065  | 328 |
| chr13 | 40571560  | 40571887  | 328 |
| chr29 | 46199047  | 46199373  | 327 |
| chr29 | 41754324  | 41754650  | 327 |
| chr29 | 26462304  | 26462630  | 327 |
| chr19 | 29122532  | 29122858  | 327 |
| chr13 | 69705324  | 69705650  | 327 |
| chr11 | 70758021  | 70758347  | 327 |
| chr22 | 51293777  | 51294102  | 326 |
| chr15 | 26733794  | 26734119  | 326 |
| chr11 | 100283492 | 100283817 | 326 |
| chrX  | 65043683  | 65044007  | 325 |
| chr23 | 15149857  | 15150181  | 325 |
| chr16 | 47182260  | 47182584  | 325 |

|       |           |           |     |
|-------|-----------|-----------|-----|
| chr15 | 24028644  | 24028968  | 325 |
| chr15 | 24537825  | 24538148  | 324 |
| chr14 | 25070820  | 25071143  | 324 |
| chr13 | 56350020  | 56350343  | 324 |
| chr1  | 144006403 | 144006726 | 324 |
| chrX  | 8114501   | 8114823   | 323 |
| chr9  | 24458509  | 24458831  | 323 |
| chr8  | 60356565  | 60356887  | 323 |
| chr19 | 39134456  | 39134778  | 323 |
| chr16 | 41474443  | 41474765  | 323 |
| chr8  | 7741818   | 7742139   | 322 |
| chr21 | 25982507  | 25982828  | 322 |
| chr1  | 75100818  | 75101139  | 322 |
| chr8  | 63934827  | 63935147  | 321 |
| chr19 | 19129552  | 19129872  | 321 |
| chr17 | 59040952  | 59041272  | 321 |
| chr16 | 34399842  | 34400162  | 321 |
| chr13 | 71191154  | 71191474  | 321 |
| chr10 | 68415948  | 68416268  | 321 |
| chr10 | 24669405  | 24669725  | 321 |
| chr7  | 46416501  | 46416820  | 320 |
| chr7  | 46403551  | 46403870  | 320 |
| chr20 | 8700484   | 8700803   | 320 |
| chr15 | 22883923  | 22884241  | 319 |
| chr11 | 104697881 | 104698199 | 319 |
| chr10 | 84019698  | 84020016  | 319 |
| chr20 | 8746436   | 8746753   | 318 |
| chr19 | 14074086  | 14074403  | 318 |
| chr6  | 115504173 | 115504489 | 317 |
| chr5  | 61248706  | 61249022  | 317 |
| chr13 | 63421630  | 63421946  | 317 |
| chr10 | 70245274  | 70245590  | 317 |
| chr1  | 152391787 | 152392103 | 317 |
| chr1  | 108214377 | 108214693 | 317 |
| chrX  | 44678065  | 44678380  | 316 |
| chrX  | 7518653   | 7518968   | 316 |
| chr4  | 28586889  | 28587204  | 316 |
| chr3  | 114230486 | 114230801 | 316 |
| chr3  | 36192452  | 36192767  | 316 |
| chrX  | 54471807  | 54472121  | 315 |
| chr8  | 8583742   | 8584056   | 315 |
| chr3  | 29968598  | 29968912  | 315 |
| chrX  | 75601389  | 75601702  | 314 |
| chr6  | 106962067 | 106962380 | 314 |
| chr19 | 59271465  | 59271778  | 314 |
| chr17 | 70077073  | 70077386  | 314 |
| chr11 | 100741766 | 100742079 | 314 |
| chr7  | 18946311  | 18946623  | 313 |
| chr16 | 72297275  | 72297587  | 313 |
| chr13 | 79702104  | 79702416  | 313 |

|       |           |           |     |
|-------|-----------|-----------|-----|
| chr10 | 83958010  | 83958322  | 313 |
| chrX  | 72104420  | 72104731  | 312 |
| chrX  | 9514566   | 9514877   | 312 |
| chr29 | 43000409  | 43000720  | 312 |
| chr26 | 21809861  | 21810172  | 312 |
| chr18 | 9793737   | 9794048   | 312 |
| chr4  | 121485451 | 121485761 | 311 |
| chr3  | 24436601  | 24436911  | 311 |
| chr27 | 26763499  | 26763809  | 311 |
| chr13 | 6947424   | 6947734   | 311 |
| chrX  | 33998995  | 33999304  | 310 |
| chrX  | 16976018  | 16976327  | 310 |
| chr19 | 36661310  | 36661619  | 310 |
| chr15 | 83925712  | 83926021  | 310 |
| chrX  | 50041118  | 50041426  | 309 |
| chr2  | 131849248 | 131849556 | 309 |
| chrX  | 5794374   | 5794681   | 308 |
| chr9  | 32735751  | 32736058  | 308 |
| chr3  | 106149966 | 106150273 | 308 |
| chr19 | 10901424  | 10901731  | 308 |
| chr9  | 104975345 | 104975650 | 306 |
| chr23 | 8581825   | 8582130   | 306 |
| chr1  | 144518217 | 144518522 | 306 |
| chrX  | 54587150  | 54587454  | 305 |
| chr25 | 43326196  | 43326500  | 305 |
| chr28 | 12470335  | 12470638  | 304 |
| chrX  | 77061004  | 77061306  | 303 |
| chr4  | 13353446  | 13353748  | 303 |
| chr17 | 37641445  | 37641747  | 303 |
| chr16 | 44653229  | 44653531  | 303 |
| chrX  | 76778070  | 76778371  | 302 |
| chr26 | 18489048  | 18489349  | 302 |
| chr10 | 17673425  | 17673726  | 302 |
| chrX  | 78444344  | 78444644  | 301 |
| chrX  | 20008459  | 20008759  | 301 |
| chr3  | 120669888 | 120670188 | 301 |
| chr23 | 11009514  | 11009814  | 301 |
| chr18 | 23488001  | 23488301  | 301 |
| chr13 | 59633613  | 59633913  | 301 |
| chr12 | 20028246  | 20028546  | 301 |
| chrX  | 9894023   | 9894322   | 300 |
| chr6  | 120840396 | 120840695 | 300 |
| chr21 | 66475590  | 66475889  | 300 |
| chr21 | 34856718  | 34857017  | 300 |
| chr19 | 33247094  | 33247393  | 300 |
| chrX  | 55586083  | 55586381  | 299 |
| chrX  | 36841168  | 36841466  | 299 |
| chrX  | 36129723  | 36130021  | 299 |
| chr5  | 31270646  | 31270944  | 299 |
| chr17 | 58457867  | 58458165  | 299 |



|       |           |           |     |
|-------|-----------|-----------|-----|
| chr11 | 66259474  | 66259772  | 299 |
| chrX  | 17949963  | 17950260  | 298 |
| chr3  | 116279808 | 116280105 | 298 |
| chr25 | 37239718  | 37240015  | 298 |
| chr17 | 13254930  | 13255227  | 298 |
| chr13 | 26175372  | 26175669  | 298 |
| chr1  | 146467534 | 146467831 | 298 |
| chr1  | 81732292  | 81732589  | 298 |
| chrX  | 75440369  | 75440665  | 297 |
| chr27 | 46966992  | 46967288  | 297 |
| chr24 | 34024950  | 34025246  | 297 |
| chrX  | 75518171  | 75518466  | 296 |
| chr5  | 28831826  | 28832121  | 296 |
| chr29 | 36380727  | 36381022  | 296 |
| chr29 | 35589480  | 35589775  | 296 |
| chr28 | 33645439  | 33645734  | 296 |
| chr25 | 37492182  | 37492477  | 296 |
| chr16 | 77533456  | 77533751  | 296 |
| chr12 | 9548237   | 9548531   | 295 |
| chr10 | 36309364  | 36309658  | 295 |
| chrX  | 50496303  | 50496596  | 294 |
| chrX  | 35552672  | 35552965  | 294 |
| chrX  | 20304950  | 20305243  | 294 |
| chr10 | 36025277  | 36025570  | 294 |
| chrX  | 65592949  | 65593241  | 293 |
| chrX  | 54133698  | 54133990  | 293 |
| chr29 | 38810354  | 38810646  | 293 |
| chrX  | 20687073  | 20687364  | 292 |
| chrX  | 12527871  | 12528162  | 292 |
| chrX  | 2500805   | 2501096   | 292 |
| chr18 | 18804269  | 18804560  | 292 |
| chrX  | 30878274  | 30878564  | 291 |
| chr3  | 115412874 | 115413164 | 291 |
| chr22 | 58478658  | 58478948  | 291 |
| chr19 | 38965034  | 38965324  | 291 |
| chr16 | 34181202  | 34181492  | 291 |
| chr2  | 131677639 | 131677928 | 290 |
| chr2  | 30963274  | 30963563  | 290 |
| chr11 | 49457656  | 49457945  | 290 |
| chr23 | 18668822  | 18669110  | 289 |
| chr22 | 54360443  | 54360731  | 289 |
| chr2  | 130892745 | 130893033 | 289 |
| chr8  | 5600276   | 5600563   | 288 |
| chrX  | 77541835  | 77542121  | 287 |
| chr8  | 60423163  | 60423449  | 287 |
| chr29 | 32155535  | 32155821  | 287 |
| chr12 | 44609556  | 44609842  | 287 |
| chr1  | 137107463 | 137107749 | 287 |
| chr1  | 84499959  | 84500245  | 287 |
| chrX  | 9154160   | 9154445   | 286 |

|       |               |           |     |
|-------|---------------|-----------|-----|
| chr27 | 38624639      | 38624924  | 286 |
| chr23 | 9108512       | 9108796   | 285 |
| chr14 | 36463351      | 36463635  | 285 |
| chr1  | 153825345     | 153825629 | 285 |
| chr24 | 40819587      | 40819870  | 284 |
| chr2  | 125986085     | 125986368 | 284 |
| chr15 | 64940713      | 64940996  | 284 |
| chr23 | 35286378      | 35286660  | 283 |
| chr20 | 8722396       | 8722678   | 283 |
| chr11 | 48979463      | 48979745  | 283 |
| chrX  | 20338949      | 20339230  | 282 |
| chr16 | 106582 106863 | 282       |     |
| chr7  | 42927020      | 42927300  | 281 |
| chr29 | 49086738      | 49087018  | 281 |
| chr11 | 100209811     | 100210091 | 281 |
| chrX  | 21139651      | 21139930  | 280 |
| chr27 | 38459689      | 38459968  | 280 |
| chr23 | 17406336      | 17406615  | 280 |
| chr2  | 124327805     | 124328084 | 280 |
| chr13 | 70219526      | 70219805  | 280 |
| chrX  | 37277820      | 37278098  | 279 |
| chr8  | 81529506      | 81529784  | 279 |
| chr5  | 120384706     | 120384984 | 279 |
| chr29 | 35106158      | 35106436  | 279 |
| chr16 | 42681448      | 42681726  | 279 |
| chr15 | 23152486      | 23152764  | 279 |
| chr26 | 44104999      | 44105276  | 278 |
| chr27 | 34786724      | 34787000  | 277 |
| chr24 | 43547413      | 43547689  | 277 |
| chr13 | 41511077      | 41511353  | 277 |
| chr11 | 87743064      | 87743340  | 277 |
| chrX  | 16956148      | 16956423  | 276 |
| chr5  | 31223813      | 31224088  | 276 |
| chrX  | 35755674      | 35755948  | 275 |
| chr15 | 68026213      | 68026487  | 275 |
| chr13 | 69803980      | 69804254  | 275 |
| chr1  | 146744675     | 146744949 | 275 |
| chrX  | 19463256      | 19463529  | 274 |
| chr6  | 105463434     | 105463707 | 274 |
| chr5  | 30046945      | 30047218  | 274 |
| chr3  | 122441248     | 122441521 | 274 |
| chr3  | 116386761     | 116387034 | 274 |
| chr1  | 133439945     | 133440218 | 274 |
| chrX  | 65253179      | 65253451  | 273 |
| chr17 | 63990916      | 63991188  | 273 |
| chr15 | 26682418      | 26682690  | 273 |
| chr11 | 91535899      | 91536171  | 273 |
| chr24 | 50886399      | 50886670  | 272 |
| chr18 | 46805601      | 46805872  | 272 |
| chrX  | 49217674      | 49217944  | 271 |

|       |               |           |     |
|-------|---------------|-----------|-----|
| chr28 | 34187744      | 34188014  | 271 |
| chr22 | 55943246      | 55943516  | 271 |
| chr26 | 30329737      | 30330006  | 270 |
| chrX  | 36488550      | 36488818  | 269 |
| chr7  | 19200869      | 19201137  | 269 |
| chr16 | 47251642      | 47251910  | 269 |
| chr26 | 9745874       | 9746140   | 267 |
| chr13 | 40953252      | 40953518  | 267 |
| chr11 | 73311718      | 73311984  | 267 |
| chrX  | 47957422      | 47957687  | 266 |
| chrX  | 20386802      | 20387067  | 266 |
| chrX  | 455726 455991 | 266       | 266 |
| chr25 | 2782648       | 2782913   | 266 |
| chr2  | 44187677      | 44187942  | 266 |
| chr19 | 25839116      | 25839381  | 266 |
| chrX  | 85763308      | 85763572  | 265 |
| chr28 | 33377519      | 33377783  | 265 |
| chrX  | 21365969      | 21366232  | 264 |
| chr18 | 18051120      | 18051383  | 264 |
| chrX  | 60875886      | 60876148  | 263 |
| chr6  | 96165430      | 96165692  | 263 |
| chr14 | 61686763      | 61687025  | 263 |
| chr4  | 98878054      | 98878315  | 262 |
| chr24 | 41751441      | 41751702  | 262 |
| chr19 | 59174049      | 59174309  | 261 |
| chr7  | 23343571      | 23343830  | 260 |
| chr8  | 8113589       | 8113847   | 259 |
| chr6  | 3028112       | 3028370   | 259 |
| chr11 | 40063964      | 40064222  | 259 |
| chr8  | 109033556     | 109033813 | 258 |
| chr6  | 72328369      | 72328626  | 258 |
| chr27 | 38671585      | 38671842  | 258 |
| chr25 | 37687677      | 37687934  | 258 |
| chr24 | 1183318       | 1183575   | 258 |
| chr23 | 19923494      | 19923751  | 258 |
| chr14 | 8247017       | 8247274   | 258 |
| chr13 | 60120925      | 60121182  | 258 |
| chr11 | 90394494      | 90394751  | 258 |
| chr1  | 160618118     | 160618375 | 258 |
| chr21 | 45848410      | 45848666  | 257 |
| chr13 | 48331605      | 48331861  | 257 |
| chrX  | 19086199      | 19086454  | 256 |
| chr12 | 31585127      | 31585382  | 256 |
| chr13 | 41675023      | 41675277  | 255 |
| chrX  | 54122794      | 54123047  | 254 |
| chr8  | 8322798       | 8323051   | 254 |
| chr7  | 17309490      | 17309743  | 254 |
| chr24 | 48443558      | 48443811  | 254 |
| chr1  | 147970577     | 147970830 | 254 |
| chr6  | 12470717      | 12470969  | 253 |

|       |          |          |     |
|-------|----------|----------|-----|
| chr12 | 32839176 | 32839428 | 253 |
| chr16 | 39515302 | 39515553 | 252 |
| chrX  | 74599277 | 74599527 | 251 |
| chr8  | 73407301 | 73407551 | 251 |
| chr29 | 17682499 | 17682749 | 251 |
| chr29 | 35147541 | 35147790 | 250 |
| chr27 | 41846916 | 41847165 | 250 |
| chr21 | 32886587 | 32886836 | 250 |
| chr18 | 50004291 | 50004540 | 250 |
| chr29 | 33783748 | 33783996 | 249 |
| chrX  | 48010060 | 48010306 | 247 |
| chr8  | 73304898 | 73305144 | 247 |
| chr6  | 34430763 | 34431009 | 247 |
| chr24 | 43625548 | 43625794 | 247 |
| chr17 | 66888689 | 66888935 | 247 |
| chr13 | 40909952 | 40910198 | 247 |
| chr15 | 28601823 | 28602068 | 246 |
| chr22 | 45398773 | 45399017 | 245 |
| chrX  | 75918670 | 75918913 | 244 |
| chr8  | 73860762 | 73861005 | 244 |
| chr7  | 62250996 | 62251239 | 244 |
| chr23 | 49904984 | 49905227 | 244 |
| chr18 | 55102758 | 55103001 | 244 |
| chrX  | 66943173 | 66943415 | 243 |
| chr11 | 5365228  | 5365470  | 243 |
| chr13 | 63251927 | 63252168 | 242 |
| chrX  | 9102137  | 9102377  | 241 |
| chr20 | 66535181 | 66535421 | 241 |
| chrX  | 53102852 | 53103091 | 240 |
| chr3  | 16745560 | 16745799 | 240 |
| chr19 | 19133888 | 19134127 | 240 |
| chr15 | 36411802 | 36412041 | 240 |
| chr11 | 77659852 | 77660090 | 239 |
| chrX  | 18856999 | 18857236 | 238 |
| chr17 | 48540344 | 48540581 | 238 |
| chr12 | 32515202 | 32515439 | 238 |
| chr11 | 7563038  | 7563275  | 238 |
| chr18 | 65142550 | 65142786 | 237 |
| chr8  | 73849783 | 73850017 | 235 |
| chr19 | 27304870 | 27305104 | 235 |
| chr19 | 11009711 | 11009945 | 235 |
| chr11 | 10188319 | 10188553 | 235 |
| chr10 | 12869101 | 12869335 | 235 |
| chr29 | 33944897 | 33945130 | 234 |
| chr16 | 2266422  | 2266655  | 234 |
| chr11 | 92162868 | 92163101 | 234 |
| chr21 | 25293580 | 25293812 | 233 |
| chr19 | 65217570 | 65217802 | 233 |
| chrX  | 19365908 | 19366138 | 231 |
| chr18 | 22064059 | 22064289 | 231 |

|       |           |           |     |
|-------|-----------|-----------|-----|
| chr29 | 37253133  | 37253361  | 229 |
| chr21 | 1905564   | 1905792   | 229 |
| chr19 | 44358504  | 44358732  | 229 |
| chr8  | 24393524  | 24393750  | 227 |
| chr19 | 23161509  | 23161735  | 227 |
| chr16 | 24044903  | 24045128  | 226 |
| chr13 | 15521625  | 15521850  | 226 |
| chr26 | 21279955  | 21280179  | 225 |
| chr20 | 71060933  | 71061157  | 225 |
| chrX  | 17405991  | 17406214  | 224 |
| chr12 | 81100540  | 81100763  | 224 |
| chr8  | 73815440  | 73815660  | 221 |
| chr8  | 89467999  | 89468218  | 220 |
| chr15 | 38322946  | 38323163  | 218 |
| chr1  | 18576093  | 18576310  | 218 |
| chr1  | 98069179  | 98069395  | 217 |
| chr9  | 90300977  | 90301192  | 216 |
| chr7  | 17406666  | 17406881  | 216 |
| chr3  | 110214227 | 110214441 | 215 |
| chr2  | 126142004 | 126142217 | 214 |
| chrX  | 68565078  | 68565290  | 213 |
| chrX  | 55342133  | 55342342  | 210 |
| chr14 | 9581478   | 9581687   | 210 |
| chr21 | 32953922  | 32954128  | 207 |
| chr29 | 44566844  | 44567048  | 205 |
| chr12 | 20405453  | 20405656  | 204 |
| chrX  | 53829374  | 53829711  | 338 |
| chrX  | 17488262  | 17488578  | 317 |
| chr10 | 24716437  | 24717011  | 575 |
| chr2  | 55731233  | 55731727  | 495 |
| chr21 | 2034915   | 2035354   | 440 |
| chr4  | 34028915  | 34029221  | 307 |
| chr8  | 73737701  | 73738072  | 372 |
| chr19 | 19131518  | 19131736  | 219 |
| chr8  | 24473384  | 24473643  | 260 |
| chr29 | 49308822  | 49309025  | 204 |
| chr19 | 38775480  | 38776443  | 964 |
| chr6  | 107331777 | 107332733 | 957 |
| chr6  | 103285564 | 103286495 | 932 |
| chr14 | 54199787  | 54200718  | 932 |
| chr19 | 37775091  | 37775960  | 870 |
| chr18 | 10834448  | 10835305  | 858 |
| chr16 | 47448459  | 47449316  | 858 |
| chr19 | 58355968  | 58356816  | 849 |
| chr3  | 99889611  | 99890450  | 840 |
| chrX  | 35761566  | 35762399  | 834 |
| chr17 | 57763511  | 57764342  | 832 |
| chr15 | 64479643  | 64480468  | 826 |
| chr10 | 3521037   | 3521857   | 821 |
| chr15 | 27454731  | 27455547  | 817 |

|       |               |           |     |
|-------|---------------|-----------|-----|
| chr21 | 20625627      | 20626433  | 807 |
| chr18 | 6981784       | 6982587   | 804 |
| chr5  | 26710349      | 26711150  | 802 |
| chrX  | 62741542      | 62742339  | 798 |
| chrX  | 30988624      | 30989419  | 796 |
| chrX  | 21668985      | 21669761  | 777 |
| chr17 | 18320280      | 18321020  | 741 |
| chr10 | 33928645      | 33929385  | 741 |
| chrX  | 7168026       | 7168764   | 739 |
| chr13 | 39696820      | 39697558  | 739 |
| chr13 | 62036168      | 62036904  | 737 |
| chr17 | 70014293      | 70015019  | 727 |
| chrX  | 12974119      | 12974842  | 724 |
| chr9  | 45922313      | 45923033  | 721 |
| chr3  | 36016936      | 36017654  | 719 |
| chr20 | 717607 718324 | 718       |     |
| chrX  | 73466716      | 73467430  | 715 |
| chr11 | 9439698       | 9440412   | 715 |
| chrX  | 71876750      | 71877463  | 714 |
| chrX  | 58058432      | 58059142  | 711 |
| chr3  | 26148943      | 26149651  | 709 |
| chr12 | 29913987      | 29914692  | 706 |
| chr5  | 30471774      | 30472477  | 704 |
| chr8  | 108764894     | 108765591 | 698 |
| chrX  | 34034039      | 34034729  | 691 |
| chr13 | 41337784      | 41338473  | 690 |
| chr2  | 26613091      | 26613779  | 689 |
| chr7  | 29472377      | 29473063  | 687 |
| chrX  | 55819604      | 55820288  | 685 |
| chr16 | 2353359       | 2354038   | 680 |
| chr8  | 80175946      | 80176623  | 678 |
| chr26 | 43906800      | 43907477  | 678 |
| chr15 | 81144920      | 81145597  | 678 |
| chrX  | 19100447      | 19101123  | 677 |
| chr4  | 96084669      | 96085345  | 677 |
| chr7  | 51693677      | 51694352  | 676 |
| chr2  | 127195755     | 127196430 | 676 |
| chrX  | 7447835       | 7448509   | 675 |
| chr16 | 67262262      | 67262934  | 673 |
| chr4  | 16850788      | 16851453  | 666 |
| chr10 | 85768774      | 85769439  | 666 |
| chr23 | 28543257      | 28543921  | 665 |
| chr19 | 33128846      | 33129509  | 664 |
| chrX  | 78313448      | 78314109  | 662 |
| chrX  | 56987721      | 56988381  | 661 |
| chr5  | 122817991     | 122818648 | 658 |
| chrX  | 50590409      | 50591064  | 656 |
| chr19 | 40972783      | 40973438  | 656 |
| chrX  | 30932491      | 30933141  | 651 |
| chr18 | 9836162       | 9836812   | 651 |

|       |           |           |     |
|-------|-----------|-----------|-----|
| chr3  | 84505769  | 84506412  | 644 |
| chr24 | 40511838  | 40512481  | 644 |
| chrX  | 54106385  | 54107027  | 643 |
| chr19 | 38845528  | 38846170  | 643 |
| chr10 | 16117501  | 16118141  | 641 |
| chr23 | 19872091  | 19872729  | 639 |
| chr16 | 77586336  | 77586974  | 639 |
| chr6  | 92306118  | 92306754  | 637 |
| chr5  | 97544123  | 97544759  | 637 |
| chr3  | 4418361   | 4418997   | 637 |
| chr17 | 18455511  | 18456147  | 637 |
| chr10 | 83324145  | 83324781  | 637 |
| chrX  | 75710897  | 75711532  | 636 |
| chrX  | 80071176  | 80071810  | 635 |
| chrX  | 12181655  | 12182289  | 635 |
| chr29 | 44559096  | 44559729  | 634 |
| chrX  | 7839142   | 7839773   | 632 |
| chr21 | 20697919  | 20698550  | 632 |
| chr17 | 64155684  | 64156315  | 632 |
| chr2  | 135103552 | 135104181 | 630 |
| chr2  | 92350125  | 92350754  | 630 |
| chr29 | 34473718  | 34474346  | 629 |
| chr25 | 3400904   | 3401531   | 628 |
| chrX  | 34055392  | 34056014  | 623 |
| chr18 | 43202329  | 43202951  | 623 |
| chr24 | 1605786   | 1606407   | 622 |
| chr16 | 2440773   | 2441394   | 622 |
| chr19 | 38778135  | 38778755  | 621 |
| chrX  | 19697796  | 19698414  | 619 |
| chr22 | 30115309  | 30115925  | 617 |
| chrX  | 34367876  | 34368488  | 613 |
| chr7  | 1879667   | 1880278   | 612 |
| chr17 | 61281118  | 61281729  | 612 |
| chrX  | 78528948  | 78529557  | 610 |
| chr5  | 30022870  | 30023479  | 610 |
| chr23 | 42931092  | 42931700  | 609 |
| chr10 | 21943867  | 21944474  | 608 |
| chr9  | 106429790 | 106430396 | 607 |
| chr15 | 32666321  | 32666927  | 607 |
| chr11 | 44768630  | 44769234  | 605 |
| chr1  | 144441701 | 144442305 | 605 |
| chrX  | 6743337   | 6743939   | 603 |
| chr23 | 18815707  | 18816309  | 603 |
| chr6  | 73587591  | 73588191  | 601 |
| chr24 | 33489133  | 33489733  | 601 |
| chr19 | 61802085  | 61802684  | 600 |
| chr7  | 3732854   | 3733451   | 598 |
| chr19 | 13572923  | 13573520  | 598 |
| chr3  | 22507873  | 22508469  | 597 |
| chr13 | 46655580  | 46656176  | 597 |

|       |           |           |     |
|-------|-----------|-----------|-----|
| chrX  | 19476899  | 19477493  | 595 |
| chr11 | 81421589  | 81422183  | 595 |
| chr12 | 30790919  | 30791512  | 594 |
| chr2  | 134079453 | 134080045 | 593 |
| chrX  | 50698116  | 50698705  | 590 |
| chr18 | 8233123   | 8233712   | 590 |
| chrX  | 52774134  | 52774722  | 589 |
| chr9  | 47052612  | 47053200  | 589 |
| chrX  | 9969134   | 9969721   | 588 |
| chr4  | 106360425 | 106361011 | 587 |
| chr19 | 64690056  | 64690642  | 587 |
| chrX  | 22562309  | 22562894  | 586 |
| chr7  | 10839856  | 10840439  | 584 |
| chr12 | 74247467  | 74248050  | 584 |
| chr11 | 81246236  | 81246818  | 583 |
| chr29 | 44546124  | 44546705  | 582 |
| chr23 | 48568715  | 48569296  | 582 |
| chr19 | 63927196  | 63927777  | 582 |
| chr7  | 110605359 | 110605939 | 581 |
| chr2  | 136761901 | 136762481 | 581 |
| chr18 | 51019202  | 51019781  | 580 |
| chr18 | 43159126  | 43159705  | 580 |
| chr12 | 32177652  | 32178231  | 580 |
| chr18 | 62227514  | 62228092  | 579 |
| chrX  | 74475767  | 74476344  | 578 |
| chr17 | 75528376  | 75528953  | 578 |
| chr15 | 24496014  | 24496591  | 578 |
| chr26 | 42113139  | 42113715  | 577 |
| chr18 | 50725079  | 50725655  | 577 |
| chr7  | 4338457   | 4339032   | 576 |
| chr26 | 18160440  | 18161014  | 575 |
| chr22 | 51342846  | 51343420  | 575 |
| chr8  | 7839536   | 7840109   | 574 |
| chr19 | 20305122  | 20305695  | 574 |
| chr18 | 23597445  | 23598016  | 572 |
| chr21 | 25460630  | 25461200  | 571 |
| chr14 | 8273372   | 8273942   | 571 |
| chrX  | 50445660  | 50446229  | 570 |
| chr22 | 22557519  | 22558088  | 570 |
| chrX  | 50837474  | 50838042  | 569 |
| chrX  | 66342765  | 66343331  | 567 |
| chr3  | 121581540 | 121582106 | 567 |
| chr19 | 43157510  | 43158076  | 567 |
| chr17 | 72762113  | 72762679  | 567 |
| chr8  | 47121254  | 47121819  | 566 |
| chr10 | 48276407  | 48276972  | 566 |
| chr25 | 38936047  | 38936611  | 565 |
| chr24 | 48958438  | 48959002  | 565 |
| chr8  | 7814001   | 7814564   | 564 |
| chr13 | 61844264  | 61844826  | 563 |



|       |               |           |     |
|-------|---------------|-----------|-----|
| chr1  | 74575892      | 74576454  | 563 |
| chr19 | 28308412      | 28308973  | 562 |
| chr19 | 16777474      | 16778035  | 562 |
| chrX  | 6423966       | 6424526   | 561 |
| chr27 | 22188418      | 22188978  | 561 |
| chr23 | 8381328       | 8381888   | 561 |
| chr2  | 134713842     | 134714402 | 561 |
| chr2  | 93394011      | 93394571  | 561 |
| chr19 | 42531670      | 42532230  | 561 |
| chrX  | 48718998      | 48719557  | 560 |
| chrX  | 37357234      | 37357793  | 560 |
| chr5  | 113918910     | 113919469 | 560 |
| chr7  | 29464440      | 29464998  | 559 |
| chr29 | 37051324      | 37051882  | 559 |
| chr13 | 35988914      | 35989472  | 559 |
| chrX  | 21251397      | 21251954  | 558 |
| chr2  | 138644950     | 138645506 | 557 |
| chr2  | 126724977     | 126725533 | 557 |
| chr18 | 53119136      | 53119692  | 557 |
| chrX  | 80226143      | 80226698  | 556 |
| chrX  | 73432966      | 73433521  | 556 |
| chr26 | 20122476      | 20123031  | 556 |
| chrX  | 353224 353778 | 555       |     |
| chr26 | 42167724      | 42168278  | 555 |
| chr8  | 108792745     | 108793297 | 553 |
| chr5  | 45664528      | 45665080  | 553 |
| chr3  | 116175064     | 116175616 | 553 |
| chr13 | 17708726      | 17709278  | 553 |
| chr25 | 1513490       | 1514041   | 552 |
| chr11 | 12874268      | 12874818  | 551 |
| chr10 | 17294837      | 17295387  | 551 |
| chrX  | 39131020      | 39131569  | 550 |
| chr20 | 74023870      | 74024419  | 550 |
| chr21 | 30844110      | 30844657  | 548 |
| chr15 | 26667477      | 26668024  | 548 |
| chrX  | 2362042       | 2362588   | 547 |
| chr28 | 15317221      | 15317766  | 546 |
| chr19 | 59050979      | 59051524  | 546 |
| chr19 | 56839475      | 56840020  | 546 |
| chr22 | 30180399      | 30180943  | 545 |
| chr17 | 41488705      | 41489249  | 545 |
| chr10 | 63871297      | 63871841  | 545 |
| chrX  | 63285513      | 63286056  | 544 |
| chrX  | 61581079      | 61581622  | 544 |
| chrX  | 347633 348176 | 544       |     |
| chr5  | 113321914     | 113322457 | 544 |
| chrX  | 53895488      | 53896030  | 543 |
| chr4  | 123625080     | 123625622 | 543 |
| chr4  | 67943753      | 67944295  | 543 |
| chr2  | 93394653      | 93395195  | 543 |

|       |               |           |     |
|-------|---------------|-----------|-----|
| chr13 | 35316252      | 35316794  | 543 |
| chr10 | 19416703      | 19417245  | 543 |
| chr23 | 13519306      | 13519847  | 542 |
| chr18 | 18529066      | 18529606  | 541 |
| chr12 | 76627660      | 76628200  | 541 |
| chr11 | 46225118      | 46225658  | 541 |
| chr24 | 48610993      | 48611532  | 540 |
| chrX  | 80392534      | 80393072  | 539 |
| chr2  | 111413080     | 111413617 | 538 |
| chr19 | 41935438      | 41935975  | 538 |
| chr17 | 62934261      | 62934798  | 538 |
| chrX  | 54722037      | 54722573  | 537 |
| chr4  | 79175683      | 79176219  | 537 |
| chr19 | 59427188      | 59427724  | 537 |
| chr15 | 29662976      | 29663512  | 537 |
| chrX  | 6134202       | 6134737   | 536 |
| chrX  | 56163992      | 56164526  | 535 |
| chr20 | 6591569       | 6592103   | 535 |
| chr18 | 3722542       | 3723076   | 535 |
| chr13 | 69714041      | 69714573  | 533 |
| chr13 | 60410741      | 60411273  | 533 |
| chr29 | 44639932      | 44640463  | 532 |
| chr25 | 37411081      | 37411612  | 532 |
| chr17 | 63466002      | 63466533  | 532 |
| chr8  | 108774147     | 108774676 | 530 |
| chr5  | 30322624      | 30323153  | 530 |
| chr29 | 34634365      | 34634894  | 530 |
| chr22 | 44914403      | 44914932  | 530 |
| chr22 | 12160680      | 12161209  | 530 |
| chr19 | 43078936      | 43079465  | 530 |
| chr18 | 12130059      | 12130588  | 530 |
| chr18 | 675159 675688 | 530       |     |
| chrX  | 74552771      | 74553299  | 529 |
| chr15 | 51284228      | 51284756  | 529 |
| chr18 | 63776271      | 63776798  | 528 |
| chrX  | 72133630      | 72134156  | 527 |
| chr18 | 4274668       | 4275194   | 527 |
| chrX  | 62446271      | 62446796  | 526 |
| chr23 | 42599209      | 42599734  | 526 |
| chr15 | 24945672      | 24946197  | 526 |
| chr26 | 48668992      | 48669516  | 525 |
| chr17 | 66528218      | 66528742  | 525 |
| chrX  | 77672212      | 77672735  | 524 |
| chrX  | 75206508      | 75207031  | 524 |
| chr5  | 74416906      | 74417429  | 524 |
| chrX  | 61348569      | 61349091  | 523 |
| chr23 | 27878615      | 27879137  | 523 |
| chr23 | 27779569      | 27780091  | 523 |
| chr19 | 55994443      | 55994965  | 523 |
| chr15 | 30150825      | 30151347  | 523 |

|       |           |           |     |
|-------|-----------|-----------|-----|
| chrX  | 61115589  | 61116110  | 522 |
| chrX  | 50211106  | 50211627  | 522 |
| chr19 | 27916675  | 27917196  | 522 |
| chrX  | 78323786  | 78324306  | 521 |
| chrX  | 46699284  | 46699804  | 521 |
| chr3  | 7804059   | 7804579   | 521 |
| chr1  | 128119512 | 128120032 | 521 |
| chrX  | 57691817  | 57692336  | 520 |
| chr7  | 44949157  | 44949676  | 520 |
| chrX  | 38486510  | 38487028  | 519 |
| chrX  | 12938129  | 12938647  | 519 |
| chr24 | 1197628   | 1198146   | 519 |
| chr17 | 58839765  | 58840283  | 519 |
| chr9  | 91190979  | 91191496  | 518 |
| chr15 | 31964012  | 31964529  | 518 |
| chr14 | 61529020  | 61529537  | 518 |
| chrX  | 19091718  | 19092234  | 517 |
| chr20 | 42348607  | 42349122  | 516 |
| chr7  | 94370662  | 94371176  | 515 |
| chr24 | 33931540  | 33932054  | 515 |
| chr19 | 23687150  | 23687664  | 515 |
| chr9  | 105818437 | 105818950 | 514 |
| chr5  | 118151391 | 118151904 | 514 |
| chr22 | 55762967  | 55763480  | 514 |
| chrX  | 21993670  | 21994182  | 513 |
| chr18 | 49527291  | 49527803  | 513 |
| chrX  | 37626770  | 37627281  | 512 |
| chr2  | 123348947 | 123349458 | 512 |
| chr5  | 33956338  | 33956848  | 511 |
| chr5  | 28899761  | 28900271  | 511 |
| chr5  | 28863030  | 28863540  | 511 |
| chr20 | 75632992  | 75633502  | 511 |
| chr19 | 12331307  | 12331817  | 511 |
| chr15 | 22993844  | 22994354  | 511 |
| chr1  | 152136270 | 152136780 | 511 |
| chr5  | 60386551  | 60387060  | 510 |
| chr3  | 20437595  | 20438104  | 510 |
| chr17 | 70431474  | 70431983  | 510 |
| chr15 | 75216186  | 75216695  | 510 |
| chr15 | 25316500  | 25317009  | 510 |
| chr10 | 17624233  | 17624742  | 510 |
| chr8  | 74348148  | 74348656  | 509 |
| chr26 | 42255051  | 42255559  | 509 |
| chr22 | 60655241  | 60655749  | 509 |
| chr3  | 35779834  | 35780341  | 508 |
| chr24 | 36865311  | 36865818  | 508 |
| chr4  | 105069988 | 105070494 | 507 |
| chr26 | 21815497  | 21816003  | 507 |
| chr5  | 120523687 | 120524192 | 506 |
| chr22 | 30230211  | 30230716  | 506 |

|       |           |           |     |
|-------|-----------|-----------|-----|
| chr13 | 67892416  | 67892921  | 506 |
| chrX  | 30880801  | 30881305  | 505 |
| chr26 | 37095170  | 37095674  | 505 |
| chr26 | 18776885  | 18777389  | 505 |
| chr19 | 61278448  | 61278952  | 505 |
| chrX  | 72681340  | 72681843  | 504 |
| chr9  | 24142673  | 24143176  | 504 |
| chr19 | 23716175  | 23716678  | 504 |
| chr12 | 84679533  | 84680036  | 504 |
| chr26 | 22238757  | 22239259  | 503 |
| chr10 | 70213155  | 70213657  | 503 |
| chrX  | 48130313  | 48130813  | 501 |
| chr11 | 9337272   | 9337772   | 501 |
| chr5  | 72518698  | 72519197  | 500 |
| chr28 | 41305056  | 41305555  | 500 |
| chr19 | 23864395  | 23864894  | 500 |
| chr11 | 107558912 | 107559411 | 500 |
| chr10 | 8365111   | 8365610   | 500 |
| chr7  | 19672057  | 19672555  | 499 |
| chr23 | 28891146  | 28891644  | 499 |
| chr2  | 135078735 | 135079233 | 499 |
| chrX  | 19460275  | 19460772  | 498 |
| chr13 | 55150487  | 55150984  | 498 |
| chr11 | 87730539  | 87731036  | 498 |
| chr9  | 87767446  | 87767942  | 497 |
| chr18 | 56824824  | 56825320  | 497 |
| chr8  | 27068599  | 27069094  | 496 |
| chr28 | 33723643  | 33724138  | 496 |
| chr2  | 132779192 | 132779687 | 496 |
| chr2  | 128591317 | 128591811 | 495 |
| chr16 | 47206728  | 47207222  | 495 |
| chrX  | 36852905  | 36853398  | 494 |
| chr10 | 48277989  | 48278482  | 494 |
| chr5  | 111208421 | 111208913 | 493 |
| chr13 | 60438862  | 60439354  | 493 |
| chrX  | 30145053  | 30145544  | 492 |
| chr12 | 84670802  | 84671293  | 492 |
| chrX  | 17460785  | 17461275  | 491 |
| chr18 | 23552182  | 23552672  | 491 |
| chr17 | 70389448  | 70389938  | 491 |
| chr10 | 35818420  | 35818910  | 491 |
| chrX  | 74294820  | 74295309  | 490 |
| chr3  | 114098881 | 114099369 | 489 |
| chr11 | 109674132 | 109674620 | 489 |
| chr5  | 30458288  | 30458775  | 488 |
| chr25 | 29301683  | 29302170  | 488 |
| chr9  | 51605508  | 51605994  | 487 |
| chr3  | 8719888   | 8720374   | 487 |
| chr13 | 42453163  | 42453649  | 487 |
| chrX  | 78259540  | 78260025  | 486 |

|       |               |           |     |
|-------|---------------|-----------|-----|
| chr28 | 5025941       | 5026426   | 486 |
| chr27 | 26638594      | 26639079  | 486 |
| chr11 | 49848919      | 49849404  | 486 |
| chrX  | 55609910      | 55610394  | 485 |
| chrX  | 50502990      | 50503474  | 485 |
| chrX  | 36333390      | 36333874  | 485 |
| chr29 | 39084468      | 39084952  | 485 |
| chr23 | 17494238      | 17494722  | 485 |
| chr17 | 62756813      | 62757297  | 485 |
| chr13 | 59109098      | 59109582  | 485 |
| chrX  | 39204073      | 39204556  | 484 |
| chr9  | 65781050      | 65781533  | 484 |
| chr19 | 39957288      | 39957771  | 484 |
| chrX  | 58865731      | 58866213  | 483 |
| chr17 | 63791656      | 63792138  | 483 |
| chr1  | 84337279      | 84337761  | 483 |
| chr11 | 90405159      | 90405640  | 482 |
| chr1  | 100032374     | 100032855 | 482 |
| chr26 | 40639897      | 40640377  | 481 |
| chr20 | 731880 732360 | 481       |     |
| chr22 | 59493295      | 59493774  | 480 |
| chr19 | 40438051      | 40438530  | 480 |
| chr25 | 8192685       | 8193163   | 479 |
| chrX  | 50278443      | 50278920  | 478 |
| chrX  | 5716838       | 5717315   | 478 |
| chr9  | 99398296      | 99398773  | 478 |
| chr5  | 30558234      | 30558711  | 478 |
| chr3  | 127830713     | 127831190 | 478 |
| chr29 | 33921076      | 33921553  | 478 |
| chr25 | 1890345       | 1890822   | 478 |
| chr24 | 41892224      | 41892701  | 478 |
| chr16 | 67434682      | 67435159  | 478 |
| chrX  | 6343920       | 6344396   | 477 |
| chr24 | 41853634      | 41854110  | 477 |
| chr23 | 28016621      | 28017097  | 477 |
| chr22 | 53994116      | 53994592  | 477 |
| chr15 | 53394412      | 53394888  | 477 |
| chr13 | 70254845      | 70255321  | 477 |
| chr10 | 70263800      | 70264276  | 477 |
| chrX  | 60424764      | 60425239  | 476 |
| chr28 | 34002674      | 34003149  | 476 |
| chr23 | 12298879      | 12299354  | 476 |
| chr13 | 41056563      | 41057038  | 476 |
| chr12 | 84292715      | 84293190  | 476 |
| chr5  | 86513602      | 86514076  | 475 |
| chrX  | 74301403      | 74301876  | 474 |
| chrX  | 37517071      | 37517544  | 474 |
| chrX  | 35790470      | 35790943  | 474 |
| chr23 | 37995136      | 37995608  | 473 |
| chr12 | 32147166      | 32147638  | 473 |

|       |               |           |     |
|-------|---------------|-----------|-----|
| chrX  | 13348580      | 13349051  | 472 |
| chr3  | 106582479     | 106582950 | 472 |
| chr19 | 48404384      | 48404855  | 472 |
| chr19 | 15908058      | 15908529  | 472 |
| chr11 | 100692093     | 100692564 | 472 |
| chr11 | 2287385       | 2287856   | 472 |
| chr4  | 71501494      | 71501964  | 471 |
| chr26 | 18832008      | 18832478  | 471 |
| chr20 | 70162261      | 70162731  | 471 |
| chr11 | 31099872      | 31100342  | 471 |
| chr10 | 19893497      | 19893967  | 471 |
| chr10 | 16772866      | 16773336  | 471 |
| chrX  | 30984636      | 30985105  | 470 |
| chr5  | 121376891     | 121377360 | 470 |
| chr24 | 61066308      | 61066777  | 470 |
| chrX  | 72185011      | 72185478  | 468 |
| chrX  | 378719 379186 | 468       |     |
| chr28 | 43334180      | 43334647  | 468 |
| chr28 | 41315513      | 41315980  | 468 |
| chr21 | 27059512      | 27059979  | 468 |
| chr13 | 59702724      | 59703191  | 468 |
| chr12 | 29825354      | 29825821  | 468 |
| chr10 | 16969008      | 16969475  | 468 |
| chr7  | 59681575      | 59682041  | 467 |
| chr24 | 34510907      | 34511373  | 467 |
| chr14 | 6710491       | 6710957   | 467 |
| chr28 | 12538779      | 12539244  | 466 |
| chr1  | 31583199      | 31583664  | 466 |
| chrX  | 56194204      | 56194668  | 465 |
| chrX  | 20470402      | 20470866  | 465 |
| chrX  | 77645932      | 77646395  | 464 |
| chr26 | 21790421      | 21790884  | 464 |
| chr17 | 47772496      | 47772959  | 464 |
| chr15 | 52240278      | 52240741  | 464 |
| chr7  | 19177965      | 19178427  | 463 |
| chr16 | 38727090      | 38727552  | 463 |
| chr15 | 24404268      | 24404729  | 462 |
| chr13 | 23799708      | 23800169  | 462 |
| chr11 | 14085364      | 14085825  | 462 |
| chrX  | 21464834      | 21465294  | 461 |
| chrX  | 12701300      | 12701760  | 461 |
| chr7  | 108421338     | 108421798 | 461 |
| chr5  | 29724763      | 29725223  | 461 |
| chr23 | 11350946      | 11351406  | 461 |
| chrX  | 21664771      | 21665230  | 460 |
| chr28 | 34110468      | 34110927  | 460 |
| chr25 | 36491558      | 36492017  | 460 |
| chr9  | 104915210     | 104915668 | 459 |
| chr21 | 66575230      | 66575688  | 459 |
| chr17 | 70458696      | 70459154  | 459 |

|       |           |           |     |
|-------|-----------|-----------|-----|
| chr29 | 30700186  | 30700643  | 458 |
| chrX  | 72545777  | 72546233  | 457 |
| chr25 | 37769060  | 37769515  | 456 |
| chr21 | 16704718  | 16705173  | 456 |
| chr15 | 25387251  | 25387706  | 456 |
| chrX  | 46479124  | 46479578  | 455 |
| chrX  | 5258799   | 5259253   | 455 |
| chr3  | 121906167 | 121906621 | 455 |
| chr29 | 12466351  | 12466805  | 455 |
| chr25 | 35367235  | 35367689  | 455 |
| chr2  | 35501655  | 35502109  | 455 |
| chr19 | 60764671  | 60765125  | 455 |
| chrX  | 75996488  | 75996941  | 454 |
| chr6  | 105589305 | 105589758 | 454 |
| chr10 | 103500420 | 103500872 | 453 |
| chrX  | 19004686  | 19005137  | 452 |
| chrX  | 6759368   | 6759819   | 452 |
| chr7  | 50522160  | 50522611  | 452 |
| chr26 | 44553558  | 44554009  | 452 |
| chr24 | 42589818  | 42590269  | 452 |
| chr19 | 33122860  | 33123311  | 452 |
| chrX  | 72824385  | 72824835  | 451 |
| chr7  | 16820522  | 16820972  | 451 |
| chr7  | 6621621   | 6622071   | 451 |
| chr2  | 134415561 | 134416011 | 451 |
| chr19 | 61279497  | 61279947  | 451 |
| chr14 | 11465252  | 11465702  | 451 |
| chr14 | 7784233   | 7784683   | 451 |
| chr9  | 77051439  | 77051888  | 450 |
| chr15 | 24032649  | 24033098  | 450 |
| chr6  | 13979480  | 13979928  | 449 |
| chr5  | 124892406 | 124892854 | 449 |
| chr4  | 101655844 | 101656292 | 449 |
| chr23 | 11451650  | 11452098  | 449 |
| chr22 | 16417788  | 16418236  | 449 |
| chr2  | 131437601 | 131438049 | 449 |
| chr12 | 53336701  | 53337149  | 449 |
| chr1  | 99883986  | 99884434  | 449 |
| chr21 | 33073959  | 33074405  | 447 |
| chr14 | 75705968  | 75706414  | 447 |
| chr13 | 59892912  | 59893358  | 447 |
| chrX  | 8308276   | 8308721   | 446 |
| chr2  | 74699200  | 74699645  | 446 |
| chr17 | 72746755  | 72747200  | 446 |
| chrX  | 71813471  | 71813915  | 445 |
| chr25 | 42749725  | 42750169  | 445 |
| chr18 | 46297000  | 46297444  | 445 |
| chrX  | 12307492  | 12307935  | 444 |
| chr13 | 56195175  | 56195618  | 444 |
| chr11 | 48697699  | 48698142  | 444 |

|       |               |           |     |
|-------|---------------|-----------|-----|
| chr8  | 25272287      | 25272729  | 443 |
| chr4  | 106960759     | 106961201 | 443 |
| chr10 | 73957752      | 73958194  | 443 |
| chr8  | 108826579     | 108827020 | 442 |
| chr8  | 24496751      | 24497192  | 442 |
| chr16 | 2096479       | 2096920   | 442 |
| chr7  | 15761254      | 15761694  | 441 |
| chr29 | 26352944      | 26353384  | 441 |
| chr2  | 134696859     | 134697299 | 441 |
| chr19 | 15904564      | 15905004  | 441 |
| chr3  | 115027361     | 115027800 | 440 |
| chr2  | 131742913     | 131743351 | 439 |
| chrX  | 60460008      | 60460445  | 438 |
| chr8  | 109564313     | 109564750 | 438 |
| chr29 | 48961400      | 48961837  | 438 |
| chr27 | 17892676      | 17893113  | 438 |
| chr23 | 10963215      | 10963652  | 438 |
| chrX  | 68959901      | 68960337  | 437 |
| chr26 | 22180533      | 22180969  | 437 |
| chr24 | 348827 349263 | 437       |     |
| chr1  | 74606211      | 74606647  | 437 |
| chr23 | 15825370      | 15825805  | 436 |
| chrX  | 34503713      | 34504147  | 435 |
| chr5  | 60383275      | 60383709  | 435 |
| chrX  | 65144750      | 65145183  | 434 |
| chrX  | 49868387      | 49868820  | 434 |
| chr19 | 45027942      | 45028375  | 434 |
| chr17 | 41483399      | 41483832  | 434 |
| chr17 | 68111497      | 68111929  | 433 |
| chr18 | 50550766      | 50551197  | 432 |
| chr15 | 30624620      | 30625050  | 431 |
| chr26 | 22000230      | 22000659  | 430 |
| chr13 | 60528322      | 60528751  | 430 |
| chr13 | 23835851      | 23836280  | 430 |
| chrX  | 21814513      | 21814941  | 429 |
| chr3  | 111480799     | 111481227 | 429 |
| chr22 | 14918907      | 14919335  | 429 |
| chr11 | 9295665       | 9296093   | 429 |
| chrX  | 59482161      | 59482588  | 428 |
| chr2  | 133653335     | 133653762 | 428 |
| chrX  | 66494703      | 66495129  | 427 |
| chrX  | 5783102       | 5783528   | 427 |
| chr4  | 32155671      | 32156097  | 427 |
| chrX  | 9317047       | 9317472   | 426 |
| chr13 | 47363381      | 47363805  | 425 |
| chr19 | 54701436      | 54701859  | 424 |
| chrX  | 56899452      | 56899874  | 423 |
| chrX  | 13814645      | 13815067  | 423 |
| chr4  | 98623657      | 98624079  | 423 |
| chr11 | 21621871      | 21622293  | 423 |



|       |           |           |     |
|-------|-----------|-----------|-----|
| chrX  | 29753010  | 29753431  | 422 |
| chr3  | 122148742 | 122149163 | 422 |
| chr13 | 60106679  | 60107100  | 422 |
| chrX  | 79780008  | 79780428  | 421 |
| chr15 | 32674007  | 32674427  | 421 |
| chr1  | 132974243 | 132974663 | 421 |
| chr8  | 59322369  | 59322788  | 420 |
| chr5  | 29127960  | 29128378  | 419 |
| chr23 | 28017810  | 28018228  | 419 |
| chr11 | 5672643   | 5673061   | 419 |
| chrX  | 34171038  | 34171454  | 417 |
| chr29 | 35157564  | 35157980  | 417 |
| chr26 | 48533526  | 48533941  | 416 |
| chrX  | 2588821   | 2589235   | 415 |
| chr22 | 30225552  | 30225966  | 415 |
| chr11 | 77545132  | 77545546  | 415 |
| chrX  | 51091929  | 51092342  | 414 |
| chr20 | 72044869  | 72045282  | 414 |
| chr25 | 37657039  | 37657451  | 413 |
| chr18 | 50307707  | 50308119  | 413 |
| chr16 | 47129776  | 47130188  | 413 |
| chrX  | 75818464  | 75818875  | 412 |
| chr13 | 22928669  | 22929080  | 412 |
| chr1  | 133441612 | 133442022 | 411 |
| chrX  | 6165806   | 6166215   | 410 |
| chr17 | 64075263  | 64075672  | 410 |
| chr16 | 43381605  | 43382014  | 410 |
| chr28 | 32381263  | 32381671  | 409 |
| chrX  | 46223209  | 46223615  | 407 |
| chr7  | 14214993  | 14215399  | 407 |
| chr5  | 30476769  | 30477175  | 407 |
| chr13 | 59108082  | 59108486  | 405 |
| chr15 | 26598411  | 26598814  | 404 |
| chr26 | 21646941  | 21647342  | 402 |
| chr21 | 32880415  | 32880816  | 402 |
| chr18 | 54111632  | 54112033  | 402 |
| chr7  | 52206044  | 52206443  | 400 |
| chrX  | 80053005  | 80053403  | 399 |
| chrX  | 78550434  | 78550832  | 399 |
| chrX  | 74485906  | 74486304  | 399 |
| chrX  | 74454642  | 74455040  | 399 |
| chrX  | 72707188  | 72707586  | 399 |
| chrX  | 72561765  | 72562163  | 399 |
| chrX  | 67817428  | 67817826  | 399 |
| chrX  | 65810031  | 65810429  | 399 |
| chrX  | 62817368  | 62817766  | 399 |
| chrX  | 56891381  | 56891779  | 399 |
| chrX  | 50803409  | 50803807  | 399 |
| chrX  | 50537158  | 50537556  | 399 |
| chrX  | 47360155  | 47360553  | 399 |

|       |           |           |     |
|-------|-----------|-----------|-----|
| chrX  | 36875846  | 36876244  | 399 |
| chrX  | 36528888  | 36529286  | 399 |
| chrX  | 32514341  | 32514739  | 399 |
| chrX  | 20232266  | 20232664  | 399 |
| chrX  | 14428153  | 14428551  | 399 |
| chrX  | 10637340  | 10637738  | 399 |
| chrX  | 10496975  | 10497373  | 399 |
| chrX  | 10222236  | 10222634  | 399 |
| chrX  | 7787369   | 7787767   | 399 |
| chrX  | 6113054   | 6113452   | 399 |
| chrX  | 5791860   | 5792258   | 399 |
| chrX  | 5502999   | 5503397   | 399 |
| chrX  | 4312755   | 4313153   | 399 |
| chr9  | 93655556  | 93655954  | 399 |
| chr9  | 26590441  | 26590839  | 399 |
| chr8  | 3715646   | 3716044   | 399 |
| chr7  | 46247303  | 46247701  | 399 |
| chr7  | 42469370  | 42469768  | 399 |
| chr6  | 106857693 | 106858091 | 399 |
| chr6  | 42771741  | 42772139  | 399 |
| chr5  | 114078284 | 114078682 | 399 |
| chr5  | 35267880  | 35268278  | 399 |
| chr5  | 31569079  | 31569477  | 399 |
| chr5  | 26126051  | 26126449  | 399 |
| chr4  | 110115672 | 110116070 | 399 |
| chr4  | 96134369  | 96134767  | 399 |
| chr4  | 95654245  | 95654643  | 399 |
| chr4  | 95080023  | 95080421  | 399 |
| chr3  | 122336695 | 122337093 | 399 |
| chr3  | 120051904 | 120052302 | 399 |
| chr3  | 108385796 | 108386194 | 399 |
| chr3  | 84911682  | 84912080  | 399 |
| chr29 | 26391479  | 26391877  | 399 |
| chr28 | 42889510  | 42889908  | 399 |
| chr28 | 42394466  | 42394864  | 399 |
| chr28 | 41016254  | 41016652  | 399 |
| chr28 | 25218802  | 25219200  | 399 |
| chr27 | 38686101  | 38686499  | 399 |
| chr26 | 44199440  | 44199838  | 399 |
| chr26 | 43657364  | 43657762  | 399 |
| chr26 | 38701548  | 38701946  | 399 |
| chr26 | 37388694  | 37389092  | 399 |
| chr24 | 20851891  | 20852289  | 399 |
| chr24 | 1670323   | 1670721   | 399 |
| chr24 | 845294    | 845692    | 399 |
| chr23 | 53006230  | 53006628  | 399 |
| chr23 | 51056317  | 51056715  | 399 |
| chr22 | 59560131  | 59560529  | 399 |
| chr22 | 30131382  | 30131780  | 399 |
| chr21 | 16073620  | 16074018  | 399 |

|       |           |           |     |
|-------|-----------|-----------|-----|
| chr20 | 75050238  | 75050636  | 399 |
| chr2  | 139944083 | 139944481 | 399 |
| chr2  | 136521068 | 136521466 | 399 |
| chr2  | 132722803 | 132723201 | 399 |
| chr2  | 111232680 | 111233078 | 399 |
| chr2  | 110637185 | 110637583 | 399 |
| chr19 | 45535705  | 45536103  | 399 |
| chr19 | 45089128  | 45089526  | 399 |
| chr19 | 38870515  | 38870913  | 399 |
| chr19 | 31952338  | 31952736  | 399 |
| chr19 | 18442047  | 18442445  | 399 |
| chr18 | 54640928  | 54641326  | 399 |
| chr17 | 67601755  | 67602153  | 399 |
| chr17 | 66493801  | 66494199  | 399 |
| chr17 | 44298613  | 44299011  | 399 |
| chr15 | 81017283  | 81017681  | 399 |
| chr15 | 30646457  | 30646855  | 399 |
| chr15 | 30098171  | 30098569  | 399 |
| chr15 | 30017450  | 30017848  | 399 |
| chr15 | 29988659  | 29989057  | 399 |
| chr15 | 28949341  | 28949739  | 399 |
| chr15 | 23599346  | 23599744  | 399 |
| chr14 | 22491951  | 22492349  | 399 |
| chr14 | 1140895   | 1141293   | 399 |
| chr13 | 82705568  | 82705966  | 399 |
| chr13 | 59692088  | 59692486  | 399 |
| chr13 | 35966295  | 35966693  | 399 |
| chr13 | 11409059  | 11409457  | 399 |
| chr12 | 85331800  | 85332198  | 399 |
| chr12 | 84203615  | 84204013  | 399 |
| chr12 | 81827702  | 81828100  | 399 |
| chr12 | 32165007  | 32165405  | 399 |
| chr11 | 81459058  | 81459456  | 399 |
| chr11 | 81377022  | 81377420  | 399 |
| chr11 | 66553120  | 66553518  | 399 |
| chr11 | 20764387  | 20764785  | 399 |
| chr11 | 2557120   | 2557518   | 399 |
| chr10 | 36913612  | 36914010  | 399 |
| chr10 | 15026658  | 15027056  | 399 |
| chr1  | 145660001 | 145660399 | 399 |
| chr1  | 118653309 | 118653707 | 399 |
| chr1  | 74889482  | 74889880  | 399 |
| chrX  | 78403850  | 78404247  | 398 |
| chr9  | 64353337  | 64353734  | 398 |
| chr8  | 76777407  | 76777804  | 398 |
| chr8  | 10960172  | 10960569  | 398 |
| chr7  | 81424202  | 81424599  | 398 |
| chr7  | 38707708  | 38708105  | 398 |
| chr5  | 122222787 | 122223184 | 398 |
| chr3  | 111685877 | 111686274 | 398 |

|       |           |           |     |
|-------|-----------|-----------|-----|
| chr3  | 20425128  | 20425525  | 398 |
| chr26 | 43037602  | 43037999  | 398 |
| chr26 | 14543352  | 14543749  | 398 |
| chr2  | 138822203 | 138822600 | 398 |
| chr2  | 115219190 | 115219587 | 398 |
| chr19 | 11006022  | 11006419  | 398 |
| chr18 | 64254748  | 64255145  | 398 |
| chr16 | 54353910  | 54354307  | 398 |
| chr16 | 40061658  | 40062055  | 398 |
| chr15 | 38251113  | 38251510  | 398 |
| chr14 | 25784197  | 25784594  | 398 |
| chr11 | 109735655 | 109736052 | 398 |
| chr11 | 100748931 | 100749328 | 398 |
| chr11 | 77616425  | 77616822  | 398 |
| chr10 | 77488294  | 77488691  | 398 |
| chr10 | 41925643  | 41926040  | 398 |
| chrX  | 83029247  | 83029643  | 397 |
| chrX  | 74801733  | 74802129  | 397 |
| chrX  | 62520860  | 62521256  | 397 |
| chrX  | 11176662  | 11177058  | 397 |
| chrX  | 9717704   | 9718100   | 397 |
| chrX  | 7047492   | 7047888   | 397 |
| chr29 | 37641341  | 37641737  | 397 |
| chr28 | 42849584  | 42849980  | 397 |
| chr23 | 16520004  | 16520400  | 397 |
| chr16 | 47227381  | 47227777  | 397 |
| chr13 | 59586685  | 59587081  | 397 |
| chr12 | 81951187  | 81951583  | 397 |
| chr1  | 74888004  | 74888400  | 397 |
| chrX  | 66401435  | 66401830  | 396 |
| chrX  | 40652884  | 40653279  | 396 |
| chr5  | 125060706 | 125061101 | 396 |
| chr5  | 120419137 | 120419532 | 396 |
| chr5  | 69512295  | 69512690  | 396 |
| chr4  | 72313618  | 72314013  | 396 |
| chr28 | 34472299  | 34472694  | 396 |
| chr25 | 42135329  | 42135724  | 396 |
| chr23 | 28063104  | 28063499  | 396 |
| chr21 | 42443256  | 42443651  | 396 |
| chr2  | 93649349  | 93649744  | 396 |
| chr17 | 66539353  | 66539748  | 396 |
| chr15 | 28629473  | 28629868  | 396 |
| chr14 | 30838586  | 30838981  | 396 |
| chr13 | 58277299  | 58277694  | 396 |
| chr12 | 69031461  | 69031856  | 396 |
| chr1  | 74733865  | 74734260  | 396 |
| chrX  | 80259209  | 80259603  | 395 |
| chrX  | 78524403  | 78524797  | 395 |
| chrX  | 74892402  | 74892796  | 395 |
| chrX  | 74220809  | 74221203  | 395 |

|       |           |           |     |
|-------|-----------|-----------|-----|
| chrX  | 59510302  | 59510696  | 395 |
| chrX  | 54655168  | 54655562  | 395 |
| chrX  | 54357408  | 54357802  | 395 |
| chrX  | 52896731  | 52897125  | 395 |
| chrX  | 49380445  | 49380839  | 395 |
| chrX  | 12640723  | 12641117  | 395 |
| chr4  | 106677233 | 106677627 | 395 |
| chr3  | 108349277 | 108349671 | 395 |
| chr27 | 34872009  | 34872403  | 395 |
| chr24 | 27148546  | 27148940  | 395 |
| chr24 | 1375392   | 1375786   | 395 |
| chr23 | 42483964  | 42484358  | 395 |
| chr21 | 34453133  | 34453527  | 395 |
| chr19 | 59407200  | 59407594  | 395 |
| chr19 | 13541620  | 13542014  | 395 |
| chr14 | 14058730  | 14059124  | 395 |
| chr12 | 84584519  | 84584913  | 395 |
| chrX  | 29509928  | 29510321  | 394 |
| chrX  | 8100946   | 8101339   | 394 |
| chr6  | 118650897 | 118651290 | 394 |
| chr24 | 62957253  | 62957646  | 394 |
| chr23 | 10536082  | 10536475  | 394 |
| chr22 | 60371792  | 60372185  | 394 |
| chr2  | 111225835 | 111226228 | 394 |
| chr2  | 68689098  | 68689491  | 394 |
| chr17 | 76315450  | 76315843  | 394 |
| chr15 | 13619881  | 13620274  | 394 |
| chr14 | 3969941   | 3970334   | 394 |
| chr13 | 80662462  | 80662855  | 394 |
| chr11 | 4813141   | 4813534   | 394 |
| chr10 | 66684145  | 66684538  | 394 |
| chrX  | 19047370  | 19047762  | 393 |
| chr6  | 65879841  | 65880233  | 393 |
| chr6  | 59514003  | 59514395  | 393 |
| chr3  | 35678528  | 35678920  | 393 |
| chr3  | 17556086  | 17556478  | 393 |
| chr29 | 33067980  | 33068372  | 393 |
| chr28 | 30517761  | 30518153  | 393 |
| chr27 | 15406195  | 15406587  | 393 |
| chr22 | 48033838  | 48034230  | 393 |
| chr21 | 58013481  | 58013873  | 393 |
| chr2  | 124459014 | 124459406 | 393 |
| chr18 | 22832615  | 22833007  | 393 |
| chr15 | 77201190  | 77201582  | 393 |
| chr13 | 70067676  | 70068068  | 393 |
| chr13 | 54505175  | 54505567  | 393 |
| chr12 | 10239952  | 10240344  | 393 |
| chrX  | 17106132  | 17106523  | 392 |
| chrX  | 5825363   | 5825754   | 392 |
| chr7  | 71386496  | 71386887  | 392 |

|       |               |           |     |
|-------|---------------|-----------|-----|
| chr7  | 45824933      | 45825324  | 392 |
| chr5  | 120372144     | 120372535 | 392 |
| chr4  | 74518346      | 74518737  | 392 |
| chr3  | 106832809     | 106833200 | 392 |
| chr29 | 34894550      | 34894941  | 392 |
| chr26 | 18198561      | 18198952  | 392 |
| chr25 | 33796726      | 33797117  | 392 |
| chr23 | 31415704      | 31416095  | 392 |
| chr21 | 18700938      | 18701329  | 392 |
| chr19 | 64372756      | 64373147  | 392 |
| chr19 | 39208128      | 39208519  | 392 |
| chr18 | 61921131      | 61921522  | 392 |
| chr18 | 11512417      | 11512808  | 392 |
| chr15 | 28447020      | 28447411  | 392 |
| chr11 | 108295946     | 108296337 | 392 |
| chrX  | 80664540      | 80664930  | 391 |
| chrX  | 65145586      | 65145976  | 391 |
| chrX  | 64491495      | 64491885  | 391 |
| chrX  | 37514664      | 37515054  | 391 |
| chrX  | 34680502      | 34680892  | 391 |
| chrX  | 8329176       | 8329566   | 391 |
| chr5  | 122052596     | 122052986 | 391 |
| chr29 | 33594136      | 33594526  | 391 |
| chr29 | 25489993      | 25490383  | 391 |
| chr24 | 967650 968040 | 391       | 391 |
| chr23 | 43285208      | 43285598  | 391 |
| chr22 | 59450186      | 59450576  | 391 |
| chr21 | 14750328      | 14750718  | 391 |
| chr2  | 26480139      | 26480529  | 391 |
| chr19 | 58467637      | 58468027  | 391 |
| chr19 | 52551619      | 52552009  | 391 |
| chr19 | 39208793      | 39209183  | 391 |
| chr19 | 28253007      | 28253397  | 391 |
| chr17 | 62513830      | 62514220  | 391 |
| chr16 | 68885778      | 68886168  | 391 |
| chr16 | 44300808      | 44301198  | 391 |
| chr16 | 38792370      | 38792760  | 391 |
| chr13 | 60401762      | 60402152  | 391 |
| chr10 | 74861263      | 74861653  | 391 |
| chr10 | 8320772       | 8321162   | 391 |
| chr1  | 138022631     | 138023021 | 391 |
| chrX  | 81306667      | 81307056  | 390 |
| chrX  | 76054853      | 76055242  | 390 |
| chrX  | 54393968      | 54394357  | 390 |
| chrX  | 36644867      | 36645256  | 390 |
| chrX  | 34571552      | 34571941  | 390 |
| chrX  | 19695314      | 19695703  | 390 |
| chrX  | 17459881      | 17460270  | 390 |
| chrX  | 10622980      | 10623369  | 390 |
| chrX  | 9190616       | 9191005   | 390 |

|       |           |           |     |
|-------|-----------|-----------|-----|
| chrX  | 3718312   | 3718701   | 390 |
| chr7  | 17088352  | 17088741  | 390 |
| chr5  | 60983109  | 60983498  | 390 |
| chr3  | 111684243 | 111684632 | 390 |
| chr28 | 34059795  | 34060184  | 390 |
| chr27 | 39220531  | 39220920  | 390 |
| chr22 | 60568927  | 60569316  | 390 |
| chr18 | 55203209  | 55203598  | 390 |
| chr16 | 67146457  | 67146846  | 390 |
| chr14 | 76305699  | 76306088  | 390 |
| chr12 | 32095881  | 32096270  | 390 |
| chr11 | 10374019  | 10374408  | 390 |
| chrX  | 80183725  | 80184113  | 389 |
| chrX  | 71887588  | 71887976  | 389 |
| chrX  | 63215173  | 63215561  | 389 |
| chrX  | 49432427  | 49432815  | 389 |
| chrX  | 35447089  | 35447477  | 389 |
| chrX  | 8244792   | 8245180   | 389 |
| chr9  | 105057816 | 105058204 | 389 |
| chr7  | 15651160  | 15651548  | 389 |
| chr3  | 116180458 | 116180846 | 389 |
| chr29 | 29691677  | 29692065  | 389 |
| chr25 | 28061626  | 28062014  | 389 |
| chr24 | 36559748  | 36560136  | 389 |
| chr19 | 20344236  | 20344624  | 389 |
| chr18 | 51274064  | 51274452  | 389 |
| chr18 | 25045087  | 25045475  | 389 |
| chr17 | 76318685  | 76319073  | 389 |
| chr14 | 62335757  | 62336145  | 389 |
| chr11 | 95022714  | 95023102  | 389 |
| chrX  | 63919111  | 63919498  | 388 |
| chrX  | 55399850  | 55400237  | 388 |
| chrX  | 54240525  | 54240912  | 388 |
| chrX  | 32829822  | 32830209  | 388 |
| chrX  | 8023145   | 8023532   | 388 |
| chrX  | 5754127   | 5754514   | 388 |
| chrX  | 5226790   | 5227177   | 388 |
| chr8  | 65304902  | 65305289  | 388 |
| chr7  | 71409322  | 71409709  | 388 |
| chr7  | 51699221  | 51699608  | 388 |
| chr6  | 106708058 | 106708445 | 388 |
| chr6  | 14230154  | 14230541  | 388 |
| chr4  | 124364113 | 124364500 | 388 |
| chr3  | 116035313 | 116035700 | 388 |
| chr3  | 16910613  | 16911000  | 388 |
| chr29 | 37255954  | 37256341  | 388 |
| chr28 | 33463107  | 33463494  | 388 |
| chr24 | 58939066  | 58939453  | 388 |
| chr21 | 15624119  | 15624506  | 388 |
| chr20 | 74707036  | 74707423  | 388 |

|       |           |           |     |
|-------|-----------|-----------|-----|
| chr19 | 65259443  | 65259830  | 388 |
| chr19 | 60450225  | 60450612  | 388 |
| chr19 | 38736648  | 38737035  | 388 |
| chr19 | 38584522  | 38584909  | 388 |
| chr18 | 52831023  | 52831410  | 388 |
| chr18 | 11762048  | 11762435  | 388 |
| chr18 | 11692252  | 11692639  | 388 |
| chr13 | 77772466  | 77772853  | 388 |
| chr13 | 68301033  | 68301420  | 388 |
| chr11 | 84530694  | 84531081  | 388 |
| chr11 | 81430115  | 81430502  | 388 |
| chr10 | 72208237  | 72208624  | 388 |
| chr10 | 53331902  | 53332289  | 388 |
| chrX  | 78620043  | 78620429  | 387 |
| chrX  | 65067906  | 65068292  | 387 |
| chrX  | 63176859  | 63177245  | 387 |
| chrX  | 52960054  | 52960440  | 387 |
| chr5  | 60738127  | 60738513  | 387 |
| chr3  | 33799284  | 33799670  | 387 |
| chr28 | 34621779  | 34622165  | 387 |
| chr27 | 32881517  | 32881903  | 387 |
| chr23 | 28465211  | 28465597  | 387 |
| chr23 | 10536523  | 10536909  | 387 |
| chr2  | 130970581 | 130970967 | 387 |
| chr16 | 44804870  | 44805256  | 387 |
| chr14 | 1140141   | 1140527   | 387 |
| chr10 | 88325655  | 88326041  | 387 |
| chrX  | 76997439  | 76997824  | 386 |
| chrX  | 72877381  | 72877766  | 386 |
| chrX  | 40424246  | 40424631  | 386 |
| chrX  | 38986286  | 38986671  | 386 |
| chrX  | 32520665  | 32521050  | 386 |
| chrX  | 8977629   | 8978014   | 386 |
| chrX  | 8329770   | 8330155   | 386 |
| chrX  | 7463419   | 7463804   | 386 |
| chr8  | 86628802  | 86629187  | 386 |
| chr8  | 76908189  | 76908574  | 386 |
| chr7  | 51850120  | 51850505  | 386 |
| chr7  | 13395952  | 13396337  | 386 |
| chr6  | 120826130 | 120826515 | 386 |
| chr6  | 94978942  | 94979327  | 386 |
| chr29 | 32053089  | 32053474  | 386 |
| chr29 | 17842089  | 17842474  | 386 |
| chr28 | 12164779  | 12165164  | 386 |
| chr22 | 32263350  | 32263735  | 386 |
| chr21 | 58795592  | 58795977  | 386 |
| chr20 | 66537552  | 66537937  | 386 |
| chr2  | 140746350 | 140746735 | 386 |
| chr19 | 23136977  | 23137362  | 386 |
| chr19 | 20511065  | 20511450  | 386 |



|       |               |           |     |
|-------|---------------|-----------|-----|
| chr19 | 16050886      | 16051271  | 386 |
| chr18 | 26492678      | 26493063  | 386 |
| chr18 | 22540983      | 22541368  | 386 |
| chr18 | 11726616      | 11727001  | 386 |
| chr13 | 68910816      | 68911201  | 386 |
| chr11 | 93643939      | 93644324  | 386 |
| chr11 | 8790062       | 8790447   | 386 |
| chr10 | 97156923      | 97157308  | 386 |
| chr10 | 88056121      | 88056506  | 386 |
| chr10 | 20851137      | 20851522  | 386 |
| chr1  | 89114189      | 89114574  | 386 |
| chrX  | 78987005      | 78987389  | 385 |
| chrX  | 52699832      | 52700216  | 385 |
| chrX  | 7951773       | 7952157   | 385 |
| chrX  | 7770870       | 7771254   | 385 |
| chrX  | 2177585       | 2177969   | 385 |
| chr7  | 38215410      | 38215794  | 385 |
| chr7  | 19251857      | 19252241  | 385 |
| chr6  | 120919504     | 120919888 | 385 |
| chr3  | 123898158     | 123898542 | 385 |
| chr29 | 51262654      | 51263038  | 385 |
| chr29 | 49969118      | 49969502  | 385 |
| chr27 | 28155398      | 28155782  | 385 |
| chr22 | 29681353      | 29681737  | 385 |
| chr19 | 50100318      | 50100702  | 385 |
| chr18 | 38346140      | 38346524  | 385 |
| chr17 | 62167623      | 62168007  | 385 |
| chr14 | 854783 855167 | 385       |     |
| chr13 | 77654313      | 77654697  | 385 |
| chr13 | 68056843      | 68057227  | 385 |
| chr13 | 66984663      | 66985047  | 385 |
| chr12 | 32135576      | 32135960  | 385 |
| chr11 | 75088259      | 75088643  | 385 |
| chr10 | 70059213      | 70059597  | 385 |
| chrX  | 75859332      | 75859715  | 384 |
| chrX  | 54767323      | 54767706  | 384 |
| chrX  | 19079286      | 19079669  | 384 |
| chrX  | 17108358      | 17108741  | 384 |
| chrX  | 7954258       | 7954641   | 384 |
| chr5  | 30932481      | 30932864  | 384 |
| chr26 | 44023559      | 44023942  | 384 |
| chr26 | 18129604      | 18129987  | 384 |
| chr23 | 52007465      | 52007848  | 384 |
| chr22 | 30130591      | 30130974  | 384 |
| chr2  | 31210053      | 31210436  | 384 |
| chr19 | 46894424      | 46894807  | 384 |
| chr18 | 45553524      | 45553907  | 384 |
| chr15 | 32675261      | 32675644  | 384 |
| chr14 | 7504948       | 7505331   | 384 |
| chr13 | 66963210      | 66963593  | 384 |

|       |               |           |     |
|-------|---------------|-----------|-----|
| chr13 | 54855943      | 54856326  | 384 |
| chr10 | 19483279      | 19483662  | 384 |
| chrX  | 62824023      | 62824405  | 383 |
| chrX  | 52811581      | 52811963  | 383 |
| chrX  | 36339605      | 36339987  | 383 |
| chrX  | 36209344      | 36209726  | 383 |
| chrX  | 8257302       | 8257684   | 383 |
| chr8  | 112065774     | 112066156 | 383 |
| chr5  | 113225753     | 113226135 | 383 |
| chr3  | 106566516     | 106566898 | 383 |
| chr3  | 22467681      | 22468063  | 383 |
| chr27 | 20603696      | 20604078  | 383 |
| chr26 | 22809478      | 22809860  | 383 |
| chr22 | 5400709       | 5401091   | 383 |
| chr21 | 13646077      | 13646459  | 383 |
| chr19 | 52042608      | 52042990  | 383 |
| chr19 | 18036189      | 18036571  | 383 |
| chr18 | 62013909      | 62014291  | 383 |
| chr18 | 52228152      | 52228534  | 383 |
| chr18 | 39919424      | 39919806  | 383 |
| chr15 | 80842519      | 80842901  | 383 |
| chr14 | 36734269      | 36734651  | 383 |
| chr14 | 1953798       | 1954180   | 383 |
| chr13 | 70175646      | 70176028  | 383 |
| chr12 | 83591296      | 83591678  | 383 |
| chr11 | 96347423      | 96347805  | 383 |
| chr11 | 96127196      | 96127578  | 383 |
| chr10 | 17384971      | 17385353  | 383 |
| chrX  | 59730317      | 59730698  | 382 |
| chrX  | 50010529      | 50010910  | 382 |
| chrX  | 38986769      | 38987150  | 382 |
| chrX  | 35648773      | 35649154  | 382 |
| chrX  | 33469420      | 33469801  | 382 |
| chr7  | 42406346      | 42406727  | 382 |
| chr3  | 124416760     | 124417141 | 382 |
| chr28 | 34082692      | 34083073  | 382 |
| chr26 | 48681574      | 48681955  | 382 |
| chr26 | 48656078      | 48656459  | 382 |
| chr26 | 18126982      | 18127363  | 382 |
| chr24 | 20909056      | 20909437  | 382 |
| chr23 | 27877242      | 27877623  | 382 |
| chr22 | 49577536      | 49577917  | 382 |
| chr19 | 59425031      | 59425412  | 382 |
| chr18 | 62047199      | 62047580  | 382 |
| chr18 | 34922686      | 34923067  | 382 |
| chr15 | 75292371      | 75292752  | 382 |
| chr15 | 20467692      | 20468073  | 382 |
| chr14 | 857795 858176 | 382       |     |
| chr12 | 82579983      | 82580364  | 382 |
| chr12 | 10775731      | 10776112  | 382 |

|       |           |           |     |
|-------|-----------|-----------|-----|
| chr10 | 52665314  | 52665695  | 382 |
| chr10 | 7675556   | 7675937   | 382 |
| chrX  | 72819353  | 72819733  | 381 |
| chrX  | 66712669  | 66713049  | 381 |
| chrX  | 62898150  | 62898530  | 381 |
| chrX  | 51548242  | 51548622  | 381 |
| chrX  | 50452175  | 50452555  | 381 |
| chrX  | 35553483  | 35553863  | 381 |
| chrX  | 34515015  | 34515395  | 381 |
| chrX  | 20710961  | 20711341  | 381 |
| chr9  | 107096153 | 107096533 | 381 |
| chr9  | 62027298  | 62027678  | 381 |
| chr8  | 65756540  | 65756920  | 381 |
| chr8  | 64681058  | 64681438  | 381 |
| chr7  | 56902126  | 56902506  | 381 |
| chr3  | 125777701 | 125778081 | 381 |
| chr3  | 15663861  | 15664241  | 381 |
| chr27 | 34788337  | 34788717  | 381 |
| chr24 | 48907870  | 48908250  | 381 |
| chr22 | 56228697  | 56229077  | 381 |
| chr2  | 132166288 | 132166668 | 381 |
| chr19 | 63956577  | 63956957  | 381 |
| chr19 | 46863151  | 46863531  | 381 |
| chr17 | 69343849  | 69344229  | 381 |
| chr17 | 64557495  | 64557875  | 381 |
| chr17 | 55506216  | 55506596  | 381 |
| chr15 | 81167870  | 81168250  | 381 |
| chr15 | 28570201  | 28570581  | 381 |
| chr10 | 80095578  | 80095958  | 381 |
| chr10 | 70145777  | 70146157  | 381 |
| chr10 | 70113547  | 70113927  | 381 |
| chr10 | 21165412  | 21165792  | 381 |
| chr10 | 17294388  | 17294768  | 381 |
| chrX  | 78618049  | 78618428  | 380 |
| chrX  | 76981535  | 76981914  | 380 |
| chrX  | 46224498  | 46224877  | 380 |
| chrX  | 37305305  | 37305684  | 380 |
| chrX  | 31363258  | 31363637  | 380 |
| chrX  | 13724310  | 13724689  | 380 |
| chr8  | 85442905  | 85443284  | 380 |
| chr8  | 63800906  | 63801285  | 380 |
| chr7  | 18475177  | 18475556  | 380 |
| chr4  | 95653334  | 95653713  | 380 |
| chr3  | 99103223  | 99103602  | 380 |
| chr3  | 36149385  | 36149764  | 380 |
| chr25 | 21654040  | 21654419  | 380 |
| chr25 | 4029311   | 4029690   | 380 |
| chr23 | 42711779  | 42712158  | 380 |
| chr22 | 31805854  | 31806233  | 380 |
| chr21 | 34502342  | 34502721  | 380 |

|       |               |           |     |
|-------|---------------|-----------|-----|
| chr2  | 135086896     | 135087275 | 380 |
| chr19 | 15831787      | 15832166  | 380 |
| chr18 | 62373890      | 62374269  | 380 |
| chr17 | 4738913       | 4739292   | 380 |
| chr13 | 63488442      | 63488821  | 380 |
| chr13 | 28745557      | 28745936  | 380 |
| chr11 | 104524757     | 104525136 | 380 |
| chrX  | 80827846      | 80828224  | 379 |
| chrX  | 80642432      | 80642810  | 379 |
| chrX  | 65897258      | 65897636  | 379 |
| chrX  | 58223807      | 58224185  | 379 |
| chrX  | 55622636      | 55623014  | 379 |
| chrX  | 50761945      | 50762323  | 379 |
| chrX  | 44725406      | 44725784  | 379 |
| chrX  | 19202054      | 19202432  | 379 |
| chrX  | 12909045      | 12909423  | 379 |
| chrX  | 9386593       | 9386971   | 379 |
| chrX  | 7360357       | 7360735   | 379 |
| chrX  | 7141102       | 7141480   | 379 |
| chrX  | 5316235       | 5316613   | 379 |
| chrX  | 134725 135103 | 379       |     |
| chr9  | 99630605      | 99630983  | 379 |
| chr8  | 7535629       | 7536007   | 379 |
| chr5  | 30644930      | 30645308  | 379 |
| chr29 | 38826747      | 38827125  | 379 |
| chr23 | 20456893      | 20457271  | 379 |
| chr22 | 53979766      | 53980144  | 379 |
| chr20 | 8682371       | 8682749   | 379 |
| chr2  | 92609620      | 92609998  | 379 |
| chr2  | 27484213      | 27484591  | 379 |
| chr19 | 47349070      | 47349448  | 379 |
| chr18 | 55153411      | 55153789  | 379 |
| chr18 | 53251910      | 53252288  | 379 |
| chr17 | 74558215      | 74558593  | 379 |
| chr17 | 48211297      | 48211675  | 379 |
| chr15 | 75537986      | 75538364  | 379 |
| chr15 | 22306613      | 22306991  | 379 |
| chr14 | 67966207      | 67966585  | 379 |
| chr11 | 46675418      | 46675796  | 379 |
| chr11 | 28806825      | 28807203  | 379 |
| chr10 | 70472466      | 70472844  | 379 |
| chr10 | 21521373      | 21521751  | 379 |
| chr10 | 17623563      | 17623941  | 379 |
| chrX  | 72543637      | 72544014  | 378 |
| chrX  | 64480703      | 64481080  | 378 |
| chrX  | 48585463      | 48585840  | 378 |
| chrX  | 48404196      | 48404573  | 378 |
| chrX  | 37336254      | 37336631  | 378 |
| chrX  | 20373660      | 20374037  | 378 |
| chr7  | 5310899       | 5311276   | 378 |

|       |               |           |     |
|-------|---------------|-----------|-----|
| chr6  | 100901001     | 100901378 | 378 |
| chr6  | 72181763      | 72182140  | 378 |
| chr29 | 37269882      | 37270259  | 378 |
| chr28 | 26787716      | 26788093  | 378 |
| chr27 | 38819027      | 38819404  | 378 |
| chr26 | 18199836      | 18200213  | 378 |
| chr22 | 32976685      | 32977062  | 378 |
| chr21 | 26745900      | 26746277  | 378 |
| chr20 | 827482 827859 | 378       | 378 |
| chr19 | 43118000      | 43118377  | 378 |
| chr19 | 29458803      | 29459180  | 378 |
| chr18 | 49094914      | 49095291  | 378 |
| chr18 | 48681594      | 48681971  | 378 |
| chr18 | 21997481      | 21997858  | 378 |
| chr18 | 12452312      | 12452689  | 378 |
| chr17 | 58840325      | 58840702  | 378 |
| chr16 | 71095230      | 71095607  | 378 |
| chr16 | 48276160      | 48276537  | 378 |
| chr15 | 32104556      | 32104933  | 378 |
| chr14 | 41717053      | 41717430  | 378 |
| chr13 | 68449050      | 68449427  | 378 |
| chr10 | 11889803      | 11890180  | 378 |
| chr1  | 127961770     | 127962147 | 378 |
| chrX  | 75316252      | 75316628  | 377 |
| chrX  | 72920712      | 72921088  | 377 |
| chrX  | 39199288      | 39199664  | 377 |
| chrX  | 24109343      | 24109719  | 377 |
| chrX  | 19297541      | 19297917  | 377 |
| chrX  | 8753278       | 8753654   | 377 |
| chrX  | 2184119       | 2184495   | 377 |
| chr8  | 74536600      | 74536976  | 377 |
| chr7  | 60384321      | 60384697  | 377 |
| chr29 | 35284179      | 35284555  | 377 |
| chr28 | 34124640      | 34125016  | 377 |
| chr24 | 41894702      | 41895078  | 377 |
| chr22 | 30300697      | 30301073  | 377 |
| chr21 | 6432457       | 6432833   | 377 |
| chr19 | 41874987      | 41875363  | 377 |
| chr18 | 56924153      | 56924529  | 377 |
| chr18 | 56431512      | 56431888  | 377 |
| chr18 | 50563274      | 50563650  | 377 |
| chr18 | 43393569      | 43393945  | 377 |
| chr17 | 67939064      | 67939440  | 377 |
| chr17 | 47406311      | 47406687  | 377 |
| chr14 | 34042897      | 34043273  | 377 |
| chr13 | 64206474      | 64206850  | 377 |
| chr13 | 36529940      | 36530316  | 377 |
| chr13 | 8740412       | 8740788   | 377 |
| chr12 | 84219312      | 84219688  | 377 |
| chr12 | 19676966      | 19677342  | 377 |

|       |               |           |     |
|-------|---------------|-----------|-----|
| chr11 | 77719038      | 77719414  | 377 |
| chr11 | 66546620      | 66546996  | 377 |
| chr1  | 75268768      | 75269144  | 377 |
| chrX  | 80075637      | 80076012  | 376 |
| chrX  | 38071305      | 38071680  | 376 |
| chrX  | 12538977      | 12539352  | 376 |
| chrX  | 5823399       | 5823774   | 376 |
| chrX  | 2537879       | 2538254   | 376 |
| chr8  | 65922493      | 65922868  | 376 |
| chr8  | 65080984      | 65081359  | 376 |
| chr8  | 7708100       | 7708475   | 376 |
| chr7  | 5513156       | 5513531   | 376 |
| chr5  | 111465341     | 111465716 | 376 |
| chr5  | 76850311      | 76850686  | 376 |
| chr5  | 69402006      | 69402381  | 376 |
| chr4  | 71878677      | 71879052  | 376 |
| chr3  | 88952706      | 88953081  | 376 |
| chr3  | 23020150      | 23020525  | 376 |
| chr26 | 41022687      | 41023062  | 376 |
| chr24 | 43977619      | 43977994  | 376 |
| chr23 | 38045996      | 38046371  | 376 |
| chr23 | 34839570      | 34839945  | 376 |
| chr19 | 40756064      | 40756439  | 376 |
| chr18 | 25321843      | 25322218  | 376 |
| chr16 | 38718939      | 38719314  | 376 |
| chr14 | 7581017       | 7581392   | 376 |
| chr13 | 77722884      | 77723259  | 376 |
| chr13 | 43418312      | 43418687  | 376 |
| chr12 | 82592592      | 82592967  | 376 |
| chr12 | 79963220      | 79963595  | 376 |
| chr10 | 20143787      | 20144162  | 376 |
| chrX  | 77878386      | 77878760  | 375 |
| chrX  | 55423237      | 55423611  | 375 |
| chrX  | 36840444      | 36840818  | 375 |
| chrX  | 30595427      | 30595801  | 375 |
| chrX  | 9319646       | 9320020   | 375 |
| chrX  | 7442526       | 7442900   | 375 |
| chrX  | 6497205       | 6497579   | 375 |
| chrX  | 724976 725350 | 375       |     |
| chr8  | 108800729     | 108801103 | 375 |
| chr8  | 93077580      | 93077954  | 375 |
| chr8  | 65385584      | 65385958  | 375 |
| chr8  | 60102662      | 60103036  | 375 |
| chr7  | 12960185      | 12960559  | 375 |
| chr6  | 102411969     | 102412343 | 375 |
| chr6  | 68559749      | 68560123  | 375 |
| chr4  | 5384378       | 5384752   | 375 |
| chr3  | 106499658     | 106500032 | 375 |
| chr29 | 31827743      | 31828117  | 375 |
| chr28 | 26577070      | 26577444  | 375 |

|       |               |           |     |
|-------|---------------|-----------|-----|
| chr26 | 20917436      | 20917810  | 375 |
| chr25 | 28651012      | 28651386  | 375 |
| chr22 | 59551625      | 59551999  | 375 |
| chr21 | 20158774      | 20159148  | 375 |
| chr19 | 17669833      | 17670207  | 375 |
| chr19 | 10990604      | 10990978  | 375 |
| chr18 | 54955481      | 54955855  | 375 |
| chr18 | 47213069      | 47213443  | 375 |
| chr18 | 18603092      | 18603466  | 375 |
| chr16 | 46995516      | 46995890  | 375 |
| chr16 | 39486661      | 39487035  | 375 |
| chr16 | 38963010      | 38963384  | 375 |
| chr13 | 59158204      | 59158578  | 375 |
| chr11 | 92018340      | 92018714  | 375 |
| chr1  | 99239018      | 99239392  | 375 |
| chrX  | 75850586      | 75850959  | 374 |
| chrX  | 74800353      | 74800726  | 374 |
| chrX  | 72795335      | 72795708  | 374 |
| chrX  | 65147434      | 65147807  | 374 |
| chrX  | 64681042      | 64681415  | 374 |
| chrX  | 53375273      | 53375646  | 374 |
| chrX  | 52961056      | 52961429  | 374 |
| chrX  | 48114095      | 48114468  | 374 |
| chrX  | 38083516      | 38083889  | 374 |
| chr8  | 64528654      | 64529027  | 374 |
| chr7  | 83681130      | 83681503  | 374 |
| chr7  | 45123237      | 45123610  | 374 |
| chr7  | 958557 958930 | 374       |     |
| chr5  | 123708148     | 123708521 | 374 |
| chr5  | 113200756     | 113201129 | 374 |
| chr5  | 77027376      | 77027749  | 374 |
| chr5  | 69142497      | 69142870  | 374 |
| chr4  | 67945666      | 67946039  | 374 |
| chr3  | 127025769     | 127026142 | 374 |
| chr3  | 121920050     | 121920423 | 374 |
| chr29 | 35597094      | 35597467  | 374 |
| chr24 | 44078200      | 44078573  | 374 |
| chr24 | 40669781      | 40670154  | 374 |
| chr21 | 68920840      | 68921213  | 374 |
| chr21 | 33775348      | 33775721  | 374 |
| chr17 | 70207423      | 70207796  | 374 |
| chr16 | 46782285      | 46782658  | 374 |
| chr13 | 75742541      | 75742914  | 374 |
| chr13 | 59809580      | 59809953  | 374 |
| chr12 | 9261214       | 9261587   | 374 |
| chr11 | 109401741     | 109402114 | 374 |
| chr11 | 89049468      | 89049841  | 374 |
| chr10 | 72902644      | 72903017  | 374 |
| chr10 | 17341695      | 17342068  | 374 |
| chr1  | 67790798      | 67791171  | 374 |

|       |           |           |     |
|-------|-----------|-----------|-----|
| chrX  | 78479430  | 78479802  | 373 |
| chrX  | 63054943  | 63055315  | 373 |
| chrX  | 55443132  | 55443504  | 373 |
| chrX  | 39068528  | 39068900  | 373 |
| chrX  | 20517485  | 20517857  | 373 |
| chr8  | 8434651   | 8435023   | 373 |
| chr5  | 121340194 | 121340566 | 373 |
| chr5  | 120366435 | 120366807 | 373 |
| chr4  | 71516105  | 71516477  | 373 |
| chr3  | 115686900 | 115687272 | 373 |
| chr29 | 36825125  | 36825497  | 373 |
| chr28 | 12165448  | 12165820  | 373 |
| chr27 | 39117104  | 39117476  | 373 |
| chr26 | 41752599  | 41752971  | 373 |
| chr26 | 39652777  | 39653149  | 373 |
| chr25 | 37869050  | 37869422  | 373 |
| chr24 | 41732046  | 41732418  | 373 |
| chr21 | 7108603   | 7108975   | 373 |
| chr2  | 134989229 | 134989601 | 373 |
| chr19 | 56531431  | 56531803  | 373 |
| chr19 | 54635683  | 54636055  | 373 |
| chr19 | 29760853  | 29761225  | 373 |
| chr19 | 13687776  | 13688148  | 373 |
| chr18 | 13201696  | 13202068  | 373 |
| chr17 | 63400403  | 63400775  | 373 |
| chr17 | 48550394  | 48550766  | 373 |
| chr17 | 36252611  | 36252983  | 373 |
| chr15 | 39930346  | 39930718  | 373 |
| chr14 | 8083954   | 8084326   | 373 |
| chr13 | 40973064  | 40973436  | 373 |
| chr12 | 14927361  | 14927733  | 373 |
| chr11 | 100437102 | 100437474 | 373 |
| chr10 | 7072983   | 7073355   | 373 |
| chr1  | 123104235 | 123104607 | 373 |
| chrX  | 75515971  | 75516342  | 372 |
| chrX  | 68322137  | 68322508  | 372 |
| chrX  | 57688758  | 57689129  | 372 |
| chrX  | 48717687  | 48718058  | 372 |
| chrX  | 33926867  | 33927238  | 372 |
| chrX  | 20384367  | 20384738  | 372 |
| chrX  | 18355421  | 18355792  | 372 |
| chrX  | 8537719   | 8538090   | 372 |
| chrX  | 6650204   | 6650575   | 372 |
| chr9  | 100173732 | 100174103 | 372 |
| chr7  | 60368149  | 60368520  | 372 |
| chr7  | 42921191  | 42921562  | 372 |
| chr7  | 14255515  | 14255886  | 372 |
| chr5  | 28376459  | 28376830  | 372 |
| chr5  | 11955563  | 11955934  | 372 |
| chr3  | 114931345 | 114931716 | 372 |



|       |           |           |     |
|-------|-----------|-----------|-----|
| chr29 | 48735107  | 48735478  | 372 |
| chr29 | 46918452  | 46918823  | 372 |
| chr28 | 33472731  | 33473102  | 372 |
| chr23 | 30258321  | 30258692  | 372 |
| chr21 | 28184937  | 28185308  | 372 |
| chr19 | 30601364  | 30601735  | 372 |
| chr18 | 11982874  | 11983245  | 372 |
| chr17 | 70049588  | 70049959  | 372 |
| chr16 | 77324687  | 77325058  | 372 |
| chr16 | 44301202  | 44301573  | 372 |
| chr15 | 75655103  | 75655474  | 372 |
| chr13 | 59107063  | 59107434  | 372 |
| chr12 | 82428322  | 82428693  | 372 |
| chr12 | 9430389   | 9430760   | 372 |
| chr11 | 104942593 | 104942964 | 372 |
| chr10 | 20519862  | 20520233  | 372 |
| chr1  | 75057190  | 75057561  | 372 |
| chrX  | 54390615  | 54390985  | 371 |
| chrX  | 36449694  | 36450064  | 371 |
| chrX  | 9657351   | 9657721   | 371 |
| chr9  | 83929247  | 83929617  | 371 |
| chr9  | 33348460  | 33348830  | 371 |
| chr7  | 43283840  | 43284210  | 371 |
| chr6  | 119531699 | 119532069 | 371 |
| chr3  | 86117420  | 86117790  | 371 |
| chr27 | 35394762  | 35395132  | 371 |
| chr24 | 60957033  | 60957403  | 371 |
| chr24 | 41806661  | 41807031  | 371 |
| chr23 | 27392598  | 27392968  | 371 |
| chr23 | 15104691  | 15105061  | 371 |
| chr20 | 6762372   | 6762742   | 371 |
| chr2  | 127638237 | 127638607 | 371 |
| chr19 | 44950667  | 44951037  | 371 |
| chr18 | 55837501  | 55837871  | 371 |
| chr18 | 54190380  | 54190750  | 371 |
| chr18 | 49818113  | 49818483  | 371 |
| chr18 | 25048217  | 25048587  | 371 |
| chr16 | 73271758  | 73272128  | 371 |
| chr16 | 56114168  | 56114538  | 371 |
| chr15 | 29891991  | 29892361  | 371 |
| chr14 | 64788438  | 64788808  | 371 |
| chr14 | 7828575   | 7828945   | 371 |
| chr13 | 80727758  | 80728128  | 371 |
| chr11 | 46170388  | 46170758  | 371 |
| chr10 | 47393501  | 47393871  | 371 |
| chr10 | 17050950  | 17051320  | 371 |
| chrX  | 56738061  | 56738430  | 370 |
| chrX  | 37959141  | 37959510  | 370 |
| chrX  | 21651339  | 21651708  | 370 |
| chrX  | 11574066  | 11574435  | 370 |

|       |           |           |     |
|-------|-----------|-----------|-----|
| chr9  | 99303624  | 99303993  | 370 |
| chr9  | 45945155  | 45945524  | 370 |
| chr7  | 49151805  | 49152174  | 370 |
| chr5  | 109131551 | 109131920 | 370 |
| chr29 | 51950664  | 51951033  | 370 |
| chr29 | 35299832  | 35300201  | 370 |
| chr29 | 35100408  | 35100777  | 370 |
| chr26 | 39826885  | 39827254  | 370 |
| chr25 | 40203255  | 40203624  | 370 |
| chr25 | 4611029   | 4611398   | 370 |
| chr25 | 2716337   | 2716706   | 370 |
| chr23 | 44817995  | 44818364  | 370 |
| chr23 | 10615797  | 10616166  | 370 |
| chr20 | 73484227  | 73484596  | 370 |
| chr20 | 6169660   | 6170029   | 370 |
| chr2  | 23424437  | 23424806  | 370 |
| chr18 | 63522256  | 63522625  | 370 |
| chr17 | 30268489  | 30268858  | 370 |
| chr16 | 39327692  | 39328061  | 370 |
| chr15 | 76581801  | 76582170  | 370 |
| chr13 | 65032574  | 65032943  | 370 |
| chr13 | 43618822  | 43619191  | 370 |
| chr13 | 18615801  | 18616170  | 370 |
| chr12 | 56376009  | 56376378  | 370 |
| chr11 | 99567013  | 99567382  | 370 |
| chr1  | 74930318  | 74930687  | 370 |
| chrX  | 58595334  | 58595702  | 369 |
| chrX  | 56711754  | 56712122  | 369 |
| chrX  | 19832821  | 19833189  | 369 |
| chrX  | 18703323  | 18703691  | 369 |
| chrX  | 13663821  | 13664189  | 369 |
| chrX  | 12174680  | 12175048  | 369 |
| chrX  | 10134485  | 10134853  | 369 |
| chrX  | 9311699   | 9312067   | 369 |
| chrX  | 7189505   | 7189873   | 369 |
| chrX  | 1246338   | 1246706   | 369 |
| chrX  | 546004    | 546372    | 369 |
| chr9  | 89848551  | 89848919  | 369 |
| chr6  | 63020672  | 63021040  | 369 |
| chr6  | 59279609  | 59279977  | 369 |
| chr5  | 28386991  | 28387359  | 369 |
| chr3  | 111642440 | 111642808 | 369 |
| chr29 | 38285884  | 38286252  | 369 |
| chr25 | 2307772   | 2308140   | 369 |
| chr24 | 34036150  | 34036518  | 369 |
| chr21 | 18477876  | 18478244  | 369 |
| chr2  | 134541692 | 134542060 | 369 |
| chr19 | 39410065  | 39410433  | 369 |
| chr16 | 53850171  | 53850539  | 369 |
| chr16 | 43844748  | 43845116  | 369 |

|       |               |           |     |
|-------|---------------|-----------|-----|
| chr14 | 61272128      | 61272496  | 369 |
| chr14 | 963230 963598 | 369       |     |
| chr13 | 72253855      | 72254223  | 369 |
| chr11 | 100951071     | 100951439 | 369 |
| chrX  | 83372644      | 83373011  | 368 |
| chrX  | 79433527      | 79433894  | 368 |
| chrX  | 78159057      | 78159424  | 368 |
| chrX  | 48402612      | 48402979  | 368 |
| chrX  | 47609891      | 47610258  | 368 |
| chrX  | 30885573      | 30885940  | 368 |
| chrX  | 18641313      | 18641680  | 368 |
| chrX  | 12111584      | 12111951  | 368 |
| chrX  | 8415817       | 8416184   | 368 |
| chrX  | 6259989       | 6260356   | 368 |
| chr9  | 60775799      | 60776166  | 368 |
| chr9  | 45099461      | 45099828  | 368 |
| chr5  | 111645412     | 111645779 | 368 |
| chr3  | 105717366     | 105717733 | 368 |
| chr28 | 41299763      | 41300130  | 368 |
| chr26 | 37877683      | 37878050  | 368 |
| chr2  | 124235869     | 124236236 | 368 |
| chr19 | 41217256      | 41217623  | 368 |
| chr18 | 22330283      | 22330650  | 368 |
| chr18 | 11758120      | 11758487  | 368 |
| chr18 | 5977498       | 5977865   | 368 |
| chr17 | 68768206      | 68768573  | 368 |
| chr17 | 62284131      | 62284498  | 368 |
| chr16 | 10912111      | 10912478  | 368 |
| chr15 | 38259472      | 38259839  | 368 |
| chr13 | 79922325      | 79922692  | 368 |
| chr13 | 74391333      | 74391700  | 368 |
| chr13 | 70232740      | 70233107  | 368 |
| chr13 | 62435547      | 62435914  | 368 |
| chr13 | 41137059      | 41137426  | 368 |
| chr12 | 82607099      | 82607466  | 368 |
| chr10 | 83093204      | 83093571  | 368 |
| chr10 | 79840722      | 79841089  | 368 |
| chr1  | 9919787       | 9920154   | 368 |
| chrX  | 56492867      | 56493233  | 367 |
| chrX  | 22521578      | 22521944  | 367 |
| chrX  | 6428613       | 6428979   | 367 |
| chr9  | 35976174      | 35976540  | 367 |
| chr7  | 38182475      | 38182841  | 367 |
| chr5  | 112082699     | 112083065 | 367 |
| chr5  | 76868895      | 76869261  | 367 |
| chr3  | 87581188      | 87581554  | 367 |
| chr3  | 35498028      | 35498394  | 367 |
| chr29 | 31434786      | 31435152  | 367 |
| chr25 | 33807884      | 33808250  | 367 |
| chr25 | 26202798      | 26203164  | 367 |

|       |           |           |     |
|-------|-----------|-----------|-----|
| chr24 | 1573190   | 1573556   | 367 |
| chr22 | 56283373  | 56283739  | 367 |
| chr22 | 50733082  | 50733448  | 367 |
| chr22 | 38490233  | 38490599  | 367 |
| chr22 | 5637069   | 5637435   | 367 |
| chr20 | 62653718  | 62654084  | 367 |
| chr18 | 48835993  | 48836359  | 367 |
| chr17 | 70193338  | 70193704  | 367 |
| chr16 | 47109568  | 47109934  | 367 |
| chr13 | 77261601  | 77261967  | 367 |
| chr13 | 18408861  | 18409227  | 367 |
| chr11 | 102379158 | 102379524 | 367 |
| chr1  | 74746347  | 74746713  | 367 |
| chrX  | 78626433  | 78626798  | 366 |
| chrX  | 59306142  | 59306507  | 366 |
| chrX  | 50708132  | 50708497  | 366 |
| chrX  | 30994457  | 30994822  | 366 |
| chrX  | 22489382  | 22489747  | 366 |
| chrX  | 13802113  | 13802478  | 366 |
| chrX  | 13710644  | 13711009  | 366 |
| chrX  | 8024783   | 8025148   | 366 |
| chrX  | 5954823   | 5955188   | 366 |
| chr8  | 58386963  | 58387328  | 366 |
| chr8  | 5767243   | 5767608   | 366 |
| chr7  | 19256432  | 19256797  | 366 |
| chr5  | 38698742  | 38699107  | 366 |
| chr3  | 83660879  | 83661244  | 366 |
| chr29 | 18250419  | 18250784  | 366 |
| chr27 | 26620582  | 26620947  | 366 |
| chr27 | 26472036  | 26472401  | 366 |
| chr24 | 29714098  | 29714463  | 366 |
| chr23 | 15937066  | 15937431  | 366 |
| chr22 | 15282887  | 15283252  | 366 |
| chr2  | 70242513  | 70242878  | 366 |
| chr2  | 24733229  | 24733594  | 366 |
| chr2  | 21804695  | 21805060  | 366 |
| chr19 | 54331734  | 54332099  | 366 |
| chr18 | 62513329  | 62513694  | 366 |
| chr18 | 22759178  | 22759543  | 366 |
| chr13 | 60717537  | 60717902  | 366 |
| chr12 | 32883875  | 32884240  | 366 |
| chr11 | 9330246   | 9330611   | 366 |
| chr1  | 144123215 | 144123580 | 366 |
| chrX  | 48802844  | 48803208  | 365 |
| chrX  | 28218583  | 28218947  | 365 |
| chrX  | 12135650  | 12136014  | 365 |
| chrX  | 8429556   | 8429920   | 365 |
| chrX  | 6910794   | 6911158   | 365 |
| chr8  | 7719353   | 7719717   | 365 |
| chr7  | 13509967  | 13510331  | 365 |

|       |           |           |     |
|-------|-----------|-----------|-----|
| chr6  | 118658688 | 118659052 | 365 |
| chr5  | 123179764 | 123180128 | 365 |
| chr3  | 119161750 | 119162114 | 365 |
| chr3  | 8766164   | 8766528   | 365 |
| chr29 | 35898182  | 35898546  | 365 |
| chr25 | 34535714  | 34536078  | 365 |
| chr23 | 45806008  | 45806372  | 365 |
| chr23 | 44826877  | 44827241  | 365 |
| chr23 | 18728659  | 18729023  | 365 |
| chr22 | 59410771  | 59411135  | 365 |
| chr19 | 54315734  | 54316098  | 365 |
| chr17 | 70205241  | 70205605  | 365 |
| chr15 | 51690664  | 51691028  | 365 |
| chr15 | 29700146  | 29700510  | 365 |
| chr14 | 65566661  | 65567025  | 365 |
| chr14 | 23193074  | 23193438  | 365 |
| chr13 | 59000859  | 59001223  | 365 |
| chr13 | 43422024  | 43422388  | 365 |
| chr13 | 26242527  | 26242891  | 365 |
| chr11 | 106236723 | 106237087 | 365 |
| chr11 | 83255123  | 83255487  | 365 |
| chr11 | 45282014  | 45282378  | 365 |
| chr10 | 81592729  | 81593093  | 365 |
| chr10 | 16903651  | 16904015  | 365 |
| chrX  | 9028400   | 9028763   | 364 |
| chr7  | 45251855  | 45252218  | 364 |
| chr7  | 19499644  | 19500007  | 364 |
| chr7  | 14410607  | 14410970  | 364 |
| chr5  | 75062878  | 75063241  | 364 |
| chr5  | 10721497  | 10721860  | 364 |
| chr4  | 72112537  | 72112900  | 364 |
| chr4  | 16865232  | 16865595  | 364 |
| chr3  | 121903428 | 121903791 | 364 |
| chr3  | 121734613 | 121734976 | 364 |
| chr29 | 43425594  | 43425957  | 364 |
| chr24 | 44276520  | 44276883  | 364 |
| chr23 | 48694875  | 48695238  | 364 |
| chr22 | 12417572  | 12417935  | 364 |
| chr21 | 47370972  | 47371335  | 364 |
| chr20 | 74448362  | 74448725  | 364 |
| chr20 | 42307779  | 42308142  | 364 |
| chr17 | 14753199  | 14753562  | 364 |
| chr14 | 26682283  | 26682646  | 364 |
| chr14 | 7751596   | 7751959   | 364 |
| chr13 | 54860055  | 54860418  | 364 |
| chr13 | 53194922  | 53195285  | 364 |
| chr11 | 108320255 | 108320618 | 364 |
| chr10 | 90298009  | 90298372  | 364 |
| chr10 | 21164534  | 21164897  | 364 |
| chr1  | 154470779 | 154471142 | 364 |

|       |           |           |     |
|-------|-----------|-----------|-----|
| chr1  | 74707368  | 74707731  | 364 |
| chr1  | 2346661   | 2347024   | 364 |
| chrX  | 62169281  | 62169643  | 363 |
| chrX  | 50514789  | 50515151  | 363 |
| chrX  | 49230512  | 49230874  | 363 |
| chrX  | 37674640  | 37675002  | 363 |
| chrX  | 34983401  | 34983763  | 363 |
| chrX  | 33729957  | 33730319  | 363 |
| chrX  | 15759036  | 15759398  | 363 |
| chrX  | 6899357   | 6899719   | 363 |
| chr8  | 108662535 | 108662897 | 363 |
| chr6  | 63163618  | 63163980  | 363 |
| chr26 | 45840311  | 45840673  | 363 |
| chr26 | 45618354  | 45618716  | 363 |
| chr26 | 39302308  | 39302670  | 363 |
| chr26 | 38919958  | 38920320  | 363 |
| chr26 | 34192798  | 34193160  | 363 |
| chr23 | 46000015  | 46000377  | 363 |
| chr23 | 28522975  | 28523337  | 363 |
| chr20 | 72372408  | 72372770  | 363 |
| chr2  | 21453265  | 21453627  | 363 |
| chr19 | 14923090  | 14923452  | 363 |
| chr18 | 16605713  | 16606075  | 363 |
| chr17 | 75788772  | 75789134  | 363 |
| chr17 | 69078457  | 69078819  | 363 |
| chr17 | 63528946  | 63529308  | 363 |
| chr16 | 75371820  | 75372182  | 363 |
| chr15 | 76146560  | 76146922  | 363 |
| chr15 | 42305381  | 42305743  | 363 |
| chr15 | 22326544  | 22326906  | 363 |
| chr15 | 16102810  | 16103172  | 363 |
| chr14 | 61555319  | 61555681  | 363 |
| chr14 | 7845629   | 7845991   | 363 |
| chr14 | 1491743   | 1492105   | 363 |
| chr13 | 75655969  | 75656331  | 363 |
| chr13 | 59706738  | 59707100  | 363 |
| chr13 | 37320886  | 37321248  | 363 |
| chr12 | 32520533  | 32520895  | 363 |
| chr11 | 105983959 | 105984321 | 363 |
| chr11 | 47289240  | 47289602  | 363 |
| chr10 | 16864232  | 16864594  | 363 |
| chr10 | 4546562   | 4546924   | 363 |
| chr1  | 138635783 | 138636145 | 363 |
| chrX  | 73164060  | 73164421  | 362 |
| chrX  | 65401282  | 65401643  | 362 |
| chrX  | 55409763  | 55410124  | 362 |
| chrX  | 44665600  | 44665961  | 362 |
| chrX  | 29919264  | 29919625  | 362 |
| chrX  | 12510459  | 12510820  | 362 |
| chrX  | 6597206   | 6597567   | 362 |

|       |               |           |     |
|-------|---------------|-----------|-----|
| chr8  | 28511049      | 28511410  | 362 |
| chr5  | 113076312     | 113076673 | 362 |
| chr5  | 28838506      | 28838867  | 362 |
| chr3  | 30021332      | 30021693  | 362 |
| chr3  | 8171722       | 8172083   | 362 |
| chr29 | 18209335      | 18209696  | 362 |
| chr27 | 4190819       | 4191180   | 362 |
| chr25 | 35518912      | 35519273  | 362 |
| chr24 | 41587715      | 41588076  | 362 |
| chr23 | 45854004      | 45854365  | 362 |
| chr23 | 19792693      | 19793054  | 362 |
| chr22 | 50871293      | 50871654  | 362 |
| chr21 | 57726532      | 57726893  | 362 |
| chr20 | 73224841      | 73225202  | 362 |
| chr2  | 131314709     | 131315070 | 362 |
| chr2  | 68413661      | 68414022  | 362 |
| chr19 | 58847678      | 58848039  | 362 |
| chr19 | 58380922      | 58381283  | 362 |
| chr19 | 43622466      | 43622827  | 362 |
| chr16 | 47916945      | 47917306  | 362 |
| chr14 | 7811526       | 7811887   | 362 |
| chr12 | 54311962      | 54312323  | 362 |
| chr11 | 14184027      | 14184388  | 362 |
| chr11 | 5782043       | 5782404   | 362 |
| chr10 | 12877690      | 12878051  | 362 |
| chrX  | 78418832      | 78419192  | 361 |
| chrX  | 73280440      | 73280800  | 361 |
| chrX  | 72639717      | 72640077  | 361 |
| chrX  | 37386218      | 37386578  | 361 |
| chrX  | 34773122      | 34773482  | 361 |
| chrX  | 12093163      | 12093523  | 361 |
| chrX  | 10505329      | 10505689  | 361 |
| chr8  | 108779239     | 108779599 | 361 |
| chr8  | 8582795       | 8583155   | 361 |
| chr7  | 15696375      | 15696735  | 361 |
| chr5  | 113173505     | 113173865 | 361 |
| chr4  | 104767499     | 104767859 | 361 |
| chr4  | 69299435      | 69299795  | 361 |
| chr3  | 111324912     | 111325272 | 361 |
| chr29 | 9749018       | 9749378   | 361 |
| chr27 | 13575289      | 13575649  | 361 |
| chr27 | 608274 608634 | 361       |     |
| chr26 | 31995615      | 31995975  | 361 |
| chr25 | 34327667      | 34328027  | 361 |
| chr24 | 33946857      | 33947217  | 361 |
| chr23 | 11766801      | 11767161  | 361 |
| chr21 | 56282137      | 56282497  | 361 |
| chr2  | 111236691     | 111237051 | 361 |
| chr19 | 47413319      | 47413679  | 361 |
| chr19 | 19239890      | 19240250  | 361 |

|       |           |           |     |
|-------|-----------|-----------|-----|
| chr18 | 47691529  | 47691889  | 361 |
| chr18 | 22133926  | 22134286  | 361 |
| chr18 | 11175418  | 11175778  | 361 |
| chr17 | 75464184  | 75464544  | 361 |
| chr17 | 65967257  | 65967617  | 361 |
| chr13 | 72754339  | 72754699  | 361 |
| chr13 | 62405338  | 62405698  | 361 |
| chr11 | 107248110 | 107248470 | 361 |
| chr11 | 104896634 | 104896994 | 361 |
| chr11 | 22333147  | 22333507  | 361 |
| chr10 | 75481226  | 75481586  | 361 |
| chr10 | 10981776  | 10982136  | 361 |
| chr10 | 4916019   | 4916379   | 361 |
| chr1  | 146178221 | 146178581 | 361 |
| chrX  | 58071658  | 58072017  | 360 |
| chrX  | 33521840  | 33522199  | 360 |
| chrX  | 9804762   | 9805121   | 360 |
| chr9  | 65787014  | 65787373  | 360 |
| chr7  | 17092527  | 17092886  | 360 |
| chr6  | 107489804 | 107490163 | 360 |
| chr5  | 113269127 | 113269486 | 360 |
| chr4  | 123099078 | 123099437 | 360 |
| chr4  | 69956196  | 69956555  | 360 |
| chr4  | 30780423  | 30780782  | 360 |
| chr3  | 116232349 | 116232708 | 360 |
| chr3  | 29970219  | 29970578  | 360 |
| chr3  | 29263888  | 29264247  | 360 |
| chr29 | 51273483  | 51273842  | 360 |
| chr29 | 37112581  | 37112940  | 360 |
| chr28 | 45306579  | 45306938  | 360 |
| chr26 | 17626626  | 17626985  | 360 |
| chr26 | 14675449  | 14675808  | 360 |
| chr24 | 49745917  | 49746276  | 360 |
| chr23 | 13450249  | 13450608  | 360 |
| chr22 | 5683961   | 5684320   | 360 |
| chr21 | 61324013  | 61324372  | 360 |
| chr21 | 29881161  | 29881520  | 360 |
| chr21 | 25977273  | 25977632  | 360 |
| chr2  | 115336017 | 115336376 | 360 |
| chr2  | 111385888 | 111386247 | 360 |
| chr19 | 47236807  | 47237166  | 360 |
| chr18 | 26391049  | 26391408  | 360 |
| chr18 | 11431037  | 11431396  | 360 |
| chr17 | 67934759  | 67935118  | 360 |
| chr17 | 66882668  | 66883027  | 360 |
| chr16 | 67175422  | 67175781  | 360 |
| chr15 | 54489129  | 54489488  | 360 |
| chr14 | 7812095   | 7812454   | 360 |
| chr13 | 77201519  | 77201878  | 360 |
| chr13 | 22887494  | 22887853  | 360 |



|       |           |           |     |
|-------|-----------|-----------|-----|
| chr13 | 14946334  | 14946693  | 360 |
| chr12 | 84205284  | 84205643  | 360 |
| chr12 | 11343948  | 11344307  | 360 |
| chr10 | 68414713  | 68415072  | 360 |
| chr10 | 48812300  | 48812659  | 360 |
| chr10 | 17591647  | 17592006  | 360 |
| chr1  | 84461737  | 84462096  | 360 |
| chrX  | 68320227  | 68320585  | 359 |
| chrX  | 54281813  | 54282171  | 359 |
| chrX  | 49208869  | 49209227  | 359 |
| chrX  | 39178511  | 39178869  | 359 |
| chrX  | 38885206  | 38885564  | 359 |
| chrX  | 30142524  | 30142882  | 359 |
| chrX  | 20668793  | 20669151  | 359 |
| chrX  | 2219234   | 2219592   | 359 |
| chr8  | 77688333  | 77688691  | 359 |
| chr7  | 71357985  | 71358343  | 359 |
| chr6  | 122427709 | 122428067 | 359 |
| chr6  | 46628665  | 46629023  | 359 |
| chr5  | 120432669 | 120433027 | 359 |
| chr5  | 115495628 | 115495986 | 359 |
| chr4  | 66679082  | 66679440  | 359 |
| chr3  | 8794117   | 8794475   | 359 |
| chr29 | 17855421  | 17855779  | 359 |
| chr26 | 46949968  | 46950326  | 359 |
| chr26 | 44002571  | 44002929  | 359 |
| chr25 | 37472561  | 37472919  | 359 |
| chr25 | 34283258  | 34283616  | 359 |
| chr22 | 48239178  | 48239536  | 359 |
| chr2  | 20941913  | 20942271  | 359 |
| chr19 | 55932034  | 55932392  | 359 |
| chr18 | 56779326  | 56779684  | 359 |
| chr17 | 61269201  | 61269559  | 359 |
| chr13 | 73274109  | 73274467  | 359 |
| chr13 | 60466092  | 60466450  | 359 |
| chr13 | 41768928  | 41769286  | 359 |
| chr12 | 20749766  | 20750124  | 359 |
| chr12 | 14250302  | 14250660  | 359 |
| chr10 | 84713590  | 84713948  | 359 |
| chr10 | 70687903  | 70688261  | 359 |
| chr1  | 61115205  | 61115563  | 359 |
| chrX  | 56559797  | 56560154  | 358 |
| chrX  | 56450644  | 56451001  | 358 |
| chrX  | 53654153  | 53654510  | 358 |
| chrX  | 17132866  | 17133223  | 358 |
| chrX  | 2435118   | 2435475   | 358 |
| chr8  | 8986092   | 8986449   | 358 |
| chr8  | 7826275   | 7826632   | 358 |
| chr7  | 9670622   | 9670979   | 358 |
| chr5  | 29014912  | 29015269  | 358 |

|       |           |           |     |
|-------|-----------|-----------|-----|
| chr4  | 115980170 | 115980527 | 358 |
| chr3  | 25729525  | 25729882  | 358 |
| chr28 | 34030800  | 34031157  | 358 |
| chr28 | 33919905  | 33920262  | 358 |
| chr26 | 20304081  | 20304438  | 358 |
| chr25 | 12676430  | 12676787  | 358 |
| chr23 | 42453041  | 42453398  | 358 |
| chr23 | 28903377  | 28903734  | 358 |
| chr22 | 56213768  | 56214125  | 358 |
| chr22 | 16338840  | 16339197  | 358 |
| chr19 | 31915617  | 31915974  | 358 |
| chr18 | 56770459  | 56770816  | 358 |
| chr18 | 11943291  | 11943648  | 358 |
| chr15 | 55421651  | 55422008  | 358 |
| chr13 | 76559138  | 76559495  | 358 |
| chr13 | 42865667  | 42866024  | 358 |
| chr12 | 82153677  | 82154034  | 358 |
| chr11 | 70683700  | 70684057  | 358 |
| chr10 | 86846261  | 86846618  | 358 |
| chr1  | 50454092  | 50454449  | 358 |
| chrX  | 80889970  | 80890326  | 357 |
| chrX  | 40731429  | 40731785  | 357 |
| chrX  | 39007859  | 39008215  | 357 |
| chrX  | 22512485  | 22512841  | 357 |
| chrX  | 19076494  | 19076850  | 357 |
| chrX  | 5787752   | 5788108   | 357 |
| chrX  | 2543031   | 2543387   | 357 |
| chr8  | 70189170  | 70189526  | 357 |
| chr7  | 50564836  | 50565192  | 357 |
| chr3  | 119682393 | 119682749 | 357 |
| chr3  | 116245113 | 116245469 | 357 |
| chr29 | 18240886  | 18241242  | 357 |
| chr27 | 15821399  | 15821755  | 357 |
| chr26 | 50282389  | 50282745  | 357 |
| chr26 | 43969788  | 43970144  | 357 |
| chr23 | 27739828  | 27740184  | 357 |
| chr23 | 15175184  | 15175540  | 357 |
| chr22 | 54393812  | 54394168  | 357 |
| chr22 | 7528494   | 7528850   | 357 |
| chr21 | 60370720  | 60371076  | 357 |
| chr21 | 14796067  | 14796423  | 357 |
| chr20 | 6623550   | 6623906   | 357 |
| chr2  | 108729844 | 108730200 | 357 |
| chr19 | 61325289  | 61325645  | 357 |
| chr19 | 27233426  | 27233782  | 357 |
| chr19 | 15130224  | 15130580  | 357 |
| chr18 | 64324707  | 64325063  | 357 |
| chr17 | 60964720  | 60965076  | 357 |
| chr16 | 72285094  | 72285450  | 357 |
| chr16 | 47224961  | 47225317  | 357 |

|       |           |           |     |
|-------|-----------|-----------|-----|
| chr15 | 27156057  | 27156413  | 357 |
| chr15 | 24205184  | 24205540  | 357 |
| chr14 | 21395418  | 21395774  | 357 |
| chr13 | 59669223  | 59669579  | 357 |
| chr12 | 82764685  | 82765041  | 357 |
| chr11 | 80417339  | 80417695  | 357 |
| chr10 | 89490038  | 89490394  | 357 |
| chr10 | 17439153  | 17439509  | 357 |
| chr1  | 149234911 | 149235267 | 357 |
| chrX  | 64422294  | 64422649  | 356 |
| chrX  | 35983720  | 35984075  | 356 |
| chrX  | 30704976  | 30705331  | 356 |
| chrX  | 17180146  | 17180501  | 356 |
| chrX  | 7661057   | 7661412   | 356 |
| chrX  | 5791285   | 5791640   | 356 |
| chr6  | 72185274  | 72185629  | 356 |
| chr6  | 47376884  | 47377239  | 356 |
| chr4  | 120946240 | 120946595 | 356 |
| chr27 | 44763212  | 44763567  | 356 |
| chr27 | 34677554  | 34677909  | 356 |
| chr27 | 16717045  | 16717400  | 356 |
| chr26 | 44193134  | 44193489  | 356 |
| chr24 | 1206885   | 1207240   | 356 |
| chr22 | 16901224  | 16901579  | 356 |
| chr21 | 65571050  | 65571405  | 356 |
| chr21 | 13618426  | 13618781  | 356 |
| chr2  | 117030714 | 117031069 | 356 |
| chr18 | 63943596  | 63943951  | 356 |
| chr18 | 11158468  | 11158823  | 356 |
| chr16 | 3716144   | 3716499   | 356 |
| chr15 | 51637723  | 51638078  | 356 |
| chr15 | 25632154  | 25632509  | 356 |
| chr13 | 67903694  | 67904049  | 356 |
| chr13 | 57412840  | 57413195  | 356 |
| chr12 | 82750365  | 82750720  | 356 |
| chr12 | 32198146  | 32198501  | 356 |
| chr12 | 21064141  | 21064496  | 356 |
| chr1  | 158501447 | 158501802 | 356 |
| chrX  | 67040574  | 67040928  | 355 |
| chrX  | 65866715  | 65867069  | 355 |
| chrX  | 63122030  | 63122384  | 355 |
| chrX  | 59459342  | 59459696  | 355 |
| chrX  | 29881173  | 29881527  | 355 |
| chrX  | 29632549  | 29632903  | 355 |
| chrX  | 20688365  | 20688719  | 355 |
| chr9  | 90815473  | 90815827  | 355 |
| chr8  | 112065350 | 112065704 | 355 |
| chr7  | 43137464  | 43137818  | 355 |
| chr6  | 121822380 | 121822734 | 355 |
| chr5  | 122673484 | 122673838 | 355 |

|       |               |           |     |
|-------|---------------|-----------|-----|
| chr4  | 53009968      | 53010322  | 355 |
| chr3  | 110733550     | 110733904 | 355 |
| chr3  | 105768580     | 105768934 | 355 |
| chr29 | 17783077      | 17783431  | 355 |
| chr28 | 33768160      | 33768514  | 355 |
| chr28 | 7293714       | 7294068   | 355 |
| chr27 | 38131771      | 38132125  | 355 |
| chr25 | 29838782      | 29839136  | 355 |
| chr21 | 66376174      | 66376528  | 355 |
| chr21 | 64520248      | 64520602  | 355 |
| chr20 | 33691197      | 33691551  | 355 |
| chr2  | 26494745      | 26495099  | 355 |
| chr19 | 28254137      | 28254491  | 355 |
| chr17 | 59055333      | 59055687  | 355 |
| chr15 | 53882785      | 53883139  | 355 |
| chr15 | 27244426      | 27244780  | 355 |
| chr14 | 3254438       | 3254792   | 355 |
| chr13 | 41360065      | 41360419  | 355 |
| chr12 | 82615739      | 82616093  | 355 |
| chr11 | 75414053      | 75414407  | 355 |
| chr1  | 151654 152008 | 355       |     |
| chrX  | 58199771      | 58200124  | 354 |
| chrX  | 53886696      | 53887049  | 354 |
| chrX  | 39149139      | 39149492  | 354 |
| chrX  | 36206416      | 36206769  | 354 |
| chrX  | 30619929      | 30620282  | 354 |
| chrX  | 20500181      | 20500534  | 354 |
| chrX  | 12543176      | 12543529  | 354 |
| chrX  | 10616822      | 10617175  | 354 |
| chrX  | 1366938       | 1367291   | 354 |
| chr9  | 65802081      | 65802434  | 354 |
| chr5  | 88050711      | 88051064  | 354 |
| chr5  | 76929752      | 76930105  | 354 |
| chr5  | 75730637      | 75730990  | 354 |
| chr4  | 123495783     | 123496136 | 354 |
| chr4  | 72570723      | 72571076  | 354 |
| chr3  | 29994244      | 29994597  | 354 |
| chr26 | 48687048      | 48687401  | 354 |
| chr26 | 41707388      | 41707741  | 354 |
| chr26 | 14915166      | 14915519  | 354 |
| chr25 | 39272111      | 39272464  | 354 |
| chr23 | 49924204      | 49924557  | 354 |
| chr22 | 43923827      | 43924180  | 354 |
| chr22 | 13411018      | 13411371  | 354 |
| chr21 | 4301802       | 4302155   | 354 |
| chr2  | 21861217      | 21861570  | 354 |
| chr19 | 48740034      | 48740387  | 354 |
| chr19 | 39475852      | 39476205  | 354 |
| chr18 | 3737030       | 3737383   | 354 |
| chr17 | 48886813      | 48887166  | 354 |

|       |               |           |     |
|-------|---------------|-----------|-----|
| chr16 | 77328949      | 77329302  | 354 |
| chr15 | 29109639      | 29109992  | 354 |
| chr15 | 24527027      | 24527380  | 354 |
| chr15 | 21301824      | 21302177  | 354 |
| chr14 | 31494911      | 31495264  | 354 |
| chr13 | 69910192      | 69910545  | 354 |
| chr13 | 68497758      | 68498111  | 354 |
| chr13 | 23647558      | 23647911  | 354 |
| chr11 | 96400911      | 96401264  | 354 |
| chr10 | 90434713      | 90435066  | 354 |
| chr10 | 70093531      | 70093884  | 354 |
| chr1  | 150079904     | 150080257 | 354 |
| chrX  | 81722520      | 81722872  | 353 |
| chrX  | 66846839      | 66847191  | 353 |
| chrX  | 31810124      | 31810476  | 353 |
| chrX  | 20727068      | 20727420  | 353 |
| chrX  | 18115586      | 18115938  | 353 |
| chr9  | 66205345      | 66205697  | 353 |
| chr9  | 42508765      | 42509117  | 353 |
| chr9  | 41556819      | 41557171  | 353 |
| chr8  | 73931309      | 73931661  | 353 |
| chr8  | 63504843      | 63505195  | 353 |
| chr8  | 25625716      | 25626068  | 353 |
| chr7  | 19210794      | 19211146  | 353 |
| chr6  | 65877771      | 65878123  | 353 |
| chr5  | 28382688      | 28383040  | 353 |
| chr4  | 121000025     | 121000377 | 353 |
| chr4  | 116716635     | 116716987 | 353 |
| chr4  | 96128928      | 96129280  | 353 |
| chr3  | 92499610      | 92499962  | 353 |
| chr3  | 92256661      | 92257013  | 353 |
| chr3  | 88228567      | 88228919  | 353 |
| chr28 | 33685117      | 33685469  | 353 |
| chr24 | 50301054      | 50301406  | 353 |
| chr23 | 45982072      | 45982424  | 353 |
| chr20 | 3615764       | 3616116   | 353 |
| chr2  | 138571684     | 138572036 | 353 |
| chr2  | 111355031     | 111355383 | 353 |
| chr19 | 58714837      | 58715189  | 353 |
| chr19 | 58618553      | 58618905  | 353 |
| chr19 | 48810931      | 48811283  | 353 |
| chr19 | 41207444      | 41207796  | 353 |
| chr19 | 30579947      | 30580299  | 353 |
| chr19 | 27369939      | 27370291  | 353 |
| chr17 | 66176988      | 66177340  | 353 |
| chr17 | 59179091      | 59179443  | 353 |
| chr15 | 22319838      | 22320190  | 353 |
| chr14 | 853781 854133 | 353       |     |
| chr13 | 73704011      | 73704363  | 353 |
| chr12 | 82627035      | 82627387  | 353 |

|       |           |           |     |
|-------|-----------|-----------|-----|
| chr11 | 76321099  | 76321451  | 353 |
| chr11 | 28653878  | 28654230  | 353 |
| chr10 | 86749751  | 86750103  | 353 |
| chr1  | 146619922 | 146620274 | 353 |
| chrX  | 64921004  | 64921355  | 352 |
| chrX  | 60134140  | 60134491  | 352 |
| chrX  | 52999682  | 53000033  | 352 |
| chrX  | 30793483  | 30793834  | 352 |
| chrX  | 30737102  | 30737453  | 352 |
| chrX  | 21291755  | 21292106  | 352 |
| chrX  | 19780496  | 19780847  | 352 |
| chrX  | 10213791  | 10214142  | 352 |
| chrX  | 5353489   | 5353840   | 352 |
| chr9  | 105446211 | 105446562 | 352 |
| chr8  | 65281917  | 65282268  | 352 |
| chr7  | 89477476  | 89477827  | 352 |
| chr6  | 63815437  | 63815788  | 352 |
| chr4  | 79087213  | 79087564  | 352 |
| chr3  | 46954868  | 46955219  | 352 |
| chr3  | 30403010  | 30403361  | 352 |
| chr28 | 7280239   | 7280590   | 352 |
| chr27 | 39109790  | 39110141  | 352 |
| chr27 | 26746574  | 26746925  | 352 |
| chr25 | 35603075  | 35603426  | 352 |
| chr24 | 61063690  | 61064041  | 352 |
| chr24 | 36949740  | 36950091  | 352 |
| chr24 | 20857017  | 20857368  | 352 |
| chr23 | 46145053  | 46145404  | 352 |
| chr23 | 34951285  | 34951636  | 352 |
| chr23 | 8789625   | 8789976   | 352 |
| chr22 | 56049999  | 56050350  | 352 |
| chr22 | 41303437  | 41303788  | 352 |
| chr21 | 64942105  | 64942456  | 352 |
| chr2  | 127771322 | 127771673 | 352 |
| chr19 | 39319089  | 39319440  | 352 |
| chr18 | 61917529  | 61917880  | 352 |
| chr16 | 47471817  | 47472168  | 352 |
| chr13 | 67882205  | 67882556  | 352 |
| chr13 | 60950235  | 60950586  | 352 |
| chr13 | 17326163  | 17326514  | 352 |
| chr12 | 14238073  | 14238424  | 352 |
| chr11 | 12905768  | 12906119  | 352 |
| chr10 | 68535655  | 68536006  | 352 |
| chr10 | 5251504   | 5251855   | 352 |
| chr1  | 66668809  | 66669160  | 352 |
| chrX  | 78659659  | 78660009  | 351 |
| chrX  | 63066018  | 63066368  | 351 |
| chrX  | 50827851  | 50828201  | 351 |
| chrX  | 31561227  | 31561577  | 351 |
| chrX  | 18161085  | 18161435  | 351 |

|       |           |           |     |
|-------|-----------|-----------|-----|
| chr9  | 99999160  | 99999510  | 351 |
| chr9  | 95328275  | 95328625  | 351 |
| chr9  | 77681497  | 77681847  | 351 |
| chr8  | 109035981 | 109036331 | 351 |
| chr6  | 120936208 | 120936558 | 351 |
| chr5  | 30552144  | 30552494  | 351 |
| chr4  | 34028070  | 34028420  | 351 |
| chr3  | 121947975 | 121948325 | 351 |
| chr3  | 106239684 | 106240034 | 351 |
| chr3  | 80336372  | 80336722  | 351 |
| chr3  | 18092361  | 18092711  | 351 |
| chr27 | 26839937  | 26840287  | 351 |
| chr27 | 15407452  | 15407802  | 351 |
| chr26 | 41556115  | 41556465  | 351 |
| chr26 | 39208630  | 39208980  | 351 |
| chr26 | 21824922  | 21825272  | 351 |
| chr25 | 1505457   | 1505807   | 351 |
| chr23 | 8360736   | 8361086   | 351 |
| chr23 | 6740250   | 6740600   | 351 |
| chr21 | 23590341  | 23590691  | 351 |
| chr2  | 95139210  | 95139560  | 351 |
| chr19 | 59533860  | 59534210  | 351 |
| chr19 | 38946467  | 38946817  | 351 |
| chr19 | 13453188  | 13453538  | 351 |
| chr18 | 57028997  | 57029347  | 351 |
| chr18 | 18444695  | 18445045  | 351 |
| chr18 | 11452919  | 11453269  | 351 |
| chr17 | 47465572  | 47465922  | 351 |
| chr16 | 26502472  | 26502822  | 351 |
| chr15 | 75340336  | 75340686  | 351 |
| chr14 | 61285135  | 61285485  | 351 |
| chr13 | 54469058  | 54469408  | 351 |
| chr11 | 101024216 | 101024566 | 351 |
| chr11 | 10739446  | 10739796  | 351 |
| chr10 | 32246002  | 32246352  | 351 |
| chr10 | 21200550  | 21200900  | 351 |
| chr1  | 82821563  | 82821913  | 351 |
| chrX  | 75452013  | 75452362  | 350 |
| chrX  | 75304934  | 75305283  | 350 |
| chrX  | 72365861  | 72366210  | 350 |
| chrX  | 21300654  | 21301003  | 350 |
| chrX  | 19273345  | 19273694  | 350 |
| chrX  | 8105514   | 8105863   | 350 |
| chrX  | 5947612   | 5947961   | 350 |
| chr8  | 7615853   | 7616202   | 350 |
| chr7  | 71314182  | 71314531  | 350 |
| chr7  | 20621445  | 20621794  | 350 |
| chr4  | 79183887  | 79184236  | 350 |
| chr26 | 51561743  | 51562092  | 350 |
| chr26 | 42171795  | 42172144  | 350 |

|       |               |           |     |
|-------|---------------|-----------|-----|
| chr24 | 31394448      | 31394797  | 350 |
| chr23 | 28800341      | 28800690  | 350 |
| chr23 | 8568492       | 8568841   | 350 |
| chr21 | 11891820      | 11892169  | 350 |
| chr19 | 60791041      | 60791390  | 350 |
| chr19 | 60421629      | 60421978  | 350 |
| chr19 | 58345178      | 58345527  | 350 |
| chr18 | 52299128      | 52299477  | 350 |
| chr18 | 33571611      | 33571960  | 350 |
| chr18 | 12778868      | 12779217  | 350 |
| chr18 | 9689048       | 9689397   | 350 |
| chr17 | 69252092      | 69252441  | 350 |
| chr16 | 47146630      | 47146979  | 350 |
| chr16 | 44149876      | 44150225  | 350 |
| chr14 | 59488318      | 59488667  | 350 |
| chr14 | 16163528      | 16163877  | 350 |
| chr14 | 856999 857348 | 350       |     |
| chr13 | 77309350      | 77309699  | 350 |
| chr13 | 73911690      | 73912039  | 350 |
| chr10 | 83529397      | 83529746  | 350 |
| chr10 | 81670967      | 81671316  | 350 |
| chr1  | 153530749     | 153531098 | 350 |
| chr1  | 136398147     | 136398496 | 350 |
| chrX  | 75724677      | 75725025  | 349 |
| chrX  | 72717507      | 72717855  | 349 |
| chrX  | 69657992      | 69658340  | 349 |
| chrX  | 65615549      | 65615897  | 349 |
| chrX  | 64421332      | 64421680  | 349 |
| chrX  | 40706636      | 40706984  | 349 |
| chrX  | 29596918      | 29597266  | 349 |
| chrX  | 10194522      | 10194870  | 349 |
| chr8  | 56614145      | 56614493  | 349 |
| chr8  | 8156427       | 8156775   | 349 |
| chr7  | 81564376      | 81564724  | 349 |
| chr7  | 48150698      | 48151046  | 349 |
| chr7  | 45535249      | 45535597  | 349 |
| chr6  | 31697991      | 31698339  | 349 |
| chr4  | 32425749      | 32426097  | 349 |
| chr29 | 36370969      | 36371317  | 349 |
| chr29 | 32522832      | 32523180  | 349 |
| chr28 | 34664524      | 34664872  | 349 |
| chr27 | 47665277      | 47665625  | 349 |
| chr23 | 49950448      | 49950796  | 349 |
| chr23 | 49724113      | 49724461  | 349 |
| chr23 | 996186 996534 | 349       |     |
| chr21 | 66490633      | 66490981  | 349 |
| chr20 | 62161296      | 62161644  | 349 |
| chr20 | 40024014      | 40024362  | 349 |
| chr20 | 35669785      | 35670133  | 349 |
| chr19 | 44996332      | 44996680  | 349 |



|       |           |           |     |
|-------|-----------|-----------|-----|
| chr19 | 26676702  | 26677050  | 349 |
| chr18 | 16426383  | 16426731  | 349 |
| chr17 | 63695398  | 63695746  | 349 |
| chr15 | 75299288  | 75299636  | 349 |
| chr15 | 26777195  | 26777543  | 349 |
| chr13 | 17278445  | 17278793  | 349 |
| chr11 | 75706504  | 75706852  | 349 |
| chr11 | 66158898  | 66159246  | 349 |
| chr11 | 5872243   | 5872591   | 349 |
| chr10 | 90421543  | 90421891  | 349 |
| chr10 | 66554240  | 66554588  | 349 |
| chr10 | 17248521  | 17248869  | 349 |
| chr10 | 12125230  | 12125578  | 349 |
| chrX  | 80524496  | 80524843  | 348 |
| chrX  | 72636262  | 72636609  | 348 |
| chrX  | 65449137  | 65449484  | 348 |
| chrX  | 62642259  | 62642606  | 348 |
| chrX  | 56607437  | 56607784  | 348 |
| chrX  | 22506451  | 22506798  | 348 |
| chrX  | 11087297  | 11087644  | 348 |
| chrX  | 6257089   | 6257436   | 348 |
| chr8  | 61039386  | 61039733  | 348 |
| chr7  | 15592293  | 15592640  | 348 |
| chr5  | 77000976  | 77001323  | 348 |
| chr4  | 38414877  | 38415224  | 348 |
| chr4  | 32433101  | 32433448  | 348 |
| chr3  | 127016240 | 127016587 | 348 |
| chr3  | 34559009  | 34559356  | 348 |
| chr29 | 48777035  | 48777382  | 348 |
| chr29 | 36961062  | 36961409  | 348 |
| chr28 | 33813711  | 33814058  | 348 |
| chr26 | 38525345  | 38525692  | 348 |
| chr26 | 35019576  | 35019923  | 348 |
| chr24 | 43653750  | 43654097  | 348 |
| chr22 | 47154334  | 47154681  | 348 |
| chr22 | 44500872  | 44501219  | 348 |
| chr2  | 91075461  | 91075808  | 348 |
| chr19 | 46672910  | 46673257  | 348 |
| chr19 | 26282389  | 26282736  | 348 |
| chr19 | 19438976  | 19439323  | 348 |
| chr18 | 52972657  | 52973004  | 348 |
| chr16 | 77338786  | 77339133  | 348 |
| chr15 | 75674712  | 75675059  | 348 |
| chr15 | 52801391  | 52801738  | 348 |
| chr14 | 61331069  | 61331416  | 348 |
| chr14 | 6211167   | 6211514   | 348 |
| chr12 | 44892102  | 44892449  | 348 |
| chr11 | 75150082  | 75150429  | 348 |
| chrX  | 63940080  | 63940426  | 347 |
| chrX  | 62727202  | 62727548  | 347 |

|       |               |           |     |
|-------|---------------|-----------|-----|
| chrX  | 51274182      | 51274528  | 347 |
| chrX  | 46403916      | 46404262  | 347 |
| chrX  | 35186161      | 35186507  | 347 |
| chrX  | 31470862      | 31471208  | 347 |
| chrX  | 21480290      | 21480636  | 347 |
| chrX  | 13150671      | 13151017  | 347 |
| chrX  | 6433543       | 6433889   | 347 |
| chrX  | 1515270       | 1515616   | 347 |
| chr9  | 11543715      | 11544061  | 347 |
| chr29 | 37340217      | 37340563  | 347 |
| chr29 | 32041828      | 32042174  | 347 |
| chr28 | 25156748      | 25157094  | 347 |
| chr27 | 29364606      | 29364952  | 347 |
| chr27 | 15372495      | 15372841  | 347 |
| chr24 | 970744 971090 | 347       |     |
| chr20 | 1240982       | 1241328   | 347 |
| chr2  | 136538453     | 136538799 | 347 |
| chr19 | 26318063      | 26318409  | 347 |
| chr19 | 16018644      | 16018990  | 347 |
| chr19 | 13456289      | 13456635  | 347 |
| chr18 | 62613778      | 62614124  | 347 |
| chr18 | 22006150      | 22006496  | 347 |
| chr15 | 43314960      | 43315306  | 347 |
| chr11 | 67486601      | 67486947  | 347 |
| chr10 | 90910966      | 90911312  | 347 |
| chr10 | 67064635      | 67064981  | 347 |
| chr10 | 8557600       | 8557946   | 347 |
| chr1  | 87336485      | 87336831  | 347 |
| chrX  | 81956628      | 81956973  | 346 |
| chrX  | 75615126      | 75615471  | 346 |
| chrX  | 54696239      | 54696584  | 346 |
| chrX  | 46085426      | 46085771  | 346 |
| chrX  | 8084755       | 8085100   | 346 |
| chr3  | 123460642     | 123460987 | 346 |
| chr3  | 121721762     | 121722107 | 346 |
| chr3  | 71117551      | 71117896  | 346 |
| chr3  | 56493082      | 56493427  | 346 |
| chr29 | 51977340      | 51977685  | 346 |
| chr29 | 31631854      | 31632199  | 346 |
| chr29 | 17344085      | 17344430  | 346 |
| chr25 | 29067256      | 29067601  | 346 |
| chr25 | 10576062      | 10576407  | 346 |
| chr23 | 30526258      | 30526603  | 346 |
| chr21 | 61627717      | 61628062  | 346 |
| chr21 | 1921935       | 1922280   | 346 |
| chr2  | 135157273     | 135157618 | 346 |
| chr2  | 131852025     | 131852370 | 346 |
| chr19 | 52418744      | 52419089  | 346 |
| chr19 | 38673628      | 38673973  | 346 |
| chr19 | 37929637      | 37929982  | 346 |

|       |               |           |     |
|-------|---------------|-----------|-----|
| chr19 | 29453823      | 29454168  | 346 |
| chr19 | 13859212      | 13859557  | 346 |
| chr18 | 46084916      | 46085261  | 346 |
| chr17 | 63177405      | 63177750  | 346 |
| chr16 | 47596083      | 47596428  | 346 |
| chr15 | 6412627       | 6412972   | 346 |
| chr13 | 80738454      | 80738799  | 346 |
| chr13 | 45320335      | 45320680  | 346 |
| chr13 | 35912395      | 35912740  | 346 |
| chr12 | 15303344      | 15303689  | 346 |
| chr11 | 81282249      | 81282594  | 346 |
| chr10 | 16876166      | 16876511  | 346 |
| chr10 | 7196679       | 7197024   | 346 |
| chr1  | 50435078      | 50435423  | 346 |
| chrX  | 78716245      | 78716589  | 345 |
| chrX  | 64807851      | 64808195  | 345 |
| chrX  | 60890401      | 60890745  | 345 |
| chrX  | 36348183      | 36348527  | 345 |
| chrX  | 35788239      | 35788583  | 345 |
| chrX  | 34642720      | 34643064  | 345 |
| chrX  | 31411498      | 31411842  | 345 |
| chrX  | 20636792      | 20637136  | 345 |
| chrX  | 19048080      | 19048424  | 345 |
| chrX  | 18706633      | 18706977  | 345 |
| chrX  | 13166020      | 13166364  | 345 |
| chrX  | 6170866       | 6171210   | 345 |
| chrX  | 5824222       | 5824566   | 345 |
| chrX  | 924354 924698 | 345       |     |
| chr8  | 116639306     | 116639650 | 345 |
| chr6  | 122125536     | 122125880 | 345 |
| chr6  | 69106707      | 69107051  | 345 |
| chr5  | 60710686      | 60711030  | 345 |
| chr4  | 95628445      | 95628789  | 345 |
| chr4  | 10752631      | 10752975  | 345 |
| chr3  | 51565034      | 51565378  | 345 |
| chr3  | 15144228      | 15144572  | 345 |
| chr24 | 41884099      | 41884443  | 345 |
| chr22 | 50791546      | 50791890  | 345 |
| chr22 | 30029409      | 30029753  | 345 |
| chr21 | 28681890      | 28682234  | 345 |
| chr20 | 60098432      | 60098776  | 345 |
| chr20 | 30943532      | 30943876  | 345 |
| chr20 | 8651348       | 8651692   | 345 |
| chr19 | 45750997      | 45751341  | 345 |
| chr19 | 39480942      | 39481286  | 345 |
| chr19 | 19378458      | 19378802  | 345 |
| chr19 | 18439489      | 18439833  | 345 |
| chr18 | 61916859      | 61917203  | 345 |
| chr18 | 22375843      | 22376187  | 345 |
| chr17 | 63458948      | 63459292  | 345 |

|       |           |           |     |
|-------|-----------|-----------|-----|
| chr15 | 23122258  | 23122602  | 345 |
| chr13 | 58473299  | 58473643  | 345 |
| chr13 | 41759905  | 41760249  | 345 |
| chr12 | 20793676  | 20794020  | 345 |
| chr11 | 2554805   | 2555149   | 345 |
| chr10 | 17536925  | 17537269  | 345 |
| chr1  | 161065958 | 161066302 | 345 |
| chr1  | 99837295  | 99837639  | 345 |
| chrX  | 80884728  | 80885071  | 344 |
| chrX  | 75534323  | 75534666  | 344 |
| chrX  | 73718545  | 73718888  | 344 |
| chrX  | 71728782  | 71729125  | 344 |
| chrX  | 68342600  | 68342943  | 344 |
| chrX  | 63139879  | 63140222  | 344 |
| chrX  | 58475070  | 58475413  | 344 |
| chrX  | 37663535  | 37663878  | 344 |
| chrX  | 19626389  | 19626732  | 344 |
| chrX  | 18412469  | 18412812  | 344 |
| chr9  | 83792372  | 83792715  | 344 |
| chr6  | 117916055 | 117916398 | 344 |
| chr3  | 123567436 | 123567779 | 344 |
| chr3  | 111693417 | 111693760 | 344 |
| chr3  | 17783577  | 17783920  | 344 |
| chr28 | 26895663  | 26896006  | 344 |
| chr27 | 35704765  | 35705108  | 344 |
| chr24 | 40722025  | 40722368  | 344 |
| chr24 | 35144710  | 35145053  | 344 |
| chr22 | 30454150  | 30454493  | 344 |
| chr21 | 24522303  | 24522646  | 344 |
| chr20 | 66337054  | 66337397  | 344 |
| chr2  | 132085238 | 132085581 | 344 |
| chr19 | 54860516  | 54860859  | 344 |
| chr19 | 42820136  | 42820479  | 344 |
| chr18 | 3662657   | 3663000   | 344 |
| chr17 | 70333943  | 70334286  | 344 |
| chr16 | 46963681  | 46964024  | 344 |
| chr15 | 63880040  | 63880383  | 344 |
| chr14 | 80586873  | 80587216  | 344 |
| chr13 | 72651321  | 72651664  | 344 |
| chr13 | 68657931  | 68658274  | 344 |
| chr10 | 74580963  | 74581306  | 344 |
| chr10 | 51505922  | 51506265  | 344 |
| chr1  | 83742511  | 83742854  | 344 |
| chrX  | 80065961  | 80066303  | 343 |
| chrX  | 72716506  | 72716848  | 343 |
| chrX  | 71176115  | 71176457  | 343 |
| chrX  | 66650226  | 66650568  | 343 |
| chrX  | 64439389  | 64439731  | 343 |
| chrX  | 56925318  | 56925660  | 343 |
| chrX  | 38189530  | 38189872  | 343 |

|       |           |           |     |
|-------|-----------|-----------|-----|
| chrX  | 29552738  | 29553080  | 343 |
| chrX  | 19717288  | 19717630  | 343 |
| chrX  | 13083346  | 13083688  | 343 |
| chrX  | 10731325  | 10731667  | 343 |
| chrX  | 6961853   | 6962195   | 343 |
| chr9  | 90431604  | 90431946  | 343 |
| chr8  | 73334056  | 73334398  | 343 |
| chr7  | 44075589  | 44075931  | 343 |
| chr7  | 19244275  | 19244617  | 343 |
| chr7  | 14903859  | 14904201  | 343 |
| chr5  | 30436655  | 30436997  | 343 |
| chr4  | 84258272  | 84258614  | 343 |
| chr3  | 105192821 | 105193163 | 343 |
| chr29 | 34899368  | 34899710  | 343 |
| chr29 | 32674493  | 32674835  | 343 |
| chr29 | 30681915  | 30682257  | 343 |
| chr27 | 27940127  | 27940469  | 343 |
| chr27 | 27374417  | 27374759  | 343 |
| chr26 | 43971413  | 43971755  | 343 |
| chr26 | 39048076  | 39048418  | 343 |
| chr25 | 2922546   | 2922888   | 343 |
| chr24 | 2832328   | 2832670   | 343 |
| chr24 | 2545515   | 2545857   | 343 |
| chr23 | 52690346  | 52690688  | 343 |
| chr22 | 30017109  | 30017451  | 343 |
| chr22 | 22039700  | 22040042  | 343 |
| chr21 | 20943546  | 20943888  | 343 |
| chr19 | 52422706  | 52423048  | 343 |
| chr18 | 53328327  | 53328669  | 343 |
| chr18 | 47694738  | 47695080  | 343 |
| chr18 | 22122790  | 22123132  | 343 |
| chr17 | 68314732  | 68315074  | 343 |
| chr17 | 64110735  | 64111077  | 343 |
| chr16 | 60428023  | 60428365  | 343 |
| chr15 | 81643041  | 81643383  | 343 |
| chr14 | 66285578  | 66285920  | 343 |
| chr14 | 61601166  | 61601508  | 343 |
| chr11 | 104957110 | 104957452 | 343 |
| chr11 | 48674818  | 48675160  | 343 |
| chr11 | 28435800  | 28436142  | 343 |
| chrX  | 72335961  | 72336302  | 342 |
| chrX  | 63040899  | 63041240  | 342 |
| chrX  | 20617901  | 20618242  | 342 |
| chrX  | 13333493  | 13333834  | 342 |
| chrX  | 8685395   | 8685736   | 342 |
| chr9  | 35454705  | 35455046  | 342 |
| chr8  | 110455352 | 110455693 | 342 |
| chr8  | 87100439  | 87100780  | 342 |
| chr5  | 35301855  | 35302196  | 342 |
| chr5  | 29800347  | 29800688  | 342 |

|       |           |           |     |
|-------|-----------|-----------|-----|
| chr3  | 121612360 | 121612701 | 342 |
| chr3  | 105075147 | 105075488 | 342 |
| chr29 | 48787513  | 48787854  | 342 |
| chr26 | 49228511  | 49228852  | 342 |
| chr25 | 39875133  | 39875474  | 342 |
| chr25 | 18659262  | 18659603  | 342 |
| chr25 | 7450177   | 7450518   | 342 |
| chr24 | 48056096  | 48056437  | 342 |
| chr24 | 44783552  | 44783893  | 342 |
| chr24 | 1693645   | 1693986   | 342 |
| chr23 | 46060978  | 46061319  | 342 |
| chr21 | 63306288  | 63306629  | 342 |
| chr20 | 61861344  | 61861685  | 342 |
| chr2  | 133642152 | 133642493 | 342 |
| chr2  | 42839853  | 42840194  | 342 |
| chr19 | 42299343  | 42299684  | 342 |
| chr18 | 43556436  | 43556777  | 342 |
| chr17 | 58993231  | 58993572  | 342 |
| chr15 | 23158308  | 23158649  | 342 |
| chr14 | 7247618   | 7247959   | 342 |
| chr13 | 38829622  | 38829963  | 342 |
| chr11 | 100687086 | 100687427 | 342 |
| chr10 | 67612348  | 67612689  | 342 |
| chr10 | 48305431  | 48305772  | 342 |
| chr10 | 8305027   | 8305368   | 342 |
| chr1  | 139864058 | 139864399 | 342 |
| chr1  | 128111792 | 128112133 | 342 |
| chr1  | 71575565  | 71575906  | 342 |
| chr1  | 50453270  | 50453611  | 342 |
| chrX  | 65447907  | 65448247  | 341 |
| chrX  | 37359318  | 37359658  | 341 |
| chrX  | 35941553  | 35941893  | 341 |
| chrX  | 9486822   | 9487162   | 341 |
| chrX  | 9200699   | 9201039   | 341 |
| chr9  | 87732131  | 87732471  | 341 |
| chr8  | 89554502  | 89554842  | 341 |
| chr4  | 27477536  | 27477876  | 341 |
| chr3  | 83722824  | 83723164  | 341 |
| chr3  | 20790057  | 20790397  | 341 |
| chr26 | 18712776  | 18713116  | 341 |
| chr26 | 7010439   | 7010779   | 341 |
| chr24 | 58904375  | 58904715  | 341 |
| chr23 | 28029307  | 28029647  | 341 |
| chr20 | 74022247  | 74022587  | 341 |
| chr19 | 58566698  | 58567038  | 341 |
| chr19 | 47311543  | 47311883  | 341 |
| chr18 | 55638419  | 55638759  | 341 |
| chr18 | 32429298  | 32429638  | 341 |
| chr18 | 25545118  | 25545458  | 341 |
| chr17 | 67219832  | 67220172  | 341 |

|       |           |           |     |
|-------|-----------|-----------|-----|
| chr17 | 64236262  | 64236602  | 341 |
| chr15 | 44748546  | 44748886  | 341 |
| chr13 | 75629240  | 75629580  | 341 |
| chr13 | 69643997  | 69644337  | 341 |
| chr13 | 68315482  | 68315822  | 341 |
| chr13 | 59689542  | 59689882  | 341 |
| chr13 | 38026662  | 38027002  | 341 |
| chr12 | 82692377  | 82692717  | 341 |
| chr11 | 91988760  | 91989100  | 341 |
| chr11 | 70957003  | 70957343  | 341 |
| chr11 | 28448000  | 28448340  | 341 |
| chr1  | 108215575 | 108215915 | 341 |
| chr1  | 53178035  | 53178375  | 341 |
| chrX  | 78076040  | 78076379  | 340 |
| chrX  | 67065586  | 67065925  | 340 |
| chrX  | 65199194  | 65199533  | 340 |
| chrX  | 12080821  | 12081160  | 340 |
| chrX  | 10064164  | 10064503  | 340 |
| chrX  | 7157484   | 7157823   | 340 |
| chr9  | 66539682  | 66540021  | 340 |
| chr8  | 58251498  | 58251837  | 340 |
| chr8  | 27045673  | 27046012  | 340 |
| chr7  | 65625898  | 65626237  | 340 |
| chr7  | 17378044  | 17378383  | 340 |
| chr7  | 15615234  | 15615573  | 340 |
| chr5  | 113284973 | 113285312 | 340 |
| chr26 | 38258531  | 38258870  | 340 |
| chr26 | 18371795  | 18372134  | 340 |
| chr25 | 27605263  | 27605602  | 340 |
| chr25 | 2238430   | 2238769   | 340 |
| chr23 | 27831848  | 27832187  | 340 |
| chr21 | 34055365  | 34055704  | 340 |
| chr21 | 18864602  | 18864941  | 340 |
| chr21 | 14731169  | 14731508  | 340 |
| chr2  | 134865174 | 134865513 | 340 |
| chr2  | 111847522 | 111847861 | 340 |
| chr19 | 54382981  | 54383320  | 340 |
| chr19 | 45055507  | 45055846  | 340 |
| chr19 | 44314681  | 44315020  | 340 |
| chr19 | 32816827  | 32817166  | 340 |
| chr19 | 24072972  | 24073311  | 340 |
| chr18 | 11985896  | 11986235  | 340 |
| chr17 | 69882256  | 69882595  | 340 |
| chr16 | 39335573  | 39335912  | 340 |
| chr16 | 20760209  | 20760548  | 340 |
| chr14 | 61514878  | 61515217  | 340 |
| chr13 | 67808634  | 67808973  | 340 |
| chr13 | 64607458  | 64607797  | 340 |
| chr12 | 32875744  | 32876083  | 340 |
| chr11 | 29854489  | 29854828  | 340 |

|       |           |           |     |
|-------|-----------|-----------|-----|
| chr10 | 79508581  | 79508920  | 340 |
| chr10 | 50906104  | 50906443  | 340 |
| chr1  | 121486143 | 121486482 | 340 |
| chrX  | 74130698  | 74131036  | 339 |
| chrX  | 49244081  | 49244419  | 339 |
| chrX  | 20126058  | 20126396  | 339 |
| chr8  | 77292468  | 77292806  | 339 |
| chr8  | 72326935  | 72327273  | 339 |
| chr7  | 57328389  | 57328727  | 339 |
| chr7  | 42314665  | 42315003  | 339 |
| chr6  | 102179983 | 102180321 | 339 |
| chr5  | 118178760 | 118179098 | 339 |
| chr5  | 26684148  | 26684486  | 339 |
| chr4  | 67588297  | 67588635  | 339 |
| chr3  | 126843616 | 126843954 | 339 |
| chr3  | 33844609  | 33844947  | 339 |
| chr3  | 29849770  | 29850108  | 339 |
| chr3  | 17300494  | 17300832  | 339 |
| chr28 | 33955853  | 33956191  | 339 |
| chr27 | 14395725  | 14396063  | 339 |
| chr26 | 22758101  | 22758439  | 339 |
| chr24 | 1184331   | 1184669   | 339 |
| chr23 | 42475029  | 42475367  | 339 |
| chr22 | 32756469  | 32756807  | 339 |
| chr21 | 59318465  | 59318803  | 339 |
| chr2  | 135718389 | 135718727 | 339 |
| chr2  | 135156818 | 135157156 | 339 |
| chr2  | 116852567 | 116852905 | 339 |
| chr2  | 92646656  | 92646994  | 339 |
| chr19 | 56609706  | 56610044  | 339 |
| chr19 | 29144362  | 29144700  | 339 |
| chr19 | 25834099  | 25834437  | 339 |
| chr17 | 73160707  | 73161045  | 339 |
| chr17 | 68025795  | 68026133  | 339 |
| chr15 | 51650551  | 51650889  | 339 |
| chr15 | 28613607  | 28613945  | 339 |
| chr14 | 27205947  | 27206285  | 339 |
| chr13 | 70234545  | 70234883  | 339 |
| chr13 | 55321155  | 55321493  | 339 |
| chr13 | 41695851  | 41696189  | 339 |
| chr11 | 104306146 | 104306484 | 339 |
| chr11 | 49418667  | 49419005  | 339 |
| chr10 | 22152868  | 22153206  | 339 |
| chr10 | 7717946   | 7718284   | 339 |
| chr1  | 82924040  | 82924378  | 339 |
| chr1  | 82835323  | 82835661  | 339 |
| chrX  | 75610761  | 75611098  | 338 |
| chrX  | 58311054  | 58311391  | 338 |
| chrX  | 58099128  | 58099465  | 338 |
| chrX  | 56035776  | 56036113  | 338 |



|       |               |           |     |
|-------|---------------|-----------|-----|
| chrX  | 47165303      | 47165640  | 338 |
| chrX  | 46501504      | 46501841  | 338 |
| chrX  | 44923229      | 44923566  | 338 |
| chrX  | 1303589       | 1303926   | 338 |
| chrX  | 424816 425153 | 338       |     |
| chr9  | 66932772      | 66933109  | 338 |
| chr8  | 108786760     | 108787097 | 338 |
| chr8  | 29352244      | 29352581  | 338 |
| chr8  | 23963850      | 23964187  | 338 |
| chr7  | 5183739       | 5184076   | 338 |
| chr5  | 121340722     | 121341059 | 338 |
| chr5  | 10540055      | 10540392  | 338 |
| chr4  | 28612944      | 28613281  | 338 |
| chr3  | 87797147      | 87797484  | 338 |
| chr29 | 36552570      | 36552907  | 338 |
| chr27 | 35351730      | 35352067  | 338 |
| chr21 | 25123233      | 25123570  | 338 |
| chr21 | 20689981      | 20690318  | 338 |
| chr21 | 20037267      | 20037604  | 338 |
| chr19 | 21734949      | 21735286  | 338 |
| chr18 | 22124660      | 22124997  | 338 |
| chr18 | 11595397      | 11595734  | 338 |
| chr17 | 4915492       | 4915829   | 338 |
| chr16 | 38780438      | 38780775  | 338 |
| chr15 | 74695913      | 74696250  | 338 |
| chr15 | 24668274      | 24668611  | 338 |
| chr14 | 6770968       | 6771305   | 338 |
| chr13 | 72344446      | 72344783  | 338 |
| chr13 | 67377459      | 67377796  | 338 |
| chr13 | 56720113      | 56720450  | 338 |
| chr12 | 77511575      | 77511912  | 338 |
| chr12 | 31237676      | 31238013  | 338 |
| chr11 | 84118672      | 84119009  | 338 |
| chr11 | 77839486      | 77839823  | 338 |
| chr11 | 44946262      | 44946599  | 338 |
| chr10 | 70454916      | 70455253  | 338 |
| chr10 | 36024376      | 36024713  | 338 |
| chr1  | 18427743      | 18428080  | 338 |
| chr1  | 676051 676388 | 338       |     |
| chrX  | 74213255      | 74213591  | 337 |
| chrX  | 67179270      | 67179606  | 337 |
| chrX  | 66804659      | 66804995  | 337 |
| chrX  | 49886264      | 49886600  | 337 |
| chrX  | 21439140      | 21439476  | 337 |
| chrX  | 13387642      | 13387978  | 337 |
| chrX  | 12023859      | 12024195  | 337 |
| chrX  | 9255656       | 9255992   | 337 |
| chrX  | 9090705       | 9091041   | 337 |
| chrX  | 6269926       | 6270262   | 337 |
| chr7  | 2954803       | 2955139   | 337 |

|       |           |           |     |
|-------|-----------|-----------|-----|
| chr6  | 120951682 | 120952018 | 337 |
| chr5  | 120369570 | 120369906 | 337 |
| chr5  | 60819424  | 60819760  | 337 |
| chr3  | 114462903 | 114463239 | 337 |
| chr3  | 20567971  | 20568307  | 337 |
| chr29 | 30730612  | 30730948  | 337 |
| chr27 | 28125281  | 28125617  | 337 |
| chr26 | 20122032  | 20122368  | 337 |
| chr26 | 20120302  | 20120638  | 337 |
| chr25 | 40819057  | 40819393  | 337 |
| chr24 | 58984463  | 58984799  | 337 |
| chr24 | 919459    | 919795    | 337 |
| chr23 | 26614386  | 26614722  | 337 |
| chr22 | 59714543  | 59714879  | 337 |
| chr22 | 52989923  | 52990259  | 337 |
| chr22 | 32217780  | 32218116  | 337 |
| chr22 | 15007468  | 15007804  | 337 |
| chr21 | 20235569  | 20235905  | 337 |
| chr20 | 45415918  | 45416254  | 337 |
| chr20 | 43692630  | 43692966  | 337 |
| chr2  | 68415966  | 68416302  | 337 |
| chr19 | 59039423  | 59039759  | 337 |
| chr19 | 39501162  | 39501498  | 337 |
| chr19 | 27375216  | 27375552  | 337 |
| chr18 | 52144874  | 52145210  | 337 |
| chr15 | 75976997  | 75977333  | 337 |
| chr14 | 63484723  | 63485059  | 337 |
| chr14 | 30273669  | 30274005  | 337 |
| chr14 | 25844597  | 25844933  | 337 |
| chr13 | 79076392  | 79076728  | 337 |
| chr13 | 41002585  | 41002921  | 337 |
| chr12 | 74440711  | 74441047  | 337 |
| chrX  | 64632031  | 64632366  | 336 |
| chrX  | 7729626   | 7729961   | 336 |
| chrX  | 2332937   | 2333272   | 336 |
| chr8  | 65400874  | 65401209  | 336 |
| chr8  | 8725836   | 8726171   | 336 |
| chr7  | 51861398  | 51861733  | 336 |
| chr7  | 39669645  | 39669980  | 336 |
| chr5  | 60377995  | 60378330  | 336 |
| chr4  | 117862692 | 117863027 | 336 |
| chr4  | 79261271  | 79261606  | 336 |
| chr3  | 87647621  | 87647956  | 336 |
| chr3  | 16748894  | 16749229  | 336 |
| chr28 | 13490208  | 13490543  | 336 |
| chr26 | 32012612  | 32012947  | 336 |
| chr26 | 14706856  | 14707191  | 336 |
| chr25 | 35513862  | 35514197  | 336 |
| chr25 | 34031184  | 34031519  | 336 |
| chr24 | 36946881  | 36947216  | 336 |

|       |           |           |     |
|-------|-----------|-----------|-----|
| chr23 | 27230657  | 27230992  | 336 |
| chr23 | 14942811  | 14943146  | 336 |
| chr21 | 18726366  | 18726701  | 336 |
| chr21 | 12353908  | 12354243  | 336 |
| chr2  | 127022658 | 127022993 | 336 |
| chr2  | 111353429 | 111353764 | 336 |
| chr19 | 58988844  | 58989179  | 336 |
| chr19 | 30442408  | 30442743  | 336 |
| chr18 | 3520990   | 3521325   | 336 |
| chr17 | 72938180  | 72938515  | 336 |
| chr14 | 30382557  | 30382892  | 336 |
| chr13 | 70249670  | 70250005  | 336 |
| chr12 | 68407636  | 68407971  | 336 |
| chr12 | 33978534  | 33978869  | 336 |
| chr12 | 32933340  | 32933675  | 336 |
| chr11 | 103742850 | 103743185 | 336 |
| chr1  | 69461418  | 69461753  | 336 |
| chrX  | 78297716  | 78298050  | 335 |
| chrX  | 50183613  | 50183947  | 335 |
| chrX  | 21799051  | 21799385  | 335 |
| chrX  | 21618856  | 21619190  | 335 |
| chrX  | 11719002  | 11719336  | 335 |
| chr9  | 65604337  | 65604671  | 335 |
| chr8  | 108751828 | 108752162 | 335 |
| chr7  | 44773948  | 44774282  | 335 |
| chr7  | 27774005  | 27774339  | 335 |
| chr7  | 10054647  | 10054981  | 335 |
| chr6  | 46683791  | 46684125  | 335 |
| chr3  | 121352475 | 121352809 | 335 |
| chr3  | 110340371 | 110340705 | 335 |
| chr3  | 108439794 | 108440128 | 335 |
| chr27 | 34351198  | 34351532  | 335 |
| chr27 | 27907521  | 27907855  | 335 |
| chr26 | 51492761  | 51493095  | 335 |
| chr24 | 46846418  | 46846752  | 335 |
| chr23 | 45666797  | 45667131  | 335 |
| chr22 | 52237288  | 52237622  | 335 |
| chr22 | 48411275  | 48411609  | 335 |
| chr22 | 14087277  | 14087611  | 335 |
| chr22 | 13578225  | 13578559  | 335 |
| chr21 | 18370518  | 18370852  | 335 |
| chr2  | 128245093 | 128245427 | 335 |
| chr19 | 59238922  | 59239256  | 335 |
| chr19 | 58705857  | 58706191  | 335 |
| chr19 | 30049355  | 30049689  | 335 |
| chr19 | 24009882  | 24010216  | 335 |
| chr15 | 29407656  | 29407990  | 335 |
| chr15 | 24588534  | 24588868  | 335 |
| chr14 | 1909795   | 1910129   | 335 |
| chr13 | 66961719  | 66962053  | 335 |

|       |           |           |     |
|-------|-----------|-----------|-----|
| chr13 | 41371943  | 41372277  | 335 |
| chr13 | 28526267  | 28526601  | 335 |
| chr13 | 23365118  | 23365452  | 335 |
| chr13 | 22011771  | 22012105  | 335 |
| chr12 | 84221364  | 84221698  | 335 |
| chr12 | 33358138  | 33358472  | 335 |
| chr11 | 5912966   | 5913300   | 335 |
| chr10 | 81883800  | 81884134  | 335 |
| chr10 | 67790867  | 67791201  | 335 |
| chr10 | 66940263  | 66940597  | 335 |
| chr10 | 6067202   | 6067536   | 335 |
| chr1  | 110658421 | 110658755 | 335 |
| chr1  | 100063265 | 100063599 | 335 |
| chrX  | 78696078  | 78696411  | 334 |
| chrX  | 75192780  | 75193113  | 334 |
| chrX  | 34576015  | 34576348  | 334 |
| chrX  | 33987714  | 33988047  | 334 |
| chrX  | 11925187  | 11925520  | 334 |
| chrX  | 8909770   | 8910103   | 334 |
| chrX  | 2263805   | 2264138   | 334 |
| chr9  | 104942752 | 104943085 | 334 |
| chr9  | 98833637  | 98833970  | 334 |
| chr9  | 52809738  | 52810071  | 334 |
| chr9  | 6513600   | 6513933   | 334 |
| chr8  | 7405958   | 7406291   | 334 |
| chr6  | 121627147 | 121627480 | 334 |
| chr6  | 7717794   | 7718127   | 334 |
| chr5  | 76719569  | 76719902  | 334 |
| chr4  | 63305566  | 63305899  | 334 |
| chr3  | 121047309 | 121047642 | 334 |
| chr3  | 25852101  | 25852434  | 334 |
| chr25 | 33344982  | 33345315  | 334 |
| chr21 | 58649770  | 58650103  | 334 |
| chr21 | 18820958  | 18821291  | 334 |
| chr2  | 114900004 | 114900337 | 334 |
| chr19 | 42583810  | 42584143  | 334 |
| chr19 | 33566611  | 33566944  | 334 |
| chr19 | 13419635  | 13419968  | 334 |
| chr19 | 12130044  | 12130377  | 334 |
| chr18 | 59071756  | 59072089  | 334 |
| chr18 | 43168437  | 43168770  | 334 |
| chr17 | 6995354   | 6995687   | 334 |
| chr16 | 77328140  | 77328473  | 334 |
| chr16 | 47079877  | 47080210  | 334 |
| chr13 | 69997246  | 69997579  | 334 |
| chr13 | 66717520  | 66717853  | 334 |
| chr13 | 59024227  | 59024560  | 334 |
| chr13 | 41207732  | 41208065  | 334 |
| chr12 | 32639241  | 32639574  | 334 |
| chr11 | 75608739  | 75609072  | 334 |

|       |               |           |     |
|-------|---------------|-----------|-----|
| chr11 | 7357040       | 7357373   | 334 |
| chr10 | 20160117      | 20160450  | 334 |
| chr1  | 33974469      | 33974802  | 334 |
| chrX  | 71900876      | 71901208  | 333 |
| chrX  | 65249394      | 65249726  | 333 |
| chrX  | 55221686      | 55222018  | 333 |
| chrX  | 11294585      | 11294917  | 333 |
| chrX  | 5601056       | 5601388   | 333 |
| chr8  | 93576530      | 93576862  | 333 |
| chr8  | 7755697       | 7756029   | 333 |
| chr8  | 7443883       | 7444215   | 333 |
| chr7  | 19301852      | 19302184  | 333 |
| chr5  | 60364520      | 60364852  | 333 |
| chr4  | 99280728      | 99281060  | 333 |
| chr4  | 73693896      | 73694228  | 333 |
| chr3  | 11533885      | 11534217  | 333 |
| chr27 | 33472919      | 33473251  | 333 |
| chr26 | 37954226      | 37954558  | 333 |
| chr25 | 40043233      | 40043565  | 333 |
| chr23 | 52892410      | 52892742  | 333 |
| chr22 | 50649635      | 50649967  | 333 |
| chr21 | 31032946      | 31033278  | 333 |
| chr21 | 19997201      | 19997533  | 333 |
| chr2  | 27520487      | 27520819  | 333 |
| chr2  | 5041551       | 5041883   | 333 |
| chr18 | 38805105      | 38805437  | 333 |
| chr17 | 59041609      | 59041941  | 333 |
| chr16 | 42143851      | 42144183  | 333 |
| chr15 | 83942970      | 83943302  | 333 |
| chr15 | 75252857      | 75253189  | 333 |
| chr15 | 65361592      | 65361924  | 333 |
| chr15 | 20812808      | 20813140  | 333 |
| chr14 | 10307007      | 10307339  | 333 |
| chr13 | 43827657      | 43827989  | 333 |
| chr12 | 76556599      | 76556931  | 333 |
| chr10 | 17044025      | 17044357  | 333 |
| chr10 | 969249 969581 | 333       |     |
| chr1  | 73142903      | 73143235  | 333 |
| chr1  | 69266566      | 69266898  | 333 |
| chr1  | 487794 488126 | 333       |     |
| chrX  | 80677818      | 80678149  | 332 |
| chrX  | 78263299      | 78263630  | 332 |
| chrX  | 65258733      | 65259064  | 332 |
| chrX  | 34549517      | 34549848  | 332 |
| chrX  | 20146129      | 20146460  | 332 |
| chrX  | 18954733      | 18955064  | 332 |
| chr8  | 60180889      | 60181220  | 332 |
| chr7  | 50610302      | 50610633  | 332 |
| chr6  | 108798813     | 108799144 | 332 |
| chr5  | 119385892     | 119386223 | 332 |

|       |           |           |     |
|-------|-----------|-----------|-----|
| chr5  | 85406021  | 85406352  | 332 |
| chr4  | 89795593  | 89795924  | 332 |
| chr4  | 84226580  | 84226911  | 332 |
| chr4  | 8762852   | 8763183   | 332 |
| chr3  | 106147440 | 106147771 | 332 |
| chr29 | 37247758  | 37248089  | 332 |
| chr29 | 33615799  | 33616130  | 332 |
| chr28 | 25155428  | 25155759  | 332 |
| chr27 | 27195447  | 27195778  | 332 |
| chr26 | 51743192  | 51743523  | 332 |
| chr26 | 51367913  | 51368244  | 332 |
| chr24 | 61065837  | 61066168  | 332 |
| chr23 | 52746383  | 52746714  | 332 |
| chr22 | 54053329  | 54053660  | 332 |
| chr22 | 5703580   | 5703911   | 332 |
| chr21 | 34235251  | 34235582  | 332 |
| chr20 | 13083507  | 13083838  | 332 |
| chr2  | 111374206 | 111374537 | 332 |
| chr2  | 92353696  | 92354027  | 332 |
| chr19 | 38920642  | 38920973  | 332 |
| chr19 | 7240529   | 7240860   | 332 |
| chr18 | 50858682  | 50859013  | 332 |
| chr18 | 32409168  | 32409499  | 332 |
| chr18 | 12606472  | 12606803  | 332 |
| chr17 | 46513471  | 46513802  | 332 |
| chr17 | 14650853  | 14651184  | 332 |
| chr16 | 38979798  | 38980129  | 332 |
| chr15 | 24513169  | 24513500  | 332 |
| chr13 | 78062792  | 78063123  | 332 |
| chr13 | 62873128  | 62873459  | 332 |
| chr13 | 35452294  | 35452625  | 332 |
| chr13 | 21729837  | 21730168  | 332 |
| chr12 | 73786312  | 73786643  | 332 |
| chr11 | 107231083 | 107231414 | 332 |
| chr11 | 50878204  | 50878535  | 332 |
| chr11 | 3816446   | 3816777   | 332 |
| chr1  | 87335480  | 87335811  | 332 |
| chrX  | 73571806  | 73572136  | 331 |
| chrX  | 28511510  | 28511840  | 331 |
| chrX  | 19454973  | 19455303  | 331 |
| chrX  | 18996352  | 18996682  | 331 |
| chrX  | 18341879  | 18342209  | 331 |
| chrX  | 13334070  | 13334400  | 331 |
| chrX  | 7250573   | 7250903   | 331 |
| chr6  | 119363953 | 119364283 | 331 |
| chr5  | 115307476 | 115307806 | 331 |
| chr5  | 29144941  | 29145271  | 331 |
| chr4  | 78683940  | 78684270  | 331 |
| chr29 | 17867099  | 17867429  | 331 |
| chr26 | 24653173  | 24653503  | 331 |

|       |           |           |     |
|-------|-----------|-----------|-----|
| chr26 | 22228510  | 22228840  | 331 |
| chr25 | 22152623  | 22152953  | 331 |
| chr24 | 50327661  | 50327991  | 331 |
| chr24 | 47819108  | 47819438  | 331 |
| chr23 | 37994230  | 37994560  | 331 |
| chr22 | 44437143  | 44437473  | 331 |
| chr2  | 92081172  | 92081502  | 331 |
| chr19 | 58875126  | 58875456  | 331 |
| chr19 | 54266636  | 54266966  | 331 |
| chr19 | 29020587  | 29020917  | 331 |
| chr19 | 27989497  | 27989827  | 331 |
| chr19 | 25780494  | 25780824  | 331 |
| chr19 | 15785760  | 15786090  | 331 |
| chr18 | 22271397  | 22271727  | 331 |
| chr14 | 67971020  | 67971350  | 331 |
| chr13 | 73061007  | 73061337  | 331 |
| chr13 | 65251366  | 65251696  | 331 |
| chr13 | 59639264  | 59639594  | 331 |
| chr10 | 10487828  | 10488158  | 331 |
| chr1  | 145456298 | 145456628 | 331 |
| chr1  | 83019570  | 83019900  | 331 |
| chrX  | 78591306  | 78591635  | 330 |
| chrX  | 76705803  | 76706132  | 330 |
| chrX  | 75888067  | 75888396  | 330 |
| chrX  | 61580467  | 61580796  | 330 |
| chrX  | 60302590  | 60302919  | 330 |
| chrX  | 21602079  | 21602408  | 330 |
| chrX  | 7711926   | 7712255   | 330 |
| chr7  | 77014514  | 77014843  | 330 |
| chr7  | 50661641  | 50661970  | 330 |
| chr5  | 125378907 | 125379236 | 330 |
| chr5  | 123204000 | 123204329 | 330 |
| chr5  | 70036273  | 70036602  | 330 |
| chr5  | 32855979  | 32856308  | 330 |
| chr5  | 21463257  | 21463586  | 330 |
| chr3  | 116461299 | 116461628 | 330 |
| chr3  | 77662109  | 77662438  | 330 |
| chr3  | 35506909  | 35507238  | 330 |
| chr28 | 34035253  | 34035582  | 330 |
| chr27 | 28123233  | 28123562  | 330 |
| chr25 | 37221663  | 37221992  | 330 |
| chr24 | 43676610  | 43676939  | 330 |
| chr24 | 40576031  | 40576360  | 330 |
| chr23 | 15391859  | 15392188  | 330 |
| chr22 | 7273345   | 7273674   | 330 |
| chr21 | 24797860  | 24798189  | 330 |
| chr21 | 19198573  | 19198902  | 330 |
| chr20 | 53387323  | 53387652  | 330 |
| chr2  | 138635474 | 138635803 | 330 |
| chr2  | 136563253 | 136563582 | 330 |

|       |           |           |     |
|-------|-----------|-----------|-----|
| chr2  | 135059794 | 135060123 | 330 |
| chr2  | 24856674  | 24857003  | 330 |
| chr19 | 27988509  | 27988838  | 330 |
| chr19 | 26969888  | 26970217  | 330 |
| chr19 | 14861846  | 14862175  | 330 |
| chr19 | 8085530   | 8085859   | 330 |
| chr18 | 48696621  | 48696950  | 330 |
| chr18 | 9705815   | 9706144   | 330 |
| chr17 | 74598629  | 74598958  | 330 |
| chr17 | 68081201  | 68081530  | 330 |
| chr17 | 61104337  | 61104666  | 330 |
| chr17 | 47359078  | 47359407  | 330 |
| chr16 | 48784604  | 48784933  | 330 |
| chr15 | 32450892  | 32451221  | 330 |
| chr13 | 58600008  | 58600337  | 330 |
| chr13 | 40850153  | 40850482  | 330 |
| chr12 | 32919513  | 32919842  | 330 |
| chr11 | 51833743  | 51834072  | 330 |
| chr10 | 83083637  | 83083966  | 330 |
| chr10 | 70023425  | 70023754  | 330 |
| chr10 | 21165997  | 21166326  | 330 |
| chr1  | 148007835 | 148008164 | 330 |
| chrX  | 50341788  | 50342116  | 329 |
| chrX  | 24007954  | 24008282  | 329 |
| chrX  | 21500807  | 21501135  | 329 |
| chrX  | 20561493  | 20561821  | 329 |
| chrX  | 19147716  | 19148044  | 329 |
| chrX  | 5876370   | 5876698   | 329 |
| chrX  | 2399185   | 2399513   | 329 |
| chr9  | 105774031 | 105774359 | 329 |
| chr9  | 43698140  | 43698468  | 329 |
| chr7  | 52164376  | 52164704  | 329 |
| chr7  | 16833915  | 16834243  | 329 |
| chr6  | 109952886 | 109953214 | 329 |
| chr3  | 113114789 | 113115117 | 329 |
| chr29 | 46346471  | 46346799  | 329 |
| chr29 | 30758392  | 30758720  | 329 |
| chr28 | 42271956  | 42272284  | 329 |
| chr28 | 33318378  | 33318706  | 329 |
| chr27 | 45277725  | 45278053  | 329 |
| chr26 | 13186697  | 13187025  | 329 |
| chr25 | 43560607  | 43560935  | 329 |
| chr25 | 34108397  | 34108725  | 329 |
| chr23 | 53252370  | 53252698  | 329 |
| chr23 | 28801867  | 28802195  | 329 |
| chr23 | 21860289  | 21860617  | 329 |
| chr23 | 19898236  | 19898564  | 329 |
| chr22 | 59526367  | 59526695  | 329 |
| chr20 | 73258773  | 73259101  | 329 |
| chr20 | 3222246   | 3222574   | 329 |



|       |           |           |     |
|-------|-----------|-----------|-----|
| chr2  | 136704054 | 136704382 | 329 |
| chr2  | 136492325 | 136492653 | 329 |
| chr19 | 41962423  | 41962751  | 329 |
| chr19 | 27306027  | 27306355  | 329 |
| chr19 | 16154826  | 16155154  | 329 |
| chr18 | 18734520  | 18734848  | 329 |
| chr17 | 64296546  | 64296874  | 329 |
| chr17 | 62177309  | 62177637  | 329 |
| chr17 | 4835374   | 4835702   | 329 |
| chr15 | 54032529  | 54032857  | 329 |
| chr15 | 42993833  | 42994161  | 329 |
| chr15 | 23135173  | 23135501  | 329 |
| chr13 | 81071641  | 81071969  | 329 |
| chr12 | 82745526  | 82745854  | 329 |
| chr12 | 20029845  | 20030173  | 329 |
| chr11 | 94984180  | 94984508  | 329 |
| chr11 | 81380564  | 81380892  | 329 |
| chr11 | 25654708  | 25655036  | 329 |
| chr11 | 3312844   | 3313172   | 329 |
| chr10 | 21139901  | 21140229  | 329 |
| chr10 | 20842667  | 20842995  | 329 |
| chr10 | 20535965  | 20536293  | 329 |
| chr1  | 67775369  | 67775697  | 329 |
| chr1  | 64955913  | 64956241  | 329 |
| chrX  | 67596004  | 67596331  | 328 |
| chrX  | 12099315  | 12099642  | 328 |
| chrX  | 11030104  | 11030431  | 328 |
| chrX  | 9173367   | 9173694   | 328 |
| chrX  | 1514575   | 1514902   | 328 |
| chr9  | 35456192  | 35456519  | 328 |
| chr7  | 77012013  | 77012340  | 328 |
| chr7  | 50341802  | 50342129  | 328 |
| chr5  | 85862531  | 85862858  | 328 |
| chr5  | 30317596  | 30317923  | 328 |
| chr4  | 118055528 | 118055855 | 328 |
| chr4  | 81960356  | 81960683  | 328 |
| chr4  | 71689085  | 71689412  | 328 |
| chr4  | 7432638   | 7432965   | 328 |
| chr3  | 111795621 | 111795948 | 328 |
| chr3  | 105362009 | 105362336 | 328 |
| chr3  | 25607390  | 25607717  | 328 |
| chr29 | 45775325  | 45775652  | 328 |
| chr29 | 33199186  | 33199513  | 328 |
| chr29 | 30628741  | 30629068  | 328 |
| chr28 | 42963084  | 42963411  | 328 |
| chr28 | 27138922  | 27139249  | 328 |
| chr27 | 28185794  | 28186121  | 328 |
| chr26 | 43956267  | 43956594  | 328 |
| chr26 | 31376040  | 31376367  | 328 |
| chr25 | 33494694  | 33495021  | 328 |

|       |           |           |     |
|-------|-----------|-----------|-----|
| chr25 | 33159701  | 33160028  | 328 |
| chr25 | 15917936  | 15918263  | 328 |
| chr24 | 41666817  | 41667144  | 328 |
| chr24 | 20375010  | 20375337  | 328 |
| chr23 | 49906180  | 49906507  | 328 |
| chr23 | 27585363  | 27585690  | 328 |
| chr22 | 48760394  | 48760721  | 328 |
| chr22 | 16357347  | 16357674  | 328 |
| chr21 | 58578168  | 58578495  | 328 |
| chr20 | 60975987  | 60976314  | 328 |
| chr20 | 43806133  | 43806460  | 328 |
| chr2  | 136685554 | 136685881 | 328 |
| chr2  | 122576568 | 122576895 | 328 |
| chr2  | 99373731  | 99374058  | 328 |
| chr19 | 39959632  | 39959959  | 328 |
| chr19 | 38312608  | 38312935  | 328 |
| chr19 | 16742008  | 16742335  | 328 |
| chr18 | 18681160  | 18681487  | 328 |
| chr16 | 75355217  | 75355544  | 328 |
| chr15 | 56050661  | 56050988  | 328 |
| chr15 | 26849168  | 26849495  | 328 |
| chr14 | 29189223  | 29189550  | 328 |
| chr13 | 80151830  | 80152157  | 328 |
| chr13 | 77596911  | 77597238  | 328 |
| chr12 | 9593694   | 9594021   | 328 |
| chr11 | 100111538 | 100111865 | 328 |
| chr11 | 98328156  | 98328483  | 328 |
| chr11 | 77650366  | 77650693  | 328 |
| chr11 | 27561130  | 27561457  | 328 |
| chr11 | 14110896  | 14111223  | 328 |
| chr11 | 2555495   | 2555822   | 328 |
| chrX  | 74880596  | 74880922  | 327 |
| chrX  | 73179601  | 73179927  | 327 |
| chrX  | 66546567  | 66546893  | 327 |
| chrX  | 65022379  | 65022705  | 327 |
| chrX  | 55203748  | 55204074  | 327 |
| chrX  | 50420316  | 50420642  | 327 |
| chrX  | 31199446  | 31199772  | 327 |
| chrX  | 27255037  | 27255363  | 327 |
| chrX  | 18973227  | 18973553  | 327 |
| chr9  | 108126572 | 108126898 | 327 |
| chr9  | 52373426  | 52373752  | 327 |
| chr8  | 110726258 | 110726584 | 327 |
| chr7  | 43181830  | 43182156  | 327 |
| chr6  | 59512176  | 59512502  | 327 |
| chr5  | 74259979  | 74260305  | 327 |
| chr5  | 53823545  | 53823871  | 327 |
| chr3  | 36154514  | 36154840  | 327 |
| chr3  | 35636000  | 35636326  | 327 |
| chr28 | 34068025  | 34068351  | 327 |

|       |               |           |     |
|-------|---------------|-----------|-----|
| chr27 | 37908268      | 37908594  | 327 |
| chr27 | 26900614      | 26900940  | 327 |
| chr26 | 50639322      | 50639648  | 327 |
| chr26 | 43833191      | 43833517  | 327 |
| chr26 | 34280542      | 34280868  | 327 |
| chr26 | 18073818      | 18074144  | 327 |
| chr25 | 27311068      | 27311394  | 327 |
| chr24 | 48951422      | 48951748  | 327 |
| chr24 | 35356120      | 35356446  | 327 |
| chr23 | 15876360      | 15876686  | 327 |
| chr23 | 15137518      | 15137844  | 327 |
| chr23 | 10005622      | 10005948  | 327 |
| chr23 | 7191692       | 7192018   | 327 |
| chr22 | 46516841      | 46517167  | 327 |
| chr22 | 44853177      | 44853503  | 327 |
| chr21 | 13951530      | 13951856  | 327 |
| chr21 | 13635127      | 13635453  | 327 |
| chr20 | 1041172       | 1041498   | 327 |
| chr20 | 715775 716101 | 327       |     |
| chr2  | 126368774     | 126369100 | 327 |
| chr19 | 54512252      | 54512578  | 327 |
| chr19 | 52476349      | 52476675  | 327 |
| chr19 | 28240536      | 28240862  | 327 |
| chr19 | 26043631      | 26043957  | 327 |
| chr19 | 10970742      | 10971068  | 327 |
| chr17 | 57741583      | 57741909  | 327 |
| chr16 | 44759227      | 44759553  | 327 |
| chr14 | 25987843      | 25988169  | 327 |
| chr13 | 52938768      | 52939094  | 327 |
| chr13 | 46220898      | 46221224  | 327 |
| chr11 | 100940037     | 100940363 | 327 |
| chr11 | 90374468      | 90374794  | 327 |
| chr11 | 27577740      | 27578066  | 327 |
| chr10 | 90321625      | 90321951  | 327 |
| chr10 | 90024936      | 90025262  | 327 |
| chr10 | 59980228      | 59980554  | 327 |
| chr10 | 21069074      | 21069400  | 327 |
| chr10 | 16936564      | 16936890  | 327 |
| chr10 | 16771452      | 16771778  | 327 |
| chr1  | 157066051     | 157066377 | 327 |
| chr1  | 137873181     | 137873507 | 327 |
| chr1  | 82907659      | 82907985  | 327 |
| chrX  | 68232750      | 68233075  | 326 |
| chrX  | 48115629      | 48115954  | 326 |
| chrX  | 48068907      | 48069232  | 326 |
| chrX  | 21888393      | 21888718  | 326 |
| chrX  | 21746648      | 21746973  | 326 |
| chrX  | 8834513       | 8834838   | 326 |
| chrX  | 5220892       | 5221217   | 326 |
| chr8  | 65816094      | 65816419  | 326 |

|       |           |           |     |
|-------|-----------|-----------|-----|
| chr7  | 44564715  | 44565040  | 326 |
| chr7  | 42844683  | 42845008  | 326 |
| chr7  | 38833820  | 38834145  | 326 |
| chr7  | 19983558  | 19983883  | 326 |
| chr5  | 112442452 | 112442777 | 326 |
| chr5  | 88751891  | 88752216  | 326 |
| chr5  | 78899400  | 78899725  | 326 |
| chr4  | 75324770  | 75325095  | 326 |
| chr4  | 28640447  | 28640772  | 326 |
| chr3  | 124088886 | 124089211 | 326 |
| chr3  | 114501218 | 114501543 | 326 |
| chr3  | 22438897  | 22439222  | 326 |
| chr3  | 22385359  | 22385684  | 326 |
| chr28 | 33453942  | 33454267  | 326 |
| chr28 | 11900709  | 11901034  | 326 |
| chr26 | 41731964  | 41732289  | 326 |
| chr26 | 14586928  | 14587253  | 326 |
| chr25 | 36456389  | 36456714  | 326 |
| chr25 | 10523241  | 10523566  | 326 |
| chr24 | 1876715   | 1877040   | 326 |
| chr23 | 46281134  | 46281459  | 326 |
| chr19 | 39142448  | 39142773  | 326 |
| chr19 | 8310819   | 8311144   | 326 |
| chr18 | 15573298  | 15573623  | 326 |
| chr17 | 70152416  | 70152741  | 326 |
| chr16 | 50279397  | 50279722  | 326 |
| chr15 | 75914450  | 75914775  | 326 |
| chr15 | 64765678  | 64766003  | 326 |
| chr15 | 26767070  | 26767395  | 326 |
| chr14 | 14000016  | 14000341  | 326 |
| chr13 | 80066053  | 80066378  | 326 |
| chr13 | 21800580  | 21800905  | 326 |
| chr12 | 35109915  | 35110240  | 326 |
| chr11 | 81385325  | 81385650  | 326 |
| chr11 | 75608137  | 75608462  | 326 |
| chr11 | 15506923  | 15507248  | 326 |
| chr11 | 13166415  | 13166740  | 326 |
| chr1  | 74328324  | 74328649  | 326 |
| chrX  | 39231085  | 39231409  | 325 |
| chrX  | 37521836  | 37522160  | 325 |
| chrX  | 35452976  | 35453300  | 325 |
| chrX  | 31549444  | 31549768  | 325 |
| chrX  | 18749420  | 18749744  | 325 |
| chrX  | 11172787  | 11173111  | 325 |
| chrX  | 2395385   | 2395709   | 325 |
| chr9  | 76044912  | 76045236  | 325 |
| chr8  | 80484247  | 80484571  | 325 |
| chr7  | 76994206  | 76994530  | 325 |
| chr7  | 43367082  | 43367406  | 325 |
| chr7  | 13085272  | 13085596  | 325 |

|       |           |           |     |
|-------|-----------|-----------|-----|
| chr5  | 113290243 | 113290567 | 325 |
| chr5  | 29124903  | 29125227  | 325 |
| chr4  | 69690593  | 69690917  | 325 |
| chr3  | 125141962 | 125142286 | 325 |
| chr29 | 49887020  | 49887344  | 325 |
| chr29 | 42917037  | 42917361  | 325 |
| chr27 | 34677032  | 34677356  | 325 |
| chr24 | 62442289  | 62442613  | 325 |
| chr24 | 61732076  | 61732400  | 325 |
| chr24 | 60693555  | 60693879  | 325 |
| chr24 | 35157895  | 35158219  | 325 |
| chr22 | 55359169  | 55359493  | 325 |
| chr21 | 30289949  | 30290273  | 325 |
| chr2  | 117698452 | 117698776 | 325 |
| chr19 | 13416499  | 13416823  | 325 |
| chr18 | 57399210  | 57399534  | 325 |
| chr18 | 50984935  | 50985259  | 325 |
| chr17 | 65663192  | 65663516  | 325 |
| chr16 | 60368338  | 60368662  | 325 |
| chr16 | 60288216  | 60288540  | 325 |
| chr16 | 58436378  | 58436702  | 325 |
| chr16 | 48806998  | 48807322  | 325 |
| chr16 | 47895781  | 47896105  | 325 |
| chr16 | 34740307  | 34740631  | 325 |
| chr13 | 72593198  | 72593522  | 325 |
| chr13 | 61340383  | 61340707  | 325 |
| chr13 | 40532366  | 40532690  | 325 |
| chr11 | 108405442 | 108405766 | 325 |
| chr11 | 108047007 | 108047331 | 325 |
| chr11 | 11647495  | 11647819  | 325 |
| chr10 | 29526316  | 29526640  | 325 |
| chr10 | 7637917   | 7638241   | 325 |
| chrX  | 74703007  | 74703330  | 324 |
| chrX  | 73372588  | 73372911  | 324 |
| chrX  | 65367646  | 65367969  | 324 |
| chrX  | 56480584  | 56480907  | 324 |
| chrX  | 49301257  | 49301580  | 324 |
| chrX  | 45883806  | 45884129  | 324 |
| chrX  | 35605339  | 35605662  | 324 |
| chrX  | 33089718  | 33090041  | 324 |
| chrX  | 32658126  | 32658449  | 324 |
| chrX  | 30283331  | 30283654  | 324 |
| chrX  | 19196675  | 19196998  | 324 |
| chrX  | 11025443  | 11025766  | 324 |
| chrX  | 9471305   | 9471628   | 324 |
| chrX  | 6465295   | 6465618   | 324 |
| chrX  | 6238291   | 6238614   | 324 |
| chr9  | 35564324  | 35564647  | 324 |
| chr8  | 90196178  | 90196501  | 324 |
| chr8  | 77303863  | 77304186  | 324 |

|       |           |           |     |
|-------|-----------|-----------|-----|
| chr7  | 17453888  | 17454211  | 324 |
| chr5  | 119146265 | 119146588 | 324 |
| chr5  | 30387881  | 30388204  | 324 |
| chr3  | 36672866  | 36673189  | 324 |
| chr28 | 12143656  | 12143979  | 324 |
| chr26 | 48437398  | 48437721  | 324 |
| chr24 | 63383047  | 63383370  | 324 |
| chr24 | 40238467  | 40238790  | 324 |
| chr23 | 19502332  | 19502655  | 324 |
| chr23 | 17778315  | 17778638  | 324 |
| chr22 | 39754816  | 39755139  | 324 |
| chr21 | 46041638  | 46041961  | 324 |
| chr19 | 56063466  | 56063789  | 324 |
| chr19 | 39498788  | 39499111  | 324 |
| chr19 | 26054620  | 26054943  | 324 |
| chr19 | 10980634  | 10980957  | 324 |
| chr18 | 17444503  | 17444826  | 324 |
| chr17 | 65559020  | 65559343  | 324 |
| chr17 | 63812299  | 63812622  | 324 |
| chr16 | 70130058  | 70130381  | 324 |
| chr15 | 75762746  | 75763069  | 324 |
| chr14 | 30999392  | 30999715  | 324 |
| chr13 | 76276582  | 76276905  | 324 |
| chr11 | 108075971 | 108076294 | 324 |
| chr11 | 105601338 | 105601661 | 324 |
| chr11 | 73171288  | 73171611  | 324 |
| chr10 | 67923969  | 67924292  | 324 |
| chr10 | 15082453  | 15082776  | 324 |
| chrX  | 71691038  | 71691360  | 323 |
| chrX  | 65561095  | 65561417  | 323 |
| chrX  | 58910916  | 58911238  | 323 |
| chrX  | 50307410  | 50307732  | 323 |
| chrX  | 20083782  | 20084104  | 323 |
| chr8  | 107695056 | 107695378 | 323 |
| chr5  | 64490168  | 64490490  | 323 |
| chr4  | 106692969 | 106693291 | 323 |
| chr4  | 67589787  | 67590109  | 323 |
| chr3  | 63221788  | 63222110  | 323 |
| chr3  | 35791897  | 35792219  | 323 |
| chr3  | 34793735  | 34794057  | 323 |
| chr29 | 48360229  | 48360551  | 323 |
| chr29 | 41470197  | 41470519  | 323 |
| chr27 | 35355158  | 35355480  | 323 |
| chr26 | 39106623  | 39106945  | 323 |
| chr26 | 21823911  | 21824233  | 323 |
| chr25 | 8675225   | 8675547   | 323 |
| chr24 | 31181292  | 31181614  | 323 |
| chr24 | 1009232   | 1009554   | 323 |
| chr23 | 49563025  | 49563347  | 323 |
| chr23 | 42396837  | 42397159  | 323 |

|       |           |           |     |
|-------|-----------|-----------|-----|
| chr23 | 15824083  | 15824405  | 323 |
| chr22 | 50854961  | 50855283  | 323 |
| chr22 | 30332289  | 30332611  | 323 |
| chr21 | 25076258  | 25076580  | 323 |
| chr2  | 132456167 | 132456489 | 323 |
| chr2  | 130994355 | 130994677 | 323 |
| chr2  | 115066513 | 115066835 | 323 |
| chr15 | 75962052  | 75962374  | 323 |
| chr15 | 74548447  | 74548769  | 323 |
| chr15 | 52282566  | 52282888  | 323 |
| chr15 | 25420228  | 25420550  | 323 |
| chr14 | 1808581   | 1808903   | 323 |
| chr13 | 5544423   | 5544745   | 323 |
| chr12 | 83888842  | 83889164  | 323 |
| chr12 | 31953014  | 31953336  | 323 |
| chr11 | 72625498  | 72625820  | 323 |
| chr10 | 24699078  | 24699400  | 323 |
| chr10 | 21440474  | 21440796  | 323 |
| chr1  | 144331631 | 144331953 | 323 |
| chr1  | 1625939   | 1626261   | 323 |
| chrX  | 80736261  | 80736582  | 322 |
| chrX  | 54516793  | 54517114  | 322 |
| chrX  | 38445562  | 38445883  | 322 |
| chrX  | 6363304   | 6363625   | 322 |
| chrX  | 5774399   | 5774720   | 322 |
| chr9  | 97723996  | 97724317  | 322 |
| chr8  | 116706808 | 116707129 | 322 |
| chr8  | 110929310 | 110929631 | 322 |
| chr8  | 61614967  | 61615288  | 322 |
| chr7  | 15442280  | 15442601  | 322 |
| chr7  | 13282455  | 13282776  | 322 |
| chr5  | 111755243 | 111755564 | 322 |
| chr5  | 73226338  | 73226659  | 322 |
| chr4  | 8728965   | 8729286   | 322 |
| chr3  | 121657316 | 121657637 | 322 |
| chr3  | 120891562 | 120891883 | 322 |
| chr29 | 34571989  | 34572310  | 322 |
| chr29 | 32149140  | 32149461  | 322 |
| chr26 | 45722047  | 45722368  | 322 |
| chr26 | 43089745  | 43090066  | 322 |
| chr26 | 37583923  | 37584244  | 322 |
| chr24 | 63028100  | 63028421  | 322 |
| chr24 | 41937998  | 41938319  | 322 |
| chr24 | 1530935   | 1531256   | 322 |
| chr23 | 40622719  | 40623040  | 322 |
| chr23 | 27226412  | 27226733  | 322 |
| chr22 | 54874358  | 54874679  | 322 |
| chr22 | 46333011  | 46333332  | 322 |
| chr22 | 29670950  | 29671271  | 322 |
| chr21 | 58579946  | 58580267  | 322 |

|       |           |           |     |
|-------|-----------|-----------|-----|
| chr21 | 33927783  | 33928104  | 322 |
| chr20 | 66545631  | 66545952  | 322 |
| chr20 | 7006080   | 7006401   | 322 |
| chr2  | 130115789 | 130116110 | 322 |
| chr19 | 46658939  | 46659260  | 322 |
| chr19 | 45768051  | 45768372  | 322 |
| chr19 | 42122690  | 42123011  | 322 |
| chr19 | 33501991  | 33502312  | 322 |
| chr19 | 23273570  | 23273891  | 322 |
| chr19 | 22561182  | 22561503  | 322 |
| chr18 | 35137959  | 35138280  | 322 |
| chr18 | 18426331  | 18426652  | 322 |
| chr17 | 70019144  | 70019465  | 322 |
| chr16 | 68763211  | 68763532  | 322 |
| chr14 | 23438362  | 23438683  | 322 |
| chr13 | 75952180  | 75952501  | 322 |
| chr13 | 41491836  | 41492157  | 322 |
| chr13 | 40513737  | 40514058  | 322 |
| chr11 | 106297363 | 106297684 | 322 |
| chr11 | 106296316 | 106296637 | 322 |
| chr11 | 72706355  | 72706676  | 322 |
| chr11 | 28436240  | 28436561  | 322 |
| chr10 | 88200308  | 88200629  | 322 |
| chr10 | 58997985  | 58998306  | 322 |
| chr10 | 22293852  | 22294173  | 322 |
| chr1  | 147181044 | 147181365 | 322 |
| chr1  | 8724905   | 8725226   | 322 |
| chrX  | 78716842  | 78717162  | 321 |
| chrX  | 78442839  | 78443159  | 321 |
| chrX  | 74322072  | 74322392  | 321 |
| chrX  | 72428291  | 72428611  | 321 |
| chrX  | 62274405  | 62274725  | 321 |
| chrX  | 37408548  | 37408868  | 321 |
| chrX  | 20752699  | 20753019  | 321 |
| chrX  | 15705489  | 15705809  | 321 |
| chrX  | 8461909   | 8462229   | 321 |
| chrX  | 2415659   | 2415979   | 321 |
| chr9  | 77731468  | 77731788  | 321 |
| chr8  | 111844770 | 111845090 | 321 |
| chr8  | 24655984  | 24656304  | 321 |
| chr7  | 38725052  | 38725372  | 321 |
| chr7  | 18482412  | 18482732  | 321 |
| chr6  | 119557505 | 119557825 | 321 |
| chr5  | 113789829 | 113790149 | 321 |
| chr5  | 61158273  | 61158593  | 321 |
| chr5  | 32930188  | 32930508  | 321 |
| chr4  | 72031266  | 72031586  | 321 |
| chr3  | 121667936 | 121668256 | 321 |
| chr3  | 62014399  | 62014719  | 321 |
| chr3  | 8175392   | 8175712   | 321 |



|       |               |           |     |
|-------|---------------|-----------|-----|
| chr29 | 49119006      | 49119326  | 321 |
| chr29 | 47972656      | 47972976  | 321 |
| chr26 | 34989297      | 34989617  | 321 |
| chr25 | 29424817      | 29425137  | 321 |
| chr24 | 33948789      | 33949109  | 321 |
| chr24 | 20379624      | 20379944  | 321 |
| chr22 | 58619523      | 58619843  | 321 |
| chr21 | 64060445      | 64060765  | 321 |
| chr21 | 21080513      | 21080833  | 321 |
| chr20 | 38864012      | 38864332  | 321 |
| chr20 | 33561236      | 33561556  | 321 |
| chr20 | 6653608       | 6653928   | 321 |
| chr2  | 128579932     | 128580252 | 321 |
| chr19 | 56605400      | 56605720  | 321 |
| chr19 | 48702809      | 48703129  | 321 |
| chr18 | 56923631      | 56923951  | 321 |
| chr17 | 69534676      | 69534996  | 321 |
| chr17 | 48113246      | 48113566  | 321 |
| chr16 | 44711595      | 44711915  | 321 |
| chr16 | 2898861       | 2899181   | 321 |
| chr15 | 39635639      | 39635959  | 321 |
| chr15 | 25501056      | 25501376  | 321 |
| chr13 | 81677142      | 81677462  | 321 |
| chr13 | 59646452      | 59646772  | 321 |
| chr11 | 84636130      | 84636450  | 321 |
| chr10 | 16675065      | 16675385  | 321 |
| chr1  | 73122494      | 73122814  | 321 |
| chrX  | 77505964      | 77506283  | 320 |
| chrX  | 59462895      | 59463214  | 320 |
| chrX  | 37277352      | 37277671  | 320 |
| chrX  | 36265976      | 36266295  | 320 |
| chrX  | 33126033      | 33126352  | 320 |
| chrX  | 30962380      | 30962699  | 320 |
| chrX  | 19089253      | 19089572  | 320 |
| chrX  | 16328356      | 16328675  | 320 |
| chrX  | 12268325      | 12268644  | 320 |
| chrX  | 10791230      | 10791549  | 320 |
| chrX  | 6419071       | 6419390   | 320 |
| chr8  | 89423691      | 89424010  | 320 |
| chr8  | 7980048       | 7980367   | 320 |
| chr8  | 683891 684210 | 320       |     |
| chr7  | 71678838      | 71679157  | 320 |
| chr7  | 60536924      | 60537243  | 320 |
| chr7  | 18840926      | 18841245  | 320 |
| chr6  | 121789479     | 121789798 | 320 |
| chr6  | 117506095     | 117506414 | 320 |
| chr5  | 120461969     | 120462288 | 320 |
| chr5  | 69092122      | 69092441  | 320 |
| chr5  | 31228509      | 31228828  | 320 |
| chr3  | 115628434     | 115628753 | 320 |

|       |           |           |     |
|-------|-----------|-----------|-----|
| chr3  | 21937955  | 21938274  | 320 |
| chr3  | 10301760  | 10302079  | 320 |
| chr3  | 2497026   | 2497345   | 320 |
| chr29 | 37332837  | 37333156  | 320 |
| chr26 | 49252041  | 49252360  | 320 |
| chr26 | 33762706  | 33763025  | 320 |
| chr25 | 34432109  | 34432428  | 320 |
| chr24 | 60783698  | 60784017  | 320 |
| chr24 | 35427864  | 35428183  | 320 |
| chr23 | 19994822  | 19995141  | 320 |
| chr22 | 54491505  | 54491824  | 320 |
| chr22 | 46300484  | 46300803  | 320 |
| chr21 | 22691004  | 22691323  | 320 |
| chr19 | 55762852  | 55763171  | 320 |
| chr19 | 17132156  | 17132475  | 320 |
| chr18 | 31856119  | 31856438  | 320 |
| chr18 | 11192148  | 11192467  | 320 |
| chr18 | 1784759   | 1785078   | 320 |
| chr16 | 75195548  | 75195867  | 320 |
| chr15 | 19964804  | 19965123  | 320 |
| chr14 | 31635916  | 31636235  | 320 |
| chr14 | 3939351   | 3939670   | 320 |
| chr13 | 66853999  | 66854318  | 320 |
| chr13 | 59629482  | 59629801  | 320 |
| chr13 | 41371413  | 41371732  | 320 |
| chr12 | 33088044  | 33088363  | 320 |
| chr12 | 14908699  | 14909018  | 320 |
| chr11 | 109869304 | 109869623 | 320 |
| chr10 | 71621861  | 71622180  | 320 |
| chr10 | 17039530  | 17039849  | 320 |
| chr1  | 158565217 | 158565536 | 320 |
| chr1  | 152272599 | 152272918 | 320 |
| chr1  | 123111572 | 123111891 | 320 |
| chrX  | 69615609  | 69615927  | 319 |
| chrX  | 49175307  | 49175625  | 319 |
| chrX  | 36083278  | 36083596  | 319 |
| chrX  | 33279992  | 33280310  | 319 |
| chrX  | 31071793  | 31072111  | 319 |
| chrX  | 18991875  | 18992193  | 319 |
| chrX  | 1326431   | 1326749   | 319 |
| chr9  | 90518844  | 90519162  | 319 |
| chr8  | 110759735 | 110760053 | 319 |
| chr8  | 72540779  | 72541097  | 319 |
| chr7  | 43740250  | 43740568  | 319 |
| chr7  | 11185109  | 11185427  | 319 |
| chr6  | 99222221  | 99222539  | 319 |
| chr6  | 14382507  | 14382825  | 319 |
| chr5  | 75201964  | 75202282  | 319 |
| chr4  | 5116735   | 5117053   | 319 |
| chr3  | 77729765  | 77730083  | 319 |

|       |               |           |     |
|-------|---------------|-----------|-----|
| chr29 | 48042018      | 48042336  | 319 |
| chr27 | 39884169      | 39884487  | 319 |
| chr27 | 301130 301448 |           | 319 |
| chr24 | 33872160      | 33872478  | 319 |
| chr23 | 49890549      | 49890867  | 319 |
| chr23 | 49862992      | 49863310  | 319 |
| chr23 | 49738990      | 49739308  | 319 |
| chr23 | 9450076       | 9450394   | 319 |
| chr22 | 60500078      | 60500396  | 319 |
| chr21 | 5991160       | 5991478   | 319 |
| chr2  | 139370108     | 139370426 | 319 |
| chr2  | 116945472     | 116945790 | 319 |
| chr19 | 47152518      | 47152836  | 319 |
| chr19 | 46615461      | 46615779  | 319 |
| chr19 | 40654444      | 40654762  | 319 |
| chr19 | 29883339      | 29883657  | 319 |
| chr19 | 27906260      | 27906578  | 319 |
| chr19 | 24516337      | 24516655  | 319 |
| chr19 | 21869970      | 21870288  | 319 |
| chr18 | 56763738      | 56764056  | 319 |
| chr18 | 22922638      | 22922956  | 319 |
| chr18 | 8185472       | 8185790   | 319 |
| chr18 | 4029395       | 4029713   | 319 |
| chr17 | 72713968      | 72714286  | 319 |
| chr17 | 70182636      | 70182954  | 319 |
| chr17 | 58888294      | 58888612  | 319 |
| chr16 | 39366036      | 39366354  | 319 |
| chr13 | 57366128      | 57366446  | 319 |
| chr11 | 107187950     | 107188268 | 319 |
| chr11 | 98425468      | 98425786  | 319 |
| chr11 | 68721869      | 68722187  | 319 |
| chr10 | 88085261      | 88085579  | 319 |
| chr10 | 86468295      | 86468613  | 319 |
| chr10 | 68043958      | 68044276  | 319 |
| chr10 | 17309428      | 17309746  | 319 |
| chr10 | 16735271      | 16735589  | 319 |
| chr1  | 159226038     | 159226356 | 319 |
| chrX  | 59854634      | 59854951  | 318 |
| chrX  | 55771088      | 55771405  | 318 |
| chrX  | 48869803      | 48870120  | 318 |
| chrX  | 46527867      | 46528184  | 318 |
| chrX  | 38277776      | 38278093  | 318 |
| chrX  | 35980089      | 35980406  | 318 |
| chrX  | 35679197      | 35679514  | 318 |
| chrX  | 21962671      | 21962988  | 318 |
| chrX  | 6611227       | 6611544   | 318 |
| chrX  | 5680047       | 5680364   | 318 |
| chrX  | 2013077       | 2013394   | 318 |
| chr9  | 100334845     | 100335162 | 318 |
| chr9  | 96397520      | 96397837  | 318 |

|       |               |           |     |
|-------|---------------|-----------|-----|
| chr9  | 90413824      | 90414141  | 318 |
| chr8  | 80837262      | 80837579  | 318 |
| chr8  | 5831828       | 5832145   | 318 |
| chr7  | 52396264      | 52396581  | 318 |
| chr7  | 50658797      | 50659114  | 318 |
| chr6  | 59761417      | 59761734  | 318 |
| chr5  | 111852020     | 111852337 | 318 |
| chr4  | 101667525     | 101667842 | 318 |
| chr3  | 110766699     | 110767016 | 318 |
| chr3  | 105442968     | 105443285 | 318 |
| chr3  | 7824863       | 7825180   | 318 |
| chr29 | 43482218      | 43482535  | 318 |
| chr29 | 17252895      | 17253212  | 318 |
| chr28 | 31324625      | 31324942  | 318 |
| chr27 | 24037931      | 24038248  | 318 |
| chr27 | 14412415      | 14412732  | 318 |
| chr26 | 43917192      | 43917509  | 318 |
| chr24 | 844061 844378 | 318       |     |
| chr22 | 60071956      | 60072273  | 318 |
| chr21 | 62912237      | 62912554  | 318 |
| chr21 | 26791100      | 26791417  | 318 |
| chr21 | 20030942      | 20031259  | 318 |
| chr21 | 18769865      | 18770182  | 318 |
| chr2  | 139505139     | 139505456 | 318 |
| chr19 | 27948874      | 27949191  | 318 |
| chr19 | 27240392      | 27240709  | 318 |
| chr19 | 21632768      | 21633085  | 318 |
| chr19 | 7756070       | 7756387   | 318 |
| chr18 | 49111792      | 49112109  | 318 |
| chr18 | 39917825      | 39918142  | 318 |
| chr17 | 64312902      | 64313219  | 318 |
| chr16 | 68059448      | 68059765  | 318 |
| chr16 | 3714797       | 3715114   | 318 |
| chr14 | 59481141      | 59481458  | 318 |
| chr14 | 29976008      | 29976325  | 318 |
| chr13 | 77400813      | 77401130  | 318 |
| chr13 | 67878389      | 67878706  | 318 |
| chr13 | 56091517      | 56091834  | 318 |
| chr13 | 33306042      | 33306359  | 318 |
| chr11 | 51348827      | 51349144  | 318 |
| chr1  | 141994157     | 141994474 | 318 |
| chrX  | 80158151      | 80158467  | 317 |
| chrX  | 69275125      | 69275441  | 317 |
| chrX  | 66519877      | 66520193  | 317 |
| chrX  | 64625690      | 64626006  | 317 |
| chrX  | 52988688      | 52989004  | 317 |
| chrX  | 50811269      | 50811585  | 317 |
| chrX  | 48726564      | 48726880  | 317 |
| chrX  | 47914607      | 47914923  | 317 |
| chrX  | 44810813      | 44811129  | 317 |

|       |           |           |     |
|-------|-----------|-----------|-----|
| chrX  | 32680098  | 32680414  | 317 |
| chrX  | 30443580  | 30443896  | 317 |
| chrX  | 21666710  | 21667026  | 317 |
| chrX  | 6655281   | 6655597   | 317 |
| chrX  | 3002532   | 3002848   | 317 |
| chr9  | 100050189 | 100050505 | 317 |
| chr8  | 114536753 | 114537069 | 317 |
| chr7  | 43083785  | 43084101  | 317 |
| chr5  | 59672684  | 59673000  | 317 |
| chr5  | 1100884   | 1101200   | 317 |
| chr3  | 127375942 | 127376258 | 317 |
| chr3  | 121907694 | 121908010 | 317 |
| chr3  | 114194012 | 114194328 | 317 |
| chr3  | 105629407 | 105629723 | 317 |
| chr3  | 22500236  | 22500552  | 317 |
| chr3  | 15385520  | 15385836  | 317 |
| chr27 | 48747192  | 48747508  | 317 |
| chr26 | 50666634  | 50666950  | 317 |
| chr26 | 48483594  | 48483910  | 317 |
| chr26 | 33319318  | 33319634  | 317 |
| chr24 | 59074605  | 59074921  | 317 |
| chr23 | 51736504  | 51736820  | 317 |
| chr23 | 46884913  | 46885229  | 317 |
| chr23 | 18161843  | 18162159  | 317 |
| chr22 | 59864992  | 59865308  | 317 |
| chr22 | 56684697  | 56685013  | 317 |
| chr21 | 56509140  | 56509456  | 317 |
| chr20 | 19368918  | 19369234  | 317 |
| chr2  | 48827574  | 48827890  | 317 |
| chr19 | 54622246  | 54622562  | 317 |
| chr19 | 32570695  | 32571011  | 317 |
| chr17 | 54360035  | 54360351  | 317 |
| chr16 | 63793442  | 63793758  | 317 |
| chr16 | 47133242  | 47133558  | 317 |
| chr15 | 25445226  | 25445542  | 317 |
| chr14 | 31502474  | 31502790  | 317 |
| chr13 | 79707663  | 79707979  | 317 |
| chr13 | 55716888  | 55717204  | 317 |
| chr12 | 74418597  | 74418913  | 317 |
| chr11 | 100888512 | 100888828 | 317 |
| chr10 | 35666161  | 35666477  | 317 |
| chr1  | 152098296 | 152098612 | 317 |
| chrX  | 74772791  | 74773106  | 316 |
| chrX  | 68853437  | 68853752  | 316 |
| chrX  | 64542701  | 64543016  | 316 |
| chrX  | 62405766  | 62406081  | 316 |
| chrX  | 53902046  | 53902361  | 316 |
| chrX  | 50252075  | 50252390  | 316 |
| chrX  | 49389259  | 49389574  | 316 |
| chrX  | 19148150  | 19148465  | 316 |

|       |               |           |     |
|-------|---------------|-----------|-----|
| chrX  | 11638083      | 11638398  | 316 |
| chrX  | 6598711       | 6599026   | 316 |
| chrX  | 588559 588874 |           | 316 |
| chr9  | 91015452      | 91015767  | 316 |
| chr8  | 72825947      | 72826262  | 316 |
| chr8  | 63517416      | 63517731  | 316 |
| chr8  | 59329686      | 59330001  | 316 |
| chr6  | 115608404     | 115608719 | 316 |
| chr5  | 120095131     | 120095446 | 316 |
| chr5  | 113227182     | 113227497 | 316 |
| chr5  | 81375163      | 81375478  | 316 |
| chr5  | 77772440      | 77772755  | 316 |
| chr4  | 99819143      | 99819458  | 316 |
| chr4  | 98748057      | 98748372  | 316 |
| chr4  | 69297474      | 69297789  | 316 |
| chr4  | 27034723      | 27035038  | 316 |
| chr3  | 121784250     | 121784565 | 316 |
| chr3  | 22541393      | 22541708  | 316 |
| chr29 | 37494967      | 37495282  | 316 |
| chr29 | 34404858      | 34405173  | 316 |
| chr29 | 33734141      | 33734456  | 316 |
| chr28 | 33559916      | 33560231  | 316 |
| chr28 | 26204996      | 26205311  | 316 |
| chr28 | 25375913      | 25376228  | 316 |
| chr27 | 6205757       | 6206072   | 316 |
| chr24 | 44371819      | 44372134  | 316 |
| chr20 | 73730007      | 73730322  | 316 |
| chr20 | 60980251      | 60980566  | 316 |
| chr2  | 139211042     | 139211357 | 316 |
| chr19 | 39358178      | 39358493  | 316 |
| chr19 | 29827605      | 29827920  | 316 |
| chr18 | 63033919      | 63034234  | 316 |
| chr18 | 11503366      | 11503681  | 316 |
| chr17 | 58772337      | 58772652  | 316 |
| chr16 | 77635082      | 77635397  | 316 |
| chr16 | 75814658      | 75814973  | 316 |
| chr16 | 72178637      | 72178952  | 316 |
| chr15 | 22542662      | 22542977  | 316 |
| chr13 | 23868145      | 23868460  | 316 |
| chr13 | 17657328      | 17657643  | 316 |
| chr12 | 30659109      | 30659424  | 316 |
| chr12 | 17198547      | 17198862  | 316 |
| chr10 | 75479310      | 75479625  | 316 |
| chr1  | 1701990       | 1702305   | 316 |
| chrX  | 72419807      | 72420121  | 315 |
| chrX  | 57801913      | 57802227  | 315 |
| chrX  | 56681044      | 56681358  | 315 |
| chrX  | 47903866      | 47904180  | 315 |
| chrX  | 31555546      | 31555860  | 315 |
| chrX  | 12983257      | 12983571  | 315 |

|       |           |           |     |
|-------|-----------|-----------|-----|
| chrX  | 8409059   | 8409373   | 315 |
| chrX  | 5682850   | 5683164   | 315 |
| chr9  | 90570170  | 90570484  | 315 |
| chr7  | 79733717  | 79734031  | 315 |
| chr7  | 46188098  | 46188412  | 315 |
| chr7  | 8841848   | 8842162   | 315 |
| chr5  | 1113634   | 1113948   | 315 |
| chr4  | 104692746 | 104693060 | 315 |
| chr3  | 125754523 | 125754837 | 315 |
| chr3  | 121919272 | 121919586 | 315 |
| chr3  | 116179987 | 116180301 | 315 |
| chr3  | 85595039  | 85595353  | 315 |
| chr3  | 52140242  | 52140556  | 315 |
| chr3  | 17995888  | 17996202  | 315 |
| chr3  | 17316295  | 17316609  | 315 |
| chr29 | 44588683  | 44588997  | 315 |
| chr29 | 36889659  | 36889973  | 315 |
| chr28 | 26782114  | 26782428  | 315 |
| chr26 | 40582621  | 40582935  | 315 |
| chr26 | 14966584  | 14966898  | 315 |
| chr25 | 22162896  | 22163210  | 315 |
| chr24 | 40782111  | 40782425  | 315 |
| chr22 | 49999320  | 49999634  | 315 |
| chr22 | 49566919  | 49567233  | 315 |
| chr21 | 66401360  | 66401674  | 315 |
| chr21 | 12002021  | 12002335  | 315 |
| chr21 | 6518664   | 6518978   | 315 |
| chr2  | 63574028  | 63574342  | 315 |
| chr19 | 56044914  | 56045228  | 315 |
| chr19 | 55405179  | 55405493  | 315 |
| chr19 | 46796797  | 46797111  | 315 |
| chr19 | 46328125  | 46328439  | 315 |
| chr19 | 30778428  | 30778742  | 315 |
| chr19 | 24641365  | 24641679  | 315 |
| chr19 | 16060211  | 16060525  | 315 |
| chr19 | 13907356  | 13907670  | 315 |
| chr19 | 11016156  | 11016470  | 315 |
| chr18 | 55012937  | 55013251  | 315 |
| chr18 | 45574524  | 45574838  | 315 |
| chr18 | 11518807  | 11519121  | 315 |
| chr16 | 75617806  | 75618120  | 315 |
| chr16 | 44380735  | 44381049  | 315 |
| chr13 | 73623868  | 73624182  | 315 |
| chr13 | 7020369   | 7020683   | 315 |
| chr12 | 48050231  | 48050545  | 315 |
| chr11 | 11772596  | 11772910  | 315 |
| chr10 | 7655397   | 7655711   | 315 |
| chr1  | 152218152 | 152218466 | 315 |
| chrX  | 70070727  | 70071040  | 314 |
| chrX  | 69119926  | 69120239  | 314 |

|       |               |           |     |
|-------|---------------|-----------|-----|
| chrX  | 66469021      | 66469334  | 314 |
| chrX  | 60084929      | 60085242  | 314 |
| chrX  | 56877574      | 56877887  | 314 |
| chrX  | 49214263      | 49214576  | 314 |
| chrX  | 21637195      | 21637508  | 314 |
| chrX  | 19685590      | 19685903  | 314 |
| chrX  | 13644805      | 13645118  | 314 |
| chrX  | 9837235       | 9837548   | 314 |
| chrX  | 8530551       | 8530864   | 314 |
| chrX  | 7131390       | 7131703   | 314 |
| chr9  | 107037602     | 107037915 | 314 |
| chr7  | 59507121      | 59507434  | 314 |
| chr7  | 5406836       | 5407149   | 314 |
| chr5  | 114775629     | 114775942 | 314 |
| chr5  | 30477177      | 30477490  | 314 |
| chr4  | 123050172     | 123050485 | 314 |
| chr3  | 116396110     | 116396423 | 314 |
| chr3  | 115756733     | 115757046 | 314 |
| chr3  | 111659833     | 111660146 | 314 |
| chr3  | 22934376      | 22934689  | 314 |
| chr29 | 33598114      | 33598427  | 314 |
| chr28 | 35085480      | 35085793  | 314 |
| chr27 | 44747988      | 44748301  | 314 |
| chr27 | 674002 674315 | 314       |     |
| chr26 | 46924003      | 46924316  | 314 |
| chr26 | 44124427      | 44124740  | 314 |
| chr26 | 22226810      | 22227123  | 314 |
| chr25 | 1228340       | 1228653   | 314 |
| chr25 | 852314 852627 | 314       |     |
| chr22 | 59188189      | 59188502  | 314 |
| chr21 | 58230652      | 58230965  | 314 |
| chr2  | 25232115      | 25232428  | 314 |
| chr19 | 38603092      | 38603405  | 314 |
| chr19 | 24156757      | 24157070  | 314 |
| chr19 | 10769994      | 10770307  | 314 |
| chr18 | 2254521       | 2254834   | 314 |
| chr16 | 69694681      | 69694994  | 314 |
| chr16 | 47466188      | 47466501  | 314 |
| chr14 | 14103607      | 14103920  | 314 |
| chr13 | 66881510      | 66881823  | 314 |
| chr11 | 77536012      | 77536325  | 314 |
| chr11 | 12066711      | 12067024  | 314 |
| chr10 | 85918529      | 85918842  | 314 |
| chr10 | 25550591      | 25550904  | 314 |
| chr1  | 99873480      | 99873793  | 314 |
| chrX  | 82071489      | 82071801  | 313 |
| chrX  | 74512935      | 74513247  | 313 |
| chrX  | 72125858      | 72126170  | 313 |
| chrX  | 69998617      | 69998929  | 313 |
| chrX  | 63137812      | 63138124  | 313 |



|       |           |           |     |
|-------|-----------|-----------|-----|
| chrX  | 53439698  | 53440010  | 313 |
| chrX  | 35136743  | 35137055  | 313 |
| chrX  | 31548421  | 31548733  | 313 |
| chrX  | 29593794  | 29594106  | 313 |
| chrX  | 12522437  | 12522749  | 313 |
| chrX  | 8691180   | 8691492   | 313 |
| chr9  | 62433186  | 62433498  | 313 |
| chr9  | 35531271  | 35531583  | 313 |
| chr9  | 26589871  | 26590183  | 313 |
| chr7  | 46550647  | 46550959  | 313 |
| chr7  | 19913831  | 19914143  | 313 |
| chr7  | 10819728  | 10820040  | 313 |
| chr7  | 9627303   | 9627615   | 313 |
| chr5  | 122276076 | 122276388 | 313 |
| chr5  | 112590313 | 112590625 | 313 |
| chr5  | 53820090  | 53820402  | 313 |
| chr5  | 23515829  | 23516141  | 313 |
| chr3  | 115861269 | 115861581 | 313 |
| chr29 | 34300815  | 34301127  | 313 |
| chr26 | 44478734  | 44479046  | 313 |
| chr25 | 36697862  | 36698174  | 313 |
| chr24 | 55942971  | 55943283  | 313 |
| chr23 | 19636747  | 19637059  | 313 |
| chr23 | 17625247  | 17625559  | 313 |
| chr22 | 61138024  | 61138336  | 313 |
| chr22 | 60007455  | 60007767  | 313 |
| chr22 | 58367224  | 58367536  | 313 |
| chr22 | 44637214  | 44637526  | 313 |
| chr22 | 41732746  | 41733058  | 313 |
| chr2  | 124979641 | 124979953 | 313 |
| chr2  | 117716756 | 117717068 | 313 |
| chr19 | 61315180  | 61315492  | 313 |
| chr19 | 34007538  | 34007850  | 313 |
| chr19 | 32318743  | 32319055  | 313 |
| chr18 | 31959866  | 31960178  | 313 |
| chr18 | 11700858  | 11701170  | 313 |
| chr17 | 70186615  | 70186927  | 313 |
| chr17 | 70091883  | 70092195  | 313 |
| chr16 | 74119883  | 74120195  | 313 |
| chr15 | 73394848  | 73395160  | 313 |
| chr15 | 64764807  | 64765119  | 313 |
| chr15 | 36253873  | 36254185  | 313 |
| chr15 | 28224396  | 28224708  | 313 |
| chr14 | 39912088  | 39912400  | 313 |
| chr13 | 81679623  | 81679935  | 313 |
| chr13 | 77777524  | 77777836  | 313 |
| chr13 | 61226338  | 61226650  | 313 |
| chr13 | 51976727  | 51977039  | 313 |
| chr13 | 35532031  | 35532343  | 313 |
| chr13 | 17659005  | 17659317  | 313 |

|       |           |           |     |
|-------|-----------|-----------|-----|
| chr12 | 84677946  | 84678258  | 313 |
| chr12 | 31168024  | 31168336  | 313 |
| chr11 | 100688555 | 100688867 | 313 |
| chr11 | 13015563  | 13015875  | 313 |
| chr10 | 16947532  | 16947844  | 313 |
| chr10 | 12732371  | 12732683  | 313 |
| chrX  | 78603623  | 78603934  | 312 |
| chrX  | 62254568  | 62254879  | 312 |
| chrX  | 61875067  | 61875378  | 312 |
| chrX  | 57614062  | 57614373  | 312 |
| chrX  | 56258684  | 56258995  | 312 |
| chrX  | 40422349  | 40422660  | 312 |
| chrX  | 21376120  | 21376431  | 312 |
| chrX  | 19367469  | 19367780  | 312 |
| chrX  | 10109591  | 10109902  | 312 |
| chrX  | 8860160   | 8860471   | 312 |
| chr9  | 90872239  | 90872550  | 312 |
| chr9  | 76810081  | 76810392  | 312 |
| chr8  | 116376848 | 116377159 | 312 |
| chr7  | 106527268 | 106527579 | 312 |
| chr7  | 44613709  | 44614020  | 312 |
| chr7  | 13266181  | 13266492  | 312 |
| chr4  | 110809189 | 110809500 | 312 |
| chr3  | 125188375 | 125188686 | 312 |
| chr3  | 123692896 | 123693207 | 312 |
| chr29 | 51981248  | 51981559  | 312 |
| chr29 | 17246972  | 17247283  | 312 |
| chr28 | 42403880  | 42404191  | 312 |
| chr26 | 22240710  | 22241021  | 312 |
| chr26 | 20242698  | 20243009  | 312 |
| chr25 | 37102927  | 37103238  | 312 |
| chr25 | 34374442  | 34374753  | 312 |
| chr22 | 52236751  | 52237062  | 312 |
| chr21 | 6466286   | 6466597   | 312 |
| chr20 | 16145823  | 16146134  | 312 |
| chr18 | 51544147  | 51544458  | 312 |
| chr18 | 25879700  | 25880011  | 312 |
| chr18 | 19361536  | 19361847  | 312 |
| chr17 | 75056705  | 75057016  | 312 |
| chr17 | 62954218  | 62954529  | 312 |
| chr16 | 61187780  | 61188091  | 312 |
| chr16 | 44144044  | 44144355  | 312 |
| chr15 | 81623403  | 81623714  | 312 |
| chr15 | 78172419  | 78172730  | 312 |
| chr15 | 22754638  | 22754949  | 312 |
| chr14 | 69595461  | 69595772  | 312 |
| chr14 | 40096449  | 40096760  | 312 |
| chr14 | 31073754  | 31074065  | 312 |
| chr14 | 8151670   | 8151981   | 312 |
| chr13 | 59509145  | 59509456  | 312 |

|       |               |           |     |
|-------|---------------|-----------|-----|
| chr13 | 58898421      | 58898732  | 312 |
| chr13 | 49830826      | 49831137  | 312 |
| chr12 | 54227277      | 54227588  | 312 |
| chr12 | 31581957      | 31582268  | 312 |
| chr11 | 27598167      | 27598478  | 312 |
| chr11 | 20961539      | 20961850  | 312 |
| chr10 | 88204649      | 88204960  | 312 |
| chr10 | 18335384      | 18335695  | 312 |
| chr10 | 17105812      | 17106123  | 312 |
| chrX  | 80594882      | 80595192  | 311 |
| chrX  | 74316984      | 74317294  | 311 |
| chrX  | 69703178      | 69703488  | 311 |
| chrX  | 30931482      | 30931792  | 311 |
| chrX  | 8518907       | 8519217   | 311 |
| chrX  | 603410 603720 | 311       |     |
| chr9  | 90804336      | 90804646  | 311 |
| chr8  | 86760417      | 86760727  | 311 |
| chr8  | 63761108      | 63761418  | 311 |
| chr7  | 71404161      | 71404471  | 311 |
| chr6  | 119402326     | 119402636 | 311 |
| chr6  | 115636641     | 115636951 | 311 |
| chr5  | 120125999     | 120126309 | 311 |
| chr5  | 117284787     | 117285097 | 311 |
| chr5  | 71208127      | 71208437  | 311 |
| chr5  | 30046598      | 30046908  | 311 |
| chr5  | 29960501      | 29960811  | 311 |
| chr5  | 10431316      | 10431626  | 311 |
| chr3  | 121606785     | 121607095 | 311 |
| chr3  | 43206066      | 43206376  | 311 |
| chr3  | 8580467       | 8580777   | 311 |
| chr29 | 43440988      | 43441298  | 311 |
| chr29 | 42915999      | 42916309  | 311 |
| chr29 | 36503405      | 36503715  | 311 |
| chr25 | 43551512      | 43551822  | 311 |
| chr23 | 11930179      | 11930489  | 311 |
| chr23 | 11895053      | 11895363  | 311 |
| chr22 | 59558887      | 59559197  | 311 |
| chr22 | 52774626      | 52774936  | 311 |
| chr22 | 45367311      | 45367621  | 311 |
| chr22 | 30173347      | 30173657  | 311 |
| chr21 | 9525718       | 9526028   | 311 |
| chr20 | 71442280      | 71442590  | 311 |
| chr20 | 18515916      | 18516226  | 311 |
| chr2  | 135605310     | 135605620 | 311 |
| chr19 | 60822847      | 60823157  | 311 |
| chr19 | 58650392      | 58650702  | 311 |
| chr19 | 58406049      | 58406359  | 311 |
| chr19 | 41925074      | 41925384  | 311 |
| chr18 | 53884900      | 53885210  | 311 |
| chr18 | 38787145      | 38787455  | 311 |

|       |           |           |     |
|-------|-----------|-----------|-----|
| chr18 | 22037812  | 22038122  | 311 |
| chr18 | 10802986  | 10803296  | 311 |
| chr18 | 3963111   | 3963421   | 311 |
| chr18 | 3557589   | 3557899   | 311 |
| chr17 | 69494953  | 69495263  | 311 |
| chr17 | 69325849  | 69326159  | 311 |
| chr17 | 68242554  | 68242864  | 311 |
| chr17 | 18371240  | 18371550  | 311 |
| chr15 | 64200210  | 64200520  | 311 |
| chr15 | 40633186  | 40633496  | 311 |
| chr15 | 29379880  | 29380190  | 311 |
| chr14 | 7799017   | 7799327   | 311 |
| chr13 | 68230181  | 68230491  | 311 |
| chr13 | 46239186  | 46239496  | 311 |
| chr13 | 40991026  | 40991336  | 311 |
| chr11 | 96148609  | 96148919  | 311 |
| chr11 | 92247490  | 92247800  | 311 |
| chr11 | 87904045  | 87904355  | 311 |
| chr11 | 82907719  | 82908029  | 311 |
| chr11 | 11545087  | 11545397  | 311 |
| chr10 | 99827748  | 99828058  | 311 |
| chr1  | 128261210 | 128261520 | 311 |
| chr1  | 84306960  | 84307270  | 311 |
| chrX  | 78333826  | 78334135  | 310 |
| chrX  | 78167266  | 78167575  | 310 |
| chrX  | 75700571  | 75700880  | 310 |
| chrX  | 75368702  | 75369011  | 310 |
| chrX  | 72376369  | 72376678  | 310 |
| chrX  | 68599284  | 68599593  | 310 |
| chrX  | 66259353  | 66259662  | 310 |
| chrX  | 62982275  | 62982584  | 310 |
| chrX  | 50549033  | 50549342  | 310 |
| chrX  | 48079729  | 48080038  | 310 |
| chrX  | 38950900  | 38951209  | 310 |
| chrX  | 35986150  | 35986459  | 310 |
| chrX  | 30675674  | 30675983  | 310 |
| chrX  | 1935692   | 1936001   | 310 |
| chr9  | 100078274 | 100078583 | 310 |
| chr8  | 108676398 | 108676707 | 310 |
| chr6  | 115507377 | 115507686 | 310 |
| chr6  | 30817992  | 30818301  | 310 |
| chr5  | 74690967  | 74691276  | 310 |
| chr5  | 35016669  | 35016978  | 310 |
| chr5  | 10623676  | 10623985  | 310 |
| chr3  | 105116308 | 105116617 | 310 |
| chr3  | 94323186  | 94323495  | 310 |
| chr3  | 30001685  | 30001994  | 310 |
| chr29 | 31448576  | 31448885  | 310 |
| chr27 | 34733046  | 34733355  | 310 |
| chr26 | 42206063  | 42206372  | 310 |

|       |           |           |     |
|-------|-----------|-----------|-----|
| chr24 | 60730273  | 60730582  | 310 |
| chr23 | 44867508  | 44867817  | 310 |
| chr23 | 43170396  | 43170705  | 310 |
| chr23 | 18649617  | 18649926  | 310 |
| chr23 | 15963381  | 15963690  | 310 |
| chr22 | 56253444  | 56253753  | 310 |
| chr22 | 42444925  | 42445234  | 310 |
| chr20 | 4974683   | 4974992   | 310 |
| chr20 | 3225757   | 3226066   | 310 |
| chr2  | 30962395  | 30962704  | 310 |
| chr19 | 27380142  | 27380451  | 310 |
| chr19 | 20838351  | 20838660  | 310 |
| chr19 | 18208266  | 18208575  | 310 |
| chr19 | 16015023  | 16015332  | 310 |
| chr18 | 25880803  | 25881112  | 310 |
| chr18 | 24020352  | 24020661  | 310 |
| chr18 | 12083046  | 12083355  | 310 |
| chr17 | 57662805  | 57663114  | 310 |
| chr16 | 43090495  | 43090804  | 310 |
| chr16 | 39565382  | 39565691  | 310 |
| chr15 | 27698152  | 27698461  | 310 |
| chr13 | 74616444  | 74616753  | 310 |
| chr13 | 63170615  | 63170924  | 310 |
| chr13 | 41013831  | 41014140  | 310 |
| chr13 | 40345316  | 40345625  | 310 |
| chr13 | 16021261  | 16021570  | 310 |
| chr11 | 14179295  | 14179604  | 310 |
| chr10 | 92310498  | 92310807  | 310 |
| chr10 | 76397518  | 76397827  | 310 |
| chrX  | 81974661  | 81974969  | 309 |
| chrX  | 77173066  | 77173374  | 309 |
| chrX  | 75748634  | 75748942  | 309 |
| chrX  | 74128362  | 74128670  | 309 |
| chrX  | 73834217  | 73834525  | 309 |
| chrX  | 64656001  | 64656309  | 309 |
| chrX  | 59670079  | 59670387  | 309 |
| chrX  | 37596671  | 37596979  | 309 |
| chrX  | 37370043  | 37370351  | 309 |
| chrX  | 21641432  | 21641740  | 309 |
| chrX  | 20653743  | 20654051  | 309 |
| chrX  | 18334969  | 18335277  | 309 |
| chrX  | 6825191   | 6825499   | 309 |
| chr8  | 8047629   | 8047937   | 309 |
| chr7  | 44954527  | 44954835  | 309 |
| chr7  | 38257212  | 38257520  | 309 |
| chr6  | 121723639 | 121723947 | 309 |
| chr6  | 121625698 | 121626006 | 309 |
| chr6  | 120746241 | 120746549 | 309 |
| chr6  | 65881865  | 65882173  | 309 |
| chr5  | 122835668 | 122835976 | 309 |

|       |           |           |     |
|-------|-----------|-----------|-----|
| chr5  | 113191124 | 113191432 | 309 |
| chr5  | 111398110 | 111398418 | 309 |
| chr5  | 64427869  | 64428177  | 309 |
| chr5  | 60381742  | 60382050  | 309 |
| chr4  | 123592770 | 123593078 | 309 |
| chr4  | 69739048  | 69739356  | 309 |
| chr3  | 116414717 | 116415025 | 309 |
| chr3  | 23625204  | 23625512  | 309 |
| chr29 | 5404122   | 5404430   | 309 |
| chr26 | 22164088  | 22164396  | 309 |
| chr25 | 37532787  | 37533095  | 309 |
| chr25 | 21914735  | 21915043  | 309 |
| chr23 | 44289809  | 44290117  | 309 |
| chr21 | 47727784  | 47728092  | 309 |
| chr21 | 28336602  | 28336910  | 309 |
| chr21 | 20746257  | 20746565  | 309 |
| chr20 | 1383375   | 1383683   | 309 |
| chr19 | 56575114  | 56575422  | 309 |
| chr19 | 47176746  | 47177054  | 309 |
| chr16 | 2161072   | 2161380   | 309 |
| chr15 | 54482159  | 54482467  | 309 |
| chr15 | 5014545   | 5014853   | 309 |
| chr14 | 77344707  | 77345015  | 309 |
| chr13 | 75729236  | 75729544  | 309 |
| chr13 | 35583300  | 35583608  | 309 |
| chr12 | 35604302  | 35604610  | 309 |
| chr11 | 97591044  | 97591352  | 309 |
| chr11 | 12904221  | 12904529  | 309 |
| chr10 | 35660069  | 35660377  | 309 |
| chr1  | 119934646 | 119934954 | 309 |
| chr1  | 98995288  | 98995596  | 309 |
| chrX  | 60037941  | 60038248  | 308 |
| chrX  | 22946814  | 22947121  | 308 |
| chrX  | 20067256  | 20067563  | 308 |
| chr9  | 106841511 | 106841818 | 308 |
| chr9  | 45428096  | 45428403  | 308 |
| chr7  | 111117979 | 111118286 | 308 |
| chr7  | 45166212  | 45166519  | 308 |
| chr7  | 42768220  | 42768527  | 308 |
| chr6  | 47882522  | 47882829  | 308 |
| chr3  | 115980001 | 115980308 | 308 |
| chr3  | 99467465  | 99467772  | 308 |
| chr29 | 51748872  | 51749179  | 308 |
| chr29 | 33613884  | 33614191  | 308 |
| chr28 | 30530550  | 30530857  | 308 |
| chr26 | 39127844  | 39128151  | 308 |
| chr26 | 19946478  | 19946785  | 308 |
| chr23 | 44702764  | 44703071  | 308 |
| chr22 | 52853394  | 52853701  | 308 |
| chr21 | 57020426  | 57020733  | 308 |

|       |           |           |     |
|-------|-----------|-----------|-----|
| chr2  | 127220344 | 127220651 | 308 |
| chr2  | 56874685  | 56874992  | 308 |
| chr2  | 35950608  | 35950915  | 308 |
| chr19 | 64686843  | 64687150  | 308 |
| chr19 | 59297860  | 59298167  | 308 |
| chr17 | 59020435  | 59020742  | 308 |
| chr16 | 70301147  | 70301454  | 308 |
| chr16 | 68761838  | 68762145  | 308 |
| chr16 | 38855932  | 38856239  | 308 |
| chr16 | 38700630  | 38700937  | 308 |
| chr15 | 75623721  | 75624028  | 308 |
| chr15 | 58022014  | 58022321  | 308 |
| chr13 | 70058647  | 70058954  | 308 |
| chr13 | 22000214  | 22000521  | 308 |
| chr11 | 48654867  | 48655174  | 308 |
| chr10 | 70039115  | 70039422  | 308 |
| chr1  | 9072020   | 9072327   | 308 |
| chrX  | 72882166  | 72882472  | 307 |
| chrX  | 50923833  | 50924139  | 307 |
| chrX  | 50208639  | 50208945  | 307 |
| chrX  | 47771123  | 47771429  | 307 |
| chrX  | 36854097  | 36854403  | 307 |
| chrX  | 32405273  | 32405579  | 307 |
| chrX  | 20981269  | 20981575  | 307 |
| chrX  | 11665782  | 11666088  | 307 |
| chrX  | 10602301  | 10602607  | 307 |
| chrX  | 2549419   | 2549725   | 307 |
| chr9  | 100330996 | 100331302 | 307 |
| chr8  | 112062230 | 112062536 | 307 |
| chr8  | 91157775  | 91158081  | 307 |
| chr8  | 22647140  | 22647446  | 307 |
| chr8  | 7789302   | 7789608   | 307 |
| chr6  | 121057272 | 121057578 | 307 |
| chr5  | 122635969 | 122636275 | 307 |
| chr5  | 103585149 | 103585455 | 307 |
| chr4  | 104934934 | 104935240 | 307 |
| chr4  | 71514593  | 71514899  | 307 |
| chr3  | 121589385 | 121589691 | 307 |
| chr3  | 121588570 | 121588876 | 307 |
| chr3  | 89748108  | 89748414  | 307 |
| chr29 | 34584765  | 34585071  | 307 |
| chr29 | 31983158  | 31983464  | 307 |
| chr29 | 26519409  | 26519715  | 307 |
| chr28 | 45891510  | 45891816  | 307 |
| chr28 | 26802204  | 26802510  | 307 |
| chr27 | 23989744  | 23990050  | 307 |
| chr27 | 8837172   | 8837478   | 307 |
| chr25 | 28125353  | 28125659  | 307 |
| chr25 | 14735266  | 14735572  | 307 |
| chr23 | 7295854   | 7296160   | 307 |

|       |           |           |     |
|-------|-----------|-----------|-----|
| chr22 | 59425703  | 59426009  | 307 |
| chr21 | 31420541  | 31420847  | 307 |
| chr20 | 74112013  | 74112319  | 307 |
| chr20 | 73547499  | 73547805  | 307 |
| chr2  | 134395927 | 134396233 | 307 |
| chr2  | 127063083 | 127063389 | 307 |
| chr18 | 3642993   | 3643299   | 307 |
| chr17 | 70409399  | 70409705  | 307 |
| chr17 | 70401709  | 70402015  | 307 |
| chr16 | 44851629  | 44851935  | 307 |
| chr14 | 4060486   | 4060792   | 307 |
| chr13 | 59773433  | 59773739  | 307 |
| chr11 | 101013552 | 101013858 | 307 |
| chr11 | 82842969  | 82843275  | 307 |
| chr10 | 36913290  | 36913596  | 307 |
| chr10 | 21483835  | 21484141  | 307 |
| chr10 | 20942057  | 20942363  | 307 |
| chr1  | 144326702 | 144327008 | 307 |
| chr1  | 81767008  | 81767314  | 307 |
| chrX  | 73639581  | 73639886  | 306 |
| chrX  | 72547013  | 72547318  | 306 |
| chrX  | 65433128  | 65433433  | 306 |
| chrX  | 39198883  | 39199188  | 306 |
| chrX  | 39046163  | 39046468  | 306 |
| chrX  | 31252635  | 31252940  | 306 |
| chrX  | 7500926   | 7501231   | 306 |
| chr9  | 29882928  | 29883233  | 306 |
| chr6  | 120765218 | 120765523 | 306 |
| chr6  | 43231107  | 43231412  | 306 |
| chr5  | 118129367 | 118129672 | 306 |
| chr5  | 113921869 | 113922174 | 306 |
| chr5  | 33959366  | 33959671  | 306 |
| chr3  | 108298730 | 108299035 | 306 |
| chr3  | 93803949  | 93804254  | 306 |
| chr3  | 25811184  | 25811489  | 306 |
| chr29 | 32046388  | 32046693  | 306 |
| chr29 | 18108484  | 18108789  | 306 |
| chr28 | 34007001  | 34007306  | 306 |
| chr27 | 39219775  | 39220080  | 306 |
| chr27 | 34418845  | 34419150  | 306 |
| chr27 | 27436432  | 27436737  | 306 |
| chr26 | 43490284  | 43490589  | 306 |
| chr26 | 9552264   | 9552569   | 306 |
| chr24 | 43695557  | 43695862  | 306 |
| chr23 | 18620001  | 18620306  | 306 |
| chr22 | 45459003  | 45459308  | 306 |
| chr22 | 30283660  | 30283965  | 306 |
| chr22 | 5676454   | 5676759   | 306 |
| chr20 | 73106620  | 73106925  | 306 |
| chr2  | 114904680 | 114904985 | 306 |



|       |           |           |     |
|-------|-----------|-----------|-----|
| chr19 | 46325294  | 46325599  | 306 |
| chr18 | 38798674  | 38798979  | 306 |
| chr17 | 66438580  | 66438885  | 306 |
| chr17 | 63266705  | 63267010  | 306 |
| chr17 | 57807704  | 57808009  | 306 |
| chr17 | 54267606  | 54267911  | 306 |
| chr16 | 19597375  | 19597680  | 306 |
| chr15 | 24433719  | 24434024  | 306 |
| chr14 | 64001240  | 64001545  | 306 |
| chr14 | 30865119  | 30865424  | 306 |
| chr13 | 68863130  | 68863435  | 306 |
| chr11 | 100307385 | 100307690 | 306 |
| chr11 | 92150377  | 92150682  | 306 |
| chr11 | 71103138  | 71103443  | 306 |
| chr10 | 16824186  | 16824491  | 306 |
| chrX  | 71897534  | 71897838  | 305 |
| chrX  | 68561703  | 68562007  | 305 |
| chrX  | 66617477  | 66617781  | 305 |
| chrX  | 58849712  | 58850016  | 305 |
| chrX  | 44555764  | 44556068  | 305 |
| chrX  | 39296195  | 39296499  | 305 |
| chrX  | 35163836  | 35164140  | 305 |
| chrX  | 33239242  | 33239546  | 305 |
| chrX  | 21613331  | 21613635  | 305 |
| chrX  | 19269081  | 19269385  | 305 |
| chrX  | 12116267  | 12116571  | 305 |
| chrX  | 11044319  | 11044623  | 305 |
| chrX  | 6334659   | 6334963   | 305 |
| chrX  | 6269561   | 6269865   | 305 |
| chr8  | 63932061  | 63932365  | 305 |
| chr7  | 70811192  | 70811496  | 305 |
| chr5  | 60326180  | 60326484  | 305 |
| chr5  | 5364978   | 5365282   | 305 |
| chr4  | 98013216  | 98013520  | 305 |
| chr4  | 62035572  | 62035876  | 305 |
| chr29 | 31808081  | 31808385  | 305 |
| chr27 | 35944735  | 35945039  | 305 |
| chr26 | 33269697  | 33270001  | 305 |
| chr25 | 39171656  | 39171960  | 305 |
| chr25 | 30131325  | 30131629  | 305 |
| chr25 | 27719119  | 27719423  | 305 |
| chr24 | 34886812  | 34887116  | 305 |
| chr23 | 46276151  | 46276455  | 305 |
| chr23 | 17943774  | 17944078  | 305 |
| chr22 | 47936770  | 47937074  | 305 |
| chr21 | 25962023  | 25962327  | 305 |
| chr20 | 74079305  | 74079609  | 305 |
| chr2  | 36270754  | 36271058  | 305 |
| chr19 | 58814476  | 58814780  | 305 |
| chr19 | 58230137  | 58230441  | 305 |

|       |               |           |     |
|-------|---------------|-----------|-----|
| chr19 | 47837373      | 47837677  | 305 |
| chr19 | 40756744      | 40757048  | 305 |
| chr19 | 26981525      | 26981829  | 305 |
| chr18 | 48364117      | 48364421  | 305 |
| chr18 | 33697761      | 33698065  | 305 |
| chr18 | 11555604      | 11555908  | 305 |
| chr18 | 4866758       | 4867062   | 305 |
| chr17 | 66185689      | 66185993  | 305 |
| chr17 | 62575328      | 62575632  | 305 |
| chr16 | 71100696      | 71101000  | 305 |
| chr15 | 74569077      | 74569381  | 305 |
| chr14 | 36727480      | 36727784  | 305 |
| chr14 | 19390202      | 19390506  | 305 |
| chr14 | 630681 630985 | 305       | 305 |
| chr13 | 73054265      | 73054569  | 305 |
| chr13 | 26181736      | 26182040  | 305 |
| chr12 | 81956086      | 81956390  | 305 |
| chr12 | 73802899      | 73803203  | 305 |
| chr12 | 31980492      | 31980796  | 305 |
| chr11 | 105658390     | 105658694 | 305 |
| chr11 | 98898706      | 98899010  | 305 |
| chr11 | 48813771      | 48814075  | 305 |
| chr11 | 9258603       | 9258907   | 305 |
| chr10 | 16771885      | 16772189  | 305 |
| chrX  | 78554912      | 78555215  | 304 |
| chrX  | 78057191      | 78057494  | 304 |
| chrX  | 67031663      | 67031966  | 304 |
| chrX  | 48667544      | 48667847  | 304 |
| chrX  | 44811737      | 44812040  | 304 |
| chrX  | 35661714      | 35662017  | 304 |
| chrX  | 21438007      | 21438310  | 304 |
| chr9  | 71700646      | 71700949  | 304 |
| chr9  | 24601292      | 24601595  | 304 |
| chr8  | 114948793     | 114949096 | 304 |
| chr8  | 88721671      | 88721974  | 304 |
| chr5  | 60719791      | 60720094  | 304 |
| chr5  | 53821092      | 53821395  | 304 |
| chr4  | 117763090     | 117763393 | 304 |
| chr3  | 18619874      | 18620177  | 304 |
| chr29 | 36474167      | 36474470  | 304 |
| chr28 | 32500375      | 32500678  | 304 |
| chr26 | 37596032      | 37596335  | 304 |
| chr26 | 22349776      | 22350079  | 304 |
| chr25 | 33230502      | 33230805  | 304 |
| chr25 | 31874535      | 31874838  | 304 |
| chr23 | 31343975      | 31344278  | 304 |
| chr21 | 28329874      | 28330177  | 304 |
| chr21 | 19008514      | 19008817  | 304 |
| chr20 | 1558815       | 1559118   | 304 |
| chr2  | 139270642     | 139270945 | 304 |

|       |           |           |     |
|-------|-----------|-----------|-----|
| chr2  | 136429697 | 136430000 | 304 |
| chr19 | 58366340  | 58366643  | 304 |
| chr18 | 54208109  | 54208412  | 304 |
| chr18 | 40275614  | 40275917  | 304 |
| chr18 | 37224076  | 37224379  | 304 |
| chr18 | 18512029  | 18512332  | 304 |
| chr17 | 70698076  | 70698379  | 304 |
| chr17 | 69725145  | 69725448  | 304 |
| chr16 | 73689560  | 73689863  | 304 |
| chr16 | 70213567  | 70213870  | 304 |
| chr15 | 81161156  | 81161459  | 304 |
| chr15 | 25373418  | 25373721  | 304 |
| chr13 | 61245851  | 61246154  | 304 |
| chr13 | 57305318  | 57305621  | 304 |
| chr13 | 55119225  | 55119528  | 304 |
| chr13 | 47364200  | 47364503  | 304 |
| chr13 | 43402440  | 43402743  | 304 |
| chr13 | 22955842  | 22956145  | 304 |
| chr13 | 10983977  | 10984280  | 304 |
| chr10 | 52986983  | 52987286  | 304 |
| chr1  | 147089297 | 147089600 | 304 |
| chr1  | 82370141  | 82370444  | 304 |
| chr1  | 69846547  | 69846850  | 304 |
| chrX  | 84950615  | 84950917  | 303 |
| chrX  | 80058639  | 80058941  | 303 |
| chrX  | 75779702  | 75780004  | 303 |
| chrX  | 73863581  | 73863883  | 303 |
| chrX  | 66791126  | 66791428  | 303 |
| chrX  | 66294982  | 66295284  | 303 |
| chrX  | 65095712  | 65096014  | 303 |
| chrX  | 61747526  | 61747828  | 303 |
| chrX  | 61340097  | 61340399  | 303 |
| chrX  | 57138491  | 57138793  | 303 |
| chrX  | 34548373  | 34548675  | 303 |
| chrX  | 10422369  | 10422671  | 303 |
| chrX  | 9060697   | 9060999   | 303 |
| chrX  | 6599983   | 6600285   | 303 |
| chr8  | 93145086  | 93145388  | 303 |
| chr7  | 64565450  | 64565752  | 303 |
| chr5  | 88042437  | 88042739  | 303 |
| chr5  | 80287839  | 80288141  | 303 |
| chr5  | 30988905  | 30989207  | 303 |
| chr5  | 28241045  | 28241347  | 303 |
| chr4  | 124158089 | 124158391 | 303 |
| chr3  | 105400396 | 105400698 | 303 |
| chr3  | 2556829   | 2557131   | 303 |
| chr28 | 40534772  | 40535074  | 303 |
| chr26 | 50431283  | 50431585  | 303 |
| chr26 | 44473391  | 44473693  | 303 |
| chr24 | 35299452  | 35299754  | 303 |

|       |           |           |     |
|-------|-----------|-----------|-----|
| chr24 | 1398423   | 1398725   | 303 |
| chr24 | 1347812   | 1348114   | 303 |
| chr22 | 56391952  | 56392254  | 303 |
| chr22 | 30576912  | 30577214  | 303 |
| chr2  | 114199954 | 114200256 | 303 |
| chr2  | 99789373  | 99789675  | 303 |
| chr2  | 37360367  | 37360669  | 303 |
| chr19 | 54462757  | 54463059  | 303 |
| chr19 | 53564810  | 53565112  | 303 |
| chr19 | 30454038  | 30454340  | 303 |
| chr18 | 56615906  | 56616208  | 303 |
| chr18 | 35138528  | 35138830  | 303 |
| chr18 | 22712364  | 22712666  | 303 |
| chr18 | 3720457   | 3720759   | 303 |
| chr18 | 3605611   | 3605913   | 303 |
| chr17 | 74505747  | 74506049  | 303 |
| chr17 | 66860130  | 66860432  | 303 |
| chr16 | 38947200  | 38947502  | 303 |
| chr15 | 63687716  | 63688018  | 303 |
| chr14 | 42517160  | 42517462  | 303 |
| chr14 | 6019263   | 6019565   | 303 |
| chr14 | 3469595   | 3469897   | 303 |
| chr14 | 1958229   | 1958531   | 303 |
| chr13 | 63229493  | 63229795  | 303 |
| chr13 | 60418051  | 60418353  | 303 |
| chr13 | 41215298  | 41215600  | 303 |
| chr13 | 22822616  | 22822918  | 303 |
| chr11 | 91246086  | 91246388  | 303 |
| chr11 | 52303273  | 52303575  | 303 |
| chr10 | 70330804  | 70331106  | 303 |
| chr10 | 17622029  | 17622331  | 303 |
| chr10 | 16734479  | 16734781  | 303 |
| chrX  | 78733680  | 78733981  | 302 |
| chrX  | 76115394  | 76115695  | 302 |
| chrX  | 69039907  | 69040208  | 302 |
| chrX  | 59575199  | 59575500  | 302 |
| chrX  | 34146989  | 34147290  | 302 |
| chrX  | 12238919  | 12239220  | 302 |
| chrX  | 7120690   | 7120991   | 302 |
| chrX  | 5879421   | 5879722   | 302 |
| chrX  | 5576602   | 5576903   | 302 |
| chrX  | 5329335   | 5329636   | 302 |
| chrX  | 2030266   | 2030567   | 302 |
| chr9  | 104901075 | 104901376 | 302 |
| chr7  | 65577301  | 65577602  | 302 |
| chr7  | 10223291  | 10223592  | 302 |
| chr5  | 33931191  | 33931492  | 302 |
| chr5  | 30853611  | 30853912  | 302 |
| chr4  | 116827408 | 116827709 | 302 |
| chr3  | 124208606 | 124208907 | 302 |

|       |               |           |     |
|-------|---------------|-----------|-----|
| chr3  | 119214978     | 119215279 | 302 |
| chr3  | 28910843      | 28911144  | 302 |
| chr29 | 36812940      | 36813241  | 302 |
| chr28 | 44964806      | 44965107  | 302 |
| chr27 | 692416 692717 | 302       |     |
| chr23 | 48789397      | 48789698  | 302 |
| chr23 | 9992207       | 9992508   | 302 |
| chr2  | 131614139     | 131614440 | 302 |
| chr2  | 116951373     | 116951674 | 302 |
| chr2  | 101672723     | 101673024 | 302 |
| chr19 | 54700590      | 54700891  | 302 |
| chr19 | 46704143      | 46704444  | 302 |
| chr19 | 31566317      | 31566618  | 302 |
| chr19 | 16831961      | 16832262  | 302 |
| chr18 | 51754461      | 51754762  | 302 |
| chr18 | 51745775      | 51746076  | 302 |
| chr16 | 54485374      | 54485675  | 302 |
| chr15 | 22334233      | 22334534  | 302 |
| chr14 | 14025076      | 14025377  | 302 |
| chr12 | 82902139      | 82902440  | 302 |
| chr12 | 77069449      | 77069750  | 302 |
| chr12 | 13622903      | 13623204  | 302 |
| chr11 | 81608141      | 81608442  | 302 |
| chr10 | 88203004      | 88203305  | 302 |
| chr10 | 43556893      | 43557194  | 302 |
| chr10 | 15028320      | 15028621  | 302 |
| chr1  | 87368906      | 87369207  | 302 |
| chrX  | 81540026      | 81540326  | 301 |
| chrX  | 79377793      | 79378093  | 301 |
| chrX  | 66216125      | 66216425  | 301 |
| chrX  | 39134556      | 39134856  | 301 |
| chrX  | 33488567      | 33488867  | 301 |
| chrX  | 31910648      | 31910948  | 301 |
| chrX  | 20699008      | 20699308  | 301 |
| chrX  | 19831104      | 19831404  | 301 |
| chrX  | 17212458      | 17212758  | 301 |
| chrX  | 15601677      | 15601977  | 301 |
| chrX  | 8748445       | 8748745   | 301 |
| chrX  | 7791549       | 7791849   | 301 |
| chr9  | 102729458     | 102729758 | 301 |
| chr9  | 90591023      | 90591323  | 301 |
| chr8  | 65294751      | 65295051  | 301 |
| chr7  | 4917648       | 4917948   | 301 |
| chr7  | 1883176       | 1883476   | 301 |
| chr5  | 117173445     | 117173745 | 301 |
| chr4  | 8874707       | 8875007   | 301 |
| chr3  | 10826762      | 10827062  | 301 |
| chr29 | 34898872      | 34899172  | 301 |
| chr28 | 1199771       | 1200071   | 301 |
| chr26 | 38196015      | 38196315  | 301 |

|       |               |           |     |
|-------|---------------|-----------|-----|
| chr26 | 34862456      | 34862756  | 301 |
| chr24 | 40823672      | 40823972  | 301 |
| chr24 | 20911360      | 20911660  | 301 |
| chr23 | 27795354      | 27795654  | 301 |
| chr23 | 19935885      | 19936185  | 301 |
| chr22 | 58625296      | 58625596  | 301 |
| chr22 | 57202829      | 57203129  | 301 |
| chr22 | 54500865      | 54501165  | 301 |
| chr20 | 8387112       | 8387412   | 301 |
| chr2  | 10213811      | 10214111  | 301 |
| chr19 | 42143712      | 42144012  | 301 |
| chr19 | 39406273      | 39406573  | 301 |
| chr19 | 39344904      | 39345204  | 301 |
| chr19 | 29667544      | 29667844  | 301 |
| chr19 | 16083469      | 16083769  | 301 |
| chr18 | 11314783      | 11315083  | 301 |
| chr17 | 69357512      | 69357812  | 301 |
| chr16 | 77828398      | 77828698  | 301 |
| chr16 | 56107530      | 56107830  | 301 |
| chr16 | 3639197       | 3639497   | 301 |
| chr15 | 41308586      | 41308886  | 301 |
| chr15 | 41296078      | 41296378  | 301 |
| chr15 | 26601528      | 26601828  | 301 |
| chr13 | 80607313      | 80607613  | 301 |
| chr13 | 69645091      | 69645391  | 301 |
| chr13 | 17246875      | 17247175  | 301 |
| chr11 | 66715845      | 66716145  | 301 |
| chr10 | 68091698      | 68091998  | 301 |
| chr10 | 67001806      | 67002106  | 301 |
| chr1  | 37563973      | 37564273  | 301 |
| chrX  | 77048610      | 77048909  | 300 |
| chrX  | 58651987      | 58652286  | 300 |
| chrX  | 50165916      | 50166215  | 300 |
| chrX  | 48656982      | 48657281  | 300 |
| chrX  | 44838146      | 44838445  | 300 |
| chrX  | 39793723      | 39794022  | 300 |
| chrX  | 35294964      | 35295263  | 300 |
| chrX  | 28545200      | 28545499  | 300 |
| chrX  | 20054009      | 20054308  | 300 |
| chrX  | 19583772      | 19584071  | 300 |
| chrX  | 16948762      | 16949061  | 300 |
| chrX  | 2579904       | 2580203   | 300 |
| chr9  | 51591414      | 51591713  | 300 |
| chr8  | 108721962     | 108722261 | 300 |
| chr7  | 38204451      | 38204750  | 300 |
| chr4  | 72294234      | 72294533  | 300 |
| chr3  | 122217374     | 122217673 | 300 |
| chr28 | 32815015      | 32815314  | 300 |
| chr28 | 26450695      | 26450994  | 300 |
| chr27 | 824968 825267 | 300       |     |

|       |           |           |     |
|-------|-----------|-----------|-----|
| chr24 | 49115017  | 49115316  | 300 |
| chr24 | 1335573   | 1335872   | 300 |
| chr23 | 27967021  | 27967320  | 300 |
| chr22 | 58704296  | 58704595  | 300 |
| chr22 | 16398471  | 16398770  | 300 |
| chr22 | 13848733  | 13849032  | 300 |
| chr19 | 38739276  | 38739575  | 300 |
| chr19 | 38349210  | 38349509  | 300 |
| chr19 | 16118776  | 16119075  | 300 |
| chr18 | 50917462  | 50917761  | 300 |
| chr18 | 39499275  | 39499574  | 300 |
| chr18 | 25488092  | 25488391  | 300 |
| chr18 | 9983175   | 9983474   | 300 |
| chr17 | 67308835  | 67309134  | 300 |
| chr16 | 73245422  | 73245721  | 300 |
| chr16 | 44104370  | 44104669  | 300 |
| chr15 | 63726985  | 63727284  | 300 |
| chr15 | 25792697  | 25792996  | 300 |
| chr14 | 61738176  | 61738475  | 300 |
| chr13 | 78680754  | 78681053  | 300 |
| chr13 | 54993435  | 54993734  | 300 |
| chr11 | 82699629  | 82699928  | 300 |
| chr11 | 77504224  | 77504523  | 300 |
| chr10 | 19417591  | 19417890  | 300 |
| chr1  | 148211608 | 148211907 | 300 |
| chr1  | 132059545 | 132059844 | 300 |
| chr1  | 74770598  | 74770897  | 300 |
| chrX  | 57733711  | 57734009  | 299 |
| chrX  | 54088827  | 54089125  | 299 |
| chrX  | 38018031  | 38018329  | 299 |
| chrX  | 9859874   | 9860172   | 299 |
| chrX  | 9361745   | 9362043   | 299 |
| chrX  | 5713815   | 5714113   | 299 |
| chrX  | 3153816   | 3154114   | 299 |
| chrX  | 2408510   | 2408808   | 299 |
| chr9  | 70498129  | 70498427  | 299 |
| chr8  | 93330223  | 93330521  | 299 |
| chr8  | 65180881  | 65181179  | 299 |
| chr8  | 42204639  | 42204937  | 299 |
| chr7  | 46182670  | 46182968  | 299 |
| chr7  | 42192966  | 42193264  | 299 |
| chr5  | 122507596 | 122507894 | 299 |
| chr5  | 120459646 | 120459944 | 299 |
| chr5  | 27949718  | 27950016  | 299 |
| chr5  | 7218529   | 7218827   | 299 |
| chr3  | 121370815 | 121371113 | 299 |
| chr3  | 29617716  | 29618014  | 299 |
| chr3  | 25780637  | 25780935  | 299 |
| chr3  | 21904082  | 21904380  | 299 |
| chr3  | 13656260  | 13656558  | 299 |

|       |               |           |     |
|-------|---------------|-----------|-----|
| chr3  | 9269397       | 9269695   | 299 |
| chr26 | 50819395      | 50819693  | 299 |
| chr26 | 42098794      | 42099092  | 299 |
| chr25 | 41650383      | 41650681  | 299 |
| chr25 | 37787888      | 37788186  | 299 |
| chr25 | 30621142      | 30621440  | 299 |
| chr24 | 1314842       | 1315140   | 299 |
| chr23 | 19931787      | 19932085  | 299 |
| chr22 | 48323613      | 48323911  | 299 |
| chr22 | 47896767      | 47897065  | 299 |
| chr21 | 60709504      | 60709802  | 299 |
| chr20 | 23115734      | 23116032  | 299 |
| chr20 | 710452 710750 |           | 299 |
| chr2  | 118355401     | 118355699 | 299 |
| chr19 | 47295830      | 47296128  | 299 |
| chr19 | 37270065      | 37270363  | 299 |
| chr19 | 32853572      | 32853870  | 299 |
| chr19 | 26672215      | 26672513  | 299 |
| chr18 | 25801170      | 25801468  | 299 |
| chr17 | 6910842       | 6911140   | 299 |
| chr16 | 60037204      | 60037502  | 299 |
| chr15 | 29439669      | 29439967  | 299 |
| chr15 | 20718387      | 20718685  | 299 |
| chr14 | 11256263      | 11256561  | 299 |
| chr14 | 3971905       | 3972203   | 299 |
| chr13 | 57088356      | 57088654  | 299 |
| chr13 | 53826845      | 53827143  | 299 |
| chr13 | 41768605      | 41768903  | 299 |
| chr13 | 38916551      | 38916849  | 299 |
| chr13 | 9939341       | 9939639   | 299 |
| chr12 | 79977319      | 79977617  | 299 |
| chr11 | 46175724      | 46176022  | 299 |
| chr11 | 25837637      | 25837935  | 299 |
| chr1  | 136108637     | 136108935 | 299 |
| chr1  | 82951130      | 82951428  | 299 |
| chr1  | 74610381      | 74610679  | 299 |
| chr1  | 1500522       | 1500820   | 299 |
| chrX  | 68996612      | 68996909  | 298 |
| chrX  | 66683042      | 66683339  | 298 |
| chrX  | 64776513      | 64776810  | 298 |
| chrX  | 53884014      | 53884311  | 298 |
| chrX  | 40934610      | 40934907  | 298 |
| chrX  | 37737104      | 37737401  | 298 |
| chrX  | 37081283      | 37081580  | 298 |
| chrX  | 36882523      | 36882820  | 298 |
| chrX  | 34280465      | 34280762  | 298 |
| chrX  | 24581338      | 24581635  | 298 |
| chrX  | 22447342      | 22447639  | 298 |
| chrX  | 21204009      | 21204306  | 298 |
| chrX  | 16002633      | 16002930  | 298 |



|       |               |           |     |
|-------|---------------|-----------|-----|
| chrX  | 13906828      | 13907125  | 298 |
| chrX  | 2055181       | 2055478   | 298 |
| chr8  | 61032870      | 61033167  | 298 |
| chr8  | 5311195       | 5311492   | 298 |
| chr7  | 4934684       | 4934981   | 298 |
| chr6  | 115587731     | 115588028 | 298 |
| chr6  | 108656970     | 108657267 | 298 |
| chr6  | 45438641      | 45438938  | 298 |
| chr4  | 72307500      | 72307797  | 298 |
| chr3  | 56813258      | 56813555  | 298 |
| chr3  | 35563209      | 35563506  | 298 |
| chr3  | 23068909      | 23069206  | 298 |
| chr29 | 42929950      | 42930247  | 298 |
| chr28 | 34227153      | 34227450  | 298 |
| chr28 | 26780752      | 26781049  | 298 |
| chr27 | 35406814      | 35407111  | 298 |
| chr27 | 29595807      | 29596104  | 298 |
| chr26 | 38918568      | 38918865  | 298 |
| chr26 | 33320732      | 33321029  | 298 |
| chr26 | 22239968      | 22240265  | 298 |
| chr25 | 520145 520442 |           | 298 |
| chr24 | 40263636      | 40263933  | 298 |
| chr22 | 10608599      | 10608896  | 298 |
| chr21 | 66481843      | 66482140  | 298 |
| chr21 | 60440635      | 60440932  | 298 |
| chr21 | 58016035      | 58016332  | 298 |
| chr21 | 19110502      | 19110799  | 298 |
| chr20 | 59990700      | 59990997  | 298 |
| chr20 | 1561050       | 1561347   | 298 |
| chr2  | 135593040     | 135593337 | 298 |
| chr2  | 130115369     | 130115666 | 298 |
| chr2  | 74015107      | 74015404  | 298 |
| chr19 | 59077797      | 59078094  | 298 |
| chr19 | 28980136      | 28980433  | 298 |
| chr19 | 7620696       | 7620993   | 298 |
| chr18 | 48451896      | 48452193  | 298 |
| chr18 | 43430562      | 43430859  | 298 |
| chr18 | 43152952      | 43153249  | 298 |
| chr18 | 33682334      | 33682631  | 298 |
| chr18 | 22342017      | 22342314  | 298 |
| chr18 | 22333410      | 22333707  | 298 |
| chr17 | 63516094      | 63516391  | 298 |
| chr17 | 47493003      | 47493300  | 298 |
| chr16 | 60343819      | 60344116  | 298 |
| chr15 | 43339802      | 43340099  | 298 |
| chr15 | 34275626      | 34275923  | 298 |
| chr14 | 6942089       | 6942386   | 298 |
| chr13 | 77730212      | 77730509  | 298 |
| chr13 | 77526587      | 77526884  | 298 |
| chr12 | 15172616      | 15172913  | 298 |

|       |           |           |     |
|-------|-----------|-----------|-----|
| chr11 | 100975616 | 100975913 | 298 |
| chr11 | 80249130  | 80249427  | 298 |
| chr11 | 14035420  | 14035717  | 298 |
| chr10 | 70409069  | 70409366  | 298 |
| chr10 | 25604194  | 25604491  | 298 |
| chr10 | 10547844  | 10548141  | 298 |
| chrX  | 74345290  | 74345586  | 297 |
| chrX  | 60493785  | 60494081  | 297 |
| chrX  | 40730528  | 40730824  | 297 |
| chrX  | 37331591  | 37331887  | 297 |
| chrX  | 36332598  | 36332894  | 297 |
| chrX  | 21997364  | 21997660  | 297 |
| chrX  | 20018994  | 20019290  | 297 |
| chrX  | 17254226  | 17254522  | 297 |
| chrX  | 12269874  | 12270170  | 297 |
| chrX  | 8374457   | 8374753   | 297 |
| chrX  | 8112119   | 8112415   | 297 |
| chrX  | 6850850   | 6851146   | 297 |
| chrX  | 2724752   | 2725048   | 297 |
| chrX  | 2698108   | 2698404   | 297 |
| chr9  | 106555261 | 106555557 | 297 |
| chr8  | 29349714  | 29350010  | 297 |
| chr7  | 46399271  | 46399567  | 297 |
| chr6  | 107266787 | 107267083 | 297 |
| chr5  | 69221989  | 69222285  | 297 |
| chr4  | 101814035 | 101814331 | 297 |
| chr3  | 122229443 | 122229739 | 297 |
| chr3  | 119325228 | 119325524 | 297 |
| chr29 | 48715879  | 48716175  | 297 |
| chr29 | 33353331  | 33353627  | 297 |
| chr29 | 25516166  | 25516462  | 297 |
| chr29 | 1810316   | 1810612   | 297 |
| chr27 | 14394467  | 14394763  | 297 |
| chr26 | 37875131  | 37875427  | 297 |
| chr26 | 20931588  | 20931884  | 297 |
| chr24 | 36035401  | 36035697  | 297 |
| chr24 | 31176229  | 31176525  | 297 |
| chr24 | 1135715   | 1136011   | 297 |
| chr23 | 33388831  | 33389127  | 297 |
| chr23 | 19925495  | 19925791  | 297 |
| chr22 | 42670567  | 42670863  | 297 |
| chr21 | 28931861  | 28932157  | 297 |
| chr21 | 22609354  | 22609650  | 297 |
| chr20 | 18489273  | 18489569  | 297 |
| chr2  | 139917815 | 139918111 | 297 |
| chr2  | 138845765 | 138846061 | 297 |
| chr2  | 110217035 | 110217331 | 297 |
| chr2  | 68163584  | 68163880  | 297 |
| chr2  | 26436234  | 26436530  | 297 |
| chr2  | 21882461  | 21882757  | 297 |

|       |           |           |     |
|-------|-----------|-----------|-----|
| chr19 | 60473983  | 60474279  | 297 |
| chr18 | 65963716  | 65964012  | 297 |
| chr17 | 69393597  | 69393893  | 297 |
| chr17 | 63500474  | 63500770  | 297 |
| chr17 | 62070445  | 62070741  | 297 |
| chr16 | 19506815  | 19507111  | 297 |
| chr15 | 24961160  | 24961456  | 297 |
| chr14 | 19351209  | 19351505  | 297 |
| chr13 | 80151195  | 80151491  | 297 |
| chr13 | 75973845  | 75974141  | 297 |
| chr13 | 67822913  | 67823209  | 297 |
| chr13 | 54210822  | 54211118  | 297 |
| chr13 | 28509840  | 28510136  | 297 |
| chr13 | 11417463  | 11417759  | 297 |
| chr12 | 31436246  | 31436542  | 297 |
| chr12 | 31203386  | 31203682  | 297 |
| chr11 | 85156825  | 85157121  | 297 |
| chr11 | 78793259  | 78793555  | 297 |
| chr11 | 3288673   | 3288969   | 297 |
| chr10 | 75473459  | 75473755  | 297 |
| chr10 | 70034160  | 70034456  | 297 |
| chr10 | 16946324  | 16946620  | 297 |
| chr1  | 131768444 | 131768740 | 297 |
| chr1  | 119995688 | 119995984 | 297 |
| chrX  | 64847234  | 64847529  | 296 |
| chrX  | 62695942  | 62696237  | 296 |
| chrX  | 6666737   | 6667032   | 296 |
| chr9  | 64354299  | 64354594  | 296 |
| chr8  | 69310386  | 69310681  | 296 |
| chr7  | 10976185  | 10976480  | 296 |
| chr4  | 95900307  | 95900602  | 296 |
| chr3  | 28316996  | 28317291  | 296 |
| chr29 | 48899748  | 48900043  | 296 |
| chr29 | 47238684  | 47238979  | 296 |
| chr29 | 33811499  | 33811794  | 296 |
| chr27 | 37016527  | 37016822  | 296 |
| chr26 | 44217718  | 44218013  | 296 |
| chr26 | 34941077  | 34941372  | 296 |
| chr25 | 18042438  | 18042733  | 296 |
| chr25 | 1046567   | 1046862   | 296 |
| chr23 | 16501745  | 16502040  | 296 |
| chr22 | 52811359  | 52811654  | 296 |
| chr21 | 61645049  | 61645344  | 296 |
| chr21 | 30836143  | 30836438  | 296 |
| chr21 | 29881641  | 29881936  | 296 |
| chr21 | 19678380  | 19678675  | 296 |
| chr20 | 71367080  | 71367375  | 296 |
| chr20 | 5241914   | 5242209   | 296 |
| chr2  | 22291294  | 22291589  | 296 |
| chr19 | 56949007  | 56949302  | 296 |

|       |           |           |     |
|-------|-----------|-----------|-----|
| chr19 | 35059696  | 35059991  | 296 |
| chr19 | 23943397  | 23943692  | 296 |
| chr19 | 11026278  | 11026573  | 296 |
| chr18 | 13552449  | 13552744  | 296 |
| chr18 | 10945055  | 10945350  | 296 |
| chr17 | 73191147  | 73191442  | 296 |
| chr16 | 44109839  | 44110134  | 296 |
| chr15 | 73834026  | 73834321  | 296 |
| chr15 | 33479693  | 33479988  | 296 |
| chr15 | 25529116  | 25529411  | 296 |
| chr14 | 61540572  | 61540867  | 296 |
| chr14 | 8215436   | 8215731   | 296 |
| chr14 | 6931031   | 6931326   | 296 |
| chr13 | 74657313  | 74657608  | 296 |
| chr13 | 58477343  | 58477638  | 296 |
| chr13 | 41283778  | 41284073  | 296 |
| chr12 | 24628421  | 24628716  | 296 |
| chr11 | 89399389  | 89399684  | 296 |
| chr11 | 72302793  | 72303088  | 296 |
| chr11 | 66219005  | 66219300  | 296 |
| chr11 | 47540847  | 47541142  | 296 |
| chr10 | 70090352  | 70090647  | 296 |
| chrX  | 77755816  | 77756110  | 295 |
| chrX  | 73282504  | 73282798  | 295 |
| chrX  | 70152062  | 70152356  | 295 |
| chrX  | 60515456  | 60515750  | 295 |
| chrX  | 58919718  | 58920012  | 295 |
| chrX  | 50719373  | 50719667  | 295 |
| chrX  | 50060613  | 50060907  | 295 |
| chrX  | 37714683  | 37714977  | 295 |
| chrX  | 30837334  | 30837628  | 295 |
| chrX  | 24422511  | 24422805  | 295 |
| chrX  | 19618243  | 19618537  | 295 |
| chrX  | 8710292   | 8710586   | 295 |
| chrX  | 2873396   | 2873690   | 295 |
| chr9  | 106082368 | 106082662 | 295 |
| chr8  | 108819870 | 108820164 | 295 |
| chr8  | 93004556  | 93004850  | 295 |
| chr8  | 73928002  | 73928296  | 295 |
| chr8  | 61028318  | 61028612  | 295 |
| chr8  | 58353756  | 58354050  | 295 |
| chr8  | 43591165  | 43591459  | 295 |
| chr8  | 7547713   | 7548007   | 295 |
| chr7  | 73520764  | 73521058  | 295 |
| chr7  | 18440687  | 18440981  | 295 |
| chr5  | 112967293 | 112967587 | 295 |
| chr5  | 61055079  | 61055373  | 295 |
| chr4  | 106925794 | 106926088 | 295 |
| chr4  | 68414919  | 68415213  | 295 |
| chr3  | 114634042 | 114634336 | 295 |

|       |           |           |     |
|-------|-----------|-----------|-----|
| chr3  | 106501737 | 106502031 | 295 |
| chr3  | 97898042  | 97898336  | 295 |
| chr3  | 56588824  | 56589118  | 295 |
| chr26 | 14197012  | 14197306  | 295 |
| chr25 | 39333355  | 39333649  | 295 |
| chr25 | 38216362  | 38216656  | 295 |
| chr25 | 4617319   | 4617613   | 295 |
| chr24 | 48601259  | 48601553  | 295 |
| chr24 | 1051525   | 1051819   | 295 |
| chr23 | 43069511  | 43069805  | 295 |
| chr22 | 30172021  | 30172315  | 295 |
| chr21 | 57146798  | 57147092  | 295 |
| chr20 | 11196772  | 11197066  | 295 |
| chr2  | 132169195 | 132169489 | 295 |
| chr2  | 111672225 | 111672519 | 295 |
| chr2  | 1710853   | 1711147   | 295 |
| chr19 | 46807246  | 46807540  | 295 |
| chr19 | 42451752  | 42452046  | 295 |
| chr18 | 62386031  | 62386325  | 295 |
| chr18 | 48710135  | 48710429  | 295 |
| chr17 | 64162359  | 64162653  | 295 |
| chr17 | 62070019  | 62070313  | 295 |
| chr17 | 55893563  | 55893857  | 295 |
| chr16 | 39801561  | 39801855  | 295 |
| chr16 | 26858746  | 26859040  | 295 |
| chr15 | 22980364  | 22980658  | 295 |
| chr15 | 20779011  | 20779305  | 295 |
| chr14 | 7805411   | 7805705   | 295 |
| chr13 | 35440270  | 35440564  | 295 |
| chr1  | 152236924 | 152237218 | 295 |
| chr1  | 152118978 | 152119272 | 295 |
| chr1  | 74709373  | 74709667  | 295 |
| chrX  | 73286897  | 73287190  | 294 |
| chrX  | 68431761  | 68432054  | 294 |
| chrX  | 51829458  | 51829751  | 294 |
| chrX  | 34179153  | 34179446  | 294 |
| chrX  | 32916187  | 32916480  | 294 |
| chrX  | 29613636  | 29613929  | 294 |
| chrX  | 21053686  | 21053979  | 294 |
| chrX  | 19539772  | 19540065  | 294 |
| chrX  | 18959340  | 18959633  | 294 |
| chrX  | 11466547  | 11466840  | 294 |
| chr9  | 90236408  | 90236701  | 294 |
| chr8  | 44143451  | 44143744  | 294 |
| chr8  | 24761489  | 24761782  | 294 |
| chr8  | 20937189  | 20937482  | 294 |
| chr5  | 113205075 | 113205368 | 294 |
| chr5  | 80196637  | 80196930  | 294 |
| chr5  | 61262924  | 61263217  | 294 |
| chr3  | 111830172 | 111830465 | 294 |

|       |           |           |     |
|-------|-----------|-----------|-----|
| chr29 | 41469335  | 41469628  | 294 |
| chr29 | 37247162  | 37247455  | 294 |
| chr29 | 36754560  | 36754853  | 294 |
| chr29 | 36559974  | 36560267  | 294 |
| chr26 | 42116952  | 42117245  | 294 |
| chr25 | 40897811  | 40898104  | 294 |
| chr24 | 59383418  | 59383711  | 294 |
| chr24 | 20759323  | 20759616  | 294 |
| chr23 | 19795482  | 19795775  | 294 |
| chr22 | 14989484  | 14989777  | 294 |
| chr21 | 9488059   | 9488352   | 294 |
| chr20 | 3315735   | 3316028   | 294 |
| chr2  | 139236093 | 139236386 | 294 |
| chr2  | 134446065 | 134446358 | 294 |
| chr2  | 124309003 | 124309296 | 294 |
| chr19 | 49382969  | 49383262  | 294 |
| chr19 | 45921650  | 45921943  | 294 |
| chr19 | 14436763  | 14437056  | 294 |
| chr18 | 11808828  | 11809121  | 294 |
| chr17 | 68421860  | 68422153  | 294 |
| chr17 | 49145962  | 49146255  | 294 |
| chr16 | 48280284  | 48280577  | 294 |
| chr16 | 47041045  | 47041338  | 294 |
| chr16 | 2152674   | 2152967   | 294 |
| chr16 | 1603173   | 1603466   | 294 |
| chr15 | 75951908  | 75952201  | 294 |
| chr15 | 33145202  | 33145495  | 294 |
| chr15 | 32257012  | 32257305  | 294 |
| chr13 | 80103787  | 80104080  | 294 |
| chr13 | 67068154  | 67068447  | 294 |
| chr13 | 59624513  | 59624806  | 294 |
| chr13 | 54837677  | 54837970  | 294 |
| chr12 | 82580383  | 82580676  | 294 |
| chr12 | 80550341  | 80550634  | 294 |
| chr11 | 62715250  | 62715543  | 294 |
| chr10 | 68284110  | 68284403  | 294 |
| chr1  | 87379345  | 87379638  | 294 |
| chr1  | 82921954  | 82922247  | 294 |
| chrX  | 65681957  | 65682249  | 293 |
| chrX  | 54829468  | 54829760  | 293 |
| chrX  | 39003250  | 39003542  | 293 |
| chrX  | 20742005  | 20742297  | 293 |
| chrX  | 17286408  | 17286700  | 293 |
| chrX  | 11598327  | 11598619  | 293 |
| chrX  | 11402950  | 11403242  | 293 |
| chrX  | 8332039   | 8332331   | 293 |
| chrX  | 1506161   | 1506453   | 293 |
| chr9  | 91895813  | 91896105  | 293 |
| chr7  | 44078157  | 44078449  | 293 |
| chr7  | 42462782  | 42463074  | 293 |

|       |           |           |     |
|-------|-----------|-----------|-----|
| chr6  | 69243395  | 69243687  | 293 |
| chr5  | 120489533 | 120489825 | 293 |
| chr5  | 112042925 | 112043217 | 293 |
| chr4  | 106062838 | 106063130 | 293 |
| chr4  | 99411979  | 99412271  | 293 |
| chr4  | 99063088  | 99063380  | 293 |
| chr4  | 28615285  | 28615577  | 293 |
| chr3  | 125582455 | 125582747 | 293 |
| chr3  | 123898953 | 123899245 | 293 |
| chr3  | 33337132  | 33337424  | 293 |
| chr27 | 44802532  | 44802824  | 293 |
| chr26 | 50176860  | 50177152  | 293 |
| chr25 | 43416174  | 43416466  | 293 |
| chr25 | 37964984  | 37965276  | 293 |
| chr25 | 37724350  | 37724642  | 293 |
| chr24 | 61030268  | 61030560  | 293 |
| chr24 | 60907489  | 60907781  | 293 |
| chr24 | 60075660  | 60075952  | 293 |
| chr24 | 51409663  | 51409955  | 293 |
| chr24 | 43304063  | 43304355  | 293 |
| chr23 | 49551856  | 49552148  | 293 |
| chr23 | 18381298  | 18381590  | 293 |
| chr22 | 56337114  | 56337406  | 293 |
| chr22 | 47845034  | 47845326  | 293 |
| chr21 | 67397249  | 67397541  | 293 |
| chr21 | 32994881  | 32995173  | 293 |
| chr20 | 43313052  | 43313344  | 293 |
| chr20 | 2449911   | 2450203   | 293 |
| chr19 | 60953218  | 60953510  | 293 |
| chr19 | 23091800  | 23092092  | 293 |
| chr18 | 31851635  | 31851927  | 293 |
| chr17 | 72644973  | 72645265  | 293 |
| chr17 | 64076194  | 64076486  | 293 |
| chr15 | 30365150  | 30365442  | 293 |
| chr15 | 22201851  | 22202143  | 293 |
| chr13 | 60874363  | 60874655  | 293 |
| chr13 | 56365467  | 56365759  | 293 |
| chr13 | 33232479  | 33232771  | 293 |
| chr13 | 28918815  | 28919107  | 293 |
| chr13 | 16186684  | 16186976  | 293 |
| chr11 | 14211660  | 14211952  | 293 |
| chr11 | 9052485   | 9052777   | 293 |
| chr10 | 17605695  | 17605987  | 293 |
| chr10 | 12714732  | 12715024  | 293 |
| chr1  | 61447532  | 61447824  | 293 |
| chrX  | 77140631  | 77140922  | 292 |
| chrX  | 75872644  | 75872935  | 292 |
| chrX  | 67170703  | 67170994  | 292 |
| chrX  | 61030724  | 61031015  | 292 |
| chrX  | 60297156  | 60297447  | 292 |

|       |           |           |     |
|-------|-----------|-----------|-----|
| chrX  | 55677729  | 55678020  | 292 |
| chrX  | 55018853  | 55019144  | 292 |
| chrX  | 54713387  | 54713678  | 292 |
| chrX  | 50633192  | 50633483  | 292 |
| chrX  | 34545828  | 34546119  | 292 |
| chrX  | 29920417  | 29920708  | 292 |
| chrX  | 24116066  | 24116357  | 292 |
| chrX  | 23157987  | 23158278  | 292 |
| chrX  | 20748306  | 20748597  | 292 |
| chrX  | 20031204  | 20031495  | 292 |
| chrX  | 12984450  | 12984741  | 292 |
| chr8  | 48466088  | 48466379  | 292 |
| chr8  | 10842304  | 10842595  | 292 |
| chr5  | 122271131 | 122271422 | 292 |
| chr5  | 34227116  | 34227407  | 292 |
| chr5  | 32849436  | 32849727  | 292 |
| chr4  | 97858620  | 97858911  | 292 |
| chr4  | 13666542  | 13666833  | 292 |
| chr3  | 125204857 | 125205148 | 292 |
| chr3  | 116515215 | 116515506 | 292 |
| chr3  | 20207585  | 20207876  | 292 |
| chr29 | 50608225  | 50608516  | 292 |
| chr28 | 33916785  | 33917076  | 292 |
| chr26 | 45985315  | 45985606  | 292 |
| chr25 | 35410748  | 35411039  | 292 |
| chr23 | 52995305  | 52995596  | 292 |
| chr23 | 28165142  | 28165433  | 292 |
| chr23 | 10609820  | 10610111  | 292 |
| chr22 | 13774467  | 13774758  | 292 |
| chr21 | 60991703  | 60991994  | 292 |
| chr21 | 46607214  | 46607505  | 292 |
| chr21 | 22464907  | 22465198  | 292 |
| chr20 | 67185401  | 67185692  | 292 |
| chr2  | 111388029 | 111388320 | 292 |
| chr19 | 60423844  | 60424135  | 292 |
| chr19 | 39022714  | 39023005  | 292 |
| chr18 | 51336703  | 51336994  | 292 |
| chr17 | 49166197  | 49166488  | 292 |
| chr17 | 46153079  | 46153370  | 292 |
| chr15 | 73781200  | 73781491  | 292 |
| chr14 | 11923601  | 11923892  | 292 |
| chr13 | 75265026  | 75265317  | 292 |
| chr13 | 71418563  | 71418854  | 292 |
| chr13 | 2523255   | 2523546   | 292 |
| chr11 | 44970186  | 44970477  | 292 |
| chr10 | 70249578  | 70249869  | 292 |
| chr10 | 36021332  | 36021623  | 292 |
| chr10 | 16829649  | 16829940  | 292 |
| chr1  | 74544763  | 74545054  | 292 |
| chrX  | 79079185  | 79079475  | 291 |



|       |           |           |     |
|-------|-----------|-----------|-----|
| chrX  | 75327347  | 75327637  | 291 |
| chrX  | 71735852  | 71736142  | 291 |
| chrX  | 55443581  | 55443871  | 291 |
| chrX  | 54521570  | 54521860  | 291 |
| chrX  | 37320778  | 37321068  | 291 |
| chrX  | 32567737  | 32568027  | 291 |
| chrX  | 31315551  | 31315841  | 291 |
| chrX  | 30438274  | 30438564  | 291 |
| chrX  | 20997014  | 20997304  | 291 |
| chrX  | 18468942  | 18469232  | 291 |
| chrX  | 8375747   | 8376037   | 291 |
| chrX  | 6675525   | 6675815   | 291 |
| chrX  | 6044766   | 6045056   | 291 |
| chrX  | 681551    | 681841    | 291 |
| chr8  | 108736112 | 108736402 | 291 |
| chr8  | 104019789 | 104020079 | 291 |
| chr8  | 73474344  | 73474634  | 291 |
| chr8  | 17269234  | 17269524  | 291 |
| chr4  | 72712840  | 72713130  | 291 |
| chr29 | 17289855  | 17290145  | 291 |
| chr29 | 7583113   | 7583403   | 291 |
| chr27 | 34417532  | 34417822  | 291 |
| chr27 | 29034789  | 29035079  | 291 |
| chr26 | 15078165  | 15078455  | 291 |
| chr25 | 33390794  | 33391084  | 291 |
| chr25 | 29406280  | 29406570  | 291 |
| chr25 | 28143570  | 28143860  | 291 |
| chr23 | 46158954  | 46159244  | 291 |
| chr23 | 15039606  | 15039896  | 291 |
| chr22 | 55381349  | 55381639  | 291 |
| chr22 | 53943674  | 53943964  | 291 |
| chr22 | 46069124  | 46069414  | 291 |
| chr21 | 64276955  | 64277245  | 291 |
| chr21 | 25750821  | 25751111  | 291 |
| chr21 | 15624955  | 15625245  | 291 |
| chr20 | 23690950  | 23691240  | 291 |
| chr2  | 129248491 | 129248781 | 291 |
| chr19 | 54271464  | 54271754  | 291 |
| chr18 | 50257005  | 50257295  | 291 |
| chr18 | 22395889  | 22396179  | 291 |
| chr18 | 10457038  | 10457328  | 291 |
| chr17 | 69876448  | 69876738  | 291 |
| chr17 | 69732527  | 69732817  | 291 |
| chr17 | 66666905  | 66667195  | 291 |
| chr16 | 43183087  | 43183377  | 291 |
| chr15 | 20916650  | 20916940  | 291 |
| chr14 | 30391946  | 30392236  | 291 |
| chr14 | 3959479   | 3959769   | 291 |
| chr13 | 75121955  | 75122245  | 291 |
| chr13 | 59193978  | 59194268  | 291 |

|       |           |           |     |
|-------|-----------|-----------|-----|
| chr13 | 11033382  | 11033672  | 291 |
| chr12 | 82899469  | 82899759  | 291 |
| chr12 | 76633412  | 76633702  | 291 |
| chr12 | 68218202  | 68218492  | 291 |
| chr12 | 9535397   | 9535687   | 291 |
| chr11 | 91256745  | 91257035  | 291 |
| chr10 | 87169287  | 87169577  | 291 |
| chr10 | 46521899  | 46522189  | 291 |
| chr10 | 20641767  | 20642057  | 291 |
| chr10 | 4890424   | 4890714   | 291 |
| chrX  | 77299275  | 77299564  | 290 |
| chrX  | 72341578  | 72341867  | 290 |
| chrX  | 58716235  | 58716524  | 290 |
| chrX  | 49193044  | 49193333  | 290 |
| chrX  | 9647064   | 9647353   | 290 |
| chrX  | 8682470   | 8682759   | 290 |
| chrX  | 2561615   | 2561904   | 290 |
| chr9  | 106670003 | 106670292 | 290 |
| chr8  | 109068678 | 109068967 | 290 |
| chr8  | 74350115  | 74350404  | 290 |
| chr6  | 108633102 | 108633391 | 290 |
| chr6  | 92834026  | 92834315  | 290 |
| chr5  | 60920470  | 60920759  | 290 |
| chr4  | 121282417 | 121282706 | 290 |
| chr3  | 122414735 | 122415024 | 290 |
| chr3  | 116955525 | 116955814 | 290 |
| chr3  | 116119816 | 116120105 | 290 |
| chr3  | 111794289 | 111794578 | 290 |
| chr3  | 29658749  | 29659038  | 290 |
| chr3  | 17475409  | 17475698  | 290 |
| chr3  | 8703485   | 8703774   | 290 |
| chr29 | 35448779  | 35449068  | 290 |
| chr27 | 48031003  | 48031292  | 290 |
| chr26 | 42992618  | 42992907  | 290 |
| chr26 | 18534585  | 18534874  | 290 |
| chr25 | 37389545  | 37389834  | 290 |
| chr25 | 6793104   | 6793393   | 290 |
| chr25 | 2708063   | 2708352   | 290 |
| chr24 | 35983445  | 35983734  | 290 |
| chr23 | 31422263  | 31422552  | 290 |
| chr23 | 28842500  | 28842789  | 290 |
| chr22 | 61047103  | 61047392  | 290 |
| chr22 | 29647123  | 29647412  | 290 |
| chr22 | 24912938  | 24913227  | 290 |
| chr2  | 132277982 | 132278271 | 290 |
| chr19 | 60439457  | 60439746  | 290 |
| chr19 | 46105151  | 46105440  | 290 |
| chr19 | 14060542  | 14060831  | 290 |
| chr18 | 46785965  | 46786254  | 290 |
| chr18 | 37175440  | 37175729  | 290 |

|       |               |           |     |
|-------|---------------|-----------|-----|
| chr18 | 18679192      | 18679481  | 290 |
| chr18 | 11394026      | 11394315  | 290 |
| chr18 | 10710697      | 10710986  | 290 |
| chr16 | 56116233      | 56116522  | 290 |
| chr16 | 43115031      | 43115320  | 290 |
| chr16 | 29031477      | 29031766  | 290 |
| chr15 | 75358743      | 75359032  | 290 |
| chr14 | 8150166       | 8150455   | 290 |
| chr13 | 70246336      | 70246625  | 290 |
| chr13 | 55559213      | 55559502  | 290 |
| chr11 | 104284433     | 104284722 | 290 |
| chr11 | 68312438      | 68312727  | 290 |
| chr11 | 16114900      | 16115189  | 290 |
| chr11 | 2067775       | 2068064   | 290 |
| chr10 | 86856100      | 86856389  | 290 |
| chr10 | 3526669       | 3526958   | 290 |
| chr1  | 132063499     | 132063788 | 290 |
| chr1  | 128122309     | 128122598 | 290 |
| chr1  | 84345080      | 84345369  | 290 |
| chrX  | 66379089      | 66379377  | 289 |
| chrX  | 65096687      | 65096975  | 289 |
| chrX  | 44967843      | 44968131  | 289 |
| chrX  | 44896901      | 44897189  | 289 |
| chrX  | 35929233      | 35929521  | 289 |
| chrX  | 35682746      | 35683034  | 289 |
| chrX  | 29516184      | 29516472  | 289 |
| chrX  | 10965915      | 10966203  | 289 |
| chrX  | 8501744       | 8502032   | 289 |
| chrX  | 2684567       | 2684855   | 289 |
| chrX  | 329430 329718 | 289       | 289 |
| chr9  | 105773694     | 105773982 | 289 |
| chr7  | 43865782      | 43866070  | 289 |
| chr7  | 19981043      | 19981331  | 289 |
| chr6  | 73758198      | 73758486  | 289 |
| chr5  | 112562435     | 112562723 | 289 |
| chr3  | 124586670     | 124586958 | 289 |
| chr3  | 123653507     | 123653795 | 289 |
| chr3  | 115420777     | 115421065 | 289 |
| chr3  | 105935578     | 105935866 | 289 |
| chr3  | 99890517      | 99890805  | 289 |
| chr3  | 33829974      | 33830262  | 289 |
| chr29 | 37003853      | 37004141  | 289 |
| chr29 | 33418687      | 33418975  | 289 |
| chr28 | 26758355      | 26758643  | 289 |
| chr27 | 44895751      | 44896039  | 289 |
| chr27 | 39159991      | 39160279  | 289 |
| chr26 | 22241455      | 22241743  | 289 |
| chr26 | 17883316      | 17883604  | 289 |
| chr25 | 40055241      | 40055529  | 289 |
| chr25 | 16587925      | 16588213  | 289 |

|       |               |           |     |
|-------|---------------|-----------|-----|
| chr25 | 2345535       | 2345823   | 289 |
| chr25 | 851601 851889 | 289       |     |
| chr24 | 33960545      | 33960833  | 289 |
| chr22 | 60252133      | 60252421  | 289 |
| chr22 | 59456628      | 59456916  | 289 |
| chr22 | 39791317      | 39791605  | 289 |
| chr22 | 12327238      | 12327526  | 289 |
| chr22 | 11894582      | 11894870  | 289 |
| chr22 | 11893732      | 11894020  | 289 |
| chr21 | 13696835      | 13697123  | 289 |
| chr20 | 74036867      | 74037155  | 289 |
| chr20 | 19966460      | 19966748  | 289 |
| chr2  | 139238948     | 139239236 | 289 |
| chr2  | 134513034     | 134513322 | 289 |
| chr18 | 36719717      | 36720005  | 289 |
| chr18 | 12079304      | 12079592  | 289 |
| chr17 | 5487826       | 5488114   | 289 |
| chr15 | 28738436      | 28738724  | 289 |
| chr13 | 72057672      | 72057960  | 289 |
| chr13 | 43438085      | 43438373  | 289 |
| chr13 | 41991774      | 41992062  | 289 |
| chr11 | 80051813      | 80052101  | 289 |
| chr11 | 70839867      | 70840155  | 289 |
| chr11 | 48675953      | 48676241  | 289 |
| chr11 | 6030324       | 6030612   | 289 |
| chr11 | 1612846       | 1613134   | 289 |
| chr10 | 16715713      | 16716001  | 289 |
| chr10 | 15084108      | 15084396  | 289 |
| chrX  | 74670825      | 74671112  | 288 |
| chrX  | 68754000      | 68754287  | 288 |
| chrX  | 54934668      | 54934955  | 288 |
| chrX  | 35206254      | 35206541  | 288 |
| chrX  | 34237849      | 34238136  | 288 |
| chrX  | 24609399      | 24609686  | 288 |
| chrX  | 22514599      | 22514886  | 288 |
| chrX  | 13265594      | 13265881  | 288 |
| chrX  | 11330777      | 11331064  | 288 |
| chr8  | 106655704     | 106655991 | 288 |
| chr8  | 65021616      | 65021903  | 288 |
| chr8  | 60099904      | 60100191  | 288 |
| chr8  | 44544169      | 44544456  | 288 |
| chr8  | 38072269      | 38072556  | 288 |
| chr8  | 7706897       | 7707184   | 288 |
| chr7  | 16519201      | 16519488  | 288 |
| chr7  | 15126389      | 15126676  | 288 |
| chr7  | 11201290      | 11201577  | 288 |
| chr5  | 26672379      | 26672666  | 288 |
| chr4  | 122029447     | 122029734 | 288 |
| chr3  | 9191607       | 9191894   | 288 |
| chr29 | 10087302      | 10087589  | 288 |

|       |           |           |     |
|-------|-----------|-----------|-----|
| chr27 | 15380607  | 15380894  | 288 |
| chr26 | 49301155  | 49301442  | 288 |
| chr26 | 34974501  | 34974788  | 288 |
| chr25 | 29083472  | 29083759  | 288 |
| chr25 | 18126707  | 18126994  | 288 |
| chr23 | 18780972  | 18781259  | 288 |
| chr22 | 23094110  | 23094397  | 288 |
| chr22 | 10164823  | 10165110  | 288 |
| chr21 | 15591552  | 15591839  | 288 |
| chr19 | 61473904  | 61474191  | 288 |
| chr19 | 54930447  | 54930734  | 288 |
| chr19 | 42347967  | 42348254  | 288 |
| chr17 | 49715899  | 49716186  | 288 |
| chr17 | 12042574  | 12042861  | 288 |
| chr16 | 44112337  | 44112624  | 288 |
| chr16 | 23653772  | 23654059  | 288 |
| chr15 | 13522048  | 13522335  | 288 |
| chr14 | 25071170  | 25071457  | 288 |
| chr14 | 13999272  | 13999559  | 288 |
| chr14 | 7502639   | 7502926   | 288 |
| chr14 | 6371817   | 6372104   | 288 |
| chr13 | 79455412  | 79455699  | 288 |
| chr13 | 70260588  | 70260875  | 288 |
| chr13 | 68946026  | 68946313  | 288 |
| chr12 | 27227078  | 27227365  | 288 |
| chr12 | 10749422  | 10749709  | 288 |
| chr11 | 104666575 | 104666862 | 288 |
| chr11 | 77758106  | 77758393  | 288 |
| chr11 | 75049324  | 75049611  | 288 |
| chr11 | 47422507  | 47422794  | 288 |
| chr11 | 9030853   | 9031140   | 288 |
| chr11 | 1329192   | 1329479   | 288 |
| chr1  | 151154207 | 151154494 | 288 |
| chrX  | 78679094  | 78679380  | 287 |
| chrX  | 66938284  | 66938570  | 287 |
| chrX  | 59325303  | 59325589  | 287 |
| chrX  | 57055629  | 57055915  | 287 |
| chrX  | 21276184  | 21276470  | 287 |
| chrX  | 11962081  | 11962367  | 287 |
| chrX  | 9166117   | 9166403   | 287 |
| chrX  | 8105865   | 8106151   | 287 |
| chr8  | 73815121  | 73815407  | 287 |
| chr7  | 45222148  | 45222434  | 287 |
| chr7  | 42271187  | 42271473  | 287 |
| chr7  | 38206882  | 38207168  | 287 |
| chr4  | 119516179 | 119516465 | 287 |
| chr4  | 106557027 | 106557313 | 287 |
| chr4  | 69298324  | 69298610  | 287 |
| chr27 | 38967564  | 38967850  | 287 |
| chr24 | 63019709  | 63019995  | 287 |

|       |           |           |     |
|-------|-----------|-----------|-----|
| chr24 | 35511271  | 35511557  | 287 |
| chr23 | 11775896  | 11776182  | 287 |
| chr22 | 61138358  | 61138644  | 287 |
| chr22 | 52885746  | 52886032  | 287 |
| chr21 | 64766656  | 64766942  | 287 |
| chr21 | 64565818  | 64566104  | 287 |
| chr21 | 60929270  | 60929556  | 287 |
| chr2  | 126709346 | 126709632 | 287 |
| chr19 | 62052877  | 62053163  | 287 |
| chr19 | 47181299  | 47181585  | 287 |
| chr19 | 46324722  | 46325008  | 287 |
| chr19 | 29701958  | 29702244  | 287 |
| chr19 | 21659599  | 21659885  | 287 |
| chr18 | 18099468  | 18099754  | 287 |
| chr15 | 57279211  | 57279497  | 287 |
| chr15 | 32943812  | 32944098  | 287 |
| chr15 | 30126248  | 30126534  | 287 |
| chr15 | 29998605  | 29998891  | 287 |
| chr14 | 15447534  | 15447820  | 287 |
| chr13 | 57388515  | 57388801  | 287 |
| chr13 | 41014173  | 41014459  | 287 |
| chr13 | 26157711  | 26157997  | 287 |
| chr13 | 11413032  | 11413318  | 287 |
| chr12 | 72718540  | 72718826  | 287 |
| chr11 | 80345931  | 80346217  | 287 |
| chr11 | 77936876  | 77937162  | 287 |
| chr11 | 46914454  | 46914740  | 287 |
| chr10 | 51515250  | 51515536  | 287 |
| chr10 | 5208464   | 5208750   | 287 |
| chrX  | 75938036  | 75938321  | 286 |
| chrX  | 65588948  | 65589233  | 286 |
| chrX  | 37414865  | 37415150  | 286 |
| chrX  | 24576934  | 24577219  | 286 |
| chrX  | 13527196  | 13527481  | 286 |
| chrX  | 9692138   | 9692423   | 286 |
| chrX  | 2593668   | 2593953   | 286 |
| chr9  | 28636504  | 28636789  | 286 |
| chr8  | 105133592 | 105133877 | 286 |
| chr8  | 8355715   | 8356000   | 286 |
| chr7  | 15016196  | 15016481  | 286 |
| chr6  | 17216831  | 17217116  | 286 |
| chr6  | 14230846  | 14231131  | 286 |
| chr6  | 2207378   | 2207663   | 286 |
| chr5  | 76314917  | 76315202  | 286 |
| chr5  | 10617858  | 10618143  | 286 |
| chr4  | 116684163 | 116684448 | 286 |
| chr3  | 87814032  | 87814317  | 286 |
| chr3  | 13612108  | 13612393  | 286 |
| chr28 | 10044150  | 10044435  | 286 |
| chr26 | 33088465  | 33088750  | 286 |

|       |           |           |     |
|-------|-----------|-----------|-----|
| chr25 | 31861856  | 31862141  | 286 |
| chr24 | 3945345   | 3945630   | 286 |
| chr24 | 1008462   | 1008747   | 286 |
| chr23 | 42628578  | 42628863  | 286 |
| chr22 | 14055759  | 14056044  | 286 |
| chr22 | 12109326  | 12109611  | 286 |
| chr21 | 60892687  | 60892972  | 286 |
| chr21 | 57424450  | 57424735  | 286 |
| chr21 | 26789486  | 26789771  | 286 |
| chr20 | 71162181  | 71162466  | 286 |
| chr20 | 58454788  | 58455073  | 286 |
| chr20 | 1464330   | 1464615   | 286 |
| chr2  | 131270612 | 131270897 | 286 |
| chr2  | 22169701  | 22169986  | 286 |
| chr19 | 23782176  | 23782461  | 286 |
| chr18 | 45441793  | 45442078  | 286 |
| chr18 | 43205067  | 43205352  | 286 |
| chr18 | 17995499  | 17995784  | 286 |
| chr17 | 67908651  | 67908936  | 286 |
| chr17 | 63147724  | 63148009  | 286 |
| chr17 | 59026438  | 59026723  | 286 |
| chr15 | 75665476  | 75665761  | 286 |
| chr15 | 61060863  | 61061148  | 286 |
| chr11 | 49597633  | 49597918  | 286 |
| chr10 | 50904835  | 50905120  | 286 |
| chr10 | 22016496  | 22016781  | 286 |
| chr10 | 21102185  | 21102470  | 286 |
| chr10 | 16698749  | 16699034  | 286 |
| chr1  | 72407927  | 72408212  | 286 |
| chr1  | 69472694  | 69472979  | 286 |
| chrX  | 76883060  | 76883344  | 285 |
| chrX  | 75885289  | 75885573  | 285 |
| chrX  | 75617079  | 75617363  | 285 |
| chrX  | 72561223  | 72561507  | 285 |
| chrX  | 72297459  | 72297743  | 285 |
| chrX  | 72090923  | 72091207  | 285 |
| chrX  | 68590755  | 68591039  | 285 |
| chrX  | 65560233  | 65560517  | 285 |
| chrX  | 63879443  | 63879727  | 285 |
| chrX  | 61210829  | 61211113  | 285 |
| chrX  | 58803742  | 58804026  | 285 |
| chrX  | 54504431  | 54504715  | 285 |
| chrX  | 50605547  | 50605831  | 285 |
| chrX  | 46412598  | 46412882  | 285 |
| chrX  | 38785962  | 38786246  | 285 |
| chrX  | 34546485  | 34546769  | 285 |
| chrX  | 32497589  | 32497873  | 285 |
| chrX  | 11632802  | 11633086  | 285 |
| chrX  | 9857805   | 9858089   | 285 |
| chrX  | 9439943   | 9440227   | 285 |

|       |               |           |     |
|-------|---------------|-----------|-----|
| chr8  | 57669700      | 57669984  | 285 |
| chr8  | 25586165      | 25586449  | 285 |
| chr7  | 3482389       | 3482673   | 285 |
| chr6  | 120794454     | 120794738 | 285 |
| chr5  | 113955497     | 113955781 | 285 |
| chr5  | 113240953     | 113241237 | 285 |
| chr5  | 61157725      | 61158009  | 285 |
| chr5  | 52617833      | 52618117  | 285 |
| chr3  | 94947518      | 94947802  | 285 |
| chr3  | 29359825      | 29360109  | 285 |
| chr28 | 25894115      | 25894399  | 285 |
| chr28 | 7613692       | 7613976   | 285 |
| chr27 | 717324 717608 | 285       |     |
| chr26 | 43850336      | 43850620  | 285 |
| chr25 | 15234657      | 15234941  | 285 |
| chr25 | 2793699       | 2793983   | 285 |
| chr24 | 35425167      | 35425451  | 285 |
| chr24 | 33879155      | 33879439  | 285 |
| chr23 | 31025533      | 31025817  | 285 |
| chr21 | 34857993      | 34858277  | 285 |
| chr20 | 33531353      | 33531637  | 285 |
| chr20 | 9167722       | 9168006   | 285 |
| chr19 | 54810168      | 54810452  | 285 |
| chr19 | 30615673      | 30615957  | 285 |
| chr19 | 17297129      | 17297413  | 285 |
| chr18 | 42907555      | 42907839  | 285 |
| chr17 | 58728221      | 58728505  | 285 |
| chr17 | 56548097      | 56548381  | 285 |
| chr15 | 26682772      | 26683056  | 285 |
| chr15 | 24978698      | 24978982  | 285 |
| chr13 | 63474354      | 63474638  | 285 |
| chr13 | 55377207      | 55377491  | 285 |
| chr13 | 45925964      | 45926248  | 285 |
| chr13 | 23973902      | 23974186  | 285 |
| chr13 | 2525116       | 2525400   | 285 |
| chr12 | 83411186      | 83411470  | 285 |
| chr12 | 74470484      | 74470768  | 285 |
| chr11 | 76375358      | 76375642  | 285 |
| chr10 | 86473906      | 86474190  | 285 |
| chr1  | 87366056      | 87366340  | 285 |
| chr1  | 82841596      | 82841880  | 285 |
| chr1  | 75139165      | 75139449  | 285 |
| chr1  | 2550682       | 2550966   | 285 |
| chrX  | 77195134      | 77195417  | 284 |
| chrX  | 68997799      | 68998082  | 284 |
| chrX  | 65515670      | 65515953  | 284 |
| chrX  | 61597347      | 61597630  | 284 |
| chrX  | 60039623      | 60039906  | 284 |
| chrX  | 57923662      | 57923945  | 284 |
| chrX  | 57160929      | 57161212  | 284 |



|       |           |           |     |
|-------|-----------|-----------|-----|
| chrX  | 56176014  | 56176297  | 284 |
| chrX  | 20739628  | 20739911  | 284 |
| chrX  | 20465825  | 20466108  | 284 |
| chrX  | 13332761  | 13333044  | 284 |
| chrX  | 7646142   | 7646425   | 284 |
| chrX  | 7454443   | 7454726   | 284 |
| chr8  | 65324846  | 65325129  | 284 |
| chr8  | 47220513  | 47220796  | 284 |
| chr8  | 23965599  | 23965882  | 284 |
| chr6  | 119201380 | 119201663 | 284 |
| chr6  | 21852488  | 21852771  | 284 |
| chr5  | 73985667  | 73985950  | 284 |
| chr5  | 29116902  | 29117185  | 284 |
| chr4  | 46285839  | 46286122  | 284 |
| chr3  | 112414652 | 112414935 | 284 |
| chr3  | 111897448 | 111897731 | 284 |
| chr3  | 99236441  | 99236724  | 284 |
| chr3  | 15651786  | 15652069  | 284 |
| chr29 | 49304323  | 49304606  | 284 |
| chr29 | 33533855  | 33534138  | 284 |
| chr27 | 44927902  | 44928185  | 284 |
| chr26 | 39176421  | 39176704  | 284 |
| chr26 | 34311962  | 34312245  | 284 |
| chr26 | 33258980  | 33259263  | 284 |
| chr26 | 20237328  | 20237611  | 284 |
| chr25 | 33328585  | 33328868  | 284 |
| chr24 | 33952498  | 33952781  | 284 |
| chr24 | 29703194  | 29703477  | 284 |
| chr23 | 28857459  | 28857742  | 284 |
| chr23 | 15360741  | 15361024  | 284 |
| chr22 | 16424672  | 16424955  | 284 |
| chr21 | 20025843  | 20026126  | 284 |
| chr21 | 19995973  | 19996256  | 284 |
| chr2  | 116714962 | 116715245 | 284 |
| chr2  | 111427876 | 111428159 | 284 |
| chr19 | 43200760  | 43201043  | 284 |
| chr19 | 13952956  | 13953239  | 284 |
| chr18 | 24245217  | 24245500  | 284 |
| chr17 | 66511609  | 66511892  | 284 |
| chr16 | 71096724  | 71097007  | 284 |
| chr16 | 68728932  | 68729215  | 284 |
| chr16 | 47136268  | 47136551  | 284 |
| chr14 | 59324820  | 59325103  | 284 |
| chr13 | 55481012  | 55481295  | 284 |
| chr11 | 106352793 | 106353076 | 284 |
| chr11 | 91553956  | 91554239  | 284 |
| chr11 | 66276395  | 66276678  | 284 |
| chr11 | 49782187  | 49782470  | 284 |
| chr11 | 14253107  | 14253390  | 284 |
| chr10 | 71038361  | 71038644  | 284 |

|       |           |           |     |
|-------|-----------|-----------|-----|
| chr10 | 17589774  | 17590057  | 284 |
| chr10 | 16893405  | 16893688  | 284 |
| chr1  | 123124726 | 123125009 | 284 |
| chrX  | 84910950  | 84911232  | 283 |
| chrX  | 78350916  | 78351198  | 283 |
| chrX  | 75201743  | 75202025  | 283 |
| chrX  | 72760939  | 72761221  | 283 |
| chrX  | 72562579  | 72562861  | 283 |
| chrX  | 65400937  | 65401219  | 283 |
| chrX  | 58444140  | 58444422  | 283 |
| chrX  | 39007070  | 39007352  | 283 |
| chrX  | 20701976  | 20702258  | 283 |
| chrX  | 13362600  | 13362882  | 283 |
| chrX  | 9773153   | 9773435   | 283 |
| chr9  | 26611004  | 26611286  | 283 |
| chr8  | 108750331 | 108750613 | 283 |
| chr8  | 107626389 | 107626671 | 283 |
| chr8  | 67089692  | 67089974  | 283 |
| chr8  | 61899140  | 61899422  | 283 |
| chr8  | 60336167  | 60336449  | 283 |
| chr8  | 29201111  | 29201393  | 283 |
| chr7  | 19830689  | 19830971  | 283 |
| chr6  | 120881579 | 120881861 | 283 |
| chr6  | 94431529  | 94431811  | 283 |
| chr6  | 59250220  | 59250502  | 283 |
| chr5  | 123014248 | 123014530 | 283 |
| chr5  | 113293124 | 113293406 | 283 |
| chr5  | 30337635  | 30337917  | 283 |
| chr5  | 29245636  | 29245918  | 283 |
| chr4  | 79661542  | 79661824  | 283 |
| chr4  | 49950397  | 49950679  | 283 |
| chr3  | 55415205  | 55415487  | 283 |
| chr29 | 47267344  | 47267626  | 283 |
| chr28 | 41276786  | 41277068  | 283 |
| chr28 | 25432456  | 25432738  | 283 |
| chr27 | 17562621  | 17562903  | 283 |
| chr26 | 49516831  | 49517113  | 283 |
| chr25 | 34398923  | 34399205  | 283 |
| chr25 | 33363298  | 33363580  | 283 |
| chr24 | 60616148  | 60616430  | 283 |
| chr24 | 51442230  | 51442512  | 283 |
| chr23 | 15072383  | 15072665  | 283 |
| chr22 | 37829672  | 37829954  | 283 |
| chr22 | 30354987  | 30355269  | 283 |
| chr21 | 18099229  | 18099511  | 283 |
| chr21 | 6520075   | 6520357   | 283 |
| chr20 | 6630644   | 6630926   | 283 |
| chr19 | 55781165  | 55781447  | 283 |
| chr19 | 54671328  | 54671610  | 283 |
| chr19 | 14565460  | 14565742  | 283 |

|       |           |           |     |
|-------|-----------|-----------|-----|
| chr19 | 11825870  | 11826152  | 283 |
| chr18 | 50665049  | 50665331  | 283 |
| chr18 | 33220091  | 33220373  | 283 |
| chr16 | 49367268  | 49367550  | 283 |
| chr11 | 106043921 | 106044203 | 283 |
| chr11 | 66274509  | 66274791  | 283 |
| chr11 | 48692986  | 48693268  | 283 |
| chr11 | 27797162  | 27797444  | 283 |
| chr10 | 67027253  | 67027535  | 283 |
| chr10 | 29861004  | 29861286  | 283 |
| chrX  | 76520231  | 76520512  | 282 |
| chrX  | 75733595  | 75733876  | 282 |
| chrX  | 73354206  | 73354487  | 282 |
| chrX  | 73180196  | 73180477  | 282 |
| chrX  | 66763782  | 66764063  | 282 |
| chrX  | 50621861  | 50622142  | 282 |
| chrX  | 38200527  | 38200808  | 282 |
| chrX  | 31708416  | 31708697  | 282 |
| chrX  | 21860347  | 21860628  | 282 |
| chrX  | 20332408  | 20332689  | 282 |
| chrX  | 9674653   | 9674934   | 282 |
| chr9  | 106852530 | 106852811 | 282 |
| chr9  | 98299432  | 98299713  | 282 |
| chr9  | 77719817  | 77720098  | 282 |
| chr9  | 43243841  | 43244122  | 282 |
| chr8  | 70680489  | 70680770  | 282 |
| chr8  | 62289162  | 62289443  | 282 |
| chr5  | 69481202  | 69481483  | 282 |
| chr5  | 30560094  | 30560375  | 282 |
| chr4  | 95651779  | 95652060  | 282 |
| chr3  | 111786743 | 111787024 | 282 |
| chr3  | 74474316  | 74474597  | 282 |
| chr3  | 33823154  | 33823435  | 282 |
| chr29 | 46923415  | 46923696  | 282 |
| chr29 | 41698262  | 41698543  | 282 |
| chr29 | 18102557  | 18102838  | 282 |
| chr29 | 1790473   | 1790754   | 282 |
| chr26 | 42049931  | 42050212  | 282 |
| chr26 | 23507202  | 23507483  | 282 |
| chr25 | 42212636  | 42212917  | 282 |
| chr24 | 1036812   | 1037093   | 282 |
| chr23 | 46653484  | 46653765  | 282 |
| chr21 | 18857434  | 18857715  | 282 |
| chr2  | 135752172 | 135752453 | 282 |
| chr2  | 131293393 | 131293674 | 282 |
| chr2  | 128358694 | 128358975 | 282 |
| chr2  | 48911905  | 48912186  | 282 |
| chr19 | 54772653  | 54772934  | 282 |
| chr19 | 53565436  | 53565717  | 282 |
| chr19 | 34961209  | 34961490  | 282 |

|       |           |           |     |
|-------|-----------|-----------|-----|
| chr19 | 27386558  | 27386839  | 282 |
| chr18 | 56186365  | 56186646  | 282 |
| chr18 | 3312215   | 3312496   | 282 |
| chr17 | 63531690  | 63531971  | 282 |
| chr17 | 56065740  | 56066021  | 282 |
| chr17 | 49445965  | 49446246  | 282 |
| chr16 | 47032512  | 47032793  | 282 |
| chr16 | 41490251  | 41490532  | 282 |
| chr16 | 39499801  | 39500082  | 282 |
| chr14 | 31501404  | 31501685  | 282 |
| chr13 | 41126412  | 41126693  | 282 |
| chr12 | 82255156  | 82255437  | 282 |
| chr12 | 14259576  | 14259857  | 282 |
| chr11 | 100892484 | 100892765 | 282 |
| chr11 | 84321435  | 84321716  | 282 |
| chr11 | 21645675  | 21645956  | 282 |
| chr11 | 10661013  | 10661294  | 282 |
| chr10 | 88196738  | 88197019  | 282 |
| chr1  | 150076344 | 150076625 | 282 |
| chr1  | 118648964 | 118649245 | 282 |
| chr1  | 2163235   | 2163516   | 282 |
| chrX  | 80951486  | 80951766  | 281 |
| chrX  | 80372587  | 80372867  | 281 |
| chrX  | 79779225  | 79779505  | 281 |
| chrX  | 62425745  | 62426025  | 281 |
| chrX  | 51745294  | 51745574  | 281 |
| chrX  | 49223596  | 49223876  | 281 |
| chrX  | 40936541  | 40936821  | 281 |
| chrX  | 37735691  | 37735971  | 281 |
| chrX  | 35117325  | 35117605  | 281 |
| chrX  | 29459934  | 29460214  | 281 |
| chrX  | 20087410  | 20087690  | 281 |
| chrX  | 10171808  | 10172088  | 281 |
| chrX  | 3015188   | 3015468   | 281 |
| chr7  | 42523556  | 42523836  | 281 |
| chr5  | 30819928  | 30820208  | 281 |
| chr4  | 120611685 | 120611965 | 281 |
| chr4  | 12830073  | 12830353  | 281 |
| chr3  | 118882601 | 118882881 | 281 |
| chr3  | 115832110 | 115832390 | 281 |
| chr29 | 18316131  | 18316411  | 281 |
| chr27 | 28167057  | 28167337  | 281 |
| chr26 | 51383180  | 51383460  | 281 |
| chr26 | 33052840  | 33053120  | 281 |
| chr25 | 38679692  | 38679972  | 281 |
| chr24 | 40804759  | 40805039  | 281 |
| chr24 | 33950769  | 33951049  | 281 |
| chr23 | 43254748  | 43255028  | 281 |
| chr23 | 41835307  | 41835587  | 281 |
| chr22 | 59241225  | 59241505  | 281 |

|       |           |           |     |
|-------|-----------|-----------|-----|
| chr21 | 63355850  | 63356130  | 281 |
| chr21 | 61337052  | 61337332  | 281 |
| chr21 | 47607637  | 47607917  | 281 |
| chr21 | 30702402  | 30702682  | 281 |
| chr21 | 25246838  | 25247118  | 281 |
| chr2  | 128301769 | 128302049 | 281 |
| chr2  | 125904432 | 125904712 | 281 |
| chr2  | 114993209 | 114993489 | 281 |
| chr19 | 37971625  | 37971905  | 281 |
| chr19 | 13571840  | 13572120  | 281 |
| chr18 | 56757365  | 56757645  | 281 |
| chr18 | 52695478  | 52695758  | 281 |
| chr18 | 44100034  | 44100314  | 281 |
| chr18 | 23894345  | 23894625  | 281 |
| chr18 | 22045717  | 22045997  | 281 |
| chr17 | 72725440  | 72725720  | 281 |
| chr17 | 68398995  | 68399275  | 281 |
| chr17 | 66852248  | 66852528  | 281 |
| chr17 | 18504129  | 18504409  | 281 |
| chr16 | 61117870  | 61118150  | 281 |
| chr16 | 47120110  | 47120390  | 281 |
| chr15 | 28567393  | 28567673  | 281 |
| chr15 | 27363177  | 27363457  | 281 |
| chr14 | 1918899   | 1919179   | 281 |
| chr13 | 63653204  | 63653484  | 281 |
| chr13 | 41343338  | 41343618  | 281 |
| chr12 | 32422710  | 32422990  | 281 |
| chr12 | 32010137  | 32010417  | 281 |
| chr11 | 80170530  | 80170810  | 281 |
| chr10 | 67028135  | 67028415  | 281 |
| chr10 | 12750414  | 12750694  | 281 |
| chr1  | 1532958   | 1533238   | 281 |
| chrX  | 78729947  | 78730226  | 280 |
| chrX  | 71348878  | 71349157  | 280 |
| chrX  | 59156189  | 59156468  | 280 |
| chrX  | 48012742  | 48013021  | 280 |
| chrX  | 47334943  | 47335222  | 280 |
| chrX  | 35982649  | 35982928  | 280 |
| chrX  | 24116464  | 24116743  | 280 |
| chrX  | 23621126  | 23621405  | 280 |
| chrX  | 19527030  | 19527309  | 280 |
| chrX  | 15686970  | 15687249  | 280 |
| chrX  | 13309276  | 13309555  | 280 |
| chrX  | 12220718  | 12220997  | 280 |
| chrX  | 9300668   | 9300947   | 280 |
| chrX  | 7495730   | 7496009   | 280 |
| chr9  | 84265713  | 84265992  | 280 |
| chr8  | 75978023  | 75978302  | 280 |
| chr8  | 65409128  | 65409407  | 280 |
| chr8  | 23039001  | 23039280  | 280 |

|       |           |           |     |
|-------|-----------|-----------|-----|
| chr7  | 43972470  | 43972749  | 280 |
| chr6  | 51517970  | 51518249  | 280 |
| chr5  | 120098635 | 120098914 | 280 |
| chr5  | 30448142  | 30448421  | 280 |
| chr4  | 121305552 | 121305831 | 280 |
| chr4  | 73684062  | 73684341  | 280 |
| chr3  | 15765122  | 15765401  | 280 |
| chr29 | 51721056  | 51721335  | 280 |
| chr29 | 30137852  | 30138131  | 280 |
| chr29 | 26789055  | 26789334  | 280 |
| chr28 | 33654884  | 33655163  | 280 |
| chr28 | 25440989  | 25441268  | 280 |
| chr26 | 38221545  | 38221824  | 280 |
| chr25 | 42246595  | 42246874  | 280 |
| chr24 | 60973941  | 60974220  | 280 |
| chr23 | 42916287  | 42916566  | 280 |
| chr23 | 30340091  | 30340370  | 280 |
| chr23 | 13323148  | 13323427  | 280 |
| chr22 | 56719923  | 56720202  | 280 |
| chr21 | 18477410  | 18477689  | 280 |
| chr2  | 136625680 | 136625959 | 280 |
| chr2  | 134907255 | 134907534 | 280 |
| chr2  | 116667297 | 116667576 | 280 |
| chr2  | 111252298 | 111252577 | 280 |
| chr2  | 75792144  | 75792423  | 280 |
| chr2  | 41329062  | 41329341  | 280 |
| chr19 | 63928205  | 63928484  | 280 |
| chr19 | 58236098  | 58236377  | 280 |
| chr18 | 47772152  | 47772431  | 280 |
| chr18 | 33806265  | 33806544  | 280 |
| chr18 | 24091250  | 24091529  | 280 |
| chr16 | 60333019  | 60333298  | 280 |
| chr16 | 2235059   | 2235338   | 280 |
| chr15 | 84552616  | 84552895  | 280 |
| chr15 | 77434774  | 77435053  | 280 |
| chr15 | 24404905  | 24405184  | 280 |
| chr14 | 25843243  | 25843522  | 280 |
| chr13 | 42396588  | 42396867  | 280 |
| chr13 | 34782673  | 34782952  | 280 |
| chr12 | 82753156  | 82753435  | 280 |
| chr11 | 106000570 | 106000849 | 280 |
| chr11 | 91673160  | 91673439  | 280 |
| chr11 | 49855986  | 49856265  | 280 |
| chr10 | 79262081  | 79262360  | 280 |
| chr10 | 16844794  | 16845073  | 280 |
| chr10 | 7879791   | 7880070   | 280 |
| chr1  | 149853508 | 149853787 | 280 |
| chr1  | 132672376 | 132672655 | 280 |
| chr1  | 85360948  | 85361227  | 280 |
| chr1  | 23204702  | 23204981  | 280 |

|       |               |           |     |
|-------|---------------|-----------|-----|
| chrX  | 78999880      | 79000158  | 279 |
| chrX  | 73350625      | 73350903  | 279 |
| chrX  | 73172996      | 73173274  | 279 |
| chrX  | 69326974      | 69327252  | 279 |
| chrX  | 66222002      | 66222280  | 279 |
| chrX  | 65081794      | 65082072  | 279 |
| chrX  | 52920227      | 52920505  | 279 |
| chrX  | 13009013      | 13009291  | 279 |
| chrX  | 3729242       | 3729520   | 279 |
| chr9  | 55353525      | 55353803  | 279 |
| chr9  | 18044 18322   | 279       |     |
| chr8  | 104074068     | 104074346 | 279 |
| chr8  | 73897755      | 73898033  | 279 |
| chr7  | 50413484      | 50413762  | 279 |
| chr7  | 38786102      | 38786380  | 279 |
| chr5  | 53446464      | 53446742  | 279 |
| chr5  | 33577792      | 33578070  | 279 |
| chr4  | 121979873     | 121980151 | 279 |
| chr4  | 117746155     | 117746433 | 279 |
| chr3  | 35463100      | 35463378  | 279 |
| chr3  | 29992800      | 29993078  | 279 |
| chr3  | 24572575      | 24572853  | 279 |
| chr3  | 22466774      | 22467052  | 279 |
| chr29 | 36706148      | 36706426  | 279 |
| chr29 | 34939001      | 34939279  | 279 |
| chr27 | 17895469      | 17895747  | 279 |
| chr25 | 35602704      | 35602982  | 279 |
| chr25 | 27868198      | 27868476  | 279 |
| chr24 | 60942240      | 60942518  | 279 |
| chr23 | 15893919      | 15894197  | 279 |
| chr23 | 7414234       | 7414512   | 279 |
| chr22 | 50746574      | 50746852  | 279 |
| chr20 | 74038277      | 74038555  | 279 |
| chr20 | 6024656       | 6024934   | 279 |
| chr2  | 139371286     | 139371564 | 279 |
| chr19 | 58988097      | 58988375  | 279 |
| chr19 | 46708283      | 46708561  | 279 |
| chr19 | 33472201      | 33472479  | 279 |
| chr19 | 27190627      | 27190905  | 279 |
| chr19 | 7787807       | 7788085   | 279 |
| chr18 | 54603692      | 54603970  | 279 |
| chr18 | 40070432      | 40070710  | 279 |
| chr18 | 33967707      | 33967985  | 279 |
| chr18 | 32578807      | 32579085  | 279 |
| chr18 | 14437986      | 14438264  | 279 |
| chr18 | 685461 685739 | 279       |     |
| chr16 | 25936759      | 25937037  | 279 |
| chr15 | 65504130      | 65504408  | 279 |
| chr15 | 54472623      | 54472901  | 279 |
| chr15 | 22161236      | 22161514  | 279 |

|       |           |           |     |
|-------|-----------|-----------|-----|
| chr14 | 9338681   | 9338959   | 279 |
| chr14 | 8481638   | 8481916   | 279 |
| chr13 | 80972025  | 80972303  | 279 |
| chr13 | 60222202  | 60222480  | 279 |
| chr13 | 56842971  | 56843249  | 279 |
| chr13 | 41760274  | 41760552  | 279 |
| chr13 | 37401972  | 37402250  | 279 |
| chr11 | 100925596 | 100925874 | 279 |
| chr11 | 87829820  | 87830098  | 279 |
| chr10 | 70176513  | 70176791  | 279 |
| chr10 | 21432736  | 21433014  | 279 |
| chr10 | 16850788  | 16851066  | 279 |
| chr1  | 82818005  | 82818283  | 279 |
| chrX  | 82918073  | 82918350  | 278 |
| chrX  | 64622912  | 64623189  | 278 |
| chrX  | 50091860  | 50092137  | 278 |
| chrX  | 50043726  | 50044003  | 278 |
| chrX  | 48440769  | 48441046  | 278 |
| chrX  | 31344349  | 31344626  | 278 |
| chrX  | 15708614  | 15708891  | 278 |
| chrX  | 7447516   | 7447793   | 278 |
| chrX  | 6905992   | 6906269   | 278 |
| chr9  | 41622498  | 41622775  | 278 |
| chr8  | 108223868 | 108224145 | 278 |
| chr8  | 89559735  | 89560012  | 278 |
| chr8  | 63919979  | 63920256  | 278 |
| chr8  | 62467017  | 62467294  | 278 |
| chr8  | 25278167  | 25278444  | 278 |
| chr6  | 108613604 | 108613881 | 278 |
| chr5  | 124757616 | 124757893 | 278 |
| chr5  | 10542591  | 10542868  | 278 |
| chr4  | 46284630  | 46284907  | 278 |
| chr3  | 104550195 | 104550472 | 278 |
| chr3  | 36198230  | 36198507  | 278 |
| chr3  | 22417046  | 22417323  | 278 |
| chr3  | 17485230  | 17485507  | 278 |
| chr3  | 2492925   | 2493202   | 278 |
| chr29 | 37422780  | 37423057  | 278 |
| chr29 | 17714428  | 17714705  | 278 |
| chr28 | 25691165  | 25691442  | 278 |
| chr27 | 47336098  | 47336375  | 278 |
| chr26 | 50175718  | 50175995  | 278 |
| chr25 | 35397652  | 35397929  | 278 |
| chr24 | 36750981  | 36751258  | 278 |
| chr24 | 31255418  | 31255695  | 278 |
| chr24 | 787317    | 787594    | 278 |
| chr23 | 45805490  | 45805767  | 278 |
| chr23 | 43889797  | 43890074  | 278 |
| chr23 | 15089247  | 15089524  | 278 |
| chr22 | 55290871  | 55291148  | 278 |



|       |               |           |     |
|-------|---------------|-----------|-----|
| chr22 | 30386186      | 30386463  | 278 |
| chr22 | 30113831      | 30114108  | 278 |
| chr21 | 64489071      | 64489348  | 278 |
| chr21 | 32943517      | 32943794  | 278 |
| chr20 | 19369820      | 19370097  | 278 |
| chr20 | 845598 845875 | 278       |     |
| chr2  | 138861498     | 138861775 | 278 |
| chr2  | 138774684     | 138774961 | 278 |
| chr2  | 132355997     | 132356274 | 278 |
| chr19 | 42264061      | 42264338  | 278 |
| chr19 | 28997723      | 28998000  | 278 |
| chr19 | 21621512      | 21621789  | 278 |
| chr18 | 41054169      | 41054446  | 278 |
| chr18 | 33919481      | 33919758  | 278 |
| chr18 | 22043205      | 22043482  | 278 |
| chr17 | 46502755      | 46503032  | 278 |
| chr16 | 38976117      | 38976394  | 278 |
| chr14 | 31986695      | 31986972  | 278 |
| chr14 | 31544996      | 31545273  | 278 |
| chr14 | 27187211      | 27187488  | 278 |
| chr14 | 5976501       | 5976778   | 278 |
| chr13 | 82646396      | 82646673  | 278 |
| chr13 | 80640681      | 80640958  | 278 |
| chr13 | 61246743      | 61247020  | 278 |
| chr13 | 35662060      | 35662337  | 278 |
| chr13 | 23551199      | 23551476  | 278 |
| chr12 | 31309061      | 31309338  | 278 |
| chr11 | 91606213      | 91606490  | 278 |
| chr11 | 88928599      | 88928876  | 278 |
| chr11 | 78094128      | 78094405  | 278 |
| chr11 | 68628636      | 68628913  | 278 |
| chr11 | 21646166      | 21646443  | 278 |
| chr10 | 69192943      | 69193220  | 278 |
| chr1  | 110650388     | 110650665 | 278 |
| chr1  | 69842403      | 69842680  | 278 |
| chrX  | 68782573      | 68782849  | 277 |
| chrX  | 67399330      | 67399606  | 277 |
| chrX  | 63890799      | 63891075  | 277 |
| chrX  | 55662825      | 55663101  | 277 |
| chrX  | 55461227      | 55461503  | 277 |
| chrX  | 50795936      | 50796212  | 277 |
| chrX  | 45968624      | 45968900  | 277 |
| chrX  | 29505363      | 29505639  | 277 |
| chrX  | 21440640      | 21440916  | 277 |
| chrX  | 19828960      | 19829236  | 277 |
| chrX  | 19390269      | 19390545  | 277 |
| chrX  | 2480157       | 2480433   | 277 |
| chr9  | 41248396      | 41248672  | 277 |
| chr8  | 65238403      | 65238679  | 277 |
| chr7  | 60977952      | 60978228  | 277 |

|       |           |           |     |
|-------|-----------|-----------|-----|
| chr7  | 18198993  | 18199269  | 277 |
| chr6  | 107378184 | 107378460 | 277 |
| chr6  | 93982393  | 93982669  | 277 |
| chr5  | 120529398 | 120529674 | 277 |
| chr5  | 114241875 | 114242151 | 277 |
| chr5  | 111874550 | 111874826 | 277 |
| chr5  | 88755183  | 88755459  | 277 |
| chr4  | 71616117  | 71616393  | 277 |
| chr4  | 21344430  | 21344706  | 277 |
| chr3  | 123265868 | 123266144 | 277 |
| chr3  | 116294762 | 116295038 | 277 |
| chr3  | 54343611  | 54343887  | 277 |
| chr3  | 24000844  | 24001120  | 277 |
| chr29 | 17649776  | 17650052  | 277 |
| chr27 | 22187379  | 22187655  | 277 |
| chr25 | 41273652  | 41273928  | 277 |
| chr24 | 44058455  | 44058731  | 277 |
| chr24 | 43565107  | 43565383  | 277 |
| chr24 | 41562182  | 41562458  | 277 |
| chr23 | 30337544  | 30337820  | 277 |
| chr22 | 5661259   | 5661535   | 277 |
| chr21 | 63913164  | 63913440  | 277 |
| chr21 | 63231898  | 63232174  | 277 |
| chr21 | 34414013  | 34414289  | 277 |
| chr21 | 13903592  | 13903868  | 277 |
| chr21 | 6518356   | 6518632   | 277 |
| chr20 | 38662492  | 38662768  | 277 |
| chr2  | 136899014 | 136899290 | 277 |
| chr2  | 115041878 | 115042154 | 277 |
| chr19 | 21616106  | 21616382  | 277 |
| chr19 | 7612130   | 7612406   | 277 |
| chr18 | 57399642  | 57399918  | 277 |
| chr18 | 55268486  | 55268762  | 277 |
| chr18 | 24147027  | 24147303  | 277 |
| chr17 | 62992305  | 62992581  | 277 |
| chr17 | 56050006  | 56050282  | 277 |
| chr15 | 76179247  | 76179523  | 277 |
| chr15 | 22933338  | 22933614  | 277 |
| chr14 | 34004323  | 34004599  | 277 |
| chr13 | 59698246  | 59698522  | 277 |
| chr11 | 103786154 | 103786430 | 277 |
| chr11 | 93709393  | 93709669  | 277 |
| chr11 | 92550907  | 92551183  | 277 |
| chr11 | 85133233  | 85133509  | 277 |
| chr11 | 23110418  | 23110694  | 277 |
| chr11 | 21834736  | 21835012  | 277 |
| chr11 | 14040048  | 14040324  | 277 |
| chrX  | 80872717  | 80872992  | 276 |
| chrX  | 80818876  | 80819151  | 276 |
| chrX  | 69513641  | 69513916  | 276 |

|       |           |           |     |
|-------|-----------|-----------|-----|
| chrX  | 64546409  | 64546684  | 276 |
| chrX  | 63269775  | 63270050  | 276 |
| chrX  | 60040250  | 60040525  | 276 |
| chrX  | 55335418  | 55335693  | 276 |
| chrX  | 50830462  | 50830737  | 276 |
| chrX  | 35185200  | 35185475  | 276 |
| chrX  | 32822902  | 32823177  | 276 |
| chrX  | 28202326  | 28202601  | 276 |
| chrX  | 23033915  | 23034190  | 276 |
| chrX  | 8197068   | 8197343   | 276 |
| chr9  | 105269297 | 105269572 | 276 |
| chr9  | 45983534  | 45983809  | 276 |
| chr8  | 86893538  | 86893813  | 276 |
| chr7  | 15678474  | 15678749  | 276 |
| chr5  | 124892007 | 124892282 | 276 |
| chr5  | 35700679  | 35700954  | 276 |
| chr5  | 31228202  | 31228477  | 276 |
| chr5  | 13458937  | 13459212  | 276 |
| chr4  | 122186147 | 122186422 | 276 |
| chr4  | 67241603  | 67241878  | 276 |
| chr3  | 105122433 | 105122708 | 276 |
| chr3  | 15960338  | 15960613  | 276 |
| chr29 | 36731219  | 36731494  | 276 |
| chr28 | 7552912   | 7553187   | 276 |
| chr27 | 27917014  | 27917289  | 276 |
| chr27 | 17509851  | 17510126  | 276 |
| chr26 | 43096645  | 43096920  | 276 |
| chr26 | 18723727  | 18724002  | 276 |
| chr25 | 36453034  | 36453309  | 276 |
| chr25 | 33426481  | 33426756  | 276 |
| chr25 | 2868717   | 2868992   | 276 |
| chr23 | 19992804  | 19993079  | 276 |
| chr23 | 16525744  | 16526019  | 276 |
| chr23 | 12306176  | 12306451  | 276 |
| chr22 | 32969955  | 32970230  | 276 |
| chr21 | 68922903  | 68923178  | 276 |
| chr21 | 63077413  | 63077688  | 276 |
| chr21 | 57717601  | 57717876  | 276 |
| chr21 | 33805678  | 33805953  | 276 |
| chr2  | 136640568 | 136640843 | 276 |
| chr2  | 111828668 | 111828943 | 276 |
| chr19 | 60448292  | 60448567  | 276 |
| chr19 | 43138864  | 43139139  | 276 |
| chr19 | 41961245  | 41961520  | 276 |
| chr19 | 34058718  | 34058993  | 276 |
| chr19 | 30266288  | 30266563  | 276 |
| chr19 | 23565586  | 23565861  | 276 |
| chr18 | 50185239  | 50185514  | 276 |
| chr18 | 43770753  | 43771028  | 276 |
| chr18 | 13553237  | 13553512  | 276 |

|       |               |           |     |
|-------|---------------|-----------|-----|
| chr18 | 12545421      | 12545696  | 276 |
| chr18 | 4601765       | 4602040   | 276 |
| chr18 | 614465 614740 |           | 276 |
| chr16 | 75231732      | 75232007  | 276 |
| chr16 | 50298276      | 50298551  | 276 |
| chr16 | 38934527      | 38934802  | 276 |
| chr15 | 65636203      | 65636478  | 276 |
| chr15 | 64534909      | 64535184  | 276 |
| chr15 | 53624934      | 53625209  | 276 |
| chr14 | 3605769       | 3606044   | 276 |
| chr13 | 61828507      | 61828782  | 276 |
| chr13 | 52936682      | 52936957  | 276 |
| chr13 | 42665902      | 42666177  | 276 |
| chr11 | 28311833      | 28312108  | 276 |
| chr10 | 15010823      | 15011098  | 276 |
| chr1  | 128258912     | 128259187 | 276 |
| chr1  | 128250629     | 128250904 | 276 |
| chr1  | 68816398      | 68816673  | 276 |
| chr1  | 1590557       | 1590832   | 276 |
| chrX  | 78622992      | 78623266  | 275 |
| chrX  | 56202987      | 56203261  | 275 |
| chrX  | 55020641      | 55020915  | 275 |
| chrX  | 54991894      | 54992168  | 275 |
| chrX  | 54816269      | 54816543  | 275 |
| chrX  | 54306820      | 54307094  | 275 |
| chrX  | 21222780      | 21223054  | 275 |
| chrX  | 2511920       | 2512194   | 275 |
| chr9  | 65776518      | 65776792  | 275 |
| chr9  | 62598467      | 62598741  | 275 |
| chr8  | 103932045     | 103932319 | 275 |
| chr7  | 19202292      | 19202566  | 275 |
| chr6  | 45976970      | 45977244  | 275 |
| chr5  | 118149683     | 118149957 | 275 |
| chr5  | 35303271      | 35303545  | 275 |
| chr3  | 105167690     | 105167964 | 275 |
| chr3  | 17703340      | 17703614  | 275 |
| chr29 | 37203924      | 37204198  | 275 |
| chr28 | 42950621      | 42950895  | 275 |
| chr28 | 25149561      | 25149835  | 275 |
| chr28 | 12424540      | 12424814  | 275 |
| chr27 | 29036979      | 29037253  | 275 |
| chr26 | 44317784      | 44318058  | 275 |
| chr25 | 43432814      | 43433088  | 275 |
| chr25 | 34439129      | 34439403  | 275 |
| chr24 | 20379160      | 20379434  | 275 |
| chr22 | 59842275      | 59842549  | 275 |
| chr22 | 55899786      | 55900060  | 275 |
| chr21 | 61081487      | 61081761  | 275 |
| chr20 | 7012880       | 7013154   | 275 |
| chr2  | 129270271     | 129270545 | 275 |

|       |           |           |     |
|-------|-----------|-----------|-----|
| chr19 | 62050539  | 62050813  | 275 |
| chr19 | 23559868  | 23560142  | 275 |
| chr19 | 19138840  | 19139114  | 275 |
| chr19 | 8392146   | 8392420   | 275 |
| chr19 | 7756630   | 7756904   | 275 |
| chr18 | 41802259  | 41802533  | 275 |
| chr18 | 9657385   | 9657659   | 275 |
| chr16 | 60777659  | 60777933  | 275 |
| chr16 | 43618282  | 43618556  | 275 |
| chr16 | 29422156  | 29422430  | 275 |
| chr15 | 65519807  | 65520081  | 275 |
| chr15 | 14192178  | 14192452  | 275 |
| chr13 | 26179535  | 26179809  | 275 |
| chr13 | 15601267  | 15601541  | 275 |
| chr13 | 6986959   | 6987233   | 275 |
| chr12 | 83940079  | 83940353  | 275 |
| chr12 | 31971712  | 31971986  | 275 |
| chr11 | 101894697 | 101894971 | 275 |
| chr11 | 87922999  | 87923273  | 275 |
| chr11 | 4586938   | 4587212   | 275 |
| chr10 | 70216935  | 70217209  | 275 |
| chr10 | 46416621  | 46416895  | 275 |
| chr10 | 43848149  | 43848423  | 275 |
| chr10 | 24173683  | 24173957  | 275 |
| chr10 | 8359185   | 8359459   | 275 |
| chr10 | 5231497   | 5231771   | 275 |
| chrX  | 74620899  | 74621172  | 274 |
| chrX  | 73283624  | 73283897  | 274 |
| chrX  | 64505824  | 64506097  | 274 |
| chrX  | 61662384  | 61662657  | 274 |
| chrX  | 38773164  | 38773437  | 274 |
| chrX  | 35486217  | 35486490  | 274 |
| chrX  | 20476042  | 20476315  | 274 |
| chrX  | 19667965  | 19668238  | 274 |
| chrX  | 19472595  | 19472868  | 274 |
| chrX  | 12541521  | 12541794  | 274 |
| chrX  | 10812285  | 10812558  | 274 |
| chrX  | 8459225   | 8459498   | 274 |
| chrX  | 6617441   | 6617714   | 274 |
| chr8  | 80491926  | 80492199  | 274 |
| chr8  | 7831543   | 7831816   | 274 |
| chr8  | 7824689   | 7824962   | 274 |
| chr7  | 46581850  | 46582123  | 274 |
| chr5  | 120245994 | 120246267 | 274 |
| chr5  | 111864672 | 111864945 | 274 |
| chr4  | 118270547 | 118270820 | 274 |
| chr4  | 106698855 | 106699128 | 274 |
| chr3  | 111047028 | 111047301 | 274 |
| chr3  | 98374524  | 98374797  | 274 |
| chr3  | 92107192  | 92107465  | 274 |

|       |           |           |     |
|-------|-----------|-----------|-----|
| chr29 | 41707603  | 41707876  | 274 |
| chr28 | 25731960  | 25732233  | 274 |
| chr27 | 36004269  | 36004542  | 274 |
| chr26 | 44511485  | 44511758  | 274 |
| chr24 | 48665537  | 48665810  | 274 |
| chr24 | 46934165  | 46934438  | 274 |
| chr24 | 39751323  | 39751596  | 274 |
| chr23 | 17501192  | 17501465  | 274 |
| chr22 | 30044845  | 30045118  | 274 |
| chr21 | 69001113  | 69001386  | 274 |
| chr21 | 33570758  | 33571031  | 274 |
| chr21 | 26957124  | 26957397  | 274 |
| chr20 | 43679211  | 43679484  | 274 |
| chr19 | 60249109  | 60249382  | 274 |
| chr19 | 59230362  | 59230635  | 274 |
| chr19 | 48910995  | 48911268  | 274 |
| chr19 | 37981720  | 37981993  | 274 |
| chr19 | 23746015  | 23746288  | 274 |
| chr19 | 15119578  | 15119851  | 274 |
| chr18 | 55207878  | 55208151  | 274 |
| chr18 | 32445659  | 32445932  | 274 |
| chr18 | 11994292  | 11994565  | 274 |
| chr18 | 11727095  | 11727368  | 274 |
| chr17 | 76117101  | 76117374  | 274 |
| chr17 | 73212711  | 73212984  | 274 |
| chr17 | 70413078  | 70413351  | 274 |
| chr16 | 60247406  | 60247679  | 274 |
| chr16 | 47033960  | 47034233  | 274 |
| chr15 | 40734381  | 40734654  | 274 |
| chr15 | 39629034  | 39629307  | 274 |
| chr15 | 28896700  | 28896973  | 274 |
| chr14 | 26118864  | 26119137  | 274 |
| chr14 | 5501272   | 5501545   | 274 |
| chr13 | 62452259  | 62452532  | 274 |
| chr13 | 39819860  | 39820133  | 274 |
| chr12 | 75291637  | 75291910  | 274 |
| chr11 | 75415183  | 75415456  | 274 |
| chr11 | 70693027  | 70693300  | 274 |
| chr10 | 48814510  | 48814783  | 274 |
| chr1  | 157329361 | 157329634 | 274 |
| chr1  | 59621449  | 59621722  | 274 |
| chrX  | 78704167  | 78704439  | 273 |
| chrX  | 71902233  | 71902505  | 273 |
| chrX  | 61577694  | 61577966  | 273 |
| chrX  | 56931966  | 56932238  | 273 |
| chrX  | 49847466  | 49847738  | 273 |
| chrX  | 38878135  | 38878407  | 273 |
| chrX  | 34596884  | 34597156  | 273 |
| chrX  | 22510443  | 22510715  | 273 |
| chrX  | 20484847  | 20485119  | 273 |

|       |               |           |     |
|-------|---------------|-----------|-----|
| chrX  | 15753938      | 15754210  | 273 |
| chrX  | 11979140      | 11979412  | 273 |
| chrX  | 6288767       | 6289039   | 273 |
| chrX  | 559240 559512 | 273       |     |
| chr8  | 108736469     | 108736741 | 273 |
| chr8  | 67712622      | 67712894  | 273 |
| chr8  | 58256522      | 58256794  | 273 |
| chr8  | 25958231      | 25958503  | 273 |
| chr7  | 46456101      | 46456373  | 273 |
| chr7  | 44639843      | 44640115  | 273 |
| chr7  | 43989219      | 43989491  | 273 |
| chr6  | 59500036      | 59500308  | 273 |
| chr5  | 28747919      | 28748191  | 273 |
| chr4  | 100155412     | 100155684 | 273 |
| chr4  | 72376679      | 72376951  | 273 |
| chr4  | 25137305      | 25137577  | 273 |
| chr3  | 35495394      | 35495666  | 273 |
| chr3  | 10636463      | 10636735  | 273 |
| chr28 | 24758036      | 24758308  | 273 |
| chr27 | 28116772      | 28117044  | 273 |
| chr27 | 26961936      | 26962208  | 273 |
| chr26 | 33231075      | 33231347  | 273 |
| chr26 | 8720546       | 8720818   | 273 |
| chr25 | 38330757      | 38331029  | 273 |
| chr25 | 35711857      | 35712129  | 273 |
| chr25 | 28286995      | 28287267  | 273 |
| chr25 | 15583345      | 15583617  | 273 |
| chr25 | 1923175       | 1923447   | 273 |
| chr24 | 48839210      | 48839482  | 273 |
| chr24 | 23947862      | 23948134  | 273 |
| chr23 | 52863147      | 52863419  | 273 |
| chr23 | 31024709      | 31024981  | 273 |
| chr23 | 28844750      | 28845022  | 273 |
| chr23 | 17497925      | 17498197  | 273 |
| chr22 | 56283007      | 56283279  | 273 |
| chr21 | 63280104      | 63280376  | 273 |
| chr21 | 24415916      | 24416188  | 273 |
| chr21 | 21274933      | 21275205  | 273 |
| chr21 | 20888801      | 20889073  | 273 |
| chr21 | 18554279      | 18554551  | 273 |
| chr2  | 126048634     | 126048906 | 273 |
| chr2  | 120920767     | 120921039 | 273 |
| chr19 | 61756380      | 61756652  | 273 |
| chr19 | 14324879      | 14325151  | 273 |
| chr18 | 4523099       | 4523371   | 273 |
| chr17 | 55462803      | 55463075  | 273 |
| chr15 | 73750511      | 73750783  | 273 |
| chr13 | 75824186      | 75824458  | 273 |
| chr13 | 74547768      | 74548040  | 273 |
| chr13 | 68927418      | 68927690  | 273 |

|       |           |           |     |
|-------|-----------|-----------|-----|
| chr13 | 56090801  | 56091073  | 273 |
| chr12 | 84588557  | 84588829  | 273 |
| chr10 | 70845825  | 70846097  | 273 |
| chr1  | 145702140 | 145702412 | 273 |
| chr1  | 144443465 | 144443737 | 273 |
| chr1  | 31591734  | 31592006  | 273 |
| chrX  | 82089819  | 82090090  | 272 |
| chrX  | 81917855  | 81918126  | 272 |
| chrX  | 78956497  | 78956768  | 272 |
| chrX  | 78238860  | 78239131  | 272 |
| chrX  | 63106265  | 63106536  | 272 |
| chrX  | 62635481  | 62635752  | 272 |
| chrX  | 56574736  | 56575007  | 272 |
| chrX  | 51667744  | 51668015  | 272 |
| chrX  | 45826761  | 45827032  | 272 |
| chrX  | 10204141  | 10204412  | 272 |
| chrX  | 6757582   | 6757853   | 272 |
| chr9  | 105756537 | 105756808 | 272 |
| chr9  | 90760821  | 90761092  | 272 |
| chr8  | 77057747  | 77058018  | 272 |
| chr8  | 73107006  | 73107277  | 272 |
| chr8  | 46162943  | 46163214  | 272 |
| chr7  | 47349709  | 47349980  | 272 |
| chr7  | 19024737  | 19025008  | 272 |
| chr5  | 79076768  | 79077039  | 272 |
| chr5  | 76858790  | 76859061  | 272 |
| chr5  | 62077083  | 62077354  | 272 |
| chr5  | 28991289  | 28991560  | 272 |
| chr5  | 28876037  | 28876308  | 272 |
| chr4  | 108704298 | 108704569 | 272 |
| chr4  | 99259493  | 99259764  | 272 |
| chr3  | 126840597 | 126840868 | 272 |
| chr3  | 114217229 | 114217500 | 272 |
| chr28 | 43037193  | 43037464  | 272 |
| chr26 | 44234531  | 44234802  | 272 |
| chr26 | 8720072   | 8720343   | 272 |
| chr25 | 36701812  | 36702083  | 272 |
| chr25 | 15627507  | 15627778  | 272 |
| chr23 | 49226433  | 49226704  | 272 |
| chr23 | 28037677  | 28037948  | 272 |
| chr23 | 13694119  | 13694390  | 272 |
| chr22 | 58423409  | 58423680  | 272 |
| chr22 | 58314633  | 58314904  | 272 |
| chr22 | 32685191  | 32685462  | 272 |
| chr22 | 30102947  | 30103218  | 272 |
| chr22 | 15005996  | 15006267  | 272 |
| chr21 | 47298102  | 47298373  | 272 |
| chr21 | 25963734  | 25964005  | 272 |
| chr2  | 132175167 | 132175438 | 272 |
| chr19 | 56109610  | 56109881  | 272 |



|       |           |           |     |
|-------|-----------|-----------|-----|
| chr19 | 46846414  | 46846685  | 272 |
| chr18 | 22339366  | 22339637  | 272 |
| chr17 | 69700603  | 69700874  | 272 |
| chr16 | 51319223  | 51319494  | 272 |
| chr14 | 30883737  | 30884008  | 272 |
| chr13 | 79891236  | 79891507  | 272 |
| chr13 | 67398174  | 67398445  | 272 |
| chr13 | 56614219  | 56614490  | 272 |
| chr12 | 75416221  | 75416492  | 272 |
| chr11 | 66231780  | 66232051  | 272 |
| chr11 | 44301667  | 44301938  | 272 |
| chr10 | 73989655  | 73989926  | 272 |
| chr10 | 71262820  | 71263091  | 272 |
| chr10 | 66923557  | 66923828  | 272 |
| chr10 | 62960383  | 62960654  | 272 |
| chr1  | 71546730  | 71547001  | 272 |
| chr1  | 1523339   | 1523610   | 272 |
| chrX  | 77135786  | 77136056  | 271 |
| chrX  | 75352238  | 75352508  | 271 |
| chrX  | 72379728  | 72379998  | 271 |
| chrX  | 39030784  | 39031054  | 271 |
| chrX  | 36041317  | 36041587  | 271 |
| chrX  | 35550087  | 35550357  | 271 |
| chrX  | 30069667  | 30069937  | 271 |
| chrX  | 21221029  | 21221299  | 271 |
| chrX  | 19389323  | 19389593  | 271 |
| chrX  | 18465729  | 18465999  | 271 |
| chrX  | 10206230  | 10206500  | 271 |
| chrX  | 5653043   | 5653313   | 271 |
| chr9  | 31069182  | 31069452  | 271 |
| chr8  | 89554064  | 89554334  | 271 |
| chr8  | 61056315  | 61056585  | 271 |
| chr7  | 38190306  | 38190576  | 271 |
| chr6  | 105527176 | 105527446 | 271 |
| chr5  | 121395003 | 121395273 | 271 |
| chr5  | 112019059 | 112019329 | 271 |
| chr5  | 100761410 | 100761680 | 271 |
| chr5  | 78547141  | 78547411  | 271 |
| chr4  | 71795080  | 71795350  | 271 |
| chr3  | 75162312  | 75162582  | 271 |
| chr3  | 18513083  | 18513353  | 271 |
| chr29 | 38403388  | 38403658  | 271 |
| chr29 | 29917150  | 29917420  | 271 |
| chr28 | 42330344  | 42330614  | 271 |
| chr28 | 41785293  | 41785563  | 271 |
| chr28 | 33598462  | 33598732  | 271 |
| chr28 | 4356093   | 4356363   | 271 |
| chr25 | 35482826  | 35483096  | 271 |
| chr25 | 5687857   | 5688127   | 271 |
| chr25 | 3395987   | 3396257   | 271 |

|       |               |           |     |
|-------|---------------|-----------|-----|
| chr23 | 48346283      | 48346553  | 271 |
| chr22 | 54240432      | 54240702  | 271 |
| chr22 | 50743603      | 50743873  | 271 |
| chr21 | 59503003      | 59503273  | 271 |
| chr21 | 31418919      | 31419189  | 271 |
| chr20 | 72397817      | 72398087  | 271 |
| chr20 | 19028482      | 19028752  | 271 |
| chr20 | 975782 976052 | 271       |     |
| chr20 | 933286 933556 | 271       |     |
| chr2  | 139202160     | 139202430 | 271 |
| chr2  | 119578081     | 119578351 | 271 |
| chr19 | 37895285      | 37895555  | 271 |
| chr19 | 19484998      | 19485268  | 271 |
| chr19 | 16154153      | 16154423  | 271 |
| chr18 | 13533871      | 13534141  | 271 |
| chr18 | 12083788      | 12084058  | 271 |
| chr17 | 70257361      | 70257631  | 271 |
| chr17 | 67966804      | 67967074  | 271 |
| chr17 | 58843725      | 58843995  | 271 |
| chr17 | 4152417       | 4152687   | 271 |
| chr16 | 73975317      | 73975587  | 271 |
| chr16 | 71423634      | 71423904  | 271 |
| chr16 | 61138150      | 61138420  | 271 |
| chr15 | 41101592      | 41101862  | 271 |
| chr15 | 30325044      | 30325314  | 271 |
| chr13 | 77319445      | 77319715  | 271 |
| chr13 | 67176214      | 67176484  | 271 |
| chr13 | 59684561      | 59684831  | 271 |
| chr13 | 57348133      | 57348403  | 271 |
| chr12 | 71816126      | 71816396  | 271 |
| chr12 | 33379340      | 33379610  | 271 |
| chr11 | 46718368      | 46718638  | 271 |
| chr1  | 135874261     | 135874531 | 271 |
| chr1  | 129867087     | 129867357 | 271 |
| chr1  | 128125875     | 128126145 | 271 |
| chrX  | 79353230      | 79353499  | 270 |
| chrX  | 77530772      | 77531041  | 270 |
| chrX  | 76082792      | 76083061  | 270 |
| chrX  | 72298303      | 72298572  | 270 |
| chrX  | 55252511      | 55252780  | 270 |
| chrX  | 49356607      | 49356876  | 270 |
| chrX  | 37282545      | 37282814  | 270 |
| chrX  | 12493249      | 12493518  | 270 |
| chrX  | 12248137      | 12248406  | 270 |
| chrX  | 2696583       | 2696852   | 270 |
| chrX  | 2602540       | 2602809   | 270 |
| chrX  | 431566 431835 | 270       |     |
| chr9  | 100467856     | 100468125 | 270 |
| chr9  | 71695367      | 71695636  | 270 |
| chr9  | 53199117      | 53199386  | 270 |

|       |           |           |     |
|-------|-----------|-----------|-----|
| chr8  | 72307816  | 72308085  | 270 |
| chr8  | 72072256  | 72072525  | 270 |
| chr8  | 7614203   | 7614472   | 270 |
| chr7  | 17971455  | 17971724  | 270 |
| chr6  | 59284886  | 59285155  | 270 |
| chr4  | 51083415  | 51083684  | 270 |
| chr4  | 8763980   | 8764249   | 270 |
| chr3  | 105169557 | 105169826 | 270 |
| chr29 | 33797534  | 33797803  | 270 |
| chr29 | 31607569  | 31607838  | 270 |
| chr29 | 18245948  | 18246217  | 270 |
| chr28 | 34141879  | 34142148  | 270 |
| chr28 | 33973391  | 33973660  | 270 |
| chr27 | 26541102  | 26541371  | 270 |
| chr26 | 44510141  | 44510410  | 270 |
| chr26 | 43252032  | 43252301  | 270 |
| chr24 | 43722632  | 43722901  | 270 |
| chr23 | 52723079  | 52723348  | 270 |
| chr23 | 19800815  | 19801084  | 270 |
| chr22 | 59668044  | 59668313  | 270 |
| chr22 | 50046179  | 50046448  | 270 |
| chr22 | 14947751  | 14948020  | 270 |
| chr21 | 59698403  | 59698672  | 270 |
| chr20 | 74466933  | 74467202  | 270 |
| chr20 | 70735248  | 70735517  | 270 |
| chr20 | 8499370   | 8499639   | 270 |
| chr2  | 139234756 | 139235025 | 270 |
| chr2  | 92647271  | 92647540  | 270 |
| chr19 | 57589778  | 57590047  | 270 |
| chr19 | 52351357  | 52351626  | 270 |
| chr19 | 49669879  | 49670148  | 270 |
| chr19 | 38359327  | 38359596  | 270 |
| chr19 | 13451783  | 13452052  | 270 |
| chr18 | 64633452  | 64633721  | 270 |
| chr18 | 51757677  | 51757946  | 270 |
| chr17 | 75531054  | 75531323  | 270 |
| chr16 | 23957783  | 23958052  | 270 |
| chr16 | 23790628  | 23790897  | 270 |
| chr15 | 75797983  | 75798252  | 270 |
| chr15 | 75512293  | 75512562  | 270 |
| chr15 | 73840283  | 73840552  | 270 |
| chr15 | 64576260  | 64576529  | 270 |
| chr15 | 64528503  | 64528772  | 270 |
| chr15 | 25029254  | 25029523  | 270 |
| chr14 | 26617199  | 26617468  | 270 |
| chr13 | 82702425  | 82702694  | 270 |
| chr13 | 80148433  | 80148702  | 270 |
| chr13 | 75991768  | 75992037  | 270 |
| chr13 | 65104108  | 65104377  | 270 |
| chr13 | 59858726  | 59858995  | 270 |

|       |           |           |     |
|-------|-----------|-----------|-----|
| chr13 | 15136902  | 15137171  | 270 |
| chr12 | 11442823  | 11443092  | 270 |
| chr11 | 104598298 | 104598567 | 270 |
| chr11 | 104491097 | 104491366 | 270 |
| chr10 | 90436847  | 90437116  | 270 |
| chr10 | 36613665  | 36613934  | 270 |
| chr10 | 17690232  | 17690501  | 270 |
| chr10 | 12003769  | 12004038  | 270 |
| chr10 | 10641893  | 10642162  | 270 |
| chr1  | 149343199 | 149343468 | 270 |
| chr1  | 68888711  | 68888980  | 270 |
| chr1  | 37559640  | 37559909  | 270 |
| chrX  | 78662069  | 78662337  | 269 |
| chrX  | 78535814  | 78536082  | 269 |
| chrX  | 75792900  | 75793168  | 269 |
| chrX  | 66419670  | 66419938  | 269 |
| chrX  | 65996619  | 65996887  | 269 |
| chrX  | 60064780  | 60065048  | 269 |
| chrX  | 55488200  | 55488468  | 269 |
| chrX  | 55003171  | 55003439  | 269 |
| chrX  | 47472921  | 47473189  | 269 |
| chrX  | 32447284  | 32447552  | 269 |
| chrX  | 22015499  | 22015767  | 269 |
| chrX  | 18947429  | 18947697  | 269 |
| chrX  | 13590960  | 13591228  | 269 |
| chrX  | 10182932  | 10183200  | 269 |
| chrX  | 8286661   | 8286929   | 269 |
| chrX  | 4441421   | 4441689   | 269 |
| chrX  | 2455930   | 2456198   | 269 |
| chr9  | 77802824  | 77803092  | 269 |
| chr9  | 42162952  | 42163220  | 269 |
| chr5  | 112187652 | 112187920 | 269 |
| chr3  | 123601488 | 123601756 | 269 |
| chr3  | 114850407 | 114850675 | 269 |
| chr3  | 106593375 | 106593643 | 269 |
| chr3  | 11495214  | 11495482  | 269 |
| chr29 | 46391303  | 46391571  | 269 |
| chr29 | 31614853  | 31615121  | 269 |
| chr28 | 25357484  | 25357752  | 269 |
| chr28 | 17927612  | 17927880  | 269 |
| chr27 | 42074957  | 42075225  | 269 |
| chr25 | 37860492  | 37860760  | 269 |
| chr25 | 3422382   | 3422650   | 269 |
| chr24 | 50221675  | 50221943  | 269 |
| chr24 | 40357559  | 40357827  | 269 |
| chr22 | 48309735  | 48310003  | 269 |
| chr22 | 18282359  | 18282627  | 269 |
| chr21 | 20876574  | 20876842  | 269 |
| chr21 | 14937193  | 14937461  | 269 |
| chr2  | 130444122 | 130444390 | 269 |

|       |               |           |     |
|-------|---------------|-----------|-----|
| chr19 | 37813518      | 37813786  | 269 |
| chr19 | 35223502      | 35223770  | 269 |
| chr19 | 12603448      | 12603716  | 269 |
| chr18 | 4585710       | 4585978   | 269 |
| chr18 | 622387 622655 | 269       |     |
| chr17 | 72358592      | 72358860  | 269 |
| chr17 | 6996892       | 6997160   | 269 |
| chr16 | 75354239      | 75354507  | 269 |
| chr16 | 50587859      | 50588127  | 269 |
| chr16 | 48797323      | 48797591  | 269 |
| chr16 | 3308515       | 3308783   | 269 |
| chr15 | 66474983      | 66475251  | 269 |
| chr15 | 28594336      | 28594604  | 269 |
| chr14 | 76168509      | 76168777  | 269 |
| chr14 | 42550705      | 42550973  | 269 |
| chr13 | 59354777      | 59355045  | 269 |
| chr13 | 6960401       | 6960669   | 269 |
| chr11 | 106319787     | 106320055 | 269 |
| chr11 | 104919791     | 104920059 | 269 |
| chr11 | 89369535      | 89369803  | 269 |
| chr11 | 66203646      | 66203914  | 269 |
| chr11 | 58476924      | 58477192  | 269 |
| chr11 | 3886097       | 3886365   | 269 |
| chrX  | 78883591      | 78883858  | 268 |
| chrX  | 74881673      | 74881940  | 268 |
| chrX  | 63895340      | 63895607  | 268 |
| chrX  | 37452755      | 37453022  | 268 |
| chrX  | 35699999      | 35700266  | 268 |
| chrX  | 30858083      | 30858350  | 268 |
| chrX  | 21642539      | 21642806  | 268 |
| chrX  | 20865156      | 20865423  | 268 |
| chrX  | 19144371      | 19144638  | 268 |
| chrX  | 13094625      | 13094892  | 268 |
| chrX  | 575821 576088 | 268       |     |
| chr9  | 78227146      | 78227413  | 268 |
| chr8  | 111453058     | 111453325 | 268 |
| chr8  | 93306899      | 93307166  | 268 |
| chr7  | 47989511      | 47989778  | 268 |
| chr7  | 17131715      | 17131982  | 268 |
| chr5  | 60317566      | 60317833  | 268 |
| chr5  | 30381278      | 30381545  | 268 |
| chr4  | 5629780       | 5630047   | 268 |
| chr3  | 115332979     | 115333246 | 268 |
| chr3  | 79690996      | 79691263  | 268 |
| chr3  | 62929134      | 62929401  | 268 |
| chr3  | 30292655      | 30292922  | 268 |
| chr29 | 38808039      | 38808306  | 268 |
| chr28 | 33735104      | 33735371  | 268 |
| chr28 | 26779742      | 26780009  | 268 |
| chr28 | 26771496      | 26771763  | 268 |

|       |               |           |     |
|-------|---------------|-----------|-----|
| chr24 | 63115489      | 63115756  | 268 |
| chr24 | 2345180       | 2345447   | 268 |
| chr23 | 19649111      | 19649378  | 268 |
| chr23 | 18741565      | 18741832  | 268 |
| chr22 | 16159904      | 16160171  | 268 |
| chr21 | 14018362      | 14018629  | 268 |
| chr20 | 5240432       | 5240699   | 268 |
| chr2  | 131678203     | 131678470 | 268 |
| chr2  | 124817561     | 124817828 | 268 |
| chr2  | 124508501     | 124508768 | 268 |
| chr19 | 56457128      | 56457395  | 268 |
| chr19 | 45757493      | 45757760  | 268 |
| chr18 | 56330364      | 56330631  | 268 |
| chr18 | 54318986      | 54319253  | 268 |
| chr18 | 11344555      | 11344822  | 268 |
| chr18 | 6271380       | 6271647   | 268 |
| chr16 | 46386341      | 46386608  | 268 |
| chr15 | 55220383      | 55220650  | 268 |
| chr13 | 76360745      | 76361012  | 268 |
| chr13 | 66941507      | 66941774  | 268 |
| chr13 | 63265623      | 63265890  | 268 |
| chr13 | 15116084      | 15116351  | 268 |
| chr13 | 15099351      | 15099618  | 268 |
| chr12 | 84296733      | 84297000  | 268 |
| chr12 | 14242886      | 14243153  | 268 |
| chr11 | 104564254     | 104564521 | 268 |
| chr11 | 101894420     | 101894687 | 268 |
| chr11 | 91626986      | 91627253  | 268 |
| chr11 | 66554000      | 66554267  | 268 |
| chr10 | 71236045      | 71236312  | 268 |
| chr10 | 70074033      | 70074300  | 268 |
| chr1  | 146784402     | 146784669 | 268 |
| chrX  | 84404801      | 84405067  | 267 |
| chrX  | 75782951      | 75783217  | 267 |
| chrX  | 72841800      | 72842066  | 267 |
| chrX  | 72470441      | 72470707  | 267 |
| chrX  | 57046382      | 57046648  | 267 |
| chrX  | 56305160      | 56305426  | 267 |
| chrX  | 54432151      | 54432417  | 267 |
| chrX  | 49296731      | 49296997  | 267 |
| chrX  | 38589053      | 38589319  | 267 |
| chrX  | 37273045      | 37273311  | 267 |
| chrX  | 29470621      | 29470887  | 267 |
| chrX  | 23401894      | 23402160  | 267 |
| chrX  | 22432310      | 22432576  | 267 |
| chrX  | 18678376      | 18678642  | 267 |
| chrX  | 15632676      | 15632942  | 267 |
| chrX  | 10200488      | 10200754  | 267 |
| chrX  | 342922 343188 | 267       |     |
| chr9  | 106008937     | 106009203 | 267 |

|       |           |           |     |
|-------|-----------|-----------|-----|
| chr9  | 41634543  | 41634809  | 267 |
| chr8  | 95818704  | 95818970  | 267 |
| chr7  | 42793287  | 42793553  | 267 |
| chr6  | 120470521 | 120470787 | 267 |
| chr4  | 96002101  | 96002367  | 267 |
| chr4  | 78898071  | 78898337  | 267 |
| chr4  | 68223446  | 68223712  | 267 |
| chr4  | 10438025  | 10438291  | 267 |
| chr3  | 121908055 | 121908321 | 267 |
| chr3  | 121790081 | 121790347 | 267 |
| chr3  | 118241563 | 118241829 | 267 |
| chr3  | 55932417  | 55932683  | 267 |
| chr28 | 32405437  | 32405703  | 267 |
| chr27 | 26735278  | 26735544  | 267 |
| chr27 | 26494951  | 26495217  | 267 |
| chr27 | 14409714  | 14409980  | 267 |
| chr26 | 43817366  | 43817632  | 267 |
| chr26 | 20864882  | 20865148  | 267 |
| chr25 | 30536490  | 30536756  | 267 |
| chr22 | 54458876  | 54459142  | 267 |
| chr22 | 40394574  | 40394840  | 267 |
| chr22 | 32728917  | 32729183  | 267 |
| chr21 | 56043911  | 56044177  | 267 |
| chr21 | 27796146  | 27796412  | 267 |
| chr20 | 2014325   | 2014591   | 267 |
| chr19 | 61888913  | 61889179  | 267 |
| chr19 | 47251957  | 47252223  | 267 |
| chr19 | 15122860  | 15123126  | 267 |
| chr19 | 8427045   | 8427311   | 267 |
| chr18 | 13555973  | 13556239  | 267 |
| chr17 | 70229385  | 70229651  | 267 |
| chr17 | 70157245  | 70157511  | 267 |
| chr16 | 47595714  | 47595980  | 267 |
| chr16 | 45914307  | 45914573  | 267 |
| chr15 | 38256910  | 38257176  | 267 |
| chr15 | 28067128  | 28067394  | 267 |
| chr15 | 19743685  | 19743951  | 267 |
| chr14 | 68064879  | 68065145  | 267 |
| chr14 | 7262117   | 7262383   | 267 |
| chr13 | 46326827  | 46327093  | 267 |
| chr13 | 41070110  | 41070376  | 267 |
| chr12 | 74208252  | 74208518  | 267 |
| chr12 | 14883609  | 14883875  | 267 |
| chr11 | 74871640  | 74871906  | 267 |
| chr11 | 50955610  | 50955876  | 267 |
| chr10 | 103761500 | 103761766 | 267 |
| chr10 | 74129352  | 74129618  | 267 |
| chr10 | 68416365  | 68416631  | 267 |
| chr10 | 67943338  | 67943604  | 267 |
| chr1  | 142507385 | 142507651 | 267 |

|       |           |           |     |
|-------|-----------|-----------|-----|
| chr1  | 113371702 | 113371968 | 267 |
| chrX  | 87718219  | 87718484  | 266 |
| chrX  | 83650063  | 83650328  | 266 |
| chrX  | 72401175  | 72401440  | 266 |
| chrX  | 71272440  | 71272705  | 266 |
| chrX  | 66904028  | 66904293  | 266 |
| chrX  | 64020656  | 64020921  | 266 |
| chrX  | 60272209  | 60272474  | 266 |
| chrX  | 35161076  | 35161341  | 266 |
| chrX  | 31759854  | 31760119  | 266 |
| chrX  | 27293774  | 27294039  | 266 |
| chrX  | 12434971  | 12435236  | 266 |
| chrX  | 7459984   | 7460249   | 266 |
| chrX  | 1211890   | 1212155   | 266 |
| chrX  | 886418    | 886683    | 266 |
| chrX  | 677286    | 677551    | 266 |
| chr9  | 45098304  | 45098569  | 266 |
| chr8  | 102093258 | 102093523 | 266 |
| chr8  | 24730455  | 24730720  | 266 |
| chr8  | 24138284  | 24138549  | 266 |
| chr7  | 43296207  | 43296472  | 266 |
| chr7  | 3524547   | 3524812   | 266 |
| chr6  | 59509223  | 59509488  | 266 |
| chr5  | 123029658 | 123029923 | 266 |
| chr5  | 73301476  | 73301741  | 266 |
| chr4  | 71494893  | 71495158  | 266 |
| chr3  | 89156012  | 89156277  | 266 |
| chr3  | 20012440  | 20012705  | 266 |
| chr28 | 33975917  | 33976182  | 266 |
| chr28 | 1260934   | 1261199   | 266 |
| chr25 | 1057956   | 1058221   | 266 |
| chr23 | 46446359  | 46446624  | 266 |
| chr23 | 11388739  | 11389004  | 266 |
| chr22 | 59628037  | 59628302  | 266 |
| chr21 | 47303847  | 47304112  | 266 |
| chr20 | 3247693   | 3247958   | 266 |
| chr2  | 139361537 | 139361802 | 266 |
| chr2  | 21137128  | 21137393  | 266 |
| chr19 | 48889824  | 48890089  | 266 |
| chr19 | 47067713  | 47067978  | 266 |
| chr19 | 44358184  | 44358449  | 266 |
| chr19 | 31755771  | 31756036  | 266 |
| chr19 | 23987039  | 23987304  | 266 |
| chr19 | 21583453  | 21583718  | 266 |
| chr18 | 35344204  | 35344469  | 266 |
| chr17 | 68512931  | 68513196  | 266 |
| chr16 | 77547452  | 77547717  | 266 |
| chr16 | 44869292  | 44869557  | 266 |
| chr16 | 30475993  | 30476258  | 266 |
| chr16 | 2198685   | 2198950   | 266 |



|       |           |           |     |
|-------|-----------|-----------|-----|
| chr15 | 74606366  | 74606631  | 266 |
| chr15 | 26902378  | 26902643  | 266 |
| chr15 | 26770878  | 26771143  | 266 |
| chr15 | 21391949  | 21392214  | 266 |
| chr14 | 10321751  | 10322016  | 266 |
| chr13 | 77345339  | 77345604  | 266 |
| chr13 | 57223622  | 57223887  | 266 |
| chr11 | 107545584 | 107545849 | 266 |
| chr10 | 87876823  | 87877088  | 266 |
| chr10 | 20161266  | 20161531  | 266 |
| chr1  | 74923873  | 74924138  | 266 |
| chr1  | 2550353   | 2550618   | 266 |
| chrX  | 74824673  | 74824937  | 265 |
| chrX  | 58616435  | 58616699  | 265 |
| chrX  | 50803019  | 50803283  | 265 |
| chrX  | 49775840  | 49776104  | 265 |
| chrX  | 49678223  | 49678487  | 265 |
| chrX  | 35084518  | 35084782  | 265 |
| chrX  | 31551300  | 31551564  | 265 |
| chrX  | 5618574   | 5618838   | 265 |
| chrX  | 2568712   | 2568976   | 265 |
| chr8  | 116777847 | 116778111 | 265 |
| chr8  | 27067326  | 27067590  | 265 |
| chr7  | 43284403  | 43284667  | 265 |
| chr7  | 15148380  | 15148644  | 265 |
| chr6  | 120943145 | 120943409 | 265 |
| chr6  | 120869459 | 120869723 | 265 |
| chr6  | 75144467  | 75144731  | 265 |
| chr5  | 111712972 | 111713236 | 265 |
| chr5  | 59592406  | 59592670  | 265 |
| chr5  | 26735238  | 26735502  | 265 |
| chr4  | 118449365 | 118449629 | 265 |
| chr4  | 116021457 | 116021721 | 265 |
| chr4  | 66686161  | 66686425  | 265 |
| chr4  | 9372756   | 9373020   | 265 |
| chr3  | 108415828 | 108416092 | 265 |
| chr3  | 105185009 | 105185273 | 265 |
| chr3  | 26155065  | 26155329  | 265 |
| chr3  | 10550966  | 10551230  | 265 |
| chr3  | 4451865   | 4452129   | 265 |
| chr29 | 50606093  | 50606357  | 265 |
| chr29 | 46653163  | 46653427  | 265 |
| chr28 | 33355615  | 33355879  | 265 |
| chr28 | 26798101  | 26798365  | 265 |
| chr28 | 26762982  | 26763246  | 265 |
| chr28 | 24759180  | 24759444  | 265 |
| chr27 | 2128457   | 2128721   | 265 |
| chr26 | 44062630  | 44062894  | 265 |
| chr26 | 42886250  | 42886514  | 265 |
| chr26 | 21777785  | 21778049  | 265 |

|       |           |           |     |
|-------|-----------|-----------|-----|
| chr24 | 43903428  | 43903692  | 265 |
| chr24 | 968627    | 968891    | 265 |
| chr23 | 33468930  | 33469194  | 265 |
| chr22 | 58498434  | 58498698  | 265 |
| chr22 | 47876794  | 47877058  | 265 |
| chr21 | 64624110  | 64624374  | 265 |
| chr21 | 59341354  | 59341618  | 265 |
| chr21 | 34351807  | 34352071  | 265 |
| chr21 | 31150694  | 31150958  | 265 |
| chr20 | 8617783   | 8618047   | 265 |
| chr19 | 41232589  | 41232853  | 265 |
| chr19 | 39407046  | 39407310  | 265 |
| chr19 | 38236536  | 38236800  | 265 |
| chr19 | 21726762  | 21727026  | 265 |
| chr18 | 63018101  | 63018365  | 265 |
| chr18 | 33824720  | 33824984  | 265 |
| chr18 | 17695418  | 17695682  | 265 |
| chr17 | 70331784  | 70332048  | 265 |
| chr17 | 63646865  | 63647129  | 265 |
| chr17 | 62368880  | 62369144  | 265 |
| chr17 | 4151747   | 4152011   | 265 |
| chr15 | 75254257  | 75254521  | 265 |
| chr15 | 64989158  | 64989422  | 265 |
| chr15 | 26835246  | 26835510  | 265 |
| chr14 | 5993753   | 5994017   | 265 |
| chr13 | 77421265  | 77421529  | 265 |
| chr13 | 43420049  | 43420313  | 265 |
| chr13 | 40565987  | 40566251  | 265 |
| chr12 | 76748185  | 76748449  | 265 |
| chr11 | 106372647 | 106372911 | 265 |
| chr11 | 80175270  | 80175534  | 265 |
| chr11 | 21007963  | 21008227  | 265 |
| chr11 | 11499761  | 11500025  | 265 |
| chr10 | 83542574  | 83542838  | 265 |
| chr10 | 28839012  | 28839276  | 265 |
| chr1  | 74611086  | 74611350  | 265 |
| chrX  | 77586330  | 77586593  | 264 |
| chrX  | 69529264  | 69529527  | 264 |
| chrX  | 57819349  | 57819612  | 264 |
| chrX  | 49781043  | 49781306  | 264 |
| chrX  | 48442113  | 48442376  | 264 |
| chrX  | 44800085  | 44800348  | 264 |
| chrX  | 20515652  | 20515915  | 264 |
| chrX  | 19833792  | 19834055  | 264 |
| chrX  | 12509223  | 12509486  | 264 |
| chrX  | 7775705   | 7775968   | 264 |
| chrX  | 7612096   | 7612359   | 264 |
| chr9  | 89170163  | 89170426  | 264 |
| chr8  | 74280841  | 74281104  | 264 |
| chr8  | 44144843  | 44145106  | 264 |

|       |           |           |     |
|-------|-----------|-----------|-----|
| chr7  | 93983413  | 93983676  | 264 |
| chr7  | 62200954  | 62201217  | 264 |
| chr7  | 7389848   | 7390111   | 264 |
| chr7  | 6631619   | 6631882   | 264 |
| chr7  | 3691987   | 3692250   | 264 |
| chr5  | 117275311 | 117275574 | 264 |
| chr4  | 121079980 | 121080243 | 264 |
| chr4  | 67840219  | 67840482  | 264 |
| chr3  | 125529469 | 125529732 | 264 |
| chr3  | 124135624 | 124135887 | 264 |
| chr3  | 121548732 | 121548995 | 264 |
| chr3  | 55578196  | 55578459  | 264 |
| chr3  | 36402908  | 36403171  | 264 |
| chr3  | 15378352  | 15378615  | 264 |
| chr29 | 42990271  | 42990534  | 264 |
| chr29 | 10088038  | 10088301  | 264 |
| chr28 | 34040945  | 34041208  | 264 |
| chr28 | 8224414   | 8224677   | 264 |
| chr27 | 35371871  | 35372134  | 264 |
| chr27 | 26733385  | 26733648  | 264 |
| chr27 | 15343452  | 15343715  | 264 |
| chr26 | 50762644  | 50762907  | 264 |
| chr25 | 37515979  | 37516242  | 264 |
| chr25 | 36753915  | 36754178  | 264 |
| chr25 | 34214070  | 34214333  | 264 |
| chr25 | 14045504  | 14045767  | 264 |
| chr24 | 59415688  | 59415951  | 264 |
| chr24 | 43690734  | 43690997  | 264 |
| chr23 | 19322622  | 19322885  | 264 |
| chr22 | 44327558  | 44327821  | 264 |
| chr22 | 39858108  | 39858371  | 264 |
| chr22 | 16782104  | 16782367  | 264 |
| chr22 | 16278184  | 16278447  | 264 |
| chr21 | 47608931  | 47609194  | 264 |
| chr21 | 25077470  | 25077733  | 264 |
| chr20 | 73480156  | 73480419  | 264 |
| chr2  | 135752581 | 135752844 | 264 |
| chr2  | 135063583 | 135063846 | 264 |
| chr2  | 126131459 | 126131722 | 264 |
| chr2  | 24123898  | 24124161  | 264 |
| chr19 | 47412647  | 47412910  | 264 |
| chr19 | 42038353  | 42038616  | 264 |
| chr19 | 39413375  | 39413638  | 264 |
| chr19 | 29098950  | 29099213  | 264 |
| chr18 | 35094165  | 35094428  | 264 |
| chr18 | 15469099  | 15469362  | 264 |
| chr18 | 12129381  | 12129644  | 264 |
| chr18 | 11984728  | 11984991  | 264 |
| chr18 | 7410102   | 7410365   | 264 |
| chr16 | 73177134  | 73177397  | 264 |

|       |           |           |     |
|-------|-----------|-----------|-----|
| chr16 | 39477422  | 39477685  | 264 |
| chr16 | 37818323  | 37818586  | 264 |
| chr16 | 928339    | 928602    | 264 |
| chr15 | 80970546  | 80970809  | 264 |
| chr15 | 23639968  | 23640231  | 264 |
| chr14 | 14071068  | 14071331  | 264 |
| chr14 | 4029589   | 4029852   | 264 |
| chr13 | 64157228  | 64157491  | 264 |
| chr13 | 55313323  | 55313586  | 264 |
| chr13 | 53197696  | 53197959  | 264 |
| chr11 | 98968988  | 98969251  | 264 |
| chr11 | 81447421  | 81447684  | 264 |
| chr11 | 81178586  | 81178849  | 264 |
| chr11 | 74214090  | 74214353  | 264 |
| chr10 | 63962655  | 63962918  | 264 |
| chr1  | 134430268 | 134430531 | 264 |
| chrX  | 86727314  | 86727576  | 263 |
| chrX  | 79211663  | 79211925  | 263 |
| chrX  | 79071342  | 79071604  | 263 |
| chrX  | 78595652  | 78595914  | 263 |
| chrX  | 74763737  | 74763999  | 263 |
| chrX  | 73415657  | 73415919  | 263 |
| chrX  | 73232996  | 73233258  | 263 |
| chrX  | 72216106  | 72216368  | 263 |
| chrX  | 64765469  | 64765731  | 263 |
| chrX  | 64155775  | 64156037  | 263 |
| chrX  | 58177450  | 58177712  | 263 |
| chrX  | 55756204  | 55756466  | 263 |
| chrX  | 55392284  | 55392546  | 263 |
| chrX  | 37969313  | 37969575  | 263 |
| chrX  | 32006162  | 32006424  | 263 |
| chrX  | 29463325  | 29463587  | 263 |
| chrX  | 17253698  | 17253960  | 263 |
| chrX  | 13654855  | 13655117  | 263 |
| chrX  | 8862796   | 8863058   | 263 |
| chrX  | 8023877   | 8024139   | 263 |
| chrX  | 3786806   | 3787068   | 263 |
| chr9  | 94835749  | 94836011  | 263 |
| chr8  | 109614392 | 109614654 | 263 |
| chr8  | 65193745  | 65194007  | 263 |
| chr7  | 43875534  | 43875796  | 263 |
| chr5  | 120108753 | 120109015 | 263 |
| chr5  | 111750850 | 111751112 | 263 |
| chr4  | 28580106  | 28580368  | 263 |
| chr4  | 13674429  | 13674691  | 263 |
| chr3  | 108162290 | 108162552 | 263 |
| chr3  | 105277499 | 105277761 | 263 |
| chr29 | 34776637  | 34776899  | 263 |
| chr29 | 33793017  | 33793279  | 263 |
| chr29 | 26651219  | 26651481  | 263 |

|       |               |           |     |
|-------|---------------|-----------|-----|
| chr29 | 18180250      | 18180512  | 263 |
| chr26 | 41777800      | 41778062  | 263 |
| chr25 | 38095335      | 38095597  | 263 |
| chr25 | 29385464      | 29385726  | 263 |
| chr24 | 62831093      | 62831355  | 263 |
| chr22 | 59546038      | 59546300  | 263 |
| chr22 | 48562839      | 48563101  | 263 |
| chr21 | 26784022      | 26784284  | 263 |
| chr20 | 74066583      | 74066845  | 263 |
| chr2  | 130992035     | 130992297 | 263 |
| chr2  | 64504102      | 64504364  | 263 |
| chr19 | 38551827      | 38552089  | 263 |
| chr19 | 29309787      | 29310049  | 263 |
| chr18 | 33993068      | 33993330  | 263 |
| chr18 | 9758668       | 9758930   | 263 |
| chr18 | 6006406       | 6006668   | 263 |
| chr17 | 73905366      | 73905628  | 263 |
| chr17 | 70419566      | 70419828  | 263 |
| chr17 | 70047884      | 70048146  | 263 |
| chr17 | 64139271      | 64139533  | 263 |
| chr17 | 55883902      | 55884164  | 263 |
| chr16 | 72157897      | 72158159  | 263 |
| chr16 | 3358102       | 3358364   | 263 |
| chr15 | 64018840      | 64019102  | 263 |
| chr15 | 30795930      | 30796192  | 263 |
| chr15 | 22915030      | 22915292  | 263 |
| chr14 | 1977743       | 1978005   | 263 |
| chr14 | 862764 863026 | 263       |     |
| chr14 | 858735 858997 | 263       |     |
| chr13 | 76109013      | 76109275  | 263 |
| chr13 | 41570593      | 41570855  | 263 |
| chr13 | 28786128      | 28786390  | 263 |
| chr13 | 23548159      | 23548421  | 263 |
| chr11 | 70636983      | 70637245  | 263 |
| chr10 | 77507477      | 77507739  | 263 |
| chr10 | 29112240      | 29112502  | 263 |
| chr1  | 157220042     | 157220304 | 263 |
| chr1  | 8990256       | 8990518   | 263 |
| chrX  | 75042851      | 75043112  | 262 |
| chrX  | 69164265      | 69164526  | 262 |
| chrX  | 64797460      | 64797721  | 262 |
| chrX  | 64759410      | 64759671  | 262 |
| chrX  | 53328360      | 53328621  | 262 |
| chrX  | 8464458       | 8464719   | 262 |
| chrX  | 6661355       | 6661616   | 262 |
| chr8  | 93909705      | 93909966  | 262 |
| chr8  | 77234087      | 77234348  | 262 |
| chr7  | 46244246      | 46244507  | 262 |
| chr7  | 10204320      | 10204581  | 262 |
| chr7  | 958991 959252 | 262       |     |

|       |               |           |     |
|-------|---------------|-----------|-----|
| chr5  | 118499866     | 118500127 | 262 |
| chr5  | 112711647     | 112711908 | 262 |
| chr5  | 112585541     | 112585802 | 262 |
| chr5  | 31573425      | 31573686  | 262 |
| chr4  | 108095341     | 108095602 | 262 |
| chr4  | 71623496      | 71623757  | 262 |
| chr3  | 126844109     | 126844370 | 262 |
| chr3  | 8559227       | 8559488   | 262 |
| chr29 | 41991779      | 41992040  | 262 |
| chr29 | 35646163      | 35646424  | 262 |
| chr29 | 18223301      | 18223562  | 262 |
| chr28 | 7607039       | 7607300   | 262 |
| chr27 | 45207451      | 45207712  | 262 |
| chr26 | 32073788      | 32074049  | 262 |
| chr26 | 13633997      | 13634258  | 262 |
| chr25 | 39875487      | 39875748  | 262 |
| chr25 | 33033062      | 33033323  | 262 |
| chr25 | 3006622       | 3006883   | 262 |
| chr24 | 60748403      | 60748664  | 262 |
| chr24 | 60515015      | 60515276  | 262 |
| chr23 | 11825972      | 11826233  | 262 |
| chr22 | 57968533      | 57968794  | 262 |
| chr22 | 17847996      | 17848257  | 262 |
| chr22 | 15964641      | 15964902  | 262 |
| chr20 | 41793758      | 41794019  | 262 |
| chr2  | 110527578     | 110527839 | 262 |
| chr2  | 22272655      | 22272916  | 262 |
| chr19 | 46125905      | 46126166  | 262 |
| chr19 | 36444286      | 36444547  | 262 |
| chr19 | 21906387      | 21906648  | 262 |
| chr19 | 15789994      | 15790255  | 262 |
| chr19 | 13538943      | 13539204  | 262 |
| chr17 | 62198040      | 62198301  | 262 |
| chr16 | 70099511      | 70099772  | 262 |
| chr16 | 41598898      | 41599159  | 262 |
| chr15 | 76735283      | 76735544  | 262 |
| chr15 | 25733666      | 25733927  | 262 |
| chr15 | 24035126      | 24035387  | 262 |
| chr14 | 61744263      | 61744524  | 262 |
| chr14 | 40005354      | 40005615  | 262 |
| chr14 | 29039958      | 29040219  | 262 |
| chr14 | 10303554      | 10303815  | 262 |
| chr14 | 828616 828877 | 262       |     |
| chr13 | 65147805      | 65148066  | 262 |
| chr11 | 77895439      | 77895700  | 262 |
| chr11 | 76078286      | 76078547  | 262 |
| chr11 | 47367233      | 47367494  | 262 |
| chr11 | 967030 967291 | 262       |     |
| chr10 | 86256936      | 86257197  | 262 |
| chr10 | 64018463      | 64018724  | 262 |

|       |           |           |     |
|-------|-----------|-----------|-----|
| chr10 | 16933174  | 16933435  | 262 |
| chr10 | 14993914  | 14994175  | 262 |
| chr1  | 161072945 | 161073206 | 262 |
| chr1  | 82442685  | 82442946  | 262 |
| chr1  | 68786862  | 68787123  | 262 |
| chrX  | 78045140  | 78045400  | 261 |
| chrX  | 72099410  | 72099670  | 261 |
| chrX  | 69209588  | 69209848  | 261 |
| chrX  | 65238357  | 65238617  | 261 |
| chrX  | 64993101  | 64993361  | 261 |
| chrX  | 62882836  | 62883096  | 261 |
| chrX  | 59290642  | 59290902  | 261 |
| chrX  | 48816576  | 48816836  | 261 |
| chrX  | 48028604  | 48028864  | 261 |
| chrX  | 47948096  | 47948356  | 261 |
| chrX  | 34368984  | 34369244  | 261 |
| chrX  | 32823382  | 32823642  | 261 |
| chrX  | 23815566  | 23815826  | 261 |
| chrX  | 20423327  | 20423587  | 261 |
| chrX  | 18813473  | 18813733  | 261 |
| chrX  | 15498844  | 15499104  | 261 |
| chrX  | 13660785  | 13661045  | 261 |
| chr8  | 86950391  | 86950651  | 261 |
| chr8  | 60176451  | 60176711  | 261 |
| chr8  | 59303216  | 59303476  | 261 |
| chr7  | 82036390  | 82036650  | 261 |
| chr7  | 52250806  | 52251066  | 261 |
| chr7  | 42213360  | 42213620  | 261 |
| chr5  | 113930225 | 113930485 | 261 |
| chr5  | 113310219 | 113310479 | 261 |
| chr5  | 31553984  | 31554244  | 261 |
| chr5  | 30191454  | 30191714  | 261 |
| chr4  | 71613628  | 71613888  | 261 |
| chr4  | 51427452  | 51427712  | 261 |
| chr3  | 125778800 | 125779060 | 261 |
| chr3  | 121805127 | 121805387 | 261 |
| chr3  | 115648076 | 115648336 | 261 |
| chr3  | 106506637 | 106506897 | 261 |
| chr3  | 105612895 | 105613155 | 261 |
| chr3  | 33018353  | 33018613  | 261 |
| chr29 | 35238633  | 35238893  | 261 |
| chr29 | 32164508  | 32164768  | 261 |
| chr28 | 45122593  | 45122853  | 261 |
| chr28 | 34510705  | 34510965  | 261 |
| chr28 | 18011610  | 18011870  | 261 |
| chr27 | 40907124  | 40907384  | 261 |
| chr27 | 28730307  | 28730567  | 261 |
| chr25 | 28188017  | 28188277  | 261 |
| chr25 | 1901294   | 1901554   | 261 |
| chr23 | 44538896  | 44539156  | 261 |

|       |               |           |     |
|-------|---------------|-----------|-----|
| chr22 | 30376913      | 30377173  | 261 |
| chr21 | 24332871      | 24333131  | 261 |
| chr20 | 75153171      | 75153431  | 261 |
| chr2  | 131473184     | 131473444 | 261 |
| chr19 | 57697340      | 57697600  | 261 |
| chr19 | 39418473      | 39418733  | 261 |
| chr19 | 11084057      | 11084317  | 261 |
| chr18 | 4071167       | 4071427   | 261 |
| chr18 | 3552874       | 3553134   | 261 |
| chr17 | 63495737      | 63495997  | 261 |
| chr16 | 47122420      | 47122680  | 261 |
| chr16 | 44386758      | 44387018  | 261 |
| chr15 | 54368689      | 54368949  | 261 |
| chr15 | 5745900       | 5746160   | 261 |
| chr14 | 19352210      | 19352470  | 261 |
| chr14 | 7367265       | 7367525   | 261 |
| chr14 | 5934581       | 5934841   | 261 |
| chr14 | 1402769       | 1403029   | 261 |
| chr13 | 77591458      | 77591718  | 261 |
| chr13 | 63312329      | 63312589  | 261 |
| chr13 | 40097208      | 40097468  | 261 |
| chr13 | 40052500      | 40052760  | 261 |
| chr13 | 39622688      | 39622948  | 261 |
| chr12 | 20029383      | 20029643  | 261 |
| chr12 | 14216512      | 14216772  | 261 |
| chr11 | 80401478      | 80401738  | 261 |
| chr10 | 92311046      | 92311306  | 261 |
| chr10 | 88127737      | 88127997  | 261 |
| chr1  | 69827011      | 69827271  | 261 |
| chrX  | 78785993      | 78786252  | 260 |
| chrX  | 77351200      | 77351459  | 260 |
| chrX  | 74926938      | 74927197  | 260 |
| chrX  | 74865680      | 74865939  | 260 |
| chrX  | 73655907      | 73656166  | 260 |
| chrX  | 66623337      | 66623596  | 260 |
| chrX  | 64773679      | 64773938  | 260 |
| chrX  | 62515893      | 62516152  | 260 |
| chrX  | 37784701      | 37784960  | 260 |
| chrX  | 37735359      | 37735618  | 260 |
| chrX  | 35036511      | 35036770  | 260 |
| chrX  | 20266681      | 20266940  | 260 |
| chrX  | 12872545      | 12872804  | 260 |
| chrX  | 11968815      | 11969074  | 260 |
| chrX  | 5450677       | 5450936   | 260 |
| chr9  | 92025947      | 92026206  | 260 |
| chr9  | 35553046      | 35553305  | 260 |
| chr8  | 110736864     | 110737123 | 260 |
| chr8  | 248805 249064 | 260       |     |
| chr7  | 14902553      | 14902812  | 260 |
| chr7  | 13105519      | 13105778  | 260 |



|       |               |           |     |
|-------|---------------|-----------|-----|
| chr7  | 11450581      | 11450840  | 260 |
| chr7  | 1751309       | 1751568   | 260 |
| chr6  | 121761915     | 121762174 | 260 |
| chr5  | 112897073     | 112897332 | 260 |
| chr5  | 76994557      | 76994816  | 260 |
| chr5  | 74756272      | 74756531  | 260 |
| chr4  | 122315046     | 122315305 | 260 |
| chr4  | 96854356      | 96854615  | 260 |
| chr4  | 32399260      | 32399519  | 260 |
| chr4  | 5119106       | 5119365   | 260 |
| chr3  | 127000495     | 127000754 | 260 |
| chr3  | 116281286     | 116281545 | 260 |
| chr3  | 105031093     | 105031352 | 260 |
| chr3  | 19997536      | 19997795  | 260 |
| chr3  | 13645489      | 13645748  | 260 |
| chr29 | 45076645      | 45076904  | 260 |
| chr29 | 38888159      | 38888418  | 260 |
| chr29 | 36422646      | 36422905  | 260 |
| chr29 | 35518470      | 35518729  | 260 |
| chr29 | 17701296      | 17701555  | 260 |
| chr28 | 41048981      | 41049240  | 260 |
| chr27 | 15343962      | 15344221  | 260 |
| chr27 | 8204160       | 8204419   | 260 |
| chr24 | 48551158      | 48551417  | 260 |
| chr24 | 1716639       | 1716898   | 260 |
| chr23 | 49893203      | 49893462  | 260 |
| chr23 | 47438384      | 47438643  | 260 |
| chr23 | 36835837      | 36836096  | 260 |
| chr23 | 11058796      | 11059055  | 260 |
| chr22 | 55904063      | 55904322  | 260 |
| chr22 | 50859107      | 50859366  | 260 |
| chr22 | 48446804      | 48447063  | 260 |
| chr22 | 7080737       | 7080996   | 260 |
| chr21 | 30517461      | 30517720  | 260 |
| chr21 | 20926002      | 20926261  | 260 |
| chr20 | 2751228       | 2751487   | 260 |
| chr20 | 682301 682560 | 260       |     |
| chr2  | 132494060     | 132494319 | 260 |
| chr19 | 46812341      | 46812600  | 260 |
| chr19 | 44881323      | 44881582  | 260 |
| chr19 | 20389657      | 20389916  | 260 |
| chr19 | 16086260      | 16086519  | 260 |
| chr19 | 9521491       | 9521750   | 260 |
| chr18 | 64349690      | 64349949  | 260 |
| chr18 | 62072015      | 62072274  | 260 |
| chr18 | 51284191      | 51284450  | 260 |
| chr18 | 39918194      | 39918453  | 260 |
| chr18 | 23486918      | 23487177  | 260 |
| chr18 | 16753272      | 16753531  | 260 |
| chr18 | 12127397      | 12127656  | 260 |

|       |           |           |     |
|-------|-----------|-----------|-----|
| chr18 | 7834508   | 7834767   | 260 |
| chr17 | 68417675  | 68417934  | 260 |
| chr17 | 66197045  | 66197304  | 260 |
| chr17 | 63555154  | 63555413  | 260 |
| chr16 | 59872059  | 59872318  | 260 |
| chr15 | 64497937  | 64498196  | 260 |
| chr15 | 28635457  | 28635716  | 260 |
| chr14 | 61202598  | 61202857  | 260 |
| chr14 | 31646289  | 31646548  | 260 |
| chr14 | 30884920  | 30885179  | 260 |
| chr14 | 13756999  | 13757258  | 260 |
| chr13 | 68459573  | 68459832  | 260 |
| chr13 | 67420158  | 67420417  | 260 |
| chr13 | 55072771  | 55073030  | 260 |
| chr13 | 37588532  | 37588791  | 260 |
| chr12 | 53059047  | 53059306  | 260 |
| chr11 | 86285519  | 86285778  | 260 |
| chr11 | 80635979  | 80636238  | 260 |
| chr11 | 46904818  | 46905077  | 260 |
| chr10 | 8519918   | 8520177   | 260 |
| chr1  | 147006549 | 147006808 | 260 |
| chrX  | 74400499  | 74400757  | 259 |
| chrX  | 73580491  | 73580749  | 259 |
| chrX  | 60425286  | 60425544  | 259 |
| chrX  | 59668473  | 59668731  | 259 |
| chrX  | 56913508  | 56913766  | 259 |
| chrX  | 49220764  | 49221022  | 259 |
| chrX  | 48059413  | 48059671  | 259 |
| chrX  | 31952624  | 31952882  | 259 |
| chrX  | 31682053  | 31682311  | 259 |
| chrX  | 30677969  | 30678227  | 259 |
| chrX  | 13909354  | 13909612  | 259 |
| chrX  | 7565476   | 7565734   | 259 |
| chr9  | 90416156  | 90416414  | 259 |
| chr8  | 104124090 | 104124348 | 259 |
| chr8  | 80184377  | 80184635  | 259 |
| chr8  | 23886514  | 23886772  | 259 |
| chr7  | 46187449  | 46187707  | 259 |
| chr7  | 44764326  | 44764584  | 259 |
| chr7  | 43965041  | 43965299  | 259 |
| chr7  | 19348577  | 19348835  | 259 |
| chr6  | 120822535 | 120822793 | 259 |
| chr5  | 112024779 | 112025037 | 259 |
| chr5  | 73366369  | 73366627  | 259 |
| chr5  | 1080128   | 1080386   | 259 |
| chr4  | 99251980  | 99252238  | 259 |
| chr4  | 75326245  | 75326503  | 259 |
| chr4  | 8758320   | 8758578   | 259 |
| chr3  | 35818581  | 35818839  | 259 |
| chr29 | 36170474  | 36170732  | 259 |

|       |           |           |     |
|-------|-----------|-----------|-----|
| chr29 | 17869734  | 17869992  | 259 |
| chr29 | 10282220  | 10282478  | 259 |
| chr26 | 50072655  | 50072913  | 259 |
| chr25 | 31861586  | 31861844  | 259 |
| chr24 | 48009944  | 48010202  | 259 |
| chr24 | 44374295  | 44374553  | 259 |
| chr24 | 34704161  | 34704419  | 259 |
| chr23 | 44778053  | 44778311  | 259 |
| chr23 | 19309510  | 19309768  | 259 |
| chr22 | 44437652  | 44437910  | 259 |
| chr21 | 22417731  | 22417989  | 259 |
| chr20 | 1354377   | 1354635   | 259 |
| chr2  | 136719624 | 136719882 | 259 |
| chr19 | 55307716  | 55307974  | 259 |
| chr19 | 43079531  | 43079789  | 259 |
| chr19 | 39318172  | 39318430  | 259 |
| chr19 | 21746280  | 21746538  | 259 |
| chr19 | 16080309  | 16080567  | 259 |
| chr18 | 63943052  | 63943310  | 259 |
| chr18 | 50986488  | 50986746  | 259 |
| chr18 | 18737193  | 18737451  | 259 |
| chr18 | 14432559  | 14432817  | 259 |
| chr18 | 11182303  | 11182561  | 259 |
| chr18 | 10227948  | 10228206  | 259 |
| chr18 | 3098729   | 3098987   | 259 |
| chr17 | 64061539  | 64061797  | 259 |
| chr17 | 63320296  | 63320554  | 259 |
| chr17 | 60580389  | 60580647  | 259 |
| chr16 | 70111828  | 70112086  | 259 |
| chr15 | 29936759  | 29937017  | 259 |
| chr14 | 1448640   | 1448898   | 259 |
| chr13 | 71530616  | 71530874  | 259 |
| chr13 | 68505539  | 68505797  | 259 |
| chr13 | 59413205  | 59413463  | 259 |
| chr13 | 45916078  | 45916336  | 259 |
| chr13 | 42038170  | 42038428  | 259 |
| chr13 | 35374798  | 35375056  | 259 |
| chr12 | 32947818  | 32948076  | 259 |
| chr11 | 98461962  | 98462220  | 259 |
| chr11 | 71102062  | 71102320  | 259 |
| chr10 | 53071862  | 53072120  | 259 |
| chr1  | 143788998 | 143789256 | 259 |
| chr1  | 74716383  | 74716641  | 259 |
| chrX  | 63184694  | 63184951  | 258 |
| chrX  | 60067227  | 60067484  | 258 |
| chrX  | 55125229  | 55125486  | 258 |
| chrX  | 54811488  | 54811745  | 258 |
| chrX  | 46574914  | 46575171  | 258 |
| chrX  | 42816464  | 42816721  | 258 |
| chrX  | 30974376  | 30974633  | 258 |

|       |           |           |     |
|-------|-----------|-----------|-----|
| chrX  | 21061260  | 21061517  | 258 |
| chrX  | 18681965  | 18682222  | 258 |
| chrX  | 12042127  | 12042384  | 258 |
| chrX  | 8718309   | 8718566   | 258 |
| chrX  | 7077362   | 7077619   | 258 |
| chr9  | 106409456 | 106409713 | 258 |
| chr9  | 106391520 | 106391777 | 258 |
| chr8  | 80134038  | 80134295  | 258 |
| chr8  | 77215546  | 77215803  | 258 |
| chr8  | 66202022  | 66202279  | 258 |
| chr8  | 58399446  | 58399703  | 258 |
| chr7  | 42800241  | 42800498  | 258 |
| chr6  | 22905651  | 22905908  | 258 |
| chr5  | 76751258  | 76751515  | 258 |
| chr4  | 120535153 | 120535410 | 258 |
| chr4  | 107498521 | 107498778 | 258 |
| chr3  | 126241576 | 126241833 | 258 |
| chr3  | 124919944 | 124920201 | 258 |
| chr3  | 116386259 | 116386516 | 258 |
| chr3  | 99108452  | 99108709  | 258 |
| chr3  | 8809769   | 8810026   | 258 |
| chr3  | 8801366   | 8801623   | 258 |
| chr29 | 48948227  | 48948484  | 258 |
| chr29 | 45795800  | 45796057  | 258 |
| chr27 | 47743541  | 47743798  | 258 |
| chr27 | 17740392  | 17740649  | 258 |
| chr26 | 20373870  | 20374127  | 258 |
| chr25 | 3088265   | 3088522   | 258 |
| chr24 | 60634320  | 60634577  | 258 |
| chr24 | 59285327  | 59285584  | 258 |
| chr23 | 49484134  | 49484391  | 258 |
| chr23 | 48693037  | 48693294  | 258 |
| chr23 | 20638904  | 20639161  | 258 |
| chr20 | 71140591  | 71140848  | 258 |
| chr20 | 6755756   | 6756013   | 258 |
| chr20 | 5294716   | 5294973   | 258 |
| chr2  | 110644574 | 110644831 | 258 |
| chr2  | 99628396  | 99628653  | 258 |
| chr2  | 75638334  | 75638591  | 258 |
| chr19 | 63519866  | 63520123  | 258 |
| chr19 | 46663900  | 46664157  | 258 |
| chr19 | 41564083  | 41564340  | 258 |
| chr19 | 31955397  | 31955654  | 258 |
| chr19 | 24307460  | 24307717  | 258 |
| chr18 | 62370780  | 62371037  | 258 |
| chr18 | 23242194  | 23242451  | 258 |
| chr18 | 17476602  | 17476859  | 258 |
| chr17 | 68782296  | 68782553  | 258 |
| chr17 | 60512813  | 60513070  | 258 |
| chr16 | 50394080  | 50394337  | 258 |

|       |           |           |     |
|-------|-----------|-----------|-----|
| chr13 | 41015521  | 41015778  | 258 |
| chr12 | 81919443  | 81919700  | 258 |
| chr12 | 76465163  | 76465420  | 258 |
| chr12 | 32873928  | 32874185  | 258 |
| chr11 | 104321980 | 104322237 | 258 |
| chr11 | 99699144  | 99699401  | 258 |
| chr11 | 98219392  | 98219649  | 258 |
| chr11 | 89449974  | 89450231  | 258 |
| chr11 | 19899532  | 19899789  | 258 |
| chr10 | 90855935  | 90856192  | 258 |
| chr10 | 68289764  | 68290021  | 258 |
| chr10 | 15000808  | 15001065  | 258 |
| chr1  | 82933178  | 82933435  | 258 |
| chr1  | 80123537  | 80123794  | 258 |
| chrX  | 78651300  | 78651556  | 257 |
| chrX  | 72025768  | 72026024  | 257 |
| chrX  | 65436128  | 65436384  | 257 |
| chrX  | 45442313  | 45442569  | 257 |
| chrX  | 39353669  | 39353925  | 257 |
| chrX  | 21074004  | 21074260  | 257 |
| chrX  | 11651091  | 11651347  | 257 |
| chrX  | 11323804  | 11324060  | 257 |
| chrX  | 8863474   | 8863730   | 257 |
| chrX  | 7534087   | 7534343   | 257 |
| chrX  | 5823831   | 5824087   | 257 |
| chrX  | 5508292   | 5508548   | 257 |
| chr9  | 105999778 | 106000034 | 257 |
| chr8  | 108707328 | 108707584 | 257 |
| chr8  | 7613604   | 7613860   | 257 |
| chr6  | 75100277  | 75100533  | 257 |
| chr5  | 30192052  | 30192308  | 257 |
| chr4  | 124183989 | 124184245 | 257 |
| chr3  | 105656044 | 105656300 | 257 |
| chr3  | 56812852  | 56813108  | 257 |
| chr3  | 33085847  | 33086103  | 257 |
| chr29 | 18214183  | 18214439  | 257 |
| chr29 | 18208953  | 18209209  | 257 |
| chr29 | 17701985  | 17702241  | 257 |
| chr28 | 42086074  | 42086330  | 257 |
| chr28 | 33674841  | 33675097  | 257 |
| chr28 | 26898215  | 26898471  | 257 |
| chr28 | 25902807  | 25903063  | 257 |
| chr27 | 15517783  | 15518039  | 257 |
| chr26 | 45338722  | 45338978  | 257 |
| chr26 | 44792103  | 44792359  | 257 |
| chr26 | 23081355  | 23081611  | 257 |
| chr25 | 39391779  | 39392035  | 257 |
| chr24 | 48896111  | 48896367  | 257 |
| chr24 | 45806766  | 45807022  | 257 |
| chr23 | 18461206  | 18461462  | 257 |

|       |           |           |     |
|-------|-----------|-----------|-----|
| chr23 | 15910256  | 15910512  | 257 |
| chr2  | 136578840 | 136579096 | 257 |
| chr2  | 134760633 | 134760889 | 257 |
| chr2  | 134036245 | 134036501 | 257 |
| chr2  | 132218929 | 132219185 | 257 |
| chr2  | 121835940 | 121836196 | 257 |
| chr2  | 115210877 | 115211133 | 257 |
| chr2  | 109403172 | 109403428 | 257 |
| chr2  | 74940837  | 74941093  | 257 |
| chr2  | 37399667  | 37399923  | 257 |
| chr19 | 61626017  | 61626273  | 257 |
| chr19 | 60831049  | 60831305  | 257 |
| chr19 | 60755715  | 60755971  | 257 |
| chr19 | 28310096  | 28310352  | 257 |
| chr18 | 45561077  | 45561333  | 257 |
| chr18 | 18673537  | 18673793  | 257 |
| chr17 | 64161381  | 64161637  | 257 |
| chr17 | 63410422  | 63410678  | 257 |
| chr16 | 41535642  | 41535898  | 257 |
| chr15 | 75289053  | 75289309  | 257 |
| chr15 | 66474662  | 66474918  | 257 |
| chr15 | 24197097  | 24197353  | 257 |
| chr13 | 64214121  | 64214377  | 257 |
| chr13 | 55961809  | 55962065  | 257 |
| chr13 | 41735324  | 41735580  | 257 |
| chr12 | 81823244  | 81823500  | 257 |
| chr12 | 75144634  | 75144890  | 257 |
| chr11 | 91090742  | 91090998  | 257 |
| chr11 | 28283387  | 28283643  | 257 |
| chr11 | 2794279   | 2794535   | 257 |
| chr10 | 17061064  | 17061320  | 257 |
| chr1  | 132845071 | 132845327 | 257 |
| chr1  | 119745722 | 119745978 | 257 |
| chrX  | 80069087  | 80069342  | 256 |
| chrX  | 75747299  | 75747554  | 256 |
| chrX  | 65129778  | 65130033  | 256 |
| chrX  | 58468966  | 58469221  | 256 |
| chrX  | 53153350  | 53153605  | 256 |
| chrX  | 39079268  | 39079523  | 256 |
| chrX  | 31960851  | 31961106  | 256 |
| chrX  | 29537633  | 29537888  | 256 |
| chrX  | 19444220  | 19444475  | 256 |
| chrX  | 11425730  | 11425985  | 256 |
| chrX  | 5406480   | 5406735   | 256 |
| chrX  | 2443560   | 2443815   | 256 |
| chr9  | 90322361  | 90322616  | 256 |
| chr8  | 85383902  | 85384157  | 256 |
| chr7  | 61012901  | 61013156  | 256 |
| chr7  | 19255187  | 19255442  | 256 |
| chr7  | 17298904  | 17299159  | 256 |

|       |           |           |     |
|-------|-----------|-----------|-----|
| chr5  | 68960517  | 68960772  | 256 |
| chr4  | 121508645 | 121508900 | 256 |
| chr4  | 118008922 | 118009177 | 256 |
| chr4  | 43278390  | 43278645  | 256 |
| chr29 | 48778693  | 48778948  | 256 |
| chr28 | 25367355  | 25367610  | 256 |
| chr28 | 25202895  | 25203150  | 256 |
| chr26 | 44523580  | 44523835  | 256 |
| chr26 | 33873645  | 33873900  | 256 |
| chr25 | 39167140  | 39167395  | 256 |
| chr25 | 33670910  | 33671165  | 256 |
| chr25 | 14373799  | 14374054  | 256 |
| chr25 | 3074322   | 3074577   | 256 |
| chr24 | 51351976  | 51352231  | 256 |
| chr24 | 43975080  | 43975335  | 256 |
| chr24 | 1111617   | 1111872   | 256 |
| chr23 | 52832308  | 52832563  | 256 |
| chr23 | 42922156  | 42922411  | 256 |
| chr23 | 14664880  | 14665135  | 256 |
| chr22 | 30410668  | 30410923  | 256 |
| chr21 | 34002153  | 34002408  | 256 |
| chr21 | 28829077  | 28829332  | 256 |
| chr21 | 27073873  | 27074128  | 256 |
| chr2  | 134969143 | 134969398 | 256 |
| chr2  | 131573127 | 131573382 | 256 |
| chr2  | 124960422 | 124960677 | 256 |
| chr2  | 49826754  | 49827009  | 256 |
| chr19 | 60543047  | 60543302  | 256 |
| chr19 | 38834894  | 38835149  | 256 |
| chr19 | 34949730  | 34949985  | 256 |
| chr19 | 24014216  | 24014471  | 256 |
| chr18 | 57062348  | 57062603  | 256 |
| chr18 | 20785140  | 20785395  | 256 |
| chr18 | 11291634  | 11291889  | 256 |
| chr17 | 73603825  | 73604080  | 256 |
| chr17 | 46605517  | 46605772  | 256 |
| chr16 | 74690234  | 74690489  | 256 |
| chr16 | 48788932  | 48789187  | 256 |
| chr16 | 42141422  | 42141677  | 256 |
| chr14 | 61600423  | 61600678  | 256 |
| chr14 | 61175585  | 61175840  | 256 |
| chr14 | 29189581  | 29189836  | 256 |
| chr14 | 9488454   | 9488709   | 256 |
| chr13 | 74502496  | 74502751  | 256 |
| chr13 | 70259729  | 70259984  | 256 |
| chr13 | 44981257  | 44981512  | 256 |
| chr13 | 22162992  | 22163247  | 256 |
| chr11 | 98424283  | 98424538  | 256 |
| chr11 | 95878718  | 95878973  | 256 |
| chr11 | 77531691  | 77531946  | 256 |

|       |               |           |     |
|-------|---------------|-----------|-----|
| chr11 | 77203323      | 77203578  | 256 |
| chr11 | 7564213       | 7564468   | 256 |
| chr10 | 10992757      | 10993012  | 256 |
| chr10 | 4503638       | 4503893   | 256 |
| chr1  | 69244999      | 69245254  | 256 |
| chrX  | 76004104      | 76004358  | 255 |
| chrX  | 75813619      | 75813873  | 255 |
| chrX  | 74539856      | 74540110  | 255 |
| chrX  | 72399202      | 72399456  | 255 |
| chrX  | 63103151      | 63103405  | 255 |
| chrX  | 54290583      | 54290837  | 255 |
| chrX  | 34158138      | 34158392  | 255 |
| chrX  | 31606444      | 31606698  | 255 |
| chrX  | 22460350      | 22460604  | 255 |
| chrX  | 15810084      | 15810338  | 255 |
| chrX  | 15574210      | 15574464  | 255 |
| chrX  | 8424265       | 8424519   | 255 |
| chrX  | 7019433       | 7019687   | 255 |
| chrX  | 6090134       | 6090388   | 255 |
| chr9  | 100980038     | 100980292 | 255 |
| chr9  | 98824622      | 98824876  | 255 |
| chr9  | 77257317      | 77257571  | 255 |
| chr9  | 63582759      | 63583013  | 255 |
| chr8  | 7396987       | 7397241   | 255 |
| chr7  | 46887027      | 46887281  | 255 |
| chr7  | 5157153       | 5157407   | 255 |
| chr6  | 22905219      | 22905473  | 255 |
| chr6  | 20760766      | 20761020  | 255 |
| chr5  | 121339440     | 121339694 | 255 |
| chr5  | 33512429      | 33512683  | 255 |
| chr4  | 117794852     | 117795106 | 255 |
| chr4  | 110767190     | 110767444 | 255 |
| chr4  | 73679843      | 73680097  | 255 |
| chr4  | 13288505      | 13288759  | 255 |
| chr3  | 115414481     | 115414735 | 255 |
| chr3  | 105017160     | 105017414 | 255 |
| chr3  | 20488053      | 20488307  | 255 |
| chr29 | 17891589      | 17891843  | 255 |
| chr28 | 26860795      | 26861049  | 255 |
| chr28 | 187102 187356 | 255       |     |
| chr24 | 49514154      | 49514408  | 255 |
| chr24 | 48577398      | 48577652  | 255 |
| chr23 | 11476223      | 11476477  | 255 |
| chr21 | 64084985      | 64085239  | 255 |
| chr21 | 57883166      | 57883420  | 255 |
| chr21 | 34162008      | 34162262  | 255 |
| chr21 | 7146594       | 7146848   | 255 |
| chr2  | 136718653     | 136718907 | 255 |
| chr2  | 134495397     | 134495651 | 255 |
| chr2  | 93355738      | 93355992  | 255 |



|       |           |           |     |
|-------|-----------|-----------|-----|
| chr19 | 43631483  | 43631737  | 255 |
| chr18 | 22374893  | 22375147  | 255 |
| chr17 | 62185199  | 62185453  | 255 |
| chr17 | 47446577  | 47446831  | 255 |
| chr15 | 64676797  | 64677051  | 255 |
| chr15 | 44831314  | 44831568  | 255 |
| chr15 | 32625726  | 32625980  | 255 |
| chr12 | 58685110  | 58685364  | 255 |
| chr12 | 48065983  | 48066237  | 255 |
| chr12 | 44611283  | 44611537  | 255 |
| chr12 | 36279358  | 36279612  | 255 |
| chr11 | 14506342  | 14506596  | 255 |
| chr1  | 81893406  | 81893660  | 255 |
| chrX  | 75859993  | 75860246  | 254 |
| chrX  | 61541958  | 61542211  | 254 |
| chrX  | 59453036  | 59453289  | 254 |
| chrX  | 58722757  | 58723010  | 254 |
| chrX  | 46542527  | 46542780  | 254 |
| chrX  | 45585573  | 45585826  | 254 |
| chrX  | 21506421  | 21506674  | 254 |
| chr9  | 100057822 | 100058075 | 254 |
| chr8  | 72426029  | 72426282  | 254 |
| chr7  | 57291957  | 57292210  | 254 |
| chr7  | 54201962  | 54202215  | 254 |
| chr7  | 44020143  | 44020396  | 254 |
| chr5  | 35145840  | 35146093  | 254 |
| chr5  | 6531047   | 6531300   | 254 |
| chr4  | 121061388 | 121061641 | 254 |
| chr4  | 79206847  | 79207100  | 254 |
| chr29 | 17817740  | 17817993  | 254 |
| chr29 | 17695728  | 17695981  | 254 |
| chr27 | 26791746  | 26791999  | 254 |
| chr26 | 43441916  | 43442169  | 254 |
| chr25 | 39421210  | 39421463  | 254 |
| chr25 | 39323868  | 39324121  | 254 |
| chr25 | 39167763  | 39168016  | 254 |
| chr24 | 51577013  | 51577266  | 254 |
| chr24 | 40442163  | 40442416  | 254 |
| chr23 | 30355044  | 30355297  | 254 |
| chr23 | 20055406  | 20055659  | 254 |
| chr23 | 11408510  | 11408763  | 254 |
| chr22 | 58640230  | 58640483  | 254 |
| chr22 | 38603465  | 38603718  | 254 |
| chr22 | 32852615  | 32852868  | 254 |
| chr22 | 32831579  | 32831832  | 254 |
| chr22 | 15050528  | 15050781  | 254 |
| chr22 | 14970476  | 14970729  | 254 |
| chr20 | 73672075  | 73672328  | 254 |
| chr2  | 30963586  | 30963839  | 254 |
| chr2  | 27995226  | 27995479  | 254 |

|       |           |           |     |
|-------|-----------|-----------|-----|
| chr19 | 62247341  | 62247594  | 254 |
| chr19 | 58231028  | 58231281  | 254 |
| chr19 | 53143738  | 53143991  | 254 |
| chr18 | 49550255  | 49550508  | 254 |
| chr18 | 48435579  | 48435832  | 254 |
| chr18 | 18476414  | 18476667  | 254 |
| chr17 | 69174263  | 69174516  | 254 |
| chr17 | 64767287  | 64767540  | 254 |
| chr16 | 77388921  | 77389174  | 254 |
| chr16 | 47166454  | 47166707  | 254 |
| chr15 | 66484797  | 66485050  | 254 |
| chr15 | 55634630  | 55634883  | 254 |
| chr14 | 21110058  | 21110311  | 254 |
| chr14 | 12282504  | 12282757  | 254 |
| chr14 | 5418908   | 5419161   | 254 |
| chr13 | 75781951  | 75782204  | 254 |
| chr13 | 73864119  | 73864372  | 254 |
| chr13 | 73527847  | 73528100  | 254 |
| chr13 | 71416565  | 71416818  | 254 |
| chr13 | 59675205  | 59675458  | 254 |
| chr13 | 56406572  | 56406825  | 254 |
| chr11 | 100660513 | 100660766 | 254 |
| chr1  | 99261403  | 99261656  | 254 |
| chr1  | 74575080  | 74575333  | 254 |
| chrX  | 76834317  | 76834569  | 253 |
| chrX  | 74778114  | 74778366  | 253 |
| chrX  | 56885641  | 56885893  | 253 |
| chrX  | 51743598  | 51743850  | 253 |
| chrX  | 24580056  | 24580308  | 253 |
| chrX  | 13128349  | 13128601  | 253 |
| chrX  | 12275332  | 12275584  | 253 |
| chrX  | 10138968  | 10139220  | 253 |
| chrX  | 7955667   | 7955919   | 253 |
| chr8  | 108824727 | 108824979 | 253 |
| chr8  | 65077839  | 65078091  | 253 |
| chr7  | 71374728  | 71374980  | 253 |
| chr7  | 50509885  | 50510137  | 253 |
| chr7  | 17299744  | 17299996  | 253 |
| chr7  | 5421363   | 5421615   | 253 |
| chr6  | 72275943  | 72276195  | 253 |
| chr6  | 58829776  | 58830028  | 253 |
| chr5  | 122130534 | 122130786 | 253 |
| chr5  | 74404903  | 74405155  | 253 |
| chr4  | 121435429 | 121435681 | 253 |
| chr4  | 99463500  | 99463752  | 253 |
| chr4  | 99051627  | 99051879  | 253 |
| chr3  | 123511675 | 123511927 | 253 |
| chr3  | 121118779 | 121119031 | 253 |
| chr3  | 97286230  | 97286482  | 253 |
| chr3  | 22935113  | 22935365  | 253 |

|       |           |           |     |
|-------|-----------|-----------|-----|
| chr29 | 41681679  | 41681931  | 253 |
| chr29 | 9100175   | 9100427   | 253 |
| chr28 | 34672044  | 34672296  | 253 |
| chr28 | 33957008  | 33957260  | 253 |
| chr27 | 30625115  | 30625367  | 253 |
| chr27 | 17433628  | 17433880  | 253 |
| chr27 | 8834009   | 8834261   | 253 |
| chr26 | 43859634  | 43859886  | 253 |
| chr26 | 42997831  | 42998083  | 253 |
| chr25 | 36102867  | 36103119  | 253 |
| chr25 | 11575983  | 11576235  | 253 |
| chr25 | 11230075  | 11230327  | 253 |
| chr24 | 21958735  | 21958987  | 253 |
| chr23 | 32662860  | 32663112  | 253 |
| chr23 | 15482982  | 15483234  | 253 |
| chr22 | 60306277  | 60306529  | 253 |
| chr22 | 30414289  | 30414541  | 253 |
| chr22 | 18281777  | 18282029  | 253 |
| chr2  | 140721431 | 140721683 | 253 |
| chr2  | 139208143 | 139208395 | 253 |
| chr2  | 136959965 | 136960217 | 253 |
| chr2  | 22505147  | 22505399  | 253 |
| chr19 | 63605761  | 63606013  | 253 |
| chr19 | 28010116  | 28010368  | 253 |
| chr19 | 13671885  | 13672137  | 253 |
| chr17 | 70680001  | 70680253  | 253 |
| chr17 | 69504498  | 69504750  | 253 |
| chr17 | 68997424  | 68997676  | 253 |
| chr17 | 67231314  | 67231566  | 253 |
| chr17 | 37813784  | 37814036  | 253 |
| chr16 | 54437060  | 54437312  | 253 |
| chr16 | 47952873  | 47953125  | 253 |
| chr15 | 51693273  | 51693525  | 253 |
| chr15 | 29254262  | 29254514  | 253 |
| chr15 | 20031161  | 20031413  | 253 |
| chr14 | 59085174  | 59085426  | 253 |
| chr13 | 75818091  | 75818343  | 253 |
| chr13 | 75782510  | 75782762  | 253 |
| chr13 | 59680528  | 59680780  | 253 |
| chr13 | 54469858  | 54470110  | 253 |
| chr13 | 14342840  | 14343092  | 253 |
| chr12 | 84196074  | 84196326  | 253 |
| chr11 | 31121827  | 31122079  | 253 |
| chr11 | 13973579  | 13973831  | 253 |
| chr10 | 16849088  | 16849340  | 253 |
| chr10 | 5314375   | 5314627   | 253 |
| chr1  | 74616868  | 74617120  | 253 |
| chr1  | 74603203  | 74603455  | 253 |
| chrX  | 78843447  | 78843698  | 252 |
| chrX  | 66793453  | 66793704  | 252 |

|       |           |           |     |
|-------|-----------|-----------|-----|
| chrX  | 64986256  | 64986507  | 252 |
| chrX  | 61365431  | 61365682  | 252 |
| chrX  | 32834395  | 32834646  | 252 |
| chr8  | 60316299  | 60316550  | 252 |
| chr8  | 58377741  | 58377992  | 252 |
| chr7  | 72444004  | 72444255  | 252 |
| chr6  | 115512578 | 115512829 | 252 |
| chr6  | 101412546 | 101412797 | 252 |
| chr5  | 121633991 | 121634242 | 252 |
| chr5  | 108329016 | 108329267 | 252 |
| chr5  | 46991269  | 46991520  | 252 |
| chr5  | 38508265  | 38508516  | 252 |
| chr5  | 33918781  | 33919032  | 252 |
| chr5  | 30438960  | 30439211  | 252 |
| chr5  | 29801578  | 29801829  | 252 |
| chr4  | 121981247 | 121981498 | 252 |
| chr4  | 118024041 | 118024292 | 252 |
| chr4  | 115867578 | 115867829 | 252 |
| chr3  | 104951034 | 104951285 | 252 |
| chr3  | 3991651   | 3991902   | 252 |
| chr29 | 51777941  | 51778192  | 252 |
| chr29 | 41706784  | 41707035  | 252 |
| chr29 | 37302375  | 37302626  | 252 |
| chr29 | 34914814  | 34915065  | 252 |
| chr28 | 27101707  | 27101958  | 252 |
| chr28 | 25366061  | 25366312  | 252 |
| chr27 | 38670704  | 38670955  | 252 |
| chr26 | 34174093  | 34174344  | 252 |
| chr26 | 19878194  | 19878445  | 252 |
| chr24 | 31000452  | 31000703  | 252 |
| chr24 | 30265868  | 30266119  | 252 |
| chr24 | 1668962   | 1669213   | 252 |
| chr23 | 49788810  | 49789061  | 252 |
| chr23 | 42897820  | 42898071  | 252 |
| chr23 | 28058400  | 28058651  | 252 |
| chr23 | 11347097  | 11347348  | 252 |
| chr22 | 51507665  | 51507916  | 252 |
| chr20 | 72075335  | 72075586  | 252 |
| chr2  | 37669947  | 37670198  | 252 |
| chr2  | 24952960  | 24953211  | 252 |
| chr2  | 1873133   | 1873384   | 252 |
| chr19 | 39187209  | 39187460  | 252 |
| chr19 | 26674244  | 26674495  | 252 |
| chr19 | 25456959  | 25457210  | 252 |
| chr19 | 6625969   | 6626220   | 252 |
| chr18 | 24087881  | 24088132  | 252 |
| chr17 | 64145152  | 64145403  | 252 |
| chr16 | 72301109  | 72301360  | 252 |
| chr16 | 38788997  | 38789248  | 252 |
| chr15 | 51708799  | 51709050  | 252 |

|       |           |           |     |
|-------|-----------|-----------|-----|
| chr15 | 27094140  | 27094391  | 252 |
| chr14 | 72314827  | 72315078  | 252 |
| chr13 | 79923425  | 79923676  | 252 |
| chr13 | 58620565  | 58620816  | 252 |
| chr13 | 17685887  | 17686138  | 252 |
| chr12 | 82311501  | 82311752  | 252 |
| chr12 | 76544823  | 76545074  | 252 |
| chr11 | 100467159 | 100467410 | 252 |
| chr11 | 82896207  | 82896458  | 252 |
| chr11 | 80695368  | 80695619  | 252 |
| chr11 | 49346872  | 49347123  | 252 |
| chr10 | 85954019  | 85954270  | 252 |
| chr10 | 73957318  | 73957569  | 252 |
| chr10 | 71739127  | 71739378  | 252 |
| chr10 | 67019331  | 67019582  | 252 |
| chr10 | 17247653  | 17247904  | 252 |
| chr10 | 8330698   | 8330949   | 252 |
| chr10 | 3255196   | 3255447   | 252 |
| chr1  | 136902673 | 136902924 | 252 |
| chr1  | 74711792  | 74712043  | 252 |
| chrX  | 83504368  | 83504618  | 251 |
| chrX  | 75042348  | 75042598  | 251 |
| chrX  | 65118628  | 65118878  | 251 |
| chrX  | 62811902  | 62812152  | 251 |
| chrX  | 56028969  | 56029219  | 251 |
| chrX  | 36435961  | 36436211  | 251 |
| chrX  | 33111571  | 33111821  | 251 |
| chrX  | 12509871  | 12510121  | 251 |
| chrX  | 9803454   | 9803704   | 251 |
| chr9  | 105442223 | 105442473 | 251 |
| chr9  | 63795142  | 63795392  | 251 |
| chr9  | 52941514  | 52941764  | 251 |
| chr8  | 103777122 | 103777372 | 251 |
| chr8  | 72178542  | 72178792  | 251 |
| chr8  | 9405427   | 9405677   | 251 |
| chr7  | 44806814  | 44807064  | 251 |
| chr7  | 23340455  | 23340705  | 251 |
| chr6  | 105468034 | 105468284 | 251 |
| chr6  | 34431344  | 34431594  | 251 |
| chr5  | 29206361  | 29206611  | 251 |
| chr4  | 113657129 | 113657379 | 251 |
| chr3  | 122280654 | 122280904 | 251 |
| chr3  | 121493534 | 121493784 | 251 |
| chr3  | 115981127 | 115981377 | 251 |
| chr3  | 115960811 | 115961061 | 251 |
| chr3  | 105483212 | 105483462 | 251 |
| chr3  | 99775124  | 99775374  | 251 |
| chr3  | 16914520  | 16914770  | 251 |
| chr3  | 9158605   | 9158855   | 251 |
| chr29 | 47344422  | 47344672  | 251 |

|       |           |           |     |
|-------|-----------|-----------|-----|
| chr29 | 33866098  | 33866348  | 251 |
| chr28 | 33881088  | 33881338  | 251 |
| chr26 | 45922805  | 45923055  | 251 |
| chr26 | 43473153  | 43473403  | 251 |
| chr25 | 37734979  | 37735229  | 251 |
| chr25 | 34423466  | 34423716  | 251 |
| chr25 | 12709078  | 12709328  | 251 |
| chr25 | 2877284   | 2877534   | 251 |
| chr24 | 2687076   | 2687326   | 251 |
| chr23 | 52824878  | 52825128  | 251 |
| chr23 | 44167367  | 44167617  | 251 |
| chr22 | 58639533  | 58639783  | 251 |
| chr22 | 16489297  | 16489547  | 251 |
| chr21 | 57458671  | 57458921  | 251 |
| chr21 | 7777862   | 7778112   | 251 |
| chr20 | 70905484  | 70905734  | 251 |
| chr20 | 64840033  | 64840283  | 251 |
| chr20 | 8623417   | 8623667   | 251 |
| chr2  | 127640404 | 127640654 | 251 |
| chr2  | 24930405  | 24930655  | 251 |
| chr2  | 21520028  | 21520278  | 251 |
| chr19 | 54158332  | 54158582  | 251 |
| chr19 | 45146417  | 45146667  | 251 |
| chr19 | 25456560  | 25456810  | 251 |
| chr19 | 25269167  | 25269417  | 251 |
| chr19 | 12320496  | 12320746  | 251 |
| chr19 | 12313541  | 12313791  | 251 |
| chr19 | 7202407   | 7202657   | 251 |
| chr18 | 18018020  | 18018270  | 251 |
| chr16 | 48012510  | 48012760  | 251 |
| chr16 | 47402412  | 47402662  | 251 |
| chr16 | 29366318  | 29366568  | 251 |
| chr15 | 35603377  | 35603627  | 251 |
| chr15 | 25246031  | 25246281  | 251 |
| chr13 | 74570248  | 74570498  | 251 |
| chr13 | 70663083  | 70663333  | 251 |
| chr12 | 80923325  | 80923575  | 251 |
| chr12 | 35329194  | 35329444  | 251 |
| chr11 | 88664723  | 88664973  | 251 |
| chr11 | 80360563  | 80360813  | 251 |
| chr11 | 77766251  | 77766501  | 251 |
| chr1  | 127892773 | 127893023 | 251 |
| chr1  | 1592794   | 1593044   | 251 |
| chrX  | 75870983  | 75871232  | 250 |
| chrX  | 75786188  | 75786437  | 250 |
| chrX  | 74661084  | 74661333  | 250 |
| chrX  | 74605664  | 74605913  | 250 |
| chrX  | 71944491  | 71944740  | 250 |
| chrX  | 58562853  | 58563102  | 250 |
| chrX  | 48418372  | 48418621  | 250 |

|       |           |           |     |
|-------|-----------|-----------|-----|
| chrX  | 38288547  | 38288796  | 250 |
| chrX  | 13154860  | 13155109  | 250 |
| chrX  | 5911518   | 5911767   | 250 |
| chrX  | 4202805   | 4203054   | 250 |
| chr9  | 93224050  | 93224299  | 250 |
| chr9  | 20195181  | 20195430  | 250 |
| chr8  | 64977525  | 64977774  | 250 |
| chr8  | 24502361  | 24502610  | 250 |
| chr7  | 46208233  | 46208482  | 250 |
| chr7  | 24214381  | 24214630  | 250 |
| chr6  | 120781780 | 120782029 | 250 |
| chr5  | 122833043 | 122833292 | 250 |
| chr5  | 121249683 | 121249932 | 250 |
| chr5  | 117583673 | 117583922 | 250 |
| chr5  | 79803056  | 79803305  | 250 |
| chr5  | 60565500  | 60565749  | 250 |
| chr5  | 60384897  | 60385146  | 250 |
| chr5  | 28779068  | 28779317  | 250 |
| chr4  | 64418280  | 64418529  | 250 |
| chr4  | 62166825  | 62167074  | 250 |
| chr3  | 22526588  | 22526837  | 250 |
| chr29 | 39034208  | 39034457  | 250 |
| chr29 | 35006723  | 35006972  | 250 |
| chr29 | 29774783  | 29775032  | 250 |
| chr29 | 6521193   | 6521442   | 250 |
| chr27 | 35830237  | 35830486  | 250 |
| chr27 | 15990139  | 15990388  | 250 |
| chr26 | 34987880  | 34988129  | 250 |
| chr25 | 36225313  | 36225562  | 250 |
| chr25 | 35388232  | 35388481  | 250 |
| chr24 | 22914335  | 22914584  | 250 |
| chr23 | 45734152  | 45734401  | 250 |
| chr23 | 14717557  | 14717806  | 250 |
| chr22 | 16261012  | 16261261  | 250 |
| chr22 | 10762495  | 10762744  | 250 |
| chr20 | 8717710   | 8717959   | 250 |
| chr20 | 6139034   | 6139283   | 250 |
| chr2  | 139222069 | 139222318 | 250 |
| chr2  | 130117771 | 130118020 | 250 |
| chr2  | 126703986 | 126704235 | 250 |
| chr2  | 93492484  | 93492733  | 250 |
| chr2  | 75741794  | 75742043  | 250 |
| chr19 | 30046103  | 30046352  | 250 |
| chr19 | 17227561  | 17227810  | 250 |
| chr19 | 16191934  | 16192183  | 250 |
| chr18 | 45198040  | 45198289  | 250 |
| chr18 | 45197688  | 45197937  | 250 |
| chr18 | 38649115  | 38649364  | 250 |
| chr17 | 18376092  | 18376341  | 250 |
| chr16 | 60179525  | 60179774  | 250 |

|       |           |           |     |
|-------|-----------|-----------|-----|
| chr16 | 41348326  | 41348575  | 250 |
| chr14 | 31830386  | 31830635  | 250 |
| chr13 | 75666268  | 75666517  | 250 |
| chr13 | 60410430  | 60410679  | 250 |
| chr13 | 57249768  | 57250017  | 250 |
| chr13 | 41186808  | 41187057  | 250 |
| chr13 | 38834351  | 38834600  | 250 |
| chr12 | 30990369  | 30990618  | 250 |
| chr11 | 104955347 | 104955596 | 250 |
| chr11 | 88923042  | 88923291  | 250 |
| chr11 | 85117849  | 85118098  | 250 |
| chr11 | 68921586  | 68921835  | 250 |
| chr11 | 14114120  | 14114369  | 250 |
| chr10 | 86714967  | 86715216  | 250 |
| chr10 | 37442012  | 37442261  | 250 |
| chr10 | 17429469  | 17429718  | 250 |
| chr10 | 12789089  | 12789338  | 250 |
| chr1  | 123100025 | 123100274 | 250 |
| chrX  | 78975789  | 78976037  | 249 |
| chrX  | 64570789  | 64571037  | 249 |
| chrX  | 64033954  | 64034202  | 249 |
| chrX  | 63491506  | 63491754  | 249 |
| chrX  | 61342064  | 61342312  | 249 |
| chrX  | 54420817  | 54421065  | 249 |
| chrX  | 50671519  | 50671767  | 249 |
| chrX  | 39083378  | 39083626  | 249 |
| chrX  | 35795118  | 35795366  | 249 |
| chrX  | 34598266  | 34598514  | 249 |
| chrX  | 22247897  | 22248145  | 249 |
| chrX  | 19820425  | 19820673  | 249 |
| chrX  | 18397225  | 18397473  | 249 |
| chrX  | 7507795   | 7508043   | 249 |
| chrX  | 1674964   | 1675212   | 249 |
| chr9  | 78269289  | 78269537  | 249 |
| chr8  | 87041959  | 87042207  | 249 |
| chr8  | 63833514  | 63833762  | 249 |
| chr7  | 62235883  | 62236131  | 249 |
| chr7  | 38379007  | 38379255  | 249 |
| chr7  | 38254883  | 38255131  | 249 |
| chr5  | 118391404 | 118391652 | 249 |
| chr5  | 80764012  | 80764260  | 249 |
| chr5  | 71194134  | 71194382  | 249 |
| chr4  | 118251349 | 118251597 | 249 |
| chr4  | 68215023  | 68215271  | 249 |
| chr4  | 28580492  | 28580740  | 249 |
| chr3  | 124471887 | 124472135 | 249 |
| chr3  | 121897273 | 121897521 | 249 |
| chr3  | 11515050  | 11515298  | 249 |
| chr28 | 26775022  | 26775270  | 249 |
| chr28 | 26076623  | 26076871  | 249 |



|       |           |           |     |
|-------|-----------|-----------|-----|
| chr27 | 599276    | 599524    | 249 |
| chr26 | 43274842  | 43275090  | 249 |
| chr26 | 37900317  | 37900565  | 249 |
| chr26 | 20487406  | 20487654  | 249 |
| chr25 | 34425638  | 34425886  | 249 |
| chr25 | 34342086  | 34342334  | 249 |
| chr25 | 8193654   | 8193902   | 249 |
| chr23 | 29074891  | 29075139  | 249 |
| chr23 | 14806367  | 14806615  | 249 |
| chr22 | 48543755  | 48544003  | 249 |
| chr21 | 69089769  | 69090017  | 249 |
| chr21 | 34042745  | 34042993  | 249 |
| chr21 | 25248806  | 25249054  | 249 |
| chr21 | 23692656  | 23692904  | 249 |
| chr21 | 14528388  | 14528636  | 249 |
| chr20 | 19000284  | 19000532  | 249 |
| chr20 | 12028229  | 12028477  | 249 |
| chr20 | 8580099   | 8580347   | 249 |
| chr20 | 5932572   | 5932820   | 249 |
| chr2  | 128110881 | 128111129 | 249 |
| chr2  | 108815094 | 108815342 | 249 |
| chr2  | 93588366  | 93588614  | 249 |
| chr2  | 5364802   | 5365050   | 249 |
| chr19 | 64005572  | 64005820  | 249 |
| chr19 | 60761319  | 60761567  | 249 |
| chr19 | 58690681  | 58690929  | 249 |
| chr19 | 53562413  | 53562661  | 249 |
| chr19 | 45589596  | 45589844  | 249 |
| chr19 | 41559764  | 41560012  | 249 |
| chr19 | 30585250  | 30585498  | 249 |
| chr19 | 26180636  | 26180884  | 249 |
| chr18 | 63748433  | 63748681  | 249 |
| chr18 | 43562832  | 43563080  | 249 |
| chr18 | 39899114  | 39899362  | 249 |
| chr18 | 39497004  | 39497252  | 249 |
| chr17 | 74036703  | 74036951  | 249 |
| chr17 | 70401449  | 70401697  | 249 |
| chr17 | 64197718  | 64197966  | 249 |
| chr16 | 73334869  | 73335117  | 249 |
| chr16 | 71877134  | 71877382  | 249 |
| chr16 | 43852178  | 43852426  | 249 |
| chr16 | 40466931  | 40467179  | 249 |
| chr16 | 26574723  | 26574971  | 249 |
| chr15 | 81601018  | 81601266  | 249 |
| chr15 | 53628365  | 53628613  | 249 |
| chr15 | 23629260  | 23629508  | 249 |
| chr15 | 22254673  | 22254921  | 249 |
| chr14 | 25625543  | 25625791  | 249 |
| chr13 | 77407849  | 77408097  | 249 |
| chr13 | 70027366  | 70027614  | 249 |

|       |           |           |     |
|-------|-----------|-----------|-----|
| chr13 | 65088208  | 65088456  | 249 |
| chr13 | 40576806  | 40577054  | 249 |
| chr12 | 54227989  | 54228237  | 249 |
| chr11 | 103349584 | 103349832 | 249 |
| chr11 | 100995127 | 100995375 | 249 |
| chr11 | 82900018  | 82900266  | 249 |
| chr11 | 74976956  | 74977204  | 249 |
| chr11 | 72068010  | 72068258  | 249 |
| chr11 | 28792594  | 28792842  | 249 |
| chr11 | 22435130  | 22435378  | 249 |
| chr11 | 9202964   | 9203212   | 249 |
| chr10 | 90497463  | 90497711  | 249 |
| chr10 | 50505969  | 50506217  | 249 |
| chr10 | 6929426   | 6929674   | 249 |
| chr1  | 145713390 | 145713638 | 249 |
| chr1  | 84399996  | 84400244  | 249 |
| chr1  | 68849113  | 68849361  | 249 |
| chr1  | 1612869   | 1613117   | 249 |
| chrX  | 75550647  | 75550894  | 248 |
| chrX  | 74719004  | 74719251  | 248 |
| chrX  | 72123367  | 72123614  | 248 |
| chrX  | 69337051  | 69337298  | 248 |
| chrX  | 62922252  | 62922499  | 248 |
| chrX  | 58785335  | 58785582  | 248 |
| chrX  | 56942376  | 56942623  | 248 |
| chrX  | 53714925  | 53715172  | 248 |
| chrX  | 53614181  | 53614428  | 248 |
| chrX  | 47947215  | 47947462  | 248 |
| chrX  | 46527316  | 46527563  | 248 |
| chrX  | 37283786  | 37284033  | 248 |
| chrX  | 36696412  | 36696659  | 248 |
| chrX  | 20462893  | 20463140  | 248 |
| chrX  | 20020310  | 20020557  | 248 |
| chrX  | 12293629  | 12293876  | 248 |
| chrX  | 11592404  | 11592651  | 248 |
| chrX  | 10188117  | 10188364  | 248 |
| chrX  | 5472071   | 5472318   | 248 |
| chr9  | 77700750  | 77700997  | 248 |
| chr8  | 74536240  | 74536487  | 248 |
| chr7  | 19178764  | 19179011  | 248 |
| chr7  | 6989913   | 6990160   | 248 |
| chr5  | 125106916 | 125107163 | 248 |
| chr5  | 111712315 | 111712562 | 248 |
| chr5  | 73270129  | 73270376  | 248 |
| chr5  | 68959874  | 68960121  | 248 |
| chr5  | 30199918  | 30200165  | 248 |
| chr4  | 72569317  | 72569564  | 248 |
| chr4  | 32148928  | 32149175  | 248 |
| chr3  | 123275665 | 123275912 | 248 |
| chr3  | 105139209 | 105139456 | 248 |

|       |               |           |     |
|-------|---------------|-----------|-----|
| chr29 | 37957123      | 37957370  | 248 |
| chr29 | 37395999      | 37396246  | 248 |
| chr29 | 35211534      | 35211781  | 248 |
| chr29 | 31858148      | 31858395  | 248 |
| chr26 | 42047932      | 42048179  | 248 |
| chr26 | 25422115      | 25422362  | 248 |
| chr25 | 34459508      | 34459755  | 248 |
| chr25 | 29125909      | 29126156  | 248 |
| chr25 | 20997861      | 20998108  | 248 |
| chr24 | 43483670      | 43483917  | 248 |
| chr23 | 43427883      | 43428130  | 248 |
| chr23 | 27974145      | 27974392  | 248 |
| chr23 | 20056953      | 20057200  | 248 |
| chr23 | 11926627      | 11926874  | 248 |
| chr23 | 7456327       | 7456574   | 248 |
| chr23 | 7381592       | 7381839   | 248 |
| chr22 | 6476280       | 6476527   | 248 |
| chr21 | 66600445      | 66600692  | 248 |
| chr2  | 127314654     | 127314901 | 248 |
| chr19 | 55748917      | 55749164  | 248 |
| chr19 | 42352898      | 42353145  | 248 |
| chr19 | 31648499      | 31648746  | 248 |
| chr19 | 30270303      | 30270550  | 248 |
| chr19 | 27097148      | 27097395  | 248 |
| chr19 | 24035984      | 24036231  | 248 |
| chr18 | 61979069      | 61979316  | 248 |
| chr18 | 42503463      | 42503710  | 248 |
| chr18 | 12042296      | 12042543  | 248 |
| chr17 | 74391725      | 74391972  | 248 |
| chr17 | 68073781      | 68074028  | 248 |
| chr16 | 50342734      | 50342981  | 248 |
| chr15 | 64486404      | 64486651  | 248 |
| chr15 | 22440856      | 22441103  | 248 |
| chr14 | 9433770       | 9434017   | 248 |
| chr14 | 4691607       | 4691854   | 248 |
| chr14 | 3966177       | 3966424   | 248 |
| chr13 | 77661980      | 77662227  | 248 |
| chr13 | 64364510      | 64364757  | 248 |
| chr13 | 55431894      | 55432141  | 248 |
| chr13 | 14677660      | 14677907  | 248 |
| chr13 | 1566592       | 1566839   | 248 |
| chr11 | 104377143     | 104377390 | 248 |
| chr11 | 23190032      | 23190279  | 248 |
| chr11 | 3352013       | 3352260   | 248 |
| chr10 | 37307583      | 37307830  | 248 |
| chr10 | 23275647      | 23275894  | 248 |
| chr10 | 17314184      | 17314431  | 248 |
| chr10 | 16952300      | 16952547  | 248 |
| chr1  | 374303 374550 | 248       |     |
| chrX  | 15868687      | 15868933  | 247 |

|       |               |           |     |
|-------|---------------|-----------|-----|
| chrX  | 9661086       | 9661332   | 247 |
| chrX  | 6691623       | 6691869   | 247 |
| chrX  | 2345135       | 2345381   | 247 |
| chr9  | 104973537     | 104973783 | 247 |
| chr9  | 90584138      | 90584384  | 247 |
| chr9  | 36074243      | 36074489  | 247 |
| chr8  | 92888855      | 92889101  | 247 |
| chr8  | 66184527      | 66184773  | 247 |
| chr8  | 60320683      | 60320929  | 247 |
| chr8  | 11425235      | 11425481  | 247 |
| chr7  | 50878179      | 50878425  | 247 |
| chr7  | 4517419       | 4517665   | 247 |
| chr6  | 107421412     | 107421658 | 247 |
| chr5  | 30157992      | 30158238  | 247 |
| chr4  | 98500015      | 98500261  | 247 |
| chr3  | 117226048     | 117226294 | 247 |
| chr3  | 20056045      | 20056291  | 247 |
| chr29 | 41708859      | 41709105  | 247 |
| chr28 | 25336622      | 25336868  | 247 |
| chr28 | 195985 196231 | 247       |     |
| chr27 | 28093220      | 28093466  | 247 |
| chr26 | 33318582      | 33318828  | 247 |
| chr26 | 31157251      | 31157497  | 247 |
| chr24 | 44253558      | 44253804  | 247 |
| chr23 | 48756849      | 48757095  | 247 |
| chr23 | 16517596      | 16517842  | 247 |
| chr21 | 61661996      | 61662242  | 247 |
| chr2  | 128848021     | 128848267 | 247 |
| chr19 | 60469941      | 60470187  | 247 |
| chr19 | 60234495      | 60234741  | 247 |
| chr18 | 57605987      | 57606233  | 247 |
| chr18 | 52758195      | 52758441  | 247 |
| chr18 | 52618046      | 52618292  | 247 |
| chr18 | 39103502      | 39103748  | 247 |
| chr17 | 66702188      | 66702434  | 247 |
| chr17 | 63185378      | 63185624  | 247 |
| chr16 | 48805095      | 48805341  | 247 |
| chr16 | 19836379      | 19836625  | 247 |
| chr16 | 984637 984883 | 247       |     |
| chr15 | 21524020      | 21524266  | 247 |
| chr14 | 10304692      | 10304938  | 247 |
| chr14 | 6416346       | 6416592   | 247 |
| chr11 | 31221617      | 31221863  | 247 |
| chr11 | 14226433      | 14226679  | 247 |
| chr10 | 106195342     | 106195588 | 247 |
| chr10 | 25218403      | 25218649  | 247 |
| chr10 | 8331993       | 8332239   | 247 |
| chr1  | 144440736     | 144440982 | 247 |
| chr1  | 72347808      | 72348054  | 247 |
| chrX  | 54037187      | 54037432  | 246 |

|       |           |           |     |
|-------|-----------|-----------|-----|
| chrX  | 51977691  | 51977936  | 246 |
| chrX  | 50398078  | 50398323  | 246 |
| chrX  | 44199723  | 44199968  | 246 |
| chrX  | 40772894  | 40773139  | 246 |
| chrX  | 39354039  | 39354284  | 246 |
| chrX  | 36367385  | 36367630  | 246 |
| chrX  | 30876791  | 30877036  | 246 |
| chrX  | 30405233  | 30405478  | 246 |
| chrX  | 29759619  | 29759864  | 246 |
| chrX  | 29754171  | 29754416  | 246 |
| chrX  | 19451658  | 19451903  | 246 |
| chrX  | 19024836  | 19025081  | 246 |
| chrX  | 11294992  | 11295237  | 246 |
| chr9  | 99762077  | 99762322  | 246 |
| chr8  | 108760617 | 108760862 | 246 |
| chr7  | 89478295  | 89478540  | 246 |
| chr7  | 77016507  | 77016752  | 246 |
| chr6  | 63159074  | 63159319  | 246 |
| chr5  | 112559238 | 112559483 | 246 |
| chr4  | 46254954  | 46255199  | 246 |
| chr3  | 109419844 | 109420089 | 246 |
| chr3  | 105171487 | 105171732 | 246 |
| chr3  | 99116627  | 99116872  | 246 |
| chr3  | 54012278  | 54012523  | 246 |
| chr3  | 8994004   | 8994249   | 246 |
| chr29 | 37065658  | 37065903  | 246 |
| chr29 | 17704023  | 17704268  | 246 |
| chr29 | 17458081  | 17458326  | 246 |
| chr26 | 44454444  | 44454689  | 246 |
| chr26 | 33307716  | 33307961  | 246 |
| chr26 | 22357203  | 22357448  | 246 |
| chr26 | 22228153  | 22228398  | 246 |
| chr25 | 34316222  | 34316467  | 246 |
| chr25 | 21648899  | 21649144  | 246 |
| chr24 | 49362002  | 49362247  | 246 |
| chr24 | 41795056  | 41795301  | 246 |
| chr23 | 44424234  | 44424479  | 246 |
| chr23 | 27136703  | 27136948  | 246 |
| chr23 | 18629544  | 18629789  | 246 |
| chr23 | 18434851  | 18435096  | 246 |
| chr23 | 17510315  | 17510560  | 246 |
| chr23 | 17469017  | 17469262  | 246 |
| chr23 | 11296552  | 11296797  | 246 |
| chr22 | 15231462  | 15231707  | 246 |
| chr20 | 37570281  | 37570526  | 246 |
| chr20 | 11756467  | 11756712  | 246 |
| chr2  | 128593546 | 128593791 | 246 |
| chr2  | 108270266 | 108270511 | 246 |
| chr2  | 21546743  | 21546988  | 246 |
| chr19 | 59234369  | 59234614  | 246 |

|       |             |           |     |
|-------|-------------|-----------|-----|
| chr19 | 51935240    | 51935485  | 246 |
| chr19 | 42358461    | 42358706  | 246 |
| chr19 | 39139992    | 39140237  | 246 |
| chr19 | 34146741    | 34146986  | 246 |
| chr19 | 25834945    | 25835190  | 246 |
| chr19 | 14868537    | 14868782  | 246 |
| chr18 | 24215023    | 24215268  | 246 |
| chr18 | 11758489    | 11758734  | 246 |
| chr18 | 4010274     | 4010519   | 246 |
| chr17 | 64149684    | 64149929  | 246 |
| chr17 | 58763568    | 58763813  | 246 |
| chr17 | 6257692     | 6257937   | 246 |
| chr16 | 73868512    | 73868757  | 246 |
| chr14 | 8426247     | 8426492   | 246 |
| chr13 | 79069681    | 79069926  | 246 |
| chr13 | 45502623    | 45502868  | 246 |
| chr13 | 23851790    | 23852035  | 246 |
| chr12 | 69011462    | 69011707  | 246 |
| chr12 | 67757417    | 67757662  | 246 |
| chr11 | 94002654    | 94002899  | 246 |
| chr11 | 28456205    | 28456450  | 246 |
| chr11 | 23140065    | 23140310  | 246 |
| chr10 | 71213092    | 71213337  | 246 |
| chr10 | 17143176    | 17143421  | 246 |
| chr1  | 138634200   | 138634445 | 246 |
| chrX  | 67072359    | 67072603  | 245 |
| chrX  | 65494488    | 65494732  | 245 |
| chrX  | 65166034    | 65166278  | 245 |
| chrX  | 61849244    | 61849488  | 245 |
| chrX  | 38305166    | 38305410  | 245 |
| chrX  | 21891987    | 21892231  | 245 |
| chrX  | 20763890    | 20764134  | 245 |
| chrX  | 17081774    | 17082018  | 245 |
| chrX  | 8766613     | 8766857   | 245 |
| chrX  | 7861463     | 7861707   | 245 |
| chrM  | 12678 12922 | 245       |     |
| chr9  | 24596405    | 24596649  | 245 |
| chr8  | 115157882   | 115158126 | 245 |
| chr8  | 92768856    | 92769100  | 245 |
| chr8  | 89860851    | 89861095  | 245 |
| chr8  | 65917524    | 65917768  | 245 |
| chr8  | 63907129    | 63907373  | 245 |
| chr8  | 53588801    | 53589045  | 245 |
| chr8  | 6762198     | 6762442   | 245 |
| chr7  | 69449053    | 69449297  | 245 |
| chr7  | 39509403    | 39509647  | 245 |
| chr6  | 103290055   | 103290299 | 245 |
| chr5  | 117344484   | 117344728 | 245 |
| chr5  | 67967633    | 67967877  | 245 |
| chr4  | 123524750   | 123524994 | 245 |

|       |               |           |     |
|-------|---------------|-----------|-----|
| chr4  | 8836873       | 8837117   | 245 |
| chr3  | 62948261      | 62948505  | 245 |
| chr29 | 36954711      | 36954955  | 245 |
| chr29 | 35143162      | 35143406  | 245 |
| chr28 | 26584100      | 26584344  | 245 |
| chr28 | 25372127      | 25372371  | 245 |
| chr28 | 7581116       | 7581360   | 245 |
| chr27 | 44746409      | 44746653  | 245 |
| chr26 | 34895356      | 34895600  | 245 |
| chr25 | 10608143      | 10608387  | 245 |
| chr25 | 8833329       | 8833573   | 245 |
| chr25 | 428089 428333 | 245       |     |
| chr24 | 59573065      | 59573309  | 245 |
| chr22 | 48357976      | 48358220  | 245 |
| chr22 | 30578185      | 30578429  | 245 |
| chr22 | 29797316      | 29797560  | 245 |
| chr22 | 22082597      | 22082841  | 245 |
| chr21 | 18457868      | 18458112  | 245 |
| chr21 | 17783407      | 17783651  | 245 |
| chr19 | 64087596      | 64087840  | 245 |
| chr19 | 62252416      | 62252660  | 245 |
| chr19 | 44603133      | 44603377  | 245 |
| chr19 | 42074469      | 42074713  | 245 |
| chr19 | 30499884      | 30500128  | 245 |
| chr19 | 16768451      | 16768695  | 245 |
| chr18 | 52596924      | 52597168  | 245 |
| chr18 | 40026068      | 40026312  | 245 |
| chr17 | 66489228      | 66489472  | 245 |
| chr16 | 60237136      | 60237380  | 245 |
| chr15 | 73820200      | 73820444  | 245 |
| chr15 | 64228603      | 64228847  | 245 |
| chr15 | 64184659      | 64184903  | 245 |
| chr15 | 37385145      | 37385389  | 245 |
| chr14 | 1389989       | 1390233   | 245 |
| chr13 | 60400831      | 60401075  | 245 |
| chr13 | 57460654      | 57460898  | 245 |
| chr12 | 31951021      | 31951265  | 245 |
| chr12 | 9643101       | 9643345   | 245 |
| chr11 | 106746869     | 106747113 | 245 |
| chr11 | 91964913      | 91965157  | 245 |
| chr11 | 80406166      | 80406410  | 245 |
| chr11 | 74425413      | 74425657  | 245 |
| chr11 | 4194994       | 4195238   | 245 |
| chr11 | 303073 303317 | 245       |     |
| chr10 | 11073870      | 11074114  | 245 |
| chr1  | 2443612       | 2443856   | 245 |
| chrX  | 74400775      | 74401018  | 244 |
| chrX  | 65982586      | 65982829  | 244 |
| chrX  | 58869962      | 58870205  | 244 |
| chrX  | 34370225      | 34370468  | 244 |

|       |           |           |     |
|-------|-----------|-----------|-----|
| chrX  | 19841237  | 19841480  | 244 |
| chrX  | 15472956  | 15473199  | 244 |
| chr9  | 89579919  | 89580162  | 244 |
| chr9  | 43894637  | 43894880  | 244 |
| chr8  | 73924787  | 73925030  | 244 |
| chr8  | 65922200  | 65922443  | 244 |
| chr8  | 24498452  | 24498695  | 244 |
| chr6  | 108745768 | 108746011 | 244 |
| chr6  | 71862111  | 71862354  | 244 |
| chr5  | 30177875  | 30178118  | 244 |
| chr4  | 122030445 | 122030688 | 244 |
| chr4  | 118011638 | 118011881 | 244 |
| chr4  | 74869167  | 74869410  | 244 |
| chr3  | 123850970 | 123851213 | 244 |
| chr3  | 121709364 | 121709607 | 244 |
| chr3  | 114529699 | 114529942 | 244 |
| chr3  | 99380890  | 99381133  | 244 |
| chr3  | 30928933  | 30929176  | 244 |
| chr3  | 25651979  | 25652222  | 244 |
| chr28 | 44000193  | 44000436  | 244 |
| chr27 | 39883724  | 39883967  | 244 |
| chr27 | 37066631  | 37066874  | 244 |
| chr27 | 34095542  | 34095785  | 244 |
| chr25 | 35496909  | 35497152  | 244 |
| chr25 | 27204376  | 27204619  | 244 |
| chr25 | 3961673   | 3961916   | 244 |
| chr24 | 60581375  | 60581618  | 244 |
| chr24 | 41580290  | 41580533  | 244 |
| chr23 | 44105536  | 44105779  | 244 |
| chr23 | 18153528  | 18153771  | 244 |
| chr22 | 56093494  | 56093737  | 244 |
| chr22 | 30579071  | 30579314  | 244 |
| chr22 | 5661914   | 5662157   | 244 |
| chr21 | 62130959  | 62131202  | 244 |
| chr21 | 58548268  | 58548511  | 244 |
| chr20 | 73089309  | 73089552  | 244 |
| chr20 | 70960372  | 70960615  | 244 |
| chr2  | 138773561 | 138773804 | 244 |
| chr2  | 138751353 | 138751596 | 244 |
| chr2  | 138569663 | 138569906 | 244 |
| chr19 | 60380686  | 60380929  | 244 |
| chr19 | 49659664  | 49659907  | 244 |
| chr19 | 42952230  | 42952473  | 244 |
| chr19 | 29475492  | 29475735  | 244 |
| chr19 | 22836894  | 22837137  | 244 |
| chr18 | 49562882  | 49563125  | 244 |
| chr17 | 73188651  | 73188894  | 244 |
| chr17 | 70317670  | 70317913  | 244 |
| chr17 | 65969973  | 65970216  | 244 |
| chr16 | 77624784  | 77625027  | 244 |



|       |               |           |     |
|-------|---------------|-----------|-----|
| chr16 | 2363180       | 2363423   | 244 |
| chr15 | 84115201      | 84115444  | 244 |
| chr15 | 63091924      | 63092167  | 244 |
| chr15 | 28904665      | 28904908  | 244 |
| chr14 | 58447926      | 58448169  | 244 |
| chr13 | 57034897      | 57035140  | 244 |
| chr13 | 43374101      | 43374344  | 244 |
| chr12 | 33043771      | 33044014  | 244 |
| chr11 | 100110644     | 100110887 | 244 |
| chr11 | 71079550      | 71079793  | 244 |
| chr11 | 48439627      | 48439870  | 244 |
| chr11 | 30933635      | 30933878  | 244 |
| chr11 | 6079551       | 6079794   | 244 |
| chr10 | 12758201      | 12758444  | 244 |
| chr10 | 10764899      | 10765142  | 244 |
| chrX  | 80116643      | 80116885  | 243 |
| chrX  | 65643750      | 65643992  | 243 |
| chrX  | 40556451      | 40556693  | 243 |
| chrX  | 36750459      | 36750701  | 243 |
| chrX  | 34266131      | 34266373  | 243 |
| chrX  | 33091880      | 33092122  | 243 |
| chrX  | 19034747      | 19034989  | 243 |
| chrX  | 18824823      | 18825065  | 243 |
| chrX  | 10670482      | 10670724  | 243 |
| chrX  | 8637441       | 8637683   | 243 |
| chrX  | 881642 881884 | 243       | 243 |
| chr9  | 106619456     | 106619698 | 243 |
| chr9  | 24593681      | 24593923  | 243 |
| chr8  | 108738975     | 108739217 | 243 |
| chr8  | 78482998      | 78483240  | 243 |
| chr7  | 95632948      | 95633190  | 243 |
| chr7  | 37512670      | 37512912  | 243 |
| chr6  | 18297050      | 18297292  | 243 |
| chr5  | 113265790     | 113266032 | 243 |
| chr5  | 44264128      | 44264370  | 243 |
| chr5  | 28855848      | 28856090  | 243 |
| chr5  | 1089446       | 1089688   | 243 |
| chr4  | 71389619      | 71389861  | 243 |
| chr3  | 111399092     | 111399334 | 243 |
| chr3  | 111335810     | 111336052 | 243 |
| chr3  | 24572892      | 24573134  | 243 |
| chr29 | 37212084      | 37212326  | 243 |
| chr29 | 35163975      | 35164217  | 243 |
| chr29 | 30821699      | 30821941  | 243 |
| chr29 | 27765287      | 27765529  | 243 |
| chr29 | 25168699      | 25168941  | 243 |
| chr28 | 33733500      | 33733742  | 243 |
| chr27 | 6070208       | 6070450   | 243 |
| chr26 | 44748609      | 44748851  | 243 |
| chr25 | 37415863      | 37416105  | 243 |

|       |           |           |     |
|-------|-----------|-----------|-----|
| chr25 | 17056060  | 17056302  | 243 |
| chr25 | 8314179   | 8314421   | 243 |
| chr25 | 1898249   | 1898491   | 243 |
| chr24 | 52546314  | 52546556  | 243 |
| chr23 | 46767014  | 46767256  | 243 |
| chr22 | 55881613  | 55881855  | 243 |
| chr22 | 48751492  | 48751734  | 243 |
| chr22 | 13995839  | 13996081  | 243 |
| chr21 | 61370040  | 61370282  | 243 |
| chr21 | 20024242  | 20024484  | 243 |
| chr20 | 10763568  | 10763810  | 243 |
| chr2  | 134424918 | 134425160 | 243 |
| chr19 | 61149041  | 61149283  | 243 |
| chr19 | 45812802  | 45813044  | 243 |
| chr19 | 44158969  | 44159211  | 243 |
| chr19 | 10931191  | 10931433  | 243 |
| chr17 | 70404849  | 70405091  | 243 |
| chr17 | 68546291  | 68546533  | 243 |
| chr17 | 62139494  | 62139736  | 243 |
| chr14 | 7479744   | 7479986   | 243 |
| chr14 | 4458454   | 4458696   | 243 |
| chr13 | 15176298  | 15176540  | 243 |
| chr13 | 6920386   | 6920628   | 243 |
| chr11 | 108438466 | 108438708 | 243 |
| chr10 | 52223792  | 52224034  | 243 |
| chrX  | 81948694  | 81948935  | 242 |
| chrX  | 72484551  | 72484792  | 242 |
| chrX  | 66045995  | 66046236  | 242 |
| chrX  | 61490190  | 61490431  | 242 |
| chrX  | 55972418  | 55972659  | 242 |
| chrX  | 50804710  | 50804951  | 242 |
| chrX  | 45882491  | 45882732  | 242 |
| chrX  | 28549809  | 28550050  | 242 |
| chrX  | 19618644  | 19618885  | 242 |
| chrX  | 19533165  | 19533406  | 242 |
| chrX  | 16324687  | 16324928  | 242 |
| chrX  | 2455461   | 2455702   | 242 |
| chr9  | 100076762 | 100077003 | 242 |
| chr9  | 87802366  | 87802607  | 242 |
| chr9  | 26970118  | 26970359  | 242 |
| chr8  | 74352104  | 74352345  | 242 |
| chr7  | 77092301  | 77092542  | 242 |
| chr6  | 101414587 | 101414828 | 242 |
| chr5  | 30345948  | 30346189  | 242 |
| chr4  | 42327987  | 42328228  | 242 |
| chr3  | 33507421  | 33507662  | 242 |
| chr3  | 26152934  | 26153175  | 242 |
| chr3  | 15399569  | 15399810  | 242 |
| chr3  | 9860929   | 9861170   | 242 |
| chr29 | 49442056  | 49442297  | 242 |

|       |               |           |     |
|-------|---------------|-----------|-----|
| chr28 | 26983583      | 26983824  | 242 |
| chr27 | 34696016      | 34696257  | 242 |
| chr26 | 50649508      | 50649749  | 242 |
| chr25 | 8775075       | 8775316   | 242 |
| chr23 | 13525768      | 13526009  | 242 |
| chr22 | 61454813      | 61455054  | 242 |
| chr21 | 8665351       | 8665592   | 242 |
| chr20 | 753872 754113 | 242       |     |
| chr2  | 44187344      | 44187585  | 242 |
| chr19 | 38696682      | 38696923  | 242 |
| chr19 | 11019664      | 11019905  | 242 |
| chr19 | 8352900       | 8353141   | 242 |
| chr18 | 45531214      | 45531455  | 242 |
| chr18 | 19364435      | 19364676  | 242 |
| chr17 | 73114522      | 73114763  | 242 |
| chr17 | 70322909      | 70323150  | 242 |
| chr16 | 72113379      | 72113620  | 242 |
| chr15 | 75213045      | 75213286  | 242 |
| chr14 | 16514475      | 16514716  | 242 |
| chr13 | 57378851      | 57379092  | 242 |
| chr13 | 54372039      | 54372280  | 242 |
| chr13 | 53281165      | 53281406  | 242 |
| chr13 | 1309918       | 1310159   | 242 |
| chr12 | 14650165      | 14650406  | 242 |
| chr11 | 104929475     | 104929716 | 242 |
| chr11 | 85931276      | 85931517  | 242 |
| chr11 | 77664759      | 77665000  | 242 |
| chr10 | 32242938      | 32243179  | 242 |
| chr10 | 16984086      | 16984327  | 242 |
| chr10 | 14967138      | 14967379  | 242 |
| chr1  | 153973424     | 153973665 | 242 |
| chr1  | 82509196      | 82509437  | 242 |
| chr1  | 1798469       | 1798710   | 242 |
| chrX  | 78804329      | 78804569  | 241 |
| chrX  | 64054697      | 64054937  | 241 |
| chrX  | 63067222      | 63067462  | 241 |
| chrX  | 62221137      | 62221377  | 241 |
| chrX  | 59330736      | 59330976  | 241 |
| chrX  | 55605198      | 55605438  | 241 |
| chrX  | 55272017      | 55272257  | 241 |
| chrX  | 49997610      | 49997850  | 241 |
| chrX  | 39126724      | 39126964  | 241 |
| chrX  | 21431186      | 21431426  | 241 |
| chrX  | 20453842      | 20454082  | 241 |
| chrX  | 19756791      | 19757031  | 241 |
| chrX  | 19122420      | 19122660  | 241 |
| chrX  | 11712158      | 11712398  | 241 |
| chr9  | 64804821      | 64805061  | 241 |
| chr8  | 83287661      | 83287901  | 241 |
| chr8  | 10479122      | 10479362  | 241 |

|       |               |           |     |
|-------|---------------|-----------|-----|
| chr8  | 8600358       | 8600598   | 241 |
| chr8  | 7983182       | 7983422   | 241 |
| chr7  | 94374469      | 94374709  | 241 |
| chr6  | 107234695     | 107234935 | 241 |
| chr6  | 3340871       | 3341111   | 241 |
| chr5  | 122487951     | 122488191 | 241 |
| chr5  | 111304522     | 111304762 | 241 |
| chr5  | 104116393     | 104116633 | 241 |
| chr5  | 81564920      | 81565160  | 241 |
| chr5  | 28962900      | 28963140  | 241 |
| chr4  | 123024439     | 123024679 | 241 |
| chr4  | 101662068     | 101662308 | 241 |
| chr4  | 95797344      | 95797584  | 241 |
| chr4  | 95655744      | 95655984  | 241 |
| chr4  | 71496502      | 71496742  | 241 |
| chr3  | 114421269     | 114421509 | 241 |
| chr3  | 105297895     | 105298135 | 241 |
| chr3  | 103583697     | 103583937 | 241 |
| chr3  | 101486195     | 101486435 | 241 |
| chr3  | 35953724      | 35953964  | 241 |
| chr29 | 48958851      | 48959091  | 241 |
| chr29 | 42763429      | 42763669  | 241 |
| chr26 | 37856295      | 37856535  | 241 |
| chr24 | 33118732      | 33118972  | 241 |
| chr23 | 38342465      | 38342705  | 241 |
| chr23 | 31606319      | 31606559  | 241 |
| chr23 | 11449657      | 11449897  | 241 |
| chr22 | 7995035       | 7995275   | 241 |
| chr20 | 74037744      | 74037984  | 241 |
| chr20 | 6786730       | 6786970   | 241 |
| chr20 | 729618 729858 | 241       | 241 |
| chr2  | 135113691     | 135113931 | 241 |
| chr2  | 127779104     | 127779344 | 241 |
| chr2  | 74880223      | 74880463  | 241 |
| chr2  | 23206190      | 23206430  | 241 |
| chr19 | 51934167      | 51934407  | 241 |
| chr19 | 46061867      | 46062107  | 241 |
| chr19 | 32178653      | 32178893  | 241 |
| chr19 | 16306328      | 16306568  | 241 |
| chr19 | 12401874      | 12402114  | 241 |
| chr19 | 12317371      | 12317611  | 241 |
| chr18 | 52801075      | 52801315  | 241 |
| chr18 | 22192125      | 22192365  | 241 |
| chr18 | 1543062       | 1543302   | 241 |
| chr17 | 70318139      | 70318379  | 241 |
| chr17 | 67989910      | 67990150  | 241 |
| chr16 | 41248147      | 41248387  | 241 |
| chr15 | 36879696      | 36879936  | 241 |
| chr14 | 61462613      | 61462853  | 241 |
| chr13 | 74036034      | 74036274  | 241 |

|       |               |           |     |
|-------|---------------|-----------|-----|
| chr13 | 22189006      | 22189246  | 241 |
| chr13 | 17757831      | 17758071  | 241 |
| chr12 | 82572889      | 82573129  | 241 |
| chr12 | 24541323      | 24541563  | 241 |
| chr12 | 20796486      | 20796726  | 241 |
| chr12 | 14800469      | 14800709  | 241 |
| chr11 | 105556604     | 105556844 | 241 |
| chr11 | 77552353      | 77552593  | 241 |
| chr11 | 7421274       | 7421514   | 241 |
| chr10 | 61280380      | 61280620  | 241 |
| chr10 | 35634091      | 35634331  | 241 |
| chr10 | 23446914      | 23447154  | 241 |
| chr1  | 129524899     | 129525139 | 241 |
| chr1  | 99688285      | 99688525  | 241 |
| chr1  | 82410726      | 82410966  | 241 |
| chr1  | 74863873      | 74864113  | 241 |
| chrX  | 81933186      | 81933425  | 240 |
| chrX  | 63464124      | 63464363  | 240 |
| chrX  | 63109327      | 63109566  | 240 |
| chrX  | 45887560      | 45887799  | 240 |
| chrX  | 36127673      | 36127912  | 240 |
| chrX  | 20059938      | 20060177  | 240 |
| chrX  | 15743980      | 15744219  | 240 |
| chrX  | 3018946       | 3019185   | 240 |
| chrX  | 2572393       | 2572632   | 240 |
| chrX  | 1916292       | 1916531   | 240 |
| chr9  | 55362048      | 55362287  | 240 |
| chr8  | 64689962      | 64690201  | 240 |
| chr8  | 58476400      | 58476639  | 240 |
| chr8  | 46622860      | 46623099  | 240 |
| chr8  | 863440 863679 | 240       | 240 |
| chr7  | 5247200       | 5247439   | 240 |
| chr7  | 3709756       | 3709995   | 240 |
| chr5  | 113176199     | 113176438 | 240 |
| chr5  | 30285702      | 30285941  | 240 |
| chr4  | 98892485      | 98892724  | 240 |
| chr4  | 98768685      | 98768924  | 240 |
| chr4  | 30813135      | 30813374  | 240 |
| chr3  | 121604314     | 121604553 | 240 |
| chr3  | 24633737      | 24633976  | 240 |
| chr29 | 49658722      | 49658961  | 240 |
| chr29 | 47337114      | 47337353  | 240 |
| chr29 | 33661668      | 33661907  | 240 |
| chr29 | 33158286      | 33158525  | 240 |
| chr28 | 33550299      | 33550538  | 240 |
| chr27 | 27742141      | 27742380  | 240 |
| chr26 | 48318070      | 48318309  | 240 |
| chr26 | 22233406      | 22233645  | 240 |
| chr23 | 53024661      | 53024900  | 240 |
| chr23 | 52940437      | 52940676  | 240 |

|       |           |           |     |
|-------|-----------|-----------|-----|
| chr22 | 48771512  | 48771751  | 240 |
| chr21 | 65575079  | 65575318  | 240 |
| chr21 | 24974024  | 24974263  | 240 |
| chr21 | 20711694  | 20711933  | 240 |
| chr21 | 10000282  | 10000521  | 240 |
| chr20 | 33364765  | 33365004  | 240 |
| chr2  | 135160489 | 135160728 | 240 |
| chr2  | 75851924  | 75852163  | 240 |
| chr2  | 73267661  | 73267900  | 240 |
| chr2  | 41328723  | 41328962  | 240 |
| chr2  | 26580184  | 26580423  | 240 |
| chr19 | 47843726  | 47843965  | 240 |
| chr19 | 40957284  | 40957523  | 240 |
| chr18 | 63029546  | 63029785  | 240 |
| chr18 | 56530042  | 56530281  | 240 |
| chr18 | 38083917  | 38084156  | 240 |
| chr17 | 75049546  | 75049785  | 240 |
| chr17 | 72137431  | 72137670  | 240 |
| chr17 | 67957000  | 67957239  | 240 |
| chr17 | 64070467  | 64070706  | 240 |
| chr17 | 63379841  | 63380080  | 240 |
| chr17 | 60722441  | 60722680  | 240 |
| chr17 | 12564598  | 12564837  | 240 |
| chr16 | 60028499  | 60028738  | 240 |
| chr15 | 25462882  | 25463121  | 240 |
| chr14 | 1851117   | 1851356   | 240 |
| chr13 | 77402109  | 77402348  | 240 |
| chr13 | 63166507  | 63166746  | 240 |
| chr13 | 58665928  | 58666167  | 240 |
| chr13 | 36761339  | 36761578  | 240 |
| chr12 | 82308668  | 82308907  | 240 |
| chr12 | 74246246  | 74246485  | 240 |
| chr12 | 24612093  | 24612332  | 240 |
| chr12 | 12037080  | 12037319  | 240 |
| chr10 | 52318153  | 52318392  | 240 |
| chr10 | 24666802  | 24667041  | 240 |
| chr1  | 10079514  | 10079753  | 240 |
| chrX  | 78390931  | 78391169  | 239 |
| chrX  | 65472997  | 65473235  | 239 |
| chrX  | 65104500  | 65104738  | 239 |
| chrX  | 55610830  | 55611068  | 239 |
| chrX  | 55268981  | 55269219  | 239 |
| chrX  | 54390986  | 54391224  | 239 |
| chrX  | 37621875  | 37622113  | 239 |
| chrX  | 30289960  | 30290198  | 239 |
| chrX  | 20208619  | 20208857  | 239 |
| chrX  | 19126492  | 19126730  | 239 |
| chrX  | 15506603  | 15506841  | 239 |
| chrX  | 10119190  | 10119428  | 239 |
| chrX  | 8103039   | 8103277   | 239 |

|       |           |           |     |
|-------|-----------|-----------|-----|
| chr9  | 12350632  | 12350870  | 239 |
| chr8  | 58219847  | 58220085  | 239 |
| chr6  | 111002790 | 111003028 | 239 |
| chr5  | 120460875 | 120461113 | 239 |
| chr5  | 28839425  | 28839663  | 239 |
| chr5  | 2460511   | 2460749   | 239 |
| chr3  | 122334958 | 122335196 | 239 |
| chr3  | 8643387   | 8643625   | 239 |
| chr29 | 38788692  | 38788930  | 239 |
| chr29 | 33067715  | 33067953  | 239 |
| chr29 | 30034686  | 30034924  | 239 |
| chr29 | 5697754   | 5697992   | 239 |
| chr28 | 33767614  | 33767852  | 239 |
| chr26 | 34959846  | 34960084  | 239 |
| chr25 | 40204554  | 40204792  | 239 |
| chr23 | 14450690  | 14450928  | 239 |
| chr23 | 9731669   | 9731907   | 239 |
| chr21 | 6517370   | 6517608   | 239 |
| chr20 | 75666734  | 75666972  | 239 |
| chr2  | 130465729 | 130465967 | 239 |
| chr2  | 22169114  | 22169352  | 239 |
| chr19 | 63637669  | 63637907  | 239 |
| chr19 | 59246872  | 59247110  | 239 |
| chr19 | 55572809  | 55573047  | 239 |
| chr19 | 42733232  | 42733470  | 239 |
| chr19 | 30134811  | 30135049  | 239 |
| chr19 | 15850363  | 15850601  | 239 |
| chr18 | 54819111  | 54819349  | 239 |
| chr18 | 11149216  | 11149454  | 239 |
| chr17 | 72336027  | 72336265  | 239 |
| chr17 | 67191071  | 67191309  | 239 |
| chr17 | 63956798  | 63957036  | 239 |
| chr17 | 6481110   | 6481348   | 239 |
| chr16 | 47323635  | 47323873  | 239 |
| chr16 | 46660187  | 46660425  | 239 |
| chr15 | 35705466  | 35705704  | 239 |
| chr13 | 60402559  | 60402797  | 239 |
| chr13 | 10612789  | 10613027  | 239 |
| chr11 | 91951855  | 91952093  | 239 |
| chr11 | 44941496  | 44941734  | 239 |
| chr10 | 2770155   | 2770393   | 239 |
| chr1  | 126809154 | 126809392 | 239 |
| chr1  | 111786064 | 111786302 | 239 |
| chr1  | 82242811  | 82243049  | 239 |
| chrX  | 73551516  | 73551753  | 238 |
| chrX  | 65133301  | 65133538  | 238 |
| chrX  | 64650107  | 64650344  | 238 |
| chrX  | 59307034  | 59307271  | 238 |
| chrX  | 53515540  | 53515777  | 238 |
| chrX  | 37726552  | 37726789  | 238 |

|       |           |           |     |
|-------|-----------|-----------|-----|
| chrX  | 30643160  | 30643397  | 238 |
| chrX  | 19711370  | 19711607  | 238 |
| chrX  | 18240880  | 18241117  | 238 |
| chrX  | 10229962  | 10230199  | 238 |
| chrX  | 8650681   | 8650918   | 238 |
| chr9  | 52407464  | 52407701  | 238 |
| chr8  | 102284004 | 102284241 | 238 |
| chr8  | 77717578  | 77717815  | 238 |
| chr8  | 63686125  | 63686362  | 238 |
| chr8  | 23626583  | 23626820  | 238 |
| chr6  | 122132080 | 122132317 | 238 |
| chr5  | 120139180 | 120139417 | 238 |
| chr4  | 118601469 | 118601706 | 238 |
| chr4  | 72725721  | 72725958  | 238 |
| chr4  | 72713218  | 72713455  | 238 |
| chr4  | 63965015  | 63965252  | 238 |
| chr3  | 121682555 | 121682792 | 238 |
| chr3  | 120351487 | 120351724 | 238 |
| chr3  | 98114365  | 98114602  | 238 |
| chr29 | 37634305  | 37634542  | 238 |
| chr28 | 33989711  | 33989948  | 238 |
| chr27 | 35442795  | 35443032  | 238 |
| chr26 | 51493599  | 51493836  | 238 |
| chr24 | 27153435  | 27153672  | 238 |
| chr23 | 8193460   | 8193697   | 238 |
| chr22 | 60382979  | 60383216  | 238 |
| chr22 | 59413148  | 59413385  | 238 |
| chr22 | 56099955  | 56100192  | 238 |
| chr22 | 51058281  | 51058518  | 238 |
| chr22 | 48314684  | 48314921  | 238 |
| chr21 | 25295862  | 25296099  | 238 |
| chr20 | 18955274  | 18955511  | 238 |
| chr2  | 126702444 | 126702681 | 238 |
| chr19 | 55510738  | 55510975  | 238 |
| chr16 | 45197003  | 45197240  | 238 |
| chr13 | 75151504  | 75151741  | 238 |
| chr13 | 66846403  | 66846640  | 238 |
| chr13 | 41842664  | 41842901  | 238 |
| chr13 | 37490183  | 37490420  | 238 |
| chr12 | 35331870  | 35332107  | 238 |
| chr11 | 70876494  | 70876731  | 238 |
| chr10 | 88318451  | 88318688  | 238 |
| chr10 | 67510036  | 67510273  | 238 |
| chr10 | 19572877  | 19573114  | 238 |
| chr10 | 17381266  | 17381503  | 238 |
| chr1  | 156991992 | 156992229 | 238 |
| chr1  | 133459546 | 133459783 | 238 |
| chrX  | 80196607  | 80196843  | 237 |
| chrX  | 74501781  | 74502017  | 237 |
| chrX  | 70441559  | 70441795  | 237 |



|       |               |           |     |
|-------|---------------|-----------|-----|
| chrX  | 65896770      | 65897006  | 237 |
| chrX  | 56632078      | 56632314  | 237 |
| chrX  | 56267094      | 56267330  | 237 |
| chrX  | 55654145      | 55654381  | 237 |
| chrX  | 54099346      | 54099582  | 237 |
| chrX  | 49335133      | 49335369  | 237 |
| chrX  | 38860037      | 38860273  | 237 |
| chrX  | 31476984      | 31477220  | 237 |
| chrX  | 30700000      | 30700236  | 237 |
| chrX  | 13340834      | 13341070  | 237 |
| chrX  | 7829815       | 7830051   | 237 |
| chr9  | 100052545     | 100052781 | 237 |
| chr9  | 99937900      | 99938136  | 237 |
| chr9  | 36864246      | 36864482  | 237 |
| chr8  | 73253175      | 73253411  | 237 |
| chr8  | 61040045      | 61040281  | 237 |
| chr8  | 24691318      | 24691554  | 237 |
| chr7  | 94384966      | 94385202  | 237 |
| chr7  | 91307080      | 91307316  | 237 |
| chr7  | 65216823      | 65217059  | 237 |
| chr7  | 46529078      | 46529314  | 237 |
| chr7  | 16321441      | 16321677  | 237 |
| chr7  | 12720882      | 12721118  | 237 |
| chr5  | 119940174     | 119940410 | 237 |
| chr5  | 118166076     | 118166312 | 237 |
| chr5  | 113323204     | 113323440 | 237 |
| chr5  | 111993592     | 111993828 | 237 |
| chr5  | 110942982     | 110943218 | 237 |
| chr5  | 76598025      | 76598261  | 237 |
| chr5  | 28885035      | 28885271  | 237 |
| chr4  | 121074362     | 121074598 | 237 |
| chr4  | 118007966     | 118008202 | 237 |
| chr4  | 82131879      | 82132115  | 237 |
| chr4  | 78726136      | 78726372  | 237 |
| chr3  | 26163714      | 26163950  | 237 |
| chr29 | 48877385      | 48877621  | 237 |
| chr29 | 41424951      | 41425187  | 237 |
| chr29 | 36694948      | 36695184  | 237 |
| chr29 | 35377200      | 35377436  | 237 |
| chr29 | 26302710      | 26302946  | 237 |
| chr29 | 7357456       | 7357692   | 237 |
| chr29 | 2513339       | 2513575   | 237 |
| chr27 | 37071484      | 37071720  | 237 |
| chr27 | 716150 716386 |           | 237 |
| chr26 | 42182232      | 42182468  | 237 |
| chr26 | 34891187      | 34891423  | 237 |
| chr22 | 59121527      | 59121763  | 237 |
| chr22 | 51095353      | 51095589  | 237 |
| chr22 | 38678876      | 38679112  | 237 |
| chr21 | 31098085      | 31098321  | 237 |

|       |           |           |     |
|-------|-----------|-----------|-----|
| chr21 | 13952329  | 13952565  | 237 |
| chr20 | 8668495   | 8668731   | 237 |
| chr20 | 5281319   | 5281555   | 237 |
| chr2  | 139855109 | 139855345 | 237 |
| chr2  | 137380504 | 137380740 | 237 |
| chr2  | 136398815 | 136399051 | 237 |
| chr2  | 125107267 | 125107503 | 237 |
| chr2  | 21136706  | 21136942  | 237 |
| chr19 | 59258454  | 59258690  | 237 |
| chr19 | 37889254  | 37889490  | 237 |
| chr19 | 22447878  | 22448114  | 237 |
| chr19 | 7762455   | 7762691   | 237 |
| chr18 | 51155242  | 51155478  | 237 |
| chr18 | 39941900  | 39942136  | 237 |
| chr18 | 33991261  | 33991497  | 237 |
| chr18 | 25047282  | 25047518  | 237 |
| chr17 | 69206713  | 69206949  | 237 |
| chr16 | 46638011  | 46638247  | 237 |
| chr15 | 61074613  | 61074849  | 237 |
| chr15 | 52263991  | 52264227  | 237 |
| chr15 | 39995663  | 39995899  | 237 |
| chr14 | 43355854  | 43356090  | 237 |
| chr14 | 23290278  | 23290514  | 237 |
| chr13 | 79695285  | 79695521  | 237 |
| chr13 | 71417804  | 71418040  | 237 |
| chr13 | 54848056  | 54848292  | 237 |
| chr13 | 6282043   | 6282279   | 237 |
| chr12 | 9474377   | 9474613   | 237 |
| chr10 | 81682992  | 81683228  | 237 |
| chr10 | 75486464  | 75486700  | 237 |
| chr10 | 70407266  | 70407502  | 237 |
| chr10 | 16132495  | 16132731  | 237 |
| chr10 | 5306870   | 5307106   | 237 |
| chr1  | 19839677  | 19839913  | 237 |
| chrX  | 77038197  | 77038432  | 236 |
| chrX  | 74457302  | 74457537  | 236 |
| chrX  | 72822482  | 72822717  | 236 |
| chrX  | 63932205  | 63932440  | 236 |
| chrX  | 61784241  | 61784476  | 236 |
| chrX  | 55166158  | 55166393  | 236 |
| chrX  | 41088709  | 41088944  | 236 |
| chrX  | 36445755  | 36445990  | 236 |
| chrX  | 36044316  | 36044551  | 236 |
| chrX  | 32948812  | 32949047  | 236 |
| chrX  | 22095699  | 22095934  | 236 |
| chrX  | 20129197  | 20129432  | 236 |
| chrX  | 10103186  | 10103421  | 236 |
| chrX  | 9472924   | 9473159   | 236 |
| chrX  | 9176201   | 9176436   | 236 |
| chrX  | 6462165   | 6462400   | 236 |

|       |           |           |     |
|-------|-----------|-----------|-----|
| chr9  | 90826130  | 90826365  | 236 |
| chr8  | 80170660  | 80170895  | 236 |
| chr8  | 27066345  | 27066580  | 236 |
| chr7  | 84680546  | 84680781  | 236 |
| chr7  | 71385939  | 71386174  | 236 |
| chr5  | 125021367 | 125021602 | 236 |
| chr5  | 121377629 | 121377864 | 236 |
| chr5  | 112146891 | 112147126 | 236 |
| chr5  | 89147842  | 89148077  | 236 |
| chr5  | 73952960  | 73953195  | 236 |
| chr5  | 28862793  | 28863028  | 236 |
| chr4  | 32757969  | 32758204  | 236 |
| chr3  | 115711584 | 115711819 | 236 |
| chr3  | 33504365  | 33504600  | 236 |
| chr3  | 32617088  | 32617323  | 236 |
| chr29 | 51947835  | 51948070  | 236 |
| chr29 | 36878040  | 36878275  | 236 |
| chr29 | 33904788  | 33905023  | 236 |
| chr29 | 25940470  | 25940705  | 236 |
| chr28 | 43031163  | 43031398  | 236 |
| chr27 | 47081115  | 47081350  | 236 |
| chr26 | 23181267  | 23181502  | 236 |
| chr26 | 17899084  | 17899319  | 236 |
| chr23 | 34946782  | 34947017  | 236 |
| chr22 | 50254446  | 50254681  | 236 |
| chr21 | 20723825  | 20724060  | 236 |
| chr21 | 18545073  | 18545308  | 236 |
| chr21 | 16674189  | 16674424  | 236 |
| chr20 | 25571447  | 25571682  | 236 |
| chr2  | 134732472 | 134732707 | 236 |
| chr2  | 64216958  | 64217193  | 236 |
| chr19 | 59061800  | 59062035  | 236 |
| chr19 | 54472851  | 54473086  | 236 |
| chr19 | 46815438  | 46815673  | 236 |
| chr19 | 38328150  | 38328385  | 236 |
| chr18 | 40113400  | 40113635  | 236 |
| chr18 | 22740188  | 22740423  | 236 |
| chr18 | 22027382  | 22027617  | 236 |
| chr17 | 57771709  | 57771944  | 236 |
| chr16 | 69001728  | 69001963  | 236 |
| chr15 | 52283060  | 52283295  | 236 |
| chr15 | 20041629  | 20041864  | 236 |
| chr14 | 65072264  | 65072499  | 236 |
| chr13 | 76280046  | 76280281  | 236 |
| chr13 | 59810915  | 59811150  | 236 |
| chr13 | 27719706  | 27719941  | 236 |
| chr12 | 82693975  | 82694210  | 236 |
| chr11 | 14391271  | 14391506  | 236 |
| chr11 | 14213213  | 14213448  | 236 |
| chr10 | 93065547  | 93065782  | 236 |

|       |           |           |     |
|-------|-----------|-----------|-----|
| chr10 | 90320801  | 90321036  | 236 |
| chr10 | 18096896  | 18097131  | 236 |
| chr1  | 153195544 | 153195779 | 236 |
| chr1  | 50448540  | 50448775  | 236 |
| chr1  | 1613122   | 1613357   | 236 |
| chrX  | 78531063  | 78531297  | 235 |
| chrX  | 55810996  | 55811230  | 235 |
| chrX  | 50180174  | 50180408  | 235 |
| chrX  | 49361812  | 49362046  | 235 |
| chrX  | 46633524  | 46633758  | 235 |
| chrX  | 38604197  | 38604431  | 235 |
| chrX  | 37987079  | 37987313  | 235 |
| chrX  | 31556783  | 31557017  | 235 |
| chrX  | 20394158  | 20394392  | 235 |
| chrX  | 16952977  | 16953211  | 235 |
| chrX  | 10708988  | 10709222  | 235 |
| chrX  | 10109008  | 10109242  | 235 |
| chrX  | 5911789   | 5912023   | 235 |
| chr8  | 63692475  | 63692709  | 235 |
| chr7  | 96284143  | 96284377  | 235 |
| chr5  | 117507555 | 117507789 | 235 |
| chr5  | 111840833 | 111841067 | 235 |
| chr4  | 47038708  | 47038942  | 235 |
| chr4  | 14691776  | 14692010  | 235 |
| chr3  | 122130792 | 122131026 | 235 |
| chr3  | 110129158 | 110129392 | 235 |
| chr29 | 38830074  | 38830308  | 235 |
| chr29 | 37919005  | 37919239  | 235 |
| chr28 | 26799212  | 26799446  | 235 |
| chr28 | 26161467  | 26161701  | 235 |
| chr27 | 34340508  | 34340742  | 235 |
| chr25 | 40215467  | 40215701  | 235 |
| chr24 | 33932179  | 33932413  | 235 |
| chr23 | 52737169  | 52737403  | 235 |
| chr23 | 49920028  | 49920262  | 235 |
| chr23 | 15157676  | 15157910  | 235 |
| chr22 | 58297521  | 58297755  | 235 |
| chr22 | 12202889  | 12203123  | 235 |
| chr21 | 32869656  | 32869890  | 235 |
| chr2  | 125917102 | 125917336 | 235 |
| chr2  | 76374555  | 76374789  | 235 |
| chr19 | 59434051  | 59434285  | 235 |
| chr19 | 45265508  | 45265742  | 235 |
| chr19 | 29705644  | 29705878  | 235 |
| chr19 | 12311277  | 12311511  | 235 |
| chr18 | 55663238  | 55663472  | 235 |
| chr18 | 19122177  | 19122411  | 235 |
| chr18 | 3539250   | 3539484   | 235 |
| chr17 | 68560501  | 68560735  | 235 |
| chr17 | 64304771  | 64305005  | 235 |

|       |           |           |     |
|-------|-----------|-----------|-----|
| chr17 | 60707710  | 60707944  | 235 |
| chr16 | 47560496  | 47560730  | 235 |
| chr15 | 80950318  | 80950552  | 235 |
| chr15 | 73701192  | 73701426  | 235 |
| chr15 | 64502557  | 64502791  | 235 |
| chr15 | 29461918  | 29462152  | 235 |
| chr15 | 26909978  | 26910212  | 235 |
| chr15 | 23087863  | 23088097  | 235 |
| chr13 | 60099530  | 60099764  | 235 |
| chr13 | 57492530  | 57492764  | 235 |
| chr13 | 28535411  | 28535645  | 235 |
| chr12 | 82030060  | 82030294  | 235 |
| chr12 | 28932299  | 28932533  | 235 |
| chr12 | 17202567  | 17202801  | 235 |
| chr12 | 13309451  | 13309685  | 235 |
| chr11 | 98456090  | 98456324  | 235 |
| chr11 | 97736365  | 97736599  | 235 |
| chr11 | 14824059  | 14824293  | 235 |
| chr10 | 16823403  | 16823637  | 235 |
| chr1  | 161072374 | 161072608 | 235 |
| chr1  | 128585460 | 128585694 | 235 |
| chr1  | 68098811  | 68099045  | 235 |
| chrX  | 81264710  | 81264943  | 234 |
| chrX  | 80788345  | 80788578  | 234 |
| chrX  | 75673917  | 75674150  | 234 |
| chrX  | 69957004  | 69957237  | 234 |
| chrX  | 68564118  | 68564351  | 234 |
| chrX  | 60551096  | 60551329  | 234 |
| chrX  | 29896502  | 29896735  | 234 |
| chrX  | 19389665  | 19389898  | 234 |
| chrX  | 7047920   | 7048153   | 234 |
| chrX  | 6388887   | 6389120   | 234 |
| chrX  | 6068865   | 6069098   | 234 |
| chr8  | 29199227  | 29199460  | 234 |
| chr7  | 22885695  | 22885928  | 234 |
| chr6  | 70503982  | 70504215  | 234 |
| chr5  | 116950612 | 116950845 | 234 |
| chr5  | 114412641 | 114412874 | 234 |
| chr5  | 113187208 | 113187441 | 234 |
| chr5  | 111825460 | 111825693 | 234 |
| chr4  | 123255628 | 123255861 | 234 |
| chr4  | 107347958 | 107348191 | 234 |
| chr4  | 106967252 | 106967485 | 234 |
| chr4  | 66656877  | 66657110  | 234 |
| chr3  | 89756909  | 89757142  | 234 |
| chr29 | 31833100  | 31833333  | 234 |
| chr28 | 34511806  | 34512039  | 234 |
| chr28 | 2798002   | 2798235   | 234 |
| chr27 | 28106982  | 28107215  | 234 |
| chr26 | 48505665  | 48505898  | 234 |

|       |           |           |     |
|-------|-----------|-----------|-----|
| chr26 | 37674219  | 37674452  | 234 |
| chr24 | 51668161  | 51668394  | 234 |
| chr24 | 1348882   | 1349115   | 234 |
| chr23 | 25230933  | 25231166  | 234 |
| chr23 | 19843688  | 19843921  | 234 |
| chr23 | 15284344  | 15284577  | 234 |
| chr23 | 3308914   | 3309147   | 234 |
| chr22 | 60067907  | 60068140  | 234 |
| chr22 | 16420137  | 16420370  | 234 |
| chr21 | 57511715  | 57511948  | 234 |
| chr20 | 1068526   | 1068759   | 234 |
| chr2  | 108799987 | 108800220 | 234 |
| chr2  | 20911843  | 20912076  | 234 |
| chr19 | 65238126  | 65238359  | 234 |
| chr19 | 44366856  | 44367089  | 234 |
| chr19 | 4165055   | 4165288   | 234 |
| chr18 | 48726529  | 48726762  | 234 |
| chr18 | 47213837  | 47214070  | 234 |
| chr17 | 72687579  | 72687812  | 234 |
| chr17 | 56045875  | 56046108  | 234 |
| chr16 | 68442428  | 68442661  | 234 |
| chr16 | 61860698  | 61860931  | 234 |
| chr16 | 27457209  | 27457442  | 234 |
| chr15 | 29438295  | 29438528  | 234 |
| chr13 | 68676847  | 68677080  | 234 |
| chr13 | 66961106  | 66961339  | 234 |
| chr13 | 41203483  | 41203716  | 234 |
| chr13 | 40989426  | 40989659  | 234 |
| chr13 | 38421771  | 38422004  | 234 |
| chr12 | 32538775  | 32539008  | 234 |
| chr12 | 30819123  | 30819356  | 234 |
| chr10 | 84020389  | 84020622  | 234 |
| chr10 | 71233973  | 71234206  | 234 |
| chr10 | 59900584  | 59900817  | 234 |
| chr1  | 149776515 | 149776748 | 234 |
| chr1  | 144489573 | 144489806 | 234 |
| chr1  | 82819400  | 82819633  | 234 |
| chr1  | 74613806  | 74614039  | 234 |
| chr1  | 68445107  | 68445340  | 234 |
| chrX  | 78366389  | 78366621  | 233 |
| chrX  | 77174810  | 77175042  | 233 |
| chrX  | 72030990  | 72031222  | 233 |
| chrX  | 65941675  | 65941907  | 233 |
| chrX  | 63981079  | 63981311  | 233 |
| chrX  | 62840390  | 62840622  | 233 |
| chrX  | 55370598  | 55370830  | 233 |
| chrX  | 50004416  | 50004648  | 233 |
| chrX  | 32453245  | 32453477  | 233 |
| chrX  | 29581458  | 29581690  | 233 |
| chrX  | 24674858  | 24675090  | 233 |

|       |           |           |     |
|-------|-----------|-----------|-----|
| chrX  | 21301357  | 21301589  | 233 |
| chrX  | 15527988  | 15528220  | 233 |
| chrX  | 13188628  | 13188860  | 233 |
| chrX  | 11071352  | 11071584  | 233 |
| chrX  | 7906356   | 7906588   | 233 |
| chrX  | 4322717   | 4322949   | 233 |
| chr9  | 86847927  | 86848159  | 233 |
| chr9  | 52827931  | 52828163  | 233 |
| chr9  | 35975413  | 35975645  | 233 |
| chr8  | 93713914  | 93714146  | 233 |
| chr8  | 60415441  | 60415673  | 233 |
| chr7  | 69791123  | 69791355  | 233 |
| chr7  | 17354838  | 17355070  | 233 |
| chr7  | 4497579   | 4497811   | 233 |
| chr5  | 78862225  | 78862457  | 233 |
| chr5  | 31226109  | 31226341  | 233 |
| chr3  | 121816992 | 121817224 | 233 |
| chr3  | 121023934 | 121024166 | 233 |
| chr3  | 111421676 | 111421908 | 233 |
| chr3  | 98736974  | 98737206  | 233 |
| chr3  | 71919255  | 71919487  | 233 |
| chr3  | 70579396  | 70579628  | 233 |
| chr3  | 4322614   | 4322846   | 233 |
| chr29 | 48957045  | 48957277  | 233 |
| chr29 | 37508258  | 37508490  | 233 |
| chr29 | 30035977  | 30036209  | 233 |
| chr26 | 22361515  | 22361747  | 233 |
| chr25 | 42298307  | 42298539  | 233 |
| chr25 | 33549819  | 33550051  | 233 |
| chr25 | 26740190  | 26740422  | 233 |
| chr24 | 40780017  | 40780249  | 233 |
| chr24 | 39742120  | 39742352  | 233 |
| chr23 | 13663471  | 13663703  | 233 |
| chr22 | 59618756  | 59618988  | 233 |
| chr22 | 46406239  | 46406471  | 233 |
| chr22 | 43932532  | 43932764  | 233 |
| chr21 | 60708441  | 60708673  | 233 |
| chr21 | 33515279  | 33515511  | 233 |
| chr21 | 33043755  | 33043987  | 233 |
| chr20 | 25728142  | 25728374  | 233 |
| chr2  | 130472875 | 130473107 | 233 |
| chr2  | 128092549 | 128092781 | 233 |
| chr2  | 124833945 | 124834177 | 233 |
| chr2  | 115121512 | 115121744 | 233 |
| chr2  | 22086199  | 22086431  | 233 |
| chr19 | 61642196  | 61642428  | 233 |
| chr19 | 60925315  | 60925547  | 233 |
| chr19 | 55936153  | 55936385  | 233 |
| chr19 | 47476803  | 47477035  | 233 |
| chr19 | 39369335  | 39369567  | 233 |

|       |           |           |     |
|-------|-----------|-----------|-----|
| chr19 | 37862148  | 37862380  | 233 |
| chr18 | 52116993  | 52117225  | 233 |
| chr18 | 22687263  | 22687495  | 233 |
| chr18 | 22546624  | 22546856  | 233 |
| chr18 | 15571086  | 15571318  | 233 |
| chr18 | 12395902  | 12396134  | 233 |
| chr17 | 68760379  | 68760611  | 233 |
| chr17 | 63397930  | 63398162  | 233 |
| chr17 | 62289721  | 62289953  | 233 |
| chr16 | 29421732  | 29421964  | 233 |
| chr15 | 75884717  | 75884949  | 233 |
| chr15 | 63941563  | 63941795  | 233 |
| chr15 | 39917688  | 39917920  | 233 |
| chr15 | 35402796  | 35403028  | 233 |
| chr14 | 7795137   | 7795369   | 233 |
| chr13 | 71418232  | 71418464  | 233 |
| chr13 | 69730000  | 69730232  | 233 |
| chr13 | 63468039  | 63468271  | 233 |
| chr13 | 43725084  | 43725316  | 233 |
| chr12 | 32633756  | 32633988  | 233 |
| chr12 | 31981080  | 31981312  | 233 |
| chr12 | 31160206  | 31160438  | 233 |
| chr12 | 9184958   | 9185190   | 233 |
| chr11 | 92469631  | 92469863  | 233 |
| chr11 | 91415842  | 91416074  | 233 |
| chr11 | 77822516  | 77822748  | 233 |
| chr11 | 71093659  | 71093891  | 233 |
| chr10 | 56047107  | 56047339  | 233 |
| chr1  | 100059392 | 100059624 | 233 |
| chr1  | 79172150  | 79172382  | 233 |
| chrX  | 77230927  | 77231158  | 232 |
| chrX  | 77227263  | 77227494  | 232 |
| chrX  | 75882011  | 75882242  | 232 |
| chrX  | 71696212  | 71696443  | 232 |
| chrX  | 64934287  | 64934518  | 232 |
| chrX  | 61230590  | 61230821  | 232 |
| chrX  | 44872794  | 44873025  | 232 |
| chrX  | 36381807  | 36382038  | 232 |
| chrX  | 35681425  | 35681656  | 232 |
| chrX  | 20233696  | 20233927  | 232 |
| chrX  | 12993496  | 12993727  | 232 |
| chrX  | 12184246  | 12184477  | 232 |
| chrX  | 7217617   | 7217848   | 232 |
| chr9  | 77196807  | 77197038  | 232 |
| chr9  | 44925906  | 44926137  | 232 |
| chr8  | 65930395  | 65930626  | 232 |
| chr5  | 124368560 | 124368791 | 232 |
| chr5  | 123126668 | 123126899 | 232 |
| chr5  | 120510272 | 120510503 | 232 |
| chr5  | 31071762  | 31071993  | 232 |



|       |           |           |     |
|-------|-----------|-----------|-----|
| chr4  | 5122240   | 5122471   | 232 |
| chr3  | 116170748 | 116170979 | 232 |
| chr29 | 34962876  | 34963107  | 232 |
| chr27 | 35448566  | 35448797  | 232 |
| chr27 | 34733500  | 34733731  | 232 |
| chr24 | 59563349  | 59563580  | 232 |
| chr23 | 15101971  | 15102202  | 232 |
| chr23 | 8086397   | 8086628   | 232 |
| chr23 | 7710674   | 7710905   | 232 |
| chr21 | 30422990  | 30423221  | 232 |
| chr21 | 1849654   | 1849885   | 232 |
| chr2  | 111403012 | 111403243 | 232 |
| chr19 | 42950160  | 42950391  | 232 |
| chr19 | 26001472  | 26001703  | 232 |
| chr18 | 51521486  | 51521717  | 232 |
| chr18 | 47200693  | 47200924  | 232 |
| chr18 | 21921337  | 21921568  | 232 |
| chr18 | 10292825  | 10293056  | 232 |
| chr17 | 70129790  | 70130021  | 232 |
| chr17 | 47339546  | 47339777  | 232 |
| chr16 | 48001552  | 48001783  | 232 |
| chr15 | 75672672  | 75672903  | 232 |
| chr15 | 38322422  | 38322653  | 232 |
| chr14 | 42432947  | 42433178  | 232 |
| chr14 | 9334264   | 9334495   | 232 |
| chr14 | 7609093   | 7609324   | 232 |
| chr13 | 75677482  | 75677713  | 232 |
| chr13 | 63641392  | 63641623  | 232 |
| chr13 | 40522839  | 40523070  | 232 |
| chr13 | 27660370  | 27660601  | 232 |
| chr11 | 106351495 | 106351726 | 232 |
| chr11 | 101428567 | 101428798 | 232 |
| chr11 | 70711330  | 70711561  | 232 |
| chr10 | 81657062  | 81657293  | 232 |
| chr10 | 71567027  | 71567258  | 232 |
| chr10 | 22037177  | 22037408  | 232 |
| chr10 | 8319846   | 8320077   | 232 |
| chr10 | 7963838   | 7964069   | 232 |
| chr10 | 7640697   | 7640928   | 232 |
| chr1  | 141364290 | 141364521 | 232 |
| chr1  | 85041169  | 85041400  | 232 |
| chrX  | 65456189  | 65456419  | 231 |
| chrX  | 63945254  | 63945484  | 231 |
| chrX  | 44906150  | 44906380  | 231 |
| chrX  | 39013280  | 39013510  | 231 |
| chrX  | 37368522  | 37368752  | 231 |
| chrX  | 34881149  | 34881379  | 231 |
| chrX  | 32904693  | 32904923  | 231 |
| chrX  | 10874411  | 10874641  | 231 |
| chrX  | 9724697   | 9724927   | 231 |

|       |           |           |     |
|-------|-----------|-----------|-----|
| chrX  | 7554863   | 7555093   | 231 |
| chr9  | 12654236  | 12654466  | 231 |
| chr7  | 15761920  | 15762150  | 231 |
| chr7  | 12607984  | 12608214  | 231 |
| chr7  | 1522841   | 1523071   | 231 |
| chr5  | 125447268 | 125447498 | 231 |
| chr5  | 113185601 | 113185831 | 231 |
| chr4  | 13319755  | 13319985  | 231 |
| chr3  | 121540035 | 121540265 | 231 |
| chr3  | 117303852 | 117304082 | 231 |
| chr3  | 106222776 | 106223006 | 231 |
| chr3  | 27414456  | 27414686  | 231 |
| chr29 | 45588433  | 45588663  | 231 |
| chr29 | 33697079  | 33697309  | 231 |
| chr26 | 31467538  | 31467768  | 231 |
| chr23 | 19779674  | 19779904  | 231 |
| chr23 | 15157010  | 15157240  | 231 |
| chr22 | 55815200  | 55815430  | 231 |
| chr22 | 16161094  | 16161324  | 231 |
| chr21 | 63065786  | 63066016  | 231 |
| chr20 | 33698864  | 33699094  | 231 |
| chr2  | 132393210 | 132393440 | 231 |
| chr2  | 129271032 | 129271262 | 231 |
| chr2  | 74013817  | 74014047  | 231 |
| chr18 | 57563016  | 57563246  | 231 |
| chr18 | 57036395  | 57036625  | 231 |
| chr18 | 22026587  | 22026817  | 231 |
| chr17 | 57811422  | 57811652  | 231 |
| chr17 | 30254994  | 30255224  | 231 |
| chr16 | 73766073  | 73766303  | 231 |
| chr16 | 72176301  | 72176531  | 231 |
| chr16 | 50278693  | 50278923  | 231 |
| chr16 | 44466495  | 44466725  | 231 |
| chr15 | 29379183  | 29379413  | 231 |
| chr15 | 23202168  | 23202398  | 231 |
| chr15 | 19800013  | 19800243  | 231 |
| chr14 | 67949091  | 67949321  | 231 |
| chr14 | 36741663  | 36741893  | 231 |
| chr13 | 72921549  | 72921779  | 231 |
| chr13 | 60453793  | 60454023  | 231 |
| chr12 | 82565913  | 82566143  | 231 |
| chr12 | 31164952  | 31165182  | 231 |
| chr11 | 89496469  | 89496699  | 231 |
| chr11 | 47546011  | 47546241  | 231 |
| chr11 | 28654652  | 28654882  | 231 |
| chr10 | 70004352  | 70004582  | 231 |
| chr1  | 152345262 | 152345492 | 231 |
| chr1  | 145819972 | 145820202 | 231 |
| chr1  | 137869138 | 137869368 | 231 |
| chr1  | 74702817  | 74703047  | 231 |

|       |           |           |     |
|-------|-----------|-----------|-----|
| chrX  | 82571538  | 82571767  | 230 |
| chrX  | 79601051  | 79601280  | 230 |
| chrX  | 71287950  | 71288179  | 230 |
| chrX  | 68231343  | 68231572  | 230 |
| chrX  | 64840039  | 64840268  | 230 |
| chrX  | 64005497  | 64005726  | 230 |
| chrX  | 63278485  | 63278714  | 230 |
| chrX  | 59418018  | 59418247  | 230 |
| chrX  | 56255955  | 56256184  | 230 |
| chrX  | 55162807  | 55163036  | 230 |
| chrX  | 50510706  | 50510935  | 230 |
| chrX  | 48490637  | 48490866  | 230 |
| chrX  | 47329990  | 47330219  | 230 |
| chrX  | 31283275  | 31283504  | 230 |
| chrX  | 20234263  | 20234492  | 230 |
| chrX  | 19493752  | 19493981  | 230 |
| chrX  | 12252263  | 12252492  | 230 |
| chrX  | 11031878  | 11032107  | 230 |
| chrX  | 5829026   | 5829255   | 230 |
| chr9  | 105465724 | 105465953 | 230 |
| chr9  | 90421942  | 90422171  | 230 |
| chr9  | 24979635  | 24979864  | 230 |
| chr8  | 108790938 | 108791167 | 230 |
| chr8  | 70685229  | 70685458  | 230 |
| chr8  | 63805758  | 63805987  | 230 |
| chr7  | 70720706  | 70720935  | 230 |
| chr7  | 65095584  | 65095813  | 230 |
| chr7  | 16790165  | 16790394  | 230 |
| chr7  | 14659302  | 14659531  | 230 |
| chr6  | 102306875 | 102307104 | 230 |
| chr6  | 59146728  | 59146957  | 230 |
| chr5  | 97728168  | 97728397  | 230 |
| chr4  | 117657104 | 117657333 | 230 |
| chr4  | 101640647 | 101640876 | 230 |
| chr3  | 123651898 | 123652127 | 230 |
| chr3  | 99477319  | 99477548  | 230 |
| chr3  | 83764498  | 83764727  | 230 |
| chr3  | 15968317  | 15968546  | 230 |
| chr3  | 4131064   | 4131293   | 230 |
| chr27 | 27942078  | 27942307  | 230 |
| chr26 | 31245668  | 31245897  | 230 |
| chr23 | 23766354  | 23766583  | 230 |
| chr23 | 19362734  | 19362963  | 230 |
| chr22 | 29690021  | 29690250  | 230 |
| chr21 | 60711862  | 60712091  | 230 |
| chr21 | 25196953  | 25197182  | 230 |
| chr20 | 8815383   | 8815612   | 230 |
| chr2  | 76520828  | 76521057  | 230 |
| chr19 | 59432543  | 59432772  | 230 |
| chr19 | 42125935  | 42126164  | 230 |

|       |           |           |     |
|-------|-----------|-----------|-----|
| chr18 | 65891695  | 65891924  | 230 |
| chr18 | 51191731  | 51191960  | 230 |
| chr18 | 25325887  | 25326116  | 230 |
| chr18 | 22031953  | 22032182  | 230 |
| chr18 | 18508203  | 18508432  | 230 |
| chr18 | 12045188  | 12045417  | 230 |
| chr17 | 73439453  | 73439682  | 230 |
| chr17 | 70712271  | 70712500  | 230 |
| chr17 | 62947982  | 62948211  | 230 |
| chr17 | 4863342   | 4863571   | 230 |
| chr14 | 6859175   | 6859404   | 230 |
| chr13 | 68514800  | 68515029  | 230 |
| chr13 | 63477244  | 63477473  | 230 |
| chr13 | 35402274  | 35402503  | 230 |
| chr13 | 11783514  | 11783743  | 230 |
| chr11 | 84855286  | 84855515  | 230 |
| chr11 | 75007105  | 75007334  | 230 |
| chr10 | 93011113  | 93011342  | 230 |
| chr1  | 128120650 | 128120879 | 230 |
| chr1  | 74920621  | 74920850  | 230 |
| chrX  | 80178272  | 80178500  | 229 |
| chrX  | 75528401  | 75528629  | 229 |
| chrX  | 75406449  | 75406677  | 229 |
| chrX  | 73399925  | 73400153  | 229 |
| chrX  | 65629797  | 65630025  | 229 |
| chrX  | 59343184  | 59343412  | 229 |
| chrX  | 55126399  | 55126627  | 229 |
| chrX  | 46677371  | 46677599  | 229 |
| chrX  | 41007957  | 41008185  | 229 |
| chrX  | 29630494  | 29630722  | 229 |
| chrX  | 21199511  | 21199739  | 229 |
| chrX  | 19157171  | 19157399  | 229 |
| chrX  | 5756429   | 5756657   | 229 |
| chr9  | 99996673  | 99996901  | 229 |
| chr9  | 74200371  | 74200599  | 229 |
| chr8  | 60123986  | 60124214  | 229 |
| chr8  | 475349    | 475577    | 229 |
| chr6  | 109586858 | 109587086 | 229 |
| chr6  | 5607533   | 5607761   | 229 |
| chr5  | 114052435 | 114052663 | 229 |
| chr5  | 32937346  | 32937574  | 229 |
| chr5  | 28832727  | 28832955  | 229 |
| chr3  | 118164133 | 118164361 | 229 |
| chr3  | 36274814  | 36275042  | 229 |
| chr29 | 36932256  | 36932484  | 229 |
| chr29 | 35300966  | 35301194  | 229 |
| chr29 | 1793530   | 1793758   | 229 |
| chr28 | 34176187  | 34176415  | 229 |
| chr26 | 41706694  | 41706922  | 229 |
| chr24 | 60994974  | 60995202  | 229 |

|       |               |           |     |
|-------|---------------|-----------|-----|
| chr23 | 27890993      | 27891221  | 229 |
| chr23 | 15296170      | 15296398  | 229 |
| chr22 | 56538836      | 56539064  | 229 |
| chr22 | 50853311      | 50853539  | 229 |
| chr22 | 48260337      | 48260565  | 229 |
| chr22 | 40797303      | 40797531  | 229 |
| chr22 | 32765904      | 32766132  | 229 |
| chr22 | 22138253      | 22138481  | 229 |
| chr21 | 62216656      | 62216884  | 229 |
| chr21 | 59653440      | 59653668  | 229 |
| chr2  | 133865980     | 133866208 | 229 |
| chr2  | 94792065      | 94792293  | 229 |
| chr19 | 46693595      | 46693823  | 229 |
| chr19 | 40463090      | 40463318  | 229 |
| chr19 | 17132666      | 17132894  | 229 |
| chr17 | 73149965      | 73150193  | 229 |
| chr17 | 55874700      | 55874928  | 229 |
| chr15 | 44871369      | 44871597  | 229 |
| chr14 | 66258124      | 66258352  | 229 |
| chr14 | 13393483      | 13393711  | 229 |
| chr14 | 6944038       | 6944266   | 229 |
| chr14 | 1901958       | 1902186   | 229 |
| chr13 | 70346111      | 70346339  | 229 |
| chr13 | 65745605      | 65745833  | 229 |
| chr13 | 61256872      | 61257100  | 229 |
| chr13 | 56818768      | 56818996  | 229 |
| chr13 | 15970948      | 15971176  | 229 |
| chr12 | 31716402      | 31716630  | 229 |
| chr11 | 93761084      | 93761312  | 229 |
| chr11 | 48725320      | 48725548  | 229 |
| chr10 | 70286947      | 70287175  | 229 |
| chr1  | 155328335     | 155328563 | 229 |
| chr1  | 144389507     | 144389735 | 229 |
| chr1  | 113398908     | 113399136 | 229 |
| chr1  | 74921088      | 74921316  | 229 |
| chr1  | 4859616       | 4859844   | 229 |
| chr1  | 579235 579463 | 229       |     |
| chrX  | 80823239      | 80823466  | 228 |
| chrX  | 80707350      | 80707577  | 228 |
| chrX  | 77216888      | 77217115  | 228 |
| chrX  | 72380811      | 72381038  | 228 |
| chrX  | 63513845      | 63514072  | 228 |
| chrX  | 56445445      | 56445672  | 228 |
| chrX  | 50953497      | 50953724  | 228 |
| chrX  | 35898376      | 35898603  | 228 |
| chrX  | 31003039      | 31003266  | 228 |
| chrX  | 21812830      | 21813057  | 228 |
| chrX  | 9604308       | 9604535   | 228 |
| chrX  | 8988767       | 8988994   | 228 |
| chrX  | 7458410       | 7458637   | 228 |

|       |           |           |     |
|-------|-----------|-----------|-----|
| chrX  | 6732085   | 6732312   | 228 |
| chrX  | 2872477   | 2872704   | 228 |
| chr9  | 87166150  | 87166377  | 228 |
| chr8  | 65723917  | 65724144  | 228 |
| chr7  | 81033342  | 81033569  | 228 |
| chr7  | 50438043  | 50438270  | 228 |
| chr7  | 43251713  | 43251940  | 228 |
| chr6  | 107492395 | 107492622 | 228 |
| chr5  | 120411247 | 120411474 | 228 |
| chr5  | 48466057  | 48466284  | 228 |
| chr5  | 27954553  | 27954780  | 228 |
| chr4  | 116862712 | 116862939 | 228 |
| chr4  | 99772978  | 99773205  | 228 |
| chr4  | 45573470  | 45573697  | 228 |
| chr3  | 117198422 | 117198649 | 228 |
| chr3  | 116478410 | 116478637 | 228 |
| chr3  | 29604266  | 29604493  | 228 |
| chr29 | 27165849  | 27166076  | 228 |
| chr28 | 32598965  | 32599192  | 228 |
| chr28 | 23386197  | 23386424  | 228 |
| chr28 | 368149    | 368376    | 228 |
| chr26 | 43266767  | 43266994  | 228 |
| chr26 | 38898159  | 38898386  | 228 |
| chr24 | 60975084  | 60975311  | 228 |
| chr24 | 51518460  | 51518687  | 228 |
| chr24 | 43684668  | 43684895  | 228 |
| chr24 | 36650809  | 36651036  | 228 |
| chr24 | 20417087  | 20417314  | 228 |
| chr23 | 45833205  | 45833432  | 228 |
| chr23 | 43418402  | 43418629  | 228 |
| chr23 | 31152527  | 31152754  | 228 |
| chr23 | 11037528  | 11037755  | 228 |
| chr22 | 53376480  | 53376707  | 228 |
| chr22 | 12954787  | 12955014  | 228 |
| chr20 | 916075    | 916302    | 228 |
| chr20 | 663498    | 663725    | 228 |
| chr2  | 139059244 | 139059471 | 228 |
| chr19 | 55745653  | 55745880  | 228 |
| chr18 | 3091980   | 3092207   | 228 |
| chr17 | 64365828  | 64366055  | 228 |
| chr17 | 48578153  | 48578380  | 228 |
| chr17 | 48287614  | 48287841  | 228 |
| chr16 | 71963806  | 71964033  | 228 |
| chr16 | 50340798  | 50341025  | 228 |
| chr16 | 38880165  | 38880392  | 228 |
| chr15 | 43681669  | 43681896  | 228 |
| chr15 | 22801173  | 22801400  | 228 |
| chr14 | 5069801   | 5070028   | 228 |
| chr13 | 68922131  | 68922358  | 228 |
| chr13 | 62131822  | 62132049  | 228 |

|       |               |           |     |
|-------|---------------|-----------|-----|
| chr13 | 18591392      | 18591619  | 228 |
| chr12 | 82291855      | 82292082  | 228 |
| chr12 | 79962351      | 79962578  | 228 |
| chr11 | 103882756     | 103882983 | 228 |
| chr11 | 80342217      | 80342444  | 228 |
| chr11 | 66562179      | 66562406  | 228 |
| chr11 | 4303241       | 4303468   | 228 |
| chr10 | 17077297      | 17077524  | 228 |
| chr10 | 15008886      | 15009113  | 228 |
| chr1  | 87329384      | 87329611  | 228 |
| chr1  | 68595954      | 68596181  | 228 |
| chrX  | 76973932      | 76974158  | 227 |
| chrX  | 72976411      | 72976637  | 227 |
| chrX  | 53674944      | 53675170  | 227 |
| chrX  | 50169466      | 50169692  | 227 |
| chrX  | 36670565      | 36670791  | 227 |
| chrX  | 31148612      | 31148838  | 227 |
| chrX  | 21231633      | 21231859  | 227 |
| chrX  | 4264891       | 4265117   | 227 |
| chr8  | 109049073     | 109049299 | 227 |
| chr8  | 102285248     | 102285474 | 227 |
| chr8  | 87111604      | 87111830  | 227 |
| chr8  | 61089945      | 61090171  | 227 |
| chr8  | 7617893       | 7618119   | 227 |
| chr7  | 94356649      | 94356875  | 227 |
| chr6  | 91928073      | 91928299  | 227 |
| chr6  | 70887197      | 70887423  | 227 |
| chr5  | 125693038     | 125693264 | 227 |
| chr5  | 29715943      | 29716169  | 227 |
| chr5  | 27938582      | 27938808  | 227 |
| chr5  | 26436232      | 26436458  | 227 |
| chr4  | 104834436     | 104834662 | 227 |
| chr4  | 102396734     | 102396960 | 227 |
| chr4  | 71543863      | 71544089  | 227 |
| chr3  | 115664482     | 115664708 | 227 |
| chr3  | 99480037      | 99480263  | 227 |
| chr3  | 77665447      | 77665673  | 227 |
| chr29 | 44622528      | 44622754  | 227 |
| chr29 | 31500395      | 31500621  | 227 |
| chr29 | 31427552      | 31427778  | 227 |
| chr28 | 7601192       | 7601418   | 227 |
| chr26 | 25476743      | 25476969  | 227 |
| chr25 | 39451898      | 39452124  | 227 |
| chr24 | 48578424      | 48578650  | 227 |
| chr24 | 23682969      | 23683195  | 227 |
| chr24 | 789165 789391 |           | 227 |
| chr23 | 48551237      | 48551463  | 227 |
| chr22 | 54064220      | 54064446  | 227 |
| chr22 | 32923408      | 32923634  | 227 |
| chr21 | 67891920      | 67892146  | 227 |

|       |           |           |     |
|-------|-----------|-----------|-----|
| chr21 | 14448664  | 14448890  | 227 |
| chr21 | 6467723   | 6467949   | 227 |
| chr20 | 14627306  | 14627532  | 227 |
| chr2  | 134601887 | 134602113 | 227 |
| chr2  | 131730641 | 131730867 | 227 |
| chr2  | 22201385  | 22201611  | 227 |
| chr19 | 64760219  | 64760445  | 227 |
| chr19 | 54741817  | 54742043  | 227 |
| chr19 | 52779427  | 52779653  | 227 |
| chr19 | 39253861  | 39254087  | 227 |
| chr19 | 32597916  | 32598142  | 227 |
| chr19 | 30359657  | 30359883  | 227 |
| chr19 | 24272336  | 24272562  | 227 |
| chr18 | 49488561  | 49488787  | 227 |
| chr18 | 43402391  | 43402617  | 227 |
| chr18 | 10211384  | 10211610  | 227 |
| chr17 | 64228097  | 64228323  | 227 |
| chr17 | 64220297  | 64220523  | 227 |
| chr16 | 73941343  | 73941569  | 227 |
| chr15 | 65603216  | 65603442  | 227 |
| chr15 | 28871848  | 28872074  | 227 |
| chr15 | 25278384  | 25278610  | 227 |
| chr15 | 25251444  | 25251670  | 227 |
| chr14 | 43109233  | 43109459  | 227 |
| chr14 | 33995773  | 33995999  | 227 |
| chr14 | 7356387   | 7356613   | 227 |
| chr13 | 42386689  | 42386915  | 227 |
| chr13 | 41135973  | 41136199  | 227 |
| chr13 | 35564488  | 35564714  | 227 |
| chr12 | 28971705  | 28971931  | 227 |
| chr11 | 81335665  | 81335891  | 227 |
| chr11 | 26602802  | 26603028  | 227 |
| chr11 | 3305442   | 3305668   | 227 |
| chr10 | 25576629  | 25576855  | 227 |
| chr1  | 145526303 | 145526529 | 227 |
| chr1  | 83496246  | 83496472  | 227 |
| chrX  | 77496858  | 77497083  | 226 |
| chrX  | 72314139  | 72314364  | 226 |
| chrX  | 58637771  | 58637996  | 226 |
| chrX  | 55286598  | 55286823  | 226 |
| chrX  | 49780584  | 49780809  | 226 |
| chrX  | 48246615  | 48246840  | 226 |
| chrX  | 48038965  | 48039190  | 226 |
| chrX  | 34578192  | 34578417  | 226 |
| chrX  | 12611427  | 12611652  | 226 |
| chrX  | 1879549   | 1879774   | 226 |
| chr8  | 46615551  | 46615776  | 226 |
| chr7  | 108354680 | 108354905 | 226 |
| chr6  | 109617708 | 109617933 | 226 |
| chr5  | 122826656 | 122826881 | 226 |



|       |           |           |     |
|-------|-----------|-----------|-----|
| chr5  | 122325609 | 122325834 | 226 |
| chr5  | 111697832 | 111698057 | 226 |
| chr5  | 80738071  | 80738296  | 226 |
| chr4  | 72616135  | 72616360  | 226 |
| chr3  | 117301415 | 117301640 | 226 |
| chr3  | 8768565   | 8768790   | 226 |
| chr29 | 33291013  | 33291238  | 226 |
| chr28 | 11369132  | 11369357  | 226 |
| chr26 | 21966047  | 21966272  | 226 |
| chr26 | 17982622  | 17982847  | 226 |
| chr26 | 15586773  | 15586998  | 226 |
| chr26 | 15584477  | 15584702  | 226 |
| chr25 | 33119720  | 33119945  | 226 |
| chr24 | 48610125  | 48610350  | 226 |
| chr24 | 46903678  | 46903903  | 226 |
| chr23 | 43351287  | 43351512  | 226 |
| chr23 | 20021266  | 20021491  | 226 |
| chr23 | 10852766  | 10852991  | 226 |
| chr22 | 30252346  | 30252571  | 226 |
| chr21 | 65721094  | 65721319  | 226 |
| chr21 | 20169798  | 20170023  | 226 |
| chr20 | 72681860  | 72682085  | 226 |
| chr2  | 124972134 | 124972359 | 226 |
| chr2  | 49800988  | 49801213  | 226 |
| chr19 | 54515377  | 54515602  | 226 |
| chr19 | 23980729  | 23980954  | 226 |
| chr18 | 39502217  | 39502442  | 226 |
| chr18 | 23884151  | 23884376  | 226 |
| chr18 | 16887352  | 16887577  | 226 |
| chr18 | 11564889  | 11565114  | 226 |
| chr17 | 47634275  | 47634500  | 226 |
| chr16 | 44789500  | 44789725  | 226 |
| chr16 | 43558968  | 43559193  | 226 |
| chr14 | 62045657  | 62045882  | 226 |
| chr14 | 20943604  | 20943829  | 226 |
| chr14 | 7883227   | 7883452   | 226 |
| chr12 | 82013883  | 82014108  | 226 |
| chr11 | 100917841 | 100918066 | 226 |
| chr11 | 82858384  | 82858609  | 226 |
| chr11 | 78140015  | 78140240  | 226 |
| chr11 | 75074815  | 75075040  | 226 |
| chr11 | 74457754  | 74457979  | 226 |
| chr11 | 73361805  | 73362030  | 226 |
| chr11 | 28821988  | 28822213  | 226 |
| chr11 | 9252431   | 9252656   | 226 |
| chrX  | 72546573  | 72546797  | 225 |
| chrX  | 61669741  | 61669965  | 225 |
| chrX  | 46634173  | 46634397  | 225 |
| chrX  | 37329659  | 37329883  | 225 |
| chrX  | 34617561  | 34617785  | 225 |

|       |               |           |     |
|-------|---------------|-----------|-----|
| chrX  | 21566512      | 21566736  | 225 |
| chrX  | 13171161      | 13171385  | 225 |
| chrX  | 2405158       | 2405382   | 225 |
| chrX  | 2084851       | 2085075   | 225 |
| chr9  | 90777520      | 90777744  | 225 |
| chr8  | 69020299      | 69020523  | 225 |
| chr8  | 1058349       | 1058573   | 225 |
| chr7  | 38371040      | 38371264  | 225 |
| chr7  | 20886783      | 20887007  | 225 |
| chr7  | 14709541      | 14709765  | 225 |
| chr6  | 119376724     | 119376948 | 225 |
| chr6  | 107330369     | 107330593 | 225 |
| chr5  | 73252051      | 73252275  | 225 |
| chr5  | 28852702      | 28852926  | 225 |
| chr4  | 99036774      | 99036998  | 225 |
| chr3  | 114542630     | 114542854 | 225 |
| chr3  | 51912719      | 51912943  | 225 |
| chr3  | 35686470      | 35686694  | 225 |
| chr3  | 8569887       | 8570111   | 225 |
| chr29 | 30124750      | 30124974  | 225 |
| chr29 | 18345693      | 18345917  | 225 |
| chr29 | 17989735      | 17989959  | 225 |
| chr29 | 17919154      | 17919378  | 225 |
| chr27 | 17310182      | 17310406  | 225 |
| chr26 | 46989086      | 46989310  | 225 |
| chr24 | 60755783      | 60756007  | 225 |
| chr23 | 49718717      | 49718941  | 225 |
| chr23 | 8371483       | 8371707   | 225 |
| chr22 | 30146778      | 30147002  | 225 |
| chr22 | 14076756      | 14076980  | 225 |
| chr20 | 75671521      | 75671745  | 225 |
| chr2  | 63510324      | 63510548  | 225 |
| chr2  | 21886219      | 21886443  | 225 |
| chr18 | 42254161      | 42254385  | 225 |
| chr18 | 38623271      | 38623495  | 225 |
| chr18 | 23575004      | 23575228  | 225 |
| chr18 | 9213931       | 9214155   | 225 |
| chr17 | 62456631      | 62456855  | 225 |
| chr15 | 29912597      | 29912821  | 225 |
| chr13 | 42895791      | 42896015  | 225 |
| chr13 | 41801951      | 41802175  | 225 |
| chr12 | 80845955      | 80846179  | 225 |
| chr12 | 33304309      | 33304533  | 225 |
| chr11 | 14239616      | 14239840  | 225 |
| chr11 | 197241 197465 | 225       |     |
| chr10 | 90317583      | 90317807  | 225 |
| chr10 | 3532417       | 3532641   | 225 |
| chrX  | 81275236      | 81275459  | 224 |
| chrX  | 76262249      | 76262472  | 224 |
| chrX  | 71990949      | 71991172  | 224 |

|       |               |           |     |
|-------|---------------|-----------|-----|
| chrX  | 64951014      | 64951237  | 224 |
| chrX  | 64669885      | 64670108  | 224 |
| chrX  | 54121766      | 54121989  | 224 |
| chrX  | 50509130      | 50509353  | 224 |
| chrX  | 10219697      | 10219920  | 224 |
| chrX  | 8544510       | 8544733   | 224 |
| chr9  | 106194926     | 106195149 | 224 |
| chr9  | 105460142     | 105460365 | 224 |
| chr9  | 77673883      | 77674106  | 224 |
| chr9  | 45993094      | 45993317  | 224 |
| chr7  | 2946493       | 2946716   | 224 |
| chr5  | 31670860      | 31671083  | 224 |
| chr3  | 15700944      | 15701167  | 224 |
| chr26 | 18452441      | 18452664  | 224 |
| chr24 | 40510516      | 40510739  | 224 |
| chr24 | 35371599      | 35371822  | 224 |
| chr24 | 781681 781904 | 224       | 224 |
| chr23 | 45784259      | 45784482  | 224 |
| chr23 | 19905872      | 19906095  | 224 |
| chr21 | 30851689      | 30851912  | 224 |
| chr20 | 38457953      | 38458176  | 224 |
| chr2  | 140101287     | 140101510 | 224 |
| chr2  | 24075614      | 24075837  | 224 |
| chr19 | 31838071      | 31838294  | 224 |
| chr19 | 30505294      | 30505517  | 224 |
| chr19 | 15273136      | 15273359  | 224 |
| chr19 | 11007437      | 11007660  | 224 |
| chr18 | 61917988      | 61918211  | 224 |
| chr18 | 55443510      | 55443733  | 224 |
| chr17 | 68247393      | 68247616  | 224 |
| chr17 | 63091314      | 63091537  | 224 |
| chr16 | 47259887      | 47260110  | 224 |
| chr14 | 44634572      | 44634795  | 224 |
| chr14 | 34726720      | 34726943  | 224 |
| chr13 | 77677504      | 77677727  | 224 |
| chr13 | 60124766      | 60124989  | 224 |
| chr13 | 58491800      | 58492023  | 224 |
| chr12 | 74407756      | 74407979  | 224 |
| chr11 | 93712736      | 93712959  | 224 |
| chr11 | 84865884      | 84866107  | 224 |
| chr11 | 31079252      | 31079475  | 224 |
| chr11 | 25649078      | 25649301  | 224 |
| chr10 | 76401751      | 76401974  | 224 |
| chr1  | 160627154     | 160627377 | 224 |
| chr1  | 88448457      | 88448680  | 224 |
| chrX  | 76810012      | 76810234  | 223 |
| chrX  | 74529416      | 74529638  | 223 |
| chrX  | 72933338      | 72933560  | 223 |
| chrX  | 68324197      | 68324419  | 223 |
| chrX  | 58741138      | 58741360  | 223 |

|       |           |           |     |
|-------|-----------|-----------|-----|
| chrX  | 38296139  | 38296361  | 223 |
| chrX  | 36256895  | 36257117  | 223 |
| chrX  | 35181850  | 35182072  | 223 |
| chrX  | 33082842  | 33083064  | 223 |
| chrX  | 31581970  | 31582192  | 223 |
| chrX  | 15643748  | 15643970  | 223 |
| chrX  | 6344744   | 6344966   | 223 |
| chr9  | 75195200  | 75195422  | 223 |
| chr8  | 9345573   | 9345795   | 223 |
| chr5  | 112049083 | 112049305 | 223 |
| chr5  | 108884962 | 108885184 | 223 |
| chr4  | 15354583  | 15354805  | 223 |
| chr3  | 22701353  | 22701575  | 223 |
| chr28 | 44211087  | 44211309  | 223 |
| chr27 | 26656266  | 26656488  | 223 |
| chr26 | 37093691  | 37093913  | 223 |
| chr25 | 43432404  | 43432626  | 223 |
| chr25 | 8179429   | 8179651   | 223 |
| chr24 | 43191856  | 43192078  | 223 |
| chr24 | 20392707  | 20392929  | 223 |
| chr23 | 28904988  | 28905210  | 223 |
| chr23 | 20006578  | 20006800  | 223 |
| chr22 | 55945223  | 55945445  | 223 |
| chr22 | 29881528  | 29881750  | 223 |
| chr21 | 58659423  | 58659645  | 223 |
| chr21 | 27952910  | 27953132  | 223 |
| chr21 | 24989783  | 24990005  | 223 |
| chr2  | 99334044  | 99334266  | 223 |
| chr2  | 75982599  | 75982821  | 223 |
| chr2  | 22208197  | 22208419  | 223 |
| chr19 | 59704200  | 59704422  | 223 |
| chr19 | 41375422  | 41375644  | 223 |
| chr19 | 31493816  | 31494038  | 223 |
| chr19 | 17142640  | 17142862  | 223 |
| chr18 | 54684834  | 54685056  | 223 |
| chr18 | 52161231  | 52161453  | 223 |
| chr18 | 24929333  | 24929555  | 223 |
| chr18 | 13561060  | 13561282  | 223 |
| chr18 | 11009785  | 11010007  | 223 |
| chr17 | 70580226  | 70580448  | 223 |
| chr17 | 69938290  | 69938512  | 223 |
| chr17 | 69893457  | 69893679  | 223 |
| chr17 | 62142728  | 62142950  | 223 |
| chr17 | 57701970  | 57702192  | 223 |
| chr15 | 74561394  | 74561616  | 223 |
| chr15 | 32291249  | 32291471  | 223 |
| chr15 | 15874613  | 15874835  | 223 |
| chr15 | 6402646   | 6402868   | 223 |
| chr14 | 5500904   | 5501126   | 223 |
| chr13 | 75527284  | 75527506  | 223 |

|       |               |           |     |
|-------|---------------|-----------|-----|
| chr13 | 70137831      | 70138053  | 223 |
| chr13 | 41506775      | 41506997  | 223 |
| chr13 | 22836064      | 22836286  | 223 |
| chr13 | 17691012      | 17691234  | 223 |
| chr12 | 32875432      | 32875654  | 223 |
| chr11 | 75155758      | 75155980  | 223 |
| chr11 | 20520156      | 20520378  | 223 |
| chr10 | 36246251      | 36246473  | 223 |
| chr10 | 17302419      | 17302641  | 223 |
| chr1  | 132081934     | 132082156 | 223 |
| chrX  | 84953562      | 84953783  | 222 |
| chrX  | 71711318      | 71711539  | 222 |
| chrX  | 64685480      | 64685701  | 222 |
| chrX  | 61687054      | 61687275  | 222 |
| chrX  | 54686416      | 54686637  | 222 |
| chrX  | 50449440      | 50449661  | 222 |
| chrX  | 47273051      | 47273272  | 222 |
| chrX  | 38995266      | 38995487  | 222 |
| chrX  | 38094693      | 38094914  | 222 |
| chrX  | 37392685      | 37392906  | 222 |
| chrX  | 33544830      | 33545051  | 222 |
| chrX  | 17540500      | 17540721  | 222 |
| chrX  | 8044245       | 8044466   | 222 |
| chrX  | 2010740       | 2010961   | 222 |
| chrX  | 458727 458948 |           | 222 |
| chr9  | 90714032      | 90714253  | 222 |
| chr7  | 80880383      | 80880604  | 222 |
| chr7  | 5046270       | 5046491   | 222 |
| chr4  | 72705274      | 72705495  | 222 |
| chr3  | 115758215     | 115758436 | 222 |
| chr3  | 114373414     | 114373635 | 222 |
| chr3  | 108320009     | 108320230 | 222 |
| chr3  | 82920466      | 82920687  | 222 |
| chr3  | 8147923       | 8148144   | 222 |
| chr29 | 41392949      | 41393170  | 222 |
| chr29 | 36393805      | 36394026  | 222 |
| chr28 | 7549927       | 7550148   | 222 |
| chr27 | 45251664      | 45251885  | 222 |
| chr27 | 35913403      | 35913624  | 222 |
| chr26 | 14491325      | 14491546  | 222 |
| chr25 | 37245680      | 37245901  | 222 |
| chr23 | 51734125      | 51734346  | 222 |
| chr22 | 53966871      | 53967092  | 222 |
| chr20 | 66026615      | 66026836  | 222 |
| chr2  | 127428560     | 127428781 | 222 |
| chr2  | 65519371      | 65519592  | 222 |
| chr19 | 60013362      | 60013583  | 222 |
| chr19 | 56844239      | 56844460  | 222 |
| chr19 | 45808284      | 45808505  | 222 |
| chr19 | 41387329      | 41387550  | 222 |

|       |           |           |     |
|-------|-----------|-----------|-----|
| chr19 | 27080674  | 27080895  | 222 |
| chr19 | 23704264  | 23704485  | 222 |
| chr18 | 64308275  | 64308496  | 222 |
| chr18 | 25269726  | 25269947  | 222 |
| chr17 | 62990883  | 62991104  | 222 |
| chr16 | 47993652  | 47993873  | 222 |
| chr16 | 41466511  | 41466732  | 222 |
| chr14 | 61783746  | 61783967  | 222 |
| chr14 | 61130942  | 61131163  | 222 |
| chr14 | 44349068  | 44349289  | 222 |
| chr14 | 1539275   | 1539496   | 222 |
| chr13 | 80186975  | 80187196  | 222 |
| chr13 | 53946848  | 53947069  | 222 |
| chr13 | 41380768  | 41380989  | 222 |
| chr13 | 40720980  | 40721201  | 222 |
| chr12 | 82016551  | 82016772  | 222 |
| chr11 | 98809069  | 98809290  | 222 |
| chr11 | 30929942  | 30930163  | 222 |
| chr10 | 70307969  | 70308190  | 222 |
| chr10 | 16703713  | 16703934  | 222 |
| chrX  | 77505109  | 77505329  | 221 |
| chrX  | 68110742  | 68110962  | 221 |
| chrX  | 66848833  | 66849053  | 221 |
| chrX  | 64690503  | 64690723  | 221 |
| chrX  | 56873362  | 56873582  | 221 |
| chrX  | 34888091  | 34888311  | 221 |
| chrX  | 33257947  | 33258167  | 221 |
| chrX  | 20237666  | 20237886  | 221 |
| chrX  | 13656766  | 13656986  | 221 |
| chrX  | 7822082   | 7822302   | 221 |
| chr9  | 107190141 | 107190361 | 221 |
| chr9  | 82369146  | 82369366  | 221 |
| chr9  | 78221085  | 78221305  | 221 |
| chr7  | 48862073  | 48862293  | 221 |
| chr6  | 105977471 | 105977691 | 221 |
| chr6  | 46697030  | 46697250  | 221 |
| chr5  | 124925536 | 124925756 | 221 |
| chr5  | 84675325  | 84675545  | 221 |
| chr4  | 32270736  | 32270956  | 221 |
| chr4  | 8716193   | 8716413   | 221 |
| chr3  | 113419938 | 113420158 | 221 |
| chr3  | 105150549 | 105150769 | 221 |
| chr29 | 45612653  | 45612873  | 221 |
| chr28 | 12465558  | 12465778  | 221 |
| chr26 | 22373336  | 22373556  | 221 |
| chr25 | 38094958  | 38095178  | 221 |
| chr23 | 49896063  | 49896283  | 221 |
| chr23 | 25314806  | 25315026  | 221 |
| chr23 | 16495547  | 16495767  | 221 |
| chr21 | 64285572  | 64285792  | 221 |

|       |           |           |     |
|-------|-----------|-----------|-----|
| chr21 | 34250979  | 34251199  | 221 |
| chr20 | 66459125  | 66459345  | 221 |
| chr20 | 16141491  | 16141711  | 221 |
| chr2  | 76672501  | 76672721  | 221 |
| chr19 | 60401701  | 60401921  | 221 |
| chr19 | 45538087  | 45538307  | 221 |
| chr19 | 41465621  | 41465841  | 221 |
| chr19 | 34612466  | 34612686  | 221 |
| chr19 | 27937608  | 27937828  | 221 |
| chr19 | 17152865  | 17153085  | 221 |
| chr19 | 13482955  | 13483175  | 221 |
| chr18 | 62377314  | 62377534  | 221 |
| chr18 | 51409697  | 51409917  | 221 |
| chr18 | 49711610  | 49711830  | 221 |
| chr18 | 23538749  | 23538969  | 221 |
| chr16 | 44147013  | 44147233  | 221 |
| chr15 | 29096002  | 29096222  | 221 |
| chr15 | 25625720  | 25625940  | 221 |
| chr14 | 29473545  | 29473765  | 221 |
| chr14 | 22023142  | 22023362  | 221 |
| chr14 | 3484567   | 3484787   | 221 |
| chr13 | 78687419  | 78687639  | 221 |
| chr13 | 75445503  | 75445723  | 221 |
| chr13 | 74329288  | 74329508  | 221 |
| chr13 | 70207230  | 70207450  | 221 |
| chr13 | 54928599  | 54928819  | 221 |
| chr13 | 35794419  | 35794639  | 221 |
| chr12 | 22120812  | 22121032  | 221 |
| chr12 | 11226504  | 11226724  | 221 |
| chr11 | 70853274  | 70853494  | 221 |
| chr11 | 30915440  | 30915660  | 221 |
| chr10 | 50518759  | 50518979  | 221 |
| chr10 | 42713511  | 42713731  | 221 |
| chr1  | 154402474 | 154402694 | 221 |
| chr1  | 137744773 | 137744993 | 221 |
| chr1  | 84912729  | 84912949  | 221 |
| chr1  | 74712434  | 74712654  | 221 |
| chrX  | 65089432  | 65089651  | 220 |
| chrX  | 64997641  | 64997860  | 220 |
| chrX  | 49335662  | 49335881  | 220 |
| chrX  | 35850444  | 35850663  | 220 |
| chrX  | 13270194  | 13270413  | 220 |
| chrX  | 12389100  | 12389319  | 220 |
| chrX  | 7611719   | 7611938   | 220 |
| chrX  | 7572335   | 7572554   | 220 |
| chr9  | 90527571  | 90527790  | 220 |
| chr9  | 65834492  | 65834711  | 220 |
| chr8  | 80223098  | 80223317  | 220 |
| chr7  | 73169290  | 73169509  | 220 |
| chr7  | 46218507  | 46218726  | 220 |

|       |           |           |     |
|-------|-----------|-----------|-----|
| chr6  | 106914676 | 106914895 | 220 |
| chr6  | 12110476  | 12110695  | 220 |
| chr5  | 125456024 | 125456243 | 220 |
| chr4  | 95602412  | 95602631  | 220 |
| chr4  | 68838875  | 68839094  | 220 |
| chr3  | 112511632 | 112511851 | 220 |
| chr3  | 73960653  | 73960872  | 220 |
| chr3  | 26149864  | 26150083  | 220 |
| chr29 | 38380179  | 38380398  | 220 |
| chr29 | 37468619  | 37468838  | 220 |
| chr29 | 26690470  | 26690689  | 220 |
| chr28 | 42365731  | 42365950  | 220 |
| chr28 | 26350691  | 26350910  | 220 |
| chr27 | 35835283  | 35835502  | 220 |
| chr26 | 20181260  | 20181479  | 220 |
| chr25 | 28059437  | 28059656  | 220 |
| chr24 | 59417010  | 59417229  | 220 |
| chr24 | 42955340  | 42955559  | 220 |
| chr23 | 25286686  | 25286905  | 220 |
| chr23 | 9996899   | 9997118   | 220 |
| chr21 | 67980521  | 67980740  | 220 |
| chr21 | 11902519  | 11902738  | 220 |
| chr2  | 97057681  | 97057900  | 220 |
| chr19 | 47216259  | 47216478  | 220 |
| chr19 | 44777892  | 44778111  | 220 |
| chr19 | 17105350  | 17105569  | 220 |
| chr18 | 39848300  | 39848519  | 220 |
| chr18 | 11034075  | 11034294  | 220 |
| chr17 | 72757180  | 72757399  | 220 |
| chr17 | 63498520  | 63498739  | 220 |
| chr17 | 61620415  | 61620634  | 220 |
| chr16 | 13458733  | 13458952  | 220 |
| chr15 | 42613074  | 42613293  | 220 |
| chr15 | 39537882  | 39538101  | 220 |
| chr13 | 63429777  | 63429996  | 220 |
| chr13 | 48464981  | 48465200  | 220 |
| chr13 | 43668906  | 43669125  | 220 |
| chr13 | 40986592  | 40986811  | 220 |
| chr11 | 44700366  | 44700585  | 220 |
| chr10 | 103076386 | 103076605 | 220 |
| chr1  | 152107761 | 152107980 | 220 |
| chr1  | 85042016  | 85042235  | 220 |
| chr1  | 80131331  | 80131550  | 220 |
| chr1  | 1610222   | 1610441   | 220 |
| chrX  | 87729743  | 87729961  | 219 |
| chrX  | 59185993  | 59186211  | 219 |
| chrX  | 55513241  | 55513459  | 219 |
| chrX  | 44903325  | 44903543  | 219 |
| chrX  | 28402547  | 28402765  | 219 |
| chrX  | 21031264  | 21031482  | 219 |



|       |               |           |     |
|-------|---------------|-----------|-----|
| chrX  | 20608902      | 20609120  | 219 |
| chrX  | 10135543      | 10135761  | 219 |
| chrX  | 5422673       | 5422891   | 219 |
| chr8  | 65724176      | 65724394  | 219 |
| chr8  | 46166868      | 46167086  | 219 |
| chr8  | 658106 658324 | 219       |     |
| chr7  | 44908457      | 44908675  | 219 |
| chr7  | 19210563      | 19210781  | 219 |
| chr6  | 121055891     | 121056109 | 219 |
| chr5  | 118235695     | 118235913 | 219 |
| chr4  | 121524595     | 121524813 | 219 |
| chr4  | 101675941     | 101676159 | 219 |
| chr3  | 124181588     | 124181806 | 219 |
| chr3  | 123622663     | 123622881 | 219 |
| chr3  | 16851693      | 16851911  | 219 |
| chr29 | 41743764      | 41743982  | 219 |
| chr29 | 37000904      | 37001122  | 219 |
| chr29 | 36678710      | 36678928  | 219 |
| chr29 | 32978913      | 32979131  | 219 |
| chr27 | 45280296      | 45280514  | 219 |
| chr27 | 38675125      | 38675343  | 219 |
| chr25 | 33144247      | 33144465  | 219 |
| chr23 | 51788001      | 51788219  | 219 |
| chr23 | 51060400      | 51060618  | 219 |
| chr21 | 59658710      | 59658928  | 219 |
| chr20 | 71146979      | 71147197  | 219 |
| chr20 | 8533307       | 8533525   | 219 |
| chr20 | 470015 470233 | 219       |     |
| chr19 | 46105594      | 46105812  | 219 |
| chr19 | 29744251      | 29744469  | 219 |
| chr19 | 19806066      | 19806284  | 219 |
| chr18 | 3820360       | 3820578   | 219 |
| chr17 | 66895716      | 66895934  | 219 |
| chr17 | 63634799      | 63635017  | 219 |
| chr15 | 29663791      | 29664009  | 219 |
| chr14 | 6073315       | 6073533   | 219 |
| chr13 | 81638244      | 81638462  | 219 |
| chr13 | 41635273      | 41635491  | 219 |
| chr12 | 82690034      | 82690252  | 219 |
| chr12 | 82346938      | 82347156  | 219 |
| chr12 | 32006074      | 32006292  | 219 |
| chr11 | 98364647      | 98364865  | 219 |
| chr11 | 89373623      | 89373841  | 219 |
| chr10 | 80096047      | 80096265  | 219 |
| chr10 | 24172482      | 24172700  | 219 |
| chr10 | 14974880      | 14975098  | 219 |
| chr1  | 100645860     | 100646078 | 219 |
| chr1  | 9070243       | 9070461   | 219 |
| chrX  | 77752767      | 77752984  | 218 |
| chrX  | 76106759      | 76106976  | 218 |

|       |           |           |     |
|-------|-----------|-----------|-----|
| chrX  | 70358137  | 70358354  | 218 |
| chrX  | 59408863  | 59409080  | 218 |
| chrX  | 53987196  | 53987413  | 218 |
| chrX  | 20302327  | 20302544  | 218 |
| chrX  | 9048890   | 9049107   | 218 |
| chrX  | 5296698   | 5296915   | 218 |
| chr9  | 51207327  | 51207544  | 218 |
| chr7  | 17346255  | 17346472  | 218 |
| chr5  | 118460323 | 118460540 | 218 |
| chr5  | 80690991  | 80691208  | 218 |
| chr3  | 52141076  | 52141293  | 218 |
| chr29 | 33789524  | 33789741  | 218 |
| chr29 | 25167873  | 25168090  | 218 |
| chr28 | 42528426  | 42528643  | 218 |
| chr26 | 18397742  | 18397959  | 218 |
| chr25 | 41240463  | 41240680  | 218 |
| chr25 | 30592803  | 30593020  | 218 |
| chr22 | 56286161  | 56286378  | 218 |
| chr21 | 18557347  | 18557564  | 218 |
| chr20 | 33556917  | 33557134  | 218 |
| chr19 | 29816005  | 29816222  | 218 |
| chr18 | 54605384  | 54605601  | 218 |
| chr16 | 67434299  | 67434516  | 218 |
| chr16 | 38550951  | 38551168  | 218 |
| chr15 | 27016471  | 27016688  | 218 |
| chr14 | 34025840  | 34026057  | 218 |
| chr14 | 9337024   | 9337241   | 218 |
| chr13 | 67872992  | 67873209  | 218 |
| chr13 | 41171229  | 41171446  | 218 |
| chr11 | 82849127  | 82849344  | 218 |
| chr11 | 14234898  | 14235115  | 218 |
| chr11 | 6428810   | 6429027   | 218 |
| chr10 | 20630310  | 20630527  | 218 |
| chr1  | 41069168  | 41069385  | 218 |
| chrX  | 41084670  | 41084886  | 217 |
| chrX  | 35604760  | 35604976  | 217 |
| chrX  | 31597395  | 31597611  | 217 |
| chrX  | 22385325  | 22385541  | 217 |
| chrX  | 7151937   | 7152153   | 217 |
| chr8  | 87918288  | 87918504  | 217 |
| chr4  | 5380126   | 5380342   | 217 |
| chr3  | 8019127   | 8019343   | 217 |
| chr27 | 15326847  | 15327063  | 217 |
| chr26 | 50106036  | 50106252  | 217 |
| chr26 | 45666441  | 45666657  | 217 |
| chr26 | 22355433  | 22355649  | 217 |
| chr25 | 39406220  | 39406436  | 217 |
| chr24 | 42454171  | 42454387  | 217 |
| chr24 | 1955279   | 1955495   | 217 |
| chr23 | 17955041  | 17955257  | 217 |

|       |               |           |     |
|-------|---------------|-----------|-----|
| chr21 | 60979676      | 60979892  | 217 |
| chr19 | 56587981      | 56588197  | 217 |
| chr19 | 33518245      | 33518461  | 217 |
| chr19 | 26044986      | 26045202  | 217 |
| chr19 | 7795689       | 7795905   | 217 |
| chr18 | 19365162      | 19365378  | 217 |
| chr18 | 9662577       | 9662793   | 217 |
| chr18 | 9527677       | 9527893   | 217 |
| chr18 | 4039679       | 4039895   | 217 |
| chr16 | 58625713      | 58625929  | 217 |
| chr16 | 40926366      | 40926582  | 217 |
| chr15 | 29215699      | 29215915  | 217 |
| chr15 | 24643217      | 24643433  | 217 |
| chr13 | 66940931      | 66941147  | 217 |
| chr12 | 82088180      | 82088396  | 217 |
| chr12 | 34506548      | 34506764  | 217 |
| chr11 | 81372407      | 81372623  | 217 |
| chrX  | 78495235      | 78495450  | 216 |
| chrX  | 77300973      | 77301188  | 216 |
| chrX  | 62292593      | 62292808  | 216 |
| chrX  | 60877922      | 60878137  | 216 |
| chrX  | 59426005      | 59426220  | 216 |
| chrX  | 38606613      | 38606828  | 216 |
| chrX  | 21137537      | 21137752  | 216 |
| chrX  | 13827669      | 13827884  | 216 |
| chrX  | 5505689       | 5505904   | 216 |
| chrX  | 5330620       | 5330835   | 216 |
| chr8  | 56698440      | 56698655  | 216 |
| chr8  | 40329680      | 40329895  | 216 |
| chr6  | 4028116       | 4028331   | 216 |
| chr5  | 118051299     | 118051514 | 216 |
| chr5  | 115509333     | 115509548 | 216 |
| chr5  | 81651382      | 81651597  | 216 |
| chr3  | 114377902     | 114378117 | 216 |
| chr3  | 304596 304811 | 216       |     |
| chr29 | 37355847      | 37356062  | 216 |
| chr29 | 34884230      | 34884445  | 216 |
| chr26 | 50291348      | 50291563  | 216 |
| chr25 | 29407692      | 29407907  | 216 |
| chr22 | 61225407      | 61225622  | 216 |
| chr22 | 58620858      | 58621073  | 216 |
| chr22 | 49574135      | 49574350  | 216 |
| chr21 | 61786538      | 61786753  | 216 |
| chr20 | 67495662      | 67495877  | 216 |
| chr19 | 56585325      | 56585540  | 216 |
| chr19 | 50154722      | 50154937  | 216 |
| chr19 | 47482754      | 47482969  | 216 |
| chr19 | 31324124      | 31324339  | 216 |
| chr19 | 19799436      | 19799651  | 216 |
| chr18 | 39978367      | 39978582  | 216 |

|       |           |           |     |
|-------|-----------|-----------|-----|
| chr17 | 67051368  | 67051583  | 216 |
| chr15 | 42593607  | 42593822  | 216 |
| chr15 | 31919336  | 31919551  | 216 |
| chr13 | 63410288  | 63410503  | 216 |
| chr13 | 62349156  | 62349371  | 216 |
| chr13 | 6986323   | 6986538   | 216 |
| chr11 | 1587781   | 1587996   | 216 |
| chr10 | 89153296  | 89153511  | 216 |
| chr10 | 15096680  | 15096895  | 216 |
| chr1  | 147894606 | 147894821 | 216 |
| chr1  | 74851598  | 74851813  | 216 |
| chrX  | 53939215  | 53939429  | 215 |
| chrX  | 35588568  | 35588782  | 215 |
| chrX  | 20200923  | 20201137  | 215 |
| chr9  | 106304386 | 106304600 | 215 |
| chr8  | 64495483  | 64495697  | 215 |
| chr7  | 77006814  | 77007028  | 215 |
| chr3  | 114667430 | 114667644 | 215 |
| chr29 | 36590151  | 36590365  | 215 |
| chr29 | 33593415  | 33593629  | 215 |
| chr27 | 32887629  | 32887843  | 215 |
| chr27 | 6159816   | 6160030   | 215 |
| chr26 | 42109933  | 42110147  | 215 |
| chr26 | 23080699  | 23080913  | 215 |
| chr24 | 41883612  | 41883826  | 215 |
| chr23 | 51998767  | 51998981  | 215 |
| chr19 | 35055221  | 35055435  | 215 |
| chr18 | 48692460  | 48692674  | 215 |
| chr18 | 32846183  | 32846397  | 215 |
| chr18 | 11272298  | 11272512  | 215 |
| chr17 | 69511512  | 69511726  | 215 |
| chr16 | 47663866  | 47664080  | 215 |
| chr15 | 74445123  | 74445337  | 215 |
| chr15 | 24849358  | 24849572  | 215 |
| chr13 | 72602121  | 72602335  | 215 |
| chr13 | 62829282  | 62829496  | 215 |
| chr13 | 48464111  | 48464325  | 215 |
| chr13 | 43640727  | 43640941  | 215 |
| chr13 | 41316382  | 41316596  | 215 |
| chr12 | 84138308  | 84138522  | 215 |
| chr11 | 82433168  | 82433382  | 215 |
| chr11 | 49763597  | 49763811  | 215 |
| chr11 | 9714422   | 9714636   | 215 |
| chr10 | 90684207  | 90684421  | 215 |
| chr10 | 35612598  | 35612812  | 215 |
| chr1  | 82742920  | 82743134  | 215 |
| chrX  | 61075223  | 61075436  | 214 |
| chrX  | 48412926  | 48413139  | 214 |
| chrX  | 38690412  | 38690625  | 214 |
| chrX  | 37368196  | 37368409  | 214 |

|       |           |           |     |
|-------|-----------|-----------|-----|
| chrX  | 31001727  | 31001940  | 214 |
| chrX  | 19275326  | 19275539  | 214 |
| chrX  | 6813110   | 6813323   | 214 |
| chrX  | 6300556   | 6300769   | 214 |
| chr9  | 46009038  | 46009251  | 214 |
| chr9  | 19268087  | 19268300  | 214 |
| chr7  | 80852595  | 80852808  | 214 |
| chr7  | 57327352  | 57327565  | 214 |
| chr7  | 16838246  | 16838459  | 214 |
| chr7  | 14488770  | 14488983  | 214 |
| chr5  | 121065777 | 121065990 | 214 |
| chr5  | 30888272  | 30888485  | 214 |
| chr4  | 123982157 | 123982370 | 214 |
| chr4  | 122177915 | 122178128 | 214 |
| chr4  | 95852075  | 95852288  | 214 |
| chr3  | 116029934 | 116030147 | 214 |
| chr26 | 43767442  | 43767655  | 214 |
| chr26 | 42994531  | 42994744  | 214 |
| chr26 | 17838495  | 17838708  | 214 |
| chr25 | 38829598  | 38829811  | 214 |
| chr25 | 37862538  | 37862751  | 214 |
| chr20 | 67496691  | 67496904  | 214 |
| chr2  | 25186820  | 25187033  | 214 |
| chr18 | 49979061  | 49979274  | 214 |
| chr18 | 49529526  | 49529739  | 214 |
| chr18 | 18608909  | 18609122  | 214 |
| chr18 | 18084811  | 18085024  | 214 |
| chr18 | 12428408  | 12428621  | 214 |
| chr17 | 6070665   | 6070878   | 214 |
| chr16 | 70519226  | 70519439  | 214 |
| chr16 | 46965824  | 46966037  | 214 |
| chr16 | 2124265   | 2124478   | 214 |
| chr15 | 19791418  | 19791631  | 214 |
| chr13 | 63304304  | 63304517  | 214 |
| chr11 | 98900246  | 98900459  | 214 |
| chr11 | 76273439  | 76273652  | 214 |
| chr1  | 142506198 | 142506411 | 214 |
| chr1  | 132113514 | 132113727 | 214 |
| chr1  | 2179658   | 2179871   | 214 |
| chrX  | 53901285  | 53901497  | 213 |
| chrX  | 30144220  | 30144432  | 213 |
| chrX  | 8217126   | 8217338   | 213 |
| chr8  | 114250058 | 114250270 | 213 |
| chr8  | 79298722  | 79298934  | 213 |
| chr6  | 122448365 | 122448577 | 213 |
| chr24 | 60806104  | 60806316  | 213 |
| chr24 | 49055572  | 49055784  | 213 |
| chr24 | 47855897  | 47856109  | 213 |
| chr24 | 41986659  | 41986871  | 213 |
| chr23 | 42504883  | 42505095  | 213 |

|       |               |           |     |
|-------|---------------|-----------|-----|
| chr20 | 44227005      | 44227217  | 213 |
| chr2  | 132340866     | 132341078 | 213 |
| chr19 | 41553629      | 41553841  | 213 |
| chr19 | 443334 443546 | 213       |     |
| chr18 | 62101422      | 62101634  | 213 |
| chr18 | 49994738      | 49994950  | 213 |
| chr18 | 48691724      | 48691936  | 213 |
| chr18 | 3928580       | 3928792   | 213 |
| chr14 | 1886496       | 1886708   | 213 |
| chr12 | 31965586      | 31965798  | 213 |
| chr11 | 106288543     | 106288755 | 213 |
| chrX  | 75892707      | 75892918  | 212 |
| chrX  | 73847046      | 73847257  | 212 |
| chrX  | 71551281      | 71551492  | 212 |
| chrX  | 62494661      | 62494872  | 212 |
| chrX  | 50430103      | 50430314  | 212 |
| chrX  | 18966558      | 18966769  | 212 |
| chr7  | 45714519      | 45714730  | 212 |
| chr4  | 34293024      | 34293235  | 212 |
| chr3  | 29471825      | 29472036  | 212 |
| chr29 | 36476457      | 36476668  | 212 |
| chr28 | 34471540      | 34471751  | 212 |
| chr28 | 34058172      | 34058383  | 212 |
| chr27 | 27433733      | 27433944  | 212 |
| chr24 | 51661804      | 51662015  | 212 |
| chr24 | 46579128      | 46579339  | 212 |
| chr20 | 38748139      | 38748350  | 212 |
| chr2  | 134464803     | 134465014 | 212 |
| chr19 | 14080011      | 14080222  | 212 |
| chr18 | 54827902      | 54828113  | 212 |
| chr18 | 54311043      | 54311254  | 212 |
| chr18 | 22331333      | 22331544  | 212 |
| chr18 | 7117047       | 7117258   | 212 |
| chr18 | 4274408       | 4274619   | 212 |
| chr17 | 53532174      | 53532385  | 212 |
| chr16 | 57020114      | 57020325  | 212 |
| chr15 | 25703390      | 25703601  | 212 |
| chr14 | 7485730       | 7485941   | 212 |
| chr14 | 1915208       | 1915419   | 212 |
| chr13 | 41636846      | 41637057  | 212 |
| chr12 | 82823911      | 82824122  | 212 |
| chr11 | 81397279      | 81397490  | 212 |
| chr10 | 10639185      | 10639396  | 212 |
| chrX  | 75497582      | 75497792  | 211 |
| chrX  | 62633154      | 62633364  | 211 |
| chrX  | 12317177      | 12317387  | 211 |
| chrX  | 702954 703164 | 211       |     |
| chr6  | 67999826      | 68000036  | 211 |
| chr5  | 6411793       | 6412003   | 211 |
| chr4  | 67501066      | 67501276  | 211 |

|       |           |           |     |
|-------|-----------|-----------|-----|
| chr4  | 45567439  | 45567649  | 211 |
| chr29 | 36370735  | 36370945  | 211 |
| chr29 | 31777985  | 31778195  | 211 |
| chr26 | 39227173  | 39227383  | 211 |
| chr26 | 21834229  | 21834439  | 211 |
| chr25 | 39871115  | 39871325  | 211 |
| chr21 | 24880614  | 24880824  | 211 |
| chr19 | 45209594  | 45209804  | 211 |
| chr18 | 63777023  | 63777233  | 211 |
| chr18 | 54686056  | 54686266  | 211 |
| chr18 | 39961239  | 39961449  | 211 |
| chr18 | 18013065  | 18013275  | 211 |
| chr16 | 46936770  | 46936980  | 211 |
| chr15 | 75283690  | 75283900  | 211 |
| chr15 | 28965022  | 28965232  | 211 |
| chr14 | 6865653   | 6865863   | 211 |
| chr11 | 91723421  | 91723631  | 211 |
| chr10 | 20841835  | 20842045  | 211 |
| chr10 | 17402862  | 17403072  | 211 |
| chr1  | 72976613  | 72976823  | 211 |
| chr1  | 72363270  | 72363480  | 211 |
| chrX  | 77467880  | 77468089  | 210 |
| chrX  | 71723848  | 71724057  | 210 |
| chrX  | 61876999  | 61877208  | 210 |
| chrX  | 48871800  | 48872009  | 210 |
| chrX  | 46703587  | 46703796  | 210 |
| chrX  | 33758691  | 33758900  | 210 |
| chrX  | 25324477  | 25324686  | 210 |
| chrX  | 22948831  | 22949040  | 210 |
| chrX  | 12922022  | 12922231  | 210 |
| chrX  | 9853484   | 9853693   | 210 |
| chr9  | 105399798 | 105400007 | 210 |
| chr9  | 33734256  | 33734465  | 210 |
| chr5  | 113202211 | 113202420 | 210 |
| chr5  | 111231737 | 111231946 | 210 |
| chr26 | 43058235  | 43058444  | 210 |
| chr24 | 59406451  | 59406660  | 210 |
| chr23 | 44404180  | 44404389  | 210 |
| chr22 | 16385206  | 16385415  | 210 |
| chr21 | 44300428  | 44300637  | 210 |
| chr2  | 129308604 | 129308813 | 210 |
| chr2  | 21057177  | 21057386  | 210 |
| chr19 | 45834885  | 45835094  | 210 |
| chr18 | 46874403  | 46874612  | 210 |
| chr18 | 26514497  | 26514706  | 210 |
| chr18 | 11653526  | 11653735  | 210 |
| chr18 | 11183803  | 11184012  | 210 |
| chr12 | 31503271  | 31503480  | 210 |
| chr11 | 66101766  | 66101975  | 210 |
| chr11 | 43193206  | 43193415  | 210 |

|       |           |           |     |
|-------|-----------|-----------|-----|
| chr1  | 99265116  | 99265325  | 210 |
| chr1  | 68383451  | 68383660  | 210 |
| chrX  | 63690048  | 63690256  | 209 |
| chrX  | 29637716  | 29637924  | 209 |
| chrX  | 1918080   | 1918288   | 209 |
| chr9  | 83800606  | 83800814  | 209 |
| chr6  | 32600040  | 32600248  | 209 |
| chr4  | 69322484  | 69322692  | 209 |
| chr3  | 119361491 | 119361699 | 209 |
| chr3  | 105471016 | 105471224 | 209 |
| chr27 | 26753390  | 26753598  | 209 |
| chr27 | 21887440  | 21887648  | 209 |
| chr25 | 21028159  | 21028367  | 209 |
| chr23 | 11080369  | 11080577  | 209 |
| chr23 | 10906955  | 10907163  | 209 |
| chr23 | 9715598   | 9715806   | 209 |
| chr19 | 22557893  | 22558101  | 209 |
| chr18 | 62509632  | 62509840  | 209 |
| chr18 | 17921864  | 17922072  | 209 |
| chr17 | 70341583  | 70341791  | 209 |
| chr17 | 62965653  | 62965861  | 209 |
| chr16 | 43832429  | 43832637  | 209 |
| chr13 | 74803140  | 74803348  | 209 |
| chr13 | 60097437  | 60097645  | 209 |
| chr13 | 59644465  | 59644673  | 209 |
| chr13 | 30831435  | 30831643  | 209 |
| chr12 | 15254590  | 15254798  | 209 |
| chr11 | 84636632  | 84636840  | 209 |
| chr1  | 81365284  | 81365492  | 209 |
| chrX  | 64382600  | 64382807  | 208 |
| chrX  | 60524238  | 60524445  | 208 |
| chrX  | 45581896  | 45582103  | 208 |
| chrX  | 2455027   | 2455234   | 208 |
| chr8  | 78846924  | 78847131  | 208 |
| chr3  | 4355066   | 4355273   | 208 |
| chr25 | 39246683  | 39246890  | 208 |
| chr24 | 59586365  | 59586572  | 208 |
| chr22 | 18561270  | 18561477  | 208 |
| chr21 | 1848251   | 1848458   | 208 |
| chr2  | 130995828 | 130996035 | 208 |
| chr19 | 30372769  | 30372976  | 208 |
| chr19 | 29124822  | 29125029  | 208 |
| chr18 | 51168938  | 51169145  | 208 |
| chr17 | 72899784  | 72899991  | 208 |
| chr17 | 62051042  | 62051249  | 208 |
| chr15 | 39920201  | 39920408  | 208 |
| chr14 | 7023594   | 7023801   | 208 |
| chr13 | 73554046  | 73554253  | 208 |
| chr11 | 86243448  | 86243655  | 208 |
| chrX  | 53820726  | 53820932  | 207 |



|       |           |           |     |
|-------|-----------|-----------|-----|
| chrX  | 984137    | 984343    | 207 |
| chr8  | 65147041  | 65147247  | 207 |
| chr8  | 10812069  | 10812275  | 207 |
| chr7  | 17406181  | 17406387  | 207 |
| chr5  | 112164515 | 112164721 | 207 |
| chr4  | 99454250  | 99454456  | 207 |
| chr4  | 28504016  | 28504222  | 207 |
| chr3  | 108415046 | 108415252 | 207 |
| chr3  | 105336506 | 105336712 | 207 |
| chr23 | 42796613  | 42796819  | 207 |
| chr23 | 15548260  | 15548466  | 207 |
| chr22 | 16219894  | 16220100  | 207 |
| chr19 | 54362435  | 54362641  | 207 |
| chr19 | 32912800  | 32913006  | 207 |
| chr18 | 65671104  | 65671310  | 207 |
| chr16 | 20758439  | 20758645  | 207 |
| chr15 | 26875814  | 26876020  | 207 |
| chr14 | 4067361   | 4067567   | 207 |
| chr13 | 40546663  | 40546869  | 207 |
| chr13 | 35984149  | 35984355  | 207 |
| chr11 | 75149668  | 75149874  | 207 |
| chr11 | 20762995  | 20763201  | 207 |
| chr10 | 84217906  | 84218112  | 207 |
| chr1  | 9859657   | 9859863   | 207 |
| chr1  | 716861    | 717067    | 207 |
| chrX  | 56578206  | 56578411  | 206 |
| chrX  | 56415349  | 56415554  | 206 |
| chrX  | 53822605  | 53822810  | 206 |
| chrX  | 29960187  | 29960392  | 206 |
| chrX  | 6580410   | 6580615   | 206 |
| chr9  | 90378184  | 90378389  | 206 |
| chr5  | 114235917 | 114236122 | 206 |
| chr5  | 75914183  | 75914388  | 206 |
| chr4  | 96105563  | 96105768  | 206 |
| chr3  | 109731061 | 109731266 | 206 |
| chr3  | 15652633  | 15652838  | 206 |
| chr27 | 38671190  | 38671395  | 206 |
| chr26 | 44710564  | 44710769  | 206 |
| chr26 | 43260036  | 43260241  | 206 |
| chr23 | 18425079  | 18425284  | 206 |
| chr23 | 11073620  | 11073825  | 206 |
| chr20 | 30193683  | 30193888  | 206 |
| chr2  | 49413547  | 49413752  | 206 |
| chr18 | 42955259  | 42955464  | 206 |
| chr18 | 22136072  | 22136277  | 206 |
| chr17 | 19697970  | 19698175  | 206 |
| chr16 | 41556096  | 41556301  | 206 |
| chr16 | 30387944  | 30388149  | 206 |
| chr13 | 66025651  | 66025856  | 206 |
| chr12 | 31286036  | 31286241  | 206 |

|       |               |           |     |
|-------|---------------|-----------|-----|
| chr11 | 102403333     | 102403538 | 206 |
| chr11 | 89680082      | 89680287  | 206 |
| chr11 | 7779138       | 7779343   | 206 |
| chr10 | 85845701      | 85845906  | 206 |
| chr1  | 88889437      | 88889642  | 206 |
| chr1  | 373916 374121 | 206       |     |
| chrX  | 22114596      | 22114800  | 205 |
| chrX  | 19111678      | 19111882  | 205 |
| chrX  | 9503562       | 9503766   | 205 |
| chr28 | 1767746       | 1767950   | 205 |
| chr27 | 15770195      | 15770399  | 205 |
| chr2  | 128026197     | 128026401 | 205 |
| chr18 | 11364253      | 11364457  | 205 |
| chr18 | 9699352       | 9699556   | 205 |
| chr17 | 54370875      | 54371079  | 205 |
| chr17 | 47342932      | 47343136  | 205 |
| chr14 | 29926216      | 29926420  | 205 |
| chr14 | 6993733       | 6993937   | 205 |
| chr13 | 39084948      | 39085152  | 205 |
| chr11 | 103314748     | 103314952 | 205 |
| chr10 | 50660097      | 50660301  | 205 |
| chr10 | 17329613      | 17329817  | 205 |
| chrX  | 54140784      | 54140987  | 204 |
| chrX  | 9644625       | 9644828   | 204 |
| chr5  | 107694846     | 107695049 | 204 |
| chr29 | 39224417      | 39224620  | 204 |
| chr29 | 26615894      | 26616097  | 204 |
| chr28 | 34737815      | 34738018  | 204 |
| chr26 | 50663769      | 50663972  | 204 |
| chr26 | 38109739      | 38109942  | 204 |
| chr21 | 66087526      | 66087729  | 204 |
| chr20 | 72610680      | 72610883  | 204 |
| chr2  | 73255787      | 73255990  | 204 |
| chr16 | 56107062      | 56107265  | 204 |
| chr12 | 84276758      | 84276961  | 204 |
| chr10 | 22979229      | 22979432  | 204 |
| chr10 | 21114182      | 21114385  | 204 |
| chrX  | 80367287      | 80367489  | 203 |
| chrX  | 6469818       | 6470020   | 203 |
| chr7  | 13102304      | 13102506  | 203 |
| chr5  | 122818949     | 122819151 | 203 |
| chr3  | 89193320      | 89193522  | 203 |
| chr29 | 33071025      | 33071227  | 203 |
| chr28 | 25489559      | 25489761  | 203 |
| chr22 | 47993229      | 47993431  | 203 |
| chr21 | 6517610       | 6517812   | 203 |
| chr13 | 80691833      | 80692035  | 203 |
| chr11 | 104943878     | 104944080 | 203 |
| chrM  | 6073 6274     | 202       |     |
| chr7  | 21115916      | 21116117  | 202 |

|       |           |           |     |
|-------|-----------|-----------|-----|
| chr5  | 76858571  | 76858772  | 202 |
| chr5  | 60444923  | 60445124  | 202 |
| chr4  | 106690079 | 106690280 | 202 |
| chr27 | 38289854  | 38290055  | 202 |
| chr24 | 1766925   | 1767126   | 202 |
| chr2  | 132248738 | 132248939 | 202 |
| chr19 | 51920383  | 51920584  | 202 |
| chr12 | 32140578  | 32140779  | 202 |
| chr10 | 24182148  | 24182349  | 202 |
| chr6  | 120424086 | 120424286 | 201 |
| chr4  | 96864697  | 96864897  | 201 |
| chr24 | 30382315  | 30382515  | 201 |
| chr21 | 64473675  | 64473875  | 201 |
| chr19 | 60161703  | 60161903  | 201 |
| chr13 | 58183554  | 58183754  | 201 |
| chr10 | 59555538  | 59555738  | 201 |
| chr8  | 73281712  | 73281911  | 200 |
| chr7  | 10278388  | 10278587  | 200 |
| chr23 | 8190826   | 8191025   | 200 |
| chr14 | 30889311  | 30889510  | 200 |
| chr23 | 27765265  | 27765666  | 402 |
| chr24 | 51339193  | 51339515  | 323 |
| chr23 | 51682958  | 51683262  | 305 |
| chr8  | 24386450  | 24386821  | 372 |
| chr22 | 59994944  | 59995317  | 374 |
| chr17 | 64603271  | 64603738  | 468 |
| chrX  | 35513874  | 35514260  | 387 |
| chr19 | 41870065  | 41870440  | 376 |
| chr8  | 73728496  | 73728851  | 356 |
| chr2  | 35952523  | 35952870  | 348 |
| chr9  | 90304263  | 90304597  | 335 |
| chr23 | 35072559  | 35072798  | 240 |
| chr24 | 1321919   | 1322157   | 239 |
| chr8  | 73324964  | 73325191  | 228 |
| chr11 | 77910832  | 77911045  | 214 |
| chr1  | 118784066 | 118784277 | 212 |
| chr1  | 19387671  | 19387880  | 210 |
| chrX  | 85128083  | 85128283  | 201 |
| chr11 | 82667029  | 82667376  | 348 |
| chr25 | 26078304  | 26078846  | 543 |
| chrX  | 71038878  | 71039390  | 513 |
| chr8  | 6482321   | 6482823   | 503 |
| chr10 | 90923052  | 90923539  | 488 |
| chr29 | 49040898  | 49041370  | 473 |
| chr12 | 77022659  | 77023128  | 470 |
| chr2  | 139233764 | 139234225 | 462 |
| chr22 | 5683327   | 5683786   | 460 |
| chr28 | 34016763  | 34017213  | 451 |
| chr24 | 49366203  | 49366633  | 431 |
| chr13 | 55381710  | 55382130  | 421 |

|       |               |           |     |
|-------|---------------|-----------|-----|
| chr14 | 22791634      | 22792048  | 415 |
| chr10 | 17140638      | 17141045  | 408 |
| chrX  | 6663278       | 6663670   | 393 |
| chrX  | 74725624      | 74725993  | 370 |
| chr4  | 121079561     | 121079918 | 358 |
| chr2  | 129217927     | 129218248 | 322 |
| chrX  | 19856543      | 19856830  | 288 |
| chr2  | 130477061     | 130477341 | 281 |
| chrX  | 34099976      | 34100505  | 530 |
| chr12 | 31976156      | 31976658  | 503 |
| chr19 | 46895620      | 46896121  | 502 |
| chr21 | 13954111      | 13954559  | 449 |
| chrX  | 58724109      | 58724552  | 444 |
| chrX  | 364105 364546 | 442       |     |
| chrX  | 50402970      | 50403369  | 400 |
| chrX  | 80365089      | 80365486  | 398 |
| chr21 | 27374942      | 27375337  | 396 |
| chrX  | 6572512       | 6572905   | 394 |
| chr26 | 18731913      | 18732296  | 384 |
| chr9  | 52976527      | 52976880  | 354 |
| chrX  | 76861106      | 76861457  | 352 |
| chr1  | 22882637      | 22882974  | 338 |
| chr13 | 63433861      | 63434197  | 337 |
| chrX  | 6311861       | 6312186   | 326 |
| chr29 | 49127742      | 49127972  | 231 |
| chr22 | 23816644      | 23817188  | 545 |
| chr24 | 64955661      | 64956115  | 455 |
| chrX  | 2421131       | 2421556   | 426 |
| chr5  | 112192451     | 112192866 | 416 |
| chr17 | 70055207      | 70055605  | 399 |
| chr5  | 115826625     | 115827022 | 398 |
| chr13 | 65351387      | 65351764  | 378 |
| chr5  | 103817431     | 103817789 | 359 |
| chrX  | 14635268      | 14635613  | 346 |
| chr3  | 118163527     | 118163870 | 344 |
| chr18 | 43455762      | 43456091  | 330 |
| chr23 | 48569722      | 48570047  | 326 |
| chr1  | 77830789      | 77831083  | 295 |
| chr21 | 33997001      | 33997281  | 281 |
| chr6  | 115587246     | 115587523 | 278 |
| chr17 | 70831521      | 70831741  | 221 |
| chr2  | 24670333      | 24670776  | 444 |
| chrX  | 47644122      | 47644536  | 415 |
| chr4  | 121284706     | 121285115 | 410 |
| chr12 | 80142390      | 80142788  | 399 |
| chr13 | 82003119      | 82003514  | 396 |
| chr10 | 12727919      | 12728291  | 373 |
| chr15 | 28284780      | 28285118  | 339 |
| chr21 | 32959424      | 32959721  | 298 |
| chr6  | 45719637      | 45719904  | 268 |

|       |           |           |     |
|-------|-----------|-----------|-----|
| chr15 | 77400613  | 77400872  | 260 |
| chr2  | 21520448  | 21520697  | 250 |
| chr15 | 36262336  | 36263011  | 676 |
| chr3  | 20496223  | 20496662  | 440 |
| chr11 | 90418670  | 90419098  | 429 |
| chr5  | 10227077  | 10227497  | 421 |
| chr7  | 52230437  | 52230843  | 407 |
| chrX  | 72730902  | 72731300  | 399 |
| chr1  | 98406566  | 98406958  | 393 |
| chr3  | 122234756 | 122235142 | 387 |
| chr24 | 1193536   | 1193922   | 387 |
| chr8  | 24395277  | 24395658  | 382 |
| chr29 | 38883811  | 38884192  | 382 |
| chr18 | 16205283  | 16205655  | 373 |
| chrX  | 74483378  | 74483749  | 372 |
| chrX  | 73169556  | 73169914  | 359 |
| chr5  | 70664446  | 70664804  | 359 |
| chr13 | 69265744  | 69266099  | 356 |
| chr16 | 44113331  | 44113679  | 349 |
| chr15 | 37126992  | 37127339  | 348 |
| chr10 | 20476002  | 20476343  | 342 |
| chr3  | 119553356 | 119553694 | 339 |
| chr16 | 60222933  | 60223268  | 336 |
| chr8  | 73735334  | 73735668  | 335 |
| chr3  | 92502623  | 92502952  | 330 |
| chr5  | 12275734  | 12276062  | 329 |
| chr16 | 38568112  | 38568437  | 326 |
| chr2  | 30966274  | 30966596  | 323 |
| chr3  | 105118112 | 105118428 | 317 |
| chr17 | 63956070  | 63956382  | 313 |
| chr5  | 30470274  | 30470578  | 305 |
| chrX  | 8953895   | 8954198   | 304 |
| chr8  | 73813857  | 73814160  | 304 |
| chrX  | 20307361  | 20307663  | 303 |
| chr11 | 100886853 | 100887152 | 300 |
| chr3  | 120629756 | 120630052 | 297 |
| chrX  | 20086664  | 20086956  | 293 |
| chr13 | 35670742  | 35671028  | 287 |
| chr8  | 99337861  | 99338142  | 282 |
| chr21 | 20008662  | 20008941  | 280 |
| chr8  | 73926394  | 73926669  | 276 |
| chr27 | 23988574  | 23988845  | 272 |
| chr9  | 87734353  | 87734620  | 268 |
| chr8  | 73925975  | 73926235  | 261 |
| chr8  | 73845382  | 73845639  | 258 |
| chr1  | 2272498   | 2272750   | 253 |
| chr3  | 106235509 | 106235760 | 252 |
| chr21 | 64274025  | 64274276  | 252 |
| chr19 | 32817708  | 32817959  | 252 |
| chr4  | 68219264  | 68219512  | 249 |

|       |               |           |     |
|-------|---------------|-----------|-----|
| chr13 | 41077754      | 41077995  | 242 |
| chr12 | 58301589      | 58301830  | 242 |
| chr14 | 21035165      | 21035405  | 241 |
| chr20 | 33562414      | 33562652  | 239 |
| chrX  | 62506494      | 62506722  | 229 |
| chr18 | 18507084      | 18507306  | 223 |
| chr15 | 10154493      | 10154715  | 223 |
| chr13 | 143356 143576 | 221       |     |
| chr13 | 12152938      | 12153154  | 217 |
| chrX  | 55124474      | 55124682  | 209 |
| chr4  | 31659607      | 31659985  | 379 |
| chr14 | 57404357      | 57404572  | 216 |
| chr15 | 66617533      | 66617913  | 381 |
| chr2  | 101672032     | 101672447 | 416 |
| chrX  | 21563906      | 21564509  | 604 |
| chrM  | 2515 3041     | 527       |     |
| chr4  | 35126315      | 35126693  | 379 |
| chr1  | 66754990      | 66755332  | 343 |
| chrX  | 69329466      | 69329795  | 330 |
| chr29 | 49347485      | 49347800  | 316 |
| chr2  | 130103686     | 130104169 | 484 |
| chr24 | 42336898      | 42337294  | 397 |
| chrX  | 50259728      | 50260114  | 387 |
| chrX  | 65081014      | 65081393  | 380 |
| chr22 | 50038993      | 50039305  | 313 |
| chr25 | 426155 426461 | 307       |     |
| chr8  | 73408353      | 73408652  | 300 |
| chr19 | 65235971      | 65236245  | 275 |
| chr1  | 153862883     | 153863126 | 244 |
| chr13 | 43616056      | 43616298  | 243 |
| chr27 | 30430905      | 30431129  | 225 |
| chr9  | 90430873      | 90431090  | 218 |
| chr25 | 34927162      | 34927375  | 214 |
| chr20 | 61430790      | 61431002  | 213 |
| chr19 | 19110963      | 19111173  | 211 |
| chr1  | 115926333     | 115926542 | 210 |
| chr21 | 59475887      | 59476092  | 206 |
| chr15 | 32664985      | 32665775  | 791 |
| chr16 | 47114333      | 47115067  | 735 |
| chr22 | 56295899      | 56296615  | 717 |
| chr5  | 31247254      | 31247963  | 710 |
| chr22 | 30186920      | 30187626  | 707 |
| chr15 | 27456529      | 27457223  | 695 |
| chr4  | 72799653      | 72800342  | 690 |
| chr23 | 18625326      | 18625990  | 665 |
| chrX  | 10235735      | 10236390  | 656 |
| chr11 | 77651830      | 77652469  | 640 |
| chr12 | 80046962      | 80047588  | 627 |
| chr1  | 74734695      | 74735321  | 627 |
| chr10 | 78653555      | 78654176  | 622 |

|       |               |           |     |
|-------|---------------|-----------|-----|
| chr7  | 19886146      | 19886766  | 621 |
| chr8  | 72313610      | 72314225  | 616 |
| chr2  | 135081742     | 135082350 | 609 |
| chr17 | 63555965      | 63556549  | 585 |
| chr10 | 91023191      | 91023770  | 580 |
| chr1  | 68477139      | 68477718  | 580 |
| chr24 | 43589461      | 43590037  | 577 |
| chrX  | 73199644      | 73200218  | 575 |
| chrX  | 77440218      | 77440781  | 564 |
| chr1  | 85432293      | 85432856  | 564 |
| chr10 | 16985677      | 16986233  | 557 |
| chr8  | 54242969      | 54243519  | 551 |
| chrX  | 35522554      | 35523103  | 550 |
| chr29 | 35169543      | 35170091  | 549 |
| chr17 | 70038472      | 70039011  | 540 |
| chr23 | 27591687      | 27592222  | 536 |
| chrX  | 20714339      | 20714871  | 533 |
| chr12 | 32156992      | 32157521  | 530 |
| chr15 | 25682316      | 25682840  | 525 |
| chr23 | 48793421      | 48793942  | 522 |
| chr25 | 40419040      | 40419560  | 521 |
| chrX  | 2456486       | 2457004   | 519 |
| chr11 | 75099008      | 75099520  | 513 |
| chr13 | 45334748      | 45335259  | 512 |
| chrX  | 20507763      | 20508271  | 509 |
| chr28 | 17382083      | 17382591  | 509 |
| chr14 | 15114872      | 15115380  | 509 |
| chr23 | 46358539      | 46359045  | 507 |
| chr4  | 67705765      | 67706270  | 506 |
| chr10 | 13575061      | 13575566  | 506 |
| chr25 | 34285128      | 34285630  | 503 |
| chr23 | 28922452      | 28922954  | 503 |
| chr10 | 70312638      | 70313137  | 500 |
| chr10 | 20456744      | 20457243  | 500 |
| chr26 | 44035220      | 44035715  | 496 |
| chr8  | 92859324      | 92859817  | 494 |
| chr16 | 39840157      | 39840650  | 494 |
| chr2  | 111545629     | 111546118 | 490 |
| chr29 | 37019123      | 37019611  | 489 |
| chr3  | 15637910      | 15638394  | 485 |
| chr2  | 139855574     | 139856058 | 485 |
| chr9  | 31069775      | 31070258  | 484 |
| chr19 | 63578488      | 63578965  | 478 |
| chrX  | 812301 812770 | 470       |     |
| chr8  | 92876386      | 92876854  | 469 |
| chr5  | 50537936      | 50538397  | 462 |
| chr15 | 64286872      | 64287330  | 459 |
| chrX  | 77224599      | 77225055  | 457 |
| chr25 | 37445820      | 37446276  | 457 |
| chr18 | 22250924      | 22251380  | 457 |

|       |           |           |     |
|-------|-----------|-----------|-----|
| chr17 | 68317275  | 68317730  | 456 |
| chr17 | 3442722   | 3443176   | 455 |
| chr8  | 109045981 | 109046434 | 454 |
| chr18 | 56886983  | 56887436  | 454 |
| chr10 | 21427232  | 21427685  | 454 |
| chr6  | 117548491 | 117548937 | 447 |
| chr13 | 77561225  | 77561668  | 444 |
| chr27 | 45264629  | 45265070  | 442 |
| chr17 | 62135067  | 62135508  | 442 |
| chr23 | 53033855  | 53034293  | 439 |
| chr13 | 80580154  | 80580591  | 438 |
| chrX  | 50832295  | 50832729  | 435 |
| chr29 | 42929073  | 42929504  | 432 |
| chrX  | 8584422   | 8584852   | 431 |
| chr23 | 15908935  | 15909365  | 431 |
| chr19 | 7647927   | 7648356   | 430 |
| chr21 | 67981397  | 67981825  | 429 |
| chr1  | 148388216 | 148388643 | 428 |
| chr16 | 54354685  | 54355109  | 425 |
| chr4  | 121265441 | 121265864 | 424 |
| chr25 | 2344494   | 2344916   | 423 |
| chr10 | 4177295   | 4177716   | 422 |
| chr17 | 68438918  | 68439338  | 421 |
| chr6  | 121094124 | 121094543 | 420 |
| chrX  | 54935323  | 54935741  | 419 |
| chr8  | 105125762 | 105126179 | 418 |
| chr9  | 22763231  | 22763647  | 417 |
| chrX  | 56954332  | 56954747  | 416 |
| chr24 | 40388981  | 40389396  | 416 |
| chr18 | 56593664  | 56594076  | 413 |
| chr13 | 22156935  | 22157343  | 409 |
| chr7  | 81586172  | 81586578  | 407 |
| chrX  | 59914284  | 59914682  | 399 |
| chrX  | 30983483  | 30983881  | 399 |
| chrX  | 9703115   | 9703513   | 399 |
| chr7  | 20323728  | 20324126  | 399 |
| chr5  | 112961504 | 112961902 | 399 |
| chr16 | 42874358  | 42874756  | 399 |
| chr13 | 30155039  | 30155436  | 398 |
| chrX  | 10669011  | 10669407  | 397 |
| chr10 | 74694411  | 74694807  | 397 |
| chrX  | 3715152   | 3715547   | 396 |
| chr23 | 48618102  | 48618497  | 396 |
| chr2  | 134065685 | 134066080 | 396 |
| chr15 | 75248318  | 75248713  | 396 |
| chr25 | 18808121  | 18808515  | 395 |
| chr20 | 30445480  | 30445874  | 395 |
| chr13 | 55118250  | 55118644  | 395 |
| chr13 | 67125924  | 67126317  | 394 |
| chrX  | 36656183  | 36656575  | 393 |



|       |           |           |     |
|-------|-----------|-----------|-----|
| chr24 | 1392777   | 1393169   | 393 |
| chr23 | 9995064   | 9995456   | 393 |
| chr14 | 12409491  | 12409883  | 393 |
| chr14 | 1826806   | 1827198   | 393 |
| chr14 | 1573323   | 1573715   | 393 |
| chr18 | 51174295  | 51174686  | 392 |
| chr3  | 116204351 | 116204741 | 391 |
| chr19 | 60266747  | 60267137  | 391 |
| chr15 | 61073216  | 61073605  | 390 |
| chrX  | 39324205  | 39324593  | 389 |
| chr3  | 116930456 | 116930844 | 389 |
| chr28 | 42361575  | 42361963  | 389 |
| chr26 | 37630803  | 37631191  | 389 |
| chr11 | 89025813  | 89026201  | 389 |
| chr19 | 33274297  | 33274684  | 388 |
| chr6  | 107048734 | 107049120 | 387 |
| chr17 | 63142164  | 63142550  | 387 |
| chr10 | 60553729  | 60554115  | 387 |
| chr9  | 104938246 | 104938631 | 386 |
| chr19 | 28006721  | 28007106  | 386 |
| chr5  | 51890904  | 51891288  | 385 |
| chr2  | 114851257 | 114851641 | 385 |
| chr13 | 14685055  | 14685439  | 385 |
| chrX  | 53877794  | 53878177  | 384 |
| chr22 | 60490968  | 60491351  | 384 |
| chr22 | 17237436  | 17237819  | 384 |
| chr20 | 72955168  | 72955551  | 384 |
| chr19 | 44801217  | 44801600  | 384 |
| chr14 | 14076124  | 14076507  | 384 |
| chrX  | 63010073  | 63010455  | 383 |
| chrX  | 46911020  | 46911402  | 383 |
| chrX  | 34797969  | 34798351  | 383 |
| chr6  | 121066219 | 121066601 | 383 |
| chr3  | 110757759 | 110758141 | 383 |
| chr19 | 13793887  | 13794269  | 383 |
| chr18 | 39967062  | 39967444  | 383 |
| chr16 | 43833017  | 43833399  | 383 |
| chr28 | 25496161  | 25496542  | 382 |
| chrX  | 62497006  | 62497386  | 381 |
| chr18 | 23589430  | 23589810  | 381 |
| chrX  | 61180080  | 61180459  | 380 |
| chrX  | 8705892   | 8706271   | 380 |
| chr7  | 93951694  | 93952073  | 380 |
| chr27 | 42712128  | 42712507  | 380 |
| chr17 | 69201195  | 69201574  | 380 |
| chr1  | 2541470   | 2541849   | 380 |
| chrX  | 19445613  | 19445991  | 379 |
| chrX  | 72536066  | 72536443  | 378 |
| chr7  | 76995543  | 76995920  | 378 |
| chr5  | 122149383 | 122149760 | 378 |

|       |           |           |     |
|-------|-----------|-----------|-----|
| chr21 | 12354256  | 12354633  | 378 |
| chr1  | 68831823  | 68832200  | 378 |
| chr26 | 21115898  | 21116274  | 377 |
| chr24 | 48582442  | 48582818  | 377 |
| chr2  | 119572374 | 119572750 | 377 |
| chr18 | 62062316  | 62062692  | 377 |
| chrX  | 5939848   | 5940223   | 376 |
| chrX  | 18494958  | 18495332  | 375 |
| chr8  | 73107538  | 73107912  | 375 |
| chr13 | 38283936  | 38284310  | 375 |
| chrX  | 64862976  | 64863349  | 374 |
| chr29 | 26686493  | 26686866  | 374 |
| chr29 | 25939822  | 25940195  | 374 |
| chr21 | 2039064   | 2039437   | 374 |
| chr1  | 145724727 | 145725099 | 373 |
| chr7  | 16648468  | 16648839  | 372 |
| chr16 | 45980163  | 45980534  | 372 |
| chr16 | 40898841  | 40899212  | 372 |
| chr11 | 108116083 | 108116454 | 372 |
| chrX  | 9262476   | 9262846   | 371 |
| chr7  | 42933597  | 42933966  | 370 |
| chr28 | 34058595  | 34058964  | 370 |
| chr15 | 24645384  | 24645753  | 370 |
| chrX  | 37598496  | 37598864  | 369 |
| chr17 | 75886169  | 75886537  | 369 |
| chr14 | 9196501   | 9196869   | 369 |
| chrX  | 6578373   | 6578740   | 368 |
| chr13 | 41646370  | 41646737  | 368 |
| chr6  | 58825673  | 58826039  | 367 |
| chr5  | 30041221  | 30041587  | 367 |
| chr2  | 111351489 | 111351855 | 367 |
| chr17 | 69085940  | 69086306  | 367 |
| chrX  | 72293919  | 72294284  | 366 |
| chr1  | 82903223  | 82903588  | 366 |
| chr19 | 37032080  | 37032443  | 364 |
| chr13 | 77301062  | 77301425  | 364 |
| chr2  | 126049259 | 126049621 | 363 |
| chr19 | 47200382  | 47200744  | 363 |
| chr11 | 68585611  | 68585973  | 363 |
| chr1  | 158503802 | 158504164 | 363 |
| chr19 | 44880494  | 44880855  | 362 |
| chr16 | 45057712  | 45058073  | 362 |
| chr14 | 3127034   | 3127395   | 362 |
| chrX  | 8103577   | 8103937   | 361 |
| chr29 | 44531702  | 44532062  | 361 |
| chr19 | 58949487  | 58949847  | 361 |
| chr17 | 63398184  | 63398544  | 361 |
| chr13 | 77593745  | 77594105  | 361 |
| chr13 | 70250388  | 70250748  | 361 |
| chr24 | 36559072  | 36559431  | 360 |

|       |               |           |     |
|-------|---------------|-----------|-----|
| chr22 | 7214229       | 7214587   | 359 |
| chr6  | 105331723     | 105332080 | 358 |
| chr5  | 117518005     | 117518362 | 358 |
| chr27 | 23992004      | 23992361  | 358 |
| chr2  | 128586016     | 128586373 | 358 |
| chr10 | 17668939      | 17669296  | 358 |
| chrX  | 58768289      | 58768645  | 357 |
| chr7  | 108571351     | 108571707 | 357 |
| chr6  | 116414694     | 116415050 | 357 |
| chr10 | 12711579      | 12711935  | 357 |
| chr24 | 40237650      | 40238005  | 356 |
| chr27 | 23988847      | 23989201  | 355 |
| chr15 | 32602743      | 32603097  | 355 |
| chrX  | 36287013      | 36287366  | 354 |
| chr18 | 4348931       | 4349283   | 353 |
| chr1  | 74577758      | 74578110  | 353 |
| chrX  | 66071778      | 66072129  | 352 |
| chr9  | 90238121      | 90238472  | 352 |
| chr28 | 11891810      | 11892161  | 352 |
| chrX  | 404065 404415 | 351       |     |
| chr23 | 28537805      | 28538155  | 351 |
| chr9  | 97908227      | 97908576  | 350 |
| chr28 | 30521899      | 30522247  | 349 |
| chr28 | 9187368       | 9187716   | 349 |
| chr22 | 22044770      | 22045118  | 349 |
| chr19 | 42977933      | 42978281  | 349 |
| chr6  | 57814105      | 57814452  | 348 |
| chr26 | 18163869      | 18164216  | 348 |
| chr23 | 28108747      | 28109094  | 348 |
| chrX  | 36484504      | 36484850  | 347 |
| chr1  | 84796530      | 84796876  | 347 |
| chrX  | 74327248      | 74327593  | 346 |
| chr3  | 124893972     | 124894317 | 346 |
| chr18 | 24583382      | 24583727  | 346 |
| chr14 | 1731558       | 1731903   | 346 |
| chrX  | 78521155      | 78521499  | 345 |
| chr26 | 41862302      | 41862645  | 344 |
| chr18 | 11699732      | 11700075  | 344 |
| chr18 | 39918767      | 39919109  | 343 |
| chr16 | 40570664      | 40571006  | 343 |
| chr3  | 120752877     | 120753218 | 342 |
| chr12 | 10784158      | 10784499  | 342 |
| chrX  | 72820069      | 72820409  | 341 |
| chr7  | 14684588      | 14684928  | 341 |
| chr21 | 9525231       | 9525571   | 341 |
| chr20 | 60474578      | 60474918  | 341 |
| chr13 | 34776596      | 34776936  | 341 |
| chr25 | 33246287      | 33246626  | 340 |
| chrX  | 9185731       | 9186069   | 339 |
| chr7  | 62788434      | 62788772  | 339 |

|       |           |           |     |
|-------|-----------|-----------|-----|
| chr28 | 25440194  | 25440532  | 339 |
| chr3  | 110151259 | 110151596 | 338 |
| chr21 | 20680865  | 20681202  | 338 |
| chr20 | 49813401  | 49813738  | 338 |
| chr11 | 75068634  | 75068971  | 338 |
| chrX  | 36121272  | 36121608  | 337 |
| chr21 | 27022765  | 27023101  | 337 |
| chr12 | 30798962  | 30799298  | 337 |
| chr17 | 66160017  | 66160351  | 335 |
| chr15 | 32143247  | 32143581  | 335 |
| chr13 | 41086405  | 41086738  | 334 |
| chr13 | 40946336  | 40946669  | 334 |
| chr3  | 116140664 | 116140996 | 333 |
| chr29 | 35954448  | 35954780  | 333 |
| chr20 | 38468906  | 38469238  | 333 |
| chr14 | 8177332   | 8177664   | 333 |
| chr24 | 40358426  | 40358757  | 332 |
| chrX  | 63475213  | 63475543  | 331 |
| chr8  | 64973464  | 64973794  | 331 |
| chr8  | 24473739  | 24474069  | 331 |
| chr2  | 127199396 | 127199726 | 331 |
| chr12 | 64736885  | 64737214  | 330 |
| chrX  | 87049939  | 87050267  | 329 |
| chrX  | 20498144  | 20498472  | 329 |
| chr5  | 113169999 | 113170327 | 329 |
| chr13 | 66845632  | 66845960  | 329 |
| chr13 | 57365255  | 57365583  | 329 |
| chrX  | 62754179  | 62754506  | 328 |
| chr13 | 58337050  | 58337377  | 328 |
| chr10 | 25038029  | 25038356  | 328 |
| chrX  | 64986623  | 64986948  | 326 |
| chr4  | 122691456 | 122691781 | 326 |
| chr24 | 35255714  | 35256039  | 326 |
| chrX  | 73841185  | 73841509  | 325 |
| chr9  | 41875728  | 41876052  | 325 |
| chr26 | 39259241  | 39259565  | 325 |
| chrX  | 22049733  | 22050055  | 323 |
| chrX  | 12090248  | 12090569  | 322 |
| chr21 | 59729514  | 59729834  | 321 |
| chr21 | 18900399  | 18900719  | 321 |
| chr16 | 67448891  | 67449210  | 320 |
| chr15 | 36228939  | 36229258  | 320 |
| chr4  | 122713379 | 122713697 | 319 |
| chr22 | 53966284  | 53966602  | 319 |
| chr7  | 66553496  | 66553812  | 317 |
| chr20 | 8812109   | 8812425   | 317 |
| chr10 | 102968355 | 102968671 | 317 |
| chr2  | 139609304 | 139609619 | 316 |
| chr20 | 38404974  | 38405288  | 315 |
| chr8  | 72329678  | 72329990  | 313 |

|       |           |           |     |
|-------|-----------|-----------|-----|
| chr15 | 21107128  | 21107440  | 313 |
| chr2  | 136968612 | 136968923 | 312 |
| chrX  | 9002858   | 9003168   | 311 |
| chr3  | 104559655 | 104559965 | 311 |
| chr23 | 49739441  | 49739750  | 310 |
| chrX  | 32700323  | 32700631  | 309 |
| chr23 | 27296175  | 27296483  | 309 |
| chr19 | 29674975  | 29675282  | 308 |
| chrX  | 72775887  | 72776193  | 307 |
| chr20 | 70626553  | 70626859  | 307 |
| chr11 | 14111392  | 14111698  | 307 |
| chr15 | 22882399  | 22882704  | 306 |
| chr10 | 89395125  | 89395429  | 305 |
| chr7  | 37364253  | 37364556  | 304 |
| chr26 | 46939944  | 46940247  | 304 |
| chr29 | 38738809  | 38739111  | 303 |
| chr25 | 18660051  | 18660353  | 303 |
| chr6  | 121784579 | 121784879 | 301 |
| chr14 | 42481325  | 42481624  | 300 |
| chrX  | 66848308  | 66848606  | 299 |
| chrX  | 34099676  | 34099974  | 299 |
| chr5  | 120425552 | 120425849 | 298 |
| chr13 | 52089947  | 52090244  | 298 |
| chr7  | 60960751  | 60961047  | 297 |
| chr20 | 61761969  | 61762264  | 296 |
| chr16 | 54165737  | 54166032  | 296 |
| chr2  | 110582332 | 110582626 | 295 |
| chr11 | 82848085  | 82848379  | 295 |
| chr21 | 31052095  | 31052388  | 294 |
| chr3  | 125754166 | 125754456 | 291 |
| chr12 | 27888887  | 27889176  | 290 |
| chr11 | 91414831  | 91415120  | 290 |
| chr21 | 62128656  | 62128944  | 289 |
| chr19 | 23698730  | 23699018  | 289 |
| chr15 | 23533005  | 23533291  | 287 |
| chrX  | 48114757  | 48115041  | 285 |
| chr16 | 44382008  | 44382292  | 285 |
| chrX  | 67047913  | 67048195  | 283 |
| chrX  | 37438068  | 37438350  | 283 |
| chrX  | 48699488  | 48699769  | 282 |
| chr17 | 59145665  | 59145945  | 281 |
| chr12 | 32231717  | 32231997  | 281 |
| chr5  | 115690840 | 115691119 | 280 |
| chrX  | 13792658  | 13792935  | 278 |
| chr9  | 21981296  | 21981569  | 274 |
| chr4  | 6113912   | 6114184   | 273 |
| chr15 | 21502878  | 21503148  | 271 |
| chr8  | 73300221  | 73300488  | 268 |
| chr7  | 4937375   | 4937642   | 268 |
| chr3  | 123580291 | 123580558 | 268 |

|       |               |           |     |
|-------|---------------|-----------|-----|
| chrX  | 30839687      | 30839950  | 264 |
| chrX  | 21575238      | 21575498  | 261 |
| chrX  | 12152221      | 12152478  | 258 |
| chr23 | 35047037      | 35047292  | 256 |
| chr14 | 435319 435574 | 256       |     |
| chr28 | 3737297       | 3737550   | 254 |
| chr19 | 60237955      | 60238208  | 254 |
| chr19 | 39107437      | 39107690  | 254 |
| chrX  | 78353005      | 78353254  | 250 |
| chrX  | 74421754      | 74422003  | 250 |
| chr16 | 39373118      | 39373366  | 249 |
| chrX  | 46220314      | 46220555  | 242 |
| chr22 | 58298775      | 58299016  | 242 |
| chr21 | 59524588      | 59524828  | 241 |
| chr7  | 50364367      | 50364606  | 240 |
| chr18 | 57987659      | 57987898  | 240 |
| chr18 | 11189879      | 11190118  | 240 |
| chr24 | 44112303      | 44112538  | 236 |
| chr15 | 71941135      | 71941367  | 233 |
| chr11 | 51833337      | 51833569  | 233 |
| chr5  | 118471760     | 118471980 | 221 |
| chr10 | 4385621       | 4385839   | 219 |
| chr3  | 109754139     | 109754351 | 213 |
| chr19 | 58565874      | 58566556  | 683 |
| chr19 | 43098453      | 43099096  | 644 |
| chr3  | 113388435     | 113389072 | 638 |
| chr13 | 59095105      | 59095736  | 632 |
| chrX  | 75873511      | 75874135  | 625 |
| chr13 | 68515116      | 68515736  | 621 |
| chr13 | 68897925      | 68898541  | 617 |
| chr23 | 14258907      | 14259516  | 610 |
| chr6  | 63033366      | 63033956  | 591 |
| chrX  | 10325704      | 10326289  | 586 |
| chr29 | 44663492      | 44664075  | 584 |
| chr20 | 6592329       | 6592911   | 583 |
| chrX  | 46624684      | 46625244  | 561 |
| chr3  | 83109302      | 83109862  | 561 |
| chrX  | 53887334      | 53887893  | 560 |
| chr18 | 63520010      | 63520565  | 556 |
| chr11 | 74210854      | 74211405  | 552 |
| chr13 | 75769737      | 75770287  | 551 |
| chr8  | 91552850      | 91553398  | 549 |
| chrX  | 8418393       | 8418935   | 543 |
| chrX  | 65778437      | 65778975  | 539 |
| chr16 | 44391644      | 44392182  | 539 |
| chr4  | 121506597     | 121507133 | 537 |
| chr10 | 20455866      | 20456397  | 532 |
| chr22 | 60031333      | 60031853  | 521 |
| chr19 | 11016676      | 11017193  | 518 |
| chr11 | 84322511      | 84323024  | 514 |

|       |               |           |     |
|-------|---------------|-----------|-----|
| chrX  | 58104988      | 58105498  | 511 |
| chr18 | 24328284      | 24328794  | 511 |
| chrX  | 12234280      | 12234785  | 506 |
| chr13 | 66720179      | 66720679  | 501 |
| chr7  | 37491067      | 37491563  | 497 |
| chr1  | 460987 461478 | 492       |     |
| chrX  | 19640387      | 19640876  | 490 |
| chr5  | 79185368      | 79185855  | 488 |
| chr22 | 32928082      | 32928565  | 484 |
| chr24 | 26199576      | 26200056  | 481 |
| chr13 | 75618399      | 75618871  | 473 |
| chrX  | 50390618      | 50391087  | 470 |
| chr12 | 15782060      | 15782527  | 468 |
| chr1  | 112146341     | 112146808 | 468 |
| chr7  | 19217068      | 19217534  | 467 |
| chr19 | 46828571      | 46829035  | 465 |
| chr17 | 70308033      | 70308494  | 462 |
| chr3  | 116219122     | 116219582 | 461 |
| chr19 | 45183604      | 45184063  | 460 |
| chrX  | 6301968       | 6302425   | 458 |
| chr5  | 30495030      | 30495485  | 456 |
| chr7  | 1880405       | 1880859   | 455 |
| chr19 | 44892479      | 44892931  | 453 |
| chr22 | 56179100      | 56179551  | 452 |
| chr19 | 37871934      | 37872384  | 451 |
| chr1  | 10170479      | 10170923  | 445 |
| chrX  | 36850126      | 36850569  | 444 |
| chr3  | 22998776      | 22999217  | 442 |
| chr1  | 1593121       | 1593558   | 438 |
| chr21 | 18743367      | 18743803  | 437 |
| chr1  | 99903849      | 99904284  | 436 |
| chrX  | 20453313      | 20453747  | 435 |
| chr12 | 35761335      | 35761769  | 435 |
| chr15 | 30162238      | 30162671  | 434 |
| chrX  | 72547976      | 72548405  | 430 |
| chrX  | 53373108      | 53373534  | 427 |
| chrX  | 6282280       | 6282706   | 427 |
| chrX  | 21489692      | 21490116  | 425 |
| chr9  | 67227192      | 67227614  | 423 |
| chr7  | 19972511      | 19972933  | 423 |
| chr17 | 64101479      | 64101901  | 423 |
| chr17 | 48190179      | 48190598  | 420 |
| chr22 | 39805637      | 39806054  | 418 |
| chr15 | 25790180      | 25790597  | 418 |
| chrX  | 39651832      | 39652247  | 416 |
| chrX  | 59322939      | 59323353  | 415 |
| chr24 | 43704506      | 43704919  | 414 |
| chr19 | 58753016      | 58753424  | 409 |
| chr12 | 32861628      | 32862036  | 409 |
| chr19 | 54380223      | 54380629  | 407 |

|       |               |           |     |
|-------|---------------|-----------|-----|
| chr14 | 42304482      | 42304888  | 407 |
| chr25 | 34415347      | 34415752  | 406 |
| chr4  | 69679920      | 69680324  | 405 |
| chrX  | 42823378      | 42823781  | 404 |
| chr6  | 46630553      | 46630954  | 402 |
| chr3  | 21897296      | 21897696  | 401 |
| chr18 | 32926452      | 32926851  | 400 |
| chrX  | 64879080      | 64879478  | 399 |
| chrX  | 48861611      | 48862009  | 399 |
| chrX  | 22023694      | 22024092  | 399 |
| chrX  | 18878039      | 18878437  | 399 |
| chrX  | 11958686      | 11959084  | 399 |
| chrX  | 10096569      | 10096967  | 399 |
| chrX  | 8259652       | 8260050   | 399 |
| chrX  | 6563295       | 6563693   | 399 |
| chr8  | 73314326      | 73314724  | 399 |
| chr7  | 14932616      | 14933014  | 399 |
| chr5  | 90130535      | 90130933  | 399 |
| chr5  | 82080291      | 82080689  | 399 |
| chr5  | 38529546      | 38529944  | 399 |
| chr4  | 97857829      | 97858227  | 399 |
| chr3  | 119662375     | 119662773 | 399 |
| chr3  | 110313486     | 110313884 | 399 |
| chr3  | 17422291      | 17422689  | 399 |
| chr3  | 7800518       | 7800916   | 399 |
| chr28 | 7321405       | 7321803   | 399 |
| chr28 | 431570 431968 | 399       |     |
| chr26 | 44236355      | 44236753  | 399 |
| chr25 | 44039756      | 44040154  | 399 |
| chr25 | 1942952       | 1943350   | 399 |
| chr24 | 40399701      | 40400099  | 399 |
| chr23 | 19628102      | 19628500  | 399 |
| chr21 | 5892097       | 5892495   | 399 |
| chr19 | 59690765      | 59691163  | 399 |
| chr19 | 57987090      | 57987488  | 399 |
| chr19 | 41867728      | 41868126  | 399 |
| chr19 | 26252137      | 26252535  | 399 |
| chr17 | 61287460      | 61287858  | 399 |
| chr16 | 75228441      | 75228839  | 399 |
| chr16 | 68726897      | 68727295  | 399 |
| chr16 | 48056839      | 48057237  | 399 |
| chr16 | 38768250      | 38768648  | 399 |
| chr13 | 61484126      | 61484524  | 399 |
| chr13 | 43425607      | 43426005  | 399 |
| chr13 | 40976296      | 40976694  | 399 |
| chr12 | 20909438      | 20909836  | 399 |
| chr11 | 89527635      | 89528033  | 399 |
| chr1  | 136908075     | 136908473 | 399 |
| chr26 | 13411243      | 13411640  | 398 |
| chr25 | 40192249      | 40192646  | 398 |



|       |               |           |     |
|-------|---------------|-----------|-----|
| chr2  | 3361047       | 3361444   | 398 |
| chr19 | 51900724      | 51901121  | 398 |
| chr19 | 23853333      | 23853730  | 398 |
| chr19 | 13440565      | 13440962  | 398 |
| chrX  | 74331108      | 74331504  | 397 |
| chrX  | 19869822      | 19870218  | 397 |
| chr4  | 120871968     | 120872364 | 397 |
| chr15 | 30354202      | 30354598  | 397 |
| chrX  | 10063423      | 10063818  | 396 |
| chr13 | 59705345      | 59705740  | 396 |
| chr19 | 45199351      | 45199745  | 395 |
| chr19 | 22339886      | 22340280  | 395 |
| chr18 | 51540981      | 51541375  | 395 |
| chr17 | 70433751      | 70434145  | 395 |
| chr14 | 20760691      | 20761085  | 395 |
| chrX  | 54001359      | 54001752  | 394 |
| chr23 | 18772490      | 18772883  | 394 |
| chr12 | 31594663      | 31595056  | 394 |
| chr11 | 81036814      | 81037207  | 394 |
| chrX  | 55127561      | 55127953  | 393 |
| chrX  | 18743656      | 18744048  | 393 |
| chr8  | 73382920      | 73383312  | 393 |
| chr6  | 120743182     | 120743574 | 393 |
| chr24 | 64994827      | 64995219  | 393 |
| chr18 | 57140132      | 57140524  | 393 |
| chr15 | 26822811      | 26823203  | 393 |
| chrX  | 11476753      | 11477144  | 392 |
| chrX  | 2619081       | 2619472   | 392 |
| chr7  | 5181556       | 5181947   | 392 |
| chr5  | 120724910     | 120725301 | 392 |
| chr4  | 106964166     | 106964557 | 392 |
| chr29 | 42361303      | 42361694  | 392 |
| chr28 | 42094310      | 42094701  | 392 |
| chrX  | 50823386      | 50823776  | 391 |
| chr8  | 115079461     | 115079851 | 391 |
| chr5  | 30215321      | 30215711  | 391 |
| chr22 | 60004214      | 60004604  | 391 |
| chr28 | 33873033      | 33873422  | 390 |
| chr2  | 21997286      | 21997675  | 390 |
| chr13 | 28688067      | 28688456  | 390 |
| chr12 | 34258725      | 34259114  | 390 |
| chr11 | 100509629     | 100510018 | 390 |
| chr3  | 127814984     | 127815372 | 389 |
| chr21 | 34497695      | 34498083  | 389 |
| chr18 | 606571 606959 |           | 389 |
| chr17 | 68153143      | 68153531  | 389 |
| chr12 | 36429793      | 36430181  | 389 |
| chr12 | 34317442      | 34317830  | 389 |
| chrX  | 9658152       | 9658539   | 388 |
| chr3  | 51920598      | 51920985  | 388 |

|       |               |           |     |
|-------|---------------|-----------|-----|
| chr29 | 34294536      | 34294923  | 388 |
| chr26 | 42219921      | 42220308  | 388 |
| chr20 | 38658894      | 38659281  | 388 |
| chr18 | 26131058      | 26131445  | 388 |
| chr18 | 25476621      | 25477008  | 388 |
| chr13 | 37655641      | 37656028  | 388 |
| chr9  | 105004901     | 105005287 | 387 |
| chr5  | 101468648     | 101469034 | 387 |
| chr29 | 43148647      | 43149033  | 387 |
| chr23 | 16523904      | 16524290  | 387 |
| chr23 | 15896198      | 15896584  | 387 |
| chr19 | 30491943      | 30492329  | 387 |
| chr19 | 25426427      | 25426813  | 387 |
| chr17 | 18624806      | 18625192  | 387 |
| chrX  | 78194175      | 78194560  | 386 |
| chrX  | 64995977      | 64996362  | 386 |
| chr5  | 113131261     | 113131646 | 386 |
| chr5  | 29160868      | 29161253  | 386 |
| chr26 | 48456409      | 48456794  | 386 |
| chr25 | 26202003      | 26202388  | 386 |
| chr21 | 56670707      | 56671092  | 386 |
| chr13 | 46430992      | 46431377  | 386 |
| chr1  | 85640077      | 85640462  | 386 |
| chr8  | 10997796      | 10998180  | 385 |
| chr7  | 6527241       | 6527625   | 385 |
| chr6  | 118800515     | 118800899 | 385 |
| chr27 | 35409881      | 35410265  | 385 |
| chr8  | 108224578     | 108224961 | 384 |
| chr18 | 11556832      | 11557215  | 384 |
| chr14 | 3494337       | 3494720   | 384 |
| chr9  | 105915853     | 105916235 | 383 |
| chr7  | 42924075      | 42924457  | 383 |
| chr4  | 123282715     | 123283097 | 383 |
| chr2  | 132463825     | 132464207 | 383 |
| chr17 | 67492872      | 67493254  | 383 |
| chrX  | 32034587      | 32034968  | 382 |
| chr7  | 20477360      | 20477741  | 382 |
| chr6  | 120879523     | 120879904 | 382 |
| chr29 | 26475529      | 26475910  | 382 |
| chr29 | 291325 291706 | 382       |     |
| chr26 | 43596579      | 43596960  | 382 |
| chr24 | 1314244       | 1314625   | 382 |
| chr23 | 28820983      | 28821364  | 382 |
| chr19 | 27242224      | 27242605  | 382 |
| chr13 | 41837893      | 41838274  | 382 |
| chr12 | 82290262      | 82290643  | 382 |
| chr8  | 73524693      | 73525073  | 381 |
| chr5  | 102226204     | 102226584 | 381 |
| chr22 | 57332940      | 57333320  | 381 |
| chr2  | 22087282      | 22087662  | 381 |

|       |           |           |     |
|-------|-----------|-----------|-----|
| chr13 | 40485076  | 40485456  | 381 |
| chr13 | 17560617  | 17560997  | 381 |
| chr12 | 30957978  | 30958358  | 381 |
| chrX  | 56189488  | 56189867  | 380 |
| chr5  | 79200361  | 79200740  | 380 |
| chr26 | 15690440  | 15690819  | 380 |
| chr21 | 22343874  | 22344253  | 380 |
| chr10 | 70212057  | 70212436  | 380 |
| chrX  | 71893096  | 71893474  | 379 |
| chr8  | 111843769 | 111844147 | 379 |
| chr13 | 74577407  | 74577785  | 379 |
| chr1  | 124942763 | 124943141 | 379 |
| chr1  | 74924290  | 74924668  | 379 |
| chrX  | 57500045  | 57500422  | 378 |
| chr7  | 42926058  | 42926435  | 378 |
| chrX  | 79867986  | 79868362  | 377 |
| chr6  | 63038167  | 63038543  | 377 |
| chr5  | 118448918 | 118449294 | 377 |
| chr8  | 102176577 | 102176952 | 376 |
| chr25 | 37239302  | 37239677  | 376 |
| chr21 | 61662605  | 61662980  | 376 |
| chr2  | 127632501 | 127632876 | 376 |
| chr19 | 25263485  | 25263860  | 376 |
| chr11 | 77837946  | 77838321  | 376 |
| chr1  | 68809252  | 68809627  | 376 |
| chrX  | 58445177  | 58445551  | 375 |
| chrX  | 47399722  | 47400096  | 375 |
| chr3  | 122433161 | 122433535 | 375 |
| chr29 | 17985935  | 17986309  | 375 |
| chr21 | 16502777  | 16503151  | 375 |
| chr13 | 40334161  | 40334535  | 375 |
| chrX  | 64073595  | 64073968  | 374 |
| chrX  | 53316326  | 53316699  | 374 |
| chrX  | 20192525  | 20192898  | 374 |
| chr5  | 61800246  | 61800619  | 374 |
| chr19 | 18361010  | 18361383  | 374 |
| chr14 | 34028408  | 34028781  | 374 |
| chr13 | 69048330  | 69048703  | 374 |
| chrX  | 54283946  | 54284318  | 373 |
| chrX  | 29465014  | 29465386  | 373 |
| chrX  | 21227484  | 21227856  | 373 |
| chr6  | 46624441  | 46624813  | 373 |
| chr3  | 15543499  | 15543871  | 373 |
| chr18 | 43505687  | 43506059  | 373 |
| chr11 | 3190198   | 3190570   | 373 |
| chrX  | 8396097   | 8396468   | 372 |
| chr22 | 54054930  | 54055301  | 372 |
| chr12 | 32550549  | 32550920  | 372 |
| chrX  | 72124807  | 72125177  | 371 |
| chrX  | 65488744  | 65489114  | 371 |

|       |           |           |     |
|-------|-----------|-----------|-----|
| chr3  | 116496249 | 116496619 | 371 |
| chr25 | 37417727  | 37418097  | 371 |
| chr19 | 41321750  | 41322120  | 371 |
| chr18 | 11446874  | 11447244  | 371 |
| chr8  | 93148385  | 93148754  | 370 |
| chr20 | 6624084   | 6624453   | 370 |
| chr18 | 26286658  | 26287027  | 370 |
| chr17 | 68339005  | 68339374  | 370 |
| chrX  | 61212308  | 61212676  | 369 |
| chr9  | 104985040 | 104985408 | 369 |
| chr6  | 121010124 | 121010492 | 369 |
| chr4  | 106676686 | 106677054 | 369 |
| chr3  | 83523080  | 83523448  | 369 |
| chr21 | 67670398  | 67670766  | 369 |
| chr19 | 38615704  | 38616072  | 369 |
| chr16 | 47529483  | 47529851  | 369 |
| chrX  | 77200388  | 77200755  | 368 |
| chr27 | 1047530   | 1047897   | 368 |
| chr2  | 21545386  | 21545753  | 368 |
| chr15 | 24005042  | 24005409  | 368 |
| chr28 | 12471109  | 12471475  | 367 |
| chr13 | 42400003  | 42400369  | 367 |
| chrX  | 65667447  | 65667812  | 366 |
| chr29 | 33881690  | 33882055  | 366 |
| chr16 | 41470199  | 41470564  | 366 |
| chr15 | 51716840  | 51717205  | 366 |
| chr6  | 107264681 | 107265045 | 365 |
| chr29 | 38395949  | 38396313  | 365 |
| chr29 | 32613190  | 32613554  | 365 |
| chr19 | 58465783  | 58466147  | 365 |
| chr15 | 23743271  | 23743635  | 365 |
| chr12 | 9564806   | 9565170   | 365 |
| chrX  | 59202178  | 59202541  | 364 |
| chr29 | 33068696  | 33069059  | 364 |
| chr21 | 66337093  | 66337456  | 364 |
| chr13 | 73639843  | 73640206  | 364 |
| chr13 | 57317460  | 57317823  | 364 |
| chr11 | 77758882  | 77759245  | 364 |
| chr22 | 50042845  | 50043207  | 363 |
| chr2  | 134333400 | 134333762 | 363 |
| chr17 | 72757621  | 72757983  | 363 |
| chr17 | 69423071  | 69423433  | 363 |
| chr15 | 26713786  | 26714148  | 363 |
| chr13 | 56554938  | 56555300  | 363 |
| chr11 | 28327186  | 28327548  | 363 |
| chr8  | 64855839  | 64856200  | 362 |
| chr29 | 32150672  | 32151033  | 362 |
| chr2  | 21840271  | 21840632  | 362 |
| chrX  | 64499542  | 64499902  | 361 |
| chr4  | 99345072  | 99345432  | 361 |

|       |           |           |     |
|-------|-----------|-----------|-----|
| chr24 | 25460737  | 25461097  | 361 |
| chr19 | 46699762  | 46700122  | 361 |
| chr15 | 24010137  | 24010497  | 361 |
| chr13 | 70290988  | 70291348  | 361 |
| chr1  | 69526209  | 69526569  | 361 |
| chrX  | 35543786  | 35544145  | 360 |
| chrX  | 2011861   | 2012220   | 360 |
| chr9  | 45166888  | 45167247  | 360 |
| chr7  | 19223615  | 19223974  | 360 |
| chr27 | 35860510  | 35860869  | 360 |
| chr25 | 4649073   | 4649432   | 360 |
| chr20 | 71147789  | 71148148  | 360 |
| chr19 | 56476545  | 56476904  | 360 |
| chr15 | 30172847  | 30173206  | 360 |
| chr14 | 8182109   | 8182468   | 360 |
| chr14 | 7840772   | 7841131   | 360 |
| chr12 | 82242928  | 82243287  | 360 |
| chr12 | 29871838  | 29872197  | 360 |
| chr11 | 3866784   | 3867143   | 360 |
| chrX  | 20620468  | 20620826  | 359 |
| chr7  | 42786195  | 42786553  | 359 |
| chr5  | 125366293 | 125366651 | 359 |
| chr3  | 116019795 | 116020153 | 359 |
| chr15 | 29705367  | 29705725  | 359 |
| chr15 | 24593231  | 24593589  | 359 |
| chr10 | 17665599  | 17665957  | 359 |
| chrX  | 62713356  | 62713713  | 358 |
| chrX  | 50689780  | 50690137  | 358 |
| chrX  | 20890440  | 20890797  | 358 |
| chr9  | 26603141  | 26603498  | 358 |
| chr3  | 20459648  | 20460005  | 358 |
| chr26 | 41459258  | 41459615  | 358 |
| chr22 | 37919430  | 37919787  | 358 |
| chrX  | 34415207  | 34415563  | 357 |
| chrX  | 22461944  | 22462300  | 357 |
| chr29 | 33566876  | 33567232  | 357 |
| chr27 | 27394141  | 27394497  | 357 |
| chr19 | 39149931  | 39150287  | 357 |
| chr15 | 29253868  | 29254224  | 357 |
| chr13 | 65085474  | 65085830  | 357 |
| chr11 | 14205611  | 14205967  | 357 |
| chr10 | 68238619  | 68238975  | 357 |
| chr7  | 80924232  | 80924587  | 356 |
| chr5  | 10735196  | 10735551  | 356 |
| chr29 | 51705892  | 51706247  | 356 |
| chr21 | 25978899  | 25979254  | 356 |
| chr17 | 57684142  | 57684497  | 356 |
| chr13 | 75315592  | 75315947  | 356 |
| chr13 | 54792549  | 54792904  | 356 |
| chr13 | 38918005  | 38918360  | 356 |

|       |           |           |     |
|-------|-----------|-----------|-----|
| chr11 | 106294691 | 106295046 | 356 |
| chr3  | 7953209   | 7953563   | 355 |
| chr29 | 36176231  | 36176585  | 355 |
| chr19 | 61179856  | 61180210  | 355 |
| chr15 | 27541636  | 27541990  | 355 |
| chr13 | 60172408  | 60172762  | 355 |
| chr13 | 40917232  | 40917586  | 355 |
| chr12 | 30784419  | 30784773  | 355 |
| chr11 | 106383829 | 106384183 | 355 |
| chr10 | 17412164  | 17412518  | 355 |
| chrX  | 60112135  | 60112488  | 354 |
| chrX  | 55344375  | 55344728  | 354 |
| chr23 | 18343644  | 18343997  | 354 |
| chr22 | 60372488  | 60372841  | 354 |
| chr19 | 16731856  | 16732209  | 354 |
| chr10 | 72470331  | 72470684  | 354 |
| chr4  | 120711830 | 120712182 | 353 |
| chr25 | 33495385  | 33495737  | 353 |
| chr24 | 59488058  | 59488410  | 353 |
| chr2  | 37674640  | 37674992  | 353 |
| chrX  | 65718412  | 65718763  | 352 |
| chrX  | 57158335  | 57158686  | 352 |
| chrX  | 35610094  | 35610445  | 352 |
| chr8  | 43234703  | 43235054  | 352 |
| chr3  | 51613189  | 51613540  | 352 |
| chr29 | 29774291  | 29774642  | 352 |
| chr16 | 72178055  | 72178406  | 352 |
| chr13 | 74712525  | 74712876  | 352 |
| chrX  | 54765711  | 54766061  | 351 |
| chrX  | 18382725  | 18383075  | 351 |
| chr5  | 10771193  | 10771543  | 351 |
| chr28 | 25362181  | 25362531  | 351 |
| chr28 | 25190325  | 25190675  | 351 |
| chr26 | 22245468  | 22245818  | 351 |
| chrX  | 60552093  | 60552442  | 350 |
| chrX  | 20089102  | 20089451  | 350 |
| chrX  | 12665081  | 12665430  | 350 |
| chrX  | 6685629   | 6685978   | 350 |
| chr23 | 19803449  | 19803798  | 350 |
| chr22 | 49168785  | 49169134  | 350 |
| chr18 | 48302653  | 48303002  | 350 |
| chr17 | 61268526  | 61268875  | 350 |
| chr13 | 67851931  | 67852280  | 350 |
| chrX  | 78615218  | 78615566  | 349 |
| chrX  | 36885807  | 36886155  | 349 |
| chr13 | 69832742  | 69833090  | 349 |
| chr13 | 56029978  | 56030326  | 349 |
| chrX  | 56268765  | 56269112  | 348 |
| chr5  | 112097550 | 112097897 | 348 |
| chr3  | 108265112 | 108265459 | 348 |

|       |           |           |     |
|-------|-----------|-----------|-----|
| chr26 | 43473431  | 43473778  | 348 |
| chr26 | 31502039  | 31502386  | 348 |
| chrX  | 55686332  | 55686678  | 347 |
| chr7  | 17491782  | 17492128  | 347 |
| chr19 | 50091406  | 50091752  | 347 |
| chr11 | 23185739  | 23186085  | 347 |
| chr1  | 83148048  | 83148394  | 347 |
| chr5  | 120406689 | 120407034 | 346 |
| chr5  | 73295614  | 73295959  | 346 |
| chr29 | 33576148  | 33576493  | 346 |
| chr21 | 61725338  | 61725683  | 346 |
| chr12 | 32524955  | 32525300  | 346 |
| chrX  | 9254589   | 9254933   | 345 |
| chrX  | 6444529   | 6444873   | 345 |
| chr5  | 28853979  | 28854323  | 345 |
| chrX  | 80994830  | 80995173  | 344 |
| chrX  | 55315797  | 55316140  | 344 |
| chrX  | 40434737  | 40435080  | 344 |
| chrX  | 21757226  | 21757569  | 344 |
| chr29 | 18245222  | 18245565  | 344 |
| chr26 | 25506710  | 25507053  | 344 |
| chr19 | 34622394  | 34622737  | 344 |
| chr25 | 39258853  | 39259195  | 343 |
| chr25 | 38038095  | 38038437  | 343 |
| chr21 | 22742199  | 22742541  | 343 |
| chr20 | 66519641  | 66519983  | 343 |
| chr18 | 51522691  | 51523033  | 343 |
| chr12 | 32530009  | 32530351  | 343 |
| chr7  | 14719449  | 14719790  | 342 |
| chr7  | 14238150  | 14238491  | 342 |
| chr3  | 111354394 | 111354735 | 342 |
| chr23 | 43158357  | 43158698  | 342 |
| chr21 | 26501741  | 26502082  | 342 |
| chrX  | 34142240  | 34142580  | 341 |
| chrX  | 30925056  | 30925396  | 341 |
| chrX  | 12672532  | 12672872  | 341 |
| chr9  | 41632422  | 41632762  | 341 |
| chr21 | 20693909  | 20694249  | 341 |
| chr18 | 8083551   | 8083891   | 341 |
| chr13 | 45461843  | 45462183  | 341 |
| chr11 | 69222150  | 69222490  | 341 |
| chrX  | 81260668  | 81261007  | 340 |
| chr28 | 41220883  | 41221222  | 340 |
| chr28 | 40383195  | 40383534  | 340 |
| chr26 | 33279734  | 33280073  | 340 |
| chr21 | 25138666  | 25139005  | 340 |
| chr19 | 41376813  | 41377152  | 340 |
| chr19 | 13971398  | 13971737  | 340 |
| chr18 | 63008075  | 63008414  | 340 |
| chr15 | 54033014  | 54033353  | 340 |

|       |               |           |     |
|-------|---------------|-----------|-----|
| chrX  | 67102077      | 67102415  | 339 |
| chr8  | 25637971      | 25638309  | 339 |
| chr3  | 16904210      | 16904548  | 339 |
| chrX  | 59451853      | 59452190  | 338 |
| chrX  | 59302928      | 59303265  | 338 |
| chrX  | 19716699      | 19717036  | 338 |
| chr5  | 103817799     | 103818136 | 338 |
| chr29 | 37194968      | 37195305  | 338 |
| chr19 | 21378073      | 21378410  | 338 |
| chrX  | 1006898       | 1007234   | 337 |
| chr8  | 85382016      | 85382352  | 337 |
| chr23 | 7291640       | 7291976   | 337 |
| chr2  | 139325262     | 139325598 | 337 |
| chr18 | 56443060      | 56443396  | 337 |
| chr13 | 55324939      | 55325275  | 337 |
| chr11 | 11628774      | 11629110  | 337 |
| chr7  | 38259934      | 38260269  | 336 |
| chr5  | 125020887     | 125021222 | 336 |
| chr27 | 38911453      | 38911788  | 336 |
| chr26 | 17152167      | 17152502  | 336 |
| chr24 | 36439639      | 36439974  | 336 |
| chr23 | 15800797      | 15801132  | 336 |
| chr22 | 50044510      | 50044845  | 336 |
| chr21 | 31673526      | 31673861  | 336 |
| chr17 | 71960154      | 71960489  | 336 |
| chr13 | 77560875      | 77561210  | 336 |
| chrX  | 78734425      | 78734759  | 335 |
| chrX  | 48116932      | 48117266  | 335 |
| chrX  | 30728404      | 30728738  | 335 |
| chr28 | 25362721      | 25363055  | 335 |
| chr11 | 74918067      | 74918401  | 335 |
| chr11 | 49348399      | 49348733  | 335 |
| chr1  | 152361569     | 152361903 | 335 |
| chrX  | 10108614      | 10108947  | 334 |
| chr28 | 46048757      | 46049090  | 334 |
| chr2  | 130509739     | 130510072 | 334 |
| chr19 | 54166237      | 54166570  | 334 |
| chr7  | 42193824      | 42194156  | 333 |
| chr22 | 18365354      | 18365686  | 333 |
| chr20 | 929263 929595 | 333       |     |
| chr11 | 98434501      | 98434833  | 333 |
| chr10 | 20632225      | 20632557  | 333 |
| chrX  | 75967758      | 75968089  | 332 |
| chr22 | 14950879      | 14951210  | 332 |
| chr16 | 51110955      | 51111286  | 332 |
| chr13 | 56292214      | 56292545  | 332 |
| chrX  | 53621984      | 53622314  | 331 |
| chr26 | 48613646      | 48613976  | 331 |
| chr26 | 15580183      | 15580513  | 331 |
| chr21 | 64554606      | 64554936  | 331 |



|       |               |           |     |
|-------|---------------|-----------|-----|
| chr16 | 40612893      | 40613223  | 331 |
| chrX  | 67061674      | 67062003  | 330 |
| chr3  | 121590432     | 121590761 | 330 |
| chr16 | 47050853      | 47051182  | 330 |
| chr13 | 41772048      | 41772377  | 330 |
| chr10 | 12117494      | 12117823  | 330 |
| chrX  | 59482620      | 59482948  | 329 |
| chrX  | 7535266       | 7535594   | 329 |
| chr3  | 37393621      | 37393949  | 329 |
| chr29 | 36576034      | 36576362  | 329 |
| chr28 | 4386029       | 4386357   | 329 |
| chr17 | 63957088      | 63957416  | 329 |
| chr15 | 43336242      | 43336570  | 329 |
| chrX  | 59153497      | 59153824  | 328 |
| chr24 | 60758945      | 60759272  | 328 |
| chr24 | 887894 888221 | 328       |     |
| chr23 | 27775614      | 27775941  | 328 |
| chr19 | 60400064      | 60400391  | 328 |
| chrX  | 61492356      | 61492682  | 327 |
| chrX  | 8037256       | 8037582   | 327 |
| chr4  | 72033346      | 72033672  | 327 |
| chr26 | 42231698      | 42232024  | 327 |
| chr23 | 28756381      | 28756707  | 327 |
| chr21 | 18464701      | 18465027  | 327 |
| chr17 | 70535858      | 70536184  | 327 |
| chr16 | 39470840      | 39471166  | 327 |
| chr15 | 24433041      | 24433367  | 327 |
| chrX  | 78706184      | 78706509  | 326 |
| chrX  | 22615470      | 22615795  | 326 |
| chr8  | 45730558      | 45730883  | 326 |
| chr29 | 36737319      | 36737644  | 326 |
| chr19 | 41488102      | 41488427  | 326 |
| chr19 | 24043173      | 24043498  | 326 |
| chr16 | 68861817      | 68862142  | 326 |
| chr11 | 2570540       | 2570865   | 326 |
| chrX  | 49321892      | 49322216  | 325 |
| chrX  | 7540765       | 7541089   | 325 |
| chr8  | 93329198      | 93329522  | 325 |
| chrX  | 21597457      | 21597780  | 324 |
| chr7  | 57260791      | 57261114  | 324 |
| chr25 | 3372796       | 3373119   | 324 |
| chr24 | 60814247      | 60814570  | 324 |
| chr21 | 39988252      | 39988575  | 324 |
| chrX  | 55161819      | 55162141  | 323 |
| chr7  | 3190399       | 3190721   | 323 |
| chr6  | 107277941     | 107278263 | 323 |
| chr23 | 7260261       | 7260583   | 323 |
| chr19 | 7644100       | 7644422   | 323 |
| chr15 | 21510291      | 21510613  | 323 |
| chr11 | 100904908     | 100905230 | 323 |

|       |               |           |     |
|-------|---------------|-----------|-----|
| chr7  | 5225588       | 5225909   | 322 |
| chr29 | 49567932      | 49568253  | 322 |
| chr26 | 49152904      | 49153225  | 322 |
| chr26 | 46329775      | 46330096  | 322 |
| chr26 | 42046655      | 42046976  | 322 |
| chr25 | 39391190      | 39391511  | 322 |
| chr21 | 68014641      | 68014962  | 322 |
| chr10 | 84362670      | 84362991  | 322 |
| chrX  | 55696007      | 55696327  | 321 |
| chrX  | 20625640      | 20625960  | 321 |
| chr9  | 104883337     | 104883657 | 321 |
| chr5  | 113217870     | 113218190 | 321 |
| chr3  | 83729292      | 83729612  | 321 |
| chr23 | 31107282      | 31107602  | 321 |
| chr23 | 28045167      | 28045487  | 321 |
| chr15 | 75791339      | 75791659  | 321 |
| chr15 | 33663903      | 33664223  | 321 |
| chrX  | 20251615      | 20251934  | 320 |
| chrX  | 12934594      | 12934913  | 320 |
| chr3  | 102900713     | 102901032 | 320 |
| chrX  | 33725462      | 33725780  | 319 |
| chr17 | 70054752      | 70055070  | 319 |
| chr15 | 54363889      | 54364207  | 319 |
| chrX  | 71931414      | 71931731  | 318 |
| chrX  | 448196 448513 | 318       |     |
| chr27 | 27900387      | 27900704  | 318 |
| chr24 | 49133134      | 49133451  | 318 |
| chr18 | 49509702      | 49510019  | 318 |
| chr18 | 23104498      | 23104815  | 318 |
| chr16 | 73968362      | 73968679  | 318 |
| chr1  | 2515749       | 2516066   | 318 |
| chrX  | 45588104      | 45588420  | 317 |
| chr26 | 37621183      | 37621499  | 317 |
| chr2  | 118535555     | 118535871 | 317 |
| chr19 | 38328453      | 38328769  | 317 |
| chr19 | 33299642      | 33299958  | 317 |
| chr11 | 4324847       | 4325163   | 317 |
| chrX  | 7099056       | 7099371   | 316 |
| chr9  | 66156361      | 66156676  | 316 |
| chr28 | 7578732       | 7579047   | 316 |
| chr23 | 7292951       | 7293266   | 316 |
| chr2  | 116755073     | 116755388 | 316 |
| chr16 | 38986516      | 38986831  | 316 |
| chr3  | 34741894      | 34742208  | 315 |
| chr19 | 25423637      | 25423951  | 315 |
| chr15 | 25210953      | 25211267  | 315 |
| chr10 | 14968573      | 14968887  | 315 |
| chr1  | 2322476       | 2322790   | 315 |
| chrX  | 34653601      | 34653914  | 314 |
| chrX  | 20715128      | 20715441  | 314 |

|       |           |           |     |
|-------|-----------|-----------|-----|
| chr8  | 72982162  | 72982475  | 314 |
| chr5  | 30528291  | 30528604  | 314 |
| chr2  | 134748138 | 134748451 | 314 |
| chr1  | 101586047 | 101586360 | 314 |
| chr8  | 108785722 | 108786034 | 313 |
| chr3  | 116504630 | 116504942 | 313 |
| chr27 | 39916323  | 39916635  | 313 |
| chr24 | 47119199  | 47119511  | 313 |
| chr21 | 58618024  | 58618336  | 313 |
| chr20 | 71433624  | 71433936  | 313 |
| chr13 | 77833112  | 77833424  | 313 |
| chrX  | 78918107  | 78918418  | 312 |
| chrX  | 22596176  | 22596487  | 312 |
| chrX  | 20175400  | 20175711  | 312 |
| chr26 | 38509764  | 38510075  | 312 |
| chr25 | 14746349  | 14746660  | 312 |
| chr2  | 109940726 | 109941037 | 312 |
| chrX  | 80953864  | 80954174  | 311 |
| chr28 | 26079258  | 26079568  | 311 |
| chr26 | 14658622  | 14658932  | 311 |
| chr22 | 56554649  | 56554959  | 311 |
| chr10 | 85927708  | 85928018  | 311 |
| chr8  | 45669221  | 45669530  | 310 |
| chr21 | 58285170  | 58285479  | 310 |
| chr19 | 56568899  | 56569208  | 310 |
| chr18 | 12120489  | 12120798  | 310 |
| chr15 | 68921683  | 68921992  | 310 |
| chr10 | 48802592  | 48802901  | 310 |
| chrX  | 54092315  | 54092623  | 309 |
| chrX  | 21602526  | 21602834  | 309 |
| chr9  | 90377682  | 90377990  | 309 |
| chr6  | 94813040  | 94813348  | 309 |
| chr29 | 31557020  | 31557328  | 309 |
| chr28 | 26790134  | 26790442  | 309 |
| chr18 | 52298799  | 52299107  | 309 |
| chr17 | 63951853  | 63952161  | 309 |
| chr15 | 25810728  | 25811036  | 309 |
| chrX  | 77229001  | 77229308  | 308 |
| chrX  | 21847569  | 21847876  | 308 |
| chrX  | 10667756  | 10668063  | 308 |
| chr9  | 100457213 | 100457520 | 308 |
| chr22 | 30048127  | 30048434  | 308 |
| chrX  | 72342833  | 72343139  | 307 |
| chr21 | 67977733  | 67978039  | 307 |
| chr21 | 61017286  | 61017592  | 307 |
| chr13 | 63434904  | 63435210  | 307 |
| chrX  | 56906746  | 56907051  | 306 |
| chrX  | 41268500  | 41268805  | 306 |
| chrX  | 21581469  | 21581774  | 306 |
| chr19 | 6578021   | 6578326   | 306 |

|       |           |           |     |
|-------|-----------|-----------|-----|
| chrX  | 65005710  | 65006014  | 305 |
| chr5  | 121061372 | 121061676 | 305 |
| chr4  | 117151762 | 117152066 | 305 |
| chr16 | 48819525  | 48819829  | 305 |
| chr13 | 59671858  | 59672162  | 305 |
| chr13 | 37158311  | 37158615  | 305 |
| chr4  | 108138226 | 108138529 | 304 |
| chr28 | 5197711   | 5198014   | 304 |
| chr23 | 18591533  | 18591836  | 304 |
| chr19 | 59410766  | 59411069  | 304 |
| chr11 | 68030195  | 68030498  | 304 |
| chr1  | 82836993  | 82837296  | 304 |
| chrX  | 58194948  | 58195250  | 303 |
| chrX  | 9060241   | 9060543   | 303 |
| chr3  | 22889631  | 22889933  | 303 |
| chr19 | 23703206  | 23703508  | 303 |
| chr13 | 71502381  | 71502683  | 303 |
| chr5  | 118440039 | 118440340 | 302 |
| chr23 | 7062809   | 7063110   | 302 |
| chr2  | 135048615 | 135048916 | 302 |
| chr19 | 22332241  | 22332542  | 302 |
| chr15 | 33491999  | 33492300  | 302 |
| chr11 | 77735533  | 77735834  | 302 |
| chr1  | 128113674 | 128113975 | 302 |
| chr9  | 76661741  | 76662041  | 301 |
| chr22 | 54112845  | 54113145  | 301 |
| chr22 | 5511824   | 5512124   | 301 |
| chr21 | 6486680   | 6486980   | 301 |
| chr13 | 49833337  | 49833637  | 301 |
| chr10 | 17711674  | 17711974  | 301 |
| chrX  | 55840470  | 55840769  | 300 |
| chr8  | 57668502  | 57668801  | 300 |
| chr6  | 115649705 | 115650004 | 300 |
| chr3  | 105121061 | 105121360 | 300 |
| chr27 | 40318517  | 40318816  | 300 |
| chr14 | 23194640  | 23194939  | 300 |
| chr12 | 11335772  | 11336071  | 300 |
| chr11 | 49368376  | 49368675  | 300 |
| chr10 | 88335997  | 88336296  | 300 |
| chrX  | 67901454  | 67901752  | 299 |
| chrX  | 61912245  | 61912543  | 299 |
| chrX  | 19444787  | 19445085  | 299 |
| chr6  | 57817074  | 57817372  | 299 |
| chr16 | 17693052  | 17693350  | 299 |
| chrX  | 34373729  | 34374026  | 298 |
| chrX  | 9027634   | 9027931   | 298 |
| chrX  | 8095617   | 8095914   | 298 |
| chr4  | 72266832  | 72267129  | 298 |
| chr20 | 6584001   | 6584298   | 298 |
| chr10 | 11026996  | 11027293  | 298 |

|       |           |           |     |
|-------|-----------|-----------|-----|
| chrX  | 17207398  | 17207694  | 297 |
| chr5  | 51978022  | 51978318  | 297 |
| chr3  | 56812536  | 56812832  | 297 |
| chr23 | 11937039  | 11937335  | 297 |
| chr19 | 42976178  | 42976474  | 297 |
| chr14 | 1971464   | 1971760   | 297 |
| chr13 | 56044010  | 56044306  | 297 |
| chrX  | 77254657  | 77254952  | 296 |
| chrX  | 8400483   | 8400778   | 296 |
| chr29 | 36741327  | 36741622  | 296 |
| chr25 | 16966431  | 16966726  | 296 |
| chr2  | 132424469 | 132424764 | 296 |
| chr17 | 48726979  | 48727274  | 296 |
| chr15 | 75709716  | 75710011  | 296 |
| chr15 | 64833687  | 64833982  | 296 |
| chr11 | 98897458  | 98897753  | 296 |
| chrX  | 74740828  | 74741122  | 295 |
| chr4  | 53162213  | 53162507  | 295 |
| chr24 | 58646898  | 58647192  | 295 |
| chr10 | 88209932  | 88210226  | 295 |
| chrX  | 64028301  | 64028594  | 294 |
| chr24 | 1390510   | 1390803   | 294 |
| chr2  | 25327291  | 25327584  | 294 |
| chr13 | 66686861  | 66687154  | 294 |
| chr13 | 35944672  | 35944965  | 294 |
| chrX  | 34413864  | 34414156  | 293 |
| chrX  | 24429449  | 24429741  | 293 |
| chr8  | 7670799   | 7671091   | 293 |
| chr5  | 69403015  | 69403307  | 293 |
| chr4  | 123125209 | 123125501 | 293 |
| chr3  | 115674188 | 115674480 | 293 |
| chr26 | 38914479  | 38914771  | 293 |
| chr23 | 28655766  | 28656058  | 293 |
| chr21 | 33994671  | 33994963  | 293 |
| chr18 | 49948988  | 49949280  | 293 |
| chr13 | 40266622  | 40266914  | 293 |
| chr5  | 31312490  | 31312781  | 292 |
| chrX  | 65092818  | 65093108  | 291 |
| chrX  | 49325139  | 49325429  | 291 |
| chr7  | 38790206  | 38790496  | 291 |
| chr17 | 74271443  | 74271733  | 291 |
| chr11 | 76357011  | 76357301  | 291 |
| chrX  | 72272563  | 72272852  | 290 |
| chrX  | 21588984  | 21589273  | 290 |
| chrX  | 11080515  | 11080804  | 290 |
| chr18 | 9492021   | 9492310   | 290 |
| chr11 | 7247801   | 7248090   | 290 |
| chr19 | 31705569  | 31705857  | 289 |
| chr16 | 38922957  | 38923245  | 289 |
| chr10 | 20850493  | 20850781  | 289 |

|       |               |           |     |
|-------|---------------|-----------|-----|
| chrX  | 30621271      | 30621558  | 288 |
| chr5  | 113133812     | 113134099 | 288 |
| chr12 | 31541570      | 31541857  | 288 |
| chr5  | 112218104     | 112218390 | 287 |
| chr29 | 36934800      | 36935086  | 287 |
| chr26 | 45879116      | 45879402  | 287 |
| chr22 | 59634421      | 59634707  | 287 |
| chr19 | 39315620      | 39315906  | 287 |
| chrX  | 69349971      | 69350256  | 286 |
| chr5  | 120382486     | 120382771 | 286 |
| chr5  | 29085534      | 29085819  | 286 |
| chr3  | 52180879      | 52181164  | 286 |
| chr2  | 140125559     | 140125844 | 286 |
| chrX  | 71940478      | 71940762  | 285 |
| chrX  | 21940517      | 21940801  | 285 |
| chr8  | 64925908      | 64926192  | 285 |
| chr29 | 35802783      | 35803067  | 285 |
| chr26 | 14918802      | 14919086  | 285 |
| chr19 | 43138554      | 43138838  | 285 |
| chr19 | 23731596      | 23731880  | 285 |
| chr14 | 9338187       | 9338471   | 285 |
| chr11 | 77668465      | 77668749  | 285 |
| chrX  | 68274945      | 68275228  | 284 |
| chrX  | 65872420      | 65872703  | 284 |
| chrX  | 45769726      | 45770009  | 284 |
| chrX  | 21195062      | 21195345  | 284 |
| chr7  | 5412883       | 5413166   | 284 |
| chr6  | 101903093     | 101903376 | 284 |
| chr5  | 116896978     | 116897261 | 284 |
| chr5  | 80168787      | 80169070  | 284 |
| chr23 | 27312404      | 27312687  | 284 |
| chr20 | 779845 780128 | 284       |     |
| chr19 | 16165881      | 16166164  | 284 |
| chr13 | 75992085      | 75992368  | 284 |
| chr10 | 70337813      | 70338096  | 284 |
| chrX  | 59370897      | 59371179  | 283 |
| chr5  | 30203894      | 30204176  | 283 |
| chr16 | 73117959      | 73118241  | 283 |
| chrX  | 80164838      | 80165119  | 282 |
| chrX  | 56091048      | 56091329  | 282 |
| chrX  | 31215201      | 31215482  | 282 |
| chr5  | 76846011      | 76846292  | 282 |
| chr26 | 42050777      | 42051058  | 282 |
| chr22 | 13577830      | 13578111  | 282 |
| chr18 | 55225927      | 55226208  | 282 |
| chr17 | 60966786      | 60967067  | 282 |
| chr17 | 54308954      | 54309235  | 282 |
| chr16 | 77499793      | 77500074  | 282 |
| chr10 | 20135230      | 20135511  | 282 |
| chrX  | 26459447      | 26459727  | 281 |

|       |           |           |     |
|-------|-----------|-----------|-----|
| chr9  | 19792508  | 19792788  | 281 |
| chr24 | 40948850  | 40949130  | 281 |
| chr23 | 45420658  | 45420938  | 281 |
| chr20 | 62158021  | 62158301  | 281 |
| chr10 | 69999663  | 69999943  | 281 |
| chrX  | 70328228  | 70328507  | 280 |
| chr5  | 30448960  | 30449239  | 280 |
| chr28 | 26467826  | 26468105  | 280 |
| chr18 | 47213469  | 47213748  | 280 |
| chr13 | 40058007  | 40058286  | 280 |
| chr11 | 70726945  | 70727224  | 280 |
| chrX  | 15743422  | 15743700  | 279 |
| chr5  | 38617758  | 38618036  | 279 |
| chr5  | 29802511  | 29802789  | 279 |
| chr26 | 18547964  | 18548242  | 279 |
| chr23 | 18830610  | 18830888  | 279 |
| chr13 | 46429295  | 46429573  | 279 |
| chrX  | 62994954  | 62995231  | 278 |
| chrX  | 56885024  | 56885301  | 278 |
| chr8  | 107707047 | 107707324 | 278 |
| chr4  | 108003037 | 108003314 | 278 |
| chr20 | 6770785   | 6771062   | 278 |
| chr19 | 56481377  | 56481654  | 278 |
| chr17 | 69307157  | 69307434  | 278 |
| chr10 | 36911412  | 36911689  | 278 |
| chr6  | 74018959  | 74019235  | 277 |
| chr5  | 112177026 | 112177302 | 277 |
| chr4  | 99298327  | 99298603  | 277 |
| chr3  | 27944543  | 27944819  | 277 |
| chr24 | 41740681  | 41740957  | 277 |
| chr23 | 27001070  | 27001346  | 277 |
| chr17 | 64154530  | 64154806  | 277 |
| chrX  | 7828728   | 7829003   | 276 |
| chr8  | 7833259   | 7833534   | 276 |
| chr6  | 120785994 | 120786269 | 276 |
| chr29 | 23331483  | 23331758  | 276 |
| chr18 | 18679727  | 18680002  | 276 |
| chr16 | 51300512  | 51300787  | 276 |
| chr8  | 80088680  | 80088954  | 275 |
| chr21 | 57828273  | 57828547  | 275 |
| chr11 | 96148926  | 96149200  | 275 |
| chrX  | 19820776  | 19821049  | 274 |
| chr29 | 41685985  | 41686258  | 274 |
| chr28 | 26764015  | 26764288  | 274 |
| chr18 | 50833928  | 50834201  | 274 |
| chr14 | 9689578   | 9689851   | 274 |
| chr1  | 145716627 | 145716900 | 274 |
| chrX  | 56269453  | 56269725  | 273 |
| chrX  | 20306456  | 20306728  | 273 |
| chr25 | 38260989  | 38261261  | 273 |

|       |           |           |     |
|-------|-----------|-----------|-----|
| chr15 | 73738653  | 73738925  | 273 |
| chr13 | 34996137  | 34996409  | 273 |
| chrX  | 22018720  | 22018991  | 272 |
| chr8  | 10173900  | 10174171  | 272 |
| chr8  | 5820853   | 5821124   | 272 |
| chr7  | 43731708  | 43731979  | 272 |
| chr5  | 30863652  | 30863923  | 272 |
| chr24 | 42116938  | 42117209  | 272 |
| chr13 | 79869878  | 79870149  | 272 |
| chrX  | 2306925   | 2307195   | 271 |
| chr8  | 108845710 | 108845980 | 271 |
| chr7  | 91306682  | 91306952  | 271 |
| chr23 | 52741888  | 52742158  | 271 |
| chr22 | 30006603  | 30006873  | 271 |
| chr18 | 25555006  | 25555276  | 271 |
| chr13 | 17731774  | 17732044  | 271 |
| chrX  | 75866345  | 75866614  | 270 |
| chrX  | 49074401  | 49074670  | 270 |
| chr6  | 115499181 | 115499450 | 270 |
| chr19 | 39976878  | 39977147  | 270 |
| chr15 | 26651392  | 26651661  | 270 |
| chr6  | 103399912 | 103400180 | 269 |
| chr17 | 70086444  | 70086712  | 269 |
| chrX  | 21694764  | 21695031  | 268 |
| chr3  | 105156195 | 105156462 | 268 |
| chr18 | 51156535  | 51156802  | 268 |
| chr18 | 12631020  | 12631287  | 268 |
| chr1  | 151603381 | 151603648 | 268 |
| chrX  | 22002694  | 22002960  | 267 |
| chr3  | 33334347  | 33334613  | 267 |
| chr19 | 37871651  | 37871917  | 267 |
| chr19 | 8396662   | 8396928   | 267 |
| chrX  | 65880598  | 65880863  | 266 |
| chrX  | 59467560  | 59467825  | 266 |
| chrX  | 53377321  | 53377586  | 266 |
| chrX  | 31651924  | 31652189  | 266 |
| chr5  | 121143243 | 121143508 | 266 |
| chr13 | 40487122  | 40487387  | 266 |
| chr10 | 21117767  | 21118032  | 266 |
| chr1  | 66114100  | 66114365  | 266 |
| chr4  | 122311147 | 122311411 | 265 |
| chr23 | 11938298  | 11938562  | 265 |
| chr25 | 37413224  | 37413487  | 264 |
| chrX  | 76004751  | 76005013  | 263 |
| chr9  | 90338828  | 90339090  | 263 |
| chr7  | 37397794  | 37398056  | 263 |
| chr10 | 75084944  | 75085206  | 263 |
| chr5  | 46087579  | 46087840  | 262 |
| chr5  | 26179069  | 26179330  | 262 |
| chr11 | 101515964 | 101516225 | 262 |



|       |               |           |     |
|-------|---------------|-----------|-----|
| chrX  | 60255323      | 60255583  | 261 |
| chr7  | 5144520       | 5144780   | 261 |
| chr3  | 120994861     | 120995121 | 261 |
| chr2  | 110034114     | 110034374 | 261 |
| chr15 | 55192801      | 55193061  | 261 |
| chr10 | 17281872      | 17282132  | 261 |
| chr1  | 3351489       | 3351749   | 261 |
| chrX  | 56577813      | 56578072  | 260 |
| chrX  | 30251207      | 30251466  | 260 |
| chr26 | 19935542      | 19935801  | 260 |
| chr25 | 10627041      | 10627300  | 260 |
| chr22 | 47855216      | 47855475  | 260 |
| chr2  | 131052777     | 131053036 | 260 |
| chr2  | 94788177      | 94788436  | 260 |
| chr18 | 50720108      | 50720367  | 260 |
| chr11 | 44710589      | 44710848  | 260 |
| chr10 | 20458060      | 20458319  | 260 |
| chr1  | 78037571      | 78037830  | 260 |
| chrX  | 77480380      | 77480638  | 259 |
| chr29 | 38284408      | 38284666  | 259 |
| chr28 | 26756372      | 26756630  | 259 |
| chr26 | 18696887      | 18697145  | 259 |
| chr19 | 19135498      | 19135756  | 259 |
| chr16 | 22468394      | 22468652  | 259 |
| chr16 | 378806 379064 | 259       | 259 |
| chr1  | 74988217      | 74988475  | 259 |
| chr1  | 3123986       | 3124244   | 259 |
| chrX  | 7151635       | 7151892   | 258 |
| chr5  | 80852104      | 80852361  | 258 |
| chr29 | 42919280      | 42919537  | 258 |
| chr26 | 43970978      | 43971235  | 258 |
| chr25 | 10462110      | 10462367  | 258 |
| chr24 | 1359791       | 1360048   | 258 |
| chr17 | 53370629      | 53370886  | 258 |
| chr13 | 80090373      | 80090630  | 258 |
| chr12 | 31474577      | 31474834  | 258 |
| chr11 | 29722257      | 29722514  | 258 |
| chrX  | 21561200      | 21561456  | 257 |
| chr19 | 44658608      | 44658864  | 257 |
| chr18 | 50864117      | 50864373  | 257 |
| chr8  | 73875480      | 73875735  | 256 |
| chr28 | 33768601      | 33768856  | 256 |
| chr18 | 55456772      | 55457027  | 256 |
| chr17 | 72143698      | 72143953  | 256 |
| chr11 | 93279404      | 93279659  | 256 |
| chrX  | 58928371      | 58928625  | 255 |
| chr7  | 51339623      | 51339877  | 255 |
| chr7  | 16852746      | 16853000  | 255 |
| chr23 | 52758495      | 52758749  | 255 |
| chr21 | 30288616      | 30288870  | 255 |

|       |               |           |     |
|-------|---------------|-----------|-----|
| chr2  | 75727236      | 75727490  | 255 |
| chr17 | 41503532      | 41503786  | 255 |
| chr15 | 75236022      | 75236276  | 255 |
| chrX  | 71140954      | 71141207  | 254 |
| chrX  | 31651176      | 31651429  | 254 |
| chr9  | 69980869      | 69981122  | 254 |
| chr22 | 15046537      | 15046790  | 254 |
| chr21 | 20658246      | 20658499  | 254 |
| chr18 | 62943482      | 62943735  | 254 |
| chr11 | 49844194      | 49844447  | 254 |
| chr1  | 130451535     | 130451788 | 254 |
| chrX  | 22569156      | 22569408  | 253 |
| chrX  | 18918305      | 18918557  | 253 |
| chrX  | 6556842       | 6557094   | 253 |
| chr28 | 26604754      | 26605006  | 253 |
| chr19 | 19125238      | 19125490  | 253 |
| chr17 | 47400299      | 47400551  | 253 |
| chr13 | 64178333      | 64178585  | 253 |
| chr13 | 35961702      | 35961954  | 253 |
| chrX  | 21686986      | 21687237  | 252 |
| chr23 | 43369106      | 43369357  | 252 |
| chr18 | 11547631      | 11547882  | 252 |
| chr14 | 863476 863727 |           | 252 |
| chr13 | 68823087      | 68823338  | 252 |
| chr13 | 68206697      | 68206948  | 252 |
| chrX  | 65502882      | 65503132  | 251 |
| chr27 | 48004663      | 48004913  | 251 |
| chr24 | 21966335      | 21966585  | 251 |
| chr17 | 45953898      | 45954148  | 251 |
| chr7  | 45690228      | 45690477  | 250 |
| chr7  | 18787072      | 18787321  | 250 |
| chr6  | 107417223     | 107417472 | 250 |
| chr26 | 39638099      | 39638348  | 250 |
| chr25 | 37528968      | 37529217  | 250 |
| chr19 | 37631505      | 37631754  | 250 |
| chr18 | 55056294      | 55056543  | 250 |
| chr18 | 22216030      | 22216279  | 250 |
| chr13 | 68059950      | 68060199  | 250 |
| chr13 | 55148452      | 55148701  | 250 |
| chrX  | 80235919      | 80236167  | 249 |
| chrX  | 7354706       | 7354954   | 249 |
| chr4  | 123016225     | 123016473 | 249 |
| chr3  | 8149928       | 8150176   | 249 |
| chr26 | 37096084      | 37096332  | 249 |
| chr2  | 139933476     | 139933724 | 249 |
| chr2  | 135719648     | 135719896 | 249 |
| chr18 | 32959642      | 32959890  | 249 |
| chr16 | 72087709      | 72087957  | 249 |
| chr11 | 90698847      | 90699095  | 249 |
| chr24 | 39742572      | 39742819  | 248 |

|       |           |           |     |
|-------|-----------|-----------|-----|
| chr22 | 7329801   | 7330048   | 248 |
| chr19 | 38936774  | 38937021  | 248 |
| chr18 | 33952273  | 33952520  | 248 |
| chrX  | 49766266  | 49766512  | 247 |
| chr3  | 125597181 | 125597427 | 247 |
| chr22 | 54091395  | 54091641  | 247 |
| chr22 | 48355349  | 48355595  | 247 |
| chr16 | 23645237  | 23645483  | 247 |
| chr16 | 3121527   | 3121773   | 247 |
| chr15 | 24908783  | 24909029  | 247 |
| chr15 | 23941877  | 23942123  | 247 |
| chr11 | 77517696  | 77517942  | 247 |
| chrX  | 58494732  | 58494977  | 246 |
| chrX  | 20319428  | 20319673  | 246 |
| chr25 | 5994290   | 5994535   | 246 |
| chr16 | 58579376  | 58579621  | 246 |
| chr15 | 29177083  | 29177328  | 246 |
| chr10 | 69993900  | 69994145  | 246 |
| chrX  | 77031491  | 77031735  | 245 |
| chrX  | 73479663  | 73479907  | 245 |
| chrX  | 50171551  | 50171795  | 245 |
| chrX  | 6897392   | 6897636   | 245 |
| chr8  | 24474167  | 24474411  | 245 |
| chr3  | 117269535 | 117269779 | 245 |
| chr27 | 15268515  | 15268759  | 245 |
| chr24 | 17600880  | 17601124  | 245 |
| chr22 | 56171662  | 56171906  | 245 |
| chr22 | 36553338  | 36553582  | 245 |
| chrX  | 75615479  | 75615722  | 244 |
| chrX  | 55500218  | 55500461  | 244 |
| chr9  | 29659577  | 29659820  | 244 |
| chr13 | 76109694  | 76109937  | 244 |
| chr11 | 70926182  | 70926425  | 244 |
| chr10 | 62901952  | 62902195  | 244 |
| chrX  | 60062698  | 60062940  | 243 |
| chrX  | 59377772  | 59378014  | 243 |
| chrX  | 18140861  | 18141103  | 243 |
| chrX  | 8937543   | 8937785   | 243 |
| chr16 | 23824643  | 23824885  | 243 |
| chr10 | 24613126  | 24613368  | 243 |
| chr1  | 75052705  | 75052947  | 243 |
| chr5  | 15560410  | 15560651  | 242 |
| chr29 | 49896122  | 49896363  | 242 |
| chr17 | 63341498  | 63341739  | 242 |
| chr16 | 47252639  | 47252880  | 242 |
| chr10 | 25297995  | 25298236  | 242 |
| chr10 | 22493963  | 22494204  | 242 |
| chrX  | 21567138  | 21567378  | 241 |
| chr8  | 24400186  | 24400426  | 241 |
| chr29 | 36172699  | 36172939  | 241 |

|       |               |           |     |
|-------|---------------|-----------|-----|
| chr17 | 61011106      | 61011346  | 241 |
| chr16 | 28762365      | 28762605  | 241 |
| chrX  | 21734622      | 21734861  | 240 |
| chr8  | 832195 832434 | 240       |     |
| chr20 | 8787933       | 8788172   | 240 |
| chr20 | 1384807       | 1385046   | 240 |
| chr19 | 56455622      | 56455861  | 240 |
| chr19 | 29703076      | 29703315  | 240 |
| chr13 | 40485828      | 40486067  | 240 |
| chr10 | 86889145      | 86889384  | 240 |
| chr10 | 21120419      | 21120658  | 240 |
| chr3  | 105444248     | 105444486 | 239 |
| chr18 | 49958319      | 49958557  | 239 |
| chr18 | 22708708      | 22708946  | 239 |
| chr11 | 82898219      | 82898457  | 239 |
| chr8  | 108751522     | 108751758 | 237 |
| chr19 | 39489923      | 39490159  | 237 |
| chr17 | 62936102      | 62936338  | 237 |
| chr17 | 4814698       | 4814934   | 237 |
| chr13 | 59825184      | 59825420  | 237 |
| chr13 | 56206209      | 56206445  | 237 |
| chrX  | 19851019      | 19851254  | 236 |
| chr2  | 92733391      | 92733626  | 236 |
| chr18 | 24351933      | 24352168  | 236 |
| chr17 | 75093146      | 75093381  | 236 |
| chr17 | 63602670      | 63602905  | 236 |
| chr12 | 34358942      | 34359177  | 236 |
| chr1  | 123756964     | 123757199 | 236 |
| chrX  | 36684909      | 36685143  | 235 |
| chr27 | 20393188      | 20393422  | 235 |
| chr18 | 51505392      | 51505626  | 235 |
| chr16 | 2261467       | 2261701   | 235 |
| chr13 | 40875177      | 40875411  | 235 |
| chr10 | 17271811      | 17272045  | 235 |
| chr1  | 83495964      | 83496198  | 235 |
| chrX  | 81036822      | 81037055  | 234 |
| chrX  | 74261878      | 74262111  | 234 |
| chr7  | 12960631      | 12960864  | 234 |
| chr7  | 4498826       | 4499059   | 234 |
| chr3  | 111242976     | 111243209 | 234 |
| chr21 | 34980737      | 34980970  | 234 |
| chr2  | 129305968     | 129306201 | 234 |
| chrX  | 19738191      | 19738423  | 233 |
| chr6  | 74570260      | 74570492  | 233 |
| chr3  | 116036553     | 116036785 | 233 |
| chr23 | 13411853      | 13412085  | 233 |
| chr22 | 14110891      | 14111123  | 233 |
| chr15 | 26756611      | 26756843  | 233 |
| chr12 | 34600565      | 34600797  | 233 |
| chrX  | 73167632      | 73167863  | 232 |

|       |           |           |     |
|-------|-----------|-----------|-----|
| chrX  | 6489727   | 6489958   | 232 |
| chr2  | 139293629 | 139293860 | 232 |
| chr14 | 34062038  | 34062269  | 232 |
| chr14 | 1419287   | 1419518   | 232 |
| chrX  | 32365058  | 32365288  | 231 |
| chr4  | 98536917  | 98537147  | 231 |
| chr19 | 41268401  | 41268631  | 231 |
| chrX  | 6572233   | 6572462   | 230 |
| chr3  | 115056745 | 115056974 | 230 |
| chr19 | 46873797  | 46874026  | 230 |
| chr19 | 15761077  | 15761306  | 230 |
| chr17 | 70047529  | 70047758  | 230 |
| chr27 | 826345    | 826573    | 229 |
| chr19 | 19137354  | 19137582  | 229 |
| chr18 | 12341361  | 12341589  | 229 |
| chrX  | 56549317  | 56549544  | 228 |
| chr18 | 25477237  | 25477464  | 228 |
| chrX  | 36312832  | 36313058  | 227 |
| chr8  | 7534623   | 7534848   | 226 |
| chr28 | 33656750  | 33656975  | 226 |
| chr22 | 54046771  | 54046996  | 226 |
| chr21 | 64080871  | 64081096  | 226 |
| chr19 | 41562278  | 41562503  | 226 |
| chr18 | 51503238  | 51503463  | 226 |
| chr12 | 79958746  | 79958971  | 226 |
| chr12 | 36287942  | 36288167  | 226 |
| chr11 | 100891737 | 100891962 | 226 |
| chr7  | 3635153   | 3635377   | 225 |
| chr19 | 46817761  | 46817985  | 225 |
| chr18 | 49513533  | 49513757  | 225 |
| chr29 | 30122250  | 30122473  | 224 |
| chrX  | 63650547  | 63650769  | 223 |
| chr29 | 49308132  | 49308354  | 223 |
| chr23 | 52647508  | 52647730  | 223 |
| chr2  | 111652705 | 111652927 | 223 |
| chr19 | 46666338  | 46666560  | 223 |
| chr18 | 25324187  | 25324409  | 223 |
| chr16 | 74118222  | 74118444  | 223 |
| chrX  | 54747244  | 54747465  | 222 |
| chr8  | 24128262  | 24128483  | 222 |
| chr8  | 7703047   | 7703268   | 222 |
| chr17 | 69836281  | 69836502  | 222 |
| chr17 | 64161639  | 64161860  | 222 |
| chrX  | 80164485  | 80164705  | 221 |
| chrX  | 59459749  | 59459969  | 221 |
| chr22 | 59505409  | 59505629  | 221 |
| chr22 | 59455996  | 59456216  | 221 |
| chr19 | 43971031  | 43971251  | 221 |
| chr16 | 70109651  | 70109871  | 221 |
| chr13 | 55524468  | 55524688  | 221 |

|       |               |           |     |
|-------|---------------|-----------|-----|
| chr4  | 33214867      | 33215086  | 220 |
| chr3  | 126965778     | 126965997 | 220 |
| chr3  | 115485961     | 115486180 | 220 |
| chr14 | 1416875       | 1417094   | 220 |
| chr13 | 74502267      | 74502486  | 220 |
| chr4  | 117252008     | 117252226 | 219 |
| chr20 | 3761153       | 3761371   | 219 |
| chrX  | 76084387      | 76084603  | 217 |
| chr8  | 73738432      | 73738648  | 217 |
| chr3  | 109682483     | 109682699 | 217 |
| chr21 | 33975660      | 33975876  | 217 |
| chr15 | 64525257      | 64525473  | 217 |
| chr14 | 8147308       | 8147524   | 217 |
| chrX  | 56403050      | 56403265  | 216 |
| chrX  | 35674791      | 35675006  | 216 |
| chrX  | 22620667      | 22620882  | 216 |
| chr9  | 90482285      | 90482500  | 216 |
| chr8  | 24428822      | 24429037  | 216 |
| chr19 | 43636382      | 43636597  | 216 |
| chr11 | 87154302      | 87154517  | 216 |
| chr10 | 56045699      | 56045914  | 216 |
| chr1  | 32736467      | 32736682  | 216 |
| chrX  | 45201176      | 45201390  | 215 |
| chr18 | 45588404      | 45588618  | 215 |
| chr5  | 34414082      | 34414295  | 214 |
| chr29 | 49128927      | 49129140  | 214 |
| chr12 | 81713306      | 81713519  | 214 |
| chrX  | 55471918      | 55472130  | 213 |
| chr9  | 108056749     | 108056961 | 213 |
| chr26 | 18799272      | 18799484  | 213 |
| chr25 | 39340951      | 39341162  | 212 |
| chr19 | 54820365      | 54820576  | 212 |
| chr19 | 15848833      | 15849044  | 212 |
| chr26 | 31026521      | 31026731  | 211 |
| chr10 | 84415842      | 84416052  | 211 |
| chr11 | 74935282      | 74935491  | 210 |
| chr25 | 39375290      | 39375498  | 209 |
| chr1  | 29439613      | 29439821  | 209 |
| chr1  | 86993429      | 86993636  | 208 |
| chrX  | 87820940      | 87821146  | 207 |
| chr25 | 465683 465889 |           | 207 |
| chr22 | 58354094      | 58354300  | 207 |
| chr18 | 11186334      | 11186540  | 207 |
| chr5  | 28901657      | 28901862  | 206 |
| chrX  | 78623800      | 78624004  | 205 |
| chr8  | 93060226      | 93060430  | 205 |
| chr19 | 8896288       | 8896492   | 205 |
| chr7  | 52394705      | 52394908  | 204 |
| chr19 | 54851917      | 54852120  | 204 |
| chr14 | 8434687       | 8434890   | 204 |

|       |               |           |     |
|-------|---------------|-----------|-----|
| chr13 | 38701781      | 38701984  | 204 |
| chrX  | 50762564      | 50762766  | 203 |
| chr9  | 29468196      | 29468398  | 203 |
| chr16 | 39571438      | 39571639  | 202 |
| chr18 | 48013912      | 48014291  | 380 |
| chr8  | 24309386      | 24309729  | 344 |
| chr8  | 73477719      | 73477934  | 216 |
| chr18 | 11978936      | 11979707  | 772 |
| chrX  | 21672182      | 21672951  | 770 |
| chr7  | 89470051      | 89470745  | 695 |
| chr20 | 70211641      | 70212322  | 682 |
| chr22 | 50788175      | 50788850  | 676 |
| chrX  | 59195775      | 59196448  | 674 |
| chr12 | 85013609      | 85014265  | 657 |
| chr5  | 76219596      | 76220246  | 651 |
| chr13 | 59596215      | 59596865  | 651 |
| chr18 | 11229804      | 11230453  | 650 |
| chr21 | 34146019      | 34146667  | 649 |
| chr11 | 81442276      | 81442921  | 646 |
| chrX  | 7443523       | 7444160   | 638 |
| chr22 | 50729055      | 50729688  | 634 |
| chr15 | 74583742      | 74584367  | 626 |
| chr26 | 28143651      | 28144272  | 622 |
| chrX  | 6328265       | 6328884   | 620 |
| chr7  | 50279110      | 50279718  | 609 |
| chr15 | 26718839      | 26719446  | 608 |
| chr21 | 58017135      | 58017738  | 604 |
| chr12 | 74206623      | 74207224  | 602 |
| chr1  | 123133380     | 123133979 | 600 |
| chr7  | 50356333      | 50356931  | 599 |
| chr10 | 17683276      | 17683870  | 595 |
| chr19 | 46781462      | 46782053  | 592 |
| chr11 | 65294200      | 65294788  | 589 |
| chr25 | 1512713       | 1513300   | 588 |
| chr7  | 61746313      | 61746898  | 586 |
| chr24 | 3952473       | 3953058   | 586 |
| chr22 | 48246710      | 48247295  | 586 |
| chr10 | 81684918      | 81685502  | 585 |
| chrX  | 58870632      | 58871215  | 584 |
| chr5  | 29153679      | 29154262  | 584 |
| chr28 | 33722924      | 33723505  | 582 |
| chr16 | 46910149      | 46910726  | 578 |
| chr24 | 1033049       | 1033625   | 577 |
| chr8  | 77219077      | 77219652  | 576 |
| chrX  | 2729748       | 2730322   | 575 |
| chr7  | 37358727      | 37359301  | 575 |
| chr2  | 12227388      | 12227959  | 572 |
| chr6  | 46652184      | 46652753  | 570 |
| chrX  | 34155836      | 34156403  | 568 |
| chr27 | 730263 730830 | 568       |     |

|       |           |           |     |
|-------|-----------|-----------|-----|
| chr24 | 790137    | 790702    | 566 |
| chr13 | 77310609  | 77311174  | 566 |
| chr13 | 17686448  | 17687013  | 566 |
| chr24 | 20422231  | 20422790  | 560 |
| chr20 | 5017147   | 5017704   | 558 |
| chr10 | 87482786  | 87483343  | 558 |
| chr3  | 111636307 | 111636862 | 556 |
| chr19 | 59073753  | 59074308  | 556 |
| chr24 | 33491112  | 33491664  | 553 |
| chr3  | 116058507 | 116059058 | 552 |
| chr16 | 1785961   | 1786512   | 552 |
| chr4  | 33413090  | 33413640  | 551 |
| chr25 | 3090591   | 3091141   | 551 |
| chr19 | 7789101   | 7789651   | 551 |
| chr10 | 77485401  | 77485951  | 551 |
| chrX  | 72874436  | 72874985  | 550 |
| chr19 | 12616954  | 12617503  | 550 |
| chr4  | 121428935 | 121429483 | 549 |
| chr28 | 33926279  | 33926827  | 549 |
| chrX  | 21267810  | 21268356  | 547 |
| chrX  | 11962722  | 11963268  | 547 |
| chr5  | 112543679 | 112544224 | 546 |
| chr2  | 110529114 | 110529658 | 545 |
| chrX  | 19323463  | 19324006  | 544 |
| chr17 | 70376475  | 70377018  | 544 |
| chr5  | 121879637 | 121880179 | 543 |
| chrX  | 10137601  | 10138142  | 542 |
| chr29 | 31635914  | 31636453  | 540 |
| chr27 | 38504942  | 38505481  | 540 |
| chrX  | 61402821  | 61403359  | 539 |
| chr6  | 107192832 | 107193370 | 539 |
| chr15 | 63999499  | 64000037  | 539 |
| chrX  | 6638351   | 6638886   | 536 |
| chrX  | 6392193   | 6392728   | 536 |
| chr21 | 67982971  | 67983506  | 536 |
| chr21 | 68798401  | 68798934  | 534 |
| chr14 | 1073959   | 1074488   | 530 |
| chr19 | 29125331  | 29125859  | 529 |
| chrX  | 54830989  | 54831514  | 526 |
| chr6  | 115563410 | 115563935 | 526 |
| chr11 | 104908742 | 104909267 | 526 |
| chr4  | 72549226  | 72549750  | 525 |
| chr19 | 16169566  | 16170090  | 525 |
| chr19 | 43127854  | 43128377  | 524 |
| chr19 | 33318234  | 33318756  | 523 |
| chr11 | 9425912   | 9426434   | 523 |
| chr28 | 33974082  | 33974603  | 522 |
| chr17 | 72396572  | 72397092  | 521 |
| chr8  | 23074948  | 23075467  | 520 |
| chr3  | 56535590  | 56536109  | 520 |



|       |           |           |     |
|-------|-----------|-----------|-----|
| chrX  | 2335616   | 2336134   | 519 |
| chr29 | 17886154  | 17886672  | 519 |
| chr13 | 71310998  | 71311516  | 519 |
| chrX  | 55882535  | 55883052  | 518 |
| chr11 | 13149471  | 13149988  | 518 |
| chr5  | 75034610  | 75035126  | 517 |
| chr3  | 125778158 | 125778674 | 517 |
| chr18 | 58382007  | 58382523  | 517 |
| chr23 | 52757028  | 52757541  | 514 |
| chrX  | 73473802  | 73474314  | 513 |
| chr3  | 121120749 | 121121261 | 513 |
| chr3  | 111649958 | 111650470 | 513 |
| chr19 | 7783950   | 7784461   | 512 |
| chr18 | 4865958   | 4866469   | 512 |
| chr11 | 77559944  | 77560454  | 511 |
| chrX  | 73610317  | 73610826  | 510 |
| chrX  | 62707553  | 62708062  | 510 |
| chr26 | 20856524  | 20857032  | 509 |
| chr24 | 59587616  | 59588123  | 508 |
| chr18 | 12536895  | 12537402  | 508 |
| chr25 | 35678243  | 35678749  | 507 |
| chrX  | 49985859  | 49986363  | 505 |
| chr7  | 46306473  | 46306977  | 505 |
| chrX  | 41295718  | 41296221  | 504 |
| chr26 | 34213287  | 34213790  | 504 |
| chr21 | 4281231   | 4281734   | 504 |
| chr19 | 55965267  | 55965770  | 504 |
| chr10 | 19597989  | 19598492  | 504 |
| chrX  | 55167271  | 55167773  | 503 |
| chr11 | 72336559  | 72337061  | 503 |
| chr4  | 121473735 | 121474236 | 502 |
| chr23 | 18766245  | 18766744  | 500 |
| chr3  | 35481968  | 35482466  | 499 |
| chr16 | 47063904  | 47064402  | 499 |
| chrX  | 49807687  | 49808184  | 498 |
| chr12 | 53332291  | 53332788  | 498 |
| chr7  | 42493807  | 42494303  | 497 |
| chr29 | 29799553  | 29800049  | 497 |
| chr26 | 18735744  | 18736240  | 497 |
| chr14 | 9663309   | 9663805   | 497 |
| chr29 | 26749813  | 26750308  | 496 |
| chr27 | 15403995  | 15404490  | 496 |
| chr25 | 27720778  | 27721272  | 495 |
| chr2  | 111766731 | 111767225 | 495 |
| chr17 | 73429641  | 73430135  | 495 |
| chr18 | 17840000  | 17840493  | 494 |
| chr22 | 47853948  | 47854440  | 493 |
| chr29 | 26166504  | 26166995  | 492 |
| chr2  | 114852449 | 114852940 | 492 |
| chr6  | 100540622 | 100541112 | 491 |

|       |               |           |     |
|-------|---------------|-----------|-----|
| chr3  | 105406047     | 105406536 | 490 |
| chr11 | 49102886      | 49103375  | 490 |
| chrX  | 49338073      | 49338561  | 489 |
| chrX  | 65660216      | 65660703  | 488 |
| chr22 | 59655801      | 59656288  | 488 |
| chr16 | 72285807      | 72286294  | 488 |
| chr18 | 11945144      | 11945629  | 486 |
| chr18 | 17920152      | 17920636  | 485 |
| chr16 | 47597669      | 47598153  | 485 |
| chr17 | 47083772      | 47084255  | 484 |
| chr5  | 111202720     | 111203202 | 483 |
| chr19 | 16703948      | 16704430  | 483 |
| chr7  | 48981914      | 48982395  | 482 |
| chr12 | 32634438      | 32634919  | 482 |
| chrX  | 6442357       | 6442837   | 481 |
| chr19 | 39502656      | 39503136  | 481 |
| chr11 | 11740851      | 11741331  | 481 |
| chr3  | 105599414     | 105599892 | 479 |
| chr20 | 784512 784990 |           | 479 |
| chr18 | 12164915      | 12165393  | 479 |
| chr3  | 123340429     | 123340906 | 478 |
| chr15 | 21218086      | 21218563  | 478 |
| chr11 | 99764566      | 99765043  | 478 |
| chrX  | 48008417      | 48008893  | 477 |
| chr18 | 48451359      | 48451835  | 477 |
| chr18 | 46531639      | 46532115  | 477 |
| chrX  | 50386261      | 50386736  | 476 |
| chrX  | 9254939       | 9255414   | 476 |
| chr4  | 71618019      | 71618494  | 476 |
| chr2  | 17540470      | 17540945  | 476 |
| chr29 | 33074787      | 33075261  | 475 |
| chr24 | 1154034       | 1154508   | 475 |
| chr24 | 889120 889594 |           | 475 |
| chr23 | 49787358      | 49787832  | 475 |
| chr15 | 75549892      | 75550366  | 475 |
| chr1  | 100090026     | 100090500 | 475 |
| chr28 | 42224716      | 42225189  | 474 |
| chr19 | 28841113      | 28841586  | 474 |
| chr13 | 23634690      | 23635163  | 474 |
| chrX  | 65002286      | 65002757  | 472 |
| chrX  | 13344772      | 13345243  | 472 |
| chr8  | 61659503      | 61659973  | 471 |
| chr24 | 50326800      | 50327270  | 471 |
| chr17 | 18370220      | 18370690  | 471 |
| chrX  | 34045439      | 34045908  | 470 |
| chrX  | 12920187      | 12920655  | 469 |
| chr19 | 29810548      | 29811016  | 469 |
| chrX  | 12637896      | 12638363  | 468 |
| chr25 | 34213578      | 34214045  | 468 |
| chr2  | 64213606      | 64214073  | 468 |

|       |           |           |     |
|-------|-----------|-----------|-----|
| chrX  | 12477743  | 12478209  | 467 |
| chr23 | 19805645  | 19806111  | 467 |
| chrX  | 54746008  | 54746473  | 466 |
| chrX  | 50032994  | 50033459  | 466 |
| chrX  | 29769105  | 29769569  | 465 |
| chr5  | 122836184 | 122836648 | 465 |
| chr19 | 8398403   | 8398867   | 465 |
| chr16 | 35875361  | 35875825  | 465 |
| chr19 | 28472790  | 28473253  | 464 |
| chr2  | 128839874 | 128840336 | 463 |
| chr16 | 56125331  | 56125793  | 463 |
| chr7  | 12919038  | 12919499  | 462 |
| chr22 | 51508890  | 51509351  | 462 |
| chr17 | 69737570  | 69738031  | 462 |
| chr10 | 90456513  | 90456974  | 462 |
| chr18 | 15795793  | 15796253  | 461 |
| chr10 | 17065275  | 17065735  | 461 |
| chrX  | 21939820  | 21940279  | 460 |
| chr3  | 111653103 | 111653562 | 460 |
| chr11 | 49665361  | 49665820  | 460 |
| chrX  | 37618360  | 37618818  | 459 |
| chr19 | 7198932   | 7199390   | 459 |
| chr12 | 82368800  | 82369258  | 459 |
| chr10 | 84437510  | 84437968  | 459 |
| chrX  | 75868518  | 75868975  | 458 |
| chr29 | 41992534  | 41992990  | 457 |
| chr11 | 77635595  | 77636050  | 456 |
| chr29 | 17882884  | 17883338  | 455 |
| chr11 | 10492681  | 10493135  | 455 |
| chr8  | 110718275 | 110718728 | 454 |
| chr15 | 32668934  | 32669387  | 454 |
| chrX  | 2382745   | 2383197   | 453 |
| chr23 | 14261097  | 14261548  | 452 |
| chrX  | 18441156  | 18441606  | 451 |
| chr8  | 25930852  | 25931300  | 449 |
| chrX  | 50536380  | 50536827  | 448 |
| chrX  | 6409931   | 6410378   | 448 |
| chrX  | 72858599  | 72859044  | 446 |
| chr21 | 11901613  | 11902058  | 446 |
| chrX  | 75375691  | 75376135  | 445 |
| chrX  | 13962918  | 13963362  | 445 |
| chr6  | 107174918 | 107175361 | 444 |
| chr28 | 34345203  | 34345646  | 444 |
| chr13 | 61753859  | 61754302  | 444 |
| chr20 | 21769365  | 21769807  | 443 |
| chr13 | 36761651  | 36762093  | 443 |
| chrX  | 30704433  | 30704874  | 442 |
| chr18 | 12340019  | 12340460  | 442 |
| chr14 | 9685174   | 9685615   | 442 |
| chr15 | 29991408  | 29991848  | 441 |

|       |               |           |     |
|-------|---------------|-----------|-----|
| chrX  | 66958743      | 66959182  | 440 |
| chrX  | 6494549       | 6494988   | 440 |
| chr3  | 30484144      | 30484583  | 440 |
| chr3  | 15632269      | 15632708  | 440 |
| chrX  | 9453026       | 9453464   | 439 |
| chrX  | 61830996      | 61831433  | 438 |
| chrX  | 38977339      | 38977776  | 438 |
| chr6  | 107139809     | 107140246 | 438 |
| chr13 | 54427571      | 54428008  | 438 |
| chr1  | 72377685      | 72378122  | 438 |
| chr19 | 12325357      | 12325793  | 437 |
| chr18 | 52788868      | 52789304  | 437 |
| chr13 | 40081732      | 40082168  | 437 |
| chr21 | 69117502      | 69117937  | 436 |
| chr21 | 34137109      | 34137544  | 436 |
| chrX  | 68449698      | 68450132  | 435 |
| chrX  | 9151453       | 9151887   | 435 |
| chr5  | 81605205      | 81605639  | 435 |
| chrX  | 54316874      | 54317307  | 434 |
| chr2  | 138021179     | 138021612 | 434 |
| chr19 | 46869311      | 46869744  | 434 |
| chr17 | 47425267      | 47425700  | 434 |
| chr13 | 61821600      | 61822032  | 433 |
| chr19 | 7541676       | 7542107   | 432 |
| chr5  | 125291890     | 125292320 | 431 |
| chr23 | 46033384      | 46033814  | 431 |
| chr14 | 30887410      | 30887839  | 430 |
| chr22 | 48197271      | 48197699  | 429 |
| chrX  | 50793358      | 50793785  | 428 |
| chr8  | 44145373      | 44145800  | 428 |
| chr19 | 19189491      | 19189917  | 427 |
| chr12 | 80834518      | 80834944  | 427 |
| chr9  | 105989011     | 105989436 | 426 |
| chr15 | 22798155      | 22798579  | 425 |
| chr15 | 38338785      | 38339208  | 424 |
| chr10 | 83558660      | 83559083  | 424 |
| chr8  | 73462649      | 73463071  | 423 |
| chr29 | 1559972       | 1560393   | 422 |
| chr20 | 786566 786987 |           | 422 |
| chr19 | 46812895      | 46813316  | 422 |
| chr13 | 77302013      | 77302434  | 422 |
| chrX  | 20693509      | 20693927  | 419 |
| chr23 | 15960140      | 15960558  | 419 |
| chrX  | 56601762      | 56602179  | 418 |
| chr2  | 123027496     | 123027913 | 418 |
| chr19 | 56612762      | 56613179  | 418 |
| chr19 | 54298260      | 54298677  | 418 |
| chr13 | 58263555      | 58263972  | 418 |
| chrX  | 74496857      | 74497273  | 417 |
| chr24 | 767872 768288 |           | 417 |

|       |           |           |     |
|-------|-----------|-----------|-----|
| chr2  | 110029888 | 110030304 | 417 |
| chrX  | 78484302  | 78484717  | 416 |
| chrX  | 78260721  | 78261134  | 414 |
| chr5  | 33941356  | 33941766  | 411 |
| chr4  | 79168353  | 79168763  | 411 |
| chr24 | 40516192  | 40516602  | 411 |
| chr19 | 39414691  | 39415101  | 411 |
| chrX  | 28217776  | 28218184  | 409 |
| chr18 | 22302903  | 22303311  | 409 |
| chr12 | 15862412  | 15862820  | 409 |
| chrX  | 9150886   | 9151293   | 408 |
| chr2  | 122977111 | 122977517 | 407 |
| chrX  | 19028847  | 19029250  | 404 |
| chr29 | 48882927  | 48883328  | 402 |
| chrX  | 72328928  | 72329326  | 399 |
| chrX  | 61876453  | 61876851  | 399 |
| chrX  | 58214560  | 58214958  | 399 |
| chrX  | 54094529  | 54094927  | 399 |
| chrX  | 15702972  | 15703370  | 399 |
| chr8  | 108813346 | 108813744 | 399 |
| chr8  | 108661318 | 108661716 | 399 |
| chr8  | 7811743   | 7812141   | 399 |
| chr7  | 61149125  | 61149523  | 399 |
| chr5  | 73195236  | 73195634  | 399 |
| chr5  | 60386116  | 60386514  | 399 |
| chr5  | 35288735  | 35289133  | 399 |
| chr5  | 30405080  | 30405478  | 399 |
| chr29 | 48333113  | 48333511  | 399 |
| chr28 | 26818202  | 26818600  | 399 |
| chr27 | 38912082  | 38912480  | 399 |
| chr26 | 45850510  | 45850908  | 399 |
| chr25 | 18121731  | 18122129  | 399 |
| chr24 | 51593663  | 51594061  | 399 |
| chr23 | 10543981  | 10544379  | 399 |
| chr22 | 39765578  | 39765976  | 399 |
| chr22 | 36141912  | 36142310  | 399 |
| chr21 | 47619789  | 47620187  | 399 |
| chr19 | 8583845   | 8584243   | 399 |
| chr18 | 13841493  | 13841891  | 399 |
| chr18 | 3580261   | 3580659   | 399 |
| chr17 | 57751262  | 57751660  | 399 |
| chr16 | 73773773  | 73774171  | 399 |
| chr15 | 76424656  | 76425054  | 399 |
| chr15 | 25188049  | 25188447  | 399 |
| chr14 | 22135884  | 22136282  | 399 |
| chr13 | 73905879  | 73906277  | 399 |
| chr13 | 39978667  | 39979065  | 399 |
| chr13 | 38354125  | 38354523  | 399 |
| chr11 | 46738703  | 46739101  | 399 |
| chr10 | 21688887  | 21689285  | 399 |

|       |           |           |     |
|-------|-----------|-----------|-----|
| chr1  | 119738876 | 119739274 | 399 |
| chrX  | 21246725  | 21247122  | 398 |
| chrX  | 11979916  | 11980313  | 398 |
| chr3  | 109761068 | 109761465 | 398 |
| chr3  | 105167269 | 105167666 | 398 |
| chr27 | 33469381  | 33469778  | 398 |
| chr26 | 43780463  | 43780860  | 398 |
| chr23 | 28836150  | 28836547  | 398 |
| chr23 | 10578403  | 10578800  | 398 |
| chr20 | 74529528  | 74529925  | 398 |
| chr2  | 139413409 | 139413806 | 398 |
| chr19 | 19306168  | 19306565  | 398 |
| chr19 | 7295766   | 7296163   | 398 |
| chr11 | 70861101  | 70861498  | 398 |
| chr10 | 106206418 | 106206815 | 398 |
| chrX  | 11032645  | 11033041  | 397 |
| chr9  | 100311881 | 100312277 | 397 |
| chr5  | 112564611 | 112565007 | 397 |
| chr19 | 61110384  | 61110780  | 397 |
| chr19 | 38237117  | 38237513  | 397 |
| chr10 | 17401819  | 17402215  | 397 |
| chrX  | 63908628  | 63909023  | 396 |
| chr8  | 57673794  | 57674189  | 396 |
| chr7  | 47383656  | 47384051  | 396 |
| chr3  | 2493474   | 2493869   | 396 |
| chr29 | 33725260  | 33725655  | 396 |
| chr9  | 47238349  | 47238743  | 395 |
| chr8  | 104192620 | 104193014 | 395 |
| chr29 | 35632972  | 35633366  | 395 |
| chr25 | 34089651  | 34090045  | 395 |
| chr23 | 50792442  | 50792836  | 395 |
| chr13 | 22160000  | 22160394  | 395 |
| chrX  | 56886936  | 56887329  | 394 |
| chrX  | 55499069  | 55499462  | 394 |
| chrX  | 7833284   | 7833677   | 394 |
| chr8  | 60323768  | 60324161  | 394 |
| chr3  | 119910730 | 119911123 | 394 |
| chr28 | 25827041  | 25827434  | 394 |
| chr26 | 35226408  | 35226801  | 394 |
| chr25 | 34507725  | 34508118  | 394 |
| chr23 | 46034214  | 46034607  | 394 |
| chr19 | 13407450  | 13407843  | 394 |
| chr17 | 73115913  | 73116306  | 394 |
| chrX  | 73345693  | 73346085  | 393 |
| chr5  | 123172959 | 123173351 | 393 |
| chr28 | 25279826  | 25280218  | 393 |
| chr13 | 58317036  | 58317428  | 393 |
| chr5  | 36376610  | 36377001  | 392 |
| chr26 | 44533620  | 44534011  | 392 |
| chr25 | 22631455  | 22631846  | 392 |

|       |               |           |     |
|-------|---------------|-----------|-----|
| chr2  | 135596096     | 135596487 | 392 |
| chr18 | 329673 330064 | 392       |     |
| chr16 | 23762861      | 23763252  | 392 |
| chr12 | 33019230      | 33019621  | 392 |
| chr11 | 104998512     | 104998903 | 392 |
| chrX  | 72869609      | 72869999  | 391 |
| chr7  | 15433259      | 15433649  | 391 |
| chr4  | 108418680     | 108419070 | 391 |
| chr3  | 88243998      | 88244388  | 391 |
| chr24 | 48973368      | 48973758  | 391 |
| chr23 | 49898835      | 49899225  | 391 |
| chr22 | 50604604      | 50604994  | 391 |
| chr19 | 39544059      | 39544449  | 391 |
| chr18 | 22173855      | 22174245  | 391 |
| chr15 | 73756791      | 73757181  | 391 |
| chr15 | 26730732      | 26731122  | 391 |
| chrX  | 12245415      | 12245804  | 390 |
| chr5  | 79224160      | 79224549  | 390 |
| chr4  | 95805131      | 95805520  | 390 |
| chr26 | 42225967      | 42226356  | 390 |
| chr26 | 21814593      | 21814982  | 390 |
| chr23 | 38492823      | 38493212  | 390 |
| chr21 | 28834513      | 28834902  | 390 |
| chr20 | 713521 713910 | 390       |     |
| chr2  | 17383162      | 17383551  | 390 |
| chr19 | 12430957      | 12431346  | 390 |
| chr17 | 64674077      | 64674466  | 390 |
| chr16 | 2459329       | 2459718   | 390 |
| chr15 | 13598610      | 13598999  | 390 |
| chr1  | 68934462      | 68934851  | 390 |
| chrX  | 53495123      | 53495511  | 389 |
| chrX  | 10106773      | 10107161  | 389 |
| chr5  | 113170893     | 113171281 | 389 |
| chr2  | 139095166     | 139095554 | 389 |
| chr16 | 71523576      | 71523964  | 389 |
| chr16 | 40934477      | 40934865  | 389 |
| chr12 | 84336463      | 84336851  | 389 |
| chr11 | 85339052      | 85339440  | 389 |
| chr11 | 69843606      | 69843994  | 389 |
| chr11 | 29164664      | 29165052  | 389 |
| chr1  | 144547701     | 144548089 | 389 |
| chrX  | 82375698      | 82376085  | 388 |
| chrX  | 54993124      | 54993511  | 388 |
| chrX  | 8022586       | 8022973   | 388 |
| chr9  | 90535197      | 90535584  | 388 |
| chr5  | 30160376      | 30160763  | 388 |
| chr29 | 29934278      | 29934665  | 388 |
| chr25 | 43219554      | 43219941  | 388 |
| chr21 | 2020701       | 2021088   | 388 |
| chr19 | 22883353      | 22883740  | 388 |

|       |               |           |     |
|-------|---------------|-----------|-----|
| chr12 | 32919111      | 32919498  | 388 |
| chr12 | 14975372      | 14975759  | 388 |
| chr11 | 91715566      | 91715953  | 388 |
| chr10 | 90928120      | 90928507  | 388 |
| chrX  | 47306939      | 47307325  | 387 |
| chr4  | 59595445      | 59595831  | 387 |
| chr3  | 22869438      | 22869824  | 387 |
| chr19 | 10991011      | 10991397  | 387 |
| chr18 | 24594036      | 24594422  | 387 |
| chr18 | 11596090      | 11596476  | 387 |
| chr16 | 38783709      | 38784095  | 387 |
| chr15 | 74708160      | 74708546  | 387 |
| chrX  | 35900726      | 35901111  | 386 |
| chr7  | 46275315      | 46275700  | 386 |
| chr7  | 18852353      | 18852738  | 386 |
| chr6  | 94910428      | 94910813  | 386 |
| chr20 | 806561 806946 | 386       |     |
| chr13 | 79529324      | 79529709  | 386 |
| chr11 | 91420353      | 91420738  | 386 |
| chr11 | 58476388      | 58476773  | 386 |
| chrX  | 55335982      | 55336366  | 385 |
| chrX  | 46666251      | 46666635  | 385 |
| chrX  | 36843694      | 36844078  | 385 |
| chrX  | 35192365      | 35192749  | 385 |
| chrX  | 33519081      | 33519465  | 385 |
| chr8  | 64488421      | 64488805  | 385 |
| chr7  | 93965221      | 93965605  | 385 |
| chr4  | 123095603     | 123095987 | 385 |
| chr3  | 114676731     | 114677115 | 385 |
| chr3  | 105100984     | 105101368 | 385 |
| chr28 | 34023817      | 34024201  | 385 |
| chr25 | 37415345      | 37415729  | 385 |
| chr22 | 50078040      | 50078424  | 385 |
| chr19 | 65236522      | 65236906  | 385 |
| chr17 | 54242873      | 54243257  | 385 |
| chr13 | 26219270      | 26219654  | 385 |
| chr10 | 66863704      | 66864088  | 385 |
| chrX  | 76994930      | 76995313  | 384 |
| chrX  | 48003597      | 48003980  | 384 |
| chrX  | 20387122      | 20387505  | 384 |
| chr8  | 4807719       | 4808102   | 384 |
| chr5  | 60900234      | 60900617  | 384 |
| chr20 | 1502834       | 1503217   | 384 |
| chr19 | 21791474      | 21791857  | 384 |
| chr18 | 65751366      | 65751749  | 384 |
| chr16 | 47059404      | 47059787  | 384 |
| chr15 | 25477047      | 25477430  | 384 |
| chrX  | 64951723      | 64952105  | 383 |
| chrX  | 38246095      | 38246477  | 383 |
| chrX  | 19481772      | 19482154  | 383 |



|       |           |           |     |
|-------|-----------|-----------|-----|
| chr9  | 106454835 | 106455217 | 383 |
| chr8  | 73726137  | 73726519  | 383 |
| chr28 | 27042403  | 27042785  | 383 |
| chr26 | 48668209  | 48668591  | 383 |
| chr23 | 19923075  | 19923457  | 383 |
| chr19 | 61112673  | 61113055  | 383 |
| chr18 | 50483996  | 50484378  | 383 |
| chr18 | 47504893  | 47505275  | 383 |
| chr17 | 72962205  | 72962587  | 383 |
| chr17 | 69421138  | 69421520  | 383 |
| chr17 | 56475175  | 56475557  | 383 |
| chr11 | 109704562 | 109704944 | 383 |
| chr11 | 6462871   | 6463253   | 383 |
| chrX  | 5669293   | 5669674   | 382 |
| chr8  | 22856556  | 22856937  | 382 |
| chr28 | 18013398  | 18013779  | 382 |
| chr21 | 2913405   | 2913786   | 382 |
| chr2  | 75981958  | 75982339  | 382 |
| chr18 | 53491460  | 53491841  | 382 |
| chr14 | 61273933  | 61274314  | 382 |
| chr11 | 77779837  | 77780218  | 382 |
| chr1  | 149697849 | 149698230 | 382 |
| chrX  | 78482965  | 78483345  | 381 |
| chrX  | 20240632  | 20241012  | 381 |
| chrX  | 2489290   | 2489670   | 381 |
| chr9  | 100481999 | 100482379 | 381 |
| chr6  | 18069262  | 18069642  | 381 |
| chr5  | 112222952 | 112223332 | 381 |
| chr3  | 111518630 | 111519010 | 381 |
| chr28 | 26342287  | 26342667  | 381 |
| chr24 | 59430105  | 59430485  | 381 |
| chr2  | 108735235 | 108735615 | 381 |
| chr2  | 99372139  | 99372519  | 381 |
| chr19 | 59238407  | 59238787  | 381 |
| chr19 | 24524545  | 24524925  | 381 |
| chr18 | 56858126  | 56858506  | 381 |
| chr18 | 54860931  | 54861311  | 381 |
| chr17 | 72688434  | 72688814  | 381 |
| chr15 | 75233774  | 75234154  | 381 |
| chr1  | 85893459  | 85893839  | 381 |
| chrX  | 78109615  | 78109994  | 380 |
| chrX  | 61144352  | 61144731  | 380 |
| chrX  | 50341405  | 50341784  | 380 |
| chr8  | 73391891  | 73392270  | 380 |
| chr4  | 121434067 | 121434446 | 380 |
| chr3  | 126214894 | 126215273 | 380 |
| chr27 | 7454822   | 7455201   | 380 |
| chr19 | 39260921  | 39261300  | 380 |
| chr12 | 33385439  | 33385818  | 380 |
| chr1  | 147626860 | 147627239 | 380 |

|       |           |           |     |
|-------|-----------|-----------|-----|
| chrX  | 62971823  | 62972201  | 379 |
| chrX  | 60558222  | 60558600  | 379 |
| chrX  | 58443661  | 58444039  | 379 |
| chrX  | 31656368  | 31656746  | 379 |
| chrX  | 21890377  | 21890755  | 379 |
| chrX  | 9309319   | 9309697   | 379 |
| chr7  | 10324016  | 10324394  | 379 |
| chr28 | 33368524  | 33368902  | 379 |
| chr21 | 32894956  | 32895334  | 379 |
| chr2  | 138688340 | 138688718 | 379 |
| chr2  | 129890080 | 129890458 | 379 |
| chr19 | 64685714  | 64686092  | 379 |
| chr19 | 58431566  | 58431944  | 379 |
| chr18 | 23496111  | 23496489  | 379 |
| chr13 | 68910356  | 68910734  | 379 |
| chrX  | 48064570  | 48064947  | 378 |
| chrX  | 36706113  | 36706490  | 378 |
| chrX  | 20017145  | 20017522  | 378 |
| chrX  | 12909462  | 12909839  | 378 |
| chrX  | 8853774   | 8854151   | 378 |
| chr6  | 119376062 | 119376439 | 378 |
| chr4  | 71687834  | 71688211  | 378 |
| chr3  | 125142581 | 125142958 | 378 |
| chr29 | 30739909  | 30740286  | 378 |
| chr28 | 26036226  | 26036603  | 378 |
| chr22 | 55790183  | 55790560  | 378 |
| chr22 | 46587337  | 46587714  | 378 |
| chr2  | 139805483 | 139805860 | 378 |
| chr19 | 20795726  | 20796103  | 378 |
| chr18 | 5542280   | 5542657   | 378 |
| chr16 | 71530912  | 71531289  | 378 |
| chr16 | 47214683  | 47215060  | 378 |
| chr16 | 47125649  | 47126026  | 378 |
| chr15 | 75839796  | 75840173  | 378 |
| chr15 | 54178851  | 54179228  | 378 |
| chr15 | 29277329  | 29277706  | 378 |
| chr13 | 70153453  | 70153830  | 378 |
| chr13 | 59612643  | 59613020  | 378 |
| chr10 | 90152667  | 90153044  | 378 |
| chr1  | 98271145  | 98271522  | 378 |
| chrX  | 53517062  | 53517438  | 377 |
| chrX  | 30828942  | 30829318  | 377 |
| chrX  | 9028868   | 9029244   | 377 |
| chr9  | 51632018  | 51632394  | 377 |
| chr3  | 111859234 | 111859610 | 377 |
| chr23 | 8382851   | 8383227   | 377 |
| chr2  | 99787785  | 99788161  | 377 |
| chr15 | 29745919  | 29746295  | 377 |
| chr14 | 1387839   | 1388215   | 377 |
| chr11 | 98371016  | 98371392  | 377 |

|       |               |           |     |
|-------|---------------|-----------|-----|
| chr11 | 77570701      | 77571077  | 377 |
| chrX  | 35891782      | 35892157  | 376 |
| chrX  | 29541766      | 29542141  | 376 |
| chrX  | 13301589      | 13301964  | 376 |
| chr7  | 16818382      | 16818757  | 376 |
| chr4  | 121087974     | 121088349 | 376 |
| chr4  | 8862154       | 8862529   | 376 |
| chr3  | 73954061      | 73954436  | 376 |
| chr3  | 56438079      | 56438454  | 376 |
| chr3  | 24599082      | 24599457  | 376 |
| chr26 | 43768397      | 43768772  | 376 |
| chr25 | 3524380       | 3524755   | 376 |
| chr23 | 28554612      | 28554987  | 376 |
| chr2  | 93912660      | 93913035  | 376 |
| chr17 | 68602465      | 68602840  | 376 |
| chr17 | 1567795       | 1568170   | 376 |
| chr16 | 40858717      | 40859092  | 376 |
| chr14 | 67981503      | 67981878  | 376 |
| chr13 | 41746486      | 41746861  | 376 |
| chr10 | 74755593      | 74755968  | 376 |
| chrX  | 53048207      | 53048581  | 375 |
| chrX  | 31944369      | 31944743  | 375 |
| chrX  | 30675259      | 30675633  | 375 |
| chrX  | 19758459      | 19758833  | 375 |
| chr9  | 59377196      | 59377570  | 375 |
| chr4  | 89753972      | 89754346  | 375 |
| chr29 | 43075190      | 43075564  | 375 |
| chr22 | 46546414      | 46546788  | 375 |
| chr15 | 81018642      | 81019016  | 375 |
| chr15 | 75381826      | 75382200  | 375 |
| chr15 | 27266548      | 27266922  | 375 |
| chr15 | 24512745      | 24513119  | 375 |
| chr13 | 56357513      | 56357887  | 375 |
| chr13 | 34856687      | 34857061  | 375 |
| chr11 | 90362900      | 90363274  | 375 |
| chr11 | 20924962      | 20925336  | 375 |
| chr10 | 84394044      | 84394418  | 375 |
| chrX  | 30993933      | 30994306  | 374 |
| chrX  | 587561 587934 | 374       |     |
| chr6  | 121763687     | 121764060 | 374 |
| chr29 | 26165316      | 26165689  | 374 |
| chr27 | 47417138      | 47417511  | 374 |
| chr25 | 40617052      | 40617425  | 374 |
| chr19 | 10996655      | 10997028  | 374 |
| chr15 | 28662318      | 28662691  | 374 |
| chr14 | 40095748      | 40096121  | 374 |
| chr14 | 10285414      | 10285787  | 374 |
| chr13 | 15799673      | 15800046  | 374 |
| chr12 | 32010522      | 32010895  | 374 |
| chr10 | 88275352      | 88275725  | 374 |

|       |               |           |     |
|-------|---------------|-----------|-----|
| chr1  | 151541206     | 151541579 | 374 |
| chrX  | 21795370      | 21795742  | 373 |
| chrX  | 20415551      | 20415923  | 373 |
| chr8  | 115738072     | 115738444 | 373 |
| chr5  | 122256427     | 122256799 | 373 |
| chr4  | 101709896     | 101710268 | 373 |
| chr29 | 30119352      | 30119724  | 373 |
| chr28 | 5026434       | 5026806   | 373 |
| chr25 | 15313211      | 15313583  | 373 |
| chr24 | 49260269      | 49260641  | 373 |
| chr23 | 32670012      | 32670384  | 373 |
| chr2  | 140624989     | 140625361 | 373 |
| chr2  | 136777360     | 136777732 | 373 |
| chr2  | 8925788       | 8926160   | 373 |
| chr17 | 4143622       | 4143994   | 373 |
| chr16 | 68764685      | 68765057  | 373 |
| chr13 | 64848897      | 64849269  | 373 |
| chr11 | 81398129      | 81398501  | 373 |
| chr10 | 86269125      | 86269497  | 373 |
| chrX  | 81259132      | 81259503  | 372 |
| chrX  | 45519292      | 45519663  | 372 |
| chrX  | 45164826      | 45165197  | 372 |
| chrX  | 31145964      | 31146335  | 372 |
| chr9  | 46009824      | 46010195  | 372 |
| chr6  | 60889243      | 60889614  | 372 |
| chr3  | 105956522     | 105956893 | 372 |
| chr3  | 4348245       | 4348616   | 372 |
| chr26 | 20284127      | 20284498  | 372 |
| chr19 | 44891212      | 44891583  | 372 |
| chr18 | 47695687      | 47696058  | 372 |
| chr18 | 22503058      | 22503429  | 372 |
| chr18 | 11935203      | 11935574  | 372 |
| chr14 | 8428254       | 8428625   | 372 |
| chr13 | 77543149      | 77543520  | 372 |
| chrX  | 79840957      | 79841327  | 371 |
| chrX  | 78171828      | 78172198  | 371 |
| chrX  | 38087682      | 38088052  | 371 |
| chrX  | 10645748      | 10646118  | 371 |
| chrX  | 547782 548152 | 371       |     |
| chr8  | 65833696      | 65834066  | 371 |
| chr6  | 32583818      | 32584188  | 371 |
| chr26 | 14918223      | 14918593  | 371 |
| chr24 | 43718187      | 43718557  | 371 |
| chr21 | 31147218      | 31147588  | 371 |
| chr21 | 20006947      | 20007317  | 371 |
| chr21 | 15537948      | 15538318  | 371 |
| chr2  | 139153584     | 139153954 | 371 |
| chr2  | 75829282      | 75829652  | 371 |
| chr18 | 52019790      | 52020160  | 371 |
| chr17 | 3238252       | 3238622   | 371 |

|       |               |           |     |
|-------|---------------|-----------|-----|
| chr15 | 61158360      | 61158730  | 371 |
| chr14 | 4457566       | 4457936   | 371 |
| chrX  | 76258336      | 76258705  | 370 |
| chrX  | 20486075      | 20486444  | 370 |
| chrX  | 12220030      | 12220399  | 370 |
| chr29 | 37382994      | 37383363  | 370 |
| chr26 | 44237307      | 44237676  | 370 |
| chr24 | 60744224      | 60744593  | 370 |
| chr19 | 31386879      | 31387248  | 370 |
| chr19 | 16155449      | 16155818  | 370 |
| chr16 | 47041453      | 47041822  | 370 |
| chr16 | 1595810       | 1596179   | 370 |
| chr13 | 74335163      | 74335532  | 370 |
| chr13 | 58365864      | 58366233  | 370 |
| chr13 | 41761004      | 41761373  | 370 |
| chr1  | 131955580     | 131955949 | 370 |
| chrX  | 74306004      | 74306372  | 369 |
| chrX  | 2346920       | 2347288   | 369 |
| chr28 | 33492800      | 33493168  | 369 |
| chr26 | 14977681      | 14978049  | 369 |
| chr22 | 15995282      | 15995650  | 369 |
| chr2  | 23206975      | 23207343  | 369 |
| chr19 | 60047569      | 60047937  | 369 |
| chr19 | 35108416      | 35108784  | 369 |
| chr17 | 69332125      | 69332493  | 369 |
| chr15 | 75631128      | 75631496  | 369 |
| chr13 | 55517757      | 55518125  | 369 |
| chr11 | 257656 258024 |           | 369 |
| chr10 | 66812194      | 66812562  | 369 |
| chr1  | 128258321     | 128258689 | 369 |
| chr1  | 1131970       | 1132338   | 369 |
| chrX  | 73350152      | 73350519  | 368 |
| chrX  | 58453858      | 58454225  | 368 |
| chrX  | 19694283      | 19694650  | 368 |
| chrX  | 18484240      | 18484607  | 368 |
| chrX  | 12231985      | 12232352  | 368 |
| chr27 | 804910 805277 |           | 368 |
| chr24 | 43786456      | 43786823  | 368 |
| chr23 | 18151518      | 18151885  | 368 |
| chr22 | 39817107      | 39817474  | 368 |
| chr21 | 67964076      | 67964443  | 368 |
| chr21 | 48713158      | 48713525  | 368 |
| chr21 | 31164614      | 31164981  | 368 |
| chr20 | 66335609      | 66335976  | 368 |
| chr19 | 15943288      | 15943655  | 368 |
| chr17 | 69399931      | 69400298  | 368 |
| chr15 | 28602858      | 28603225  | 368 |
| chr13 | 6611147       | 6611514   | 368 |
| chr11 | 2559120       | 2559487   | 368 |
| chr1  | 84905243      | 84905610  | 368 |

|       |           |           |     |
|-------|-----------|-----------|-----|
| chrX  | 78115982  | 78116348  | 367 |
| chrX  | 6330235   | 6330601   | 367 |
| chr9  | 90674768  | 90675134  | 367 |
| chr6  | 23533277  | 23533643  | 367 |
| chr5  | 75031395  | 75031761  | 367 |
| chr4  | 96286524  | 96286890  | 367 |
| chr23 | 44801546  | 44801912  | 367 |
| chr2  | 131212863 | 131213229 | 367 |
| chr19 | 43628375  | 43628741  | 367 |
| chr18 | 63777639  | 63778005  | 367 |
| chr18 | 12783691  | 12784057  | 367 |
| chr15 | 24145134  | 24145500  | 367 |
| chr13 | 72626230  | 72626596  | 367 |
| chr11 | 98901346  | 98901712  | 367 |
| chr11 | 28423159  | 28423525  | 367 |
| chr10 | 29549365  | 29549731  | 367 |
| chrX  | 71922221  | 71922586  | 366 |
| chrX  | 8479585   | 8479950   | 366 |
| chrX  | 7172191   | 7172556   | 366 |
| chr5  | 55578376  | 55578741  | 366 |
| chr29 | 35250164  | 35250529  | 366 |
| chr26 | 48672371  | 48672736  | 366 |
| chr25 | 3268674   | 3269039   | 366 |
| chr23 | 19839617  | 19839982  | 366 |
| chr23 | 14938482  | 14938847  | 366 |
| chr18 | 53962840  | 53963205  | 366 |
| chr15 | 24217018  | 24217383  | 366 |
| chr13 | 68950517  | 68950882  | 366 |
| chr13 | 59869056  | 59869421  | 366 |
| chr11 | 81791962  | 81792327  | 366 |
| chr10 | 71066349  | 71066714  | 366 |
| chr10 | 25683927  | 25684292  | 366 |
| chr10 | 15015343  | 15015708  | 366 |
| chrX  | 35878064  | 35878428  | 365 |
| chrX  | 22398924  | 22399288  | 365 |
| chrX  | 8413775   | 8414139   | 365 |
| chr26 | 37545406  | 37545770  | 365 |
| chr25 | 33520612  | 33520976  | 365 |
| chr21 | 18625005  | 18625369  | 365 |
| chr2  | 116807685 | 116808049 | 365 |
| chr2  | 93693210  | 93693574  | 365 |
| chr16 | 67431455  | 67431819  | 365 |
| chr12 | 34283004  | 34283368  | 365 |
| chr10 | 17008236  | 17008600  | 365 |
| chrX  | 53937105  | 53937468  | 364 |
| chrX  | 45777271  | 45777634  | 364 |
| chrX  | 39066422  | 39066785  | 364 |
| chrX  | 35890965  | 35891328  | 364 |
| chr8  | 61042425  | 61042788  | 364 |
| chr7  | 57334028  | 57334391  | 364 |

|       |           |           |     |
|-------|-----------|-----------|-----|
| chr7  | 38873248  | 38873611  | 364 |
| chr5  | 80283098  | 80283461  | 364 |
| chr3  | 119276409 | 119276772 | 364 |
| chr3  | 13652055  | 13652418  | 364 |
| chr27 | 21494947  | 21495310  | 364 |
| chr23 | 25143227  | 25143590  | 364 |
| chr23 | 7426029   | 7426392   | 364 |
| chr22 | 61053210  | 61053573  | 364 |
| chr22 | 12416294  | 12416657  | 364 |
| chr21 | 66481361  | 66481724  | 364 |
| chr21 | 28837432  | 28837795  | 364 |
| chr17 | 46489061  | 46489424  | 364 |
| chr10 | 17013879  | 17014242  | 364 |
| chrX  | 65643212  | 65643574  | 363 |
| chrX  | 58176919  | 58177281  | 363 |
| chrX  | 50328228  | 50328590  | 363 |
| chr9  | 44075501  | 44075863  | 363 |
| chr8  | 50294743  | 50295105  | 363 |
| chr7  | 106621760 | 106622122 | 363 |
| chr5  | 29802844  | 29803206  | 363 |
| chr3  | 111220579 | 111220941 | 363 |
| chr29 | 35059276  | 35059638  | 363 |
| chr24 | 48602489  | 48602851  | 363 |
| chr15 | 75535182  | 75535544  | 363 |
| chr11 | 77736039  | 77736401  | 363 |
| chr10 | 17375000  | 17375362  | 363 |
| chr1  | 44932390  | 44932752  | 363 |
| chrX  | 51041091  | 51041452  | 362 |
| chrX  | 7139965   | 7140326   | 362 |
| chr9  | 52399366  | 52399727  | 362 |
| chr8  | 68215499  | 68215860  | 362 |
| chr8  | 8106361   | 8106722   | 362 |
| chr5  | 74599953  | 74600314  | 362 |
| chr5  | 35444956  | 35445317  | 362 |
| chr22 | 16352207  | 16352568  | 362 |
| chr21 | 18473489  | 18473850  | 362 |
| chr19 | 60457638  | 60457999  | 362 |
| chr19 | 30417435  | 30417796  | 362 |
| chr16 | 53914760  | 53915121  | 362 |
| chr13 | 38996360  | 38996721  | 362 |
| chr11 | 100875310 | 100875671 | 362 |
| chr11 | 11229754  | 11230115  | 362 |
| chr10 | 50522865  | 50523226  | 362 |
| chrX  | 77234244  | 77234604  | 361 |
| chrX  | 75185841  | 75186201  | 361 |
| chrX  | 10118759  | 10119119  | 361 |
| chr8  | 63801724  | 63802084  | 361 |
| chr3  | 111790508 | 111790868 | 361 |
| chr29 | 36962158  | 36962518  | 361 |
| chr27 | 39172297  | 39172657  | 361 |

|       |               |           |     |
|-------|---------------|-----------|-----|
| chr20 | 6764151       | 6764511   | 361 |
| chr19 | 59385107      | 59385467  | 361 |
| chr17 | 59013617      | 59013977  | 361 |
| chr16 | 77690775      | 77691135  | 361 |
| chr16 | 2360117       | 2360477   | 361 |
| chr13 | 65811363      | 65811723  | 361 |
| chr13 | 20973453      | 20973813  | 361 |
| chrX  | 74890248      | 74890607  | 360 |
| chrX  | 74849059      | 74849418  | 360 |
| chrX  | 11834561      | 11834920  | 360 |
| chrX  | 2189632       | 2189991   | 360 |
| chr9  | 106709420     | 106709779 | 360 |
| chr7  | 10411419      | 10411778  | 360 |
| chr25 | 40407125      | 40407484  | 360 |
| chr25 | 3087871       | 3088230   | 360 |
| chr23 | 28820390      | 28820749  | 360 |
| chr19 | 63926820      | 63927179  | 360 |
| chr19 | 62986886      | 62987245  | 360 |
| chr19 | 38734478      | 38734837  | 360 |
| chr19 | 23720315      | 23720674  | 360 |
| chr18 | 11426948      | 11427307  | 360 |
| chr17 | 66936264      | 66936623  | 360 |
| chr15 | 32251814      | 32252173  | 360 |
| chr10 | 12721425      | 12721784  | 360 |
| chrX  | 50459164      | 50459522  | 359 |
| chrX  | 50430462      | 50430820  | 359 |
| chrX  | 49867709      | 49868067  | 359 |
| chrX  | 37428208      | 37428566  | 359 |
| chrX  | 20333004      | 20333362  | 359 |
| chrX  | 19369668      | 19370026  | 359 |
| chrX  | 12305512      | 12305870  | 359 |
| chrX  | 8413033       | 8413391   | 359 |
| chrX  | 941588 941946 |           | 359 |
| chr3  | 119274517     | 119274875 | 359 |
| chr24 | 43700968      | 43701326  | 359 |
| chr23 | 44523841      | 44524199  | 359 |
| chr23 | 28541684      | 28542042  | 359 |
| chr21 | 30797152      | 30797510  | 359 |
| chr21 | 25988063      | 25988421  | 359 |
| chr2  | 115036528     | 115036886 | 359 |
| chr19 | 33586000      | 33586358  | 359 |
| chr17 | 47311678      | 47312036  | 359 |
| chr16 | 43079275      | 43079633  | 359 |
| chr13 | 41632073      | 41632431  | 359 |
| chr12 | 33714840      | 33715198  | 359 |
| chr11 | 25644364      | 25644722  | 359 |
| chr10 | 32351995      | 32352353  | 359 |
| chrX  | 34435088      | 34435445  | 358 |
| chr9  | 77053976      | 77054333  | 358 |
| chr28 | 13492157      | 13492514  | 358 |



|       |           |           |     |
|-------|-----------|-----------|-----|
| chr24 | 33794603  | 33794960  | 358 |
| chr24 | 1704094   | 1704451   | 358 |
| chr23 | 46031946  | 46032303  | 358 |
| chr22 | 30150902  | 30151259  | 358 |
| chr21 | 34017247  | 34017604  | 358 |
| chr19 | 61619531  | 61619888  | 358 |
| chr16 | 43421922  | 43422279  | 358 |
| chr14 | 77724915  | 77725272  | 358 |
| chr12 | 32170221  | 32170578  | 358 |
| chr10 | 99828395  | 99828752  | 358 |
| chr10 | 87489678  | 87490035  | 358 |
| chr1  | 75038597  | 75038954  | 358 |
| chrX  | 75814774  | 75815130  | 357 |
| chrX  | 58413960  | 58414316  | 357 |
| chrX  | 39029563  | 39029919  | 357 |
| chrX  | 12642725  | 12643081  | 357 |
| chrX  | 7789285   | 7789641   | 357 |
| chr7  | 5198319   | 5198675   | 357 |
| chr4  | 104613026 | 104613382 | 357 |
| chr29 | 36842890  | 36843246  | 357 |
| chr26 | 18739426  | 18739782  | 357 |
| chr19 | 29792504  | 29792860  | 357 |
| chr18 | 11258404  | 11258760  | 357 |
| chr16 | 49437044  | 49437400  | 357 |
| chr13 | 70968733  | 70969089  | 357 |
| chr12 | 31964927  | 31965283  | 357 |
| chr11 | 104276902 | 104277258 | 357 |
| chr11 | 7549267   | 7549623   | 357 |
| chrX  | 71035287  | 71035642  | 356 |
| chrX  | 69711898  | 69712253  | 356 |
| chrX  | 34145890  | 34146245  | 356 |
| chrX  | 21607932  | 21608287  | 356 |
| chr8  | 62603911  | 62604266  | 356 |
| chr4  | 99345585  | 99345940  | 356 |
| chr3  | 110819657 | 110820012 | 356 |
| chr28 | 33800040  | 33800395  | 356 |
| chr26 | 48626645  | 48627000  | 356 |
| chr25 | 23564140  | 23564495  | 356 |
| chr25 | 23192025  | 23192380  | 356 |
| chr24 | 20362113  | 20362468  | 356 |
| chr22 | 61341153  | 61341508  | 356 |
| chr21 | 59819647  | 59820002  | 356 |
| chr19 | 45226326  | 45226681  | 356 |
| chr17 | 63496984  | 63497339  | 356 |
| chr15 | 35982028  | 35982383  | 356 |
| chr15 | 20063000  | 20063355  | 356 |
| chr11 | 70660513  | 70660868  | 356 |
| chr11 | 1643175   | 1643530   | 356 |
| chr1  | 153811229 | 153811584 | 356 |
| chrX  | 56602682  | 56603036  | 355 |

|       |           |           |     |
|-------|-----------|-----------|-----|
| chrX  | 41166097  | 41166451  | 355 |
| chrX  | 39046837  | 39047191  | 355 |
| chrX  | 35760927  | 35761281  | 355 |
| chrX  | 16908623  | 16908977  | 355 |
| chr7  | 82141937  | 82142291  | 355 |
| chr5  | 28850545  | 28850899  | 355 |
| chr4  | 119254117 | 119254471 | 355 |
| chr3  | 35827850  | 35828204  | 355 |
| chr29 | 51678946  | 51679300  | 355 |
| chr28 | 41780380  | 41780734  | 355 |
| chr26 | 41857641  | 41857995  | 355 |
| chr25 | 33352695  | 33353049  | 355 |
| chr24 | 25765371  | 25765725  | 355 |
| chr23 | 28540660  | 28541014  | 355 |
| chr2  | 131247385 | 131247739 | 355 |
| chr2  | 111243119 | 111243473 | 355 |
| chr19 | 43194401  | 43194755  | 355 |
| chr19 | 36325185  | 36325539  | 355 |
| chr18 | 49466343  | 49466697  | 355 |
| chr18 | 3643368   | 3643722   | 355 |
| chr17 | 74996637  | 74996991  | 355 |
| chr17 | 68733675  | 68734029  | 355 |
| chr17 | 60568482  | 60568836  | 355 |
| chr15 | 39995126  | 39995480  | 355 |
| chr14 | 20926138  | 20926492  | 355 |
| chr13 | 73617045  | 73617399  | 355 |
| chr12 | 84205660  | 84206014  | 355 |
| chr12 | 24551118  | 24551472  | 355 |
| chr11 | 89684009  | 89684363  | 355 |
| chr11 | 70793358  | 70793712  | 355 |
| chr1  | 139869221 | 139869575 | 355 |
| chr1  | 84562002  | 84562356  | 355 |
| chr1  | 1577854   | 1578208   | 355 |
| chrX  | 72829621  | 72829974  | 354 |
| chrX  | 52946568  | 52946921  | 354 |
| chr5  | 114992967 | 114993320 | 354 |
| chr5  | 30864754  | 30865107  | 354 |
| chr4  | 71621233  | 71621586  | 354 |
| chr3  | 123578480 | 123578833 | 354 |
| chr3  | 35461934  | 35462287  | 354 |
| chr26 | 49033710  | 49034063  | 354 |
| chr26 | 14907517  | 14907870  | 354 |
| chr24 | 20348810  | 20349163  | 354 |
| chr23 | 49949035  | 49949388  | 354 |
| chr22 | 54681561  | 54681914  | 354 |
| chr22 | 5617652   | 5618005   | 354 |
| chr2  | 139181767 | 139182120 | 354 |
| chr2  | 131265869 | 131266222 | 354 |
| chr2  | 115056385 | 115056738 | 354 |
| chr18 | 49784882  | 49785235  | 354 |

|       |           |           |     |
|-------|-----------|-----------|-----|
| chr18 | 25813323  | 25813676  | 354 |
| chr18 | 4090471   | 4090824   | 354 |
| chr17 | 49393435  | 49393788  | 354 |
| chr15 | 62537944  | 62538297  | 354 |
| chr13 | 54203141  | 54203494  | 354 |
| chr12 | 25691336  | 25691689  | 354 |
| chr11 | 89528399  | 89528752  | 354 |
| chr11 | 6050868   | 6051221   | 354 |
| chrX  | 22574690  | 22575042  | 353 |
| chrX  | 10100813  | 10101165  | 353 |
| chr5  | 51889293  | 51889645  | 353 |
| chr4  | 74537910  | 74538262  | 353 |
| chr3  | 8578162   | 8578514   | 353 |
| chr29 | 17870526  | 17870878  | 353 |
| chr23 | 48506681  | 48507033  | 353 |
| chr22 | 17267406  | 17267758  | 353 |
| chr19 | 41724841  | 41725193  | 353 |
| chr18 | 11394568  | 11394920  | 353 |
| chr17 | 66163883  | 66164235  | 353 |
| chr17 | 5258779   | 5259131   | 353 |
| chr15 | 63089884  | 63090236  | 353 |
| chr14 | 26614209  | 26614561  | 353 |
| chr14 | 12483722  | 12484074  | 353 |
| chr13 | 68300378  | 68300730  | 353 |
| chr11 | 84583474  | 84583826  | 353 |
| chr10 | 84377886  | 84378238  | 353 |
| chr10 | 35666579  | 35666931  | 353 |
| chrX  | 65180208  | 65180559  | 352 |
| chr6  | 114681359 | 114681710 | 352 |
| chr5  | 111892261 | 111892612 | 352 |
| chr28 | 33097126  | 33097477  | 352 |
| chr26 | 42145980  | 42146331  | 352 |
| chr26 | 18950159  | 18950510  | 352 |
| chr22 | 30250312  | 30250663  | 352 |
| chr22 | 16312500  | 16312851  | 352 |
| chr2  | 131415647 | 131415998 | 352 |
| chr19 | 37704587  | 37704938  | 352 |
| chr17 | 67601205  | 67601556  | 352 |
| chr14 | 58210065  | 58210416  | 352 |
| chr13 | 68248253  | 68248604  | 352 |
| chr1  | 99263874  | 99264225  | 352 |
| chrX  | 12572479  | 12572829  | 351 |
| chrX  | 10130109  | 10130459  | 351 |
| chrX  | 10104699  | 10105049  | 351 |
| chr5  | 59664991  | 59665341  | 351 |
| chr3  | 120174084 | 120174434 | 351 |
| chr3  | 117311660 | 117312010 | 351 |
| chr29 | 34736101  | 34736451  | 351 |
| chr26 | 51256081  | 51256431  | 351 |
| chr26 | 15002674  | 15003024  | 351 |

|       |           |           |     |
|-------|-----------|-----------|-----|
| chr23 | 52875767  | 52876117  | 351 |
| chr22 | 16432239  | 16432589  | 351 |
| chr21 | 45780741  | 45781091  | 351 |
| chr20 | 73543530  | 73543880  | 351 |
| chr2  | 132508182 | 132508532 | 351 |
| chr2  | 64217206  | 64217556  | 351 |
| chr19 | 29799307  | 29799657  | 351 |
| chr18 | 55700819  | 55701169  | 351 |
| chr15 | 51586944  | 51587294  | 351 |
| chr13 | 25447290  | 25447640  | 351 |
| chr11 | 90393257  | 90393607  | 351 |
| chr10 | 23009199  | 23009549  | 351 |
| chrX  | 58356978  | 58357327  | 350 |
| chrX  | 39095997  | 39096346  | 350 |
| chrX  | 37337072  | 37337421  | 350 |
| chrX  | 14361268  | 14361617  | 350 |
| chr9  | 78224812  | 78225161  | 350 |
| chr5  | 112189810 | 112190159 | 350 |
| chr29 | 11147453  | 11147802  | 350 |
| chr26 | 43273763  | 43274112  | 350 |
| chr25 | 34253345  | 34253694  | 350 |
| chr23 | 50740818  | 50741167  | 350 |
| chr22 | 15003900  | 15004249  | 350 |
| chr22 | 11610525  | 11610874  | 350 |
| chr21 | 28903186  | 28903535  | 350 |
| chr2  | 99033665  | 99034014  | 350 |
| chr19 | 17112413  | 17112762  | 350 |
| chr17 | 64805240  | 64805589  | 350 |
| chr15 | 33586632  | 33586981  | 350 |
| chr15 | 32070915  | 32071264  | 350 |
| chr14 | 7268309   | 7268658   | 350 |
| chr12 | 32949637  | 32949986  | 350 |
| chr12 | 31435646  | 31435995  | 350 |
| chr11 | 48809791  | 48810140  | 350 |
| chr11 | 48694248  | 48694597  | 350 |
| chr11 | 26167280  | 26167629  | 350 |
| chr10 | 88219216  | 88219565  | 350 |
| chr10 | 17556915  | 17557264  | 350 |
| chr10 | 13048303  | 13048652  | 350 |
| chrX  | 75748132  | 75748480  | 349 |
| chrX  | 72372318  | 72372666  | 349 |
| chrX  | 71119282  | 71119630  | 349 |
| chrX  | 65802416  | 65802764  | 349 |
| chrX  | 61488354  | 61488702  | 349 |
| chrX  | 37731852  | 37732200  | 349 |
| chrX  | 19252275  | 19252623  | 349 |
| chrX  | 16934212  | 16934560  | 349 |
| chr5  | 31004919  | 31005267  | 349 |
| chr4  | 84572738  | 84573086  | 349 |
| chr28 | 33567543  | 33567891  | 349 |

|       |           |           |     |
|-------|-----------|-----------|-----|
| chr27 | 41734395  | 41734743  | 349 |
| chr26 | 43377463  | 43377811  | 349 |
| chr22 | 56571945  | 56572293  | 349 |
| chr22 | 56127260  | 56127608  | 349 |
| chr17 | 70347802  | 70348150  | 349 |
| chr17 | 12574152  | 12574500  | 349 |
| chr16 | 1868491   | 1868839   | 349 |
| chr15 | 56680216  | 56680564  | 349 |
| chr14 | 28930760  | 28931108  | 349 |
| chr13 | 72655930  | 72656278  | 349 |
| chr13 | 40867490  | 40867838  | 349 |
| chr13 | 10985836  | 10986184  | 349 |
| chr1  | 82820922  | 82821270  | 349 |
| chr1  | 3579993   | 3580341   | 349 |
| chrX  | 13828047  | 13828394  | 348 |
| chrX  | 6860676   | 6861023   | 348 |
| chrX  | 6488516   | 6488863   | 348 |
| chr7  | 42206095  | 42206442  | 348 |
| chr7  | 13012409  | 13012756  | 348 |
| chr6  | 99624927  | 99625274  | 348 |
| chr6  | 17966968  | 17967315  | 348 |
| chr5  | 112211722 | 112212069 | 348 |
| chr5  | 28823693  | 28824040  | 348 |
| chr3  | 8759043   | 8759390   | 348 |
| chr26 | 41631859  | 41632206  | 348 |
| chr26 | 14990699  | 14991046  | 348 |
| chr21 | 16353868  | 16354215  | 348 |
| chr2  | 138245580 | 138245927 | 348 |
| chr19 | 60991218  | 60991565  | 348 |
| chr19 | 56488456  | 56488803  | 348 |
| chr18 | 40028304  | 40028651  | 348 |
| chr15 | 80856178  | 80856525  | 348 |
| chr15 | 51292127  | 51292474  | 348 |
| chr13 | 77286720  | 77287067  | 348 |
| chr13 | 55937611  | 55937958  | 348 |
| chr12 | 31594191  | 31594538  | 348 |
| chr10 | 68436482  | 68436829  | 348 |
| chrX  | 64805944  | 64806290  | 347 |
| chrX  | 50832776  | 50833122  | 347 |
| chrX  | 37330047  | 37330393  | 347 |
| chrX  | 36791492  | 36791838  | 347 |
| chrX  | 13228502  | 13228848  | 347 |
| chrX  | 8456456   | 8456802   | 347 |
| chrX  | 2465221   | 2465567   | 347 |
| chr9  | 63404374  | 63404720  | 347 |
| chr5  | 79199873  | 79200219  | 347 |
| chr5  | 78589008  | 78589354  | 347 |
| chr4  | 32440967  | 32441313  | 347 |
| chr3  | 33111385  | 33111731  | 347 |
| chr29 | 36814133  | 36814479  | 347 |

|       |           |           |     |
|-------|-----------|-----------|-----|
| chr22 | 5380654   | 5381000   | 347 |
| chr2  | 134755139 | 134755485 | 347 |
| chr2  | 40158012  | 40158358  | 347 |
| chr19 | 22346457  | 22346803  | 347 |
| chr19 | 11165206  | 11165552  | 347 |
| chr18 | 48630614  | 48630960  | 347 |
| chr18 | 23071237  | 23071583  | 347 |
| chr17 | 69498770  | 69499116  | 347 |
| chr17 | 67312609  | 67312955  | 347 |
| chr17 | 46513917  | 46514263  | 347 |
| chr16 | 60329168  | 60329514  | 347 |
| chr16 | 47407731  | 47408077  | 347 |
| chr13 | 80567334  | 80567680  | 347 |
| chr13 | 40565089  | 40565435  | 347 |
| chr13 | 23243645  | 23243991  | 347 |
| chr12 | 54179525  | 54179871  | 347 |
| chr1  | 123115733 | 123116079 | 347 |
| chrX  | 80112347  | 80112692  | 346 |
| chrX  | 72737855  | 72738200  | 346 |
| chrX  | 65224930  | 65225275  | 346 |
| chrX  | 62571039  | 62571384  | 346 |
| chr5  | 74796879  | 74797224  | 346 |
| chr3  | 127662927 | 127663272 | 346 |
| chr3  | 106852734 | 106853079 | 346 |
| chr29 | 42391332  | 42391677  | 346 |
| chr26 | 31989545  | 31989890  | 346 |
| chr26 | 14971423  | 14971768  | 346 |
| chr25 | 23354437  | 23354782  | 346 |
| chr20 | 1280811   | 1281156   | 346 |
| chr2  | 130431829 | 130432174 | 346 |
| chr2  | 122826271 | 122826616 | 346 |
| chr18 | 11522042  | 11522387  | 346 |
| chr17 | 64635777  | 64636122  | 346 |
| chr13 | 25914948  | 25915293  | 346 |
| chr12 | 17160515  | 17160860  | 346 |
| chr11 | 91008546  | 91008891  | 346 |
| chrX  | 75774949  | 75775293  | 345 |
| chrX  | 71964204  | 71964548  | 345 |
| chrX  | 71586583  | 71586927  | 345 |
| chrX  | 67044779  | 67045123  | 345 |
| chrX  | 37987878  | 37988222  | 345 |
| chrX  | 21569880  | 21570224  | 345 |
| chrX  | 20882092  | 20882436  | 345 |
| chr9  | 35047258  | 35047602  | 345 |
| chr9  | 19273261  | 19273605  | 345 |
| chr8  | 79379238  | 79379582  | 345 |
| chr6  | 74858070  | 74858414  | 345 |
| chr5  | 112216206 | 112216550 | 345 |
| chr3  | 124951223 | 124951567 | 345 |
| chr29 | 37221426  | 37221770  | 345 |

|       |           |           |     |
|-------|-----------|-----------|-----|
| chr29 | 35103169  | 35103513  | 345 |
| chr29 | 34974551  | 34974895  | 345 |
| chr29 | 2520534   | 2520878   | 345 |
| chr28 | 32815514  | 32815858  | 345 |
| chr27 | 26908442  | 26908786  | 345 |
| chr21 | 29200809  | 29201153  | 345 |
| chr20 | 75055435  | 75055779  | 345 |
| chr20 | 73661630  | 73661974  | 345 |
| chr20 | 42109278  | 42109622  | 345 |
| chr2  | 127641976 | 127642320 | 345 |
| chr19 | 60294706  | 60295050  | 345 |
| chr16 | 74241149  | 74241493  | 345 |
| chr15 | 75270009  | 75270353  | 345 |
| chr14 | 1532426   | 1532770   | 345 |
| chr14 | 1138596   | 1138940   | 345 |
| chr12 | 73388479  | 73388823  | 345 |
| chr12 | 15207926  | 15208270  | 345 |
| chrX  | 62923533  | 62923876  | 344 |
| chr7  | 51930166  | 51930509  | 344 |
| chr7  | 48824334  | 48824677  | 344 |
| chr4  | 73474560  | 73474903  | 344 |
| chr3  | 25918000  | 25918343  | 344 |
| chr3  | 4310840   | 4311183   | 344 |
| chr26 | 31373294  | 31373637  | 344 |
| chr25 | 15355249  | 15355592  | 344 |
| chr23 | 10600088  | 10600431  | 344 |
| chr20 | 8651967   | 8652310   | 344 |
| chr2  | 130969439 | 130969782 | 344 |
| chr19 | 7533825   | 7534168   | 344 |
| chr17 | 75719723  | 75720066  | 344 |
| chr16 | 46985785  | 46986128  | 344 |
| chr15 | 74459519  | 74459862  | 344 |
| chr14 | 32871879  | 32872222  | 344 |
| chr14 | 7807222   | 7807565   | 344 |
| chr13 | 77138839  | 77139182  | 344 |
| chr12 | 70982186  | 70982529  | 344 |
| chr12 | 31580646  | 31580989  | 344 |
| chr11 | 11751047  | 11751390  | 344 |
| chr10 | 103080865 | 103081208 | 344 |
| chr10 | 53468537  | 53468880  | 344 |
| chr10 | 15012123  | 15012466  | 344 |
| chr1  | 83272268  | 83272611  | 344 |
| chrX  | 72843505  | 72843847  | 343 |
| chrX  | 38790327  | 38790669  | 343 |
| chrX  | 6716867   | 6717209   | 343 |
| chr8  | 62039342  | 62039684  | 343 |
| chr7  | 5237077   | 5237419   | 343 |
| chr6  | 121735176 | 121735518 | 343 |
| chr6  | 59142337  | 59142679  | 343 |
| chr5  | 113147687 | 113148029 | 343 |

|       |               |           |     |
|-------|---------------|-----------|-----|
| chr5  | 30679371      | 30679713  | 343 |
| chr3  | 36469285      | 36469627  | 343 |
| chr26 | 78845 79187   | 343       |     |
| chr22 | 60486184      | 60486526  | 343 |
| chr21 | 59299920      | 59300262  | 343 |
| chr20 | 70204890      | 70205232  | 343 |
| chr19 | 59244696      | 59245038  | 343 |
| chr18 | 47216460      | 47216802  | 343 |
| chr17 | 69415037      | 69415379  | 343 |
| chr17 | 68119815      | 68120157  | 343 |
| chr15 | 41392515      | 41392857  | 343 |
| chr13 | 74505967      | 74506309  | 343 |
| chr13 | 63597102      | 63597444  | 343 |
| chr11 | 105629715     | 105630057 | 343 |
| chr11 | 88926057      | 88926399  | 343 |
| chr11 | 11242784      | 11243126  | 343 |
| chr1  | 82815306      | 82815648  | 343 |
| chr1  | 75030696      | 75031038  | 343 |
| chrX  | 74103849      | 74104190  | 342 |
| chrX  | 23403770      | 23404111  | 342 |
| chrX  | 20927224      | 20927565  | 342 |
| chrX  | 19372412      | 19372753  | 342 |
| chrX  | 12860721      | 12861062  | 342 |
| chr9  | 101420303     | 101420644 | 342 |
| chr8  | 80065345      | 80065686  | 342 |
| chr8  | 873987 874328 | 342       |     |
| chr7  | 76947102      | 76947443  | 342 |
| chr4  | 101655256     | 101655597 | 342 |
| chr3  | 75835461      | 75835802  | 342 |
| chr3  | 30223786      | 30224127  | 342 |
| chr28 | 33766105      | 33766446  | 342 |
| chr27 | 29020842      | 29021183  | 342 |
| chr23 | 15973976      | 15974317  | 342 |
| chr2  | 132020525     | 132020866 | 342 |
| chr18 | 65595471      | 65595812  | 342 |
| chr18 | 22144421      | 22144762  | 342 |
| chr15 | 54025568      | 54025909  | 342 |
| chr14 | 52505727      | 52506068  | 342 |
| chr14 | 7782033       | 7782374   | 342 |
| chr11 | 93762170      | 93762511  | 342 |
| chr11 | 89548095      | 89548436  | 342 |
| chr10 | 99598075      | 99598416  | 342 |
| chrX  | 62240224      | 62240564  | 341 |
| chrX  | 34614085      | 34614425  | 341 |
| chrX  | 11984244      | 11984584  | 341 |
| chr9  | 90739405      | 90739745  | 341 |
| chr8  | 63831885      | 63832225  | 341 |
| chr6  | 16971152      | 16971492  | 341 |
| chr5  | 112976426     | 112976766 | 341 |
| chr3  | 110216300     | 110216640 | 341 |



|       |               |           |     |
|-------|---------------|-----------|-----|
| chr26 | 45816713      | 45817053  | 341 |
| chr25 | 43487014      | 43487354  | 341 |
| chr25 | 38678160      | 38678500  | 341 |
| chr23 | 30496275      | 30496615  | 341 |
| chr22 | 15012123      | 15012463  | 341 |
| chr21 | 18909606      | 18909946  | 341 |
| chr20 | 484803 485143 | 341       |     |
| chr19 | 33602694      | 33603034  | 341 |
| chr19 | 20791605      | 20791945  | 341 |
| chr19 | 14804748      | 14805088  | 341 |
| chr18 | 34823391      | 34823731  | 341 |
| chr16 | 68061869      | 68062209  | 341 |
| chr14 | 59270250      | 59270590  | 341 |
| chr13 | 79203370      | 79203710  | 341 |
| chr13 | 75688213      | 75688553  | 341 |
| chr13 | 69993925      | 69994265  | 341 |
| chr13 | 26330968      | 26331308  | 341 |
| chrX  | 76592019      | 76592358  | 340 |
| chrX  | 62318498      | 62318837  | 340 |
| chrX  | 36644356      | 36644695  | 340 |
| chrX  | 376445 376784 | 340       |     |
| chr7  | 16288366      | 16288705  | 340 |
| chr6  | 108402465     | 108402804 | 340 |
| chr5  | 117491429     | 117491768 | 340 |
| chr4  | 68213578      | 68213917  | 340 |
| chr3  | 105292122     | 105292461 | 340 |
| chr3  | 88786623      | 88786962  | 340 |
| chr3  | 15766528      | 15766867  | 340 |
| chr27 | 38800977      | 38801316  | 340 |
| chr25 | 15303513      | 15303852  | 340 |
| chr2  | 140351243     | 140351582 | 340 |
| chr2  | 127971322     | 127971661 | 340 |
| chr2  | 117712580     | 117712919 | 340 |
| chr19 | 43632880      | 43633219  | 340 |
| chr19 | 34118580      | 34118919  | 340 |
| chr18 | 56944217      | 56944556  | 340 |
| chr18 | 7805865       | 7806204   | 340 |
| chr17 | 68340519      | 68340858  | 340 |
| chr17 | 57754988      | 57755327  | 340 |
| chr15 | 27021941      | 27022280  | 340 |
| chr15 | 13595442      | 13595781  | 340 |
| chr11 | 91943350      | 91943689  | 340 |
| chr10 | 17018964      | 17019303  | 340 |
| chr1  | 74944816      | 74945155  | 340 |
| chrX  | 31414437      | 31414775  | 339 |
| chrX  | 12308544      | 12308882  | 339 |
| chrX  | 7167686       | 7168024   | 339 |
| chr7  | 59923980      | 59924318  | 339 |
| chr7  | 17492364      | 17492702  | 339 |
| chr6  | 94362866      | 94363204  | 339 |

|       |           |           |     |
|-------|-----------|-----------|-----|
| chr5  | 123876660 | 123876998 | 339 |
| chr5  | 118385887 | 118386225 | 339 |
| chr5  | 29985465  | 29985803  | 339 |
| chr3  | 29668006  | 29668344  | 339 |
| chr29 | 36972101  | 36972439  | 339 |
| chr28 | 33658820  | 33659158  | 339 |
| chr27 | 33669459  | 33669797  | 339 |
| chr27 | 26969541  | 26969879  | 339 |
| chr24 | 20726514  | 20726852  | 339 |
| chr23 | 31085461  | 31085799  | 339 |
| chr2  | 75693035  | 75693373  | 339 |
| chr19 | 56013924  | 56014262  | 339 |
| chr17 | 75016904  | 75017242  | 339 |
| chr17 | 60287114  | 60287452  | 339 |
| chr16 | 39592813  | 39593151  | 339 |
| chr15 | 26670592  | 26670930  | 339 |
| chr14 | 7464716   | 7465054   | 339 |
| chr13 | 63311742  | 63312080  | 339 |
| chr11 | 5126554   | 5126892   | 339 |
| chr11 | 2501944   | 2502282   | 339 |
| chrX  | 60073160  | 60073497  | 338 |
| chrX  | 47327066  | 47327403  | 338 |
| chrX  | 33111898  | 33112235  | 338 |
| chrX  | 28089132  | 28089469  | 338 |
| chrX  | 20980778  | 20981115  | 338 |
| chr9  | 90555818  | 90556155  | 338 |
| chr6  | 13903280  | 13903617  | 338 |
| chr5  | 115159010 | 115159347 | 338 |
| chr3  | 109596085 | 109596422 | 338 |
| chr3  | 35636753  | 35637090  | 338 |
| chr29 | 30767809  | 30768146  | 338 |
| chr28 | 40458921  | 40459258  | 338 |
| chr26 | 43458608  | 43458945  | 338 |
| chr26 | 18713917  | 18714254  | 338 |
| chr23 | 20687730  | 20688067  | 338 |
| chr21 | 26470627  | 26470964  | 338 |
| chr20 | 6732250   | 6732587   | 338 |
| chr2  | 127753607 | 127753944 | 338 |
| chr19 | 54612711  | 54613048  | 338 |
| chr19 | 35797703  | 35798040  | 338 |
| chr17 | 67988327  | 67988664  | 338 |
| chr13 | 63102735  | 63103072  | 338 |
| chr13 | 11419027  | 11419364  | 338 |
| chrX  | 77468678  | 77469014  | 337 |
| chrX  | 69137195  | 69137531  | 337 |
| chrX  | 48746366  | 48746702  | 337 |
| chrX  | 38037702  | 38038038  | 337 |
| chr9  | 76817272  | 76817608  | 337 |
| chr8  | 116477299 | 116477635 | 337 |
| chr4  | 122722908 | 122723244 | 337 |

|       |               |           |     |
|-------|---------------|-----------|-----|
| chr4  | 69965051      | 69965387  | 337 |
| chr3  | 123540710     | 123541046 | 337 |
| chr3  | 280180 280516 |           | 337 |
| chr27 | 6201632       | 6201968   | 337 |
| chr26 | 21972917      | 21973253  | 337 |
| chr24 | 63497671      | 63498007  | 337 |
| chr24 | 59602082      | 59602418  | 337 |
| chr23 | 8473401       | 8473737   | 337 |
| chr22 | 59460111      | 59460447  | 337 |
| chr22 | 55385054      | 55385390  | 337 |
| chr19 | 50150019      | 50150355  | 337 |
| chr19 | 12509127      | 12509463  | 337 |
| chr15 | 25612804      | 25613140  | 337 |
| chr14 | 52551253      | 52551589  | 337 |
| chr11 | 77625338      | 77625674  | 337 |
| chr11 | 49846093      | 49846429  | 337 |
| chr1  | 69495979      | 69496315  | 337 |
| chrX  | 56331188      | 56331523  | 336 |
| chrX  | 53613134      | 53613469  | 336 |
| chrX  | 31152102      | 31152437  | 336 |
| chrX  | 28567390      | 28567725  | 336 |
| chr8  | 82836636      | 82836971  | 336 |
| chr8  | 63324109      | 63324444  | 336 |
| chr8  | 7645988       | 7646323   | 336 |
| chr7  | 89471751      | 89472086  | 336 |
| chr7  | 42209698      | 42210033  | 336 |
| chr6  | 114987562     | 114987897 | 336 |
| chr5  | 100134894     | 100135229 | 336 |
| chr3  | 125182596     | 125182931 | 336 |
| chr29 | 17649029      | 17649364  | 336 |
| chr28 | 33533887      | 33534222  | 336 |
| chr26 | 37538040      | 37538375  | 336 |
| chr23 | 15090404      | 15090739  | 336 |
| chr22 | 56698906      | 56699241  | 336 |
| chr20 | 74518722      | 74519057  | 336 |
| chr20 | 6163094       | 6163429   | 336 |
| chr2  | 111266523     | 111266858 | 336 |
| chr18 | 56833968      | 56834303  | 336 |
| chr18 | 52245352      | 52245687  | 336 |
| chr18 | 45727903      | 45728238  | 336 |
| chr17 | 73166564      | 73166899  | 336 |
| chr13 | 41557151      | 41557486  | 336 |
| chr11 | 107580989     | 107581324 | 336 |
| chr11 | 90295802      | 90296137  | 336 |
| chr10 | 84514899      | 84515234  | 336 |
| chr10 | 69086814      | 69087149  | 336 |
| chr10 | 51420564      | 51420899  | 336 |
| chr10 | 48640086      | 48640421  | 336 |
| chr10 | 20131746      | 20132081  | 336 |
| chrX  | 78298476      | 78298810  | 335 |

|       |           |           |     |
|-------|-----------|-----------|-----|
| chrX  | 78217872  | 78218206  | 335 |
| chrX  | 74118973  | 74119307  | 335 |
| chrX  | 63227758  | 63228092  | 335 |
| chrX  | 40786313  | 40786647  | 335 |
| chrX  | 36331905  | 36332239  | 335 |
| chrX  | 19257807  | 19258141  | 335 |
| chr9  | 78229680  | 78230014  | 335 |
| chr8  | 93138690  | 93139024  | 335 |
| chr8  | 78462308  | 78462642  | 335 |
| chr3  | 127750719 | 127751053 | 335 |
| chr3  | 115300060 | 115300394 | 335 |
| chr3  | 110044213 | 110044547 | 335 |
| chr29 | 35172875  | 35173209  | 335 |
| chr28 | 42375529  | 42375863  | 335 |
| chr26 | 48595271  | 48595605  | 335 |
| chr26 | 41448590  | 41448924  | 335 |
| chr24 | 48613331  | 48613665  | 335 |
| chr23 | 31613121  | 31613455  | 335 |
| chr21 | 32874083  | 32874417  | 335 |
| chr21 | 18523338  | 18523672  | 335 |
| chr2  | 135800081 | 135800415 | 335 |
| chr2  | 121787239 | 121787573 | 335 |
| chr2  | 25318707  | 25319041  | 335 |
| chr19 | 38609072  | 38609406  | 335 |
| chr18 | 13123943  | 13124277  | 335 |
| chr17 | 75723739  | 75724073  | 335 |
| chr15 | 32725581  | 32725915  | 335 |
| chr15 | 28689603  | 28689937  | 335 |
| chr12 | 11335435  | 11335769  | 335 |
| chr11 | 49325974  | 49326308  | 335 |
| chr11 | 25654053  | 25654387  | 335 |
| chr10 | 75520869  | 75521203  | 335 |
| chr10 | 4982542   | 4982876   | 335 |
| chr1  | 153889460 | 153889794 | 335 |
| chr1  | 55094232  | 55094566  | 335 |
| chrX  | 61203048  | 61203381  | 334 |
| chrX  | 37369340  | 37369673  | 334 |
| chrX  | 36326566  | 36326899  | 334 |
| chrX  | 9462846   | 9463179   | 334 |
| chr9  | 74201472  | 74201805  | 334 |
| chr7  | 50849350  | 50849683  | 334 |
| chr5  | 111237617 | 111237950 | 334 |
| chr5  | 76220404  | 76220737  | 334 |
| chr5  | 31243522  | 31243855  | 334 |
| chr3  | 122244132 | 122244465 | 334 |
| chr24 | 51352758  | 51353091  | 334 |
| chr22 | 30285116  | 30285449  | 334 |
| chr21 | 69105450  | 69105783  | 334 |
| chr21 | 57498376  | 57498709  | 334 |
| chr19 | 52347530  | 52347863  | 334 |

|       |               |           |     |
|-------|---------------|-----------|-----|
| chr18 | 7881120       | 7881453   | 334 |
| chr17 | 70123167      | 70123500  | 334 |
| chr13 | 55034846      | 55035179  | 334 |
| chr12 | 15288107      | 15288440  | 334 |
| chr11 | 77555078      | 77555411  | 334 |
| chr10 | 83085394      | 83085727  | 334 |
| chr10 | 78876432      | 78876765  | 334 |
| chrX  | 35512267      | 35512599  | 333 |
| chrX  | 31786019      | 31786351  | 333 |
| chrX  | 19261375      | 19261707  | 333 |
| chrX  | 6751890       | 6752222   | 333 |
| chrX  | 6316065       | 6316397   | 333 |
| chr9  | 106699304     | 106699636 | 333 |
| chr3  | 120052802     | 120053134 | 333 |
| chr29 | 18216417      | 18216749  | 333 |
| chr28 | 7524240       | 7524572   | 333 |
| chr28 | 3241670       | 3242002   | 333 |
| chr26 | 50806474      | 50806806  | 333 |
| chr26 | 41796281      | 41796613  | 333 |
| chr25 | 43548417      | 43548749  | 333 |
| chr24 | 51403214      | 51403546  | 333 |
| chr24 | 51353612      | 51353944  | 333 |
| chr24 | 50999073      | 50999405  | 333 |
| chr23 | 44429686      | 44430018  | 333 |
| chr23 | 18671859      | 18672191  | 333 |
| chr21 | 64754276      | 64754608  | 333 |
| chr2  | 23116108      | 23116440  | 333 |
| chr19 | 38301160      | 38301492  | 333 |
| chr18 | 57365760      | 57366092  | 333 |
| chr18 | 56610403      | 56610735  | 333 |
| chr18 | 53128354      | 53128686  | 333 |
| chr17 | 72726372      | 72726704  | 333 |
| chr13 | 75168763      | 75169095  | 333 |
| chr10 | 78875623      | 78875955  | 333 |
| chr1  | 132015451     | 132015783 | 333 |
| chr1  | 118641029     | 118641361 | 333 |
| chrX  | 78691377      | 78691708  | 332 |
| chrX  | 50591304      | 50591635  | 332 |
| chrX  | 28353490      | 28353821  | 332 |
| chrX  | 7329953       | 7330284   | 332 |
| chrX  | 720574 720905 |           | 332 |
| chr9  | 63425174      | 63425505  | 332 |
| chr6  | 121060613     | 121060944 | 332 |
| chr5  | 61257753      | 61258084  | 332 |
| chr5  | 30810121      | 30810452  | 332 |
| chr3  | 114933872     | 114934203 | 332 |
| chr3  | 111354939     | 111355270 | 332 |
| chr3  | 74449381      | 74449712  | 332 |
| chr3  | 13490829      | 13491160  | 332 |
| chr29 | 37095549      | 37095880  | 332 |

|       |           |           |     |
|-------|-----------|-----------|-----|
| chr20 | 8324297   | 8324628   | 332 |
| chr20 | 5797164   | 5797495   | 332 |
| chr20 | 4964870   | 4965201   | 332 |
| chr19 | 48390824  | 48391155  | 332 |
| chr19 | 14885983  | 14886314  | 332 |
| chr18 | 43129856  | 43130187  | 332 |
| chr17 | 71870626  | 71870957  | 332 |
| chr17 | 64015134  | 64015465  | 332 |
| chr17 | 49405838  | 49406169  | 332 |
| chr16 | 43020714  | 43021045  | 332 |
| chr14 | 19325728  | 19326059  | 332 |
| chr10 | 90683665  | 90683996  | 332 |
| chr10 | 15329958  | 15330289  | 332 |
| chrX  | 69936479  | 69936809  | 331 |
| chrX  | 65257005  | 65257335  | 331 |
| chrX  | 19701925  | 19702255  | 331 |
| chr7  | 30268925  | 30269255  | 331 |
| chr5  | 104054655 | 104054985 | 331 |
| chr5  | 82103967  | 82104297  | 331 |
| chr3  | 112413982 | 112414312 | 331 |
| chr29 | 48375784  | 48376114  | 331 |
| chr26 | 32394198  | 32394528  | 331 |
| chr24 | 47807654  | 47807984  | 331 |
| chr24 | 44148030  | 44148360  | 331 |
| chr21 | 56446453  | 56446783  | 331 |
| chr21 | 29199827  | 29200157  | 331 |
| chr19 | 59749404  | 59749734  | 331 |
| chr19 | 37580331  | 37580661  | 331 |
| chr18 | 52014999  | 52015329  | 331 |
| chr18 | 50721318  | 50721648  | 331 |
| chr17 | 63347870  | 63348200  | 331 |
| chr15 | 75268933  | 75269263  | 331 |
| chr15 | 24935245  | 24935575  | 331 |
| chr13 | 54549433  | 54549763  | 331 |
| chr10 | 51849071  | 51849401  | 331 |
| chr10 | 16839180  | 16839510  | 331 |
| chrX  | 72709308  | 72709637  | 330 |
| chrX  | 69256613  | 69256942  | 330 |
| chrX  | 62589579  | 62589908  | 330 |
| chrX  | 27280836  | 27281165  | 330 |
| chrX  | 20518356  | 20518685  | 330 |
| chrX  | 19851271  | 19851600  | 330 |
| chr9  | 105879295 | 105879624 | 330 |
| chr9  | 104847845 | 104848174 | 330 |
| chr9  | 52371897  | 52372226  | 330 |
| chr8  | 104241642 | 104241971 | 330 |
| chr8  | 77303131  | 77303460  | 330 |
| chr7  | 46274442  | 46274771  | 330 |
| chr7  | 38683670  | 38683999  | 330 |
| chr5  | 111694139 | 111694468 | 330 |

|       |           |           |     |
|-------|-----------|-----------|-----|
| chr5  | 91830568  | 91830897  | 330 |
| chr4  | 97079652  | 97079981  | 330 |
| chr3  | 9112389   | 9112718   | 330 |
| chr28 | 33639394  | 33639723  | 330 |
| chr26 | 43001838  | 43002167  | 330 |
| chr25 | 37656026  | 37656355  | 330 |
| chr23 | 43051663  | 43051992  | 330 |
| chr22 | 56289447  | 56289776  | 330 |
| chr21 | 18490837  | 18491166  | 330 |
| chr21 | 15503009  | 15503338  | 330 |
| chr19 | 42149214  | 42149543  | 330 |
| chr19 | 16059800  | 16060129  | 330 |
| chr18 | 52622429  | 52622758  | 330 |
| chr17 | 74031541  | 74031870  | 330 |
| chr17 | 69248939  | 69249268  | 330 |
| chr17 | 65919977  | 65920306  | 330 |
| chr15 | 28940184  | 28940513  | 330 |
| chr15 | 22885871  | 22886200  | 330 |
| chr14 | 7764998   | 7765327   | 330 |
| chr14 | 7763782   | 7764111   | 330 |
| chr13 | 14259511  | 14259840  | 330 |
| chr13 | 3371265   | 3371594   | 330 |
| chrX  | 71567645  | 71567973  | 329 |
| chrX  | 56918912  | 56919240  | 329 |
| chrX  | 37499957  | 37500285  | 329 |
| chrX  | 23709810  | 23710138  | 329 |
| chrX  | 16287079  | 16287407  | 329 |
| chr9  | 23158425  | 23158753  | 329 |
| chr4  | 72714349  | 72714677  | 329 |
| chr4  | 8761977   | 8762305   | 329 |
| chr3  | 15787482  | 15787810  | 329 |
| chr27 | 41847628  | 41847956  | 329 |
| chr24 | 33904482  | 33904810  | 329 |
| chr24 | 1487510   | 1487838   | 329 |
| chr22 | 44343661  | 44343989  | 329 |
| chr22 | 39864712  | 39865040  | 329 |
| chr21 | 34539939  | 34540267  | 329 |
| chr2  | 132386083 | 132386411 | 329 |
| chr2  | 122328081 | 122328409 | 329 |
| chr18 | 11406627  | 11406955  | 329 |
| chr17 | 73156306  | 73156634  | 329 |
| chr16 | 45044919  | 45045247  | 329 |
| chr15 | 28985404  | 28985732  | 329 |
| chr14 | 63486180  | 63486508  | 329 |
| chr13 | 23432538  | 23432866  | 329 |
| chr11 | 80689705  | 80690033  | 329 |
| chr11 | 73310854  | 73311182  | 329 |
| chr11 | 46737084  | 46737412  | 329 |
| chr10 | 80788795  | 80789123  | 329 |
| chr1  | 73144840  | 73145168  | 329 |

|       |           |           |     |
|-------|-----------|-----------|-----|
| chrX  | 72263565  | 72263892  | 328 |
| chrX  | 67884512  | 67884839  | 328 |
| chrX  | 67583024  | 67583351  | 328 |
| chrX  | 63061379  | 63061706  | 328 |
| chrX  | 50425777  | 50426104  | 328 |
| chrX  | 50335094  | 50335421  | 328 |
| chrX  | 49829148  | 49829475  | 328 |
| chrX  | 20280315  | 20280642  | 328 |
| chrX  | 10201821  | 10202148  | 328 |
| chrX  | 7985983   | 7986310   | 328 |
| chr8  | 73002002  | 73002329  | 328 |
| chr8  | 249568    | 249895    | 328 |
| chr7  | 71320604  | 71320931  | 328 |
| chr7  | 45692053  | 45692380  | 328 |
| chr7  | 1886552   | 1886879   | 328 |
| chr3  | 106604076 | 106604403 | 328 |
| chr3  | 77664441  | 77664768  | 328 |
| chr28 | 42142132  | 42142459  | 328 |
| chr24 | 48954543  | 48954870  | 328 |
| chr23 | 51443097  | 51443424  | 328 |
| chr23 | 27863809  | 27864136  | 328 |
| chr22 | 58639198  | 58639525  | 328 |
| chr22 | 50757930  | 50758257  | 328 |
| chr22 | 7996908   | 7997235   | 328 |
| chr21 | 22611597  | 22611924  | 328 |
| chr20 | 74516217  | 74516544  | 328 |
| chr2  | 135872016 | 135872343 | 328 |
| chr2  | 131176478 | 131176805 | 328 |
| chr19 | 59040200  | 59040527  | 328 |
| chr18 | 39516103  | 39516430  | 328 |
| chr17 | 68131984  | 68132311  | 328 |
| chr16 | 60233513  | 60233840  | 328 |
| chr16 | 48716210  | 48716537  | 328 |
| chr15 | 76733934  | 76734261  | 328 |
| chr13 | 80640111  | 80640438  | 328 |
| chr13 | 41298708  | 41299035  | 328 |
| chr11 | 102222826 | 102223153 | 328 |
| chrX  | 31558007  | 31558333  | 327 |
| chr8  | 10169700  | 10170026  | 327 |
| chr5  | 111974621 | 111974947 | 327 |
| chr4  | 123982626 | 123982952 | 327 |
| chr4  | 122690731 | 122691057 | 327 |
| chr29 | 50604521  | 50604847  | 327 |
| chr28 | 41302062  | 41302388  | 327 |
| chr22 | 16431815  | 16432141  | 327 |
| chr21 | 69073690  | 69074016  | 327 |
| chr21 | 63327220  | 63327546  | 327 |
| chr2  | 138573481 | 138573807 | 327 |
| chr19 | 7632138   | 7632464   | 327 |
| chr16 | 77685617  | 77685943  | 327 |



|       |           |           |     |
|-------|-----------|-----------|-----|
| chr15 | 36137092  | 36137418  | 327 |
| chr13 | 79930873  | 79931199  | 327 |
| chr11 | 30815997  | 30816323  | 327 |
| chr10 | 70530624  | 70530950  | 327 |
| chr10 | 66809997  | 66810323  | 327 |
| chr10 | 17161808  | 17162134  | 327 |
| chr10 | 16706578  | 16706904  | 327 |
| chr10 | 8487874   | 8488200   | 327 |
| chrX  | 68549731  | 68550056  | 326 |
| chrX  | 65453773  | 65454098  | 326 |
| chrX  | 65392334  | 65392659  | 326 |
| chrX  | 63935696  | 63936021  | 326 |
| chr8  | 107554352 | 107554677 | 326 |
| chr7  | 59682779  | 59683104  | 326 |
| chr5  | 28695326  | 28695651  | 326 |
| chr4  | 69857144  | 69857469  | 326 |
| chr3  | 25813841  | 25814166  | 326 |
| chr29 | 48181161  | 48181486  | 326 |
| chr29 | 35099688  | 35100013  | 326 |
| chr26 | 47744367  | 47744692  | 326 |
| chr26 | 5889745   | 5890070   | 326 |
| chr24 | 20757025  | 20757350  | 326 |
| chr22 | 12930266  | 12930591  | 326 |
| chr2  | 139162783 | 139163108 | 326 |
| chr2  | 132170285 | 132170610 | 326 |
| chr19 | 33230267  | 33230592  | 326 |
| chr19 | 7220103   | 7220428   | 326 |
| chr18 | 52677355  | 52677680  | 326 |
| chr18 | 12144239  | 12144564  | 326 |
| chr18 | 3896145   | 3896470   | 326 |
| chr17 | 72957346  | 72957671  | 326 |
| chr16 | 70299637  | 70299962  | 326 |
| chr15 | 76024223  | 76024548  | 326 |
| chr15 | 31340041  | 31340366  | 326 |
| chr13 | 55713389  | 55713714  | 326 |
| chr12 | 79614081  | 79614406  | 326 |
| chr11 | 26870056  | 26870381  | 326 |
| chr10 | 17289610  | 17289935  | 326 |
| chr1  | 61336281  | 61336606  | 326 |
| chr1  | 35901957  | 35902282  | 326 |
| chrX  | 74583348  | 74583672  | 325 |
| chrX  | 63426043  | 63426367  | 325 |
| chrX  | 58474088  | 58474412  | 325 |
| chrX  | 21184447  | 21184771  | 325 |
| chrX  | 2740200   | 2740524   | 325 |
| chr9  | 90747856  | 90748180  | 325 |
| chr7  | 46252419  | 46252743  | 325 |
| chr5  | 91030169  | 91030493  | 325 |
| chr5  | 71652816  | 71653140  | 325 |
| chr3  | 123391063 | 123391387 | 325 |

|       |           |           |     |
|-------|-----------|-----------|-----|
| chr29 | 31564707  | 31565031  | 325 |
| chr27 | 43919592  | 43919916  | 325 |
| chr24 | 39094641  | 39094965  | 325 |
| chr20 | 7983240   | 7983564   | 325 |
| chr2  | 110529994 | 110530318 | 325 |
| chr2  | 23942811  | 23943135  | 325 |
| chr19 | 56526824  | 56527148  | 325 |
| chr19 | 25423285  | 25423609  | 325 |
| chr18 | 39624696  | 39625020  | 325 |
| chr17 | 6234960   | 6235284   | 325 |
| chr15 | 44959750  | 44960074  | 325 |
| chr15 | 24928613  | 24928937  | 325 |
| chr14 | 79856928  | 79857252  | 325 |
| chr12 | 14784557  | 14784881  | 325 |
| chr11 | 49236846  | 49237170  | 325 |
| chr1  | 158501892 | 158502216 | 325 |
| chr1  | 68887272  | 68887596  | 325 |
| chrX  | 77229566  | 77229889  | 324 |
| chrX  | 63234187  | 63234510  | 324 |
| chrX  | 19342265  | 19342588  | 324 |
| chr7  | 42480662  | 42480985  | 324 |
| chr7  | 14822203  | 14822526  | 324 |
| chr4  | 116824769 | 116825092 | 324 |
| chr4  | 106993054 | 106993377 | 324 |
| chr3  | 74455585  | 74455908  | 324 |
| chr25 | 38939224  | 38939547  | 324 |
| chr25 | 35579251  | 35579574  | 324 |
| chr25 | 29082923  | 29083246  | 324 |
| chr23 | 52840396  | 52840719  | 324 |
| chr23 | 19296069  | 19296392  | 324 |
| chr23 | 18667033  | 18667356  | 324 |
| chr22 | 59958782  | 59959105  | 324 |
| chr20 | 9168453   | 9168776   | 324 |
| chr19 | 30767058  | 30767381  | 324 |
| chr17 | 68268192  | 68268515  | 324 |
| chr15 | 14578568  | 14578891  | 324 |
| chr14 | 39884282  | 39884605  | 324 |
| chr13 | 69196613  | 69196936  | 324 |
| chr13 | 68913406  | 68913729  | 324 |
| chr12 | 75030269  | 75030592  | 324 |
| chr11 | 29824354  | 29824677  | 324 |
| chr10 | 89231956  | 89232279  | 324 |
| chr10 | 71230876  | 71231199  | 324 |
| chr10 | 66920653  | 66920976  | 324 |
| chrX  | 75754145  | 75754467  | 323 |
| chrX  | 74118381  | 74118703  | 323 |
| chrX  | 66797909  | 66798231  | 323 |
| chrX  | 61712707  | 61713029  | 323 |
| chrX  | 61300417  | 61300739  | 323 |
| chrX  | 55296697  | 55297019  | 323 |

|       |               |           |     |
|-------|---------------|-----------|-----|
| chrX  | 44696110      | 44696432  | 323 |
| chrX  | 30732814      | 30733136  | 323 |
| chrX  | 225034 225356 | 323       |     |
| chr7  | 3931302       | 3931624   | 323 |
| chr4  | 99025269      | 99025591  | 323 |
| chr4  | 95611424      | 95611746  | 323 |
| chr4  | 69448675      | 69448997  | 323 |
| chr3  | 119641361     | 119641683 | 323 |
| chr29 | 43406537      | 43406859  | 323 |
| chr29 | 31562621      | 31562943  | 323 |
| chr29 | 29690256      | 29690578  | 323 |
| chr28 | 17354295      | 17354617  | 323 |
| chr26 | 41726873      | 41727195  | 323 |
| chr25 | 37729194      | 37729516  | 323 |
| chr23 | 52133132      | 52133454  | 323 |
| chr23 | 42930698      | 42931020  | 323 |
| chr22 | 13448417      | 13448739  | 323 |
| chr21 | 67397804      | 67398126  | 323 |
| chr21 | 61028164      | 61028486  | 323 |
| chr2  | 36365532      | 36365854  | 323 |
| chr17 | 60597847      | 60598169  | 323 |
| chr17 | 18727337      | 18727659  | 323 |
| chr15 | 24386669      | 24386991  | 323 |
| chr15 | 21820183      | 21820505  | 323 |
| chr14 | 15686711      | 15687033  | 323 |
| chr14 | 9682327       | 9682649   | 323 |
| chr14 | 7833463       | 7833785   | 323 |
| chr14 | 6392372       | 6392694   | 323 |
| chr13 | 63489737      | 63490059  | 323 |
| chr13 | 59619884      | 59620206  | 323 |
| chr13 | 57650833      | 57651155  | 323 |
| chr13 | 48464415      | 48464737  | 323 |
| chr13 | 45355418      | 45355740  | 323 |
| chr13 | 40563496      | 40563818  | 323 |
| chr11 | 96402731      | 96403053  | 323 |
| chr11 | 28570078      | 28570400  | 323 |
| chr1  | 118650312     | 118650634 | 323 |
| chrX  | 55198484      | 55198805  | 322 |
| chrX  | 39114681      | 39115002  | 322 |
| chrX  | 13853737      | 13854058  | 322 |
| chrX  | 8727677       | 8727998   | 322 |
| chrX  | 7433840       | 7434161   | 322 |
| chrX  | 6397931       | 6398252   | 322 |
| chrX  | 2460836       | 2461157   | 322 |
| chr8  | 63904561      | 63904882  | 322 |
| chr6  | 108729652     | 108729973 | 322 |
| chr27 | 23957413      | 23957734  | 322 |
| chr26 | 18822382      | 18822703  | 322 |
| chr25 | 41289640      | 41289961  | 322 |
| chr25 | 13992992      | 13993313  | 322 |

|       |           |           |     |
|-------|-----------|-----------|-----|
| chr25 | 2398196   | 2398517   | 322 |
| chr24 | 61731527  | 61731848  | 322 |
| chr23 | 48758218  | 48758539  | 322 |
| chr23 | 43424662  | 43424983  | 322 |
| chr23 | 10610885  | 10611206  | 322 |
| chr19 | 47323310  | 47323631  | 322 |
| chr19 | 20396710  | 20397031  | 322 |
| chr18 | 45848436  | 45848757  | 322 |
| chr18 | 39821700  | 39822021  | 322 |
| chr17 | 47888983  | 47889304  | 322 |
| chr16 | 47163834  | 47164155  | 322 |
| chr16 | 47104433  | 47104754  | 322 |
| chr15 | 64545187  | 64545508  | 322 |
| chr14 | 29626172  | 29626493  | 322 |
| chr13 | 41374122  | 41374443  | 322 |
| chr10 | 35637135  | 35637456  | 322 |
| chr1  | 152638688 | 152639009 | 322 |
| chrX  | 78696422  | 78696742  | 321 |
| chrX  | 59545612  | 59545932  | 321 |
| chrX  | 50327486  | 50327806  | 321 |
| chr9  | 41689220  | 41689540  | 321 |
| chr8  | 63928460  | 63928780  | 321 |
| chr7  | 60926400  | 60926720  | 321 |
| chr5  | 111239318 | 111239638 | 321 |
| chr5  | 60362786  | 60363106  | 321 |
| chr4  | 120797081 | 120797401 | 321 |
| chr4  | 13481434  | 13481754  | 321 |
| chr3  | 84506533  | 84506853  | 321 |
| chr3  | 47197914  | 47198234  | 321 |
| chr3  | 8986387   | 8986707   | 321 |
| chr29 | 49458392  | 49458712  | 321 |
| chr29 | 37264947  | 37265267  | 321 |
| chr28 | 25008699  | 25009019  | 321 |
| chr26 | 48437039  | 48437359  | 321 |
| chr23 | 52280036  | 52280356  | 321 |
| chr22 | 17588129  | 17588449  | 321 |
| chr22 | 10757916  | 10758236  | 321 |
| chr20 | 74515795  | 74516115  | 321 |
| chr2  | 25325581  | 25325901  | 321 |
| chr16 | 3343817   | 3344137   | 321 |
| chr11 | 91805985  | 91806305  | 321 |
| chr11 | 80798463  | 80798783  | 321 |
| chr1  | 149544078 | 149544398 | 321 |
| chrX  | 58703587  | 58703906  | 320 |
| chrX  | 52759654  | 52759973  | 320 |
| chrX  | 30500005  | 30500324  | 320 |
| chr3  | 116282340 | 116282659 | 320 |
| chr3  | 113468262 | 113468581 | 320 |
| chr29 | 33831582  | 33831901  | 320 |
| chr28 | 17918316  | 17918635  | 320 |

|       |           |           |     |
|-------|-----------|-----------|-----|
| chr21 | 68959287  | 68959606  | 320 |
| chr21 | 33995562  | 33995881  | 320 |
| chr2  | 15394897  | 15395216  | 320 |
| chr19 | 58947931  | 58948250  | 320 |
| chr19 | 22543378  | 22543697  | 320 |
| chr18 | 38778432  | 38778751  | 320 |
| chr18 | 33211737  | 33212056  | 320 |
| chr17 | 72685096  | 72685415  | 320 |
| chr15 | 45843997  | 45844316  | 320 |
| chr13 | 54446399  | 54446718  | 320 |
| chr11 | 31055824  | 31056143  | 320 |
| chr11 | 22440847  | 22441166  | 320 |
| chr10 | 7965059   | 7965378   | 320 |
| chr1  | 127801191 | 127801510 | 320 |
| chrX  | 78655192  | 78655510  | 319 |
| chrX  | 71202921  | 71203239  | 319 |
| chrX  | 22853585  | 22853903  | 319 |
| chrX  | 19044642  | 19044960  | 319 |
| chr9  | 90999894  | 91000212  | 319 |
| chr9  | 89726507  | 89726825  | 319 |
| chr5  | 125490224 | 125490542 | 319 |
| chr3  | 98229760  | 98230078  | 319 |
| chr3  | 20461511  | 20461829  | 319 |
| chr3  | 13623434  | 13623752  | 319 |
| chr27 | 39096448  | 39096766  | 319 |
| chr26 | 39140435  | 39140753  | 319 |
| chr23 | 42886372  | 42886690  | 319 |
| chr23 | 15938331  | 15938649  | 319 |
| chr23 | 15511870  | 15512188  | 319 |
| chr21 | 25251767  | 25252085  | 319 |
| chr2  | 128043330 | 128043648 | 319 |
| chr19 | 31949157  | 31949475  | 319 |
| chr19 | 24087147  | 24087465  | 319 |
| chr16 | 62775942  | 62776260  | 319 |
| chr15 | 32302975  | 32303293  | 319 |
| chr13 | 55383993  | 55384311  | 319 |
| chr13 | 41844534  | 41844852  | 319 |
| chr12 | 55783355  | 55783673  | 319 |
| chr11 | 66459973  | 66460291  | 319 |
| chr1  | 152245222 | 152245540 | 319 |
| chr1  | 3087405   | 3087723   | 319 |
| chrX  | 78176874  | 78177191  | 318 |
| chrX  | 66863628  | 66863945  | 318 |
| chrX  | 58896965  | 58897282  | 318 |
| chrX  | 37496692  | 37497009  | 318 |
| chrX  | 36035731  | 36036048  | 318 |
| chrX  | 34542277  | 34542594  | 318 |
| chrX  | 30990451  | 30990768  | 318 |
| chrX  | 30147897  | 30148214  | 318 |
| chrX  | 9593411   | 9593728   | 318 |

|       |           |           |     |
|-------|-----------|-----------|-----|
| chr9  | 26602773  | 26603090  | 318 |
| chr7  | 91309799  | 91310116  | 318 |
| chr3  | 121957940 | 121958257 | 318 |
| chr3  | 112714885 | 112715202 | 318 |
| chr29 | 45198544  | 45198861  | 318 |
| chr29 | 33614301  | 33614618  | 318 |
| chr28 | 33672554  | 33672871  | 318 |
| chr25 | 28482644  | 28482961  | 318 |
| chr24 | 41664404  | 41664721  | 318 |
| chr2  | 124271797 | 124272114 | 318 |
| chr19 | 56096230  | 56096547  | 318 |
| chr17 | 53449194  | 53449511  | 318 |
| chr16 | 67430933  | 67431250  | 318 |
| chr10 | 86404348  | 86404665  | 318 |
| chr1  | 96192977  | 96193294  | 318 |
| chr1  | 67760180  | 67760497  | 318 |
| chrX  | 65467694  | 65468010  | 317 |
| chrX  | 21074785  | 21075101  | 317 |
| chrX  | 17133875  | 17134191  | 317 |
| chrX  | 12998147  | 12998463  | 317 |
| chrX  | 10988271  | 10988587  | 317 |
| chr9  | 99126545  | 99126861  | 317 |
| chr8  | 72145161  | 72145477  | 317 |
| chr7  | 94363484  | 94363800  | 317 |
| chr5  | 118172378 | 118172694 | 317 |
| chr5  | 82886596  | 82886912  | 317 |
| chr5  | 78904970  | 78905286  | 317 |
| chr4  | 45567844  | 45568160  | 317 |
| chr3  | 118286648 | 118286964 | 317 |
| chr26 | 37607463  | 37607779  | 317 |
| chr25 | 14047834  | 14048150  | 317 |
| chr25 | 674626    | 674942    | 317 |
| chr24 | 33296053  | 33296369  | 317 |
| chr21 | 60706890  | 60707206  | 317 |
| chr2  | 127527311 | 127527627 | 317 |
| chr19 | 59033307  | 59033623  | 317 |
| chr18 | 55880865  | 55881181  | 317 |
| chr18 | 45974428  | 45974744  | 317 |
| chr17 | 72714425  | 72714741  | 317 |
| chr16 | 54347866  | 54348182  | 317 |
| chr15 | 63842791  | 63843107  | 317 |
| chr15 | 54010422  | 54010738  | 317 |
| chr15 | 51705351  | 51705667  | 317 |
| chr15 | 29110192  | 29110508  | 317 |
| chr15 | 26641911  | 26642227  | 317 |
| chr14 | 19536930  | 19537246  | 317 |
| chr11 | 88177827  | 88178143  | 317 |
| chr11 | 72765976  | 72766292  | 317 |
| chr10 | 67494998  | 67495314  | 317 |
| chrX  | 77486805  | 77487120  | 316 |

|       |           |           |     |
|-------|-----------|-----------|-----|
| chrX  | 63104905  | 63105220  | 316 |
| chrX  | 58806629  | 58806944  | 316 |
| chrX  | 34506403  | 34506718  | 316 |
| chrX  | 20271803  | 20272118  | 316 |
| chrX  | 20058652  | 20058967  | 316 |
| chrX  | 19676630  | 19676945  | 316 |
| chrX  | 19125442  | 19125757  | 316 |
| chrX  | 7612950   | 7613265   | 316 |
| chrX  | 6133373   | 6133688   | 316 |
| chr6  | 120835724 | 120836039 | 316 |
| chr6  | 107091958 | 107092273 | 316 |
| chr6  | 75137023  | 75137338  | 316 |
| chr5  | 124708822 | 124709137 | 316 |
| chr5  | 113111508 | 113111823 | 316 |
| chr3  | 115866452 | 115866767 | 316 |
| chr3  | 115049546 | 115049861 | 316 |
| chr3  | 31583771  | 31584086  | 316 |
| chr3  | 20525334  | 20525649  | 316 |
| chr29 | 39073281  | 39073596  | 316 |
| chr26 | 10110322  | 10110637  | 316 |
| chr25 | 21515539  | 21515854  | 316 |
| chr24 | 52625020  | 52625335  | 316 |
| chr23 | 17870676  | 17870991  | 316 |
| chr21 | 9962875   | 9963190   | 316 |
| chr21 | 6554657   | 6554972   | 316 |
| chr2  | 132445810 | 132446125 | 316 |
| chr19 | 61344531  | 61344846  | 316 |
| chr19 | 53529620  | 53529935  | 316 |
| chr19 | 25432322  | 25432637  | 316 |
| chr19 | 15133327  | 15133642  | 316 |
| chr18 | 62123083  | 62123398  | 316 |
| chr18 | 25609319  | 25609634  | 316 |
| chr17 | 63265273  | 63265588  | 316 |
| chr15 | 32152820  | 32153135  | 316 |
| chr13 | 33305725  | 33306040  | 316 |
| chr11 | 92877029  | 92877344  | 316 |
| chr11 | 80356582  | 80356897  | 316 |
| chr10 | 22020667  | 22020982  | 316 |
| chrX  | 60428454  | 60428768  | 315 |
| chrX  | 59305791  | 59306105  | 315 |
| chrX  | 58596356  | 58596670  | 315 |
| chrX  | 58461600  | 58461914  | 315 |
| chrX  | 56924145  | 56924459  | 315 |
| chrX  | 48111599  | 48111913  | 315 |
| chrX  | 18909136  | 18909450  | 315 |
| chrX  | 8933856   | 8934170   | 315 |
| chrX  | 5759679   | 5759993   | 315 |
| chr9  | 26895896  | 26896210  | 315 |
| chr8  | 11505451  | 11505765  | 315 |
| chr7  | 5259031   | 5259345   | 315 |

|       |           |           |     |
|-------|-----------|-----------|-----|
| chr6  | 121015143 | 121015457 | 315 |
| chr5  | 76761848  | 76762162  | 315 |
| chr5  | 30411263  | 30411577  | 315 |
| chr29 | 30527300  | 30527614  | 315 |
| chr22 | 16164553  | 16164867  | 315 |
| chr21 | 5986922   | 5987236   | 315 |
| chr21 | 3598343   | 3598657   | 315 |
| chr2  | 136575421 | 136575735 | 315 |
| chr19 | 62984824  | 62985138  | 315 |
| chr19 | 61753252  | 61753566  | 315 |
| chr19 | 59001697  | 59002011  | 315 |
| chr19 | 31508219  | 31508533  | 315 |
| chr16 | 77339290  | 77339604  | 315 |
| chr14 | 1825728   | 1826042   | 315 |
| chr13 | 75765377  | 75765691  | 315 |
| chr12 | 83594952  | 83595266  | 315 |
| chr10 | 14996166  | 14996480  | 315 |
| chr1  | 5319253   | 5319567   | 315 |
| chrX  | 77679082  | 77679395  | 314 |
| chrX  | 58500914  | 58501227  | 314 |
| chrX  | 49338858  | 49339171  | 314 |
| chr7  | 3972753   | 3973066   | 314 |
| chr6  | 109622120 | 109622433 | 314 |
| chr5  | 81599264  | 81599577  | 314 |
| chr3  | 125700826 | 125701139 | 314 |
| chr3  | 35821086  | 35821399  | 314 |
| chr3  | 17390221  | 17390534  | 314 |
| chr29 | 50232722  | 50233035  | 314 |
| chr29 | 31543197  | 31543510  | 314 |
| chr21 | 25327004  | 25327317  | 314 |
| chr2  | 17541363  | 17541676  | 314 |
| chr19 | 49738550  | 49738863  | 314 |
| chr19 | 49375696  | 49376009  | 314 |
| chr18 | 24088341  | 24088654  | 314 |
| chr17 | 70490449  | 70490762  | 314 |
| chr17 | 69484792  | 69485105  | 314 |
| chr17 | 63458192  | 63458505  | 314 |
| chr17 | 59078796  | 59079109  | 314 |
| chr17 | 48310580  | 48310893  | 314 |
| chr15 | 36410702  | 36411015  | 314 |
| chr12 | 32188505  | 32188818  | 314 |
| chr11 | 80154630  | 80154943  | 314 |
| chr10 | 17035247  | 17035560  | 314 |
| chrX  | 64673186  | 64673498  | 313 |
| chrX  | 63417797  | 63418109  | 313 |
| chrX  | 54135981  | 54136293  | 313 |
| chrX  | 50225162  | 50225474  | 313 |
| chrX  | 48664206  | 48664518  | 313 |
| chrX  | 46543532  | 46543844  | 313 |
| chr9  | 99296140  | 99296452  | 313 |



|       |               |           |     |
|-------|---------------|-----------|-----|
| chr9  | 91915733      | 91916045  | 313 |
| chr9  | 55336468      | 55336780  | 313 |
| chr9  | 39976050      | 39976362  | 313 |
| chr8  | 79112766      | 79113078  | 313 |
| chr8  | 59908262      | 59908574  | 313 |
| chr7  | 94356151      | 94356463  | 313 |
| chr5  | 124891080     | 124891392 | 313 |
| chr5  | 29712788      | 29713100  | 313 |
| chr4  | 72803269      | 72803581  | 313 |
| chr3  | 118198748     | 118199060 | 313 |
| chr3  | 116468542     | 116468854 | 313 |
| chr3  | 8803216       | 8803528   | 313 |
| chr3  | 8555365       | 8555677   | 313 |
| chr29 | 36404685      | 36404997  | 313 |
| chr27 | 15347908      | 15348220  | 313 |
| chr26 | 37575438      | 37575750  | 313 |
| chr23 | 15041137      | 15041449  | 313 |
| chr21 | 18507362      | 18507674  | 313 |
| chr20 | 552707 553019 | 313       |     |
| chr2  | 124302356     | 124302668 | 313 |
| chr18 | 57030499      | 57030811  | 313 |
| chr18 | 41793364      | 41793676  | 313 |
| chr17 | 68052017      | 68052329  | 313 |
| chr16 | 75618361      | 75618673  | 313 |
| chr15 | 33090225      | 33090537  | 313 |
| chr15 | 24410192      | 24410504  | 313 |
| chr14 | 18685756      | 18686068  | 313 |
| chr11 | 110150507     | 110150819 | 313 |
| chr11 | 2907758       | 2908070   | 313 |
| chr1  | 147125888     | 147126200 | 313 |
| chr1  | 84432743      | 84433055  | 313 |
| chrX  | 73186009      | 73186320  | 312 |
| chrX  | 54091523      | 54091834  | 312 |
| chrX  | 50878048      | 50878359  | 312 |
| chrX  | 36313144      | 36313455  | 312 |
| chr9  | 64590419      | 64590730  | 312 |
| chr7  | 3944017       | 3944328   | 312 |
| chr4  | 105090490     | 105090801 | 312 |
| chr4  | 81961165      | 81961476  | 312 |
| chr4  | 71441618      | 71441929  | 312 |
| chr3  | 15431366      | 15431677  | 312 |
| chr29 | 46938631      | 46938942  | 312 |
| chr20 | 75735296      | 75735607  | 312 |
| chr2  | 138553304     | 138553615 | 312 |
| chr19 | 28535585      | 28535896  | 312 |
| chr18 | 25887707      | 25888018  | 312 |
| chr18 | 12913964      | 12914275  | 312 |
| chr18 | 3740840       | 3741151   | 312 |
| chr16 | 25967134      | 25967445  | 312 |
| chr15 | 55211725      | 55212036  | 312 |

|       |           |           |     |
|-------|-----------|-----------|-----|
| chr15 | 38251544  | 38251855  | 312 |
| chr15 | 13641281  | 13641592  | 312 |
| chr14 | 19393724  | 19394035  | 312 |
| chr13 | 22183482  | 22183793  | 312 |
| chr11 | 84448218  | 84448529  | 312 |
| chr11 | 74275819  | 74276130  | 312 |
| chr11 | 1615115   | 1615426   | 312 |
| chr10 | 103820644 | 103820955 | 312 |
| chrX  | 74345602  | 74345912  | 311 |
| chrX  | 66893105  | 66893415  | 311 |
| chrX  | 53082859  | 53083169  | 311 |
| chrX  | 36386553  | 36386863  | 311 |
| chrX  | 31210473  | 31210783  | 311 |
| chrX  | 3708533   | 3708843   | 311 |
| chr8  | 72741756  | 72742066  | 311 |
| chr7  | 42501410  | 42501720  | 311 |
| chr6  | 122258184 | 122258494 | 311 |
| chr6  | 99215389  | 99215699  | 311 |
| chr6  | 38124364  | 38124674  | 311 |
| chr5  | 74681163  | 74681473  | 311 |
| chr4  | 118165553 | 118165863 | 311 |
| chr3  | 125477755 | 125478065 | 311 |
| chr3  | 124413319 | 124413629 | 311 |
| chr29 | 46029353  | 46029663  | 311 |
| chr28 | 43046043  | 43046353  | 311 |
| chr28 | 25242472  | 25242782  | 311 |
| chr24 | 60943209  | 60943519  | 311 |
| chr24 | 43300471  | 43300781  | 311 |
| chr24 | 35143835  | 35144145  | 311 |
| chr23 | 44293227  | 44293537  | 311 |
| chr23 | 19938107  | 19938417  | 311 |
| chr22 | 57377776  | 57378086  | 311 |
| chr21 | 30813353  | 30813663  | 311 |
| chr19 | 60834207  | 60834517  | 311 |
| chr19 | 57042002  | 57042312  | 311 |
| chr19 | 26861719  | 26862029  | 311 |
| chr19 | 21883621  | 21883931  | 311 |
| chr19 | 21441581  | 21441891  | 311 |
| chr18 | 52324719  | 52325029  | 311 |
| chr18 | 38308179  | 38308489  | 311 |
| chr18 | 24018134  | 24018444  | 311 |
| chr13 | 78432021  | 78432331  | 311 |
| chr13 | 68866555  | 68866865  | 311 |
| chr13 | 59850022  | 59850332  | 311 |
| chr12 | 33053082  | 33053392  | 311 |
| chr10 | 86499252  | 86499562  | 311 |
| chr10 | 62511022  | 62511332  | 311 |
| chr1  | 82990328  | 82990638  | 311 |
| chrX  | 56536513  | 56536822  | 310 |
| chr8  | 86631484  | 86631793  | 310 |

|       |           |           |     |
|-------|-----------|-----------|-----|
| chr8  | 24195118  | 24195427  | 310 |
| chr8  | 10928519  | 10928828  | 310 |
| chr7  | 95939476  | 95939785  | 310 |
| chr7  | 60369777  | 60370086  | 310 |
| chr7  | 1841472   | 1841781   | 310 |
| chr3  | 127867176 | 127867485 | 310 |
| chr3  | 15405561  | 15405870  | 310 |
| chr29 | 38323418  | 38323727  | 310 |
| chr29 | 27220802  | 27221111  | 310 |
| chr29 | 26537364  | 26537673  | 310 |
| chr25 | 35398997  | 35399306  | 310 |
| chr25 | 34508488  | 34508797  | 310 |
| chr25 | 28052397  | 28052706  | 310 |
| chr24 | 40956143  | 40956452  | 310 |
| chr23 | 10604959  | 10605268  | 310 |
| chr20 | 2022050   | 2022359   | 310 |
| chr19 | 64339255  | 64339564  | 310 |
| chr18 | 56922570  | 56922879  | 310 |
| chr18 | 43167598  | 43167907  | 310 |
| chr17 | 57357896  | 57358205  | 310 |
| chr14 | 7415033   | 7415342   | 310 |
| chr13 | 80596663  | 80596972  | 310 |
| chr13 | 67148842  | 67149151  | 310 |
| chr11 | 91987944  | 91988253  | 310 |
| chr10 | 46189806  | 46190115  | 310 |
| chr10 | 17426839  | 17427148  | 310 |
| chr1  | 69548135  | 69548444  | 310 |
| chrX  | 66161397  | 66161705  | 309 |
| chrX  | 63250593  | 63250901  | 309 |
| chrX  | 18989555  | 18989863  | 309 |
| chr9  | 90522724  | 90523032  | 309 |
| chr8  | 25931657  | 25931965  | 309 |
| chr7  | 62955697  | 62956005  | 309 |
| chr5  | 35568754  | 35569062  | 309 |
| chr4  | 28550047  | 28550355  | 309 |
| chr3  | 123443382 | 123443690 | 309 |
| chr3  | 117414572 | 117414880 | 309 |
| chr28 | 7316450   | 7316758   | 309 |
| chr25 | 33566674  | 33566982  | 309 |
| chr24 | 59473396  | 59473704  | 309 |
| chr24 | 50995157  | 50995465  | 309 |
| chr24 | 23161999  | 23162307  | 309 |
| chr23 | 8337003   | 8337311   | 309 |
| chr22 | 12214461  | 12214769  | 309 |
| chr21 | 59114311  | 59114619  | 309 |
| chr21 | 34015320  | 34015628  | 309 |
| chr2  | 75910860  | 75911168  | 309 |
| chr19 | 41473103  | 41473411  | 309 |
| chr19 | 30344110  | 30344418  | 309 |
| chr19 | 13570706  | 13571014  | 309 |

|       |           |           |     |
|-------|-----------|-----------|-----|
| chr19 | 12352192  | 12352500  | 309 |
| chr17 | 66166348  | 66166656  | 309 |
| chr15 | 62573633  | 62573941  | 309 |
| chr15 | 25291952  | 25292260  | 309 |
| chr15 | 24964753  | 24965061  | 309 |
| chr14 | 5737299   | 5737607   | 309 |
| chr13 | 80011239  | 80011547  | 309 |
| chr13 | 72920960  | 72921268  | 309 |
| chr13 | 66712970  | 66713278  | 309 |
| chr11 | 98365882  | 98366190  | 309 |
| chr11 | 49096266  | 49096574  | 309 |
| chr10 | 86569794  | 86570102  | 309 |
| chr10 | 80439234  | 80439542  | 309 |
| chr10 | 20136857  | 20137165  | 309 |
| chr10 | 16892295  | 16892603  | 309 |
| chr10 | 7517678   | 7517986   | 309 |
| chrX  | 77178827  | 77179134  | 308 |
| chrX  | 70560699  | 70561006  | 308 |
| chrX  | 41260496  | 41260803  | 308 |
| chrX  | 34570720  | 34571027  | 308 |
| chrX  | 27464100  | 27464407  | 308 |
| chrX  | 12976953  | 12977260  | 308 |
| chrX  | 6262420   | 6262727   | 308 |
| chr9  | 108054136 | 108054443 | 308 |
| chr9  | 104222583 | 104222890 | 308 |
| chr8  | 64945661  | 64945968  | 308 |
| chr8  | 63996289  | 63996596  | 308 |
| chr8  | 8589848   | 8590155   | 308 |
| chr7  | 80840979  | 80841286  | 308 |
| chr7  | 43980468  | 43980775  | 308 |
| chr5  | 60216215  | 60216522  | 308 |
| chr3  | 114935772 | 114936079 | 308 |
| chr3  | 113827021 | 113827328 | 308 |
| chr3  | 8772608   | 8772915   | 308 |
| chr3  | 4030820   | 4031127   | 308 |
| chr29 | 18001909  | 18002216  | 308 |
| chr28 | 17356042  | 17356349  | 308 |
| chr23 | 49888542  | 49888849  | 308 |
| chr23 | 13605669  | 13605976  | 308 |
| chr21 | 66056559  | 66056866  | 308 |
| chr21 | 27703388  | 27703695  | 308 |
| chr21 | 13682712  | 13683019  | 308 |
| chr2  | 134888899 | 134889206 | 308 |
| chr2  | 130806420 | 130806727 | 308 |
| chr2  | 114988802 | 114989109 | 308 |
| chr19 | 40393387  | 40393694  | 308 |
| chr19 | 16659795  | 16660102  | 308 |
| chr18 | 54575776  | 54576083  | 308 |
| chr18 | 22114583  | 22114890  | 308 |
| chr18 | 4031064   | 4031371   | 308 |

|       |               |           |     |
|-------|---------------|-----------|-----|
| chr16 | 75868456      | 75868763  | 308 |
| chr15 | 73797332      | 73797639  | 308 |
| chr15 | 43431674      | 43431981  | 308 |
| chr12 | 32251594      | 32251901  | 308 |
| chr11 | 74562053      | 74562360  | 308 |
| chr11 | 48549283      | 48549590  | 308 |
| chr11 | 13329592      | 13329899  | 308 |
| chr1  | 74709047      | 74709354  | 308 |
| chrX  | 75482451      | 75482757  | 307 |
| chrX  | 74558878      | 74559184  | 307 |
| chrX  | 72339385      | 72339691  | 307 |
| chrX  | 62731652      | 62731958  | 307 |
| chrX  | 50921747      | 50922053  | 307 |
| chrX  | 50242794      | 50243100  | 307 |
| chrX  | 34728539      | 34728845  | 307 |
| chrX  | 19088134      | 19088440  | 307 |
| chr8  | 106648718     | 106649024 | 307 |
| chr8  | 65277671      | 65277977  | 307 |
| chr8  | 47604382      | 47604688  | 307 |
| chr7  | 50884391      | 50884697  | 307 |
| chr7  | 5431771       | 5432077   | 307 |
| chr26 | 17981840      | 17982146  | 307 |
| chr25 | 38256635      | 38256941  | 307 |
| chr25 | 17733111      | 17733417  | 307 |
| chr24 | 20457951      | 20458257  | 307 |
| chr21 | 60854106      | 60854412  | 307 |
| chr20 | 19080996      | 19081302  | 307 |
| chr2  | 135720019     | 135720325 | 307 |
| chr2  | 135013381     | 135013687 | 307 |
| chr19 | 59121315      | 59121621  | 307 |
| chr18 | 39527824      | 39528130  | 307 |
| chr18 | 33680520      | 33680826  | 307 |
| chr17 | 70165016      | 70165322  | 307 |
| chr16 | 68892283      | 68892589  | 307 |
| chr15 | 35423267      | 35423573  | 307 |
| chr13 | 76237272      | 76237578  | 307 |
| chr13 | 60990382      | 60990688  | 307 |
| chr11 | 76299188      | 76299494  | 307 |
| chr11 | 74212736      | 74213042  | 307 |
| chr11 | 70684730      | 70685036  | 307 |
| chr11 | 30912630      | 30912936  | 307 |
| chr11 | 12032426      | 12032732  | 307 |
| chr11 | 1320568       | 1320874   | 307 |
| chr11 | 253384 253690 |           | 307 |
| chr10 | 103110945     | 103111251 | 307 |
| chrX  | 74255329      | 74255634  | 306 |
| chrX  | 65451172      | 65451477  | 306 |
| chrX  | 63234881      | 63235186  | 306 |
| chrX  | 36292103      | 36292408  | 306 |
| chrX  | 23826327      | 23826632  | 306 |

|       |           |           |     |
|-------|-----------|-----------|-----|
| chrX  | 7804187   | 7804492   | 306 |
| chr9  | 90507665  | 90507970  | 306 |
| chr7  | 37554755  | 37555060  | 306 |
| chr6  | 63069920  | 63070225  | 306 |
| chr4  | 122123544 | 122123849 | 306 |
| chr3  | 23869211  | 23869516  | 306 |
| chr29 | 38744723  | 38745028  | 306 |
| chr28 | 22555955  | 22556260  | 306 |
| chr26 | 34955989  | 34956294  | 306 |
| chr25 | 28515236  | 28515541  | 306 |
| chr24 | 60193565  | 60193870  | 306 |
| chr23 | 10548584  | 10548889  | 306 |
| chr21 | 66461821  | 66462126  | 306 |
| chr21 | 47569943  | 47570248  | 306 |
| chr21 | 31042560  | 31042865  | 306 |
| chr2  | 129683936 | 129684241 | 306 |
| chr2  | 124414250 | 124414555 | 306 |
| chr19 | 21596778  | 21597083  | 306 |
| chr17 | 26907810  | 26908115  | 306 |
| chr16 | 48866000  | 48866305  | 306 |
| chr15 | 63090591  | 63090896  | 306 |
| chr14 | 7838993   | 7839298   | 306 |
| chr13 | 42701718  | 42702023  | 306 |
| chr11 | 77833385  | 77833690  | 306 |
| chr11 | 29857095  | 29857400  | 306 |
| chr10 | 70024033  | 70024338  | 306 |
| chr10 | 50309079  | 50309384  | 306 |
| chr10 | 48247560  | 48247865  | 306 |
| chrX  | 55048305  | 55048609  | 305 |
| chrX  | 34025913  | 34026217  | 305 |
| chrX  | 10095159  | 10095463  | 305 |
| chrX  | 8085945   | 8086249   | 305 |
| chr9  | 99028721  | 99029025  | 305 |
| chr8  | 108689544 | 108689848 | 305 |
| chr8  | 72159221  | 72159525  | 305 |
| chr4  | 49026583  | 49026887  | 305 |
| chr3  | 115648776 | 115649080 | 305 |
| chr29 | 41859079  | 41859383  | 305 |
| chr24 | 43630539  | 43630843  | 305 |
| chr24 | 20549976  | 20550280  | 305 |
| chr22 | 27769430  | 27769734  | 305 |
| chr20 | 19388578  | 19388882  | 305 |
| chr19 | 39143819  | 39144123  | 305 |
| chr18 | 52643201  | 52643505  | 305 |
| chr18 | 50590383  | 50590687  | 305 |
| chr18 | 11541595  | 11541899  | 305 |
| chr17 | 61071029  | 61071333  | 305 |
| chr17 | 44389291  | 44389595  | 305 |
| chr15 | 81745480  | 81745784  | 305 |
| chr14 | 14028123  | 14028427  | 305 |

|       |           |           |     |
|-------|-----------|-----------|-----|
| chr13 | 82856076  | 82856380  | 305 |
| chr13 | 60754383  | 60754687  | 305 |
| chr12 | 84295508  | 84295812  | 305 |
| chr12 | 31103790  | 31104094  | 305 |
| chr12 | 15225812  | 15226116  | 305 |
| chr10 | 88333965  | 88334269  | 305 |
| chr10 | 69525072  | 69525376  | 305 |
| chr1  | 1130394   | 1130698   | 305 |
| chrX  | 73834541  | 73834844  | 304 |
| chrX  | 73327367  | 73327670  | 304 |
| chrX  | 62668601  | 62668904  | 304 |
| chrX  | 60576132  | 60576435  | 304 |
| chrX  | 53612302  | 53612605  | 304 |
| chrX  | 53091747  | 53092050  | 304 |
| chrX  | 49178156  | 49178459  | 304 |
| chrX  | 37353675  | 37353978  | 304 |
| chrX  | 33215761  | 33216064  | 304 |
| chrX  | 12926525  | 12926828  | 304 |
| chrX  | 12029837  | 12030140  | 304 |
| chrX  | 10449904  | 10450207  | 304 |
| chr9  | 106678039 | 106678342 | 304 |
| chr7  | 70805024  | 70805327  | 304 |
| chr7  | 38684119  | 38684422  | 304 |
| chr5  | 112085409 | 112085712 | 304 |
| chr3  | 106523359 | 106523662 | 304 |
| chr3  | 11535692  | 11535995  | 304 |
| chr3  | 11518066  | 11518369  | 304 |
| chr29 | 33771878  | 33772181  | 304 |
| chr29 | 26557141  | 26557444  | 304 |
| chr28 | 42107358  | 42107661  | 304 |
| chr25 | 38523771  | 38524074  | 304 |
| chr23 | 19908256  | 19908559  | 304 |
| chr21 | 56058089  | 56058392  | 304 |
| chr2  | 133161289 | 133161592 | 304 |
| chr2  | 133072572 | 133072875 | 304 |
| chr19 | 27070325  | 27070628  | 304 |
| chr19 | 14636392  | 14636695  | 304 |
| chr17 | 64302646  | 64302949  | 304 |
| chr15 | 62423175  | 62423478  | 304 |
| chr15 | 28625249  | 28625552  | 304 |
| chr14 | 7590440   | 7590743   | 304 |
| chr13 | 66693210  | 66693513  | 304 |
| chr13 | 37538712  | 37539015  | 304 |
| chr11 | 99181639  | 99181942  | 304 |
| chr10 | 66900370  | 66900673  | 304 |
| chr1  | 145324076 | 145324379 | 304 |
| chr1  | 74518544  | 74518847  | 304 |
| chrX  | 80828470  | 80828772  | 303 |
| chrX  | 62407684  | 62407986  | 303 |
| chrX  | 34159746  | 34160048  | 303 |

|       |               |           |     |
|-------|---------------|-----------|-----|
| chrX  | 3002100       | 3002402   | 303 |
| chrX  | 2325587       | 2325889   | 303 |
| chr9  | 77197213      | 77197515  | 303 |
| chr7  | 50413029      | 50413331  | 303 |
| chr7  | 4508294       | 4508596   | 303 |
| chr5  | 124636649     | 124636951 | 303 |
| chr5  | 79162055      | 79162357  | 303 |
| chr4  | 89784919      | 89785221  | 303 |
| chr28 | 34133725      | 34134027  | 303 |
| chr27 | 44655019      | 44655321  | 303 |
| chr25 | 40885894      | 40886196  | 303 |
| chr23 | 44846483      | 44846785  | 303 |
| chr22 | 48382841      | 48383143  | 303 |
| chr20 | 22411760      | 22412062  | 303 |
| chr20 | 490838 491140 | 303       |     |
| chr18 | 33339712      | 33340014  | 303 |
| chr17 | 75727608      | 75727910  | 303 |
| chr17 | 49395458      | 49395760  | 303 |
| chr16 | 67528604      | 67528906  | 303 |
| chr16 | 23896187      | 23896489  | 303 |
| chr15 | 54157336      | 54157638  | 303 |
| chr15 | 6413051       | 6413353   | 303 |
| chr14 | 62335417      | 62335719  | 303 |
| chr14 | 61359007      | 61359309  | 303 |
| chr11 | 64802947      | 64803249  | 303 |
| chr10 | 77485088      | 77485390  | 303 |
| chr1  | 157160933     | 157161235 | 303 |
| chr1  | 68782181      | 68782483  | 303 |
| chrX  | 72798559      | 72798860  | 302 |
| chrX  | 66960280      | 66960581  | 302 |
| chrX  | 66861518      | 66861819  | 302 |
| chrX  | 62459348      | 62459649  | 302 |
| chrX  | 30835125      | 30835426  | 302 |
| chr9  | 98918113      | 98918414  | 302 |
| chr8  | 63981356      | 63981657  | 302 |
| chr8  | 45773666      | 45773967  | 302 |
| chr8  | 23931950      | 23932251  | 302 |
| chr8  | 8289470       | 8289771   | 302 |
| chr8  | 7681068       | 7681369   | 302 |
| chr6  | 121080949     | 121081250 | 302 |
| chr5  | 111148030     | 111148331 | 302 |
| chr5  | 61044807      | 61045108  | 302 |
| chr4  | 32174761      | 32175062  | 302 |
| chr3  | 7059817       | 7060118   | 302 |
| chr26 | 38585128      | 38585429  | 302 |
| chr25 | 41166096      | 41166397  | 302 |
| chr24 | 26736384      | 26736685  | 302 |
| chr21 | 20156442      | 20156743  | 302 |
| chr20 | 72431999      | 72432300  | 302 |
| chr20 | 8699956       | 8700257   | 302 |



|       |               |           |     |
|-------|---------------|-----------|-----|
| chr20 | 3575019       | 3575320   | 302 |
| chr19 | 55986639      | 55986940  | 302 |
| chr19 | 51901574      | 51901875  | 302 |
| chr19 | 47415776      | 47416077  | 302 |
| chr19 | 47114624      | 47114925  | 302 |
| chr19 | 22353124      | 22353425  | 302 |
| chr18 | 11165943      | 11166244  | 302 |
| chr17 | 74602285      | 74602586  | 302 |
| chr17 | 59053260      | 59053561  | 302 |
| chr16 | 73768253      | 73768554  | 302 |
| chr16 | 50230900      | 50231201  | 302 |
| chr14 | 61589852      | 61590153  | 302 |
| chr12 | 34541898      | 34542199  | 302 |
| chr12 | 19020551      | 19020852  | 302 |
| chr11 | 102184222     | 102184523 | 302 |
| chrX  | 73276520      | 73276820  | 301 |
| chrX  | 56092324      | 56092624  | 301 |
| chrX  | 54786886      | 54787186  | 301 |
| chrX  | 48015690      | 48015990  | 301 |
| chrX  | 46293132      | 46293432  | 301 |
| chrX  | 38241521      | 38241821  | 301 |
| chrX  | 36685880      | 36686180  | 301 |
| chrX  | 19385002      | 19385302  | 301 |
| chrX  | 16882085      | 16882385  | 301 |
| chr9  | 56002526      | 56002826  | 301 |
| chr9  | 41642867      | 41643167  | 301 |
| chr8  | 40247814      | 40248114  | 301 |
| chr6  | 11314078      | 11314378  | 301 |
| chr5  | 71445571      | 71445871  | 301 |
| chr4  | 97712866      | 97713166  | 301 |
| chr3  | 115951451     | 115951751 | 301 |
| chr3  | 111396709     | 111397009 | 301 |
| chr28 | 43042417      | 43042717  | 301 |
| chr28 | 633469 633769 | 301       |     |
| chr27 | 35013907      | 35014207  | 301 |
| chr26 | 42092672      | 42092972  | 301 |
| chr26 | 21622229      | 21622529  | 301 |
| chr25 | 39190864      | 39191164  | 301 |
| chr24 | 64218014      | 64218314  | 301 |
| chr24 | 37558245      | 37558545  | 301 |
| chr23 | 49734014      | 49734314  | 301 |
| chr23 | 43425057      | 43425357  | 301 |
| chr23 | 40639609      | 40639909  | 301 |
| chr23 | 30241676      | 30241976  | 301 |
| chr23 | 19636362      | 19636662  | 301 |
| chr23 | 13695331      | 13695631  | 301 |
| chr22 | 53985137      | 53985437  | 301 |
| chr22 | 51508266      | 51508566  | 301 |
| chr21 | 56097181      | 56097481  | 301 |
| chr18 | 57037719      | 57038019  | 301 |

|       |           |           |     |
|-------|-----------|-----------|-----|
| chr18 | 25799649  | 25799949  | 301 |
| chr18 | 22900438  | 22900738  | 301 |
| chr16 | 19105995  | 19106295  | 301 |
| chr13 | 77200205  | 77200505  | 301 |
| chr13 | 66841852  | 66842152  | 301 |
| chr13 | 18364896  | 18365196  | 301 |
| chr11 | 99774316  | 99774616  | 301 |
| chr11 | 48386882  | 48387182  | 301 |
| chr11 | 6928285   | 6928585   | 301 |
| chr10 | 8085516   | 8085816   | 301 |
| chr1  | 145415920 | 145416220 | 301 |
| chr1  | 68899764  | 68900064  | 301 |
| chrX  | 74604961  | 74605260  | 300 |
| chrX  | 21484532  | 21484831  | 300 |
| chr8  | 110459618 | 110459917 | 300 |
| chr7  | 65085370  | 65085669  | 300 |
| chr7  | 18471284  | 18471583  | 300 |
| chr6  | 101090390 | 101090689 | 300 |
| chr3  | 108041941 | 108042240 | 300 |
| chr29 | 37008641  | 37008940  | 300 |
| chr23 | 11951558  | 11951857  | 300 |
| chr23 | 3217044   | 3217343   | 300 |
| chr22 | 59519519  | 59519818  | 300 |
| chr22 | 29776886  | 29777185  | 300 |
| chr21 | 61038679  | 61038978  | 300 |
| chr21 | 33136907  | 33137206  | 300 |
| chr21 | 25938176  | 25938475  | 300 |
| chr21 | 23691744  | 23692043  | 300 |
| chr20 | 73908812  | 73909111  | 300 |
| chr20 | 73791773  | 73792072  | 300 |
| chr19 | 40506227  | 40506526  | 300 |
| chr16 | 23671526  | 23671825  | 300 |
| chr13 | 73076229  | 73076528  | 300 |
| chr12 | 30585100  | 30585399  | 300 |
| chr11 | 96134266  | 96134565  | 300 |
| chr11 | 14119300  | 14119599  | 300 |
| chr10 | 103082139 | 103082438 | 300 |
| chr10 | 90167995  | 90168294  | 300 |
| chr10 | 35661891  | 35662190  | 300 |
| chr10 | 32472930  | 32473229  | 300 |
| chr10 | 11650129  | 11650428  | 300 |
| chr10 | 8336414   | 8336713   | 300 |
| chrX  | 75503859  | 75504157  | 299 |
| chrX  | 56092931  | 56093229  | 299 |
| chrX  | 54927166  | 54927464  | 299 |
| chrX  | 36310762  | 36311060  | 299 |
| chr8  | 77375720  | 77376018  | 299 |
| chr7  | 70811604  | 70811902  | 299 |
| chr7  | 68705503  | 68705801  | 299 |
| chr7  | 38189405  | 38189703  | 299 |

|       |           |           |     |
|-------|-----------|-----------|-----|
| chr6  | 122480130 | 122480428 | 299 |
| chr5  | 111893064 | 111893362 | 299 |
| chr5  | 111525847 | 111526145 | 299 |
| chr4  | 67319966  | 67320264  | 299 |
| chr3  | 123904376 | 123904674 | 299 |
| chr29 | 49579809  | 49580107  | 299 |
| chr29 | 26769635  | 26769933  | 299 |
| chr28 | 42789616  | 42789914  | 299 |
| chr28 | 34046059  | 34046357  | 299 |
| chr28 | 33492015  | 33492313  | 299 |
| chr28 | 25331676  | 25331974  | 299 |
| chr25 | 39495226  | 39495524  | 299 |
| chr25 | 39408016  | 39408314  | 299 |
| chr24 | 7189113   | 7189411   | 299 |
| chr22 | 55959295  | 55959593  | 299 |
| chr22 | 54443444  | 54443742  | 299 |
| chr22 | 52572287  | 52572585  | 299 |
| chr22 | 45630746  | 45631044  | 299 |
| chr2  | 111881596 | 111881894 | 299 |
| chr19 | 51685222  | 51685520  | 299 |
| chr19 | 43160991  | 43161289  | 299 |
| chr19 | 38922591  | 38922889  | 299 |
| chr18 | 54584745  | 54585043  | 299 |
| chr18 | 43178252  | 43178550  | 299 |
| chr17 | 49148478  | 49148776  | 299 |
| chr16 | 77060786  | 77061084  | 299 |
| chr16 | 23707097  | 23707395  | 299 |
| chr15 | 42285265  | 42285563  | 299 |
| chr15 | 24660108  | 24660406  | 299 |
| chr11 | 77553590  | 77553888  | 299 |
| chr10 | 50563418  | 50563716  | 299 |
| chr10 | 13283395  | 13283693  | 299 |
| chrX  | 74785081  | 74785378  | 298 |
| chrX  | 64243245  | 64243542  | 298 |
| chrX  | 6511891   | 6512188   | 298 |
| chr7  | 17316249  | 17316546  | 298 |
| chr6  | 94980157  | 94980454  | 298 |
| chr5  | 23524863  | 23525160  | 298 |
| chr4  | 71438995  | 71439292  | 298 |
| chr4  | 8970198   | 8970495   | 298 |
| chr3  | 35986188  | 35986485  | 298 |
| chr28 | 33544633  | 33544930  | 298 |
| chr26 | 42821657  | 42821954  | 298 |
| chr26 | 32249532  | 32249829  | 298 |
| chr25 | 34489832  | 34490129  | 298 |
| chr24 | 48448012  | 48448309  | 298 |
| chr24 | 4299758   | 4300055   | 298 |
| chr23 | 25838768  | 25839065  | 298 |
| chr22 | 5612278   | 5612575   | 298 |
| chr19 | 44870941  | 44871238  | 298 |

|       |           |           |     |
|-------|-----------|-----------|-----|
| chr19 | 33122551  | 33122848  | 298 |
| chr18 | 49995766  | 49996063  | 298 |
| chr18 | 25759845  | 25760142  | 298 |
| chr17 | 64532461  | 64532758  | 298 |
| chr17 | 15147523  | 15147820  | 298 |
| chr14 | 29056605  | 29056902  | 298 |
| chr12 | 82589797  | 82590094  | 298 |
| chr11 | 88184272  | 88184569  | 298 |
| chr11 | 75414694  | 75414991  | 298 |
| chr11 | 4350825   | 4351122   | 298 |
| chr10 | 32323142  | 32323439  | 298 |
| chr1  | 99018510  | 99018807  | 298 |
| chrX  | 80260084  | 80260380  | 297 |
| chrX  | 75352896  | 75353192  | 297 |
| chrX  | 72114337  | 72114633  | 297 |
| chrX  | 71610329  | 71610625  | 297 |
| chrX  | 56027771  | 56028067  | 297 |
| chrX  | 51870692  | 51870988  | 297 |
| chrX  | 49100671  | 49100967  | 297 |
| chrX  | 35099163  | 35099459  | 297 |
| chrX  | 13182466  | 13182762  | 297 |
| chrX  | 11037365  | 11037661  | 297 |
| chrX  | 9991573   | 9991869   | 297 |
| chrX  | 3374537   | 3374833   | 297 |
| chrX  | 2617432   | 2617728   | 297 |
| chr9  | 44305200  | 44305496  | 297 |
| chr9  | 41524168  | 41524464  | 297 |
| chr8  | 56697837  | 56698133  | 297 |
| chr7  | 33939449  | 33939745  | 297 |
| chr4  | 5115458   | 5115754   | 297 |
| chr3  | 111647323 | 111647619 | 297 |
| chr29 | 49033019  | 49033315  | 297 |
| chr29 | 35301275  | 35301571  | 297 |
| chr28 | 33474375  | 33474671  | 297 |
| chr25 | 35493490  | 35493786  | 297 |
| chr24 | 1373724   | 1374020   | 297 |
| chr22 | 29889849  | 29890145  | 297 |
| chr22 | 17234811  | 17235107  | 297 |
| chr21 | 61222008  | 61222304  | 297 |
| chr19 | 57133834  | 57134130  | 297 |
| chr19 | 37454794  | 37455090  | 297 |
| chr19 | 22345664  | 22345960  | 297 |
| chr18 | 22883109  | 22883405  | 297 |
| chr17 | 58843368  | 58843664  | 297 |
| chr17 | 15956133  | 15956429  | 297 |
| chr16 | 48789834  | 48790130  | 297 |
| chr15 | 24659374  | 24659670  | 297 |
| chr15 | 24543076  | 24543372  | 297 |
| chr13 | 77356159  | 77356455  | 297 |
| chr13 | 38015688  | 38015984  | 297 |

|       |           |           |     |
|-------|-----------|-----------|-----|
| chr13 | 26204543  | 26204839  | 297 |
| chr12 | 29715664  | 29715960  | 297 |
| chr12 | 20786934  | 20787230  | 297 |
| chr11 | 90504668  | 90504964  | 297 |
| chr11 | 81295208  | 81295504  | 297 |
| chr11 | 62707777  | 62708073  | 297 |
| chr10 | 35956254  | 35956550  | 297 |
| chrX  | 81589971  | 81590266  | 296 |
| chrX  | 55446861  | 55447156  | 296 |
| chrX  | 54373940  | 54374235  | 296 |
| chrX  | 46665372  | 46665667  | 296 |
| chrX  | 34652685  | 34652980  | 296 |
| chrX  | 6336009   | 6336304   | 296 |
| chr9  | 91222894  | 91223189  | 296 |
| chr8  | 65185406  | 65185701  | 296 |
| chr6  | 120907066 | 120907361 | 296 |
| chr6  | 18179047  | 18179342  | 296 |
| chr5  | 111736649 | 111736944 | 296 |
| chr5  | 29017728  | 29018023  | 296 |
| chr5  | 11226964  | 11227259  | 296 |
| chr4  | 91119939  | 91120234  | 296 |
| chr4  | 28593889  | 28594184  | 296 |
| chr29 | 49599194  | 49599489  | 296 |
| chr29 | 36433646  | 36433941  | 296 |
| chr26 | 49159282  | 49159577  | 296 |
| chr23 | 43009367  | 43009662  | 296 |
| chr22 | 48227642  | 48227937  | 296 |
| chr22 | 30284715  | 30285010  | 296 |
| chr21 | 34144773  | 34145068  | 296 |
| chr20 | 6339837   | 6340132   | 296 |
| chr2  | 126422583 | 126422878 | 296 |
| chr2  | 119910087 | 119910382 | 296 |
| chr2  | 78970625  | 78970920  | 296 |
| chr19 | 54823349  | 54823644  | 296 |
| chr19 | 51921626  | 51921921  | 296 |
| chr19 | 30168192  | 30168487  | 296 |
| chr16 | 75305743  | 75306038  | 296 |
| chr15 | 26898499  | 26898794  | 296 |
| chr13 | 41306766  | 41307061  | 296 |
| chr12 | 74411264  | 74411559  | 296 |
| chr10 | 90965415  | 90965710  | 296 |
| chrX  | 71583879  | 71584173  | 295 |
| chrX  | 69066031  | 69066325  | 295 |
| chrX  | 34809049  | 34809343  | 295 |
| chrX  | 20877631  | 20877925  | 295 |
| chrX  | 19343961  | 19344255  | 295 |
| chrX  | 1635905   | 1636199   | 295 |
| chr5  | 31216599  | 31216893  | 295 |
| chr4  | 85018473  | 85018767  | 295 |
| chr3  | 121663714 | 121664008 | 295 |

|       |           |           |     |
|-------|-----------|-----------|-----|
| chr29 | 48965365  | 48965659  | 295 |
| chr29 | 30679876  | 30680170  | 295 |
| chr25 | 2086951   | 2087245   | 295 |
| chr21 | 24475791  | 24476085  | 295 |
| chr21 | 13936721  | 13937015  | 295 |
| chr2  | 108950707 | 108951001 | 295 |
| chr19 | 46874798  | 46875092  | 295 |
| chr18 | 64261664  | 64261958  | 295 |
| chr18 | 25554684  | 25554978  | 295 |
| chr17 | 61498517  | 61498811  | 295 |
| chr16 | 23845007  | 23845301  | 295 |
| chr16 | 23299504  | 23299798  | 295 |
| chr15 | 81602435  | 81602729  | 295 |
| chr15 | 53395433  | 53395727  | 295 |
| chr15 | 36307269  | 36307563  | 295 |
| chr13 | 77766903  | 77767197  | 295 |
| chr12 | 24624900  | 24625194  | 295 |
| chr12 | 14749818  | 14750112  | 295 |
| chr12 | 9568421   | 9568715   | 295 |
| chr11 | 82660988  | 82661282  | 295 |
| chr11 | 76333912  | 76334206  | 295 |
| chr11 | 6929207   | 6929501   | 295 |
| chr10 | 89233155  | 89233449  | 295 |
| chr10 | 52309728  | 52310022  | 295 |
| chrX  | 79444604  | 79444897  | 294 |
| chrX  | 74500263  | 74500556  | 294 |
| chrX  | 71050117  | 71050410  | 294 |
| chrX  | 60006261  | 60006554  | 294 |
| chrX  | 50808339  | 50808632  | 294 |
| chrX  | 48043405  | 48043698  | 294 |
| chrX  | 47629208  | 47629501  | 294 |
| chrX  | 19331718  | 19332011  | 294 |
| chrX  | 10758870  | 10759163  | 294 |
| chrX  | 6119886   | 6120179   | 294 |
| chr9  | 12231436  | 12231729  | 294 |
| chr8  | 80180208  | 80180501  | 294 |
| chr5  | 120513091 | 120513384 | 294 |
| chr5  | 30167001  | 30167294  | 294 |
| chr3  | 105596050 | 105596343 | 294 |
| chr29 | 36907949  | 36908242  | 294 |
| chr29 | 34891487  | 34891780  | 294 |
| chr27 | 28115889  | 28116182  | 294 |
| chr27 | 27946875  | 27947168  | 294 |
| chr25 | 15314091  | 15314384  | 294 |
| chr24 | 51560460  | 51560753  | 294 |
| chr24 | 43568124  | 43568417  | 294 |
| chr24 | 35373602  | 35373895  | 294 |
| chr24 | 20675999  | 20676292  | 294 |
| chr22 | 32964787  | 32965080  | 294 |
| chr21 | 60430819  | 60431112  | 294 |

|       |           |           |     |
|-------|-----------|-----------|-----|
| chr2  | 135121471 | 135121764 | 294 |
| chr2  | 123785715 | 123786008 | 294 |
| chr19 | 54618448  | 54618741  | 294 |
| chr19 | 41922797  | 41923090  | 294 |
| chr19 | 40831784  | 40832077  | 294 |
| chr19 | 34060191  | 34060484  | 294 |
| chr19 | 14999861  | 15000154  | 294 |
| chr19 | 11095901  | 11096194  | 294 |
| chr18 | 47877470  | 47877763  | 294 |
| chr18 | 7642000   | 7642293   | 294 |
| chr18 | 7406044   | 7406337   | 294 |
| chr17 | 69077766  | 69078059  | 294 |
| chr17 | 58754082  | 58754375  | 294 |
| chr16 | 46463794  | 46464087  | 294 |
| chr15 | 75843516  | 75843809  | 294 |
| chr15 | 75217597  | 75217890  | 294 |
| chr15 | 64477013  | 64477306  | 294 |
| chr15 | 56048799  | 56049092  | 294 |
| chr15 | 31792949  | 31793242  | 294 |
| chr15 | 22794623  | 22794916  | 294 |
| chr14 | 21383886  | 21384179  | 294 |
| chr14 | 7813256   | 7813549   | 294 |
| chr13 | 61784147  | 61784440  | 294 |
| chr13 | 54421795  | 54422088  | 294 |
| chr13 | 38841276  | 38841569  | 294 |
| chr12 | 32428137  | 32428430  | 294 |
| chr10 | 103819477 | 103819770 | 294 |
| chr10 | 70531448  | 70531741  | 294 |
| chr10 | 66800057  | 66800350  | 294 |
| chr10 | 62959778  | 62960071  | 294 |
| chr1  | 144899207 | 144899500 | 294 |
| chrX  | 71822864  | 71823156  | 293 |
| chrX  | 55434831  | 55435123  | 293 |
| chrX  | 54988436  | 54988728  | 293 |
| chrX  | 29425997  | 29426289  | 293 |
| chrX  | 23051610  | 23051902  | 293 |
| chrX  | 22522934  | 22523226  | 293 |
| chr7  | 93893130  | 93893422  | 293 |
| chr7  | 70499325  | 70499617  | 293 |
| chr7  | 15591834  | 15592126  | 293 |
| chr7  | 14484939  | 14485231  | 293 |
| chr6  | 119363258 | 119363550 | 293 |
| chr6  | 118270735 | 118271027 | 293 |
| chr5  | 28844775  | 28845067  | 293 |
| chr4  | 123124489 | 123124781 | 293 |
| chr4  | 118019977 | 118020269 | 293 |
| chr4  | 87709229  | 87709521  | 293 |
| chr4  | 74534267  | 74534559  | 293 |
| chr3  | 115336016 | 115336308 | 293 |
| chr3  | 111478063 | 111478355 | 293 |

|       |           |           |     |
|-------|-----------|-----------|-----|
| chr3  | 83719359  | 83719651  | 293 |
| chr28 | 26782454  | 26782746  | 293 |
| chr26 | 41695715  | 41696007  | 293 |
| chr25 | 22632685  | 22632977  | 293 |
| chr25 | 4005053   | 4005345   | 293 |
| chr24 | 61098460  | 61098752  | 293 |
| chr24 | 45032971  | 45033263  | 293 |
| chr24 | 41670200  | 41670492  | 293 |
| chr24 | 1211489   | 1211781   | 293 |
| chr22 | 16326479  | 16326771  | 293 |
| chr21 | 47628998  | 47629290  | 293 |
| chr20 | 70380043  | 70380335  | 293 |
| chr20 | 67460072  | 67460364  | 293 |
| chr2  | 139232070 | 139232362 | 293 |
| chr2  | 131500762 | 131501054 | 293 |
| chr2  | 32729710  | 32730002  | 293 |
| chr19 | 29121515  | 29121807  | 293 |
| chr18 | 11815349  | 11815641  | 293 |
| chr17 | 57783500  | 57783792  | 293 |
| chr15 | 55670395  | 55670687  | 293 |
| chr15 | 24577441  | 24577733  | 293 |
| chr11 | 104889914 | 104890206 | 293 |
| chr11 | 98315218  | 98315510  | 293 |
| chr11 | 88469007  | 88469299  | 293 |
| chr11 | 71074678  | 71074970  | 293 |
| chr11 | 21879261  | 21879553  | 293 |
| chr10 | 70172571  | 70172863  | 293 |
| chr10 | 52949258  | 52949550  | 293 |
| chr10 | 22408526  | 22408818  | 293 |
| chr10 | 17041828  | 17042120  | 293 |
| chrX  | 81591369  | 81591660  | 292 |
| chrX  | 58687579  | 58687870  | 292 |
| chrX  | 53910540  | 53910831  | 292 |
| chrX  | 8062869   | 8063160   | 292 |
| chr9  | 98512436  | 98512727  | 292 |
| chr7  | 45767524  | 45767815  | 292 |
| chr6  | 75199049  | 75199340  | 292 |
| chr5  | 48041575  | 48041866  | 292 |
| chr4  | 123226461 | 123226752 | 292 |
| chr3  | 22891984  | 22892275  | 292 |
| chr27 | 39906357  | 39906648  | 292 |
| chr26 | 42058242  | 42058533  | 292 |
| chr25 | 39874746  | 39875037  | 292 |
| chr24 | 60512197  | 60512488  | 292 |
| chr20 | 25664527  | 25664818  | 292 |
| chr19 | 36355285  | 36355576  | 292 |
| chr19 | 24517037  | 24517328  | 292 |
| chr19 | 23136534  | 23136825  | 292 |
| chr18 | 40883424  | 40883715  | 292 |
| chr18 | 40315180  | 40315471  | 292 |



|       |               |           |     |
|-------|---------------|-----------|-----|
| chr18 | 23240590      | 23240881  | 292 |
| chr17 | 56044799      | 56045090  | 292 |
| chr17 | 48244415      | 48244706  | 292 |
| chr14 | 30858807      | 30859098  | 292 |
| chr13 | 29263278      | 29263569  | 292 |
| chr13 | 18447356      | 18447647  | 292 |
| chr13 | 14338883      | 14339174  | 292 |
| chr12 | 52444746      | 52445037  | 292 |
| chr1  | 78831020      | 78831311  | 292 |
| chr1  | 44720373      | 44720664  | 292 |
| chr1  | 153505 153796 | 292       |     |
| chrX  | 62819514      | 62819804  | 291 |
| chrX  | 58060257      | 58060547  | 291 |
| chrX  | 48022864      | 48023154  | 291 |
| chrX  | 34017302      | 34017592  | 291 |
| chrX  | 10940582      | 10940872  | 291 |
| chrX  | 6276583       | 6276873   | 291 |
| chr7  | 47386844      | 47387134  | 291 |
| chr6  | 120728760     | 120729050 | 291 |
| chr6  | 70830223      | 70830513  | 291 |
| chr6  | 16272410      | 16272700  | 291 |
| chr4  | 68222781      | 68223071  | 291 |
| chr3  | 92507117      | 92507407  | 291 |
| chr29 | 36286273      | 36286563  | 291 |
| chr27 | 47301975      | 47302265  | 291 |
| chr25 | 37500817      | 37501107  | 291 |
| chr23 | 15121258      | 15121548  | 291 |
| chr22 | 59998900      | 59999190  | 291 |
| chr22 | 50870902      | 50871192  | 291 |
| chr20 | 6745615       | 6745905   | 291 |
| chr2  | 110535508     | 110535798 | 291 |
| chr2  | 68583177      | 68583467  | 291 |
| chr19 | 58097454      | 58097744  | 291 |
| chr19 | 38629386      | 38629676  | 291 |
| chr19 | 28535149      | 28535439  | 291 |
| chr18 | 33711466      | 33711756  | 291 |
| chr18 | 26162321      | 26162611  | 291 |
| chr16 | 43163519      | 43163809  | 291 |
| chr15 | 32084614      | 32084904  | 291 |
| chr15 | 23909987      | 23910277  | 291 |
| chr14 | 63485861      | 63486151  | 291 |
| chr14 | 40500805      | 40501095  | 291 |
| chr14 | 12159661      | 12159951  | 291 |
| chr13 | 66876116      | 66876406  | 291 |
| chr13 | 64760393      | 64760683  | 291 |
| chr13 | 60006625      | 60006915  | 291 |
| chr13 | 59957955      | 59958245  | 291 |
| chr13 | 59785118      | 59785408  | 291 |
| chr11 | 91925899      | 91926189  | 291 |
| chr10 | 15069976      | 15070266  | 291 |

|       |           |           |     |
|-------|-----------|-----------|-----|
| chr1  | 144422824 | 144423114 | 291 |
| chr1  | 2117066   | 2117356   | 291 |
| chrX  | 58689409  | 58689698  | 290 |
| chrX  | 54137541  | 54137830  | 290 |
| chrX  | 40772452  | 40772741  | 290 |
| chrX  | 10475798  | 10476087  | 290 |
| chr8  | 94527560  | 94527849  | 290 |
| chr8  | 62343239  | 62343528  | 290 |
| chr7  | 13374066  | 13374355  | 290 |
| chr6  | 113356204 | 113356493 | 290 |
| chr6  | 108487947 | 108488236 | 290 |
| chr6  | 47367278  | 47367567  | 290 |
| chr6  | 20108403  | 20108692  | 290 |
| chr5  | 125765419 | 125765708 | 290 |
| chr5  | 121402276 | 121402565 | 290 |
| chr5  | 118418563 | 118418852 | 290 |
| chr5  | 30288774  | 30289063  | 290 |
| chr4  | 99570878  | 99571167  | 290 |
| chr4  | 10813310  | 10813599  | 290 |
| chr3  | 33098928  | 33099217  | 290 |
| chr29 | 44712281  | 44712570  | 290 |
| chr29 | 31829231  | 31829520  | 290 |
| chr27 | 26753937  | 26754226  | 290 |
| chr26 | 46125562  | 46125851  | 290 |
| chr24 | 43636473  | 43636762  | 290 |
| chr23 | 15396353  | 15396642  | 290 |
| chr21 | 14810447  | 14810736  | 290 |
| chr20 | 10770218  | 10770507  | 290 |
| chr18 | 45340037  | 45340326  | 290 |
| chr18 | 25335976  | 25336265  | 290 |
| chr18 | 7453002   | 7453291   | 290 |
| chr17 | 57788445  | 57788734  | 290 |
| chr16 | 67662173  | 67662462  | 290 |
| chr16 | 60032144  | 60032433  | 290 |
| chr16 | 43112872  | 43113161  | 290 |
| chr16 | 24312034  | 24312323  | 290 |
| chr14 | 34051310  | 34051599  | 290 |
| chr13 | 80783284  | 80783573  | 290 |
| chr11 | 69725545  | 69725834  | 290 |
| chr11 | 48385727  | 48386016  | 290 |
| chr11 | 46854387  | 46854676  | 290 |
| chr10 | 71296664  | 71296953  | 290 |
| chr10 | 69482731  | 69483020  | 290 |
| chr10 | 51441320  | 51441609  | 290 |
| chrX  | 78103675  | 78103963  | 289 |
| chrX  | 75855574  | 75855862  | 289 |
| chrX  | 50867911  | 50868199  | 289 |
| chrX  | 46531200  | 46531488  | 289 |
| chrX  | 35548175  | 35548463  | 289 |
| chrX  | 33620719  | 33621007  | 289 |

|       |               |           |     |
|-------|---------------|-----------|-----|
| chrX  | 30208373      | 30208661  | 289 |
| chr9  | 47112123      | 47112411  | 289 |
| chr8  | 111876388     | 111876676 | 289 |
| chr8  | 7793434       | 7793722   | 289 |
| chr7  | 49833868      | 49834156  | 289 |
| chr7  | 20847072      | 20847360  | 289 |
| chr5  | 72614119      | 72614407  | 289 |
| chr5  | 51650413      | 51650701  | 289 |
| chr3  | 119619011     | 119619299 | 289 |
| chr3  | 109690508     | 109690796 | 289 |
| chr3  | 25556763      | 25557051  | 289 |
| chr3  | 147591 147879 |           | 289 |
| chr29 | 44456014      | 44456302  | 289 |
| chr29 | 41659914      | 41660202  | 289 |
| chr25 | 41185693      | 41185981  | 289 |
| chr23 | 49748944      | 49749232  | 289 |
| chr23 | 46422550      | 46422838  | 289 |
| chr23 | 15918614      | 15918902  | 289 |
| chr22 | 52230574      | 52230862  | 289 |
| chr2  | 130466116     | 130466404 | 289 |
| chr2  | 65294027      | 65294315  | 289 |
| chr19 | 41425496      | 41425784  | 289 |
| chr19 | 13582016      | 13582304  | 289 |
| chr18 | 56736688      | 56736976  | 289 |
| chr18 | 22994120      | 22994408  | 289 |
| chr17 | 73038580      | 73038868  | 289 |
| chr17 | 56767910      | 56768198  | 289 |
| chr16 | 44086576      | 44086864  | 289 |
| chr14 | 7027039       | 7027327   | 289 |
| chr13 | 40543727      | 40544015  | 289 |
| chr12 | 36333601      | 36333889  | 289 |
| chr11 | 7365254       | 7365542   | 289 |
| chr10 | 52690644      | 52690932  | 289 |
| chr10 | 16997001      | 16997289  | 289 |
| chr10 | 16772425      | 16772713  | 289 |
| chr1  | 76310666      | 76310954  | 289 |
| chrX  | 68347917      | 68348204  | 288 |
| chrX  | 58929060      | 58929347  | 288 |
| chrX  | 36849604      | 36849891  | 288 |
| chrX  | 22000030      | 22000317  | 288 |
| chrX  | 11472636      | 11472923  | 288 |
| chr8  | 65058967      | 65059254  | 288 |
| chr3  | 123675110     | 123675397 | 288 |
| chr3  | 111601804     | 111602091 | 288 |
| chr3  | 33130182      | 33130469  | 288 |
| chr29 | 34936138      | 34936425  | 288 |
| chr29 | 18311354      | 18311641  | 288 |
| chr29 | 18030318      | 18030605  | 288 |
| chr28 | 42457620      | 42457907  | 288 |
| chr28 | 33796048      | 33796335  | 288 |

|       |           |           |     |
|-------|-----------|-----------|-----|
| chr27 | 15228658  | 15228945  | 288 |
| chr27 | 14395316  | 14395603  | 288 |
| chr26 | 43662746  | 43663033  | 288 |
| chr26 | 15915417  | 15915704  | 288 |
| chr25 | 20981371  | 20981658  | 288 |
| chr23 | 30221796  | 30222083  | 288 |
| chr23 | 13866469  | 13866756  | 288 |
| chr22 | 39757744  | 39758031  | 288 |
| chr21 | 6447244   | 6447531   | 288 |
| chr2  | 138516078 | 138516365 | 288 |
| chr19 | 29704692  | 29704979  | 288 |
| chr19 | 23969623  | 23969910  | 288 |
| chr19 | 13527141  | 13527428  | 288 |
| chr18 | 56463259  | 56463546  | 288 |
| chr18 | 39501653  | 39501940  | 288 |
| chr17 | 58971763  | 58972050  | 288 |
| chr16 | 59066440  | 59066727  | 288 |
| chr15 | 25811335  | 25811622  | 288 |
| chr14 | 12285538  | 12285825  | 288 |
| chr13 | 60059597  | 60059884  | 288 |
| chr13 | 59323006  | 59323293  | 288 |
| chr13 | 58656366  | 58656653  | 288 |
| chr11 | 110148936 | 110149223 | 288 |
| chr11 | 103733944 | 103734231 | 288 |
| chr11 | 91723122  | 91723409  | 288 |
| chr11 | 67936229  | 67936516  | 288 |
| chr11 | 21639813  | 21640100  | 288 |
| chr10 | 86873642  | 86873929  | 288 |
| chr1  | 136573223 | 136573510 | 288 |
| chrX  | 48080063  | 48080349  | 287 |
| chrX  | 37505791  | 37506077  | 287 |
| chrX  | 31772726  | 31773012  | 287 |
| chrX  | 30981456  | 30981742  | 287 |
| chrX  | 15636687  | 15636973  | 287 |
| chr9  | 106088934 | 106089220 | 287 |
| chr8  | 108823094 | 108823380 | 287 |
| chr5  | 124701951 | 124702237 | 287 |
| chr5  | 121457883 | 121458169 | 287 |
| chr5  | 120461678 | 120461964 | 287 |
| chr5  | 29165209  | 29165495  | 287 |
| chr4  | 102065626 | 102065912 | 287 |
| chr3  | 115481015 | 115481301 | 287 |
| chr27 | 26984748  | 26985034  | 287 |
| chr26 | 49154219  | 49154505  | 287 |
| chr26 | 46089764  | 46090050  | 287 |
| chr26 | 44697755  | 44698041  | 287 |
| chr25 | 39405207  | 39405493  | 287 |
| chr25 | 23008557  | 23008843  | 287 |
| chr25 | 3962250   | 3962536   | 287 |
| chr23 | 49767030  | 49767316  | 287 |

|       |           |           |     |
|-------|-----------|-----------|-----|
| chr22 | 54156361  | 54156647  | 287 |
| chr22 | 16430808  | 16431094  | 287 |
| chr21 | 56291055  | 56291341  | 287 |
| chr2  | 111371949 | 111372235 | 287 |
| chr19 | 26115068  | 26115354  | 287 |
| chr18 | 22848714  | 22849000  | 287 |
| chr17 | 68290696  | 68290982  | 287 |
| chr17 | 19254014  | 19254300  | 287 |
| chr15 | 77198925  | 77199211  | 287 |
| chr15 | 39622403  | 39622689  | 287 |
| chr14 | 7358811   | 7359097   | 287 |
| chr13 | 60530495  | 60530781  | 287 |
| chr12 | 17314586  | 17314872  | 287 |
| chr11 | 2851755   | 2852041   | 287 |
| chr10 | 17388829  | 17389115  | 287 |
| chr1  | 100142424 | 100142710 | 287 |
| chrX  | 75875612  | 75875897  | 286 |
| chrX  | 72360812  | 72361097  | 286 |
| chrX  | 66908368  | 66908653  | 286 |
| chrX  | 32862986  | 32863271  | 286 |
| chrX  | 20130712  | 20130997  | 286 |
| chrX  | 15026412  | 15026697  | 286 |
| chrX  | 3025064   | 3025349   | 286 |
| chrX  | 2257471   | 2257756   | 286 |
| chr9  | 52906432  | 52906717  | 286 |
| chr8  | 63757551  | 63757836  | 286 |
| chr7  | 65243060  | 65243345  | 286 |
| chr4  | 119644248 | 119644533 | 286 |
| chr4  | 71784324  | 71784609  | 286 |
| chr4  | 71418443  | 71418728  | 286 |
| chr3  | 125577620 | 125577905 | 286 |
| chr3  | 119299290 | 119299575 | 286 |
| chr3  | 105776309 | 105776594 | 286 |
| chr3  | 25244588  | 25244873  | 286 |
| chr29 | 51721347  | 51721632  | 286 |
| chr29 | 37070552  | 37070837  | 286 |
| chr29 | 26576883  | 26577168  | 286 |
| chr26 | 38199153  | 38199438  | 286 |
| chr25 | 34256910  | 34257195  | 286 |
| chr24 | 49891659  | 49891944  | 286 |
| chr23 | 27219581  | 27219866  | 286 |
| chr22 | 59237771  | 59238056  | 286 |
| chr21 | 57716569  | 57716854  | 286 |
| chr21 | 30797512  | 30797797  | 286 |
| chr21 | 20677592  | 20677877  | 286 |
| chr19 | 56655482  | 56655767  | 286 |
| chr19 | 14916508  | 14916793  | 286 |
| chr19 | 7824272   | 7824557   | 286 |
| chr18 | 10007916  | 10008201  | 286 |
| chr16 | 60268230  | 60268515  | 286 |

|       |           |           |     |
|-------|-----------|-----------|-----|
| chr16 | 47258314  | 47258599  | 286 |
| chr15 | 29801846  | 29802131  | 286 |
| chr14 | 21919161  | 21919446  | 286 |
| chr13 | 70174696  | 70174981  | 286 |
| chr13 | 60761875  | 60762160  | 286 |
| chr13 | 60451157  | 60451442  | 286 |
| chr12 | 82628427  | 82628712  | 286 |
| chr11 | 100687638 | 100687923 | 286 |
| chr11 | 47282365  | 47282650  | 286 |
| chr10 | 83139860  | 83140145  | 286 |
| chr10 | 29113189  | 29113474  | 286 |
| chrX  | 77375664  | 77375948  | 285 |
| chrX  | 63996143  | 63996427  | 285 |
| chrX  | 55069990  | 55070274  | 285 |
| chrX  | 27299701  | 27299985  | 285 |
| chrX  | 19813766  | 19814050  | 285 |
| chrX  | 18744912  | 18745196  | 285 |
| chrX  | 15771167  | 15771451  | 285 |
| chrX  | 2602105   | 2602389   | 285 |
| chr9  | 35989507  | 35989791  | 285 |
| chr6  | 69243703  | 69243987  | 285 |
| chr5  | 54508110  | 54508394  | 285 |
| chr5  | 7225040   | 7225324   | 285 |
| chr3  | 127649001 | 127649285 | 285 |
| chr3  | 114229388 | 114229672 | 285 |
| chr3  | 105962556 | 105962840 | 285 |
| chr28 | 34101835  | 34102119  | 285 |
| chr27 | 28124510  | 28124794  | 285 |
| chr26 | 43044868  | 43045152  | 285 |
| chr25 | 26426676  | 26426960  | 285 |
| chr24 | 1007575   | 1007859   | 285 |
| chr23 | 47372196  | 47372480  | 285 |
| chr23 | 15163767  | 15164051  | 285 |
| chr21 | 25016008  | 25016292  | 285 |
| chr20 | 62095134  | 62095418  | 285 |
| chr2  | 75827930  | 75828214  | 285 |
| chr18 | 64301229  | 64301513  | 285 |
| chr18 | 21955392  | 21955676  | 285 |
| chr18 | 16640701  | 16640985  | 285 |
| chr18 | 5341445   | 5341729   | 285 |
| chr16 | 50349608  | 50349892  | 285 |
| chr16 | 2278345   | 2278629   | 285 |
| chr15 | 26699970  | 26700254  | 285 |
| chr15 | 22976279  | 22976563  | 285 |
| chr14 | 22787068  | 22787352  | 285 |
| chr14 | 7804907   | 7805191   | 285 |
| chr13 | 77406335  | 77406619  | 285 |
| chr13 | 75840865  | 75841149  | 285 |
| chr13 | 22832929  | 22833213  | 285 |
| chr12 | 82895977  | 82896261  | 285 |

|       |           |           |     |
|-------|-----------|-----------|-----|
| chr12 | 82784028  | 82784312  | 285 |
| chr12 | 14881138  | 14881422  | 285 |
| chr11 | 98322137  | 98322421  | 285 |
| chr11 | 45282527  | 45282811  | 285 |
| chr1  | 148406768 | 148407052 | 285 |
| chr1  | 83004846  | 83005130  | 285 |
| chrX  | 79439071  | 79439354  | 284 |
| chrX  | 69338258  | 69338541  | 284 |
| chrX  | 64144005  | 64144288  | 284 |
| chrX  | 63555999  | 63556282  | 284 |
| chrX  | 55277491  | 55277774  | 284 |
| chrX  | 50176436  | 50176719  | 284 |
| chrX  | 37651601  | 37651884  | 284 |
| chrX  | 35462095  | 35462378  | 284 |
| chrX  | 12494417  | 12494700  | 284 |
| chrX  | 12466184  | 12466467  | 284 |
| chrX  | 10106387  | 10106670  | 284 |
| chr9  | 51588901  | 51589184  | 284 |
| chr8  | 65315652  | 65315935  | 284 |
| chr7  | 19764115  | 19764398  | 284 |
| chr5  | 52962638  | 52962921  | 284 |
| chr5  | 29250564  | 29250847  | 284 |
| chr4  | 69215950  | 69216233  | 284 |
| chr4  | 53437085  | 53437368  | 284 |
| chr4  | 46262501  | 46262784  | 284 |
| chr3  | 114971966 | 114972249 | 284 |
| chr3  | 35599748  | 35600031  | 284 |
| chr28 | 34674305  | 34674588  | 284 |
| chr28 | 25129642  | 25129925  | 284 |
| chr27 | 26963893  | 26964176  | 284 |
| chr27 | 26702281  | 26702564  | 284 |
| chr24 | 59093309  | 59093592  | 284 |
| chr24 | 43923935  | 43924218  | 284 |
| chr23 | 46429930  | 46430213  | 284 |
| chr23 | 31070140  | 31070423  | 284 |
| chr23 | 7015378   | 7015661   | 284 |
| chr22 | 48227015  | 48227298  | 284 |
| chr22 | 44914034  | 44914317  | 284 |
| chr21 | 29188255  | 29188538  | 284 |
| chr21 | 25055905  | 25056188  | 284 |
| chr20 | 1275001   | 1275284   | 284 |
| chr2  | 122826719 | 122827002 | 284 |
| chr19 | 60409260  | 60409543  | 284 |
| chr19 | 47410019  | 47410302  | 284 |
| chr19 | 38324252  | 38324535  | 284 |
| chr18 | 53313477  | 53313760  | 284 |
| chr18 | 25629045  | 25629328  | 284 |
| chr18 | 6605385   | 6605668   | 284 |
| chr16 | 70329579  | 70329862  | 284 |
| chr16 | 42633884  | 42634167  | 284 |

|       |           |           |     |
|-------|-----------|-----------|-----|
| chr15 | 29143851  | 29144134  | 284 |
| chr14 | 19510726  | 19511009  | 284 |
| chr13 | 43331088  | 43331371  | 284 |
| chr11 | 28442144  | 28442427  | 284 |
| chr11 | 1980746   | 1981029   | 284 |
| chr10 | 50576420  | 50576703  | 284 |
| chrX  | 72228297  | 72228579  | 283 |
| chrX  | 71770008  | 71770290  | 283 |
| chrX  | 64509710  | 64509992  | 283 |
| chrX  | 64191136  | 64191418  | 283 |
| chrX  | 63663860  | 63664142  | 283 |
| chrX  | 63179319  | 63179601  | 283 |
| chrX  | 46313199  | 46313481  | 283 |
| chrX  | 45444385  | 45444667  | 283 |
| chrX  | 22140052  | 22140334  | 283 |
| chrX  | 19101421  | 19101703  | 283 |
| chrX  | 12077602  | 12077884  | 283 |
| chrX  | 11463969  | 11464251  | 283 |
| chrX  | 9357887   | 9358169   | 283 |
| chrX  | 5738465   | 5738747   | 283 |
| chr8  | 25578681  | 25578963  | 283 |
| chr5  | 114062330 | 114062612 | 283 |
| chr5  | 80132163  | 80132445  | 283 |
| chr4  | 98846811  | 98847093  | 283 |
| chr4  | 73680183  | 73680465  | 283 |
| chr3  | 33665593  | 33665875  | 283 |
| chr29 | 34475310  | 34475592  | 283 |
| chr28 | 7576003   | 7576285   | 283 |
| chr27 | 1339405   | 1339687   | 283 |
| chr26 | 14968334  | 14968616  | 283 |
| chr24 | 795643    | 795925    | 283 |
| chr23 | 7450000   | 7450282   | 283 |
| chr22 | 58273715  | 58273997  | 283 |
| chr22 | 2463352   | 2463634   | 283 |
| chr21 | 15434206  | 15434488  | 283 |
| chr20 | 43693492  | 43693774  | 283 |
| chr2  | 128243614 | 128243896 | 283 |
| chr19 | 59304062  | 59304344  | 283 |
| chr18 | 4536368   | 4536650   | 283 |
| chr18 | 4248873   | 4249155   | 283 |
| chr17 | 66835392  | 66835674  | 283 |
| chr15 | 83745096  | 83745378  | 283 |
| chr15 | 64324322  | 64324604  | 283 |
| chr15 | 22785895  | 22786177  | 283 |
| chr14 | 7577544   | 7577826   | 283 |
| chr13 | 69821789  | 69822071  | 283 |
| chr13 | 64378292  | 64378574  | 283 |
| chr13 | 41957361  | 41957643  | 283 |
| chr12 | 31611403  | 31611685  | 283 |
| chr12 | 11430700  | 11430982  | 283 |



|       |               |           |     |
|-------|---------------|-----------|-----|
| chr11 | 66542915      | 66543197  | 283 |
| chr10 | 70067087      | 70067369  | 283 |
| chr10 | 22441177      | 22441459  | 283 |
| chrX  | 72904803      | 72905084  | 282 |
| chrX  | 12959311      | 12959592  | 282 |
| chrX  | 656672 656953 | 282       |     |
| chr9  | 75321476      | 75321757  | 282 |
| chr8  | 6481331       | 6481612   | 282 |
| chr7  | 57576167      | 57576448  | 282 |
| chr5  | 112089629     | 112089910 | 282 |
| chr5  | 30277517      | 30277798  | 282 |
| chr4  | 121434771     | 121435052 | 282 |
| chr4  | 21511246      | 21511527  | 282 |
| chr3  | 111606457     | 111606738 | 282 |
| chr3  | 25717501      | 25717782  | 282 |
| chr29 | 33878052      | 33878333  | 282 |
| chr28 | 43722385      | 43722666  | 282 |
| chr27 | 23976226      | 23976507  | 282 |
| chr26 | 37831619      | 37831900  | 282 |
| chr26 | 20359505      | 20359786  | 282 |
| chr24 | 43675918      | 43676199  | 282 |
| chr23 | 43312319      | 43312600  | 282 |
| chr23 | 28539532      | 28539813  | 282 |
| chr21 | 61190626      | 61190907  | 282 |
| chr21 | 33235545      | 33235826  | 282 |
| chr20 | 62709333      | 62709614  | 282 |
| chr20 | 8314005       | 8314286   | 282 |
| chr2  | 97237954      | 97238235  | 282 |
| chr19 | 41392894      | 41393175  | 282 |
| chr19 | 11108208      | 11108489  | 282 |
| chr18 | 48770879      | 48771160  | 282 |
| chr18 | 35121394      | 35121675  | 282 |
| chr18 | 25344349      | 25344630  | 282 |
| chr18 | 22818677      | 22818958  | 282 |
| chr18 | 11448747      | 11449028  | 282 |
| chr18 | 4018553       | 4018834   | 282 |
| chr18 | 2867133       | 2867414   | 282 |
| chr17 | 57734841      | 57735122  | 282 |
| chr16 | 38790069      | 38790350  | 282 |
| chr16 | 24035612      | 24035893  | 282 |
| chr15 | 75261444      | 75261725  | 282 |
| chr12 | 82574382      | 82574663  | 282 |
| chr12 | 76754009      | 76754290  | 282 |
| chr12 | 74209195      | 74209476  | 282 |
| chr12 | 20910918      | 20911199  | 282 |
| chr11 | 92609644      | 92609925  | 282 |
| chr10 | 52235442      | 52235723  | 282 |
| chr10 | 50657520      | 50657801  | 282 |
| chrX  | 66439103      | 66439383  | 281 |
| chrX  | 63796591      | 63796871  | 281 |

|       |           |           |     |
|-------|-----------|-----------|-----|
| chrX  | 63208230  | 63208510  | 281 |
| chrX  | 58769619  | 58769899  | 281 |
| chrX  | 48149608  | 48149888  | 281 |
| chrX  | 37775716  | 37775996  | 281 |
| chrX  | 20253415  | 20253695  | 281 |
| chrX  | 9665844   | 9666124   | 281 |
| chrX  | 8815109   | 8815389   | 281 |
| chr9  | 70977305  | 70977585  | 281 |
| chr9  | 45692401  | 45692681  | 281 |
| chr7  | 46201022  | 46201302  | 281 |
| chr7  | 4931238   | 4931518   | 281 |
| chr5  | 116874002 | 116874282 | 281 |
| chr5  | 76889716  | 76889996  | 281 |
| chr5  | 28889239  | 28889519  | 281 |
| chr4  | 69686275  | 69686555  | 281 |
| chr3  | 122390223 | 122390503 | 281 |
| chr3  | 115796208 | 115796488 | 281 |
| chr3  | 22939744  | 22940024  | 281 |
| chr28 | 26167987  | 26168267  | 281 |
| chr27 | 31455034  | 31455314  | 281 |
| chr26 | 44531134  | 44531414  | 281 |
| chr26 | 41876257  | 41876537  | 281 |
| chr25 | 30885142  | 30885422  | 281 |
| chr24 | 60578600  | 60578880  | 281 |
| chr24 | 40445369  | 40445649  | 281 |
| chr22 | 13670169  | 13670449  | 281 |
| chr21 | 14272195  | 14272475  | 281 |
| chr2  | 49412751  | 49413031  | 281 |
| chr19 | 43062336  | 43062616  | 281 |
| chr19 | 30817984  | 30818264  | 281 |
| chr18 | 60756619  | 60756899  | 281 |
| chr18 | 53516738  | 53517018  | 281 |
| chr18 | 4910176   | 4910456   | 281 |
| chr15 | 40411456  | 40411736  | 281 |
| chr15 | 19671445  | 19671725  | 281 |
| chr13 | 65144935  | 65145215  | 281 |
| chr13 | 42401585  | 42401865  | 281 |
| chr12 | 84678678  | 84678958  | 281 |
| chr12 | 54418042  | 54418322  | 281 |
| chr12 | 31206298  | 31206578  | 281 |
| chr12 | 21885711  | 21885991  | 281 |
| chr12 | 9455304   | 9455584   | 281 |
| chr11 | 104314057 | 104314337 | 281 |
| chr10 | 18779577  | 18779857  | 281 |
| chr1  | 137725614 | 137725894 | 281 |
| chrX  | 75789388  | 75789667  | 280 |
| chrX  | 68296240  | 68296519  | 280 |
| chrX  | 65150354  | 65150633  | 280 |
| chrX  | 55815532  | 55815811  | 280 |
| chrX  | 35018750  | 35019029  | 280 |

|       |               |           |     |
|-------|---------------|-----------|-----|
| chrX  | 34460675      | 34460954  | 280 |
| chrX  | 30637028      | 30637307  | 280 |
| chrX  | 29552398      | 29552677  | 280 |
| chrX  | 20752085      | 20752364  | 280 |
| chrX  | 17086237      | 17086516  | 280 |
| chrX  | 927604 927883 | 280       |     |
| chr9  | 31070484      | 31070763  | 280 |
| chr8  | 63994053      | 63994332  | 280 |
| chr7  | 91334828      | 91335107  | 280 |
| chr5  | 122639427     | 122639706 | 280 |
| chr4  | 101832271     | 101832550 | 280 |
| chr3  | 122248819     | 122249098 | 280 |
| chr3  | 33338577      | 33338856  | 280 |
| chr3  | 22889211      | 22889490  | 280 |
| chr3  | 20486969      | 20487248  | 280 |
| chr29 | 36916689      | 36916968  | 280 |
| chr29 | 31696935      | 31697214  | 280 |
| chr27 | 34992496      | 34992775  | 280 |
| chr25 | 38291747      | 38292026  | 280 |
| chr24 | 37639372      | 37639651  | 280 |
| chr23 | 44553581      | 44553860  | 280 |
| chr23 | 18240928      | 18241207  | 280 |
| chr23 | 8172839       | 8173118   | 280 |
| chr21 | 68015133      | 68015412  | 280 |
| chr20 | 33541698      | 33541977  | 280 |
| chr20 | 8667623       | 8667902   | 280 |
| chr19 | 29743923      | 29744202  | 280 |
| chr19 | 14085381      | 14085660  | 280 |
| chr18 | 22903277      | 22903556  | 280 |
| chr16 | 51424571      | 51424850  | 280 |
| chr16 | 35501 35780   | 280       |     |
| chr15 | 32243044      | 32243323  | 280 |
| chr14 | 3029345       | 3029624   | 280 |
| chr14 | 438967 439246 | 280       |     |
| chr13 | 79706246      | 79706525  | 280 |
| chr13 | 69724497      | 69724776  | 280 |
| chr13 | 42467926      | 42468205  | 280 |
| chr13 | 2965463       | 2965742   | 280 |
| chr11 | 21619619      | 21619898  | 280 |
| chr11 | 4296061       | 4296340   | 280 |
| chr10 | 70148164      | 70148443  | 280 |
| chr10 | 14998901      | 14999180  | 280 |
| chr1  | 70741873      | 70742152  | 280 |
| chrX  | 71780394      | 71780672  | 279 |
| chrX  | 58701154      | 58701432  | 279 |
| chrX  | 58270638      | 58270916  | 279 |
| chrX  | 54083890      | 54084168  | 279 |
| chrX  | 36049705      | 36049983  | 279 |
| chrX  | 30735692      | 30735970  | 279 |
| chrX  | 29539949      | 29540227  | 279 |

|       |           |           |     |
|-------|-----------|-----------|-----|
| chrX  | 13193147  | 13193425  | 279 |
| chrX  | 11212534  | 11212812  | 279 |
| chrX  | 3067343   | 3067621   | 279 |
| chr8  | 45767740  | 45768018  | 279 |
| chr7  | 69241610  | 69241888  | 279 |
| chr7  | 51732559  | 51732837  | 279 |
| chr7  | 18486015  | 18486293  | 279 |
| chr7  | 15309666  | 15309944  | 279 |
| chr7  | 5432649   | 5432927   | 279 |
| chr6  | 18160893  | 18161171  | 279 |
| chr5  | 118314731 | 118315009 | 279 |
| chr3  | 111766961 | 111767239 | 279 |
| chr3  | 35670843  | 35671121  | 279 |
| chr29 | 17253827  | 17254105  | 279 |
| chr28 | 34120910  | 34121188  | 279 |
| chr26 | 49891802  | 49892080  | 279 |
| chr26 | 43124601  | 43124879  | 279 |
| chr26 | 42577911  | 42578189  | 279 |
| chr24 | 40427226  | 40427504  | 279 |
| chr22 | 55382542  | 55382820  | 279 |
| chr22 | 47721054  | 47721332  | 279 |
| chr21 | 64580684  | 64580962  | 279 |
| chr21 | 20007965  | 20008243  | 279 |
| chr21 | 15981755  | 15982033  | 279 |
| chr21 | 14816574  | 14816852  | 279 |
| chr19 | 54181097  | 54181375  | 279 |
| chr19 | 44075316  | 44075594  | 279 |
| chr19 | 39827596  | 39827874  | 279 |
| chr19 | 27182319  | 27182597  | 279 |
| chr19 | 26287227  | 26287505  | 279 |
| chr18 | 50262120  | 50262398  | 279 |
| chr18 | 3711201   | 3711479   | 279 |
| chr17 | 63333472  | 63333750  | 279 |
| chr17 | 6218277   | 6218555   | 279 |
| chr16 | 43088956  | 43089234  | 279 |
| chr16 | 20645726  | 20646004  | 279 |
| chr15 | 24181472  | 24181750  | 279 |
| chr14 | 30396817  | 30397095  | 279 |
| chr14 | 16509468  | 16509746  | 279 |
| chr13 | 74345331  | 74345609  | 279 |
| chr13 | 61211337  | 61211615  | 279 |
| chr12 | 9527053   | 9527331   | 279 |
| chr10 | 16914744  | 16915022  | 279 |
| chr1  | 59600849  | 59601127  | 279 |
| chrX  | 75402395  | 75402672  | 278 |
| chrX  | 55888280  | 55888557  | 278 |
| chrX  | 54327187  | 54327464  | 278 |
| chrX  | 20687913  | 20688190  | 278 |
| chrX  | 15477920  | 15478197  | 278 |
| chrX  | 8754458   | 8754735   | 278 |

|       |           |           |     |
|-------|-----------|-----------|-----|
| chr9  | 102178099 | 102178376 | 278 |
| chr9  | 41493726  | 41494003  | 278 |
| chr8  | 79303105  | 79303382  | 278 |
| chr8  | 63899892  | 63900169  | 278 |
| chr8  | 59941900  | 59942177  | 278 |
| chr7  | 59831118  | 59831395  | 278 |
| chr7  | 46506401  | 46506678  | 278 |
| chr6  | 121843696 | 121843973 | 278 |
| chr5  | 125713139 | 125713416 | 278 |
| chr5  | 113938015 | 113938292 | 278 |
| chr5  | 74716364  | 74716641  | 278 |
| chr4  | 107991852 | 107992129 | 278 |
| chr4  | 46291779  | 46292056  | 278 |
| chr3  | 121510221 | 121510498 | 278 |
| chr3  | 105643431 | 105643708 | 278 |
| chr29 | 34721544  | 34721821  | 278 |
| chr29 | 2439502   | 2439779   | 278 |
| chr26 | 48722777  | 48723054  | 278 |
| chr26 | 17159326  | 17159603  | 278 |
| chr25 | 29594634  | 29594911  | 278 |
| chr25 | 3238161   | 3238438   | 278 |
| chr23 | 48673313  | 48673590  | 278 |
| chr23 | 43417987  | 43418264  | 278 |
| chr23 | 27959403  | 27959680  | 278 |
| chr22 | 46318359  | 46318636  | 278 |
| chr21 | 68475198  | 68475475  | 278 |
| chr21 | 33082776  | 33083053  | 278 |
| chr19 | 31872402  | 31872679  | 278 |
| chr19 | 16739500  | 16739777  | 278 |
| chr19 | 7876084   | 7876361   | 278 |
| chr18 | 43160013  | 43160290  | 278 |
| chr18 | 4049188   | 4049465   | 278 |
| chr17 | 56782018  | 56782295  | 278 |
| chr16 | 47248294  | 47248571  | 278 |
| chr16 | 2200759   | 2201036   | 278 |
| chr13 | 18519000  | 18519277  | 278 |
| chr12 | 80020741  | 80021018  | 278 |
| chr12 | 33344856  | 33345133  | 278 |
| chr12 | 20130466  | 20130743  | 278 |
| chr12 | 14795950  | 14796227  | 278 |
| chr11 | 36886100  | 36886377  | 278 |
| chr11 | 28764314  | 28764591  | 278 |
| chr10 | 25040242  | 25040519  | 278 |
| chr10 | 16983774  | 16984051  | 278 |
| chr1  | 69614266  | 69614543  | 278 |
| chrX  | 80271549  | 80271825  | 277 |
| chrX  | 70127592  | 70127868  | 277 |
| chrX  | 68842637  | 68842913  | 277 |
| chrX  | 60577445  | 60577721  | 277 |
| chrX  | 52924527  | 52924803  | 277 |

|       |           |           |     |
|-------|-----------|-----------|-----|
| chrX  | 50822381  | 50822657  | 277 |
| chrX  | 49082135  | 49082411  | 277 |
| chrX  | 46564618  | 46564894  | 277 |
| chrX  | 35017378  | 35017654  | 277 |
| chrX  | 31547610  | 31547886  | 277 |
| chrX  | 29597903  | 29598179  | 277 |
| chrX  | 21303074  | 21303350  | 277 |
| chrX  | 20466370  | 20466646  | 277 |
| chrX  | 12443422  | 12443698  | 277 |
| chrX  | 12116761  | 12117037  | 277 |
| chrX  | 7364341   | 7364617   | 277 |
| chrX  | 5528452   | 5528728   | 277 |
| chr6  | 121785501 | 121785777 | 277 |
| chr5  | 59666385  | 59666661  | 277 |
| chr5  | 33961133  | 33961409  | 277 |
| chr4  | 72806921  | 72807197  | 277 |
| chr3  | 114598019 | 114598295 | 277 |
| chr3  | 105149676 | 105149952 | 277 |
| chr3  | 35954112  | 35954388  | 277 |
| chr29 | 35147792  | 35148068  | 277 |
| chr28 | 41332456  | 41332732  | 277 |
| chr28 | 33957727  | 33958003  | 277 |
| chr28 | 33263088  | 33263364  | 277 |
| chr28 | 25411003  | 25411279  | 277 |
| chr26 | 38917960  | 38918236  | 277 |
| chr25 | 26727555  | 26727831  | 277 |
| chr23 | 28758169  | 28758445  | 277 |
| chr22 | 52775089  | 52775365  | 277 |
| chr22 | 17554205  | 17554481  | 277 |
| chr20 | 35780987  | 35781263  | 277 |
| chr19 | 56578946  | 56579222  | 277 |
| chr19 | 27305692  | 27305968  | 277 |
| chr19 | 25408927  | 25409203  | 277 |
| chr18 | 58724442  | 58724718  | 277 |
| chr18 | 39934116  | 39934392  | 277 |
| chr18 | 21198437  | 21198713  | 277 |
| chr17 | 64205379  | 64205655  | 277 |
| chr17 | 62613408  | 62613684  | 277 |
| chr17 | 55440871  | 55441147  | 277 |
| chr16 | 47612914  | 47613190  | 277 |
| chr15 | 42719555  | 42719831  | 277 |
| chr15 | 26801598  | 26801874  | 277 |
| chr15 | 24654289  | 24654565  | 277 |
| chr13 | 60002072  | 60002348  | 277 |
| chr13 | 54429471  | 54429747  | 277 |
| chr13 | 40344480  | 40344756  | 277 |
| chr11 | 102386821 | 102387097 | 277 |
| chr11 | 68438816  | 68439092  | 277 |
| chr11 | 21308612  | 21308888  | 277 |
| chr11 | 2255117   | 2255393   | 277 |

|       |               |           |     |
|-------|---------------|-----------|-----|
| chr10 | 13342555      | 13342831  | 277 |
| chr1  | 154401760     | 154402036 | 277 |
| chr1  | 76420148      | 76420424  | 277 |
| chrX  | 70077586      | 70077861  | 276 |
| chrX  | 66637303      | 66637578  | 276 |
| chrX  | 34484758      | 34485033  | 276 |
| chrX  | 19219402      | 19219677  | 276 |
| chr9  | 36287391      | 36287666  | 276 |
| chr9  | 34924126      | 34924401  | 276 |
| chr8  | 116782605     | 116782880 | 276 |
| chr8  | 88000131      | 88000406  | 276 |
| chr5  | 124426864     | 124427139 | 276 |
| chr4  | 28625336      | 28625611  | 276 |
| chr3  | 99348921      | 99349196  | 276 |
| chr3  | 74845783      | 74846058  | 276 |
| chr3  | 33552915      | 33553190  | 276 |
| chr28 | 4264775       | 4265050   | 276 |
| chr28 | 4202927       | 4203202   | 276 |
| chr26 | 49666265      | 49666540  | 276 |
| chr26 | 44164781      | 44165056  | 276 |
| chr23 | 44737003      | 44737278  | 276 |
| chr23 | 33089287      | 33089562  | 276 |
| chr22 | 13373384      | 13373659  | 276 |
| chr21 | 6426600       | 6426875   | 276 |
| chr20 | 28005463      | 28005738  | 276 |
| chr20 | 796396 796671 | 276       |     |
| chr2  | 95104787      | 95105062  | 276 |
| chr2  | 26482057      | 26482332  | 276 |
| chr19 | 61381049      | 61381324  | 276 |
| chr18 | 18495392      | 18495667  | 276 |
| chr17 | 67409335      | 67409610  | 276 |
| chr15 | 77199823      | 77200098  | 276 |
| chr15 | 54258851      | 54259126  | 276 |
| chr15 | 33717820      | 33718095  | 276 |
| chr15 | 24403410      | 24403685  | 276 |
| chr14 | 39967113      | 39967388  | 276 |
| chr13 | 58482674      | 58482949  | 276 |
| chr13 | 41672480      | 41672755  | 276 |
| chr13 | 29432635      | 29432910  | 276 |
| chr12 | 76524462      | 76524737  | 276 |
| chr11 | 89999924      | 90000199  | 276 |
| chr11 | 29809175      | 29809450  | 276 |
| chr10 | 67103058      | 67103333  | 276 |
| chr10 | 25757783      | 25758058  | 276 |
| chr10 | 16928389      | 16928664  | 276 |
| chr10 | 12725717      | 12725992  | 276 |
| chr1  | 123131414     | 123131689 | 276 |
| chr1  | 1135703       | 1135978   | 276 |
| chrX  | 78777212      | 78777486  | 275 |
| chrX  | 75389777      | 75390051  | 275 |

|       |               |           |     |
|-------|---------------|-----------|-----|
| chrX  | 70091019      | 70091293  | 275 |
| chrX  | 63519384      | 63519658  | 275 |
| chrX  | 55644862      | 55645136  | 275 |
| chrX  | 34090762      | 34091036  | 275 |
| chrX  | 28405490      | 28405764  | 275 |
| chrX  | 9940042       | 9940316   | 275 |
| chrX  | 514644 514918 | 275       |     |
| chr9  | 100322602     | 100322876 | 275 |
| chr8  | 116891179     | 116891453 | 275 |
| chr8  | 91158121      | 91158395  | 275 |
| chr7  | 51687957      | 51688231  | 275 |
| chr7  | 1687551       | 1687825   | 275 |
| chr5  | 123686908     | 123687182 | 275 |
| chr4  | 99726011      | 99726285  | 275 |
| chr4  | 71616878      | 71617152  | 275 |
| chr3  | 104200683     | 104200957 | 275 |
| chr3  | 88580078      | 88580352  | 275 |
| chr29 | 34896772      | 34897046  | 275 |
| chr29 | 27027064      | 27027338  | 275 |
| chr27 | 26766108      | 26766382  | 275 |
| chr26 | 44715313      | 44715587  | 275 |
| chr26 | 34406962      | 34407236  | 275 |
| chr23 | 46285605      | 46285879  | 275 |
| chr23 | 34814361      | 34814635  | 275 |
| chr21 | 28929627      | 28929901  | 275 |
| chr21 | 2015973       | 2016247   | 275 |
| chr20 | 38431559      | 38431833  | 275 |
| chr20 | 24027444      | 24027718  | 275 |
| chr2  | 127215128     | 127215402 | 275 |
| chr19 | 14404596      | 14404870  | 275 |
| chr19 | 8427834       | 8428108   | 275 |
| chr18 | 64354122      | 64354396  | 275 |
| chr18 | 54203565      | 54203839  | 275 |
| chr18 | 38538957      | 38539231  | 275 |
| chr18 | 34844461      | 34844735  | 275 |
| chr18 | 23106640      | 23106914  | 275 |
| chr18 | 12385233      | 12385507  | 275 |
| chr17 | 63655894      | 63656168  | 275 |
| chr16 | 41461049      | 41461323  | 275 |
| chr16 | 38969194      | 38969468  | 275 |
| chr15 | 81137891      | 81138165  | 275 |
| chr15 | 28883321      | 28883595  | 275 |
| chr15 | 22528145      | 22528419  | 275 |
| chr14 | 8006116       | 8006390   | 275 |
| chr12 | 74244564      | 74244838  | 275 |
| chr12 | 13532111      | 13532385  | 275 |
| chr11 | 103769032     | 103769306 | 275 |
| chr11 | 83180024      | 83180298  | 275 |
| chr11 | 81406667      | 81406941  | 275 |
| chr11 | 71712208      | 71712482  | 275 |



|       |           |           |     |
|-------|-----------|-----------|-----|
| chr1  | 132011528 | 132011802 | 275 |
| chr1  | 118861773 | 118862047 | 275 |
| chrX  | 78061609  | 78061882  | 274 |
| chrX  | 47997122  | 47997395  | 274 |
| chrX  | 36473464  | 36473737  | 274 |
| chrX  | 19269627  | 19269900  | 274 |
| chrX  | 14036462  | 14036735  | 274 |
| chr8  | 27602475  | 27602748  | 274 |
| chr7  | 57328778  | 57329051  | 274 |
| chr7  | 10820918  | 10821191  | 274 |
| chr5  | 52578293  | 52578566  | 274 |
| chr5  | 33596694  | 33596967  | 274 |
| chr5  | 26762052  | 26762325  | 274 |
| chr4  | 79102145  | 79102418  | 274 |
| chr3  | 123247666 | 123247939 | 274 |
| chr3  | 117274371 | 117274644 | 274 |
| chr3  | 102723595 | 102723868 | 274 |
| chr3  | 33833422  | 33833695  | 274 |
| chr29 | 26710184  | 26710457  | 274 |
| chr28 | 3312851   | 3313124   | 274 |
| chr27 | 15841965  | 15842238  | 274 |
| chr25 | 34299976  | 34300249  | 274 |
| chr25 | 8175656   | 8175929   | 274 |
| chr24 | 1236876   | 1237149   | 274 |
| chr23 | 28653056  | 28653329  | 274 |
| chr23 | 18817352  | 18817625  | 274 |
| chr23 | 7654903   | 7655176   | 274 |
| chr22 | 22140922  | 22141195  | 274 |
| chr22 | 10950163  | 10950436  | 274 |
| chr2  | 139314483 | 139314756 | 274 |
| chr2  | 124811033 | 124811306 | 274 |
| chr19 | 10828428  | 10828701  | 274 |
| chr18 | 56875108  | 56875381  | 274 |
| chr17 | 69208843  | 69209116  | 274 |
| chr16 | 72287260  | 72287533  | 274 |
| chr15 | 64487332  | 64487605  | 274 |
| chr15 | 64480524  | 64480797  | 274 |
| chr13 | 79689933  | 79690206  | 274 |
| chr13 | 72751532  | 72751805  | 274 |
| chr13 | 70017426  | 70017699  | 274 |
| chr13 | 63579371  | 63579644  | 274 |
| chr13 | 56358178  | 56358451  | 274 |
| chr11 | 100935606 | 100935879 | 274 |
| chr11 | 76362388  | 76362661  | 274 |
| chr11 | 27588921  | 27589194  | 274 |
| chr11 | 7946384   | 7946657   | 274 |
| chr10 | 86469093  | 86469366  | 274 |
| chr10 | 77488799  | 77489072  | 274 |
| chr1  | 68397162  | 68397435  | 274 |
| chrX  | 78660423  | 78660695  | 273 |

|       |           |           |     |
|-------|-----------|-----------|-----|
| chrX  | 77004000  | 77004272  | 273 |
| chrX  | 58106569  | 58106841  | 273 |
| chrX  | 36672679  | 36672951  | 273 |
| chrX  | 15759875  | 15760147  | 273 |
| chrX  | 530401    | 530673    | 273 |
| chr8  | 93079915  | 93080187  | 273 |
| chr8  | 89557138  | 89557410  | 273 |
| chr8  | 89424509  | 89424781  | 273 |
| chr8  | 74397364  | 74397636  | 273 |
| chr8  | 22969882  | 22970154  | 273 |
| chr7  | 92198236  | 92198508  | 273 |
| chr7  | 80989593  | 80989865  | 273 |
| chr3  | 114849369 | 114849641 | 273 |
| chr3  | 7806602   | 7806874   | 273 |
| chr29 | 34968109  | 34968381  | 273 |
| chr28 | 43717100  | 43717372  | 273 |
| chr28 | 33774157  | 33774429  | 273 |
| chr26 | 45975312  | 45975584  | 273 |
| chr26 | 38265894  | 38266166  | 273 |
| chr26 | 23088728  | 23089000  | 273 |
| chr26 | 22214348  | 22214620  | 273 |
| chr25 | 33023486  | 33023758  | 273 |
| chr24 | 50887913  | 50888185  | 273 |
| chr24 | 44641807  | 44642079  | 273 |
| chr24 | 1427033   | 1427305   | 273 |
| chr23 | 43027627  | 43027899  | 273 |
| chr22 | 61480090  | 61480362  | 273 |
| chr22 | 49163668  | 49163940  | 273 |
| chr22 | 16169677  | 16169949  | 273 |
| chr21 | 59677255  | 59677527  | 273 |
| chr21 | 58461147  | 58461419  | 273 |
| chr21 | 22607927  | 22608199  | 273 |
| chr20 | 74049669  | 74049941  | 273 |
| chr20 | 38853028  | 38853300  | 273 |
| chr20 | 6342823   | 6343095   | 273 |
| chr20 | 1134878   | 1135150   | 273 |
| chr2  | 133866760 | 133867032 | 273 |
| chr2  | 21887268  | 21887540  | 273 |
| chr19 | 58322226  | 58322498  | 273 |
| chr19 | 22643386  | 22643658  | 273 |
| chr18 | 23241404  | 23241676  | 273 |
| chr17 | 73607868  | 73608140  | 273 |
| chr16 | 72308715  | 72308987  | 273 |
| chr16 | 70088205  | 70088477  | 273 |
| chr16 | 67219818  | 67220090  | 273 |
| chr16 | 41082001  | 41082273  | 273 |
| chr13 | 59071009  | 59071281  | 273 |
| chr11 | 47757413  | 47757685  | 273 |
| chr10 | 53325547  | 53325819  | 273 |
| chr1  | 153442883 | 153443155 | 273 |

|       |               |           |     |
|-------|---------------|-----------|-----|
| chr1  | 111931230     | 111931502 | 273 |
| chrX  | 68962597      | 68962868  | 272 |
| chrX  | 58853418      | 58853689  | 272 |
| chrX  | 12132813      | 12133084  | 272 |
| chrX  | 8068118       | 8068389   | 272 |
| chrX  | 6576528       | 6576799   | 272 |
| chrX  | 2404370       | 2404641   | 272 |
| chr9  | 66638179      | 66638450  | 272 |
| chr8  | 104243310     | 104243581 | 272 |
| chr8  | 89528378      | 89528649  | 272 |
| chr8  | 8094936       | 8095207   | 272 |
| chr8  | 7705520       | 7705791   | 272 |
| chr7  | 50524768      | 50525039  | 272 |
| chr5  | 120362244     | 120362515 | 272 |
| chr5  | 33334396      | 33334667  | 272 |
| chr5  | 26717511      | 26717782  | 272 |
| chr4  | 123254113     | 123254384 | 272 |
| chr4  | 118162930     | 118163201 | 272 |
| chr4  | 65375456      | 65375727  | 272 |
| chr3  | 127692331     | 127692602 | 272 |
| chr3  | 121534785     | 121535056 | 272 |
| chr3  | 119399212     | 119399483 | 272 |
| chr3  | 95729891      | 95730162  | 272 |
| chr3  | 35416052      | 35416323  | 272 |
| chr26 | 39265266      | 39265537  | 272 |
| chr26 | 18487274      | 18487545  | 272 |
| chr25 | 37529389      | 37529660  | 272 |
| chr25 | 21703244      | 21703515  | 272 |
| chr24 | 64477571      | 64477842  | 272 |
| chr24 | 464678 464949 |           | 272 |
| chr22 | 56300560      | 56300831  | 272 |
| chr22 | 50818453      | 50818724  | 272 |
| chr22 | 14960182      | 14960453  | 272 |
| chr20 | 40140579      | 40140850  | 272 |
| chr19 | 41933476      | 41933747  | 272 |
| chr19 | 39521942      | 39522213  | 272 |
| chr19 | 14902420      | 14902691  | 272 |
| chr18 | 49983001      | 49983272  | 272 |
| chr18 | 45023394      | 45023665  | 272 |
| chr18 | 25853218      | 25853489  | 272 |
| chr18 | 22731136      | 22731407  | 272 |
| chr17 | 63024127      | 63024398  | 272 |
| chr16 | 45615273      | 45615544  | 272 |
| chr15 | 54483760      | 54484031  | 272 |
| chr15 | 22814322      | 22814593  | 272 |
| chr14 | 59937695      | 59937966  | 272 |
| chr14 | 59521160      | 59521431  | 272 |
| chr14 | 48319286      | 48319557  | 272 |
| chr13 | 55281419      | 55281690  | 272 |
| chr13 | 41391306      | 41391577  | 272 |

|       |               |           |     |
|-------|---------------|-----------|-----|
| chr12 | 34387034      | 34387305  | 272 |
| chr11 | 77761968      | 77762239  | 272 |
| chr11 | 72224728      | 72224999  | 272 |
| chr11 | 63291147      | 63291418  | 272 |
| chr11 | 50869289      | 50869560  | 272 |
| chr11 | 14209495      | 14209766  | 272 |
| chr10 | 53911164      | 53911435  | 272 |
| chrX  | 55469928      | 55470198  | 271 |
| chrX  | 55239720      | 55239990  | 271 |
| chrX  | 50928464      | 50928734  | 271 |
| chrX  | 35355753      | 35356023  | 271 |
| chrX  | 29578387      | 29578657  | 271 |
| chrX  | 21045195      | 21045465  | 271 |
| chrX  | 19159960      | 19160230  | 271 |
| chrX  | 13938159      | 13938429  | 271 |
| chrX  | 8589247       | 8589517   | 271 |
| chrX  | 7081479       | 7081749   | 271 |
| chrX  | 6373625       | 6373895   | 271 |
| chrX  | 3577885       | 3578155   | 271 |
| chr8  | 70637682      | 70637952  | 271 |
| chr8  | 65301720      | 65301990  | 271 |
| chr8  | 60031042      | 60031312  | 271 |
| chr8  | 9303164       | 9303434   | 271 |
| chr7  | 52367020      | 52367290  | 271 |
| chr5  | 117655197     | 117655467 | 271 |
| chr4  | 117843505     | 117843775 | 271 |
| chr4  | 98896995      | 98897265  | 271 |
| chr4  | 9103606       | 9103876   | 271 |
| chr3  | 116352330     | 116352600 | 271 |
| chr3  | 51910152      | 51910422  | 271 |
| chr3  | 33509769      | 33510039  | 271 |
| chr29 | 44669579      | 44669849  | 271 |
| chr29 | 36988731      | 36989001  | 271 |
| chr29 | 29666933      | 29667203  | 271 |
| chr28 | 41045862      | 41046132  | 271 |
| chr27 | 15845569      | 15845839  | 271 |
| chr27 | 689032 689302 | 271       |     |
| chr26 | 50687023      | 50687293  | 271 |
| chr26 | 43804003      | 43804273  | 271 |
| chr26 | 18040278      | 18040548  | 271 |
| chr25 | 43227091      | 43227361  | 271 |
| chr25 | 30505636      | 30505906  | 271 |
| chr25 | 5686856       | 5687126   | 271 |
| chr24 | 61141190      | 61141460  | 271 |
| chr24 | 186045 186315 | 271       |     |
| chr23 | 51964063      | 51964333  | 271 |
| chr22 | 30421729      | 30421999  | 271 |
| chr21 | 64430974      | 64431244  | 271 |
| chr21 | 18361488      | 18361758  | 271 |
| chr2  | 22284501      | 22284771  | 271 |

|       |           |           |     |
|-------|-----------|-----------|-----|
| chr19 | 53048593  | 53048863  | 271 |
| chr19 | 49651330  | 49651600  | 271 |
| chr19 | 45935262  | 45935532  | 271 |
| chr19 | 41301282  | 41301552  | 271 |
| chr18 | 33955032  | 33955302  | 271 |
| chr16 | 22585116  | 22585386  | 271 |
| chr15 | 24188927  | 24189197  | 271 |
| chr14 | 12101150  | 12101420  | 271 |
| chr13 | 60755835  | 60756105  | 271 |
| chr13 | 41152080  | 41152350  | 271 |
| chr12 | 84218904  | 84219174  | 271 |
| chr12 | 65176960  | 65177230  | 271 |
| chr12 | 33060184  | 33060454  | 271 |
| chr11 | 82552459  | 82552729  | 271 |
| chr11 | 70976481  | 70976751  | 271 |
| chr10 | 90130925  | 90131195  | 271 |
| chr10 | 48133574  | 48133844  | 271 |
| chr1  | 73072955  | 73073225  | 271 |
| chrX  | 78730618  | 78730887  | 270 |
| chrX  | 75483813  | 75484082  | 270 |
| chrX  | 62933598  | 62933867  | 270 |
| chrX  | 61491501  | 61491770  | 270 |
| chrX  | 59407284  | 59407553  | 270 |
| chrX  | 50058625  | 50058894  | 270 |
| chrX  | 39124576  | 39124845  | 270 |
| chrX  | 22561985  | 22562254  | 270 |
| chrX  | 20307784  | 20308053  | 270 |
| chrX  | 19007023  | 19007292  | 270 |
| chrX  | 14709784  | 14710053  | 270 |
| chrX  | 6401242   | 6401511   | 270 |
| chrX  | 2363668   | 2363937   | 270 |
| chrX  | 1305129   | 1305398   | 270 |
| chr9  | 90654503  | 90654772  | 270 |
| chr8  | 73887182  | 73887451  | 270 |
| chr6  | 122414881 | 122415150 | 270 |
| chr6  | 110995799 | 110996068 | 270 |
| chr6  | 108703108 | 108703377 | 270 |
| chr5  | 75533734  | 75534003  | 270 |
| chr4  | 66612139  | 66612408  | 270 |
| chr4  | 28602185  | 28602454  | 270 |
| chr3  | 115982561 | 115982830 | 270 |
| chr3  | 55888947  | 55889216  | 270 |
| chr3  | 20682024  | 20682293  | 270 |
| chr29 | 41642900  | 41643169  | 270 |
| chr29 | 33551649  | 33551918  | 270 |
| chr29 | 31739590  | 31739859  | 270 |
| chr27 | 34991890  | 34992159  | 270 |
| chr27 | 15288797  | 15289066  | 270 |
| chr27 | 1046959   | 1047228   | 270 |
| chr27 | 721648    | 721917    | 270 |

|       |               |           |     |
|-------|---------------|-----------|-----|
| chr25 | 40380796      | 40381065  | 270 |
| chr25 | 27311480      | 27311749  | 270 |
| chr25 | 15859123      | 15859392  | 270 |
| chr24 | 44262983      | 44263252  | 270 |
| chr24 | 1710845       | 1711114   | 270 |
| chr23 | 20144568      | 20144837  | 270 |
| chr22 | 56359492      | 56359761  | 270 |
| chr21 | 26506946      | 26507215  | 270 |
| chr20 | 756597 756866 | 270       | 270 |
| chr19 | 30118813      | 30119082  | 270 |
| chr19 | 14293651      | 14293920  | 270 |
| chr17 | 66498845      | 66499114  | 270 |
| chr17 | 62655872      | 62656141  | 270 |
| chr14 | 7051119       | 7051388   | 270 |
| chr13 | 61188169      | 61188438  | 270 |
| chr13 | 60536320      | 60536589  | 270 |
| chr13 | 41388378      | 41388647  | 270 |
| chr12 | 83851751      | 83852020  | 270 |
| chr11 | 103369453     | 103369722 | 270 |
| chr11 | 64800131      | 64800400  | 270 |
| chr11 | 21144649      | 21144918  | 270 |
| chr11 | 7855121       | 7855390   | 270 |
| chr10 | 74584523      | 74584792  | 270 |
| chr1  | 158508053     | 158508322 | 270 |
| chr1  | 74700112      | 74700381  | 270 |
| chrX  | 78374552      | 78374820  | 269 |
| chrX  | 75910327      | 75910595  | 269 |
| chrX  | 54674045      | 54674313  | 269 |
| chrX  | 50425222      | 50425490  | 269 |
| chrX  | 13924704      | 13924972  | 269 |
| chr9  | 52949059      | 52949327  | 269 |
| chr9  | 38601253      | 38601521  | 269 |
| chr7  | 59717189      | 59717457  | 269 |
| chr5  | 29131561      | 29131829  | 269 |
| chr4  | 95081103      | 95081371  | 269 |
| chr4  | 21343734      | 21344002  | 269 |
| chr3  | 75017262      | 75017530  | 269 |
| chr29 | 49467530      | 49467798  | 269 |
| chr29 | 37712306      | 37712574  | 269 |
| chr29 | 31060539      | 31060807  | 269 |
| chr26 | 49161394      | 49161662  | 269 |
| chr25 | 41257463      | 41257731  | 269 |
| chr24 | 58833866      | 58834134  | 269 |
| chr24 | 48781853      | 48782121  | 269 |
| chr24 | 1017927       | 1018195   | 269 |
| chr22 | 48299170      | 48299438  | 269 |
| chr22 | 30083346      | 30083614  | 269 |
| chr21 | 61359841      | 61360109  | 269 |
| chr21 | 23031131      | 23031399  | 269 |
| chr19 | 63485959      | 63486227  | 269 |

|       |           |           |     |
|-------|-----------|-----------|-----|
| chr19 | 39670433  | 39670701  | 269 |
| chr19 | 39158501  | 39158769  | 269 |
| chr18 | 9656907   | 9657175   | 269 |
| chr17 | 72707182  | 72707450  | 269 |
| chr17 | 62255159  | 62255427  | 269 |
| chr16 | 77370702  | 77370970  | 269 |
| chr16 | 39570579  | 39570847  | 269 |
| chr16 | 38564031  | 38564299  | 269 |
| chr16 | 2529781   | 2530049   | 269 |
| chr15 | 74570490  | 74570758  | 269 |
| chr15 | 26709904  | 26710172  | 269 |
| chr15 | 24197616  | 24197884  | 269 |
| chr14 | 61236629  | 61236897  | 269 |
| chr14 | 1956546   | 1956814   | 269 |
| chr13 | 68878932  | 68879200  | 269 |
| chr13 | 41069467  | 41069735  | 269 |
| chr13 | 40564097  | 40564365  | 269 |
| chr12 | 64658014  | 64658282  | 269 |
| chr12 | 52378340  | 52378608  | 269 |
| chr12 | 16929477  | 16929745  | 269 |
| chr11 | 70703659  | 70703927  | 269 |
| chr10 | 79197563  | 79197831  | 269 |
| chr1  | 154929711 | 154929979 | 269 |
| chr1  | 84788075  | 84788343  | 269 |
| chr1  | 68899483  | 68899751  | 269 |
| chrX  | 78514979  | 78515246  | 268 |
| chrX  | 50476251  | 50476518  | 268 |
| chrX  | 45027320  | 45027587  | 268 |
| chrX  | 18379078  | 18379345  | 268 |
| chrX  | 6636836   | 6637103   | 268 |
| chr8  | 63742714  | 63742981  | 268 |
| chr7  | 19987985  | 19988252  | 268 |
| chr6  | 46712117  | 46712384  | 268 |
| chr5  | 71294458  | 71294725  | 268 |
| chr3  | 115688665 | 115688932 | 268 |
| chr29 | 33792652  | 33792919  | 268 |
| chr28 | 34041430  | 34041697  | 268 |
| chr24 | 59278841  | 59279108  | 268 |
| chr24 | 46543115  | 46543382  | 268 |
| chr24 | 35423715  | 35423982  | 268 |
| chr23 | 15987276  | 15987543  | 268 |
| chr23 | 9776890   | 9777157   | 268 |
| chr22 | 55842572  | 55842839  | 268 |
| chr21 | 34257312  | 34257579  | 268 |
| chr21 | 28316712  | 28316979  | 268 |
| chr21 | 19209962  | 19210229  | 268 |
| chr20 | 73239712  | 73239979  | 268 |
| chr20 | 25704016  | 25704283  | 268 |
| chr2  | 126085161 | 126085428 | 268 |
| chr2  | 21883407  | 21883674  | 268 |

|       |               |           |     |
|-------|---------------|-----------|-----|
| chr19 | 62010715      | 62010982  | 268 |
| chr19 | 61452396      | 61452663  | 268 |
| chr19 | 50710312      | 50710579  | 268 |
| chr19 | 39845042      | 39845309  | 268 |
| chr19 | 39165197      | 39165464  | 268 |
| chr19 | 27947330      | 27947597  | 268 |
| chr18 | 40337061      | 40337328  | 268 |
| chr18 | 7379620       | 7379887   | 268 |
| chr18 | 631357 631624 | 268       |     |
| chr17 | 62510171      | 62510438  | 268 |
| chr16 | 46409395      | 46409662  | 268 |
| chr16 | 43540001      | 43540268  | 268 |
| chr16 | 23667453      | 23667720  | 268 |
| chr16 | 19094085      | 19094352  | 268 |
| chr15 | 22343283      | 22343550  | 268 |
| chr14 | 7408948       | 7409215   | 268 |
| chr13 | 77655279      | 77655546  | 268 |
| chr13 | 68308244      | 68308511  | 268 |
| chr13 | 41734678      | 41734945  | 268 |
| chr13 | 23529658      | 23529925  | 268 |
| chr10 | 106079425     | 106079692 | 268 |
| chr10 | 102674066     | 102674333 | 268 |
| chr10 | 89027600      | 89027867  | 268 |
| chr10 | 70351971      | 70352238  | 268 |
| chr10 | 17683993      | 17684260  | 268 |
| chr10 | 12154215      | 12154482  | 268 |
| chr1  | 99264393      | 99264660  | 268 |
| chr1  | 82739604      | 82739871  | 268 |
| chr1  | 1787826       | 1788093   | 268 |
| chrX  | 80153497      | 80153763  | 267 |
| chrX  | 75798917      | 75799183  | 267 |
| chrX  | 46713350      | 46713616  | 267 |
| chrX  | 44914474      | 44914740  | 267 |
| chrX  | 30566419      | 30566685  | 267 |
| chrX  | 30391229      | 30391495  | 267 |
| chrX  | 11110537      | 11110803  | 267 |
| chrX  | 10964600      | 10964866  | 267 |
| chrX  | 10057620      | 10057886  | 267 |
| chr9  | 94966173      | 94966439  | 267 |
| chr8  | 104239686     | 104239952 | 267 |
| chr8  | 96331980      | 96332246  | 267 |
| chr7  | 88847387      | 88847653  | 267 |
| chr4  | 68020696      | 68020962  | 267 |
| chr3  | 113385399     | 113385665 | 267 |
| chr3  | 33972116      | 33972382  | 267 |
| chr29 | 36880418      | 36880684  | 267 |
| chr28 | 43298028      | 43298294  | 267 |
| chr25 | 37955979      | 37956245  | 267 |
| chr25 | 33477416      | 33477682  | 267 |
| chr23 | 13877774      | 13878040  | 267 |



|       |           |           |     |
|-------|-----------|-----------|-----|
| chr22 | 16276006  | 16276272  | 267 |
| chr21 | 26269047  | 26269313  | 267 |
| chr20 | 23691605  | 23691871  | 267 |
| chr2  | 108841970 | 108842236 | 267 |
| chr2  | 67830740  | 67831006  | 267 |
| chr2  | 22162719  | 22162985  | 267 |
| chr18 | 23152488  | 23152754  | 267 |
| chr16 | 70295973  | 70296239  | 267 |
| chr16 | 39534804  | 39535070  | 267 |
| chr15 | 22925512  | 22925778  | 267 |
| chr14 | 12180640  | 12180906  | 267 |
| chr14 | 1544123   | 1544389   | 267 |
| chr13 | 63004307  | 63004573  | 267 |
| chr13 | 42846852  | 42847118  | 267 |
| chr12 | 34599821  | 34600087  | 267 |
| chr12 | 15295415  | 15295681  | 267 |
| chr11 | 82655306  | 82655572  | 267 |
| chr10 | 102296786 | 102297052 | 267 |
| chr10 | 35884751  | 35885017  | 267 |
| chr10 | 35856120  | 35856386  | 267 |
| chr10 | 17592652  | 17592918  | 267 |
| chr1  | 75101532  | 75101798  | 267 |
| chr1  | 68930783  | 68931049  | 267 |
| chrX  | 74580977  | 74581242  | 266 |
| chrX  | 73329168  | 73329433  | 266 |
| chrX  | 61355669  | 61355934  | 266 |
| chrX  | 61251858  | 61252123  | 266 |
| chrX  | 40555956  | 40556221  | 266 |
| chrX  | 30594000  | 30594265  | 266 |
| chrX  | 24544100  | 24544365  | 266 |
| chrX  | 12086217  | 12086482  | 266 |
| chrX  | 11941658  | 11941923  | 266 |
| chrX  | 7174189   | 7174454   | 266 |
| chrX  | 7010031   | 7010296   | 266 |
| chrX  | 6429250   | 6429515   | 266 |
| chr9  | 100067949 | 100068214 | 266 |
| chr8  | 60303869  | 60304134  | 266 |
| chr7  | 103086734 | 103086999 | 266 |
| chr7  | 101689898 | 101690163 | 266 |
| chr6  | 107092713 | 107092978 | 266 |
| chr6  | 101606911 | 101607176 | 266 |
| chr6  | 86345485  | 86345750  | 266 |
| chr5  | 113209039 | 113209304 | 266 |
| chr5  | 72428148  | 72428413  | 266 |
| chr4  | 98011249  | 98011514  | 266 |
| chr4  | 96852178  | 96852443  | 266 |
| chr3  | 110753788 | 110754053 | 266 |
| chr3  | 52148690  | 52148955  | 266 |
| chr3  | 35474347  | 35474612  | 266 |
| chr29 | 31822310  | 31822575  | 266 |

|       |           |           |     |
|-------|-----------|-----------|-----|
| chr28 | 25840048  | 25840313  | 266 |
| chr28 | 25431506  | 25431771  | 266 |
| chr27 | 26444608  | 26444873  | 266 |
| chr26 | 15111122  | 15111387  | 266 |
| chr26 | 14988018  | 14988283  | 266 |
| chr24 | 35369227  | 35369492  | 266 |
| chr23 | 18767656  | 18767921  | 266 |
| chr22 | 58315689  | 58315954  | 266 |
| chr22 | 49580983  | 49581248  | 266 |
| chr22 | 48762628  | 48762893  | 266 |
| chr22 | 42611191  | 42611456  | 266 |
| chr21 | 32958489  | 32958754  | 266 |
| chr20 | 62772934  | 62773199  | 266 |
| chr2  | 138610736 | 138611001 | 266 |
| chr2  | 75764431  | 75764696  | 266 |
| chr19 | 65144428  | 65144693  | 266 |
| chr19 | 46141347  | 46141612  | 266 |
| chr18 | 40004664  | 40004929  | 266 |
| chr18 | 9780786   | 9781051   | 266 |
| chr17 | 75679256  | 75679521  | 266 |
| chr17 | 67036479  | 67036744  | 266 |
| chr17 | 6626604   | 6626869   | 266 |
| chr15 | 55214203  | 55214468  | 266 |
| chr15 | 28593289  | 28593554  | 266 |
| chr15 | 22403075  | 22403340  | 266 |
| chr14 | 13430462  | 13430727  | 266 |
| chr13 | 23483183  | 23483448  | 266 |
| chr12 | 22089098  | 22089363  | 266 |
| chr12 | 20109208  | 20109473  | 266 |
| chr11 | 70855968  | 70856233  | 266 |
| chr11 | 13920300  | 13920565  | 266 |
| chr10 | 35204604  | 35204869  | 266 |
| chr1  | 159079007 | 159079272 | 266 |
| chr1  | 144414135 | 144414400 | 266 |
| chr1  | 107883384 | 107883649 | 266 |
| chrX  | 77047302  | 77047566  | 265 |
| chrX  | 76091611  | 76091875  | 265 |
| chrX  | 75433478  | 75433742  | 265 |
| chrX  | 65063308  | 65063572  | 265 |
| chrX  | 39053360  | 39053624  | 265 |
| chrX  | 37713163  | 37713427  | 265 |
| chrX  | 37640946  | 37641210  | 265 |
| chrX  | 34581369  | 34581633  | 265 |
| chrX  | 22522366  | 22522630  | 265 |
| chrX  | 21697861  | 21698125  | 265 |
| chrX  | 21003401  | 21003665  | 265 |
| chrX  | 13755356  | 13755620  | 265 |
| chrX  | 12469677  | 12469941  | 265 |
| chrX  | 8838558   | 8838822   | 265 |
| chr9  | 107189369 | 107189633 | 265 |

|       |           |           |     |
|-------|-----------|-----------|-----|
| chr8  | 104101076 | 104101340 | 265 |
| chr8  | 103922111 | 103922375 | 265 |
| chr8  | 60284658  | 60284922  | 265 |
| chr5  | 69091148  | 69091412  | 265 |
| chr5  | 30140413  | 30140677  | 265 |
| chr4  | 79959600  | 79959864  | 265 |
| chr4  | 79451513  | 79451777  | 265 |
| chr3  | 122412124 | 122412388 | 265 |
| chr3  | 115964547 | 115964811 | 265 |
| chr3  | 109639619 | 109639883 | 265 |
| chr3  | 106803496 | 106803760 | 265 |
| chr3  | 99466034  | 99466298  | 265 |
| chr29 | 18307145  | 18307409  | 265 |
| chr28 | 40950098  | 40950362  | 265 |
| chr28 | 40756498  | 40756762  | 265 |
| chr28 | 33574884  | 33575148  | 265 |
| chr28 | 26856448  | 26856712  | 265 |
| chr28 | 17932982  | 17933246  | 265 |
| chr27 | 31522822  | 31523086  | 265 |
| chr27 | 15230783  | 15231047  | 265 |
| chr26 | 47996157  | 47996421  | 265 |
| chr25 | 3043830   | 3044094   | 265 |
| chr24 | 49027884  | 49028148  | 265 |
| chr24 | 40834583  | 40834847  | 265 |
| chr23 | 28771333  | 28771597  | 265 |
| chr23 | 13516868  | 13517132  | 265 |
| chr22 | 54042755  | 54043019  | 265 |
| chr22 | 5687506   | 5687770   | 265 |
| chr21 | 28713627  | 28713891  | 265 |
| chr21 | 18465904  | 18466168  | 265 |
| chr20 | 60224620  | 60224884  | 265 |
| chr2  | 136382463 | 136382727 | 265 |
| chr2  | 135853628 | 135853892 | 265 |
| chr2  | 111850800 | 111851064 | 265 |
| chr19 | 61487025  | 61487289  | 265 |
| chr19 | 61218819  | 61219083  | 265 |
| chr19 | 43184250  | 43184514  | 265 |
| chr19 | 40451893  | 40452157  | 265 |
| chr19 | 34004398  | 34004662  | 265 |
| chr19 | 30819494  | 30819758  | 265 |
| chr19 | 26860382  | 26860646  | 265 |
| chr19 | 15914863  | 15915127  | 265 |
| chr18 | 52210270  | 52210534  | 265 |
| chr18 | 22108312  | 22108576  | 265 |
| chr18 | 17842596  | 17842860  | 265 |
| chr18 | 11713096  | 11713360  | 265 |
| chr16 | 74189716  | 74189980  | 265 |
| chr16 | 1602559   | 1602823   | 265 |
| chr13 | 41268096  | 41268360  | 265 |
| chr12 | 31573157  | 31573421  | 265 |

|       |               |           |     |
|-------|---------------|-----------|-----|
| chr12 | 10715068      | 10715332  | 265 |
| chr12 | 9123982       | 9124246   | 265 |
| chr10 | 13541632      | 13541896  | 265 |
| chr1  | 71897175      | 71897439  | 265 |
| chrX  | 78350001      | 78350264  | 264 |
| chrX  | 74595896      | 74596159  | 264 |
| chrX  | 51590026      | 51590289  | 264 |
| chrX  | 38208928      | 38209191  | 264 |
| chrX  | 32861387      | 32861650  | 264 |
| chrX  | 11470506      | 11470769  | 264 |
| chrX  | 1300953       | 1301216   | 264 |
| chrX  | 1229646       | 1229909   | 264 |
| chrX  | 367793 368056 | 264       |     |
| chr8  | 8158357       | 8158620   | 264 |
| chr7  | 77033310      | 77033573  | 264 |
| chr7  | 37461956      | 37462219  | 264 |
| chr7  | 17467365      | 17467628  | 264 |
| chr7  | 13255996      | 13256259  | 264 |
| chr5  | 115663228     | 115663491 | 264 |
| chr5  | 73210723      | 73210986  | 264 |
| chr4  | 101416121     | 101416384 | 264 |
| chr4  | 7607605       | 7607868   | 264 |
| chr3  | 32630587      | 32630850  | 264 |
| chr29 | 547574 547837 | 264       |     |
| chr28 | 12533890      | 12534153  | 264 |
| chr26 | 49048971      | 49049234  | 264 |
| chr26 | 44932318      | 44932581  | 264 |
| chr26 | 21635208      | 21635471  | 264 |
| chr25 | 34295944      | 34296207  | 264 |
| chr24 | 48752664      | 48752927  | 264 |
| chr23 | 35041654      | 35041917  | 264 |
| chr23 | 32665682      | 32665945  | 264 |
| chr23 | 10573181      | 10573444  | 264 |
| chr22 | 52990421      | 52990684  | 264 |
| chr20 | 35599240      | 35599503  | 264 |
| chr2  | 124459612     | 124459875 | 264 |
| chr19 | 54656138      | 54656401  | 264 |
| chr19 | 51847152      | 51847415  | 264 |
| chr19 | 40524433      | 40524696  | 264 |
| chr19 | 24223915      | 24224178  | 264 |
| chr18 | 46875439      | 46875702  | 264 |
| chr17 | 75478387      | 75478650  | 264 |
| chr17 | 58738270      | 58738533  | 264 |
| chr16 | 47210111      | 47210374  | 264 |
| chr16 | 30597536      | 30597799  | 264 |
| chr15 | 55826258      | 55826521  | 264 |
| chr15 | 29755383      | 29755646  | 264 |
| chr14 | 52473823      | 52474086  | 264 |
| chr14 | 3248273       | 3248536   | 264 |
| chr13 | 40195995      | 40196258  | 264 |

|       |             |           |     |
|-------|-------------|-----------|-----|
| chr12 | 70547678    | 70547941  | 264 |
| chr12 | 9502229     | 9502492   | 264 |
| chr11 | 98434208    | 98434471  | 264 |
| chr11 | 77617706    | 77617969  | 264 |
| chr11 | 71064804    | 71065067  | 264 |
| chr11 | 66952398    | 66952661  | 264 |
| chr11 | 24007968    | 24008231  | 264 |
| chr10 | 16745947    | 16746210  | 264 |
| chrX  | 72701097    | 72701359  | 263 |
| chrX  | 72055148    | 72055410  | 263 |
| chrX  | 66442786    | 66443048  | 263 |
| chrX  | 65456460    | 65456722  | 263 |
| chrX  | 59426818    | 59427080  | 263 |
| chrX  | 56179971    | 56180233  | 263 |
| chrX  | 35180823    | 35181085  | 263 |
| chrX  | 34432462    | 34432724  | 263 |
| chrX  | 31300651    | 31300913  | 263 |
| chrX  | 19312147    | 19312409  | 263 |
| chrX  | 11664452    | 11664714  | 263 |
| chr9  | 99781971    | 99782233  | 263 |
| chr8  | 107924978   | 107925240 | 263 |
| chr8  | 78563675    | 78563937  | 263 |
| chr8  | 8036935     | 8037197   | 263 |
| chr8  | 7715648     | 7715910   | 263 |
| chr7  | 62251300    | 62251562  | 263 |
| chr7  | 42207872    | 42208134  | 263 |
| chr7  | 11527327    | 11527589  | 263 |
| chr7  | 10976775    | 10977037  | 263 |
| chr6  | 99226667    | 99226929  | 263 |
| chr6  | 14529427    | 14529689  | 263 |
| chr4  | 99309516    | 99309778  | 263 |
| chr4  | 31331787    | 31332049  | 263 |
| chr3  | 119420008   | 119420270 | 263 |
| chr3  | 114799871   | 114800133 | 263 |
| chr3  | 90407394    | 90407656  | 263 |
| chr3  | 36849531    | 36849793  | 263 |
| chr3  | 9156445     | 9156707   | 263 |
| chr3  | 4490785     | 4491047   | 263 |
| chr28 | 23558990    | 23559252  | 263 |
| chr27 | 34986387    | 34986649  | 263 |
| chr27 | 33109921    | 33110183  | 263 |
| chr27 | 26796840    | 26797102  | 263 |
| chr25 | 28416 28678 | 263       |     |
| chr23 | 45979778    | 45980040  | 263 |
| chr23 | 42334920    | 42335182  | 263 |
| chr23 | 28879931    | 28880193  | 263 |
| chr23 | 27743683    | 27743945  | 263 |
| chr21 | 62085426    | 62085688  | 263 |
| chr21 | 60506095    | 60506357  | 263 |
| chr21 | 26862098    | 26862360  | 263 |

|       |           |           |     |
|-------|-----------|-----------|-----|
| chr21 | 25113209  | 25113471  | 263 |
| chr20 | 75036649  | 75036911  | 263 |
| chr20 | 56697572  | 56697834  | 263 |
| chr20 | 4912530   | 4912792   | 263 |
| chr19 | 33448543  | 33448805  | 263 |
| chr19 | 19274370  | 19274632  | 263 |
| chr19 | 8400467   | 8400729   | 263 |
| chr18 | 49788955  | 49789217  | 263 |
| chr18 | 33560971  | 33561233  | 263 |
| chr15 | 54008639  | 54008901  | 263 |
| chr14 | 40013641  | 40013903  | 263 |
| chr13 | 37583057  | 37583319  | 263 |
| chr13 | 17766987  | 17767249  | 263 |
| chr11 | 106075177 | 106075439 | 263 |
| chr11 | 47421358  | 47421620  | 263 |
| chr11 | 23137187  | 23137449  | 263 |
| chr11 | 22096144  | 22096406  | 263 |
| chr11 | 11760096  | 11760358  | 263 |
| chr10 | 87379739  | 87380001  | 263 |
| chr10 | 16978810  | 16979072  | 263 |
| chr10 | 16821579  | 16821841  | 263 |
| chr1  | 146625321 | 146625583 | 263 |
| chr1  | 74710533  | 74710795  | 263 |
| chr1  | 72570502  | 72570764  | 263 |
| chr1  | 69078701  | 69078963  | 263 |
| chrX  | 78334859  | 78335120  | 262 |
| chrX  | 75439423  | 75439684  | 262 |
| chrX  | 50418994  | 50419255  | 262 |
| chrX  | 11720121  | 11720382  | 262 |
| chrX  | 8164827   | 8165088   | 262 |
| chr9  | 33734485  | 33734746  | 262 |
| chr8  | 108664945 | 108665206 | 262 |
| chr7  | 42481131  | 42481392  | 262 |
| chr7  | 3031357   | 3031618   | 262 |
| chr5  | 115871211 | 115871472 | 262 |
| chr4  | 105182620 | 105182881 | 262 |
| chr4  | 69968283  | 69968544  | 262 |
| chr3  | 116462779 | 116463040 | 262 |
| chr3  | 106524129 | 106524390 | 262 |
| chr29 | 18141831  | 18142092  | 262 |
| chr28 | 33776899  | 33777160  | 262 |
| chr28 | 25259222  | 25259483  | 262 |
| chr27 | 7280243   | 7280504   | 262 |
| chr26 | 18448633  | 18448894  | 262 |
| chr25 | 24017748  | 24018009  | 262 |
| chr23 | 30365399  | 30365660  | 262 |
| chr23 | 18749270  | 18749531  | 262 |
| chr22 | 54127220  | 54127481  | 262 |
| chr22 | 30355938  | 30356199  | 262 |
| chr21 | 65397937  | 65398198  | 262 |

|       |           |           |     |
|-------|-----------|-----------|-----|
| chr20 | 72858289  | 72858550  | 262 |
| chr2  | 131474830 | 131475091 | 262 |
| chr19 | 18313973  | 18314234  | 262 |
| chr19 | 14851738  | 14851999  | 262 |
| chr19 | 7618230   | 7618491   | 262 |
| chr18 | 63762476  | 63762737  | 262 |
| chr18 | 45711807  | 45712068  | 262 |
| chr18 | 40336338  | 40336599  | 262 |
| chr18 | 39220584  | 39220845  | 262 |
| chr18 | 25046786  | 25047047  | 262 |
| chr18 | 6979253   | 6979514   | 262 |
| chr17 | 60821153  | 60821414  | 262 |
| chr17 | 55884777  | 55885038  | 262 |
| chr16 | 3570954   | 3571215   | 262 |
| chr15 | 54285008  | 54285269  | 262 |
| chr14 | 59645324  | 59645585  | 262 |
| chr12 | 80838997  | 80839258  | 262 |
| chr12 | 75210387  | 75210648  | 262 |
| chr12 | 13406073  | 13406334  | 262 |
| chr11 | 85333431  | 85333692  | 262 |
| chr11 | 34221364  | 34221625  | 262 |
| chr10 | 59530263  | 59530524  | 262 |
| chr10 | 17024520  | 17024781  | 262 |
| chr1  | 146955627 | 146955888 | 262 |
| chr1  | 86357912  | 86358173  | 262 |
| chr1  | 82855657  | 82855918  | 262 |
| chrX  | 79640701  | 79640961  | 261 |
| chrX  | 77500741  | 77501001  | 261 |
| chrX  | 71496329  | 71496589  | 261 |
| chrX  | 68307456  | 68307716  | 261 |
| chrX  | 65345354  | 65345614  | 261 |
| chrX  | 61544830  | 61545090  | 261 |
| chrX  | 54458086  | 54458346  | 261 |
| chrX  | 37427872  | 37428132  | 261 |
| chrX  | 20382529  | 20382789  | 261 |
| chrX  | 19724680  | 19724940  | 261 |
| chrX  | 18645963  | 18646223  | 261 |
| chrX  | 11783455  | 11783715  | 261 |
| chr9  | 66206062  | 66206322  | 261 |
| chr8  | 77215217  | 77215477  | 261 |
| chr7  | 60936677  | 60936937  | 261 |
| chr7  | 21218309  | 21218569  | 261 |
| chr5  | 118330360 | 118330620 | 261 |
| chr5  | 81344937  | 81345197  | 261 |
| chr4  | 121569065 | 121569325 | 261 |
| chr4  | 98537185  | 98537445  | 261 |
| chr4  | 67660938  | 67661198  | 261 |
| chr4  | 9213865   | 9214125   | 261 |
| chr29 | 41425929  | 41426189  | 261 |
| chr29 | 33845341  | 33845601  | 261 |

|       |           |           |     |
|-------|-----------|-----------|-----|
| chr28 | 33599959  | 33600219  | 261 |
| chr28 | 11609676  | 11609936  | 261 |
| chr27 | 27005037  | 27005297  | 261 |
| chr26 | 48669544  | 48669804  | 261 |
| chr26 | 19931444  | 19931704  | 261 |
| chr25 | 36670135  | 36670395  | 261 |
| chr24 | 43707516  | 43707776  | 261 |
| chr24 | 35465066  | 35465326  | 261 |
| chr24 | 34063251  | 34063511  | 261 |
| chr24 | 1328502   | 1328762   | 261 |
| chr23 | 49777431  | 49777691  | 261 |
| chr23 | 42932269  | 42932529  | 261 |
| chr22 | 52807659  | 52807919  | 261 |
| chr22 | 45385830  | 45386090  | 261 |
| chr22 | 12130765  | 12131025  | 261 |
| chr21 | 25199742  | 25200002  | 261 |
| chr21 | 9152336   | 9152596   | 261 |
| chr20 | 6581094   | 6581354   | 261 |
| chr2  | 126173664 | 126173924 | 261 |
| chr2  | 115226515 | 115226775 | 261 |
| chr2  | 65350027  | 65350287  | 261 |
| chr19 | 61347644  | 61347904  | 261 |
| chr19 | 34002843  | 34003103  | 261 |
| chr19 | 32390347  | 32390607  | 261 |
| chr19 | 21443766  | 21444026  | 261 |
| chr19 | 12509523  | 12509783  | 261 |
| chr18 | 22302611  | 22302871  | 261 |
| chr18 | 18566547  | 18566807  | 261 |
| chr18 | 11713543  | 11713803  | 261 |
| chr17 | 72686480  | 72686740  | 261 |
| chr16 | 75812035  | 75812295  | 261 |
| chr15 | 55181500  | 55181760  | 261 |
| chr15 | 43026192  | 43026452  | 261 |
| chr13 | 51259888  | 51260148  | 261 |
| chr11 | 93777463  | 93777723  | 261 |
| chr11 | 81470423  | 81470683  | 261 |
| chr11 | 64812427  | 64812687  | 261 |
| chr11 | 47543004  | 47543264  | 261 |
| chr11 | 24008771  | 24009031  | 261 |
| chr10 | 89213719  | 89213979  | 261 |
| chr10 | 71368349  | 71368609  | 261 |
| chr10 | 53033739  | 53033999  | 261 |
| chr10 | 24985387  | 24985647  | 261 |
| chr10 | 17327560  | 17327820  | 261 |
| chr10 | 10770839  | 10771099  | 261 |
| chr1  | 75267837  | 75268097  | 261 |
| chr1  | 61459949  | 61460209  | 261 |
| chrX  | 83026880  | 83027139  | 260 |
| chrX  | 72544328  | 72544587  | 260 |
| chrX  | 72292430  | 72292689  | 260 |



|       |           |           |     |
|-------|-----------|-----------|-----|
| chrX  | 67062983  | 67063242  | 260 |
| chrX  | 62408608  | 62408867  | 260 |
| chrX  | 55294595  | 55294854  | 260 |
| chrX  | 47475471  | 47475730  | 260 |
| chrX  | 37936756  | 37937015  | 260 |
| chrX  | 29463770  | 29464029  | 260 |
| chrX  | 22575613  | 22575872  | 260 |
| chrX  | 19530638  | 19530897  | 260 |
| chrX  | 13893986  | 13894245  | 260 |
| chrX  | 12250399  | 12250658  | 260 |
| chrX  | 11082686  | 11082945  | 260 |
| chrX  | 9582130   | 9582389   | 260 |
| chrX  | 2193252   | 2193511   | 260 |
| chr9  | 100211842 | 100212101 | 260 |
| chr8  | 64994237  | 64994496  | 260 |
| chr8  | 7517834   | 7518093   | 260 |
| chr7  | 14666157  | 14666416  | 260 |
| chr6  | 108204173 | 108204432 | 260 |
| chr6  | 71169147  | 71169406  | 260 |
| chr6  | 2228333   | 2228592   | 260 |
| chr5  | 104105861 | 104106120 | 260 |
| chr5  | 28673385  | 28673644  | 260 |
| chr5  | 10130964  | 10131223  | 260 |
| chr4  | 120920960 | 120921219 | 260 |
| chr4  | 116129591 | 116129850 | 260 |
| chr3  | 127833710 | 127833969 | 260 |
| chr3  | 121870348 | 121870607 | 260 |
| chr3  | 116114810 | 116115069 | 260 |
| chr3  | 115061620 | 115061879 | 260 |
| chr3  | 113370152 | 113370411 | 260 |
| chr3  | 105325828 | 105326087 | 260 |
| chr3  | 93588852  | 93589111  | 260 |
| chr3  | 54807796  | 54808055  | 260 |
| chr3  | 21918041  | 21918300  | 260 |
| chr29 | 37125515  | 37125774  | 260 |
| chr28 | 12471500  | 12471759  | 260 |
| chr25 | 40042775  | 40043034  | 260 |
| chr25 | 15689841  | 15690100  | 260 |
| chr24 | 47122431  | 47122690  | 260 |
| chr24 | 4333794   | 4334053   | 260 |
| chr23 | 18722352  | 18722611  | 260 |
| chr23 | 8325416   | 8325675   | 260 |
| chr22 | 15011199  | 15011458  | 260 |
| chr20 | 62728900  | 62729159  | 260 |
| chr20 | 822640    | 822899    | 260 |
| chr20 | 535911    | 536170    | 260 |
| chr2  | 134559994 | 134560253 | 260 |
| chr2  | 130148171 | 130148430 | 260 |
| chr2  | 36268293  | 36268552  | 260 |
| chr2  | 20313412  | 20313671  | 260 |

|       |          |          |     |
|-------|----------|----------|-----|
| chr19 | 62056351 | 62056610 | 260 |
| chr19 | 62004451 | 62004710 | 260 |
| chr19 | 54852716 | 54852975 | 260 |
| chr19 | 41563098 | 41563357 | 260 |
| chr19 | 41337123 | 41337382 | 260 |
| chr19 | 38938183 | 38938442 | 260 |
| chr19 | 21903773 | 21904032 | 260 |
| chr19 | 11035114 | 11035373 | 260 |
| chr18 | 54207119 | 54207378 | 260 |
| chr18 | 49520653 | 49520912 | 260 |
| chr18 | 48519620 | 48519879 | 260 |
| chr18 | 17985724 | 17985983 | 260 |
| chr18 | 12042015 | 12042274 | 260 |
| chr18 | 6644565  | 6644824  | 260 |
| chr17 | 57735524 | 57735783 | 260 |
| chr16 | 43911401 | 43911660 | 260 |
| chr16 | 2140542  | 2140801  | 260 |
| chr15 | 28950567 | 28950826 | 260 |
| chr15 | 23109923 | 23110182 | 260 |
| chr15 | 21072640 | 21072899 | 260 |
| chr14 | 59507236 | 59507495 | 260 |
| chr14 | 12304970 | 12305229 | 260 |
| chr14 | 8153700  | 8153959  | 260 |
| chr14 | 7690966  | 7691225  | 260 |
| chr14 | 1519964  | 1520223  | 260 |
| chr13 | 68447317 | 68447576 | 260 |
| chr13 | 54851013 | 54851272 | 260 |
| chr13 | 41127910 | 41128169 | 260 |
| chr13 | 35921616 | 35921875 | 260 |
| chr13 | 34903944 | 34904203 | 260 |
| chr12 | 35758803 | 35759062 | 260 |
| chr12 | 17193796 | 17194055 | 260 |
| chr11 | 89026904 | 89027163 | 260 |
| chr11 | 48722777 | 48723036 | 260 |
| chr11 | 44949233 | 44949492 | 260 |
| chr11 | 44774191 | 44774450 | 260 |
| chr11 | 28750863 | 28751122 | 260 |
| chr11 | 21615606 | 21615865 | 260 |
| chr11 | 14165700 | 14165959 | 260 |
| chr10 | 71335439 | 71335698 | 260 |
| chr10 | 21374778 | 21375037 | 260 |
| chr10 | 20889952 | 20890211 | 260 |
| chrX  | 76088625 | 76088883 | 259 |
| chrX  | 72089067 | 72089325 | 259 |
| chrX  | 65502011 | 65502269 | 259 |
| chrX  | 44897666 | 44897924 | 259 |
| chrX  | 33238820 | 33239078 | 259 |
| chrX  | 11650053 | 11650311 | 259 |
| chrX  | 2973954  | 2974212  | 259 |
| chrX  | 1536880  | 1537138  | 259 |

|       |               |           |     |
|-------|---------------|-----------|-----|
| chr9  | 77672846      | 77673104  | 259 |
| chr8  | 70523088      | 70523346  | 259 |
| chr8  | 7643859       | 7644117   | 259 |
| chr7  | 70783842      | 70784100  | 259 |
| chr7  | 50667829      | 50668087  | 259 |
| chr6  | 108702165     | 108702423 | 259 |
| chr6  | 102041419     | 102041677 | 259 |
| chr5  | 117282263     | 117282521 | 259 |
| chr5  | 26737279      | 26737537  | 259 |
| chr4  | 123624158     | 123624416 | 259 |
| chr4  | 123210430     | 123210688 | 259 |
| chr4  | 95067686      | 95067944  | 259 |
| chr3  | 121712794     | 121713052 | 259 |
| chr3  | 115962021     | 115962279 | 259 |
| chr3  | 114850090     | 114850348 | 259 |
| chr3  | 109663500     | 109663758 | 259 |
| chr3  | 107450131     | 107450389 | 259 |
| chr3  | 4150471       | 4150729   | 259 |
| chr3  | 304184 304442 |           | 259 |
| chr29 | 37126930      | 37127188  | 259 |
| chr29 | 18266426      | 18266684  | 259 |
| chr28 | 40399042      | 40399300  | 259 |
| chr26 | 37584646      | 37584904  | 259 |
| chr26 | 32086006      | 32086264  | 259 |
| chr25 | 35495091      | 35495349  | 259 |
| chr25 | 29603114      | 29603372  | 259 |
| chr25 | 29286901      | 29287159  | 259 |
| chr24 | 48583552      | 48583810  | 259 |
| chr23 | 41321202      | 41321460  | 259 |
| chr23 | 10424822      | 10425080  | 259 |
| chr21 | 67888097      | 67888355  | 259 |
| chr21 | 19992894      | 19993152  | 259 |
| chr21 | 19214802      | 19215060  | 259 |
| chr21 | 18859033      | 18859291  | 259 |
| chr20 | 70924107      | 70924365  | 259 |
| chr2  | 135087621     | 135087879 | 259 |
| chr2  | 122906787     | 122907045 | 259 |
| chr19 | 58849065      | 58849323  | 259 |
| chr19 | 45284502      | 45284760  | 259 |
| chr19 | 29443335      | 29443593  | 259 |
| chr19 | 15923933      | 15924191  | 259 |
| chr19 | 13910338      | 13910596  | 259 |
| chr18 | 37054269      | 37054527  | 259 |
| chr16 | 74682599      | 74682857  | 259 |
| chr16 | 72166171      | 72166429  | 259 |
| chr16 | 71129858      | 71130116  | 259 |
| chr15 | 26622130      | 26622388  | 259 |
| chr15 | 25293860      | 25294118  | 259 |
| chr14 | 76897594      | 76897852  | 259 |
| chr13 | 74913955      | 74914213  | 259 |

|       |               |           |     |
|-------|---------------|-----------|-----|
| chr12 | 34086536      | 34086794  | 259 |
| chr11 | 89409716      | 89409974  | 259 |
| chr10 | 90302828      | 90303086  | 259 |
| chr10 | 16982618      | 16982876  | 259 |
| chrX  | 78670223      | 78670480  | 258 |
| chrX  | 74795720      | 74795977  | 258 |
| chrX  | 73335236      | 73335493  | 258 |
| chrX  | 71349567      | 71349824  | 258 |
| chrX  | 66876543      | 66876800  | 258 |
| chrX  | 58799387      | 58799644  | 258 |
| chrX  | 54378168      | 54378425  | 258 |
| chrX  | 53358758      | 53359015  | 258 |
| chrX  | 30832140      | 30832397  | 258 |
| chrX  | 21843031      | 21843288  | 258 |
| chrX  | 19714353      | 19714610  | 258 |
| chrX  | 13008322      | 13008579  | 258 |
| chrX  | 8401767       | 8402024   | 258 |
| chrX  | 6734244       | 6734501   | 258 |
| chrX  | 6730071       | 6730328   | 258 |
| chrX  | 782738 782995 | 258       |     |
| chrX  | 309317 309574 | 258       |     |
| chr9  | 77539835      | 77540092  | 258 |
| chr8  | 108786037     | 108786294 | 258 |
| chr8  | 63060333      | 63060590  | 258 |
| chr7  | 65533094      | 65533351  | 258 |
| chr6  | 46663162      | 46663419  | 258 |
| chr5  | 113264132     | 113264389 | 258 |
| chr5  | 80742785      | 80743042  | 258 |
| chr5  | 32941955      | 32942212  | 258 |
| chr4  | 117756676     | 117756933 | 258 |
| chr4  | 54042052      | 54042309  | 258 |
| chr3  | 56837998      | 56838255  | 258 |
| chr3  | 20572605      | 20572862  | 258 |
| chr29 | 26598409      | 26598666  | 258 |
| chr29 | 17918254      | 17918511  | 258 |
| chr28 | 41334101      | 41334358  | 258 |
| chr28 | 25530050      | 25530307  | 258 |
| chr26 | 49418340      | 49418597  | 258 |
| chr26 | 18370004      | 18370261  | 258 |
| chr26 | 18252247      | 18252504  | 258 |
| chr24 | 58606298      | 58606555  | 258 |
| chr24 | 40443621      | 40443878  | 258 |
| chr24 | 23950070      | 23950327  | 258 |
| chr24 | 1530665       | 1530922   | 258 |
| chr22 | 51060565      | 51060822  | 258 |
| chr20 | 73255796      | 73256053  | 258 |
| chr20 | 19405855      | 19406112  | 258 |
| chr20 | 640550 640807 | 258       |     |
| chr2  | 136906221     | 136906478 | 258 |
| chr2  | 119947605     | 119947862 | 258 |

|       |           |           |     |
|-------|-----------|-----------|-----|
| chr2  | 75984029  | 75984286  | 258 |
| chr2  | 38891259  | 38891516  | 258 |
| chr19 | 63505136  | 63505393  | 258 |
| chr19 | 23680274  | 23680531  | 258 |
| chr19 | 19029131  | 19029388  | 258 |
| chr19 | 15933882  | 15934139  | 258 |
| chr19 | 8720390   | 8720647   | 258 |
| chr18 | 56746720  | 56746977  | 258 |
| chr18 | 23502545  | 23502802  | 258 |
| chr18 | 23322748  | 23323005  | 258 |
| chr18 | 23218562  | 23218819  | 258 |
| chr17 | 54588060  | 54588317  | 258 |
| chr15 | 83914622  | 83914879  | 258 |
| chr15 | 31082560  | 31082817  | 258 |
| chr15 | 27339003  | 27339260  | 258 |
| chr15 | 25582684  | 25582941  | 258 |
| chr14 | 7786463   | 7786720   | 258 |
| chr13 | 77425105  | 77425362  | 258 |
| chr13 | 69072933  | 69073190  | 258 |
| chr13 | 67768086  | 67768343  | 258 |
| chr13 | 62243862  | 62244119  | 258 |
| chr13 | 59416631  | 59416888  | 258 |
| chr13 | 37449466  | 37449723  | 258 |
| chr13 | 6633467   | 6633724   | 258 |
| chr12 | 84240491  | 84240748  | 258 |
| chr12 | 70980972  | 70981229  | 258 |
| chr12 | 48057770  | 48058027  | 258 |
| chr11 | 106900009 | 106900266 | 258 |
| chr11 | 47792157  | 47792414  | 258 |
| chr11 | 28427156  | 28427413  | 258 |
| chr11 | 7910686   | 7910943   | 258 |
| chr10 | 99931010  | 99931267  | 258 |
| chr10 | 19499498  | 19499755  | 258 |
| chrX  | 77981777  | 77982033  | 257 |
| chrX  | 68441940  | 68442196  | 257 |
| chrX  | 59375579  | 59375835  | 257 |
| chrX  | 53904020  | 53904276  | 257 |
| chrX  | 49434317  | 49434573  | 257 |
| chrX  | 49270466  | 49270722  | 257 |
| chrX  | 36329323  | 36329579  | 257 |
| chrX  | 35966381  | 35966637  | 257 |
| chrX  | 33494372  | 33494628  | 257 |
| chrX  | 18428256  | 18428512  | 257 |
| chrX  | 13742419  | 13742675  | 257 |
| chr9  | 107558346 | 107558602 | 257 |
| chr8  | 109017628 | 109017884 | 257 |
| chr8  | 63726555  | 63726811  | 257 |
| chr6  | 108855114 | 108855370 | 257 |
| chr6  | 106981251 | 106981507 | 257 |
| chr6  | 95240086  | 95240342  | 257 |

|       |               |           |     |
|-------|---------------|-----------|-----|
| chr5  | 2023562       | 2023818   | 257 |
| chr4  | 50815871      | 50816127  | 257 |
| chr3  | 115698175     | 115698431 | 257 |
| chr29 | 31603623      | 31603879  | 257 |
| chr28 | 26597902      | 26598158  | 257 |
| chr27 | 26755438      | 26755694  | 257 |
| chr26 | 15716227      | 15716483  | 257 |
| chr25 | 38913481      | 38913737  | 257 |
| chr25 | 24846783      | 24847039  | 257 |
| chr25 | 10607220      | 10607476  | 257 |
| chr24 | 840015 840271 |           | 257 |
| chr23 | 31137161      | 31137417  | 257 |
| chr22 | 48254771      | 48255027  | 257 |
| chr22 | 12473509      | 12473765  | 257 |
| chr21 | 60120076      | 60120332  | 257 |
| chr21 | 59532965      | 59533221  | 257 |
| chr20 | 74230913      | 74231169  | 257 |
| chr2  | 132993427     | 132993683 | 257 |
| chr2  | 128794617     | 128794873 | 257 |
| chr2  | 1497506       | 1497762   | 257 |
| chr19 | 44462139      | 44462395  | 257 |
| chr19 | 39823112      | 39823368  | 257 |
| chr19 | 25534314      | 25534570  | 257 |
| chr18 | 62610730      | 62610986  | 257 |
| chr18 | 23301198      | 23301454  | 257 |
| chr18 | 13777979      | 13778235  | 257 |
| chr18 | 4077239       | 4077495   | 257 |
| chr16 | 71402456      | 71402712  | 257 |
| chr16 | 47183704      | 47183960  | 257 |
| chr16 | 42451219      | 42451475  | 257 |
| chr15 | 29900574      | 29900830  | 257 |
| chr15 | 25140738      | 25140994  | 257 |
| chr14 | 60066424      | 60066680  | 257 |
| chr13 | 52088146      | 52088402  | 257 |
| chr13 | 42611341      | 42611597  | 257 |
| chr11 | 50005938      | 50006194  | 257 |
| chr11 | 47155938      | 47156194  | 257 |
| chr11 | 14125014      | 14125270  | 257 |
| chr11 | 10121199      | 10121455  | 257 |
| chr11 | 6475347       | 6475603   | 257 |
| chr10 | 102977317     | 102977573 | 257 |
| chr10 | 32244777      | 32245033  | 257 |
| chr1  | 150243863     | 150244119 | 257 |
| chrX  | 80552561      | 80552816  | 256 |
| chrX  | 77320363      | 77320618  | 256 |
| chrX  | 72429010      | 72429265  | 256 |
| chrX  | 65587117      | 65587372  | 256 |
| chrX  | 57333380      | 57333635  | 256 |
| chrX  | 49972354      | 49972609  | 256 |
| chrX  | 36830462      | 36830717  | 256 |

|       |           |           |     |
|-------|-----------|-----------|-----|
| chrX  | 29944236  | 29944491  | 256 |
| chrX  | 6986787   | 6987042   | 256 |
| chr8  | 7837333   | 7837588   | 256 |
| chr7  | 77235112  | 77235367  | 256 |
| chr5  | 120224896 | 120225151 | 256 |
| chr5  | 33596188  | 33596443  | 256 |
| chr4  | 46972423  | 46972678  | 256 |
| chr3  | 34064760  | 34065015  | 256 |
| chr29 | 33969317  | 33969572  | 256 |
| chr28 | 46063707  | 46063962  | 256 |
| chr25 | 34190781  | 34191036  | 256 |
| chr25 | 28643642  | 28643897  | 256 |
| chr24 | 33270602  | 33270857  | 256 |
| chr23 | 46081710  | 46081965  | 256 |
| chr22 | 55796273  | 55796528  | 256 |
| chr22 | 32821654  | 32821909  | 256 |
| chr21 | 20835782  | 20836037  | 256 |
| chr2  | 139410529 | 139410784 | 256 |
| chr2  | 135716603 | 135716858 | 256 |
| chr2  | 127818434 | 127818689 | 256 |
| chr2  | 111237632 | 111237887 | 256 |
| chr2  | 80018790  | 80019045  | 256 |
| chr2  | 5041934   | 5042189   | 256 |
| chr19 | 58853546  | 58853801  | 256 |
| chr19 | 23138302  | 23138557  | 256 |
| chr19 | 15980977  | 15981232  | 256 |
| chr18 | 32870457  | 32870712  | 256 |
| chr18 | 22885943  | 22886198  | 256 |
| chr17 | 70349448  | 70349703  | 256 |
| chr17 | 61305141  | 61305396  | 256 |
| chr17 | 48098367  | 48098622  | 256 |
| chr16 | 58540443  | 58540698  | 256 |
| chr16 | 54655220  | 54655475  | 256 |
| chr16 | 41532249  | 41532504  | 256 |
| chr15 | 51706831  | 51707086  | 256 |
| chr15 | 23084318  | 23084573  | 256 |
| chr15 | 15994731  | 15994986  | 256 |
| chr14 | 17131813  | 17132068  | 256 |
| chr13 | 67926081  | 67926336  | 256 |
| chr13 | 25993729  | 25993984  | 256 |
| chr13 | 22927395  | 22927650  | 256 |
| chr12 | 82805005  | 82805260  | 256 |
| chr12 | 80602153  | 80602408  | 256 |
| chr12 | 66633162  | 66633417  | 256 |
| chr12 | 64739018  | 64739273  | 256 |
| chr12 | 32544572  | 32544827  | 256 |
| chr12 | 31156585  | 31156840  | 256 |
| chr11 | 100360931 | 100361186 | 256 |
| chr11 | 99649212  | 99649467  | 256 |
| chr11 | 86252646  | 86252901  | 256 |

|       |           |           |     |
|-------|-----------|-----------|-----|
| chr11 | 81055632  | 81055887  | 256 |
| chr11 | 29134734  | 29134989  | 256 |
| chr11 | 4812853   | 4813108   | 256 |
| chr1  | 83015861  | 83016116  | 256 |
| chr1  | 81064049  | 81064304  | 256 |
| chrX  | 80625737  | 80625991  | 255 |
| chrX  | 77313245  | 77313499  | 255 |
| chrX  | 72395108  | 72395362  | 255 |
| chrX  | 64892610  | 64892864  | 255 |
| chrX  | 54992412  | 54992666  | 255 |
| chrX  | 33974124  | 33974378  | 255 |
| chrX  | 32986832  | 32987086  | 255 |
| chrX  | 32156549  | 32156803  | 255 |
| chrX  | 30170978  | 30171232  | 255 |
| chrX  | 21165995  | 21166249  | 255 |
| chrX  | 12912813  | 12913067  | 255 |
| chrX  | 10571755  | 10572009  | 255 |
| chrX  | 10115191  | 10115445  | 255 |
| chrX  | 9505914   | 9506168   | 255 |
| chrX  | 2128361   | 2128615   | 255 |
| chr8  | 60951972  | 60952226  | 255 |
| chr7  | 50577389  | 50577643  | 255 |
| chr7  | 44019741  | 44019995  | 255 |
| chr5  | 85418368  | 85418622  | 255 |
| chr5  | 75726763  | 75727017  | 255 |
| chr5  | 72155992  | 72156246  | 255 |
| chr4  | 98847174  | 98847428  | 255 |
| chr4  | 72190915  | 72191169  | 255 |
| chr4  | 33429883  | 33430137  | 255 |
| chr3  | 115916560 | 115916814 | 255 |
| chr3  | 105296773 | 105297027 | 255 |
| chr3  | 98371125  | 98371379  | 255 |
| chr3  | 25541486  | 25541740  | 255 |
| chr29 | 42413144  | 42413398  | 255 |
| chr29 | 37100080  | 37100334  | 255 |
| chr27 | 42249536  | 42249790  | 255 |
| chr27 | 42200557  | 42200811  | 255 |
| chr26 | 51449999  | 51450253  | 255 |
| chr26 | 37798528  | 37798782  | 255 |
| chr25 | 34255800  | 34256054  | 255 |
| chr25 | 30123311  | 30123565  | 255 |
| chr24 | 59441050  | 59441304  | 255 |
| chr24 | 35485089  | 35485343  | 255 |
| chr24 | 35339941  | 35340195  | 255 |
| chr23 | 28803038  | 28803292  | 255 |
| chr22 | 59538152  | 59538406  | 255 |
| chr22 | 59139204  | 59139458  | 255 |
| chr22 | 54572459  | 54572713  | 255 |
| chr21 | 24408806  | 24409060  | 255 |
| chr21 | 18706560  | 18706814  | 255 |



|       |           |           |     |
|-------|-----------|-----------|-----|
| chr20 | 19423056  | 19423310  | 255 |
| chr2  | 136547945 | 136548199 | 255 |
| chr2  | 127585624 | 127585878 | 255 |
| chr2  | 25246813  | 25247067  | 255 |
| chr19 | 55964920  | 55965174  | 255 |
| chr19 | 13930751  | 13931005  | 255 |
| chr18 | 42248391  | 42248645  | 255 |
| chr18 | 22408183  | 22408437  | 255 |
| chr18 | 22018733  | 22018987  | 255 |
| chr16 | 47980693  | 47980947  | 255 |
| chr15 | 64579712  | 64579966  | 255 |
| chr15 | 15844882  | 15845136  | 255 |
| chr13 | 48475863  | 48476117  | 255 |
| chr13 | 37629575  | 37629829  | 255 |
| chr13 | 14677202  | 14677456  | 255 |
| chr11 | 92153231  | 92153485  | 255 |
| chr11 | 77779234  | 77779488  | 255 |
| chr11 | 68439501  | 68439755  | 255 |
| chr10 | 17802254  | 17802508  | 255 |
| chr10 | 17117369  | 17117623  | 255 |
| chr10 | 16940269  | 16940523  | 255 |
| chr10 | 13342987  | 13343241  | 255 |
| chrX  | 80294106  | 80294359  | 254 |
| chrX  | 77151228  | 77151481  | 254 |
| chrX  | 72733258  | 72733511  | 254 |
| chrX  | 70881587  | 70881840  | 254 |
| chrX  | 62195044  | 62195297  | 254 |
| chrX  | 55263527  | 55263780  | 254 |
| chrX  | 50337168  | 50337421  | 254 |
| chrX  | 47474641  | 47474894  | 254 |
| chrX  | 21337817  | 21338070  | 254 |
| chrX  | 21042754  | 21043007  | 254 |
| chrX  | 20492663  | 20492916  | 254 |
| chrX  | 19836466  | 19836719  | 254 |
| chrX  | 10014594  | 10014847  | 254 |
| chr9  | 106498164 | 106498417 | 254 |
| chr9  | 102554713 | 102554966 | 254 |
| chr9  | 45942604  | 45942857  | 254 |
| chr8  | 7807550   | 7807803   | 254 |
| chr8  | 7724504   | 7724757   | 254 |
| chr6  | 65880362  | 65880615  | 254 |
| chr5  | 113140110 | 113140363 | 254 |
| chr5  | 110949734 | 110949987 | 254 |
| chr5  | 32988000  | 32988253  | 254 |
| chr3  | 123230451 | 123230704 | 254 |
| chr3  | 123155215 | 123155468 | 254 |
| chr3  | 111259112 | 111259365 | 254 |
| chr3  | 110313905 | 110314158 | 254 |
| chr3  | 30439401  | 30439654  | 254 |
| chr3  | 9171503   | 9171756   | 254 |

|       |           |           |     |
|-------|-----------|-----------|-----|
| chr29 | 35215635  | 35215888  | 254 |
| chr28 | 23926848  | 23927101  | 254 |
| chr27 | 26746977  | 26747230  | 254 |
| chr26 | 34193205  | 34193458  | 254 |
| chr26 | 19955925  | 19956178  | 254 |
| chr25 | 42039175  | 42039428  | 254 |
| chr25 | 30894628  | 30894881  | 254 |
| chr25 | 22544277  | 22544530  | 254 |
| chr24 | 61710843  | 61711096  | 254 |
| chr24 | 27145616  | 27145869  | 254 |
| chr22 | 60188275  | 60188528  | 254 |
| chr22 | 48768206  | 48768459  | 254 |
| chr22 | 15242164  | 15242417  | 254 |
| chr21 | 25155044  | 25155297  | 254 |
| chr21 | 16783686  | 16783939  | 254 |
| chr20 | 8827016   | 8827269   | 254 |
| chr2  | 129852194 | 129852447 | 254 |
| chr2  | 126812194 | 126812447 | 254 |
| chr19 | 46885764  | 46886017  | 254 |
| chr19 | 42445428  | 42445681  | 254 |
| chr19 | 39673046  | 39673299  | 254 |
| chr19 | 16081135  | 16081388  | 254 |
| chr18 | 62380358  | 62380611  | 254 |
| chr18 | 47223870  | 47224123  | 254 |
| chr18 | 17929441  | 17929694  | 254 |
| chr17 | 70035671  | 70035924  | 254 |
| chr17 | 63682428  | 63682681  | 254 |
| chr17 | 63550071  | 63550324  | 254 |
| chr16 | 48447208  | 48447461  | 254 |
| chr16 | 44457736  | 44457989  | 254 |
| chr15 | 27093837  | 27094090  | 254 |
| chr14 | 61264567  | 61264820  | 254 |
| chr13 | 71359599  | 71359852  | 254 |
| chr13 | 43379137  | 43379390  | 254 |
| chr13 | 41128483  | 41128736  | 254 |
| chr12 | 74273342  | 74273595  | 254 |
| chr12 | 68004107  | 68004360  | 254 |
| chr11 | 108858698 | 108858951 | 254 |
| chr11 | 12026085  | 12026338  | 254 |
| chr10 | 71267492  | 71267745  | 254 |
| chr10 | 67022092  | 67022345  | 254 |
| chrX  | 79107599  | 79107851  | 253 |
| chrX  | 72798284  | 72798536  | 253 |
| chrX  | 71764682  | 71764934  | 253 |
| chrX  | 68921147  | 68921399  | 253 |
| chrX  | 68406537  | 68406789  | 253 |
| chrX  | 67036740  | 67036992  | 253 |
| chrX  | 63974862  | 63975114  | 253 |
| chrX  | 63057970  | 63058222  | 253 |
| chrX  | 55366271  | 55366523  | 253 |

|       |               |           |     |
|-------|---------------|-----------|-----|
| chrX  | 55339789      | 55340041  | 253 |
| chrX  | 49800564      | 49800816  | 253 |
| chrX  | 39029155      | 39029407  | 253 |
| chrX  | 35961440      | 35961692  | 253 |
| chrX  | 35852369      | 35852621  | 253 |
| chrX  | 1535007       | 1535259   | 253 |
| chrX  | 670699 670951 |           | 253 |
| chr9  | 98298092      | 98298344  | 253 |
| chr9  | 47055151      | 47055403  | 253 |
| chr8  | 74449326      | 74449578  | 253 |
| chr8  | 72816100      | 72816352  | 253 |
| chr8  | 65531578      | 65531830  | 253 |
| chr8  | 11325537      | 11325789  | 253 |
| chr7  | 94377563      | 94377815  | 253 |
| chr7  | 93955151      | 93955403  | 253 |
| chr6  | 107139281     | 107139533 | 253 |
| chr6  | 93290963      | 93291215  | 253 |
| chr5  | 123130841     | 123131093 | 253 |
| chr5  | 122666897     | 122667149 | 253 |
| chr5  | 112310236     | 112310488 | 253 |
| chr5  | 74672619      | 74672871  | 253 |
| chr4  | 103114634     | 103114886 | 253 |
| chr4  | 99410874      | 99411126  | 253 |
| chr3  | 87615327      | 87615579  | 253 |
| chr3  | 36663067      | 36663319  | 253 |
| chr3  | 35499494      | 35499746  | 253 |
| chr3  | 15778012      | 15778264  | 253 |
| chr27 | 47875367      | 47875619  | 253 |
| chr27 | 35356142      | 35356394  | 253 |
| chr26 | 31168006      | 31168258  | 253 |
| chr25 | 39281180      | 39281432  | 253 |
| chr23 | 43089113      | 43089365  | 253 |
| chr23 | 31138664      | 31138916  | 253 |
| chr23 | 22833889      | 22834141  | 253 |
| chr22 | 54010142      | 54010394  | 253 |
| chr22 | 5833170       | 5833422   | 253 |
| chr21 | 31492068      | 31492320  | 253 |
| chr21 | 20671091      | 20671343  | 253 |
| chr20 | 74368170      | 74368422  | 253 |
| chr20 | 71117842      | 71118094  | 253 |
| chr2  | 131144496     | 131144748 | 253 |
| chr2  | 120159428     | 120159680 | 253 |
| chr19 | 33519410      | 33519662  | 253 |
| chr19 | 31659632      | 31659884  | 253 |
| chr19 | 29700421      | 29700673  | 253 |
| chr19 | 11200654      | 11200906  | 253 |
| chr18 | 52801816      | 52802068  | 253 |
| chr18 | 48401911      | 48402163  | 253 |
| chr18 | 23692549      | 23692801  | 253 |
| chr18 | 9649456       | 9649708   | 253 |

|       |           |           |     |
|-------|-----------|-----------|-----|
| chr17 | 56069291  | 56069543  | 253 |
| chr16 | 77523717  | 77523969  | 253 |
| chr16 | 70129717  | 70129969  | 253 |
| chr16 | 45007376  | 45007628  | 253 |
| chr16 | 39500942  | 39501194  | 253 |
| chr15 | 33723322  | 33723574  | 253 |
| chr15 | 29419546  | 29419798  | 253 |
| chr15 | 29037567  | 29037819  | 253 |
| chr15 | 24021134  | 24021386  | 253 |
| chr14 | 40159855  | 40160107  | 253 |
| chr14 | 26604966  | 26605218  | 253 |
| chr13 | 76308286  | 76308538  | 253 |
| chr13 | 70345788  | 70346040  | 253 |
| chr13 | 66566163  | 66566415  | 253 |
| chr13 | 59985373  | 59985625  | 253 |
| chr13 | 59808799  | 59809051  | 253 |
| chr13 | 36364518  | 36364770  | 253 |
| chr12 | 81692054  | 81692306  | 253 |
| chr12 | 74307198  | 74307450  | 253 |
| chr12 | 34566893  | 34567145  | 253 |
| chr11 | 28594183  | 28594435  | 253 |
| chr1  | 118792428 | 118792680 | 253 |
| chr1  | 98698062  | 98698314  | 253 |
| chrX  | 72842228  | 72842479  | 252 |
| chrX  | 61059328  | 61059579  | 252 |
| chrX  | 53993613  | 53993864  | 252 |
| chrX  | 53941178  | 53941429  | 252 |
| chrX  | 47167501  | 47167752  | 252 |
| chrX  | 46680274  | 46680525  | 252 |
| chrX  | 33519634  | 33519885  | 252 |
| chrX  | 30258650  | 30258901  | 252 |
| chrX  | 21133415  | 21133666  | 252 |
| chrX  | 10207702  | 10207953  | 252 |
| chrX  | 1569798   | 1570049   | 252 |
| chrX  | 466374    | 466625    | 252 |
| chr9  | 99001541  | 99001792  | 252 |
| chr8  | 103805964 | 103806215 | 252 |
| chr7  | 45118376  | 45118627  | 252 |
| chr7  | 37134373  | 37134624  | 252 |
| chr7  | 17473501  | 17473752  | 252 |
| chr7  | 13491273  | 13491524  | 252 |
| chr7  | 13102518  | 13102769  | 252 |
| chr6  | 63384493  | 63384744  | 252 |
| chr5  | 74422675  | 74422926  | 252 |
| chr5  | 29826366  | 29826617  | 252 |
| chr5  | 13459338  | 13459589  | 252 |
| chr5  | 1170313   | 1170564   | 252 |
| chr4  | 72499549  | 72499800  | 252 |
| chr3  | 123920786 | 123921037 | 252 |
| chr3  | 114406429 | 114406680 | 252 |

|       |           |           |     |
|-------|-----------|-----------|-----|
| chr3  | 33707960  | 33708211  | 252 |
| chr29 | 42387034  | 42387285  | 252 |
| chr28 | 43861029  | 43861280  | 252 |
| chr27 | 39908021  | 39908272  | 252 |
| chr27 | 35369272  | 35369523  | 252 |
| chr27 | 26494069  | 26494320  | 252 |
| chr27 | 8317652   | 8317903   | 252 |
| chr26 | 31338963  | 31339214  | 252 |
| chr25 | 18807280  | 18807531  | 252 |
| chr24 | 49686887  | 49687138  | 252 |
| chr24 | 48779707  | 48779958  | 252 |
| chr23 | 52426574  | 52426825  | 252 |
| chr23 | 32673312  | 32673563  | 252 |
| chr23 | 19343638  | 19343889  | 252 |
| chr22 | 56349755  | 56350006  | 252 |
| chr22 | 55353099  | 55353350  | 252 |
| chr22 | 44667134  | 44667385  | 252 |
| chr22 | 33352434  | 33352685  | 252 |
| chr21 | 60462557  | 60462808  | 252 |
| chr21 | 28884922  | 28885173  | 252 |
| chr20 | 29919962  | 29920213  | 252 |
| chr20 | 5922212   | 5922463   | 252 |
| chr2  | 110522202 | 110522453 | 252 |
| chr19 | 56884705  | 56884956  | 252 |
| chr19 | 45024530  | 45024781  | 252 |
| chr19 | 43197663  | 43197914  | 252 |
| chr19 | 42898508  | 42898759  | 252 |
| chr18 | 22152022  | 22152273  | 252 |
| chr18 | 4071952   | 4072203   | 252 |
| chr17 | 55131528  | 55131779  | 252 |
| chr17 | 48282575  | 48282826  | 252 |
| chr17 | 47371436  | 47371687  | 252 |
| chr16 | 72906198  | 72906449  | 252 |
| chr16 | 51482635  | 51482886  | 252 |
| chr15 | 76631107  | 76631358  | 252 |
| chr15 | 75234156  | 75234407  | 252 |
| chr15 | 74552037  | 74552288  | 252 |
| chr15 | 45608413  | 45608664  | 252 |
| chr15 | 27362255  | 27362506  | 252 |
| chr15 | 26702756  | 26703007  | 252 |
| chr15 | 24430659  | 24430910  | 252 |
| chr15 | 24406767  | 24407018  | 252 |
| chr15 | 17627460  | 17627711  | 252 |
| chr14 | 30329543  | 30329794  | 252 |
| chr14 | 21203509  | 21203760  | 252 |
| chr13 | 70993989  | 70994240  | 252 |
| chr12 | 82930458  | 82930709  | 252 |
| chr12 | 72368549  | 72368800  | 252 |
| chr11 | 108366241 | 108366492 | 252 |
| chr11 | 80125457  | 80125708  | 252 |

|       |               |           |     |
|-------|---------------|-----------|-----|
| chr11 | 5895927       | 5896178   | 252 |
| chr10 | 50263607      | 50263858  | 252 |
| chr10 | 16674573      | 16674824  | 252 |
| chr10 | 7681351       | 7681602   | 252 |
| chr1  | 377740 377991 | 252       |     |
| chrX  | 82247654      | 82247904  | 251 |
| chrX  | 78757012      | 78757262  | 251 |
| chrX  | 68358311      | 68358561  | 251 |
| chrX  | 58594575      | 58594825  | 251 |
| chrX  | 45775580      | 45775830  | 251 |
| chrX  | 34131422      | 34131672  | 251 |
| chrX  | 32431238      | 32431488  | 251 |
| chrX  | 29298914      | 29299164  | 251 |
| chrX  | 13399908      | 13400158  | 251 |
| chrX  | 11298251      | 11298501  | 251 |
| chrX  | 3261587       | 3261837   | 251 |
| chr9  | 90546523      | 90546773  | 251 |
| chr7  | 34407755      | 34408005  | 251 |
| chr7  | 4356650       | 4356900   | 251 |
| chr7  | 2438017       | 2438267   | 251 |
| chr6  | 19588015      | 19588265  | 251 |
| chr5  | 125436756     | 125437006 | 251 |
| chr5  | 121250020     | 121250270 | 251 |
| chr5  | 118481303     | 118481553 | 251 |
| chr4  | 33247802      | 33248052  | 251 |
| chr4  | 8718333       | 8718583   | 251 |
| chr3  | 116474551     | 116474801 | 251 |
| chr3  | 116308032     | 116308282 | 251 |
| chr3  | 111458831     | 111459081 | 251 |
| chr3  | 104180930     | 104181180 | 251 |
| chr29 | 48829109      | 48829359  | 251 |
| chr27 | 30515780      | 30516030  | 251 |
| chr26 | 40599779      | 40600029  | 251 |
| chr26 | 31199381      | 31199631  | 251 |
| chr26 | 18788122      | 18788372  | 251 |
| chr25 | 34401369      | 34401619  | 251 |
| chr25 | 34326693      | 34326943  | 251 |
| chr24 | 60258190      | 60258440  | 251 |
| chr24 | 50222070      | 50222320  | 251 |
| chr24 | 40557542      | 40557792  | 251 |
| chr23 | 49706931      | 49707181  | 251 |
| chr23 | 41437476      | 41437726  | 251 |
| chr22 | 60503070      | 60503320  | 251 |
| chr22 | 47872022      | 47872272  | 251 |
| chr21 | 69167201      | 69167451  | 251 |
| chr21 | 57514887      | 57515137  | 251 |
| chr21 | 42447521      | 42447771  | 251 |
| chr21 | 33972688      | 33972938  | 251 |
| chr20 | 8577944       | 8578194   | 251 |
| chr2  | 117738809     | 117739059 | 251 |

|       |          |          |     |
|-------|----------|----------|-----|
| chr19 | 58617542 | 58617792 | 251 |
| chr19 | 28300369 | 28300619 | 251 |
| chr19 | 15785502 | 15785752 | 251 |
| chr18 | 35852092 | 35852342 | 251 |
| chr17 | 75471411 | 75471661 | 251 |
| chr17 | 70056899 | 70057149 | 251 |
| chr17 | 68812747 | 68812997 | 251 |
| chr17 | 68250070 | 68250320 | 251 |
| chr16 | 73182251 | 73182501 | 251 |
| chr16 | 68748272 | 68748522 | 251 |
| chr15 | 22816584 | 22816834 | 251 |
| chr14 | 68046911 | 68047161 | 251 |
| chr14 | 40128476 | 40128726 | 251 |
| chr14 | 9553408  | 9553658  | 251 |
| chr13 | 63669963 | 63670213 | 251 |
| chr13 | 63323034 | 63323284 | 251 |
| chr13 | 51978854 | 51979104 | 251 |
| chr13 | 40090609 | 40090859 | 251 |
| chr12 | 77350134 | 77350384 | 251 |
| chr12 | 74307633 | 74307883 | 251 |
| chr12 | 31542031 | 31542281 | 251 |
| chr12 | 31500758 | 31501008 | 251 |
| chr11 | 92472214 | 92472464 | 251 |
| chr11 | 21647377 | 21647627 | 251 |
| chr11 | 14191800 | 14192050 | 251 |
| chr10 | 47390252 | 47390502 | 251 |
| chr1  | 73010493 | 73010743 | 251 |
| chr1  | 47172485 | 47172735 | 251 |
| chrX  | 78974301 | 78974550 | 250 |
| chrX  | 77638018 | 77638267 | 250 |
| chrX  | 77191897 | 77192146 | 250 |
| chrX  | 74792351 | 74792600 | 250 |
| chrX  | 74634312 | 74634561 | 250 |
| chrX  | 73992180 | 73992429 | 250 |
| chrX  | 71851615 | 71851864 | 250 |
| chrX  | 63159464 | 63159713 | 250 |
| chrX  | 50587737 | 50587986 | 250 |
| chrX  | 39179454 | 39179703 | 250 |
| chrX  | 37935126 | 37935375 | 250 |
| chrX  | 35942041 | 35942290 | 250 |
| chrX  | 22552821 | 22553070 | 250 |
| chrX  | 21196667 | 21196916 | 250 |
| chrX  | 19695818 | 19696067 | 250 |
| chrX  | 19471821 | 19472070 | 250 |
| chrX  | 18938399 | 18938648 | 250 |
| chrX  | 13073112 | 13073361 | 250 |
| chrX  | 8868040  | 8868289  | 250 |
| chrX  | 5592891  | 5593140  | 250 |
| chr9  | 41523450 | 41523699 | 250 |
| chr9  | 18258304 | 18258553 | 250 |

|       |           |           |     |
|-------|-----------|-----------|-----|
| chr8  | 115729919 | 115730168 | 250 |
| chr8  | 77386220  | 77386469  | 250 |
| chr7  | 103084697 | 103084946 | 250 |
| chr7  | 58197204  | 58197453  | 250 |
| chr7  | 46394285  | 46394534  | 250 |
| chr7  | 45724480  | 45724729  | 250 |
| chr7  | 44900194  | 44900443  | 250 |
| chr7  | 9128994   | 9129243   | 250 |
| chr6  | 113384640 | 113384889 | 250 |
| chr6  | 107096882 | 107097131 | 250 |
| chr4  | 66894821  | 66895070  | 250 |
| chr4  | 32626532  | 32626781  | 250 |
| chr4  | 15657792  | 15658041  | 250 |
| chr3  | 116331289 | 116331538 | 250 |
| chr3  | 110685830 | 110686079 | 250 |
| chr3  | 23867104  | 23867353  | 250 |
| chr29 | 31826350  | 31826599  | 250 |
| chr29 | 30819299  | 30819548  | 250 |
| chr28 | 41274149  | 41274398  | 250 |
| chr28 | 41181477  | 41181726  | 250 |
| chr28 | 23513868  | 23514117  | 250 |
| chr27 | 38779553  | 38779802  | 250 |
| chr26 | 22398382  | 22398631  | 250 |
| chr25 | 15255220  | 15255469  | 250 |
| chr24 | 33488852  | 33489101  | 250 |
| chr24 | 2043016   | 2043265   | 250 |
| chr23 | 46365140  | 46365389  | 250 |
| chr23 | 43794832  | 43795081  | 250 |
| chr22 | 50585929  | 50586178  | 250 |
| chr21 | 20315204  | 20315453  | 250 |
| chr20 | 10863744  | 10863993  | 250 |
| chr20 | 4992419   | 4992668   | 250 |
| chr20 | 862367    | 862616    | 250 |
| chr2  | 95147064  | 95147313  | 250 |
| chr2  | 5183653   | 5183902   | 250 |
| chr19 | 62853464  | 62853713  | 250 |
| chr19 | 56633062  | 56633311  | 250 |
| chr19 | 54599483  | 54599732  | 250 |
| chr19 | 37872418  | 37872667  | 250 |
| chr19 | 14851165  | 14851414  | 250 |
| chr18 | 51617410  | 51617659  | 250 |
| chr18 | 51305580  | 51305829  | 250 |
| chr18 | 12593700  | 12593949  | 250 |
| chr17 | 68584524  | 68584773  | 250 |
| chr17 | 66867749  | 66867998  | 250 |
| chr17 | 66184093  | 66184342  | 250 |
| chr17 | 58716635  | 58716884  | 250 |
| chr16 | 68641345  | 68641594  | 250 |
| chr16 | 60377703  | 60377952  | 250 |
| chr16 | 47182777  | 47183026  | 250 |



|       |           |           |     |
|-------|-----------|-----------|-----|
| chr16 | 47032158  | 47032407  | 250 |
| chr15 | 53918793  | 53919042  | 250 |
| chr15 | 31627383  | 31627632  | 250 |
| chr15 | 25322378  | 25322627  | 250 |
| chr14 | 67973001  | 67973250  | 250 |
| chr14 | 31013928  | 31014177  | 250 |
| chr14 | 15711137  | 15711386  | 250 |
| chr14 | 7507301   | 7507550   | 250 |
| chr13 | 81083869  | 81084118  | 250 |
| chr13 | 79244986  | 79245235  | 250 |
| chr13 | 55340610  | 55340859  | 250 |
| chr13 | 28498465  | 28498714  | 250 |
| chr12 | 76630944  | 76631193  | 250 |
| chr12 | 35782241  | 35782490  | 250 |
| chr12 | 20903481  | 20903730  | 250 |
| chr11 | 71099407  | 71099656  | 250 |
| chr11 | 44990029  | 44990278  | 250 |
| chr11 | 28313193  | 28313442  | 250 |
| chr10 | 84399948  | 84400197  | 250 |
| chr10 | 17519796  | 17520045  | 250 |
| chr1  | 145750135 | 145750384 | 250 |
| chr1  | 74599616  | 74599865  | 250 |
| chrX  | 76698027  | 76698275  | 249 |
| chrX  | 61887688  | 61887936  | 249 |
| chrX  | 60262119  | 60262367  | 249 |
| chrX  | 60055339  | 60055587  | 249 |
| chrX  | 56684033  | 56684281  | 249 |
| chrX  | 51660917  | 51661165  | 249 |
| chrX  | 48064992  | 48065240  | 249 |
| chrX  | 20497635  | 20497883  | 249 |
| chrX  | 13541211  | 13541459  | 249 |
| chrX  | 12996062  | 12996310  | 249 |
| chrX  | 9404447   | 9404695   | 249 |
| chr9  | 77743563  | 77743811  | 249 |
| chr9  | 65950377  | 65950625  | 249 |
| chr9  | 30852404  | 30852652  | 249 |
| chr8  | 70664257  | 70664505  | 249 |
| chr7  | 17094616  | 17094864  | 249 |
| chr7  | 13329835  | 13330083  | 249 |
| chr7  | 2948076   | 2948324   | 249 |
| chr6  | 93680819  | 93681067  | 249 |
| chr6  | 26201064  | 26201312  | 249 |
| chr5  | 117619541 | 117619789 | 249 |
| chr5  | 73945676  | 73945924  | 249 |
| chr5  | 61258159  | 61258407  | 249 |
| chr3  | 124413765 | 124414013 | 249 |
| chr3  | 124077859 | 124078107 | 249 |
| chr3  | 121865952 | 121866200 | 249 |
| chr3  | 117327200 | 117327448 | 249 |
| chr3  | 105414945 | 105415193 | 249 |

|       |           |           |     |
|-------|-----------|-----------|-----|
| chr3  | 99592708  | 99592956  | 249 |
| chr3  | 30548742  | 30548990  | 249 |
| chr3  | 30332227  | 30332475  | 249 |
| chr3  | 23826874  | 23827122  | 249 |
| chr29 | 51679887  | 51680135  | 249 |
| chr29 | 34745877  | 34746125  | 249 |
| chr29 | 33746751  | 33746999  | 249 |
| chr29 | 26387482  | 26387730  | 249 |
| chr29 | 21730894  | 21731142  | 249 |
| chr28 | 40370916  | 40371164  | 249 |
| chr28 | 26504601  | 26504849  | 249 |
| chr27 | 45235515  | 45235763  | 249 |
| chr26 | 43907577  | 43907825  | 249 |
| chr25 | 34376066  | 34376314  | 249 |
| chr25 | 31875384  | 31875632  | 249 |
| chr25 | 26079365  | 26079613  | 249 |
| chr25 | 2885371   | 2885619   | 249 |
| chr24 | 60191968  | 60192216  | 249 |
| chr24 | 46861374  | 46861622  | 249 |
| chr24 | 20359624  | 20359872  | 249 |
| chr24 | 3995145   | 3995393   | 249 |
| chr23 | 44496064  | 44496312  | 249 |
| chr23 | 43060669  | 43060917  | 249 |
| chr23 | 27815468  | 27815716  | 249 |
| chr23 | 16487846  | 16488094  | 249 |
| chr23 | 13627143  | 13627391  | 249 |
| chr23 | 7368884   | 7369132   | 249 |
| chr22 | 58445841  | 58446089  | 249 |
| chr22 | 7271098   | 7271346   | 249 |
| chr21 | 34589509  | 34589757  | 249 |
| chr21 | 25581561  | 25581809  | 249 |
| chr21 | 18457613  | 18457861  | 249 |
| chr21 | 13706602  | 13706850  | 249 |
| chr21 | 13214064  | 13214312  | 249 |
| chr20 | 43798788  | 43799036  | 249 |
| chr20 | 8591739   | 8591987   | 249 |
| chr20 | 6320725   | 6320973   | 249 |
| chr20 | 5013136   | 5013384   | 249 |
| chr20 | 1047125   | 1047373   | 249 |
| chr2  | 130154453 | 130154701 | 249 |
| chr2  | 94798423  | 94798671  | 249 |
| chr2  | 22087719  | 22087967  | 249 |
| chr19 | 58232888  | 58233136  | 249 |
| chr19 | 30292757  | 30293005  | 249 |
| chr18 | 54357524  | 54357772  | 249 |
| chr18 | 52753131  | 52753379  | 249 |
| chr18 | 43155149  | 43155397  | 249 |
| chr18 | 23488328  | 23488576  | 249 |
| chr18 | 22346159  | 22346407  | 249 |
| chr18 | 10938253  | 10938501  | 249 |

|       |               |           |     |
|-------|---------------|-----------|-----|
| chr18 | 9741281       | 9741529   | 249 |
| chr18 | 663336 663584 |           | 249 |
| chr17 | 18507178      | 18507426  | 249 |
| chr17 | 2897794       | 2898042   | 249 |
| chr16 | 77290186      | 77290434  | 249 |
| chr16 | 68450424      | 68450672  | 249 |
| chr16 | 47423137      | 47423385  | 249 |
| chr16 | 38780790      | 38781038  | 249 |
| chr16 | 23845763      | 23846011  | 249 |
| chr15 | 74597561      | 74597809  | 249 |
| chr15 | 62755898      | 62756146  | 249 |
| chr15 | 35719886      | 35720134  | 249 |
| chr15 | 23868610      | 23868858  | 249 |
| chr14 | 21762610      | 21762858  | 249 |
| chr14 | 17593996      | 17594244  | 249 |
| chr13 | 71369915      | 71370163  | 249 |
| chr13 | 61885359      | 61885607  | 249 |
| chr13 | 56975074      | 56975322  | 249 |
| chr13 | 37806354      | 37806602  | 249 |
| chr12 | 32154704      | 32154952  | 249 |
| chr12 | 30968962      | 30969210  | 249 |
| chr12 | 9117511       | 9117759   | 249 |
| chr11 | 12881475      | 12881723  | 249 |
| chr10 | 84204424      | 84204672  | 249 |
| chr10 | 80442503      | 80442751  | 249 |
| chr10 | 70329568      | 70329816  | 249 |
| chr10 | 70308777      | 70309025  | 249 |
| chr10 | 51516241      | 51516489  | 249 |
| chr10 | 24179424      | 24179672  | 249 |
| chr10 | 20635198      | 20635446  | 249 |
| chr10 | 7144888       | 7145136   | 249 |
| chr10 | 5300849       | 5301097   | 249 |
| chr10 | 3515555       | 3515803   | 249 |
| chrX  | 76759195      | 76759442  | 248 |
| chrX  | 72944181      | 72944428  | 248 |
| chrX  | 72440959      | 72441206  | 248 |
| chrX  | 56572463      | 56572710  | 248 |
| chrX  | 47878146      | 47878393  | 248 |
| chrX  | 19493985      | 19494232  | 248 |
| chrX  | 46339 46586   |           | 248 |
| chr9  | 75095345      | 75095592  | 248 |
| chr8  | 102858755     | 102859002 | 248 |
| chr8  | 77809246      | 77809493  | 248 |
| chr8  | 76005637      | 76005884  | 248 |
| chr8  | 70674102      | 70674349  | 248 |
| chr8  | 47595961      | 47596208  | 248 |
| chr7  | 81247447      | 81247694  | 248 |
| chr7  | 70706113      | 70706360  | 248 |
| chr7  | 45253791      | 45254038  | 248 |
| chr7  | 15437160      | 15437407  | 248 |

|       |           |           |     |
|-------|-----------|-----------|-----|
| chr7  | 6983001   | 6983248   | 248 |
| chr6  | 109941831 | 109942078 | 248 |
| chr6  | 99351338  | 99351585  | 248 |
| chr5  | 125216600 | 125216847 | 248 |
| chr5  | 125134505 | 125134752 | 248 |
| chr5  | 119390204 | 119390451 | 248 |
| chr5  | 1084296   | 1084543   | 248 |
| chr4  | 38533020  | 38533267  | 248 |
| chr3  | 115476313 | 115476560 | 248 |
| chr3  | 110782653 | 110782900 | 248 |
| chr3  | 56589409  | 56589656  | 248 |
| chr3  | 52448754  | 52449001  | 248 |
| chr3  | 31691390  | 31691637  | 248 |
| chr3  | 20408803  | 20409050  | 248 |
| chr29 | 34732718  | 34732965  | 248 |
| chr29 | 18264400  | 18264647  | 248 |
| chr28 | 43969751  | 43969998  | 248 |
| chr28 | 42854518  | 42854765  | 248 |
| chr28 | 41273504  | 41273751  | 248 |
| chr27 | 35929029  | 35929276  | 248 |
| chr27 | 16040022  | 16040269  | 248 |
| chr26 | 51014911  | 51015158  | 248 |
| chr26 | 44205298  | 44205545  | 248 |
| chr25 | 43473078  | 43473325  | 248 |
| chr25 | 34027635  | 34027882  | 248 |
| chr25 | 28186913  | 28187160  | 248 |
| chr25 | 1913143   | 1913390   | 248 |
| chr24 | 59456645  | 59456892  | 248 |
| chr24 | 59298357  | 59298604  | 248 |
| chr24 | 47994873  | 47995120  | 248 |
| chr24 | 35991853  | 35992100  | 248 |
| chr24 | 22045995  | 22046242  | 248 |
| chr23 | 52902585  | 52902832  | 248 |
| chr22 | 7237994   | 7238241   | 248 |
| chr21 | 61080801  | 61081048  | 248 |
| chr21 | 25949273  | 25949520  | 248 |
| chr21 | 1973430   | 1973677   | 248 |
| chr20 | 71355172  | 71355419  | 248 |
| chr20 | 66665326  | 66665573  | 248 |
| chr20 | 60938087  | 60938334  | 248 |
| chr20 | 40250372  | 40250619  | 248 |
| chr2  | 122211712 | 122211959 | 248 |
| chr2  | 111815810 | 111816057 | 248 |
| chr2  | 99346306  | 99346553  | 248 |
| chr19 | 63581094  | 63581341  | 248 |
| chr19 | 59215158  | 59215405  | 248 |
| chr19 | 40909060  | 40909307  | 248 |
| chr19 | 38874241  | 38874488  | 248 |
| chr19 | 32710397  | 32710644  | 248 |
| chr18 | 16729952  | 16730199  | 248 |

|       |               |           |     |
|-------|---------------|-----------|-----|
| chr17 | 19218724      | 19218971  | 248 |
| chr17 | 14833916      | 14834163  | 248 |
| chr16 | 68762527      | 68762774  | 248 |
| chr16 | 60416906      | 60417153  | 248 |
| chr16 | 50015074      | 50015321  | 248 |
| chr16 | 46430606      | 46430853  | 248 |
| chr15 | 83233928      | 83234175  | 248 |
| chr15 | 81673557      | 81673804  | 248 |
| chr15 | 74558392      | 74558639  | 248 |
| chr15 | 37811974      | 37812221  | 248 |
| chr15 | 22183323      | 22183570  | 248 |
| chr15 | 14288255      | 14288502  | 248 |
| chr14 | 7403458       | 7403705   | 248 |
| chr14 | 192565 192812 | 248       |     |
| chr13 | 72592846      | 72593093  | 248 |
| chr13 | 41367420      | 41367667  | 248 |
| chr13 | 27913350      | 27913597  | 248 |
| chr13 | 15713851      | 15714098  | 248 |
| chr12 | 53333170      | 53333417  | 248 |
| chr12 | 40307200      | 40307447  | 248 |
| chr12 | 31282520      | 31282767  | 248 |
| chr12 | 9570751       | 9570998   | 248 |
| chr11 | 90126870      | 90127117  | 248 |
| chr11 | 82668178      | 82668425  | 248 |
| chr11 | 63315393      | 63315640  | 248 |
| chr11 | 27409172      | 27409419  | 248 |
| chr10 | 88271520      | 88271767  | 248 |
| chr10 | 71211252      | 71211499  | 248 |
| chr10 | 66863333      | 66863580  | 248 |
| chr10 | 36897539      | 36897786  | 248 |
| chr10 | 10677511      | 10677758  | 248 |
| chr1  | 123079838     | 123080085 | 248 |
| chrX  | 81255191      | 81255437  | 247 |
| chrX  | 72072406      | 72072652  | 247 |
| chrX  | 70696668      | 70696914  | 247 |
| chrX  | 60061058      | 60061304  | 247 |
| chrX  | 58783786      | 58784032  | 247 |
| chrX  | 55816917      | 55817163  | 247 |
| chrX  | 49694418      | 49694664  | 247 |
| chrX  | 36848272      | 36848518  | 247 |
| chrX  | 36446186      | 36446432  | 247 |
| chrX  | 35730685      | 35730931  | 247 |
| chrX  | 25346212      | 25346458  | 247 |
| chrX  | 23588645      | 23588891  | 247 |
| chrX  | 22540191      | 22540437  | 247 |
| chr9  | 100097139     | 100097385 | 247 |
| chr8  | 86960271      | 86960517  | 247 |
| chr8  | 76770103      | 76770349  | 247 |
| chr8  | 65289707      | 65289953  | 247 |
| chr8  | 8584646       | 8584892   | 247 |

|       |           |           |     |
|-------|-----------|-----------|-----|
| chr8  | 8507400   | 8507646   | 247 |
| chr7  | 65075358  | 65075604  | 247 |
| chr7  | 16550838  | 16551084  | 247 |
| chr6  | 115764293 | 115764539 | 247 |
| chr6  | 101867691 | 101867937 | 247 |
| chr6  | 74537524  | 74537770  | 247 |
| chr6  | 69541176  | 69541422  | 247 |
| chr5  | 104050255 | 104050501 | 247 |
| chr5  | 94640834  | 94641080  | 247 |
| chr4  | 99523485  | 99523731  | 247 |
| chr4  | 79048090  | 79048336  | 247 |
| chr4  | 9247540   | 9247786   | 247 |
| chr3  | 126067539 | 126067785 | 247 |
| chr3  | 121098594 | 121098840 | 247 |
| chr3  | 116167498 | 116167744 | 247 |
| chr3  | 114201364 | 114201610 | 247 |
| chr29 | 34842768  | 34843014  | 247 |
| chr28 | 34474386  | 34474632  | 247 |
| chr28 | 34104402  | 34104648  | 247 |
| chr27 | 15377105  | 15377351  | 247 |
| chr26 | 33360052  | 33360298  | 247 |
| chr25 | 42715355  | 42715601  | 247 |
| chr25 | 37863642  | 37863888  | 247 |
| chr25 | 28273668  | 28273914  | 247 |
| chr25 | 11575429  | 11575675  | 247 |
| chr24 | 59553925  | 59554171  | 247 |
| chr24 | 1208191   | 1208437   | 247 |
| chr24 | 1206592   | 1206838   | 247 |
| chr23 | 19998077  | 19998323  | 247 |
| chr22 | 16542053  | 16542299  | 247 |
| chr22 | 15559712  | 15559958  | 247 |
| chr20 | 62666167  | 62666413  | 247 |
| chr20 | 21436126  | 21436372  | 247 |
| chr2  | 135830295 | 135830541 | 247 |
| chr2  | 135730332 | 135730578 | 247 |
| chr2  | 124320161 | 124320407 | 247 |
| chr19 | 44356388  | 44356634  | 247 |
| chr19 | 42393596  | 42393842  | 247 |
| chr19 | 30872786  | 30873032  | 247 |
| chr19 | 25777600  | 25777846  | 247 |
| chr18 | 56888938  | 56889184  | 247 |
| chr18 | 51526787  | 51527033  | 247 |
| chr18 | 40335956  | 40336202  | 247 |
| chr18 | 22329076  | 22329322  | 247 |
| chr18 | 12031510  | 12031756  | 247 |
| chr18 | 11985225  | 11985471  | 247 |
| chr17 | 70505417  | 70505663  | 247 |
| chr17 | 61004987  | 61005233  | 247 |
| chr17 | 48593480  | 48593726  | 247 |
| chr17 | 37622975  | 37623221  | 247 |

|       |           |           |     |
|-------|-----------|-----------|-----|
| chr16 | 77587439  | 77587685  | 247 |
| chr16 | 41347448  | 41347694  | 247 |
| chr16 | 17672895  | 17673141  | 247 |
| chr15 | 74467092  | 74467338  | 247 |
| chr14 | 64013342  | 64013588  | 247 |
| chr14 | 61323868  | 61324114  | 247 |
| chr14 | 43118276  | 43118522  | 247 |
| chr14 | 13931858  | 13932104  | 247 |
| chr14 | 5728571   | 5728817   | 247 |
| chr13 | 79696090  | 79696336  | 247 |
| chr13 | 43615075  | 43615321  | 247 |
| chr12 | 32830724  | 32830970  | 247 |
| chr12 | 31688333  | 31688579  | 247 |
| chr11 | 77593056  | 77593302  | 247 |
| chr11 | 70917508  | 70917754  | 247 |
| chr11 | 10552056  | 10552302  | 247 |
| chr10 | 88075570  | 88075816  | 247 |
| chr10 | 17508641  | 17508887  | 247 |
| chr10 | 12871579  | 12871825  | 247 |
| chr1  | 68856946  | 68857192  | 247 |
| chr1  | 66304185  | 66304431  | 247 |
| chrX  | 80207403  | 80207648  | 246 |
| chrX  | 80176595  | 80176840  | 246 |
| chrX  | 73278344  | 73278589  | 246 |
| chrX  | 70324037  | 70324282  | 246 |
| chrX  | 69660849  | 69661094  | 246 |
| chrX  | 64865692  | 64865937  | 246 |
| chrX  | 61908777  | 61909022  | 246 |
| chrX  | 55927947  | 55928192  | 246 |
| chrX  | 52722703  | 52722948  | 246 |
| chrX  | 46534552  | 46534797  | 246 |
| chrX  | 31244099  | 31244344  | 246 |
| chrX  | 18912510  | 18912755  | 246 |
| chrX  | 18590027  | 18590272  | 246 |
| chrX  | 12412706  | 12412951  | 246 |
| chrX  | 11433502  | 11433747  | 246 |
| chrX  | 9698951   | 9699196   | 246 |
| chrX  | 8192551   | 8192796   | 246 |
| chr9  | 27429182  | 27429427  | 246 |
| chr8  | 112156179 | 112156424 | 246 |
| chr7  | 59788620  | 59788865  | 246 |
| chr7  | 46551054  | 46551299  | 246 |
| chr7  | 43520856  | 43521101  | 246 |
| chr5  | 60996636  | 60996881  | 246 |
| chr5  | 52960340  | 52960585  | 246 |
| chr4  | 72613756  | 72614001  | 246 |
| chr4  | 52515224  | 52515469  | 246 |
| chr4  | 49153325  | 49153570  | 246 |
| chr3  | 121385624 | 121385869 | 246 |
| chr3  | 106063382 | 106063627 | 246 |

|       |           |           |     |
|-------|-----------|-----------|-----|
| chr3  | 105233266 | 105233511 | 246 |
| chr3  | 48214500  | 48214745  | 246 |
| chr3  | 30429467  | 30429712  | 246 |
| chr3  | 22387788  | 22388033  | 246 |
| chr3  | 157439    | 157684    | 246 |
| chr29 | 48297979  | 48298224  | 246 |
| chr29 | 31375778  | 31376023  | 246 |
| chr28 | 25521445  | 25521690  | 246 |
| chr27 | 15557891  | 15558136  | 246 |
| chr26 | 22346119  | 22346364  | 246 |
| chr25 | 39408689  | 39408934  | 246 |
| chr25 | 37500531  | 37500776  | 246 |
| chr25 | 28052879  | 28053124  | 246 |
| chr25 | 2706394   | 2706639   | 246 |
| chr24 | 60872724  | 60872969  | 246 |
| chr24 | 20544969  | 20545214  | 246 |
| chr23 | 53264858  | 53265103  | 246 |
| chr23 | 49897212  | 49897457  | 246 |
| chr22 | 58700095  | 58700340  | 246 |
| chr22 | 30183643  | 30183888  | 246 |
| chr22 | 16131671  | 16131916  | 246 |
| chr21 | 60477069  | 60477314  | 246 |
| chr21 | 45540441  | 45540686  | 246 |
| chr20 | 75736220  | 75736465  | 246 |
| chr2  | 126942383 | 126942628 | 246 |
| chr19 | 60834653  | 60834898  | 246 |
| chr19 | 52040732  | 52040977  | 246 |
| chr19 | 35056150  | 35056395  | 246 |
| chr19 | 27527716  | 27527961  | 246 |
| chr19 | 11171540  | 11171785  | 246 |
| chr18 | 47768139  | 47768384  | 246 |
| chr18 | 39967458  | 39967703  | 246 |
| chr18 | 13135752  | 13135997  | 246 |
| chr17 | 64022989  | 64023234  | 246 |
| chr16 | 58645543  | 58645788  | 246 |
| chr16 | 55761555  | 55761800  | 246 |
| chr16 | 49672583  | 49672828  | 246 |
| chr16 | 1596623   | 1596868   | 246 |
| chr15 | 51681988  | 51682233  | 246 |
| chr15 | 33089976  | 33090221  | 246 |
| chr15 | 18342849  | 18343094  | 246 |
| chr14 | 9641740   | 9641985   | 246 |
| chr14 | 6825387   | 6825632   | 246 |
| chr13 | 76560952  | 76561197  | 246 |
| chr13 | 71123050  | 71123295  | 246 |
| chr12 | 77022291  | 77022536  | 246 |
| chr12 | 34362644  | 34362889  | 246 |
| chr12 | 32004837  | 32005082  | 246 |
| chr11 | 3831970   | 3832215   | 246 |
| chr10 | 17142690  | 17142935  | 246 |



|       |           |           |     |
|-------|-----------|-----------|-----|
| chr10 | 16868501  | 16868746  | 246 |
| chr1  | 118200266 | 118200511 | 246 |
| chr1  | 68862263  | 68862508  | 246 |
| chrX  | 77127753  | 77127997  | 245 |
| chrX  | 71922764  | 71923008  | 245 |
| chrX  | 69348236  | 69348480  | 245 |
| chrX  | 62534462  | 62534706  | 245 |
| chrX  | 61677481  | 61677725  | 245 |
| chrX  | 60870030  | 60870274  | 245 |
| chrX  | 59601764  | 59602008  | 245 |
| chrX  | 59005704  | 59005948  | 245 |
| chrX  | 58091084  | 58091328  | 245 |
| chrX  | 56348720  | 56348964  | 245 |
| chrX  | 48687011  | 48687255  | 245 |
| chrX  | 36700933  | 36701177  | 245 |
| chrX  | 36538237  | 36538481  | 245 |
| chrX  | 34555438  | 34555682  | 245 |
| chrX  | 21217098  | 21217342  | 245 |
| chrX  | 21060217  | 21060461  | 245 |
| chrX  | 11578189  | 11578433  | 245 |
| chrX  | 10636141  | 10636385  | 245 |
| chrX  | 6566453   | 6566697   | 245 |
| chrX  | 5537818   | 5538062   | 245 |
| chrX  | 2998471   | 2998715   | 245 |
| chr9  | 90717478  | 90717722  | 245 |
| chr9  | 61965024  | 61965268  | 245 |
| chr9  | 33775046  | 33775290  | 245 |
| chr8  | 116695388 | 116695632 | 245 |
| chr8  | 92300590  | 92300834  | 245 |
| chr8  | 24232679  | 24232923  | 245 |
| chr8  | 7704299   | 7704543   | 245 |
| chr7  | 97933061  | 97933305  | 245 |
| chr7  | 59934539  | 59934783  | 245 |
| chr7  | 46269899  | 46270143  | 245 |
| chr7  | 38316338  | 38316582  | 245 |
| chr6  | 106989386 | 106989630 | 245 |
| chr5  | 122318409 | 122318653 | 245 |
| chr5  | 118454500 | 118454744 | 245 |
| chr5  | 74592893  | 74593137  | 245 |
| chr5  | 35459911  | 35460155  | 245 |
| chr5  | 1138153   | 1138397   | 245 |
| chr4  | 118695682 | 118695926 | 245 |
| chr4  | 72593239  | 72593483  | 245 |
| chr4  | 67345296  | 67345540  | 245 |
| chr3  | 110067131 | 110067375 | 245 |
| chr3  | 47765090  | 47765334  | 245 |
| chr3  | 33504614  | 33504858  | 245 |
| chr3  | 22887830  | 22888074  | 245 |
| chr29 | 38752131  | 38752375  | 245 |
| chr29 | 27019140  | 27019384  | 245 |

|       |           |           |     |
|-------|-----------|-----------|-----|
| chr29 | 736688    | 736932    | 245 |
| chr28 | 34228144  | 34228388  | 245 |
| chr28 | 26971997  | 26972241  | 245 |
| chr28 | 7613234   | 7613478   | 245 |
| chr27 | 30474597  | 30474841  | 245 |
| chr27 | 26912743  | 26912987  | 245 |
| chr26 | 50355520  | 50355764  | 245 |
| chr26 | 48545719  | 48545963  | 245 |
| chr26 | 11340127  | 11340371  | 245 |
| chr25 | 41192519  | 41192763  | 245 |
| chr25 | 40095272  | 40095516  | 245 |
| chr25 | 27875885  | 27876129  | 245 |
| chr25 | 27147491  | 27147735  | 245 |
| chr25 | 22582826  | 22583070  | 245 |
| chr24 | 59954666  | 59954910  | 245 |
| chr24 | 51009149  | 51009393  | 245 |
| chr23 | 32898004  | 32898248  | 245 |
| chr23 | 11072018  | 11072262  | 245 |
| chr22 | 48063405  | 48063649  | 245 |
| chr22 | 39008178  | 39008422  | 245 |
| chr22 | 16261590  | 16261834  | 245 |
| chr21 | 66416238  | 66416482  | 245 |
| chr21 | 10002070  | 10002314  | 245 |
| chr21 | 7775748   | 7775992   | 245 |
| chr20 | 58453864  | 58454108  | 245 |
| chr20 | 8581326   | 8581570   | 245 |
| chr20 | 7424271   | 7424515   | 245 |
| chr20 | 761679    | 761923    | 245 |
| chr2  | 139401144 | 139401388 | 245 |
| chr2  | 130453260 | 130453504 | 245 |
| chr2  | 115034934 | 115035178 | 245 |
| chr2  | 21876045  | 21876289  | 245 |
| chr19 | 59191440  | 59191684  | 245 |
| chr19 | 51664354  | 51664598  | 245 |
| chr19 | 46875952  | 46876196  | 245 |
| chr19 | 41373605  | 41373849  | 245 |
| chr19 | 40843109  | 40843353  | 245 |
| chr19 | 26365362  | 26365606  | 245 |
| chr19 | 16332822  | 16333066  | 245 |
| chr18 | 53500638  | 53500882  | 245 |
| chr18 | 51709156  | 51709400  | 245 |
| chr18 | 11391967  | 11392211  | 245 |
| chr17 | 75033989  | 75034233  | 245 |
| chr17 | 70233498  | 70233742  | 245 |
| chr17 | 69386080  | 69386324  | 245 |
| chr17 | 63418186  | 63418430  | 245 |
| chr17 | 52174055  | 52174299  | 245 |
| chr17 | 49388285  | 49388529  | 245 |
| chr16 | 75728906  | 75729150  | 245 |
| chr16 | 75726726  | 75726970  | 245 |

|       |           |           |     |
|-------|-----------|-----------|-----|
| chr16 | 73869106  | 73869350  | 245 |
| chr16 | 73750816  | 73751060  | 245 |
| chr16 | 44679404  | 44679648  | 245 |
| chr15 | 63891238  | 63891482  | 245 |
| chr15 | 25122591  | 25122835  | 245 |
| chr14 | 77338702  | 77338946  | 245 |
| chr14 | 52538765  | 52539009  | 245 |
| chr14 | 7586908   | 7587152   | 245 |
| chr14 | 6510553   | 6510797   | 245 |
| chr13 | 75673632  | 75673876  | 245 |
| chr13 | 72459910  | 72460154  | 245 |
| chr13 | 66985381  | 66985625  | 245 |
| chr13 | 58999969  | 59000213  | 245 |
| chr13 | 55099818  | 55100062  | 245 |
| chr13 | 41332750  | 41332994  | 245 |
| chr12 | 80856693  | 80856937  | 245 |
| chr12 | 54225998  | 54226242  | 245 |
| chr12 | 14729954  | 14730198  | 245 |
| chr11 | 92078582  | 92078826  | 245 |
| chr11 | 91595657  | 91595901  | 245 |
| chr11 | 11734106  | 11734350  | 245 |
| chr10 | 86509142  | 86509386  | 245 |
| chr10 | 83022427  | 83022671  | 245 |
| chr10 | 64022124  | 64022368  | 245 |
| chr10 | 62963219  | 62963463  | 245 |
| chr1  | 1467016   | 1467260   | 245 |
| chrX  | 80819448  | 80819691  | 244 |
| chrX  | 79795834  | 79796077  | 244 |
| chrX  | 78679689  | 78679932  | 244 |
| chrX  | 75869219  | 75869462  | 244 |
| chrX  | 75485123  | 75485366  | 244 |
| chrX  | 73445948  | 73446191  | 244 |
| chrX  | 72130002  | 72130245  | 244 |
| chrX  | 65072980  | 65073223  | 244 |
| chrX  | 58527767  | 58528010  | 244 |
| chrX  | 55257421  | 55257664  | 244 |
| chrX  | 53663959  | 53664202  | 244 |
| chrX  | 37597000  | 37597243  | 244 |
| chrX  | 11555751  | 11555994  | 244 |
| chrX  | 11419187  | 11419430  | 244 |
| chrX  | 11257190  | 11257433  | 244 |
| chr9  | 26968578  | 26968821  | 244 |
| chr8  | 109282958 | 109283201 | 244 |
| chr8  | 93637186  | 93637429  | 244 |
| chr7  | 43776779  | 43777022  | 244 |
| chr7  | 37492309  | 37492552  | 244 |
| chr7  | 19491905  | 19492148  | 244 |
| chr7  | 14160873  | 14161116  | 244 |
| chr7  | 10049696  | 10049939  | 244 |
| chr5  | 112561869 | 112562112 | 244 |

|       |           |           |     |
|-------|-----------|-----------|-----|
| chr5  | 111261661 | 111261904 | 244 |
| chr5  | 79227516  | 79227759  | 244 |
| chr5  | 60004466  | 60004709  | 244 |
| chr5  | 59830239  | 59830482  | 244 |
| chr5  | 33509006  | 33509249  | 244 |
| chr5  | 31244201  | 31244444  | 244 |
| chr5  | 30811901  | 30812144  | 244 |
| chr5  | 28080521  | 28080764  | 244 |
| chr4  | 118057231 | 118057474 | 244 |
| chr4  | 66615314  | 66615557  | 244 |
| chr4  | 62687299  | 62687542  | 244 |
| chr3  | 124137976 | 124138219 | 244 |
| chr3  | 106526004 | 106526247 | 244 |
| chr3  | 74382457  | 74382700  | 244 |
| chr3  | 36672474  | 36672717  | 244 |
| chr3  | 35480565  | 35480808  | 244 |
| chr29 | 48700332  | 48700575  | 244 |
| chr29 | 47346610  | 47346853  | 244 |
| chr29 | 43442916  | 43443159  | 244 |
| chr29 | 37518624  | 37518867  | 244 |
| chr29 | 35648715  | 35648958  | 244 |
| chr27 | 35364490  | 35364733  | 244 |
| chr27 | 23597200  | 23597443  | 244 |
| chr26 | 39105915  | 39106158  | 244 |
| chr25 | 30499558  | 30499801  | 244 |
| chr25 | 14296558  | 14296801  | 244 |
| chr24 | 60753479  | 60753722  | 244 |
| chr24 | 51056724  | 51056967  | 244 |
| chr23 | 28823527  | 28823770  | 244 |
| chr22 | 59436963  | 59437206  | 244 |
| chr22 | 55791299  | 55791542  | 244 |
| chr22 | 30061297  | 30061540  | 244 |
| chr21 | 69169892  | 69170135  | 244 |
| chr21 | 50116426  | 50116669  | 244 |
| chr21 | 26296546  | 26296789  | 244 |
| chr21 | 25058996  | 25059239  | 244 |
| chr21 | 7064668   | 7064911   | 244 |
| chr2  | 131144847 | 131145090 | 244 |
| chr2  | 14480636  | 14480879  | 244 |
| chr19 | 61656245  | 61656488  | 244 |
| chr19 | 59512225  | 59512468  | 244 |
| chr19 | 54511625  | 54511868  | 244 |
| chr19 | 44670837  | 44671080  | 244 |
| chr19 | 41963074  | 41963317  | 244 |
| chr19 | 41374647  | 41374890  | 244 |
| chr19 | 23919498  | 23919741  | 244 |
| chr19 | 23718919  | 23719162  | 244 |
| chr19 | 23083014  | 23083257  | 244 |
| chr18 | 32865402  | 32865645  | 244 |
| chr18 | 23517113  | 23517356  | 244 |

|       |               |           |     |
|-------|---------------|-----------|-----|
| chr18 | 14367237      | 14367480  | 244 |
| chr18 | 13200140      | 13200383  | 244 |
| chr17 | 72756861      | 72757104  | 244 |
| chr17 | 72662992      | 72663235  | 244 |
| chr17 | 67968166      | 67968409  | 244 |
| chr17 | 58837992      | 58838235  | 244 |
| chr17 | 54486858      | 54487101  | 244 |
| chr17 | 18607000      | 18607243  | 244 |
| chr16 | 59413519      | 59413762  | 244 |
| chr16 | 38862703      | 38862946  | 244 |
| chr15 | 75353350      | 75353593  | 244 |
| chr15 | 32069810      | 32070053  | 244 |
| chr15 | 27931048      | 27931291  | 244 |
| chr14 | 72595573      | 72595816  | 244 |
| chr14 | 26468991      | 26469234  | 244 |
| chr13 | 65069598      | 65069841  | 244 |
| chr13 | 57245123      | 57245366  | 244 |
| chr13 | 42864312      | 42864555  | 244 |
| chr13 | 41995066      | 41995309  | 244 |
| chr13 | 28539194      | 28539437  | 244 |
| chr13 | 22164109      | 22164352  | 244 |
| chr12 | 22966953      | 22967196  | 244 |
| chr11 | 80405877      | 80406120  | 244 |
| chr11 | 19863626      | 19863869  | 244 |
| chr11 | 11150498      | 11150741  | 244 |
| chr11 | 3252271       | 3252514   | 244 |
| chr10 | 93106448      | 93106691  | 244 |
| chr10 | 57375096      | 57375339  | 244 |
| chr10 | 17042815      | 17043058  | 244 |
| chr10 | 4864042       | 4864285   | 244 |
| chr1  | 123092586     | 123092829 | 244 |
| chrX  | 82893490      | 82893732  | 243 |
| chrX  | 74032554      | 74032796  | 243 |
| chrX  | 62892708      | 62892950  | 243 |
| chrX  | 61472968      | 61473210  | 243 |
| chrX  | 58866565      | 58866807  | 243 |
| chrX  | 58803046      | 58803288  | 243 |
| chrX  | 34072935      | 34073177  | 243 |
| chrX  | 27291542      | 27291784  | 243 |
| chrX  | 18367244      | 18367486  | 243 |
| chrX  | 12023213      | 12023455  | 243 |
| chrX  | 7354201       | 7354443   | 243 |
| chrX  | 2185203       | 2185445   | 243 |
| chrX  | 668818 669060 | 243       |     |
| chrX  | 372494 372736 | 243       |     |
| chr9  | 90533564      | 90533806  | 243 |
| chr7  | 50587706      | 50587948  | 243 |
| chr6  | 121699046     | 121699288 | 243 |
| chr6  | 108658894     | 108659136 | 243 |
| chr6  | 70883180      | 70883422  | 243 |

|       |           |           |     |
|-------|-----------|-----------|-----|
| chr6  | 24639333  | 24639575  | 243 |
| chr4  | 124332193 | 124332435 | 243 |
| chr4  | 121569815 | 121570057 | 243 |
| chr4  | 71682231  | 71682473  | 243 |
| chr4  | 66689427  | 66689669  | 243 |
| chr3  | 124556039 | 124556281 | 243 |
| chr3  | 116144165 | 116144407 | 243 |
| chr3  | 113083311 | 113083553 | 243 |
| chr29 | 48880927  | 48881169  | 243 |
| chr28 | 12432962  | 12433204  | 243 |
| chr27 | 28481011  | 28481253  | 243 |
| chr27 | 17252629  | 17252871  | 243 |
| chr27 | 16719093  | 16719335  | 243 |
| chr26 | 45930358  | 45930600  | 243 |
| chr26 | 44795016  | 44795258  | 243 |
| chr26 | 44081590  | 44081832  | 243 |
| chr26 | 39680517  | 39680759  | 243 |
| chr26 | 13865800  | 13866042  | 243 |
| chr25 | 35507417  | 35507659  | 243 |
| chr25 | 31874169  | 31874411  | 243 |
| chr24 | 64983652  | 64983894  | 243 |
| chr24 | 61068053  | 61068295  | 243 |
| chr24 | 20891482  | 20891724  | 243 |
| chr24 | 1218344   | 1218586   | 243 |
| chr23 | 32685361  | 32685603  | 243 |
| chr23 | 20361184  | 20361426  | 243 |
| chr23 | 20018627  | 20018869  | 243 |
| chr23 | 19795024  | 19795266  | 243 |
| chr23 | 10547604  | 10547846  | 243 |
| chr22 | 57380262  | 57380504  | 243 |
| chr22 | 30056517  | 30056759  | 243 |
| chr22 | 5890559   | 5890801   | 243 |
| chr21 | 60938877  | 60939119  | 243 |
| chr21 | 34457305  | 34457547  | 243 |
| chr21 | 27376278  | 27376520  | 243 |
| chr21 | 13643906  | 13644148  | 243 |
| chr2  | 132448643 | 132448885 | 243 |
| chr2  | 129377514 | 129377756 | 243 |
| chr2  | 18839274  | 18839516  | 243 |
| chr19 | 54851106  | 54851348  | 243 |
| chr19 | 54791954  | 54792196  | 243 |
| chr19 | 42301624  | 42301866  | 243 |
| chr19 | 38631624  | 38631866  | 243 |
| chr18 | 61929877  | 61930119  | 243 |
| chr18 | 56737617  | 56737859  | 243 |
| chr18 | 52678744  | 52678986  | 243 |
| chr18 | 45529693  | 45529935  | 243 |
| chr18 | 34879414  | 34879656  | 243 |
| chr18 | 33565370  | 33565612  | 243 |
| chr18 | 23493126  | 23493368  | 243 |

|       |           |           |     |
|-------|-----------|-----------|-----|
| chr18 | 23172115  | 23172357  | 243 |
| chr18 | 13556642  | 13556884  | 243 |
| chr18 | 11986280  | 11986522  | 243 |
| chr17 | 72748564  | 72748806  | 243 |
| chr17 | 59133426  | 59133668  | 243 |
| chr16 | 74046953  | 74047195  | 243 |
| chr16 | 73725092  | 73725334  | 243 |
| chr16 | 46997136  | 46997378  | 243 |
| chr15 | 73745327  | 73745569  | 243 |
| chr15 | 64227438  | 64227680  | 243 |
| chr15 | 51564674  | 51564916  | 243 |
| chr15 | 26751184  | 26751426  | 243 |
| chr14 | 28069480  | 28069722  | 243 |
| chr14 | 7435648   | 7435890   | 243 |
| chr14 | 7364330   | 7364572   | 243 |
| chr14 | 1097227   | 1097469   | 243 |
| chr14 | 1070814   | 1071056   | 243 |
| chr13 | 78591449  | 78591691  | 243 |
| chr13 | 53916808  | 53917050  | 243 |
| chr13 | 35646962  | 35647204  | 243 |
| chr13 | 25453519  | 25453761  | 243 |
| chr13 | 11034683  | 11034925  | 243 |
| chr12 | 83890719  | 83890961  | 243 |
| chr12 | 32230310  | 32230552  | 243 |
| chr12 | 24625306  | 24625548  | 243 |
| chr11 | 84287830  | 84288072  | 243 |
| chr11 | 74852981  | 74853223  | 243 |
| chr11 | 69093421  | 69093663  | 243 |
| chr11 | 62715920  | 62716162  | 243 |
| chr11 | 14175072  | 14175314  | 243 |
| chr10 | 36615317  | 36615559  | 243 |
| chr10 | 17272117  | 17272359  | 243 |
| chr1  | 147251032 | 147251274 | 243 |
| chr1  | 91768312  | 91768554  | 243 |
| chrX  | 80184458  | 80184699  | 242 |
| chrX  | 71687082  | 71687323  | 242 |
| chrX  | 70878109  | 70878350  | 242 |
| chrX  | 69746218  | 69746459  | 242 |
| chrX  | 53928229  | 53928470  | 242 |
| chrX  | 48403828  | 48404069  | 242 |
| chrX  | 47471797  | 47472038  | 242 |
| chrX  | 36079283  | 36079524  | 242 |
| chrX  | 35985766  | 35986007  | 242 |
| chrX  | 34039837  | 34040078  | 242 |
| chrX  | 21594332  | 21594573  | 242 |
| chrX  | 21313542  | 21313783  | 242 |
| chrX  | 20503638  | 20503879  | 242 |
| chrX  | 10113574  | 10113815  | 242 |
| chrX  | 7539670   | 7539911   | 242 |
| chr9  | 104895579 | 104895820 | 242 |

|       |           |           |     |
|-------|-----------|-----------|-----|
| chr8  | 110444367 | 110444608 | 242 |
| chr8  | 58222833  | 58223074  | 242 |
| chr7  | 1142140   | 1142381   | 242 |
| chr6  | 120776774 | 120777015 | 242 |
| chr6  | 16819190  | 16819431  | 242 |
| chr5  | 121460304 | 121460545 | 242 |
| chr5  | 111780511 | 111780752 | 242 |
| chr5  | 111475935 | 111476176 | 242 |
| chr5  | 30279534  | 30279775  | 242 |
| chr5  | 29189760  | 29190001  | 242 |
| chr4  | 107922606 | 107922847 | 242 |
| chr3  | 118866613 | 118866854 | 242 |
| chr3  | 117227463 | 117227704 | 242 |
| chr3  | 114470698 | 114470939 | 242 |
| chr3  | 52006459  | 52006700  | 242 |
| chr29 | 26593643  | 26593884  | 242 |
| chr28 | 42127620  | 42127861  | 242 |
| chr27 | 40306728  | 40306969  | 242 |
| chr26 | 42566765  | 42567006  | 242 |
| chr25 | 42746379  | 42746620  | 242 |
| chr25 | 35696296  | 35696537  | 242 |
| chr25 | 33407158  | 33407399  | 242 |
| chr25 | 4852915   | 4853156   | 242 |
| chr24 | 36949312  | 36949553  | 242 |
| chr24 | 35355877  | 35356118  | 242 |
| chr23 | 46343397  | 46343638  | 242 |
| chr23 | 35466721  | 35466962  | 242 |
| chr23 | 27958084  | 27958325  | 242 |
| chr22 | 30092331  | 30092572  | 242 |
| chr21 | 57575635  | 57575876  | 242 |
| chr21 | 20623893  | 20624134  | 242 |
| chr21 | 13955053  | 13955294  | 242 |
| chr20 | 66355256  | 66355497  | 242 |
| chr20 | 34685363  | 34685604  | 242 |
| chr20 | 1550009   | 1550250   | 242 |
| chr2  | 139408510 | 139408751 | 242 |
| chr2  | 111415698 | 111415939 | 242 |
| chr19 | 56005553  | 56005794  | 242 |
| chr19 | 40449514  | 40449755  | 242 |
| chr19 | 39541664  | 39541905  | 242 |
| chr19 | 27097750  | 27097991  | 242 |
| chr19 | 16733208  | 16733449  | 242 |
| chr19 | 13681062  | 13681303  | 242 |
| chr19 | 10981679  | 10981920  | 242 |
| chr19 | 8394020   | 8394261   | 242 |
| chr18 | 57329005  | 57329246  | 242 |
| chr18 | 54199563  | 54199804  | 242 |
| chr18 | 24134772  | 24135013  | 242 |
| chr18 | 11038795  | 11039036  | 242 |
| chr18 | 10275439  | 10275680  | 242 |



|       |           |           |     |
|-------|-----------|-----------|-----|
| chr18 | 2541696   | 2541937   | 242 |
| chr17 | 70066426  | 70066667  | 242 |
| chr17 | 68053494  | 68053735  | 242 |
| chr17 | 15207083  | 15207324  | 242 |
| chr17 | 5500276   | 5500517   | 242 |
| chr16 | 54335368  | 54335609  | 242 |
| chr16 | 43862536  | 43862777  | 242 |
| chr16 | 42167740  | 42167981  | 242 |
| chr16 | 6673379   | 6673620   | 242 |
| chr15 | 75220740  | 75220981  | 242 |
| chr15 | 32111911  | 32112152  | 242 |
| chr15 | 25461593  | 25461834  | 242 |
| chr15 | 24321300  | 24321541  | 242 |
| chr15 | 14582029  | 14582270  | 242 |
| chr14 | 12995815  | 12996056  | 242 |
| chr14 | 9610991   | 9611232   | 242 |
| chr13 | 56061208  | 56061449  | 242 |
| chr13 | 18449940  | 18450181  | 242 |
| chr13 | 11067681  | 11067922  | 242 |
| chr12 | 84827733  | 84827974  | 242 |
| chr12 | 32168746  | 32168987  | 242 |
| chr11 | 108119968 | 108120209 | 242 |
| chr11 | 92573576  | 92573817  | 242 |
| chr11 | 87920330  | 87920571  | 242 |
| chr11 | 49022286  | 49022527  | 242 |
| chr11 | 48739672  | 48739913  | 242 |
| chr11 | 13443127  | 13443368  | 242 |
| chr11 | 9309418   | 9309659   | 242 |
| chr10 | 88374789  | 88375030  | 242 |
| chr10 | 71334758  | 71334999  | 242 |
| chr10 | 47444909  | 47445150  | 242 |
| chr10 | 32504649  | 32504890  | 242 |
| chr10 | 25233493  | 25233734  | 242 |
| chr10 | 21123542  | 21123783  | 242 |
| chr10 | 17236676  | 17236917  | 242 |
| chr10 | 16815664  | 16815905  | 242 |
| chr1  | 154405239 | 154405480 | 242 |
| chr1  | 141723062 | 141723303 | 242 |
| chr1  | 132081580 | 132081821 | 242 |
| chr1  | 108672519 | 108672760 | 242 |
| chr1  | 82938004  | 82938245  | 242 |
| chr1  | 74787226  | 74787467  | 242 |
| chr1  | 57554526  | 57554767  | 242 |
| chr1  | 57461709  | 57461950  | 242 |
| chrX  | 78793222  | 78793462  | 241 |
| chrX  | 74574087  | 74574327  | 241 |
| chrX  | 73163449  | 73163689  | 241 |
| chrX  | 62637373  | 62637613  | 241 |
| chrX  | 54499105  | 54499345  | 241 |
| chrX  | 37600732  | 37600972  | 241 |

|       |           |           |     |
|-------|-----------|-----------|-----|
| chrX  | 36868478  | 36868718  | 241 |
| chrX  | 35536163  | 35536403  | 241 |
| chrX  | 33983032  | 33983272  | 241 |
| chrX  | 31595094  | 31595334  | 241 |
| chrX  | 29571588  | 29571828  | 241 |
| chrX  | 20119314  | 20119554  | 241 |
| chrX  | 14539010  | 14539250  | 241 |
| chrX  | 10122250  | 10122490  | 241 |
| chrX  | 8811657   | 8811897   | 241 |
| chrX  | 5805023   | 5805263   | 241 |
| chrX  | 5663872   | 5664112   | 241 |
| chrX  | 2825392   | 2825632   | 241 |
| chr8  | 109018261 | 109018501 | 241 |
| chr8  | 61603409  | 61603649  | 241 |
| chr7  | 97947224  | 97947464  | 241 |
| chr7  | 50420881  | 50421121  | 241 |
| chr7  | 44038704  | 44038944  | 241 |
| chr7  | 37575809  | 37576049  | 241 |
| chr5  | 121618449 | 121618689 | 241 |
| chr5  | 113827553 | 113827793 | 241 |
| chr5  | 108821029 | 108821269 | 241 |
| chr4  | 118049406 | 118049646 | 241 |
| chr4  | 95068461  | 95068701  | 241 |
| chr4  | 71688251  | 71688491  | 241 |
| chr4  | 14349892  | 14350132  | 241 |
| chr3  | 121361205 | 121361445 | 241 |
| chr3  | 107335213 | 107335453 | 241 |
| chr3  | 99641906  | 99642146  | 241 |
| chr3  | 99324346  | 99324586  | 241 |
| chr3  | 56578901  | 56579141  | 241 |
| chr29 | 33541282  | 33541522  | 241 |
| chr29 | 18211110  | 18211350  | 241 |
| chr29 | 1868295   | 1868535   | 241 |
| chr27 | 38696109  | 38696349  | 241 |
| chr27 | 36025816  | 36026056  | 241 |
| chr27 | 23950442  | 23950682  | 241 |
| chr26 | 44046941  | 44047181  | 241 |
| chr25 | 34535055  | 34535295  | 241 |
| chr25 | 34447699  | 34447939  | 241 |
| chr25 | 32975138  | 32975378  | 241 |
| chr23 | 37996434  | 37996674  | 241 |
| chr23 | 15913605  | 15913845  | 241 |
| chr23 | 14952367  | 14952607  | 241 |
| chr23 | 11066932  | 11067172  | 241 |
| chr23 | 8420003   | 8420243   | 241 |
| chr22 | 58656578  | 58656818  | 241 |
| chr22 | 54069034  | 54069274  | 241 |
| chr22 | 12362388  | 12362628  | 241 |
| chr22 | 7290398   | 7290638   | 241 |
| chr21 | 68800385  | 68800625  | 241 |

|       |           |           |     |
|-------|-----------|-----------|-----|
| chr21 | 66401771  | 66402011  | 241 |
| chr21 | 61531862  | 61532102  | 241 |
| chr21 | 58568871  | 58569111  | 241 |
| chr21 | 58010817  | 58011057  | 241 |
| chr21 | 25669680  | 25669920  | 241 |
| chr2  | 127060641 | 127060881 | 241 |
| chr2  | 127009249 | 127009489 | 241 |
| chr19 | 59079553  | 59079793  | 241 |
| chr19 | 53544475  | 53544715  | 241 |
| chr19 | 45812346  | 45812586  | 241 |
| chr19 | 15250187  | 15250427  | 241 |
| chr19 | 8565138   | 8565378   | 241 |
| chr18 | 19615380  | 19615620  | 241 |
| chr18 | 11439326  | 11439566  | 241 |
| chr18 | 10709316  | 10709556  | 241 |
| chr17 | 66538769  | 66539009  | 241 |
| chr17 | 65286481  | 65286721  | 241 |
| chr17 | 58117218  | 58117458  | 241 |
| chr16 | 60347211  | 60347451  | 241 |
| chr16 | 3314165   | 3314405   | 241 |
| chr15 | 63905891  | 63906131  | 241 |
| chr15 | 26572320  | 26572560  | 241 |
| chr14 | 31006580  | 31006820  | 241 |
| chr14 | 3131112   | 3131352   | 241 |
| chr13 | 76173389  | 76173629  | 241 |
| chr13 | 66233872  | 66234112  | 241 |
| chr13 | 61201272  | 61201512  | 241 |
| chr13 | 42164620  | 42164860  | 241 |
| chr13 | 34892132  | 34892372  | 241 |
| chr12 | 83901581  | 83901821  | 241 |
| chr12 | 80058656  | 80058896  | 241 |
| chr12 | 32230712  | 32230952  | 241 |
| chr11 | 84623079  | 84623319  | 241 |
| chr11 | 74205896  | 74206136  | 241 |
| chr11 | 26870581  | 26870821  | 241 |
| chr11 | 7112031   | 7112271   | 241 |
| chr10 | 70014866  | 70015106  | 241 |
| chr10 | 14993519  | 14993759  | 241 |
| chr10 | 11012087  | 11012327  | 241 |
| chr1  | 145359393 | 145359633 | 241 |
| chr1  | 10650379  | 10650619  | 241 |
| chrX  | 81913372  | 81913611  | 240 |
| chrX  | 81531300  | 81531539  | 240 |
| chrX  | 74640173  | 74640412  | 240 |
| chrX  | 74570758  | 74570997  | 240 |
| chrX  | 68301447  | 68301686  | 240 |
| chrX  | 66823042  | 66823281  | 240 |
| chrX  | 64257473  | 64257712  | 240 |
| chrX  | 62314595  | 62314834  | 240 |
| chrX  | 58719383  | 58719622  | 240 |

|       |           |           |     |
|-------|-----------|-----------|-----|
| chrX  | 53616021  | 53616260  | 240 |
| chrX  | 50269225  | 50269464  | 240 |
| chrX  | 40976816  | 40977055  | 240 |
| chrX  | 34444952  | 34445191  | 240 |
| chrX  | 20325104  | 20325343  | 240 |
| chrX  | 19545574  | 19545813  | 240 |
| chrX  | 19430877  | 19431116  | 240 |
| chrX  | 19375469  | 19375708  | 240 |
| chrX  | 15748703  | 15748942  | 240 |
| chrX  | 5872557   | 5872796   | 240 |
| chrX  | 2783936   | 2784175   | 240 |
| chrX  | 435433    | 435672    | 240 |
| chrX  | 396115    | 396354    | 240 |
| chr9  | 104466647 | 104466886 | 240 |
| chr8  | 78853771  | 78854010  | 240 |
| chr8  | 58398150  | 58398389  | 240 |
| chr8  | 8296400   | 8296639   | 240 |
| chr8  | 8066037   | 8066276   | 240 |
| chr7  | 51344200  | 51344439  | 240 |
| chr7  | 50341484  | 50341723  | 240 |
| chr7  | 45894529  | 45894768  | 240 |
| chr7  | 15051475  | 15051714  | 240 |
| chr7  | 3628276   | 3628515   | 240 |
| chr6  | 108506583 | 108506822 | 240 |
| chr6  | 101862425 | 101862664 | 240 |
| chr6  | 63043482  | 63043721  | 240 |
| chr6  | 18102589  | 18102828  | 240 |
| chr5  | 122318055 | 122318294 | 240 |
| chr5  | 120523251 | 120523490 | 240 |
| chr5  | 113296317 | 113296556 | 240 |
| chr5  | 111444338 | 111444577 | 240 |
| chr5  | 80268519  | 80268758  | 240 |
| chr5  | 74666664  | 74666903  | 240 |
| chr5  | 30072020  | 30072259  | 240 |
| chr4  | 72137817  | 72138056  | 240 |
| chr4  | 64238891  | 64239130  | 240 |
| chr3  | 116385523 | 116385762 | 240 |
| chr3  | 55877385  | 55877624  | 240 |
| chr3  | 16821856  | 16822095  | 240 |
| chr3  | 9069182   | 9069421   | 240 |
| chr29 | 36390417  | 36390656  | 240 |
| chr29 | 34853733  | 34853972  | 240 |
| chr28 | 44559375  | 44559614  | 240 |
| chr28 | 27096292  | 27096531  | 240 |
| chr28 | 4229771   | 4230010   | 240 |
| chr27 | 28588967  | 28589206  | 240 |
| chr27 | 26741200  | 26741439  | 240 |
| chr26 | 48458575  | 48458814  | 240 |
| chr25 | 41377556  | 41377795  | 240 |
| chr25 | 40819401  | 40819640  | 240 |

|       |               |           |     |
|-------|---------------|-----------|-----|
| chr24 | 49026369      | 49026608  | 240 |
| chr24 | 1352391       | 1352630   | 240 |
| chr23 | 44451148      | 44451387  | 240 |
| chr23 | 42408323      | 42408562  | 240 |
| chr23 | 31103524      | 31103763  | 240 |
| chr22 | 5767185       | 5767424   | 240 |
| chr21 | 26825571      | 26825810  | 240 |
| chr21 | 24567199      | 24567438  | 240 |
| chr21 | 6527435       | 6527674   | 240 |
| chr21 | 6480661       | 6480900   | 240 |
| chr20 | 25837362      | 25837601  | 240 |
| chr2  | 138659003     | 138659242 | 240 |
| chr2  | 116846717     | 116846956 | 240 |
| chr2  | 111359490     | 111359729 | 240 |
| chr2  | 75567336      | 75567575  | 240 |
| chr19 | 47301640      | 47301879  | 240 |
| chr19 | 29095692      | 29095931  | 240 |
| chr19 | 19808765      | 19809004  | 240 |
| chr19 | 14968529      | 14968768  | 240 |
| chr19 | 14563095      | 14563334  | 240 |
| chr18 | 50586635      | 50586874  | 240 |
| chr18 | 49823475      | 49823714  | 240 |
| chr18 | 45433632      | 45433871  | 240 |
| chr18 | 10265873      | 10266112  | 240 |
| chr18 | 8072362       | 8072601   | 240 |
| chr18 | 4282453       | 4282692   | 240 |
| chr17 | 54762823      | 54763062  | 240 |
| chr16 | 45770363      | 45770602  | 240 |
| chr16 | 34709300      | 34709539  | 240 |
| chr15 | 73804286      | 73804525  | 240 |
| chr15 | 73724220      | 73724459  | 240 |
| chr15 | 66099298      | 66099537  | 240 |
| chr15 | 65772488      | 65772727  | 240 |
| chr15 | 64532840      | 64533079  | 240 |
| chr15 | 64218701      | 64218940  | 240 |
| chr15 | 24628431      | 24628670  | 240 |
| chr14 | 9195098       | 9195337   | 240 |
| chr14 | 6056775       | 6057014   | 240 |
| chr14 | 956742 956981 | 240       | 240 |
| chr13 | 80737006      | 80737245  | 240 |
| chr13 | 77200714      | 77200953  | 240 |
| chr13 | 75714136      | 75714375  | 240 |
| chr13 | 74659207      | 74659446  | 240 |
| chr13 | 26220588      | 26220827  | 240 |
| chr12 | 34353848      | 34354087  | 240 |
| chr11 | 102021280     | 102021519 | 240 |
| chr11 | 92877600      | 92877839  | 240 |
| chr11 | 65956699      | 65956938  | 240 |
| chr11 | 11141879      | 11142118  | 240 |
| chr10 | 58995803      | 58996042  | 240 |

|       |           |           |     |
|-------|-----------|-----------|-----|
| chr10 | 14966779  | 14967018  | 240 |
| chr1  | 152604947 | 152605186 | 240 |
| chr1  | 99864629  | 99864868  | 240 |
| chrX  | 78514373  | 78514611  | 239 |
| chrX  | 73333233  | 73333471  | 239 |
| chrX  | 72836174  | 72836412  | 239 |
| chrX  | 63865064  | 63865302  | 239 |
| chrX  | 58785599  | 58785837  | 239 |
| chrX  | 45311137  | 45311375  | 239 |
| chrX  | 37349437  | 37349675  | 239 |
| chrX  | 37343936  | 37344174  | 239 |
| chrX  | 33725121  | 33725359  | 239 |
| chrX  | 27970499  | 27970737  | 239 |
| chrX  | 19013455  | 19013693  | 239 |
| chrX  | 12039826  | 12040064  | 239 |
| chrX  | 8808373   | 8808611   | 239 |
| chrX  | 2259071   | 2259309   | 239 |
| chr9  | 105943705 | 105943943 | 239 |
| chr8  | 63694506  | 63694744  | 239 |
| chr8  | 27427642  | 27427880  | 239 |
| chr7  | 38251697  | 38251935  | 239 |
| chr7  | 37559264  | 37559502  | 239 |
| chr7  | 16887106  | 16887344  | 239 |
| chr7  | 14383271  | 14383509  | 239 |
| chr6  | 115689093 | 115689331 | 239 |
| chr6  | 107468030 | 107468268 | 239 |
| chr6  | 106722722 | 106722960 | 239 |
| chr6  | 92463901  | 92464139  | 239 |
| chr6  | 74861422  | 74861660  | 239 |
| chr6  | 63740918  | 63741156  | 239 |
| chr5  | 118973988 | 118974226 | 239 |
| chr5  | 75960926  | 75961164  | 239 |
| chr4  | 98001654  | 98001892  | 239 |
| chr4  | 96246016  | 96246254  | 239 |
| chr4  | 69739807  | 69740045  | 239 |
| chr3  | 55988724  | 55988962  | 239 |
| chr3  | 34558664  | 34558902  | 239 |
| chr3  | 33130514  | 33130752  | 239 |
| chr3  | 18506344  | 18506582  | 239 |
| chr29 | 46242880  | 46243118  | 239 |
| chr29 | 41982987  | 41983225  | 239 |
| chr29 | 36750277  | 36750515  | 239 |
| chr29 | 33545517  | 33545755  | 239 |
| chr29 | 25491326  | 25491564  | 239 |
| chr29 | 17227679  | 17227917  | 239 |
| chr28 | 42329733  | 42329971  | 239 |
| chr28 | 33783558  | 33783796  | 239 |
| chr28 | 27068548  | 27068786  | 239 |
| chr27 | 18028844  | 18029082  | 239 |
| chr26 | 51559224  | 51559462  | 239 |

|       |             |           |     |
|-------|-------------|-----------|-----|
| chr26 | 38910083    | 38910321  | 239 |
| chr26 | 33340761    | 33340999  | 239 |
| chr24 | 51231945    | 51232183  | 239 |
| chr23 | 19321097    | 19321335  | 239 |
| chr23 | 17982347    | 17982585  | 239 |
| chr22 | 58544902    | 58545140  | 239 |
| chr22 | 48241457    | 48241695  | 239 |
| chr22 | 44509667    | 44509905  | 239 |
| chr21 | 34996111    | 34996349  | 239 |
| chr20 | 38847844    | 38848082  | 239 |
| chr2  | 139069485   | 139069723 | 239 |
| chr2  | 131318078   | 131318316 | 239 |
| chr2  | 111461159   | 111461397 | 239 |
| chr19 | 62249444    | 62249682  | 239 |
| chr19 | 61765875    | 61766113  | 239 |
| chr19 | 61147312    | 61147550  | 239 |
| chr19 | 52749743    | 52749981  | 239 |
| chr19 | 47457820    | 47458058  | 239 |
| chr19 | 45051343    | 45051581  | 239 |
| chr19 | 34560734    | 34560972  | 239 |
| chr19 | 14250336    | 14250574  | 239 |
| chr18 | 64270388    | 64270626  | 239 |
| chr18 | 52013427    | 52013665  | 239 |
| chr18 | 48729309    | 48729547  | 239 |
| chr18 | 42915409    | 42915647  | 239 |
| chr18 | 33660185    | 33660423  | 239 |
| chr18 | 26288643    | 26288881  | 239 |
| chr18 | 22164101    | 22164339  | 239 |
| chr17 | 66144805    | 66145043  | 239 |
| chr17 | 5382949     | 5383187   | 239 |
| chr16 | 42420164    | 42420402  | 239 |
| chr16 | 41449792    | 41450030  | 239 |
| chr16 | 1552599     | 1552837   | 239 |
| chr16 | 69678 69916 | 239       | 239 |
| chr15 | 64133100    | 64133338  | 239 |
| chr15 | 42589885    | 42590123  | 239 |
| chr15 | 37698457    | 37698695  | 239 |
| chr15 | 24910553    | 24910791  | 239 |
| chr15 | 23831975    | 23832213  | 239 |
| chr14 | 61581604    | 61581842  | 239 |
| chr14 | 29182582    | 29182820  | 239 |
| chr14 | 8045707     | 8045945   | 239 |
| chr14 | 6125990     | 6126228   | 239 |
| chr13 | 75949188    | 75949426  | 239 |
| chr13 | 75701964    | 75702202  | 239 |
| chr13 | 37858879    | 37859117  | 239 |
| chr13 | 32707503    | 32707741  | 239 |
| chr13 | 29037900    | 29038138  | 239 |
| chr12 | 84787907    | 84788145  | 239 |
| chr12 | 61173905    | 61174143  | 239 |

|       |               |           |     |
|-------|---------------|-----------|-----|
| chr12 | 34016992      | 34017230  | 239 |
| chr12 | 32588930      | 32589168  | 239 |
| chr11 | 104978928     | 104979166 | 239 |
| chr11 | 70650663      | 70650901  | 239 |
| chr11 | 25610664      | 25610902  | 239 |
| chr10 | 20988239      | 20988477  | 239 |
| chr10 | 17575782      | 17576020  | 239 |
| chr10 | 10237782      | 10238020  | 239 |
| chr10 | 5252714       | 5252952   | 239 |
| chr1  | 113384648     | 113384886 | 239 |
| chr1  | 47177647      | 47177885  | 239 |
| chr1  | 17187865      | 17188103  | 239 |
| chrX  | 83474747      | 83474984  | 238 |
| chrX  | 78792761      | 78792998  | 238 |
| chrX  | 76076102      | 76076339  | 238 |
| chrX  | 72855483      | 72855720  | 238 |
| chrX  | 72545445      | 72545682  | 238 |
| chrX  | 66097559      | 66097796  | 238 |
| chrX  | 62670630      | 62670867  | 238 |
| chrX  | 60137872      | 60138109  | 238 |
| chrX  | 53712910      | 53713147  | 238 |
| chrX  | 44976530      | 44976767  | 238 |
| chrX  | 36682103      | 36682340  | 238 |
| chrX  | 28363269      | 28363506  | 238 |
| chrX  | 15388569      | 15388806  | 238 |
| chrX  | 13906223      | 13906460  | 238 |
| chr9  | 101121997     | 101122234 | 238 |
| chr9  | 90600334      | 90600571  | 238 |
| chr9  | 45520465      | 45520702  | 238 |
| chr8  | 87070037      | 87070274  | 238 |
| chr8  | 55394156      | 55394393  | 238 |
| chr8  | 7724993       | 7725230   | 238 |
| chr7  | 50665836      | 50666073  | 238 |
| chr7  | 50282102      | 50282339  | 238 |
| chr7  | 38209780      | 38210017  | 238 |
| chr7  | 19505010      | 19505247  | 238 |
| chr7  | 19223195      | 19223432  | 238 |
| chr7  | 3635379       | 3635616   | 238 |
| chr6  | 93420440      | 93420677  | 238 |
| chr6  | 72346307      | 72346544  | 238 |
| chr6  | 63011538      | 63011775  | 238 |
| chr5  | 124717977     | 124718214 | 238 |
| chr5  | 122285028     | 122285265 | 238 |
| chr5  | 121800173     | 121800410 | 238 |
| chr5  | 112271150     | 112271387 | 238 |
| chr5  | 80642393      | 80642630  | 238 |
| chr5  | 76213506      | 76213743  | 238 |
| chr5  | 30202349      | 30202586  | 238 |
| chr5  | 28872916      | 28873153  | 238 |
| chr5  | 294354 294591 |           | 238 |



|       |           |           |     |
|-------|-----------|-----------|-----|
| chr4  | 124303964 | 124304201 | 238 |
| chr4  | 98607466  | 98607703  | 238 |
| chr4  | 96850542  | 96850779  | 238 |
| chr4  | 80408924  | 80409161  | 238 |
| chr4  | 66676816  | 66677053  | 238 |
| chr3  | 127656570 | 127656807 | 238 |
| chr3  | 124629860 | 124630097 | 238 |
| chr3  | 90408071  | 90408308  | 238 |
| chr3  | 59335742  | 59335979  | 238 |
| chr3  | 33333282  | 33333519  | 238 |
| chr3  | 27379177  | 27379414  | 238 |
| chr3  | 9180101   | 9180338   | 238 |
| chr29 | 25299011  | 25299248  | 238 |
| chr28 | 40911518  | 40911755  | 238 |
| chr28 | 33289952  | 33290189  | 238 |
| chr27 | 33401782  | 33402019  | 238 |
| chr27 | 23996717  | 23996954  | 238 |
| chr26 | 39101891  | 39102128  | 238 |
| chr26 | 33824743  | 33824980  | 238 |
| chr26 | 31329127  | 31329364  | 238 |
| chr26 | 5872349   | 5872586   | 238 |
| chr25 | 30900124  | 30900361  | 238 |
| chr25 | 22905748  | 22905985  | 238 |
| chr25 | 14741895  | 14742132  | 238 |
| chr25 | 10606852  | 10607089  | 238 |
| chr24 | 60795017  | 60795254  | 238 |
| chr24 | 40580086  | 40580323  | 238 |
| chr23 | 50013111  | 50013348  | 238 |
| chr23 | 27393441  | 27393678  | 238 |
| chr22 | 39805138  | 39805375  | 238 |
| chr21 | 24857531  | 24857768  | 238 |
| chr21 | 20917832  | 20918069  | 238 |
| chr2  | 134943558 | 134943795 | 238 |
| chr2  | 130290484 | 130290721 | 238 |
| chr2  | 126468168 | 126468405 | 238 |
| chr2  | 111860592 | 111860829 | 238 |
| chr19 | 63549717  | 63549954  | 238 |
| chr19 | 61900064  | 61900301  | 238 |
| chr19 | 54493424  | 54493661  | 238 |
| chr19 | 46701976  | 46702213  | 238 |
| chr19 | 45188253  | 45188490  | 238 |
| chr19 | 42296573  | 42296810  | 238 |
| chr19 | 42277829  | 42278066  | 238 |
| chr19 | 39258730  | 39258967  | 238 |
| chr18 | 48033841  | 48034078  | 238 |
| chr18 | 22755215  | 22755452  | 238 |
| chr18 | 18712783  | 18713020  | 238 |
| chr18 | 5667851   | 5668088   | 238 |
| chr17 | 67058556  | 67058793  | 238 |
| chr17 | 63722567  | 63722804  | 238 |

|       |           |           |     |
|-------|-----------|-----------|-----|
| chr17 | 63432544  | 63432781  | 238 |
| chr16 | 77255951  | 77256188  | 238 |
| chr16 | 44378703  | 44378940  | 238 |
| chr16 | 43485177  | 43485414  | 238 |
| chr16 | 42668566  | 42668803  | 238 |
| chr16 | 33367197  | 33367434  | 238 |
| chr15 | 62706190  | 62706427  | 238 |
| chr15 | 41228100  | 41228337  | 238 |
| chr15 | 39608125  | 39608362  | 238 |
| chr15 | 39503407  | 39503644  | 238 |
| chr15 | 22890034  | 22890271  | 238 |
| chr14 | 14145550  | 14145787  | 238 |
| chr14 | 11989509  | 11989746  | 238 |
| chr13 | 74529620  | 74529857  | 238 |
| chr13 | 66833322  | 66833559  | 238 |
| chr13 | 60612213  | 60612450  | 238 |
| chr13 | 54070996  | 54071233  | 238 |
| chr13 | 42012777  | 42013014  | 238 |
| chr13 | 39692994  | 39693231  | 238 |
| chr13 | 22164998  | 22165235  | 238 |
| chr12 | 83821440  | 83821677  | 238 |
| chr11 | 104301021 | 104301258 | 238 |
| chr11 | 92952492  | 92952729  | 238 |
| chr11 | 81629204  | 81629441  | 238 |
| chr11 | 29452058  | 29452295  | 238 |
| chr11 | 13349911  | 13350148  | 238 |
| chr11 | 4352841   | 4353078   | 238 |
| chr10 | 44051370  | 44051607  | 238 |
| chr10 | 36013564  | 36013801  | 238 |
| chr10 | 20979300  | 20979537  | 238 |
| chr10 | 20894907  | 20895144  | 238 |
| chr10 | 12894833  | 12895070  | 238 |
| chr10 | 12749900  | 12750137  | 238 |
| chr1  | 74733363  | 74733600  | 238 |
| chrX  | 80123507  | 80123743  | 237 |
| chrX  | 78647392  | 78647628  | 237 |
| chrX  | 74307577  | 74307813  | 237 |
| chrX  | 71671137  | 71671373  | 237 |
| chrX  | 69163879  | 69164115  | 237 |
| chrX  | 64489741  | 64489977  | 237 |
| chrX  | 62479094  | 62479330  | 237 |
| chrX  | 62424327  | 62424563  | 237 |
| chrX  | 58466225  | 58466461  | 237 |
| chrX  | 58442092  | 58442328  | 237 |
| chrX  | 55067833  | 55068069  | 237 |
| chrX  | 54287826  | 54288062  | 237 |
| chrX  | 53033113  | 53033349  | 237 |
| chrX  | 49143553  | 49143789  | 237 |
| chrX  | 48492082  | 48492318  | 237 |
| chrX  | 48119013  | 48119249  | 237 |

|       |           |           |     |
|-------|-----------|-----------|-----|
| chrX  | 47997476  | 47997712  | 237 |
| chrX  | 46631627  | 46631863  | 237 |
| chrX  | 18804219  | 18804455  | 237 |
| chrX  | 11975175  | 11975411  | 237 |
| chrX  | 11721371  | 11721607  | 237 |
| chrX  | 7448624   | 7448860   | 237 |
| chrX  | 6739609   | 6739845   | 237 |
| chr7  | 50465551  | 50465787  | 237 |
| chr7  | 45963023  | 45963259  | 237 |
| chr7  | 10276197  | 10276433  | 237 |
| chr7  | 3690195   | 3690431   | 237 |
| chr6  | 120824425 | 120824661 | 237 |
| chr5  | 117520995 | 117521231 | 237 |
| chr5  | 103513123 | 103513359 | 237 |
| chr5  | 75111384  | 75111620  | 237 |
| chr5  | 33930371  | 33930607  | 237 |
| chr4  | 98853281  | 98853517  | 237 |
| chr4  | 98494479  | 98494715  | 237 |
| chr4  | 46389327  | 46389563  | 237 |
| chr4  | 13484496  | 13484732  | 237 |
| chr3  | 125718928 | 125719164 | 237 |
| chr3  | 116924391 | 116924627 | 237 |
| chr3  | 105951173 | 105951409 | 237 |
| chr3  | 105428657 | 105428893 | 237 |
| chr3  | 56846772  | 56847008  | 237 |
| chr29 | 35507252  | 35507488  | 237 |
| chr28 | 41747127  | 41747363  | 237 |
| chr28 | 7605362   | 7605598   | 237 |
| chr27 | 35371569  | 35371805  | 237 |
| chr27 | 26676016  | 26676252  | 237 |
| chr26 | 50796417  | 50796653  | 237 |
| chr26 | 45319191  | 45319427  | 237 |
| chr26 | 37093358  | 37093594  | 237 |
| chr25 | 42141120  | 42141356  | 237 |
| chr24 | 48868442  | 48868678  | 237 |
| chr24 | 31394044  | 31394280  | 237 |
| chr24 | 22298449  | 22298685  | 237 |
| chr24 | 20841250  | 20841486  | 237 |
| chr23 | 52812872  | 52813108  | 237 |
| chr23 | 44280628  | 44280864  | 237 |
| chr23 | 27953009  | 27953245  | 237 |
| chr22 | 48583142  | 48583378  | 237 |
| chr22 | 48278579  | 48278815  | 237 |
| chr22 | 29920704  | 29920940  | 237 |
| chr21 | 34541653  | 34541889  | 237 |
| chr21 | 25345071  | 25345307  | 237 |
| chr20 | 75115808  | 75116044  | 237 |
| chr20 | 70749260  | 70749496  | 237 |
| chr2  | 127976582 | 127976818 | 237 |
| chr2  | 108720429 | 108720665 | 237 |

|       |           |           |     |
|-------|-----------|-----------|-----|
| chr2  | 92603119  | 92603355  | 237 |
| chr2  | 64508412  | 64508648  | 237 |
| chr2  | 30859561  | 30859797  | 237 |
| chr19 | 63910294  | 63910530  | 237 |
| chr19 | 59078120  | 59078356  | 237 |
| chr19 | 54533789  | 54534025  | 237 |
| chr18 | 52596120  | 52596356  | 237 |
| chr18 | 50724776  | 50725012  | 237 |
| chr18 | 15256060  | 15256296  | 237 |
| chr18 | 11651079  | 11651315  | 237 |
| chr18 | 11648935  | 11649171  | 237 |
| chr18 | 11510833  | 11511069  | 237 |
| chr16 | 76582037  | 76582273  | 237 |
| chr16 | 60245670  | 60245906  | 237 |
| chr16 | 42932234  | 42932470  | 237 |
| chr15 | 64737158  | 64737394  | 237 |
| chr15 | 43397760  | 43397996  | 237 |
| chr15 | 29377345  | 29377581  | 237 |
| chr15 | 25328213  | 25328449  | 237 |
| chr14 | 12279586  | 12279822  | 237 |
| chr13 | 77205345  | 77205581  | 237 |
| chr13 | 70353154  | 70353390  | 237 |
| chr13 | 61196396  | 61196632  | 237 |
| chr13 | 55088795  | 55089031  | 237 |
| chr13 | 22149305  | 22149541  | 237 |
| chr11 | 106274207 | 106274443 | 237 |
| chr11 | 96126035  | 96126271  | 237 |
| chr10 | 52301527  | 52301763  | 237 |
| chr10 | 15027220  | 15027456  | 237 |
| chr10 | 7655918   | 7656154   | 237 |
| chr1  | 149600271 | 149600507 | 237 |
| chr1  | 100048984 | 100049220 | 237 |
| chr1  | 82978977  | 82979213  | 237 |
| chr1  | 77749026  | 77749262  | 237 |
| chr1  | 30690970  | 30691206  | 237 |
| chrX  | 78765936  | 78766171  | 236 |
| chrX  | 78331907  | 78332142  | 236 |
| chrX  | 74165677  | 74165912  | 236 |
| chrX  | 72085948  | 72086183  | 236 |
| chrX  | 71314909  | 71315144  | 236 |
| chrX  | 62818801  | 62819036  | 236 |
| chrX  | 61888124  | 61888359  | 236 |
| chrX  | 31480863  | 31481098  | 236 |
| chrX  | 14038448  | 14038683  | 236 |
| chrX  | 12058725  | 12058960  | 236 |
| chrX  | 11432622  | 11432857  | 236 |
| chrX  | 2717957   | 2718192   | 236 |
| chrX  | 1486622   | 1486857   | 236 |
| chr8  | 90739779  | 90740014  | 236 |
| chr8  | 73394280  | 73394515  | 236 |

|       |           |           |     |
|-------|-----------|-----------|-----|
| chr8  | 53593657  | 53593892  | 236 |
| chr7  | 64801509  | 64801744  | 236 |
| chr7  | 10053194  | 10053429  | 236 |
| chr6  | 109633435 | 109633670 | 236 |
| chr6  | 70485056  | 70485291  | 236 |
| chr6  | 63703874  | 63704109  | 236 |
| chr5  | 112954149 | 112954384 | 236 |
| chr5  | 112079777 | 112080012 | 236 |
| chr5  | 79179106  | 79179341  | 236 |
| chr4  | 98809807  | 98810042  | 236 |
| chr4  | 47427091  | 47427326  | 236 |
| chr3  | 105757684 | 105757919 | 236 |
| chr3  | 97932715  | 97932950  | 236 |
| chr3  | 33534602  | 33534837  | 236 |
| chr3  | 15788769  | 15789004  | 236 |
| chr29 | 32072276  | 32072511  | 236 |
| chr29 | 10280283  | 10280518  | 236 |
| chr27 | 38621573  | 38621808  | 236 |
| chr26 | 47932462  | 47932697  | 236 |
| chr26 | 41005297  | 41005532  | 236 |
| chr26 | 31986814  | 31987049  | 236 |
| chr26 | 18881505  | 18881740  | 236 |
| chr25 | 3394673   | 3394908   | 236 |
| chr24 | 60686819  | 60687054  | 236 |
| chr24 | 40313788  | 40314023  | 236 |
| chr23 | 44728277  | 44728512  | 236 |
| chr23 | 27902689  | 27902924  | 236 |
| chr23 | 19920250  | 19920485  | 236 |
| chr22 | 59105250  | 59105485  | 236 |
| chr22 | 54409626  | 54409861  | 236 |
| chr22 | 31415859  | 31416094  | 236 |
| chr21 | 57987350  | 57987585  | 236 |
| chr20 | 73525960  | 73526195  | 236 |
| chr2  | 132300616 | 132300851 | 236 |
| chr2  | 123380757 | 123380992 | 236 |
| chr2  | 110536174 | 110536409 | 236 |
| chr2  | 26583537  | 26583772  | 236 |
| chr2  | 21877109  | 21877344  | 236 |
| chr19 | 41410759  | 41410994  | 236 |
| chr19 | 28957335  | 28957570  | 236 |
| chr18 | 25558627  | 25558862  | 236 |
| chr18 | 11415147  | 11415382  | 236 |
| chr18 | 11093352  | 11093587  | 236 |
| chr17 | 66537383  | 66537618  | 236 |
| chr17 | 64146859  | 64147094  | 236 |
| chr17 | 48538446  | 48538681  | 236 |
| chr16 | 68765670  | 68765905  | 236 |
| chr16 | 39015006  | 39015241  | 236 |
| chr16 | 30418464  | 30418699  | 236 |
| chr16 | 2352091   | 2352326   | 236 |

|       |               |           |     |
|-------|---------------|-----------|-----|
| chr16 | 1443202       | 1443437   | 236 |
| chr15 | 81163077      | 81163312  | 236 |
| chr15 | 55180601      | 55180836  | 236 |
| chr15 | 32682673      | 32682908  | 236 |
| chr14 | 5059787       | 5060022   | 236 |
| chr13 | 74363393      | 74363628  | 236 |
| chr13 | 72536953      | 72537188  | 236 |
| chr13 | 61157957      | 61158192  | 236 |
| chr13 | 45542894      | 45543129  | 236 |
| chr13 | 40341478      | 40341713  | 236 |
| chr13 | 6956742       | 6956977   | 236 |
| chr13 | 3056990       | 3057225   | 236 |
| chr12 | 31279838      | 31280073  | 236 |
| chr11 | 100109555     | 100109790 | 236 |
| chr11 | 96182032      | 96182267  | 236 |
| chr11 | 45286094      | 45286329  | 236 |
| chr11 | 29384165      | 29384400  | 236 |
| chr11 | 1380042       | 1380277   | 236 |
| chr10 | 83072679      | 83072914  | 236 |
| chr10 | 10737486      | 10737721  | 236 |
| chr1  | 83277928      | 83278163  | 236 |
| chr1  | 74576923      | 74577158  | 236 |
| chr1  | 74227956      | 74228191  | 236 |
| chr1  | 69461059      | 69461294  | 236 |
| chrX  | 82871780      | 82872014  | 235 |
| chrX  | 79774922      | 79775156  | 235 |
| chrX  | 74232061      | 74232295  | 235 |
| chrX  | 74120477      | 74120711  | 235 |
| chrX  | 70533966      | 70534200  | 235 |
| chrX  | 69234713      | 69234947  | 235 |
| chrX  | 58589099      | 58589333  | 235 |
| chrX  | 55839846      | 55840080  | 235 |
| chrX  | 55460470      | 55460704  | 235 |
| chrX  | 46563453      | 46563687  | 235 |
| chrX  | 37426839      | 37427073  | 235 |
| chrX  | 33981838      | 33982072  | 235 |
| chrX  | 31439422      | 31439656  | 235 |
| chrX  | 30939912      | 30940146  | 235 |
| chrX  | 29540712      | 29540946  | 235 |
| chrX  | 28468758      | 28468992  | 235 |
| chrX  | 20112445      | 20112679  | 235 |
| chrX  | 18600394      | 18600628  | 235 |
| chrX  | 9085843       | 9086077   | 235 |
| chrX  | 6318642       | 6318876   | 235 |
| chrX  | 6183476       | 6183710   | 235 |
| chrX  | 5571679       | 5571913   | 235 |
| chrX  | 417439 417673 | 235       |     |
| chr9  | 106522193     | 106522427 | 235 |
| chr9  | 101431146     | 101431380 | 235 |
| chr9  | 91897040      | 91897274  | 235 |

|       |           |           |     |
|-------|-----------|-----------|-----|
| chr9  | 77814400  | 77814634  | 235 |
| chr9  | 76660214  | 76660448  | 235 |
| chr9  | 47262218  | 47262452  | 235 |
| chr9  | 43014748  | 43014982  | 235 |
| chr9  | 41676596  | 41676830  | 235 |
| chr8  | 103805411 | 103805645 | 235 |
| chr8  | 73001670  | 73001904  | 235 |
| chr8  | 8578082   | 8578316   | 235 |
| chr8  | 7812516   | 7812750   | 235 |
| chr8  | 6442844   | 6443078   | 235 |
| chr7  | 50602549  | 50602783  | 235 |
| chr7  | 38178988  | 38179222  | 235 |
| chr6  | 120755366 | 120755600 | 235 |
| chr6  | 109916377 | 109916611 | 235 |
| chr5  | 120530903 | 120531137 | 235 |
| chr5  | 112096251 | 112096485 | 235 |
| chr5  | 95943522  | 95943756  | 235 |
| chr5  | 76996688  | 76996922  | 235 |
| chr4  | 121729813 | 121730047 | 235 |
| chr4  | 121262996 | 121263230 | 235 |
| chr4  | 98047982  | 98048216  | 235 |
| chr4  | 94772678  | 94772912  | 235 |
| chr4  | 71377902  | 71378136  | 235 |
| chr4  | 46292556  | 46292790  | 235 |
| chr3  | 121235082 | 121235316 | 235 |
| chr3  | 102025258 | 102025492 | 235 |
| chr3  | 99272222  | 99272456  | 235 |
| chr3  | 92613998  | 92614232  | 235 |
| chr3  | 73929332  | 73929566  | 235 |
| chr3  | 23022664  | 23022898  | 235 |
| chr29 | 51978339  | 51978573  | 235 |
| chr29 | 42975701  | 42975935  | 235 |
| chr29 | 38879385  | 38879619  | 235 |
| chr29 | 33972441  | 33972675  | 235 |
| chr29 | 26794479  | 26794713  | 235 |
| chr28 | 27168316  | 27168550  | 235 |
| chr28 | 25903121  | 25903355  | 235 |
| chr26 | 49257398  | 49257632  | 235 |
| chr25 | 30489927  | 30490161  | 235 |
| chr25 | 23558928  | 23559162  | 235 |
| chr25 | 18184360  | 18184594  | 235 |
| chr24 | 39768244  | 39768478  | 235 |
| chr23 | 49921459  | 49921693  | 235 |
| chr23 | 45481530  | 45481764  | 235 |
| chr23 | 44514573  | 44514807  | 235 |
| chr23 | 19332487  | 19332721  | 235 |
| chr23 | 16201314  | 16201548  | 235 |
| chr22 | 50719623  | 50719857  | 235 |
| chr22 | 48226051  | 48226285  | 235 |
| chr22 | 30102033  | 30102267  | 235 |

|       |           |           |     |
|-------|-----------|-----------|-----|
| chr21 | 62052092  | 62052326  | 235 |
| chr21 | 13949951  | 13950185  | 235 |
| chr20 | 72047013  | 72047247  | 235 |
| chr20 | 60490429  | 60490663  | 235 |
| chr20 | 34204594  | 34204828  | 235 |
| chr20 | 33687549  | 33687783  | 235 |
| chr20 | 3252443   | 3252677   | 235 |
| chr2  | 128040630 | 128040864 | 235 |
| chr2  | 21545796  | 21546030  | 235 |
| chr19 | 62202227  | 62202461  | 235 |
| chr19 | 61243552  | 61243786  | 235 |
| chr19 | 61082233  | 61082467  | 235 |
| chr19 | 58689459  | 58689693  | 235 |
| chr19 | 58676731  | 58676965  | 235 |
| chr19 | 24013839  | 24014073  | 235 |
| chr19 | 21861335  | 21861569  | 235 |
| chr19 | 21782580  | 21782814  | 235 |
| chr19 | 17916925  | 17917159  | 235 |
| chr19 | 17862683  | 17862917  | 235 |
| chr18 | 48798546  | 48798780  | 235 |
| chr18 | 24145798  | 24146032  | 235 |
| chr18 | 23003890  | 23004124  | 235 |
| chr18 | 13278854  | 13279088  | 235 |
| chr18 | 13119794  | 13120028  | 235 |
| chr18 | 11423104  | 11423338  | 235 |
| chr18 | 10739357  | 10739591  | 235 |
| chr18 | 10319226  | 10319460  | 235 |
| chr17 | 72410331  | 72410565  | 235 |
| chr17 | 69522938  | 69523172  | 235 |
| chr17 | 69395147  | 69395381  | 235 |
| chr17 | 68153714  | 68153948  | 235 |
| chr17 | 66276563  | 66276797  | 235 |
| chr16 | 71385829  | 71386063  | 235 |
| chr16 | 68899094  | 68899328  | 235 |
| chr16 | 48731309  | 48731543  | 235 |
| chr16 | 43152855  | 43153089  | 235 |
| chr15 | 25141825  | 25142059  | 235 |
| chr14 | 56672470  | 56672704  | 235 |
| chr13 | 77247337  | 77247571  | 235 |
| chr13 | 65093630  | 65093864  | 235 |
| chr13 | 61066424  | 61066658  | 235 |
| chr13 | 58034786  | 58035020  | 235 |
| chr13 | 36245223  | 36245457  | 235 |
| chr13 | 15758347  | 15758581  | 235 |
| chr12 | 81712525  | 81712759  | 235 |
| chr12 | 34276434  | 34276668  | 235 |
| chr11 | 97584700  | 97584934  | 235 |
| chr11 | 89457681  | 89457915  | 235 |
| chr11 | 72264946  | 72265180  | 235 |
| chr11 | 68113891  | 68114125  | 235 |



|       |           |           |     |
|-------|-----------|-----------|-----|
| chr11 | 49489365  | 49489599  | 235 |
| chr11 | 10255131  | 10255365  | 235 |
| chr10 | 86433500  | 86433734  | 235 |
| chr10 | 70146697  | 70146931  | 235 |
| chr10 | 67097451  | 67097685  | 235 |
| chr10 | 57344222  | 57344456  | 235 |
| chr10 | 49231923  | 49232157  | 235 |
| chr10 | 12253587  | 12253821  | 235 |
| chr1  | 85050461  | 85050695  | 235 |
| chr1  | 84503717  | 84503951  | 235 |
| chr1  | 68900094  | 68900328  | 235 |
| chrX  | 77646420  | 77646653  | 234 |
| chrX  | 73337430  | 73337663  | 234 |
| chrX  | 73280993  | 73281226  | 234 |
| chrX  | 72502735  | 72502968  | 234 |
| chrX  | 62511531  | 62511764  | 234 |
| chrX  | 39625351  | 39625584  | 234 |
| chrX  | 37438510  | 37438743  | 234 |
| chrX  | 35748378  | 35748611  | 234 |
| chrX  | 30279760  | 30279993  | 234 |
| chrX  | 20615971  | 20616204  | 234 |
| chrX  | 20506471  | 20506704  | 234 |
| chrX  | 13399435  | 13399668  | 234 |
| chrX  | 13277930  | 13278163  | 234 |
| chrX  | 8457860   | 8458093   | 234 |
| chr9  | 106589287 | 106589520 | 234 |
| chr9  | 89878052  | 89878285  | 234 |
| chr9  | 78274242  | 78274475  | 234 |
| chr8  | 115794202 | 115794435 | 234 |
| chr8  | 72413982  | 72414215  | 234 |
| chr8  | 70671560  | 70671793  | 234 |
| chr8  | 58507849  | 58508082  | 234 |
| chr7  | 77005029  | 77005262  | 234 |
| chr7  | 51831263  | 51831496  | 234 |
| chr7  | 44804267  | 44804500  | 234 |
| chr7  | 42571086  | 42571319  | 234 |
| chr7  | 21162823  | 21163056  | 234 |
| chr7  | 13422834  | 13423067  | 234 |
| chr7  | 4742291   | 4742524   | 234 |
| chr6  | 108808513 | 108808746 | 234 |
| chr6  | 105884266 | 105884499 | 234 |
| chr6  | 18102020  | 18102253  | 234 |
| chr5  | 124666287 | 124666520 | 234 |
| chr5  | 112171785 | 112172018 | 234 |
| chr4  | 119343091 | 119343324 | 234 |
| chr4  | 95628798  | 95629031  | 234 |
| chr3  | 123957618 | 123957851 | 234 |
| chr3  | 123619751 | 123619984 | 234 |
| chr3  | 110820117 | 110820350 | 234 |
| chr3  | 108785707 | 108785940 | 234 |

|       |               |           |     |
|-------|---------------|-----------|-----|
| chr3  | 102712137     | 102712370 | 234 |
| chr3  | 95778365      | 95778598  | 234 |
| chr3  | 62687160      | 62687393  | 234 |
| chr3  | 33790783      | 33791016  | 234 |
| chr3  | 30011627      | 30011860  | 234 |
| chr29 | 36383057      | 36383290  | 234 |
| chr29 | 31579912      | 31580145  | 234 |
| chr29 | 7809552       | 7809785   | 234 |
| chr28 | 33311331      | 33311564  | 234 |
| chr27 | 46119673      | 46119906  | 234 |
| chr27 | 32834671      | 32834904  | 234 |
| chr27 | 26952210      | 26952443  | 234 |
| chr27 | 26781950      | 26782183  | 234 |
| chr26 | 50955262      | 50955495  | 234 |
| chr26 | 41249618      | 41249851  | 234 |
| chr26 | 39171851      | 39172084  | 234 |
| chr26 | 30856247      | 30856480  | 234 |
| chr26 | 18368807      | 18369040  | 234 |
| chr26 | 18289347      | 18289580  | 234 |
| chr26 | 8720931       | 8721164   | 234 |
| chr25 | 3795458       | 3795691   | 234 |
| chr24 | 45965270      | 45965503  | 234 |
| chr24 | 37009806      | 37010039  | 234 |
| chr24 | 31179556      | 31179789  | 234 |
| chr24 | 2947794       | 2948027   | 234 |
| chr23 | 52689932      | 52690165  | 234 |
| chr23 | 52685060      | 52685293  | 234 |
| chr23 | 44428300      | 44428533  | 234 |
| chr23 | 7458550       | 7458783   | 234 |
| chr22 | 56509939      | 56510172  | 234 |
| chr22 | 48674305      | 48674538  | 234 |
| chr22 | 48315970      | 48316203  | 234 |
| chr22 | 40901810      | 40902043  | 234 |
| chr21 | 34160189      | 34160422  | 234 |
| chr21 | 32934203      | 32934436  | 234 |
| chr21 | 22611129      | 22611362  | 234 |
| chr21 | 19800678      | 19800911  | 234 |
| chr21 | 4321504       | 4321737   | 234 |
| chr20 | 73919736      | 73919969  | 234 |
| chr20 | 19372591      | 19372824  | 234 |
| chr20 | 12343500      | 12343733  | 234 |
| chr20 | 6711185       | 6711418   | 234 |
| chr20 | 5212775       | 5213008   | 234 |
| chr20 | 3248922       | 3249155   | 234 |
| chr20 | 708891 709124 | 234       |     |
| chr2  | 111754998     | 111755231 | 234 |
| chr2  | 75912111      | 75912344  | 234 |
| chr2  | 37667495      | 37667728  | 234 |
| chr19 | 60226935      | 60227168  | 234 |
| chr19 | 58645244      | 58645477  | 234 |

|       |           |           |     |
|-------|-----------|-----------|-----|
| chr19 | 57180617  | 57180850  | 234 |
| chr19 | 45029128  | 45029361  | 234 |
| chr19 | 39454030  | 39454263  | 234 |
| chr19 | 39148178  | 39148411  | 234 |
| chr19 | 27952262  | 27952495  | 234 |
| chr19 | 20309816  | 20310049  | 234 |
| chr19 | 16014337  | 16014570  | 234 |
| chr19 | 12312781  | 12313014  | 234 |
| chr18 | 54053730  | 54053963  | 234 |
| chr18 | 45932579  | 45932812  | 234 |
| chr18 | 32451774  | 32452007  | 234 |
| chr18 | 22888770  | 22889003  | 234 |
| chr18 | 22108951  | 22109184  | 234 |
| chr18 | 1518066   | 1518299   | 234 |
| chr17 | 72144385  | 72144618  | 234 |
| chr17 | 67305551  | 67305784  | 234 |
| chr17 | 60997011  | 60997244  | 234 |
| chr16 | 58575942  | 58576175  | 234 |
| chr16 | 45085472  | 45085705  | 234 |
| chr16 | 1797230   | 1797463   | 234 |
| chr15 | 74144671  | 74144904  | 234 |
| chr15 | 66568678  | 66568911  | 234 |
| chr15 | 38323428  | 38323661  | 234 |
| chr15 | 32162222  | 32162455  | 234 |
| chr15 | 28710414  | 28710647  | 234 |
| chr15 | 25414993  | 25415226  | 234 |
| chr14 | 7642976   | 7643209   | 234 |
| chr14 | 7350352   | 7350585   | 234 |
| chr13 | 75841481  | 75841714  | 234 |
| chr13 | 69867791  | 69868024  | 234 |
| chr13 | 59654208  | 59654441  | 234 |
| chr13 | 47368096  | 47368329  | 234 |
| chr12 | 82020277  | 82020510  | 234 |
| chr12 | 81553743  | 81553976  | 234 |
| chr12 | 70463160  | 70463393  | 234 |
| chr12 | 35709809  | 35710042  | 234 |
| chr12 | 14957848  | 14958081  | 234 |
| chr11 | 91998334  | 91998567  | 234 |
| chr11 | 89891339  | 89891572  | 234 |
| chr11 | 74759203  | 74759436  | 234 |
| chr11 | 48810801  | 48811034  | 234 |
| chr11 | 46764916  | 46765149  | 234 |
| chr11 | 11246279  | 11246512  | 234 |
| chr10 | 90941180  | 90941413  | 234 |
| chr10 | 46864243  | 46864476  | 234 |
| chr10 | 20845141  | 20845374  | 234 |
| chr10 | 19769357  | 19769590  | 234 |
| chr1  | 145360893 | 145361126 | 234 |
| chr1  | 118838862 | 118839095 | 234 |
| chrX  | 78173418  | 78173650  | 233 |

|       |           |           |     |
|-------|-----------|-----------|-----|
| chrX  | 72655760  | 72655992  | 233 |
| chrX  | 63306739  | 63306971  | 233 |
| chrX  | 63123347  | 63123579  | 233 |
| chrX  | 56720115  | 56720347  | 233 |
| chrX  | 39294181  | 39294413  | 233 |
| chrX  | 36120667  | 36120899  | 233 |
| chrX  | 34289358  | 34289590  | 233 |
| chrX  | 23400948  | 23401180  | 233 |
| chrX  | 21999794  | 22000026  | 233 |
| chrX  | 19054086  | 19054318  | 233 |
| chrX  | 17204074  | 17204306  | 233 |
| chrX  | 15079480  | 15079712  | 233 |
| chrX  | 731119    | 731351    | 233 |
| chrM  | 4513      | 4745      | 233 |
| chr8  | 85512607  | 85512839  | 233 |
| chr8  | 70635931  | 70636163  | 233 |
| chr8  | 59829556  | 59829788  | 233 |
| chr7  | 42014552  | 42014784  | 233 |
| chr7  | 3574578   | 3574810   | 233 |
| chr7  | 1110841   | 1111073   | 233 |
| chr5  | 113555975 | 113556207 | 233 |
| chr5  | 111316199 | 111316431 | 233 |
| chr5  | 73012409  | 73012641  | 233 |
| chr5  | 72861033  | 72861265  | 233 |
| chr5  | 29178291  | 29178523  | 233 |
| chr5  | 28776381  | 28776613  | 233 |
| chr4  | 121918528 | 121918760 | 233 |
| chr4  | 115866713 | 115866945 | 233 |
| chr4  | 5621152   | 5621384   | 233 |
| chr3  | 126835725 | 126835957 | 233 |
| chr3  | 126211675 | 126211907 | 233 |
| chr3  | 122179168 | 122179400 | 233 |
| chr3  | 121233907 | 121234139 | 233 |
| chr3  | 114483957 | 114484189 | 233 |
| chr3  | 105470603 | 105470835 | 233 |
| chr3  | 31629225  | 31629457  | 233 |
| chr3  | 23870134  | 23870366  | 233 |
| chr3  | 23760637  | 23760869  | 233 |
| chr3  | 22658200  | 22658432  | 233 |
| chr3  | 15420079  | 15420311  | 233 |
| chr3  | 7993897   | 7994129   | 233 |
| chr29 | 44694024  | 44694256  | 233 |
| chr29 | 37322691  | 37322923  | 233 |
| chr29 | 31571797  | 31572029  | 233 |
| chr28 | 33947673  | 33947905  | 233 |
| chr28 | 30702587  | 30702819  | 233 |
| chr28 | 7281080   | 7281312   | 233 |
| chr27 | 35408589  | 35408821  | 233 |
| chr26 | 43969165  | 43969397  | 233 |
| chr26 | 33278947  | 33279179  | 233 |

|       |           |           |     |
|-------|-----------|-----------|-----|
| chr25 | 39876770  | 39877002  | 233 |
| chr25 | 33450605  | 33450837  | 233 |
| chr25 | 31889670  | 31889902  | 233 |
| chr25 | 4813392   | 4813624   | 233 |
| chr24 | 44162406  | 44162638  | 233 |
| chr24 | 39288794  | 39289026  | 233 |
| chr24 | 35036230  | 35036462  | 233 |
| chr24 | 33122699  | 33122931  | 233 |
| chr24 | 1577486   | 1577718   | 233 |
| chr23 | 52736482  | 52736714  | 233 |
| chr23 | 31100403  | 31100635  | 233 |
| chr23 | 11069289  | 11069521  | 233 |
| chr23 | 7606093   | 7606325   | 233 |
| chr22 | 59788772  | 59789004  | 233 |
| chr22 | 56473768  | 56474000  | 233 |
| chr21 | 58570100  | 58570332  | 233 |
| chr21 | 56672514  | 56672746  | 233 |
| chr21 | 50184576  | 50184808  | 233 |
| chr21 | 33010231  | 33010463  | 233 |
| chr21 | 25791113  | 25791345  | 233 |
| chr2  | 128077048 | 128077280 | 233 |
| chr19 | 62139704  | 62139936  | 233 |
| chr19 | 61401771  | 61402003  | 233 |
| chr19 | 43302323  | 43302555  | 233 |
| chr19 | 33399899  | 33400131  | 233 |
| chr19 | 18098121  | 18098353  | 233 |
| chr19 | 16859556  | 16859788  | 233 |
| chr19 | 15968726  | 15968958  | 233 |
| chr18 | 57365201  | 57365433  | 233 |
| chr18 | 56460942  | 56461174  | 233 |
| chr18 | 39510737  | 39510969  | 233 |
| chr18 | 15578781  | 15579013  | 233 |
| chr18 | 9976035   | 9976267   | 233 |
| chr18 | 8075683   | 8075915   | 233 |
| chr17 | 69824844  | 69825076  | 233 |
| chr17 | 64940300  | 64940532  | 233 |
| chr16 | 74537866  | 74538098  | 233 |
| chr16 | 73139770  | 73140002  | 233 |
| chr16 | 47523512  | 47523744  | 233 |
| chr16 | 44701789  | 44702021  | 233 |
| chr16 | 44465995  | 44466227  | 233 |
| chr15 | 63719555  | 63719787  | 233 |
| chr15 | 35404062  | 35404294  | 233 |
| chr15 | 29375329  | 29375561  | 233 |
| chr15 | 28283320  | 28283552  | 233 |
| chr14 | 42271592  | 42271824  | 233 |
| chr13 | 71110007  | 71110239  | 233 |
| chr13 | 40915943  | 40916175  | 233 |
| chr12 | 84321415  | 84321647  | 233 |
| chr11 | 101080812 | 101081044 | 233 |

|       |           |           |     |
|-------|-----------|-----------|-----|
| chr11 | 91943834  | 91944066  | 233 |
| chr11 | 28384432  | 28384664  | 233 |
| chr11 | 9031277   | 9031509   | 233 |
| chr11 | 7796690   | 7796922   | 233 |
| chr10 | 48323538  | 48323770  | 233 |
| chr10 | 17070613  | 17070845  | 233 |
| chr10 | 9857783   | 9858015   | 233 |
| chr10 | 8569594   | 8569826   | 233 |
| chr1  | 150069530 | 150069762 | 233 |
| chr1  | 146744376 | 146744608 | 233 |
| chr1  | 146455452 | 146455684 | 233 |
| chrX  | 79854501  | 79854732  | 232 |
| chrX  | 72371127  | 72371358  | 232 |
| chrX  | 66097814  | 66098045  | 232 |
| chrX  | 64739579  | 64739810  | 232 |
| chrX  | 63099929  | 63100160  | 232 |
| chrX  | 59458934  | 59459165  | 232 |
| chrX  | 54060744  | 54060975  | 232 |
| chrX  | 52146734  | 52146965  | 232 |
| chrX  | 50891320  | 50891551  | 232 |
| chrX  | 50852993  | 50853224  | 232 |
| chrX  | 50197646  | 50197877  | 232 |
| chrX  | 39261677  | 39261908  | 232 |
| chrX  | 38115215  | 38115446  | 232 |
| chrX  | 29159547  | 29159778  | 232 |
| chrX  | 19641537  | 19641768  | 232 |
| chrX  | 19280249  | 19280480  | 232 |
| chrX  | 14846720  | 14846951  | 232 |
| chrX  | 13548179  | 13548410  | 232 |
| chrX  | 13536963  | 13537194  | 232 |
| chrX  | 10490756  | 10490987  | 232 |
| chrX  | 9373833   | 9374064   | 232 |
| chrX  | 8478674   | 8478905   | 232 |
| chrX  | 8174813   | 8175044   | 232 |
| chrX  | 5956444   | 5956675   | 232 |
| chrX  | 5293130   | 5293361   | 232 |
| chrX  | 2148324   | 2148555   | 232 |
| chr9  | 106511618 | 106511849 | 232 |
| chr9  | 99847073  | 99847304  | 232 |
| chr9  | 77198027  | 77198258  | 232 |
| chr9  | 26958271  | 26958502  | 232 |
| chr9  | 24644643  | 24644874  | 232 |
| chr8  | 79287908  | 79288139  | 232 |
| chr8  | 73236107  | 73236338  | 232 |
| chr8  | 45729067  | 45729298  | 232 |
| chr8  | 866202    | 866433    | 232 |
| chr7  | 96289220  | 96289451  | 232 |
| chr7  | 38372814  | 38373045  | 232 |
| chr7  | 29992374  | 29992605  | 232 |
| chr6  | 121284857 | 121285088 | 232 |

|       |           |           |     |
|-------|-----------|-----------|-----|
| chr6  | 107154236 | 107154467 | 232 |
| chr6  | 46650148  | 46650379  | 232 |
| chr6  | 38114505  | 38114736  | 232 |
| chr5  | 122350550 | 122350781 | 232 |
| chr5  | 116551394 | 116551625 | 232 |
| chr5  | 112958400 | 112958631 | 232 |
| chr5  | 112561027 | 112561258 | 232 |
| chr5  | 88666030  | 88666261  | 232 |
| chr5  | 80267377  | 80267608  | 232 |
| chr5  | 79225993  | 79226224  | 232 |
| chr5  | 61251891  | 61252122  | 232 |
| chr5  | 55265319  | 55265550  | 232 |
| chr5  | 29796316  | 29796547  | 232 |
| chr5  | 27742626  | 27742857  | 232 |
| chr4  | 121942187 | 121942418 | 232 |
| chr4  | 117733510 | 117733741 | 232 |
| chr4  | 116859246 | 116859477 | 232 |
| chr4  | 104930038 | 104930269 | 232 |
| chr4  | 72286088  | 72286319  | 232 |
| chr4  | 64571509  | 64571740  | 232 |
| chr3  | 123201301 | 123201532 | 232 |
| chr3  | 115697634 | 115697865 | 232 |
| chr3  | 109001182 | 109001413 | 232 |
| chr3  | 105418837 | 105419068 | 232 |
| chr3  | 51910639  | 51910870  | 232 |
| chr29 | 36618492  | 36618723  | 232 |
| chr28 | 33821255  | 33821486  | 232 |
| chr27 | 38418809  | 38419040  | 232 |
| chr27 | 33461639  | 33461870  | 232 |
| chr27 | 15159263  | 15159494  | 232 |
| chr26 | 42008192  | 42008423  | 232 |
| chr26 | 35033441  | 35033672  | 232 |
| chr25 | 29373692  | 29373923  | 232 |
| chr25 | 16974396  | 16974627  | 232 |
| chr25 | 13095578  | 13095809  | 232 |
| chr24 | 46993737  | 46993968  | 232 |
| chr24 | 41572823  | 41573054  | 232 |
| chr24 | 4003154   | 4003385   | 232 |
| chr23 | 52431739  | 52431970  | 232 |
| chr23 | 44860602  | 44860833  | 232 |
| chr23 | 27405562  | 27405793  | 232 |
| chr23 | 20056666  | 20056897  | 232 |
| chr22 | 59334445  | 59334676  | 232 |
| chr22 | 54183191  | 54183422  | 232 |
| chr22 | 32765339  | 32765570  | 232 |
| chr21 | 69001661  | 69001892  | 232 |
| chr21 | 67766206  | 67766437  | 232 |
| chr21 | 34139453  | 34139684  | 232 |
| chr21 | 33583943  | 33584174  | 232 |
| chr21 | 28836287  | 28836518  | 232 |

|       |           |           |     |
|-------|-----------|-----------|-----|
| chr21 | 2052992   | 2053223   | 232 |
| chr20 | 71355463  | 71355694  | 232 |
| chr20 | 69156629  | 69156860  | 232 |
| chr20 | 2617927   | 2618158   | 232 |
| chr2  | 130756083 | 130756314 | 232 |
| chr2  | 92141352  | 92141583  | 232 |
| chr2  | 75956058  | 75956289  | 232 |
| chr2  | 65357736  | 65357967  | 232 |
| chr2  | 23934315  | 23934546  | 232 |
| chr2  | 21413969  | 21414200  | 232 |
| chr2  | 1301124   | 1301355   | 232 |
| chr19 | 14056659  | 14056890  | 232 |
| chr19 | 13555085  | 13555316  | 232 |
| chr18 | 63707891  | 63708122  | 232 |
| chr18 | 63218829  | 63219060  | 232 |
| chr18 | 60068382  | 60068613  | 232 |
| chr18 | 44987654  | 44987885  | 232 |
| chr18 | 24344534  | 24344765  | 232 |
| chr18 | 22712668  | 22712899  | 232 |
| chr18 | 22180330  | 22180561  | 232 |
| chr18 | 22044390  | 22044621  | 232 |
| chr18 | 12142015  | 12142246  | 232 |
| chr18 | 8083894   | 8084125   | 232 |
| chr18 | 4923586   | 4923817   | 232 |
| chr18 | 4454978   | 4455209   | 232 |
| chr17 | 76100243  | 76100474  | 232 |
| chr17 | 66832282  | 66832513  | 232 |
| chr17 | 56078632  | 56078863  | 232 |
| chr17 | 56040652  | 56040883  | 232 |
| chr16 | 73972119  | 73972350  | 232 |
| chr16 | 50911731  | 50911962  | 232 |
| chr16 | 45045283  | 45045514  | 232 |
| chr16 | 29309644  | 29309875  | 232 |
| chr15 | 81842562  | 81842793  | 232 |
| chr15 | 75513897  | 75514128  | 232 |
| chr15 | 69058267  | 69058498  | 232 |
| chr15 | 39651035  | 39651266  | 232 |
| chr15 | 24308253  | 24308484  | 232 |
| chr15 | 21269441  | 21269672  | 232 |
| chr14 | 22964983  | 22965214  | 232 |
| chr14 | 22079028  | 22079259  | 232 |
| chr13 | 76165790  | 76166021  | 232 |
| chr13 | 69045942  | 69046173  | 232 |
| chr13 | 64225272  | 64225503  | 232 |
| chr13 | 62347754  | 62347985  | 232 |
| chr13 | 54907844  | 54908075  | 232 |
| chr12 | 81449692  | 81449923  | 232 |
| chr12 | 36411162  | 36411393  | 232 |
| chr12 | 9448446   | 9448677   | 232 |
| chr11 | 93857004  | 93857235  | 232 |



|       |           |           |     |
|-------|-----------|-----------|-----|
| chr11 | 70833683  | 70833914  | 232 |
| chr10 | 70031612  | 70031843  | 232 |
| chr10 | 33267669  | 33267900  | 232 |
| chr1  | 154743926 | 154744157 | 232 |
| chr1  | 136686852 | 136687083 | 232 |
| chr1  | 83115310  | 83115541  | 232 |
| chr1  | 74558619  | 74558850  | 232 |
| chr1  | 57459537  | 57459768  | 232 |
| chrX  | 77669205  | 77669435  | 231 |
| chrX  | 77218707  | 77218937  | 231 |
| chrX  | 75318339  | 75318569  | 231 |
| chrX  | 74203908  | 74204138  | 231 |
| chrX  | 68184509  | 68184739  | 231 |
| chrX  | 65450900  | 65451130  | 231 |
| chrX  | 63892183  | 63892413  | 231 |
| chrX  | 60878681  | 60878911  | 231 |
| chrX  | 60158669  | 60158899  | 231 |
| chrX  | 59148141  | 59148371  | 231 |
| chrX  | 54128330  | 54128560  | 231 |
| chrX  | 53287920  | 53288150  | 231 |
| chrX  | 46521219  | 46521449  | 231 |
| chrX  | 39575576  | 39575806  | 231 |
| chrX  | 37522226  | 37522456  | 231 |
| chrX  | 34167944  | 34168174  | 231 |
| chrX  | 34129931  | 34130161  | 231 |
| chrX  | 29556663  | 29556893  | 231 |
| chrX  | 20525928  | 20526158  | 231 |
| chrX  | 18650800  | 18651030  | 231 |
| chrX  | 13703749  | 13703979  | 231 |
| chrX  | 8186022   | 8186252   | 231 |
| chrX  | 6454084   | 6454314   | 231 |
| chr9  | 66107148  | 66107378  | 231 |
| chr8  | 101338639 | 101338869 | 231 |
| chr8  | 73381805  | 73382035  | 231 |
| chr8  | 6103563   | 6103793   | 231 |
| chr7  | 62883597  | 62883827  | 231 |
| chr7  | 61018118  | 61018348  | 231 |
| chr7  | 46272910  | 46273140  | 231 |
| chr7  | 5460492   | 5460722   | 231 |
| chr7  | 4552525   | 4552755   | 231 |
| chr5  | 123652854 | 123653084 | 231 |
| chr5  | 115549816 | 115550046 | 231 |
| chr5  | 77754348  | 77754578  | 231 |
| chr5  | 76579037  | 76579267  | 231 |
| chr5  | 60288656  | 60288886  | 231 |
| chr4  | 72217019  | 72217249  | 231 |
| chr4  | 69597217  | 69597447  | 231 |
| chr4  | 63963734  | 63963964  | 231 |
| chr4  | 26586727  | 26586957  | 231 |
| chr3  | 120822556 | 120822786 | 231 |

|       |           |           |     |
|-------|-----------|-----------|-----|
| chr3  | 120598926 | 120599156 | 231 |
| chr3  | 113116978 | 113117208 | 231 |
| chr3  | 107761778 | 107762008 | 231 |
| chr3  | 86116436  | 86116666  | 231 |
| chr3  | 23028017  | 23028247  | 231 |
| chr29 | 50032157  | 50032387  | 231 |
| chr29 | 36933583  | 36933813  | 231 |
| chr29 | 33947058  | 33947288  | 231 |
| chr29 | 33406209  | 33406439  | 231 |
| chr29 | 32421977  | 32422207  | 231 |
| chr29 | 26539050  | 26539280  | 231 |
| chr29 | 26201450  | 26201680  | 231 |
| chr29 | 2414625   | 2414855   | 231 |
| chr28 | 35293352  | 35293582  | 231 |
| chr27 | 37720826  | 37721056  | 231 |
| chr27 | 35407631  | 35407861  | 231 |
| chr27 | 28017921  | 28018151  | 231 |
| chr27 | 26839072  | 26839302  | 231 |
| chr26 | 41333396  | 41333626  | 231 |
| chr26 | 18823366  | 18823596  | 231 |
| chr26 | 15978573  | 15978803  | 231 |
| chr25 | 42075771  | 42076001  | 231 |
| chr25 | 21767407  | 21767637  | 231 |
| chr25 | 2270770   | 2271000   | 231 |
| chr24 | 49812913  | 49813143  | 231 |
| chr24 | 49739847  | 49740077  | 231 |
| chr24 | 40669154  | 40669384  | 231 |
| chr24 | 25969341  | 25969571  | 231 |
| chr24 | 11512382  | 11512612  | 231 |
| chr23 | 51822991  | 51823221  | 231 |
| chr23 | 49882062  | 49882292  | 231 |
| chr23 | 45646612  | 45646842  | 231 |
| chr23 | 16186591  | 16186821  | 231 |
| chr23 | 15019583  | 15019813  | 231 |
| chr23 | 10747905  | 10748135  | 231 |
| chr22 | 56460025  | 56460255  | 231 |
| chr22 | 16900935  | 16901165  | 231 |
| chr22 | 10945120  | 10945350  | 231 |
| chr21 | 64519537  | 64519767  | 231 |
| chr20 | 62653471  | 62653701  | 231 |
| chr20 | 30272832  | 30273062  | 231 |
| chr20 | 5566328   | 5566558   | 231 |
| chr2  | 139329130 | 139329360 | 231 |
| chr2  | 128327383 | 128327613 | 231 |
| chr2  | 124794788 | 124795018 | 231 |
| chr2  | 108790195 | 108790425 | 231 |
| chr2  | 73999902  | 74000132  | 231 |
| chr19 | 60898686  | 60898916  | 231 |
| chr19 | 59488707  | 59488937  | 231 |
| chr19 | 58231329  | 58231559  | 231 |

|       |           |           |     |
|-------|-----------|-----------|-----|
| chr19 | 39500383  | 39500613  | 231 |
| chr19 | 18333102  | 18333332  | 231 |
| chr19 | 14783959  | 14784189  | 231 |
| chr18 | 56736357  | 56736587  | 231 |
| chr18 | 56556361  | 56556591  | 231 |
| chr18 | 56527420  | 56527650  | 231 |
| chr18 | 48709815  | 48710045  | 231 |
| chr18 | 42207993  | 42208223  | 231 |
| chr18 | 38678615  | 38678845  | 231 |
| chr18 | 33674666  | 33674896  | 231 |
| chr18 | 23335082  | 23335312  | 231 |
| chr18 | 12394143  | 12394373  | 231 |
| chr18 | 3097343   | 3097573   | 231 |
| chr17 | 69447819  | 69448049  | 231 |
| chr17 | 67896712  | 67896942  | 231 |
| chr17 | 66161642  | 66161872  | 231 |
| chr17 | 1566268   | 1566498   | 231 |
| chr16 | 68865091  | 68865321  | 231 |
| chr16 | 47280860  | 47281090  | 231 |
| chr16 | 39380555  | 39380785  | 231 |
| chr15 | 74643846  | 74644076  | 231 |
| chr15 | 65741118  | 65741348  | 231 |
| chr15 | 30968494  | 30968724  | 231 |
| chr15 | 24725856  | 24726086  | 231 |
| chr14 | 32671085  | 32671315  | 231 |
| chr14 | 26545088  | 26545318  | 231 |
| chr14 | 8547476   | 8547706   | 231 |
| chr13 | 74019017  | 74019247  | 231 |
| chr13 | 59632494  | 59632724  | 231 |
| chr13 | 59576490  | 59576720  | 231 |
| chr13 | 54019847  | 54020077  | 231 |
| chr12 | 84827052  | 84827282  | 231 |
| chr12 | 74420044  | 74420274  | 231 |
| chr12 | 33048110  | 33048340  | 231 |
| chr12 | 32526530  | 32526760  | 231 |
| chr12 | 18747017  | 18747247  | 231 |
| chr11 | 87932248  | 87932478  | 231 |
| chr11 | 63391813  | 63392043  | 231 |
| chr11 | 46640682  | 46640912  | 231 |
| chr11 | 29850182  | 29850412  | 231 |
| chr11 | 20449776  | 20450006  | 231 |
| chr10 | 87488706  | 87488936  | 231 |
| chr10 | 80605879  | 80606109  | 231 |
| chr10 | 80095047  | 80095277  | 231 |
| chr10 | 53028508  | 53028738  | 231 |
| chr10 | 24616150  | 24616380  | 231 |
| chr10 | 17832388  | 17832618  | 231 |
| chr10 | 17733404  | 17733634  | 231 |
| chr10 | 16880023  | 16880253  | 231 |
| chr1  | 150215503 | 150215733 | 231 |

|      |           |           |     |
|------|-----------|-----------|-----|
| chr1 | 148296479 | 148296709 | 231 |
| chr1 | 137435080 | 137435310 | 231 |
| chr1 | 126908558 | 126908788 | 231 |
| chr1 | 59053353  | 59053583  | 231 |
| chrX | 77100776  | 77101005  | 230 |
| chrX | 75426447  | 75426676  | 230 |
| chrX | 74929949  | 74930178  | 230 |
| chrX | 71686080  | 71686309  | 230 |
| chrX | 66244423  | 66244652  | 230 |
| chrX | 63724714  | 63724943  | 230 |
| chrX | 62498935  | 62499164  | 230 |
| chrX | 62329457  | 62329686  | 230 |
| chrX | 60268694  | 60268923  | 230 |
| chrX | 55231143  | 55231372  | 230 |
| chrX | 51044832  | 51045061  | 230 |
| chrX | 44904075  | 44904304  | 230 |
| chrX | 30963854  | 30964083  | 230 |
| chrX | 30878644  | 30878873  | 230 |
| chrX | 22588614  | 22588843  | 230 |
| chrX | 19275830  | 19276059  | 230 |
| chrX | 13847197  | 13847426  | 230 |
| chrX | 11808917  | 11809146  | 230 |
| chrX | 9510243   | 9510472   | 230 |
| chrX | 8917752   | 8917981   | 230 |
| chrX | 6340379   | 6340608   | 230 |
| chrX | 4014726   | 4014955   | 230 |
| chrX | 2428533   | 2428762   | 230 |
| chr9 | 104762297 | 104762526 | 230 |
| chr9 | 100364532 | 100364761 | 230 |
| chr9 | 89849054  | 89849283  | 230 |
| chr9 | 56350235  | 56350464  | 230 |
| chr9 | 51633219  | 51633448  | 230 |
| chr9 | 47237808  | 47238037  | 230 |
| chr8 | 110882797 | 110883026 | 230 |
| chr8 | 108831223 | 108831452 | 230 |
| chr8 | 77203711  | 77203940  | 230 |
| chr8 | 70825594  | 70825823  | 230 |
| chr8 | 67710316  | 67710545  | 230 |
| chr8 | 45659208  | 45659437  | 230 |
| chr8 | 10188229  | 10188458  | 230 |
| chr7 | 88623468  | 88623697  | 230 |
| chr7 | 45778337  | 45778566  | 230 |
| chr7 | 43052043  | 43052272  | 230 |
| chr7 | 5645018   | 5645247   | 230 |
| chr6 | 114777373 | 114777602 | 230 |
| chr6 | 106820075 | 106820304 | 230 |
| chr6 | 47384040  | 47384269  | 230 |
| chr6 | 20793532  | 20793761  | 230 |
| chr5 | 88052099  | 88052328  | 230 |
| chr4 | 121222684 | 121222913 | 230 |

|       |           |           |     |
|-------|-----------|-----------|-----|
| chr4  | 98757204  | 98757433  | 230 |
| chr4  | 56787049  | 56787278  | 230 |
| chr3  | 116465508 | 116465737 | 230 |
| chr3  | 116328958 | 116329187 | 230 |
| chr3  | 54806607  | 54806836  | 230 |
| chr29 | 35373140  | 35373369  | 230 |
| chr28 | 25827613  | 25827842  | 230 |
| chr26 | 39591700  | 39591929  | 230 |
| chr26 | 39129068  | 39129297  | 230 |
| chr26 | 37505578  | 37505807  | 230 |
| chr26 | 31324938  | 31325167  | 230 |
| chr26 | 28146867  | 28147096  | 230 |
| chr26 | 11897046  | 11897275  | 230 |
| chr25 | 33285517  | 33285746  | 230 |
| chr25 | 17171947  | 17172176  | 230 |
| chr25 | 4811051   | 4811280   | 230 |
| chr25 | 4616802   | 4617031   | 230 |
| chr24 | 51787264  | 51787493  | 230 |
| chr24 | 40910147  | 40910376  | 230 |
| chr24 | 35230336  | 35230565  | 230 |
| chr23 | 52745990  | 52746219  | 230 |
| chr23 | 41896555  | 41896784  | 230 |
| chr23 | 23847392  | 23847621  | 230 |
| chr23 | 11407740  | 11407969  | 230 |
| chr22 | 59501673  | 59501902  | 230 |
| chr22 | 18357960  | 18358189  | 230 |
| chr21 | 26806568  | 26806797  | 230 |
| chr21 | 25950535  | 25950764  | 230 |
| chr21 | 22735822  | 22736051  | 230 |
| chr21 | 19849697  | 19849926  | 230 |
| chr20 | 73577957  | 73578186  | 230 |
| chr20 | 59407811  | 59408040  | 230 |
| chr20 | 13791373  | 13791602  | 230 |
| chr2  | 134987662 | 134987891 | 230 |
| chr2  | 131793424 | 131793653 | 230 |
| chr2  | 124255724 | 124255953 | 230 |
| chr2  | 121544853 | 121545082 | 230 |
| chr19 | 56492605  | 56492834  | 230 |
| chr19 | 46715920  | 46716149  | 230 |
| chr19 | 46656944  | 46657173  | 230 |
| chr19 | 14074424  | 14074653  | 230 |
| chr18 | 62664424  | 62664653  | 230 |
| chr18 | 50026425  | 50026654  | 230 |
| chr18 | 49479813  | 49480042  | 230 |
| chr18 | 49115302  | 49115531  | 230 |
| chr18 | 23126023  | 23126252  | 230 |
| chr18 | 12010702  | 12010931  | 230 |
| chr18 | 11973651  | 11973880  | 230 |
| chr18 | 7263065   | 7263294   | 230 |
| chr17 | 69776426  | 69776655  | 230 |

|       |          |          |     |
|-------|----------|----------|-----|
| chr17 | 69701374 | 69701603 | 230 |
| chr17 | 52172953 | 52173182 | 230 |
| chr17 | 5928877  | 5929106  | 230 |
| chr16 | 75961174 | 75961403 | 230 |
| chr16 | 56115379 | 56115608 | 230 |
| chr16 | 49504093 | 49504322 | 230 |
| chr15 | 24414733 | 24414962 | 230 |
| chr14 | 14199106 | 14199335 | 230 |
| chr14 | 9609230  | 9609459  | 230 |
| chr14 | 8034336  | 8034565  | 230 |
| chr14 | 5597105  | 5597334  | 230 |
| chr13 | 80060586 | 80060815 | 230 |
| chr13 | 79690318 | 79690547 | 230 |
| chr13 | 78071255 | 78071484 | 230 |
| chr13 | 72791338 | 72791567 | 230 |
| chr13 | 66991526 | 66991755 | 230 |
| chr13 | 65031351 | 65031580 | 230 |
| chr13 | 59819567 | 59819796 | 230 |
| chr13 | 59151719 | 59151948 | 230 |
| chr13 | 58660601 | 58660830 | 230 |
| chr13 | 16079966 | 16080195 | 230 |
| chr13 | 12315044 | 12315273 | 230 |
| chr11 | 49340741 | 49340970 | 230 |
| chr10 | 90182707 | 90182936 | 230 |
| chr10 | 88687035 | 88687264 | 230 |
| chr10 | 83847213 | 83847442 | 230 |
| chr10 | 70160249 | 70160478 | 230 |
| chr10 | 66850459 | 66850688 | 230 |
| chr10 | 59979889 | 59980118 | 230 |
| chr10 | 45525162 | 45525391 | 230 |
| chr10 | 20436774 | 20437003 | 230 |
| chr10 | 12942535 | 12942764 | 230 |
| chr1  | 1866610  | 1866839  | 230 |
| chrX  | 79858636 | 79858864 | 229 |
| chrX  | 76054065 | 76054293 | 229 |
| chrX  | 75276233 | 75276461 | 229 |
| chrX  | 56888566 | 56888794 | 229 |
| chrX  | 56733197 | 56733425 | 229 |
| chrX  | 54596641 | 54596869 | 229 |
| chrX  | 47377546 | 47377774 | 229 |
| chrX  | 38095240 | 38095468 | 229 |
| chrX  | 34160214 | 34160442 | 229 |
| chrX  | 29560383 | 29560611 | 229 |
| chrX  | 21835829 | 21836057 | 229 |
| chrX  | 20468976 | 20469204 | 229 |
| chrX  | 19440585 | 19440813 | 229 |
| chrX  | 15627798 | 15628026 | 229 |
| chrX  | 11850500 | 11850728 | 229 |
| chrX  | 10968974 | 10969202 | 229 |
| chrX  | 5596648  | 5596876  | 229 |

|       |               |           |     |
|-------|---------------|-----------|-----|
| chrX  | 1317010       | 1317238   | 229 |
| chr9  | 35995394      | 35995622  | 229 |
| chr9  | 34938317      | 34938545  | 229 |
| chr9  | 29836926      | 29837154  | 229 |
| chr9  | 29823551      | 29823779  | 229 |
| chr9  | 10497353      | 10497581  | 229 |
| chr8  | 93572912      | 93573140  | 229 |
| chr8  | 78490245      | 78490473  | 229 |
| chr8  | 56720397      | 56720625  | 229 |
| chr8  | 55541986      | 55542214  | 229 |
| chr8  | 25627398      | 25627626  | 229 |
| chr8  | 7703955       | 7704183   | 229 |
| chr7  | 80922029      | 80922257  | 229 |
| chr7  | 70311308      | 70311536  | 229 |
| chr7  | 44443456      | 44443684  | 229 |
| chr7  | 37558275      | 37558503  | 229 |
| chr7  | 19250853      | 19251081  | 229 |
| chr6  | 75143446      | 75143674  | 229 |
| chr5  | 118506064     | 118506292 | 229 |
| chr4  | 99604009      | 99604237  | 229 |
| chr4  | 99468462      | 99468690  | 229 |
| chr4  | 95605610      | 95605838  | 229 |
| chr4  | 80107169      | 80107397  | 229 |
| chr4  | 80020972      | 80021200  | 229 |
| chr4  | 32881060      | 32881288  | 229 |
| chr4  | 10708341      | 10708569  | 229 |
| chr3  | 111627366     | 111627594 | 229 |
| chr3  | 33847436      | 33847664  | 229 |
| chr29 | 51701371      | 51701599  | 229 |
| chr29 | 51578284      | 51578512  | 229 |
| chr29 | 47305050      | 47305278  | 229 |
| chr29 | 39034827      | 39035055  | 229 |
| chr29 | 30642073      | 30642301  | 229 |
| chr29 | 26702030      | 26702258  | 229 |
| chr29 | 17456011      | 17456239  | 229 |
| chr29 | 2516071       | 2516299   | 229 |
| chr28 | 35284160      | 35284388  | 229 |
| chr27 | 27952146      | 27952374  | 229 |
| chr27 | 733708 733936 |           | 229 |
| chr26 | 37445055      | 37445283  | 229 |
| chr26 | 14676782      | 14677010  | 229 |
| chr26 | 5870216       | 5870444   | 229 |
| chr25 | 38931928      | 38932156  | 229 |
| chr25 | 29078211      | 29078439  | 229 |
| chr25 | 6977170       | 6977398   | 229 |
| chr24 | 60650497      | 60650725  | 229 |
| chr24 | 59542446      | 59542674  | 229 |
| chr24 | 40786207      | 40786435  | 229 |
| chr24 | 20562993      | 20563221  | 229 |
| chr23 | 43083650      | 43083878  | 229 |

|       |           |           |     |
|-------|-----------|-----------|-----|
| chr23 | 38607318  | 38607546  | 229 |
| chr23 | 21068896  | 21069124  | 229 |
| chr22 | 30027554  | 30027782  | 229 |
| chr22 | 16569611  | 16569839  | 229 |
| chr22 | 11283094  | 11283322  | 229 |
| chr21 | 66600927  | 66601155  | 229 |
| chr21 | 63278020  | 63278248  | 229 |
| chr21 | 14704077  | 14704305  | 229 |
| chr20 | 72728997  | 72729225  | 229 |
| chr20 | 66438531  | 66438759  | 229 |
| chr20 | 5119916   | 5120144   | 229 |
| chr2  | 135865583 | 135865811 | 229 |
| chr2  | 133449907 | 133450135 | 229 |
| chr2  | 111396012 | 111396240 | 229 |
| chr19 | 61512635  | 61512863  | 229 |
| chr19 | 60387337  | 60387565  | 229 |
| chr19 | 59077289  | 59077517  | 229 |
| chr19 | 58195179  | 58195407  | 229 |
| chr19 | 54658070  | 54658298  | 229 |
| chr19 | 54475597  | 54475825  | 229 |
| chr19 | 42235135  | 42235363  | 229 |
| chr19 | 33719001  | 33719229  | 229 |
| chr19 | 29690742  | 29690970  | 229 |
| chr19 | 8582879   | 8583107   | 229 |
| chr18 | 64298677  | 64298905  | 229 |
| chr18 | 55154576  | 55154804  | 229 |
| chr18 | 47222843  | 47223071  | 229 |
| chr18 | 33610282  | 33610510  | 229 |
| chr18 | 33113764  | 33113992  | 229 |
| chr18 | 11232487  | 11232715  | 229 |
| chr18 | 3832357   | 3832585   | 229 |
| chr18 | 3752580   | 3752808   | 229 |
| chr17 | 72331494  | 72331722  | 229 |
| chr17 | 62122189  | 62122417  | 229 |
| chr17 | 60998816  | 60999044  | 229 |
| chr17 | 19705622  | 19705850  | 229 |
| chr17 | 17304867  | 17305095  | 229 |
| chr16 | 67840359  | 67840587  | 229 |
| chr16 | 61649084  | 61649312  | 229 |
| chr15 | 64185083  | 64185311  | 229 |
| chr15 | 22318386  | 22318614  | 229 |
| chr14 | 80787249  | 80787477  | 229 |
| chr14 | 34035514  | 34035742  | 229 |
| chr14 | 30900668  | 30900896  | 229 |
| chr13 | 77307038  | 77307266  | 229 |
| chr13 | 71283010  | 71283238  | 229 |
| chr13 | 70297732  | 70297960  | 229 |
| chr13 | 70291673  | 70291901  | 229 |
| chr13 | 66838561  | 66838789  | 229 |
| chr13 | 63159817  | 63160045  | 229 |



|       |           |           |     |
|-------|-----------|-----------|-----|
| chr13 | 62348496  | 62348724  | 229 |
| chr13 | 60008098  | 60008326  | 229 |
| chr13 | 59988968  | 59989196  | 229 |
| chr13 | 57211146  | 57211374  | 229 |
| chr13 | 28533070  | 28533298  | 229 |
| chr13 | 23845384  | 23845612  | 229 |
| chr12 | 68412632  | 68412860  | 229 |
| chr12 | 31380532  | 31380760  | 229 |
| chr11 | 109506729 | 109506957 | 229 |
| chr11 | 106354319 | 106354547 | 229 |
| chr11 | 105997592 | 105997820 | 229 |
| chr11 | 103894664 | 103894892 | 229 |
| chr11 | 84128459  | 84128687  | 229 |
| chr11 | 71523281  | 71523509  | 229 |
| chr11 | 70717508  | 70717736  | 229 |
| chr11 | 50938277  | 50938505  | 229 |
| chr10 | 79571103  | 79571331  | 229 |
| chr10 | 32244400  | 32244628  | 229 |
| chr10 | 17324363  | 17324591  | 229 |
| chr1  | 157079129 | 157079357 | 229 |
| chr1  | 149495272 | 149495500 | 229 |
| chr1  | 149487284 | 149487512 | 229 |
| chrX  | 80155159  | 80155386  | 228 |
| chrX  | 76809783  | 76810010  | 228 |
| chrX  | 75778084  | 75778311  | 228 |
| chrX  | 74232708  | 74232935  | 228 |
| chrX  | 72613668  | 72613895  | 228 |
| chrX  | 72539173  | 72539400  | 228 |
| chrX  | 71662938  | 71663165  | 228 |
| chrX  | 66957888  | 66958115  | 228 |
| chrX  | 66422136  | 66422363  | 228 |
| chrX  | 65656436  | 65656663  | 228 |
| chrX  | 62914008  | 62914235  | 228 |
| chrX  | 61478851  | 61479078  | 228 |
| chrX  | 61337898  | 61338125  | 228 |
| chrX  | 56959927  | 56960154  | 228 |
| chrX  | 56264135  | 56264362  | 228 |
| chrX  | 47883476  | 47883703  | 228 |
| chrX  | 39606583  | 39606810  | 228 |
| chrX  | 35609727  | 35609954  | 228 |
| chrX  | 13335963  | 13336190  | 228 |
| chrX  | 10101759  | 10101986  | 228 |
| chr9  | 90738569  | 90738796  | 228 |
| chr9  | 89172688  | 89172915  | 228 |
| chr9  | 75435191  | 75435418  | 228 |
| chr9  | 29886894  | 29887121  | 228 |
| chr8  | 115116478 | 115116705 | 228 |
| chr8  | 89468972  | 89469199  | 228 |
| chr8  | 65399882  | 65400109  | 228 |
| chr8  | 63764202  | 63764429  | 228 |

|       |           |           |     |
|-------|-----------|-----------|-----|
| chr8  | 45669571  | 45669798  | 228 |
| chr7  | 47110096  | 47110323  | 228 |
| chr7  | 39105657  | 39105884  | 228 |
| chr6  | 110037009 | 110037236 | 228 |
| chr6  | 109573082 | 109573309 | 228 |
| chr5  | 116931990 | 116932217 | 228 |
| chr5  | 103549456 | 103549683 | 228 |
| chr5  | 91639183  | 91639410  | 228 |
| chr5  | 72893056  | 72893283  | 228 |
| chr5  | 28760270  | 28760497  | 228 |
| chr5  | 28354866  | 28355093  | 228 |
| chr5  | 10524206  | 10524433  | 228 |
| chr4  | 10707933  | 10708160  | 228 |
| chr3  | 122178823 | 122179050 | 228 |
| chr3  | 120815575 | 120815802 | 228 |
| chr3  | 116912111 | 116912338 | 228 |
| chr3  | 116466376 | 116466603 | 228 |
| chr3  | 35497080  | 35497307  | 228 |
| chr3  | 33832301  | 33832528  | 228 |
| chr29 | 37479495  | 37479722  | 228 |
| chr29 | 18239370  | 18239597  | 228 |
| chr28 | 40301307  | 40301534  | 228 |
| chr27 | 39967954  | 39968181  | 228 |
| chr27 | 7977930   | 7978157   | 228 |
| chr26 | 39266425  | 39266652  | 228 |
| chr26 | 22807357  | 22807584  | 228 |
| chr26 | 20583183  | 20583410  | 228 |
| chr26 | 17502936  | 17503163  | 228 |
| chr26 | 17249106  | 17249333  | 228 |
| chr25 | 43398639  | 43398866  | 228 |
| chr25 | 41286844  | 41287071  | 228 |
| chr25 | 35472269  | 35472496  | 228 |
| chr25 | 30513935  | 30514162  | 228 |
| chr24 | 58899243  | 58899470  | 228 |
| chr24 | 58852239  | 58852466  | 228 |
| chr24 | 20858421  | 20858648  | 228 |
| chr24 | 1125181   | 1125408   | 228 |
| chr23 | 46506244  | 46506471  | 228 |
| chr23 | 46356574  | 46356801  | 228 |
| chr23 | 38343172  | 38343399  | 228 |
| chr23 | 28758937  | 28759164  | 228 |
| chr23 | 23759172  | 23759399  | 228 |
| chr23 | 18777267  | 18777494  | 228 |
| chr23 | 11009834  | 11010061  | 228 |
| chr23 | 10176568  | 10176795  | 228 |
| chr22 | 55675579  | 55675806  | 228 |
| chr22 | 48764197  | 48764424  | 228 |
| chr22 | 47799450  | 47799677  | 228 |
| chr22 | 36137189  | 36137416  | 228 |
| chr22 | 30421213  | 30421440  | 228 |

|       |           |           |     |
|-------|-----------|-----------|-----|
| chr21 | 66440638  | 66440865  | 228 |
| chr21 | 59022922  | 59023149  | 228 |
| chr21 | 15953812  | 15954039  | 228 |
| chr2  | 131758908 | 131759135 | 228 |
| chr2  | 99121051  | 99121278  | 228 |
| chr2  | 36274912  | 36275139  | 228 |
| chr2  | 21540657  | 21540884  | 228 |
| chr19 | 61797499  | 61797726  | 228 |
| chr19 | 48665338  | 48665565  | 228 |
| chr19 | 43094209  | 43094436  | 228 |
| chr19 | 30774027  | 30774254  | 228 |
| chr19 | 30019173  | 30019400  | 228 |
| chr19 | 14688539  | 14688766  | 228 |
| chr18 | 43582113  | 43582340  | 228 |
| chr18 | 32413195  | 32413422  | 228 |
| chr18 | 25321078  | 25321305  | 228 |
| chr18 | 16636841  | 16637068  | 228 |
| chr18 | 11412117  | 11412344  | 228 |
| chr18 | 6953807   | 6954034   | 228 |
| chr17 | 73914368  | 73914595  | 228 |
| chr17 | 69240664  | 69240891  | 228 |
| chr17 | 66427877  | 66428104  | 228 |
| chr17 | 3973602   | 3973829   | 228 |
| chr16 | 73428458  | 73428685  | 228 |
| chr16 | 47219087  | 47219314  | 228 |
| chr16 | 38767541  | 38767768  | 228 |
| chr16 | 32738141  | 32738368  | 228 |
| chr15 | 61355494  | 61355721  | 228 |
| chr15 | 30026330  | 30026557  | 228 |
| chr15 | 25442340  | 25442567  | 228 |
| chr15 | 22528602  | 22528829  | 228 |
| chr14 | 72406418  | 72406645  | 228 |
| chr13 | 71574002  | 71574229  | 228 |
| chr13 | 41525120  | 41525347  | 228 |
| chr13 | 40977189  | 40977416  | 228 |
| chr13 | 40574150  | 40574377  | 228 |
| chr13 | 40316503  | 40316730  | 228 |
| chr13 | 17680973  | 17681200  | 228 |
| chr11 | 102846723 | 102846950 | 228 |
| chr11 | 92934357  | 92934584  | 228 |
| chr11 | 91623906  | 91624133  | 228 |
| chr11 | 71455230  | 71455457  | 228 |
| chr11 | 70636351  | 70636578  | 228 |
| chr10 | 86855450  | 86855677  | 228 |
| chr1  | 147322909 | 147323136 | 228 |
| chr1  | 82789722  | 82789949  | 228 |
| chrX  | 84913532  | 84913758  | 227 |
| chrX  | 78134638  | 78134864  | 227 |
| chrX  | 77117375  | 77117601  | 227 |
| chrX  | 76084625  | 76084851  | 227 |

|       |           |           |     |
|-------|-----------|-----------|-----|
| chrX  | 75251019  | 75251245  | 227 |
| chrX  | 74321663  | 74321889  | 227 |
| chrX  | 71627417  | 71627643  | 227 |
| chrX  | 66082396  | 66082622  | 227 |
| chrX  | 64566007  | 64566233  | 227 |
| chrX  | 64296283  | 64296509  | 227 |
| chrX  | 63956998  | 63957224  | 227 |
| chrX  | 61003772  | 61003998  | 227 |
| chrX  | 60519248  | 60519474  | 227 |
| chrX  | 60075597  | 60075823  | 227 |
| chrX  | 36317456  | 36317682  | 227 |
| chrX  | 35720717  | 35720943  | 227 |
| chrX  | 35204664  | 35204890  | 227 |
| chrX  | 35180325  | 35180551  | 227 |
| chrX  | 34790991  | 34791217  | 227 |
| chrX  | 34717150  | 34717376  | 227 |
| chrX  | 32537292  | 32537518  | 227 |
| chrX  | 30574591  | 30574817  | 227 |
| chrX  | 19453936  | 19454162  | 227 |
| chrX  | 19050621  | 19050847  | 227 |
| chrX  | 16478253  | 16478479  | 227 |
| chrX  | 13801840  | 13802066  | 227 |
| chrX  | 9979070   | 9979296   | 227 |
| chrX  | 9080860   | 9081086   | 227 |
| chrX  | 6861352   | 6861578   | 227 |
| chr9  | 106092834 | 106093060 | 227 |
| chr9  | 98742468  | 98742694  | 227 |
| chr8  | 72532403  | 72532629  | 227 |
| chr8  | 10814303  | 10814529  | 227 |
| chr7  | 93076401  | 93076627  | 227 |
| chr7  | 52227698  | 52227924  | 227 |
| chr7  | 50540265  | 50540491  | 227 |
| chr7  | 47428324  | 47428550  | 227 |
| chr7  | 19924122  | 19924348  | 227 |
| chr7  | 13553425  | 13553651  | 227 |
| chr6  | 108714029 | 108714255 | 227 |
| chr5  | 62078797  | 62079023  | 227 |
| chr5  | 33549669  | 33549895  | 227 |
| chr5  | 30204305  | 30204531  | 227 |
| chr5  | 10785493  | 10785719  | 227 |
| chr4  | 72228938  | 72229164  | 227 |
| chr3  | 127884262 | 127884488 | 227 |
| chr3  | 115915592 | 115915818 | 227 |
| chr3  | 105553454 | 105553680 | 227 |
| chr3  | 17485676  | 17485902  | 227 |
| chr3  | 17475170  | 17475396  | 227 |
| chr29 | 45775709  | 45775935  | 227 |
| chr29 | 35782137  | 35782363  | 227 |
| chr29 | 34597474  | 34597700  | 227 |
| chr29 | 33770552  | 33770778  | 227 |

|       |           |           |     |
|-------|-----------|-----------|-----|
| chr29 | 26495747  | 26495973  | 227 |
| chr29 | 26351578  | 26351804  | 227 |
| chr28 | 32496192  | 32496418  | 227 |
| chr28 | 26906680  | 26906906  | 227 |
| chr28 | 15325899  | 15326125  | 227 |
| chr26 | 50289619  | 50289845  | 227 |
| chr26 | 24300497  | 24300723  | 227 |
| chr25 | 22578909  | 22579135  | 227 |
| chr25 | 9957107   | 9957333   | 227 |
| chr25 | 4596086   | 4596312   | 227 |
| chr24 | 58640674  | 58640900  | 227 |
| chr23 | 42955857  | 42956083  | 227 |
| chr23 | 24200684  | 24200910  | 227 |
| chr23 | 19806498  | 19806724  | 227 |
| chr22 | 50736149  | 50736375  | 227 |
| chr22 | 39815882  | 39816108  | 227 |
| chr22 | 22151585  | 22151811  | 227 |
| chr22 | 7559986   | 7560212   | 227 |
| chr21 | 34531719  | 34531945  | 227 |
| chr21 | 13650406  | 13650632  | 227 |
| chr20 | 73874381  | 73874607  | 227 |
| chr20 | 19810701  | 19810927  | 227 |
| chr20 | 18851018  | 18851244  | 227 |
| chr20 | 10865024  | 10865250  | 227 |
| chr2  | 132406897 | 132407123 | 227 |
| chr2  | 131302596 | 131302822 | 227 |
| chr2  | 127009492 | 127009718 | 227 |
| chr2  | 110781604 | 110781830 | 227 |
| chr2  | 66425795  | 66426021  | 227 |
| chr2  | 23424943  | 23425169  | 227 |
| chr19 | 39224242  | 39224468  | 227 |
| chr19 | 30460189  | 30460415  | 227 |
| chr19 | 15817544  | 15817770  | 227 |
| chr19 | 10767432  | 10767658  | 227 |
| chr19 | 6509143   | 6509369   | 227 |
| chr18 | 62736810  | 62737036  | 227 |
| chr18 | 55199589  | 55199815  | 227 |
| chr18 | 49795898  | 49796124  | 227 |
| chr18 | 46929185  | 46929411  | 227 |
| chr18 | 32412675  | 32412901  | 227 |
| chr18 | 12054971  | 12055197  | 227 |
| chr18 | 11644510  | 11644736  | 227 |
| chr17 | 72447889  | 72448115  | 227 |
| chr17 | 63377868  | 63378094  | 227 |
| chr17 | 14508042  | 14508268  | 227 |
| chr16 | 44923802  | 44924028  | 227 |
| chr16 | 26543615  | 26543841  | 227 |
| chr16 | 3562676   | 3562902   | 227 |
| chr15 | 26582102  | 26582328  | 227 |
| chr15 | 24481600  | 24481826  | 227 |

|       |           |           |     |
|-------|-----------|-----------|-----|
| chr14 | 66438632  | 66438858  | 227 |
| chr13 | 78327937  | 78328163  | 227 |
| chr13 | 78000091  | 78000317  | 227 |
| chr13 | 73320563  | 73320789  | 227 |
| chr13 | 70972883  | 70973109  | 227 |
| chr13 | 70346590  | 70346816  | 227 |
| chr13 | 69045073  | 69045299  | 227 |
| chr13 | 66855359  | 66855585  | 227 |
| chr13 | 60438527  | 60438753  | 227 |
| chr13 | 59001276  | 59001502  | 227 |
| chr13 | 56165494  | 56165720  | 227 |
| chr13 | 56105106  | 56105332  | 227 |
| chr13 | 54379473  | 54379699  | 227 |
| chr13 | 53371884  | 53372110  | 227 |
| chr13 | 35399592  | 35399818  | 227 |
| chr12 | 34386302  | 34386528  | 227 |
| chr12 | 9685355   | 9685581   | 227 |
| chr11 | 87908871  | 87909097  | 227 |
| chr11 | 84847965  | 84848191  | 227 |
| chr11 | 77716536  | 77716762  | 227 |
| chr11 | 76747320  | 76747546  | 227 |
| chr11 | 70952259  | 70952485  | 227 |
| chr11 | 68991958  | 68992184  | 227 |
| chr11 | 49514396  | 49514622  | 227 |
| chr11 | 47420540  | 47420766  | 227 |
| chr11 | 21156768  | 21156994  | 227 |
| chr11 | 16923746  | 16923972  | 227 |
| chr11 | 11721963  | 11722189  | 227 |
| chr11 | 10369559  | 10369785  | 227 |
| chr10 | 102693367 | 102693593 | 227 |
| chr10 | 74867028  | 74867254  | 227 |
| chr10 | 12712751  | 12712977  | 227 |
| chr10 | 12356763  | 12356989  | 227 |
| chr1  | 139613136 | 139613362 | 227 |
| chr1  | 69460784  | 69461010  | 227 |
| chrX  | 75471363  | 75471588  | 226 |
| chrX  | 70033746  | 70033971  | 226 |
| chrX  | 65744634  | 65744859  | 226 |
| chrX  | 65009103  | 65009328  | 226 |
| chrX  | 64466073  | 64466298  | 226 |
| chrX  | 58808157  | 58808382  | 226 |
| chrX  | 55604467  | 55604692  | 226 |
| chrX  | 50510443  | 50510668  | 226 |
| chrX  | 36270458  | 36270683  | 226 |
| chrX  | 35611539  | 35611764  | 226 |
| chrX  | 35304002  | 35304227  | 226 |
| chrX  | 32434922  | 32435147  | 226 |
| chrX  | 31419234  | 31419459  | 226 |
| chrX  | 21797434  | 21797659  | 226 |
| chrX  | 20053366  | 20053591  | 226 |

|       |           |           |     |
|-------|-----------|-----------|-----|
| chrX  | 19430608  | 19430833  | 226 |
| chrX  | 18803278  | 18803503  | 226 |
| chrX  | 17146692  | 17146917  | 226 |
| chrX  | 15663599  | 15663824  | 226 |
| chrX  | 9471712   | 9471937   | 226 |
| chrX  | 5757989   | 5758214   | 226 |
| chrX  | 5593281   | 5593506   | 226 |
| chrX  | 2626733   | 2626958   | 226 |
| chr9  | 105935778 | 105936003 | 226 |
| chr9  | 90740608  | 90740833  | 226 |
| chr9  | 27114322  | 27114547  | 226 |
| chr8  | 93644208  | 93644433  | 226 |
| chr8  | 65880457  | 65880682  | 226 |
| chr8  | 60411996  | 60412221  | 226 |
| chr8  | 22857050  | 22857275  | 226 |
| chr8  | 7371697   | 7371922   | 226 |
| chr7  | 71269609  | 71269834  | 226 |
| chr7  | 6577718   | 6577943   | 226 |
| chr6  | 120925054 | 120925279 | 226 |
| chr6  | 71147454  | 71147679  | 226 |
| chr6  | 18101454  | 18101679  | 226 |
| chr5  | 117302581 | 117302806 | 226 |
| chr5  | 80742559  | 80742784  | 226 |
| chr5  | 79202079  | 79202304  | 226 |
| chr5  | 73232873  | 73233098  | 226 |
| chr5  | 69092532  | 69092757  | 226 |
| chr4  | 69161166  | 69161391  | 226 |
| chr3  | 116464230 | 116464455 | 226 |
| chr3  | 110137905 | 110138130 | 226 |
| chr3  | 36149029  | 36149254  | 226 |
| chr3  | 15783924  | 15784149  | 226 |
| chr3  | 9191370   | 9191595   | 226 |
| chr29 | 44641070  | 44641295  | 226 |
| chr29 | 37908512  | 37908737  | 226 |
| chr29 | 37159787  | 37160012  | 226 |
| chr29 | 34744925  | 34745150  | 226 |
| chr29 | 33916158  | 33916383  | 226 |
| chr29 | 31659519  | 31659744  | 226 |
| chr28 | 43266840  | 43267065  | 226 |
| chr28 | 35240868  | 35241093  | 226 |
| chr28 | 32814323  | 32814548  | 226 |
| chr28 | 32212808  | 32213033  | 226 |
| chr28 | 24710255  | 24710480  | 226 |
| chr27 | 39902402  | 39902627  | 226 |
| chr27 | 7235164   | 7235389   | 226 |
| chr26 | 48289875  | 48290100  | 226 |
| chr26 | 44517817  | 44518042  | 226 |
| chr26 | 19030907  | 19031132  | 226 |
| chr26 | 14572984  | 14573209  | 226 |
| chr25 | 39274287  | 39274512  | 226 |

|       |               |           |     |
|-------|---------------|-----------|-----|
| chr25 | 37401433      | 37401658  | 226 |
| chr25 | 17670875      | 17671100  | 226 |
| chr25 | 17441385      | 17441610  | 226 |
| chr25 | 2693748       | 2693973   | 226 |
| chr24 | 60820649      | 60820874  | 226 |
| chr24 | 59392760      | 59392985  | 226 |
| chr24 | 49000689      | 49000914  | 226 |
| chr24 | 46326209      | 46326434  | 226 |
| chr24 | 38474700      | 38474925  | 226 |
| chr24 | 31905724      | 31905949  | 226 |
| chr24 | 1348142       | 1348367   | 226 |
| chr23 | 43150701      | 43150926  | 226 |
| chr23 | 22777547      | 22777772  | 226 |
| chr23 | 20461606      | 20461831  | 226 |
| chr23 | 7890473       | 7890698   | 226 |
| chr22 | 29672120      | 29672345  | 226 |
| chr21 | 66139571      | 66139796  | 226 |
| chr21 | 61026581      | 61026806  | 226 |
| chr21 | 48704967      | 48705192  | 226 |
| chr21 | 47671300      | 47671525  | 226 |
| chr21 | 34170745      | 34170970  | 226 |
| chr20 | 74488053      | 74488278  | 226 |
| chr20 | 43461401      | 43461626  | 226 |
| chr20 | 26374509      | 26374734  | 226 |
| chr2  | 136662943     | 136663168 | 226 |
| chr2  | 136547703     | 136547928 | 226 |
| chr2  | 127058612     | 127058837 | 226 |
| chr2  | 91147012      | 91147237  | 226 |
| chr2  | 76013652      | 76013877  | 226 |
| chr2  | 73257804      | 73258029  | 226 |
| chr19 | 63639612      | 63639837  | 226 |
| chr19 | 58851441      | 58851666  | 226 |
| chr19 | 45061276      | 45061501  | 226 |
| chr19 | 45010448      | 45010673  | 226 |
| chr19 | 43632151      | 43632376  | 226 |
| chr19 | 42331131      | 42331356  | 226 |
| chr19 | 20151890      | 20152115  | 226 |
| chr19 | 16797011      | 16797236  | 226 |
| chr19 | 6524456       | 6524681   | 226 |
| chr18 | 52199650      | 52199875  | 226 |
| chr18 | 33893210      | 33893435  | 226 |
| chr18 | 1518797       | 1519022   | 226 |
| chr18 | 460083 460308 | 226       |     |
| chr17 | 74994749      | 74994974  | 226 |
| chr17 | 67874960      | 67875185  | 226 |
| chr17 | 64169392      | 64169617  | 226 |
| chr17 | 48884989      | 48885214  | 226 |
| chr16 | 70104030      | 70104255  | 226 |
| chr16 | 50605407      | 50605632  | 226 |
| chr15 | 75588045      | 75588270  | 226 |



|       |           |           |     |
|-------|-----------|-----------|-----|
| chr15 | 55761546  | 55761771  | 226 |
| chr15 | 38496556  | 38496781  | 226 |
| chr15 | 37632738  | 37632963  | 226 |
| chr15 | 18333167  | 18333392  | 226 |
| chr14 | 15553349  | 15553574  | 226 |
| chr14 | 8264077   | 8264302   | 226 |
| chr14 | 4018613   | 4018838   | 226 |
| chr14 | 2952652   | 2952877   | 226 |
| chr13 | 75445167  | 75445392  | 226 |
| chr13 | 73897407  | 73897632  | 226 |
| chr13 | 70893059  | 70893284  | 226 |
| chr13 | 68448067  | 68448292  | 226 |
| chr13 | 41010742  | 41010967  | 226 |
| chr13 | 28448432  | 28448657  | 226 |
| chr13 | 17704211  | 17704436  | 226 |
| chr13 | 7539006   | 7539231   | 226 |
| chr12 | 82840156  | 82840381  | 226 |
| chr12 | 68242964  | 68243189  | 226 |
| chr12 | 34247098  | 34247323  | 226 |
| chr12 | 31240508  | 31240733  | 226 |
| chr12 | 20788577  | 20788802  | 226 |
| chr11 | 79978937  | 79979162  | 226 |
| chr11 | 77899315  | 77899540  | 226 |
| chr11 | 75627294  | 75627519  | 226 |
| chr11 | 70679087  | 70679312  | 226 |
| chr11 | 64386402  | 64386627  | 226 |
| chr11 | 48551516  | 48551741  | 226 |
| chr11 | 16962200  | 16962425  | 226 |
| chr11 | 14095665  | 14095890  | 226 |
| chr11 | 2933675   | 2933900   | 226 |
| chr11 | 1642618   | 1642843   | 226 |
| chr10 | 104321364 | 104321589 | 226 |
| chr10 | 86568985  | 86569210  | 226 |
| chr10 | 70475030  | 70475255  | 226 |
| chr10 | 36614095  | 36614320  | 226 |
| chr10 | 31223494  | 31223719  | 226 |
| chr10 | 17465671  | 17465896  | 226 |
| chr10 | 17326237  | 17326462  | 226 |
| chr10 | 15132347  | 15132572  | 226 |
| chr1  | 137054866 | 137055091 | 226 |
| chrX  | 79802720  | 79802944  | 225 |
| chrX  | 78303237  | 78303461  | 225 |
| chrX  | 75083537  | 75083761  | 225 |
| chrX  | 74783715  | 74783939  | 225 |
| chrX  | 68862604  | 68862828  | 225 |
| chrX  | 67858903  | 67859127  | 225 |
| chrX  | 66694257  | 66694481  | 225 |
| chrX  | 65691605  | 65691829  | 225 |
| chrX  | 65631113  | 65631337  | 225 |
| chrX  | 64163440  | 64163664  | 225 |

|      |           |           |     |
|------|-----------|-----------|-----|
| chrX | 55276893  | 55277117  | 225 |
| chrX | 54280685  | 54280909  | 225 |
| chrX | 51057394  | 51057618  | 225 |
| chrX | 49380198  | 49380422  | 225 |
| chrX | 49319950  | 49320174  | 225 |
| chrX | 40562385  | 40562609  | 225 |
| chrX | 16970978  | 16971202  | 225 |
| chrX | 15777081  | 15777305  | 225 |
| chrX | 10132495  | 10132719  | 225 |
| chrX | 7916314   | 7916538   | 225 |
| chrX | 7832191   | 7832415   | 225 |
| chrX | 6630588   | 6630812   | 225 |
| chrX | 2940585   | 2940809   | 225 |
| chrX | 1312177   | 1312401   | 225 |
| chr9 | 64803782  | 64804006  | 225 |
| chr8 | 111012025 | 111012249 | 225 |
| chr8 | 93196515  | 93196739  | 225 |
| chr8 | 45679675  | 45679899  | 225 |
| chr7 | 71610894  | 71611118  | 225 |
| chr7 | 70814346  | 70814570  | 225 |
| chr7 | 52384649  | 52384873  | 225 |
| chr7 | 50366153  | 50366377  | 225 |
| chr7 | 18074438  | 18074662  | 225 |
| chr6 | 108854443 | 108854667 | 225 |
| chr6 | 72035088  | 72035312  | 225 |
| chr6 | 46689688  | 46689912  | 225 |
| chr5 | 122667573 | 122667797 | 225 |
| chr5 | 122275493 | 122275717 | 225 |
| chr5 | 111146546 | 111146770 | 225 |
| chr5 | 111021383 | 111021607 | 225 |
| chr5 | 110735515 | 110735739 | 225 |
| chr5 | 109130760 | 109130984 | 225 |
| chr5 | 103702625 | 103702849 | 225 |
| chr5 | 60450078  | 60450302  | 225 |
| chr5 | 52196204  | 52196428  | 225 |
| chr5 | 31352277  | 31352501  | 225 |
| chr4 | 124295837 | 124296061 | 225 |
| chr4 | 124285037 | 124285261 | 225 |
| chr4 | 95667835  | 95668059  | 225 |
| chr4 | 85697623  | 85697847  | 225 |
| chr4 | 72048949  | 72049173  | 225 |
| chr4 | 64274057  | 64274281  | 225 |
| chr4 | 13675042  | 13675266  | 225 |
| chr3 | 125709731 | 125709955 | 225 |
| chr3 | 121339966 | 121340190 | 225 |
| chr3 | 116051483 | 116051707 | 225 |
| chr3 | 115060366 | 115060590 | 225 |
| chr3 | 111257377 | 111257601 | 225 |
| chr3 | 105844041 | 105844265 | 225 |
| chr3 | 62647975  | 62648199  | 225 |

|       |           |           |     |
|-------|-----------|-----------|-----|
| chr3  | 36671976  | 36672200  | 225 |
| chr3  | 35667252  | 35667476  | 225 |
| chr3  | 33834093  | 33834317  | 225 |
| chr3  | 30428679  | 30428903  | 225 |
| chr3  | 24592292  | 24592516  | 225 |
| chr3  | 23644910  | 23645134  | 225 |
| chr3  | 23615169  | 23615393  | 225 |
| chr29 | 48706972  | 48707196  | 225 |
| chr29 | 36290931  | 36291155  | 225 |
| chr29 | 33352118  | 33352342  | 225 |
| chr29 | 31060306  | 31060530  | 225 |
| chr28 | 30797863  | 30798087  | 225 |
| chr26 | 48607679  | 48607903  | 225 |
| chr26 | 45338225  | 45338449  | 225 |
| chr26 | 25576460  | 25576684  | 225 |
| chr26 | 18432503  | 18432727  | 225 |
| chr26 | 6389436   | 6389660   | 225 |
| chr25 | 44029147  | 44029371  | 225 |
| chr25 | 42634384  | 42634608  | 225 |
| chr25 | 42028289  | 42028513  | 225 |
| chr25 | 34027409  | 34027633  | 225 |
| chr25 | 27597138  | 27597362  | 225 |
| chr25 | 26615652  | 26615876  | 225 |
| chr25 | 21761323  | 21761547  | 225 |
| chr25 | 3826680   | 3826904   | 225 |
| chr24 | 49141667  | 49141891  | 225 |
| chr24 | 44774267  | 44774491  | 225 |
| chr24 | 40505437  | 40505661  | 225 |
| chr24 | 34961578  | 34961802  | 225 |
| chr24 | 1592772   | 1592996   | 225 |
| chr23 | 42483215  | 42483439  | 225 |
| chr23 | 28964007  | 28964231  | 225 |
| chr23 | 16185507  | 16185731  | 225 |
| chr23 | 13446932  | 13447156  | 225 |
| chr23 | 7391944   | 7392168   | 225 |
| chr22 | 61046132  | 61046356  | 225 |
| chr21 | 66653228  | 66653452  | 225 |
| chr21 | 66624527  | 66624751  | 225 |
| chr21 | 60176741  | 60176965  | 225 |
| chr21 | 57715210  | 57715434  | 225 |
| chr21 | 47689627  | 47689851  | 225 |
| chr21 | 7113964   | 7114188   | 225 |
| chr20 | 8466600   | 8466824   | 225 |
| chr2  | 117437490 | 117437714 | 225 |
| chr2  | 75830546  | 75830770  | 225 |
| chr19 | 58469020  | 58469244  | 225 |
| chr19 | 45182008  | 45182232  | 225 |
| chr19 | 39559074  | 39559298  | 225 |
| chr19 | 37776608  | 37776832  | 225 |
| chr19 | 26291281  | 26291505  | 225 |

|       |               |           |     |
|-------|---------------|-----------|-----|
| chr19 | 8974787       | 8975011   | 225 |
| chr18 | 50720758      | 50720982  | 225 |
| chr18 | 39499623      | 39499847  | 225 |
| chr18 | 26110295      | 26110519  | 225 |
| chr18 | 677866 678090 | 225       |     |
| chr17 | 74258701      | 74258925  | 225 |
| chr17 | 70266793      | 70267017  | 225 |
| chr16 | 74060010      | 74060234  | 225 |
| chr16 | 68637423      | 68637647  | 225 |
| chr16 | 50343044      | 50343268  | 225 |
| chr16 | 43875910      | 43876134  | 225 |
| chr16 | 41452177      | 41452401  | 225 |
| chr16 | 41252625      | 41252849  | 225 |
| chr16 | 38824655      | 38824879  | 225 |
| chr16 | 38791733      | 38791957  | 225 |
| chr15 | 81030663      | 81030887  | 225 |
| chr15 | 75802605      | 75802829  | 225 |
| chr15 | 75682049      | 75682273  | 225 |
| chr15 | 66515754      | 66515978  | 225 |
| chr15 | 39041599      | 39041823  | 225 |
| chr15 | 26758824      | 26759048  | 225 |
| chr15 | 24870396      | 24870620  | 225 |
| chr13 | 77643422      | 77643646  | 225 |
| chr13 | 77428588      | 77428812  | 225 |
| chr13 | 77338964      | 77339188  | 225 |
| chr13 | 72580770      | 72580994  | 225 |
| chr13 | 71519096      | 71519320  | 225 |
| chr13 | 58901962      | 58902186  | 225 |
| chr13 | 58627575      | 58627799  | 225 |
| chr13 | 57635890      | 57636114  | 225 |
| chr13 | 55340342      | 55340566  | 225 |
| chr13 | 53169813      | 53170037  | 225 |
| chr12 | 83892321      | 83892545  | 225 |
| chr12 | 74537072      | 74537296  | 225 |
| chr12 | 49423046      | 49423270  | 225 |
| chr12 | 31627368      | 31627592  | 225 |
| chr12 | 30509756      | 30509980  | 225 |
| chr12 | 14869279      | 14869503  | 225 |
| chr11 | 108411891     | 108412115 | 225 |
| chr11 | 108411276     | 108411500 | 225 |
| chr11 | 104972030     | 104972254 | 225 |
| chr11 | 98944043      | 98944267  | 225 |
| chr11 | 88687863      | 88688087  | 225 |
| chr11 | 81369011      | 81369235  | 225 |
| chr11 | 77572637      | 77572861  | 225 |
| chr11 | 66039088      | 66039312  | 225 |
| chr11 | 11249501      | 11249725  | 225 |
| chr11 | 1641318       | 1641542   | 225 |
| chr10 | 86324313      | 86324537  | 225 |
| chr10 | 70180364      | 70180588  | 225 |

|       |               |           |     |
|-------|---------------|-----------|-----|
| chr10 | 70067910      | 70068134  | 225 |
| chr10 | 23768126      | 23768350  | 225 |
| chr10 | 19891324      | 19891548  | 225 |
| chr10 | 13039883      | 13040107  | 225 |
| chr10 | 5255553       | 5255777   | 225 |
| chr10 | 4913365       | 4913589   | 225 |
| chr1  | 99117369      | 99117593  | 225 |
| chrX  | 78794279      | 78794502  | 224 |
| chrX  | 78596758      | 78596981  | 224 |
| chrX  | 78168949      | 78169172  | 224 |
| chrX  | 72382272      | 72382495  | 224 |
| chrX  | 71697889      | 71698112  | 224 |
| chrX  | 64619853      | 64620076  | 224 |
| chrX  | 64166358      | 64166581  | 224 |
| chrX  | 63048287      | 63048510  | 224 |
| chrX  | 62854685      | 62854908  | 224 |
| chrX  | 62698872      | 62699095  | 224 |
| chrX  | 59677675      | 59677898  | 224 |
| chrX  | 56615222      | 56615445  | 224 |
| chrX  | 55743200      | 55743423  | 224 |
| chrX  | 53038513      | 53038736  | 224 |
| chrX  | 50781252      | 50781475  | 224 |
| chrX  | 50386023      | 50386246  | 224 |
| chrX  | 38965333      | 38965556  | 224 |
| chrX  | 38371439      | 38371662  | 224 |
| chrX  | 37932438      | 37932661  | 224 |
| chrX  | 34555758      | 34555981  | 224 |
| chrX  | 31192391      | 31192614  | 224 |
| chrX  | 28206017      | 28206240  | 224 |
| chrX  | 20066510      | 20066733  | 224 |
| chrX  | 734488 734711 | 224       | 224 |
| chr9  | 105835872     | 105836095 | 224 |
| chr9  | 90794184      | 90794407  | 224 |
| chr9  | 78518859      | 78519082  | 224 |
| chr9  | 29825750      | 29825973  | 224 |
| chr9  | 26588569      | 26588792  | 224 |
| chr8  | 56615876      | 56616099  | 224 |
| chr8  | 8117165       | 8117388   | 224 |
| chr7  | 69059098      | 69059321  | 224 |
| chr7  | 46567384      | 46567607  | 224 |
| chr7  | 46566549      | 46566772  | 224 |
| chr7  | 44013961      | 44014184  | 224 |
| chr7  | 5399944       | 5400167   | 224 |
| chr7  | 5238475       | 5238698   | 224 |
| chr5  | 122626791     | 122627014 | 224 |
| chr5  | 121345317     | 121345540 | 224 |
| chr5  | 118118408     | 118118631 | 224 |
| chr5  | 106258138     | 106258361 | 224 |
| chr5  | 103549174     | 103549397 | 224 |
| chr5  | 30407122      | 30407345  | 224 |

|       |           |           |     |
|-------|-----------|-----------|-----|
| chr5  | 28837334  | 28837557  | 224 |
| chr4  | 120932837 | 120933060 | 224 |
| chr4  | 120240279 | 120240502 | 224 |
| chr4  | 101944260 | 101944483 | 224 |
| chr4  | 67849199  | 67849422  | 224 |
| chr4  | 66882424  | 66882647  | 224 |
| chr4  | 5636518   | 5636741   | 224 |
| chr3  | 127835746 | 127835969 | 224 |
| chr3  | 124920554 | 124920777 | 224 |
| chr3  | 121664202 | 121664425 | 224 |
| chr3  | 116183445 | 116183668 | 224 |
| chr3  | 116056451 | 116056674 | 224 |
| chr3  | 110199731 | 110199954 | 224 |
| chr3  | 106318527 | 106318750 | 224 |
| chr3  | 98121574  | 98121797  | 224 |
| chr3  | 83665524  | 83665747  | 224 |
| chr3  | 33926916  | 33927139  | 224 |
| chr3  | 9102314   | 9102537   | 224 |
| chr29 | 32940183  | 32940406  | 224 |
| chr29 | 31985455  | 31985678  | 224 |
| chr29 | 25939516  | 25939739  | 224 |
| chr28 | 34508122  | 34508345  | 224 |
| chr27 | 27858317  | 27858540  | 224 |
| chr26 | 47982118  | 47982341  | 224 |
| chr26 | 43766513  | 43766736  | 224 |
| chr26 | 34941981  | 34942204  | 224 |
| chr26 | 19899955  | 19900178  | 224 |
| chr26 | 17845997  | 17846220  | 224 |
| chr26 | 14543010  | 14543233  | 224 |
| chr26 | 13874581  | 13874804  | 224 |
| chr25 | 41288494  | 41288717  | 224 |
| chr25 | 37807732  | 37807955  | 224 |
| chr25 | 30878144  | 30878367  | 224 |
| chr25 | 18693437  | 18693660  | 224 |
| chr25 | 17619087  | 17619310  | 224 |
| chr25 | 15312938  | 15313161  | 224 |
| chr25 | 11630685  | 11630908  | 224 |
| chr25 | 4000366   | 4000589   | 224 |
| chr25 | 2084055   | 2084278   | 224 |
| chr24 | 61635269  | 61635492  | 224 |
| chr24 | 59930534  | 59930757  | 224 |
| chr24 | 58744091  | 58744314  | 224 |
| chr24 | 51595688  | 51595911  | 224 |
| chr24 | 51401636  | 51401859  | 224 |
| chr24 | 38476982  | 38477205  | 224 |
| chr23 | 51836623  | 51836846  | 224 |
| chr23 | 51229901  | 51230124  | 224 |
| chr23 | 44800077  | 44800300  | 224 |
| chr23 | 29018599  | 29018822  | 224 |
| chr23 | 28893448  | 28893671  | 224 |

|       |           |           |     |
|-------|-----------|-----------|-----|
| chr23 | 16190093  | 16190316  | 224 |
| chr23 | 8584213   | 8584436   | 224 |
| chr22 | 59128559  | 59128782  | 224 |
| chr22 | 52708158  | 52708381  | 224 |
| chr22 | 7575493   | 7575716   | 224 |
| chr21 | 57709553  | 57709776  | 224 |
| chr21 | 57533414  | 57533637  | 224 |
| chr21 | 33234471  | 33234694  | 224 |
| chr2  | 139920804 | 139921027 | 224 |
| chr2  | 139094340 | 139094563 | 224 |
| chr2  | 132337166 | 132337389 | 224 |
| chr2  | 120028646 | 120028869 | 224 |
| chr2  | 99302969  | 99303192  | 224 |
| chr2  | 22231435  | 22231658  | 224 |
| chr2  | 21516759  | 21516982  | 224 |
| chr19 | 61182855  | 61183078  | 224 |
| chr19 | 58946472  | 58946695  | 224 |
| chr19 | 29783305  | 29783528  | 224 |
| chr19 | 23858129  | 23858352  | 224 |
| chr19 | 15761509  | 15761732  | 224 |
| chr19 | 14048516  | 14048739  | 224 |
| chr18 | 50994689  | 50994912  | 224 |
| chr18 | 50916355  | 50916578  | 224 |
| chr18 | 33673964  | 33674187  | 224 |
| chr18 | 22271905  | 22272128  | 224 |
| chr18 | 13160433  | 13160656  | 224 |
| chr17 | 72760215  | 72760438  | 224 |
| chr17 | 70549058  | 70549281  | 224 |
| chr17 | 63930021  | 63930244  | 224 |
| chr16 | 68897581  | 68897804  | 224 |
| chr16 | 46011398  | 46011621  | 224 |
| chr16 | 41028510  | 41028733  | 224 |
| chr16 | 39528600  | 39528823  | 224 |
| chr16 | 30486030  | 30486253  | 224 |
| chr16 | 26623037  | 26623260  | 224 |
| chr16 | 2133769   | 2133992   | 224 |
| chr15 | 64490373  | 64490596  | 224 |
| chr15 | 51613592  | 51613815  | 224 |
| chr15 | 51308136  | 51308359  | 224 |
| chr15 | 51008682  | 51008905  | 224 |
| chr15 | 33097132  | 33097355  | 224 |
| chr15 | 25573602  | 25573825  | 224 |
| chr13 | 79076950  | 79077173  | 224 |
| chr13 | 76001543  | 76001766  | 224 |
| chr13 | 61228396  | 61228619  | 224 |
| chr13 | 41686659  | 41686882  | 224 |
| chr13 | 41311582  | 41311805  | 224 |
| chr13 | 29726209  | 29726432  | 224 |
| chr12 | 83603104  | 83603327  | 224 |
| chr11 | 87961811  | 87962034  | 224 |

|       |           |           |     |
|-------|-----------|-----------|-----|
| chr11 | 77546358  | 77546581  | 224 |
| chr11 | 49397366  | 49397589  | 224 |
| chr11 | 45070935  | 45071158  | 224 |
| chr11 | 28790339  | 28790562  | 224 |
| chr11 | 3813074   | 3813297   | 224 |
| chr10 | 90238994  | 90239217  | 224 |
| chr10 | 70033897  | 70034120  | 224 |
| chr10 | 58781969  | 58782192  | 224 |
| chr10 | 44389860  | 44390083  | 224 |
| chr10 | 22493430  | 22493653  | 224 |
| chr10 | 17541604  | 17541827  | 224 |
| chr10 | 17485180  | 17485403  | 224 |
| chr10 | 14224318  | 14224541  | 224 |
| chr10 | 12346014  | 12346237  | 224 |
| chr10 | 6912133   | 6912356   | 224 |
| chr1  | 153506209 | 153506432 | 224 |
| chr1  | 129677057 | 129677280 | 224 |
| chr1  | 120261885 | 120262108 | 224 |
| chr1  | 118647175 | 118647398 | 224 |
| chr1  | 74611573  | 74611796  | 224 |
| chr1  | 73119020  | 73119243  | 224 |
| chr1  | 1132506   | 1132729   | 224 |
| chrX  | 85937277  | 85937499  | 223 |
| chrX  | 79790322  | 79790544  | 223 |
| chrX  | 73198511  | 73198733  | 223 |
| chrX  | 71650929  | 71651151  | 223 |
| chrX  | 71288947  | 71289169  | 223 |
| chrX  | 68561136  | 68561358  | 223 |
| chrX  | 56900617  | 56900839  | 223 |
| chrX  | 55613534  | 55613756  | 223 |
| chrX  | 49780303  | 49780525  | 223 |
| chrX  | 49667145  | 49667367  | 223 |
| chrX  | 44678776  | 44678998  | 223 |
| chrX  | 44532484  | 44532706  | 223 |
| chrX  | 35595892  | 35596114  | 223 |
| chrX  | 32245792  | 32246014  | 223 |
| chrX  | 29652159  | 29652381  | 223 |
| chrX  | 28548091  | 28548313  | 223 |
| chrX  | 28497841  | 28498063  | 223 |
| chrX  | 23362992  | 23363214  | 223 |
| chrX  | 21788398  | 21788620  | 223 |
| chrX  | 16323218  | 16323440  | 223 |
| chrX  | 11319138  | 11319360  | 223 |
| chrX  | 10953856  | 10954078  | 223 |
| chrX  | 10077380  | 10077602  | 223 |
| chrX  | 9836192   | 9836414   | 223 |
| chrX  | 7952568   | 7952790   | 223 |
| chrX  | 5766751   | 5766973   | 223 |
| chrX  | 2694916   | 2695138   | 223 |
| chrX  | 874703    | 874925    | 223 |



|       |               |           |     |
|-------|---------------|-----------|-----|
| chr9  | 106217667     | 106217889 | 223 |
| chr9  | 105463197     | 105463419 | 223 |
| chr9  | 104465815     | 104466037 | 223 |
| chr9  | 90641831      | 90642053  | 223 |
| chr9  | 87733164      | 87733386  | 223 |
| chr9  | 77052141      | 77052363  | 223 |
| chr8  | 63759453      | 63759675  | 223 |
| chr8  | 62363760      | 62363982  | 223 |
| chr8  | 47130954      | 47131176  | 223 |
| chr8  | 5378896       | 5379118   | 223 |
| chr7  | 82321593      | 82321815  | 223 |
| chr7  | 73527167      | 73527389  | 223 |
| chr7  | 20708577      | 20708799  | 223 |
| chr7  | 19192540      | 19192762  | 223 |
| chr6  | 79722691      | 79722913  | 223 |
| chr5  | 122421928     | 122422150 | 223 |
| chr5  | 121330288     | 121330510 | 223 |
| chr5  | 118494557     | 118494779 | 223 |
| chr5  | 112166171     | 112166393 | 223 |
| chr5  | 108881516     | 108881738 | 223 |
| chr5  | 101517622     | 101517844 | 223 |
| chr5  | 61801563      | 61801785  | 223 |
| chr5  | 30455790      | 30456012  | 223 |
| chr4  | 123044082     | 123044304 | 223 |
| chr4  | 109574776     | 109574998 | 223 |
| chr4  | 99186510      | 99186732  | 223 |
| chr4  | 72799371      | 72799593  | 223 |
| chr4  | 70611838      | 70612060  | 223 |
| chr4  | 36670990      | 36671212  | 223 |
| chr3  | 127878652     | 127878874 | 223 |
| chr3  | 123962612     | 123962834 | 223 |
| chr3  | 123690014     | 123690236 | 223 |
| chr3  | 123558427     | 123558649 | 223 |
| chr3  | 118238685     | 118238907 | 223 |
| chr3  | 51921202      | 51921424  | 223 |
| chr3  | 35994774      | 35994996  | 223 |
| chr3  | 18495518      | 18495740  | 223 |
| chr3  | 14132414      | 14132636  | 223 |
| chr3  | 456621 456843 | 223       | 223 |
| chr29 | 50005884      | 50006106  | 223 |
| chr29 | 33382938      | 33383160  | 223 |
| chr29 | 32661078      | 32661300  | 223 |
| chr29 | 30638584      | 30638806  | 223 |
| chr29 | 19542426      | 19542648  | 223 |
| chr28 | 44193482      | 44193704  | 223 |
| chr27 | 38638770      | 38638992  | 223 |
| chr26 | 50501105      | 50501327  | 223 |
| chr26 | 43974695      | 43974917  | 223 |
| chr26 | 41836304      | 41836526  | 223 |
| chr26 | 38995727      | 38995949  | 223 |

|       |           |           |     |
|-------|-----------|-----------|-----|
| chr26 | 38510618  | 38510840  | 223 |
| chr25 | 40320423  | 40320645  | 223 |
| chr25 | 38367012  | 38367234  | 223 |
| chr25 | 36491118  | 36491340  | 223 |
| chr25 | 3178877   | 3179099   | 223 |
| chr24 | 49127773  | 49127995  | 223 |
| chr24 | 35238378  | 35238600  | 223 |
| chr24 | 31254706  | 31254928  | 223 |
| chr24 | 1161759   | 1161981   | 223 |
| chr24 | 1145573   | 1145795   | 223 |
| chr23 | 52671272  | 52671494  | 223 |
| chr23 | 51963577  | 51963799  | 223 |
| chr23 | 48332012  | 48332234  | 223 |
| chr23 | 44214956  | 44215178  | 223 |
| chr23 | 27058298  | 27058520  | 223 |
| chr23 | 14766254  | 14766476  | 223 |
| chr23 | 13606411  | 13606633  | 223 |
| chr23 | 10648246  | 10648468  | 223 |
| chr23 | 9729986   | 9730208   | 223 |
| chr22 | 7090665   | 7090887   | 223 |
| chr21 | 34426807  | 34427029  | 223 |
| chr21 | 20692341  | 20692563  | 223 |
| chr21 | 18130126  | 18130348  | 223 |
| chr21 | 15398918  | 15399140  | 223 |
| chr21 | 4789937   | 4790159   | 223 |
| chr20 | 75057582  | 75057804  | 223 |
| chr20 | 74768913  | 74769135  | 223 |
| chr20 | 14048451  | 14048673  | 223 |
| chr2  | 135597071 | 135597293 | 223 |
| chr2  | 132656164 | 132656386 | 223 |
| chr2  | 127278853 | 127279075 | 223 |
| chr2  | 120273695 | 120273917 | 223 |
| chr2  | 117032367 | 117032589 | 223 |
| chr19 | 60330787  | 60331009  | 223 |
| chr19 | 59696109  | 59696331  | 223 |
| chr19 | 59042373  | 59042595  | 223 |
| chr19 | 45927585  | 45927807  | 223 |
| chr19 | 45010141  | 45010363  | 223 |
| chr19 | 44997498  | 44997720  | 223 |
| chr19 | 43032100  | 43032322  | 223 |
| chr19 | 40527196  | 40527418  | 223 |
| chr19 | 34636668  | 34636890  | 223 |
| chr19 | 31553418  | 31553640  | 223 |
| chr19 | 31312279  | 31312501  | 223 |
| chr19 | 26972110  | 26972332  | 223 |
| chr19 | 20403395  | 20403617  | 223 |
| chr19 | 12299536  | 12299758  | 223 |
| chr19 | 7807629   | 7807851   | 223 |
| chr18 | 65998725  | 65998947  | 223 |
| chr18 | 49486769  | 49486991  | 223 |

|       |               |          |     |
|-------|---------------|----------|-----|
| chr18 | 48384705      | 48384927 | 223 |
| chr18 | 47673585      | 47673807 | 223 |
| chr18 | 45646150      | 45646372 | 223 |
| chr18 | 43765905      | 43766127 | 223 |
| chr18 | 23993129      | 23993351 | 223 |
| chr18 | 22669062      | 22669284 | 223 |
| chr18 | 22500131      | 22500353 | 223 |
| chr18 | 17990553      | 17990775 | 223 |
| chr18 | 11961267      | 11961489 | 223 |
| chr18 | 11186661      | 11186883 | 223 |
| chr17 | 53313736      | 53313958 | 223 |
| chr17 | 8344892       | 8345114  | 223 |
| chr16 | 48111375      | 48111597 | 223 |
| chr16 | 48068312      | 48068534 | 223 |
| chr16 | 23622817      | 23623039 | 223 |
| chr16 | 2207735       | 2207957  | 223 |
| chr16 | 471924 472146 |          | 223 |
| chr15 | 64844144      | 64844366 | 223 |
| chr15 | 26734589      | 26734811 | 223 |
| chr15 | 25752507      | 25752729 | 223 |
| chr15 | 20948416      | 20948638 | 223 |
| chr15 | 20716468      | 20716690 | 223 |
| chr15 | 19702292      | 19702514 | 223 |
| chr14 | 61671984      | 61672206 | 223 |
| chr14 | 24091652      | 24091874 | 223 |
| chr14 | 7609954       | 7610176  | 223 |
| chr13 | 75777188      | 75777410 | 223 |
| chr13 | 66847314      | 66847536 | 223 |
| chr13 | 66017460      | 66017682 | 223 |
| chr13 | 56112846      | 56113068 | 223 |
| chr13 | 55320911      | 55321133 | 223 |
| chr13 | 45496463      | 45496685 | 223 |
| chr13 | 38361514      | 38361736 | 223 |
| chr12 | 81553347      | 81553569 | 223 |
| chr12 | 37027962      | 37028184 | 223 |
| chr12 | 34348823      | 34349045 | 223 |
| chr11 | 69093819      | 69094041 | 223 |
| chr11 | 48723186      | 48723408 | 223 |
| chr11 | 25848153      | 25848375 | 223 |
| chr11 | 3892008       | 3892230  | 223 |
| chr10 | 89981174      | 89981396 | 223 |
| chr10 | 85845364      | 85845586 | 223 |
| chr10 | 70299266      | 70299488 | 223 |
| chr10 | 66943250      | 66943472 | 223 |
| chr10 | 60544599      | 60544821 | 223 |
| chr10 | 7512519       | 7512741  | 223 |
| chr1  | 96011059      | 96011281 | 223 |
| chr1  | 75268339      | 75268561 | 223 |
| chr1  | 74910790      | 74911012 | 223 |
| chr1  | 74785150      | 74785372 | 223 |

|      |           |           |     |
|------|-----------|-----------|-----|
| chr1 | 67765257  | 67765479  | 223 |
| chrX | 87546560  | 87546781  | 222 |
| chrX | 78308680  | 78308901  | 222 |
| chrX | 77489833  | 77490054  | 222 |
| chrX | 75043526  | 75043747  | 222 |
| chrX | 74175197  | 74175418  | 222 |
| chrX | 73266752  | 73266973  | 222 |
| chrX | 72493890  | 72494111  | 222 |
| chrX | 71886723  | 71886944  | 222 |
| chrX | 64570001  | 64570222  | 222 |
| chrX | 61376413  | 61376634  | 222 |
| chrX | 58785016  | 58785237  | 222 |
| chrX | 55821244  | 55821465  | 222 |
| chrX | 55383083  | 55383304  | 222 |
| chrX | 55282735  | 55282956  | 222 |
| chrX | 53808951  | 53809172  | 222 |
| chrX | 50549543  | 50549764  | 222 |
| chrX | 50189255  | 50189476  | 222 |
| chrX | 49341049  | 49341270  | 222 |
| chrX | 49282682  | 49282903  | 222 |
| chrX | 48662949  | 48663170  | 222 |
| chrX | 40423827  | 40424048  | 222 |
| chrX | 37592832  | 37593053  | 222 |
| chrX | 37401411  | 37401632  | 222 |
| chrX | 35543076  | 35543297  | 222 |
| chrX | 32334418  | 32334639  | 222 |
| chrX | 21219748  | 21219969  | 222 |
| chrX | 19245256  | 19245477  | 222 |
| chrX | 12170340  | 12170561  | 222 |
| chrX | 11547621  | 11547842  | 222 |
| chrX | 9473505   | 9473726   | 222 |
| chrX | 7951545   | 7951766   | 222 |
| chrX | 7893865   | 7894086   | 222 |
| chrX | 7524191   | 7524412   | 222 |
| chrX | 6633246   | 6633467   | 222 |
| chrX | 2422730   | 2422951   | 222 |
| chr9 | 106563340 | 106563561 | 222 |
| chr9 | 100279404 | 100279625 | 222 |
| chr9 | 90599689  | 90599910  | 222 |
| chr9 | 41635637  | 41635858  | 222 |
| chr9 | 11545315  | 11545536  | 222 |
| chr8 | 110306558 | 110306779 | 222 |
| chr8 | 86893152  | 86893373  | 222 |
| chr8 | 60032812  | 60033033  | 222 |
| chr7 | 81023689  | 81023910  | 222 |
| chr7 | 62248923  | 62249144  | 222 |
| chr7 | 46576835  | 46577056  | 222 |
| chr7 | 44676909  | 44677130  | 222 |
| chr7 | 43394825  | 43395046  | 222 |
| chr7 | 28044797  | 28045018  | 222 |

|       |               |           |     |
|-------|---------------|-----------|-----|
| chr7  | 15589326      | 15589547  | 222 |
| chr7  | 2430404       | 2430625   | 222 |
| chr6  | 120972794     | 120973015 | 222 |
| chr6  | 107235754     | 107235975 | 222 |
| chr6  | 93922931      | 93923152  | 222 |
| chr6  | 72307445      | 72307666  | 222 |
| chr5  | 114655297     | 114655518 | 222 |
| chr5  | 76847224      | 76847445  | 222 |
| chr5  | 68971453      | 68971674  | 222 |
| chr5  | 61802513      | 61802734  | 222 |
| chr5  | 30604436      | 30604657  | 222 |
| chr4  | 104919775     | 104919996 | 222 |
| chr4  | 71392184      | 71392405  | 222 |
| chr4  | 69680435      | 69680656  | 222 |
| chr3  | 117326705     | 117326926 | 222 |
| chr3  | 113485052     | 113485273 | 222 |
| chr3  | 113367241     | 113367462 | 222 |
| chr3  | 35976542      | 35976763  | 222 |
| chr29 | 38808813      | 38809034  | 222 |
| chr29 | 33922148      | 33922369  | 222 |
| chr29 | 33575858      | 33576079  | 222 |
| chr29 | 18222401      | 18222622  | 222 |
| chr29 | 17196601      | 17196822  | 222 |
| chr28 | 34205636      | 34205857  | 222 |
| chr28 | 1260081       | 1260302   | 222 |
| chr27 | 542309 542530 | 222       | 222 |
| chr26 | 39661390      | 39661611  | 222 |
| chr26 | 18877932      | 18878153  | 222 |
| chr25 | 40598654      | 40598875  | 222 |
| chr25 | 39386221      | 39386442  | 222 |
| chr25 | 38844271      | 38844492  | 222 |
| chr25 | 37221045      | 37221266  | 222 |
| chr25 | 34106690      | 34106911  | 222 |
| chr25 | 30876398      | 30876619  | 222 |
| chr25 | 27876422      | 27876643  | 222 |
| chr25 | 22261081      | 22261302  | 222 |
| chr25 | 11228716      | 11228937  | 222 |
| chr24 | 64277450      | 64277671  | 222 |
| chr24 | 35144176      | 35144397  | 222 |
| chr24 | 34700222      | 34700443  | 222 |
| chr24 | 2545292       | 2545513   | 222 |
| chr24 | 1399509       | 1399730   | 222 |
| chr23 | 53253025      | 53253246  | 222 |
| chr23 | 52133592      | 52133813  | 222 |
| chr23 | 48828623      | 48828844  | 222 |
| chr23 | 46055049      | 46055270  | 222 |
| chr23 | 45776994      | 45777215  | 222 |
| chr23 | 42306173      | 42306394  | 222 |
| chr23 | 25123228      | 25123449  | 222 |
| chr23 | 22774626      | 22774847  | 222 |

|       |           |           |     |
|-------|-----------|-----------|-----|
| chr23 | 19689913  | 19690134  | 222 |
| chr23 | 17139722  | 17139943  | 222 |
| chr23 | 13324559  | 13324780  | 222 |
| chr23 | 11953668  | 11953889  | 222 |
| chr22 | 61457689  | 61457910  | 222 |
| chr22 | 29922015  | 29922236  | 222 |
| chr21 | 27451128  | 27451349  | 222 |
| chr21 | 26893248  | 26893469  | 222 |
| chr21 | 25615620  | 25615841  | 222 |
| chr21 | 22338588  | 22338809  | 222 |
| chr20 | 72929980  | 72930201  | 222 |
| chr20 | 72730167  | 72730388  | 222 |
| chr20 | 41507455  | 41507676  | 222 |
| chr20 | 25689625  | 25689846  | 222 |
| chr2  | 139447249 | 139447470 | 222 |
| chr2  | 138771747 | 138771968 | 222 |
| chr2  | 138665592 | 138665813 | 222 |
| chr2  | 136945365 | 136945586 | 222 |
| chr2  | 134684265 | 134684486 | 222 |
| chr2  | 131038852 | 131039073 | 222 |
| chr2  | 111767301 | 111767522 | 222 |
| chr2  | 94804056  | 94804277  | 222 |
| chr2  | 5039546   | 5039767   | 222 |
| chr19 | 65255133  | 65255354  | 222 |
| chr19 | 58745977  | 58746198  | 222 |
| chr19 | 47285676  | 47285897  | 222 |
| chr19 | 42016110  | 42016331  | 222 |
| chr19 | 33853387  | 33853608  | 222 |
| chr19 | 32856467  | 32856688  | 222 |
| chr19 | 30790054  | 30790275  | 222 |
| chr19 | 25250811  | 25251032  | 222 |
| chr19 | 14667834  | 14668055  | 222 |
| chr19 | 7737788   | 7738009   | 222 |
| chr19 | 6517417   | 6517638   | 222 |
| chr18 | 57434340  | 57434561  | 222 |
| chr18 | 51333080  | 51333301  | 222 |
| chr18 | 45545632  | 45545853  | 222 |
| chr18 | 40016312  | 40016533  | 222 |
| chr18 | 34858698  | 34858919  | 222 |
| chr18 | 25488398  | 25488619  | 222 |
| chr18 | 23555607  | 23555828  | 222 |
| chr18 | 22722494  | 22722715  | 222 |
| chr18 | 22391956  | 22392177  | 222 |
| chr18 | 21994527  | 21994748  | 222 |
| chr18 | 12087875  | 12088096  | 222 |
| chr18 | 11081997  | 11082218  | 222 |
| chr17 | 69298591  | 69298812  | 222 |
| chr17 | 68293486  | 68293707  | 222 |
| chr17 | 66846286  | 66846507  | 222 |
| chr17 | 64123906  | 64124127  | 222 |

|       |           |           |     |
|-------|-----------|-----------|-----|
| chr17 | 63047870  | 63048091  | 222 |
| chr17 | 59287749  | 59287970  | 222 |
| chr17 | 14832205  | 14832426  | 222 |
| chr17 | 5471924   | 5472145   | 222 |
| chr17 | 5471669   | 5471890   | 222 |
| chr16 | 77254534  | 77254755  | 222 |
| chr16 | 43296518  | 43296739  | 222 |
| chr15 | 64524691  | 64524912  | 222 |
| chr15 | 31132163  | 31132384  | 222 |
| chr15 | 26597120  | 26597341  | 222 |
| chr15 | 17625443  | 17625664  | 222 |
| chr14 | 30656388  | 30656609  | 222 |
| chr14 | 14642718  | 14642939  | 222 |
| chr14 | 7333906   | 7334127   | 222 |
| chr13 | 74400427  | 74400648  | 222 |
| chr13 | 74392663  | 74392884  | 222 |
| chr13 | 70025938  | 70026159  | 222 |
| chr13 | 59698014  | 59698235  | 222 |
| chr13 | 58597133  | 58597354  | 222 |
| chr13 | 53462107  | 53462328  | 222 |
| chr13 | 52970524  | 52970745  | 222 |
| chr12 | 33073212  | 33073433  | 222 |
| chr12 | 31951429  | 31951650  | 222 |
| chr12 | 31648015  | 31648236  | 222 |
| chr12 | 31625383  | 31625604  | 222 |
| chr12 | 25693940  | 25694161  | 222 |
| chr12 | 14817253  | 14817474  | 222 |
| chr11 | 102183610 | 102183831 | 222 |
| chr11 | 91541134  | 91541355  | 222 |
| chr11 | 70867032  | 70867253  | 222 |
| chr11 | 49817606  | 49817827  | 222 |
| chr10 | 79784870  | 79785091  | 222 |
| chr10 | 74729929  | 74730150  | 222 |
| chr10 | 67367459  | 67367680  | 222 |
| chr10 | 51502604  | 51502825  | 222 |
| chr10 | 16729225  | 16729446  | 222 |
| chr10 | 13049215  | 13049436  | 222 |
| chr1  | 133439398 | 133439619 | 222 |
| chr1  | 128259308 | 128259529 | 222 |
| chr1  | 98980549  | 98980770  | 222 |
| chr1  | 81198859  | 81199080  | 222 |
| chrX  | 79225851  | 79226071  | 221 |
| chrX  | 73427471  | 73427691  | 221 |
| chrX  | 72338323  | 72338543  | 221 |
| chrX  | 71575968  | 71576188  | 221 |
| chrX  | 70841452  | 70841672  | 221 |
| chrX  | 68773611  | 68773831  | 221 |
| chrX  | 64953252  | 64953472  | 221 |
| chrX  | 64396766  | 64396986  | 221 |
| chrX  | 61403950  | 61404170  | 221 |

|      |               |           |     |
|------|---------------|-----------|-----|
| chrX | 56587348      | 56587568  | 221 |
| chrX | 56472697      | 56472917  | 221 |
| chrX | 50797657      | 50797877  | 221 |
| chrX | 50463678      | 50463898  | 221 |
| chrX | 49107922      | 49108142  | 221 |
| chrX | 46134626      | 46134846  | 221 |
| chrX | 45025670      | 45025890  | 221 |
| chrX | 37352924      | 37353144  | 221 |
| chrX | 36210008      | 36210228  | 221 |
| chrX | 34597697      | 34597917  | 221 |
| chrX | 33540731      | 33540951  | 221 |
| chrX | 21685631      | 21685851  | 221 |
| chrX | 20919601      | 20919821  | 221 |
| chrX | 20419865      | 20420085  | 221 |
| chrX | 19480607      | 19480827  | 221 |
| chrX | 12228311      | 12228531  | 221 |
| chrX | 8749024       | 8749244   | 221 |
| chrX | 8131884       | 8132104   | 221 |
| chrX | 8115902       | 8116122   | 221 |
| chrX | 8091667       | 8091887   | 221 |
| chrX | 8013386       | 8013606   | 221 |
| chrX | 2343236       | 2343456   | 221 |
| chr9 | 91998726      | 91998946  | 221 |
| chr9 | 75044788      | 75045008  | 221 |
| chr9 | 70497797      | 70498017  | 221 |
| chr9 | 46011625      | 46011845  | 221 |
| chr9 | 37883704      | 37883924  | 221 |
| chr8 | 74345769      | 74345989  | 221 |
| chr8 | 55418648      | 55418868  | 221 |
| chr8 | 45791145      | 45791365  | 221 |
| chr8 | 874489 874709 |           | 221 |
| chr7 | 80839494      | 80839714  | 221 |
| chr7 | 64987538      | 64987758  | 221 |
| chr7 | 59573934      | 59574154  | 221 |
| chr7 | 51856189      | 51856409  | 221 |
| chr7 | 46428587      | 46428807  | 221 |
| chr7 | 46282842      | 46283062  | 221 |
| chr7 | 14213932      | 14214152  | 221 |
| chr7 | 5249857       | 5250077   | 221 |
| chr6 | 46614542      | 46614762  | 221 |
| chr5 | 115542789     | 115543009 | 221 |
| chr5 | 113549031     | 113549251 | 221 |
| chr5 | 76993622      | 76993842  | 221 |
| chr5 | 76276148      | 76276368  | 221 |
| chr5 | 73132515      | 73132735  | 221 |
| chr5 | 62207529      | 62207749  | 221 |
| chr5 | 28870815      | 28871035  | 221 |
| chr5 | 28417035      | 28417255  | 221 |
| chr5 | 28291244      | 28291464  | 221 |
| chr4 | 121485146     | 121485366 | 221 |



|       |           |           |     |
|-------|-----------|-----------|-----|
| chr4  | 99055290  | 99055510  | 221 |
| chr4  | 96577249  | 96577469  | 221 |
| chr4  | 72740909  | 72741129  | 221 |
| chr4  | 49020991  | 49021211  | 221 |
| chr4  | 32440214  | 32440434  | 221 |
| chr3  | 124129311 | 124129531 | 221 |
| chr3  | 119542335 | 119542555 | 221 |
| chr3  | 116596365 | 116596585 | 221 |
| chr3  | 114286933 | 114287153 | 221 |
| chr3  | 106603081 | 106603301 | 221 |
| chr3  | 105717826 | 105718046 | 221 |
| chr3  | 105308341 | 105308561 | 221 |
| chr3  | 22862528  | 22862748  | 221 |
| chr3  | 20793172  | 20793392  | 221 |
| chr29 | 44464702  | 44464922  | 221 |
| chr29 | 42988360  | 42988580  | 221 |
| chr29 | 41278579  | 41278799  | 221 |
| chr29 | 35139408  | 35139628  | 221 |
| chr29 | 33878871  | 33879091  | 221 |
| chr29 | 19341272  | 19341492  | 221 |
| chr29 | 16877976  | 16878196  | 221 |
| chr28 | 40205049  | 40205269  | 221 |
| chr28 | 32541356  | 32541576  | 221 |
| chr28 | 13221929  | 13222149  | 221 |
| chr28 | 7312404   | 7312624   | 221 |
| chr27 | 44777678  | 44777898  | 221 |
| chr27 | 39882275  | 39882495  | 221 |
| chr27 | 27019518  | 27019738  | 221 |
| chr26 | 47909699  | 47909919  | 221 |
| chr25 | 34093289  | 34093509  | 221 |
| chr25 | 26449235  | 26449455  | 221 |
| chr25 | 1931878   | 1932098   | 221 |
| chr24 | 60823026  | 60823246  | 221 |
| chr24 | 20561022  | 20561242  | 221 |
| chr24 | 1109120   | 1109340   | 221 |
| chr24 | 1036219   | 1036439   | 221 |
| chr23 | 31025114  | 31025334  | 221 |
| chr23 | 30252575  | 30252795  | 221 |
| chr23 | 28901717  | 28901937  | 221 |
| chr23 | 21237258  | 21237478  | 221 |
| chr23 | 17777541  | 17777761  | 221 |
| chr22 | 55898542  | 55898762  | 221 |
| chr22 | 30185031  | 30185251  | 221 |
| chr22 | 23812923  | 23813143  | 221 |
| chr22 | 15012989  | 15013209  | 221 |
| chr22 | 6758572   | 6758792   | 221 |
| chr21 | 46944485  | 46944705  | 221 |
| chr21 | 32199459  | 32199679  | 221 |
| chr21 | 24221198  | 24221418  | 221 |
| chr21 | 21291478  | 21291698  | 221 |

|       |           |           |     |
|-------|-----------|-----------|-----|
| chr21 | 19975271  | 19975491  | 221 |
| chr21 | 13801252  | 13801472  | 221 |
| chr21 | 11909299  | 11909519  | 221 |
| chr21 | 7072136   | 7072356   | 221 |
| chr20 | 70555781  | 70556001  | 221 |
| chr20 | 39760747  | 39760967  | 221 |
| chr2  | 132331024 | 132331244 | 221 |
| chr2  | 114181881 | 114182101 | 221 |
| chr2  | 99037518  | 99037738  | 221 |
| chr2  | 28169785  | 28170005  | 221 |
| chr19 | 63629881  | 63630101  | 221 |
| chr19 | 59069910  | 59070130  | 221 |
| chr19 | 47362239  | 47362459  | 221 |
| chr19 | 26918282  | 26918502  | 221 |
| chr19 | 26667107  | 26667327  | 221 |
| chr19 | 26105417  | 26105637  | 221 |
| chr19 | 20347150  | 20347370  | 221 |
| chr19 | 16135867  | 16136087  | 221 |
| chr18 | 63033646  | 63033866  | 221 |
| chr18 | 61970873  | 61971093  | 221 |
| chr18 | 47210626  | 47210846  | 221 |
| chr18 | 24238798  | 24239018  | 221 |
| chr18 | 6017888   | 6018108   | 221 |
| chr17 | 76301297  | 76301517  | 221 |
| chr17 | 70344352  | 70344572  | 221 |
| chr17 | 67407981  | 67408201  | 221 |
| chr17 | 62407416  | 62407636  | 221 |
| chr17 | 62167381  | 62167601  | 221 |
| chr17 | 54771305  | 54771525  | 221 |
| chr16 | 53852841  | 53853061  | 221 |
| chr16 | 45241549  | 45241769  | 221 |
| chr16 | 2013587   | 2013807   | 221 |
| chr15 | 83614989  | 83615209  | 221 |
| chr15 | 74651073  | 74651293  | 221 |
| chr15 | 64540594  | 64540814  | 221 |
| chr15 | 63237980  | 63238200  | 221 |
| chr15 | 36411114  | 36411334  | 221 |
| chr15 | 30130228  | 30130448  | 221 |
| chr15 | 24648013  | 24648233  | 221 |
| chr15 | 20337793  | 20338013  | 221 |
| chr14 | 79947362  | 79947582  | 221 |
| chr14 | 30829441  | 30829661  | 221 |
| chr14 | 4024891   | 4025111   | 221 |
| chr14 | 3558649   | 3558869   | 221 |
| chr13 | 77303317  | 77303537  | 221 |
| chr13 | 67869909  | 67870129  | 221 |
| chr13 | 66985108  | 66985328  | 221 |
| chr13 | 66800772  | 66800992  | 221 |
| chr13 | 59586234  | 59586454  | 221 |
| chr13 | 59038816  | 59039036  | 221 |

|       |           |           |     |
|-------|-----------|-----------|-----|
| chr13 | 58625847  | 58626067  | 221 |
| chr13 | 58622983  | 58623203  | 221 |
| chr13 | 45358066  | 45358286  | 221 |
| chr13 | 22826587  | 22826807  | 221 |
| chr13 | 14726474  | 14726694  | 221 |
| chr12 | 84792874  | 84793094  | 221 |
| chr12 | 14703011  | 14703231  | 221 |
| chr11 | 108951248 | 108951468 | 221 |
| chr11 | 103325557 | 103325777 | 221 |
| chr11 | 87962718  | 87962938  | 221 |
| chr11 | 75113263  | 75113483  | 221 |
| chr11 | 51512173  | 51512393  | 221 |
| chr11 | 44984201  | 44984421  | 221 |
| chr11 | 30755356  | 30755576  | 221 |
| chr11 | 28315986  | 28316206  | 221 |
| chr11 | 5897303   | 5897523   | 221 |
| chr10 | 79573313  | 79573533  | 221 |
| chr10 | 79240128  | 79240348  | 221 |
| chr10 | 74698755  | 74698975  | 221 |
| chr10 | 69485004  | 69485224  | 221 |
| chr10 | 48391077  | 48391297  | 221 |
| chr10 | 28159778  | 28159998  | 221 |
| chr10 | 26007647  | 26007867  | 221 |
| chr10 | 21934733  | 21934953  | 221 |
| chr10 | 20489067  | 20489287  | 221 |
| chr10 | 14919156  | 14919376  | 221 |
| chr10 | 10894294  | 10894514  | 221 |
| chr1  | 153863128 | 153863348 | 221 |
| chr1  | 81444766  | 81444986  | 221 |
| chrX  | 80181458  | 80181677  | 220 |
| chrX  | 80168682  | 80168901  | 220 |
| chrX  | 78831839  | 78832058  | 220 |
| chrX  | 78344220  | 78344439  | 220 |
| chrX  | 69622508  | 69622727  | 220 |
| chrX  | 68397117  | 68397336  | 220 |
| chrX  | 64614917  | 64615136  | 220 |
| chrX  | 64438720  | 64438939  | 220 |
| chrX  | 63692233  | 63692452  | 220 |
| chrX  | 60876696  | 60876915  | 220 |
| chrX  | 57101301  | 57101520  | 220 |
| chrX  | 57066525  | 57066744  | 220 |
| chrX  | 56257309  | 56257528  | 220 |
| chrX  | 50103396  | 50103615  | 220 |
| chrX  | 48651939  | 48652158  | 220 |
| chrX  | 44991458  | 44991677  | 220 |
| chrX  | 37278114  | 37278333  | 220 |
| chrX  | 33088649  | 33088868  | 220 |
| chrX  | 31798154  | 31798373  | 220 |
| chrX  | 30470343  | 30470562  | 220 |
| chrX  | 22462380  | 22462599  | 220 |

|       |           |           |     |
|-------|-----------|-----------|-----|
| chrX  | 21575787  | 21576006  | 220 |
| chrX  | 20902262  | 20902481  | 220 |
| chrX  | 18116714  | 18116933  | 220 |
| chrX  | 17654878  | 17655097  | 220 |
| chrX  | 15519669  | 15519888  | 220 |
| chrX  | 10440339  | 10440558  | 220 |
| chrX  | 10203889  | 10204108  | 220 |
| chrX  | 10027050  | 10027269  | 220 |
| chrX  | 8511012   | 8511231   | 220 |
| chrX  | 6575456   | 6575675   | 220 |
| chrX  | 5169656   | 5169875   | 220 |
| chr9  | 90711486  | 90711705  | 220 |
| chr9  | 77713680  | 77713899  | 220 |
| chr9  | 65788181  | 65788400  | 220 |
| chr9  | 43803921  | 43804140  | 220 |
| chr9  | 14598846  | 14599065  | 220 |
| chr8  | 110732007 | 110732226 | 220 |
| chr8  | 92209881  | 92210100  | 220 |
| chr8  | 11469838  | 11470057  | 220 |
| chr8  | 11425558  | 11425777  | 220 |
| chr8  | 7376724   | 7376943   | 220 |
| chr7  | 42559354  | 42559573  | 220 |
| chr6  | 102177013 | 102177232 | 220 |
| chr6  | 92939729  | 92939948  | 220 |
| chr6  | 20765317  | 20765536  | 220 |
| chr6  | 2225743   | 2225962   | 220 |
| chr5  | 121374530 | 121374749 | 220 |
| chr5  | 118155889 | 118156108 | 220 |
| chr5  | 113674895 | 113675114 | 220 |
| chr5  | 111340864 | 111341083 | 220 |
| chr5  | 97727469  | 97727688  | 220 |
| chr5  | 74689159  | 74689378  | 220 |
| chr5  | 32538918  | 32539137  | 220 |
| chr4  | 104620796 | 104621015 | 220 |
| chr4  | 98893931  | 98894150  | 220 |
| chr4  | 98735407  | 98735626  | 220 |
| chr4  | 98729368  | 98729587  | 220 |
| chr4  | 96000227  | 96000446  | 220 |
| chr4  | 32180890  | 32181109  | 220 |
| chr3  | 116129145 | 116129364 | 220 |
| chr3  | 106495071 | 106495290 | 220 |
| chr3  | 99339407  | 99339626  | 220 |
| chr3  | 63259308  | 63259527  | 220 |
| chr3  | 9523955   | 9524174   | 220 |
| chr29 | 51994131  | 51994350  | 220 |
| chr29 | 46033062  | 46033281  | 220 |
| chr29 | 41753379  | 41753598  | 220 |
| chr29 | 39158501  | 39158720  | 220 |
| chr29 | 36248472  | 36248691  | 220 |
| chr29 | 35252583  | 35252802  | 220 |

|       |           |           |     |
|-------|-----------|-----------|-----|
| chr29 | 26714892  | 26715111  | 220 |
| chr28 | 42484589  | 42484808  | 220 |
| chr28 | 33929620  | 33929839  | 220 |
| chr28 | 4328588   | 4328807   | 220 |
| chr27 | 41620452  | 41620671  | 220 |
| chr27 | 35337178  | 35337397  | 220 |
| chr27 | 26729670  | 26729889  | 220 |
| chr26 | 48456813  | 48457032  | 220 |
| chr26 | 48433671  | 48433890  | 220 |
| chr26 | 35191458  | 35191677  | 220 |
| chr26 | 3129009   | 3129228   | 220 |
| chr25 | 36159630  | 36159849  | 220 |
| chr25 | 34801603  | 34801822  | 220 |
| chr25 | 8732808   | 8733027   | 220 |
| chr24 | 61363324  | 61363543  | 220 |
| chr24 | 61124378  | 61124597  | 220 |
| chr24 | 52803932  | 52804151  | 220 |
| chr24 | 48944786  | 48945005  | 220 |
| chr24 | 39327671  | 39327890  | 220 |
| chr23 | 44515568  | 44515787  | 220 |
| chr23 | 14665947  | 14666166  | 220 |
| chr23 | 14263036  | 14263255  | 220 |
| chr23 | 13635020  | 13635239  | 220 |
| chr22 | 58701658  | 58701877  | 220 |
| chr22 | 56618738  | 56618957  | 220 |
| chr22 | 49720997  | 49721216  | 220 |
| chr22 | 12477835  | 12478054  | 220 |
| chr21 | 65570152  | 65570371  | 220 |
| chr21 | 57481662  | 57481881  | 220 |
| chr21 | 33019044  | 33019263  | 220 |
| chr21 | 24856726  | 24856945  | 220 |
| chr21 | 22605792  | 22606011  | 220 |
| chr21 | 12609225  | 12609444  | 220 |
| chr20 | 41514254  | 41514473  | 220 |
| chr20 | 13789553  | 13789772  | 220 |
| chr2  | 134762039 | 134762258 | 220 |
| chr2  | 121947253 | 121947472 | 220 |
| chr2  | 54407093  | 54407312  | 220 |
| chr2  | 32336929  | 32337148  | 220 |
| chr19 | 58354405  | 58354624  | 220 |
| chr19 | 55484142  | 55484361  | 220 |
| chr19 | 41421100  | 41421319  | 220 |
| chr19 | 30850229  | 30850448  | 220 |
| chr19 | 27923074  | 27923293  | 220 |
| chr18 | 61932175  | 61932394  | 220 |
| chr18 | 51764014  | 51764233  | 220 |
| chr18 | 49726932  | 49727151  | 220 |
| chr18 | 40003955  | 40004174  | 220 |
| chr18 | 20823004  | 20823223  | 220 |
| chr18 | 19009659  | 19009878  | 220 |

|       |          |          |     |
|-------|----------|----------|-----|
| chr18 | 18096065 | 18096284 | 220 |
| chr18 | 12591144 | 12591363 | 220 |
| chr18 | 12168472 | 12168691 | 220 |
| chr18 | 5315235  | 5315454  | 220 |
| chr17 | 74756002 | 74756221 | 220 |
| chr17 | 70089552 | 70089771 | 220 |
| chr17 | 62404185 | 62404404 | 220 |
| chr17 | 60773599 | 60773818 | 220 |
| chr17 | 59190090 | 59190309 | 220 |
| chr17 | 59023981 | 59024200 | 220 |
| chr17 | 47362732 | 47362951 | 220 |
| chr16 | 73172364 | 73172583 | 220 |
| chr16 | 71947251 | 71947470 | 220 |
| chr16 | 47652253 | 47652472 | 220 |
| chr16 | 45923588 | 45923807 | 220 |
| chr16 | 38709908 | 38710127 | 220 |
| chr16 | 22669621 | 22669840 | 220 |
| chr16 | 1086389  | 1086608  | 220 |
| chr15 | 64926451 | 64926670 | 220 |
| chr15 | 45817072 | 45817291 | 220 |
| chr15 | 43389914 | 43390133 | 220 |
| chr15 | 30626865 | 30627084 | 220 |
| chr15 | 29971489 | 29971708 | 220 |
| chr15 | 29668837 | 29669056 | 220 |
| chr15 | 27122247 | 27122466 | 220 |
| chr15 | 23807626 | 23807845 | 220 |
| chr15 | 23595431 | 23595650 | 220 |
| chr15 | 22869741 | 22869960 | 220 |
| chr14 | 75936897 | 75937116 | 220 |
| chr14 | 42146784 | 42147003 | 220 |
| chr14 | 26136047 | 26136266 | 220 |
| chr14 | 21784009 | 21784228 | 220 |
| chr14 | 16637300 | 16637519 | 220 |
| chr13 | 79904097 | 79904316 | 220 |
| chr13 | 79424616 | 79424835 | 220 |
| chr13 | 77425653 | 77425872 | 220 |
| chr13 | 75629957 | 75630176 | 220 |
| chr13 | 74000477 | 74000696 | 220 |
| chr13 | 72699941 | 72700160 | 220 |
| chr13 | 65092673 | 65092892 | 220 |
| chr13 | 62349949 | 62350168 | 220 |
| chr13 | 60749984 | 60750203 | 220 |
| chr13 | 59864109 | 59864328 | 220 |
| chr13 | 57640511 | 57640730 | 220 |
| chr13 | 41635544 | 41635763 | 220 |
| chr13 | 41303375 | 41303594 | 220 |
| chr13 | 35659587 | 35659806 | 220 |
| chr12 | 31571310 | 31571529 | 220 |
| chr12 | 31377950 | 31378169 | 220 |
| chr12 | 14222742 | 14222961 | 220 |

|       |           |           |     |
|-------|-----------|-----------|-----|
| chr11 | 95528211  | 95528430  | 220 |
| chr11 | 85893033  | 85893252  | 220 |
| chr11 | 78378263  | 78378482  | 220 |
| chr11 | 72025300  | 72025519  | 220 |
| chr11 | 71595728  | 71595947  | 220 |
| chr11 | 66276747  | 66276966  | 220 |
| chr11 | 57074839  | 57075058  | 220 |
| chr11 | 46196101  | 46196320  | 220 |
| chr11 | 2325435   | 2325654   | 220 |
| chr10 | 90424935  | 90425154  | 220 |
| chr10 | 83530558  | 83530777  | 220 |
| chr10 | 51495445  | 51495664  | 220 |
| chr10 | 49317307  | 49317526  | 220 |
| chr10 | 21362301  | 21362520  | 220 |
| chr10 | 20822283  | 20822502  | 220 |
| chr10 | 16837893  | 16838112  | 220 |
| chr1  | 144135201 | 144135420 | 220 |
| chr1  | 81523437  | 81523656  | 220 |
| chrX  | 79109378  | 79109596  | 219 |
| chrX  | 78668010  | 78668228  | 219 |
| chrX  | 78197695  | 78197913  | 219 |
| chrX  | 74895484  | 74895702  | 219 |
| chrX  | 74685875  | 74686093  | 219 |
| chrX  | 74489848  | 74490066  | 219 |
| chrX  | 72338043  | 72338261  | 219 |
| chrX  | 66974140  | 66974358  | 219 |
| chrX  | 64366174  | 64366392  | 219 |
| chrX  | 63211206  | 63211424  | 219 |
| chrX  | 61868279  | 61868497  | 219 |
| chrX  | 57438433  | 57438651  | 219 |
| chrX  | 55256459  | 55256677  | 219 |
| chrX  | 51321571  | 51321789  | 219 |
| chrX  | 50192765  | 50192983  | 219 |
| chrX  | 49811760  | 49811978  | 219 |
| chrX  | 48219351  | 48219569  | 219 |
| chrX  | 46222603  | 46222821  | 219 |
| chrX  | 38979271  | 38979489  | 219 |
| chrX  | 37057969  | 37058187  | 219 |
| chrX  | 34566649  | 34566867  | 219 |
| chrX  | 34256208  | 34256426  | 219 |
| chrX  | 32196219  | 32196437  | 219 |
| chrX  | 20727502  | 20727720  | 219 |
| chrX  | 18433766  | 18433984  | 219 |
| chrX  | 17405139  | 17405357  | 219 |
| chrX  | 13330955  | 13331173  | 219 |
| chrX  | 11783113  | 11783331  | 219 |
| chrX  | 9450651   | 9450869   | 219 |
| chrX  | 8935454   | 8935672   | 219 |
| chrX  | 7452439   | 7452657   | 219 |
| chrX  | 6191188   | 6191406   | 219 |

|       |           |           |     |
|-------|-----------|-----------|-----|
| chr9  | 44287118  | 44287336  | 219 |
| chr8  | 115803737 | 115803955 | 219 |
| chr8  | 112941906 | 112942124 | 219 |
| chr8  | 86712907  | 86713125  | 219 |
| chr8  | 72150401  | 72150619  | 219 |
| chr8  | 61791094  | 61791312  | 219 |
| chr8  | 60199009  | 60199227  | 219 |
| chr7  | 96597375  | 96597593  | 219 |
| chr7  | 17129810  | 17130028  | 219 |
| chr6  | 107491923 | 107492141 | 219 |
| chr6  | 107116120 | 107116338 | 219 |
| chr6  | 27301721  | 27301939  | 219 |
| chr5  | 125686989 | 125687207 | 219 |
| chr5  | 118512142 | 118512360 | 219 |
| chr5  | 114123294 | 114123512 | 219 |
| chr5  | 114058014 | 114058232 | 219 |
| chr5  | 113107089 | 113107307 | 219 |
| chr5  | 85308889  | 85309107  | 219 |
| chr5  | 80765216  | 80765434  | 219 |
| chr5  | 31349801  | 31350019  | 219 |
| chr5  | 31224518  | 31224736  | 219 |
| chr5  | 30267373  | 30267591  | 219 |
| chr5  | 28507276  | 28507494  | 219 |
| chr4  | 116925019 | 116925237 | 219 |
| chr4  | 78825549  | 78825767  | 219 |
| chr4  | 77332381  | 77332599  | 219 |
| chr4  | 69993762  | 69993980  | 219 |
| chr4  | 8936036   | 8936254   | 219 |
| chr3  | 123945616 | 123945834 | 219 |
| chr3  | 120959852 | 120960070 | 219 |
| chr3  | 116413504 | 116413722 | 219 |
| chr3  | 115701278 | 115701496 | 219 |
| chr3  | 108444107 | 108444325 | 219 |
| chr3  | 105324132 | 105324350 | 219 |
| chr3  | 36656749  | 36656967  | 219 |
| chr3  | 35995730  | 35995948  | 219 |
| chr3  | 33794635  | 33794853  | 219 |
| chr3  | 24429777  | 24429995  | 219 |
| chr3  | 22454685  | 22454903  | 219 |
| chr3  | 4520255   | 4520473   | 219 |
| chr29 | 45767543  | 45767761  | 219 |
| chr29 | 37624753  | 37624971  | 219 |
| chr29 | 36942322  | 36942540  | 219 |
| chr29 | 36280198  | 36280416  | 219 |
| chr29 | 33331587  | 33331805  | 219 |
| chr29 | 27569493  | 27569711  | 219 |
| chr29 | 17792662  | 17792880  | 219 |
| chr28 | 26776901  | 26777119  | 219 |
| chr27 | 35838592  | 35838810  | 219 |
| chr27 | 27942868  | 27943086  | 219 |



|       |               |           |     |
|-------|---------------|-----------|-----|
| chr27 | 17471082      | 17471300  | 219 |
| chr26 | 48991859      | 48992077  | 219 |
| chr26 | 45654546      | 45654764  | 219 |
| chr26 | 44252322      | 44252540  | 219 |
| chr26 | 42896520      | 42896738  | 219 |
| chr26 | 18226760      | 18226978  | 219 |
| chr25 | 42750295      | 42750513  | 219 |
| chr25 | 37199375      | 37199593  | 219 |
| chr25 | 2932156       | 2932374   | 219 |
| chr25 | 1059649       | 1059867   | 219 |
| chr24 | 63046767      | 63046985  | 219 |
| chr24 | 61082199      | 61082417  | 219 |
| chr24 | 41895423      | 41895641  | 219 |
| chr24 | 872169 872387 |           | 219 |
| chr23 | 44280258      | 44280476  | 219 |
| chr23 | 42935361      | 42935579  | 219 |
| chr23 | 27906854      | 27907072  | 219 |
| chr23 | 16516042      | 16516260  | 219 |
| chr23 | 15096476      | 15096694  | 219 |
| chr22 | 57714673      | 57714891  | 219 |
| chr22 | 52738643      | 52738861  | 219 |
| chr22 | 49927334      | 49927552  | 219 |
| chr22 | 48556389      | 48556607  | 219 |
| chr22 | 5669540       | 5669758   | 219 |
| chr21 | 69107361      | 69107579  | 219 |
| chr21 | 24898037      | 24898255  | 219 |
| chr21 | 21336485      | 21336703  | 219 |
| chr21 | 18487648      | 18487866  | 219 |
| chr20 | 74521626      | 74521844  | 219 |
| chr2  | 134748804     | 134749022 | 219 |
| chr2  | 129698071     | 129698289 | 219 |
| chr2  | 124324222     | 124324440 | 219 |
| chr2  | 122923781     | 122923999 | 219 |
| chr2  | 120647260     | 120647478 | 219 |
| chr2  | 111365219     | 111365437 | 219 |
| chr2  | 94349075      | 94349293  | 219 |
| chr2  | 18614078      | 18614296  | 219 |
| chr19 | 63006497      | 63006715  | 219 |
| chr19 | 61990610      | 61990828  | 219 |
| chr19 | 61801678      | 61801896  | 219 |
| chr19 | 61621202      | 61621420  | 219 |
| chr19 | 56576415      | 56576633  | 219 |
| chr19 | 47350635      | 47350853  | 219 |
| chr19 | 34574083      | 34574301  | 219 |
| chr19 | 26107886      | 26108104  | 219 |
| chr19 | 17088486      | 17088704  | 219 |
| chr19 | 17020054      | 17020272  | 219 |
| chr19 | 16171042      | 16171260  | 219 |
| chr19 | 14908961      | 14909179  | 219 |
| chr18 | 54519641      | 54519859  | 219 |

|       |           |           |     |
|-------|-----------|-----------|-----|
| chr18 | 34879163  | 34879381  | 219 |
| chr18 | 33631393  | 33631611  | 219 |
| chr18 | 22098494  | 22098712  | 219 |
| chr18 | 15861557  | 15861775  | 219 |
| chr18 | 11623047  | 11623265  | 219 |
| chr18 | 11433451  | 11433669  | 219 |
| chr18 | 11402522  | 11402740  | 219 |
| chr18 | 10056751  | 10056969  | 219 |
| chr17 | 73807453  | 73807671  | 219 |
| chr17 | 70491369  | 70491587  | 219 |
| chr17 | 69425503  | 69425721  | 219 |
| chr17 | 62089082  | 62089300  | 219 |
| chr17 | 59351589  | 59351807  | 219 |
| chr17 | 53935491  | 53935709  | 219 |
| chr17 | 47430177  | 47430395  | 219 |
| chr17 | 12574701  | 12574919  | 219 |
| chr16 | 47295037  | 47295255  | 219 |
| chr16 | 47231957  | 47232175  | 219 |
| chr16 | 45937985  | 45938203  | 219 |
| chr16 | 43274202  | 43274420  | 219 |
| chr16 | 3747873   | 3748091   | 219 |
| chr16 | 1103805   | 1104023   | 219 |
| chr16 | 1070865   | 1071083   | 219 |
| chr15 | 75688402  | 75688620  | 219 |
| chr15 | 75614530  | 75614748  | 219 |
| chr15 | 65641019  | 65641237  | 219 |
| chr15 | 34029073  | 34029291  | 219 |
| chr15 | 23920866  | 23921084  | 219 |
| chr14 | 68055486  | 68055704  | 219 |
| chr14 | 9327456   | 9327674   | 219 |
| chr14 | 7863054   | 7863272   | 219 |
| chr14 | 4039512   | 4039730   | 219 |
| chr13 | 77613773  | 77613991  | 219 |
| chr13 | 75999998  | 76000216  | 219 |
| chr13 | 75706631  | 75706849  | 219 |
| chr13 | 68610761  | 68610979  | 219 |
| chr13 | 63419731  | 63419949  | 219 |
| chr13 | 61483694  | 61483912  | 219 |
| chr13 | 60178738  | 60178956  | 219 |
| chr13 | 58603343  | 58603561  | 219 |
| chr13 | 23427167  | 23427385  | 219 |
| chr13 | 2259365   | 2259583   | 219 |
| chr12 | 84239442  | 84239660  | 219 |
| chr12 | 83857928  | 83858146  | 219 |
| chr12 | 82812499  | 82812717  | 219 |
| chr12 | 80942648  | 80942866  | 219 |
| chr11 | 104473803 | 104474021 | 219 |
| chr11 | 100496006 | 100496224 | 219 |
| chr11 | 89547836  | 89548054  | 219 |
| chr11 | 88666123  | 88666341  | 219 |

|       |           |           |     |
|-------|-----------|-----------|-----|
| chr11 | 49937015  | 49937233  | 219 |
| chr11 | 46195278  | 46195496  | 219 |
| chr11 | 44930469  | 44930687  | 219 |
| chr11 | 31951728  | 31951946  | 219 |
| chr11 | 25615973  | 25616191  | 219 |
| chr11 | 14047788  | 14048006  | 219 |
| chr11 | 3726193   | 3726411   | 219 |
| chr10 | 80303417  | 80303635  | 219 |
| chr10 | 79144897  | 79145115  | 219 |
| chr10 | 53261711  | 53261929  | 219 |
| chr10 | 45528625  | 45528843  | 219 |
| chr10 | 25270589  | 25270807  | 219 |
| chr10 | 16694193  | 16694411  | 219 |
| chr1  | 132662865 | 132663083 | 219 |
| chr1  | 99507780  | 99507998  | 219 |
| chr1  | 99191293  | 99191511  | 219 |
| chr1  | 82864274  | 82864492  | 219 |
| chr1  | 75290541  | 75290759  | 219 |
| chr1  | 70494670  | 70494888  | 219 |
| chr1  | 69352259  | 69352477  | 219 |
| chrX  | 79753310  | 79753527  | 218 |
| chrX  | 78600919  | 78601136  | 218 |
| chrX  | 77042371  | 77042588  | 218 |
| chrX  | 72104137  | 72104354  | 218 |
| chrX  | 65237767  | 65237984  | 218 |
| chrX  | 64995530  | 64995747  | 218 |
| chrX  | 64302933  | 64303150  | 218 |
| chrX  | 62937896  | 62938113  | 218 |
| chrX  | 62931214  | 62931431  | 218 |
| chrX  | 62363578  | 62363795  | 218 |
| chrX  | 61367279  | 61367496  | 218 |
| chrX  | 61231951  | 61232168  | 218 |
| chrX  | 61154928  | 61155145  | 218 |
| chrX  | 60192087  | 60192304  | 218 |
| chrX  | 55507667  | 55507884  | 218 |
| chrX  | 55448387  | 55448604  | 218 |
| chrX  | 54525561  | 54525778  | 218 |
| chrX  | 50820661  | 50820878  | 218 |
| chrX  | 50552380  | 50552597  | 218 |
| chrX  | 50164354  | 50164571  | 218 |
| chrX  | 38068196  | 38068413  | 218 |
| chrX  | 36413438  | 36413655  | 218 |
| chrX  | 33755518  | 33755735  | 218 |
| chrX  | 33409936  | 33410153  | 218 |
| chrX  | 32339879  | 32340096  | 218 |
| chrX  | 30732416  | 30732633  | 218 |
| chrX  | 30637754  | 30637971  | 218 |
| chrX  | 29590858  | 29591075  | 218 |
| chrX  | 29558068  | 29558285  | 218 |
| chrX  | 29250225  | 29250442  | 218 |

|       |           |           |     |
|-------|-----------|-----------|-----|
| chrX  | 15755713  | 15755930  | 218 |
| chrX  | 13966725  | 13966942  | 218 |
| chrX  | 11960031  | 11960248  | 218 |
| chrX  | 11747561  | 11747778  | 218 |
| chrX  | 9789318   | 9789535   | 218 |
| chrX  | 9656988   | 9657205   | 218 |
| chrX  | 9293429   | 9293646   | 218 |
| chrX  | 8302441   | 8302658   | 218 |
| chrX  | 7462967   | 7463184   | 218 |
| chrX  | 5942340   | 5942557   | 218 |
| chr9  | 100082159 | 100082376 | 218 |
| chr9  | 52812064  | 52812281  | 218 |
| chr9  | 26578969  | 26579186  | 218 |
| chr8  | 48979005  | 48979222  | 218 |
| chr8  | 27419676  | 27419893  | 218 |
| chr8  | 24460130  | 24460347  | 218 |
| chr8  | 23022094  | 23022311  | 218 |
| chr7  | 60120419  | 60120636  | 218 |
| chr7  | 50498354  | 50498571  | 218 |
| chr7  | 46208711  | 46208928  | 218 |
| chr7  | 38653447  | 38653664  | 218 |
| chr7  | 37475053  | 37475270  | 218 |
| chr7  | 37227439  | 37227656  | 218 |
| chr7  | 18764721  | 18764938  | 218 |
| chr7  | 18346400  | 18346617  | 218 |
| chr6  | 121015510 | 121015727 | 218 |
| chr6  | 115598131 | 115598348 | 218 |
| chr6  | 46829576  | 46829793  | 218 |
| chr5  | 119356217 | 119356434 | 218 |
| chr5  | 5810860   | 5811077   | 218 |
| chr4  | 123046648 | 123046865 | 218 |
| chr4  | 99006677  | 99006894  | 218 |
| chr4  | 78902780  | 78902997  | 218 |
| chr4  | 68074335  | 68074552  | 218 |
| chr4  | 34475519  | 34475736  | 218 |
| chr4  | 32154256  | 32154473  | 218 |
| chr4  | 28616604  | 28616821  | 218 |
| chr3  | 127184467 | 127184684 | 218 |
| chr3  | 126878377 | 126878594 | 218 |
| chr3  | 126109939 | 126110156 | 218 |
| chr3  | 123676615 | 123676832 | 218 |
| chr3  | 123295729 | 123295946 | 218 |
| chr3  | 121423758 | 121423975 | 218 |
| chr3  | 119964692 | 119964909 | 218 |
| chr3  | 115867977 | 115868194 | 218 |
| chr3  | 115484925 | 115485142 | 218 |
| chr3  | 99306589  | 99306806  | 218 |
| chr3  | 71035234  | 71035451  | 218 |
| chr3  | 22409286  | 22409503  | 218 |
| chr29 | 38315465  | 38315682  | 218 |

|       |               |          |     |
|-------|---------------|----------|-----|
| chr29 | 35109173      | 35109390 | 218 |
| chr29 | 32071950      | 32072167 | 218 |
| chr29 | 31612431      | 31612648 | 218 |
| chr29 | 29881463      | 29881680 | 218 |
| chr29 | 9706633       | 9706850  | 218 |
| chr28 | 45796259      | 45796476 | 218 |
| chr28 | 43892682      | 43892899 | 218 |
| chr28 | 33426215      | 33426432 | 218 |
| chr28 | 26450307      | 26450524 | 218 |
| chr28 | 8115064       | 8115281  | 218 |
| chr27 | 31487109      | 31487326 | 218 |
| chr27 | 16566454      | 16566671 | 218 |
| chr27 | 58235 58452   | 218      |     |
| chr26 | 48902494      | 48902711 | 218 |
| chr26 | 48899972      | 48900189 | 218 |
| chr26 | 38496562      | 38496779 | 218 |
| chr26 | 31329379      | 31329596 | 218 |
| chr26 | 5875062       | 5875279  | 218 |
| chr25 | 37866942      | 37867159 | 218 |
| chr25 | 36437674      | 36437891 | 218 |
| chr25 | 35845026      | 35845243 | 218 |
| chr25 | 1897259       | 1897476  | 218 |
| chr24 | 60800853      | 60801070 | 218 |
| chr24 | 59566292      | 59566509 | 218 |
| chr24 | 50261470      | 50261687 | 218 |
| chr24 | 41521613      | 41521830 | 218 |
| chr24 | 31400212      | 31400429 | 218 |
| chr24 | 952247 952464 | 218      |     |
| chr23 | 49592300      | 49592517 | 218 |
| chr23 | 42780230      | 42780447 | 218 |
| chr23 | 37980455      | 37980672 | 218 |
| chr23 | 27945730      | 27945947 | 218 |
| chr23 | 27832461      | 27832678 | 218 |
| chr23 | 18864641      | 18864858 | 218 |
| chr23 | 18633544      | 18633761 | 218 |
| chr22 | 56357667      | 56357884 | 218 |
| chr22 | 54260397      | 54260614 | 218 |
| chr22 | 29795547      | 29795764 | 218 |
| chr21 | 67964630      | 67964847 | 218 |
| chr21 | 61671156      | 61671373 | 218 |
| chr21 | 56320367      | 56320584 | 218 |
| chr21 | 48712804      | 48713021 | 218 |
| chr21 | 18600991      | 18601208 | 218 |
| chr20 | 71401651      | 71401868 | 218 |
| chr20 | 71392055      | 71392272 | 218 |
| chr20 | 70200330      | 70200547 | 218 |
| chr20 | 67230544      | 67230761 | 218 |
| chr20 | 45416389      | 45416606 | 218 |
| chr20 | 42307280      | 42307497 | 218 |
| chr20 | 19422150      | 19422367 | 218 |

|       |           |           |     |
|-------|-----------|-----------|-----|
| chr20 | 8699245   | 8699462   | 218 |
| chr2  | 139485483 | 139485700 | 218 |
| chr2  | 130118488 | 130118705 | 218 |
| chr2  | 127998341 | 127998558 | 218 |
| chr2  | 126748006 | 126748223 | 218 |
| chr2  | 126105040 | 126105257 | 218 |
| chr2  | 115078585 | 115078802 | 218 |
| chr2  | 39200035  | 39200252  | 218 |
| chr19 | 63624785  | 63625002  | 218 |
| chr19 | 60427486  | 60427703  | 218 |
| chr19 | 54451943  | 54452160  | 218 |
| chr19 | 54448744  | 54448961  | 218 |
| chr19 | 47065704  | 47065921  | 218 |
| chr19 | 43149977  | 43150194  | 218 |
| chr19 | 41395165  | 41395382  | 218 |
| chr19 | 39458228  | 39458445  | 218 |
| chr19 | 25439211  | 25439428  | 218 |
| chr19 | 23732488  | 23732705  | 218 |
| chr19 | 17119267  | 17119484  | 218 |
| chr19 | 11130379  | 11130596  | 218 |
| chr19 | 10855266  | 10855483  | 218 |
| chr18 | 61999390  | 61999607  | 218 |
| chr18 | 58005344  | 58005561  | 218 |
| chr18 | 54353650  | 54353867  | 218 |
| chr18 | 52689669  | 52689886  | 218 |
| chr18 | 51624941  | 51625158  | 218 |
| chr18 | 22149366  | 22149583  | 218 |
| chr18 | 11648592  | 11648809  | 218 |
| chr18 | 11474800  | 11475017  | 218 |
| chr18 | 11011110  | 11011327  | 218 |
| chr18 | 9646043   | 9646260   | 218 |
| chr17 | 66839682  | 66839899  | 218 |
| chr17 | 63526255  | 63526472  | 218 |
| chr17 | 63381168  | 63381385  | 218 |
| chr16 | 73941622  | 73941839  | 218 |
| chr16 | 71968057  | 71968274  | 218 |
| chr16 | 39608890  | 39609107  | 218 |
| chr16 | 38378871  | 38379088  | 218 |
| chr16 | 18773876  | 18774093  | 218 |
| chr15 | 81168996  | 81169213  | 218 |
| chr15 | 64189630  | 64189847  | 218 |
| chr15 | 41239257  | 41239474  | 218 |
| chr15 | 22796083  | 22796300  | 218 |
| chr15 | 22266216  | 22266433  | 218 |
| chr14 | 8149922   | 8150139   | 218 |
| chr14 | 3516911   | 3517128   | 218 |
| chr14 | 3261578   | 3261795   | 218 |
| chr14 | 1968281   | 1968498   | 218 |
| chr13 | 77108727  | 77108944  | 218 |
| chr13 | 76194023  | 76194240  | 218 |

|       |           |           |     |
|-------|-----------|-----------|-----|
| chr13 | 71334061  | 71334278  | 218 |
| chr13 | 61782738  | 61782955  | 218 |
| chr13 | 61485436  | 61485653  | 218 |
| chr13 | 55109398  | 55109615  | 218 |
| chr13 | 39147781  | 39147998  | 218 |
| chr13 | 38828031  | 38828248  | 218 |
| chr13 | 17741018  | 17741235  | 218 |
| chr13 | 15769134  | 15769351  | 218 |
| chr12 | 33514186  | 33514403  | 218 |
| chr12 | 31003707  | 31003924  | 218 |
| chr11 | 109778954 | 109779171 | 218 |
| chr11 | 104188207 | 104188424 | 218 |
| chr11 | 92319691  | 92319908  | 218 |
| chr11 | 76371222  | 76371439  | 218 |
| chr11 | 47227698  | 47227915  | 218 |
| chr11 | 46637087  | 46637304  | 218 |
| chr11 | 29449511  | 29449728  | 218 |
| chr11 | 12000090  | 12000307  | 218 |
| chr11 | 10400910  | 10401127  | 218 |
| chr11 | 5867174   | 5867391   | 218 |
| chr11 | 520778    | 520995    | 218 |
| chr10 | 72468762  | 72468979  | 218 |
| chr10 | 70693856  | 70694073  | 218 |
| chr10 | 62959230  | 62959447  | 218 |
| chr10 | 37426190  | 37426407  | 218 |
| chr10 | 20901328  | 20901545  | 218 |
| chr1  | 144715335 | 144715552 | 218 |
| chr1  | 123124445 | 123124662 | 218 |
| chr1  | 123109482 | 123109699 | 218 |
| chr1  | 109487307 | 109487524 | 218 |
| chr1  | 100400349 | 100400566 | 218 |
| chr1  | 99778945  | 99779162  | 218 |
| chr1  | 82924667  | 82924884  | 218 |
| chr1  | 82865237  | 82865454  | 218 |
| chr1  | 76556516  | 76556733  | 218 |
| chr1  | 76217422  | 76217639  | 218 |
| chrX  | 87117869  | 87118085  | 217 |
| chrX  | 78761787  | 78762003  | 217 |
| chrX  | 77980904  | 77981120  | 217 |
| chrX  | 75754650  | 75754866  | 217 |
| chrX  | 75350893  | 75351109  | 217 |
| chrX  | 73471399  | 73471615  | 217 |
| chrX  | 72787264  | 72787480  | 217 |
| chrX  | 71471100  | 71471316  | 217 |
| chrX  | 70946233  | 70946449  | 217 |
| chrX  | 70884667  | 70884883  | 217 |
| chrX  | 69240300  | 69240516  | 217 |
| chrX  | 66519476  | 66519692  | 217 |
| chrX  | 65793346  | 65793562  | 217 |
| chrX  | 65772182  | 65772398  | 217 |

|      |           |           |     |
|------|-----------|-----------|-----|
| chrX | 59379167  | 59379383  | 217 |
| chrX | 56603129  | 56603345  | 217 |
| chrX | 56088732  | 56088948  | 217 |
| chrX | 55969752  | 55969968  | 217 |
| chrX | 55500753  | 55500969  | 217 |
| chrX | 53279025  | 53279241  | 217 |
| chrX | 51854931  | 51855147  | 217 |
| chrX | 51085740  | 51085956  | 217 |
| chrX | 49349486  | 49349702  | 217 |
| chrX | 46190393  | 46190609  | 217 |
| chrX | 33493419  | 33493635  | 217 |
| chrX | 30562312  | 30562528  | 217 |
| chrX | 22430294  | 22430510  | 217 |
| chrX | 13251011  | 13251227  | 217 |
| chrX | 12981476  | 12981692  | 217 |
| chrX | 12434042  | 12434258  | 217 |
| chrX | 11683549  | 11683765  | 217 |
| chrX | 10406922  | 10407138  | 217 |
| chrX | 10054497  | 10054713  | 217 |
| chrX | 9017716   | 9017932   | 217 |
| chrX | 7090663   | 7090879   | 217 |
| chrX | 6250700   | 6250916   | 217 |
| chr9 | 99610035  | 99610251  | 217 |
| chr9 | 62459048  | 62459264  | 217 |
| chr9 | 45979966  | 45980182  | 217 |
| chr8 | 109075001 | 109075217 | 217 |
| chr8 | 86751088  | 86751304  | 217 |
| chr8 | 85443568  | 85443784  | 217 |
| chr8 | 65247445  | 65247661  | 217 |
| chr7 | 42749170  | 42749386  | 217 |
| chr7 | 18737891  | 18738107  | 217 |
| chr7 | 18198122  | 18198338  | 217 |
| chr7 | 7406267   | 7406483   | 217 |
| chr7 | 7217329   | 7217545   | 217 |
| chr7 | 5095859   | 5096075   | 217 |
| chr6 | 79720077  | 79720293  | 217 |
| chr6 | 63153438  | 63153654  | 217 |
| chr6 | 61947568  | 61947784  | 217 |
| chr6 | 14199778  | 14199994  | 217 |
| chr5 | 103506692 | 103506908 | 217 |
| chr5 | 81363759  | 81363975  | 217 |
| chr5 | 80728935  | 80729151  | 217 |
| chr5 | 80687657  | 80687873  | 217 |
| chr5 | 80085774  | 80085990  | 217 |
| chr5 | 71638440  | 71638656  | 217 |
| chr5 | 69402407  | 69402623  | 217 |
| chr5 | 30189915  | 30190131  | 217 |
| chr5 | 30156360  | 30156576  | 217 |
| chr4 | 88546027  | 88546243  | 217 |
| chr4 | 75321274  | 75321490  | 217 |



|       |           |           |     |
|-------|-----------|-----------|-----|
| chr4  | 51359671  | 51359887  | 217 |
| chr4  | 47353629  | 47353845  | 217 |
| chr4  | 32394066  | 32394282  | 217 |
| chr4  | 29004915  | 29005131  | 217 |
| chr3  | 127875088 | 127875304 | 217 |
| chr3  | 127752238 | 127752454 | 217 |
| chr3  | 120663831 | 120664047 | 217 |
| chr3  | 62930208  | 62930424  | 217 |
| chr3  | 52149732  | 52149948  | 217 |
| chr3  | 35988837  | 35989053  | 217 |
| chr3  | 35464452  | 35464668  | 217 |
| chr3  | 31696025  | 31696241  | 217 |
| chr3  | 30724966  | 30725182  | 217 |
| chr3  | 16916972  | 16917188  | 217 |
| chr29 | 51259195  | 51259411  | 217 |
| chr29 | 50556963  | 50557179  | 217 |
| chr29 | 38853162  | 38853378  | 217 |
| chr29 | 36381398  | 36381614  | 217 |
| chr29 | 31894232  | 31894448  | 217 |
| chr28 | 40681505  | 40681721  | 217 |
| chr28 | 34222940  | 34223156  | 217 |
| chr28 | 34201578  | 34201794  | 217 |
| chr28 | 33957392  | 33957608  | 217 |
| chr28 | 25723191  | 25723407  | 217 |
| chr27 | 16065359  | 16065575  | 217 |
| chr26 | 51634807  | 51635023  | 217 |
| chr26 | 43904282  | 43904498  | 217 |
| chr26 | 42740734  | 42740950  | 217 |
| chr26 | 38113842  | 38114058  | 217 |
| chr26 | 35207001  | 35207217  | 217 |
| chr26 | 31243615  | 31243831  | 217 |
| chr26 | 20893933  | 20894149  | 217 |
| chr26 | 14672725  | 14672941  | 217 |
| chr25 | 39160344  | 39160560  | 217 |
| chr25 | 35541814  | 35542030  | 217 |
| chr25 | 33542431  | 33542647  | 217 |
| chr25 | 31432704  | 31432920  | 217 |
| chr24 | 58686528  | 58686744  | 217 |
| chr24 | 43722122  | 43722338  | 217 |
| chr24 | 34716694  | 34716910  | 217 |
| chr24 | 1589871   | 1590087   | 217 |
| chr23 | 34811081  | 34811297  | 217 |
| chr23 | 19853502  | 19853718  | 217 |
| chr23 | 19797639  | 19797855  | 217 |
| chr23 | 19448122  | 19448338  | 217 |
| chr23 | 17491293  | 17491509  | 217 |
| chr23 | 15934326  | 15934542  | 217 |
| chr23 | 14263573  | 14263789  | 217 |
| chr23 | 11815447  | 11815663  | 217 |
| chr23 | 11412523  | 11412739  | 217 |

|       |           |           |     |
|-------|-----------|-----------|-----|
| chr23 | 7719757   | 7719973   | 217 |
| chr22 | 60017225  | 60017441  | 217 |
| chr22 | 58640670  | 58640886  | 217 |
| chr22 | 52748147  | 52748363  | 217 |
| chr22 | 50024949  | 50025165  | 217 |
| chr22 | 46435493  | 46435709  | 217 |
| chr22 | 39471800  | 39472016  | 217 |
| chr22 | 38908879  | 38909095  | 217 |
| chr22 | 30072428  | 30072644  | 217 |
| chr22 | 16612718  | 16612934  | 217 |
| chr22 | 16085407  | 16085623  | 217 |
| chr22 | 12379995  | 12380211  | 217 |
| chr22 | 2840467   | 2840683   | 217 |
| chr21 | 29454891  | 29455107  | 217 |
| chr21 | 18491944  | 18492160  | 217 |
| chr21 | 14885141  | 14885357  | 217 |
| chr20 | 29953046  | 29953262  | 217 |
| chr20 | 27259417  | 27259633  | 217 |
| chr20 | 6415689   | 6415905   | 217 |
| chr2  | 139185473 | 139185689 | 217 |
| chr2  | 136604131 | 136604347 | 217 |
| chr2  | 127977567 | 127977783 | 217 |
| chr2  | 111674076 | 111674292 | 217 |
| chr19 | 64037584  | 64037800  | 217 |
| chr19 | 45502613  | 45502829  | 217 |
| chr19 | 43017495  | 43017711  | 217 |
| chr19 | 41394552  | 41394768  | 217 |
| chr19 | 41302225  | 41302441  | 217 |
| chr19 | 41217893  | 41218109  | 217 |
| chr19 | 28105412  | 28105628  | 217 |
| chr19 | 21756262  | 21756478  | 217 |
| chr19 | 15891928  | 15892144  | 217 |
| chr19 | 15631647  | 15631863  | 217 |
| chr19 | 12618380  | 12618596  | 217 |
| chr18 | 64338114  | 64338330  | 217 |
| chr18 | 52700780  | 52700996  | 217 |
| chr18 | 51619557  | 51619773  | 217 |
| chr18 | 43442936  | 43443152  | 217 |
| chr18 | 43122989  | 43123205  | 217 |
| chr18 | 15518833  | 15519049  | 217 |
| chr18 | 11848694  | 11848910  | 217 |
| chr17 | 67910010  | 67910226  | 217 |
| chr17 | 62708062  | 62708278  | 217 |
| chr17 | 61001940  | 61002156  | 217 |
| chr17 | 36129992  | 36130208  | 217 |
| chr17 | 13794853  | 13795069  | 217 |
| chr16 | 74461842  | 74462058  | 217 |
| chr16 | 73777737  | 73777953  | 217 |
| chr16 | 69243670  | 69243886  | 217 |
| chr16 | 61136621  | 61136837  | 217 |

|       |           |           |     |
|-------|-----------|-----------|-----|
| chr16 | 60469014  | 60469230  | 217 |
| chr16 | 52721028  | 52721244  | 217 |
| chr16 | 46652403  | 46652619  | 217 |
| chr16 | 39584249  | 39584465  | 217 |
| chr15 | 64933857  | 64934073  | 217 |
| chr15 | 54373931  | 54374147  | 217 |
| chr15 | 39469434  | 39469650  | 217 |
| chr15 | 33718208  | 33718424  | 217 |
| chr15 | 32803422  | 32803638  | 217 |
| chr15 | 29217034  | 29217250  | 217 |
| chr15 | 28722734  | 28722950  | 217 |
| chr15 | 27444007  | 27444223  | 217 |
| chr15 | 26686398  | 26686614  | 217 |
| chr14 | 67981087  | 67981303  | 217 |
| chr14 | 22987287  | 22987503  | 217 |
| chr13 | 80057158  | 80057374  | 217 |
| chr13 | 79868237  | 79868453  | 217 |
| chr13 | 69259414  | 69259630  | 217 |
| chr13 | 59871117  | 59871333  | 217 |
| chr13 | 58890653  | 58890869  | 217 |
| chr13 | 52655320  | 52655536  | 217 |
| chr13 | 40953987  | 40954203  | 217 |
| chr13 | 32774108  | 32774324  | 217 |
| chr13 | 27626318  | 27626534  | 217 |
| chr13 | 15880087  | 15880303  | 217 |
| chr12 | 85043000  | 85043216  | 217 |
| chr12 | 80078930  | 80079146  | 217 |
| chr12 | 37026399  | 37026615  | 217 |
| chr12 | 34068661  | 34068877  | 217 |
| chr12 | 32886245  | 32886461  | 217 |
| chr12 | 31163028  | 31163244  | 217 |
| chr12 | 5275129   | 5275345   | 217 |
| chr11 | 105648617 | 105648833 | 217 |
| chr11 | 101499803 | 101500019 | 217 |
| chr11 | 88919711  | 88919927  | 217 |
| chr11 | 75005663  | 75005879  | 217 |
| chr11 | 49387649  | 49387865  | 217 |
| chr11 | 29442194  | 29442410  | 217 |
| chr11 | 14617918  | 14618134  | 217 |
| chr11 | 3273910   | 3274126   | 217 |
| chr10 | 90924297  | 90924513  | 217 |
| chr10 | 86898639  | 86898855  | 217 |
| chr10 | 80463445  | 80463661  | 217 |
| chr10 | 12759234  | 12759450  | 217 |
| chr10 | 12103049  | 12103265  | 217 |
| chr10 | 9801034   | 9801250   | 217 |
| chr1  | 144125242 | 144125458 | 217 |
| chr1  | 134801623 | 134801839 | 217 |
| chr1  | 131840844 | 131841060 | 217 |
| chr1  | 50450934  | 50451150  | 217 |

|      |           |           |     |
|------|-----------|-----------|-----|
| chr1 | 2328207   | 2328423   | 217 |
| chrX | 79211039  | 79211254  | 216 |
| chrX | 78782819  | 78783034  | 216 |
| chrX | 78605057  | 78605272  | 216 |
| chrX | 78486758  | 78486973  | 216 |
| chrX | 78387854  | 78388069  | 216 |
| chrX | 77526779  | 77526994  | 216 |
| chrX | 76073529  | 76073744  | 216 |
| chrX | 74300403  | 74300618  | 216 |
| chrX | 73636920  | 73637135  | 216 |
| chrX | 72766033  | 72766248  | 216 |
| chrX | 72653678  | 72653893  | 216 |
| chrX | 71715263  | 71715478  | 216 |
| chrX | 69208439  | 69208654  | 216 |
| chrX | 68575706  | 68575921  | 216 |
| chrX | 66438185  | 66438400  | 216 |
| chrX | 65761414  | 65761629  | 216 |
| chrX | 62922984  | 62923199  | 216 |
| chrX | 62700185  | 62700400  | 216 |
| chrX | 61349178  | 61349393  | 216 |
| chrX | 58983420  | 58983635  | 216 |
| chrX | 49865088  | 49865303  | 216 |
| chrX | 30679846  | 30680061  | 216 |
| chrX | 19622237  | 19622452  | 216 |
| chrX | 11245484  | 11245699  | 216 |
| chrX | 9312228   | 9312443   | 216 |
| chrX | 8538711   | 8538926   | 216 |
| chrX | 1304400   | 1304615   | 216 |
| chr9 | 106000513 | 106000728 | 216 |
| chr9 | 105112875 | 105113090 | 216 |
| chr9 | 95679208  | 95679423  | 216 |
| chr9 | 37106653  | 37106868  | 216 |
| chr8 | 92992504  | 92992719  | 216 |
| chr8 | 66412012  | 66412227  | 216 |
| chr8 | 60304762  | 60304977  | 216 |
| chr8 | 45732924  | 45733139  | 216 |
| chr8 | 27490423  | 27490638  | 216 |
| chr8 | 27077242  | 27077457  | 216 |
| chr8 | 7954184   | 7954399   | 216 |
| chr7 | 45664437  | 45664652  | 216 |
| chr7 | 19386420  | 19386635  | 216 |
| chr7 | 13096411  | 13096626  | 216 |
| chr7 | 3923940   | 3924155   | 216 |
| chr6 | 95609182  | 95609397  | 216 |
| chr6 | 94955761  | 94955976  | 216 |
| chr6 | 46682844  | 46683059  | 216 |
| chr5 | 118504578 | 118504793 | 216 |
| chr5 | 117519315 | 117519530 | 216 |
| chr5 | 115090094 | 115090309 | 216 |
| chr5 | 113181516 | 113181731 | 216 |

|       |           |           |     |
|-------|-----------|-----------|-----|
| chr5  | 111330995 | 111331210 | 216 |
| chr5  | 110727051 | 110727266 | 216 |
| chr5  | 104024870 | 104025085 | 216 |
| chr5  | 79222101  | 79222316  | 216 |
| chr5  | 26316742  | 26316957  | 216 |
| chr4  | 123253522 | 123253737 | 216 |
| chr4  | 121715210 | 121715425 | 216 |
| chr4  | 117608187 | 117608402 | 216 |
| chr4  | 82000919  | 82001134  | 216 |
| chr4  | 65387409  | 65387624  | 216 |
| chr4  | 46298611  | 46298826  | 216 |
| chr4  | 43938405  | 43938620  | 216 |
| chr4  | 8844688   | 8844903   | 216 |
| chr3  | 123165257 | 123165472 | 216 |
| chr3  | 122330885 | 122331100 | 216 |
| chr3  | 115680846 | 115681061 | 216 |
| chr3  | 110321326 | 110321541 | 216 |
| chr3  | 99945366  | 99945581  | 216 |
| chr3  | 28916841  | 28917056  | 216 |
| chr3  | 22484072  | 22484287  | 216 |
| chr3  | 18562274  | 18562489  | 216 |
| chr29 | 44455598  | 44455813  | 216 |
| chr29 | 41610470  | 41610685  | 216 |
| chr28 | 44497367  | 44497582  | 216 |
| chr28 | 34034116  | 34034331  | 216 |
| chr28 | 4246071   | 4246286   | 216 |
| chr27 | 46072028  | 46072243  | 216 |
| chr27 | 15766406  | 15766621  | 216 |
| chr26 | 40178776  | 40178991  | 216 |
| chr26 | 33814967  | 33815182  | 216 |
| chr25 | 35368505  | 35368720  | 216 |
| chr25 | 34380596  | 34380811  | 216 |
| chr25 | 30478658  | 30478873  | 216 |
| chr25 | 4593810   | 4594025   | 216 |
| chr24 | 61077854  | 61078069  | 216 |
| chr24 | 60625297  | 60625512  | 216 |
| chr24 | 46904268  | 46904483  | 216 |
| chr24 | 43623732  | 43623947  | 216 |
| chr24 | 40819941  | 40820156  | 216 |
| chr24 | 40646765  | 40646980  | 216 |
| chr24 | 1378366   | 1378581   | 216 |
| chr24 | 1366225   | 1366440   | 216 |
| chr23 | 11873732  | 11873947  | 216 |
| chr23 | 11360674  | 11360889  | 216 |
| chr22 | 59330296  | 59330511  | 216 |
| chr22 | 56703470  | 56703685  | 216 |
| chr22 | 55934292  | 55934507  | 216 |
| chr22 | 53486119  | 53486334  | 216 |
| chr22 | 48419933  | 48420148  | 216 |
| chr22 | 17574391  | 17574606  | 216 |

|       |           |           |     |
|-------|-----------|-----------|-----|
| chr21 | 62980675  | 62980890  | 216 |
| chr21 | 46015767  | 46015982  | 216 |
| chr21 | 34763286  | 34763501  | 216 |
| chr21 | 28798811  | 28799026  | 216 |
| chr21 | 27960162  | 27960377  | 216 |
| chr21 | 26851989  | 26852204  | 216 |
| chr21 | 18169589  | 18169804  | 216 |
| chr20 | 73541675  | 73541890  | 216 |
| chr20 | 73473749  | 73473964  | 216 |
| chr20 | 66798684  | 66798899  | 216 |
| chr20 | 5971029   | 5971244   | 216 |
| chr20 | 754598    | 754813    | 216 |
| chr2  | 139068975 | 139069190 | 216 |
| chr2  | 138669489 | 138669704 | 216 |
| chr2  | 132359922 | 132360137 | 216 |
| chr2  | 99692207  | 99692422  | 216 |
| chr2  | 75691295  | 75691510  | 216 |
| chr2  | 23187154  | 23187369  | 216 |
| chr2  | 22503717  | 22503932  | 216 |
| chr19 | 45090694  | 45090909  | 216 |
| chr19 | 43631242  | 43631457  | 216 |
| chr19 | 42300846  | 42301061  | 216 |
| chr19 | 34635402  | 34635617  | 216 |
| chr19 | 31309097  | 31309312  | 216 |
| chr19 | 31085701  | 31085916  | 216 |
| chr19 | 21616942  | 21617157  | 216 |
| chr19 | 16173190  | 16173405  | 216 |
| chr18 | 49959593  | 49959808  | 216 |
| chr18 | 39260568  | 39260783  | 216 |
| chr18 | 12439321  | 12439536  | 216 |
| chr18 | 7102271   | 7102486   | 216 |
| chr18 | 2829625   | 2829840   | 216 |
| chr17 | 70025597  | 70025812  | 216 |
| chr17 | 68271480  | 68271695  | 216 |
| chr17 | 65987033  | 65987248  | 216 |
| chr17 | 64038725  | 64038940  | 216 |
| chr17 | 62955965  | 62956180  | 216 |
| chr17 | 46288990  | 46289205  | 216 |
| chr16 | 77507374  | 77507589  | 216 |
| chr16 | 54640906  | 54641121  | 216 |
| chr16 | 32732927  | 32733142  | 216 |
| chr16 | 23929034  | 23929249  | 216 |
| chr15 | 75790509  | 75790724  | 216 |
| chr15 | 43391638  | 43391853  | 216 |
| chr15 | 37577191  | 37577406  | 216 |
| chr15 | 24202053  | 24202268  | 216 |
| chr15 | 22812663  | 22812878  | 216 |
| chr14 | 61218343  | 61218558  | 216 |
| chr14 | 15778618  | 15778833  | 216 |
| chr14 | 11990120  | 11990335  | 216 |

|       |           |           |     |
|-------|-----------|-----------|-----|
| chr14 | 7490406   | 7490621   | 216 |
| chr14 | 5578029   | 5578244   | 216 |
| chr13 | 75686621  | 75686836  | 216 |
| chr13 | 63230460  | 63230675  | 216 |
| chr13 | 58373639  | 58373854  | 216 |
| chr13 | 44875552  | 44875767  | 216 |
| chr13 | 37688505  | 37688720  | 216 |
| chr13 | 23527974  | 23528189  | 216 |
| chr13 | 14604901  | 14605116  | 216 |
| chr12 | 35584934  | 35585149  | 216 |
| chr11 | 104283360 | 104283575 | 216 |
| chr11 | 91390186  | 91390401  | 216 |
| chr11 | 84959889  | 84960104  | 216 |
| chr11 | 84283573  | 84283788  | 216 |
| chr11 | 72009294  | 72009509  | 216 |
| chr11 | 7069597   | 7069812   | 216 |
| chr11 | 5722165   | 5722380   | 216 |
| chr10 | 88991366  | 88991581  | 216 |
| chr10 | 86855110  | 86855325  | 216 |
| chr10 | 60777619  | 60777834  | 216 |
| chr10 | 51200531  | 51200746  | 216 |
| chr10 | 50595346  | 50595561  | 216 |
| chr10 | 21127699  | 21127914  | 216 |
| chr10 | 17600167  | 17600382  | 216 |
| chr10 | 17101036  | 17101251  | 216 |
| chr10 | 8710907   | 8711122   | 216 |
| chr1  | 159067668 | 159067883 | 216 |
| chr1  | 123092984 | 123093199 | 216 |
| chr1  | 70379298  | 70379513  | 216 |
| chr1  | 635750    | 635965    | 216 |
| chrX  | 80501696  | 80501910  | 215 |
| chrX  | 79761072  | 79761286  | 215 |
| chrX  | 74747688  | 74747902  | 215 |
| chrX  | 74689389  | 74689603  | 215 |
| chrX  | 74436671  | 74436885  | 215 |
| chrX  | 72807617  | 72807831  | 215 |
| chrX  | 72122215  | 72122429  | 215 |
| chrX  | 72111353  | 72111567  | 215 |
| chrX  | 71584774  | 71584988  | 215 |
| chrX  | 71195011  | 71195225  | 215 |
| chrX  | 69276924  | 69277138  | 215 |
| chrX  | 65896242  | 65896456  | 215 |
| chrX  | 63709346  | 63709560  | 215 |
| chrX  | 63228678  | 63228892  | 215 |
| chrX  | 61156613  | 61156827  | 215 |
| chrX  | 55812700  | 55812914  | 215 |
| chrX  | 55245827  | 55246041  | 215 |
| chrX  | 55010650  | 55010864  | 215 |
| chrX  | 54782314  | 54782528  | 215 |
| chrX  | 54519995  | 54520209  | 215 |

|      |               |           |     |
|------|---------------|-----------|-----|
| chrX | 52944540      | 52944754  | 215 |
| chrX | 52224262      | 52224476  | 215 |
| chrX | 50707813      | 50708027  | 215 |
| chrX | 50414337      | 50414551  | 215 |
| chrX | 49255691      | 49255905  | 215 |
| chrX | 47368916      | 47369130  | 215 |
| chrX | 38232078      | 38232292  | 215 |
| chrX | 37628496      | 37628710  | 215 |
| chrX | 37384668      | 37384882  | 215 |
| chrX | 37358554      | 37358768  | 215 |
| chrX | 34172220      | 34172434  | 215 |
| chrX | 33849294      | 33849508  | 215 |
| chrX | 32451685      | 32451899  | 215 |
| chrX | 31417672      | 31417886  | 215 |
| chrX | 31241677      | 31241891  | 215 |
| chrX | 29436274      | 29436488  | 215 |
| chrX | 28074928      | 28075142  | 215 |
| chrX | 27767455      | 27767669  | 215 |
| chrX | 22071151      | 22071365  | 215 |
| chrX | 21636240      | 21636454  | 215 |
| chrX | 20888101      | 20888315  | 215 |
| chrX | 20494106      | 20494320  | 215 |
| chrX | 19680968      | 19681182  | 215 |
| chrX | 18266778      | 18266992  | 215 |
| chrX | 13615020      | 13615234  | 215 |
| chrX | 10098005      | 10098219  | 215 |
| chrX | 8937975       | 8938189   | 215 |
| chrX | 5861753       | 5861967   | 215 |
| chrX | 5382048       | 5382262   | 215 |
| chrX | 2008398       | 2008612   | 215 |
| chrX | 859522 859736 |           | 215 |
| chr9 | 106397672     | 106397886 | 215 |
| chr9 | 106085282     | 106085496 | 215 |
| chr9 | 87973545      | 87973759  | 215 |
| chr9 | 65813047      | 65813261  | 215 |
| chr9 | 45688654      | 45688868  | 215 |
| chr9 | 22765594      | 22765808  | 215 |
| chr8 | 108834617     | 108834831 | 215 |
| chr8 | 80425831      | 80426045  | 215 |
| chr8 | 73931799      | 73932013  | 215 |
| chr8 | 71498682      | 71498896  | 215 |
| chr7 | 91308314      | 91308528  | 215 |
| chr7 | 76985635      | 76985849  | 215 |
| chr7 | 71245370      | 71245584  | 215 |
| chr7 | 43435882      | 43436096  | 215 |
| chr7 | 17928559      | 17928773  | 215 |
| chr6 | 63160655      | 63160869  | 215 |
| chr6 | 57818301      | 57818515  | 215 |
| chr6 | 45632552      | 45632766  | 215 |
| chr6 | 17906317      | 17906531  | 215 |



|       |               |           |     |
|-------|---------------|-----------|-----|
| chr5  | 122613313     | 122613527 | 215 |
| chr5  | 120492951     | 120493165 | 215 |
| chr5  | 74604243      | 74604457  | 215 |
| chr5  | 73980863      | 73981077  | 215 |
| chr5  | 35471834      | 35472048  | 215 |
| chr5  | 28846774      | 28846988  | 215 |
| chr5  | 26132248      | 26132462  | 215 |
| chr5  | 20850537      | 20850751  | 215 |
| chr4  | 118024298     | 118024512 | 215 |
| chr4  | 98478961      | 98479175  | 215 |
| chr4  | 96564640      | 96564854  | 215 |
| chr4  | 95626368      | 95626582  | 215 |
| chr4  | 85443774      | 85443988  | 215 |
| chr4  | 77371165      | 77371379  | 215 |
| chr4  | 45610328      | 45610542  | 215 |
| chr4  | 32395123      | 32395337  | 215 |
| chr3  | 123924158     | 123924372 | 215 |
| chr3  | 114418544     | 114418758 | 215 |
| chr3  | 114337573     | 114337787 | 215 |
| chr3  | 105032423     | 105032637 | 215 |
| chr3  | 93538011      | 93538225  | 215 |
| chr3  | 71422264      | 71422478  | 215 |
| chr3  | 53044784      | 53044998  | 215 |
| chr3  | 36904315      | 36904529  | 215 |
| chr3  | 35690221      | 35690435  | 215 |
| chr3  | 35225317      | 35225531  | 215 |
| chr3  | 25134548      | 25134762  | 215 |
| chr3  | 4371283       | 4371497   | 215 |
| chr29 | 45893404      | 45893618  | 215 |
| chr29 | 41642340      | 41642554  | 215 |
| chr29 | 36964218      | 36964432  | 215 |
| chr29 | 36109862      | 36110076  | 215 |
| chr29 | 27184513      | 27184727  | 215 |
| chr29 | 26648257      | 26648471  | 215 |
| chr29 | 17863813      | 17864027  | 215 |
| chr28 | 42179888      | 42180102  | 215 |
| chr28 | 35081796      | 35082010  | 215 |
| chr28 | 33310547      | 33310761  | 215 |
| chr28 | 25187890      | 25188104  | 215 |
| chr28 | 425479 425693 | 215       |     |
| chr27 | 45322518      | 45322732  | 215 |
| chr27 | 23988335      | 23988549  | 215 |
| chr26 | 49306670      | 49306884  | 215 |
| chr26 | 48335705      | 48335919  | 215 |
| chr26 | 45637766      | 45637980  | 215 |
| chr26 | 40184471      | 40184685  | 215 |
| chr26 | 39651864      | 39652078  | 215 |
| chr26 | 31514779      | 31514993  | 215 |
| chr25 | 36755365      | 36755579  | 215 |
| chr25 | 30521933      | 30522147  | 215 |

|       |           |           |     |
|-------|-----------|-----------|-----|
| chr25 | 29289916  | 29290130  | 215 |
| chr25 | 16663524  | 16663738  | 215 |
| chr24 | 48425169  | 48425383  | 215 |
| chr24 | 42070715  | 42070929  | 215 |
| chr24 | 20416726  | 20416940  | 215 |
| chr23 | 50054751  | 50054965  | 215 |
| chr23 | 38053996  | 38054210  | 215 |
| chr23 | 28845099  | 28845313  | 215 |
| chr23 | 27905748  | 27905962  | 215 |
| chr23 | 17982069  | 17982283  | 215 |
| chr23 | 15145148  | 15145362  | 215 |
| chr23 | 15020765  | 15020979  | 215 |
| chr22 | 58490368  | 58490582  | 215 |
| chr22 | 55897520  | 55897734  | 215 |
| chr22 | 52125698  | 52125912  | 215 |
| chr22 | 49564716  | 49564930  | 215 |
| chr22 | 16358458  | 16358672  | 215 |
| chr22 | 12214922  | 12215136  | 215 |
| chr22 | 1781510   | 1781724   | 215 |
| chr21 | 64518156  | 64518370  | 215 |
| chr21 | 31198792  | 31199006  | 215 |
| chr21 | 26468758  | 26468972  | 215 |
| chr21 | 13657631  | 13657845  | 215 |
| chr21 | 6462645   | 6462859   | 215 |
| chr20 | 43368860  | 43369074  | 215 |
| chr20 | 8602413   | 8602627   | 215 |
| chr20 | 6292855   | 6293069   | 215 |
| chr2  | 135578738 | 135578952 | 215 |
| chr2  | 133867182 | 133867396 | 215 |
| chr2  | 127629222 | 127629436 | 215 |
| chr2  | 127170951 | 127171165 | 215 |
| chr2  | 124975708 | 124975922 | 215 |
| chr2  | 124813233 | 124813447 | 215 |
| chr2  | 111285264 | 111285478 | 215 |
| chr2  | 94787189  | 94787403  | 215 |
| chr2  | 49419989  | 49420203  | 215 |
| chr2  | 32417006  | 32417220  | 215 |
| chr19 | 65139852  | 65140066  | 215 |
| chr19 | 60455201  | 60455415  | 215 |
| chr19 | 58666909  | 58667123  | 215 |
| chr19 | 56511663  | 56511877  | 215 |
| chr19 | 41441319  | 41441533  | 215 |
| chr19 | 39494010  | 39494224  | 215 |
| chr19 | 39399006  | 39399220  | 215 |
| chr19 | 38308783  | 38308997  | 215 |
| chr19 | 34897852  | 34898066  | 215 |
| chr19 | 25425464  | 25425678  | 215 |
| chr19 | 24622207  | 24622421  | 215 |
| chr19 | 21727962  | 21728176  | 215 |
| chr19 | 14983438  | 14983652  | 215 |

|       |          |          |     |
|-------|----------|----------|-----|
| chr18 | 56829992 | 56830206 | 215 |
| chr18 | 56045723 | 56045937 | 215 |
| chr18 | 55719967 | 55720181 | 215 |
| chr18 | 55247701 | 55247915 | 215 |
| chr18 | 51277640 | 51277854 | 215 |
| chr18 | 45668690 | 45668904 | 215 |
| chr18 | 45058219 | 45058433 | 215 |
| chr18 | 40018459 | 40018673 | 215 |
| chr18 | 33812955 | 33813169 | 215 |
| chr18 | 32421799 | 32422013 | 215 |
| chr18 | 25546865 | 25547079 | 215 |
| chr18 | 23234162 | 23234376 | 215 |
| chr18 | 22738485 | 22738699 | 215 |
| chr18 | 11537939 | 11538153 | 215 |
| chr17 | 70386199 | 70386413 | 215 |
| chr17 | 69493548 | 69493762 | 215 |
| chr17 | 69209756 | 69209970 | 215 |
| chr17 | 67950750 | 67950964 | 215 |
| chr17 | 64720226 | 64720440 | 215 |
| chr17 | 60571769 | 60571983 | 215 |
| chr17 | 48682787 | 48683001 | 215 |
| chr16 | 42639709 | 42639923 | 215 |
| chr16 | 29202596 | 29202810 | 215 |
| chr15 | 77296829 | 77297043 | 215 |
| chr15 | 64831375 | 64831589 | 215 |
| chr15 | 64264606 | 64264820 | 215 |
| chr15 | 36009209 | 36009423 | 215 |
| chr15 | 31875284 | 31875498 | 215 |
| chr15 | 24050165 | 24050379 | 215 |
| chr15 | 23988792 | 23989006 | 215 |
| chr14 | 64131729 | 64131943 | 215 |
| chr14 | 39104245 | 39104459 | 215 |
| chr14 | 39050018 | 39050232 | 215 |
| chr14 | 34729868 | 34730082 | 215 |
| chr14 | 23499749 | 23499963 | 215 |
| chr13 | 77610115 | 77610329 | 215 |
| chr13 | 74702344 | 74702558 | 215 |
| chr13 | 68654990 | 68655204 | 215 |
| chr13 | 67836183 | 67836397 | 215 |
| chr13 | 66684186 | 66684400 | 215 |
| chr13 | 57221920 | 57222134 | 215 |
| chr13 | 54933327 | 54933541 | 215 |
| chr13 | 54851692 | 54851906 | 215 |
| chr13 | 43880666 | 43880880 | 215 |
| chr13 | 41345914 | 41346128 | 215 |
| chr13 | 40561464 | 40561678 | 215 |
| chr13 | 35092567 | 35092781 | 215 |
| chr13 | 30864853 | 30865067 | 215 |
| chr13 | 24081883 | 24082097 | 215 |
| chr12 | 67977859 | 67978073 | 215 |

|       |               |           |     |
|-------|---------------|-----------|-----|
| chr12 | 33932435      | 33932649  | 215 |
| chr12 | 33624812      | 33625026  | 215 |
| chr12 | 33571451      | 33571665  | 215 |
| chr12 | 32640991      | 32641205  | 215 |
| chr11 | 103511474     | 103511688 | 215 |
| chr11 | 100677579     | 100677793 | 215 |
| chr11 | 100406093     | 100406307 | 215 |
| chr11 | 91419491      | 91419705  | 215 |
| chr11 | 90371640      | 90371854  | 215 |
| chr11 | 85081169      | 85081383  | 215 |
| chr11 | 84108256      | 84108470  | 215 |
| chr11 | 51910820      | 51911034  | 215 |
| chr11 | 50857206      | 50857420  | 215 |
| chr11 | 49358068      | 49358282  | 215 |
| chr11 | 23029672      | 23029886  | 215 |
| chr11 | 22435768      | 22435982  | 215 |
| chr11 | 899959 900173 | 215       | 215 |
| chr10 | 102274652     | 102274866 | 215 |
| chr10 | 86567906      | 86568120  | 215 |
| chr10 | 70165100      | 70165314  | 215 |
| chr10 | 53259370      | 53259584  | 215 |
| chr10 | 48390817      | 48391031  | 215 |
| chr10 | 24692170      | 24692384  | 215 |
| chr10 | 19944193      | 19944407  | 215 |
| chr10 | 17554557      | 17554771  | 215 |
| chr10 | 17029661      | 17029875  | 215 |
| chr10 | 16857725      | 16857939  | 215 |
| chr1  | 152137892     | 152138106 | 215 |
| chr1  | 144583037     | 144583251 | 215 |
| chr1  | 132231879     | 132232093 | 215 |
| chr1  | 110525030     | 110525244 | 215 |
| chr1  | 100641547     | 100641761 | 215 |
| chr1  | 82868786      | 82869000  | 215 |
| chr1  | 61447983      | 61448197  | 215 |
| chr1  | 8747775       | 8747989   | 215 |
| chrX  | 81725929      | 81726142  | 214 |
| chrX  | 78791675      | 78791888  | 214 |
| chrX  | 78767898      | 78768111  | 214 |
| chrX  | 78198683      | 78198896  | 214 |
| chrX  | 70630328      | 70630541  | 214 |
| chrX  | 68276153      | 68276366  | 214 |
| chrX  | 63515995      | 63516208  | 214 |
| chrX  | 62729551      | 62729764  | 214 |
| chrX  | 54520329      | 54520542  | 214 |
| chrX  | 54349284      | 54349497  | 214 |
| chrX  | 48148517      | 48148730  | 214 |
| chrX  | 47479314      | 47479527  | 214 |
| chrX  | 41296393      | 41296606  | 214 |
| chrX  | 39076342      | 39076555  | 214 |
| chrX  | 38623099      | 38623312  | 214 |

|      |               |           |     |
|------|---------------|-----------|-----|
| chrX | 38616610      | 38616823  | 214 |
| chrX | 37373707      | 37373920  | 214 |
| chrX | 36666407      | 36666620  | 214 |
| chrX | 36665949      | 36666162  | 214 |
| chrX | 34703710      | 34703923  | 214 |
| chrX | 31780566      | 31780779  | 214 |
| chrX | 30961553      | 30961766  | 214 |
| chrX | 24418600      | 24418813  | 214 |
| chrX | 20673670      | 20673883  | 214 |
| chrX | 18905618      | 18905831  | 214 |
| chrX | 18761715      | 18761928  | 214 |
| chrX | 18532002      | 18532215  | 214 |
| chrX | 17857721      | 17857934  | 214 |
| chrX | 14297094      | 14297307  | 214 |
| chrX | 11974905      | 11975118  | 214 |
| chrX | 11886096      | 11886309  | 214 |
| chrX | 9699472       | 9699685   | 214 |
| chrX | 8046468       | 8046681   | 214 |
| chrX | 7947375       | 7947588   | 214 |
| chrX | 7602233       | 7602446   | 214 |
| chrX | 6527360       | 6527573   | 214 |
| chrX | 2260220       | 2260433   | 214 |
| chrX | 775155 775368 | 214       |     |
| chr9 | 106870638     | 106870851 | 214 |
| chr9 | 104974786     | 104974999 | 214 |
| chr9 | 90806626      | 90806839  | 214 |
| chr9 | 83539857      | 83540070  | 214 |
| chr9 | 66715791      | 66716004  | 214 |
| chr8 | 108764420     | 108764633 | 214 |
| chr8 | 104197813     | 104198026 | 214 |
| chr8 | 24499131      | 24499344  | 214 |
| chr7 | 60119526      | 60119739  | 214 |
| chr7 | 45734486      | 45734699  | 214 |
| chr7 | 45015813      | 45016026  | 214 |
| chr7 | 43975143      | 43975356  | 214 |
| chr7 | 37501756      | 37501969  | 214 |
| chr7 | 19905637      | 19905850  | 214 |
| chr6 | 109074177     | 109074390 | 214 |
| chr6 | 109073420     | 109073633 | 214 |
| chr6 | 107156522     | 107156735 | 214 |
| chr6 | 73089511      | 73089724  | 214 |
| chr5 | 125673572     | 125673785 | 214 |
| chr5 | 118299815     | 118300028 | 214 |
| chr5 | 115157165     | 115157378 | 214 |
| chr5 | 111176611     | 111176824 | 214 |
| chr5 | 102831963     | 102832176 | 214 |
| chr5 | 75672411      | 75672624  | 214 |
| chr5 | 59907046      | 59907259  | 214 |
| chr5 | 35743687      | 35743900  | 214 |
| chr5 | 30206790      | 30207003  | 214 |

|       |           |           |     |
|-------|-----------|-----------|-----|
| chr5  | 30075573  | 30075786  | 214 |
| chr5  | 29259636  | 29259849  | 214 |
| chr5  | 20850821  | 20851034  | 214 |
| chr4  | 122178795 | 122179008 | 214 |
| chr4  | 120503412 | 120503625 | 214 |
| chr4  | 118273098 | 118273311 | 214 |
| chr4  | 101734673 | 101734886 | 214 |
| chr4  | 72941702  | 72941915  | 214 |
| chr4  | 72560837  | 72561050  | 214 |
| chr4  | 69955589  | 69955802  | 214 |
| chr4  | 47359437  | 47359650  | 214 |
| chr4  | 9110494   | 9110707   | 214 |
| chr3  | 127866938 | 127867151 | 214 |
| chr3  | 126904286 | 126904499 | 214 |
| chr3  | 126068586 | 126068799 | 214 |
| chr3  | 112233488 | 112233701 | 214 |
| chr3  | 108264155 | 108264368 | 214 |
| chr3  | 107647828 | 107648041 | 214 |
| chr3  | 105516162 | 105516375 | 214 |
| chr3  | 105474051 | 105474264 | 214 |
| chr3  | 104289086 | 104289299 | 214 |
| chr3  | 102896819 | 102897032 | 214 |
| chr3  | 51874658  | 51874871  | 214 |
| chr3  | 48214961  | 48215174  | 214 |
| chr3  | 33934094  | 33934307  | 214 |
| chr3  | 30045125  | 30045338  | 214 |
| chr3  | 30008670  | 30008883  | 214 |
| chr3  | 20574677  | 20574890  | 214 |
| chr29 | 44765143  | 44765356  | 214 |
| chr29 | 39086663  | 39086876  | 214 |
| chr29 | 38061941  | 38062154  | 214 |
| chr29 | 30024305  | 30024518  | 214 |
| chr29 | 7855674   | 7855887   | 214 |
| chr29 | 1790035   | 1790248   | 214 |
| chr28 | 43829768  | 43829981  | 214 |
| chr28 | 42392144  | 42392357  | 214 |
| chr28 | 33962958  | 33963171  | 214 |
| chr28 | 33794576  | 33794789  | 214 |
| chr28 | 26631568  | 26631781  | 214 |
| chr27 | 35931013  | 35931226  | 214 |
| chr27 | 15858724  | 15858937  | 214 |
| chr26 | 50409930  | 50410143  | 214 |
| chr26 | 49451129  | 49451342  | 214 |
| chr26 | 43774114  | 43774327  | 214 |
| chr26 | 34841949  | 34842162  | 214 |
| chr26 | 31991331  | 31991544  | 214 |
| chr26 | 28144400  | 28144613  | 214 |
| chr26 | 24347871  | 24348084  | 214 |
| chr26 | 20985713  | 20985926  | 214 |
| chr26 | 5878692   | 5878905   | 214 |

|       |           |           |     |
|-------|-----------|-----------|-----|
| chr25 | 40222549  | 40222762  | 214 |
| chr25 | 37830935  | 37831148  | 214 |
| chr25 | 35575851  | 35576064  | 214 |
| chr25 | 33404511  | 33404724  | 214 |
| chr25 | 8610631   | 8610844   | 214 |
| chr25 | 1048843   | 1049056   | 214 |
| chr24 | 38969492  | 38969705  | 214 |
| chr24 | 31242554  | 31242767  | 214 |
| chr24 | 20704436  | 20704649  | 214 |
| chr24 | 4230302   | 4230515   | 214 |
| chr23 | 49550188  | 49550401  | 214 |
| chr23 | 42704925  | 42705138  | 214 |
| chr23 | 38261071  | 38261284  | 214 |
| chr23 | 30527177  | 30527390  | 214 |
| chr23 | 19778768  | 19778981  | 214 |
| chr23 | 13607851  | 13608064  | 214 |
| chr23 | 9539529   | 9539742   | 214 |
| chr22 | 61388779  | 61388992  | 214 |
| chr22 | 59596481  | 59596694  | 214 |
| chr22 | 55950854  | 55951067  | 214 |
| chr22 | 55391974  | 55392187  | 214 |
| chr22 | 51053043  | 51053256  | 214 |
| chr22 | 12375065  | 12375278  | 214 |
| chr21 | 67988467  | 67988680  | 214 |
| chr21 | 66400493  | 66400706  | 214 |
| chr21 | 34208762  | 34208975  | 214 |
| chr21 | 33970085  | 33970298  | 214 |
| chr21 | 20727413  | 20727626  | 214 |
| chr21 | 11792314  | 11792527  | 214 |
| chr20 | 65534068  | 65534281  | 214 |
| chr20 | 8807879   | 8808092   | 214 |
| chr2  | 139241476 | 139241689 | 214 |
| chr2  | 136956310 | 136956523 | 214 |
| chr2  | 132359548 | 132359761 | 214 |
| chr2  | 80084883  | 80085096  | 214 |
| chr2  | 66668131  | 66668344  | 214 |
| chr2  | 41313628  | 41313841  | 214 |
| chr2  | 26458204  | 26458417  | 214 |
| chr2  | 20711092  | 20711305  | 214 |
| chr19 | 61360078  | 61360291  | 214 |
| chr19 | 60819184  | 60819397  | 214 |
| chr19 | 59058261  | 59058474  | 214 |
| chr19 | 58989319  | 58989532  | 214 |
| chr19 | 56843886  | 56844099  | 214 |
| chr19 | 55743661  | 55743874  | 214 |
| chr19 | 54709958  | 54710171  | 214 |
| chr19 | 38919716  | 38919929  | 214 |
| chr19 | 36138669  | 36138882  | 214 |
| chr19 | 27126310  | 27126523  | 214 |
| chr19 | 25420874  | 25421087  | 214 |

|       |          |          |     |
|-------|----------|----------|-----|
| chr19 | 23966916 | 23967129 | 214 |
| chr19 | 21322016 | 21322229 | 214 |
| chr19 | 19800495 | 19800708 | 214 |
| chr19 | 8735140  | 8735353  | 214 |
| chr18 | 51528975 | 51529188 | 214 |
| chr18 | 37191211 | 37191424 | 214 |
| chr18 | 23327520 | 23327733 | 214 |
| chr18 | 22710028 | 22710241 | 214 |
| chr18 | 18468408 | 18468621 | 214 |
| chr18 | 11733044 | 11733257 | 214 |
| chr18 | 11151855 | 11152068 | 214 |
| chr18 | 6954379  | 6954592  | 214 |
| chr17 | 72460678 | 72460891 | 214 |
| chr17 | 69329112 | 69329325 | 214 |
| chr17 | 64881082 | 64881295 | 214 |
| chr17 | 57786242 | 57786455 | 214 |
| chr17 | 6379663  | 6379876  | 214 |
| chr17 | 6246878  | 6247091  | 214 |
| chr17 | 1569041  | 1569254  | 214 |
| chr16 | 77617795 | 77618008 | 214 |
| chr16 | 51063224 | 51063437 | 214 |
| chr16 | 46908850 | 46909063 | 214 |
| chr16 | 39517577 | 39517790 | 214 |
| chr16 | 26565293 | 26565506 | 214 |
| chr15 | 75492982 | 75493195 | 214 |
| chr15 | 64359369 | 64359582 | 214 |
| chr15 | 46097941 | 46098154 | 214 |
| chr15 | 38292311 | 38292524 | 214 |
| chr15 | 29030382 | 29030595 | 214 |
| chr15 | 27154869 | 27155082 | 214 |
| chr15 | 25654643 | 25654856 | 214 |
| chr15 | 24617101 | 24617314 | 214 |
| chr14 | 20647910 | 20648123 | 214 |
| chr14 | 7877351  | 7877564  | 214 |
| chr14 | 5732398  | 5732611  | 214 |
| chr14 | 1180728  | 1180941  | 214 |
| chr14 | 754093   | 754306   | 214 |
| chr13 | 73107410 | 73107623 | 214 |
| chr13 | 66802134 | 66802347 | 214 |
| chr13 | 62100762 | 62100975 | 214 |
| chr13 | 59427245 | 59427458 | 214 |
| chr13 | 59359363 | 59359576 | 214 |
| chr13 | 41205464 | 41205677 | 214 |
| chr13 | 41142048 | 41142261 | 214 |
| chr13 | 40925608 | 40925821 | 214 |
| chr13 | 37634076 | 37634289 | 214 |
| chr13 | 33327576 | 33327789 | 214 |
| chr13 | 17758875 | 17759088 | 214 |
| chr13 | 17711319 | 17711532 | 214 |
| chr13 | 14628106 | 14628319 | 214 |



|       |           |           |     |
|-------|-----------|-----------|-----|
| chr12 | 35560993  | 35561206  | 214 |
| chr12 | 32137304  | 32137517  | 214 |
| chr12 | 30647806  | 30648019  | 214 |
| chr12 | 30546417  | 30546630  | 214 |
| chr12 | 27885182  | 27885395  | 214 |
| chr12 | 21568323  | 21568536  | 214 |
| chr12 | 20880317  | 20880530  | 214 |
| chr11 | 104516862 | 104517075 | 214 |
| chr11 | 103306158 | 103306371 | 214 |
| chr11 | 100982023 | 100982236 | 214 |
| chr11 | 100879851 | 100880064 | 214 |
| chr11 | 100410573 | 100410786 | 214 |
| chr11 | 93299555  | 93299768  | 214 |
| chr11 | 68012980  | 68013193  | 214 |
| chr11 | 50884652  | 50884865  | 214 |
| chr11 | 3875195   | 3875408   | 214 |
| chr10 | 92065135  | 92065348  | 214 |
| chr10 | 86856954  | 86857167  | 214 |
| chr10 | 83958370  | 83958583  | 214 |
| chr10 | 51446150  | 51446363  | 214 |
| chr10 | 47441578  | 47441791  | 214 |
| chr10 | 23903153  | 23903366  | 214 |
| chr10 | 21270964  | 21271177  | 214 |
| chr10 | 21118695  | 21118908  | 214 |
| chr10 | 17072874  | 17073087  | 214 |
| chr10 | 12941672  | 12941885  | 214 |
| chr1  | 153231958 | 153232171 | 214 |
| chr1  | 132101190 | 132101403 | 214 |
| chr1  | 1751442   | 1751655   | 214 |
| chrX  | 80728229  | 80728441  | 213 |
| chrX  | 75033379  | 75033591  | 213 |
| chrX  | 73849832  | 73850044  | 213 |
| chrX  | 71955839  | 71956051  | 213 |
| chrX  | 69899665  | 69899877  | 213 |
| chrX  | 68316280  | 68316492  | 213 |
| chrX  | 66927180  | 66927392  | 213 |
| chrX  | 65620415  | 65620627  | 213 |
| chrX  | 63261040  | 63261252  | 213 |
| chrX  | 62920527  | 62920739  | 213 |
| chrX  | 61661997  | 61662209  | 213 |
| chrX  | 61609736  | 61609948  | 213 |
| chrX  | 56337770  | 56337982  | 213 |
| chrX  | 55919135  | 55919347  | 213 |
| chrX  | 55805888  | 55806100  | 213 |
| chrX  | 55258890  | 55259102  | 213 |
| chrX  | 54666061  | 54666273  | 213 |
| chrX  | 53138719  | 53138931  | 213 |
| chrX  | 50688412  | 50688624  | 213 |
| chrX  | 49878145  | 49878357  | 213 |
| chrX  | 46196897  | 46197109  | 213 |

|      |               |           |     |
|------|---------------|-----------|-----|
| chrX | 46186166      | 46186378  | 213 |
| chrX | 39347204      | 39347416  | 213 |
| chrX | 36311945      | 36312157  | 213 |
| chrX | 33993972      | 33994184  | 213 |
| chrX | 30864552      | 30864764  | 213 |
| chrX | 30791406      | 30791618  | 213 |
| chrX | 29939154      | 29939366  | 213 |
| chrX | 20907228      | 20907440  | 213 |
| chrX | 19871205      | 19871417  | 213 |
| chrX | 18394558      | 18394770  | 213 |
| chrX | 15753316      | 15753528  | 213 |
| chrX | 13661228      | 13661440  | 213 |
| chrX | 11318111      | 11318323  | 213 |
| chrX | 7625367       | 7625579   | 213 |
| chrX | 6813759       | 6813971   | 213 |
| chrX | 5750926       | 5751138   | 213 |
| chrX | 2487168       | 2487380   | 213 |
| chrX | 733274 733486 |           | 213 |
| chrX | 69568 69780   |           | 213 |
| chr9 | 106193178     | 106193390 | 213 |
| chr9 | 100340565     | 100340777 | 213 |
| chr9 | 67046835      | 67047047  | 213 |
| chr9 | 52418830      | 52419042  | 213 |
| chr9 | 45099232      | 45099444  | 213 |
| chr9 | 35455084      | 35455296  | 213 |
| chr9 | 12246144      | 12246356  | 213 |
| chr8 | 78660358      | 78660570  | 213 |
| chr8 | 78502119      | 78502331  | 213 |
| chr8 | 74707228      | 74707440  | 213 |
| chr8 | 40833697      | 40833909  | 213 |
| chr8 | 27050488      | 27050700  | 213 |
| chr8 | 10806468      | 10806680  | 213 |
| chr8 | 9296492       | 9296704   | 213 |
| chr7 | 81263173      | 81263385  | 213 |
| chr7 | 52363555      | 52363767  | 213 |
| chr7 | 51849762      | 51849974  | 213 |
| chr7 | 43739050      | 43739262  | 213 |
| chr7 | 20129459      | 20129671  | 213 |
| chr7 | 3573730       | 3573942   | 213 |
| chr6 | 59499156      | 59499368  | 213 |
| chr6 | 32579037      | 32579249  | 213 |
| chr5 | 111738837     | 111739049 | 213 |
| chr5 | 111439251     | 111439463 | 213 |
| chr5 | 30180285      | 30180497  | 213 |
| chr4 | 64267412      | 64267624  | 213 |
| chr4 | 47354551      | 47354763  | 213 |
| chr4 | 28600061      | 28600273  | 213 |
| chr4 | 28586347      | 28586559  | 213 |
| chr3 | 118886740     | 118886952 | 213 |
| chr3 | 114893695     | 114893907 | 213 |

|       |               |           |     |
|-------|---------------|-----------|-----|
| chr3  | 111942613     | 111942825 | 213 |
| chr3  | 110663544     | 110663756 | 213 |
| chr3  | 110109370     | 110109582 | 213 |
| chr3  | 98135397      | 98135609  | 213 |
| chr3  | 97890484      | 97890696  | 213 |
| chr3  | 52140668      | 52140880  | 213 |
| chr3  | 15958991      | 15959203  | 213 |
| chr3  | 15128277      | 15128489  | 213 |
| chr3  | 4350173       | 4350385   | 213 |
| chr29 | 48905629      | 48905841  | 213 |
| chr29 | 45277031      | 45277243  | 213 |
| chr29 | 34975035      | 34975247  | 213 |
| chr29 | 34915381      | 34915593  | 213 |
| chr29 | 30490573      | 30490785  | 213 |
| chr29 | 2430253       | 2430465   | 213 |
| chr27 | 32834458      | 32834670  | 213 |
| chr27 | 17837383      | 17837595  | 213 |
| chr27 | 16091868      | 16092080  | 213 |
| chr27 | 6060329       | 6060541   | 213 |
| chr26 | 51745069      | 51745281  | 213 |
| chr26 | 43141790      | 43142002  | 213 |
| chr26 | 33057053      | 33057265  | 213 |
| chr26 | 18801120      | 18801332  | 213 |
| chr26 | 11184197      | 11184409  | 213 |
| chr25 | 23192686      | 23192898  | 213 |
| chr25 | 21041916      | 21042128  | 213 |
| chr25 | 8125033       | 8125245   | 213 |
| chr25 | 3066530       | 3066742   | 213 |
| chr25 | 2487451       | 2487663   | 213 |
| chr25 | 491105 491317 | 213       |     |
| chr24 | 58770496      | 58770708  | 213 |
| chr24 | 58663481      | 58663693  | 213 |
| chr24 | 51559286      | 51559498  | 213 |
| chr24 | 48613102      | 48613314  | 213 |
| chr24 | 44246577      | 44246789  | 213 |
| chr24 | 40670265      | 40670477  | 213 |
| chr24 | 36911899      | 36912111  | 213 |
| chr24 | 55904 56116   | 213       |     |
| chr23 | 45214815      | 45215027  | 213 |
| chr23 | 25580009      | 25580221  | 213 |
| chr23 | 18361690      | 18361902  | 213 |
| chr23 | 17476615      | 17476827  | 213 |
| chr23 | 11324419      | 11324631  | 213 |
| chr23 | 8469000       | 8469212   | 213 |
| chr23 | 7293796       | 7294008   | 213 |
| chr22 | 47855777      | 47855989  | 213 |
| chr22 | 38595697      | 38595909  | 213 |
| chr22 | 12412110      | 12412322  | 213 |
| chr21 | 63066018      | 63066230  | 213 |
| chr21 | 62671170      | 62671382  | 213 |

|       |           |           |     |
|-------|-----------|-----------|-----|
| chr21 | 61945645  | 61945857  | 213 |
| chr21 | 26622156  | 26622368  | 213 |
| chr21 | 22479979  | 22480191  | 213 |
| chr21 | 13905640  | 13905852  | 213 |
| chr20 | 73195753  | 73195965  | 213 |
| chr20 | 66439273  | 66439485  | 213 |
| chr20 | 25691106  | 25691318  | 213 |
| chr20 | 21770901  | 21771113  | 213 |
| chr20 | 18988472  | 18988684  | 213 |
| chr2  | 132655559 | 132655771 | 213 |
| chr2  | 126890043 | 126890255 | 213 |
| chr2  | 100415114 | 100415326 | 213 |
| chr2  | 24944390  | 24944602  | 213 |
| chr19 | 61706054  | 61706266  | 213 |
| chr19 | 61645193  | 61645405  | 213 |
| chr19 | 59111026  | 59111238  | 213 |
| chr19 | 43305625  | 43305837  | 213 |
| chr19 | 42308600  | 42308812  | 213 |
| chr19 | 39551782  | 39551994  | 213 |
| chr19 | 30398868  | 30399080  | 213 |
| chr19 | 29385623  | 29385835  | 213 |
| chr19 | 25807594  | 25807806  | 213 |
| chr19 | 25797303  | 25797515  | 213 |
| chr19 | 16171734  | 16171946  | 213 |
| chr19 | 14975971  | 14976183  | 213 |
| chr19 | 14759184  | 14759396  | 213 |
| chr18 | 55758403  | 55758615  | 213 |
| chr18 | 55206326  | 55206538  | 213 |
| chr18 | 52861729  | 52861941  | 213 |
| chr18 | 46017481  | 46017693  | 213 |
| chr18 | 45308933  | 45309145  | 213 |
| chr18 | 24008201  | 24008413  | 213 |
| chr18 | 23689253  | 23689465  | 213 |
| chr18 | 22770321  | 22770533  | 213 |
| chr18 | 22102324  | 22102536  | 213 |
| chr18 | 20681802  | 20682014  | 213 |
| chr18 | 13139725  | 13139937  | 213 |
| chr18 | 12087235  | 12087447  | 213 |
| chr18 | 6317343   | 6317555   | 213 |
| chr17 | 55478905  | 55479117  | 213 |
| chr17 | 54299244  | 54299456  | 213 |
| chr17 | 47768002  | 47768214  | 213 |
| chr16 | 72291005  | 72291217  | 213 |
| chr16 | 23848407  | 23848619  | 213 |
| chr16 | 3637139   | 3637351   | 213 |
| chr16 | 3351427   | 3351639   | 213 |
| chr15 | 64206635  | 64206847  | 213 |
| chr15 | 64189271  | 64189483  | 213 |
| chr15 | 43390225  | 43390437  | 213 |
| chr15 | 41343782  | 41343994  | 213 |

|       |           |           |     |
|-------|-----------|-----------|-----|
| chr15 | 32614531  | 32614743  | 213 |
| chr15 | 30402607  | 30402819  | 213 |
| chr15 | 25102222  | 25102434  | 213 |
| chr14 | 61448642  | 61448854  | 213 |
| chr14 | 8045389   | 8045601   | 213 |
| chr14 | 7587501   | 7587713   | 213 |
| chr14 | 1650384   | 1650596   | 213 |
| chr13 | 76242316  | 76242528  | 213 |
| chr13 | 71193910  | 71194122  | 213 |
| chr13 | 64218186  | 64218398  | 213 |
| chr13 | 63283236  | 63283448  | 213 |
| chr13 | 57657922  | 57658134  | 213 |
| chr13 | 57401118  | 57401330  | 213 |
| chr13 | 56863193  | 56863405  | 213 |
| chr13 | 41380513  | 41380725  | 213 |
| chr13 | 41224952  | 41225164  | 213 |
| chr13 | 41146551  | 41146763  | 213 |
| chr13 | 35016775  | 35016987  | 213 |
| chr13 | 34810788  | 34811000  | 213 |
| chr13 | 30139875  | 30140087  | 213 |
| chr13 | 26638389  | 26638601  | 213 |
| chr13 | 15171902  | 15172114  | 213 |
| chr12 | 81698611  | 81698823  | 213 |
| chr12 | 73772357  | 73772569  | 213 |
| chr12 | 72405348  | 72405560  | 213 |
| chr12 | 32237840  | 32238052  | 213 |
| chr12 | 31974267  | 31974479  | 213 |
| chr12 | 31091476  | 31091688  | 213 |
| chr12 | 14791885  | 14792097  | 213 |
| chr11 | 110095970 | 110096182 | 213 |
| chr11 | 100681897 | 100682109 | 213 |
| chr11 | 98478897  | 98479109  | 213 |
| chr11 | 98316637  | 98316849  | 213 |
| chr11 | 85231517  | 85231729  | 213 |
| chr11 | 84019421  | 84019633  | 213 |
| chr11 | 71601361  | 71601573  | 213 |
| chr11 | 71496793  | 71497005  | 213 |
| chr11 | 49381252  | 49381464  | 213 |
| chr11 | 31112901  | 31113113  | 213 |
| chr11 | 28362180  | 28362392  | 213 |
| chr11 | 9561367   | 9561579   | 213 |
| chr11 | 5362280   | 5362492   | 213 |
| chr10 | 90676561  | 90676773  | 213 |
| chr10 | 90025896  | 90026108  | 213 |
| chr10 | 70784402  | 70784614  | 213 |
| chr10 | 70338227  | 70338439  | 213 |
| chr10 | 70274313  | 70274525  | 213 |
| chr10 | 67757751  | 67757963  | 213 |
| chr10 | 48923760  | 48923972  | 213 |
| chr10 | 21194398  | 21194610  | 213 |

|       |           |           |     |
|-------|-----------|-----------|-----|
| chr10 | 20928228  | 20928440  | 213 |
| chr10 | 19589990  | 19590202  | 213 |
| chr10 | 19505293  | 19505505  | 213 |
| chr10 | 17721623  | 17721835  | 213 |
| chr10 | 17701652  | 17701864  | 213 |
| chr10 | 16071186  | 16071398  | 213 |
| chr10 | 13367610  | 13367822  | 213 |
| chr10 | 13025611  | 13025823  | 213 |
| chr10 | 12721001  | 12721213  | 213 |
| chr1  | 145309844 | 145310056 | 213 |
| chr1  | 80083318  | 80083530  | 213 |
| chr1  | 74552401  | 74552613  | 213 |
| chr1  | 74507553  | 74507765  | 213 |
| chr1  | 73729889  | 73730101  | 213 |
| chr1  | 72999586  | 72999798  | 213 |
| chr1  | 69088004  | 69088216  | 213 |
| chrX  | 82919904  | 82920115  | 212 |
| chrX  | 77558334  | 77558545  | 212 |
| chrX  | 75402002  | 75402213  | 212 |
| chrX  | 75207092  | 75207303  | 212 |
| chrX  | 74869947  | 74870158  | 212 |
| chrX  | 74380188  | 74380399  | 212 |
| chrX  | 73348376  | 73348587  | 212 |
| chrX  | 73341621  | 73341832  | 212 |
| chrX  | 73176788  | 73176999  | 212 |
| chrX  | 71955423  | 71955634  | 212 |
| chrX  | 71539108  | 71539319  | 212 |
| chrX  | 70176825  | 70177036  | 212 |
| chrX  | 69526463  | 69526674  | 212 |
| chrX  | 67102545  | 67102756  | 212 |
| chrX  | 65568071  | 65568282  | 212 |
| chrX  | 63676206  | 63676417  | 212 |
| chrX  | 59699520  | 59699731  | 212 |
| chrX  | 55483042  | 55483253  | 212 |
| chrX  | 49633480  | 49633691  | 212 |
| chrX  | 49373362  | 49373573  | 212 |
| chrX  | 48191068  | 48191279  | 212 |
| chrX  | 48029185  | 48029396  | 212 |
| chrX  | 45869519  | 45869730  | 212 |
| chrX  | 41100135  | 41100346  | 212 |
| chrX  | 40251577  | 40251788  | 212 |
| chrX  | 38342534  | 38342745  | 212 |
| chrX  | 38190068  | 38190279  | 212 |
| chrX  | 35874615  | 35874826  | 212 |
| chrX  | 32634471  | 32634682  | 212 |
| chrX  | 31667019  | 31667230  | 212 |
| chrX  | 30592155  | 30592366  | 212 |
| chrX  | 23570933  | 23571144  | 212 |
| chrX  | 21762645  | 21762856  | 212 |
| chrX  | 21481333  | 21481544  | 212 |

|      |           |           |     |
|------|-----------|-----------|-----|
| chrX | 20499634  | 20499845  | 212 |
| chrX | 19088601  | 19088812  | 212 |
| chrX | 19047068  | 19047279  | 212 |
| chrX | 17781047  | 17781258  | 212 |
| chrX | 15409003  | 15409214  | 212 |
| chrX | 11031648  | 11031859  | 212 |
| chrX | 10451741  | 10451952  | 212 |
| chrX | 10041616  | 10041827  | 212 |
| chrX | 9328951   | 9329162   | 212 |
| chrX | 8465620   | 8465831   | 212 |
| chrX | 8447466   | 8447677   | 212 |
| chrX | 8151239   | 8151450   | 212 |
| chrX | 7727370   | 7727581   | 212 |
| chrX | 7617213   | 7617424   | 212 |
| chrX | 6324081   | 6324292   | 212 |
| chrX | 2086379   | 2086590   | 212 |
| chr9 | 100095687 | 100095898 | 212 |
| chr9 | 100056116 | 100056327 | 212 |
| chr9 | 99980355  | 99980566  | 212 |
| chr9 | 50711543  | 50711754  | 212 |
| chr9 | 50710314  | 50710525  | 212 |
| chr8 | 93190317  | 93190528  | 212 |
| chr8 | 85462557  | 85462768  | 212 |
| chr8 | 77409506  | 77409717  | 212 |
| chr8 | 72525884  | 72526095  | 212 |
| chr8 | 66266858  | 66267069  | 212 |
| chr8 | 63868592  | 63868803  | 212 |
| chr8 | 63821835  | 63822046  | 212 |
| chr8 | 60314379  | 60314590  | 212 |
| chr7 | 50607528  | 50607739  | 212 |
| chr7 | 50552348  | 50552559  | 212 |
| chr7 | 45833191  | 45833402  | 212 |
| chr7 | 42978919  | 42979130  | 212 |
| chr7 | 18711905  | 18712116  | 212 |
| chr7 | 18694518  | 18694729  | 212 |
| chr7 | 17931502  | 17931713  | 212 |
| chr7 | 4492270   | 4492481   | 212 |
| chr6 | 107128970 | 107129181 | 212 |
| chr6 | 31230154  | 31230365  | 212 |
| chr5 | 111235094 | 111235305 | 212 |
| chr5 | 90851938  | 90852149  | 212 |
| chr5 | 80721239  | 80721450  | 212 |
| chr5 | 74678287  | 74678498  | 212 |
| chr5 | 70688371  | 70688582  | 212 |
| chr5 | 30677424  | 30677635  | 212 |
| chr5 | 28615601  | 28615812  | 212 |
| chr5 | 26183349  | 26183560  | 212 |
| chr4 | 118551965 | 118552176 | 212 |
| chr4 | 89314992  | 89315203  | 212 |
| chr3 | 125602027 | 125602238 | 212 |

|       |               |           |     |
|-------|---------------|-----------|-----|
| chr3  | 116179250     | 116179461 | 212 |
| chr3  | 115654655     | 115654866 | 212 |
| chr3  | 111645487     | 111645698 | 212 |
| chr3  | 111490271     | 111490482 | 212 |
| chr3  | 109861495     | 109861706 | 212 |
| chr3  | 108346838     | 108347049 | 212 |
| chr3  | 106491320     | 106491531 | 212 |
| chr3  | 105129887     | 105130098 | 212 |
| chr3  | 47198428      | 47198639  | 212 |
| chr3  | 35789959      | 35790170  | 212 |
| chr3  | 30430278      | 30430489  | 212 |
| chr3  | 20683582      | 20683793  | 212 |
| chr3  | 15965414      | 15965625  | 212 |
| chr3  | 8743417       | 8743628   | 212 |
| chr3  | 4679522       | 4679733   | 212 |
| chr3  | 398220 398431 |           | 212 |
| chr29 | 48706407      | 48706618  | 212 |
| chr29 | 38800628      | 38800839  | 212 |
| chr29 | 38442286      | 38442497  | 212 |
| chr29 | 37019773      | 37019984  | 212 |
| chr29 | 36904967      | 36905178  | 212 |
| chr29 | 35190224      | 35190435  | 212 |
| chr29 | 34258929      | 34259140  | 212 |
| chr29 | 33595665      | 33595876  | 212 |
| chr29 | 32550496      | 32550707  | 212 |
| chr29 | 9356724       | 9356935   | 212 |
| chr29 | 2417570       | 2417781   | 212 |
| chr28 | 41057784      | 41057995  | 212 |
| chr28 | 33471203      | 33471414  | 212 |
| chr28 | 26982741      | 26982952  | 212 |
| chr27 | 28541807      | 28542018  | 212 |
| chr27 | 28120746      | 28120957  | 212 |
| chr27 | 20598802      | 20599013  | 212 |
| chr27 | 17306908      | 17307119  | 212 |
| chr27 | 15267166      | 15267377  | 212 |
| chr26 | 50016804      | 50017015  | 212 |
| chr26 | 48529838      | 48530049  | 212 |
| chr26 | 44934128      | 44934339  | 212 |
| chr26 | 37576984      | 37577195  | 212 |
| chr26 | 25804456      | 25804667  | 212 |
| chr26 | 18900605      | 18900816  | 212 |
| chr25 | 43542274      | 43542485  | 212 |
| chr25 | 40344489      | 40344700  | 212 |
| chr25 | 40204089      | 40204300  | 212 |
| chr25 | 38399409      | 38399620  | 212 |
| chr25 | 36689750      | 36689961  | 212 |
| chr25 | 34632025      | 34632236  | 212 |
| chr25 | 34470360      | 34470571  | 212 |
| chr25 | 29117389      | 29117600  | 212 |
| chr25 | 24014223      | 24014434  | 212 |



|       |               |           |     |
|-------|---------------|-----------|-----|
| chr25 | 15233664      | 15233875  | 212 |
| chr24 | 45963507      | 45963718  | 212 |
| chr24 | 45244757      | 45244968  | 212 |
| chr24 | 40948545      | 40948756  | 212 |
| chr23 | 49923893      | 49924104  | 212 |
| chr23 | 44864528      | 44864739  | 212 |
| chr23 | 42520482      | 42520693  | 212 |
| chr23 | 25102548      | 25102759  | 212 |
| chr23 | 18664332      | 18664543  | 212 |
| chr23 | 14887148      | 14887359  | 212 |
| chr23 | 11001172      | 11001383  | 212 |
| chr23 | 8493146       | 8493357   | 212 |
| chr23 | 7174721       | 7174932   | 212 |
| chr22 | 60365395      | 60365606  | 212 |
| chr22 | 50740302      | 50740513  | 212 |
| chr22 | 46409037      | 46409248  | 212 |
| chr22 | 44843939      | 44844150  | 212 |
| chr22 | 16651211      | 16651422  | 212 |
| chr21 | 33073703      | 33073914  | 212 |
| chr21 | 30676813      | 30677024  | 212 |
| chr21 | 20675958      | 20676169  | 212 |
| chr20 | 73888511      | 73888722  | 212 |
| chr20 | 5039941       | 5040152   | 212 |
| chr20 | 784135 784346 |           | 212 |
| chr2  | 139339286     | 139339497 | 212 |
| chr2  | 137678822     | 137679033 | 212 |
| chr2  | 135752903     | 135753114 | 212 |
| chr2  | 124754558     | 124754769 | 212 |
| chr2  | 123477978     | 123478189 | 212 |
| chr2  | 111651517     | 111651728 | 212 |
| chr2  | 111618859     | 111619070 | 212 |
| chr2  | 95171576      | 95171787  | 212 |
| chr2  | 74071512      | 74071723  | 212 |
| chr2  | 66424594      | 66424805  | 212 |
| chr2  | 65238900      | 65239111  | 212 |
| chr2  | 24940898      | 24941109  | 212 |
| chr2  | 24496706      | 24496917  | 212 |
| chr19 | 56042801      | 56043012  | 212 |
| chr19 | 54778434      | 54778645  | 212 |
| chr19 | 41414296      | 41414507  | 212 |
| chr19 | 33386241      | 33386452  | 212 |
| chr19 | 31616865      | 31617076  | 212 |
| chr19 | 25239541      | 25239752  | 212 |
| chr19 | 24021028      | 24021239  | 212 |
| chr19 | 22884555      | 22884766  | 212 |
| chr19 | 19744341      | 19744552  | 212 |
| chr19 | 14989463      | 14989674  | 212 |
| chr19 | 13452270      | 13452481  | 212 |
| chr19 | 10992232      | 10992443  | 212 |
| chr19 | 7137724       | 7137935   | 212 |

|       |          |          |     |
|-------|----------|----------|-----|
| chr18 | 56889745 | 56889956 | 212 |
| chr18 | 51621238 | 51621449 | 212 |
| chr18 | 34048434 | 34048645 | 212 |
| chr18 | 22844120 | 22844331 | 212 |
| chr18 | 18594201 | 18594412 | 212 |
| chr18 | 18049795 | 18050006 | 212 |
| chr17 | 75515450 | 75515661 | 212 |
| chr17 | 72359417 | 72359628 | 212 |
| chr17 | 69923696 | 69923907 | 212 |
| chr17 | 69485739 | 69485950 | 212 |
| chr17 | 62257611 | 62257822 | 212 |
| chr17 | 46526759 | 46526970 | 212 |
| chr16 | 75866414 | 75866625 | 212 |
| chr16 | 70302925 | 70303136 | 212 |
| chr16 | 47485057 | 47485268 | 212 |
| chr16 | 38939961 | 38940172 | 212 |
| chr16 | 37879636 | 37879847 | 212 |
| chr16 | 1798800  | 1799011  | 212 |
| chr16 | 1786544  | 1786755  | 212 |
| chr15 | 81089607 | 81089818 | 212 |
| chr15 | 73839099 | 73839310 | 212 |
| chr15 | 64488934 | 64489145 | 212 |
| chr15 | 34032751 | 34032962 | 212 |
| chr15 | 23940752 | 23940963 | 212 |
| chr15 | 20484520 | 20484731 | 212 |
| chr14 | 61294065 | 61294276 | 212 |
| chr14 | 40058192 | 40058403 | 212 |
| chr14 | 34101121 | 34101332 | 212 |
| chr14 | 16706706 | 16706917 | 212 |
| chr14 | 10088333 | 10088544 | 212 |
| chr14 | 6961842  | 6962053  | 212 |
| chr14 | 3464007  | 3464218  | 212 |
| chr14 | 3039620  | 3039831  | 212 |
| chr13 | 82639983 | 82640194 | 212 |
| chr13 | 77217720 | 77217931 | 212 |
| chr13 | 75991385 | 75991596 | 212 |
| chr13 | 68929814 | 68930025 | 212 |
| chr13 | 68602194 | 68602405 | 212 |
| chr13 | 65351064 | 65351275 | 212 |
| chr13 | 57378135 | 57378346 | 212 |
| chr13 | 45924230 | 45924441 | 212 |
| chr13 | 43313969 | 43314180 | 212 |
| chr13 | 39078349 | 39078560 | 212 |
| chr13 | 23850313 | 23850524 | 212 |
| chr13 | 21951507 | 21951718 | 212 |
| chr13 | 18589608 | 18589819 | 212 |
| chr12 | 80325420 | 80325631 | 212 |
| chr12 | 61819373 | 61819584 | 212 |
| chr12 | 51068302 | 51068513 | 212 |
| chr11 | 92863052 | 92863263 | 212 |

|       |           |           |     |
|-------|-----------|-----------|-----|
| chr11 | 82713308  | 82713519  | 212 |
| chr11 | 77858576  | 77858787  | 212 |
| chr11 | 49324320  | 49324531  | 212 |
| chr11 | 30889045  | 30889256  | 212 |
| chr11 | 1345597   | 1345808   | 212 |
| chr10 | 105740607 | 105740818 | 212 |
| chr10 | 105014027 | 105014238 | 212 |
| chr10 | 104816089 | 104816300 | 212 |
| chr10 | 90382589  | 90382800  | 212 |
| chr10 | 80614747  | 80614958  | 212 |
| chr10 | 69999022  | 69999233  | 212 |
| chr10 | 35675594  | 35675805  | 212 |
| chr10 | 22349701  | 22349912  | 212 |
| chr10 | 21639879  | 21640090  | 212 |
| chr10 | 17770000  | 17770211  | 212 |
| chr10 | 17669345  | 17669556  | 212 |
| chr10 | 7879049   | 7879260   | 212 |
| chr10 | 4734469   | 4734680   | 212 |
| chr1  | 153163019 | 153163230 | 212 |
| chr1  | 101566130 | 101566341 | 212 |
| chr1  | 82891194  | 82891405  | 212 |
| chr1  | 74643740  | 74643951  | 212 |
| chr1  | 73033888  | 73034099  | 212 |
| chr1  | 69683732  | 69683943  | 212 |
| chr1  | 35452833  | 35453044  | 212 |
| chrX  | 81078351  | 81078561  | 211 |
| chrX  | 80187042  | 80187252  | 211 |
| chrX  | 80107034  | 80107244  | 211 |
| chrX  | 78345763  | 78345973  | 211 |
| chrX  | 77632764  | 77632974  | 211 |
| chrX  | 77106675  | 77106885  | 211 |
| chrX  | 76878701  | 76878911  | 211 |
| chrX  | 76666297  | 76666507  | 211 |
| chrX  | 75499650  | 75499860  | 211 |
| chrX  | 74396866  | 74397076  | 211 |
| chrX  | 66831536  | 66831746  | 211 |
| chrX  | 66379682  | 66379892  | 211 |
| chrX  | 63631268  | 63631478  | 211 |
| chrX  | 62628764  | 62628974  | 211 |
| chrX  | 58738858  | 58739068  | 211 |
| chrX  | 57854123  | 57854333  | 211 |
| chrX  | 56836747  | 56836957  | 211 |
| chrX  | 56726558  | 56726768  | 211 |
| chrX  | 56336941  | 56337151  | 211 |
| chrX  | 50641908  | 50642118  | 211 |
| chrX  | 50200559  | 50200769  | 211 |
| chrX  | 49973464  | 49973674  | 211 |
| chrX  | 48665547  | 48665757  | 211 |
| chrX  | 44199467  | 44199677  | 211 |
| chrX  | 37485196  | 37485406  | 211 |

|      |           |           |     |
|------|-----------|-----------|-----|
| chrX | 34083846  | 34084056  | 211 |
| chrX | 30254090  | 30254300  | 211 |
| chrX | 28513203  | 28513413  | 211 |
| chrX | 23569588  | 23569798  | 211 |
| chrX | 20716071  | 20716281  | 211 |
| chrX | 20071734  | 20071944  | 211 |
| chrX | 18942357  | 18942567  | 211 |
| chrX | 13789531  | 13789741  | 211 |
| chrX | 13239824  | 13240034  | 211 |
| chrX | 12490295  | 12490505  | 211 |
| chrX | 12218651  | 12218861  | 211 |
| chrX | 12158395  | 12158605  | 211 |
| chrX | 11963709  | 11963919  | 211 |
| chrX | 11071030  | 11071240  | 211 |
| chrX | 9896000   | 9896210   | 211 |
| chrX | 8869943   | 8870153   | 211 |
| chrX | 8414211   | 8414421   | 211 |
| chrX | 8294896   | 8295106   | 211 |
| chrX | 6275812   | 6276022   | 211 |
| chrX | 5779123   | 5779333   | 211 |
| chrX | 4011083   | 4011293   | 211 |
| chr9 | 101645605 | 101645815 | 211 |
| chr9 | 45963225  | 45963435  | 211 |
| chr8 | 108821668 | 108821878 | 211 |
| chr8 | 86713246  | 86713456  | 211 |
| chr8 | 78848929  | 78849139  | 211 |
| chr8 | 60324649  | 60324859  | 211 |
| chr8 | 23917074  | 23917284  | 211 |
| chr8 | 7717697   | 7717907   | 211 |
| chr8 | 659068    | 659278    | 211 |
| chr7 | 94548743  | 94548953  | 211 |
| chr7 | 81021090  | 81021300  | 211 |
| chr7 | 80986292  | 80986502  | 211 |
| chr7 | 80934766  | 80934976  | 211 |
| chr7 | 71393231  | 71393441  | 211 |
| chr7 | 70760473  | 70760683  | 211 |
| chr7 | 58202090  | 58202300  | 211 |
| chr7 | 56533324  | 56533534  | 211 |
| chr7 | 43249611  | 43249821  | 211 |
| chr7 | 38721234  | 38721444  | 211 |
| chr7 | 37511797  | 37512007  | 211 |
| chr7 | 15651731  | 15651941  | 211 |
| chr7 | 10416292  | 10416502  | 211 |
| chr6 | 121755719 | 121755929 | 211 |
| chr6 | 118641077 | 118641287 | 211 |
| chr6 | 2229674   | 2229884   | 211 |
| chr5 | 121848991 | 121849201 | 211 |
| chr5 | 115802947 | 115803157 | 211 |
| chr5 | 113105058 | 113105268 | 211 |
| chr5 | 81689743  | 81689953  | 211 |

|       |           |           |     |
|-------|-----------|-----------|-----|
| chr5  | 80712921  | 80713131  | 211 |
| chr5  | 78114699  | 78114909  | 211 |
| chr5  | 60103912  | 60104122  | 211 |
| chr4  | 117252359 | 117252569 | 211 |
| chr4  | 66366338  | 66366548  | 211 |
| chr4  | 28584760  | 28584970  | 211 |
| chr3  | 124890924 | 124891134 | 211 |
| chr3  | 121786542 | 121786752 | 211 |
| chr3  | 121432562 | 121432772 | 211 |
| chr3  | 116216914 | 116217124 | 211 |
| chr3  | 105119064 | 105119274 | 211 |
| chr3  | 105030732 | 105030942 | 211 |
| chr3  | 82799472  | 82799682  | 211 |
| chr3  | 56449465  | 56449675  | 211 |
| chr3  | 54063044  | 54063254  | 211 |
| chr3  | 34788921  | 34789131  | 211 |
| chr29 | 51995509  | 51995719  | 211 |
| chr29 | 48900205  | 48900415  | 211 |
| chr29 | 44750529  | 44750739  | 211 |
| chr29 | 38093369  | 38093579  | 211 |
| chr29 | 36367752  | 36367962  | 211 |
| chr29 | 34478025  | 34478235  | 211 |
| chr29 | 32067373  | 32067583  | 211 |
| chr28 | 45568290  | 45568500  | 211 |
| chr28 | 43585746  | 43585956  | 211 |
| chr28 | 43030544  | 43030754  | 211 |
| chr28 | 34210426  | 34210636  | 211 |
| chr28 | 34118254  | 34118464  | 211 |
| chr28 | 34109654  | 34109864  | 211 |
| chr28 | 26792539  | 26792749  | 211 |
| chr28 | 12379523  | 12379733  | 211 |
| chr26 | 44120256  | 44120466  | 211 |
| chr26 | 44094850  | 44095060  | 211 |
| chr26 | 41291642  | 41291852  | 211 |
| chr26 | 40901011  | 40901221  | 211 |
| chr26 | 38473351  | 38473561  | 211 |
| chr26 | 38472235  | 38472445  | 211 |
| chr26 | 37946788  | 37946998  | 211 |
| chr26 | 37548749  | 37548959  | 211 |
| chr26 | 18369550  | 18369760  | 211 |
| chr26 | 18060580  | 18060790  | 211 |
| chr26 | 9669189   | 9669399   | 211 |
| chr25 | 41228835  | 41229045  | 211 |
| chr25 | 40811153  | 40811363  | 211 |
| chr25 | 37490715  | 37490925  | 211 |
| chr25 | 37387595  | 37387805  | 211 |
| chr25 | 28653472  | 28653682  | 211 |
| chr25 | 28314828  | 28315038  | 211 |
| chr25 | 3079946   | 3080156   | 211 |
| chr24 | 64277710  | 64277920  | 211 |

|       |           |           |     |
|-------|-----------|-----------|-----|
| chr24 | 62301495  | 62301705  | 211 |
| chr24 | 59444610  | 59444820  | 211 |
| chr24 | 48906663  | 48906873  | 211 |
| chr24 | 48449018  | 48449228  | 211 |
| chr24 | 46625022  | 46625232  | 211 |
| chr24 | 44157624  | 44157834  | 211 |
| chr24 | 40497455  | 40497665  | 211 |
| chr24 | 39954079  | 39954289  | 211 |
| chr24 | 23375555  | 23375765  | 211 |
| chr23 | 43259035  | 43259245  | 211 |
| chr23 | 42469736  | 42469946  | 211 |
| chr23 | 28467353  | 28467563  | 211 |
| chr23 | 27759197  | 27759407  | 211 |
| chr23 | 19591266  | 19591476  | 211 |
| chr23 | 17781143  | 17781353  | 211 |
| chr23 | 15997236  | 15997446  | 211 |
| chr23 | 15136755  | 15136965  | 211 |
| chr22 | 56593726  | 56593936  | 211 |
| chr22 | 44488830  | 44489040  | 211 |
| chr22 | 17581566  | 17581776  | 211 |
| chr22 | 12160205  | 12160415  | 211 |
| chr21 | 67765952  | 67766162  | 211 |
| chr21 | 64626932  | 64627142  | 211 |
| chr21 | 64234797  | 64235007  | 211 |
| chr21 | 60425949  | 60426159  | 211 |
| chr21 | 28024345  | 28024555  | 211 |
| chr21 | 6962380   | 6962590   | 211 |
| chr20 | 59995793  | 59996003  | 211 |
| chr20 | 53389056  | 53389266  | 211 |
| chr20 | 38661392  | 38661602  | 211 |
| chr20 | 24170435  | 24170645  | 211 |
| chr20 | 19405200  | 19405410  | 211 |
| chr20 | 8044883   | 8045093   | 211 |
| chr20 | 1551140   | 1551350   | 211 |
| chr2  | 139016089 | 139016299 | 211 |
| chr2  | 130977187 | 130977397 | 211 |
| chr2  | 127509388 | 127509598 | 211 |
| chr2  | 97113249  | 97113459  | 211 |
| chr2  | 92641342  | 92641552  | 211 |
| chr2  | 76571952  | 76572162  | 211 |
| chr2  | 21546152  | 21546362  | 211 |
| chr19 | 63939622  | 63939832  | 211 |
| chr19 | 60047962  | 60048172  | 211 |
| chr19 | 58734473  | 58734683  | 211 |
| chr19 | 54489419  | 54489629  | 211 |
| chr19 | 54466203  | 54466413  | 211 |
| chr19 | 47335403  | 47335613  | 211 |
| chr19 | 45744033  | 45744243  | 211 |
| chr19 | 42934877  | 42935087  | 211 |
| chr19 | 41964233  | 41964443  | 211 |

|       |          |          |     |
|-------|----------|----------|-----|
| chr19 | 41921738 | 41921948 | 211 |
| chr19 | 41416530 | 41416740 | 211 |
| chr19 | 38738941 | 38739151 | 211 |
| chr19 | 37890451 | 37890661 | 211 |
| chr19 | 29769655 | 29769865 | 211 |
| chr19 | 25844722 | 25844932 | 211 |
| chr19 | 23269014 | 23269224 | 211 |
| chr19 | 20837564 | 20837774 | 211 |
| chr19 | 16351372 | 16351582 | 211 |
| chr18 | 55747137 | 55747347 | 211 |
| chr18 | 55270396 | 55270606 | 211 |
| chr18 | 49526557 | 49526767 | 211 |
| chr18 | 39237794 | 39238004 | 211 |
| chr18 | 17979711 | 17979921 | 211 |
| chr18 | 12157928 | 12158138 | 211 |
| chr18 | 11644826 | 11645036 | 211 |
| chr18 | 11449079 | 11449289 | 211 |
| chr18 | 3757799  | 3758009  | 211 |
| chr17 | 75470800 | 75471010 | 211 |
| chr17 | 68151284 | 68151494 | 211 |
| chr17 | 63001614 | 63001824 | 211 |
| chr17 | 60773870 | 60774080 | 211 |
| chr17 | 49020576 | 49020786 | 211 |
| chr17 | 8336102  | 8336312  | 211 |
| chr16 | 68785477 | 68785687 | 211 |
| chr16 | 60343379 | 60343589 | 211 |
| chr16 | 43624903 | 43625113 | 211 |
| chr16 | 23866547 | 23866757 | 211 |
| chr16 | 3689144  | 3689354  | 211 |
| chr15 | 75308673 | 75308883 | 211 |
| chr15 | 54375677 | 54375887 | 211 |
| chr15 | 52823372 | 52823582 | 211 |
| chr15 | 51815083 | 51815293 | 211 |
| chr15 | 39615687 | 39615897 | 211 |
| chr15 | 38575557 | 38575767 | 211 |
| chr15 | 33730277 | 33730487 | 211 |
| chr15 | 26850196 | 26850406 | 211 |
| chr15 | 24033421 | 24033631 | 211 |
| chr15 | 22249340 | 22249550 | 211 |
| chr14 | 66248550 | 66248760 | 211 |
| chr14 | 63519465 | 63519675 | 211 |
| chr14 | 61504074 | 61504284 | 211 |
| chr14 | 52286440 | 52286650 | 211 |
| chr14 | 34095634 | 34095844 | 211 |
| chr14 | 9368495  | 9368705  | 211 |
| chr13 | 72867375 | 72867585 | 211 |
| chr13 | 68929061 | 68929271 | 211 |
| chr13 | 66113743 | 66113953 | 211 |
| chr13 | 65983559 | 65983769 | 211 |
| chr13 | 59232076 | 59232286 | 211 |

|       |           |           |     |
|-------|-----------|-----------|-----|
| chr13 | 54797190  | 54797400  | 211 |
| chr13 | 40574725  | 40574935  | 211 |
| chr13 | 35499155  | 35499365  | 211 |
| chr13 | 34755988  | 34756198  | 211 |
| chr13 | 11406685  | 11406895  | 211 |
| chr12 | 81482191  | 81482401  | 211 |
| chr12 | 31014098  | 31014308  | 211 |
| chr12 | 19676327  | 19676537  | 211 |
| chr11 | 92644593  | 92644803  | 211 |
| chr11 | 84646293  | 84646503  | 211 |
| chr11 | 84596540  | 84596750  | 211 |
| chr11 | 81326240  | 81326450  | 211 |
| chr11 | 76077913  | 76078123  | 211 |
| chr11 | 68687994  | 68688204  | 211 |
| chr11 | 65945114  | 65945324  | 211 |
| chr11 | 49359530  | 49359740  | 211 |
| chr11 | 25810821  | 25811031  | 211 |
| chr11 | 8788785   | 8788995   | 211 |
| chr11 | 5723864   | 5724074   | 211 |
| chr11 | 5218244   | 5218454   | 211 |
| chr10 | 103018925 | 103019135 | 211 |
| chr10 | 91452374  | 91452584  | 211 |
| chr10 | 81608667  | 81608877  | 211 |
| chr10 | 74128106  | 74128316  | 211 |
| chr10 | 72469468  | 72469678  | 211 |
| chr10 | 67755250  | 67755460  | 211 |
| chr10 | 67633661  | 67633871  | 211 |
| chr10 | 21993447  | 21993657  | 211 |
| chr10 | 19473849  | 19474059  | 211 |
| chr10 | 17411756  | 17411966  | 211 |
| chr10 | 17018654  | 17018864  | 211 |
| chr10 | 4368880   | 4369090   | 211 |
| chr10 | 2770775   | 2770985   | 211 |
| chr1  | 147611903 | 147612113 | 211 |
| chr1  | 114628461 | 114628671 | 211 |
| chr1  | 109083887 | 109084097 | 211 |
| chr1  | 99824304  | 99824514  | 211 |
| chr1  | 99401763  | 99401973  | 211 |
| chr1  | 89236933  | 89237143  | 211 |
| chr1  | 83272832  | 83273042  | 211 |
| chr1  | 73124814  | 73125024  | 211 |
| chr1  | 67728130  | 67728340  | 211 |
| chr1  | 3095192   | 3095402   | 211 |
| chr1  | 1467342   | 1467552   | 211 |
| chrX  | 78737826  | 78738035  | 210 |
| chrX  | 78523510  | 78523719  | 210 |
| chrX  | 77661654  | 77661863  | 210 |
| chrX  | 77409245  | 77409454  | 210 |
| chrX  | 75981114  | 75981323  | 210 |
| chrX  | 74346161  | 74346370  | 210 |



|      |          |          |     |
|------|----------|----------|-----|
| chrX | 71443194 | 71443403 | 210 |
| chrX | 68758546 | 68758755 | 210 |
| chrX | 68631126 | 68631335 | 210 |
| chrX | 66987110 | 66987319 | 210 |
| chrX | 66683349 | 66683558 | 210 |
| chrX | 65078063 | 65078272 | 210 |
| chrX | 65060049 | 65060258 | 210 |
| chrX | 64375811 | 64376020 | 210 |
| chrX | 64156080 | 64156289 | 210 |
| chrX | 63424049 | 63424258 | 210 |
| chrX | 63422532 | 63422741 | 210 |
| chrX | 61744181 | 61744390 | 210 |
| chrX | 55161508 | 55161717 | 210 |
| chrX | 55026205 | 55026414 | 210 |
| chrX | 54023959 | 54024168 | 210 |
| chrX | 50713084 | 50713293 | 210 |
| chrX | 50299908 | 50300117 | 210 |
| chrX | 50218185 | 50218394 | 210 |
| chrX | 49931026 | 49931235 | 210 |
| chrX | 46533330 | 46533539 | 210 |
| chrX | 45504267 | 45504476 | 210 |
| chrX | 38846216 | 38846425 | 210 |
| chrX | 38032474 | 38032683 | 210 |
| chrX | 37482473 | 37482682 | 210 |
| chrX | 35693664 | 35693873 | 210 |
| chrX | 34660891 | 34661100 | 210 |
| chrX | 34187743 | 34187952 | 210 |
| chrX | 30471944 | 30472153 | 210 |
| chrX | 30057591 | 30057800 | 210 |
| chrX | 21269410 | 21269619 | 210 |
| chrX | 20721507 | 20721716 | 210 |
| chrX | 14265161 | 14265370 | 210 |
| chrX | 12659005 | 12659214 | 210 |
| chrX | 12305892 | 12306101 | 210 |
| chrX | 8466498  | 8466707  | 210 |
| chrX | 8450717  | 8450926  | 210 |
| chrX | 6564916  | 6565125  | 210 |
| chrX | 4405777  | 4405986  | 210 |
| chrX | 2538850  | 2539059  | 210 |
| chrX | 1516948  | 1517157  | 210 |
| chr9 | 88420094 | 88420303 | 210 |
| chr9 | 47113250 | 47113459 | 210 |
| chr9 | 45438581 | 45438790 | 210 |
| chr8 | 89499338 | 89499547 | 210 |
| chr8 | 86786021 | 86786230 | 210 |
| chr8 | 64614941 | 64615150 | 210 |
| chr8 | 27616744 | 27616953 | 210 |
| chr8 | 23039424 | 23039633 | 210 |
| chr7 | 42453425 | 42453634 | 210 |
| chr7 | 2203905  | 2204114  | 210 |

|       |           |           |     |
|-------|-----------|-----------|-----|
| chr6  | 120404237 | 120404446 | 210 |
| chr6  | 115648145 | 115648354 | 210 |
| chr6  | 109291220 | 109291429 | 210 |
| chr6  | 93006450  | 93006659  | 210 |
| chr6  | 70511521  | 70511730  | 210 |
| chr5  | 122361031 | 122361240 | 210 |
| chr5  | 121554513 | 121554722 | 210 |
| chr5  | 112188331 | 112188540 | 210 |
| chr5  | 111714549 | 111714758 | 210 |
| chr5  | 80198094  | 80198303  | 210 |
| chr5  | 79342327  | 79342536  | 210 |
| chr5  | 78690747  | 78690956  | 210 |
| chr5  | 73161826  | 73162035  | 210 |
| chr5  | 30261891  | 30262100  | 210 |
| chr5  | 28767479  | 28767688  | 210 |
| chr5  | 26178717  | 26178926  | 210 |
| chr5  | 20852950  | 20853159  | 210 |
| chr5  | 1601911   | 1602120   | 210 |
| chr5  | 1139163   | 1139372   | 210 |
| chr4  | 106682778 | 106682987 | 210 |
| chr4  | 98115177  | 98115386  | 210 |
| chr4  | 97088063  | 97088272  | 210 |
| chr4  | 96303408  | 96303617  | 210 |
| chr4  | 82132317  | 82132526  | 210 |
| chr4  | 72412635  | 72412844  | 210 |
| chr4  | 72009465  | 72009674  | 210 |
| chr4  | 31607037  | 31607246  | 210 |
| chr4  | 7488511   | 7488720   | 210 |
| chr3  | 126210115 | 126210324 | 210 |
| chr3  | 121495098 | 121495307 | 210 |
| chr3  | 121103753 | 121103962 | 210 |
| chr3  | 118877691 | 118877900 | 210 |
| chr3  | 114841315 | 114841524 | 210 |
| chr3  | 111750843 | 111751052 | 210 |
| chr3  | 111042543 | 111042752 | 210 |
| chr3  | 105412794 | 105413003 | 210 |
| chr3  | 104475852 | 104476061 | 210 |
| chr3  | 102721644 | 102721853 | 210 |
| chr3  | 99105626  | 99105835  | 210 |
| chr3  | 27452422  | 27452631  | 210 |
| chr3  | 25772506  | 25772715  | 210 |
| chr3  | 23025726  | 23025935  | 210 |
| chr3  | 10270843  | 10271052  | 210 |
| chr29 | 49040658  | 49040867  | 210 |
| chr29 | 44746246  | 44746455  | 210 |
| chr29 | 37047078  | 37047287  | 210 |
| chr29 | 36946534  | 36946743  | 210 |
| chr29 | 35780783  | 35780992  | 210 |
| chr29 | 34216914  | 34217123  | 210 |
| chr29 | 33569982  | 33570191  | 210 |

|       |          |          |     |
|-------|----------|----------|-----|
| chr29 | 27188213 | 27188422 | 210 |
| chr29 | 26782270 | 26782479 | 210 |
| chr29 | 18188455 | 18188664 | 210 |
| chr28 | 42345590 | 42345799 | 210 |
| chr28 | 32931120 | 32931329 | 210 |
| chr28 | 26983848 | 26984057 | 210 |
| chr26 | 51558094 | 51558303 | 210 |
| chr26 | 46849770 | 46849979 | 210 |
| chr26 | 45344176 | 45344385 | 210 |
| chr26 | 44933043 | 44933252 | 210 |
| chr26 | 43778473 | 43778682 | 210 |
| chr26 | 38511774 | 38511983 | 210 |
| chr26 | 28147522 | 28147731 | 210 |
| chr26 | 23075290 | 23075499 | 210 |
| chr25 | 41675113 | 41675322 | 210 |
| chr25 | 40888104 | 40888313 | 210 |
| chr25 | 37781799 | 37782008 | 210 |
| chr25 | 35665933 | 35666142 | 210 |
| chr25 | 31843689 | 31843898 | 210 |
| chr25 | 28061148 | 28061357 | 210 |
| chr25 | 27305310 | 27305519 | 210 |
| chr25 | 26452355 | 26452564 | 210 |
| chr25 | 12477830 | 12478039 | 210 |
| chr24 | 60260506 | 60260715 | 210 |
| chr24 | 43628802 | 43629011 | 210 |
| chr24 | 41147084 | 41147293 | 210 |
| chr24 | 33056488 | 33056697 | 210 |
| chr24 | 23893760 | 23893969 | 210 |
| chr24 | 20745127 | 20745336 | 210 |
| chr23 | 48734278 | 48734487 | 210 |
| chr23 | 19857024 | 19857233 | 210 |
| chr23 | 15438762 | 15438971 | 210 |
| chr23 | 14875154 | 14875363 | 210 |
| chr23 | 8176935  | 8177144  | 210 |
| chr22 | 58695644 | 58695853 | 210 |
| chr22 | 58686831 | 58687040 | 210 |
| chr22 | 52858764 | 52858973 | 210 |
| chr22 | 48665468 | 48665677 | 210 |
| chr22 | 48224522 | 48224731 | 210 |
| chr22 | 46491161 | 46491370 | 210 |
| chr22 | 18389754 | 18389963 | 210 |
| chr22 | 16206553 | 16206762 | 210 |
| chr21 | 66736639 | 66736848 | 210 |
| chr21 | 64274786 | 64274995 | 210 |
| chr21 | 62649406 | 62649615 | 210 |
| chr21 | 28838376 | 28838585 | 210 |
| chr21 | 22611383 | 22611592 | 210 |
| chr21 | 19274190 | 19274399 | 210 |
| chr20 | 72742822 | 72743031 | 210 |
| chr20 | 70238392 | 70238601 | 210 |

|       |           |           |     |
|-------|-----------|-----------|-----|
| chr20 | 70202108  | 70202317  | 210 |
| chr20 | 6623138   | 6623347   | 210 |
| chr20 | 6294643   | 6294852   | 210 |
| chr2  | 139461602 | 139461811 | 210 |
| chr2  | 139221081 | 139221290 | 210 |
| chr2  | 138928830 | 138929039 | 210 |
| chr2  | 138875519 | 138875728 | 210 |
| chr2  | 138692175 | 138692384 | 210 |
| chr2  | 136537857 | 136538066 | 210 |
| chr2  | 134070602 | 134070811 | 210 |
| chr2  | 132971710 | 132971919 | 210 |
| chr2  | 129704162 | 129704371 | 210 |
| chr2  | 127641354 | 127641563 | 210 |
| chr2  | 124645202 | 124645411 | 210 |
| chr2  | 122889414 | 122889623 | 210 |
| chr2  | 102755359 | 102755568 | 210 |
| chr2  | 76575906  | 76576115  | 210 |
| chr2  | 74697498  | 74697707  | 210 |
| chr2  | 74313247  | 74313456  | 210 |
| chr2  | 46267693  | 46267902  | 210 |
| chr2  | 44181019  | 44181228  | 210 |
| chr2  | 27003516  | 27003725  | 210 |
| chr2  | 26927814  | 26928023  | 210 |
| chr2  | 22285033  | 22285242  | 210 |
| chr2  | 1863269   | 1863478   | 210 |
| chr19 | 65210855  | 65211064  | 210 |
| chr19 | 61808891  | 61809100  | 210 |
| chr19 | 61749140  | 61749349  | 210 |
| chr19 | 56482415  | 56482624  | 210 |
| chr19 | 54986647  | 54986856  | 210 |
| chr19 | 46141837  | 46142046  | 210 |
| chr19 | 44344627  | 44344836  | 210 |
| chr19 | 41465273  | 41465482  | 210 |
| chr19 | 35026788  | 35026997  | 210 |
| chr19 | 33296593  | 33296802  | 210 |
| chr19 | 30404458  | 30404667  | 210 |
| chr19 | 27921421  | 27921630  | 210 |
| chr19 | 23570516  | 23570725  | 210 |
| chr19 | 17176137  | 17176346  | 210 |
| chr19 | 7311979   | 7312188   | 210 |
| chr18 | 62926440  | 62926649  | 210 |
| chr18 | 57370523  | 57370732  | 210 |
| chr18 | 57032044  | 57032253  | 210 |
| chr18 | 56876495  | 56876704  | 210 |
| chr18 | 56456327  | 56456536  | 210 |
| chr18 | 56227010  | 56227219  | 210 |
| chr18 | 52803228  | 52803437  | 210 |
| chr18 | 51615585  | 51615794  | 210 |
| chr18 | 48777243  | 48777452  | 210 |
| chr18 | 45734707  | 45734916  | 210 |

|       |          |          |     |
|-------|----------|----------|-----|
| chr18 | 45293244 | 45293453 | 210 |
| chr18 | 39962489 | 39962698 | 210 |
| chr18 | 37227995 | 37228204 | 210 |
| chr18 | 36892413 | 36892622 | 210 |
| chr18 | 34637171 | 34637380 | 210 |
| chr18 | 26775467 | 26775676 | 210 |
| chr18 | 22541609 | 22541818 | 210 |
| chr18 | 22458638 | 22458847 | 210 |
| chr18 | 22006616 | 22006825 | 210 |
| chr18 | 18394130 | 18394339 | 210 |
| chr18 | 11565159 | 11565368 | 210 |
| chr18 | 9401867  | 9402076  | 210 |
| chr17 | 75026451 | 75026660 | 210 |
| chr17 | 70715983 | 70716192 | 210 |
| chr17 | 68152743 | 68152952 | 210 |
| chr17 | 63934762 | 63934971 | 210 |
| chr17 | 62188634 | 62188843 | 210 |
| chr17 | 56548704 | 56548913 | 210 |
| chr17 | 53173055 | 53173264 | 210 |
| chr16 | 71120151 | 71120360 | 210 |
| chr16 | 47409192 | 47409401 | 210 |
| chr16 | 42980720 | 42980929 | 210 |
| chr16 | 42666615 | 42666824 | 210 |
| chr16 | 38701511 | 38701720 | 210 |
| chr16 | 28445990 | 28446199 | 210 |
| chr16 | 26244291 | 26244500 | 210 |
| chr16 | 23012269 | 23012478 | 210 |
| chr15 | 75842621 | 75842830 | 210 |
| chr15 | 74142971 | 74143180 | 210 |
| chr15 | 52830469 | 52830678 | 210 |
| chr15 | 52621750 | 52621959 | 210 |
| chr15 | 30288545 | 30288754 | 210 |
| chr15 | 29278518 | 29278727 | 210 |
| chr15 | 27335789 | 27335998 | 210 |
| chr15 | 27106790 | 27106999 | 210 |
| chr15 | 25623336 | 25623545 | 210 |
| chr15 | 24530472 | 24530681 | 210 |
| chr15 | 23934737 | 23934946 | 210 |
| chr15 | 22973536 | 22973745 | 210 |
| chr14 | 79957110 | 79957319 | 210 |
| chr14 | 79618688 | 79618897 | 210 |
| chr14 | 59350726 | 59350935 | 210 |
| chr14 | 44815825 | 44816034 | 210 |
| chr14 | 44622042 | 44622251 | 210 |
| chr14 | 39053210 | 39053419 | 210 |
| chr14 | 25938925 | 25939134 | 210 |
| chr14 | 6867448  | 6867657  | 210 |
| chr13 | 82344996 | 82345205 | 210 |
| chr13 | 75086714 | 75086923 | 210 |
| chr13 | 73614524 | 73614733 | 210 |

|       |           |           |     |
|-------|-----------|-----------|-----|
| chr13 | 69926407  | 69926616  | 210 |
| chr13 | 68948010  | 68948219  | 210 |
| chr13 | 68449802  | 68450011  | 210 |
| chr13 | 59836789  | 59836998  | 210 |
| chr13 | 57656640  | 57656849  | 210 |
| chr13 | 56393049  | 56393258  | 210 |
| chr13 | 54864997  | 54865206  | 210 |
| chr13 | 53059030  | 53059239  | 210 |
| chr13 | 41498236  | 41498445  | 210 |
| chr13 | 41305696  | 41305905  | 210 |
| chr13 | 41151869  | 41152078  | 210 |
| chr13 | 37647903  | 37648112  | 210 |
| chr13 | 36886987  | 36887196  | 210 |
| chr12 | 82364153  | 82364362  | 210 |
| chr12 | 82214280  | 82214489  | 210 |
| chr12 | 82193193  | 82193402  | 210 |
| chr12 | 82013432  | 82013641  | 210 |
| chr12 | 80139615  | 80139824  | 210 |
| chr12 | 73787786  | 73787995  | 210 |
| chr12 | 32821910  | 32822119  | 210 |
| chr12 | 32568724  | 32568933  | 210 |
| chr12 | 21965565  | 21965774  | 210 |
| chr12 | 17734354  | 17734563  | 210 |
| chr12 | 17229020  | 17229229  | 210 |
| chr12 | 11888394  | 11888603  | 210 |
| chr11 | 108729082 | 108729291 | 210 |
| chr11 | 106031317 | 106031526 | 210 |
| chr11 | 104898865 | 104899074 | 210 |
| chr11 | 96271445  | 96271654  | 210 |
| chr11 | 91001785  | 91001994  | 210 |
| chr11 | 90362578  | 90362787  | 210 |
| chr11 | 89533139  | 89533348  | 210 |
| chr11 | 89506403  | 89506612  | 210 |
| chr11 | 77608806  | 77609015  | 210 |
| chr11 | 72418660  | 72418869  | 210 |
| chr11 | 11162317  | 11162526  | 210 |
| chr11 | 8567542   | 8567751   | 210 |
| chr11 | 3865599   | 3865808   | 210 |
| chr10 | 103515788 | 103515997 | 210 |
| chr10 | 91049850  | 91050059  | 210 |
| chr10 | 81672623  | 81672832  | 210 |
| chr10 | 72475873  | 72476082  | 210 |
| chr10 | 71506757  | 71506966  | 210 |
| chr10 | 71075537  | 71075746  | 210 |
| chr10 | 69406028  | 69406237  | 210 |
| chr10 | 21971760  | 21971969  | 210 |
| chr10 | 16737665  | 16737874  | 210 |
| chr10 | 15019380  | 15019589  | 210 |
| chr10 | 12117843  | 12118052  | 210 |
| chr10 | 8322636   | 8322845   | 210 |

|      |           |           |     |
|------|-----------|-----------|-----|
| chr1 | 153307650 | 153307859 | 210 |
| chr1 | 132073578 | 132073787 | 210 |
| chr1 | 6454586   | 6454795   | 210 |
| chr1 | 1608761   | 1608970   | 210 |
| chrX | 78445468  | 78445676  | 209 |
| chrX | 78323151  | 78323359  | 209 |
| chrX | 77710839  | 77711047  | 209 |
| chrX | 75594343  | 75594551  | 209 |
| chrX | 74776364  | 74776572  | 209 |
| chrX | 74264804  | 74265012  | 209 |
| chrX | 72779975  | 72780183  | 209 |
| chrX | 72739743  | 72739951  | 209 |
| chrX | 72238278  | 72238486  | 209 |
| chrX | 68564443  | 68564651  | 209 |
| chrX | 63685390  | 63685598  | 209 |
| chrX | 62200255  | 62200463  | 209 |
| chrX | 57491932  | 57492140  | 209 |
| chrX | 56724772  | 56724980  | 209 |
| chrX | 55422265  | 55422473  | 209 |
| chrX | 55405499  | 55405707  | 209 |
| chrX | 50862960  | 50863168  | 209 |
| chrX | 50274942  | 50275150  | 209 |
| chrX | 48182529  | 48182737  | 209 |
| chrX | 46884505  | 46884713  | 209 |
| chrX | 40760039  | 40760247  | 209 |
| chrX | 38117658  | 38117866  | 209 |
| chrX | 36933002  | 36933210  | 209 |
| chrX | 36740342  | 36740550  | 209 |
| chrX | 35118878  | 35119086  | 209 |
| chrX | 21629308  | 21629516  | 209 |
| chrX | 20666070  | 20666278  | 209 |
| chrX | 20086196  | 20086404  | 209 |
| chrX | 19486505  | 19486713  | 209 |
| chrX | 18844453  | 18844661  | 209 |
| chrX | 18738828  | 18739036  | 209 |
| chrX | 10448540  | 10448748  | 209 |
| chrX | 10271556  | 10271764  | 209 |
| chrX | 8632958   | 8633166   | 209 |
| chrX | 8467054   | 8467262   | 209 |
| chrX | 7802675   | 7802883   | 209 |
| chrX | 7645697   | 7645905   | 209 |
| chrX | 5716231   | 5716439   | 209 |
| chrX | 5506430   | 5506638   | 209 |
| chrX | 2780762   | 2780970   | 209 |
| chr9 | 106708701 | 106708909 | 209 |
| chr9 | 91227056  | 91227264  | 209 |
| chr9 | 90422355  | 90422563  | 209 |
| chr9 | 39975499  | 39975707  | 209 |
| chr8 | 111288120 | 111288328 | 209 |
| chr8 | 110984835 | 110985043 | 209 |

|      |           |           |     |
|------|-----------|-----------|-----|
| chr8 | 104238582 | 104238790 | 209 |
| chr8 | 95567068  | 95567276  | 209 |
| chr8 | 74466219  | 74466427  | 209 |
| chr8 | 63902605  | 63902813  | 209 |
| chr8 | 63871745  | 63871953  | 209 |
| chr8 | 57997521  | 57997729  | 209 |
| chr8 | 35973807  | 35974015  | 209 |
| chr8 | 27047069  | 27047277  | 209 |
| chr8 | 7550747   | 7550955   | 209 |
| chr7 | 45813466  | 45813674  | 209 |
| chr7 | 42935122  | 42935330  | 209 |
| chr7 | 42780416  | 42780624  | 209 |
| chr7 | 38500171  | 38500379  | 209 |
| chr7 | 5403480   | 5403688   | 209 |
| chr6 | 115938168 | 115938376 | 209 |
| chr6 | 112996769 | 112996977 | 209 |
| chr6 | 63155639  | 63155847  | 209 |
| chr6 | 59505046  | 59505254  | 209 |
| chr6 | 16227950  | 16228158  | 209 |
| chr5 | 122274716 | 122274924 | 209 |
| chr5 | 117217589 | 117217797 | 209 |
| chr5 | 116700764 | 116700972 | 209 |
| chr5 | 115179823 | 115180031 | 209 |
| chr5 | 115157435 | 115157643 | 209 |
| chr5 | 113209589 | 113209797 | 209 |
| chr5 | 78536583  | 78536791  | 209 |
| chr5 | 76867690  | 76867898  | 209 |
| chr5 | 30216493  | 30216701  | 209 |
| chr5 | 30196868  | 30197076  | 209 |
| chr5 | 30148133  | 30148341  | 209 |
| chr5 | 30022566  | 30022774  | 209 |
| chr5 | 27948933  | 27949141  | 209 |
| chr4 | 118681625 | 118681833 | 209 |
| chr4 | 118131881 | 118132089 | 209 |
| chr4 | 80434112  | 80434320  | 209 |
| chr4 | 71694611  | 71694819  | 209 |
| chr4 | 71419326  | 71419534  | 209 |
| chr4 | 32438059  | 32438267  | 209 |
| chr3 | 124913393 | 124913601 | 209 |
| chr3 | 123363542 | 123363750 | 209 |
| chr3 | 120920687 | 120920895 | 209 |
| chr3 | 118026447 | 118026655 | 209 |
| chr3 | 115991911 | 115992119 | 209 |
| chr3 | 115787132 | 115787340 | 209 |
| chr3 | 114933580 | 114933788 | 209 |
| chr3 | 110203269 | 110203477 | 209 |
| chr3 | 105642854 | 105643062 | 209 |
| chr3 | 99332746  | 99332954  | 209 |
| chr3 | 55945965  | 55946173  | 209 |
| chr3 | 9408120   | 9408328   | 209 |



|       |          |          |     |
|-------|----------|----------|-----|
| chr3  | 9139957  | 9140165  | 209 |
| chr29 | 51865889 | 51866097 | 209 |
| chr29 | 49139421 | 49139629 | 209 |
| chr29 | 49105761 | 49105969 | 209 |
| chr29 | 46925051 | 46925259 | 209 |
| chr29 | 46686630 | 46686838 | 209 |
| chr29 | 44455118 | 44455326 | 209 |
| chr29 | 35827635 | 35827843 | 209 |
| chr29 | 33107495 | 33107703 | 209 |
| chr29 | 31969038 | 31969246 | 209 |
| chr29 | 26510059 | 26510267 | 209 |
| chr29 | 25518539 | 25518747 | 209 |
| chr29 | 2437810  | 2438018  | 209 |
| chr28 | 42176815 | 42177023 | 209 |
| chr28 | 30538291 | 30538499 | 209 |
| chr27 | 48023521 | 48023729 | 209 |
| chr26 | 50421930 | 50422138 | 209 |
| chr26 | 48995315 | 48995523 | 209 |
| chr26 | 43072606 | 43072814 | 209 |
| chr26 | 42083438 | 42083646 | 209 |
| chr26 | 25186694 | 25186902 | 209 |
| chr26 | 21775847 | 21776055 | 209 |
| chr26 | 19877519 | 19877727 | 209 |
| chr26 | 15025706 | 15025914 | 209 |
| chr25 | 43565514 | 43565722 | 209 |
| chr25 | 41644821 | 41645029 | 209 |
| chr25 | 36820234 | 36820442 | 209 |
| chr25 | 36671382 | 36671590 | 209 |
| chr25 | 33293756 | 33293964 | 209 |
| chr25 | 4753827  | 4754035  | 209 |
| chr25 | 2964898  | 2965106  | 209 |
| chr24 | 60991035 | 60991243 | 209 |
| chr24 | 45972825 | 45973033 | 209 |
| chr24 | 40669445 | 40669653 | 209 |
| chr24 | 24718496 | 24718704 | 209 |
| chr24 | 23946932 | 23947140 | 209 |
| chr23 | 19642903 | 19643111 | 209 |
| chr22 | 56601045 | 56601253 | 209 |
| chr22 | 56517450 | 56517658 | 209 |
| chr22 | 55868818 | 55869026 | 209 |
| chr22 | 53331037 | 53331245 | 209 |
| chr22 | 48271013 | 48271221 | 209 |
| chr22 | 12134063 | 12134271 | 209 |
| chr22 | 11253455 | 11253663 | 209 |
| chr22 | 7219832  | 7220040  | 209 |
| chr22 | 5729877  | 5730085  | 209 |
| chr21 | 67991241 | 67991449 | 209 |
| chr21 | 62223557 | 62223765 | 209 |
| chr21 | 60699607 | 60699815 | 209 |
| chr21 | 24463583 | 24463791 | 209 |

|       |           |           |     |
|-------|-----------|-----------|-----|
| chr21 | 6562016   | 6562224   | 209 |
| chr20 | 74410905  | 74411113  | 209 |
| chr20 | 25156345  | 25156553  | 209 |
| chr20 | 19379417  | 19379625  | 209 |
| chr20 | 8260723   | 8260931   | 209 |
| chr2  | 134937311 | 134937519 | 209 |
| chr2  | 133753395 | 133753603 | 209 |
| chr2  | 130126151 | 130126359 | 209 |
| chr2  | 126047558 | 126047766 | 209 |
| chr2  | 93356129  | 93356337  | 209 |
| chr2  | 48828063  | 48828271  | 209 |
| chr2  | 27703985  | 27704193  | 209 |
| chr2  | 4931607   | 4931815   | 209 |
| chr19 | 55485280  | 55485488  | 209 |
| chr19 | 54209074  | 54209282  | 209 |
| chr19 | 51933081  | 51933289  | 209 |
| chr19 | 47176042  | 47176250  | 209 |
| chr19 | 38638528  | 38638736  | 209 |
| chr19 | 37954885  | 37955093  | 209 |
| chr19 | 36137686  | 36137894  | 209 |
| chr19 | 33448907  | 33449115  | 209 |
| chr19 | 32700443  | 32700651  | 209 |
| chr19 | 13455388  | 13455596  | 209 |
| chr19 | 12359501  | 12359709  | 209 |
| chr19 | 8467092   | 8467300   | 209 |
| chr19 | 7543873   | 7544081   | 209 |
| chr19 | 7314920   | 7315128   | 209 |
| chr18 | 61968733  | 61968941  | 209 |
| chr18 | 54201030  | 54201238  | 209 |
| chr18 | 44139620  | 44139828  | 209 |
| chr18 | 23109227  | 23109435  | 209 |
| chr18 | 20510368  | 20510576  | 209 |
| chr18 | 13571072  | 13571280  | 209 |
| chr18 | 11728471  | 11728679  | 209 |
| chr18 | 3670027   | 3670235   | 209 |
| chr17 | 73890915  | 73891123  | 209 |
| chr17 | 72736254  | 72736462  | 209 |
| chr17 | 69723946  | 69724154  | 209 |
| chr17 | 68150664  | 68150872  | 209 |
| chr17 | 67899525  | 67899733  | 209 |
| chr17 | 66438194  | 66438402  | 209 |
| chr17 | 59005375  | 59005583  | 209 |
| chr17 | 58790098  | 58790306  | 209 |
| chr17 | 37617165  | 37617373  | 209 |
| chr16 | 65142148  | 65142356  | 209 |
| chr16 | 54344365  | 54344573  | 209 |
| chr16 | 47253787  | 47253995  | 209 |
| chr16 | 44814878  | 44815086  | 209 |
| chr16 | 44373336  | 44373544  | 209 |
| chr16 | 41491422  | 41491630  | 209 |

|       |           |           |     |
|-------|-----------|-----------|-----|
| chr16 | 41349672  | 41349880  | 209 |
| chr16 | 38862982  | 38863190  | 209 |
| chr16 | 20660111  | 20660319  | 209 |
| chr15 | 77782261  | 77782469  | 209 |
| chr15 | 60444549  | 60444757  | 209 |
| chr15 | 30961418  | 30961626  | 209 |
| chr15 | 30837028  | 30837236  | 209 |
| chr15 | 22219968  | 22220176  | 209 |
| chr14 | 61678561  | 61678769  | 209 |
| chr14 | 43933009  | 43933217  | 209 |
| chr14 | 26135033  | 26135241  | 209 |
| chr14 | 21220135  | 21220343  | 209 |
| chr14 | 19348329  | 19348537  | 209 |
| chr14 | 3002770   | 3002978   | 209 |
| chr13 | 80357741  | 80357949  | 209 |
| chr13 | 77766376  | 77766584  | 209 |
| chr13 | 77310345  | 77310553  | 209 |
| chr13 | 76575088  | 76575296  | 209 |
| chr13 | 75818921  | 75819129  | 209 |
| chr13 | 69913431  | 69913639  | 209 |
| chr13 | 69836979  | 69837187  | 209 |
| chr13 | 68928238  | 68928446  | 209 |
| chr13 | 67643426  | 67643634  | 209 |
| chr13 | 64163404  | 64163612  | 209 |
| chr13 | 59334904  | 59335112  | 209 |
| chr13 | 55308997  | 55309205  | 209 |
| chr13 | 54839097  | 54839305  | 209 |
| chr13 | 42622587  | 42622795  | 209 |
| chr13 | 42398369  | 42398577  | 209 |
| chr13 | 26270935  | 26271143  | 209 |
| chr13 | 23030764  | 23030972  | 209 |
| chr13 | 3911002   | 3911210   | 209 |
| chr12 | 75095295  | 75095503  | 209 |
| chr12 | 32646430  | 32646638  | 209 |
| chr12 | 30475936  | 30476144  | 209 |
| chr12 | 14896012  | 14896220  | 209 |
| chr12 | 9454554   | 9454762   | 209 |
| chr11 | 109637292 | 109637500 | 209 |
| chr11 | 93743721  | 93743929  | 209 |
| chr11 | 88911429  | 88911637  | 209 |
| chr11 | 86259670  | 86259878  | 209 |
| chr11 | 85013218  | 85013426  | 209 |
| chr11 | 70666827  | 70667035  | 209 |
| chr11 | 70624177  | 70624385  | 209 |
| chr11 | 11932658  | 11932866  | 209 |
| chr11 | 287803    | 288011    | 209 |
| chr11 | 262101    | 262309    | 209 |
| chr10 | 90394705  | 90394913  | 209 |
| chr10 | 90143786  | 90143994  | 209 |
| chr10 | 70525792  | 70526000  | 209 |

|       |           |           |     |
|-------|-----------|-----------|-----|
| chr10 | 67959023  | 67959231  | 209 |
| chr10 | 58732632  | 58732840  | 209 |
| chr10 | 58709069  | 58709277  | 209 |
| chr10 | 17130186  | 17130394  | 209 |
| chr10 | 4893389   | 4893597   | 209 |
| chr10 | 4476152   | 4476360   | 209 |
| chr1  | 145992959 | 145993167 | 209 |
| chr1  | 144316478 | 144316686 | 209 |
| chr1  | 130000430 | 130000638 | 209 |
| chr1  | 85152769  | 85152977  | 209 |
| chr1  | 83110408  | 83110616  | 209 |
| chr1  | 82869429  | 82869637  | 209 |
| chr1  | 82842469  | 82842677  | 209 |
| chr1  | 2178994   | 2179202   | 209 |
| chrX  | 80940903  | 80941110  | 208 |
| chrX  | 80265386  | 80265593  | 208 |
| chrX  | 78517830  | 78518037  | 208 |
| chrX  | 77253729  | 77253936  | 208 |
| chrX  | 75525843  | 75526050  | 208 |
| chrX  | 72792352  | 72792559  | 208 |
| chrX  | 72062594  | 72062801  | 208 |
| chrX  | 69147184  | 69147391  | 208 |
| chrX  | 68351193  | 68351400  | 208 |
| chrX  | 66832150  | 66832357  | 208 |
| chrX  | 66782149  | 66782356  | 208 |
| chrX  | 63502316  | 63502523  | 208 |
| chrX  | 62985766  | 62985973  | 208 |
| chrX  | 61477026  | 61477233  | 208 |
| chrX  | 59329252  | 59329459  | 208 |
| chrX  | 58407966  | 58408173  | 208 |
| chrX  | 55335746  | 55335953  | 208 |
| chrX  | 55089497  | 55089704  | 208 |
| chrX  | 54994870  | 54995077  | 208 |
| chrX  | 50540602  | 50540809  | 208 |
| chrX  | 50424176  | 50424383  | 208 |
| chrX  | 49902695  | 49902902  | 208 |
| chrX  | 49787152  | 49787359  | 208 |
| chrX  | 49388502  | 49388709  | 208 |
| chrX  | 38342014  | 38342221  | 208 |
| chrX  | 37776754  | 37776961  | 208 |
| chrX  | 36205419  | 36205626  | 208 |
| chrX  | 35809458  | 35809665  | 208 |
| chrX  | 35551242  | 35551449  | 208 |
| chrX  | 31629641  | 31629848  | 208 |
| chrX  | 31037436  | 31037643  | 208 |
| chrX  | 24423336  | 24423543  | 208 |
| chrX  | 21991757  | 21991964  | 208 |
| chrX  | 21427395  | 21427602  | 208 |
| chrX  | 21061029  | 21061236  | 208 |
| chrX  | 20755804  | 20756011  | 208 |

|      |           |           |     |
|------|-----------|-----------|-----|
| chrX | 20628221  | 20628428  | 208 |
| chrX | 20537728  | 20537935  | 208 |
| chrX | 20338499  | 20338706  | 208 |
| chrX | 20281430  | 20281637  | 208 |
| chrX | 20239642  | 20239849  | 208 |
| chrX | 19859127  | 19859334  | 208 |
| chrX | 19655503  | 19655710  | 208 |
| chrX | 18493006  | 18493213  | 208 |
| chrX | 18455542  | 18455749  | 208 |
| chrX | 16470015  | 16470222  | 208 |
| chrX | 13966000  | 13966207  | 208 |
| chrX | 12563991  | 12564198  | 208 |
| chrX | 11966253  | 11966460  | 208 |
| chrX | 11030485  | 11030692  | 208 |
| chrX | 10728380  | 10728587  | 208 |
| chrX | 8768197   | 8768404   | 208 |
| chrX | 8423951   | 8424158   | 208 |
| chrX | 7818500   | 7818707   | 208 |
| chrX | 6962248   | 6962455   | 208 |
| chrX | 5781652   | 5781859   | 208 |
| chrX | 2860548   | 2860755   | 208 |
| chrX | 2530016   | 2530223   | 208 |
| chr9 | 100327790 | 100327997 | 208 |
| chr9 | 95835974  | 95836181  | 208 |
| chr9 | 90646049  | 90646256  | 208 |
| chr9 | 72538736  | 72538943  | 208 |
| chr9 | 66282693  | 66282900  | 208 |
| chr9 | 64660601  | 64660808  | 208 |
| chr9 | 63307348  | 63307555  | 208 |
| chr9 | 52352242  | 52352449  | 208 |
| chr9 | 27093201  | 27093408  | 208 |
| chr8 | 116226342 | 116226549 | 208 |
| chr8 | 115737582 | 115737789 | 208 |
| chr8 | 109973548 | 109973755 | 208 |
| chr8 | 108732076 | 108732283 | 208 |
| chr8 | 93110854  | 93111061  | 208 |
| chr8 | 87129439  | 87129646  | 208 |
| chr8 | 78545819  | 78546026  | 208 |
| chr8 | 73810859  | 73811066  | 208 |
| chr8 | 8557552   | 8557759   | 208 |
| chr8 | 1061039   | 1061246   | 208 |
| chr7 | 61477172  | 61477379  | 208 |
| chr7 | 52375323  | 52375530  | 208 |
| chr7 | 43260707  | 43260914  | 208 |
| chr7 | 20132036  | 20132243  | 208 |
| chr7 | 14389450  | 14389657  | 208 |
| chr7 | 14288659  | 14288866  | 208 |
| chr6 | 120470032 | 120470239 | 208 |
| chr6 | 113481936 | 113482143 | 208 |
| chr6 | 73800283  | 73800490  | 208 |

|       |           |           |     |
|-------|-----------|-----------|-----|
| chr6  | 41395378  | 41395585  | 208 |
| chr5  | 115513366 | 115513573 | 208 |
| chr5  | 113923513 | 113923720 | 208 |
| chr5  | 112248678 | 112248885 | 208 |
| chr5  | 111516413 | 111516620 | 208 |
| chr5  | 80742212  | 80742419  | 208 |
| chr5  | 74035812  | 74036019  | 208 |
| chr5  | 73145713  | 73145920  | 208 |
| chr5  | 31221382  | 31221589  | 208 |
| chr4  | 121270250 | 121270457 | 208 |
| chr4  | 95089872  | 95090079  | 208 |
| chr4  | 71477185  | 71477392  | 208 |
| chr4  | 71350402  | 71350609  | 208 |
| chr4  | 67687139  | 67687346  | 208 |
| chr4  | 39492294  | 39492501  | 208 |
| chr4  | 15410901  | 15411108  | 208 |
| chr4  | 13662666  | 13662873  | 208 |
| chr3  | 127439799 | 127440006 | 208 |
| chr3  | 127291280 | 127291487 | 208 |
| chr3  | 124553327 | 124553534 | 208 |
| chr3  | 123997496 | 123997703 | 208 |
| chr3  | 121690487 | 121690694 | 208 |
| chr3  | 117297409 | 117297616 | 208 |
| chr3  | 116247464 | 116247671 | 208 |
| chr3  | 114862083 | 114862290 | 208 |
| chr3  | 112991558 | 112991765 | 208 |
| chr3  | 105937173 | 105937380 | 208 |
| chr3  | 93426237  | 93426444  | 208 |
| chr3  | 73959434  | 73959641  | 208 |
| chr3  | 52829105  | 52829312  | 208 |
| chr3  | 36659983  | 36660190  | 208 |
| chr3  | 35625959  | 35626166  | 208 |
| chr3  | 25624731  | 25624938  | 208 |
| chr3  | 22379269  | 22379476  | 208 |
| chr3  | 15542680  | 15542887  | 208 |
| chr3  | 4406557   | 4406764   | 208 |
| chr29 | 48886828  | 48887035  | 208 |
| chr29 | 46672033  | 46672240  | 208 |
| chr29 | 36465282  | 36465489  | 208 |
| chr29 | 35524732  | 35524939  | 208 |
| chr29 | 34720072  | 34720279  | 208 |
| chr29 | 31779159  | 31779366  | 208 |
| chr28 | 40751040  | 40751247  | 208 |
| chr28 | 33640124  | 33640331  | 208 |
| chr28 | 26755149  | 26755356  | 208 |
| chr27 | 41895168  | 41895375  | 208 |
| chr27 | 28480387  | 28480594  | 208 |
| chr26 | 50633340  | 50633547  | 208 |
| chr26 | 45852571  | 45852778  | 208 |
| chr26 | 41858603  | 41858810  | 208 |

|       |           |           |     |
|-------|-----------|-----------|-----|
| chr26 | 22399019  | 22399226  | 208 |
| chr26 | 18876120  | 18876327  | 208 |
| chr26 | 18792037  | 18792244  | 208 |
| chr26 | 14912848  | 14913055  | 208 |
| chr25 | 42800691  | 42800898  | 208 |
| chr25 | 41211424  | 41211631  | 208 |
| chr25 | 39262967  | 39263174  | 208 |
| chr25 | 30880531  | 30880738  | 208 |
| chr25 | 2701927   | 2702134   | 208 |
| chr24 | 60845466  | 60845673  | 208 |
| chr24 | 60514592  | 60514799  | 208 |
| chr24 | 49800700  | 49800907  | 208 |
| chr24 | 45222541  | 45222748  | 208 |
| chr24 | 40944762  | 40944969  | 208 |
| chr24 | 34497086  | 34497293  | 208 |
| chr23 | 48564150  | 48564357  | 208 |
| chr23 | 42543583  | 42543790  | 208 |
| chr23 | 42320973  | 42321180  | 208 |
| chr23 | 30036088  | 30036295  | 208 |
| chr23 | 15058283  | 15058490  | 208 |
| chr23 | 11887407  | 11887614  | 208 |
| chr23 | 9983185   | 9983392   | 208 |
| chr22 | 57211321  | 57211528  | 208 |
| chr22 | 56567832  | 56568039  | 208 |
| chr22 | 55547085  | 55547292  | 208 |
| chr22 | 51775344  | 51775551  | 208 |
| chr22 | 46584833  | 46585040  | 208 |
| chr22 | 30191168  | 30191375  | 208 |
| chr22 | 22041632  | 22041839  | 208 |
| chr22 | 16405324  | 16405531  | 208 |
| chr22 | 15040425  | 15040632  | 208 |
| chr22 | 5759838   | 5760045   | 208 |
| chr21 | 69086698  | 69086905  | 208 |
| chr21 | 64227470  | 64227677  | 208 |
| chr21 | 62677302  | 62677509  | 208 |
| chr21 | 62227889  | 62228096  | 208 |
| chr21 | 22367796  | 22368003  | 208 |
| chr21 | 20193355  | 20193562  | 208 |
| chr20 | 19390271  | 19390478  | 208 |
| chr2  | 135471542 | 135471749 | 208 |
| chr2  | 131003499 | 131003706 | 208 |
| chr2  | 130976894 | 130977101 | 208 |
| chr2  | 123014822 | 123015029 | 208 |
| chr2  | 89804127  | 89804334  | 208 |
| chr2  | 21896899  | 21897106  | 208 |
| chr2  | 5040504   | 5040711   | 208 |
| chr19 | 62003306  | 62003513  | 208 |
| chr19 | 59383707  | 59383914  | 208 |
| chr19 | 56991050  | 56991257  | 208 |
| chr19 | 56073423  | 56073630  | 208 |

|       |          |          |     |
|-------|----------|----------|-----|
| chr19 | 55768401 | 55768608 | 208 |
| chr19 | 54263012 | 54263219 | 208 |
| chr19 | 48184440 | 48184647 | 208 |
| chr19 | 33460148 | 33460355 | 208 |
| chr19 | 27068532 | 27068739 | 208 |
| chr19 | 12336070 | 12336277 | 208 |
| chr19 | 7855042  | 7855249  | 208 |
| chr18 | 65135177 | 65135384 | 208 |
| chr18 | 63697568 | 63697775 | 208 |
| chr18 | 52102129 | 52102336 | 208 |
| chr18 | 50988822 | 50989029 | 208 |
| chr18 | 49361815 | 49362022 | 208 |
| chr18 | 46016209 | 46016416 | 208 |
| chr18 | 45336332 | 45336539 | 208 |
| chr18 | 12477970 | 12478177 | 208 |
| chr18 | 12044855 | 12045062 | 208 |
| chr18 | 11805688 | 11805895 | 208 |
| chr18 | 7813267  | 7813474  | 208 |
| chr18 | 3808258  | 3808465  | 208 |
| chr18 | 3703976  | 3704183  | 208 |
| chr17 | 68356439 | 68356646 | 208 |
| chr17 | 63192957 | 63193164 | 208 |
| chr17 | 56552380 | 56552587 | 208 |
| chr17 | 54612476 | 54612683 | 208 |
| chr17 | 22177850 | 22178057 | 208 |
| chr16 | 77622640 | 77622847 | 208 |
| chr16 | 67511794 | 67512001 | 208 |
| chr16 | 55354187 | 55354394 | 208 |
| chr16 | 45031215 | 45031422 | 208 |
| chr16 | 18967428 | 18967635 | 208 |
| chr15 | 65641955 | 65642162 | 208 |
| chr15 | 45510940 | 45511147 | 208 |
| chr15 | 28919989 | 28920196 | 208 |
| chr15 | 26532202 | 26532409 | 208 |
| chr15 | 25678616 | 25678823 | 208 |
| chr15 | 25371581 | 25371788 | 208 |
| chr15 | 24732577 | 24732784 | 208 |
| chr15 | 16016254 | 16016461 | 208 |
| chr14 | 40048043 | 40048250 | 208 |
| chr14 | 20970480 | 20970687 | 208 |
| chr14 | 8463031  | 8463238  | 208 |
| chr13 | 72527063 | 72527270 | 208 |
| chr13 | 70708036 | 70708243 | 208 |
| chr13 | 70173494 | 70173701 | 208 |
| chr13 | 69875580 | 69875787 | 208 |
| chr13 | 69766569 | 69766776 | 208 |
| chr13 | 59993976 | 59994183 | 208 |
| chr13 | 59432881 | 59433088 | 208 |
| chr13 | 52667057 | 52667264 | 208 |
| chr13 | 41212900 | 41213107 | 208 |



|       |           |           |     |
|-------|-----------|-----------|-----|
| chr13 | 38809711  | 38809918  | 208 |
| chr13 | 36875602  | 36875809  | 208 |
| chr13 | 35498706  | 35498913  | 208 |
| chr13 | 35314003  | 35314210  | 208 |
| chr13 | 15763092  | 15763299  | 208 |
| chr13 | 14366111  | 14366318  | 208 |
| chr13 | 10522645  | 10522852  | 208 |
| chr13 | 6927318   | 6927525   | 208 |
| chr13 | 2966519   | 2966726   | 208 |
| chr12 | 84240827  | 84241034  | 208 |
| chr12 | 34010347  | 34010554  | 208 |
| chr12 | 14244210  | 14244417  | 208 |
| chr11 | 107557684 | 107557891 | 208 |
| chr11 | 95260928  | 95261135  | 208 |
| chr11 | 93908108  | 93908315  | 208 |
| chr11 | 90387200  | 90387407  | 208 |
| chr11 | 89399157  | 89399364  | 208 |
| chr11 | 87865547  | 87865754  | 208 |
| chr11 | 74205169  | 74205376  | 208 |
| chr11 | 70932064  | 70932271  | 208 |
| chr11 | 50010306  | 50010513  | 208 |
| chr11 | 49488872  | 49489079  | 208 |
| chr11 | 46672580  | 46672787  | 208 |
| chr11 | 29843018  | 29843225  | 208 |
| chr11 | 23184264  | 23184471  | 208 |
| chr11 | 7923499   | 7923706   | 208 |
| chr11 | 2286993   | 2287200   | 208 |
| chr10 | 104782376 | 104782583 | 208 |
| chr10 | 70020700  | 70020907  | 208 |
| chr10 | 58994687  | 58994894  | 208 |
| chr10 | 44583307  | 44583514  | 208 |
| chr10 | 25251964  | 25252171  | 208 |
| chr10 | 19633432  | 19633639  | 208 |
| chr10 | 17038851  | 17039058  | 208 |
| chr10 | 12252511  | 12252718  | 208 |
| chr1  | 142223803 | 142224010 | 208 |
| chr1  | 138035498 | 138035705 | 208 |
| chr1  | 136399608 | 136399815 | 208 |
| chr1  | 128123600 | 128123807 | 208 |
| chr1  | 110655340 | 110655547 | 208 |
| chr1  | 82981796  | 82982003  | 208 |
| chr1  | 74573869  | 74574076  | 208 |
| chr1  | 72594756  | 72594963  | 208 |
| chr1  | 69460407  | 69460614  | 208 |
| chr1  | 68831327  | 68831534  | 208 |
| chr1  | 68817850  | 68818057  | 208 |
| chr1  | 67747292  | 67747499  | 208 |
| chrX  | 80236527  | 80236733  | 207 |
| chrX  | 79752022  | 79752228  | 207 |
| chrX  | 78125653  | 78125859  | 207 |

|      |          |          |     |
|------|----------|----------|-----|
| chrX | 77459646 | 77459852 | 207 |
| chrX | 76843933 | 76844139 | 207 |
| chrX | 76786195 | 76786401 | 207 |
| chrX | 75691846 | 75692052 | 207 |
| chrX | 75653913 | 75654119 | 207 |
| chrX | 72874055 | 72874261 | 207 |
| chrX | 72827449 | 72827655 | 207 |
| chrX | 72695232 | 72695438 | 207 |
| chrX | 72089469 | 72089675 | 207 |
| chrX | 66382107 | 66382313 | 207 |
| chrX | 66220445 | 66220651 | 207 |
| chrX | 64466976 | 64467182 | 207 |
| chrX | 63729828 | 63730034 | 207 |
| chrX | 62590042 | 62590248 | 207 |
| chrX | 60561827 | 60562033 | 207 |
| chrX | 56927039 | 56927245 | 207 |
| chrX | 56598009 | 56598215 | 207 |
| chrX | 55626199 | 55626405 | 207 |
| chrX | 55624368 | 55624574 | 207 |
| chrX | 55290641 | 55290847 | 207 |
| chrX | 55278218 | 55278424 | 207 |
| chrX | 54933210 | 54933416 | 207 |
| chrX | 54373668 | 54373874 | 207 |
| chrX | 53960731 | 53960937 | 207 |
| chrX | 53420811 | 53421017 | 207 |
| chrX | 50230458 | 50230664 | 207 |
| chrX | 48658981 | 48659187 | 207 |
| chrX | 47877918 | 47878124 | 207 |
| chrX | 37385505 | 37385711 | 207 |
| chrX | 37292092 | 37292298 | 207 |
| chrX | 33976700 | 33976906 | 207 |
| chrX | 32125036 | 32125242 | 207 |
| chrX | 31669149 | 31669355 | 207 |
| chrX | 30832603 | 30832809 | 207 |
| chrX | 30709664 | 30709870 | 207 |
| chrX | 28519419 | 28519625 | 207 |
| chrX | 28069555 | 28069761 | 207 |
| chrX | 23076969 | 23077175 | 207 |
| chrX | 22758575 | 22758781 | 207 |
| chrX | 21613755 | 21613961 | 207 |
| chrX | 12991267 | 12991473 | 207 |
| chrX | 11699848 | 11700054 | 207 |
| chrX | 11532048 | 11532254 | 207 |
| chrX | 10718410 | 10718616 | 207 |
| chrX | 9645513  | 9645719  | 207 |
| chrX | 8284326  | 8284532  | 207 |
| chrX | 8049001  | 8049207  | 207 |
| chrX | 7619007  | 7619213  | 207 |
| chrX | 7204314  | 7204520  | 207 |
| chrX | 5433509  | 5433715  | 207 |

|      |           |           |     |
|------|-----------|-----------|-----|
| chrX | 5059876   | 5060082   | 207 |
| chr9 | 106173714 | 106173920 | 207 |
| chr9 | 105908709 | 105908915 | 207 |
| chr9 | 87776217  | 87776423  | 207 |
| chr9 | 35459785  | 35459991  | 207 |
| chr8 | 115022829 | 115023035 | 207 |
| chr8 | 111118842 | 111119048 | 207 |
| chr8 | 110734160 | 110734366 | 207 |
| chr8 | 108332042 | 108332248 | 207 |
| chr8 | 96338215  | 96338421  | 207 |
| chr8 | 92982749  | 92982955  | 207 |
| chr8 | 65226564  | 65226770  | 207 |
| chr8 | 38071108  | 38071314  | 207 |
| chr8 | 7544375   | 7544581   | 207 |
| chr8 | 1061361   | 1061567   | 207 |
| chr7 | 80921179  | 80921385  | 207 |
| chr7 | 70718928  | 70719134  | 207 |
| chr7 | 50255887  | 50256093  | 207 |
| chr7 | 46466426  | 46466632  | 207 |
| chr7 | 43727434  | 43727640  | 207 |
| chr7 | 37380733  | 37380939  | 207 |
| chr7 | 19202895  | 19203101  | 207 |
| chr7 | 1688568   | 1688774   | 207 |
| chr6 | 113338050 | 113338256 | 207 |
| chr6 | 94068330  | 94068536  | 207 |
| chr6 | 72743078  | 72743284  | 207 |
| chr6 | 59937047  | 59937253  | 207 |
| chr5 | 111468701 | 111468907 | 207 |
| chr5 | 103257378 | 103257584 | 207 |
| chr5 | 101620619 | 101620825 | 207 |
| chr5 | 90421446  | 90421652  | 207 |
| chr5 | 81496743  | 81496949  | 207 |
| chr5 | 33886284  | 33886490  | 207 |
| chr5 | 31475442  | 31475648  | 207 |
| chr5 | 30438190  | 30438396  | 207 |
| chr5 | 28860478  | 28860684  | 207 |
| chr4 | 119338843 | 119339049 | 207 |
| chr4 | 109507930 | 109508136 | 207 |
| chr4 | 103104093 | 103104299 | 207 |
| chr4 | 99260679  | 99260885  | 207 |
| chr4 | 99034608  | 99034814  | 207 |
| chr4 | 97736761  | 97736967  | 207 |
| chr4 | 97703844  | 97704050  | 207 |
| chr4 | 95784679  | 95784885  | 207 |
| chr4 | 69312843  | 69313049  | 207 |
| chr4 | 13318912  | 13319118  | 207 |
| chr4 | 8713748   | 8713954   | 207 |
| chr4 | 4910059   | 4910265   | 207 |
| chr3 | 124132002 | 124132208 | 207 |
| chr3 | 122336069 | 122336275 | 207 |

|       |           |           |     |
|-------|-----------|-----------|-----|
| chr3  | 121912898 | 121913104 | 207 |
| chr3  | 121690968 | 121691174 | 207 |
| chr3  | 111808861 | 111809067 | 207 |
| chr3  | 110129602 | 110129808 | 207 |
| chr3  | 105244745 | 105244951 | 207 |
| chr3  | 102957917 | 102958123 | 207 |
| chr3  | 102696603 | 102696809 | 207 |
| chr3  | 89879241  | 89879447  | 207 |
| chr3  | 33112109  | 33112315  | 207 |
| chr29 | 45133814  | 45134020  | 207 |
| chr29 | 42394458  | 42394664  | 207 |
| chr29 | 38045256  | 38045462  | 207 |
| chr29 | 37420997  | 37421203  | 207 |
| chr29 | 33897442  | 33897648  | 207 |
| chr29 | 33374587  | 33374793  | 207 |
| chr29 | 30028532  | 30028738  | 207 |
| chr28 | 46066658  | 46066864  | 207 |
| chr28 | 42183364  | 42183570  | 207 |
| chr28 | 40384653  | 40384859  | 207 |
| chr28 | 5027196   | 5027402   | 207 |
| chr27 | 28398246  | 28398452  | 207 |
| chr27 | 26361216  | 26361422  | 207 |
| chr27 | 17523840  | 17524046  | 207 |
| chr26 | 49434957  | 49435163  | 207 |
| chr26 | 46840303  | 46840509  | 207 |
| chr26 | 44188512  | 44188718  | 207 |
| chr26 | 31172297  | 31172503  | 207 |
| chr26 | 23072793  | 23072999  | 207 |
| chr26 | 21601845  | 21602051  | 207 |
| chr26 | 21593418  | 21593624  | 207 |
| chr25 | 33175658  | 33175864  | 207 |
| chr25 | 33174991  | 33175197  | 207 |
| chr25 | 30616224  | 30616430  | 207 |
| chr25 | 29292890  | 29293096  | 207 |
| chr25 | 24615454  | 24615660  | 207 |
| chr25 | 5044343   | 5044549   | 207 |
| chr25 | 3992753   | 3992959   | 207 |
| chr25 | 3060866   | 3061072   | 207 |
| chr24 | 60780551  | 60780757  | 207 |
| chr24 | 60767582  | 60767788  | 207 |
| chr24 | 48954267  | 48954473  | 207 |
| chr24 | 48175188  | 48175394  | 207 |
| chr24 | 40577939  | 40578145  | 207 |
| chr24 | 31393426  | 31393632  | 207 |
| chr24 | 22946705  | 22946911  | 207 |
| chr24 | 1485512   | 1485718   | 207 |
| chr23 | 52866538  | 52866744  | 207 |
| chr23 | 51986637  | 51986843  | 207 |
| chr23 | 42536533  | 42536739  | 207 |
| chr23 | 41800800  | 41801006  | 207 |

|       |               |           |     |
|-------|---------------|-----------|-----|
| chr23 | 38454840      | 38455046  | 207 |
| chr23 | 31391934      | 31392140  | 207 |
| chr23 | 31137531      | 31137737  | 207 |
| chr23 | 29016587      | 29016793  | 207 |
| chr23 | 20452861      | 20453067  | 207 |
| chr23 | 18732279      | 18732485  | 207 |
| chr23 | 17492532      | 17492738  | 207 |
| chr23 | 15858275      | 15858481  | 207 |
| chr23 | 15524899      | 15525105  | 207 |
| chr23 | 11485081      | 11485287  | 207 |
| chr23 | 11372822      | 11373028  | 207 |
| chr23 | 7715352       | 7715558   | 207 |
| chr22 | 59341930      | 59342136  | 207 |
| chr22 | 59111031      | 59111237  | 207 |
| chr22 | 58277361      | 58277567  | 207 |
| chr22 | 54237059      | 54237265  | 207 |
| chr22 | 42643215      | 42643421  | 207 |
| chr22 | 8000232       | 8000438   | 207 |
| chr21 | 59925642      | 59925848  | 207 |
| chr21 | 59032998      | 59033204  | 207 |
| chr21 | 58555426      | 58555632  | 207 |
| chr21 | 28867655      | 28867861  | 207 |
| chr21 | 25302012      | 25302218  | 207 |
| chr21 | 22427428      | 22427634  | 207 |
| chr21 | 14018898      | 14019104  | 207 |
| chr21 | 2914012       | 2914218   | 207 |
| chr20 | 25510055      | 25510261  | 207 |
| chr20 | 6729804       | 6730010   | 207 |
| chr20 | 6139650       | 6139856   | 207 |
| chr20 | 1561433       | 1561639   | 207 |
| chr20 | 1191531       | 1191737   | 207 |
| chr20 | 703928 704134 | 207       |     |
| chr2  | 139599809     | 139600015 | 207 |
| chr2  | 136609330     | 136609536 | 207 |
| chr2  | 131546208     | 131546414 | 207 |
| chr2  | 127225927     | 127226133 | 207 |
| chr2  | 126139747     | 126139953 | 207 |
| chr2  | 114877015     | 114877221 | 207 |
| chr2  | 99670903      | 99671109  | 207 |
| chr2  | 92360781      | 92360987  | 207 |
| chr2  | 22304232      | 22304438  | 207 |
| chr19 | 61408114      | 61408320  | 207 |
| chr19 | 60323432      | 60323638  | 207 |
| chr19 | 59245843      | 59246049  | 207 |
| chr19 | 59090306      | 59090512  | 207 |
| chr19 | 57041570      | 57041776  | 207 |
| chr19 | 56086894      | 56087100  | 207 |
| chr19 | 53168144      | 53168350  | 207 |
| chr19 | 52414810      | 52415016  | 207 |
| chr19 | 43215099      | 43215305  | 207 |

|       |          |          |     |
|-------|----------|----------|-----|
| chr19 | 39257256 | 39257462 | 207 |
| chr19 | 39161744 | 39161950 | 207 |
| chr19 | 38550688 | 38550894 | 207 |
| chr19 | 27188012 | 27188218 | 207 |
| chr19 | 24626619 | 24626825 | 207 |
| chr19 | 24525121 | 24525327 | 207 |
| chr18 | 65789642 | 65789848 | 207 |
| chr18 | 55103346 | 55103552 | 207 |
| chr18 | 43577418 | 43577624 | 207 |
| chr18 | 42919648 | 42919854 | 207 |
| chr18 | 35616967 | 35617173 | 207 |
| chr18 | 32874828 | 32875034 | 207 |
| chr18 | 25487364 | 25487570 | 207 |
| chr18 | 24197548 | 24197754 | 207 |
| chr18 | 22688917 | 22689123 | 207 |
| chr18 | 13581636 | 13581842 | 207 |
| chr18 | 12098254 | 12098460 | 207 |
| chr18 | 4311596  | 4311802  | 207 |
| chr17 | 70282447 | 70282653 | 207 |
| chr17 | 69170626 | 69170832 | 207 |
| chr17 | 55478510 | 55478716 | 207 |
| chr17 | 46775674 | 46775880 | 207 |
| chr16 | 77614237 | 77614443 | 207 |
| chr16 | 77599524 | 77599730 | 207 |
| chr16 | 76027048 | 76027254 | 207 |
| chr16 | 75885332 | 75885538 | 207 |
| chr16 | 60182544 | 60182750 | 207 |
| chr16 | 56090560 | 56090766 | 207 |
| chr16 | 47881938 | 47882144 | 207 |
| chr16 | 47108954 | 47109160 | 207 |
| chr16 | 46803082 | 46803288 | 207 |
| chr16 | 44888975 | 44889181 | 207 |
| chr16 | 44873338 | 44873544 | 207 |
| chr16 | 43503100 | 43503306 | 207 |
| chr16 | 38860062 | 38860268 | 207 |
| chr16 | 30596163 | 30596369 | 207 |
| chr16 | 26561069 | 26561275 | 207 |
| chr16 | 3645216  | 3645422  | 207 |
| chr15 | 62580952 | 62581158 | 207 |
| chr15 | 56048203 | 56048409 | 207 |
| chr15 | 55218459 | 55218665 | 207 |
| chr15 | 51655338 | 51655544 | 207 |
| chr15 | 39667222 | 39667428 | 207 |
| chr15 | 37262961 | 37263167 | 207 |
| chr15 | 30498503 | 30498709 | 207 |
| chr15 | 25788045 | 25788251 | 207 |
| chr15 | 25549618 | 25549824 | 207 |
| chr15 | 23640701 | 23640907 | 207 |
| chr15 | 22239639 | 22239845 | 207 |
| chr15 | 20882361 | 20882567 | 207 |

|       |           |           |     |
|-------|-----------|-----------|-----|
| chr15 | 16015954  | 16016160  | 207 |
| chr14 | 72406750  | 72406956  | 207 |
| chr14 | 63485323  | 63485529  | 207 |
| chr14 | 61272779  | 61272985  | 207 |
| chr14 | 21029025  | 21029231  | 207 |
| chr14 | 11927436  | 11927642  | 207 |
| chr13 | 75975058  | 75975264  | 207 |
| chr13 | 68891123  | 68891329  | 207 |
| chr13 | 63206203  | 63206409  | 207 |
| chr13 | 62046436  | 62046642  | 207 |
| chr13 | 60907450  | 60907656  | 207 |
| chr13 | 57229242  | 57229448  | 207 |
| chr13 | 56392356  | 56392562  | 207 |
| chr13 | 55715753  | 55715959  | 207 |
| chr13 | 54921794  | 54922000  | 207 |
| chr13 | 53700573  | 53700779  | 207 |
| chr13 | 42664353  | 42664559  | 207 |
| chr13 | 35964057  | 35964263  | 207 |
| chr13 | 35579877  | 35580083  | 207 |
| chr13 | 35387384  | 35387590  | 207 |
| chr13 | 16261584  | 16261790  | 207 |
| chr13 | 14649312  | 14649518  | 207 |
| chr13 | 13563635  | 13563841  | 207 |
| chr13 | 6962512   | 6962718   | 207 |
| chr12 | 82523512  | 82523718  | 207 |
| chr12 | 80971079  | 80971285  | 207 |
| chr12 | 80748486  | 80748692  | 207 |
| chr12 | 35465177  | 35465383  | 207 |
| chr12 | 32447719  | 32447925  | 207 |
| chr12 | 31067768  | 31067974  | 207 |
| chr12 | 29869261  | 29869467  | 207 |
| chr11 | 104903657 | 104903863 | 207 |
| chr11 | 90359275  | 90359481  | 207 |
| chr11 | 77569938  | 77570144  | 207 |
| chr11 | 74456582  | 74456788  | 207 |
| chr11 | 74450005  | 74450211  | 207 |
| chr11 | 71915395  | 71915601  | 207 |
| chr11 | 47837497  | 47837703  | 207 |
| chr11 | 47254492  | 47254698  | 207 |
| chr11 | 40277675  | 40277881  | 207 |
| chr11 | 28434423  | 28434629  | 207 |
| chr11 | 28366731  | 28366937  | 207 |
| chr11 | 28328673  | 28328879  | 207 |
| chr11 | 28317839  | 28318045  | 207 |
| chr11 | 19894960  | 19895166  | 207 |
| chr10 | 78877059  | 78877265  | 207 |
| chr10 | 53327749  | 53327955  | 207 |
| chr10 | 16839830  | 16840036  | 207 |
| chr10 | 16814117  | 16814323  | 207 |
| chr10 | 12743607  | 12743813  | 207 |

|       |           |           |     |
|-------|-----------|-----------|-----|
| chr10 | 11828744  | 11828950  | 207 |
| chr1  | 148225238 | 148225444 | 207 |
| chr1  | 145585348 | 145585554 | 207 |
| chr1  | 128584003 | 128584209 | 207 |
| chr1  | 81764082  | 81764288  | 207 |
| chr1  | 80780817  | 80781023  | 207 |
| chr1  | 76415345  | 76415551  | 207 |
| chr1  | 75384704  | 75384910  | 207 |
| chr1  | 74558150  | 74558356  | 207 |
| chr1  | 1624642   | 1624848   | 207 |
| chrX  | 83010503  | 83010708  | 206 |
| chrX  | 80691230  | 80691435  | 206 |
| chrX  | 80409155  | 80409360  | 206 |
| chrX  | 79643494  | 79643699  | 206 |
| chrX  | 79056798  | 79057003  | 206 |
| chrX  | 77238342  | 77238547  | 206 |
| chrX  | 76035476  | 76035681  | 206 |
| chrX  | 75920804  | 75921009  | 206 |
| chrX  | 75917740  | 75917945  | 206 |
| chrX  | 75759046  | 75759251  | 206 |
| chrX  | 75486229  | 75486434  | 206 |
| chrX  | 74897499  | 74897704  | 206 |
| chrX  | 74580063  | 74580268  | 206 |
| chrX  | 74494438  | 74494643  | 206 |
| chrX  | 74393375  | 74393580  | 206 |
| chrX  | 73792946  | 73793151  | 206 |
| chrX  | 71710549  | 71710754  | 206 |
| chrX  | 69142625  | 69142830  | 206 |
| chrX  | 67910877  | 67911082  | 206 |
| chrX  | 67878150  | 67878355  | 206 |
| chrX  | 66973803  | 66974008  | 206 |
| chrX  | 66267855  | 66268060  | 206 |
| chrX  | 65653485  | 65653690  | 206 |
| chrX  | 65190003  | 65190208  | 206 |
| chrX  | 64568190  | 64568395  | 206 |
| chrX  | 60828712  | 60828917  | 206 |
| chrX  | 59469881  | 59470086  | 206 |
| chrX  | 58478850  | 58479055  | 206 |
| chrX  | 56948486  | 56948691  | 206 |
| chrX  | 56876992  | 56877197  | 206 |
| chrX  | 56725532  | 56725737  | 206 |
| chrX  | 56254697  | 56254902  | 206 |
| chrX  | 55473690  | 55473895  | 206 |
| chrX  | 54775760  | 54775965  | 206 |
| chrX  | 53279724  | 53279929  | 206 |
| chrX  | 50701018  | 50701223  | 206 |
| chrX  | 50044119  | 50044324  | 206 |
| chrX  | 50038962  | 50039167  | 206 |
| chrX  | 49290422  | 49290627  | 206 |
| chrX  | 36845352  | 36845557  | 206 |



|      |               |           |     |
|------|---------------|-----------|-----|
| chrX | 36376554      | 36376759  | 206 |
| chrX | 30922968      | 30923173  | 206 |
| chrX | 30207688      | 30207893  | 206 |
| chrX | 29554530      | 29554735  | 206 |
| chrX | 21448150      | 21448355  | 206 |
| chrX | 21143580      | 21143785  | 206 |
| chrX | 19619555      | 19619760  | 206 |
| chrX | 19445193      | 19445398  | 206 |
| chrX | 13307389      | 13307594  | 206 |
| chrX | 12235121      | 12235326  | 206 |
| chrX | 10613357      | 10613562  | 206 |
| chrX | 9654214       | 9654419   | 206 |
| chrX | 9481966       | 9482171   | 206 |
| chrX | 7446036       | 7446241   | 206 |
| chrX | 6733324       | 6733529   | 206 |
| chrX | 6694119       | 6694324   | 206 |
| chrX | 6609996       | 6610201   | 206 |
| chrX | 2553083       | 2553288   | 206 |
| chrX | 914298 914503 | 206       |     |
| chr9 | 77765773      | 77765978  | 206 |
| chr9 | 76822531      | 76822736  | 206 |
| chr9 | 63302343      | 63302548  | 206 |
| chr9 | 41631166      | 41631371  | 206 |
| chr9 | 35469605      | 35469810  | 206 |
| chr9 | 27029718      | 27029923  | 206 |
| chr8 | 116893102     | 116893307 | 206 |
| chr8 | 109484738     | 109484943 | 206 |
| chr8 | 105127129     | 105127334 | 206 |
| chr8 | 12256750      | 12256955  | 206 |
| chr8 | 8517765       | 8517970   | 206 |
| chr7 | 91311523      | 91311728  | 206 |
| chr7 | 77078477      | 77078682  | 206 |
| chr7 | 65224069      | 65224274  | 206 |
| chr7 | 61463447      | 61463652  | 206 |
| chr7 | 59556371      | 59556576  | 206 |
| chr7 | 52281182      | 52281387  | 206 |
| chr7 | 42804442      | 42804647  | 206 |
| chr7 | 37508240      | 37508445  | 206 |
| chr7 | 16671010      | 16671215  | 206 |
| chr7 | 5413711       | 5413916   | 206 |
| chr6 | 121716859     | 121717064 | 206 |
| chr6 | 121079876     | 121080081 | 206 |
| chr6 | 108540338     | 108540543 | 206 |
| chr6 | 102161769     | 102161974 | 206 |
| chr6 | 93037404      | 93037609  | 206 |
| chr6 | 16973727      | 16973932  | 206 |
| chr5 | 125715413     | 125715618 | 206 |
| chr5 | 123605656     | 123605861 | 206 |
| chr5 | 122222332     | 122222537 | 206 |
| chr5 | 120479474     | 120479679 | 206 |

|       |           |           |     |
|-------|-----------|-----------|-----|
| chr5  | 116388993 | 116389198 | 206 |
| chr5  | 112049350 | 112049555 | 206 |
| chr5  | 62076030  | 62076235  | 206 |
| chr5  | 38520606  | 38520811  | 206 |
| chr5  | 31112562  | 31112767  | 206 |
| chr5  | 29206613  | 29206818  | 206 |
| chr5  | 29129836  | 29130041  | 206 |
| chr5  | 28415545  | 28415750  | 206 |
| chr5  | 10190546  | 10190751  | 206 |
| chr4  | 118257017 | 118257222 | 206 |
| chr4  | 118008354 | 118008559 | 206 |
| chr4  | 101947899 | 101948104 | 206 |
| chr4  | 99473907  | 99474112  | 206 |
| chr4  | 99415650  | 99415855  | 206 |
| chr4  | 72498999  | 72499204  | 206 |
| chr4  | 49599238  | 49599443  | 206 |
| chr4  | 12018255  | 12018460  | 206 |
| chr3  | 127886191 | 127886396 | 206 |
| chr3  | 124044895 | 124045100 | 206 |
| chr3  | 122459276 | 122459481 | 206 |
| chr3  | 119704646 | 119704851 | 206 |
| chr3  | 115760931 | 115761136 | 206 |
| chr3  | 113287753 | 113287958 | 206 |
| chr3  | 105202694 | 105202899 | 206 |
| chr3  | 104547092 | 104547297 | 206 |
| chr3  | 99257643  | 99257848  | 206 |
| chr3  | 97887303  | 97887508  | 206 |
| chr3  | 36841758  | 36841963  | 206 |
| chr3  | 24499761  | 24499966  | 206 |
| chr3  | 4454611   | 4454816   | 206 |
| chr29 | 31542534  | 31542739  | 206 |
| chr29 | 26466927  | 26467132  | 206 |
| chr29 | 12802534  | 12802739  | 206 |
| chr29 | 2427505   | 2427710   | 206 |
| chr28 | 42158478  | 42158683  | 206 |
| chr28 | 34644301  | 34644506  | 206 |
| chr28 | 33404407  | 33404612  | 206 |
| chr27 | 35958437  | 35958642  | 206 |
| chr27 | 34976438  | 34976643  | 206 |
| chr27 | 27745513  | 27745718  | 206 |
| chr27 | 15398874  | 15399079  | 206 |
| chr27 | 6783442   | 6783647   | 206 |
| chr26 | 51375841  | 51376046  | 206 |
| chr26 | 45960195  | 45960400  | 206 |
| chr26 | 43973468  | 43973673  | 206 |
| chr26 | 43599005  | 43599210  | 206 |
| chr26 | 42085570  | 42085775  | 206 |
| chr26 | 41271649  | 41271854  | 206 |
| chr26 | 41142395  | 41142600  | 206 |
| chr26 | 38527949  | 38528154  | 206 |

|       |          |          |     |
|-------|----------|----------|-----|
| chr26 | 37855055 | 37855260 | 206 |
| chr26 | 31364335 | 31364540 | 206 |
| chr26 | 23514456 | 23514661 | 206 |
| chr26 | 22381965 | 22382170 | 206 |
| chr26 | 19753853 | 19754058 | 206 |
| chr25 | 42786994 | 42787199 | 206 |
| chr25 | 38528538 | 38528743 | 206 |
| chr25 | 33769256 | 33769461 | 206 |
| chr25 | 29851805 | 29852010 | 206 |
| chr25 | 26203455 | 26203660 | 206 |
| chr25 | 10521744 | 10521949 | 206 |
| chr25 | 8609911  | 8610116  | 206 |
| chr25 | 1055526  | 1055731  | 206 |
| chr24 | 58906297 | 58906502 | 206 |
| chr24 | 58691419 | 58691624 | 206 |
| chr24 | 51530130 | 51530335 | 206 |
| chr24 | 51414312 | 51414517 | 206 |
| chr24 | 49032138 | 49032343 | 206 |
| chr24 | 39454945 | 39455150 | 206 |
| chr24 | 23959549 | 23959754 | 206 |
| chr24 | 20855366 | 20855571 | 206 |
| chr23 | 49386416 | 49386621 | 206 |
| chr23 | 43273376 | 43273581 | 206 |
| chr23 | 29031539 | 29031744 | 206 |
| chr23 | 29015127 | 29015332 | 206 |
| chr23 | 28050215 | 28050420 | 206 |
| chr23 | 19683067 | 19683272 | 206 |
| chr23 | 16083020 | 16083225 | 206 |
| chr22 | 59606902 | 59607107 | 206 |
| chr22 | 52809107 | 52809312 | 206 |
| chr22 | 49577935 | 49578140 | 206 |
| chr22 | 48494328 | 48494533 | 206 |
| chr22 | 30036832 | 30037037 | 206 |
| chr22 | 27770408 | 27770613 | 206 |
| chr22 | 14984205 | 14984410 | 206 |
| chr22 | 7197718  | 7197923  | 206 |
| chr21 | 64064473 | 64064678 | 206 |
| chr21 | 61512877 | 61513082 | 206 |
| chr21 | 61197498 | 61197703 | 206 |
| chr21 | 60991218 | 60991423 | 206 |
| chr21 | 57020071 | 57020276 | 206 |
| chr21 | 32981457 | 32981662 | 206 |
| chr21 | 28944790 | 28944995 | 206 |
| chr21 | 28654762 | 28654967 | 206 |
| chr21 | 25496932 | 25497137 | 206 |
| chr21 | 24986586 | 24986791 | 206 |
| chr21 | 24878137 | 24878342 | 206 |
| chr21 | 20721263 | 20721468 | 206 |
| chr21 | 20035496 | 20035701 | 206 |
| chr20 | 73215168 | 73215373 | 206 |

|       |           |           |     |
|-------|-----------|-----------|-----|
| chr20 | 66168578  | 66168783  | 206 |
| chr20 | 41282980  | 41283185  | 206 |
| chr20 | 3608739   | 3608944   | 206 |
| chr20 | 1292075   | 1292280   | 206 |
| chr2  | 127553110 | 127553315 | 206 |
| chr2  | 25246109  | 25246314  | 206 |
| chr2  | 24932590  | 24932795  | 206 |
| chr19 | 63539742  | 63539947  | 206 |
| chr19 | 61565640  | 61565845  | 206 |
| chr19 | 61142408  | 61142613  | 206 |
| chr19 | 61035742  | 61035947  | 206 |
| chr19 | 59071225  | 59071430  | 206 |
| chr19 | 57181659  | 57181864  | 206 |
| chr19 | 55958214  | 55958419  | 206 |
| chr19 | 46878290  | 46878495  | 206 |
| chr19 | 42497006  | 42497211  | 206 |
| chr19 | 42383651  | 42383856  | 206 |
| chr19 | 41406470  | 41406675  | 206 |
| chr19 | 40856482  | 40856687  | 206 |
| chr19 | 39497295  | 39497500  | 206 |
| chr19 | 38939392  | 38939597  | 206 |
| chr19 | 37572536  | 37572741  | 206 |
| chr19 | 27525852  | 27526057  | 206 |
| chr19 | 24002706  | 24002911  | 206 |
| chr19 | 19871537  | 19871742  | 206 |
| chr19 | 15915366  | 15915571  | 206 |
| chr19 | 7606365   | 7606570   | 206 |
| chr18 | 56922224  | 56922429  | 206 |
| chr18 | 52244547  | 52244752  | 206 |
| chr18 | 47221085  | 47221290  | 206 |
| chr18 | 43442322  | 43442527  | 206 |
| chr18 | 40116900  | 40117105  | 206 |
| chr18 | 33149937  | 33150142  | 206 |
| chr18 | 22502312  | 22502517  | 206 |
| chr18 | 22243186  | 22243391  | 206 |
| chr18 | 5900516   | 5900721   | 206 |
| chr18 | 377819    | 378024    | 206 |
| chr17 | 73976569  | 73976774  | 206 |
| chr17 | 73150787  | 73150992  | 206 |
| chr17 | 71822894  | 71823099  | 206 |
| chr17 | 70679392  | 70679597  | 206 |
| chr17 | 70244784  | 70244989  | 206 |
| chr17 | 70220001  | 70220206  | 206 |
| chr17 | 70089919  | 70090124  | 206 |
| chr17 | 68171845  | 68172050  | 206 |
| chr17 | 64303038  | 64303243  | 206 |
| chr17 | 63528418  | 63528623  | 206 |
| chr17 | 63508896  | 63509101  | 206 |
| chr17 | 63190237  | 63190442  | 206 |
| chr17 | 57703376  | 57703581  | 206 |

|       |          |          |     |
|-------|----------|----------|-----|
| chr17 | 55479219 | 55479424 | 206 |
| chr17 | 47431642 | 47431847 | 206 |
| chr17 | 36916888 | 36917093 | 206 |
| chr17 | 31426740 | 31426945 | 206 |
| chr17 | 19158672 | 19158877 | 206 |
| chr16 | 73732214 | 73732419 | 206 |
| chr16 | 72154189 | 72154394 | 206 |
| chr16 | 68980496 | 68980701 | 206 |
| chr16 | 68801886 | 68802091 | 206 |
| chr16 | 58628529 | 58628734 | 206 |
| chr16 | 56458101 | 56458306 | 206 |
| chr16 | 56115940 | 56116145 | 206 |
| chr16 | 42928628 | 42928833 | 206 |
| chr16 | 40904162 | 40904367 | 206 |
| chr16 | 26585812 | 26586017 | 206 |
| chr16 | 20647331 | 20647536 | 206 |
| chr15 | 74876171 | 74876376 | 206 |
| chr15 | 74598849 | 74599054 | 206 |
| chr15 | 74563425 | 74563630 | 206 |
| chr15 | 73790614 | 73790819 | 206 |
| chr15 | 72761166 | 72761371 | 206 |
| chr15 | 65742585 | 65742790 | 206 |
| chr15 | 64490039 | 64490244 | 206 |
| chr15 | 40734072 | 40734277 | 206 |
| chr15 | 39470114 | 39470319 | 206 |
| chr15 | 33146990 | 33147195 | 206 |
| chr15 | 24970625 | 24970830 | 206 |
| chr15 | 24543582 | 24543787 | 206 |
| chr14 | 77337622 | 77337827 | 206 |
| chr14 | 60078479 | 60078684 | 206 |
| chr14 | 42305723 | 42305928 | 206 |
| chr14 | 23728443 | 23728648 | 206 |
| chr14 | 21921699 | 21921904 | 206 |
| chr14 | 19905014 | 19905219 | 206 |
| chr14 | 7762180  | 7762385  | 206 |
| chr14 | 7734272  | 7734477  | 206 |
| chr14 | 7584035  | 7584240  | 206 |
| chr14 | 1630954  | 1631159  | 206 |
| chr14 | 1137791  | 1137996  | 206 |
| chr13 | 77771917 | 77772122 | 206 |
| chr13 | 76183384 | 76183589 | 206 |
| chr13 | 75451150 | 75451355 | 206 |
| chr13 | 59802668 | 59802873 | 206 |
| chr13 | 56511049 | 56511254 | 206 |
| chr13 | 56390367 | 56390572 | 206 |
| chr13 | 54884939 | 54885144 | 206 |
| chr13 | 45394352 | 45394557 | 206 |
| chr13 | 42391986 | 42392191 | 206 |
| chr13 | 37569136 | 37569341 | 206 |
| chr13 | 30854727 | 30854932 | 206 |

|       |               |           |     |
|-------|---------------|-----------|-----|
| chr13 | 15815750      | 15815955  | 206 |
| chr13 | 15643287      | 15643492  | 206 |
| chr13 | 7537145       | 7537350   | 206 |
| chr12 | 84409323      | 84409528  | 206 |
| chr12 | 82762799      | 82763004  | 206 |
| chr12 | 73451925      | 73452130  | 206 |
| chr12 | 39632242      | 39632447  | 206 |
| chr12 | 34400710      | 34400915  | 206 |
| chr12 | 34364368      | 34364573  | 206 |
| chr12 | 31510289      | 31510494  | 206 |
| chr12 | 27889856      | 27890061  | 206 |
| chr12 | 14188279      | 14188484  | 206 |
| chr11 | 104316087     | 104316292 | 206 |
| chr11 | 103527071     | 103527276 | 206 |
| chr11 | 100758182     | 100758387 | 206 |
| chr11 | 87902345      | 87902550  | 206 |
| chr11 | 84960253      | 84960458  | 206 |
| chr11 | 77822251      | 77822456  | 206 |
| chr11 | 71600592      | 71600797  | 206 |
| chr11 | 67448819      | 67449024  | 206 |
| chr11 | 65071008      | 65071213  | 206 |
| chr11 | 62716224      | 62716429  | 206 |
| chr11 | 47240142      | 47240347  | 206 |
| chr11 | 46208879      | 46209084  | 206 |
| chr11 | 38882166      | 38882371  | 206 |
| chr11 | 30552866      | 30553071  | 206 |
| chr10 | 102385330     | 102385535 | 206 |
| chr10 | 83064304      | 83064509  | 206 |
| chr10 | 74819108      | 74819313  | 206 |
| chr10 | 70048991      | 70049196  | 206 |
| chr10 | 25581954      | 25582159  | 206 |
| chr10 | 17546710      | 17546915  | 206 |
| chr10 | 16862429      | 16862634  | 206 |
| chr10 | 10181331      | 10181536  | 206 |
| chr1  | 159076332     | 159076537 | 206 |
| chr1  | 156997315     | 156997520 | 206 |
| chr1  | 153841617     | 153841822 | 206 |
| chr1  | 147245487     | 147245692 | 206 |
| chr1  | 145726936     | 145727141 | 206 |
| chr1  | 139861590     | 139861795 | 206 |
| chr1  | 91731245      | 91731450  | 206 |
| chr1  | 69886808      | 69887013  | 206 |
| chr1  | 152232 152437 | 206       |     |
| chrX  | 80941255      | 80941459  | 205 |
| chrX  | 79797901      | 79798105  | 205 |
| chrX  | 77490210      | 77490414  | 205 |
| chrX  | 76518327      | 76518531  | 205 |
| chrX  | 76091905      | 76092109  | 205 |
| chrX  | 74559295      | 74559499  | 205 |
| chrX  | 73341916      | 73342120  | 205 |

|      |           |           |     |
|------|-----------|-----------|-----|
| chrX | 72728125  | 72728329  | 205 |
| chrX | 72606827  | 72607031  | 205 |
| chrX | 71876455  | 71876659  | 205 |
| chrX | 67946346  | 67946550  | 205 |
| chrX | 65674481  | 65674685  | 205 |
| chrX | 65655217  | 65655421  | 205 |
| chrX | 64487688  | 64487892  | 205 |
| chrX | 62562456  | 62562660  | 205 |
| chrX | 59855744  | 59855948  | 205 |
| chrX | 58871447  | 58871651  | 205 |
| chrX | 58719758  | 58719962  | 205 |
| chrX | 58385976  | 58386180  | 205 |
| chrX | 56400329  | 56400533  | 205 |
| chrX | 55325945  | 55326149  | 205 |
| chrX | 54724955  | 54725159  | 205 |
| chrX | 54686876  | 54687080  | 205 |
| chrX | 53986704  | 53986908  | 205 |
| chrX | 51901708  | 51901912  | 205 |
| chrX | 51885124  | 51885328  | 205 |
| chrX | 51219281  | 51219485  | 205 |
| chrX | 50959770  | 50959974  | 205 |
| chrX | 50303030  | 50303234  | 205 |
| chrX | 47946997  | 47947201  | 205 |
| chrX | 46259232  | 46259436  | 205 |
| chrX | 40934975  | 40935179  | 205 |
| chrX | 36395252  | 36395456  | 205 |
| chrX | 36344456  | 36344660  | 205 |
| chrX | 36189580  | 36189784  | 205 |
| chrX | 34495501  | 34495705  | 205 |
| chrX | 34056289  | 34056493  | 205 |
| chrX | 31299749  | 31299953  | 205 |
| chrX | 29517495  | 29517699  | 205 |
| chrX | 22448043  | 22448247  | 205 |
| chrX | 19668783  | 19668987  | 205 |
| chrX | 18993972  | 18994176  | 205 |
| chrX | 18880736  | 18880940  | 205 |
| chrX | 16025648  | 16025852  | 205 |
| chrX | 15690280  | 15690484  | 205 |
| chrX | 12573419  | 12573623  | 205 |
| chrX | 12213913  | 12214117  | 205 |
| chrX | 11249835  | 11250039  | 205 |
| chrX | 9942406   | 9942610   | 205 |
| chrX | 8304609   | 8304813   | 205 |
| chrX | 8192196   | 8192400   | 205 |
| chrX | 8178609   | 8178813   | 205 |
| chrX | 5941233   | 5941437   | 205 |
| chrX | 5724140   | 5724344   | 205 |
| chrX | 4360680   | 4360884   | 205 |
| chrX | 2498466   | 2498670   | 205 |
| chr9 | 104919145 | 104919349 | 205 |

|      |           |           |     |
|------|-----------|-----------|-----|
| chr9 | 91192084  | 91192288  | 205 |
| chr9 | 90640450  | 90640654  | 205 |
| chr9 | 66122646  | 66122850  | 205 |
| chr9 | 62606889  | 62607093  | 205 |
| chr9 | 43860609  | 43860813  | 205 |
| chr8 | 110853183 | 110853387 | 205 |
| chr8 | 108365995 | 108366199 | 205 |
| chr8 | 87338371  | 87338575  | 205 |
| chr8 | 73185072  | 73185276  | 205 |
| chr8 | 73112435  | 73112639  | 205 |
| chr8 | 63999168  | 63999372  | 205 |
| chr8 | 60239670  | 60239874  | 205 |
| chr8 | 10454436  | 10454640  | 205 |
| chr8 | 9330640   | 9330844   | 205 |
| chr7 | 65091509  | 65091713  | 205 |
| chr7 | 64850952  | 64851156  | 205 |
| chr7 | 48602568  | 48602772  | 205 |
| chr7 | 19193792  | 19193996  | 205 |
| chr7 | 16527302  | 16527506  | 205 |
| chr7 | 16275548  | 16275752  | 205 |
| chr6 | 106838115 | 106838319 | 205 |
| chr6 | 99621945  | 99622149  | 205 |
| chr6 | 74250146  | 74250350  | 205 |
| chr6 | 46695327  | 46695531  | 205 |
| chr5 | 121225616 | 121225820 | 205 |
| chr5 | 117848681 | 117848885 | 205 |
| chr5 | 115143335 | 115143539 | 205 |
| chr5 | 112074943 | 112075147 | 205 |
| chr5 | 78605054  | 78605258  | 205 |
| chr5 | 61038674  | 61038878  | 205 |
| chr5 | 35309155  | 35309359  | 205 |
| chr5 | 30845947  | 30846151  | 205 |
| chr5 | 30188991  | 30189195  | 205 |
| chr4 | 107112755 | 107112959 | 205 |
| chr4 | 104611935 | 104612139 | 205 |
| chr4 | 95651424  | 95651628  | 205 |
| chr4 | 72741537  | 72741741  | 205 |
| chr4 | 69060127  | 69060331  | 205 |
| chr4 | 66641313  | 66641517  | 205 |
| chr4 | 51764144  | 51764348  | 205 |
| chr4 | 32857846  | 32858050  | 205 |
| chr4 | 12886191  | 12886395  | 205 |
| chr3 | 121803446 | 121803650 | 205 |
| chr3 | 116510161 | 116510365 | 205 |
| chr3 | 116333234 | 116333438 | 205 |
| chr3 | 108745314 | 108745518 | 205 |
| chr3 | 104540158 | 104540362 | 205 |
| chr3 | 85366216  | 85366420  | 205 |
| chr3 | 74442243  | 74442447  | 205 |
| chr3 | 71984771  | 71984975  | 205 |



|       |          |          |     |
|-------|----------|----------|-----|
| chr3  | 37394228 | 37394432 | 205 |
| chr3  | 35662129 | 35662333 | 205 |
| chr3  | 35338644 | 35338848 | 205 |
| chr3  | 31760843 | 31761047 | 205 |
| chr3  | 31638065 | 31638269 | 205 |
| chr3  | 29901792 | 29901996 | 205 |
| chr3  | 20497570 | 20497774 | 205 |
| chr3  | 16739191 | 16739395 | 205 |
| chr3  | 9152523  | 9152727  | 205 |
| chr3  | 7761305  | 7761509  | 205 |
| chr3  | 2557535  | 2557739  | 205 |
| chr29 | 49989503 | 49989707 | 205 |
| chr29 | 48855909 | 48856113 | 205 |
| chr29 | 43059208 | 43059412 | 205 |
| chr29 | 37048371 | 37048575 | 205 |
| chr29 | 36401042 | 36401246 | 205 |
| chr29 | 35001230 | 35001434 | 205 |
| chr29 | 34754434 | 34754638 | 205 |
| chr29 | 34293379 | 34293583 | 205 |
| chr29 | 30789873 | 30790077 | 205 |
| chr28 | 40759294 | 40759498 | 205 |
| chr28 | 35283761 | 35283965 | 205 |
| chr28 | 33978321 | 33978525 | 205 |
| chr28 | 33528883 | 33529087 | 205 |
| chr28 | 33514300 | 33514504 | 205 |
| chr28 | 11895649 | 11895853 | 205 |
| chr27 | 29126511 | 29126715 | 205 |
| chr27 | 28171903 | 28172107 | 205 |
| chr27 | 26962568 | 26962772 | 205 |
| chr27 | 17755621 | 17755825 | 205 |
| chr27 | 15227848 | 15228052 | 205 |
| chr27 | 5815177  | 5815381  | 205 |
| chr26 | 43050625 | 43050829 | 205 |
| chr26 | 42114340 | 42114544 | 205 |
| chr26 | 42093047 | 42093251 | 205 |
| chr26 | 39905031 | 39905235 | 205 |
| chr26 | 39753653 | 39753857 | 205 |
| chr26 | 39623631 | 39623835 | 205 |
| chr26 | 38356375 | 38356579 | 205 |
| chr26 | 22360232 | 22360436 | 205 |
| chr26 | 18057878 | 18058082 | 205 |
| chr26 | 17891782 | 17891986 | 205 |
| chr26 | 17676459 | 17676663 | 205 |
| chr26 | 11613753 | 11613957 | 205 |
| chr25 | 37799661 | 37799865 | 205 |
| chr25 | 37579404 | 37579608 | 205 |
| chr25 | 26315439 | 26315643 | 205 |
| chr25 | 14677355 | 14677559 | 205 |
| chr24 | 60583048 | 60583252 | 205 |
| chr24 | 51806000 | 51806204 | 205 |

|       |           |           |     |
|-------|-----------|-----------|-----|
| chr24 | 48055077  | 48055281  | 205 |
| chr24 | 40949194  | 40949398  | 205 |
| chr24 | 40940110  | 40940314  | 205 |
| chr24 | 38475037  | 38475241  | 205 |
| chr23 | 47371430  | 47371634  | 205 |
| chr23 | 42423280  | 42423484  | 205 |
| chr23 | 32683983  | 32684187  | 205 |
| chr23 | 24192591  | 24192795  | 205 |
| chr23 | 14971119  | 14971323  | 205 |
| chr23 | 13695018  | 13695222  | 205 |
| chr22 | 57618294  | 57618498  | 205 |
| chr22 | 55933839  | 55934043  | 205 |
| chr22 | 53376765  | 53376969  | 205 |
| chr22 | 50728814  | 50729018  | 205 |
| chr22 | 50589021  | 50589225  | 205 |
| chr22 | 44913367  | 44913571  | 205 |
| chr22 | 38979163  | 38979367  | 205 |
| chr22 | 22043043  | 22043247  | 205 |
| chr22 | 15956925  | 15957129  | 205 |
| chr22 | 14923136  | 14923340  | 205 |
| chr22 | 12108242  | 12108446  | 205 |
| chr22 | 11747129  | 11747333  | 205 |
| chr21 | 61505531  | 61505735  | 205 |
| chr21 | 56044812  | 56045016  | 205 |
| chr21 | 32906611  | 32906815  | 205 |
| chr21 | 32899769  | 32899973  | 205 |
| chr21 | 31654999  | 31655203  | 205 |
| chr21 | 23715802  | 23716006  | 205 |
| chr21 | 19841360  | 19841564  | 205 |
| chr21 | 15513969  | 15514173  | 205 |
| chr20 | 73064422  | 73064626  | 205 |
| chr20 | 27255619  | 27255823  | 205 |
| chr20 | 863444    | 863648    | 205 |
| chr2  | 139968113 | 139968317 | 205 |
| chr2  | 136902468 | 136902672 | 205 |
| chr2  | 135843391 | 135843595 | 205 |
| chr2  | 76969993  | 76970197  | 205 |
| chr2  | 49565073  | 49565277  | 205 |
| chr2  | 10070685  | 10070889  | 205 |
| chr19 | 61109779  | 61109983  | 205 |
| chr19 | 59484934  | 59485138  | 205 |
| chr19 | 56506827  | 56507031  | 205 |
| chr19 | 47484540  | 47484744  | 205 |
| chr19 | 47458714  | 47458918  | 205 |
| chr19 | 39447959  | 39448163  | 205 |
| chr19 | 39340723  | 39340927  | 205 |
| chr19 | 39313775  | 39313979  | 205 |
| chr19 | 38921941  | 38922145  | 205 |
| chr19 | 32411070  | 32411274  | 205 |
| chr19 | 31493586  | 31493790  | 205 |

|       |          |          |     |
|-------|----------|----------|-----|
| chr19 | 27360211 | 27360415 | 205 |
| chr19 | 23159032 | 23159236 | 205 |
| chr19 | 21589112 | 21589316 | 205 |
| chr19 | 16206592 | 16206796 | 205 |
| chr19 | 15909605 | 15909809 | 205 |
| chr19 | 12306557 | 12306761 | 205 |
| chr19 | 7663314  | 7663518  | 205 |
| chr18 | 45486294 | 45486498 | 205 |
| chr18 | 42238201 | 42238405 | 205 |
| chr18 | 13307921 | 13308125 | 205 |
| chr18 | 7815605  | 7815809  | 205 |
| chr18 | 3556727  | 3556931  | 205 |
| chr17 | 74700404 | 74700608 | 205 |
| chr17 | 70510238 | 70510442 | 205 |
| chr17 | 60986969 | 60987173 | 205 |
| chr17 | 59198265 | 59198469 | 205 |
| chr17 | 59059938 | 59060142 | 205 |
| chr17 | 56097246 | 56097450 | 205 |
| chr17 | 51479167 | 51479371 | 205 |
| chr17 | 31316096 | 31316300 | 205 |
| chr16 | 45167839 | 45168043 | 205 |
| chr16 | 41465009 | 41465213 | 205 |
| chr16 | 38520729 | 38520933 | 205 |
| chr16 | 17681886 | 17682090 | 205 |
| chr15 | 63065016 | 63065220 | 205 |
| chr15 | 55825895 | 55826099 | 205 |
| chr15 | 39931366 | 39931570 | 205 |
| chr15 | 29971773 | 29971977 | 205 |
| chr15 | 29438014 | 29438218 | 205 |
| chr15 | 27271877 | 27272081 | 205 |
| chr15 | 26886804 | 26887008 | 205 |
| chr15 | 24675836 | 24676040 | 205 |
| chr15 | 24391195 | 24391399 | 205 |
| chr15 | 23175335 | 23175539 | 205 |
| chr15 | 22188211 | 22188415 | 205 |
| chr15 | 15536292 | 15536496 | 205 |
| chr15 | 8623110  | 8623314  | 205 |
| chr14 | 61607779 | 61607983 | 205 |
| chr14 | 52680684 | 52680888 | 205 |
| chr14 | 14690787 | 14690991 | 205 |
| chr14 | 3615155  | 3615359  | 205 |
| chr14 | 859730   | 859934   | 205 |
| chr13 | 77366527 | 77366731 | 205 |
| chr13 | 75992688 | 75992892 | 205 |
| chr13 | 75648129 | 75648333 | 205 |
| chr13 | 70148675 | 70148879 | 205 |
| chr13 | 65877761 | 65877965 | 205 |
| chr13 | 65104599 | 65104803 | 205 |
| chr13 | 60021221 | 60021425 | 205 |
| chr13 | 54204628 | 54204832 | 205 |

|       |               |           |     |
|-------|---------------|-----------|-----|
| chr13 | 41841514      | 41841718  | 205 |
| chr13 | 21881698      | 21881902  | 205 |
| chr12 | 83873726      | 83873930  | 205 |
| chr12 | 75702448      | 75702652  | 205 |
| chr12 | 34843269      | 34843473  | 205 |
| chr12 | 32152897      | 32153101  | 205 |
| chr12 | 31268866      | 31269070  | 205 |
| chr11 | 103726410     | 103726614 | 205 |
| chr11 | 100256376     | 100256580 | 205 |
| chr11 | 85117226      | 85117430  | 205 |
| chr11 | 84323330      | 84323534  | 205 |
| chr11 | 81462981      | 81463185  | 205 |
| chr11 | 80271670      | 80271874  | 205 |
| chr11 | 76360227      | 76360431  | 205 |
| chr11 | 71086028      | 71086232  | 205 |
| chr11 | 23131310      | 23131514  | 205 |
| chr11 | 22483580      | 22483784  | 205 |
| chr11 | 15009498      | 15009702  | 205 |
| chr11 | 14084931      | 14085135  | 205 |
| chr11 | 13235253      | 13235457  | 205 |
| chr11 | 10653042      | 10653246  | 205 |
| chr11 | 1747041       | 1747245   | 205 |
| chr10 | 99816774      | 99816978  | 205 |
| chr10 | 90943704      | 90943908  | 205 |
| chr10 | 81657414      | 81657618  | 205 |
| chr10 | 70363982      | 70364186  | 205 |
| chr10 | 62962080      | 62962284  | 205 |
| chr10 | 62960159      | 62960363  | 205 |
| chr10 | 58247887      | 58248091  | 205 |
| chr10 | 51421858      | 51422062  | 205 |
| chr10 | 45678363      | 45678567  | 205 |
| chr10 | 29858736      | 29858940  | 205 |
| chr10 | 29546925      | 29547129  | 205 |
| chr10 | 21906677      | 21906881  | 205 |
| chr10 | 20159024      | 20159228  | 205 |
| chr10 | 20150735      | 20150939  | 205 |
| chr10 | 16831942      | 16832146  | 205 |
| chr10 | 7320955       | 7321159   | 205 |
| chr10 | 3539852       | 3540056   | 205 |
| chr1  | 159484739     | 159484943 | 205 |
| chr1  | 154472679     | 154472883 | 205 |
| chr1  | 147112511     | 147112715 | 205 |
| chr1  | 145890599     | 145890803 | 205 |
| chr1  | 82488749      | 82488953  | 205 |
| chr1  | 74784885      | 74785089  | 205 |
| chr1  | 74569298      | 74569502  | 205 |
| chr1  | 27117927      | 27118131  | 205 |
| chr1  | 618235 618439 | 205       |     |
| chrX  | 87717137      | 87717340  | 204 |
| chrX  | 83607606      | 83607809  | 204 |

|      |           |           |     |
|------|-----------|-----------|-----|
| chrX | 80110072  | 80110275  | 204 |
| chrX | 78644051  | 78644254  | 204 |
| chrX | 78522401  | 78522604  | 204 |
| chrX | 78433150  | 78433353  | 204 |
| chrX | 78223171  | 78223374  | 204 |
| chrX | 75673208  | 75673411  | 204 |
| chrX | 74494828  | 74495031  | 204 |
| chrX | 72281001  | 72281204  | 204 |
| chrX | 70705242  | 70705445  | 204 |
| chrX | 67636571  | 67636774  | 204 |
| chrX | 67108422  | 67108625  | 204 |
| chrX | 66811913  | 66812116  | 204 |
| chrX | 66432418  | 66432621  | 204 |
| chrX | 65074264  | 65074467  | 204 |
| chrX | 62278641  | 62278844  | 204 |
| chrX | 58432169  | 58432372  | 204 |
| chrX | 56713552  | 56713755  | 204 |
| chrX | 56068051  | 56068254  | 204 |
| chrX | 55246753  | 55246956  | 204 |
| chrX | 53989323  | 53989526  | 204 |
| chrX | 53152585  | 53152788  | 204 |
| chrX | 50669039  | 50669242  | 204 |
| chrX | 46468535  | 46468738  | 204 |
| chrX | 40794873  | 40795076  | 204 |
| chrX | 38862272  | 38862475  | 204 |
| chrX | 37591044  | 37591247  | 204 |
| chrX | 36274590  | 36274793  | 204 |
| chrX | 34507590  | 34507793  | 204 |
| chrX | 29437433  | 29437636  | 204 |
| chrX | 28455590  | 28455793  | 204 |
| chrX | 22594000  | 22594203  | 204 |
| chrX | 20496139  | 20496342  | 204 |
| chrX | 17133328  | 17133531  | 204 |
| chrX | 15735883  | 15736086  | 204 |
| chrX | 12164680  | 12164883  | 204 |
| chrX | 11247367  | 11247570  | 204 |
| chrX | 8953283   | 8953486   | 204 |
| chrX | 8631671   | 8631874   | 204 |
| chrX | 8189227   | 8189430   | 204 |
| chrX | 6581650   | 6581853   | 204 |
| chrX | 5119102   | 5119305   | 204 |
| chrX | 1656362   | 1656565   | 204 |
| chr9 | 104892822 | 104893025 | 204 |
| chr9 | 90653012  | 90653215  | 204 |
| chr9 | 89724759  | 89724962  | 204 |
| chr9 | 83803263  | 83803466  | 204 |
| chr9 | 78767109  | 78767312  | 204 |
| chr9 | 47586413  | 47586616  | 204 |
| chr9 | 46173152  | 46173355  | 204 |
| chr9 | 45695551  | 45695754  | 204 |

|      |           |           |     |
|------|-----------|-----------|-----|
| chr9 | 35977913  | 35978116  | 204 |
| chr9 | 25132515  | 25132718  | 204 |
| chr9 | 8046747   | 8046950   | 204 |
| chr8 | 95570264  | 95570467  | 204 |
| chr8 | 94960336  | 94960539  | 204 |
| chr8 | 93642957  | 93643160  | 204 |
| chr8 | 63728288  | 63728491  | 204 |
| chr8 | 47646146  | 47646349  | 204 |
| chr8 | 46639785  | 46639988  | 204 |
| chr8 | 26576172  | 26576375  | 204 |
| chr8 | 24752277  | 24752480  | 204 |
| chr8 | 9440403   | 9440606   | 204 |
| chr8 | 704637    | 704840    | 204 |
| chr7 | 80884021  | 80884224  | 204 |
| chr7 | 70761000  | 70761203  | 204 |
| chr7 | 42560121  | 42560324  | 204 |
| chr7 | 37582831  | 37583034  | 204 |
| chr7 | 37450612  | 37450815  | 204 |
| chr7 | 34407054  | 34407257  | 204 |
| chr7 | 17354140  | 17354343  | 204 |
| chr6 | 119518965 | 119519168 | 204 |
| chr6 | 47881088  | 47881291  | 204 |
| chr5 | 121248755 | 121248958 | 204 |
| chr5 | 72915727  | 72915930  | 204 |
| chr5 | 51656744  | 51656947  | 204 |
| chr5 | 29113531  | 29113734  | 204 |
| chr4 | 121856731 | 121856934 | 204 |
| chr4 | 121079007 | 121079210 | 204 |
| chr4 | 115979834 | 115980037 | 204 |
| chr4 | 104929724 | 104929927 | 204 |
| chr4 | 98994139  | 98994342  | 204 |
| chr4 | 68922538  | 68922741  | 204 |
| chr4 | 66675206  | 66675409  | 204 |
| chr4 | 65384353  | 65384556  | 204 |
| chr4 | 29007063  | 29007266  | 204 |
| chr4 | 10793162  | 10793365  | 204 |
| chr3 | 116395586 | 116395789 | 204 |
| chr3 | 115758663 | 115758866 | 204 |
| chr3 | 113473648 | 113473851 | 204 |
| chr3 | 106491080 | 106491283 | 204 |
| chr3 | 105475038 | 105475241 | 204 |
| chr3 | 97890049  | 97890252  | 204 |
| chr3 | 59336681  | 59336884  | 204 |
| chr3 | 59336224  | 59336427  | 204 |
| chr3 | 52154732  | 52154935  | 204 |
| chr3 | 43205540  | 43205743  | 204 |
| chr3 | 33076671  | 33076874  | 204 |
| chr3 | 30294716  | 30294919  | 204 |
| chr3 | 23621407  | 23621610  | 204 |
| chr3 | 23104458  | 23104661  | 204 |

|       |               |          |     |
|-------|---------------|----------|-----|
| chr3  | 15387294      | 15387497 | 204 |
| chr29 | 51810458      | 51810661 | 204 |
| chr29 | 49823312      | 49823515 | 204 |
| chr29 | 48991028      | 48991231 | 204 |
| chr29 | 45890733      | 45890936 | 204 |
| chr29 | 33822745      | 33822948 | 204 |
| chr29 | 31685539      | 31685742 | 204 |
| chr29 | 26940831      | 26941034 | 204 |
| chr29 | 26059234      | 26059437 | 204 |
| chr29 | 17769578      | 17769781 | 204 |
| chr29 | 11822790      | 11822993 | 204 |
| chr28 | 41036452      | 41036655 | 204 |
| chr28 | 41026015      | 41026218 | 204 |
| chr28 | 26819562      | 26819765 | 204 |
| chr28 | 26770229      | 26770432 | 204 |
| chr28 | 2972174       | 2972377  | 204 |
| chr27 | 26976623      | 26976826 | 204 |
| chr27 | 723002 723205 |          | 204 |
| chr27 | 561328 561531 |          | 204 |
| chr26 | 49172926      | 49173129 | 204 |
| chr26 | 38928391      | 38928594 | 204 |
| chr26 | 28144704      | 28144907 | 204 |
| chr26 | 21966346      | 21966549 | 204 |
| chr26 | 21858297      | 21858500 | 204 |
| chr26 | 20236599      | 20236802 | 204 |
| chr26 | 18800746      | 18800949 | 204 |
| chr25 | 41207581      | 41207784 | 204 |
| chr25 | 38808183      | 38808386 | 204 |
| chr25 | 38382809      | 38383012 | 204 |
| chr25 | 37962676      | 37962879 | 204 |
| chr25 | 37459262      | 37459465 | 204 |
| chr25 | 34341748      | 34341951 | 204 |
| chr25 | 29384621      | 29384824 | 204 |
| chr24 | 49361481      | 49361684 | 204 |
| chr24 | 44039306      | 44039509 | 204 |
| chr24 | 36423627      | 36423830 | 204 |
| chr24 | 31177345      | 31177548 | 204 |
| chr24 | 20741168      | 20741371 | 204 |
| chr24 | 1766158       | 1766361  | 204 |
| chr23 | 46503314      | 46503517 | 204 |
| chr23 | 43100563      | 43100766 | 204 |
| chr23 | 33678860      | 33679063 | 204 |
| chr23 | 31388366      | 31388569 | 204 |
| chr23 | 28648208      | 28648411 | 204 |
| chr23 | 28054631      | 28054834 | 204 |
| chr23 | 19818530      | 19818733 | 204 |
| chr23 | 13266191      | 13266394 | 204 |
| chr23 | 11922664      | 11922867 | 204 |
| chr23 | 11795068      | 11795271 | 204 |
| chr23 | 11330815      | 11331018 | 204 |

|       |               |          |     |
|-------|---------------|----------|-----|
| chr23 | 10518213      | 10518416 | 204 |
| chr23 | 10460021      | 10460224 | 204 |
| chr23 | 8415070       | 8415273  | 204 |
| chr23 | 7273795       | 7273998  | 204 |
| chr23 | 7169343       | 7169546  | 204 |
| chr23 | 1765726       | 1765929  | 204 |
| chr22 | 61475514      | 61475717 | 204 |
| chr22 | 61447113      | 61447316 | 204 |
| chr22 | 58414324      | 58414527 | 204 |
| chr22 | 44869670      | 44869873 | 204 |
| chr22 | 39583414      | 39583617 | 204 |
| chr22 | 30289585      | 30289788 | 204 |
| chr22 | 16209460      | 16209663 | 204 |
| chr22 | 13798232      | 13798435 | 204 |
| chr22 | 5552550       | 5552753  | 204 |
| chr22 | 830518 830721 | 204      |     |
| chr21 | 67959230      | 67959433 | 204 |
| chr21 | 66465982      | 66466185 | 204 |
| chr21 | 61624594      | 61624797 | 204 |
| chr21 | 60429905      | 60430108 | 204 |
| chr21 | 60377962      | 60378165 | 204 |
| chr21 | 57721970      | 57722173 | 204 |
| chr21 | 47516515      | 47516718 | 204 |
| chr21 | 34454937      | 34455140 | 204 |
| chr21 | 34205967      | 34206170 | 204 |
| chr21 | 31122937      | 31123140 | 204 |
| chr21 | 27997272      | 27997475 | 204 |
| chr21 | 27269396      | 27269599 | 204 |
| chr21 | 26463450      | 26463653 | 204 |
| chr21 | 25977770      | 25977973 | 204 |
| chr21 | 25198523      | 25198726 | 204 |
| chr21 | 20760265      | 20760468 | 204 |
| chr21 | 16354868      | 16355071 | 204 |
| chr21 | 16056693      | 16056896 | 204 |
| chr21 | 7109035       | 7109238  | 204 |
| chr21 | 6517126       | 6517329  | 204 |
| chr20 | 73375804      | 73376007 | 204 |
| chr20 | 70918057      | 70918260 | 204 |
| chr20 | 66344364      | 66344567 | 204 |
| chr20 | 36380683      | 36380886 | 204 |
| chr20 | 19419108      | 19419311 | 204 |
| chr20 | 8810444       | 8810647  | 204 |
| chr20 | 8771415       | 8771618  | 204 |
| chr20 | 8618653       | 8618856  | 204 |
| chr20 | 6419078       | 6419281  | 204 |
| chr20 | 6068422       | 6068625  | 204 |
| chr20 | 4908586       | 4908789  | 204 |
| chr20 | 2530202       | 2530405  | 204 |
| chr20 | 1270580       | 1270783  | 204 |
| chr20 | 776782 776985 | 204      |     |



|       |           |           |     |
|-------|-----------|-----------|-----|
| chr2  | 138635122 | 138635325 | 204 |
| chr2  | 130116297 | 130116500 | 204 |
| chr2  | 127542945 | 127543148 | 204 |
| chr2  | 126122156 | 126122359 | 204 |
| chr2  | 125486405 | 125486608 | 204 |
| chr2  | 124968993 | 124969196 | 204 |
| chr2  | 117657233 | 117657436 | 204 |
| chr2  | 93353823  | 93354026  | 204 |
| chr2  | 75692564  | 75692767  | 204 |
| chr19 | 63305229  | 63305432  | 204 |
| chr19 | 59440903  | 59441106  | 204 |
| chr19 | 54794513  | 54794716  | 204 |
| chr19 | 52656249  | 52656452  | 204 |
| chr19 | 47462859  | 47463062  | 204 |
| chr19 | 46108119  | 46108322  | 204 |
| chr19 | 42307123  | 42307326  | 204 |
| chr19 | 42047585  | 42047788  | 204 |
| chr19 | 42045823  | 42046026  | 204 |
| chr19 | 33454247  | 33454450  | 204 |
| chr19 | 32368364  | 32368567  | 204 |
| chr19 | 30578519  | 30578722  | 204 |
| chr19 | 27366973  | 27367176  | 204 |
| chr19 | 26062721  | 26062924  | 204 |
| chr19 | 22349474  | 22349677  | 204 |
| chr19 | 19868214  | 19868417  | 204 |
| chr19 | 19852276  | 19852479  | 204 |
| chr19 | 17409242  | 17409445  | 204 |
| chr19 | 16072795  | 16072998  | 204 |
| chr19 | 10774254  | 10774457  | 204 |
| chr18 | 66016939  | 66017142  | 204 |
| chr18 | 54831838  | 54832041  | 204 |
| chr18 | 53123087  | 53123290  | 204 |
| chr18 | 50212068  | 50212271  | 204 |
| chr18 | 49465798  | 49466001  | 204 |
| chr18 | 46088346  | 46088549  | 204 |
| chr18 | 25333476  | 25333679  | 204 |
| chr18 | 24007127  | 24007330  | 204 |
| chr18 | 22146670  | 22146873  | 204 |
| chr18 | 22058900  | 22059103  | 204 |
| chr18 | 12431036  | 12431239  | 204 |
| chr18 | 11786125  | 11786328  | 204 |
| chr18 | 11074604  | 11074807  | 204 |
| chr18 | 7646906   | 7647109   | 204 |
| chr17 | 73945548  | 73945751  | 204 |
| chr17 | 68197108  | 68197311  | 204 |
| chr17 | 62823811  | 62824014  | 204 |
| chr17 | 45955096  | 45955299  | 204 |
| chr17 | 23042866  | 23043069  | 204 |
| chr16 | 75421605  | 75421808  | 204 |
| chr16 | 70215496  | 70215699  | 204 |

|       |           |           |     |
|-------|-----------|-----------|-----|
| chr16 | 58520176  | 58520379  | 204 |
| chr16 | 49833865  | 49834068  | 204 |
| chr16 | 47350762  | 47350965  | 204 |
| chr16 | 38841799  | 38842002  | 204 |
| chr16 | 2244697   | 2244900   | 204 |
| chr16 | 2212744   | 2212947   | 204 |
| chr16 | 2208177   | 2208380   | 204 |
| chr15 | 73413225  | 73413428  | 204 |
| chr15 | 64515479  | 64515682  | 204 |
| chr15 | 56259896  | 56260099  | 204 |
| chr15 | 41385727  | 41385930  | 204 |
| chr15 | 24980161  | 24980364  | 204 |
| chr15 | 22869428  | 22869631  | 204 |
| chr15 | 22772711  | 22772914  | 204 |
| chr15 | 22719078  | 22719281  | 204 |
| chr15 | 22487291  | 22487494  | 204 |
| chr15 | 21219782  | 21219985  | 204 |
| chr15 | 20714885  | 20715088  | 204 |
| chr14 | 15548461  | 15548664  | 204 |
| chr14 | 12330330  | 12330533  | 204 |
| chr14 | 7658634   | 7658837   | 204 |
| chr14 | 7099831   | 7100034   | 204 |
| chr14 | 6016542   | 6016745   | 204 |
| chr14 | 1494127   | 1494330   | 204 |
| chr13 | 80222862  | 80223065  | 204 |
| chr13 | 80211591  | 80211794  | 204 |
| chr13 | 77820106  | 77820309  | 204 |
| chr13 | 77652397  | 77652600  | 204 |
| chr13 | 77592123  | 77592326  | 204 |
| chr13 | 75088789  | 75088992  | 204 |
| chr13 | 66810967  | 66811170  | 204 |
| chr13 | 66800078  | 66800281  | 204 |
| chr13 | 53438229  | 53438432  | 204 |
| chr13 | 45480713  | 45480916  | 204 |
| chr13 | 37857567  | 37857770  | 204 |
| chr13 | 37166909  | 37167112  | 204 |
| chr13 | 35403072  | 35403275  | 204 |
| chr13 | 31721119  | 31721322  | 204 |
| chr13 | 30819780  | 30819983  | 204 |
| chr13 | 18346587  | 18346790  | 204 |
| chr13 | 11419902  | 11420105  | 204 |
| chr13 | 6979947   | 6980150   | 204 |
| chr12 | 48067745  | 48067948  | 204 |
| chr12 | 29706122  | 29706325  | 204 |
| chr12 | 14646268  | 14646471  | 204 |
| chr12 | 9123514   | 9123717   | 204 |
| chr11 | 109708806 | 109709009 | 204 |
| chr11 | 104944199 | 104944402 | 204 |
| chr11 | 104881159 | 104881362 | 204 |
| chr11 | 99757642  | 99757845  | 204 |

|       |           |           |     |
|-------|-----------|-----------|-----|
| chr11 | 95268738  | 95268941  | 204 |
| chr11 | 93703115  | 93703318  | 204 |
| chr11 | 88348903  | 88349106  | 204 |
| chr11 | 84906081  | 84906284  | 204 |
| chr11 | 14269682  | 14269885  | 204 |
| chr11 | 14236073  | 14236276  | 204 |
| chr11 | 14191329  | 14191532  | 204 |
| chr11 | 9095081   | 9095284   | 204 |
| chr11 | 4208510   | 4208713   | 204 |
| chr11 | 3304233   | 3304436   | 204 |
| chr10 | 97453315  | 97453518  | 204 |
| chr10 | 88198167  | 88198370  | 204 |
| chr10 | 83860686  | 83860889  | 204 |
| chr10 | 83567909  | 83568112  | 204 |
| chr10 | 79574234  | 79574437  | 204 |
| chr10 | 72476407  | 72476610  | 204 |
| chr10 | 63793646  | 63793849  | 204 |
| chr10 | 55229398  | 55229601  | 204 |
| chr10 | 25272558  | 25272761  | 204 |
| chr10 | 20479092  | 20479295  | 204 |
| chr10 | 20134607  | 20134810  | 204 |
| chr10 | 14987748  | 14987951  | 204 |
| chr10 | 2791580   | 2791783   | 204 |
| chr1  | 142250652 | 142250855 | 204 |
| chr1  | 136897651 | 136897854 | 204 |
| chr1  | 123121487 | 123121690 | 204 |
| chr1  | 99072082  | 99072285  | 204 |
| chr1  | 84818586  | 84818789  | 204 |
| chr1  | 82885100  | 82885303  | 204 |
| chr1  | 80152800  | 80153003  | 204 |
| chr1  | 74996259  | 74996462  | 204 |
| chr1  | 74102068  | 74102271  | 204 |
| chr1  | 74030130  | 74030333  | 204 |
| chr1  | 1469500   | 1469703   | 204 |
| chr1  | 1134845   | 1135048   | 204 |
| chrX  | 82100170  | 82100372  | 203 |
| chrX  | 81919501  | 81919703  | 203 |
| chrX  | 80708547  | 80708749  | 203 |
| chrX  | 80276839  | 80277041  | 203 |
| chrX  | 80241253  | 80241455  | 203 |
| chrX  | 75881243  | 75881445  | 203 |
| chrX  | 74467180  | 74467382  | 203 |
| chrX  | 74381115  | 74381317  | 203 |
| chrX  | 74117127  | 74117329  | 203 |
| chrX  | 72097865  | 72098067  | 203 |
| chrX  | 68681369  | 68681571  | 203 |
| chrX  | 65955053  | 65955255  | 203 |
| chrX  | 65514135  | 65514337  | 203 |
| chrX  | 65245598  | 65245800  | 203 |
| chrX  | 64811303  | 64811505  | 203 |

|      |           |           |     |
|------|-----------|-----------|-----|
| chrX | 63094889  | 63095091  | 203 |
| chrX | 62552934  | 62553136  | 203 |
| chrX | 61874792  | 61874994  | 203 |
| chrX | 60054622  | 60054824  | 203 |
| chrX | 59322181  | 59322383  | 203 |
| chrX | 58625786  | 58625988  | 203 |
| chrX | 58425062  | 58425264  | 203 |
| chrX | 56715143  | 56715345  | 203 |
| chrX | 55435981  | 55436183  | 203 |
| chrX | 54929089  | 54929291  | 203 |
| chrX | 51752964  | 51753166  | 203 |
| chrX | 49472388  | 49472590  | 203 |
| chrX | 37314689  | 37314891  | 203 |
| chrX | 35396681  | 35396883  | 203 |
| chrX | 34683237  | 34683439  | 203 |
| chrX | 30937388  | 30937590  | 203 |
| chrX | 28460879  | 28461081  | 203 |
| chrX | 21936041  | 21936243  | 203 |
| chrX | 21839969  | 21840171  | 203 |
| chrX | 21248908  | 21249110  | 203 |
| chrX | 20888655  | 20888857  | 203 |
| chrX | 20082957  | 20083159  | 203 |
| chrX | 18746421  | 18746623  | 203 |
| chrX | 18379905  | 18380107  | 203 |
| chrX | 14011514  | 14011716  | 203 |
| chrX | 10205981  | 10206183  | 203 |
| chrX | 10132902  | 10133104  | 203 |
| chrX | 9670238   | 9670440   | 203 |
| chrX | 8478321   | 8478523   | 203 |
| chrX | 8432212   | 8432414   | 203 |
| chrX | 8089849   | 8090051   | 203 |
| chrX | 7533290   | 7533492   | 203 |
| chrX | 5749931   | 5750133   | 203 |
| chrX | 5566343   | 5566545   | 203 |
| chrX | 2519772   | 2519974   | 203 |
| chrX | 1312974   | 1313176   | 203 |
| chr9 | 104997789 | 104997991 | 203 |
| chr9 | 100278911 | 100279113 | 203 |
| chr9 | 98501631  | 98501833  | 203 |
| chr9 | 98098384  | 98098586  | 203 |
| chr9 | 75203159  | 75203361  | 203 |
| chr9 | 70611996  | 70612198  | 203 |
| chr9 | 63066352  | 63066554  | 203 |
| chr9 | 43786623  | 43786825  | 203 |
| chr9 | 36032513  | 36032715  | 203 |
| chr8 | 108794941 | 108795143 | 203 |
| chr8 | 108783135 | 108783337 | 203 |
| chr8 | 103258104 | 103258306 | 203 |
| chr8 | 73469750  | 73469952  | 203 |
| chr8 | 63803804  | 63804006  | 203 |

|      |           |           |     |
|------|-----------|-----------|-----|
| chr8 | 61611522  | 61611724  | 203 |
| chr8 | 60193652  | 60193854  | 203 |
| chr8 | 52919702  | 52919904  | 203 |
| chr8 | 47612432  | 47612634  | 203 |
| chr8 | 7788585   | 7788787   | 203 |
| chr7 | 52249782  | 52249984  | 203 |
| chr7 | 50436985  | 50437187  | 203 |
| chr7 | 50261570  | 50261772  | 203 |
| chr7 | 19294491  | 19294693  | 203 |
| chr7 | 17982020  | 17982222  | 203 |
| chr7 | 4551768   | 4551970   | 203 |
| chr6 | 121842052 | 121842254 | 203 |
| chr6 | 119559488 | 119559690 | 203 |
| chr6 | 114643523 | 114643725 | 203 |
| chr6 | 92970420  | 92970622  | 203 |
| chr6 | 32715503  | 32715705  | 203 |
| chr6 | 4272704   | 4272906   | 203 |
| chr5 | 122152797 | 122152999 | 203 |
| chr5 | 118277441 | 118277643 | 203 |
| chr5 | 113711481 | 113711683 | 203 |
| chr5 | 112419291 | 112419493 | 203 |
| chr5 | 90141678  | 90141880  | 203 |
| chr5 | 60934042  | 60934244  | 203 |
| chr5 | 54783122  | 54783324  | 203 |
| chr5 | 34054316  | 34054518  | 203 |
| chr5 | 32920398  | 32920600  | 203 |
| chr5 | 30683871  | 30684073  | 203 |
| chr5 | 30653947  | 30654149  | 203 |
| chr5 | 1101314   | 1101516   | 203 |
| chr4 | 121982809 | 121983011 | 203 |
| chr4 | 118242060 | 118242262 | 203 |
| chr4 | 116121477 | 116121679 | 203 |
| chr4 | 99291172  | 99291374  | 203 |
| chr4 | 95078594  | 95078796  | 203 |
| chr4 | 78311329  | 78311531  | 203 |
| chr4 | 47030647  | 47030849  | 203 |
| chr3 | 127857583 | 127857785 | 203 |
| chr3 | 126946490 | 126946692 | 203 |
| chr3 | 122142761 | 122142963 | 203 |
| chr3 | 121885481 | 121885683 | 203 |
| chr3 | 121502491 | 121502693 | 203 |
| chr3 | 121428834 | 121429036 | 203 |
| chr3 | 120744141 | 120744343 | 203 |
| chr3 | 116912405 | 116912607 | 203 |
| chr3 | 115685924 | 115686126 | 203 |
| chr3 | 115417558 | 115417760 | 203 |
| chr3 | 44863893  | 44864095  | 203 |
| chr3 | 30569813  | 30570015  | 203 |
| chr3 | 30309349  | 30309551  | 203 |
| chr3 | 20905974  | 20906176  | 203 |

|       |          |          |     |
|-------|----------|----------|-----|
| chr3  | 18313891 | 18314093 | 203 |
| chr3  | 4686176  | 4686378  | 203 |
| chr29 | 49709018 | 49709220 | 203 |
| chr29 | 46672490 | 46672692 | 203 |
| chr29 | 36872361 | 36872563 | 203 |
| chr29 | 33875649 | 33875851 | 203 |
| chr29 | 33419529 | 33419731 | 203 |
| chr29 | 32550132 | 32550334 | 203 |
| chr29 | 31679606 | 31679808 | 203 |
| chr29 | 27569884 | 27570086 | 203 |
| chr29 | 17675316 | 17675518 | 203 |
| chr28 | 42478525 | 42478727 | 203 |
| chr28 | 42364736 | 42364938 | 203 |
| chr28 | 42150997 | 42151199 | 203 |
| chr28 | 40376269 | 40376471 | 203 |
| chr28 | 32682546 | 32682748 | 203 |
| chr28 | 13717198 | 13717400 | 203 |
| chr27 | 41727389 | 41727591 | 203 |
| chr27 | 34698160 | 34698362 | 203 |
| chr26 | 48992632 | 48992834 | 203 |
| chr26 | 44085917 | 44086119 | 203 |
| chr26 | 43565131 | 43565333 | 203 |
| chr26 | 43243020 | 43243222 | 203 |
| chr26 | 39636085 | 39636287 | 203 |
| chr26 | 31481816 | 31482018 | 203 |
| chr26 | 21629096 | 21629298 | 203 |
| chr26 | 19873998 | 19874200 | 203 |
| chr26 | 17890923 | 17891125 | 203 |
| chr25 | 36692610 | 36692812 | 203 |
| chr25 | 35101227 | 35101429 | 203 |
| chr25 | 33633320 | 33633522 | 203 |
| chr25 | 33316245 | 33316447 | 203 |
| chr25 | 30784140 | 30784342 | 203 |
| chr25 | 10634536 | 10634738 | 203 |
| chr25 | 1879187  | 1879389  | 203 |
| chr24 | 62338737 | 62338939 | 203 |
| chr24 | 61097745 | 61097947 | 203 |
| chr24 | 60808419 | 60808621 | 203 |
| chr24 | 44188869 | 44189071 | 203 |
| chr24 | 43931989 | 43932191 | 203 |
| chr24 | 34966782 | 34966984 | 203 |
| chr23 | 28458928 | 28459130 | 203 |
| chr23 | 27896827 | 27897029 | 203 |
| chr23 | 23891207 | 23891409 | 203 |
| chr23 | 18769762 | 18769964 | 203 |
| chr23 | 8794615  | 8794817  | 203 |
| chr22 | 50820141 | 50820343 | 203 |
| chr22 | 50774428 | 50774630 | 203 |
| chr22 | 50610849 | 50611051 | 203 |
| chr22 | 48248271 | 48248473 | 203 |

|       |               |           |     |
|-------|---------------|-----------|-----|
| chr22 | 30017626      | 30017828  | 203 |
| chr22 | 30010536      | 30010738  | 203 |
| chr22 | 16299327      | 16299529  | 203 |
| chr22 | 16165294      | 16165496  | 203 |
| chr22 | 12414726      | 12414928  | 203 |
| chr21 | 67971670      | 67971872  | 203 |
| chr21 | 66476327      | 66476529  | 203 |
| chr21 | 47723546      | 47723748  | 203 |
| chr21 | 26457041      | 26457243  | 203 |
| chr21 | 21159261      | 21159463  | 203 |
| chr20 | 42587394      | 42587596  | 203 |
| chr20 | 32403350      | 32403552  | 203 |
| chr20 | 8625445       | 8625647   | 203 |
| chr20 | 7209951       | 7210153   | 203 |
| chr20 | 934224 934426 |           | 203 |
| chr20 | 509372 509574 |           | 203 |
| chr2  | 126955775     | 126955977 | 203 |
| chr2  | 126686094     | 126686296 | 203 |
| chr2  | 126086571     | 126086773 | 203 |
| chr2  | 125129972     | 125130174 | 203 |
| chr2  | 117031335     | 117031537 | 203 |
| chr2  | 101516345     | 101516547 | 203 |
| chr2  | 99833444      | 99833646  | 203 |
| chr2  | 99341033      | 99341235  | 203 |
| chr2  | 92609123      | 92609325  | 203 |
| chr2  | 72859061      | 72859263  | 203 |
| chr2  | 66913709      | 66913911  | 203 |
| chr2  | 27316935      | 27317137  | 203 |
| chr2  | 5074648       | 5074850   | 203 |
| chr19 | 64768215      | 64768417  | 203 |
| chr19 | 61921699      | 61921901  | 203 |
| chr19 | 61746178      | 61746380  | 203 |
| chr19 | 61536153      | 61536355  | 203 |
| chr19 | 60973265      | 60973467  | 203 |
| chr19 | 60828148      | 60828350  | 203 |
| chr19 | 60707507      | 60707709  | 203 |
| chr19 | 59287705      | 59287907  | 203 |
| chr19 | 59205786      | 59205988  | 203 |
| chr19 | 57564628      | 57564830  | 203 |
| chr19 | 54708402      | 54708604  | 203 |
| chr19 | 53974801      | 53975003  | 203 |
| chr19 | 50651421      | 50651623  | 203 |
| chr19 | 49331519      | 49331721  | 203 |
| chr19 | 39842756      | 39842958  | 203 |
| chr19 | 39393191      | 39393393  | 203 |
| chr19 | 34638878      | 34639080  | 203 |
| chr19 | 31272139      | 31272341  | 203 |
| chr19 | 30584848      | 30585050  | 203 |
| chr19 | 19417572      | 19417774  | 203 |
| chr19 | 15875278      | 15875480  | 203 |

|       |          |          |     |
|-------|----------|----------|-----|
| chr19 | 13965270 | 13965472 | 203 |
| chr19 | 13418491 | 13418693 | 203 |
| chr19 | 11080340 | 11080542 | 203 |
| chr19 | 10769547 | 10769749 | 203 |
| chr18 | 62105302 | 62105504 | 203 |
| chr18 | 47496302 | 47496504 | 203 |
| chr18 | 40277462 | 40277664 | 203 |
| chr18 | 24341188 | 24341390 | 203 |
| chr18 | 23071751 | 23071953 | 203 |
| chr18 | 22769979 | 22770181 | 203 |
| chr18 | 22016503 | 22016705 | 203 |
| chr18 | 21957795 | 21957997 | 203 |
| chr18 | 18735064 | 18735266 | 203 |
| chr18 | 18423898 | 18424100 | 203 |
| chr18 | 13309618 | 13309820 | 203 |
| chr18 | 12140913 | 12141115 | 203 |
| chr18 | 12003019 | 12003221 | 203 |
| chr18 | 10705210 | 10705412 | 203 |
| chr18 | 9920841  | 9921043  | 203 |
| chr18 | 9710253  | 9710455  | 203 |
| chr18 | 6956857  | 6957059  | 203 |
| chr18 | 3534061  | 3534263  | 203 |
| chr17 | 73968690 | 73968892 | 203 |
| chr17 | 72952956 | 72953158 | 203 |
| chr17 | 70125258 | 70125460 | 203 |
| chr17 | 66847127 | 66847329 | 203 |
| chr17 | 66526629 | 66526831 | 203 |
| chr17 | 64077438 | 64077640 | 203 |
| chr17 | 63659192 | 63659394 | 203 |
| chr17 | 60575791 | 60575993 | 203 |
| chr17 | 58807176 | 58807378 | 203 |
| chr17 | 49586491 | 49586693 | 203 |
| chr16 | 60062748 | 60062950 | 203 |
| chr16 | 48306492 | 48306694 | 203 |
| chr16 | 48017390 | 48017592 | 203 |
| chr16 | 47256284 | 47256486 | 203 |
| chr16 | 47126586 | 47126788 | 203 |
| chr16 | 43137831 | 43138033 | 203 |
| chr16 | 41522978 | 41523180 | 203 |
| chr16 | 39772016 | 39772218 | 203 |
| chr16 | 38949417 | 38949619 | 203 |
| chr16 | 38782580 | 38782782 | 203 |
| chr16 | 34178297 | 34178499 | 203 |
| chr16 | 24770103 | 24770305 | 203 |
| chr16 | 1621936  | 1622138  | 203 |
| chr15 | 84545527 | 84545729 | 203 |
| chr15 | 81458738 | 81458940 | 203 |
| chr15 | 64831063 | 64831265 | 203 |
| chr15 | 54539763 | 54539965 | 203 |
| chr15 | 32971104 | 32971306 | 203 |



|       |           |           |     |
|-------|-----------|-----------|-----|
| chr15 | 32700700  | 32700902  | 203 |
| chr15 | 31628170  | 31628372  | 203 |
| chr15 | 26629274  | 26629476  | 203 |
| chr15 | 24519989  | 24520191  | 203 |
| chr15 | 23585395  | 23585597  | 203 |
| chr15 | 22797374  | 22797576  | 203 |
| chr14 | 73041005  | 73041207  | 203 |
| chr14 | 61448391  | 61448593  | 203 |
| chr14 | 31049706  | 31049908  | 203 |
| chr14 | 29135442  | 29135644  | 203 |
| chr14 | 24822869  | 24823071  | 203 |
| chr14 | 21562105  | 21562307  | 203 |
| chr14 | 20893313  | 20893515  | 203 |
| chr14 | 6716892   | 6717094   | 203 |
| chr14 | 2112955   | 2113157   | 203 |
| chr13 | 80903506  | 80903708  | 203 |
| chr13 | 77774122  | 77774324  | 203 |
| chr13 | 77423131  | 77423333  | 203 |
| chr13 | 76388930  | 76389132  | 203 |
| chr13 | 75439838  | 75440040  | 203 |
| chr13 | 73888595  | 73888797  | 203 |
| chr13 | 73858994  | 73859196  | 203 |
| chr13 | 69806911  | 69807113  | 203 |
| chr13 | 69527933  | 69528135  | 203 |
| chr13 | 65741086  | 65741288  | 203 |
| chr13 | 60053762  | 60053964  | 203 |
| chr13 | 59710585  | 59710787  | 203 |
| chr13 | 59129328  | 59129530  | 203 |
| chr13 | 56379888  | 56380090  | 203 |
| chr13 | 56017180  | 56017382  | 203 |
| chr13 | 54433104  | 54433306  | 203 |
| chr13 | 39049302  | 39049504  | 203 |
| chr13 | 29080219  | 29080421  | 203 |
| chr13 | 28529986  | 28530188  | 203 |
| chr13 | 25820915  | 25821117  | 203 |
| chr13 | 15077109  | 15077311  | 203 |
| chr12 | 79964704  | 79964906  | 203 |
| chr12 | 76389234  | 76389436  | 203 |
| chr12 | 68729441  | 68729643  | 203 |
| chr12 | 32177431  | 32177633  | 203 |
| chr12 | 31614371  | 31614573  | 203 |
| chr11 | 105652498 | 105652700 | 203 |
| chr11 | 104575934 | 104576136 | 203 |
| chr11 | 104331884 | 104332086 | 203 |
| chr11 | 95196900  | 95197102  | 203 |
| chr11 | 95032311  | 95032513  | 203 |
| chr11 | 93049501  | 93049703  | 203 |
| chr11 | 82901905  | 82902107  | 203 |
| chr11 | 81415571  | 81415773  | 203 |
| chr11 | 70700773  | 70700975  | 203 |

|       |               |           |     |
|-------|---------------|-----------|-----|
| chr11 | 65750262      | 65750464  | 203 |
| chr11 | 44900594      | 44900796  | 203 |
| chr11 | 29983072      | 29983274  | 203 |
| chr11 | 28760617      | 28760819  | 203 |
| chr11 | 25612243      | 25612445  | 203 |
| chr11 | 10776067      | 10776269  | 203 |
| chr11 | 10143651      | 10143853  | 203 |
| chr11 | 9354964       | 9355166   | 203 |
| chr11 | 5257781       | 5257983   | 203 |
| chr11 | 2537638       | 2537840   | 203 |
| chr10 | 104200689     | 104200891 | 203 |
| chr10 | 87489436      | 87489638  | 203 |
| chr10 | 86367830      | 86368032  | 203 |
| chr10 | 79572489      | 79572691  | 203 |
| chr10 | 70072497      | 70072699  | 203 |
| chr10 | 70022262      | 70022464  | 203 |
| chr10 | 38306988      | 38307190  | 203 |
| chr10 | 35388557      | 35388759  | 203 |
| chr10 | 20627881      | 20628083  | 203 |
| chr10 | 17781846      | 17782048  | 203 |
| chr10 | 17310371      | 17310573  | 203 |
| chr10 | 16868969      | 16869171  | 203 |
| chr10 | 10044093      | 10044295  | 203 |
| chr10 | 5541110       | 5541312   | 203 |
| chr10 | 4546244       | 4546446   | 203 |
| chr1  | 122875572     | 122875774 | 203 |
| chr1  | 99823015      | 99823217  | 203 |
| chr1  | 88379926      | 88380128  | 203 |
| chr1  | 82904495      | 82904697  | 203 |
| chr1  | 81128537      | 81128739  | 203 |
| chr1  | 59352278      | 59352480  | 203 |
| chr1  | 26546060      | 26546262  | 203 |
| chr1  | 2716161       | 2716363   | 203 |
| chr1  | 738885 739087 |           | 203 |
| chrX  | 86240227      | 86240428  | 202 |
| chrX  | 84806270      | 84806471  | 202 |
| chrX  | 80722501      | 80722702  | 202 |
| chrX  | 79605125      | 79605326  | 202 |
| chrX  | 77339051      | 77339252  | 202 |
| chrX  | 74151177      | 74151378  | 202 |
| chrX  | 72983165      | 72983366  | 202 |
| chrX  | 72821466      | 72821667  | 202 |
| chrX  | 68673092      | 68673293  | 202 |
| chrX  | 66813624      | 66813825  | 202 |
| chrX  | 64439773      | 64439974  | 202 |
| chrX  | 63232166      | 63232367  | 202 |
| chrX  | 63079432      | 63079633  | 202 |
| chrX  | 60271403      | 60271604  | 202 |
| chrX  | 59470718      | 59470919  | 202 |
| chrX  | 58372645      | 58372846  | 202 |

|      |           |           |     |
|------|-----------|-----------|-----|
| chrX | 58104514  | 58104715  | 202 |
| chrX | 56087042  | 56087243  | 202 |
| chrX | 55963217  | 55963418  | 202 |
| chrX | 51042487  | 51042688  | 202 |
| chrX | 48154219  | 48154420  | 202 |
| chrX | 46703246  | 46703447  | 202 |
| chrX | 45733224  | 45733425  | 202 |
| chrX | 37774975  | 37775176  | 202 |
| chrX | 37287651  | 37287852  | 202 |
| chrX | 36340765  | 36340966  | 202 |
| chrX | 34831029  | 34831230  | 202 |
| chrX | 34514203  | 34514404  | 202 |
| chrX | 33111346  | 33111547  | 202 |
| chrX | 31043717  | 31043918  | 202 |
| chrX | 29639024  | 29639225  | 202 |
| chrX | 22007741  | 22007942  | 202 |
| chrX | 20205097  | 20205298  | 202 |
| chrX | 19528554  | 19528755  | 202 |
| chrX | 18989343  | 18989544  | 202 |
| chrX | 17107097  | 17107298  | 202 |
| chrX | 11974346  | 11974547  | 202 |
| chrX | 11460134  | 11460335  | 202 |
| chrX | 9991059   | 9991260   | 202 |
| chrX | 9622238   | 9622439   | 202 |
| chrX | 9172697   | 9172898   | 202 |
| chrX | 8611496   | 8611697   | 202 |
| chrX | 8256896   | 8257097   | 202 |
| chrX | 2784844   | 2785045   | 202 |
| chrX | 2209556   | 2209757   | 202 |
| chr9 | 106036143 | 106036344 | 202 |
| chr9 | 87723676  | 87723877  | 202 |
| chr9 | 27090853  | 27091054  | 202 |
| chr8 | 109861198 | 109861399 | 202 |
| chr8 | 76024579  | 76024780  | 202 |
| chr8 | 73481641  | 73481842  | 202 |
| chr8 | 65315375  | 65315576  | 202 |
| chr8 | 63991042  | 63991243  | 202 |
| chr8 | 61158399  | 61158600  | 202 |
| chr7 | 70724959  | 70725160  | 202 |
| chr7 | 65630218  | 65630419  | 202 |
| chr7 | 65185780  | 65185981  | 202 |
| chr7 | 57614643  | 57614844  | 202 |
| chr7 | 45782656  | 45782857  | 202 |
| chr7 | 45702758  | 45702959  | 202 |
| chr7 | 45271083  | 45271284  | 202 |
| chr7 | 44507469  | 44507670  | 202 |
| chr7 | 38719014  | 38719215  | 202 |
| chr7 | 15438318  | 15438519  | 202 |
| chr6 | 120889308 | 120889509 | 202 |
| chr6 | 107006208 | 107006409 | 202 |

|       |           |           |     |
|-------|-----------|-----------|-----|
| chr6  | 18487483  | 18487684  | 202 |
| chr5  | 125723551 | 125723752 | 202 |
| chr5  | 124880011 | 124880212 | 202 |
| chr5  | 122814049 | 122814250 | 202 |
| chr5  | 111013510 | 111013711 | 202 |
| chr5  | 78453968  | 78454169  | 202 |
| chr5  | 76069382  | 76069583  | 202 |
| chr5  | 75852847  | 75853048  | 202 |
| chr5  | 51633790  | 51633991  | 202 |
| chr5  | 30756740  | 30756941  | 202 |
| chr5  | 29928895  | 29929096  | 202 |
| chr5  | 28351278  | 28351479  | 202 |
| chr5  | 12279769  | 12279970  | 202 |
| chr4  | 123107157 | 123107358 | 202 |
| chr4  | 121731452 | 121731653 | 202 |
| chr4  | 99723499  | 99723700  | 202 |
| chr4  | 79267694  | 79267895  | 202 |
| chr4  | 72270902  | 72271103  | 202 |
| chr4  | 69619619  | 69619820  | 202 |
| chr4  | 5065012   | 5065213   | 202 |
| chr3  | 125683342 | 125683543 | 202 |
| chr3  | 118029946 | 118030147 | 202 |
| chr3  | 116910228 | 116910429 | 202 |
| chr3  | 114511622 | 114511823 | 202 |
| chr3  | 111643835 | 111644036 | 202 |
| chr3  | 106486583 | 106486784 | 202 |
| chr3  | 104558882 | 104559083 | 202 |
| chr3  | 98220070  | 98220271  | 202 |
| chr3  | 83489562  | 83489763  | 202 |
| chr3  | 36276709  | 36276910  | 202 |
| chr3  | 35677257  | 35677458  | 202 |
| chr3  | 25819460  | 25819661  | 202 |
| chr3  | 16928678  | 16928879  | 202 |
| chr3  | 15388256  | 15388457  | 202 |
| chr3  | 7814731   | 7814932   | 202 |
| chr29 | 51579245  | 51579446  | 202 |
| chr29 | 48040544  | 48040745  | 202 |
| chr29 | 34675072  | 34675273  | 202 |
| chr29 | 33627491  | 33627692  | 202 |
| chr29 | 33151910  | 33152111  | 202 |
| chr29 | 32537757  | 32537958  | 202 |
| chr29 | 31405847  | 31406048  | 202 |
| chr29 | 30678112  | 30678313  | 202 |
| chr29 | 26827782  | 26827983  | 202 |
| chr28 | 43057706  | 43057907  | 202 |
| chr28 | 42154899  | 42155100  | 202 |
| chr28 | 40706744  | 40706945  | 202 |
| chr28 | 32412831  | 32413032  | 202 |
| chr28 | 26979973  | 26980174  | 202 |
| chr28 | 25369618  | 25369819  | 202 |

|       |               |          |     |
|-------|---------------|----------|-----|
| chr28 | 12405296      | 12405497 | 202 |
| chr28 | 7319082       | 7319283  | 202 |
| chr28 | 4249231       | 4249432  | 202 |
| chr28 | 3537682       | 3537883  | 202 |
| chr27 | 45435937      | 45436138 | 202 |
| chr27 | 42038260      | 42038461 | 202 |
| chr27 | 41492895      | 41493096 | 202 |
| chr27 | 39882588      | 39882789 | 202 |
| chr27 | 26644908      | 26645109 | 202 |
| chr27 | 26461560      | 26461761 | 202 |
| chr27 | 5721525       | 5721726  | 202 |
| chr27 | 718132 718333 | 202      |     |
| chr26 | 48711548      | 48711749 | 202 |
| chr26 | 48428669      | 48428870 | 202 |
| chr26 | 44745841      | 44746042 | 202 |
| chr26 | 44702974      | 44703175 | 202 |
| chr26 | 40181777      | 40181978 | 202 |
| chr26 | 39197078      | 39197279 | 202 |
| chr26 | 37836148      | 37836349 | 202 |
| chr26 | 35613198      | 35613399 | 202 |
| chr26 | 31984593      | 31984794 | 202 |
| chr26 | 22375080      | 22375281 | 202 |
| chr26 | 17681484      | 17681685 | 202 |
| chr25 | 37271996      | 37272197 | 202 |
| chr25 | 35373066      | 35373267 | 202 |
| chr25 | 35350504      | 35350705 | 202 |
| chr25 | 33549415      | 33549616 | 202 |
| chr25 | 30128123      | 30128324 | 202 |
| chr25 | 27329985      | 27330186 | 202 |
| chr25 | 17674649      | 17674850 | 202 |
| chr25 | 3828866       | 3829067  | 202 |
| chr24 | 63025211      | 63025412 | 202 |
| chr24 | 60690001      | 60690202 | 202 |
| chr24 | 59442129      | 59442330 | 202 |
| chr24 | 48957087      | 48957288 | 202 |
| chr24 | 46463755      | 46463956 | 202 |
| chr24 | 41875306      | 41875507 | 202 |
| chr24 | 41692593      | 41692794 | 202 |
| chr24 | 41247645      | 41247846 | 202 |
| chr24 | 41108619      | 41108820 | 202 |
| chr24 | 38971464      | 38971665 | 202 |
| chr24 | 24716877      | 24717078 | 202 |
| chr23 | 51099493      | 51099694 | 202 |
| chr23 | 50043609      | 50043810 | 202 |
| chr23 | 48695830      | 48696031 | 202 |
| chr23 | 42396484      | 42396685 | 202 |
| chr23 | 40274681      | 40274882 | 202 |
| chr23 | 30356066      | 30356267 | 202 |
| chr23 | 28057216      | 28057417 | 202 |
| chr23 | 19610421      | 19610622 | 202 |

|       |           |           |     |
|-------|-----------|-----------|-----|
| chr23 | 19537550  | 19537751  | 202 |
| chr23 | 18462609  | 18462810  | 202 |
| chr23 | 15869613  | 15869814  | 202 |
| chr23 | 8325890   | 8326091   | 202 |
| chr22 | 60379935  | 60380136  | 202 |
| chr22 | 58413015  | 58413216  | 202 |
| chr22 | 56137190  | 56137391  | 202 |
| chr22 | 56023140  | 56023341  | 202 |
| chr22 | 47468082  | 47468283  | 202 |
| chr22 | 36553656  | 36553857  | 202 |
| chr22 | 29372184  | 29372385  | 202 |
| chr22 | 18376162  | 18376363  | 202 |
| chr22 | 16348243  | 16348444  | 202 |
| chr22 | 6491741   | 6491942   | 202 |
| chr22 | 5672086   | 5672287   | 202 |
| chr21 | 64820213  | 64820414  | 202 |
| chr21 | 63123178  | 63123379  | 202 |
| chr21 | 61507211  | 61507412  | 202 |
| chr21 | 60769460  | 60769661  | 202 |
| chr21 | 59888943  | 59889144  | 202 |
| chr21 | 58832249  | 58832450  | 202 |
| chr21 | 57818727  | 57818928  | 202 |
| chr21 | 48668009  | 48668210  | 202 |
| chr21 | 47609829  | 47610030  | 202 |
| chr21 | 34167941  | 34168142  | 202 |
| chr21 | 22665780  | 22665981  | 202 |
| chr21 | 20682006  | 20682207  | 202 |
| chr21 | 19201343  | 19201544  | 202 |
| chr21 | 14609833  | 14610034  | 202 |
| chr21 | 11917277  | 11917478  | 202 |
| chr21 | 9469501   | 9469702   | 202 |
| chr20 | 74110425  | 74110626  | 202 |
| chr20 | 61745135  | 61745336  | 202 |
| chr20 | 60344018  | 60344219  | 202 |
| chr20 | 8806521   | 8806722   | 202 |
| chr20 | 8003249   | 8003450   | 202 |
| chr2  | 132723447 | 132723648 | 202 |
| chr2  | 130752837 | 130753038 | 202 |
| chr2  | 129214386 | 129214587 | 202 |
| chr2  | 128001386 | 128001587 | 202 |
| chr2  | 124979074 | 124979275 | 202 |
| chr2  | 95159886  | 95160087  | 202 |
| chr2  | 75569626  | 75569827  | 202 |
| chr2  | 66734849  | 66735050  | 202 |
| chr2  | 54399300  | 54399501  | 202 |
| chr2  | 32337367  | 32337568  | 202 |
| chr2  | 29977094  | 29977295  | 202 |
| chr2  | 24955032  | 24955233  | 202 |
| chr2  | 21883177  | 21883378  | 202 |
| chr19 | 59410454  | 59410655  | 202 |

|       |               |          |     |
|-------|---------------|----------|-----|
| chr19 | 55405991      | 55406192 | 202 |
| chr19 | 43154212      | 43154413 | 202 |
| chr19 | 42040013      | 42040214 | 202 |
| chr19 | 39370772      | 39370973 | 202 |
| chr19 | 38551467      | 38551668 | 202 |
| chr19 | 32920967      | 32921168 | 202 |
| chr19 | 32806492      | 32806693 | 202 |
| chr19 | 25078473      | 25078674 | 202 |
| chr19 | 24621849      | 24622050 | 202 |
| chr19 | 21612513      | 21612714 | 202 |
| chr19 | 18046709      | 18046910 | 202 |
| chr19 | 15845176      | 15845377 | 202 |
| chr19 | 14948936      | 14949137 | 202 |
| chr19 | 11019354      | 11019555 | 202 |
| chr19 | 4705041       | 4705242  | 202 |
| chr18 | 56814012      | 56814213 | 202 |
| chr18 | 55268083      | 55268284 | 202 |
| chr18 | 54989036      | 54989237 | 202 |
| chr18 | 52146060      | 52146261 | 202 |
| chr18 | 51768718      | 51768919 | 202 |
| chr18 | 50049319      | 50049520 | 202 |
| chr18 | 47208839      | 47209040 | 202 |
| chr18 | 43065323      | 43065524 | 202 |
| chr18 | 41237849      | 41238050 | 202 |
| chr18 | 39850102      | 39850303 | 202 |
| chr18 | 37218335      | 37218536 | 202 |
| chr18 | 21961950      | 21962151 | 202 |
| chr18 | 17923605      | 17923806 | 202 |
| chr18 | 11553488      | 11553689 | 202 |
| chr18 | 628939 629140 | 202      | 202 |
| chr17 | 71731457      | 71731658 | 202 |
| chr17 | 70120382      | 70120583 | 202 |
| chr17 | 63413841      | 63414042 | 202 |
| chr17 | 62213580      | 62213781 | 202 |
| chr17 | 18452458      | 18452659 | 202 |
| chr17 | 4569038       | 4569239  | 202 |
| chr17 | 4207502       | 4207703  | 202 |
| chr16 | 75975842      | 75976043 | 202 |
| chr16 | 73777102      | 73777303 | 202 |
| chr16 | 60706311      | 60706512 | 202 |
| chr16 | 47941092      | 47941293 | 202 |
| chr16 | 47597268      | 47597469 | 202 |
| chr16 | 47173618      | 47173819 | 202 |
| chr16 | 45187885      | 45188086 | 202 |
| chr16 | 43843972      | 43844173 | 202 |
| chr16 | 43831848      | 43832049 | 202 |
| chr16 | 41438810      | 41439011 | 202 |
| chr16 | 38269724      | 38269925 | 202 |
| chr16 | 20762012      | 20762213 | 202 |
| chr16 | 1785330       | 1785531  | 202 |

|       |               |          |     |
|-------|---------------|----------|-----|
| chr15 | 75539292      | 75539493 | 202 |
| chr15 | 74606023      | 74606224 | 202 |
| chr15 | 33768400      | 33768601 | 202 |
| chr15 | 29032023      | 29032224 | 202 |
| chr15 | 27275316      | 27275517 | 202 |
| chr15 | 26533611      | 26533812 | 202 |
| chr15 | 24591176      | 24591377 | 202 |
| chr15 | 23930437      | 23930638 | 202 |
| chr14 | 35503813      | 35504014 | 202 |
| chr14 | 30892477      | 30892678 | 202 |
| chr14 | 21092038      | 21092239 | 202 |
| chr14 | 13857773      | 13857974 | 202 |
| chr14 | 5904079       | 5904280  | 202 |
| chr14 | 1972503       | 1972704  | 202 |
| chr14 | 192191 192392 | 202      |     |
| chr13 | 80661826      | 80662027 | 202 |
| chr13 | 80015168      | 80015369 | 202 |
| chr13 | 77610768      | 77610969 | 202 |
| chr13 | 77384463      | 77384664 | 202 |
| chr13 | 77328690      | 77328891 | 202 |
| chr13 | 77256139      | 77256340 | 202 |
| chr13 | 76160567      | 76160768 | 202 |
| chr13 | 73948039      | 73948240 | 202 |
| chr13 | 71053416      | 71053617 | 202 |
| chr13 | 70705732      | 70705933 | 202 |
| chr13 | 69869720      | 69869921 | 202 |
| chr13 | 67881107      | 67881308 | 202 |
| chr13 | 66146274      | 66146475 | 202 |
| chr13 | 60125930      | 60126131 | 202 |
| chr13 | 59864434      | 59864635 | 202 |
| chr13 | 59791230      | 59791431 | 202 |
| chr13 | 59090907      | 59091108 | 202 |
| chr13 | 58282731      | 58282932 | 202 |
| chr13 | 55313596      | 55313797 | 202 |
| chr13 | 46431437      | 46431638 | 202 |
| chr13 | 45869337      | 45869538 | 202 |
| chr13 | 45495943      | 45496144 | 202 |
| chr13 | 43990494      | 43990695 | 202 |
| chr13 | 40742106      | 40742307 | 202 |
| chr13 | 40714497      | 40714698 | 202 |
| chr13 | 37640039      | 37640240 | 202 |
| chr13 | 35664181      | 35664382 | 202 |
| chr13 | 24207107      | 24207308 | 202 |
| chr12 | 84319405      | 84319606 | 202 |
| chr12 | 34853994      | 34854195 | 202 |
| chr12 | 33991533      | 33991734 | 202 |
| chr12 | 33059816      | 33060017 | 202 |
| chr12 | 32830187      | 32830388 | 202 |
| chr12 | 30775470      | 30775671 | 202 |
| chr12 | 19344055      | 19344256 | 202 |



|       |           |           |     |
|-------|-----------|-----------|-----|
| chr11 | 109643222 | 109643423 | 202 |
| chr11 | 103459830 | 103460031 | 202 |
| chr11 | 99561988  | 99562189  | 202 |
| chr11 | 98510909  | 98511110  | 202 |
| chr11 | 92530116  | 92530317  | 202 |
| chr11 | 84589123  | 84589324  | 202 |
| chr11 | 83219854  | 83220055  | 202 |
| chr11 | 80357575  | 80357776  | 202 |
| chr11 | 76476169  | 76476370  | 202 |
| chr11 | 71078522  | 71078723  | 202 |
| chr11 | 51021978  | 51022179  | 202 |
| chr11 | 49003045  | 49003246  | 202 |
| chr11 | 44994058  | 44994259  | 202 |
| chr11 | 23179401  | 23179602  | 202 |
| chr11 | 21636977  | 21637178  | 202 |
| chr10 | 104437561 | 104437762 | 202 |
| chr10 | 103027836 | 103028037 | 202 |
| chr10 | 87166786  | 87166987  | 202 |
| chr10 | 84171051  | 84171252  | 202 |
| chr10 | 75472783  | 75472984  | 202 |
| chr10 | 70417539  | 70417740  | 202 |
| chr10 | 67736647  | 67736848  | 202 |
| chr10 | 66777957  | 66778158  | 202 |
| chr10 | 60487362  | 60487563  | 202 |
| chr10 | 49329895  | 49330096  | 202 |
| chr10 | 36010502  | 36010703  | 202 |
| chr10 | 17676768  | 17676969  | 202 |
| chr10 | 15147722  | 15147923  | 202 |
| chr10 | 6059356   | 6059557   | 202 |
| chr10 | 5240481   | 5240682   | 202 |
| chr1  | 150684301 | 150684502 | 202 |
| chr1  | 139461574 | 139461775 | 202 |
| chr1  | 109224800 | 109225001 | 202 |
| chr1  | 83135777  | 83135978  | 202 |
| chr1  | 75108202  | 75108403  | 202 |
| chr1  | 68457127  | 68457328  | 202 |
| chr1  | 9056185   | 9056386   | 202 |
| chr1  | 1479837   | 1480038   | 202 |
| chrX  | 83548550  | 83548750  | 201 |
| chrX  | 80775857  | 80776057  | 201 |
| chrX  | 80707656  | 80707856  | 201 |
| chrX  | 78600153  | 78600353  | 201 |
| chrX  | 78583767  | 78583967  | 201 |
| chrX  | 78321570  | 78321770  | 201 |
| chrX  | 78204631  | 78204831  | 201 |
| chrX  | 75865791  | 75865991  | 201 |
| chrX  | 75607438  | 75607638  | 201 |
| chrX  | 75455678  | 75455878  | 201 |
| chrX  | 69354408  | 69354608  | 201 |
| chrX  | 66802444  | 66802644  | 201 |

|      |           |           |     |
|------|-----------|-----------|-----|
| chrX | 59503635  | 59503835  | 201 |
| chrX | 55767391  | 55767591  | 201 |
| chrX | 54832382  | 54832582  | 201 |
| chrX | 54574365  | 54574565  | 201 |
| chrX | 49785628  | 49785828  | 201 |
| chrX | 49171595  | 49171795  | 201 |
| chrX | 45599601  | 45599801  | 201 |
| chrX | 39067592  | 39067792  | 201 |
| chrX | 35822366  | 35822566  | 201 |
| chrX | 31799548  | 31799748  | 201 |
| chrX | 30916543  | 30916743  | 201 |
| chrX | 30697117  | 30697317  | 201 |
| chrX | 30283858  | 30284058  | 201 |
| chrX | 29631853  | 29632053  | 201 |
| chrX | 23646092  | 23646292  | 201 |
| chrX | 22424010  | 22424210  | 201 |
| chrX | 20866305  | 20866505  | 201 |
| chrX | 20586915  | 20587115  | 201 |
| chrX | 19427218  | 19427418  | 201 |
| chrX | 18993612  | 18993812  | 201 |
| chrX | 18769475  | 18769675  | 201 |
| chrX | 12414050  | 12414250  | 201 |
| chrX | 12356150  | 12356350  | 201 |
| chrX | 10448792  | 10448992  | 201 |
| chrX | 10110764  | 10110964  | 201 |
| chrX | 9984129   | 9984329   | 201 |
| chrX | 9953344   | 9953544   | 201 |
| chrX | 9525107   | 9525307   | 201 |
| chrX | 9464023   | 9464223   | 201 |
| chrX | 8694248   | 8694448   | 201 |
| chrX | 8674612   | 8674812   | 201 |
| chrX | 8080654   | 8080854   | 201 |
| chrX | 7628964   | 7629164   | 201 |
| chrX | 7361020   | 7361220   | 201 |
| chrX | 6752569   | 6752769   | 201 |
| chrX | 4869930   | 4870130   | 201 |
| chrX | 2637321   | 2637521   | 201 |
| chrX | 2571269   | 2571469   | 201 |
| chrX | 2022809   | 2023009   | 201 |
| chrX | 850746    | 850946    | 201 |
| chrX | 469039    | 469239    | 201 |
| chrX | 428648    | 428848    | 201 |
| chrX | 356604    | 356804    | 201 |
| chrX | 16637     | 16837     | 201 |
| chr9 | 102639141 | 102639341 | 201 |
| chr9 | 102369614 | 102369814 | 201 |
| chr9 | 98099863  | 98100063  | 201 |
| chr9 | 68966836  | 68967036  | 201 |
| chr9 | 41689668  | 41689868  | 201 |
| chr9 | 33774618  | 33774818  | 201 |

|      |           |           |     |
|------|-----------|-----------|-----|
| chr9 | 16968707  | 16968907  | 201 |
| chr8 | 108763927 | 108764127 | 201 |
| chr8 | 61166084  | 61166284  | 201 |
| chr8 | 36607173  | 36607373  | 201 |
| chr8 | 29349176  | 29349376  | 201 |
| chr8 | 27175140  | 27175340  | 201 |
| chr8 | 27076942  | 27077142  | 201 |
| chr8 | 25641392  | 25641592  | 201 |
| chr8 | 24664115  | 24664315  | 201 |
| chr8 | 17091340  | 17091540  | 201 |
| chr7 | 89469453  | 89469653  | 201 |
| chr7 | 70804713  | 70804913  | 201 |
| chr7 | 70308682  | 70308882  | 201 |
| chr7 | 59683616  | 59683816  | 201 |
| chr7 | 51773318  | 51773518  | 201 |
| chr7 | 46215558  | 46215758  | 201 |
| chr7 | 46133887  | 46134087  | 201 |
| chr7 | 44821760  | 44821960  | 201 |
| chr7 | 44065242  | 44065442  | 201 |
| chr7 | 30068904  | 30069104  | 201 |
| chr7 | 15705635  | 15705835  | 201 |
| chr7 | 14697550  | 14697750  | 201 |
| chr6 | 121007704 | 121007904 | 201 |
| chr6 | 109046125 | 109046325 | 201 |
| chr6 | 107373881 | 107374081 | 201 |
| chr6 | 107134053 | 107134253 | 201 |
| chr6 | 106953309 | 106953509 | 201 |
| chr6 | 93291417  | 93291617  | 201 |
| chr6 | 70890580  | 70890780  | 201 |
| chr6 | 46594709  | 46594909  | 201 |
| chr5 | 122665983 | 122666183 | 201 |
| chr5 | 122181549 | 122181749 | 201 |
| chr5 | 120136511 | 120136711 | 201 |
| chr5 | 117110756 | 117110956 | 201 |
| chr5 | 114414230 | 114414430 | 201 |
| chr5 | 112952057 | 112952257 | 201 |
| chr5 | 112547983 | 112548183 | 201 |
| chr5 | 77044685  | 77044885  | 201 |
| chr5 | 62216494  | 62216694  | 201 |
| chr5 | 30234642  | 30234842  | 201 |
| chr5 | 30191750  | 30191950  | 201 |
| chr4 | 122998625 | 122998825 | 201 |
| chr4 | 121996719 | 121996919 | 201 |
| chr4 | 107560022 | 107560222 | 201 |
| chr4 | 104619650 | 104619850 | 201 |
| chr4 | 65388858  | 65389058  | 201 |
| chr4 | 28612406  | 28612606  | 201 |
| chr4 | 21346847  | 21347047  | 201 |
| chr4 | 13615381  | 13615581  | 201 |
| chr3 | 127440880 | 127441080 | 201 |

|       |           |           |     |
|-------|-----------|-----------|-----|
| chr3  | 126895501 | 126895701 | 201 |
| chr3  | 124921046 | 124921246 | 201 |
| chr3  | 122325111 | 122325311 | 201 |
| chr3  | 119298010 | 119298210 | 201 |
| chr3  | 119193213 | 119193413 | 201 |
| chr3  | 116254950 | 116255150 | 201 |
| chr3  | 116161372 | 116161572 | 201 |
| chr3  | 115463568 | 115463768 | 201 |
| chr3  | 114284688 | 114284888 | 201 |
| chr3  | 109747783 | 109747983 | 201 |
| chr3  | 107496042 | 107496242 | 201 |
| chr3  | 105711158 | 105711358 | 201 |
| chr3  | 105159083 | 105159283 | 201 |
| chr3  | 105150347 | 105150547 | 201 |
| chr3  | 101785067 | 101785267 | 201 |
| chr3  | 92505065  | 92505265  | 201 |
| chr3  | 88331401  | 88331601  | 201 |
| chr3  | 83765683  | 83765883  | 201 |
| chr3  | 80225411  | 80225611  | 201 |
| chr3  | 73929858  | 73930058  | 201 |
| chr3  | 48209912  | 48210112  | 201 |
| chr3  | 36026023  | 36026223  | 201 |
| chr3  | 33464753  | 33464953  | 201 |
| chr3  | 23239964  | 23240164  | 201 |
| chr3  | 13640403  | 13640603  | 201 |
| chr3  | 4369239   | 4369439   | 201 |
| chr3  | 4206709   | 4206909   | 201 |
| chr29 | 49508763  | 49508963  | 201 |
| chr29 | 49087173  | 49087373  | 201 |
| chr29 | 48705764  | 48705964  | 201 |
| chr29 | 48047230  | 48047430  | 201 |
| chr29 | 45773410  | 45773610  | 201 |
| chr29 | 44569287  | 44569487  | 201 |
| chr29 | 41639056  | 41639256  | 201 |
| chr29 | 37211514  | 37211714  | 201 |
| chr29 | 37018295  | 37018495  | 201 |
| chr29 | 33553537  | 33553737  | 201 |
| chr29 | 31566280  | 31566480  | 201 |
| chr29 | 26479054  | 26479254  | 201 |
| chr29 | 17893490  | 17893690  | 201 |
| chr28 | 42810289  | 42810489  | 201 |
| chr28 | 42406103  | 42406303  | 201 |
| chr27 | 39424458  | 39424658  | 201 |
| chr27 | 38626331  | 38626531  | 201 |
| chr27 | 37927238  | 37927438  | 201 |
| chr27 | 34437969  | 34438169  | 201 |
| chr27 | 27437698  | 27437898  | 201 |
| chr27 | 21090229  | 21090429  | 201 |
| chr27 | 17848147  | 17848347  | 201 |
| chr26 | 50291700  | 50291900  | 201 |

|       |          |          |     |
|-------|----------|----------|-----|
| chr26 | 48571144 | 48571344 | 201 |
| chr26 | 46041670 | 46041870 | 201 |
| chr26 | 45607657 | 45607857 | 201 |
| chr26 | 44247562 | 44247762 | 201 |
| chr26 | 44016639 | 44016839 | 201 |
| chr26 | 39132094 | 39132294 | 201 |
| chr26 | 38486535 | 38486735 | 201 |
| chr26 | 34156332 | 34156532 | 201 |
| chr26 | 23523001 | 23523201 | 201 |
| chr26 | 22619131 | 22619331 | 201 |
| chr26 | 21290835 | 21291035 | 201 |
| chr26 | 15728807 | 15729007 | 201 |
| chr25 | 40903099 | 40903299 | 201 |
| chr25 | 37217590 | 37217790 | 201 |
| chr25 | 36481652 | 36481852 | 201 |
| chr25 | 35566543 | 35566743 | 201 |
| chr25 | 34577916 | 34578116 | 201 |
| chr25 | 34044983 | 34045183 | 201 |
| chr25 | 31858907 | 31859107 | 201 |
| chr25 | 30779585 | 30779785 | 201 |
| chr25 | 24076259 | 24076459 | 201 |
| chr25 | 23354840 | 23355040 | 201 |
| chr25 | 1054264  | 1054464  | 201 |
| chr24 | 63019307 | 63019507 | 201 |
| chr24 | 61720651 | 61720851 | 201 |
| chr24 | 49778874 | 49779074 | 201 |
| chr24 | 47070676 | 47070876 | 201 |
| chr24 | 35363110 | 35363310 | 201 |
| chr24 | 34683589 | 34683789 | 201 |
| chr24 | 1367165  | 1367365  | 201 |
| chr23 | 48673755 | 48673955 | 201 |
| chr23 | 44827332 | 44827532 | 201 |
| chr23 | 31292009 | 31292209 | 201 |
| chr23 | 27897334 | 27897534 | 201 |
| chr23 | 23758297 | 23758497 | 201 |
| chr23 | 19772138 | 19772338 | 201 |
| chr23 | 18828343 | 18828543 | 201 |
| chr23 | 18647151 | 18647351 | 201 |
| chr23 | 13668343 | 13668543 | 201 |
| chr23 | 9378372  | 9378572  | 201 |
| chr23 | 9348415  | 9348615  | 201 |
| chr23 | 8867032  | 8867232  | 201 |
| chr23 | 8324359  | 8324559  | 201 |
| chr23 | 7413220  | 7413420  | 201 |
| chr22 | 57198072 | 57198272 | 201 |
| chr22 | 56707813 | 56708013 | 201 |
| chr22 | 56221451 | 56221651 | 201 |
| chr22 | 52231428 | 52231628 | 201 |
| chr22 | 51417341 | 51417541 | 201 |
| chr22 | 50602892 | 50603092 | 201 |

|       |               |           |     |
|-------|---------------|-----------|-----|
| chr22 | 49901586      | 49901786  | 201 |
| chr22 | 49597627      | 49597827  | 201 |
| chr22 | 48298839      | 48299039  | 201 |
| chr22 | 48232212      | 48232412  | 201 |
| chr22 | 30396713      | 30396913  | 201 |
| chr22 | 29772760      | 29772960  | 201 |
| chr22 | 17555899      | 17556099  | 201 |
| chr22 | 15404131      | 15404331  | 201 |
| chr22 | 14108210      | 14108410  | 201 |
| chr22 | 7554697       | 7554897   | 201 |
| chr22 | 5668229       | 5668429   | 201 |
| chr21 | 69011466      | 69011666  | 201 |
| chr21 | 64467972      | 64468172  | 201 |
| chr21 | 63098689      | 63098889  | 201 |
| chr21 | 60152765      | 60152965  | 201 |
| chr21 | 47723763      | 47723963  | 201 |
| chr21 | 47358044      | 47358244  | 201 |
| chr21 | 32335438      | 32335638  | 201 |
| chr21 | 28356440      | 28356640  | 201 |
| chr21 | 25160965      | 25161165  | 201 |
| chr21 | 20741712      | 20741912  | 201 |
| chr21 | 20682927      | 20683127  | 201 |
| chr21 | 19254377      | 19254577  | 201 |
| chr21 | 18463532      | 18463732  | 201 |
| chr21 | 13886743      | 13886943  | 201 |
| chr21 | 13604178      | 13604378  | 201 |
| chr21 | 13550418      | 13550618  | 201 |
| chr20 | 74710100      | 74710300  | 201 |
| chr20 | 72074855      | 72075055  | 201 |
| chr20 | 19030723      | 19030923  | 201 |
| chr20 | 8767188       | 8767388   | 201 |
| chr20 | 3277758       | 3277958   | 201 |
| chr20 | 1136517       | 1136717   | 201 |
| chr20 | 579888 580088 | 201       | 201 |
| chr2  | 136895199     | 136895399 | 201 |
| chr2  | 133925095     | 133925295 | 201 |
| chr2  | 126367769     | 126367969 | 201 |
| chr2  | 123715235     | 123715435 | 201 |
| chr2  | 122882137     | 122882337 | 201 |
| chr2  | 111697836     | 111698036 | 201 |
| chr2  | 36269317      | 36269517  | 201 |
| chr2  | 21522786      | 21522986  | 201 |
| chr19 | 64047154      | 64047354  | 201 |
| chr19 | 58870295      | 58870495  | 201 |
| chr19 | 58416610      | 58416810  | 201 |
| chr19 | 58244443      | 58244643  | 201 |
| chr19 | 56648677      | 56648877  | 201 |
| chr19 | 53024070      | 53024270  | 201 |
| chr19 | 52855426      | 52855626  | 201 |
| chr19 | 51990594      | 51990794  | 201 |

|       |          |          |     |
|-------|----------|----------|-----|
| chr19 | 46129165 | 46129365 | 201 |
| chr19 | 43149450 | 43149650 | 201 |
| chr19 | 43010931 | 43011131 | 201 |
| chr19 | 42351016 | 42351216 | 201 |
| chr19 | 42330649 | 42330849 | 201 |
| chr19 | 40441351 | 40441551 | 201 |
| chr19 | 39473215 | 39473415 | 201 |
| chr19 | 35804205 | 35804405 | 201 |
| chr19 | 33855556 | 33855756 | 201 |
| chr19 | 31221862 | 31222062 | 201 |
| chr19 | 30787948 | 30788148 | 201 |
| chr19 | 27160273 | 27160473 | 201 |
| chr19 | 26944042 | 26944242 | 201 |
| chr19 | 24678172 | 24678372 | 201 |
| chr19 | 23942167 | 23942367 | 201 |
| chr19 | 19142634 | 19142834 | 201 |
| chr19 | 13447987 | 13448187 | 201 |
| chr19 | 10815229 | 10815429 | 201 |
| chr19 | 10204541 | 10204741 | 201 |
| chr18 | 65648137 | 65648337 | 201 |
| chr18 | 63586488 | 63586688 | 201 |
| chr18 | 63028384 | 63028584 | 201 |
| chr18 | 62475544 | 62475744 | 201 |
| chr18 | 62315103 | 62315303 | 201 |
| chr18 | 62004412 | 62004612 | 201 |
| chr18 | 54090529 | 54090729 | 201 |
| chr18 | 51445854 | 51446054 | 201 |
| chr18 | 50977191 | 50977391 | 201 |
| chr18 | 33104591 | 33104791 | 201 |
| chr18 | 23585106 | 23585306 | 201 |
| chr18 | 23484004 | 23484204 | 201 |
| chr18 | 23104836 | 23105036 | 201 |
| chr18 | 18688276 | 18688476 | 201 |
| chr18 | 18060893 | 18061093 | 201 |
| chr18 | 12616263 | 12616463 | 201 |
| chr18 | 12592699 | 12592899 | 201 |
| chr18 | 11683761 | 11683961 | 201 |
| chr18 | 9799954  | 9800154  | 201 |
| chr18 | 8082056  | 8082256  | 201 |
| chr18 | 7642371  | 7642571  | 201 |
| chr18 | 3069968  | 3070168  | 201 |
| chr17 | 73133981 | 73134181 | 201 |
| chr17 | 72737715 | 72737915 | 201 |
| chr17 | 72696364 | 72696564 | 201 |
| chr17 | 68980013 | 68980213 | 201 |
| chr17 | 66809473 | 66809673 | 201 |
| chr17 | 66753652 | 66753852 | 201 |
| chr17 | 66695632 | 66695832 | 201 |
| chr17 | 64030622 | 64030822 | 201 |
| chr17 | 63700241 | 63700441 | 201 |

|       |          |          |     |
|-------|----------|----------|-----|
| chr17 | 48586887 | 48587087 | 201 |
| chr16 | 77560944 | 77561144 | 201 |
| chr16 | 71130529 | 71130729 | 201 |
| chr16 | 67433405 | 67433605 | 201 |
| chr16 | 49956243 | 49956443 | 201 |
| chr16 | 47674549 | 47674749 | 201 |
| chr16 | 45904585 | 45904785 | 201 |
| chr16 | 43103524 | 43103724 | 201 |
| chr16 | 41067912 | 41068112 | 201 |
| chr16 | 40926879 | 40927079 | 201 |
| chr16 | 38571475 | 38571675 | 201 |
| chr16 | 36927614 | 36927814 | 201 |
| chr16 | 17716885 | 17717085 | 201 |
| chr15 | 64784877 | 64785077 | 201 |
| chr15 | 64300075 | 64300275 | 201 |
| chr15 | 55192565 | 55192765 | 201 |
| chr15 | 51674383 | 51674583 | 201 |
| chr15 | 51654920 | 51655120 | 201 |
| chr15 | 29237449 | 29237649 | 201 |
| chr15 | 28623723 | 28623923 | 201 |
| chr15 | 28620692 | 28620892 | 201 |
| chr15 | 23636493 | 23636693 | 201 |
| chr15 | 22502732 | 22502932 | 201 |
| chr15 | 20030877 | 20031077 | 201 |
| chr14 | 59978119 | 59978319 | 201 |
| chr14 | 33994702 | 33994902 | 201 |
| chr14 | 21375637 | 21375837 | 201 |
| chr14 | 8039544  | 8039744  | 201 |
| chr14 | 7753087  | 7753287  | 201 |
| chr14 | 6891894  | 6892094  | 201 |
| chr14 | 1072558  | 1072758  | 201 |
| chr13 | 76430025 | 76430225 | 201 |
| chr13 | 74459495 | 74459695 | 201 |
| chr13 | 70173894 | 70174094 | 201 |
| chr13 | 69963579 | 69963779 | 201 |
| chr13 | 68059316 | 68059516 | 201 |
| chr13 | 67799950 | 67800150 | 201 |
| chr13 | 67123420 | 67123620 | 201 |
| chr13 | 66854919 | 66855119 | 201 |
| chr13 | 65106611 | 65106811 | 201 |
| chr13 | 63293467 | 63293667 | 201 |
| chr13 | 62038825 | 62039025 | 201 |
| chr13 | 61257699 | 61257899 | 201 |
| chr13 | 61199264 | 61199464 | 201 |
| chr13 | 60943951 | 60944151 | 201 |
| chr13 | 59359885 | 59360085 | 201 |
| chr13 | 58487249 | 58487449 | 201 |
| chr13 | 56019242 | 56019442 | 201 |
| chr13 | 47257776 | 47257976 | 201 |
| chr13 | 43432396 | 43432596 | 201 |



|       |           |           |     |
|-------|-----------|-----------|-----|
| chr13 | 37519692  | 37519892  | 201 |
| chr13 | 30727330  | 30727530  | 201 |
| chr13 | 16334509  | 16334709  | 201 |
| chr13 | 12534994  | 12535194  | 201 |
| chr12 | 82750870  | 82751070  | 201 |
| chr12 | 82593091  | 82593291  | 201 |
| chr12 | 76482435  | 76482635  | 201 |
| chr12 | 31264168  | 31264368  | 201 |
| chr12 | 14971744  | 14971944  | 201 |
| chr11 | 106072978 | 106073178 | 201 |
| chr11 | 104300389 | 104300589 | 201 |
| chr11 | 98430895  | 98431095  | 201 |
| chr11 | 98328526  | 98328726  | 201 |
| chr11 | 84107783  | 84107983  | 201 |
| chr11 | 81630943  | 81631143  | 201 |
| chr11 | 71129404  | 71129604  | 201 |
| chr11 | 66199568  | 66199768  | 201 |
| chr11 | 48409865  | 48410065  | 201 |
| chr11 | 47360345  | 47360545  | 201 |
| chr11 | 31960209  | 31960409  | 201 |
| chr11 | 10331887  | 10332087  | 201 |
| chr11 | 7068092   | 7068292   | 201 |
| chr10 | 105036597 | 105036797 | 201 |
| chr10 | 90278885  | 90279085  | 201 |
| chr10 | 88578200  | 88578400  | 201 |
| chr10 | 83840292  | 83840492  | 201 |
| chr10 | 70103458  | 70103658  | 201 |
| chr10 | 67080028  | 67080228  | 201 |
| chr10 | 66684681  | 66684881  | 201 |
| chr10 | 57343543  | 57343743  | 201 |
| chr10 | 53297537  | 53297737  | 201 |
| chr10 | 48924855  | 48925055  | 201 |
| chr10 | 19904948  | 19905148  | 201 |
| chr10 | 12714156  | 12714356  | 201 |
| chr10 | 8367464   | 8367664   | 201 |
| chr1  | 154436324 | 154436524 | 201 |
| chr1  | 141667266 | 141667466 | 201 |
| chr1  | 100041693 | 100041893 | 201 |
| chr1  | 99807637  | 99807837  | 201 |
| chr1  | 82913646  | 82913846  | 201 |
| chr1  | 82904913  | 82905113  | 201 |
| chr1  | 74924864  | 74925064  | 201 |
| chr1  | 74565958  | 74566158  | 201 |
| chr1  | 64860434  | 64860634  | 201 |
| chrX  | 81285886  | 81286085  | 200 |
| chrX  | 79858316  | 79858515  | 200 |
| chrX  | 78715084  | 78715283  | 200 |
| chrX  | 78017385  | 78017584  | 200 |
| chrX  | 77388751  | 77388950  | 200 |
| chrX  | 77200756  | 77200955  | 200 |

|      |          |          |     |
|------|----------|----------|-----|
| chrX | 74872127 | 74872326 | 200 |
| chrX | 74684554 | 74684753 | 200 |
| chrX | 74335310 | 74335509 | 200 |
| chrX | 74060681 | 74060880 | 200 |
| chrX | 73257528 | 73257727 | 200 |
| chrX | 71581840 | 71582039 | 200 |
| chrX | 70631256 | 70631455 | 200 |
| chrX | 70538116 | 70538315 | 200 |
| chrX | 69314446 | 69314645 | 200 |
| chrX | 66053459 | 66053658 | 200 |
| chrX | 65378792 | 65378991 | 200 |
| chrX | 65085161 | 65085360 | 200 |
| chrX | 64478501 | 64478700 | 200 |
| chrX | 63940793 | 63940992 | 200 |
| chrX | 62938306 | 62938505 | 200 |
| chrX | 61890582 | 61890781 | 200 |
| chrX | 61877836 | 61878035 | 200 |
| chrX | 61702326 | 61702525 | 200 |
| chrX | 61220410 | 61220609 | 200 |
| chrX | 57177943 | 57178142 | 200 |
| chrX | 57045105 | 57045304 | 200 |
| chrX | 55384283 | 55384482 | 200 |
| chrX | 55216890 | 55217089 | 200 |
| chrX | 54925650 | 54925849 | 200 |
| chrX | 54730566 | 54730765 | 200 |
| chrX | 53961073 | 53961272 | 200 |
| chrX | 49831784 | 49831983 | 200 |
| chrX | 49774515 | 49774714 | 200 |
| chrX | 48146816 | 48147015 | 200 |
| chrX | 47947639 | 47947838 | 200 |
| chrX | 47391628 | 47391827 | 200 |
| chrX | 47153918 | 47154117 | 200 |
| chrX | 45565640 | 45565839 | 200 |
| chrX | 44525315 | 44525514 | 200 |
| chrX | 38594789 | 38594988 | 200 |
| chrX | 38226212 | 38226411 | 200 |
| chrX | 37587578 | 37587777 | 200 |
| chrX | 37404713 | 37404912 | 200 |
| chrX | 36183670 | 36183869 | 200 |
| chrX | 34159146 | 34159345 | 200 |
| chrX | 34032228 | 34032427 | 200 |
| chrX | 32696889 | 32697088 | 200 |
| chrX | 32512841 | 32513040 | 200 |
| chrX | 32370849 | 32371048 | 200 |
| chrX | 30880223 | 30880422 | 200 |
| chrX | 28498371 | 28498570 | 200 |
| chrX | 20718304 | 20718503 | 200 |
| chrX | 19679149 | 19679348 | 200 |
| chrX | 19473382 | 19473581 | 200 |
| chrX | 19267665 | 19267864 | 200 |

|      |               |           |     |
|------|---------------|-----------|-----|
| chrX | 18878722      | 18878921  | 200 |
| chrX | 18179396      | 18179595  | 200 |
| chrX | 16422852      | 16423051  | 200 |
| chrX | 15767611      | 15767810  | 200 |
| chrX | 15666630      | 15666829  | 200 |
| chrX | 13904658      | 13904857  | 200 |
| chrX | 13768224      | 13768423  | 200 |
| chrX | 13295309      | 13295508  | 200 |
| chrX | 12576376      | 12576575  | 200 |
| chrX | 12079394      | 12079593  | 200 |
| chrX | 12066721      | 12066920  | 200 |
| chrX | 9454345       | 9454544   | 200 |
| chrX | 9254302       | 9254501   | 200 |
| chrX | 8415049       | 8415248   | 200 |
| chrX | 8122706       | 8122905   | 200 |
| chrX | 7661858       | 7662057   | 200 |
| chrX | 5828763       | 5828962   | 200 |
| chrX | 2562146       | 2562345   | 200 |
| chrX | 2305170       | 2305369   | 200 |
| chrX | 1537313       | 1537512   | 200 |
| chrX | 132702 132901 | 200       |     |
| chr9 | 102730060     | 102730259 | 200 |
| chr9 | 101024544     | 101024743 | 200 |
| chr9 | 91301063      | 91301262  | 200 |
| chr9 | 38294258      | 38294457  | 200 |
| chr8 | 110083668     | 110083867 | 200 |
| chr8 | 108828877     | 108829076 | 200 |
| chr8 | 80496528      | 80496727  | 200 |
| chr8 | 74326470      | 74326669  | 200 |
| chr8 | 70456285      | 70456484  | 200 |
| chr8 | 65842973      | 65843172  | 200 |
| chr8 | 61173381      | 61173580  | 200 |
| chr8 | 27066122      | 27066321  | 200 |
| chr8 | 25595425      | 25595624  | 200 |
| chr8 | 24217218      | 24217417  | 200 |
| chr7 | 64815939      | 64816138  | 200 |
| chr7 | 50659818      | 50660017  | 200 |
| chr7 | 50612285      | 50612484  | 200 |
| chr7 | 44753850      | 44754049  | 200 |
| chr7 | 44060541      | 44060740  | 200 |
| chr7 | 38499805      | 38500004  | 200 |
| chr7 | 37578860      | 37579059  | 200 |
| chr7 | 28267700      | 28267899  | 200 |
| chr7 | 19023461      | 19023660  | 200 |
| chr7 | 18729955      | 18730154  | 200 |
| chr7 | 14710806      | 14711005  | 200 |
| chr7 | 5415324       | 5415523   | 200 |
| chr6 | 121888316     | 121888515 | 200 |
| chr6 | 115485183     | 115485382 | 200 |
| chr6 | 66118526      | 66118725  | 200 |

|      |           |           |     |
|------|-----------|-----------|-----|
| chr6 | 4409598   | 4409797   | 200 |
| chr5 | 124974365 | 124974564 | 200 |
| chr5 | 122030823 | 122031022 | 200 |
| chr5 | 120398953 | 120399152 | 200 |
| chr5 | 118417933 | 118418132 | 200 |
| chr5 | 117521902 | 117522101 | 200 |
| chr5 | 114306134 | 114306333 | 200 |
| chr5 | 113241523 | 113241722 | 200 |
| chr5 | 112662457 | 112662656 | 200 |
| chr5 | 112125989 | 112126188 | 200 |
| chr5 | 112086829 | 112087028 | 200 |
| chr5 | 111995786 | 111995985 | 200 |
| chr5 | 111671542 | 111671741 | 200 |
| chr5 | 81628477  | 81628676  | 200 |
| chr5 | 80956726  | 80956925  | 200 |
| chr5 | 79196354  | 79196553  | 200 |
| chr5 | 76975148  | 76975347  | 200 |
| chr5 | 72898110  | 72898309  | 200 |
| chr5 | 62207213  | 62207412  | 200 |
| chr5 | 33966093  | 33966292  | 200 |
| chr5 | 31215650  | 31215849  | 200 |
| chr5 | 30935986  | 30936185  | 200 |
| chr5 | 30021749  | 30021948  | 200 |
| chr5 | 29989847  | 29990046  | 200 |
| chr5 | 28737972  | 28738171  | 200 |
| chr4 | 123413114 | 123413313 | 200 |
| chr4 | 121868121 | 121868320 | 200 |
| chr4 | 116785545 | 116785744 | 200 |
| chr4 | 107021561 | 107021760 | 200 |
| chr4 | 102931387 | 102931586 | 200 |
| chr4 | 99713926  | 99714125  | 200 |
| chr4 | 99406683  | 99406882  | 200 |
| chr4 | 88573649  | 88573848  | 200 |
| chr4 | 72649924  | 72650123  | 200 |
| chr4 | 70678693  | 70678892  | 200 |
| chr4 | 67940249  | 67940448  | 200 |
| chr4 | 67574295  | 67574494  | 200 |
| chr4 | 67421401  | 67421600  | 200 |
| chr4 | 64264854  | 64265053  | 200 |
| chr4 | 8866574   | 8866773   | 200 |
| chr3 | 123597671 | 123597870 | 200 |
| chr3 | 123396237 | 123396436 | 200 |
| chr3 | 123168614 | 123168813 | 200 |
| chr3 | 120752633 | 120752832 | 200 |
| chr3 | 116466684 | 116466883 | 200 |
| chr3 | 115677134 | 115677333 | 200 |
| chr3 | 113391621 | 113391820 | 200 |
| chr3 | 113271825 | 113272024 | 200 |
| chr3 | 109982653 | 109982852 | 200 |
| chr3 | 105188690 | 105188889 | 200 |

|       |           |           |     |
|-------|-----------|-----------|-----|
| chr3  | 105120525 | 105120724 | 200 |
| chr3  | 102698788 | 102698987 | 200 |
| chr3  | 97462625  | 97462824  | 200 |
| chr3  | 87796530  | 87796729  | 200 |
| chr3  | 87183292  | 87183491  | 200 |
| chr3  | 85500748  | 85500947  | 200 |
| chr3  | 45696026  | 45696225  | 200 |
| chr3  | 31102566  | 31102765  | 200 |
| chr3  | 26007723  | 26007922  | 200 |
| chr3  | 25812532  | 25812731  | 200 |
| chr3  | 16742849  | 16743048  | 200 |
| chr3  | 14148273  | 14148472  | 200 |
| chr3  | 7804849   | 7805048   | 200 |
| chr29 | 47972245  | 47972444  | 200 |
| chr29 | 46022907  | 46023106  | 200 |
| chr29 | 41881459  | 41881658  | 200 |
| chr29 | 38788186  | 38788385  | 200 |
| chr29 | 37402344  | 37402543  | 200 |
| chr29 | 37111589  | 37111788  | 200 |
| chr29 | 37090397  | 37090596  | 200 |
| chr29 | 36951170  | 36951369  | 200 |
| chr29 | 36591374  | 36591573  | 200 |
| chr29 | 36453644  | 36453843  | 200 |
| chr29 | 36203386  | 36203585  | 200 |
| chr29 | 34752271  | 34752470  | 200 |
| chr29 | 34378557  | 34378756  | 200 |
| chr29 | 33286634  | 33286833  | 200 |
| chr29 | 31972287  | 31972486  | 200 |
| chr29 | 30632293  | 30632492  | 200 |
| chr29 | 17782508  | 17782707  | 200 |
| chr29 | 17616850  | 17617049  | 200 |
| chr29 | 9997204   | 9997403   | 200 |
| chr28 | 42170353  | 42170552  | 200 |
| chr28 | 35231295  | 35231494  | 200 |
| chr28 | 34154693  | 34154892  | 200 |
| chr28 | 33930707  | 33930906  | 200 |
| chr28 | 30519199  | 30519398  | 200 |
| chr28 | 11364873  | 11365072  | 200 |
| chr28 | 2874327   | 2874526   | 200 |
| chr27 | 39102124  | 39102323  | 200 |
| chr27 | 35940585  | 35940784  | 200 |
| chr27 | 35931765  | 35931964  | 200 |
| chr27 | 32961149  | 32961348  | 200 |
| chr26 | 49671543  | 49671742  | 200 |
| chr26 | 46802596  | 46802795  | 200 |
| chr26 | 43094707  | 43094906  | 200 |
| chr26 | 41851713  | 41851912  | 200 |
| chr26 | 39271672  | 39271871  | 200 |
| chr26 | 39136544  | 39136743  | 200 |
| chr26 | 39099463  | 39099662  | 200 |

|       |               |          |     |
|-------|---------------|----------|-----|
| chr26 | 38756434      | 38756633 | 200 |
| chr26 | 31553239      | 31553438 | 200 |
| chr26 | 21824236      | 21824435 | 200 |
| chr26 | 21600984      | 21601183 | 200 |
| chr26 | 20940079      | 20940278 | 200 |
| chr26 | 18390018      | 18390217 | 200 |
| chr26 | 6867516       | 6867715  | 200 |
| chr25 | 40425124      | 40425323 | 200 |
| chr25 | 40238689      | 40238888 | 200 |
| chr25 | 38254821      | 38255020 | 200 |
| chr25 | 37540927      | 37541126 | 200 |
| chr25 | 37426687      | 37426886 | 200 |
| chr25 | 35506775      | 35506974 | 200 |
| chr25 | 34290822      | 34291021 | 200 |
| chr25 | 33273055      | 33273254 | 200 |
| chr25 | 28644790      | 28644989 | 200 |
| chr25 | 28146744      | 28146943 | 200 |
| chr25 | 23866600      | 23866799 | 200 |
| chr25 | 21659278      | 21659477 | 200 |
| chr25 | 17756987      | 17757186 | 200 |
| chr25 | 10544245      | 10544444 | 200 |
| chr25 | 10458687      | 10458886 | 200 |
| chr25 | 3392497       | 3392696  | 200 |
| chr25 | 520492 520691 | 200      |     |
| chr25 | 271495 271694 | 200      |     |
| chr24 | 63475266      | 63475465 | 200 |
| chr24 | 58843526      | 58843725 | 200 |
| chr24 | 49786366      | 49786565 | 200 |
| chr24 | 44079316      | 44079515 | 200 |
| chr24 | 41733099      | 41733298 | 200 |
| chr24 | 31588714      | 31588913 | 200 |
| chr24 | 26205968      | 26206167 | 200 |
| chr24 | 20889155      | 20889354 | 200 |
| chr23 | 52893265      | 52893464 | 200 |
| chr23 | 52774744      | 52774943 | 200 |
| chr23 | 52765634      | 52765833 | 200 |
| chr23 | 49543694      | 49543893 | 200 |
| chr23 | 48571926      | 48572125 | 200 |
| chr23 | 38289759      | 38289958 | 200 |
| chr23 | 27952023      | 27952222 | 200 |
| chr23 | 19954945      | 19955144 | 200 |
| chr23 | 19907879      | 19908078 | 200 |
| chr23 | 18720871      | 18721070 | 200 |
| chr23 | 18673762      | 18673961 | 200 |
| chr23 | 15921873      | 15922072 | 200 |
| chr23 | 15746075      | 15746274 | 200 |
| chr23 | 15096926      | 15097125 | 200 |
| chr23 | 14261954      | 14262153 | 200 |
| chr23 | 9546692       | 9546891  | 200 |
| chr23 | 8238223       | 8238422  | 200 |

|       |           |           |     |
|-------|-----------|-----------|-----|
| chr23 | 7425814   | 7426013   | 200 |
| chr22 | 57329529  | 57329728  | 200 |
| chr22 | 54681045  | 54681244  | 200 |
| chr22 | 51114274  | 51114473  | 200 |
| chr22 | 50527058  | 50527257  | 200 |
| chr22 | 49133859  | 49134058  | 200 |
| chr22 | 48029521  | 48029720  | 200 |
| chr22 | 16346875  | 16347074  | 200 |
| chr22 | 12185644  | 12185843  | 200 |
| chr22 | 6775962   | 6776161   | 200 |
| chr21 | 66239026  | 66239225  | 200 |
| chr21 | 64580369  | 64580568  | 200 |
| chr21 | 63953041  | 63953240  | 200 |
| chr21 | 61267715  | 61267914  | 200 |
| chr21 | 58630297  | 58630496  | 200 |
| chr21 | 32982562  | 32982761  | 200 |
| chr21 | 30795532  | 30795731  | 200 |
| chr21 | 27887845  | 27888044  | 200 |
| chr21 | 13588995  | 13589194  | 200 |
| chr21 | 2055058   | 2055257   | 200 |
| chr21 | 1925594   | 1925793   | 200 |
| chr20 | 73919136  | 73919335  | 200 |
| chr20 | 73733930  | 73734129  | 200 |
| chr20 | 73650714  | 73650913  | 200 |
| chr20 | 71170000  | 71170199  | 200 |
| chr20 | 43463335  | 43463534  | 200 |
| chr2  | 137107833 | 137108032 | 200 |
| chr2  | 136735574 | 136735773 | 200 |
| chr2  | 136628756 | 136628955 | 200 |
| chr2  | 131272574 | 131272773 | 200 |
| chr2  | 131151220 | 131151419 | 200 |
| chr2  | 123356043 | 123356242 | 200 |
| chr2  | 120034359 | 120034558 | 200 |
| chr2  | 77089143  | 77089342  | 200 |
| chr2  | 18843430  | 18843629  | 200 |
| chr19 | 60682368  | 60682567  | 200 |
| chr19 | 60029750  | 60029949  | 200 |
| chr19 | 59122478  | 59122677  | 200 |
| chr19 | 59096117  | 59096316  | 200 |
| chr19 | 59021327  | 59021526  | 200 |
| chr19 | 58675657  | 58675856  | 200 |
| chr19 | 56602761  | 56602960  | 200 |
| chr19 | 54458197  | 54458396  | 200 |
| chr19 | 41879269  | 41879468  | 200 |
| chr19 | 40665366  | 40665565  | 200 |
| chr19 | 40396771  | 40396970  | 200 |
| chr19 | 39466704  | 39466903  | 200 |
| chr19 | 36119631  | 36119830  | 200 |
| chr19 | 32557499  | 32557698  | 200 |
| chr19 | 30165240  | 30165439  | 200 |

|       |          |          |     |
|-------|----------|----------|-----|
| chr19 | 29655359 | 29655558 | 200 |
| chr19 | 27081100 | 27081299 | 200 |
| chr19 | 25400379 | 25400578 | 200 |
| chr19 | 18315310 | 18315509 | 200 |
| chr19 | 14356929 | 14357128 | 200 |
| chr19 | 13431984 | 13432183 | 200 |
| chr19 | 12610071 | 12610270 | 200 |
| chr19 | 11190148 | 11190347 | 200 |
| chr19 | 10793708 | 10793907 | 200 |
| chr19 | 7779073  | 7779272  | 200 |
| chr18 | 58983473 | 58983672 | 200 |
| chr18 | 53312619 | 53312818 | 200 |
| chr18 | 53257853 | 53258052 | 200 |
| chr18 | 52120313 | 52120512 | 200 |
| chr18 | 49092234 | 49092433 | 200 |
| chr18 | 45429361 | 45429560 | 200 |
| chr18 | 42953670 | 42953869 | 200 |
| chr18 | 42916248 | 42916447 | 200 |
| chr18 | 40295684 | 40295883 | 200 |
| chr18 | 24520292 | 24520491 | 200 |
| chr18 | 18669110 | 18669309 | 200 |
| chr18 | 12342201 | 12342400 | 200 |
| chr18 | 11594771 | 11594970 | 200 |
| chr18 | 11525289 | 11525488 | 200 |
| chr18 | 11505136 | 11505335 | 200 |
| chr18 | 6620483  | 6620682  | 200 |
| chr17 | 73956124 | 73956323 | 200 |
| chr17 | 73116859 | 73117058 | 200 |
| chr17 | 70493760 | 70493959 | 200 |
| chr17 | 69264030 | 69264229 | 200 |
| chr17 | 63787799 | 63787998 | 200 |
| chr17 | 63369625 | 63369824 | 200 |
| chr17 | 62077791 | 62077990 | 200 |
| chr17 | 59181434 | 59181633 | 200 |
| chr17 | 50855536 | 50855735 | 200 |
| chr17 | 18663324 | 18663523 | 200 |
| chr17 | 5377011  | 5377210  | 200 |
| chr16 | 67229782 | 67229981 | 200 |
| chr16 | 60556278 | 60556477 | 200 |
| chr16 | 60372694 | 60372893 | 200 |
| chr16 | 60244831 | 60245030 | 200 |
| chr16 | 39841832 | 39842031 | 200 |
| chr16 | 34770374 | 34770573 | 200 |
| chr16 | 3704489  | 3704688  | 200 |
| chr16 | 2113966  | 2114165  | 200 |
| chr15 | 64796610 | 64796809 | 200 |
| chr15 | 64304103 | 64304302 | 200 |
| chr15 | 61247791 | 61247990 | 200 |
| chr15 | 53391101 | 53391300 | 200 |
| chr15 | 52239379 | 52239578 | 200 |



|       |           |           |     |
|-------|-----------|-----------|-----|
| chr15 | 45501240  | 45501439  | 200 |
| chr15 | 38292703  | 38292902  | 200 |
| chr15 | 34004660  | 34004859  | 200 |
| chr15 | 30023070  | 30023269  | 200 |
| chr15 | 28892802  | 28893001  | 200 |
| chr15 | 28055244  | 28055443  | 200 |
| chr15 | 26733171  | 26733370  | 200 |
| chr15 | 24004027  | 24004226  | 200 |
| chr15 | 22320897  | 22321096  | 200 |
| chr14 | 30319865  | 30320064  | 200 |
| chr14 | 14001247  | 14001446  | 200 |
| chr14 | 8534204   | 8534403   | 200 |
| chr14 | 6227899   | 6228098   | 200 |
| chr14 | 6119162   | 6119361   | 200 |
| chr14 | 6072982   | 6073181   | 200 |
| chr14 | 1918442   | 1918641   | 200 |
| chr14 | 1285926   | 1286125   | 200 |
| chr13 | 82641527  | 82641726  | 200 |
| chr13 | 79452306  | 79452505  | 200 |
| chr13 | 68623840  | 68624039  | 200 |
| chr13 | 67104825  | 67105024  | 200 |
| chr13 | 63456641  | 63456840  | 200 |
| chr13 | 61845491  | 61845690  | 200 |
| chr13 | 57393789  | 57393988  | 200 |
| chr13 | 57382613  | 57382812  | 200 |
| chr13 | 54731649  | 54731848  | 200 |
| chr13 | 54020161  | 54020360  | 200 |
| chr13 | 41399175  | 41399374  | 200 |
| chr13 | 37534683  | 37534882  | 200 |
| chr13 | 35112847  | 35113046  | 200 |
| chr13 | 14682805  | 14683004  | 200 |
| chr13 | 10533550  | 10533749  | 200 |
| chr12 | 84606648  | 84606847  | 200 |
| chr12 | 83862300  | 83862499  | 200 |
| chr12 | 56343862  | 56344061  | 200 |
| chr12 | 35279729  | 35279928  | 200 |
| chr12 | 32495363  | 32495562  | 200 |
| chr12 | 31309881  | 31310080  | 200 |
| chr12 | 30818076  | 30818275  | 200 |
| chr12 | 30495696  | 30495895  | 200 |
| chr12 | 15302720  | 15302919  | 200 |
| chr12 | 15260201  | 15260400  | 200 |
| chr11 | 105034814 | 105035013 | 200 |
| chr11 | 100907819 | 100908018 | 200 |
| chr11 | 96082840  | 96083039  | 200 |
| chr11 | 92575856  | 92576055  | 200 |
| chr11 | 81553191  | 81553390  | 200 |
| chr11 | 77560560  | 77560759  | 200 |
| chr11 | 75098059  | 75098258  | 200 |
| chr11 | 47093487  | 47093686  | 200 |

|       |           |           |     |
|-------|-----------|-----------|-----|
| chr11 | 25643422  | 25643621  | 200 |
| chr11 | 23111009  | 23111208  | 200 |
| chr11 | 14036804  | 14037003  | 200 |
| chr10 | 104400019 | 104400218 | 200 |
| chr10 | 90733739  | 90733938  | 200 |
| chr10 | 86828077  | 86828276  | 200 |
| chr10 | 85788461  | 85788660  | 200 |
| chr10 | 79259034  | 79259233  | 200 |
| chr10 | 77490585  | 77490784  | 200 |
| chr10 | 73852053  | 73852252  | 200 |
| chr10 | 70419927  | 70420126  | 200 |
| chr10 | 70039463  | 70039662  | 200 |
| chr10 | 52979253  | 52979452  | 200 |
| chr10 | 36393820  | 36394019  | 200 |
| chr10 | 20836842  | 20837041  | 200 |
| chr10 | 17392594  | 17392793  | 200 |
| chr10 | 17316106  | 17316305  | 200 |
| chr1  | 152060431 | 152060630 | 200 |
| chr1  | 146178857 | 146179056 | 200 |
| chr1  | 123102932 | 123103131 | 200 |
| chr1  | 120773737 | 120773936 | 200 |
| chr1  | 115885375 | 115885574 | 200 |
| chr1  | 99802929  | 99803128  | 200 |
| chr1  | 97780994  | 97781193  | 200 |
| chr1  | 82990676  | 82990875  | 200 |
| chr1  | 74991926  | 74992125  | 200 |
| chr1  | 72555870  | 72556069  | 200 |
| chr1  | 54950048  | 54950247  | 200 |
| chr1  | 10211630  | 10211829  | 200 |
| chr11 | 22227132  | 22227335  | 204 |
| chr8  | 73773786  | 73774350  | 565 |
| chr17 | 73170917  | 73171366  | 450 |
| chrX  | 62972247  | 62972645  | 399 |
| chrX  | 59386904  | 59387302  | 399 |
| chr13 | 64205711  | 64206107  | 397 |
| chr26 | 25489186  | 25489580  | 395 |
| chr28 | 33997851  | 33998241  | 391 |
| chrX  | 5260652   | 5261036   | 385 |
| chr15 | 25393438  | 25393818  | 381 |
| chr19 | 13981029  | 13981404  | 376 |
| chr29 | 37396980  | 37397354  | 375 |
| chrX  | 55627747  | 55628118  | 372 |
| chr7  | 3945143   | 3945513   | 371 |
| chr3  | 123495574 | 123495943 | 370 |
| chr12 | 82709624  | 82709986  | 363 |
| chrX  | 24602738  | 24603092  | 355 |
| chr19 | 52051045  | 52051393  | 349 |
| chr23 | 8445971   | 8446317   | 347 |
| chr25 | 25894934  | 25895276  | 343 |
| chr12 | 32156528  | 32156864  | 337 |

|       |               |           |     |
|-------|---------------|-----------|-----|
| chrX  | 20009104      | 20009437  | 334 |
| chr7  | 50617116      | 50617449  | 334 |
| chr5  | 74573821      | 74574145  | 325 |
| chr29 | 37014544      | 37014848  | 305 |
| chr10 | 10952551      | 10952838  | 288 |
| chr15 | 32193848      | 32194102  | 255 |
| chr8  | 73521607      | 73521813  | 207 |
| chr13 | 59753974      | 59754629  | 656 |
| chrX  | 58723183      | 58723758  | 576 |
| chr19 | 30823539      | 30824050  | 512 |
| chr5  | 29190619      | 29191056  | 438 |
| chr4  | 122352302     | 122352719 | 418 |
| chr11 | 106306818     | 106307235 | 418 |
| chr4  | 71857588      | 71857985  | 398 |
| chr5  | 120045073     | 120045462 | 390 |
| chr14 | 7628075       | 7628464   | 390 |
| chr20 | 469532 469917 | 386       |     |
| chr14 | 76346534      | 76346913  | 380 |
| chr17 | 47426707      | 47427077  | 371 |
| chr1  | 87143895      | 87144247  | 353 |
| chr5  | 100648909     | 100649257 | 349 |
| chr6  | 72063569      | 72063915  | 347 |
| chr21 | 20168624      | 20168970  | 347 |
| chr15 | 29757424      | 29757758  | 335 |
| chrX  | 20501885      | 20502215  | 331 |
| chrX  | 80187887      | 80188175  | 289 |
| chr21 | 59699456      | 59699720  | 265 |
| chr21 | 67767887      | 67768133  | 247 |
| chr16 | 47248641      | 47249202  | 562 |
| chrX  | 8839582       | 8840077   | 496 |
| chrX  | 33728786      | 33729236  | 451 |
| chr21 | 27570097      | 27570526  | 430 |
| chrX  | 49232287      | 49232709  | 423 |
| chr13 | 63387708      | 63388112  | 405 |
| chr13 | 79070615      | 79070951  | 337 |
| chr4  | 124345535     | 124345794 | 260 |
| chr10 | 16853824      | 16854209  | 386 |
| chr1  | 10770044      | 10770423  | 380 |
| chr4  | 124149557     | 124149934 | 378 |
| chr29 | 39088527      | 39088897  | 371 |
| chr18 | 48791317      | 48791687  | 371 |
| chr3  | 126968451     | 126968814 | 364 |
| chr14 | 17981287      | 17981650  | 364 |
| chr5  | 111828194     | 111828549 | 356 |
| chr19 | 19143057      | 19143405  | 349 |
| chr13 | 62382769      | 62383108  | 340 |
| chr6  | 46639197      | 46639531  | 335 |
| chrX  | 72134969      | 72135296  | 328 |
| chr18 | 40272414      | 40272735  | 322 |
| chr6  | 18977548      | 18977863  | 316 |

|       |           |           |     |
|-------|-----------|-----------|-----|
| chr23 | 28845351  | 28845664  | 314 |
| chr25 | 44041922  | 44042220  | 299 |
| chr22 | 6485846   | 6486134   | 289 |
| chr10 | 43674355  | 43674638  | 284 |
| chrX  | 1642302   | 1642580   | 279 |
| chr22 | 15047422  | 15047698  | 277 |
| chr10 | 17702518  | 17702791  | 274 |
| chr19 | 46802107  | 46802379  | 273 |
| chrX  | 59822920  | 59823191  | 272 |
| chr20 | 73115696  | 73115965  | 270 |
| chr15 | 30168190  | 30168459  | 270 |
| chr1  | 67789499  | 67789768  | 270 |
| chr7  | 71399852  | 71400118  | 267 |
| chr13 | 42629828  | 42630078  | 251 |
| chr7  | 13488441  | 13488688  | 248 |
| chr19 | 50340554  | 50340799  | 246 |
| chr29 | 50437669  | 50437906  | 238 |
| chr6  | 115506523 | 115506759 | 237 |
| chrX  | 49287670  | 49287899  | 230 |
| chrM  | 498 727   | 230       |     |
| chr19 | 59237819  | 59238047  | 229 |
| chr5  | 30308678  | 30308900  | 223 |
| chr25 | 30626940  | 30627161  | 222 |
| chr27 | 46944991  | 46945210  | 220 |
| chr13 | 77366164  | 77366383  | 220 |
| chr8  | 93712312  | 93712530  | 219 |
| chr11 | 48671658  | 48671876  | 219 |
| chr14 | 38854457  | 38854671  | 215 |
| chr13 | 38357390  | 38357604  | 215 |
| chr10 | 5452213   | 5452427   | 215 |
| chr16 | 47257042  | 47257255  | 214 |
| chr24 | 20894068  | 20894280  | 213 |
| chr17 | 64552501  | 64552713  | 213 |
| chrX  | 21144590  | 21144801  | 212 |
| chrX  | 37263728  | 37263935  | 208 |
| chrX  | 8710682   | 8710889   | 208 |
| chr23 | 51680859  | 51681065  | 207 |
| chr5  | 13534828  | 13535033  | 206 |
| chr18 | 58942395  | 58942600  | 206 |
| chr1  | 87379847  | 87380051  | 205 |
| chr21 | 66600138  | 66600341  | 204 |
| chr21 | 59030411  | 59030614  | 204 |
| chr10 | 34357081  | 34357282  | 202 |
| chr1  | 144774253 | 144774453 | 201 |
| chrX  | 17458123  | 17458322  | 200 |
| chr12 | 48394257  | 48394456  | 200 |
| chr11 | 49318119  | 49318400  | 282 |
| chr8  | 73838226  | 73838445  | 220 |
| chrX  | 14026754  | 14027102  | 349 |
| chr11 | 50448624  | 50448920  | 297 |

|       |           |           |     |
|-------|-----------|-----------|-----|
| chr2  | 121797686 | 121798079 | 394 |
| chr15 | 59414912  | 59415239  | 328 |
| chr13 | 68503278  | 68504007  | 730 |
| chrX  | 31580183  | 31580911  | 729 |
| chr10 | 17101300  | 17101959  | 660 |
| chrX  | 20410969  | 20411575  | 607 |
| chrX  | 56257953  | 56258546  | 594 |
| chr19 | 38772859  | 38773410  | 552 |
| chr15 | 45842260  | 45842807  | 548 |
| chr22 | 53965177  | 53965720  | 544 |
| chr5  | 88027812  | 88028348  | 537 |
| chr10 | 50981588  | 50982120  | 533 |
| chr10 | 81682319  | 81682849  | 531 |
| chr14 | 1734301   | 1734829   | 529 |
| chr9  | 106483865 | 106484392 | 528 |
| chr20 | 74227213  | 74227737  | 525 |
| chrX  | 20417543  | 20418066  | 524 |
| chr7  | 13275288  | 13275808  | 521 |
| chr24 | 20731869  | 20732386  | 518 |
| chr16 | 68898368  | 68898885  | 518 |
| chr2  | 131210813 | 131211323 | 511 |
| chrX  | 19863558  | 19864066  | 509 |
| chr2  | 1300332   | 1300835   | 504 |
| chr19 | 54364776  | 54365279  | 504 |
| chr23 | 15803071  | 15803570  | 500 |
| chr29 | 34912969  | 34913461  | 493 |
| chr24 | 51441622  | 51442114  | 493 |
| chr18 | 45434597  | 45435084  | 488 |
| chrX  | 22012623  | 22013109  | 487 |
| chr21 | 64570163  | 64570649  | 487 |
| chr11 | 1977782   | 1978267   | 486 |
| chr23 | 19914413  | 19914897  | 485 |
| chr18 | 11561083  | 11561560  | 478 |
| chrX  | 62818270  | 62818738  | 469 |
| chr5  | 30839322  | 30839790  | 469 |
| chr26 | 21889668  | 21890135  | 468 |
| chrX  | 75380515  | 75380976  | 462 |
| chr2  | 122997746 | 122998207 | 462 |
| chr22 | 60012733  | 60013188  | 456 |
| chrX  | 22564074  | 22564526  | 453 |
| chrX  | 31596577  | 31597025  | 449 |
| chr29 | 2438202   | 2438649   | 448 |
| chr1  | 70854087  | 70854534  | 448 |
| chr3  | 116184609 | 116185051 | 443 |
| chr18 | 13575976  | 13576416  | 441 |
| chrX  | 45813023  | 45813461  | 439 |
| chr8  | 24325606  | 24326044  | 439 |
| chr21 | 13960611  | 13961043  | 433 |
| chrX  | 61781397  | 61781827  | 431 |
| chr22 | 5346092   | 5346522   | 431 |

|       |           |           |     |
|-------|-----------|-----------|-----|
| chr19 | 27936914  | 27937344  | 431 |
| chr25 | 34394709  | 34395138  | 430 |
| chr10 | 67002358  | 67002784  | 427 |
| chr13 | 80050940  | 80051364  | 425 |
| chr19 | 29767914  | 29768331  | 418 |
| chr19 | 25734311  | 25734718  | 408 |
| chr19 | 41252933  | 41253339  | 407 |
| chrX  | 31826242  | 31826641  | 400 |
| chr26 | 38110984  | 38111383  | 400 |
| chrX  | 78613657  | 78614055  | 399 |
| chrX  | 67050733  | 67051131  | 399 |
| chrX  | 21160099  | 21160497  | 399 |
| chrX  | 6896455   | 6896853   | 399 |
| chr7  | 42283099  | 42283497  | 399 |
| chr5  | 119147846 | 119148244 | 399 |
| chr4  | 121475823 | 121476221 | 399 |
| chr3  | 111653696 | 111654094 | 399 |
| chr29 | 34900915  | 34901313  | 399 |
| chr28 | 26092685  | 26093083  | 399 |
| chr23 | 18463139  | 18463537  | 399 |
| chr22 | 58618776  | 58619174  | 399 |
| chr21 | 25076895  | 25077293  | 399 |
| chr21 | 20982160  | 20982558  | 399 |
| chr2  | 75984623  | 75985021  | 399 |
| chr19 | 42265860  | 42266258  | 399 |
| chr18 | 62456925  | 62457323  | 399 |
| chr15 | 62757313  | 62757711  | 399 |
| chr15 | 28965463  | 28965861  | 399 |
| chr12 | 75122952  | 75123350  | 399 |
| chr10 | 68215802  | 68216200  | 399 |
| chrX  | 8478956   | 8479353   | 398 |
| chr21 | 67957985  | 67958382  | 398 |
| chr16 | 23833503  | 23833900  | 398 |
| chr13 | 80782626  | 80783023  | 398 |
| chrX  | 76086777  | 76087173  | 397 |
| chrX  | 8364848   | 8365244   | 397 |
| chr3  | 123593856 | 123594252 | 397 |
| chr28 | 34065520  | 34065916  | 397 |
| chr16 | 72291347  | 72291743  | 397 |
| chrX  | 65719008  | 65719403  | 396 |
| chrX  | 54089753  | 54090148  | 396 |
| chrX  | 31222127  | 31222522  | 396 |
| chr2  | 110034535 | 110034930 | 396 |
| chr19 | 12306934  | 12307329  | 396 |
| chrX  | 54410963  | 54411357  | 395 |
| chrX  | 6399360   | 6399754   | 395 |
| chr26 | 31921969  | 31922363  | 395 |
| chr18 | 50857951  | 50858345  | 395 |
| chr13 | 53710520  | 53710914  | 395 |
| chrX  | 78243923  | 78244316  | 394 |

|       |           |           |     |
|-------|-----------|-----------|-----|
| chrX  | 8425204   | 8425597   | 394 |
| chr7  | 65994657  | 65995050  | 394 |
| chr5  | 116926405 | 116926798 | 394 |
| chr21 | 61261557  | 61261950  | 394 |
| chr14 | 9196937   | 9197330   | 394 |
| chr5  | 29132812  | 29133204  | 393 |
| chr22 | 48588452  | 48588844  | 393 |
| chr19 | 60400934  | 60401326  | 393 |
| chr18 | 54083059  | 54083451  | 393 |
| chr16 | 71563734  | 71564126  | 393 |
| chr15 | 28600986  | 28601378  | 393 |
| chrX  | 74201679  | 74202070  | 392 |
| chr3  | 123671141 | 123671532 | 392 |
| chr28 | 33663565  | 33663956  | 392 |
| chr26 | 21958704  | 21959095  | 392 |
| chr22 | 30091688  | 30092079  | 392 |
| chr13 | 57686008  | 57686399  | 392 |
| chr13 | 28784972  | 28785363  | 392 |
| chr10 | 74112566  | 74112957  | 392 |
| chrX  | 12428103  | 12428493  | 391 |
| chr8  | 65915655  | 65916045  | 391 |
| chr3  | 33739708  | 33740098  | 391 |
| chr23 | 31301088  | 31301478  | 391 |
| chr18 | 45844321  | 45844711  | 391 |
| chr14 | 68003598  | 68003988  | 391 |
| chrX  | 73335876  | 73336265  | 390 |
| chrX  | 37358918  | 37359307  | 390 |
| chrX  | 35164282  | 35164671  | 390 |
| chr27 | 26690677  | 26691066  | 390 |
| chr19 | 43067452  | 43067841  | 390 |
| chr16 | 44876335  | 44876724  | 390 |
| chr14 | 1541936   | 1542325   | 390 |
| chr11 | 2805761   | 2806150   | 390 |
| chrX  | 72656318  | 72656706  | 389 |
| chr5  | 118413060 | 118413448 | 389 |
| chr3  | 24965786  | 24966174  | 389 |
| chr29 | 49794701  | 49795089  | 389 |
| chr19 | 58651587  | 58651975  | 389 |
| chr19 | 8312417   | 8312805   | 389 |
| chr13 | 72724511  | 72724899  | 389 |
| chrX  | 78567394  | 78567781  | 388 |
| chrX  | 74141322  | 74141709  | 388 |
| chr7  | 45716700  | 45717087  | 388 |
| chr5  | 112364036 | 112364423 | 388 |
| chr27 | 44699540  | 44699927  | 388 |
| chr25 | 43955211  | 43955598  | 388 |
| chr2  | 139469025 | 139469412 | 388 |
| chr5  | 20847243  | 20847629  | 387 |
| chr22 | 54354881  | 54355267  | 387 |
| chr2  | 75675295  | 75675681  | 387 |

|       |               |           |     |
|-------|---------------|-----------|-----|
| chr16 | 1655042       | 1655428   | 387 |
| chr10 | 106078432     | 106078818 | 387 |
| chrX  | 9520669       | 9521054   | 386 |
| chr28 | 6196916       | 6197301   | 386 |
| chr23 | 28564020      | 28564405  | 386 |
| chr20 | 6590204       | 6590589   | 386 |
| chr7  | 10977359      | 10977743  | 385 |
| chr7  | 10822121      | 10822505  | 385 |
| chr3  | 117199645     | 117200029 | 385 |
| chr3  | 54277602      | 54277986  | 385 |
| chr21 | 33806228      | 33806612  | 385 |
| chr19 | 13469895      | 13470279  | 385 |
| chr10 | 17029892      | 17030276  | 385 |
| chr1  | 153187958     | 153188342 | 385 |
| chr25 | 37198523      | 37198906  | 384 |
| chr25 | 412180 412563 | 384       |     |
| chrX  | 78700950      | 78701332  | 383 |
| chrX  | 20392404      | 20392786  | 383 |
| chr5  | 79209504      | 79209886  | 383 |
| chr29 | 49465442      | 49465824  | 383 |
| chr19 | 59295936      | 59296318  | 383 |
| chr19 | 25088438      | 25088820  | 383 |
| chr17 | 11547377      | 11547759  | 383 |
| chr13 | 41932070      | 41932452  | 383 |
| chrX  | 50876880      | 50877261  | 382 |
| chr8  | 89534547      | 89534927  | 381 |
| chr8  | 60309863      | 60310243  | 381 |
| chr7  | 61737902      | 61738282  | 381 |
| chr6  | 120639417     | 120639797 | 381 |
| chr27 | 34802604      | 34802984  | 381 |
| chr19 | 61749782      | 61750162  | 381 |
| chr18 | 49260041      | 49260421  | 381 |
| chr18 | 12084111      | 12084491  | 381 |
| chr18 | 7817353       | 7817733   | 381 |
| chr14 | 13944663      | 13945043  | 381 |
| chr11 | 10123299      | 10123679  | 381 |
| chr21 | 27128670      | 27129049  | 380 |
| chr19 | 21374704      | 21375083  | 380 |
| chr11 | 71968314      | 71968693  | 380 |
| chr10 | 90484324      | 90484703  | 380 |
| chrX  | 21547747      | 21548125  | 379 |
| chr19 | 45275249      | 45275627  | 379 |
| chr10 | 79844915      | 79845293  | 379 |
| chr9  | 52831660      | 52832037  | 378 |
| chr7  | 37876446      | 37876823  | 378 |
| chr7  | 15597110      | 15597487  | 378 |
| chr5  | 27978350      | 27978727  | 378 |
| chr28 | 184770 185147 | 378       |     |
| chr15 | 74261431      | 74261808  | 378 |
| chrX  | 6451029       | 6451405   | 377 |



|       |               |           |     |
|-------|---------------|-----------|-----|
| chrX  | 2043200       | 2043576   | 377 |
| chr7  | 65073283      | 65073659  | 377 |
| chr5  | 61062202      | 61062578  | 377 |
| chr29 | 50012015      | 50012391  | 377 |
| chr28 | 33897562      | 33897938  | 377 |
| chr25 | 34327179      | 34327555  | 377 |
| chr25 | 1301992       | 1302368   | 377 |
| chr23 | 11051055      | 11051431  | 377 |
| chr10 | 88032847      | 88033223  | 377 |
| chrX  | 80221324      | 80221699  | 376 |
| chrX  | 9522084       | 9522459   | 376 |
| chr29 | 42400625      | 42401000  | 376 |
| chr13 | 70078884      | 70079259  | 376 |
| chrX  | 74866670      | 74867044  | 375 |
| chr17 | 63034372      | 63034746  | 375 |
| chr12 | 75108726      | 75109100  | 375 |
| chrX  | 70489233      | 70489606  | 374 |
| chr4  | 82905053      | 82905426  | 374 |
| chr25 | 38030601      | 38030974  | 374 |
| chr23 | 34952994      | 34953367  | 374 |
| chr21 | 64564912      | 64565285  | 374 |
| chr19 | 11019945      | 11020318  | 374 |
| chr1  | 184869 185242 | 374       |     |
| chr3  | 111807880     | 111808252 | 373 |
| chr25 | 1056653       | 1057025   | 373 |
| chr16 | 71115203      | 71115575  | 373 |
| chr15 | 64150130      | 64150502  | 373 |
| chr10 | 62962792      | 62963164  | 373 |
| chr5  | 120417280     | 120417651 | 372 |
| chr5  | 120139639     | 120140010 | 372 |
| chr5  | 71680518      | 71680889  | 372 |
| chr4  | 106556569     | 106556940 | 372 |
| chr3  | 7787523       | 7787894   | 372 |
| chr26 | 44112615      | 44112986  | 372 |
| chr23 | 16856391      | 16856762  | 372 |
| chr21 | 69151775      | 69152146  | 372 |
| chrX  | 35483054      | 35483424  | 371 |
| chrX  | 8831827       | 8832197   | 371 |
| chr3  | 115499677     | 115500047 | 371 |
| chr3  | 108997826     | 108998196 | 371 |
| chrX  | 74787034      | 74787403  | 370 |
| chr8  | 24334009      | 24334378  | 370 |
| chr8  | 24274100      | 24274469  | 370 |
| chr26 | 44539688      | 44540057  | 370 |
| chr13 | 67103818      | 67104187  | 370 |
| chr11 | 25609885      | 25610254  | 370 |
| chr11 | 12880540      | 12880909  | 370 |
| chr5  | 111996989     | 111997357 | 369 |
| chr19 | 65229375      | 65229743  | 369 |
| chr17 | 53497463      | 53497831  | 369 |

|       |               |           |     |
|-------|---------------|-----------|-----|
| chr13 | 75759319      | 75759687  | 369 |
| chr10 | 19631507      | 19631875  | 369 |
| chr8  | 102177026     | 102177393 | 368 |
| chr16 | 43862914      | 43863281  | 368 |
| chrX  | 53370888      | 53371254  | 367 |
| chr9  | 106527256     | 106527622 | 367 |
| chr9  | 99324548      | 99324914  | 367 |
| chr22 | 49898876      | 49899242  | 367 |
| chr21 | 59764932      | 59765298  | 367 |
| chr14 | 9431582       | 9431948   | 367 |
| chr7  | 77026520      | 77026885  | 366 |
| chr7  | 57163768      | 57164133  | 366 |
| chr1  | 82992748      | 82993113  | 366 |
| chrX  | 20455136      | 20455500  | 365 |
| chr3  | 108764951     | 108765315 | 365 |
| chr24 | 60256352      | 60256716  | 365 |
| chr17 | 70160362      | 70160726  | 365 |
| chr16 | 73776728      | 73777092  | 365 |
| chrX  | 31957864      | 31958227  | 364 |
| chrX  | 12002264      | 12002627  | 364 |
| chrX  | 11646327      | 11646690  | 364 |
| chrX  | 820263 820626 | 364       |     |
| chr2  | 114975197     | 114975560 | 364 |
| chr19 | 10232388      | 10232751  | 364 |
| chrX  | 72865437      | 72865799  | 363 |
| chrX  | 32185891      | 32186253  | 363 |
| chrX  | 16506657      | 16507019  | 363 |
| chr6  | 121015736     | 121016098 | 363 |
| chr5  | 70009998      | 70010360  | 363 |
| chr22 | 17235119      | 17235481  | 363 |
| chr2  | 127640916     | 127641278 | 363 |
| chr19 | 31761316      | 31761678  | 363 |
| chr18 | 39511365      | 39511727  | 363 |
| chr12 | 32219669      | 32220031  | 363 |
| chrX  | 54996531      | 54996892  | 362 |
| chr8  | 11308330      | 11308691  | 362 |
| chr7  | 77005289      | 77005650  | 362 |
| chr3  | 121325512     | 121325873 | 362 |
| chr13 | 63497120      | 63497481  | 362 |
| chr13 | 61787119      | 61787480  | 362 |
| chr13 | 41134870      | 41135231  | 362 |
| chr12 | 31281562      | 31281923  | 362 |
| chr10 | 15003549      | 15003910  | 362 |
| chr5  | 80878206      | 80878566  | 361 |
| chr27 | 803921 804281 | 361       |     |
| chr23 | 49496330      | 49496690  | 361 |
| chr21 | 32955226      | 32955586  | 361 |
| chr2  | 68345038      | 68345398  | 361 |
| chr18 | 15861895      | 15862255  | 361 |
| chr13 | 63402515      | 63402875  | 361 |

|       |           |           |     |
|-------|-----------|-----------|-----|
| chr13 | 21030524  | 21030884  | 361 |
| chr9  | 77188979  | 77189338  | 360 |
| chr28 | 34043900  | 34044259  | 360 |
| chr25 | 30121005  | 30121364  | 360 |
| chr23 | 27594779  | 27595138  | 360 |
| chr16 | 44886186  | 44886545  | 360 |
| chr16 | 26854444  | 26854803  | 360 |
| chr1  | 3638248   | 3638607   | 360 |
| chrX  | 54617666  | 54618024  | 359 |
| chrX  | 50488154  | 50488512  | 359 |
| chrX  | 2730578   | 2730936   | 359 |
| chr6  | 72046476  | 72046834  | 359 |
| chr29 | 17808873  | 17809231  | 359 |
| chr26 | 43041342  | 43041700  | 359 |
| chr25 | 1888160   | 1888518   | 359 |
| chr23 | 42535621  | 42535979  | 359 |
| chr23 | 18824970  | 18825328  | 359 |
| chr20 | 66655577  | 66655935  | 359 |
| chr12 | 75465802  | 75466160  | 359 |
| chr11 | 103312475 | 103312833 | 359 |
| chr1  | 147604131 | 147604489 | 359 |
| chrX  | 19220490  | 19220847  | 358 |
| chr7  | 94365619  | 94365976  | 358 |
| chr27 | 42073933  | 42074290  | 358 |
| chr25 | 37252489  | 37252846  | 358 |
| chr20 | 5070985   | 5071342   | 358 |
| chr18 | 18052861  | 18053218  | 358 |
| chr11 | 102842103 | 102842460 | 358 |
| chr1  | 96924559  | 96924916  | 358 |
| chr6  | 108696275 | 108696631 | 357 |
| chr6  | 105332286 | 105332642 | 357 |
| chr4  | 32438497  | 32438853  | 357 |
| chr19 | 34600671  | 34601027  | 357 |
| chr13 | 34818181  | 34818537  | 357 |
| chr12 | 75159388  | 75159744  | 357 |
| chr11 | 81349628  | 81349984  | 357 |
| chrX  | 9653676   | 9654031   | 356 |
| chr8  | 24386925  | 24387280  | 356 |
| chr7  | 71678171  | 71678526  | 356 |
| chr3  | 71912960  | 71913315  | 356 |
| chr19 | 61541792  | 61542147  | 356 |
| chr19 | 54654694  | 54655049  | 356 |
| chrX  | 34554924  | 34555278  | 355 |
| chr8  | 24475792  | 24476146  | 355 |
| chr5  | 113293540 | 113293894 | 355 |
| chr5  | 80953644  | 80953998  | 355 |
| chr4  | 79043679  | 79044033  | 355 |
| chr28 | 33946099  | 33946453  | 355 |
| chr24 | 51561092  | 51561446  | 355 |
| chr24 | 7381370   | 7381724   | 355 |

|       |               |           |     |
|-------|---------------|-----------|-----|
| chr22 | 59411772      | 59412126  | 355 |
| chr15 | 54175783      | 54176137  | 355 |
| chrX  | 23052146      | 23052499  | 354 |
| chr7  | 18411174      | 18411527  | 354 |
| chr3  | 15670513      | 15670866  | 354 |
| chr23 | 16494951      | 16495304  | 354 |
| chr22 | 38818631      | 38818984  | 354 |
| chr19 | 47160877      | 47161230  | 354 |
| chr13 | 144165 144518 | 354       |     |
| chr10 | 8596050       | 8596403   | 354 |
| chrX  | 81592775      | 81593127  | 353 |
| chr3  | 121882526     | 121882878 | 353 |
| chr21 | 57526793      | 57527145  | 353 |
| chr17 | 66164437      | 66164789  | 353 |
| chrX  | 10807283      | 10807634  | 352 |
| chr3  | 125770143     | 125770494 | 352 |
| chr29 | 42906394      | 42906745  | 352 |
| chr27 | 34987884      | 34988235  | 352 |
| chr26 | 50062962      | 50063313  | 352 |
| chr23 | 31428843      | 31429194  | 352 |
| chr19 | 60769180      | 60769531  | 352 |
| chr18 | 49815157      | 49815508  | 352 |
| chr17 | 69089691      | 69090042  | 352 |
| chr17 | 48891329      | 48891680  | 352 |
| chr16 | 69243279      | 69243630  | 352 |
| chr15 | 64153076      | 64153427  | 352 |
| chrX  | 57991042      | 57991392  | 351 |
| chrX  | 49789609      | 49789959  | 351 |
| chr20 | 6385327       | 6385677   | 351 |
| chr16 | 47109205      | 47109555  | 351 |
| chr14 | 482257 482607 | 351       |     |
| chr10 | 93069831      | 93070181  | 351 |
| chrX  | 39729023      | 39729372  | 350 |
| chr8  | 102825955     | 102826304 | 350 |
| chr7  | 46372472      | 46372821  | 350 |
| chr29 | 37097761      | 37098110  | 350 |
| chr18 | 52695827      | 52696176  | 350 |
| chr14 | 3483365       | 3483714   | 350 |
| chr1  | 75057608      | 75057957  | 350 |
| chrX  | 55037348      | 55037696  | 349 |
| chrX  | 12272020      | 12272368  | 349 |
| chr26 | 41859875      | 41860223  | 349 |
| chr26 | 41307839      | 41308187  | 349 |
| chr25 | 39327802      | 39328150  | 349 |
| chr20 | 1589442       | 1589790   | 349 |
| chr20 | 430721 431069 | 349       |     |
| chr11 | 107581572     | 107581920 | 349 |
| chr10 | 36839131      | 36839479  | 349 |
| chrX  | 55512477      | 55512824  | 348 |
| chrX  | 55150160      | 55150507  | 348 |

|       |           |           |     |
|-------|-----------|-----------|-----|
| chrX  | 11473303  | 11473650  | 348 |
| chr9  | 100245278 | 100245625 | 348 |
| chr6  | 7305828   | 7306175   | 348 |
| chr5  | 80619989  | 80620336  | 348 |
| chr25 | 2782175   | 2782522   | 348 |
| chr23 | 34938449  | 34938796  | 348 |
| chr23 | 8423644   | 8423991   | 348 |
| chr20 | 73526243  | 73526590  | 348 |
| chr19 | 27984789  | 27985136  | 348 |
| chr19 | 15970704  | 15971051  | 348 |
| chr16 | 44701220  | 44701567  | 348 |
| chr15 | 74584971  | 74585318  | 348 |
| chrX  | 65591037  | 65591383  | 347 |
| chrX  | 50814798  | 50815144  | 347 |
| chrX  | 45565202  | 45565548  | 347 |
| chrX  | 39103451  | 39103797  | 347 |
| chr8  | 78551195  | 78551541  | 347 |
| chr5  | 116681691 | 116682037 | 347 |
| chr3  | 4349752   | 4350098   | 347 |
| chr26 | 20906817  | 20907163  | 347 |
| chr2  | 135590002 | 135590348 | 347 |
| chr19 | 17118061  | 17118407  | 347 |
| chr13 | 63603486  | 63603832  | 347 |
| chr12 | 17198991  | 17199337  | 347 |
| chr10 | 66767544  | 66767890  | 347 |
| chrX  | 61251063  | 61251408  | 346 |
| chrX  | 49546751  | 49547096  | 346 |
| chrX  | 48730555  | 48730900  | 346 |
| chrX  | 7788692   | 7789037   | 346 |
| chr4  | 50892760  | 50893105  | 346 |
| chr23 | 12300390  | 12300735  | 346 |
| chr21 | 57524594  | 57524939  | 346 |
| chr21 | 24605600  | 24605945  | 346 |
| chr18 | 53326511  | 53326856  | 346 |
| chr16 | 54648638  | 54648983  | 346 |
| chr12 | 33267339  | 33267684  | 346 |
| chrX  | 59399798  | 59400142  | 345 |
| chrX  | 50591805  | 50592149  | 345 |
| chr9  | 106474377 | 106474721 | 345 |
| chr3  | 55889770  | 55890114  | 345 |
| chr18 | 42231860  | 42232204  | 345 |
| chr14 | 8053579   | 8053923   | 345 |
| chr10 | 10177921  | 10178265  | 345 |
| chrX  | 21077999  | 21078342  | 344 |
| chr3  | 77721263  | 77721606  | 344 |
| chr29 | 37251374  | 37251717  | 344 |
| chr23 | 43298019  | 43298362  | 344 |
| chr22 | 55883576  | 55883919  | 344 |
| chr19 | 31705860  | 31706203  | 344 |
| chr11 | 104364190 | 104364533 | 344 |

|       |           |           |     |
|-------|-----------|-----------|-----|
| chr7  | 52413809  | 52414151  | 343 |
| chr6  | 120489335 | 120489677 | 343 |
| chr6  | 62539145  | 62539487  | 343 |
| chr3  | 121928299 | 121928641 | 343 |
| chr23 | 46094292  | 46094634  | 343 |
| chr22 | 61534757  | 61535099  | 343 |
| chr21 | 20941599  | 20941941  | 343 |
| chr16 | 2285527   | 2285869   | 343 |
| chr10 | 22092951  | 22093293  | 343 |
| chr1  | 74575472  | 74575814  | 343 |
| chrX  | 67423818  | 67424159  | 342 |
| chr5  | 122706805 | 122707146 | 342 |
| chr28 | 17934649  | 17934990  | 342 |
| chr27 | 15311559  | 15311900  | 342 |
| chr13 | 70209520  | 70209861  | 342 |
| chr13 | 65740554  | 65740895  | 342 |
| chr10 | 90698407  | 90698748  | 342 |
| chrX  | 78649963  | 78650303  | 341 |
| chrX  | 77197759  | 77198099  | 341 |
| chr24 | 35103785  | 35104125  | 341 |
| chr22 | 50873194  | 50873534  | 341 |
| chr19 | 56598426  | 56598766  | 341 |
| chr17 | 69818840  | 69819180  | 341 |
| chr1  | 75032639  | 75032979  | 341 |
| chr9  | 45100238  | 45100577  | 340 |
| chr5  | 35289152  | 35289491  | 340 |
| chr24 | 44160347  | 44160686  | 340 |
| chr23 | 9959118   | 9959457   | 340 |
| chr21 | 49254172  | 49254511  | 340 |
| chr2  | 138608155 | 138608494 | 340 |
| chrX  | 7105810   | 7106148   | 339 |
| chr8  | 87100069  | 87100407  | 339 |
| chr8  | 73749727  | 73750065  | 339 |
| chr29 | 34929401  | 34929739  | 339 |
| chr20 | 1311990   | 1312328   | 339 |
| chrX  | 81128774  | 81129111  | 338 |
| chrX  | 54088073  | 54088410  | 338 |
| chr7  | 48474712  | 48475049  | 338 |
| chr28 | 33956624  | 33956961  | 338 |
| chr27 | 34644007  | 34644344  | 338 |
| chr26 | 14572645  | 14572982  | 338 |
| chr16 | 45181658  | 45181995  | 338 |
| chr13 | 43764171  | 43764508  | 338 |
| chrX  | 45937000  | 45937336  | 337 |
| chrX  | 35820626  | 35820962  | 337 |
| chr22 | 30339763  | 30340099  | 337 |
| chr13 | 67407105  | 67407441  | 337 |
| chr11 | 85872298  | 85872634  | 337 |
| chrX  | 55491959  | 55492294  | 336 |
| chrX  | 36529799  | 36530134  | 336 |

|       |               |           |     |
|-------|---------------|-----------|-----|
| chrX  | 10056220      | 10056555  | 336 |
| chrX  | 298462 298797 |           | 336 |
| chr3  | 30167773      | 30168108  | 336 |
| chr29 | 46939910      | 46940245  | 336 |
| chr28 | 43886657      | 43886992  | 336 |
| chr23 | 49664021      | 49664356  | 336 |
| chr20 | 62651404      | 62651739  | 336 |
| chr2  | 139441910     | 139442245 | 336 |
| chr18 | 56998815      | 56999150  | 336 |
| chr14 | 22201968      | 22202303  | 336 |
| chr13 | 70283751      | 70284086  | 336 |
| chrX  | 62402171      | 62402505  | 335 |
| chr5  | 29711856      | 29712190  | 335 |
| chr4  | 108664905     | 108665239 | 335 |
| chr28 | 33460081      | 33460415  | 335 |
| chr23 | 15040096      | 15040430  | 335 |
| chr19 | 35857998      | 35858332  | 335 |
| chr11 | 29136544      | 29136878  | 335 |
| chrX  | 20562808      | 20563141  | 334 |
| chr3  | 121434832     | 121435165 | 334 |
| chr16 | 2245442       | 2245775   | 334 |
| chr12 | 28796858      | 28797191  | 334 |
| chr1  | 69831075      | 69831408  | 334 |
| chr29 | 36933910      | 36934242  | 333 |
| chr21 | 5974617       | 5974949   | 333 |
| chr11 | 100435656     | 100435988 | 333 |
| chrX  | 55019912      | 55020243  | 332 |
| chrX  | 47166435      | 47166766  | 332 |
| chr8  | 86758944      | 86759275  | 332 |
| chr8  | 73330862      | 73331193  | 332 |
| chr5  | 111383480     | 111383811 | 332 |
| chr4  | 10792025      | 10792356  | 332 |
| chr29 | 37324181      | 37324512  | 332 |
| chr29 | 30716420      | 30716751  | 332 |
| chr23 | 18758920      | 18759251  | 332 |
| chr22 | 50749054      | 50749385  | 332 |
| chr18 | 18070959      | 18071290  | 332 |
| chr13 | 27862772      | 27863103  | 332 |
| chr12 | 75679694      | 75680025  | 332 |
| chrX  | 74382555      | 74382885  | 331 |
| chr13 | 66068331      | 66068661  | 331 |
| chr12 | 75214365      | 75214695  | 331 |
| chrX  | 2699885       | 2700214   | 330 |
| chr29 | 31516588      | 31516917  | 330 |
| chr2  | 131476150     | 131476479 | 330 |
| chr15 | 73721493      | 73721822  | 330 |
| chrX  | 62874349      | 62874677  | 329 |
| chrX  | 34863757      | 34864085  | 329 |
| chrX  | 2495948       | 2496276   | 329 |
| chr5  | 118389714     | 118390042 | 329 |

|       |           |           |     |
|-------|-----------|-----------|-----|
| chr4  | 106687330 | 106687658 | 329 |
| chr27 | 15769835  | 15770163  | 329 |
| chr25 | 37217077  | 37217405  | 329 |
| chr18 | 23621224  | 23621552  | 329 |
| chr12 | 22098407  | 22098735  | 329 |
| chr12 | 14993034  | 14993362  | 329 |
| chrX  | 51700677  | 51701004  | 328 |
| chrX  | 9838919   | 9839246   | 328 |
| chr5  | 112255113 | 112255440 | 328 |
| chr3  | 115032956 | 115033283 | 328 |
| chr20 | 1419589   | 1419916   | 328 |
| chr2  | 122839913 | 122840240 | 328 |
| chr17 | 54333996  | 54334323  | 328 |
| chr1  | 2170590   | 2170917   | 328 |
| chrX  | 48740045  | 48740371  | 327 |
| chr8  | 8332711   | 8333037   | 327 |
| chr5  | 117529148 | 117529474 | 327 |
| chr24 | 1718783   | 1719109   | 327 |
| chr22 | 54240995  | 54241321  | 327 |
| chr20 | 60981029  | 60981355  | 327 |
| chr16 | 2569004   | 2569330   | 327 |
| chr15 | 41294757  | 41295083  | 327 |
| chr12 | 31961341  | 31961667  | 327 |
| chr10 | 35958078  | 35958404  | 327 |
| chr9  | 35446523  | 35446848  | 326 |
| chr8  | 108780473 | 108780798 | 326 |
| chr7  | 15495061  | 15495386  | 326 |
| chr6  | 69500293  | 69500618  | 326 |
| chr4  | 66629533  | 66629858  | 326 |
| chr15 | 54637457  | 54637782  | 326 |
| chr15 | 23154951  | 23155276  | 326 |
| chr13 | 73054654  | 73054979  | 326 |
| chr12 | 32250942  | 32251267  | 326 |
| chr11 | 7422445   | 7422770   | 326 |
| chr10 | 11080472  | 11080797  | 326 |
| chrX  | 65172561  | 65172885  | 325 |
| chrX  | 9505248   | 9505572   | 325 |
| chr9  | 100308897 | 100309221 | 325 |
| chr3  | 115340881 | 115341205 | 325 |
| chr28 | 34036901  | 34037225  | 325 |
| chr28 | 33672063  | 33672387  | 325 |
| chr2  | 131876189 | 131876513 | 325 |
| chr19 | 8191506   | 8191830   | 325 |
| chr14 | 21759641  | 21759965  | 325 |
| chr13 | 42407860  | 42408184  | 325 |
| chrX  | 20072738  | 20073061  | 324 |
| chr29 | 49773568  | 49773891  | 324 |
| chr29 | 47266875  | 47267198  | 324 |
| chr28 | 5249661   | 5249984   | 324 |
| chr13 | 60444132  | 60444455  | 324 |



|       |               |           |     |
|-------|---------------|-----------|-----|
| chrX  | 50165065      | 50165387  | 323 |
| chrX  | 49317978      | 49318300  | 323 |
| chr8  | 59207213      | 59207535  | 323 |
| chr5  | 113834100     | 113834422 | 323 |
| chr25 | 482461 482783 | 323       |     |
| chr21 | 58546775      | 58547097  | 323 |
| chr13 | 69767643      | 69767965  | 323 |
| chr11 | 84943844      | 84944166  | 323 |
| chr10 | 16730308      | 16730630  | 323 |
| chrX  | 56005900      | 56006221  | 322 |
| chr5  | 116925462     | 116925783 | 322 |
| chr29 | 36247250      | 36247571  | 322 |
| chr22 | 29800514      | 29800835  | 322 |
| chr2  | 110019823     | 110020144 | 322 |
| chr17 | 64036096      | 64036417  | 322 |
| chr17 | 49441426      | 49441747  | 322 |
| chr10 | 19496504      | 19496825  | 322 |
| chr1  | 153430752     | 153431073 | 322 |
| chr1  | 151290355     | 151290676 | 322 |
| chrX  | 18399313      | 18399633  | 321 |
| chrX  | 7846182       | 7846502   | 321 |
| chr8  | 63824002      | 63824322  | 321 |
| chr5  | 36610423      | 36610743  | 321 |
| chr3  | 106511543     | 106511863 | 321 |
| chr29 | 36990736      | 36991056  | 321 |
| chr28 | 34664012      | 34664332  | 321 |
| chr19 | 38866016      | 38866336  | 321 |
| chr17 | 63697012      | 63697332  | 321 |
| chr17 | 56554937      | 56555257  | 321 |
| chr15 | 62419306      | 62419626  | 321 |
| chr13 | 37639318      | 37639638  | 321 |
| chrX  | 59911219      | 59911538  | 320 |
| chrX  | 921331 921650 | 320       |     |
| chr9  | 66289381      | 66289700  | 320 |
| chr29 | 41709385      | 41709704  | 320 |
| chr29 | 37638232      | 37638551  | 320 |
| chr20 | 6361966       | 6362285   | 320 |
| chr19 | 59227166      | 59227485  | 320 |
| chr19 | 24392936      | 24393255  | 320 |
| chr18 | 65955922      | 65956241  | 320 |
| chr18 | 26058114      | 26058433  | 320 |
| chr10 | 16955444      | 16955763  | 320 |
| chrX  | 71955065      | 71955383  | 319 |
| chr8  | 79975444      | 79975762  | 319 |
| chr26 | 42887227      | 42887545  | 319 |
| chr21 | 20924234      | 20924552  | 319 |
| chr2  | 74193926      | 74194244  | 319 |
| chr19 | 20389144      | 20389462  | 319 |
| chr17 | 75724348      | 75724666  | 319 |
| chr10 | 59923132      | 59923450  | 319 |

|       |           |           |     |
|-------|-----------|-----------|-----|
| chr1  | 74101572  | 74101890  | 319 |
| chrX  | 77909089  | 77909406  | 318 |
| chrX  | 39014241  | 39014558  | 318 |
| chrX  | 29556275  | 29556592  | 318 |
| chr7  | 46371911  | 46372228  | 318 |
| chr5  | 61262132  | 61262449  | 318 |
| chr3  | 15417844  | 15418161  | 318 |
| chr24 | 49176431  | 49176748  | 318 |
| chr22 | 55816545  | 55816862  | 318 |
| chr15 | 39582591  | 39582908  | 318 |
| chr13 | 35360829  | 35361146  | 318 |
| chr13 | 15177884  | 15178201  | 318 |
| chr12 | 21942278  | 21942595  | 318 |
| chr1  | 153187367 | 153187684 | 318 |
| chr7  | 50839407  | 50839723  | 317 |
| chr7  | 39662252  | 39662568  | 317 |
| chr29 | 34293868  | 34294184  | 317 |
| chr28 | 17390649  | 17390965  | 317 |
| chr27 | 35395821  | 35396137  | 317 |
| chr26 | 46176674  | 46176990  | 317 |
| chr22 | 56606542  | 56606858  | 317 |
| chr21 | 64455671  | 64455987  | 317 |
| chr19 | 55772583  | 55772899  | 317 |
| chr15 | 75271787  | 75272103  | 317 |
| chr1  | 73008395  | 73008711  | 317 |
| chrX  | 55648165  | 55648480  | 316 |
| chr3  | 118029099 | 118029414 | 316 |
| chrX  | 31797441  | 31797755  | 315 |
| chr4  | 66883026  | 66883340  | 315 |
| chr29 | 2529890   | 2530204   | 315 |
| chr28 | 43860590  | 43860904  | 315 |
| chr27 | 27190189  | 27190503  | 315 |
| chr19 | 7790179   | 7790493   | 315 |
| chr18 | 44768259  | 44768573  | 315 |
| chr18 | 36838164  | 36838478  | 315 |
| chr18 | 23629890  | 23630204  | 315 |
| chr16 | 47226140  | 47226454  | 315 |
| chrX  | 11439066  | 11439379  | 314 |
| chr3  | 111337139 | 111337452 | 314 |
| chr27 | 46454200  | 46454513  | 314 |
| chr25 | 40963875  | 40964188  | 314 |
| chr23 | 13676134  | 13676447  | 314 |
| chr19 | 45933294  | 45933607  | 314 |
| chr19 | 37557469  | 37557782  | 314 |
| chr18 | 36961842  | 36962155  | 314 |
| chr17 | 63694352  | 63694665  | 314 |
| chr16 | 43280329  | 43280642  | 314 |
| chrX  | 58574280  | 58574592  | 313 |
| chrX  | 51670595  | 51670907  | 313 |
| chrX  | 48454160  | 48454472  | 313 |

|       |               |           |     |
|-------|---------------|-----------|-----|
| chrX  | 19866801      | 19867113  | 313 |
| chr5  | 120375916     | 120376228 | 313 |
| chr3  | 115755026     | 115755338 | 313 |
| chr3  | 114281169     | 114281481 | 313 |
| chr3  | 33831876      | 33832188  | 313 |
| chr26 | 31880364      | 31880676  | 313 |
| chr22 | 46501276      | 46501588  | 313 |
| chr15 | 27193816      | 27194128  | 313 |
| chr13 | 34984126      | 34984438  | 313 |
| chr10 | 106282925     | 106283237 | 313 |
| chrX  | 62475002      | 62475313  | 312 |
| chrX  | 19805817      | 19806128  | 312 |
| chr6  | 72040533      | 72040844  | 312 |
| chr29 | 37955665      | 37955976  | 312 |
| chr11 | 91519032      | 91519343  | 312 |
| chr11 | 70871593      | 70871904  | 312 |
| chrX  | 75009394      | 75009704  | 311 |
| chr6  | 108708793     | 108709103 | 311 |
| chr5  | 28876639      | 28876949  | 311 |
| chr4  | 96862292      | 96862602  | 311 |
| chr4  | 95716240      | 95716550  | 311 |
| chr4  | 7448954       | 7449264   | 311 |
| chr29 | 37459939      | 37460249  | 311 |
| chr25 | 40423062      | 40423372  | 311 |
| chr21 | 27658474      | 27658784  | 311 |
| chr18 | 17422484      | 17422794  | 311 |
| chr16 | 23822839      | 23823149  | 311 |
| chr15 | 53627919      | 53628229  | 311 |
| chr13 | 11031949      | 11032259  | 311 |
| chr10 | 36576161      | 36576471  | 311 |
| chr1  | 87334130      | 87334440  | 311 |
| chr21 | 20718853      | 20719162  | 310 |
| chr10 | 69119532      | 69119841  | 310 |
| chr1  | 43098047      | 43098356  | 310 |
| chrX  | 35445509      | 35445817  | 309 |
| chr7  | 481579 481887 |           | 309 |
| chr5  | 112097176     | 112097484 | 309 |
| chr3  | 111651263     | 111651571 | 309 |
| chr26 | 43002629      | 43002937  | 309 |
| chr22 | 59715412      | 59715720  | 309 |
| chr2  | 122199270     | 122199578 | 309 |
| chr15 | 38528551      | 38528859  | 309 |
| chr13 | 77231726      | 77232034  | 309 |
| chr10 | 66859522      | 66859830  | 309 |
| chrX  | 35991987      | 35992294  | 308 |
| chr9  | 74293083      | 74293390  | 308 |
| chr8  | 7778766       | 7779073   | 308 |
| chr4  | 94706959      | 94707266  | 308 |
| chr3  | 35562572      | 35562879  | 308 |
| chr27 | 26924445      | 26924752  | 308 |

|       |             |           |     |
|-------|-------------|-----------|-----|
| chr2  | 24055600    | 24055907  | 308 |
| chrX  | 35183922    | 35184228  | 307 |
| chrX  | 21304689    | 21304995  | 307 |
| chr4  | 124150713   | 124151019 | 307 |
| chr3  | 121427505   | 121427811 | 307 |
| chr29 | 37242123    | 37242429  | 307 |
| chr26 | 23523335    | 23523641  | 307 |
| chr25 | 15719 16025 | 307       |     |
| chr21 | 58737373    | 58737679  | 307 |
| chr2  | 127203680   | 127203986 | 307 |
| chr2  | 74035847    | 74036153  | 307 |
| chr12 | 83812092    | 83812398  | 307 |
| chr11 | 77740425    | 77740731  | 307 |
| chrX  | 80843711    | 80844016  | 306 |
| chrX  | 57131980    | 57132285  | 306 |
| chrX  | 50388752    | 50389057  | 306 |
| chr6  | 33823971    | 33824276  | 306 |
| chr5  | 81594329    | 81594634  | 306 |
| chr29 | 39376697    | 39377002  | 306 |
| chr27 | 27906743    | 27907048  | 306 |
| chr22 | 59240064    | 59240369  | 306 |
| chr22 | 56315433    | 56315738  | 306 |
| chr20 | 2183845     | 2184150   | 306 |
| chr19 | 45807168    | 45807473  | 306 |
| chr14 | 61610671    | 61610976  | 306 |
| chr11 | 47419329    | 47419634  | 306 |
| chrX  | 73431650    | 73431954  | 305 |
| chrX  | 59812308    | 59812612  | 305 |
| chrX  | 18632368    | 18632672  | 305 |
| chrX  | 5660466     | 5660770   | 305 |
| chr4  | 72038553    | 72038857  | 305 |
| chr4  | 38563668    | 38563972  | 305 |
| chr18 | 22337625    | 22337929  | 305 |
| chr14 | 59634014    | 59634318  | 305 |
| chr13 | 39962720    | 39963024  | 305 |
| chr13 | 35498064    | 35498368  | 305 |
| chr10 | 16780478    | 16780782  | 305 |
| chr1  | 55359187    | 55359491  | 305 |
| chrX  | 22398146    | 22398449  | 304 |
| chr8  | 8004750     | 8005053   | 304 |
| chr8  | 1838570     | 1838873   | 304 |
| chr5  | 111625847   | 111626150 | 304 |
| chr4  | 123276042   | 123276345 | 304 |
| chr24 | 60768896    | 60769199  | 304 |
| chr20 | 38233336    | 38233639  | 304 |
| chr14 | 3210863     | 3211166   | 304 |
| chr13 | 65530704    | 65531007  | 304 |
| chr12 | 84138588    | 84138891  | 304 |
| chr11 | 105669527   | 105669830 | 304 |
| chr10 | 25608196    | 25608499  | 304 |

|       |           |           |     |
|-------|-----------|-----------|-----|
| chrX  | 74813059  | 74813361  | 303 |
| chrX  | 72473240  | 72473542  | 303 |
| chrX  | 55969125  | 55969427  | 303 |
| chr5  | 118524811 | 118525113 | 303 |
| chr4  | 67942519  | 67942821  | 303 |
| chr3  | 15963006  | 15963308  | 303 |
| chr25 | 39458917  | 39459219  | 303 |
| chr23 | 14830567  | 14830869  | 303 |
| chr19 | 15172172  | 15172474  | 303 |
| chr18 | 33312685  | 33312987  | 303 |
| chr18 | 13280166  | 13280468  | 303 |
| chr17 | 67033990  | 67034292  | 303 |
| chr15 | 54363202  | 54363504  | 303 |
| chr14 | 22019577  | 22019879  | 303 |
| chr13 | 73071522  | 73071824  | 303 |
| chrX  | 78528576  | 78528877  | 302 |
| chr3  | 18618452  | 18618753  | 302 |
| chr29 | 35141605  | 35141906  | 302 |
| chr27 | 35011762  | 35012063  | 302 |
| chr25 | 38836285  | 38836586  | 302 |
| chr22 | 22040393  | 22040694  | 302 |
| chr21 | 27273792  | 27274093  | 302 |
| chr21 | 13701354  | 13701655  | 302 |
| chr19 | 39355811  | 39356112  | 302 |
| chrX  | 63037789  | 63038089  | 301 |
| chrX  | 34173754  | 34174054  | 301 |
| chr7  | 89430410  | 89430710  | 301 |
| chr7  | 4340687   | 4340987   | 301 |
| chr4  | 98468948  | 98469248  | 301 |
| chr27 | 38663069  | 38663369  | 301 |
| chr24 | 1068229   | 1068529   | 301 |
| chr22 | 61437747  | 61438047  | 301 |
| chr19 | 39823668  | 39823968  | 301 |
| chrX  | 68606109  | 68606408  | 300 |
| chr8  | 64958861  | 64959160  | 300 |
| chr7  | 57604516  | 57604815  | 300 |
| chr4  | 29784512  | 29784811  | 300 |
| chr27 | 35439149  | 35439448  | 300 |
| chr19 | 60799694  | 60799993  | 300 |
| chr19 | 54577876  | 54578175  | 300 |
| chr19 | 39972802  | 39973101  | 300 |
| chr17 | 69397689  | 69397988  | 300 |
| chr15 | 31332098  | 31332397  | 300 |
| chrX  | 49332016  | 49332314  | 299 |
| chrX  | 2759345   | 2759643   | 299 |
| chr9  | 106803220 | 106803518 | 299 |
| chr3  | 36003913  | 36004211  | 299 |
| chr20 | 8831034   | 8831332   | 299 |
| chr15 | 29050982  | 29051280  | 299 |
| chr14 | 480863    | 481161    | 299 |

|       |           |           |     |
|-------|-----------|-----------|-----|
| chr13 | 62820951  | 62821249  | 299 |
| chrX  | 58862769  | 58863066  | 298 |
| chrX  | 34032907  | 34033204  | 298 |
| chrX  | 9348290   | 9348587   | 298 |
| chrX  | 6684787   | 6685084   | 298 |
| chr23 | 27953396  | 27953693  | 298 |
| chr22 | 56540703  | 56541000  | 298 |
| chr22 | 14977671  | 14977968  | 298 |
| chr21 | 63208885  | 63209182  | 298 |
| chr10 | 86570509  | 86570806  | 298 |
| chr10 | 76060571  | 76060868  | 298 |
| chr1  | 84910426  | 84910723  | 298 |
| chrX  | 56610166  | 56610462  | 297 |
| chr8  | 80215236  | 80215532  | 297 |
| chr8  | 40248676  | 40248972  | 297 |
| chr5  | 51587333  | 51587629  | 297 |
| chr25 | 33593026  | 33593322  | 297 |
| chr2  | 121893580 | 121893876 | 297 |
| chr19 | 59348243  | 59348539  | 297 |
| chr18 | 54053381  | 54053677  | 297 |
| chr18 | 18813100  | 18813396  | 297 |
| chr14 | 61330143  | 61330439  | 297 |
| chr12 | 21588476  | 21588772  | 297 |
| chr12 | 9491292   | 9491588   | 297 |
| chr10 | 88373299  | 88373595  | 297 |
| chr1  | 130451804 | 130452100 | 297 |
| chr1  | 9031347   | 9031643   | 297 |
| chr1  | 1528498   | 1528794   | 297 |
| chrX  | 13746307  | 13746602  | 296 |
| chr5  | 111323605 | 111323900 | 296 |
| chr29 | 34921465  | 34921760  | 296 |
| chr25 | 37313797  | 37314092  | 296 |
| chr23 | 14502788  | 14503083  | 296 |
| chr22 | 48249261  | 48249556  | 296 |
| chr21 | 64489350  | 64489645  | 296 |
| chr2  | 132168810 | 132169105 | 296 |
| chr19 | 46724776  | 46725071  | 296 |
| chr10 | 62348863  | 62349158  | 296 |
| chrX  | 9973319   | 9973613   | 295 |
| chr5  | 80724268  | 80724562  | 295 |
| chr3  | 35562892  | 35563186  | 295 |
| chr23 | 10617299  | 10617593  | 295 |
| chr20 | 73686995  | 73687289  | 295 |
| chr20 | 25771638  | 25771932  | 295 |
| chr20 | 25647318  | 25647612  | 295 |
| chr2  | 36073886  | 36074180  | 295 |
| chr15 | 26606466  | 26606760  | 295 |
| chr13 | 60147561  | 60147855  | 295 |
| chr12 | 83403173  | 83403467  | 295 |
| chr11 | 91467269  | 91467563  | 295 |

|       |               |           |     |
|-------|---------------|-----------|-----|
| chr10 | 70332667      | 70332961  | 295 |
| chrX  | 80243282      | 80243575  | 294 |
| chrX  | 76664652      | 76664945  | 294 |
| chrX  | 63280931      | 63281224  | 294 |
| chrX  | 1247944       | 1248237   | 294 |
| chr5  | 76994201      | 76994494  | 294 |
| chr4  | 118691039     | 118691332 | 294 |
| chr26 | 44889976      | 44890269  | 294 |
| chr25 | 33486581      | 33486874  | 294 |
| chr23 | 31132679      | 31132972  | 294 |
| chr11 | 81797069      | 81797362  | 294 |
| chr11 | 31116765      | 31117058  | 294 |
| chr10 | 70247791      | 70248084  | 294 |
| chr1  | 72550643      | 72550936  | 294 |
| chrX  | 78423412      | 78423704  | 293 |
| chr26 | 51488089      | 51488381  | 293 |
| chr26 | 22386996      | 22387288  | 293 |
| chr24 | 33790707      | 33790999  | 293 |
| chr2  | 18838411      | 18838703  | 293 |
| chr18 | 34063050      | 34063342  | 293 |
| chr15 | 77436347      | 77436639  | 293 |
| chr13 | 41516494      | 41516786  | 293 |
| chr12 | 33280609      | 33280901  | 293 |
| chr10 | 88306622      | 88306914  | 293 |
| chrX  | 12130956      | 12131247  | 292 |
| chrX  | 6303614       | 6303905   | 292 |
| chr8  | 72668821      | 72669112  | 292 |
| chr7  | 71370150      | 71370441  | 292 |
| chr7  | 37427387      | 37427678  | 292 |
| chr5  | 531748 532039 | 292       | 292 |
| chr28 | 5251920       | 5252211   | 292 |
| chr26 | 45807162      | 45807453  | 292 |
| chr23 | 48348178      | 48348469  | 292 |
| chr21 | 61702805      | 61703096  | 292 |
| chr16 | 74188270      | 74188561  | 292 |
| chr13 | 55545522      | 55545813  | 292 |
| chr1  | 67760951      | 67761242  | 292 |
| chrX  | 71936113      | 71936403  | 291 |
| chr3  | 125587569     | 125587859 | 291 |
| chr29 | 45781437      | 45781727  | 291 |
| chr25 | 34508807      | 34509097  | 291 |
| chr25 | 27277100      | 27277390  | 291 |
| chr25 | 2241608       | 2241898   | 291 |
| chr23 | 42375430      | 42375720  | 291 |
| chr22 | 46800016      | 46800306  | 291 |
| chr20 | 19950572      | 19950862  | 291 |
| chr20 | 19815166      | 19815456  | 291 |
| chr2  | 120157879     | 120158169 | 291 |
| chr17 | 68275848      | 68276138  | 291 |
| chr15 | 24038686      | 24038976  | 291 |

|       |           |           |     |
|-------|-----------|-----------|-----|
| chr14 | 2046398   | 2046688   | 291 |
| chr13 | 59751413  | 59751703  | 291 |
| chr13 | 59111014  | 59111304  | 291 |
| chr10 | 70141852  | 70142142  | 291 |
| chrX  | 77182169  | 77182458  | 290 |
| chrX  | 55883559  | 55883848  | 290 |
| chrX  | 33730368  | 33730657  | 290 |
| chrX  | 19070122  | 19070411  | 290 |
| chr5  | 121282929 | 121283218 | 290 |
| chr5  | 32850703  | 32850992  | 290 |
| chr21 | 19989677  | 19989966  | 290 |
| chr20 | 11115345  | 11115634  | 290 |
| chr20 | 7615986   | 7616275   | 290 |
| chr15 | 29876226  | 29876515  | 290 |
| chr14 | 26122692  | 26122981  | 290 |
| chrX  | 13797501  | 13797789  | 289 |
| chrX  | 8799488   | 8799776   | 289 |
| chr6  | 108715627 | 108715915 | 289 |
| chr3  | 116218604 | 116218892 | 289 |
| chr3  | 115692887 | 115693175 | 289 |
| chr27 | 6003966   | 6004254   | 289 |
| chr21 | 28992284  | 28992572  | 289 |
| chr21 | 11754728  | 11755016  | 289 |
| chr20 | 71567655  | 71567943  | 289 |
| chr17 | 67056509  | 67056797  | 289 |
| chr13 | 67925625  | 67925913  | 289 |
| chr12 | 15847009  | 15847297  | 289 |
| chrX  | 66333337  | 66333624  | 288 |
| chrX  | 37480816  | 37481103  | 288 |
| chr9  | 105832913 | 105833200 | 288 |
| chr7  | 25666838  | 25667125  | 288 |
| chr6  | 79721803  | 79722090  | 288 |
| chr27 | 27013104  | 27013391  | 288 |
| chr22 | 29880192  | 29880479  | 288 |
| chr2  | 138913325 | 138913612 | 288 |
| chr18 | 11530158  | 11530445  | 288 |
| chr13 | 79691265  | 79691552  | 288 |
| chr10 | 25255396  | 25255683  | 288 |
| chrX  | 50500257  | 50500543  | 287 |
| chrX  | 30580152  | 30580438  | 287 |
| chrX  | 3882857   | 3883143   | 287 |
| chr3  | 105593811 | 105594097 | 287 |
| chr24 | 35463387  | 35463673  | 287 |
| chr22 | 9610961   | 9611247   | 287 |
| chr21 | 14004616  | 14004902  | 287 |
| chr2  | 135731995 | 135732281 | 287 |
| chr2  | 43863155  | 43863441  | 287 |
| chr19 | 58670983  | 58671269  | 287 |
| chr19 | 30065315  | 30065601  | 287 |
| chr13 | 58625149  | 58625435  | 287 |



|       |           |           |     |
|-------|-----------|-----------|-----|
| chr13 | 29664327  | 29664613  | 287 |
| chr11 | 91017085  | 91017371  | 287 |
| chr9  | 36072304  | 36072589  | 286 |
| chr5  | 12504862  | 12505147  | 286 |
| chr4  | 79269496  | 79269781  | 286 |
| chr20 | 5927717   | 5928002   | 286 |
| chrX  | 51485142  | 51485426  | 285 |
| chrX  | 20030466  | 20030750  | 285 |
| chr8  | 108770086 | 108770370 | 285 |
| chr7  | 50343314  | 50343598  | 285 |
| chr6  | 115586896 | 115587180 | 285 |
| chr5  | 113909558 | 113909842 | 285 |
| chr5  | 79798824  | 79799108  | 285 |
| chr3  | 127716283 | 127716567 | 285 |
| chr3  | 114070760 | 114071044 | 285 |
| chr26 | 5867198   | 5867482   | 285 |
| chr23 | 53029992  | 53030276  | 285 |
| chr21 | 61620526  | 61620810  | 285 |
| chr21 | 27437987  | 27438271  | 285 |
| chr19 | 29716991  | 29717275  | 285 |
| chr16 | 44301693  | 44301977  | 285 |
| chr15 | 24535043  | 24535327  | 285 |
| chr13 | 35932928  | 35933212  | 285 |
| chrX  | 49773216  | 49773499  | 284 |
| chrX  | 31623632  | 31623915  | 284 |
| chrX  | 13942491  | 13942774  | 284 |
| chr8  | 24400428  | 24400711  | 284 |
| chr5  | 108980497 | 108980780 | 284 |
| chr23 | 20123248  | 20123531  | 284 |
| chr2  | 131256537 | 131256820 | 284 |
| chr17 | 62571765  | 62572048  | 284 |
| chr15 | 51668704  | 51668987  | 284 |
| chr14 | 59480737  | 59481020  | 284 |
| chr11 | 104910835 | 104911118 | 284 |
| chr11 | 85272726  | 85273009  | 284 |
| chr1  | 19196332  | 19196615  | 284 |
| chrX  | 48005207  | 48005489  | 283 |
| chrX  | 41176841  | 41177123  | 283 |
| chrX  | 20731445  | 20731727  | 283 |
| chr8  | 65300433  | 65300715  | 283 |
| chr3  | 111339974 | 111340256 | 283 |
| chr19 | 47368536  | 47368818  | 283 |
| chr17 | 70258883  | 70259165  | 283 |
| chr15 | 62432496  | 62432778  | 283 |
| chr13 | 6620347   | 6620629   | 283 |
| chr11 | 29134206  | 29134488  | 283 |
| chr10 | 25586792  | 25587074  | 283 |
| chrX  | 45337302  | 45337583  | 282 |
| chr7  | 42979609  | 42979890  | 282 |
| chr3  | 110463838 | 110464119 | 282 |

|       |           |           |     |
|-------|-----------|-----------|-----|
| chr3  | 33120454  | 33120735  | 282 |
| chr28 | 12382894  | 12383175  | 282 |
| chr26 | 37443031  | 37443312  | 282 |
| chr26 | 14884083  | 14884364  | 282 |
| chr25 | 4846065   | 4846346   | 282 |
| chr25 | 2973301   | 2973582   | 282 |
| chr17 | 63543284  | 63543565  | 282 |
| chr17 | 60812513  | 60812794  | 282 |
| chr13 | 83005324  | 83005605  | 282 |
| chr13 | 26259767  | 26260048  | 282 |
| chr10 | 36914128  | 36914409  | 282 |
| chr10 | 14989561  | 14989842  | 282 |
| chrX  | 75226558  | 75226838  | 281 |
| chrX  | 20621207  | 20621487  | 281 |
| chrX  | 6341992   | 6342272   | 281 |
| chr8  | 23829189  | 23829469  | 281 |
| chr6  | 18296013  | 18296293  | 281 |
| chr26 | 46050710  | 46050990  | 281 |
| chr23 | 19842032  | 19842312  | 281 |
| chr22 | 22142577  | 22142857  | 281 |
| chr15 | 65748990  | 65749270  | 281 |
| chr14 | 19547619  | 19547899  | 281 |
| chr11 | 105653121 | 105653401 | 281 |
| chrX  | 55757646  | 55757925  | 280 |
| chr6  | 120875377 | 120875656 | 280 |
| chr5  | 35142203  | 35142482  | 280 |
| chr18 | 50276284  | 50276563  | 280 |
| chr15 | 64642452  | 64642731  | 280 |
| chr13 | 16293467  | 16293746  | 280 |
| chrX  | 50958692  | 50958970  | 279 |
| chrX  | 49535997  | 49536275  | 279 |
| chr8  | 102280355 | 102280633 | 279 |
| chr8  | 43892530  | 43892808  | 279 |
| chr7  | 20016664  | 20016942  | 279 |
| chr5  | 95940487  | 95940765  | 279 |
| chr22 | 46577236  | 46577514  | 279 |
| chr2  | 29978026  | 29978304  | 279 |
| chr1  | 61337988  | 61338266  | 279 |
| chrX  | 62359365  | 62359642  | 278 |
| chrX  | 44964362  | 44964639  | 278 |
| chrX  | 9054056   | 9054333   | 278 |
| chr9  | 44105976  | 44106253  | 278 |
| chr7  | 50439561  | 50439838  | 278 |
| chr7  | 37389551  | 37389828  | 278 |
| chr3  | 114204831 | 114205108 | 278 |
| chr24 | 36867450  | 36867727  | 278 |
| chr24 | 1202475   | 1202752   | 278 |
| chr2  | 134973461 | 134973738 | 278 |
| chr2  | 92613452  | 92613729  | 278 |
| chrX  | 71222279  | 71222555  | 277 |

|       |           |           |     |
|-------|-----------|-----------|-----|
| chrX  | 35983211  | 35983487  | 277 |
| chrX  | 5821404   | 5821680   | 277 |
| chr9  | 104901794 | 104902070 | 277 |
| chr29 | 36660228  | 36660504  | 277 |
| chr26 | 19741443  | 19741719  | 277 |
| chr21 | 30228545  | 30228821  | 277 |
| chr21 | 18834773  | 18835049  | 277 |
| chr15 | 36589296  | 36589572  | 277 |
| chr13 | 57480351  | 57480627  | 277 |
| chr13 | 38017014  | 38017290  | 277 |
| chr11 | 98365103  | 98365379  | 277 |
| chrX  | 72150003  | 72150278  | 276 |
| chrX  | 21460874  | 21461149  | 276 |
| chrX  | 11726199  | 11726474  | 276 |
| chr9  | 83640784  | 83641059  | 276 |
| chr8  | 24214222  | 24214497  | 276 |
| chr28 | 25369152  | 25369427  | 276 |
| chr25 | 37565013  | 37565288  | 276 |
| chr24 | 34685371  | 34685646  | 276 |
| chr23 | 6961868   | 6962143   | 276 |
| chr17 | 74380756  | 74381031  | 276 |
| chr17 | 47098566  | 47098841  | 276 |
| chr13 | 75815873  | 75816148  | 276 |
| chr13 | 59824848  | 59825123  | 276 |
| chrX  | 45186689  | 45186963  | 275 |
| chrX  | 21592124  | 21592398  | 275 |
| chrX  | 9862409   | 9862683   | 275 |
| chr5  | 60719403  | 60719677  | 275 |
| chr4  | 91482598  | 91482872  | 275 |
| chr3  | 98134437  | 98134711  | 275 |
| chr29 | 37335286  | 37335560  | 275 |
| chr24 | 1589003   | 1589277   | 275 |
| chr22 | 30185704  | 30185978  | 275 |
| chr2  | 25326796  | 25327070  | 275 |
| chr19 | 23719306  | 23719580  | 275 |
| chr18 | 49550732  | 49551006  | 275 |
| chr12 | 9998861   | 9999135   | 275 |
| chr10 | 36840129  | 36840403  | 275 |
| chr10 | 14080368  | 14080642  | 275 |
| chrX  | 35511681  | 35511954  | 274 |
| chrX  | 17146002  | 17146275  | 274 |
| chrX  | 8040356   | 8040629   | 274 |
| chr7  | 43416205  | 43416478  | 274 |
| chr5  | 120421785 | 120422058 | 274 |
| chr4  | 123117875 | 123118148 | 274 |
| chr3  | 87402813  | 87403086  | 274 |
| chr24 | 42040581  | 42040854  | 274 |
| chr24 | 40598044  | 40598317  | 274 |
| chr24 | 35245062  | 35245335  | 274 |
| chr19 | 32519289  | 32519562  | 274 |

|       |           |           |     |
|-------|-----------|-----------|-----|
| chr17 | 73213958  | 73214231  | 274 |
| chr13 | 68057547  | 68057820  | 274 |
| chr11 | 44713027  | 44713300  | 274 |
| chrX  | 34028048  | 34028320  | 273 |
| chrX  | 30599452  | 30599724  | 273 |
| chrX  | 28493520  | 28493792  | 273 |
| chr6  | 72293697  | 72293969  | 273 |
| chr5  | 76072262  | 76072534  | 273 |
| chr4  | 33850037  | 33850309  | 273 |
| chr26 | 14588072  | 14588344  | 273 |
| chr23 | 51681801  | 51682073  | 273 |
| chr22 | 60375016  | 60375288  | 273 |
| chr22 | 7257471   | 7257743   | 273 |
| chr21 | 62255674  | 62255946  | 273 |
| chr18 | 25673471  | 25673743  | 273 |
| chr18 | 17917066  | 17917338  | 273 |
| chr16 | 45972957  | 45973229  | 273 |
| chr13 | 73026862  | 73027134  | 273 |
| chr13 | 41143853  | 41144125  | 273 |
| chr13 | 11415522  | 11415794  | 273 |
| chr11 | 106065796 | 106066068 | 273 |
| chrX  | 59406906  | 59407177  | 272 |
| chrX  | 35615698  | 35615969  | 272 |
| chr7  | 111053028 | 111053299 | 272 |
| chr7  | 19180885  | 19181156  | 272 |
| chr6  | 113358181 | 113358452 | 272 |
| chr4  | 72727219  | 72727490  | 272 |
| chr3  | 35504159  | 35504430  | 272 |
| chr28 | 27129559  | 27129830  | 272 |
| chr28 | 3537256   | 3537527   | 272 |
| chr23 | 44115468  | 44115739  | 272 |
| chr20 | 72561402  | 72561673  | 272 |
| chr19 | 56478080  | 56478351  | 272 |
| chr19 | 25411515  | 25411786  | 272 |
| chr12 | 28796287  | 28796558  | 272 |
| chr11 | 100693107 | 100693378 | 272 |
| chr11 | 69385699  | 69385970  | 272 |
| chr11 | 47073410  | 47073681  | 272 |
| chr10 | 70107765  | 70108036  | 272 |
| chrX  | 74742468  | 74742738  | 271 |
| chrX  | 62524797  | 62525067  | 271 |
| chrX  | 19281696  | 19281966  | 271 |
| chr4  | 98024134  | 98024404  | 271 |
| chr4  | 32375343  | 32375613  | 271 |
| chr29 | 27027573  | 27027843  | 271 |
| chr26 | 24344474  | 24344744  | 271 |
| chr26 | 18720117  | 18720387  | 271 |
| chr23 | 30221009  | 30221279  | 271 |
| chr2  | 132489848 | 132490118 | 271 |
| chr19 | 17780034  | 17780304  | 271 |

|       |           |           |     |
|-------|-----------|-----------|-----|
| chr18 | 11559367  | 11559637  | 271 |
| chr15 | 75656842  | 75657112  | 271 |
| chr13 | 16097142  | 16097412  | 271 |
| chr12 | 81800874  | 81801144  | 271 |
| chr11 | 80351130  | 80351400  | 271 |
| chrX  | 77718935  | 77719204  | 270 |
| chrX  | 22444615  | 22444884  | 270 |
| chrX  | 1607993   | 1608262   | 270 |
| chr3  | 29585826  | 29586095  | 270 |
| chr21 | 30173068  | 30173337  | 270 |
| chr20 | 74546125  | 74546394  | 270 |
| chr19 | 30384550  | 30384819  | 270 |
| chr19 | 15893597  | 15893866  | 270 |
| chr18 | 55845343  | 55845612  | 270 |
| chr18 | 42166941  | 42167210  | 270 |
| chr18 | 40111270  | 40111539  | 270 |
| chr18 | 23109942  | 23110211  | 270 |
| chr15 | 24520556  | 24520825  | 270 |
| chr11 | 23160375  | 23160644  | 270 |
| chr10 | 86443695  | 86443964  | 270 |
| chr10 | 84376210  | 84376479  | 270 |
| chr1  | 77797206  | 77797475  | 270 |
| chrX  | 62997739  | 62998007  | 269 |
| chrX  | 20404327  | 20404595  | 269 |
| chr8  | 24707495  | 24707763  | 269 |
| chr7  | 11037910  | 11038178  | 269 |
| chr23 | 18749533  | 18749801  | 269 |
| chr22 | 56086720  | 56086988  | 269 |
| chr22 | 12351477  | 12351745  | 269 |
| chr17 | 68469987  | 68470255  | 269 |
| chr10 | 16946737  | 16947005  | 269 |
| chrX  | 78699619  | 78699886  | 268 |
| chrX  | 58226014  | 58226281  | 268 |
| chrX  | 50600881  | 50601148  | 268 |
| chrX  | 11667687  | 11667954  | 268 |
| chrX  | 7726709   | 7726976   | 268 |
| chr8  | 40827203  | 40827470  | 268 |
| chr7  | 62883019  | 62883286  | 268 |
| chr26 | 44521253  | 44521520  | 268 |
| chr24 | 60545854  | 60546121  | 268 |
| chr24 | 5112065   | 5112332   | 268 |
| chr2  | 130993730 | 130993997 | 268 |
| chr19 | 7297575   | 7297842   | 268 |
| chr15 | 65507514  | 65507781  | 268 |
| chr11 | 14236523  | 14236790  | 268 |
| chr1  | 82380078  | 82380345  | 268 |
| chr1  | 76215895  | 76216162  | 268 |
| chrX  | 56445106  | 56445372  | 267 |
| chrX  | 20244448  | 20244714  | 267 |
| chrX  | 10209625  | 10209891  | 267 |

|       |           |           |     |
|-------|-----------|-----------|-----|
| chr7  | 50502937  | 50503203  | 267 |
| chr3  | 126086844 | 126087110 | 267 |
| chr3  | 107744734 | 107745000 | 267 |
| chr29 | 31849064  | 31849330  | 267 |
| chr22 | 54043072  | 54043338  | 267 |
| chr19 | 38639521  | 38639787  | 267 |
| chr17 | 70243037  | 70243303  | 267 |
| chr16 | 70098592  | 70098858  | 267 |
| chr16 | 49482238  | 49482504  | 267 |
| chr14 | 63518886  | 63519152  | 267 |
| chr13 | 77347106  | 77347372  | 267 |
| chr12 | 80559876  | 80560142  | 267 |
| chr1  | 83129334  | 83129600  | 267 |
| chr1  | 78592618  | 78592884  | 267 |
| chrX  | 57588672  | 57588937  | 266 |
| chrX  | 22446922  | 22447187  | 266 |
| chrX  | 21535410  | 21535675  | 266 |
| chr5  | 81477637  | 81477902  | 266 |
| chr4  | 68840429  | 68840694  | 266 |
| chr29 | 30044905  | 30045170  | 266 |
| chr23 | 19327152  | 19327417  | 266 |
| chr23 | 16864665  | 16864930  | 266 |
| chr22 | 56218465  | 56218730  | 266 |
| chr22 | 5707845   | 5708110   | 266 |
| chr19 | 24367205  | 24367470  | 266 |
| chr15 | 15922561  | 15922826  | 266 |
| chrX  | 75261422  | 75261686  | 265 |
| chrX  | 74760745  | 74761009  | 265 |
| chrX  | 48409947  | 48410211  | 265 |
| chrX  | 12532100  | 12532364  | 265 |
| chr8  | 112053809 | 112054073 | 265 |
| chr23 | 10539612  | 10539876  | 265 |
| chr23 | 10339233  | 10339497  | 265 |
| chr21 | 20838954  | 20839218  | 265 |
| chr15 | 24489444  | 24489708  | 265 |
| chr14 | 31498124  | 31498388  | 265 |
| chr13 | 41543430  | 41543694  | 265 |
| chr12 | 74294999  | 74295263  | 265 |
| chr11 | 69090694  | 69090958  | 265 |
| chr10 | 70276041  | 70276305  | 265 |
| chr1  | 161065292 | 161065556 | 265 |
| chrX  | 8299036   | 8299299   | 264 |
| chr6  | 117590426 | 117590689 | 264 |
| chr29 | 33683267  | 33683530  | 264 |
| chr22 | 16417205  | 16417468  | 264 |
| chr21 | 34513669  | 34513932  | 264 |
| chr2  | 132757465 | 132757728 | 264 |
| chr2  | 75555570  | 75555833  | 264 |
| chr16 | 61523552  | 61523815  | 264 |
| chr15 | 54549827  | 54550090  | 264 |

|       |           |           |     |
|-------|-----------|-----------|-----|
| chr15 | 26807112  | 26807375  | 264 |
| chr12 | 74567583  | 74567846  | 264 |
| chr11 | 75420842  | 75421105  | 264 |
| chrX  | 77589324  | 77589586  | 263 |
| chrX  | 49209626  | 49209888  | 263 |
| chrX  | 30827992  | 30828254  | 263 |
| chr8  | 60119581  | 60119843  | 263 |
| chr4  | 121438399 | 121438661 | 263 |
| chr22 | 30343932  | 30344194  | 263 |
| chr2  | 139565338 | 139565600 | 263 |
| chr19 | 54438336  | 54438598  | 263 |
| chr18 | 23588975  | 23589237  | 263 |
| chr17 | 67940504  | 67940766  | 263 |
| chr1  | 59655590  | 59655852  | 263 |
| chrX  | 36806862  | 36807123  | 262 |
| chrX  | 35511972  | 35512233  | 262 |
| chrX  | 34095559  | 34095820  | 262 |
| chrX  | 21189189  | 21189450  | 262 |
| chrX  | 18852390  | 18852651  | 262 |
| chrX  | 8116244   | 8116505   | 262 |
| chrX  | 6316531   | 6316792   | 262 |
| chrX  | 2527957   | 2528218   | 262 |
| chr9  | 99103713  | 99103974  | 262 |
| chr29 | 31648479  | 31648740  | 262 |
| chr26 | 41922800  | 41923061  | 262 |
| chr21 | 33984112  | 33984373  | 262 |
| chr2  | 134941636 | 134941897 | 262 |
| chr2  | 111209759 | 111210020 | 262 |
| chr19 | 60333585  | 60333846  | 262 |
| chr15 | 25431170  | 25431431  | 262 |
| chr15 | 21190128  | 21190389  | 262 |
| chrX  | 64650895  | 64651155  | 261 |
| chrX  | 54686040  | 54686300  | 261 |
| chrX  | 34516241  | 34516501  | 261 |
| chr7  | 15695573  | 15695833  | 261 |
| chr5  | 76650503  | 76650763  | 261 |
| chr5  | 48465429  | 48465689  | 261 |
| chr4  | 95905534  | 95905794  | 261 |
| chr3  | 33421685  | 33421945  | 261 |
| chr23 | 28962542  | 28962802  | 261 |
| chr19 | 18347033  | 18347293  | 261 |
| chr16 | 25987127  | 25987387  | 261 |
| chr13 | 59685442  | 59685702  | 261 |
| chr10 | 70343824  | 70344084  | 261 |
| chrX  | 74509709  | 74509968  | 260 |
| chrX  | 62524114  | 62524373  | 260 |
| chrX  | 20715810  | 20716069  | 260 |
| chr9  | 87169940  | 87170199  | 260 |
| chr4  | 95607847  | 95608106  | 260 |
| chr4  | 49918544  | 49918803  | 260 |

|       |           |           |     |
|-------|-----------|-----------|-----|
| chr29 | 33556449  | 33556708  | 260 |
| chr29 | 7749624   | 7749883   | 260 |
| chr26 | 20909133  | 20909392  | 260 |
| chr24 | 37009053  | 37009312  | 260 |
| chr23 | 28487508  | 28487767  | 260 |
| chr23 | 18787368  | 18787627  | 260 |
| chr21 | 69014916  | 69015175  | 260 |
| chr17 | 70245622  | 70245881  | 260 |
| chr17 | 66182502  | 66182761  | 260 |
| chr14 | 8152937   | 8153196   | 260 |
| chr14 | 6800073   | 6800332   | 260 |
| chr13 | 16097479  | 16097738  | 260 |
| chr11 | 90394094  | 90394353  | 260 |
| chr11 | 75072401  | 75072660  | 260 |
| chr11 | 51832185  | 51832444  | 260 |
| chr11 | 13361672  | 13361931  | 260 |
| chr10 | 46678175  | 46678434  | 260 |
| chrX  | 58650123  | 58650381  | 259 |
| chr8  | 109019053 | 109019311 | 259 |
| chr8  | 88720491  | 88720749  | 259 |
| chr8  | 77148580  | 77148838  | 259 |
| chr7  | 52826753  | 52827011  | 259 |
| chr7  | 18536342  | 18536600  | 259 |
| chr7  | 10391060  | 10391318  | 259 |
| chr19 | 39388225  | 39388483  | 259 |
| chr19 | 8234701   | 8234959   | 259 |
| chr17 | 74604533  | 74604791  | 259 |
| chr15 | 76179569  | 76179827  | 259 |
| chr13 | 17741694  | 17741952  | 259 |
| chr11 | 70930523  | 70930781  | 259 |
| chrX  | 30439050  | 30439307  | 258 |
| chr6  | 121780671 | 121780928 | 258 |
| chr29 | 36510005  | 36510262  | 258 |
| chr26 | 41460939  | 41461196  | 258 |
| chr21 | 24881679  | 24881936  | 258 |
| chr20 | 70604327  | 70604584  | 258 |
| chr20 | 25833562  | 25833819  | 258 |
| chr19 | 54159736  | 54159993  | 258 |
| chr19 | 40652455  | 40652712  | 258 |
| chr15 | 28621768  | 28622025  | 258 |
| chr1  | 145826578 | 145826835 | 258 |
| chrX  | 36394217  | 36394473  | 257 |
| chrX  | 33050447  | 33050703  | 257 |
| chrX  | 31008498  | 31008754  | 257 |
| chrX  | 22612213  | 22612469  | 257 |
| chrX  | 20757809  | 20758065  | 257 |
| chr9  | 35531737  | 35531993  | 257 |
| chr7  | 16287061  | 16287317  | 257 |
| chr3  | 122389085 | 122389341 | 257 |
| chr3  | 108999270 | 108999526 | 257 |



|       |               |           |     |
|-------|---------------|-----------|-----|
| chr29 | 36751633      | 36751889  | 257 |
| chr20 | 1051175       | 1051431   | 257 |
| chr2  | 128426054     | 128426310 | 257 |
| chr19 | 46055315      | 46055571  | 257 |
| chr19 | 31283427      | 31283683  | 257 |
| chr16 | 72117384      | 72117640  | 257 |
| chr14 | 6364730       | 6364986   | 257 |
| chr11 | 85143722      | 85143978  | 257 |
| chr11 | 80568927      | 80569183  | 257 |
| chr1  | 41433479      | 41433735  | 257 |
| chrX  | 56857987      | 56858242  | 256 |
| chrX  | 6676264       | 6676519   | 256 |
| chrX  | 5524351       | 5524606   | 256 |
| chr9  | 78496233      | 78496488  | 256 |
| chr7  | 52366298      | 52366553  | 256 |
| chr4  | 72743604      | 72743859  | 256 |
| chr3  | 111491959     | 111492214 | 256 |
| chr29 | 43426007      | 43426262  | 256 |
| chr23 | 43307565      | 43307820  | 256 |
| chr22 | 58581218      | 58581473  | 256 |
| chr22 | 56303280      | 56303535  | 256 |
| chr18 | 4178183       | 4178438   | 256 |
| chr14 | 63517512      | 63517767  | 256 |
| chr12 | 80708982      | 80709237  | 256 |
| chr12 | 34852162      | 34852417  | 256 |
| chr1  | 128263614     | 128263869 | 256 |
| chrX  | 59394886      | 59395140  | 255 |
| chr9  | 90359924      | 90360178  | 255 |
| chr8  | 10928890      | 10929144  | 255 |
| chr7  | 43659060      | 43659314  | 255 |
| chr5  | 30284753      | 30285007  | 255 |
| chr4  | 99037231      | 99037485  | 255 |
| chr22 | 48559338      | 48559592  | 255 |
| chr20 | 1188622       | 1188876   | 255 |
| chr19 | 12610650      | 12610904  | 255 |
| chr18 | 25328760      | 25329014  | 255 |
| chrX  | 74365457      | 74365710  | 254 |
| chrX  | 72011259      | 72011512  | 254 |
| chrX  | 56279225      | 56279478  | 254 |
| chr7  | 89429358      | 89429611  | 254 |
| chr3  | 115993497     | 115993750 | 254 |
| chr29 | 26494160      | 26494413  | 254 |
| chr28 | 25159288      | 25159541  | 254 |
| chr23 | 30664619      | 30664872  | 254 |
| chr22 | 5022606       | 5022859   | 254 |
| chr19 | 51832958      | 51833211  | 254 |
| chr19 | 26927492      | 26927745  | 254 |
| chr18 | 374794 375047 | 254       |     |
| chr14 | 67980441      | 67980694  | 254 |
| chr11 | 25643021      | 25643274  | 254 |

|       |           |           |     |
|-------|-----------|-----------|-----|
| chr10 | 88049566  | 88049819  | 254 |
| chrX  | 53727248  | 53727500  | 253 |
| chrX  | 50790307  | 50790559  | 253 |
| chrX  | 19813435  | 19813687  | 253 |
| chr8  | 111759066 | 111759318 | 253 |
| chr8  | 61858557  | 61858809  | 253 |
| chr29 | 35311889  | 35312141  | 253 |
| chr26 | 50179783  | 50180035  | 253 |
| chr22 | 58628381  | 58628633  | 253 |
| chr20 | 65533151  | 65533403  | 253 |
| chr17 | 64558288  | 64558540  | 253 |
| chr17 | 49153805  | 49154057  | 253 |
| chr15 | 29036602  | 29036854  | 253 |
| chr13 | 72782913  | 72783165  | 253 |
| chr13 | 38836534  | 38836786  | 253 |
| chr10 | 55736309  | 55736561  | 253 |
| chrX  | 55284240  | 55284491  | 252 |
| chr9  | 87169627  | 87169878  | 252 |
| chr8  | 112075925 | 112076176 | 252 |
| chr29 | 44560980  | 44561231  | 252 |
| chr29 | 31419340  | 31419591  | 252 |
| chr25 | 34468822  | 34469073  | 252 |
| chr23 | 27586479  | 27586730  | 252 |
| chr2  | 21513267  | 21513518  | 252 |
| chr19 | 32572282  | 32572533  | 252 |
| chr18 | 11405384  | 11405635  | 252 |
| chr17 | 70378527  | 70378778  | 252 |
| chr11 | 107074283 | 107074534 | 252 |
| chr10 | 81681591  | 81681842  | 252 |
| chr10 | 67058886  | 67059137  | 252 |
| chrX  | 12940533  | 12940783  | 251 |
| chrX  | 9813672   | 9813922   | 251 |
| chr8  | 73896745  | 73896995  | 251 |
| chr5  | 101588212 | 101588462 | 251 |
| chr4  | 95066051  | 95066301  | 251 |
| chr3  | 114246087 | 114246337 | 251 |
| chr29 | 33761445  | 33761695  | 251 |
| chr25 | 29087801  | 29088051  | 251 |
| chr22 | 54389557  | 54389807  | 251 |
| chr21 | 56213636  | 56213886  | 251 |
| chr10 | 20452663  | 20452913  | 251 |
| chrX  | 84390000  | 84390249  | 250 |
| chrX  | 48075221  | 48075470  | 250 |
| chr8  | 87823900  | 87824149  | 250 |
| chr7  | 59631139  | 59631388  | 250 |
| chr3  | 44179198  | 44179447  | 250 |
| chr3  | 36904951  | 36905200  | 250 |
| chr23 | 51983075  | 51983324  | 250 |
| chr21 | 26859986  | 26860235  | 250 |
| chr19 | 42083197  | 42083446  | 250 |

|       |           |           |     |
|-------|-----------|-----------|-----|
| chr16 | 43375616  | 43375865  | 250 |
| chr13 | 41786851  | 41787100  | 250 |
| chr13 | 10556459  | 10556708  | 250 |
| chr12 | 75293034  | 75293283  | 250 |
| chrX  | 57924845  | 57925093  | 249 |
| chrX  | 56623811  | 56624059  | 249 |
| chrX  | 53903373  | 53903621  | 249 |
| chrX  | 21245519  | 21245767  | 249 |
| chr7  | 68053856  | 68054104  | 249 |
| chr7  | 5248438   | 5248686   | 249 |
| chr5  | 72614519  | 72614767  | 249 |
| chr3  | 33786593  | 33786841  | 249 |
| chr29 | 33079792  | 33080040  | 249 |
| chr28 | 44468232  | 44468480  | 249 |
| chr27 | 35370519  | 35370767  | 249 |
| chr25 | 35374471  | 35374719  | 249 |
| chr2  | 17542876  | 17543124  | 249 |
| chr18 | 50459170  | 50459418  | 249 |
| chr18 | 11748790  | 11749038  | 249 |
| chr17 | 72960295  | 72960543  | 249 |
| chr14 | 69480909  | 69481157  | 249 |
| chr13 | 2524055   | 2524303   | 249 |
| chr11 | 96403495  | 96403743  | 249 |
| chr8  | 73729049  | 73729296  | 248 |
| chr8  | 11313300  | 11313547  | 248 |
| chr5  | 112308831 | 112309078 | 248 |
| chr4  | 92164663  | 92164910  | 248 |
| chr29 | 49569011  | 49569258  | 248 |
| chr28 | 34053542  | 34053789  | 248 |
| chr27 | 28020815  | 28021062  | 248 |
| chr24 | 34024043  | 34024290  | 248 |
| chr18 | 18803543  | 18803790  | 248 |
| chr16 | 47284603  | 47284850  | 248 |
| chr11 | 28635967  | 28636214  | 248 |
| chrX  | 55966895  | 55967141  | 247 |
| chrX  | 31427171  | 31427417  | 247 |
| chrX  | 2370450   | 2370696   | 247 |
| chr9  | 99984585  | 99984831  | 247 |
| chr7  | 69241206  | 69241452  | 247 |
| chr26 | 34282017  | 34282263  | 247 |
| chr2  | 46960129  | 46960375  | 247 |
| chr19 | 20346222  | 20346468  | 247 |
| chr18 | 62520917  | 62521163  | 247 |
| chr18 | 11988830  | 11989076  | 247 |
| chr15 | 29957347  | 29957593  | 247 |
| chr13 | 41698758  | 41699004  | 247 |
| chr11 | 100332217 | 100332463 | 247 |
| chrX  | 51878855  | 51879100  | 246 |
| chrX  | 41259171  | 41259416  | 246 |
| chrX  | 2056990   | 2057235   | 246 |

|       |           |           |     |
|-------|-----------|-----------|-----|
| chr7  | 42501163  | 42501408  | 246 |
| chr7  | 37468765  | 37469010  | 246 |
| chr5  | 74547699  | 74547944  | 246 |
| chr4  | 8852098   | 8852343   | 246 |
| chr26 | 15013180  | 15013425  | 246 |
| chr25 | 35414360  | 35414605  | 246 |
| chr25 | 22682812  | 22683057  | 246 |
| chr21 | 59691986  | 59692231  | 246 |
| chr2  | 130875517 | 130875762 | 246 |
| chr19 | 60263224  | 60263469  | 246 |
| chr19 | 46858639  | 46858884  | 246 |
| chr15 | 29991152  | 29991397  | 246 |
| chr12 | 33214011  | 33214256  | 246 |
| chr11 | 98370769  | 98371014  | 246 |
| chr1  | 82257785  | 82258030  | 246 |
| chrX  | 60565547  | 60565791  | 245 |
| chr8  | 58223754  | 58223998  | 245 |
| chr7  | 16642406  | 16642650  | 245 |
| chr3  | 123416729 | 123416973 | 245 |
| chr28 | 12162886  | 12163130  | 245 |
| chr24 | 33117322  | 33117566  | 245 |
| chr21 | 33090408  | 33090652  | 245 |
| chr2  | 131007270 | 131007514 | 245 |
| chr19 | 33397378  | 33397622  | 245 |
| chr17 | 69732864  | 69733108  | 245 |
| chr15 | 19887656  | 19887900  | 245 |
| chr11 | 93771937  | 93772181  | 245 |
| chr11 | 44933031  | 44933275  | 245 |
| chr9  | 61948461  | 61948704  | 244 |
| chr7  | 50689184  | 50689427  | 244 |
| chr6  | 115516571 | 115516814 | 244 |
| chr3  | 55414771  | 55415014  | 244 |
| chr24 | 48645073  | 48645316  | 244 |
| chr24 | 1767128   | 1767371   | 244 |
| chr23 | 52806891  | 52807134  | 244 |
| chr23 | 28777588  | 28777831  | 244 |
| chr2  | 139165240 | 139165483 | 244 |
| chr19 | 7605972   | 7606215   | 244 |
| chr14 | 35352221  | 35352464  | 244 |
| chr11 | 107056994 | 107057237 | 244 |
| chr10 | 44931531  | 44931774  | 244 |
| chrX  | 72234059  | 72234301  | 243 |
| chrX  | 11344876  | 11345118  | 243 |
| chrX  | 9982692   | 9982934   | 243 |
| chr8  | 24434960  | 24435202  | 243 |
| chr29 | 48991348  | 48991590  | 243 |
| chr21 | 34481838  | 34482080  | 243 |
| chr19 | 42325471  | 42325713  | 243 |
| chr16 | 69930728  | 69930970  | 243 |
| chr15 | 32670524  | 32670766  | 243 |

|       |           |           |     |
|-------|-----------|-----------|-----|
| chr11 | 65939178  | 65939420  | 243 |
| chrX  | 56272037  | 56272278  | 242 |
| chrX  | 9708808   | 9709049   | 242 |
| chr9  | 70871992  | 70872233  | 242 |
| chr7  | 45777879  | 45778120  | 242 |
| chr3  | 86975713  | 86975954  | 242 |
| chr28 | 26456068  | 26456309  | 242 |
| chr21 | 34373139  | 34373380  | 242 |
| chr21 | 13648510  | 13648751  | 242 |
| chr20 | 19472571  | 19472812  | 242 |
| chr2  | 3827778   | 3828019   | 242 |
| chr19 | 42064986  | 42065227  | 242 |
| chr19 | 14926810  | 14927051  | 242 |
| chr18 | 51552247  | 51552488  | 242 |
| chr18 | 33396929  | 33397170  | 242 |
| chr17 | 63518302  | 63518543  | 242 |
| chr14 | 7094103   | 7094344   | 242 |
| chr13 | 29690549  | 29690790  | 242 |
| chr11 | 48670556  | 48670797  | 242 |
| chr10 | 81675310  | 81675551  | 242 |
| chrX  | 11403349  | 11403589  | 241 |
| chr8  | 112096881 | 112097121 | 241 |
| chr8  | 11308728  | 11308968  | 241 |
| chr6  | 106803674 | 106803914 | 241 |
| chr5  | 111206898 | 111207138 | 241 |
| chr21 | 28982205  | 28982445  | 241 |
| chr19 | 33213536  | 33213776  | 241 |
| chr19 | 31277775  | 31278015  | 241 |
| chr19 | 12512566  | 12512806  | 241 |
| chr18 | 29273340  | 29273580  | 241 |
| chr15 | 65633545  | 65633785  | 241 |
| chr15 | 29331699  | 29331939  | 241 |
| chr14 | 8247767   | 8248007   | 241 |
| chr13 | 15819921  | 15820161  | 241 |
| chr11 | 99695684  | 99695924  | 241 |
| chrX  | 73988512  | 73988751  | 240 |
| chrX  | 49218013  | 49218252  | 240 |
| chrX  | 32527939  | 32528178  | 240 |
| chrX  | 6663971   | 6664210   | 240 |
| chr21 | 28636070  | 28636309  | 240 |
| chr21 | 2918923   | 2919162   | 240 |
| chr17 | 70256636  | 70256875  | 240 |
| chr17 | 64713389  | 64713628  | 240 |
| chr17 | 48796053  | 48796292  | 240 |
| chr16 | 44425675  | 44425914  | 240 |
| chr15 | 22188490  | 22188729  | 240 |
| chr13 | 53388250  | 53388489  | 240 |
| chr13 | 48547485  | 48547724  | 240 |
| chr13 | 29654747  | 29654986  | 240 |
| chr11 | 77591952  | 77592191  | 240 |

|       |               |           |     |
|-------|---------------|-----------|-----|
| chrX  | 39047428      | 39047666  | 239 |
| chr3  | 35567633      | 35567871  | 239 |
| chr26 | 22304066      | 22304304  | 239 |
| chr25 | 37733201      | 37733439  | 239 |
| chr21 | 59063470      | 59063708  | 239 |
| chr16 | 47328836      | 47329074  | 239 |
| chr15 | 32644745      | 32644983  | 239 |
| chr15 | 22756917      | 22757155  | 239 |
| chr14 | 30395193      | 30395431  | 239 |
| chr13 | 68273983      | 68274221  | 239 |
| chr9  | 90742766      | 90743003  | 238 |
| chr26 | 40941838      | 40942075  | 238 |
| chr24 | 40818304      | 40818541  | 238 |
| chr23 | 35041126      | 35041363  | 238 |
| chr22 | 59962581      | 59962818  | 238 |
| chr22 | 30032146      | 30032383  | 238 |
| chr16 | 23554848      | 23555085  | 238 |
| chr12 | 34845262      | 34845499  | 238 |
| chr1  | 58867992      | 58868229  | 238 |
| chrX  | 10400924      | 10401160  | 237 |
| chr8  | 108213955     | 108214191 | 237 |
| chr8  | 77387258      | 77387494  | 237 |
| chr7  | 45780000      | 45780236  | 237 |
| chr29 | 33583163      | 33583399  | 237 |
| chr29 | 11887986      | 11888222  | 237 |
| chr25 | 33351731      | 33351967  | 237 |
| chr24 | 48426209      | 48426445  | 237 |
| chr21 | 25645321      | 25645557  | 237 |
| chr19 | 56659543      | 56659779  | 237 |
| chr19 | 33119680      | 33119916  | 237 |
| chr18 | 56889350      | 56889586  | 237 |
| chr18 | 52739985      | 52740221  | 237 |
| chr17 | 20187434      | 20187670  | 237 |
| chr14 | 38759046      | 38759282  | 237 |
| chr13 | 77403357      | 77403593  | 237 |
| chrX  | 48252969      | 48253204  | 236 |
| chrX  | 10011312      | 10011547  | 236 |
| chrX  | 544824 545059 | 236       |     |
| chr4  | 32398967      | 32399202  | 236 |
| chr3  | 28407482      | 28407717  | 236 |
| chr28 | 33635114      | 33635349  | 236 |
| chr22 | 30341398      | 30341633  | 236 |
| chr21 | 26784396      | 26784631  | 236 |
| chr2  | 68158201      | 68158436  | 236 |
| chr18 | 23598576      | 23598811  | 236 |
| chr13 | 61479412      | 61479647  | 236 |
| chr11 | 104377899     | 104378134 | 236 |
| chr10 | 86424234      | 86424469  | 236 |
| chr10 | 1995485       | 1995720   | 236 |
| chrX  | 60902382      | 60902616  | 235 |

|       |           |           |     |
|-------|-----------|-----------|-----|
| chrX  | 2414364   | 2414598   | 235 |
| chr4  | 118580288 | 118580522 | 235 |
| chr4  | 81964835  | 81965069  | 235 |
| chr26 | 42793829  | 42794063  | 235 |
| chr21 | 34412606  | 34412840  | 235 |
| chr21 | 19686462  | 19686696  | 235 |
| chr19 | 42431427  | 42431661  | 235 |
| chr16 | 73948740  | 73948974  | 235 |
| chr15 | 41339535  | 41339769  | 235 |
| chr10 | 70537589  | 70537823  | 235 |
| chr1  | 140799914 | 140800148 | 235 |
| chrX  | 31697560  | 31697793  | 234 |
| chr5  | 78411111  | 78411344  | 234 |
| chr25 | 44050582  | 44050815  | 234 |
| chr22 | 54159976  | 54160209  | 234 |
| chr22 | 51502190  | 51502423  | 234 |
| chr21 | 33996516  | 33996749  | 234 |
| chr19 | 54851636  | 54851869  | 234 |
| chr19 | 46778648  | 46778881  | 234 |
| chr19 | 7857370   | 7857603   | 234 |
| chr18 | 49959835  | 49960068  | 234 |
| chr17 | 64293391  | 64293624  | 234 |
| chrX  | 54315715  | 54315947  | 233 |
| chr5  | 31075311  | 31075543  | 233 |
| chr5  | 10387462  | 10387694  | 233 |
| chr3  | 120695475 | 120695707 | 233 |
| chr29 | 17793568  | 17793800  | 233 |
| chr28 | 26925199  | 26925431  | 233 |
| chr25 | 21837316  | 21837548  | 233 |
| chr19 | 39821763  | 39821995  | 233 |
| chr19 | 8336350   | 8336582   | 233 |
| chr18 | 18105007  | 18105239  | 233 |
| chr13 | 59765500  | 59765732  | 233 |
| chr13 | 53363549  | 53363781  | 233 |
| chr11 | 100344728 | 100344960 | 233 |
| chr1  | 144422405 | 144422637 | 233 |
| chr29 | 35209133  | 35209364  | 232 |
| chr25 | 34473497  | 34473728  | 232 |
| chr24 | 43975365  | 43975596  | 232 |
| chr24 | 31162810  | 31163041  | 232 |
| chr24 | 13106010  | 13106241  | 232 |
| chr23 | 10578043  | 10578274  | 232 |
| chr21 | 67966489  | 67966720  | 232 |
| chr18 | 8131801   | 8132032   | 232 |
| chr17 | 68426496  | 68426727  | 232 |
| chr15 | 54287333  | 54287564  | 232 |
| chr15 | 25414522  | 25414753  | 232 |
| chr13 | 59633205  | 59633436  | 232 |
| chr1  | 68522368  | 68522599  | 232 |
| chrX  | 8154482   | 8154712   | 231 |

|       |           |           |     |
|-------|-----------|-----------|-----|
| chr3  | 31628910  | 31629140  | 231 |
| chr26 | 22231596  | 22231826  | 231 |
| chr22 | 12935086  | 12935316  | 231 |
| chr19 | 44799270  | 44799500  | 231 |
| chr19 | 39536909  | 39537139  | 231 |
| chr19 | 13549456  | 13549686  | 231 |
| chr16 | 3822495   | 3822725   | 231 |
| chr13 | 73523655  | 73523885  | 231 |
| chr11 | 79269804  | 79270034  | 231 |
| chr11 | 71611704  | 71611934  | 231 |
| chr10 | 12828885  | 12829115  | 231 |
| chrX  | 80926411  | 80926640  | 230 |
| chrX  | 6995646   | 6995875   | 230 |
| chr7  | 47535099  | 47535328  | 230 |
| chr5  | 29245920  | 29246149  | 230 |
| chr4  | 121388397 | 121388626 | 230 |
| chr27 | 34830696  | 34830925  | 230 |
| chr27 | 31429301  | 31429530  | 230 |
| chr26 | 42107936  | 42108165  | 230 |
| chr26 | 38899828  | 38900057  | 230 |
| chr19 | 37923447  | 37923676  | 230 |
| chr18 | 51706440  | 51706669  | 230 |
| chr18 | 9505394   | 9505623   | 230 |
| chr17 | 59195525  | 59195754  | 230 |
| chr16 | 34117710  | 34117939  | 230 |
| chr11 | 14165261  | 14165490  | 230 |
| chr8  | 60422885  | 60423113  | 229 |
| chr5  | 60363714  | 60363942  | 229 |
| chr23 | 42681537  | 42681765  | 229 |
| chr18 | 63774957  | 63775185  | 229 |
| chr15 | 66547391  | 66547619  | 229 |
| chr14 | 34005009  | 34005237  | 229 |
| chr13 | 24117529  | 24117757  | 229 |
| chrX  | 78178723  | 78178950  | 228 |
| chrX  | 59208576  | 59208803  | 228 |
| chr5  | 30812367  | 30812594  | 228 |
| chr3  | 123746000 | 123746227 | 228 |
| chr3  | 115476698 | 115476925 | 228 |
| chr28 | 33779770  | 33779997  | 228 |
| chr27 | 26053304  | 26053531  | 228 |
| chr23 | 31425487  | 31425714  | 228 |
| chr20 | 13798899  | 13799126  | 228 |
| chr15 | 30108335  | 30108562  | 228 |
| chrX  | 68366038  | 68366264  | 227 |
| chrX  | 64540376  | 64540602  | 227 |
| chr3  | 124088091 | 124088317 | 227 |
| chr25 | 34376634  | 34376860  | 227 |
| chr24 | 60818558  | 60818784  | 227 |
| chr23 | 48786151  | 48786377  | 227 |
| chr22 | 30401004  | 30401230  | 227 |



|       |           |           |     |
|-------|-----------|-----------|-----|
| chr20 | 73236053  | 73236279  | 227 |
| chr17 | 73155752  | 73155978  | 227 |
| chr17 | 72898905  | 72899131  | 227 |
| chr17 | 59609016  | 59609242  | 227 |
| chr15 | 29865025  | 29865251  | 227 |
| chr14 | 1414507   | 1414733   | 227 |
| chr10 | 31902580  | 31902806  | 227 |
| chrX  | 9938002   | 9938227   | 226 |
| chr9  | 104976066 | 104976291 | 226 |
| chr6  | 109616479 | 109616704 | 226 |
| chr6  | 70535627  | 70535852  | 226 |
| chr4  | 124304472 | 124304697 | 226 |
| chr19 | 56660352  | 56660577  | 226 |
| chr18 | 12343360  | 12343585  | 226 |
| chr15 | 42518413  | 42518638  | 226 |
| chr15 | 39888114  | 39888339  | 226 |
| chr13 | 2720870   | 2721095   | 226 |
| chr12 | 32130632  | 32130857  | 226 |
| chr1  | 152168610 | 152168835 | 226 |
| chrX  | 50501583  | 50501807  | 225 |
| chrX  | 11153596  | 11153820  | 225 |
| chr8  | 73483092  | 73483316  | 225 |
| chr7  | 50864548  | 50864772  | 225 |
| chr26 | 41884334  | 41884558  | 225 |
| chr24 | 35238132  | 35238356  | 225 |
| chr20 | 8312056   | 8312280   | 225 |
| chr18 | 51521050  | 51521274  | 225 |
| chr17 | 47633974  | 47634198  | 225 |
| chr15 | 30693567  | 30693791  | 225 |
| chr13 | 58334797  | 58335021  | 225 |
| chr10 | 60558196  | 60558420  | 225 |
| chr1  | 82162722  | 82162946  | 225 |
| chrX  | 72417642  | 72417865  | 224 |
| chrX  | 55232042  | 55232265  | 224 |
| chrX  | 35526732  | 35526955  | 224 |
| chr8  | 74298546  | 74298769  | 224 |
| chr4  | 32398555  | 32398778  | 224 |
| chr23 | 28823885  | 28824108  | 224 |
| chr21 | 16739766  | 16739989  | 224 |
| chr19 | 63540810  | 63541033  | 224 |
| chr19 | 24697722  | 24697945  | 224 |
| chr17 | 19215461  | 19215684  | 224 |
| chr15 | 24686220  | 24686443  | 224 |
| chr15 | 9009659   | 9009882   | 224 |
| chr13 | 81680752  | 81680975  | 224 |
| chrX  | 18270686  | 18270908  | 223 |
| chrX  | 15675169  | 15675391  | 223 |
| chr29 | 38718617  | 38718839  | 223 |
| chr29 | 37629142  | 37629364  | 223 |
| chr29 | 5586229   | 5586451   | 223 |

|       |           |           |     |
|-------|-----------|-----------|-----|
| chr24 | 63384495  | 63384717  | 223 |
| chr15 | 64200745  | 64200967  | 223 |
| chr14 | 81337248  | 81337470  | 223 |
| chr14 | 6959943   | 6960165   | 223 |
| chr13 | 74612847  | 74613069  | 223 |
| chr13 | 55146811  | 55147033  | 223 |
| chrX  | 20684581  | 20684802  | 222 |
| chr6  | 46337936  | 46338157  | 222 |
| chr29 | 51222120  | 51222341  | 222 |
| chr26 | 43893046  | 43893267  | 222 |
| chr25 | 4661730   | 4661951   | 222 |
| chr23 | 26980153  | 26980374  | 222 |
| chr20 | 5068316   | 5068537   | 222 |
| chr18 | 41053238  | 41053459  | 222 |
| chr11 | 105947607 | 105947828 | 222 |
| chr7  | 46433992  | 46434212  | 221 |
| chr4  | 63968715  | 63968935  | 221 |
| chr28 | 33731727  | 33731947  | 221 |
| chr24 | 60575840  | 60576060  | 221 |
| chr2  | 24964326  | 24964546  | 221 |
| chr13 | 70089017  | 70089237  | 221 |
| chr11 | 100881599 | 100881819 | 221 |
| chrX  | 35493529  | 35493748  | 220 |
| chrX  | 34857606  | 34857825  | 220 |
| chrX  | 30608278  | 30608497  | 220 |
| chrX  | 29578024  | 29578243  | 220 |
| chrX  | 21368330  | 21368549  | 220 |
| chr3  | 126951126 | 126951345 | 220 |
| chr3  | 114797852 | 114798071 | 220 |
| chr29 | 51849605  | 51849824  | 220 |
| chr21 | 61002961  | 61003180  | 220 |
| chr21 | 15467835  | 15468054  | 220 |
| chr2  | 66966399  | 66966618  | 220 |
| chr15 | 81061724  | 81061943  | 220 |
| chr15 | 65612289  | 65612508  | 220 |
| chr11 | 29960553  | 29960772  | 220 |
| chr10 | 74943812  | 74944031  | 220 |
| chr1  | 128304994 | 128305213 | 220 |
| chrX  | 77197371  | 77197589  | 219 |
| chrX  | 30399856  | 30400074  | 219 |
| chr4  | 107200973 | 107201191 | 219 |
| chr4  | 94215061  | 94215279  | 219 |
| chr3  | 127716717 | 127716935 | 219 |
| chr29 | 31830837  | 31831055  | 219 |
| chr19 | 38777822  | 38778040  | 219 |
| chr17 | 63090634  | 63090852  | 219 |
| chr13 | 73648515  | 73648733  | 219 |
| chr13 | 44917685  | 44917903  | 219 |
| chr12 | 79019678  | 79019896  | 219 |
| chr12 | 34600304  | 34600522  | 219 |

|       |           |           |     |
|-------|-----------|-----------|-----|
| chr10 | 94629860  | 94630078  | 219 |
| chrX  | 60141897  | 60142114  | 218 |
| chrX  | 59819948  | 59820165  | 218 |
| chrX  | 22537945  | 22538162  | 218 |
| chrX  | 21461256  | 21461473  | 218 |
| chr23 | 41874289  | 41874506  | 218 |
| chr23 | 10570343  | 10570560  | 218 |
| chr23 | 10531572  | 10531789  | 218 |
| chr19 | 59242258  | 59242475  | 218 |
| chr15 | 54550092  | 54550309  | 218 |
| chr11 | 70930271  | 70930488  | 218 |
| chr10 | 89218922  | 89219139  | 218 |
| chr8  | 24457479  | 24457695  | 217 |
| chr29 | 29785115  | 29785331  | 217 |
| chr24 | 58831502  | 58831718  | 217 |
| chr22 | 59893753  | 59893969  | 217 |
| chr22 | 12360527  | 12360743  | 217 |
| chr20 | 4978706   | 4978922   | 217 |
| chr2  | 139122321 | 139122537 | 217 |
| chr19 | 58655750  | 58655966  | 217 |
| chr16 | 67178873  | 67179089  | 217 |
| chr14 | 9566032   | 9566248   | 217 |
| chr13 | 30837804  | 30838020  | 217 |
| chr11 | 72747636  | 72747852  | 217 |
| chr11 | 30902250  | 30902466  | 217 |
| chrX  | 62836036  | 62836251  | 216 |
| chrX  | 58463874  | 58464089  | 216 |
| chr8  | 76020799  | 76021014  | 216 |
| chr5  | 112588640 | 112588855 | 216 |
| chr3  | 118035587 | 118035802 | 216 |
| chr3  | 87401074  | 87401289  | 216 |
| chr3  | 48400078  | 48400293  | 216 |
| chr29 | 34582993  | 34583208  | 216 |
| chr22 | 12205918  | 12206133  | 216 |
| chr21 | 34857763  | 34857978  | 216 |
| chr17 | 67088471  | 67088686  | 216 |
| chr15 | 23193152  | 23193367  | 216 |
| chr12 | 30463861  | 30464076  | 216 |
| chr1  | 133441291 | 133441506 | 216 |
| chrX  | 13704249  | 13704463  | 215 |
| chrX  | 8954618   | 8954832   | 215 |
| chrX  | 6875210   | 6875424   | 215 |
| chr24 | 43692024  | 43692238  | 215 |
| chr19 | 59814932  | 59815146  | 215 |
| chr19 | 42030521  | 42030735  | 215 |
| chr15 | 81850785  | 81850999  | 215 |
| chr14 | 57271332  | 57271546  | 215 |
| chr14 | 26584153  | 26584367  | 215 |
| chr13 | 31476408  | 31476622  | 215 |
| chr11 | 29825043  | 29825257  | 215 |

|       |               |           |     |
|-------|---------------|-----------|-----|
| chrX  | 20664438      | 20664651  | 214 |
| chrX  | 20004686      | 20004899  | 214 |
| chrX  | 9517052       | 9517265   | 214 |
| chr7  | 81249028      | 81249241  | 214 |
| chr7  | 10640891      | 10641104  | 214 |
| chr7  | 5184968       | 5185181   | 214 |
| chr3  | 110218613     | 110218826 | 214 |
| chr26 | 44959451      | 44959664  | 214 |
| chr24 | 64962108      | 64962321  | 214 |
| chr2  | 110589910     | 110590123 | 214 |
| chr19 | 60810518      | 60810731  | 214 |
| chr19 | 19142053      | 19142266  | 214 |
| chr18 | 4028624       | 4028837   | 214 |
| chr13 | 48331333      | 48331546  | 214 |
| chrX  | 19987925      | 19988137  | 213 |
| chrX  | 5919126       | 5919338   | 213 |
| chr7  | 70806104      | 70806316  | 213 |
| chr7  | 19385130      | 19385342  | 213 |
| chr5  | 122406564     | 122406776 | 213 |
| chr4  | 123085433     | 123085645 | 213 |
| chr26 | 44452007      | 44452219  | 213 |
| chr26 | 16600242      | 16600454  | 213 |
| chr18 | 52803606      | 52803818  | 213 |
| chr13 | 40258325      | 40258537  | 213 |
| chrX  | 71477649      | 71477860  | 212 |
| chr29 | 36946280      | 36946491  | 212 |
| chr22 | 54216026      | 54216237  | 212 |
| chr19 | 40510444      | 40510655  | 212 |
| chr19 | 17667952      | 17668163  | 212 |
| chr18 | 62105506      | 62105717  | 212 |
| chr15 | 51587584      | 51587795  | 212 |
| chr10 | 23975336      | 23975547  | 212 |
| chr1  | 500709 500920 | 212       |     |
| chrX  | 55964706      | 55964916  | 211 |
| chrX  | 8169816       | 8170026   | 211 |
| chr24 | 33492935      | 33493145  | 211 |
| chr21 | 60704088      | 60704298  | 211 |
| chr21 | 27778032      | 27778242  | 211 |
| chr2  | 122987358     | 122987568 | 211 |
| chr13 | 59734897      | 59735107  | 211 |
| chr10 | 103313088     | 103313298 | 211 |
| chr10 | 81676005      | 81676215  | 211 |
| chr10 | 35912987      | 35913197  | 211 |
| chrX  | 61271210      | 61271419  | 210 |
| chrX  | 50333612      | 50333821  | 210 |
| chrX  | 20514888      | 20515097  | 210 |
| chr29 | 30644148      | 30644357  | 210 |
| chr25 | 35687468      | 35687677  | 210 |
| chr18 | 64167273      | 64167482  | 210 |
| chr15 | 31526691      | 31526900  | 210 |

|       |           |           |     |
|-------|-----------|-----------|-----|
| chr10 | 24714841  | 24715050  | 210 |
| chr10 | 17725794  | 17726003  | 210 |
| chrX  | 57136775  | 57136983  | 209 |
| chrX  | 53759833  | 53760041  | 209 |
| chr9  | 105945978 | 105946186 | 209 |
| chr3  | 33109614  | 33109822  | 209 |
| chr3  | 24637670  | 24637878  | 209 |
| chr27 | 39690086  | 39690294  | 209 |
| chr21 | 18457032  | 18457240  | 209 |
| chr20 | 67089536  | 67089744  | 209 |
| chr19 | 47239018  | 47239226  | 209 |
| chr18 | 49971163  | 49971371  | 209 |
| chr17 | 49434960  | 49435168  | 209 |
| chr13 | 77163831  | 77164039  | 209 |
| chr10 | 25586081  | 25586289  | 209 |
| chr1  | 86357500  | 86357708  | 209 |
| chrX  | 77071852  | 77072059  | 208 |
| chr3  | 99892074  | 99892281  | 208 |
| chr29 | 23091713  | 23091920  | 208 |
| chr23 | 52742353  | 52742560  | 208 |
| chr21 | 25968753  | 25968960  | 208 |
| chr16 | 25414942  | 25415149  | 208 |
| chr13 | 57617854  | 57618061  | 208 |
| chr13 | 41923002  | 41923209  | 208 |
| chr10 | 74859702  | 74859909  | 208 |
| chr10 | 6921116   | 6921323   | 208 |
| chr1  | 154620997 | 154621204 | 208 |
| chr1  | 64816659  | 64816866  | 208 |
| chrX  | 12237934  | 12238140  | 207 |
| chr8  | 73532168  | 73532374  | 207 |
| chr8  | 60395906  | 60396112  | 207 |
| chr6  | 94814908  | 94815114  | 207 |
| chr5  | 61046679  | 61046885  | 207 |
| chr26 | 18286904  | 18287110  | 207 |
| chr21 | 28186044  | 28186250  | 207 |
| chr15 | 81088677  | 81088883  | 207 |
| chr14 | 8360537   | 8360743   | 207 |
| chr10 | 12129751  | 12129957  | 207 |
| chrX  | 2377880   | 2378085   | 206 |
| chr29 | 42437293  | 42437498  | 206 |
| chr2  | 135751364 | 135751569 | 206 |
| chr19 | 54759173  | 54759378  | 206 |
| chr19 | 37334214  | 37334419  | 206 |
| chr16 | 23712819  | 23713024  | 206 |
| chr8  | 65916232  | 65916436  | 205 |
| chr27 | 11612433  | 11612637  | 205 |
| chr23 | 22520515  | 22520719  | 205 |
| chr18 | 16201056  | 16201260  | 205 |
| chr16 | 74665925  | 74666129  | 205 |
| chr11 | 106389406 | 106389610 | 205 |

|       |           |           |     |
|-------|-----------|-----------|-----|
| chr10 | 67932867  | 67933071  | 205 |
| chr1  | 83000850  | 83001054  | 205 |
| chrX  | 63061146  | 63061349  | 204 |
| chr8  | 27381790  | 27381993  | 204 |
| chr8  | 26227497  | 26227700  | 204 |
| chr3  | 113977298 | 113977501 | 204 |
| chr23 | 45602774  | 45602977  | 204 |
| chr22 | 16360232  | 16360435  | 204 |
| chr19 | 44367217  | 44367420  | 204 |
| chr19 | 44224298  | 44224501  | 204 |
| chr18 | 49942027  | 49942230  | 204 |
| chr16 | 18982760  | 18982963  | 204 |
| chr13 | 29062746  | 29062949  | 204 |
| chr11 | 86353378  | 86353581  | 204 |
| chr10 | 24413945  | 24414148  | 204 |
| chrX  | 22564875  | 22565077  | 203 |
| chrX  | 7103691   | 7103893   | 203 |
| chr7  | 46426165  | 46426367  | 203 |
| chr25 | 4622980   | 4623182   | 203 |
| chr19 | 58961908  | 58962110  | 203 |
| chr15 | 54527505  | 54527707  | 203 |
| chr14 | 8157986   | 8158188   | 203 |
| chr13 | 71115294  | 71115496  | 203 |
| chr13 | 58637766  | 58637968  | 203 |
| chr12 | 67063999  | 67064201  | 203 |
| chr21 | 2052219   | 2052420   | 202 |
| chr13 | 56224102  | 56224303  | 202 |
| chr11 | 104954140 | 104954341 | 202 |
| chr10 | 18638827  | 18639028  | 202 |
| chrX  | 57176273  | 57176473  | 201 |
| chr7  | 19222237  | 19222437  | 201 |
| chr6  | 115898769 | 115898969 | 201 |
| chr3  | 15433009  | 15433209  | 201 |
| chr18 | 47885776  | 47885976  | 201 |
| chr1  | 153884237 | 153884437 | 201 |
| chrX  | 67393054  | 67393253  | 200 |
| chrX  | 20709150  | 20709349  | 200 |
| chr3  | 9887964   | 9888163   | 200 |
| chr29 | 33923629  | 33923828  | 200 |
| chr17 | 16989158  | 16989357  | 200 |
| chr1  | 12116201  | 12116400  | 200 |
| chr25 | 40884644  | 40884987  | 344 |
| chr5  | 80246859  | 80247196  | 338 |
| chr16 | 20486978  | 20487249  | 272 |
| chr3  | 120638300 | 120638528 | 229 |
| chr11 | 102151611 | 102152004 | 394 |
| chr14 | 17435992  | 17436375  | 384 |
| chr8  | 73410938  | 73411293  | 356 |
| chr1  | 7451100   | 7451425   | 326 |
| chr8  | 95943892  | 95944186  | 295 |

|       |           |           |     |
|-------|-----------|-----------|-----|
| chr1  | 54059556  | 54059841  | 286 |
| chr1  | 81931174  | 81931419  | 246 |
| chrX  | 60423614  | 60423858  | 245 |
| chr23 | 7429268   | 7429511   | 244 |
| chrX  | 20099880  | 20100095  | 216 |
| chr8  | 73332401  | 73332601  | 201 |
| chr8  | 24319171  | 24319388  | 218 |
| chr6  | 93918497  | 93918711  | 215 |
| chr1  | 141469644 | 141470027 | 384 |
| chr21 | 13816287  | 13816645  | 359 |
| chr1  | 78036103  | 78036307  | 205 |
| chr19 | 38181933  | 38182136  | 204 |
| chr19 | 51920724  | 51920980  | 257 |
| chr13 | 43479963  | 43480166  | 204 |
| chr26 | 43034061  | 43034423  | 363 |
| chr23 | 31128676  | 31129007  | 332 |
| chr8  | 73349428  | 73349766  | 339 |
| chr25 | 16586805  | 16587137  | 333 |
| chr5  | 32913913  | 32914227  | 315 |
| chr19 | 62667486  | 62667728  | 243 |
| chr8  | 73325457  | 73325688  | 232 |
| chr29 | 49321681  | 49321910  | 230 |
| chr29 | 50440102  | 50440319  | 218 |
| chr13 | 24435923  | 24436269  | 347 |
| chr8  | 24399824  | 24400158  | 335 |
| chr3  | 31872148  | 31872451  | 304 |
| chrX  | 54972090  | 54972365  | 276 |
| chr21 | 1921630   | 1921896   | 267 |
| chr1  | 25856789  | 25857040  | 252 |
| chr8  | 73733566  | 73733789  | 224 |
| chr22 | 12898083  | 12898303  | 221 |
| chr11 | 44983261  | 44983478  | 218 |
| chr8  | 73880413  | 73880626  | 214 |
| chr20 | 64808255  | 64808466  | 212 |
| chr6  | 5533747   | 5533955   | 209 |
| chr12 | 4727203   | 4727404   | 202 |
| chr10 | 39329525  | 39329724  | 200 |
| chr19 | 19124315  | 19124606  | 292 |
| chr29 | 44478420  | 44478624  | 205 |
| chr1  | 100088042 | 100088531 | 490 |
| chr1  | 153973817 | 153974291 | 475 |
| chr15 | 41242482  | 41242944  | 463 |
| chrX  | 19126872  | 19127311  | 440 |
| chr4  | 123220899 | 123221312 | 414 |
| chrX  | 34523592  | 34523990  | 399 |
| chr22 | 50516348  | 50516746  | 399 |
| chr13 | 22707822  | 22708219  | 398 |
| chr8  | 73752160  | 73752555  | 396 |
| chr4  | 29006088  | 29006474  | 387 |
| chrX  | 47640965  | 47641341  | 377 |

|       |               |           |     |
|-------|---------------|-----------|-----|
| chrX  | 31148853      | 31149227  | 375 |
| chr8  | 72613222      | 72613586  | 365 |
| chrX  | 7412651       | 7413008   | 358 |
| chr5  | 112122551     | 112122906 | 356 |
| chr26 | 22225763      | 22226113  | 351 |
| chr12 | 32547397      | 32547717  | 321 |
| chrX  | 50258694      | 50259013  | 320 |
| chr3  | 114469134     | 114469452 | 319 |
| chrX  | 11433003      | 11433318  | 316 |
| chr5  | 118153178     | 118153483 | 306 |
| chrX  | 64668007      | 64668310  | 304 |
| chrX  | 36786903      | 36787201  | 299 |
| chr18 | 49999635      | 49999930  | 296 |
| chrX  | 50503499      | 50503789  | 291 |
| chrX  | 47271504      | 47271784  | 281 |
| chr26 | 50754519      | 50754797  | 279 |
| chr17 | 74024936      | 74025211  | 276 |
| chrX  | 2387215       | 2387485   | 271 |
| chrX  | 34811432      | 34811699  | 268 |
| chr16 | 48702949      | 48703206  | 258 |
| chr10 | 59537865      | 59538111  | 247 |
| chrX  | 7502621       | 7502866   | 246 |
| chrX  | 19484852      | 19485084  | 233 |
| chr24 | 1140885       | 1141106   | 222 |
| chr20 | 65507682      | 65507894  | 213 |
| chr26 | 746922 747131 | 210       |     |
| chr10 | 20966465      | 20967124  | 660 |
| chr24 | 2945219       | 2945673   | 455 |
| chr5  | 111320817     | 111321260 | 444 |
| chr23 | 19870760      | 19871189  | 430 |
| chr18 | 24330585      | 24330996  | 412 |
| chrX  | 78752503      | 78752909  | 407 |
| chr4  | 32879555      | 32879957  | 403 |
| chr14 | 64787162      | 64787557  | 396 |
| chr2  | 14162009      | 14162402  | 394 |
| chrX  | 73719000      | 73719371  | 372 |
| chr21 | 2920666       | 2921023   | 358 |
| chr29 | 49709657      | 49710007  | 351 |
| chr3  | 112874930     | 112875278 | 349 |
| chr14 | 14029071      | 14029417  | 347 |
| chr25 | 40195602      | 40195947  | 346 |
| chr2  | 131025239     | 131025580 | 342 |
| chrX  | 12219109      | 12219445  | 337 |
| chr14 | 38850606      | 38850936  | 331 |
| chr25 | 34272790      | 34273111  | 322 |
| chr13 | 14948490      | 14948803  | 314 |
| chr10 | 14957444      | 14957748  | 305 |
| chrX  | 76807449      | 76807752  | 304 |
| chr23 | 15292309      | 15292601  | 293 |
| chr22 | 42656230      | 42656507  | 278 |



|       |           |           |     |
|-------|-----------|-----------|-----|
| chr7  | 19201268  | 19201533  | 266 |
| chr23 | 27811618  | 27811883  | 266 |
| chrX  | 77747222  | 77747485  | 264 |
| chr22 | 36552667  | 36552924  | 258 |
| chr1  | 141045943 | 141046198 | 256 |
| chr3  | 109863920 | 109864425 | 506 |
| chr5  | 113194829 | 113195201 | 373 |
| chr21 | 26828025  | 26828373  | 349 |
| chr17 | 4049622   | 4049969   | 348 |
| chr4  | 124378286 | 124378632 | 347 |
| chr26 | 42139538  | 42139883  | 346 |
| chr21 | 33993797  | 33994127  | 331 |
| chr11 | 92615381  | 92615711  | 331 |
| chrX  | 61339766  | 61340095  | 330 |
| chr29 | 27614354  | 27614678  | 325 |
| chr7  | 3574249   | 3574567   | 319 |
| chr26 | 48807925  | 48808240  | 316 |
| chrX  | 52926573  | 52926886  | 314 |
| chr18 | 48339262  | 48339575  | 314 |
| chr21 | 19831137  | 19831447  | 311 |
| chr1  | 74108976  | 74109285  | 310 |
| chrX  | 44936603  | 44936911  | 309 |
| chrX  | 75887695  | 75888001  | 307 |
| chr16 | 3639783   | 3640083   | 301 |
| chr26 | 44908594  | 44908892  | 299 |
| chr12 | 24558246  | 24558540  | 295 |
| chrX  | 78145444  | 78145735  | 292 |
| chr8  | 112027537 | 112027827 | 291 |
| chr15 | 24387975  | 24388265  | 291 |
| chr7  | 17090612  | 17090901  | 290 |
| chrX  | 11245919  | 11246205  | 287 |
| chrX  | 48120613  | 48120898  | 286 |
| chrX  | 22440207  | 22440486  | 280 |
| chr5  | 115156062 | 115156338 | 277 |
| chr29 | 38762479  | 38762751  | 273 |
| chr25 | 39264646  | 39264911  | 266 |
| chr15 | 30054203  | 30054466  | 264 |
| chrX  | 54105755  | 54106016  | 262 |
| chr25 | 40823870  | 40824131  | 262 |
| chrX  | 56024006  | 56024266  | 261 |
| chrX  | 19376122  | 19376381  | 260 |
| chr12 | 17178444  | 17178701  | 258 |
| chr23 | 10520180  | 10520436  | 257 |
| chrX  | 21590197  | 21590452  | 256 |
| chr6  | 120635021 | 120635274 | 254 |
| chr17 | 64144060  | 64144313  | 254 |
| chrX  | 75996148  | 75996398  | 251 |
| chr13 | 64037379  | 64037627  | 249 |
| chr16 | 58687704  | 58687951  | 248 |
| chr10 | 70653530  | 70653777  | 248 |

|       |           |           |     |
|-------|-----------|-----------|-----|
| chr20 | 71125254  | 71125500  | 247 |
| chr9  | 12414541  | 12414786  | 246 |
| chr23 | 15790276  | 15790521  | 246 |
| chr17 | 68997110  | 68997355  | 246 |
| chr8  | 73930620  | 73930861  | 242 |
| chr8  | 7549573   | 7549813   | 241 |
| chr2  | 127187597 | 127187837 | 241 |
| chr10 | 12743903  | 12744142  | 240 |
| chr19 | 24073371  | 24073607  | 237 |
| chr25 | 33524155  | 33524390  | 236 |
| chr20 | 73580084  | 73580319  | 236 |
| chr18 | 51335057  | 51335292  | 236 |
| chr14 | 8699059   | 8699294   | 236 |
| chr4  | 72716978  | 72717212  | 235 |
| chr15 | 75813603  | 75813837  | 235 |
| chr15 | 63890430  | 63890663  | 234 |
| chr3  | 116148286 | 116148518 | 233 |
| chr5  | 61000933  | 61001164  | 232 |
| chrX  | 12897800  | 12898026  | 227 |
| chr21 | 28951373  | 28951596  | 224 |
| chr8  | 73748016  | 73748234  | 219 |
| chr13 | 38647433  | 38647651  | 219 |
| chr10 | 24700252  | 24700470  | 219 |
| chr13 | 14155044  | 14155261  | 218 |
| chr29 | 38286397  | 38286612  | 216 |
| chr20 | 33689685  | 33689900  | 216 |
| chr28 | 46055392  | 46055606  | 215 |
| chr19 | 51907592  | 51907806  | 215 |
| chr13 | 63399527  | 63399741  | 215 |
| chr8  | 73734189  | 73734400  | 212 |
| chr25 | 40368315  | 40368526  | 212 |
| chr21 | 19438873  | 19439083  | 211 |
| chr18 | 50557817  | 50558027  | 211 |
| chrX  | 33749849  | 33750058  | 210 |
| chr2  | 56697644  | 56697853  | 210 |
| chr2  | 3418571   | 3418780   | 210 |
| chr1  | 19990957  | 19991165  | 209 |
| chr26 | 20734363  | 20734570  | 208 |
| chr17 | 57630970  | 57631177  | 208 |
| chr8  | 5838875   | 5839080   | 206 |
| chr7  | 71679164  | 71679369  | 206 |
| chr29 | 2534542   | 2534747   | 206 |
| chr19 | 13062317  | 13062522  | 206 |
| chr16 | 39449722  | 39449927  | 206 |
| chr18 | 58686740  | 58686944  | 205 |
| chrX  | 30890965  | 30891168  | 204 |
| chr21 | 60412579  | 60412782  | 204 |
| chr18 | 24347264  | 24347467  | 204 |
| chr14 | 29059495  | 29059698  | 204 |
| chr21 | 2052422   | 2052623   | 202 |

|       |           |           |     |
|-------|-----------|-----------|-----|
| chr15 | 55913272  | 55913473  | 202 |
| chr15 | 21809240  | 21809441  | 202 |
| chr3  | 114524905 | 114525105 | 201 |
| chr16 | 41441673  | 41441873  | 201 |
| chr13 | 59959281  | 59959480  | 200 |
| chr6  | 6448960   | 6449203   | 244 |
| chr8  | 73771113  | 73771319  | 207 |
| chr8  | 73777563  | 73777820  | 258 |
| chr21 | 52075536  | 52075815  | 280 |
| chr1  | 148196748 | 148196956 | 209 |
| chr16 | 72157150  | 72157782  | 633 |
| chrX  | 19873199  | 19873765  | 567 |
| chr21 | 60177330  | 60177896  | 567 |
| chr9  | 90303374  | 90303917  | 544 |
| chr25 | 3044882   | 3045423   | 542 |
| chrX  | 36145909  | 36146443  | 535 |
| chrX  | 55650559  | 55651092  | 534 |
| chr1  | 133334771 | 133335302 | 532 |
| chr19 | 59068808  | 59069335  | 528 |
| chr26 | 21808165  | 21808689  | 525 |
| chrX  | 36282612  | 36283117  | 506 |
| chr21 | 6415726   | 6416220   | 495 |
| chrX  | 50711329  | 50711812  | 484 |
| chrX  | 18425392  | 18425866  | 475 |
| chr5  | 29127045  | 29127499  | 455 |
| chrX  | 7890147   | 7890592   | 446 |
| chrX  | 22507606  | 22508050  | 445 |
| chr5  | 41162478  | 41162922  | 445 |
| chr13 | 59417985  | 59418429  | 445 |
| chrX  | 75623636  | 75624070  | 435 |
| chr7  | 5453113   | 5453545   | 433 |
| chr8  | 63905545  | 63905976  | 432 |
| chr20 | 8696257   | 8696686   | 430 |
| chr13 | 77712800  | 77713229  | 430 |
| chr21 | 34904699  | 34905126  | 428 |
| chr1  | 75262888  | 75263315  | 428 |
| chrX  | 2548484   | 2548906   | 423 |
| chrX  | 60290184  | 60290604  | 421 |
| chr21 | 64819219  | 64819639  | 421 |
| chr29 | 44610667  | 44611085  | 419 |
| chrX  | 79775314  | 79775712  | 399 |
| chrX  | 75865070  | 75865468  | 399 |
| chrX  | 74731108  | 74731506  | 399 |
| chrX  | 60274189  | 60274587  | 399 |
| chrX  | 55230330  | 55230728  | 399 |
| chrX  | 48186235  | 48186633  | 399 |
| chrX  | 34878695  | 34879093  | 399 |
| chr9  | 105061603 | 105062001 | 399 |
| chr7  | 96597621  | 96598019  | 399 |
| chr7  | 42207405  | 42207803  | 399 |

|       |           |           |     |
|-------|-----------|-----------|-----|
| chr4  | 98879654  | 98880052  | 399 |
| chr4  | 12017041  | 12017439  | 399 |
| chr3  | 111673085 | 111673483 | 399 |
| chr23 | 11062885  | 11063283  | 399 |
| chr20 | 8770912   | 8771310   | 399 |
| chr19 | 61637871  | 61638269  | 399 |
| chr18 | 55069212  | 55069610  | 399 |
| chr18 | 11991475  | 11991873  | 399 |
| chr9  | 90814229  | 90814626  | 398 |
| chr9  | 41252212  | 41252609  | 398 |
| chr14 | 34061253  | 34061650  | 398 |
| chr2  | 15384776  | 15385172  | 397 |
| chr6  | 119396400 | 119396795 | 396 |
| chr27 | 48052207  | 48052601  | 395 |
| chr20 | 73221726  | 73222119  | 394 |
| chr19 | 61640020  | 61640413  | 394 |
| chrX  | 64909310  | 64909702  | 393 |
| chrX  | 36664028  | 36664420  | 393 |
| chr20 | 6822067   | 6822459   | 393 |
| chr18 | 25262712  | 25263104  | 393 |
| chr11 | 77880078  | 77880470  | 393 |
| chr9  | 90516636  | 90517027  | 392 |
| chr11 | 68666459  | 68666850  | 392 |
| chrX  | 6450367   | 6450757   | 391 |
| chr4  | 116925512 | 116925902 | 391 |
| chr19 | 13439766  | 13440156  | 391 |
| chr10 | 74733133  | 74733523  | 391 |
| chr2  | 134918073 | 134918462 | 390 |
| chr14 | 63516922  | 63517311  | 390 |
| chr14 | 1136647   | 1137036   | 390 |
| chrX  | 30281230  | 30281618  | 389 |
| chr26 | 48988316  | 48988704  | 389 |
| chr26 | 24746163  | 24746551  | 389 |
| chr10 | 81653163  | 81653551  | 389 |
| chrX  | 55260948  | 55261335  | 388 |
| chr21 | 1582354   | 1582740   | 387 |
| chr29 | 50310007  | 50310391  | 385 |
| chr10 | 21935972  | 21936356  | 385 |
| chrX  | 8223067   | 8223450   | 384 |
| chr5  | 121323222 | 121323605 | 384 |
| chr20 | 60941934  | 60942317  | 384 |
| chrX  | 57599710  | 57600092  | 383 |
| chr4  | 32439139  | 32439521  | 383 |
| chr19 | 51903906  | 51904288  | 383 |
| chr18 | 23580589  | 23580971  | 383 |
| chr16 | 5090697   | 5091079   | 383 |
| chr15 | 62734291  | 62734673  | 383 |
| chr15 | 54288132  | 54288514  | 383 |
| chrX  | 37390391  | 37390772  | 382 |
| chr28 | 3495614   | 3495995   | 382 |

|       |               |           |     |
|-------|---------------|-----------|-----|
| chr11 | 14212148      | 14212529  | 382 |
| chr9  | 100172014     | 100172394 | 381 |
| chr17 | 70010729      | 70011109  | 381 |
| chr16 | 72309027      | 72309407  | 381 |
| chr4  | 96245061      | 96245440  | 380 |
| chr19 | 45169497      | 45169876  | 380 |
| chr18 | 62005904      | 62006283  | 380 |
| chr7  | 51074617      | 51074995  | 379 |
| chr17 | 67097758      | 67098136  | 379 |
| chrX  | 75026210      | 75026587  | 378 |
| chr3  | 26135840      | 26136217  | 378 |
| chr27 | 34697252      | 34697629  | 378 |
| chr15 | 26783403      | 26783780  | 378 |
| chrX  | 65465336      | 65465712  | 377 |
| chrX  | 36739323      | 36739699  | 377 |
| chrX  | 36204840      | 36205216  | 377 |
| chr8  | 53317970      | 53318346  | 377 |
| chr28 | 41314477      | 41314853  | 377 |
| chr24 | 51379206      | 51379582  | 377 |
| chr23 | 52675086      | 52675462  | 377 |
| chrX  | 55149518      | 55149893  | 376 |
| chr25 | 29633670      | 29634045  | 376 |
| chr18 | 54942578      | 54942953  | 376 |
| chr11 | 106379111     | 106379486 | 376 |
| chr11 | 91571303      | 91571678  | 376 |
| chr5  | 82082526      | 82082900  | 375 |
| chr29 | 30638875      | 30639249  | 375 |
| chr27 | 39923067      | 39923441  | 375 |
| chr22 | 16107418      | 16107792  | 375 |
| chr21 | 17356044      | 17356418  | 375 |
| chr1  | 153884539     | 153884913 | 375 |
| chrX  | 80994299      | 80994672  | 374 |
| chr19 | 7607493       | 7607866   | 374 |
| chr4  | 71605347      | 71605719  | 373 |
| chr2  | 138929595     | 138929967 | 373 |
| chr19 | 56617580      | 56617952  | 373 |
| chr18 | 40274637      | 40275009  | 373 |
| chr11 | 108444966     | 108445338 | 373 |
| chr16 | 47113920      | 47114291  | 372 |
| chr11 | 70721577      | 70721948  | 372 |
| chr8  | 5370986       | 5371356   | 371 |
| chr26 | 21759243      | 21759613  | 371 |
| chr24 | 20831778      | 20832148  | 371 |
| chr16 | 2177152       | 2177522   | 371 |
| chr4  | 95614038      | 95614407  | 370 |
| chr16 | 72019439      | 72019808  | 370 |
| chrX  | 406332 406700 | 369       |     |
| chr3  | 15130558      | 15130926  | 369 |
| chr18 | 18421223      | 18421591  | 369 |
| chr13 | 75620002      | 75620370  | 369 |

|       |           |           |     |
|-------|-----------|-----------|-----|
| chr10 | 87169784  | 87170152  | 369 |
| chr3  | 22400138  | 22400505  | 368 |
| chr15 | 30357034  | 30357401  | 368 |
| chr12 | 9260706   | 9261073   | 368 |
| chr11 | 108403394 | 108403761 | 368 |
| chrX  | 59329660  | 59330026  | 367 |
| chr4  | 122600735 | 122601101 | 367 |
| chr22 | 59668831  | 59669197  | 367 |
| chr16 | 26627415  | 26627781  | 367 |
| chr11 | 68639923  | 68640289  | 367 |
| chrX  | 5957543   | 5957908   | 366 |
| chr6  | 120729665 | 120730030 | 366 |
| chr24 | 63497034  | 63497399  | 366 |
| chr21 | 7143027   | 7143392   | 366 |
| chr16 | 47515040  | 47515405  | 366 |
| chr14 | 22070898  | 22071263  | 366 |
| chrX  | 74472047  | 74472411  | 365 |
| chrX  | 62287376  | 62287740  | 365 |
| chr24 | 49216989  | 49217353  | 365 |
| chrX  | 55594712  | 55595075  | 364 |
| chrX  | 54097100  | 54097463  | 364 |
| chr23 | 27807675  | 27808038  | 364 |
| chr20 | 73070991  | 73071354  | 364 |
| chrX  | 75603575  | 75603937  | 363 |
| chrX  | 68627126  | 68627488  | 363 |
| chrX  | 56333382  | 56333744  | 363 |
| chrX  | 36377148  | 36377510  | 363 |
| chr4  | 72740143  | 72740505  | 363 |
| chr3  | 115090910 | 115091272 | 363 |
| chr3  | 115088916 | 115089278 | 363 |
| chr19 | 11011150  | 11011512  | 363 |
| chr18 | 66016266  | 66016628  | 363 |
| chrX  | 49385454  | 49385815  | 362 |
| chr4  | 74507653  | 74508014  | 362 |
| chr15 | 24532703  | 24533064  | 362 |
| chr13 | 80020401  | 80020762  | 362 |
| chr12 | 32952023  | 32952384  | 362 |
| chrX  | 80806339  | 80806699  | 361 |
| chrX  | 70114207  | 70114567  | 361 |
| chr5  | 29957706  | 29958066  | 361 |
| chr14 | 20510344  | 20510704  | 361 |
| chr14 | 13963864  | 13964224  | 361 |
| chrX  | 75753285  | 75753644  | 360 |
| chrX  | 64258938  | 64259297  | 360 |
| chr28 | 5654800   | 5655159   | 360 |
| chr27 | 26695356  | 26695715  | 360 |
| chr14 | 7832348   | 7832707   | 360 |
| chr13 | 35192088  | 35192447  | 360 |
| chrX  | 13615899  | 13616257  | 359 |
| chrX  | 13260553  | 13260911  | 359 |

|       |           |           |     |
|-------|-----------|-----------|-----|
| chr28 | 25188803  | 25189161  | 359 |
| chr26 | 42129589  | 42129947  | 359 |
| chr26 | 23079678  | 23080036  | 359 |
| chr24 | 43555426  | 43555784  | 359 |
| chr23 | 52748828  | 52749186  | 359 |
| chr2  | 131038186 | 131038544 | 359 |
| chr19 | 41215527  | 41215885  | 359 |
| chr18 | 11015978  | 11016336  | 359 |
| chr1  | 74598905  | 74599263  | 359 |
| chr8  | 73425568  | 73425925  | 358 |
| chr4  | 28552230  | 28552587  | 358 |
| chr29 | 17647554  | 17647911  | 358 |
| chr25 | 3390135   | 3390492   | 358 |
| chr21 | 63105443  | 63105800  | 358 |
| chr21 | 20586947  | 20587304  | 358 |
| chr20 | 73610389  | 73610746  | 358 |
| chr19 | 35796727  | 35797084  | 358 |
| chr16 | 60776821  | 60777178  | 358 |
| chr14 | 23550339  | 23550696  | 358 |
| chr13 | 66021321  | 66021678  | 358 |
| chrX  | 47164006  | 47164362  | 357 |
| chrX  | 13973631  | 13973987  | 357 |
| chr8  | 25596167  | 25596523  | 357 |
| chr5  | 60987691  | 60988047  | 357 |
| chr15 | 62732933  | 62733289  | 357 |
| chrX  | 72751863  | 72752218  | 356 |
| chr29 | 33071306  | 33071661  | 356 |
| chr25 | 39163222  | 39163577  | 356 |
| chr2  | 97172612  | 97172967  | 356 |
| chr19 | 59107231  | 59107586  | 356 |
| chr18 | 33327689  | 33328044  | 356 |
| chr17 | 66281396  | 66281751  | 356 |
| chr15 | 73697783  | 73698138  | 356 |
| chr15 | 62595437  | 62595792  | 356 |
| chr15 | 30646952  | 30647307  | 356 |
| chr28 | 26083780  | 26084134  | 355 |
| chr25 | 3214703   | 3215057   | 355 |
| chr2  | 138954547 | 138954901 | 355 |
| chrX  | 63972707  | 63973060  | 354 |
| chr26 | 32018249  | 32018602  | 354 |
| chr24 | 35335823  | 35336176  | 354 |
| chr21 | 60705594  | 60705947  | 354 |
| chr9  | 106829923 | 106830275 | 353 |
| chr23 | 38352938  | 38353290  | 353 |
| chr10 | 37308966  | 37309318  | 353 |
| chrX  | 19634411  | 19634762  | 352 |
| chr4  | 108000523 | 108000874 | 352 |
| chr4  | 80433589  | 80433940  | 352 |
| chr3  | 120350055 | 120350406 | 352 |
| chr27 | 29093012  | 29093363  | 352 |

|       |               |           |     |
|-------|---------------|-----------|-----|
| chr2  | 21411967      | 21412318  | 352 |
| chr10 | 63616365      | 63616716  | 352 |
| chr10 | 14332082      | 14332433  | 352 |
| chrX  | 73390207      | 73390557  | 351 |
| chr7  | 61723054      | 61723404  | 351 |
| chr5  | 59673468      | 59673818  | 351 |
| chr3  | 7069215       | 7069565   | 351 |
| chr22 | 50067755      | 50068105  | 351 |
| chr18 | 13559699      | 13560049  | 351 |
| chr18 | 12417744      | 12418094  | 351 |
| chr15 | 80881020      | 80881370  | 351 |
| chr1  | 69069257      | 69069607  | 351 |
| chrX  | 63641203      | 63641552  | 350 |
| chrX  | 50840546      | 50840895  | 350 |
| chrX  | 8830628       | 8830977   | 350 |
| chr7  | 14663780      | 14664129  | 350 |
| chr3  | 35820292      | 35820641  | 350 |
| chr26 | 43253241      | 43253590  | 350 |
| chr2  | 100096795     | 100097144 | 350 |
| chr19 | 46835595      | 46835944  | 350 |
| chr19 | 39177263      | 39177612  | 350 |
| chr18 | 6122878       | 6123227   | 350 |
| chr12 | 70599283      | 70599632  | 350 |
| chrX  | 20364932      | 20365280  | 349 |
| chrX  | 10209916      | 10210264  | 349 |
| chr29 | 31865764      | 31866112  | 349 |
| chr21 | 24441638      | 24441986  | 349 |
| chr20 | 5117795       | 5118143   | 349 |
| chr19 | 29024498      | 29024846  | 349 |
| chr18 | 354295 354643 | 349       |     |
| chr13 | 56538206      | 56538554  | 349 |
| chr10 | 23722542      | 23722890  | 349 |
| chr8  | 72164093      | 72164440  | 348 |
| chr5  | 115163803     | 115164150 | 348 |
| chr4  | 95476361      | 95476708  | 348 |
| chrX  | 73274510      | 73274856  | 347 |
| chr3  | 123579924     | 123580270 | 347 |
| chr3  | 36931779      | 36932125  | 347 |
| chr21 | 28909668      | 28910014  | 347 |
| chr20 | 6132858       | 6133204   | 347 |
| chr17 | 49429425      | 49429771  | 347 |
| chr17 | 5639002       | 5639348   | 347 |
| chr11 | 9425477       | 9425823   | 347 |
| chr9  | 100281430     | 100281775 | 346 |
| chr29 | 42762184      | 42762529  | 346 |
| chr19 | 24265068      | 24265413  | 346 |
| chr18 | 62114775      | 62115120  | 346 |
| chr26 | 41810390      | 41810734  | 345 |
| chr21 | 68024978      | 68025322  | 345 |
| chr8  | 73741904      | 73742247  | 344 |



|       |               |           |     |
|-------|---------------|-----------|-----|
| chr3  | 62929604      | 62929946  | 343 |
| chr28 | 40375745      | 40376087  | 343 |
| chr22 | 58313974      | 58314316  | 343 |
| chr2  | 21086058      | 21086400  | 343 |
| chr19 | 7537233       | 7537575   | 343 |
| chr17 | 73187323      | 73187665  | 343 |
| chr13 | 60464330      | 60464672  | 343 |
| chrX  | 50697004      | 50697345  | 342 |
| chr8  | 80072526      | 80072867  | 342 |
| chr25 | 26709996      | 26710337  | 342 |
| chr2  | 74450461      | 74450802  | 342 |
| chr16 | 60378738      | 60379079  | 342 |
| chr13 | 63407681      | 63408022  | 342 |
| chrX  | 6646622       | 6646962   | 341 |
| chr5  | 30049895      | 30050235  | 341 |
| chr3  | 89578559      | 89578899  | 341 |
| chr29 | 49327187      | 49327527  | 341 |
| chr29 | 35965893      | 35966233  | 341 |
| chr13 | 63414010      | 63414350  | 341 |
| chr1  | 375935 376275 |           | 341 |
| chr3  | 121893916     | 121894255 | 340 |
| chr28 | 26197186      | 26197525  | 340 |
| chr2  | 131764720     | 131765059 | 340 |
| chr11 | 100408321     | 100408660 | 340 |
| chrX  | 55397856      | 55398194  | 339 |
| chr9  | 105860533     | 105860871 | 339 |
| chr28 | 26991446      | 26991784  | 339 |
| chr23 | 14503177      | 14503515  | 339 |
| chr18 | 47859295      | 47859633  | 339 |
| chrX  | 66640908      | 66641245  | 338 |
| chrX  | 13821383      | 13821720  | 338 |
| chr8  | 55107052      | 55107389  | 338 |
| chr3  | 114454971     | 114455308 | 338 |
| chr26 | 39137056      | 39137393  | 338 |
| chr20 | 25620274      | 25620611  | 338 |
| chr1  | 67747951      | 67748288  | 338 |
| chrX  | 78781438      | 78781774  | 337 |
| chr29 | 33289214      | 33289550  | 337 |
| chr27 | 34438770      | 34439106  | 337 |
| chr26 | 20707720      | 20708056  | 337 |
| chr19 | 47414286      | 47414622  | 337 |
| chr19 | 12444568      | 12444904  | 337 |
| chrX  | 71655303      | 71655638  | 336 |
| chrX  | 50822970      | 50823305  | 336 |
| chr18 | 50292294      | 50292629  | 336 |
| chr16 | 39070248      | 39070583  | 336 |
| chrX  | 72409332      | 72409666  | 335 |
| chr6  | 72286081      | 72286415  | 335 |
| chr23 | 38374306      | 38374640  | 335 |
| chr23 | 18839446      | 18839780  | 335 |

|       |               |           |     |
|-------|---------------|-----------|-----|
| chr2  | 122875005     | 122875339 | 335 |
| chr15 | 27272881      | 27273215  | 335 |
| chr15 | 25450368      | 25450702  | 335 |
| chr14 | 439593 439927 | 335       |     |
| chr11 | 100111172     | 100111506 | 335 |
| chrX  | 6862281       | 6862614   | 334 |
| chr8  | 74306422      | 74306755  | 334 |
| chr7  | 45764211      | 45764544  | 334 |
| chr7  | 16522924      | 16523257  | 334 |
| chr5  | 80743992      | 80744325  | 334 |
| chr4  | 110099163     | 110099496 | 334 |
| chr25 | 37226321      | 37226654  | 334 |
| chr24 | 40393382      | 40393715  | 334 |
| chr24 | 31174914      | 31175247  | 334 |
| chr20 | 19372097      | 19372430  | 334 |
| chr2  | 111539882     | 111540215 | 334 |
| chr2  | 110620515     | 110620848 | 334 |
| chr15 | 20021932      | 20022265  | 334 |
| chr11 | 104925158     | 104925491 | 334 |
| chrX  | 79838844      | 79839176  | 333 |
| chr9  | 91927285      | 91927617  | 333 |
| chr4  | 28548101      | 28548433  | 333 |
| chr19 | 19413753      | 19414085  | 333 |
| chr18 | 18463923      | 18464255  | 333 |
| chr12 | 32571298      | 32571630  | 333 |
| chrX  | 49470908      | 49471239  | 332 |
| chr29 | 34560467      | 34560798  | 332 |
| chr20 | 8720351       | 8720682   | 332 |
| chr2  | 74012301      | 74012632  | 332 |
| chr19 | 48438273      | 48438604  | 332 |
| chr16 | 2460569       | 2460900   | 332 |
| chr12 | 31971149      | 31971480  | 332 |
| chr11 | 106307453     | 106307784 | 332 |
| chrX  | 19574751      | 19575081  | 331 |
| chr8  | 86892772      | 86893102  | 331 |
| chr8  | 62607177      | 62607507  | 331 |
| chr5  | 122453269     | 122453599 | 331 |
| chr4  | 71681057      | 71681387  | 331 |
| chr29 | 49004394      | 49004724  | 331 |
| chr27 | 45262753      | 45263083  | 331 |
| chr24 | 42715239      | 42715569  | 331 |
| chr22 | 16162112      | 16162442  | 331 |
| chr19 | 39468292      | 39468622  | 331 |
| chr11 | 91587058      | 91587388  | 331 |
| chr1  | 73567688      | 73568018  | 331 |
| chrX  | 50803943      | 50804272  | 330 |
| chrX  | 6714718       | 6715047   | 330 |
| chr9  | 87834898      | 87835227  | 330 |
| chr5  | 124842290     | 124842619 | 330 |
| chr5  | 118435684     | 118436013 | 330 |

|       |               |           |     |
|-------|---------------|-----------|-----|
| chr29 | 49048137      | 49048466  | 330 |
| chr26 | 48471749      | 48472078  | 330 |
| chr25 | 3093389       | 3093718   | 330 |
| chr24 | 49789989      | 49790318  | 330 |
| chr23 | 15026918      | 15027247  | 330 |
| chr18 | 11739899      | 11740228  | 330 |
| chr11 | 104940229     | 104940558 | 330 |
| chr1  | 99867018      | 99867347  | 330 |
| chrX  | 65057424      | 65057752  | 329 |
| chrX  | 19487940      | 19488268  | 329 |
| chr8  | 86969913      | 86970241  | 329 |
| chr7  | 64861009      | 64861337  | 329 |
| chr5  | 124659802     | 124660130 | 329 |
| chr3  | 34725054      | 34725382  | 329 |
| chr25 | 39336872      | 39337200  | 329 |
| chr22 | 17878999      | 17879327  | 329 |
| chr19 | 45556269      | 45556597  | 329 |
| chr19 | 19112446      | 19112774  | 329 |
| chr18 | 24022915      | 24023243  | 329 |
| chr17 | 47313118      | 47313446  | 329 |
| chr16 | 45152606      | 45152934  | 329 |
| chrX  | 50655912      | 50656239  | 328 |
| chrX  | 1440694       | 1441021   | 328 |
| chr5  | 73074070      | 73074397  | 328 |
| chr3  | 26144282      | 26144609  | 328 |
| chr28 | 26564752      | 26565079  | 328 |
| chr25 | 40218519      | 40218846  | 328 |
| chr20 | 73293856      | 73294183  | 328 |
| chr20 | 8644353       | 8644680   | 328 |
| chr2  | 21523026      | 21523353  | 328 |
| chr15 | 54276320      | 54276647  | 328 |
| chrX  | 61852907      | 61853233  | 327 |
| chrX  | 20010195      | 20010521  | 327 |
| chrX  | 16958838      | 16959164  | 327 |
| chrX  | 8442492       | 8442818   | 327 |
| chr3  | 124565985     | 124566311 | 327 |
| chr21 | 32890053      | 32890379  | 327 |
| chr1  | 145256838     | 145257164 | 327 |
| chr1  | 114271129     | 114271455 | 327 |
| chrX  | 54573643      | 54573968  | 326 |
| chrX  | 37615044      | 37615369  | 326 |
| chr3  | 108387463     | 108387788 | 326 |
| chr25 | 4624267       | 4624592   | 326 |
| chr21 | 26229954      | 26230279  | 326 |
| chr20 | 641216 641541 | 326       |     |
| chr15 | 25061903      | 25062228  | 326 |
| chr12 | 74272821      | 74273146  | 326 |
| chrX  | 65105128      | 65105452  | 325 |
| chr9  | 93653246      | 93653570  | 325 |
| chr8  | 7988420       | 7988744   | 325 |

|       |           |           |     |
|-------|-----------|-----------|-----|
| chr5  | 71191920  | 71192244  | 325 |
| chr27 | 27034503  | 27034827  | 325 |
| chr21 | 55801357  | 55801681  | 325 |
| chr21 | 33086247  | 33086571  | 325 |
| chr2  | 111265920 | 111266244 | 325 |
| chr2  | 75894698  | 75895022  | 325 |
| chr17 | 68576412  | 68576736  | 325 |
| chr12 | 11452400  | 11452724  | 325 |
| chr11 | 74967563  | 74967887  | 325 |
| chr11 | 47368346  | 47368670  | 325 |
| chr24 | 1708090   | 1708413   | 324 |
| chr23 | 8060331   | 8060654   | 324 |
| chr20 | 70618033  | 70618356  | 324 |
| chr16 | 68520206  | 68520529  | 324 |
| chrX  | 75855007  | 75855329  | 323 |
| chrX  | 55495698  | 55496020  | 323 |
| chr9  | 90353931  | 90354253  | 323 |
| chr5  | 71540063  | 71540385  | 323 |
| chr29 | 17631779  | 17632101  | 323 |
| chr21 | 26508492  | 26508814  | 323 |
| chr2  | 91077798  | 91078120  | 323 |
| chr18 | 25303875  | 25304197  | 323 |
| chr17 | 64147102  | 64147424  | 323 |
| chrX  | 35584071  | 35584392  | 322 |
| chr7  | 12988750  | 12989071  | 322 |
| chr5  | 114266808 | 114267129 | 322 |
| chr5  | 112191586 | 112191907 | 322 |
| chr4  | 118176866 | 118177187 | 322 |
| chr26 | 18065144  | 18065465  | 322 |
| chr24 | 35298896  | 35299217  | 322 |
| chr21 | 26975331  | 26975652  | 322 |
| chr19 | 54576698  | 54577019  | 322 |
| chr16 | 47250823  | 47251144  | 322 |
| chr14 | 75942885  | 75943206  | 322 |
| chr13 | 61258330  | 61258651  | 322 |
| chr10 | 60544034  | 60544355  | 322 |
| chrX  | 56446924  | 56447244  | 321 |
| chrX  | 33745503  | 33745823  | 321 |
| chrX  | 12513644  | 12513964  | 321 |
| chr5  | 121042199 | 121042519 | 321 |
| chr4  | 116002631 | 116002951 | 321 |
| chr26 | 15373853  | 15374173  | 321 |
| chr25 | 28315366  | 28315686  | 321 |
| chr24 | 1212013   | 1212333   | 321 |
| chr23 | 17980199  | 17980519  | 321 |
| chr20 | 73897708  | 73898028  | 321 |
| chr19 | 31898846  | 31899166  | 321 |
| chr17 | 61073593  | 61073913  | 321 |
| chr14 | 8007386   | 8007706   | 321 |
| chrX  | 64315785  | 64316104  | 320 |

|       |               |           |     |
|-------|---------------|-----------|-----|
| chrX  | 52809588      | 52809907  | 320 |
| chr5  | 121797894     | 121798213 | 320 |
| chr3  | 115461288     | 115461607 | 320 |
| chr3  | 25937619      | 25937938  | 320 |
| chr27 | 1505333       | 1505652   | 320 |
| chr21 | 20922977      | 20923296  | 320 |
| chr21 | 20620692      | 20621011  | 320 |
| chr2  | 131742051     | 131742370 | 320 |
| chr19 | 37952395      | 37952714  | 320 |
| chrX  | 29442506      | 29442824  | 319 |
| chrX  | 6375487       | 6375805   | 319 |
| chrX  | 3124576       | 3124894   | 319 |
| chr8  | 80068332      | 80068650  | 319 |
| chr4  | 124319983     | 124320301 | 319 |
| chr29 | 49770744      | 49771062  | 319 |
| chr28 | 41026993      | 41027311  | 319 |
| chr19 | 27302867      | 27303185  | 319 |
| chr18 | 11966925      | 11967243  | 319 |
| chr13 | 45338751      | 45339069  | 319 |
| chr11 | 84293307      | 84293625  | 319 |
| chr10 | 74698121      | 74698439  | 319 |
| chrX  | 71639995      | 71640312  | 318 |
| chrX  | 6690185       | 6690502   | 318 |
| chr7  | 14237105      | 14237422  | 318 |
| chr6  | 106962623     | 106962940 | 318 |
| chr5  | 64916156      | 64916473  | 318 |
| chr4  | 101699297     | 101699614 | 318 |
| chr4  | 33242435      | 33242752  | 318 |
| chr25 | 39873536      | 39873853  | 318 |
| chr23 | 24902862      | 24903179  | 318 |
| chr2  | 134008246     | 134008563 | 318 |
| chr19 | 57826144      | 57826461  | 318 |
| chr19 | 15164960      | 15165277  | 318 |
| chr17 | 70399661      | 70399978  | 318 |
| chr13 | 55119778      | 55120095  | 318 |
| chrX  | 19661306      | 19661622  | 317 |
| chr8  | 72072859      | 72073175  | 317 |
| chr6  | 108580988     | 108581304 | 317 |
| chr27 | 26570235      | 26570551  | 317 |
| chr26 | 44397491      | 44397807  | 317 |
| chr2  | 134696354     | 134696670 | 317 |
| chr11 | 47544053      | 47544369  | 317 |
| chr10 | 8321179       | 8321495   | 317 |
| chrX  | 37516006      | 37516321  | 316 |
| chr8  | 23882202      | 23882517  | 316 |
| chr8  | 702125 702440 | 316       |     |
| chr3  | 22636805      | 22637120  | 316 |
| chr28 | 26163730      | 26164045  | 316 |
| chr23 | 49872533      | 49872848  | 316 |
| chr19 | 62246728      | 62247043  | 316 |

|       |           |           |     |
|-------|-----------|-----------|-----|
| chr17 | 63341862  | 63342177  | 316 |
| chr12 | 32215685  | 32216000  | 316 |
| chr10 | 36588197  | 36588512  | 316 |
| chrX  | 45906348  | 45906662  | 315 |
| chr9  | 66156780  | 66157094  | 315 |
| chr7  | 77173524  | 77173838  | 315 |
| chr3  | 56415925  | 56416239  | 315 |
| chr2  | 117508858 | 117509172 | 315 |
| chr19 | 45262899  | 45263213  | 315 |
| chr18 | 2528179   | 2528493   | 315 |
| chr15 | 25150299  | 25150613  | 315 |
| chr15 | 20981348  | 20981662  | 315 |
| chr13 | 54849392  | 54849706  | 315 |
| chr13 | 29698220  | 29698534  | 315 |
| chrX  | 49737514  | 49737827  | 314 |
| chrX  | 49234153  | 49234466  | 314 |
| chrX  | 21378394  | 21378707  | 314 |
| chrX  | 18672840  | 18673153  | 314 |
| chr5  | 80321656  | 80321969  | 314 |
| chr4  | 101638950 | 101639263 | 314 |
| chr3  | 121124339 | 121124652 | 314 |
| chr29 | 5409073   | 5409386   | 314 |
| chr26 | 43167032  | 43167345  | 314 |
| chr21 | 33066506  | 33066819  | 314 |
| chr19 | 46090998  | 46091311  | 314 |
| chr19 | 32339135  | 32339448  | 314 |
| chr12 | 64656660  | 64656973  | 314 |
| chr11 | 70746542  | 70746855  | 314 |
| chr11 | 46187669  | 46187982  | 314 |
| chrX  | 72410006  | 72410318  | 313 |
| chrX  | 58872844  | 58873156  | 313 |
| chr5  | 74680252  | 74680564  | 313 |
| chr29 | 37044555  | 37044867  | 313 |
| chr22 | 48762254  | 48762566  | 313 |
| chr22 | 48403474  | 48403786  | 313 |
| chr20 | 41847421  | 41847733  | 313 |
| chr16 | 47211361  | 47211673  | 313 |
| chr13 | 67134208  | 67134520  | 313 |
| chrX  | 12559118  | 12559429  | 312 |
| chr8  | 25636836  | 25637147  | 312 |
| chr7  | 19224357  | 19224668  | 312 |
| chr29 | 17984001  | 17984312  | 312 |
| chr20 | 5003131   | 5003442   | 312 |
| chr2  | 127780225 | 127780536 | 312 |
| chr19 | 18440208  | 18440519  | 312 |
| chr17 | 68482097  | 68482408  | 312 |
| chr16 | 59324441  | 59324752  | 312 |
| chr10 | 90911336  | 90911647  | 312 |
| chrX  | 68590421  | 68590731  | 311 |
| chrX  | 65781412  | 65781722  | 311 |

|       |               |           |     |
|-------|---------------|-----------|-----|
| chrX  | 22620337      | 22620647  | 311 |
| chrX  | 18214031      | 18214341  | 311 |
| chr7  | 61081471      | 61081781  | 311 |
| chr3  | 115765845     | 115766155 | 311 |
| chr29 | 44692058      | 44692368  | 311 |
| chr25 | 3808486       | 3808796   | 311 |
| chr21 | 52078767      | 52079077  | 311 |
| chr19 | 25410575      | 25410885  | 311 |
| chr14 | 68723393      | 68723703  | 311 |
| chr13 | 76241835      | 76242145  | 311 |
| chr13 | 57427880      | 57428190  | 311 |
| chr11 | 104971590     | 104971900 | 311 |
| chr10 | 53261318      | 53261628  | 311 |
| chrX  | 55451023      | 55451332  | 310 |
| chrX  | 23569910      | 23570219  | 310 |
| chrX  | 21687244      | 21687553  | 310 |
| chr7  | 43523057      | 43523366  | 310 |
| chr29 | 33845701      | 33846010  | 310 |
| chr22 | 12724268      | 12724577  | 310 |
| chr21 | 64154368      | 64154677  | 310 |
| chr19 | 26316835      | 26317144  | 310 |
| chr17 | 64118546      | 64118855  | 310 |
| chr12 | 82752493      | 82752802  | 310 |
| chr10 | 17157682      | 17157991  | 310 |
| chrX  | 64627689      | 64627997  | 309 |
| chr8  | 8336571       | 8336879   | 309 |
| chr4  | 63978840      | 63979148  | 309 |
| chr4  | 8981911       | 8982219   | 309 |
| chr29 | 18316694      | 18317002  | 309 |
| chr27 | 28578167      | 28578475  | 309 |
| chr21 | 34625500      | 34625808  | 309 |
| chr20 | 4997661       | 4997969   | 309 |
| chr20 | 3316748       | 3317056   | 309 |
| chr2  | 115068344     | 115068652 | 309 |
| chr18 | 4444348       | 4444656   | 309 |
| chr17 | 64115986      | 64116294  | 309 |
| chr16 | 77059457      | 77059765  | 309 |
| chr13 | 63263649      | 63263957  | 309 |
| chr11 | 46674977      | 46675285  | 309 |
| chr11 | 829807 830115 | 309       |     |
| chr10 | 47391088      | 47391396  | 309 |
| chr7  | 17968422      | 17968729  | 308 |
| chr5  | 122274019     | 122274326 | 308 |
| chr3  | 16757251      | 16757558  | 308 |
| chr3  | 8688532       | 8688839   | 308 |
| chr29 | 37329243      | 37329550  | 308 |
| chr24 | 36563374      | 36563681  | 308 |
| chr20 | 1256431       | 1256738   | 308 |
| chr18 | 64628898      | 64629205  | 308 |
| chr18 | 18524253      | 18524560  | 308 |

|       |           |           |     |
|-------|-----------|-----------|-----|
| chr17 | 57782510  | 57782817  | 308 |
| chr15 | 43589499  | 43589806  | 308 |
| chrX  | 50306648  | 50306954  | 307 |
| chrX  | 49719160  | 49719466  | 307 |
| chrX  | 19246362  | 19246668  | 307 |
| chrX  | 7577191   | 7577497   | 307 |
| chrX  | 6611598   | 6611904   | 307 |
| chrX  | 2934906   | 2935212   | 307 |
| chr8  | 81398923  | 81399229  | 307 |
| chr5  | 121512843 | 121513149 | 307 |
| chr4  | 54416874  | 54417180  | 307 |
| chr22 | 43925101  | 43925407  | 307 |
| chr21 | 67976247  | 67976553  | 307 |
| chr19 | 58481979  | 58482285  | 307 |
| chr19 | 30066834  | 30067140  | 307 |
| chr18 | 12088257  | 12088563  | 307 |
| chr16 | 46004005  | 46004311  | 307 |
| chr13 | 80594280  | 80594586  | 307 |
| chr13 | 45503548  | 45503854  | 307 |
| chr11 | 70879596  | 70879902  | 307 |
| chrX  | 88166375  | 88166680  | 306 |
| chr7  | 50842741  | 50843046  | 306 |
| chr4  | 32175287  | 32175592  | 306 |
| chr22 | 44865646  | 44865951  | 306 |
| chr2  | 131762407 | 131762712 | 306 |
| chrX  | 56168751  | 56169055  | 305 |
| chrX  | 29542773  | 29543077  | 305 |
| chrX  | 12180393  | 12180697  | 305 |
| chr9  | 90455409  | 90455713  | 305 |
| chr8  | 72433657  | 72433961  | 305 |
| chr3  | 20495468  | 20495772  | 305 |
| chr29 | 41633628  | 41633932  | 305 |
| chr29 | 17633692  | 17633996  | 305 |
| chr26 | 50055056  | 50055360  | 305 |
| chr2  | 65294812  | 65295116  | 305 |
| chr19 | 59191055  | 59191359  | 305 |
| chr19 | 23170067  | 23170371  | 305 |
| chr13 | 70160156  | 70160460  | 305 |
| chr12 | 12826080  | 12826384  | 305 |
| chr11 | 103806357 | 103806661 | 305 |
| chr1  | 153893593 | 153893897 | 305 |
| chrX  | 78715828  | 78716131  | 304 |
| chr8  | 72817588  | 72817891  | 304 |
| chr4  | 97932485  | 97932788  | 304 |
| chr26 | 50632997  | 50633300  | 304 |
| chr23 | 44876502  | 44876805  | 304 |
| chr16 | 46438191  | 46438494  | 304 |
| chr13 | 64036125  | 64036428  | 304 |
| chr1  | 141656860 | 141657163 | 304 |
| chrX  | 72602562  | 72602864  | 303 |



|       |           |           |     |
|-------|-----------|-----------|-----|
| chr8  | 86630809  | 86631111  | 303 |
| chr5  | 1123850   | 1124152   | 303 |
| chr3  | 53030728  | 53031030  | 303 |
| chr28 | 26768192  | 26768494  | 303 |
| chr26 | 22429645  | 22429947  | 303 |
| chr24 | 43577277  | 43577579  | 303 |
| chr2  | 134448853 | 134449155 | 303 |
| chr2  | 128326986 | 128327288 | 303 |
| chr19 | 42323491  | 42323793  | 303 |
| chr16 | 77647198  | 77647500  | 303 |
| chr10 | 23680121  | 23680423  | 303 |
| chrX  | 79098850  | 79099151  | 302 |
| chrX  | 20086958  | 20087259  | 302 |
| chrX  | 7824968   | 7825269   | 302 |
| chr9  | 90718019  | 90718320  | 302 |
| chr8  | 93194622  | 93194923  | 302 |
| chr4  | 79088582  | 79088883  | 302 |
| chr3  | 33109292  | 33109593  | 302 |
| chr21 | 61776637  | 61776938  | 302 |
| chr2  | 34118713  | 34119014  | 302 |
| chr19 | 34637197  | 34637498  | 302 |
| chr18 | 12097508  | 12097809  | 302 |
| chr17 | 58907898  | 58908199  | 302 |
| chr16 | 44085905  | 44086206  | 302 |
| chr15 | 26655620  | 26655921  | 302 |
| chr13 | 56347632  | 56347933  | 302 |
| chr11 | 90420092  | 90420393  | 302 |
| chr11 | 45162576  | 45162877  | 302 |
| chr11 | 14259526  | 14259827  | 302 |
| chrX  | 48105910  | 48106210  | 301 |
| chrX  | 45189918  | 45190218  | 301 |
| chrX  | 31607202  | 31607502  | 301 |
| chr6  | 70862600  | 70862900  | 301 |
| chr26 | 47958646  | 47958946  | 301 |
| chr26 | 21789349  | 21789649  | 301 |
| chr25 | 18701130  | 18701430  | 301 |
| chr23 | 7253283   | 7253583   | 301 |
| chr22 | 50735710  | 50736010  | 301 |
| chr15 | 24582090  | 24582390  | 301 |
| chr11 | 77823501  | 77823801  | 301 |
| chr10 | 70248892  | 70249192  | 301 |
| chrX  | 21279664  | 21279963  | 300 |
| chr5  | 122822601 | 122822900 | 300 |
| chr5  | 29107170  | 29107469  | 300 |
| chr25 | 35599910  | 35600209  | 300 |
| chr23 | 8304244   | 8304543   | 300 |
| chr15 | 42309085  | 42309384  | 300 |
| chr13 | 60020884  | 60021183  | 300 |
| chr13 | 45593554  | 45593853  | 300 |
| chrX  | 27270191  | 27270489  | 299 |

|       |           |           |     |
|-------|-----------|-----------|-----|
| chrX  | 10191781  | 10192079  | 299 |
| chr9  | 95011820  | 95012118  | 299 |
| chr9  | 66716116  | 66716414  | 299 |
| chr8  | 10605141  | 10605439  | 299 |
| chr6  | 46410354  | 46410652  | 299 |
| chr3  | 116947539 | 116947837 | 299 |
| chr29 | 36735797  | 36736095  | 299 |
| chr29 | 34432710  | 34433008  | 299 |
| chr26 | 48178348  | 48178646  | 299 |
| chr25 | 42032818  | 42033116  | 299 |
| chr2  | 134041301 | 134041599 | 299 |
| chr2  | 111123300 | 111123598 | 299 |
| chr18 | 12050363  | 12050661  | 299 |
| chr16 | 44290247  | 44290545  | 299 |
| chr15 | 26814693  | 26814991  | 299 |
| chr13 | 60205412  | 60205710  | 299 |
| chr12 | 82788167  | 82788465  | 299 |
| chrX  | 21197837  | 21198134  | 298 |
| chrX  | 7219979   | 7220276   | 298 |
| chr8  | 65919860  | 65920157  | 298 |
| chr6  | 63131901  | 63132198  | 298 |
| chr3  | 114228476 | 114228773 | 298 |
| chr3  | 34054437  | 34054734  | 298 |
| chr26 | 48546196  | 48546493  | 298 |
| chr24 | 40401751  | 40402048  | 298 |
| chr21 | 13802787  | 13803084  | 298 |
| chr19 | 32848889  | 32849186  | 298 |
| chr19 | 13474874  | 13475171  | 298 |
| chr18 | 49850453  | 49850750  | 298 |
| chr17 | 73953460  | 73953757  | 298 |
| chr15 | 34287445  | 34287742  | 298 |
| chr13 | 41308532  | 41308829  | 298 |
| chr13 | 24584323  | 24584620  | 298 |
| chr12 | 74090390  | 74090687  | 298 |
| chr10 | 25965654  | 25965951  | 298 |
| chr10 | 13542376  | 13542673  | 298 |
| chrX  | 65507905  | 65508201  | 297 |
| chrX  | 50702877  | 50703173  | 297 |
| chrX  | 36533648  | 36533944  | 297 |
| chrX  | 20018599  | 20018895  | 297 |
| chrX  | 18798665  | 18798961  | 297 |
| chr5  | 76241308  | 76241604  | 297 |
| chr3  | 78295229  | 78295525  | 297 |
| chr25 | 4706321   | 4706617   | 297 |
| chr21 | 25348264  | 25348560  | 297 |
| chr2  | 138237015 | 138237311 | 297 |
| chr19 | 38567506  | 38567802  | 297 |
| chr14 | 22038974  | 22039270  | 297 |
| chr13 | 38863809  | 38864105  | 297 |
| chr12 | 20798606  | 20798902  | 297 |

|       |           |           |     |
|-------|-----------|-----------|-----|
| chr11 | 99296077  | 99296373  | 297 |
| chr1  | 139432156 | 139432452 | 297 |
| chrX  | 65235038  | 65235333  | 296 |
| chrX  | 60548136  | 60548431  | 296 |
| chrX  | 54771576  | 54771871  | 296 |
| chrX  | 49313923  | 49314218  | 296 |
| chrX  | 34047269  | 34047564  | 296 |
| chrX  | 32350777  | 32351072  | 296 |
| chrX  | 22555099  | 22555394  | 296 |
| chrX  | 19092748  | 19093043  | 296 |
| chrX  | 13831942  | 13832237  | 296 |
| chr3  | 121310494 | 121310789 | 296 |
| chr3  | 10508795  | 10509090  | 296 |
| chr25 | 1161636   | 1161931   | 296 |
| chr21 | 60377520  | 60377815  | 296 |
| chr19 | 45036140  | 45036435  | 296 |
| chr19 | 25735830  | 25736125  | 296 |
| chr18 | 5502143   | 5502438   | 296 |
| chr15 | 22974918  | 22975213  | 296 |
| chr13 | 79694938  | 79695233  | 296 |
| chr13 | 67164249  | 67164544  | 296 |
| chrX  | 51450753  | 51451047  | 295 |
| chrX  | 22372998  | 22373292  | 295 |
| chr7  | 96599940  | 96600234  | 295 |
| chr5  | 28856709  | 28857003  | 295 |
| chr4  | 121895483 | 121895777 | 295 |
| chr3  | 120741309 | 120741603 | 295 |
| chr3  | 113376703 | 113376997 | 295 |
| chr27 | 37720068  | 37720362  | 295 |
| chr25 | 30543241  | 30543535  | 295 |
| chr23 | 28046249  | 28046543  | 295 |
| chr2  | 108792307 | 108792601 | 295 |
| chr14 | 68043995  | 68044289  | 295 |
| chr13 | 17762011  | 17762305  | 295 |
| chr10 | 29552018  | 29552312  | 295 |
| chr10 | 6731534   | 6731828   | 295 |
| chrX  | 48151065  | 48151358  | 294 |
| chr9  | 70495291  | 70495584  | 294 |
| chr5  | 122332406 | 122332699 | 294 |
| chr4  | 10437066  | 10437359  | 294 |
| chr3  | 110810710 | 110811003 | 294 |
| chr28 | 5620957   | 5621250   | 294 |
| chr19 | 40973702  | 40973995  | 294 |
| chr16 | 68990562  | 68990855  | 294 |
| chr15 | 29229499  | 29229792  | 294 |
| chr13 | 57282778  | 57283071  | 294 |
| chr1  | 74973437  | 74973730  | 294 |
| chr1  | 69505665  | 69505958  | 294 |
| chr1  | 58867131  | 58867424  | 294 |
| chrX  | 11827855  | 11828147  | 293 |

|       |               |           |     |
|-------|---------------|-----------|-----|
| chr7  | 3944716       | 3945008   | 293 |
| chr6  | 107059976     | 107060268 | 293 |
| chr5  | 28813307      | 28813599  | 293 |
| chr4  | 71612181      | 71612473  | 293 |
| chr20 | 684732 685024 | 293       |     |
| chr2  | 76567912      | 76568204  | 293 |
| chr19 | 39512016      | 39512308  | 293 |
| chr19 | 19822456      | 19822748  | 293 |
| chr17 | 67954245      | 67954537  | 293 |
| chr17 | 48223682      | 48223974  | 293 |
| chr11 | 47280829      | 47281121  | 293 |
| chrX  | 73295797      | 73296088  | 292 |
| chrX  | 64903579      | 64903870  | 292 |
| chrX  | 37668517      | 37668808  | 292 |
| chrX  | 35825417      | 35825708  | 292 |
| chrX  | 7138371       | 7138662   | 292 |
| chr9  | 41247366      | 41247657  | 292 |
| chr29 | 49580578      | 49580869  | 292 |
| chr26 | 15004702      | 15004993  | 292 |
| chr10 | 17160079      | 17160370  | 292 |
| chr1  | 84587050      | 84587341  | 292 |
| chrX  | 17110138      | 17110428  | 291 |
| chr7  | 45834285      | 45834575  | 291 |
| chr28 | 32381755      | 32382045  | 291 |
| chr26 | 38224528      | 38224818  | 291 |
| chr2  | 139482402     | 139482692 | 291 |
| chr2  | 132464268     | 132464558 | 291 |
| chr18 | 11516451      | 11516741  | 291 |
| chr18 | 5073043       | 5073333   | 291 |
| chr14 | 4058763       | 4059053   | 291 |
| chr13 | 69806405      | 69806695  | 291 |
| chr12 | 36440167      | 36440457  | 291 |
| chr10 | 23269529      | 23269819  | 291 |
| chr1  | 695547 695837 | 291       |     |
| chrX  | 78039921      | 78040210  | 290 |
| chrX  | 35596421      | 35596710  | 290 |
| chr4  | 99011141      | 99011430  | 290 |
| chr29 | 51144419      | 51144708  | 290 |
| chr24 | 59071427      | 59071716  | 290 |
| chr24 | 35480121      | 35480410  | 290 |
| chr23 | 7257987       | 7258276   | 290 |
| chr23 | 7168845       | 7169134   | 290 |
| chr22 | 30365156      | 30365445  | 290 |
| chr21 | 64527067      | 64527356  | 290 |
| chr19 | 56111778      | 56112067  | 290 |
| chr19 | 10980034      | 10980323  | 290 |
| chr13 | 39992386      | 39992675  | 290 |
| chr11 | 68879407      | 68879696  | 290 |
| chr11 | 48764424      | 48764713  | 290 |
| chr11 | 14401161      | 14401450  | 290 |

|       |           |           |     |
|-------|-----------|-----------|-----|
| chr10 | 84459814  | 84460103  | 290 |
| chrX  | 72177098  | 72177386  | 289 |
| chrX  | 65442198  | 65442486  | 289 |
| chrX  | 49321294  | 49321582  | 289 |
| chrX  | 35654439  | 35654727  | 289 |
| chrX  | 2343773   | 2344061   | 289 |
| chr7  | 45738508  | 45738796  | 289 |
| chr5  | 90117744  | 90118032  | 289 |
| chr5  | 74677010  | 74677298  | 289 |
| chr5  | 28851087  | 28851375  | 289 |
| chr4  | 118256309 | 118256597 | 289 |
| chr27 | 15378429  | 15378717  | 289 |
| chr25 | 33492163  | 33492451  | 289 |
| chr23 | 13659682  | 13659970  | 289 |
| chr22 | 48415279  | 48415567  | 289 |
| chr22 | 39478108  | 39478396  | 289 |
| chr21 | 5992743   | 5993031   | 289 |
| chr2  | 124207244 | 124207532 | 289 |
| chr2  | 14084173  | 14084461  | 289 |
| chr15 | 30877761  | 30878049  | 289 |
| chr14 | 61569967  | 61570255  | 289 |
| chr13 | 42256179  | 42256467  | 289 |
| chr11 | 82302533  | 82302821  | 289 |
| chrX  | 36626482  | 36626769  | 288 |
| chrX  | 5473526   | 5473813   | 288 |
| chr9  | 106473257 | 106473544 | 288 |
| chr8  | 8431087   | 8431374   | 288 |
| chr8  | 6285486   | 6285773   | 288 |
| chr7  | 46284221  | 46284508  | 288 |
| chr5  | 113329360 | 113329647 | 288 |
| chr3  | 105074817 | 105075104 | 288 |
| chr3  | 29975953  | 29976240  | 288 |
| chr29 | 31758827  | 31759114  | 288 |
| chr27 | 28130355  | 28130642  | 288 |
| chr27 | 26964429  | 26964716  | 288 |
| chr26 | 43869727  | 43870014  | 288 |
| chr23 | 19861955  | 19862242  | 288 |
| chr23 | 18161526  | 18161813  | 288 |
| chr18 | 18689097  | 18689384  | 288 |
| chr15 | 74477989  | 74478276  | 288 |
| chr8  | 116250790 | 116251076 | 287 |
| chr5  | 121654921 | 121655207 | 287 |
| chr22 | 59596709  | 59596995  | 287 |
| chr21 | 34808267  | 34808553  | 287 |
| chr2  | 139832775 | 139833061 | 287 |
| chr19 | 56656617  | 56656903  | 287 |
| chr15 | 51348988  | 51349274  | 287 |
| chr15 | 28849311  | 28849597  | 287 |
| chr14 | 6014890   | 6015176   | 287 |
| chr12 | 49390876  | 49391162  | 287 |

|       |           |           |     |
|-------|-----------|-----------|-----|
| chrX  | 68597279  | 68597564  | 286 |
| chrX  | 55723795  | 55724080  | 286 |
| chrX  | 53494486  | 53494771  | 286 |
| chr8  | 85348469  | 85348754  | 286 |
| chr5  | 121229820 | 121230105 | 286 |
| chr4  | 95682674  | 95682959  | 286 |
| chr3  | 108041398 | 108041683 | 286 |
| chr26 | 20951439  | 20951724  | 286 |
| chr23 | 49496775  | 49497060  | 286 |
| chr16 | 44696835  | 44697120  | 286 |
| chr13 | 41109983  | 41110268  | 286 |
| chr12 | 36324973  | 36325258  | 286 |
| chr12 | 31239590  | 31239875  | 286 |
| chrX  | 58674772  | 58675056  | 285 |
| chrX  | 56957101  | 56957385  | 285 |
| chrX  | 12450512  | 12450796  | 285 |
| chr7  | 14741833  | 14742117  | 285 |
| chr27 | 25711894  | 25712178  | 285 |
| chr25 | 29403552  | 29403836  | 285 |
| chr24 | 60747733  | 60748017  | 285 |
| chr23 | 16177887  | 16178171  | 285 |
| chr22 | 58708365  | 58708649  | 285 |
| chr21 | 20218316  | 20218600  | 285 |
| chr20 | 73105435  | 73105719  | 285 |
| chr2  | 132360282 | 132360566 | 285 |
| chr2  | 99083048  | 99083332  | 285 |
| chr19 | 46714445  | 46714729  | 285 |
| chr19 | 46633927  | 46634211  | 285 |
| chr19 | 7547024   | 7547308   | 285 |
| chr18 | 46081642  | 46081926  | 285 |
| chr18 | 21191566  | 21191850  | 285 |
| chr16 | 23655625  | 23655909  | 285 |
| chr13 | 66809994  | 66810278  | 285 |
| chr11 | 72293369  | 72293653  | 285 |
| chr10 | 50516328  | 50516612  | 285 |
| chrX  | 72495065  | 72495348  | 284 |
| chrX  | 63030706  | 63030989  | 284 |
| chrX  | 50687589  | 50687872  | 284 |
| chrX  | 48501224  | 48501507  | 284 |
| chrX  | 37494972  | 37495255  | 284 |
| chrX  | 36518770  | 36519053  | 284 |
| chr8  | 72313317  | 72313600  | 284 |
| chr7  | 11538126  | 11538409  | 284 |
| chr29 | 26673248  | 26673531  | 284 |
| chr26 | 42184272  | 42184555  | 284 |
| chr20 | 3543775   | 3544058   | 284 |
| chr18 | 18099896  | 18100179  | 284 |
| chr13 | 55428071  | 55428354  | 284 |
| chr10 | 81645471  | 81645754  | 284 |
| chrX  | 79103216  | 79103498  | 283 |

|       |               |           |     |
|-------|---------------|-----------|-----|
| chrX  | 78221696      | 78221978  | 283 |
| chrX  | 65603716      | 65603998  | 283 |
| chrX  | 12627432      | 12627714  | 283 |
| chrX  | 9161678       | 9161960   | 283 |
| chrX  | 5824579       | 5824861   | 283 |
| chr8  | 110095658     | 110095940 | 283 |
| chr8  | 80487057      | 80487339  | 283 |
| chr6  | 2207062       | 2207344   | 283 |
| chr3  | 127180832     | 127181114 | 283 |
| chr29 | 48363976      | 48364258  | 283 |
| chr19 | 38774879      | 38775161  | 283 |
| chr16 | 72240177      | 72240459  | 283 |
| chr16 | 39457080      | 39457362  | 283 |
| chr14 | 19569538      | 19569820  | 283 |
| chr11 | 81368188      | 81368470  | 283 |
| chr10 | 88143308      | 88143590  | 283 |
| chr10 | 17231344      | 17231626  | 283 |
| chr1  | 144145119     | 144145401 | 283 |
| chrX  | 35617842      | 35618123  | 282 |
| chr5  | 73849094      | 73849375  | 282 |
| chr4  | 98904398      | 98904679  | 282 |
| chr3  | 105093029     | 105093310 | 282 |
| chr21 | 64533977      | 64534258  | 282 |
| chr20 | 778301 778582 | 282       |     |
| chr2  | 124307362     | 124307643 | 282 |
| chr19 | 47237957      | 47238238  | 282 |
| chr19 | 23767857      | 23768138  | 282 |
| chr18 | 33904778      | 33905059  | 282 |
| chr18 | 12135065      | 12135346  | 282 |
| chr17 | 55505257      | 55505538  | 282 |
| chr10 | 88349369      | 88349650  | 282 |
| chrX  | 45790371      | 45790651  | 281 |
| chrX  | 35640470      | 35640750  | 281 |
| chrX  | 13667160      | 13667440  | 281 |
| chr8  | 111144123     | 111144403 | 281 |
| chr5  | 28717715      | 28717995  | 281 |
| chr4  | 110053134     | 110053414 | 281 |
| chr3  | 105758410     | 105758690 | 281 |
| chr24 | 51775228      | 51775508  | 281 |
| chr23 | 8484776       | 8485056   | 281 |
| chr2  | 115058892     | 115059172 | 281 |
| chr18 | 51525005      | 51525285  | 281 |
| chr16 | 60343023      | 60343303  | 281 |
| chr16 | 38853052      | 38853332  | 281 |
| chr13 | 41190638      | 41190918  | 281 |
| chr12 | 31996428      | 31996708  | 281 |
| chrX  | 54134623      | 54134902  | 280 |
| chrX  | 49844162      | 49844441  | 280 |
| chr5  | 28897157      | 28897436  | 280 |
| chr3  | 111429549     | 111429828 | 280 |

|       |           |           |     |
|-------|-----------|-----------|-----|
| chr28 | 42373384  | 42373663  | 280 |
| chr25 | 30315804  | 30316083  | 280 |
| chr24 | 1416760   | 1417039   | 280 |
| chr23 | 52669774  | 52670053  | 280 |
| chr23 | 48678294  | 48678573  | 280 |
| chr2  | 130775451 | 130775730 | 280 |
| chr2  | 49774284  | 49774563  | 280 |
| chr19 | 30825157  | 30825436  | 280 |
| chr19 | 28231817  | 28232096  | 280 |
| chr19 | 20354050  | 20354329  | 280 |
| chr19 | 15308789  | 15309068  | 280 |
| chr17 | 62310059  | 62310338  | 280 |
| chr15 | 24224123  | 24224402  | 280 |
| chr13 | 63668772  | 63669051  | 280 |
| chr11 | 76388484  | 76388763  | 280 |
| chr1  | 100648497 | 100648776 | 280 |
| chrX  | 63259936  | 63260214  | 279 |
| chr9  | 66170788  | 66171066  | 279 |
| chr4  | 121283593 | 121283871 | 279 |
| chr4  | 10707243  | 10707521  | 279 |
| chr3  | 33105957  | 33106235  | 279 |
| chr3  | 30179785  | 30180063  | 279 |
| chr29 | 45782503  | 45782781  | 279 |
| chr23 | 10203590  | 10203868  | 279 |
| chr22 | 14946238  | 14946516  | 279 |
| chr20 | 71437689  | 71437967  | 279 |
| chr2  | 130975382 | 130975660 | 279 |
| chr2  | 110157361 | 110157639 | 279 |
| chr19 | 12614742  | 12615020  | 279 |
| chr18 | 48764414  | 48764692  | 279 |
| chr18 | 6377781   | 6378059   | 279 |
| chr15 | 33591853  | 33592131  | 279 |
| chr13 | 66824646  | 66824924  | 279 |
| chr11 | 7550366   | 7550644   | 279 |
| chr11 | 5913572   | 5913850   | 279 |
| chr10 | 32349800  | 32350078  | 279 |
| chrX  | 34034954  | 34035231  | 278 |
| chrX  | 20279750  | 20280027  | 278 |
| chrX  | 2524420   | 2524697   | 278 |
| chr8  | 86966524  | 86966801  | 278 |
| chr25 | 34569488  | 34569765  | 278 |
| chr23 | 18819676  | 18819953  | 278 |
| chr21 | 9546434   | 9546711   | 278 |
| chr20 | 38503240  | 38503517  | 278 |
| chr20 | 6409861   | 6410138   | 278 |
| chr2  | 140716144 | 140716421 | 278 |
| chr2  | 128354181 | 128354458 | 278 |
| chr19 | 7284555   | 7284832   | 278 |
| chr17 | 8554080   | 8554357   | 278 |
| chr16 | 43293058  | 43293335  | 278 |



|       |               |           |     |
|-------|---------------|-----------|-----|
| chr15 | 29802644      | 29802921  | 278 |
| chr15 | 29354388      | 29354665  | 278 |
| chr13 | 46222790      | 46223067  | 278 |
| chr12 | 69512766      | 69513043  | 278 |
| chr10 | 8506932       | 8507209   | 278 |
| chr1  | 75290847      | 75291124  | 278 |
| chrX  | 71992811      | 71993087  | 277 |
| chrX  | 40008264      | 40008540  | 277 |
| chr5  | 111350314     | 111350590 | 277 |
| chr5  | 10226741      | 10227017  | 277 |
| chr3  | 122425518     | 122425794 | 277 |
| chr23 | 28110090      | 28110366  | 277 |
| chr2  | 138636088     | 138636364 | 277 |
| chr2  | 67372176      | 67372452  | 277 |
| chr19 | 42959482      | 42959758  | 277 |
| chr18 | 16530769      | 16531045  | 277 |
| chr18 | 9928867       | 9929143   | 277 |
| chr15 | 54180056      | 54180332  | 277 |
| chr15 | 49829609      | 49829885  | 277 |
| chr15 | 25472369      | 25472645  | 277 |
| chr1  | 137372329     | 137372605 | 277 |
| chr1  | 87331309      | 87331585  | 277 |
| chrX  | 62755010      | 62755285  | 276 |
| chrX  | 59812624      | 59812899  | 276 |
| chrX  | 55742021      | 55742296  | 276 |
| chrX  | 51169346      | 51169621  | 276 |
| chrX  | 18466767      | 18467042  | 276 |
| chr9  | 65791274      | 65791549  | 276 |
| chr9  | 35544223      | 35544498  | 276 |
| chr4  | 116683812     | 116684087 | 276 |
| chr3  | 110331431     | 110331706 | 276 |
| chr29 | 42389914      | 42390189  | 276 |
| chr24 | 20864472      | 20864747  | 276 |
| chr21 | 27578544      | 27578819  | 276 |
| chr21 | 25299545      | 25299820  | 276 |
| chr2  | 100820183     | 100820458 | 276 |
| chr18 | 49543974      | 49544249  | 276 |
| chr18 | 47702233      | 47702508  | 276 |
| chr17 | 67233463      | 67233738  | 276 |
| chr17 | 4984328       | 4984603   | 276 |
| chr16 | 75335045      | 75335320  | 276 |
| chr15 | 77199213      | 77199488  | 276 |
| chr15 | 54668847      | 54669122  | 276 |
| chr12 | 14729393      | 14729668  | 276 |
| chr11 | 28523060      | 28523335  | 276 |
| chr10 | 59977293      | 59977568  | 276 |
| chrX  | 733574 733848 | 275       |     |
| chr8  | 73416460      | 73416734  | 275 |
| chr3  | 88601472      | 88601746  | 275 |
| chr3  | 18299228      | 18299502  | 275 |

|       |           |           |     |
|-------|-----------|-----------|-----|
| chr27 | 35397809  | 35398083  | 275 |
| chr26 | 42048190  | 42048464  | 275 |
| chr26 | 17832546  | 17832820  | 275 |
| chr22 | 16359440  | 16359714  | 275 |
| chr22 | 5672939   | 5673213   | 275 |
| chr21 | 31691621  | 31691895  | 275 |
| chr20 | 60003275  | 60003549  | 275 |
| chr2  | 134886051 | 134886325 | 275 |
| chr2  | 110825103 | 110825377 | 275 |
| chr19 | 33277729  | 33278003  | 275 |
| chr18 | 65792398  | 65792672  | 275 |
| chr17 | 48130872  | 48131146  | 275 |
| chr16 | 47358322  | 47358596  | 275 |
| chr13 | 58308330  | 58308604  | 275 |
| chr11 | 44763732  | 44764006  | 275 |
| chr10 | 94843313  | 94843587  | 275 |
| chr1  | 84555876  | 84556150  | 275 |
| chrX  | 63254248  | 63254521  | 274 |
| chrX  | 38997453  | 38997726  | 274 |
| chrX  | 36236653  | 36236926  | 274 |
| chrX  | 19479125  | 19479398  | 274 |
| chrX  | 13547299  | 13547572  | 274 |
| chrX  | 13458136  | 13458409  | 274 |
| chrX  | 5680827   | 5681100   | 274 |
| chr9  | 104798219 | 104798492 | 274 |
| chr9  | 90633853  | 90634126  | 274 |
| chr9  | 90292852  | 90293125  | 274 |
| chr8  | 7787016   | 7787289   | 274 |
| chr7  | 5677867   | 5678140   | 274 |
| chr3  | 95724761  | 95725034  | 274 |
| chr22 | 55814026  | 55814299  | 274 |
| chr22 | 48278817  | 48279090  | 274 |
| chr22 | 39820833  | 39821106  | 274 |
| chr21 | 63404790  | 63405063  | 274 |
| chr2  | 139189759 | 139190032 | 274 |
| chr2  | 92316157  | 92316430  | 274 |
| chr18 | 52826134  | 52826407  | 274 |
| chr17 | 76311476  | 76311749  | 274 |
| chr15 | 29729358  | 29729631  | 274 |
| chr15 | 8621950   | 8622223   | 274 |
| chr10 | 19510755  | 19511028  | 274 |
| chrX  | 8924683   | 8924955   | 273 |
| chr5  | 73130627  | 73130899  | 273 |
| chr4  | 71358240  | 71358512  | 273 |
| chr4  | 67948798  | 67949070  | 273 |
| chr20 | 38849555  | 38849827  | 273 |
| chr19 | 61286039  | 61286311  | 273 |
| chr19 | 38950037  | 38950309  | 273 |
| chr19 | 29002852  | 29003124  | 273 |
| chr18 | 51733036  | 51733308  | 273 |

|       |           |           |     |
|-------|-----------|-----------|-----|
| chr18 | 4005630   | 4005902   | 273 |
| chr14 | 7608674   | 7608946   | 273 |
| chr13 | 70290544  | 70290816  | 273 |
| chr13 | 42399234  | 42399506  | 273 |
| chr10 | 90541161  | 90541433  | 273 |
| chr10 | 79337034  | 79337306  | 273 |
| chrX  | 13760143  | 13760414  | 272 |
| chrX  | 8112804   | 8113075   | 272 |
| chr4  | 79770023  | 79770294  | 272 |
| chr24 | 43685541  | 43685812  | 272 |
| chr22 | 11625397  | 11625668  | 272 |
| chr20 | 21870907  | 21871178  | 272 |
| chr19 | 56113884  | 56114155  | 272 |
| chr16 | 46422683  | 46422954  | 272 |
| chr15 | 75923541  | 75923812  | 272 |
| chr15 | 54376103  | 54376374  | 272 |
| chr13 | 75803600  | 75803871  | 272 |
| chr11 | 14189782  | 14190053  | 272 |
| chr10 | 17625820  | 17626091  | 272 |
| chrX  | 50856266  | 50856536  | 271 |
| chrX  | 30710012  | 30710282  | 271 |
| chrX  | 13083802  | 13084072  | 271 |
| chr8  | 72143832  | 72144102  | 271 |
| chr6  | 102276488 | 102276758 | 271 |
| chr6  | 46686391  | 46686661  | 271 |
| chr5  | 112590713 | 112590983 | 271 |
| chr3  | 115053318 | 115053588 | 271 |
| chr22 | 5674251   | 5674521   | 271 |
| chr21 | 60861371  | 60861641  | 271 |
| chr18 | 62519078  | 62519348  | 271 |
| chr18 | 37860763  | 37861033  | 271 |
| chr17 | 67896067  | 67896337  | 271 |
| chr15 | 30625551  | 30625821  | 271 |
| chr15 | 20499574  | 20499844  | 271 |
| chr13 | 42487425  | 42487695  | 271 |
| chr13 | 37682407  | 37682677  | 271 |
| chr12 | 34110057  | 34110327  | 271 |
| chr11 | 72583936  | 72584206  | 271 |
| chr11 | 72530917  | 72531187  | 271 |
| chr10 | 22015317  | 22015587  | 271 |
| chrX  | 79750519  | 79750788  | 270 |
| chrX  | 75668483  | 75668752  | 270 |
| chrX  | 66127065  | 66127334  | 270 |
| chrX  | 48875699  | 48875968  | 270 |
| chrX  | 21012285  | 21012554  | 270 |
| chrX  | 19585294  | 19585563  | 270 |
| chrX  | 8709082   | 8709351   | 270 |
| chr9  | 90721072  | 90721341  | 270 |
| chr9  | 64805292  | 64805561  | 270 |
| chr5  | 12281652  | 12281921  | 270 |

|       |               |           |     |
|-------|---------------|-----------|-----|
| chr4  | 120811487     | 120811756 | 270 |
| chr4  | 72263918      | 72264187  | 270 |
| chr3  | 127004117     | 127004386 | 270 |
| chr29 | 31506175      | 31506444  | 270 |
| chr28 | 30530214      | 30530483  | 270 |
| chr27 | 850024 850293 | 270       |     |
| chr18 | 50281464      | 50281733  | 270 |
| chr18 | 22167689      | 22167958  | 270 |
| chr15 | 26863459      | 26863728  | 270 |
| chr14 | 6984804       | 6985073   | 270 |
| chr13 | 72095646      | 72095915  | 270 |
| chr13 | 40916726      | 40916995  | 270 |
| chr12 | 53340009      | 53340278  | 270 |
| chr11 | 92489429      | 92489698  | 270 |
| chrX  | 72580884      | 72581152  | 269 |
| chrX  | 49324058      | 49324326  | 269 |
| chrX  | 34683690      | 34683958  | 269 |
| chrX  | 33997901      | 33998169  | 269 |
| chrX  | 32743118      | 32743386  | 269 |
| chr9  | 90228564      | 90228832  | 269 |
| chr8  | 23944625      | 23944893  | 269 |
| chr4  | 95635999      | 95636267  | 269 |
| chr3  | 108172790     | 108173058 | 269 |
| chr28 | 34180558      | 34180826  | 269 |
| chr28 | 30521562      | 30521830  | 269 |
| chr25 | 37433571      | 37433839  | 269 |
| chr25 | 2701598       | 2701866   | 269 |
| chr24 | 51802182      | 51802450  | 269 |
| chr24 | 1154546       | 1154814   | 269 |
| chr22 | 47811556      | 47811824  | 269 |
| chr22 | 16406581      | 16406849  | 269 |
| chr21 | 56517137      | 56517405  | 269 |
| chr20 | 3527520       | 3527788   | 269 |
| chr19 | 14065990      | 14066258  | 269 |
| chr16 | 70458972      | 70459240  | 269 |
| chr16 | 59652466      | 59652734  | 269 |
| chr14 | 52550296      | 52550564  | 269 |
| chr14 | 21585378      | 21585646  | 269 |
| chr13 | 81678163      | 81678431  | 269 |
| chr10 | 7869194       | 7869462   | 269 |
| chrX  | 46101550      | 46101817  | 268 |
| chrX  | 35562262      | 35562529  | 268 |
| chrX  | 33723616      | 33723883  | 268 |
| chr8  | 95959696      | 95959963  | 268 |
| chr6  | 46616850      | 46617117  | 268 |
| chr5  | 113185890     | 113186157 | 268 |
| chr5  | 55575926      | 55576193  | 268 |
| chr29 | 37254085      | 37254352  | 268 |
| chr29 | 29779398      | 29779665  | 268 |
| chr28 | 25216982      | 25217249  | 268 |

|       |               |           |     |
|-------|---------------|-----------|-----|
| chr28 | 13724275      | 13724542  | 268 |
| chr26 | 41985286      | 41985553  | 268 |
| chr25 | 28197354      | 28197621  | 268 |
| chr24 | 60552028      | 60552295  | 268 |
| chr23 | 27943557      | 27943824  | 268 |
| chr22 | 50721507      | 50721774  | 268 |
| chr21 | 59727678      | 59727945  | 268 |
| chr21 | 26449207      | 26449474  | 268 |
| chr19 | 63579690      | 63579957  | 268 |
| chr18 | 53868461      | 53868728  | 268 |
| chr18 | 11388904      | 11389171  | 268 |
| chr15 | 24965565      | 24965832  | 268 |
| chr14 | 66368447      | 66368714  | 268 |
| chr13 | 63411864      | 63412131  | 268 |
| chr13 | 63293800      | 63294067  | 268 |
| chr10 | 83972938      | 83973205  | 268 |
| chrX  | 62850321      | 62850587  | 267 |
| chrX  | 59400750      | 59401016  | 267 |
| chrX  | 15414409      | 15414675  | 267 |
| chrX  | 453061 453327 |           | 267 |
| chr4  | 63045109      | 63045375  | 267 |
| chr29 | 8477387       | 8477653   | 267 |
| chr23 | 35320483      | 35320749  | 267 |
| chr23 | 11801769      | 11802035  | 267 |
| chr22 | 57219083      | 57219349  | 267 |
| chr22 | 56617662      | 56617928  | 267 |
| chr21 | 27284433      | 27284699  | 267 |
| chr2  | 114158208     | 114158474 | 267 |
| chr19 | 23967557      | 23967823  | 267 |
| chr19 | 10998135      | 10998401  | 267 |
| chr18 | 62404819      | 62405085  | 267 |
| chr17 | 47274610      | 47274876  | 267 |
| chr12 | 80030517      | 80030783  | 267 |
| chr11 | 66257785      | 66258051  | 267 |
| chr10 | 86269630      | 86269896  | 267 |
| chr1  | 151127773     | 151128039 | 267 |
| chr1  | 148414582     | 148414848 | 267 |
| chr1  | 144887544     | 144887810 | 267 |
| chr1  | 81730731      | 81730997  | 267 |
| chrX  | 65657326      | 65657591  | 266 |
| chrX  | 55559811      | 55560076  | 266 |
| chrX  | 19264647      | 19264912  | 266 |
| chrX  | 6330743       | 6331008   | 266 |
| chr8  | 10171692      | 10171957  | 266 |
| chr7  | 47404362      | 47404627  | 266 |
| chr5  | 112094927     | 112095192 | 266 |
| chr5  | 28881940      | 28882205  | 266 |
| chr4  | 103199322     | 103199587 | 266 |
| chr3  | 123271170     | 123271435 | 266 |
| chr28 | 25210422      | 25210687  | 266 |

|       |           |           |     |
|-------|-----------|-----------|-----|
| chr26 | 41462159  | 41462424  | 266 |
| chr26 | 14704179  | 14704444  | 266 |
| chr24 | 46835079  | 46835344  | 266 |
| chr23 | 14943244  | 14943509  | 266 |
| chr20 | 4895844   | 4896109   | 266 |
| chr19 | 25085942  | 25086207  | 266 |
| chr19 | 16764175  | 16764440  | 266 |
| chr17 | 3443178   | 3443443   | 266 |
| chr16 | 55223368  | 55223633  | 266 |
| chr15 | 30201082  | 30201347  | 266 |
| chr14 | 20883671  | 20883936  | 266 |
| chr10 | 72476660  | 72476925  | 266 |
| chrX  | 79666161  | 79666425  | 265 |
| chrX  | 71773118  | 71773382  | 265 |
| chrX  | 36542061  | 36542325  | 265 |
| chrX  | 19308017  | 19308281  | 265 |
| chrX  | 11631495  | 11631759  | 265 |
| chrX  | 2384870   | 2385134   | 265 |
| chr8  | 29374120  | 29374384  | 265 |
| chr7  | 61903182  | 61903446  | 265 |
| chr6  | 107116797 | 107117061 | 265 |
| chr5  | 60988600  | 60988864  | 265 |
| chr29 | 30044303  | 30044567  | 265 |
| chr28 | 41312454  | 41312718  | 265 |
| chr25 | 39329579  | 39329843  | 265 |
| chr24 | 61005548  | 61005812  | 265 |
| chr24 | 41744173  | 41744437  | 265 |
| chr24 | 1527308   | 1527572   | 265 |
| chr23 | 49905784  | 49906048  | 265 |
| chr23 | 38507459  | 38507723  | 265 |
| chr23 | 15279230  | 15279494  | 265 |
| chr22 | 56138463  | 56138727  | 265 |
| chr22 | 33430454  | 33430718  | 265 |
| chr22 | 30040875  | 30041139  | 265 |
| chr21 | 15189259  | 15189523  | 265 |
| chr21 | 7804363   | 7804627   | 265 |
| chr2  | 90140344  | 90140608  | 265 |
| chr18 | 53234457  | 53234721  | 265 |
| chr15 | 23003726  | 23003990  | 265 |
| chr14 | 42225642  | 42225906  | 265 |
| chr13 | 23632344  | 23632608  | 265 |
| chr11 | 103460087 | 103460351 | 265 |
| chrX  | 60163848  | 60164111  | 264 |
| chrX  | 55273787  | 55274050  | 264 |
| chrX  | 8298633   | 8298896   | 264 |
| chr8  | 7535042   | 7535305   | 264 |
| chr4  | 72743292  | 72743555  | 264 |
| chr4  | 49616005  | 49616268  | 264 |
| chr24 | 48627906  | 48628169  | 264 |
| chr23 | 19589505  | 19589768  | 264 |

|       |           |           |     |
|-------|-----------|-----------|-----|
| chr21 | 57761296  | 57761559  | 264 |
| chr2  | 134691952 | 134692215 | 264 |
| chr19 | 45183319  | 45183582  | 264 |
| chr19 | 23974624  | 23974887  | 264 |
| chr18 | 22027851  | 22028114  | 264 |
| chr17 | 58983983  | 58984246  | 264 |
| chr13 | 41006909  | 41007172  | 264 |
| chr13 | 35988266  | 35988529  | 264 |
| chr1  | 141716168 | 141716431 | 264 |
| chr1  | 84893548  | 84893811  | 264 |
| chr1  | 82398127  | 82398390  | 264 |
| chrX  | 36042762  | 36043024  | 263 |
| chrX  | 35871463  | 35871725  | 263 |
| chrX  | 30612510  | 30612772  | 263 |
| chr9  | 99302593  | 99302855  | 263 |
| chr6  | 120786445 | 120786707 | 263 |
| chr3  | 52004572  | 52004834  | 263 |
| chr25 | 34433298  | 34433560  | 263 |
| chr21 | 69030039  | 69030301  | 263 |
| chr21 | 56354938  | 56355200  | 263 |
| chr19 | 49637611  | 49637873  | 263 |
| chr19 | 25420495  | 25420757  | 263 |
| chr16 | 38982600  | 38982862  | 263 |
| chr15 | 62538706  | 62538968  | 263 |
| chr12 | 31440229  | 31440491  | 263 |
| chr11 | 89588895  | 89589157  | 263 |
| chr10 | 7188555   | 7188817   | 263 |
| chrX  | 18925755  | 18926016  | 262 |
| chr5  | 97184262  | 97184523  | 262 |
| chr5  | 60136257  | 60136518  | 262 |
| chr5  | 30198591  | 30198852  | 262 |
| chr28 | 42138863  | 42139124  | 262 |
| chr28 | 25915521  | 25915782  | 262 |
| chr25 | 41116477  | 41116738  | 262 |
| chr24 | 1828231   | 1828492   | 262 |
| chr20 | 19410035  | 19410296  | 262 |
| chr18 | 63460932  | 63461193  | 262 |
| chr18 | 37213963  | 37214224  | 262 |
| chr18 | 22804102  | 22804363  | 262 |
| chr17 | 70522759  | 70523020  | 262 |
| chr17 | 66833205  | 66833466  | 262 |
| chr17 | 64293893  | 64294154  | 262 |
| chr15 | 51701282  | 51701543  | 262 |
| chr14 | 66249991  | 66250252  | 262 |
| chr13 | 63231493  | 63231754  | 262 |
| chr11 | 104878023 | 104878284 | 262 |
| chr11 | 77614841  | 77615102  | 262 |
| chr10 | 50597635  | 50597896  | 262 |
| chrX  | 72154819  | 72155079  | 261 |
| chrX  | 13408739  | 13408999  | 261 |

|       |           |           |     |
|-------|-----------|-----------|-----|
| chr8  | 116005015 | 116005275 | 261 |
| chr7  | 51763486  | 51763746  | 261 |
| chr7  | 46248867  | 46249127  | 261 |
| chr7  | 20752761  | 20753021  | 261 |
| chr4  | 121478658 | 121478918 | 261 |
| chr28 | 33768945  | 33769205  | 261 |
| chr27 | 31450735  | 31450995  | 261 |
| chr26 | 21764520  | 21764780  | 261 |
| chr21 | 45709414  | 45709674  | 261 |
| chr21 | 9449690   | 9449950   | 261 |
| chr19 | 42896036  | 42896296  | 261 |
| chr18 | 43581534  | 43581794  | 261 |
| chr14 | 33278357  | 33278617  | 261 |
| chr12 | 22220951  | 22221211  | 261 |
| chr11 | 100429793 | 100430053 | 261 |
| chr10 | 70405387  | 70405647  | 261 |
| chr10 | 50756001  | 50756261  | 261 |
| chr1  | 44931715  | 44931975  | 261 |
| chrX  | 65013656  | 65013915  | 260 |
| chrX  | 48158296  | 48158555  | 260 |
| chrX  | 44676098  | 44676357  | 260 |
| chrX  | 20661653  | 20661912  | 260 |
| chrX  | 2237480   | 2237739   | 260 |
| chr7  | 18477426  | 18477685  | 260 |
| chr7  | 17958748  | 17959007  | 260 |
| chr5  | 120499350 | 120499609 | 260 |
| chr5  | 30155913  | 30156172  | 260 |
| chr4  | 116723321 | 116723580 | 260 |
| chr3  | 105361392 | 105361651 | 260 |
| chr29 | 36397871  | 36398130  | 260 |
| chr29 | 25514353  | 25514612  | 260 |
| chr27 | 46988581  | 46988840  | 260 |
| chr27 | 14739202  | 14739461  | 260 |
| chr26 | 40994228  | 40994487  | 260 |
| chr25 | 34507431  | 34507690  | 260 |
| chr23 | 40625640  | 40625899  | 260 |
| chr23 | 27740750  | 27741009  | 260 |
| chr22 | 30409012  | 30409271  | 260 |
| chr17 | 65970333  | 65970592  | 260 |
| chr16 | 39508133  | 39508392  | 260 |
| chr15 | 45862872  | 45863131  | 260 |
| chr15 | 24490434  | 24490693  | 260 |
| chr13 | 40333874  | 40334133  | 260 |
| chr13 | 19101241  | 19101500  | 260 |
| chr12 | 32916638  | 32916897  | 260 |
| chr11 | 90668115  | 90668374  | 260 |
| chrX  | 72945811  | 72946069  | 259 |
| chrX  | 61117236  | 61117494  | 259 |
| chrX  | 11669098  | 11669356  | 259 |
| chr7  | 62956039  | 62956297  | 259 |



|       |               |           |     |
|-------|---------------|-----------|-----|
| chr5  | 17190474      | 17190732  | 259 |
| chr3  | 102894239     | 102894497 | 259 |
| chr26 | 41693618      | 41693876  | 259 |
| chr22 | 48346509      | 48346767  | 259 |
| chr21 | 32959144      | 32959402  | 259 |
| chr21 | 20008335      | 20008593  | 259 |
| chr19 | 60794054      | 60794312  | 259 |
| chr19 | 31914763      | 31915021  | 259 |
| chr19 | 26074224      | 26074482  | 259 |
| chr18 | 45509966      | 45510224  | 259 |
| chr18 | 33653898      | 33654156  | 259 |
| chr18 | 11691567      | 11691825  | 259 |
| chr17 | 56474850      | 56475108  | 259 |
| chr16 | 68651641      | 68651899  | 259 |
| chr15 | 84501850      | 84502108  | 259 |
| chr15 | 76723256      | 76723514  | 259 |
| chr14 | 440821 441079 |           | 259 |
| chr13 | 56980824      | 56981082  | 259 |
| chr1  | 145854160     | 145854418 | 259 |
| chr1  | 50169575      | 50169833  | 259 |
| chrX  | 21684831      | 21685088  | 258 |
| chr9  | 106557084     | 106557341 | 258 |
| chr5  | 53835818      | 53836075  | 258 |
| chr5  | 29119375      | 29119632  | 258 |
| chr3  | 116360445     | 116360702 | 258 |
| chr3  | 10636061      | 10636318  | 258 |
| chr29 | 46864846      | 46865103  | 258 |
| chr27 | 26676521      | 26676778  | 258 |
| chr26 | 45634782      | 45635039  | 258 |
| chr26 | 38202102      | 38202359  | 258 |
| chr26 | 19879802      | 19880059  | 258 |
| chr25 | 39198546      | 39198803  | 258 |
| chr24 | 40368777      | 40369034  | 258 |
| chr23 | 18508599      | 18508856  | 258 |
| chr23 | 15926258      | 15926515  | 258 |
| chr22 | 5512388       | 5512645   | 258 |
| chr19 | 14301323      | 14301580  | 258 |
| chr19 | 10816087      | 10816344  | 258 |
| chr17 | 62403529      | 62403786  | 258 |
| chr16 | 57110482      | 57110739  | 258 |
| chr13 | 75838612      | 75838869  | 258 |
| chr13 | 65092174      | 65092431  | 258 |
| chr13 | 62035752      | 62036009  | 258 |
| chr11 | 93761547      | 93761804  | 258 |
| chr10 | 49257078      | 49257335  | 258 |
| chr10 | 17009022      | 17009279  | 258 |
| chr10 | 16696295      | 16696552  | 258 |
| chr1  | 43813550      | 43813807  | 258 |
| chrX  | 65677184      | 65677440  | 257 |
| chrX  | 38534481      | 38534737  | 257 |

|       |               |           |     |
|-------|---------------|-----------|-----|
| chrX  | 34495938      | 34496194  | 257 |
| chrX  | 6390798       | 6391054   | 257 |
| chr8  | 87085170      | 87085426  | 257 |
| chr5  | 30461535      | 30461791  | 257 |
| chr5  | 30162802      | 30163058  | 257 |
| chr4  | 123135355     | 123135611 | 257 |
| chr4  | 72359422      | 72359678  | 257 |
| chr29 | 35162904      | 35163160  | 257 |
| chr28 | 7622569       | 7622825   | 257 |
| chr27 | 26957947      | 26958203  | 257 |
| chr24 | 64978016      | 64978272  | 257 |
| chr23 | 43082852      | 43083108  | 257 |
| chr22 | 54315436      | 54315692  | 257 |
| chr21 | 61091491      | 61091747  | 257 |
| chr21 | 28703642      | 28703898  | 257 |
| chr21 | 25764248      | 25764504  | 257 |
| chr2  | 124415525     | 124415781 | 257 |
| chr19 | 28224112      | 28224368  | 257 |
| chr17 | 68824586      | 68824842  | 257 |
| chr15 | 31940752      | 31941008  | 257 |
| chr13 | 21878937      | 21879193  | 257 |
| chr12 | 34397541      | 34397797  | 257 |
| chr11 | 103314388     | 103314644 | 257 |
| chr11 | 31106403      | 31106659  | 257 |
| chr10 | 17695776      | 17696032  | 257 |
| chr10 | 17678282      | 17678538  | 257 |
| chrX  | 65897993      | 65898248  | 256 |
| chrX  | 53647769      | 53648024  | 256 |
| chrX  | 35284136      | 35284391  | 256 |
| chrX  | 11572891      | 11573146  | 256 |
| chr9  | 95096013      | 95096268  | 256 |
| chr8  | 102884045     | 102884300 | 256 |
| chr7  | 71382066      | 71382321  | 256 |
| chr6  | 108657374     | 108657629 | 256 |
| chr6  | 107461936     | 107462191 | 256 |
| chr3  | 105619178     | 105619433 | 256 |
| chr29 | 36479772      | 36480027  | 256 |
| chr27 | 22180515      | 22180770  | 256 |
| chr26 | 24399322      | 24399577  | 256 |
| chr26 | 18298969      | 18299224  | 256 |
| chr23 | 33000242      | 33000497  | 256 |
| chr21 | 58548660      | 58548915  | 256 |
| chr20 | 913450 913705 | 256       |     |
| chr2  | 95246474      | 95246729  | 256 |
| chr19 | 13487098      | 13487353  | 256 |
| chr19 | 10863423      | 10863678  | 256 |
| chr18 | 56617283      | 56617538  | 256 |
| chr15 | 45864382      | 45864637  | 256 |
| chr13 | 74330229      | 74330484  | 256 |
| chr12 | 18574792      | 18575047  | 256 |

|       |           |           |     |
|-------|-----------|-----------|-----|
| chr11 | 32237587  | 32237842  | 256 |
| chr1  | 110581317 | 110581572 | 256 |
| chrX  | 73266239  | 73266493  | 255 |
| chrX  | 47280926  | 47281180  | 255 |
| chr7  | 44034652  | 44034906  | 255 |
| chr7  | 42754436  | 42754690  | 255 |
| chr6  | 70858289  | 70858543  | 255 |
| chr5  | 69401345  | 69401599  | 255 |
| chr3  | 117280800 | 117281054 | 255 |
| chr3  | 4238087   | 4238341   | 255 |
| chr25 | 34188507  | 34188761  | 255 |
| chr24 | 59040368  | 59040622  | 255 |
| chr23 | 26963411  | 26963665  | 255 |
| chr23 | 7701859   | 7702113   | 255 |
| chr22 | 57727368  | 57727622  | 255 |
| chr21 | 64497851  | 64498105  | 255 |
| chr2  | 139160313 | 139160567 | 255 |
| chr2  | 128069146 | 128069400 | 255 |
| chr2  | 5177392   | 5177646   | 255 |
| chr19 | 30723695  | 30723949  | 255 |
| chr18 | 56447168  | 56447422  | 255 |
| chr18 | 45990106  | 45990360  | 255 |
| chr16 | 77282763  | 77283017  | 255 |
| chr16 | 44699599  | 44699853  | 255 |
| chr16 | 23963353  | 23963607  | 255 |
| chr15 | 24031518  | 24031772  | 255 |
| chr11 | 92467340  | 92467594  | 255 |
| chr11 | 80169852  | 80170106  | 255 |
| chr11 | 77648330  | 77648584  | 255 |
| chrX  | 54294193  | 54294446  | 254 |
| chrX  | 47686131  | 47686384  | 254 |
| chrX  | 22511638  | 22511891  | 254 |
| chr6  | 72326523  | 72326776  | 254 |
| chr6  | 46696131  | 46696384  | 254 |
| chr5  | 112699444 | 112699697 | 254 |
| chr5  | 28700960  | 28701213  | 254 |
| chr3  | 119485492 | 119485745 | 254 |
| chr29 | 48886009  | 48886262  | 254 |
| chr29 | 17467656  | 17467909  | 254 |
| chr25 | 36591670  | 36591923  | 254 |
| chr23 | 14452727  | 14452980  | 254 |
| chr23 | 3316581   | 3316834   | 254 |
| chr22 | 48279109  | 48279362  | 254 |
| chr2  | 130994100 | 130994353 | 254 |
| chr2  | 99085909  | 99086162  | 254 |
| chr16 | 56114704  | 56114957  | 254 |
| chr13 | 56644531  | 56644784  | 254 |
| chr11 | 100434991 | 100435244 | 254 |
| chr11 | 80356932  | 80357185  | 254 |
| chr10 | 106277980 | 106278233 | 254 |

|       |           |           |     |
|-------|-----------|-----------|-----|
| chr10 | 83522929  | 83523182  | 254 |
| chrX  | 65403764  | 65404016  | 253 |
| chrX  | 34030237  | 34030489  | 253 |
| chr8  | 116777227 | 116777479 | 253 |
| chr8  | 62517367  | 62517619  | 253 |
| chr6  | 106853157 | 106853409 | 253 |
| chr5  | 60375870  | 60376122  | 253 |
| chr3  | 124468610 | 124468862 | 253 |
| chr3  | 35505190  | 35505442  | 253 |
| chr29 | 37117122  | 37117374  | 253 |
| chr29 | 31408181  | 31408433  | 253 |
| chr25 | 8696670   | 8696922   | 253 |
| chr24 | 43645084  | 43645336  | 253 |
| chr24 | 1767472   | 1767724   | 253 |
| chr24 | 1196211   | 1196463   | 253 |
| chr23 | 27948552  | 27948804  | 253 |
| chr23 | 7292095   | 7292347   | 253 |
| chr2  | 115705193 | 115705445 | 253 |
| chr19 | 56064871  | 56065123  | 253 |
| chr19 | 30715083  | 30715335  | 253 |
| chr17 | 69433135  | 69433387  | 253 |
| chr17 | 60293237  | 60293489  | 253 |
| chr16 | 76027288  | 76027540  | 253 |
| chr15 | 63879707  | 63879959  | 253 |
| chr14 | 14048403  | 14048655  | 253 |
| chr14 | 9403424   | 9403676   | 253 |
| chr13 | 70093623  | 70093875  | 253 |
| chr13 | 59996300  | 59996552  | 253 |
| chr12 | 14907602  | 14907854  | 253 |
| chr11 | 70719876  | 70720128  | 253 |
| chr10 | 84435659  | 84435911  | 253 |
| chr10 | 83990025  | 83990277  | 253 |
| chrX  | 48867713  | 48867964  | 252 |
| chrX  | 46400849  | 46401100  | 252 |
| chrX  | 13342487  | 13342738  | 252 |
| chr9  | 105908080 | 105908331 | 252 |
| chr3  | 109481848 | 109482099 | 252 |
| chr3  | 33104683  | 33104934  | 252 |
| chr29 | 48953269  | 48953520  | 252 |
| chr28 | 25114096  | 25114347  | 252 |
| chr23 | 15399418  | 15399669  | 252 |
| chr21 | 59879007  | 59879258  | 252 |
| chr21 | 32897806  | 32898057  | 252 |
| chr19 | 24026580  | 24026831  | 252 |
| chr18 | 38678853  | 38679104  | 252 |
| chr17 | 51478861  | 51479112  | 252 |
| chr16 | 68030783  | 68031034  | 252 |
| chr15 | 64199602  | 64199853  | 252 |
| chr15 | 25681897  | 25682148  | 252 |
| chr15 | 21200326  | 21200577  | 252 |

|       |               |           |     |
|-------|---------------|-----------|-----|
| chr14 | 61695180      | 61695431  | 252 |
| chr13 | 57420270      | 57420521  | 252 |
| chr13 | 53116198      | 53116449  | 252 |
| chr13 | 45928463      | 45928714  | 252 |
| chr11 | 77551762      | 77552013  | 252 |
| chr11 | 48552128      | 48552379  | 252 |
| chr10 | 104991957     | 104992208 | 252 |
| chr1  | 75058470      | 75058721  | 252 |
| chrX  | 72743499      | 72743749  | 251 |
| chrX  | 68072249      | 68072499  | 251 |
| chrX  | 56196914      | 56197164  | 251 |
| chrX  | 36366072      | 36366322  | 251 |
| chrX  | 20145719      | 20145969  | 251 |
| chr9  | 104872201     | 104872451 | 251 |
| chr9  | 102694072     | 102694322 | 251 |
| chr9  | 100209985     | 100210235 | 251 |
| chr8  | 7769927       | 7770177   | 251 |
| chr7  | 45730162      | 45730412  | 251 |
| chr6  | 51513884      | 51514134  | 251 |
| chr6  | 13898475      | 13898725  | 251 |
| chr5  | 125489109     | 125489359 | 251 |
| chr5  | 115057668     | 115057918 | 251 |
| chr5  | 81582092      | 81582342  | 251 |
| chr5  | 52823779      | 52824029  | 251 |
| chr4  | 116134253     | 116134503 | 251 |
| chr4  | 71605740      | 71605990  | 251 |
| chr3  | 116473040     | 116473290 | 251 |
| chr3  | 105331607     | 105331857 | 251 |
| chr29 | 18106673      | 18106923  | 251 |
| chr27 | 592418 592668 | 251       |     |
| chr25 | 18693906      | 18694156  | 251 |
| chr24 | 48629702      | 48629952  | 251 |
| chr24 | 46545853      | 46546103  | 251 |
| chr24 | 1024755       | 1025005   | 251 |
| chr22 | 55799466      | 55799716  | 251 |
| chr21 | 19211151      | 19211401  | 251 |
| chr2  | 12229809      | 12230059  | 251 |
| chr19 | 54647478      | 54647728  | 251 |
| chr19 | 39843263      | 39843513  | 251 |
| chr18 | 48783785      | 48784035  | 251 |
| chr13 | 60454796      | 60455046  | 251 |
| chr13 | 54439617      | 54439867  | 251 |
| chr11 | 62310652      | 62310902  | 251 |
| chr10 | 90260685      | 90260935  | 251 |
| chrX  | 67405829      | 67406078  | 250 |
| chrX  | 46354464      | 46354713  | 250 |
| chrX  | 37334165      | 37334414  | 250 |
| chrX  | 10947556      | 10947805  | 250 |
| chrX  | 311163 311412 | 250       |     |
| chr9  | 91051111      | 91051360  | 250 |

|       |           |           |     |
|-------|-----------|-----------|-----|
| chr9  | 44115669  | 44115918  | 250 |
| chr8  | 116065566 | 116065815 | 250 |
| chr5  | 35290158  | 35290407  | 250 |
| chr3  | 115751328 | 115751577 | 250 |
| chr3  | 99810538  | 99810787  | 250 |
| chr3  | 22503126  | 22503375  | 250 |
| chr28 | 31876164  | 31876413  | 250 |
| chr26 | 35733216  | 35733465  | 250 |
| chr24 | 60936163  | 60936412  | 250 |
| chr21 | 28182367  | 28182616  | 250 |
| chr20 | 6133262   | 6133511   | 250 |
| chr2  | 139117485 | 139117734 | 250 |
| chr19 | 58713369  | 58713618  | 250 |
| chr19 | 45126099  | 45126348  | 250 |
| chr19 | 38558350  | 38558599  | 250 |
| chr18 | 43148536  | 43148785  | 250 |
| chr18 | 11428479  | 11428728  | 250 |
| chr17 | 72632082  | 72632331  | 250 |
| chr17 | 64150076  | 64150325  | 250 |
| chr16 | 38977494  | 38977743  | 250 |
| chr14 | 12232459  | 12232708  | 250 |
| chr13 | 60952310  | 60952559  | 250 |
| chr12 | 84227362  | 84227611  | 250 |
| chr11 | 81407988  | 81408237  | 250 |
| chr1  | 135791954 | 135792203 | 250 |
| chr1  | 98942303  | 98942552  | 250 |
| chrX  | 75889923  | 75890171  | 249 |
| chrX  | 55800330  | 55800578  | 249 |
| chrX  | 50606429  | 50606677  | 249 |
| chrX  | 50000811  | 50001059  | 249 |
| chrX  | 19084554  | 19084802  | 249 |
| chrX  | 8110348   | 8110596   | 249 |
| chr9  | 90297665  | 90297913  | 249 |
| chr4  | 98550135  | 98550383  | 249 |
| chr4  | 95658208  | 95658456  | 249 |
| chr29 | 48713334  | 48713582  | 249 |
| chr29 | 17664292  | 17664540  | 249 |
| chr25 | 18131609  | 18131857  | 249 |
| chr24 | 4940132   | 4940380   | 249 |
| chr23 | 14115570  | 14115818  | 249 |
| chr22 | 45245364  | 45245612  | 249 |
| chr21 | 63210436  | 63210684  | 249 |
| chr21 | 26304800  | 26305048  | 249 |
| chr21 | 6476163   | 6476411   | 249 |
| chr20 | 4896935   | 4897183   | 249 |
| chr2  | 131207928 | 131208176 | 249 |
| chr19 | 8245142   | 8245390   | 249 |
| chr16 | 70114583  | 70114831  | 249 |
| chr16 | 60029284  | 60029532  | 249 |
| chr16 | 54513226  | 54513474  | 249 |

|       |               |           |     |
|-------|---------------|-----------|-----|
| chr16 | 23155631      | 23155879  | 249 |
| chr15 | 25653460      | 25653708  | 249 |
| chr13 | 66803933      | 66804181  | 249 |
| chr11 | 98961939      | 98962187  | 249 |
| chr11 | 98448822      | 98449070  | 249 |
| chr1  | 68855149      | 68855397  | 249 |
| chrX  | 65792478      | 65792725  | 248 |
| chrX  | 31800528      | 31800775  | 248 |
| chrX  | 10488978      | 10489225  | 248 |
| chr8  | 93640161      | 93640408  | 248 |
| chr7  | 43594321      | 43594568  | 248 |
| chr5  | 30562523      | 30562770  | 248 |
| chr4  | 69676485      | 69676732  | 248 |
| chr4  | 32880660      | 32880907  | 248 |
| chr3  | 45695759      | 45696006  | 248 |
| chr3  | 43206400      | 43206647  | 248 |
| chr3  | 33849526      | 33849773  | 248 |
| chr3  | 20408405      | 20408652  | 248 |
| chr24 | 59020749      | 59020996  | 248 |
| chr24 | 40610190      | 40610437  | 248 |
| chr24 | 34958536      | 34958783  | 248 |
| chr21 | 61661144      | 61661391  | 248 |
| chr20 | 16144975      | 16145222  | 248 |
| chr2  | 124590514     | 124590761 | 248 |
| chr2  | 111816384     | 111816631 | 248 |
| chr18 | 63798469      | 63798716  | 248 |
| chr18 | 46754050      | 46754297  | 248 |
| chr17 | 58816555      | 58816802  | 248 |
| chr16 | 728926 729173 | 248       |     |
| chr13 | 40313886      | 40314133  | 248 |
| chr13 | 40021340      | 40021587  | 248 |
| chr10 | 59975744      | 59975991  | 248 |
| chr1  | 80032556      | 80032803  | 248 |
| chrX  | 59828356      | 59828602  | 247 |
| chrX  | 40639446      | 40639692  | 247 |
| chrX  | 24106506      | 24106752  | 247 |
| chrX  | 12658716      | 12658962  | 247 |
| chr8  | 116101686     | 116101932 | 247 |
| chr6  | 71160410      | 71160656  | 247 |
| chr5  | 122452916     | 122453162 | 247 |
| chr5  | 112765439     | 112765685 | 247 |
| chr4  | 32164070      | 32164316  | 247 |
| chr25 | 37812232      | 37812478  | 247 |
| chr23 | 16531382      | 16531628  | 247 |
| chr21 | 30323354      | 30323600  | 247 |
| chr19 | 45731990      | 45732236  | 247 |
| chr19 | 33540240      | 33540486  | 247 |
| chr18 | 57375188      | 57375434  | 247 |
| chr18 | 45392132      | 45392378  | 247 |
| chr13 | 79987612      | 79987858  | 247 |

|       |               |           |     |
|-------|---------------|-----------|-----|
| chr13 | 75681349      | 75681595  | 247 |
| chr13 | 73252414      | 73252660  | 247 |
| chr13 | 69851133      | 69851379  | 247 |
| chr13 | 145062 145308 | 247       |     |
| chr12 | 32508306      | 32508552  | 247 |
| chr10 | 71294362      | 71294608  | 247 |
| chr10 | 42622105      | 42622351  | 247 |
| chr1  | 119181704     | 119181950 | 247 |
| chr1  | 110526004     | 110526250 | 247 |
| chr1  | 68493442      | 68493688  | 247 |
| chrX  | 33993485      | 33993730  | 246 |
| chrX  | 12160873      | 12161118  | 246 |
| chrX  | 513462 513707 | 246       |     |
| chr5  | 120456195     | 120456440 | 246 |
| chr3  | 121772448     | 121772693 | 246 |
| chr3  | 35679513      | 35679758  | 246 |
| chr3  | 34035083      | 34035328  | 246 |
| chr29 | 42891124      | 42891369  | 246 |
| chr29 | 36300701      | 36300946  | 246 |
| chr27 | 7670079       | 7670324   | 246 |
| chr27 | 1116326       | 1116571   | 246 |
| chr26 | 15108020      | 15108265  | 246 |
| chr24 | 41670905      | 41671150  | 246 |
| chr24 | 35282604      | 35282849  | 246 |
| chr23 | 15874400      | 15874645  | 246 |
| chr23 | 14945519      | 14945764  | 246 |
| chr22 | 50888485      | 50888730  | 246 |
| chr2  | 132408569     | 132408814 | 246 |
| chr2  | 131061673     | 131061918 | 246 |
| chr19 | 43157080      | 43157325  | 246 |
| chr19 | 42528661      | 42528906  | 246 |
| chr19 | 33400152      | 33400397  | 246 |
| chr18 | 26149801      | 26150046  | 246 |
| chr16 | 70144639      | 70144884  | 246 |
| chr15 | 24598207      | 24598452  | 246 |
| chr13 | 62871621      | 62871866  | 246 |
| chr13 | 60119780      | 60120025  | 246 |
| chr13 | 42398928      | 42399173  | 246 |
| chr12 | 82487193      | 82487438  | 246 |
| chr11 | 96080494      | 96080739  | 246 |
| chr11 | 47218712      | 47218957  | 246 |
| chr10 | 67755949      | 67756194  | 246 |
| chr10 | 24718649      | 24718894  | 246 |
| chr1  | 69249891      | 69250136  | 246 |
| chrX  | 72194835      | 72195079  | 245 |
| chrX  | 69645021      | 69645265  | 245 |
| chrX  | 64466434      | 64466678  | 245 |
| chrX  | 50545518      | 50545762  | 245 |
| chrX  | 49021209      | 49021453  | 245 |
| chrX  | 29890291      | 29890535  | 245 |



|       |               |           |     |
|-------|---------------|-----------|-----|
| chrX  | 20318550      | 20318794  | 245 |
| chrX  | 9678169       | 9678413   | 245 |
| chr5  | 121229040     | 121229284 | 245 |
| chr5  | 113111838     | 113112082 | 245 |
| chr4  | 14971384      | 14971628  | 245 |
| chr3  | 117713810     | 117714054 | 245 |
| chr3  | 86200289      | 86200533  | 245 |
| chr29 | 27742720      | 27742964  | 245 |
| chr26 | 21758955      | 21759199  | 245 |
| chr25 | 35387260      | 35387504  | 245 |
| chr21 | 2029115       | 2029359   | 245 |
| chr2  | 139311399     | 139311643 | 245 |
| chr18 | 61975018      | 61975262  | 245 |
| chr17 | 62884918      | 62885162  | 245 |
| chr15 | 25059980      | 25060224  | 245 |
| chr14 | 42553722      | 42553966  | 245 |
| chr13 | 74356925      | 74357169  | 245 |
| chr13 | 70097901      | 70098145  | 245 |
| chr13 | 17789848      | 17790092  | 245 |
| chr13 | 5862989       | 5863233   | 245 |
| chr11 | 106353660     | 106353904 | 245 |
| chrX  | 29509651      | 29509894  | 244 |
| chr8  | 8594522       | 8594765   | 244 |
| chr7  | 5046701       | 5046944   | 244 |
| chr7  | 3972400       | 3972643   | 244 |
| chr6  | 63129582      | 63129825  | 244 |
| chr4  | 67824840      | 67825083  | 244 |
| chr3  | 13561640      | 13561883  | 244 |
| chr29 | 45792293      | 45792536  | 244 |
| chr29 | 38315106      | 38315349  | 244 |
| chr27 | 27241635      | 27241878  | 244 |
| chr27 | 8319302       | 8319545   | 244 |
| chr27 | 669583 669826 |           | 244 |
| chr26 | 43854137      | 43854380  | 244 |
| chr25 | 36479216      | 36479459  | 244 |
| chr23 | 44461907      | 44462150  | 244 |
| chr23 | 10525932      | 10526175  | 244 |
| chr20 | 73457288      | 73457531  | 244 |
| chr20 | 6410161       | 6410404   | 244 |
| chr19 | 58744249      | 58744492  | 244 |
| chr19 | 30380596      | 30380839  | 244 |
| chr18 | 48776674      | 48776917  | 244 |
| chr18 | 39898027      | 39898270  | 244 |
| chr18 | 32931120      | 32931363  | 244 |
| chr17 | 64551824      | 64552067  | 244 |
| chr16 | 2368601       | 2368844   | 244 |
| chr15 | 21966609      | 21966852  | 244 |
| chr13 | 63410778      | 63411021  | 244 |
| chr13 | 60975000      | 60975243  | 244 |
| chr13 | 35662542      | 35662785  | 244 |

|       |               |           |     |
|-------|---------------|-----------|-----|
| chr12 | 82744733      | 82744976  | 244 |
| chr11 | 28435508      | 28435751  | 244 |
| chr1  | 63944937      | 63945180  | 244 |
| chrX  | 72772737      | 72772979  | 243 |
| chrX  | 72154346      | 72154588  | 243 |
| chrX  | 61242101      | 61242343  | 243 |
| chrX  | 36120235      | 36120477  | 243 |
| chrX  | 31555980      | 31556222  | 243 |
| chrX  | 2381850       | 2382092   | 243 |
| chr9  | 105270908     | 105271150 | 243 |
| chr8  | 65005123      | 65005365  | 243 |
| chr7  | 38229189      | 38229431  | 243 |
| chr7  | 20812415      | 20812657  | 243 |
| chr5  | 111209518     | 111209760 | 243 |
| chr4  | 95790293      | 95790535  | 243 |
| chr3  | 116598462     | 116598704 | 243 |
| chr25 | 18643259      | 18643501  | 243 |
| chr25 | 10465663      | 10465905  | 243 |
| chr23 | 28028193      | 28028435  | 243 |
| chr22 | 48413878      | 48414120  | 243 |
| chr21 | 47628523      | 47628765  | 243 |
| chr20 | 468209 468451 | 243       |     |
| chr2  | 128028368     | 128028610 | 243 |
| chr19 | 64686149      | 64686391  | 243 |
| chr19 | 37851315      | 37851557  | 243 |
| chr18 | 22165235      | 22165477  | 243 |
| chr18 | 3578014       | 3578256   | 243 |
| chr18 | 511678 511920 | 243       |     |
| chr17 | 72346274      | 72346516  | 243 |
| chr17 | 59250202      | 59250444  | 243 |
| chr16 | 49022470      | 49022712  | 243 |
| chr16 | 44331274      | 44331516  | 243 |
| chr15 | 28631961      | 28632203  | 243 |
| chr15 | 22797827      | 22798069  | 243 |
| chr14 | 61569515      | 61569757  | 243 |
| chr13 | 60060095      | 60060337  | 243 |
| chr13 | 23834380      | 23834622  | 243 |
| chr12 | 9528569       | 9528811   | 243 |
| chr11 | 71122081      | 71122323  | 243 |
| chr10 | 70368687      | 70368929  | 243 |
| chr10 | 13035261      | 13035503  | 243 |
| chrX  | 54930499      | 54930740  | 242 |
| chrX  | 51433771      | 51434012  | 242 |
| chrX  | 21812402      | 21812643  | 242 |
| chrX  | 19740809      | 19741050  | 242 |
| chrX  | 11249124      | 11249365  | 242 |
| chr8  | 98362311      | 98362552  | 242 |
| chr8  | 11309801      | 11310042  | 242 |
| chr7  | 14728171      | 14728412  | 242 |
| chr6  | 46682563      | 46682804  | 242 |

|       |               |           |     |
|-------|---------------|-----------|-----|
| chr3  | 127836762     | 127837003 | 242 |
| chr3  | 121950313     | 121950554 | 242 |
| chr3  | 119910072     | 119910313 | 242 |
| chr29 | 41704780      | 41705021  | 242 |
| chr29 | 35091376      | 35091617  | 242 |
| chr26 | 38278379      | 38278620  | 242 |
| chr24 | 33218022      | 33218263  | 242 |
| chr23 | 13602024      | 13602265  | 242 |
| chr21 | 28846640      | 28846881  | 242 |
| chr20 | 6685436       | 6685677   | 242 |
| chr19 | 16043905      | 16044146  | 242 |
| chr18 | 51308731      | 51308972  | 242 |
| chr18 | 26112028      | 26112269  | 242 |
| chr18 | 21188476      | 21188717  | 242 |
| chr15 | 43332144      | 43332385  | 242 |
| chr15 | 32953018      | 32953259  | 242 |
| chr13 | 21988903      | 21989144  | 242 |
| chr12 | 14718216      | 14718457  | 242 |
| chr11 | 81363961      | 81364202  | 242 |
| chr10 | 73464372      | 73464613  | 242 |
| chr10 | 30113628      | 30113869  | 242 |
| chr1  | 59902649      | 59902890  | 242 |
| chrX  | 72733823      | 72734063  | 241 |
| chrX  | 62812227      | 62812467  | 241 |
| chrX  | 60786657      | 60786897  | 241 |
| chrX  | 44929645      | 44929885  | 241 |
| chrX  | 21072252      | 21072492  | 241 |
| chrX  | 796823 797063 | 241       |     |
| chr9  | 72535001      | 72535241  | 241 |
| chr9  | 62605868      | 62606108  | 241 |
| chr5  | 118253814     | 118254054 | 241 |
| chr3  | 121910479     | 121910719 | 241 |
| chr3  | 117291112     | 117291352 | 241 |
| chr3  | 116162617     | 116162857 | 241 |
| chr27 | 45255851      | 45256091  | 241 |
| chr25 | 34277582      | 34277822  | 241 |
| chr24 | 1198373       | 1198613   | 241 |
| chr23 | 43245981      | 43246221  | 241 |
| chr23 | 10537769      | 10538009  | 241 |
| chr23 | 8250861       | 8251101   | 241 |
| chr22 | 48415900      | 48416140  | 241 |
| chr22 | 21810252      | 21810492  | 241 |
| chr21 | 23010673      | 23010913  | 241 |
| chr21 | 20902235      | 20902475  | 241 |
| chr20 | 8671077       | 8671317   | 241 |
| chr2  | 127243553     | 127243793 | 241 |
| chr19 | 29689660      | 29689900  | 241 |
| chr18 | 625749 625989 | 241       |     |
| chr17 | 70277304      | 70277544  | 241 |
| chr17 | 68136000      | 68136240  | 241 |

|       |           |           |     |
|-------|-----------|-----------|-----|
| chr16 | 75654022  | 75654262  | 241 |
| chr16 | 73073910  | 73074150  | 241 |
| chr16 | 43113598  | 43113838  | 241 |
| chr15 | 38452647  | 38452887  | 241 |
| chr15 | 29027672  | 29027912  | 241 |
| chr11 | 70830826  | 70831066  | 241 |
| chr10 | 5323430   | 5323670   | 241 |
| chr1  | 153881518 | 153881758 | 241 |
| chr1  | 8943001   | 8943241   | 241 |
| chrX  | 78063481  | 78063720  | 240 |
| chrX  | 58082974  | 58083213  | 240 |
| chrX  | 38371139  | 38371378  | 240 |
| chrX  | 13797193  | 13797432  | 240 |
| chrX  | 2416108   | 2416347   | 240 |
| chr9  | 44303761  | 44304000  | 240 |
| chr7  | 108568319 | 108568558 | 240 |
| chr7  | 94365244  | 94365483  | 240 |
| chr7  | 20563445  | 20563684  | 240 |
| chr4  | 16827598  | 16827837  | 240 |
| chr29 | 47327845  | 47328084  | 240 |
| chr26 | 45282978  | 45283217  | 240 |
| chr26 | 43042686  | 43042925  | 240 |
| chr26 | 31159042  | 31159281  | 240 |
| chr25 | 4703812   | 4704051   | 240 |
| chr24 | 64115648  | 64115887  | 240 |
| chr24 | 61731272  | 61731511  | 240 |
| chr24 | 59473072  | 59473311  | 240 |
| chr23 | 44107499  | 44107738  | 240 |
| chr2  | 21394910  | 21395149  | 240 |
| chr19 | 39164918  | 39165157  | 240 |
| chr19 | 10984860  | 10985099  | 240 |
| chr17 | 70232638  | 70232877  | 240 |
| chr15 | 26761760  | 26761999  | 240 |
| chr15 | 25373161  | 25373400  | 240 |
| chr15 | 24575605  | 24575844  | 240 |
| chr14 | 42909985  | 42910224  | 240 |
| chr13 | 57589652  | 57589891  | 240 |
| chr13 | 15723964  | 15724203  | 240 |
| chr12 | 32874624  | 32874863  | 240 |
| chr12 | 20911281  | 20911520  | 240 |
| chr12 | 8749999   | 8750238   | 240 |
| chr11 | 102379923 | 102380162 | 240 |
| chr10 | 49974707  | 49974946  | 240 |
| chr1  | 71954467  | 71954706  | 240 |
| chrX  | 78175563  | 78175801  | 239 |
| chrX  | 56090761  | 56090999  | 239 |
| chrX  | 40765744  | 40765982  | 239 |
| chrX  | 20736440  | 20736678  | 239 |
| chrX  | 6656385   | 6656623   | 239 |
| chr6  | 120791771 | 120792009 | 239 |

|       |           |           |     |
|-------|-----------|-----------|-----|
| chr6  | 119404103 | 119404341 | 239 |
| chr5  | 121268618 | 121268856 | 239 |
| chr4  | 42346000  | 42346238  | 239 |
| chr29 | 31393883  | 31394121  | 239 |
| chr29 | 26751243  | 26751481  | 239 |
| chr26 | 31330408  | 31330646  | 239 |
| chr25 | 33286000  | 33286238  | 239 |
| chr25 | 1509517   | 1509755   | 239 |
| chr24 | 44218217  | 44218455  | 239 |
| chr24 | 43685027  | 43685265  | 239 |
| chr24 | 40671755  | 40671993  | 239 |
| chr23 | 18064830  | 18065068  | 239 |
| chr23 | 14997999  | 14998237  | 239 |
| chr22 | 5665199   | 5665437   | 239 |
| chr21 | 26573930  | 26574168  | 239 |
| chr21 | 11794625  | 11794863  | 239 |
| chr20 | 8569698   | 8569936   | 239 |
| chr19 | 42829941  | 42830179  | 239 |
| chr19 | 37928888  | 37929126  | 239 |
| chr16 | 50272092  | 50272330  | 239 |
| chr15 | 30174044  | 30174282  | 239 |
| chr13 | 59878580  | 59878818  | 239 |
| chr10 | 42934906  | 42935144  | 239 |
| chrX  | 80966366  | 80966603  | 238 |
| chrX  | 66190788  | 66191025  | 238 |
| chrX  | 57491200  | 57491437  | 238 |
| chrX  | 37338020  | 37338257  | 238 |
| chrX  | 34125710  | 34125947  | 238 |
| chrX  | 31758356  | 31758593  | 238 |
| chrX  | 19757637  | 19757874  | 238 |
| chrX  | 18448871  | 18449108  | 238 |
| chrX  | 10938132  | 10938369  | 238 |
| chrX  | 5829837   | 5830074   | 238 |
| chrX  | 1740466   | 1740703   | 238 |
| chr9  | 27088520  | 27088757  | 238 |
| chr8  | 89468638  | 89468875  | 238 |
| chr7  | 18667497  | 18667734  | 238 |
| chr5  | 112178499 | 112178736 | 238 |
| chr5  | 101513999 | 101514236 | 238 |
| chr5  | 74313489  | 74313726  | 238 |
| chr4  | 104611469 | 104611706 | 238 |
| chr4  | 99058078  | 99058315  | 238 |
| chr4  | 45566044  | 45566281  | 238 |
| chr29 | 36498666  | 36498903  | 238 |
| chr28 | 27059758  | 27059995  | 238 |
| chr26 | 43778153  | 43778390  | 238 |
| chr26 | 31340238  | 31340475  | 238 |
| chr25 | 28508680  | 28508917  | 238 |
| chr23 | 38045017  | 38045254  | 238 |
| chr23 | 25837657  | 25837894  | 238 |

|       |           |           |     |
|-------|-----------|-----------|-----|
| chr21 | 58547944  | 58548181  | 238 |
| chr20 | 6755206   | 6755443   | 238 |
| chr18 | 21186994  | 21187231  | 238 |
| chr17 | 5486498   | 5486735   | 238 |
| chr15 | 23860437  | 23860674  | 238 |
| chr14 | 30832917  | 30833154  | 238 |
| chr14 | 12755889  | 12756126  | 238 |
| chr13 | 16140959  | 16141196  | 238 |
| chr12 | 75415598  | 75415835  | 238 |
| chr11 | 80807632  | 80807869  | 238 |
| chr1  | 123097604 | 123097841 | 238 |
| chrX  | 13362988  | 13363224  | 237 |
| chrX  | 11265496  | 11265732  | 237 |
| chrX  | 7014903   | 7015139   | 237 |
| chrX  | 2353354   | 2353590   | 237 |
| chrX  | 2300109   | 2300345   | 237 |
| chrM  | 1733 1969 | 237       |     |
| chr8  | 72378282  | 72378518  | 237 |
| chr8  | 57679657  | 57679893  | 237 |
| chr8  | 45758605  | 45758841  | 237 |
| chr7  | 11546624  | 11546860  | 237 |
| chr6  | 115539080 | 115539316 | 237 |
| chr5  | 35764932  | 35765168  | 237 |
| chr3  | 120988668 | 120988904 | 237 |
| chr3  | 115982319 | 115982555 | 237 |
| chr3  | 11495519  | 11495755  | 237 |
| chr27 | 26951645  | 26951881  | 237 |
| chr25 | 38042301  | 38042537  | 237 |
| chr25 | 37527799  | 37528035  | 237 |
| chr21 | 47608182  | 47608418  | 237 |
| chr21 | 24393672  | 24393908  | 237 |
| chr20 | 8717962   | 8718198   | 237 |
| chr19 | 24071271  | 24071507  | 237 |
| chr18 | 45482677  | 45482913  | 237 |
| chr17 | 4514852   | 4515088   | 237 |
| chr16 | 47561815  | 47562051  | 237 |
| chr15 | 75213590  | 75213826  | 237 |
| chr15 | 29068598  | 29068834  | 237 |
| chr14 | 15462832  | 15463068  | 237 |
| chr13 | 59838346  | 59838582  | 237 |
| chr13 | 39957848  | 39958084  | 237 |
| chr11 | 47362501  | 47362737  | 237 |
| chr10 | 16794702  | 16794938  | 237 |
| chrX  | 81133007  | 81133242  | 236 |
| chrX  | 75452638  | 75452873  | 236 |
| chrX  | 71610980  | 71611215  | 236 |
| chrX  | 71052662  | 71052897  | 236 |
| chrX  | 56736732  | 56736967  | 236 |
| chrX  | 56570460  | 56570695  | 236 |
| chrX  | 22949403  | 22949638  | 236 |

|       |           |           |     |
|-------|-----------|-----------|-----|
| chr8  | 107529522 | 107529757 | 236 |
| chr7  | 38167781  | 38168016  | 236 |
| chr6  | 51515058  | 51515293  | 236 |
| chr5  | 115872763 | 115872998 | 236 |
| chr4  | 67695948  | 67696183  | 236 |
| chr3  | 121751814 | 121752049 | 236 |
| chr3  | 100176741 | 100176976 | 236 |
| chr3  | 10637483  | 10637718  | 236 |
| chr3  | 9425460   | 9425695   | 236 |
| chr29 | 33668374  | 33668609  | 236 |
| chr25 | 33291347  | 33291582  | 236 |
| chr25 | 30535777  | 30536012  | 236 |
| chr24 | 42591880  | 42592115  | 236 |
| chr22 | 29695538  | 29695773  | 236 |
| chr19 | 31306965  | 31307200  | 236 |
| chr18 | 48298527  | 48298762  | 236 |
| chr18 | 21962260  | 21962495  | 236 |
| chr18 | 17887118  | 17887353  | 236 |
| chr18 | 11416338  | 11416573  | 236 |
| chr16 | 46649245  | 46649480  | 236 |
| chr13 | 79084115  | 79084350  | 236 |
| chr13 | 65985219  | 65985454  | 236 |
| chr13 | 60617355  | 60617590  | 236 |
| chr13 | 59618915  | 59619150  | 236 |
| chr12 | 75114964  | 75115199  | 236 |
| chr11 | 5842016   | 5842251   | 236 |
| chr10 | 8332796   | 8333031   | 236 |
| chr1  | 68096083  | 68096318  | 236 |
| chrX  | 72040083  | 72040317  | 235 |
| chrX  | 49342216  | 49342450  | 235 |
| chrX  | 46405751  | 46405985  | 235 |
| chrX  | 38237323  | 38237557  | 235 |
| chrX  | 25323996  | 25324230  | 235 |
| chrX  | 21835417  | 21835651  | 235 |
| chr8  | 80074677  | 80074911  | 235 |
| chr8  | 60099064  | 60099298  | 235 |
| chr7  | 50043519  | 50043753  | 235 |
| chr7  | 37485839  | 37486073  | 235 |
| chr5  | 125342410 | 125342644 | 235 |
| chr5  | 124681416 | 124681650 | 235 |
| chr5  | 123163054 | 123163288 | 235 |
| chr4  | 117847337 | 117847571 | 235 |
| chr4  | 74913537  | 74913771  | 235 |
| chr3  | 108998287 | 108998521 | 235 |
| chr3  | 98037794  | 98038028  | 235 |
| chr3  | 56307038  | 56307272  | 235 |
| chr26 | 37515211  | 37515445  | 235 |
| chr23 | 44806476  | 44806710  | 235 |
| chr22 | 60407708  | 60407942  | 235 |
| chr22 | 56383532  | 56383766  | 235 |

|       |             |           |     |
|-------|-------------|-----------|-----|
| chr21 | 20877777    | 20878011  | 235 |
| chr20 | 6688029     | 6688263   | 235 |
| chr19 | 61178303    | 61178537  | 235 |
| chr19 | 46670541    | 46670775  | 235 |
| chr18 | 54189788    | 54190022  | 235 |
| chr18 | 52736982    | 52737216  | 235 |
| chr18 | 39822339    | 39822573  | 235 |
| chr18 | 26061610    | 26061844  | 235 |
| chr16 | 48565361    | 48565595  | 235 |
| chr14 | 1990843     | 1991077   | 235 |
| chr13 | 22627434    | 22627668  | 235 |
| chr13 | 6122122     | 6122356   | 235 |
| chr12 | 83974189    | 83974423  | 235 |
| chr11 | 70882090    | 70882324  | 235 |
| chr10 | 35604877    | 35605111  | 235 |
| chr1  | 141491674   | 141491908 | 235 |
| chrX  | 60147571    | 60147804  | 234 |
| chrX  | 55995227    | 55995460  | 234 |
| chrX  | 55288379    | 55288612  | 234 |
| chrX  | 46889912    | 46890145  | 234 |
| chr9  | 99793097    | 99793330  | 234 |
| chr9  | 45970784    | 45971017  | 234 |
| chr6  | 12114922    | 12115155  | 234 |
| chr4  | 121889436   | 121889669 | 234 |
| chr29 | 35481440    | 35481673  | 234 |
| chr28 | 32395237    | 32395470  | 234 |
| chr25 | 34259826    | 34260059  | 234 |
| chr25 | 11591540    | 11591773  | 234 |
| chr25 | 2794671     | 2794904   | 234 |
| chr22 | 60197635    | 60197868  | 234 |
| chr22 | 12050492    | 12050725  | 234 |
| chr21 | 31663666    | 31663899  | 234 |
| chr18 | 51622098    | 51622331  | 234 |
| chr18 | 50268715    | 50268948  | 234 |
| chr17 | 70106466    | 70106699  | 234 |
| chr16 | 48839697    | 48839930  | 234 |
| chr16 | 47069000    | 47069233  | 234 |
| chr16 | 1622303     | 1622536   | 234 |
| chr16 | 32982 33215 | 234       |     |
| chr15 | 75800817    | 75801050  | 234 |
| chr15 | 29462158    | 29462391  | 234 |
| chr15 | 23592194    | 23592427  | 234 |
| chr15 | 21196467    | 21196700  | 234 |
| chr14 | 6963791     | 6964024   | 234 |
| chr14 | 1647419     | 1647652   | 234 |
| chr13 | 63171816    | 63172049  | 234 |
| chr13 | 61278711    | 61278944  | 234 |
| chr13 | 59093311    | 59093544  | 234 |
| chr12 | 10282706    | 10282939  | 234 |
| chr11 | 107577258   | 107577491 | 234 |



|       |               |           |     |
|-------|---------------|-----------|-----|
| chr11 | 98912842      | 98913075  | 234 |
| chr10 | 20819589      | 20819822  | 234 |
| chrX  | 55765013      | 55765245  | 233 |
| chrX  | 55620079      | 55620311  | 233 |
| chrX  | 48204222      | 48204454  | 233 |
| chrX  | 38942898      | 38943130  | 233 |
| chr9  | 66540311      | 66540543  | 233 |
| chr3  | 120960519     | 120960751 | 233 |
| chr29 | 50048723      | 50048955  | 233 |
| chr26 | 22315448      | 22315680  | 233 |
| chr23 | 50964710      | 50964942  | 233 |
| chr23 | 15823367      | 15823599  | 233 |
| chr22 | 50795308      | 50795540  | 233 |
| chr22 | 11626348      | 11626580  | 233 |
| chr20 | 60702202      | 60702434  | 233 |
| chr20 | 2532196       | 2532428   | 233 |
| chr20 | 2145451       | 2145683   | 233 |
| chr2  | 136976347     | 136976579 | 233 |
| chr2  | 21053846      | 21054078  | 233 |
| chr19 | 29014700      | 29014932  | 233 |
| chr19 | 7797126       | 7797358   | 233 |
| chr17 | 64068028      | 64068260  | 233 |
| chr17 | 60728587      | 60728819  | 233 |
| chr16 | 28761467      | 28761699  | 233 |
| chr11 | 100750773     | 100751005 | 233 |
| chr11 | 90390839      | 90391071  | 233 |
| chr1  | 138634579     | 138634811 | 233 |
| chrX  | 38309674      | 38309905  | 232 |
| chrX  | 29715608      | 29715839  | 232 |
| chrX  | 20301380      | 20301611  | 232 |
| chrX  | 6574386       | 6574617   | 232 |
| chrX  | 943616 943847 |           | 232 |
| chr7  | 52468136      | 52468367  | 232 |
| chr7  | 14679371      | 14679602  | 232 |
| chr7  | 9074000       | 9074231   | 232 |
| chr3  | 123524013     | 123524244 | 232 |
| chr3  | 119401543     | 119401774 | 232 |
| chr3  | 114304103     | 114304334 | 232 |
| chr3  | 55909320      | 55909551  | 232 |
| chr29 | 49683032      | 49683263  | 232 |
| chr28 | 12430880      | 12431111  | 232 |
| chr27 | 21413759      | 21413990  | 232 |
| chr25 | 39213646      | 39213877  | 232 |
| chr25 | 28060687      | 28060918  | 232 |
| chr24 | 40381943      | 40382174  | 232 |
| chr22 | 38528851      | 38529082  | 232 |
| chr21 | 63899972      | 63900203  | 232 |
| chr21 | 61662365      | 61662596  | 232 |
| chr21 | 32841042      | 32841273  | 232 |
| chr21 | 30807529      | 30807760  | 232 |

|       |           |           |     |
|-------|-----------|-----------|-----|
| chr2  | 135707479 | 135707710 | 232 |
| chr19 | 61779728  | 61779959  | 232 |
| chr18 | 38529064  | 38529295  | 232 |
| chr18 | 17983605  | 17983836  | 232 |
| chr18 | 12123839  | 12124070  | 232 |
| chr17 | 68402356  | 68402587  | 232 |
| chr17 | 66837386  | 66837617  | 232 |
| chr17 | 60296808  | 60297039  | 232 |
| chr14 | 61131612  | 61131843  | 232 |
| chr14 | 7820225   | 7820456   | 232 |
| chr14 | 3715084   | 3715315   | 232 |
| chr11 | 88837089  | 88837320  | 232 |
| chr10 | 17156959  | 17157190  | 232 |
| chrX  | 56984767  | 56984997  | 231 |
| chrX  | 56754600  | 56754830  | 231 |
| chrX  | 22400462  | 22400692  | 231 |
| chrX  | 19417843  | 19418073  | 231 |
| chrX  | 10824985  | 10825215  | 231 |
| chr9  | 74458275  | 74458505  | 231 |
| chr8  | 87999820  | 88000050  | 231 |
| chr8  | 63898901  | 63899131  | 231 |
| chr7  | 61089301  | 61089531  | 231 |
| chr5  | 118150719 | 118150949 | 231 |
| chr3  | 121735275 | 121735505 | 231 |
| chr3  | 21894413  | 21894643  | 231 |
| chr28 | 34072013  | 34072243  | 231 |
| chr26 | 46824416  | 46824646  | 231 |
| chr25 | 35372101  | 35372331  | 231 |
| chr24 | 1206040   | 1206270   | 231 |
| chr2  | 76610352  | 76610582  | 231 |
| chr19 | 58324198  | 58324428  | 231 |
| chr19 | 25997339  | 25997569  | 231 |
| chr19 | 22566880  | 22567110  | 231 |
| chr19 | 12128282  | 12128512  | 231 |
| chr19 | 8486889   | 8487119   | 231 |
| chr19 | 7310063   | 7310293   | 231 |
| chr15 | 81601268  | 81601498  | 231 |
| chr15 | 54325644  | 54325874  | 231 |
| chr15 | 42593937  | 42594167  | 231 |
| chr13 | 70386703  | 70386933  | 231 |
| chr13 | 68898543  | 68898773  | 231 |
| chr13 | 63510278  | 63510508  | 231 |
| chr13 | 57561898  | 57562128  | 231 |
| chr13 | 26226387  | 26226617  | 231 |
| chr11 | 44707635  | 44707865  | 231 |
| chr10 | 17668318  | 17668548  | 231 |
| chr10 | 14131417  | 14131647  | 231 |
| chr1  | 147253265 | 147253495 | 231 |
| chrX  | 83458402  | 83458631  | 230 |
| chrX  | 80899068  | 80899297  | 230 |

|       |           |           |     |
|-------|-----------|-----------|-----|
| chrX  | 65957357  | 65957586  | 230 |
| chrX  | 62813324  | 62813553  | 230 |
| chrX  | 31943580  | 31943809  | 230 |
| chrX  | 31343862  | 31344091  | 230 |
| chrX  | 8672133   | 8672362   | 230 |
| chrX  | 6560689   | 6560918   | 230 |
| chr5  | 120498525 | 120498754 | 230 |
| chr5  | 30355934  | 30356163  | 230 |
| chr3  | 121155199 | 121155428 | 230 |
| chr29 | 34256989  | 34257218  | 230 |
| chr28 | 35184753  | 35184982  | 230 |
| chr27 | 44797558  | 44797787  | 230 |
| chr26 | 49110668  | 49110897  | 230 |
| chr26 | 48716119  | 48716348  | 230 |
| chr26 | 34910187  | 34910416  | 230 |
| chr25 | 27303766  | 27303995  | 230 |
| chr2  | 135625773 | 135626002 | 230 |
| chr18 | 15806848  | 15807077  | 230 |
| chr18 | 11966126  | 11966355  | 230 |
| chr14 | 21177018  | 21177247  | 230 |
| chr13 | 38418605  | 38418834  | 230 |
| chr13 | 16056668  | 16056897  | 230 |
| chr12 | 37155383  | 37155612  | 230 |
| chr10 | 21003953  | 21004182  | 230 |
| chr1  | 147305186 | 147305415 | 230 |
| chr1  | 58613096  | 58613325  | 230 |
| chrX  | 71141405  | 71141633  | 229 |
| chrX  | 65393312  | 65393540  | 229 |
| chrX  | 65073835  | 65074063  | 229 |
| chrX  | 63227324  | 63227552  | 229 |
| chrX  | 59573912  | 59574140  | 229 |
| chrX  | 35437608  | 35437836  | 229 |
| chrX  | 34527711  | 34527939  | 229 |
| chr7  | 76987129  | 76987357  | 229 |
| chr7  | 19215050  | 19215278  | 229 |
| chr7  | 15407657  | 15407885  | 229 |
| chr6  | 109834411 | 109834639 | 229 |
| chr6  | 46562807  | 46563035  | 229 |
| chr4  | 64221909  | 64222137  | 229 |
| chr29 | 37623371  | 37623599  | 229 |
| chr29 | 32063151  | 32063379  | 229 |
| chr28 | 33819640  | 33819868  | 229 |
| chr26 | 39813588  | 39813816  | 229 |
| chr25 | 38529479  | 38529707  | 229 |
| chr25 | 34241046  | 34241274  | 229 |
| chr23 | 30759542  | 30759770  | 229 |
| chr23 | 27764660  | 27764888  | 229 |
| chr23 | 25287076  | 25287304  | 229 |
| chr23 | 9729704   | 9729932   | 229 |
| chr21 | 63411907  | 63412135  | 229 |

|       |               |           |     |
|-------|---------------|-----------|-----|
| chr21 | 58687739      | 58687967  | 229 |
| chr21 | 33044150      | 33044378  | 229 |
| chr2  | 132407687     | 132407915 | 229 |
| chr19 | 46053494      | 46053722  | 229 |
| chr19 | 38232053      | 38232281  | 229 |
| chr18 | 694223 694451 |           | 229 |
| chr17 | 68347143      | 68347371  | 229 |
| chr17 | 63000227      | 63000455  | 229 |
| chr16 | 48696263      | 48696491  | 229 |
| chr11 | 105630395     | 105630623 | 229 |
| chr11 | 71119519      | 71119747  | 229 |
| chrX  | 75656846      | 75657073  | 228 |
| chrX  | 63229539      | 63229766  | 228 |
| chrX  | 50618067      | 50618294  | 228 |
| chrX  | 12168983      | 12169210  | 228 |
| chrX  | 7633103       | 7633330   | 228 |
| chrX  | 2452382       | 2452609   | 228 |
| chr7  | 19831476      | 19831703  | 228 |
| chr5  | 125031575     | 125031802 | 228 |
| chr5  | 115047581     | 115047808 | 228 |
| chr4  | 121000582     | 121000809 | 228 |
| chr3  | 123618463     | 123618690 | 228 |
| chr3  | 119551045     | 119551272 | 228 |
| chr24 | 51556201      | 51556428  | 228 |
| chr23 | 31289764      | 31289991  | 228 |
| chr22 | 56103540      | 56103767  | 228 |
| chr22 | 41737380      | 41737607  | 228 |
| chr21 | 15366741      | 15366968  | 228 |
| chr19 | 57138253      | 57138480  | 228 |
| chr19 | 54045764      | 54045991  | 228 |
| chr19 | 39502273      | 39502500  | 228 |
| chr18 | 46684676      | 46684903  | 228 |
| chr17 | 73149346      | 73149573  | 228 |
| chr16 | 43439837      | 43440064  | 228 |
| chr15 | 64187467      | 64187694  | 228 |
| chr15 | 43071442      | 43071669  | 228 |
| chr15 | 28948159      | 28948386  | 228 |
| chr13 | 60166865      | 60167092  | 228 |
| chr13 | 58656756      | 58656983  | 228 |
| chr12 | 74465369      | 74465596  | 228 |
| chr11 | 94091338      | 94091565  | 228 |
| chr1  | 81341765      | 81341992  | 228 |
| chrX  | 74109891      | 74110117  | 227 |
| chrX  | 49296421      | 49296647  | 227 |
| chrX  | 48121104      | 48121330  | 227 |
| chr8  | 72069444      | 72069670  | 227 |
| chr8  | 7428384       | 7428610   | 227 |
| chr7  | 95949239      | 95949465  | 227 |
| chr7  | 52360618      | 52360844  | 227 |
| chr7  | 46293459      | 46293685  | 227 |

|       |           |           |     |
|-------|-----------|-----------|-----|
| chr6  | 91903983  | 91904209  | 227 |
| chr5  | 29110793  | 29111019  | 227 |
| chr4  | 123497826 | 123498052 | 227 |
| chr4  | 98631998  | 98632224  | 227 |
| chr3  | 111918620 | 111918846 | 227 |
| chr3  | 99189486  | 99189712  | 227 |
| chr3  | 34623677  | 34623903  | 227 |
| chr3  | 20577462  | 20577688  | 227 |
| chr28 | 26451973  | 26452199  | 227 |
| chr27 | 27698662  | 27698888  | 227 |
| chr26 | 38206006  | 38206232  | 227 |
| chr25 | 39184130  | 39184356  | 227 |
| chr24 | 60998841  | 60999067  | 227 |
| chr24 | 60411035  | 60411261  | 227 |
| chr24 | 39069523  | 39069749  | 227 |
| chr23 | 19861677  | 19861903  | 227 |
| chr23 | 14842903  | 14843129  | 227 |
| chr22 | 50763614  | 50763840  | 227 |
| chr21 | 64195401  | 64195627  | 227 |
| chr21 | 59740056  | 59740282  | 227 |
| chr21 | 33137862  | 33138088  | 227 |
| chr20 | 33694183  | 33694409  | 227 |
| chr2  | 24906024  | 24906250  | 227 |
| chr17 | 70082849  | 70083075  | 227 |
| chr17 | 61072308  | 61072534  | 227 |
| chr16 | 77519674  | 77519900  | 227 |
| chr16 | 67202622  | 67202848  | 227 |
| chr15 | 74687507  | 74687733  | 227 |
| chr14 | 1808108   | 1808334   | 227 |
| chr13 | 56196888  | 56197114  | 227 |
| chr13 | 41514133  | 41514359  | 227 |
| chr13 | 38276805  | 38277031  | 227 |
| chr12 | 34031431  | 34031657  | 227 |
| chr11 | 100905609 | 100905835 | 227 |
| chr11 | 88928340  | 88928566  | 227 |
| chr1  | 74604981  | 74605207  | 227 |
| chrX  | 72639167  | 72639392  | 226 |
| chrX  | 70834813  | 70835038  | 226 |
| chrX  | 62916304  | 62916529  | 226 |
| chrX  | 58755301  | 58755526  | 226 |
| chrX  | 56338759  | 56338984  | 226 |
| chrX  | 54766550  | 54766775  | 226 |
| chrX  | 54093890  | 54094115  | 226 |
| chrX  | 31072748  | 31072973  | 226 |
| chrX  | 10225420  | 10225645  | 226 |
| chr9  | 91011212  | 91011437  | 226 |
| chr9  | 90428206  | 90428431  | 226 |
| chr9  | 36046127  | 36046352  | 226 |
| chr9  | 26579411  | 26579636  | 226 |
| chr7  | 44767774  | 44767999  | 226 |

|       |           |           |     |
|-------|-----------|-----------|-----|
| chr7  | 3589928   | 3590153   | 226 |
| chr29 | 38060937  | 38061162  | 226 |
| chr28 | 7293207   | 7293432   | 226 |
| chr27 | 34575210  | 34575435  | 226 |
| chr25 | 30370652  | 30370877  | 226 |
| chr23 | 32651662  | 32651887  | 226 |
| chr22 | 50781485  | 50781710  | 226 |
| chr21 | 56023490  | 56023715  | 226 |
| chr20 | 2012072   | 2012297   | 226 |
| chr2  | 126731247 | 126731472 | 226 |
| chr2  | 73945657  | 73945882  | 226 |
| chr19 | 39830198  | 39830423  | 226 |
| chr18 | 33701330  | 33701555  | 226 |
| chr18 | 22154357  | 22154582  | 226 |
| chr17 | 70360211  | 70360436  | 226 |
| chr16 | 44360105  | 44360330  | 226 |
| chr16 | 26581952  | 26582177  | 226 |
| chr13 | 49830417  | 49830642  | 226 |
| chr11 | 66322883  | 66323108  | 226 |
| chr10 | 90201161  | 90201386  | 226 |
| chr10 | 89498960  | 89499185  | 226 |
| chr10 | 20492712  | 20492937  | 226 |
| chr10 | 17315606  | 17315831  | 226 |
| chrX  | 60299855  | 60300079  | 225 |
| chrX  | 57055213  | 57055437  | 225 |
| chrX  | 56624099  | 56624323  | 225 |
| chrX  | 55421683  | 55421907  | 225 |
| chrX  | 54514376  | 54514600  | 225 |
| chrX  | 53334664  | 53334888  | 225 |
| chrX  | 50849930  | 50850154  | 225 |
| chrX  | 48711815  | 48712039  | 225 |
| chrX  | 38055118  | 38055342  | 225 |
| chrX  | 36841928  | 36842152  | 225 |
| chrX  | 20307055  | 20307279  | 225 |
| chrX  | 8020589   | 8020813   | 225 |
| chrX  | 6629109   | 6629333   | 225 |
| chr7  | 52397761  | 52397985  | 225 |
| chr7  | 50659232  | 50659456  | 225 |
| chr7  | 13272997  | 13273221  | 225 |
| chr6  | 106970752 | 106970976 | 225 |
| chr5  | 113194151 | 113194375 | 225 |
| chr5  | 112035994 | 112036218 | 225 |
| chr4  | 30313916  | 30314140  | 225 |
| chr3  | 112901445 | 112901669 | 225 |
| chr3  | 99605344  | 99605568  | 225 |
| chr3  | 7698151   | 7698375   | 225 |
| chr29 | 36890608  | 36890832  | 225 |
| chr29 | 33590121  | 33590345  | 225 |
| chr27 | 30619207  | 30619431  | 225 |
| chr26 | 48530996  | 48531220  | 225 |

|       |           |           |     |
|-------|-----------|-----------|-----|
| chr25 | 34498748  | 34498972  | 225 |
| chr24 | 11507572  | 11507796  | 225 |
| chr23 | 27730548  | 27730772  | 225 |
| chr22 | 54390881  | 54391105  | 225 |
| chr22 | 30260011  | 30260235  | 225 |
| chr2  | 111414788 | 111415012 | 225 |
| chr19 | 30079531  | 30079755  | 225 |
| chr19 | 21684678  | 21684902  | 225 |
| chr18 | 63045307  | 63045531  | 225 |
| chr18 | 54670302  | 54670526  | 225 |
| chr18 | 51761658  | 51761882  | 225 |
| chr17 | 71872879  | 71873103  | 225 |
| chr17 | 60740823  | 60741047  | 225 |
| chr17 | 16731385  | 16731609  | 225 |
| chr15 | 29188261  | 29188485  | 225 |
| chr15 | 24289777  | 24290001  | 225 |
| chr15 | 21465238  | 21465462  | 225 |
| chr14 | 8246551   | 8246775   | 225 |
| chr13 | 42638213  | 42638437  | 225 |
| chr13 | 17749802  | 17750026  | 225 |
| chr13 | 15148354  | 15148578  | 225 |
| chr11 | 106003768 | 106003992 | 225 |
| chr11 | 96562027  | 96562251  | 225 |
| chr11 | 11750089  | 11750313  | 225 |
| chrX  | 75882455  | 75882678  | 224 |
| chrX  | 74682275  | 74682498  | 224 |
| chrX  | 71225528  | 71225751  | 224 |
| chrX  | 61248172  | 61248395  | 224 |
| chrX  | 54956253  | 54956476  | 224 |
| chrX  | 34407075  | 34407298  | 224 |
| chrX  | 32516164  | 32516387  | 224 |
| chrX  | 30878953  | 30879176  | 224 |
| chrX  | 24602512  | 24602735  | 224 |
| chr8  | 55496621  | 55496844  | 224 |
| chr7  | 88951555  | 88951778  | 224 |
| chr7  | 51604127  | 51604350  | 224 |
| chr7  | 13537191  | 13537414  | 224 |
| chr6  | 108860870 | 108861093 | 224 |
| chr3  | 116066851 | 116067074 | 224 |
| chr3  | 115642528 | 115642751 | 224 |
| chr3  | 9111544   | 9111767   | 224 |
| chr29 | 49051695  | 49051918  | 224 |
| chr29 | 31762706  | 31762929  | 224 |
| chr28 | 26596293  | 26596516  | 224 |
| chr26 | 43008480  | 43008703  | 224 |
| chr26 | 39829827  | 39830050  | 224 |
| chr26 | 38265096  | 38265319  | 224 |
| chr23 | 49851313  | 49851536  | 224 |
| chr23 | 43159194  | 43159417  | 224 |
| chr22 | 30360118  | 30360341  | 224 |

|       |           |           |     |
|-------|-----------|-----------|-----|
| chr20 | 6622222   | 6622445   | 224 |
| chr19 | 39617926  | 39618149  | 224 |
| chr19 | 16052778  | 16053001  | 224 |
| chr18 | 56482420  | 56482643  | 224 |
| chr13 | 74727204  | 74727427  | 224 |
| chr13 | 13580489  | 13580712  | 224 |
| chr12 | 75485306  | 75485529  | 224 |
| chr12 | 31204857  | 31205080  | 224 |
| chr11 | 91964101  | 91964324  | 224 |
| chr11 | 77915535  | 77915758  | 224 |
| chr11 | 77815722  | 77815945  | 224 |
| chrX  | 79004693  | 79004915  | 223 |
| chrX  | 49843425  | 49843647  | 223 |
| chrX  | 36415887  | 36416109  | 223 |
| chrX  | 36311318  | 36311540  | 223 |
| chrX  | 13788389  | 13788611  | 223 |
| chrX  | 8354161   | 8354383   | 223 |
| chr9  | 57912060  | 57912282  | 223 |
| chr8  | 87879826  | 87880048  | 223 |
| chr7  | 43096603  | 43096825  | 223 |
| chr7  | 10402929  | 10403151  | 223 |
| chr5  | 120381131 | 120381353 | 223 |
| chr4  | 98623137  | 98623359  | 223 |
| chr3  | 105410813 | 105411035 | 223 |
| chr3  | 55884395  | 55884617  | 223 |
| chr3  | 36906988  | 36907210  | 223 |
| chr3  | 8802849   | 8803071   | 223 |
| chr29 | 44925266  | 44925488  | 223 |
| chr29 | 27729247  | 27729469  | 223 |
| chr23 | 48560736  | 48560958  | 223 |
| chr23 | 7704245   | 7704467   | 223 |
| chr2  | 134895243 | 134895465 | 223 |
| chr19 | 61905946  | 61906168  | 223 |
| chr19 | 39315937  | 39316159  | 223 |
| chr19 | 33552166  | 33552388  | 223 |
| chr18 | 54179901  | 54180123  | 223 |
| chr17 | 70281719  | 70281941  | 223 |
| chr17 | 69953138  | 69953360  | 223 |
| chr16 | 47064567  | 47064789  | 223 |
| chr15 | 75942910  | 75943132  | 223 |
| chr14 | 26591930  | 26592152  | 223 |
| chr14 | 8044673   | 8044895   | 223 |
| chr13 | 59543023  | 59543245  | 223 |
| chr12 | 82033092  | 82033314  | 223 |
| chr11 | 103803504 | 103803726 | 223 |
| chr11 | 6476724   | 6476946   | 223 |
| chr1  | 112955669 | 112955891 | 223 |
| chrX  | 63102425  | 63102646  | 222 |
| chrX  | 54485330  | 54485551  | 222 |
| chrX  | 30676507  | 30676728  | 222 |



|       |           |           |     |
|-------|-----------|-----------|-----|
| chrX  | 22445785  | 22446006  | 222 |
| chrX  | 6726556   | 6726777   | 222 |
| chr8  | 77557073  | 77557294  | 222 |
| chr8  | 73748475  | 73748696  | 222 |
| chr7  | 53257633  | 53257854  | 222 |
| chr7  | 16329294  | 16329515  | 222 |
| chr6  | 88275421  | 88275642  | 222 |
| chr4  | 116045164 | 116045385 | 222 |
| chr3  | 98305541  | 98305762  | 222 |
| chr3  | 87404652  | 87404873  | 222 |
| chr3  | 29300729  | 29300950  | 222 |
| chr28 | 26164110  | 26164331  | 222 |
| chr28 | 23905540  | 23905761  | 222 |
| chr27 | 42867846  | 42868067  | 222 |
| chr26 | 32140534  | 32140755  | 222 |
| chr26 | 18424770  | 18424991  | 222 |
| chr24 | 35358295  | 35358516  | 222 |
| chr23 | 43311033  | 43311254  | 222 |
| chr23 | 30148298  | 30148519  | 222 |
| chr23 | 26517917  | 26518138  | 222 |
| chr22 | 50877359  | 50877580  | 222 |
| chr19 | 61955911  | 61956132  | 222 |
| chr18 | 56734638  | 56734859  | 222 |
| chr18 | 23257961  | 23258182  | 222 |
| chr18 | 8077764   | 8077985   | 222 |
| chr15 | 25130071  | 25130292  | 222 |
| chr13 | 35891114  | 35891335  | 222 |
| chr10 | 84495493  | 84495714  | 222 |
| chr10 | 66896462  | 66896683  | 222 |
| chr10 | 17281496  | 17281717  | 222 |
| chr10 | 16953749  | 16953970  | 222 |
| chr1  | 157328519 | 157328740 | 222 |
| chr1  | 69975090  | 69975311  | 222 |
| chrX  | 75033025  | 75033245  | 221 |
| chrX  | 72597829  | 72598049  | 221 |
| chrX  | 72216881  | 72217101  | 221 |
| chrX  | 46031076  | 46031296  | 221 |
| chrX  | 22531882  | 22532102  | 221 |
| chrX  | 20294191  | 20294411  | 221 |
| chrX  | 2375653   | 2375873   | 221 |
| chr9  | 50709420  | 50709640  | 221 |
| chr8  | 61615402  | 61615622  | 221 |
| chr8  | 60304504  | 60304724  | 221 |
| chr7  | 62788880  | 62789100  | 221 |
| chr7  | 18948528  | 18948748  | 221 |
| chr7  | 10643402  | 10643622  | 221 |
| chr5  | 112020540 | 112020760 | 221 |
| chr5  | 111811962 | 111812182 | 221 |
| chr5  | 30078288  | 30078508  | 221 |
| chr4  | 95705252  | 95705472  | 221 |

|       |           |           |     |
|-------|-----------|-----------|-----|
| chr4  | 68020219  | 68020439  | 221 |
| chr3  | 33505393  | 33505613  | 221 |
| chr3  | 15380458  | 15380678  | 221 |
| chr3  | 10272683  | 10272903  | 221 |
| chr29 | 46267083  | 46267303  | 221 |
| chr28 | 38942930  | 38943150  | 221 |
| chr28 | 26769344  | 26769564  | 221 |
| chr26 | 43121767  | 43121987  | 221 |
| chr24 | 43974462  | 43974682  | 221 |
| chr24 | 1612344   | 1612564   | 221 |
| chr23 | 46024068  | 46024288  | 221 |
| chr23 | 41813621  | 41813841  | 221 |
| chr23 | 21583885  | 21584105  | 221 |
| chr22 | 12345312  | 12345532  | 221 |
| chr22 | 5705705   | 5705925   | 221 |
| chr21 | 61778733  | 61778953  | 221 |
| chr21 | 59305521  | 59305741  | 221 |
| chr20 | 33627867  | 33628087  | 221 |
| chr20 | 13063678  | 13063898  | 221 |
| chr2  | 38906109  | 38906329  | 221 |
| chr18 | 48847154  | 48847374  | 221 |
| chr18 | 12557250  | 12557470  | 221 |
| chr18 | 9687041   | 9687261   | 221 |
| chr17 | 75739246  | 75739466  | 221 |
| chr16 | 47647454  | 47647674  | 221 |
| chr15 | 54474820  | 54475040  | 221 |
| chr15 | 38451644  | 38451864  | 221 |
| chr14 | 34005452  | 34005672  | 221 |
| chr14 | 25894632  | 25894852  | 221 |
| chr14 | 5914561   | 5914781   | 221 |
| chr13 | 62465691  | 62465911  | 221 |
| chr12 | 35104065  | 35104285  | 221 |
| chr12 | 34021890  | 34022110  | 221 |
| chr12 | 32501642  | 32501862  | 221 |
| chr11 | 77790946  | 77791166  | 221 |
| chrX  | 76694872  | 76695091  | 220 |
| chrX  | 75767680  | 75767899  | 220 |
| chrX  | 74093592  | 74093811  | 220 |
| chrX  | 71203465  | 71203684  | 220 |
| chrX  | 44937163  | 44937382  | 220 |
| chrX  | 22573638  | 22573857  | 220 |
| chrX  | 21619296  | 21619515  | 220 |
| chr7  | 101690679 | 101690898 | 220 |
| chr5  | 123652493 | 123652712 | 220 |
| chr5  | 30381933  | 30382152  | 220 |
| chr3  | 121359149 | 121359368 | 220 |
| chr3  | 113826191 | 113826410 | 220 |
| chr3  | 2491390   | 2491609   | 220 |
| chr29 | 35633750  | 35633969  | 220 |
| chr29 | 18328588  | 18328807  | 220 |

|       |           |           |     |
|-------|-----------|-----------|-----|
| chr26 | 44241543  | 44241762  | 220 |
| chr26 | 31158436  | 31158655  | 220 |
| chr25 | 37195372  | 37195591  | 220 |
| chr25 | 33392119  | 33392338  | 220 |
| chr25 | 31776592  | 31776811  | 220 |
| chr24 | 43930556  | 43930775  | 220 |
| chr24 | 15678126  | 15678345  | 220 |
| chr23 | 50066493  | 50066712  | 220 |
| chr23 | 27220290  | 27220509  | 220 |
| chr23 | 19347944  | 19348163  | 220 |
| chr19 | 55810539  | 55810758  | 220 |
| chr19 | 43126569  | 43126788  | 220 |
| chr18 | 39897550  | 39897769  | 220 |
| chr18 | 39581151  | 39581370  | 220 |
| chr18 | 11341861  | 11342080  | 220 |
| chr18 | 6279775   | 6279994   | 220 |
| chr12 | 75179192  | 75179411  | 220 |
| chr11 | 103319657 | 103319876 | 220 |
| chr11 | 91967885  | 91968104  | 220 |
| chr11 | 44978232  | 44978451  | 220 |
| chr11 | 14185063  | 14185282  | 220 |
| chr10 | 66939269  | 66939488  | 220 |
| chr1  | 68450435  | 68450654  | 220 |
| chrX  | 71646777  | 71646995  | 219 |
| chrX  | 59303963  | 59304181  | 219 |
| chrX  | 55970683  | 55970901  | 219 |
| chrX  | 50443665  | 50443883  | 219 |
| chrX  | 20084137  | 20084355  | 219 |
| chrX  | 6680956   | 6681174   | 219 |
| chr9  | 100324067 | 100324285 | 219 |
| chr8  | 63505432  | 63505650  | 219 |
| chr7  | 10628433  | 10628651  | 219 |
| chr7  | 10306493  | 10306711  | 219 |
| chr3  | 122116087 | 122116305 | 219 |
| chr3  | 116177297 | 116177515 | 219 |
| chr3  | 22973361  | 22973579  | 219 |
| chr28 | 7619859   | 7620077   | 219 |
| chr27 | 38656023  | 38656241  | 219 |
| chr26 | 43780880  | 43781098  | 219 |
| chr26 | 20245859  | 20246077  | 219 |
| chr23 | 18788820  | 18789038  | 219 |
| chr23 | 13661054  | 13661272  | 219 |
| chr23 | 3311233   | 3311451   | 219 |
| chr22 | 59789683  | 59789901  | 219 |
| chr22 | 50029884  | 50030102  | 219 |
| chr21 | 4300654   | 4300872   | 219 |
| chr18 | 40126710  | 40126928  | 219 |
| chr17 | 62515039  | 62515257  | 219 |
| chr17 | 58366477  | 58366695  | 219 |
| chr16 | 72417901  | 72418119  | 219 |

|       |               |           |     |
|-------|---------------|-----------|-----|
| chr15 | 23147737      | 23147955  | 219 |
| chr14 | 25854074      | 25854292  | 219 |
| chr13 | 77575983      | 77576201  | 219 |
| chr13 | 70191971      | 70192189  | 219 |
| chr13 | 29289380      | 29289598  | 219 |
| chr10 | 13292707      | 13292925  | 219 |
| chr1  | 132065689     | 132065907 | 219 |
| chrX  | 74095030      | 74095247  | 218 |
| chrX  | 65787499      | 65787716  | 218 |
| chrX  | 12909995      | 12910212  | 218 |
| chrX  | 278158 278375 | 218       |     |
| chr9  | 84240445      | 84240662  | 218 |
| chr8  | 93197043      | 93197260  | 218 |
| chr8  | 9325625       | 9325842   | 218 |
| chr6  | 120581815     | 120582032 | 218 |
| chr6  | 120409752     | 120409969 | 218 |
| chr6  | 118800938     | 118801155 | 218 |
| chr6  | 108801704     | 108801921 | 218 |
| chr5  | 35299962      | 35300179  | 218 |
| chr4  | 121987811     | 121988028 | 218 |
| chr3  | 35998127      | 35998344  | 218 |
| chr29 | 47909557      | 47909774  | 218 |
| chr29 | 38404018      | 38404235  | 218 |
| chr28 | 34318524      | 34318741  | 218 |
| chr28 | 33460702      | 33460919  | 218 |
| chr28 | 27051899      | 27052116  | 218 |
| chr25 | 40424084      | 40424301  | 218 |
| chr20 | 74194335      | 74194552  | 218 |
| chr20 | 35138580      | 35138797  | 218 |
| chr19 | 58451758      | 58451975  | 218 |
| chr18 | 56533498      | 56533715  | 218 |
| chr18 | 49820720      | 49820937  | 218 |
| chr18 | 11392654      | 11392871  | 218 |
| chr18 | 3793546       | 3793763   | 218 |
| chr15 | 74915722      | 74915939  | 218 |
| chr14 | 67965525      | 67965742  | 218 |
| chr14 | 61502567      | 61502784  | 218 |
| chr13 | 54425046      | 54425263  | 218 |
| chr13 | 40531899      | 40532116  | 218 |
| chr13 | 37797555      | 37797772  | 218 |
| chr11 | 25739855      | 25740072  | 218 |
| chr10 | 103753844     | 103754061 | 218 |
| chr10 | 17094696      | 17094913  | 218 |
| chrX  | 38862528      | 38862744  | 217 |
| chrX  | 33974499      | 33974715  | 217 |
| chrX  | 33109613      | 33109829  | 217 |
| chrX  | 30577520      | 30577736  | 217 |
| chrX  | 20128941      | 20129157  | 217 |
| chrX  | 6654339       | 6654555   | 217 |
| chrX  | 5752422       | 5752638   | 217 |

|       |           |           |     |
|-------|-----------|-----------|-----|
| chrX  | 2296603   | 2296819   | 217 |
| chr9  | 95327486  | 95327702  | 217 |
| chr8  | 10981693  | 10981909  | 217 |
| chr4  | 108695449 | 108695665 | 217 |
| chr3  | 126099471 | 126099687 | 217 |
| chr3  | 119303119 | 119303335 | 217 |
| chr3  | 23237952  | 23238168  | 217 |
| chr27 | 35400802  | 35401018  | 217 |
| chr26 | 38128692  | 38128908  | 217 |
| chr26 | 37496435  | 37496651  | 217 |
| chr23 | 51251015  | 51251231  | 217 |
| chr22 | 29360918  | 29361134  | 217 |
| chr22 | 5747461   | 5747677   | 217 |
| chr21 | 18672358  | 18672574  | 217 |
| chr20 | 5049730   | 5049946   | 217 |
| chr19 | 46833773  | 46833989  | 217 |
| chr19 | 43048801  | 43049017  | 217 |
| chr19 | 38930515  | 38930731  | 217 |
| chr19 | 23748855  | 23749071  | 217 |
| chr19 | 18425319  | 18425535  | 217 |
| chr18 | 33327468  | 33327684  | 217 |
| chr17 | 70228950  | 70229166  | 217 |
| chr17 | 62577910  | 62578126  | 217 |
| chr17 | 11970814  | 11971030  | 217 |
| chr16 | 64419795  | 64420011  | 217 |
| chr15 | 24687016  | 24687232  | 217 |
| chr11 | 25733816  | 25734032  | 217 |
| chr10 | 20864925  | 20865141  | 217 |
| chr10 | 20201023  | 20201239  | 217 |
| chrX  | 73976606  | 73976821  | 216 |
| chrX  | 65127699  | 65127914  | 216 |
| chrX  | 34548757  | 34548972  | 216 |
| chrX  | 34099098  | 34099313  | 216 |
| chrX  | 22583167  | 22583382  | 216 |
| chrX  | 20274381  | 20274596  | 216 |
| chrX  | 10929093  | 10929308  | 216 |
| chrX  | 7467255   | 7467470   | 216 |
| chrX  | 6738594   | 6738809   | 216 |
| chrX  | 3655897   | 3656112   | 216 |
| chr8  | 7675192   | 7675407   | 216 |
| chr7  | 81585911  | 81586126  | 216 |
| chr7  | 71809159  | 71809374  | 216 |
| chr6  | 18476589  | 18476804  | 216 |
| chr5  | 111644465 | 111644680 | 216 |
| chr5  | 111448772 | 111448987 | 216 |
| chr5  | 78284439  | 78284654  | 216 |
| chr5  | 30059740  | 30059955  | 216 |
| chr4  | 123594754 | 123594969 | 216 |
| chr29 | 35407732  | 35407947  | 216 |
| chr29 | 31909725  | 31909940  | 216 |

|       |           |           |     |
|-------|-----------|-----------|-----|
| chr28 | 3059969   | 3060184   | 216 |
| chr27 | 26983726  | 26983941  | 216 |
| chr26 | 34344092  | 34344307  | 216 |
| chr23 | 28596130  | 28596345  | 216 |
| chr21 | 34883344  | 34883559  | 216 |
| chr21 | 7784475   | 7784690   | 216 |
| chr20 | 59514916  | 59515131  | 216 |
| chr2  | 115042249 | 115042464 | 216 |
| chr2  | 75908475  | 75908690  | 216 |
| chr2  | 65753219  | 65753434  | 216 |
| chr19 | 15985128  | 15985343  | 216 |
| chr18 | 9648046   | 9648261   | 216 |
| chr17 | 59179529  | 59179744  | 216 |
| chr14 | 18631081  | 18631296  | 216 |
| chr13 | 54503848  | 54504063  | 216 |
| chr12 | 82203365  | 82203580  | 216 |
| chr11 | 104987617 | 104987832 | 216 |
| chr1  | 18427476  | 18427691  | 216 |
| chrX  | 48407770  | 48407984  | 215 |
| chrX  | 48050982  | 48051196  | 215 |
| chrX  | 5664758   | 5664972   | 215 |
| chr8  | 110853890 | 110854104 | 215 |
| chr8  | 55303889  | 55304103  | 215 |
| chr8  | 7397702   | 7397916   | 215 |
| chr7  | 12949674  | 12949888  | 215 |
| chr5  | 28862038  | 28862252  | 215 |
| chr4  | 121570806 | 121571020 | 215 |
| chr3  | 119354424 | 119354638 | 215 |
| chr3  | 114405190 | 114405404 | 215 |
| chr3  | 25847948  | 25848162  | 215 |
| chr3  | 13464390  | 13464604  | 215 |
| chr26 | 34654245  | 34654459  | 215 |
| chr24 | 49485901  | 49486115  | 215 |
| chr24 | 43676972  | 43677186  | 215 |
| chr24 | 40230670  | 40230884  | 215 |
| chr23 | 28118768  | 28118982  | 215 |
| chr22 | 59545454  | 59545668  | 215 |
| chr21 | 66458856  | 66459070  | 215 |
| chr21 | 31130442  | 31130656  | 215 |
| chr20 | 8656219   | 8656433   | 215 |
| chr2  | 127270346 | 127270560 | 215 |
| chr2  | 111267303 | 111267517 | 215 |
| chr19 | 26191161  | 26191375  | 215 |
| chr19 | 14281313  | 14281527  | 215 |
| chr18 | 51717803  | 51718017  | 215 |
| chr15 | 82248219  | 82248433  | 215 |
| chr15 | 33724255  | 33724469  | 215 |
| chr15 | 29151377  | 29151591  | 215 |
| chr15 | 21218718  | 21218932  | 215 |
| chr14 | 3413448   | 3413662   | 215 |

|       |           |           |     |
|-------|-----------|-----------|-----|
| chr13 | 79870900  | 79871114  | 215 |
| chr13 | 63485464  | 63485678  | 215 |
| chr12 | 9278051   | 9278265   | 215 |
| chr11 | 96076863  | 96077077  | 215 |
| chr11 | 84088296  | 84088510  | 215 |
| chr10 | 90021547  | 90021761  | 215 |
| chr10 | 15044930  | 15045144  | 215 |
| chr10 | 5024926   | 5025140   | 215 |
| chr1  | 152086816 | 152087030 | 215 |
| chr1  | 131428109 | 131428323 | 215 |
| chrX  | 77043303  | 77043516  | 214 |
| chrX  | 60396678  | 60396891  | 214 |
| chrX  | 50880868  | 50881081  | 214 |
| chrX  | 48699776  | 48699989  | 214 |
| chrX  | 38304433  | 38304646  | 214 |
| chrX  | 29469691  | 29469904  | 214 |
| chrX  | 13338304  | 13338517  | 214 |
| chrX  | 7517761   | 7517974   | 214 |
| chr9  | 50724875  | 50725088  | 214 |
| chr6  | 17414469  | 17414682  | 214 |
| chr5  | 102223328 | 102223541 | 214 |
| chr5  | 80000825  | 80001038  | 214 |
| chr3  | 109439236 | 109439449 | 214 |
| chr3  | 104965093 | 104965306 | 214 |
| chr3  | 88881847  | 88882060  | 214 |
| chr3  | 33835290  | 33835503  | 214 |
| chr29 | 36986777  | 36986990  | 214 |
| chr29 | 36175995  | 36176208  | 214 |
| chr29 | 31726042  | 31726255  | 214 |
| chr24 | 40578150  | 40578363  | 214 |
| chr23 | 31994389  | 31994602  | 214 |
| chr21 | 25778026  | 25778239  | 214 |
| chr21 | 20162548  | 20162761  | 214 |
| chr20 | 6409452   | 6409665   | 214 |
| chr2  | 137100980 | 137101193 | 214 |
| chr17 | 68471934  | 68472147  | 214 |
| chr17 | 46899094  | 46899307  | 214 |
| chr15 | 25341084  | 25341297  | 214 |
| chr15 | 24934440  | 24934653  | 214 |
| chr14 | 4151758   | 4151971   | 214 |
| chr13 | 65254340  | 65254553  | 214 |
| chr13 | 59679707  | 59679920  | 214 |
| chr13 | 55763373  | 55763586  | 214 |
| chr12 | 33072658  | 33072871  | 214 |
| chr11 | 104552560 | 104552773 | 214 |
| chr10 | 7636789   | 7637002   | 214 |
| chrX  | 78487228  | 78487440  | 213 |
| chrX  | 72384221  | 72384433  | 213 |
| chrX  | 63111323  | 63111535  | 213 |
| chrX  | 54457734  | 54457946  | 213 |

|       |           |           |     |
|-------|-----------|-----------|-----|
| chrX  | 50669591  | 50669803  | 213 |
| chrX  | 48076786  | 48076998  | 213 |
| chrX  | 34140502  | 34140714  | 213 |
| chrX  | 21304168  | 21304380  | 213 |
| chrX  | 21222094  | 21222306  | 213 |
| chrX  | 20628847  | 20629059  | 213 |
| chrX  | 16971425  | 16971637  | 213 |
| chrX  | 6596936   | 6597148   | 213 |
| chr9  | 66156041  | 66156253  | 213 |
| chr9  | 26963842  | 26964054  | 213 |
| chr8  | 48008893  | 48009105  | 213 |
| chr8  | 23632393  | 23632605  | 213 |
| chr7  | 50417499  | 50417711  | 213 |
| chr5  | 123481883 | 123482095 | 213 |
| chr5  | 112507945 | 112508157 | 213 |
| chr5  | 108635245 | 108635457 | 213 |
| chr4  | 110049713 | 110049925 | 213 |
| chr4  | 104220569 | 104220781 | 213 |
| chr4  | 98817141  | 98817353  | 213 |
| chr4  | 98491862  | 98492074  | 213 |
| chr4  | 79049679  | 79049891  | 213 |
| chr3  | 126087722 | 126087934 | 213 |
| chr27 | 47556235  | 47556447  | 213 |
| chr27 | 15314022  | 15314234  | 213 |
| chr26 | 18519488  | 18519700  | 213 |
| chr26 | 15611571  | 15611783  | 213 |
| chr25 | 38034246  | 38034458  | 213 |
| chr25 | 33454221  | 33454433  | 213 |
| chr25 | 33426845  | 33427057  | 213 |
| chr23 | 3314326   | 3314538   | 213 |
| chr22 | 60258981  | 60259193  | 213 |
| chr22 | 59566160  | 59566372  | 213 |
| chr21 | 68022643  | 68022855  | 213 |
| chr21 | 67966030  | 67966242  | 213 |
| chr21 | 23901536  | 23901748  | 213 |
| chr21 | 2069558   | 2069770   | 213 |
| chr2  | 127263341 | 127263553 | 213 |
| chr19 | 49333959  | 49334171  | 213 |
| chr19 | 44307205  | 44307417  | 213 |
| chr19 | 22391603  | 22391815  | 213 |
| chr18 | 54954386  | 54954598  | 213 |
| chr18 | 6006679   | 6006891   | 213 |
| chr16 | 53899047  | 53899259  | 213 |
| chr16 | 41479844  | 41480056  | 213 |
| chr14 | 7765460   | 7765672   | 213 |
| chr13 | 77781106  | 77781318  | 213 |
| chr13 | 74329527  | 74329739  | 213 |
| chr13 | 59919939  | 59920151  | 213 |
| chr13 | 59821654  | 59821866  | 213 |
| chr11 | 106381910 | 106382122 | 213 |



|       |               |           |     |
|-------|---------------|-----------|-----|
| chr11 | 104954806     | 104955018 | 213 |
| chr11 | 26122948      | 26123160  | 213 |
| chr1  | 133440246     | 133440458 | 213 |
| chrX  | 83024941      | 83025152  | 212 |
| chrX  | 72995592      | 72995803  | 212 |
| chrX  | 71384525      | 71384736  | 212 |
| chrX  | 67772399      | 67772610  | 212 |
| chrX  | 65753590      | 65753801  | 212 |
| chrX  | 65132830      | 65133041  | 212 |
| chrX  | 64052762      | 64052973  | 212 |
| chrX  | 63154160      | 63154371  | 212 |
| chrX  | 50582607      | 50582818  | 212 |
| chrX  | 50531640      | 50531851  | 212 |
| chrX  | 22361536      | 22361747  | 212 |
| chrX  | 20112873      | 20113084  | 212 |
| chrX  | 12032547      | 12032758  | 212 |
| chrX  | 8402915       | 8403126   | 212 |
| chr8  | 843183 843394 | 212       |     |
| chr7  | 37571083      | 37571294  | 212 |
| chr7  | 11031040      | 11031251  | 212 |
| chr7  | 5598989       | 5599200   | 212 |
| chr7  | 5250296       | 5250507   | 212 |
| chr5  | 112520047     | 112520258 | 212 |
| chr3  | 121683138     | 121683349 | 212 |
| chr3  | 105644405     | 105644616 | 212 |
| chr29 | 25905800      | 25906011  | 212 |
| chr29 | 17800787      | 17800998  | 212 |
| chr28 | 43900777      | 43900988  | 212 |
| chr28 | 42375296      | 42375507  | 212 |
| chr27 | 28099875      | 28100086  | 212 |
| chr27 | 26922305      | 26922516  | 212 |
| chr26 | 48677983      | 48678194  | 212 |
| chr25 | 40362846      | 40363057  | 212 |
| chr23 | 15417413      | 15417624  | 212 |
| chr21 | 19261505      | 19261716  | 212 |
| chr19 | 59109589      | 59109800  | 212 |
| chr18 | 36834921      | 36835132  | 212 |
| chr16 | 75602013      | 75602224  | 212 |
| chr16 | 54686118      | 54686329  | 212 |
| chr16 | 47683801      | 47684012  | 212 |
| chr15 | 20807755      | 20807966  | 212 |
| chr14 | 61786491      | 61786702  | 212 |
| chr12 | 31294890      | 31295101  | 212 |
| chr11 | 101007990     | 101008201 | 212 |
| chr11 | 75083262      | 75083473  | 212 |
| chr11 | 65226201      | 65226412  | 212 |
| chr11 | 20113899      | 20114110  | 212 |
| chr1  | 41781407      | 41781618  | 212 |
| chrX  | 72155329      | 72155539  | 211 |
| chrX  | 62720345      | 62720555  | 211 |

|       |           |           |     |
|-------|-----------|-----------|-----|
| chrX  | 58626138  | 58626348  | 211 |
| chrX  | 56278995  | 56279205  | 211 |
| chrX  | 27286016  | 27286226  | 211 |
| chrX  | 13284656  | 13284866  | 211 |
| chrX  | 10420887  | 10421097  | 211 |
| chrX  | 9674996   | 9675206   | 211 |
| chr9  | 90447086  | 90447296  | 211 |
| chr8  | 63326179  | 63326389  | 211 |
| chr7  | 62204947  | 62205157  | 211 |
| chr7  | 18666950  | 18667160  | 211 |
| chr6  | 16759900  | 16760110  | 211 |
| chr5  | 34388599  | 34388809  | 211 |
| chr28 | 17931680  | 17931890  | 211 |
| chr24 | 7191205   | 7191415   | 211 |
| chr22 | 16402620  | 16402830  | 211 |
| chr21 | 26563311  | 26563521  | 211 |
| chr21 | 13996523  | 13996733  | 211 |
| chr21 | 10842819  | 10843029  | 211 |
| chr2  | 136384401 | 136384611 | 211 |
| chr2  | 132031016 | 132031226 | 211 |
| chr2  | 111754106 | 111754316 | 211 |
| chr19 | 30269552  | 30269762  | 211 |
| chr18 | 48392670  | 48392880  | 211 |
| chr18 | 11387803  | 11388013  | 211 |
| chr17 | 64850373  | 64850583  | 211 |
| chr17 | 23554497  | 23554707  | 211 |
| chr16 | 17717371  | 17717581  | 211 |
| chr13 | 61283233  | 61283443  | 211 |
| chr13 | 59615017  | 59615227  | 211 |
| chr10 | 21438858  | 21439068  | 211 |
| chr10 | 7629487   | 7629697   | 211 |
| chr1  | 77996875  | 77997085  | 211 |
| chrX  | 74537927  | 74538136  | 210 |
| chrX  | 66846365  | 66846574  | 210 |
| chrX  | 60940946  | 60941155  | 210 |
| chrX  | 50597124  | 50597333  | 210 |
| chrX  | 32364843  | 32365052  | 210 |
| chr8  | 42298061  | 42298270  | 210 |
| chr7  | 37580717  | 37580926  | 210 |
| chr6  | 120924748 | 120924957 | 210 |
| chr6  | 120868022 | 120868231 | 210 |
| chr5  | 29753631  | 29753840  | 210 |
| chr4  | 4544192   | 4544401   | 210 |
| chr3  | 33488051  | 33488260  | 210 |
| chr3  | 8987570   | 8987779   | 210 |
| chr29 | 31664565  | 31664774  | 210 |
| chr25 | 29403048  | 29403257  | 210 |
| chr25 | 28888620  | 28888829  | 210 |
| chr23 | 27405983  | 27406192  | 210 |
| chr22 | 16206890  | 16207099  | 210 |

|       |           |           |     |
|-------|-----------|-----------|-----|
| chr2  | 127990061 | 127990270 | 210 |
| chr2  | 75855445  | 75855654  | 210 |
| chr19 | 55817161  | 55817370  | 210 |
| chr19 | 8437232   | 8437441   | 210 |
| chr16 | 51469945  | 51470154  | 210 |
| chr16 | 41360239  | 41360448  | 210 |
| chr15 | 26753545  | 26753754  | 210 |
| chr14 | 7752599   | 7752808   | 210 |
| chr13 | 35988602  | 35988811  | 210 |
| chr12 | 21589436  | 21589645  | 210 |
| chr11 | 71077771  | 71077980  | 210 |
| chr10 | 15211484  | 15211693  | 210 |
| chr10 | 5239513   | 5239722   | 210 |
| chr1  | 147301290 | 147301499 | 210 |
| chrX  | 75879480  | 75879688  | 209 |
| chrX  | 74889846  | 74890054  | 209 |
| chrX  | 50223147  | 50223355  | 209 |
| chrX  | 9162204   | 9162412   | 209 |
| chr7  | 19672595  | 19672803  | 209 |
| chr6  | 120629727 | 120629935 | 209 |
| chr5  | 20847792  | 20848000  | 209 |
| chr26 | 34986308  | 34986516  | 209 |
| chr25 | 22139147  | 22139355  | 209 |
| chr24 | 2384795   | 2385003   | 209 |
| chr22 | 50786988  | 50787196  | 209 |
| chr20 | 13025459  | 13025667  | 209 |
| chr2  | 123573448 | 123573656 | 209 |
| chr18 | 59652529  | 59652737  | 209 |
| chr18 | 51273018  | 51273226  | 209 |
| chr18 | 48381638  | 48381846  | 209 |
| chr16 | 49956921  | 49957129  | 209 |
| chr16 | 25937856  | 25938064  | 209 |
| chr16 | 3742379   | 3742587   | 209 |
| chr13 | 68877416  | 68877624  | 209 |
| chr12 | 37151994  | 37152202  | 209 |
| chr12 | 32432245  | 32432453  | 209 |
| chr12 | 31095440  | 31095648  | 209 |
| chr11 | 105669079 | 105669287 | 209 |
| chr11 | 73310239  | 73310447  | 209 |
| chr11 | 44984508  | 44984716  | 209 |
| chr1  | 114958863 | 114959071 | 209 |
| chrX  | 78624202  | 78624409  | 208 |
| chrX  | 76129210  | 76129417  | 208 |
| chrX  | 72361343  | 72361550  | 208 |
| chrX  | 66641462  | 66641669  | 208 |
| chrX  | 64694192  | 64694399  | 208 |
| chrX  | 50509510  | 50509717  | 208 |
| chrX  | 37335923  | 37336130  | 208 |
| chrX  | 30127828  | 30128035  | 208 |
| chr7  | 70810036  | 70810243  | 208 |

|       |           |           |     |
|-------|-----------|-----------|-----|
| chr5  | 121512401 | 121512608 | 208 |
| chr5  | 120721083 | 120721290 | 208 |
| chr5  | 116926045 | 116926252 | 208 |
| chr5  | 51887129  | 51887336  | 208 |
| chr3  | 127015231 | 127015438 | 208 |
| chr3  | 109000651 | 109000858 | 208 |
| chr3  | 22935745  | 22935952  | 208 |
| chr29 | 51748659  | 51748866  | 208 |
| chr22 | 38975272  | 38975479  | 208 |
| chr21 | 34995589  | 34995796  | 208 |
| chr20 | 70172962  | 70173169  | 208 |
| chr2  | 136508629 | 136508836 | 208 |
| chr2  | 9326398   | 9326605   | 208 |
| chr19 | 10885807  | 10886014  | 208 |
| chr18 | 56963319  | 56963526  | 208 |
| chr18 | 13897535  | 13897742  | 208 |
| chr18 | 3755462   | 3755669   | 208 |
| chr15 | 24974069  | 24974276  | 208 |
| chr14 | 1422247   | 1422454   | 208 |
| chr13 | 77594707  | 77594914  | 208 |
| chr13 | 43613349  | 43613556  | 208 |
| chr11 | 104227042 | 104227249 | 208 |
| chr11 | 74469672  | 74469879  | 208 |
| chr11 | 6310473   | 6310680   | 208 |
| chr10 | 70176045  | 70176252  | 208 |
| chr10 | 24715397  | 24715604  | 208 |
| chr1  | 128609093 | 128609300 | 208 |
| chrX  | 62760870  | 62761076  | 207 |
| chrX  | 49595408  | 49595614  | 207 |
| chrX  | 47230994  | 47231200  | 207 |
| chrX  | 24399218  | 24399424  | 207 |
| chr8  | 61152719  | 61152925  | 207 |
| chr7  | 51337552  | 51337758  | 207 |
| chr6  | 46689017  | 46689223  | 207 |
| chr5  | 80611235  | 80611441  | 207 |
| chr5  | 30597987  | 30598193  | 207 |
| chr4  | 122955591 | 122955797 | 207 |
| chr4  | 109376708 | 109376914 | 207 |
| chr28 | 46067698  | 46067904  | 207 |
| chr28 | 33882261  | 33882467  | 207 |
| chr28 | 33252106  | 33252312  | 207 |
| chr26 | 51653799  | 51654005  | 207 |
| chr25 | 8904150   | 8904356   | 207 |
| chr25 | 1944575   | 1944781   | 207 |
| chr23 | 28903751  | 28903957  | 207 |
| chr23 | 28899220  | 28899426  | 207 |
| chr22 | 29776031  | 29776237  | 207 |
| chr2  | 139934465 | 139934671 | 207 |
| chr19 | 56098448  | 56098654  | 207 |
| chr19 | 33094818  | 33095024  | 207 |

|       |               |           |     |
|-------|---------------|-----------|-----|
| chr16 | 74226905      | 74227111  | 207 |
| chr16 | 51414823      | 51415029  | 207 |
| chr16 | 44374844      | 44375050  | 207 |
| chr13 | 59755477      | 59755683  | 207 |
| chr13 | 41644139      | 41644345  | 207 |
| chr13 | 40507992      | 40508198  | 207 |
| chr11 | 69809654      | 69809860  | 207 |
| chr10 | 20526223      | 20526429  | 207 |
| chr1  | 1522423       | 1522629   | 207 |
| chrX  | 66691402      | 66691607  | 206 |
| chrX  | 61823458      | 61823663  | 206 |
| chrX  | 18241297      | 18241502  | 206 |
| chrX  | 13297996      | 13298201  | 206 |
| chrX  | 10770685      | 10770890  | 206 |
| chr9  | 51873176      | 51873381  | 206 |
| chr9  | 45929259      | 45929464  | 206 |
| chr7  | 14213175      | 14213380  | 206 |
| chr5  | 60907223      | 60907428  | 206 |
| chr3  | 111647114     | 111647319 | 206 |
| chr3  | 31102052      | 31102257  | 206 |
| chr29 | 36272043      | 36272248  | 206 |
| chr29 | 35622679      | 35622884  | 206 |
| chr29 | 33784253      | 33784458  | 206 |
| chr28 | 25312812      | 25313017  | 206 |
| chr25 | 38677522      | 38677727  | 206 |
| chr22 | 44835544      | 44835749  | 206 |
| chr21 | 60431579      | 60431784  | 206 |
| chr2  | 136776152     | 136776357 | 206 |
| chr2  | 115025471     | 115025676 | 206 |
| chr2  | 91081429      | 91081634  | 206 |
| chr19 | 43970191      | 43970396  | 206 |
| chr19 | 38682621      | 38682826  | 206 |
| chr19 | 37537883      | 37538088  | 206 |
| chr18 | 39904172      | 39904377  | 206 |
| chr18 | 39385418      | 39385623  | 206 |
| chr16 | 47964435      | 47964640  | 206 |
| chr15 | 31966093      | 31966298  | 206 |
| chr13 | 44931408      | 44931613  | 206 |
| chr12 | 9124375       | 9124580   | 206 |
| chr11 | 100886350     | 100886555 | 206 |
| chr11 | 93206300      | 93206505  | 206 |
| chr10 | 66027766      | 66027971  | 206 |
| chr10 | 8722578       | 8722783   | 206 |
| chr1  | 120059509     | 120059714 | 206 |
| chrX  | 55228800      | 55229004  | 205 |
| chrX  | 49769531      | 49769735  | 205 |
| chrX  | 18675715      | 18675919  | 205 |
| chrX  | 737137 737341 |           | 205 |
| chr9  | 42972566      | 42972770  | 205 |
| chr9  | 16530250      | 16530454  | 205 |

|       |               |           |     |
|-------|---------------|-----------|-----|
| chr8  | 24194497      | 24194701  | 205 |
| chr6  | 107195569     | 107195773 | 205 |
| chr6  | 94011521      | 94011725  | 205 |
| chr5  | 118452446     | 118452650 | 205 |
| chr4  | 101716945     | 101717149 | 205 |
| chr29 | 49982115      | 49982319  | 205 |
| chr29 | 44722171      | 44722375  | 205 |
| chr23 | 33000752      | 33000956  | 205 |
| chr21 | 31420858      | 31421062  | 205 |
| chr21 | 13700110      | 13700314  | 205 |
| chr2  | 136575881     | 136576085 | 205 |
| chr2  | 127845148     | 127845352 | 205 |
| chr19 | 20385943      | 20386147  | 205 |
| chr19 | 13954644      | 13954848  | 205 |
| chr16 | 44865302      | 44865506  | 205 |
| chr16 | 38948999      | 38949203  | 205 |
| chr13 | 78696986      | 78697190  | 205 |
| chr13 | 75085744      | 75085948  | 205 |
| chr13 | 51701867      | 51702071  | 205 |
| chr11 | 71541954      | 71542158  | 205 |
| chr11 | 70932332      | 70932536  | 205 |
| chr10 | 35496269      | 35496473  | 205 |
| chr10 | 7074530       | 7074734   | 205 |
| chrX  | 75638837      | 75639040  | 204 |
| chrX  | 59213967      | 59214170  | 204 |
| chrX  | 55623606      | 55623809  | 204 |
| chrX  | 49993534      | 49993737  | 204 |
| chrX  | 41232499      | 41232702  | 204 |
| chrX  | 20691031      | 20691234  | 204 |
| chr8  | 23829507      | 23829710  | 204 |
| chr7  | 5054229       | 5054432   | 204 |
| chr5  | 113194450     | 113194653 | 204 |
| chr5  | 112045857     | 112046060 | 204 |
| chr5  | 30229339      | 30229542  | 204 |
| chr4  | 53026620      | 53026823  | 204 |
| chr29 | 33750098      | 33750301  | 204 |
| chr25 | 345435 345638 | 204       |     |
| chr23 | 40638696      | 40638899  | 204 |
| chr23 | 16287422      | 16287625  | 204 |
| chr21 | 59000316      | 59000519  | 204 |
| chr21 | 19190713      | 19190916  | 204 |
| chr21 | 1860335       | 1860538   | 204 |
| chr2  | 134419319     | 134419522 | 204 |
| chr2  | 115539676     | 115539879 | 204 |
| chr2  | 71357500      | 71357703  | 204 |
| chr2  | 32188449      | 32188652  | 204 |
| chr18 | 11981037      | 11981240  | 204 |
| chr18 | 3539028       | 3539231   | 204 |
| chr18 | 637348 637551 | 204       |     |
| chr17 | 73895913      | 73896116  | 204 |

|       |           |           |     |
|-------|-----------|-----------|-----|
| chr17 | 69450890  | 69451093  | 204 |
| chr17 | 21126217  | 21126420  | 204 |
| chr16 | 68881646  | 68881849  | 204 |
| chr16 | 47966442  | 47966645  | 204 |
| chr15 | 32683752  | 32683955  | 204 |
| chr13 | 16141201  | 16141404  | 204 |
| chr11 | 104998053 | 104998256 | 204 |
| chr11 | 84294387  | 84294590  | 204 |
| chr11 | 70785946  | 70786149  | 204 |
| chr1  | 74632120  | 74632323  | 204 |
| chrX  | 15476483  | 15476685  | 203 |
| chr8  | 65188710  | 65188912  | 203 |
| chr5  | 32446463  | 32446665  | 203 |
| chr5  | 28379502  | 28379704  | 203 |
| chr5  | 28209510  | 28209712  | 203 |
| chr3  | 118048696 | 118048898 | 203 |
| chr29 | 34842461  | 34842663  | 203 |
| chr26 | 46960257  | 46960459  | 203 |
| chr26 | 31993211  | 31993413  | 203 |
| chr25 | 2706854   | 2707056   | 203 |
| chr24 | 33833719  | 33833921  | 203 |
| chr24 | 30905266  | 30905468  | 203 |
| chr24 | 20887881  | 20888083  | 203 |
| chr22 | 58292690  | 58292892  | 203 |
| chr22 | 56301611  | 56301813  | 203 |
| chr22 | 1828166   | 1828368   | 203 |
| chr21 | 29196183  | 29196385  | 203 |
| chr2  | 130157797 | 130157999 | 203 |
| chr2  | 127012844 | 127013046 | 203 |
| chr2  | 122889627 | 122889829 | 203 |
| chr2  | 24160010  | 24160212  | 203 |
| chr2  | 22169413  | 22169615  | 203 |
| chr19 | 54655269  | 54655471  | 203 |
| chr19 | 34905467  | 34905669  | 203 |
| chr17 | 5021396   | 5021598   | 203 |
| chr16 | 50606279  | 50606481  | 203 |
| chr16 | 48024873  | 48025075  | 203 |
| chr15 | 23012799  | 23013001  | 203 |
| chr13 | 80058400  | 80058602  | 203 |
| chr13 | 63482566  | 63482768  | 203 |
| chr10 | 84605920  | 84606122  | 203 |
| chr10 | 22022711  | 22022913  | 203 |
| chr1  | 69853495  | 69853697  | 203 |
| chrX  | 76804370  | 76804571  | 202 |
| chrX  | 74675591  | 74675792  | 202 |
| chr4  | 19475062  | 19475263  | 202 |
| chr29 | 29897759  | 29897960  | 202 |
| chr26 | 21760578  | 21760779  | 202 |
| chr26 | 21757003  | 21757204  | 202 |
| chr25 | 39280002  | 39280203  | 202 |

|       |               |           |     |
|-------|---------------|-----------|-----|
| chr24 | 60882305      | 60882506  | 202 |
| chr24 | 1072928       | 1073129   | 202 |
| chr24 | 840281 840482 | 202       |     |
| chr21 | 66475110      | 66475311  | 202 |
| chr21 | 57422932      | 57423133  | 202 |
| chr19 | 33086390      | 33086591  | 202 |
| chr18 | 18603998      | 18604199  | 202 |
| chr15 | 24206156      | 24206357  | 202 |
| chr13 | 78680420      | 78680621  | 202 |
| chr13 | 41619058      | 41619259  | 202 |
| chrX  | 48001607      | 48001807  | 201 |
| chrX  | 20269457      | 20269657  | 201 |
| chr9  | 33352171      | 33352371  | 201 |
| chr9  | 10498168      | 10498368  | 201 |
| chr7  | 46472055      | 46472255  | 201 |
| chr7  | 14823262      | 14823462  | 201 |
| chr6  | 41975520      | 41975720  | 201 |
| chr5  | 121235690     | 121235890 | 201 |
| chr4  | 118593270     | 118593470 | 201 |
| chr3  | 114216897     | 114217097 | 201 |
| chr3  | 15798092      | 15798292  | 201 |
| chr29 | 50439890      | 50440090  | 201 |
| chr25 | 37658671      | 37658871  | 201 |
| chr25 | 3387344       | 3387544   | 201 |
| chr25 | 452269 452469 | 201       |     |
| chr22 | 50088377      | 50088577  | 201 |
| chr21 | 67957580      | 67957780  | 201 |
| chr19 | 12322346      | 12322546  | 201 |
| chr18 | 29911686      | 29911886  | 201 |
| chr17 | 67998293      | 67998493  | 201 |
| chr13 | 77148381      | 77148581  | 201 |
| chr13 | 66135902      | 66136102  | 201 |
| chr10 | 16781335      | 16781535  | 201 |
| chrX  | 78060634      | 78060833  | 200 |
| chrX  | 31416031      | 31416230  | 200 |
| chrX  | 2270944       | 2271143   | 200 |
| chr9  | 63421126      | 63421325  | 200 |
| chr8  | 73384728      | 73384927  | 200 |
| chr7  | 56413361      | 56413560  | 200 |
| chr7  | 5407387       | 5407586   | 200 |
| chr5  | 30488064      | 30488263  | 200 |
| chr5  | 27399266      | 27399465  | 200 |
| chr3  | 46619191      | 46619390  | 200 |
| chr29 | 42397459      | 42397658  | 200 |
| chr29 | 36974079      | 36974278  | 200 |
| chr26 | 46879996      | 46880195  | 200 |
| chr26 | 19859058      | 19859257  | 200 |
| chr22 | 56742865      | 56743064  | 200 |
| chr20 | 39779213      | 39779412  | 200 |
| chr19 | 65218855      | 65219054  | 200 |



|       |           |           |     |
|-------|-----------|-----------|-----|
| chr18 | 58392920  | 58393119  | 200 |
| chr18 | 51534903  | 51535102  | 200 |
| chr17 | 57225534  | 57225733  | 200 |
| chr16 | 46659914  | 46660113  | 200 |
| chr15 | 28621320  | 28621519  | 200 |
| chr13 | 78025193  | 78025392  | 200 |
| chr13 | 74461282  | 74461481  | 200 |
| chr12 | 80204328  | 80204527  | 200 |
| chr12 | 35104731  | 35104930  | 200 |
| chr8  | 73927282  | 73927562  | 281 |
| chr25 | 16639080  | 16639454  | 375 |
| chr10 | 17371055  | 17371584  | 530 |
| chrX  | 50288870  | 50289368  | 499 |
| chrX  | 78619049  | 78619501  | 453 |
| chr2  | 124959653 | 124960092 | 440 |
| chr23 | 7435535   | 7435970   | 436 |
| chr13 | 61823034  | 61823459  | 426 |
| chrX  | 30854154  | 30854572  | 419 |
| chr3  | 105958746 | 105959141 | 396 |
| chr1  | 150068257 | 150068648 | 392 |
| chrX  | 49231641  | 49232013  | 373 |
| chr11 | 96272865  | 96273237  | 373 |
| chr10 | 29547291  | 29547661  | 371 |
| chr10 | 35667510  | 35667877  | 368 |
| chr10 | 68245229  | 68245595  | 367 |
| chr18 | 11975465  | 11975828  | 364 |
| chr29 | 31650209  | 31650571  | 363 |
| chr25 | 37972951  | 37973312  | 362 |
| chr23 | 51610066  | 51610421  | 356 |
| chr16 | 38378478  | 38378833  | 356 |
| chr3  | 123362343 | 123362697 | 355 |
| chr22 | 56616946  | 56617292  | 347 |
| chr25 | 2488452   | 2488792   | 341 |
| chrX  | 24113455  | 24113791  | 337 |
| chr9  | 83791588  | 83791919  | 332 |
| chr21 | 24839038  | 24839366  | 329 |
| chr1  | 149727471 | 149727796 | 326 |
| chr13 | 41004490  | 41004807  | 318 |
| chrX  | 34190349  | 34190655  | 307 |
| chr25 | 20805596  | 20805899  | 304 |
| chr19 | 38551065  | 38551368  | 304 |
| chr6  | 112942918 | 112943220 | 303 |
| chr5  | 35304268  | 35304569  | 302 |
| chr21 | 34809248  | 34809549  | 302 |
| chr13 | 75132104  | 75132402  | 299 |
| chr18 | 57372882  | 57373175  | 294 |
| chr11 | 103310444 | 103310735 | 292 |
| chr26 | 37669539  | 37669829  | 291 |
| chr2  | 73268382  | 73268668  | 287 |
| chr18 | 50185605  | 50185891  | 287 |

|       |           |           |     |
|-------|-----------|-----------|-----|
| chr8  | 23965886  | 23966169  | 284 |
| chr26 | 19740579  | 19740862  | 284 |
| chr10 | 70159240  | 70159523  | 284 |
| chr16 | 39585921  | 39586200  | 280 |
| chr12 | 76536984  | 76537262  | 279 |
| chrX  | 78545868  | 78546141  | 274 |
| chr9  | 106131992 | 106132265 | 274 |
| chrX  | 60424315  | 60424583  | 269 |
| chr21 | 64083156  | 64083424  | 269 |
| chr1  | 141690414 | 141690682 | 269 |
| chr7  | 108288896 | 108289162 | 267 |
| chrX  | 35491948  | 35492212  | 265 |
| chr21 | 55796408  | 55796671  | 264 |
| chr19 | 22120233  | 22120492  | 260 |
| chr8  | 25271930  | 25272183  | 254 |
| chr13 | 9941742   | 9941994   | 253 |
| chr28 | 33784394  | 33784644  | 251 |
| chr2  | 28238704  | 28238949  | 246 |
| chr11 | 18867646  | 18867890  | 245 |
| chr12 | 82613544  | 82613784  | 241 |
| chr2  | 56204534  | 56204746  | 213 |
| chr13 | 51461563  | 51461774  | 212 |
| chr20 | 2716906   | 2717113   | 208 |
| chr17 | 70439442  | 70439834  | 393 |
| chr1  | 149423510 | 149423896 | 387 |
| chr25 | 40360803  | 40361183  | 381 |
| chr26 | 41450402  | 41450778  | 377 |
| chr24 | 40262479  | 40262838  | 360 |
| chr28 | 33462430  | 33462785  | 356 |
| chr21 | 25597209  | 25597553  | 345 |
| chr13 | 59710808  | 59711134  | 327 |
| chr12 | 49347633  | 49347954  | 322 |
| chr4  | 98826833  | 98827145  | 313 |
| chr7  | 3960381   | 3960687   | 307 |
| chr13 | 70516114  | 70516416  | 303 |
| chr10 | 89503567  | 89503868  | 302 |
| chr6  | 63195806  | 63196106  | 301 |
| chr8  | 73777884  | 73778179  | 296 |
| chrX  | 55686727  | 55687021  | 295 |
| chr16 | 67622570  | 67622864  | 295 |
| chrX  | 35769433  | 35769724  | 292 |
| chr5  | 80322124  | 80322414  | 291 |
| chr1  | 114238360 | 114238647 | 288 |
| chrX  | 20931470  | 20931753  | 284 |
| chrX  | 19478371  | 19478654  | 284 |
| chr22 | 16422692  | 16422974  | 283 |
| chr15 | 22951352  | 22951631  | 280 |
| chr21 | 57501516  | 57501794  | 279 |
| chr11 | 100380174 | 100380450 | 277 |
| chrX  | 55459915  | 55460190  | 276 |

|       |               |           |     |
|-------|---------------|-----------|-----|
| chr18 | 54944119      | 54944394  | 276 |
| chr1  | 74629011      | 74629285  | 275 |
| chr19 | 30343835      | 30344100  | 266 |
| chr13 | 55463983      | 55464245  | 263 |
| chrX  | 41246543      | 41246802  | 260 |
| chr2  | 132359251     | 132359510 | 260 |
| chr22 | 48292073      | 48292331  | 259 |
| chrX  | 58484982      | 58485238  | 257 |
| chr26 | 21971342      | 21971598  | 257 |
| chr2  | 133041202     | 133041458 | 257 |
| chr19 | 7783461       | 7783717   | 257 |
| chr12 | 32008864      | 32009119  | 256 |
| chr8  | 78963870      | 78964123  | 254 |
| chr21 | 56520398      | 56520651  | 254 |
| chrX  | 36012311      | 36012562  | 252 |
| chr9  | 51602900      | 51603151  | 252 |
| chr8  | 60414766      | 60415016  | 251 |
| chrM  | 14904 15152   | 249       |     |
| chr13 | 37648114      | 37648362  | 249 |
| chr8  | 109035631     | 109035878 | 248 |
| chr24 | 58940574      | 58940821  | 248 |
| chr16 | 40922836      | 40923082  | 247 |
| chr19 | 60715905      | 60716148  | 244 |
| chr4  | 124168026     | 124168268 | 243 |
| chr2  | 42835281      | 42835523  | 243 |
| chr15 | 129850 130091 | 242       |     |
| chr26 | 38407738      | 38407978  | 241 |
| chr26 | 15399727      | 15399966  | 240 |
| chrX  | 59584650      | 59584887  | 238 |
| chr7  | 17130069      | 17130304  | 236 |
| chr27 | 48726247      | 48726481  | 235 |
| chr10 | 89402231      | 89402465  | 235 |
| chrX  | 20699380      | 20699613  | 234 |
| chr4  | 110059920     | 110060153 | 234 |
| chrX  | 20505008      | 20505240  | 233 |
| chr5  | 75034149      | 75034381  | 233 |
| chr18 | 42208967      | 42209199  | 233 |
| chr26 | 43484959      | 43485190  | 232 |
| chrX  | 9507269       | 9507498   | 230 |
| chrX  | 8680996       | 8681225   | 230 |
| chr2  | 73058788      | 73059016  | 229 |
| chrX  | 46166643      | 46166867  | 225 |
| chr3  | 115989972     | 115990196 | 225 |
| chr12 | 14805543      | 14805767  | 225 |
| chr14 | 31071629      | 31071852  | 224 |
| chr20 | 72430643      | 72430864  | 222 |
| chr19 | 40828527      | 40828748  | 222 |
| chr19 | 16975462      | 16975683  | 222 |
| chr1  | 142505093     | 142505313 | 221 |
| chr18 | 12041527      | 12041746  | 220 |

|       |           |           |     |
|-------|-----------|-----------|-----|
| chr13 | 62452926  | 62453145  | 220 |
| chr23 | 15856123  | 15856341  | 219 |
| chr22 | 16321292  | 16321510  | 219 |
| chr4  | 97859192  | 97859409  | 218 |
| chr24 | 46939765  | 46939981  | 217 |
| chr21 | 26821296  | 26821512  | 217 |
| chr19 | 54803991  | 54804207  | 217 |
| chr16 | 61135595  | 61135811  | 217 |
| chrX  | 78372731  | 78372946  | 216 |
| chr11 | 63314294  | 63314509  | 216 |
| chr8  | 60396481  | 60396695  | 215 |
| chr21 | 19428230  | 19428444  | 215 |
| chr11 | 77643324  | 77643538  | 215 |
| chrX  | 33976446  | 33976659  | 214 |
| chr9  | 90352591  | 90352804  | 214 |
| chr8  | 24474673  | 24474886  | 214 |
| chr29 | 18208121  | 18208334  | 214 |
| chr10 | 44383986  | 44384199  | 214 |
| chr23 | 53006715  | 53006927  | 213 |
| chr23 | 27178369  | 27178581  | 213 |
| chrX  | 30905887  | 30906098  | 212 |
| chr22 | 16158214  | 16158425  | 212 |
| chr18 | 18056950  | 18057161  | 212 |
| chr13 | 63467497  | 63467708  | 212 |
| chr8  | 23891462  | 23891672  | 211 |
| chrX  | 55965317  | 55965526  | 210 |
| chrX  | 21560916  | 21561125  | 210 |
| chr23 | 34844068  | 34844277  | 210 |
| chr18 | 65330704  | 65330913  | 210 |
| chr18 | 23539709  | 23539918  | 210 |
| chrX  | 56726344  | 56726552  | 209 |
| chr8  | 73844672  | 73844880  | 209 |
| chr3  | 127005159 | 127005367 | 209 |
| chr24 | 58982617  | 58982825  | 209 |
| chr21 | 1578590   | 1578798   | 209 |
| chr19 | 19123425  | 19123633  | 209 |
| chr19 | 54446522  | 54446729  | 208 |
| chr17 | 64025770  | 64025977  | 208 |
| chr1  | 25974271  | 25974478  | 208 |
| chr6  | 101737336 | 101737542 | 207 |
| chr29 | 18215745  | 18215951  | 207 |
| chr28 | 41301623  | 41301829  | 207 |
| chr23 | 49198909  | 49199115  | 207 |
| chr22 | 16646305  | 16646510  | 206 |
| chr19 | 51898195  | 51898400  | 206 |
| chrX  | 61356707  | 61356911  | 205 |
| chrX  | 55483270  | 55483474  | 205 |
| chrX  | 35948330  | 35948534  | 205 |
| chrX  | 20643711  | 20643915  | 205 |
| chr3  | 115473447 | 115473651 | 205 |

|       |               |           |     |
|-------|---------------|-----------|-----|
| chr29 | 49308554      | 49308758  | 205 |
| chr27 | 11601351      | 11601555  | 205 |
| chr8  | 101963569     | 101963772 | 204 |
| chr28 | 41181743      | 41181946  | 204 |
| chr26 | 11908024      | 11908227  | 204 |
| chr23 | 15955831      | 15956034  | 204 |
| chr21 | 34809644      | 34809847  | 204 |
| chrX  | 51675166      | 51675368  | 203 |
| chrX  | 8927602       | 8927804   | 203 |
| chr13 | 84231022      | 84231224  | 203 |
| chr1  | 74523542      | 74523744  | 203 |
| chr10 | 23224778      | 23224979  | 202 |
| chr9  | 23437931      | 23438131  | 201 |
| chr3  | 37912323      | 37912523  | 201 |
| chr29 | 26914017      | 26914217  | 201 |
| chr25 | 480956 481156 | 201       |     |
| chr17 | 70218366      | 70218566  | 201 |
| chr12 | 740807 741007 | 201       |     |
| chr25 | 14691283      | 14691482  | 200 |
| chr17 | 55450168      | 55450367  | 200 |
| chr17 | 70133147      | 70133513  | 367 |
| chr1  | 149732842     | 149733156 | 315 |
| chr19 | 58167370      | 58167650  | 281 |
| chrX  | 14646365      | 14646610  | 246 |
| chr21 | 30585610      | 30585980  | 371 |
| chr18 | 48785910      | 48786246  | 337 |
| chr13 | 63501478      | 63501789  | 312 |
| chr15 | 75248861      | 75249137  | 277 |
| chrX  | 60083888      | 60084149  | 262 |
| chr9  | 62693504      | 62693753  | 250 |
| chr27 | 15229855      | 15230086  | 232 |
| chr1  | 138846463     | 138846685 | 223 |
| chr18 | 43146432      | 43146653  | 222 |
| chr3  | 77586317      | 77586537  | 221 |
| chr15 | 13014842      | 13015054  | 213 |
| chrX  | 55962082      | 55962291  | 210 |
| chr15 | 58841302      | 58841511  | 210 |
| chr9  | 90411703      | 90411909  | 207 |
| chr21 | 7085662       | 7085863   | 202 |
| chr19 | 19135843      | 19136044  | 202 |
| chr1  | 144441235     | 144441434 | 200 |
| chr13 | 77259565      | 77259769  | 205 |
| chr13 | 41315130      | 41315654  | 525 |
| chr21 | 59031563      | 59032068  | 506 |
| chrX  | 5749227       | 5749723   | 497 |
| chr23 | 18853799      | 18854274  | 476 |
| chr29 | 18317719      | 18318162  | 444 |
| chrX  | 50670264      | 50670668  | 405 |
| chrX  | 18990870      | 18991271  | 402 |
| chrX  | 36908910      | 36909308  | 399 |

|       |           |           |     |
|-------|-----------|-----------|-----|
| chr19 | 15785047  | 15785445  | 399 |
| chr28 | 26477503  | 26477900  | 398 |
| chr19 | 24705601  | 24705998  | 398 |
| chrX  | 57059358  | 57059752  | 395 |
| chr18 | 40295955  | 40296346  | 392 |
| chr2  | 92449107  | 92449495  | 389 |
| chr15 | 37553831  | 37554219  | 389 |
| chr11 | 84957381  | 84957769  | 389 |
| chr27 | 17893208  | 17893595  | 388 |
| chrX  | 77406688  | 77407074  | 387 |
| chrX  | 75717006  | 75717392  | 387 |
| chr6  | 108667113 | 108667499 | 387 |
| chr12 | 80035330  | 80035716  | 387 |
| chr11 | 48679212  | 48679598  | 387 |
| chrX  | 31954471  | 31954854  | 384 |
| chrX  | 31439986  | 31440369  | 384 |
| chr17 | 64904936  | 64905318  | 383 |
| chr13 | 77411206  | 77411588  | 383 |
| chrX  | 47960676  | 47961057  | 382 |
| chr25 | 10640300  | 10640681  | 382 |
| chr11 | 70895380  | 70895760  | 381 |
| chr10 | 36909036  | 36909416  | 381 |
| chrX  | 54484901  | 54485280  | 380 |
| chr19 | 4703928   | 4704307   | 380 |
| chr7  | 14383791  | 14384168  | 378 |
| chr22 | 56252848  | 56253225  | 378 |
| chr12 | 80042251  | 80042628  | 378 |
| chr11 | 100423483 | 100423859 | 377 |
| chrX  | 82052983  | 82053357  | 375 |
| chr3  | 15182649  | 15183023  | 375 |
| chr17 | 70381051  | 70381425  | 375 |
| chrX  | 78721935  | 78722308  | 374 |
| chrX  | 65431774  | 65432147  | 374 |
| chr19 | 23854637  | 23855010  | 374 |
| chrX  | 20581335  | 20581707  | 373 |
| chr7  | 6719740   | 6720111   | 372 |
| chr29 | 33076484  | 33076855  | 372 |
| chr24 | 1529427   | 1529797   | 371 |
| chrX  | 75535063  | 75535431  | 369 |
| chr3  | 118149651 | 118150018 | 368 |
| chr19 | 61775834  | 61776201  | 368 |
| chr14 | 6354775   | 6355142   | 368 |
| chr26 | 18231697  | 18232063  | 367 |
| chr21 | 56032627  | 56032993  | 367 |
| chr13 | 63469783  | 63470149  | 367 |
| chr8  | 23817221  | 23817585  | 365 |
| chr28 | 45351452  | 45351816  | 365 |
| chr15 | 75913297  | 75913661  | 365 |
| chr13 | 77241718  | 77242082  | 365 |
| chr4  | 106086508 | 106086871 | 364 |

|       |           |           |     |
|-------|-----------|-----------|-----|
| chr21 | 7629342   | 7629704   | 363 |
| chr18 | 22156733  | 22157095  | 363 |
| chr4  | 124422628 | 124422989 | 362 |
| chr19 | 30121405  | 30121766  | 362 |
| chrX  | 74769632  | 74769992  | 361 |
| chr5  | 75986476  | 75986836  | 361 |
| chr16 | 40901461  | 40901821  | 361 |
| chr15 | 64041810  | 64042170  | 361 |
| chr23 | 52845962  | 52846321  | 360 |
| chr11 | 100415016 | 100415375 | 360 |
| chrX  | 33257091  | 33257449  | 359 |
| chrX  | 64661479  | 64661836  | 358 |
| chr3  | 121365860 | 121366217 | 358 |
| chr18 | 50325339  | 50325695  | 357 |
| chr10 | 8597920   | 8598275   | 356 |
| chrX  | 48075865  | 48076219  | 355 |
| chr3  | 115403905 | 115404259 | 355 |
| chr13 | 82337423  | 82337777  | 355 |
| chr13 | 77419039  | 77419393  | 355 |
| chr13 | 63479620  | 63479974  | 355 |
| chrX  | 30393196  | 30393549  | 354 |
| chr28 | 26027524  | 26027876  | 353 |
| chr26 | 51451975  | 51452327  | 353 |
| chr23 | 10643415  | 10643767  | 353 |
| chr14 | 8146023   | 8146373   | 351 |
| chr13 | 26330180  | 26330530  | 351 |
| chrX  | 8987782   | 8988131   | 350 |
| chr3  | 11537133  | 11537482  | 350 |
| chr23 | 52811474  | 52811823  | 350 |
| chrX  | 13598959  | 13599307  | 349 |
| chr5  | 114113740 | 114114088 | 349 |
| chr27 | 7127181   | 7127529   | 349 |
| chr21 | 62429392  | 62429740  | 349 |
| chr26 | 25016089  | 25016436  | 348 |
| chr17 | 68265509  | 68265856  | 348 |
| chr6  | 113397585 | 113397931 | 347 |
| chr4  | 121089919 | 121090265 | 347 |
| chr2  | 90696584  | 90696930  | 347 |
| chr19 | 13642054  | 13642400  | 347 |
| chr15 | 26793214  | 26793559  | 346 |
| chrX  | 9086457   | 9086801   | 345 |
| chr5  | 120729902 | 120730246 | 345 |
| chr26 | 48898918  | 48899262  | 345 |
| chr23 | 44422395  | 44422739  | 345 |
| chr18 | 50864535  | 50864879  | 345 |
| chrX  | 9137602   | 9137945   | 344 |
| chrX  | 2879857   | 2880200   | 344 |
| chr19 | 39898738  | 39899081  | 344 |
| chr26 | 14939969  | 14940311  | 343 |
| chr22 | 60649236  | 60649578  | 343 |

|       |               |           |     |
|-------|---------------|-----------|-----|
| chr2  | 133075063     | 133075405 | 343 |
| chr1  | 47822888      | 47823230  | 343 |
| chrX  | 35879319      | 35879660  | 342 |
| chr17 | 70110337      | 70110678  | 342 |
| chr15 | 42306757      | 42307097  | 341 |
| chr11 | 12865713      | 12866052  | 340 |
| chrX  | 78393655      | 78393993  | 339 |
| chr9  | 16970919      | 16971257  | 339 |
| chr6  | 121808931     | 121809269 | 339 |
| chr16 | 67203066      | 67203404  | 339 |
| chr12 | 34349616      | 34349953  | 338 |
| chrX  | 44535396      | 44535732  | 337 |
| chrX  | 29556942      | 29557278  | 337 |
| chr29 | 44994843      | 44995179  | 337 |
| chr29 | 36175094      | 36175430  | 337 |
| chr28 | 43737868      | 43738204  | 337 |
| chr25 | 33078205      | 33078541  | 337 |
| chr21 | 25193914      | 25194250  | 337 |
| chrX  | 11982316      | 11982651  | 336 |
| chr24 | 35352470      | 35352805  | 336 |
| chr19 | 19275013      | 19275348  | 336 |
| chr10 | 103763223     | 103763558 | 336 |
| chr23 | 15933896      | 15934230  | 335 |
| chr19 | 26270075      | 26270409  | 335 |
| chrX  | 6721875       | 6722208   | 334 |
| chr27 | 26547484      | 26547817  | 334 |
| chr2  | 131573938     | 131574271 | 334 |
| chr13 | 45331038      | 45331371  | 334 |
| chr13 | 136014 136347 | 334       |     |
| chr3  | 24046027      | 24046359  | 333 |
| chr3  | 18553596      | 18553928  | 333 |
| chr23 | 30669722      | 30670054  | 333 |
| chr6  | 69740242      | 69740573  | 332 |
| chr21 | 18782277      | 18782608  | 332 |
| chr20 | 75744077      | 75744408  | 332 |
| chr19 | 39229775      | 39230106  | 332 |
| chrX  | 19266609      | 19266939  | 331 |
| chrX  | 6736980       | 6737310   | 331 |
| chr26 | 21624008      | 21624338  | 331 |
| chr16 | 29020256      | 29020586  | 331 |
| chr13 | 41285320      | 41285650  | 331 |
| chrX  | 80249080      | 80249409  | 330 |
| chr4  | 99749035      | 99749364  | 330 |
| chr25 | 23557934      | 23558263  | 330 |
| chr4  | 71408653      | 71408981  | 329 |
| chr25 | 27154324      | 27154652  | 329 |
| chr19 | 46789071      | 46789399  | 329 |
| chrX  | 40697362      | 40697689  | 328 |
| chr23 | 20466918      | 20467245  | 328 |
| chr13 | 60726789      | 60727116  | 328 |



|       |               |           |     |
|-------|---------------|-----------|-----|
| chr1  | 68846916      | 68847243  | 328 |
| chr11 | 107572467     | 107572793 | 327 |
| chrX  | 54209147      | 54209472  | 326 |
| chr29 | 49266736      | 49267061  | 326 |
| chr15 | 25450901      | 25451226  | 326 |
| chr13 | 63431477      | 63431802  | 326 |
| chr10 | 47697877      | 47698202  | 326 |
| chr1  | 133458508     | 133458833 | 326 |
| chrX  | 37652216      | 37652540  | 325 |
| chr3  | 121579996     | 121580320 | 325 |
| chr29 | 36951531      | 36951855  | 325 |
| chr15 | 23200475      | 23200799  | 325 |
| chrX  | 11926508      | 11926830  | 323 |
| chr7  | 19171132      | 19171454  | 323 |
| chr12 | 17984447      | 17984769  | 323 |
| chrX  | 59466223      | 59466544  | 322 |
| chr29 | 42168856      | 42169177  | 322 |
| chr25 | 8733185       | 8733506   | 322 |
| chr24 | 43890201      | 43890522  | 322 |
| chr23 | 18463804      | 18464125  | 322 |
| chr16 | 60455364      | 60455685  | 322 |
| chr25 | 23353964      | 23354284  | 321 |
| chr23 | 15088409      | 15088729  | 321 |
| chr19 | 54795249      | 54795569  | 321 |
| chr18 | 22172811      | 22173131  | 321 |
| chr5  | 28896311      | 28896630  | 320 |
| chr3  | 108827690     | 108828009 | 320 |
| chr20 | 650606 650925 |           | 320 |
| chr18 | 57155447      | 57155766  | 320 |
| chr17 | 60287728      | 60288047  | 320 |
| chr15 | 32995836      | 32996155  | 320 |
| chr13 | 64378940      | 64379259  | 320 |
| chr23 | 10472475      | 10472793  | 319 |
| chr19 | 58173694      | 58174012  | 319 |
| chr19 | 29717436      | 29717754  | 319 |
| chr18 | 35064351      | 35064669  | 319 |
| chr11 | 14167026      | 14167344  | 319 |
| chr9  | 106630781     | 106631098 | 318 |
| chr24 | 1749710       | 1750027   | 318 |
| chr2  | 74700726      | 74701043  | 318 |
| chr12 | 14968769      | 14969086  | 318 |
| chr5  | 51787291      | 51787607  | 317 |
| chr29 | 41619268      | 41619584  | 317 |
| chr22 | 50739949      | 50740265  | 317 |
| chr2  | 111472638     | 111472954 | 317 |
| chr17 | 57587327      | 57587643  | 317 |
| chr16 | 47063119      | 47063435  | 317 |
| chr6  | 120488776     | 120489091 | 316 |
| chr5  | 18730141      | 18730456  | 316 |
| chr18 | 56858584      | 56858899  | 316 |

|       |           |           |     |
|-------|-----------|-----------|-----|
| chr15 | 73776897  | 73777212  | 316 |
| chr15 | 32136454  | 32136769  | 316 |
| chr12 | 82309834  | 82310149  | 316 |
| chr11 | 92182275  | 92182590  | 316 |
| chrX  | 46870128  | 46870442  | 315 |
| chrX  | 38035294  | 38035608  | 315 |
| chrX  | 2568347   | 2568661   | 315 |
| chr8  | 73826985  | 73827299  | 315 |
| chr13 | 37663170  | 37663483  | 314 |
| chrX  | 64394296  | 64394608  | 313 |
| chrX  | 54736211  | 54736523  | 313 |
| chr7  | 18181528  | 18181840  | 313 |
| chr3  | 35403696  | 35404008  | 313 |
| chr2  | 125743609 | 125743921 | 313 |
| chr17 | 65139692  | 65140004  | 313 |
| chrX  | 80797413  | 80797724  | 312 |
| chr19 | 54536167  | 54536478  | 312 |
| chr19 | 28738290  | 28738601  | 312 |
| chrX  | 35697818  | 35698128  | 311 |
| chr7  | 52397080  | 52397390  | 311 |
| chr29 | 31632644  | 31632954  | 311 |
| chr24 | 25448543  | 25448853  | 311 |
| chr20 | 19431562  | 19431872  | 311 |
| chr18 | 43401306  | 43401616  | 311 |
| chr18 | 23564899  | 23565209  | 311 |
| chr18 | 18719935  | 18720245  | 311 |
| chr17 | 67404821  | 67405131  | 311 |
| chr14 | 28105736  | 28106046  | 311 |
| chr13 | 72659656  | 72659966  | 311 |
| chr9  | 90295669  | 90295978  | 310 |
| chr7  | 17970927  | 17971236  | 310 |
| chr19 | 45101561  | 45101870  | 310 |
| chr12 | 32162445  | 32162754  | 310 |
| chr10 | 83988118  | 83988427  | 310 |
| chr1  | 76555553  | 76555862  | 310 |
| chrX  | 66244032  | 66244340  | 309 |
| chr4  | 33237129  | 33237437  | 309 |
| chr19 | 26219393  | 26219701  | 309 |
| chr14 | 8167456   | 8167764   | 309 |
| chr4  | 71501093  | 71501400  | 308 |
| chr11 | 80553802  | 80554109  | 308 |
| chr1  | 68948896  | 68949203  | 308 |
| chr28 | 26783717  | 26784023  | 307 |
| chr24 | 46914461  | 46914767  | 307 |
| chr23 | 43930463  | 43930769  | 307 |
| chrX  | 45425621  | 45425926  | 306 |
| chrX  | 8043254   | 8043559   | 306 |
| chr29 | 23642848  | 23643153  | 306 |
| chr26 | 44229093  | 44229398  | 306 |
| chr22 | 29998671  | 29998976  | 306 |

|       |           |           |     |
|-------|-----------|-----------|-----|
| chr16 | 1788949   | 1789254   | 306 |
| chr15 | 42679055  | 42679360  | 306 |
| chr10 | 74755182  | 74755487  | 306 |
| chr10 | 16735891  | 16736196  | 306 |
| chr23 | 10972199  | 10972503  | 305 |
| chr20 | 72947372  | 72947676  | 305 |
| chr17 | 58831462  | 58831766  | 305 |
| chrX  | 83349404  | 83349707  | 304 |
| chrX  | 79851394  | 79851697  | 304 |
| chr8  | 77710346  | 77710649  | 304 |
| chr7  | 43707172  | 43707475  | 304 |
| chr4  | 123282243 | 123282546 | 304 |
| chr28 | 25332712  | 25333015  | 304 |
| chr22 | 12195675  | 12195978  | 304 |
| chr21 | 26718491  | 26718794  | 304 |
| chr18 | 5298445   | 5298748   | 304 |
| chr16 | 38833603  | 38833906  | 304 |
| chr15 | 33656994  | 33657297  | 304 |
| chr1  | 83019941  | 83020244  | 304 |
| chrX  | 77546210  | 77546512  | 303 |
| chr16 | 68883062  | 68883364  | 303 |
| chr15 | 29672924  | 29673226  | 303 |
| chr12 | 69049808  | 69050110  | 303 |
| chrX  | 77914779  | 77915080  | 302 |
| chrX  | 8522639   | 8522940   | 302 |
| chr9  | 47252791  | 47253092  | 302 |
| chr8  | 71390739  | 71391040  | 302 |
| chr7  | 38834302  | 38834603  | 302 |
| chr16 | 77462112  | 77462413  | 302 |
| chr13 | 33289962  | 33290263  | 302 |
| chrX  | 72139343  | 72139643  | 301 |
| chrX  | 20391524  | 20391824  | 301 |
| chr4  | 71427334  | 71427634  | 301 |
| chr3  | 92847621  | 92847921  | 301 |
| chr29 | 46023298  | 46023598  | 301 |
| chr21 | 26294957  | 26295257  | 301 |
| chr20 | 66538904  | 66539204  | 301 |
| chr2  | 26599498  | 26599798  | 301 |
| chr15 | 75586786  | 75587086  | 301 |
| chr11 | 85415320  | 85415620  | 301 |
| chrX  | 20697016  | 20697315  | 300 |
| chrX  | 8212310   | 8212609   | 300 |
| chr3  | 120573351 | 120573650 | 300 |
| chr23 | 43389117  | 43389416  | 300 |
| chr10 | 71125412  | 71125711  | 300 |
| chrX  | 60509247  | 60509545  | 299 |
| chr5  | 120480409 | 120480707 | 299 |
| chr4  | 98877753  | 98878051  | 299 |
| chr3  | 110147953 | 110148251 | 299 |
| chr19 | 57048871  | 57049169  | 299 |

|       |           |           |     |
|-------|-----------|-----------|-----|
| chr19 | 40532606  | 40532904  | 299 |
| chr16 | 2429576   | 2429874   | 299 |
| chr15 | 25377641  | 25377939  | 299 |
| chr12 | 21664131  | 21664429  | 299 |
| chrX  | 29590536  | 29590833  | 298 |
| chrX  | 9266934   | 9267231   | 298 |
| chrX  | 7428271   | 7428568   | 298 |
| chr25 | 34494159  | 34494456  | 298 |
| chr20 | 2008715   | 2009012   | 298 |
| chr19 | 55511369  | 55511666  | 298 |
| chrX  | 22536346  | 22536642  | 297 |
| chr9  | 90513606  | 90513902  | 297 |
| chr9  | 47269346  | 47269642  | 297 |
| chr23 | 43924517  | 43924813  | 297 |
| chr2  | 111225321 | 111225617 | 297 |
| chr18 | 11941790  | 11942086  | 297 |
| chr17 | 70480480  | 70480776  | 297 |
| chr17 | 63700752  | 63701048  | 297 |
| chr12 | 32903062  | 32903358  | 297 |
| chrX  | 70142267  | 70142562  | 296 |
| chrX  | 16340733  | 16341028  | 296 |
| chr5  | 51889919  | 51890214  | 296 |
| chr24 | 1099255   | 1099550   | 296 |
| chr20 | 75038395  | 75038690  | 296 |
| chr19 | 23707264  | 23707559  | 296 |
| chr18 | 56878514  | 56878809  | 296 |
| chr18 | 51538062  | 51538357  | 296 |
| chr13 | 35570857  | 35571152  | 296 |
| chr11 | 49419331  | 49419626  | 296 |
| chr1  | 147113210 | 147113505 | 296 |
| chrX  | 21271248  | 21271542  | 295 |
| chr5  | 74417695  | 74417989  | 295 |
| chr27 | 41543240  | 41543534  | 295 |
| chr17 | 70361524  | 70361818  | 295 |
| chr16 | 40615168  | 40615462  | 295 |
| chrX  | 66622946  | 66623239  | 294 |
| chrX  | 48048597  | 48048890  | 294 |
| chr9  | 94548937  | 94549230  | 294 |
| chr7  | 47417562  | 47417855  | 294 |
| chr5  | 122135998 | 122136291 | 294 |
| chr28 | 42156079  | 42156372  | 294 |
| chr27 | 30517697  | 30517990  | 294 |
| chr21 | 18829414  | 18829707  | 294 |
| chr19 | 62075749  | 62076042  | 294 |
| chr16 | 73186629  | 73186922  | 294 |
| chr12 | 27343880  | 27344173  | 294 |
| chr8  | 61907838  | 61908130  | 293 |
| chr6  | 91888331  | 91888623  | 293 |
| chr3  | 127655156 | 127655448 | 293 |
| chr25 | 38238961  | 38239253  | 293 |

|       |           |           |     |
|-------|-----------|-----------|-----|
| chr21 | 5992380   | 5992672   | 293 |
| chr18 | 56411979  | 56412271  | 293 |
| chr15 | 14234945  | 14235237  | 293 |
| chr13 | 60744360  | 60744652  | 293 |
| chr11 | 9352658   | 9352950   | 293 |
| chrX  | 64153106  | 64153397  | 292 |
| chrX  | 62970779  | 62971070  | 292 |
| chr9  | 75086313  | 75086604  | 292 |
| chr3  | 93652648  | 93652939  | 292 |
| chr24 | 45836004  | 45836295  | 292 |
| chr22 | 56310415  | 56310706  | 292 |
| chr19 | 42876464  | 42876755  | 292 |
| chrX  | 8205775   | 8206065   | 291 |
| chr4  | 116562882 | 116563172 | 291 |
| chr26 | 17899967  | 17900257  | 291 |
| chr21 | 31164080  | 31164370  | 291 |
| chr15 | 22531378  | 22531668  | 291 |
| chr1  | 153865814 | 153866104 | 291 |
| chrX  | 77734564  | 77734853  | 290 |
| chrX  | 3008542   | 3008831   | 290 |
| chr4  | 10815124  | 10815413  | 290 |
| chr3  | 55883859  | 55884148  | 290 |
| chr2  | 123711461 | 123711750 | 290 |
| chr19 | 45024186  | 45024475  | 290 |
| chrX  | 47995535  | 47995823  | 289 |
| chr20 | 3350141   | 3350429   | 289 |
| chr19 | 59424393  | 59424681  | 289 |
| chr15 | 28644209  | 28644497  | 289 |
| chr11 | 103306921 | 103307209 | 289 |
| chrX  | 23411318  | 23411605  | 288 |
| chr3  | 22530803  | 22531090  | 288 |
| chr27 | 1339825   | 1340112   | 288 |
| chr24 | 44146903  | 44147190  | 288 |
| chr22 | 54679852  | 54680139  | 288 |
| chr22 | 10745239  | 10745526  | 288 |
| chr13 | 55374707  | 55374994  | 288 |
| chrX  | 82900755  | 82901041  | 287 |
| chrX  | 74328111  | 74328397  | 287 |
| chrX  | 65679790  | 65680076  | 287 |
| chrX  | 16232336  | 16232622  | 287 |
| chrX  | 15477492  | 15477778  | 287 |
| chr7  | 14374800  | 14375086  | 287 |
| chr5  | 73219834  | 73220120  | 287 |
| chr24 | 62824532  | 62824818  | 287 |
| chr23 | 49362418  | 49362704  | 287 |
| chr2  | 131758124 | 131758410 | 287 |
| chr2  | 66648665  | 66648951  | 287 |
| chr18 | 39480274  | 39480560  | 287 |
| chrX  | 78248437  | 78248722  | 286 |
| chrX  | 58804614  | 58804899  | 286 |

|       |           |           |     |
|-------|-----------|-----------|-----|
| chrX  | 16304700  | 16304985  | 286 |
| chr8  | 49115242  | 49115527  | 286 |
| chr7  | 16515385  | 16515670  | 286 |
| chr6  | 2241876   | 2242161   | 286 |
| chr3  | 126979042 | 126979327 | 286 |
| chr3  | 116072602 | 116072887 | 286 |
| chr3  | 30453974  | 30454259  | 286 |
| chr29 | 31668716  | 31669001  | 286 |
| chr22 | 54176260  | 54176545  | 286 |
| chr20 | 74332060  | 74332345  | 286 |
| chr19 | 58613986  | 58614271  | 286 |
| chr18 | 50280019  | 50280304  | 286 |
| chr18 | 11804351  | 11804636  | 286 |
| chr18 | 11230644  | 11230929  | 286 |
| chr14 | 76290645  | 76290930  | 286 |
| chr11 | 44704579  | 44704864  | 286 |
| chr10 | 70212643  | 70212928  | 286 |
| chr4  | 50757565  | 50757849  | 285 |
| chr4  | 33216127  | 33216411  | 285 |
| chr23 | 10525441  | 10525725  | 285 |
| chr22 | 14121535  | 14121819  | 285 |
| chr21 | 24426057  | 24426341  | 285 |
| chr21 | 22942118  | 22942402  | 285 |
| chr20 | 72940183  | 72940467  | 285 |
| chr19 | 14669104  | 14669388  | 285 |
| chr18 | 25861649  | 25861933  | 285 |
| chr13 | 57481625  | 57481909  | 285 |
| chr21 | 24366789  | 24367072  | 284 |
| chr18 | 24646444  | 24646727  | 284 |
| chr17 | 4156959   | 4157242   | 284 |
| chr16 | 25978863  | 25979146  | 284 |
| chr13 | 41386814  | 41387097  | 284 |
| chrX  | 65810593  | 65810875  | 283 |
| chrX  | 53389074  | 53389356  | 283 |
| chr20 | 2284431   | 2284713   | 283 |
| chr19 | 56085052  | 56085334  | 283 |
| chr19 | 20373060  | 20373342  | 283 |
| chr18 | 39937528  | 39937810  | 283 |
| chr15 | 21218963  | 21219245  | 283 |
| chr13 | 61789588  | 61789870  | 283 |
| chrX  | 56893921  | 56894202  | 282 |
| chrX  | 21220130  | 21220411  | 282 |
| chr8  | 7789725   | 7790006   | 282 |
| chr7  | 68053452  | 68053733  | 282 |
| chr28 | 22553094  | 22553375  | 282 |
| chr23 | 19921133  | 19921414  | 282 |
| chr19 | 60468465  | 60468746  | 282 |
| chr19 | 21726114  | 21726395  | 282 |
| chr19 | 8443590   | 8443871   | 282 |
| chr11 | 50879260  | 50879541  | 282 |

|       |               |           |     |
|-------|---------------|-----------|-----|
| chrX  | 83517690      | 83517970  | 281 |
| chrX  | 9643955       | 9644235   | 281 |
| chrX  | 8123384       | 8123664   | 281 |
| chr22 | 58368434      | 58368714  | 281 |
| chr21 | 31085795      | 31086075  | 281 |
| chr20 | 8598766       | 8599046   | 281 |
| chr20 | 486602 486882 | 281       |     |
| chr19 | 27258093      | 27258373  | 281 |
| chr19 | 10213103      | 10213383  | 281 |
| chr17 | 4841476       | 4841756   | 281 |
| chr16 | 41499764      | 41500044  | 281 |
| chr16 | 40611518      | 40611798  | 281 |
| chr13 | 59846329      | 59846609  | 281 |
| chr12 | 17985302      | 17985582  | 281 |
| chr10 | 83837671      | 83837951  | 281 |
| chr10 | 46189113      | 46189393  | 281 |
| chr8  | 109354825     | 109355104 | 280 |
| chr8  | 75982380      | 75982659  | 280 |
| chr7  | 60120040      | 60120319  | 280 |
| chr4  | 97732979      | 97733258  | 280 |
| chr23 | 43075717      | 43075996  | 280 |
| chr21 | 48665965      | 48666244  | 280 |
| chr2  | 124468318     | 124468597 | 280 |
| chr17 | 47099131      | 47099410  | 280 |
| chr14 | 80584643      | 80584922  | 280 |
| chr11 | 100875752     | 100876031 | 280 |
| chr11 | 91896287      | 91896566  | 280 |
| chr10 | 11092342      | 11092621  | 280 |
| chr1  | 128522339     | 128522618 | 280 |
| chrX  | 74804177      | 74804455  | 279 |
| chr4  | 14688313      | 14688591  | 279 |
| chr29 | 48840962      | 48841240  | 279 |
| chr25 | 33551742      | 33552020  | 279 |
| chr2  | 131753417     | 131753695 | 279 |
| chr14 | 61507876      | 61508154  | 279 |
| chr12 | 81867739      | 81868017  | 279 |
| chr11 | 107565765     | 107566043 | 279 |
| chr11 | 10394278      | 10394556  | 279 |
| chrX  | 75665090      | 75665367  | 278 |
| chr9  | 77673280      | 77673557  | 278 |
| chr5  | 52567880      | 52568157  | 278 |
| chr4  | 64298354      | 64298631  | 278 |
| chr3  | 122393910     | 122394187 | 278 |
| chr28 | 42273347      | 42273624  | 278 |
| chr18 | 24238519      | 24238796  | 278 |
| chr17 | 48288209      | 48288486  | 278 |
| chr16 | 58986752      | 58987029  | 278 |
| chr14 | 66222595      | 66222872  | 278 |
| chr13 | 79665314      | 79665591  | 278 |
| chr13 | 60182954      | 60183231  | 278 |

|       |               |           |     |
|-------|---------------|-----------|-----|
| chr10 | 12126357      | 12126634  | 278 |
| chr10 | 7598793       | 7599070   | 278 |
| chrX  | 51322427      | 51322703  | 277 |
| chrX  | 49772502      | 49772778  | 277 |
| chr5  | 117269031     | 117269307 | 277 |
| chr4  | 51770970      | 51771246  | 277 |
| chr18 | 54683655      | 54683931  | 277 |
| chr15 | 63695923      | 63696199  | 277 |
| chr14 | 76633060      | 76633336  | 277 |
| chr12 | 79554601      | 79554877  | 277 |
| chr11 | 102386374     | 102386650 | 277 |
| chr11 | 65773760      | 65774036  | 277 |
| chrX  | 60544207      | 60544482  | 276 |
| chr9  | 41636791      | 41637066  | 276 |
| chr7  | 16329648      | 16329923  | 276 |
| chr4  | 117838782     | 117839057 | 276 |
| chr4  | 38292399      | 38292674  | 276 |
| chr3  | 120578125     | 120578400 | 276 |
| chr3  | 111658200     | 111658475 | 276 |
| chr26 | 23069024      | 23069299  | 276 |
| chr23 | 14991975      | 14992250  | 276 |
| chr21 | 34499007      | 34499282  | 276 |
| chr2  | 115081740     | 115082015 | 276 |
| chr19 | 12327134      | 12327409  | 276 |
| chr17 | 68246442      | 68246717  | 276 |
| chr13 | 68791842      | 68792117  | 276 |
| chr13 | 55385068      | 55385343  | 276 |
| chr13 | 38732220      | 38732495  | 276 |
| chrX  | 72374515      | 72374789  | 275 |
| chrX  | 33969076      | 33969350  | 275 |
| chrX  | 13819662      | 13819936  | 275 |
| chr29 | 43375729      | 43376003  | 275 |
| chr19 | 26045406      | 26045680  | 275 |
| chr13 | 66077237      | 66077511  | 275 |
| chr10 | 63062070      | 63062344  | 275 |
| chrX  | 55029560      | 55029833  | 274 |
| chr9  | 45958069      | 45958342  | 274 |
| chr29 | 36150430      | 36150703  | 274 |
| chr22 | 57246693      | 57246966  | 274 |
| chr20 | 11106726      | 11106999  | 274 |
| chr18 | 54205807      | 54206080  | 274 |
| chr18 | 644487 644760 | 274       |     |
| chr17 | 63041006      | 63041279  | 274 |
| chr15 | 31339370      | 31339643  | 274 |
| chr11 | 105968406     | 105968679 | 274 |
| chrX  | 19221328      | 19221600  | 273 |
| chrX  | 7955136       | 7955408   | 273 |
| chr5  | 116699325     | 116699597 | 273 |
| chr4  | 116027664     | 116027936 | 273 |
| chr26 | 51653401      | 51653673  | 273 |



|       |           |           |     |
|-------|-----------|-----------|-----|
| chr2  | 131568164 | 131568436 | 273 |
| chr19 | 34960917  | 34961189  | 273 |
| chr18 | 4595269   | 4595541   | 273 |
| chr15 | 24422766  | 24423038  | 273 |
| chr14 | 66244111  | 66244383  | 273 |
| chr13 | 60762487  | 60762759  | 273 |
| chr12 | 53337969  | 53338241  | 273 |
| chr11 | 91633546  | 91633818  | 273 |
| chr1  | 123116878 | 123117150 | 273 |
| chrX  | 84949762  | 84950033  | 272 |
| chrX  | 40789120  | 40789391  | 272 |
| chrX  | 37922424  | 37922695  | 272 |
| chr8  | 94990704  | 94990975  | 272 |
| chr8  | 92919166  | 92919437  | 272 |
| chr5  | 80141331  | 80141602  | 272 |
| chr5  | 75987493  | 75987764  | 272 |
| chr29 | 36160423  | 36160694  | 272 |
| chr29 | 31643685  | 31643956  | 272 |
| chr23 | 53033254  | 53033525  | 272 |
| chr18 | 25547241  | 25547512  | 272 |
| chr14 | 53866422  | 53866693  | 272 |
| chr13 | 75697370  | 75697641  | 272 |
| chr13 | 60001767  | 60002038  | 272 |
| chr11 | 26126334  | 26126605  | 272 |
| chr10 | 32472198  | 32472469  | 272 |
| chr1  | 72096735  | 72097006  | 272 |
| chr1  | 57795080  | 57795351  | 272 |
| chrX  | 2709401   | 2709671   | 271 |
| chr7  | 44203630  | 44203900  | 271 |
| chr6  | 18491827  | 18492097  | 271 |
| chr4  | 120964361 | 120964631 | 271 |
| chr4  | 72387348  | 72387618  | 271 |
| chr24 | 59060713  | 59060983  | 271 |
| chr22 | 30018845  | 30019115  | 271 |
| chr19 | 7931777   | 7932047   | 271 |
| chr16 | 58536973  | 58537243  | 271 |
| chr13 | 52942082  | 52942352  | 271 |
| chr11 | 85221412  | 85221682  | 271 |
| chrX  | 77698541  | 77698810  | 270 |
| chrX  | 54167974  | 54168243  | 270 |
| chrX  | 38499595  | 38499864  | 270 |
| chr8  | 59305014  | 59305283  | 270 |
| chr4  | 98095683  | 98095952  | 270 |
| chr3  | 105397384 | 105397653 | 270 |
| chr29 | 35338232  | 35338501  | 270 |
| chr23 | 49928995  | 49929264  | 270 |
| chr13 | 55518912  | 55519181  | 270 |
| chr12 | 34315749  | 34316018  | 270 |
| chr11 | 103543117 | 103543386 | 270 |
| chr10 | 74722093  | 74722362  | 270 |

|       |           |           |     |
|-------|-----------|-----------|-----|
| chr1  | 145838657 | 145838926 | 270 |
| chrX  | 55640955  | 55641223  | 269 |
| chrX  | 6443197   | 6443465   | 269 |
| chr9  | 35096163  | 35096431  | 269 |
| chr5  | 111025436 | 111025704 | 269 |
| chr5  | 30819526  | 30819794  | 269 |
| chr3  | 111259500 | 111259768 | 269 |
| chr25 | 30949866  | 30950134  | 269 |
| chr23 | 42383461  | 42383729  | 269 |
| chr21 | 6181079   | 6181347   | 269 |
| chr2  | 64218335  | 64218603  | 269 |
| chr19 | 26958049  | 26958317  | 269 |
| chr19 | 13484745  | 13485013  | 269 |
| chr15 | 30368102  | 30368370  | 269 |
| chr12 | 55168690  | 55168958  | 269 |
| chrX  | 78812394  | 78812661  | 268 |
| chrX  | 65687454  | 65687721  | 268 |
| chrX  | 34590533  | 34590800  | 268 |
| chrX  | 33849522  | 33849789  | 268 |
| chrX  | 19257490  | 19257757  | 268 |
| chr6  | 108578895 | 108579162 | 268 |
| chr4  | 32147266  | 32147533  | 268 |
| chr3  | 127761193 | 127761460 | 268 |
| chr3  | 104619935 | 104620202 | 268 |
| chr27 | 27035538  | 27035805  | 268 |
| chr26 | 41253781  | 41254048  | 268 |
| chr25 | 39407727  | 39407994  | 268 |
| chr24 | 22873555  | 22873822  | 268 |
| chr23 | 31439733  | 31440000  | 268 |
| chr2  | 136957303 | 136957570 | 268 |
| chr18 | 22474714  | 22474981  | 268 |
| chr17 | 73136558  | 73136825  | 268 |
| chr15 | 22864513  | 22864780  | 268 |
| chr14 | 4032445   | 4032712   | 268 |
| chr14 | 1945580   | 1945847   | 268 |
| chr13 | 82641118  | 82641385  | 268 |
| chr13 | 63375391  | 63375658  | 268 |
| chr10 | 17407709  | 17407976  | 268 |
| chr10 | 17366316  | 17366583  | 268 |
| chrX  | 56151530  | 56151796  | 267 |
| chrX  | 55493887  | 55494153  | 267 |
| chrX  | 20084649  | 20084915  | 267 |
| chrX  | 19487436  | 19487702  | 267 |
| chr8  | 67014247  | 67014513  | 267 |
| chr4  | 106557317 | 106557583 | 267 |
| chr29 | 37508770  | 37509036  | 267 |
| chr23 | 49892264  | 49892530  | 267 |
| chr2  | 123754235 | 123754501 | 267 |
| chr19 | 34055556  | 34055822  | 267 |
| chr17 | 70512911  | 70513177  | 267 |

|       |           |           |     |
|-------|-----------|-----------|-----|
| chr17 | 63609720  | 63609986  | 267 |
| chr13 | 43428963  | 43429229  | 267 |
| chr11 | 108370102 | 108370368 | 267 |
| chr1  | 142068005 | 142068271 | 267 |
| chr8  | 8589346   | 8589611   | 266 |
| chr5  | 33927189  | 33927454  | 266 |
| chr29 | 38837220  | 38837485  | 266 |
| chr26 | 19956437  | 19956702  | 266 |
| chr24 | 64994240  | 64994505  | 266 |
| chr23 | 46110335  | 46110600  | 266 |
| chr23 | 17810549  | 17810814  | 266 |
| chr22 | 14941328  | 14941593  | 266 |
| chr2  | 76031872  | 76032137  | 266 |
| chr18 | 59397118  | 59397383  | 266 |
| chr17 | 66934043  | 66934308  | 266 |
| chr13 | 75756253  | 75756518  | 266 |
| chr13 | 6635939   | 6636204   | 266 |
| chr11 | 80173090  | 80173355  | 266 |
| chr11 | 2265696   | 2265961   | 266 |
| chr1  | 145500742 | 145501007 | 266 |
| chrX  | 75496528  | 75496792  | 265 |
| chrX  | 32655654  | 32655918  | 265 |
| chrX  | 18822812  | 18823076  | 265 |
| chrX  | 10928080  | 10928344  | 265 |
| chrX  | 7808598   | 7808862   | 265 |
| chr5  | 124901654 | 124901918 | 265 |
| chr5  | 112051635 | 112051899 | 265 |
| chr4  | 117143906 | 117144170 | 265 |
| chr24 | 60737777  | 60738041  | 265 |
| chr24 | 51787606  | 51787870  | 265 |
| chr24 | 40229695  | 40229959  | 265 |
| chr24 | 36021866  | 36022130  | 265 |
| chr22 | 53947258  | 53947522  | 265 |
| chr19 | 39935687  | 39935951  | 265 |
| chr19 | 39400994  | 39401258  | 265 |
| chr18 | 11701602  | 11701866  | 265 |
| chr18 | 11218542  | 11218806  | 265 |
| chr15 | 74659903  | 74660167  | 265 |
| chr11 | 98325152  | 98325416  | 265 |
| chr11 | 91578189  | 91578453  | 265 |
| chr10 | 64018181  | 64018445  | 265 |
| chr1  | 74529071  | 74529335  | 265 |
| chrX  | 18392505  | 18392768  | 264 |
| chrX  | 11260060  | 11260323  | 264 |
| chrX  | 9452720   | 9452983   | 264 |
| chr9  | 90457610  | 90457873  | 264 |
| chr6  | 74439420  | 74439683  | 264 |
| chr5  | 10533975  | 10534238  | 264 |
| chr3  | 122392006 | 122392269 | 264 |
| chr29 | 35492502  | 35492765  | 264 |

|       |           |           |     |
|-------|-----------|-----------|-----|
| chr26 | 41735208  | 41735471  | 264 |
| chr26 | 40892291  | 40892554  | 264 |
| chr21 | 26318878  | 26319141  | 264 |
| chr20 | 71906927  | 71907190  | 264 |
| chr2  | 76585103  | 76585366  | 264 |
| chr19 | 17847744  | 17848007  | 264 |
| chr19 | 13551080  | 13551343  | 264 |
| chr17 | 64033770  | 64034033  | 264 |
| chr17 | 60909494  | 60909757  | 264 |
| chr15 | 28941710  | 28941973  | 264 |
| chrX  | 17223684  | 17223946  | 263 |
| chr9  | 106453284 | 106453546 | 263 |
| chr9  | 43831991  | 43832253  | 263 |
| chr5  | 17188814  | 17189076  | 263 |
| chr4  | 98823161  | 98823423  | 263 |
| chr3  | 113293211 | 113293473 | 263 |
| chr28 | 32672232  | 32672494  | 263 |
| chr25 | 33486876  | 33487138  | 263 |
| chr25 | 1900431   | 1900693   | 263 |
| chr23 | 31068223  | 31068485  | 263 |
| chr22 | 58613415  | 58613677  | 263 |
| chr22 | 22167917  | 22168179  | 263 |
| chr19 | 59299385  | 59299647  | 263 |
| chr19 | 40527602  | 40527864  | 263 |
| chr16 | 47203588  | 47203850  | 263 |
| chr10 | 86873249  | 86873511  | 263 |
| chr10 | 66779406  | 66779668  | 263 |
| chr10 | 16903338  | 16903600  | 263 |
| chrX  | 9675861   | 9676122   | 262 |
| chr3  | 111846322 | 111846583 | 262 |
| chr26 | 20966871  | 20967132  | 262 |
| chr26 | 20871510  | 20871771  | 262 |
| chr23 | 42492999  | 42493260  | 262 |
| chr2  | 95272772  | 95273033  | 262 |
| chr19 | 58652653  | 58652914  | 262 |
| chr19 | 37752424  | 37752685  | 262 |
| chr17 | 64162009  | 64162270  | 262 |
| chr13 | 46430070  | 46430331  | 262 |
| chr13 | 19071231  | 19071492  | 262 |
| chr12 | 9561638   | 9561899   | 262 |
| chr11 | 106909697 | 106909958 | 262 |
| chr11 | 91815658  | 91815919  | 262 |
| chr1  | 72532873  | 72533134  | 262 |
| chrX  | 66604836  | 66605096  | 261 |
| chrX  | 12862894  | 12863154  | 261 |
| chrX  | 12640260  | 12640520  | 261 |
| chrX  | 10436401  | 10436661  | 261 |
| chr9  | 99712395  | 99712655  | 261 |
| chr4  | 14681130  | 14681390  | 261 |
| chr3  | 121228103 | 121228363 | 261 |

|       |             |           |     |
|-------|-------------|-----------|-----|
| chr3  | 52011410    | 52011670  | 261 |
| chr3  | 17478293    | 17478553  | 261 |
| chr29 | 36559496    | 36559756  | 261 |
| chr29 | 7824214     | 7824474   | 261 |
| chr23 | 51987324    | 51987584  | 261 |
| chr23 | 35217508    | 35217768  | 261 |
| chr22 | 44873813    | 44874073  | 261 |
| chr19 | 39829598    | 39829858  | 261 |
| chr19 | 30468456    | 30468716  | 261 |
| chr17 | 70609126    | 70609386  | 261 |
| chr15 | 39633939    | 39634199  | 261 |
| chrX  | 38295433    | 38295692  | 260 |
| chrX  | 35572116    | 35572375  | 260 |
| chrX  | 12217179    | 12217438  | 260 |
| chrX  | 3894303     | 3894562   | 260 |
| chr3  | 121970004   | 121970263 | 260 |
| chr28 | 3552543     | 3552802   | 260 |
| chr27 | 13112 13371 | 260       |     |
| chr22 | 32810149    | 32810408  | 260 |
| chr21 | 23037973    | 23038232  | 260 |
| chr21 | 19823222    | 19823481  | 260 |
| chr19 | 25780970    | 25781229  | 260 |
| chr16 | 1582789     | 1583048   | 260 |
| chr13 | 63004816    | 63005075  | 260 |
| chr13 | 55377617    | 55377876  | 260 |
| chr11 | 72719209    | 72719468  | 260 |
| chr10 | 10860982    | 10861241  | 260 |
| chrX  | 55651769    | 55652027  | 259 |
| chrX  | 50820193    | 50820451  | 259 |
| chrX  | 21223457    | 21223715  | 259 |
| chrX  | 20533973    | 20534231  | 259 |
| chr9  | 77769775    | 77770033  | 259 |
| chr8  | 89522956    | 89523214  | 259 |
| chr7  | 20990328    | 20990586  | 259 |
| chr3  | 115096002   | 115096260 | 259 |
| chr22 | 60075798    | 60076056  | 259 |
| chr22 | 52446663    | 52446921  | 259 |
| chr22 | 39063157    | 39063415  | 259 |
| chr16 | 45220030    | 45220288  | 259 |
| chr15 | 72760842    | 72761100  | 259 |
| chr13 | 57553997    | 57554255  | 259 |
| chr13 | 55960000    | 55960258  | 259 |
| chr11 | 100892829   | 100893087 | 259 |
| chr10 | 67035631    | 67035889  | 259 |
| chrX  | 74602250    | 74602507  | 258 |
| chrX  | 74289468    | 74289725  | 258 |
| chrX  | 67046135    | 67046392  | 258 |
| chr28 | 41276243    | 41276500  | 258 |
| chr25 | 36340616    | 36340873  | 258 |
| chr22 | 50776740    | 50776997  | 258 |

|       |               |           |     |
|-------|---------------|-----------|-----|
| chr20 | 45412504      | 45412761  | 258 |
| chr2  | 108610698     | 108610955 | 258 |
| chr19 | 51923950      | 51924207  | 258 |
| chr19 | 43061908      | 43062165  | 258 |
| chr19 | 41472010      | 41472267  | 258 |
| chr19 | 16152036      | 16152293  | 258 |
| chr18 | 33566626      | 33566883  | 258 |
| chr18 | 26289281      | 26289538  | 258 |
| chr17 | 63319340      | 63319597  | 258 |
| chr16 | 3671125       | 3671382   | 258 |
| chr14 | 23296196      | 23296453  | 258 |
| chr13 | 54469426      | 54469683  | 258 |
| chr12 | 82696981      | 82697238  | 258 |
| chr10 | 90693019      | 90693276  | 258 |
| chr10 | 16795726      | 16795983  | 258 |
| chrX  | 80821286      | 80821542  | 257 |
| chrX  | 32890421      | 32890677  | 257 |
| chrX  | 30929683      | 30929939  | 257 |
| chrX  | 19022160      | 19022416  | 257 |
| chrX  | 2487537       | 2487793   | 257 |
| chr9  | 61947782      | 61948038  | 257 |
| chr7  | 80366257      | 80366513  | 257 |
| chr4  | 120466217     | 120466473 | 257 |
| chr3  | 32929426      | 32929682  | 257 |
| chr26 | 31872385      | 31872641  | 257 |
| chr23 | 42603763      | 42604019  | 257 |
| chr23 | 16417368      | 16417624  | 257 |
| chr20 | 507401 507657 |           | 257 |
| chr2  | 128118738     | 128118994 | 257 |
| chr19 | 61052395      | 61052651  | 257 |
| chr19 | 58729315      | 58729571  | 257 |
| chr19 | 10982814      | 10983070  | 257 |
| chr18 | 51642757      | 51643013  | 257 |
| chr17 | 52139502      | 52139758  | 257 |
| chr17 | 6628314       | 6628570   | 257 |
| chr15 | 22517683      | 22517939  | 257 |
| chr13 | 43621682      | 43621938  | 257 |
| chr12 | 75697787      | 75698043  | 257 |
| chr12 | 55155973      | 55156229  | 257 |
| chr11 | 92550258      | 92550514  | 257 |
| chrX  | 78214701      | 78214956  | 256 |
| chrX  | 73869235      | 73869490  | 256 |
| chrX  | 56719280      | 56719535  | 256 |
| chrX  | 56195367      | 56195622  | 256 |
| chrX  | 34430664      | 34430919  | 256 |
| chrX  | 5236999       | 5237254   | 256 |
| chr9  | 103710008     | 103710263 | 256 |
| chr8  | 104374392     | 104374647 | 256 |
| chr7  | 43055772      | 43056027  | 256 |
| chr4  | 48952706      | 48952961  | 256 |

|       |           |           |     |
|-------|-----------|-----------|-----|
| chr3  | 110818088 | 110818343 | 256 |
| chr29 | 35423950  | 35424205  | 256 |
| chr23 | 46116593  | 46116848  | 256 |
| chr22 | 8047189   | 8047444   | 256 |
| chr21 | 20900021  | 20900276  | 256 |
| chr17 | 70246091  | 70246346  | 256 |
| chr17 | 60565732  | 60565987  | 256 |
| chr16 | 42183296  | 42183551  | 256 |
| chr16 | 40870007  | 40870262  | 256 |
| chr14 | 34038425  | 34038680  | 256 |
| chr14 | 3197262   | 3197517   | 256 |
| chr13 | 70187435  | 70187690  | 256 |
| chr13 | 42863936  | 42864191  | 256 |
| chr11 | 7850124   | 7850379   | 256 |
| chr1  | 144440454 | 144440709 | 256 |
| chrX  | 72592495  | 72592749  | 255 |
| chrX  | 53964733  | 53964987  | 255 |
| chrX  | 12235755  | 12236009  | 255 |
| chrX  | 12158996  | 12159250  | 255 |
| chr7  | 48857003  | 48857257  | 255 |
| chr5  | 124841287 | 124841541 | 255 |
| chr5  | 10522865  | 10523119  | 255 |
| chr29 | 35215374  | 35215628  | 255 |
| chr24 | 2382889   | 2383143   | 255 |
| chr23 | 51924231  | 51924485  | 255 |
| chr2  | 111769969 | 111770223 | 255 |
| chr19 | 59327465  | 59327719  | 255 |
| chr19 | 31267716  | 31267970  | 255 |
| chr18 | 22889873  | 22890127  | 255 |
| chr16 | 68074573  | 68074827  | 255 |
| chr15 | 22806079  | 22806333  | 255 |
| chr14 | 6845871   | 6846125   | 255 |
| chr14 | 6749030   | 6749284   | 255 |
| chr13 | 34772888  | 34773142  | 255 |
| chr11 | 3280030   | 3280284   | 255 |
| chr10 | 93070211  | 93070465  | 255 |
| chr1  | 142237277 | 142237531 | 255 |
| chr1  | 8739009   | 8739263   | 255 |
| chrX  | 71292082  | 71292335  | 254 |
| chrX  | 66819230  | 66819483  | 254 |
| chrX  | 63131580  | 63131833  | 254 |
| chrX  | 17704083  | 17704336  | 254 |
| chr7  | 38217985  | 38218238  | 254 |
| chr24 | 59967641  | 59967894  | 254 |
| chr23 | 26064753  | 26065006  | 254 |
| chr23 | 10547933  | 10548186  | 254 |
| chr21 | 60135942  | 60136195  | 254 |
| chr2  | 26582091  | 26582344  | 254 |
| chr19 | 38038777  | 38039030  | 254 |
| chr19 | 9414608   | 9414861   | 254 |

|       |               |           |     |
|-------|---------------|-----------|-----|
| chr19 | 8566018       | 8566271   | 254 |
| chr16 | 60355157      | 60355410  | 254 |
| chr15 | 55817062      | 55817315  | 254 |
| chr15 | 39922223      | 39922476  | 254 |
| chr15 | 24314283      | 24314536  | 254 |
| chr13 | 6862274       | 6862527   | 254 |
| chr12 | 21938051      | 21938304  | 254 |
| chrX  | 78388359      | 78388611  | 253 |
| chrX  | 27726739      | 27726991  | 253 |
| chrX  | 21150758      | 21151010  | 253 |
| chrX  | 12178099      | 12178351  | 253 |
| chrX  | 11709340      | 11709592  | 253 |
| chr8  | 80181826      | 80182078  | 253 |
| chr8  | 72525117      | 72525369  | 253 |
| chr7  | 18826418      | 18826670  | 253 |
| chr5  | 124372671     | 124372923 | 253 |
| chr5  | 121325296     | 121325548 | 253 |
| chr4  | 72680672      | 72680924  | 253 |
| chr29 | 33611843      | 33612095  | 253 |
| chr29 | 33166751      | 33167003  | 253 |
| chr26 | 42244855      | 42245107  | 253 |
| chr24 | 828281 828533 | 253       |     |
| chr20 | 67069807      | 67070059  | 253 |
| chr2  | 31507154      | 31507406  | 253 |
| chr19 | 59081144      | 59081396  | 253 |
| chr19 | 49648795      | 49649047  | 253 |
| chr17 | 64317472      | 64317724  | 253 |
| chr13 | 41125874      | 41126126  | 253 |
| chr10 | 71069014      | 71069266  | 253 |
| chr10 | 16809732      | 16809984  | 253 |
| chrX  | 81335109      | 81335360  | 252 |
| chrX  | 50249975      | 50250226  | 252 |
| chr7  | 51826251      | 51826502  | 252 |
| chr7  | 47416354      | 47416605  | 252 |
| chr3  | 105607509     | 105607760 | 252 |
| chr28 | 30818740      | 30818991  | 252 |
| chr24 | 46605590      | 46605841  | 252 |
| chr23 | 45673292      | 45673543  | 252 |
| chr22 | 40873249      | 40873500  | 252 |
| chr19 | 52857903      | 52858154  | 252 |
| chr19 | 41417757      | 41418008  | 252 |
| chr19 | 31811711      | 31811962  | 252 |
| chr18 | 41631781      | 41632032  | 252 |
| chr16 | 45584900      | 45585151  | 252 |
| chr16 | 44871561      | 44871812  | 252 |
| chr14 | 66386008      | 66386259  | 252 |
| chr14 | 42551582      | 42551833  | 252 |
| chr11 | 27740052      | 27740303  | 252 |
| chrX  | 55966463      | 55966713  | 251 |
| chrX  | 21623099      | 21623349  | 251 |



|       |           |           |     |
|-------|-----------|-----------|-----|
| chrX  | 9725103   | 9725353   | 251 |
| chrX  | 8540299   | 8540549   | 251 |
| chr9  | 98099563  | 98099813  | 251 |
| chr9  | 94948387  | 94948637  | 251 |
| chr5  | 28886818  | 28887068  | 251 |
| chr3  | 122144853 | 122145103 | 251 |
| chr29 | 29934773  | 29935023  | 251 |
| chr25 | 36442442  | 36442692  | 251 |
| chr25 | 35664462  | 35664712  | 251 |
| chr25 | 10932953  | 10933203  | 251 |
| chr24 | 33926897  | 33927147  | 251 |
| chr23 | 18854994  | 18855244  | 251 |
| chr23 | 9415389   | 9415639   | 251 |
| chr23 | 8385421   | 8385671   | 251 |
| chr21 | 34629107  | 34629357  | 251 |
| chr21 | 915418    | 915668    | 251 |
| chr20 | 538579    | 538829    | 251 |
| chr19 | 16027906  | 16028156  | 251 |
| chr18 | 22271099  | 22271349  | 251 |
| chr16 | 38649662  | 38649912  | 251 |
| chr15 | 36332506  | 36332756  | 251 |
| chr14 | 5727623   | 5727873   | 251 |
| chrX  | 72097465  | 72097714  | 250 |
| chrX  | 61264472  | 61264721  | 250 |
| chrX  | 143678    | 143927    | 250 |
| chr5  | 118540637 | 118540886 | 250 |
| chr5  | 114098557 | 114098806 | 250 |
| chr5  | 60371136  | 60371385  | 250 |
| chr4  | 9715091   | 9715340   | 250 |
| chr3  | 97567438  | 97567687  | 250 |
| chr25 | 27412007  | 27412256  | 250 |
| chr23 | 45580061  | 45580310  | 250 |
| chr23 | 44156723  | 44156972  | 250 |
| chr23 | 42905160  | 42905409  | 250 |
| chr23 | 12365963  | 12366212  | 250 |
| chr21 | 60850970  | 60851219  | 250 |
| chr21 | 31088634  | 31088883  | 250 |
| chr20 | 463976    | 464225    | 250 |
| chr19 | 52986546  | 52986795  | 250 |
| chr19 | 43011720  | 43011969  | 250 |
| chr19 | 17112947  | 17113196  | 250 |
| chr18 | 52294194  | 52294443  | 250 |
| chr17 | 54327025  | 54327274  | 250 |
| chr16 | 50805784  | 50806033  | 250 |
| chr16 | 39358699  | 39358948  | 250 |
| chr12 | 82250622  | 82250871  | 250 |
| chr11 | 5839228   | 5839477   | 250 |
| chr10 | 67023967  | 67024216  | 250 |
| chr10 | 7687254   | 7687503   | 250 |
| chrX  | 50206082  | 50206330  | 249 |

|       |           |           |     |
|-------|-----------|-----------|-----|
| chrX  | 34893352  | 34893600  | 249 |
| chr7  | 46874039  | 46874287  | 249 |
| chr6  | 115624525 | 115624773 | 249 |
| chr5  | 122650239 | 122650487 | 249 |
| chr5  | 108979053 | 108979301 | 249 |
| chr3  | 115722288 | 115722536 | 249 |
| chr3  | 105635767 | 105636015 | 249 |
| chr3  | 63095580  | 63095828  | 249 |
| chr3  | 25606077  | 25606325  | 249 |
| chr28 | 34032279  | 34032527  | 249 |
| chr24 | 25522991  | 25523239  | 249 |
| chr23 | 40830229  | 40830477  | 249 |
| chr23 | 31630978  | 31631226  | 249 |
| chr23 | 23887851  | 23888099  | 249 |
| chr23 | 19347551  | 19347799  | 249 |
| chr22 | 59572340  | 59572588  | 249 |
| chr2  | 112189433 | 112189681 | 249 |
| chr2  | 26580596  | 26580844  | 249 |
| chr19 | 14351487  | 14351735  | 249 |
| chr18 | 55454851  | 55455099  | 249 |
| chr18 | 45513921  | 45514169  | 249 |
| chr18 | 33170107  | 33170355  | 249 |
| chr18 | 14243246  | 14243494  | 249 |
| chr18 | 11807900  | 11808148  | 249 |
| chr16 | 60253050  | 60253298  | 249 |
| chr16 | 29052648  | 29052896  | 249 |
| chr15 | 74639602  | 74639850  | 249 |
| chr15 | 30116409  | 30116657  | 249 |
| chr14 | 67962982  | 67963230  | 249 |
| chr14 | 14058064  | 14058312  | 249 |
| chr14 | 6378494   | 6378742   | 249 |
| chr13 | 80163362  | 80163610  | 249 |
| chr13 | 73925070  | 73925318  | 249 |
| chr13 | 68741104  | 68741352  | 249 |
| chr13 | 55506001  | 55506249  | 249 |
| chr13 | 15964968  | 15965216  | 249 |
| chr10 | 4179252   | 4179500   | 249 |
| chrX  | 71547137  | 71547384  | 248 |
| chrX  | 58628848  | 58629095  | 248 |
| chrX  | 50899708  | 50899955  | 248 |
| chr9  | 44810773  | 44811020  | 248 |
| chr8  | 26561297  | 26561544  | 248 |
| chr7  | 60996624  | 60996871  | 248 |
| chr6  | 121695449 | 121695696 | 248 |
| chr28 | 33404122  | 33404369  | 248 |
| chr28 | 17376276  | 17376523  | 248 |
| chr27 | 14413479  | 14413726  | 248 |
| chr26 | 50345535  | 50345782  | 248 |
| chr26 | 44883856  | 44884103  | 248 |
| chr26 | 21966895  | 21967142  | 248 |

|       |               |           |     |
|-------|---------------|-----------|-----|
| chr25 | 35395612      | 35395859  | 248 |
| chr25 | 4331479       | 4331726   | 248 |
| chr24 | 64476079      | 64476326  | 248 |
| chr24 | 46917968      | 46918215  | 248 |
| chr23 | 42605967      | 42606214  | 248 |
| chr23 | 28044699      | 28044946  | 248 |
| chr21 | 18503185      | 18503432  | 248 |
| chr19 | 17006583      | 17006830  | 248 |
| chr18 | 56905293      | 56905540  | 248 |
| chr18 | 50473813      | 50474060  | 248 |
| chr18 | 25042195      | 25042442  | 248 |
| chr18 | 12627677      | 12627924  | 248 |
| chr17 | 73438890      | 73439137  | 248 |
| chr16 | 60494859      | 60495106  | 248 |
| chr14 | 6390291       | 6390538   | 248 |
| chr14 | 433301 433548 |           | 248 |
| chr13 | 28613665      | 28613912  | 248 |
| chr13 | 18775216      | 18775463  | 248 |
| chr11 | 82302926      | 82303173  | 248 |
| chr11 | 21618917      | 21619164  | 248 |
| chr10 | 45413092      | 45413339  | 248 |
| chr10 | 36829132      | 36829379  | 248 |
| chr1  | 74709809      | 74710056  | 248 |
| chrX  | 37461443      | 37461689  | 247 |
| chrX  | 21802090      | 21802336  | 247 |
| chrX  | 21430111      | 21430357  | 247 |
| chrX  | 19201692      | 19201938  | 247 |
| chrX  | 18593485      | 18593731  | 247 |
| chrX  | 13380301      | 13380547  | 247 |
| chr3  | 114894407     | 114894653 | 247 |
| chr3  | 35541892      | 35542138  | 247 |
| chr29 | 44735065      | 44735311  | 247 |
| chr24 | 43696817      | 43697063  | 247 |
| chr23 | 31312668      | 31312914  | 247 |
| chr22 | 59653264      | 59653510  | 247 |
| chr21 | 60480252      | 60480498  | 247 |
| chr21 | 57733481      | 57733727  | 247 |
| chr19 | 56475121      | 56475367  | 247 |
| chr19 | 34063266      | 34063512  | 247 |
| chr18 | 46957314      | 46957560  | 247 |
| chr18 | 32865832      | 32866078  | 247 |
| chr17 | 46151822      | 46152068  | 247 |
| chr17 | 37641120      | 37641366  | 247 |
| chr16 | 59813036      | 59813282  | 247 |
| chr14 | 7491877       | 7492123   | 247 |
| chr13 | 78031719      | 78031965  | 247 |
| chr13 | 75528447      | 75528693  | 247 |
| chr11 | 77781840      | 77782086  | 247 |
| chr11 | 28444207      | 28444453  | 247 |
| chr10 | 36899133      | 36899379  | 247 |

|       |           |           |     |
|-------|-----------|-----------|-----|
| chr1  | 2173935   | 2174181   | 247 |
| chrX  | 73865747  | 73865992  | 246 |
| chrX  | 55624779  | 55625024  | 246 |
| chrX  | 9614665   | 9614910   | 246 |
| chr9  | 65796950  | 65797195  | 246 |
| chr8  | 10109434  | 10109679  | 246 |
| chr7  | 52228282  | 52228527  | 246 |
| chr4  | 97930693  | 97930938  | 246 |
| chr3  | 122068239 | 122068484 | 246 |
| chr3  | 116336464 | 116336709 | 246 |
| chr3  | 111370797 | 111371042 | 246 |
| chr3  | 105227889 | 105228134 | 246 |
| chr29 | 38886872  | 38887117  | 246 |
| chr25 | 37523982  | 37524227  | 246 |
| chr25 | 36132524  | 36132769  | 246 |
| chr25 | 29384973  | 29385218  | 246 |
| chr24 | 47840496  | 47840741  | 246 |
| chr24 | 36041975  | 36042220  | 246 |
| chr23 | 46126513  | 46126758  | 246 |
| chr23 | 30035325  | 30035570  | 246 |
| chr23 | 27962002  | 27962247  | 246 |
| chr21 | 18750024  | 18750269  | 246 |
| chr19 | 65207170  | 65207415  | 246 |
| chr18 | 45447129  | 45447374  | 246 |
| chr17 | 68072166  | 68072411  | 246 |
| chr16 | 77318352  | 77318597  | 246 |
| chr15 | 24569314  | 24569559  | 246 |
| chr14 | 68438567  | 68438812  | 246 |
| chr14 | 7732856   | 7733101   | 246 |
| chr13 | 15370280  | 15370525  | 246 |
| chr11 | 51879121  | 51879366  | 246 |
| chr10 | 60967813  | 60968058  | 246 |
| chr1  | 74879058  | 74879303  | 246 |
| chr1  | 1708863   | 1709108   | 246 |
| chrX  | 64508341  | 64508585  | 245 |
| chrX  | 22466877  | 22467121  | 245 |
| chrX  | 9300109   | 9300353   | 245 |
| chrX  | 2370962   | 2371206   | 245 |
| chr9  | 82949164  | 82949408  | 245 |
| chr9  | 63807056  | 63807300  | 245 |
| chr9  | 62439530  | 62439774  | 245 |
| chr8  | 63807259  | 63807503  | 245 |
| chr5  | 31562973  | 31563217  | 245 |
| chr5  | 28880586  | 28880830  | 245 |
| chr3  | 106865417 | 106865661 | 245 |
| chr3  | 73948989  | 73949233  | 245 |
| chr3  | 31731433  | 31731677  | 245 |
| chr3  | 23864548  | 23864792  | 245 |
| chr29 | 37384468  | 37384712  | 245 |
| chr26 | 24347317  | 24347561  | 245 |

|       |             |           |     |
|-------|-------------|-----------|-----|
| chr25 | 33552023    | 33552267  | 245 |
| chr24 | 40650958    | 40651202  | 245 |
| chr23 | 43925443    | 43925687  | 245 |
| chr22 | 51289524    | 51289768  | 245 |
| chr22 | 30285831    | 30286075  | 245 |
| chr22 | 10237 10481 | 245       |     |
| chr21 | 27450585    | 27450829  | 245 |
| chr19 | 55405552    | 55405796  | 245 |
| chr19 | 51902604    | 51902848  | 245 |
| chr19 | 13788709    | 13788953  | 245 |
| chr18 | 43383532    | 43383776  | 245 |
| chr17 | 47336157    | 47336401  | 245 |
| chr16 | 73812163    | 73812407  | 245 |
| chr16 | 38789696    | 38789940  | 245 |
| chr16 | 38693830    | 38694074  | 245 |
| chr16 | 2189786     | 2190030   | 245 |
| chr15 | 64247333    | 64247577  | 245 |
| chr15 | 29115660    | 29115904  | 245 |
| chr13 | 82640859    | 82641103  | 245 |
| chr13 | 60022917    | 60023161  | 245 |
| chr13 | 26171300    | 26171544  | 245 |
| chr12 | 82257929    | 82258173  | 245 |
| chr12 | 34381533    | 34381777  | 245 |
| chr11 | 102183926   | 102184170 | 245 |
| chr11 | 78937255    | 78937499  | 245 |
| chr11 | 51974200    | 51974444  | 245 |
| chr11 | 44978931    | 44979175  | 245 |
| chr10 | 14014754    | 14014998  | 245 |
| chr1  | 82483728    | 82483972  | 245 |
| chrX  | 61891848    | 61892091  | 244 |
| chrX  | 61856381    | 61856624  | 244 |
| chrX  | 59332041    | 59332284  | 244 |
| chrX  | 53882008    | 53882251  | 244 |
| chrX  | 39175761    | 39176004  | 244 |
| chrX  | 39105273    | 39105516  | 244 |
| chrX  | 34721101    | 34721344  | 244 |
| chrX  | 31042982    | 31043225  | 244 |
| chrX  | 12982064    | 12982307  | 244 |
| chr9  | 90303991    | 90304234  | 244 |
| chr9  | 52826805    | 52827048  | 244 |
| chr8  | 95464788    | 95465031  | 244 |
| chr8  | 24502003    | 24502246  | 244 |
| chr7  | 51416108    | 51416351  | 244 |
| chr7  | 50865385    | 50865628  | 244 |
| chr6  | 99672071    | 99672314  | 244 |
| chr4  | 64045064    | 64045307  | 244 |
| chr29 | 35380425    | 35380668  | 244 |
| chr29 | 34915615    | 34915858  | 244 |
| chr29 | 30046296    | 30046539  | 244 |
| chr26 | 22617267    | 22617510  | 244 |

|       |           |           |     |
|-------|-----------|-----------|-----|
| chr24 | 36741145  | 36741388  | 244 |
| chr24 | 36413459  | 36413702  | 244 |
| chr22 | 56667265  | 56667508  | 244 |
| chr22 | 48760824  | 48761067  | 244 |
| chr22 | 48420332  | 48420575  | 244 |
| chr21 | 63279415  | 63279658  | 244 |
| chr21 | 20675653  | 20675896  | 244 |
| chr20 | 19415526  | 19415769  | 244 |
| chr2  | 24066498  | 24066741  | 244 |
| chr19 | 59341000  | 59341243  | 244 |
| chr19 | 34615553  | 34615796  | 244 |
| chr19 | 34527822  | 34528065  | 244 |
| chr18 | 55215359  | 55215602  | 244 |
| chr18 | 14366865  | 14367108  | 244 |
| chr15 | 64533967  | 64534210  | 244 |
| chr14 | 21040277  | 21040520  | 244 |
| chr14 | 14664026  | 14664269  | 244 |
| chr13 | 72148556  | 72148799  | 244 |
| chr13 | 54378512  | 54378755  | 244 |
| chr11 | 82854714  | 82854957  | 244 |
| chr10 | 90455178  | 90455421  | 244 |
| chr10 | 67503851  | 67504094  | 244 |
| chrX  | 79480129  | 79480371  | 243 |
| chrX  | 71319197  | 71319439  | 243 |
| chrX  | 60401006  | 60401248  | 243 |
| chrX  | 55375151  | 55375393  | 243 |
| chrX  | 51662069  | 51662311  | 243 |
| chrX  | 38769720  | 38769962  | 243 |
| chr9  | 105012751 | 105012993 | 243 |
| chr8  | 104098285 | 104098527 | 243 |
| chr7  | 19385665  | 19385907  | 243 |
| chr7  | 10822603  | 10822845  | 243 |
| chr5  | 72552160  | 72552402  | 243 |
| chr4  | 117846097 | 117846339 | 243 |
| chr4  | 13358302  | 13358544  | 243 |
| chr29 | 36192930  | 36193172  | 243 |
| chr29 | 35501533  | 35501775  | 243 |
| chr26 | 42900002  | 42900244  | 243 |
| chr26 | 20992810  | 20993052  | 243 |
| chr24 | 31254217  | 31254459  | 243 |
| chr22 | 16248620  | 16248862  | 243 |
| chr21 | 4302178   | 4302420   | 243 |
| chr2  | 135166494 | 135166736 | 243 |
| chr2  | 130975130 | 130975372 | 243 |
| chr18 | 58387192  | 58387434  | 243 |
| chr15 | 65768634  | 65768876  | 243 |
| chr15 | 25438620  | 25438862  | 243 |
| chr15 | 21858274  | 21858516  | 243 |
| chr14 | 7803980   | 7804222   | 243 |
| chr13 | 55408183  | 55408425  | 243 |

|       |             |           |     |
|-------|-------------|-----------|-----|
| chr12 | 24333910    | 24334152  | 243 |
| chr12 | 23089232    | 23089474  | 243 |
| chr11 | 91714404    | 91714646  | 243 |
| chr11 | 80786926    | 80787168  | 243 |
| chr11 | 9209278     | 9209520   | 243 |
| chr11 | 5828743     | 5828985   | 243 |
| chrX  | 48004598    | 48004839  | 242 |
| chrX  | 45600785    | 45601026  | 242 |
| chrX  | 31763457    | 31763698  | 242 |
| chr4  | 117038587   | 117038828 | 242 |
| chr4  | 98559399    | 98559640  | 242 |
| chr3  | 111269609   | 111269850 | 242 |
| chr29 | 34916025    | 34916266  | 242 |
| chr27 | 17518847    | 17519088  | 242 |
| chr26 | 51204446    | 51204687  | 242 |
| chr26 | 40604587    | 40604828  | 242 |
| chr25 | 37492650    | 37492891  | 242 |
| chr25 | 27714068    | 27714309  | 242 |
| chr24 | 51411266    | 51411507  | 242 |
| chr23 | 19802887    | 19803128  | 242 |
| chr19 | 54203077    | 54203318  | 242 |
| chr19 | 28107014    | 28107255  | 242 |
| chr19 | 27158548    | 27158789  | 242 |
| chr19 | 16048259    | 16048500  | 242 |
| chr17 | 63356412    | 63356653  | 242 |
| chr17 | 54514109    | 54514350  | 242 |
| chr17 | 46899613    | 46899854  | 242 |
| chr16 | 60077025    | 60077266  | 242 |
| chr16 | 46127353    | 46127594  | 242 |
| chr15 | 51684596    | 51684837  | 242 |
| chr15 | 36663822    | 36664063  | 242 |
| chr15 | 26860955    | 26861196  | 242 |
| chr15 | 24447949    | 24448190  | 242 |
| chr14 | 2107495     | 2107736   | 242 |
| chr1  | 74592383    | 74592624  | 242 |
| chrX  | 58627197    | 58627437  | 241 |
| chrX  | 50801267    | 50801507  | 241 |
| chrX  | 63313 63553 | 241       |     |
| chr8  | 65937596    | 65937836  | 241 |
| chr8  | 7826951     | 7827191   | 241 |
| chr7  | 18436245    | 18436485  | 241 |
| chr7  | 5433490     | 5433730   | 241 |
| chr6  | 120742640   | 120742880 | 241 |
| chr5  | 112406248   | 112406488 | 241 |
| chr5  | 70596945    | 70597185  | 241 |
| chr4  | 124387807   | 124388047 | 241 |
| chr4  | 121714512   | 121714752 | 241 |
| chr4  | 110024788   | 110025028 | 241 |
| chr4  | 98549042    | 98549282  | 241 |
| chr3  | 106575949   | 106576189 | 241 |

|       |           |           |     |
|-------|-----------|-----------|-----|
| chr3  | 31682979  | 31683219  | 241 |
| chr3  | 23729184  | 23729424  | 241 |
| chr29 | 35181657  | 35181897  | 241 |
| chr27 | 38222801  | 38223041  | 241 |
| chr22 | 48768753  | 48768993  | 241 |
| chr22 | 48361345  | 48361585  | 241 |
| chr21 | 26303382  | 26303622  | 241 |
| chr19 | 61127996  | 61128236  | 241 |
| chr19 | 47890258  | 47890498  | 241 |
| chr19 | 23171009  | 23171249  | 241 |
| chr17 | 58871750  | 58871990  | 241 |
| chr16 | 38710505  | 38710745  | 241 |
| chr15 | 54496513  | 54496753  | 241 |
| chr14 | 59656338  | 59656578  | 241 |
| chr14 | 26678566  | 26678806  | 241 |
| chr13 | 58745326  | 58745566  | 241 |
| chr13 | 56573167  | 56573407  | 241 |
| chr13 | 47260141  | 47260381  | 241 |
| chr13 | 14949121  | 14949361  | 241 |
| chr12 | 31291869  | 31292109  | 241 |
| chr11 | 12908999  | 12909239  | 241 |
| chr10 | 75552289  | 75552529  | 241 |
| chr1  | 88445579  | 88445819  | 241 |
| chr1  | 74612609  | 74612849  | 241 |
| chrX  | 75854686  | 75854925  | 240 |
| chrX  | 59371206  | 59371445  | 240 |
| chrX  | 57113785  | 57114024  | 240 |
| chrX  | 41105330  | 41105569  | 240 |
| chrX  | 36083883  | 36084122  | 240 |
| chrX  | 12416106  | 12416345  | 240 |
| chrX  | 11244463  | 11244702  | 240 |
| chrX  | 4198697   | 4198936   | 240 |
| chrX  | 2859632   | 2859871   | 240 |
| chr9  | 89966663  | 89966902  | 240 |
| chr8  | 61046906  | 61047145  | 240 |
| chr6  | 105574553 | 105574792 | 240 |
| chr6  | 58830362  | 58830601  | 240 |
| chr5  | 76995077  | 76995316  | 240 |
| chr4  | 69269549  | 69269788  | 240 |
| chr3  | 108293458 | 108293697 | 240 |
| chr29 | 33655681  | 33655920  | 240 |
| chr28 | 33627470  | 33627709  | 240 |
| chr27 | 44893259  | 44893498  | 240 |
| chr27 | 35937046  | 35937285  | 240 |
| chr26 | 51257795  | 51258034  | 240 |
| chr25 | 1926284   | 1926523   | 240 |
| chr23 | 46428598  | 46428837  | 240 |
| chr23 | 32390006  | 32390245  | 240 |
| chr23 | 28454278  | 28454517  | 240 |
| chr22 | 59692118  | 59692357  | 240 |



|       |           |           |     |
|-------|-----------|-----------|-----|
| chr22 | 48225657  | 48225896  | 240 |
| chr21 | 29550448  | 29550687  | 240 |
| chr21 | 16314931  | 16315170  | 240 |
| chr2  | 101180777 | 101181016 | 240 |
| chr19 | 65220994  | 65221233  | 240 |
| chr19 | 59088178  | 59088417  | 240 |
| chr19 | 29719658  | 29719897  | 240 |
| chr19 | 29126830  | 29127069  | 240 |
| chr12 | 83978467  | 83978706  | 240 |
| chr11 | 46193697  | 46193936  | 240 |
| chrX  | 75483277  | 75483515  | 239 |
| chrX  | 64884241  | 64884479  | 239 |
| chrX  | 50391852  | 50392090  | 239 |
| chrX  | 31400425  | 31400663  | 239 |
| chr9  | 100985051 | 100985289 | 239 |
| chr8  | 65779322  | 65779560  | 239 |
| chr8  | 61834266  | 61834504  | 239 |
| chr7  | 52412908  | 52413146  | 239 |
| chr5  | 107263039 | 107263277 | 239 |
| chr5  | 75731892  | 75732130  | 239 |
| chr4  | 68293635  | 68293873  | 239 |
| chr3  | 33820635  | 33820873  | 239 |
| chr29 | 49735037  | 49735275  | 239 |
| chr29 | 42916329  | 42916567  | 239 |
| chr29 | 38044330  | 38044568  | 239 |
| chr28 | 41728222  | 41728460  | 239 |
| chr26 | 49171505  | 49171743  | 239 |
| chr26 | 34841015  | 34841253  | 239 |
| chr25 | 3825118   | 3825356   | 239 |
| chr23 | 49874694  | 49874932  | 239 |
| chr23 | 44165925  | 44166163  | 239 |
| chr23 | 34838776  | 34839014  | 239 |
| chr22 | 54101906  | 54102144  | 239 |
| chr21 | 66376558  | 66376796  | 239 |
| chr20 | 37252137  | 37252375  | 239 |
| chr19 | 37869959  | 37870197  | 239 |
| chr19 | 10985101  | 10985339  | 239 |
| chr19 | 10956064  | 10956302  | 239 |
| chr18 | 4029836   | 4030074   | 239 |
| chr18 | 3795183   | 3795421   | 239 |
| chr17 | 4225252   | 4225490   | 239 |
| chr16 | 3713704   | 3713942   | 239 |
| chr15 | 55811151  | 55811389  | 239 |
| chr15 | 37565575  | 37565813  | 239 |
| chr15 | 26643848  | 26644086  | 239 |
| chr14 | 6853110   | 6853348   | 239 |
| chr14 | 1635523   | 1635761   | 239 |
| chr13 | 75829810  | 75830048  | 239 |
| chr13 | 56546005  | 56546243  | 239 |
| chr12 | 77347113  | 77347351  | 239 |

|       |           |           |     |
|-------|-----------|-----------|-----|
| chr11 | 93710149  | 93710387  | 239 |
| chr1  | 148340584 | 148340822 | 239 |
| chr1  | 74502755  | 74502993  | 239 |
| chrX  | 58096030  | 58096267  | 238 |
| chrX  | 53369884  | 53370121  | 238 |
| chr9  | 29879458  | 29879695  | 238 |
| chr8  | 24668246  | 24668483  | 238 |
| chr7  | 50435112  | 50435349  | 238 |
| chr5  | 118531920 | 118532157 | 238 |
| chr5  | 112057415 | 112057652 | 238 |
| chr5  | 31795968  | 31796205  | 238 |
| chr4  | 5515583   | 5515820   | 238 |
| chr3  | 125502167 | 125502404 | 238 |
| chr3  | 118853858 | 118854095 | 238 |
| chr3  | 116389615 | 116389852 | 238 |
| chr3  | 108386736 | 108386973 | 238 |
| chr3  | 55866609  | 55866846  | 238 |
| chr26 | 40795587  | 40795824  | 238 |
| chr25 | 16151137  | 16151374  | 238 |
| chr23 | 15042195  | 15042432  | 238 |
| chr21 | 66714904  | 66715141  | 238 |
| chr21 | 66566556  | 66566793  | 238 |
| chr21 | 22629597  | 22629834  | 238 |
| chr19 | 51672102  | 51672339  | 238 |
| chr18 | 24277031  | 24277268  | 238 |
| chr18 | 13546333  | 13546570  | 238 |
| chr18 | 9735691   | 9735928   | 238 |
| chr15 | 75955114  | 75955351  | 238 |
| chr13 | 68310014  | 68310251  | 238 |
| chr12 | 35773620  | 35773857  | 238 |
| chr11 | 13056542  | 13056779  | 238 |
| chr10 | 53093377  | 53093614  | 238 |
| chr10 | 4491051   | 4491288   | 238 |
| chr1  | 145223374 | 145223611 | 238 |
| chr1  | 144013868 | 144014105 | 238 |
| chrX  | 77534245  | 77534481  | 237 |
| chrX  | 74621245  | 74621481  | 237 |
| chrX  | 65714317  | 65714553  | 237 |
| chrX  | 56728179  | 56728415  | 237 |
| chrX  | 55151316  | 55151552  | 237 |
| chrX  | 46526609  | 46526845  | 237 |
| chrX  | 32437578  | 32437814  | 237 |
| chrX  | 19970090  | 19970326  | 237 |
| chrX  | 6153225   | 6153461   | 237 |
| chr9  | 90591928  | 90592164  | 237 |
| chr7  | 42422482  | 42422718  | 237 |
| chr7  | 17321145  | 17321381  | 237 |
| chr5  | 121828201 | 121828437 | 237 |
| chr4  | 95081830  | 95082066  | 237 |
| chr4  | 64269831  | 64270067  | 237 |

|       |           |           |     |
|-------|-----------|-----------|-----|
| chr4  | 32758498  | 32758734  | 237 |
| chr3  | 116380024 | 116380260 | 237 |
| chr3  | 107661514 | 107661750 | 237 |
| chr3  | 89516062  | 89516298  | 237 |
| chr3  | 62647415  | 62647651  | 237 |
| chr3  | 8821123   | 8821359   | 237 |
| chr25 | 40905973  | 40906209  | 237 |
| chr22 | 31450867  | 31451103  | 237 |
| chr20 | 6687598   | 6687834   | 237 |
| chr19 | 29063323  | 29063559  | 237 |
| chr18 | 65196054  | 65196290  | 237 |
| chr18 | 45195168  | 45195404  | 237 |
| chr17 | 66669207  | 66669443  | 237 |
| chr17 | 66498333  | 66498569  | 237 |
| chr16 | 67150876  | 67151112  | 237 |
| chr16 | 29019600  | 29019836  | 237 |
| chr15 | 40659665  | 40659901  | 237 |
| chr13 | 35486585  | 35486821  | 237 |
| chr13 | 2569411   | 2569647   | 237 |
| chr11 | 22099971  | 22100207  | 237 |
| chr11 | 3866254   | 3866490   | 237 |
| chr10 | 89079377  | 89079613  | 237 |
| chrX  | 80351097  | 80351332  | 236 |
| chrX  | 74537541  | 74537776  | 236 |
| chrX  | 69720754  | 69720989  | 236 |
| chrX  | 66230461  | 66230696  | 236 |
| chrX  | 63518019  | 63518254  | 236 |
| chrX  | 60363969  | 60364204  | 236 |
| chrX  | 59349340  | 59349575  | 236 |
| chrX  | 44559019  | 44559254  | 236 |
| chrX  | 39330720  | 39330955  | 236 |
| chrX  | 37366152  | 37366387  | 236 |
| chrX  | 36175525  | 36175760  | 236 |
| chrX  | 20122684  | 20122919  | 236 |
| chrX  | 19703805  | 19704040  | 236 |
| chrX  | 15663357  | 15663592  | 236 |
| chrX  | 6638986   | 6639221   | 236 |
| chr9  | 3120651   | 3120886   | 236 |
| chr8  | 70185776  | 70186011  | 236 |
| chr5  | 84538492  | 84538727  | 236 |
| chr5  | 10064364  | 10064599  | 236 |
| chr5  | 5337337   | 5337572   | 236 |
| chr4  | 68259536  | 68259771  | 236 |
| chr4  | 47878296  | 47878531  | 236 |
| chr3  | 110184347 | 110184582 | 236 |
| chr3  | 82794011  | 82794246  | 236 |
| chr28 | 1209865   | 1210100   | 236 |
| chr27 | 26681755  | 26681990  | 236 |
| chr26 | 43165494  | 43165729  | 236 |
| chr26 | 33356259  | 33356494  | 236 |

|       |           |           |     |
|-------|-----------|-----------|-----|
| chr24 | 60584690  | 60584925  | 236 |
| chr24 | 48645704  | 48645939  | 236 |
| chr24 | 1745572   | 1745807   | 236 |
| chr22 | 60566716  | 60566951  | 236 |
| chr21 | 9287276   | 9287511   | 236 |
| chr19 | 62170099  | 62170334  | 236 |
| chr19 | 61535042  | 61535277  | 236 |
| chr19 | 59109343  | 59109578  | 236 |
| chr19 | 44201389  | 44201624  | 236 |
| chr19 | 32417461  | 32417696  | 236 |
| chr18 | 40278475  | 40278710  | 236 |
| chr18 | 23468589  | 23468824  | 236 |
| chr18 | 14364490  | 14364725  | 236 |
| chr17 | 70240408  | 70240643  | 236 |
| chr17 | 68749277  | 68749512  | 236 |
| chr15 | 84033685  | 84033920  | 236 |
| chr15 | 64228276  | 64228511  | 236 |
| chr14 | 40093468  | 40093703  | 236 |
| chr14 | 20511163  | 20511398  | 236 |
| chr14 | 10325198  | 10325433  | 236 |
| chr13 | 67829802  | 67830037  | 236 |
| chr13 | 41408884  | 41409119  | 236 |
| chr11 | 104482408 | 104482643 | 236 |
| chr11 | 71985468  | 71985703  | 236 |
| chr10 | 17453133  | 17453368  | 236 |
| chrX  | 76454462  | 76454696  | 235 |
| chrX  | 74510283  | 74510517  | 235 |
| chrX  | 69310813  | 69311047  | 235 |
| chrX  | 48677924  | 48678158  | 235 |
| chrX  | 44963140  | 44963374  | 235 |
| chrX  | 33731023  | 33731257  | 235 |
| chrX  | 8504725   | 8504959   | 235 |
| chrX  | 6720006   | 6720240   | 235 |
| chrX  | 5504904   | 5505138   | 235 |
| chrX  | 3030327   | 3030561   | 235 |
| chr9  | 102728940 | 102729174 | 235 |
| chr7  | 50696547  | 50696781  | 235 |
| chr6  | 108825083 | 108825317 | 235 |
| chr5  | 111910419 | 111910653 | 235 |
| chr5  | 79982043  | 79982277  | 235 |
| chr5  | 30422197  | 30422431  | 235 |
| chr5  | 10196350  | 10196584  | 235 |
| chr4  | 68052384  | 68052618  | 235 |
| chr3  | 126209505 | 126209739 | 235 |
| chr3  | 120034928 | 120035162 | 235 |
| chr3  | 24978885  | 24979119  | 235 |
| chr3  | 20466623  | 20466857  | 235 |
| chr29 | 17601591  | 17601825  | 235 |
| chr28 | 42069494  | 42069728  | 235 |
| chr28 | 27306708  | 27306942  | 235 |

|       |             |           |     |
|-------|-------------|-----------|-----|
| chr27 | 45992391    | 45992625  | 235 |
| chr27 | 26957035    | 26957269  | 235 |
| chr27 | 21549 21783 | 235       |     |
| chr26 | 31153950    | 31154184  | 235 |
| chr25 | 33305628    | 33305862  | 235 |
| chr24 | 61090171    | 61090405  | 235 |
| chr23 | 42359600    | 42359834  | 235 |
| chr23 | 27938966    | 27939200  | 235 |
| chr23 | 14257165    | 14257399  | 235 |
| chr22 | 61565059    | 61565293  | 235 |
| chr22 | 48310630    | 48310864  | 235 |
| chr22 | 28553431    | 28553665  | 235 |
| chr21 | 60477708    | 60477942  | 235 |
| chr21 | 58826068    | 58826302  | 235 |
| chr21 | 13914108    | 13914342  | 235 |
| chr20 | 73688833    | 73689067  | 235 |
| chr20 | 6227507     | 6227741   | 235 |
| chr18 | 23532673    | 23532907  | 235 |
| chr18 | 12174867    | 12175101  | 235 |
| chr18 | 9506695     | 9506929   | 235 |
| chr18 | 4203862     | 4204096   | 235 |
| chr14 | 29195950    | 29196184  | 235 |
| chr14 | 6707929     | 6708163   | 235 |
| chr13 | 63513297    | 63513531  | 235 |
| chr13 | 63418796    | 63419030  | 235 |
| chr13 | 60778492    | 60778726  | 235 |
| chr13 | 57248527    | 57248761  | 235 |
| chr11 | 88840323    | 88840557  | 235 |
| chr10 | 25966864    | 25967098  | 235 |
| chr10 | 13033721    | 13033955  | 235 |
| chrX  | 77046282    | 77046515  | 234 |
| chrX  | 68993510    | 68993743  | 234 |
| chrX  | 37356237    | 37356470  | 234 |
| chrX  | 36842495    | 36842728  | 234 |
| chrX  | 33281474    | 33281707  | 234 |
| chrX  | 20930201    | 20930434  | 234 |
| chrX  | 19870370    | 19870603  | 234 |
| chrX  | 13234627    | 13234860  | 234 |
| chrX  | 8426194     | 8426427   | 234 |
| chrX  | 7882026     | 7882259   | 234 |
| chrX  | 7502334     | 7502567   | 234 |
| chrX  | 1910315     | 1910548   | 234 |
| chr8  | 76347140    | 76347373  | 234 |
| chr7  | 52385572    | 52385805  | 234 |
| chr7  | 50610051    | 50610284  | 234 |
| chr7  | 38654368    | 38654601  | 234 |
| chr7  | 4522464     | 4522697   | 234 |
| chr5  | 73847845    | 73848078  | 234 |
| chr4  | 98503276    | 98503509  | 234 |
| chr3  | 115907446   | 115907679 | 234 |

|       |           |           |     |
|-------|-----------|-----------|-----|
| chr28 | 26067200  | 26067433  | 234 |
| chr28 | 5318234   | 5318467   | 234 |
| chr27 | 36020941  | 36021174  | 234 |
| chr26 | 41861428  | 41861661  | 234 |
| chr25 | 23136970  | 23137203  | 234 |
| chr24 | 51474590  | 51474823  | 234 |
| chr22 | 56668146  | 56668379  | 234 |
| chr22 | 18387275  | 18387508  | 234 |
| chr2  | 139936732 | 139936965 | 234 |
| chr2  | 124222120 | 124222353 | 234 |
| chr2  | 74001842  | 74002075  | 234 |
| chr19 | 50179985  | 50180218  | 234 |
| chr19 | 39601517  | 39601750  | 234 |
| chr19 | 19454429  | 19454662  | 234 |
| chr19 | 18051561  | 18051794  | 234 |
| chr18 | 33659567  | 33659800  | 234 |
| chr18 | 33215833  | 33216066  | 234 |
| chr17 | 68109697  | 68109930  | 234 |
| chr16 | 42644904  | 42645137  | 234 |
| chr16 | 23935383  | 23935616  | 234 |
| chr16 | 18010090  | 18010323  | 234 |
| chr15 | 65664321  | 65664554  | 234 |
| chr15 | 22851097  | 22851330  | 234 |
| chr14 | 21030999  | 21031232  | 234 |
| chr13 | 71343188  | 71343421  | 234 |
| chr13 | 65095089  | 65095322  | 234 |
| chr13 | 57181873  | 57182106  | 234 |
| chr13 | 45976774  | 45977007  | 234 |
| chr13 | 16080854  | 16081087  | 234 |
| chr12 | 30530023  | 30530256  | 234 |
| chr11 | 19855314  | 19855547  | 234 |
| chr10 | 45501798  | 45502031  | 234 |
| chr10 | 20153027  | 20153260  | 234 |
| chr10 | 12744923  | 12745156  | 234 |
| chrX  | 63111641  | 63111873  | 233 |
| chrX  | 56620366  | 56620598  | 233 |
| chrX  | 4645491   | 4645723   | 233 |
| chr9  | 41966976  | 41967208  | 233 |
| chr8  | 80992848  | 80993080  | 233 |
| chr7  | 43513801  | 43514033  | 233 |
| chr7  | 18551734  | 18551966  | 233 |
| chr7  | 16124935  | 16125167  | 233 |
| chr6  | 120839839 | 120840071 | 233 |
| chr5  | 113570077 | 113570309 | 233 |
| chr4  | 79770978  | 79771210  | 233 |
| chr3  | 120833199 | 120833431 | 233 |
| chr25 | 18691877  | 18692109  | 233 |
| chr24 | 59988162  | 59988394  | 233 |
| chr24 | 34496644  | 34496876  | 233 |
| chr23 | 49707366  | 49707598  | 233 |

|       |               |           |     |
|-------|---------------|-----------|-----|
| chr23 | 10573446      | 10573678  | 233 |
| chr22 | 59536147      | 59536379  | 233 |
| chr22 | 56544581      | 56544813  | 233 |
| chr22 | 39800729      | 39800961  | 233 |
| chr21 | 45528668      | 45528900  | 233 |
| chr20 | 39644561      | 39644793  | 233 |
| chr20 | 6384201       | 6384433   | 233 |
| chr20 | 6321445       | 6321677   | 233 |
| chr2  | 128146826     | 128147058 | 233 |
| chr2  | 99336456      | 99336688  | 233 |
| chr2  | 25120476      | 25120708  | 233 |
| chr19 | 59324747      | 59324979  | 233 |
| chr19 | 53081290      | 53081522  | 233 |
| chr19 | 42334801      | 42335033  | 233 |
| chr19 | 42282589      | 42282821  | 233 |
| chr18 | 55068443      | 55068675  | 233 |
| chr18 | 684783 685015 | 233       |     |
| chr17 | 48971019      | 48971251  | 233 |
| chr16 | 60517617      | 60517849  | 233 |
| chr16 | 39844098      | 39844330  | 233 |
| chr16 | 38736784      | 38737016  | 233 |
| chr15 | 75165232      | 75165464  | 233 |
| chr15 | 65655531      | 65655763  | 233 |
| chr15 | 29440871      | 29441103  | 233 |
| chr13 | 79643049      | 79643281  | 233 |
| chr13 | 70200002      | 70200234  | 233 |
| chr13 | 69597898      | 69598130  | 233 |
| chr13 | 41504458      | 41504690  | 233 |
| chr13 | 40729458      | 40729690  | 233 |
| chr11 | 100471737     | 100471969 | 233 |
| chr11 | 97660789      | 97661021  | 233 |
| chr11 | 44767070      | 44767302  | 233 |
| chr11 | 11243421      | 11243653  | 233 |
| chr1  | 143844237     | 143844469 | 233 |
| chrX  | 83690661      | 83690892  | 232 |
| chrX  | 80709398      | 80709629  | 232 |
| chrX  | 78663055      | 78663286  | 232 |
| chrX  | 57127764      | 57127995  | 232 |
| chrX  | 55599137      | 55599368  | 232 |
| chrX  | 20916094      | 20916325  | 232 |
| chrX  | 18589693      | 18589924  | 232 |
| chrX  | 6678410       | 6678641   | 232 |
| chrX  | 6678057       | 6678288   | 232 |
| chr9  | 106603070     | 106603301 | 232 |
| chr9  | 99985400      | 99985631  | 232 |
| chr9  | 87747038      | 87747269  | 232 |
| chr7  | 61017397      | 61017628  | 232 |
| chr3  | 116281724     | 116281955 | 232 |
| chr3  | 111398736     | 111398967 | 232 |
| chr3  | 33931518      | 33931749  | 232 |

|       |               |           |     |
|-------|---------------|-----------|-----|
| chr29 | 33673582      | 33673813  | 232 |
| chr28 | 33959029      | 33959260  | 232 |
| chr27 | 33481688      | 33481919  | 232 |
| chr27 | 619409 619640 | 232       |     |
| chr26 | 39228968      | 39229199  | 232 |
| chr26 | 25304256      | 25304487  | 232 |
| chr24 | 43863895      | 43864126  | 232 |
| chr23 | 47623364      | 47623595  | 232 |
| chr23 | 30576261      | 30576492  | 232 |
| chr23 | 19480365      | 19480596  | 232 |
| chr23 | 13783132      | 13783363  | 232 |
| chr22 | 30134106      | 30134337  | 232 |
| chr21 | 19443885      | 19444116  | 232 |
| chr20 | 19386866      | 19387097  | 232 |
| chr20 | 1051463       | 1051694   | 232 |
| chr2  | 123890706     | 123890937 | 232 |
| chr19 | 56594739      | 56594970  | 232 |
| chr19 | 42975148      | 42975379  | 232 |
| chr19 | 41866218      | 41866449  | 232 |
| chr19 | 33482833      | 33483064  | 232 |
| chr19 | 30022585      | 30022816  | 232 |
| chr19 | 14860654      | 14860885  | 232 |
| chr18 | 56631193      | 56631424  | 232 |
| chr18 | 51231798      | 51232029  | 232 |
| chr18 | 37163394      | 37163625  | 232 |
| chr16 | 47885906      | 47886137  | 232 |
| chr16 | 47094560      | 47094791  | 232 |
| chr15 | 72764157      | 72764388  | 232 |
| chr15 | 53918292      | 53918523  | 232 |
| chr15 | 30174534      | 30174765  | 232 |
| chr15 | 25589693      | 25589924  | 232 |
| chr15 | 22727256      | 22727487  | 232 |
| chr15 | 21476017      | 21476248  | 232 |
| chr13 | 77260055      | 77260286  | 232 |
| chr11 | 90298044      | 90298275  | 232 |
| chr11 | 253820 254051 | 232       |     |
| chr10 | 66607217      | 66607448  | 232 |
| chrX  | 81275571      | 81275801  | 231 |
| chrX  | 61300818      | 61301048  | 231 |
| chrX  | 55820938      | 55821168  | 231 |
| chrX  | 54925073      | 54925303  | 231 |
| chrX  | 46911913      | 46912143  | 231 |
| chrX  | 11074883      | 11075113  | 231 |
| chr8  | 111820729     | 111820959 | 231 |
| chr8  | 74280007      | 74280237  | 231 |
| chr8  | 65342785      | 65343015  | 231 |
| chr8  | 63525820      | 63526050  | 231 |
| chr8  | 24735182      | 24735412  | 231 |
| chr8  | 7794214       | 7794444   | 231 |
| chr7  | 4912663       | 4912893   | 231 |



|       |           |           |     |
|-------|-----------|-----------|-----|
| chr5  | 111891874 | 111892104 | 231 |
| chr5  | 31246362  | 31246592  | 231 |
| chr4  | 79453851  | 79454081  | 231 |
| chr3  | 113405423 | 113405653 | 231 |
| chr3  | 60412850  | 60413080  | 231 |
| chr26 | 47006729  | 47006959  | 231 |
| chr25 | 6795866   | 6796096   | 231 |
| chr25 | 4622631   | 4622861   | 231 |
| chr25 | 3078594   | 3078824   | 231 |
| chr23 | 52694951  | 52695181  | 231 |
| chr22 | 33377997  | 33378227  | 231 |
| chr22 | 30179266  | 30179496  | 231 |
| chr22 | 5433405   | 5433635   | 231 |
| chr21 | 64843360  | 64843590  | 231 |
| chr21 | 15616136  | 15616366  | 231 |
| chr20 | 33517224  | 33517454  | 231 |
| chr20 | 6264938   | 6265168   | 231 |
| chr2  | 125926156 | 125926386 | 231 |
| chr19 | 28222934  | 28223164  | 231 |
| chr19 | 13862638  | 13862868  | 231 |
| chr18 | 3671716   | 3671946   | 231 |
| chr18 | 1194375   | 1194605   | 231 |
| chr18 | 635066    | 635296    | 231 |
| chr17 | 70062082  | 70062312  | 231 |
| chr17 | 58856717  | 58856947  | 231 |
| chr17 | 30245483  | 30245713  | 231 |
| chr16 | 60178082  | 60178312  | 231 |
| chr16 | 47521963  | 47522193  | 231 |
| chr15 | 47192999  | 47193229  | 231 |
| chr13 | 60439402  | 60439632  | 231 |
| chr13 | 41675310  | 41675540  | 231 |
| chr12 | 20026733  | 20026963  | 231 |
| chr11 | 70667185  | 70667415  | 231 |
| chr11 | 21653459  | 21653689  | 231 |
| chr10 | 70072793  | 70073023  | 231 |
| chr10 | 17600441  | 17600671  | 231 |
| chrX  | 81862970  | 81863199  | 230 |
| chrX  | 60356258  | 60356487  | 230 |
| chrX  | 50303343  | 50303572  | 230 |
| chrX  | 37512189  | 37512418  | 230 |
| chr8  | 72334667  | 72334896  | 230 |
| chr7  | 17325373  | 17325602  | 230 |
| chr7  | 3962917   | 3963146   | 230 |
| chr6  | 72041077  | 72041306  | 230 |
| chr5  | 116834878 | 116835107 | 230 |
| chr4  | 11763647  | 11763876  | 230 |
| chr3  | 123325323 | 123325552 | 230 |
| chr3  | 121030132 | 121030361 | 230 |
| chr3  | 120033308 | 120033537 | 230 |
| chr3  | 29983911  | 29984140  | 230 |

|       |               |           |     |
|-------|---------------|-----------|-----|
| chr29 | 51767155      | 51767384  | 230 |
| chr26 | 45952181      | 45952410  | 230 |
| chr26 | 20485662      | 20485891  | 230 |
| chr25 | 43558345      | 43558574  | 230 |
| chr24 | 48953086      | 48953315  | 230 |
| chr24 | 46687603      | 46687832  | 230 |
| chr23 | 15877243      | 15877472  | 230 |
| chr23 | 9036047       | 9036276   | 230 |
| chr22 | 9658903       | 9659132   | 230 |
| chr2  | 130141000     | 130141229 | 230 |
| chr2  | 114994712     | 114994941 | 230 |
| chr2  | 90556143      | 90556372  | 230 |
| chr2  | 26560939      | 26561168  | 230 |
| chr19 | 62155382      | 62155611  | 230 |
| chr18 | 62205597      | 62205826  | 230 |
| chr18 | 56227858      | 56228087  | 230 |
| chr18 | 43769288      | 43769517  | 230 |
| chr18 | 39582612      | 39582841  | 230 |
| chr18 | 12139082      | 12139311  | 230 |
| chr18 | 10030921      | 10031150  | 230 |
| chr18 | 4036218       | 4036447   | 230 |
| chr17 | 3892400       | 3892629   | 230 |
| chr16 | 47252908      | 47253137  | 230 |
| chr15 | 24359225      | 24359454  | 230 |
| chr13 | 77386239      | 77386468  | 230 |
| chr13 | 70138860      | 70139089  | 230 |
| chr13 | 69701541      | 69701770  | 230 |
| chr12 | 35103345      | 35103574  | 230 |
| chr12 | 25036673      | 25036902  | 230 |
| chr12 | 12089909      | 12090138  | 230 |
| chr11 | 105622642     | 105622871 | 230 |
| chr11 | 70657656      | 70657885  | 230 |
| chr11 | 44940997      | 44941226  | 230 |
| chr11 | 14038620      | 14038849  | 230 |
| chr10 | 20152517      | 20152746  | 230 |
| chrX  | 78798522      | 78798750  | 229 |
| chrX  | 55039836      | 55040064  | 229 |
| chrX  | 48074105      | 48074333  | 229 |
| chrX  | 20459007      | 20459235  | 229 |
| chrX  | 19350380      | 19350608  | 229 |
| chrX  | 18761131      | 18761359  | 229 |
| chrX  | 15444987      | 15445215  | 229 |
| chrX  | 367028 367256 |           | 229 |
| chr9  | 66946247      | 66946475  | 229 |
| chr8  | 80495404      | 80495632  | 229 |
| chr7  | 57675751      | 57675979  | 229 |
| chr7  | 17478525      | 17478753  | 229 |
| chr5  | 119360725     | 119360953 | 229 |
| chr5  | 80003027      | 80003255  | 229 |
| chr5  | 65037589      | 65037817  | 229 |

|       |               |           |     |
|-------|---------------|-----------|-----|
| chr3  | 116205495     | 116205723 | 229 |
| chr3  | 110733919     | 110734147 | 229 |
| chr3  | 31740193      | 31740421  | 229 |
| chr29 | 37328330      | 37328558  | 229 |
| chr28 | 34228783      | 34229011  | 229 |
| chr27 | 15416351      | 15416579  | 229 |
| chr25 | 406991 407219 | 229       |     |
| chr24 | 60937285      | 60937513  | 229 |
| chr24 | 47039829      | 47040057  | 229 |
| chr24 | 1745843       | 1746071   | 229 |
| chr23 | 51691778      | 51692006  | 229 |
| chr23 | 28892561      | 28892789  | 229 |
| chr22 | 10951140      | 10951368  | 229 |
| chr21 | 59052198      | 59052426  | 229 |
| chr21 | 33236229      | 33236457  | 229 |
| chr21 | 27103261      | 27103489  | 229 |
| chr21 | 25818929      | 25819157  | 229 |
| chr20 | 4409965       | 4410193   | 229 |
| chr2  | 111252000     | 111252228 | 229 |
| chr19 | 41374201      | 41374429  | 229 |
| chr18 | 41803962      | 41804190  | 229 |
| chr18 | 25473507      | 25473735  | 229 |
| chr18 | 12617398      | 12617626  | 229 |
| chr17 | 68715504      | 68715732  | 229 |
| chr15 | 54031760      | 54031988  | 229 |
| chr15 | 25597622      | 25597850  | 229 |
| chr14 | 21999714      | 21999942  | 229 |
| chr13 | 62037315      | 62037543  | 229 |
| chr13 | 61766837      | 61767065  | 229 |
| chr13 | 21880437      | 21880665  | 229 |
| chr11 | 70825833      | 70826061  | 229 |
| chr11 | 11513815      | 11514043  | 229 |
| chr10 | 74866493      | 74866721  | 229 |
| chr10 | 13417256      | 13417484  | 229 |
| chr1  | 129526502     | 129526730 | 229 |
| chrX  | 80414761      | 80414988  | 228 |
| chrX  | 65379329      | 65379556  | 228 |
| chrX  | 38786284      | 38786511  | 228 |
| chrX  | 7210337       | 7210564   | 228 |
| chr9  | 100058630     | 100058857 | 228 |
| chr8  | 78823576      | 78823803  | 228 |
| chr8  | 64535935      | 64536162  | 228 |
| chr8  | 49634329      | 49634556  | 228 |
| chr8  | 10179688      | 10179915  | 228 |
| chr7  | 94380681      | 94380908  | 228 |
| chr6  | 59496172      | 59496399  | 228 |
| chr5  | 121502824     | 121503051 | 228 |
| chr5  | 121333136     | 121333363 | 228 |
| chr5  | 120357661     | 120357888 | 228 |
| chr5  | 118163568     | 118163795 | 228 |

|       |           |           |     |
|-------|-----------|-----------|-----|
| chr5  | 30150803  | 30151030  | 228 |
| chr5  | 28891726  | 28891953  | 228 |
| chr4  | 81496034  | 81496261  | 228 |
| chr4  | 54040148  | 54040375  | 228 |
| chr3  | 94323571  | 94323798  | 228 |
| chr3  | 34009154  | 34009381  | 228 |
| chr29 | 50259557  | 50259784  | 228 |
| chr29 | 36748816  | 36749043  | 228 |
| chr29 | 34324612  | 34324839  | 228 |
| chr29 | 25486234  | 25486461  | 228 |
| chr29 | 17366579  | 17366806  | 228 |
| chr28 | 38965372  | 38965599  | 228 |
| chr28 | 3483351   | 3483578   | 228 |
| chr26 | 43857892  | 43858119  | 228 |
| chr25 | 29404648  | 29404875  | 228 |
| chr25 | 4741925   | 4742152   | 228 |
| chr22 | 42483297  | 42483524  | 228 |
| chr22 | 30234156  | 30234383  | 228 |
| chr21 | 25280991  | 25281218  | 228 |
| chr21 | 7127113   | 7127340   | 228 |
| chr2  | 134661213 | 134661440 | 228 |
| chr2  | 130028033 | 130028260 | 228 |
| chr19 | 63504565  | 63504792  | 228 |
| chr19 | 14084586  | 14084813  | 228 |
| chr18 | 63471067  | 63471294  | 228 |
| chr18 | 4015310   | 4015537   | 228 |
| chr17 | 59274019  | 59274246  | 228 |
| chr16 | 69572199  | 69572426  | 228 |
| chr16 | 44392808  | 44393035  | 228 |
| chr16 | 41502620  | 41502847  | 228 |
| chr15 | 80814082  | 80814309  | 228 |
| chr15 | 25258016  | 25258243  | 228 |
| chr14 | 61489114  | 61489341  | 228 |
| chr14 | 54259398  | 54259625  | 228 |
| chr14 | 33429271  | 33429498  | 228 |
| chr13 | 43541070  | 43541297  | 228 |
| chr12 | 34097219  | 34097446  | 228 |
| chr12 | 32248140  | 32248367  | 228 |
| chr12 | 14903984  | 14904211  | 228 |
| chr10 | 60550548  | 60550775  | 228 |
| chr10 | 25648335  | 25648562  | 228 |
| chr1  | 101829270 | 101829497 | 228 |
| chr1  | 1549681   | 1549908   | 228 |
| chrX  | 72294352  | 72294578  | 227 |
| chrX  | 64401980  | 64402206  | 227 |
| chrX  | 63908197  | 63908423  | 227 |
| chrX  | 59126779  | 59127005  | 227 |
| chrX  | 40667977  | 40668203  | 227 |
| chrX  | 21830991  | 21831217  | 227 |
| chrX  | 18759109  | 18759335  | 227 |

|       |               |           |     |
|-------|---------------|-----------|-----|
| chrX  | 16629687      | 16629913  | 227 |
| chrX  | 11550942      | 11551168  | 227 |
| chrX  | 690005 690231 |           | 227 |
| chr9  | 106092131     | 106092357 | 227 |
| chr9  | 95693200      | 95693426  | 227 |
| chr9  | 66932454      | 66932680  | 227 |
| chr9  | 14598008      | 14598234  | 227 |
| chr8  | 107529827     | 107530053 | 227 |
| chr8  | 87202782      | 87203008  | 227 |
| chr7  | 50357587      | 50357813  | 227 |
| chr7  | 3941536       | 3941762   | 227 |
| chr6  | 105364855     | 105365081 | 227 |
| chr4  | 116845831     | 116846057 | 227 |
| chr4  | 98808779      | 98809005  | 227 |
| chr4  | 72532338      | 72532564  | 227 |
| chr4  | 46299381      | 46299607  | 227 |
| chr3  | 121792207     | 121792433 | 227 |
| chr3  | 114677548     | 114677774 | 227 |
| chr3  | 108798368     | 108798594 | 227 |
| chr3  | 58924226      | 58924452  | 227 |
| chr3  | 56833814      | 56834040  | 227 |
| chr3  | 24620642      | 24620868  | 227 |
| chr29 | 36948187      | 36948413  | 227 |
| chr29 | 33727909      | 33728135  | 227 |
| chr29 | 18227228      | 18227454  | 227 |
| chr28 | 4250573       | 4250799   | 227 |
| chr27 | 35832335      | 35832561  | 227 |
| chr26 | 24405349      | 24405575  | 227 |
| chr24 | 59053703      | 59053929  | 227 |
| chr24 | 51371000      | 51371226  | 227 |
| chr24 | 40766656      | 40766882  | 227 |
| chr23 | 49873672      | 49873898  | 227 |
| chr23 | 19808976      | 19809202  | 227 |
| chr23 | 17858254      | 17858480  | 227 |
| chr23 | 14941650      | 14941876  | 227 |
| chr22 | 60192771      | 60192997  | 227 |
| chr22 | 7209323       | 7209549   | 227 |
| chr20 | 66100974      | 66101200  | 227 |
| chr20 | 25871450      | 25871676  | 227 |
| chr2  | 134061547     | 134061773 | 227 |
| chr2  | 132395582     | 132395808 | 227 |
| chr19 | 55756498      | 55756724  | 227 |
| chr19 | 47486602      | 47486828  | 227 |
| chr19 | 40462693      | 40462919  | 227 |
| chr19 | 19369062      | 19369288  | 227 |
| chr19 | 17098102      | 17098328  | 227 |
| chr19 | 13583653      | 13583879  | 227 |
| chr19 | 13442286      | 13442512  | 227 |
| chr18 | 53561416      | 53561642  | 227 |
| chr18 | 23093633      | 23093859  | 227 |

|       |           |           |     |
|-------|-----------|-----------|-----|
| chr17 | 63932651  | 63932877  | 227 |
| chr17 | 53414414  | 53414640  | 227 |
| chr17 | 49710282  | 49710508  | 227 |
| chr17 | 49459843  | 49460069  | 227 |
| chr16 | 68620773  | 68620999  | 227 |
| chr15 | 29092346  | 29092572  | 227 |
| chr15 | 15963914  | 15964140  | 227 |
| chr13 | 59851663  | 59851889  | 227 |
| chr13 | 55950828  | 55951054  | 227 |
| chr12 | 82432953  | 82433179  | 227 |
| chr12 | 33088933  | 33089159  | 227 |
| chr12 | 21919867  | 21920093  | 227 |
| chr11 | 91588566  | 91588792  | 227 |
| chr11 | 85349236  | 85349462  | 227 |
| chr11 | 75508360  | 75508586  | 227 |
| chr11 | 49012705  | 49012931  | 227 |
| chr10 | 20837918  | 20838144  | 227 |
| chr10 | 16217146  | 16217372  | 227 |
| chr1  | 102175449 | 102175675 | 227 |
| chrX  | 76000506  | 76000731  | 226 |
| chrX  | 73240368  | 73240593  | 226 |
| chrX  | 64056365  | 64056590  | 226 |
| chrX  | 61210038  | 61210263  | 226 |
| chrX  | 52474821  | 52475046  | 226 |
| chrX  | 34113712  | 34113937  | 226 |
| chrX  | 30859148  | 30859373  | 226 |
| chrX  | 19496989  | 19497214  | 226 |
| chrX  | 16890486  | 16890711  | 226 |
| chrX  | 12404764  | 12404989  | 226 |
| chrX  | 11784592  | 11784817  | 226 |
| chrX  | 10491592  | 10491817  | 226 |
| chr8  | 114496808 | 114497033 | 226 |
| chr8  | 78828804  | 78829029  | 226 |
| chr7  | 71183921  | 71184146  | 226 |
| chr7  | 62134890  | 62135115  | 226 |
| chr7  | 37440330  | 37440555  | 226 |
| chr7  | 12981418  | 12981643  | 226 |
| chr5  | 121250949 | 121251174 | 226 |
| chr4  | 122598250 | 122598475 | 226 |
| chr4  | 119793409 | 119793634 | 226 |
| chr4  | 16921549  | 16921774  | 226 |
| chr3  | 127024595 | 127024820 | 226 |
| chr3  | 119690162 | 119690387 | 226 |
| chr3  | 17650945  | 17651170  | 226 |
| chr3  | 15173399  | 15173624  | 226 |
| chr29 | 36813430  | 36813655  | 226 |
| chr29 | 35157168  | 35157393  | 226 |
| chr28 | 34074127  | 34074352  | 226 |
| chr27 | 27862581  | 27862806  | 226 |
| chr26 | 49106916  | 49107141  | 226 |

|       |               |           |     |
|-------|---------------|-----------|-----|
| chr26 | 32080701      | 32080926  | 226 |
| chr25 | 28058222      | 28058447  | 226 |
| chr24 | 46536235      | 46536460  | 226 |
| chr23 | 38050320      | 38050545  | 226 |
| chr22 | 55935220      | 55935445  | 226 |
| chr21 | 33040734      | 33040959  | 226 |
| chr20 | 715392 715617 | 226       |     |
| chr20 | 565766 565991 | 226       |     |
| chr2  | 75926106      | 75926331  | 226 |
| chr2  | 75915444      | 75915669  | 226 |
| chr19 | 44180306      | 44180531  | 226 |
| chr18 | 62611742      | 62611967  | 226 |
| chr18 | 45987315      | 45987540  | 226 |
| chr18 | 43371487      | 43371712  | 226 |
| chr18 | 38347334      | 38347559  | 226 |
| chr17 | 69486066      | 69486291  | 226 |
| chr16 | 76356948      | 76357173  | 226 |
| chr16 | 49473919      | 49474144  | 226 |
| chr16 | 45220668      | 45220893  | 226 |
| chr16 | 43494982      | 43495207  | 226 |
| chr16 | 26128369      | 26128594  | 226 |
| chr16 | 1798042       | 1798267   | 226 |
| chr13 | 63392285      | 63392510  | 226 |
| chr13 | 54838403      | 54838628  | 226 |
| chr12 | 71945965      | 71946190  | 226 |
| chr12 | 31571864      | 31572089  | 226 |
| chr12 | 30502731      | 30502956  | 226 |
| chr12 | 11889620      | 11889845  | 226 |
| chr11 | 107214764     | 107214989 | 226 |
| chr10 | 21192718      | 21192943  | 226 |
| chr1  | 73784919      | 73785144  | 226 |
| chr1  | 67997054      | 67997279  | 226 |
| chr1  | 8281661       | 8281886   | 226 |
| chrX  | 71709639      | 71709863  | 225 |
| chrX  | 58446331      | 58446555  | 225 |
| chrX  | 28558370      | 28558594  | 225 |
| chrX  | 7887982       | 7888206   | 225 |
| chrX  | 7430098       | 7430322   | 225 |
| chr9  | 87777132      | 87777356  | 225 |
| chr9  | 27113383      | 27113607  | 225 |
| chr8  | 63835124      | 63835348  | 225 |
| chr7  | 43966579      | 43966803  | 225 |
| chr7  | 38202518      | 38202742  | 225 |
| chr7  | 19370495      | 19370719  | 225 |
| chr6  | 103143553     | 103143777 | 225 |
| chr5  | 124932363     | 124932587 | 225 |
| chr5  | 122322943     | 122323167 | 225 |
| chr5  | 111441651     | 111441875 | 225 |
| chr5  | 29931688      | 29931912  | 225 |
| chr4  | 98754369      | 98754593  | 225 |

|       |           |           |     |
|-------|-----------|-----------|-----|
| chr4  | 72212504  | 72212728  | 225 |
| chr4  | 66635075  | 66635299  | 225 |
| chr3  | 126932586 | 126932810 | 225 |
| chr3  | 116510993 | 116511217 | 225 |
| chr3  | 115486863 | 115487087 | 225 |
| chr3  | 57221665  | 57221889  | 225 |
| chr29 | 50442544  | 50442768  | 225 |
| chr29 | 34629175  | 34629399  | 225 |
| chr28 | 33729263  | 33729487  | 225 |
| chr28 | 32886102  | 32886326  | 225 |
| chr26 | 51367596  | 51367820  | 225 |
| chr26 | 34214467  | 34214691  | 225 |
| chr25 | 35473855  | 35474079  | 225 |
| chr25 | 27877360  | 27877584  | 225 |
| chr25 | 27289081  | 27289305  | 225 |
| chr24 | 52425072  | 52425296  | 225 |
| chr23 | 48756257  | 48756481  | 225 |
| chr23 | 17946880  | 17947104  | 225 |
| chr23 | 12367299  | 12367523  | 225 |
| chr22 | 31487388  | 31487612  | 225 |
| chr21 | 9469963   | 9470187   | 225 |
| chr20 | 73922993  | 73923217  | 225 |
| chr20 | 40030123  | 40030347  | 225 |
| chr20 | 30194037  | 30194261  | 225 |
| chr20 | 6550273   | 6550497   | 225 |
| chr2  | 93731409  | 93731633  | 225 |
| chr19 | 60364451  | 60364675  | 225 |
| chr19 | 58354794  | 58355018  | 225 |
| chr19 | 56559419  | 56559643  | 225 |
| chr19 | 56079834  | 56080058  | 225 |
| chr19 | 47468353  | 47468577  | 225 |
| chr19 | 45063185  | 45063409  | 225 |
| chr19 | 41419675  | 41419899  | 225 |
| chr19 | 10212733  | 10212957  | 225 |
| chr18 | 29576696  | 29576920  | 225 |
| chr18 | 17348372  | 17348596  | 225 |
| chr18 | 629416    | 629640    | 225 |
| chr17 | 68002530  | 68002754  | 225 |
| chr16 | 60486890  | 60487114  | 225 |
| chr16 | 60239195  | 60239419  | 225 |
| chr15 | 60447256  | 60447480  | 225 |
| chr14 | 64007524  | 64007748  | 225 |
| chr14 | 61213274  | 61213498  | 225 |
| chr14 | 43131897  | 43132121  | 225 |
| chr14 | 42139579  | 42139803  | 225 |
| chr14 | 20982660  | 20982884  | 225 |
| chr14 | 8798057   | 8798281   | 225 |
| chr13 | 77772175  | 77772399  | 225 |
| chr13 | 75448922  | 75449146  | 225 |
| chr13 | 56486426  | 56486650  | 225 |



|       |               |           |     |
|-------|---------------|-----------|-----|
| chr13 | 53215385      | 53215609  | 225 |
| chr12 | 25192234      | 25192458  | 225 |
| chr12 | 9074417       | 9074641   | 225 |
| chr11 | 97734957      | 97735181  | 225 |
| chr11 | 14681490      | 14681714  | 225 |
| chr10 | 36021025      | 36021249  | 225 |
| chr10 | 35933723      | 35933947  | 225 |
| chr10 | 16922574      | 16922798  | 225 |
| chr10 | 5611197       | 5611421   | 225 |
| chr1  | 146365458     | 146365682 | 225 |
| chr1  | 128106986     | 128107210 | 225 |
| chrX  | 81203064      | 81203287  | 224 |
| chrX  | 80772053      | 80772276  | 224 |
| chrX  | 73353898      | 73354121  | 224 |
| chrX  | 73170029      | 73170252  | 224 |
| chrX  | 62364423      | 62364646  | 224 |
| chrX  | 60071489      | 60071712  | 224 |
| chrX  | 55476774      | 55476997  | 224 |
| chrX  | 54075299      | 54075522  | 224 |
| chrX  | 7221337       | 7221560   | 224 |
| chrX  | 6631466       | 6631689   | 224 |
| chrX  | 1490978       | 1491201   | 224 |
| chr9  | 35093232      | 35093455  | 224 |
| chr8  | 77169350      | 77169573  | 224 |
| chr8  | 689212 689435 | 224       |     |
| chr7  | 17343789      | 17344012  | 224 |
| chr6  | 106944295     | 106944518 | 224 |
| chr5  | 30316148      | 30316371  | 224 |
| chr4  | 123716642     | 123716865 | 224 |
| chr4  | 84347179      | 84347402  | 224 |
| chr4  | 33205248      | 33205471  | 224 |
| chr4  | 8720189       | 8720412   | 224 |
| chr4  | 7327786       | 7328009   | 224 |
| chr3  | 126978783     | 126979006 | 224 |
| chr3  | 123693735     | 123693958 | 224 |
| chr3  | 114371262     | 114371485 | 224 |
| chr3  | 83116761      | 83116984  | 224 |
| chr29 | 49739591      | 49739814  | 224 |
| chr29 | 35286520      | 35286743  | 224 |
| chr28 | 35573800      | 35574023  | 224 |
| chr27 | 851806 852029 | 224       |     |
| chr26 | 44129814      | 44130037  | 224 |
| chr26 | 41151954      | 41152177  | 224 |
| chr26 | 34314456      | 34314679  | 224 |
| chr26 | 15809983      | 15810206  | 224 |
| chr25 | 36117680      | 36117903  | 224 |
| chr25 | 17181266      | 17181489  | 224 |
| chr25 | 4342920       | 4343143   | 224 |
| chr24 | 63992586      | 63992809  | 224 |
| chr24 | 796433 796656 | 224       |     |

|       |           |           |     |
|-------|-----------|-----------|-----|
| chr23 | 32672530  | 32672753  | 224 |
| chr23 | 30520028  | 30520251  | 224 |
| chr23 | 27874945  | 27875168  | 224 |
| chr22 | 55365885  | 55366108  | 224 |
| chr21 | 69025433  | 69025656  | 224 |
| chr21 | 61673500  | 61673723  | 224 |
| chr21 | 34171159  | 34171382  | 224 |
| chr21 | 32970262  | 32970485  | 224 |
| chr20 | 8489370   | 8489593   | 224 |
| chr20 | 1283710   | 1283933   | 224 |
| chr2  | 115260916 | 115261139 | 224 |
| chr2  | 26684501  | 26684724  | 224 |
| chr19 | 58689766  | 58689989  | 224 |
| chr19 | 26265378  | 26265601  | 224 |
| chr19 | 15128917  | 15129140  | 224 |
| chr19 | 11020676  | 11020899  | 224 |
| chr18 | 48014551  | 48014774  | 224 |
| chr18 | 23575726  | 23575949  | 224 |
| chr18 | 4531962   | 4532185   | 224 |
| chr16 | 55913335  | 55913558  | 224 |
| chr15 | 24053325  | 24053548  | 224 |
| chr15 | 19538322  | 19538545  | 224 |
| chr14 | 22993740  | 22993963  | 224 |
| chr13 | 77679911  | 77680134  | 224 |
| chr13 | 61806240  | 61806463  | 224 |
| chr13 | 57401503  | 57401726  | 224 |
| chr13 | 41075180  | 41075403  | 224 |
| chr13 | 37670199  | 37670422  | 224 |
| chr13 | 35563949  | 35564172  | 224 |
| chr13 | 16080567  | 16080790  | 224 |
| chr11 | 93278934  | 93279157  | 224 |
| chr11 | 6479112   | 6479335   | 224 |
| chr10 | 103776478 | 103776701 | 224 |
| chr10 | 80242890  | 80243113  | 224 |
| chr10 | 58788622  | 58788845  | 224 |
| chr10 | 51364025  | 51364248  | 224 |
| chr10 | 10618107  | 10618330  | 224 |
| chr1  | 153429712 | 153429935 | 224 |
| chr1  | 1518210   | 1518433   | 224 |
| chrX  | 73354817  | 73355039  | 223 |
| chrX  | 64037872  | 64038094  | 223 |
| chrX  | 61617187  | 61617409  | 223 |
| chrX  | 56197744  | 56197966  | 223 |
| chrX  | 54972995  | 54973217  | 223 |
| chrX  | 49216938  | 49217160  | 223 |
| chrX  | 36643904  | 36644126  | 223 |
| chrX  | 36226287  | 36226509  | 223 |
| chrX  | 21839570  | 21839792  | 223 |
| chrX  | 19971042  | 19971264  | 223 |
| chrX  | 16298731  | 16298953  | 223 |

|       |           |           |     |
|-------|-----------|-----------|-----|
| chrX  | 8210682   | 8210904   | 223 |
| chr9  | 106563005 | 106563227 | 223 |
| chr9  | 106410838 | 106411060 | 223 |
| chr8  | 10891105  | 10891327  | 223 |
| chr7  | 45068338  | 45068560  | 223 |
| chr7  | 3709369   | 3709591   | 223 |
| chr6  | 117246873 | 117247095 | 223 |
| chr6  | 72284992  | 72285214  | 223 |
| chr5  | 118350787 | 118351009 | 223 |
| chr5  | 114258530 | 114258752 | 223 |
| chr5  | 113712792 | 113713014 | 223 |
| chr5  | 113134101 | 113134323 | 223 |
| chr5  | 112585880 | 112586102 | 223 |
| chr5  | 111916043 | 111916265 | 223 |
| chr5  | 32551824  | 32552046  | 223 |
| chr5  | 28872004  | 28872226  | 223 |
| chr4  | 71743510  | 71743732  | 223 |
| chr3  | 123748863 | 123749085 | 223 |
| chr3  | 123655018 | 123655240 | 223 |
| chr3  | 122281166 | 122281388 | 223 |
| chr3  | 116400977 | 116401199 | 223 |
| chr3  | 115829238 | 115829460 | 223 |
| chr3  | 114677879 | 114678101 | 223 |
| chr3  | 62636978  | 62637200  | 223 |
| chr3  | 56440606  | 56440828  | 223 |
| chr29 | 49798128  | 49798350  | 223 |
| chr29 | 49173339  | 49173561  | 223 |
| chr29 | 38778610  | 38778832  | 223 |
| chr29 | 35936701  | 35936923  | 223 |
| chr29 | 30021644  | 30021866  | 223 |
| chr28 | 41784803  | 41785025  | 223 |
| chr28 | 35088802  | 35089024  | 223 |
| chr28 | 33895855  | 33896077  | 223 |
| chr28 | 33674593  | 33674815  | 223 |
| chr28 | 11597446  | 11597668  | 223 |
| chr27 | 27815799  | 27816021  | 223 |
| chr25 | 29672849  | 29673071  | 223 |
| chr25 | 14037654  | 14037876  | 223 |
| chr24 | 20403762  | 20403984  | 223 |
| chr24 | 1538650   | 1538872   | 223 |
| chr23 | 19777880  | 19778102  | 223 |
| chr23 | 15978591  | 15978813  | 223 |
| chr22 | 55899551  | 55899773  | 223 |
| chr22 | 38135950  | 38136172  | 223 |
| chr22 | 36053574  | 36053796  | 223 |
| chr21 | 27688959  | 27689181  | 223 |
| chr21 | 26270837  | 26271059  | 223 |
| chr21 | 22662682  | 22662904  | 223 |
| chr20 | 25614647  | 25614869  | 223 |
| chr20 | 3403893   | 3404115   | 223 |

|       |           |           |     |
|-------|-----------|-----------|-----|
| chr2  | 111397771 | 111397993 | 223 |
| chr19 | 54620661  | 54620883  | 223 |
| chr19 | 41473469  | 41473691  | 223 |
| chr19 | 17850727  | 17850949  | 223 |
| chr18 | 49961671  | 49961893  | 223 |
| chr17 | 69339373  | 69339595  | 223 |
| chr17 | 66888018  | 66888240  | 223 |
| chr16 | 49458067  | 49458289  | 223 |
| chr16 | 47463829  | 47464051  | 223 |
| chr15 | 39463694  | 39463916  | 223 |
| chr15 | 31006035  | 31006257  | 223 |
| chr15 | 28827591  | 28827813  | 223 |
| chr15 | 23711579  | 23711801  | 223 |
| chr14 | 9144023   | 9144245   | 223 |
| chr14 | 1910202   | 1910424   | 223 |
| chr13 | 80607868  | 80608090  | 223 |
| chr13 | 79061812  | 79062034  | 223 |
| chr13 | 75708931  | 75709153  | 223 |
| chr13 | 70161836  | 70162058  | 223 |
| chr13 | 54852473  | 54852695  | 223 |
| chr12 | 35247897  | 35248119  | 223 |
| chr11 | 100437492 | 100437714 | 223 |
| chr11 | 81334908  | 81335130  | 223 |
| chr11 | 76313147  | 76313369  | 223 |
| chr11 | 68737171  | 68737393  | 223 |
| chr11 | 28636957  | 28637179  | 223 |
| chr11 | 9292747   | 9292969   | 223 |
| chr10 | 70327027  | 70327249  | 223 |
| chr10 | 27778965  | 27779187  | 223 |
| chr10 | 21193872  | 21194094  | 223 |
| chr10 | 10680795  | 10681017  | 223 |
| chr1  | 156933287 | 156933509 | 223 |
| chrX  | 79442443  | 79442664  | 222 |
| chrX  | 63141013  | 63141234  | 222 |
| chrX  | 63136480  | 63136701  | 222 |
| chrX  | 61576433  | 61576654  | 222 |
| chrX  | 21363743  | 21363964  | 222 |
| chrX  | 7017749   | 7017970   | 222 |
| chrX  | 2627086   | 2627307   | 222 |
| chr9  | 106043429 | 106043650 | 222 |
| chr9  | 39977786  | 39978007  | 222 |
| chr8  | 65882426  | 65882647  | 222 |
| chr8  | 65251720  | 65251941  | 222 |
| chr6  | 101910145 | 101910366 | 222 |
| chr6  | 99407324  | 99407545  | 222 |
| chr5  | 120442814 | 120443035 | 222 |
| chr5  | 113162782 | 113163003 | 222 |
| chr5  | 72431791  | 72432012  | 222 |
| chr5  | 33517025  | 33517246  | 222 |
| chr5  | 30554051  | 30554272  | 222 |

|       |           |           |     |
|-------|-----------|-----------|-----|
| chr3  | 110807967 | 110808188 | 222 |
| chr3  | 30003712  | 30003933  | 222 |
| chr3  | 15186345  | 15186566  | 222 |
| chr29 | 37098516  | 37098737  | 222 |
| chr29 | 31490936  | 31491157  | 222 |
| chr28 | 34950940  | 34951161  | 222 |
| chr28 | 11900407  | 11900628  | 222 |
| chr27 | 26711172  | 26711393  | 222 |
| chr26 | 44843244  | 44843465  | 222 |
| chr26 | 43861255  | 43861476  | 222 |
| chr26 | 18881011  | 18881232  | 222 |
| chr25 | 31379841  | 31380062  | 222 |
| chr24 | 61041558  | 61041779  | 222 |
| chr24 | 48747329  | 48747550  | 222 |
| chr24 | 47281728  | 47281949  | 222 |
| chr24 | 35370218  | 35370439  | 222 |
| chr23 | 51641938  | 51642159  | 222 |
| chr23 | 45420971  | 45421192  | 222 |
| chr23 | 15249150  | 15249371  | 222 |
| chr22 | 47869356  | 47869577  | 222 |
| chr22 | 15019940  | 15020161  | 222 |
| chr22 | 1251077   | 1251298   | 222 |
| chr21 | 28907009  | 28907230  | 222 |
| chr20 | 22365982  | 22366203  | 222 |
| chr2  | 127168137 | 127168358 | 222 |
| chr2  | 116700483 | 116700704 | 222 |
| chr19 | 63505675  | 63505896  | 222 |
| chr19 | 34604680  | 34604901  | 222 |
| chr19 | 26368995  | 26369216  | 222 |
| chr19 | 23042124  | 23042345  | 222 |
| chr19 | 19225622  | 19225843  | 222 |
| chr19 | 16843882  | 16844103  | 222 |
| chr19 | 16222033  | 16222254  | 222 |
| chr18 | 49451920  | 49452141  | 222 |
| chr17 | 67485853  | 67486074  | 222 |
| chr17 | 57769864  | 57770085  | 222 |
| chr17 | 56736172  | 56736393  | 222 |
| chr17 | 47266162  | 47266383  | 222 |
| chr16 | 2705976   | 2706197   | 222 |
| chr15 | 50035465  | 50035686  | 222 |
| chr15 | 33722009  | 33722230  | 222 |
| chr15 | 32258081  | 32258302  | 222 |
| chr14 | 72595909  | 72596130  | 222 |
| chr14 | 68922559  | 68922780  | 222 |
| chr14 | 64243520  | 64243741  | 222 |
| chr14 | 61705847  | 61706068  | 222 |
| chr14 | 29846816  | 29847037  | 222 |
| chr14 | 26489148  | 26489369  | 222 |
| chr14 | 9208162   | 9208383   | 222 |
| chr13 | 73116958  | 73117179  | 222 |

|       |               |           |     |
|-------|---------------|-----------|-----|
| chr13 | 26272065      | 26272286  | 222 |
| chr12 | 82486838      | 82487059  | 222 |
| chr12 | 64654544      | 64654765  | 222 |
| chr12 | 9489390       | 9489611   | 222 |
| chr11 | 103749145     | 103749366 | 222 |
| chr11 | 93812905      | 93813126  | 222 |
| chr11 | 2803831       | 2804052   | 222 |
| chr10 | 98718658      | 98718879  | 222 |
| chr10 | 88225556      | 88225777  | 222 |
| chr10 | 88172364      | 88172585  | 222 |
| chr10 | 79524025      | 79524246  | 222 |
| chr10 | 64271562      | 64271783  | 222 |
| chr10 | 50625478      | 50625699  | 222 |
| chr10 | 16911899      | 16912120  | 222 |
| chr10 | 9745761       | 9745982   | 222 |
| chr1  | 145993483     | 145993704 | 222 |
| chr1  | 135776703     | 135776924 | 222 |
| chr1  | 2724060       | 2724281   | 222 |
| chrX  | 81715991      | 81716211  | 221 |
| chrX  | 75934057      | 75934277  | 221 |
| chrX  | 75251297      | 75251517  | 221 |
| chrX  | 69701974      | 69702194  | 221 |
| chrX  | 65090003      | 65090223  | 221 |
| chrX  | 64881911      | 64882131  | 221 |
| chrX  | 62615338      | 62615558  | 221 |
| chrX  | 58173528      | 58173748  | 221 |
| chrX  | 57422860      | 57423080  | 221 |
| chrX  | 51981362      | 51981582  | 221 |
| chrX  | 30402565      | 30402785  | 221 |
| chrX  | 29714448      | 29714668  | 221 |
| chrX  | 10214927      | 10215147  | 221 |
| chrX  | 9930413       | 9930633   | 221 |
| chrX  | 6693084       | 6693304   | 221 |
| chrX  | 6493400       | 6493620   | 221 |
| chrX  | 789144 789364 | 221       |     |
| chrX  | 39950 40170   | 221       |     |
| chr9  | 91761307      | 91761527  | 221 |
| chr9  | 87746566      | 87746786  | 221 |
| chr8  | 74327595      | 74327815  | 221 |
| chr8  | 60160616      | 60160836  | 221 |
| chr8  | 10970221      | 10970441  | 221 |
| chr7  | 43776439      | 43776659  | 221 |
| chr7  | 38685619      | 38685839  | 221 |
| chr7  | 20130637      | 20130857  | 221 |
| chr6  | 107257770     | 107257990 | 221 |
| chr6  | 73970670      | 73970890  | 221 |
| chr5  | 30371971      | 30372191  | 221 |
| chr4  | 122957208     | 122957428 | 221 |
| chr4  | 116859943     | 116860163 | 221 |
| chr4  | 49382127      | 49382347  | 221 |

|       |           |           |     |
|-------|-----------|-----------|-----|
| chr3  | 110113212 | 110113432 | 221 |
| chr3  | 18659343  | 18659563  | 221 |
| chr29 | 51794818  | 51795038  | 221 |
| chr29 | 51262348  | 51262568  | 221 |
| chr29 | 36979792  | 36980012  | 221 |
| chr29 | 36506437  | 36506657  | 221 |
| chr28 | 45150572  | 45150792  | 221 |
| chr26 | 47784705  | 47784925  | 221 |
| chr26 | 44859051  | 44859271  | 221 |
| chr26 | 23491788  | 23492008  | 221 |
| chr25 | 20262453  | 20262673  | 221 |
| chr25 | 1927361   | 1927581   | 221 |
| chr24 | 44122879  | 44123099  | 221 |
| chr23 | 18658492  | 18658712  | 221 |
| chr23 | 17868873  | 17869093  | 221 |
| chr23 | 17471822  | 17472042  | 221 |
| chr22 | 30123602  | 30123822  | 221 |
| chr22 | 29699059  | 29699279  | 221 |
| chr22 | 10776719  | 10776939  | 221 |
| chr21 | 64280641  | 64280861  | 221 |
| chr21 | 61642808  | 61643028  | 221 |
| chr2  | 116679724 | 116679944 | 221 |
| chr2  | 111372237 | 111372457 | 221 |
| chr2  | 110072497 | 110072717 | 221 |
| chr2  | 93538258  | 93538478  | 221 |
| chr2  | 25366391  | 25366611  | 221 |
| chr2  | 22084861  | 22085081  | 221 |
| chr19 | 39153369  | 39153589  | 221 |
| chr19 | 31291911  | 31292131  | 221 |
| chr19 | 29053644  | 29053864  | 221 |
| chr19 | 14850211  | 14850431  | 221 |
| chr18 | 51336307  | 51336527  | 221 |
| chr18 | 43066050  | 43066270  | 221 |
| chr18 | 35077746  | 35077966  | 221 |
| chr18 | 13842758  | 13842978  | 221 |
| chr18 | 11939190  | 11939410  | 221 |
| chr18 | 11468483  | 11468703  | 221 |
| chr18 | 4049722   | 4049942   | 221 |
| chr17 | 68399378  | 68399598  | 221 |
| chr17 | 66504620  | 66504840  | 221 |
| chr17 | 30235738  | 30235958  | 221 |
| chr16 | 23996362  | 23996582  | 221 |
| chr15 | 41154880  | 41155100  | 221 |
| chr15 | 25329088  | 25329308  | 221 |
| chr15 | 24644256  | 24644476  | 221 |
| chr15 | 23722485  | 23722705  | 221 |
| chr14 | 8244470   | 8244690   | 221 |
| chr13 | 61504948  | 61505168  | 221 |
| chr12 | 35656269  | 35656489  | 221 |
| chr11 | 104917895 | 104918115 | 221 |

|       |           |           |     |
|-------|-----------|-----------|-----|
| chr11 | 95110165  | 95110385  | 221 |
| chr11 | 71478370  | 71478590  | 221 |
| chr10 | 70683364  | 70683584  | 221 |
| chr10 | 70259798  | 70260018  | 221 |
| chr10 | 66551039  | 66551259  | 221 |
| chr10 | 63777088  | 63777308  | 221 |
| chr10 | 25584467  | 25584687  | 221 |
| chr1  | 156151228 | 156151448 | 221 |
| chr1  | 76362298  | 76362518  | 221 |
| chr1  | 74955398  | 74955618  | 221 |
| chr1  | 74570396  | 74570616  | 221 |
| chrX  | 80238739  | 80238958  | 220 |
| chrX  | 75373028  | 75373247  | 220 |
| chrX  | 69120326  | 69120545  | 220 |
| chrX  | 67738394  | 67738613  | 220 |
| chrX  | 67080933  | 67081152  | 220 |
| chrX  | 66624788  | 66625007  | 220 |
| chrX  | 54550258  | 54550477  | 220 |
| chrX  | 54138297  | 54138516  | 220 |
| chrX  | 54125561  | 54125780  | 220 |
| chrX  | 50881545  | 50881764  | 220 |
| chrX  | 50824522  | 50824741  | 220 |
| chrX  | 10812602  | 10812821  | 220 |
| chrX  | 6446951   | 6447170   | 220 |
| chr8  | 77820661  | 77820880  | 220 |
| chr7  | 46520880  | 46521099  | 220 |
| chr6  | 121813648 | 121813867 | 220 |
| chr5  | 122820223 | 122820442 | 220 |
| chr5  | 113743833 | 113744052 | 220 |
| chr5  | 76221049  | 76221268  | 220 |
| chr5  | 50573493  | 50573712  | 220 |
| chr5  | 29165720  | 29165939  | 220 |
| chr5  | 28887090  | 28887309  | 220 |
| chr4  | 77569870  | 77570089  | 220 |
| chr4  | 72293200  | 72293419  | 220 |
| chr3  | 112895355 | 112895574 | 220 |
| chr3  | 15799206  | 15799425  | 220 |
| chr3  | 15634640  | 15634859  | 220 |
| chr29 | 45786650  | 45786869  | 220 |
| chr29 | 31496628  | 31496847  | 220 |
| chr29 | 31492801  | 31493020  | 220 |
| chr29 | 29690624  | 29690843  | 220 |
| chr28 | 26736181  | 26736400  | 220 |
| chr27 | 40305307  | 40305526  | 220 |
| chr27 | 26326911  | 26327130  | 220 |
| chr26 | 39126498  | 39126717  | 220 |
| chr26 | 38358849  | 38359068  | 220 |
| chr25 | 35540633  | 35540852  | 220 |
| chr25 | 30420240  | 30420459  | 220 |
| chr25 | 18143731  | 18143950  | 220 |



|       |           |           |     |
|-------|-----------|-----------|-----|
| chr24 | 59440733  | 59440952  | 220 |
| chr24 | 44160736  | 44160955  | 220 |
| chr24 | 40846517  | 40846736  | 220 |
| chr24 | 1749302   | 1749521   | 220 |
| chr23 | 27095707  | 27095926  | 220 |
| chr23 | 25836909  | 25837128  | 220 |
| chr23 | 8264199   | 8264418   | 220 |
| chr22 | 12172979  | 12173198  | 220 |
| chr21 | 66376948  | 66377167  | 220 |
| chr21 | 33515845  | 33516064  | 220 |
| chr21 | 24970496  | 24970715  | 220 |
| chr20 | 27292019  | 27292238  | 220 |
| chr2  | 140634710 | 140634929 | 220 |
| chr2  | 139310851 | 139311070 | 220 |
| chr2  | 125857722 | 125857941 | 220 |
| chr2  | 116606841 | 116607060 | 220 |
| chr2  | 101131196 | 101131415 | 220 |
| chr2  | 92358489  | 92358708  | 220 |
| chr2  | 74689448  | 74689667  | 220 |
| chr2  | 3996313   | 3996532   | 220 |
| chr19 | 63589313  | 63589532  | 220 |
| chr19 | 35795426  | 35795645  | 220 |
| chr18 | 51412699  | 51412918  | 220 |
| chr18 | 44125209  | 44125428  | 220 |
| chr18 | 39779316  | 39779535  | 220 |
| chr18 | 39596713  | 39596932  | 220 |
| chr18 | 39596319  | 39596538  | 220 |
| chr18 | 24005869  | 24006088  | 220 |
| chr18 | 2359716   | 2359935   | 220 |
| chr17 | 70581591  | 70581810  | 220 |
| chr17 | 63104067  | 63104286  | 220 |
| chr17 | 21442331  | 21442550  | 220 |
| chr16 | 54624418  | 54624637  | 220 |
| chr16 | 43631507  | 43631726  | 220 |
| chr15 | 75627204  | 75627423  | 220 |
| chr15 | 74160406  | 74160625  | 220 |
| chr15 | 28824942  | 28825161  | 220 |
| chr15 | 25091685  | 25091904  | 220 |
| chr15 | 24003205  | 24003424  | 220 |
| chr14 | 61696523  | 61696742  | 220 |
| chr14 | 4033103   | 4033322   | 220 |
| chr13 | 72692591  | 72692810  | 220 |
| chr13 | 45737535  | 45737754  | 220 |
| chr12 | 20785608  | 20785827  | 220 |
| chr11 | 98302823  | 98303042  | 220 |
| chr11 | 77531433  | 77531652  | 220 |
| chr11 | 75077217  | 75077436  | 220 |
| chr11 | 44728407  | 44728626  | 220 |
| chr11 | 44060798  | 44061017  | 220 |
| chr10 | 37449652  | 37449871  | 220 |

|       |           |           |     |
|-------|-----------|-----------|-----|
| chr10 | 14985896  | 14986115  | 220 |
| chr1  | 123073858 | 123074077 | 220 |
| chrX  | 80077187  | 80077405  | 219 |
| chrX  | 77446195  | 77446413  | 219 |
| chrX  | 75688133  | 75688351  | 219 |
| chrX  | 74847609  | 74847827  | 219 |
| chrX  | 58908975  | 58909193  | 219 |
| chrX  | 48198465  | 48198683  | 219 |
| chrX  | 40783461  | 40783679  | 219 |
| chrX  | 36169215  | 36169433  | 219 |
| chrX  | 30694830  | 30695048  | 219 |
| chrX  | 18778203  | 18778421  | 219 |
| chrX  | 11938142  | 11938360  | 219 |
| chrX  | 11255782  | 11256000  | 219 |
| chrX  | 10746083  | 10746301  | 219 |
| chrX  | 9685575   | 9685793   | 219 |
| chrX  | 8182828   | 8183046   | 219 |
| chr8  | 86981339  | 86981557  | 219 |
| chr8  | 8789281   | 8789499   | 219 |
| chr8  | 7678741   | 7678959   | 219 |
| chr7  | 38683450  | 38683668  | 219 |
| chr6  | 122120368 | 122120586 | 219 |
| chr5  | 124372439 | 124372657 | 219 |
| chr5  | 61800912  | 61801130  | 219 |
| chr5  | 46571774  | 46571992  | 219 |
| chr4  | 72557392  | 72557610  | 219 |
| chr4  | 5394741   | 5394959   | 219 |
| chr3  | 125722662 | 125722880 | 219 |
| chr3  | 33553274  | 33553492  | 219 |
| chr3  | 25720391  | 25720609  | 219 |
| chr3  | 11530699  | 11530917  | 219 |
| chr3  | 8700709   | 8700927   | 219 |
| chr29 | 47162221  | 47162439  | 219 |
| chr29 | 17936827  | 17937045  | 219 |
| chr28 | 41323488  | 41323706  | 219 |
| chr26 | 34188214  | 34188432  | 219 |
| chr25 | 26451269  | 26451487  | 219 |
| chr25 | 18134691  | 18134909  | 219 |
| chr24 | 49006059  | 49006277  | 219 |
| chr24 | 43644521  | 43644739  | 219 |
| chr24 | 30917134  | 30917352  | 219 |
| chr23 | 50044584  | 50044802  | 219 |
| chr23 | 44286790  | 44287008  | 219 |
| chr23 | 28553331  | 28553549  | 219 |
| chr23 | 19886775  | 19886993  | 219 |
| chr22 | 59792792  | 59793010  | 219 |
| chr22 | 56572434  | 56572652  | 219 |
| chr22 | 52525312  | 52525530  | 219 |
| chr22 | 39767517  | 39767735  | 219 |
| chr22 | 12352813  | 12353031  | 219 |

|       |           |           |     |
|-------|-----------|-----------|-----|
| chr21 | 58791336  | 58791554  | 219 |
| chr21 | 9414643   | 9414861   | 219 |
| chr2  | 130289465 | 130289683 | 219 |
| chr2  | 77107138  | 77107356  | 219 |
| chr19 | 16352272  | 16352490  | 219 |
| chr19 | 12495720  | 12495938  | 219 |
| chr18 | 62215687  | 62215905  | 219 |
| chr18 | 61982483  | 61982701  | 219 |
| chr18 | 56360308  | 56360526  | 219 |
| chr18 | 37005772  | 37005990  | 219 |
| chr18 | 9402266   | 9402484   | 219 |
| chr17 | 69934083  | 69934301  | 219 |
| chr17 | 53471802  | 53472020  | 219 |
| chr15 | 75341670  | 75341888  | 219 |
| chr15 | 24611336  | 24611554  | 219 |
| chr15 | 24465715  | 24465933  | 219 |
| chr15 | 16113048  | 16113266  | 219 |
| chr13 | 69922738  | 69922956  | 219 |
| chr13 | 64152382  | 64152600  | 219 |
| chr13 | 59669921  | 59670139  | 219 |
| chr13 | 59425539  | 59425757  | 219 |
| chr13 | 55714466  | 55714684  | 219 |
| chr13 | 48894099  | 48894317  | 219 |
| chr13 | 41130110  | 41130328  | 219 |
| chr13 | 32243188  | 32243406  | 219 |
| chr13 | 17730083  | 17730301  | 219 |
| chr11 | 77757216  | 77757434  | 219 |
| chr11 | 75122458  | 75122676  | 219 |
| chr11 | 14435087  | 14435305  | 219 |
| chr10 | 17140152  | 17140370  | 219 |
| chr10 | 11090068  | 11090286  | 219 |
| chr1  | 148201443 | 148201661 | 219 |
| chr1  | 144475559 | 144475777 | 219 |
| chr1  | 131981642 | 131981860 | 219 |
| chrX  | 80218153  | 80218370  | 218 |
| chrX  | 75843452  | 75843669  | 218 |
| chrX  | 72452955  | 72453172  | 218 |
| chrX  | 65569553  | 65569770  | 218 |
| chrX  | 60565118  | 60565335  | 218 |
| chrX  | 59815953  | 59816170  | 218 |
| chrX  | 55368588  | 55368805  | 218 |
| chrX  | 53921618  | 53921835  | 218 |
| chrX  | 48514003  | 48514220  | 218 |
| chrX  | 40764796  | 40765013  | 218 |
| chrX  | 36351839  | 36352056  | 218 |
| chrX  | 30924014  | 30924231  | 218 |
| chrX  | 20920761  | 20920978  | 218 |
| chrX  | 19662703  | 19662920  | 218 |
| chrX  | 19424597  | 19424814  | 218 |
| chrX  | 9049169   | 9049386   | 218 |

|       |               |           |     |
|-------|---------------|-----------|-----|
| chrX  | 7203654       | 7203871   | 218 |
| chrX  | 3812385       | 3812602   | 218 |
| chrX  | 1977990       | 1978207   | 218 |
| chrX  | 373830 374047 | 218       |     |
| chr9  | 104815828     | 104816045 | 218 |
| chr9  | 90582534      | 90582751  | 218 |
| chr8  | 42059943      | 42060160  | 218 |
| chr8  | 23486294      | 23486511  | 218 |
| chr8  | 9316608       | 9316825   | 218 |
| chr5  | 125778259     | 125778476 | 218 |
| chr5  | 114232052     | 114232269 | 218 |
| chr5  | 84608403      | 84608620  | 218 |
| chr5  | 76198232      | 76198449  | 218 |
| chr5  | 74618213      | 74618430  | 218 |
| chr5  | 60387132      | 60387349  | 218 |
| chr5  | 35459606      | 35459823  | 218 |
| chr5  | 11953112      | 11953329  | 218 |
| chr4  | 107507461     | 107507678 | 218 |
| chr4  | 11441946      | 11442163  | 218 |
| chr3  | 121908410     | 121908627 | 218 |
| chr3  | 120669443     | 120669660 | 218 |
| chr3  | 115626146     | 115626363 | 218 |
| chr3  | 104482022     | 104482239 | 218 |
| chr3  | 30753544      | 30753761  | 218 |
| chr29 | 44745885      | 44746102  | 218 |
| chr29 | 36175474      | 36175691  | 218 |
| chr29 | 35327168      | 35327385  | 218 |
| chr29 | 34863667      | 34863884  | 218 |
| chr29 | 26685545      | 26685762  | 218 |
| chr29 | 26508383      | 26508600  | 218 |
| chr29 | 10280706      | 10280923  | 218 |
| chr26 | 43934853      | 43935070  | 218 |
| chr26 | 42895007      | 42895224  | 218 |
| chr26 | 38261950      | 38262167  | 218 |
| chr26 | 16979790      | 16980007  | 218 |
| chr25 | 22577667      | 22577884  | 218 |
| chr24 | 41673594      | 41673811  | 218 |
| chr24 | 20862199      | 20862416  | 218 |
| chr23 | 30150088      | 30150305  | 218 |
| chr23 | 25100141      | 25100358  | 218 |
| chr23 | 15083867      | 15084084  | 218 |
| chr22 | 46577574      | 46577791  | 218 |
| chr22 | 14942549      | 14942766  | 218 |
| chr21 | 61489013      | 61489230  | 218 |
| chr21 | 57448325      | 57448542  | 218 |
| chr21 | 47632852      | 47633069  | 218 |
| chr21 | 12662581      | 12662798  | 218 |
| chr2  | 139216299     | 139216516 | 218 |
| chr2  | 136714613     | 136714830 | 218 |
| chr2  | 135113451     | 135113668 | 218 |

|       |               |           |     |
|-------|---------------|-----------|-----|
| chr2  | 111674381     | 111674598 | 218 |
| chr2  | 74262476      | 74262693  | 218 |
| chr2  | 27021736      | 27021953  | 218 |
| chr2  | 26795504      | 26795721  | 218 |
| chr19 | 43630506      | 43630723  | 218 |
| chr19 | 41406820      | 41407037  | 218 |
| chr19 | 38863994      | 38864211  | 218 |
| chr19 | 36368881      | 36369098  | 218 |
| chr19 | 34051504      | 34051721  | 218 |
| chr19 | 32891268      | 32891485  | 218 |
| chr19 | 27935172      | 27935389  | 218 |
| chr19 | 13569046      | 13569263  | 218 |
| chr18 | 54679886      | 54680103  | 218 |
| chr18 | 49550513      | 49550730  | 218 |
| chr18 | 32419973      | 32420190  | 218 |
| chr18 | 18040885      | 18041102  | 218 |
| chr18 | 364246 364463 | 218       | 218 |
| chr17 | 69931069      | 69931286  | 218 |
| chr17 | 69721501      | 69721718  | 218 |
| chr17 | 63645132      | 63645349  | 218 |
| chr17 | 62931715      | 62931932  | 218 |
| chr17 | 62598908      | 62599125  | 218 |
| chr17 | 56048671      | 56048888  | 218 |
| chr16 | 41439042      | 41439259  | 218 |
| chr15 | 35837423      | 35837640  | 218 |
| chr15 | 32237885      | 32238102  | 218 |
| chr15 | 29890020      | 29890237  | 218 |
| chr15 | 21456996      | 21457213  | 218 |
| chr14 | 64000516      | 64000733  | 218 |
| chr14 | 59543953      | 59544170  | 218 |
| chr14 | 37520498      | 37520715  | 218 |
| chr14 | 25977767      | 25977984  | 218 |
| chr13 | 61823751      | 61823968  | 218 |
| chr11 | 104556438     | 104556655 | 218 |
| chr11 | 90279652      | 90279869  | 218 |
| chr11 | 74285395      | 74285612  | 218 |
| chr11 | 49850335      | 49850552  | 218 |
| chr11 | 28664165      | 28664382  | 218 |
| chr10 | 96160096      | 96160313  | 218 |
| chr10 | 71296327      | 71296544  | 218 |
| chr10 | 35836564      | 35836781  | 218 |
| chr10 | 25032869      | 25033086  | 218 |
| chr10 | 20855742      | 20855959  | 218 |
| chr1  | 156150998     | 156151215 | 218 |
| chr1  | 132007864     | 132008081 | 218 |
| chr1  | 100008759     | 100008976 | 218 |
| chrX  | 80213585      | 80213801  | 217 |
| chrX  | 78322838      | 78323054  | 217 |
| chrX  | 74893884      | 74894100  | 217 |
| chrX  | 62749119      | 62749335  | 217 |

|       |           |           |     |
|-------|-----------|-----------|-----|
| chrX  | 60582731  | 60582947  | 217 |
| chrX  | 56668408  | 56668624  | 217 |
| chrX  | 53794928  | 53795144  | 217 |
| chrX  | 53346158  | 53346374  | 217 |
| chrX  | 49094342  | 49094558  | 217 |
| chrX  | 31958321  | 31958537  | 217 |
| chrX  | 19230751  | 19230967  | 217 |
| chrX  | 10443641  | 10443857  | 217 |
| chrX  | 7981140   | 7981356   | 217 |
| chr8  | 107418813 | 107419029 | 217 |
| chr8  | 65323131  | 65323347  | 217 |
| chr8  | 63756488  | 63756704  | 217 |
| chr7  | 94382921  | 94383137  | 217 |
| chr7  | 71313197  | 71313413  | 217 |
| chr7  | 19174048  | 19174264  | 217 |
| chr7  | 5390655   | 5390871   | 217 |
| chr7  | 2205212   | 2205428   | 217 |
| chr6  | 108850731 | 108850947 | 217 |
| chr5  | 122691037 | 122691253 | 217 |
| chr5  | 121326963 | 121327179 | 217 |
| chr5  | 115686706 | 115686922 | 217 |
| chr5  | 115067720 | 115067936 | 217 |
| chr5  | 54505925  | 54506141  | 217 |
| chr4  | 109433990 | 109434206 | 217 |
| chr4  | 107984669 | 107984885 | 217 |
| chr3  | 122415438 | 122415654 | 217 |
| chr3  | 116173283 | 116173499 | 217 |
| chr3  | 35650571  | 35650787  | 217 |
| chr29 | 44491507  | 44491723  | 217 |
| chr29 | 19343398  | 19343614  | 217 |
| chr29 | 18269617  | 18269833  | 217 |
| chr28 | 42456594  | 42456810  | 217 |
| chr28 | 26746444  | 26746660  | 217 |
| chr28 | 25103975  | 25104191  | 217 |
| chr28 | 7525685   | 7525901   | 217 |
| chr27 | 26815634  | 26815850  | 217 |
| chr27 | 14688310  | 14688526  | 217 |
| chr26 | 50056241  | 50056457  | 217 |
| chr26 | 32850919  | 32851135  | 217 |
| chr24 | 49281670  | 49281886  | 217 |
| chr24 | 36583799  | 36584015  | 217 |
| chr23 | 38036597  | 38036813  | 217 |
| chr23 | 35327561  | 35327777  | 217 |
| chr23 | 30335339  | 30335555  | 217 |
| chr23 | 27229714  | 27229930  | 217 |
| chr23 | 25123712  | 25123928  | 217 |
| chr23 | 10460424  | 10460640  | 217 |
| chr22 | 16327168  | 16327384  | 217 |
| chr21 | 67931819  | 67932035  | 217 |
| chr21 | 66132029  | 66132245  | 217 |

|       |               |           |     |
|-------|---------------|-----------|-----|
| chr21 | 34242248      | 34242464  | 217 |
| chr21 | 34054932      | 34055148  | 217 |
| chr21 | 34001419      | 34001635  | 217 |
| chr21 | 19127576      | 19127792  | 217 |
| chr20 | 8207196       | 8207412   | 217 |
| chr20 | 5640685       | 5640901   | 217 |
| chr20 | 729104 729320 |           | 217 |
| chr2  | 135122144     | 135122360 | 217 |
| chr2  | 128329066     | 128329282 | 217 |
| chr2  | 110132002     | 110132218 | 217 |
| chr19 | 45819366      | 45819582  | 217 |
| chr19 | 45560208      | 45560424  | 217 |
| chr19 | 30816156      | 30816372  | 217 |
| chr19 | 26043968      | 26044184  | 217 |
| chr19 | 22351660      | 22351876  | 217 |
| chr17 | 58853294      | 58853510  | 217 |
| chr17 | 18671770      | 18671986  | 217 |
| chr16 | 59654527      | 59654743  | 217 |
| chr16 | 30463882      | 30464098  | 217 |
| chr16 | 29421476      | 29421692  | 217 |
| chr15 | 42600030      | 42600246  | 217 |
| chr15 | 39386384      | 39386600  | 217 |
| chr15 | 29855006      | 29855222  | 217 |
| chr15 | 26871800      | 26872016  | 217 |
| chr14 | 59391970      | 59392186  | 217 |
| chr14 | 22106043      | 22106259  | 217 |
| chr13 | 73106882      | 73107098  | 217 |
| chr13 | 64085836      | 64086052  | 217 |
| chr13 | 63424544      | 63424760  | 217 |
| chr13 | 60729865      | 60730081  | 217 |
| chr13 | 55375014      | 55375230  | 217 |
| chr13 | 46269531      | 46269747  | 217 |
| chr13 | 41697239      | 41697455  | 217 |
| chr13 | 37381864      | 37382080  | 217 |
| chr13 | 16169366      | 16169582  | 217 |
| chr12 | 31440991      | 31441207  | 217 |
| chr12 | 24620523      | 24620739  | 217 |
| chr11 | 100468426     | 100468642 | 217 |
| chr11 | 98462841      | 98463057  | 217 |
| chr11 | 97742511      | 97742727  | 217 |
| chr11 | 92168471      | 92168687  | 217 |
| chr11 | 91697710      | 91697926  | 217 |
| chr11 | 76259971      | 76260187  | 217 |
| chr11 | 75066251      | 75066467  | 217 |
| chr11 | 70951787      | 70952003  | 217 |
| chr10 | 90273775      | 90273991  | 217 |
| chr10 | 89364338      | 89364554  | 217 |
| chr10 | 36624037      | 36624253  | 217 |
| chr10 | 13606083      | 13606299  | 217 |
| chr10 | 12959301      | 12959517  | 217 |

|       |           |           |     |
|-------|-----------|-----------|-----|
| chr1  | 144666901 | 144667117 | 217 |
| chr1  | 109058577 | 109058793 | 217 |
| chr1  | 81398612  | 81398828  | 217 |
| chr1  | 2542297   | 2542513   | 217 |
| chrX  | 78174134  | 78174349  | 216 |
| chrX  | 67070615  | 67070830  | 216 |
| chrX  | 65717333  | 65717548  | 216 |
| chrX  | 62383137  | 62383352  | 216 |
| chrX  | 50266371  | 50266586  | 216 |
| chrX  | 33744640  | 33744855  | 216 |
| chrX  | 21801558  | 21801773  | 216 |
| chrX  | 20079091  | 20079306  | 216 |
| chrX  | 13311198  | 13311413  | 216 |
| chrX  | 9053292   | 9053507   | 216 |
| chrX  | 7885672   | 7885887   | 216 |
| chrX  | 6254185   | 6254400   | 216 |
| chrX  | 2600463   | 2600678   | 216 |
| chr9  | 65790094  | 65790309  | 216 |
| chr8  | 66645963  | 66646178  | 216 |
| chr8  | 65299894  | 65300109  | 216 |
| chr7  | 57551701  | 57551916  | 216 |
| chr7  | 17445980  | 17446195  | 216 |
| chr7  | 17334159  | 17334374  | 216 |
| chr6  | 73356843  | 73357058  | 216 |
| chr6  | 63815044  | 63815259  | 216 |
| chr6  | 46099547  | 46099762  | 216 |
| chr5  | 125342847 | 125343062 | 216 |
| chr5  | 118316252 | 118316467 | 216 |
| chr5  | 111878648 | 111878863 | 216 |
| chr5  | 111379698 | 111379913 | 216 |
| chr5  | 61497004  | 61497219  | 216 |
| chr5  | 28882535  | 28882750  | 216 |
| chr4  | 124451479 | 124451694 | 216 |
| chr4  | 124351222 | 124351437 | 216 |
| chr4  | 99039733  | 99039948  | 216 |
| chr4  | 27844032  | 27844247  | 216 |
| chr3  | 123635234 | 123635449 | 216 |
| chr3  | 121009241 | 121009456 | 216 |
| chr3  | 120200626 | 120200841 | 216 |
| chr3  | 105424514 | 105424729 | 216 |
| chr3  | 4453619   | 4453834   | 216 |
| chr29 | 48316003  | 48316218  | 216 |
| chr29 | 37021561  | 37021776  | 216 |
| chr29 | 32251010  | 32251225  | 216 |
| chr28 | 40385877  | 40386092  | 216 |
| chr28 | 26777495  | 26777710  | 216 |
| chr27 | 46461293  | 46461508  | 216 |
| chr27 | 6173085   | 6173300   | 216 |
| chr26 | 49213526  | 49213741  | 216 |
| chr26 | 48510190  | 48510405  | 216 |



|       |               |           |     |
|-------|---------------|-----------|-----|
| chr26 | 44238774      | 44238989  | 216 |
| chr26 | 42033567      | 42033782  | 216 |
| chr26 | 21961696      | 21961911  | 216 |
| chr26 | 14573881      | 14574096  | 216 |
| chr25 | 41376738      | 41376953  | 216 |
| chr25 | 28332648      | 28332863  | 216 |
| chr25 | 3835360       | 3835575   | 216 |
| chr25 | 483126 483341 | 216       | 216 |
| chr24 | 59621812      | 59622027  | 216 |
| chr23 | 17870222      | 17870437  | 216 |
| chr22 | 48203566      | 48203781  | 216 |
| chr22 | 12110392      | 12110607  | 216 |
| chr21 | 64483757      | 64483972  | 216 |
| chr21 | 50122524      | 50122739  | 216 |
| chr21 | 34797221      | 34797436  | 216 |
| chr21 | 27420841      | 27421056  | 216 |
| chr21 | 15456777      | 15456992  | 216 |
| chr20 | 22032719      | 22032934  | 216 |
| chr2  | 132461003     | 132461218 | 216 |
| chr2  | 127486242     | 127486457 | 216 |
| chr2  | 122299404     | 122299619 | 216 |
| chr2  | 26961712      | 26961927  | 216 |
| chr2  | 15393342      | 15393557  | 216 |
| chr19 | 58650964      | 58651179  | 216 |
| chr19 | 45902117      | 45902332  | 216 |
| chr19 | 30780453      | 30780668  | 216 |
| chr18 | 54832795      | 54833010  | 216 |
| chr18 | 46073575      | 46073790  | 216 |
| chr18 | 4072426       | 4072641   | 216 |
| chr18 | 3826441       | 3826656   | 216 |
| chr18 | 3069448       | 3069663   | 216 |
| chr17 | 72344472      | 72344687  | 216 |
| chr17 | 69224668      | 69224883  | 216 |
| chr17 | 60900917      | 60901132  | 216 |
| chr16 | 73278748      | 73278963  | 216 |
| chr16 | 60313095      | 60313310  | 216 |
| chr16 | 50646046      | 50646261  | 216 |
| chr16 | 38778926      | 38779141  | 216 |
| chr16 | 2420353       | 2420568   | 216 |
| chr15 | 64918383      | 64918598  | 216 |
| chr15 | 63231433      | 63231648  | 216 |
| chr15 | 32666038      | 32666253  | 216 |
| chr15 | 23062340      | 23062555  | 216 |
| chr15 | 22731017      | 22731232  | 216 |
| chr14 | 19625148      | 19625363  | 216 |
| chr14 | 12756455      | 12756670  | 216 |
| chr14 | 7183875       | 7184090   | 216 |
| chr14 | 7084779       | 7084994   | 216 |
| chr13 | 39609086      | 39609301  | 216 |
| chr13 | 14366967      | 14367182  | 216 |

|       |           |           |     |
|-------|-----------|-----------|-----|
| chr12 | 84326009  | 84326224  | 216 |
| chr12 | 31972804  | 31973019  | 216 |
| chr12 | 30660954  | 30661169  | 216 |
| chr11 | 91476691  | 91476906  | 216 |
| chr11 | 83852400  | 83852615  | 216 |
| chr11 | 70908238  | 70908453  | 216 |
| chr11 | 30750737  | 30750952  | 216 |
| chr11 | 7854404   | 7854619   | 216 |
| chr10 | 86540435  | 86540650  | 216 |
| chr10 | 70784037  | 70784252  | 216 |
| chr10 | 70407022  | 70407237  | 216 |
| chr10 | 52942023  | 52942238  | 216 |
| chr10 | 24672814  | 24673029  | 216 |
| chr10 | 17836281  | 17836496  | 216 |
| chr10 | 16954209  | 16954424  | 216 |
| chr10 | 7182884   | 7183099   | 216 |
| chr1  | 141950386 | 141950601 | 216 |
| chr1  | 81765067  | 81765282  | 216 |
| chr1  | 9227950   | 9228165   | 216 |
| chrX  | 74796100  | 74796314  | 215 |
| chrX  | 62362255  | 62362469  | 215 |
| chrX  | 60524690  | 60524904  | 215 |
| chrX  | 55469093  | 55469307  | 215 |
| chrX  | 54729822  | 54730036  | 215 |
| chrX  | 39207531  | 39207745  | 215 |
| chrX  | 37042375  | 37042589  | 215 |
| chrX  | 36188158  | 36188372  | 215 |
| chrX  | 35564846  | 35565060  | 215 |
| chrX  | 33641053  | 33641267  | 215 |
| chrX  | 31625392  | 31625606  | 215 |
| chrX  | 22554564  | 22554778  | 215 |
| chrX  | 21302782  | 21302996  | 215 |
| chrX  | 21067851  | 21068065  | 215 |
| chrX  | 20113475  | 20113689  | 215 |
| chrX  | 19643210  | 19643424  | 215 |
| chrX  | 16962565  | 16962779  | 215 |
| chrX  | 13722405  | 13722619  | 215 |
| chrX  | 11430212  | 11430426  | 215 |
| chrX  | 8358394   | 8358608   | 215 |
| chrX  | 8353354   | 8353568   | 215 |
| chrX  | 6376825   | 6377039   | 215 |
| chr8  | 80416337  | 80416551  | 215 |
| chr8  | 60130093  | 60130307  | 215 |
| chr8  | 33388173  | 33388387  | 215 |
| chr8  | 10607160  | 10607374  | 215 |
| chr8  | 1621740   | 1621954   | 215 |
| chr7  | 13480493  | 13480707  | 215 |
| chr7  | 13436731  | 13436945  | 215 |
| chr6  | 107241707 | 107241921 | 215 |
| chr6  | 72314038  | 72314252  | 215 |

|       |           |           |     |
|-------|-----------|-----------|-----|
| chr5  | 125208917 | 125209131 | 215 |
| chr5  | 120444882 | 120445096 | 215 |
| chr5  | 102743514 | 102743728 | 215 |
| chr4  | 117125120 | 117125334 | 215 |
| chr3  | 124068956 | 124069170 | 215 |
| chr3  | 116311809 | 116312023 | 215 |
| chr3  | 114469523 | 114469737 | 215 |
| chr3  | 108265520 | 108265734 | 215 |
| chr3  | 35845128  | 35845342  | 215 |
| chr3  | 24587192  | 24587406  | 215 |
| chr28 | 25275776  | 25275990  | 215 |
| chr26 | 48512624  | 48512838  | 215 |
| chr26 | 43947224  | 43947438  | 215 |
| chr25 | 41548308  | 41548522  | 215 |
| chr25 | 29844737  | 29844951  | 215 |
| chr24 | 57357986  | 57358200  | 215 |
| chr24 | 49114763  | 49114977  | 215 |
| chr24 | 31182122  | 31182336  | 215 |
| chr24 | 7161724   | 7161938   | 215 |
| chr23 | 48584103  | 48584317  | 215 |
| chr22 | 60045610  | 60045824  | 215 |
| chr22 | 11635126  | 11635340  | 215 |
| chr21 | 64436706  | 64436920  | 215 |
| chr21 | 11858735  | 11858949  | 215 |
| chr20 | 75666147  | 75666361  | 215 |
| chr19 | 60750157  | 60750371  | 215 |
| chr19 | 56003116  | 56003330  | 215 |
| chr19 | 30579350  | 30579564  | 215 |
| chr19 | 22352077  | 22352291  | 215 |
| chr19 | 19180229  | 19180443  | 215 |
| chr19 | 13473524  | 13473738  | 215 |
| chr19 | 6507291   | 6507505   | 215 |
| chr17 | 63454520  | 63454734  | 215 |
| chr17 | 4845017   | 4845231   | 215 |
| chr17 | 4740254   | 4740468   | 215 |
| chr16 | 77007261  | 77007475  | 215 |
| chr16 | 48056322  | 48056536  | 215 |
| chr16 | 44391398  | 44391612  | 215 |
| chr16 | 44367530  | 44367744  | 215 |
| chr16 | 44145009  | 44145223  | 215 |
| chr16 | 3706936   | 3707150   | 215 |
| chr15 | 53621228  | 53621442  | 215 |
| chr15 | 30157854  | 30158068  | 215 |
| chr15 | 29213635  | 29213849  | 215 |
| chr15 | 22726933  | 22727147  | 215 |
| chr14 | 63514467  | 63514681  | 215 |
| chr14 | 24747174  | 24747388  | 215 |
| chr14 | 1114809   | 1115023   | 215 |
| chr13 | 61192403  | 61192617  | 215 |
| chr13 | 55529190  | 55529404  | 215 |

|       |           |           |     |
|-------|-----------|-----------|-----|
| chr13 | 54838813  | 54839027  | 215 |
| chr13 | 45357595  | 45357809  | 215 |
| chr13 | 38894317  | 38894531  | 215 |
| chr13 | 23677948  | 23678162  | 215 |
| chr11 | 104521939 | 104522153 | 215 |
| chr11 | 88437081  | 88437295  | 215 |
| chr10 | 80145167  | 80145381  | 215 |
| chr10 | 68076896  | 68077110  | 215 |
| chr10 | 36914665  | 36914879  | 215 |
| chr10 | 17454705  | 17454919  | 215 |
| chr1  | 150935628 | 150935842 | 215 |
| chr1  | 81745584  | 81745798  | 215 |
| chr1  | 79933484  | 79933698  | 215 |
| chr1  | 75264998  | 75265212  | 215 |
| chr1  | 73137663  | 73137877  | 215 |
| chrX  | 83517363  | 83517576  | 214 |
| chrX  | 80777820  | 80778033  | 214 |
| chrX  | 78606489  | 78606702  | 214 |
| chrX  | 78103360  | 78103573  | 214 |
| chrX  | 74774026  | 74774239  | 214 |
| chrX  | 72638292  | 72638505  | 214 |
| chrX  | 60563350  | 60563563  | 214 |
| chrX  | 55369624  | 55369837  | 214 |
| chrX  | 55246958  | 55247171  | 214 |
| chrX  | 48713373  | 48713586  | 214 |
| chrX  | 39082202  | 39082415  | 214 |
| chrX  | 37498705  | 37498918  | 214 |
| chrX  | 35720347  | 35720560  | 214 |
| chrX  | 33723265  | 33723478  | 214 |
| chrX  | 30436623  | 30436836  | 214 |
| chrX  | 21838279  | 21838492  | 214 |
| chrX  | 20405937  | 20406150  | 214 |
| chrX  | 20267708  | 20267921  | 214 |
| chrX  | 20093232  | 20093445  | 214 |
| chrX  | 19107371  | 19107584  | 214 |
| chrX  | 13727206  | 13727419  | 214 |
| chrX  | 13544707  | 13544920  | 214 |
| chrX  | 10104021  | 10104234  | 214 |
| chrX  | 7077632   | 7077845   | 214 |
| chrX  | 6527128   | 6527341   | 214 |
| chr9  | 106177086 | 106177299 | 214 |
| chr9  | 100917437 | 100917650 | 214 |
| chr9  | 98742044  | 98742257  | 214 |
| chr9  | 29880649  | 29880862  | 214 |
| chr8  | 111860398 | 111860611 | 214 |
| chr8  | 65246793  | 65247006  | 214 |
| chr7  | 43739742  | 43739955  | 214 |
| chr7  | 43145845  | 43146058  | 214 |
| chr7  | 5600642   | 5600855   | 214 |
| chr6  | 94503224  | 94503437  | 214 |

|       |           |           |     |
|-------|-----------|-----------|-----|
| chr6  | 71842884  | 71843097  | 214 |
| chr5  | 117291773 | 117291986 | 214 |
| chr5  | 115268459 | 115268672 | 214 |
| chr5  | 76649926  | 76650139  | 214 |
| chr5  | 71192548  | 71192761  | 214 |
| chr5  | 29149737  | 29149950  | 214 |
| chr4  | 121748022 | 121748235 | 214 |
| chr4  | 99604790  | 99605003  | 214 |
| chr4  | 69244988  | 69245201  | 214 |
| chr4  | 32172661  | 32172874  | 214 |
| chr3  | 121058738 | 121058951 | 214 |
| chr3  | 54363286  | 54363499  | 214 |
| chr3  | 16082678  | 16082891  | 214 |
| chr3  | 13700034  | 13700247  | 214 |
| chr29 | 26508158  | 26508371  | 214 |
| chr29 | 26454119  | 26454332  | 214 |
| chr28 | 41333117  | 41333330  | 214 |
| chr28 | 25495006  | 25495219  | 214 |
| chr28 | 25189620  | 25189833  | 214 |
| chr26 | 42174790  | 42175003  | 214 |
| chr26 | 34681634  | 34681847  | 214 |
| chr26 | 31946662  | 31946875  | 214 |
| chr26 | 20364111  | 20364324  | 214 |
| chr26 | 18460197  | 18460410  | 214 |
| chr25 | 38032204  | 38032417  | 214 |
| chr25 | 4645111   | 4645324   | 214 |
| chr23 | 15071027  | 15071240  | 214 |
| chr23 | 14497092  | 14497305  | 214 |
| chr22 | 56459779  | 56459992  | 214 |
| chr21 | 59723971  | 59724184  | 214 |
| chr21 | 59485742  | 59485955  | 214 |
| chr21 | 57728497  | 57728710  | 214 |
| chr21 | 33815174  | 33815387  | 214 |
| chr20 | 73808530  | 73808743  | 214 |
| chr20 | 19818416  | 19818629  | 214 |
| chr20 | 1374546   | 1374759   | 214 |
| chr2  | 131037657 | 131037870 | 214 |
| chr2  | 126980650 | 126980863 | 214 |
| chr2  | 111826436 | 111826649 | 214 |
| chr2  | 24695940  | 24696153  | 214 |
| chr19 | 46692929  | 46693142  | 214 |
| chr19 | 42590217  | 42590430  | 214 |
| chr19 | 31917536  | 31917749  | 214 |
| chr19 | 25080557  | 25080770  | 214 |
| chr19 | 15693479  | 15693692  | 214 |
| chr19 | 14656587  | 14656800  | 214 |
| chr19 | 8934744   | 8934957   | 214 |
| chr18 | 52951689  | 52951902  | 214 |
| chr18 | 49553385  | 49553598  | 214 |
| chr18 | 48528282  | 48528495  | 214 |

|       |               |           |     |
|-------|---------------|-----------|-----|
| chr18 | 43441873      | 43442086  | 214 |
| chr18 | 5704430       | 5704643   | 214 |
| chr17 | 70387825      | 70388038  | 214 |
| chr17 | 70159947      | 70160160  | 214 |
| chr17 | 66182148      | 66182361  | 214 |
| chr17 | 61265971      | 61266184  | 214 |
| chr17 | 58941902      | 58942115  | 214 |
| chr17 | 5061837       | 5062050   | 214 |
| chr16 | 68622023      | 68622236  | 214 |
| chr16 | 53892562      | 53892775  | 214 |
| chr16 | 50231375      | 50231588  | 214 |
| chr16 | 49671981      | 49672194  | 214 |
| chr16 | 37026293      | 37026506  | 214 |
| chr15 | 73821062      | 73821275  | 214 |
| chr15 | 29893385      | 29893598  | 214 |
| chr15 | 25451338      | 25451551  | 214 |
| chr15 | 24931526      | 24931739  | 214 |
| chr14 | 21767219      | 21767432  | 214 |
| chr13 | 59414861      | 59415074  | 214 |
| chr12 | 82864966      | 82865179  | 214 |
| chr12 | 74549770      | 74549983  | 214 |
| chr12 | 37182467      | 37182680  | 214 |
| chr12 | 33071180      | 33071393  | 214 |
| chr12 | 14910659      | 14910872  | 214 |
| chr11 | 80340752      | 80340965  | 214 |
| chr11 | 51007745      | 51007958  | 214 |
| chr11 | 25514441      | 25514654  | 214 |
| chr11 | 11645898      | 11646111  | 214 |
| chr11 | 10394963      | 10395176  | 214 |
| chr10 | 103313972     | 103314185 | 214 |
| chr10 | 24692464      | 24692677  | 214 |
| chr10 | 21848626      | 21848839  | 214 |
| chr10 | 16777876      | 16778089  | 214 |
| chr1  | 145719208     | 145719421 | 214 |
| chr1  | 109023130     | 109023343 | 214 |
| chr1  | 500202 500415 | 214       |     |
| chrX  | 78470739      | 78470951  | 213 |
| chrX  | 74605351      | 74605563  | 213 |
| chrX  | 71579288      | 71579500  | 213 |
| chrX  | 65789537      | 65789749  | 213 |
| chrX  | 59731078      | 59731290  | 213 |
| chrX  | 56586205      | 56586417  | 213 |
| chrX  | 53496142      | 53496354  | 213 |
| chrX  | 49284100      | 49284312  | 213 |
| chrX  | 30574292      | 30574504  | 213 |
| chrX  | 19720730      | 19720942  | 213 |
| chrX  | 19106130      | 19106342  | 213 |
| chrX  | 16984301      | 16984513  | 213 |
| chrX  | 8361132       | 8361344   | 213 |
| chrX  | 8351934       | 8352146   | 213 |

|       |           |           |     |
|-------|-----------|-----------|-----|
| chrX  | 5753719   | 5753931   | 213 |
| chr9  | 104893569 | 104893781 | 213 |
| chr8  | 77576975  | 77577187  | 213 |
| chr8  | 76701126  | 76701338  | 213 |
| chr8  | 65172125  | 65172337  | 213 |
| chr8  | 63855041  | 63855253  | 213 |
| chr7  | 91981748  | 91981960  | 213 |
| chr7  | 84757637  | 84757849  | 213 |
| chr7  | 65084854  | 65085066  | 213 |
| chr7  | 4704983   | 4705195   | 213 |
| chr6  | 120405098 | 120405310 | 213 |
| chr6  | 38120656  | 38120868  | 213 |
| chr5  | 118093236 | 118093448 | 213 |
| chr5  | 79242825  | 79243037  | 213 |
| chr5  | 75505792  | 75506004  | 213 |
| chr5  | 35486651  | 35486863  | 213 |
| chr5  | 29802070  | 29802282  | 213 |
| chr4  | 106376611 | 106376823 | 213 |
| chr4  | 101976949 | 101977161 | 213 |
| chr3  | 115489402 | 115489614 | 213 |
| chr3  | 109418503 | 109418715 | 213 |
| chr3  | 33463385  | 33463597  | 213 |
| chr3  | 15145047  | 15145259  | 213 |
| chr29 | 49724167  | 49724379  | 213 |
| chr29 | 36975228  | 36975440  | 213 |
| chr29 | 31696136  | 31696348  | 213 |
| chr27 | 32971546  | 32971758  | 213 |
| chr27 | 8042345   | 8042557   | 213 |
| chr27 | 660109    | 660321    | 213 |
| chr27 | 27369     | 27581     | 213 |
| chr26 | 32050642  | 32050854  | 213 |
| chr25 | 38409079  | 38409291  | 213 |
| chr25 | 33292680  | 33292892  | 213 |
| chr25 | 8132743   | 8132955   | 213 |
| chr25 | 2029648   | 2029860   | 213 |
| chr24 | 20859970  | 20860182  | 213 |
| chr23 | 43026981  | 43027193  | 213 |
| chr23 | 28828735  | 28828947  | 213 |
| chr23 | 28680447  | 28680659  | 213 |
| chr23 | 19894133  | 19894345  | 213 |
| chr23 | 17572371  | 17572583  | 213 |
| chr22 | 30313765  | 30313977  | 213 |
| chr22 | 22168321  | 22168533  | 213 |
| chr22 | 14954502  | 14954714  | 213 |
| chr21 | 64602677  | 64602889  | 213 |
| chr21 | 64498661  | 64498873  | 213 |
| chr21 | 61072146  | 61072358  | 213 |
| chr21 | 34950909  | 34951121  | 213 |
| chr21 | 12647772  | 12647984  | 213 |
| chr20 | 74162090  | 74162302  | 213 |

|       |           |           |     |
|-------|-----------|-----------|-----|
| chr20 | 73551975  | 73552187  | 213 |
| chr2  | 5177178   | 5177390   | 213 |
| chr19 | 56124891  | 56125103  | 213 |
| chr19 | 43185093  | 43185305  | 213 |
| chr19 | 39985115  | 39985327  | 213 |
| chr19 | 29723003  | 29723215  | 213 |
| chr19 | 28979075  | 28979287  | 213 |
| chr19 | 26334365  | 26334577  | 213 |
| chr19 | 26148432  | 26148644  | 213 |
| chr18 | 64163708  | 64163920  | 213 |
| chr18 | 7951826   | 7952038   | 213 |
| chr18 | 7831211   | 7831423   | 213 |
| chr18 | 4335858   | 4336070   | 213 |
| chr18 | 3892244   | 3892456   | 213 |
| chr18 | 1537502   | 1537714   | 213 |
| chr17 | 72837255  | 72837467  | 213 |
| chr17 | 68604616  | 68604828  | 213 |
| chr17 | 62755156  | 62755368  | 213 |
| chr17 | 60289790  | 60290002  | 213 |
| chr17 | 54356843  | 54357055  | 213 |
| chr16 | 75356444  | 75356656  | 213 |
| chr16 | 60771507  | 60771719  | 213 |
| chr16 | 60243258  | 60243470  | 213 |
| chr16 | 47281826  | 47282038  | 213 |
| chr16 | 38707990  | 38708202  | 213 |
| chr15 | 52800925  | 52801137  | 213 |
| chr15 | 38257592  | 38257804  | 213 |
| chr15 | 28616658  | 28616870  | 213 |
| chr15 | 26245708  | 26245920  | 213 |
| chr14 | 9207657   | 9207869   | 213 |
| chr13 | 70080237  | 70080449  | 213 |
| chr13 | 54792912  | 54793124  | 213 |
| chr12 | 83768547  | 83768759  | 213 |
| chr12 | 72577575  | 72577787  | 213 |
| chr11 | 92361116  | 92361328  | 213 |
| chr11 | 88840873  | 88841085  | 213 |
| chr11 | 44913163  | 44913375  | 213 |
| chr11 | 44687373  | 44687585  | 213 |
| chr10 | 20839076  | 20839288  | 213 |
| chr10 | 11037772  | 11037984  | 213 |
| chr1  | 146921369 | 146921581 | 213 |
| chr1  | 85042903  | 85043115  | 213 |
| chr1  | 72903934  | 72904146  | 213 |
| chr1  | 69086600  | 69086812  | 213 |
| chrX  | 80453920  | 80454131  | 212 |
| chrX  | 78547980  | 78548191  | 212 |
| chrX  | 76009273  | 76009484  | 212 |
| chrX  | 74332010  | 74332221  | 212 |
| chrX  | 65585057  | 65585268  | 212 |
| chrX  | 58486354  | 58486565  | 212 |



|       |               |           |     |
|-------|---------------|-----------|-----|
| chrX  | 34172608      | 34172819  | 212 |
| chrX  | 33618935      | 33619146  | 212 |
| chrX  | 30960400      | 30960611  | 212 |
| chrX  | 29768628      | 29768839  | 212 |
| chrX  | 27291912      | 27292123  | 212 |
| chrX  | 18777646      | 18777857  | 212 |
| chrX  | 13291847      | 13292058  | 212 |
| chrX  | 12914881      | 12915092  | 212 |
| chrX  | 12700951      | 12701162  | 212 |
| chrX  | 9662833       | 9663044   | 212 |
| chrX  | 8629474       | 8629685   | 212 |
| chrX  | 6452094       | 6452305   | 212 |
| chrX  | 373592 373803 | 212       |     |
| chr9  | 100081501     | 100081712 | 212 |
| chr9  | 86706709      | 86706920  | 212 |
| chr8  | 110909605     | 110909816 | 212 |
| chr8  | 78536358      | 78536569  | 212 |
| chr8  | 25960734      | 25960945  | 212 |
| chr8  | 5343789       | 5344000   | 212 |
| chr7  | 88951225      | 88951436  | 212 |
| chr7  | 29469726      | 29469937  | 212 |
| chr7  | 4941828       | 4942039   | 212 |
| chr6  | 98422502      | 98422713  | 212 |
| chr6  | 69103191      | 69103402  | 212 |
| chr6  | 47888764      | 47888975  | 212 |
| chr6  | 13429461      | 13429672  | 212 |
| chr5  | 125564418     | 125564629 | 212 |
| chr5  | 111998890     | 111999101 | 212 |
| chr5  | 81320000      | 81320211  | 212 |
| chr5  | 73074598      | 73074809  | 212 |
| chr4  | 97909190      | 97909401  | 212 |
| chr3  | 120909444     | 120909655 | 212 |
| chr3  | 101084662     | 101084873 | 212 |
| chr29 | 51971867      | 51972078  | 212 |
| chr29 | 42448945      | 42449156  | 212 |
| chr29 | 36839321      | 36839532  | 212 |
| chr29 | 35662397      | 35662608  | 212 |
| chr29 | 29706990      | 29707201  | 212 |
| chr29 | 6136457       | 6136668   | 212 |
| chr29 | 2686684       | 2686895   | 212 |
| chr28 | 34509580      | 34509791  | 212 |
| chr28 | 32484954      | 32485165  | 212 |
| chr28 | 26723274      | 26723485  | 212 |
| chr27 | 45234749      | 45234960  | 212 |
| chr27 | 36003085      | 36003296  | 212 |
| chr26 | 48568460      | 48568671  | 212 |
| chr26 | 48545154      | 48545365  | 212 |
| chr26 | 20974828      | 20975039  | 212 |
| chr26 | 18250877      | 18251088  | 212 |
| chr25 | 37830394      | 37830605  | 212 |

|       |           |           |     |
|-------|-----------|-----------|-----|
| chr25 | 37471655  | 37471866  | 212 |
| chr25 | 34347763  | 34347974  | 212 |
| chr23 | 52452058  | 52452269  | 212 |
| chr23 | 19810105  | 19810316  | 212 |
| chr23 | 13421144  | 13421355  | 212 |
| chr23 | 10647867  | 10648078  | 212 |
| chr22 | 17866130  | 17866341  | 212 |
| chr21 | 61047254  | 61047465  | 212 |
| chr21 | 58529864  | 58530075  | 212 |
| chr21 | 34034246  | 34034457  | 212 |
| chr20 | 73229880  | 73230091  | 212 |
| chr20 | 70811671  | 70811882  | 212 |
| chr2  | 136664941 | 136665152 | 212 |
| chr2  | 74010642  | 74010853  | 212 |
| chr19 | 54579548  | 54579759  | 212 |
| chr19 | 53975778  | 53975989  | 212 |
| chr19 | 53024428  | 53024639  | 212 |
| chr19 | 33311711  | 33311922  | 212 |
| chr19 | 30651794  | 30652005  | 212 |
| chr19 | 23062071  | 23062282  | 212 |
| chr19 | 16900580  | 16900791  | 212 |
| chr19 | 14986103  | 14986314  | 212 |
| chr18 | 48376217  | 48376428  | 212 |
| chr18 | 32444928  | 32445139  | 212 |
| chr18 | 23558774  | 23558985  | 212 |
| chr18 | 21959994  | 21960205  | 212 |
| chr18 | 11021066  | 11021277  | 212 |
| chr17 | 69774888  | 69775099  | 212 |
| chr17 | 69432224  | 69432435  | 212 |
| chr17 | 66740540  | 66740751  | 212 |
| chr17 | 63550427  | 63550638  | 212 |
| chr17 | 60246299  | 60246510  | 212 |
| chr16 | 67174293  | 67174504  | 212 |
| chr16 | 48701719  | 48701930  | 212 |
| chr16 | 44843999  | 44844210  | 212 |
| chr16 | 44805385  | 44805596  | 212 |
| chr16 | 44393916  | 44394127  | 212 |
| chr16 | 27337206  | 27337417  | 212 |
| chr16 | 2266062   | 2266273   | 212 |
| chr15 | 73778843  | 73779054  | 212 |
| chr15 | 39876077  | 39876288  | 212 |
| chr15 | 32083948  | 32084159  | 212 |
| chr15 | 25724567  | 25724778  | 212 |
| chr15 | 25331859  | 25332070  | 212 |
| chr15 | 24992035  | 24992246  | 212 |
| chr14 | 25765055  | 25765266  | 212 |
| chr13 | 80405896  | 80406107  | 212 |
| chr13 | 73856101  | 73856312  | 212 |
| chr13 | 56041074  | 56041285  | 212 |
| chr13 | 42028231  | 42028442  | 212 |

|       |               |           |     |
|-------|---------------|-----------|-----|
| chr13 | 35346279      | 35346490  | 212 |
| chr12 | 70595613      | 70595824  | 212 |
| chr12 | 14699482      | 14699693  | 212 |
| chr11 | 101001788     | 101001999 | 212 |
| chr11 | 93186188      | 93186399  | 212 |
| chr11 | 93009693      | 93009904  | 212 |
| chr11 | 77789843      | 77790054  | 212 |
| chr11 | 13337039      | 13337250  | 212 |
| chr11 | 4811782       | 4811993   | 212 |
| chr10 | 66853662      | 66853873  | 212 |
| chr10 | 53761159      | 53761370  | 212 |
| chr10 | 48244704      | 48244915  | 212 |
| chr10 | 32242725      | 32242936  | 212 |
| chr10 | 19497300      | 19497511  | 212 |
| chr10 | 3523790       | 3524001   | 212 |
| chr1  | 82919169      | 82919380  | 212 |
| chr1  | 73139479      | 73139690  | 212 |
| chr1  | 64590972      | 64591183  | 212 |
| chr1  | 50451352      | 50451563  | 212 |
| chrX  | 80153805      | 80154015  | 211 |
| chrX  | 75496064      | 75496274  | 211 |
| chrX  | 72822185      | 72822395  | 211 |
| chrX  | 69058305      | 69058515  | 211 |
| chrX  | 66330042      | 66330252  | 211 |
| chrX  | 65648883      | 65649093  | 211 |
| chrX  | 63730813      | 63731023  | 211 |
| chrX  | 62661409      | 62661619  | 211 |
| chrX  | 57958753      | 57958963  | 211 |
| chrX  | 56632490      | 56632700  | 211 |
| chrX  | 56382510      | 56382720  | 211 |
| chrX  | 55662365      | 55662575  | 211 |
| chrX  | 55649218      | 55649428  | 211 |
| chrX  | 49408677      | 49408887  | 211 |
| chrX  | 48193683      | 48193893  | 211 |
| chrX  | 47373074      | 47373284  | 211 |
| chrX  | 46548769      | 46548979  | 211 |
| chrX  | 39191336      | 39191546  | 211 |
| chrX  | 37521262      | 37521472  | 211 |
| chrX  | 36930239      | 36930449  | 211 |
| chrX  | 36517060      | 36517270  | 211 |
| chrX  | 35811475      | 35811685  | 211 |
| chrX  | 22489823      | 22490033  | 211 |
| chrX  | 21035403      | 21035613  | 211 |
| chrX  | 20642238      | 20642448  | 211 |
| chrX  | 8094046       | 8094256   | 211 |
| chrX  | 2848296       | 2848506   | 211 |
| chrX  | 163262 163472 | 211       | 211 |
| chr8  | 108405658     | 108405868 | 211 |
| chr8  | 72542549      | 72542759  | 211 |
| chr8  | 59304261      | 59304471  | 211 |

|       |               |           |     |
|-------|---------------|-----------|-----|
| chr8  | 55305131      | 55305341  | 211 |
| chr8  | 8577713       | 8577923   | 211 |
| chr8  | 825131 825341 | 211       |     |
| chr7  | 76951967      | 76952177  | 211 |
| chr7  | 38308372      | 38308582  | 211 |
| chr7  | 20572766      | 20572976  | 211 |
| chr7  | 19934245      | 19934455  | 211 |
| chr7  | 18074839      | 18075049  | 211 |
| chr7  | 18072904      | 18073114  | 211 |
| chr7  | 16545450      | 16545660  | 211 |
| chr7  | 14709993      | 14710203  | 211 |
| chr5  | 119145346     | 119145556 | 211 |
| chr5  | 116889250     | 116889460 | 211 |
| chr5  | 103263109     | 103263319 | 211 |
| chr5  | 35299577      | 35299787  | 211 |
| chr5  | 29939690      | 29939900  | 211 |
| chr4  | 115871170     | 115871380 | 211 |
| chr4  | 77071928      | 77072138  | 211 |
| chr3  | 127248694     | 127248904 | 211 |
| chr3  | 124415148     | 124415358 | 211 |
| chr3  | 115433682     | 115433892 | 211 |
| chr3  | 114947538     | 114947748 | 211 |
| chr3  | 23097186      | 23097396  | 211 |
| chr3  | 10713433      | 10713643  | 211 |
| chr3  | 10711206      | 10711416  | 211 |
| chr3  | 8742029       | 8742239   | 211 |
| chr29 | 46352420      | 46352630  | 211 |
| chr29 | 41694578      | 41694788  | 211 |
| chr29 | 37060775      | 37060985  | 211 |
| chr29 | 36797191      | 36797401  | 211 |
| chr29 | 31776923      | 31777133  | 211 |
| chr29 | 31611371      | 31611581  | 211 |
| chr29 | 30107428      | 30107638  | 211 |
| chr28 | 13724804      | 13725014  | 211 |
| chr28 | 1767417       | 1767627   | 211 |
| chr27 | 15776060      | 15776270  | 211 |
| chr26 | 44082990      | 44083200  | 211 |
| chr26 | 43445968      | 43446178  | 211 |
| chr26 | 14882041      | 14882251  | 211 |
| chr26 | 12854854      | 12855064  | 211 |
| chr25 | 30894960      | 30895170  | 211 |
| chr25 | 21902436      | 21902646  | 211 |
| chr25 | 476052 476262 | 211       |     |
| chr24 | 59508831      | 59509041  | 211 |
| chr24 | 46809541      | 46809751  | 211 |
| chr23 | 15869269      | 15869479  | 211 |
| chr23 | 8283308       | 8283518   | 211 |
| chr22 | 58613043      | 58613253  | 211 |
| chr22 | 52821043      | 52821253  | 211 |
| chr22 | 50855859      | 50856069  | 211 |

|       |               |           |     |
|-------|---------------|-----------|-----|
| chr22 | 48306591      | 48306801  | 211 |
| chr22 | 48291666      | 48291876  | 211 |
| chr22 | 12427699      | 12427909  | 211 |
| chr22 | 1419676       | 1419886   | 211 |
| chr21 | 62074572      | 62074782  | 211 |
| chr21 | 61640443      | 61640653  | 211 |
| chr21 | 59017690      | 59017900  | 211 |
| chr21 | 31692762      | 31692972  | 211 |
| chr21 | 20622582      | 20622792  | 211 |
| chr21 | 13969306      | 13969516  | 211 |
| chr20 | 73445022      | 73445232  | 211 |
| chr20 | 25729242      | 25729452  | 211 |
| chr20 | 10747800      | 10748010  | 211 |
| chr20 | 3521553       | 3521763   | 211 |
| chr20 | 2450685       | 2450895   | 211 |
| chr20 | 1059409       | 1059619   | 211 |
| chr2  | 137186328     | 137186538 | 211 |
| chr2  | 125085130     | 125085340 | 211 |
| chr2  | 124983058     | 124983268 | 211 |
| chr2  | 124303637     | 124303847 | 211 |
| chr19 | 60228843      | 60229053  | 211 |
| chr19 | 54631805      | 54632015  | 211 |
| chr19 | 41921497      | 41921707  | 211 |
| chr19 | 40850295      | 40850505  | 211 |
| chr19 | 39239174      | 39239384  | 211 |
| chr19 | 34836530      | 34836740  | 211 |
| chr19 | 7774118       | 7774328   | 211 |
| chr18 | 62697241      | 62697451  | 211 |
| chr18 | 45561644      | 45561854  | 211 |
| chr18 | 27441971      | 27442181  | 211 |
| chr18 | 22850658      | 22850868  | 211 |
| chr18 | 10518710      | 10518920  | 211 |
| chr17 | 71695507      | 71695717  | 211 |
| chr17 | 70088533      | 70088743  | 211 |
| chr17 | 66701965      | 66702175  | 211 |
| chr16 | 77725192      | 77725402  | 211 |
| chr16 | 50537278      | 50537488  | 211 |
| chr16 | 41551657      | 41551867  | 211 |
| chr16 | 3641413       | 3641623   | 211 |
| chr16 | 2237115       | 2237325   | 211 |
| chr16 | 689415 689625 | 211       |     |
| chr15 | 39430145      | 39430355  | 211 |
| chr15 | 28673799      | 28674009  | 211 |
| chr15 | 25056976      | 25057186  | 211 |
| chr15 | 24403789      | 24403999  | 211 |
| chr15 | 16023044      | 16023254  | 211 |
| chr14 | 6083698       | 6083908   | 211 |
| chr14 | 6023268       | 6023478   | 211 |
| chr13 | 69550891      | 69551101  | 211 |
| chr13 | 68301902      | 68302112  | 211 |

|       |           |           |     |
|-------|-----------|-----------|-----|
| chr13 | 64205401  | 64205611  | 211 |
| chr13 | 58182164  | 58182374  | 211 |
| chr13 | 57202804  | 57203014  | 211 |
| chr13 | 55352286  | 55352496  | 211 |
| chr13 | 52538429  | 52538639  | 211 |
| chr13 | 41299209  | 41299419  | 211 |
| chr13 | 14329283  | 14329493  | 211 |
| chr13 | 14257901  | 14258111  | 211 |
| chr12 | 36282521  | 36282731  | 211 |
| chr12 | 31035828  | 31036038  | 211 |
| chr12 | 4809229   | 4809439   | 211 |
| chr11 | 93320982  | 93321192  | 211 |
| chr11 | 92469892  | 92470102  | 211 |
| chr11 | 82855001  | 82855211  | 211 |
| chr11 | 23375184  | 23375394  | 211 |
| chr10 | 87164283  | 87164493  | 211 |
| chr10 | 83567459  | 83567669  | 211 |
| chr1  | 115677707 | 115677917 | 211 |
| chr1  | 65465817  | 65466027  | 211 |
| chrX  | 75376710  | 75376919  | 210 |
| chrX  | 71497737  | 71497946  | 210 |
| chrX  | 70320129  | 70320338  | 210 |
| chrX  | 69661800  | 69662009  | 210 |
| chrX  | 67423550  | 67423759  | 210 |
| chrX  | 66800281  | 66800490  | 210 |
| chrX  | 65989744  | 65989953  | 210 |
| chrX  | 64195865  | 64196074  | 210 |
| chrX  | 58560660  | 58560869  | 210 |
| chrX  | 56916039  | 56916248  | 210 |
| chrX  | 55554087  | 55554296  | 210 |
| chrX  | 54873154  | 54873363  | 210 |
| chrX  | 53484534  | 53484743  | 210 |
| chrX  | 52774992  | 52775201  | 210 |
| chrX  | 50891108  | 50891317  | 210 |
| chrX  | 50447432  | 50447641  | 210 |
| chrX  | 50252621  | 50252830  | 210 |
| chrX  | 45123471  | 45123680  | 210 |
| chrX  | 40790397  | 40790606  | 210 |
| chrX  | 36313609  | 36313818  | 210 |
| chrX  | 36235723  | 36235932  | 210 |
| chrX  | 34280229  | 34280438  | 210 |
| chrX  | 20639875  | 20640084  | 210 |
| chrX  | 20079462  | 20079671  | 210 |
| chrX  | 19811591  | 19811800  | 210 |
| chrX  | 19753521  | 19753730  | 210 |
| chrX  | 12630996  | 12631205  | 210 |
| chrX  | 12234823  | 12235032  | 210 |
| chrX  | 10940020  | 10940229  | 210 |
| chrX  | 9269543   | 9269752   | 210 |
| chrX  | 8278283   | 8278492   | 210 |

|       |               |           |     |
|-------|---------------|-----------|-----|
| chrX  | 6682195       | 6682404   | 210 |
| chrX  | 5576287       | 5576496   | 210 |
| chrX  | 232349 232558 |           | 210 |
| chr9  | 98837215      | 98837424  | 210 |
| chr8  | 93039172      | 93039381  | 210 |
| chr8  | 82827059      | 82827268  | 210 |
| chr7  | 61013439      | 61013648  | 210 |
| chr7  | 44019499      | 44019708  | 210 |
| chr7  | 18452539      | 18452748  | 210 |
| chr7  | 17445603      | 17445812  | 210 |
| chr6  | 100658173     | 100658382 | 210 |
| chr6  | 98560233      | 98560442  | 210 |
| chr5  | 112231372     | 112231581 | 210 |
| chr5  | 29317374      | 29317583  | 210 |
| chr5  | 29016423      | 29016632  | 210 |
| chr5  | 28826542      | 28826751  | 210 |
| chr5  | 9556593       | 9556802   | 210 |
| chr4  | 118025836     | 118026045 | 210 |
| chr4  | 99427120      | 99427329  | 210 |
| chr4  | 79260395      | 79260604  | 210 |
| chr4  | 71878067      | 71878276  | 210 |
| chr4  | 13615006      | 13615215  | 210 |
| chr3  | 121787419     | 121787628 | 210 |
| chr3  | 111235224     | 111235433 | 210 |
| chr3  | 105076475     | 105076684 | 210 |
| chr3  | 104524814     | 104525023 | 210 |
| chr3  | 101745809     | 101746018 | 210 |
| chr29 | 46221615      | 46221824  | 210 |
| chr29 | 44538311      | 44538520  | 210 |
| chr29 | 39085646      | 39085855  | 210 |
| chr29 | 36520264      | 36520473  | 210 |
| chr29 | 34881267      | 34881476  | 210 |
| chr29 | 33944233      | 33944442  | 210 |
| chr29 | 33932030      | 33932239  | 210 |
| chr29 | 31792202      | 31792411  | 210 |
| chr29 | 18058295      | 18058504  | 210 |
| chr28 | 42586997      | 42587206  | 210 |
| chr28 | 41288768      | 41288977  | 210 |
| chr27 | 27850007      | 27850216  | 210 |
| chr26 | 43656030      | 43656239  | 210 |
| chr26 | 32087561      | 32087770  | 210 |
| chr26 | 22397341      | 22397550  | 210 |
| chr26 | 21973380      | 21973589  | 210 |
| chr26 | 20190118      | 20190327  | 210 |
| chr26 | 20137533      | 20137742  | 210 |
| chr26 | 18719479      | 18719688  | 210 |
| chr25 | 41645538      | 41645747  | 210 |
| chr25 | 37802000      | 37802209  | 210 |
| chr24 | 59663330      | 59663539  | 210 |
| chr24 | 1072187       | 1072396   | 210 |

|       |           |           |     |
|-------|-----------|-----------|-----|
| chr23 | 42988606  | 42988815  | 210 |
| chr23 | 23758702  | 23758911  | 210 |
| chr23 | 17511329  | 17511538  | 210 |
| chr23 | 11493183  | 11493392  | 210 |
| chr23 | 11036587  | 11036796  | 210 |
| chr22 | 49572685  | 49572894  | 210 |
| chr22 | 14939955  | 14940164  | 210 |
| chr21 | 60854987  | 60855196  | 210 |
| chr21 | 55798835  | 55799044  | 210 |
| chr21 | 20187642  | 20187851  | 210 |
| chr21 | 18506789  | 18506998  | 210 |
| chr20 | 70648571  | 70648780  | 210 |
| chr20 | 70380772  | 70380981  | 210 |
| chr20 | 70151924  | 70152133  | 210 |
| chr20 | 70135858  | 70136067  | 210 |
| chr20 | 38467441  | 38467650  | 210 |
| chr2  | 127335014 | 127335223 | 210 |
| chr2  | 111849009 | 111849218 | 210 |
| chr2  | 111370109 | 111370318 | 210 |
| chr2  | 103296966 | 103297175 | 210 |
| chr2  | 99798105  | 99798314  | 210 |
| chr19 | 60952482  | 60952691  | 210 |
| chr19 | 59521147  | 59521356  | 210 |
| chr19 | 58715267  | 58715476  | 210 |
| chr19 | 57833304  | 57833513  | 210 |
| chr19 | 56576870  | 56577079  | 210 |
| chr19 | 54156766  | 54156975  | 210 |
| chr19 | 47301266  | 47301475  | 210 |
| chr19 | 42247744  | 42247953  | 210 |
| chr19 | 35022698  | 35022907  | 210 |
| chr19 | 27274097  | 27274306  | 210 |
| chr19 | 24016909  | 24017118  | 210 |
| chr18 | 51599010  | 51599219  | 210 |
| chr18 | 43228563  | 43228772  | 210 |
| chr18 | 37985033  | 37985242  | 210 |
| chr18 | 26116702  | 26116911  | 210 |
| chr18 | 24211058  | 24211267  | 210 |
| chr18 | 23176835  | 23177044  | 210 |
| chr18 | 4380309   | 4380518   | 210 |
| chr17 | 69812270  | 69812479  | 210 |
| chr17 | 64539782  | 64539991  | 210 |
| chr17 | 64139634  | 64139843  | 210 |
| chr16 | 54620710  | 54620919  | 210 |
| chr16 | 43476688  | 43476897  | 210 |
| chr16 | 42150812  | 42151021  | 210 |
| chr16 | 24036724  | 24036933  | 210 |
| chr16 | 18428728  | 18428937  | 210 |
| chr16 | 2266750   | 2266959   | 210 |
| chr15 | 58874541  | 58874750  | 210 |
| chr15 | 28685395  | 28685604  | 210 |



|       |           |           |     |
|-------|-----------|-----------|-----|
| chr15 | 20932328  | 20932537  | 210 |
| chr14 | 40039572  | 40039781  | 210 |
| chr14 | 14118923  | 14119132  | 210 |
| chr13 | 77411641  | 77411850  | 210 |
| chr13 | 71568842  | 71569051  | 210 |
| chr13 | 59087762  | 59087971  | 210 |
| chr13 | 55544954  | 55545163  | 210 |
| chr13 | 55312168  | 55312377  | 210 |
| chr13 | 42394576  | 42394785  | 210 |
| chr13 | 41376139  | 41376348  | 210 |
| chr12 | 83782713  | 83782922  | 210 |
| chr12 | 83287914  | 83288123  | 210 |
| chr12 | 32570848  | 32571057  | 210 |
| chr12 | 10297939  | 10298148  | 210 |
| chr11 | 93252036  | 93252245  | 210 |
| chr10 | 90936906  | 90937115  | 210 |
| chr10 | 70550791  | 70551000  | 210 |
| chr10 | 68157991  | 68158200  | 210 |
| chr10 | 21431948  | 21432157  | 210 |
| chr10 | 18759429  | 18759638  | 210 |
| chr10 | 16973038  | 16973247  | 210 |
| chr1  | 154574815 | 154575024 | 210 |
| chr1  | 116045131 | 116045340 | 210 |
| chr1  | 86861248  | 86861457  | 210 |
| chrX  | 78790806  | 78791014  | 209 |
| chrX  | 77730240  | 77730448  | 209 |
| chrX  | 74717368  | 74717576  | 209 |
| chrX  | 74062133  | 74062341  | 209 |
| chrX  | 70549949  | 70550157  | 209 |
| chrX  | 70327131  | 70327339  | 209 |
| chrX  | 69161919  | 69162127  | 209 |
| chrX  | 65475043  | 65475251  | 209 |
| chrX  | 64933886  | 64934094  | 209 |
| chrX  | 60436958  | 60437166  | 209 |
| chrX  | 59750410  | 59750618  | 209 |
| chrX  | 55341692  | 55341900  | 209 |
| chrX  | 54524296  | 54524504  | 209 |
| chrX  | 53499483  | 53499691  | 209 |
| chrX  | 49182920  | 49183128  | 209 |
| chrX  | 48145591  | 48145799  | 209 |
| chrX  | 48002156  | 48002364  | 209 |
| chrX  | 43860539  | 43860747  | 209 |
| chrX  | 37595950  | 37596158  | 209 |
| chrX  | 37418456  | 37418664  | 209 |
| chrX  | 35286547  | 35286755  | 209 |
| chrX  | 30428830  | 30429038  | 209 |
| chrX  | 28480030  | 28480238  | 209 |
| chrX  | 21943926  | 21944134  | 209 |
| chrX  | 20086428  | 20086636  | 209 |
| chrX  | 14009575  | 14009783  | 209 |

|       |           |           |     |
|-------|-----------|-----------|-----|
| chrX  | 13882894  | 13883102  | 209 |
| chrX  | 13179665  | 13179873  | 209 |
| chrX  | 2467857   | 2468065   | 209 |
| chr9  | 45970292  | 45970500  | 209 |
| chr8  | 108619168 | 108619376 | 209 |
| chr8  | 77281078  | 77281286  | 209 |
| chr8  | 10173126  | 10173334  | 209 |
| chr8  | 7840596   | 7840804   | 209 |
| chr7  | 71320951  | 71321159  | 209 |
| chr7  | 60384775  | 60384983  | 209 |
| chr7  | 45754418  | 45754626  | 209 |
| chr7  | 15005592  | 15005800  | 209 |
| chr7  | 5514844   | 5515052   | 209 |
| chr6  | 113490059 | 113490267 | 209 |
| chr6  | 106803304 | 106803512 | 209 |
| chr5  | 118210964 | 118211172 | 209 |
| chr5  | 104129714 | 104129922 | 209 |
| chr5  | 33318910  | 33319118  | 209 |
| chr4  | 118283443 | 118283651 | 209 |
| chr4  | 108393206 | 108393414 | 209 |
| chr4  | 107349720 | 107349928 | 209 |
| chr4  | 78895013  | 78895221  | 209 |
| chr4  | 72042619  | 72042827  | 209 |
| chr4  | 71437907  | 71438115  | 209 |
| chr4  | 43277084  | 43277292  | 209 |
| chr3  | 122232044 | 122232252 | 209 |
| chr3  | 121905509 | 121905717 | 209 |
| chr3  | 121763952 | 121764160 | 209 |
| chr3  | 105134249 | 105134457 | 209 |
| chr3  | 44831861  | 44832069  | 209 |
| chr3  | 33961801  | 33962009  | 209 |
| chr3  | 33832656  | 33832864  | 209 |
| chr29 | 31875747  | 31875955  | 209 |
| chr29 | 26749386  | 26749594  | 209 |
| chr28 | 45467641  | 45467849  | 209 |
| chr28 | 1230317   | 1230525   | 209 |
| chr27 | 47609609  | 47609817  | 209 |
| chr27 | 40758772  | 40758980  | 209 |
| chr27 | 34996658  | 34996866  | 209 |
| chr26 | 41884079  | 41884287  | 209 |
| chr26 | 38197988  | 38198196  | 209 |
| chr26 | 37668838  | 37669046  | 209 |
| chr26 | 22010025  | 22010233  | 209 |
| chr26 | 18163386  | 18163594  | 209 |
| chr25 | 39335688  | 39335896  | 209 |
| chr25 | 33178640  | 33178848  | 209 |
| chr25 | 28655336  | 28655544  | 209 |
| chr24 | 36044243  | 36044451  | 209 |
| chr24 | 35484251  | 35484459  | 209 |
| chr23 | 19932981  | 19933189  | 209 |

|       |           |           |     |
|-------|-----------|-----------|-----|
| chr23 | 14811754  | 14811962  | 209 |
| chr23 | 7623567   | 7623775   | 209 |
| chr22 | 59794325  | 59794533  | 209 |
| chr22 | 59041506  | 59041714  | 209 |
| chr22 | 54102203  | 54102411  | 209 |
| chr22 | 48759694  | 48759902  | 209 |
| chr22 | 30381121  | 30381329  | 209 |
| chr21 | 57407059  | 57407267  | 209 |
| chr21 | 32842348  | 32842556  | 209 |
| chr21 | 25029585  | 25029793  | 209 |
| chr21 | 24799470  | 24799678  | 209 |
| chr20 | 73225721  | 73225929  | 209 |
| chr2  | 134685053 | 134685261 | 209 |
| chr2  | 132021620 | 132021828 | 209 |
| chr2  | 129263761 | 129263969 | 209 |
| chr2  | 116889817 | 116890025 | 209 |
| chr2  | 95105607  | 95105815  | 209 |
| chr2  | 89154255  | 89154463  | 209 |
| chr2  | 26479105  | 26479313  | 209 |
| chr2  | 21050548  | 21050756  | 209 |
| chr19 | 58886881  | 58887089  | 209 |
| chr19 | 56075318  | 56075526  | 209 |
| chr19 | 46735502  | 46735710  | 209 |
| chr19 | 32586495  | 32586703  | 209 |
| chr19 | 28274749  | 28274957  | 209 |
| chr19 | 19321032  | 19321240  | 209 |
| chr19 | 8090726   | 8090934   | 209 |
| chr18 | 59652004  | 59652212  | 209 |
| chr18 | 56616653  | 56616861  | 209 |
| chr18 | 56605410  | 56605618  | 209 |
| chr18 | 52362724  | 52362932  | 209 |
| chr18 | 51528223  | 51528431  | 209 |
| chr18 | 47517119  | 47517327  | 209 |
| chr18 | 33143806  | 33144014  | 209 |
| chr18 | 5539349   | 5539557   | 209 |
| chr18 | 3928200   | 3928408   | 209 |
| chr17 | 74006009  | 74006217  | 209 |
| chr17 | 70108859  | 70109067  | 209 |
| chr17 | 62258580  | 62258788  | 209 |
| chr16 | 77309714  | 77309922  | 209 |
| chr16 | 50312082  | 50312290  | 209 |
| chr16 | 46313854  | 46314062  | 209 |
| chr16 | 40823299  | 40823507  | 209 |
| chr16 | 24048263  | 24048471  | 209 |
| chr16 | 2251669   | 2251877   | 209 |
| chr15 | 81656710  | 81656918  | 209 |
| chr15 | 65668074  | 65668282  | 209 |
| chr15 | 62863809  | 62864017  | 209 |
| chr15 | 52290753  | 52290961  | 209 |
| chr15 | 39384631  | 39384839  | 209 |

|       |           |           |     |
|-------|-----------|-----------|-----|
| chr15 | 36272536  | 36272744  | 209 |
| chr15 | 29464251  | 29464459  | 209 |
| chr15 | 28879843  | 28880051  | 209 |
| chr15 | 27280975  | 27281183  | 209 |
| chr14 | 63524851  | 63525059  | 209 |
| chr14 | 61512492  | 61512700  | 209 |
| chr14 | 55774760  | 55774968  | 209 |
| chr14 | 21382301  | 21382509  | 209 |
| chr14 | 7998590   | 7998798   | 209 |
| chr13 | 82601662  | 82601870  | 209 |
| chr13 | 80084643  | 80084851  | 209 |
| chr13 | 75628964  | 75629172  | 209 |
| chr13 | 68981535  | 68981743  | 209 |
| chr13 | 56495305  | 56495513  | 209 |
| chr13 | 53939378  | 53939586  | 209 |
| chr13 | 52941872  | 52942080  | 209 |
| chr13 | 40021644  | 40021852  | 209 |
| chr12 | 77056668  | 77056876  | 209 |
| chr12 | 29720280  | 29720488  | 209 |
| chr12 | 21008392  | 21008600  | 209 |
| chr12 | 14871971  | 14872179  | 209 |
| chr12 | 9651252   | 9651460   | 209 |
| chr11 | 105993972 | 105994180 | 209 |
| chr11 | 104522330 | 104522538 | 209 |
| chr11 | 102426316 | 102426524 | 209 |
| chr11 | 91546474  | 91546682  | 209 |
| chr11 | 30901621  | 30901829  | 209 |
| chr10 | 106192681 | 106192889 | 209 |
| chr10 | 90473604  | 90473812  | 209 |
| chr10 | 85776510  | 85776718  | 209 |
| chr10 | 71020203  | 71020411  | 209 |
| chr10 | 21431269  | 21431477  | 209 |
| chr1  | 154931810 | 154932018 | 209 |
| chr1  | 136895140 | 136895348 | 209 |
| chr1  | 123084772 | 123084980 | 209 |
| chr1  | 68482929  | 68483137  | 209 |
| chr1  | 68451031  | 68451239  | 209 |
| chr1  | 51024939  | 51025147  | 209 |
| chrX  | 83438834  | 83439041  | 208 |
| chrX  | 80989398  | 80989605  | 208 |
| chrX  | 80122846  | 80123053  | 208 |
| chrX  | 75563971  | 75564178  | 208 |
| chrX  | 72849670  | 72849877  | 208 |
| chrX  | 68435279  | 68435486  | 208 |
| chrX  | 65233128  | 65233335  | 208 |
| chrX  | 65172075  | 65172282  | 208 |
| chrX  | 62806832  | 62807039  | 208 |
| chrX  | 61287798  | 61288005  | 208 |
| chrX  | 60159863  | 60160070  | 208 |
| chrX  | 58225762  | 58225969  | 208 |

|      |           |           |     |
|------|-----------|-----------|-----|
| chrX | 57742102  | 57742309  | 208 |
| chrX | 54387944  | 54388151  | 208 |
| chrX | 54191394  | 54191601  | 208 |
| chrX | 50238317  | 50238524  | 208 |
| chrX | 50207918  | 50208125  | 208 |
| chrX | 46546078  | 46546285  | 208 |
| chrX | 38879905  | 38880112  | 208 |
| chrX | 38221614  | 38221821  | 208 |
| chrX | 36237303  | 36237510  | 208 |
| chrX | 36114353  | 36114560  | 208 |
| chrX | 35538076  | 35538283  | 208 |
| chrX | 32578055  | 32578262  | 208 |
| chrX | 30624764  | 30624971  | 208 |
| chrX | 23346030  | 23346237  | 208 |
| chrX | 22108643  | 22108850  | 208 |
| chrX | 20550122  | 20550329  | 208 |
| chrX | 19007366  | 19007573  | 208 |
| chrX | 18496592  | 18496799  | 208 |
| chrX | 16003970  | 16004177  | 208 |
| chrX | 12934275  | 12934482  | 208 |
| chrX | 10713581  | 10713788  | 208 |
| chrX | 7863310   | 7863517   | 208 |
| chrX | 7405893   | 7406100   | 208 |
| chrX | 6908651   | 6908858   | 208 |
| chr9 | 90671057  | 90671264  | 208 |
| chr9 | 90422632  | 90422839  | 208 |
| chr8 | 93565320  | 93565527  | 208 |
| chr8 | 82866965  | 82867172  | 208 |
| chr8 | 80139586  | 80139793  | 208 |
| chr8 | 65322548  | 65322755  | 208 |
| chr8 | 63727415  | 63727622  | 208 |
| chr8 | 23833266  | 23833473  | 208 |
| chr8 | 7551471   | 7551678   | 208 |
| chr7 | 60979229  | 60979436  | 208 |
| chr7 | 49836014  | 49836221  | 208 |
| chr7 | 48179251  | 48179458  | 208 |
| chr7 | 45750413  | 45750620  | 208 |
| chr7 | 5246953   | 5247160   | 208 |
| chr7 | 2575468   | 2575675   | 208 |
| chr5 | 118531421 | 118531628 | 208 |
| chr5 | 117517218 | 117517425 | 208 |
| chr5 | 111125314 | 111125521 | 208 |
| chr5 | 81295768  | 81295975  | 208 |
| chr5 | 76960500  | 76960707  | 208 |
| chr5 | 28840171  | 28840378  | 208 |
| chr4 | 94750143  | 94750350  | 208 |
| chr4 | 80432730  | 80432937  | 208 |
| chr4 | 79109132  | 79109339  | 208 |
| chr4 | 53875989  | 53876196  | 208 |
| chr4 | 32546518  | 32546725  | 208 |

|       |               |           |     |
|-------|---------------|-----------|-----|
| chr4  | 28541971      | 28542178  | 208 |
| chr3  | 123291458     | 123291665 | 208 |
| chr3  | 117339457     | 117339664 | 208 |
| chr3  | 114467273     | 114467480 | 208 |
| chr3  | 100031167     | 100031374 | 208 |
| chr3  | 25751755      | 25751962  | 208 |
| chr3  | 21922388      | 21922595  | 208 |
| chr3  | 8802040       | 8802247   | 208 |
| chr3  | 2494496       | 2494703   | 208 |
| chr29 | 48952263      | 48952470  | 208 |
| chr29 | 48679527      | 48679734  | 208 |
| chr29 | 29937156      | 29937363  | 208 |
| chr29 | 29932865      | 29933072  | 208 |
| chr28 | 42356597      | 42356804  | 208 |
| chr28 | 34184240      | 34184447  | 208 |
| chr27 | 718463 718670 |           | 208 |
| chr26 | 49196170      | 49196377  | 208 |
| chr26 | 45987385      | 45987592  | 208 |
| chr26 | 43846062      | 43846269  | 208 |
| chr26 | 42180209      | 42180416  | 208 |
| chr26 | 42131893      | 42132100  | 208 |
| chr26 | 39936729      | 39936936  | 208 |
| chr26 | 35850885      | 35851092  | 208 |
| chr26 | 22250587      | 22250794  | 208 |
| chr26 | 20101519      | 20101726  | 208 |
| chr25 | 39385141      | 39385348  | 208 |
| chr24 | 59051677      | 59051884  | 208 |
| chr24 | 38322428      | 38322635  | 208 |
| chr24 | 36749261      | 36749468  | 208 |
| chr24 | 1887589       | 1887796   | 208 |
| chr24 | 969670 969877 |           | 208 |
| chr24 | 933425 933632 |           | 208 |
| chr23 | 49794769      | 49794976  | 208 |
| chr23 | 38071559      | 38071766  | 208 |
| chr23 | 33369417      | 33369624  | 208 |
| chr23 | 20638546      | 20638753  | 208 |
| chr23 | 8400095       | 8400302   | 208 |
| chr22 | 59113427      | 59113634  | 208 |
| chr22 | 48308134      | 48308341  | 208 |
| chr22 | 48060820      | 48061027  | 208 |
| chr22 | 38155408      | 38155615  | 208 |
| chr21 | 61645645      | 61645852  | 208 |
| chr21 | 26440676      | 26440883  | 208 |
| chr20 | 5096920       | 5097127   | 208 |
| chr20 | 622403 622610 |           | 208 |
| chr2  | 138669139     | 138669346 | 208 |
| chr2  | 136720925     | 136721132 | 208 |
| chr2  | 133074473     | 133074680 | 208 |
| chr2  | 65360115      | 65360322  | 208 |
| chr19 | 58992683      | 58992890  | 208 |

|       |           |           |     |
|-------|-----------|-----------|-----|
| chr19 | 47472624  | 47472831  | 208 |
| chr19 | 44369508  | 44369715  | 208 |
| chr19 | 37895557  | 37895764  | 208 |
| chr19 | 28469120  | 28469327  | 208 |
| chr19 | 11055458  | 11055665  | 208 |
| chr18 | 62039839  | 62040046  | 208 |
| chr18 | 55725753  | 55725960  | 208 |
| chr18 | 55204247  | 55204454  | 208 |
| chr18 | 45842434  | 45842641  | 208 |
| chr18 | 32820663  | 32820870  | 208 |
| chr18 | 24313739  | 24313946  | 208 |
| chr18 | 9802198   | 9802405   | 208 |
| chr17 | 63562168  | 63562375  | 208 |
| chr17 | 60933913  | 60934120  | 208 |
| chr17 | 59436017  | 59436224  | 208 |
| chr17 | 53988054  | 53988261  | 208 |
| chr17 | 49424793  | 49425000  | 208 |
| chr17 | 37622516  | 37622723  | 208 |
| chr17 | 11316154  | 11316361  | 208 |
| chr16 | 77705536  | 77705743  | 208 |
| chr16 | 67159960  | 67160167  | 208 |
| chr16 | 47260192  | 47260399  | 208 |
| chr16 | 47107570  | 47107777  | 208 |
| chr16 | 46001942  | 46002149  | 208 |
| chr16 | 45889782  | 45889989  | 208 |
| chr16 | 42985813  | 42986020  | 208 |
| chr16 | 42897551  | 42897758  | 208 |
| chr16 | 42448340  | 42448547  | 208 |
| chr16 | 2243349   | 2243556   | 208 |
| chr15 | 74659688  | 74659895  | 208 |
| chr15 | 39495454  | 39495661  | 208 |
| chr15 | 36413184  | 36413391  | 208 |
| chr15 | 30142434  | 30142641  | 208 |
| chr15 | 25499711  | 25499918  | 208 |
| chr14 | 1863656   | 1863863   | 208 |
| chr13 | 74766581  | 74766788  | 208 |
| chr13 | 72475454  | 72475661  | 208 |
| chr13 | 68287487  | 68287694  | 208 |
| chr13 | 41240639  | 41240846  | 208 |
| chr13 | 38757450  | 38757657  | 208 |
| chr13 | 38278501  | 38278708  | 208 |
| chr13 | 29062537  | 29062744  | 208 |
| chr13 | 23953685  | 23953892  | 208 |
| chr13 | 10596358  | 10596565  | 208 |
| chr12 | 35786422  | 35786629  | 208 |
| chr12 | 30820968  | 30821175  | 208 |
| chr11 | 106373656 | 106373863 | 208 |
| chr11 | 104582643 | 104582850 | 208 |
| chr11 | 104487258 | 104487465 | 208 |
| chr11 | 83186756  | 83186963  | 208 |

|       |           |           |     |
|-------|-----------|-----------|-----|
| chr11 | 81278746  | 81278953  | 208 |
| chr11 | 80344616  | 80344823  | 208 |
| chr11 | 79550541  | 79550748  | 208 |
| chr11 | 77713253  | 77713460  | 208 |
| chr11 | 56765906  | 56766113  | 208 |
| chr10 | 90537585  | 90537792  | 208 |
| chr10 | 69086478  | 69086685  | 208 |
| chr10 | 20450861  | 20451068  | 208 |
| chr10 | 17727976  | 17728183  | 208 |
| chr1  | 144420438 | 144420645 | 208 |
| chr1  | 141813218 | 141813425 | 208 |
| chr1  | 74929888  | 74930095  | 208 |
| chr1  | 68419883  | 68420090  | 208 |
| chrX  | 80859225  | 80859431  | 207 |
| chrX  | 79174273  | 79174479  | 207 |
| chrX  | 77141795  | 77142001  | 207 |
| chrX  | 77122559  | 77122765  | 207 |
| chrX  | 74721653  | 74721859  | 207 |
| chrX  | 74551634  | 74551840  | 207 |
| chrX  | 74427554  | 74427760  | 207 |
| chrX  | 72716032  | 72716238  | 207 |
| chrX  | 64992023  | 64992229  | 207 |
| chrX  | 64570392  | 64570598  | 207 |
| chrX  | 64294377  | 64294583  | 207 |
| chrX  | 61757625  | 61757831  | 207 |
| chrX  | 59471775  | 59471981  | 207 |
| chrX  | 59440191  | 59440397  | 207 |
| chrX  | 55346571  | 55346777  | 207 |
| chrX  | 53278679  | 53278885  | 207 |
| chrX  | 50762831  | 50763037  | 207 |
| chrX  | 50201782  | 50201988  | 207 |
| chrX  | 48251213  | 48251419  | 207 |
| chrX  | 37384268  | 37384474  | 207 |
| chrX  | 36295994  | 36296200  | 207 |
| chrX  | 34805690  | 34805896  | 207 |
| chrX  | 31714153  | 31714359  | 207 |
| chrX  | 30613233  | 30613439  | 207 |
| chrX  | 24115705  | 24115911  | 207 |
| chrX  | 22572194  | 22572400  | 207 |
| chrX  | 22546659  | 22546865  | 207 |
| chrX  | 19357583  | 19357789  | 207 |
| chrX  | 13087413  | 13087619  | 207 |
| chrX  | 10889967  | 10890173  | 207 |
| chrX  | 9990781   | 9990987   | 207 |
| chrX  | 6643043   | 6643249   | 207 |
| chrX  | 5461036   | 5461242   | 207 |
| chrX  | 2634394   | 2634600   | 207 |
| chrX  | 825377    | 825583    | 207 |
| chr9  | 77790594  | 77790800  | 207 |
| chr9  | 77648205  | 77648411  | 207 |



|       |               |           |     |
|-------|---------------|-----------|-----|
| chr9  | 45944406      | 45944612  | 207 |
| chr8  | 104465259     | 104465465 | 207 |
| chr8  | 87505409      | 87505615  | 207 |
| chr8  | 73808439      | 73808645  | 207 |
| chr8  | 58333977      | 58334183  | 207 |
| chr7  | 62244977      | 62245183  | 207 |
| chr7  | 52397405      | 52397611  | 207 |
| chr7  | 46199717      | 46199923  | 207 |
| chr7  | 37412188      | 37412394  | 207 |
| chr7  | 13047900      | 13048106  | 207 |
| chr7  | 5058624       | 5058830   | 207 |
| chr5  | 125763893     | 125764099 | 207 |
| chr5  | 115150514     | 115150720 | 207 |
| chr5  | 111694563     | 111694769 | 207 |
| chr5  | 79800835      | 79801041  | 207 |
| chr5  | 67789064      | 67789270  | 207 |
| chr5  | 32516367      | 32516573  | 207 |
| chr5  | 28370960      | 28371166  | 207 |
| chr5  | 10195023      | 10195229  | 207 |
| chr4  | 122984703     | 122984909 | 207 |
| chr4  | 121408497     | 121408703 | 207 |
| chr4  | 69931395      | 69931601  | 207 |
| chr4  | 68039729      | 68039935  | 207 |
| chr4  | 57719339      | 57719545  | 207 |
| chr4  | 53161140      | 53161346  | 207 |
| chr4  | 32402339      | 32402545  | 207 |
| chr4  | 13974531      | 13974737  | 207 |
| chr4  | 8720797       | 8721003   | 207 |
| chr3  | 125588404     | 125588610 | 207 |
| chr3  | 120978358     | 120978564 | 207 |
| chr3  | 116431325     | 116431531 | 207 |
| chr3  | 114931018     | 114931224 | 207 |
| chr3  | 111808389     | 111808595 | 207 |
| chr3  | 109689824     | 109690030 | 207 |
| chr3  | 108922573     | 108922779 | 207 |
| chr3  | 22214341      | 22214547  | 207 |
| chr3  | 375235 375441 |           | 207 |
| chr29 | 48856375      | 48856581  | 207 |
| chr29 | 44643665      | 44643871  | 207 |
| chr29 | 38760099      | 38760305  | 207 |
| chr29 | 37075773      | 37075979  | 207 |
| chr29 | 33791703      | 33791909  | 207 |
| chr29 | 31407207      | 31407413  | 207 |
| chr29 | 18226805      | 18227011  | 207 |
| chr29 | 2431626       | 2431832   | 207 |
| chr28 | 40388471      | 40388677  | 207 |
| chr28 | 38916321      | 38916527  | 207 |
| chr28 | 30798205      | 30798411  | 207 |
| chr28 | 26604171      | 26604377  | 207 |
| chr26 | 50495844      | 50496050  | 207 |

|       |           |           |     |
|-------|-----------|-----------|-----|
| chr26 | 22764857  | 22765063  | 207 |
| chr25 | 38032724  | 38032930  | 207 |
| chr25 | 30899384  | 30899590  | 207 |
| chr25 | 22543906  | 22544112  | 207 |
| chr25 | 2975864   | 2976070   | 207 |
| chr24 | 41552069  | 41552275  | 207 |
| chr23 | 52586332  | 52586538  | 207 |
| chr23 | 43154067  | 43154273  | 207 |
| chr23 | 41423079  | 41423285  | 207 |
| chr23 | 15844895  | 15845101  | 207 |
| chr23 | 11029948  | 11030154  | 207 |
| chr23 | 9451200   | 9451406   | 207 |
| chr23 | 8424554   | 8424760   | 207 |
| chr22 | 59515080  | 59515286  | 207 |
| chr22 | 45758491  | 45758697  | 207 |
| chr22 | 30595021  | 30595227  | 207 |
| chr22 | 17726111  | 17726317  | 207 |
| chr22 | 17496685  | 17496891  | 207 |
| chr21 | 67401525  | 67401731  | 207 |
| chr21 | 66454912  | 66455118  | 207 |
| chr21 | 64398706  | 64398912  | 207 |
| chr21 | 55886446  | 55886652  | 207 |
| chr21 | 47630273  | 47630479  | 207 |
| chr21 | 32957121  | 32957327  | 207 |
| chr21 | 32902545  | 32902751  | 207 |
| chr21 | 26621066  | 26621272  | 207 |
| chr21 | 15189666  | 15189872  | 207 |
| chr20 | 9167371   | 9167577   | 207 |
| chr20 | 6122986   | 6123192   | 207 |
| chr20 | 2523753   | 2523959   | 207 |
| chr2  | 139276963 | 139277169 | 207 |
| chr2  | 131029041 | 131029247 | 207 |
| chr2  | 92125861  | 92126067  | 207 |
| chr2  | 74339851  | 74340057  | 207 |
| chr2  | 32728718  | 32728924  | 207 |
| chr19 | 59229531  | 59229737  | 207 |
| chr19 | 59206364  | 59206570  | 207 |
| chr19 | 46834813  | 46835019  | 207 |
| chr19 | 45144992  | 45145198  | 207 |
| chr19 | 43008419  | 43008625  | 207 |
| chr19 | 42476594  | 42476800  | 207 |
| chr19 | 35294742  | 35294948  | 207 |
| chr19 | 33544301  | 33544507  | 207 |
| chr19 | 14927374  | 14927580  | 207 |
| chr19 | 14740889  | 14741095  | 207 |
| chr18 | 62035299  | 62035505  | 207 |
| chr18 | 40791118  | 40791324  | 207 |
| chr18 | 39804151  | 39804357  | 207 |
| chr18 | 33827781  | 33827987  | 207 |
| chr18 | 11285295  | 11285501  | 207 |

|       |           |           |     |
|-------|-----------|-----------|-----|
| chr18 | 2994508   | 2994714   | 207 |
| chr17 | 72711573  | 72711779  | 207 |
| chr17 | 69708954  | 69709160  | 207 |
| chr17 | 69388634  | 69388840  | 207 |
| chr17 | 69366493  | 69366699  | 207 |
| chr17 | 67960872  | 67961078  | 207 |
| chr17 | 64556021  | 64556227  | 207 |
| chr17 | 62491164  | 62491370  | 207 |
| chr17 | 48310948  | 48311154  | 207 |
| chr17 | 31527927  | 31528133  | 207 |
| chr16 | 74658203  | 74658409  | 207 |
| chr16 | 47119838  | 47120044  | 207 |
| chr16 | 45205196  | 45205402  | 207 |
| chr16 | 42994635  | 42994841  | 207 |
| chr16 | 2573100   | 2573306   | 207 |
| chr15 | 76583359  | 76583565  | 207 |
| chr15 | 75249742  | 75249948  | 207 |
| chr15 | 74619139  | 74619345  | 207 |
| chr15 | 67143306  | 67143512  | 207 |
| chr15 | 39562029  | 39562235  | 207 |
| chr15 | 33091263  | 33091469  | 207 |
| chr15 | 26903449  | 26903655  | 207 |
| chr15 | 26792128  | 26792334  | 207 |
| chr14 | 72405673  | 72405879  | 207 |
| chr14 | 42162113  | 42162319  | 207 |
| chr14 | 21031934  | 21032140  | 207 |
| chr14 | 9525150   | 9525356   | 207 |
| chr13 | 77834478  | 77834684  | 207 |
| chr13 | 75696705  | 75696911  | 207 |
| chr13 | 75687097  | 75687303  | 207 |
| chr13 | 73411650  | 73411856  | 207 |
| chr13 | 55384787  | 55384993  | 207 |
| chr13 | 37486204  | 37486410  | 207 |
| chr13 | 35661283  | 35661489  | 207 |
| chr13 | 29050033  | 29050239  | 207 |
| chr13 | 28560647  | 28560853  | 207 |
| chr13 | 28460226  | 28460432  | 207 |
| chr13 | 14643281  | 14643487  | 207 |
| chr13 | 14344260  | 14344466  | 207 |
| chr12 | 82534168  | 82534374  | 207 |
| chr12 | 50120935  | 50121141  | 207 |
| chr12 | 35234786  | 35234992  | 207 |
| chr12 | 34294960  | 34295166  | 207 |
| chr12 | 33245997  | 33246203  | 207 |
| chr12 | 33244079  | 33244285  | 207 |
| chr12 | 32849264  | 32849470  | 207 |
| chr11 | 107536056 | 107536262 | 207 |
| chr11 | 104899086 | 104899292 | 207 |
| chr11 | 89461473  | 89461679  | 207 |
| chr11 | 85008763  | 85008969  | 207 |

|       |           |           |     |
|-------|-----------|-----------|-----|
| chr11 | 82679035  | 82679241  | 207 |
| chr11 | 77938495  | 77938701  | 207 |
| chr11 | 72736449  | 72736655  | 207 |
| chr11 | 71612215  | 71612421  | 207 |
| chr11 | 30932893  | 30933099  | 207 |
| chr11 | 23579798  | 23580004  | 207 |
| chr10 | 90309738  | 90309944  | 207 |
| chr10 | 73974715  | 73974921  | 207 |
| chr10 | 70694589  | 70694795  | 207 |
| chr10 | 25988171  | 25988377  | 207 |
| chr10 | 25690856  | 25691062  | 207 |
| chr10 | 22444915  | 22445121  | 207 |
| chr10 | 21948602  | 21948808  | 207 |
| chr10 | 16851426  | 16851632  | 207 |
| chr10 | 9164636   | 9164842   | 207 |
| chr1  | 147992266 | 147992472 | 207 |
| chr1  | 132064523 | 132064729 | 207 |
| chr1  | 129920998 | 129921204 | 207 |
| chr1  | 123079515 | 123079721 | 207 |
| chr1  | 76358612  | 76358818  | 207 |
| chr1  | 54291803  | 54292009  | 207 |
| chrX  | 78764443  | 78764648  | 206 |
| chrX  | 78760850  | 78761055  | 206 |
| chrX  | 78744282  | 78744487  | 206 |
| chrX  | 75678409  | 75678614  | 206 |
| chrX  | 74902224  | 74902429  | 206 |
| chrX  | 72770645  | 72770850  | 206 |
| chrX  | 65482290  | 65482495  | 206 |
| chrX  | 64725648  | 64725853  | 206 |
| chrX  | 62978668  | 62978873  | 206 |
| chrX  | 61265399  | 61265604  | 206 |
| chrX  | 59257971  | 59258176  | 206 |
| chrX  | 55508047  | 55508252  | 206 |
| chrX  | 54804051  | 54804256  | 206 |
| chrX  | 53374177  | 53374382  | 206 |
| chrX  | 49307818  | 49308023  | 206 |
| chrX  | 49218912  | 49219117  | 206 |
| chrX  | 48795253  | 48795458  | 206 |
| chrX  | 48176483  | 48176688  | 206 |
| chrX  | 48117587  | 48117792  | 206 |
| chrX  | 38106806  | 38107011  | 206 |
| chrX  | 28197787  | 28197992  | 206 |
| chrX  | 22010803  | 22011008  | 206 |
| chrX  | 17250989  | 17251194  | 206 |
| chrX  | 16031529  | 16031734  | 206 |
| chrX  | 12497964  | 12498169  | 206 |
| chrX  | 12257067  | 12257272  | 206 |
| chrX  | 8352272   | 8352477   | 206 |
| chrX  | 8217867   | 8218072   | 206 |
| chrX  | 6264459   | 6264664   | 206 |

|       |           |           |     |
|-------|-----------|-----------|-----|
| chrX  | 5708620   | 5708825   | 206 |
| chr9  | 106665462 | 106665667 | 206 |
| chr9  | 104994495 | 104994700 | 206 |
| chr9  | 101523019 | 101523224 | 206 |
| chr9  | 90367112  | 90367317  | 206 |
| chr9  | 89023641  | 89023846  | 206 |
| chr8  | 108668881 | 108669086 | 206 |
| chr8  | 85414391  | 85414596  | 206 |
| chr8  | 24410413  | 24410618  | 206 |
| chr7  | 90975171  | 90975376  | 206 |
| chr7  | 44016732  | 44016937  | 206 |
| chr7  | 42342307  | 42342512  | 206 |
| chr7  | 28455591  | 28455796  | 206 |
| chr7  | 19888542  | 19888747  | 206 |
| chr7  | 11372694  | 11372899  | 206 |
| chr6  | 121812646 | 121812851 | 206 |
| chr6  | 88273042  | 88273247  | 206 |
| chr6  | 46337709  | 46337914  | 206 |
| chr5  | 113925091 | 113925296 | 206 |
| chr5  | 113061678 | 113061883 | 206 |
| chr5  | 111293603 | 111293808 | 206 |
| chr5  | 74684659  | 74684864  | 206 |
| chr5  | 70011193  | 70011398  | 206 |
| chr5  | 29102695  | 29102900  | 206 |
| chr5  | 28983259  | 28983464  | 206 |
| chr4  | 121741011 | 121741216 | 206 |
| chr4  | 106932928 | 106933133 | 206 |
| chr3  | 123369873 | 123370078 | 206 |
| chr3  | 123170254 | 123170459 | 206 |
| chr3  | 115800082 | 115800287 | 206 |
| chr3  | 114268198 | 114268403 | 206 |
| chr3  | 111680305 | 111680510 | 206 |
| chr3  | 108851203 | 108851408 | 206 |
| chr3  | 99463872  | 99464077  | 206 |
| chr3  | 63221230  | 63221435  | 206 |
| chr3  | 30659060  | 30659265  | 206 |
| chr29 | 50227985  | 50228190  | 206 |
| chr29 | 44923302  | 44923507  | 206 |
| chr29 | 41645062  | 41645267  | 206 |
| chr29 | 38309845  | 38310050  | 206 |
| chr29 | 18229553  | 18229758  | 206 |
| chr29 | 17814109  | 17814314  | 206 |
| chr28 | 34030154  | 34030359  | 206 |
| chr28 | 33782365  | 33782570  | 206 |
| chr28 | 26058625  | 26058830  | 206 |
| chr28 | 5332561   | 5332766   | 206 |
| chr28 | 3657405   | 3657610   | 206 |
| chr27 | 35354451  | 35354656  | 206 |
| chr26 | 43567777  | 43567982  | 206 |
| chr26 | 42036472  | 42036677  | 206 |

|       |               |           |     |
|-------|---------------|-----------|-----|
| chr26 | 18998871      | 18999076  | 206 |
| chr25 | 34411108      | 34411313  | 206 |
| chr25 | 3044545       | 3044750   | 206 |
| chr25 | 2931945       | 2932150   | 206 |
| chr24 | 51346118      | 51346323  | 206 |
| chr24 | 47125057      | 47125262  | 206 |
| chr24 | 43932410      | 43932615  | 206 |
| chr24 | 41147325      | 41147530  | 206 |
| chr23 | 48806104      | 48806309  | 206 |
| chr23 | 33513420      | 33513625  | 206 |
| chr23 | 31087322      | 31087527  | 206 |
| chr23 | 30397540      | 30397745  | 206 |
| chr23 | 18754056      | 18754261  | 206 |
| chr23 | 15276033      | 15276238  | 206 |
| chr23 | 13634493      | 13634698  | 206 |
| chr22 | 54034077      | 54034282  | 206 |
| chr22 | 50853906      | 50854111  | 206 |
| chr22 | 47843196      | 47843401  | 206 |
| chr22 | 45226000      | 45226205  | 206 |
| chr22 | 30018052      | 30018257  | 206 |
| chr22 | 13865723      | 13865928  | 206 |
| chr22 | 12126381      | 12126586  | 206 |
| chr21 | 26634676      | 26634881  | 206 |
| chr21 | 25058693      | 25058898  | 206 |
| chr21 | 18149596      | 18149801  | 206 |
| chr20 | 73438486      | 73438691  | 206 |
| chr20 | 37249627      | 37249832  | 206 |
| chr20 | 14042360      | 14042565  | 206 |
| chr20 | 10155134      | 10155339  | 206 |
| chr20 | 524362 524567 | 206       | 206 |
| chr2  | 139850012     | 139850217 | 206 |
| chr2  | 139151568     | 139151773 | 206 |
| chr2  | 136771644     | 136771849 | 206 |
| chr2  | 130973460     | 130973665 | 206 |
| chr2  | 123007458     | 123007663 | 206 |
| chr2  | 115012980     | 115013185 | 206 |
| chr2  | 49414675      | 49414880  | 206 |
| chr2  | 27905347      | 27905552  | 206 |
| chr2  | 26467362      | 26467567  | 206 |
| chr19 | 65232002      | 65232207  | 206 |
| chr19 | 60971219      | 60971424  | 206 |
| chr19 | 56457524      | 56457729  | 206 |
| chr19 | 40892744      | 40892949  | 206 |
| chr19 | 40768091      | 40768296  | 206 |
| chr19 | 38912372      | 38912577  | 206 |
| chr19 | 37954546      | 37954751  | 206 |
| chr19 | 36322426      | 36322631  | 206 |
| chr19 | 29908331      | 29908536  | 206 |
| chr19 | 27346711      | 27346916  | 206 |
| chr19 | 24062218      | 24062423  | 206 |

|       |           |           |     |
|-------|-----------|-----------|-----|
| chr19 | 17780344  | 17780549  | 206 |
| chr19 | 11578229  | 11578434  | 206 |
| chr18 | 66017379  | 66017584  | 206 |
| chr18 | 25037285  | 25037490  | 206 |
| chr18 | 24356612  | 24356817  | 206 |
| chr18 | 19012730  | 19012935  | 206 |
| chr18 | 4082809   | 4083014   | 206 |
| chr17 | 72994702  | 72994907  | 206 |
| chr17 | 66007897  | 66008102  | 206 |
| chr17 | 63457219  | 63457424  | 206 |
| chr17 | 63054738  | 63054943  | 206 |
| chr17 | 58765943  | 58766148  | 206 |
| chr16 | 73038631  | 73038836  | 206 |
| chr16 | 44419157  | 44419362  | 206 |
| chr16 | 44084428  | 44084633  | 206 |
| chr16 | 41071955  | 41072160  | 206 |
| chr16 | 39090225  | 39090430  | 206 |
| chr16 | 2118742   | 2118947   | 206 |
| chr15 | 63686284  | 63686489  | 206 |
| chr15 | 52825389  | 52825594  | 206 |
| chr15 | 29448933  | 29449138  | 206 |
| chr15 | 24863909  | 24864114  | 206 |
| chr15 | 22938176  | 22938381  | 206 |
| chr15 | 22178950  | 22179155  | 206 |
| chr14 | 66336754  | 66336959  | 206 |
| chr14 | 32173108  | 32173313  | 206 |
| chr14 | 31071310  | 31071515  | 206 |
| chr14 | 9666543   | 9666748   | 206 |
| chr14 | 3031754   | 3031959   | 206 |
| chr13 | 76184028  | 76184233  | 206 |
| chr13 | 75664490  | 75664695  | 206 |
| chr13 | 68055532  | 68055737  | 206 |
| chr13 | 59838717  | 59838922  | 206 |
| chr13 | 59507975  | 59508180  | 206 |
| chr13 | 57208907  | 57209112  | 206 |
| chr13 | 43329319  | 43329524  | 206 |
| chr13 | 40272283  | 40272488  | 206 |
| chr13 | 17758421  | 17758626  | 206 |
| chr12 | 84611954  | 84612159  | 206 |
| chr12 | 84335748  | 84335953  | 206 |
| chr12 | 34304400  | 34304605  | 206 |
| chr12 | 30767306  | 30767511  | 206 |
| chr12 | 19104009  | 19104214  | 206 |
| chr11 | 103621377 | 103621582 | 206 |
| chr11 | 96403771  | 96403976  | 206 |
| chr11 | 89045595  | 89045800  | 206 |
| chr11 | 84853344  | 84853549  | 206 |
| chr11 | 81451994  | 81452199  | 206 |
| chr11 | 81342698  | 81342903  | 206 |
| chr11 | 75072948  | 75073153  | 206 |

|       |           |           |     |
|-------|-----------|-----------|-----|
| chr11 | 52794720  | 52794925  | 206 |
| chr10 | 91070386  | 91070591  | 206 |
| chr10 | 90428916  | 90429121  | 206 |
| chr10 | 89199597  | 89199802  | 206 |
| chr10 | 67055844  | 67056049  | 206 |
| chr10 | 25603188  | 25603393  | 206 |
| chr1  | 132685252 | 132685457 | 206 |
| chr1  | 8499368   | 8499573   | 206 |
| chrX  | 79829915  | 79830119  | 205 |
| chrX  | 79486425  | 79486629  | 205 |
| chrX  | 78381804  | 78382008  | 205 |
| chrX  | 77467073  | 77467277  | 205 |
| chrX  | 75822686  | 75822890  | 205 |
| chrX  | 75584602  | 75584806  | 205 |
| chrX  | 75505459  | 75505663  | 205 |
| chrX  | 72582742  | 72582946  | 205 |
| chrX  | 72317380  | 72317584  | 205 |
| chrX  | 71670714  | 71670918  | 205 |
| chrX  | 71120045  | 71120249  | 205 |
| chrX  | 65937777  | 65937981  | 205 |
| chrX  | 65335821  | 65336025  | 205 |
| chrX  | 61330291  | 61330495  | 205 |
| chrX  | 59351055  | 59351259  | 205 |
| chrX  | 59216902  | 59217106  | 205 |
| chrX  | 32451309  | 32451513  | 205 |
| chrX  | 20691491  | 20691695  | 205 |
| chrX  | 19869427  | 19869631  | 205 |
| chrX  | 17321323  | 17321527  | 205 |
| chrX  | 13957556  | 13957760  | 205 |
| chrX  | 12504040  | 12504244  | 205 |
| chrX  | 12052097  | 12052301  | 205 |
| chrX  | 11188295  | 11188499  | 205 |
| chrX  | 9603531   | 9603735   | 205 |
| chrX  | 8210085   | 8210289   | 205 |
| chr9  | 105438065 | 105438269 | 205 |
| chr9  | 105433406 | 105433610 | 205 |
| chr9  | 90294587  | 90294791  | 205 |
| chr9  | 65800369  | 65800573  | 205 |
| chr9  | 62616525  | 62616729  | 205 |
| chr9  | 30543584  | 30543788  | 205 |
| chr9  | 29902350  | 29902554  | 205 |
| chr8  | 87040969  | 87041173  | 205 |
| chr8  | 73279598  | 73279802  | 205 |
| chr8  | 66115694  | 66115898  | 205 |
| chr8  | 63833922  | 63834126  | 205 |
| chr8  | 44544584  | 44544788  | 205 |
| chr8  | 11480018  | 11480222  | 205 |
| chr7  | 94379156  | 94379360  | 205 |
| chr7  | 50662228  | 50662432  | 205 |
| chr6  | 109578939 | 109579143 | 205 |



|       |           |           |     |
|-------|-----------|-----------|-----|
| chr6  | 75198708  | 75198912  | 205 |
| chr6  | 70543944  | 70544148  | 205 |
| chr5  | 122337727 | 122337931 | 205 |
| chr5  | 122061836 | 122062040 | 205 |
| chr5  | 121326669 | 121326873 | 205 |
| chr5  | 118500467 | 118500671 | 205 |
| chr5  | 112398490 | 112398694 | 205 |
| chr5  | 110965579 | 110965783 | 205 |
| chr5  | 79205223  | 79205427  | 205 |
| chr5  | 76205113  | 76205317  | 205 |
| chr5  | 60975616  | 60975820  | 205 |
| chr5  | 60898917  | 60899121  | 205 |
| chr5  | 30541040  | 30541244  | 205 |
| chr5  | 17764632  | 17764836  | 205 |
| chr4  | 120836485 | 120836689 | 205 |
| chr4  | 117745409 | 117745613 | 205 |
| chr4  | 108418409 | 108418613 | 205 |
| chr4  | 105184539 | 105184743 | 205 |
| chr4  | 98629886  | 98630090  | 205 |
| chr4  | 74510758  | 74510962  | 205 |
| chr4  | 73642924  | 73643128  | 205 |
| chr4  | 73434187  | 73434391  | 205 |
| chr4  | 66171844  | 66172048  | 205 |
| chr3  | 120655573 | 120655777 | 205 |
| chr3  | 115360989 | 115361193 | 205 |
| chr3  | 106551849 | 106552053 | 205 |
| chr3  | 35639325  | 35639529  | 205 |
| chr3  | 25798911  | 25799115  | 205 |
| chr3  | 4343703   | 4343907   | 205 |
| chr3  | 4314148   | 4314352   | 205 |
| chr29 | 41707295  | 41707499  | 205 |
| chr29 | 37416695  | 37416899  | 205 |
| chr29 | 36984102  | 36984306  | 205 |
| chr29 | 34741582  | 34741786  | 205 |
| chr29 | 33622844  | 33623048  | 205 |
| chr29 | 29943569  | 29943773  | 205 |
| chr28 | 35268996  | 35269200  | 205 |
| chr28 | 33925966  | 33926170  | 205 |
| chr28 | 26334142  | 26334346  | 205 |
| chr27 | 44655502  | 44655706  | 205 |
| chr27 | 41945385  | 41945589  | 205 |
| chr27 | 38704650  | 38704854  | 205 |
| chr27 | 38662564  | 38662768  | 205 |
| chr27 | 30619458  | 30619662  | 205 |
| chr26 | 45846363  | 45846567  | 205 |
| chr26 | 44422103  | 44422307  | 205 |
| chr26 | 41725410  | 41725614  | 205 |
| chr26 | 16446499  | 16446703  | 205 |
| chr24 | 59346161  | 59346365  | 205 |
| chr24 | 49097338  | 49097542  | 205 |

|       |           |           |     |
|-------|-----------|-----------|-----|
| chr23 | 49717553  | 49717757  | 205 |
| chr23 | 30250189  | 30250393  | 205 |
| chr23 | 28780968  | 28781172  | 205 |
| chr23 | 15138916  | 15139120  | 205 |
| chr23 | 9567631   | 9567835   | 205 |
| chr22 | 59965385  | 59965589  | 205 |
| chr22 | 56188911  | 56189115  | 205 |
| chr22 | 52758461  | 52758665  | 205 |
| chr22 | 50759394  | 50759598  | 205 |
| chr22 | 48303946  | 48304150  | 205 |
| chr22 | 21369486  | 21369690  | 205 |
| chr22 | 12309405  | 12309609  | 205 |
| chr21 | 67979584  | 67979788  | 205 |
| chr21 | 66054562  | 66054766  | 205 |
| chr21 | 57731546  | 57731750  | 205 |
| chr21 | 50188852  | 50189056  | 205 |
| chr21 | 34408430  | 34408634  | 205 |
| chr21 | 33049517  | 33049721  | 205 |
| chr21 | 27034447  | 27034651  | 205 |
| chr21 | 26712001  | 26712205  | 205 |
| chr21 | 18471126  | 18471330  | 205 |
| chr21 | 18274996  | 18275200  | 205 |
| chr21 | 15396655  | 15396859  | 205 |
| chr21 | 2913093   | 2913297   | 205 |
| chr20 | 73429688  | 73429892  | 205 |
| chr20 | 73304471  | 73304675  | 205 |
| chr20 | 60340882  | 60341086  | 205 |
| chr20 | 5152443   | 5152647   | 205 |
| chr2  | 134003442 | 134003646 | 205 |
| chr2  | 111317000 | 111317204 | 205 |
| chr2  | 83712541  | 83712745  | 205 |
| chr2  | 29747716  | 29747920  | 205 |
| chr2  | 21886577  | 21886781  | 205 |
| chr2  | 21454151  | 21454355  | 205 |
| chr19 | 60283721  | 60283925  | 205 |
| chr19 | 41228557  | 41228761  | 205 |
| chr19 | 38934033  | 38934237  | 205 |
| chr19 | 34160396  | 34160600  | 205 |
| chr19 | 26271538  | 26271742  | 205 |
| chr19 | 23704597  | 23704801  | 205 |
| chr19 | 21701048  | 21701252  | 205 |
| chr19 | 16704449  | 16704653  | 205 |
| chr19 | 13807528  | 13807732  | 205 |
| chr18 | 62380665  | 62380869  | 205 |
| chr18 | 57311395  | 57311599  | 205 |
| chr18 | 56750399  | 56750603  | 205 |
| chr18 | 51658983  | 51659187  | 205 |
| chr18 | 48522714  | 48522918  | 205 |
| chr18 | 45668116  | 45668320  | 205 |
| chr18 | 32037028  | 32037232  | 205 |

|       |               |           |     |
|-------|---------------|-----------|-----|
| chr18 | 22427256      | 22427460  | 205 |
| chr18 | 11485927      | 11486131  | 205 |
| chr18 | 7597399       | 7597603   | 205 |
| chr18 | 3542802       | 3543006   | 205 |
| chr18 | 1513469       | 1513673   | 205 |
| chr17 | 72725167      | 72725371  | 205 |
| chr17 | 69952653      | 69952857  | 205 |
| chr17 | 66853374      | 66853578  | 205 |
| chr17 | 63499544      | 63499748  | 205 |
| chr16 | 45066786      | 45066990  | 205 |
| chr16 | 43492150      | 43492354  | 205 |
| chr16 | 34179393      | 34179597  | 205 |
| chr16 | 28056206      | 28056410  | 205 |
| chr16 | 952557 952761 | 205       |     |
| chr15 | 83625203      | 83625407  | 205 |
| chr15 | 65536845      | 65537049  | 205 |
| chr15 | 52289400      | 52289604  | 205 |
| chr15 | 39560353      | 39560557  | 205 |
| chr15 | 34588471      | 34588675  | 205 |
| chr15 | 30005163      | 30005367  | 205 |
| chr15 | 28575416      | 28575620  | 205 |
| chr15 | 22927134      | 22927338  | 205 |
| chr15 | 22551283      | 22551487  | 205 |
| chr15 | 20491657      | 20491861  | 205 |
| chr15 | 19871846      | 19872050  | 205 |
| chr13 | 77688817      | 77689021  | 205 |
| chr13 | 75662246      | 75662450  | 205 |
| chr13 | 70192597      | 70192801  | 205 |
| chr13 | 63331713      | 63331917  | 205 |
| chr13 | 60966205      | 60966409  | 205 |
| chr13 | 59373286      | 59373490  | 205 |
| chr13 | 41187173      | 41187377  | 205 |
| chr13 | 37810577      | 37810781  | 205 |
| chr13 | 29449153      | 29449357  | 205 |
| chr12 | 81918288      | 81918492  | 205 |
| chr12 | 33038587      | 33038791  | 205 |
| chr12 | 31292971      | 31293175  | 205 |
| chr12 | 9459405       | 9459609   | 205 |
| chr11 | 102858979     | 102859183 | 205 |
| chr11 | 98370301      | 98370505  | 205 |
| chr11 | 98370052      | 98370256  | 205 |
| chr11 | 92538220      | 92538424  | 205 |
| chr11 | 91419257      | 91419461  | 205 |
| chr11 | 81396680      | 81396884  | 205 |
| chr11 | 80338859      | 80339063  | 205 |
| chr11 | 75079976      | 75080180  | 205 |
| chr11 | 70720413      | 70720617  | 205 |
| chr10 | 88086449      | 88086653  | 205 |
| chr10 | 70106730      | 70106934  | 205 |
| chr10 | 69093872      | 69094076  | 205 |

|       |               |           |     |
|-------|---------------|-----------|-----|
| chr10 | 52959343      | 52959547  | 205 |
| chr10 | 25030958      | 25031162  | 205 |
| chr10 | 12690926      | 12691130  | 205 |
| chr10 | 9755828       | 9756032   | 205 |
| chr10 | 898766 898970 | 205       |     |
| chr1  | 144390249     | 144390453 | 205 |
| chr1  | 123462807     | 123463011 | 205 |
| chr1  | 113561719     | 113561923 | 205 |
| chr1  | 82371187      | 82371391  | 205 |
| chr1  | 74991467      | 74991671  | 205 |
| chr1  | 73212180      | 73212384  | 205 |
| chr1  | 1564914       | 1565118   | 205 |
| chr1  | 671723 671927 | 205       |     |
| chrX  | 80674275      | 80674478  | 204 |
| chrX  | 80299451      | 80299654  | 204 |
| chrX  | 78762249      | 78762452  | 204 |
| chrX  | 78547569      | 78547772  | 204 |
| chrX  | 76087868      | 76088071  | 204 |
| chrX  | 74480410      | 74480613  | 204 |
| chrX  | 71954456      | 71954659  | 204 |
| chrX  | 71609409      | 71609612  | 204 |
| chrX  | 69876872      | 69877075  | 204 |
| chrX  | 68724781      | 68724984  | 204 |
| chrX  | 61749181      | 61749384  | 204 |
| chrX  | 56927668      | 56927871  | 204 |
| chrX  | 54926156      | 54926359  | 204 |
| chrX  | 54155038      | 54155241  | 204 |
| chrX  | 50450562      | 50450765  | 204 |
| chrX  | 50325072      | 50325275  | 204 |
| chrX  | 50240202      | 50240405  | 204 |
| chrX  | 50233063      | 50233266  | 204 |
| chrX  | 47934141      | 47934344  | 204 |
| chrX  | 45687039      | 45687242  | 204 |
| chrX  | 40768186      | 40768389  | 204 |
| chrX  | 38978541      | 38978744  | 204 |
| chrX  | 37587831      | 37588034  | 204 |
| chrX  | 35690347      | 35690550  | 204 |
| chrX  | 34242409      | 34242612  | 204 |
| chrX  | 31773129      | 31773332  | 204 |
| chrX  | 30139019      | 30139222  | 204 |
| chrX  | 29728241      | 29728444  | 204 |
| chrX  | 20724830      | 20725033  | 204 |
| chrX  | 20229468      | 20229671  | 204 |
| chrX  | 18687353      | 18687556  | 204 |
| chrX  | 16978011      | 16978214  | 204 |
| chrX  | 15758271      | 15758474  | 204 |
| chrX  | 13714553      | 13714756  | 204 |
| chrX  | 12614170      | 12614373  | 204 |
| chrX  | 11667015      | 11667218  | 204 |
| chrX  | 10966311      | 10966514  | 204 |

|       |               |           |     |
|-------|---------------|-----------|-----|
| chrX  | 8669319       | 8669522   | 204 |
| chrX  | 8133137       | 8133340   | 204 |
| chrX  | 672256 672459 | 204       |     |
| chr9  | 106483441     | 106483644 | 204 |
| chr8  | 108780265     | 108780468 | 204 |
| chr8  | 108651491     | 108651694 | 204 |
| chr8  | 82588417      | 82588620  | 204 |
| chr8  | 81843774      | 81843977  | 204 |
| chr8  | 63739922      | 63740125  | 204 |
| chr7  | 77215456      | 77215659  | 204 |
| chr7  | 73517966      | 73518169  | 204 |
| chr7  | 52279725      | 52279928  | 204 |
| chr7  | 37499569      | 37499772  | 204 |
| chr7  | 10633926      | 10634129  | 204 |
| chr7  | 4485595       | 4485798   | 204 |
| chr6  | 117555079     | 117555282 | 204 |
| chr6  | 99220804      | 99221007  | 204 |
| chr5  | 112898895     | 112899098 | 204 |
| chr5  | 111199754     | 111199957 | 204 |
| chr5  | 80287348      | 80287551  | 204 |
| chr5  | 79086032      | 79086235  | 204 |
| chr5  | 74081779      | 74081982  | 204 |
| chr5  | 69092873      | 69093076  | 204 |
| chr5  | 61497555      | 61497758  | 204 |
| chr4  | 122123336     | 122123539 | 204 |
| chr4  | 119753604     | 119753807 | 204 |
| chr4  | 116868303     | 116868506 | 204 |
| chr4  | 101677043     | 101677246 | 204 |
| chr4  | 79280545      | 79280748  | 204 |
| chr4  | 79262242      | 79262445  | 204 |
| chr4  | 50940480      | 50940683  | 204 |
| chr4  | 33240184      | 33240387  | 204 |
| chr4  | 32452608      | 32452811  | 204 |
| chr4  | 32174469      | 32174672  | 204 |
| chr3  | 124090864     | 124091067 | 204 |
| chr3  | 120687794     | 120687997 | 204 |
| chr3  | 116415030     | 116415233 | 204 |
| chr3  | 116206264     | 116206467 | 204 |
| chr3  | 115680367     | 115680570 | 204 |
| chr3  | 114244132     | 114244335 | 204 |
| chr3  | 58923222      | 58923425  | 204 |
| chr3  | 33339683      | 33339886  | 204 |
| chr3  | 28308788      | 28308991  | 204 |
| chr3  | 27919419      | 27919622  | 204 |
| chr3  | 16740358      | 16740561  | 204 |
| chr29 | 34733229      | 34733432  | 204 |
| chr29 | 26472557      | 26472760  | 204 |
| chr29 | 18235810      | 18236013  | 204 |
| chr29 | 18181589      | 18181792  | 204 |
| chr29 | 17839148      | 17839351  | 204 |

|       |           |           |     |
|-------|-----------|-----------|-----|
| chr29 | 8280908   | 8281111   | 204 |
| chr28 | 43580906  | 43581109  | 204 |
| chr28 | 26899686  | 26899889  | 204 |
| chr27 | 44802992  | 44803195  | 204 |
| chr27 | 27902285  | 27902488  | 204 |
| chr27 | 11590829  | 11591032  | 204 |
| chr26 | 51489610  | 51489813  | 204 |
| chr26 | 44401006  | 44401209  | 204 |
| chr26 | 37966355  | 37966558  | 204 |
| chr26 | 37899128  | 37899331  | 204 |
| chr26 | 32143775  | 32143978  | 204 |
| chr25 | 37803290  | 37803493  | 204 |
| chr25 | 37772981  | 37773184  | 204 |
| chr25 | 34198836  | 34199039  | 204 |
| chr25 | 1952827   | 1953030   | 204 |
| chr24 | 63486130  | 63486333  | 204 |
| chr24 | 61720133  | 61720336  | 204 |
| chr24 | 58628840  | 58629043  | 204 |
| chr24 | 34871602  | 34871805  | 204 |
| chr24 | 20701502  | 20701705  | 204 |
| chr24 | 3146200   | 3146403   | 204 |
| chr23 | 52769565  | 52769768  | 204 |
| chr23 | 48597018  | 48597221  | 204 |
| chr23 | 40721569  | 40721772  | 204 |
| chr23 | 30086862  | 30087065  | 204 |
| chr23 | 27220549  | 27220752  | 204 |
| chr23 | 19850241  | 19850444  | 204 |
| chr23 | 16529231  | 16529434  | 204 |
| chr23 | 16525539  | 16525742  | 204 |
| chr23 | 15973690  | 15973893  | 204 |
| chr23 | 15054528  | 15054731  | 204 |
| chr22 | 57210210  | 57210413  | 204 |
| chr22 | 55340224  | 55340427  | 204 |
| chr22 | 50758470  | 50758673  | 204 |
| chr22 | 32581824  | 32582027  | 204 |
| chr22 | 30105652  | 30105855  | 204 |
| chr21 | 64195944  | 64196147  | 204 |
| chr21 | 61984081  | 61984284  | 204 |
| chr21 | 61286678  | 61286881  | 204 |
| chr21 | 33516901  | 33517104  | 204 |
| chr21 | 24472278  | 24472481  | 204 |
| chr2  | 139523900 | 139524103 | 204 |
| chr2  | 139268810 | 139269013 | 204 |
| chr2  | 136660942 | 136661145 | 204 |
| chr2  | 135616337 | 135616540 | 204 |
| chr2  | 135591897 | 135592100 | 204 |
| chr2  | 115014532 | 115014735 | 204 |
| chr2  | 110128837 | 110129040 | 204 |
| chr2  | 101132691 | 101132894 | 204 |
| chr2  | 93601125  | 93601328  | 204 |

|       |          |          |     |
|-------|----------|----------|-----|
| chr2  | 24076467 | 24076670 | 204 |
| chr19 | 63569633 | 63569836 | 204 |
| chr19 | 61591954 | 61592157 | 204 |
| chr19 | 59277840 | 59278043 | 204 |
| chr19 | 58072235 | 58072438 | 204 |
| chr19 | 54333627 | 54333830 | 204 |
| chr19 | 53144624 | 53144827 | 204 |
| chr19 | 52573396 | 52573599 | 204 |
| chr19 | 47316573 | 47316776 | 204 |
| chr19 | 39138049 | 39138252 | 204 |
| chr19 | 38934559 | 38934762 | 204 |
| chr19 | 31314978 | 31315181 | 204 |
| chr19 | 28257838 | 28258041 | 204 |
| chr19 | 27126103 | 27126306 | 204 |
| chr19 | 22329667 | 22329870 | 204 |
| chr19 | 16237377 | 16237580 | 204 |
| chr19 | 7775386  | 7775589  | 204 |
| chr18 | 51331457 | 51331660 | 204 |
| chr18 | 50473290 | 50473493 | 204 |
| chr18 | 44990339 | 44990542 | 204 |
| chr18 | 38200633 | 38200836 | 204 |
| chr18 | 25037573 | 25037776 | 204 |
| chr18 | 24257094 | 24257297 | 204 |
| chr18 | 14683722 | 14683925 | 204 |
| chr18 | 11416655 | 11416858 | 204 |
| chr18 | 11190252 | 11190455 | 204 |
| chr18 | 11183152 | 11183355 | 204 |
| chr17 | 64366561 | 64366764 | 204 |
| chr17 | 64306920 | 64307123 | 204 |
| chr17 | 64018626 | 64018829 | 204 |
| chr17 | 5379660  | 5379863  | 204 |
| chr16 | 72144156 | 72144359 | 204 |
| chr16 | 70206699 | 70206902 | 204 |
| chr16 | 47071365 | 47071568 | 204 |
| chr16 | 2181556  | 2181759  | 204 |
| chr16 | 1617151  | 1617354  | 204 |
| chr15 | 75584492 | 75584695 | 204 |
| chr15 | 64819312 | 64819515 | 204 |
| chr15 | 57793903 | 57794106 | 204 |
| chr15 | 31332807 | 31333010 | 204 |
| chr14 | 34095991 | 34096194 | 204 |
| chr14 | 27842946 | 27843149 | 204 |
| chr14 | 9716597  | 9716800  | 204 |
| chr14 | 7850168  | 7850371  | 204 |
| chr13 | 82337128 | 82337331 | 204 |
| chr13 | 76278292 | 76278495 | 204 |
| chr13 | 70002168 | 70002371 | 204 |
| chr13 | 68180217 | 68180420 | 204 |
| chr13 | 67411614 | 67411817 | 204 |
| chr13 | 57722624 | 57722827 | 204 |

|       |               |           |     |
|-------|---------------|-----------|-----|
| chr13 | 46276159      | 46276362  | 204 |
| chr13 | 40492343      | 40492546  | 204 |
| chr13 | 35575587      | 35575790  | 204 |
| chr12 | 75319397      | 75319600  | 204 |
| chr12 | 34285038      | 34285241  | 204 |
| chr12 | 33318358      | 33318561  | 204 |
| chr12 | 13265914      | 13266117  | 204 |
| chr11 | 108369250     | 108369453 | 204 |
| chr11 | 103744069     | 103744272 | 204 |
| chr11 | 101071942     | 101072145 | 204 |
| chr11 | 96267142      | 96267345  | 204 |
| chr11 | 89526755      | 89526958  | 204 |
| chr11 | 89511611      | 89511814  | 204 |
| chr11 | 74867641      | 74867844  | 204 |
| chr11 | 71721307      | 71721510  | 204 |
| chr11 | 70774222      | 70774425  | 204 |
| chr11 | 51957254      | 51957457  | 204 |
| chr11 | 46219673      | 46219876  | 204 |
| chr11 | 44759636      | 44759839  | 204 |
| chr11 | 33347555      | 33347758  | 204 |
| chr11 | 25852178      | 25852381  | 204 |
| chr11 | 13929234      | 13929437  | 204 |
| chr11 | 5801967       | 5802170   | 204 |
| chr11 | 2507593       | 2507796   | 204 |
| chr11 | 521119 521322 | 204       | 204 |
| chr10 | 91047855      | 91048058  | 204 |
| chr10 | 80448343      | 80448546  | 204 |
| chr10 | 66944365      | 66944568  | 204 |
| chr10 | 62494165      | 62494368  | 204 |
| chr10 | 53332667      | 53332870  | 204 |
| chr10 | 38206958      | 38207161  | 204 |
| chr10 | 36758236      | 36758439  | 204 |
| chr10 | 17330701      | 17330904  | 204 |
| chr10 | 16863992      | 16864195  | 204 |
| chr10 | 12841589      | 12841792  | 204 |
| chr10 | 6691983       | 6692186   | 204 |
| chr1  | 153842936     | 153843139 | 204 |
| chr1  | 142509605     | 142509808 | 204 |
| chr1  | 136399336     | 136399539 | 204 |
| chr1  | 123132102     | 123132305 | 204 |
| chr1  | 114708977     | 114709180 | 204 |
| chr1  | 82917235      | 82917438  | 204 |
| chr1  | 74676791      | 74676994  | 204 |
| chr1  | 26542535      | 26542738  | 204 |
| chr1  | 188358 188561 | 204       | 204 |
| chrX  | 85964898      | 85965100  | 203 |
| chrX  | 82182638      | 82182840  | 203 |
| chrX  | 81569717      | 81569919  | 203 |
| chrX  | 78721313      | 78721515  | 203 |
| chrX  | 78076512      | 78076714  | 203 |



|      |           |           |     |
|------|-----------|-----------|-----|
| chrX | 76056898  | 76057100  | 203 |
| chrX | 75944195  | 75944397  | 203 |
| chrX | 75419069  | 75419271  | 203 |
| chrX | 74723990  | 74724192  | 203 |
| chrX | 74717104  | 74717306  | 203 |
| chrX | 71661655  | 71661857  | 203 |
| chrX | 71131934  | 71132136  | 203 |
| chrX | 71042822  | 71043024  | 203 |
| chrX | 65018992  | 65019194  | 203 |
| chrX | 61201387  | 61201589  | 203 |
| chrX | 60291003  | 60291205  | 203 |
| chrX | 58459380  | 58459582  | 203 |
| chrX | 55763605  | 55763807  | 203 |
| chrX | 51741600  | 51741802  | 203 |
| chrX | 49988400  | 49988602  | 203 |
| chrX | 48454488  | 48454690  | 203 |
| chrX | 47167005  | 47167207  | 203 |
| chrX | 41175986  | 41176188  | 203 |
| chrX | 39178290  | 39178492  | 203 |
| chrX | 35441392  | 35441594  | 203 |
| chrX | 35430785  | 35430987  | 203 |
| chrX | 33085167  | 33085369  | 203 |
| chrX | 31656123  | 31656325  | 203 |
| chrX | 30729008  | 30729210  | 203 |
| chrX | 30575471  | 30575673  | 203 |
| chrX | 21628218  | 21628420  | 203 |
| chrX | 21497262  | 21497464  | 203 |
| chrX | 21290682  | 21290884  | 203 |
| chrX | 19692955  | 19693157  | 203 |
| chrX | 19188658  | 19188860  | 203 |
| chrX | 9752082   | 9752284   | 203 |
| chrX | 9157159   | 9157361   | 203 |
| chrX | 8401409   | 8401611   | 203 |
| chrX | 7580756   | 7580958   | 203 |
| chrX | 7547606   | 7547808   | 203 |
| chrX | 6085966   | 6086168   | 203 |
| chrX | 2533394   | 2533596   | 203 |
| chrX | 2271235   | 2271437   | 203 |
| chr9 | 90797875  | 90798077  | 203 |
| chr9 | 87768019  | 87768221  | 203 |
| chr9 | 45586162  | 45586364  | 203 |
| chr8 | 102825300 | 102825502 | 203 |
| chr8 | 93328638  | 93328840  | 203 |
| chr8 | 80486067  | 80486269  | 203 |
| chr8 | 73522194  | 73522396  | 203 |
| chr8 | 25580309  | 25580511  | 203 |
| chr8 | 24333401  | 24333603  | 203 |
| chr8 | 8575968   | 8576170   | 203 |
| chr8 | 7656271   | 7656473   | 203 |
| chr7 | 45655896  | 45656098  | 203 |

|       |           |           |     |
|-------|-----------|-----------|-----|
| chr7  | 43044804  | 43045006  | 203 |
| chr7  | 5067590   | 5067792   | 203 |
| chr6  | 118164862 | 118165064 | 203 |
| chr6  | 106716859 | 106717061 | 203 |
| chr6  | 103144319 | 103144521 | 203 |
| chr5  | 123717410 | 123717612 | 203 |
| chr5  | 113171434 | 113171636 | 203 |
| chr5  | 60155434  | 60155636  | 203 |
| chr5  | 30081942  | 30082144  | 203 |
| chr5  | 28873159  | 28873361  | 203 |
| chr4  | 95068890  | 95069092  | 203 |
| chr4  | 79923268  | 79923470  | 203 |
| chr4  | 77369535  | 77369737  | 203 |
| chr4  | 10811264  | 10811466  | 203 |
| chr3  | 123216020 | 123216222 | 203 |
| chr3  | 121422813 | 121423015 | 203 |
| chr3  | 120989089 | 120989291 | 203 |
| chr3  | 116345846 | 116346048 | 203 |
| chr3  | 115019459 | 115019661 | 203 |
| chr3  | 105477511 | 105477713 | 203 |
| chr3  | 105245682 | 105245884 | 203 |
| chr3  | 89430489  | 89430691  | 203 |
| chr3  | 36661893  | 36662095  | 203 |
| chr3  | 13858082  | 13858284  | 203 |
| chr29 | 48933479  | 48933681  | 203 |
| chr29 | 44744949  | 44745151  | 203 |
| chr29 | 43095621  | 43095823  | 203 |
| chr29 | 36382666  | 36382868  | 203 |
| chr29 | 35252338  | 35252540  | 203 |
| chr29 | 35178867  | 35179069  | 203 |
| chr29 | 34345345  | 34345547  | 203 |
| chr29 | 31787791  | 31787993  | 203 |
| chr29 | 30098873  | 30099075  | 203 |
| chr29 | 2413519   | 2413721   | 203 |
| chr28 | 34177471  | 34177673  | 203 |
| chr28 | 33953576  | 33953778  | 203 |
| chr28 | 33727400  | 33727602  | 203 |
| chr28 | 27087582  | 27087784  | 203 |
| chr28 | 25118477  | 25118679  | 203 |
| chr28 | 5224801   | 5225003   | 203 |
| chr27 | 48005455  | 48005657  | 203 |
| chr27 | 45308895  | 45309097  | 203 |
| chr27 | 34788919  | 34789121  | 203 |
| chr27 | 29108560  | 29108762  | 203 |
| chr27 | 26905006  | 26905208  | 203 |
| chr27 | 26770192  | 26770394  | 203 |
| chr27 | 5268334   | 5268536   | 203 |
| chr26 | 45317573  | 45317775  | 203 |
| chr26 | 43198516  | 43198718  | 203 |
| chr26 | 31015949  | 31016151  | 203 |

|       |               |           |     |
|-------|---------------|-----------|-----|
| chr26 | 22358300      | 22358502  | 203 |
| chr26 | 21786943      | 21787145  | 203 |
| chr26 | 17922870      | 17923072  | 203 |
| chr25 | 37645114      | 37645316  | 203 |
| chr25 | 33987170      | 33987372  | 203 |
| chr25 | 2995965       | 2996167   | 203 |
| chr24 | 61411793      | 61411995  | 203 |
| chr24 | 51413058      | 51413260  | 203 |
| chr24 | 50961384      | 50961586  | 203 |
| chr24 | 49044974      | 49045176  | 203 |
| chr24 | 35334684      | 35334886  | 203 |
| chr24 | 3962038       | 3962240   | 203 |
| chr23 | 44492687      | 44492889  | 203 |
| chr23 | 14674310      | 14674512  | 203 |
| chr23 | 8509670       | 8509872   | 203 |
| chr22 | 57246234      | 57246436  | 203 |
| chr22 | 56454064      | 56454266  | 203 |
| chr22 | 55770032      | 55770234  | 203 |
| chr22 | 48220706      | 48220908  | 203 |
| chr22 | 38128529      | 38128731  | 203 |
| chr22 | 16422976      | 16423178  | 203 |
| chr21 | 65570588      | 65570790  | 203 |
| chr21 | 33982520      | 33982722  | 203 |
| chr21 | 29307352      | 29307554  | 203 |
| chr21 | 29129314      | 29129516  | 203 |
| chr21 | 28712867      | 28713069  | 203 |
| chr21 | 25684890      | 25685092  | 203 |
| chr21 | 25082217      | 25082419  | 203 |
| chr21 | 22355962      | 22356164  | 203 |
| chr21 | 21149590      | 21149792  | 203 |
| chr21 | 14031428      | 14031630  | 203 |
| chr21 | 13904017      | 13904219  | 203 |
| chr20 | 72588815      | 72589017  | 203 |
| chr20 | 72431556      | 72431758  | 203 |
| chr20 | 45985481      | 45985683  | 203 |
| chr20 | 705756 705958 |           | 203 |
| chr2  | 140717520     | 140717722 | 203 |
| chr2  | 135806446     | 135806648 | 203 |
| chr2  | 134084818     | 134085020 | 203 |
| chr2  | 132409902     | 132410104 | 203 |
| chr2  | 116947516     | 116947718 | 203 |
| chr19 | 59411295      | 59411497  | 203 |
| chr19 | 55995577      | 55995779  | 203 |
| chr19 | 54460004      | 54460206  | 203 |
| chr19 | 47288816      | 47289018  | 203 |
| chr19 | 34794317      | 34794519  | 203 |
| chr19 | 33471831      | 33472033  | 203 |
| chr19 | 31866952      | 31867154  | 203 |
| chr19 | 27269699      | 27269901  | 203 |
| chr19 | 16989634      | 16989836  | 203 |

|       |          |          |     |
|-------|----------|----------|-----|
| chr19 | 14973014 | 14973216 | 203 |
| chr19 | 10208832 | 10209034 | 203 |
| chr19 | 7819049  | 7819251  | 203 |
| chr18 | 62703895 | 62704097 | 203 |
| chr18 | 51183908 | 51184110 | 203 |
| chr18 | 50461580 | 50461782 | 203 |
| chr18 | 26282392 | 26282594 | 203 |
| chr18 | 24309834 | 24310036 | 203 |
| chr18 | 14428675 | 14428877 | 203 |
| chr18 | 11958677 | 11958879 | 203 |
| chr18 | 11702366 | 11702568 | 203 |
| chr18 | 1515530  | 1515732  | 203 |
| chr17 | 74515699 | 74515901 | 203 |
| chr17 | 74080323 | 74080525 | 203 |
| chr17 | 72642846 | 72643048 | 203 |
| chr17 | 69930863 | 69931065 | 203 |
| chr17 | 66498634 | 66498836 | 203 |
| chr17 | 60895588 | 60895790 | 203 |
| chr17 | 57784272 | 57784474 | 203 |
| chr17 | 47089278 | 47089480 | 203 |
| chr17 | 4205845  | 4206047  | 203 |
| chr17 | 3086803  | 3087005  | 203 |
| chr16 | 77580985 | 77581187 | 203 |
| chr16 | 58539651 | 58539853 | 203 |
| chr16 | 57044455 | 57044657 | 203 |
| chr16 | 53962437 | 53962639 | 203 |
| chr16 | 43851841 | 43852043 | 203 |
| chr16 | 41433388 | 41433590 | 203 |
| chr16 | 2905034  | 2905236  | 203 |
| chr15 | 64308533 | 64308735 | 203 |
| chr15 | 44854910 | 44855112 | 203 |
| chr15 | 44220996 | 44221198 | 203 |
| chr15 | 30002207 | 30002409 | 203 |
| chr15 | 29381141 | 29381343 | 203 |
| chr15 | 25214466 | 25214668 | 203 |
| chr14 | 76359484 | 76359686 | 203 |
| chr14 | 76311923 | 76312125 | 203 |
| chr13 | 77690744 | 77690946 | 203 |
| chr13 | 76269160 | 76269362 | 203 |
| chr13 | 75711724 | 75711926 | 203 |
| chr13 | 74001208 | 74001410 | 203 |
| chr13 | 69883681 | 69883883 | 203 |
| chr13 | 59993527 | 59993729 | 203 |
| chr13 | 59708970 | 59709172 | 203 |
| chr13 | 54209220 | 54209422 | 203 |
| chr13 | 35096538 | 35096740 | 203 |
| chr13 | 26039548 | 26039750 | 203 |
| chr13 | 25453006 | 25453208 | 203 |
| chr13 | 18608441 | 18608643 | 203 |
| chr13 | 14679300 | 14679502 | 203 |

|       |           |           |     |
|-------|-----------|-----------|-----|
| chr11 | 103032016 | 103032218 | 203 |
| chr11 | 97666657  | 97666859  | 203 |
| chr11 | 92601177  | 92601379  | 203 |
| chr11 | 85333965  | 85334167  | 203 |
| chr11 | 82740868  | 82741070  | 203 |
| chr11 | 80150477  | 80150679  | 203 |
| chr11 | 72546065  | 72546267  | 203 |
| chr11 | 48663026  | 48663228  | 203 |
| chr11 | 27434175  | 27434377  | 203 |
| chr10 | 91077259  | 91077461  | 203 |
| chr10 | 90931717  | 90931919  | 203 |
| chr10 | 90306854  | 90307056  | 203 |
| chr10 | 90270175  | 90270377  | 203 |
| chr10 | 86275609  | 86275811  | 203 |
| chr10 | 84066760  | 84066962  | 203 |
| chr10 | 81675731  | 81675933  | 203 |
| chr10 | 80240411  | 80240613  | 203 |
| chr10 | 53329237  | 53329439  | 203 |
| chr10 | 36550122  | 36550324  | 203 |
| chr10 | 23731622  | 23731824  | 203 |
| chr10 | 22064727  | 22064929  | 203 |
| chr10 | 3239231   | 3239433   | 203 |
| chr10 | 2293862   | 2294064   | 203 |
| chr1  | 111786557 | 111786759 | 203 |
| chr1  | 99027424  | 99027626  | 203 |
| chr1  | 66081681  | 66081883  | 203 |
| chr1  | 64425941  | 64426143  | 203 |
| chrX  | 78623535  | 78623736  | 202 |
| chrX  | 78386326  | 78386527  | 202 |
| chrX  | 75719812  | 75720013  | 202 |
| chrX  | 73338205  | 73338406  | 202 |
| chrX  | 65689726  | 65689927  | 202 |
| chrX  | 56574401  | 56574602  | 202 |
| chrX  | 55556986  | 55557187  | 202 |
| chrX  | 55460850  | 55461051  | 202 |
| chrX  | 55386470  | 55386671  | 202 |
| chrX  | 54965898  | 54966099  | 202 |
| chrX  | 54137211  | 54137412  | 202 |
| chrX  | 50417919  | 50418120  | 202 |
| chrX  | 48151810  | 48152011  | 202 |
| chrX  | 48045828  | 48046029  | 202 |
| chrX  | 46878056  | 46878257  | 202 |
| chrX  | 37701074  | 37701275  | 202 |
| chrX  | 36868999  | 36869200  | 202 |
| chrX  | 34720883  | 34721084  | 202 |
| chrX  | 29248703  | 29248904  | 202 |
| chrX  | 20509081  | 20509282  | 202 |
| chrX  | 19450071  | 19450272  | 202 |
| chrX  | 19347496  | 19347697  | 202 |
| chrX  | 19174083  | 19174284  | 202 |

|      |           |           |     |
|------|-----------|-----------|-----|
| chrX | 19168587  | 19168788  | 202 |
| chrX | 12982879  | 12983080  | 202 |
| chrX | 12958306  | 12958507  | 202 |
| chrX | 12558582  | 12558783  | 202 |
| chrX | 9968855   | 9969056   | 202 |
| chrX | 9687855   | 9688056   | 202 |
| chrX | 9362694   | 9362895   | 202 |
| chrX | 8789711   | 8789912   | 202 |
| chrX | 6633928   | 6634129   | 202 |
| chrX | 1489155   | 1489356   | 202 |
| chrX | 1486383   | 1486584   | 202 |
| chr9 | 105478101 | 105478302 | 202 |
| chr9 | 78309635  | 78309836  | 202 |
| chr8 | 110874457 | 110874658 | 202 |
| chr8 | 108837133 | 108837334 | 202 |
| chr8 | 101425788 | 101425989 | 202 |
| chr8 | 73747588  | 73747789  | 202 |
| chr8 | 11393389  | 11393590  | 202 |
| chr8 | 7720939   | 7721140   | 202 |
| chr7 | 77322914  | 77323115  | 202 |
| chr7 | 71244717  | 71244918  | 202 |
| chr7 | 64849276  | 64849477  | 202 |
| chr7 | 64690663  | 64690864  | 202 |
| chr7 | 61430326  | 61430527  | 202 |
| chr7 | 52314882  | 52315083  | 202 |
| chr7 | 50595810  | 50596011  | 202 |
| chr7 | 48103277  | 48103478  | 202 |
| chr7 | 42924654  | 42924855  | 202 |
| chr7 | 19501008  | 19501209  | 202 |
| chr5 | 122070094 | 122070295 | 202 |
| chr5 | 112093776 | 112093977 | 202 |
| chr5 | 111400480 | 111400681 | 202 |
| chr5 | 111347531 | 111347732 | 202 |
| chr5 | 78662516  | 78662717  | 202 |
| chr5 | 31321985  | 31322186  | 202 |
| chr5 | 29139870  | 29140071  | 202 |
| chr5 | 28881336  | 28881537  | 202 |
| chr4 | 121267521 | 121267722 | 202 |
| chr4 | 120174312 | 120174513 | 202 |
| chr4 | 115751782 | 115751983 | 202 |
| chr4 | 72614301  | 72614502  | 202 |
| chr4 | 72230618  | 72230819  | 202 |
| chr4 | 53018289  | 53018490  | 202 |
| chr4 | 9373238   | 9373439   | 202 |
| chr3 | 119579751 | 119579952 | 202 |
| chr3 | 115775401 | 115775602 | 202 |
| chr3 | 115403059 | 115403260 | 202 |
| chr3 | 115110000 | 115110201 | 202 |
| chr3 | 113472305 | 113472506 | 202 |
| chr3 | 113466940 | 113467141 | 202 |

|       |             |           |     |
|-------|-------------|-----------|-----|
| chr3  | 106072320   | 106072521 | 202 |
| chr3  | 87795338    | 87795539  | 202 |
| chr3  | 73943443    | 73943644  | 202 |
| chr3  | 52005257    | 52005458  | 202 |
| chr3  | 36902552    | 36902753  | 202 |
| chr29 | 49931688    | 49931889  | 202 |
| chr29 | 48957816    | 48958017  | 202 |
| chr29 | 46218545    | 46218746  | 202 |
| chr29 | 35950472    | 35950673  | 202 |
| chr29 | 30766358    | 30766559  | 202 |
| chr29 | 26350359    | 26350560  | 202 |
| chr28 | 26608725    | 26608926  | 202 |
| chr28 | 26095413    | 26095614  | 202 |
| chr27 | 35846906    | 35847107  | 202 |
| chr27 | 35832578    | 35832779  | 202 |
| chr27 | 35145942    | 35146143  | 202 |
| chr26 | 48429454    | 48429655  | 202 |
| chr26 | 22008376    | 22008577  | 202 |
| chr26 | 21964818    | 21965019  | 202 |
| chr26 | 21775291    | 21775492  | 202 |
| chr26 | 18732827    | 18733028  | 202 |
| chr25 | 43326552    | 43326753  | 202 |
| chr25 | 37956599    | 37956800  | 202 |
| chr25 | 37301334    | 37301535  | 202 |
| chr25 | 34043693    | 34043894  | 202 |
| chr25 | 27323317    | 27323518  | 202 |
| chr25 | 27238107    | 27238308  | 202 |
| chr25 | 1952311     | 1952512   | 202 |
| chr24 | 63026365    | 63026566  | 202 |
| chr24 | 51842638    | 51842839  | 202 |
| chr24 | 47875478    | 47875679  | 202 |
| chr24 | 23162518    | 23162719  | 202 |
| chr24 | 1360056     | 1360257   | 202 |
| chr24 | 55483 55684 | 202       |     |
| chr23 | 52776226    | 52776427  | 202 |
| chr23 | 49789742    | 49789943  | 202 |
| chr23 | 42725129    | 42725330  | 202 |
| chr23 | 42450226    | 42450427  | 202 |
| chr23 | 40507811    | 40508012  | 202 |
| chr23 | 28895536    | 28895737  | 202 |
| chr23 | 14494257    | 14494458  | 202 |
| chr23 | 13713986    | 13714187  | 202 |
| chr23 | 10630092    | 10630293  | 202 |
| chr23 | 10349609    | 10349810  | 202 |
| chr22 | 57639625    | 57639826  | 202 |
| chr22 | 57420886    | 57421087  | 202 |
| chr22 | 56272952    | 56273153  | 202 |
| chr22 | 46204003    | 46204204  | 202 |
| chr22 | 44491265    | 44491466  | 202 |
| chr22 | 32927879    | 32928080  | 202 |

|       |               |           |     |
|-------|---------------|-----------|-----|
| chr22 | 29138299      | 29138500  | 202 |
| chr22 | 22551944      | 22552145  | 202 |
| chr21 | 62254191      | 62254392  | 202 |
| chr21 | 57473655      | 57473856  | 202 |
| chr21 | 34902681      | 34902882  | 202 |
| chr21 | 32923850      | 32924051  | 202 |
| chr21 | 30667930      | 30668131  | 202 |
| chr21 | 22429789      | 22429990  | 202 |
| chr21 | 19212528      | 19212729  | 202 |
| chr20 | 70753074      | 70753275  | 202 |
| chr20 | 59465264      | 59465465  | 202 |
| chr20 | 38483650      | 38483851  | 202 |
| chr20 | 8809923       | 8810124   | 202 |
| chr20 | 8726397       | 8726598   | 202 |
| chr20 | 6539952       | 6540153   | 202 |
| chr20 | 2184286       | 2184487   | 202 |
| chr2  | 139304049     | 139304250 | 202 |
| chr2  | 126086830     | 126087031 | 202 |
| chr2  | 126026562     | 126026763 | 202 |
| chr2  | 25786333      | 25786534  | 202 |
| chr2  | 492281 492482 | 202       | 202 |
| chr19 | 61468432      | 61468633  | 202 |
| chr19 | 59320175      | 59320376  | 202 |
| chr19 | 36674582      | 36674783  | 202 |
| chr19 | 30723078      | 30723279  | 202 |
| chr19 | 29785905      | 29786106  | 202 |
| chr19 | 23747951      | 23748152  | 202 |
| chr19 | 21679852      | 21680053  | 202 |
| chr19 | 20837994      | 20838195  | 202 |
| chr19 | 11058002      | 11058203  | 202 |
| chr19 | 7799779       | 7799980   | 202 |
| chr18 | 62465982      | 62466183  | 202 |
| chr18 | 54566237      | 54566438  | 202 |
| chr18 | 50293311      | 50293512  | 202 |
| chr18 | 48753418      | 48753619  | 202 |
| chr18 | 22178797      | 22178998  | 202 |
| chr18 | 16752114      | 16752315  | 202 |
| chr18 | 11734523      | 11734724  | 202 |
| chr17 | 59009276      | 59009477  | 202 |
| chr16 | 60716828      | 60717029  | 202 |
| chr16 | 60194364      | 60194565  | 202 |
| chr16 | 60085060      | 60085261  | 202 |
| chr16 | 47187877      | 47188078  | 202 |
| chr16 | 43056495      | 43056696  | 202 |
| chr16 | 3643169       | 3643370   | 202 |
| chr15 | 83923755      | 83923956  | 202 |
| chr15 | 65685729      | 65685930  | 202 |
| chr15 | 45820728      | 45820929  | 202 |
| chr15 | 40546321      | 40546522  | 202 |
| chr15 | 29797839      | 29798040  | 202 |



|       |               |           |     |
|-------|---------------|-----------|-----|
| chr15 | 22325285      | 22325486  | 202 |
| chr15 | 21106870      | 21107071  | 202 |
| chr14 | 26479437      | 26479638  | 202 |
| chr14 | 22965983      | 22966184  | 202 |
| chr14 | 19609535      | 19609736  | 202 |
| chr13 | 79672882      | 79673083  | 202 |
| chr13 | 76179109      | 76179310  | 202 |
| chr13 | 74608663      | 74608864  | 202 |
| chr13 | 74365203      | 74365404  | 202 |
| chr13 | 63352300      | 63352501  | 202 |
| chr13 | 62601707      | 62601908  | 202 |
| chr13 | 60425289      | 60425490  | 202 |
| chr13 | 59689314      | 59689515  | 202 |
| chr13 | 59070299      | 59070500  | 202 |
| chr13 | 49810610      | 49810811  | 202 |
| chr13 | 41147307      | 41147508  | 202 |
| chr13 | 40104036      | 40104237  | 202 |
| chr13 | 14491575      | 14491776  | 202 |
| chr13 | 14368397      | 14368598  | 202 |
| chr12 | 83816512      | 83816713  | 202 |
| chr12 | 17973927      | 17974128  | 202 |
| chr11 | 104551160     | 104551361 | 202 |
| chr11 | 100878349     | 100878550 | 202 |
| chr11 | 99673409      | 99673610  | 202 |
| chr11 | 91450399      | 91450600  | 202 |
| chr11 | 84466131      | 84466332  | 202 |
| chr11 | 81531336      | 81531537  | 202 |
| chr11 | 80984731      | 80984932  | 202 |
| chr11 | 77717588      | 77717789  | 202 |
| chr11 | 76387925      | 76388126  | 202 |
| chr11 | 75033061      | 75033262  | 202 |
| chr11 | 50542365      | 50542566  | 202 |
| chr11 | 16084283      | 16084484  | 202 |
| chr11 | 11143653      | 11143854  | 202 |
| chr11 | 9355389       | 9355590   | 202 |
| chr11 | 9332665       | 9332866   | 202 |
| chr11 | 7944621       | 7944822   | 202 |
| chr11 | 4367357       | 4367558   | 202 |
| chr10 | 104416914     | 104417115 | 202 |
| chr10 | 64849778      | 64849979  | 202 |
| chr10 | 48222584      | 48222785  | 202 |
| chr10 | 17280251      | 17280452  | 202 |
| chr1  | 161010216     | 161010417 | 202 |
| chr1  | 132767578     | 132767779 | 202 |
| chr1  | 106414016     | 106414217 | 202 |
| chr1  | 82821307      | 82821508  | 202 |
| chr1  | 53178543      | 53178744  | 202 |
| chr1  | 7342165       | 7342366   | 202 |
| chr1  | 739384 739585 | 202       |     |
| chrX  | 78735696      | 78735896  | 201 |

|      |           |           |     |
|------|-----------|-----------|-----|
| chrX | 76966832  | 76967032  | 201 |
| chrX | 76257897  | 76258097  | 201 |
| chrX | 76062918  | 76063118  | 201 |
| chrX | 73358776  | 73358976  | 201 |
| chrX | 72298763  | 72298963  | 201 |
| chrX | 72046351  | 72046551  | 201 |
| chrX | 66342147  | 66342347  | 201 |
| chrX | 66266622  | 66266822  | 201 |
| chrX | 62481150  | 62481350  | 201 |
| chrX | 59819008  | 59819208  | 201 |
| chrX | 58738518  | 58738718  | 201 |
| chrX | 55154039  | 55154239  | 201 |
| chrX | 53867198  | 53867398  | 201 |
| chrX | 53810624  | 53810824  | 201 |
| chrX | 49312822  | 49313022  | 201 |
| chrX | 48095168  | 48095368  | 201 |
| chrX | 46371202  | 46371402  | 201 |
| chrX | 45906991  | 45907191  | 201 |
| chrX | 40768464  | 40768664  | 201 |
| chrX | 37780728  | 37780928  | 201 |
| chrX | 31668891  | 31669091  | 201 |
| chrX | 30069260  | 30069460  | 201 |
| chrX | 29616083  | 29616283  | 201 |
| chrX | 28415122  | 28415322  | 201 |
| chrX | 24110375  | 24110575  | 201 |
| chrX | 22458853  | 22459053  | 201 |
| chrX | 21944995  | 21945195  | 201 |
| chrX | 20101923  | 20102123  | 201 |
| chrX | 19969840  | 19970040  | 201 |
| chrX | 19747279  | 19747479  | 201 |
| chrX | 19493093  | 19493293  | 201 |
| chrX | 19340951  | 19341151  | 201 |
| chrX | 11916477  | 11916677  | 201 |
| chrX | 10793024  | 10793224  | 201 |
| chrX | 10665827  | 10666027  | 201 |
| chrX | 9656780   | 9656980   | 201 |
| chrX | 3611809   | 3612009   | 201 |
| chrX | 3366664   | 3366864   | 201 |
| chrX | 2282794   | 2282994   | 201 |
| chrX | 1741710   | 1741910   | 201 |
| chrX | 1395689   | 1395889   | 201 |
| chrX | 719443    | 719643    | 201 |
| chr9 | 105989702 | 105989902 | 201 |
| chr9 | 52094552  | 52094752  | 201 |
| chr9 | 44101180  | 44101380  | 201 |
| chr8 | 93800939  | 93801139  | 201 |
| chr8 | 77123495  | 77123695  | 201 |
| chr8 | 73284000  | 73284200  | 201 |
| chr8 | 72180489  | 72180689  | 201 |
| chr8 | 60335578  | 60335778  | 201 |

|       |               |           |     |
|-------|---------------|-----------|-----|
| chr8  | 10593630      | 10593830  | 201 |
| chr8  | 7653882       | 7654082   | 201 |
| chr7  | 68615407      | 68615607  | 201 |
| chr7  | 52250554      | 52250754  | 201 |
| chr7  | 48033272      | 48033472  | 201 |
| chr7  | 45688977      | 45689177  | 201 |
| chr7  | 43324459      | 43324659  | 201 |
| chr7  | 42421768      | 42421968  | 201 |
| chr7  | 17614540      | 17614740  | 201 |
| chr7  | 17322400      | 17322600  | 201 |
| chr7  | 13273225      | 13273425  | 201 |
| chr7  | 5676685       | 5676885   | 201 |
| chr7  | 5464599       | 5464799   | 201 |
| chr7  | 4148730       | 4148930   | 201 |
| chr7  | 699603 699803 | 201       |     |
| chr6  | 108828093     | 108828293 | 201 |
| chr6  | 98560597      | 98560797  | 201 |
| chr6  | 12634027      | 12634227  | 201 |
| chr5  | 94653269      | 94653469  | 201 |
| chr5  | 81565436      | 81565636  | 201 |
| chr5  | 80852877      | 80853077  | 201 |
| chr5  | 73596451      | 73596651  | 201 |
| chr5  | 60996248      | 60996448  | 201 |
| chr5  | 60915859      | 60916059  | 201 |
| chr5  | 60159460      | 60159660  | 201 |
| chr5  | 31564808      | 31565008  | 201 |
| chr5  | 30852971      | 30853171  | 201 |
| chr5  | 30146269      | 30146469  | 201 |
| chr4  | 121260013     | 121260213 | 201 |
| chr4  | 120742470     | 120742670 | 201 |
| chr4  | 97967060      | 97967260  | 201 |
| chr3  | 123528886     | 123529086 | 201 |
| chr3  | 121547738     | 121547938 | 201 |
| chr3  | 121235836     | 121236036 | 201 |
| chr3  | 113388171     | 113388371 | 201 |
| chr3  | 111672878     | 111673078 | 201 |
| chr3  | 111470713     | 111470913 | 201 |
| chr3  | 110399593     | 110399793 | 201 |
| chr3  | 105403849     | 105404049 | 201 |
| chr3  | 86199958      | 86200158  | 201 |
| chr3  | 83532205      | 83532405  | 201 |
| chr3  | 36954452      | 36954652  | 201 |
| chr3  | 36721474      | 36721674  | 201 |
| chr3  | 35651254      | 35651454  | 201 |
| chr3  | 22947519      | 22947719  | 201 |
| chr3  | 20581078      | 20581278  | 201 |
| chr3  | 20573261      | 20573461  | 201 |
| chr3  | 4493947       | 4494147   | 201 |
| chr29 | 49456416      | 49456616  | 201 |
| chr29 | 48785984      | 48786184  | 201 |

|       |               |          |     |
|-------|---------------|----------|-----|
| chr29 | 45080984      | 45081184 | 201 |
| chr29 | 35407248      | 35407448 | 201 |
| chr29 | 34958750      | 34958950 | 201 |
| chr29 | 34582762      | 34582962 | 201 |
| chr29 | 33549216      | 33549416 | 201 |
| chr29 | 31614248      | 31614448 | 201 |
| chr29 | 29692855      | 29693055 | 201 |
| chr28 | 40371895      | 40372095 | 201 |
| chr28 | 27138228      | 27138428 | 201 |
| chr28 | 27132673      | 27132873 | 201 |
| chr28 | 26060398      | 26060598 | 201 |
| chr28 | 25496611      | 25496811 | 201 |
| chr28 | 185548 185748 | 201      |     |
| chr27 | 27945277      | 27945477 | 201 |
| chr27 | 27925998      | 27926198 | 201 |
| chr27 | 27016361      | 27016561 | 201 |
| chr26 | 44392053      | 44392253 | 201 |
| chr26 | 42741171      | 42741371 | 201 |
| chr26 | 42254507      | 42254707 | 201 |
| chr26 | 41249853      | 41250053 | 201 |
| chr26 | 33343683      | 33343883 | 201 |
| chr26 | 33088007      | 33088207 | 201 |
| chr26 | 18049766      | 18049966 | 201 |
| chr26 | 17666969      | 17667169 | 201 |
| chr25 | 40363738      | 40363938 | 201 |
| chr25 | 33390081      | 33390281 | 201 |
| chr25 | 30855910      | 30856110 | 201 |
| chr25 | 29650360      | 29650560 | 201 |
| chr25 | 26409968      | 26410168 | 201 |
| chr25 | 11260722      | 11260922 | 201 |
| chr25 | 8729069       | 8729269  | 201 |
| chr25 | 3064244       | 3064444  | 201 |
| chr25 | 11331 11531   | 201      |     |
| chr24 | 49791695      | 49791895 | 201 |
| chr24 | 49785809      | 49786009 | 201 |
| chr24 | 43677553      | 43677753 | 201 |
| chr24 | 40327361      | 40327561 | 201 |
| chr24 | 34981325      | 34981525 | 201 |
| chr24 | 791550 791750 | 201      |     |
| chr23 | 52811195      | 52811395 | 201 |
| chr23 | 52598825      | 52599025 | 201 |
| chr23 | 43944848      | 43945048 | 201 |
| chr23 | 43091634      | 43091834 | 201 |
| chr23 | 38065920      | 38066120 | 201 |
| chr23 | 28894854      | 28895054 | 201 |
| chr23 | 27951663      | 27951863 | 201 |
| chr23 | 15950608      | 15950808 | 201 |
| chr23 | 11969361      | 11969561 | 201 |
| chr23 | 10485783      | 10485983 | 201 |
| chr22 | 52235074      | 52235274 | 201 |

|       |           |           |     |
|-------|-----------|-----------|-----|
| chr22 | 49568302  | 49568502  | 201 |
| chr22 | 15012652  | 15012852  | 201 |
| chr21 | 66664388  | 66664588  | 201 |
| chr21 | 34795346  | 34795546  | 201 |
| chr21 | 33663006  | 33663206  | 201 |
| chr21 | 23691496  | 23691696  | 201 |
| chr21 | 13693618  | 13693818  | 201 |
| chr20 | 25819755  | 25819955  | 201 |
| chr20 | 10764889  | 10765089  | 201 |
| chr20 | 2631966   | 2632166   | 201 |
| chr2  | 140616257 | 140616457 | 201 |
| chr2  | 139368745 | 139368945 | 201 |
| chr2  | 135134978 | 135135178 | 201 |
| chr2  | 132165988 | 132166188 | 201 |
| chr2  | 76375272  | 76375472  | 201 |
| chr2  | 74013247  | 74013447  | 201 |
| chr2  | 56955026  | 56955226  | 201 |
| chr19 | 62249899  | 62250099  | 201 |
| chr19 | 58854053  | 58854253  | 201 |
| chr19 | 47384858  | 47385058  | 201 |
| chr19 | 46893846  | 46894046  | 201 |
| chr19 | 42305691  | 42305891  | 201 |
| chr19 | 32878659  | 32878859  | 201 |
| chr19 | 29698154  | 29698354  | 201 |
| chr19 | 28207636  | 28207836  | 201 |
| chr19 | 19130772  | 19130972  | 201 |
| chr19 | 16971437  | 16971637  | 201 |
| chr19 | 12321625  | 12321825  | 201 |
| chr19 | 12301263  | 12301463  | 201 |
| chr19 | 10950245  | 10950445  | 201 |
| chr19 | 6517139   | 6517339   | 201 |
| chr18 | 64643103  | 64643303  | 201 |
| chr18 | 58675691  | 58675891  | 201 |
| chr18 | 50917775  | 50917975  | 201 |
| chr18 | 50263777  | 50263977  | 201 |
| chr18 | 33707645  | 33707845  | 201 |
| chr18 | 23924060  | 23924260  | 201 |
| chr18 | 22245333  | 22245533  | 201 |
| chr18 | 11790676  | 11790876  | 201 |
| chr18 | 11556345  | 11556545  | 201 |
| chr18 | 4706033   | 4706233   | 201 |
| chr17 | 70172984  | 70173184  | 201 |
| chr17 | 69924018  | 69924218  | 201 |
| chr17 | 68400293  | 68400493  | 201 |
| chr17 | 68399634  | 68399834  | 201 |
| chr17 | 61077049  | 61077249  | 201 |
| chr17 | 49438034  | 49438234  | 201 |
| chr17 | 48248251  | 48248451  | 201 |
| chr16 | 59071012  | 59071212  | 201 |
| chr16 | 54563134  | 54563334  | 201 |

|       |           |           |     |
|-------|-----------|-----------|-----|
| chr16 | 46661660  | 46661860  | 201 |
| chr16 | 39600263  | 39600463  | 201 |
| chr16 | 38787198  | 38787398  | 201 |
| chr16 | 1333625   | 1333825   | 201 |
| chr15 | 26798334  | 26798534  | 201 |
| chr15 | 24448692  | 24448892  | 201 |
| chr15 | 23235171  | 23235371  | 201 |
| chr15 | 22500351  | 22500551  | 201 |
| chr14 | 61114922  | 61115122  | 201 |
| chr14 | 19420785  | 19420985  | 201 |
| chr14 | 17059492  | 17059692  | 201 |
| chr14 | 7800557   | 7800757   | 201 |
| chr13 | 77804126  | 77804326  | 201 |
| chr13 | 70141587  | 70141787  | 201 |
| chr13 | 61867799  | 61867999  | 201 |
| chr13 | 59725517  | 59725717  | 201 |
| chr13 | 59671656  | 59671856  | 201 |
| chr13 | 59017923  | 59018123  | 201 |
| chr13 | 56204782  | 56204982  | 201 |
| chr13 | 55315193  | 55315393  | 201 |
| chr13 | 41379940  | 41380140  | 201 |
| chr13 | 41257450  | 41257650  | 201 |
| chr13 | 18326903  | 18327103  | 201 |
| chr13 | 17727744  | 17727944  | 201 |
| chr13 | 17674624  | 17674824  | 201 |
| chr13 | 1280656   | 1280856   | 201 |
| chr12 | 34282493  | 34282693  | 201 |
| chr12 | 29892696  | 29892896  | 201 |
| chr12 | 16808513  | 16808713  | 201 |
| chr11 | 105645273 | 105645473 | 201 |
| chr11 | 98368398  | 98368598  | 201 |
| chr11 | 80825943  | 80826143  | 201 |
| chr11 | 77795433  | 77795633  | 201 |
| chr11 | 77627127  | 77627327  | 201 |
| chr11 | 71541739  | 71541939  | 201 |
| chr11 | 71064309  | 71064509  | 201 |
| chr11 | 49415783  | 49415983  | 201 |
| chr11 | 30752444  | 30752644  | 201 |
| chr11 | 23852028  | 23852228  | 201 |
| chr11 | 13419849  | 13420049  | 201 |
| chr11 | 1642035   | 1642235   | 201 |
| chr10 | 87925496  | 87925696  | 201 |
| chr10 | 83882540  | 83882740  | 201 |
| chr10 | 70528602  | 70528802  | 201 |
| chr10 | 21529334  | 21529534  | 201 |
| chr10 | 21137334  | 21137534  | 201 |
| chr10 | 20495545  | 20495745  | 201 |
| chr10 | 17331266  | 17331466  | 201 |
| chr10 | 16976955  | 16977155  | 201 |
| chr10 | 16845423  | 16845623  | 201 |

|      |               |           |     |
|------|---------------|-----------|-----|
| chr1 | 145750386     | 145750586 | 201 |
| chr1 | 144811957     | 144812157 | 201 |
| chr1 | 144797789     | 144797989 | 201 |
| chr1 | 124253565     | 124253765 | 201 |
| chr1 | 112144917     | 112145117 | 201 |
| chr1 | 75483958      | 75484158  | 201 |
| chr1 | 74912722      | 74912922  | 201 |
| chr1 | 72398772      | 72398972  | 201 |
| chr1 | 72380633      | 72380833  | 201 |
| chr1 | 59610551      | 59610751  | 201 |
| chr1 | 1701352       | 1701552   | 201 |
| chr1 | 707405 707605 | 201       |     |
| chrX | 81039353      | 81039552  | 200 |
| chrX | 79849365      | 79849564  | 200 |
| chrX | 78930447      | 78930646  | 200 |
| chrX | 78259310      | 78259509  | 200 |
| chrX | 75995442      | 75995641  | 200 |
| chrX | 75412622      | 75412821  | 200 |
| chrX | 72721310      | 72721509  | 200 |
| chrX | 72439145      | 72439344  | 200 |
| chrX | 72173089      | 72173288  | 200 |
| chrX | 71946851      | 71947050  | 200 |
| chrX | 68151182      | 68151381  | 200 |
| chrX | 67160189      | 67160388  | 200 |
| chrX | 65866407      | 65866606  | 200 |
| chrX | 64434741      | 64434940  | 200 |
| chrX | 61247692      | 61247891  | 200 |
| chrX | 61084189      | 61084388  | 200 |
| chrX | 61003337      | 61003536  | 200 |
| chrX | 56925982      | 56926181  | 200 |
| chrX | 56008984      | 56009183  | 200 |
| chrX | 55293621      | 55293820  | 200 |
| chrX | 52223806      | 52224005  | 200 |
| chrX | 51166271      | 51166470  | 200 |
| chrX | 50706195      | 50706394  | 200 |
| chrX | 50510117      | 50510316  | 200 |
| chrX | 49838444      | 49838643  | 200 |
| chrX | 49639381      | 49639580  | 200 |
| chrX | 41167147      | 41167346  | 200 |
| chrX | 40642324      | 40642523  | 200 |
| chrX | 35795713      | 35795912  | 200 |
| chrX | 34500271      | 34500470  | 200 |
| chrX | 34055150      | 34055349  | 200 |
| chrX | 30688957      | 30689156  | 200 |
| chrX | 30569765      | 30569964  | 200 |
| chrX | 22520669      | 22520868  | 200 |
| chrX | 21542836      | 21543035  | 200 |
| chrX | 20489698      | 20489897  | 200 |
| chrX | 20455669      | 20455868  | 200 |
| chrX | 19778982      | 19779181  | 200 |

|      |           |           |     |
|------|-----------|-----------|-----|
| chrX | 18466490  | 18466689  | 200 |
| chrX | 17374178  | 17374377  | 200 |
| chrX | 14631630  | 14631829  | 200 |
| chrX | 10721216  | 10721415  | 200 |
| chrX | 8360012   | 8360211   | 200 |
| chrX | 6640182   | 6640381   | 200 |
| chrX | 6431572   | 6431771   | 200 |
| chrX | 2382400   | 2382599   | 200 |
| chr9 | 104875224 | 104875423 | 200 |
| chr9 | 92191419  | 92191618  | 200 |
| chr9 | 90601926  | 90602125  | 200 |
| chr9 | 90454720  | 90454919  | 200 |
| chr9 | 90237008  | 90237207  | 200 |
| chr9 | 87730437  | 87730636  | 200 |
| chr9 | 76345113  | 76345312  | 200 |
| chr9 | 66152104  | 66152303  | 200 |
| chr9 | 41986568  | 41986767  | 200 |
| chr9 | 38368999  | 38369198  | 200 |
| chr8 | 105587481 | 105587680 | 200 |
| chr8 | 72074883  | 72075082  | 200 |
| chr8 | 27082998  | 27083197  | 200 |
| chr8 | 25638809  | 25639008  | 200 |
| chr7 | 45120439  | 45120638  | 200 |
| chr7 | 44413747  | 44413946  | 200 |
| chr7 | 42925336  | 42925535  | 200 |
| chr7 | 38862525  | 38862724  | 200 |
| chr7 | 3966547   | 3966746   | 200 |
| chr6 | 114783379 | 114783578 | 200 |
| chr5 | 121819705 | 121819904 | 200 |
| chr5 | 113322979 | 113323178 | 200 |
| chr5 | 113309684 | 113309883 | 200 |
| chr5 | 113219772 | 113219971 | 200 |
| chr5 | 103823652 | 103823851 | 200 |
| chr5 | 102831253 | 102831452 | 200 |
| chr5 | 30820424  | 30820623  | 200 |
| chr5 | 29921191  | 29921390  | 200 |
| chr5 | 28803693  | 28803892  | 200 |
| chr5 | 10778143  | 10778342  | 200 |
| chr5 | 5359662   | 5359861   | 200 |
| chr4 | 122567358 | 122567557 | 200 |
| chr4 | 121031924 | 121032123 | 200 |
| chr4 | 116551324 | 116551523 | 200 |
| chr4 | 102028247 | 102028446 | 200 |
| chr4 | 71615469  | 71615668  | 200 |
| chr4 | 55201386  | 55201585  | 200 |
| chr4 | 34302406  | 34302605  | 200 |
| chr4 | 26585807  | 26586006  | 200 |
| chr3 | 123424557 | 123424756 | 200 |
| chr3 | 118240338 | 118240537 | 200 |
| chr3 | 115477667 | 115477866 | 200 |



|       |               |           |     |
|-------|---------------|-----------|-----|
| chr3  | 115423565     | 115423764 | 200 |
| chr3  | 113403024     | 113403223 | 200 |
| chr3  | 109783518     | 109783717 | 200 |
| chr3  | 99898884      | 99899083  | 200 |
| chr3  | 99629016      | 99629215  | 200 |
| chr3  | 99273660      | 99273859  | 200 |
| chr3  | 99148246      | 99148445  | 200 |
| chr3  | 86906365      | 86906564  | 200 |
| chr3  | 83321397      | 83321596  | 200 |
| chr3  | 24653391      | 24653590  | 200 |
| chr3  | 15774959      | 15775158  | 200 |
| chr3  | 10271446      | 10271645  | 200 |
| chr3  | 7801814       | 7802013   | 200 |
| chr29 | 42935688      | 42935887  | 200 |
| chr29 | 37709265      | 37709464  | 200 |
| chr29 | 36727446      | 36727645  | 200 |
| chr29 | 35721542      | 35721741  | 200 |
| chr29 | 34594983      | 34595182  | 200 |
| chr29 | 33878592      | 33878791  | 200 |
| chr29 | 33558508      | 33558707  | 200 |
| chr29 | 17456449      | 17456648  | 200 |
| chr28 | 37396518      | 37396717  | 200 |
| chr28 | 27085900      | 27086099  | 200 |
| chr28 | 26413349      | 26413548  | 200 |
| chr28 | 25119963      | 25120162  | 200 |
| chr28 | 23925778      | 23925977  | 200 |
| chr28 | 3057255       | 3057454   | 200 |
| chr28 | 1279543       | 1279742   | 200 |
| chr27 | 48684438      | 48684637  | 200 |
| chr27 | 38508364      | 38508563  | 200 |
| chr27 | 28104107      | 28104306  | 200 |
| chr27 | 26880074      | 26880273  | 200 |
| chr27 | 26520747      | 26520946  | 200 |
| chr27 | 17058378      | 17058577  | 200 |
| chr26 | 48844781      | 48844980  | 200 |
| chr26 | 43575896      | 43576095  | 200 |
| chr26 | 39132775      | 39132974  | 200 |
| chr26 | 38458009      | 38458208  | 200 |
| chr26 | 34888460      | 34888659  | 200 |
| chr26 | 32736640      | 32736839  | 200 |
| chr26 | 23892142      | 23892341  | 200 |
| chr25 | 43493625      | 43493824  | 200 |
| chr25 | 40207650      | 40207849  | 200 |
| chr25 | 38315712      | 38315911  | 200 |
| chr25 | 38098837      | 38099036  | 200 |
| chr25 | 33206995      | 33207194  | 200 |
| chr25 | 22687407      | 22687606  | 200 |
| chr25 | 411339 411538 | 200       |     |
| chr24 | 46929142      | 46929341  | 200 |
| chr24 | 43706230      | 43706429  | 200 |

|       |               |           |     |
|-------|---------------|-----------|-----|
| chr24 | 35427519      | 35427718  | 200 |
| chr24 | 35171967      | 35172166  | 200 |
| chr24 | 20892702      | 20892901  | 200 |
| chr24 | 1427975       | 1428174   | 200 |
| chr24 | 941900 942099 | 200       |     |
| chr23 | 49793172      | 49793371  | 200 |
| chr23 | 46059265      | 46059464  | 200 |
| chr23 | 38064913      | 38065112  | 200 |
| chr23 | 27759893      | 27760092  | 200 |
| chr23 | 15866575      | 15866774  | 200 |
| chr23 | 8362048       | 8362247   | 200 |
| chr22 | 60195893      | 60196092  | 200 |
| chr22 | 58509624      | 58509823  | 200 |
| chr22 | 54522535      | 54522734  | 200 |
| chr22 | 52233876      | 52234075  | 200 |
| chr22 | 30357749      | 30357948  | 200 |
| chr22 | 30297684      | 30297883  | 200 |
| chr22 | 29876894      | 29877093  | 200 |
| chr22 | 11107010      | 11107209  | 200 |
| chr22 | 1417632       | 1417831   | 200 |
| chr21 | 65654275      | 65654474  | 200 |
| chr21 | 62428401      | 62428600  | 200 |
| chr21 | 28929139      | 28929338  | 200 |
| chr21 | 27104268      | 27104467  | 200 |
| chr21 | 26714712      | 26714911  | 200 |
| chr21 | 25334415      | 25334614  | 200 |
| chr21 | 19296182      | 19296381  | 200 |
| chr20 | 71437460      | 71437659  | 200 |
| chr20 | 71111729      | 71111928  | 200 |
| chr20 | 70806955      | 70807154  | 200 |
| chr20 | 62763456      | 62763655  | 200 |
| chr20 | 22281579      | 22281778  | 200 |
| chr20 | 7289718       | 7289917   | 200 |
| chr20 | 1209599       | 1209798   | 200 |
| chr2  | 140615684     | 140615883 | 200 |
| chr2  | 139918369     | 139918568 | 200 |
| chr2  | 134675264     | 134675463 | 200 |
| chr2  | 131061924     | 131062123 | 200 |
| chr2  | 123753027     | 123753226 | 200 |
| chr2  | 123454092     | 123454291 | 200 |
| chr2  | 75821932      | 75822131  | 200 |
| chr2  | 75812473      | 75812672  | 200 |
| chr2  | 26588104      | 26588303  | 200 |
| chr19 | 65243588      | 65243787  | 200 |
| chr19 | 63625895      | 63626094  | 200 |
| chr19 | 63078256      | 63078455  | 200 |
| chr19 | 62423011      | 62423210  | 200 |
| chr19 | 62212645      | 62212844  | 200 |
| chr19 | 58570994      | 58571193  | 200 |
| chr19 | 56529170      | 56529369  | 200 |

|       |          |          |     |
|-------|----------|----------|-----|
| chr19 | 56497172 | 56497371 | 200 |
| chr19 | 55782965 | 55783164 | 200 |
| chr19 | 52411177 | 52411376 | 200 |
| chr19 | 47234550 | 47234749 | 200 |
| chr19 | 45061907 | 45062106 | 200 |
| chr19 | 42055552 | 42055751 | 200 |
| chr19 | 39251372 | 39251571 | 200 |
| chr19 | 38550132 | 38550331 | 200 |
| chr19 | 32535068 | 32535267 | 200 |
| chr19 | 29098469 | 29098668 | 200 |
| chr19 | 27088129 | 27088328 | 200 |
| chr19 | 25428712 | 25428911 | 200 |
| chr19 | 24262739 | 24262938 | 200 |
| chr19 | 24248380 | 24248579 | 200 |
| chr19 | 18935003 | 18935202 | 200 |
| chr19 | 17254185 | 17254384 | 200 |
| chr19 | 17044378 | 17044577 | 200 |
| chr19 | 14959669 | 14959868 | 200 |
| chr19 | 13576883 | 13577082 | 200 |
| chr19 | 8398870  | 8399069  | 200 |
| chr19 | 7878408  | 7878607  | 200 |
| chr19 | 7225195  | 7225394  | 200 |
| chr19 | 3993725  | 3993924  | 200 |
| chr18 | 57196252 | 57196451 | 200 |
| chr18 | 42246190 | 42246389 | 200 |
| chr18 | 42059376 | 42059575 | 200 |
| chr18 | 35093930 | 35094129 | 200 |
| chr18 | 25340230 | 25340429 | 200 |
| chr18 | 18657281 | 18657480 | 200 |
| chr18 | 18133109 | 18133308 | 200 |
| chr18 | 11822372 | 11822571 | 200 |
| chr18 | 11392392 | 11392591 | 200 |
| chr18 | 9826742  | 9826941  | 200 |
| chr18 | 9394682  | 9394881  | 200 |
| chr18 | 8052431  | 8052630  | 200 |
| chr18 | 3643921  | 3644120  | 200 |
| chr17 | 74942267 | 74942466 | 200 |
| chr17 | 67218571 | 67218770 | 200 |
| chr17 | 64359097 | 64359296 | 200 |
| chr17 | 64103196 | 64103395 | 200 |
| chr17 | 63500192 | 63500391 | 200 |
| chr17 | 63114627 | 63114826 | 200 |
| chr17 | 58923878 | 58924077 | 200 |
| chr17 | 56061399 | 56061598 | 200 |
| chr17 | 49047154 | 49047353 | 200 |
| chr17 | 13211424 | 13211623 | 200 |
| chr16 | 71568522 | 71568721 | 200 |
| chr16 | 60010001 | 60010200 | 200 |
| chr16 | 49444327 | 49444526 | 200 |
| chr16 | 48399739 | 48399938 | 200 |

|       |           |           |     |
|-------|-----------|-----------|-----|
| chr16 | 46481171  | 46481370  | 200 |
| chr16 | 46398861  | 46399060  | 200 |
| chr16 | 43110707  | 43110906  | 200 |
| chr16 | 41471757  | 41471956  | 200 |
| chr16 | 26106983  | 26107182  | 200 |
| chr15 | 75594592  | 75594791  | 200 |
| chr15 | 44242001  | 44242200  | 200 |
| chr15 | 30280938  | 30281137  | 200 |
| chr15 | 26869786  | 26869985  | 200 |
| chr15 | 25622699  | 25622898  | 200 |
| chr15 | 22768451  | 22768650  | 200 |
| chr15 | 5382056   | 5382255   | 200 |
| chr14 | 73041366  | 73041565  | 200 |
| chr14 | 36553107  | 36553306  | 200 |
| chr14 | 23383588  | 23383787  | 200 |
| chr14 | 17064348  | 17064547  | 200 |
| chr14 | 8756708   | 8756907   | 200 |
| chr13 | 68211988  | 68212187  | 200 |
| chr13 | 63322641  | 63322840  | 200 |
| chr13 | 61665638  | 61665837  | 200 |
| chr13 | 60964402  | 60964601  | 200 |
| chr13 | 59836127  | 59836326  | 200 |
| chr13 | 58667153  | 58667352  | 200 |
| chr13 | 56322623  | 56322822  | 200 |
| chr13 | 55087501  | 55087700  | 200 |
| chr13 | 42803845  | 42804044  | 200 |
| chr13 | 41924802  | 41925001  | 200 |
| chr13 | 40075851  | 40076050  | 200 |
| chr13 | 34753299  | 34753498  | 200 |
| chr12 | 32845782  | 32845981  | 200 |
| chr12 | 30992974  | 30993173  | 200 |
| chr12 | 29563749  | 29563948  | 200 |
| chr12 | 23090873  | 23091072  | 200 |
| chr11 | 109301132 | 109301331 | 200 |
| chr11 | 108119518 | 108119717 | 200 |
| chr11 | 106738594 | 106738793 | 200 |
| chr11 | 105200024 | 105200223 | 200 |
| chr11 | 100493964 | 100494163 | 200 |
| chr11 | 92516160  | 92516359  | 200 |
| chr11 | 87836095  | 87836294  | 200 |
| chr11 | 82895683  | 82895882  | 200 |
| chr11 | 80216666  | 80216865  | 200 |
| chr11 | 76380400  | 76380599  | 200 |
| chr11 | 75101039  | 75101238  | 200 |
| chr11 | 73194128  | 73194327  | 200 |
| chr11 | 72736237  | 72736436  | 200 |
| chr11 | 65204797  | 65204996  | 200 |
| chr11 | 62442473  | 62442672  | 200 |
| chr11 | 39502207  | 39502406  | 200 |
| chr11 | 20973373  | 20973572  | 200 |

|       |             |           |     |
|-------|-------------|-----------|-----|
| chr11 | 14389365    | 14389564  | 200 |
| chr11 | 9256637     | 9256836   | 200 |
| chr10 | 104435226   | 104435425 | 200 |
| chr10 | 90532182    | 90532381  | 200 |
| chr10 | 90504566    | 90504765  | 200 |
| chr10 | 83320304    | 83320503  | 200 |
| chr10 | 35636785    | 35636984  | 200 |
| chr10 | 19600903    | 19601102  | 200 |
| chr10 | 17311015    | 17311214  | 200 |
| chr1  | 160852059   | 160852258 | 200 |
| chr1  | 154181173   | 154181372 | 200 |
| chr1  | 151962321   | 151962520 | 200 |
| chr1  | 98967948    | 98968147  | 200 |
| chr1  | 64052127    | 64052326  | 200 |
| chr1  | 39233360    | 39233559  | 200 |
| chr1  | 1520680     | 1520879   | 200 |
| chr10 | 7834788     | 7835007   | 220 |
| chr17 | 17446241    | 17446446  | 206 |
| chr1  | 53883396    | 53883735  | 340 |
| chr28 | 46076478    | 46076745  | 268 |
| chr1  | 67932995    | 67933205  | 211 |
| chr6  | 34878420    | 34878628  | 209 |
| chr3  | 24651309    | 24651572  | 264 |
| chr8  | 73758673    | 73758873  | 201 |
| chr2  | 133490182   | 133490382 | 201 |
| chr25 | 13328 13527 | 200       |     |
| chr2  | 72410867    | 72411066  | 200 |
| chr15 | 80878697    | 80878896  | 200 |
| chr12 | 5754364     | 5754563   | 200 |
| chr20 | 73397653    | 73397856  | 204 |
| chrX  | 49585492    | 49585889  | 398 |
| chr4  | 124450856   | 124451066 | 211 |
| chr4  | 88062128    | 88062327  | 200 |
| chr25 | 5828499     | 5828721   | 223 |
| chrX  | 66635628    | 66636011  | 384 |
| chr18 | 58984204    | 58984567  | 364 |
| chr1  | 45995429    | 45995770  | 342 |
| chr18 | 36038631    | 36038960  | 330 |
| chr25 | 78149 78463 | 315       |     |
| chr21 | 19210374    | 19210666  | 293 |
| chrX  | 6641874     | 6642160   | 287 |
| chr1  | 86258393    | 86258678  | 286 |
| chrX  | 20559710    | 20559989  | 280 |
| chr8  | 48465045    | 48465324  | 280 |
| chr5  | 111148380   | 111148657 | 278 |
| chr26 | 37973998    | 37974270  | 273 |
| chr18 | 22531302    | 22531574  | 273 |
| chr24 | 43484043    | 43484314  | 272 |
| chr11 | 88512183    | 88512448  | 266 |
| chrX  | 10004218    | 10004482  | 265 |

|       |           |           |     |
|-------|-----------|-----------|-----|
| chr5  | 31794827  | 31795087  | 261 |
| chr19 | 38561709  | 38561969  | 261 |
| chrX  | 20766257  | 20766514  | 258 |
| chr25 | 43226569  | 43226826  | 258 |
| chr13 | 41639008  | 41639264  | 257 |
| chrX  | 34543177  | 34543432  | 256 |
| chr26 | 23073715  | 23073968  | 254 |
| chr4  | 79038474  | 79038726  | 253 |
| chr23 | 18831255  | 18831507  | 253 |
| chr23 | 11069032  | 11069282  | 251 |
| chr8  | 24329143  | 24329392  | 250 |
| chr23 | 35014231  | 35014479  | 249 |
| chrX  | 53447663  | 53447909  | 247 |
| chr9  | 47119450  | 47119696  | 247 |
| chr13 | 27113570  | 27113816  | 247 |
| chr2  | 68455052  | 68455296  | 245 |
| chrX  | 72005100  | 72005343  | 244 |
| chr5  | 51968913  | 51969154  | 242 |
| chr29 | 34910114  | 34910355  | 242 |
| chr22 | 36608343  | 36608584  | 242 |
| chr15 | 30006251  | 30006492  | 242 |
| chr9  | 52817883  | 52818123  | 241 |
| chr3  | 9151298   | 9151538   | 241 |
| chr18 | 50551271  | 50551511  | 241 |
| chr9  | 100332007 | 100332246 | 240 |
| chr25 | 21767011  | 21767250  | 240 |
| chr22 | 30577800  | 30578038  | 239 |
| chr21 | 58567784  | 58568022  | 239 |
| chr4  | 10767436  | 10767673  | 238 |
| chr8  | 24440095  | 24440329  | 235 |
| chrX  | 9156565   | 9156798   | 234 |
| chr26 | 41432976  | 41433209  | 234 |
| chr21 | 1927407   | 1927640   | 234 |
| chr18 | 24348199  | 24348432  | 234 |
| chr8  | 87802166  | 87802398  | 233 |
| chr24 | 1885143   | 1885375   | 233 |
| chr21 | 60841262  | 60841494  | 233 |
| chrX  | 20002924  | 20003155  | 232 |
| chr3  | 33956941  | 33957172  | 232 |
| chr14 | 26470966  | 26471195  | 230 |
| chr1  | 99249652  | 99249881  | 230 |
| chr5  | 43555545  | 43555773  | 229 |
| chr29 | 44625158  | 44625386  | 229 |
| chr1  | 2335126   | 2335353   | 228 |
| chr6  | 59504309  | 59504535  | 227 |
| chr28 | 34121253  | 34121479  | 227 |
| chr17 | 70080735  | 70080961  | 227 |
| chr10 | 90944276  | 90944502  | 227 |
| chr7  | 17958120  | 17958345  | 226 |
| chr28 | 26766233  | 26766458  | 226 |

|       |               |           |     |
|-------|---------------|-----------|-----|
| chrX  | 57132913      | 57133137  | 225 |
| chr5  | 30401627      | 30401851  | 225 |
| chr18 | 11730946      | 11731170  | 225 |
| chr1  | 145719477     | 145719701 | 225 |
| chr24 | 1594367       | 1594590   | 224 |
| chr19 | 40974117      | 40974340  | 224 |
| chr7  | 80958180      | 80958402  | 223 |
| chr7  | 14732896      | 14733118  | 223 |
| chr2  | 34400781      | 34401002  | 222 |
| chr28 | 196469 196689 | 221       |     |
| chr25 | 37802379      | 37802599  | 221 |
| chr14 | 64390692      | 64390912  | 221 |
| chr1  | 147246314     | 147246534 | 221 |
| chr2  | 31191875      | 31192094  | 220 |
| chr16 | 50359691      | 50359910  | 220 |
| chr15 | 54276669      | 54276888  | 220 |
| chr10 | 81624004      | 81624223  | 220 |
| chr9  | 52092527      | 52092745  | 219 |
| chr28 | 7603145       | 7603363   | 219 |
| chr12 | 32238171      | 32238389  | 219 |
| chrX  | 80240401      | 80240618  | 218 |
| chrX  | 6471072       | 6471289   | 218 |
| chr8  | 24337326      | 24337543  | 218 |
| chr11 | 95252429      | 95252646  | 218 |
| chr10 | 12111875      | 12112092  | 218 |
| chrX  | 8180569       | 8180785   | 217 |
| chr17 | 63415275      | 63415491  | 217 |
| chr8  | 73826040      | 73826255  | 216 |
| chr7  | 17485682      | 17485897  | 216 |
| chr11 | 89688824      | 89689039  | 216 |
| chr1  | 9026073       | 9026288   | 216 |
| chr7  | 43392590      | 43392804  | 215 |
| chr6  | 5856056       | 5856270   | 215 |
| chr22 | 46604107      | 46604321  | 215 |
| chr18 | 50487204      | 50487418  | 215 |
| chrX  | 34110384      | 34110597  | 214 |
| chr9  | 106834272     | 106834485 | 214 |
| chr2  | 26492750      | 26492963  | 214 |
| chr18 | 63414226      | 63414439  | 214 |
| chr11 | 1648332       | 1648545   | 214 |
| chrX  | 72906742      | 72906954  | 213 |
| chrX  | 61846733      | 61846945  | 213 |
| chr6  | 115523597     | 115523809 | 213 |
| chr3  | 123303521     | 123303733 | 213 |
| chrX  | 23394208      | 23394419  | 212 |
| chr3  | 111256475     | 111256686 | 212 |
| chr3  | 62686536      | 62686747  | 212 |
| chr15 | 29991923      | 29992134  | 212 |
| chrX  | 20981783      | 20981993  | 211 |
| chr23 | 18764606      | 18764816  | 211 |

|       |           |           |     |
|-------|-----------|-----------|-----|
| chr19 | 41390283  | 41390493  | 211 |
| chr19 | 30696209  | 30696419  | 211 |
| chr18 | 34059382  | 34059592  | 211 |
| chr16 | 3637843   | 3638053   | 211 |
| chr13 | 42259984  | 42260194  | 211 |
| chr11 | 106313165 | 106313375 | 211 |
| chr11 | 40253855  | 40254065  | 211 |
| chr11 | 11044387  | 11044597  | 211 |
| chrX  | 55157426  | 55157635  | 210 |
| chrX  | 36453011  | 36453220  | 210 |
| chr9  | 90478660  | 90478869  | 210 |
| chr27 | 11600525  | 11600734  | 210 |
| chr1  | 82236300  | 82236509  | 210 |
| chrX  | 48722776  | 48722984  | 209 |
| chr5  | 29956833  | 29957041  | 209 |
| chr3  | 115969143 | 115969351 | 209 |
| chr26 | 18202775  | 18202983  | 209 |
| chr16 | 47189898  | 47190106  | 209 |
| chr11 | 13156518  | 13156726  | 209 |
| chrX  | 16960665  | 16960872  | 208 |
| chr8  | 73322432  | 73322639  | 208 |
| chr25 | 2800485   | 2800692   | 208 |
| chr21 | 25191340  | 25191547  | 208 |
| chr19 | 48250333  | 48250540  | 208 |
| chr17 | 64607272  | 64607479  | 208 |
| chr11 | 70904175  | 70904382  | 208 |
| chr10 | 89397070  | 89397277  | 208 |
| chr8  | 73295624  | 73295830  | 207 |
| chr4  | 118013992 | 118014198 | 207 |
| chr4  | 98534076  | 98534282  | 207 |
| chr18 | 33212380  | 33212586  | 207 |
| chr16 | 40935851  | 40936057  | 207 |
| chr15 | 22795447  | 22795653  | 207 |
| chr15 | 10162842  | 10163048  | 207 |
| chr10 | 36245895  | 36246101  | 207 |
| chrX  | 80059130  | 80059335  | 206 |
| chrX  | 65688970  | 65689175  | 206 |
| chrX  | 59273348  | 59273553  | 206 |
| chrX  | 58676629  | 58676834  | 206 |
| chrX  | 56640272  | 56640477  | 206 |
| chrX  | 54994155  | 54994360  | 206 |
| chrX  | 9679936   | 9680141   | 206 |
| chrX  | 2578674   | 2578879   | 206 |
| chr8  | 112097752 | 112097957 | 206 |
| chr8  | 73828336  | 73828541  | 206 |
| chr6  | 45916603  | 45916808  | 206 |
| chr3  | 105725368 | 105725573 | 206 |
| chr29 | 49580270  | 49580475  | 206 |
| chr29 | 2536975   | 2537180   | 206 |
| chr24 | 1116809   | 1117014   | 206 |



|       |               |           |     |
|-------|---------------|-----------|-----|
| chr22 | 59235974      | 59236179  | 206 |
| chr20 | 59408831      | 59409036  | 206 |
| chr19 | 49636001      | 49636206  | 206 |
| chr18 | 49813180      | 49813385  | 206 |
| chr17 | 18732158      | 18732363  | 206 |
| chr15 | 36410404      | 36410609  | 206 |
| chr10 | 60340271      | 60340476  | 206 |
| chr10 | 10599348      | 10599553  | 206 |
| chrX  | 9054941       | 9055145   | 205 |
| chr4  | 108016047     | 108016251 | 205 |
| chr29 | 49049913      | 49050117  | 205 |
| chr26 | 43489953      | 43490157  | 205 |
| chr22 | 48831658      | 48831862  | 205 |
| chr22 | 12308252      | 12308456  | 205 |
| chr21 | 48696009      | 48696213  | 205 |
| chr2  | 123015666     | 123015870 | 205 |
| chr19 | 61511460      | 61511664  | 205 |
| chr18 | 54221896      | 54222100  | 205 |
| chr14 | 1827233       | 1827437   | 205 |
| chr11 | 71065765      | 71065969  | 205 |
| chr10 | 83086094      | 83086298  | 205 |
| chr9  | 499664 499867 | 204       |     |
| chr6  | 121698739     | 121698942 | 204 |
| chr5  | 76865301      | 76865504  | 204 |
| chr5  | 29956363      | 29956566  | 204 |
| chr22 | 48204060      | 48204263  | 204 |
| chr22 | 17799388      | 17799591  | 204 |
| chr21 | 26526902      | 26527105  | 204 |
| chr19 | 32886031      | 32886234  | 204 |
| chr18 | 64273278      | 64273481  | 204 |
| chr13 | 40271738      | 40271941  | 204 |
| chrX  | 19133692      | 19133894  | 203 |
| chr8  | 24216816      | 24217018  | 203 |
| chr7  | 38183378      | 38183580  | 203 |
| chr5  | 30356459      | 30356661  | 203 |
| chr4  | 117765333     | 117765535 | 203 |
| chr4  | 79046795      | 79046997  | 203 |
| chr3  | 45697253      | 45697455  | 203 |
| chr29 | 2528347       | 2528549   | 203 |
| chr28 | 26627217      | 26627419  | 203 |
| chr24 | 20365821      | 20366023  | 203 |
| chr23 | 42796138      | 42796340  | 203 |
| chr2  | 131298139     | 131298341 | 203 |
| chr1  | 30227118      | 30227320  | 203 |
| chr1  | 18874457      | 18874659  | 203 |
| chr1  | 5309083       | 5309285   | 203 |
| chrX  | 13644427      | 13644628  | 202 |
| chrX  | 8829776       | 8829977   | 202 |
| chr8  | 74934266      | 74934467  | 202 |
| chr8  | 73837347      | 73837548  | 202 |

|       |           |           |     |
|-------|-----------|-----------|-----|
| chr8  | 40965296  | 40965497  | 202 |
| chr7  | 80888998  | 80889199  | 202 |
| chr7  | 46528266  | 46528467  | 202 |
| chr6  | 120923586 | 120923787 | 202 |
| chr5  | 113219357 | 113219558 | 202 |
| chr5  | 110794757 | 110794958 | 202 |
| chr5  | 31294656  | 31294857  | 202 |
| chr29 | 29235843  | 29236044  | 202 |
| chr24 | 34703455  | 34703656  | 202 |
| chr24 | 5370270   | 5370471   | 202 |
| chr23 | 52693706  | 52693907  | 202 |
| chr21 | 1985104   | 1985305   | 202 |
| chr18 | 11417868  | 11418069  | 202 |
| chr16 | 2130069   | 2130270   | 202 |
| chr15 | 63091455  | 63091656  | 202 |
| chr14 | 76930350  | 76930551  | 202 |
| chr13 | 71188641  | 71188842  | 202 |
| chrX  | 59127288  | 59127488  | 201 |
| chr7  | 81898850  | 81899050  | 201 |
| chr6  | 72056122  | 72056322  | 201 |
| chr4  | 72230867  | 72231067  | 201 |
| chr24 | 60519040  | 60519240  | 201 |
| chr21 | 25300539  | 25300739  | 201 |
| chr19 | 62948263  | 62948463  | 201 |
| chr19 | 53138816  | 53139016  | 201 |
| chr19 | 38963796  | 38963996  | 201 |
| chr19 | 19123686  | 19123886  | 201 |
| chr18 | 11959595  | 11959795  | 201 |
| chr13 | 79913611  | 79913811  | 201 |
| chr13 | 45361300  | 45361500  | 201 |
| chr11 | 37443057  | 37443257  | 201 |
| chr1  | 153863385 | 153863585 | 201 |
| chrX  | 60303520  | 60303719  | 200 |
| chr8  | 73927623  | 73927822  | 200 |
| chr7  | 112049342 | 112049541 | 200 |
| chr5  | 118438901 | 118439100 | 200 |
| chr4  | 36672347  | 36672546  | 200 |
| chr4  | 12830682  | 12830881  | 200 |
| chr3  | 103484114 | 103484313 | 200 |
| chr3  | 14263301  | 14263500  | 200 |
| chr29 | 49346909  | 49347108  | 200 |
| chr29 | 44542754  | 44542953  | 200 |
| chr28 | 33885315  | 33885514  | 200 |
| chr21 | 58632035  | 58632234  | 200 |
| chr19 | 44303003  | 44303202  | 200 |
| chr18 | 13571299  | 13571498  | 200 |
| chr17 | 70308642  | 70308841  | 200 |
| chr16 | 48034723  | 48034922  | 200 |
| chr16 | 44844212  | 44844411  | 200 |
| chr16 | 43073289  | 43073488  | 200 |

|       |               |           |     |
|-------|---------------|-----------|-----|
| chr14 | 38855203      | 38855402  | 200 |
| chr14 | 35937800      | 35937999  | 200 |
| chr10 | 88371992      | 88372191  | 200 |
| chr10 | 67105109      | 67105308  | 200 |
| chr3  | 50398018      | 50398219  | 202 |
| chr21 | 2028612       | 2028812   | 201 |
| chr21 | 52077827      | 52078219  | 393 |
| chr2  | 111843922     | 111844188 | 267 |
| chrX  | 6598180       | 6598399   | 220 |
| chr1  | 5000850       | 5001058   | 209 |
| chr9  | 87753306      | 87753511  | 206 |
| chr8  | 24216262      | 24216466  | 205 |
| chr10 | 10835706      | 10835910  | 205 |
| chr7  | 24283576      | 24283779  | 204 |
| chr22 | 37062076      | 37062279  | 204 |
| chr15 | 18279806      | 18280008  | 203 |
| chr13 | 60440209      | 60440411  | 203 |
| chr15 | 65126847      | 65127048  | 202 |
| chr13 | 63469580      | 63469781  | 202 |
| chr8  | 73873862      | 73874062  | 201 |
| chr8  | 60679204      | 60679404  | 201 |
| chr25 | 266592 266792 | 201       |     |
| chr16 | 44002859      | 44003059  | 201 |
| chr11 | 96694734      | 96694934  | 201 |
| chrX  | 6518336       | 6518535   | 200 |
| chr3  | 86918628      | 86918827  | 200 |
| chr21 | 2056379       | 2056578   | 200 |
| chr13 | 4069643       | 4069842   | 200 |
| chr7  | 189109 189315 | 207       |     |
