# Supplementary material for: Genomic architecture of histone 3 lysine 27 trimethylation during late ovine skeletal muscle development
Source: PubMed Central journal article supplement — Anim Genet. 2014 Mar 27;45(3):427–38. doi: 10.1111/age.12145 (PMC4286725; doi:10.1111/age.12145), 2014-03-27
Supplement: age-45-427-s12.pdf [file age-45-427-s12.pdf]

**Table S3** Lamb H3K27me3 peaks

Details of the H3K27me3 peak co-ordinates identified using CisGenome lamb. The file lists chromosome, peak genomic co-ordinates and peak length.

| Chr | No.   | Start     | Stop      | Length |
|-----|-------|-----------|-----------|--------|
|     | chr20 | 33677194  | 33679851  | 2658   |
|     | chr3  | 20057420  | 20060024  | 2605   |
|     | chr24 | 814874    | 818676    | 3803   |
|     | chr25 | 44033223  | 44035113  | 1891   |
|     | chr19 | 54277523  | 54290741  | 13219  |
|     | chr3  | 88248894  | 88251666  | 2773   |
|     | chr23 | 49955962  | 49965530  | 9569   |
|     | chr2  | 23101236  | 23109981  | 8746   |
|     | chr19 | 37883468  | 37886910  | 3443   |
|     | chr1  | 87345690  | 87347665  | 1976   |
|     | chr23 | 31306702  | 31310081  | 3380   |
|     | chr26 | 21982076  | 21983044  | 969    |
|     | chr14 | 66266990  | 66269264  | 2275   |
|     | chr6  | 63050578  | 63052172  | 1595   |
|     | chr10 | 8341737   | 8344198   | 2462   |
|     | chr23 | 31310227  | 31312050  | 1824   |
|     | chr3  | 88255171  | 88261652  | 6482   |
|     | chr4  | 71566289  | 71571638  | 5350   |
|     | chr3  | 102660283 | 102665901 | 5619   |
|     | chr5  | 28917436  | 28921102  | 3667   |
|     | chr14 | 31023303  | 31024355  | 1053   |
|     | chr13 | 40894918  | 40895942  | 1025   |
|     | chr8  | 55395848  | 55401627  | 5780   |
|     | chr4  | 71580136  | 71592719  | 12584  |
|     | chr6  | 14219596  | 14223678  | 4083   |
|     | chr3  | 22925806  | 22929149  | 3344   |
|     | chr15 | 62394514  | 62397309  | 2796   |
|     | chr2  | 92335497  | 92342407  | 6911   |
|     | chr2  | 111301145 | 111303247 | 2103   |
|     | chr3  | 123187480 | 123192152 | 4673   |
|     | chr2  | 36097945  | 36099093  | 1149   |
|     | chr20 | 33643939  | 33650771  | 6833   |
|     | chr2  | 21489911  | 21495675  | 5765   |
|     | chr3  | 55958649  | 55959976  | 1328   |
|     | chr3  | 23078788  | 23086006  | 7219   |
|     | chr7  | 65566367  | 65570310  | 3944   |
|     | chr9  | 26596801  | 26599658  | 2858   |
|     | chr12 | 36444226  | 36445949  | 1724   |
|     | chr26 | 43503568  | 43511688  | 8121   |
|     | chr6  | 18479982  | 18486417  | 6436   |
|     | chr5  | 28944691  | 28950430  | 5740   |
|     | chr23 | 31318580  | 31322203  | 3624   |
|     | chr13 | 40811791  | 40815114  | 3324   |
|     | chr11 | 11989051  | 11991270  | 2220   |

|       |               |           |       |
|-------|---------------|-----------|-------|
| chr3  | 54319273      | 54327585  | 8313  |
| chr10 | 74707053      | 74714819  | 7767  |
| chr4  | 89766598      | 89772558  | 5961  |
| chr18 | 34988025      | 34991401  | 3377  |
| chr16 | 75215683      | 75218185  | 2503  |
| chr9  | 53319120      | 53319715  | 596   |
| chr12 | 54238010      | 54245026  | 7017  |
| chr3  | 55960254      | 55964884  | 4631  |
| chr2  | 41324029      | 41328258  | 4230  |
| chr8  | 55404440      | 55407669  | 3230  |
| chr12 | 19011198      | 19013994  | 2797  |
| chr7  | 89432217      | 89451686  | 19470 |
| chr21 | 31677532      | 31689769  | 12238 |
| chr11 | 63297156      | 63307144  | 9989  |
| chr29 | 26774399      | 26777346  | 2948  |
| chr7  | 89452745      | 89454835  | 2091  |
| chr24 | 813301 814835 | 1535      |       |
| chr17 | 47074386      | 47077430  | 3045  |
| chr3  | 23031717      | 23034618  | 2902  |
| chr7  | 89454895      | 89465789  | 10895 |
| chr11 | 98338152      | 98346600  | 8449  |
| chr2  | 36099101      | 36105237  | 6137  |
| chr2  | 25305346      | 25310531  | 5186  |
| chr3  | 23075762      | 23078761  | 3000  |
| chr7  | 10971447      | 10973789  | 2343  |
| chr9  | 26595457      | 26596713  | 1257  |
| chr8  | 55403059      | 55404296  | 1238  |
| chr2  | 21460705      | 21469009  | 8305  |
| chr2  | 25298587      | 25305129  | 6543  |
| chr2  | 23094500      | 23100892  | 6393  |
| chr15 | 62405486      | 62409917  | 4432  |
| chr11 | 63293074      | 63297019  | 3946  |
| chr11 | 28333778      | 28337364  | 3587  |
| chr16 | 68887329      | 68890709  | 3381  |
| chr10 | 88067147      | 88070334  | 3188  |
| chr4  | 72316796      | 72319059  | 2264  |
| chr1  | 111309490     | 111311745 | 2256  |
| chr20 | 4958820       | 4961495   | 2676  |
| chr3  | 22908113      | 22910513  | 2401  |
| chr26 | 43513536      | 43518730  | 5195  |
| chr4  | 14644140      | 14648946  | 4807  |
| chr9  | 74254446      | 74258515  | 4070  |
| chr3  | 31676297      | 31679166  | 2870  |
| chr15 | 62383640      | 62386052  | 2413  |
| chr3  | 105734509     | 105745672 | 11164 |
| chr9  | 43795917      | 43803716  | 7800  |
| chr13 | 22909254      | 22915800  | 6547  |
| chr3  | 123180950     | 123185036 | 4087  |
| chr18 | 22703243      | 22706846  | 3604  |
| chr19 | 38745733      | 38748426  | 2694  |

|       |           |           |       |
|-------|-----------|-----------|-------|
| chr19 | 39094524  | 39096834  | 2311  |
| chr24 | 35322010  | 35323878  | 1869  |
| chr10 | 8352740   | 8358906   | 6167  |
| chr8  | 45745239  | 45751135  | 5897  |
| chr1  | 100069517 | 100075323 | 5807  |
| chr19 | 41236185  | 41241029  | 4845  |
| chr24 | 1948481   | 1951195   | 2715  |
| chr4  | 71574743  | 71577456  | 2714  |
| chr4  | 71522467  | 71540201  | 17735 |
| chr2  | 25286996  | 25291125  | 4130  |
| chr10 | 50638872  | 50642543  | 3672  |
| chr11 | 106005524 | 106009059 | 3536  |
| chr26 | 22267137  | 22270010  | 2874  |
| chr19 | 54274836  | 54277450  | 2615  |
| chr20 | 33650780  | 33652265  | 1486  |
| chr1  | 132084114 | 132094227 | 10114 |
| chr2  | 21478813  | 21484134  | 5322  |
| chr13 | 14703338  | 14708631  | 5294  |
| chr4  | 72751584  | 72756080  | 4497  |
| chr19 | 65221998  | 65225279  | 3282  |
| chr8  | 45751179  | 45753966  | 2788  |
| chr2  | 21496700  | 21499123  | 2424  |
| chr16 | 68757223  | 68758969  | 1747  |
| chr18 | 22701523  | 22703221  | 1699  |
| chr21 | 48682785  | 48683929  | 1145  |
| chr8  | 7571894   | 7573019   | 1126  |
| chr21 | 47703357  | 47709173  | 5817  |
| chr10 | 32251206  | 32256573  | 5368  |
| chr14 | 34078016  | 34082316  | 4301  |
| chr5  | 17178076  | 17181668  | 3593  |
| chr8  | 46606478  | 46609906  | 3429  |
| chr4  | 33415910  | 33419305  | 3396  |
| chr2  | 25292648  | 25295047  | 2400  |
| chr20 | 38856076  | 38858303  | 2228  |
| chr11 | 9234111   | 9235973   | 1863  |
| chr12 | 81460361  | 81461728  | 1368  |
| chr7  | 65557330  | 65562888  | 5559  |
| chr10 | 50628591  | 50633673  | 5083  |
| chr4  | 64284638  | 64289060  | 4423  |
| chr9  | 104926233 | 104929679 | 3447  |
| chr4  | 30804630  | 30807810  | 3181  |
| chr11 | 28464552  | 28467456  | 2905  |
| chr2  | 115086741 | 115088569 | 1829  |
| chr8  | 7593333   | 7601080   | 7748  |
| chr12 | 74525354  | 74529595  | 4242  |
| chr6  | 63167258  | 63170882  | 3625  |
| chr3  | 22855393  | 22857913  | 2521  |
| chr21 | 48690497  | 48692984  | 2488  |
| chr11 | 10450486  | 10452354  | 1869  |
| chr11 | 44961978  | 44963547  | 1570  |

|       |           |           |      |
|-------|-----------|-----------|------|
| chr20 | 29954724  | 29963620  | 8897 |
| chr1  | 87347710  | 87356488  | 8779 |
| chr7  | 13289295  | 13297399  | 8105 |
| chr8  | 65857051  | 65864988  | 7938 |
| chr14 | 29198335  | 29203077  | 4743 |
| chr2  | 72870451  | 72873613  | 3163 |
| chr4  | 14635889  | 14638758  | 2870 |
| chr5  | 28953860  | 28956067  | 2208 |
| chr1  | 87362709  | 87363391  | 683  |
| chr12 | 54248240  | 54252476  | 4237 |
| chr9  | 52388736  | 52392868  | 4133 |
| chr15 | 74502542  | 74505907  | 3366 |
| chr3  | 106538802 | 106542082 | 3281 |
| chr9  | 43807918  | 43810890  | 2973 |
| chr23 | 17460803  | 17463556  | 2754 |
| chr2  | 21484426  | 21486282  | 1857 |
| chr11 | 9229459   | 9230469   | 1011 |
| chr12 | 84177558  | 84178554  | 997  |
| chr3  | 106542192 | 106542946 | 755  |
| chr11 | 10433454  | 10439505  | 6052 |
| chr3  | 15409580  | 15415445  | 5866 |
| chr3  | 55968461  | 55974167  | 5707 |
| chr8  | 5800580   | 5806273   | 5694 |
| chr6  | 14207613  | 14212436  | 4824 |
| chr10 | 71250188  | 71254928  | 4741 |
| chr14 | 66262227  | 66266963  | 4737 |
| chr5  | 35468936  | 35472620  | 3685 |
| chr6  | 14215938  | 14219497  | 3560 |
| chr6  | 113384892 | 113388284 | 3393 |
| chr13 | 42876106  | 42879414  | 3309 |
| chr2  | 92329361  | 92332480  | 3120 |
| chr3  | 55954314  | 55957084  | 2771 |
| chr16 | 40906014  | 40908784  | 2771 |
| chr23 | 52710404  | 52712956  | 2553 |
| chr3  | 22917634  | 22920116  | 2483 |
| chr9  | 74258937  | 74261411  | 2475 |
| chr11 | 9231332   | 9233306   | 1975 |
| chr23 | 27977539  | 27979403  | 1865 |
| chr3  | 22625208  | 22627026  | 1819 |
| chr12 | 84185559  | 84187336  | 1778 |
| chr26 | 22812091  | 22813741  | 1651 |
| chr26 | 51190353  | 51191891  | 1539 |
| chr21 | 39965649  | 39966781  | 1133 |
| chr6  | 63049841  | 63050516  | 676  |
| chr2  | 36090556  | 36097921  | 7366 |
| chr7  | 29487069  | 29490218  | 3150 |
| chr22 | 29662681  | 29664954  | 2274 |
| chr25 | 43521158  | 43522888  | 1731 |
| chr8  | 46610087  | 46611760  | 1674 |
| chr7  | 50550026  | 50551489  | 1464 |

|       |               |           |      |
|-------|---------------|-----------|------|
| chr26 | 21983167      | 21984461  | 1295 |
| chr4  | 121725317     | 121726579 | 1263 |
| chr10 | 58739432      | 58746861  | 7430 |
| chr20 | 33670370      | 33675632  | 5263 |
| chr4  | 96841168      | 96845756  | 4589 |
| chr22 | 39845850      | 39849695  | 3846 |
| chr15 | 62390742      | 62394430  | 3689 |
| chr21 | 47550036      | 47553416  | 3381 |
| chr22 | 1939665       | 1942299   | 2635 |
| chr20 | 33666468      | 33668412  | 1945 |
| chr21 | 30790401      | 30792154  | 1754 |
| chr9  | 59369552      | 59371136  | 1585 |
| chr14 | 8183569       | 8184986   | 1418 |
| chr12 | 68231013      | 68232416  | 1404 |
| chr20 | 25591448      | 25592301  | 854  |
| chr8  | 77272362      | 77280383  | 8022 |
| chr7  | 45667008      | 45674429  | 7422 |
| chr26 | 18754504      | 18760677  | 6174 |
| chr15 | 62397332      | 62403354  | 6023 |
| chr19 | 38982969      | 38988661  | 5693 |
| chr7  | 45675487      | 45680765  | 5279 |
| chr1  | 1630284       | 1635187   | 4904 |
| chr24 | 803730 807622 | 3893      |      |
| chr8  | 89549018      | 89552614  | 3597 |
| chr10 | 8713483       | 8716990   | 3508 |
| chr10 | 8349182       | 8352629   | 3448 |
| chr20 | 25592932      | 25595870  | 2939 |
| chr8  | 7578343       | 7581058   | 2716 |
| chr9  | 24597634      | 24599822  | 2189 |
| chr11 | 14131654      | 14133816  | 2163 |
| chr6  | 69745319      | 69747268  | 1950 |
| chr8  | 6474276       | 6475766   | 1491 |
| chr16 | 44123786      | 44125207  | 1422 |
| chr29 | 42920711      | 42921940  | 1230 |
| chr2  | 23090509      | 23091547  | 1039 |
| chr21 | 52051725      | 52052508  | 784  |
| chr8  | 63951692      | 63959777  | 8086 |
| chr23 | 46385918      | 46392135  | 6218 |
| chr9  | 51619078      | 51624518  | 5441 |
| chr4  | 14658225      | 14662982  | 4758 |
| chr1  | 87356751      | 87361356  | 4606 |
| chr11 | 98349720      | 98354169  | 4450 |
| chr25 | 3192131       | 3196525   | 4395 |
| chr9  | 52393117      | 52397480  | 4364 |
| chr24 | 36940583      | 36944334  | 3752 |
| chr2  | 21457228      | 21460586  | 3359 |
| chr22 | 1942367       | 1945477   | 3111 |
| chr19 | 39081490      | 39084105  | 2616 |
| chr2  | 15372511      | 15375092  | 2582 |
| chr7  | 43756588      | 43759013  | 2426 |

|       |           |           |      |
|-------|-----------|-----------|------|
| chr9  | 90381530  | 90383514  | 1985 |
| chr11 | 66707628  | 66709305  | 1678 |
| chr23 | 46406706  | 46408253  | 1548 |
| chr3  | 73955914  | 73957380  | 1467 |
| chr19 | 20358078  | 20359446  | 1369 |
| chr2  | 115103501 | 115104815 | 1315 |
| chr3  | 15647844  | 15649111  | 1268 |
| chr23 | 31323961  | 31325074  | 1114 |
| chr24 | 36031151  | 36031897  | 747  |
| chr20 | 4943283   | 4948554   | 5272 |
| chr19 | 39855419  | 39860538  | 5120 |
| chr4  | 121400933 | 121405659 | 4727 |
| chr26 | 21880697  | 21884670  | 3974 |
| chr19 | 39852266  | 39855192  | 2927 |
| chr23 | 52704292  | 52707187  | 2896 |
| chr21 | 20599278  | 20601937  | 2660 |
| chr13 | 22901771  | 22904414  | 2644 |
| chr19 | 10944642  | 10946907  | 2266 |
| chr8  | 72308229  | 72310472  | 2244 |
| chr16 | 46750482  | 46752531  | 2050 |
| chr23 | 15830411  | 15832166  | 1756 |
| chr5  | 71660265  | 71661948  | 1684 |
| chr6  | 63052655  | 63054311  | 1657 |
| chr3  | 74461528  | 74462926  | 1399 |
| chr23 | 46414166  | 46415517  | 1352 |
| chr27 | 26741538  | 26742028  | 491  |
| chr16 | 75204473  | 75212921  | 8449 |
| chr2  | 21469621  | 21477482  | 7862 |
| chr27 | 16699824  | 16706061  | 6238 |
| chr26 | 22260963  | 22267089  | 6127 |
| chr22 | 1932742   | 1937288   | 4547 |
| chr8  | 67693494  | 67697111  | 3618 |
| chr6  | 63174562  | 63177659  | 3098 |
| chr3  | 123177053 | 123180134 | 3082 |
| chr9  | 46019044  | 46021514  | 2471 |
| chr8  | 7582359   | 7584818   | 2460 |
| chr8  | 7573028   | 7575446   | 2419 |
| chr10 | 36835439  | 36837551  | 2113 |
| chr22 | 12064446  | 12066090  | 1645 |
| chr18 | 62515744  | 62517291  | 1548 |
| chr7  | 43517504  | 43518923  | 1420 |
| chr12 | 74482140  | 74483386  | 1247 |
| chr28 | 26748133  | 26749313  | 1181 |
| chr11 | 14152318  | 14153347  | 1030 |
| chr3  | 22670413  | 22671357  | 945  |
| chr13 | 75540679  | 75541554  | 876  |
| chr19 | 58169915  | 58170722  | 808  |
| chr3  | 102653263 | 102654013 | 751  |
| chr11 | 11981465  | 11988635  | 7171 |
| chr13 | 40589271  | 40595678  | 6408 |

|       |               |           |      |
|-------|---------------|-----------|------|
| chr24 | 58972002      | 58978073  | 6072 |
| chr3  | 4361019       | 4366213   | 5195 |
| chr9  | 51607299      | 51612222  | 4924 |
| chr6  | 32558529      | 32563359  | 4831 |
| chr21 | 59895766      | 59900393  | 4628 |
| chr19 | 54216524      | 54219721  | 3198 |
| chr1  | 1584995       | 1588117   | 3123 |
| chr19 | 46099584      | 46102581  | 2998 |
| chr11 | 9223998       | 9226755   | 2758 |
| chr18 | 50666406      | 50669152  | 2747 |
| chr23 | 51446242      | 51448079  | 1838 |
| chr26 | 21801728      | 21803485  | 1758 |
| chr7  | 5154237       | 5155924   | 1688 |
| chrX  | 11011205      | 11012889  | 1685 |
| chr26 | 43511757      | 43513404  | 1648 |
| chr18 | 51029841      | 51031416  | 1576 |
| chr27 | 26742119      | 26743663  | 1545 |
| chr8  | 24448319      | 24449780  | 1462 |
| chr7  | 94412298      | 94413696  | 1399 |
| chr3  | 15546023      | 15547416  | 1394 |
| chr5  | 71668982      | 71670352  | 1371 |
| chr18 | 55851641      | 55852996  | 1356 |
| chr2  | 21477484      | 21478792  | 1309 |
| chr9  | 90379945      | 90381187  | 1243 |
| chr22 | 1950604       | 1951818   | 1215 |
| chr10 | 32487289      | 32488459  | 1171 |
| chr1  | 100636419     | 100637222 | 804  |
| chr7  | 29481150      | 29486824  | 5675 |
| chr7  | 3711365       | 3716648   | 5284 |
| chr2  | 21499310      | 21504380  | 5071 |
| chr11 | 96173830      | 96178667  | 4838 |
| chr24 | 807643 811711 | 4069      |      |
| chr3  | 105914278     | 105918233 | 3956 |
| chr3  | 22486352      | 22490267  | 3916 |
| chr14 | 29204643      | 29208245  | 3603 |
| chr23 | 15832986      | 15836582  | 3597 |
| chr9  | 43789004      | 43792466  | 3463 |
| chr18 | 22696259      | 22699625  | 3367 |
| chr2  | 25295127      | 25298414  | 3288 |
| chr4  | 122648118     | 122651379 | 3262 |
| chr5  | 28921309      | 28924567  | 3259 |
| chr25 | 38758212      | 38761163  | 2952 |
| chr21 | 48675655      | 48678476  | 2822 |
| chr12 | 32022057      | 32024720  | 2664 |
| chr8  | 7575496       | 7578103   | 2608 |
| chr20 | 3179406       | 3181484   | 2079 |
| chr19 | 39914029      | 39916039  | 2011 |
| chr8  | 20941034      | 20942863  | 1830 |
| chr5  | 29211658      | 29213026  | 1369 |
| chr20 | 33668499      | 33669727  | 1229 |

|       |           |           |       |
|-------|-----------|-----------|-------|
| chr5  | 35467601  | 35468766  | 1166  |
| chr9  | 93651122  | 93652092  | 971   |
| chr17 | 55857791  | 55858731  | 941   |
| chr22 | 1945515   | 1946430   | 916   |
| chr18 | 52756065  | 52756938  | 874   |
| chr24 | 35316567  | 35317434  | 868   |
| chr18 | 63526455  | 63527270  | 816   |
| chr3  | 8817246   | 8817921   | 676   |
| chr5  | 28924631  | 28935226  | 10596 |
| chr9  | 66522622  | 66529023  | 6402  |
| chr5  | 33868097  | 33874345  | 6249  |
| chr3  | 102654125 | 102660246 | 6122  |
| chr5  | 75023997  | 75029485  | 5489  |
| chr11 | 28467527  | 28472013  | 4487  |
| chr2  | 132433801 | 132438195 | 4395  |
| chr29 | 44671535  | 44675623  | 4089  |
| chr12 | 54254067  | 54257039  | 2973  |
| chr8  | 77284777  | 77287625  | 2849  |
| chr18 | 18700724  | 18702867  | 2144  |
| chr7  | 43766863  | 43768917  | 2055  |
| chr3  | 33116609  | 33118604  | 1996  |
| chr15 | 62747219  | 62748845  | 1627  |
| chr9  | 52378817  | 52380436  | 1620  |
| chr8  | 24664677  | 24665900  | 1224  |
| chr24 | 48630981  | 48632111  | 1131  |
| chr5  | 29255653  | 29256494  | 842   |
| chr19 | 39900604  | 39901414  | 811   |
| chr3  | 22957234  | 22957794  | 561   |
| chr26 | 21867067  | 21878414  | 11348 |
| chr20 | 33659880  | 33665878  | 5999  |
| chr6  | 113371482 | 113376804 | 5323  |
| chr7  | 94413712  | 94418479  | 4768  |
| chr18 | 11579645  | 11583896  | 4252  |
| chr16 | 19556801  | 19561049  | 4249  |
| chr19 | 12686023  | 12690153  | 4131  |
| chr18 | 55846153  | 55850122  | 3970  |
| chr4  | 121450763 | 121454508 | 3746  |
| chr11 | 48684242  | 48687947  | 3706  |
| chr5  | 33518076  | 33521612  | 3537  |
| chr9  | 53324525  | 53327904  | 3380  |
| chr5  | 33320455  | 33323601  | 3147  |
| chr26 | 14899877  | 14902947  | 3071  |
| chr4  | 121500834 | 121503891 | 3058  |
| chr8  | 5792733   | 5795676   | 2944  |
| chr4  | 64224278  | 64227158  | 2881  |
| chr21 | 47539012  | 47541817  | 2806  |
| chr11 | 12866220  | 12868978  | 2759  |
| chr19 | 46848461  | 46851207  | 2747  |
| chr11 | 14136315  | 14139060  | 2746  |
| chr11 | 31103443  | 31106074  | 2632  |



|       |               |           |      |
|-------|---------------|-----------|------|
| chr2  | 115090421     | 115093047 | 2627 |
| chr12 | 74513113      | 74515679  | 2567 |
| chr23 | 19328691      | 19331215  | 2525 |
| chr10 | 74715762      | 74718196  | 2435 |
| chr22 | 16293305      | 16295654  | 2350 |
| chr14 | 66278632      | 66280953  | 2322 |
| chr3  | 8940374       | 8942647   | 2274 |
| chr11 | 28472234      | 28474257  | 2024 |
| chr4  | 96845984      | 96847879  | 1896 |
| chr19 | 10950900      | 10952603  | 1704 |
| chr4  | 122654396     | 122655942 | 1547 |
| chr7  | 15013654      | 15014995  | 1342 |
| chr10 | 93067081      | 93067937  | 857  |
| chr12 | 36446621      | 36447436  | 816  |
| chr13 | 40097171      | 40097823  | 653  |
| chr23 | 10253660      | 10254133  | 474  |
| chr9  | 53330569      | 53335533  | 4965 |
| chr1  | 133451744     | 133456654 | 4911 |
| chr21 | 48671023      | 48675325  | 4303 |
| chr3  | 55857896      | 55861664  | 3769 |
| chr24 | 58966128      | 58969296  | 3169 |
| chr11 | 28482509      | 28485460  | 2952 |
| chr23 | 52616110      | 52618871  | 2762 |
| chr12 | 54245306      | 54247889  | 2584 |
| chr13 | 26209194      | 26211699  | 2506 |
| chr19 | 39917047      | 39919167  | 2121 |
| chr3  | 23034660      | 23036499  | 1840 |
| chr3  | 15661321      | 15663149  | 1829 |
| chr4  | 121447317     | 121449067 | 1751 |
| chr19 | 37854168      | 37855887  | 1720 |
| chr8  | 7585457       | 7587140   | 1684 |
| chr23 | 17488834      | 17490334  | 1501 |
| chr5  | 60733240      | 60734733  | 1494 |
| chr26 | 22258883      | 22260271  | 1389 |
| chr19 | 39098642      | 39100003  | 1362 |
| chr27 | 22183416      | 22184538  | 1123 |
| chr18 | 54937709      | 54938802  | 1094 |
| chr19 | 41242087      | 41243030  | 944  |
| chr3  | 88246143      | 88247061  | 919  |
| chr18 | 22073011      | 22073919  | 909  |
| chr4  | 73688922      | 73689771  | 850  |
| chr25 | 666483 667319 | 837       |      |
| chr12 | 32117863      | 32118661  | 799  |
| chr24 | 20555412      | 20556073  | 662  |
| chr3  | 22617231      | 22618613  | 1383 |
| chr19 | 38996237      | 39003609  | 7373 |
| chr19 | 12678445      | 12683271  | 4827 |
| chr19 | 40418122      | 40422724  | 4603 |
| chr11 | 106394915     | 106399447 | 4533 |
| chr24 | 35325138      | 35329212  | 4075 |

|       |           |           |      |
|-------|-----------|-----------|------|
| chr15 | 62386622  | 62390124  | 3503 |
| chr23 | 46382247  | 46385720  | 3474 |
| chr3  | 115101293 | 115104511 | 3219 |
| chr15 | 65648374  | 65651487  | 3114 |
| chr7  | 38210774  | 38213586  | 2813 |
| chr29 | 23650248  | 23652760  | 2513 |
| chr7  | 43742333  | 43744784  | 2452 |
| chr5  | 28941809  | 28944217  | 2409 |
| chr24 | 20552265  | 20554601  | 2337 |
| chr12 | 74498798  | 74500962  | 2165 |
| chr5  | 28906447  | 28908538  | 2092 |
| chr8  | 24692127  | 24693896  | 1770 |
| chr2  | 111347593 | 111349347 | 1755 |
| chr19 | 7828932   | 7830576   | 1645 |
| chr29 | 44374886  | 44376395  | 1510 |
| chr19 | 47277399  | 47278793  | 1395 |
| chr4  | 72732705  | 72734094  | 1390 |
| chr8  | 23072679  | 23073996  | 1318 |
| chr10 | 71247801  | 71249025  | 1225 |
| chr23 | 46415519  | 46416620  | 1102 |
| chr23 | 46399479  | 46400555  | 1077 |
| chr8  | 89547591  | 89548573  | 983  |
| chr14 | 26680639  | 26681582  | 944  |
| chr16 | 66331338  | 66332252  | 915  |
| chr26 | 22270609  | 22271519  | 911  |
| chr18 | 11628862  | 11629703  | 842  |
| chr20 | 4954626   | 4955410   | 785  |
| chr10 | 32482153  | 32482902  | 750  |
| chr14 | 34083611  | 34084166  | 556  |
| chr18 | 11569442  | 11575249  | 5808 |
| chr5  | 51887551  | 51892627  | 5077 |
| chr6  | 113377366 | 113382182 | 4817 |
| chr6  | 103302346 | 103306886 | 4541 |
| chr1  | 132096164 | 132100298 | 4135 |
| chr19 | 39068848  | 39072660  | 3813 |
| chr11 | 89528188  | 89531643  | 3456 |
| chr13 | 60156782  | 60160202  | 3421 |
| chr6  | 63181407  | 63184547  | 3141 |
| chr3  | 9140349   | 9143289   | 2941 |
| chr26 | 19025474  | 19028414  | 2941 |
| chr15 | 73769546  | 73772169  | 2624 |
| chr17 | 63285670  | 63288281  | 2612 |
| chr4  | 29008324  | 29010754  | 2431 |
| chr19 | 39078595  | 39080944  | 2350 |
| chr15 | 62410154  | 62412121  | 1968 |
| chr10 | 85924218  | 85926178  | 1961 |
| chr2  | 111326319 | 111328264 | 1946 |
| chr24 | 36935203  | 36937076  | 1874 |
| chr22 | 1948771   | 1950412   | 1642 |
| chr21 | 18884696  | 18886322  | 1627 |

|       |               |          |      |
|-------|---------------|----------|------|
| chr11 | 89076842      | 89078342 | 1501 |
| chr14 | 23262160      | 23263624 | 1465 |
| chr18 | 51591733      | 51593165 | 1433 |
| chr10 | 74684315      | 74685718 | 1404 |
| chr22 | 30571991      | 30573295 | 1305 |
| chr12 | 36455020      | 36456213 | 1194 |
| chr18 | 42959212      | 42960392 | 1181 |
| chr13 | 52535790      | 52536905 | 1116 |
| chr3  | 22929209      | 22930291 | 1083 |
| chr3  | 8629825       | 8630835  | 1011 |
| chr18 | 12407844      | 12408765 | 922  |
| chr18 | 38530320      | 38531010 | 691  |
| chr18 | 57608992      | 57609546 | 555  |
| chr29 | 37262700      | 37263190 | 491  |
| chr12 | 74501026      | 74504419 | 3394 |
| chr26 | 38240280      | 38244659 | 4380 |
| chr11 | 11623435      | 11627453 | 4019 |
| chr22 | 7224445       | 7228459  | 4015 |
| chr20 | 74014554      | 74018502 | 3949 |
| chr20 | 42309267      | 42313208 | 3942 |
| chr25 | 3188315       | 3191675  | 3361 |
| chr13 | 23637674      | 23641001 | 3328 |
| chr26 | 22183533      | 22186573 | 3041 |
| chr24 | 48620996      | 48623808 | 2813 |
| chr11 | 21627434      | 21630189 | 2756 |
| chr8  | 23488574      | 23491317 | 2744 |
| chr7  | 43759271      | 43761771 | 2501 |
| chr25 | 671820 674305 | 2486     |      |
| chr19 | 54338529      | 54340999 | 2471 |
| chr22 | 14929517      | 14931869 | 2353 |
| chr12 | 18236722      | 18239071 | 2350 |
| chr17 | 31870894      | 31873183 | 2290 |
| chr11 | 44973784      | 44976048 | 2265 |
| chr26 | 43497215      | 43499423 | 2209 |
| chr11 | 44959510      | 44961632 | 2123 |
| chr13 | 59656447      | 59658491 | 2045 |
| chr24 | 60605636      | 60607563 | 1928 |
| chr5  | 29199084      | 29200829 | 1746 |
| chr25 | 38339069      | 38340710 | 1642 |
| chr12 | 84179202      | 84180795 | 1594 |
| chr2  | 46204277      | 46205836 | 1560 |
| chr9  | 74252541      | 74254089 | 1549 |
| chr7  | 14896447      | 14897988 | 1542 |
| chr12 | 32116095      | 32117615 | 1521 |
| chr15 | 62739907      | 62741383 | 1477 |
| chr23 | 49953749      | 49955085 | 1337 |
| chr24 | 48619442      | 48620724 | 1283 |
| chr29 | 44739678      | 44740930 | 1253 |
| chr13 | 65071496      | 65072744 | 1249 |
| chr26 | 38244661      | 38245804 | 1144 |

|       |           |           |      |
|-------|-----------|-----------|------|
| chr25 | 43518331  | 43519455  | 1125 |
| chr25 | 43522958  | 43523914  | 957  |
| chr8  | 23066457  | 23067320  | 864  |
| chr7  | 12966463  | 12967190  | 728  |
| chr29 | 29794186  | 29794853  | 668  |
| chr3  | 127030591 | 127031127 | 537  |
| chr19 | 53553223  | 53560556  | 7334 |
| chr10 | 58755760  | 58762607  | 6848 |
| chr21 | 48684428  | 48690413  | 5986 |
| chr6  | 72298660  | 72303600  | 4941 |
| chr2  | 92342428  | 92347174  | 4747 |
| chr13 | 22904557  | 22909163  | 4607 |
| chr3  | 36036651  | 36041231  | 4581 |
| chr19 | 39003723  | 39008199  | 4477 |
| chr20 | 29515356  | 29519613  | 4258 |
| chr3  | 74462949  | 74466998  | 4050 |
| chr8  | 5785236   | 5789259   | 4024 |
| chr3  | 55975959  | 55979834  | 3876 |
| chr8  | 63947972  | 63951543  | 3572 |
| chr9  | 52409925  | 52413189  | 3265 |
| chr4  | 64290037  | 64293241  | 3205 |
| chr19 | 27064981  | 27067909  | 2929 |
| chr8  | 23029646  | 23032533  | 2888 |
| chr9  | 43793066  | 43795861  | 2796 |
| chr5  | 17175240  | 17177984  | 2745 |
| chr10 | 50636187  | 50638869  | 2683 |
| chr23 | 27979960  | 27982559  | 2600 |
| chr1  | 1637234   | 1639585   | 2352 |
| chr18 | 11629713  | 11632043  | 2331 |
| chr26 | 19028463  | 19030680  | 2218 |
| chr20 | 29510477  | 29512609  | 2133 |
| chr1  | 111297395 | 111299465 | 2071 |
| chr11 | 14147912  | 14149961  | 2050 |
| chr10 | 75484880  | 75486839  | 1960 |
| chr3  | 71910178  | 71912097  | 1920 |
| chr19 | 26371708  | 26373472  | 1765 |
| chr18 | 53262199  | 53263897  | 1699 |
| chr18 | 48679348  | 48681044  | 1697 |
| chr13 | 41713788  | 41715315  | 1528 |
| chr26 | 14890689  | 14892189  | 1501 |
| chr9  | 74194574  | 74196060  | 1487 |
| chr19 | 6519973   | 6520931   | 959  |
| chr18 | 53875271  | 53876224  | 954  |
| chr6  | 63390580  | 63391487  | 908  |
| chr4  | 72798073  | 72798899  | 827  |
| chr26 | 41015361  | 41016092  | 732  |
| chr1  | 109021468 | 109022116 | 649  |
| chr5  | 120118324 | 120118960 | 637  |
| chr16 | 59050063  | 59056886  | 6824 |
| chr19 | 39053008  | 39058578  | 5571 |

|       |               |           |      |
|-------|---------------|-----------|------|
| chr29 | 44379610      | 44384207  | 4598 |
| chr2  | 74322948      | 74326509  | 3562 |
| chr23 | 46374582      | 46377980  | 3399 |
| chr10 | 20465957      | 20469244  | 3288 |
| chr26 | 31868126      | 31871176  | 3051 |
| chr21 | 47709303      | 47712316  | 3014 |
| chr6  | 108681267     | 108684097 | 2831 |
| chr17 | 63480281      | 63483047  | 2767 |
| chr19 | 38989090      | 38991740  | 2651 |
| chr11 | 98335406      | 98337877  | 2472 |
| chr10 | 89404771      | 89407157  | 2387 |
| chr18 | 52660784      | 52663165  | 2382 |
| chr13 | 65414475      | 65416792  | 2318 |
| chr2  | 25281338      | 25283585  | 2248 |
| chr11 | 44957178      | 44959396  | 2219 |
| chr14 | 29052095      | 29054198  | 2104 |
| chr7  | 46227308      | 46229135  | 1828 |
| chr23 | 48564609      | 48566376  | 1768 |
| chr28 | 43741971      | 43743698  | 1728 |
| chr21 | 20597344      | 20599011  | 1668 |
| chr15 | 62403396      | 62405019  | 1624 |
| chr19 | 39029753      | 39031356  | 1604 |
| chr19 | 38671485      | 38673071  | 1587 |
| chr24 | 193718 195214 | 1497      |      |
| chr18 | 22073954      | 22075427  | 1474 |
| chr22 | 1937463       | 1938897   | 1435 |
| chr4  | 118254163     | 118255585 | 1423 |
| chr26 | 51192579      | 51193913  | 1335 |
| chr5  | 80847563      | 80848847  | 1285 |
| chr2  | 49578723      | 49579997  | 1275 |
| chr22 | 18285711      | 18286973  | 1263 |
| chr5  | 28956310      | 28957563  | 1254 |
| chr10 | 21664007      | 21665226  | 1220 |
| chr26 | 21843443      | 21844617  | 1175 |
| chr19 | 58226996      | 58228081  | 1086 |
| chr24 | 58964794      | 58965877  | 1084 |
| chr8  | 9358146       | 9359179   | 1034 |
| chr19 | 10939432      | 10940425  | 994  |
| chr12 | 9552326       | 9553285   | 960  |
| chr4  | 33421156      | 33422074  | 919  |
| chr9  | 47245003      | 47245888  | 886  |
| chr5  | 10614548      | 10615365  | 818  |
| chr8  | 23059686      | 23060494  | 809  |
| chr12 | 74497675      | 74498454  | 780  |
| chr7  | 18717225      | 18717673  | 449  |
| chr19 | 10886972      | 10895063  | 8092 |
| chr21 | 20641380      | 20649265  | 7886 |
| chr15 | 74505949      | 74512681  | 6733 |
| chr3  | 16895856      | 16900701  | 4846 |
| chr9  | 51612273      | 51617103  | 4831 |

|       |           |           |      |
|-------|-----------|-----------|------|
| chr5  | 60131752  | 60135976  | 4225 |
| chr17 | 63282053  | 63285589  | 3537 |
| chr10 | 66911197  | 66914405  | 3209 |
| chr20 | 8537540   | 8540160   | 2621 |
| chr16 | 59056925  | 59059177  | 2253 |
| chr23 | 13593929  | 13595994  | 2066 |
| chr22 | 16316090  | 16318132  | 2043 |
| chr3  | 54327595  | 54329589  | 1995 |
| chr5  | 33530902  | 33532884  | 1983 |
| chr22 | 13453984  | 13455960  | 1977 |
| chr29 | 36687373  | 36689299  | 1927 |
| chr5  | 55578883  | 55580766  | 1884 |
| chr20 | 6601014   | 6602842   | 1829 |
| chr25 | 43515655  | 43517482  | 1828 |
| chr2  | 114195127 | 114196814 | 1688 |
| chr19 | 38751035  | 38752685  | 1651 |
| chr24 | 41575937  | 41577567  | 1631 |
| chr19 | 12690156  | 12691734  | 1579 |
| chr10 | 17157968  | 17159432  | 1465 |
| chr16 | 44126001  | 44127463  | 1463 |
| chr6  | 103299380 | 103300697 | 1318 |
| chr4  | 64293266  | 64294537  | 1272 |
| chr2  | 101814340 | 101815584 | 1245 |
| chr13 | 74408169  | 74409311  | 1143 |
| chr21 | 49256624  | 49257757  | 1134 |
| chr14 | 34082400  | 34083450  | 1051 |
| chr8  | 108654106 | 108655151 | 1046 |
| chr2  | 130156230 | 130157274 | 1045 |
| chr3  | 105913330 | 105914239 | 910  |
| chr28 | 46066502  | 46067398  | 897  |
| chr21 | 48694741  | 48695595  | 855  |
| chr8  | 5795804   | 5796636   | 833  |
| chr23 | 53263959  | 53264630  | 672  |
| chr5  | 27945323  | 27945872  | 550  |
| chr3  | 22677651  | 22678186  | 536  |
| chr11 | 77866486  | 77867016  | 531  |
| chr7  | 10969572  | 10970088  | 517  |
| chr5  | 7221784   | 7222212   | 429  |
| chr17 | 63314238  | 63319198  | 4961 |
| chr15 | 36294142  | 36299084  | 4943 |
| chr1  | 100076928 | 100081442 | 4515 |
| chr3  | 26128477  | 26132834  | 4358 |
| chr5  | 28913162  | 28917263  | 4102 |
| chr2  | 21507924  | 21511939  | 4016 |
| chr5  | 29190654  | 29194138  | 3485 |
| chr26 | 21863094  | 21866573  | 3480 |
| chr13 | 41022699  | 41026002  | 3304 |
| chr13 | 41657356  | 41660625  | 3270 |
| chr11 | 28479098  | 28482273  | 3176 |
| chr14 | 35496590  | 35499503  | 2914 |

|       |           |           |      |
|-------|-----------|-----------|------|
| chr10 | 58748663  | 58751562  | 2900 |
| chr26 | 14549798  | 14552631  | 2834 |
| chr3  | 105460491 | 105463174 | 2684 |
| chr17 | 7827217   | 7829797   | 2581 |
| chr13 | 38264781  | 38267194  | 2414 |
| chr24 | 48632241  | 48634651  | 2411 |
| chr23 | 52707253  | 52709662  | 2410 |
| chr21 | 52049233  | 52051635  | 2403 |
| chr9  | 53313986  | 53316345  | 2360 |
| chr3  | 29962596  | 29964928  | 2333 |
| chr4  | 89764265  | 89766588  | 2324 |
| chr13 | 40883919  | 40886181  | 2263 |
| chr4  | 72320720  | 72322970  | 2251 |
| chr17 | 63485492  | 63487543  | 2052 |
| chr18 | 50834744  | 50836745  | 2002 |
| chr8  | 77282282  | 77284275  | 1994 |
| chr3  | 22461127  | 22463090  | 1964 |
| chr21 | 24497238  | 24499175  | 1938 |
| chr23 | 31160270  | 31162206  | 1937 |
| chr1  | 82746217  | 82748126  | 1910 |
| chr3  | 54330085  | 54331993  | 1909 |
| chr23 | 52700093  | 52701916  | 1824 |
| chr7  | 13403166  | 13404966  | 1801 |
| chr8  | 63975227  | 63976978  | 1752 |
| chr12 | 74523582  | 74525333  | 1752 |
| chr25 | 39432471  | 39434200  | 1730 |
| chr22 | 38940164  | 38941801  | 1638 |
| chr2  | 115104879 | 115106453 | 1575 |
| chr18 | 56633213  | 56634778  | 1566 |
| chr7  | 13484141  | 13485702  | 1562 |
| chr19 | 10896616  | 10898159  | 1544 |
| chr6  | 103297843 | 103299351 | 1509 |
| chr24 | 51803675  | 51805166  | 1492 |
| chr21 | 59894068  | 59895465  | 1398 |
| chr26 | 22325451  | 22326841  | 1391 |
| chr19 | 38980988  | 38982270  | 1283 |
| chr15 | 44887854  | 44889097  | 1244 |
| chr21 | 39975528  | 39976758  | 1231 |
| chr16 | 47995063  | 47996263  | 1201 |
| chr9  | 104924550 | 104925684 | 1135 |
| chr4  | 71579021  | 71580104  | 1084 |
| chr11 | 98334079  | 98335157  | 1079 |
| chr15 | 74501459  | 74502523  | 1065 |
| chr8  | 23046330  | 23047368  | 1039 |
| chr19 | 23141092  | 23142124  | 1033 |
| chr19 | 46720391  | 46721406  | 1016 |
| chr21 | 31055455  | 31056414  | 960  |
| chr9  | 90541275  | 90542232  | 958  |
| chr6  | 32563644  | 32564572  | 929  |
| chr14 | 34077126  | 34078008  | 883  |

|       |           |           |      |
|-------|-----------|-----------|------|
| chr7  | 94386664  | 94387487  | 824  |
| chr26 | 21979192  | 21980011  | 820  |
| chr26 | 18764565  | 18765369  | 805  |
| chr6  | 72182886  | 72183678  | 793  |
| chr7  | 19971549  | 19972284  | 736  |
| chr7  | 42537892  | 42538600  | 709  |
| chr3  | 35414350  | 35414987  | 638  |
| chr24 | 38472938  | 38473488  | 551  |
| chr8  | 73492415  | 73492957  | 543  |
| chr11 | 106238900 | 106239432 | 533  |
| chr1  | 132083372 | 132083864 | 493  |
| chr4  | 30796074  | 30799916  | 3843 |
| chr26 | 37862399  | 37869587  | 7189 |
| chr2  | 115093079 | 115099563 | 6485 |
| chr8  | 89541939  | 89547041  | 5103 |
| chr1  | 133444453 | 133448942 | 4490 |
| chr22 | 39849696  | 39854161  | 4466 |
| chr10 | 66931338  | 66935768  | 4431 |
| chr15 | 73762326  | 73766480  | 4155 |
| chr4  | 16839159  | 16842955  | 3797 |
| chr15 | 54491119  | 54494661  | 3543 |
| chr26 | 37887711  | 37890955  | 3245 |
| chr13 | 38267493  | 38270726  | 3234 |
| chr7  | 44049469  | 44052639  | 3171 |
| chr10 | 8345200   | 8348349   | 3150 |
| chr17 | 63475975  | 63479121  | 3147 |
| chr19 | 33100344  | 33103440  | 3097 |
| chr18 | 51037080  | 51040130  | 3051 |
| chr2  | 23091551  | 23094498  | 2948 |
| chr1  | 111305572 | 111308432 | 2861 |
| chr4  | 14650065  | 14652915  | 2851 |
| chr1  | 59068347  | 59070974  | 2628 |
| chr8  | 63911578  | 63914193  | 2616 |
| chrX  | 72246685  | 72249290  | 2606 |
| chr9  | 47242075  | 47244619  | 2545 |
| chr21 | 9436863   | 9439394   | 2532 |
| chr19 | 45279350  | 45281819  | 2470 |
| chr3  | 119959927 | 119962360 | 2434 |
| chr1  | 148010340 | 148012652 | 2313 |
| chr22 | 52227320  | 52229606  | 2287 |
| chr2  | 111328306 | 111330475 | 2170 |
| chrX  | 29567592  | 29569730  | 2139 |
| chr5  | 17172539  | 17174670  | 2132 |
| chr3  | 36956610  | 36958509  | 1900 |
| chr25 | 35604109  | 35605996  | 1888 |
| chr10 | 7683140   | 7685009   | 1870 |
| chr10 | 32248529  | 32250382  | 1854 |
| chr1  | 144523176 | 144525014 | 1839 |
| chr4  | 89779845  | 89781624  | 1780 |
| chr23 | 52605541  | 52607296  | 1756 |



|       |               |           |       |
|-------|---------------|-----------|-------|
| chr2  | 115088646     | 115090385 | 1740  |
| chr11 | 106399478     | 106401159 | 1682  |
| chr23 | 27963225      | 27964874  | 1650  |
| chr3  | 22546344      | 22547983  | 1640  |
| chr3  | 20455587      | 20457167  | 1581  |
| chr19 | 38978927      | 38980491  | 1565  |
| chr2  | 92333908      | 92335464  | 1557  |
| chr14 | 441742 443276 | 1535      |       |
| chr3  | 23041422      | 23042928  | 1507  |
| chr9  | 45692885      | 45694307  | 1423  |
| chr10 | 90285188      | 90286593  | 1406  |
| chr7  | 24214355      | 24215742  | 1388  |
| chr1  | 111295860     | 111297246 | 1387  |
| chr22 | 16288812      | 16290180  | 1369  |
| chr4  | 71686139      | 71687478  | 1340  |
| chr6  | 92304104      | 92305390  | 1287  |
| chr19 | 39117002      | 39118280  | 1279  |
| chr4  | 122653086     | 122654356 | 1271  |
| chr2  | 21488489      | 21489748  | 1260  |
| chr19 | 8942238       | 8943456   | 1219  |
| chr2  | 124796117     | 124797293 | 1177  |
| chr21 | 24230156      | 24231326  | 1171  |
| chr13 | 79920154      | 79921321  | 1168  |
| chr11 | 9247234       | 9248388   | 1155  |
| chr3  | 22944387      | 22945533  | 1147  |
| chr19 | 46879433      | 46880579  | 1147  |
| chr1  | 81428003      | 81429115  | 1113  |
| chr4  | 105186945     | 105188024 | 1080  |
| chr14 | 34045269      | 34046324  | 1056  |
| chr12 | 32028114      | 32029155  | 1042  |
| chr16 | 59049012      | 59050022  | 1011  |
| chr6  | 121762893     | 121763774 | 882   |
| chr19 | 38749028      | 38749909  | 882   |
| chr13 | 46212979      | 46213807  | 829   |
| chr19 | 23142467      | 23143279  | 813   |
| chr9  | 24602677      | 24603484  | 808   |
| chr18 | 14680660      | 14681448  | 789   |
| chr5  | 27942832      | 27943619  | 788   |
| chr7  | 14253441      | 14254199  | 759   |
| chr20 | 74013572      | 74014299  | 728   |
| chr8  | 73308740      | 73309387  | 648   |
| chr14 | 29054901      | 29055490  | 590   |
| chr2  | 140658106     | 140658692 | 587   |
| chr29 | 37260901      | 37261468  | 568   |
| chr3  | 22463738      | 22464264  | 527   |
| chr2  | 26496064      | 26507299  | 11236 |
| chr4  | 30786803      | 30792661  | 5859  |
| chr17 | 64187687      | 64192566  | 4880  |
| chr4  | 121394276     | 121398387 | 4112  |
| chr4  | 96837335      | 96841153  | 3819  |

|       |           |           |      |
|-------|-----------|-----------|------|
| chr19 | 33104292  | 33107977  | 3686 |
| chr22 | 61186344  | 61190014  | 3671 |
| chr26 | 38248245  | 38251886  | 3642 |
| chr10 | 66916626  | 66920167  | 3542 |
| chr18 | 11623598  | 11626943  | 3346 |
| chr21 | 47546660  | 47549996  | 3337 |
| chrX  | 13631341  | 13634376  | 3036 |
| chr4  | 30792719  | 30795709  | 2991 |
| chr4  | 71552740  | 71555723  | 2984 |
| chr21 | 39981497  | 39984426  | 2930 |
| chr18 | 47768810  | 47771583  | 2774 |
| chr2  | 138649330 | 138651901 | 2572 |
| chr13 | 61233908  | 61236317  | 2410 |
| chr12 | 74516537  | 74518938  | 2402 |
| chr19 | 13491285  | 13493638  | 2354 |
| chr21 | 9443792   | 9446130   | 2339 |
| chr20 | 4948689   | 4951010   | 2322 |
| chr18 | 53015383  | 53017655  | 2273 |
| chr11 | 66710829  | 66713085  | 2257 |
| chr25 | 3198585   | 3200711   | 2127 |
| chr3  | 79687294  | 79689413  | 2120 |
| chr18 | 62673368  | 62675442  | 2075 |
| chr1  | 123125889 | 123127956 | 2068 |
| chr20 | 29512618  | 29514668  | 2051 |
| chr11 | 2141963   | 2144013   | 2051 |
| chr18 | 33568113  | 33570121  | 2009 |
| chr25 | 43532500  | 43534505  | 2006 |
| chr7  | 14486413  | 14488410  | 1998 |
| chr8  | 65865368  | 65867351  | 1984 |
| chr12 | 32202830  | 32204795  | 1966 |
| chr7  | 5454936   | 5456831   | 1896 |
| chr15 | 32265871  | 32267740  | 1870 |
| chr8  | 112054371 | 112056226 | 1856 |
| chr17 | 73181553  | 73183312  | 1760 |
| chr11 | 104666999 | 104668741 | 1743 |
| chr18 | 51027171  | 51028874  | 1704 |
| chr4  | 107996363 | 107998016 | 1654 |
| chr2  | 124972393 | 124974028 | 1636 |
| chr4  | 29054573  | 29056152  | 1580 |
| chr8  | 63658306  | 63659858  | 1553 |
| chr18 | 22699856  | 22701395  | 1540 |
| chr14 | 48325098  | 48326629  | 1532 |
| chr14 | 66273189  | 66274630  | 1442 |
| chr21 | 20605291  | 20606721  | 1431 |
| chr9  | 82369952  | 82371379  | 1428 |
| chr9  | 90476377  | 90477787  | 1411 |
| chr18 | 52790430  | 52791833  | 1404 |
| chr17 | 63470838  | 63472210  | 1373 |
| chr5  | 120050380 | 120051744 | 1365 |
| chr4  | 121719882 | 121721190 | 1309 |

|       |           |           |      |
|-------|-----------|-----------|------|
| chr21 | 47699162  | 47700437  | 1276 |
| chr22 | 55760136  | 55761403  | 1268 |
| chr26 | 38411257  | 38412522  | 1266 |
| chr8  | 76015281  | 76016500  | 1220 |
| chr16 | 68755445  | 68756649  | 1205 |
| chr26 | 21980838  | 21981984  | 1147 |
| chr12 | 74455819  | 74456951  | 1133 |
| chr12 | 74432851  | 74433848  | 998  |
| chr10 | 71249045  | 71250036  | 992  |
| chr17 | 7830791   | 7831755   | 965  |
| chr26 | 22256777  | 22257732  | 956  |
| chr23 | 30247597  | 30248547  | 951  |
| chr23 | 31322908  | 31323837  | 930  |
| chr20 | 73285445  | 73286361  | 917  |
| chr29 | 41637065  | 41637950  | 886  |
| chr10 | 74714853  | 74715734  | 882  |
| chr12 | 84686893  | 84687760  | 868  |
| chr18 | 49262500  | 49263245  | 746  |
| chr8  | 91390814  | 91391541  | 728  |
| chr1  | 100075375 | 100076095 | 721  |
| chr7  | 46236912  | 46237609  | 698  |
| chr7  | 14211366  | 14212059  | 694  |
| chr7  | 89465867  | 89466535  | 669  |
| chr19 | 20342898  | 20343564  | 667  |
| chr4  | 71597725  | 71598381  | 657  |
| chr20 | 32403697  | 32404337  | 641  |
| chr23 | 27823646  | 27824215  | 570  |
| chr18 | 55851019  | 55851543  | 525  |
| chr2  | 25286287  | 25286783  | 497  |
| chr26 | 44944174  | 44944668  | 495  |
| chr2  | 115115683 | 115116163 | 481  |
| chr25 | 44055152  | 44055590  | 439  |
| chr9  | 77690918  | 77695391  | 4474 |
| chr19 | 10940681  | 10944598  | 3918 |
| chr18 | 22079378  | 22082901  | 3524 |
| chr26 | 38231919  | 38235207  | 3289 |
| chr8  | 7566287   | 7569226   | 2940 |
| chr10 | 32492233  | 32495114  | 2882 |
| chr19 | 12683274  | 12685990  | 2717 |
| chr4  | 71571663  | 71574269  | 2607 |
| chr10 | 71255017  | 71257584  | 2568 |
| chr21 | 39971186  | 39973745  | 2560 |
| chr26 | 44540423  | 44542898  | 2476 |
| chr26 | 21852614  | 21855088  | 2475 |
| chr14 | 31024370  | 31026828  | 2459 |
| chr9  | 77192699  | 77195072  | 2374 |
| chr11 | 28462107  | 28464469  | 2363 |
| chr16 | 44305169  | 44307401  | 2233 |
| chr20 | 29521459  | 29523688  | 2230 |
| chr27 | 27692051  | 27694278  | 2228 |

|       |           |           |      |
|-------|-----------|-----------|------|
| chr11 | 14139625  | 14141844  | 2220 |
| chr3  | 29960425  | 29962595  | 2171 |
| chr26 | 43501617  | 43503549  | 1933 |
| chr1  | 87343617  | 87345534  | 1918 |
| chr13 | 37445676  | 37447592  | 1917 |
| chr3  | 9183571   | 9185476   | 1906 |
| chr13 | 74419833  | 74421726  | 1894 |
| chr12 | 84175366  | 84177211  | 1846 |
| chr21 | 20978950  | 20980771  | 1822 |
| chr13 | 74412167  | 74413935  | 1769 |
| chr5  | 28952059  | 28953796  | 1738 |
| chr3  | 36034719  | 36036431  | 1713 |
| chr7  | 13287005  | 13288674  | 1670 |
| chr10 | 35960282  | 35961890  | 1609 |
| chr6  | 120808998 | 120810601 | 1604 |
| chr7  | 88947969  | 88949559  | 1591 |
| chr28 | 26918902  | 26920445  | 1544 |
| chr13 | 30825758  | 30827257  | 1500 |
| chr10 | 74123894  | 74125352  | 1459 |
| chr8  | 67697543  | 67698994  | 1452 |
| chr7  | 18715594  | 18717034  | 1441 |
| chr10 | 58747171  | 58748610  | 1440 |
| chr26 | 31335698  | 31337074  | 1377 |
| chr3  | 48207424  | 48208785  | 1362 |
| chr10 | 50634781  | 50636139  | 1359 |
| chr15 | 26891146  | 26892439  | 1294 |
| chr22 | 61184667  | 61185945  | 1279 |
| chr29 | 36689848  | 36691073  | 1226 |
| chr3  | 81167454  | 81168640  | 1187 |
| chr5  | 35296356  | 35297528  | 1173 |
| chr13 | 14693626  | 14694767  | 1142 |
| chr6  | 118505101 | 118506196 | 1096 |
| chr24 | 48634695  | 48635777  | 1083 |
| chr18 | 47797133  | 47798155  | 1023 |
| chr8  | 5798128   | 5799120   | 993  |
| chr17 | 64196595  | 64197584  | 990  |
| chr21 | 46609020  | 46609863  | 844  |
| chr6  | 91877733  | 91878561  | 829  |
| chr7  | 12985930  | 12986735  | 806  |
| chr18 | 52686284  | 52687083  | 800  |
| chr9  | 29470699  | 29471411  | 713  |
| chr7  | 54940626  | 54941330  | 705  |
| chr6  | 72201962  | 72202582  | 621  |
| chr3  | 22576807  | 22577381  | 575  |
| chr6  | 72183746  | 72184281  | 536  |
| chr3  | 105748481 | 105752688 | 4208 |
| chr20 | 8685731   | 8689835   | 4105 |
| chr26 | 22250590  | 22254509  | 3920 |
| chr13 | 23664688  | 23668591  | 3904 |
| chr9  | 53308458  | 53312019  | 3562 |

|       |           |           |      |
|-------|-----------|-----------|------|
| chr15 | 51341629  | 51345172  | 3544 |
| chr13 | 40535345  | 40538295  | 2951 |
| chr11 | 70712493  | 70715429  | 2937 |
| chr7  | 2275834   | 2278560   | 2727 |
| chr23 | 46370315  | 46372925  | 2611 |
| chr4  | 14667131  | 14669645  | 2515 |
| chr20 | 73286366  | 73288801  | 2436 |
| chr24 | 58969305  | 58971739  | 2435 |
| chr11 | 15011757  | 15014162  | 2406 |
| chr29 | 25944823  | 25947184  | 2362 |
| chr11 | 104686542 | 104688901 | 2360 |
| chr8  | 74393513  | 74395863  | 2351 |
| chr14 | 9201228   | 9203570   | 2343 |
| chr9  | 51627201  | 51629541  | 2341 |
| chr13 | 14711382  | 14713719  | 2338 |
| chr23 | 46404185  | 46406471  | 2287 |
| chr7  | 43752230  | 43754506  | 2277 |
| chr8  | 23063740  | 23065949  | 2210 |
| chr2  | 111405002 | 111407189 | 2188 |
| chr11 | 74463309  | 74465376  | 2068 |
| chr15 | 29180785  | 29182799  | 2015 |
| chr24 | 20399565  | 20401549  | 1985 |
| chr7  | 14296274  | 14298248  | 1975 |
| chr2  | 111330970 | 111332838 | 1869 |
| chr25 | 3167219   | 3169061   | 1843 |
| chr13 | 25500996  | 25502787  | 1792 |
| chr5  | 28936831  | 28938594  | 1764 |
| chr19 | 37878561  | 37880323  | 1763 |
| chr6  | 108678058 | 108679762 | 1705 |
| chr10 | 66936213  | 66937917  | 1705 |
| chr1  | 84791417  | 84793116  | 1700 |
| chr24 | 36937203  | 36938826  | 1624 |
| chr22 | 12196085  | 12197702  | 1618 |
| chr4  | 121455232 | 121456801 | 1570 |
| chr7  | 50287212  | 50288742  | 1531 |
| chr13 | 64758544  | 64760069  | 1526 |
| chr4  | 122656051 | 122657537 | 1487 |
| chr18 | 51045283  | 51046762  | 1480 |
| chr23 | 19333434  | 19334899  | 1466 |
| chr23 | 11787113  | 11788549  | 1437 |
| chr8  | 67692106  | 67693477  | 1372 |
| chr21 | 20651457  | 20652788  | 1332 |
| chr19 | 40520537  | 40521866  | 1330 |
| chr8  | 7569337   | 7570656   | 1320 |
| chr8  | 73939385  | 73940698  | 1314 |
| chr29 | 35601066  | 35602370  | 1305 |
| chr19 | 14992561  | 14993865  | 1305 |
| chr5  | 75021663  | 75022966  | 1304 |
| chr23 | 46396035  | 46397323  | 1289 |
| chr19 | 52417626  | 52418910  | 1285 |

|       |               |           |      |
|-------|---------------|-----------|------|
| chr8  | 74336873      | 74338144  | 1272 |
| chr13 | 40880218      | 40881449  | 1232 |
| chr10 | 90926706      | 90927926  | 1221 |
| chr26 | 34968770      | 34969974  | 1205 |
| chr13 | 74397331      | 74398482  | 1152 |
| chr18 | 34826581      | 34827674  | 1094 |
| chr17 | 73122668      | 73123758  | 1091 |
| chr18 | 45979224      | 45980309  | 1086 |
| chr12 | 84173162      | 84174221  | 1060 |
| chr9  | 46021524      | 46022579  | 1056 |
| chr22 | 60502099      | 60503135  | 1037 |
| chr6  | 103282838     | 103283854 | 1017 |
| chr23 | 7427198       | 7428210   | 1013 |
| chr3  | 8960692       | 8961689   | 998  |
| chrX  | 72249316      | 72250281  | 966  |
| chr25 | 42242566      | 42243524  | 959  |
| chr23 | 46416852      | 46417809  | 958  |
| chr24 | 60608520      | 60609467  | 948  |
| chr2  | 122973768     | 122974702 | 935  |
| chr18 | 11326084      | 11327016  | 933  |
| chr12 | 74485091      | 74486011  | 921  |
| chr16 | 20649607      | 20650526  | 920  |
| chr19 | 52420167      | 52421078  | 912  |
| chr21 | 47532671      | 47533578  | 908  |
| chr23 | 46398538      | 46399411  | 874  |
| chr5  | 121058920     | 121059792 | 873  |
| chr5  | 33874432      | 33875303  | 872  |
| chr29 | 46655025      | 46655882  | 858  |
| chr17 | 73192611      | 73193446  | 836  |
| chr17 | 75034342      | 75035150  | 809  |
| chr27 | 38668025      | 38668816  | 792  |
| chr8  | 23041753      | 23042536  | 784  |
| chr13 | 73923916      | 73924623  | 708  |
| chr1  | 100068671     | 100069377 | 707  |
| chr7  | 70507515      | 70508195  | 681  |
| chr7  | 14251482      | 14252153  | 672  |
| chr22 | 39845177      | 39845848  | 672  |
| chr19 | 65226013      | 65226658  | 646  |
| chr4  | 71577486      | 71578103  | 618  |
| chr13 | 82704839      | 82705436  | 598  |
| chr16 | 2195690       | 2196257   | 568  |
| chr25 | 275613 276155 | 543       |      |
| chr2  | 115114420     | 115114929 | 510  |
| chr13 | 59930156      | 59930625  | 470  |
| chr2  | 111843813     | 111844260 | 448  |
| chr3  | 33115574      | 33116018  | 445  |
| chr24 | 20770300      | 20770706  | 407  |
| chr19 | 8396713       | 8397119   | 407  |
| chr20 | 33639982      | 33641292  | 1311 |
| chr11 | 28485929      | 28491576  | 5648 |

|       |           |           |      |
|-------|-----------|-----------|------|
| chr19 | 39063414  | 39068778  | 5365 |
| chr12 | 61823406  | 61827848  | 4443 |
| chr8  | 45740426  | 45744311  | 3886 |
| chr25 | 37700868  | 37704126  | 3259 |
| chr15 | 38532026  | 38535108  | 3083 |
| chr16 | 47269668  | 47272694  | 3027 |
| chr3  | 4340228   | 4342995   | 2768 |
| chr4  | 118017076 | 118019829 | 2754 |
| chr14 | 29208548  | 29211301  | 2754 |
| chr4  | 16847660  | 16850295  | 2636 |
| chr10 | 35814435  | 35816843  | 2409 |
| chr21 | 52046781  | 52049120  | 2340 |
| chr12 | 74507005  | 74509325  | 2321 |
| chr19 | 54271748  | 54274054  | 2307 |
| chr8  | 89539537  | 89541830  | 2294 |
| chr5  | 29200996  | 29203138  | 2143 |
| chr1  | 104690138 | 104692280 | 2143 |
| chr4  | 72795825  | 72797961  | 2137 |
| chr13 | 23032125  | 23034233  | 2109 |
| chr6  | 72190556  | 72192653  | 2098 |
| chr6  | 108672312 | 108674379 | 2068 |
| chr22 | 50591874  | 50593893  | 2020 |
| chr23 | 52613905  | 52615890  | 1986 |
| chr20 | 6610014   | 6611955   | 1942 |
| chr2  | 111303320 | 111305222 | 1903 |
| chr23 | 31129539  | 31131424  | 1886 |
| chr12 | 31547851  | 31549723  | 1873 |
| chr11 | 100733492 | 100735350 | 1859 |
| chr10 | 103071639 | 103073469 | 1831 |
| chr5  | 33523144  | 33524952  | 1809 |
| chr2  | 115215959 | 115217767 | 1809 |
| chr3  | 88253342  | 88255139  | 1798 |
| chr2  | 115101632 | 115103409 | 1778 |
| chr11 | 66705822  | 66707592  | 1771 |
| chr15 | 76731194  | 76732935  | 1742 |
| chr13 | 41722673  | 41724414  | 1742 |
| chr11 | 100735375 | 100737091 | 1717 |
| chr23 | 9457167   | 9458832   | 1666 |
| chr3  | 117409526 | 117411183 | 1658 |
| chr7  | 65570464  | 65572091  | 1628 |
| chr5  | 35465464  | 35467077  | 1614 |
| chr7  | 29476302  | 29477835  | 1534 |
| chr18 | 23120108  | 23121611  | 1504 |
| chr3  | 22663833  | 22665330  | 1498 |
| chr18 | 55833230  | 55834711  | 1482 |
| chr18 | 62691197  | 62692673  | 1477 |
| chr18 | 51048632  | 51050084  | 1453 |
| chr16 | 67435221  | 67436667  | 1447 |
| chr16 | 38729824  | 38731248  | 1425 |
| chr24 | 31249708  | 31251078  | 1371 |

|       |           |           |      |
|-------|-----------|-----------|------|
| chr6  | 16237537  | 16238906  | 1370 |
| chr7  | 81426204  | 81427555  | 1352 |
| chr20 | 43469042  | 43470392  | 1351 |
| chr26 | 12850160  | 12851502  | 1343 |
| chr5  | 38697075  | 38698398  | 1324 |
| chr4  | 122645325 | 122646630 | 1306 |
| chr26 | 34967476  | 34968760  | 1285 |
| chr10 | 103070226 | 103071491 | 1266 |
| chr12 | 32029187  | 32030439  | 1253 |
| chr12 | 74477859  | 74479110  | 1252 |
| chr10 | 61471551  | 61472791  | 1241 |
| chr7  | 10978044  | 10979271  | 1228 |
| chr3  | 35412489  | 35413703  | 1215 |
| chr20 | 1137127   | 1138337   | 1211 |
| chr19 | 39075975  | 39077138  | 1164 |
| chr8  | 7776375   | 7777531   | 1157 |
| chr13 | 55111432  | 55112586  | 1155 |
| chr9  | 74196096  | 74197249  | 1154 |
| chr29 | 44677948  | 44679101  | 1154 |
| chr11 | 74969100  | 74970226  | 1127 |
| chr13 | 40809362  | 40810470  | 1109 |
| chr21 | 65212081  | 65213187  | 1107 |
| chr16 | 75220118  | 75221205  | 1088 |
| chr25 | 2989602   | 2990687   | 1086 |
| chr7  | 94407011  | 94408083  | 1073 |
| chr16 | 38731698  | 38732765  | 1068 |
| chr19 | 41235082  | 41236145  | 1064 |
| chr11 | 75411068  | 75412085  | 1018 |
| chr4  | 71864236  | 71865243  | 1008 |
| chr25 | 2990941   | 2991943   | 1003 |
| chr12 | 74522540  | 74523537  | 998  |
| chr13 | 6924700   | 6925668   | 969  |
| chr7  | 17947413  | 17948359  | 947  |
| chr3  | 84505973  | 84506916  | 944  |
| chr13 | 46211951  | 46212893  | 943  |
| chr5  | 29203180  | 29204089  | 910  |
| chr3  | 22627213  | 22628065  | 853  |
| chr23 | 12342273  | 12343118  | 846  |
| chr13 | 70043681  | 70044449  | 769  |
| chr17 | 55859164  | 55859923  | 760  |
| chr18 | 39910519  | 39911256  | 738  |
| chr14 | 66293250  | 66293983  | 734  |
| chr18 | 11513596  | 11514299  | 704  |
| chr1  | 87362000  | 87362685  | 686  |
| chr20 | 59409054  | 59409724  | 671  |
| chr2  | 75599124  | 75599733  | 610  |
| chr17 | 72764425  | 72764998  | 574  |
| chr13 | 75813020  | 75813578  | 559  |
| chr29 | 46656710  | 46657267  | 558  |
| chr4  | 121458376 | 121458907 | 532  |



|       |           |           |      |
|-------|-----------|-----------|------|
| chr23 | 15798953  | 15799478  | 526  |
| chr27 | 31453143  | 31453642  | 500  |
| chr11 | 9226804   | 9227249   | 446  |
| chr25 | 37691418  | 37691847  | 430  |
| chr17 | 73428792  | 73429205  | 414  |
| chr18 | 52826725  | 52827129  | 405  |
| chr12 | 32015819  | 32021037  | 5219 |
| chr4  | 14652983  | 14658184  | 5202 |
| chr16 | 38942617  | 38947480  | 4864 |
| chr6  | 63054322  | 63059134  | 4813 |
| chr2  | 130977631 | 130981576 | 3946 |
| chr13 | 55513264  | 55517167  | 3904 |
| chr19 | 13493708  | 13497286  | 3579 |
| chr7  | 5202772   | 5206338   | 3567 |
| chr2  | 26591879  | 26595305  | 3427 |
| chr6  | 103279630 | 103282780 | 3151 |
| chr2  | 111259881 | 111262941 | 3061 |
| chr21 | 47700462  | 47703352  | 2891 |
| chr10 | 71259096  | 71261930  | 2835 |
| chr25 | 3185480   | 3188274   | 2795 |
| chr7  | 14230183  | 14232973  | 2791 |
| chr21 | 47615143  | 47617898  | 2756 |
| chr29 | 23647397  | 23650149  | 2753 |
| chr7  | 94408100  | 94410815  | 2716 |
| chr21 | 25086067  | 25088775  | 2709 |
| chr5  | 33879235  | 33881897  | 2663 |
| chr23 | 23868585  | 23871154  | 2570 |
| chr6  | 63178573  | 63181134  | 2562 |
| chr19 | 37875941  | 37878432  | 2492 |
| chr10 | 8527272   | 8529750   | 2479 |
| chr20 | 38858411  | 38860726  | 2316 |
| chr6  | 108675751 | 108678056 | 2306 |
| chr10 | 58753279  | 58755532  | 2254 |
| chr13 | 14697673  | 14699857  | 2185 |
| chr4  | 121398653 | 121400749 | 2097 |
| chr3  | 106583108 | 106585166 | 2059 |
| chrX  | 72253601  | 72255588  | 1988 |
| chr12 | 84189313  | 84191300  | 1988 |
| chr4  | 71547620  | 71549599  | 1980 |
| chr7  | 45681483  | 45683437  | 1955 |
| chr26 | 38238063  | 38239993  | 1931 |
| chr4  | 74074214  | 74076082  | 1869 |
| chr26 | 20854742  | 20856606  | 1865 |
| chr20 | 35135328  | 35137169  | 1842 |
| chr16 | 2217360   | 2219183   | 1824 |
| chr13 | 14700871  | 14702681  | 1811 |
| chr14 | 39880709  | 39882487  | 1779 |
| chr4  | 110045888 | 110047655 | 1768 |
| chr12 | 74519229  | 74520996  | 1768 |
| chr2  | 111676366 | 111678069 | 1704 |

|       |           |           |      |
|-------|-----------|-----------|------|
| chr21 | 39978921  | 39980595  | 1675 |
| chr19 | 38669425  | 38671081  | 1657 |
| chr4  | 29013031  | 29014673  | 1643 |
| chr9  | 86707051  | 86708690  | 1640 |
| chr18 | 43459322  | 43460920  | 1599 |
| chr16 | 59059359  | 59060953  | 1595 |
| chr11 | 96081852  | 96083435  | 1584 |
| chr22 | 48550413  | 48551995  | 1583 |
| chr19 | 46822937  | 46824485  | 1549 |
| chr5  | 33323639  | 33325165  | 1527 |
| chr11 | 9245557   | 9247072   | 1516 |
| chr8  | 15100458  | 15101960  | 1503 |
| chr2  | 21504405  | 21505890  | 1486 |
| chr21 | 33821489  | 33822971  | 1483 |
| chr4  | 33410663  | 33412128  | 1466 |
| chr18 | 11378214  | 11379670  | 1457 |
| chr20 | 33568167  | 33569619  | 1453 |
| chr19 | 45282098  | 45283461  | 1364 |
| chr19 | 46898114  | 46899466  | 1353 |
| chr21 | 20613120  | 20614469  | 1350 |
| chr5  | 26713192  | 26714528  | 1337 |
| chr5  | 120051784 | 120053088 | 1305 |
| chr7  | 46239730  | 46241033  | 1304 |
| chr7  | 19937752  | 19939034  | 1283 |
| chr26 | 25508546  | 25509781  | 1236 |
| chr19 | 37880368  | 37881537  | 1170 |
| chr4  | 110055542 | 110056671 | 1130 |
| chr8  | 24132645  | 24133766  | 1122 |
| chr10 | 6923714   | 6924831   | 1118 |
| chr19 | 39101924  | 39102995  | 1072 |
| chr25 | 3035158   | 3036209   | 1052 |
| chrX  | 55578332  | 55579361  | 1030 |
| chr18 | 54940986  | 54942004  | 1019 |
| chr2  | 26455407  | 26456422  | 1016 |
| chr26 | 11336857  | 11337860  | 1004 |
| chr4  | 29010755  | 29011707  | 953  |
| chr18 | 47500813  | 47501749  | 937  |
| chr29 | 46230848  | 46231780  | 933  |
| chr22 | 50105420  | 50106328  | 909  |
| chr18 | 23472710  | 23473592  | 883  |
| chr6  | 120818322 | 120819187 | 866  |
| chr11 | 11621450  | 11622294  | 845  |
| chr25 | 43235892  | 43236725  | 834  |
| chr10 | 29819887  | 29820678  | 792  |
| chr4  | 47033734  | 47034520  | 787  |
| chr4  | 64289198  | 64289950  | 753  |
| chr15 | 73767703  | 73768439  | 737  |
| chr13 | 35971086  | 35971815  | 730  |
| chr2  | 132438258 | 132438966 | 709  |
| chr6  | 103294891 | 103295591 | 701  |

|       |           |           |      |
|-------|-----------|-----------|------|
| chr1  | 156681804 | 156682465 | 662  |
| chr6  | 63391619  | 63392276  | 658  |
| chr10 | 12131751  | 12132404  | 654  |
| chr26 | 22271779  | 22272405  | 627  |
| chr1  | 69495248  | 69495854  | 607  |
| chr29 | 48791688  | 48792288  | 601  |
| chr12 | 36464369  | 36464967  | 599  |
| chr23 | 28001572  | 28002164  | 593  |
| chr18 | 53559440  | 53560032  | 593  |
| chr3  | 8950595   | 8951169   | 575  |
| chr6  | 113363035 | 113363584 | 550  |
| chr18 | 63024705  | 63025252  | 548  |
| chr24 | 193035    | 193562    | 528  |
| chr22 | 54871217  | 54871744  | 528  |
| chr21 | 39970453  | 39970962  | 510  |
| chr2  | 99791456  | 99791930  | 475  |
| chr3  | 23043225  | 23043697  | 473  |
| chr11 | 49321204  | 49321629  | 426  |
| chr8  | 73284776  | 73285185  | 410  |
| chr4  | 14638765  | 14643328  | 4564 |
| chr13 | 75518849  | 75523349  | 4501 |
| chr21 | 47542115  | 47546314  | 4200 |
| chr23 | 18412411  | 18416353  | 3943 |
| chr2  | 27646582  | 27650112  | 3531 |
| chr21 | 48678848  | 48682269  | 3422 |
| chr28 | 26749330  | 26752593  | 3264 |
| chr11 | 96168963  | 96172188  | 3226 |
| chr7  | 65563102  | 65566273  | 3172 |
| chr14 | 19968344  | 19971318  | 2975 |
| chr5  | 33864070  | 33867009  | 2940 |
| chr8  | 56060212  | 56063137  | 2926 |
| chr18 | 45970035  | 45972942  | 2908 |
| chr4  | 89772687  | 89775584  | 2898 |
| chr18 | 53024884  | 53027683  | 2800 |
| chr1  | 87337729  | 87340498  | 2770 |
| chr3  | 48210970  | 48213684  | 2715 |
| chr11 | 3860591   | 3863292   | 2702 |
| chr6  | 108689625 | 108692241 | 2617 |
| chr18 | 37156766  | 37159377  | 2612 |
| chr26 | 37869902  | 37872481  | 2580 |
| chr17 | 67106642  | 67109212  | 2571 |
| chr3  | 23044916  | 23047465  | 2550 |
| chr19 | 10946970  | 10949456  | 2487 |
| chr5  | 17181685  | 17184110  | 2426 |
| chrX  | 10995425  | 10997817  | 2393 |
| chr7  | 57588108  | 57590439  | 2332 |
| chr21 | 20592708  | 20595023  | 2316 |
| chr3  | 123185109 | 123187364 | 2256 |
| chr18 | 11318134  | 11320369  | 2236 |
| chr21 | 47554012  | 47556199  | 2188 |

|       |           |           |      |
|-------|-----------|-----------|------|
| chr13 | 30823456  | 30825611  | 2156 |
| chr20 | 38853831  | 38855808  | 1978 |
| chr16 | 47600665  | 47602536  | 1872 |
| chr17 | 49390262  | 49392125  | 1864 |
| chr1  | 1641300   | 1643148   | 1849 |
| chr11 | 31100986  | 31102793  | 1808 |
| chr5  | 69512948  | 69514736  | 1789 |
| chr13 | 2455897   | 2457684   | 1788 |
| chr21 | 67919673  | 67921445  | 1773 |
| chr3  | 15394363  | 15396105  | 1743 |
| chr5  | 10729688  | 10731414  | 1727 |
| chr6  | 103296028 | 103297744 | 1717 |
| chr27 | 47332143  | 47333856  | 1714 |
| chr15 | 62741540  | 62743176  | 1637 |
| chr26 | 43499722  | 43501280  | 1559 |
| chr18 | 18706332  | 18707852  | 1521 |
| chr1  | 1639659   | 1641168   | 1510 |
| chr17 | 64184630  | 64186131  | 1502 |
| chr3  | 105190917 | 105192410 | 1494 |
| chr2  | 124287867 | 124289359 | 1493 |
| chr19 | 37337637  | 37339103  | 1467 |
| chr8  | 80178715  | 80180173  | 1459 |
| chr15 | 21055191  | 21056646  | 1456 |
| chr6  | 103293345 | 103294797 | 1453 |
| chr24 | 60609668  | 60611120  | 1453 |
| chr13 | 14692180  | 14693623  | 1444 |
| chr11 | 11991559  | 11992972  | 1414 |
| chr20 | 74772290  | 74773692  | 1403 |
| chr1  | 111299495 | 111300888 | 1394 |
| chr19 | 39077196  | 39078579  | 1384 |
| chr7  | 13100229  | 13101607  | 1379 |
| chr18 | 23121638  | 23123003  | 1366 |
| chr27 | 35433558  | 35434921  | 1364 |
| chr3  | 22923770  | 22925121  | 1352 |
| chr29 | 25561936  | 25563253  | 1318 |
| chr26 | 14547756  | 14549060  | 1305 |
| chr23 | 11081889  | 11083190  | 1302 |
| chr21 | 68955593  | 68956890  | 1298 |
| chr5  | 28940502  | 28941781  | 1280 |
| chr13 | 40595744  | 40597017  | 1274 |
| chr20 | 8544396   | 8545657   | 1262 |
| chr21 | 29696755  | 29698014  | 1260 |
| chr6  | 67341304  | 67342558  | 1255 |
| chr5  | 116334147 | 116335391 | 1245 |
| chr23 | 27988735  | 27989944  | 1210 |
| chr17 | 63487916  | 63489122  | 1207 |
| chr5  | 60735105  | 60736295  | 1191 |
| chr20 | 29520166  | 29521353  | 1188 |
| chr19 | 40456569  | 40457744  | 1176 |
| chr11 | 48682376  | 48683535  | 1160 |

|       |               |           |      |
|-------|---------------|-----------|------|
| chr2  | 124304121     | 124305244 | 1124 |
| chr4  | 64294538      | 64295651  | 1114 |
| chr12 | 32025959      | 32027058  | 1100 |
| chr11 | 106402444     | 106403508 | 1065 |
| chr9  | 90810271      | 90811324  | 1054 |
| chr23 | 31169879      | 31170930  | 1052 |
| chr16 | 46747849      | 46748900  | 1052 |
| chr8  | 63946920      | 63947970  | 1051 |
| chr4  | 123127539     | 123128587 | 1049 |
| chr12 | 34262662      | 34263680  | 1019 |
| chr24 | 60611701      | 60612646  | 946  |
| chr5  | 113261401     | 113262325 | 925  |
| chr10 | 50633826      | 50634750  | 925  |
| chr18 | 62345678      | 62346595  | 918  |
| chr13 | 80746285      | 80747200  | 916  |
| chr17 | 73180223      | 73181128  | 906  |
| chr15 | 44753360      | 44754264  | 905  |
| chr3  | 15424805      | 15425681  | 877  |
| chr26 | 21861642      | 21862499  | 858  |
| chr3  | 22895178      | 22896029  | 852  |
| chr26 | 44948412      | 44949215  | 804  |
| chr7  | 29480317      | 29481114  | 798  |
| chr18 | 50978353      | 50979140  | 788  |
| chr25 | 942950 943724 | 775       |      |
| chr11 | 7545626       | 7546397   | 772  |
| chr3  | 22686327      | 22687094  | 768  |
| chr1  | 152267403     | 152268159 | 757  |
| chr21 | 65570067      | 65570808  | 742  |
| chr20 | 4942468       | 4943185   | 718  |
| chr13 | 2466283       | 2466999   | 717  |
| chr7  | 19670610      | 19671310  | 701  |
| chr18 | 51615991      | 51616670  | 680  |
| chr21 | 20695000      | 20695672  | 673  |
| chr18 | 49549132      | 49549796  | 665  |
| chr29 | 33919395      | 33920058  | 664  |
| chr8  | 6478580       | 6479238   | 659  |
| chr23 | 10343875      | 10344505  | 631  |
| chr13 | 26304029      | 26304657  | 629  |
| chr24 | 51583246      | 51583873  | 628  |
| chr25 | 3166601       | 3167157   | 557  |
| chr13 | 41724658      | 41725198  | 541  |
| chr16 | 2444076       | 2444608   | 533  |
| chr23 | 31118031      | 31118560  | 530  |
| chr13 | 78421209      | 78421697  | 489  |
| chr19 | 56662003      | 56662474  | 472  |
| chr8  | 80608229      | 80608687  | 459  |
| chr15 | 62382507      | 62382945  | 439  |
| chr9  | 90387172      | 90387595  | 424  |
| chr18 | 51032021      | 51032438  | 418  |
| chr17 | 66894631      | 66895040  | 410  |

|       |           |           |      |
|-------|-----------|-----------|------|
| chr26 | 18749357  | 18754243  | 4887 |
| chr10 | 71237512  | 71241830  | 4319 |
| chr3  | 117404917 | 117409171 | 4255 |
| chr16 | 60225531  | 60229549  | 4019 |
| chr19 | 41243115  | 41246376  | 3262 |
| chr26 | 22339194  | 22342347  | 3154 |
| chr19 | 13497416  | 13500542  | 3127 |
| chr7  | 57584229  | 57587089  | 2861 |
| chr13 | 70040413  | 70043269  | 2857 |
| chr4  | 15271183  | 15273766  | 2584 |
| chr16 | 75201829  | 75204301  | 2473 |
| chr11 | 14133818  | 14136289  | 2472 |
| chr22 | 33356298  | 33358682  | 2385 |
| chr3  | 22655199  | 22657581  | 2383 |
| chr23 | 31167359  | 31169713  | 2355 |
| chr1  | 152255364 | 152257650 | 2287 |
| chr23 | 31302659  | 31304905  | 2247 |
| chr1  | 111301068 | 111303267 | 2200 |
| chr26 | 44949806  | 44951946  | 2141 |
| chr19 | 27183951  | 27186081  | 2131 |
| chr19 | 38991890  | 38993985  | 2096 |
| chr2  | 132430042 | 132432134 | 2093 |
| chr7  | 43769048  | 43771120  | 2073 |
| chr2  | 21486311  | 21488373  | 2063 |
| chr10 | 88070597  | 88072652  | 2056 |
| chr9  | 47257032  | 47259059  | 2028 |
| chr29 | 46657865  | 46659863  | 1999 |
| chr3  | 36019015  | 36021008  | 1994 |
| chr26 | 23515635  | 23517617  | 1983 |
| chr15 | 37556110  | 37558082  | 1973 |
| chr26 | 37892806  | 37894718  | 1913 |
| chr7  | 11429029  | 11430913  | 1885 |
| chr3  | 83724805  | 83726689  | 1885 |
| chr25 | 3200819   | 3202663   | 1845 |
| chr8  | 10474940  | 10476733  | 1794 |
| chr3  | 48202786  | 48204569  | 1784 |
| chr10 | 13031935  | 13033634  | 1700 |
| chr6  | 108692268 | 108693934 | 1667 |
| chr17 | 63474035  | 63475700  | 1666 |
| chr9  | 44918172  | 44919824  | 1653 |
| chr3  | 113457540 | 113459176 | 1637 |
| chr3  | 55843192  | 55844820  | 1629 |
| chr26 | 51625401  | 51627028  | 1628 |
| chr11 | 9221135   | 9222756   | 1622 |
| chr3  | 100242541 | 100244155 | 1615 |
| chr16 | 44356632  | 44358218  | 1587 |
| chr8  | 22648042  | 22649566  | 1525 |
| chr17 | 69315076  | 69316587  | 1512 |
| chr5  | 30928008  | 30929498  | 1491 |
| chr1  | 136905110 | 136906581 | 1472 |

|       |           |           |      |
|-------|-----------|-----------|------|
| chr11 | 56768841  | 56770270  | 1430 |
| chr15 | 42602610  | 42604016  | 1407 |
| chr18 | 55009690  | 55011091  | 1402 |
| chr14 | 29047041  | 29048424  | 1384 |
| chr25 | 2928026   | 2929398   | 1373 |
| chr29 | 29797139  | 29798501  | 1363 |
| chr7  | 13405326  | 13406671  | 1346 |
| chr4  | 72747021  | 72748352  | 1332 |
| chr23 | 52609014  | 52610322  | 1309 |
| chr1  | 159084628 | 159085913 | 1286 |
| chr8  | 23025538  | 23026817  | 1280 |
| chr21 | 20147553  | 20148822  | 1270 |
| chr10 | 71242312  | 71243567  | 1256 |
| chr7  | 42539225  | 42540474  | 1250 |
| chr26 | 23483551  | 23484796  | 1246 |
| chr26 | 45750523  | 45751754  | 1232 |
| chr27 | 38665026  | 38666234  | 1209 |
| chr3  | 73954275  | 73955479  | 1205 |
| chr11 | 89078709  | 89079910  | 1202 |
| chr18 | 45388756  | 45389928  | 1173 |
| chr23 | 46401537  | 46402686  | 1150 |
| chr23 | 30293552  | 30294651  | 1100 |
| chr1  | 84463603  | 84464672  | 1070 |
| chr14 | 66260714  | 66261752  | 1039 |
| chr2  | 115039270 | 115040299 | 1030 |
| chr22 | 7228515   | 7229531   | 1017 |
| chr15 | 43591128  | 43592125  | 998  |
| chr11 | 99199750  | 99200709  | 960  |
| chr8  | 74377828  | 74378784  | 957  |
| chr6  | 19590103  | 19591056  | 954  |
| chr17 | 72989148  | 72990095  | 948  |
| chr4  | 113659198 | 113660138 | 941  |
| chr3  | 22556025  | 22556963  | 939  |
| chr19 | 10895153  | 10896085  | 933  |
| chr16 | 60230179  | 60231107  | 929  |
| chr2  | 131054700 | 131055615 | 916  |
| chr2  | 140656564 | 140657469 | 906  |
| chr29 | 42922164  | 42923061  | 898  |
| chr10 | 70842598  | 70843438  | 841  |
| chr2  | 137656984 | 137657780 | 797  |
| chr15 | 65651489  | 65652278  | 790  |
| chr24 | 44249897  | 44250685  | 789  |
| chr15 | 28823982  | 28824765  | 784  |
| chr18 | 35068136  | 35068911  | 776  |
| chr23 | 18409835  | 18410602  | 768  |
| chr8  | 9354737   | 9355481   | 745  |
| chr23 | 23876037  | 23876774  | 738  |
| chr4  | 14666084  | 14666818  | 735  |
| chr17 | 67109374  | 67110098  | 725  |
| chr2  | 26595750  | 26596467  | 718  |

|       |           |           |      |
|-------|-----------|-----------|------|
| chr21 | 62226156  | 62226863  | 708  |
| chr20 | 75795418  | 75796118  | 701  |
| chr5  | 71659250  | 71659940  | 691  |
| chr3  | 35955062  | 35955752  | 691  |
| chr23 | 31117249  | 31117917  | 669  |
| chr4  | 121467301 | 121467959 | 659  |
| chr11 | 104663199 | 104663856 | 658  |
| chr9  | 90285937  | 90286593  | 657  |
| chr3  | 113363384 | 113364031 | 648  |
| chr9  | 86251233  | 86251872  | 640  |
| chr4  | 14643432  | 14644040  | 609  |
| chr11 | 14126120  | 14126725  | 606  |
| chr11 | 46006923  | 46007512  | 590  |
| chr21 | 68943190  | 68943774  | 585  |
| chr10 | 47390854  | 47391421  | 568  |
| chr23 | 36832148  | 36832713  | 566  |
| chr18 | 53874635  | 53875193  | 559  |
| chr16 | 31702256  | 31702812  | 557  |
| chr23 | 31402194  | 31402730  | 537  |
| chr23 | 27824631  | 27825166  | 536  |
| chr24 | 60833306  | 60833819  | 514  |
| chr9  | 53312434  | 53312943  | 510  |
| chr14 | 30836775  | 30837266  | 492  |
| chr19 | 39100554  | 39101044  | 491  |
| chr18 | 56826652  | 56827138  | 487  |
| chr8  | 65867912  | 65868394  | 483  |
| chr4  | 120189018 | 120189471 | 454  |
| chr19 | 40429002  | 40429448  | 447  |
| chr25 | 2687958   | 2688403   | 446  |
| chr25 | 39143602  | 39144031  | 430  |
| chr3  | 8946938   | 8950570   | 3633 |
| chr17 | 63289785  | 63296791  | 7007 |
| chr21 | 34636183  | 34641328  | 5146 |
| chr20 | 6603066   | 6607107   | 4042 |
| chr9  | 16961231  | 16965030  | 3800 |
| chr7  | 51444343  | 51447544  | 3202 |
| chr4  | 95615018  | 95618093  | 3076 |
| chr16 | 41353743  | 41356723  | 2981 |
| chr7  | 3021770   | 3024585   | 2816 |
| chr11 | 107590116 | 107592799 | 2684 |
| chr13 | 14713862  | 14716460  | 2599 |
| chr3  | 55841027  | 55843098  | 2072 |
| chr6  | 113382184 | 113384202 | 2019 |
| chr17 | 69312743  | 69314729  | 1987 |
| chr8  | 5777565   | 5779512   | 1948 |
| chr13 | 55113074  | 55114855  | 1782 |
| chr2  | 75594932  | 75596647  | 1716 |
| chr21 | 64510664  | 64512363  | 1700 |
| chr17 | 65959045  | 65960689  | 1645 |
| chr21 | 19202931  | 19204550  | 1620 |



|       |           |           |      |
|-------|-----------|-----------|------|
| chr19 | 39967600  | 39969159  | 1560 |
| chr24 | 35319577  | 35321109  | 1533 |
| chr28 | 25327343  | 25328802  | 1460 |
| chr2  | 115111764 | 115113169 | 1406 |
| chr26 | 18763159  | 18764545  | 1387 |
| chr9  | 47245905  | 47247220  | 1316 |
| chr23 | 46084923  | 46086189  | 1267 |
| chr7  | 4515651   | 4516752   | 1102 |
| chr15 | 62748992  | 62749983  | 992  |
| chr10 | 25839558  | 25840546  | 989  |
| chr20 | 8540308   | 8541267   | 960  |
| chr17 | 64179625  | 64180558  | 934  |
| chr8  | 74371586  | 74372480  | 895  |
| chr8  | 24509177  | 24510012  | 836  |
| chr8  | 5808811   | 5809642   | 832  |
| chr3  | 101085547 | 101086336 | 790  |
| chr15 | 74512712  | 74513443  | 732  |
| chr3  | 127032923 | 127033531 | 609  |
| chr20 | 3182737   | 3188808   | 6072 |
| chr7  | 84420361  | 84423552  | 3192 |
| chr22 | 48108420  | 48111238  | 2819 |
| chr9  | 77695530  | 77698297  | 2768 |
| chr8  | 74372584  | 74375304  | 2721 |
| chr7  | 46237688  | 46239645  | 1958 |
| chr16 | 24765402  | 24767273  | 1872 |
| chr13 | 74410484  | 74412165  | 1682 |
| chr5  | 61475609  | 61477261  | 1653 |
| chr14 | 8048734   | 8050351   | 1618 |
| chr13 | 72603989  | 72605581  | 1593 |
| chr19 | 40513115  | 40514546  | 1432 |
| chr20 | 33658009  | 33659389  | 1381 |
| chr8  | 8709452   | 8710815   | 1364 |
| chr27 | 48382023  | 48383247  | 1225 |
| chr10 | 90237388  | 90238550  | 1163 |
| chr17 | 63280715  | 63281875  | 1161 |
| chr22 | 39843590  | 39844671  | 1082 |
| chr7  | 57591226  | 57592228  | 1003 |
| chr6  | 107137067 | 107137953 | 887  |
| chr9  | 90315936  | 90316690  | 755  |
| chrX  | 75397826  | 75398522  | 697  |
| chr18 | 11637534  | 11642053  | 4520 |
| chr23 | 52697030  | 52699961  | 2932 |
| chr18 | 53170750  | 53173536  | 2787 |
| chr4  | 122659209 | 122661753 | 2545 |
| chr5  | 71663318  | 71665290  | 1973 |
| chr9  | 9369994   | 9371947   | 1954 |
| chr19 | 60531223  | 60533169  | 1947 |
| chr3  | 93809853  | 93811732  | 1880 |
| chr19 | 46851248  | 46853089  | 1842 |
| chr12 | 76541042  | 76542878  | 1837 |

|       |               |           |      |
|-------|---------------|-----------|------|
| chr10 | 88368966      | 88370783  | 1818 |
| chr11 | 14150296      | 14152046  | 1751 |
| chr3  | 88247101      | 88248803  | 1703 |
| chr20 | 74777854      | 74779527  | 1674 |
| chr23 | 23858637      | 23860233  | 1597 |
| chr19 | 41478433      | 41479888  | 1456 |
| chr2  | 25291208      | 25292623  | 1416 |
| chr4  | 124323449     | 124324789 | 1341 |
| chr21 | 67918104      | 67919411  | 1308 |
| chr11 | 12864217      | 12865453  | 1237 |
| chr2  | 125919975     | 125921130 | 1156 |
| chr4  | 105188056     | 105189198 | 1143 |
| chr19 | 39263091      | 39264207  | 1117 |
| chr11 | 4359583       | 4360637   | 1055 |
| chr5  | 29750696      | 29751720  | 1025 |
| chr2  | 111407270     | 111408226 | 957  |
| chr6  | 69750862      | 69751681  | 820  |
| chr14 | 66272401      | 66273174  | 774  |
| chr21 | 56511129      | 56511887  | 759  |
| chr13 | 80588934      | 80589674  | 741  |
| chr5  | 60157897      | 60158509  | 613  |
| chr13 | 42885798      | 42886328  | 531  |
| chr10 | 32483965      | 32487250  | 3286 |
| chr25 | 37705783      | 37708665  | 2883 |
| chr13 | 55510466      | 55513198  | 2733 |
| chr2  | 111244150     | 111246868 | 2719 |
| chr19 | 54443734      | 54446298  | 2565 |
| chr3  | 36021918      | 36024454  | 2537 |
| chr12 | 3678023       | 3680555   | 2533 |
| chr13 | 14708756      | 14711261  | 2506 |
| chr10 | 8524526       | 8526941   | 2416 |
| chr23 | 31422660      | 31424857  | 2198 |
| chr25 | 667327 669501 | 2175      |      |
| chr4  | 68277421      | 68279502  | 2082 |
| chr20 | 4956745       | 4958734   | 1990 |
| chr8  | 5806828       | 5808808   | 1981 |
| chr3  | 22542125      | 22543991  | 1867 |
| chr18 | 51593945      | 51595726  | 1782 |
| chr29 | 31977493      | 31979231  | 1739 |
| chr15 | 13648366      | 13650052  | 1687 |
| chr29 | 31981356      | 31983033  | 1678 |
| chr8  | 67699110      | 67700770  | 1661 |
| chr7  | 4347513       | 4349137   | 1625 |
| chr3  | 105921373     | 105922939 | 1567 |
| chr3  | 55974273      | 55975779  | 1507 |
| chr23 | 31325251      | 31326751  | 1501 |
| chr12 | 70972812      | 70974232  | 1421 |
| chr12 | 54252579      | 54253946  | 1368 |
| chr26 | 21879154      | 21880475  | 1322 |
| chr8  | 23060647      | 23061960  | 1314 |

|       |           |           |      |
|-------|-----------|-----------|------|
| chr15 | 60442846  | 60443959  | 1114 |
| chr3  | 8814464   | 8815565   | 1102 |
| chr7  | 65673913  | 65674989  | 1077 |
| chr1  | 111308492 | 111309472 | 981  |
| chr8  | 74376788  | 74377761  | 974  |
| chr4  | 30803788  | 30804616  | 829  |
| chr7  | 46229531  | 46230272  | 742  |
| chr3  | 36021254  | 36021913  | 660  |
| chr8  | 73840691  | 73841266  | 576  |
| chr13 | 73920260  | 73920699  | 440  |
| chr18 | 48672567  | 48674754  | 2188 |
| chr18 | 55839910  | 55844376  | 4467 |
| chr13 | 41715979  | 41719170  | 3192 |
| chr18 | 11576240  | 11579314  | 3075 |
| chr7  | 15096469  | 15099282  | 2814 |
| chr7  | 4349167   | 4351757   | 2591 |
| chr12 | 54233549  | 54235880  | 2332 |
| chr9  | 53319888  | 53322196  | 2309 |
| chr19 | 58159424  | 58161542  | 2119 |
| chr5  | 71666524  | 71668542  | 2019 |
| chr21 | 25235690  | 25237618  | 1929 |
| chr11 | 9240615   | 9242475   | 1861 |
| chr26 | 18945030  | 18946857  | 1828 |
| chr18 | 34823748  | 34825418  | 1671 |
| chr2  | 111340885 | 111342459 | 1575 |
| chr11 | 77867494  | 77869040  | 1547 |
| chr22 | 16290593  | 16292072  | 1480 |
| chr2  | 131201974 | 131203354 | 1381 |
| chr3  | 105762532 | 105763879 | 1348 |
| chr22 | 12198070  | 12199382  | 1313 |
| chr21 | 20603965  | 20605260  | 1296 |
| chr28 | 8227222   | 8228493   | 1272 |
| chr3  | 22569593  | 22570725  | 1133 |
| chr13 | 55719034  | 55720138  | 1105 |
| chr15 | 62380361  | 62381426  | 1066 |
| chr29 | 48794551  | 48795582  | 1032 |
| chr10 | 71257603  | 71258447  | 845  |
| chr11 | 100911349 | 100912136 | 788  |
| chr7  | 4354847   | 4355616   | 770  |
| chr18 | 10708189  | 10708897  | 709  |
| chr3  | 23014469  | 23015072  | 604  |
| chr3  | 22662650  | 22663214  | 565  |
| chr22 | 50591291  | 50591831  | 541  |
| chr26 | 22274285  | 22277619  | 3335 |
| chr19 | 38975573  | 38978859  | 3287 |
| chr13 | 2462719   | 2465582   | 2864 |
| chr21 | 34632612  | 34635117  | 2506 |
| chr8  | 45737935  | 45740353  | 2419 |
| chr26 | 22328856  | 22331127  | 2272 |
| chr15 | 32269753  | 32271857  | 2105 |

|       |           |           |      |
|-------|-----------|-----------|------|
| chr29 | 46663813  | 46665690  | 1878 |
| chr11 | 80554837  | 80556688  | 1852 |
| chr18 | 11633420  | 11635261  | 1842 |
| chr3  | 55965147  | 55966894  | 1748 |
| chr11 | 96179069  | 96180791  | 1723 |
| chr4  | 89775586  | 89777260  | 1675 |
| chr5  | 111687646 | 111689192 | 1547 |
| chr12 | 74486727  | 74488218  | 1492 |
| chr25 | 37692320  | 37693769  | 1450 |
| chr5  | 28950518  | 28951964  | 1447 |
| chr23 | 46373207  | 46374540  | 1334 |
| chr11 | 74461963  | 74463270  | 1308 |
| chr28 | 12378071  | 12379365  | 1295 |
| chr25 | 43202348  | 43203602  | 1255 |
| chr2  | 125929524 | 125930641 | 1118 |
| chr19 | 40429677  | 40430714  | 1038 |
| chr24 | 64976824  | 64977756  | 933  |
| chr4  | 30799967  | 30803671  | 3705 |
| chr5  | 114071768 | 114074938 | 3171 |
| chr16 | 46742819  | 46745930  | 3112 |
| chr12 | 74494526  | 74497404  | 2879 |
| chr1  | 68447146  | 68449404  | 2259 |
| chr1  | 149420853 | 149422879 | 2027 |
| chr24 | 60568053  | 60569640  | 1588 |
| chr13 | 60160421  | 60161937  | 1517 |
| chr26 | 31866490  | 31867991  | 1502 |
| chr28 | 36450503  | 36451920  | 1418 |
| chr8  | 10473478  | 10474803  | 1326 |
| chr13 | 40890699  | 40891844  | 1146 |
| chr8  | 5774714   | 5775773   | 1060 |
| chr20 | 73281570  | 73282607  | 1038 |
| chr9  | 91905404  | 91906425  | 1022 |
| chr6  | 91904946  | 91905960  | 1015 |
| chr13 | 55371901  | 55372834  | 934  |
| chr12 | 84181326  | 84182255  | 930  |
| chr2  | 128492753 | 128493670 | 918  |
| chr21 | 34635132  | 34636045  | 914  |
| chr3  | 15643016  | 15643916  | 901  |
| chr7  | 17098564  | 17099422  | 859  |
| chr3  | 22672694  | 22673547  | 854  |
| chr2  | 130448342 | 130449155 | 814  |
| chr18 | 51035695  | 51036446  | 752  |
| chr3  | 22663221  | 22663829  | 609  |
| chr23 | 8791621   | 8792194   | 574  |
| chr3  | 33823535  | 33826742  | 3208 |
| chr23 | 46411067  | 46414048  | 2982 |
| chr7  | 42929206  | 42931925  | 2720 |
| chr8  | 42206483  | 42208641  | 2159 |
| chr26 | 21840804  | 21842931  | 2128 |
| chr6  | 72192782  | 72194638  | 1857 |

|       |           |           |      |
|-------|-----------|-----------|------|
| chr18 | 23601589  | 23603330  | 1742 |
| chr4  | 33408672  | 33410339  | 1668 |
| chr12 | 32031635  | 32033113  | 1479 |
| chr6  | 117843431 | 117844892 | 1462 |
| chr28 | 46061549  | 46062745  | 1197 |
| chr1  | 1635767   | 1636931   | 1165 |
| chr19 | 44173861  | 44174942  | 1082 |
| chr11 | 106401261 | 106402314 | 1054 |
| chr15 | 62744803  | 62745796  | 994  |
| chr14 | 31498594  | 31499514  | 921  |
| chr26 | 50752902  | 50753756  | 855  |
| chr26 | 21819295  | 21820132  | 838  |
| chr18 | 55850138  | 55850969  | 832  |
| chr5  | 28910004  | 28910727  | 724  |
| chr2  | 111325628 | 111326291 | 664  |
| chr19 | 65258002  | 65258477  | 476  |
| chr19 | 41246454  | 41249552  | 3099 |
| chr4  | 14663056  | 14665993  | 2938 |
| chr17 | 26902534  | 26905063  | 2530 |
| chr10 | 68227091  | 68229385  | 2295 |
| chr4  | 95677325  | 95679340  | 2016 |
| chr1  | 74494381  | 74496039  | 1659 |
| chr13 | 10556369  | 10557971  | 1603 |
| chr16 | 38564601  | 38566116  | 1516 |
| chr8  | 110722711 | 110724199 | 1489 |
| chr23 | 17626857  | 17627930  | 1074 |
| chr24 | 36944659  | 36945690  | 1032 |
| chr21 | 20602752  | 20603712  | 961  |
| chr26 | 21844738  | 21845535  | 798  |
| chr3  | 78293605  | 78294388  | 784  |
| chr18 | 11317407  | 11318100  | 694  |
| chr8  | 73096010  | 73096571  | 562  |
| chr15 | 45866119  | 45868375  | 2257 |
| chr10 | 2772747   | 2774444   | 1698 |
| chr3  | 15641619  | 15642935  | 1317 |
| chr8  | 24352623  | 24353567  | 945  |
| chr24 | 35323949  | 35324757  | 809  |
| chr29 | 25947596  | 25948387  | 792  |
| chr6  | 117845129 | 117845590 | 462  |
| chr25 | 44030985  | 44031413  | 429  |
| chr16 | 59047422  | 59048021  | 600  |
| chr23 | 23851200  | 23853691  | 2492 |
| chr10 | 35962061  | 35964432  | 2372 |
| chr3  | 105918519 | 105920509 | 1991 |
| chr14 | 66269397  | 66271382  | 1986 |
| chr14 | 61207504  | 61209224  | 1721 |
| chr13 | 75564813  | 75566011  | 1199 |
| chr11 | 28475277  | 28476381  | 1105 |
| chr23 | 7695526   | 7696619   | 1094 |
| chr11 | 28474259  | 28475275  | 1017 |

|       |           |           |      |
|-------|-----------|-----------|------|
| chr11 | 46007612  | 46008476  | 865  |
| chr24 | 64979169  | 64980015  | 847  |
| chr4  | 35126315  | 35126878  | 564  |
| chr12 | 9557087   | 9558926   | 1840 |
| chr13 | 41708928  | 41710669  | 1742 |
| chr3  | 22577900  | 22578440  | 541  |
| chr3  | 23011635  | 23013565  | 1931 |
| chr3  | 115100104 | 115100899 | 796  |
| chr5  | 29196558  | 29199034  | 2477 |
| chr17 | 12581273  | 12583141  | 1869 |
| chr1  | 100633540 | 100635007 | 1468 |
| chr9  | 42057777  | 42059210  | 1434 |
| chr16 | 20651005  | 20652338  | 1334 |
| chr17 | 14835494  | 14836801  | 1308 |
| chr1  | 144316949 | 144318205 | 1257 |
| chr19 | 37937638  | 37939315  | 1678 |
| chr6  | 34431206  | 34432307  | 1102 |
| chr2  | 108811551 | 108812057 | 507  |
| chr28 | 46062765  | 46063653  | 889  |
| chr4  | 46282007  | 46283296  | 1290 |
| chr15 | 74516801  | 74517455  | 655  |
| chr3  | 35955876  | 35958244  | 2369 |
| chr23 | 8286461   | 8288240   | 1780 |
| chr19 | 45918066  | 45919702  | 1637 |
| chr29 | 34639827  | 34641284  | 1458 |
| chr6  | 62537212  | 62538632  | 1421 |
| chr2  | 5181410   | 5182817   | 1408 |
| chr11 | 7203323   | 7204658   | 1336 |
| chr3  | 35493011  | 35494191  | 1181 |
| chr24 | 36938847  | 36940023  | 1177 |
| chr7  | 43728181  | 43729303  | 1123 |
| chr3  | 8632788   | 8633867   | 1080 |
| chr5  | 32845691  | 32846665  | 975  |
| chr3  | 8635305   | 8636221   | 917  |
| chr2  | 92333147  | 92333891  | 745  |
| chr1  | 100635321 | 100636060 | 740  |
| chr5  | 67822887  | 67823421  | 535  |
| chr5  | 112140151 | 112140640 | 490  |
| chr8  | 24492066  | 24494641  | 2576 |
| chr26 | 22206344  | 22208100  | 1757 |
| chr11 | 11993832  | 11995556  | 1725 |
| chr18 | 13778553  | 13780123  | 1571 |
| chr13 | 36763085  | 36764624  | 1540 |
| chr19 | 45828646  | 45830118  | 1473 |
| chr22 | 14932041  | 14933135  | 1095 |
| chr13 | 46431795  | 46432633  | 839  |
| chr7  | 88946637  | 88947920  | 1284 |
| chr5  | 33529899  | 33530514  | 616  |
| chr8  | 73837582  | 73838098  | 517  |
| chr29 | 45770923  | 45773414  | 2492 |

|       |           |           |      |
|-------|-----------|-----------|------|
| chr5  | 33526519  | 33528611  | 2093 |
| chr5  | 121396947 | 121398969 | 2023 |
| chr23 | 44401513  | 44402454  | 942  |
| chr4  | 29018958  | 29019883  | 926  |
| chr28 | 43863555  | 43865686  | 2132 |
| chr3  | 113827806 | 113829344 | 1539 |
| chr24 | 64980369  | 64981727  | 1359 |
| chr7  | 10976448  | 10977748  | 1301 |
| chr11 | 9222791   | 9223985   | 1195 |
| chrX  | 72244298  | 72245477  | 1180 |
| chr29 | 46031355  | 46032510  | 1156 |
| chr28 | 42787400  | 42788524  | 1125 |
| chr4  | 124244369 | 124245176 | 808  |
| chr25 | 43531060  | 43531820  | 761  |
| chr3  | 8942762   | 8943362   | 601  |
| chr28 | 43866132  | 43867168  | 1037 |
| chr3  | 8815698   | 8816327   | 630  |
| chr3  | 22864429  | 22864859  | 431  |
| chr23 | 33462926  | 33464024  | 1099 |
| chr20 | 3178254   | 3179156   | 903  |
| chr19 | 6522021   | 6522651   | 631  |
| chr7  | 10967331  | 10969200  | 1870 |
| chr7  | 5397228   | 5398868   | 1641 |
| chr3  | 113407558 | 113408976 | 1419 |
| chr7  | 19210933  | 19211899  | 967  |
| chr28 | 33884448  | 33885385  | 938  |
| chr23 | 52753500  | 52754323  | 824  |
| chr3  | 126945617 | 126946351 | 735  |
| chr21 | 9441898   | 9442625   | 728  |
| chr23 | 28658196  | 28659292  | 1097 |
| chr2  | 111324703 | 111325581 | 879  |
| chr2  | 123458207 | 123458847 | 641  |
| chr6  | 72187382  | 72188428  | 1047 |
| chr2  | 111408700 | 111409708 | 1009 |
| chr3  | 22566934  | 22567868  | 935  |
| chr22 | 16292355  | 16293157  | 803  |
| chr20 | 66536132  | 66536737  | 606  |
| chr28 | 15321142  | 15321620  | 479  |
| chr12 | 32924160  | 32925768  | 1609 |
| chr18 | 11584855  | 11586029  | 1175 |
| chr11 | 14078989  | 14079478  | 490  |
| chr2  | 15369611  | 15371823  | 2213 |
| chr6  | 118655338 | 118656582 | 1245 |
| chr18 | 11627729  | 11628730  | 1002 |
| chr23 | 48772798  | 48773629  | 832  |
| chr8  | 73484765  | 73485595  | 831  |
| chr6  | 121048945 | 121049753 | 809  |
| chr8  | 24481292  | 24483620  | 2329 |
| chr8  | 73832844  | 73834408  | 1565 |
| chr3  | 126944569 | 126945536 | 968  |

|       |               |           |      |
|-------|---------------|-----------|------|
| chr9  | 44104593      | 44105395  | 803  |
| chr11 | 31054704      | 31055445  | 742  |
| chr18 | 62212159      | 62213415  | 1257 |
| chr2  | 40158804      | 40159617  | 814  |
| chr8  | 24199865      | 24200300  | 436  |
| chr17 | 56061800      | 56062993  | 1194 |
| chr19 | 45541715      | 45542884  | 1170 |
| chr3  | 106546015     | 106547145 | 1131 |
| chr7  | 4927937       | 4928849   | 913  |
| chr7  | 16525368      | 16526149  | 782  |
| chr22 | 10750176      | 10750760  | 585  |
| chr14 | 22089510      | 22090007  | 498  |
| chr20 | 75669669      | 75670135  | 467  |
| chr20 | 4952911       | 4953373   | 463  |
| chr3  | 8818851       | 8819960   | 1110 |
| chr22 | 59420891      | 59421899  | 1009 |
| chr16 | 29423612      | 29424396  | 785  |
| chr13 | 73920721      | 73921383  | 663  |
| chr6  | 63184844      | 63185436  | 593  |
| chr5  | 123171298     | 123171868 | 571  |
| chr6  | 74347152      | 74347721  | 570  |
| chr3  | 23010909      | 23011439  | 531  |
| chr11 | 100871915     | 100872421 | 507  |
| chr17 | 70375067      | 70375505  | 439  |
| chr3  | 8943435       | 8945961   | 2527 |
| chr9  | 90827849      | 90828635  | 787  |
| chr23 | 27974140      | 27975331  | 1192 |
| chr8  | 73828071      | 73830152  | 2082 |
| chr27 | 39226468      | 39227279  | 812  |
| chr11 | 9242497       | 9243214   | 718  |
| chr26 | 9745160       | 9746448   | 1289 |
| chr23 | 27804521      | 27805575  | 1055 |
| chr29 | 48736010      | 48736820  | 811  |
| chr8  | 73826384      | 73826959  | 576  |
| chr8  | 72613615      | 72614446  | 832  |
| chr25 | 44021964      | 44022389  | 426  |
| chr3  | 8946322       | 8946894   | 573  |
| chr1  | 84784456      | 84785196  | 741  |
| chr4  | 121724441     | 121725315 | 875  |
| chr13 | 181086 181946 | 861       |      |
| chr3  | 126952933     | 126953718 | 786  |
| chr7  | 59498960      | 59499631  | 672  |
| chr4  | 95664991      | 95665448  | 458  |
| chr28 | 46053420      | 46054223  | 804  |
| chr8  | 73519483      | 73520110  | 628  |
| chr21 | 1927792       | 1928216   | 425  |
| chr18 | 37024640      | 37025149  | 510  |
| chr19 | 39086015      | 39090176  | 4162 |
| chr2  | 84791199      | 84795340  | 4142 |
| chr23 | 23854094      | 23857566  | 3473 |



|       |           |           |      |
|-------|-----------|-----------|------|
| chr16 | 77488217  | 77491615  | 3399 |
| chr11 | 80556901  | 80560222  | 3322 |
| chr3  | 30433039  | 30436178  | 3140 |
| chr21 | 47535520  | 47538488  | 2969 |
| chr4  | 121497854 | 121500710 | 2857 |
| chr19 | 52559267  | 52562074  | 2808 |
| chr4  | 71559119  | 71561840  | 2722 |
| chr6  | 113368786 | 113371351 | 2566 |
| chr17 | 72140036  | 72142584  | 2549 |
| chr9  | 77687617  | 77690144  | 2528 |
| chr22 | 7221602   | 7224116   | 2515 |
| chr5  | 123162812 | 123165231 | 2420 |
| chr6  | 30812944  | 30815317  | 2374 |
| chr4  | 71601785  | 71604122  | 2338 |
| chr18 | 18703892  | 18706156  | 2265 |
| chr22 | 7556884   | 7559037   | 2154 |
| chr10 | 46990537  | 46992634  | 2098 |
| chr5  | 117214397 | 117216483 | 2087 |
| chr9  | 43847218  | 43849269  | 2052 |
| chr21 | 20639236  | 20641286  | 2051 |
| chr13 | 55038576  | 55040594  | 2019 |
| chr17 | 44038387  | 44040403  | 2017 |
| chr3  | 20501040  | 20503052  | 2013 |
| chr8  | 9355849   | 9357858   | 2010 |
| chr6  | 69107405  | 69109405  | 2001 |
| chr19 | 47279193  | 47281142  | 1950 |
| chr11 | 14145257  | 14147204  | 1948 |
| chr27 | 39223396  | 39225330  | 1935 |
| chr16 | 40885426  | 40887344  | 1919 |
| chr19 | 18372927  | 18374821  | 1895 |
| chr5  | 33855623  | 33857512  | 1890 |
| chr3  | 95079077  | 95080966  | 1890 |
| chr13 | 41033215  | 41035066  | 1852 |
| chr13 | 42607835  | 42609659  | 1825 |
| chr9  | 77190658  | 77192457  | 1800 |
| chr9  | 53328629  | 53330427  | 1799 |
| chr27 | 26766616  | 26768384  | 1769 |
| chr9  | 107090555 | 107092238 | 1684 |
| chr14 | 64004721  | 64006400  | 1680 |
| chr17 | 63472367  | 63474021  | 1655 |
| chr10 | 74861947  | 74863598  | 1652 |
| chr9  | 35467272  | 35468918  | 1647 |
| chr2  | 136423489 | 136425032 | 1544 |
| chr4  | 123130731 | 123132243 | 1513 |
| chr25 | 1380525   | 1382037   | 1513 |
| chr8  | 74369662  | 74371136  | 1475 |
| chr11 | 104894528 | 104895994 | 1467 |
| chr9  | 105000844 | 105002283 | 1440 |
| chr20 | 30446402  | 30447825  | 1424 |
| chr9  | 35968434  | 35969824  | 1391 |

|       |           |           |      |
|-------|-----------|-----------|------|
| chr5  | 29210256  | 29211613  | 1358 |
| chr3  | 8962036   | 8963388   | 1353 |
| chr15 | 81397288  | 81398635  | 1348 |
| chr13 | 40892737  | 40894077  | 1341 |
| chr12 | 81686911  | 81688243  | 1333 |
| chr25 | 1972644   | 1973964   | 1321 |
| chr29 | 25487830  | 25489123  | 1294 |
| chr6  | 92968625  | 92969901  | 1277 |
| chr4  | 122657692 | 122658955 | 1264 |
| chr10 | 95114509  | 95115758  | 1250 |
| chr17 | 12569546  | 12570772  | 1227 |
| chr10 | 46992666  | 46993879  | 1214 |
| chr3  | 106532015 | 106533222 | 1208 |
| chr16 | 29425604  | 29426811  | 1208 |
| chr3  | 115467700 | 115468888 | 1189 |
| chr16 | 2898942   | 2900120   | 1179 |
| chr7  | 5244661   | 5245817   | 1157 |
| chr2  | 125487264 | 125488398 | 1135 |
| chr12 | 74479757  | 74480885  | 1129 |
| chr7  | 10973938  | 10975060  | 1123 |
| chr1  | 104693522 | 104694643 | 1122 |
| chr9  | 66529458  | 66530558  | 1101 |
| chr3  | 99101405  | 99102483  | 1079 |
| chr26 | 18745100  | 18746171  | 1072 |
| chr5  | 72151170  | 72152230  | 1061 |
| chr11 | 109689154 | 109690210 | 1057 |
| chr20 | 27300494  | 27301546  | 1053 |
| chr16 | 31703096  | 31704136  | 1041 |
| chr18 | 54198160  | 54199195  | 1036 |
| chr18 | 49948854  | 49949857  | 1004 |
| chr23 | 31109067  | 31110056  | 990  |
| chr10 | 21665521  | 21666457  | 937  |
| chr4  | 121459166 | 121460094 | 929  |
| chr8  | 8836623   | 8837549   | 927  |
| chr1  | 147251015 | 147251915 | 901  |
| chr9  | 50723705  | 50724578  | 874  |
| chr18 | 54354719  | 54355589  | 871  |
| chr14 | 48323347  | 48324206  | 860  |
| chr4  | 13672127  | 13672962  | 836  |
| chr3  | 22667045  | 22667874  | 830  |
| chr1  | 141990805 | 141991632 | 828  |
| chr1  | 149232099 | 149232921 | 823  |
| chr5  | 60170591  | 60171397  | 807  |
| chr23 | 17418977  | 17419774  | 798  |
| chr10 | 32483057  | 32483844  | 788  |
| chr19 | 39074099  | 39074859  | 761  |
| chr21 | 56287739  | 56288491  | 753  |
| chr26 | 51194023  | 51194773  | 751  |
| chr19 | 51426147  | 51426875  | 729  |
| chr8  | 8304591   | 8305314   | 724  |

|       |           |           |      |
|-------|-----------|-----------|------|
| chr6  | 16253979  | 16254691  | 713  |
| chr3  | 62930625  | 62931331  | 707  |
| chr13 | 75811114  | 75811813  | 700  |
| chr19 | 41241364  | 41242032  | 669  |
| chr26 | 18748423  | 18749088  | 666  |
| chr23 | 52717595  | 52718232  | 638  |
| chr18 | 50837242  | 50837857  | 616  |
| chr10 | 90296584  | 90297183  | 600  |
| chr11 | 104885740 | 104886333 | 594  |
| chr20 | 25762050  | 25762635  | 586  |
| chr2  | 130155642 | 130156224 | 583  |
| chr22 | 18287880  | 18288459  | 580  |
| chr12 | 84214927  | 84215500  | 574  |
| chr25 | 2926435   | 2927005   | 571  |
| chr1  | 154418754 | 154419320 | 567  |
| chr3  | 22460163  | 22460720  | 558  |
| chr12 | 32206981  | 32207529  | 549  |
| chr2  | 138652879 | 138653404 | 526  |
| chr4  | 5385744   | 5386268   | 525  |
| chr8  | 5806311   | 5806826   | 516  |
| chr3  | 5539028   | 5539504   | 477  |
| chr3  | 113465492 | 113465958 | 467  |
| chr29 | 45075750  | 45076216  | 467  |
| chr4  | 71613512  | 71613965  | 454  |
| chr18 | 65961561  | 65962009  | 449  |
| chr10 | 5341495   | 5341932   | 438  |
| chr5  | 60726955  | 60731060  | 4106 |
| chr23 | 31284705  | 31288606  | 3902 |
| chr5  | 10227093  | 10230615  | 3523 |
| chr18 | 51041612  | 51045097  | 3486 |
| chr26 | 14887322  | 14890631  | 3310 |
| chr24 | 58980413  | 58983249  | 2837 |
| chr9  | 25139044  | 25141796  | 2753 |
| chr19 | 25279729  | 25282356  | 2628 |
| chr3  | 106535823 | 106538438 | 2616 |
| chr8  | 6476010   | 6478512   | 2503 |
| chr14 | 23433165  | 23435620  | 2456 |
| chr11 | 44953204  | 44955656  | 2453 |
| chr13 | 41028552  | 41030878  | 2327 |
| chr15 | 25662870  | 25665078  | 2209 |
| chr11 | 106289317 | 106291412 | 2096 |
| chr13 | 60794854  | 60796929  | 2076 |
| chr13 | 47743878  | 47745909  | 2032 |
| chr26 | 22208131  | 22210158  | 2028 |
| chr3  | 125628632 | 125630658 | 2027 |
| chr9  | 43845217  | 43847216  | 2000 |
| chr11 | 14158139  | 14160093  | 1955 |
| chr14 | 1525849   | 1527744   | 1896 |
| chr10 | 45521853  | 45523701  | 1849 |
| chr26 | 37890957  | 37892798  | 1842 |

|       |           |           |      |
|-------|-----------|-----------|------|
| chr6  | 67339422  | 67341215  | 1794 |
| chr3  | 31679878  | 31681599  | 1722 |
| chr8  | 7849761   | 7851479   | 1719 |
| chr21 | 9446726   | 9448351   | 1626 |
| chr25 | 38673866  | 38675445  | 1580 |
| chr13 | 80404618  | 80406182  | 1565 |
| chr19 | 39264298  | 39265835  | 1538 |
| chr26 | 44952316  | 44953843  | 1528 |
| chr15 | 54176555  | 54178060  | 1506 |
| chr23 | 17666965  | 17668466  | 1502 |
| chr11 | 10448982  | 10450480  | 1499 |
| chr19 | 56610135  | 56611602  | 1468 |
| chr11 | 104664192 | 104665642 | 1451 |
| chr9  | 50715851  | 50717288  | 1438 |
| chr7  | 10311853  | 10313287  | 1435 |
| chr17 | 64195120  | 64196554  | 1435 |
| chr7  | 4511239   | 4512667   | 1429 |
| chr23 | 31073325  | 31074711  | 1387 |
| chr7  | 42476494  | 42477869  | 1376 |
| chr9  | 52384856  | 52386207  | 1352 |
| chr5  | 114979766 | 114981077 | 1312 |
| chr16 | 39063918  | 39065224  | 1307 |
| chr9  | 26592186  | 26593491  | 1306 |
| chr19 | 37334583  | 37335885  | 1303 |
| chr1  | 76416942  | 76418236  | 1295 |
| chr12 | 74483825  | 74485089  | 1265 |
| chr20 | 4951102   | 4952363   | 1262 |
| chr25 | 8460992   | 8462244   | 1253 |
| chr13 | 60161944  | 60163177  | 1234 |
| chr14 | 21587838  | 21589060  | 1223 |
| chr19 | 6523696   | 6524893   | 1198 |
| chr25 | 38342115  | 38343282  | 1168 |
| chr3  | 26125822  | 26126987  | 1166 |
| chr23 | 27975904  | 27977054  | 1151 |
| chr28 | 25326161  | 25327292  | 1132 |
| chr1  | 3349878   | 3351009   | 1132 |
| chr3  | 105463313 | 105464442 | 1130 |
| chr28 | 11366522  | 11367639  | 1118 |
| chr3  | 18095441  | 18096538  | 1098 |
| chr14 | 52547876  | 52548927  | 1052 |
| chr2  | 111403832 | 111404874 | 1043 |
| chr23 | 15829358  | 15830388  | 1031 |
| chr11 | 26236798  | 26237791  | 994  |
| chr7  | 29477871  | 29478844  | 974  |
| chr11 | 107593616 | 107594588 | 973  |
| chr24 | 47125320  | 47126279  | 960  |
| chr3  | 55856635  | 55857593  | 959  |
| chr23 | 7394611   | 7395554   | 944  |
| chr19 | 39103035  | 39103976  | 942  |
| chr10 | 4380936   | 4381867   | 932  |

|       |           |           |     |
|-------|-----------|-----------|-----|
| chr19 | 54442051  | 54442980  | 930 |
| chr20 | 30952050  | 30952975  | 926 |
| chr23 | 46113431  | 46114352  | 922 |
| chr22 | 10169944  | 10170863  | 920 |
| chr14 | 21778959  | 21779842  | 884 |
| chr6  | 16260991  | 16261873  | 883 |
| chr4  | 122977864 | 122978740 | 877 |
| chr18 | 54192605  | 54193478  | 874 |
| chr12 | 32030747  | 32031619  | 873 |
| chr4  | 16846157  | 16847022  | 866 |
| chr17 | 63438870  | 63439724  | 855 |
| chr3  | 88252408  | 88253249  | 842 |
| chr12 | 81459085  | 81459921  | 837 |
| chr29 | 43171114  | 43171949  | 836 |
| chr2  | 1709625   | 1710460   | 836 |
| chr1  | 153527873 | 153528701 | 829 |
| chr18 | 52977024  | 52977850  | 827 |
| chr7  | 95945071  | 95945893  | 823 |
| chr1  | 84820180  | 84820980  | 801 |
| chr16 | 2435942   | 2436740   | 799 |
| chr7  | 18791895  | 18792678  | 784 |
| chr23 | 48773685  | 48774447  | 763 |
| chr1  | 64867075  | 64867817  | 743 |
| chr19 | 8940889   | 8941618   | 730 |
| chr21 | 31053744  | 31054471  | 728 |
| chr6  | 113388395 | 113389114 | 720 |
| chr18 | 53018729  | 53019440  | 712 |
| chr17 | 47081728  | 47082438  | 711 |
| chr11 | 11980702  | 11981412  | 711 |
| chr21 | 20632609  | 20633315  | 707 |
| chr3  | 23030685  | 23031381  | 697 |
| chr26 | 18946916  | 18947590  | 675 |
| chr10 | 24715423  | 24716080  | 658 |
| chr4  | 89353397  | 89354052  | 656 |
| chr7  | 12965729  | 12966375  | 647 |
| chr29 | 29794861  | 29795506  | 646 |
| chr13 | 68921223  | 68921868  | 646 |
| chr10 | 36834635  | 36835243  | 609 |
| chr16 | 38184307  | 38184911  | 605 |
| chr8  | 76014679  | 76015279  | 601 |
| chr19 | 23726055  | 23726643  | 589 |
| chr5  | 28904591  | 28905173  | 583 |
| chr12 | 66634837  | 66635375  | 539 |
| chr13 | 40815261  | 40815798  | 538 |
| chr29 | 45769955  | 45770483  | 529 |
| chr19 | 27199828  | 27200356  | 529 |
| chr17 | 46284348  | 46284864  | 517 |
| chr20 | 33675634  | 33676138  | 505 |
| chr1  | 87371534  | 87372026  | 493 |
| chr5  | 33563856  | 33564327  | 472 |

|       |           |           |      |
|-------|-----------|-----------|------|
| chr13 | 42883501  | 42883971  | 471  |
| chr26 | 17674119  | 17674588  | 470  |
| chr11 | 103738318 | 103738779 | 462  |
| chr17 | 18377906  | 18378337  | 432  |
| chr25 | 26449481  | 26449903  | 423  |
| chr6  | 32564596  | 32568027  | 3432 |
| chrX  | 35195872  | 35199184  | 3313 |
| chr1  | 152250460 | 152253300 | 2841 |
| chr25 | 37697750  | 37700585  | 2836 |
| chr15 | 63690298  | 63693118  | 2821 |
| chr4  | 33412974  | 33415792  | 2819 |
| chr3  | 112892242 | 112894888 | 2647 |
| chr5  | 10527793  | 10530319  | 2527 |
| chr6  | 32570786  | 32573294  | 2509 |
| chr29 | 25940917  | 25943119  | 2203 |
| chr21 | 57504213  | 57506319  | 2107 |
| chr23 | 52713052  | 52714994  | 1943 |
| chr15 | 32267768  | 32269634  | 1867 |
| chr12 | 51064592  | 51066443  | 1852 |
| chr24 | 40811358  | 40813132  | 1775 |
| chr8  | 23027889  | 23029629  | 1741 |
| chr29 | 38283961  | 38285663  | 1703 |
| chr2  | 15367170  | 15368803  | 1634 |
| chr6  | 16246144  | 16247763  | 1620 |
| chr22 | 15014776  | 15016377  | 1602 |
| chr5  | 13460081  | 13461653  | 1573 |
| chr19 | 47371936  | 47373506  | 1571 |
| chr15 | 36591836  | 36593395  | 1560 |
| chr3  | 74459821  | 74461310  | 1490 |
| chr13 | 73533648  | 73535130  | 1483 |
| chr9  | 43849849  | 43851317  | 1469 |
| chr17 | 73173143  | 73174611  | 1469 |
| chr8  | 74382677  | 74384118  | 1442 |
| chr6  | 63811139  | 63812554  | 1416 |
| chr23 | 46088250  | 46089662  | 1413 |
| chr24 | 44047025  | 44048379  | 1355 |
| chr14 | 21251000  | 21252351  | 1352 |
| chr18 | 51024270  | 51025610  | 1341 |
| chr21 | 20595224  | 20596558  | 1335 |
| chr23 | 31142976  | 31144215  | 1240 |
| chr7  | 11033106  | 11034344  | 1239 |
| chr5  | 33564667  | 33565905  | 1239 |
| chr4  | 50701568  | 50702800  | 1233 |
| chr6  | 120810728 | 120811958 | 1231 |
| chr3  | 15544154  | 15545367  | 1214 |
| chr5  | 28905181  | 28906362  | 1182 |
| chr4  | 122662022 | 122663183 | 1162 |
| chr2  | 25283609  | 25284761  | 1153 |
| chr20 | 3190300   | 3191434   | 1135 |
| chr29 | 37701475  | 37702586  | 1112 |

|       |           |           |      |
|-------|-----------|-----------|------|
| chr5  | 69597104  | 69598195  | 1092 |
| chr14 | 76894948  | 76896025  | 1078 |
| chr4  | 96848101  | 96849170  | 1070 |
| chr27 | 29597338  | 29598393  | 1056 |
| chr1  | 139865370 | 139866425 | 1056 |
| chr8  | 55401636  | 55402689  | 1054 |
| chr29 | 25563454  | 25564497  | 1044 |
| chr16 | 59064501  | 59065541  | 1041 |
| chr16 | 58552242  | 58553281  | 1040 |
| chr23 | 31338877  | 31339915  | 1039 |
| chr4  | 53163574  | 53164601  | 1028 |
| chr4  | 29020769  | 29021792  | 1024 |
| chr22 | 16287407  | 16288424  | 1018 |
| chr6  | 14223698  | 14224697  | 1000 |
| chr14 | 17667368  | 17668367  | 1000 |
| chr24 | 51581994  | 51582974  | 981  |
| chr12 | 74504468  | 74505437  | 970  |
| chr10 | 60554247  | 60555213  | 967  |
| chr28 | 42170724  | 42171684  | 961  |
| chr8  | 77287877  | 77288823  | 947  |
| chr19 | 38994206  | 38995146  | 941  |
| chr12 | 9119298   | 9120238   | 941  |
| chr11 | 14160215  | 14161133  | 919  |
| chr8  | 80490315  | 80491230  | 916  |
| chr19 | 27198638  | 27199550  | 913  |
| chr23 | 52678939  | 52679840  | 902  |
| chr26 | 22319996  | 22320896  | 901  |
| chr18 | 53031435  | 53032324  | 890  |
| chr18 | 11091626  | 11092514  | 889  |
| chr15 | 34283588  | 34284473  | 886  |
| chr10 | 35482594  | 35483454  | 861  |
| chr21 | 62225277  | 62226131  | 855  |
| chr15 | 21510575  | 21511429  | 855  |
| chr13 | 41018448  | 41019297  | 850  |
| chr9  | 83791860  | 83792706  | 847  |
| chr21 | 30789043  | 30789885  | 843  |
| chr17 | 64080170  | 64080996  | 827  |
| chr2  | 14082019  | 14082834  | 816  |
| chr24 | 29712398  | 29713204  | 807  |
| chr17 | 63438052  | 63438844  | 793  |
| chr9  | 16966174  | 16966943  | 770  |
| chr14 | 67992485  | 67993253  | 769  |
| chr24 | 40611244  | 40612000  | 757  |
| chr1  | 141993380 | 141994132 | 753  |
| chr4  | 71685170  | 71685915  | 746  |
| chr6  | 99406813  | 99407545  | 733  |
| chr10 | 74718227  | 74718958  | 732  |
| chr4  | 82136031  | 82136761  | 731  |
| chr3  | 123193589 | 123194318 | 730  |
| chr6  | 58828118  | 58828846  | 729  |

|       |           |           |      |
|-------|-----------|-----------|------|
| chr18 | 50028162  | 50028825  | 664  |
| chr2  | 136383004 | 136383643 | 640  |
| chr22 | 50727027  | 50727635  | 609  |
| chr13 | 80713168  | 80713771  | 604  |
| chr26 | 51536930  | 51537531  | 602  |
| chr7  | 50414441  | 50415037  | 597  |
| chr19 | 26944416  | 26945001  | 586  |
| chr17 | 65962307  | 65962890  | 584  |
| chr1  | 87374022  | 87374601  | 580  |
| chr23 | 9740153   | 9740717   | 565  |
| chr14 | 64335797  | 64336359  | 563  |
| chr27 | 17753821  | 17754372  | 552  |
| chr8  | 63915776  | 63916314  | 539  |
| chr18 | 55585357  | 55585891  | 535  |
| chr4  | 98487160  | 98487692  | 533  |
| chr13 | 75538082  | 75538613  | 532  |
| chr18 | 23298986  | 23299505  | 520  |
| chr18 | 50029086  | 50029593  | 508  |
| chr9  | 62317822  | 62318321  | 500  |
| chr21 | 6515744   | 6516234   | 491  |
| chr6  | 122429107 | 122429596 | 490  |
| chr17 | 63313439  | 63313926  | 488  |
| chr19 | 37636284  | 37636765  | 482  |
| chr8  | 7563632   | 7564110   | 479  |
| chr21 | 20596877  | 20597337  | 461  |
| chr24 | 52340690  | 52341143  | 454  |
| chr13 | 40896235  | 40896674  | 440  |
| chr5  | 27943734  | 27944165  | 432  |
| chr3  | 22866632  | 22867057  | 426  |
| chr18 | 11062978  | 11063378  | 401  |
| chr17 | 12584563  | 12587177  | 2615 |
| chr3  | 15643937  | 15646370  | 2434 |
| chr10 | 29539998  | 29541943  | 1946 |
| chr6  | 12110954  | 12112623  | 1670 |
| chr21 | 15490862  | 15492316  | 1455 |
| chr23 | 30341601  | 30343011  | 1411 |
| chr2  | 115117213 | 115118403 | 1191 |
| chr29 | 44738443  | 44739508  | 1066 |
| chr23 | 53262697  | 53263663  | 967  |
| chr8  | 23830840  | 23831755  | 916  |
| chr3  | 105911452 | 105912059 | 608  |
| chr21 | 67900554  | 67902655  | 2102 |
| chr10 | 20469729  | 20471812  | 2084 |
| chr18 | 54048518  | 54049995  | 1478 |
| chr22 | 1947262   | 1948737   | 1476 |
| chr8  | 20939637  | 20941027  | 1391 |
| chr19 | 39074906  | 39075973  | 1068 |
| chr26 | 20376949  | 20377976  | 1028 |
| chr9  | 46029737  | 46030557  | 821  |
| chr8  | 74073363  | 74074138  | 776  |



|       |           |           |      |
|-------|-----------|-----------|------|
| chr15 | 74513480  | 74516383  | 2904 |
| chr21 | 49257838  | 49260270  | 2433 |
| chr18 | 22814802  | 22816854  | 2053 |
| chr26 | 18746392  | 18748272  | 1881 |
| chr13 | 24029057  | 24030727  | 1671 |
| chr28 | 15319127  | 15320526  | 1400 |
| chr18 | 50981639  | 50982486  | 848  |
| chr25 | 38834290  | 38834952  | 663  |
| chr3  | 22916604  | 22917090  | 487  |
| chr4  | 74534825  | 74536693  | 1869 |
| chr18 | 18699125  | 18700509  | 1385 |
| chr13 | 80587336  | 80588649  | 1314 |
| chr18 | 52663656  | 52664934  | 1279 |
| chr9  | 90451665  | 90452714  | 1050 |
| chr3  | 22600026  | 22601023  | 998  |
| chr18 | 55008134  | 55008987  | 854  |
| chr2  | 115099565 | 115101499 | 1935 |
| chr4  | 71540305  | 71541432  | 1128 |
| chr22 | 39842585  | 39843588  | 1004 |
| chr20 | 3181636   | 3182560   | 925  |
| chr18 | 57399994  | 57400756  | 763  |
| chr19 | 37851617  | 37852305  | 689  |
| chr16 | 59046769  | 59047355  | 587  |
| chr11 | 106749967 | 106752219 | 2253 |
| chr18 | 62460757  | 62462938  | 2182 |
| chr9  | 90655647  | 90657553  | 1907 |
| chr7  | 8913953   | 8915749   | 1797 |
| chr7  | 3934407   | 3936091   | 1685 |
| chr5  | 113257792 | 113259382 | 1591 |
| chr14 | 5906911   | 5908135   | 1225 |
| chr22 | 17558931  | 17559959  | 1029 |
| chr17 | 53516491  | 53517487  | 997  |
| chr9  | 90826359  | 90827152  | 794  |
| chr14 | 76892737  | 76893344  | 608  |
| chr1  | 64866521  | 64867062  | 542  |
| chr12 | 68226221  | 68228068  | 1848 |
| chr19 | 37855987  | 37857656  | 1670 |
| chr7  | 52391109  | 52392622  | 1514 |
| chr13 | 42880715  | 42881995  | 1281 |
| chr4  | 65384646  | 65385910  | 1265 |
| chr29 | 49571480  | 49572521  | 1042 |
| chr6  | 107495780 | 107496599 | 820  |
| chr20 | 4969275   | 4969717   | 443  |
| chr9  | 86251903  | 86255208  | 3306 |
| chr7  | 43754514  | 43756359  | 1846 |
| chr3  | 35991844  | 35993536  | 1693 |
| chr5  | 29213149  | 29214783  | 1635 |
| chr19 | 45533099  | 45534557  | 1459 |
| chr15 | 58027321  | 58028578  | 1258 |
| chr6  | 72200186  | 72201182  | 997  |

|       |                    |           |      |
|-------|--------------------|-----------|------|
| chr19 | 6517766            | 6518468   | 703  |
| chr4  | 34028710           | 34029361  | 652  |
| chr18 | 50839450           | 50841524  | 2075 |
| chr19 | 52555422           | 52557049  | 1628 |
| chr20 | 6598755            | 6600322   | 1568 |
| chr26 | 23485218           | 23486407  | 1190 |
| chr5  | 60303479           | 60304529  | 1051 |
| chr24 | 60613649           | 60615674  | 2026 |
| chr19 | 57259425           | 57261199  | 1775 |
| chr29 | 48739029           | 48740674  | 1646 |
| chr18 | 22083006           | 22084422  | 1417 |
| chr9  | 29468951           | 29470285  | 1335 |
| chr26 | 38252641           | 38253877  | 1237 |
| chr11 | 28546689           | 28547920  | 1232 |
| chr9  | 106826627          | 106827761 | 1135 |
| chr11 | 1644807            | 1645596   | 790  |
| chr5  | 30993060           | 30993841  | 782  |
| chr12 | 36465718           | 36466404  | 687  |
| chr21 | 65549740           | 65550350  | 611  |
| chr5  | 112138593          | 112140021 | 1429 |
| chr29 | 25558729           | 25559474  | 746  |
| chr15 | 22221557           | 22222505  | 949  |
| chr23 | 27747330           | 27748682  | 1353 |
| chr19 | 37858065           | 37859217  | 1153 |
| chr19 | 30567974           | 30568520  | 547  |
| chr9  | 24600528           | 24601073  | 546  |
| chr4  | 122870781          | 122871235 | 455  |
| chr2  | 111851890          | 111852331 | 442  |
| chr3  | 22862977           | 22863389  | 413  |
| chr8  | 73529486           | 73530491  | 1006 |
| chr24 | 819596 820489 894  |           |      |
| chr19 | 65215091           | 65215993  | 903  |
| chr13 | 73998818           | 73999485  | 668  |
| chr7  | 71679515           | 71680099  | 585  |
| chr16 | 48303632           | 48304073  | 442  |
| chr5  | 28761875           | 28762422  | 548  |
| chr20 | 45417235           | 45418475  | 1241 |
| chr2  | 131203706          | 131204108 | 403  |
| chr8  | 24682310           | 24682737  | 428  |
| chr18 | 53265648           | 53266225  | 578  |
| chr7  | 14212068           | 14212544  | 477  |
| chr28 | 652001 656235 4235 |           |      |
| chr28 | 41017412           | 41020990  | 3579 |
| chr8  | 5779514            | 5782889   | 3376 |
| chr12 | 32112104           | 32115439  | 3336 |
| chr13 | 26205152           | 26208044  | 2893 |
| chr24 | 44266571           | 44269318  | 2748 |
| chr3  | 116030938          | 116033500 | 2563 |
| chr14 | 2882770            | 2885297   | 2528 |
| chr19 | 38742535           | 38744932  | 2398 |

|       |           |           |      |
|-------|-----------|-----------|------|
| chr18 | 48674857  | 48677162  | 2306 |
| chr15 | 54028710  | 54030993  | 2284 |
| chr13 | 41026224  | 41028455  | 2232 |
| chr10 | 36288759  | 36290947  | 2189 |
| chr3  | 112890001 | 112892186 | 2186 |
| chr13 | 54756050  | 54758210  | 2161 |
| chr8  | 75979295  | 75981452  | 2158 |
| chr18 | 50979328  | 50981435  | 2108 |
| chr16 | 41357148  | 41359253  | 2106 |
| chr15 | 51345533  | 51347573  | 2041 |
| chr1  | 123135027 | 123137067 | 2041 |
| chr8  | 80219609  | 80221535  | 1927 |
| chr9  | 72539091  | 72541007  | 1917 |
| chr19 | 40517495  | 40519400  | 1906 |
| chr21 | 22694616  | 22696511  | 1896 |
| chr19 | 20340671  | 20342486  | 1816 |
| chr10 | 78878029  | 78879822  | 1794 |
| chr1  | 146735876 | 146737626 | 1751 |
| chr20 | 8607038   | 8608774   | 1737 |
| chr4  | 5387933   | 5389661   | 1729 |
| chr9  | 75442835  | 75444545  | 1711 |
| chr20 | 74011712  | 74013407  | 1696 |
| chr11 | 98347820  | 98349498  | 1679 |
| chr17 | 67110304  | 67111915  | 1612 |
| chr10 | 6922145   | 6923712   | 1568 |
| chr17 | 49443942  | 49445471  | 1530 |
| chr11 | 7369318   | 7370842   | 1525 |
| chr7  | 37390042  | 37391559  | 1518 |
| chr23 | 46380756  | 46382232  | 1477 |
| chr10 | 4382321   | 4383775   | 1455 |
| chr7  | 16507785  | 16509230  | 1446 |
| chr13 | 40881598  | 40883035  | 1438 |
| chr3  | 115016715 | 115018123 | 1409 |
| chr15 | 25575823  | 25577219  | 1397 |
| chr4  | 71593974  | 71595342  | 1369 |
| chr23 | 30255749  | 30257102  | 1354 |
| chr28 | 36452449  | 36453797  | 1349 |
| chr5  | 10530899  | 10532238  | 1340 |
| chr8  | 86892351  | 86893672  | 1322 |
| chr6  | 108558675 | 108559946 | 1272 |
| chr17 | 70112601  | 70113863  | 1263 |
| chr21 | 9440011   | 9441254   | 1244 |
| chr5  | 33528613  | 33529852  | 1240 |
| chr3  | 20498552  | 20499783  | 1232 |
| chr18 | 13573257  | 13574473  | 1217 |
| chr29 | 42923826  | 42925037  | 1212 |
| chr2  | 111853423 | 111854621 | 1199 |
| chr5  | 60387555  | 60388728  | 1174 |
| chr25 | 22142557  | 22143715  | 1159 |
| chr7  | 18386824  | 18387973  | 1150 |

|       |               |           |      |
|-------|---------------|-----------|------|
| chr2  | 115106518     | 115107666 | 1149 |
| chr18 | 63529551      | 63530698  | 1148 |
| chr11 | 30925680      | 30926827  | 1148 |
| chr14 | 67993356      | 67994491  | 1136 |
| chr4  | 71608209      | 71609340  | 1132 |
| chr23 | 23754706      | 23755837  | 1132 |
| chr19 | 47852344      | 47853473  | 1130 |
| chr21 | 44301381      | 44302504  | 1124 |
| chr19 | 45126889      | 45128004  | 1116 |
| chr3  | 22914486      | 22915599  | 1114 |
| chr18 | 62679603      | 62680691  | 1089 |
| chr19 | 39072769      | 39073852  | 1084 |
| chr3  | 15660207      | 15661287  | 1081 |
| chr13 | 72606680      | 72607760  | 1081 |
| chr1  | 67724542      | 67725619  | 1078 |
| chr18 | 648882 649945 | 1064      |      |
| chr21 | 18881310      | 18882364  | 1055 |
| chr9  | 9368380       | 9369433   | 1054 |
| chr12 | 74476304      | 74477348  | 1045 |
| chr10 | 21848214      | 21849233  | 1020 |
| chr18 | 53022103      | 53023120  | 1018 |
| chr6  | 119358766     | 119359773 | 1008 |
| chr4  | 116980778     | 116981783 | 1006 |
| chr10 | 88144263      | 88145259  | 997  |
| chrX  | 13634584      | 13635575  | 992  |
| chr18 | 51033554      | 51034541  | 988  |
| chr24 | 2019319       | 2020283   | 965  |
| chr8  | 5797114       | 5798072   | 959  |
| chr12 | 83826204      | 83827125  | 922  |
| chr7  | 5155957       | 5156866   | 910  |
| chr25 | 37874401      | 37875303  | 903  |
| chr11 | 96147620      | 96148519  | 900  |
| chrX  | 10427458      | 10428355  | 898  |
| chr7  | 13483232      | 13484126  | 895  |
| chr11 | 107586105     | 107586998 | 894  |
| chr3  | 116927441     | 116928317 | 877  |
| chr10 | 29820930      | 29821795  | 866  |
| chr17 | 64193118      | 64193977  | 860  |
| chr4  | 30808289      | 30809142  | 854  |
| chr24 | 40809043      | 40809893  | 851  |
| chr4  | 71863056      | 71863903  | 848  |
| chr10 | 75522306      | 75523153  | 848  |
| chr17 | 64292064      | 64292905  | 842  |
| chr29 | 38285828      | 38286658  | 831  |
| chr18 | 55586226      | 55587048  | 823  |
| chr8  | 7590352       | 7591173   | 822  |
| chr26 | 11338264      | 11339085  | 822  |
| chr15 | 24670473      | 24671285  | 813  |
| chr16 | 2443255       | 2444064   | 810  |
| chr12 | 84563305      | 84564113  | 809  |

|       |           |           |     |
|-------|-----------|-----------|-----|
| chr5  | 115311311 | 115312115 | 805 |
| chr5  | 60160377  | 60161177  | 801 |
| chr18 | 62668985  | 62669773  | 789 |
| chr14 | 21780402  | 21781189  | 788 |
| chr4  | 117618483 | 117619269 | 787 |
| chr1  | 156680864 | 156681643 | 780 |
| chr5  | 116335657 | 116336431 | 775 |
| chr26 | 22816560  | 22817323  | 764 |
| chr15 | 22321573  | 22322332  | 760 |
| chr15 | 74520680  | 74521414  | 735 |
| chr16 | 75866891  | 75867609  | 719 |
| chr17 | 66703916  | 66704627  | 712 |
| chr14 | 25072667  | 25073377  | 711 |
| chr12 | 24475491  | 24476201  | 711 |
| chr10 | 46989647  | 46990357  | 711 |
| chr19 | 12677152  | 12677857  | 706 |
| chr25 | 3171714   | 3172416   | 703 |
| chr29 | 48776112  | 48776805  | 694 |
| chr13 | 14717577  | 14718253  | 677 |
| chr6  | 108685988 | 108686646 | 659 |
| chr3  | 115115378 | 115116036 | 659 |
| chr2  | 95918185  | 95918841  | 657 |
| chr8  | 47981467  | 47982116  | 650 |
| chr25 | 42633622  | 42634271  | 650 |
| chr10 | 66930679  | 66931321  | 643 |
| chr16 | 68759713  | 68760346  | 634 |
| chr26 | 21797718  | 21798349  | 632 |
| chr7  | 16319905  | 16320533  | 629 |
| chr11 | 28476385  | 28477009  | 625 |
| chr21 | 65546583  | 65547188  | 606 |
| chr21 | 20608582  | 20609178  | 597 |
| chr15 | 62390149  | 62390740  | 592 |
| chr6  | 73623418  | 73624005  | 588 |
| chr12 | 32207604  | 32208185  | 582 |
| chr6  | 120741333 | 120741911 | 579 |
| chr23 | 46087560  | 46088134  | 575 |
| chr26 | 38235359  | 38235931  | 573 |
| chr25 | 1303156   | 1303725   | 570 |
| chr26 | 22201827  | 22202391  | 565 |
| chr11 | 10447903  | 10448455  | 553 |
| chr24 | 64978155  | 64978705  | 551 |
| chr2  | 25280549  | 25281097  | 549 |
| chr2  | 131540353 | 131540896 | 544 |
| chr27 | 38663985  | 38664525  | 541 |
| chr29 | 46657333  | 46657863  | 531 |
| chr21 | 20630213  | 20630741  | 529 |
| chr9  | 66530807  | 66531333  | 527 |
| chr5  | 33325250  | 33325776  | 527 |
| chr5  | 68969237  | 68969762  | 526 |
| chr25 | 3238809   | 3239323   | 515 |

|       |               |           |      |
|-------|---------------|-----------|------|
| chr7  | 5252627       | 5253138   | 512  |
| chr21 | 28188506      | 28189008  | 503  |
| chr22 | 58634247      | 58634740  | 494  |
| chr11 | 28459781      | 28460263  | 483  |
| chr10 | 8520823       | 8521300   | 478  |
| chr14 | 22073368      | 22073843  | 476  |
| chr26 | 37628043      | 37628490  | 448  |
| chr15 | 6408886       | 6409333   | 448  |
| chr8  | 73823875      | 73824319  | 445  |
| chr9  | 87763509      | 87763949  | 441  |
| chr7  | 50415297      | 50415733  | 437  |
| chr13 | 74409365      | 74409799  | 435  |
| chr22 | 50106791      | 50107219  | 429  |
| chr22 | 15400830      | 15401254  | 425  |
| chr17 | 70524321      | 70524706  | 386  |
| chr8  | 73485815      | 73486197  | 383  |
| chr28 | 38898408      | 38901336  | 2929 |
| chr21 | 47692574      | 47695122  | 2549 |
| chr25 | 37984283      | 37986580  | 2298 |
| chr19 | 44171361      | 44173623  | 2263 |
| chr9  | 52383183      | 52384834  | 1652 |
| chrX  | 21082819      | 21084260  | 1442 |
| chr18 | 22694933      | 22696206  | 1274 |
| chr8  | 63914322      | 63915304  | 983  |
| chr6  | 72297700      | 72298648  | 949  |
| chr7  | 88944971      | 88945849  | 879  |
| chr21 | 64508650      | 64509517  | 868  |
| chr3  | 25001011      | 25001615  | 605  |
| chr8  | 78091782      | 78095052  | 3271 |
| chr2  | 111344487     | 111347231 | 2745 |
| chr26 | 37884669      | 37887386  | 2718 |
| chr18 | 49446883      | 49448704  | 1822 |
| chr28 | 427162 428676 | 1515      |      |
| chr7  | 95942596      | 95944074  | 1479 |
| chr7  | 4355628       | 4356829   | 1202 |
| chr14 | 29042469      | 29043632  | 1164 |
| chr22 | 55396087      | 55397145  | 1059 |
| chr11 | 20451363      | 20452359  | 997  |
| chr7  | 14819941      | 14820895  | 955  |
| chr23 | 30357381      | 30358188  | 808  |
| chr1  | 61276741      | 61277539  | 799  |
| chr12 | 32108395      | 32109114  | 720  |
| chr21 | 67962385      | 67963097  | 713  |
| chr15 | 29374227      | 29374935  | 709  |
| chr18 | 45431562      | 45432197  | 636  |
| chr13 | 75438021      | 75438641  | 621  |
| chr22 | 55758337      | 55758798  | 462  |
| chr21 | 66580589      | 66582923  | 2335 |
| chr21 | 26453461      | 26455583  | 2123 |
| chr2  | 124325699     | 124327433 | 1735 |

|       |               |           |      |
|-------|---------------|-----------|------|
| chr5  | 11953653      | 11955280  | 1628 |
| chr12 | 32088488      | 32090013  | 1526 |
| chr11 | 305165 306619 | 1455      |      |
| chr11 | 107246274     | 107247549 | 1276 |
| chr19 | 46721469      | 46722732  | 1264 |
| chr19 | 8472412       | 8473557   | 1146 |
| chr13 | 40810525      | 40811497  | 973  |
| chr19 | 12315055      | 12315960  | 906  |
| chr1  | 150072645     | 150073506 | 862  |
| chr21 | 9486503       | 9487283   | 781  |
| chr18 | 12727039      | 12727787  | 749  |
| chr13 | 14716506      | 14717244  | 739  |
| chr1  | 76369296      | 76369956  | 661  |
| chr22 | 56290610      | 56291172  | 563  |
| chr28 | 40391375      | 40391924  | 550  |
| chr22 | 50752624      | 50755816  | 3193 |
| chr29 | 25559823      | 25561805  | 1983 |
| chr5  | 28910813      | 28912230  | 1418 |
| chr26 | 22376093      | 22377360  | 1268 |
| chr5  | 79214754      | 79215942  | 1189 |
| chr16 | 41369065      | 41370190  | 1126 |
| chr7  | 3933132       | 3934223   | 1092 |
| chr25 | 3205407       | 3206485   | 1079 |
| chr4  | 123977694     | 123978705 | 1012 |
| chr24 | 34966176      | 34966960  | 785  |
| chr9  | 35967510      | 35968255  | 746  |
| chr17 | 72137523      | 72140032  | 2510 |
| chr8  | 72305801      | 72307720  | 1920 |
| chr15 | 51660824      | 51662700  | 1877 |
| chr5  | 30485227      | 30487016  | 1790 |
| chr25 | 40220391      | 40222043  | 1653 |
| chr18 | 17992650      | 17994080  | 1431 |
| chr5  | 52620203      | 52621617  | 1415 |
| chr23 | 52612509      | 52613891  | 1383 |
| chr25 | 38337759      | 38339050  | 1292 |
| chr26 | 14895601      | 14896798  | 1198 |
| chr18 | 64342552      | 64343536  | 985  |
| chr9  | 98742871      | 98743362  | 492  |
| chr3  | 105959530     | 105961390 | 1861 |
| chr1  | 96195237      | 96197040  | 1804 |
| chr6  | 120801100     | 120802693 | 1594 |
| chr14 | 23259087      | 23260468  | 1382 |
| chr20 | 29509093      | 29510410  | 1318 |
| chr1  | 115601305     | 115602321 | 1017 |
| chr3  | 120952510     | 120953422 | 913  |
| chr16 | 38773270      | 38774117  | 848  |
| chr13 | 14694777      | 14696859  | 2083 |
| chr2  | 111255434     | 111257157 | 1724 |
| chr7  | 14894507      | 14896146  | 1640 |
| chr12 | 14705812      | 14707252  | 1441 |

|       |           |           |      |
|-------|-----------|-----------|------|
| chr25 | 43525407  | 43526692  | 1286 |
| chr8  | 63936149  | 63936951  | 803  |
| chr8  | 7541045   | 7541598   | 554  |
| chr18 | 62683316  | 62685538  | 2223 |
| chr17 | 63483165  | 63484186  | 1022 |
| chr13 | 75691824  | 75692769  | 946  |
| chr19 | 12123185  | 12124122  | 938  |
| chr24 | 36029173  | 36029819  | 647  |
| chr18 | 56825566  | 56826202  | 637  |
| chr19 | 44175455  | 44176067  | 613  |
| chr25 | 27389911  | 27390384  | 474  |
| chr7  | 3963449   | 3965625   | 2177 |
| chr13 | 40579924  | 40581888  | 1965 |
| chr19 | 59466007  | 59467356  | 1350 |
| chr5  | 10726064  | 10727125  | 1062 |
| chr19 | 65220844  | 65221667  | 824  |
| chr26 | 11610521  | 11611015  | 495  |
| chr13 | 76003618  | 76005214  | 1597 |
| chr7  | 85413634  | 85414938  | 1305 |
| chr3  | 55967143  | 55968387  | 1245 |
| chr16 | 75200488  | 75201688  | 1201 |
| chr10 | 25838337  | 25839362  | 1026 |
| chrX  | 72255705  | 72256632  | 928  |
| chr25 | 29345988  | 29346777  | 790  |
| chr18 | 57608331  | 57608932  | 602  |
| chr11 | 98355048  | 98355562  | 515  |
| chr5  | 33532948  | 33534022  | 1075 |
| chr10 | 3528371   | 3529244   | 874  |
| chr3  | 115331501 | 115332292 | 792  |
| chr19 | 45827772  | 45828560  | 789  |
| chr18 | 33213803  | 33214380  | 578  |
| chr27 | 47334255  | 47334770  | 516  |
| chr17 | 63288833  | 63289339  | 507  |
| chr5  | 1094893   | 1095390   | 498  |
| chr13 | 55104229  | 55105177  | 949  |
| chr7  | 8915758   | 8916440   | 683  |
| chr29 | 51165817  | 51166463  | 647  |
| chr23 | 31335446  | 31335873  | 428  |
| chr5  | 119902852 | 119904487 | 1636 |
| chr6  | 108694701 | 108695679 | 979  |
| chr17 | 18512605  | 18513483  | 879  |
| chr7  | 10313421  | 10314211  | 791  |
| chr8  | 23067959  | 23068720  | 762  |
| chr25 | 42523644  | 42524118  | 475  |
| chr12 | 9560601   | 9561075   | 475  |
| chr21 | 65552301  | 65554106  | 1806 |
| chr3  | 54809190  | 54810490  | 1301 |
| chr13 | 74417856  | 74418913  | 1058 |
| chr19 | 8508629   | 8509999   | 1371 |
| chr3  | 15770536  | 15771678  | 1143 |



|       |               |           |      |
|-------|---------------|-----------|------|
| chr18 | 54177003      | 54177741  | 739  |
| chr14 | 34009245      | 34010085  | 841  |
| chr8  | 114247996     | 114248679 | 684  |
| chr3  | 22603299      | 22603958  | 660  |
| chr19 | 38752766      | 38753368  | 603  |
| chr20 | 33676248      | 33677187  | 940  |
| chr21 | 31675091      | 31675849  | 759  |
| chr7  | 18827653      | 18828401  | 749  |
| chr5  | 28935951      | 28936692  | 742  |
| chr16 | 46913020      | 46913703  | 684  |
| chr19 | 27063727      | 27064407  | 681  |
| chr11 | 49744138      | 49744577  | 440  |
| chr13 | 74401145      | 74402126  | 982  |
| chr25 | 1047488       | 1048362   | 875  |
| chr18 | 39911992      | 39912728  | 737  |
| chr18 | 47500098      | 47500753  | 656  |
| chr25 | 44031421      | 44032072  | 652  |
| chr3  | 105761690     | 105762296 | 607  |
| chr9  | 87744968      | 87745495  | 528  |
| chr19 | 39115839      | 39116349  | 511  |
| chr11 | 93279199      | 93279687  | 489  |
| chr14 | 77339972      | 77340411  | 440  |
| chr15 | 42604092      | 42605295  | 1204 |
| chr18 | 54210217      | 54211317  | 1101 |
| chr16 | 47034966      | 47036054  | 1089 |
| chr16 | 68759162      | 68759682  | 521  |
| chr10 | 74725826      | 74726303  | 478  |
| chr9  | 90287913      | 90288810  | 898  |
| chr25 | 44036749      | 44037360  | 612  |
| chr28 | 43867614      | 43868156  | 543  |
| chr14 | 609824 610495 | 672       |      |
| chr19 | 65245931      | 65246509  | 579  |
| chr8  | 73821787      | 73822874  | 1088 |
| chr14 | 439450 440084 | 635       |      |
| chr8  | 73525446      | 73525988  | 543  |
| chr7  | 17099648      | 17100409  | 762  |
| chr21 | 1925587       | 1926144   | 558  |
| chr25 | 44022473      | 44023366  | 894  |
| chr5  | 60715529      | 60718899  | 3371 |
| chr6  | 120798164     | 120800910 | 2747 |
| chr4  | 107993682     | 107996361 | 2680 |
| chr27 | 38908867      | 38911336  | 2470 |
| chr26 | 21769133      | 21771375  | 2243 |
| chr28 | 25133650      | 25135858  | 2209 |
| chr10 | 64972114      | 64974270  | 2157 |
| chr9  | 53316626      | 53318697  | 2072 |
| chr19 | 39109799      | 39111810  | 2012 |
| chr9  | 43804374      | 43806361  | 1988 |
| chr11 | 107582505     | 107584438 | 1934 |
| chr11 | 46743053      | 46744919  | 1867 |

|       |           |           |      |
|-------|-----------|-----------|------|
| chr4  | 14633958  | 14635776  | 1819 |
| chr5  | 111685604 | 111687408 | 1805 |
| chr11 | 74465395  | 74467147  | 1753 |
| chr6  | 74547027  | 74548771  | 1745 |
| chr23 | 31690563  | 31692292  | 1730 |
| chr2  | 19392310  | 19394019  | 1710 |
| chr25 | 43236986  | 43238683  | 1698 |
| chr25 | 43513970  | 43515639  | 1670 |
| chr3  | 115327584 | 115329250 | 1667 |
| chr2  | 111222253 | 111223884 | 1632 |
| chr18 | 62688518  | 62690133  | 1616 |
| chr2  | 111349663 | 111351271 | 1609 |
| chr26 | 35196131  | 35197737  | 1607 |
| chr29 | 29792325  | 29793913  | 1589 |
| chr4  | 71598755  | 71600334  | 1580 |
| chr15 | 62743223  | 62744801  | 1579 |
| chr18 | 51104234  | 51105810  | 1577 |
| chr18 | 11090016  | 11091583  | 1568 |
| chr16 | 44335315  | 44336882  | 1568 |
| chr12 | 36418317  | 36419838  | 1522 |
| chr14 | 64002739  | 64004259  | 1521 |
| chr5  | 119143165 | 119144672 | 1508 |
| chr18 | 23619123  | 23620620  | 1498 |
| chr11 | 9219308   | 9220794   | 1487 |
| chr1  | 3091813   | 3093290   | 1478 |
| chr10 | 22152558  | 22154019  | 1462 |
| chr11 | 81749385  | 81750833  | 1449 |
| chr23 | 48768139  | 48769569  | 1431 |
| chr5  | 71673330  | 71674750  | 1421 |
| chr11 | 10522048  | 10523450  | 1403 |
| chr3  | 33328100  | 33329486  | 1387 |
| chr29 | 48372687  | 48374071  | 1385 |
| chr19 | 46880827  | 46882207  | 1381 |
| chr4  | 123133609 | 123134986 | 1378 |
| chr7  | 81581401  | 81582769  | 1369 |
| chr2  | 130444457 | 130445817 | 1361 |
| chr3  | 102666068 | 102667421 | 1354 |
| chr4  | 94703729  | 94705075  | 1347 |
| chr25 | 29344574  | 29345892  | 1319 |
| chr3  | 24597207  | 24598507  | 1301 |
| chr13 | 68204677  | 68205960  | 1284 |
| chr7  | 89430756  | 89432028  | 1273 |
| chr5  | 30501995  | 30503267  | 1273 |
| chr11 | 98356380  | 98357638  | 1259 |
| chr26 | 31472282  | 31473538  | 1257 |
| chr7  | 17322888  | 17324127  | 1240 |
| chr6  | 22906024  | 22907258  | 1235 |
| chr25 | 43484009  | 43485235  | 1227 |
| chr4  | 56785664  | 56786850  | 1187 |
| chr21 | 25974638  | 25975811  | 1174 |

|       |           |           |      |
|-------|-----------|-----------|------|
| chr23 | 28888346  | 28889509  | 1164 |
| chr21 | 48693007  | 48694165  | 1159 |
| chr12 | 68235961  | 68237114  | 1154 |
| chr1  | 99118442  | 99119578  | 1137 |
| chr3  | 47195768  | 47196895  | 1128 |
| chr6  | 74458917  | 74460040  | 1124 |
| chr27 | 31456122  | 31457245  | 1124 |
| chr2  | 138642339 | 138643462 | 1124 |
| chr2  | 111338582 | 111339679 | 1098 |
| chr27 | 14401901  | 14402982  | 1082 |
| chr12 | 32081876  | 32082957  | 1082 |
| chr10 | 90288237  | 90289312  | 1076 |
| chr29 | 48896455  | 48897512  | 1058 |
| chr10 | 36824816  | 36825842  | 1027 |
| chr12 | 73449173  | 73450187  | 1015 |
| chr18 | 53877117  | 53878125  | 1009 |
| chr12 | 31387095  | 31388097  | 1003 |
| chr29 | 46666032  | 46667032  | 1001 |
| chr23 | 11785849  | 11786844  | 996  |
| chr13 | 55721941  | 55722931  | 991  |
| chr29 | 51264977  | 51265961  | 985  |
| chr2  | 73258088  | 73259065  | 978  |
| chr19 | 23713604  | 23714580  | 977  |
| chr19 | 60240619  | 60241591  | 973  |
| chr18 | 45390366  | 45391334  | 969  |
| chr23 | 49966488  | 49967455  | 968  |
| chr1  | 82745250  | 82746215  | 966  |
| chr4  | 72319137  | 72320093  | 957  |
| chr18 | 35066925  | 35067880  | 956  |
| chr25 | 37986878  | 37987829  | 952  |
| chr2  | 111409739 | 111410686 | 948  |
| chr29 | 46346449  | 46347388  | 940  |
| chr12 | 36543219  | 36544148  | 930  |
| chr2  | 74034113  | 74035035  | 923  |
| chr21 | 68954664  | 68955584  | 921  |
| chr8  | 23056909  | 23057815  | 907  |
| chr26 | 7006270   | 7007173   | 904  |
| chr16 | 48800564  | 48801465  | 902  |
| chr8  | 63977143  | 63978037  | 895  |
| chr29 | 44376465  | 44377348  | 884  |
| chr29 | 43025534  | 43026409  | 876  |
| chr22 | 61191646  | 61192521  | 876  |
| chr11 | 14439820  | 14440684  | 865  |
| chr10 | 90284130  | 90284994  | 865  |
| chr20 | 75032434  | 75033290  | 857  |
| chr2  | 56953675  | 56954491  | 817  |
| chr23 | 31385714  | 31386524  | 811  |
| chr18 | 18697851  | 18698652  | 802  |
| chr29 | 33699925  | 33700719  | 795  |
| chr24 | 48970853  | 48971637  | 785  |

|       |           |           |     |
|-------|-----------|-----------|-----|
| chr10 | 25033351  | 25034119  | 769 |
| chr24 | 26733314  | 26734073  | 760 |
| chr8  | 23040806  | 23041558  | 753 |
| chr5  | 33861824  | 33862575  | 752 |
| chr10 | 36375620  | 36376370  | 751 |
| chr3  | 15773399  | 15774145  | 747 |
| chr18 | 39773911  | 39774642  | 732 |
| chr25 | 4708338   | 4709066   | 729 |
| chr17 | 53514421  | 53515145  | 725 |
| chr7  | 94410970  | 94411692  | 723 |
| chr19 | 39397183  | 39397886  | 704 |
| chr5  | 81595980  | 81596682  | 703 |
| chr19 | 54219947  | 54220649  | 703 |
| chr18 | 55593574  | 55594247  | 674 |
| chr18 | 18666300  | 18666973  | 674 |
| chr17 | 64183896  | 64184569  | 674 |
| chr2  | 21455494  | 21456154  | 661 |
| chr5  | 88036973  | 88037630  | 658 |
| chr19 | 30821052  | 30821706  | 655 |
| chr5  | 29204707  | 29205359  | 653 |
| chr8  | 23045083  | 23045732  | 650 |
| chr5  | 72152528  | 72153172  | 645 |
| chr5  | 122828862 | 122829497 | 636 |
| chr25 | 2992035   | 2992669   | 635 |
| chr3  | 54316112  | 54316743  | 632 |
| chr12 | 68233872  | 68234495  | 624 |
| chr18 | 45430914  | 45431532  | 619 |
| chr17 | 74612709  | 74613327  | 619 |
| chr17 | 70303532  | 70304148  | 617 |
| chr13 | 57584039  | 57584655  | 617 |
| chr18 | 11635288  | 11635890  | 603 |
| chr18 | 62227404  | 62227989  | 586 |
| chr13 | 78420589  | 78421172  | 584 |
| chr2  | 42834529  | 42835098  | 570 |
| chr19 | 37581101  | 37581655  | 555 |
| chr6  | 72194789  | 72195339  | 551 |
| chr14 | 3500958   | 3501499   | 542 |
| chr9  | 53371785  | 53372325  | 541 |
| chr1  | 132101662 | 132102201 | 540 |
| chr28 | 5024255   | 5024789   | 535 |
| chr19 | 38736271  | 38736801  | 531 |
| chr12 | 52443090  | 52443620  | 531 |
| chr23 | 36833447  | 36833969  | 523 |
| chr1  | 133457658 | 133458180 | 523 |
| chr7  | 42260932  | 42261451  | 520 |
| chr23 | 7624427   | 7624944   | 518 |
| chr5  | 108825583 | 108826098 | 516 |
| chr5  | 118054946 | 118055444 | 499 |
| chr18 | 48781246  | 48781731  | 486 |
| chr21 | 47556301  | 47556785  | 485 |

|       |           |           |      |
|-------|-----------|-----------|------|
| chr19 | 14042520  | 14043004  | 485  |
| chr6  | 108560072 | 108560555 | 484  |
| chr25 | 36470597  | 36471080  | 484  |
| chr2  | 23110213  | 23110696  | 484  |
| chr12 | 74486070  | 74486551  | 482  |
| chr25 | 37697197  | 37697675  | 479  |
| chr10 | 90968803  | 90969275  | 473  |
| chr12 | 31524352  | 31524823  | 472  |
| chr19 | 37852331  | 37852790  | 460  |
| chr23 | 27821979  | 27822436  | 458  |
| chr13 | 14697217  | 14697671  | 455  |
| chr6  | 107359766 | 107360216 | 451  |
| chr6  | 119120118 | 119120558 | 441  |
| chr12 | 74441506  | 74441931  | 426  |
| chr18 | 49513362  | 49513785  | 424  |
| chr24 | 44248485  | 44249866  | 1382 |
| chr15 | 24023498  | 24024815  | 1318 |
| chr25 | 44025278  | 44026840  | 1563 |
| chr7  | 32283153  | 32284218  | 1066 |
| chr7  | 81253605  | 81254313  | 709  |
| chr23 | 15870770  | 15871742  | 973  |
| chr5  | 35294248  | 35295010  | 763  |
| chr2  | 128835302 | 128837484 | 2183 |
| chr4  | 124322522 | 124323263 | 742  |
| chr19 | 46152328  | 46153248  | 921  |
| chr8  | 73750177  | 73751676  | 1500 |
| chr26 | 50954844  | 50956177  | 1334 |
| chr25 | 3182719   | 3183436   | 718  |
| chr19 | 54800355  | 54801456  | 1102 |
| chr12 | 32024897  | 32025775  | 879  |
| chr28 | 46065486  | 46066418  | 933  |
| chr18 | 62009304  | 62010210  | 907  |
| chr17 | 26901515  | 26902355  | 841  |
| chr13 | 54854479  | 54854884  | 406  |
| chr8  | 24738456  | 24739130  | 675  |
| chr25 | 36475462  | 36476034  | 573  |
| chr11 | 14087531  | 14088044  | 514  |
| chr8  | 73312135  | 73312680  | 546  |
| chr8  | 24480097  | 24480710  | 614  |
| chr8  | 24712437  | 24713174  | 738  |
| chr1  | 141897272 | 141897674 | 403  |
| chr19 | 65260057  | 65260683  | 627  |
| chr27 | 11605532  | 11606084  | 553  |
| chr8  | 73096738  | 73099415  | 2678 |
| chr18 | 48685996  | 48687072  | 1077 |
| chr13 | 52672320  | 52673321  | 1002 |
| chr12 | 48062798  | 48063513  | 716  |
| chr29 | 50438941  | 50439625  | 685  |
| chr8  | 52921849  | 52924490  | 2642 |
| chr16 | 60033714  | 60035913  | 2200 |

|       |           |           |      |
|-------|-----------|-----------|------|
| chr18 | 13780378  | 13782132  | 1755 |
| chr21 | 4257510   | 4259150   | 1641 |
| chr17 | 66514951  | 66516436  | 1486 |
| chr17 | 63444803  | 63446178  | 1376 |
| chr23 | 8441771   | 8442958   | 1188 |
| chr11 | 3863311   | 3864033   | 723  |
| chr3  | 116926837 | 116927391 | 555  |
| chr11 | 100737264 | 100738659 | 1396 |
| chr7  | 10936522  | 10937880  | 1359 |
| chr13 | 54430436  | 54431263  | 828  |
| chrX  | 10879928  | 10881919  | 1992 |
| chr13 | 75808032  | 75809612  | 1581 |
| chr10 | 103503225 | 103504777 | 1553 |
| chr10 | 12133381  | 12134652  | 1272 |
| chr26 | 39268022  | 39269279  | 1258 |
| chr18 | 39776264  | 39777239  | 976  |
| chr22 | 13124003  | 13124888  | 886  |
| chr24 | 23953402  | 23956631  | 3230 |
| chr4  | 67702859  | 67704933  | 2075 |
| chr1  | 87341950  | 87343614  | 1665 |
| chr9  | 29831406  | 29832984  | 1579 |
| chr28 | 12164095  | 12165588  | 1494 |
| chr11 | 104958222 | 104959241 | 1020 |
| chr10 | 5234828   | 5235816   | 989  |
| chr7  | 94418771  | 94419529  | 759  |
| chr16 | 2467001   | 2469125   | 2125 |
| chr12 | 74481160  | 74481863  | 704  |
| chr11 | 103811934 | 103812425 | 492  |
| chr13 | 40943705  | 40944155  | 451  |
| chr12 | 58680322  | 58682649  | 2328 |
| chr21 | 6545984   | 6547435   | 1452 |
| chr2  | 135581854 | 135583220 | 1367 |
| chr25 | 37516359  | 37517714  | 1356 |
| chr9  | 90658012  | 90658453  | 442  |
| chr5  | 51975721  | 51977382  | 1662 |
| chr8  | 7581187   | 7582032   | 846  |
| chr23 | 23882305  | 23882799  | 495  |
| chr1  | 154413184 | 154414535 | 1352 |
| chr15 | 34582796  | 34583765  | 970  |
| chr20 | 22299684  | 22300800  | 1117 |
| chr19 | 27443940  | 27444824  | 885  |
| chr29 | 41710920  | 41711547  | 628  |
| chr12 | 14938691  | 14939882  | 1192 |
| chr21 | 61030425  | 61030949  | 525  |
| chr21 | 20631684  | 20632565  | 882  |
| chr13 | 55036725  | 55037426  | 702  |
| chr19 | 45205692  | 45206339  | 648  |
| chr18 | 52026971  | 52027595  | 625  |
| chr4  | 69677976  | 69678503  | 528  |
| chr29 | 31558334  | 31558859  | 526  |

|       |               |           |      |
|-------|---------------|-----------|------|
| chr16 | 2258232       | 2258750   | 519  |
| chr24 | 64978716      | 64979164  | 449  |
| chr4  | 95675848      | 95676294  | 447  |
| chr19 | 21698264      | 21698683  | 420  |
| chr4  | 69934236      | 69934764  | 529  |
| chr11 | 46742317      | 46742796  | 480  |
| chr5  | 123166366     | 123169671 | 3306 |
| chr17 | 3234693       | 3237450   | 2758 |
| chr6  | 99217027      | 99219672  | 2646 |
| chr12 | 34259630      | 34262245  | 2616 |
| chr20 | 74781406      | 74783882  | 2477 |
| chr12 | 9553516       | 9555919   | 2404 |
| chr11 | 98964181      | 98966518  | 2338 |
| chr26 | 22813932      | 22816166  | 2235 |
| chr23 | 11788565      | 11790769  | 2205 |
| chr7  | 46192761      | 46194953  | 2193 |
| chr26 | 37860123      | 37862298  | 2176 |
| chr18 | 651429 653576 | 2148      |      |
| chr1  | 76553180      | 76555211  | 2032 |
| chr3  | 70576294      | 70578292  | 1999 |
| chr17 | 12578990      | 12580986  | 1997 |
| chr19 | 41868394      | 41870375  | 1982 |
| chr5  | 10612327      | 10614292  | 1966 |
| chr11 | 98905605      | 98907541  | 1937 |
| chr11 | 75092623      | 75094530  | 1908 |
| chr19 | 59346152      | 59348037  | 1886 |
| chr18 | 47667220      | 47669098  | 1879 |
| chr24 | 58978535      | 58980400  | 1866 |
| chr16 | 48313705      | 48315502  | 1798 |
| chr7  | 50416078      | 50417830  | 1753 |
| chr26 | 38228521      | 38230192  | 1672 |
| chr7  | 37398545      | 37400204  | 1660 |
| chr3  | 22900978      | 22902631  | 1654 |
| chr2  | 124290055     | 124291691 | 1637 |
| chr3  | 15423138      | 15424733  | 1596 |
| chr7  | 15012080      | 15013652  | 1573 |
| chr11 | 21630245      | 21631810  | 1566 |
| chr12 | 11446609      | 11448160  | 1552 |
| chr8  | 6472653       | 6474189   | 1537 |
| chr21 | 55794382      | 55795916  | 1535 |
| chr10 | 11650790      | 11652308  | 1519 |
| chr2  | 115110269     | 115111762 | 1494 |
| chr9  | 50722226      | 50723703  | 1478 |
| chr28 | 25137870      | 25139346  | 1477 |
| chr3  | 15181122      | 15182544  | 1423 |
| chr12 | 32110451      | 32111836  | 1386 |
| chr5  | 113789288     | 113790593 | 1306 |
| chr18 | 54232677      | 54233965  | 1289 |
| chr25 | 38165781      | 38167064  | 1284 |
| chr23 | 52610344      | 52611617  | 1274 |

|       |               |           |      |
|-------|---------------|-----------|------|
| chr23 | 31189626      | 31190890  | 1265 |
| chr18 | 62686121      | 62687373  | 1253 |
| chr9  | 70494364      | 70495591  | 1228 |
| chr11 | 49852147      | 49853368  | 1222 |
| chr18 | 63025361      | 63026574  | 1214 |
| chr3  | 116025378     | 116026590 | 1213 |
| chr18 | 53878657      | 53879866  | 1210 |
| chr16 | 58554078      | 58555262  | 1185 |
| chr23 | 31176054      | 31177219  | 1166 |
| chr6  | 122419675     | 122420833 | 1159 |
| chr18 | 51711606      | 51712759  | 1154 |
| chr17 | 12571187      | 12572340  | 1154 |
| chr12 | 32105358      | 32106502  | 1145 |
| chr10 | 2774799       | 2775936   | 1138 |
| chr7  | 57583062      | 57584198  | 1137 |
| chr15 | 58029473      | 58030608  | 1136 |
| chr18 | 53122062      | 53123179  | 1118 |
| chr18 | 11322011      | 11323121  | 1111 |
| chr11 | 107230164     | 107231270 | 1107 |
| chr28 | 428740 429844 | 1105      |      |
| chr9  | 27111836      | 27112932  | 1097 |
| chr8  | 28006479      | 28007575  | 1097 |
| chr2  | 61110462      | 61111558  | 1097 |
| chr3  | 92501513      | 92502608  | 1096 |
| chr14 | 23261032      | 23262117  | 1086 |
| chr11 | 9227254       | 9228336   | 1083 |
| chr29 | 33704295      | 33705362  | 1068 |
| chr17 | 53515367      | 53516422  | 1056 |
| chr3  | 26127385      | 26128439  | 1055 |
| chr7  | 43519675      | 43520727  | 1053 |
| chr11 | 104912385     | 104913403 | 1019 |
| chr3  | 113364051     | 113365057 | 1007 |
| chr2  | 140756690     | 140757693 | 1004 |
| chr9  | 44920062      | 44921059  | 998  |
| chr7  | 10948214      | 10949207  | 994  |
| chr3  | 74470130      | 74471111  | 982  |
| chr4  | 106692879     | 106693858 | 980  |
| chr16 | 75218888      | 75219866  | 979  |
| chr2  | 37671469      | 37672444  | 976  |
| chr5  | 115155409     | 115156379 | 971  |
| chr14 | 44635631      | 44636594  | 964  |
| chr24 | 3950827       | 3951787   | 961  |
| chr23 | 23747132      | 23748084  | 953  |
| chr3  | 105747471     | 105748419 | 949  |
| chr16 | 2219217       | 2220161   | 945  |
| chr19 | 23859828      | 23860770  | 943  |
| chr24 | 53851271      | 53852202  | 932  |
| chr4  | 68261691      | 68262614  | 924  |
| chr25 | 38213251      | 38214166  | 916  |
| chr5  | 115152933     | 115153845 | 913  |



|       |               |           |     |
|-------|---------------|-----------|-----|
| chr19 | 33111631      | 33112542  | 912 |
| chr3  | 54318252      | 54319148  | 897 |
| chr11 | 75407247      | 75408141  | 895 |
| chr11 | 6310097       | 6310983   | 887 |
| chr18 | 23117460      | 23118332  | 873 |
| chr25 | 40828826      | 40829692  | 867 |
| chr20 | 33700257      | 33701118  | 862 |
| chr5  | 117212604     | 117213462 | 859 |
| chr6  | 100540283     | 100541122 | 840 |
| chr3  | 113594320     | 113595156 | 837 |
| chr22 | 20115224      | 20116038  | 815 |
| chr5  | 125560998     | 125561798 | 801 |
| chr18 | 55836446      | 55837242  | 797 |
| chr5  | 38696217      | 38697003  | 787 |
| chr6  | 103292532     | 103293313 | 782 |
| chr26 | 22327155      | 22327931  | 777 |
| chr4  | 5624376       | 5625136   | 761 |
| chr3  | 18607590      | 18608347  | 758 |
| chr26 | 48443972      | 48444729  | 758 |
| chrX  | 11010313      | 11011068  | 756 |
| chr1  | 68416168      | 68416919  | 752 |
| chr15 | 34581467      | 34582213  | 747 |
| chr13 | 75567041      | 75567783  | 743 |
| chr4  | 5626013       | 5626746   | 734 |
| chr16 | 70101063      | 70101789  | 727 |
| chr14 | 825543 826266 | 724       |     |
| chr4  | 121561521     | 121562243 | 723 |
| chr12 | 34330122      | 34330837  | 716 |
| chr21 | 64512628      | 64513340  | 713 |
| chr26 | 44383293      | 44383993  | 701 |
| chr11 | 106253558     | 106254257 | 700 |
| chr9  | 26594029      | 26594724  | 696 |
| chr7  | 52388836      | 52389529  | 694 |
| chr29 | 29656464      | 29657155  | 692 |
| chr23 | 31341663      | 31342353  | 691 |
| chr6  | 22239273      | 22239951  | 679 |
| chr23 | 53033879      | 53034549  | 671 |
| chr5  | 67822108      | 67822766  | 659 |
| chr20 | 6830925       | 6831565   | 641 |
| chr7  | 18730310      | 18730942  | 633 |
| chr9  | 51606085      | 51606714  | 630 |
| chr10 | 44052534      | 44053163  | 630 |
| chr26 | 22258166      | 22258793  | 628 |
| chr24 | 29711675      | 29712297  | 623 |
| chr1  | 96194510      | 96195131  | 622 |
| chr10 | 8361269       | 8361889   | 621 |
| chr9  | 22765429      | 22766042  | 614 |
| chr18 | 55193495      | 55194100  | 606 |
| chr2  | 138641467     | 138642070 | 604 |
| chr21 | 47531826      | 47532428  | 603 |

|       |           |           |      |
|-------|-----------|-----------|------|
| chr10 | 35782536  | 35783136  | 601  |
| chr12 | 84254147  | 84254742  | 596  |
| chr3  | 22965861  | 22966448  | 588  |
| chr8  | 1631932   | 1632518   | 587  |
| chr28 | 46055953  | 46056528  | 576  |
| chr23 | 7250897   | 7251470   | 574  |
| chr19 | 37864307  | 37864879  | 573  |
| chr19 | 56128853  | 56129421  | 569  |
| chr26 | 24745996  | 24746563  | 568  |
| chr23 | 49952117  | 49952675  | 559  |
| chr25 | 27390912  | 27391461  | 550  |
| chr29 | 12465045  | 12465586  | 542  |
| chr19 | 39833684  | 39834217  | 534  |
| chr2  | 138640181 | 138640713 | 533  |
| chr12 | 36463683  | 36464214  | 532  |
| chr25 | 43152145  | 43152675  | 531  |
| chr18 | 50027594  | 50028123  | 530  |
| chr5  | 38695460  | 38695987  | 528  |
| chr2  | 76633258  | 76633781  | 524  |
| chr22 | 13124948  | 13125465  | 518  |
| chr15 | 71860902  | 71861417  | 516  |
| chr10 | 81701391  | 81701906  | 516  |
| chr7  | 5599683   | 5600194   | 512  |
| chr12 | 32115586  | 32116094  | 509  |
| chr19 | 6507707   | 6508213   | 507  |
| chr19 | 39241294  | 39241798  | 505  |
| chr7  | 14250640  | 14251139  | 500  |
| chr22 | 10748814  | 10749301  | 488  |
| chr2  | 136621308 | 136621794 | 487  |
| chr22 | 30083935  | 30084412  | 478  |
| chr5  | 28764811  | 28765285  | 475  |
| chr7  | 42572581  | 42573047  | 467  |
| chr5  | 116425492 | 116425957 | 466  |
| chr19 | 46142644  | 46143104  | 461  |
| chr4  | 118625232 | 118625688 | 457  |
| chr13 | 26304765  | 26305219  | 455  |
| chr5  | 32648057  | 32648510  | 454  |
| chr16 | 47997820  | 47998267  | 448  |
| chr19 | 24703158  | 24703595  | 438  |
| chr6  | 108855717 | 108856153 | 437  |
| chr24 | 58648063  | 58648498  | 436  |
| chr28 | 42734001  | 42734435  | 435  |
| chr28 | 46060889  | 46061318  | 430  |
| chr21 | 33819191  | 33819620  | 430  |
| chr12 | 32087842  | 32088270  | 429  |
| chr15 | 45787544  | 45787953  | 410  |
| chr28 | 46050641  | 46051044  | 404  |
| chrX  | 11013100  | 11013500  | 401  |
| chr11 | 14092968  | 14093282  | 315  |
| chr19 | 43091418  | 43094414  | 2997 |

|       |               |           |      |
|-------|---------------|-----------|------|
| chr13 | 73478925      | 73480936  | 2012 |
| chr1  | 84586772      | 84588542  | 1771 |
| chr11 | 28477164      | 28478868  | 1705 |
| chr6  | 106818213     | 106819825 | 1613 |
| chr13 | 40889195      | 40890627  | 1433 |
| chr7  | 14249348      | 14250582  | 1235 |
| chr18 | 62692725      | 62693712  | 988  |
| chr3  | 115468905     | 115469733 | 829  |
| chr25 | 4655084       | 4655767   | 684  |
| chr16 | 2120672       | 2121291   | 620  |
| chr13 | 41020667      | 41021206  | 540  |
| chr10 | 32478375      | 32481049  | 2675 |
| chr10 | 7601915       | 7604094   | 2180 |
| chr5  | 116835289     | 116837313 | 2025 |
| chr17 | 63938050      | 63939329  | 1280 |
| chr2  | 115119617     | 115120891 | 1275 |
| chr18 | 56619373      | 56620582  | 1210 |
| chr6  | 63165654      | 63166717  | 1064 |
| chr6  | 72197075      | 72197995  | 921  |
| chr20 | 33680239      | 33681132  | 894  |
| chr17 | 7829823       | 7830570   | 748  |
| chr2  | 111235509     | 111236161 | 653  |
| chr28 | 43744103      | 43744732  | 630  |
| chr6  | 120812064     | 120812628 | 565  |
| chr22 | 17238212      | 17238750  | 539  |
| chr11 | 100912264     | 100913356 | 1093 |
| chr11 | 77901532      | 77902618  | 1087 |
| chr3  | 15966529      | 15967063  | 535  |
| chr17 | 68169721      | 68171527  | 1807 |
| chr18 | 11315631      | 11317114  | 1484 |
| chr26 | 22182637      | 22183484  | 848  |
| chr12 | 34046188      | 34046981  | 794  |
| chr11 | 9053199       | 9053818   | 620  |
| chr25 | 39390637      | 39391163  | 527  |
| chr19 | 40457913      | 40459030  | 1118 |
| chr18 | 62454615      | 62455866  | 1252 |
| chr12 | 61822201      | 61823369  | 1169 |
| chr3  | 79685932      | 79686884  | 953  |
| chr3  | 22632607      | 22633499  | 893  |
| chr4  | 106691512     | 106692358 | 847  |
| chr22 | 15013933      | 15014706  | 774  |
| chr1  | 148034377     | 148034931 | 555  |
| chr3  | 22545737      | 22546223  | 487  |
| chr13 | 61129976      | 61130452  | 477  |
| chr21 | 28186712      | 28188371  | 1660 |
| chr25 | 38761206      | 38762443  | 1238 |
| chr27 | 299073 300270 | 1198      |      |
| chr9  | 37889823      | 37890671  | 849  |
| chr19 | 29000051      | 29000818  | 768  |
| chr29 | 44737539      | 44738270  | 732  |

|       |               |           |      |
|-------|---------------|-----------|------|
| chr6  | 69749583      | 69750235  | 653  |
| chr11 | 109405584     | 109407089 | 1506 |
| chr7  | 17131071      | 17132048  | 978  |
| chr21 | 58719006      | 58719774  | 769  |
| chr20 | 767105 767698 | 594       |      |
| chr16 | 48012002      | 48012507  | 506  |
| chr9  | 22764153      | 22764783  | 631  |
| chr16 | 44308555      | 44310215  | 1661 |
| chr15 | 74517545      | 74518876  | 1332 |
| chr15 | 27273742      | 27274998  | 1257 |
| chr1  | 123137238     | 123138832 | 1595 |
| chr19 | 39262378      | 39263089  | 712  |
| chr14 | 32873258      | 32874546  | 1289 |
| chr13 | 64763837      | 64764921  | 1085 |
| chr11 | 107533490     | 107534308 | 819  |
| chr17 | 69747361      | 69748063  | 703  |
| chr14 | 22074331      | 22075296  | 966  |
| chr2  | 26590794      | 26591347  | 554  |
| chr21 | 67773221      | 67774183  | 963  |
| chr19 | 21699189      | 21700125  | 937  |
| chr18 | 43153307      | 43154118  | 812  |
| chr10 | 15075985      | 15076680  | 696  |
| chr10 | 81699252      | 81700142  | 891  |
| chr8  | 65815609      | 65816084  | 476  |
| chr16 | 46843967      | 46845187  | 1221 |
| chr1  | 99266646      | 99267378  | 733  |
| chr2  | 111234550     | 111235197 | 648  |
| chr3  | 92503399      | 92503914  | 516  |
| chr5  | 121337697     | 121338180 | 484  |
| chr23 | 28004566      | 28004979  | 414  |
| chr19 | 54798449      | 54800005  | 1557 |
| chr26 | 22323737      | 22324684  | 948  |
| chr3  | 15547515      | 15548446  | 932  |
| chr21 | 47622744      | 47623258  | 515  |
| chr23 | 28484079      | 28484561  | 483  |
| chr18 | 11355822      | 11359003  | 3182 |
| chr15 | 62737266      | 62739771  | 2506 |
| chr14 | 54196487      | 54198792  | 2306 |
| chr9  | 66532188      | 66534428  | 2241 |
| chr19 | 37930820      | 37933047  | 2228 |
| chr2  | 120921308     | 120923527 | 2220 |
| chr25 | 36457538      | 36459750  | 2213 |
| chr24 | 60569822      | 60572002  | 2181 |
| chr11 | 28539475      | 28541604  | 2130 |
| chr2  | 111844758     | 111846720 | 1963 |
| chr4  | 29014694      | 29016643  | 1950 |
| chr10 | 91109808      | 91111752  | 1945 |
| chr13 | 55041115      | 55043056  | 1942 |
| chr16 | 13950588      | 13952475  | 1888 |
| chr15 | 54271266      | 54273108  | 1843 |

|       |           |           |      |
|-------|-----------|-----------|------|
| chr12 | 46762014  | 46763795  | 1782 |
| chr27 | 23638631  | 23640410  | 1780 |
| chr11 | 106003684 | 106005448 | 1765 |
| chr26 | 44944918  | 44946652  | 1735 |
| chr5  | 112140844 | 112142573 | 1730 |
| chr7  | 10281658  | 10283358  | 1701 |
| chr6  | 120807254 | 120808943 | 1690 |
| chr4  | 64282708  | 64284394  | 1687 |
| chr11 | 47257220  | 47258892  | 1673 |
| chr13 | 40876915  | 40878584  | 1670 |
| chr16 | 47036902  | 47038570  | 1669 |
| chr8  | 5790786   | 5792366   | 1581 |
| chr11 | 47255494  | 47257056  | 1563 |
| chr18 | 13536044  | 13537604  | 1561 |
| chr25 | 14683173  | 14684712  | 1540 |
| chr1  | 85898577  | 85900110  | 1534 |
| chr26 | 21885060  | 21886576  | 1517 |
| chr5  | 60731591  | 60733068  | 1478 |
| chr11 | 30035024  | 30036476  | 1453 |
| chr19 | 46150811  | 46152262  | 1452 |
| chr20 | 64883658  | 64885080  | 1423 |
| chr24 | 50880425  | 50881837  | 1413 |
| chr18 | 38358672  | 38360073  | 1402 |
| chr3  | 15548536  | 15549919  | 1384 |
| chr11 | 76256812  | 76258194  | 1383 |
| chr19 | 64764365  | 64765745  | 1381 |
| chr27 | 4191488   | 4192844   | 1357 |
| chr26 | 39266552  | 39267905  | 1354 |
| chr10 | 36837563  | 36838909  | 1347 |
| chr1  | 74523092  | 74524438  | 1347 |
| chr19 | 58228160  | 58229504  | 1345 |
| chr15 | 62750908  | 62752249  | 1342 |
| chr19 | 41265712  | 41267038  | 1327 |
| chr4  | 33419578  | 33420894  | 1317 |
| chr19 | 12319405  | 12320709  | 1305 |
| chr15 | 62412490  | 62413785  | 1296 |
| chr27 | 35292285  | 35293571  | 1287 |
| chr3  | 24428541  | 24429811  | 1271 |
| chr3  | 113614769 | 113616029 | 1261 |
| chr26 | 15369084  | 15370328  | 1245 |
| chr9  | 37890819  | 37892062  | 1244 |
| chr15 | 19971003  | 19972244  | 1242 |
| chr3  | 26124323  | 26125559  | 1237 |
| chr19 | 15782362  | 15783594  | 1233 |
| chr3  | 22696391  | 22697613  | 1223 |
| chr3  | 20574709  | 20575930  | 1222 |
| chr7  | 3936594   | 3937800   | 1207 |
| chr27 | 35431282  | 35432486  | 1205 |
| chr18 | 61961215  | 61962418  | 1204 |
| chr7  | 4513593   | 4514794   | 1202 |

|       |           |           |      |
|-------|-----------|-----------|------|
| chr2  | 115085514 | 115086709 | 1196 |
| chr19 | 39132009  | 39133200  | 1192 |
| chr13 | 60960878  | 60962069  | 1192 |
| chr16 | 45911484  | 45912674  | 1191 |
| chr6  | 72189327  | 72190513  | 1187 |
| chr3  | 4491973   | 4493154   | 1182 |
| chr2  | 74326592  | 74327762  | 1171 |
| chr1  | 146929243 | 146930405 | 1163 |
| chr29 | 51261601  | 51262762  | 1162 |
| chr11 | 104913619 | 104914780 | 1162 |
| chr11 | 106404304 | 106405462 | 1159 |
| chr26 | 14898713  | 14899867  | 1155 |
| chr10 | 8533499   | 8534653   | 1155 |
| chr23 | 46397356  | 46398506  | 1151 |
| chr1  | 123127996 | 123129144 | 1149 |
| chr3  | 119912408 | 119913551 | 1144 |
| chr8  | 107679747 | 107680888 | 1142 |
| chr1  | 68415037  | 68416166  | 1130 |
| chr13 | 31723535  | 31724661  | 1127 |
| chr21 | 11888191  | 11889313  | 1123 |
| chr21 | 47713799  | 47714911  | 1113 |
| chr9  | 90317187  | 90318282  | 1096 |
| chr3  | 22910950  | 22912038  | 1089 |
| chr16 | 77487144  | 77488209  | 1066 |
| chr24 | 60830842  | 60831887  | 1046 |
| chr9  | 77686476  | 77687520  | 1045 |
| chr26 | 34970030  | 34971062  | 1033 |
| chr21 | 22611504  | 22612529  | 1026 |
| chr6  | 63047927  | 63048951  | 1025 |
| chr26 | 21648773  | 21649791  | 1019 |
| chr23 | 10346963  | 10347980  | 1018 |
| chr14 | 29045982  | 29046999  | 1018 |
| chr14 | 80588103  | 80589086  | 984  |
| chr29 | 50588911  | 50589890  | 980  |
| chr19 | 11828851  | 11829829  | 979  |
| chr19 | 40423162  | 40424128  | 967  |
| chr17 | 75977629  | 75978595  | 967  |
| chr11 | 74427259  | 74428223  | 965  |
| chr8  | 7777535   | 7778497   | 963  |
| chr16 | 66332858  | 66333819  | 962  |
| chr26 | 31473945  | 31474900  | 956  |
| chr1  | 82486910  | 82487865  | 956  |
| chr3  | 114209235 | 114210185 | 951  |
| chr25 | 44018311  | 44019249  | 939  |
| chr7  | 84419414  | 84420349  | 936  |
| chr4  | 121739186 | 121740121 | 936  |
| chr13 | 40598822  | 40599754  | 933  |
| chr18 | 49512396  | 49513325  | 930  |
| chr7  | 37489216  | 37490138  | 923  |
| chr1  | 137873723 | 137874643 | 921  |

|       |               |           |     |
|-------|---------------|-----------|-----|
| chr19 | 27912502      | 27913421  | 920 |
| chr23 | 31340133      | 31341049  | 917 |
| chr9  | 50712439      | 50713344  | 906 |
| chr16 | 75221722      | 75222622  | 901 |
| chr11 | 102019608     | 102020499 | 892 |
| chr20 | 70572061      | 70572949  | 889 |
| chr9  | 12682337      | 12683223  | 887 |
| chr3  | 105591727     | 105592609 | 883 |
| chr1  | 158088 158964 | 877       |     |
| chr9  | 35466369      | 35467237  | 869 |
| chr21 | 64472878      | 64473735  | 858 |
| chr21 | 61310045      | 61310887  | 843 |
| chr19 | 26942738      | 26943568  | 831 |
| chr23 | 28021415      | 28022242  | 828 |
| chr20 | 72725688      | 72726512  | 825 |
| chr29 | 38048995      | 38049818  | 824 |
| chr24 | 818749 819572 | 824       |     |
| chr4  | 118623425     | 118624243 | 819 |
| chr25 | 2924948       | 2925750   | 803 |
| chr25 | 2929439       | 2930236   | 798 |
| chr4  | 21344350      | 21345143  | 794 |
| chr11 | 98358658      | 98359449  | 792 |
| chr6  | 51517019      | 51517808  | 790 |
| chr18 | 31844230      | 31845018  | 789 |
| chr15 | 81400701      | 81401489  | 789 |
| chr6  | 108680432     | 108681219 | 788 |
| chr4  | 71521115      | 71521898  | 784 |
| chr11 | 104698291     | 104699074 | 784 |
| chr2  | 111650064     | 111650841 | 778 |
| chrX  | 72250400      | 72251176  | 777 |
| chr8  | 89536928      | 89537704  | 777 |
| chr21 | 24229207      | 24229983  | 777 |
| chr10 | 66929631      | 66930407  | 777 |
| chr14 | 23257393      | 23258160  | 768 |
| chr18 | 63760609      | 63761371  | 763 |
| chr1  | 62292608      | 62293360  | 753 |
| chr6  | 63173796      | 63174546  | 751 |
| chr19 | 21319946      | 21320695  | 750 |
| chr27 | 35428866      | 35429614  | 749 |
| chr15 | 32264914      | 32265661  | 748 |
| chr11 | 92952187      | 92952927  | 741 |
| chr4  | 122639543     | 122640281 | 739 |
| chr4  | 105189229     | 105189963 | 735 |
| chr4  | 107992840     | 107993572 | 733 |
| chr1  | 132082623     | 132083353 | 731 |
| chr19 | 23140337      | 23141064  | 728 |
| chr22 | 50889564      | 50890289  | 726 |
| chr14 | 59026356      | 59027079  | 724 |
| chr29 | 48851869      | 48852573  | 705 |
| chr14 | 66276181      | 66276883  | 703 |

|       |               |           |     |
|-------|---------------|-----------|-----|
| chr20 | 75668980      | 75669667  | 688 |
| chr18 | 33314119      | 33314802  | 684 |
| chr12 | 14936825      | 14937503  | 679 |
| chr13 | 57591147      | 57591820  | 674 |
| chr22 | 50755818      | 50756470  | 653 |
| chr25 | 12712899      | 12713543  | 645 |
| chr11 | 107587319     | 107587961 | 643 |
| chr7  | 29491474      | 29492112  | 639 |
| chr4  | 121988995     | 121989631 | 637 |
| chr11 | 9427151       | 9427779   | 629 |
| chr9  | 26591068      | 26591695  | 628 |
| chr4  | 106087941     | 106088561 | 621 |
| chr19 | 23715225      | 23715842  | 618 |
| chr5  | 110917280     | 110917894 | 615 |
| chr18 | 56733112      | 56733725  | 614 |
| chr6  | 68558561      | 68559170  | 610 |
| chr13 | 22150805      | 22151412  | 608 |
| chr21 | 18880597      | 18881199  | 603 |
| chr17 | 72731912      | 72732513  | 602 |
| chr4  | 71865719      | 71866313  | 595 |
| chr5  | 121337075     | 121337656 | 582 |
| chr21 | 20592114      | 20592692  | 579 |
| chr8  | 15102113      | 15102688  | 576 |
| chr8  | 24667370      | 24667937  | 568 |
| chr14 | 21777014      | 21777577  | 564 |
| chr3  | 17468437      | 17468993  | 557 |
| chr25 | 24848249      | 24848805  | 557 |
| chr17 | 63323786      | 63324342  | 557 |
| chr11 | 28458654      | 28459208  | 555 |
| chr17 | 69748490      | 69749040  | 551 |
| chr16 | 955687 956232 | 546       |     |
| chr19 | 19276109      | 19276646  | 538 |
| chr8  | 23034425      | 23034950  | 526 |
| chr15 | 29338921      | 29339444  | 524 |
| chr23 | 15832246      | 15832766  | 521 |
| chr19 | 40430717      | 40431236  | 520 |
| chr14 | 611997 612515 | 519       |     |
| chr12 | 79077820      | 79078338  | 519 |
| chr29 | 17458765      | 17459274  | 510 |
| chrX  | 11000450      | 11000955  | 506 |
| chr3  | 23037583      | 23038078  | 496 |
| chr13 | 40878854      | 40879344  | 491 |
| chr3  | 22484964      | 22485441  | 478 |
| chr7  | 11035170      | 11035646  | 477 |
| chr19 | 41934941      | 41935409  | 469 |
| chr15 | 25573452      | 25573920  | 469 |
| chr6  | 61949418      | 61949883  | 466 |
| chr2  | 5180804       | 5181265   | 462 |
| chr7  | 5243693       | 5244153   | 461 |
| chr13 | 38254745      | 38255205  | 461 |



|       |           |           |      |
|-------|-----------|-----------|------|
| chr11 | 100112444 | 100112902 | 459  |
| chr23 | 23751711  | 23752166  | 456  |
| chr11 | 48687962  | 48688415  | 454  |
| chr17 | 74556200  | 74556649  | 450  |
| chr17 | 72351214  | 72351663  | 450  |
| chr6  | 12633541  | 12633987  | 447  |
| chr5  | 94237857  | 94238301  | 445  |
| chrX  | 23613564  | 23614001  | 438  |
| chr19 | 42260327  | 42260757  | 431  |
| chr13 | 42609950  | 42610380  | 431  |
| chr21 | 64509921  | 64510344  | 424  |
| chr21 | 10793311  | 10793733  | 423  |
| chr1  | 82867282  | 82867699  | 418  |
| chr1  | 150071014 | 150071427 | 414  |
| chr18 | 50665981  | 50666385  | 405  |
| chr3  | 20453076  | 20453472  | 397  |
| chr18 | 54222193  | 54222578  | 386  |
| chr11 | 14139216  | 14139586  | 371  |
| chr4  | 96859572  | 96861359  | 1788 |
| chr18 | 47795184  | 47796942  | 1759 |
| chr26 | 24341356  | 24343086  | 1731 |
| chr29 | 25943207  | 25944169  | 963  |
| chr7  | 6621599   | 6622478   | 880  |
| chr25 | 35673385  | 35674146  | 762  |
| chr7  | 10406161  | 10406690  | 530  |
| chr3  | 5540559   | 5541073   | 515  |
| chr24 | 35317618  | 35319536  | 1919 |
| chr7  | 43747266  | 43748428  | 1163 |
| chr20 | 8684408   | 8685531   | 1124 |
| chr4  | 117839997 | 117841027 | 1031 |
| chr7  | 14335158  | 14336157  | 1000 |
| chr1  | 149725872 | 149726739 | 868  |
| chr26 | 14553862  | 14554435  | 574  |
| chr1  | 97144862  | 97146684  | 1823 |
| chr19 | 39051045  | 39052824  | 1780 |
| chr3  | 22471507  | 22472863  | 1357 |
| chr5  | 121628441 | 121629582 | 1142 |
| chr29 | 44666776  | 44667826  | 1051 |
| chr13 | 62424181  | 62425059  | 879  |
| chr7  | 14375644  | 14376502  | 859  |
| chr3  | 22601056  | 22601902  | 847  |
| chr20 | 8752863   | 8753682   | 820  |
| chr5  | 81602885  | 81603515  | 631  |
| chr11 | 98333254  | 98333869  | 616  |
| chr19 | 33099678  | 33100258  | 581  |
| chr5  | 54503380  | 54503954  | 575  |
| chr13 | 61294946  | 61296334  | 1389 |
| chr18 | 55583774  | 55584961  | 1188 |
| chr1  | 107885440 | 107886552 | 1113 |
| chr18 | 654238    | 655266    | 1029 |

|       |           |           |      |
|-------|-----------|-----------|------|
| chr7  | 14298370  | 14299275  | 906  |
| chr16 | 75214356  | 75215231  | 876  |
| chr7  | 16315830  | 16316629  | 800  |
| chr18 | 56442982  | 56443490  | 509  |
| chr5  | 30323312  | 30323634  | 323  |
| chr23 | 27799894  | 27801344  | 1451 |
| chr3  | 105464533 | 105465716 | 1184 |
| chr11 | 104688935 | 104689890 | 956  |
| chr8  | 40330977  | 40331777  | 801  |
| chr11 | 66702421  | 66702915  | 495  |
| chr19 | 45272013  | 45272504  | 492  |
| chr19 | 18371184  | 18372443  | 1260 |
| chr21 | 61032058  | 61033123  | 1066 |
| chr20 | 8755195   | 8755754   | 560  |
| chr19 | 39062854  | 39063387  | 534  |
| chr5  | 54504027  | 54505715  | 1689 |
| chr13 | 62875276  | 62876364  | 1089 |
| chr22 | 15016549  | 15017204  | 656  |
| chr23 | 10549078  | 10549671  | 594  |
| chr11 | 12862979  | 12864164  | 1186 |
| chr7  | 16543345  | 16544439  | 1095 |
| chr4  | 51761799  | 51762561  | 763  |
| chr24 | 41577792  | 41578417  | 626  |
| chrX  | 72256668  | 72258675  | 2008 |
| chr7  | 46834705  | 46836612  | 1908 |
| chr23 | 28004987  | 28006290  | 1304 |
| chr5  | 91521547  | 91522446  | 900  |
| chr15 | 36593479  | 36594289  | 811  |
| chr24 | 31169343  | 31170140  | 798  |
| chr18 | 51719039  | 51719700  | 662  |
| chr10 | 66914407  | 66914939  | 533  |
| chr13 | 55280882  | 55281405  | 524  |
| chr20 | 35925737  | 35926827  | 1091 |
| chr5  | 116935773 | 116936741 | 969  |
| chr17 | 2899981   | 2900953   | 973  |
| chr10 | 8359539   | 8360008   | 470  |
| chr7  | 42228080  | 42229436  | 1357 |
| chr18 | 62678361  | 62679487  | 1127 |
| chr15 | 24024892  | 24025964  | 1073 |
| chr22 | 30060012  | 30060778  | 767  |
| chr12 | 32920920  | 32921594  | 675  |
| chr12 | 36447631  | 36448272  | 642  |
| chr18 | 62744946  | 62745582  | 637  |
| chr26 | 25512196  | 25512789  | 594  |
| chr25 | 37704911  | 37705498  | 588  |
| chr25 | 40214715  | 40215282  | 568  |
| chr18 | 56795542  | 56796106  | 565  |
| chr7  | 44913036  | 44913539  | 504  |
| chr9  | 90658536  | 90659024  | 489  |
| chr7  | 81580087  | 81580571  | 485  |

|       |           |           |      |
|-------|-----------|-----------|------|
| chr18 | 62701901  | 62702380  | 480  |
| chr8  | 8436582   | 8437038   | 457  |
| chr6  | 74860892  | 74861310  | 419  |
| chr19 | 65217607  | 65218006  | 400  |
| chr12 | 46767191  | 46767631  | 441  |
| chr8  | 23941894  | 23942212  | 319  |
| chr14 | 22090420  | 22091327  | 908  |
| chr8  | 24748353  | 24748947  | 595  |
| chr24 | 49362414  | 49363645  | 1232 |
| chr18 | 56044462  | 56045679  | 1218 |
| chr4  | 71562063  | 71564241  | 2179 |
| chr17 | 61285300  | 61287207  | 1908 |
| chr9  | 106558138 | 106559303 | 1166 |
| chr2  | 134741740 | 134743015 | 1276 |
| chr23 | 23849777  | 23851151  | 1375 |
| chr5  | 30490748  | 30491841  | 1094 |
| chr13 | 41021831  | 41022375  | 545  |
| chr3  | 8631860   | 8632274   | 415  |
| chr18 | 64275095  | 64275481  | 387  |
| chr8  | 73408270  | 73408844  | 575  |
| chr19 | 57302494  | 57305909  | 3416 |
| chr19 | 46853309  | 46855343  | 2035 |
| chr25 | 2986016   | 2987994   | 1979 |
| chr18 | 62502081  | 62503575  | 1495 |
| chr11 | 2144083   | 2145570   | 1488 |
| chr15 | 29375610  | 29376833  | 1224 |
| chr7  | 14388113  | 14389238  | 1126 |
| chr18 | 62378849  | 62379957  | 1109 |
| chr2  | 126129330 | 126130418 | 1089 |
| chr16 | 48572257  | 48573201  | 945  |
| chr23 | 27223618  | 27224559  | 942  |
| chr23 | 46378444  | 46379297  | 854  |
| chr28 | 33811087  | 33811861  | 775  |
| chr25 | 3108722   | 3109375   | 654  |
| chr3  | 106543579 | 106545891 | 2313 |
| chr16 | 67442434  | 67443823  | 1390 |
| chr3  | 105681998 | 105683344 | 1347 |
| chr5  | 91480992  | 91481885  | 894  |
| chr14 | 34047281  | 34048099  | 819  |
| chr2  | 132780764 | 132781571 | 808  |
| chr8  | 24713716  | 24714445  | 730  |
| chr7  | 50342278  | 50342927  | 650  |
| chr24 | 47061813  | 47062175  | 363  |
| chr11 | 89685080  | 89686938  | 1859 |
| chr14 | 34046387  | 34047258  | 872  |
| chr5  | 123710490 | 123711289 | 800  |
| chr11 | 34073634  | 34074091  | 458  |
| chr23 | 52755329  | 52756848  | 1520 |
| chr19 | 23044733  | 23045899  | 1167 |
| chr18 | 48677216  | 48678212  | 997  |

|       |               |           |      |
|-------|---------------|-----------|------|
| chr23 | 8413022       | 8414001   | 980  |
| chr5  | 10734126      | 10734728  | 603  |
| chr7  | 57592283      | 57592805  | 523  |
| chr28 | 656277 656880 | 604       |      |
| chr11 | 84106681      | 84107215  | 535  |
| chr5  | 28763938      | 28764468  | 531  |
| chr1  | 68921443      | 68923301  | 1859 |
| chr14 | 239869 241477 | 1609      |      |
| chr4  | 33854447      | 33856026  | 1580 |
| chr18 | 54225693      | 54227207  | 1515 |
| chr23 | 31115980      | 31117217  | 1238 |
| chr26 | 21984696      | 21985738  | 1043 |
| chr29 | 49570527      | 49571333  | 807  |
| chr17 | 70304390      | 70305075  | 686  |
| chr16 | 47263890      | 47264555  | 666  |
| chr8  | 24695952      | 24696600  | 649  |
| chr18 | 54317213      | 54317826  | 614  |
| chr23 | 23877702      | 23879478  | 1777 |
| chr11 | 109761964     | 109763090 | 1127 |
| chr19 | 21722223      | 21723039  | 817  |
| chr22 | 54871928      | 54872696  | 769  |
| chr10 | 23772002      | 23772400  | 399  |
| chr21 | 67400019      | 67401221  | 1203 |
| chr26 | 22320933      | 22322119  | 1187 |
| chr1  | 152249074     | 152249760 | 687  |
| chr3  | 22575213      | 22575846  | 634  |
| chr1  | 146782003     | 146783477 | 1475 |
| chr17 | 72044619      | 72046248  | 1630 |
| chr3  | 82837529      | 82838490  | 962  |
| chr18 | 56862742      | 56863468  | 727  |
| chr15 | 63094735      | 63095173  | 439  |
| chr25 | 31391 31804   | 414       |      |
| chr10 | 6062359       | 6063459   | 1101 |
| chr10 | 88081133      | 88082149  | 1017 |
| chr19 | 39114855      | 39115716  | 862  |
| chr16 | 2223234       | 2223978   | 745  |
| chr18 | 11568650      | 11569372  | 723  |
| chr10 | 90930489      | 90931207  | 719  |
| chr5  | 70639623      | 70640586  | 964  |
| chr23 | 51054088      | 51055011  | 924  |
| chr10 | 88082235      | 88082797  | 563  |
| chr12 | 32209198      | 32210218  | 1021 |
| chr21 | 20038402      | 20038984  | 583  |
| chr18 | 56444357      | 56444895  | 539  |
| chr11 | 106069158     | 106069987 | 830  |
| chr8  | 89538203      | 89538846  | 644  |
| chr19 | 60795794      | 60796368  | 575  |
| chr24 | 20729489      | 20730036  | 548  |
| chr8  | 73324549      | 73325068  | 520  |
| chr19 | 38720240      | 38720726  | 487  |

|       |           |           |      |
|-------|-----------|-----------|------|
| chr16 | 2137720   | 2138184   | 465  |
| chr4  | 123028490 | 123028919 | 430  |
| chr19 | 23727020  | 23727837  | 818  |
| chr19 | 39971024  | 39972448  | 1425 |
| chr10 | 16426099  | 16426941  | 843  |
| chr11 | 44963565  | 44964411  | 847  |
| chr23 | 16522279  | 16523595  | 1317 |
| chr29 | 25555148  | 25556410  | 1263 |
| chr22 | 57367186  | 57369023  | 1838 |
| chr7  | 14898660  | 14899725  | 1066 |
| chr6  | 38121262  | 38122370  | 1109 |
| chr25 | 3183488   | 3184455   | 968  |
| chr8  | 24450925  | 24451431  | 507  |
| chr28 | 25728629  | 25729984  | 1356 |
| chr17 | 63441122  | 63442847  | 1726 |
| chr19 | 16699162  | 16700223  | 1062 |
| chr28 | 43861674  | 43862724  | 1051 |
| chr10 | 20454446  | 20455191  | 746  |
| chr2  | 130981764 | 130982572 | 809  |
| chr26 | 21795448  | 21796304  | 857  |
| chr15 | 36664599  | 36665083  | 485  |
| chr18 | 55017229  | 55017705  | 477  |
| chr3  | 8821754   | 8822314   | 561  |
| chr5  | 30318931  | 30319658  | 728  |
| chr1  | 133450906 | 133451593 | 688  |
| chr8  | 73754940  | 73755608  | 669  |
| chr3  | 106530899 | 106531658 | 760  |
| chr25 | 44024592  | 44024971  | 380  |
| chr23 | 31305833  | 31306662  | 830  |
| chr8  | 73744194  | 73744910  | 717  |
| chr20 | 43240501  | 43240900  | 400  |
| chr8  | 73930733  | 73931166  | 434  |
| chr29 | 49128383  | 49128802  | 420  |
| chr12 | 68238391  | 68241153  | 2763 |
| chr6  | 120804082 | 120806606 | 2525 |
| chr11 | 14141884  | 14144352  | 2469 |
| chr8  | 62504812  | 62507213  | 2402 |
| chr19 | 45203517  | 45205484  | 1968 |
| chr27 | 14741005  | 14742886  | 1882 |
| chr17 | 63467901  | 63469652  | 1752 |
| chr4  | 121726936 | 121728678 | 1743 |
| chr7  | 18792996  | 18794694  | 1699 |
| chr23 | 46089771  | 46091464  | 1694 |
| chr19 | 8510339   | 8512023   | 1685 |
| chr20 | 6614396   | 6616058   | 1663 |
| chr15 | 73772259  | 73773905  | 1647 |
| chr7  | 97194266  | 97195905  | 1640 |
| chr10 | 15074115  | 15075754  | 1640 |
| chr20 | 27298896  | 27300463  | 1568 |
| chr23 | 48770402  | 48771967  | 1566 |

|       |           |           |      |
|-------|-----------|-----------|------|
| chr19 | 39850119  | 39851676  | 1558 |
| chr18 | 31841297  | 31842800  | 1504 |
| chr6  | 16256339  | 16257838  | 1500 |
| chr16 | 44084946  | 44086414  | 1469 |
| chr26 | 21820333  | 21821770  | 1438 |
| chr7  | 11035798  | 11037228  | 1431 |
| chr20 | 44897433  | 44898847  | 1415 |
| chr18 | 54222867  | 54224255  | 1389 |
| chr11 | 28337952  | 28339340  | 1389 |
| chr5  | 28938657  | 28940028  | 1372 |
| chr6  | 107361344 | 107362691 | 1348 |
| chr29 | 51263125  | 51264462  | 1338 |
| chr14 | 1925023   | 1926359   | 1337 |
| chr3  | 117305602 | 117306937 | 1336 |
| chr19 | 41481700  | 41482998  | 1299 |
| chr25 | 29597642  | 29598907  | 1266 |
| chr10 | 103067382 | 103068642 | 1261 |
| chr18 | 56973792  | 56975050  | 1259 |
| chr25 | 28175875  | 28177117  | 1243 |
| chr15 | 43332641  | 43333860  | 1220 |
| chr13 | 76273972  | 76275150  | 1179 |
| chr4  | 29783160  | 29784318  | 1159 |
| chr18 | 13571780  | 13572937  | 1158 |
| chr9  | 106560781 | 106561936 | 1156 |
| chr5  | 70037358  | 70038510  | 1153 |
| chr13 | 61222338  | 61223484  | 1147 |
| chr5  | 28771631  | 28772766  | 1136 |
| chr21 | 6569949   | 6571068   | 1120 |
| chr8  | 5789484   | 5790602   | 1119 |
| chr3  | 20568656  | 20569765  | 1110 |
| chr14 | 72121955  | 72123063  | 1109 |
| chr15 | 39620025  | 39621120  | 1096 |
| chr15 | 36594926  | 36596017  | 1092 |
| chr4  | 11125098  | 11126187  | 1090 |
| chr2  | 95916711  | 95917799  | 1089 |
| chr19 | 58881993  | 58883077  | 1085 |
| chr18 | 64320096  | 64321179  | 1084 |
| chr10 | 5343554   | 5344630   | 1077 |
| chr10 | 16427061  | 16428135  | 1075 |
| chr11 | 49407125  | 49408198  | 1074 |
| chr6  | 14214833  | 14215900  | 1068 |
| chr15 | 74658580  | 74659642  | 1063 |
| chr13 | 73525365  | 73526423  | 1059 |
| chr14 | 48320409  | 48321463  | 1055 |
| chr1  | 132110447 | 132111501 | 1055 |
| chr4  | 89782006  | 89783058  | 1053 |
| chr19 | 29016624  | 29017674  | 1051 |
| chr19 | 44877238  | 44878287  | 1050 |
| chr2  | 21512097  | 21513145  | 1049 |
| chr9  | 42059351  | 42060396  | 1046 |

|       |           |           |      |
|-------|-----------|-----------|------|
| chr19 | 57054560  | 57055604  | 1045 |
| chr9  | 51626128  | 51627166  | 1039 |
| chr18 | 52690107  | 52691138  | 1032 |
| chr19 | 12407919  | 12408944  | 1026 |
| chr25 | 3008509   | 3009516   | 1008 |
| chr7  | 18437692  | 18438690  | 999  |
| chr17 | 64378913  | 64379908  | 996  |
| chr8  | 72304810  | 72305799  | 990  |
| chr10 | 25841407  | 25842396  | 990  |
| chr8  | 82099480  | 82100467  | 988  |
| chr4  | 79039823  | 79040808  | 986  |
| chr7  | 42765962  | 42766923  | 962  |
| chr13 | 35924482  | 35925432  | 951  |
| chr2  | 134755554 | 134756485 | 932  |
| chr11 | 31100008  | 31100935  | 928  |
| chr6  | 16234084  | 16235009  | 926  |
| chr18 | 45981195  | 45982111  | 917  |
| chr8  | 45755106  | 45756020  | 915  |
| chr20 | 44899050  | 44899949  | 900  |
| chr5  | 81601931  | 81602828  | 898  |
| chr17 | 72755131  | 72756026  | 896  |
| chr15 | 44752059  | 44752953  | 895  |
| chr7  | 17943698  | 17944590  | 893  |
| chr16 | 40882997  | 40883887  | 891  |
| chr29 | 30031796  | 30032677  | 882  |
| chr19 | 63923865  | 63924746  | 882  |
| chr26 | 22319088  | 22319964  | 877  |
| chr12 | 36544365  | 36545229  | 865  |
| chr21 | 6564762   | 6565623   | 862  |
| chr19 | 40519611  | 40520466  | 856  |
| chr17 | 64194241  | 64195094  | 854  |
| chr19 | 41255435  | 41256287  | 853  |
| chr26 | 50066226  | 50067073  | 848  |
| chr26 | 21838674  | 21839521  | 848  |
| chr20 | 74776426  | 74777270  | 845  |
| chrX  | 13626469  | 13627310  | 842  |
| chr16 | 48010704  | 48011540  | 837  |
| chr5  | 120065083 | 120065916 | 834  |
| chr18 | 51715755  | 51716588  | 834  |
| chr18 | 18137222  | 18138055  | 834  |
| chr15 | 76733093  | 76733919  | 827  |
| chr21 | 67398330  | 67399146  | 817  |
| chr16 | 44310444  | 44311259  | 816  |
| chr24 | 5446260   | 5447074   | 815  |
| chr8  | 89552674  | 89553484  | 811  |
| chr25 | 39212368  | 39213178  | 811  |
| chr26 | 37540372  | 37541177  | 806  |
| chr27 | 14401030  | 14401834  | 805  |
| chr24 | 35305304  | 35306108  | 805  |
| chr11 | 75095643  | 75096446  | 804  |

|       |               |           |     |
|-------|---------------|-----------|-----|
| chr16 | 26258411      | 26259198  | 788 |
| chr8  | 64534026      | 64534795  | 770 |
| chr27 | 27687642      | 27688409  | 768 |
| chr10 | 88368211      | 88368964  | 754 |
| chr21 | 34763170      | 34763916  | 747 |
| chr19 | 38234544      | 38235287  | 744 |
| chr16 | 77697606      | 77698346  | 741 |
| chr7  | 11373151      | 11373881  | 731 |
| chr12 | 52443838      | 52444567  | 730 |
| chr18 | 11550408      | 11551133  | 726 |
| chr8  | 10961970      | 10962693  | 724 |
| chr12 | 54237093      | 54237812  | 720 |
| chr17 | 71962644      | 71963359  | 716 |
| chr13 | 75524557      | 75525265  | 709 |
| chr13 | 60451034      | 60451742  | 709 |
| chr14 | 22102306      | 22103013  | 708 |
| chr14 | 9199262       | 9199966   | 705 |
| chr21 | 914798 915493 | 696       |     |
| chr22 | 50751440      | 50752131  | 692 |
| chr13 | 55115682      | 55116373  | 692 |
| chr25 | 40240566      | 40241252  | 687 |
| chr2  | 67372048      | 67372733  | 686 |
| chr13 | 52671606      | 52672288  | 683 |
| chr1  | 64865081      | 64865752  | 672 |
| chr11 | 14501348      | 14502016  | 669 |
| chr5  | 35566478      | 35567144  | 667 |
| chr4  | 123137405     | 123138071 | 667 |
| chr20 | 70570663      | 70571329  | 667 |
| chr4  | 106677995     | 106678649 | 655 |
| chr4  | 71564330      | 71564983  | 654 |
| chr9  | 52092913      | 52093553  | 641 |
| chr8  | 74020259      | 74020897  | 639 |
| chr1  | 113587556     | 113588193 | 638 |
| chr23 | 9460119       | 9460754   | 636 |
| chr4  | 121469741     | 121470370 | 630 |
| chr22 | 56588078      | 56588705  | 628 |
| chr19 | 64758783      | 64759404  | 622 |
| chr22 | 46578293      | 46578911  | 619 |
| chr26 | 21804020      | 21804636  | 617 |
| chr13 | 55037717      | 55038331  | 615 |
| chr21 | 47534902      | 47535514  | 613 |
| chr2  | 117719567     | 117720175 | 609 |
| chr10 | 29542067      | 29542674  | 608 |
| chr23 | 15970113      | 15970701  | 589 |
| chr20 | 4904377       | 4904958   | 582 |
| chr18 | 57300868      | 57301448  | 581 |
| chr17 | 73177293      | 73177869  | 577 |
| chr4  | 121461099     | 121461670 | 572 |
| chr25 | 2800342       | 2800911   | 570 |
| chr7  | 15656415      | 15656980  | 566 |



|       |               |           |     |
|-------|---------------|-----------|-----|
| chr9  | 90537628      | 90538192  | 565 |
| chr17 | 75290115      | 75290675  | 561 |
| chr23 | 8427197       | 8427755   | 559 |
| chr25 | 4656240       | 4656794   | 555 |
| chr17 | 59295158      | 59295711  | 554 |
| chr11 | 40331105      | 40331658  | 554 |
| chr11 | 104685978     | 104686527 | 550 |
| chr18 | 63770406      | 63770943  | 538 |
| chr2  | 48913436      | 48913969  | 534 |
| chr7  | 19669930      | 19670461  | 532 |
| chr11 | 71594017      | 71594541  | 525 |
| chr20 | 74773870      | 74774392  | 523 |
| chr2  | 111828673     | 111829192 | 520 |
| chr12 | 68237336      | 68237850  | 515 |
| chr11 | 76363245      | 76363755  | 511 |
| chr11 | 30922950      | 30923456  | 507 |
| chr17 | 63440263      | 63440766  | 504 |
| chr19 | 29001684      | 29002184  | 501 |
| chr13 | 75844099      | 75844591  | 493 |
| chr26 | 20933199      | 20933690  | 492 |
| chr5  | 55581190      | 55581674  | 485 |
| chr15 | 21508287      | 21508771  | 485 |
| chr27 | 8831450       | 8831933   | 484 |
| chr11 | 106539387     | 106539868 | 482 |
| chr9  | 26593551      | 26594024  | 474 |
| chr4  | 21345184      | 21345657  | 474 |
| chr4  | 6108669       | 6109141   | 473 |
| chr20 | 4954000       | 4954472   | 473 |
| chr5  | 76160507      | 76160976  | 470 |
| chr21 | 48711223      | 48711692  | 470 |
| chr18 | 43460936      | 43461403  | 468 |
| chr24 | 31171456      | 31171917  | 462 |
| chr18 | 45819810      | 45820266  | 457 |
| chr13 | 72602673      | 72603129  | 457 |
| chr22 | 59267875      | 59268330  | 456 |
| chr16 | 65519337      | 65519791  | 455 |
| chr2  | 124287304     | 124287757 | 454 |
| chr7  | 46231944      | 46232396  | 453 |
| chr15 | 73741473      | 73741924  | 452 |
| chr3  | 118881489     | 118881938 | 450 |
| chr19 | 45278832      | 45279281  | 450 |
| chr20 | 5048275       | 5048723   | 449 |
| chr2  | 134682122     | 134682569 | 448 |
| chr24 | 836568 837014 |           | 447 |
| chr2  | 139181077     | 139181523 | 447 |
| chr26 | 20150716      | 20151160  | 445 |
| chr2  | 136624924     | 136625368 | 445 |
| chr23 | 10600043      | 10600486  | 444 |
| chr17 | 2902329       | 2902772   | 444 |
| chr8  | 23062890      | 23063332  | 443 |

|       |               |           |      |
|-------|---------------|-----------|------|
| chr26 | 51629179      | 51629621  | 443  |
| chr10 | 74682922      | 74683364  | 443  |
| chr22 | 55479441      | 55479880  | 440  |
| chr9  | 90395441      | 90395879  | 439  |
| chr29 | 48791166      | 48791602  | 437  |
| chr5  | 40128750      | 40129185  | 436  |
| chr12 | 11242942      | 11243373  | 432  |
| chr26 | 22260292      | 22260717  | 426  |
| chr4  | 124326482     | 124326905 | 424  |
| chr28 | 5023752       | 5024175   | 424  |
| chr20 | 6783882       | 6784305   | 424  |
| chr4  | 50700288      | 50700710  | 423  |
| chr11 | 105662724     | 105663141 | 418  |
| chr2  | 111333127     | 111333543 | 417  |
| chr13 | 59659491      | 59659907  | 417  |
| chr11 | 66704530      | 66704946  | 417  |
| chr3  | 22898488      | 22898901  | 414  |
| chr25 | 36488840      | 36489252  | 413  |
| chr18 | 54176226      | 54176636  | 411  |
| chr16 | 44121194      | 44121601  | 408  |
| chr11 | 105667225     | 105667631 | 407  |
| chr13 | 179783 180186 | 404       |      |
| chr1  | 67726360      | 67726763  | 404  |
| chr1  | 42748141      | 42748543  | 403  |
| chr5  | 94237393      | 94237790  | 398  |
| chr3  | 125770141     | 125770537 | 397  |
| chr15 | 31332347      | 31332740  | 394  |
| chr17 | 63442945      | 63443335  | 391  |
| chr11 | 90355788      | 90356167  | 380  |
| chr29 | 49321471      | 49321775  | 305  |
| chr1  | 132094604     | 132096123 | 1520 |
| chr25 | 21762122      | 21763393  | 1272 |
| chr26 | 21980046      | 21980722  | 677  |
| chr6  | 107498176     | 107499154 | 979  |
| chr20 | 8551125       | 8552069   | 945  |
| chr25 | 38167634      | 38168272  | 639  |
| chr12 | 14820058      | 14820905  | 848  |
| chr2  | 108809416     | 108810516 | 1101 |
| chr13 | 60793698      | 60794688  | 991  |
| chr17 | 73810173      | 73811541  | 1369 |
| chr9  | 51617332      | 51619033  | 1702 |
| chr3  | 22590916      | 22591727  | 812  |
| chr19 | 39090212      | 39091884  | 1673 |
| chr4  | 47035042      | 47035958  | 917  |
| chr19 | 8470844       | 8472107   | 1264 |
| chr7  | 18713850      | 18715515  | 1666 |
| chr11 | 28544456      | 28545744  | 1289 |
| chr16 | 62077150      | 62078013  | 864  |
| chr29 | 38309674      | 38310144  | 471  |
| chr24 | 64961761      | 64962205  | 445  |

|       |           |           |      |
|-------|-----------|-----------|------|
| chr4  | 94705151  | 94706287  | 1137 |
| chr18 | 50833811  | 50834238  | 428  |
| chr24 | 64985698  | 64986204  | 507  |
| chr5  | 117693972 | 117694424 | 453  |
| chr3  | 105765182 | 105765752 | 571  |
| chr18 | 49482315  | 49483804  | 1490 |
| chr13 | 80585978  | 80587303  | 1326 |
| chr19 | 39009915  | 39010345  | 431  |
| chr1  | 149233401 | 149234047 | 647  |
| chr9  | 90358501  | 90359395  | 895  |
| chr26 | 17674594  | 17675191  | 598  |
| chr1  | 147178454 | 147179016 | 563  |
| chr3  | 126968129 | 126968993 | 865  |
| chr16 | 29427805  | 29428406  | 602  |
| chr3  | 106542971 | 106543404 | 434  |
| chr8  | 24170286  | 24170693  | 408  |
| chr23 | 31689953  | 31690363  | 411  |
| chr13 | 52533748  | 52535676  | 1929 |
| chr6  | 16266020  | 16267658  | 1639 |
| chr19 | 37860355  | 37861789  | 1435 |
| chr1  | 74631959  | 74633229  | 1271 |
| chr22 | 55756892  | 55757902  | 1011 |
| chr14 | 76891122  | 76892108  | 987  |
| chr7  | 70504691  | 70505485  | 795  |
| chr26 | 50068191  | 50068919  | 729  |
| chr25 | 43241014  | 43241615  | 602  |
| chr11 | 7547358   | 7547877   | 520  |
| chr16 | 44303493  | 44304010  | 518  |
| chr13 | 73995392  | 73995818  | 427  |
| chr28 | 43744778  | 43746642  | 1865 |
| chr24 | 58903267  | 58904673  | 1407 |
| chr2  | 111224163 | 111225319 | 1157 |
| chr17 | 63434957  | 63436101  | 1145 |
| chr15 | 31333535  | 31334675  | 1141 |
| chr2  | 125931862 | 125932795 | 934  |
| chr15 | 58026372  | 58027275  | 904  |
| chr3  | 94151351  | 94152159  | 809  |
| chr25 | 38264233  | 38264688  | 456  |
| chr19 | 46092572  | 46093010  | 439  |
| chr5  | 31260976  | 31264340  | 3365 |
| chr21 | 20609180  | 20610712  | 1533 |
| chr29 | 48736877  | 48738272  | 1396 |
| chr6  | 67959722  | 67960930  | 1209 |
| chr18 | 9803247   | 9804236   | 990  |
| chr6  | 16257949  | 16258846  | 898  |
| chr25 | 3040403   | 3041298   | 896  |
| chr5  | 67821098  | 67821852  | 755  |
| chr5  | 91522902  | 91523569  | 668  |
| chr8  | 74379720  | 74380243  | 524  |
| chr21 | 6544057   | 6544484   | 428  |

|       |               |           |      |
|-------|---------------|-----------|------|
| chr3  | 125196939     | 125198786 | 1848 |
| chr15 | 34285008      | 34286746  | 1739 |
| chr17 | 18320743      | 18322314  | 1572 |
| chr2  | 65515288      | 65516689  | 1402 |
| chr26 | 14558196      | 14559260  | 1065 |
| chr7  | 3710329       | 3711362   | 1034 |
| chr20 | 6612125       | 6613052   | 928  |
| chr2  | 21541448      | 21542189  | 742  |
| chr6  | 118504391     | 118504941 | 551  |
| chr4  | 89777646      | 89778178  | 533  |
| chr1  | 74628374      | 74628811  | 438  |
| chr17 | 64181319      | 64183644  | 2326 |
| chr9  | 35566431      | 35567980  | 1550 |
| chr8  | 46611843      | 46613332  | 1490 |
| chr25 | 670322 671800 | 1479      |      |
| chr10 | 72207091      | 72208183  | 1093 |
| chr1  | 110660674     | 110661725 | 1052 |
| chr25 | 1974562       | 1975485   | 924  |
| chr16 | 48277692      | 48278266  | 575  |
| chr29 | 48810019      | 48811359  | 1341 |
| chr18 | 49547522      | 49548630  | 1109 |
| chr7  | 19984206      | 19985279  | 1074 |
| chr6  | 113366580     | 113367289 | 710  |
| chr3  | 22594330      | 22594992  | 663  |
| chr17 | 66513316      | 66513773  | 458  |
| chr19 | 38530704      | 38531335  | 632  |
| chr6  | 119517878     | 119518372 | 495  |
| chr11 | 11620837      | 11621264  | 428  |
| chr19 | 39093364      | 39094349  | 986  |
| chr21 | 48711707      | 48712571  | 865  |
| chr21 | 6551670       | 6552494   | 825  |
| chr27 | 38667039      | 38667822  | 784  |
| chr21 | 67960718      | 67962320  | 1603 |
| chr1  | 154410332     | 154411043 | 712  |
| chr26 | 22360952      | 22361469  | 518  |
| chr19 | 21744396      | 21745237  | 842  |
| chr10 | 28950952      | 28951728  | 777  |
| chr1  | 87340983      | 87341414  | 432  |
| chr8  | 102279488     | 102280653 | 1166 |
| chr25 | 43239840      | 43240952  | 1113 |
| chr10 | 32481057      | 32482125  | 1069 |
| chr29 | 29682125      | 29682798  | 674  |
| chr20 | 43472874      | 43473367  | 494  |
| chr5  | 120549008     | 120550469 | 1462 |
| chr19 | 15131942      | 15132778  | 837  |
| chr17 | 74492431      | 74493018  | 588  |
| chr5  | 30544112      | 30544702  | 591  |
| chr18 | 62453368      | 62453958  | 591  |
| chr6  | 58826844      | 58827909  | 1066 |
| chr8  | 24450058      | 24450606  | 549  |

|       |           |           |      |
|-------|-----------|-----------|------|
| chr25 | 44044673  | 44045146  | 474  |
| chr7  | 71378618  | 71379654  | 1037 |
| chr8  | 80994643  | 80995667  | 1025 |
| chr11 | 3350798   | 3351684   | 887  |
| chr7  | 50285721  | 50286514  | 794  |
| chr3  | 55853279  | 55854033  | 755  |
| chr12 | 23537177  | 23537851  | 675  |
| chr5  | 30499929  | 30500506  | 578  |
| chr13 | 48304665  | 48305221  | 557  |
| chr3  | 123245809 | 123246348 | 540  |
| chr4  | 124172960 | 124173444 | 485  |
| chr26 | 25112910  | 25113388  | 479  |
| chr3  | 22463201  | 22463622  | 422  |
| chr23 | 27730525  | 27730937  | 413  |
| chr4  | 121736181 | 121736585 | 405  |
| chr16 | 2228297   | 2228695   | 399  |
| chr20 | 73278194  | 73281406  | 3213 |
| chr5  | 60711319  | 60713657  | 2339 |
| chr13 | 15168730  | 15170732  | 2003 |
| chr19 | 23162579  | 23164540  | 1962 |
| chr2  | 111389705 | 111391599 | 1895 |
| chr8  | 11423405  | 11425238  | 1834 |
| chr21 | 9479796   | 9481594   | 1799 |
| chr4  | 33424627  | 33426380  | 1754 |
| chr14 | 1578664   | 1580409   | 1746 |
| chr4  | 69316227  | 69317958  | 1732 |
| chr27 | 17515340  | 17517069  | 1730 |
| chr19 | 43302579  | 43304229  | 1651 |
| chr1  | 114234156 | 114235779 | 1624 |
| chr29 | 37258971  | 37260585  | 1615 |
| chr19 | 37881637  | 37883236  | 1600 |
| chr6  | 109418442 | 109420034 | 1593 |
| chr25 | 30459699  | 30461237  | 1539 |
| chr17 | 69744321  | 69745850  | 1530 |
| chr16 | 77480768  | 77482294  | 1527 |
| chr29 | 7663337   | 7664858   | 1522 |
| chr1  | 144521663 | 144523144 | 1482 |
| chr29 | 34642404  | 34643866  | 1463 |
| chr13 | 49391230  | 49392688  | 1459 |
| chr6  | 16242835  | 16244271  | 1437 |
| chr4  | 14632525  | 14633948  | 1424 |
| chr6  | 16254871  | 16256286  | 1416 |
| chr19 | 39091913  | 39093324  | 1412 |
| chr6  | 40948196  | 40949604  | 1409 |
| chr4  | 72749655  | 72751047  | 1393 |
| chr5  | 88031711  | 88033095  | 1385 |
| chr24 | 4161429   | 4162798   | 1370 |
| chr5  | 61800888  | 61802256  | 1369 |
| chr20 | 8546477   | 8547823   | 1347 |
| chr15 | 20037114  | 20038458  | 1345 |

|       |           |           |      |
|-------|-----------|-----------|------|
| chr25 | 43803408  | 43804744  | 1337 |
| chr25 | 40201110  | 40202440  | 1331 |
| chr20 | 41247931  | 41249248  | 1318 |
| chr2  | 125918655 | 125919969 | 1315 |
| chr5  | 114245196 | 114246502 | 1307 |
| chr23 | 46409701  | 46411006  | 1306 |
| chr8  | 9353412   | 9354715   | 1304 |
| chr28 | 32817184  | 32818471  | 1288 |
| chr12 | 74471460  | 74472746  | 1287 |
| chr16 | 77685910  | 77687192  | 1283 |
| chr15 | 74536672  | 74537949  | 1278 |
| chr19 | 58190897  | 58192167  | 1271 |
| chr18 | 12409104  | 12410355  | 1252 |
| chr7  | 81582918  | 81584164  | 1247 |
| chrX  | 11016433  | 11017668  | 1236 |
| chr5  | 35295012  | 35296244  | 1233 |
| chr7  | 94360264  | 94361493  | 1230 |
| chr8  | 77310760  | 77311969  | 1210 |
| chr7  | 42657737  | 42658945  | 1209 |
| chr5  | 29256617  | 29257811  | 1195 |
| chr17 | 70098499  | 70099690  | 1192 |
| chr29 | 41468194  | 41469381  | 1188 |
| chr19 | 26977304  | 26978466  | 1163 |
| chr2  | 128595550 | 128596700 | 1151 |
| chr12 | 32205026  | 32206174  | 1149 |
| chr26 | 22200029  | 22201170  | 1142 |
| chr4  | 90996208  | 90997339  | 1132 |
| chr1  | 82162609  | 82163727  | 1119 |
| chr2  | 121895284 | 121896395 | 1112 |
| chr29 | 43173096  | 43174199  | 1104 |
| chr2  | 131053572 | 131054671 | 1100 |
| chr8  | 103777978 | 103779076 | 1099 |
| chr3  | 26133436  | 26134534  | 1099 |
| chr26 | 21978002  | 21979095  | 1094 |
| chr23 | 11084494  | 11085557  | 1064 |
| chr19 | 59068442  | 59069486  | 1045 |
| chr19 | 52421079  | 52422119  | 1041 |
| chr13 | 60163208  | 60164246  | 1039 |
| chr9  | 53312955  | 53313982  | 1028 |
| chr16 | 2023430   | 2024453   | 1024 |
| chr9  | 14573451  | 14574471  | 1021 |
| chr8  | 73820364  | 73821384  | 1021 |
| chr1  | 87377621  | 87378640  | 1020 |
| chr5  | 33521623  | 33522641  | 1019 |
| chr19 | 64685597  | 64686613  | 1017 |
| chr19 | 43191738  | 43192752  | 1015 |
| chr20 | 22298506  | 22299519  | 1014 |
| chr7  | 3939073   | 3940085   | 1013 |
| chr29 | 42925046  | 42926047  | 1002 |
| chr29 | 11353428  | 11354416  | 989  |

|       |           |           |     |
|-------|-----------|-----------|-----|
| chr7  | 18826475  | 18827448  | 974 |
| chr19 | 44076738  | 44077710  | 973 |
| chr6  | 113363700 | 113364654 | 955 |
| chr6  | 107360220 | 107361173 | 954 |
| chr8  | 45666181  | 45667132  | 952 |
| chr21 | 9442788   | 9443726   | 939 |
| chr18 | 56666731  | 56667666  | 936 |
| chr12 | 32084162  | 32085097  | 936 |
| chr7  | 4926904   | 4927835   | 932 |
| chr25 | 35602724  | 35603655  | 932 |
| chr14 | 67996953  | 67997871  | 919 |
| chr12 | 37024022  | 37024940  | 919 |
| chr3  | 15183331  | 15184247  | 917 |
| chr23 | 27597344  | 27598254  | 911 |
| chr27 | 28580781  | 28581685  | 905 |
| chr9  | 14572427  | 14573321  | 895 |
| chr17 | 18513795  | 18514686  | 892 |
| chr13 | 42882001  | 42882892  | 892 |
| chr19 | 28998271  | 28999160  | 890 |
| chr3  | 22699454  | 22700336  | 883 |
| chr3  | 10563965  | 10564847  | 883 |
| chr8  | 63978373  | 63979253  | 881 |
| chr23 | 46367395  | 46368265  | 871 |
| chr17 | 60188679  | 60189535  | 857 |
| chr18 | 11540325  | 11541176  | 852 |
| chr23 | 27772204  | 27773053  | 850 |
| chr19 | 33115715  | 33116548  | 834 |
| chr26 | 48297418  | 48298248  | 831 |
| chr19 | 39113567  | 39114396  | 830 |
| chr22 | 49564051  | 49564879  | 829 |
| chr13 | 65981493  | 65982309  | 817 |
| chr3  | 127431022 | 127431835 | 814 |
| chr26 | 38246398  | 38247211  | 814 |
| chr15 | 13522587  | 13523399  | 813 |
| chr4  | 29053546  | 29054354  | 809 |
| chr19 | 23168404  | 23169210  | 807 |
| chr7  | 13545557  | 13546354  | 798 |
| chr3  | 30932851  | 30933647  | 797 |
| chr4  | 47036449  | 47037244  | 796 |
| chr24 | 24720367  | 24721161  | 795 |
| chr3  | 23086167  | 23086959  | 793 |
| chr2  | 132428926 | 132429717 | 792 |
| chr17 | 5057225   | 5058013   | 789 |
| chr6  | 40946265  | 40947052  | 788 |
| chr19 | 42258979  | 42259766  | 788 |
| chr7  | 30482944  | 30483730  | 787 |
| chr11 | 74468402  | 74469180  | 779 |
| chr13 | 55384658  | 55385419  | 762 |
| chr15 | 81399495  | 81400251  | 757 |
| chr10 | 75554136  | 75554892  | 757 |

|       |           |           |     |
|-------|-----------|-----------|-----|
| chr29 | 46351651  | 46352403  | 753 |
| chr11 | 109642405 | 109643149 | 745 |
| chr22 | 50598688  | 50599428  | 741 |
| chr22 | 59415632  | 59416370  | 739 |
| chr6  | 107499990 | 107500726 | 737 |
| chr18 | 55582721  | 55583453  | 733 |
| chr24 | 40613942  | 40614672  | 731 |
| chr22 | 18287123  | 18287851  | 729 |
| chr27 | 4193913   | 4194636   | 724 |
| chr4  | 117754023 | 117754741 | 719 |
| chr8  | 23048893  | 23049607  | 715 |
| chr2  | 138608171 | 138608884 | 714 |
| chr22 | 17580494  | 17581204  | 711 |
| chrX  | 55577548  | 55578255  | 708 |
| chr4  | 116943780 | 116944480 | 701 |
| chr16 | 46747010  | 46747692  | 683 |
| chr5  | 101585733 | 101586413 | 681 |
| chr12 | 84688558  | 84689235  | 678 |
| chr10 | 35812961  | 35813638  | 678 |
| chr22 | 51291733  | 51292408  | 676 |
| chr10 | 35113203  | 35113878  | 676 |
| chr10 | 88072970  | 88073642  | 673 |
| chr2  | 110555503 | 110556172 | 670 |
| chr18 | 40337435  | 40338102  | 668 |
| chr13 | 68449212  | 68449877  | 666 |
| chr7  | 81896890  | 81897552  | 663 |
| chr28 | 33879902  | 33880564  | 663 |
| chr5  | 110918135 | 110918795 | 661 |
| chr17 | 70026367  | 70027022  | 656 |
| chr29 | 48740830  | 48741472  | 643 |
| chr9  | 99935986  | 99936626  | 641 |
| chr29 | 48793217  | 48793857  | 641 |
| chr13 | 11417675  | 11418313  | 639 |
| chr21 | 66478574  | 66479210  | 637 |
| chr22 | 50789294  | 50789928  | 635 |
| chr17 | 60882057  | 60882688  | 632 |
| chr21 | 20232529  | 20233159  | 631 |
| chr11 | 48563488  | 48564111  | 624 |
| chr29 | 48788622  | 48789244  | 623 |
| chr1  | 68855454  | 68856076  | 623 |
| chrX  | 72246020  | 72246639  | 620 |
| chr21 | 30313035  | 30313653  | 619 |
| chr11 | 91255277  | 91255895  | 619 |
| chr12 | 54236388  | 54237005  | 618 |
| chr25 | 38033418  | 38034034  | 617 |
| chr13 | 59930627  | 59931237  | 611 |
| chr2  | 126365442 | 126366050 | 609 |
| chr19 | 12119993  | 12120600  | 608 |
| chr23 | 17487838  | 17488441  | 604 |
| chr19 | 54441437  | 54442038  | 602 |



|       |           |           |     |
|-------|-----------|-----------|-----|
| chr6  | 69504251  | 69504851  | 601 |
| chr13 | 31725073  | 31725670  | 598 |
| chr1  | 84556078  | 84556668  | 591 |
| chr29 | 48792549  | 48793133  | 585 |
| chr8  | 1632541   | 1633122   | 582 |
| chr10 | 13367570  | 13368150  | 581 |
| chr21 | 6482136   | 6482715   | 580 |
| chr28 | 11378176  | 11378748  | 573 |
| chr5  | 114979111 | 114979679 | 569 |
| chr7  | 43047708  | 43048272  | 565 |
| chr18 | 54200129  | 54200690  | 562 |
| chr10 | 81725385  | 81725945  | 561 |
| chr11 | 101429590 | 101430148 | 559 |
| chr3  | 114220758 | 114221315 | 558 |
| chr6  | 94813043  | 94813593  | 551 |
| chr23 | 27095655  | 27096205  | 551 |
| chr17 | 64363625  | 64364175  | 551 |
| chr18 | 64317273  | 64317822  | 550 |
| chr29 | 50606975  | 50607513  | 539 |
| chr4  | 82137236  | 82137771  | 536 |
| chr11 | 100741608 | 100742142 | 535 |
| chr18 | 51032629  | 51033162  | 534 |
| chr5  | 88039608  | 88040140  | 533 |
| chr16 | 20640124  | 20640653  | 530 |
| chr7  | 12987507  | 12988029  | 523 |
| chr27 | 40803055  | 40803574  | 520 |
| chr12 | 70975719  | 70976238  | 520 |
| chr28 | 7559124   | 7559634   | 511 |
| chr11 | 14147294  | 14147803  | 510 |
| chr2  | 131764823 | 131765331 | 509 |
| chr17 | 18378720  | 18379226  | 507 |
| chr21 | 26456235  | 26456740  | 506 |
| chr2  | 15369097  | 15369599  | 503 |
| chr10 | 29856194  | 29856692  | 499 |
| chr10 | 5024690   | 5025188   | 499 |
| chr7  | 13098622  | 13099117  | 496 |
| chr4  | 116859362 | 116859857 | 496 |
| chr2  | 140744882 | 140745377 | 496 |
| chr3  | 22465650  | 22466143  | 494 |
| chr16 | 48788066  | 48788557  | 492 |
| chr29 | 47916402  | 47916886  | 485 |
| chr19 | 29817560  | 29818043  | 484 |
| chr3  | 22671458  | 22671939  | 482 |
| chr19 | 25414120  | 25414598  | 479 |
| chr5  | 32846718  | 32847195  | 478 |
| chr13 | 40587503  | 40587977  | 475 |
| chr2  | 132441838 | 132442307 | 470 |
| chr19 | 65144295  | 65144764  | 470 |
| chr3  | 106514425 | 106514893 | 469 |
| chr19 | 18438092  | 18438556  | 465 |

|       |               |           |      |
|-------|---------------|-----------|------|
| chr16 | 56104498      | 56104959  | 462  |
| chr3  | 15351501      | 15351960  | 460  |
| chr18 | 62510409      | 62510868  | 460  |
| chr21 | 33924093      | 33924548  | 456  |
| chr16 | 24764836      | 24765291  | 456  |
| chr14 | 608572 609025 | 454       |      |
| chr13 | 79688642      | 79689095  | 454  |
| chr18 | 31842948      | 31843399  | 452  |
| chr5  | 120505016     | 120505465 | 450  |
| chr26 | 22186621      | 22187067  | 447  |
| chr10 | 83848996      | 83849441  | 446  |
| chr17 | 63446683      | 63447120  | 438  |
| chr13 | 52673620      | 52674054  | 435  |
| chr15 | 51737695      | 51738125  | 431  |
| chr26 | 43251370      | 43251799  | 430  |
| chr2  | 134717515     | 134717942 | 428  |
| chr1  | 1627465       | 1627892   | 428  |
| chr3  | 106515922     | 106516344 | 423  |
| chr1  | 36232765      | 36233187  | 423  |
| chr2  | 136722805     | 136723226 | 422  |
| chr3  | 124563495     | 124563911 | 417  |
| chr3  | 121138871     | 121139287 | 417  |
| chr5  | 121199191     | 121199606 | 416  |
| chr24 | 44375545      | 44375960  | 416  |
| chr23 | 10348160      | 10348571  | 412  |
| chr15 | 54288076      | 54288485  | 410  |
| chr18 | 53311618      | 53312025  | 408  |
| chr28 | 26918358      | 26918764  | 407  |
| chr22 | 60364321      | 60364721  | 401  |
| chr26 | 5878231       | 5878629   | 399  |
| chr18 | 22715290      | 22715672  | 383  |
| chr5  | 30557491      | 30557822  | 332  |
| chr18 | 55831068      | 55831832  | 765  |
| chr28 | 33812086      | 33812948  | 863  |
| chr26 | 22254855      | 22256429  | 1575 |
| chr8  | 23905009      | 23905619  | 611  |
| chr23 | 27744686      | 27745397  | 712  |
| chr23 | 29078209      | 29079028  | 820  |
| chr27 | 11614782      | 11615140  | 359  |
| chr7  | 15099629      | 15100862  | 1234 |
| chr18 | 11592095      | 11593176  | 1082 |
| chr24 | 192261 192931 | 671       |      |
| chr7  | 19249181      | 19249786  | 606  |
| chr5  | 30929573      | 30930078  | 506  |
| chr13 | 82703426      | 82704828  | 1403 |
| chr3  | 106520237     | 106521611 | 1375 |
| chr9  | 52381985      | 52383103  | 1119 |
| chr18 | 56655028      | 56656079  | 1052 |
| chr4  | 105185390     | 105186413 | 1024 |
| chr7  | 11034382      | 11035168  | 787  |

|       |               |           |      |
|-------|---------------|-----------|------|
| chr24 | 50879720      | 50880293  | 574  |
| chr23 | 17464178      | 17465338  | 1161 |
| chr26 | 21811441      | 21812479  | 1039 |
| chr9  | 90430263      | 90431267  | 1005 |
| chr7  | 43771772      | 43772437  | 666  |
| chr13 | 41712484      | 41713484  | 1001 |
| chr7  | 89429616      | 89430679  | 1064 |
| chr24 | 47123978      | 47124618  | 641  |
| chr10 | 66909135      | 66910002  | 868  |
| chr16 | 75197073      | 75197716  | 644  |
| chr27 | 11601809      | 11602332  | 524  |
| chr17 | 5058085       | 5058415   | 331  |
| chr27 | 11617207      | 11617648  | 442  |
| chr1  | 149420192     | 149420777 | 586  |
| chr5  | 32915407      | 32916048  | 642  |
| chr13 | 35925714      | 35926220  | 507  |
| chr5  | 30544911      | 30545376  | 466  |
| chr1  | 43722388      | 43722835  | 448  |
| chr7  | 18838808      | 18839248  | 441  |
| chr5  | 118479944     | 118480356 | 413  |
| chr12 | 74429437      | 74431821  | 2385 |
| chr3  | 20453714      | 20455567  | 1854 |
| chr21 | 56285835      | 56287320  | 1486 |
| chr2  | 130446623     | 130447787 | 1165 |
| chr3  | 118026249     | 118027411 | 1163 |
| chr18 | 11590757      | 11591883  | 1127 |
| chr14 | 61746517      | 61747550  | 1034 |
| chr4  | 121464811     | 121465774 | 964  |
| chr2  | 29976149      | 29977100  | 952  |
| chr13 | 54794545      | 54795472  | 928  |
| chr15 | 13639783      | 13640554  | 772  |
| chr14 | 945301 946063 | 763       |      |
| chr11 | 9236135       | 9236829   | 695  |
| chr20 | 43472024      | 43472447  | 424  |
| chr13 | 75833897      | 75836005  | 2109 |
| chr3  | 94152308      | 94154172  | 1865 |
| chr7  | 3025074       | 3026849   | 1776 |
| chr12 | 32086118      | 32087811  | 1694 |
| chr26 | 48667644      | 48668642  | 999  |
| chr11 | 2388361       | 2389289   | 929  |
| chr19 | 27349121      | 27350044  | 924  |
| chr21 | 9526454       | 9527373   | 920  |
| chr13 | 84228787      | 84229591  | 805  |
| chr25 | 651513 652269 | 757       |      |
| chrX  | 13628770      | 13629217  | 448  |
| chr2  | 110555109     | 110555496 | 388  |
| chr14 | 40160196      | 40161470  | 1275 |
| chr17 | 57628699      | 57629962  | 1264 |
| chr13 | 75751644      | 75752775  | 1132 |
| chr23 | 28601075      | 28602204  | 1130 |

|       |           |           |      |
|-------|-----------|-----------|------|
| chr25 | 1251453   | 1252354   | 902  |
| chr5  | 112656124 | 112656982 | 859  |
| chr29 | 25556464  | 25557269  | 806  |
| chr28 | 40395311  | 40395955  | 645  |
| chr18 | 39906099  | 39906693  | 595  |
| chr17 | 72895843  | 72896363  | 521  |
| chr1  | 74588440  | 74588956  | 517  |
| chr12 | 9550902   | 9552180   | 1279 |
| chr2  | 131303329 | 131304451 | 1123 |
| chr4  | 104611426 | 104612056 | 631  |
| chr11 | 14127676  | 14128149  | 474  |
| chr3  | 105447490 | 105448427 | 938  |
| chr22 | 2841118   | 2842002   | 885  |
| chr22 | 39841639  | 39842220  | 582  |
| chr18 | 11575560  | 11576093  | 534  |
| chr17 | 72352359  | 72353761  | 1403 |
| chr19 | 14297530  | 14298725  | 1196 |
| chr18 | 61979443  | 61980495  | 1053 |
| chr16 | 39515971  | 39516491  | 521  |
| chr13 | 54755379  | 54755868  | 490  |
| chr17 | 61872609  | 61873007  | 399  |
| chr15 | 76179090  | 76180011  | 922  |
| chr20 | 33699565  | 33700093  | 529  |
| chr6  | 63812696  | 63814324  | 1629 |
| chr2  | 75980762  | 75982028  | 1267 |
| chr11 | 49404200  | 49405165  | 966  |
| chr5  | 38511444  | 38512252  | 809  |
| chr21 | 27811339  | 27811929  | 591  |
| chr6  | 38122595  | 38123090  | 496  |
| chr13 | 77366231  | 77366582  | 352  |
| chr3  | 39117501  | 39118271  | 771  |
| chr3  | 116024256 | 116024971 | 716  |
| chr18 | 38804323  | 38804924  | 602  |
| chr10 | 71243781  | 71245446  | 1666 |
| chr29 | 35090982  | 35091658  | 677  |
| chr23 | 27596671  | 27597319  | 649  |
| chr15 | 36594307  | 36594896  | 590  |
| chr25 | 3202762   | 3203197   | 436  |
| chr13 | 60441716  | 60442149  | 434  |
| chr19 | 58958394  | 58958819  | 426  |
| chr18 | 64321283  | 64322071  | 789  |
| chr7  | 45830428  | 45831495  | 1068 |
| chr25 | 3038666   | 3039281   | 616  |
| chr13 | 42604693  | 42605306  | 614  |
| chr15 | 45868673  | 45869263  | 591  |
| chr11 | 74860686  | 74861673  | 988  |
| chr17 | 70105825  | 70106609  | 785  |
| chr25 | 3010492   | 3011243   | 752  |
| chr23 | 10340467  | 10341164  | 698  |
| chr10 | 78657317  | 78657920  | 604  |

|       |           |           |      |
|-------|-----------|-----------|------|
| chr3  | 126956405 | 126956997 | 593  |
| chr7  | 4353172   | 4353757   | 586  |
| chr25 | 28069693  | 28070259  | 567  |
| chr20 | 8609804   | 8610369   | 566  |
| chr29 | 49129980  | 49130464  | 485  |
| chr23 | 15872796  | 15873251  | 456  |
| chr7  | 94362379  | 94362768  | 390  |
| chr3  | 127004683 | 127005064 | 382  |
| chr5  | 33853288  | 33855530  | 2243 |
| chr17 | 47768442  | 47770620  | 2179 |
| chr26 | 18181330  | 18183348  | 2019 |
| chr18 | 3884891   | 3886908   | 2018 |
| chr14 | 52284158  | 52286113  | 1956 |
| chr18 | 13841079  | 13843011  | 1933 |
| chr26 | 14892414  | 14894334  | 1921 |
| chr11 | 108406967 | 108408853 | 1887 |
| chr24 | 48616775  | 48618628  | 1854 |
| chr29 | 35602821  | 35604590  | 1770 |
| chr7  | 70510413  | 70512134  | 1722 |
| chr17 | 59295768  | 59297469  | 1702 |
| chr20 | 8549272   | 8550948   | 1677 |
| chr3  | 11532581  | 11534249  | 1669 |
| chr29 | 38053640  | 38055293  | 1654 |
| chr1  | 100637482 | 100639125 | 1644 |
| chr12 | 68177632  | 68179256  | 1625 |
| chr13 | 41662490  | 41664104  | 1615 |
| chr4  | 121383430 | 121385031 | 1602 |
| chr3  | 18609119  | 18610712  | 1594 |
| chr21 | 55792800  | 55794380  | 1581 |
| chrX  | 35193757  | 35195288  | 1532 |
| chr24 | 40612205  | 40613728  | 1524 |
| chr13 | 53464680  | 53466191  | 1512 |
| chr12 | 68722357  | 68723867  | 1511 |
| chr21 | 42441659  | 42443146  | 1488 |
| chr29 | 50555464  | 50556940  | 1477 |
| chr25 | 43528873  | 43530294  | 1422 |
| chr3  | 113290085 | 113291469 | 1385 |
| chr23 | 15077012  | 15078394  | 1383 |
| chr4  | 115952644 | 115954022 | 1379 |
| chr14 | 1385764   | 1387097   | 1334 |
| chr11 | 28647451  | 28648783  | 1333 |
| chr18 | 50865495  | 50866824  | 1330 |
| chr2  | 139916891 | 139918213 | 1323 |
| chr5  | 115153961 | 115155269 | 1309 |
| chr22 | 47888493  | 47889772  | 1280 |
| chr12 | 36286728  | 36287996  | 1269 |
| chr18 | 55688150  | 55689413  | 1264 |
| chr28 | 25914530  | 25915790  | 1261 |
| chr14 | 52502820  | 52504054  | 1235 |
| chr21 | 59892336  | 59893567  | 1232 |

|       |           |           |      |
|-------|-----------|-----------|------|
| chr13 | 40597297  | 40598524  | 1228 |
| chr4  | 32436310  | 32437536  | 1227 |
| chr19 | 12133327  | 12134548  | 1222 |
| chr17 | 60880422  | 60881643  | 1222 |
| chr24 | 40261169  | 40262377  | 1209 |
| chr5  | 60314857  | 60316059  | 1203 |
| chr23 | 15916007  | 15917204  | 1198 |
| chr3  | 15636169  | 15637359  | 1191 |
| chr14 | 35499592  | 35500780  | 1189 |
| chr26 | 22331759  | 22332943  | 1185 |
| chr6  | 120773723 | 120774898 | 1176 |
| chr7  | 2428800   | 2429974   | 1175 |
| chr17 | 76319181  | 76320353  | 1173 |
| chr10 | 74856277  | 74857446  | 1170 |
| chr7  | 94385314  | 94386481  | 1168 |
| chr28 | 36449313  | 36450458  | 1146 |
| chr5  | 112652314 | 112653425 | 1112 |
| chr7  | 46230521  | 46231623  | 1103 |
| chr5  | 30753614  | 30754714  | 1101 |
| chr29 | 29772248  | 29773348  | 1101 |
| chr3  | 123173236 | 123174334 | 1099 |
| chr16 | 44127584  | 44128678  | 1095 |
| chr10 | 88083894  | 88084986  | 1093 |
| chr16 | 41371224  | 41372312  | 1089 |
| chr7  | 14252277  | 14253358  | 1082 |
| chr13 | 52088593  | 52089674  | 1082 |
| chr13 | 35969387  | 35970459  | 1073 |
| chr6  | 106816855 | 106817923 | 1069 |
| chr19 | 20324881  | 20325940  | 1060 |
| chr23 | 8064146   | 8065202   | 1057 |
| chr22 | 18284541  | 18285588  | 1048 |
| chr13 | 54924011  | 54925055  | 1045 |
| chr3  | 102652073 | 102653114 | 1042 |
| chr19 | 23701067  | 23702107  | 1041 |
| chr9  | 14567215  | 14568253  | 1039 |
| chr19 | 39206886  | 39207922  | 1037 |
| chr18 | 11587317  | 11588350  | 1034 |
| chr10 | 36374588  | 36375618  | 1031 |
| chr8  | 62463221  | 62464245  | 1025 |
| chr24 | 34082900  | 34083922  | 1023 |
| chr8  | 7711201   | 7712222   | 1022 |
| chr20 | 15472087  | 15473107  | 1021 |
| chr4  | 66895985  | 66897004  | 1020 |
| chr18 | 35341984  | 35342998  | 1015 |
| chr11 | 63291052  | 63292066  | 1015 |
| chr17 | 3233667   | 3234679   | 1013 |
| chr18 | 62741414  | 62742422  | 1009 |
| chr13 | 54793454  | 54794461  | 1008 |
| chr2  | 131475149 | 131476138 | 990  |
| chr5  | 115503763 | 115504746 | 984  |

|       |           |           |     |
|-------|-----------|-----------|-----|
| chr18 | 56777533  | 56778516  | 984 |
| chr26 | 21800016  | 21800996  | 981 |
| chr25 | 2984305   | 2985285   | 981 |
| chr19 | 39013210  | 39014190  | 981 |
| chr3  | 55854107  | 55855059  | 953 |
| chr29 | 33709089  | 33710037  | 949 |
| chr10 | 58751842  | 58752789  | 948 |
| chr24 | 31248555  | 31249500  | 946 |
| chr12 | 68721110  | 68722054  | 945 |
| chr23 | 27757122  | 27758061  | 940 |
| chr3  | 15421013  | 15421936  | 924 |
| chrX  | 23155887  | 23156809  | 923 |
| chr19 | 39969901  | 39970819  | 919 |
| chr10 | 10767541  | 10768450  | 910 |
| chr29 | 43169158  | 43170051  | 894 |
| chr13 | 80742537  | 80743426  | 890 |
| chr12 | 68180450  | 68181330  | 881 |
| chr7  | 9679611   | 9680490   | 880 |
| chr8  | 9362894   | 9363767   | 874 |
| chr21 | 6544801   | 6545673   | 873 |
| chr4  | 121712981 | 121713852 | 872 |
| chr21 | 20919820  | 20920691  | 872 |
| chr3  | 36955630  | 36956498  | 869 |
| chr24 | 20363681  | 20364547  | 867 |
| chr3  | 22865180  | 22866045  | 866 |
| chr6  | 121050750 | 121051611 | 862 |
| chr7  | 51487968  | 51488819  | 852 |
| chr11 | 1971659   | 1972502   | 844 |
| chr7  | 10937890  | 10938729  | 840 |
| chr25 | 35674435  | 35675274  | 840 |
| chr4  | 121718640 | 121719473 | 834 |
| chr21 | 33926769  | 33927601  | 833 |
| chr9  | 90473174  | 90474005  | 832 |
| chr6  | 18478500  | 18479325  | 826 |
| chr25 | 38045205  | 38046026  | 822 |
| chr4  | 122640600 | 122641418 | 819 |
| chr24 | 27092888  | 27093701  | 814 |
| chr17 | 63436715  | 63437522  | 808 |
| chr7  | 49011376  | 49012182  | 807 |
| chr3  | 4236230   | 4237036   | 807 |
| chr25 | 29069251  | 29070051  | 801 |
| chr25 | 3197766   | 3198564   | 799 |
| chr1  | 74589569  | 74590364  | 796 |
| chr12 | 31995942  | 31996731  | 790 |
| chr29 | 51266323  | 51267111  | 789 |
| chr18 | 53327065  | 53327850  | 786 |
| chr10 | 103073979 | 103074763 | 785 |
| chr29 | 27291102  | 27291876  | 775 |
| chr9  | 45715258  | 45716030  | 773 |
| chr19 | 46096321  | 46097087  | 767 |

|       |           |           |     |
|-------|-----------|-----------|-----|
| chr18 | 23114450  | 23115212  | 763 |
| chr3  | 105118014 | 105118772 | 759 |
| chr17 | 23554150  | 23554904  | 755 |
| chr29 | 46660546  | 46661299  | 754 |
| chr7  | 8913143   | 8913883   | 741 |
| chr16 | 19553915  | 19554655  | 741 |
| chr3  | 55957770  | 55958507  | 738 |
| chr1  | 68449911  | 68450648  | 738 |
| chr26 | 41013832  | 41014567  | 736 |
| chr24 | 58961572  | 58962306  | 735 |
| chr11 | 47544005  | 47544736  | 732 |
| chr3  | 127442134 | 127442861 | 728 |
| chr17 | 52393363  | 52394089  | 727 |
| chr19 | 14058630  | 14059354  | 725 |
| chr9  | 76812835  | 76813558  | 724 |
| chr2  | 126130436 | 126131158 | 723 |
| chr14 | 29048463  | 29049176  | 714 |
| chr28 | 42369105  | 42369816  | 712 |
| chr3  | 11534301  | 11535011  | 711 |
| chr13 | 75566319  | 75567027  | 709 |
| chr19 | 17669694  | 17670394  | 701 |
| chr26 | 22205417  | 22206113  | 697 |
| chr22 | 57977630  | 57978325  | 696 |
| chr19 | 44881439  | 44882126  | 688 |
| chr14 | 22494551  | 22495238  | 688 |
| chr4  | 118624324 | 118624999 | 676 |
| chr9  | 99306615  | 99307287  | 673 |
| chr25 | 29121853  | 29122523  | 671 |
| chr13 | 40098089  | 40098759  | 671 |
| chr18 | 14681896  | 14682564  | 669 |
| chr5  | 110919975 | 110920639 | 665 |
| chr3  | 110746576 | 110747238 | 663 |
| chr23 | 17162202  | 17162863  | 662 |
| chr19 | 30849298  | 30849952  | 655 |
| chr4  | 69679457  | 69680109  | 653 |
| chr7  | 52229400  | 52230047  | 648 |
| chr21 | 65810725  | 65811366  | 642 |
| chr22 | 12947303  | 12947943  | 641 |
| chr19 | 20344208  | 20344845  | 638 |
| chr5  | 30505205  | 30505839  | 635 |
| chr21 | 6567943   | 6568574   | 632 |
| chr8  | 7587888   | 7588517   | 630 |
| chr17 | 49143680  | 49144307  | 628 |
| chr12 | 84587413  | 84588039  | 627 |
| chr19 | 59192279  | 59192904  | 626 |
| chr19 | 30537432  | 30538052  | 621 |
| chr17 | 73439236  | 73439856  | 621 |
| chr29 | 44662788  | 44663400  | 613 |
| chr28 | 33883228  | 33883838  | 611 |
| chr6  | 120779900 | 120780503 | 604 |



|       |           |           |     |
|-------|-----------|-----------|-----|
| chr10 | 12872477  | 12873077  | 601 |
| chr18 | 16526848  | 16527438  | 591 |
| chr11 | 103768000 | 103768590 | 591 |
| chr11 | 45743870  | 45744457  | 588 |
| chr4  | 121406826 | 121407412 | 587 |
| chr28 | 43739456  | 43740042  | 587 |
| chr15 | 81398840  | 81399426  | 587 |
| chr6  | 94811876  | 94812460  | 585 |
| chr12 | 32199089  | 32199668  | 580 |
| chr25 | 18132902  | 18133480  | 579 |
| chr4  | 120187315 | 120187890 | 576 |
| chr5  | 60157242  | 60157816  | 575 |
| chr29 | 17833010  | 17833581  | 572 |
| chr15 | 21512956  | 21513524  | 569 |
| chr15 | 20864530  | 20865095  | 566 |
| chr15 | 29340259  | 29340822  | 564 |
| chr5  | 33883745  | 33884305  | 561 |
| chr19 | 47282645  | 47283203  | 559 |
| chr25 | 43233398  | 43233950  | 553 |
| chr18 | 56776939  | 56777490  | 552 |
| chr11 | 106013562 | 106014109 | 548 |
| chr25 | 15314383  | 15314929  | 547 |
| chr21 | 64517138  | 64517682  | 545 |
| chr25 | 4623176   | 4623718   | 543 |
| chr23 | 52667096  | 52667638  | 543 |
| chr11 | 103739408 | 103739946 | 539 |
| chr18 | 36954897  | 36955434  | 538 |
| chr19 | 57057658  | 57058192  | 535 |
| chr4  | 121737604 | 121738137 | 534 |
| chr13 | 54832744  | 54833275  | 532 |
| chr3  | 4360453   | 4360982   | 530 |
| chr18 | 64296114  | 64296643  | 530 |
| chr1  | 68925466  | 68925994  | 529 |
| chr10 | 32477743  | 32478269  | 527 |
| chr9  | 52387645  | 52388170  | 526 |
| chr9  | 47259283  | 47259808  | 526 |
| chr13 | 77724512  | 77725037  | 526 |
| chr13 | 61258342  | 61258864  | 523 |
| chr15 | 58028739  | 58029257  | 519 |
| chr13 | 52970454  | 52970970  | 517 |
| chr2  | 5043517   | 5044029   | 513 |
| chr27 | 21559737  | 21560247  | 511 |
| chr10 | 50625845  | 50626355  | 511 |
| chr19 | 23685480  | 23685988  | 509 |
| chr22 | 50726487  | 50726994  | 508 |
| chr12 | 32208685  | 32209189  | 505 |
| chr1  | 149419648 | 149420150 | 503 |
| chr23 | 12375858  | 12376358  | 501 |
| chr13 | 54762640  | 54763140  | 501 |
| chr21 | 47695148  | 47695646  | 499 |

|       |           |           |     |
|-------|-----------|-----------|-----|
| chr3  | 15788636  | 15789132  | 497 |
| chr19 | 38313677  | 38314171  | 495 |
| chr19 | 40461124  | 40461613  | 490 |
| chr20 | 6629966   | 6630453   | 488 |
| chr19 | 33110073  | 33110554  | 482 |
| chr7  | 18438794  | 18439273  | 480 |
| chr25 | 30458639  | 30459118  | 480 |
| chr20 | 41249304  | 41249783  | 480 |
| chr11 | 106001576 | 106002052 | 477 |
| chr7  | 52389942  | 52390413  | 472 |
| chr4  | 46286198  | 46286669  | 472 |
| chr20 | 37560177  | 37560648  | 472 |
| chr25 | 38675502  | 38675971  | 470 |
| chr2  | 85088324  | 85088791  | 468 |
| chr5  | 94856192  | 94856658  | 467 |
| chr11 | 105386908 | 105387373 | 466 |
| chr14 | 41734487  | 41734951  | 465 |
| chr3  | 15646399  | 15646862  | 464 |
| chr26 | 25511727  | 25512189  | 463 |
| chr22 | 57726624  | 57727085  | 462 |
| chr12 | 76539340  | 76539801  | 462 |
| chr2  | 99656107  | 99656566  | 460 |
| chr16 | 51415842  | 51416299  | 458 |
| chr13 | 73996822  | 73997279  | 458 |
| chr12 | 31293026  | 31293481  | 456 |
| chr16 | 2150277   | 2150730   | 454 |
| chr11 | 105989868 | 105990321 | 454 |
| chr17 | 64104634  | 64105086  | 453 |
| chr16 | 38529018  | 38529468  | 451 |
| chr10 | 21110697  | 21111147  | 451 |
| chr18 | 11417786  | 11418233  | 448 |
| chr8  | 24130272  | 24130717  | 446 |
| chr15 | 75923414  | 75923859  | 446 |
| chr15 | 32171380  | 32171825  | 446 |
| chr7  | 94388023  | 94388466  | 444 |
| chr16 | 45908688  | 45909131  | 444 |
| chr3  | 115495619 | 115496061 | 443 |
| chr18 | 11710819  | 11711258  | 440 |
| chr22 | 51034659  | 51035096  | 438 |
| chr3  | 22571432  | 22571863  | 432 |
| chr18 | 57610536  | 57610967  | 432 |
| chr10 | 17520722  | 17521151  | 430 |
| chrX  | 11006685  | 11007110  | 426 |
| chr6  | 18479452  | 18479877  | 426 |
| chr12 | 32010483  | 32010908  | 426 |
| chr1  | 82897324  | 82897748  | 425 |
| chr22 | 7236437   | 7236860   | 424 |
| chr5  | 114982752 | 114983174 | 423 |
| chr10 | 13030473  | 13030895  | 423 |
| chr13 | 40958623  | 40959044  | 422 |

|       |           |           |      |
|-------|-----------|-----------|------|
| chr5  | 117766385 | 117766805 | 421  |
| chr7  | 50657089  | 50657508  | 420  |
| chr18 | 57603855  | 57604274  | 420  |
| chr15 | 81395148  | 81395567  | 420  |
| chr3  | 105912197 | 105912615 | 419  |
| chr9  | 90355208  | 90355624  | 417  |
| chr11 | 96167405  | 96167821  | 417  |
| chr23 | 51443137  | 51443552  | 416  |
| chr5  | 28908899  | 28909312  | 414  |
| chr22 | 10171367  | 10171779  | 413  |
| chr28 | 25528087  | 25528496  | 410  |
| chr3  | 115326806 | 115327212 | 407  |
| chr21 | 9487469   | 9487875   | 407  |
| chr22 | 55365733  | 55366137  | 405  |
| chr25 | 10599899  | 10600300  | 402  |
| chr22 | 49605326  | 49605724  | 399  |
| chr11 | 70883439  | 70883837  | 399  |
| chr26 | 15370610  | 15371007  | 398  |
| chr9  | 90236301  | 90236697  | 397  |
| chr19 | 12303426  | 12303818  | 393  |
| chr7  | 45699490  | 45699881  | 392  |
| chr13 | 52663997  | 52664375  | 379  |
| chr4  | 52526095  | 52526465  | 371  |
| chr4  | 121740133 | 121740476 | 344  |
| chr13 | 40897592  | 40897934  | 343  |
| chr13 | 75814673  | 75816209  | 1537 |
| chr26 | 22324686  | 22325379  | 694  |
| chr25 | 35567717  | 35569495  | 1779 |
| chr10 | 32488678  | 32490281  | 1604 |
| chr17 | 4154399   | 4155250   | 852  |
| chr19 | 65227016  | 65227779  | 764  |
| chr18 | 48688219  | 48688776  | 558  |
| chr18 | 61962676  | 61963138  | 463  |
| chr18 | 18707869  | 18709033  | 1165 |
| chr19 | 65247355  | 65248379  | 1025 |
| chr7  | 5251996   | 5252590   | 595  |
| chr25 | 37694197  | 37695737  | 1541 |
| chr23 | 8443084   | 8444117   | 1034 |
| chr4  | 53162771  | 53163425  | 655  |
| chr23 | 9730781   | 9731554   | 774  |
| chr3  | 127005603 | 127006127 | 525  |
| chr18 | 52977942  | 52978693  | 752  |
| chr1  | 68924812  | 68925407  | 596  |
| chr3  | 22870431  | 22870829  | 399  |
| chr2  | 134718292 | 134718901 | 610  |
| chr28 | 7292381   | 7293037   | 657  |
| chr17 | 60187420  | 60187864  | 445  |
| chr9  | 37892082  | 37892867  | 786  |
| chr11 | 3864189   | 3864892   | 704  |
| chr23 | 31446085  | 31447462  | 1378 |

|       |           |           |      |
|-------|-----------|-----------|------|
| chr8  | 78845539  | 78846508  | 970  |
| chr19 | 20363087  | 20363911  | 825  |
| chr2  | 134678104 | 134678617 | 514  |
| chr21 | 33067287  | 33068368  | 1082 |
| chr28 | 46068554  | 46069058  | 505  |
| chr16 | 60229608  | 60230017  | 410  |
| chr11 | 100871394 | 100871871 | 478  |
| chr14 | 22095273  | 22095840  | 568  |
| chr18 | 51336280  | 51336787  | 508  |
| chr18 | 50841645  | 50842151  | 507  |
| chr3  | 25000153  | 25000627  | 475  |
| chr17 | 70112148  | 70112546  | 399  |
| chr2  | 125921799 | 125922187 | 389  |
| chr3  | 15351994  | 15352338  | 345  |
| chr18 | 49946651  | 49946980  | 330  |
| chr26 | 22322575  | 22323531  | 957  |
| chr6  | 42770383  | 42770852  | 470  |
| chr18 | 45641103  | 45641842  | 740  |
| chr19 | 12336873  | 12337916  | 1044 |
| chr21 | 64486522  | 64487160  | 639  |
| chr21 | 1926640   | 1927188   | 549  |
| chr3  | 10439257  | 10439800  | 544  |
| chr29 | 51690540  | 51690909  | 370  |
| chr12 | 32169077  | 32169964  | 888  |
| chr7  | 37378659  | 37379660  | 1002 |
| chr21 | 67963369  | 67964035  | 667  |
| chr8  | 73824739  | 73825466  | 728  |
| chr8  | 73830964  | 73832178  | 1215 |
| chr21 | 52063050  | 52063421  | 372  |
| chr8  | 73303074  | 73303624  | 551  |
| chr3  | 126955548 | 126956113 | 566  |
| chr8  | 73325074  | 73325604  | 531  |
| chr21 | 2033464   | 2034063   | 600  |
| chr8  | 73773988  | 73774490  | 503  |
| chr4  | 118020463 | 118022115 | 1653 |
| chr18 | 49491179  | 49492538  | 1360 |
| chr3  | 123192326 | 123193475 | 1150 |
| chr11 | 9249296   | 9250399   | 1104 |
| chr26 | 37776598  | 37777312  | 715  |
| chr11 | 97742876  | 97743511  | 636  |
| chr2  | 75639783  | 75640382  | 600  |
| chr26 | 22617737  | 22618139  | 403  |
| chr25 | 1506228   | 1507882   | 1655 |
| chr14 | 42300631  | 42302173  | 1543 |
| chr23 | 27882381  | 27883854  | 1474 |
| chr4  | 117152398 | 117153786 | 1389 |
| chr25 | 37236966  | 37238340  | 1375 |
| chr28 | 33870519  | 33871671  | 1153 |
| chr7  | 14246259  | 14247364  | 1106 |
| chr25 | 38334748  | 38335843  | 1096 |

|       |           |           |      |
|-------|-----------|-----------|------|
| chr14 | 48322222  | 48323251  | 1030 |
| chrX  | 75400350  | 75401314  | 965  |
| chr2  | 99676627  | 99677534  | 908  |
| chr25 | 37704153  | 37704906  | 754  |
| chr28 | 43995560  | 43996201  | 642  |
| chr17 | 5018794   | 5019259   | 466  |
| chr3  | 8630936   | 8631338   | 403  |
| chr19 | 37852843  | 37854141  | 1299 |
| chr13 | 22174768  | 22175891  | 1124 |
| chr7  | 20813016  | 20814007  | 992  |
| chr24 | 30500581  | 30501547  | 967  |
| chr8  | 45754014  | 45754912  | 899  |
| chr13 | 2460090   | 2460960   | 871  |
| chr21 | 9488402   | 9489228   | 827  |
| chr25 | 37241128  | 37241907  | 780  |
| chr23 | 27870871  | 27871545  | 675  |
| chr21 | 25258072  | 25258641  | 570  |
| chr5  | 33525966  | 33526459  | 494  |
| chr13 | 23753231  | 23753669  | 439  |
| chr7  | 18837499  | 18838563  | 1065 |
| chr6  | 16248912  | 16249944  | 1033 |
| chr28 | 25139634  | 25140444  | 811  |
| chr17 | 66151855  | 66152649  | 795  |
| chr10 | 25035528  | 25036262  | 735  |
| chr9  | 43788469  | 43788949  | 481  |
| chr16 | 44156457  | 44158952  | 2496 |
| chr7  | 10949219  | 10950715  | 1497 |
| chr1  | 147179275 | 147180685 | 1411 |
| chr4  | 8814987   | 8816223   | 1237 |
| chr9  | 67497094  | 67498293  | 1200 |
| chr7  | 19985550  | 19986617  | 1068 |
| chr15 | 84520672  | 84521685  | 1014 |
| chr24 | 20763811  | 20764797  | 987  |
| chr25 | 1971135   | 1972558   | 1424 |
| chr9  | 92183223  | 92184637  | 1415 |
| chr16 | 44121707  | 44122563  | 857  |
| chr6  | 107134913 | 107135599 | 687  |
| chr4  | 121523890 | 121524570 | 681  |
| chr11 | 108296926 | 108297565 | 640  |
| chr2  | 15365316  | 15365779  | 464  |
| chr24 | 60979203  | 60980874  | 1672 |
| chr7  | 10825365  | 10826584  | 1220 |
| chr8  | 20943144  | 20944283  | 1140 |
| chr11 | 1972567   | 1973608   | 1042 |
| chr9  | 45716044  | 45716973  | 930  |
| chr19 | 23861445  | 23862102  | 658  |
| chr2  | 111657476 | 111657981 | 506  |
| chr5  | 121346340 | 121346738 | 399  |
| chr5  | 121335476 | 121336455 | 980  |
| chr5  | 28903401  | 28904357  | 957  |

|       |           |           |      |
|-------|-----------|-----------|------|
| chr22 | 59993297  | 59994180  | 884  |
| chr7  | 43745294  | 43746150  | 857  |
| chr21 | 20624551  | 20625171  | 621  |
| chr15 | 6408012   | 6408527   | 516  |
| chr9  | 53323316  | 53323774  | 459  |
| chr15 | 62753341  | 62753747  | 407  |
| chr19 | 37634502  | 37635525  | 1024 |
| chr17 | 72894840  | 72895818  | 979  |
| chr21 | 20918043  | 20918997  | 955  |
| chr5  | 1093711   | 1094560   | 850  |
| chr16 | 40910402  | 40911093  | 692  |
| chr18 | 56536004  | 56536612  | 609  |
| chr29 | 9517690   | 9518841   | 1152 |
| chr19 | 57694991  | 57695893  | 903  |
| chr8  | 52920630  | 52921489  | 860  |
| chr23 | 53261867  | 53262675  | 809  |
| chr18 | 54242229  | 54242766  | 538  |
| chr19 | 41250383  | 41251151  | 769  |
| chr7  | 43722533  | 43723436  | 904  |
| chr17 | 57626972  | 57627847  | 876  |
| chr2  | 74031395  | 74032081  | 687  |
| chr5  | 30319834  | 30320763  | 930  |
| chr21 | 64513405  | 64514308  | 904  |
| chr2  | 134063752 | 134064636 | 885  |
| chr10 | 19512236  | 19512686  | 451  |
| chr13 | 40988217  | 40989068  | 852  |
| chr5  | 33769709  | 33770508  | 800  |
| chr4  | 120189906 | 120190638 | 733  |
| chr25 | 39140458  | 39141177  | 720  |
| chr16 | 47611884  | 47612562  | 679  |
| chr8  | 73846273  | 73846928  | 656  |
| chr29 | 48894471  | 48895054  | 584  |
| chr13 | 38261990  | 38262559  | 570  |
| chr3  | 118065715 | 118066272 | 558  |
| chr4  | 121450062 | 121450608 | 547  |
| chr2  | 131762378 | 131762913 | 536  |
| chr18 | 3547472   | 3547980   | 509  |
| chr2  | 123753715 | 123754217 | 503  |
| chr12 | 32201459  | 32201944  | 486  |
| chr4  | 117881528 | 117881989 | 462  |
| chr19 | 40460532  | 40460988  | 457  |
| chr25 | 1923792   | 1924220   | 429  |
| chr19 | 23730126  | 23730552  | 427  |
| chr9  | 47260717  | 47261140  | 424  |
| chr10 | 88202073  | 88202494  | 422  |
| chr19 | 43148450  | 43148870  | 421  |
| chr13 | 64765045  | 64765450  | 406  |
| chr14 | 60732290  | 60732690  | 401  |
| chr22 | 16100520  | 16100896  | 377  |
| chr20 | 29503690  | 29506087  | 2398 |

|       |           |           |      |
|-------|-----------|-----------|------|
| chrX  | 10998027  | 11000383  | 2357 |
| chr6  | 19591118  | 19593388  | 2271 |
| chr11 | 28531714  | 28533911  | 2198 |
| chr12 | 84170138  | 84172288  | 2151 |
| chr4  | 104222515 | 104224542 | 2028 |
| chr23 | 52603452  | 52605441  | 1990 |
| chr17 | 66168342  | 66170293  | 1952 |
| chr5  | 113925666 | 113927496 | 1831 |
| chr23 | 8392447   | 8394187   | 1741 |
| chr21 | 33823722  | 33825459  | 1738 |
| chr13 | 23668620  | 23670331  | 1712 |
| chr3  | 78291185  | 78292842  | 1658 |
| chr2  | 74032135  | 74033755  | 1621 |
| chr20 | 5044653   | 5046189   | 1537 |
| chr3  | 114210192 | 114211720 | 1529 |
| chr18 | 11340635  | 11342150  | 1516 |
| chr13 | 29976764  | 29978264  | 1501 |
| chrX  | 35199519  | 35201008  | 1490 |
| chr3  | 55855107  | 55856570  | 1464 |
| chr18 | 6979779   | 6981211   | 1433 |
| chr13 | 77310992  | 77312384  | 1393 |
| chr13 | 14718411  | 14719802  | 1392 |
| chr22 | 59417812  | 59419196  | 1385 |
| chr14 | 27318033  | 27319412  | 1380 |
| chr6  | 14213059  | 14214428  | 1370 |
| chr25 | 3109590   | 3110949   | 1360 |
| chr18 | 64432971  | 64434311  | 1341 |
| chr18 | 22155006  | 22156343  | 1338 |
| chr12 | 31550710  | 31552040  | 1331 |
| chr6  | 118804168 | 118805494 | 1327 |
| chr25 | 14681663  | 14682982  | 1320 |
| chr7  | 4685887   | 4687202   | 1316 |
| chr22 | 32761211  | 32762524  | 1314 |
| chr3  | 35558579  | 35559890  | 1312 |
| chr26 | 21855338  | 21856638  | 1301 |
| chr8  | 79343510  | 79344805  | 1296 |
| chr18 | 18664789  | 18666080  | 1292 |
| chr10 | 44053379  | 44054658  | 1280 |
| chr7  | 3020472   | 3021750   | 1279 |
| chr14 | 75489693  | 75490970  | 1278 |
| chr4  | 66691897  | 66693168  | 1272 |
| chr26 | 25507217  | 25508471  | 1255 |
| chr8  | 74384209  | 74385459  | 1251 |
| chr21 | 31088444  | 31089694  | 1251 |
| chr10 | 50624157  | 50625398  | 1242 |
| chr15 | 13637965  | 13639195  | 1231 |
| chr17 | 70043157  | 70044379  | 1223 |
| chr4  | 67944833  | 67946051  | 1219 |
| chr3  | 118165978 | 118167192 | 1215 |
| chr24 | 40807421  | 40808630  | 1210 |

|       |               |           |      |
|-------|---------------|-----------|------|
| chr13 | 23663047      | 23664256  | 1210 |
| chr3  | 74467238      | 74468434  | 1197 |
| chr21 | 47712362      | 47713558  | 1197 |
| chr13 | 54986316      | 54987482  | 1167 |
| chr2  | 115038027     | 115039189 | 1163 |
| chr2  | 123359073     | 123360227 | 1155 |
| chr10 | 21088687      | 21089834  | 1148 |
| chr7  | 37467883      | 37469018  | 1136 |
| chr15 | 52286024      | 52287158  | 1135 |
| chr6  | 109596087     | 109597220 | 1134 |
| chr9  | 90450343      | 90451456  | 1114 |
| chr21 | 69100937      | 69102050  | 1114 |
| chr21 | 66480123      | 66481236  | 1114 |
| chr23 | 7260741       | 7261849   | 1109 |
| chr23 | 46394850      | 46395956  | 1107 |
| chr25 | 42203884      | 42204987  | 1104 |
| chr23 | 28019611      | 28020705  | 1095 |
| chr13 | 75831859      | 75832940  | 1082 |
| chr19 | 47275787      | 47276867  | 1081 |
| chr19 | 40427872      | 40428951  | 1080 |
| chr5  | 27944181      | 27945254  | 1074 |
| chr4  | 107351356     | 107352429 | 1074 |
| chr2  | 125911136     | 125912196 | 1061 |
| chr19 | 46847082      | 46848131  | 1050 |
| chr10 | 32491142      | 32492184  | 1043 |
| chr15 | 81154466      | 81155507  | 1042 |
| chr16 | 51086879      | 51087911  | 1033 |
| chr6  | 117848125     | 117849143 | 1019 |
| chr25 | 38340970      | 38341988  | 1019 |
| chr2  | 131197661     | 131198676 | 1016 |
| chr5  | 51892888      | 51893894  | 1007 |
| chr24 | 25454188      | 25455189  | 1002 |
| chr25 | 36487593      | 36488590  | 998  |
| chr28 | 26075106      | 26076098  | 993  |
| chr12 | 32021044      | 32022033  | 990  |
| chr29 | 41879409      | 41880397  | 989  |
| chr23 | 17625172      | 17626158  | 987  |
| chr24 | 48623810      | 48624791  | 982  |
| chr13 | 66020405      | 66021385  | 981  |
| chr21 | 69055185      | 69056155  | 971  |
| chr14 | 959871 960826 | 956       |      |
| chr22 | 59413806      | 59414760  | 955  |
| chr19 | 40974809      | 40975757  | 949  |
| chr29 | 29791075      | 29792022  | 948  |
| chr22 | 53955658      | 53956604  | 947  |
| chrX  | 72252552      | 72253485  | 934  |
| chr25 | 2993912       | 2994841   | 930  |
| chr4  | 117878617     | 117879544 | 928  |
| chr16 | 38708850      | 38709776  | 927  |
| chr6  | 59499977      | 59500897  | 921  |



|       |           |           |     |
|-------|-----------|-----------|-----|
| chr3  | 16894912  | 16895830  | 919 |
| chr7  | 10024721  | 10025627  | 907 |
| chr20 | 16813002  | 16813906  | 905 |
| chr14 | 64390129  | 64391030  | 902 |
| chr12 | 84174371  | 84175272  | 902 |
| chr8  | 78541389  | 78542284  | 896 |
| chr23 | 2540574   | 2541469   | 896 |
| chr18 | 10945208  | 10946095  | 888 |
| chr19 | 39670248  | 39671126  | 879 |
| chr17 | 63469899  | 63470773  | 875 |
| chr14 | 29050883  | 29051757  | 875 |
| chr22 | 56093869  | 56094734  | 866 |
| chr18 | 54938939  | 54939804  | 866 |
| chr23 | 15892231  | 15893093  | 863 |
| chr25 | 4636490   | 4637351   | 862 |
| chr11 | 28501876  | 28502737  | 862 |
| chr20 | 9172037   | 9172896   | 860 |
| chr20 | 8690770   | 8691625   | 856 |
| chr10 | 74847051  | 74847900  | 850 |
| chr2  | 31564221  | 31565067  | 847 |
| chr28 | 7556693   | 7557538   | 846 |
| chr19 | 20356844  | 20357688  | 845 |
| chr1  | 123131421 | 123132264 | 844 |
| chr19 | 45060085  | 45060926  | 842 |
| chr18 | 39906954  | 39907792  | 839 |
| chr25 | 2801136   | 2801970   | 835 |
| chr6  | 119204253 | 119205085 | 833 |
| chr25 | 8195507   | 8196337   | 831 |
| chr19 | 40531254  | 40532083  | 830 |
| chr1  | 123124842 | 123125669 | 828 |
| chr1  | 1530412   | 1531236   | 825 |
| chr6  | 92070944  | 92071764  | 821 |
| chr22 | 59852573  | 59853385  | 813 |
| chr12 | 68235130  | 68235938  | 809 |
| chr15 | 21389629  | 21390435  | 807 |
| chr3  | 105448822 | 105449621 | 800 |
| chr1  | 137872664 | 137873460 | 797 |
| chr5  | 35143591  | 35144386  | 796 |
| chr18 | 33644403  | 33645197  | 795 |
| chr7  | 5465829   | 5466621   | 793 |
| chr25 | 35670889  | 35671679  | 791 |
| chr25 | 24849727  | 24850515  | 789 |
| chr8  | 24471226  | 24472001  | 776 |
| chr21 | 24416930  | 24417705  | 776 |
| chr19 | 21863411  | 21864185  | 775 |
| chr1  | 84462600  | 84463373  | 774 |
| chr12 | 81686086  | 81686850  | 765 |
| chr2  | 5371649   | 5372404   | 756 |
| chr11 | 91839898  | 91840649  | 752 |
| chr4  | 56784529  | 56785274  | 746 |

|       |           |           |     |
|-------|-----------|-----------|-----|
| chr15 | 84469415  | 84470155  | 741 |
| chr11 | 34072849  | 34073587  | 739 |
| chr19 | 18370206  | 18370940  | 735 |
| chr19 | 54295924  | 54296643  | 720 |
| chr4  | 33879384  | 33880099  | 716 |
| chr24 | 51579611  | 51580325  | 715 |
| chr5  | 69514875  | 69515586  | 712 |
| chr7  | 43763101  | 43763809  | 709 |
| chr10 | 83522055  | 83522763  | 709 |
| chr5  | 122486225 | 122486932 | 708 |
| chr3  | 95081029  | 95081727  | 699 |
| chr13 | 22174065  | 22174761  | 697 |
| chr12 | 84187440  | 84188136  | 697 |
| chr20 | 74019891  | 74020584  | 694 |
| chr3  | 33827309  | 33827999  | 691 |
| chr2  | 138224416 | 138225105 | 690 |
| chr17 | 49389550  | 49390239  | 690 |
| chr17 | 48920367  | 48921052  | 686 |
| chr11 | 44951640  | 44952320  | 681 |
| chr2  | 41323061  | 41323738  | 678 |
| chr9  | 90353930  | 90354605  | 676 |
| chr19 | 46826010  | 46826683  | 674 |
| chr13 | 79919483  | 79920152  | 670 |
| chr7  | 44058809  | 44059476  | 668 |
| chr5  | 120116194 | 120116861 | 668 |
| chr7  | 96285313  | 96285979  | 667 |
| chr11 | 7073336   | 7074001   | 666 |
| chr4  | 121711984 | 121712648 | 665 |
| chr5  | 76864345  | 76865003  | 659 |
| chr13 | 76271846  | 76272504  | 659 |
| chr23 | 18410915  | 18411572  | 658 |
| chr1  | 133450044 | 133450701 | 658 |
| chr22 | 61141180  | 61141833  | 654 |
| chr13 | 14720631  | 14721280  | 650 |
| chr16 | 70102319  | 70102964  | 646 |
| chr11 | 2264603   | 2265247   | 645 |
| chr17 | 64180601  | 64181239  | 639 |
| chr2  | 134080316 | 134080953 | 638 |
| chr3  | 113292115 | 113292751 | 637 |
| chr18 | 52117889  | 52118524  | 636 |
| chr6  | 12632565  | 12633199  | 635 |
| chr7  | 61014261  | 61014887  | 627 |
| chr26 | 18761778  | 18762402  | 625 |
| chr16 | 67439177  | 67439795  | 619 |
| chr19 | 56463116  | 56463730  | 615 |
| chr16 | 2220888   | 2221501   | 614 |
| chr14 | 7579214   | 7579825   | 612 |
| chr5  | 112237797 | 112238407 | 611 |
| chr11 | 28331653  | 28332263  | 611 |
| chr9  | 90356350  | 90356959  | 610 |

|       |           |           |     |
|-------|-----------|-----------|-----|
| chr7  | 70508557  | 70509165  | 609 |
| chr19 | 59412947  | 59413554  | 608 |
| chr16 | 45909189  | 45909794  | 606 |
| chr6  | 63064444  | 63065048  | 605 |
| chr6  | 120796819 | 120797421 | 603 |
| chr18 | 62680798  | 62681399  | 602 |
| chr3  | 111426743 | 111427342 | 600 |
| chr24 | 44049299  | 44049898  | 600 |
| chr29 | 45910637  | 45911235  | 599 |
| chr20 | 75635282  | 75635880  | 599 |
| chr16 | 2264019   | 2264616   | 598 |
| chr17 | 73440525  | 73441118  | 594 |
| chr6  | 103401431 | 103402021 | 591 |
| chr29 | 48851080  | 48851668  | 589 |
| chr26 | 18492131  | 18492719  | 589 |
| chr7  | 14816384  | 14816968  | 585 |
| chr14 | 1490772   | 1491354   | 583 |
| chr25 | 43531906  | 43532486  | 581 |
| chr26 | 22244709  | 22245287  | 579 |
| chr4  | 98486556  | 98487131  | 576 |
| chr4  | 95650896  | 95651470  | 575 |
| chr7  | 2278562   | 2279135   | 574 |
| chr1  | 61275898  | 61276467  | 570 |
| chr11 | 107588427 | 107588995 | 569 |
| chr18 | 3550218   | 3550782   | 565 |
| chr7  | 43676005  | 43676568  | 564 |
| chr26 | 22215155  | 22215718  | 564 |
| chr4  | 110056930 | 110057490 | 561 |
| chr5  | 28898962  | 28899521  | 560 |
| chr11 | 12872769  | 12873327  | 559 |
| chr10 | 83522876  | 83523434  | 559 |
| chr16 | 38734056  | 38734610  | 555 |
| chr3  | 125627977 | 125628530 | 554 |
| chr12 | 54232992  | 54233537  | 546 |
| chr22 | 10749573  | 10750116  | 544 |
| chr8  | 80217000  | 80217540  | 541 |
| chr23 | 27798794  | 27799332  | 539 |
| chr5  | 120368558 | 120369095 | 538 |
| chr23 | 40626282  | 40626819  | 538 |
| chr13 | 74406465  | 74407002  | 538 |
| chr4  | 96849172  | 96849706  | 535 |
| chr26 | 20290257  | 20290790  | 534 |
| chr10 | 93069253  | 93069784  | 532 |
| chr3  | 10565006  | 10565536  | 531 |
| chr11 | 84531378  | 84531907  | 530 |
| chr18 | 1194677   | 1195203   | 527 |
| chr9  | 87762314  | 87762836  | 523 |
| chr19 | 39979920  | 39980442  | 523 |
| chr29 | 38855947  | 38856466  | 520 |
| chr2  | 135727174 | 135727692 | 519 |

|       |           |           |     |
|-------|-----------|-----------|-----|
| chr19 | 20338740  | 20339255  | 516 |
| chr2  | 23112118  | 23112631  | 514 |
| chr18 | 47671154  | 47671667  | 514 |
| chr19 | 38310778  | 38311289  | 512 |
| chr18 | 6608290   | 6608800   | 511 |
| chr18 | 56778665  | 56779171  | 507 |
| chr7  | 81896383  | 81896888  | 506 |
| chr12 | 68179889  | 68180393  | 505 |
| chrX  | 13636082  | 13636584  | 503 |
| chr18 | 25323972  | 25324471  | 500 |
| chr7  | 5245849   | 5246346   | 498 |
| chr27 | 36026204  | 36026701  | 498 |
| chr1  | 132685074 | 132685570 | 497 |
| chr12 | 68182156  | 68182644  | 489 |
| chr18 | 48682619  | 48683106  | 488 |
| chr3  | 125635001 | 125635486 | 486 |
| chr4  | 30785992  | 30786471  | 480 |
| chr23 | 27740640  | 27741119  | 480 |
| chr26 | 51590424  | 51590902  | 479 |
| chr10 | 79333424  | 79333902  | 479 |
| chr20 | 29506389  | 29506863  | 475 |
| chr17 | 70103733  | 70104205  | 473 |
| chr17 | 70198875  | 70199344  | 470 |
| chr19 | 60829033  | 60829501  | 469 |
| chr17 | 5379251   | 5379719   | 469 |
| chr7  | 13415784  | 13416251  | 468 |
| chr6  | 118510378 | 118510840 | 463 |
| chr19 | 27443166  | 27443628  | 463 |
| chr17 | 7832267   | 7832729   | 463 |
| chr9  | 62315717  | 62316178  | 462 |
| chr12 | 68183652  | 68184113  | 462 |
| chr19 | 45733105  | 45733564  | 460 |
| chr5  | 60302762  | 60303220  | 459 |
| chr3  | 102696357 | 102696815 | 459 |
| chr7  | 5042836   | 5043292   | 457 |
| chr23 | 17491743  | 17492199  | 457 |
| chr5  | 28770669  | 28771124  | 456 |
| chr3  | 114211731 | 114212186 | 456 |
| chr16 | 44359631  | 44360085  | 455 |
| chr5  | 29208866  | 29209319  | 454 |
| chr13 | 23034623  | 23035075  | 453 |
| chr11 | 28510085  | 28510537  | 453 |
| chr1  | 148281331 | 148281783 | 453 |
| chr8  | 108708996 | 108709447 | 452 |
| chr29 | 18323157  | 18323607  | 451 |
| chr21 | 64515816  | 64516266  | 451 |
| chr13 | 54510374  | 54510822  | 449 |
| chr1  | 159918563 | 159919009 | 447 |
| chr2  | 134947012 | 134947456 | 445 |
| chr4  | 72320157  | 72320600  | 444 |

|       |           |           |     |
|-------|-----------|-----------|-----|
| chr26 | 37958726  | 37959169  | 444 |
| chr16 | 39495439  | 39495880  | 442 |
| chr16 | 23849508  | 23849949  | 442 |
| chr5  | 114077163 | 114077603 | 441 |
| chr23 | 19331856  | 19332296  | 441 |
| chr6  | 92969976  | 92970415  | 440 |
| chr4  | 123135797 | 123136234 | 438 |
| chr27 | 16699382  | 16699819  | 438 |
| chr21 | 20698363  | 20698800  | 438 |
| chr18 | 35070126  | 35070562  | 437 |
| chr29 | 36691985  | 36692419  | 435 |
| chr13 | 54429690  | 54430123  | 434 |
| chr7  | 5694810   | 5695242   | 433 |
| chr27 | 15726490  | 15726921  | 432 |
| chr19 | 56481721  | 56482152  | 432 |
| chr3  | 105732402 | 105732832 | 431 |
| chr21 | 6553142   | 6553566   | 425 |
| chr5  | 113446071 | 113446494 | 424 |
| chr11 | 107589222 | 107589645 | 424 |
| chr7  | 45680834  | 45681255  | 422 |
| chr5  | 30488101  | 30488521  | 421 |
| chr18 | 18703401  | 18703821  | 421 |
| chr4  | 34961536  | 34961955  | 420 |
| chr29 | 36689409  | 36689827  | 419 |
| chr10 | 21261323  | 21261740  | 418 |
| chr8  | 45665478  | 45665894  | 417 |
| chr26 | 42169981  | 42170397  | 417 |
| chr12 | 32171666  | 32172081  | 416 |
| chr3  | 121431024 | 121431438 | 415 |
| chr2  | 131742934 | 131743348 | 415 |
| chr25 | 35474700  | 35475113  | 414 |
| chr24 | 3949557   | 3949970   | 414 |
| chr2  | 74328055  | 74328467  | 413 |
| chr18 | 45041260  | 45041671  | 412 |
| chr13 | 41711652  | 41712061  | 410 |
| chr2  | 26507308  | 26507716  | 409 |
| chr19 | 24249422  | 24249830  | 409 |
| chr3  | 26148935  | 26149342  | 408 |
| chr8  | 82101017  | 82101423  | 407 |
| chr12 | 32561904  | 32562310  | 407 |
| chr27 | 38974678  | 38975082  | 405 |
| chr21 | 64274351  | 64274754  | 404 |
| chr19 | 58172596  | 58172998  | 403 |
| chr3  | 22578448  | 22578849  | 402 |
| chr8  | 102262562 | 102262962 | 401 |
| chr5  | 29207977  | 29208377  | 401 |
| chr28 | 46051380  | 46051780  | 401 |
| chr5  | 60710633  | 60711032  | 400 |
| chr23 | 9424334   | 9424733   | 400 |
| chr17 | 49447024  | 49447423  | 400 |

|       |           |           |      |
|-------|-----------|-----------|------|
| chr5  | 28689006  | 28689404  | 399  |
| chr3  | 126981988 | 126982386 | 399  |
| chr3  | 123270732 | 123271130 | 399  |
| chr23 | 31700194  | 31700592  | 399  |
| chr11 | 11706379  | 11706777  | 399  |
| chr1  | 154415639 | 154416037 | 399  |
| chr29 | 48777228  | 48777624  | 397  |
| chr11 | 14119220  | 14119616  | 397  |
| chr18 | 23471441  | 23471836  | 396  |
| chr26 | 51194870  | 51195264  | 395  |
| chr1  | 134428815 | 134429205 | 391  |
| chr2  | 21456236  | 21456625  | 390  |
| chr4  | 122639050 | 122639436 | 387  |
| chr25 | 30115896  | 30116278  | 383  |
| chr4  | 123624958 | 123625337 | 380  |
| chr28 | 25915921  | 25916296  | 376  |
| chr4  | 124363594 | 124363968 | 375  |
| chr25 | 44041671  | 44042032  | 362  |
| chr16 | 40909879  | 40910213  | 335  |
| chr12 | 15865062  | 15865395  | 334  |
| chr21 | 34362925  | 34363257  | 333  |
| chr19 | 47319951  | 47320263  | 313  |
| chr1  | 100067222 | 100067769 | 548  |
| chr8  | 46164404  | 46165224  | 821  |
| chr12 | 36453769  | 36454420  | 652  |
| chr29 | 44676670  | 44677849  | 1180 |
| chr7  | 50252878  | 50253455  | 578  |
| chr18 | 56859979  | 56860466  | 488  |
| chr23 | 31317959  | 31318578  | 620  |
| chr23 | 15969529  | 15970023  | 495  |
| chr28 | 46076441  | 46076917  | 477  |
| chr4  | 124195918 | 124196316 | 399  |
| chr9  | 90304207  | 90305073  | 867  |
| chr8  | 73827557  | 73827843  | 287  |
| chr16 | 47268549  | 47269373  | 825  |
| chr25 | 35472916  | 35474152  | 1237 |
| chr14 | 18683984  | 18685204  | 1221 |
| chr14 | 77340691  | 77341871  | 1181 |
| chr6  | 12112824  | 12113716  | 893  |
| chr15 | 83837543  | 83838007  | 465  |
| chr24 | 40813708  | 40814935  | 1228 |
| chr16 | 47273912  | 47274400  | 489  |
| chr4  | 71565111  | 71566288  | 1178 |
| chr20 | 64882263  | 64883180  | 918  |
| chr10 | 32256637  | 32257715  | 1079 |
| chr18 | 11715171  | 11715869  | 699  |
| chr8  | 73735893  | 73736524  | 632  |
| chr4  | 124325062 | 124325613 | 552  |
| chr22 | 39296866  | 39297493  | 628  |
| chr26 | 50847357  | 50847919  | 563  |

|       |               |           |      |
|-------|---------------|-----------|------|
| chr8  | 80221581      | 80222450  | 870  |
| chr13 | 26305402      | 26305948  | 547  |
| chr18 | 51415035      | 51415488  | 454  |
| chr6  | 63177731      | 63178501  | 771  |
| chr15 | 63095690      | 63096283  | 594  |
| chr2  | 138643731     | 138644129 | 399  |
| chr21 | 64505653      | 64506139  | 487  |
| chr8  | 73326750      | 73328050  | 1301 |
| chr11 | 48681626      | 48682111  | 486  |
| chr7  | 19246837      | 19247280  | 444  |
| chr19 | 27064469      | 27064912  | 444  |
| chr18 | 26254665      | 26256368  | 1704 |
| chr18 | 53023232      | 53024799  | 1568 |
| chr4  | 94702078      | 94703593  | 1516 |
| chr13 | 54925538      | 54926764  | 1227 |
| chr1  | 27347237      | 27348375  | 1139 |
| chr8  | 8712107       | 8713234   | 1128 |
| chr4  | 117823699     | 117824764 | 1066 |
| chr14 | 67995900      | 67996772  | 873  |
| chr29 | 33710884      | 33711575  | 692  |
| chr20 | 499715 500395 | 681       |      |
| chr2  | 140047009     | 140047681 | 673  |
| chr15 | 65647637      | 65648308  | 672  |
| chr4  | 73689905      | 73690524  | 620  |
| chr5  | 81507921      | 81508518  | 598  |
| chr15 | 45858269      | 45858838  | 570  |
| chr12 | 84788862      | 84789408  | 547  |
| chr3  | 71912214      | 71912668  | 455  |
| chr19 | 40455944      | 40456394  | 451  |
| chr23 | 9776991       | 9777429   | 439  |
| chr10 | 8701633       | 8703592   | 1960 |
| chr22 | 56603950      | 56605255  | 1306 |
| chr24 | 35314090      | 35315132  | 1043 |
| chr23 | 23874297      | 23875333  | 1037 |
| chr18 | 51034566      | 51035599  | 1034 |
| chr10 | 68235050      | 68236032  | 983  |
| chr5  | 120053399     | 120054344 | 946  |
| chr13 | 41037499      | 41038417  | 919  |
| chr25 | 43511186      | 43512098  | 913  |
| chr7  | 50412938      | 50413777  | 840  |
| chr25 | 39204514      | 39205332  | 819  |
| chr1  | 150071801     | 150072510 | 710  |
| chr7  | 37876174      | 37876870  | 697  |
| chr18 | 24337187      | 24337881  | 695  |
| chr9  | 95327319      | 95327854  | 536  |
| chr26 | 22021583      | 22022089  | 507  |
| chr29 | 49307857      | 49308270  | 414  |
| chr1  | 152246540     | 152249034 | 2495 |
| chr23 | 23861438      | 23862863  | 1426 |
| chr8  | 65868519      | 65869789  | 1271 |

|       |           |           |      |
|-------|-----------|-----------|------|
| chr7  | 43741016  | 43742047  | 1032 |
| chr4  | 53019309  | 53020302  | 994  |
| chr29 | 33701439  | 33702273  | 835  |
| chr24 | 48625315  | 48626121  | 807  |
| chr23 | 23881161  | 23881802  | 642  |
| chr23 | 30542651  | 30543221  | 571  |
| chr22 | 17558311  | 17558860  | 550  |
| chr23 | 27094099  | 27094637  | 539  |
| chr6  | 120814197 | 120814690 | 494  |
| chr4  | 71593314  | 71593795  | 482  |
| chr8  | 1626551   | 1627026   | 476  |
| chr13 | 72603479  | 72603922  | 444  |
| chr4  | 110047811 | 110048222 | 412  |
| chr5  | 29631543  | 29633907  | 2365 |
| chr10 | 90286760  | 90288187  | 1428 |
| chr18 | 56860566  | 56861811  | 1246 |
| chr3  | 22464294  | 22465501  | 1208 |
| chr18 | 62504926  | 62506073  | 1148 |
| chr13 | 75539421  | 75540560  | 1140 |
| chr16 | 46749193  | 46750133  | 941  |
| chr24 | 20556598  | 20557453  | 856  |
| chr21 | 31009301  | 31010127  | 827  |
| chr17 | 75029726  | 75030493  | 768  |
| chr20 | 6613483   | 6614198   | 716  |
| chr3  | 17321709  | 17322404  | 696  |
| chr24 | 29706374  | 29706894  | 521  |
| chr19 | 12316096  | 12316583  | 488  |
| chrX  | 13627423  | 13628386  | 964  |
| chr12 | 29803608  | 29804497  | 890  |
| chr20 | 2013107   | 2013971   | 865  |
| chr21 | 30313983  | 30314694  | 712  |
| chr5  | 35297588  | 35298223  | 636  |
| chr19 | 30569038  | 30569593  | 556  |
| chr18 | 39774712  | 39776206  | 1495 |
| chr29 | 29683076  | 29684072  | 997  |
| chr12 | 31524913  | 31525765  | 853  |
| chr7  | 17946428  | 17947014  | 587  |
| chr23 | 10254220  | 10254726  | 507  |
| chr11 | 106748654 | 106749104 | 451  |
| chr28 | 41061648  | 41062095  | 448  |
| chr8  | 73827128  | 73827555  | 428  |
| chr27 | 11582686  | 11583088  | 403  |
| chr4  | 29021911  | 29022294  | 384  |
| chr26 | 18178067  | 18178840  | 774  |
| chr7  | 5046507   | 5047171   | 665  |
| chr15 | 73766851  | 73767474  | 624  |
| chr2  | 132432232 | 132432693 | 462  |
| chr25 | 43436156  | 43436602  | 447  |
| chr23 | 27748875  | 27750102  | 1228 |
| chr28 | 12465772  | 12466784  | 1013 |



|       |           |           |      |
|-------|-----------|-----------|------|
| chr3  | 119675165 | 119675942 | 778  |
| chr1  | 146780292 | 146780929 | 638  |
| chr3  | 22590365  | 22590903  | 539  |
| chr17 | 72733125  | 72733621  | 497  |
| chr2  | 124305754 | 124306779 | 1026 |
| chr20 | 60492430  | 60493046  | 617  |
| chr7  | 3938453   | 3939009   | 557  |
| chr17 | 72729244  | 72730247  | 1004 |
| chr29 | 44663422  | 44664090  | 669  |
| chr7  | 57582382  | 57582890  | 509  |
| chr10 | 87161973  | 87162402  | 430  |
| chr21 | 11890106  | 11890893  | 788  |
| chr3  | 125544071 | 125544839 | 769  |
| chr14 | 31027012  | 31027779  | 768  |
| chr29 | 51776409  | 51777161  | 753  |
| chr24 | 60604082  | 60604635  | 554  |
| chr17 | 75044630  | 75045119  | 490  |
| chr23 | 52726011  | 52726431  | 421  |
| chr28 | 25263038  | 25263872  | 835  |
| chr3  | 111486753 | 111487483 | 731  |
| chr3  | 11516415  | 11517138  | 724  |
| chr28 | 4793890   | 4794570   | 681  |
| chr4  | 99596270  | 99596869  | 600  |
| chr13 | 26215508  | 26216074  | 567  |
| chr19 | 37574123  | 37574673  | 551  |
| chr10 | 16926252  | 16926796  | 545  |
| chr8  | 24684083  | 24684611  | 529  |
| chr22 | 50594544  | 50595069  | 526  |
| chr7  | 38520930  | 38521453  | 524  |
| chr28 | 33874744  | 33875240  | 497  |
| chr19 | 46779688  | 46780184  | 497  |
| chr25 | 23439414  | 23439897  | 484  |
| chr18 | 56669513  | 56669986  | 474  |
| chr29 | 33708142  | 33708607  | 466  |
| chr26 | 37775450  | 37775903  | 454  |
| chr13 | 80039516  | 80039969  | 454  |
| chr22 | 49579206  | 49579652  | 447  |
| chr1  | 152249805 | 152250250 | 446  |
| chr11 | 96165916  | 96166359  | 444  |
| chr14 | 1622075   | 1622503   | 429  |
| chr21 | 30353239  | 30353666  | 428  |
| chr3  | 126980234 | 126980655 | 422  |
| chr10 | 17115951  | 17116363  | 413  |
| chr9  | 12698534  | 12698934  | 401  |
| chr5  | 114234068 | 114234466 | 399  |
| chr19 | 43633025  | 43633423  | 399  |
| chr2  | 131304991 | 131305698 | 708  |
| chr12 | 32119494  | 32120037  | 544  |
| chr18 | 11263674  | 11264245  | 572  |
| chr10 | 92146394  | 92146800  | 407  |

|       |           |           |      |
|-------|-----------|-----------|------|
| chr2  | 136612727 | 136615029 | 2303 |
| chr6  | 111010858 | 111012957 | 2100 |
| chrX  | 10993318  | 10995392  | 2075 |
| chr18 | 37159381  | 37161418  | 2038 |
| chr5  | 60308122  | 60310151  | 2030 |
| chr23 | 23863117  | 23865142  | 2026 |
| chr22 | 46579407  | 46581374  | 1968 |
| chr15 | 53625737  | 53627646  | 1910 |
| chr17 | 66278373  | 66280211  | 1839 |
| chr18 | 11353203  | 11354923  | 1721 |
| chr5  | 114241897 | 114243600 | 1704 |
| chr29 | 37639740  | 37641428  | 1689 |
| chr29 | 6657003   | 6658685   | 1683 |
| chr2  | 68157501  | 68159060  | 1560 |
| chr11 | 80560522  | 80562048  | 1527 |
| chr25 | 38676385  | 38677852  | 1468 |
| chr3  | 55861678  | 55863143  | 1466 |
| chr5  | 60169123  | 60170567  | 1445 |
| chr9  | 46034465  | 46035844  | 1380 |
| chr10 | 90969429  | 90970806  | 1378 |
| chr11 | 28649069  | 28650427  | 1359 |
| chr10 | 8717533   | 8718882   | 1350 |
| chr14 | 21774975  | 21776318  | 1344 |
| chr19 | 46103274  | 46104570  | 1297 |
| chr2  | 123751915 | 123753202 | 1288 |
| chr3  | 37616113  | 37617379  | 1267 |
| chr7  | 42339082  | 42340344  | 1263 |
| chr25 | 40217206  | 40218429  | 1224 |
| chr4  | 75322700  | 75323922  | 1223 |
| chr14 | 7609279   | 7610485   | 1207 |
| chr18 | 52649327  | 52650526  | 1200 |
| chr5  | 122127780 | 122128974 | 1195 |
| chr2  | 139215104 | 139216297 | 1194 |
| chr19 | 34007811  | 34009000  | 1190 |
| chr9  | 45938616  | 45939765  | 1150 |
| chr3  | 114451298 | 114452447 | 1150 |
| chr1  | 147252058 | 147253203 | 1146 |
| chr13 | 73531860  | 73533000  | 1141 |
| chr17 | 72765529  | 72766664  | 1136 |
| chr13 | 66018615  | 66019743  | 1129 |
| chr18 | 18686054  | 18687178  | 1125 |
| chr22 | 39855026  | 39856141  | 1116 |
| chr18 | 53501525  | 53502639  | 1115 |
| chr7  | 51604647  | 51605747  | 1101 |
| chr29 | 44384316  | 44385405  | 1090 |
| chr12 | 74454135  | 74455222  | 1088 |
| chr11 | 9243420   | 9244505   | 1086 |
| chr16 | 23865804  | 23866888  | 1085 |
| chr10 | 33928840  | 33929922  | 1083 |
| chr26 | 22333058  | 22334139  | 1082 |

|       |           |           |      |
|-------|-----------|-----------|------|
| chr16 | 47603944  | 47605022  | 1079 |
| chr6  | 40950116  | 40951193  | 1078 |
| chr14 | 9200028   | 9201093   | 1066 |
| chr19 | 48753886  | 48754944  | 1059 |
| chr13 | 59932099  | 59933157  | 1059 |
| chr10 | 21849984  | 21851041  | 1058 |
| chr14 | 21777580  | 21778632  | 1053 |
| chr15 | 24560270  | 24561320  | 1051 |
| chr4  | 121393152 | 121394196 | 1045 |
| chr25 | 2930419   | 2931461   | 1043 |
| chr12 | 84212161  | 84213199  | 1039 |
| chr8  | 78540229  | 78541257  | 1029 |
| chr4  | 25136514  | 25137541  | 1028 |
| chr13 | 75541574  | 75542600  | 1027 |
| chr4  | 121461695 | 121462703 | 1009 |
| chr29 | 25557642  | 25558643  | 1002 |
| chr21 | 3046326   | 3047317   | 992  |
| chr1  | 50435420  | 50436410  | 991  |
| chr6  | 16263116  | 16264103  | 988  |
| chr5  | 28959288  | 28960265  | 978  |
| chr1  | 137999786 | 138000754 | 969  |
| chr13 | 52080319  | 52081286  | 968  |
| chr12 | 84586313  | 84587279  | 967  |
| chr21 | 25347134  | 25348099  | 966  |
| chr6  | 120790729 | 120791690 | 962  |
| chr18 | 11817862  | 11818822  | 961  |
| chr12 | 36434214  | 36435172  | 959  |
| chr8  | 24472429  | 24473383  | 955  |
| chr5  | 51886425  | 51887374  | 950  |
| chr8  | 96336390  | 96337338  | 949  |
| chr21 | 20146280  | 20147213  | 934  |
| chr23 | 46403011  | 46403940  | 930  |
| chr22 | 15402634  | 15403563  | 930  |
| chr18 | 22072027  | 22072946  | 920  |
| chr9  | 99934654  | 99935568  | 915  |
| chr8  | 110721107 | 110722021 | 915  |
| chr14 | 67994982  | 67995895  | 914  |
| chr16 | 41352807  | 41353719  | 913  |
| chrX  | 18945758  | 18946663  | 906  |
| chr25 | 4837047   | 4837948   | 902  |
| chr18 | 63756688  | 63757587  | 900  |
| chr16 | 49328978  | 49329871  | 894  |
| chr18 | 1192881   | 1193773   | 893  |
| chr15 | 34580457  | 34581345  | 889  |
| chr14 | 29044550  | 29045433  | 884  |
| chr3  | 87809022  | 87809897  | 876  |
| chr17 | 11547185  | 11548051  | 867  |
| chr11 | 100873465 | 100874329 | 865  |
| chr12 | 74451351  | 74452212  | 862  |
| chr19 | 39085017  | 39085877  | 861  |

|       |               |           |     |
|-------|---------------|-----------|-----|
| chr19 | 40516022      | 40516876  | 855 |
| chr16 | 34663942      | 34664796  | 855 |
| chr19 | 49339874      | 49340727  | 854 |
| chr19 | 23099783      | 23100636  | 854 |
| chr3  | 106516840     | 106517690 | 851 |
| chr4  | 77071080      | 77071929  | 850 |
| chr2  | 130428184     | 130429027 | 844 |
| chr25 | 38096304      | 38097145  | 842 |
| chr14 | 52549219      | 52550059  | 841 |
| chr25 | 2927089       | 2927928   | 840 |
| chr24 | 62454461      | 62455299  | 839 |
| chr10 | 8544278       | 8545115   | 838 |
| chr3  | 115337080     | 115337913 | 834 |
| chr21 | 20004070      | 20004902  | 833 |
| chr25 | 2961716       | 2962547   | 832 |
| chr21 | 42443703      | 42444532  | 830 |
| chr5  | 28887071      | 28887898  | 828 |
| chr18 | 56440624      | 56441448  | 825 |
| chr26 | 22375045      | 22375866  | 822 |
| chr18 | 11713415      | 11714235  | 821 |
| chr12 | 9556145       | 9556963   | 819 |
| chr10 | 87481672      | 87482490  | 819 |
| chr11 | 63307365      | 63308182  | 818 |
| chr11 | 28538458      | 28539274  | 817 |
| chr4  | 95069232      | 95070047  | 816 |
| chr18 | 50982843      | 50983657  | 815 |
| chr29 | 48704468      | 48705277  | 810 |
| chr26 | 21857103      | 21857907  | 805 |
| chr3  | 17469488      | 17470289  | 802 |
| chr25 | 27392908      | 27393708  | 801 |
| chr9  | 8644848       | 8645644   | 797 |
| chr3  | 22621595      | 22622388  | 794 |
| chr29 | 45074948      | 45075739  | 792 |
| chr26 | 21976163      | 21976951  | 789 |
| chr16 | 44334510      | 44335298  | 789 |
| chr4  | 104224968     | 104225753 | 786 |
| chr4  | 97712430      | 97713214  | 785 |
| chr22 | 59419573      | 59420357  | 785 |
| chr14 | 826910 827688 | 779       |     |
| chr9  | 74251619      | 74252395  | 777 |
| chr25 | 758070 758846 | 777       |     |
| chr12 | 64735618      | 64736392  | 775 |
| chr3  | 15772356      | 15773129  | 774 |
| chr9  | 99307326      | 99308098  | 773 |
| chr14 | 34075464      | 34076231  | 768 |
| chr8  | 45664379      | 45665145  | 767 |
| chr29 | 45909869      | 45910635  | 767 |
| chr18 | 39777459      | 39778224  | 766 |
| chr18 | 12394816      | 12395579  | 764 |
| chr18 | 54195033      | 54195789  | 757 |

|       |               |           |     |
|-------|---------------|-----------|-----|
| chr11 | 13924143      | 13924899  | 757 |
| chr4  | 96130565      | 96131318  | 754 |
| chr13 | 77335667      | 77336419  | 753 |
| chr19 | 38756399      | 38757149  | 751 |
| chr5  | 113256149     | 113256898 | 750 |
| chr13 | 55116885      | 55117634  | 750 |
| chr22 | 7192874       | 7193621   | 748 |
| chr25 | 35540320      | 35541066  | 747 |
| chr21 | 24503740      | 24504484  | 745 |
| chr11 | 49853440      | 49854184  | 745 |
| chr8  | 1633140       | 1633883   | 744 |
| chr22 | 12181836      | 12182573  | 738 |
| chr9  | 52401025      | 52401761  | 737 |
| chr16 | 40909142      | 40909877  | 736 |
| chr6  | 72195919      | 72196642  | 724 |
| chr11 | 104889759     | 104890479 | 721 |
| chr18 | 11773884      | 11774600  | 717 |
| chr6  | 120922582     | 120923293 | 712 |
| chr6  | 115901299     | 115902006 | 708 |
| chr9  | 43806422      | 43807128  | 707 |
| chr3  | 105405952     | 105406650 | 699 |
| chr11 | 23183104      | 23183800  | 697 |
| chr6  | 120642848     | 120643543 | 696 |
| chr18 | 42957786      | 42958481  | 696 |
| chr18 | 62508777      | 62509469  | 693 |
| chr13 | 62363739      | 62364431  | 693 |
| chr8  | 63802685      | 63803374  | 690 |
| chr29 | 288060 288749 | 690       |     |
| chr1  | 87370584      | 87371271  | 688 |
| chr7  | 43731012      | 43731697  | 686 |
| chr23 | 15857287      | 15857969  | 683 |
| chr13 | 54922706      | 54923387  | 682 |
| chr22 | 51506940      | 51507617  | 678 |
| chr3  | 106580851     | 106581526 | 676 |
| chr26 | 37094168      | 37094841  | 674 |
| chr2  | 110556420     | 110557091 | 672 |
| chr25 | 27393968      | 27394638  | 671 |
| chr7  | 8911958       | 8912625   | 668 |
| chr21 | 34631669      | 34632336  | 668 |
| chr11 | 46008863      | 46009530  | 668 |
| chr9  | 91712740      | 91713406  | 667 |
| chr7  | 5039796       | 5040462   | 667 |
| chr15 | 77187840      | 77188505  | 666 |
| chr5  | 81629999      | 81630660  | 662 |
| chr10 | 13031191      | 13031852  | 662 |
| chr13 | 53214007      | 53214666  | 660 |
| chr4  | 72308791      | 72309449  | 659 |
| chr18 | 49550483      | 49551139  | 657 |
| chr3  | 39115752      | 39116407  | 656 |
| chr26 | 37956830      | 37957485  | 656 |

|       |           |           |     |
|-------|-----------|-----------|-----|
| chr13 | 55381178  | 55381832  | 655 |
| chr1  | 84538936  | 84539590  | 655 |
| chr21 | 20652985  | 20653632  | 648 |
| chr2  | 74783449  | 74784094  | 646 |
| chr4  | 34027989  | 34028633  | 645 |
| chr20 | 8567940   | 8568583   | 644 |
| chr8  | 80296239  | 80296880  | 642 |
| chr17 | 4151437   | 4152074   | 638 |
| chr5  | 111684817 | 111685452 | 636 |
| chr21 | 64485660  | 64486295  | 636 |
| chr21 | 24499998  | 24500633  | 636 |
| chr6  | 63048983  | 63049613  | 631 |
| chr17 | 70278898  | 70279528  | 631 |
| chr15 | 34583801  | 34584431  | 631 |
| chr4  | 116944986 | 116945615 | 630 |
| chr2  | 126086569 | 126087195 | 627 |
| chr18 | 7174661   | 7175285   | 625 |
| chr13 | 79927885  | 79928509  | 625 |
| chr16 | 1334177   | 1334800   | 624 |
| chrX  | 11014275  | 11014896  | 622 |
| chr16 | 44086433  | 44087054  | 622 |
| chr2  | 111305231 | 111305850 | 620 |
| chr5  | 79198823  | 79199441  | 619 |
| chr12 | 12228313  | 12228926  | 614 |
| chr10 | 19486800  | 19487411  | 612 |
| chr23 | 44802448  | 44803058  | 611 |
| chr5  | 81596806  | 81597414  | 609 |
| chr2  | 139446224 | 139446832 | 609 |
| chr18 | 1544171   | 1544779   | 609 |
| chr19 | 41252657  | 41253264  | 608 |
| chr29 | 34638354  | 34638960  | 607 |
| chr23 | 10546584  | 10547188  | 605 |
| chr23 | 27900254  | 27900857  | 604 |
| chr6  | 42771061  | 42771662  | 602 |
| chr19 | 45534582  | 45535182  | 601 |
| chr10 | 36377060  | 36377659  | 600 |
| chr26 | 38236685  | 38237282  | 598 |
| chr13 | 42012369  | 42012966  | 598 |
| chr5  | 1091986   | 1092581   | 596 |
| chrX  | 33515171  | 33515764  | 594 |
| chr6  | 107493426 | 107494019 | 594 |
| chr3  | 22596813  | 22597403  | 591 |
| chr13 | 70065027  | 70065616  | 590 |
| chr8  | 86627725  | 86628312  | 588 |
| chr6  | 107136149 | 107136734 | 586 |
| chr5  | 75733154  | 75733727  | 574 |
| chr14 | 35501001  | 35501569  | 569 |
| chr25 | 12714998  | 12715564  | 567 |
| chr18 | 11426942  | 11427506  | 565 |
| chr20 | 38406340  | 38406903  | 564 |

|       |           |           |     |
|-------|-----------|-----------|-----|
| chr16 | 47550253  | 47550814  | 562 |
| chr22 | 32762589  | 32763146  | 558 |
| chr7  | 4346838   | 4347394   | 557 |
| chr23 | 48776406  | 48776960  | 555 |
| chr16 | 1129336   | 1129886   | 551 |
| chr2  | 136975600 | 136976149 | 550 |
| chr22 | 17429745  | 17430293  | 549 |
| chr20 | 8690003   | 8690551   | 549 |
| chr17 | 67112670  | 67113218  | 549 |
| chr11 | 11749952  | 11750499  | 548 |
| chr19 | 56315436  | 56315982  | 547 |
| chr18 | 22070668  | 22071211  | 544 |
| chr14 | 27320347  | 27320878  | 532 |
| chr7  | 51661625  | 51662153  | 529 |
| chr9  | 87741390  | 87741914  | 525 |
| chr19 | 44876030  | 44876553  | 524 |
| chr19 | 24265024  | 24265547  | 524 |
| chr15 | 27280021  | 27280544  | 524 |
| chr18 | 56622096  | 56622618  | 523 |
| chr22 | 26873511  | 26874031  | 521 |
| chr21 | 61642031  | 61642551  | 521 |
| chr2  | 124974623 | 124975143 | 521 |
| chr1  | 84685776  | 84686295  | 520 |
| chr20 | 40450829  | 40451346  | 518 |
| chr9  | 104922742 | 104923258 | 517 |
| chr5  | 120066181 | 120066695 | 515 |
| chr3  | 127374018 | 127374531 | 514 |
| chr9  | 104923288 | 104923798 | 511 |
| chr11 | 74935341  | 74935851  | 511 |
| chr25 | 29291162  | 29291670  | 509 |
| chr1  | 84790653  | 84791160  | 508 |
| chr23 | 31699502  | 31700008  | 507 |
| chr8  | 54242400  | 54242897  | 498 |
| chr6  | 119389432 | 119389918 | 487 |
| chr22 | 55397462  | 55397947  | 486 |
| chr11 | 9218205   | 9218688   | 484 |
| chr3  | 22959198  | 22959680  | 483 |
| chr10 | 86408342  | 86408823  | 482 |
| chr14 | 59531822  | 59532302  | 481 |
| chr5  | 121061282 | 121061759 | 478 |
| chr1  | 128608146 | 128608621 | 476 |
| chr22 | 50881925  | 50882399  | 475 |
| chr5  | 123126260 | 123126733 | 474 |
| chr6  | 121061583 | 121062055 | 473 |
| chr5  | 28888525  | 28888997  | 473 |
| chr17 | 63276830  | 63277302  | 473 |
| chr9  | 78231465  | 78231936  | 472 |
| chr24 | 60826203  | 60826674  | 472 |
| chr16 | 1798858   | 1799329   | 472 |
| chr10 | 83773230  | 83773698  | 469 |

|       |           |           |     |
|-------|-----------|-----------|-----|
| chr11 | 105985029 | 105985491 | 463 |
| chr8  | 60192148  | 60192607  | 460 |
| chr7  | 16524899  | 16525358  | 460 |
| chr28 | 25882045  | 25882503  | 459 |
| chr9  | 44101684  | 44102141  | 458 |
| chr15 | 29671557  | 29672014  | 458 |
| chr10 | 20851686  | 20852141  | 456 |
| chr3  | 22468359  | 22468813  | 455 |
| chr26 | 50845188  | 50845642  | 455 |
| chr23 | 46084436  | 46084890  | 455 |
| chr19 | 12580819  | 12581272  | 454 |
| chr19 | 39100025  | 39100477  | 453 |
| chr13 | 74395717  | 74396169  | 453 |
| chr5  | 120058401 | 120058852 | 452 |
| chr23 | 11823716  | 11824166  | 451 |
| chr22 | 30059476  | 30059925  | 450 |
| chr26 | 47956515  | 47956963  | 449 |
| chr25 | 3172986   | 3173434   | 449 |
| chr23 | 9458843   | 9459290   | 448 |
| chrX  | 11009793  | 11010239  | 447 |
| chr11 | 74471078  | 74471524  | 447 |
| chr6  | 121842612 | 121843057 | 446 |
| chr7  | 42786635  | 42787078  | 444 |
| chr2  | 127667021 | 127667464 | 444 |
| chr19 | 23723768  | 23724211  | 444 |
| chr6  | 63172609  | 63173050  | 442 |
| chr17 | 7833406   | 7833845   | 440 |
| chr23 | 23875383  | 23875821  | 439 |
| chr21 | 67896525  | 67896963  | 439 |
| chr19 | 15781125  | 15781563  | 439 |
| chr17 | 44040639  | 44041074  | 436 |
| chr5  | 117492798 | 117493231 | 434 |
| chr17 | 69496026  | 69496458  | 433 |
| chr12 | 36283706  | 36284138  | 433 |
| chr7  | 5150592   | 5151023   | 432 |
| chr25 | 35691881  | 35692312  | 432 |
| chr18 | 1579620   | 1580051   | 432 |
| chr14 | 61746084  | 61746515  | 432 |
| chr3  | 116012285 | 116012715 | 431 |
| chr21 | 33820493  | 33820921  | 429 |
| chr5  | 29249699  | 29250125  | 427 |
| chr4  | 33431516  | 33431942  | 427 |
| chr29 | 49713498  | 49713924  | 427 |
| chr7  | 5432177   | 5432602   | 426 |
| chr23 | 3313861   | 3314286   | 426 |
| chr18 | 23243137  | 23243561  | 425 |
| chr3  | 33830049  | 33830472  | 424 |
| chr24 | 20402249  | 20402672  | 424 |
| chr4  | 53162155  | 53162577  | 423 |
| chr22 | 54041863  | 54042285  | 423 |



|       |           |           |     |
|-------|-----------|-----------|-----|
| chr18 | 11549645  | 11550066  | 422 |
| chr4  | 124190688 | 124191108 | 421 |
| chr16 | 28762387  | 28762807  | 421 |
| chr4  | 123261629 | 123262048 | 420 |
| chr18 | 16526201  | 16526619  | 419 |
| chr11 | 48738894  | 48739312  | 419 |
| chr8  | 23039952  | 23040369  | 418 |
| chr4  | 121481135 | 121481551 | 417 |
| chr19 | 7767588   | 7768004   | 417 |
| chr3  | 16669829  | 16670244  | 416 |
| chr18 | 64254683  | 64255097  | 415 |
| chr2  | 75597173  | 75597586  | 414 |
| chr5  | 50541048  | 50541460  | 413 |
| chr17 | 73210585  | 73210997  | 413 |
| chr19 | 23063954  | 23064363  | 410 |
| chr19 | 12693099  | 12693508  | 410 |
| chr1  | 99267491  | 99267900  | 410 |
| chr4  | 95650329  | 95650736  | 408 |
| chr6  | 73625066  | 73625472  | 407 |
| chr21 | 61628572  | 61628978  | 407 |
| chr13 | 60753369  | 60753775  | 407 |
| chr11 | 108405821 | 108406226 | 406 |
| chr10 | 87170285  | 87170690  | 406 |
| chr4  | 20639150  | 20639554  | 405 |
| chr12 | 76540586  | 76540990  | 405 |
| chr5  | 114244788 | 114245191 | 404 |
| chr5  | 28881772  | 28882175  | 404 |
| chr2  | 136622007 | 136622408 | 402 |
| chr11 | 103811400 | 103811801 | 402 |
| chr28 | 11367702  | 11368101  | 400 |
| chr23 | 51980179  | 51980578  | 400 |
| chr10 | 90938799  | 90939198  | 400 |
| chr3  | 22867143  | 22867541  | 399 |
| chr3  | 22602096  | 22602494  | 399 |
| chr22 | 53596600  | 53596998  | 399 |
| chr21 | 56289125  | 56289523  | 399 |
| chr2  | 134752956 | 134753354 | 399 |
| chr4  | 51582891  | 51583288  | 398 |
| chr19 | 23160786  | 23161182  | 397 |
| chr2  | 111337628 | 111338019 | 392 |
| chr19 | 58651515  | 58651906  | 392 |
| chr3  | 125660038 | 125660428 | 391 |
| chr21 | 21156913  | 21157302  | 390 |
| chr19 | 54860507  | 54860895  | 389 |
| chr14 | 75942895  | 75943283  | 389 |
| chr29 | 49256371  | 49256758  | 388 |
| chr18 | 52685668  | 52686055  | 388 |
| chr23 | 45980132  | 45980516  | 385 |
| chr2  | 123510267 | 123510648 | 382 |
| chr18 | 51714045  | 51714417  | 373 |

|       |               |           |      |
|-------|---------------|-----------|------|
| chr5  | 113208091     | 113208462 | 372  |
| chr13 | 56029112      | 56029478  | 367  |
| chr11 | 106295532     | 106295890 | 359  |
| chr15 | 32952662      | 32953000  | 339  |
| chr22 | 53954741      | 53955055  | 315  |
| chr3  | 15388442      | 15388722  | 281  |
| chr6  | 121761743     | 121762276 | 534  |
| chr10 | 12135307      | 12136794  | 1488 |
| chr16 | 44332940      | 44334139  | 1200 |
| chr28 | 33862850      | 33863998  | 1149 |
| chr5  | 122816780     | 122817713 | 934  |
| chr4  | 51583478      | 51584389  | 912  |
| chr11 | 104475190     | 104475957 | 768  |
| chr26 | 22335236      | 22335959  | 724  |
| chr18 | 11352398      | 11353088  | 691  |
| chr8  | 73326199      | 73326553  | 355  |
| chr5  | 33767962      | 33768761  | 800  |
| chr25 | 39410009      | 39411118  | 1110 |
| chr8  | 107681260     | 107681708 | 449  |
| chr6  | 121697280     | 121698569 | 1290 |
| chr8  | 109031746     | 109032674 | 929  |
| chr7  | 16506252      | 16507773  | 1522 |
| chr2  | 126029946     | 126030757 | 812  |
| chr5  | 30505841      | 30506538  | 698  |
| chr15 | 25661763      | 25662439  | 677  |
| chr3  | 98036912      | 98037858  | 947  |
| chr13 | 57575796      | 57576549  | 754  |
| chr8  | 24229591      | 24230133  | 543  |
| chr6  | 16262049      | 16262493  | 445  |
| chr16 | 59065823      | 59066658  | 836  |
| chr8  | 78843875      | 78844633  | 759  |
| chr13 | 70705962      | 70706726  | 765  |
| chr3  | 85953135      | 85953793  | 659  |
| chr9  | 90229311      | 90229956  | 646  |
| chr16 | 48304454      | 48304821  | 368  |
| chr29 | 46662298      | 46663417  | 1120 |
| chr29 | 42923126      | 42923694  | 569  |
| chr26 | 50067244      | 50067650  | 407  |
| chr13 | 141907 142450 | 544       |      |
| chr8  | 24507640      | 24508122  | 483  |
| chr17 | 63312480      | 63312796  | 317  |
| chr5  | 60464971      | 60465591  | 621  |
| chr18 | 63506078      | 63506463  | 386  |
| chr8  | 24495447      | 24495893  | 447  |
| chr15 | 24669427      | 24670338  | 912  |
| chr14 | 241479 242015 | 537       |      |
| chr4  | 121721360     | 121721805 | 446  |
| chr5  | 43085192      | 43085630  | 439  |
| chr13 | 77393554      | 77393978  | 425  |
| chr22 | 59561622      | 59562039  | 418  |

|       |           |           |      |
|-------|-----------|-----------|------|
| chr10 | 104762720 | 104764178 | 1459 |
| chr8  | 73742409  | 73742935  | 527  |
| chr1  | 154620619 | 154621180 | 562  |
| chr25 | 2234896   | 2237445   | 2550 |
| chr8  | 63926794  | 63928201  | 1408 |
| chr28 | 33807900  | 33809288  | 1389 |
| chr14 | 1451806   | 1452961   | 1156 |
| chr29 | 35015618  | 35016729  | 1112 |
| chr18 | 49489794  | 49490807  | 1014 |
| chr24 | 36557624  | 36558496  | 873  |
| chr2  | 134680503 | 134681217 | 715  |
| chr12 | 9696554   | 9697243   | 690  |
| chr2  | 116696378 | 116697014 | 637  |
| chr19 | 64051376  | 64051931  | 556  |
| chr2  | 138647009 | 138647541 | 533  |
| chr26 | 37539860  | 37540369  | 510  |
| chr25 | 43513293  | 43513749  | 457  |
| chr4  | 5623834   | 5624282   | 449  |
| chr11 | 34070529  | 34072778  | 2250 |
| chr5  | 71636907  | 71638182  | 1276 |
| chr19 | 55766773  | 55767981  | 1209 |
| chr6  | 46495209  | 46496316  | 1108 |
| chr19 | 37703016  | 37704120  | 1105 |
| chr18 | 56043435  | 56044453  | 1019 |
| chr5  | 88753988  | 88754957  | 970  |
| chr8  | 74071849  | 74072757  | 909  |
| chr21 | 59900704  | 59901588  | 885  |
| chr11 | 104884237 | 104885060 | 824  |
| chr6  | 36504537  | 36505355  | 819  |
| chr23 | 27400160  | 27400968  | 809  |
| chr6  | 103284592 | 103285357 | 766  |
| chr15 | 74500642  | 74501398  | 757  |
| chr18 | 62022403  | 62023149  | 747  |
| chr29 | 6658893   | 6659636   | 744  |
| chr13 | 2459288   | 2460024   | 737  |
| chr5  | 29253846  | 29254435  | 590  |
| chr20 | 59408150  | 59408709  | 560  |
| chr19 | 37887691  | 37888236  | 546  |
| chr8  | 110720349 | 110720889 | 541  |
| chr8  | 5784005   | 5784411   | 407  |
| chr7  | 59961860  | 59962248  | 389  |
| chr11 | 77863104  | 77864885  | 1782 |
| chr18 | 25471080  | 25472528  | 1449 |
| chr19 | 39129128  | 39130431  | 1304 |
| chr19 | 54296924  | 54297979  | 1056 |
| chr13 | 55373162  | 55374121  | 960  |
| chr1  | 84504753  | 84505534  | 782  |
| chr16 | 77482846  | 77483625  | 780  |
| chr4  | 82135019  | 82135711  | 693  |
| chr18 | 47669932  | 47670591  | 660  |

|       |                   |           |      |
|-------|-------------------|-----------|------|
| chr3  | 33129338          | 33129951  | 614  |
| chr12 | 18239608          | 18240218  | 611  |
| chr11 | 74970243          | 74970828  | 586  |
| chr23 | 48761484          | 48762055  | 572  |
| chr16 | 49376843          | 49377355  | 513  |
| chr18 | 64340876          | 64341308  | 433  |
| chr8  | 7565640           | 7566067   | 428  |
| chr13 | 75698299          | 75698706  | 408  |
| chr20 | 16143998          | 16145259  | 1262 |
| chr19 | 40433888          | 40435057  | 1170 |
| chr19 | 38770507          | 38771660  | 1154 |
| chr19 | 58170852          | 58171997  | 1146 |
| chr5  | 30572158          | 30573209  | 1052 |
| chr7  | 10057936          | 10058775  | 840  |
| chr19 | 39835034          | 39835866  | 833  |
| chr23 | 52716128          | 52716885  | 758  |
| chr15 | 62381453          | 62382193  | 741  |
| chr21 | 64507319          | 64507977  | 659  |
| chr5  | 29253149          | 29253770  | 622  |
| chr14 | 48321577          | 48322152  | 576  |
| chr3  | 8818114           | 8818660   | 547  |
| chr19 | 45222514          | 45222998  | 485  |
| chr21 | 6463572           | 6463970   | 399  |
| chr11 | 98355821          | 98356186  | 366  |
| chr29 | 33702341          | 33703960  | 1620 |
| chr10 | 20461941          | 20463245  | 1305 |
| chr14 | 22086159          | 22087296  | 1138 |
| chr27 | 39117766          | 39118767  | 1002 |
| chr25 | 28190245          | 28191086  | 842  |
| chr12 | 84184742          | 84185383  | 642  |
| chr25 | 35541665          | 35542179  | 515  |
| chr26 | 25511051          | 25511560  | 510  |
| chr24 | 60612923          | 60613420  | 498  |
| chr19 | 38529474          | 38529913  | 440  |
| chr5  | 82888586          | 82888994  | 409  |
| chr19 | 58197171          | 58197486  | 316  |
| chr18 | 56818869          | 56820894  | 2026 |
| chr5  | 112941082         | 112942434 | 1353 |
| chr19 | 38555167          | 38556247  | 1081 |
| chr1  | 156318 157275 958 |           |      |
| chr4  | 95613965          | 95614902  | 938  |
| chr24 | 20730294          | 20731176  | 883  |
| chr13 | 40098773          | 40099550  | 778  |
| chr3  | 106555626         | 106556340 | 715  |
| chr10 | 90748332          | 90749022  | 691  |
| chr13 | 77240725          | 77241411  | 687  |
| chr29 | 47271962          | 47272540  | 579  |
| chr2  | 131854556         | 131855012 | 457  |
| chr13 | 70284822          | 70285188  | 367  |
| chr17 | 49718145          | 49719240  | 1096 |

|       |           |           |      |
|-------|-----------|-----------|------|
| chr16 | 58426628  | 58427361  | 734  |
| chr2  | 74024935  | 74026984  | 2050 |
| chr22 | 30106398  | 30107756  | 1359 |
| chr11 | 9237935   | 9239062   | 1128 |
| chr9  | 41874477  | 41875501  | 1025 |
| chr21 | 24500657  | 24501158  | 502  |
| chr3  | 22900478  | 22900890  | 413  |
| chr22 | 49566137  | 49566980  | 844  |
| chr28 | 43578235  | 43578897  | 663  |
| chr7  | 14816976  | 14817612  | 637  |
| chr11 | 108046953 | 108047407 | 455  |
| chr22 | 16198488  | 16199657  | 1170 |
| chr18 | 56668445  | 56669036  | 592  |
| chr23 | 27774163  | 27774751  | 589  |
| chr5  | 30490131  | 30490707  | 577  |
| chr2  | 99656656  | 99658023  | 1368 |
| chr10 | 19862694  | 19863421  | 728  |
| chr26 | 17916173  | 17916747  | 575  |
| chr21 | 64147101  | 64147675  | 575  |
| chr18 | 62503885  | 62504333  | 449  |
| chr1  | 84785768  | 84786161  | 394  |
| chr11 | 105623503 | 105623878 | 376  |
| chr23 | 52718470  | 52719530  | 1061 |
| chr18 | 49792495  | 49793241  | 747  |
| chr7  | 73519344  | 73519864  | 521  |
| chr13 | 41710765  | 41711233  | 469  |
| chr5  | 103603900 | 103604360 | 461  |
| chr29 | 31555848  | 31556741  | 894  |
| chr16 | 2445554   | 2446377   | 824  |
| chr26 | 18196702  | 18197487  | 786  |
| chr6  | 62538741  | 62539479  | 739  |
| chr7  | 51488821  | 51489453  | 633  |
| chr18 | 47499157  | 47499776  | 620  |
| chr16 | 47261003  | 47261618  | 616  |
| chr2  | 21456628  | 21457225  | 598  |
| chr22 | 50102558  | 50103148  | 591  |
| chr5  | 29750075  | 29750625  | 551  |
| chr23 | 9725341   | 9725890   | 550  |
| chr15 | 51709362  | 51709889  | 528  |
| chr29 | 29798553  | 29799078  | 526  |
| chr19 | 34060951  | 34061443  | 493  |
| chr5  | 52619652  | 52620139  | 488  |
| chr26 | 22382887  | 22383368  | 482  |
| chr23 | 11450793  | 11451265  | 473  |
| chr15 | 81177180  | 81177639  | 460  |
| chr23 | 11081056  | 11081505  | 450  |
| chr2  | 111336505 | 111336943 | 439  |
| chr18 | 11539132  | 11539569  | 438  |
| chr5  | 28385775  | 28386209  | 435  |
| chr2  | 17539881  | 17540297  | 417  |

|       |           |           |      |
|-------|-----------|-----------|------|
| chr15 | 73769112  | 73769522  | 411  |
| chr26 | 18731269  | 18731671  | 403  |
| chr21 | 49260532  | 49260934  | 403  |
| chr3  | 127043170 | 127043569 | 400  |
| chr18 | 49985296  | 49985694  | 399  |
| chr25 | 35398966  | 35399362  | 397  |
| chr12 | 84319405  | 84319795  | 391  |
| chr15 | 75160040  | 75160429  | 390  |
| chr23 | 53266199  | 53266513  | 315  |
| chr17 | 64219017  | 64219323  | 307  |
| chr5  | 28957797  | 28959237  | 1441 |
| chr1  | 136909327 | 136910032 | 706  |
| chr19 | 39916360  | 39917037  | 678  |
| chr7  | 5145454   | 5146329   | 876  |
| chr5  | 31670005  | 31670927  | 923  |
| chr25 | 40898210  | 40899166  | 957  |
| chr7  | 10962381  | 10962845  | 465  |
| chr27 | 11609339  | 11609722  | 384  |
| chr11 | 74862968  | 74864376  | 1409 |
| chr13 | 59660970  | 59662329  | 1360 |
| chr2  | 125927859 | 125928580 | 722  |
| chr22 | 15401263  | 15402134  | 872  |
| chr15 | 54490176  | 54490962  | 787  |
| chr11 | 23180575  | 23181265  | 691  |
| chr1  | 160625281 | 160625696 | 416  |
| chr20 | 9170344   | 9171028   | 685  |
| chr8  | 74368422  | 74369645  | 1224 |
| chr8  | 66199604  | 66200665  | 1062 |
| chr10 | 88082838  | 88083860  | 1023 |
| chr6  | 115601785 | 115602800 | 1016 |
| chr1  | 104692539 | 104693487 | 949  |
| chr15 | 22806656  | 22807545  | 890  |
| chr7  | 50549276  | 50549950  | 675  |
| chr10 | 66927351  | 66929565  | 2215 |
| chr16 | 44122593  | 44123771  | 1179 |
| chr22 | 60360387  | 60360954  | 568  |
| chr13 | 75509839  | 75510384  | 546  |
| chr6  | 108857160 | 108857777 | 618  |
| chr23 | 10346198  | 10346787  | 590  |
| chr12 | 70598473  | 70599661  | 1189 |
| chr8  | 24721817  | 24722317  | 501  |
| chr13 | 43439468  | 43440870  | 1403 |
| chr15 | 15537200  | 15538437  | 1238 |
| chr23 | 49965554  | 49966442  | 889  |
| chr18 | 45982681  | 45983299  | 619  |
| chr10 | 9754572   | 9755376   | 805  |
| chr7  | 46235421  | 46236055  | 635  |
| chr16 | 59062387  | 59062813  | 427  |
| chr28 | 46046818  | 46047326  | 509  |
| chr19 | 41259495  | 41259907  | 413  |

|       |               |           |      |
|-------|---------------|-----------|------|
| chr19 | 34795967      | 34797005  | 1039 |
| chr3  | 105728796     | 105729474 | 679  |
| chr18 | 33212134      | 33212601  | 468  |
| chr13 | 52664468      | 52664886  | 419  |
| chr16 | 47118513      | 47118960  | 448  |
| chr8  | 9327006       | 9327706   | 701  |
| chr2  | 138648748     | 138649314 | 567  |
| chr17 | 68369605      | 68370118  | 514  |
| chr11 | 106403752     | 106404259 | 508  |
| chr29 | 26777843      | 26778286  | 444  |
| chr25 | 37803538      | 37803966  | 429  |
| chr28 | 33880783      | 33881132  | 350  |
| chr25 | 3063412       | 3063755   | 344  |
| chr17 | 70292643      | 70292943  | 301  |
| chr10 | 88064478      | 88067123  | 2646 |
| chr11 | 86244803      | 86247248  | 2446 |
| chr23 | 13672990      | 13675244  | 2255 |
| chr21 | 20611240      | 20613076  | 1837 |
| chrX  | 72259235      | 72260975  | 1741 |
| chr26 | 18765874      | 18767614  | 1741 |
| chr15 | 26889439      | 26891114  | 1676 |
| chr9  | 99304685      | 99306350  | 1666 |
| chr15 | 30160009      | 30161653  | 1645 |
| chr8  | 20938000      | 20939631  | 1632 |
| chr8  | 15098785      | 15100415  | 1631 |
| chr11 | 99197456      | 99199086  | 1631 |
| chr18 | 56637311      | 56638912  | 1602 |
| chr18 | 23115325      | 23116914  | 1590 |
| chr21 | 66577297      | 66578877  | 1581 |
| chr23 | 19807809      | 19809366  | 1558 |
| chr1  | 153526226     | 153527774 | 1549 |
| chr3  | 123175433     | 123176976 | 1544 |
| chr4  | 16837630      | 16839141  | 1512 |
| chr10 | 74850994      | 74852503  | 1510 |
| chr26 | 38230334      | 38231835  | 1502 |
| chr8  | 80177202      | 80178695  | 1494 |
| chr12 | 32120493      | 32121957  | 1465 |
| chr4  | 11126496      | 11127933  | 1438 |
| chr2  | 138638420     | 138639847 | 1428 |
| chr19 | 58161627      | 58163048  | 1422 |
| chr3  | 72519479      | 72520896  | 1418 |
| chr8  | 8107977       | 8109389   | 1413 |
| chr4  | 92164419      | 92165787  | 1369 |
| chr4  | 96835810      | 96837177  | 1368 |
| chr24 | 348190 349551 | 1362      |      |
| chr11 | 71887781      | 71889105  | 1325 |
| chr5  | 120048165     | 120049477 | 1313 |
| chr7  | 84678727      | 84680036  | 1310 |
| chr13 | 61292520      | 61293823  | 1304 |
| chr16 | 77720685      | 77721980  | 1296 |

|       |           |           |      |
|-------|-----------|-----------|------|
| chr11 | 71886472  | 71887766  | 1295 |
| chr16 | 44132387  | 44133649  | 1263 |
| chr13 | 75128803  | 75130060  | 1258 |
| chr7  | 19883477  | 19884724  | 1248 |
| chr18 | 23118460  | 23119704  | 1245 |
| chr13 | 41720525  | 41721761  | 1237 |
| chr6  | 103301101 | 103302329 | 1229 |
| chr6  | 63059314  | 63060528  | 1215 |
| chr7  | 5606580   | 5607793   | 1214 |
| chr14 | 25850958  | 25852157  | 1200 |
| chr25 | 18810186  | 18811379  | 1194 |
| chr29 | 42919355  | 42920545  | 1191 |
| chrX  | 21081117  | 21082303  | 1187 |
| chr27 | 35398970  | 35400156  | 1187 |
| chr5  | 101469725 | 101470908 | 1184 |
| chr6  | 107496646 | 107497827 | 1182 |
| chr8  | 23042644  | 23043811  | 1168 |
| chr22 | 60571346  | 60572511  | 1166 |
| chr25 | 1063301   | 1064443   | 1143 |
| chr18 | 34638474  | 34639597  | 1124 |
| chr4  | 122664255 | 122665376 | 1122 |
| chr19 | 23678710  | 23679818  | 1109 |
| chr22 | 59850669  | 59851774  | 1106 |
| chr17 | 75724155  | 75725254  | 1100 |
| chr3  | 74458612  | 74459703  | 1092 |
| chr16 | 2216034   | 2217114   | 1081 |
| chr5  | 81597654  | 81598733  | 1080 |
| chr5  | 32843231  | 32844294  | 1064 |
| chr23 | 51052492  | 51053555  | 1064 |
| chr7  | 94358498  | 94359559  | 1062 |
| chr12 | 32921862  | 32922920  | 1059 |
| chr15 | 32661836  | 32662886  | 1051 |
| chr16 | 47264623  | 47265670  | 1048 |
| chr12 | 74521089  | 74522134  | 1046 |
| chr2  | 136521532 | 136522568 | 1037 |
| chr13 | 75806967  | 75807995  | 1029 |
| chr11 | 28502811  | 28503837  | 1027 |
| chr11 | 11632672  | 11633693  | 1022 |
| chr24 | 25451370  | 25452389  | 1020 |
| chr2  | 111258070 | 111259089 | 1020 |
| chr13 | 23674750  | 23675769  | 1020 |
| chr13 | 24028005  | 24029022  | 1018 |
| chr16 | 47267411  | 47268415  | 1005 |
| chr17 | 66935238  | 66936236  | 999  |
| chr23 | 9732082   | 9733079   | 998  |
| chr16 | 77688929  | 77689911  | 983  |
| chr18 | 15862011  | 15862985  | 975  |
| chr2  | 25284812  | 25285780  | 969  |
| chr18 | 55452663  | 55453618  | 956  |
| chr25 | 43512179  | 43513128  | 950  |



|       |               |           |     |
|-------|---------------|-----------|-----|
| chr5  | 10609799      | 10610746  | 948 |
| chr25 | 42244404      | 42245351  | 948 |
| chr2  | 74016156      | 74017099  | 944 |
| chr3  | 22476960      | 22477902  | 943 |
| chr29 | 49975362      | 49976304  | 943 |
| chr25 | 26449986      | 26450925  | 940 |
| chr4  | 64281587      | 64282525  | 939 |
| chr18 | 34060908      | 34061842  | 935 |
| chr10 | 6064364       | 6065296   | 933 |
| chr2  | 115337626     | 115338554 | 929 |
| chr19 | 38750077      | 38751004  | 928 |
| chr27 | 36002718      | 36003639  | 922 |
| chr25 | 675363 676281 | 919       |     |
| chr11 | 63292106      | 63293024  | 919 |
| chr15 | 75390581      | 75391498  | 918 |
| chr18 | 57034780      | 57035694  | 915 |
| chr23 | 31407454      | 31408367  | 914 |
| chr15 | 51657640      | 51658553  | 914 |
| chr10 | 81678076      | 81678986  | 911 |
| chr22 | 17430831      | 17431739  | 909 |
| chr19 | 20402246      | 20403154  | 909 |
| chr23 | 23749183      | 23750078  | 896 |
| chr25 | 2240218       | 2241112   | 895 |
| chr17 | 58972312      | 58973205  | 894 |
| chr11 | 4336654       | 4337543   | 890 |
| chr1  | 1546081       | 1546969   | 889 |
| chr16 | 58322504      | 58323387  | 884 |
| chr9  | 44103234      | 44104115  | 882 |
| chr9  | 72541193      | 72542072  | 880 |
| chr5  | 51974695      | 51975570  | 876 |
| chr14 | 26679531      | 26680406  | 876 |
| chr24 | 20862627      | 20863501  | 875 |
| chr3  | 121233816     | 121234686 | 871 |
| chr4  | 121468022     | 121468885 | 864 |
| chr16 | 48788839      | 48789695  | 857 |
| chr17 | 63443435      | 63444286  | 852 |
| chr2  | 6583465       | 6584314   | 850 |
| chrX  | 72243430      | 72244276  | 847 |
| chr26 | 21886692      | 21887536  | 845 |
| chr21 | 46610027      | 46610870  | 844 |
| chr2  | 131037703     | 131038544 | 842 |
| chr2  | 123351113     | 123351952 | 840 |
| chr1  | 23004456      | 23005290  | 835 |
| chr7  | 19222437      | 19223267  | 831 |
| chr13 | 54470578      | 54471408  | 831 |
| chr2  | 138633625     | 138634446 | 822 |
| chr25 | 28055280      | 28056097  | 818 |
| chr9  | 51625310      | 51626126  | 817 |
| chr19 | 12132414      | 12133226  | 813 |
| chr19 | 46859610      | 46860412  | 803 |

|       |           |           |     |
|-------|-----------|-----------|-----|
| chr18 | 11376925  | 11377723  | 799 |
| chr15 | 63096367  | 63097160  | 794 |
| chr10 | 15077290  | 15078083  | 794 |
| chr21 | 9494454   | 9495246   | 793 |
| chr18 | 63773026  | 63773818  | 793 |
| chr26 | 41016248  | 41017031  | 784 |
| chr20 | 29500353  | 29501135  | 783 |
| chr29 | 21729555  | 21730336  | 782 |
| chr18 | 52693086  | 52693867  | 782 |
| chr3  | 2494447   | 2495227   | 781 |
| chr2  | 139482714 | 139483493 | 780 |
| chr13 | 75670345  | 75671122  | 778 |
| chr13 | 75542819  | 75543596  | 778 |
| chr23 | 49952747  | 49953519  | 773 |
| chr4  | 47453841  | 47454611  | 771 |
| chr26 | 14903060  | 14903830  | 771 |
| chr23 | 8560474   | 8561243   | 770 |
| chr7  | 10979308  | 10980076  | 769 |
| chr18 | 52756978  | 52757745  | 768 |
| chr13 | 40886222  | 40886989  | 768 |
| chr10 | 36831674  | 36832439  | 766 |
| chr24 | 49744782  | 49745543  | 762 |
| chr24 | 1109811   | 1110570   | 760 |
| chr6  | 121869201 | 121869959 | 759 |
| chr20 | 8542688   | 8543446   | 759 |
| chr13 | 75810354  | 75811112  | 759 |
| chr16 | 19554862  | 19555619  | 758 |
| chr13 | 11410269  | 11411023  | 755 |
| chrX  | 23614356  | 23615108  | 753 |
| chr3  | 22861122  | 22861874  | 753 |
| chr3  | 17470943  | 17471693  | 751 |
| chr4  | 71578234  | 71578983  | 750 |
| chr2  | 26590017  | 26590763  | 747 |
| chr17 | 50983211  | 50983957  | 747 |
| chr19 | 37958161  | 37958905  | 745 |
| chr17 | 57627948  | 57628692  | 745 |
| chr24 | 39746371  | 39747114  | 744 |
| chr4  | 67946201  | 67946943  | 743 |
| chr19 | 63927058  | 63927800  | 743 |
| chr13 | 40561996  | 40562732  | 737 |
| chr1  | 68446333  | 68447069  | 737 |
| chr14 | 39053617  | 39054350  | 734 |
| chr17 | 75522070  | 75522802  | 733 |
| chr16 | 71116601  | 71117332  | 732 |
| chr18 | 64535885  | 64536615  | 731 |
| chr13 | 62037522  | 62038251  | 730 |
| chr2  | 26554971  | 26555698  | 728 |
| chr2  | 5180073   | 5180800   | 728 |
| chr11 | 96071783  | 96072503  | 721 |
| chr25 | 42141017  | 42141733  | 717 |

|       |           |           |     |
|-------|-----------|-----------|-----|
| chr18 | 56622925  | 56623641  | 717 |
| chr16 | 29426876  | 29427592  | 717 |
| chr2  | 42835906  | 42836621  | 716 |
| chr16 | 23837391  | 23838104  | 714 |
| chr12 | 46761186  | 46761899  | 714 |
| chr9  | 52381184  | 52381890  | 707 |
| chr16 | 58553305  | 58554011  | 707 |
| chr2  | 76632396  | 76633100  | 705 |
| chr13 | 37651314  | 37652018  | 705 |
| chr19 | 54514255  | 54514958  | 704 |
| chr8  | 5782944   | 5783643   | 700 |
| chr12 | 73450453  | 73451145  | 693 |
| chr8  | 109038633 | 109039324 | 692 |
| chr29 | 51850413  | 51851103  | 691 |
| chr25 | 37872910  | 37873600  | 691 |
| chr22 | 55478243  | 55478933  | 691 |
| chr28 | 26920695  | 26921380  | 686 |
| chr3  | 17481849  | 17482532  | 684 |
| chr15 | 73742284  | 73742966  | 683 |
| chr21 | 31008521  | 31009201  | 681 |
| chr2  | 135639141 | 135639820 | 680 |
| chr13 | 14689586  | 14690264  | 679 |
| chr28 | 34179602  | 34180277  | 676 |
| chr18 | 56573598  | 56574273  | 676 |
| chr4  | 99601870  | 99602543  | 674 |
| chr10 | 8726733   | 8727406   | 674 |
| chr18 | 34825714  | 34826386  | 673 |
| chr20 | 29501139  | 29501810  | 672 |
| chr12 | 32123219  | 32123887  | 669 |
| chr4  | 87709932  | 87710597  | 666 |
| chr19 | 40917085  | 40917750  | 666 |
| chr28 | 40373441  | 40374105  | 665 |
| chr19 | 40416174  | 40416838  | 665 |
| chr23 | 10345381  | 10346044  | 664 |
| chr17 | 74489177  | 74489838  | 662 |
| chr5  | 33768839  | 33769498  | 660 |
| chr13 | 23660450  | 23661106  | 657 |
| chr23 | 23750819  | 23751474  | 656 |
| chr16 | 44307560  | 44308214  | 655 |
| chr9  | 14568698  | 14569351  | 654 |
| chr23 | 15861172  | 15861825  | 654 |
| chr14 | 5911274   | 5911923   | 650 |
| chr21 | 11795623  | 11796266  | 644 |
| chr6  | 120793691 | 120794332 | 642 |
| chr9  | 91082975  | 91083615  | 641 |
| chr14 | 22088611  | 22089250  | 640 |
| chr11 | 66705094  | 66705733  | 640 |
| chr22 | 55758984  | 55759618  | 635 |
| chr16 | 44120511  | 44121145  | 635 |
| chr5  | 115152278 | 115152911 | 634 |

|       |           |           |     |
|-------|-----------|-----------|-----|
| chr5  | 28377077  | 28377710  | 634 |
| chr19 | 58959015  | 58959648  | 634 |
| chr13 | 61198116  | 61198748  | 633 |
| chr15 | 26893629  | 26894259  | 631 |
| chr7  | 10057002  | 10057630  | 629 |
| chr20 | 73819909  | 73820537  | 629 |
| chr17 | 61074427  | 61075054  | 628 |
| chr29 | 44565893  | 44566518  | 626 |
| chr13 | 75130116  | 75130740  | 625 |
| chr5  | 120380518 | 120381138 | 621 |
| chr19 | 45383364  | 45383984  | 621 |
| chr18 | 63703479  | 63704099  | 621 |
| chr23 | 9378151   | 9378770   | 620 |
| chr16 | 39470898  | 39471514  | 617 |
| chr18 | 54355591  | 54356201  | 611 |
| chr17 | 69879990  | 69880600  | 611 |
| chr15 | 14579995  | 14580605  | 611 |
| chr29 | 44016203  | 44016807  | 605 |
| chr9  | 90282390  | 90282993  | 604 |
| chr19 | 60548452  | 60549054  | 603 |
| chr8  | 106149393 | 106149991 | 599 |
| chr11 | 101430220 | 101430818 | 599 |
| chr3  | 84504971  | 84505568  | 598 |
| chr25 | 22548723  | 22549320  | 598 |
| chr17 | 57439988  | 57440585  | 598 |
| chr16 | 55224841  | 55225434  | 594 |
| chr15 | 43340916  | 43341509  | 594 |
| chr18 | 56876418  | 56877008  | 591 |
| chr22 | 59457710  | 59458299  | 590 |
| chr25 | 12713719  | 12714305  | 587 |
| chr10 | 8523745   | 8524329   | 585 |
| chr26 | 21826820  | 21827403  | 584 |
| chr11 | 48551363  | 48551945  | 583 |
| chr26 | 21846953  | 21847534  | 582 |
| chr21 | 69013441  | 69014022  | 582 |
| chr21 | 42374521  | 42375102  | 582 |
| chr16 | 41452117  | 41452696  | 580 |
| chr6  | 108687705 | 108688278 | 574 |
| chr17 | 49717189  | 49717761  | 573 |
| chr17 | 74559153  | 74559724  | 572 |
| chr29 | 50554833  | 50555400  | 568 |
| chr25 | 8734868   | 8735434   | 567 |
| chr5  | 118052429 | 118052993 | 565 |
| chr15 | 51656664  | 51657228  | 565 |
| chr9  | 44923399  | 44923962  | 564 |
| chr8  | 24361899  | 24362461  | 563 |
| chr4  | 27845950  | 27846512  | 563 |
| chr10 | 24716875  | 24717437  | 563 |
| chr2  | 138249111 | 138249670 | 560 |
| chr16 | 47039473  | 47040031  | 559 |

|       |               |           |     |
|-------|---------------|-----------|-----|
| chr19 | 34623614      | 34624171  | 558 |
| chr23 | 12300454      | 12301010  | 557 |
| chr23 | 19335230      | 19335785  | 556 |
| chr2  | 136397734     | 136398289 | 556 |
| chr5  | 110919310     | 110919863 | 554 |
| chr2  | 125926682     | 125927234 | 553 |
| chr23 | 23748086      | 23748637  | 552 |
| chr13 | 6921175       | 6921725   | 551 |
| chr2  | 130994818     | 130995367 | 550 |
| chr18 | 33214945      | 33215493  | 549 |
| chr2  | 140742439     | 140742986 | 548 |
| chr19 | 38311963      | 38312509  | 547 |
| chr13 | 56040837      | 56041382  | 546 |
| chr17 | 73139802      | 73140344  | 543 |
| chr3  | 4339214       | 4339754   | 541 |
| chr19 | 10900415      | 10900953  | 539 |
| chr11 | 74862304      | 74862841  | 538 |
| chr7  | 17097377      | 17097912  | 536 |
| chr22 | 32927209      | 32927744  | 536 |
| chr7  | 42475852      | 42476386  | 535 |
| chr12 | 74432207      | 74432740  | 534 |
| chr23 | 31289624      | 31290153  | 530 |
| chr23 | 27739826      | 27740354  | 529 |
| chr23 | 12345934      | 12346459  | 526 |
| chr18 | 52325613      | 52326138  | 526 |
| chr2  | 111374234     | 111374757 | 524 |
| chr19 | 57987039      | 57987562  | 524 |
| chr1  | 82898687      | 82899210  | 524 |
| chr9  | 100488362     | 100488883 | 522 |
| chr16 | 47528104      | 47528625  | 522 |
| chr17 | 69814740      | 69815260  | 521 |
| chr15 | 25665857      | 25666377  | 521 |
| chr13 | 80226087      | 80226607  | 521 |
| chr4  | 29784375      | 29784893  | 519 |
| chr1  | 84556907      | 84557425  | 519 |
| chr3  | 113076599     | 113077116 | 518 |
| chr12 | 32192818      | 32193332  | 515 |
| chr8  | 9360573       | 9361085   | 513 |
| chr23 | 31111617      | 31112129  | 513 |
| chr2  | 138694936     | 138695448 | 513 |
| chr11 | 9428521       | 9429033   | 513 |
| chr13 | 75842040      | 75842551  | 512 |
| chr8  | 873308 873818 | 511       |     |
| chr25 | 39435020      | 39435530  | 511 |
| chr11 | 104911525     | 104912034 | 510 |
| chr22 | 30090597      | 30091103  | 507 |
| chr16 | 44332079      | 44332585  | 507 |
| chr15 | 74533402      | 74533908  | 507 |
| chr12 | 84209989      | 84210495  | 507 |
| chr2  | 99040948      | 99041453  | 506 |

|       |           |           |     |
|-------|-----------|-----------|-----|
| chr5  | 120379737 | 120380241 | 505 |
| chr21 | 6558097   | 6558601   | 505 |
| chr19 | 39097085  | 39097589  | 505 |
| chr13 | 42872549  | 42873052  | 504 |
| chr6  | 73191953  | 73192455  | 503 |
| chr27 | 35830328  | 35830828  | 501 |
| chr16 | 59040580  | 59041080  | 501 |
| chr16 | 2022607   | 2023107   | 501 |
| chr7  | 10965432  | 10965929  | 498 |
| chr6  | 45445470  | 45445967  | 498 |
| chr4  | 71517084  | 71517579  | 496 |
| chr11 | 89532032  | 89532526  | 495 |
| chr4  | 91483625  | 91484114  | 490 |
| chr29 | 31974498  | 31974985  | 488 |
| chr23 | 16080932  | 16081419  | 488 |
| chr2  | 124795547 | 124796034 | 488 |
| chr19 | 28215507  | 28215994  | 488 |
| chr14 | 26116101  | 26116588  | 488 |
| chr21 | 20633409  | 20633895  | 487 |
| chr7  | 42217985  | 42218470  | 486 |
| chr19 | 57593892  | 57594376  | 485 |
| chr13 | 60092321  | 60092805  | 485 |
| chr18 | 11943373  | 11943856  | 484 |
| chr16 | 72302273  | 72302755  | 483 |
| chr8  | 73757275  | 73757755  | 481 |
| chr20 | 35925156  | 35925632  | 477 |
| chr2  | 74011846  | 74012322  | 477 |
| chr11 | 99194579  | 99195055  | 477 |
| chr22 | 30111239  | 30111714  | 476 |
| chr12 | 74453159  | 74453634  | 476 |
| chr5  | 28796146  | 28796619  | 474 |
| chr23 | 49332755  | 49333228  | 474 |
| chr19 | 23707407  | 23707879  | 473 |
| chr12 | 14938134  | 14938605  | 472 |
| chr5  | 103819425 | 103819895 | 471 |
| chr3  | 114224773 | 114225243 | 471 |
| chr27 | 35368473  | 35368943  | 471 |
| chr24 | 36875129  | 36875598  | 470 |
| chr11 | 107556168 | 107556637 | 470 |
| chr4  | 50703841  | 50704309  | 469 |
| chr1  | 1628905   | 1629373   | 469 |
| chr4  | 4596333   | 4596800   | 468 |
| chr17 | 76297202  | 76297666  | 465 |
| chr13 | 39802468  | 39802932  | 465 |
| chr3  | 106585215 | 106585675 | 461 |
| chr5  | 81504992  | 81505450  | 459 |
| chr29 | 25564849  | 25565306  | 458 |
| chr8  | 108710997 | 108711453 | 457 |
| chr6  | 108684152 | 108684608 | 457 |
| chr5  | 27940162  | 27940618  | 457 |

|       |           |           |     |
|-------|-----------|-----------|-----|
| chr22 | 10751858  | 10752313  | 456 |
| chr20 | 3251182   | 3251636   | 455 |
| chr23 | 31671111  | 31671564  | 454 |
| chr20 | 16598081  | 16598534  | 454 |
| chr22 | 50601288  | 50601740  | 453 |
| chr18 | 56444906  | 56445358  | 453 |
| chr9  | 90338684  | 90339133  | 450 |
| chr22 | 5685615   | 5686063   | 449 |
| chr10 | 103502743 | 103503191 | 449 |
| chr10 | 17146264  | 17146712  | 449 |
| chr12 | 84249508  | 84249955  | 448 |
| chr11 | 14120073  | 14120519  | 447 |
| chr11 | 90413578  | 90414023  | 446 |
| chr3  | 105404629 | 105405072 | 444 |
| chr11 | 11627667  | 11628110  | 444 |
| chr23 | 11834920  | 11835362  | 443 |
| chr11 | 3859424   | 3859865   | 442 |
| chr24 | 58983307  | 58983747  | 441 |
| chr18 | 11512362  | 11512802  | 441 |
| chr15 | 75535565  | 75536004  | 440 |
| chr6  | 2244067   | 2244505   | 439 |
| chr4  | 121485261 | 121485699 | 439 |
| chr4  | 121421824 | 121422261 | 438 |
| chr8  | 105127085 | 105127521 | 437 |
| chr6  | 118649850 | 118650286 | 437 |
| chr22 | 59849310  | 59849746  | 437 |
| chr22 | 15012333  | 15012769  | 437 |
| chr7  | 43049781  | 43050214  | 434 |
| chr4  | 68276948  | 68277380  | 433 |
| chr5  | 111213429 | 111213858 | 430 |
| chr10 | 13606083  | 13606512  | 430 |
| chr7  | 10406710  | 10407138  | 429 |
| chr12 | 14804318  | 14804744  | 427 |
| chr24 | 36034127  | 36034552  | 426 |
| chr21 | 32868096  | 32868521  | 426 |
| chr13 | 59000987  | 59001411  | 425 |
| chr7  | 19212095  | 19212518  | 424 |
| chr6  | 27735890  | 27736313  | 424 |
| chr24 | 20556089  | 20556512  | 424 |
| chr20 | 33682610  | 33683033  | 424 |
| chr19 | 13472140  | 13472563  | 424 |
| chr3  | 39116735  | 39117157  | 423 |
| chr21 | 31489312  | 31489734  | 423 |
| chr11 | 70879372  | 70879794  | 423 |
| chrX  | 72242618  | 72243039  | 422 |
| chr7  | 36635911  | 36636332  | 422 |
| chr6  | 118507753 | 118508171 | 419 |
| chr4  | 71623094  | 71623512  | 419 |
| chr2  | 110526572 | 110526990 | 419 |
| chr17 | 70192003  | 70192421  | 419 |

|       |           |           |     |
|-------|-----------|-----------|-----|
| chr19 | 39010981  | 39011398  | 418 |
| chr18 | 45820339  | 45820756  | 418 |
| chr7  | 45120432  | 45120848  | 417 |
| chr14 | 72121409  | 72121824  | 416 |
| chr8  | 23952959  | 23953372  | 414 |
| chr23 | 52808256  | 52808669  | 414 |
| chr25 | 23844720  | 23845132  | 413 |
| chr23 | 48147371  | 48147783  | 413 |
| chr19 | 11828403  | 11828814  | 412 |
| chr9  | 87771839  | 87772249  | 411 |
| chr20 | 35928183  | 35928593  | 411 |
| chr5  | 29205712  | 29206121  | 410 |
| chr19 | 18375343  | 18375752  | 410 |
| chr13 | 80147816  | 80148225  | 410 |
| chr4  | 121488437 | 121488845 | 409 |
| chr5  | 26671883  | 26672290  | 408 |
| chr14 | 1635680   | 1636087   | 408 |
| chr13 | 40879459  | 40879866  | 408 |
| chr7  | 59500073  | 59500479  | 407 |
| chr29 | 29943911  | 29944317  | 407 |
| chr25 | 29396441  | 29396847  | 407 |
| chr23 | 15797916  | 15798322  | 407 |
| chr18 | 54229990  | 54230396  | 407 |
| chr13 | 75799278  | 75799684  | 407 |
| chr11 | 101013531 | 101013937 | 407 |
| chr2  | 124980246 | 124980651 | 406 |
| chr11 | 48688510  | 48688915  | 406 |
| chr26 | 48568955  | 48569359  | 405 |
| chr26 | 22618366  | 22618769  | 404 |
| chr24 | 49744358  | 49744761  | 404 |
| chr13 | 80652767  | 80653170  | 404 |
| chr10 | 103066262 | 103066665 | 404 |
| chr29 | 51950665  | 51951067  | 403 |
| chr25 | 41267752  | 41268154  | 403 |
| chr23 | 10484940  | 10485342  | 403 |
| chr3  | 35415061  | 35415462  | 402 |
| chr22 | 52233088  | 52233489  | 402 |
| chr19 | 62667368  | 62667768  | 401 |
| chr19 | 54931962  | 54932362  | 401 |
| chr18 | 56922661  | 56923061  | 401 |
| chr26 | 21789323  | 21789722  | 400 |
| chr12 | 74546127  | 74546526  | 400 |
| chr1  | 131396654 | 131397053 | 400 |
| chr4  | 51581594  | 51581992  | 399 |
| chr3  | 106574457 | 106574855 | 399 |
| chr3  | 22893391  | 22893789  | 399 |
| chr26 | 43677918  | 43678316  | 399 |
| chr25 | 3204231   | 3204629   | 399 |
| chr24 | 65003450  | 65003848  | 399 |
| chr21 | 20610761  | 20611159  | 399 |



|       |           |           |      |
|-------|-----------|-----------|------|
| chr2  | 4929734   | 4930132   | 399  |
| chr18 | 53020369  | 53020767  | 399  |
| chr15 | 66098352  | 66098750  | 399  |
| chr14 | 66277507  | 66277905  | 399  |
| chr11 | 105622647 | 105623045 | 399  |
| chr11 | 102386820 | 102387218 | 399  |
| chr1  | 87341526  | 87341924  | 399  |
| chr8  | 90192900  | 90193297  | 398  |
| chr8  | 63942144  | 63942540  | 397  |
| chr3  | 121477896 | 121478291 | 396  |
| chr2  | 124234692 | 124235086 | 395  |
| chr15 | 75921844  | 75922238  | 395  |
| chr14 | 1285454   | 1285847   | 394  |
| chr26 | 21764676  | 21765067  | 392  |
| chr2  | 111310165 | 111310554 | 390  |
| chr29 | 50396263  | 50396649  | 387  |
| chr19 | 12611496  | 12611881  | 386  |
| chr19 | 64748604  | 64748986  | 383  |
| chr11 | 2389347   | 2389728   | 382  |
| chr7  | 37499587  | 37499967  | 381  |
| chr7  | 49142561  | 49142940  | 380  |
| chr17 | 73891710  | 73892086  | 377  |
| chr5  | 123479241 | 123479616 | 376  |
| chr26 | 5873489   | 5873864   | 376  |
| chr2  | 138632682 | 138633057 | 376  |
| chr8  | 73938838  | 73939212  | 375  |
| chr1  | 132080196 | 132080568 | 373  |
| chr18 | 11423140  | 11423509  | 370  |
| chr13 | 42892517  | 42892885  | 369  |
| chr7  | 50661625  | 50661987  | 363  |
| chr22 | 44873661  | 44874023  | 363  |
| chr11 | 100732516 | 100732865 | 350  |
| chr5  | 28701575  | 28701912  | 338  |
| chr23 | 31021182  | 31021519  | 338  |
| chr13 | 49393049  | 49393382  | 334  |
| chr13 | 75694249  | 75694580  | 332  |
| chr9  | 105818712 | 105819042 | 331  |
| chr7  | 50285407  | 50285719  | 313  |
| chr18 | 13576029  | 13576340  | 312  |
| chr15 | 21451701  | 21452012  | 312  |
| chr21 | 20634896  | 20635202  | 307  |
| chr20 | 1136561   | 1136856   | 296  |
| chr19 | 37940381  | 37940671  | 291  |
| chr3  | 22948517  | 22949307  | 791  |
| chr8  | 24693920  | 24694668  | 749  |
| chr7  | 51646070  | 51646548  | 479  |
| chr14 | 22097403  | 22099378  | 1976 |
| chr19 | 12125313  | 12126657  | 1345 |
| chr26 | 40175980  | 40177043  | 1064 |
| chr18 | 45984489  | 45985547  | 1059 |

|       |           |           |      |
|-------|-----------|-----------|------|
| chr18 | 3886919   | 3887874   | 956  |
| chr21 | 9492717   | 9493659   | 943  |
| chr13 | 51461070  | 51461923  | 854  |
| chr22 | 24914838  | 24915658  | 821  |
| chr6  | 73624187  | 73625004  | 818  |
| chr29 | 49037085  | 49037890  | 806  |
| chr23 | 15859908  | 15860708  | 801  |
| chr14 | 77342903  | 77343582  | 680  |
| chr5  | 10615369  | 10616034  | 666  |
| chr16 | 47969573  | 47970226  | 654  |
| chr26 | 38894493  | 38895045  | 553  |
| chr2  | 126725088 | 126725599 | 512  |
| chr23 | 36831208  | 36831711  | 504  |
| chr9  | 53335546  | 53335971  | 426  |
| chr19 | 16701490  | 16703372  | 1883 |
| chr5  | 88030141  | 88031628  | 1488 |
| chr22 | 61194293  | 61195633  | 1341 |
| chr20 | 71869380  | 71870602  | 1223 |
| chr7  | 4352127   | 4353159   | 1033 |
| chr2  | 139213865 | 139214834 | 970  |
| chr13 | 80149384  | 80150214  | 831  |
| chr17 | 64114631  | 64115455  | 825  |
| chr7  | 50356737  | 50357560  | 824  |
| chr25 | 38333665  | 38334467  | 803  |
| chr21 | 47534054  | 47534850  | 797  |
| chr10 | 3526895   | 3527633   | 739  |
| chr29 | 44595705  | 44596406  | 702  |
| chr24 | 20398852  | 20399517  | 666  |
| chr19 | 33098666  | 33099325  | 660  |
| chr1  | 22673172  | 22673791  | 620  |
| chr11 | 105659718 | 105660307 | 590  |
| chr17 | 12568603  | 12569063  | 461  |
| chr19 | 55481193  | 55482730  | 1538 |
| chr2  | 111343016 | 111344280 | 1265 |
| chr21 | 67892379  | 67893435  | 1057 |
| chr16 | 2197016   | 2198059   | 1044 |
| chr10 | 8534877   | 8535910   | 1034 |
| chr6  | 16235815  | 16236702  | 888  |
| chr10 | 76058256  | 76059024  | 769  |
| chr19 | 30848371  | 30849104  | 734  |
| chr16 | 47128244  | 47128953  | 710  |
| chr8  | 46613496  | 46614127  | 632  |
| chr2  | 42834018  | 42834504  | 487  |
| chr20 | 20843115  | 20843566  | 452  |
| chr9  | 98749512  | 98749923  | 412  |
| chr19 | 29001092  | 29001503  | 412  |
| chr28 | 33897040  | 33897438  | 399  |
| chr5  | 32920592  | 32922307  | 1716 |
| chr24 | 22274131  | 22275304  | 1174 |
| chr23 | 28008124  | 28009096  | 973  |

|       |               |           |      |
|-------|---------------|-----------|------|
| chr13 | 75836716      | 75837675  | 960  |
| chr16 | 47994054      | 47994988  | 935  |
| chr2  | 130473358     | 130474094 | 737  |
| chr18 | 54357652      | 54358366  | 715  |
| chr7  | 8842398       | 8843106   | 709  |
| chr3  | 111643047     | 111643739 | 693  |
| chr7  | 10172286      | 10172918  | 633  |
| chr11 | 81752633      | 81753080  | 448  |
| chr3  | 95081762      | 95082208  | 447  |
| chr5  | 113421945     | 113422375 | 431  |
| chr11 | 90394375      | 90394787  | 413  |
| chr28 | 33806563      | 33806971  | 409  |
| chr13 | 41035075      | 41036944  | 1870 |
| chr6  | 120641699     | 120642821 | 1123 |
| chr26 | 51186172      | 51187131  | 960  |
| chr19 | 60409896      | 60410809  | 914  |
| chr19 | 39978810      | 39979713  | 904  |
| chr12 | 35066316      | 35067176  | 861  |
| chr3  | 85365250      | 85365877  | 628  |
| chr7  | 478328 478896 | 569       |      |
| chr27 | 22184575      | 22185137  | 563  |
| chr4  | 71868931      | 71869448  | 518  |
| chr7  | 42227264      | 42227753  | 490  |
| chr23 | 23750277      | 23750741  | 465  |
| chr3  | 29976560      | 29977010  | 451  |
| chr4  | 118022175     | 118022624 | 450  |
| chr3  | 24596718      | 24597147  | 430  |
| chr6  | 121698669     | 121699028 | 360  |
| chr29 | 33917802      | 33918083  | 282  |
| chr26 | 51554341      | 51556090  | 1750 |
| chr8  | 43601596      | 43602670  | 1075 |
| chr16 | 1787902       | 1788976   | 1075 |
| chr17 | 64186475      | 64187531  | 1057 |
| chr4  | 13317787      | 13318606  | 820  |
| chr10 | 21181034      | 21181802  | 769  |
| chr18 | 53326075      | 53326833  | 759  |
| chr22 | 61111530      | 61112285  | 756  |
| chr27 | 41851059      | 41851800  | 742  |
| chr19 | 8512058       | 8512719   | 662  |
| chr4  | 5381994       | 5382619   | 626  |
| chr12 | 74463489      | 74463994  | 506  |
| chr25 | 4835741       | 4836185   | 445  |
| chr28 | 42851744      | 42853060  | 1317 |
| chr26 | 48470273      | 48471230  | 958  |
| chr27 | 35434940      | 35435757  | 818  |
| chr25 | 39142633      | 39143409  | 777  |
| chr10 | 20967405      | 20967946  | 542  |
| chr7  | 4990895       | 4991417   | 523  |
| chr13 | 21886434      | 21886878  | 445  |
| chr5  | 118256483     | 118256917 | 435  |

|       |               |           |      |
|-------|---------------|-----------|------|
| chr3  | 22548368      | 22548777  | 410  |
| chr2  | 1707476       | 1708724   | 1249 |
| chr26 | 20860155      | 20861240  | 1086 |
| chr3  | 118066515     | 118067267 | 753  |
| chr13 | 42866440      | 42867180  | 741  |
| chr17 | 73134657      | 73135355  | 699  |
| chr18 | 49528327      | 49528998  | 672  |
| chr16 | 956392 957059 | 668       |      |
| chr17 | 73174928      | 73175486  | 559  |
| chr24 | 187876 188399 | 524       |      |
| chr27 | 17517128      | 17517636  | 509  |
| chr14 | 7851532       | 7852018   | 487  |
| chr2  | 49580420      | 49580877  | 458  |
| chr26 | 14555794      | 14556411  | 618  |
| chr10 | 79257219      | 79257770  | 552  |
| chr11 | 21501756      | 21502158  | 403  |
| chr13 | 45502996      | 45503384  | 389  |
| chr18 | 24331113      | 24331475  | 363  |
| chr23 | 50000386      | 50001086  | 701  |
| chr23 | 44403379      | 44403932  | 554  |
| chr21 | 59890850      | 59891753  | 904  |
| chr23 | 27988074      | 27988677  | 604  |
| chr24 | 20893961      | 20894516  | 556  |
| chr16 | 48786451      | 48787396  | 946  |
| chr26 | 42168993      | 42169868  | 876  |
| chr4  | 98483784      | 98484642  | 859  |
| chr23 | 9738971       | 9739745   | 775  |
| chr18 | 42165772      | 42166504  | 733  |
| chr5  | 33867013      | 33867698  | 686  |
| chr16 | 44331409      | 44332039  | 631  |
| chr19 | 44875357      | 44875954  | 598  |
| chr14 | 610525 611114 | 590       |      |
| chr26 | 11609877      | 11610443  | 567  |
| chr18 | 33955701      | 33956266  | 566  |
| chr7  | 15103401      | 15103961  | 561  |
| chr11 | 86247433      | 86247981  | 549  |
| chr29 | 17463154      | 17463695  | 542  |
| chr3  | 10565694      | 10566160  | 467  |
| chr22 | 57638616      | 57639077  | 462  |
| chr16 | 44153334      | 44153773  | 440  |
| chr2  | 133730682     | 133731113 | 432  |
| chr25 | 2238875       | 2239304   | 430  |
| chr5  | 30993918      | 30994339  | 422  |
| chr11 | 100914074     | 100914494 | 421  |
| chr6  | 67958966      | 67959379  | 414  |
| chr9  | 104931376     | 104931788 | 413  |
| chr23 | 27818145      | 27818557  | 413  |
| chr24 | 40816196      | 40816594  | 399  |
| chr2  | 136720773     | 136721171 | 399  |
| chr10 | 14984277      | 14984675  | 399  |

|       |           |           |      |
|-------|-----------|-----------|------|
| chr4  | 68218411  | 68218806  | 396  |
| chr1  | 123076014 | 123076405 | 392  |
| chr25 | 37273145  | 37273535  | 391  |
| chr10 | 5033769   | 5034159   | 391  |
| chr8  | 24444263  | 24444652  | 390  |
| chr23 | 15912292  | 15912677  | 386  |
| chr5  | 120488189 | 120488573 | 385  |
| chr2  | 40157993  | 40158373  | 381  |
| chr4  | 124241258 | 124241635 | 378  |
| chr19 | 8474756   | 8475115   | 360  |
| chr8  | 65248481  | 65248839  | 359  |
| chr10 | 76397914  | 76398264  | 351  |
| chr5  | 33566915  | 33567262  | 348  |
| chr23 | 18591468  | 18591805  | 338  |
| chr18 | 51191418  | 51191749  | 332  |
| chr8  | 73771343  | 73771657  | 315  |
| chr28 | 33932835  | 33933145  | 311  |
| chr13 | 60441265  | 60441571  | 307  |
| chr21 | 7014523   | 7014826   | 304  |
| chr3  | 126954103 | 126954885 | 783  |
| chr8  | 73523148  | 73523999  | 852  |
| chr21 | 2061868   | 2062279   | 412  |
| chr27 | 36113975  | 36114240  | 266  |
| chr3  | 24656348  | 24656921  | 574  |
| chr8  | 73858682  | 73859616  | 935  |
| chr7  | 14336444  | 14337232  | 789  |
| chr23 | 27599153  | 27600080  | 928  |
| chr8  | 24387686  | 24388071  | 386  |
| chr1  | 2167143   | 2168863   | 1721 |
| chr2  | 21506321  | 21507512  | 1192 |
| chr7  | 42573076  | 42573649  | 574  |
| chr19 | 8564099   | 8564610   | 512  |
| chr19 | 40435291  | 40435686  | 396  |
| chr8  | 73794269  | 73794707  | 439  |
| chr16 | 46911084  | 46912738  | 1655 |
| chr6  | 113364809 | 113366319 | 1511 |
| chr3  | 62688631  | 62690050  | 1420 |
| chr5  | 28912276  | 28913079  | 804  |
| chr25 | 37239373  | 37240092  | 720  |
| chr17 | 62171095  | 62171623  | 529  |
| chr8  | 9359222   | 9360376   | 1155 |
| chr12 | 58683523  | 58684020  | 498  |
| chr14 | 79949707  | 79950140  | 434  |
| chr11 | 14107957  | 14109308  | 1352 |
| chr15 | 62559487  | 62560107  | 621  |
| chr2  | 74019359  | 74021036  | 1678 |
| chr7  | 37568051  | 37569380  | 1330 |
| chr19 | 37859226  | 37860353  | 1128 |
| chr19 | 47281233  | 47282222  | 990  |
| chr19 | 14049692  | 14050413  | 722  |

|       |               |           |      |
|-------|---------------|-----------|------|
| chr27 | 40755315      | 40756261  | 947  |
| chr17 | 4156298       | 4156873   | 576  |
| chr1  | 143793980     | 143794525 | 546  |
| chr13 | 73995822      | 73996768  | 947  |
| chr7  | 14365586      | 14366737  | 1152 |
| chr7  | 85412352      | 85413261  | 910  |
| chr2  | 123459306     | 123459976 | 671  |
| chr26 | 18177565      | 18178030  | 466  |
| chr26 | 20125619      | 20126651  | 1033 |
| chr5  | 82081126      | 82082334  | 1209 |
| chr5  | 28935236      | 28935950  | 715  |
| chr8  | 73306997      | 73307415  | 419  |
| chr14 | 29195194      | 29195891  | 698  |
| chr7  | 14677120      | 14677706  | 587  |
| chr25 | 43485271      | 43485997  | 727  |
| chr3  | 105167154     | 105167823 | 670  |
| chr19 | 23712273      | 23712833  | 561  |
| chr8  | 23955386      | 23955789  | 404  |
| chr8  | 23050693      | 23051128  | 436  |
| chr13 | 51462369      | 51462727  | 359  |
| chr17 | 64221020      | 64221485  | 466  |
| chr8  | 80216403      | 80216724  | 322  |
| chr18 | 707066 707727 | 662       |      |
| chr19 | 46896313      | 46896901  | 589  |
| chr19 | 26644610      | 26645448  | 839  |
| chr7  | 16319061      | 16319644  | 584  |
| chr6  | 72743097      | 72743477  | 381  |
| chrX  | 35195342      | 35195779  | 438  |
| chr1  | 159083085     | 159083515 | 431  |
| chr29 | 47269803      | 47270208  | 406  |
| chr2  | 134905744     | 134906129 | 386  |
| chr13 | 63502787      | 63503157  | 371  |
| chr8  | 7601923       | 7602256   | 334  |
| chr29 | 49306096      | 49306429  | 334  |
| chr8  | 73843870      | 73844192  | 323  |
| chr23 | 18409542      | 18409833  | 292  |
| chr8  | 73844949      | 73845381  | 433  |
| chr5  | 71670356      | 71672553  | 2198 |
| chr25 | 40818606      | 40820662  | 2057 |
| chr17 | 68367485      | 68369472  | 1988 |
| chr6  | 84626290      | 84628215  | 1926 |
| chr8  | 93912608      | 93914334  | 1727 |
| chr7  | 23843708      | 23845366  | 1659 |
| chrX  | 40427379      | 40429011  | 1633 |
| chr24 | 27150489      | 27152117  | 1629 |
| chr5  | 29183389      | 29184982  | 1594 |
| chr10 | 81676155      | 81677724  | 1570 |
| chr8  | 5776003       | 5777506   | 1504 |
| chr14 | 33889643      | 33891120  | 1478 |
| chr25 | 2809208       | 2810656   | 1449 |

|       |           |           |      |
|-------|-----------|-----------|------|
| chr24 | 35140809  | 35142256  | 1448 |
| chr19 | 39164869  | 39166244  | 1376 |
| chr3  | 118879570 | 118880885 | 1316 |
| chr15 | 65645856  | 65647147  | 1292 |
| chr9  | 74250329  | 74251617  | 1289 |
| chr14 | 80585449  | 80586732  | 1284 |
| chr21 | 47613204  | 47614486  | 1283 |
| chr11 | 47259827  | 47261108  | 1282 |
| chr10 | 72664002  | 72665274  | 1273 |
| chr13 | 28495743  | 28497012  | 1270 |
| chr26 | 8943597   | 8944863   | 1267 |
| chr7  | 1884811   | 1886059   | 1249 |
| chr18 | 57299025  | 57300241  | 1217 |
| chr5  | 35298364  | 35299564  | 1201 |
| chr8  | 63659860  | 63661037  | 1178 |
| chr16 | 67440636  | 67441804  | 1169 |
| chr17 | 61075127  | 61076281  | 1155 |
| chr7  | 108571347 | 108572485 | 1139 |
| chr11 | 28284405  | 28285541  | 1137 |
| chr25 | 43433550  | 43434680  | 1131 |
| chr2  | 122972063 | 122973193 | 1131 |
| chr21 | 68476508  | 68477632  | 1125 |
| chr1  | 113586389 | 113587501 | 1113 |
| chr7  | 42283282  | 42284388  | 1107 |
| chr4  | 69737525  | 69738631  | 1107 |
| chr5  | 112236689 | 112237790 | 1102 |
| chr25 | 22547217  | 22548311  | 1095 |
| chr29 | 30030245  | 30031332  | 1088 |
| chr10 | 17788062  | 17789149  | 1088 |
| chr19 | 24684569  | 24685648  | 1080 |
| chr4  | 99598920  | 99599996  | 1077 |
| chr1  | 99903385  | 99904444  | 1060 |
| chr3  | 15639681  | 15640737  | 1057 |
| chr15 | 66194575  | 66195614  | 1040 |
| chr13 | 57574235  | 57575272  | 1038 |
| chr3  | 102699418 | 102700441 | 1024 |
| chr9  | 19637618  | 19638631  | 1014 |
| chr19 | 58192990  | 58193993  | 1004 |
| chr12 | 22968270  | 22969266  | 997  |
| chr5  | 10734791  | 10735786  | 996  |
| chr4  | 122983422 | 122984408 | 987  |
| chr24 | 51560477  | 51561458  | 982  |
| chr23 | 23883605  | 23884579  | 975  |
| chr7  | 3973077   | 3974044   | 968  |
| chr1  | 145721251 | 145722218 | 968  |
| chr22 | 61046126  | 61047090  | 965  |
| chr3  | 18610736  | 18611693  | 958  |
| chr1  | 133448969 | 133449906 | 938  |
| chr15 | 57277618  | 57278549  | 932  |
| chr19 | 39980900  | 39981822  | 923  |

|       |           |           |     |
|-------|-----------|-----------|-----|
| chr1  | 73793651  | 73794569  | 919 |
| chr10 | 83836259  | 83837176  | 918 |
| chr7  | 14295275  | 14296191  | 917 |
| chr9  | 106386407 | 106387318 | 912 |
| chr1  | 151601552 | 151602462 | 911 |
| chr22 | 30573729  | 30574635  | 907 |
| chr19 | 41937327  | 41938233  | 907 |
| chr5  | 28756426  | 28757329  | 904 |
| chr23 | 11844185  | 11845084  | 900 |
| chr19 | 44882983  | 44883882  | 900 |
| chr1  | 74558066  | 74558964  | 899 |
| chr17 | 72357531  | 72358427  | 897 |
| chr7  | 12968040  | 12968935  | 896 |
| chr3  | 105765826 | 105766720 | 895 |
| chr6  | 119066225 | 119067114 | 890 |
| chr17 | 47450096  | 47450985  | 890 |
| chr9  | 70495764  | 70496649  | 886 |
| chr11 | 97744662  | 97745544  | 883 |
| chr2  | 134753455 | 134754335 | 881 |
| chr16 | 48447229  | 48448108  | 880 |
| chr20 | 6608120   | 6608996   | 877 |
| chr17 | 72350268  | 72351144  | 877 |
| chr16 | 2264784   | 2265658   | 875 |
| chr3  | 35989870  | 35990742  | 873 |
| chr26 | 34966165  | 34967035  | 871 |
| chr21 | 28190376  | 28191244  | 869 |
| chr24 | 20853332  | 20854197  | 866 |
| chr28 | 41181297  | 41182158  | 862 |
| chr18 | 52879622  | 52880478  | 857 |
| chr19 | 45732208  | 45733059  | 852 |
| chr3  | 33808448  | 33809293  | 846 |
| chr5  | 33525117  | 33525961  | 845 |
| chr19 | 64037741  | 64038583  | 843 |
| chr5  | 50539401  | 50540240  | 840 |
| chr23 | 8285500   | 8286333   | 834 |
| chr2  | 99345738  | 99346566  | 829 |
| chr7  | 17406209  | 17407029  | 821 |
| chr5  | 10537877  | 10538695  | 819 |
| chr11 | 14500089  | 14500905  | 817 |
| chr8  | 93696270  | 93697085  | 816 |
| chr2  | 92328057  | 92328867  | 811 |
| chr19 | 27350542  | 27351351  | 810 |
| chr8  | 116102134 | 116102939 | 806 |
| chr27 | 30622163  | 30622966  | 804 |
| chr1  | 1628037   | 1628837   | 801 |
| chr22 | 15403653  | 15404452  | 800 |
| chr4  | 117880117 | 117880915 | 799 |
| chr3  | 22940757  | 22941555  | 799 |
| chr6  | 79723059  | 79723854  | 796 |
| chr28 | 43741171  | 43741956  | 786 |



|       |           |           |     |
|-------|-----------|-----------|-----|
| chr13 | 14691208  | 14691993  | 786 |
| chr15 | 22791416  | 22792198  | 783 |
| chr23 | 30208505  | 30209285  | 781 |
| chr18 | 54315545  | 54316325  | 781 |
| chr7  | 38314734  | 38315513  | 780 |
| chr2  | 134757229 | 134758008 | 780 |
| chr18 | 61976796  | 61977574  | 779 |
| chr2  | 21543296  | 21544072  | 777 |
| chr3  | 106501183 | 106501953 | 771 |
| chr19 | 59105831  | 59106601  | 771 |
| chr29 | 51997176  | 51997944  | 769 |
| chr25 | 12711307  | 12712074  | 768 |
| chr1  | 145354229 | 145354995 | 767 |
| chr6  | 58828973  | 58829737  | 765 |
| chr5  | 120466072 | 120466835 | 764 |
| chr3  | 115097549 | 115098311 | 763 |
| chr18 | 47879385  | 47880146  | 762 |
| chr22 | 50750387  | 50751146  | 760 |
| chr3  | 22532724  | 22533482  | 759 |
| chr4  | 79304127  | 79304879  | 753 |
| chr13 | 76272581  | 76273331  | 751 |
| chr19 | 13580628  | 13581376  | 749 |
| chr18 | 17362597  | 17363344  | 748 |
| chr23 | 46368978  | 46369717  | 740 |
| chr2  | 128593875 | 128594606 | 732 |
| chr4  | 71545090  | 71545818  | 729 |
| chr25 | 3003891   | 3004618   | 728 |
| chr5  | 120505620 | 120506341 | 722 |
| chr5  | 112088553 | 112089272 | 720 |
| chr25 | 1975599   | 1976318   | 720 |
| chr9  | 106562064 | 106562781 | 718 |
| chr7  | 6526865   | 6527582   | 718 |
| chr19 | 63558206  | 63558923  | 718 |
| chr25 | 1919836   | 1920550   | 715 |
| chr4  | 121457274 | 121457987 | 714 |
| chr2  | 135727802 | 135728515 | 714 |
| chr15 | 62379418  | 62380131  | 714 |
| chr6  | 108674869 | 108675581 | 713 |
| chr3  | 22618754  | 22619466  | 713 |
| chr19 | 56884120  | 56884825  | 706 |
| chr13 | 23661229  | 23661933  | 705 |
| chr11 | 96161563  | 96162267  | 705 |
| chr29 | 45078605  | 45079305  | 701 |
| chr5  | 112235479 | 112236177 | 699 |
| chr14 | 1977167   | 1977865   | 699 |
| chr19 | 58167948  | 58168643  | 696 |
| chr11 | 77869751  | 77870446  | 696 |
| chr13 | 53862256  | 53862949  | 694 |
| chr13 | 15174537  | 15175226  | 690 |
| chr5  | 29751757  | 29752445  | 689 |

|       |           |           |     |
|-------|-----------|-----------|-----|
| chr18 | 55839089  | 55839777  | 689 |
| chr15 | 76433186  | 76433874  | 689 |
| chr21 | 58016900  | 58017587  | 688 |
| chr20 | 3249242   | 3249929   | 688 |
| chr10 | 21182014  | 21182701  | 688 |
| chr17 | 58768906  | 58769592  | 687 |
| chr7  | 37391576  | 37392258  | 683 |
| chr6  | 63090465  | 63091146  | 682 |
| chr9  | 62316695  | 62317375  | 681 |
| chr19 | 65143207  | 65143887  | 681 |
| chr13 | 79895312  | 79895988  | 677 |
| chr1  | 1589385   | 1590061   | 677 |
| chr10 | 90294542  | 90295217  | 676 |
| chr21 | 65846465  | 65847137  | 673 |
| chr10 | 90292020  | 90292692  | 673 |
| chr21 | 6517370   | 6518039   | 670 |
| chr7  | 38317507  | 38318172  | 666 |
| chr22 | 56175270  | 56175935  | 666 |
| chr2  | 130429447 | 130430112 | 666 |
| chr28 | 25492625  | 25493289  | 665 |
| chr1  | 145352652 | 145353316 | 665 |
| chr5  | 88037721  | 88038382  | 662 |
| chr8  | 64927588  | 64928246  | 659 |
| chr3  | 20060671  | 20061329  | 659 |
| chr18 | 24013909  | 24014567  | 659 |
| chr7  | 4509627   | 4510284   | 658 |
| chr24 | 44046232  | 44046885  | 654 |
| chr19 | 39127676  | 39128329  | 654 |
| chr18 | 55456400  | 55457052  | 653 |
| chr1  | 137741786 | 137742437 | 652 |
| chr10 | 68473124  | 68473774  | 651 |
| chr1  | 152257933 | 152258582 | 650 |
| chr21 | 61629161  | 61629809  | 649 |
| chr25 | 21513526  | 21514173  | 648 |
| chr3  | 51913487  | 51914133  | 647 |
| chr19 | 39901911  | 39902557  | 647 |
| chr2  | 14081173  | 14081816  | 644 |
| chr29 | 45534714  | 45535356  | 643 |
| chr11 | 9233465   | 9234107   | 643 |
| chr23 | 23879597  | 23880238  | 642 |
| chr12 | 34325322  | 34325963  | 642 |
| chr22 | 52490109  | 52490749  | 641 |
| chr4  | 106660652 | 106661291 | 640 |
| chr25 | 40900668  | 40901305  | 638 |
| chr24 | 23957866  | 23958503  | 638 |
| chr19 | 10936182  | 10936819  | 638 |
| chr13 | 31722406  | 31723042  | 637 |
| chr4  | 98482365  | 98483000  | 636 |
| chr12 | 29826104  | 29826738  | 635 |
| chr5  | 111181774 | 111182407 | 634 |

|       |           |           |     |
|-------|-----------|-----------|-----|
| chr5  | 88036336  | 88036969  | 634 |
| chr4  | 116920382 | 116921015 | 634 |
| chr12 | 84255492  | 84256125  | 634 |
| chr5  | 119901973 | 119902605 | 633 |
| chr11 | 104665713 | 104666345 | 633 |
| chr29 | 49036274  | 49036905  | 632 |
| chr3  | 124920259 | 124920889 | 631 |
| chr11 | 104887260 | 104887887 | 628 |
| chr13 | 77627737  | 77628362  | 626 |
| chr3  | 126101913 | 126102534 | 622 |
| chr21 | 68798410  | 68799030  | 621 |
| chr4  | 117617833 | 117618451 | 619 |
| chr19 | 37957264  | 37957880  | 617 |
| chr9  | 53327936  | 53328551  | 616 |
| chr1  | 144387520 | 144388135 | 616 |
| chr4  | 98038110  | 98038722  | 613 |
| chr10 | 48122306  | 48122918  | 613 |
| chr17 | 66175650  | 66176257  | 608 |
| chr10 | 25840630  | 25841237  | 608 |
| chr18 | 18685277  | 18685883  | 607 |
| chr10 | 17702386  | 17702992  | 607 |
| chr3  | 105466086 | 105466691 | 606 |
| chr2  | 75910863  | 75911467  | 605 |
| chr23 | 23857759  | 23858361  | 603 |
| chr22 | 11609756  | 11610358  | 603 |
| chr29 | 49712748  | 49713347  | 600 |
| chr18 | 13571156  | 13571755  | 600 |
| chr4  | 98039660  | 98040258  | 599 |
| chr25 | 35539689  | 35540286  | 598 |
| chr10 | 83577190  | 83577787  | 598 |
| chr6  | 118652847 | 118653443 | 597 |
| chr18 | 62699740  | 62700333  | 594 |
| chr12 | 84252948  | 84253541  | 594 |
| chr22 | 59676371  | 59676963  | 593 |
| chr4  | 122663343 | 122663930 | 588 |
| chr23 | 52659602  | 52660189  | 588 |
| chr21 | 33822992  | 33823577  | 586 |
| chr27 | 48380811  | 48381395  | 585 |
| chr15 | 54026796  | 54027380  | 585 |
| chrX  | 22948692  | 22949275  | 584 |
| chr5  | 113918696 | 113919279 | 584 |
| chr25 | 38565798  | 38566381  | 584 |
| chr19 | 46832880  | 46833462  | 583 |
| chr15 | 65652758  | 65653337  | 580 |
| chr20 | 35924550  | 35925128  | 579 |
| chr14 | 39051577  | 39052153  | 577 |
| chr3  | 85952493  | 85953067  | 575 |
| chr11 | 71594674  | 71595248  | 575 |
| chr6  | 108694059 | 108694632 | 574 |
| chr13 | 3372916   | 3373489   | 574 |

|       |           |           |     |
|-------|-----------|-----------|-----|
| chr1  | 146928292 | 146928865 | 574 |
| chr18 | 11376286  | 11376858  | 573 |
| chr12 | 51063493  | 51064065  | 573 |
| chr28 | 44520357  | 44520927  | 571 |
| chr25 | 1304962   | 1305530   | 569 |
| chr10 | 45673485  | 45674052  | 568 |
| chr9  | 67286732  | 67287298  | 567 |
| chr17 | 70228917  | 70229483  | 567 |
| chr12 | 33362408  | 33362972  | 565 |
| chr22 | 57245975  | 57246538  | 564 |
| chr9  | 106388169 | 106388731 | 563 |
| chr9  | 74634999  | 74635561  | 563 |
| chr11 | 11704719  | 11705281  | 563 |
| chr15 | 6406195   | 6406755   | 561 |
| chr17 | 70387965  | 70388524  | 560 |
| chr16 | 46812828  | 46813387  | 560 |
| chr7  | 5047173   | 5047728   | 556 |
| chr19 | 40415614  | 40416169  | 556 |
| chr20 | 4965475   | 4966029   | 555 |
| chr24 | 49132524  | 49133077  | 554 |
| chr23 | 31150574  | 31151127  | 554 |
| chr5  | 75984251  | 75984802  | 552 |
| chr2  | 116697541 | 116698091 | 551 |
| chr7  | 17129883  | 17130432  | 550 |
| chr11 | 100886752 | 100887300 | 549 |
| chr10 | 74921128  | 74921675  | 548 |
| chr5  | 75733831  | 75734377  | 547 |
| chr23 | 46379968  | 46380514  | 547 |
| chr2  | 74024375  | 74024921  | 547 |
| chr26 | 5869804   | 5870348   | 545 |
| chr14 | 61209946  | 61210489  | 544 |
| chr18 | 11649261  | 11649803  | 543 |
| chr13 | 78425396  | 78425938  | 543 |
| chr13 | 52663453  | 52663995  | 543 |
| chr4  | 71683413  | 71683954  | 542 |
| chr13 | 80585439  | 80585976  | 538 |
| chr3  | 33828517  | 33829052  | 536 |
| chr21 | 59305453  | 59305988  | 536 |
| chr11 | 14130593  | 14131128  | 536 |
| chr12 | 64735068  | 64735600  | 533 |
| chr24 | 44255529  | 44256060  | 532 |
| chr19 | 41477860  | 41478391  | 532 |
| chr11 | 9467369   | 9467896   | 528 |
| chr22 | 59558642  | 59559168  | 527 |
| chr3  | 113593793 | 113594318 | 526 |
| chr19 | 23161916  | 23162441  | 526 |
| chr11 | 107593090 | 107593615 | 526 |
| chr2  | 125489454 | 125489978 | 525 |
| chr18 | 11586785  | 11587308  | 524 |
| chr15 | 32738753  | 32739275  | 523 |

|       |           |           |     |
|-------|-----------|-----------|-----|
| chr2  | 74012452  | 74012973  | 522 |
| chr7  | 69057879  | 69058399  | 521 |
| chr18 | 22692499  | 22693017  | 519 |
| chr14 | 21250226  | 21250744  | 519 |
| chr1  | 83272737  | 83273255  | 519 |
| chr29 | 48826761  | 48827277  | 517 |
| chr11 | 48683672  | 48684188  | 517 |
| chr11 | 107195118 | 107195633 | 516 |
| chr8  | 60184625  | 60185139  | 515 |
| chr17 | 70405390  | 70405902  | 513 |
| chr1  | 85639191  | 85639701  | 511 |
| chr11 | 1645756   | 1646265   | 510 |
| chr25 | 22141964  | 22142471  | 508 |
| chr7  | 14821108  | 14821613  | 506 |
| chr18 | 11321438  | 11321943  | 506 |
| chr4  | 36672915  | 36673418  | 504 |
| chr6  | 121049814 | 121050315 | 502 |
| chr12 | 74531414  | 74531914  | 501 |
| chr10 | 88085040  | 88085540  | 501 |
| chr20 | 44420872  | 44421370  | 499 |
| chr14 | 61274657  | 61275155  | 499 |
| chr23 | 10344558  | 10345055  | 498 |
| chr18 | 51595787  | 51596284  | 498 |
| chr5  | 113257214 | 113257709 | 496 |
| chr4  | 71859598  | 71860092  | 495 |
| chr1  | 57458698  | 57459192  | 495 |
| chr9  | 74218787  | 74219280  | 494 |
| chr29 | 29685267  | 29685760  | 494 |
| chr12 | 74538310  | 74538803  | 494 |
| chr2  | 139122071 | 139122563 | 493 |
| chr13 | 75694582  | 75695074  | 493 |
| chr5  | 121808082 | 121808571 | 490 |
| chr2  | 36083781  | 36084270  | 490 |
| chr8  | 77683579  | 77684067  | 489 |
| chr2  | 124231683 | 124232170 | 488 |
| chr12 | 68237860  | 68238347  | 488 |
| chr2  | 136395627 | 136396113 | 487 |
| chr4  | 74076128  | 74076612  | 485 |
| chr11 | 74971964  | 74972447  | 484 |
| chr24 | 48957543  | 48958024  | 482 |
| chr22 | 60180709  | 60181190  | 482 |
| chr7  | 64578391  | 64578870  | 480 |
| chr3  | 33016045  | 33016523  | 479 |
| chr11 | 106777265 | 106777740 | 476 |
| chr6  | 51515926  | 51516400  | 475 |
| chr24 | 60978636  | 60979110  | 475 |
| chr3  | 22991235  | 22991707  | 473 |
| chr20 | 29514861  | 29515333  | 473 |
| chr16 | 75653789  | 75654261  | 473 |
| chr13 | 80084341  | 80084813  | 473 |

|       |           |           |     |
|-------|-----------|-----------|-----|
| chr8  | 74335792  | 74336263  | 472 |
| chr1  | 132082053 | 132082524 | 472 |
| chr18 | 54356336  | 54356806  | 471 |
| chr20 | 3188855   | 3189324   | 470 |
| chr29 | 25765993  | 25766459  | 467 |
| chr6  | 107093276 | 107093741 | 466 |
| chr25 | 37459859  | 37460324  | 466 |
| chr15 | 25734019  | 25734484  | 466 |
| chr13 | 52985696  | 52986161  | 466 |
| chr5  | 33767279  | 33767743  | 465 |
| chr23 | 48767408  | 48767872  | 465 |
| chr13 | 75702296  | 75702760  | 465 |
| chr13 | 40277606  | 40278070  | 465 |
| chr4  | 33423345  | 33423807  | 463 |
| chr2  | 111846928 | 111847390 | 463 |
| chr8  | 73099701  | 73100162  | 462 |
| chr19 | 20343611  | 20344071  | 461 |
| chr16 | 2098334   | 2098794   | 461 |
| chr3  | 123195759 | 123196217 | 459 |
| chr28 | 33807241  | 33807699  | 459 |
| chr24 | 44269803  | 44270261  | 459 |
| chr11 | 81452925  | 81453383  | 459 |
| chr23 | 11949735  | 11950192  | 458 |
| chr25 | 28054822  | 28055278  | 457 |
| chr18 | 55455894  | 55456349  | 456 |
| chr7  | 43764730  | 43765183  | 454 |
| chr25 | 1056223   | 1056676   | 454 |
| chr17 | 73152198  | 73152651  | 454 |
| chr9  | 90388574  | 90389026  | 453 |
| chr29 | 43172150  | 43172602  | 453 |
| chr22 | 59540018  | 59540470  | 453 |
| chr19 | 42215174  | 42215626  | 453 |
| chr21 | 6520765   | 6521216   | 452 |
| chr5  | 108823170 | 108823620 | 451 |
| chr17 | 73184891  | 73185341  | 451 |
| chr23 | 11843320  | 11843769  | 450 |
| chr19 | 59427270  | 59427719  | 450 |
| chr29 | 49035626  | 49036074  | 449 |
| chr20 | 4955521   | 4955969   | 449 |
| chr24 | 41095510  | 41095956  | 447 |
| chr21 | 19208955  | 19209401  | 447 |
| chr19 | 60451148  | 60451594  | 447 |
| chr2  | 134716130 | 134716575 | 446 |
| chr2  | 76118215  | 76118659  | 445 |
| chr19 | 30343963  | 30344407  | 445 |
| chr12 | 35067732  | 35068175  | 444 |
| chr18 | 53014396  | 53014837  | 442 |
| chr17 | 12587285  | 12587726  | 442 |
| chr15 | 75462948  | 75463389  | 442 |
| chr11 | 74867560  | 74868001  | 442 |

|       |           |           |     |
|-------|-----------|-----------|-----|
| chr23 | 46112725  | 46113165  | 441 |
| chr9  | 108137630 | 108138069 | 440 |
| chr21 | 20649774  | 20650213  | 440 |
| chr1  | 41781402  | 41781841  | 440 |
| chr15 | 76158679  | 76159117  | 439 |
| chr19 | 46095303  | 46095740  | 438 |
| chr11 | 69037796  | 69038233  | 438 |
| chr5  | 113147018 | 113147453 | 436 |
| chr23 | 18820900  | 18821334  | 435 |
| chr4  | 121466090 | 121466523 | 434 |
| chr3  | 127032317 | 127032750 | 434 |
| chr19 | 6723902   | 6724335   | 434 |
| chr15 | 74563900  | 74564333  | 434 |
| chr11 | 90269501  | 90269933  | 433 |
| chr11 | 81751365  | 81751797  | 433 |
| chr18 | 62024835  | 62025266  | 432 |
| chr7  | 18842580  | 18843010  | 431 |
| chr22 | 48112215  | 48112645  | 431 |
| chr8  | 7559361   | 7559790   | 430 |
| chr3  | 35991231  | 35991660  | 430 |
| chr4  | 98888505  | 98888933  | 429 |
| chr3  | 106500361 | 106500789 | 429 |
| chr18 | 56858938  | 56859366  | 429 |
| chr18 | 48866430  | 48866857  | 428 |
| chr1  | 123122625 | 123123052 | 428 |
| chr7  | 14337339  | 14337764  | 426 |
| chr17 | 70399199  | 70399624  | 426 |
| chr25 | 2962817   | 2963241   | 425 |
| chr23 | 51982240  | 51982664  | 425 |
| chr23 | 27401368  | 27401792  | 425 |
| chr14 | 22088088  | 22088512  | 425 |
| chr29 | 49112364  | 49112787  | 424 |
| chr29 | 48299927  | 48300350  | 424 |
| chr15 | 64006283  | 64006706  | 424 |
| chr11 | 47281086  | 47281509  | 424 |
| chr1  | 84670911  | 84671334  | 424 |
| chr25 | 3178499   | 3178921   | 423 |
| chr8  | 60191528  | 60191949  | 422 |
| chr8  | 45756521  | 45756941  | 421 |
| chr22 | 11610501  | 11610921  | 421 |
| chr2  | 74321683  | 74322103  | 421 |
| chr17 | 69815657  | 69816077  | 421 |
| chr14 | 67999934  | 68000354  | 421 |
| chr1  | 1580473   | 1580893   | 421 |
| chr24 | 20097751  | 20098170  | 420 |
| chr7  | 57327582  | 57328000  | 419 |
| chr23 | 27739073  | 27739491  | 419 |
| chr19 | 54154549  | 54154967  | 419 |
| chr15 | 55635504  | 55635922  | 419 |
| chr13 | 37681880  | 37682298  | 419 |

|       |           |           |     |
|-------|-----------|-----------|-----|
| chr26 | 22377608  | 22378025  | 418 |
| chr14 | 22096035  | 22096452  | 418 |
| chr3  | 114204831 | 114205247 | 417 |
| chr5  | 33566478  | 33566893  | 416 |
| chr3  | 5538467   | 5538882   | 416 |
| chr20 | 25590146  | 25590561  | 416 |
| chr13 | 45323471  | 45323885  | 415 |
| chr21 | 28837375  | 28837788  | 414 |
| chr14 | 22094699  | 22095112  | 414 |
| chr29 | 45789023  | 45789435  | 413 |
| chr23 | 31108157  | 31108568  | 412 |
| chr19 | 56284946  | 56285357  | 412 |
| chr19 | 54167890  | 54168301  | 412 |
| chr13 | 40865764  | 40866175  | 412 |
| chr8  | 24697662  | 24698072  | 411 |
| chr4  | 105186450 | 105186860 | 411 |
| chr18 | 48628707  | 48629117  | 411 |
| chr13 | 14721928  | 14722338  | 411 |
| chr4  | 118707286 | 118707695 | 410 |
| chr4  | 13317321  | 13317730  | 410 |
| chr3  | 28923738  | 28924147  | 410 |
| chr26 | 35195515  | 35195924  | 410 |
| chr25 | 2988125   | 2988534   | 410 |
| chr23 | 27831818  | 27832227  | 410 |
| chr22 | 59677007  | 59677416  | 410 |
| chr13 | 76111749  | 76112158  | 410 |
| chr4  | 8874799   | 8875207   | 409 |
| chr21 | 60217584  | 60217992  | 409 |
| chr17 | 67960032  | 67960440  | 409 |
| chr17 | 47772688  | 47773096  | 409 |
| chr23 | 31173417  | 31173824  | 408 |
| chr15 | 22796742  | 22797149  | 408 |
| chr28 | 32884589  | 32884995  | 407 |
| chr25 | 34379303  | 34379709  | 407 |
| chr2  | 140754457 | 140754863 | 407 |
| chr19 | 41474661  | 41475067  | 407 |
| chr6  | 69748356  | 69748761  | 406 |
| chr5  | 108600434 | 108600839 | 406 |
| chr3  | 22466249  | 22466654  | 406 |
| chr23 | 15891824  | 15892229  | 406 |
| chr11 | 76474503  | 76474908  | 406 |
| chr1  | 83508676  | 83509081  | 406 |
| chr12 | 68228078  | 68228482  | 405 |
| chr5  | 30575254  | 30575657  | 404 |
| chr29 | 46351246  | 46351649  | 404 |
| chr21 | 33569889  | 33570292  | 404 |
| chr2  | 123023321 | 123023724 | 404 |
| chr7  | 25668329  | 25668731  | 403 |
| chr5  | 32851890  | 32852292  | 403 |
| chr18 | 47597708  | 47598110  | 403 |



|       |           |           |     |
|-------|-----------|-----------|-----|
| chr8  | 7607764   | 7608165   | 402 |
| chr7  | 52205958  | 52206359  | 402 |
| chr5  | 33863645  | 33864046  | 402 |
| chr16 | 39565270  | 39565671  | 402 |
| chr27 | 26355841  | 26356241  | 401 |
| chr23 | 31132580  | 31132980  | 401 |
| chr11 | 104909860 | 104910260 | 401 |
| chr1  | 12368097  | 12368497  | 401 |
| chr3  | 127444270 | 127444669 | 400 |
| chr3  | 114452528 | 114452927 | 400 |
| chr3  | 24594533  | 24594932  | 400 |
| chr28 | 26062875  | 26063274  | 400 |
| chr13 | 75537490  | 75537889  | 400 |
| chr13 | 38765571  | 38765970  | 400 |
| chr12 | 84182265  | 84182664  | 400 |
| chr9  | 90284688  | 90285086  | 399 |
| chr8  | 7801590   | 7801988   | 399 |
| chr7  | 39665516  | 39665914  | 399 |
| chr4  | 124192202 | 124192600 | 399 |
| chr4  | 30812416  | 30812814  | 399 |
| chr4  | 7509679   | 7510077   | 399 |
| chr3  | 123228525 | 123228923 | 399 |
| chr28 | 46048747  | 46049145  | 399 |
| chr25 | 43232291  | 43232689  | 399 |
| chr25 | 40238509  | 40238907  | 399 |
| chr24 | 64987099  | 64987497  | 399 |
| chr24 | 1072169   | 1072567   | 399 |
| chr22 | 15966493  | 15966891  | 399 |
| chr20 | 4969836   | 4970234   | 399 |
| chr19 | 65219629  | 65220027  | 399 |
| chr19 | 34578574  | 34578972  | 399 |
| chr18 | 53324135  | 53324533  | 399 |
| chr17 | 63961721  | 63962119  | 399 |
| chr16 | 2122377   | 2122775   | 399 |
| chr13 | 22176082  | 22176480  | 399 |
| chr12 | 84256847  | 84257245  | 399 |
| chr11 | 90422088  | 90422486  | 399 |
| chr10 | 21663014  | 21663412  | 399 |
| chr10 | 20852257  | 20852655  | 399 |
| chr5  | 111851500 | 111851897 | 398 |
| chr11 | 98365222  | 98365619  | 398 |
| chr9  | 78478489  | 78478885  | 397 |
| chr21 | 42443258  | 42443654  | 397 |
| chr14 | 21188818  | 21189214  | 397 |
| chr5  | 121446677 | 121447071 | 395 |
| chr19 | 44999185  | 44999578  | 394 |
| chr19 | 12122658  | 12123051  | 394 |
| chr22 | 50726007  | 50726399  | 393 |
| chr29 | 30636762  | 30637153  | 392 |
| chr24 | 41691477  | 41691867  | 391 |

|       |           |           |      |
|-------|-----------|-----------|------|
| chr18 | 61978628  | 61979018  | 391  |
| chr5  | 112048814 | 112049203 | 390  |
| chr24 | 41780645  | 41781033  | 389  |
| chr15 | 66200211  | 66200599  | 389  |
| chr16 | 19561423  | 19561810  | 388  |
| chr16 | 26563896  | 26564280  | 385  |
| chr25 | 22259391  | 22259774  | 384  |
| chr29 | 49973610  | 49973992  | 383  |
| chr21 | 65805388  | 65805770  | 383  |
| chr13 | 55105257  | 55105638  | 382  |
| chr9  | 26589357  | 26589737  | 381  |
| chr19 | 46856796  | 46857175  | 380  |
| chr13 | 72445266  | 72445645  | 380  |
| chr7  | 19900520  | 19900898  | 379  |
| chr11 | 10524256  | 10524634  | 379  |
| chr13 | 11408978  | 11409355  | 378  |
| chr17 | 4833442   | 4833818   | 377  |
| chr13 | 57575284  | 57575660  | 377  |
| chr16 | 41435438  | 41435813  | 376  |
| chr13 | 63427153  | 63427528  | 376  |
| chr7  | 18423460  | 18423834  | 375  |
| chr2  | 140623740 | 140624114 | 375  |
| chr4  | 57717959  | 57718332  | 374  |
| chr2  | 126724713 | 126725086 | 374  |
| chr8  | 78845170  | 78845537  | 368  |
| chr18 | 23603332  | 23603697  | 366  |
| chr1  | 45790967  | 45791331  | 365  |
| chr23 | 9721657   | 9722018   | 362  |
| chr8  | 73882619  | 73882979  | 361  |
| chr18 | 34225224  | 34225584  | 361  |
| chr13 | 38836488  | 38836843  | 356  |
| chr29 | 48852616  | 48852969  | 354  |
| chr2  | 74018882  | 74019235  | 354  |
| chr13 | 77652316  | 77652669  | 354  |
| chr18 | 34054994  | 34055345  | 352  |
| chr5  | 27341818  | 27342161  | 344  |
| chr2  | 124205111 | 124205451 | 341  |
| chr21 | 59425683  | 59426008  | 326  |
| chr10 | 24669244  | 24669565  | 322  |
| chr11 | 9212096   | 9212416   | 321  |
| chr19 | 40432485  | 40432801  | 317  |
| chr24 | 50889402  | 50889700  | 299  |
| chr15 | 32436603  | 32436899  | 297  |
| chr23 | 8263469   | 8263764   | 296  |
| chr25 | 3385277   | 3385553   | 277  |
| chr8  | 73761675  | 73761939  | 265  |
| chr8  | 73294786  | 73295028  | 243  |
| chr17 | 70136459  | 70137761  | 1303 |
| chr21 | 20606946  | 20607637  | 692  |
| chr16 | 44129212  | 44129900  | 689  |

|       |               |           |      |
|-------|---------------|-----------|------|
| chr25 | 37518369      | 37518909  | 541  |
| chr26 | 23492928      | 23494511  | 1584 |
| chr13 | 26208298      | 26209178  | 881  |
| chr18 | 53029728      | 53031088  | 1361 |
| chr15 | 21856674      | 21857111  | 438  |
| chr2  | 111336958     | 111337507 | 550  |
| chr11 | 106749275     | 106749723 | 449  |
| chr8  | 24470759      | 24471176  | 418  |
| chr22 | 58743090      | 58743479  | 390  |
| chr19 | 25415701      | 25416483  | 783  |
| chr9  | 90305490      | 90306591  | 1102 |
| chr24 | 64971217      | 64971763  | 547  |
| chr4  | 96131913      | 96133630  | 1718 |
| chr19 | 38372541      | 38374078  | 1538 |
| chr21 | 18882824      | 18884273  | 1450 |
| chr3  | 118883380     | 118884555 | 1176 |
| chr24 | 837181 838237 | 1057      |      |
| chr13 | 77195050      | 77196041  | 992  |
| chr21 | 61661279      | 61662222  | 944  |
| chr10 | 5026131       | 5027072   | 942  |
| chr23 | 21861616      | 21862523  | 908  |
| chr7  | 2535649       | 2536535   | 887  |
| chr22 | 58644831      | 58645682  | 852  |
| chr18 | 48452342      | 48453189  | 848  |
| chr10 | 12114726      | 12115469  | 744  |
| chr17 | 5058417       | 5059128   | 712  |
| chr3  | 15425685      | 15426342  | 658  |
| chr7  | 43723555      | 43724210  | 656  |
| chr7  | 4507504       | 4508109   | 606  |
| chr25 | 36449233      | 36449831  | 599  |
| chr22 | 61053746      | 61054325  | 580  |
| chr16 | 44084084      | 44084621  | 538  |
| chr23 | 27870158      | 27870660  | 503  |
| chr18 | 35075593      | 35076080  | 488  |
| chr10 | 10766794      | 10767242  | 449  |
| chr24 | 64983502      | 64983922  | 421  |
| chr9  | 104525920     | 104526336 | 417  |
| chr23 | 23764012      | 23764425  | 414  |
| chr2  | 125988861     | 125989273 | 413  |
| chr7  | 70514062      | 70514467  | 406  |
| chr13 | 61149069      | 61149467  | 399  |
| chr18 | 56577269      | 56578955  | 1687 |
| chr3  | 22503575      | 22505061  | 1487 |
| chr5  | 120451636     | 120452996 | 1361 |
| chrX  | 75398908      | 75400133  | 1226 |
| chr6  | 99404925      | 99406080  | 1156 |
| chr22 | 60361845      | 60362961  | 1117 |
| chr5  | 32837468      | 32838557  | 1090 |
| chr5  | 114981634     | 114982716 | 1083 |
| chr19 | 63510359      | 63511396  | 1038 |

|       |               |           |      |
|-------|---------------|-----------|------|
| chr1  | 152264126     | 152265150 | 1025 |
| chr12 | 25037674      | 25038641  | 968  |
| chr2  | 115113698     | 115114418 | 721  |
| chr17 | 64201259      | 64201961  | 703  |
| chr19 | 12332752      | 12333345  | 594  |
| chr5  | 116937014     | 116937578 | 565  |
| chr21 | 47614488      | 47615046  | 559  |
| chr10 | 43843924      | 43844476  | 553  |
| chr8  | 78539681      | 78540214  | 534  |
| chr22 | 57336578      | 57337063  | 486  |
| chr29 | 48794045      | 48794510  | 466  |
| chr11 | 104691569     | 104692018 | 450  |
| chr20 | 65532660      | 65533102  | 443  |
| chr5  | 97544590      | 97545022  | 433  |
| chr7  | 46192142      | 46192571  | 430  |
| chr6  | 16252989      | 16253413  | 425  |
| chr18 | 53558485      | 53558881  | 397  |
| chr3  | 127858523     | 127858850 | 328  |
| chr29 | 38312140      | 38314196  | 2057 |
| chr17 | 19694907      | 19696249  | 1343 |
| chr2  | 21388161      | 21389281  | 1121 |
| chr7  | 4988591       | 4989542   | 952  |
| chr4  | 89783061      | 89783985  | 925  |
| chr2  | 99038101      | 99039007  | 907  |
| chr7  | 44485767      | 44486642  | 876  |
| chr17 | 73159332      | 73160181  | 850  |
| chr23 | 20456433      | 20457279  | 847  |
| chr7  | 37576285      | 37577114  | 830  |
| chr15 | 51740633      | 51741410  | 778  |
| chr18 | 23473718      | 23474455  | 738  |
| chr25 | 35691099      | 35691649  | 551  |
| chr7  | 5047897       | 5048438   | 542  |
| chr15 | 22793362      | 22793865  | 504  |
| chr17 | 55862162      | 55862577  | 416  |
| chr13 | 60181926      | 60182325  | 400  |
| chr19 | 60533519      | 60534635  | 1117 |
| chr8  | 863194 864121 | 928       |      |
| chr15 | 27092558      | 27093290  | 733  |
| chr28 | 5330174       | 5330827   | 654  |
| chr13 | 68926793      | 68927419  | 627  |
| chr18 | 11423772      | 11424295  | 524  |
| chr7  | 9679078       | 9679589   | 512  |
| chr29 | 18825269      | 18825780  | 512  |
| chr3  | 105165447     | 105165949 | 503  |
| chr15 | 34586863      | 34587354  | 492  |
| chr2  | 140048475     | 140049489 | 1015 |
| chr21 | 39974024      | 39974911  | 888  |
| chr18 | 53508456      | 53509218  | 763  |
| chr11 | 40330350      | 40331094  | 745  |
| chr18 | 11806352      | 11807008  | 657  |

|       |           |           |      |
|-------|-----------|-----------|------|
| chr1  | 2718910   | 2719561   | 652  |
| chr20 | 5047658   | 5048273   | 616  |
| chr18 | 23298411  | 23298984  | 574  |
| chr12 | 32109747  | 32110312  | 566  |
| chr5  | 68968319  | 68968853  | 535  |
| chr1  | 110662710 | 110663206 | 497  |
| chr13 | 60151958  | 60152425  | 468  |
| chr23 | 48778774  | 48779228  | 455  |
| chr16 | 49338704  | 49339152  | 449  |
| chr25 | 40421499  | 40421876  | 378  |
| chr24 | 40262492  | 40263705  | 1214 |
| chr25 | 28068610  | 28069671  | 1062 |
| chr24 | 40809919  | 40810944  | 1026 |
| chr22 | 51293061  | 51293933  | 873  |
| chr13 | 67720153  | 67720995  | 843  |
| chr9  | 47259810  | 47260564  | 755  |
| chr9  | 90292898  | 90293638  | 741  |
| chr14 | 22082903  | 22083582  | 680  |
| chr13 | 54471550  | 54472174  | 625  |
| chr6  | 121827841 | 121828420 | 580  |
| chr15 | 13523502  | 13523998  | 497  |
| chr18 | 49810814  | 49811282  | 469  |
| chr7  | 53436478  | 53436937  | 460  |
| chr22 | 60171702  | 60172143  | 442  |
| chr15 | 29749687  | 29750128  | 442  |
| chr29 | 34636280  | 34636703  | 424  |
| chr3  | 127372326 | 127372744 | 419  |
| chr18 | 7088647   | 7088995   | 349  |
| chr3  | 123220949 | 123221282 | 334  |
| chr16 | 48697457  | 48698468  | 1012 |
| chr14 | 52504085  | 52505077  | 993  |
| chr29 | 33918085  | 33918754  | 670  |
| chr18 | 62668113  | 62668751  | 639  |
| chr6  | 109304112 | 109304630 | 519  |
| chr29 | 49592204  | 49592686  | 483  |
| chr4  | 34961049  | 34961496  | 448  |
| chr13 | 59434918  | 59435361  | 444  |
| chr2  | 128470564 | 128471432 | 869  |
| chr8  | 73737173  | 73737967  | 795  |
| chr28 | 46063699  | 46064463  | 765  |
| chr5  | 28879897  | 28880507  | 611  |
| chr2  | 102428710 | 102429313 | 604  |
| chr10 | 87518449  | 87519051  | 603  |
| chr21 | 22742157  | 22742694  | 538  |
| chr24 | 60747066  | 60747549  | 484  |
| chr13 | 77302517  | 77302978  | 462  |
| chr7  | 19939576  | 19940005  | 430  |
| chr11 | 28285682  | 28286111  | 430  |
| chr11 | 90301472  | 90301895  | 424  |
| chr8  | 50707226  | 50707979  | 754  |

|       |           |           |      |
|-------|-----------|-----------|------|
| chr29 | 44563860  | 44564567  | 708  |
| chr2  | 111682009 | 111682492 | 484  |
| chr13 | 64763383  | 64763758  | 376  |
| chr15 | 24671988  | 24672736  | 749  |
| chr18 | 24586420  | 24587030  | 611  |
| chr13 | 74414703  | 74415184  | 482  |
| chr16 | 44090589  | 44091043  | 455  |
| chr25 | 44036164  | 44036579  | 416  |
| chr7  | 39029378  | 39030458  | 1081 |
| chr19 | 38732891  | 38733695  | 805  |
| chr29 | 50405079  | 50405842  | 764  |
| chr2  | 111335561 | 111336309 | 749  |
| chr18 | 49951878  | 49952623  | 746  |
| chr2  | 135101799 | 135102505 | 707  |
| chr9  | 6678871   | 6679472   | 602  |
| chr12 | 53338028  | 53338624  | 597  |
| chr18 | 6951138   | 6951712   | 575  |
| chr8  | 45667640  | 45668168  | 529  |
| chr24 | 3950155   | 3950665   | 511  |
| chr15 | 75531657  | 75532150  | 494  |
| chr29 | 44736961  | 44737451  | 491  |
| chr22 | 12066481  | 12066956  | 476  |
| chr13 | 31725962  | 31726416  | 455  |
| chr4  | 71607013  | 71607457  | 445  |
| chr6  | 16260210  | 16260653  | 444  |
| chr13 | 14719934  | 14720376  | 443  |
| chr29 | 26771468  | 26771908  | 441  |
| chr3  | 124921048 | 124921481 | 434  |
| chr22 | 1946455   | 1946882   | 428  |
| chr23 | 15805245  | 15805671  | 427  |
| chr18 | 62669881  | 62670303  | 423  |
| chr3  | 73957525  | 73957946  | 422  |
| chr29 | 49110735  | 49111150  | 416  |
| chr13 | 41031162  | 41031575  | 414  |
| chr28 | 40401000  | 40401411  | 412  |
| chr5  | 30321113  | 30321519  | 407  |
| chr3  | 124560399 | 124560805 | 407  |
| chr27 | 39115525  | 39115925  | 401  |
| chr18 | 52853797  | 52854196  | 400  |
| chr5  | 121399905 | 121400303 | 399  |
| chr5  | 32918844  | 32919242  | 399  |
| chr26 | 50431262  | 50431660  | 399  |
| chr19 | 27911865  | 27912263  | 399  |
| chr21 | 47622189  | 47622580  | 392  |
| chr16 | 67206227  | 67206608  | 382  |
| chr25 | 30894982  | 30895358  | 377  |
| chr18 | 23572957  | 23573308  | 352  |
| chr22 | 48413195  | 48413539  | 345  |
| chr13 | 75817549  | 75817889  | 341  |
| chr2  | 129886486 | 129886815 | 330  |

|       |               |           |      |
|-------|---------------|-----------|------|
| chr11 | 11741908      | 11742212  | 305  |
| chr20 | 5858488       | 5858769   | 282  |
| chr10 | 25843559      | 25845095  | 1537 |
| chr3  | 22683915      | 22684451  | 537  |
| chr19 | 56611717      | 56612306  | 590  |
| chr8  | 73839897      | 73840317  | 421  |
| chr26 | 43730695      | 43731106  | 412  |
| chr17 | 15639072      | 15639309  | 238  |
| chr7  | 102475271     | 102475616 | 346  |
| chr19 | 40974067      | 40974799  | 733  |
| chr25 | 34029340      | 34029853  | 514  |
| chr22 | 10170876      | 10171273  | 398  |
| chr5  | 117518061     | 117519473 | 1413 |
| chr23 | 1302405       | 1303719   | 1315 |
| chr25 | 941867 942871 | 1005      |      |
| chr28 | 33864905      | 33865305  | 401  |
| chr11 | 109403395     | 109404655 | 1261 |
| chr3  | 61484994      | 61485914  | 921  |
| chr16 | 43316074      | 43316640  | 567  |
| chr8  | 62044024      | 62044463  | 440  |
| chr1  | 74180541      | 74181487  | 947  |
| chr22 | 59848524      | 59849237  | 714  |
| chr25 | 944000 944545 | 546       |      |
| chr22 | 54314662      | 54315237  | 576  |
| chr19 | 38962824      | 38963275  | 452  |
| chr5  | 112137034     | 112138417 | 1384 |
| chr19 | 39062055      | 39062852  | 798  |
| chr26 | 31337755      | 31338417  | 663  |
| chr2  | 135124535     | 135125093 | 559  |
| chr22 | 59677703      | 59678084  | 382  |
| chr9  | 47241388      | 47241975  | 588  |
| chr8  | 24388593      | 24389128  | 536  |
| chr2  | 111656830     | 111657431 | 602  |
| chr3  | 116026591     | 116027041 | 451  |
| chr25 | 28060819      | 28061124  | 306  |
| chr2  | 393540 394185 | 646       |      |
| chr29 | 51978867      | 51979322  | 456  |
| chr13 | 54834752      | 54835439  | 688  |
| chr29 | 33700752      | 33701277  | 526  |
| chr11 | 49744641      | 49745116  | 476  |
| chr27 | 39221749      | 39222325  | 577  |
| chr19 | 51920571      | 51921033  | 463  |
| chr1  | 20644120      | 20644468  | 349  |
| chr13 | 57573513      | 57573987  | 475  |
| chr7  | 19213574      | 19213985  | 412  |
| chr11 | 76364847      | 76365426  | 580  |
| chr13 | 25500281      | 25500697  | 417  |
| chr21 | 65538707      | 65539120  | 414  |
| chr17 | 48809530      | 48809911  | 382  |
| chr29 | 49305589      | 49305961  | 373  |

|       |               |           |      |
|-------|---------------|-----------|------|
| chr1  | 114237115     | 114237473 | 359  |
| chr19 | 38980684      | 38980943  | 260  |
| chr19 | 38974402      | 38975571  | 1170 |
| chr8  | 24720259      | 24720657  | 399  |
| chr17 | 17446291      | 17446637  | 347  |
| chr23 | 27598302      | 27599057  | 756  |
| chr15 | 74640082      | 74641663  | 1582 |
| chr5  | 29958868      | 29959552  | 685  |
| chr13 | 74417418      | 74417828  | 411  |
| chr18 | 49950030      | 49951006  | 977  |
| chr28 | 46054273      | 46054983  | 711  |
| chr8  | 73758530      | 73759078  | 549  |
| chr19 | 65231538      | 65232396  | 859  |
| chr19 | 12677912      | 12678257  | 346  |
| chr12 | 34329349      | 34329805  | 457  |
| chr14 | 64336762      | 64337326  | 565  |
| chr17 | 65961001      | 65961414  | 414  |
| chr8  | 72613176      | 72613564  | 389  |
| chr5  | 10611719      | 10612099  | 381  |
| chr23 | 28014729      | 28015065  | 337  |
| chr15 | 71861489      | 71861824  | 336  |
| chr12 | 70974482      | 70975664  | 1183 |
| chr27 | 38658731      | 38659760  | 1030 |
| chr22 | 55930595      | 55931589  | 995  |
| chr15 | 74521456      | 74522437  | 982  |
| chr4  | 33426667      | 33427607  | 941  |
| chr18 | 55205777      | 55206687  | 911  |
| chr22 | 7229645       | 7230528   | 884  |
| chr16 | 59045751      | 59046625  | 875  |
| chr4  | 123626923     | 123627792 | 870  |
| chr19 | 64689518      | 64690376  | 859  |
| chr27 | 852417 853238 | 822       |      |
| chr2  | 135099753     | 135100547 | 795  |
| chr5  | 100129205     | 100129996 | 792  |
| chr23 | 46111881      | 46112629  | 749  |
| chr3  | 22620663      | 22621393  | 731  |
| chr19 | 25796943      | 25797666  | 724  |
| chr5  | 114984254     | 114984897 | 644  |
| chr15 | 76027744      | 76028359  | 616  |
| chr8  | 5810960       | 5811533   | 574  |
| chr29 | 34840548      | 34841116  | 569  |
| chr1  | 84503318      | 84503864  | 547  |
| chr8  | 62042707      | 62043220  | 514  |
| chr22 | 26871995      | 26872504  | 510  |
| chr13 | 17759056      | 17759536  | 481  |
| chr7  | 42785392      | 42785844  | 453  |
| chr9  | 90305075      | 90305488  | 414  |
| chr16 | 75196561      | 75196967  | 407  |
| chr26 | 21884693      | 21885009  | 317  |
| chr25 | 21763585      | 21765090  | 1506 |



|       |           |           |      |
|-------|-----------|-----------|------|
| chr18 | 11632088  | 11633355  | 1268 |
| chr16 | 38728308  | 38729549  | 1242 |
| chr2  | 136429522 | 136430681 | 1160 |
| chr13 | 56357311  | 56358382  | 1072 |
| chr8  | 48464738  | 48465787  | 1050 |
| chr18 | 55837374  | 55838411  | 1038 |
| chr15 | 20035728  | 20036713  | 986  |
| chr14 | 22091791  | 22092697  | 907  |
| chr10 | 76398273  | 76399137  | 865  |
| chr18 | 62511481  | 62512265  | 785  |
| chr28 | 12429276  | 12429972  | 697  |
| chrX  | 31427983  | 31428637  | 655  |
| chr22 | 16902210  | 16902843  | 634  |
| chr7  | 57590574  | 57591193  | 620  |
| chr11 | 9425993   | 9426605   | 613  |
| chr7  | 17090670  | 17091277  | 608  |
| chr10 | 19485595  | 19486077  | 483  |
| chr5  | 121243336 | 121243785 | 450  |
| chr13 | 17315447  | 17315867  | 421  |
| chr29 | 47909541  | 47909944  | 404  |
| chr17 | 16989159  | 16989561  | 403  |
| chr28 | 46059618  | 46060018  | 401  |
| chr8  | 72535045  | 72535443  | 399  |
| chr21 | 25180059  | 25180434  | 376  |
| chr5  | 7618962   | 7619318   | 357  |
| chr8  | 24489995  | 24490294  | 300  |
| chr5  | 52921428  | 52922899  | 1472 |
| chr23 | 28006913  | 28008103  | 1191 |
| chr13 | 41664588  | 41665708  | 1121 |
| chr3  | 115689754 | 115690750 | 997  |
| chr19 | 17670665  | 17671607  | 943  |
| chr22 | 17557211  | 17558143  | 933  |
| chr10 | 74126111  | 74127018  | 908  |
| chr11 | 9244514   | 9245370   | 857  |
| chr29 | 33706893  | 33707739  | 847  |
| chr25 | 29070565  | 29071400  | 836  |
| chr3  | 15647003  | 15647833  | 831  |
| chr28 | 10781928  | 10782743  | 816  |
| chr18 | 11324507  | 11325273  | 767  |
| chr13 | 70707154  | 70707900  | 747  |
| chr25 | 20256883  | 20257619  | 737  |
| chr13 | 59931261  | 59931957  | 697  |
| chr25 | 43551969  | 43552578  | 610  |
| chr24 | 20886292  | 20886892  | 601  |
| chr27 | 35441593  | 35442172  | 580  |
| chr17 | 66895395  | 66895965  | 571  |
| chr3  | 35491277  | 35491818  | 542  |
| chr29 | 46668872  | 46669406  | 535  |
| chr21 | 20654057  | 20654547  | 491  |
| chr19 | 18439440  | 18439903  | 464  |

|       |           |           |      |
|-------|-----------|-----------|------|
| chr20 | 627549    | 627993    | 445  |
| chr3  | 22962107  | 22962540  | 434  |
| chr8  | 79975337  | 79975769  | 433  |
| chr1  | 87332838  | 87333241  | 404  |
| chr24 | 60619360  | 60619758  | 399  |
| chr2  | 136398782 | 136399180 | 399  |
| chr16 | 77695026  | 77695373  | 348  |
| chr10 | 8575766   | 8576087   | 322  |
| chr8  | 65073258  | 65074431  | 1174 |
| chr22 | 50595679  | 50596637  | 959  |
| chr14 | 59325183  | 59326023  | 841  |
| chr1  | 155214707 | 155215543 | 837  |
| chr5  | 120099843 | 120100610 | 768  |
| chr19 | 40449167  | 40449863  | 697  |
| chr4  | 95663513  | 95664164  | 652  |
| chr22 | 30226728  | 30227348  | 621  |
| chr26 | 23488402  | 23489008  | 607  |
| chr2  | 27645836  | 27646389  | 554  |
| chr7  | 10827499  | 10828015  | 517  |
| chr29 | 45774551  | 45774993  | 443  |
| chr5  | 111323511 | 111323945 | 435  |
| chr6  | 16253515  | 16253938  | 424  |
| chr18 | 23642784  | 23643205  | 422  |
| chr17 | 72720060  | 72720472  | 413  |
| chr1  | 83275763  | 83276168  | 406  |
| chr3  | 22892374  | 22892777  | 404  |
| chr3  | 121236717 | 121237091 | 375  |
| chr6  | 101901414 | 101902582 | 1169 |
| chr13 | 22156819  | 22157842  | 1024 |
| chr13 | 56350380  | 56351387  | 1008 |
| chr14 | 42138488  | 42139442  | 955  |
| chr5  | 33884363  | 33885183  | 821  |
| chr3  | 13654744  | 13655530  | 787  |
| chr4  | 107998852 | 107999617 | 766  |
| chr22 | 39854189  | 39854937  | 749  |
| chr2  | 26596567  | 26597289  | 723  |
| chr3  | 114586201 | 114586915 | 715  |
| chr29 | 34919156  | 34919867  | 712  |
| chr6  | 84628411  | 84629065  | 655  |
| chr14 | 34074110  | 34074674  | 565  |
| chr3  | 55415032  | 55415546  | 515  |
| chr18 | 51143719  | 51144208  | 490  |
| chr4  | 71592807  | 71593290  | 484  |
| chr11 | 106405513 | 106405974 | 462  |
| chr16 | 20647912  | 20648370  | 459  |
| chr7  | 17485603  | 17486003  | 401  |
| chr10 | 70397683  | 70399168  | 1486 |
| chr5  | 51825434  | 51826637  | 1204 |
| chr4  | 117838659 | 117839797 | 1139 |
| chr10 | 8736412   | 8737409   | 998  |

|       |           |           |      |
|-------|-----------|-----------|------|
| chr1  | 123139584 | 123140547 | 964  |
| chr20 | 73282738  | 73283672  | 935  |
| chr15 | 84535014  | 84535920  | 907  |
| chr4  | 12016559  | 12017440  | 882  |
| chr16 | 2350825   | 2351535   | 711  |
| chr20 | 38861051  | 38861731  | 681  |
| chr3  | 116511015 | 116511666 | 652  |
| chr26 | 48682913  | 48683543  | 631  |
| chr10 | 5342078   | 5342706   | 629  |
| chr10 | 25849203  | 25849771  | 569  |
| chr18 | 56985516  | 56986067  | 552  |
| chr18 | 53881400  | 53881936  | 537  |
| chr13 | 63772575  | 63773102  | 528  |
| chr12 | 68230204  | 68230715  | 512  |
| chr17 | 65981101  | 65981582  | 482  |
| chr20 | 20842662  | 20843112  | 451  |
| chr5  | 35463319  | 35463755  | 437  |
| chr9  | 107092357 | 107092755 | 399  |
| chr19 | 10938432  | 10939266  | 835  |
| chr2  | 75593898  | 75594662  | 765  |
| chr7  | 68705153  | 68705899  | 747  |
| chr11 | 98331039  | 98331730  | 692  |
| chr5  | 79236860  | 79237401  | 542  |
| chr5  | 35142936  | 35143477  | 542  |
| chr19 | 57053495  | 57053945  | 451  |
| chr6  | 73587644  | 73588092  | 449  |
| chr17 | 63448267  | 63448714  | 448  |
| chr17 | 74491516  | 74491928  | 413  |
| chr18 | 52976562  | 52976925  | 364  |
| chr25 | 43851426  | 43852769  | 1344 |
| chr7  | 3733388   | 3734687   | 1300 |
| chr29 | 49040594  | 49041547  | 954  |
| chr25 | 38046163  | 38046967  | 805  |
| chr11 | 23182297  | 23183044  | 748  |
| chr9  | 104921783 | 104922297 | 515  |
| chr13 | 38287480  | 38287958  | 479  |
| chr1  | 50454860  | 50455323  | 464  |
| chr2  | 108812348 | 108812787 | 440  |
| chr1  | 82899411  | 82899849  | 439  |
| chr2  | 25310573  | 25310992  | 420  |
| chr26 | 51661264  | 51661645  | 382  |
| chr5  | 32937229  | 32937593  | 365  |
| chr10 | 19863434  | 19864375  | 942  |
| chr10 | 66797799  | 66798675  | 877  |
| chr4  | 85020604  | 85021287  | 684  |
| chr29 | 26773766  | 26774359  | 594  |
| chr5  | 122822569 | 122823141 | 573  |
| chr2  | 134906147 | 134906682 | 536  |
| chr6  | 45974886  | 45975416  | 531  |
| chr11 | 81753891  | 81754389  | 499  |

|       |               |           |      |
|-------|---------------|-----------|------|
| chr5  | 120725900     | 120726366 | 467  |
| chr18 | 18684571      | 18684990  | 420  |
| chr5  | 112134846     | 112135261 | 416  |
| chr7  | 14293443      | 14293849  | 407  |
| chr19 | 37924961      | 37925355  | 395  |
| chr5  | 121643493     | 121644291 | 799  |
| chr3  | 55883945      | 55884715  | 771  |
| chr19 | 23063007      | 23063760  | 754  |
| chr2  | 123751221     | 123751904 | 684  |
| chr24 | 31168642      | 31169299  | 658  |
| chr25 | 1924721       | 1925289   | 569  |
| chr2  | 126892344     | 126892898 | 555  |
| chr2  | 95147662      | 95148191  | 530  |
| chr15 | 74519010      | 74519469  | 460  |
| chr25 | 37810757      | 37811201  | 445  |
| chr19 | 54270988      | 54271428  | 441  |
| chr23 | 7621802       | 7622233   | 432  |
| chr10 | 15007562      | 15007991  | 430  |
| chr21 | 33926039      | 33926456  | 418  |
| chr5  | 121062289     | 121062673 | 385  |
| chr9  | 90234984      | 90235349  | 366  |
| chr5  | 100127953     | 100129031 | 1079 |
| chr7  | 38206936      | 38207771  | 836  |
| chr23 | 9785992       | 9786741   | 750  |
| chr22 | 30274293      | 30275028  | 736  |
| chr16 | 47274738      | 47275473  | 736  |
| chr3  | 113237808     | 113238482 | 675  |
| chr11 | 102425413     | 102426066 | 654  |
| chr23 | 17485265      | 17485875  | 611  |
| chr18 | 48013735      | 48014306  | 572  |
| chr19 | 12405863      | 12406420  | 558  |
| chr17 | 5055090       | 5055639   | 550  |
| chr7  | 18410352      | 18410879  | 528  |
| chr24 | 49131990      | 49132506  | 517  |
| chr9  | 33772624      | 33773134  | 511  |
| chr14 | 611207 611713 | 507       |      |
| chr22 | 53940222      | 53940695  | 474  |
| chr19 | 39080957      | 39081429  | 473  |
| chr18 | 33212983      | 33213452  | 470  |
| chr24 | 50881840      | 50882307  | 468  |
| chr11 | 100921479     | 100921944 | 466  |
| chr8  | 24749032      | 24749486  | 455  |
| chr15 | 31332812      | 31333264  | 453  |
| chr13 | 67140167      | 67140617  | 451  |
| chr1  | 82873920      | 82874370  | 451  |
| chr18 | 22157981      | 22158429  | 449  |
| chr3  | 114469063     | 114469510 | 448  |
| chr22 | 52235626      | 52236066  | 441  |
| chr18 | 45983812      | 45984242  | 431  |
| chr2  | 15364873      | 15365294  | 422  |

|       |               |           |      |
|-------|---------------|-----------|------|
| chr1  | 87373272      | 87373693  | 422  |
| chr11 | 106000171     | 106000589 | 419  |
| chr22 | 53487255      | 53487670  | 416  |
| chr24 | 40820303      | 40820717  | 415  |
| chr16 | 48839654      | 48840065  | 412  |
| chr23 | 18453733      | 18454143  | 411  |
| chr13 | 46210865      | 46211270  | 406  |
| chr4  | 98485504      | 98485908  | 405  |
| chr26 | 21959269      | 21959672  | 404  |
| chr22 | 15233293      | 15233695  | 403  |
| chr1  | 152343718     | 152344118 | 401  |
| chr19 | 39149411      | 39149810  | 400  |
| chr10 | 17331091      | 17331490  | 400  |
| chr23 | 27819938      | 27820336  | 399  |
| chr10 | 35890647      | 35891045  | 399  |
| chr19 | 45734944      | 45735341  | 398  |
| chr17 | 70047378      | 70047774  | 397  |
| chr15 | 54180653      | 54181048  | 396  |
| chr23 | 28758645      | 28759039  | 395  |
| chr5  | 113916768     | 113917159 | 392  |
| chr11 | 28537858      | 28538247  | 390  |
| chr23 | 51687161      | 51687548  | 388  |
| chr19 | 14044630      | 14045011  | 382  |
| chr15 | 25665080      | 25665459  | 380  |
| chr10 | 12746905      | 12747284  | 380  |
| chr14 | 840996 841371 | 376       |      |
| chr24 | 64998744      | 64999102  | 359  |
| chr8  | 24394481      | 24394837  | 357  |
| chr3  | 111897446     | 111897773 | 328  |
| chr4  | 31608481      | 31608804  | 324  |
| chr23 | 7455905       | 7456176   | 272  |
| chr25 | 3239426       | 3239670   | 245  |
| chr2  | 138636066     | 138637761 | 1696 |
| chr2  | 115072511     | 115074191 | 1681 |
| chr3  | 113459254     | 113460870 | 1617 |
| chr2  | 83587372      | 83588971  | 1600 |
| chr16 | 61645000      | 61646568  | 1569 |
| chr13 | 42874519      | 42876011  | 1493 |
| chr14 | 39879203      | 39880642  | 1440 |
| chr3  | 105909700     | 105911115 | 1416 |
| chr12 | 36285154      | 36286549  | 1396 |
| chr7  | 38262538      | 38263921  | 1384 |
| chr3  | 106488773     | 106490148 | 1376 |
| chr7  | 38399537      | 38400879  | 1343 |
| chr5  | 60448527      | 60449867  | 1341 |
| chr15 | 24026132      | 24027453  | 1322 |
| chr13 | 70044879      | 70046196  | 1318 |
| chr6  | 72741790      | 72743093  | 1304 |
| chr2  | 121897280     | 121898557 | 1278 |
| chr19 | 59377791      | 59379028  | 1238 |

|       |             |           |      |
|-------|-------------|-----------|------|
| chr6  | 94977589    | 94978824  | 1236 |
| chr15 | 28525656    | 28526868  | 1213 |
| chr19 | 56549849    | 56551051  | 1203 |
| chr25 | 38034063    | 38035255  | 1193 |
| chr16 | 3351848     | 3353009   | 1162 |
| chr23 | 27092905    | 27094055  | 1151 |
| chr7  | 58200032    | 58201177  | 1146 |
| chr10 | 6925586     | 6926729   | 1144 |
| chr15 | 32283243    | 32284373  | 1131 |
| chr3  | 117294154   | 117295283 | 1130 |
| chr23 | 8066045     | 8067151   | 1107 |
| chr18 | 63755483    | 63756588  | 1106 |
| chr4  | 5389840     | 5390941   | 1102 |
| chr7  | 80881880    | 80882980  | 1101 |
| chr11 | 56767547    | 56768643  | 1097 |
| chr16 | 77484663    | 77485758  | 1096 |
| chr21 | 20635246    | 20636340  | 1095 |
| chr5  | 32848713    | 32849803  | 1091 |
| chr1  | 131394123   | 131395192 | 1070 |
| chr14 | 57316501    | 57317548  | 1048 |
| chr27 | 30512464    | 30513507  | 1044 |
| chr5  | 26710914    | 26711940  | 1027 |
| chr14 | 62324061    | 62325084  | 1024 |
| chr7  | 42500916    | 42501922  | 1007 |
| chr22 | 61221637    | 61222643  | 1007 |
| chr11 | 108119499   | 108120501 | 1003 |
| chr27 | 26639 27639 | 1001      |      |
| chr19 | 37335966    | 37336962  | 997  |
| chr8  | 78842460    | 78843455  | 996  |
| chr2  | 131196542   | 131197535 | 994  |
| chr27 | 29101622    | 29102603  | 982  |
| chr4  | 121444469   | 121445445 | 977  |
| chr11 | 104915943   | 104916916 | 974  |
| chr2  | 132439662   | 132440632 | 971  |
| chr25 | 3179120     | 3180087   | 968  |
| chr29 | 41711676    | 41712641  | 966  |
| chr15 | 75536336    | 75537301  | 966  |
| chr18 | 11621747    | 11622705  | 959  |
| chr3  | 55852157    | 55853112  | 956  |
| chr16 | 47324275    | 47325229  | 955  |
| chr22 | 7230747     | 7231700   | 954  |
| chr2  | 49416920    | 49417872  | 953  |
| chr19 | 7636996     | 7637948   | 953  |
| chr17 | 72347606    | 72348558  | 953  |
| chr6  | 103402328   | 103403279 | 952  |
| chr17 | 72763409    | 72764353  | 945  |
| chr3  | 122224641   | 122225576 | 936  |
| chr13 | 58882508    | 58883442  | 935  |
| chr5  | 111689247   | 111690179 | 933  |
| chr19 | 46857804    | 46858735  | 932  |

|       |               |           |     |
|-------|---------------|-----------|-----|
| chr18 | 48515367      | 48516298  | 932 |
| chr6  | 16251553      | 16252482  | 930 |
| chr26 | 31921492      | 31922416  | 925 |
| chr15 | 63722314      | 63723232  | 919 |
| chr14 | 42906531      | 42907449  | 919 |
| chr2  | 35503564      | 35504476  | 913 |
| chr2  | 133040010     | 133040919 | 910 |
| chr22 | 36555075      | 36555980  | 906 |
| chr5  | 27946165      | 27947069  | 905 |
| chr16 | 41370237      | 41371141  | 905 |
| chr13 | 59926983      | 59927887  | 905 |
| chr7  | 15439624      | 15440521  | 898 |
| chr3  | 23255419      | 23256315  | 897 |
| chr15 | 76723918      | 76724810  | 893 |
| chr17 | 74655526      | 74656416  | 891 |
| chr7  | 71680603      | 71681469  | 867 |
| chr2  | 111309245     | 111310108 | 864 |
| chr19 | 12613284      | 12614147  | 864 |
| chr2  | 111768113     | 111768975 | 863 |
| chr11 | 107244827     | 107245687 | 861 |
| chr8  | 35971083      | 35971941  | 859 |
| chr11 | 81176681      | 81177537  | 857 |
| chr26 | 21799145      | 21800000  | 856 |
| chr22 | 37806370      | 37807225  | 856 |
| chr4  | 99598065      | 99598917  | 853 |
| chr3  | 15665117      | 15665964  | 848 |
| chr11 | 14230471      | 14231316  | 846 |
| chr25 | 941023 941865 | 843       |     |
| chr17 | 73441120      | 73441958  | 839 |
| chr11 | 104908400     | 104909230 | 831 |
| chr9  | 87730296      | 87731122  | 827 |
| chr13 | 66136225      | 66137049  | 825 |
| chr19 | 41218252      | 41219068  | 817 |
| chr20 | 6681014       | 6681829   | 816 |
| chr15 | 58025259      | 58026072  | 814 |
| chr28 | 25328845      | 25329655  | 811 |
| chr19 | 38772411      | 38773221  | 811 |
| chr13 | 60154728      | 60155538  | 811 |
| chr14 | 3267917       | 3268726   | 810 |
| chr6  | 108696151     | 108696958 | 808 |
| chr20 | 2533521       | 2534326   | 806 |
| chr8  | 7592514       | 7593314   | 801 |
| chr18 | 12410456      | 12411256  | 801 |
| chr7  | 10970564      | 10971359  | 796 |
| chr2  | 124799283     | 124800078 | 796 |
| chr19 | 38233224      | 38234019  | 796 |
| chr22 | 14934807      | 14935600  | 794 |
| chr19 | 39108441      | 39109234  | 794 |
| chr7  | 71377418      | 71378209  | 792 |
| chr18 | 33707319      | 33708101  | 783 |

|       |           |           |     |
|-------|-----------|-----------|-----|
| chr18 | 7639588   | 7640368   | 781 |
| chr13 | 37690085  | 37690865  | 781 |
| chr21 | 30285033  | 30285811  | 779 |
| chr3  | 36041629  | 36042404  | 776 |
| chr5  | 30046364  | 30047136  | 773 |
| chr25 | 35566374  | 35567146  | 773 |
| chr21 | 19202055  | 19202826  | 772 |
| chr25 | 36484779  | 36485549  | 771 |
| chr20 | 27301609  | 27302377  | 769 |
| chr4  | 67700737  | 67701496  | 760 |
| chr13 | 60703568  | 60704325  | 758 |
| chr7  | 37549981  | 37550735  | 755 |
| chr23 | 28032462  | 28033216  | 755 |
| chr10 | 66925505  | 66926256  | 752 |
| chr23 | 23764443  | 23765185  | 743 |
| chr28 | 34019395  | 34020136  | 742 |
| chr2  | 139918273 | 139919009 | 737 |
| chr27 | 38968075  | 38968810  | 736 |
| chr3  | 125754529 | 125755263 | 735 |
| chr17 | 76296178  | 76296912  | 735 |
| chr8  | 74365712  | 74366445  | 734 |
| chr11 | 25615915  | 25616648  | 734 |
| chr8  | 10813848  | 10814577  | 730 |
| chr3  | 8151518   | 8152247   | 730 |
| chr11 | 98328437  | 98329165  | 729 |
| chr18 | 52691852  | 52692579  | 728 |
| chr12 | 23538721  | 23539448  | 728 |
| chr15 | 27280712  | 27281437  | 726 |
| chr7  | 10951218  | 10951941  | 724 |
| chr10 | 79257774  | 79258497  | 724 |
| chr28 | 25882977  | 25883695  | 719 |
| chr17 | 69497417  | 69498134  | 718 |
| chr5  | 12283644  | 12284359  | 716 |
| chr29 | 46392953  | 46393667  | 715 |
| chr6  | 121694424 | 121695137 | 714 |
| chr10 | 83520955  | 83521667  | 713 |
| chr19 | 41262759  | 41263469  | 711 |
| chr5  | 122829511 | 122830219 | 709 |
| chr23 | 9377065   | 9377771   | 707 |
| chr20 | 75793978  | 75794680  | 703 |
| chr20 | 4941760   | 4942462   | 703 |
| chr12 | 68181415  | 68182117  | 703 |
| chr12 | 36456665  | 36457365  | 701 |
| chr4  | 121446600 | 121447299 | 700 |
| chr10 | 12115635  | 12116334  | 700 |
| chr24 | 63496898  | 63497593  | 696 |
| chr25 | 10599122  | 10599816  | 695 |
| chr13 | 52089987  | 52090676  | 690 |
| chr18 | 11348239  | 11348927  | 689 |
| chr11 | 28534951  | 28535638  | 688 |



|       |           |           |     |
|-------|-----------|-----------|-----|
| chr7  | 51390109  | 51390794  | 686 |
| chr19 | 56885256  | 56885935  | 680 |
| chr7  | 3717039   | 3717716   | 678 |
| chr2  | 134947543 | 134948220 | 678 |
| chr15 | 32272803  | 32273479  | 677 |
| chr19 | 56595039  | 56595713  | 675 |
| chr7  | 17928231  | 17928903  | 673 |
| chr24 | 5538499   | 5539170   | 672 |
| chr29 | 44377371  | 44378041  | 671 |
| chr16 | 48792203  | 48792872  | 670 |
| chr15 | 32171856  | 32172525  | 670 |
| chr23 | 15913476  | 15914143  | 668 |
| chr19 | 58464832  | 58465499  | 668 |
| chr17 | 73138418  | 73139085  | 668 |
| chr25 | 7029739   | 7030405   | 667 |
| chr10 | 74920325  | 74920991  | 667 |
| chr5  | 10536871  | 10537536  | 666 |
| chr18 | 45992732  | 45993397  | 666 |
| chr13 | 42011574  | 42012239  | 666 |
| chr1  | 99825348  | 99826008  | 661 |
| chr19 | 51662311  | 51662968  | 658 |
| chr25 | 28054114  | 28054770  | 657 |
| chr4  | 118056756 | 118057411 | 656 |
| chr23 | 28754732  | 28755387  | 656 |
| chr8  | 44141280  | 44141934  | 655 |
| chr5  | 79213969  | 79214620  | 652 |
| chr18 | 7190936   | 7191587   | 652 |
| chr2  | 111385748 | 111386395 | 648 |
| chr25 | 37275331  | 37275971  | 641 |
| chr13 | 84226027  | 84226667  | 641 |
| chr23 | 28833763  | 28834402  | 640 |
| chr27 | 15766789  | 15767426  | 638 |
| chr1  | 123115869 | 123116506 | 638 |
| chr6  | 94910896  | 94911532  | 637 |
| chr23 | 7431186   | 7431821   | 636 |
| chr28 | 26785953  | 26786587  | 635 |
| chr13 | 66873546  | 66874180  | 635 |
| chr19 | 43137757  | 43138390  | 634 |
| chr3  | 33971778  | 33972410  | 633 |
| chr7  | 73167681  | 73168312  | 632 |
| chr29 | 51948798  | 51949427  | 630 |
| chr19 | 44160879  | 44161507  | 629 |
| chr19 | 13486688  | 13487315  | 628 |
| chr13 | 63668734  | 63669361  | 628 |
| chr11 | 103576782 | 103577409 | 628 |
| chr9  | 26944212  | 26944835  | 624 |
| chr18 | 34225616  | 34226239  | 624 |
| chr19 | 39118516  | 39119138  | 623 |
| chr5  | 112051551 | 112052172 | 622 |
| chr28 | 40396511  | 40397132  | 622 |

|       |           |           |     |
|-------|-----------|-----------|-----|
| chr12 | 81462378  | 81462999  | 622 |
| chr19 | 38705157  | 38705777  | 621 |
| chr4  | 8844855   | 8845472   | 618 |
| chr14 | 63512052  | 63512669  | 618 |
| chr21 | 26451268  | 26451884  | 617 |
| chr19 | 38302511  | 38303124  | 614 |
| chr10 | 19487493  | 19488106  | 614 |
| chr2  | 138021133 | 138021744 | 612 |
| chr5  | 120463943 | 120464553 | 611 |
| chr26 | 48285124  | 48285734  | 611 |
| chrX  | 33515766  | 33516373  | 608 |
| chr7  | 11032348  | 11032955  | 608 |
| chr6  | 72188690  | 72189295  | 606 |
| chr21 | 34764068  | 34764671  | 604 |
| chr16 | 47119131  | 47119733  | 603 |
| chr12 | 32083156  | 32083758  | 603 |
| chr18 | 33826758  | 33827359  | 602 |
| chr12 | 32008752  | 32009353  | 602 |
| chr21 | 24502503  | 24503102  | 600 |
| chr19 | 10953727  | 10954324  | 598 |
| chr8  | 55407709  | 55408305  | 597 |
| chr23 | 44861369  | 44861965  | 597 |
| chr21 | 6485195   | 6485787   | 593 |
| chr5  | 102830921 | 102831512 | 592 |
| chr3  | 4366564   | 4367155   | 592 |
| chr11 | 70710433  | 70711024  | 592 |
| chr5  | 121629803 | 121630393 | 591 |
| chr19 | 58447215  | 58447805  | 591 |
| chr1  | 74179750  | 74180339  | 590 |
| chr3  | 29959438  | 29960023  | 586 |
| chr2  | 111604274 | 111604859 | 586 |
| chr10 | 72205763  | 72206347  | 585 |
| chr25 | 8196640   | 8197223   | 584 |
| chr7  | 29475217  | 29475799  | 583 |
| chr7  | 37566615  | 37567195  | 581 |
| chr21 | 64482530  | 64483110  | 581 |
| chr2  | 95160064  | 95160644  | 581 |
| chr11 | 66549723  | 66550303  | 581 |
| chr5  | 115526743 | 115527322 | 580 |
| chr19 | 43633657  | 43634235  | 579 |
| chr17 | 4149809   | 4150387   | 579 |
| chr3  | 55871426  | 55872001  | 576 |
| chr12 | 80141529  | 80142104  | 576 |
| chr3  | 98135437  | 98136010  | 574 |
| chr29 | 47971279  | 47971850  | 572 |
| chr23 | 11018799  | 11019370  | 572 |
| chr23 | 23882873  | 23883442  | 570 |
| chr8  | 116715148 | 116715716 | 569 |
| chr18 | 55720439  | 55721007  | 569 |
| chr1  | 123085829 | 123086395 | 567 |

|       |               |           |     |
|-------|---------------|-----------|-----|
| chr12 | 19010572      | 19011137  | 566 |
| chr7  | 46468907      | 46469471  | 565 |
| chr28 | 41335214      | 41335775  | 562 |
| chr23 | 31137931      | 31138491  | 561 |
| chr9  | 105835310     | 105835869 | 560 |
| chr23 | 10030443      | 10031001  | 559 |
| chr14 | 59025467      | 59026024  | 558 |
| chr7  | 5116396       | 5116951   | 556 |
| chr21 | 68943980      | 68944535  | 556 |
| chr19 | 48753322      | 48753877  | 556 |
| chr19 | 58356351      | 58356905  | 555 |
| chr18 | 62380656      | 62381209  | 554 |
| chr18 | 7219334       | 7219886   | 553 |
| chr19 | 59107650      | 59108201  | 552 |
| chr14 | 34094634      | 34095185  | 552 |
| chr25 | 7032832       | 7033382   | 551 |
| chr3  | 118165377     | 118165925 | 549 |
| chr27 | 26725324      | 26725872  | 549 |
| chr13 | 23659901      | 23660449  | 549 |
| chr5  | 81603689      | 81604236  | 548 |
| chr19 | 21742442      | 21742988  | 547 |
| chr15 | 42718949      | 42719495  | 547 |
| chr5  | 125564179     | 125564724 | 546 |
| chr25 | 43204088      | 43204631  | 544 |
| chr17 | 70439212      | 70439755  | 544 |
| chr13 | 62414526      | 62415068  | 543 |
| chrX  | 3013138       | 3013679   | 542 |
| chr2  | 96975246      | 96975787  | 542 |
| chr19 | 37633299      | 37633838  | 540 |
| chr17 | 68600378      | 68600917  | 540 |
| chr6  | 45444498      | 45445034  | 537 |
| chr4  | 118718021     | 118718557 | 537 |
| chr5  | 29249143      | 29249678  | 536 |
| chr26 | 51439712      | 51440247  | 536 |
| chrX  | 21086643      | 21087176  | 534 |
| chr18 | 13539678      | 13540211  | 534 |
| chr7  | 4338412       | 4338943   | 532 |
| chr8  | 86894050      | 86894579  | 530 |
| chr2  | 75827085      | 75827613  | 529 |
| chr8  | 80139477      | 80140003  | 527 |
| chr4  | 90363753      | 90364279  | 527 |
| chr14 | 433941 434464 | 524       |     |
| chr17 | 47356360      | 47356882  | 523 |
| chr7  | 5398956       | 5399477   | 522 |
| chr5  | 117210508     | 117211029 | 522 |
| chr22 | 49578571      | 49579092  | 522 |
| chr3  | 124086810     | 124087330 | 521 |
| chr6  | 16235136      | 16235655  | 520 |
| chr19 | 42259781      | 42260300  | 520 |
| chr18 | 11685091      | 11685609  | 519 |

|       |           |           |     |
|-------|-----------|-----------|-----|
| chr29 | 44565219  | 44565736  | 518 |
| chr15 | 75248678  | 75249194  | 517 |
| chr17 | 11546652  | 11547167  | 516 |
| chr20 | 74775004  | 74775518  | 515 |
| chr3  | 121421457 | 121421970 | 514 |
| chr12 | 20077867  | 20078380  | 514 |
| chr29 | 38379983  | 38380494  | 512 |
| chr3  | 109788085 | 109788594 | 510 |
| chr18 | 1543643   | 1544151   | 509 |
| chr25 | 36476118  | 36476624  | 507 |
| chr29 | 29917743  | 29918247  | 505 |
| chr2  | 111247231 | 111247732 | 502 |
| chr13 | 80146654  | 80147155  | 502 |
| chr11 | 106067889 | 106068389 | 501 |
| chr5  | 113255178 | 113255676 | 499 |
| chr25 | 43855432  | 43855930  | 499 |
| chr29 | 30758241  | 30758738  | 498 |
| chr22 | 30262055  | 30262552  | 498 |
| chr13 | 38257302  | 38257799  | 498 |
| chr6  | 120965246 | 120965741 | 496 |
| chr22 | 17495051  | 17495545  | 495 |
| chr15 | 65363285  | 65363779  | 495 |
| chr23 | 8240161   | 8240653   | 493 |
| chr28 | 25727619  | 25728109  | 491 |
| chr10 | 5344798   | 5345288   | 491 |
| chr25 | 42123850  | 42124339  | 490 |
| chr22 | 30376445  | 30376934  | 490 |
| chr2  | 63490002  | 63490489  | 488 |
| chr16 | 46690200  | 46690687  | 488 |
| chr26 | 51527608  | 51528094  | 487 |
| chr23 | 7710602   | 7711088   | 487 |
| chr16 | 75199893  | 75200377  | 485 |
| chr1  | 72593889  | 72594373  | 485 |
| chr13 | 72862589  | 72863072  | 484 |
| chr17 | 64333667  | 64334149  | 483 |
| chr19 | 57592944  | 57593425  | 482 |
| chr15 | 74522509  | 74522990  | 482 |
| chr19 | 60229271  | 60229751  | 481 |
| chr18 | 54951330  | 54951810  | 481 |
| chr4  | 29017896  | 29018375  | 480 |
| chr3  | 62649471  | 62649949  | 479 |
| chr19 | 55482773  | 55483251  | 479 |
| chr15 | 41251463  | 41251941  | 479 |
| chr13 | 47742407  | 47742885  | 479 |
| chr3  | 33105012  | 33105487  | 476 |
| chr17 | 72893690  | 72894165  | 476 |
| chr13 | 11066265  | 11066740  | 476 |
| chr26 | 39256896  | 39257370  | 475 |
| chr7  | 14376564  | 14377037  | 474 |
| chr29 | 2684396   | 2684869   | 474 |

|       |           |           |     |
|-------|-----------|-----------|-----|
| chr19 | 41234533  | 41235006  | 474 |
| chr2  | 134744269 | 134744741 | 473 |
| chr13 | 41704811  | 41705283  | 473 |
| chr25 | 22039862  | 22040333  | 472 |
| chr18 | 56443842  | 56444313  | 472 |
| chr20 | 74780156  | 74780625  | 470 |
| chr22 | 50727652  | 50728120  | 469 |
| chr3  | 88605832  | 88606299  | 468 |
| chr7  | 89451918  | 89452384  | 467 |
| chr14 | 76181095  | 76181561  | 467 |
| chr11 | 74461241  | 74461707  | 467 |
| chr4  | 96874421  | 96874886  | 466 |
| chr8  | 42206003  | 42206466  | 464 |
| chr25 | 3965198   | 3965661   | 464 |
| chr18 | 52210155  | 52210618  | 464 |
| chr13 | 67075447  | 67075910  | 464 |
| chr17 | 53520919  | 53521381  | 463 |
| chr14 | 1585940   | 1586402   | 463 |
| chr5  | 28831637  | 28832098  | 462 |
| chr25 | 10600394  | 10600855  | 462 |
| chr4  | 69932516  | 69932975  | 460 |
| chr21 | 65209496  | 65209954  | 459 |
| chr2  | 111603614 | 111604071 | 458 |
| chr14 | 2888607   | 2889063   | 457 |
| chr17 | 65981774  | 65982229  | 456 |
| chr15 | 55760551  | 55761006  | 456 |
| chr19 | 13544434  | 13544888  | 455 |
| chr15 | 28527839  | 28528293  | 455 |
| chr5  | 16818090  | 16818543  | 454 |
| chrX  | 54352079  | 54352531  | 453 |
| chrX  | 11015818  | 11016270  | 453 |
| chr9  | 90454938  | 90455390  | 453 |
| chr7  | 95941112  | 95941564  | 453 |
| chr6  | 72331650  | 72332102  | 453 |
| chr18 | 45973900  | 45974352  | 453 |
| chr10 | 76057449  | 76057901  | 453 |
| chr12 | 14937574  | 14938025  | 452 |
| chr8  | 55411741  | 55412191  | 451 |
| chr1  | 68923370  | 68923820  | 451 |
| chr4  | 72734158  | 72734607  | 450 |
| chr5  | 33522646  | 33523094  | 449 |
| chr19 | 21772666  | 21773112  | 447 |
| chr17 | 70409400  | 70409846  | 447 |
| chr7  | 44804408  | 44804853  | 446 |
| chr7  | 43775586  | 43776030  | 445 |
| chr26 | 51191947  | 51192391  | 445 |
| chr5  | 28888081  | 28888523  | 443 |
| chr4  | 71605662  | 71606104  | 443 |
| chr28 | 26202644  | 26203085  | 442 |
| chr20 | 42313727  | 42314168  | 442 |

|       |           |           |     |
|-------|-----------|-----------|-----|
| chr24 | 51806667  | 51807107  | 441 |
| chr17 | 75978610  | 75979050  | 441 |
| chr7  | 94411704  | 94412142  | 439 |
| chr20 | 8567455   | 8567893   | 439 |
| chr2  | 115115041 | 115115479 | 439 |
| chr14 | 1572702   | 1573140   | 439 |
| chr13 | 75777157  | 75777594  | 438 |
| chr12 | 84607950  | 84608387  | 438 |
| chr12 | 11471943  | 11472380  | 438 |
| chr5  | 28838710  | 28839145  | 436 |
| chr19 | 46846089  | 46846523  | 435 |
| chr18 | 62740861  | 62741294  | 434 |
| chr18 | 22817247  | 22817680  | 434 |
| chr11 | 21633051  | 21633484  | 434 |
| chr22 | 55394070  | 55394502  | 433 |
| chr15 | 76435556  | 76435987  | 432 |
| chr12 | 33980053  | 33980484  | 432 |
| chr17 | 63299066  | 63299496  | 431 |
| chr8  | 76003553  | 76003982  | 430 |
| chr20 | 33689762  | 33690191  | 430 |
| chr18 | 37162946  | 37163375  | 430 |
| chr16 | 71090048  | 71090477  | 430 |
| chr12 | 68234691  | 68235120  | 430 |
| chr17 | 70397360  | 70397788  | 429 |
| chr1  | 132828841 | 132829269 | 429 |
| chr19 | 59316110  | 59316537  | 428 |
| chr19 | 39122134  | 39122561  | 428 |
| chr18 | 56537203  | 56537630  | 428 |
| chr17 | 67101611  | 67102038  | 428 |
| chr13 | 65092288  | 65092715  | 428 |
| chr2  | 111338069 | 111338495 | 427 |
| chr12 | 84292758  | 84293184  | 427 |
| chr11 | 68919347  | 68919773  | 427 |
| chr1  | 145353505 | 145353931 | 427 |
| chr6  | 20764231  | 20764656  | 426 |
| chr3  | 8759007   | 8759432   | 426 |
| chr29 | 38052421  | 38052846  | 426 |
| chr18 | 45980345  | 45980770  | 426 |
| chr18 | 11373412  | 11373837  | 426 |
| chr18 | 22777266  | 22777690  | 425 |
| chr3  | 115107245 | 115107668 | 424 |
| chr3  | 35958478  | 35958901  | 424 |
| chr3  | 121850742 | 121851164 | 423 |
| chr18 | 9503499   | 9503921   | 423 |
| chr7  | 65575236  | 65575657  | 422 |
| chr25 | 1512249   | 1512670   | 422 |
| chr15 | 36292637  | 36293057  | 421 |
| chr15 | 28824823  | 28825243  | 421 |
| chr11 | 97591157  | 97591576  | 420 |
| chr15 | 76724889  | 76725307  | 419 |

|       |           |           |     |
|-------|-----------|-----------|-----|
| chrX  | 72241523  | 72241940  | 418 |
| chr3  | 99100879  | 99101296  | 418 |
| chr13 | 17715190  | 17715607  | 418 |
| chr12 | 82629648  | 82630065  | 418 |
| chr8  | 65179492  | 65179908  | 417 |
| chr27 | 33669902  | 33670318  | 417 |
| chr22 | 59342962  | 59343378  | 417 |
| chr1  | 61278125  | 61278541  | 417 |
| chr3  | 97901659  | 97902074  | 416 |
| chr22 | 50757867  | 50758282  | 416 |
| chr21 | 65545222  | 65545637  | 416 |
| chr18 | 65964646  | 65965061  | 416 |
| chr12 | 53338782  | 53339197  | 416 |
| chr7  | 50657605  | 50658019  | 415 |
| chr22 | 23092576  | 23092990  | 415 |
| chr8  | 80170645  | 80171058  | 414 |
| chr2  | 127215010 | 127215423 | 414 |
| chr19 | 64697476  | 64697889  | 414 |
| chr19 | 39119741  | 39120154  | 414 |
| chr11 | 84864264  | 84864677  | 414 |
| chr6  | 120837632 | 120838044 | 413 |
| chr28 | 33768573  | 33768985  | 413 |
| chr1  | 150076399 | 150076811 | 413 |
| chr2  | 15376841  | 15377252  | 412 |
| chr17 | 64124555  | 64124966  | 412 |
| chr15 | 29892873  | 29893284  | 412 |
| chr7  | 57164540  | 57164950  | 411 |
| chr6  | 40951289  | 40951699  | 411 |
| chr27 | 39908143  | 39908553  | 411 |
| chr24 | 1688118   | 1688528   | 411 |
| chr19 | 37564771  | 37565181  | 411 |
| chr11 | 99687211  | 99687621  | 411 |
| chr7  | 3574160   | 3574569   | 410 |
| chr5  | 118467157 | 118467566 | 410 |
| chr20 | 5034984   | 5035393   | 410 |
| chr2  | 5178726   | 5179135   | 410 |
| chr22 | 30240647  | 30241055  | 409 |
| chr21 | 11889596  | 11890004  | 409 |
| chr18 | 49929508  | 49929916  | 409 |
| chr7  | 57587116  | 57587523  | 408 |
| chr5  | 51968963  | 51969370  | 408 |
| chr28 | 33467016  | 33467423  | 408 |
| chr26 | 45637941  | 45638348  | 408 |
| chr25 | 43553455  | 43553862  | 408 |
| chr22 | 54046012  | 54046419  | 408 |
| chr12 | 9641274   | 9641681   | 408 |
| chr3  | 35791274  | 35791680  | 407 |
| chr23 | 13511274  | 13511680  | 407 |
| chr12 | 68176926  | 68177332  | 407 |
| chr1  | 82903317  | 82903723  | 407 |

|       |          |          |     |
|-------|----------|----------|-----|
| chr28 | 25883822 | 25884227 | 406 |
| chr25 | 33266839 | 33267244 | 406 |
| chr19 | 38736973 | 38737378 | 406 |
| chr13 | 40534839 | 40535244 | 406 |
| chr8  | 25636077 | 25636481 | 405 |
| chr5  | 30672925 | 30673329 | 405 |
| chr23 | 19629108 | 19629512 | 405 |
| chr23 | 17977570 | 17977974 | 405 |
| chr22 | 18378692 | 18379096 | 405 |
| chr7  | 43764077 | 43764480 | 404 |
| chr4  | 69678521 | 69678924 | 404 |
| chr20 | 1138549  | 1138952  | 404 |
| chr18 | 57328964 | 57329367 | 404 |
| chr18 | 35074013 | 35074416 | 404 |
| chr11 | 4324781  | 4325184  | 404 |
| chr3  | 17295298 | 17295700 | 403 |
| chr19 | 12131706 | 12132108 | 403 |
| chr13 | 80179740 | 80180142 | 403 |
| chr25 | 8720858  | 8721259  | 402 |
| chr19 | 40525838 | 40526239 | 402 |
| chr19 | 14988770 | 14989171 | 402 |
| chr10 | 88046860 | 88047261 | 402 |
| chr2  | 70241755 | 70242155 | 401 |
| chr18 | 54197330 | 54197730 | 401 |
| chr16 | 77696785 | 77697185 | 401 |
| chr7  | 45122611 | 45123010 | 400 |
| chr5  | 52965358 | 52965757 | 400 |
| chr28 | 25901843 | 25902242 | 400 |
| chr26 | 21859359 | 21859758 | 400 |
| chr26 | 21845767 | 21846166 | 400 |
| chr19 | 14428988 | 14429387 | 400 |
| chr17 | 73213851 | 73214250 | 400 |
| chr13 | 57589602 | 57590001 | 400 |
| chr9  | 87767968 | 87768366 | 399 |
| chr8  | 40333282 | 40333680 | 399 |
| chr7  | 52414490 | 52414888 | 399 |
| chr7  | 19987877 | 19988275 | 399 |
| chr7  | 5149250  | 5149648  | 399 |
| chr6  | 63166754 | 63167152 | 399 |
| chr6  | 63063300 | 63063698 | 399 |
| chr6  | 5809187  | 5809585  | 399 |
| chr5  | 52964932 | 52965330 | 399 |
| chr5  | 28871562 | 28871960 | 399 |
| chr4  | 72800308 | 72800706 | 399 |
| chr4  | 66770657 | 66771055 | 399 |
| chr3  | 22665545 | 22665943 | 399 |
| chr29 | 49113310 | 49113708 | 399 |
| chr29 | 7320761  | 7321159  | 399 |
| chr28 | 25136617 | 25137015 | 399 |
| chr27 | 964380   | 964778   | 399 |



|       |               |           |     |
|-------|---------------|-----------|-----|
| chr26 | 20933906      | 20934304  | 399 |
| chr25 | 39430924      | 39431322  | 399 |
| chr25 | 35216023      | 35216421  | 399 |
| chr25 | 34278925      | 34279323  | 399 |
| chr24 | 60982011      | 60982409  | 399 |
| chr23 | 10617629      | 10618027  | 399 |
| chr22 | 59508170      | 59508568  | 399 |
| chr21 | 68960877      | 68961275  | 399 |
| chr20 | 75114022      | 75114420  | 399 |
| chr20 | 74777272      | 74777670  | 399 |
| chr2  | 139111010     | 139111408 | 399 |
| chr2  | 135591761     | 135592159 | 399 |
| chr2  | 134891071     | 134891469 | 399 |
| chr2  | 134750858     | 134751256 | 399 |
| chr2  | 115082521     | 115082919 | 399 |
| chr19 | 59463327      | 59463725  | 399 |
| chr19 | 12410733      | 12411131  | 399 |
| chr18 | 16430596      | 16430994  | 399 |
| chr17 | 74557645      | 74558043  | 399 |
| chr17 | 65973181      | 65973579  | 399 |
| chr17 | 64378483      | 64378881  | 399 |
| chr17 | 58944027      | 58944425  | 399 |
| chr17 | 48146265      | 48146663  | 399 |
| chr16 | 48727053      | 48727451  | 399 |
| chr15 | 73716968      | 73717366  | 399 |
| chr15 | 66092756      | 66093154  | 399 |
| chr15 | 42515558      | 42515956  | 399 |
| chr14 | 20885213      | 20885611  | 399 |
| chr13 | 68180195      | 68180593  | 399 |
| chr13 | 61840596      | 61840994  | 399 |
| chr13 | 59765152      | 59765550  | 399 |
| chr13 | 59755243      | 59755641  | 399 |
| chr13 | 35961590      | 35961988  | 399 |
| chr12 | 83850139      | 83850537  | 399 |
| chr11 | 98966682      | 98967080  | 399 |
| chr11 | 51854890      | 51855288  | 399 |
| chr10 | 90479227      | 90479625  | 399 |
| chr10 | 36287748      | 36288146  | 399 |
| chr10 | 13591479      | 13591877  | 399 |
| chr8  | 74074235      | 74074632  | 398 |
| chr3  | 25816315      | 25816712  | 398 |
| chr3  | 20509439      | 20509836  | 398 |
| chr20 | 469531 469928 |           | 398 |
| chr18 | 50262103      | 50262500  | 398 |
| chr12 | 31005470      | 31005867  | 398 |
| chr7  | 13397158      | 13397553  | 396 |
| chr25 | 35579174      | 35579569  | 396 |
| chr20 | 8748772       | 8749167   | 396 |
| chr19 | 43967491      | 43967886  | 396 |
| chr17 | 63107371      | 63107766  | 396 |

|       |           |           |     |
|-------|-----------|-----------|-----|
| chr10 | 3515859   | 3516254   | 396 |
| chr25 | 1484096   | 1484490   | 395 |
| chr2  | 127816378 | 127816772 | 395 |
| chr19 | 56456411  | 56456805  | 395 |
| chr25 | 1301368   | 1301761   | 394 |
| chr13 | 35968841  | 35969234  | 394 |
| chr29 | 46030063  | 46030455  | 393 |
| chr17 | 63308194  | 63308586  | 393 |
| chr11 | 84865645  | 84866037  | 393 |
| chr3  | 105207373 | 105207764 | 392 |
| chr29 | 50613977  | 50614368  | 392 |
| chr13 | 41733246  | 41733637  | 392 |
| chr26 | 24343132  | 24343522  | 391 |
| chr13 | 41016891  | 41017281  | 391 |
| chr26 | 48426684  | 48427073  | 390 |
| chr13 | 75439185  | 75439574  | 390 |
| chr13 | 73410101  | 73410490  | 390 |
| chr19 | 12400885  | 12401273  | 389 |
| chr22 | 1909749   | 1910136   | 388 |
| chr2  | 34673984  | 34674371  | 388 |
| chr18 | 56625239  | 56625626  | 388 |
| chr22 | 49565029  | 49565415  | 387 |
| chr16 | 38923641  | 38924026  | 386 |
| chr4  | 98040988  | 98041372  | 385 |
| chr18 | 23472324  | 23472708  | 385 |
| chr19 | 6724554   | 6724937   | 384 |
| chr12 | 74460486  | 74460869  | 384 |
| chr9  | 43831908  | 43832290  | 383 |
| chr2  | 122975537 | 122975919 | 383 |
| chr2  | 74781426  | 74781808  | 383 |
| chr19 | 56594007  | 56594389  | 383 |
| chr24 | 49125009  | 49125390  | 382 |
| chr17 | 4156892   | 4157273   | 382 |
| chr13 | 18453755  | 18454136  | 382 |
| chr1  | 146784513 | 146784894 | 382 |
| chr6  | 16241903  | 16242282  | 380 |
| chr21 | 33087741  | 33088120  | 380 |
| chr19 | 22333341  | 22333720  | 380 |
| chr15 | 29292347  | 29292726  | 380 |
| chr29 | 26660935  | 26661313  | 379 |
| chr23 | 7297700   | 7298076   | 377 |
| chr2  | 135584977 | 135585353 | 377 |
| chr16 | 46966371  | 46966747  | 377 |
| chr7  | 13050295  | 13050670  | 376 |
| chr4  | 36672380  | 36672755  | 376 |
| chr18 | 62959653  | 62960028  | 376 |
| chr3  | 116948811 | 116949185 | 375 |
| chr28 | 41301546  | 41301919  | 374 |
| chr17 | 70122510  | 70122883  | 374 |
| chr17 | 47096718  | 47097091  | 374 |

|       |           |           |     |
|-------|-----------|-----------|-----|
| chr13 | 62364525  | 62364898  | 374 |
| chr12 | 31997653  | 31998026  | 374 |
| chr10 | 93068687  | 93069059  | 373 |
| chr2  | 134064810 | 134065181 | 372 |
| chr29 | 48814057  | 48814427  | 371 |
| chr8  | 45761702  | 45762070  | 369 |
| chr5  | 53445758  | 53446125  | 368 |
| chr25 | 35690718  | 35691084  | 367 |
| chr2  | 134707691 | 134708057 | 367 |
| chr15 | 75535154  | 75535520  | 367 |
| chr23 | 52724486  | 52724851  | 366 |
| chr19 | 59239290  | 59239655  | 366 |
| chr13 | 59957942  | 59958307  | 366 |
| chr16 | 39513378  | 39513740  | 363 |
| chr13 | 60431680  | 60432042  | 363 |
| chr26 | 22808317  | 22808678  | 362 |
| chr5  | 121457183 | 121457541 | 359 |
| chr14 | 61305656  | 61306014  | 359 |
| chr1  | 74227897  | 74228255  | 359 |
| chr16 | 44116476  | 44116833  | 358 |
| chr13 | 40953108  | 40953465  | 358 |
| chr5  | 33878293  | 33878649  | 357 |
| chr5  | 31308577  | 31308933  | 357 |
| chr3  | 110399915 | 110400271 | 357 |
| chr19 | 46098037  | 46098392  | 356 |
| chr17 | 70292945  | 70293297  | 353 |
| chr13 | 63428955  | 63429307  | 353 |
| chr3  | 126952184 | 126952534 | 351 |
| chr27 | 45262965  | 45263315  | 351 |
| chr26 | 51367296  | 51367645  | 350 |
| chr18 | 62382889  | 62383231  | 343 |
| chr16 | 46689278  | 46689607  | 330 |
| chr11 | 106065777 | 106066102 | 326 |
| chr18 | 12122800  | 12123123  | 324 |
| chr13 | 65806840  | 65807162  | 323 |
| chr8  | 51934433  | 51934747  | 315 |
| chr19 | 59689881  | 59690195  | 315 |
| chr25 | 35119234  | 35119547  | 314 |
| chr18 | 63807811  | 63808122  | 312 |
| chr28 | 33314425  | 33314735  | 311 |
| chr1  | 158766152 | 158766459 | 308 |
| chr26 | 37479302  | 37479605  | 304 |
| chr3  | 8220393   | 8220689   | 297 |
| chr1  | 1597719   | 1598015   | 297 |
| chr10 | 19415642  | 19415936  | 295 |
| chr19 | 23061886  | 23062174  | 289 |
| chr12 | 34268134  | 34268403  | 270 |
| chr14 | 5910389   | 5911171   | 783 |
| chr13 | 59929321  | 59929998  | 678 |
| chr5  | 28747858  | 28748407  | 550 |

|       |           |           |      |
|-------|-----------|-----------|------|
| chr13 | 75754316  | 75754714  | 399  |
| chr20 | 38407920  | 38408747  | 828  |
| chr13 | 46316358  | 46316754  | 397  |
| chr15 | 28667120  | 28668416  | 1297 |
| chr26 | 38247394  | 38248204  | 811  |
| chr10 | 81698302  | 81699081  | 780  |
| chr19 | 39061150  | 39061787  | 638  |
| chr19 | 45535527  | 45536122  | 596  |
| chr23 | 28756421  | 28756942  | 522  |
| chr13 | 37672889  | 37673232  | 344  |
| chr13 | 75523380  | 75523871  | 492  |
| chr18 | 54818037  | 54818872  | 836  |
| chr5  | 33766402  | 33767212  | 811  |
| chr1  | 132078151 | 132078818 | 668  |
| chr18 | 57604996  | 57605450  | 455  |
| chr2  | 111651740 | 111652186 | 447  |
| chr3  | 127005076 | 127005473 | 398  |
| chr8  | 77680567  | 77681927  | 1361 |
| chr6  | 63046778  | 63047285  | 508  |
| chr10 | 4380183   | 4380931   | 749  |
| chr22 | 36553906  | 36554504  | 599  |
| chr3  | 17480525  | 17480996  | 472  |
| chr13 | 52984368  | 52985148  | 781  |
| chr18 | 49476996  | 49477605  | 610  |
| chr24 | 26731959  | 26732473  | 515  |
| chr19 | 38734420  | 38735143  | 724  |
| chr17 | 65978476  | 65979160  | 685  |
| chr4  | 117966680 | 117967796 | 1117 |
| chr11 | 98354417  | 98354894  | 478  |
| chr2  | 124327605 | 124328060 | 456  |
| chr22 | 54125489  | 54125859  | 371  |
| chr28 | 7555970   | 7556516   | 547  |
| chr18 | 43461505  | 43462485  | 981  |
| chr13 | 77196123  | 77196609  | 487  |
| chr23 | 28002414  | 28002820  | 407  |
| chr3  | 22558757  | 22559409  | 653  |
| chr4  | 124236910 | 124237318 | 409  |
| chr19 | 20339563  | 20340579  | 1017 |
| chr19 | 14051234  | 14051800  | 567  |
| chr11 | 96162562  | 96163062  | 501  |
| chr25 | 44006047  | 44006519  | 473  |
| chr25 | 26710516  | 26710953  | 438  |
| chr16 | 48103313  | 48103742  | 430  |
| chr19 | 23703182  | 23703605  | 424  |
| chr18 | 11359032  | 11359412  | 381  |
| chr21 | 33924967  | 33925312  | 346  |
| chr8  | 45736872  | 45737314  | 443  |
| chr13 | 42879855  | 42880437  | 583  |
| chr8  | 73778084  | 73778411  | 328  |
| chr5  | 113929056 | 113929608 | 553  |

|       |           |           |      |
|-------|-----------|-----------|------|
| chr7  | 46196507  | 46197286  | 780  |
| chr9  | 50713525  | 50714770  | 1246 |
| chr3  | 4683250   | 4684060   | 811  |
| chr10 | 99452345  | 99452892  | 548  |
| chr3  | 81166401  | 81167363  | 963  |
| chr4  | 98597776  | 98598268  | 493  |
| chr9  | 87734366  | 87735005  | 640  |
| chr11 | 2536616   | 2537096   | 481  |
| chr8  | 23934020  | 23934395  | 376  |
| chr19 | 51897994  | 51898347  | 354  |
| chr8  | 73732030  | 73732355  | 326  |
| chr12 | 24621348  | 24623236  | 1889 |
| chr7  | 70505548  | 70507273  | 1726 |
| chr6  | 120814989 | 120816593 | 1605 |
| chr21 | 61671598  | 61673145  | 1548 |
| chr16 | 44114564  | 44116027  | 1464 |
| chr2  | 111247852 | 111249286 | 1435 |
| chr20 | 8535908   | 8537327   | 1420 |
| chr17 | 51577817  | 51579229  | 1413 |
| chr8  | 8713929   | 8715311   | 1383 |
| chr19 | 27377706  | 27379081  | 1376 |
| chr19 | 8512909   | 8514280   | 1372 |
| chr23 | 31198612  | 31199943  | 1332 |
| chr11 | 104896459 | 104897727 | 1269 |
| chr9  | 73510462  | 73511671  | 1210 |
| chr18 | 4032504   | 4033696   | 1193 |
| chr6  | 72198980  | 72200164  | 1185 |
| chr16 | 23645291  | 23646453  | 1163 |
| chr18 | 11695317  | 11696469  | 1153 |
| chr3  | 15179841  | 15180976  | 1136 |
| chr9  | 87772393  | 87773515  | 1123 |
| chr19 | 12313586  | 12314688  | 1103 |
| chr19 | 39838548  | 39839649  | 1102 |
| chr3  | 116028595 | 116029687 | 1093 |
| chr23 | 49714488  | 49715568  | 1081 |
| chr2  | 75984277  | 75985340  | 1064 |
| chr16 | 49381540  | 49382602  | 1063 |
| chr13 | 22890014  | 22891070  | 1057 |
| chr4  | 33244265  | 33245319  | 1055 |
| chr23 | 30543318  | 30544362  | 1045 |
| chr27 | 35439733  | 35440770  | 1038 |
| chr3  | 29966009  | 29967039  | 1031 |
| chr8  | 78695585  | 78696608  | 1024 |
| chr1  | 143791265 | 143792262 | 998  |
| chr1  | 144811813 | 144812806 | 994  |
| chr9  | 105526620 | 105527612 | 993  |
| chr9  | 106475553 | 106476539 | 987  |
| chr17 | 72757031  | 72758017  | 987  |
| chr19 | 46722773  | 46723758  | 986  |
| chr12 | 84612668  | 84613651  | 984  |

|       |           |           |     |
|-------|-----------|-----------|-----|
| chr8  | 74333979  | 74334953  | 975 |
| chr5  | 33858802  | 33859772  | 971 |
| chr20 | 74957497  | 74958466  | 970 |
| chr16 | 75197899  | 75198862  | 964 |
| chr7  | 13402202  | 13403164  | 963 |
| chr26 | 18297257  | 18298213  | 957 |
| chrX  | 36652263  | 36653218  | 956 |
| chr19 | 39150880  | 39151829  | 950 |
| chr3  | 35891799  | 35892747  | 949 |
| chr27 | 30620553  | 30621498  | 946 |
| chr7  | 46276851  | 46277794  | 944 |
| chr22 | 58635936  | 58636876  | 941 |
| chr6  | 72185812  | 72186750  | 939 |
| chr24 | 35312950  | 35313884  | 935 |
| chr19 | 60775324  | 60776257  | 934 |
| chr11 | 14254199  | 14255132  | 934 |
| chr5  | 80849500  | 80850428  | 929 |
| chr15 | 42518402  | 42519328  | 927 |
| chr18 | 54939936  | 54940861  | 926 |
| chr5  | 28759594  | 28760515  | 922 |
| chr4  | 120607510 | 120608431 | 922 |
| chr2  | 17538433  | 17539353  | 921 |
| chr16 | 38735638  | 38736557  | 920 |
| chr17 | 47098132  | 47099050  | 919 |
| chr29 | 17702270  | 17703187  | 918 |
| chr23 | 8391437   | 8392352   | 916 |
| chr7  | 81251866  | 81252779  | 914 |
| chr6  | 121765897 | 121766809 | 913 |
| chr2  | 135599053 | 135599963 | 911 |
| chr13 | 54761706  | 54762611  | 906 |
| chr4  | 99570132  | 99571033  | 902 |
| chr24 | 44425616  | 44426514  | 899 |
| chr13 | 61167246  | 61168139  | 894 |
| chr7  | 70513125  | 70514009  | 885 |
| chr19 | 46697734  | 46698615  | 882 |
| chr11 | 84624986  | 84625867  | 882 |
| chr10 | 4983025   | 4983903   | 879 |
| chr16 | 2214526   | 2215395   | 870 |
| chr16 | 1797436   | 1798305   | 870 |
| chr24 | 29710628  | 29711493  | 866 |
| chr26 | 18178853  | 18179715  | 863 |
| chr28 | 12376790  | 12377650  | 861 |
| chr5  | 76858754  | 76859613  | 860 |
| chr4  | 95472874  | 95473733  | 860 |
| chr16 | 23647504  | 23648354  | 851 |
| chr12 | 32591011  | 32591858  | 848 |
| chr29 | 25554127  | 25554971  | 845 |
| chr29 | 29795757  | 29796597  | 841 |
| chr26 | 44241392  | 44242227  | 836 |
| chr2  | 132507255 | 132508090 | 836 |

|       |           |           |     |
|-------|-----------|-----------|-----|
| chr27 | 14399875  | 14400709  | 835 |
| chr2  | 75979581  | 75980412  | 832 |
| chr16 | 44336884  | 44337714  | 831 |
| chr14 | 10321415  | 10322243  | 829 |
| chr13 | 59662469  | 59663297  | 829 |
| chr11 | 100872479 | 100873307 | 829 |
| chr10 | 81590184  | 81591009  | 826 |
| chr1  | 1643202   | 1644027   | 826 |
| chr21 | 27812813  | 27813637  | 825 |
| chr19 | 60742336  | 60743160  | 825 |
| chr15 | 33142195  | 33143019  | 825 |
| chr2  | 111675528 | 111676350 | 823 |
| chr18 | 62681911  | 62682731  | 821 |
| chr29 | 34260831  | 34261650  | 820 |
| chr20 | 29507521  | 29508333  | 813 |
| chr9  | 77698459  | 77699269  | 811 |
| chr22 | 20116208  | 20117017  | 810 |
| chr24 | 34081584  | 34082392  | 809 |
| chr2  | 119408970 | 119409778 | 809 |
| chr25 | 10601572  | 10602376  | 805 |
| chr10 | 74852957  | 74853759  | 803 |
| chr19 | 58562778  | 58563579  | 802 |
| chr18 | 24012364  | 24013163  | 800 |
| chr5  | 113919506 | 113920304 | 799 |
| chr17 | 73151381  | 73152178  | 798 |
| chr11 | 1302138   | 1302933   | 796 |
| chr12 | 32158778  | 32159571  | 794 |
| chr24 | 5539986   | 5540778   | 793 |
| chr20 | 8754238   | 8755030   | 793 |
| chr18 | 61996604  | 61997396  | 793 |
| chr4  | 102394896 | 102395685 | 790 |
| chr13 | 75996748  | 75997536  | 789 |
| chr12 | 34328217  | 34329004  | 788 |
| chr2  | 111402433 | 111403219 | 787 |
| chr18 | 4966541   | 4967327   | 787 |
| chr9  | 45923092  | 45923877  | 786 |
| chr9  | 104802591 | 104803373 | 783 |
| chr22 | 14933259  | 14934036  | 778 |
| chr18 | 50984220  | 50984996  | 777 |
| chr16 | 44358840  | 44359616  | 777 |
| chr6  | 120771813 | 120772588 | 776 |
| chr15 | 58004243  | 58005018  | 776 |
| chr11 | 83225632  | 83226407  | 776 |
| chr7  | 14293881  | 14294655  | 775 |
| chr15 | 81519952  | 81520722  | 771 |
| chr1  | 87336561  | 87337331  | 771 |
| chr20 | 66662922  | 66663688  | 767 |
| chr3  | 125707531 | 125708295 | 765 |
| chr16 | 25937642  | 25938405  | 764 |
| chr10 | 83517531  | 83518292  | 762 |

|       |           |           |     |
|-------|-----------|-----------|-----|
| chr23 | 8790328   | 8791087   | 760 |
| chr3  | 85366530  | 85367288  | 759 |
| chr19 | 63707163  | 63707920  | 758 |
| chr19 | 59690907  | 59691661  | 755 |
| chr20 | 70569866  | 70570617  | 752 |
| chr1  | 83004456  | 83005205  | 750 |
| chr29 | 17701182  | 17701928  | 747 |
| chr11 | 77172922  | 77173668  | 747 |
| chr28 | 41777804  | 41778547  | 744 |
| chr16 | 77343699  | 77344441  | 743 |
| chr3  | 127025775 | 127026515 | 741 |
| chr1  | 108511753 | 108512491 | 739 |
| chrX  | 54353712  | 54354443  | 732 |
| chr26 | 22381519  | 22382250  | 732 |
| chr5  | 27465147  | 27465877  | 731 |
| chr5  | 30484424  | 30485153  | 730 |
| chr23 | 27867741  | 27868469  | 729 |
| chr26 | 50843436  | 50844159  | 724 |
| chr5  | 30992275  | 30992996  | 722 |
| chr19 | 14750879  | 14751600  | 722 |
| chr18 | 62458365  | 62459085  | 721 |
| chr17 | 44179510  | 44180230  | 721 |
| chr14 | 64534385  | 64535104  | 720 |
| chr23 | 52681765  | 52682483  | 719 |
| chr19 | 45060950  | 45061666  | 717 |
| chr4  | 79040816  | 79041531  | 716 |
| chr6  | 120816730 | 120817444 | 715 |
| chr25 | 4836324   | 4837038   | 715 |
| chr1  | 41780521  | 41781233  | 713 |
| chr26 | 37959969  | 37960679  | 711 |
| chr25 | 27391521  | 27392230  | 710 |
| chr29 | 26783905  | 26784611  | 707 |
| chr12 | 36189107  | 36189813  | 707 |
| chr12 | 20026031  | 20026737  | 707 |
| chr19 | 32593966  | 32594671  | 706 |
| chr25 | 40224155  | 40224859  | 705 |
| chr19 | 38609665  | 38610369  | 705 |
| chr4  | 5386699   | 5387398   | 700 |
| chr21 | 39967234  | 39967933  | 700 |
| chr17 | 72702452  | 72703150  | 699 |
| chr3  | 8761231   | 8761924   | 694 |
| chr17 | 63484265  | 63484955  | 691 |
| chr18 | 62007080  | 62007769  | 690 |
| chr29 | 13603850  | 13604536  | 687 |
| chr3  | 121431458 | 121432143 | 686 |
| chr28 | 26782067  | 26782752  | 686 |
| chr28 | 26772919  | 26773604  | 686 |
| chr22 | 55898507  | 55899192  | 686 |
| chr26 | 51453138  | 51453819  | 682 |
| chr5  | 123165396 | 123166074 | 679 |



|       |               |           |     |
|-------|---------------|-----------|-----|
| chr13 | 65413740      | 65414416  | 677 |
| chr10 | 21090460      | 21091136  | 677 |
| chr19 | 39620254      | 39620929  | 676 |
| chr19 | 46300165      | 46300838  | 674 |
| chr18 | 9806736       | 9807408   | 673 |
| chr1  | 143796711     | 143797383 | 673 |
| chr1  | 123142646     | 123143318 | 673 |
| chr6  | 74546169      | 74546840  | 672 |
| chr4  | 121392170     | 121392839 | 670 |
| chr20 | 914309 914975 | 667       |     |
| chr17 | 65983544      | 65984208  | 665 |
| chr4  | 118055310     | 118055973 | 664 |
| chr13 | 75624830      | 75625493  | 664 |
| chr1  | 111303896     | 111304554 | 659 |
| chr2  | 126027906     | 126028562 | 657 |
| chr18 | 17990916      | 17991572  | 657 |
| chr29 | 29686539      | 29687193  | 655 |
| chr7  | 94375349      | 94376002  | 654 |
| chr26 | 22798011      | 22798662  | 652 |
| chr5  | 33877488      | 33878138  | 651 |
| chr3  | 108368839     | 108369489 | 651 |
| chr17 | 48919434      | 48920084  | 651 |
| chr22 | 58439748      | 58440397  | 650 |
| chr4  | 80433542      | 80434190  | 649 |
| chr14 | 59272117      | 59272765  | 649 |
| chr13 | 11118699      | 11119346  | 648 |
| chr5  | 121056040     | 121056686 | 647 |
| chr2  | 129888394     | 129889040 | 647 |
| chr6  | 121786687     | 121787332 | 646 |
| chr27 | 856720 857365 | 646       |     |
| chr5  | 28382497      | 28383141  | 645 |
| chr3  | 22654264      | 22654908  | 645 |
| chr23 | 36834929      | 36835573  | 645 |
| chr1  | 152265765     | 152266408 | 644 |
| chr25 | 1302473       | 1303115   | 643 |
| chr22 | 59672147      | 59672788  | 642 |
| chr22 | 59560972      | 59561612  | 641 |
| chr6  | 72740797      | 72741436  | 640 |
| chr5  | 111892227     | 111892866 | 640 |
| chr5  | 71538311      | 71538949  | 639 |
| chr11 | 98967440      | 98968078  | 639 |
| chr2  | 74017744      | 74018381  | 638 |
| chr11 | 30921897      | 30922533  | 637 |
| chr25 | 42635189      | 42635824  | 636 |
| chr12 | 68186504      | 68187139  | 636 |
| chr19 | 60776717      | 60777351  | 635 |
| chr2  | 139112449     | 139113081 | 633 |
| chr13 | 60962110      | 60962742  | 633 |
| chr18 | 64316028      | 64316657  | 630 |
| chr13 | 75833002      | 75833630  | 629 |

|       |               |           |     |
|-------|---------------|-----------|-----|
| chr8  | 108709800     | 108710427 | 628 |
| chr13 | 84227788      | 84228414  | 627 |
| chr23 | 994164 994788 | 625       |     |
| chr19 | 39116356      | 39116980  | 625 |
| chr8  | 5774078       | 5774701   | 624 |
| chr19 | 28255445      | 28256068  | 624 |
| chr15 | 26756366      | 26756987  | 622 |
| chr1  | 44930943      | 44931564  | 622 |
| chr6  | 16239403      | 16240023  | 621 |
| chr7  | 6620937       | 6621554   | 618 |
| chr24 | 44048459      | 44049076  | 618 |
| chr23 | 28485915      | 28486530  | 616 |
| chr2  | 123021579     | 123022194 | 616 |
| chr17 | 72334772      | 72335386  | 615 |
| chr16 | 42869816      | 42870427  | 612 |
| chr3  | 10697932      | 10698542  | 611 |
| chr13 | 11415482      | 11416092  | 611 |
| chr22 | 16296455      | 16297064  | 610 |
| chr13 | 14721288      | 14721896  | 609 |
| chr19 | 55980039      | 55980645  | 607 |
| chr12 | 46763859      | 46764465  | 607 |
| chr24 | 47126811      | 47127416  | 606 |
| chr20 | 73290991      | 73291596  | 606 |
| chr2  | 135621882     | 135622487 | 606 |
| chr11 | 771396 772001 | 606       |     |
| chr10 | 8529752       | 8530357   | 606 |
| chr17 | 12564617      | 12565221  | 605 |
| chr14 | 66294033      | 66294637  | 605 |
| chr22 | 46576192      | 46576794  | 603 |
| chr18 | 51413993      | 51414594  | 602 |
| chr11 | 106239554     | 106240155 | 602 |
| chr15 | 29340840      | 29341440  | 601 |
| chr13 | 11224448      | 11225043  | 596 |
| chr25 | 1105250       | 1105843   | 594 |
| chr3  | 13490588      | 13491180  | 593 |
| chr19 | 14241589      | 14242181  | 593 |
| chr16 | 71665120      | 71665711  | 592 |
| chr18 | 62500384      | 62500973  | 590 |
| chr3  | 125635719     | 125636305 | 587 |
| chr23 | 10471350      | 10471935  | 586 |
| chr26 | 23075324      | 23075908  | 585 |
| chr15 | 76159942      | 76160526  | 585 |
| chr21 | 15490188      | 15490770  | 583 |
| chr5  | 28883400      | 28883979  | 580 |
| chr4  | 47452846      | 47453425  | 580 |
| chr1  | 146738095     | 146738674 | 580 |
| chr23 | 8794514       | 8795092   | 579 |
| chr13 | 77770076      | 77770653  | 578 |
| chr12 | 18233501      | 18234078  | 578 |
| chr25 | 35602003      | 35602579  | 577 |

|       |           |           |     |
|-------|-----------|-----------|-----|
| chr7  | 15761745  | 15762320  | 576 |
| chr24 | 47677854  | 47678426  | 573 |
| chr15 | 55636660  | 55637232  | 573 |
| chr18 | 62743280  | 62743851  | 572 |
| chr25 | 756986    | 757556    | 571 |
| chr18 | 11760392  | 11760962  | 571 |
| chr14 | 42555155  | 42555723  | 569 |
| chr3  | 114217813 | 114218378 | 566 |
| chr26 | 51561042  | 51561607  | 566 |
| chr13 | 37856736  | 37857301  | 566 |
| chr1  | 2165709   | 2166273   | 565 |
| chr27 | 38666340  | 38666903  | 564 |
| chr13 | 54833565  | 54834128  | 564 |
| chr11 | 14253417  | 14253980  | 564 |
| chr8  | 28007710  | 28008271  | 562 |
| chr17 | 62073607  | 62074168  | 562 |
| chr25 | 42142383  | 42142942  | 560 |
| chr24 | 36028543  | 36029100  | 558 |
| chr28 | 43862971  | 43863527  | 557 |
| chr12 | 84215590  | 84216145  | 556 |
| chr24 | 25450671  | 25451225  | 555 |
| chr13 | 80099667  | 80100221  | 555 |
| chr18 | 18051455  | 18052008  | 554 |
| chr12 | 64734314  | 64734866  | 553 |
| chr19 | 29813592  | 29814143  | 552 |
| chr7  | 43700051  | 43700601  | 551 |
| chr4  | 79305905  | 79306455  | 551 |
| chr3  | 97867146  | 97867696  | 551 |
| chr21 | 68475723  | 68476273  | 551 |
| chr19 | 13477827  | 13478377  | 551 |
| chr19 | 46897412  | 46897961  | 550 |
| chr5  | 123876368 | 123876916 | 549 |
| chr23 | 27745408  | 27745955  | 548 |
| chr2  | 135638043 | 135638590 | 548 |
| chr19 | 47267059  | 47267606  | 548 |
| chr16 | 40887593  | 40888140  | 548 |
| chr11 | 49398101  | 49398648  | 548 |
| chr7  | 79734830  | 79735376  | 547 |
| chr5  | 28901494  | 28902039  | 546 |
| chr18 | 54191312  | 54191857  | 546 |
| chr24 | 49366285  | 49366827  | 543 |
| chr7  | 3697997   | 3698538   | 542 |
| chr20 | 67486988  | 67487529  | 542 |
| chr2  | 134749293 | 134749834 | 542 |
| chr23 | 45576084  | 45576624  | 541 |
| chr29 | 2685660   | 2686199   | 540 |
| chr17 | 64311430  | 64311969  | 540 |
| chr23 | 27843714  | 27844251  | 538 |
| chr11 | 96163862  | 96164399  | 538 |
| chr18 | 48379491  | 48380027  | 537 |

|       |           |           |     |
|-------|-----------|-----------|-----|
| chr10 | 88372835  | 88373371  | 537 |
| chr12 | 75679528  | 75680063  | 536 |
| chr10 | 25848154  | 25848689  | 536 |
| chr3  | 115465963 | 115466496 | 534 |
| chr9  | 106389769 | 106390301 | 533 |
| chr4  | 57718334  | 57718866  | 533 |
| chr11 | 90409140  | 90409671  | 532 |
| chr26 | 50819298  | 50819828  | 531 |
| chr26 | 48681234  | 48681763  | 530 |
| chr29 | 33712231  | 33712758  | 528 |
| chr25 | 39164100  | 39164627  | 528 |
| chr7  | 19219974  | 19220500  | 527 |
| chr29 | 49710208  | 49710734  | 527 |
| chr23 | 30341027  | 30341553  | 527 |
| chr9  | 106858626 | 106859151 | 526 |
| chr25 | 28052937  | 28053462  | 526 |
| chr16 | 56113155  | 56113678  | 524 |
| chr17 | 69746546  | 69747068  | 523 |
| chr9  | 104923941 | 104924462 | 522 |
| chr18 | 62012725  | 62013246  | 522 |
| chr1  | 123104221 | 123104742 | 522 |
| chrX  | 55280965  | 55281485  | 521 |
| chr24 | 58902714  | 58903234  | 521 |
| chr24 | 36027738  | 36028258  | 521 |
| chr21 | 30287082  | 30287600  | 519 |
| chr1  | 84686371  | 84686889  | 519 |
| chr18 | 62457624  | 62458141  | 518 |
| chr7  | 14377127  | 14377643  | 517 |
| chr25 | 37193764  | 37194280  | 517 |
| chr24 | 44045549  | 44046065  | 517 |
| chr24 | 35329447  | 35329963  | 517 |
| chr20 | 75633228  | 75633744  | 517 |
| chr19 | 46093063  | 46093579  | 517 |
| chr19 | 21617661  | 21618177  | 517 |
| chr23 | 17418440  | 17418953  | 514 |
| chr7  | 45666363  | 45666875  | 513 |
| chr5  | 52964389  | 52964899  | 511 |
| chr5  | 29194711  | 29195221  | 511 |
| chr26 | 20302896  | 20303406  | 511 |
| chr18 | 38343762  | 38344272  | 511 |
| chr23 | 19332833  | 19333342  | 510 |
| chr18 | 52688090  | 52688599  | 510 |
| chr23 | 27402304  | 27402812  | 509 |
| chr17 | 64377865  | 64378371  | 507 |
| chr13 | 80406225  | 80406731  | 507 |
| chr3  | 35492442  | 35492946  | 505 |
| chr3  | 17479947  | 17480451  | 505 |
| chr17 | 75028924  | 75029428  | 505 |
| chr10 | 84542748  | 84543251  | 504 |
| chr21 | 20943027  | 20943529  | 503 |

|       |           |           |     |
|-------|-----------|-----------|-----|
| chr15 | 24027539  | 24028041  | 503 |
| chr18 | 11516861  | 11517360  | 500 |
| chr21 | 19179917  | 19180414  | 498 |
| chr9  | 29836375  | 29836871  | 497 |
| chr5  | 111326999 | 111327495 | 497 |
| chr3  | 105156079 | 105156575 | 497 |
| chr14 | 1978230   | 1978725   | 496 |
| chr25 | 28056269  | 28056763  | 495 |
| chr13 | 57621099  | 57621593  | 495 |
| chr21 | 20693909  | 20694402  | 494 |
| chr13 | 6923494   | 6923987   | 494 |
| chr10 | 68236542  | 68237035  | 494 |
| chr12 | 74428468  | 74428960  | 493 |
| chr5  | 30492144  | 30492635  | 492 |
| chr25 | 2972085   | 2972576   | 492 |
| chr10 | 8719702   | 8720193   | 492 |
| chr3  | 95078031  | 95078521  | 491 |
| chr29 | 34425571  | 34426060  | 490 |
| chr2  | 140659246 | 140659735 | 490 |
| chr19 | 60405510  | 60405999  | 490 |
| chr22 | 57638092  | 57638580  | 489 |
| chr18 | 24319503  | 24319988  | 486 |
| chr13 | 25502891  | 25503376  | 486 |
| chr11 | 98374159  | 98374644  | 486 |
| chr7  | 45700046  | 45700529  | 484 |
| chr5  | 73071117  | 73071600  | 484 |
| chr4  | 70709999  | 70710482  | 484 |
| chr25 | 30894287  | 30894769  | 483 |
| chr17 | 47399763  | 47400245  | 483 |
| chr4  | 95999409  | 95999890  | 482 |
| chr26 | 22291263  | 22291744  | 482 |
| chr25 | 37529405  | 37529886  | 482 |
| chr22 | 17560047  | 17560528  | 482 |
| chr4  | 110054662 | 110055142 | 481 |
| chr1  | 84795317  | 84795797  | 481 |
| chr28 | 26788431  | 26788910  | 480 |
| chr19 | 38741863  | 38742342  | 480 |
| chr19 | 58732259  | 58732736  | 478 |
| chr19 | 44764737  | 44765212  | 476 |
| chr10 | 68472543  | 68473017  | 475 |
| chr7  | 50091075  | 50091547  | 473 |
| chr21 | 34513460  | 34513932  | 473 |
| chr18 | 62377164  | 62377636  | 473 |
| chr25 | 4619140   | 4619609   | 470 |
| chr29 | 46653057  | 46653523  | 467 |
| chr20 | 4443702   | 4444168   | 467 |
| chr16 | 39377950  | 39378416  | 467 |
| chr25 | 3011879   | 3012344   | 466 |
| chr13 | 42869870  | 42870335  | 466 |
| chr16 | 46843429  | 46843893  | 465 |

|       |           |           |     |
|-------|-----------|-----------|-----|
| chr26 | 5698396   | 5698859   | 464 |
| chr14 | 52286952  | 52287415  | 464 |
| chr24 | 50228643  | 50229105  | 463 |
| chr18 | 64278091  | 64278553  | 463 |
| chr8  | 108405652 | 108406113 | 462 |
| chr7  | 42217429  | 42217890  | 462 |
| chr29 | 49567425  | 49567886  | 462 |
| chr16 | 47248706  | 47249167  | 462 |
| chr19 | 46824950  | 46825410  | 461 |
| chr15 | 64165848  | 64166307  | 460 |
| chr22 | 50869332  | 50869790  | 459 |
| chr13 | 75713778  | 75714236  | 459 |
| chr20 | 3176076   | 3176533   | 458 |
| chr16 | 2261331   | 2261787   | 457 |
| chr13 | 77734554  | 77735010  | 457 |
| chr8  | 116795484 | 116795939 | 456 |
| chr27 | 35838511  | 35838966  | 456 |
| chr19 | 46771992  | 46772447  | 456 |
| chr19 | 46703281  | 46703736  | 456 |
| chr13 | 14724782  | 14725237  | 456 |
| chrX  | 11000969  | 11001423  | 455 |
| chr28 | 41788977  | 41789431  | 455 |
| chr15 | 32950477  | 32950930  | 454 |
| chr11 | 89687461  | 89687914  | 454 |
| chr3  | 9069744   | 9070196   | 453 |
| chr21 | 24839053  | 24839505  | 453 |
| chr19 | 65236515  | 65236966  | 452 |
| chr19 | 58225201  | 58225652  | 452 |
| chr11 | 81751799  | 81752250  | 452 |
| chr8  | 72427250  | 72427700  | 451 |
| chr9  | 74215844  | 74216293  | 450 |
| chr5  | 20851595  | 20852044  | 450 |
| chr24 | 52339874  | 52340322  | 449 |
| chr6  | 121882695 | 121883142 | 448 |
| chr18 | 56924449  | 56924896  | 448 |
| chr16 | 46746497  | 46746944  | 448 |
| chr6  | 36503848  | 36504294  | 447 |
| chr3  | 30724741  | 30725187  | 447 |
| chr16 | 39530761  | 39531206  | 446 |
| chr16 | 2254420   | 2254865   | 446 |
| chr4  | 96854380  | 96854823  | 444 |
| chr26 | 18185477  | 18185920  | 444 |
| chr19 | 60809624  | 60810067  | 444 |
| chr19 | 12304186  | 12304628  | 443 |
| chr7  | 36640493  | 36640934  | 442 |
| chr22 | 49579992  | 49580433  | 442 |
| chr19 | 26945245  | 26945686  | 442 |
| chr7  | 3035155   | 3035595   | 441 |
| chr4  | 95804208  | 95804648  | 441 |
| chr27 | 29598778  | 29599218  | 441 |

|       |           |           |     |
|-------|-----------|-----------|-----|
| chr21 | 9491657   | 9492097   | 441 |
| chr9  | 104900686 | 104901124 | 439 |
| chr5  | 120496910 | 120497347 | 438 |
| chr21 | 69095693  | 69096130  | 438 |
| chr13 | 75811873  | 75812310  | 438 |
| chr5  | 33878651  | 33879087  | 437 |
| chr19 | 18379994  | 18380430  | 437 |
| chr18 | 54208689  | 54209125  | 437 |
| chr17 | 75092402  | 75092838  | 437 |
| chr1  | 68823731  | 68824167  | 437 |
| chr23 | 44103160  | 44103595  | 436 |
| chr5  | 10771955  | 10772389  | 435 |
| chr16 | 77491685  | 77492119  | 435 |
| chr21 | 7603578   | 7604011   | 434 |
| chr13 | 52532446  | 52532879  | 434 |
| chr10 | 59922651  | 59923084  | 434 |
| chr5  | 52618609  | 52619041  | 433 |
| chr19 | 44601282  | 44601714  | 433 |
| chr12 | 30495017  | 30495449  | 433 |
| chr7  | 10283488  | 10283919  | 432 |
| chr22 | 30118530  | 30118961  | 432 |
| chr19 | 56654885  | 56655316  | 432 |
| chr19 | 54512272  | 54512703  | 432 |
| chr1  | 145722345 | 145722776 | 432 |
| chr3  | 15769574  | 15770004  | 431 |
| chr28 | 40401611  | 40402041  | 431 |
| chr23 | 15964865  | 15965295  | 431 |
| chr5  | 28895603  | 28896032  | 430 |
| chr10 | 16999343  | 16999772  | 430 |
| chr5  | 112591943 | 112592370 | 428 |
| chr26 | 51255296  | 51255723  | 428 |
| chr7  | 19199496  | 19199922  | 427 |
| chr5  | 112785376 | 112785802 | 427 |
| chr23 | 17898646  | 17899072  | 427 |
| chr11 | 5358276   | 5358702   | 427 |
| chr21 | 27930219  | 27930644  | 426 |
| chr11 | 49327668  | 49328093  | 426 |
| chr1  | 87377193  | 87377618  | 426 |
| chr9  | 76814651  | 76815075  | 425 |
| chr5  | 60448061  | 60448485  | 425 |
| chr26 | 22358609  | 22359033  | 425 |
| chr12 | 66632181  | 66632605  | 425 |
| chr27 | 39135075  | 39135498  | 424 |
| chr19 | 8944031   | 8944454   | 424 |
| chr15 | 30917419  | 30917842  | 424 |
| chr7  | 10173019  | 10173441  | 423 |
| chr4  | 96000674  | 96001096  | 423 |
| chr22 | 58437701  | 58438123  | 423 |
| chr18 | 11963064  | 11963486  | 423 |
| chr13 | 26036140  | 26036562  | 423 |

|       |               |           |     |
|-------|---------------|-----------|-----|
| chr1  | 68920549      | 68920971  | 423 |
| chr6  | 109422619     | 109423040 | 422 |
| chr24 | 20885766      | 20886187  | 422 |
| chr23 | 27595216      | 27595637  | 422 |
| chr21 | 39969039      | 39969460  | 422 |
| chr15 | 74530338      | 74530759  | 422 |
| chr10 | 74865071      | 74865492  | 422 |
| chr24 | 43307405      | 43307825  | 421 |
| chr20 | 74018985      | 74019405  | 421 |
| chr9  | 91902250      | 91902669  | 420 |
| chr8  | 114247471     | 114247890 | 420 |
| chr7  | 3974077       | 3974496   | 420 |
| chr26 | 18762650      | 18763069  | 420 |
| chr14 | 20759940      | 20760359  | 420 |
| chr8  | 80607717      | 80608135  | 419 |
| chr23 | 46392661      | 46393079  | 419 |
| chr19 | 12309611      | 12310029  | 419 |
| chr17 | 64137352      | 64137770  | 419 |
| chr11 | 49402355      | 49402773  | 419 |
| chr8  | 80491288      | 80491705  | 418 |
| chr23 | 31148162      | 31148579  | 418 |
| chr19 | 38744993      | 38745410  | 418 |
| chr5  | 119146275     | 119146691 | 417 |
| chr8  | 65870396      | 65870811  | 416 |
| chr28 | 46057234      | 46057649  | 416 |
| chr23 | 27790830      | 27791245  | 416 |
| chr20 | 37572557      | 37572972  | 416 |
| chr17 | 69534699      | 69535114  | 416 |
| chr13 | 79071501      | 79071916  | 416 |
| chr13 | 70283750      | 70284165  | 416 |
| chr13 | 66940774      | 66941189  | 416 |
| chr13 | 17315887      | 17316302  | 416 |
| chr3  | 123243629     | 123244043 | 415 |
| chr19 | 12494433      | 12494847  | 415 |
| chr7  | 14899844      | 14900257  | 414 |
| chr26 | 41460366      | 41460779  | 414 |
| chr23 | 31403114      | 31403527  | 414 |
| chr13 | 80051320      | 80051733  | 414 |
| chr29 | 46654570      | 46654982  | 413 |
| chr18 | 2527986       | 2528398   | 413 |
| chr17 | 64109682      | 64110094  | 413 |
| chr3  | 33126524      | 33126935  | 412 |
| chr20 | 67488905      | 67489316  | 412 |
| chr19 | 12499632      | 12500043  | 412 |
| chr13 | 73535167      | 73535578  | 412 |
| chr6  | 63172161      | 63172571  | 411 |
| chr5  | 119147799     | 119148209 | 411 |
| chr25 | 652646 653056 |           | 411 |
| chr19 | 33428710      | 33429120  | 411 |
| chr16 | 61522106      | 61522516  | 411 |



|       |           |           |     |
|-------|-----------|-----------|-----|
| chr9  | 100329451 | 100329860 | 410 |
| chr7  | 5607853   | 5608262   | 410 |
| chr6  | 120806619 | 120807028 | 410 |
| chr3  | 125632816 | 125633225 | 410 |
| chr2  | 121935761 | 121936170 | 410 |
| chr12 | 22970431  | 22970840  | 410 |
| chr1  | 154074049 | 154074458 | 410 |
| chr20 | 73290178  | 73290586  | 409 |
| chr2  | 126724150 | 126724558 | 409 |
| chr12 | 74449377  | 74449785  | 409 |
| chr12 | 31318095  | 31318503  | 409 |
| chr7  | 51404459  | 51404866  | 408 |
| chr6  | 70183348  | 70183755  | 408 |
| chr5  | 30671979  | 30672386  | 408 |
| chr3  | 113292779 | 113293186 | 408 |
| chr2  | 99336465  | 99336872  | 408 |
| chr16 | 39597887  | 39598294  | 408 |
| chr28 | 26079248  | 26079654  | 407 |
| chr17 | 58985364  | 58985770  | 407 |
| chr15 | 81216693  | 81217099  | 407 |
| chr15 | 42719822  | 42720228  | 407 |
| chr28 | 33926388  | 33926793  | 406 |
| chr23 | 11848869  | 11849274  | 406 |
| chr23 | 7065483   | 7065888   | 406 |
| chr7  | 50547337  | 50547741  | 405 |
| chr6  | 118184125 | 118184529 | 405 |
| chr29 | 38314318  | 38314722  | 405 |
| chr18 | 47494301  | 47494705  | 405 |
| chr17 | 63325294  | 63325698  | 405 |
| chr11 | 75084054  | 75084458  | 405 |
| chr9  | 91083792  | 91084195  | 404 |
| chr7  | 10824362  | 10824765  | 404 |
| chr29 | 50441525  | 50441928  | 404 |
| chr23 | 13692730  | 13693133  | 404 |
| chr19 | 59477329  | 59477732  | 404 |
| chr16 | 2441959   | 2442362   | 404 |
| chr5  | 118152199 | 118152601 | 403 |
| chr5  | 26714547  | 26714949  | 403 |
| chr3  | 22642775  | 22643177  | 403 |
| chr23 | 10992628  | 10993030  | 403 |
| chr2  | 138648328 | 138648730 | 403 |
| chr18 | 38529887  | 38530289  | 403 |
| chr12 | 32198137  | 32198539  | 403 |
| chr10 | 48390911  | 48391313  | 403 |
| chr3  | 35690179  | 35690580  | 402 |
| chr29 | 44561575  | 44561976  | 402 |
| chr22 | 50610219  | 50610620  | 402 |
| chr4  | 27847286  | 27847686  | 401 |
| chr3  | 125658813 | 125659213 | 401 |
| chr3  | 116332674 | 116333074 | 401 |

|       |           |           |     |
|-------|-----------|-----------|-----|
| chr3  | 105732955 | 105733355 | 401 |
| chr3  | 22942372  | 22942772  | 401 |
| chr20 | 33697659  | 33698059  | 401 |
| chr19 | 64055780  | 64056180  | 401 |
| chr18 | 49546157  | 49546557  | 401 |
| chr18 | 34991407  | 34991807  | 401 |
| chr17 | 72987000  | 72987400  | 401 |
| chr16 | 75213014  | 75213414  | 401 |
| chr12 | 10236135  | 10236535  | 401 |
| chr1  | 75058525  | 75058925  | 401 |
| chr9  | 47232060  | 47232459  | 400 |
| chr28 | 30766207  | 30766606  | 400 |
| chr19 | 54851646  | 54852045  | 400 |
| chr19 | 30577564  | 30577963  | 400 |
| chr18 | 12020028  | 12020427  | 400 |
| chr18 | 11480524  | 11480923  | 400 |
| chr12 | 31552634  | 31553033  | 400 |
| chr1  | 141484931 | 141485330 | 400 |
| chr9  | 62693432  | 62693830  | 399 |
| chr7  | 20479241  | 20479639  | 399 |
| chr7  | 15592231  | 15592629  | 399 |
| chr6  | 118202885 | 118203283 | 399 |
| chr6  | 61947617  | 61948015  | 399 |
| chr5  | 120503722 | 120504120 | 399 |
| chr5  | 60313871  | 60314269  | 399 |
| chr5  | 26682801  | 26683199  | 399 |
| chr4  | 116723337 | 116723735 | 399 |
| chr4  | 96244013  | 96244411  | 399 |
| chr4  | 76962770  | 76963168  | 399 |
| chr4  | 27845476  | 27845874  | 399 |
| chr3  | 116011675 | 116012073 | 399 |
| chr3  | 114238151 | 114238549 | 399 |
| chr3  | 61483559  | 61483957  | 399 |
| chr3  | 33326996  | 33327394  | 399 |
| chr29 | 51970228  | 51970626  | 399 |
| chr28 | 26843584  | 26843982  | 399 |
| chr26 | 17905141  | 17905539  | 399 |
| chr25 | 43854983  | 43855381  | 399 |
| chr25 | 43275249  | 43275647  | 399 |
| chr25 | 39176186  | 39176584  | 399 |
| chr23 | 10398431  | 10398829  | 399 |
| chr22 | 16158880  | 16159278  | 399 |
| chr21 | 20840251  | 20840649  | 399 |
| chr20 | 74082231  | 74082629  | 399 |
| chr20 | 38739993  | 38740391  | 399 |
| chr2  | 134534696 | 134535094 | 399 |
| chr19 | 60826705  | 60827103  | 399 |
| chr19 | 54619302  | 54619700  | 399 |
| chr19 | 28253028  | 28253426  | 399 |
| chr19 | 13510861  | 13511259  | 399 |

|       |               |           |     |
|-------|---------------|-----------|-----|
| chr19 | 12330869      | 12331267  | 399 |
| chr17 | 70135026      | 70135424  | 399 |
| chr15 | 24005164      | 24005562  | 399 |
| chr14 | 66275286      | 66275684  | 399 |
| chr14 | 6387063       | 6387461   | 399 |
| chr13 | 75445471      | 75445869  | 399 |
| chr13 | 61486091      | 61486489  | 399 |
| chr13 | 31476989      | 31477387  | 399 |
| chr13 | 24031194      | 24031592  | 399 |
| chr11 | 108936966     | 108937364 | 399 |
| chr11 | 105624487     | 105624885 | 399 |
| chr11 | 104915485     | 104915883 | 399 |
| chr11 | 99196196      | 99196594  | 399 |
| chr10 | 32258694      | 32259092  | 399 |
| chr1  | 156726813     | 156727211 | 399 |
| chr1  | 123140640     | 123141038 | 399 |
| chr1  | 1821042       | 1821440   | 399 |
| chr4  | 121131851     | 121132248 | 398 |
| chr24 | 20564753      | 20565150  | 398 |
| chr23 | 53022932      | 53023329  | 398 |
| chr22 | 59530541      | 59530938  | 398 |
| chr22 | 55392974      | 55393371  | 398 |
| chr20 | 3484108       | 3484505   | 398 |
| chr19 | 14084792      | 14085189  | 398 |
| chr10 | 10765952      | 10766349  | 398 |
| chrX  | 13625953      | 13626349  | 397 |
| chr3  | 126065176     | 126065572 | 397 |
| chr3  | 31684826      | 31685222  | 397 |
| chr28 | 12376372      | 12376768  | 397 |
| chr24 | 36557088      | 36557484  | 397 |
| chr24 | 826702 827098 | 397       |     |
| chr19 | 38262942      | 38263338  | 397 |
| chr12 | 9550482       | 9550878   | 397 |
| chr9  | 104994712     | 104995107 | 396 |
| chr5  | 122832448     | 122832843 | 396 |
| chr3  | 115025087     | 115025482 | 396 |
| chr29 | 49711090      | 49711485  | 396 |
| chr17 | 69878803      | 69879198  | 396 |
| chr16 | 77301106      | 77301501  | 396 |
| chr8  | 10187746      | 10188140  | 395 |
| chr3  | 116513778     | 116514172 | 395 |
| chr15 | 42545868      | 42546262  | 395 |
| chr1  | 84686929      | 84687323  | 395 |
| chr4  | 110808412     | 110808805 | 394 |
| chr29 | 51614650      | 51615043  | 394 |
| chr29 | 41778890      | 41779283  | 394 |
| chr22 | 54390163      | 54390556  | 394 |
| chr2  | 140000909     | 140001302 | 394 |
| chr8  | 24415612      | 24416004  | 393 |
| chr26 | 23490445      | 23490837  | 393 |

|       |           |           |     |
|-------|-----------|-----------|-----|
| chr23 | 31174552  | 31174944  | 393 |
| chr15 | 77543538  | 77543930  | 393 |
| chr11 | 71122532  | 71122924  | 393 |
| chr4  | 117149996 | 117150387 | 392 |
| chr19 | 59406039  | 59406430  | 392 |
| chr19 | 26930242  | 26930633  | 392 |
| chr15 | 20502136  | 20502527  | 392 |
| chr11 | 4807590   | 4807981   | 392 |
| chr8  | 24164174  | 24164564  | 391 |
| chr5  | 79803447  | 79803837  | 391 |
| chr3  | 127878534 | 127878924 | 391 |
| chr26 | 39229700  | 39230090  | 391 |
| chr14 | 9692731   | 9693121   | 391 |
| chr12 | 81683643  | 81684033  | 391 |
| chr5  | 80168776  | 80169165  | 390 |
| chr29 | 36280817  | 36281206  | 390 |
| chr2  | 111539833 | 111540222 | 390 |
| chr2  | 99665772  | 99666161  | 390 |
| chr19 | 46710700  | 46711089  | 390 |
| chr19 | 4704278   | 4704667   | 390 |
| chr13 | 77432263  | 77432652  | 390 |
| chr3  | 116218994 | 116219382 | 389 |
| chr29 | 34926632  | 34927020  | 389 |
| chr22 | 60779792  | 60780180  | 389 |
| chr21 | 30785785  | 30786173  | 389 |
| chr21 | 11900848  | 11901236  | 389 |
| chr20 | 3555947   | 3556335   | 389 |
| chr19 | 41213388  | 41213776  | 389 |
| chr19 | 25434151  | 25434539  | 389 |
| chr18 | 12623664  | 12624052  | 389 |
| chr26 | 22270190  | 22270577  | 388 |
| chr24 | 31701403  | 31701790  | 388 |
| chr22 | 49577547  | 49577934  | 388 |
| chr13 | 55040596  | 55040983  | 388 |
| chr13 | 6926194   | 6926581   | 388 |
| chr6  | 122431104 | 122431490 | 387 |
| chr29 | 33969207  | 33969593  | 387 |
| chr25 | 18017697  | 18018083  | 387 |
| chr13 | 59587150  | 59587536  | 387 |
| chr7  | 19243725  | 19244110  | 386 |
| chr26 | 37881458  | 37881843  | 386 |
| chr19 | 59469327  | 59469712  | 386 |
| chr9  | 106391024 | 106391408 | 385 |
| chr4  | 122982186 | 122982570 | 385 |
| chr29 | 49458349  | 49458733  | 385 |
| chr2  | 5074392   | 5074776   | 385 |
| chr18 | 7235048   | 7235431   | 384 |
| chr18 | 5166281   | 5166664   | 384 |
| chr15 | 26798627  | 26799010  | 384 |
| chr11 | 100732867 | 100733250 | 384 |

|       |               |           |     |
|-------|---------------|-----------|-----|
| chr22 | 44859795      | 44860177  | 383 |
| chr20 | 74689845      | 74690227  | 383 |
| chr12 | 82703157      | 82703539  | 383 |
| chr8  | 108661587     | 108661968 | 382 |
| chr22 | 17563683      | 17564064  | 382 |
| chr2  | 131853699     | 131854080 | 382 |
| chr16 | 72180771      | 72181151  | 381 |
| chr16 | 44159376      | 44159756  | 381 |
| chr23 | 12314840      | 12315219  | 380 |
| chr16 | 44146213      | 44146592  | 380 |
| chr15 | 62419106      | 62419485  | 380 |
| chr26 | 34973695      | 34974073  | 379 |
| chr2  | 139933064     | 139933442 | 379 |
| chr19 | 23160406      | 23160784  | 379 |
| chr18 | 45300821      | 45301199  | 379 |
| chr8  | 77206662      | 77207039  | 378 |
| chr24 | 47123598      | 47123975  | 378 |
| chr17 | 72047732      | 72048109  | 378 |
| chr9  | 100481355     | 100481731 | 377 |
| chr6  | 69749124      | 69749500  | 377 |
| chr2  | 75592172      | 75592548  | 377 |
| chr15 | 56125512      | 56125886  | 375 |
| chr14 | 9198429       | 9198803   | 375 |
| chr29 | 48375883      | 48376256  | 374 |
| chr23 | 13596564      | 13596937  | 374 |
| chr13 | 16135806      | 16136179  | 374 |
| chr12 | 54225892      | 54226265  | 374 |
| chr29 | 31975139      | 31975511  | 373 |
| chr21 | 64864007      | 64864379  | 373 |
| chr19 | 47374601      | 47374973  | 373 |
| chr12 | 74239358      | 74239730  | 373 |
| chr23 | 7292897       | 7293268   | 372 |
| chr19 | 11826134      | 11826505  | 372 |
| chr13 | 58336599      | 58336970  | 372 |
| chr10 | 24711681      | 24712052  | 372 |
| chr11 | 74865145      | 74865515  | 371 |
| chr5  | 113570037     | 113570406 | 370 |
| chr3  | 64492035      | 64492404  | 370 |
| chr16 | 47114989      | 47115358  | 370 |
| chr16 | 38978056      | 38978425  | 370 |
| chr22 | 57617023      | 57617391  | 369 |
| chr15 | 52330876      | 52331244  | 369 |
| chr6  | 113367930     | 113368297 | 368 |
| chr4  | 79259467      | 79259834  | 368 |
| chr23 | 1767381       | 1767748   | 368 |
| chr19 | 32591553      | 32591920  | 368 |
| chr19 | 21596614      | 21596981  | 368 |
| chr24 | 20396876      | 20397242  | 367 |
| chr17 | 58906117      | 58906483  | 367 |
| chr20 | 523760 524125 | 366       |     |

|       |           |           |     |
|-------|-----------|-----------|-----|
| chr17 | 70233009  | 70233374  | 366 |
| chr8  | 96335508  | 96335872  | 365 |
| chr21 | 6566319   | 6566683   | 365 |
| chr28 | 41273846  | 41274209  | 364 |
| chr17 | 71684342  | 71684705  | 364 |
| chr5  | 52921020  | 52921381  | 362 |
| chr21 | 6485829   | 6486190   | 362 |
| chr18 | 56667708  | 56668069  | 362 |
| chr5  | 113922460 | 113922820 | 361 |
| chr8  | 7616765   | 7617124   | 360 |
| chr18 | 57375681  | 57376040  | 360 |
| chr1  | 115887816 | 115888174 | 359 |
| chr16 | 61647331  | 61647688  | 358 |
| chr1  | 147616288 | 147616643 | 356 |
| chr5  | 125563685 | 125564038 | 354 |
| chr5  | 33857547  | 33857900  | 354 |
| chr3  | 116119717 | 116120070 | 354 |
| chr19 | 51922709  | 51923062  | 354 |
| chr18 | 48783884  | 48784237  | 354 |
| chr7  | 17467425  | 17467776  | 352 |
| chr24 | 43483940  | 43484291  | 352 |
| chr23 | 19627180  | 19627531  | 352 |
| chr12 | 31240594  | 31240943  | 350 |
| chr10 | 24163482  | 24163830  | 349 |
| chr29 | 48839178  | 48839525  | 348 |
| chr16 | 60042985  | 60043332  | 348 |
| chr11 | 107589721 | 107590068 | 348 |
| chr16 | 47018611  | 47018957  | 347 |
| chr3  | 22933551  | 22933895  | 345 |
| chr15 | 76581791  | 76582135  | 345 |
| chr19 | 24689471  | 24689814  | 344 |
| chr18 | 5495406   | 5495749   | 344 |
| chr9  | 105921659 | 105922001 | 343 |
| chr5  | 112013449 | 112013790 | 342 |
| chr18 | 51768531  | 51768871  | 341 |
| chr16 | 1128460   | 1128799   | 340 |
| chr26 | 23517645  | 23517983  | 339 |
| chr18 | 22694032  | 22694370  | 339 |
| chr18 | 22712332  | 22712669  | 338 |
| chr13 | 54754756  | 54755092  | 337 |
| chr7  | 13329089  | 13329423  | 335 |
| chr20 | 8530836   | 8531166   | 331 |
| chr3  | 111912081 | 111912409 | 329 |
| chr19 | 39123672  | 39123997  | 326 |
| chr16 | 60775767  | 60776092  | 326 |
| chr13 | 60106567  | 60106891  | 325 |
| chr19 | 20361762  | 20362083  | 322 |
| chr5  | 28975733  | 28976053  | 321 |
| chr25 | 3807549   | 3807866   | 318 |
| chr15 | 73830289  | 73830606  | 318 |

|       |               |           |      |
|-------|---------------|-----------|------|
| chr26 | 18743631      | 18743947  | 317  |
| chr4  | 68094323      | 68094638  | 316  |
| chr11 | 48414800      | 48415115  | 316  |
| chr21 | 20629522      | 20629835  | 314  |
| chr2  | 114197617     | 114197928 | 312  |
| chr23 | 8416197       | 8416507   | 311  |
| chr7  | 42764959      | 42765268  | 310  |
| chr17 | 70280285      | 70280593  | 309  |
| chr11 | 103810177     | 103810482 | 306  |
| chr11 | 9250441       | 9250746   | 306  |
| chr18 | 50847582      | 50847884  | 303  |
| chr24 | 58629835      | 58630135  | 301  |
| chr5  | 94855873      | 94856164  | 292  |
| chr18 | 49261415      | 49261706  | 292  |
| chr17 | 71963614      | 71963904  | 291  |
| chr25 | 37793698      | 37793986  | 289  |
| chr25 | 26730883      | 26731166  | 284  |
| chr4  | 98747408      | 98747686  | 279  |
| chr29 | 44923961      | 44924237  | 277  |
| chr26 | 48653346      | 48653622  | 277  |
| chr21 | 14885354      | 14885629  | 276  |
| chr9  | 66290710      | 66290983  | 274  |
| chr16 | 71534586      | 71534854  | 269  |
| chr7  | 5433003       | 5433265   | 263  |
| chr1  | 69891239      | 69891500  | 262  |
| chr28 | 6754062       | 6754322   | 261  |
| chr19 | 38661971      | 38662224  | 254  |
| chr29 | 49306785      | 49307028  | 244  |
| chrX  | 10882524      | 10883740  | 1217 |
| chr19 | 12501486      | 12502700  | 1215 |
| chr2  | 63490538      | 63491700  | 1163 |
| chr17 | 66856823      | 66857985  | 1163 |
| chr4  | 72291364      | 72292498  | 1135 |
| chr11 | 96380976      | 96382077  | 1102 |
| chr5  | 60713730      | 60714788  | 1059 |
| chr1  | 84821084      | 84822025  | 942  |
| chr28 | 7557895       | 7558813   | 919  |
| chr13 | 40807566      | 40808484  | 919  |
| chr20 | 767812 768648 | 837       |      |
| chr21 | 20720260      | 20721032  | 773  |
| chr24 | 36945764      | 36946484  | 721  |
| chr20 | 8548500       | 8549217   | 718  |
| chr8  | 55408919      | 55409570  | 652  |
| chr2  | 132779223     | 132779874 | 652  |
| chr14 | 63518663      | 63519298  | 636  |
| chr12 | 31319202      | 31319760  | 559  |
| chr29 | 31556758      | 31557277  | 520  |
| chr3  | 123215824     | 123216337 | 514  |
| chr19 | 60330369      | 60330879  | 511  |
| chr20 | 62160114      | 62160620  | 507  |

|       |           |           |      |
|-------|-----------|-----------|------|
| chr18 | 49793894  | 49794397  | 504  |
| chr21 | 11887627  | 11888117  | 491  |
| chr11 | 44955712  | 44956186  | 475  |
| chr23 | 13039583  | 13040031  | 449  |
| chr12 | 32260558  | 32260993  | 436  |
| chr26 | 17896726  | 17897142  | 417  |
| chr15 | 63234000  | 63234404  | 405  |
| chr3  | 20576236  | 20577652  | 1417 |
| chr16 | 48790688  | 48791847  | 1160 |
| chr12 | 3681671   | 3682743   | 1073 |
| chr3  | 115338026 | 115339065 | 1040 |
| chr25 | 1252450   | 1253369   | 920  |
| chr29 | 25553329  | 25554123  | 795  |
| chr13 | 62872562  | 62873332  | 771  |
| chr3  | 121373750 | 121374518 | 769  |
| chr18 | 62748616  | 62749377  | 762  |
| chr18 | 56665863  | 56666584  | 722  |
| chr7  | 4714343   | 4715058   | 716  |
| chr15 | 80853678  | 80854384  | 707  |
| chr11 | 2265586   | 2266268   | 683  |
| chr16 | 2438449   | 2439078   | 630  |
| chr18 | 53028920  | 53029495  | 576  |
| chr18 | 55591257  | 55591823  | 567  |
| chr18 | 63758706  | 63759266  | 561  |
| chr2  | 110222723 | 110223263 | 541  |
| chr13 | 68910594  | 68911096  | 503  |
| chr10 | 21974100  | 21974600  | 501  |
| chr19 | 39861318  | 39861804  | 487  |
| chr24 | 30917097  | 30917579  | 483  |
| chr12 | 74505514  | 74505992  | 479  |
| chr3  | 17467950  | 17468427  | 478  |
| chr13 | 46213916  | 46214391  | 476  |
| chr23 | 32871983  | 32872425  | 443  |
| chr11 | 76388378  | 76388791  | 414  |
| chr29 | 45077047  | 45077455  | 409  |
| chr29 | 24951310  | 24951717  | 408  |
| chr1  | 45764671  | 45765066  | 396  |
| chr4  | 121237196 | 121238271 | 1076 |
| chr22 | 26872525  | 26873506  | 982  |
| chr19 | 38759970  | 38760950  | 981  |
| chr29 | 41638268  | 41639230  | 963  |
| chr7  | 16317502  | 16318449  | 948  |
| chr3  | 33932784  | 33933730  | 947  |
| chr26 | 19742034  | 19742974  | 941  |
| chr11 | 106237923 | 106238802 | 880  |
| chr1  | 146779378 | 146780231 | 854  |
| chr19 | 27234457  | 27235297  | 841  |
| chr3  | 108154559 | 108155267 | 709  |
| chr9  | 83793164  | 83793871  | 708  |
| chr17 | 63325760  | 63326432  | 673  |



|       |           |           |      |
|-------|-----------|-----------|------|
| chr7  | 37370576  | 37371231  | 656  |
| chr13 | 53865170  | 53865738  | 569  |
| chr2  | 74028031  | 74028582  | 552  |
| chr11 | 99195459  | 99195995  | 537  |
| chr11 | 24010269  | 24010776  | 508  |
| chr29 | 37385787  | 37386246  | 460  |
| chr3  | 20462967  | 20463399  | 433  |
| chr8  | 88616788  | 88617209  | 422  |
| chr23 | 31100275  | 31100686  | 412  |
| chr25 | 35512956  | 35513359  | 404  |
| chr3  | 15354467  | 15354869  | 403  |
| chr22 | 27357252  | 27357650  | 399  |
| chr27 | 35341406  | 35341801  | 396  |
| chr19 | 56115606  | 56115913  | 308  |
| chr27 | 14398878  | 14399755  | 878  |
| chr5  | 33765367  | 33766143  | 777  |
| chr19 | 42263252  | 42263996  | 745  |
| chr27 | 26793009  | 26793739  | 731  |
| chr13 | 75720490  | 75721213  | 724  |
| chr2  | 136610411 | 136611111 | 701  |
| chr4  | 122968262 | 122968919 | 658  |
| chr11 | 109779674 | 109780319 | 646  |
| chr5  | 123709816 | 123710409 | 594  |
| chr2  | 115108295 | 115108854 | 560  |
| chr25 | 37198357  | 37198910  | 554  |
| chr25 | 39211740  | 39212277  | 538  |
| chr2  | 15371879  | 15372360  | 482  |
| chr9  | 77685737  | 77686217  | 481  |
| chr3  | 117289369 | 117289838 | 470  |
| chr25 | 37871390  | 37871855  | 466  |
| chr9  | 74212351  | 74212807  | 457  |
| chr12 | 31961275  | 31961727  | 453  |
| chr8  | 7570715   | 7571164   | 450  |
| chr6  | 18477858  | 18478304  | 447  |
| chr18 | 12405830  | 12406270  | 441  |
| chr25 | 41377477  | 41377905  | 429  |
| chr5  | 123172004 | 123172386 | 383  |
| chr13 | 37447937  | 37449098  | 1162 |
| chr22 | 60490574  | 60491493  | 920  |
| chr21 | 20663683  | 20664485  | 803  |
| chr21 | 26540729  | 26541451  | 723  |
| chr8  | 6471714   | 6472403   | 690  |
| chr2  | 127974936 | 127975583 | 648  |
| chr25 | 43431726  | 43432327  | 602  |
| chr13 | 17680322  | 17680917  | 596  |
| chr4  | 99597456  | 99598023  | 568  |
| chr19 | 37973892  | 37974444  | 553  |
| chr5  | 46372382  | 46372908  | 527  |
| chr19 | 10953192  | 10953710  | 519  |
| chr3  | 15408887  | 15409336  | 450  |

|       |               |           |      |
|-------|---------------|-----------|------|
| chr21 | 68797530      | 68797976  | 447  |
| chr10 | 8704377       | 8704805   | 429  |
| chr7  | 14251171      | 14251480  | 310  |
| chr19 | 23973391      | 23974260  | 870  |
| chr25 | 3824898       | 3825622   | 725  |
| chr2  | 125421454     | 125422177 | 724  |
| chr21 | 64504862      | 64505519  | 658  |
| chr19 | 12124347      | 12125004  | 658  |
| chr2  | 130293660     | 130294262 | 603  |
| chr17 | 63936067      | 63936617  | 551  |
| chr18 | 23116951      | 23117458  | 508  |
| chr11 | 2564161       | 2564580   | 420  |
| chr26 | 48284652      | 48285031  | 380  |
| chr16 | 47686496      | 47686796  | 301  |
| chr23 | 15840993      | 15841868  | 876  |
| chr3  | 112380723     | 112381456 | 734  |
| chr19 | 56572641      | 56573353  | 713  |
| chr12 | 35783540      | 35784235  | 696  |
| chr25 | 29068567      | 29069210  | 644  |
| chr13 | 67376503      | 67377111  | 609  |
| chr18 | 48380133      | 48380732  | 600  |
| chr19 | 58957309      | 58957856  | 548  |
| chr24 | 59572317      | 59572823  | 507  |
| chr10 | 20842589      | 20843030  | 442  |
| chr18 | 50985036      | 50985475  | 440  |
| chr24 | 58962821      | 58963257  | 437  |
| chr18 | 11944369      | 11944804  | 436  |
| chr5  | 113920639     | 113921054 | 416  |
| chr15 | 23995011      | 23995278  | 268  |
| chr12 | 31994782      | 31995388  | 607  |
| chr3  | 106518022     | 106518620 | 599  |
| chr23 | 28830247      | 28830796  | 550  |
| chr14 | 40057586      | 40058019  | 434  |
| chr8  | 62462525      | 62462947  | 423  |
| chr15 | 26598011      | 26598418  | 408  |
| chr6  | 16244274      | 16244680  | 407  |
| chr11 | 4334574       | 4334906   | 333  |
| chr8  | 55408608      | 55408905  | 298  |
| chr16 | 23838277      | 23839332  | 1056 |
| chr24 | 64988137      | 64988975  | 839  |
| chr3  | 47194889      | 47195647  | 759  |
| chr26 | 48743395      | 48744143  | 749  |
| chr17 | 64099094      | 64099797  | 704  |
| chr19 | 41395074      | 41395762  | 689  |
| chr25 | 40200086      | 40200768  | 683  |
| chr3  | 22913591      | 22914261  | 671  |
| chr5  | 112957989     | 112958639 | 651  |
| chr4  | 123496850     | 123497470 | 621  |
| chr21 | 58720483      | 58721093  | 611  |
| chr14 | 243241 243773 | 533       |      |

|       |                   |           |     |
|-------|-------------------|-----------|-----|
| chr20 | 773361 773875 515 |           |     |
| chr8  | 24719745          | 24720237  | 493 |
| chr11 | 104565775         | 104566256 | 482 |
| chr5  | 28700868          | 28701347  | 480 |
| chr19 | 12492440          | 12492916  | 477 |
| chr26 | 8706763           | 8707232   | 470 |
| chr1  | 87369269          | 87369734  | 466 |
| chr14 | 23435806          | 23436267  | 462 |
| chr13 | 66985651          | 66986109  | 459 |
| chr15 | 24596615          | 24597071  | 457 |
| chr3  | 48202326          | 48202781  | 456 |
| chr26 | 21823122          | 21823575  | 454 |
| chr12 | 20910447          | 20910889  | 443 |
| chr11 | 100742576         | 100743018 | 443 |
| chr9  | 67286095          | 67286535  | 441 |
| chr2  | 136616248         | 136616688 | 441 |
| chr2  | 99792892          | 99793332  | 441 |
| chr14 | 40041608          | 40042046  | 439 |
| chr18 | 34828467          | 34828895  | 429 |
| chr13 | 75704524          | 75704951  | 428 |
| chr11 | 70667049          | 70667476  | 428 |
| chr7  | 50543336          | 50543760  | 425 |
| chr6  | 17412084          | 17412507  | 424 |
| chr19 | 29457844          | 29458265  | 422 |
| chr21 | 26472579          | 26472999  | 421 |
| chr8  | 73295621          | 73296040  | 420 |
| chr18 | 11088848          | 11089266  | 419 |
| chr11 | 21639784          | 21640200  | 417 |
| chr15 | 54489523          | 54489938  | 416 |
| chr23 | 8829639           | 8830052   | 414 |
| chr2  | 108814394         | 108814805 | 412 |
| chr18 | 23242151          | 23242559  | 409 |
| chr17 | 76101880          | 76102283  | 404 |
| chr14 | 6416692           | 6417095   | 404 |
| chr3  | 9423792           | 9424194   | 403 |
| chr25 | 3387284           | 3387685   | 402 |
| chr13 | 59109450          | 59109850  | 401 |
| chr27 | 11600522          | 11600921  | 400 |
| chr7  | 45717779          | 45718177  | 399 |
| chr3  | 126943653         | 126944051 | 399 |
| chr23 | 29090091          | 29090489  | 399 |
| chr20 | 20840624          | 20841022  | 399 |
| chr2  | 130468110         | 130468508 | 399 |
| chr19 | 33132086          | 33132484  | 399 |
| chr18 | 25340048          | 25340446  | 399 |
| chr13 | 22151452          | 22151850  | 399 |
| chr12 | 7327714           | 7328112   | 399 |
| chr9  | 90431287          | 90431680  | 394 |
| chr3  | 106003898         | 106004291 | 394 |
| chr13 | 22173620          | 22174013  | 394 |

|       |           |           |      |
|-------|-----------|-----------|------|
| chr7  | 15052271  | 15052663  | 393  |
| chr18 | 57301575  | 57301967  | 393  |
| chr11 | 109646752 | 109647144 | 393  |
| chr7  | 10947776  | 10948167  | 392  |
| chr15 | 24002162  | 24002552  | 391  |
| chr10 | 8536288   | 8536676   | 389  |
| chr23 | 15908660  | 15909045  | 386  |
| chr24 | 61109433  | 61109815  | 383  |
| chr19 | 29439779  | 29440161  | 383  |
| chr25 | 23439935  | 23440314  | 380  |
| chr11 | 49320745  | 49321122  | 378  |
| chr9  | 90300817  | 90301192  | 376  |
| chr21 | 22724759  | 22725134  | 376  |
| chrX  | 87043270  | 87043644  | 375  |
| chr18 | 53880642  | 53881015  | 374  |
| chr19 | 38773835  | 38774207  | 373  |
| chr21 | 65757292  | 65757662  | 371  |
| chr16 | 1786144   | 1786508   | 365  |
| chr1  | 19990807  | 19991170  | 364  |
| chr17 | 61283441  | 61283803  | 363  |
| chr13 | 53171578  | 53171936  | 359  |
| chr1  | 123076758 | 123077114 | 357  |
| chr9  | 92181711  | 92182064  | 354  |
| chr10 | 78879824  | 78880171  | 348  |
| chr11 | 81098973  | 81099311  | 339  |
| chr2  | 132506900 | 132507228 | 329  |
| chr9  | 100070820 | 100071146 | 327  |
| chr10 | 3522411   | 3522733   | 323  |
| chr7  | 19491046  | 19491365  | 320  |
| chr26 | 22198976  | 22199286  | 311  |
| chr23 | 15855684  | 15855993  | 310  |
| chr18 | 12324840  | 12325149  | 310  |
| chr28 | 42532061  | 42532368  | 308  |
| chr15 | 76730580  | 76730879  | 300  |
| chr8  | 24416795  | 24417088  | 294  |
| chr24 | 61114734  | 61115027  | 294  |
| chr22 | 16101165  | 16101944  | 780  |
| chr5  | 28383162  | 28383910  | 749  |
| chr7  | 46176107  | 46176850  | 744  |
| chr29 | 34672076  | 34672494  | 419  |
| chr7  | 20356424  | 20357224  | 801  |
| chr15 | 33728577  | 33729346  | 770  |
| chr5  | 122706895 | 122707581 | 687  |
| chr2  | 31565633  | 31566305  | 673  |
| chr11 | 28460394  | 28461060  | 667  |
| chr26 | 38408962  | 38409487  | 526  |
| chr6  | 113389368 | 113389817 | 450  |
| chr8  | 103964834 | 103965263 | 430  |
| chr22 | 7551620   | 7552041   | 422  |
| chr13 | 40887948  | 40888978  | 1031 |

|       |           |           |      |
|-------|-----------|-----------|------|
| chr22 | 47860536  | 47861464  | 929  |
| chr8  | 72615450  | 72616051  | 602  |
| chr13 | 73027352  | 73027832  | 481  |
| chr16 | 2277220   | 2277636   | 417  |
| chr7  | 4683811   | 4684775   | 965  |
| chr7  | 4510620   | 4511059   | 440  |
| chr19 | 27242195  | 27242673  | 479  |
| chr29 | 44741292  | 44742522  | 1231 |
| chr17 | 47449387  | 47449953  | 567  |
| chr3  | 22593688  | 22594122  | 435  |
| chr21 | 9485478   | 9486447   | 970  |
| chr10 | 74855200  | 74856138  | 939  |
| chr16 | 47129749  | 47130441  | 693  |
| chr17 | 69749044  | 69749620  | 577  |
| chr13 | 75563462  | 75563928  | 467  |
| chr18 | 22711033  | 22711624  | 592  |
| chr19 | 37875132  | 37875861  | 730  |
| chr10 | 90282921  | 90283581  | 661  |
| chr7  | 16315225  | 16315678  | 454  |
| chr25 | 43437389  | 43437836  | 448  |
| chr4  | 124304438 | 124304852 | 415  |
| chr1  | 101566282 | 101566723 | 442  |
| chr18 | 11554470  | 11554866  | 397  |
| chr7  | 37378244  | 37378635  | 392  |
| chr12 | 32468472  | 32468830  | 359  |
| chr10 | 72206401  | 72206908  | 508  |
| chr28 | 32819380  | 32820028  | 649  |
| chr17 | 60187869  | 60188435  | 567  |
| chr8  | 73749530  | 73750045  | 516  |
| chr11 | 74470411  | 74470918  | 508  |
| chr11 | 104987826 | 104988274 | 449  |
| chr29 | 50404412  | 50404848  | 437  |
| chr3  | 105724537 | 105724972 | 436  |
| chr19 | 38668725  | 38669136  | 412  |
| chr26 | 22000284  | 22000690  | 407  |
| chr4  | 124252766 | 124253166 | 401  |
| chr18 | 62742586  | 62742980  | 395  |
| chr19 | 39938073  | 39938453  | 381  |
| chr14 | 63518118  | 63518498  | 381  |
| chr3  | 4493156   | 4493522   | 367  |
| chr1  | 144012996 | 144013353 | 358  |
| chr28 | 26078731  | 26079069  | 339  |
| chr19 | 54168443  | 54168766  | 324  |
| chr22 | 50908851  | 50909171  | 321  |
| chr8  | 23891391  | 23891693  | 303  |
| chr10 | 20463477  | 20463751  | 275  |
| chr8  | 24441810  | 24442274  | 465  |
| chr8  | 73868730  | 73869060  | 331  |
| chr8  | 73477547  | 73477904  | 358  |
| chr8  | 72614584  | 72614894  | 311  |

|       |               |           |      |
|-------|---------------|-----------|------|
| chr25 | 42522306      | 42522930  | 625  |
| chr9  | 16965340      | 16965806  | 467  |
| chr14 | 1584488       | 1585506   | 1019 |
| chr10 | 83867198      | 83867786  | 589  |
| chr16 | 44128805      | 44129198  | 394  |
| chr4  | 68279513      | 68280557  | 1045 |
| chr14 | 1949130       | 1949805   | 676  |
| chr29 | 46195961      | 46196529  | 569  |
| chr21 | 68032593      | 68032961  | 369  |
| chr14 | 29054261      | 29054664  | 404  |
| chr13 | 23670900      | 23671496  | 597  |
| chr12 | 68759939      | 68760355  | 417  |
| chr8  | 23932958      | 23933505  | 548  |
| chr18 | 25344948      | 25345344  | 397  |
| chr21 | 2026475       | 2026867   | 393  |
| chr8  | 24494726      | 24495339  | 614  |
| chr13 | 180339 180939 | 601       |      |
| chr3  | 279482 279888 | 407       |      |
| chr25 | 72663 72980   | 318       |      |
| chr21 | 52083862      | 52084255  | 394  |
| chr21 | 52033751      | 52034298  | 548  |
| chr8  | 73847829      | 73848174  | 346  |
| chr8  | 73834679      | 73835054  | 376  |
| chr8  | 73755611      | 73755971  | 361  |
| chr29 | 51167466      | 51168337  | 872  |
| chr8  | 24319292      | 24319591  | 300  |
| chr24 | 35310992      | 35311616  | 625  |
| chr4  | 88061977      | 88062197  | 221  |
| chr8  | 24719269      | 24719718  | 450  |
| chr25 | 28065638      | 28066066  | 429  |
| chr8  | 73835552      | 73835950  | 399  |
| chr8  | 73463111      | 73463430  | 320  |
| chr23 | 27985791      | 27986186  | 396  |
| chr8  | 24726152      | 24726625  | 474  |
| chr19 | 25996551      | 25996985  | 435  |
| chr11 | 106407030     | 106407957 | 928  |
| chr9  | 25142491      | 25143324  | 834  |
| chr1  | 152632138     | 152632626 | 489  |
| chr19 | 21320697      | 21321066  | 370  |
| chr16 | 67439854      | 67440634  | 781  |
| chr6  | 17411301      | 17412048  | 748  |
| chr23 | 10551043      | 10551609  | 567  |
| chr17 | 76007094      | 76007566  | 473  |
| chr7  | 20477839      | 20479166  | 1328 |
| chr1  | 150076952     | 150077700 | 749  |
| chr11 | 104925141     | 104925880 | 740  |
| chr10 | 43557550      | 43558202  | 653  |
| chr17 | 73176594      | 73177210  | 617  |
| chr16 | 47208451      | 47208943  | 493  |
| chr17 | 72046844      | 72047724  | 881  |

|       |               |           |      |
|-------|---------------|-----------|------|
| chr8  | 29352311      | 29353111  | 801  |
| chr3  | 111896690     | 111897423 | 734  |
| chr27 | 29600632      | 29601200  | 569  |
| chr6  | 121055088     | 121055571 | 484  |
| chr5  | 114978023     | 114978482 | 460  |
| chr20 | 6629541       | 6629916   | 376  |
| chr13 | 79070549      | 79071485  | 937  |
| chr2  | 138644140     | 138645055 | 916  |
| chr16 | 71113592      | 71114281  | 690  |
| chr18 | 45978438      | 45978890  | 453  |
| chr29 | 7662651       | 7663064   | 414  |
| chr1  | 1635237       | 1635616   | 380  |
| chr19 | 37579606      | 37581017  | 1412 |
| chr10 | 90024116      | 90024798  | 683  |
| chr23 | 17468020      | 17468593  | 574  |
| chr3  | 109001614     | 109002064 | 451  |
| chr11 | 81750946      | 81751321  | 376  |
| chr27 | 543755 544614 | 860       |      |
| chr3  | 61485916      | 61486606  | 691  |
| chr11 | 104882163     | 104882722 | 560  |
| chr2  | 126085604     | 126086064 | 461  |
| chr7  | 17096979      | 17097343  | 365  |
| chr26 | 22336198      | 22336801  | 604  |
| chr23 | 19866841      | 19867326  | 486  |
| chr7  | 50551683      | 50552098  | 416  |
| chr7  | 51381524      | 51382165  | 642  |
| chr3  | 33829191      | 33829668  | 478  |
| chr21 | 67984984      | 67985394  | 411  |
| chr10 | 99925307      | 99925705  | 399  |
| chr18 | 45974601      | 45975158  | 558  |
| chr12 | 36464969      | 36465466  | 498  |
| chr17 | 50984600      | 50985084  | 485  |
| chr19 | 49751966      | 49752381  | 416  |
| chr3  | 409867 410269 | 403       |      |
| chr18 | 13557809      | 13558371  | 563  |
| chr11 | 81756412      | 81756915  | 504  |
| chr13 | 30827418      | 30827783  | 366  |
| chr10 | 20965425      | 20965777  | 353  |
| chr7  | 51487566      | 51487966  | 401  |
| chr4  | 124149712     | 124150074 | 363  |
| chr7  | 19972320      | 19972817  | 498  |
| chr13 | 41701460      | 41701896  | 437  |
| chr8  | 24467468      | 24467880  | 413  |
| chr29 | 35443474      | 35443856  | 383  |
| chr1  | 143790322     | 143790694 | 373  |
| chr7  | 42192015      | 42192390  | 376  |
| chr19 | 27095644      | 27096668  | 1025 |
| chr18 | 64326598      | 64327279  | 682  |
| chr10 | 71247054      | 71247731  | 678  |
| chr19 | 15784598      | 15785173  | 576  |

|       |           |           |      |
|-------|-----------|-----------|------|
| chr2  | 111334989 | 111335523 | 535  |
| chr11 | 11705344  | 11705854  | 511  |
| chr28 | 34013982  | 34014444  | 463  |
| chr8  | 105589932 | 105590366 | 435  |
| chr20 | 25597186  | 25597608  | 423  |
| chr3  | 86199390  | 86199805  | 416  |
| chr3  | 22490645  | 22491054  | 410  |
| chr6  | 59068976  | 59069383  | 408  |
| chr5  | 44014101  | 44014499  | 399  |
| chr12 | 82620614  | 82621007  | 394  |
| chr23 | 27987402  | 27987793  | 392  |
| chr8  | 63945701  | 63946086  | 386  |
| chr8  | 24652104  | 24652489  | 386  |
| chr3  | 127866814 | 127867192 | 379  |
| chr6  | 63195043  | 63195419  | 377  |
| chr19 | 54166238  | 54166604  | 367  |
| chr6  | 5797576   | 5797935   | 360  |
| chr6  | 72297279  | 72297633  | 355  |
| chr9  | 89173385  | 89173727  | 343  |
| chr15 | 75509201  | 75509536  | 336  |
| chr3  | 125700286 | 125700606 | 321  |
| chr28 | 34028590  | 34028907  | 318  |
| chr18 | 51026892  | 51027169  | 278  |
| chr8  | 73854928  | 73855197  | 270  |
| chr18 | 50916721  | 50918078  | 1358 |
| chr21 | 68957416  | 68958518  | 1103 |
| chr24 | 33781576  | 33782597  | 1022 |
| chr15 | 25590177  | 25591169  | 993  |
| chr25 | 40197932  | 40198869  | 938  |
| chr15 | 34590957  | 34591856  | 900  |
| chr5  | 29209493  | 29210254  | 762  |
| chr8  | 7613849   | 7614609   | 761  |
| chr4  | 94701037  | 94701795  | 759  |
| chr25 | 43436606  | 43437340  | 735  |
| chr17 | 48684681  | 48685348  | 668  |
| chr4  | 8814176   | 8814838   | 663  |
| chr28 | 40382282  | 40382921  | 640  |
| chr23 | 46408443  | 46409073  | 631  |
| chr18 | 62499752  | 62500381  | 630  |
| chr18 | 34827703  | 34828330  | 628  |
| chr13 | 60153292  | 60153916  | 625  |
| chr6  | 120784705 | 120785325 | 621  |
| chr25 | 1128386   | 1128971   | 586  |
| chr7  | 13288676  | 13289258  | 583  |
| chr7  | 15761120  | 15761699  | 580  |
| chr19 | 39101124  | 39101700  | 577  |
| chr19 | 47348863  | 47349428  | 566  |
| chr29 | 46661389  | 46661948  | 560  |
| chr26 | 41249725  | 41250281  | 557  |
| chr8  | 101703383 | 101703860 | 478  |



|       |               |           |      |
|-------|---------------|-----------|------|
| chr19 | 13556501      | 13556959  | 459  |
| chr7  | 36635408      | 36635864  | 457  |
| chr27 | 11613083      | 11613535  | 453  |
| chr7  | 15599345      | 15599792  | 448  |
| chr5  | 121627487     | 121627929 | 443  |
| chr2  | 134740522     | 134740960 | 439  |
| chr24 | 838920 839343 | 424       |      |
| chr18 | 11755917      | 11756338  | 422  |
| chr25 | 29295874      | 29296287  | 414  |
| chr19 | 10991078      | 10991482  | 405  |
| chr9  | 26600622      | 26601024  | 403  |
| chr19 | 59409977      | 59410379  | 403  |
| chr17 | 2824039       | 2824437   | 399  |
| chr15 | 75181326      | 75181724  | 399  |
| chr14 | 6710008       | 6710371   | 364  |
| chr4  | 5382631       | 5382981   | 351  |
| chr10 | 81724442      | 81724788  | 347  |
| chr2  | 132779888     | 132780208 | 321  |
| chr20 | 4967534       | 4969037   | 1504 |
| chr12 | 32199747      | 32200967  | 1221 |
| chr18 | 11644131      | 11645168  | 1038 |
| chr15 | 24559287      | 24560250  | 964  |
| chr3  | 105116777     | 105117654 | 878  |
| chr23 | 8241379       | 8242197   | 819  |
| chr25 | 34536359      | 34537163  | 805  |
| chr8  | 77685115      | 77685914  | 800  |
| chr13 | 62423114      | 62423906  | 793  |
| chr11 | 44950878      | 44951638  | 761  |
| chr3  | 111644406     | 111645135 | 730  |
| chr9  | 105014471     | 105015155 | 685  |
| chr22 | 56174401      | 56175058  | 658  |
| chr23 | 9459411       | 9459999   | 589  |
| chr23 | 32783967      | 32784513  | 547  |
| chr10 | 2772160       | 2772675   | 516  |
| chr12 | 83818817      | 83819331  | 515  |
| chr16 | 48312392      | 48312900  | 509  |
| chr23 | 10548494      | 10548998  | 505  |
| chr2  | 140364473     | 140364960 | 488  |
| chr7  | 14169723      | 14170200  | 478  |
| chr7  | 108574718     | 108575190 | 473  |
| chr28 | 25136011      | 25136475  | 465  |
| chr28 | 12165959      | 12166422  | 464  |
| chr29 | 50310909      | 50311355  | 447  |
| chr10 | 16767020      | 16767441  | 422  |
| chr3  | 29256402      | 29256822  | 421  |
| chr13 | 9940354       | 9940774   | 421  |
| chr16 | 40883987      | 40884385  | 399  |
| chr15 | 83837042      | 83837440  | 399  |
| chr10 | 24712211      | 24712604  | 394  |
| chr2  | 134920391     | 134920782 | 392  |

|       |           |           |      |
|-------|-----------|-----------|------|
| chr13 | 68926048  | 68926427  | 380  |
| chr27 | 26770115  | 26770437  | 323  |
| chr9  | 90276680  | 90276983  | 304  |
| chr5  | 116935469 | 116935771 | 303  |
| chr1  | 99692825  | 99694288  | 1464 |
| chr13 | 2457797   | 2459152   | 1356 |
| chr21 | 4303546   | 4304441   | 896  |
| chr15 | 81177781  | 81178675  | 895  |
| chr15 | 24008582  | 24009473  | 892  |
| chr4  | 89763256  | 89764018  | 763  |
| chr12 | 32118673  | 32119379  | 707  |
| chr21 | 64480708  | 64481413  | 706  |
| chr5  | 115824726 | 115825424 | 699  |
| chr12 | 36462882  | 36463575  | 694  |
| chr15 | 81173037  | 81173727  | 691  |
| chr5  | 28726596  | 28727264  | 669  |
| chr18 | 14364785  | 14365446  | 662  |
| chr14 | 34084949  | 34085587  | 639  |
| chr15 | 25574190  | 25574818  | 629  |
| chr7  | 42928226  | 42928813  | 588  |
| chr6  | 74860064  | 74860629  | 566  |
| chr24 | 60567496  | 60568050  | 555  |
| chr19 | 7821935   | 7822484   | 550  |
| chr26 | 22198125  | 22198673  | 549  |
| chr7  | 17490214  | 17490757  | 544  |
| chr3  | 22896081  | 22896620  | 540  |
| chr3  | 51911840  | 51912345  | 506  |
| chr16 | 47272922  | 47273410  | 489  |
| chr7  | 79734169  | 79734646  | 478  |
| chr11 | 70852053  | 70852526  | 474  |
| chr19 | 43136820  | 43137283  | 464  |
| chr1  | 109022607 | 109023055 | 449  |
| chr20 | 74785258  | 74785681  | 424  |
| chr26 | 48670502  | 48670924  | 423  |
| chr7  | 10950800  | 10951215  | 416  |
| chr10 | 16852860  | 16853275  | 416  |
| chr5  | 114986527 | 114986935 | 409  |
| chr19 | 26976759  | 26977165  | 407  |
| chr9  | 69981771  | 69982169  | 399  |
| chr2  | 126747907 | 126748305 | 399  |
| chr25 | 37567380  | 37567771  | 392  |
| chr18 | 61977648  | 61978507  | 860  |
| chr20 | 74770552  | 74771362  | 811  |
| chr2  | 124966524 | 124967311 | 788  |
| chr18 | 47794163  | 47794945  | 783  |
| chr1  | 114236249 | 114237012 | 764  |
| chr9  | 63405038  | 63405767  | 730  |
| chr7  | 3026902   | 3027618   | 717  |
| chr1  | 96193606  | 96194318  | 713  |
| chr4  | 118683114 | 118683794 | 681  |

|       |           |           |     |
|-------|-----------|-----------|-----|
| chr6  | 100069408 | 100070043 | 636 |
| chr27 | 26468592  | 26469226  | 635 |
| chr7  | 4353858   | 4354477   | 620 |
| chr9  | 99936643  | 99937219  | 577 |
| chr12 | 74435500  | 74436038  | 539 |
| chr9  | 106380340 | 106380840 | 501 |
| chr13 | 54855297  | 54855781  | 485 |
| chr10 | 20469245  | 20469703  | 459 |
| chr5  | 121401461 | 121401882 | 422 |
| chr18 | 33645527  | 33645935  | 409 |
| chr12 | 18234466  | 18234874  | 409 |
| chr17 | 69312246  | 69312651  | 406 |
| chr19 | 44893564  | 44893966  | 403 |
| chr25 | 15315024  | 15315422  | 399 |
| chr9  | 67495753  | 67496124  | 372 |
| chr11 | 90403003  | 90403364  | 362 |
| chr23 | 27990005  | 27990340  | 336 |
| chr9  | 65835374  | 65835676  | 303 |
| chr21 | 47696394  | 47697313  | 920 |
| chr8  | 70187718  | 70188606  | 889 |
| chr8  | 77682577  | 77683443  | 867 |
| chr8  | 60189909  | 60190719  | 811 |
| chr13 | 41705908  | 41706713  | 806 |
| chr16 | 68804875  | 68805606  | 732 |
| chr14 | 1806512   | 1807241   | 730 |
| chr9  | 44921117  | 44921819  | 703 |
| chr23 | 12341542  | 12342241  | 700 |
| chr18 | 12134177  | 12134868  | 692 |
| chr13 | 46216897  | 46217568  | 672 |
| chr10 | 88270813  | 88271482  | 670 |
| chr2  | 111221347 | 111221968 | 622 |
| chr13 | 41736050  | 41736654  | 605 |
| chr13 | 52656068  | 52656662  | 595 |
| chr15 | 74145244  | 74145795  | 552 |
| chr19 | 58408924  | 58409447  | 524 |
| chr17 | 67101027  | 67101501  | 475 |
| chr5  | 28505389  | 28505857  | 469 |
| chr1  | 67760334  | 67760799  | 466 |
| chr23 | 23746551  | 23747005  | 455 |
| chr13 | 60165130  | 60165579  | 450 |
| chr9  | 91900382  | 91900815  | 434 |
| chr19 | 46091934  | 46092360  | 427 |
| chr6  | 120778457 | 120778863 | 407 |
| chr22 | 43632415  | 43632818  | 404 |
| chr5  | 60719350  | 60719750  | 401 |
| chr3  | 110400409 | 110401392 | 984 |
| chr28 | 42533563  | 42534433  | 871 |
| chr9  | 87834915  | 87835585  | 671 |
| chr3  | 121137760 | 121138430 | 671 |
| chr17 | 72712181  | 72712812  | 632 |

|       |               |           |     |
|-------|---------------|-----------|-----|
| chr5  | 80848849      | 80849432  | 584 |
| chr8  | 57992844      | 57993384  | 541 |
| chr1  | 18427020      | 18427543  | 524 |
| chr3  | 115470565     | 115471058 | 494 |
| chr17 | 70350372      | 70350864  | 493 |
| chr15 | 28527252      | 28527700  | 449 |
| chr10 | 12120831      | 12121266  | 436 |
| chr21 | 64533562      | 64533987  | 426 |
| chr17 | 66710276      | 66710680  | 405 |
| chr22 | 56173454      | 56173856  | 403 |
| chr26 | 11907845      | 11908243  | 399 |
| chr13 | 77759606      | 77759997  | 392 |
| chr26 | 31480806      | 31481195  | 390 |
| chr13 | 75798168      | 75798557  | 390 |
| chr10 | 90306554      | 90306931  | 378 |
| chr3  | 4367156       | 4367530   | 375 |
| chr5  | 88757054      | 88757404  | 351 |
| chr7  | 42477871      | 42478738  | 868 |
| chr28 | 40376788      | 40377574  | 787 |
| chr2  | 99039028      | 99039745  | 718 |
| chr7  | 18440368      | 18440990  | 623 |
| chr16 | 38377182      | 38377803  | 622 |
| chr7  | 19207688      | 19208293  | 606 |
| chr23 | 23763051      | 23763624  | 574 |
| chr19 | 41963100      | 41963594  | 495 |
| chr8  | 5819252       | 5819731   | 480 |
| chr26 | 14898140      | 14898616  | 477 |
| chr3  | 15197739      | 15198201  | 463 |
| chr2  | 126699421     | 126699851 | 431 |
| chr18 | 56817054      | 56817477  | 424 |
| chr15 | 6405648       | 6406054   | 407 |
| chr5  | 121228899     | 121229302 | 404 |
| chr23 | 48778394      | 48778768  | 375 |
| chr2  | 136626694     | 136626935 | 242 |
| chr4  | 121420823     | 121421587 | 765 |
| chr8  | 73794917      | 73795516  | 600 |
| chr13 | 56354202      | 56354797  | 596 |
| chr11 | 11707276      | 11707832  | 557 |
| chr6  | 111014293     | 111014839 | 547 |
| chr8  | 24721111      | 24721617  | 507 |
| chr5  | 8968165       | 8968584   | 420 |
| chr12 | 34045663      | 34046073  | 411 |
| chr20 | 463258 463656 | 399       |     |
| chr5  | 10527434      | 10527742  | 309 |
| chr7  | 50654897      | 50655780  | 884 |
| chr11 | 2565476       | 2566359   | 884 |
| chr26 | 44947411      | 44948263  | 853 |
| chr5  | 60736896      | 60737674  | 779 |
| chr17 | 61284047      | 61284808  | 762 |
| chr19 | 28207155      | 28207913  | 759 |

|       |           |           |     |
|-------|-----------|-----------|-----|
| chr23 | 27986515  | 27987260  | 746 |
| chr11 | 14065340  | 14066030  | 691 |
| chr13 | 54835862  | 54836544  | 683 |
| chr23 | 52715075  | 52715733  | 659 |
| chr13 | 42605436  | 42606094  | 659 |
| chr7  | 14683645  | 14684300  | 656 |
| chr5  | 30849977  | 30850624  | 648 |
| chr28 | 11368411  | 11369038  | 628 |
| chr19 | 39849443  | 39850067  | 625 |
| chr11 | 4357865   | 4358489   | 625 |
| chr7  | 50548487  | 50549101  | 615 |
| chr9  | 38371813  | 38372423  | 611 |
| chr8  | 7534675   | 7535273   | 599 |
| chr26 | 5868739   | 5869324   | 586 |
| chr2  | 115337020 | 115337597 | 578 |
| chr14 | 53421423  | 53421996  | 574 |
| chr18 | 63775699  | 63776261  | 563 |
| chr3  | 106556384 | 106556925 | 542 |
| chr14 | 22084963  | 22085503  | 541 |
| chr23 | 20635765  | 20636303  | 539 |
| chr13 | 62873368  | 62873894  | 527 |
| chr11 | 21624972  | 21625497  | 526 |
| chr17 | 73169659  | 73170164  | 506 |
| chr18 | 55006985  | 55007485  | 501 |
| chr23 | 11791674  | 11792168  | 495 |
| chr18 | 55844420  | 55844907  | 488 |
| chr3  | 15396155  | 15396638  | 484 |
| chr5  | 30504528  | 30505004  | 477 |
| chr7  | 15356549  | 15357021  | 473 |
| chr13 | 55509794  | 55510262  | 469 |
| chr1  | 143831122 | 143831583 | 462 |
| chr13 | 59934521  | 59934974  | 454 |
| chr4  | 71609831  | 71610283  | 453 |
| chr18 | 53021218  | 53021662  | 445 |
| chr20 | 66551909  | 66552349  | 441 |
| chr7  | 5694019   | 5694457   | 439 |
| chr22 | 59855770  | 59856204  | 435 |
| chr5  | 113703533 | 113703961 | 429 |
| chr25 | 2689564   | 2689984   | 421 |
| chr1  | 152265318 | 152265737 | 420 |
| chr11 | 28500986  | 28501401  | 416 |
| chr11 | 100910489 | 100910896 | 408 |
| chr11 | 14231387  | 14231794  | 408 |
| chr26 | 48683647  | 48684052  | 406 |
| chr19 | 43160212  | 43160617  | 406 |
| chr8  | 45763672  | 45764076  | 405 |
| chr3  | 25814303  | 25814706  | 404 |
| chr2  | 130472067 | 130472470 | 404 |
| chr15 | 75662943  | 75663346  | 404 |
| chr3  | 4418674   | 4419075   | 402 |

|       |           |           |     |
|-------|-----------|-----------|-----|
| chr12 | 22970946  | 22971347  | 402 |
| chr22 | 50795205  | 50795605  | 401 |
| chr7  | 51343635  | 51344034  | 400 |
| chr8  | 89537751  | 89538149  | 399 |
| chr8  | 45663975  | 45664373  | 399 |
| chr7  | 15598926  | 15599324  | 399 |
| chr25 | 37500779  | 37501177  | 399 |
| chr24 | 40338418  | 40338816  | 399 |
| chr23 | 18679360  | 18679758  | 399 |
| chr2  | 65516809  | 65517207  | 399 |
| chr19 | 33760987  | 33761385  | 399 |
| chr18 | 43654622  | 43655020  | 399 |
| chr18 | 40336287  | 40336685  | 399 |
| chr13 | 82344841  | 82345239  | 399 |
| chr5  | 32917893  | 32918290  | 398 |
| chr3  | 97870426  | 97870823  | 398 |
| chr22 | 29372225  | 29372622  | 398 |
| chr21 | 67970852  | 67971248  | 397 |
| chr19 | 42445382  | 42445778  | 397 |
| chr7  | 64577392  | 64577787  | 396 |
| chr28 | 26179696  | 26180091  | 396 |
| chr19 | 61751011  | 61751403  | 393 |
| chr11 | 34745660  | 34746052  | 393 |
| chr5  | 120054738 | 120055129 | 392 |
| chr16 | 43624563  | 43624947  | 385 |
| chr12 | 36442498  | 36442882  | 385 |
| chr14 | 1492456   | 1492838   | 383 |
| chr19 | 12491841  | 12492222  | 382 |
| chr19 | 65234893  | 65235270  | 378 |
| chr23 | 10536167  | 10536542  | 376 |
| chr19 | 29753747  | 29754122  | 376 |
| chr19 | 46827725  | 46828092  | 368 |
| chr5  | 75983846  | 75984212  | 367 |
| chr1  | 36232391  | 36232756  | 366 |
| chr11 | 44956236  | 44956597  | 362 |
| chr2  | 123755146 | 123755506 | 361 |
| chr10 | 20475952  | 20476312  | 361 |
| chr18 | 62510870  | 62511225  | 356 |
| chr26 | 43496473  | 43496827  | 355 |
| chr4  | 98040482  | 98040835  | 354 |
| chr23 | 16524036  | 16524388  | 353 |
| chr7  | 51660680  | 51661026  | 347 |
| chr15 | 30335594  | 30335940  | 347 |
| chr19 | 26978468  | 26978811  | 344 |
| chr12 | 83827931  | 83828274  | 344 |
| chr19 | 39012088  | 39012430  | 343 |
| chr22 | 45454939  | 45455270  | 332 |
| chr26 | 22254525  | 22254853  | 329 |
| chr13 | 37687247  | 37687574  | 328 |
| chr13 | 60440460  | 60440782  | 323 |

|       |           |           |      |
|-------|-----------|-----------|------|
| chr17 | 66528520  | 66528838  | 319  |
| chr20 | 33666043  | 33666345  | 303  |
| chr7  | 51339315  | 51339615  | 301  |
| chr28 | 33869543  | 33869836  | 294  |
| chr11 | 94116978  | 94117265  | 288  |
| chr21 | 67923450  | 67923735  | 286  |
| chr5  | 28759262  | 28759529  | 268  |
| chr11 | 10432900  | 10433166  | 267  |
| chr5  | 81595684  | 81595912  | 229  |
| chr24 | 64984881  | 64985279  | 399  |
| chr8  | 73749222  | 73749528  | 307  |
| chr21 | 2040040   | 2040480   | 441  |
| chr8  | 20911469  | 20913438  | 1970 |
| chr19 | 58241441  | 58243121  | 1681 |
| chr19 | 46320135  | 46321668  | 1534 |
| chr1  | 5323389   | 5324855   | 1467 |
| chr7  | 40315242  | 40316674  | 1433 |
| chr19 | 14074805  | 14076172  | 1368 |
| chr2  | 37673618  | 37674972  | 1355 |
| chr6  | 122258602 | 122259930 | 1329 |
| chr11 | 66709496  | 66710771  | 1276 |
| chr11 | 2286738   | 2288002   | 1265 |
| chr3  | 35489991  | 35491171  | 1181 |
| chr22 | 56458162  | 56459304  | 1143 |
| chr13 | 61236345  | 61237485  | 1141 |
| chr18 | 53011885  | 53013019  | 1135 |
| chr11 | 21643955  | 21645058  | 1104 |
| chr10 | 73959420  | 73960522  | 1103 |
| chr17 | 75934411  | 75935512  | 1102 |
| chr5  | 60385717  | 60386811  | 1095 |
| chr19 | 17676356  | 17677449  | 1094 |
| chr23 | 9462301   | 9463392   | 1092 |
| chr3  | 4684640   | 4685727   | 1088 |
| chr21 | 25348691  | 25349772  | 1082 |
| chr23 | 17483874  | 17484943  | 1070 |
| chr12 | 68224396  | 68225454  | 1059 |
| chr3  | 108265881 | 108266937 | 1057 |
| chr13 | 66950575  | 66951631  | 1057 |
| chr24 | 20887688  | 20888740  | 1053 |
| chr8  | 72303679  | 72304723  | 1045 |
| chr14 | 29203191  | 29204225  | 1035 |
| chr28 | 5331154   | 5332183   | 1030 |
| chr26 | 18169410  | 18170437  | 1028 |
| chr5  | 113947914 | 113948935 | 1022 |
| chr4  | 123019218 | 123020237 | 1020 |
| chr18 | 56458068  | 56459086  | 1019 |
| chr10 | 13034774  | 13035792  | 1019 |
| chr6  | 94978929  | 94979946  | 1018 |
| chr17 | 37619035  | 37620046  | 1012 |
| chr5  | 60446586  | 60447594  | 1009 |

|       |               |           |      |
|-------|---------------|-----------|------|
| chr16 | 68760416      | 68761424  | 1009 |
| chr21 | 25085005      | 25086011  | 1007 |
| chr25 | 40362914      | 40363900  | 987  |
| chr11 | 11976786      | 11977762  | 977  |
| chr16 | 44337718      | 44338692  | 975  |
| chr13 | 75632685      | 75633656  | 972  |
| chr10 | 74723079      | 74724049  | 971  |
| chr18 | 13158758      | 13159726  | 969  |
| chr26 | 21793549      | 21794510  | 962  |
| chr26 | 18200010      | 18200971  | 962  |
| chr13 | 11056376      | 11057321  | 946  |
| chr5  | 76161107      | 76162049  | 943  |
| chr19 | 15783604      | 15784545  | 942  |
| chr14 | 440694 441635 | 942       |      |
| chr13 | 36873753      | 36874686  | 934  |
| chr1  | 74308238      | 74309170  | 933  |
| chr13 | 75766857      | 75767778  | 922  |
| chr10 | 17697749      | 17698662  | 914  |
| chr24 | 33501215      | 33502127  | 913  |
| chr17 | 37640865      | 37641777  | 913  |
| chr3  | 115353965     | 115354865 | 901  |
| chr8  | 8438601       | 8439495   | 895  |
| chr29 | 51966017      | 51966900  | 884  |
| chr20 | 43468119      | 43469002  | 884  |
| chr16 | 26583043      | 26583922  | 880  |
| chr13 | 75842561      | 75843434  | 874  |
| chr4  | 121238594     | 121239466 | 873  |
| chr21 | 59064201      | 59065069  | 869  |
| chr18 | 62023955      | 62024819  | 865  |
| chr7  | 19970373      | 19971234  | 862  |
| chr2  | 124975239     | 124976098 | 860  |
| chr10 | 90290526      | 90291371  | 846  |
| chr9  | 106709959     | 106710802 | 844  |
| chr13 | 41708050      | 41708890  | 841  |
| chr12 | 74434570      | 74435410  | 841  |
| chr18 | 12142244      | 12143082  | 839  |
| chr11 | 109704468     | 109705304 | 837  |
| chr11 | 106070767     | 106071603 | 837  |
| chr17 | 47354791      | 47355626  | 836  |
| chr7  | 42219477      | 42220311  | 835  |
| chr13 | 77223865      | 77224699  | 835  |
| chr18 | 33453981      | 33454813  | 833  |
| chr13 | 26211885      | 26212716  | 832  |
| chr1  | 45536608      | 45537437  | 830  |
| chr29 | 44734870      | 44735693  | 824  |
| chr4  | 72745431      | 72746253  | 823  |
| chr13 | 55524440      | 55525261  | 822  |
| chr10 | 4840697       | 4841518   | 822  |
| chr4  | 79048404      | 79049222  | 819  |
| chr18 | 52694479      | 52695297  | 819  |



|       |           |           |     |
|-------|-----------|-----------|-----|
| chr23 | 8250729   | 8251540   | 812 |
| chr6  | 121695573 | 121696383 | 811 |
| chr10 | 103505448 | 103506255 | 808 |
| chr10 | 21974905  | 21975711  | 807 |
| chr24 | 59039656  | 59040460  | 805 |
| chr20 | 5046786   | 5047589   | 804 |
| chr18 | 56921459  | 56922253  | 795 |
| chr21 | 28673950  | 28674741  | 792 |
| chr29 | 51834661  | 51835446  | 786 |
| chr11 | 75307910  | 75308694  | 785 |
| chr21 | 9481634   | 9482414   | 781 |
| chr14 | 22787149  | 22787929  | 781 |
| chr28 | 40374623  | 40375402  | 780 |
| chr23 | 18761851  | 18762627  | 777 |
| chr11 | 52301448  | 52302222  | 775 |
| chr26 | 21759468  | 21760237  | 770 |
| chr12 | 74466799  | 74467567  | 769 |
| chr23 | 18435262  | 18436029  | 768 |
| chr10 | 20464959  | 20465724  | 766 |
| chr13 | 80103573  | 80104337  | 765 |
| chr24 | 1182714   | 1183477   | 764 |
| chr2  | 111604914 | 111605673 | 760 |
| chr21 | 67397395  | 67398151  | 757 |
| chr18 | 56972145  | 56972899  | 755 |
| chr19 | 28238064  | 28238815  | 752 |
| chr2  | 124971162 | 124971911 | 750 |
| chr12 | 20090350  | 20091099  | 750 |
| chr3  | 29958536  | 29959284  | 749 |
| chr11 | 14066247  | 14066995  | 749 |
| chr10 | 36830701  | 36831448  | 748 |
| chr23 | 33461936  | 33462682  | 747 |
| chr1  | 68450864  | 68451610  | 747 |
| chr1  | 87363813  | 87364557  | 745 |
| chr23 | 44804406  | 44805145  | 740 |
| chr13 | 80830869  | 80831608  | 740 |
| chr22 | 54313805  | 54314542  | 738 |
| chr3  | 125093609 | 125094344 | 736 |
| chr19 | 39266333  | 39267067  | 735 |
| chr17 | 64331329  | 64332063  | 735 |
| chr8  | 105588357 | 105589087 | 731 |
| chr6  | 109067392 | 109068122 | 731 |
| chr18 | 11350482  | 11351211  | 730 |
| chr2  | 139212721 | 139213449 | 729 |
| chr15 | 64194364  | 64195091  | 728 |
| chr3  | 95747602  | 95748327  | 726 |
| chr22 | 23093272  | 23093997  | 726 |
| chr10 | 104889439 | 104890163 | 725 |
| chr25 | 36476658  | 36477381  | 724 |
| chr17 | 21443356  | 21444074  | 719 |
| chr21 | 20943840  | 20944557  | 718 |

|       |           |           |     |
|-------|-----------|-----------|-----|
| chr13 | 59658618  | 59659333  | 716 |
| chr11 | 70956022  | 70956737  | 716 |
| chr6  | 121699046 | 121699760 | 715 |
| chr25 | 1064491   | 1065205   | 715 |
| chr3  | 119156249 | 119156962 | 714 |
| chr27 | 17754961  | 17755674  | 714 |
| chr7  | 15107119  | 15107828  | 710 |
| chr20 | 16815343  | 16816051  | 709 |
| chr5  | 121338925 | 121339632 | 708 |
| chr18 | 1195348   | 1196055   | 708 |
| chr19 | 40443900  | 40444606  | 707 |
| chr21 | 22343458  | 22344163  | 706 |
| chr13 | 37444431  | 37445136  | 706 |
| chr3  | 23625122  | 23625825  | 704 |
| chr5  | 28529425  | 28530127  | 703 |
| chr19 | 46148021  | 46148722  | 702 |
| chr3  | 22977610  | 22978309  | 700 |
| chr14 | 1909805   | 1910504   | 700 |
| chr7  | 37397829  | 37398527  | 699 |
| chr19 | 54294767  | 54295464  | 698 |
| chr18 | 3551364   | 3552059   | 696 |
| chr6  | 103291141 | 103291835 | 695 |
| chr19 | 58733178  | 58733872  | 695 |
| chr12 | 9448815   | 9449508   | 694 |
| chr13 | 80833356  | 80834047  | 692 |
| chr25 | 2811237   | 2811927   | 691 |
| chr16 | 71090695  | 71091383  | 689 |
| chr5  | 120046408 | 120047095 | 688 |
| chr19 | 38757888  | 38758573  | 686 |
| chr19 | 27359083  | 27359768  | 686 |
| chr18 | 20247064  | 20247748  | 685 |
| chr15 | 64192427  | 64193111  | 685 |
| chr14 | 66277926  | 66278609  | 684 |
| chr10 | 63871108  | 63871789  | 682 |
| chr2  | 139481517 | 139482196 | 680 |
| chr8  | 85315716  | 85316394  | 679 |
| chr10 | 3527670   | 3528347   | 678 |
| chr11 | 108405030 | 108405706 | 677 |
| chr2  | 129887714 | 129888389 | 676 |
| chr7  | 42404048  | 42404722  | 675 |
| chr5  | 122133663 | 122134337 | 675 |
| chr19 | 45200677  | 45201350  | 674 |
| chr23 | 45576653  | 45577323  | 671 |
| chr11 | 44976263  | 44976926  | 664 |
| chr4  | 123982639 | 123983301 | 663 |
| chr3  | 123244921 | 123245583 | 663 |
| chr23 | 30547964  | 30548625  | 662 |
| chr2  | 74781810  | 74782471  | 662 |
| chr11 | 75405698  | 75406359  | 662 |
| chr1  | 118198657 | 118199317 | 661 |

|       |           |           |     |
|-------|-----------|-----------|-----|
| chr26 | 24340504  | 24341161  | 658 |
| chr18 | 55594803  | 55595460  | 658 |
| chr3  | 111813167 | 111813821 | 655 |
| chr3  | 115106050 | 115106701 | 652 |
| chr29 | 41880610  | 41881261  | 652 |
| chr3  | 35996956  | 35997605  | 650 |
| chr4  | 122980523 | 122981167 | 645 |
| chr3  | 108999070 | 108999713 | 644 |
| chr19 | 51905433  | 51906075  | 643 |
| chr13 | 65143325  | 65143967  | 643 |
| chr19 | 60239918  | 60240559  | 642 |
| chr16 | 41352110  | 41352750  | 641 |
| chr1  | 123099397 | 123100037 | 641 |
| chr5  | 28748506  | 28749145  | 640 |
| chr1  | 73788804  | 73789443  | 640 |
| chr4  | 121482270 | 121482908 | 639 |
| chr19 | 54775511  | 54776147  | 637 |
| chr3  | 93811999  | 93812634  | 636 |
| chr4  | 97714465  | 97715099  | 635 |
| chr13 | 73523631  | 73524265  | 635 |
| chr11 | 68918166  | 68918799  | 634 |
| chr1  | 123097957 | 123098589 | 633 |
| chr3  | 115329660 | 115330291 | 632 |
| chr19 | 45206358  | 45206989  | 632 |
| chr1  | 77994541  | 77995172  | 632 |
| chr5  | 1092583   | 1093212   | 630 |
| chr11 | 7039527   | 7040155   | 629 |
| chr22 | 59503092  | 59503718  | 627 |
| chrX  | 23350188  | 23350813  | 626 |
| chr22 | 12352209  | 12352834  | 626 |
| chr11 | 104589557 | 104590181 | 625 |
| chr26 | 51628242  | 51628865  | 624 |
| chr14 | 1581483   | 1582106   | 624 |
| chr7  | 46225644  | 46226265  | 622 |
| chr29 | 36735619  | 36736240  | 622 |
| chr29 | 33068470  | 33069091  | 622 |
| chr3  | 26150804  | 26151423  | 620 |
| chr16 | 2135942   | 2136561   | 620 |
| chr23 | 46012561  | 46013179  | 619 |
| chr9  | 73509810  | 73510427  | 618 |
| chr8  | 7591328   | 7591942   | 615 |
| chr10 | 8735458   | 8736071   | 614 |
| chr2  | 23187650  | 23188262  | 613 |
| chr19 | 59542358  | 59542967  | 610 |
| chr11 | 56740479  | 56741088  | 610 |
| chr6  | 108671178 | 108671786 | 609 |
| chr25 | 33468659  | 33469267  | 609 |
| chr15 | 84518713  | 84519321  | 609 |
| chr5  | 28844529  | 28845136  | 608 |
| chr10 | 67034181  | 67034787  | 607 |

|       |               |           |     |
|-------|---------------|-----------|-----|
| chr2  | 115214548     | 115215153 | 606 |
| chr11 | 11620053      | 11620658  | 606 |
| chr9  | 106708654     | 106709258 | 605 |
| chr9  | 84270508      | 84271112  | 605 |
| chr28 | 25133005      | 25133608  | 604 |
| chr16 | 34508117      | 34508719  | 603 |
| chr6  | 119360726     | 119361327 | 602 |
| chr11 | 71889160      | 71889758  | 599 |
| chr12 | 80615491      | 80616088  | 598 |
| chr5  | 29185358      | 29185952  | 595 |
| chr21 | 20839023      | 20839617  | 595 |
| chr2  | 135580235     | 135580829 | 595 |
| chr8  | 90192294      | 90192886  | 593 |
| chr21 | 30354611      | 30355202  | 592 |
| chr1  | 152261691     | 152262281 | 591 |
| chr11 | 100421973     | 100422562 | 590 |
| chr12 | 32538246      | 32538834  | 589 |
| chr29 | 23653122      | 23653709  | 588 |
| chr13 | 53879747      | 53880334  | 588 |
| chr11 | 96164805      | 96165392  | 588 |
| chr7  | 38576907      | 38577493  | 587 |
| chr5  | 79212020      | 79212606  | 587 |
| chr28 | 11378951      | 11379536  | 586 |
| chr7  | 17931023      | 17931607  | 585 |
| chr6  | 91645654      | 91646238  | 585 |
| chr6  | 59250420      | 59251004  | 585 |
| chr21 | 64146497      | 64147081  | 585 |
| chr11 | 5915398       | 5915982   | 585 |
| chr25 | 43230723      | 43231306  | 584 |
| chr8  | 862379 862961 | 583       |     |
| chr18 | 11330846      | 11331428  | 583 |
| chr23 | 16080160      | 16080741  | 582 |
| chr16 | 74123813      | 74124394  | 582 |
| chr6  | 32701683      | 32702263  | 581 |
| chr4  | 117151502     | 117152082 | 581 |
| chr16 | 3121144       | 3121724   | 581 |
| chr29 | 27218736      | 27219315  | 580 |
| chr23 | 2539742       | 2540321   | 580 |
| chr28 | 25729987      | 25730565  | 579 |
| chr19 | 38914867      | 38915445  | 579 |
| chr19 | 63707996      | 63708572  | 577 |
| chr11 | 25608349      | 25608925  | 577 |
| chr10 | 33930096      | 33930672  | 577 |
| chr13 | 23672975      | 23673549  | 575 |
| chr7  | 4496952       | 4497525   | 574 |
| chr12 | 71803173      | 71803745  | 573 |
| chr23 | 18466039      | 18466610  | 572 |
| chr2  | 140061365     | 140061936 | 572 |
| chr8  | 72617060      | 72617630  | 571 |
| chr18 | 45643168      | 45643738  | 571 |

|       |           |           |     |
|-------|-----------|-----------|-----|
| chr1  | 152632831 | 152633399 | 569 |
| chr22 | 30261392  | 30261958  | 567 |
| chr12 | 36424503  | 36425069  | 567 |
| chr8  | 24447634  | 24448199  | 566 |
| chr29 | 49110169  | 49110733  | 565 |
| chr20 | 6627995   | 6628559   | 565 |
| chr19 | 39123109  | 39123667  | 559 |
| chr8  | 73795858  | 73796415  | 558 |
| chr4  | 71604587  | 71605143  | 557 |
| chr24 | 33789845  | 33790401  | 557 |
| chr2  | 135768075 | 135768631 | 557 |
| chr15 | 30157735  | 30158290  | 556 |
| chr22 | 55932654  | 55933206  | 553 |
| chr15 | 28666216  | 28666767  | 552 |
| chr29 | 33705964  | 33706514  | 551 |
| chr23 | 8508490   | 8509040   | 551 |
| chr7  | 4687947   | 4688496   | 550 |
| chr10 | 36598342  | 36598890  | 549 |
| chr2  | 133739700 | 133740247 | 548 |
| chr5  | 121398985 | 121399531 | 547 |
| chr1  | 144666763 | 144667309 | 547 |
| chr21 | 48928140  | 48928685  | 546 |
| chr2  | 140751309 | 140751854 | 546 |
| chr19 | 59520711  | 59521256  | 546 |
| chr28 | 14098709  | 14099253  | 545 |
| chr21 | 9834285   | 9834828   | 544 |
| chr18 | 45196612  | 45197155  | 544 |
| chr16 | 38378213  | 38378756  | 544 |
| chr7  | 51085764  | 51086305  | 542 |
| chr2  | 125921252 | 125921793 | 542 |
| chr2  | 48912723  | 48913264  | 542 |
| chr7  | 5403406   | 5403946   | 541 |
| chr29 | 34582848  | 34583388  | 541 |
| chr17 | 60186570  | 60187110  | 541 |
| chr7  | 19224239  | 19224778  | 540 |
| chr4  | 118131718 | 118132256 | 539 |
| chr27 | 15727038  | 15727576  | 539 |
| chr22 | 59847470  | 59848008  | 539 |
| chr14 | 3499726   | 3500264   | 539 |
| chr12 | 32170980  | 32171518  | 539 |
| chr27 | 41849697  | 41850232  | 536 |
| chr9  | 78232307  | 78232841  | 535 |
| chr25 | 3041647   | 3042181   | 535 |
| chr2  | 75593293  | 75593827  | 535 |
| chr6  | 16264942  | 16265475  | 534 |
| chr7  | 88945989  | 88946518  | 530 |
| chr19 | 37333969  | 37334498  | 530 |
| chr8  | 80171656  | 80172184  | 529 |
| chr11 | 14156554  | 14157080  | 527 |
| chr1  | 123118128 | 123118652 | 525 |

|       |               |           |     |
|-------|---------------|-----------|-----|
| chr5  | 26711969      | 26712492  | 524 |
| chr26 | 41539510      | 41540033  | 524 |
| chr13 | 73993095      | 73993618  | 524 |
| chr19 | 7800971       | 7801493   | 523 |
| chr21 | 39968386      | 39968906  | 521 |
| chr5  | 30850802      | 30851320  | 519 |
| chr26 | 44384354      | 44384872  | 519 |
| chr25 | 40900117      | 40900635  | 519 |
| chr18 | 650898 651416 | 519       |     |
| chr17 | 68459167      | 68459685  | 519 |
| chr3  | 115476335     | 115476852 | 518 |
| chr27 | 14402999      | 14403516  | 518 |
| chr10 | 88063402      | 88063919  | 518 |
| chr22 | 30031879      | 30032395  | 517 |
| chr19 | 37589675      | 37590191  | 517 |
| chr12 | 84183257      | 84183773  | 517 |
| chr4  | 123259870     | 123260384 | 515 |
| chr17 | 68481870      | 68482384  | 515 |
| chr24 | 20384569      | 20385082  | 514 |
| chr21 | 29188030      | 29188543  | 514 |
| chr16 | 48312964      | 48313476  | 513 |
| chr2  | 139238255     | 139238766 | 512 |
| chr7  | 66722613      | 66723123  | 511 |
| chr21 | 61785142      | 61785649  | 508 |
| chr14 | 31071386      | 31071893  | 508 |
| chr13 | 63107702      | 63108209  | 508 |
| chr2  | 74696518      | 74697024  | 507 |
| chr19 | 65204602      | 65205108  | 507 |
| chr13 | 54499864      | 54500368  | 505 |
| chr10 | 88054194      | 88054698  | 505 |
| chr18 | 50261539      | 50262042  | 504 |
| chr5  | 33942684      | 33943186  | 503 |
| chr3  | 123171917     | 123172418 | 502 |
| chr24 | 60512022      | 60512523  | 502 |
| chr3  | 112300692     | 112301192 | 501 |
| chr24 | 44374148      | 44374648  | 501 |
| chr13 | 59789179      | 59789678  | 500 |
| chr18 | 4042176       | 4042673   | 498 |
| chr15 | 62378281      | 62378778  | 498 |
| chr28 | 41279104      | 41279600  | 497 |
| chr19 | 39260318      | 39260814  | 497 |
| chr8  | 23896541      | 23897036  | 496 |
| chr12 | 9121079       | 9121573   | 495 |
| chr23 | 23865451      | 23865943  | 493 |
| chr11 | 75406451      | 75406943  | 493 |
| chr9  | 77305336      | 77305827  | 492 |
| chr5  | 113559016     | 113559507 | 492 |
| chr29 | 51144485      | 51144976  | 492 |
| chr19 | 33111119      | 33111610  | 492 |
| chr5  | 10194288      | 10194778  | 491 |

|       |           |           |     |
|-------|-----------|-----------|-----|
| chr26 | 51533158  | 51533648  | 491 |
| chr5  | 121338375 | 121338863 | 489 |
| chr17 | 48918941  | 48919429  | 489 |
| chr12 | 33361868  | 33362356  | 489 |
| chr8  | 93710554  | 93711039  | 486 |
| chr9  | 67496608  | 67497092  | 485 |
| chr20 | 66782640  | 66783124  | 485 |
| chr16 | 2193383   | 2193867   | 485 |
| chr11 | 88928448  | 88928931  | 484 |
| chr11 | 93744737  | 93745219  | 483 |
| chr7  | 43915945  | 43916426  | 482 |
| chr17 | 70523246  | 70523727  | 482 |
| chr19 | 51427011  | 51427491  | 481 |
| chr19 | 21319020  | 21319500  | 481 |
| chr10 | 22092789  | 22093269  | 481 |
| chr5  | 76995755  | 76996234  | 480 |
| chr25 | 42647148  | 42647627  | 480 |
| chr19 | 19830443  | 19830922  | 480 |
| chr2  | 131474379 | 131474857 | 479 |
| chr29 | 48741748  | 48742225  | 478 |
| chr12 | 85013231  | 85013708  | 478 |
| chr7  | 13269274  | 13269750  | 477 |
| chr13 | 75839646  | 75840122  | 477 |
| chr8  | 77124733  | 77125208  | 476 |
| chr3  | 20510110  | 20510585  | 476 |
| chr24 | 30502739  | 30503214  | 476 |
| chr21 | 65761166  | 65761641  | 476 |
| chr11 | 104901380 | 104901854 | 475 |
| chr4  | 27033154  | 27033627  | 474 |
| chr22 | 51292460  | 51292931  | 472 |
| chr29 | 44590437  | 44590907  | 471 |
| chr2  | 21544801  | 21545271  | 471 |
| chr2  | 134332685 | 134333153 | 469 |
| chr11 | 108952020 | 108952488 | 469 |
| chr2  | 134964779 | 134965246 | 468 |
| chr13 | 84224571  | 84225038  | 468 |
| chr7  | 18729797  | 18730263  | 467 |
| chr23 | 27797956  | 27798422  | 467 |
| chr19 | 37862719  | 37863185  | 467 |
| chr19 | 8443440   | 8443906   | 467 |
| chr13 | 14702768  | 14703234  | 467 |
| chr1  | 68830548  | 68831014  | 467 |
| chr2  | 117720786 | 117721251 | 466 |
| chr18 | 22724830  | 22725295  | 466 |
| chr17 | 72941546  | 72942011  | 466 |
| chr3  | 81165793  | 81166257  | 465 |
| chr6  | 46829658  | 46830121  | 464 |
| chr4  | 107998026 | 107998489 | 464 |
| chr16 | 44078380  | 44078843  | 464 |
| chr12 | 34263832  | 34264295  | 464 |

|       |           |           |     |
|-------|-----------|-----------|-----|
| chr24 | 44270475  | 44270936  | 462 |
| chr3  | 109418281 | 109418741 | 461 |
| chr20 | 32402272  | 32402732  | 461 |
| chr2  | 132757336 | 132757796 | 461 |
| chr9  | 90397604  | 90398063  | 460 |
| chr16 | 2258805   | 2259264   | 460 |
| chr12 | 23537891  | 23538350  | 460 |
| chr4  | 104184580 | 104185038 | 459 |
| chr29 | 48785324  | 48785781  | 458 |
| chr21 | 22740356  | 22740813  | 458 |
| chr3  | 127833571 | 127834027 | 457 |
| chr19 | 29014582  | 29015037  | 456 |
| chr14 | 66295432  | 66295887  | 456 |
| chr13 | 79918856  | 79919311  | 456 |
| chr4  | 108339164 | 108339618 | 455 |
| chr21 | 22689429  | 22689883  | 455 |
| chr19 | 25283201  | 25283655  | 455 |
| chr15 | 74708171  | 74708625  | 455 |
| chr7  | 4687457   | 4687910   | 454 |
| chr19 | 47289930  | 47290383  | 454 |
| chr14 | 7629271   | 7629724   | 454 |
| chr13 | 73944419  | 73944872  | 454 |
| chr25 | 36586378  | 36586830  | 453 |
| chr24 | 60573540  | 60573992  | 453 |
| chr18 | 61976153  | 61976605  | 453 |
| chr23 | 19336078  | 19336529  | 452 |
| chr15 | 26892563  | 26893014  | 452 |
| chr7  | 17971485  | 17971935  | 451 |
| chr5  | 88034887  | 88035337  | 451 |
| chr19 | 38530022  | 38530472  | 451 |
| chr12 | 68429212  | 68429662  | 451 |
| chr5  | 121216796 | 121217245 | 450 |
| chr8  | 90193315  | 90193763  | 449 |
| chr18 | 62752166  | 62752614  | 449 |
| chr6  | 122261424 | 122261871 | 448 |
| chr28 | 26789040  | 26789487  | 448 |
| chr24 | 5104677   | 5105124   | 448 |
| chr21 | 20914838  | 20915284  | 447 |
| chr16 | 44105015  | 44105461  | 447 |
| chr9  | 37892875  | 37893320  | 446 |
| chr5  | 120366376 | 120366821 | 446 |
| chr8  | 90190509  | 90190953  | 445 |
| chr22 | 58740239  | 58740683  | 445 |
| chr3  | 8150597   | 8151040   | 444 |
| chr14 | 19303089  | 19303532  | 444 |
| chr25 | 3965720   | 3966162   | 443 |
| chr19 | 19134870  | 19135312  | 443 |
| chr8  | 65249010  | 65249451  | 442 |
| chr3  | 123679384 | 123679825 | 442 |
| chr28 | 13491775  | 13492216  | 442 |



|       |               |           |     |
|-------|---------------|-----------|-----|
| chr24 | 1092724       | 1093163   | 440 |
| chr11 | 104876697     | 104877136 | 440 |
| chr1  | 84498645      | 84499084  | 440 |
| chr24 | 60828951      | 60829389  | 439 |
| chr23 | 27397978      | 27398416  | 439 |
| chr19 | 19745579      | 19746017  | 439 |
| chr5  | 31260115      | 31260552  | 438 |
| chr5  | 28854106      | 28854543  | 438 |
| chr14 | 8047321       | 8047758   | 438 |
| chr23 | 30354087      | 30354523  | 437 |
| chr2  | 135157544     | 135157980 | 437 |
| chr19 | 21720124      | 21720560  | 437 |
| chr11 | 793946 794382 |           | 437 |
| chr5  | 116425047     | 116425482 | 436 |
| chr25 | 1950442       | 1950877   | 436 |
| chr22 | 39296335      | 39296770  | 436 |
| chr17 | 73194134      | 73194569  | 436 |
| chr15 | 75389906      | 75390341  | 436 |
| chr13 | 54836546      | 54836981  | 436 |
| chr7  | 51851445      | 51851879  | 435 |
| chr5  | 60731074      | 60731506  | 433 |
| chr28 | 24808228      | 24808660  | 433 |
| chr23 | 14262321      | 14262753  | 433 |
| chr25 | 39389475      | 39389906  | 432 |
| chr5  | 116700310     | 116700740 | 431 |
| chr5  | 38509737      | 38510167  | 431 |
| chr1  | 67726905      | 67727335  | 431 |
| chr1  | 67583848      | 67584277  | 430 |
| chr21 | 59030191      | 59030619  | 429 |
| chr16 | 59038888      | 59039316  | 429 |
| chr11 | 103740609     | 103741037 | 429 |
| chr29 | 36380674      | 36381101  | 428 |
| chr23 | 11968518      | 11968945  | 428 |
| chr16 | 41502230      | 41502657  | 428 |
| chr1  | 74033049      | 74033476  | 428 |
| chr10 | 16911098      | 16911524  | 427 |
| chr28 | 34106152      | 34106577  | 426 |
| chr19 | 47237832      | 47238257  | 426 |
| chr18 | 56864541      | 56864966  | 426 |
| chr14 | 31022230      | 31022655  | 426 |
| chr12 | 84979430      | 84979855  | 426 |
| chr26 | 43444460      | 43444884  | 425 |
| chr2  | 138900791     | 138901215 | 425 |
| chr19 | 56660436      | 56660860  | 425 |
| chr17 | 75723563      | 75723987  | 425 |
| chr11 | 28339415      | 28339839  | 425 |
| chr26 | 50638682      | 50639105  | 424 |
| chr18 | 57028948      | 57029371  | 424 |
| chr16 | 47976121      | 47976544  | 424 |
| chr6  | 98306414      | 98306836  | 423 |

|       |               |           |     |
|-------|---------------|-----------|-----|
| chr23 | 27158951      | 27159373  | 423 |
| chr22 | 13125896      | 13126318  | 423 |
| chr18 | 62014664      | 62015086  | 423 |
| chr9  | 106387340     | 106387761 | 422 |
| chr3  | 13651984      | 13652405  | 422 |
| chr17 | 76318658      | 76319079  | 422 |
| chr11 | 88926841      | 88927262  | 422 |
| chr7  | 43720513      | 43720933  | 421 |
| chr3  | 102650273     | 102650693 | 421 |
| chr17 | 64018477      | 64018897  | 421 |
| chr8  | 108713686     | 108714105 | 420 |
| chr23 | 15884196      | 15884615  | 420 |
| chr22 | 6684045       | 6684464   | 420 |
| chr10 | 86858890      | 86859309  | 420 |
| chr6  | 94429462      | 94429880  | 419 |
| chr3  | 55839235      | 55839653  | 419 |
| chr12 | 32090051      | 32090469  | 419 |
| chr10 | 18763193      | 18763611  | 419 |
| chr6  | 13978062      | 13978479  | 418 |
| chr19 | 59690197      | 59690613  | 417 |
| chr13 | 55533133      | 55533549  | 417 |
| chr5  | 29141116      | 29141531  | 416 |
| chr29 | 35015010      | 35015425  | 416 |
| chr25 | 37783602      | 37784017  | 416 |
| chr2  | 138645091     | 138645506 | 416 |
| chr16 | 71073650      | 71074065  | 416 |
| chr5  | 27939143      | 27939557  | 415 |
| chr3  | 102722831     | 102723245 | 415 |
| chr5  | 115049243     | 115049656 | 414 |
| chr3  | 22493260      | 22493673  | 414 |
| chr29 | 34259647      | 34260060  | 414 |
| chr15 | 26893056      | 26893469  | 414 |
| chr9  | 8179239       | 8179651   | 413 |
| chr29 | 36910769      | 36911181  | 413 |
| chr23 | 17468757      | 17469169  | 413 |
| chr19 | 64762407      | 64762819  | 413 |
| chr19 | 38969356      | 38969768  | 413 |
| chr11 | 70861111      | 70861523  | 413 |
| chr13 | 77287359      | 77287770  | 412 |
| chr8  | 66668310      | 66668720  | 411 |
| chr4  | 14624749      | 14625159  | 411 |
| chr19 | 27258054      | 27258464  | 411 |
| chr3  | 55863376      | 55863785  | 410 |
| chr24 | 36934769      | 36935178  | 410 |
| chr19 | 45058418      | 45058827  | 410 |
| chr14 | 609413 609822 | 410       |     |
| chr11 | 6309399       | 6309808   | 410 |
| chr10 | 24414028      | 24414437  | 410 |
| chr29 | 44566794      | 44567202  | 409 |
| chr27 | 31454321      | 31454729  | 409 |

|       |           |           |     |
|-------|-----------|-----------|-----|
| chr27 | 717326    | 717734    | 409 |
| chr19 | 46901504  | 46901912  | 409 |
| chr2  | 21541036  | 21541443  | 408 |
| chr19 | 63956160  | 63956567  | 408 |
| chr19 | 60823251  | 60823658  | 408 |
| chr18 | 64323249  | 64323656  | 408 |
| chr3  | 54333836  | 54334242  | 407 |
| chr3  | 35667051  | 35667457  | 407 |
| chr24 | 36556428  | 36556834  | 407 |
| chr22 | 12205818  | 12206224  | 407 |
| chr8  | 60189208  | 60189613  | 406 |
| chr4  | 116918748 | 116919153 | 406 |
| chr24 | 1937622   | 1938027   | 406 |
| chr14 | 23263692  | 23264097  | 406 |
| chr8  | 60099792  | 60100196  | 405 |
| chr28 | 4792813   | 4793217   | 405 |
| chr19 | 27362961  | 27363365  | 405 |
| chr5  | 120495756 | 120496159 | 404 |
| chr5  | 75732667  | 75733070  | 404 |
| chr19 | 29734830  | 29735233  | 404 |
| chr18 | 13149824  | 13150227  | 404 |
| chr13 | 77695188  | 77695591  | 404 |
| chr11 | 108416844 | 108417247 | 404 |
| chr7  | 818709    | 819111    | 403 |
| chr23 | 52845980  | 52846382  | 403 |
| chr23 | 14261827  | 14262229  | 403 |
| chr21 | 22691799  | 22692201  | 403 |
| chr2  | 89154063  | 89154465  | 403 |
| chr18 | 52738642  | 52739044  | 403 |
| chr12 | 46768155  | 46768557  | 403 |
| chr10 | 20851118  | 20851520  | 403 |
| chr23 | 51924223  | 51924624  | 402 |
| chr23 | 43424170  | 43424571  | 402 |
| chr19 | 24087300  | 24087701  | 402 |
| chr18 | 63471066  | 63471467  | 402 |
| chr14 | 34067461  | 34067862  | 402 |
| chr11 | 306841    | 307242    | 402 |
| chr7  | 4917568   | 4917968   | 401 |
| chr24 | 33492185  | 33492585  | 401 |
| chr21 | 7064652   | 7065052   | 401 |
| chr17 | 48725362  | 48725762  | 401 |
| chr6  | 69744845  | 69745244  | 400 |
| chr5  | 64500037  | 64500436  | 400 |
| chr3  | 115355464 | 115355863 | 400 |
| chr3  | 114206697 | 114207096 | 400 |
| chr28 | 26723540  | 26723939  | 400 |
| chr25 | 42036072  | 42036471  | 400 |
| chr2  | 119412308 | 119412707 | 400 |
| chr1  | 154415179 | 154415578 | 400 |
| chr9  | 41875728  | 41876126  | 399 |

|       |           |           |     |
|-------|-----------|-----------|-----|
| chr8  | 79342790  | 79343188  | 399 |
| chr7  | 81895591  | 81895989  | 399 |
| chr7  | 46195260  | 46195658  | 399 |
| chr7  | 15591798  | 15592196  | 399 |
| chr7  | 5453146   | 5453544   | 399 |
| chr6  | 121840527 | 121840925 | 399 |
| chr6  | 108670708 | 108671106 | 399 |
| chr5  | 122818266 | 122818664 | 399 |
| chr5  | 113949054 | 113949452 | 399 |
| chr5  | 112767177 | 112767575 | 399 |
| chr5  | 71662713  | 71663111  | 399 |
| chr4  | 4595890   | 4596288   | 399 |
| chr3  | 114205535 | 114205933 | 399 |
| chr3  | 111753981 | 111754379 | 399 |
| chr3  | 62648945  | 62649343  | 399 |
| chr3  | 22500970  | 22501368  | 399 |
| chr29 | 48836938  | 48837336  | 399 |
| chr29 | 31791497  | 31791895  | 399 |
| chr28 | 33891780  | 33892178  | 399 |
| chr28 | 33561650  | 33562048  | 399 |
| chr27 | 47515075  | 47515473  | 399 |
| chr27 | 35371833  | 35372231  | 399 |
| chr27 | 26466357  | 26466755  | 399 |
| chr27 | 26356724  | 26357122  | 399 |
| chr25 | 37864235  | 37864633  | 399 |
| chr25 | 37389338  | 37389736  | 399 |
| chr25 | 3059218   | 3059616   | 399 |
| chr24 | 41096101  | 41096499  | 399 |
| chr24 | 25455363  | 25455761  | 399 |
| chr23 | 51058854  | 51059252  | 399 |
| chr23 | 31415166  | 31415564  | 399 |
| chr22 | 61193652  | 61194050  | 399 |
| chr22 | 56077345  | 56077743  | 399 |
| chr22 | 50962310  | 50962708  | 399 |
| chr22 | 29707805  | 29708203  | 399 |
| chr21 | 65761655  | 65762053  | 399 |
| chr21 | 62224247  | 62224645  | 399 |
| chr20 | 75445157  | 75445555  | 399 |
| chr20 | 40854329  | 40854727  | 399 |
| chr20 | 16597480  | 16597878  | 399 |
| chr20 | 3571788   | 3572186   | 399 |
| chr2  | 136620878 | 136621276 | 399 |
| chr19 | 63980743  | 63981141  | 399 |
| chr19 | 63894837  | 63895235  | 399 |
| chr19 | 59534911  | 59535309  | 399 |
| chr19 | 54654137  | 54654535  | 399 |
| chr19 | 47266530  | 47266928  | 399 |
| chr19 | 46900524  | 46900922  | 399 |
| chr19 | 23713090  | 23713488  | 399 |
| chr19 | 14045937  | 14046335  | 399 |

|       |               |           |     |
|-------|---------------|-----------|-----|
| chr18 | 62385775      | 62386173  | 399 |
| chr18 | 23153991      | 23154389  | 399 |
| chr18 | 11315002      | 11315400  | 399 |
| chr17 | 75885191      | 75885589  | 399 |
| chr17 | 70218151      | 70218549  | 399 |
| chr17 | 70121124      | 70121522  | 399 |
| chr17 | 48918306      | 48918704  | 399 |
| chr16 | 67211182      | 67211580  | 399 |
| chr16 | 59062817      | 59063215  | 399 |
| chr16 | 42145033      | 42145431  | 399 |
| chr15 | 22321142      | 22321540  | 399 |
| chr15 | 21334672      | 21335070  | 399 |
| chr14 | 52854257      | 52854655  | 399 |
| chr14 | 42554687      | 42555085  | 399 |
| chr14 | 7493705       | 7494103   | 399 |
| chr13 | 80222057      | 80222455  | 399 |
| chr13 | 76213988      | 76214386  | 399 |
| chr13 | 66683512      | 66683910  | 399 |
| chr13 | 63230127      | 63230525  | 399 |
| chr13 | 58264362      | 58264760  | 399 |
| chr13 | 36767410      | 36767808  | 399 |
| chr12 | 76057016      | 76057414  | 399 |
| chr12 | 29828117      | 29828515  | 399 |
| chr11 | 85421411      | 85421809  | 399 |
| chr11 | 81271305      | 81271703  | 399 |
| chr11 | 71122058      | 71122456  | 399 |
| chr10 | 90929332      | 90929730  | 399 |
| chr10 | 87481209      | 87481607  | 399 |
| chr10 | 53473029      | 53473427  | 399 |
| chr1  | 123085196     | 123085594 | 399 |
| chr1  | 112531956     | 112532354 | 399 |
| chr1  | 5324859       | 5325257   | 399 |
| chr7  | 18666834      | 18667231  | 398 |
| chr7  | 14823166      | 14823563  | 398 |
| chr6  | 121052513     | 121052910 | 398 |
| chr6  | 118503129     | 118503526 | 398 |
| chr3  | 15766482      | 15766879  | 398 |
| chr29 | 46519511      | 46519908  | 398 |
| chr28 | 34015513      | 34015910  | 398 |
| chr26 | 31444942      | 31445339  | 398 |
| chr25 | 35101225      | 35101622  | 398 |
| chr22 | 61221155      | 61221552  | 398 |
| chr20 | 44306975      | 44307372  | 398 |
| chr17 | 59195373      | 59195770  | 398 |
| chr13 | 26219763      | 26220160  | 398 |
| chr3  | 23867039      | 23867435  | 397 |
| chr3  | 458192 458588 | 397       |     |
| chr27 | 30621501      | 30621897  | 397 |
| chr25 | 40215465      | 40215861  | 397 |
| chr23 | 31883579      | 31883975  | 397 |

|       |           |           |     |
|-------|-----------|-----------|-----|
| chr22 | 50735160  | 50735556  | 397 |
| chr21 | 24501986  | 24502382  | 397 |
| chr2  | 111353329 | 111353725 | 397 |
| chr15 | 22808723  | 22809119  | 397 |
| chr9  | 10497989  | 10498384  | 396 |
| chr7  | 2537300   | 2537695   | 396 |
| chr5  | 122149336 | 122149731 | 396 |
| chr29 | 41850921  | 41851316  | 396 |
| chr5  | 121252370 | 121252764 | 395 |
| chr3  | 115094492 | 115094886 | 395 |
| chr28 | 40390540  | 40390934  | 395 |
| chr24 | 60594076  | 60594470  | 395 |
| chr21 | 58796433  | 58796827  | 395 |
| chr19 | 38739678  | 38740072  | 395 |
| chr19 | 21714522  | 21714916  | 395 |
| chr18 | 65962262  | 65962656  | 395 |
| chr14 | 40159747  | 40160141  | 395 |
| chr5  | 60921557  | 60921950  | 394 |
| chr4  | 96130051  | 96130444  | 394 |
| chr21 | 20661296  | 20661689  | 394 |
| chr16 | 10912093  | 10912486  | 394 |
| chr13 | 73478458  | 73478851  | 394 |
| chr26 | 14616842  | 14617234  | 393 |
| chr24 | 35306889  | 35307281  | 393 |
| chr21 | 24405856  | 24406248  | 393 |
| chr2  | 136688667 | 136689059 | 393 |
| chr19 | 14079862  | 14080254  | 393 |
| chr17 | 72746855  | 72747247  | 393 |
| chr13 | 67852138  | 67852530  | 393 |
| chr13 | 59996129  | 59996521  | 393 |
| chr10 | 83323539  | 83323931  | 393 |
| chr4  | 98812330  | 98812721  | 392 |
| chr29 | 34262691  | 34263082  | 392 |
| chr25 | 42103790  | 42104181  | 392 |
| chr23 | 13628094  | 13628485  | 392 |
| chr19 | 54511836  | 54512227  | 392 |
| chr19 | 18398089  | 18398480  | 392 |
| chr5  | 121218622 | 121219012 | 391 |
| chr19 | 61930532  | 61930922  | 391 |
| chr19 | 39159708  | 39160098  | 391 |
| chr15 | 78187591  | 78187981  | 391 |
| chr14 | 22988084  | 22988474  | 391 |
| chr14 | 8174426   | 8174816   | 391 |
| chr11 | 89075602  | 89075992  | 391 |
| chr11 | 77864936  | 77865326  | 391 |
| chr10 | 16960138  | 16960528  | 391 |
| chr3  | 127182768 | 127183157 | 390 |
| chr28 | 7863418   | 7863807   | 390 |
| chr2  | 134082919 | 134083308 | 390 |
| chr19 | 29438578  | 29438967  | 390 |

|       |           |           |     |
|-------|-----------|-----------|-----|
| chr18 | 51726970  | 51727359  | 390 |
| chr15 | 74654969  | 74655358  | 390 |
| chr10 | 21437999  | 21438388  | 390 |
| chrX  | 72261157  | 72261545  | 389 |
| chr3  | 121131211 | 121131599 | 389 |
| chr26 | 41299601  | 41299989  | 389 |
| chr23 | 31114274  | 31114662  | 389 |
| chr22 | 59412181  | 59412569  | 389 |
| chr22 | 29776308  | 29776696  | 389 |
| chr2  | 26591489  | 26591877  | 389 |
| chr7  | 57581932  | 57582319  | 388 |
| chr24 | 40614848  | 40615235  | 388 |
| chr17 | 72947340  | 72947727  | 388 |
| chr14 | 8426560   | 8426947   | 388 |
| chr12 | 82486753  | 82487140  | 388 |
| chr10 | 7516046   | 7516433   | 388 |
| chr1  | 78592947  | 78593334  | 388 |
| chr1  | 33445357  | 33445744  | 388 |
| chr29 | 48701612  | 48701998  | 387 |
| chr26 | 44228497  | 44228883  | 387 |
| chr25 | 10600858  | 10601244  | 387 |
| chr21 | 67966103  | 67966489  | 387 |
| chr19 | 23731236  | 23731622  | 387 |
| chr8  | 23021978  | 23022363  | 386 |
| chr3  | 127016189 | 127016574 | 386 |
| chr24 | 50982625  | 50983010  | 386 |
| chr23 | 27399461  | 27399846  | 386 |
| chr22 | 7117448   | 7117833   | 386 |
| chr19 | 37811110  | 37811495  | 386 |
| chr18 | 51716879  | 51717264  | 386 |
| chr11 | 105663216 | 105663601 | 386 |
| chr16 | 2685368   | 2685752   | 385 |
| chr15 | 74656873  | 74657257  | 385 |
| chr15 | 33518545  | 33518929  | 385 |
| chr27 | 39219883  | 39220266  | 384 |
| chr26 | 22279245  | 22279628  | 384 |
| chr15 | 24397941  | 24398324  | 384 |
| chr6  | 122433164 | 122433546 | 383 |
| chr25 | 36445463  | 36445845  | 383 |
| chr25 | 34395562  | 34395944  | 383 |
| chr22 | 36554612  | 36554994  | 383 |
| chr20 | 33531256  | 33531638  | 383 |
| chr2  | 115120991 | 115121373 | 383 |
| chr19 | 58562394  | 58562776  | 383 |
| chr19 | 46771487  | 46771869  | 383 |
| chr12 | 81458294  | 81458676  | 383 |
| chr9  | 53353580  | 53353961  | 382 |
| chr3  | 126081520 | 126081901 | 382 |
| chr6  | 13979551  | 13979931  | 381 |
| chr5  | 121656937 | 121657317 | 381 |

|       |               |           |     |
|-------|---------------|-----------|-----|
| chr15 | 75696647      | 75697027  | 381 |
| chr10 | 17005121      | 17005501  | 381 |
| chr8  | 7556936       | 7557315   | 380 |
| chr20 | 8813264       | 8813643   | 380 |
| chr2  | 128471840     | 128472219 | 380 |
| chr13 | 14690745      | 14691124  | 380 |
| chr3  | 114213572     | 114213950 | 379 |
| chr24 | 44266177      | 44266555  | 379 |
| chr18 | 53500660      | 53501038  | 379 |
| chr16 | 48565257      | 48565635  | 379 |
| chr13 | 66990918      | 66991296  | 379 |
| chr3  | 88245431      | 88245808  | 378 |
| chr25 | 33808317      | 33808694  | 378 |
| chr23 | 52722108      | 52722485  | 378 |
| chr19 | 37572766      | 37573143  | 378 |
| chr18 | 54221734      | 54222111  | 378 |
| chr5  | 122705448     | 122705824 | 377 |
| chr25 | 43954820      | 43955196  | 377 |
| chr25 | 43853180      | 43853556  | 377 |
| chr19 | 38781105      | 38781481  | 377 |
| chr18 | 56862075      | 56862451  | 377 |
| chr17 | 70270509      | 70270885  | 377 |
| chr27 | 16074883      | 16075258  | 376 |
| chr18 | 12137435      | 12137810  | 376 |
| chr15 | 51834177      | 51834552  | 376 |
| chr7  | 39031098      | 39031472  | 375 |
| chr3  | 4237494       | 4237868   | 375 |
| chr26 | 22765945      | 22766319  | 375 |
| chr25 | 3171327       | 3171701   | 375 |
| chr17 | 76315485      | 76315859  | 375 |
| chr16 | 67436707      | 67437081  | 375 |
| chr13 | 75533847      | 75534221  | 375 |
| chr1  | 74564687      | 74565061  | 375 |
| chr8  | 92975239      | 92975612  | 374 |
| chr6  | 118799600     | 118799973 | 374 |
| chr5  | 117631798     | 117632171 | 374 |
| chr25 | 39448387      | 39448760  | 374 |
| chr2  | 74698178      | 74698551  | 374 |
| chr19 | 7796729       | 7797102   | 374 |
| chr15 | 28731464      | 28731837  | 374 |
| chr3  | 122145403     | 122145775 | 373 |
| chr3  | 119384320     | 119384692 | 373 |
| chr18 | 45949131      | 45949503  | 373 |
| chr17 | 54293909      | 54294281  | 373 |
| chr15 | 24673389      | 24673761  | 373 |
| chr14 | 31008467      | 31008839  | 373 |
| chr1  | 638129 638501 | 373       |     |
| chr19 | 14924535      | 14924906  | 372 |
| chr18 | 47598683      | 47599054  | 372 |
| chr18 | 11405309      | 11405680  | 372 |



|       |               |           |     |
|-------|---------------|-----------|-----|
| chr15 | 66132308      | 66132679  | 372 |
| chr15 | 64499418      | 64499789  | 372 |
| chr15 | 64197623      | 64197994  | 372 |
| chr3  | 43205657      | 43206027  | 371 |
| chr10 | 90533574      | 90533944  | 371 |
| chr26 | 22014545      | 22014914  | 370 |
| chr11 | 31053885      | 31054254  | 370 |
| chr10 | 23587535      | 23587904  | 370 |
| chr7  | 5399944       | 5400312   | 369 |
| chr29 | 36473594      | 36473962  | 369 |
| chr2  | 128594616     | 128594984 | 369 |
| chr18 | 56538192      | 56538559  | 368 |
| chr11 | 104689892     | 104690259 | 368 |
| chr20 | 59997892      | 59998258  | 367 |
| chr1  | 143794795     | 143795161 | 367 |
| chr8  | 8115044       | 8115409   | 366 |
| chr5  | 112192732     | 112193097 | 366 |
| chr17 | 31425725      | 31426090  | 366 |
| chr16 | 49378148      | 49378513  | 366 |
| chr13 | 54837653      | 54838018  | 366 |
| chr11 | 66549273      | 66549638  | 366 |
| chr7  | 43250608      | 43250972  | 365 |
| chr18 | 56883174      | 56883538  | 365 |
| chr10 | 104782081     | 104782445 | 365 |
| chr6  | 103286846     | 103287209 | 364 |
| chr3  | 115962592     | 115962955 | 364 |
| chr19 | 40535177      | 40535540  | 364 |
| chr9  | 106560338     | 106560700 | 363 |
| chr26 | 51261159      | 51261521  | 363 |
| chr21 | 69105313      | 69105675  | 363 |
| chr1  | 74103210      | 74103572  | 363 |
| chr8  | 72163979      | 72164340  | 362 |
| chr26 | 45879144      | 45879505  | 362 |
| chr17 | 70434171      | 70434532  | 362 |
| chr9  | 106832265     | 106832625 | 361 |
| chr27 | 301807 302167 | 361       |     |
| chr5  | 122833014     | 122833373 | 360 |
| chr25 | 8765136       | 8765495   | 360 |
| chr23 | 49724095      | 49724454  | 360 |
| chr17 | 46057815      | 46058174  | 360 |
| chr16 | 2195179       | 2195538   | 360 |
| chr13 | 70003294      | 70003653  | 360 |
| chr19 | 47301673      | 47302031  | 359 |
| chr9  | 90601169      | 90601526  | 358 |
| chr5  | 28897109      | 28897466  | 358 |
| chr26 | 21771444      | 21771801  | 358 |
| chr2  | 139134935     | 139135292 | 358 |
| chr6  | 72296846      | 72297202  | 357 |
| chr25 | 40216749      | 40217105  | 357 |
| chr17 | 70251924      | 70252280  | 357 |

|       |           |           |     |
|-------|-----------|-----------|-----|
| chr15 | 39933063  | 39933419  | 357 |
| chr13 | 77323058  | 77323414  | 357 |
| chr1  | 123115054 | 123115410 | 357 |
| chr5  | 31311832  | 31312187  | 356 |
| chr13 | 62832641  | 62832996  | 356 |
| chr9  | 106951183 | 106951536 | 354 |
| chr4  | 120933917 | 120934270 | 354 |
| chr3  | 62178216  | 62178569  | 354 |
| chr7  | 5257975   | 5258327   | 353 |
| chr3  | 121490891 | 121491243 | 353 |
| chr24 | 61141081  | 61141433  | 353 |
| chr7  | 5676618   | 5676969   | 352 |
| chr11 | 92673306  | 92673657  | 352 |
| chr5  | 114121923 | 114122273 | 351 |
| chr2  | 135065350 | 135065700 | 351 |
| chr19 | 43234337  | 43234687  | 351 |
| chr1  | 84399456  | 84399806  | 351 |
| chr7  | 46234174  | 46234523  | 350 |
| chr3  | 126866488 | 126866837 | 350 |
| chr29 | 45774171  | 45774520  | 350 |
| chr26 | 22204120  | 22204469  | 350 |
| chr18 | 43146274  | 43146623  | 350 |
| chr14 | 1414415   | 1414764   | 350 |
| chr3  | 26146807  | 26147155  | 349 |
| chr19 | 54774884  | 54775232  | 349 |
| chr17 | 68153122  | 68153470  | 349 |
| chr26 | 50954094  | 50954441  | 348 |
| chr20 | 33681134  | 33681481  | 348 |
| chr26 | 37645691  | 37646036  | 346 |
| chr13 | 73994485  | 73994830  | 346 |
| chr25 | 3087886   | 3088230   | 345 |
| chr22 | 54125901  | 54126245  | 345 |
| chr24 | 40234832  | 40235174  | 343 |
| chr17 | 63406430  | 63406772  | 343 |
| chr10 | 68220917  | 68221259  | 343 |
| chr17 | 70310803  | 70311144  | 342 |
| chr13 | 41135891  | 41136232  | 342 |
| chr28 | 26413219  | 26413559  | 341 |
| chr26 | 23487889  | 23488229  | 341 |
| chr26 | 18186223  | 18186563  | 341 |
| chr18 | 18017907  | 18018247  | 341 |
| chr18 | 12450034  | 12450374  | 341 |
| chr13 | 74028381  | 74028721  | 341 |
| chr3  | 121489584 | 121489923 | 340 |
| chr7  | 14669510  | 14669848  | 339 |
| chr23 | 11017630  | 11017968  | 339 |
| chr2  | 135041010 | 135041348 | 339 |
| chr12 | 76555539  | 76555877  | 339 |
| chr18 | 38351164  | 38351501  | 338 |
| chr1  | 148009979 | 148010316 | 338 |

|       |           |           |     |
|-------|-----------|-----------|-----|
| chr1  | 132972723 | 132973060 | 338 |
| chr23 | 51444171  | 51444507  | 337 |
| chr26 | 41013190  | 41013525  | 336 |
| chr12 | 84191593  | 84191928  | 336 |
| chr4  | 67701524  | 67701857  | 334 |
| chr26 | 44453319  | 44453650  | 332 |
| chr24 | 60990976  | 60991307  | 332 |
| chr13 | 41517921  | 41518252  | 332 |
| chr5  | 111712902 | 111713232 | 331 |
| chr25 | 4635188   | 4635517   | 330 |
| chr10 | 20472033  | 20472362  | 330 |
| chr18 | 49940119  | 49940447  | 329 |
| chr13 | 73060253  | 73060581  | 329 |
| chr10 | 66945683  | 66946010  | 328 |
| chr10 | 66607183  | 66607510  | 328 |
| chr7  | 3975372   | 3975697   | 326 |
| chr19 | 43145478  | 43145803  | 326 |
| chr5  | 82116924  | 82117248  | 325 |
| chr11 | 12006595  | 12006919  | 325 |
| chr10 | 12977938  | 12978261  | 324 |
| chr22 | 1939053   | 1939375   | 323 |
| chr25 | 40207536  | 40207857  | 322 |
| chr2  | 135104425 | 135104746 | 322 |
| chr17 | 75046085  | 75046405  | 321 |
| chr15 | 75215917  | 75216237  | 321 |
| chr11 | 25653123  | 25653443  | 321 |
| chr24 | 24724191  | 24724510  | 320 |
| chrX  | 33523152  | 33523470  | 319 |
| chr6  | 121870196 | 121870513 | 318 |
| chr5  | 30400915  | 30401231  | 317 |
| chr21 | 66206741  | 66207057  | 317 |
| chr16 | 42897792  | 42898108  | 317 |
| chr11 | 2261899   | 2262214   | 316 |
| chr5  | 111841977 | 111842291 | 315 |
| chr17 | 53529779  | 53530091  | 313 |
| chr11 | 28461085  | 28461395  | 311 |
| chr5  | 28983105  | 28983413  | 309 |
| chr18 | 56824845  | 56825153  | 309 |
| chr11 | 2919877   | 2920185   | 309 |
| chr3  | 126936035 | 126936342 | 308 |
| chr18 | 49955256  | 49955563  | 308 |
| chr19 | 60448280  | 60448583  | 304 |
| chr19 | 56113871  | 56114173  | 303 |
| chr25 | 38337382  | 38337681  | 300 |
| chr18 | 11593485  | 11593784  | 300 |
| chr13 | 57617777  | 57618074  | 298 |
| chr21 | 13914155  | 13914451  | 297 |
| chr13 | 46429207  | 46429503  | 297 |
| chr2  | 138270752 | 138271047 | 296 |
| chr1  | 152246221 | 152246511 | 291 |

|       |           |           |     |
|-------|-----------|-----------|-----|
| chr7  | 13399363  | 13399651  | 289 |
| chr7  | 13105207  | 13105494  | 288 |
| chr3  | 112716020 | 112716307 | 288 |
| chr22 | 61438850  | 61439137  | 288 |
| chr18 | 7219973   | 7220260   | 288 |
| chr10 | 20475527  | 20475812  | 286 |
| chr19 | 40435932  | 40436214  | 283 |
| chr17 | 71966502  | 71966784  | 283 |
| chr13 | 46204349  | 46204630  | 282 |
| chr5  | 120097240 | 120097518 | 279 |
| chr29 | 38750465  | 38750742  | 278 |
| chr9  | 100077742 | 100078017 | 276 |
| chr21 | 19441284  | 19441555  | 272 |
| chr19 | 56568946  | 56569215  | 270 |
| chr5  | 111324036 | 111324302 | 267 |
| chr18 | 53310745  | 53311010  | 266 |
| chr23 | 26980096  | 26980360  | 265 |
| chr16 | 46843061  | 46843322  | 262 |
| chr12 | 32193334  | 32193595  | 262 |
| chr22 | 50708747  | 50709004  | 258 |
| chr28 | 27716967  | 27717206  | 240 |
| chr25 | 2077688   | 2077927   | 240 |
| chr2  | 117508991 | 117509226 | 236 |
| chr23 | 13446072  | 13446304  | 233 |
| chr2  | 139933506 | 139933727 | 222 |
| chr10 | 44579066  | 44579270  | 205 |
| chr3  | 126967009 | 126967639 | 631 |
| chr18 | 47798971  | 47799829  | 859 |
| chr5  | 120423883 | 120424500 | 618 |
| chr17 | 72897914  | 72898478  | 565 |
| chr9  | 104994027 | 104994692 | 666 |
| chr22 | 60223590  | 60224059  | 470 |
| chr10 | 17316357  | 17316853  | 497 |
| chr2  | 72873679  | 72874076  | 398 |
| chr19 | 28215069  | 28215443  | 375 |
| chr25 | 37459187  | 37459639  | 453 |
| chr7  | 37569439  | 37569951  | 513 |
| chr16 | 38776651  | 38777028  | 378 |
| chr1  | 74630940  | 74631625  | 686 |
| chr3  | 127650479 | 127650855 | 377 |
| chr26 | 43041582  | 43041963  | 382 |
| chr8  | 73865382  | 73866002  | 621 |
| chr27 | 11616097  | 11616634  | 538 |
| chr9  | 87764064  | 87764980  | 917 |
| chr8  | 73387028  | 73387387  | 360 |
| chr18 | 51173380  | 51173856  | 477 |
| chr4  | 89778282  | 89778700  | 419 |
| chr18 | 56816388  | 56816786  | 399 |
| chr23 | 43422029  | 43422367  | 339 |
| chr18 | 62465965  | 62466277  | 313 |

|       |               |           |      |
|-------|---------------|-----------|------|
| chr21 | 20638590      | 20638988  | 399  |
| chr1  | 153885006     | 153885379 | 374  |
| chr8  | 73825547      | 73826268  | 722  |
| chr1  | 86993086      | 86993499  | 414  |
| chr8  | 73521703      | 73522011  | 309  |
| chr21 | 31053327      | 31053721  | 395  |
| chr8  | 73783647      | 73783981  | 335  |
| chr6  | 5564150       | 5564402   | 253  |
| chr4  | 117400504     | 117401036 | 533  |
| chr8  | 73853216      | 73853741  | 526  |
| chr3  | 409267 409665 | 399       |      |
| chr10 | 68473779      | 68474077  | 299  |
| chr16 | 48701961      | 48702224  | 264  |
| chr25 | 1052593       | 1053719   | 1127 |
| chr11 | 99650696      | 99651788  | 1093 |
| chr20 | 45412603      | 45413693  | 1091 |
| chr5  | 10226024      | 10227091  | 1068 |
| chr3  | 22863431      | 22864424  | 994  |
| chr19 | 14998107      | 14998982  | 876  |
| chr23 | 31197708      | 31198577  | 870  |
| chr16 | 1621905       | 1622683   | 779  |
| chr18 | 53324734      | 53325490  | 757  |
| chr26 | 20376096      | 20376844  | 749  |
| chr18 | 11320701      | 11321435  | 735  |
| chr25 | 3036862       | 3037575   | 714  |
| chr8  | 80489591      | 80490302  | 712  |
| chr6  | 111013125     | 111013830 | 706  |
| chr13 | 80406875      | 80407541  | 667  |
| chr23 | 9456339       | 9456990   | 652  |
| chr7  | 57576993      | 57577628  | 636  |
| chr20 | 74020939      | 74021549  | 611  |
| chr4  | 72290250      | 72290826  | 577  |
| chr25 | 1970346       | 1970914   | 569  |
| chr4  | 6106520       | 6107075   | 556  |
| chr18 | 13558677      | 13559212  | 536  |
| chr1  | 51024673      | 51025206  | 534  |
| chr13 | 68202827      | 68203352  | 526  |
| chr1  | 110659629     | 110660152 | 524  |
| chr5  | 118151461     | 118151981 | 521  |
| chr25 | 1508143       | 1508651   | 509  |
| chr11 | 9228781       | 9229281   | 501  |
| chr24 | 35311675      | 35312174  | 500  |
| chr2  | 138569483     | 138569977 | 495  |
| chr3  | 105756053     | 105756542 | 490  |
| chr10 | 78656727      | 78657208  | 482  |
| chr5  | 121400691     | 121401147 | 457  |
| chr2  | 114197098     | 114197533 | 436  |
| chr25 | 37418001      | 37418426  | 426  |
| chr28 | 32820408      | 32820829  | 422  |
| chr7  | 46563021      | 46563433  | 413  |

|       |               |           |      |
|-------|---------------|-----------|------|
| chr19 | 44100768      | 44101174  | 407  |
| chr15 | 75842584      | 75842986  | 403  |
| chr13 | 57592824      | 57593225  | 402  |
| chr8  | 7606565       | 7606964   | 400  |
| chr17 | 66008482      | 66008880  | 399  |
| chr15 | 75662120      | 75662517  | 398  |
| chr3  | 106534985     | 106535377 | 393  |
| chr9  | 84269993      | 84270381  | 389  |
| chr4  | 124350946     | 124351327 | 382  |
| chr19 | 43157675      | 43158029  | 355  |
| chr14 | 7715572       | 7715922   | 351  |
| chr1  | 74629097      | 74629435  | 339  |
| chr5  | 28903067      | 28903399  | 333  |
| chr3  | 15789173      | 15789496  | 324  |
| chr1  | 1580005       | 1580319   | 315  |
| chr16 | 1105497       | 1105791   | 295  |
| chr15 | 22219910      | 22221404  | 1495 |
| chr14 | 1524433       | 1525635   | 1203 |
| chr26 | 21839546      | 21840608  | 1063 |
| chr3  | 29977389      | 29978444  | 1056 |
| chr6  | 62052330      | 62053307  | 978  |
| chr16 | 75656055      | 75656968  | 914  |
| chr7  | 19248182      | 19249093  | 912  |
| chr10 | 8522253       | 8523157   | 905  |
| chr7  | 70514474      | 70515343  | 870  |
| chr10 | 17139079      | 17139944  | 866  |
| chr4  | 121449131     | 121449961 | 831  |
| chr9  | 8645799       | 8646600   | 802  |
| chr16 | 817056 817853 | 798       |      |
| chr9  | 66534442      | 66535233  | 792  |
| chr12 | 30954672      | 30955420  | 749  |
| chr24 | 1217749       | 1218486   | 738  |
| chr8  | 116103051     | 116103785 | 735  |
| chr3  | 109740066     | 109740761 | 696  |
| chr19 | 52416572      | 52417247  | 676  |
| chr18 | 55195553      | 55196211  | 659  |
| chr2  | 111317538     | 111318191 | 654  |
| chr2  | 5177787       | 5178435   | 649  |
| chr18 | 49546570      | 49547215  | 646  |
| chr4  | 98483160      | 98483780  | 621  |
| chr18 | 11519320      | 11519938  | 619  |
| chr22 | 46581570      | 46582168  | 599  |
| chr15 | 81179292      | 81179883  | 592  |
| chr11 | 14178234      | 14178821  | 588  |
| chr10 | 104760696     | 104761283 | 588  |
| chr15 | 34582275      | 34582786  | 512  |
| chr23 | 27857093      | 27857583  | 491  |
| chr18 | 50854392      | 50854871  | 480  |
| chr23 | 11060376      | 11060851  | 476  |
| chr13 | 75532601      | 75533074  | 474  |

|       |           |           |     |
|-------|-----------|-----------|-----|
| chr24 | 65014302  | 65014744  | 443 |
| chr5  | 29187803  | 29188232  | 430 |
| chr20 | 8801536   | 8801964   | 429 |
| chr15 | 26896157  | 26896574  | 418 |
| chr11 | 92949555  | 92949965  | 411 |
| chr23 | 15800829  | 15801229  | 401 |
| chr5  | 30927001  | 30927399  | 399 |
| chr26 | 51589732  | 51590130  | 399 |
| chr20 | 3174647   | 3175045   | 399 |
| chr13 | 82708430  | 82708828  | 399 |
| chr7  | 18728438  | 18728835  | 398 |
| chr4  | 119333623 | 119334019 | 397 |
| chr13 | 59909805  | 59910192  | 388 |
| chr10 | 8537860   | 8538246   | 387 |
| chr21 | 69089413  | 69089785  | 373 |
| chr29 | 36693496  | 36693810  | 315 |
| chr27 | 11621348  | 11621563  | 216 |
| chr13 | 75672075  | 75672983  | 909 |
| chr15 | 25574905  | 25575802  | 898 |
| chr26 | 24585421  | 24586310  | 890 |
| chr19 | 33108161  | 33108950  | 790 |
| chr10 | 59997579  | 59998354  | 776 |
| chr2  | 74023365  | 74024127  | 763 |
| chr18 | 57615638  | 57616382  | 745 |
| chr19 | 55782602  | 55783340  | 739 |
| chr20 | 2011412   | 2012114   | 703 |
| chr25 | 33248270  | 33248940  | 671 |
| chr15 | 51658785  | 51659451  | 667 |
| chr21 | 9482416   | 9483077   | 662 |
| chr18 | 45968538  | 45969188  | 651 |
| chr7  | 29490604  | 29491248  | 645 |
| chr5  | 12504846  | 12505456  | 611 |
| chr20 | 74097056  | 74097665  | 610 |
| chr28 | 40399469  | 40400068  | 600 |
| chr4  | 121442883 | 121443475 | 593 |
| chr18 | 52974166  | 52974708  | 543 |
| chr8  | 73792160  | 73792696  | 537 |
| chr13 | 67076117  | 67076645  | 529 |
| chr5  | 28780566  | 28781085  | 520 |
| chr9  | 105513653 | 105514168 | 516 |
| chr9  | 104918684 | 104919181 | 498 |
| chr19 | 57258853  | 57259344  | 492 |
| chr11 | 10523664  | 10524127  | 464 |
| chr19 | 27385183  | 27385639  | 457 |
| chr26 | 44229306  | 44229756  | 451 |
| chr26 | 22277820  | 22278268  | 449 |
| chr2  | 130993653 | 130994082 | 430 |
| chr15 | 21335132  | 21335554  | 423 |
| chr10 | 8719006   | 8719426   | 421 |
| chr17 | 63447767  | 63448166  | 400 |

|       |           |           |      |
|-------|-----------|-----------|------|
| chr5  | 74439872  | 74440270  | 399  |
| chr22 | 12062774  | 12063172  | 399  |
| chr19 | 59536598  | 59536996  | 399  |
| chr19 | 45223478  | 45223876  | 399  |
| chr13 | 40588196  | 40588594  | 399  |
| chr5  | 40100740  | 40101137  | 398  |
| chr18 | 33567562  | 33567959  | 398  |
| chr8  | 5766958   | 5767352   | 395  |
| chr4  | 121562713 | 121563104 | 392  |
| chr27 | 35930828  | 35931215  | 388  |
| chr16 | 42146459  | 42146843  | 385  |
| chr29 | 51271057  | 51271430  | 374  |
| chr19 | 33118189  | 33119413  | 1225 |
| chr3  | 105771177 | 105772103 | 927  |
| chr8  | 29195383  | 29196239  | 857  |
| chr2  | 124206544 | 124207396 | 853  |
| chr21 | 20590591  | 20591290  | 700  |
| chr5  | 27465950  | 27466638  | 689  |
| chr17 | 70406762  | 70407384  | 623  |
| chr29 | 46923762  | 46924341  | 580  |
| chr26 | 48900342  | 48900897  | 556  |
| chr8  | 5347620   | 5348159   | 540  |
| chr23 | 52740803  | 52741340  | 538  |
| chr15 | 74569035  | 74569567  | 533  |
| chr5  | 122818748 | 122819270 | 523  |
| chr3  | 17481354  | 17481848  | 495  |
| chr28 | 44000081  | 44000574  | 494  |
| chr21 | 20696466  | 20696955  | 490  |
| chr12 | 84309675  | 84310157  | 483  |
| chr8  | 7694155   | 7694615   | 461  |
| chr25 | 1959102   | 1959541   | 440  |
| chr23 | 3310227   | 3310662   | 436  |
| chr2  | 115123453 | 115123872 | 420  |
| chr18 | 18733588  | 18734003  | 416  |
| chr12 | 82864621  | 82865023  | 403  |
| chr29 | 36383843  | 36384241  | 399  |
| chr17 | 70457846  | 70458244  | 399  |
| chr11 | 28286124  | 28286522  | 399  |
| chr19 | 40916666  | 40917063  | 398  |
| chr11 | 96075020  | 96075417  | 398  |
| chr27 | 35396684  | 35397080  | 397  |
| chr3  | 124138012 | 124138329 | 318  |
| chr7  | 16542431  | 16543298  | 868  |
| chr17 | 76311057  | 76311818  | 762  |
| chr13 | 70347206  | 70347943  | 738  |
| chr18 | 62613351  | 62613971  | 621  |
| chr28 | 25102651  | 25103262  | 612  |
| chr6  | 118508173 | 118508761 | 589  |
| chr22 | 45456078  | 45456635  | 558  |
| chr13 | 52537779  | 52538306  | 528  |



|       |               |           |     |
|-------|---------------|-----------|-----|
| chr13 | 9941304       | 9941827   | 524 |
| chr3  | 74471169      | 74471679  | 511 |
| chr29 | 51004246      | 51004747  | 502 |
| chr14 | 66271631      | 66272128  | 498 |
| chr27 | 35290451      | 35290937  | 487 |
| chr11 | 100881298     | 100881778 | 481 |
| chr13 | 74415286      | 74415761  | 476 |
| chr4  | 71606480      | 71606935  | 456 |
| chr15 | 28529002      | 28529447  | 446 |
| chr5  | 12282825      | 12283250  | 426 |
| chr8  | 77270748      | 77271167  | 420 |
| chr15 | 22436164      | 22436566  | 403 |
| chr18 | 18693129      | 18693529  | 401 |
| chr26 | 49021006      | 49021404  | 399 |
| chr17 | 5021299       | 5021697   | 399 |
| chr21 | 30788576      | 30788962  | 387 |
| chr24 | 65011798      | 65012168  | 371 |
| chr16 | 46842656      | 46843019  | 364 |
| chr13 | 63478451      | 63478814  | 364 |
| chr11 | 10700402      | 10700751  | 350 |
| chr19 | 52476496      | 52477220  | 725 |
| chr1  | 133456922     | 133457596 | 675 |
| chr27 | 851340 852009 | 670       |     |
| chr13 | 59705744      | 59706402  | 659 |
| chr13 | 75737808      | 75738432  | 625 |
| chr18 | 4031864       | 4032480   | 617 |
| chr4  | 122956394     | 122957006 | 613 |
| chr5  | 28718624      | 28719234  | 611 |
| chr19 | 20386487      | 20387059  | 573 |
| chr21 | 65544063      | 65544619  | 557 |
| chr5  | 120382363     | 120382892 | 530 |
| chr23 | 28599965      | 28600493  | 529 |
| chr10 | 17787271      | 17787788  | 518 |
| chr5  | 30470148      | 30470662  | 515 |
| chr12 | 82292181      | 82292612  | 432 |
| chr19 | 39966811      | 39967230  | 420 |
| chr16 | 61522785      | 61523204  | 420 |
| chr2  | 102761559     | 102761970 | 412 |
| chr17 | 66832181      | 66832589  | 409 |
| chr24 | 464121 464516 | 396       |     |
| chr20 | 62728925      | 62729308  | 384 |
| chr21 | 65208102      | 65208472  | 371 |
| chr7  | 45704824      | 45705191  | 368 |
| chr23 | 45978491      | 45978856  | 366 |
| chr5  | 113150719     | 113151082 | 364 |
| chr28 | 33813395      | 33813939  | 545 |
| chr13 | 73365436      | 73365965  | 530 |
| chr12 | 31967213      | 31967724  | 512 |
| chr17 | 73124296      | 73124755  | 460 |
| chr21 | 65800805      | 65801255  | 451 |

|       |               |           |     |
|-------|---------------|-----------|-----|
| chr22 | 60419823      | 60420270  | 448 |
| chr5  | 10194949      | 10195394  | 446 |
| chr28 | 33967035      | 33967480  | 446 |
| chr10 | 90923018      | 90923463  | 446 |
| chr5  | 121241851     | 121242271 | 421 |
| chr19 | 54694269      | 54694683  | 415 |
| chr15 | 37320473      | 37320884  | 412 |
| chr10 | 89492832      | 89493241  | 410 |
| chr8  | 28006101      | 28006477  | 377 |
| chr25 | 42245779      | 42246142  | 364 |
| chr4  | 46280113      | 46280450  | 338 |
| chr25 | 29291672      | 29291990  | 319 |
| chr7  | 21161233      | 21161921  | 689 |
| chr6  | 94869719      | 94870399  | 681 |
| chr5  | 111212600     | 111213276 | 677 |
| chr15 | 21056821      | 21057432  | 612 |
| chr4  | 34029545      | 34030143  | 599 |
| chr25 | 1333017       | 1333596   | 580 |
| chr18 | 13547111      | 13547670  | 560 |
| chr3  | 24793419      | 24793975  | 557 |
| chr8  | 65072636      | 65073180  | 545 |
| chr19 | 38311378      | 38311920  | 543 |
| chr24 | 40513281      | 40513822  | 542 |
| chr20 | 6628867       | 6629407   | 541 |
| chr23 | 17191646      | 17192166  | 521 |
| chr27 | 26007 26525   | 519       |     |
| chr7  | 44059478      | 44059993  | 516 |
| chr7  | 19884963      | 19885466  | 504 |
| chr10 | 91112279      | 91112773  | 495 |
| chr13 | 41020026      | 41020505  | 480 |
| chr3  | 11531907      | 11532385  | 479 |
| chr11 | 108406299     | 108406774 | 476 |
| chr28 | 30874511      | 30874968  | 458 |
| chr8  | 88617422      | 88617877  | 456 |
| chr15 | 419687 420141 | 455       |     |
| chr23 | 31192316      | 31192768  | 453 |
| chr19 | 43191054      | 43191503  | 450 |
| chr26 | 38237284      | 38237732  | 449 |
| chr19 | 59460986      | 59461432  | 447 |
| chr13 | 80831645      | 80832086  | 442 |
| chr1  | 144124332     | 144124773 | 442 |
| chr6  | 94980048      | 94980486  | 439 |
| chr26 | 37625134      | 37625570  | 437 |
| chr17 | 66513828      | 66514261  | 434 |
| chr19 | 46099045      | 46099476  | 432 |
| chr5  | 18730234      | 18730664  | 431 |
| chr7  | 5253199       | 5253626   | 428 |
| chr22 | 44855222      | 44855647  | 426 |
| chr26 | 37945129      | 37945550  | 422 |
| chr1  | 145355197     | 145355618 | 422 |

|       |               |           |     |
|-------|---------------|-----------|-----|
| chr7  | 37558302      | 37558719  | 418 |
| chr11 | 100343190     | 100343607 | 418 |
| chr21 | 56446411      | 56446823  | 413 |
| chr16 | 47407646      | 47408057  | 412 |
| chr24 | 834261 834670 | 410       |     |
| chr21 | 55733887      | 55734294  | 408 |
| chr19 | 44874518      | 44874925  | 408 |
| chrX  | 23347836      | 23348242  | 407 |
| chr25 | 37687802      | 37688208  | 407 |
| chr12 | 82630246      | 82630652  | 407 |
| chr26 | 43973887      | 43974291  | 405 |
| chr19 | 12575351      | 12575754  | 404 |
| chr29 | 34382167      | 34382568  | 402 |
| chr23 | 31064243      | 31064643  | 401 |
| chr22 | 48786504      | 48786904  | 401 |
| chr5  | 71675444      | 71675842  | 399 |
| chr27 | 35947069      | 35947467  | 399 |
| chr23 | 50741145      | 50741543  | 399 |
| chr2  | 79728199      | 79728597  | 399 |
| chr19 | 65245183      | 65245581  | 399 |
| chr19 | 30534412      | 30534810  | 399 |
| chr13 | 78421783      | 78422181  | 399 |
| chr13 | 70351950      | 70352348  | 399 |
| chr1  | 2720299       | 2720697   | 399 |
| chr19 | 54167178      | 54167575  | 398 |
| chr3  | 15402233      | 15402629  | 397 |
| chr23 | 31178060      | 31178456  | 397 |
| chr2  | 126882407     | 126882803 | 397 |
| chr8  | 73752834      | 73753229  | 396 |
| chr20 | 19965525      | 19965920  | 396 |
| chr6  | 115767618     | 115768012 | 395 |
| chr3  | 25718158      | 25718552  | 395 |
| chr6  | 59497948      | 59498341  | 394 |
| chr2  | 134689987     | 134690379 | 393 |
| chr13 | 53693747      | 53694138  | 392 |
| chr15 | 75216244      | 75216634  | 391 |
| chr10 | 43844491      | 43844880  | 390 |
| chr13 | 11411041      | 11411429  | 389 |
| chr6  | 65878304      | 65878690  | 387 |
| chr3  | 4150438       | 4150824   | 387 |
| chr14 | 5924111       | 5924496   | 386 |
| chr19 | 44872377      | 44872761  | 385 |
| chr18 | 56770386      | 56770770  | 385 |
| chr16 | 38937912      | 38938296  | 385 |
| chr7  | 108421526     | 108421909 | 384 |
| chr1  | 152259459     | 152259842 | 384 |
| chr8  | 74147908      | 74148289  | 382 |
| chr29 | 49347424      | 49347804  | 381 |
| chr21 | 67979436      | 67979816  | 381 |
| chr15 | 28633032      | 28633411  | 380 |

|       |           |           |     |
|-------|-----------|-----------|-----|
| chr24 | 43700246  | 43700623  | 378 |
| chr16 | 39571346  | 39571723  | 378 |
| chr12 | 82682488  | 82682863  | 376 |
| chr18 | 33106527  | 33106899  | 373 |
| chr7  | 3019325   | 3019696   | 372 |
| chr18 | 56663555  | 56663926  | 372 |
| chr23 | 15888238  | 15888608  | 371 |
| chr8  | 67691631  | 67692000  | 370 |
| chr5  | 86514847  | 86515214  | 368 |
| chr22 | 30075933  | 30076299  | 367 |
| chr5  | 120723356 | 120723720 | 365 |
| chr15 | 30412221  | 30412585  | 365 |
| chr4  | 85445208  | 85445570  | 363 |
| chr5  | 33318700  | 33319060  | 361 |
| chr8  | 63740563  | 63740922  | 360 |
| chr19 | 45182008  | 45182367  | 360 |
| chr19 | 41371639  | 41371998  | 360 |
| chr19 | 20313694  | 20314052  | 359 |
| chr16 | 47528853  | 47529210  | 358 |
| chr27 | 34789273  | 34789626  | 354 |
| chr29 | 17871543  | 17871894  | 352 |
| chr25 | 3068317   | 3068668   | 352 |
| chr18 | 26052650  | 26053000  | 351 |
| chr15 | 75240476  | 75240825  | 350 |
| chr21 | 64463702  | 64464049  | 348 |
| chr8  | 24695251  | 24695596  | 346 |
| chr13 | 54824836  | 54825180  | 345 |
| chr10 | 15000339  | 15000680  | 342 |
| chr22 | 48787702  | 48788041  | 340 |
| chr10 | 76573695  | 76574029  | 335 |
| chr16 | 47551582  | 47551910  | 329 |
| chr9  | 74409086  | 74409411  | 326 |
| chr1  | 132113222 | 132113545 | 324 |
| chr12 | 36279435  | 36279757  | 323 |
| chr26 | 43038866  | 43039186  | 321 |
| chr22 | 50749614  | 50749933  | 320 |
| chr19 | 60461589  | 60461905  | 317 |
| chr21 | 58718307  | 58718621  | 315 |
| chr9  | 90333691  | 90334004  | 314 |
| chr25 | 22549322  | 22549625  | 304 |
| chr7  | 51444040  | 51444342  | 303 |
| chr25 | 29070124  | 29070424  | 301 |
| chr2  | 125489042 | 125489342 | 301 |
| chr16 | 71880846  | 71881145  | 300 |
| chr2  | 111321893 | 111322187 | 295 |
| chr16 | 68550304  | 68550598  | 295 |
| chr12 | 82751610  | 82751904  | 295 |
| chr14 | 66274764  | 66275057  | 294 |
| chr6  | 121760727 | 121761018 | 292 |
| chr20 | 74024717  | 74025008  | 292 |

|       |           |           |      |
|-------|-----------|-----------|------|
| chr16 | 71131136  | 71131424  | 289  |
| chr5  | 28699707  | 28699994  | 288  |
| chr25 | 2538807   | 2539089   | 283  |
| chr11 | 84625991  | 84626260  | 270  |
| chr26 | 44954085  | 44954349  | 265  |
| chr19 | 54618573  | 54618831  | 259  |
| chr19 | 12325523  | 12325776  | 254  |
| chr13 | 62465600  | 62465847  | 248  |
| chr17 | 70299874  | 70301146  | 1273 |
| chr13 | 74403623  | 74404522  | 900  |
| chr29 | 30637159  | 30637767  | 609  |
| chr2  | 115040814 | 115041377 | 564  |
| chr17 | 73126927  | 73127447  | 521  |
| chr3  | 105764634 | 105765106 | 473  |
| chr15 | 28048266  | 28048723  | 458  |
| chr16 | 48034651  | 48035056  | 406  |
| chr5  | 28760679  | 28761519  | 841  |
| chr27 | 15408659  | 15409471  | 813  |
| chr21 | 6523380   | 6524059   | 680  |
| chr14 | 63520857  | 63521596  | 740  |
| chr17 | 70393017  | 70393636  | 620  |
| chr16 | 48804788  | 48805352  | 565  |
| chr24 | 1216918   | 1217391   | 474  |
| chr3  | 119673588 | 119674060 | 473  |
| chr22 | 44839507  | 44839906  | 400  |
| chr5  | 120055214 | 120056229 | 1016 |
| chr7  | 42537151  | 42537765  | 615  |
| chr20 | 73819271  | 73819761  | 491  |
| chr15 | 25506714  | 25507178  | 465  |
| chr8  | 73344682  | 73345593  | 912  |
| chr21 | 30787709  | 30788501  | 793  |
| chr19 | 24673108  | 24673836  | 729  |
| chr23 | 52648260  | 52648530  | 271  |
| chr2  | 111233505 | 111234400 | 896  |
| chr7  | 19199967  | 19200609  | 643  |
| chr5  | 51815635  | 51816113  | 479  |
| chr23 | 15094068  | 15094486  | 419  |
| chr27 | 14403977  | 14404356  | 380  |
| chr11 | 107229497 | 107230160 | 664  |
| chr25 | 2993254   | 2993759   | 506  |
| chr23 | 18662428  | 18662871  | 444  |
| chr21 | 65213656  | 65214484  | 829  |
| chr13 | 41661387  | 41661829  | 443  |
| chr6  | 115902563 | 115902961 | 399  |
| chr21 | 9436265   | 9436663   | 399  |
| chr5  | 121334162 | 121335035 | 874  |
| chr7  | 46467012  | 46467612  | 601  |
| chr2  | 135167976 | 135168417 | 442  |
| chr12 | 81927660  | 81928004  | 345  |
| chr8  | 24215661  | 24215985  | 325  |

|       |               |           |     |
|-------|---------------|-----------|-----|
| chr22 | 60009991      | 60010369  | 379 |
| chr14 | 35501633      | 35502027  | 395 |
| chr4  | 95775939      | 95776310  | 372 |
| chr4  | 87711943      | 87712296  | 354 |
| chr13 | 72863541      | 72863858  | 318 |
| chr7  | 81254492      | 81255030  | 539 |
| chr15 | 25587673      | 25588199  | 527 |
| chr13 | 41669042      | 41669564  | 523 |
| chr18 | 54192107      | 54192599  | 493 |
| chr5  | 115823992     | 115824452 | 461 |
| chr13 | 60753841      | 60754300  | 460 |
| chr17 | 53969817      | 53970242  | 426 |
| chr3  | 116020587     | 116021003 | 417 |
| chr17 | 47100156      | 47100566  | 411 |
| chr6  | 74439333      | 74439730  | 398 |
| chr11 | 4356935       | 4357329   | 395 |
| chr5  | 60464442      | 60464834  | 393 |
| chr6  | 108689185     | 108689569 | 385 |
| chr10 | 87162979      | 87163363  | 385 |
| chr23 | 8866991       | 8867372   | 382 |
| chr19 | 45540403      | 45540783  | 381 |
| chr19 | 41233685      | 41234063  | 379 |
| chr14 | 17587736      | 17588109  | 374 |
| chr19 | 40427516      | 40427871  | 356 |
| chr22 | 39856209      | 39856530  | 322 |
| chr26 | 14574327      | 14574647  | 321 |
| chr16 | 47104455      | 47104760  | 306 |
| chr13 | 6864406       | 6864703   | 298 |
| chr11 | 10448691      | 10448980  | 290 |
| chr16 | 39522630      | 39522917  | 288 |
| chr16 | 75232124      | 75232406  | 283 |
| chr15 | 53624837      | 53625117  | 281 |
| chr7  | 14292883      | 14293162  | 280 |
| chr26 | 25111926      | 25112893  | 968 |
| chr7  | 81425358      | 81425900  | 543 |
| chr24 | 20362576      | 20363181  | 606 |
| chr1  | 1617172       | 1617629   | 458 |
| chr10 | 21428614      | 21429041  | 428 |
| chr13 | 140765 141410 | 646       |     |
| chr29 | 49127544      | 49128053  | 510 |
| chr19 | 23728588      | 23729095  | 508 |
| chr18 | 49474882      | 49475252  | 371 |
| chr8  | 73881958      | 73882260  | 303 |
| chr18 | 38355631      | 38356020  | 390 |
| chr11 | 100922721     | 100923302 | 582 |
| chr15 | 28632596      | 28632926  | 331 |
| chr3  | 36018306      | 36018966  | 661 |
| chr3  | 111642427     | 111642838 | 412 |
| chr17 | 64332812      | 64333228  | 417 |
| chr2  | 135588820     | 135589211 | 392 |

|       |               |           |      |
|-------|---------------|-----------|------|
| chr10 | 89507039      | 89507572  | 534  |
| chr23 | 17509781      | 17510249  | 469  |
| chr16 | 71665732      | 71666135  | 404  |
| chr1  | 45804101      | 45804429  | 329  |
| chr25 | 12710802      | 12711099  | 298  |
| chr25 | 30457679      | 30457971  | 293  |
| chr21 | 18882521      | 18882805  | 285  |
| chr18 | 11360521      | 11361385  | 865  |
| chr11 | 6844609       | 6845007   | 399  |
| chr27 | 11622429      | 11622699  | 271  |
| chr6  | 69751902      | 69753570  | 1669 |
| chr19 | 39105072      | 39106472  | 1401 |
| chr24 | 58646277      | 58647652  | 1376 |
| chr13 | 54763183      | 54764546  | 1364 |
| chr13 | 75614828      | 75616175  | 1348 |
| chr19 | 59459501      | 59460829  | 1329 |
| chr29 | 49033639      | 49034949  | 1311 |
| chr24 | 801011 802311 | 1301      |      |
| chr22 | 5344506       | 5345776   | 1271 |
| chr10 | 20965813      | 20967080  | 1268 |
| chr11 | 98331895      | 98333110  | 1216 |
| chr24 | 59603324      | 59604480  | 1157 |
| chr3  | 22957987      | 22959142  | 1156 |
| chr23 | 51913647      | 51914800  | 1154 |
| chr4  | 6109185       | 6110324   | 1140 |
| chr26 | 39257722      | 39258837  | 1116 |
| chr22 | 16355654      | 16356754  | 1101 |
| chr10 | 72466066      | 72467150  | 1085 |
| chr16 | 13948000      | 13949067  | 1068 |
| chr4  | 69934770      | 69935831  | 1062 |
| chr2  | 134959122     | 134960181 | 1060 |
| chr18 | 55834938      | 55835992  | 1055 |
| chr5  | 29944716      | 29945768  | 1053 |
| chr21 | 68959809      | 68960827  | 1019 |
| chr13 | 75631042      | 75632040  | 999  |
| chr26 | 14894512      | 14895503  | 992  |
| chr13 | 62036216      | 62037202  | 987  |
| chr10 | 32476699      | 32477665  | 967  |
| chr16 | 47448499      | 47449462  | 964  |
| chr2  | 126084502     | 126085456 | 955  |
| chr2  | 74027063      | 74028015  | 953  |
| chr26 | 22210573      | 22211522  | 950  |
| chr19 | 38760982      | 38761930  | 949  |
| chr8  | 80995669      | 80996610  | 942  |
| chr18 | 33698698      | 33699632  | 935  |
| chr5  | 91868177      | 91869109  | 933  |
| chr1  | 146409769     | 146410701 | 933  |
| chr1  | 123074095     | 123075020 | 926  |
| chr21 | 19204558      | 19205476  | 919  |
| chr12 | 83824881      | 83825794  | 914  |

|       |           |           |     |
|-------|-----------|-----------|-----|
| chr5  | 112900635 | 112901535 | 901 |
| chr12 | 10752336  | 10753231  | 896 |
| chr16 | 47259497  | 47260385  | 889 |
| chr5  | 115214627 | 115215511 | 885 |
| chr19 | 37701995  | 37702879  | 885 |
| chr18 | 47702207  | 47703082  | 876 |
| chr19 | 29771094  | 29771966  | 873 |
| chr13 | 55716980  | 55717848  | 869 |
| chr2  | 132443560 | 132444424 | 865 |
| chr29 | 50310002  | 50310860  | 859 |
| chr2  | 111881072 | 111881927 | 856 |
| chr6  | 63170911  | 63171761  | 851 |
| chr24 | 35308536  | 35309381  | 846 |
| chr18 | 37023682  | 37024525  | 844 |
| chr11 | 105986518 | 105987359 | 842 |
| chr17 | 76294166  | 76295006  | 841 |
| chr15 | 21511733  | 21512573  | 841 |
| chr13 | 75746783  | 75747621  | 839 |
| chr18 | 45986379  | 45987216  | 838 |
| chr11 | 21642642  | 21643466  | 825 |
| chr18 | 56944979  | 56945797  | 819 |
| chr6  | 45443085  | 45443899  | 815 |
| chr16 | 47040711  | 47041522  | 812 |
| chr18 | 63769161  | 63769968  | 808 |
| chr2  | 49414983  | 49415789  | 807 |
| chr17 | 76290082  | 76290885  | 804 |
| chr10 | 12113886  | 12114689  | 804 |
| chr28 | 34178495  | 34179297  | 803 |
| chr18 | 56944085  | 56944885  | 801 |
| chr7  | 42336822  | 42337621  | 800 |
| chr11 | 84622816  | 84623608  | 793 |
| chr28 | 3538685   | 3539476   | 792 |
| chr29 | 41855919  | 41856708  | 790 |
| chr16 | 40611921  | 40612709  | 789 |
| chr17 | 72344234  | 72345021  | 788 |
| chr23 | 19803513  | 19804294  | 782 |
| chr8  | 7841445   | 7842222   | 778 |
| chr20 | 67487568  | 67488343  | 776 |
| chr5  | 112133677 | 112134450 | 774 |
| chr19 | 64688416  | 64689187  | 772 |
| chr17 | 74567231  | 74567999  | 769 |
| chr11 | 106254345 | 106255113 | 769 |
| chr10 | 21949521  | 21950289  | 769 |
| chr4  | 30810217  | 30810983  | 767 |
| chr16 | 47263104  | 47263870  | 767 |
| chr25 | 3180277   | 3181042   | 766 |
| chr19 | 29097703  | 29098465  | 763 |
| chr20 | 75030522  | 75031282  | 761 |
| chr19 | 32590296  | 32591053  | 758 |
| chr12 | 32160149  | 32160906  | 758 |



|       |               |           |     |
|-------|---------------|-----------|-----|
| chrX  | 3014603       | 3015358   | 756 |
| chr10 | 17311197      | 17311952  | 756 |
| chr23 | 18795843      | 18796597  | 755 |
| chr7  | 18946836      | 18947589  | 754 |
| chr19 | 14074051      | 14074803  | 753 |
| chr18 | 1542630       | 1543380   | 751 |
| chr14 | 40161694      | 40162444  | 751 |
| chr21 | 64868796      | 64869545  | 750 |
| chr15 | 58006543      | 58007291  | 749 |
| chr29 | 31976194      | 31976941  | 748 |
| chr3  | 105730107     | 105730851 | 745 |
| chr12 | 36451790      | 36452533  | 744 |
| chr26 | 37883768      | 37884509  | 742 |
| chr21 | 6462357       | 6463097   | 741 |
| chr3  | 17479123      | 17479862  | 740 |
| chr24 | 59293974      | 59294712  | 739 |
| chr2  | 130871713     | 130872451 | 739 |
| chr6  | 105588625     | 105589362 | 738 |
| chr12 | 32177300      | 32178036  | 737 |
| chr14 | 40094397      | 40095132  | 736 |
| chr5  | 113184939     | 113185673 | 735 |
| chr3  | 115466634     | 115467368 | 735 |
| chr12 | 68232786      | 68233520  | 735 |
| chr8  | 73094510      | 73095243  | 734 |
| chr5  | 125495099     | 125495832 | 734 |
| chr3  | 22586793      | 22587525  | 733 |
| chr13 | 58892743      | 58893474  | 732 |
| chr4  | 121506486     | 121507214 | 729 |
| chr15 | 3226447       | 3227175   | 729 |
| chr6  | 38120521      | 38121247  | 727 |
| chr12 | 32468922      | 32469648  | 727 |
| chrX  | 13636734      | 13637458  | 725 |
| chr4  | 33880187      | 33880911  | 725 |
| chr2  | 123024366     | 123025088 | 723 |
| chr28 | 26781103      | 26781824  | 722 |
| chr25 | 44035210      | 44035930  | 721 |
| chr13 | 40582025      | 40582744  | 720 |
| chr2  | 136725497     | 136726214 | 718 |
| chr19 | 27383851      | 27384564  | 714 |
| chr19 | 14043744      | 14044457  | 714 |
| chr29 | 30029533      | 30030243  | 711 |
| chr16 | 39514548      | 39515257  | 710 |
| chr20 | 73276833      | 73277541  | 709 |
| chr19 | 33129771      | 33130479  | 709 |
| chr5  | 50537350      | 50538054  | 705 |
| chr5  | 30511639      | 30512341  | 703 |
| chr29 | 48715342      | 48716043  | 702 |
| chr13 | 55118269      | 55118970  | 702 |
| chr11 | 304454 305151 | 698       |     |
| chr14 | 72313989      | 72314684  | 696 |

|       |               |           |     |
|-------|---------------|-----------|-----|
| chr9  | 106000942     | 106001635 | 694 |
| chr22 | 59893412      | 59894105  | 694 |
| chr5  | 32844448      | 32845140  | 693 |
| chr24 | 60869765      | 60870457  | 693 |
| chr25 | 39526942      | 39527633  | 692 |
| chr5  | 80747758      | 80748447  | 690 |
| chr23 | 15861827      | 15862515  | 689 |
| chr13 | 75831120      | 75831807  | 688 |
| chr5  | 116927994     | 116928680 | 687 |
| chr12 | 54231677      | 54232363  | 687 |
| chr3  | 111184973     | 111185656 | 684 |
| chr15 | 24393290      | 24393971  | 682 |
| chr14 | 959041 959719 | 679       |     |
| chr19 | 51906610      | 51907287  | 678 |
| chr19 | 40506921      | 40507598  | 678 |
| chr1  | 82163796      | 82164472  | 677 |
| chr18 | 33102661      | 33103336  | 676 |
| chr10 | 21133201      | 21133876  | 676 |
| chr13 | 57576777      | 57577450  | 674 |
| chr9  | 52408970      | 52409642  | 673 |
| chr1  | 148008850     | 148009521 | 672 |
| chr22 | 16382181      | 16382849  | 669 |
| chr12 | 3680605       | 3681271   | 667 |
| chr10 | 22479729      | 22480395  | 667 |
| chr18 | 9805186       | 9805850   | 665 |
| chr11 | 96167928      | 96168592  | 665 |
| chr3  | 8757636       | 8758299   | 664 |
| chr5  | 111211267     | 111211929 | 663 |
| chr21 | 39977351      | 39978012  | 662 |
| chr18 | 14678821      | 14679479  | 659 |
| chr12 | 36417032      | 36417689  | 658 |
| chr29 | 51166723      | 51167377  | 655 |
| chr9  | 51624654      | 51625305  | 652 |
| chr7  | 3019750       | 3020401   | 652 |
| chr26 | 21826090      | 21826741  | 652 |
| chr27 | 17893540      | 17894190  | 651 |
| chr19 | 8939020       | 8939669   | 650 |
| chr17 | 57524122      | 57524771  | 650 |
| chr26 | 38227840      | 38228487  | 648 |
| chr21 | 25082753      | 25083400  | 648 |
| chr4  | 121415439     | 121416085 | 647 |
| chr8  | 1345031       | 1345676   | 646 |
| chr18 | 43451496      | 43452140  | 645 |
| chr13 | 14439637      | 14440280  | 644 |
| chr20 | 67503288      | 67503930  | 643 |
| chr11 | 81753201      | 81753843  | 643 |
| chr7  | 4685104       | 4685745   | 642 |
| chr3  | 123667603     | 123668243 | 641 |
| chr4  | 106593466     | 106594104 | 639 |
| chr25 | 14680824      | 14681462  | 639 |

|       |           |           |     |
|-------|-----------|-----------|-----|
| chr11 | 100887970 | 100888606 | 637 |
| chr8  | 80180732  | 80181367  | 636 |
| chr18 | 55589628  | 55590263  | 636 |
| chr5  | 113235692 | 113236326 | 635 |
| chr16 | 47971314  | 47971948  | 635 |
| chr13 | 77242217  | 77242850  | 634 |
| chr7  | 18369800  | 18370431  | 632 |
| chr17 | 12567962  | 12568593  | 632 |
| chr14 | 2889124   | 2889755   | 632 |
| chr3  | 105767151 | 105767780 | 630 |
| chr3  | 29849498  | 29850126  | 629 |
| chr19 | 51673738  | 51674366  | 629 |
| chr19 | 8473568   | 8474195   | 628 |
| chr19 | 7789387   | 7790013   | 627 |
| chr28 | 41022034  | 41022659  | 626 |
| chr4  | 121740889 | 121741513 | 625 |
| chr16 | 2446734   | 2447358   | 625 |
| chr11 | 75149794  | 75150418  | 625 |
| chr3  | 105189199 | 105189820 | 622 |
| chr5  | 36609014  | 36609634  | 621 |
| chr1  | 123111072 | 123111692 | 621 |
| chr15 | 42679572  | 42680190  | 619 |
| chr13 | 11407283  | 11407901  | 619 |
| chr7  | 36639171  | 36639788  | 618 |
| chr21 | 20693067  | 20693683  | 617 |
| chr11 | 96182723  | 96183339  | 617 |
| chr5  | 95941416  | 95942031  | 616 |
| chr25 | 37216844  | 37217459  | 616 |
| chr16 | 38721925  | 38722540  | 616 |
| chr6  | 40947575  | 40948189  | 615 |
| chr1  | 101590579 | 101591192 | 614 |
| chr2  | 130994154 | 130994766 | 613 |
| chr3  | 23070694  | 23071304  | 611 |
| chr2  | 131838677 | 131839287 | 611 |
| chr8  | 73489544  | 73490153  | 610 |
| chr13 | 79710862  | 79711471  | 610 |
| chr11 | 30924358  | 30924967  | 610 |
| chr21 | 65790476  | 65791082  | 607 |
| chr23 | 18434535  | 18435140  | 606 |
| chr4  | 66882936  | 66883540  | 605 |
| chr3  | 82607468  | 82608072  | 605 |
| chr8  | 102177341 | 102177943 | 603 |
| chr24 | 60607835  | 60608436  | 602 |
| chr19 | 38556582  | 38557183  | 602 |
| chr23 | 44801846  | 44802444  | 599 |
| chr19 | 58847841  | 58848439  | 599 |
| chr19 | 54165499  | 54166096  | 598 |
| chr19 | 62074454  | 62075050  | 597 |
| chr3  | 112903598 | 112904193 | 596 |
| chr19 | 58731385  | 58731980  | 596 |

|       |           |           |     |
|-------|-----------|-----------|-----|
| chr11 | 99191872  | 99192467  | 596 |
| chr8  | 52924544  | 52925138  | 595 |
| chr23 | 18825853  | 18826446  | 594 |
| chr12 | 58682656  | 58683249  | 594 |
| chr16 | 60776094  | 60776686  | 593 |
| chr29 | 34892188  | 34892779  | 592 |
| chr16 | 59068851  | 59069442  | 592 |
| chr9  | 104524332 | 104524922 | 591 |
| chr12 | 31316763  | 31317352  | 590 |
| chr19 | 39837043  | 39837631  | 589 |
| chr13 | 66805839  | 66806426  | 588 |
| chr23 | 10352749  | 10353335  | 587 |
| chr7  | 43751449  | 43752034  | 586 |
| chr4  | 79659661  | 79660245  | 585 |
| chr3  | 105709743 | 105710327 | 585 |
| chr3  | 88251678  | 88252262  | 585 |
| chr7  | 19283537  | 19284120  | 584 |
| chr8  | 108826661 | 108827243 | 583 |
| chr2  | 133428276 | 133428858 | 583 |
| chr18 | 23608687  | 23609269  | 583 |
| chr29 | 51964503  | 51965084  | 582 |
| chr25 | 7032152   | 7032732   | 581 |
| chr14 | 34089418  | 34089996  | 579 |
| chr27 | 40619443  | 40620018  | 576 |
| chr27 | 29599672  | 29600247  | 576 |
| chr19 | 20387282  | 20387855  | 574 |
| chr3  | 118031530 | 118032102 | 573 |
| chr10 | 13578796  | 13579368  | 573 |
| chr1  | 123138865 | 123139434 | 570 |
| chr11 | 92467080  | 92467648  | 569 |
| chr21 | 47612402  | 47612969  | 568 |
| chr4  | 68275598  | 68276164  | 567 |
| chr10 | 8532531   | 8533096   | 566 |
| chr18 | 24585487  | 24586051  | 565 |
| chr11 | 84530465  | 84531029  | 565 |
| chr3  | 116022957 | 116023519 | 563 |
| chr27 | 35440773  | 35441335  | 563 |
| chr22 | 9612434   | 9612996   | 563 |
| chr10 | 17100872  | 17101434  | 563 |
| chr10 | 12130119  | 12130681  | 563 |
| chr2  | 135626725 | 135627286 | 562 |
| chr15 | 36411955  | 36412516  | 562 |
| chr23 | 15078478  | 15079038  | 561 |
| chr2  | 136622530 | 136623090 | 561 |
| chr17 | 63170151  | 63170711  | 561 |
| chr26 | 51440464  | 51441023  | 560 |
| chr21 | 67771625  | 67772184  | 560 |
| chr19 | 46895599  | 46896158  | 560 |
| chrX  | 7892315   | 7892873   | 559 |
| chr3  | 114221351 | 114221909 | 559 |

|       |           |           |     |
|-------|-----------|-----------|-----|
| chr29 | 9464896   | 9465452   | 557 |
| chr11 | 108370038 | 108370594 | 557 |
| chr4  | 71683956  | 71684511  | 556 |
| chr18 | 7810565   | 7811120   | 556 |
| chr23 | 27838022  | 27838576  | 555 |
| chr13 | 57775395  | 57775949  | 555 |
| chr9  | 21982284  | 21982837  | 554 |
| chr19 | 58983556  | 58984108  | 553 |
| chr15 | 24011233  | 24011785  | 553 |
| chr5  | 120688831 | 120689382 | 552 |
| chr26 | 51367653  | 51368203  | 551 |
| chr24 | 44247810  | 44248360  | 551 |
| chr2  | 135169354 | 135169904 | 551 |
| chr16 | 41498982  | 41499532  | 551 |
| chr5  | 125491770 | 125492319 | 550 |
| chr3  | 74468647  | 74469196  | 550 |
| chr7  | 1686040   | 1686588   | 549 |
| chr5  | 113194717 | 113195264 | 548 |
| chr3  | 126842800 | 126843347 | 548 |
| chr19 | 46718172  | 46718719  | 548 |
| chr5  | 78721668  | 78722213  | 546 |
| chr1  | 76369958  | 76370502  | 545 |
| chr14 | 54198914  | 54199456  | 543 |
| chr12 | 31980352  | 31980894  | 543 |
| chr13 | 60024689  | 60025229  | 541 |
| chr29 | 5408934   | 5409473   | 540 |
| chr19 | 60681798  | 60682337  | 540 |
| chr14 | 40082030  | 40082569  | 540 |
| chr12 | 20793669  | 20794208  | 540 |
| chr23 | 10543689  | 10544227  | 539 |
| chr17 | 63106561  | 63107099  | 539 |
| chr11 | 105974636 | 105975173 | 538 |
| chr10 | 12120288  | 12120824  | 537 |
| chr19 | 43190394  | 43190928  | 535 |
| chr11 | 10772027  | 10772560  | 534 |
| chr3  | 106548211 | 106548742 | 532 |
| chr2  | 139211059 | 139211590 | 532 |
| chr16 | 46967136  | 46967667  | 532 |
| chr3  | 95748797  | 95749327  | 531 |
| chr10 | 90927989  | 90928518  | 530 |
| chr17 | 44041290  | 44041818  | 529 |
| chr21 | 20623916  | 20624443  | 528 |
| chr14 | 1577874   | 1578401   | 528 |
| chr18 | 45977012  | 45977538  | 527 |
| chr18 | 12726308  | 12726834  | 527 |
| chr13 | 59000313  | 59000838  | 526 |
| chr9  | 66206522  | 66207045  | 524 |
| chr16 | 59041230  | 59041753  | 524 |
| chr12 | 54227166  | 54227689  | 524 |
| chr15 | 28620308  | 28620830  | 523 |

|       |           |           |     |
|-------|-----------|-----------|-----|
| chr11 | 100922189 | 100922710 | 522 |
| chr5  | 34001746  | 34002266  | 521 |
| chr16 | 47599964  | 47600484  | 521 |
| chr10 | 19510688  | 19511207  | 520 |
| chr29 | 34257538  | 34258056  | 519 |
| chr24 | 31247578  | 31248095  | 518 |
| chr18 | 55587412  | 55587929  | 518 |
| chr20 | 3177502   | 3178018   | 517 |
| chr3  | 22931574  | 22932088  | 515 |
| chr25 | 22146750  | 22147264  | 515 |
| chr2  | 139599647 | 139600161 | 515 |
| chr19 | 38568205  | 38568719  | 515 |
| chr3  | 33125004  | 33125516  | 513 |
| chr9  | 104804359 | 104804870 | 512 |
| chr13 | 57590536  | 57591047  | 512 |
| chr4  | 116982099 | 116982609 | 511 |
| chr3  | 124522634 | 124523144 | 511 |
| chr25 | 37800887  | 37801397  | 511 |
| chr23 | 43311038  | 43311548  | 511 |
| chr18 | 11191525  | 11192034  | 510 |
| chr17 | 75719618  | 75720127  | 510 |
| chr17 | 69309805  | 69310314  | 510 |
| chr1  | 9073300   | 9073806   | 507 |
| chr25 | 1048462   | 1048967   | 506 |
| chr21 | 67966687  | 67967192  | 506 |
| chr2  | 99371712  | 99372217  | 506 |
| chrX  | 10878996  | 10879498  | 503 |
| chr15 | 42517361  | 42517862  | 502 |
| chr3  | 29281560  | 29282060  | 501 |
| chr16 | 49378894  | 49379394  | 501 |
| chr23 | 31171054  | 31171553  | 500 |
| chr19 | 40505067  | 40505566  | 500 |
| chrX  | 54351575  | 54352073  | 499 |
| chr8  | 78839056  | 78839552  | 497 |
| chrX  | 13136182  | 13136677  | 496 |
| chr4  | 123205133 | 123205628 | 496 |
| chr2  | 65517253  | 65517748  | 496 |
| chr18 | 12448702  | 12449197  | 496 |
| chr15 | 28603105  | 28603600  | 496 |
| chr10 | 23584788  | 23585283  | 496 |
| chr8  | 112056283 | 112056777 | 495 |
| chr4  | 121463326 | 121463820 | 495 |
| chr12 | 20911769  | 20912263  | 495 |
| chr1  | 1468866   | 1469360   | 495 |
| chr24 | 60768790  | 60769283  | 494 |
| chr19 | 44076205  | 44076697  | 493 |
| chr29 | 46667105  | 46667596  | 492 |
| chr25 | 43469218  | 43469709  | 492 |
| chr12 | 84016998  | 84017489  | 492 |
| chr19 | 59368966  | 59369456  | 491 |

|       |               |           |     |
|-------|---------------|-----------|-----|
| chr18 | 22691835      | 22692325  | 491 |
| chr13 | 60856550      | 60857040  | 491 |
| chr22 | 50790325      | 50790814  | 490 |
| chr13 | 41677079      | 41677568  | 490 |
| chr21 | 27813690      | 27814178  | 489 |
| chr18 | 42955912      | 42956400  | 489 |
| chr9  | 56347143      | 56347630  | 488 |
| chr20 | 8647362       | 8647849   | 488 |
| chr25 | 39213517      | 39214003  | 487 |
| chr13 | 54431389      | 54431875  | 487 |
| chr12 | 32563434      | 32563920  | 487 |
| chr13 | 80740605      | 80741090  | 486 |
| chr7  | 37465670      | 37466154  | 485 |
| chr28 | 40372071      | 40372555  | 485 |
| chr13 | 64762628      | 64763112  | 485 |
| chr12 | 53335719      | 53336203  | 485 |
| chr2  | 75693874      | 75694357  | 484 |
| chr13 | 40806312      | 40806795  | 484 |
| chr10 | 88199980      | 88200463  | 484 |
| chr18 | 51175348      | 51175830  | 483 |
| chr18 | 13143917      | 13144399  | 483 |
| chr8  | 93055874      | 93056355  | 482 |
| chr14 | 1577333       | 1577814   | 482 |
| chr17 | 47086249      | 47086729  | 481 |
| chr15 | 29832615      | 29833095  | 481 |
| chr21 | 6554628       | 6555107   | 480 |
| chr17 | 72716545      | 72717024  | 480 |
| chr21 | 16476127      | 16476605  | 479 |
| chr4  | 121470372     | 121470849 | 478 |
| chr26 | 22378606      | 22379083  | 478 |
| chr21 | 48682289      | 48682766  | 478 |
| chr17 | 12588096      | 12588573  | 478 |
| chr3  | 33986408      | 33986884  | 477 |
| chr28 | 33860771      | 33861247  | 477 |
| chr16 | 23646812      | 23647288  | 477 |
| chr10 | 7623304       | 7623780   | 477 |
| chr4  | 116919325     | 116919800 | 476 |
| chr19 | 12332064      | 12332539  | 476 |
| chr1  | 152260055     | 152260530 | 476 |
| chr4  | 5622761       | 5623235   | 475 |
| chr29 | 45074392      | 45074866  | 475 |
| chr11 | 96148764      | 96149238  | 475 |
| chr1  | 143795869     | 143796343 | 475 |
| chr20 | 648658 649131 | 474       |     |
| chr21 | 60719282      | 60719754  | 473 |
| chr13 | 67165729      | 67166201  | 473 |
| chr17 | 74558298      | 74558769  | 472 |
| chr1  | 2169178       | 2169649   | 472 |
| chr3  | 74866100      | 74866569  | 470 |
| chr25 | 35387151      | 35387620  | 470 |

|       |           |           |     |
|-------|-----------|-----------|-----|
| chr23 | 49738951  | 49739420  | 470 |
| chr23 | 27858140  | 27858609  | 470 |
| chr24 | 39745827  | 39746295  | 469 |
| chr13 | 22172089  | 22172557  | 469 |
| chr23 | 27587760  | 27588227  | 468 |
| chr13 | 75822036  | 75822503  | 468 |
| chr6  | 118163275 | 118163741 | 467 |
| chr3  | 114262849 | 114263315 | 467 |
| chr22 | 51509108  | 51509574  | 467 |
| chr8  | 7811738   | 7812203   | 466 |
| chr3  | 116629415 | 116629880 | 466 |
| chr20 | 64588475  | 64588940  | 466 |
| chr19 | 29699989  | 29700454  | 466 |
| chr13 | 59985817  | 59986282  | 466 |
| chr22 | 50820373  | 50820837  | 465 |
| chr17 | 72333421  | 72333885  | 465 |
| chr11 | 26871010  | 26871474  | 465 |
| chr7  | 51355957  | 51356420  | 464 |
| chr4  | 123625350 | 123625813 | 464 |
| chr3  | 115408452 | 115408915 | 464 |
| chr27 | 26764712  | 26765175  | 464 |
| chr25 | 1065980   | 1066443   | 464 |
| chr14 | 31918534  | 31918997  | 464 |
| chr7  | 15440907  | 15441369  | 463 |
| chr20 | 75668288  | 75668750  | 463 |
| chr8  | 93177009  | 93177470  | 462 |
| chr15 | 27447388  | 27447849  | 462 |
| chr9  | 105997773 | 105998233 | 461 |
| chr13 | 77800109  | 77800569  | 461 |
| chr9  | 105512016 | 105512475 | 460 |
| chr5  | 35445397  | 35445856  | 460 |
| chr3  | 23020206  | 23020665  | 460 |
| chr5  | 76849648  | 76850106  | 459 |
| chr2  | 115068460 | 115068918 | 459 |
| chr19 | 32595018  | 32595476  | 459 |
| chr19 | 21771343  | 21771801  | 459 |
| chr23 | 18668969  | 18669426  | 458 |
| chr21 | 31674099  | 31674556  | 458 |
| chr5  | 112236231 | 112236687 | 457 |
| chr6  | 118828021 | 118828476 | 456 |
| chr21 | 61033576  | 61034031  | 456 |
| chr3  | 35461754  | 35462208  | 455 |
| chr26 | 34963635  | 34964089  | 455 |
| chr2  | 140055627 | 140056081 | 455 |
| chr20 | 35929030  | 35929483  | 454 |
| chr15 | 21858062  | 21858515  | 454 |
| chr6  | 19589640  | 19590092  | 453 |
| chr26 | 47957621  | 47958073  | 453 |
| chr21 | 52052594  | 52053046  | 453 |
| chr18 | 62373851  | 62374303  | 453 |



|       |           |           |     |
|-------|-----------|-----------|-----|
| chr18 | 11228631  | 11229083  | 453 |
| chr17 | 64285897  | 64286349  | 453 |
| chr10 | 36600863  | 36601315  | 453 |
| chr25 | 37415763  | 37416214  | 452 |
| chr25 | 35397585  | 35398036  | 452 |
| chr18 | 33105192  | 33105643  | 452 |
| chr12 | 84180843  | 84181294  | 452 |
| chr10 | 88177949  | 88178400  | 452 |
| chr9  | 47053738  | 47054188  | 451 |
| chr20 | 74447794  | 74448244  | 451 |
| chr2  | 54397805  | 54398255  | 451 |
| chr17 | 63277675  | 63278125  | 451 |
| chr13 | 41715515  | 41715965  | 451 |
| chr3  | 15545572  | 15546021  | 450 |
| chr29 | 34263556  | 34264005  | 450 |
| chr23 | 48775906  | 48776355  | 450 |
| chr21 | 27292133  | 27292582  | 450 |
| chr19 | 59379491  | 59379940  | 450 |
| chr19 | 58655124  | 58655572  | 449 |
| chr19 | 33119721  | 33120169  | 449 |
| chr16 | 67147442  | 67147890  | 449 |
| chr3  | 108040715 | 108041162 | 448 |
| chr19 | 35272100  | 35272547  | 448 |
| chr6  | 118802045 | 118802491 | 447 |
| chr19 | 23727906  | 23728352  | 447 |
| chr25 | 39409427  | 39409872  | 446 |
| chr23 | 44432739  | 44433184  | 446 |
| chr18 | 64316818  | 64317263  | 446 |
| chr17 | 64081423  | 64081868  | 446 |
| chr1  | 74227064  | 74227509  | 446 |
| chr5  | 113448197 | 113448641 | 445 |
| chr23 | 15828505  | 15828949  | 445 |
| chr2  | 132166608 | 132167052 | 445 |
| chr2  | 125912230 | 125912674 | 445 |
| chr14 | 6215627   | 6216071   | 445 |
| chr13 | 58336007  | 58336451  | 445 |
| chrX  | 23059025  | 23059468  | 444 |
| chr15 | 74528209  | 74528652  | 444 |
| chr4  | 71620494  | 71620936  | 443 |
| chr18 | 53170041  | 53170483  | 443 |
| chr8  | 108715130 | 108715571 | 442 |
| chr8  | 8715950   | 8716391   | 442 |
| chr23 | 10592363  | 10592804  | 442 |
| chr16 | 47126486  | 47126927  | 442 |
| chr10 | 29113573  | 29114014  | 442 |
| chr3  | 123865401 | 123865841 | 441 |
| chr13 | 42398809  | 42399249  | 441 |
| chr29 | 47906764  | 47907203  | 440 |
| chr15 | 26966471  | 26966910  | 440 |
| chr10 | 67101864  | 67102303  | 440 |

|       |               |           |     |
|-------|---------------|-----------|-----|
| chr3  | 105923487     | 105923925 | 439 |
| chr11 | 37924287      | 37924725  | 439 |
| chr5  | 28727816      | 28728253  | 438 |
| chr18 | 655346 655783 | 438       |     |
| chr4  | 79261206      | 79261642  | 437 |
| chr18 | 49511909      | 49512345  | 437 |
| chr24 | 840089 840524 | 436       |     |
| chr2  | 140057541     | 140057976 | 436 |
| chr2  | 127815318     | 127815753 | 436 |
| chr3  | 127819808     | 127820242 | 435 |
| chr16 | 47967724      | 47968158  | 435 |
| chr18 | 52758557      | 52758990  | 434 |
| chr16 | 45962890      | 45963322  | 433 |
| chr11 | 47289072      | 47289504  | 433 |
| chr10 | 75482139      | 75482571  | 433 |
| chr3  | 5539772       | 5540203   | 432 |
| chr26 | 23087679      | 23088110  | 432 |
| chrX  | 31429831      | 31430261  | 431 |
| chr14 | 63511620      | 63512050  | 431 |
| chr10 | 81697467      | 81697897  | 431 |
| chr19 | 28979947      | 28980376  | 430 |
| chr18 | 56624362      | 56624790  | 429 |
| chr17 | 70025693      | 70026121  | 429 |
| chr8  | 60185430      | 60185857  | 428 |
| chr23 | 15093603      | 15094030  | 428 |
| chr16 | 46742237      | 46742664  | 428 |
| chr12 | 31552140      | 31552567  | 428 |
| chr11 | 70843710      | 70844137  | 428 |
| chr1  | 61338388      | 61338815  | 428 |
| chr5  | 81496343      | 81496769  | 427 |
| chr4  | 72322976      | 72323402  | 427 |
| chr4  | 71549947      | 71550373  | 427 |
| chr17 | 70291766      | 70292192  | 427 |
| chr11 | 103683516     | 103683942 | 427 |
| chr4  | 121079547     | 121079972 | 426 |
| chr26 | 31467181      | 31467606  | 426 |
| chr2  | 75982793      | 75983218  | 426 |
| chr29 | 48680547      | 48680971  | 425 |
| chr16 | 47598579      | 47599003  | 425 |
| chr11 | 107585617     | 107586041 | 425 |
| chr11 | 107355531     | 107355955 | 425 |
| chr11 | 75096912      | 75097336  | 425 |
| chr1  | 132079019     | 132079443 | 425 |
| chr3  | 115104571     | 115104994 | 424 |
| chr29 | 51860374      | 51860797  | 424 |
| chr26 | 21805362      | 21805785  | 424 |
| chr2  | 138573432     | 138573855 | 424 |
| chr6  | 74019917      | 74020339  | 423 |
| chr25 | 22684066      | 22684488  | 423 |
| chr24 | 59582888      | 59583310  | 423 |

|       |               |           |     |
|-------|---------------|-----------|-----|
| chr17 | 4683534       | 4683956   | 423 |
| chr25 | 39874164      | 39874585  | 422 |
| chr20 | 15473760      | 15474181  | 422 |
| chr19 | 13787944      | 13788365  | 422 |
| chr10 | 69086808      | 69087229  | 422 |
| chr2  | 139936579     | 139936999 | 421 |
| chr15 | 43341891      | 43342311  | 421 |
| chr13 | 38829139      | 38829559  | 421 |
| chr1  | 145694294     | 145694714 | 421 |
| chr1  | 82918405      | 82918825  | 421 |
| chr7  | 13545123      | 13545542  | 420 |
| chr24 | 60772615      | 60773034  | 420 |
| chr18 | 9982217       | 9982636   | 420 |
| chrX  | 78768609      | 78769027  | 419 |
| chr3  | 15176512      | 15176930  | 419 |
| chr21 | 62447913      | 62448331  | 419 |
| chr13 | 75697386      | 75697804  | 419 |
| chr1  | 154403323     | 154403741 | 419 |
| chr25 | 43231809      | 43232226  | 418 |
| chr25 | 38049860      | 38050277  | 418 |
| chr22 | 50868488      | 50868905  | 418 |
| chr2  | 125490363     | 125490780 | 418 |
| chr18 | 35071430      | 35071847  | 418 |
| chr16 | 3710802       | 3711219   | 418 |
| chr14 | 63514806      | 63515223  | 418 |
| chr10 | 11770682      | 11771099  | 418 |
| chrX  | 21085320      | 21085736  | 417 |
| chr8  | 63992419      | 63992835  | 417 |
| chr25 | 37517847      | 37518263  | 417 |
| chr13 | 59659919      | 59660335  | 417 |
| chr3  | 121369436     | 121369851 | 416 |
| chr20 | 59414332      | 59414747  | 416 |
| chr19 | 39899883      | 39900298  | 416 |
| chr13 | 80710287      | 80710702  | 416 |
| chr23 | 30372035      | 30372449  | 415 |
| chr19 | 59465348      | 59465762  | 415 |
| chr14 | 872122 872536 | 415       |     |
| chr5  | 113170839     | 113171252 | 414 |
| chr3  | 17393388      | 17393801  | 414 |
| chr23 | 52813304      | 52813717  | 414 |
| chr19 | 31841815      | 31842228  | 414 |
| chr17 | 63432836      | 63433249  | 414 |
| chr17 | 4832194       | 4832607   | 414 |
| chr1  | 151602612     | 151603025 | 414 |
| chr3  | 107737420     | 107737832 | 413 |
| chr25 | 42521751      | 42522163  | 413 |
| chr20 | 70120972      | 70121384  | 413 |
| chr19 | 33097124      | 33097536  | 413 |
| chr15 | 37554718      | 37555130  | 413 |
| chr28 | 41778887      | 41779298  | 412 |

|       |           |           |     |
|-------|-----------|-----------|-----|
| chr4  | 79194951  | 79195361  | 411 |
| chr29 | 42400881  | 42401291  | 411 |
| chr21 | 64516482  | 64516892  | 411 |
| chr19 | 60811001  | 60811411  | 411 |
| chr11 | 28534395  | 28534805  | 411 |
| chr7  | 17322188  | 17322597  | 410 |
| chr4  | 95680878  | 95681287  | 410 |
| chr19 | 60750037  | 60750446  | 410 |
| chr18 | 61974147  | 61974556  | 410 |
| chr13 | 41668006  | 41668415  | 410 |
| chr10 | 70153875  | 70154284  | 410 |
| chr22 | 55337231  | 55337639  | 409 |
| chr19 | 10902329  | 10902737  | 409 |
| chr17 | 75523324  | 75523732  | 409 |
| chr11 | 75412240  | 75412648  | 409 |
| chr26 | 41920732  | 41921139  | 408 |
| chr26 | 31502042  | 31502449  | 408 |
| chr2  | 24074501  | 24074908  | 408 |
| chr14 | 29045498  | 29045905  | 408 |
| chr12 | 33978772  | 33979179  | 408 |
| chr6  | 92458494  | 92458900  | 407 |
| chr5  | 120384654 | 120385060 | 407 |
| chr17 | 73125766  | 73126172  | 407 |
| chr14 | 19303567  | 19303973  | 407 |
| chr13 | 59655958  | 59656364  | 407 |
| chr7  | 50367336  | 50367741  | 406 |
| chr24 | 48611059  | 48611464  | 406 |
| chr13 | 54796119  | 54796524  | 406 |
| chr9  | 105442274 | 105442678 | 405 |
| chr7  | 96286399  | 96286803  | 405 |
| chr5  | 118256990 | 118257394 | 405 |
| chr20 | 3250263   | 3250667   | 405 |
| chr16 | 48801820  | 48802224  | 405 |
| chr14 | 38759161  | 38759565  | 405 |
| chr28 | 25489418  | 25489821  | 404 |
| chr1  | 137263794 | 137264197 | 404 |
| chr9  | 90235354  | 90235756  | 403 |
| chr28 | 7862285   | 7862687   | 403 |
| chr26 | 51196173  | 51196575  | 403 |
| chr22 | 58685441  | 58685843  | 403 |
| chr15 | 25588861  | 25589263  | 403 |
| chr13 | 55062610  | 55063012  | 403 |
| chr3  | 30465968  | 30466369  | 402 |
| chr23 | 20261724  | 20262125  | 402 |
| chr2  | 140048027 | 140048428 | 402 |
| chr18 | 11206663  | 11207064  | 402 |
| chr11 | 9329179   | 9329580   | 402 |
| chr7  | 45695814  | 45696214  | 401 |
| chr5  | 26685160  | 26685560  | 401 |
| chr5  | 10432256  | 10432656  | 401 |

|       |               |           |     |
|-------|---------------|-----------|-----|
| chr25 | 43241757      | 43242157  | 401 |
| chr22 | 56520056      | 56520456  | 401 |
| chr19 | 44991561      | 44991961  | 401 |
| chr18 | 56632077      | 56632477  | 401 |
| chr18 | 9829211       | 9829611   | 401 |
| chr10 | 89000210      | 89000610  | 401 |
| chr8  | 80183776      | 80184175  | 400 |
| chr7  | 50403534      | 50403933  | 400 |
| chr7  | 8843315       | 8843714   | 400 |
| chr4  | 121434052     | 121434451 | 400 |
| chr29 | 43026607      | 43027006  | 400 |
| chr28 | 33622363      | 33622762  | 400 |
| chr25 | 29602139      | 29602538  | 400 |
| chr19 | 4165412       | 4165811   | 400 |
| chr16 | 2244703       | 2245102   | 400 |
| chr12 | 32228483      | 32228882  | 400 |
| chr11 | 20450421      | 20450820  | 400 |
| chr10 | 17790616      | 17791015  | 400 |
| chr1  | 88298457      | 88298856  | 400 |
| chr9  | 105511097     | 105511495 | 399 |
| chr9  | 84271646      | 84272044  | 399 |
| chr9  | 82554474      | 82554872  | 399 |
| chr8  | 96335916      | 96336314  | 399 |
| chr8  | 77271707      | 77272105  | 399 |
| chr8  | 23048315      | 23048713  | 399 |
| chr8  | 20934540      | 20934938  | 399 |
| chr8  | 8583695       | 8584093   | 399 |
| chr8  | 261048 261446 |           | 399 |
| chr7  | 60384843      | 60385241  | 399 |
| chr5  | 118054073     | 118054471 | 399 |
| chr5  | 112933810     | 112934208 | 399 |
| chr5  | 111319462     | 111319860 | 399 |
| chr5  | 80743532      | 80743930  | 399 |
| chr5  | 30598585      | 30598983  | 399 |
| chr5  | 27947870      | 27948268  | 399 |
| chr5  | 10193265      | 10193663  | 399 |
| chr4  | 106595860     | 106596258 | 399 |
| chr4  | 71619320      | 71619718  | 399 |
| chr4  | 70017434      | 70017832  | 399 |
| chr3  | 33486450      | 33486848  | 399 |
| chr3  | 28909958      | 28910356  | 399 |
| chr3  | 22233996      | 22234394  | 399 |
| chr3  | 15677959      | 15678357  | 399 |
| chr29 | 37700993      | 37701391  | 399 |
| chr29 | 36692756      | 36693154  | 399 |
| chr29 | 34909941      | 34910339  | 399 |
| chr29 | 31675488      | 31675886  | 399 |
| chr28 | 33675634      | 33676032  | 399 |
| chr26 | 49489438      | 49489836  | 399 |
| chr26 | 47954028      | 47954426  | 399 |

|       |           |           |     |
|-------|-----------|-----------|-----|
| chr26 | 41018598  | 41018996  | 399 |
| chr26 | 34287417  | 34287815  | 399 |
| chr25 | 28277303  | 28277701  | 399 |
| chr25 | 27880641  | 27881039  | 399 |
| chr25 | 22260401  | 22260799  | 399 |
| chr25 | 10639911  | 10640309  | 399 |
| chr25 | 8705719   | 8706117   | 399 |
| chr25 | 3182058   | 3182456   | 399 |
| chr24 | 38969972  | 38970370  | 399 |
| chr24 | 35309560  | 35309958  | 399 |
| chr23 | 31144859  | 31145257  | 399 |
| chr23 | 15879118  | 15879516  | 399 |
| chr23 | 7251813   | 7252211   | 399 |
| chr21 | 59069100  | 59069498  | 399 |
| chr20 | 7005618   | 7006016   | 399 |
| chr2  | 140623336 | 140623734 | 399 |
| chr2  | 135015820 | 135016218 | 399 |
| chr2  | 128426976 | 128427374 | 399 |
| chr2  | 100015307 | 100015705 | 399 |
| chr2  | 99682219  | 99682617  | 399 |
| chr2  | 74015231  | 74015629  | 399 |
| chr19 | 63611526  | 63611924  | 399 |
| chr19 | 44176466  | 44176864  | 399 |
| chr19 | 44160232  | 44160630  | 399 |
| chr19 | 39258674  | 39259072  | 399 |
| chr19 | 39126953  | 39127351  | 399 |
| chr19 | 37333393  | 37333791  | 399 |
| chr19 | 33094925  | 33095323  | 399 |
| chr19 | 21631786  | 21632184  | 399 |
| chr19 | 18039757  | 18040155  | 399 |
| chr18 | 62463654  | 62464052  | 399 |
| chr18 | 56456821  | 56457219  | 399 |
| chr18 | 49793273  | 49793671  | 399 |
| chr18 | 25812817  | 25813215  | 399 |
| chr18 | 11192168  | 11192566  | 399 |
| chr18 | 9829718   | 9830116   | 399 |
| chr18 | 9504704   | 9505102   | 399 |
| chr17 | 64102448  | 64102846  | 399 |
| chr17 | 63103277  | 63103675  | 399 |
| chr17 | 51905829  | 51906227  | 399 |
| chr17 | 18510640  | 18511038  | 399 |
| chr16 | 52196463  | 52196861  | 399 |
| chr16 | 47668083  | 47668481  | 399 |
| chr16 | 47591131  | 47591529  | 399 |
| chr16 | 46991564  | 46991962  | 399 |
| chr16 | 46962373  | 46962771  | 399 |
| chr16 | 46741323  | 46741721  | 399 |
| chr16 | 39601747  | 39602145  | 399 |
| chr16 | 38733141  | 38733539  | 399 |
| chr15 | 81016865  | 81017263  | 399 |

|       |               |           |     |
|-------|---------------|-----------|-----|
| chr15 | 75340333      | 75340731  | 399 |
| chr15 | 25446466      | 25446864  | 399 |
| chr14 | 29626521      | 29626919  | 399 |
| chr14 | 1584068       | 1584466   | 399 |
| chr13 | 79645161      | 79645559  | 399 |
| chr13 | 79636298      | 79636696  | 399 |
| chr13 | 75632215      | 75632613  | 399 |
| chr13 | 75534597      | 75534995  | 399 |
| chr13 | 68942178      | 68942576  | 399 |
| chr13 | 57584708      | 57585106  | 399 |
| chr13 | 26204687      | 26205085  | 399 |
| chr12 | 82811080      | 82811478  | 399 |
| chr12 | 81825601      | 81825999  | 399 |
| chr11 | 105976033     | 105976431 | 399 |
| chr11 | 66567683      | 66568081  | 399 |
| chr11 | 21632508      | 21632906  | 399 |
| chr10 | 69401982      | 69402380  | 399 |
| chr10 | 58763598      | 58763996  | 399 |
| chr1  | 74102035      | 74102433  | 399 |
| chr1  | 457449 457847 |           | 399 |
| chr7  | 3925390       | 3925787   | 398 |
| chr4  | 121495868     | 121496265 | 398 |
| chr3  | 119215243     | 119215640 | 398 |
| chr3  | 118878942     | 118879339 | 398 |
| chr29 | 44559254      | 44559651  | 398 |
| chr26 | 37542264      | 37542661  | 398 |
| chr21 | 66579215      | 66579612  | 398 |
| chr2  | 139182228     | 139182625 | 398 |
| chr19 | 22336996      | 22337393  | 398 |
| chr11 | 98359507      | 98359904  | 398 |
| chr9  | 104913258     | 104913654 | 397 |
| chr7  | 5309920       | 5310316   | 397 |
| chr24 | 5339590       | 5339986   | 397 |
| chr23 | 27796952      | 27797348  | 397 |
| chr23 | 10140526      | 10140922  | 397 |
| chr22 | 59556097      | 59556493  | 397 |
| chr17 | 18377508      | 18377904  | 397 |
| chr15 | 83162802      | 83163198  | 397 |
| chr10 | 32476202      | 32476598  | 397 |
| chr1  | 140799884     | 140800280 | 397 |
| chr9  | 90540181      | 90540576  | 396 |
| chr3  | 124588205     | 124588600 | 396 |
| chr29 | 49970923      | 49971318  | 396 |
| chr27 | 666106 666501 |           | 396 |
| chr22 | 60443961      | 60444356  | 396 |
| chr21 | 68961340      | 68961735  | 396 |
| chr2  | 123753308     | 123753703 | 396 |
| chr19 | 61473884      | 61474279  | 396 |
| chr19 | 58169140      | 58169535  | 396 |
| chr19 | 15289345      | 15289740  | 396 |

|       |           |           |     |
|-------|-----------|-----------|-----|
| chr18 | 65103509  | 65103904  | 396 |
| chr17 | 63411211  | 63411606  | 396 |
| chr14 | 66276974  | 66277369  | 396 |
| chr12 | 30510024  | 30510419  | 396 |
| chr10 | 66776906  | 66777301  | 396 |
| chr1  | 99695122  | 99695517  | 396 |
| chrX  | 36642917  | 36643311  | 395 |
| chr9  | 104930944 | 104931338 | 395 |
| chr9  | 46018017  | 46018411  | 395 |
| chr7  | 65555678  | 65556072  | 395 |
| chr3  | 88244636  | 88245030  | 395 |
| chr28 | 40369528  | 40369922  | 395 |
| chr25 | 39171725  | 39172119  | 395 |
| chr24 | 36877523  | 36877917  | 395 |
| chr20 | 3203268   | 3203662   | 395 |
| chr2  | 139445178 | 139445572 | 395 |
| chr2  | 134752267 | 134752661 | 395 |
| chr19 | 32596395  | 32596789  | 395 |
| chr18 | 45442360  | 45442754  | 395 |
| chr13 | 77555888  | 77556282  | 395 |
| chr11 | 85419793  | 85420187  | 395 |
| chr11 | 26235570  | 26235964  | 395 |
| chr11 | 9743067   | 9743461   | 395 |
| chr11 | 2559094   | 2559488   | 395 |
| chr9  | 90608564  | 90608957  | 394 |
| chr5  | 113254534 | 113254927 | 394 |
| chr25 | 39375149  | 39375542  | 394 |
| chr24 | 49786234  | 49786627  | 394 |
| chr23 | 9450360   | 9450753   | 394 |
| chr19 | 50706045  | 50706438  | 394 |
| chr17 | 74563735  | 74564128  | 394 |
| chr15 | 33143139  | 33143532  | 394 |
| chr13 | 14723410  | 14723803  | 394 |
| chr12 | 32173506  | 32173899  | 394 |
| chr11 | 109846402 | 109846795 | 394 |
| chr11 | 104942617 | 104943010 | 394 |
| chr11 | 96172244  | 96172637  | 394 |
| chr10 | 81627550  | 81627943  | 394 |
| chr10 | 13026752  | 13027145  | 394 |
| chr1  | 1612397   | 1612790   | 394 |
| chr1  | 1591072   | 1591465   | 394 |
| chr7  | 50248325  | 50248717  | 393 |
| chr5  | 86514304  | 86514696  | 393 |
| chr4  | 71551493  | 71551885  | 393 |
| chr3  | 22932362  | 22932754  | 393 |
| chr19 | 30292827  | 30293219  | 393 |
| chr14 | 3488951   | 3489343   | 393 |
| chr10 | 3535879   | 3536271   | 393 |
| chr5  | 108579567 | 108579958 | 392 |
| chr3  | 106868475 | 106868866 | 392 |



|       |           |           |     |
|-------|-----------|-----------|-----|
| chr3  | 63096539  | 63096930  | 392 |
| chr3  | 21937955  | 21938346  | 392 |
| chr23 | 15868446  | 15868837  | 392 |
| chr23 | 15807477  | 15807868  | 392 |
| chr23 | 10397294  | 10397685  | 392 |
| chr20 | 19403904  | 19404295  | 392 |
| chr2  | 110823997 | 110824388 | 392 |
| chr19 | 58231375  | 58231766  | 392 |
| chr17 | 47501781  | 47502172  | 392 |
| chr16 | 77345017  | 77345408  | 392 |
| chr14 | 48324531  | 48324922  | 392 |
| chr12 | 31316290  | 31316681  | 392 |
| chr9  | 106859218 | 106859608 | 391 |
| chr5  | 30474101  | 30474491  | 391 |
| chr4  | 124306312 | 124306702 | 391 |
| chr3  | 22643949  | 22644339  | 391 |
| chr29 | 46922924  | 46923314  | 391 |
| chr27 | 14740445  | 14740835  | 391 |
| chr26 | 48560567  | 48560957  | 391 |
| chr25 | 3165235   | 3165625   | 391 |
| chr24 | 60908574  | 60908964  | 391 |
| chr24 | 44269396  | 44269786  | 391 |
| chr23 | 52645535  | 52645925  | 391 |
| chr2  | 115629651 | 115630041 | 391 |
| chr19 | 7121783   | 7122173   | 391 |
| chr18 | 55454289  | 55454679  | 391 |
| chr18 | 4830035   | 4830425   | 391 |
| chr15 | 80921477  | 80921867  | 391 |
| chr13 | 58597658  | 58598048  | 391 |
| chr10 | 17637703  | 17638093  | 391 |
| chr1  | 149246008 | 149246398 | 391 |
| chr9  | 90645260  | 90645649  | 390 |
| chr8  | 24709962  | 24710351  | 390 |
| chr7  | 19226774  | 19227163  | 390 |
| chr7  | 17981952  | 17982341  | 390 |
| chr4  | 122126747 | 122127136 | 390 |
| chr3  | 15177806  | 15178195  | 390 |
| chr22 | 59866985  | 59867374  | 390 |
| chr2  | 139417290 | 139417679 | 390 |
| chr19 | 41396516  | 41396905  | 390 |
| chr19 | 31900708  | 31901097  | 390 |
| chr12 | 74465756  | 74466145  | 390 |
| chr12 | 70978818  | 70979207  | 390 |
| chr11 | 81414782  | 81415171  | 390 |
| chr11 | 28417623  | 28418012  | 390 |
| chr10 | 103763230 | 103763619 | 390 |
| chr10 | 67021692  | 67022081  | 390 |
| chr10 | 36368604  | 36368993  | 390 |
| chr10 | 19499468  | 19499857  | 390 |
| chr1  | 146460075 | 146460464 | 390 |

|       |           |           |     |
|-------|-----------|-----------|-----|
| chr8  | 24751036  | 24751424  | 389 |
| chr7  | 37562534  | 37562922  | 389 |
| chr3  | 13649933  | 13650321  | 389 |
| chr26 | 22015986  | 22016374  | 389 |
| chr24 | 48093719  | 48094107  | 389 |
| chr23 | 31149560  | 31149948  | 389 |
| chr23 | 13689889  | 13690277  | 389 |
| chr21 | 33821099  | 33821487  | 389 |
| chr20 | 8718606   | 8718994   | 389 |
| chr19 | 23161347  | 23161735  | 389 |
| chr18 | 17989300  | 17989688  | 389 |
| chr17 | 74941850  | 74942238  | 389 |
| chr13 | 66017329  | 66017717  | 389 |
| chr12 | 15294540  | 15294928  | 389 |
| chr11 | 104892135 | 104892523 | 389 |
| chr1  | 68806421  | 68806809  | 389 |
| chr6  | 107416992 | 107417379 | 388 |
| chr3  | 105628298 | 105628685 | 388 |
| chr23 | 31398396  | 31398783  | 388 |
| chr17 | 60287125  | 60287512  | 388 |
| chr17 | 4150826   | 4151213   | 388 |
| chr11 | 70555839  | 70556226  | 388 |
| chr11 | 28504797  | 28505184  | 388 |
| chr3  | 18097574  | 18097960  | 387 |
| chr29 | 37125484  | 37125870  | 387 |
| chr22 | 44124529  | 44124915  | 387 |
| chr19 | 59013133  | 59013519  | 387 |
| chr18 | 62008916  | 62009302  | 387 |
| chr18 | 52667788  | 52668174  | 387 |
| chr13 | 22900958  | 22901344  | 387 |
| chr7  | 80765337  | 80765722  | 386 |
| chr7  | 50364023  | 50364408  | 386 |
| chr7  | 38313133  | 38313518  | 386 |
| chr4  | 122701719 | 122702104 | 386 |
| chr23 | 7291620   | 7292005   | 386 |
| chr22 | 53954176  | 53954561  | 386 |
| chr22 | 17430301  | 17430686  | 386 |
| chr19 | 39261453  | 39261838  | 386 |
| chr18 | 50587479  | 50587864  | 386 |
| chr17 | 66452530  | 66452915  | 386 |
| chr12 | 32509588  | 32509973  | 386 |
| chr11 | 26164231  | 26164616  | 386 |
| chr8  | 8594459   | 8594843   | 385 |
| chr28 | 40370203  | 40370587  | 385 |
| chr27 | 17532173  | 17532557  | 385 |
| chr23 | 46087159  | 46087543  | 385 |
| chr20 | 29502399  | 29502783  | 385 |
| chr2  | 111365338 | 111365722 | 385 |
| chr14 | 40042725  | 40043109  | 385 |
| chr9  | 63067337  | 63067720  | 384 |

|       |           |           |     |
|-------|-----------|-----------|-----|
| chr6  | 120771216 | 120771599 | 384 |
| chr5  | 28851631  | 28852014  | 384 |
| chr4  | 95619052  | 95619435  | 384 |
| chr25 | 40906396  | 40906779  | 384 |
| chr19 | 38849382  | 38849765  | 384 |
| chr7  | 43774576  | 43774958  | 383 |
| chr4  | 77569593  | 77569975  | 383 |
| chr4  | 71612884  | 71613266  | 383 |
| chr3  | 127658355 | 127658737 | 383 |
| chr26 | 9671081   | 9671463   | 383 |
| chr17 | 73892200  | 73892582  | 383 |
| chr16 | 77699542  | 77699924  | 383 |
| chr13 | 73999502  | 73999884  | 383 |
| chr8  | 89554053  | 89554434  | 382 |
| chr7  | 42466326  | 42466707  | 382 |
| chr7  | 13254489  | 13254870  | 382 |
| chr29 | 31496555  | 31496936  | 382 |
| chr26 | 44233774  | 44234155  | 382 |
| chr25 | 34408701  | 34409082  | 382 |
| chr23 | 10500403  | 10500784  | 382 |
| chr18 | 57612219  | 57612600  | 382 |
| chr18 | 54113064  | 54113445  | 382 |
| chr18 | 53557603  | 53557984  | 382 |
| chr17 | 69433374  | 69433755  | 382 |
| chr16 | 47061040  | 47061421  | 382 |
| chr14 | 7861663   | 7862044   | 382 |
| chr13 | 54939749  | 54940130  | 382 |
| chr13 | 22152351  | 22152732  | 382 |
| chr10 | 58764486  | 58764867  | 382 |
| chr5  | 29718328  | 29718708  | 381 |
| chr3  | 55845379  | 55845759  | 381 |
| chr29 | 36841254  | 36841634  | 381 |
| chr26 | 7005875   | 7006255   | 381 |
| chr22 | 57219619  | 57219999  | 381 |
| chr22 | 55390233  | 55390613  | 381 |
| chr2  | 111652507 | 111652887 | 381 |
| chr16 | 71134070  | 71134450  | 381 |
| chr16 | 38528608  | 38528988  | 381 |
| chr15 | 81171886  | 81172266  | 381 |
| chr7  | 46949032  | 46949411  | 380 |
| chr7  | 44064303  | 44064682  | 380 |
| chr4  | 104749000 | 104749379 | 380 |
| chr3  | 17483819  | 17484198  | 380 |
| chr21 | 65802228  | 65802607  | 380 |
| chr18 | 11697814  | 11698193  | 380 |
| chr18 | 7373816   | 7374195   | 380 |
| chr15 | 26895248  | 26895627  | 380 |
| chr8  | 24441269  | 24441647  | 379 |
| chr5  | 88756558  | 88756936  | 379 |
| chr5  | 83347274  | 83347652  | 379 |

|       |               |           |     |
|-------|---------------|-----------|-----|
| chr4  | 67832618      | 67832996  | 379 |
| chr29 | 36589740      | 36590118  | 379 |
| chr24 | 58606161      | 58606539  | 379 |
| chr23 | 10252758      | 10253136  | 379 |
| chr2  | 111142174     | 111142552 | 379 |
| chr2  | 12229632      | 12230010  | 379 |
| chr19 | 37935225      | 37935603  | 379 |
| chr16 | 77526871      | 77527249  | 379 |
| chr15 | 82248104      | 82248482  | 379 |
| chr15 | 43508884      | 43509262  | 379 |
| chr13 | 74347027      | 74347405  | 379 |
| chr13 | 40869426      | 40869804  | 379 |
| chr10 | 13584131      | 13584509  | 379 |
| chr8  | 103256289     | 103256666 | 378 |
| chr8  | 67700986      | 67701363  | 378 |
| chr25 | 27715851      | 27716228  | 378 |
| chr22 | 50767580      | 50767957  | 378 |
| chr2  | 124960658     | 124961035 | 378 |
| chr18 | 31945336      | 31945713  | 378 |
| chr17 | 74839215      | 74839592  | 378 |
| chr17 | 63500078      | 63500455  | 378 |
| chr1  | 671662 672039 | 378       |     |
| chr7  | 32284725      | 32285101  | 377 |
| chr4  | 66612656      | 66613032  | 377 |
| chr3  | 126088355     | 126088731 | 377 |
| chr3  | 22544957      | 22545333  | 377 |
| chr29 | 33889801      | 33890177  | 377 |
| chr26 | 51189243      | 51189619  | 377 |
| chr25 | 33363584      | 33363960  | 377 |
| chr22 | 56139342      | 56139718  | 377 |
| chr21 | 59017565      | 59017941  | 377 |
| chr19 | 41475839      | 41476215  | 377 |
| chr13 | 55061332      | 55061708  | 377 |
| chr10 | 21663414      | 21663790  | 377 |
| chr10 | 15031265      | 15031641  | 377 |
| chr5  | 12281900      | 12282275  | 376 |
| chr25 | 35624368      | 35624743  | 376 |
| chr23 | 11456069      | 11456444  | 376 |
| chr21 | 56512611      | 56512986  | 376 |
| chr19 | 60821264      | 60821639  | 376 |
| chr17 | 70383696      | 70384071  | 376 |
| chr14 | 1154191       | 1154566   | 376 |
| chr12 | 36461227      | 36461602  | 376 |
| chr10 | 68223027      | 68223402  | 376 |
| chr10 | 16919733      | 16920108  | 376 |
| chr5  | 17174751      | 17175125  | 375 |
| chr23 | 44868222      | 44868596  | 375 |
| chr22 | 50046136      | 50046510  | 375 |
| chr2  | 134741336     | 134741710 | 375 |
| chr19 | 29816935      | 29817309  | 375 |

|       |           |           |     |
|-------|-----------|-----------|-----|
| chr19 | 13554732  | 13555106  | 375 |
| chr16 | 41414994  | 41415368  | 375 |
| chr15 | 75286292  | 75286666  | 375 |
| chr9  | 90455442  | 90455815  | 374 |
| chr5  | 117840323 | 117840696 | 374 |
| chr26 | 46723573  | 46723946  | 374 |
| chr23 | 18637963  | 18638336  | 374 |
| chr19 | 54448078  | 54448451  | 374 |
| chr18 | 62953025  | 62953398  | 374 |
| chr13 | 77265708  | 77266081  | 374 |
| chr10 | 3532024   | 3532397   | 374 |
| chr7  | 46196070  | 46196442  | 373 |
| chr5  | 117580055 | 117580427 | 373 |
| chr25 | 4835350   | 4835722   | 373 |
| chr2  | 124988901 | 124989273 | 373 |
| chr19 | 14991928  | 14992300  | 373 |
| chr16 | 49672858  | 49673230  | 373 |
| chr12 | 30768102  | 30768474  | 373 |
| chr21 | 13683414  | 13683785  | 372 |
| chr19 | 59319648  | 59320019  | 372 |
| chr19 | 29743770  | 29744141  | 372 |
| chr17 | 70395135  | 70395506  | 372 |
| chr16 | 44155931  | 44156302  | 372 |
| chr12 | 83821783  | 83822154  | 372 |
| chr11 | 84451443  | 84451814  | 372 |
| chr9  | 90739417  | 90739787  | 371 |
| chr26 | 22304240  | 22304610  | 371 |
| chr17 | 72760145  | 72760515  | 371 |
| chr17 | 63300269  | 63300639  | 371 |
| chr9  | 34925333  | 34925702  | 370 |
| chr7  | 50658817  | 50659186  | 370 |
| chr7  | 18779554  | 18779923  | 370 |
| chr5  | 113521960 | 113522329 | 370 |
| chr3  | 105172162 | 105172531 | 370 |
| chr23 | 51991445  | 51991814  | 370 |
| chr18 | 56865478  | 56865847  | 370 |
| chr18 | 47488403  | 47488772  | 370 |
| chr13 | 42398095  | 42398464  | 370 |
| chr1  | 127976800 | 127977169 | 370 |
| chr29 | 51991107  | 51991475  | 369 |
| chr29 | 34894206  | 34894574  | 369 |
| chr18 | 26256424  | 26256792  | 369 |
| chr17 | 70330790  | 70331158  | 369 |
| chr11 | 98947430  | 98947798  | 369 |
| chr7  | 19219025  | 19219392  | 368 |
| chr5  | 80934161  | 80934528  | 368 |
| chr3  | 127793755 | 127794122 | 368 |
| chr3  | 22903747  | 22904114  | 368 |
| chr27 | 31452520  | 31452887  | 368 |
| chr14 | 1143631   | 1143998   | 368 |

|       |           |           |     |
|-------|-----------|-----------|-----|
| chr5  | 26708505  | 26708871  | 367 |
| chr3  | 114473193 | 114473559 | 367 |
| chr2  | 124309023 | 124309389 | 367 |
| chr19 | 54705784  | 54706150  | 367 |
| chr19 | 41211906  | 41212272  | 367 |
| chr13 | 15783179  | 15783545  | 367 |
| chr11 | 30757213  | 30757579  | 367 |
| chr2  | 111825117 | 111825482 | 366 |
| chr19 | 20355841  | 20356206  | 366 |
| chr18 | 40276952  | 40277317  | 366 |
| chr15 | 39667243  | 39667608  | 366 |
| chr8  | 45669103  | 45669467  | 365 |
| chr8  | 40332170  | 40332534  | 365 |
| chr5  | 117567229 | 117567593 | 365 |
| chr5  | 112010161 | 112010525 | 365 |
| chr24 | 42592152  | 42592516  | 365 |
| chr22 | 56033735  | 56034099  | 365 |
| chr22 | 53595334  | 53595698  | 365 |
| chr11 | 106068762 | 106069126 | 365 |
| chr6  | 91926572  | 91926935  | 364 |
| chr5  | 121332994 | 121333357 | 364 |
| chr29 | 38057150  | 38057513  | 364 |
| chr27 | 46072956  | 46073319  | 364 |
| chr23 | 38544138  | 38544501  | 364 |
| chr23 | 8284460   | 8284823   | 364 |
| chr22 | 10750855  | 10751218  | 364 |
| chr19 | 21599055  | 21599418  | 364 |
| chr16 | 23970164  | 23970527  | 364 |
| chr13 | 77752679  | 77753042  | 364 |
| chr10 | 35666166  | 35666529  | 364 |
| chr6  | 122177876 | 122178238 | 363 |
| chr5  | 67785868  | 67786230  | 363 |
| chr26 | 21824300  | 21824662  | 363 |
| chr23 | 19839478  | 19839840  | 363 |
| chr22 | 14934439  | 14934801  | 363 |
| chr19 | 30853823  | 30854185  | 363 |
| chr16 | 47222856  | 47223218  | 363 |
| chr11 | 84584815  | 84585177  | 363 |
| chr10 | 104783365 | 104783727 | 363 |
| chr10 | 12878023  | 12878385  | 363 |
| chr7  | 14902601  | 14902962  | 362 |
| chr25 | 39142103  | 39142464  | 362 |
| chr2  | 23189800  | 23190161  | 362 |
| chr19 | 23061392  | 23061753  | 362 |
| chr17 | 69498889  | 69499250  | 362 |
| chr17 | 53170789  | 53171150  | 362 |
| chr16 | 75232413  | 75232774  | 362 |
| chr15 | 22197424  | 22197785  | 362 |
| chr4  | 79260670  | 79261030  | 361 |
| chr21 | 15537350  | 15537710  | 361 |

|       |           |           |     |
|-------|-----------|-----------|-----|
| chr19 | 45830210  | 45830570  | 361 |
| chr16 | 44851653  | 44852013  | 361 |
| chr15 | 20534835  | 20535195  | 361 |
| chr10 | 15140285  | 15140645  | 361 |
| chr8  | 82101670  | 82102029  | 360 |
| chr4  | 98829356  | 98829715  | 360 |
| chr28 | 25106792  | 25107151  | 360 |
| chr22 | 29710524  | 29710883  | 360 |
| chr21 | 66585082  | 66585441  | 360 |
| chr18 | 62185944  | 62186303  | 360 |
| chr18 | 46050773  | 46051132  | 360 |
| chr17 | 67409286  | 67409645  | 360 |
| chr12 | 82705408  | 82705767  | 360 |
| chr1  | 99267942  | 99268301  | 360 |
| chr5  | 125765394 | 125765752 | 359 |
| chr5  | 30471980  | 30472338  | 359 |
| chr29 | 34839108  | 34839466  | 359 |
| chr19 | 6512634   | 6512992   | 359 |
| chr18 | 53517185  | 53517543  | 359 |
| chr14 | 9727388   | 9727746   | 359 |
| chr11 | 109706491 | 109706849 | 359 |
| chr10 | 16864568  | 16864926  | 359 |
| chr7  | 17427473  | 17427830  | 358 |
| chr23 | 31375111  | 31375468  | 358 |
| chr23 | 30531503  | 30531860  | 358 |
| chr19 | 14242580  | 14242937  | 358 |
| chr10 | 99924766  | 99925123  | 358 |
| chr10 | 75473442  | 75473799  | 358 |
| chr1  | 73979884  | 73980241  | 358 |
| chr7  | 38254004  | 38254360  | 357 |
| chr3  | 119652689 | 119653045 | 357 |
| chr3  | 102649055 | 102649411 | 357 |
| chr3  | 27912187  | 27912543  | 357 |
| chr21 | 47553590  | 47553946  | 357 |
| chr19 | 59703893  | 59704249  | 357 |
| chr19 | 40301703  | 40302059  | 357 |
| chr1  | 68445722  | 68446078  | 357 |
| chr29 | 38287021  | 38287376  | 356 |
| chr22 | 61471820  | 61472175  | 356 |
| chr14 | 1522019   | 1522374   | 356 |
| chr12 | 68179467  | 68179822  | 356 |
| chr4  | 119334492 | 119334846 | 355 |
| chr9  | 90447637  | 90447990  | 354 |
| chr8  | 8582963   | 8583316   | 354 |
| chr7  | 43511831  | 43512184  | 354 |
| chr23 | 8394522   | 8394875   | 354 |
| chr2  | 131150933 | 131151286 | 354 |
| chrX  | 17129525  | 17129877  | 353 |
| chr8  | 74018879  | 74019231  | 353 |
| chr4  | 30811025  | 30811377  | 353 |

|       |               |           |     |
|-------|---------------|-----------|-----|
| chr29 | 17869721      | 17870073  | 353 |
| chr21 | 25215657      | 25216009  | 353 |
| chr2  | 127814418     | 127814770 | 353 |
| chr18 | 41056570      | 41056922  | 353 |
| chr16 | 2437260       | 2437612   | 353 |
| chr12 | 74536037      | 74536389  | 353 |
| chr8  | 73525054      | 73525405  | 352 |
| chr3  | 55868964      | 55869315  | 352 |
| chr19 | 64746775      | 64747126  | 352 |
| chr5  | 111020817     | 111021167 | 351 |
| chr5  | 32909998      | 32910348  | 351 |
| chr26 | 18370406      | 18370756  | 351 |
| chr12 | 14818635      | 14818985  | 351 |
| chr10 | 66779998      | 66780348  | 351 |
| chr8  | 5342742       | 5343091   | 350 |
| chr2  | 74009631      | 74009980  | 350 |
| chr19 | 60828532      | 60828881  | 350 |
| chr13 | 42013625      | 42013974  | 350 |
| chr12 | 68760938      | 68761287  | 350 |
| chr11 | 656567 656916 | 350       |     |
| chr10 | 4918094       | 4918443   | 350 |
| chr5  | 121335109     | 121335457 | 349 |
| chr25 | 21765662      | 21766010  | 349 |
| chr19 | 39909795      | 39910143  | 349 |
| chr19 | 38230232      | 38230580  | 349 |
| chr19 | 10935038      | 10935386  | 349 |
| chr18 | 12115846      | 12116194  | 349 |
| chr17 | 66166804      | 66167152  | 349 |
| chr16 | 59670483      | 59670831  | 349 |
| chr16 | 38783366      | 38783714  | 349 |
| chr12 | 32195330      | 32195678  | 349 |
| chr6  | 14228106      | 14228453  | 348 |
| chr3  | 110986183     | 110986530 | 348 |
| chr29 | 31490360      | 31490707  | 348 |
| chr25 | 22533077      | 22533424  | 348 |
| chr18 | 23610587      | 23610934  | 348 |
| chr17 | 75049433      | 75049780  | 348 |
| chr8  | 40332613      | 40332959  | 347 |
| chr25 | 39446649      | 39446995  | 347 |
| chr23 | 28059993      | 28060339  | 347 |
| chr13 | 43438939      | 43439285  | 347 |
| chr12 | 17315397      | 17315743  | 347 |
| chr8  | 65249581      | 65249926  | 346 |
| chr7  | 12982404      | 12982749  | 346 |
| chr29 | 46654132      | 46654477  | 346 |
| chr29 | 46240393      | 46240738  | 346 |
| chr18 | 11937461      | 11937806  | 346 |
| chr14 | 61346058      | 61346403  | 346 |
| chr7  | 16552408      | 16552752  | 345 |
| chr7  | 14992362      | 14992706  | 345 |



|       |           |           |     |
|-------|-----------|-----------|-----|
| chr6  | 46615210  | 46615554  | 345 |
| chr4  | 122870117 | 122870461 | 345 |
| chr17 | 65951596  | 65951940  | 345 |
| chr1  | 123111946 | 123112290 | 345 |
| chr7  | 43152250  | 43152593  | 344 |
| chr19 | 25407050  | 25407393  | 344 |
| chr4  | 74867391  | 74867733  | 343 |
| chr22 | 53948262  | 53948604  | 343 |
| chr22 | 41732746  | 41733088  | 343 |
| chr17 | 15957075  | 15957417  | 343 |
| chr10 | 5259889   | 5260231   | 343 |
| chr5  | 76197085  | 76197426  | 342 |
| chr3  | 17447228  | 17447569  | 342 |
| chr2  | 21515235  | 21515576  | 342 |
| chr17 | 57768787  | 57769128  | 342 |
| chr15 | 22790315  | 22790656  | 342 |
| chr2  | 75830910  | 75831250  | 341 |
| chr17 | 73161538  | 73161878  | 341 |
| chr7  | 15677844  | 15678183  | 340 |
| chr5  | 33860220  | 33860559  | 340 |
| chr3  | 35457292  | 35457631  | 340 |
| chr18 | 55704057  | 55704396  | 340 |
| chr16 | 46640525  | 46640864  | 340 |
| chr15 | 34587531  | 34587870  | 340 |
| chr10 | 24174949  | 24175288  | 340 |
| chr7  | 20357338  | 20357676  | 339 |
| chr3  | 29256990  | 29257328  | 339 |
| chr23 | 18648693  | 18649031  | 339 |
| chr5  | 81687715  | 81688052  | 338 |
| chr3  | 107735370 | 107735707 | 338 |
| chr29 | 41641651  | 41641988  | 338 |
| chr18 | 23609357  | 23609694  | 338 |
| chr11 | 6928652   | 6928989   | 338 |
| chr6  | 121873038 | 121873374 | 337 |
| chr5  | 33882684  | 33883020  | 337 |
| chr23 | 35217570  | 35217906  | 337 |
| chr23 | 31071210  | 31071546  | 337 |
| chr19 | 44178069  | 44178405  | 337 |
| chr18 | 63018058  | 63018394  | 337 |
| chr15 | 73778557  | 73778893  | 337 |
| chr13 | 77296858  | 77297194  | 337 |
| chr6  | 121751646 | 121751981 | 336 |
| chr5  | 32838774  | 32839109  | 336 |
| chr8  | 65725442  | 65725776  | 335 |
| chr18 | 62702473  | 62702807  | 335 |
| chr18 | 55588551  | 55588885  | 335 |
| chr8  | 63916632  | 63916965  | 334 |
| chr3  | 126957853 | 126958185 | 333 |
| chr3  | 121502403 | 121502735 | 333 |
| chr24 | 40817127  | 40817459  | 333 |

|       |               |           |     |
|-------|---------------|-----------|-----|
| chr21 | 9489662       | 9489994   | 333 |
| chr13 | 45322934      | 45323266  | 333 |
| chr10 | 90433446      | 90433778  | 333 |
| chr8  | 73748542      | 73748873  | 332 |
| chr4  | 92166724      | 92167055  | 332 |
| chr22 | 53951435      | 53951766  | 332 |
| chr18 | 50864002      | 50864333  | 332 |
| chr5  | 120139564     | 120139894 | 331 |
| chr22 | 60420475      | 60420805  | 331 |
| chr2  | 10213803      | 10214133  | 331 |
| chr19 | 44873435      | 44873765  | 331 |
| chr18 | 56639782      | 56640112  | 331 |
| chr15 | 26729542      | 26729872  | 331 |
| chr12 | 17228820      | 17229150  | 331 |
| chr3  | 117311208     | 117311537 | 330 |
| chr29 | 46346097      | 46346426  | 330 |
| chr23 | 48735124      | 48735453  | 330 |
| chr8  | 1292097       | 1292425   | 329 |
| chr6  | 122420843     | 122421171 | 329 |
| chr1  | 83272360      | 83272688  | 329 |
| chr25 | 40214156      | 40214483  | 328 |
| chr16 | 69927618      | 69927945  | 328 |
| chr14 | 48326631      | 48326958  | 328 |
| chr23 | 27884398      | 27884723  | 326 |
| chr22 | 57378396      | 57378721  | 326 |
| chr17 | 66838766      | 66839091  | 326 |
| chr23 | 47206990      | 47207314  | 325 |
| chr21 | 22722995      | 22723319  | 325 |
| chr14 | 829305 829629 | 325       |     |
| chr4  | 66754311      | 66754634  | 324 |
| chr3  | 85366140      | 85366463  | 324 |
| chr24 | 58978105      | 58978428  | 324 |
| chr7  | 5239697       | 5240019   | 323 |
| chr18 | 11368515      | 11368837  | 323 |
| chr17 | 61076725      | 61077047  | 323 |
| chr27 | 17828533      | 17828854  | 322 |
| chr13 | 60698037      | 60698358  | 322 |
| chr22 | 58658162      | 58658481  | 320 |
| chr16 | 51063081      | 51063400  | 320 |
| chr11 | 92684286      | 92684605  | 320 |
| chr27 | 826149 826467 | 319       |     |
| chr24 | 2545572       | 2545890   | 319 |
| chr23 | 28011779      | 28012097  | 319 |
| chr21 | 66575924      | 66576242  | 319 |
| chr19 | 38837138      | 38837456  | 319 |
| chr29 | 48790165      | 48790482  | 318 |
| chr18 | 22152879      | 22153196  | 318 |
| chr13 | 77721362      | 77721679  | 318 |
| chr3  | 121124293     | 121124609 | 317 |
| chr26 | 22346981      | 22347297  | 317 |

|       |               |           |     |
|-------|---------------|-----------|-----|
| chr11 | 93280413      | 93280729  | 317 |
| chr19 | 47921235      | 47921550  | 316 |
| chr19 | 41211019      | 41211334  | 316 |
| chr1  | 1568461       | 1568776   | 316 |
| chr19 | 8605608       | 8605920   | 313 |
| chr3  | 51912690      | 51913001  | 312 |
| chr13 | 77526517      | 77526826  | 310 |
| chr3  | 24046019      | 24046327  | 309 |
| chr10 | 20459920      | 20460228  | 309 |
| chr1  | 84446091      | 84446399  | 309 |
| chr9  | 90428788      | 90429095  | 308 |
| chr15 | 75499343      | 75499650  | 308 |
| chr14 | 435862 436169 | 308       |     |
| chr22 | 50997678      | 50997984  | 307 |
| chr19 | 53552886      | 53553192  | 307 |
| chr18 | 22333018      | 22333324  | 307 |
| chr18 | 13539035      | 13539341  | 307 |
| chr22 | 38941998      | 38942302  | 305 |
| chr19 | 59581994      | 59582298  | 305 |
| chr24 | 49772595      | 49772898  | 304 |
| chrX  | 87713726      | 87714028  | 303 |
| chr21 | 31098078      | 31098380  | 303 |
| chr19 | 54446439      | 54446741  | 303 |
| chr7  | 3685098       | 3685399   | 302 |
| chr17 | 3233361       | 3233662   | 302 |
| chr4  | 117844962     | 117845262 | 301 |
| chr18 | 11374990      | 11375290  | 301 |
| chr18 | 64297005      | 64297304  | 300 |
| chr8  | 7587238       | 7587536   | 299 |
| chr23 | 13597649      | 13597947  | 299 |
| chr24 | 20835562      | 20835859  | 298 |
| chr24 | 60587483      | 60587779  | 297 |
| chr22 | 44835543      | 44835839  | 297 |
| chr2  | 135169906     | 135170202 | 297 |
| chr19 | 5962766       | 5963062   | 297 |
| chr23 | 16081744      | 16082039  | 296 |
| chr5  | 72150874      | 72151168  | 295 |
| chr18 | 56886402      | 56886696  | 295 |
| chr19 | 59298518      | 59298811  | 294 |
| chr19 | 27542919      | 27543212  | 294 |
| chr19 | 26651898      | 26652191  | 294 |
| chr11 | 97543334      | 97543627  | 294 |
| chr27 | 28117417      | 28117709  | 293 |
| chr25 | 22541292      | 22541584  | 293 |
| chr21 | 25801319      | 25801611  | 293 |
| chr13 | 75737083      | 75737375  | 293 |
| chr12 | 83801365      | 83801657  | 293 |
| chr3  | 22912864      | 22913155  | 292 |
| chr21 | 26975235      | 26975526  | 292 |
| chr13 | 41077527      | 41077818  | 292 |

|       |               |           |     |
|-------|---------------|-----------|-----|
| chr1  | 100630770     | 100631061 | 292 |
| chr26 | 50766992      | 50767282  | 291 |
| chr19 | 38235306      | 38235596  | 291 |
| chr5  | 123144527     | 123144816 | 290 |
| chr25 | 36446251      | 36446540  | 290 |
| chr19 | 26949796      | 26950085  | 290 |
| chr27 | 11608482      | 11608770  | 289 |
| chr16 | 47131344      | 47131632  | 289 |
| chr29 | 36751467      | 36751754  | 288 |
| chr20 | 38860732      | 38861019  | 288 |
| chr5  | 118535486     | 118535771 | 286 |
| chr3  | 15782104      | 15782389  | 286 |
| chr16 | 23957619      | 23957904  | 286 |
| chr17 | 5392404       | 5392688   | 285 |
| chr23 | 10610320      | 10610602  | 283 |
| chr21 | 20722690      | 20722970  | 281 |
| chr19 | 56609216      | 56609496  | 281 |
| chr19 | 46048750      | 46049030  | 281 |
| chr21 | 65797803      | 65798082  | 280 |
| chr8  | 103804089     | 103804367 | 279 |
| chr2  | 75694840      | 75695118  | 279 |
| chr5  | 103507698     | 103507973 | 276 |
| chr25 | 28068189      | 28068464  | 276 |
| chr19 | 37939594      | 37939869  | 276 |
| chr18 | 11418471      | 11418746  | 276 |
| chr7  | 19940140      | 19940414  | 275 |
| chr18 | 11550132      | 11550406  | 275 |
| chr19 | 58194765      | 58195037  | 273 |
| chr20 | 647980 648249 | 270       |     |
| chr23 | 46379698      | 46379965  | 268 |
| chr27 | 40725742      | 40726005  | 264 |
| chr27 | 297065 297324 | 260       |     |
| chr17 | 57857370      | 57857629  | 260 |
| chr4  | 116863162     | 116863419 | 258 |
| chr19 | 39011461      | 39011718  | 258 |
| chr29 | 46241054      | 46241308  | 255 |
| chr19 | 56477423      | 56477677  | 255 |
| chr23 | 51252374      | 51252626  | 253 |
| chr17 | 63463832      | 63464084  | 253 |
| chr14 | 24233938      | 24234188  | 251 |
| chr3  | 98114516      | 98114764  | 249 |
| chr3  | 39117209      | 39117456  | 248 |
| chr13 | 77342945      | 77343190  | 246 |
| chr11 | 14220588      | 14220833  | 246 |
| chr5  | 113187039     | 113187280 | 242 |
| chr26 | 38194465      | 38194705  | 241 |
| chr7  | 42659640      | 42659879  | 240 |
| chr16 | 58323464      | 58323703  | 240 |
| chr20 | 838813 839051 | 239       |     |
| chr16 | 22468265      | 22468502  | 238 |

|       |               |           |      |
|-------|---------------|-----------|------|
| chr7  | 51402862      | 51403232  | 371  |
| chr2  | 49566484      | 49566879  | 396  |
| chr18 | 48365207      | 48365944  | 738  |
| chr7  | 51332486      | 51332864  | 379  |
| chr17 | 68461961      | 68462229  | 269  |
| chr8  | 24316500      | 24316911  | 412  |
| chr8  | 73531706      | 73532113  | 408  |
| chr4  | 124285343     | 124285617 | 275  |
| chr8  | 24393518      | 24393916  | 399  |
| chr8  | 108710621     | 108710995 | 375  |
| chr7  | 17307247      | 17307659  | 413  |
| chr26 | 21977597      | 21977911  | 315  |
| chr8  | 73776661      | 73776968  | 308  |
| chr3  | 114208822     | 114209160 | 339  |
| chr8  | 73298348      | 73298562  | 215  |
| chr19 | 20360599      | 20361540  | 942  |
| chr9  | 46028883      | 46029654  | 772  |
| chr15 | 22144836      | 22145543  | 708  |
| chr20 | 769549 770244 | 696       |      |
| chr1  | 152258871     | 152259458 | 588  |
| chr19 | 18437448      | 18438023  | 576  |
| chr7  | 70727451      | 70727974  | 524  |
| chr12 | 34514175      | 34514684  | 510  |
| chr20 | 65531241      | 65531707  | 467  |
| chr6  | 103307419     | 103307809 | 391  |
| chr11 | 10298052      | 10299227  | 1176 |
| chr11 | 16112929      | 16113981  | 1053 |
| chr7  | 46232509      | 46233305  | 797  |
| chr18 | 57315571      | 57316325  | 755  |
| chr12 | 82310738      | 82311147  | 410  |
| chr14 | 7824706       | 7825099   | 394  |
| chr18 | 51524334      | 51524714  | 381  |
| chr8  | 7521757       | 7522735   | 979  |
| chr7  | 19882680      | 19883472  | 793  |
| chr5  | 33860604      | 33861160  | 557  |
| chr19 | 65244020      | 65244567  | 548  |
| chr4  | 123011319     | 123011860 | 542  |
| chr19 | 38970675      | 38971038  | 364  |
| chr11 | 89067072      | 89067584  | 513  |
| chr3  | 105123652     | 105124082 | 431  |
| chr9  | 106591764     | 106592162 | 399  |
| chr18 | 51047172      | 51047558  | 387  |
| chr23 | 23867786      | 23868498  | 713  |
| chr19 | 25282416      | 25283090  | 675  |
| chr1  | 67725717      | 67726316  | 600  |
| chr8  | 8713275       | 8713782   | 508  |
| chr2  | 123015944     | 123016408 | 465  |
| chr29 | 17871053      | 17871440  | 388  |
| chr3  | 15782631      | 15783426  | 796  |
| chr13 | 35972227      | 35972683  | 457  |

|       |               |           |     |
|-------|---------------|-----------|-----|
| chr15 | 81088577      | 81088899  | 323 |
| chr4  | 47454668      | 47455158  | 491 |
| chr25 | 35563282      | 35563766  | 485 |
| chr25 | 27388149      | 27388574  | 426 |
| chr25 | 3072873       | 3073267   | 395 |
| chr3  | 98224531      | 98224867  | 337 |
| chr3  | 10566227      | 10566974  | 748 |
| chr29 | 26878202      | 26878921  | 720 |
| chr16 | 47996710      | 47997129  | 420 |
| chr15 | 54287085      | 54287459  | 375 |
| chr13 | 61189614      | 61190101  | 488 |
| chr5  | 100127070     | 100127505 | 436 |
| chr24 | 48171284      | 48171682  | 399 |
| chr25 | 43850949      | 43851334  | 386 |
| chr5  | 113205356     | 113206060 | 705 |
| chr21 | 25976058      | 25976583  | 526 |
| chr8  | 70187066      | 70187512  | 447 |
| chr5  | 117279324     | 117279722 | 399 |
| chr22 | 55496029      | 55496369  | 341 |
| chr15 | 25789133      | 25789808  | 676 |
| chr4  | 123023284     | 123023721 | 438 |
| chr14 | 607157 607567 | 411       |     |
| chr23 | 28505916      | 28506323  | 408 |
| chr3  | 115688197     | 115688574 | 378 |
| chr6  | 120775146     | 120775436 | 291 |
| chr15 | 22792359      | 22792859  | 501 |
| chr23 | 30667326      | 30667772  | 447 |
| chr11 | 104889041     | 104889471 | 431 |
| chr21 | 52039454      | 52039852  | 399 |
| chr23 | 43420772      | 43421168  | 397 |
| chr7  | 42220704      | 42221260  | 557 |
| chr17 | 44382590      | 44383094  | 505 |
| chr26 | 50637993      | 50638464  | 472 |
| chr12 | 82618557      | 82618991  | 435 |
| chr23 | 11083252      | 11083685  | 434 |
| chr21 | 28902607      | 28903040  | 434 |
| chr10 | 99928676      | 99929093  | 418 |
| chr25 | 40821549      | 40821962  | 414 |
| chr16 | 48202058      | 48202456  | 399 |
| chr21 | 6563870       | 6564265   | 396 |
| chr9  | 10496869      | 10497258  | 390 |
| chr28 | 33892498      | 33892874  | 377 |
| chr8  | 23055384      | 23055759  | 376 |
| chr3  | 17448295      | 17448667  | 373 |
| chr22 | 50120311      | 50120679  | 369 |
| chr25 | 38041255      | 38041622  | 368 |
| chr14 | 5905739       | 5906106   | 368 |
| chr21 | 65845518      | 65845877  | 360 |
| chr5  | 29182970      | 29183327  | 358 |
| chr10 | 19415938      | 19416289  | 352 |

|       |               |           |      |
|-------|---------------|-----------|------|
| chr8  | 7555469       | 7555816   | 348  |
| chr7  | 17132298      | 17132640  | 343  |
| chr23 | 8467898       | 8468239   | 342  |
| chr25 | 21765103      | 21765425  | 323  |
| chr8  | 70337879      | 70338189  | 311  |
| chr3  | 22963175      | 22963436  | 262  |
| chr21 | 18781641      | 18781896  | 256  |
| chr25 | 388043 388293 | 251       |      |
| chr11 | 76256512      | 76256745  | 234  |
| chr20 | 73397652      | 73397851  | 200  |
| chr21 | 66583966      | 66584970  | 1005 |
| chr19 | 30535170      | 30536046  | 877  |
| chr4  | 123023822     | 123024661 | 840  |
| chr19 | 21867133      | 21867937  | 805  |
| chr17 | 69881834      | 69882622  | 789  |
| chr13 | 39953408      | 39954192  | 785  |
| chr13 | 41707195      | 41707952  | 758  |
| chr25 | 40367372      | 40368072  | 701  |
| chr8  | 90191044      | 90191740  | 697  |
| chr19 | 14053972      | 14054659  | 688  |
| chr28 | 26333553      | 26334236  | 684  |
| chr11 | 10248587      | 10249266  | 680  |
| chr2  | 119578779     | 119579440 | 662  |
| chr29 | 44686778      | 44687436  | 659  |
| chr28 | 33727165      | 33727820  | 656  |
| chr28 | 26973804      | 26974458  | 655  |
| chr3  | 31675083      | 31675714  | 632  |
| chr16 | 39471570      | 39472200  | 631  |
| chr18 | 681304 681920 | 617       |      |
| chr10 | 19423240      | 19423846  | 607  |
| chr18 | 3548943       | 3549545   | 603  |
| chr23 | 52754767      | 52755327  | 561  |
| chr22 | 57637532      | 57638087  | 556  |
| chr1  | 128118764     | 128119316 | 553  |
| chr7  | 10961747      | 10962283  | 537  |
| chr23 | 9749302       | 9749830   | 529  |
| chr19 | 29754436      | 29754960  | 525  |
| chr16 | 48790043      | 48790558  | 516  |
| chr12 | 35605801      | 35606312  | 512  |
| chr18 | 54101321      | 54101816  | 496  |
| chr7  | 60984973      | 60985462  | 490  |
| chr3  | 127707768     | 127708252 | 485  |
| chr9  | 43851391      | 43851865  | 475  |
| chr18 | 58674859      | 58675314  | 456  |
| chr15 | 22219271      | 22219710  | 440  |
| chr15 | 24005735      | 24006172  | 438  |
| chr1  | 19194702      | 19195127  | 426  |
| chr7  | 64577879      | 64578302  | 424  |
| chr19 | 55305665      | 55306085  | 421  |
| chr3  | 52140840      | 52141253  | 414  |

|       |               |           |      |
|-------|---------------|-----------|------|
| chr25 | 34821429      | 34821841  | 413  |
| chr29 | 48938278      | 48938688  | 411  |
| chr11 | 102382359     | 102382769 | 411  |
| chr3  | 122737648     | 122738057 | 410  |
| chr16 | 2232399       | 2232805   | 407  |
| chr5  | 10728427      | 10728831  | 405  |
| chr25 | 38400920      | 38401322  | 403  |
| chr27 | 17847992      | 17848393  | 402  |
| chr18 | 49484946      | 49485346  | 401  |
| chr9  | 52380641      | 52381040  | 400  |
| chr18 | 37220636      | 37221034  | 399  |
| chr17 | 70007246      | 70007644  | 399  |
| chr11 | 109497084     | 109497482 | 399  |
| chr4  | 46281595      | 46281989  | 395  |
| chr28 | 26778045      | 26778434  | 390  |
| chr18 | 11675693      | 11676082  | 390  |
| chr3  | 23728940      | 23729328  | 389  |
| chr25 | 665066 665450 | 385       |      |
| chr12 | 30498304      | 30498684  | 381  |
| chr5  | 26715627      | 26716000  | 374  |
| chr10 | 12129699      | 12130069  | 371  |
| chr19 | 54631830      | 54632178  | 349  |
| chr3  | 21917332      | 21917657  | 326  |
| chr16 | 40904998      | 40905292  | 295  |
| chr18 | 51102670      | 51104110  | 1441 |
| chr29 | 48891626      | 48892801  | 1176 |
| chr7  | 16523870      | 16524867  | 998  |
| chr20 | 33637907      | 33638872  | 966  |
| chr11 | 96399365      | 96400248  | 884  |
| chr26 | 37872574      | 37873449  | 876  |
| chr19 | 54741633      | 54742486  | 854  |
| chr10 | 3519608       | 3520400   | 793  |
| chr9  | 100481808     | 100482582 | 775  |
| chr7  | 38313858      | 38314628  | 771  |
| chr16 | 44154002      | 44154770  | 769  |
| chr5  | 43085851      | 43086595  | 745  |
| chr24 | 189373 190103 | 731       |      |
| chr19 | 14072387      | 14073109  | 723  |
| chr11 | 109648810     | 109649529 | 720  |
| chr7  | 15233175      | 15233859  | 685  |
| chr28 | 34081604      | 34082288  | 685  |
| chr11 | 48564421      | 48565101  | 681  |
| chr18 | 48453469      | 48454137  | 669  |
| chr12 | 74462751      | 74463419  | 669  |
| chr29 | 41467516      | 41468182  | 667  |
| chr11 | 70860358      | 70861023  | 666  |
| chr25 | 37195582      | 37196236  | 655  |
| chr19 | 21728228      | 21728846  | 619  |
| chr19 | 29018182      | 29018793  | 612  |
| chr8  | 45668454      | 45669058  | 605  |



|       |               |           |      |
|-------|---------------|-----------|------|
| chr9  | 26585787      | 26586390  | 604  |
| chr23 | 12315251      | 12315831  | 581  |
| chr3  | 109757432     | 109758011 | 580  |
| chr16 | 50270259      | 50270825  | 567  |
| chr23 | 9738376       | 9738938   | 563  |
| chr22 | 30119159      | 30119715  | 557  |
| chr19 | 24687136      | 24687689  | 554  |
| chr16 | 50274920      | 50275471  | 552  |
| chr18 | 25545989      | 25546534  | 546  |
| chr13 | 59928444      | 59928981  | 538  |
| chr5  | 114243609     | 114244145 | 537  |
| chr5  | 29635769      | 29636293  | 525  |
| chr9  | 63426098      | 63426612  | 515  |
| chr1  | 84461241      | 84461741  | 501  |
| chr13 | 55119769      | 55120266  | 498  |
| chr26 | 31887719      | 31888203  | 485  |
| chr15 | 29290231      | 29290715  | 485  |
| chr25 | 37850605      | 37851085  | 481  |
| chr10 | 20897480      | 20897958  | 479  |
| chr16 | 41351649      | 41352108  | 460  |
| chr20 | 9171391       | 9171834   | 444  |
| chr19 | 46726911      | 46727343  | 433  |
| chr10 | 74704832      | 74705255  | 424  |
| chr19 | 12511607      | 12512027  | 421  |
| chr3  | 114849375     | 114849788 | 414  |
| chr14 | 6709572       | 6709984   | 413  |
| chr2  | 73259593      | 73260002  | 410  |
| chr8  | 110929318     | 110929724 | 407  |
| chr10 | 16893733      | 16894134  | 402  |
| chr25 | 36439222      | 36439622  | 401  |
| chr22 | 749373 749771 | 399       |      |
| chr17 | 75532171      | 75532569  | 399  |
| chr15 | 24194853      | 24195251  | 399  |
| chr1  | 145355631     | 145356029 | 399  |
| chr13 | 67393036      | 67393430  | 395  |
| chr3  | 123462511     | 123462899 | 389  |
| chr13 | 77336936      | 77337317  | 382  |
| chr13 | 60411433      | 60411802  | 370  |
| chr17 | 67106063      | 67106420  | 358  |
| chr21 | 65676414      | 65676767  | 354  |
| chr11 | 56770316      | 56770664  | 349  |
| chr11 | 91377512      | 91377859  | 348  |
| chr28 | 34054311      | 34054641  | 331  |
| chr11 | 28536449      | 28537762  | 1314 |
| chr20 | 73732476      | 73733425  | 950  |
| chr11 | 107557132     | 107558030 | 899  |
| chr9  | 12683921      | 12684800  | 880  |
| chr23 | 52757029      | 52757828  | 800  |
| chr2  | 139202839     | 139203607 | 769  |
| chr9  | 104827653     | 104828404 | 752  |

|       |           |           |      |
|-------|-----------|-----------|------|
| chr18 | 53354199  | 53354909  | 711  |
| chr19 | 64726002  | 64726710  | 709  |
| chr8  | 9364119   | 9364825   | 707  |
| chr5  | 30597809  | 30598490  | 682  |
| chr3  | 127049194 | 127049873 | 680  |
| chr4  | 113657805 | 113658450 | 646  |
| chr12 | 74459211  | 74459850  | 640  |
| chr5  | 33919146  | 33919780  | 635  |
| chr21 | 33069269  | 33069902  | 634  |
| chr18 | 39913543  | 39914153  | 611  |
| chr28 | 26787644  | 26788251  | 608  |
| chr12 | 36431864  | 36432460  | 597  |
| chr20 | 75050847  | 75051439  | 593  |
| chr23 | 52702096  | 52702674  | 579  |
| chr23 | 31103273  | 31103799  | 527  |
| chr26 | 51196635  | 51197153  | 519  |
| chr15 | 75264665  | 75265179  | 515  |
| chr10 | 84019683  | 84020184  | 502  |
| chr8  | 103922986 | 103923468 | 483  |
| chr16 | 2122824   | 2123300   | 477  |
| chr21 | 68944573  | 68945037  | 465  |
| chr21 | 30323279  | 30323735  | 457  |
| chr17 | 62073002  | 62073447  | 446  |
| chr26 | 22811100  | 22811526  | 427  |
| chr14 | 22085574  | 22085990  | 417  |
| chr7  | 42205004  | 42205402  | 399  |
| chr7  | 15592658  | 15593056  | 399  |
| chr24 | 44346852  | 44347250  | 399  |
| chr13 | 57416069  | 57416463  | 395  |
| chr8  | 63935755  | 63936147  | 393  |
| chr3  | 102696817 | 102697204 | 388  |
| chr6  | 5811384   | 5811763   | 380  |
| chr19 | 64703466  | 64703843  | 378  |
| chr18 | 38354703  | 38355080  | 378  |
| chr4  | 97712054  | 97712428  | 375  |
| chr17 | 69424091  | 69424463  | 373  |
| chr15 | 75510862  | 75511221  | 360  |
| chr15 | 27455043  | 27455397  | 355  |
| chr7  | 75400185  | 75400533  | 349  |
| chr23 | 10339901  | 10340247  | 347  |
| chr17 | 70334374  | 70334697  | 324  |
| chr3  | 111812620 | 111812932 | 313  |
| chr23 | 52608527  | 52608837  | 311  |
| chr5  | 115158705 | 115159762 | 1058 |
| chr19 | 38300582  | 38301425  | 844  |
| chr23 | 27953648  | 27954425  | 778  |
| chr13 | 66137062  | 66137822  | 761  |
| chr29 | 41855109  | 41855852  | 744  |
| chr17 | 73190159  | 73190892  | 734  |
| chr13 | 77285138  | 77285778  | 641  |

|       |             |           |     |
|-------|-------------|-----------|-----|
| chr2  | 17537290    | 17537909  | 620 |
| chr19 | 60380951    | 60381537  | 587 |
| chr22 | 59998898    | 59999473  | 576 |
| chr11 | 98962809    | 98963381  | 573 |
| chr10 | 20878484    | 20879055  | 572 |
| chr7  | 37371501    | 37372061  | 561 |
| chr19 | 37926358    | 37926915  | 558 |
| chr15 | 44885536    | 44886075  | 540 |
| chr11 | 9427920     | 9428459   | 540 |
| chr26 | 22212507    | 22213038  | 532 |
| chr20 | 32404380    | 32404896  | 517 |
| chr8  | 63741073    | 63741582  | 510 |
| chr6  | 32568843    | 32569347  | 505 |
| chr18 | 57564229    | 57564722  | 494 |
| chr8  | 116065446   | 116065924 | 479 |
| chr12 | 74243334    | 74243803  | 470 |
| chr13 | 72606170    | 72606633  | 464 |
| chr15 | 33477315    | 33477775  | 461 |
| chr13 | 28495042    | 28495501  | 460 |
| chr17 | 68351576    | 68352029  | 454 |
| chr14 | 76892249    | 76892701  | 453 |
| chr13 | 59908648    | 59909098  | 451 |
| chr23 | 17420023    | 17420470  | 448 |
| chr8  | 62579916    | 62580358  | 443 |
| chr2  | 76374919    | 76375357  | 439 |
| chr17 | 66821245    | 66821681  | 437 |
| chr13 | 75962830    | 75963259  | 430 |
| chr19 | 54309320    | 54309747  | 428 |
| chr19 | 12320975    | 12321398  | 424 |
| chr13 | 65855035    | 65855458  | 424 |
| chr22 | 15243114    | 15243535  | 422 |
| chr1  | 1644522     | 1644943   | 422 |
| chr19 | 21764634    | 21765052  | 419 |
| chr8  | 24690750    | 24691167  | 418 |
| chr18 | 12128354    | 12128758  | 405 |
| chr14 | 51959 52361 | 403       |     |
| chr19 | 27350057    | 27350458  | 402 |
| chr21 | 46877981    | 46878379  | 399 |
| chr18 | 33313290    | 33313688  | 399 |
| chr17 | 63280182    | 63280580  | 399 |
| chr11 | 84506016    | 84506414  | 399 |
| chr22 | 59559269    | 59559662  | 394 |
| chr3  | 22623465    | 22623856  | 392 |
| chr1  | 100083281   | 100083672 | 392 |
| chr16 | 57535352    | 57535737  | 386 |
| chr25 | 2985287     | 2985666   | 380 |
| chr13 | 75678026    | 75678402  | 377 |
| chr16 | 73688723    | 73689096  | 374 |
| chr15 | 29895872    | 29896238  | 367 |
| chr7  | 85415002    | 85415344  | 343 |

|       |           |           |      |
|-------|-----------|-----------|------|
| chr13 | 54854886  | 54855222  | 337  |
| chr15 | 65645482  | 65645798  | 317  |
| chr1  | 68927198  | 68927511  | 314  |
| chr10 | 13592061  | 13593131  | 1071 |
| chr17 | 66157378  | 66158128  | 751  |
| chr4  | 48872082  | 48872798  | 717  |
| chr8  | 7848970   | 7849625   | 656  |
| chr24 | 29708361  | 29709014  | 654  |
| chr19 | 14085903  | 14086545  | 643  |
| chr3  | 105194427 | 105195061 | 635  |
| chr6  | 62053309  | 62053931  | 623  |
| chr14 | 7767182   | 7767773   | 592  |
| chr13 | 61505958  | 61506542  | 585  |
| chr4  | 90366582  | 90367141  | 560  |
| chr29 | 42917845  | 42918397  | 553  |
| chr11 | 105669525 | 105670056 | 532  |
| chr23 | 43288883  | 43289374  | 492  |
| chr11 | 98322949  | 98323429  | 481  |
| chr10 | 8537112   | 8537577   | 466  |
| chr13 | 75817929  | 75818388  | 460  |
| chr25 | 28177270  | 28177711  | 442  |
| chr29 | 46221655  | 46222095  | 441  |
| chr2  | 74028998  | 74029435  | 438  |
| chr14 | 23180953  | 23181380  | 428  |
| chr13 | 80222758  | 80223178  | 421  |
| chr21 | 67399404  | 67399823  | 420  |
| chr21 | 47691966  | 47692378  | 413  |
| chr19 | 39365675  | 39366084  | 410  |
| chr29 | 30031338  | 30031744  | 407  |
| chr19 | 60411128  | 60411534  | 407  |
| chr1  | 123142213 | 123142616 | 404  |
| chr19 | 61738466  | 61738855  | 390  |
| chr23 | 14261317  | 14261696  | 380  |
| chr19 | 14997103  | 14997480  | 378  |
| chr28 | 26402181  | 26402553  | 373  |
| chr25 | 8710518   | 8710886   | 369  |
| chr4  | 51585738  | 51586105  | 368  |
| chr3  | 110767660 | 110768018 | 359  |
| chr3  | 123642831 | 123643179 | 349  |
| chr19 | 12325169  | 12325515  | 347  |
| chr18 | 11362791  | 11363100  | 310  |
| chr18 | 11366823  | 11367735  | 913  |
| chr19 | 22564810  | 22565657  | 848  |
| chr23 | 16082723  | 16083455  | 733  |
| chr4  | 78895725  | 78896372  | 648  |
| chr21 | 22692958  | 22693549  | 592  |
| chr19 | 19139755  | 19140272  | 518  |
| chr16 | 23865287  | 23865800  | 514  |
| chr29 | 41679297  | 41679806  | 510  |
| chr15 | 76734542  | 76735030  | 489  |

|       |               |           |      |
|-------|---------------|-----------|------|
| chr23 | 3255154       | 3255619   | 466  |
| chr21 | 9524543       | 9525005   | 463  |
| chr2  | 74011129      | 74011587  | 459  |
| chr29 | 44665477      | 44665934  | 458  |
| chr18 | 635369 635821 | 453       |      |
| chr9  | 90635235      | 90635653  | 419  |
| chr24 | 60820806      | 60821221  | 416  |
| chr2  | 125320817     | 125321209 | 393  |
| chr3  | 115018159     | 115018549 | 391  |
| chr26 | 39256065      | 39256438  | 374  |
| chr16 | 46651058      | 46651424  | 367  |
| chr19 | 57256576      | 57256941  | 366  |
| chr7  | 93966883      | 93967154  | 272  |
| chr19 | 46855455      | 46856468  | 1014 |
| chr23 | 11845773      | 11846644  | 872  |
| chr3  | 15349663      | 15350393  | 731  |
| chr11 | 100920731     | 100921427 | 697  |
| chr8  | 35970136      | 35970802  | 667  |
| chr17 | 68400692      | 68401345  | 654  |
| chr4  | 71557449      | 71558096  | 648  |
| chr13 | 54760532      | 54761170  | 639  |
| chr26 | 38221985      | 38222613  | 629  |
| chr11 | 104916918     | 104917535 | 618  |
| chr4  | 79270338      | 79270939  | 602  |
| chr3  | 116496851     | 116497431 | 581  |
| chr2  | 131033397     | 131033976 | 580  |
| chr26 | 48613090      | 48613659  | 570  |
| chr7  | 19668847      | 19669406  | 560  |
| chr12 | 36461745      | 36462299  | 555  |
| chr3  | 111659697     | 111660239 | 543  |
| chr21 | 67969841      | 67970379  | 539  |
| chr13 | 54501626      | 54502156  | 531  |
| chr4  | 72327000      | 72327519  | 520  |
| chr17 | 64218458      | 64218948  | 491  |
| chr1  | 100065665     | 100066137 | 473  |
| chr18 | 62690139      | 62690601  | 463  |
| chr20 | 66534477      | 66534937  | 461  |
| chr7  | 43045630      | 43046074  | 445  |
| chr21 | 18874734      | 18875167  | 434  |
| chr7  | 65599407      | 65599838  | 432  |
| chr14 | 59528669      | 59529099  | 431  |
| chr11 | 105994174     | 105994600 | 427  |
| chr21 | 67013565      | 67013990  | 426  |
| chr19 | 27198204      | 27198626  | 423  |
| chr25 | 37492334      | 37492752  | 419  |
| chr12 | 25440812      | 25441229  | 418  |
| chr18 | 13575613      | 13576027  | 415  |
| chr15 | 22795371      | 22795785  | 415  |
| chr19 | 40527349      | 40527759  | 411  |
| chr19 | 13430936      | 13431346  | 411  |

|       |           |           |     |
|-------|-----------|-----------|-----|
| chr11 | 107565292 | 107565697 | 406 |
| chr25 | 39192141  | 39192543  | 403 |
| chr13 | 75518402  | 75518804  | 403 |
| chr15 | 51659539  | 51659940  | 402 |
| chr16 | 39597307  | 39597707  | 401 |
| chr3  | 105726107 | 105726506 | 400 |
| chr21 | 65851671  | 65852070  | 400 |
| chr9  | 46030561  | 46030959  | 399 |
| chr5  | 112049461 | 112049859 | 399 |
| chr3  | 121534760 | 121535158 | 399 |
| chr24 | 35359560  | 35359958  | 399 |
| chr23 | 30249988  | 30250386  | 399 |
| chr19 | 65229346  | 65229744  | 399 |
| chr19 | 30852393  | 30852791  | 399 |
| chr19 | 13578421  | 13578819  | 399 |
| chr14 | 34010219  | 34010617  | 399 |
| chr12 | 11216803  | 11217201  | 399 |
| chr1  | 64869792  | 64870190  | 399 |
| chr25 | 37410348  | 37410745  | 398 |
| chr2  | 140773294 | 140773691 | 398 |
| chr2  | 108713609 | 108714006 | 398 |
| chr18 | 22496408  | 22496804  | 397 |
| chr23 | 53270007  | 53270400  | 394 |
| chr15 | 75146364  | 75146757  | 394 |
| chr13 | 35439738  | 35440131  | 394 |
| chr1  | 143832016 | 143832408 | 393 |
| chr8  | 61900673  | 61901064  | 392 |
| chr21 | 22738210  | 22738601  | 392 |
| chr19 | 22340575  | 22340966  | 392 |
| chr17 | 71964776  | 71965167  | 392 |
| chr4  | 5621069   | 5621458   | 390 |
| chr21 | 32841716  | 32842105  | 390 |
| chr16 | 40935709  | 40936098  | 390 |
| chr10 | 3519119   | 3519507   | 389 |
| chr6  | 59251277  | 59251664  | 388 |
| chr5  | 115060348 | 115060735 | 388 |
| chr4  | 71604162  | 71604549  | 388 |
| chr19 | 39259571  | 39259958  | 388 |
| chr18 | 11958502  | 11958889  | 388 |
| chr7  | 58199595  | 58199981  | 387 |
| chr26 | 31466238  | 31466623  | 386 |
| chr13 | 77683382  | 77683767  | 386 |
| chr25 | 23438922  | 23439306  | 385 |
| chr19 | 39113137  | 39113518  | 382 |
| chr25 | 35402172  | 35402552  | 381 |
| chr20 | 70567536  | 70567915  | 380 |
| chr25 | 37578702  | 37579080  | 379 |
| chr16 | 59064121  | 59064499  | 379 |
| chr12 | 83782784  | 83783160  | 377 |
| chr24 | 31934500  | 31934874  | 375 |

|       |           |           |     |
|-------|-----------|-----------|-----|
| chr1  | 74568166  | 74568540  | 375 |
| chr2  | 24080129  | 24080502  | 374 |
| chr5  | 120370881 | 120371253 | 373 |
| chr2  | 136689436 | 136689808 | 373 |
| chr2  | 115217950 | 115218322 | 373 |
| chr27 | 17470908  | 17471279  | 372 |
| chr16 | 1106016   | 1106387   | 372 |
| chr4  | 110059967 | 110060337 | 371 |
| chr23 | 52602431  | 52602801  | 371 |
| chr23 | 45804573  | 45804943  | 371 |
| chr22 | 55759685  | 55760053  | 369 |
| chr4  | 68069437  | 68069804  | 368 |
| chr19 | 54934021  | 54934388  | 368 |
| chr6  | 73194682  | 73195047  | 366 |
| chr3  | 115016329 | 115016694 | 366 |
| chr3  | 20511449  | 20511813  | 365 |
| chr29 | 36304699  | 36305063  | 365 |
| chr13 | 42397730  | 42398094  | 365 |
| chr14 | 21177259  | 21177622  | 364 |
| chr5  | 122349107 | 122349469 | 363 |
| chr2  | 132211112 | 132211474 | 363 |
| chr5  | 103435647 | 103436008 | 362 |
| chr3  | 109881304 | 109881664 | 361 |
| chr14 | 5912192   | 5912547   | 356 |
| chr17 | 74039325  | 74039679  | 355 |
| chr7  | 51779474  | 51779827  | 354 |
| chr1  | 1577833   | 1578186   | 354 |
| chr7  | 46198364  | 46198716  | 353 |
| chr4  | 68018659  | 68019011  | 353 |
| chr17 | 70274246  | 70274598  | 353 |
| chr8  | 78852835  | 78853186  | 352 |
| chr25 | 1092479   | 1092830   | 352 |
| chr22 | 47833121  | 47833471  | 351 |
| chr2  | 132661967 | 132662317 | 351 |
| chr13 | 63332028  | 63332378  | 351 |
| chr13 | 59106197  | 59106547  | 351 |
| chr6  | 63034643  | 63034992  | 350 |
| chr19 | 28257427  | 28257776  | 350 |
| chr19 | 26668012  | 26668361  | 350 |
| chr3  | 22852603  | 22852951  | 349 |
| chr2  | 44185076  | 44185421  | 346 |
| chr16 | 77524340  | 77524684  | 345 |
| chr1  | 74634908  | 74635252  | 345 |
| chr11 | 107182285 | 107182628 | 344 |
| chr10 | 8248009   | 8248352   | 344 |
| chr3  | 11561786  | 11562125  | 340 |
| chr23 | 49569030  | 49569367  | 338 |
| chr5  | 123482258 | 123482594 | 337 |
| chr20 | 64808268  | 64808603  | 336 |
| chr16 | 48014349  | 48014683  | 335 |

|       |           |           |     |
|-------|-----------|-----------|-----|
| chr15 | 75312372  | 75312706  | 335 |
| chr19 | 29016257  | 29016590  | 334 |
| chr14 | 1808101   | 1808433   | 333 |
| chr16 | 3716121   | 3716452   | 332 |
| chr3  | 35503676  | 35504006  | 331 |
| chr24 | 1202939   | 1203269   | 331 |
| chr2  | 108726262 | 108726592 | 331 |
| chr19 | 24272043  | 24272373  | 331 |
| chr8  | 7679878   | 7680207   | 330 |
| chr5  | 114076581 | 114076908 | 328 |
| chr13 | 63491519  | 63491846  | 328 |
| chr19 | 44873024  | 44873346  | 323 |
| chr16 | 59703589  | 59703911  | 323 |
| chr9  | 90405549  | 90405870  | 322 |
| chr7  | 14710794  | 14711110  | 317 |
| chr19 | 39383249  | 39383565  | 317 |
| chr19 | 54158046  | 54158359  | 314 |
| chr15 | 75310964  | 75311277  | 314 |
| chr12 | 82607027  | 82607339  | 313 |
| chr10 | 66895976  | 66896288  | 313 |
| chr27 | 17892478  | 17892789  | 312 |
| chr3  | 117291117 | 117291426 | 310 |
| chr3  | 63221060  | 63221368  | 309 |
| chr29 | 30806097  | 30806404  | 308 |
| chr28 | 43580189  | 43580496  | 308 |
| chr1  | 148281004 | 148281311 | 308 |
| chr1  | 2649696   | 2650001   | 306 |
| chr18 | 11265104  | 11265406  | 303 |
| chr1  | 85142100  | 85142401  | 302 |
| chr3  | 23073184  | 23073484  | 301 |
| chr17 | 63275662  | 63275962  | 301 |
| chr8  | 73778469  | 73778767  | 299 |
| chr14 | 64535355  | 64535653  | 299 |
| chr18 | 34638124  | 34638421  | 298 |
| chr19 | 54166882  | 54167177  | 296 |
| chr23 | 18418051  | 18418345  | 295 |
| chr13 | 75690442  | 75690736  | 295 |
| chr14 | 48319804  | 48320096  | 293 |
| chr9  | 41081515  | 41081796  | 282 |
| chr13 | 55408183  | 55408462  | 280 |
| chr11 | 101501208 | 101501485 | 278 |
| chr19 | 58367331  | 58367605  | 275 |
| chr16 | 44117400  | 44117668  | 269 |
| chr1  | 84685189  | 84685457  | 269 |
| chr28 | 43266121  | 43266387  | 267 |
| chr10 | 13735765  | 13736031  | 267 |
| chr18 | 49941053  | 49941317  | 265 |
| chr20 | 33684043  | 33684299  | 257 |
| chr8  | 108214799 | 108215044 | 246 |
| chr15 | 58874363  | 58874608  | 246 |



|       |               |           |      |
|-------|---------------|-----------|------|
| chr19 | 40656697      | 40656937  | 241  |
| chr9  | 44105413      | 44105651  | 239  |
| chr18 | 51708232      | 51708470  | 239  |
| chr8  | 102278806     | 102279042 | 237  |
| chr10 | 90926087      | 90926320  | 234  |
| chr10 | 81723551      | 81723778  | 228  |
| chr29 | 49324930      | 49325465  | 536  |
| chr22 | 50869978      | 50870874  | 897  |
| chr5  | 117195283     | 117196337 | 1055 |
| chr21 | 50110274      | 50111046  | 773  |
| chr12 | 31984536      | 31985056  | 521  |
| chr18 | 11568163      | 11568645  | 483  |
| chr4  | 119251840     | 119252470 | 631  |
| chr21 | 65848994      | 65849648  | 655  |
| chr21 | 55796084      | 55796448  | 365  |
| chr11 | 74609545      | 74609947  | 403  |
| chr19 | 58167377      | 58167717  | 341  |
| chr24 | 65017648      | 65017887  | 240  |
| chr10 | 67038927      | 67039154  | 228  |
| chr5  | 116935169     | 116935411 | 243  |
| chr8  | 73830561      | 73830956  | 396  |
| chr25 | 434363 434928 | 566       |      |
| chr3  | 16953936      | 16954354  | 419  |
| chr29 | 49308613      | 49309166  | 554  |
| chr29 | 49324442      | 49324667  | 226  |
| chr21 | 52075681      | 52075926  | 246  |
| chr21 | 52076286      | 52076525  | 240  |
| chr29 | 49311563      | 49311860  | 298  |
| chr8  | 73728089      | 73728329  | 241  |
| chr21 | 52060945      | 52061286  | 342  |
| chr10 | 5236212       | 5237571   | 1360 |
| chr19 | 21696512      | 21697720  | 1209 |
| chr27 | 32884253      | 32885448  | 1196 |
| chr26 | 12848845      | 12850026  | 1182 |
| chr18 | 11804412      | 11805592  | 1181 |
| chr19 | 54453510      | 54454654  | 1145 |
| chr10 | 90970846      | 90971951  | 1106 |
| chr29 | 49794944      | 49796041  | 1098 |
| chr9  | 64804547      | 64805599  | 1053 |
| chr10 | 60360680      | 60361727  | 1048 |
| chr22 | 16314305      | 16315295  | 991  |
| chr17 | 64362574      | 64363544  | 971  |
| chr17 | 5055858       | 5056814   | 957  |
| chr5  | 81503679      | 81504626  | 948  |
| chr3  | 115339470     | 115340412 | 943  |
| chr20 | 74446510      | 74447441  | 932  |
| chr2  | 140764299     | 140765216 | 918  |
| chrX  | 11022234      | 11023149  | 916  |
| chr7  | 48173607      | 48174520  | 914  |
| chr4  | 33422081      | 33422994  | 914  |

|       |           |           |     |
|-------|-----------|-----------|-----|
| chr5  | 120724900 | 120725812 | 913 |
| chr4  | 72748731  | 72749641  | 911 |
| chr29 | 45768474  | 45769367  | 894 |
| chr16 | 77625793  | 77626658  | 866 |
| chr8  | 74332243  | 74333106  | 864 |
| chrX  | 36640973  | 36641834  | 862 |
| chr6  | 117922304 | 117923165 | 862 |
| chr15 | 64006762  | 64007622  | 861 |
| chr2  | 108767137 | 108767982 | 846 |
| chr21 | 66332882  | 66333724  | 843 |
| chr19 | 23720349  | 23721190  | 842 |
| chrX  | 6895852   | 6896687   | 836 |
| chr13 | 54851445  | 54852279  | 835 |
| chr9  | 93206960  | 93207784  | 825 |
| chr16 | 38964212  | 38965036  | 825 |
| chr15 | 27267015  | 27267838  | 824 |
| chr18 | 34639821  | 34640639  | 819 |
| chr13 | 53034985  | 53035799  | 815 |
| chr11 | 50877771  | 50878580  | 810 |
| chr2  | 108705222 | 108706025 | 804 |
| chr26 | 21824871  | 21825668  | 798 |
| chr18 | 52684577  | 52685367  | 791 |
| chr4  | 95067282  | 95068070  | 789 |
| chr2  | 110527447 | 110528234 | 788 |
| chr26 | 20984092  | 20984875  | 784 |
| chr4  | 121239613 | 121240394 | 782 |
| chr24 | 5107233   | 5108011   | 779 |
| chr12 | 76054798  | 76055576  | 779 |
| chr13 | 80590127  | 80590900  | 774 |
| chr13 | 3371941   | 3372714   | 774 |
| chr19 | 14240805  | 14241577  | 773 |
| chr7  | 42152539  | 42153305  | 767 |
| chr18 | 56578986  | 56579751  | 766 |
| chr25 | 43415818  | 43416582  | 765 |
| chr5  | 28882272  | 28883034  | 763 |
| chr2  | 134683269 | 134684030 | 762 |
| chr23 | 50797204  | 50797964  | 761 |
| chr6  | 120812713 | 120813472 | 760 |
| chr26 | 15715089  | 15715847  | 759 |
| chr1  | 37557366  | 37558119  | 754 |
| chr17 | 72940698  | 72941449  | 752 |
| chr22 | 30075110  | 30075853  | 744 |
| chr23 | 12317128  | 12317869  | 742 |
| chr27 | 39232877  | 39233617  | 741 |
| chr13 | 38868900  | 38869640  | 741 |
| chr4  | 32181526  | 32182262  | 737 |
| chr3  | 115105103 | 115105835 | 733 |
| chr16 | 42896592  | 42897324  | 733 |
| chr18 | 53490955  | 53491685  | 731 |
| chr17 | 59128062  | 59128790  | 729 |

|       |           |           |     |
|-------|-----------|-----------|-----|
| chr10 | 35817375  | 35818102  | 728 |
| chr21 | 28903377  | 28904096  | 720 |
| chr19 | 47178686  | 47179405  | 720 |
| chr17 | 63321665  | 63322384  | 720 |
| chr2  | 111319967 | 111320685 | 719 |
| chr19 | 12494882  | 12495600  | 719 |
| chr22 | 59494619  | 59495329  | 711 |
| chr2  | 111655911 | 111656620 | 710 |
| chr13 | 56353163  | 56353871  | 709 |
| chr2  | 111262975 | 111263682 | 708 |
| chr10 | 83524612  | 83525319  | 708 |
| chr27 | 48379488  | 48380191  | 704 |
| chr11 | 45279282  | 45279984  | 703 |
| chr10 | 88197834  | 88198536  | 703 |
| chr5  | 123143312 | 123144013 | 702 |
| chr26 | 22342354  | 22343051  | 698 |
| chr7  | 52394517  | 52395213  | 697 |
| chr6  | 101414263 | 101414959 | 697 |
| chr25 | 34470362  | 34471058  | 697 |
| chr1  | 156678844 | 156679538 | 695 |
| chr8  | 104099013 | 104099706 | 694 |
| chr29 | 47268664  | 47269356  | 693 |
| chr18 | 23074681  | 23075370  | 690 |
| chr18 | 22338584  | 22339270  | 687 |
| chr16 | 1595024   | 1595710   | 687 |
| chr9  | 8180023   | 8180705   | 683 |
| chr5  | 100131184 | 100131866 | 683 |
| chr28 | 33866214  | 33866895  | 682 |
| chr17 | 5060445   | 5061124   | 680 |
| chr1  | 82886983  | 82887662  | 680 |
| chr18 | 54047761  | 54048439  | 679 |
| chr7  | 3940248   | 3940925   | 678 |
| chr15 | 24029168  | 24029845  | 678 |
| chr10 | 17153743  | 17154420  | 678 |
| chr7  | 4343723   | 4344398   | 676 |
| chr19 | 56077685  | 56078360  | 676 |
| chr17 | 66529919  | 66530592  | 674 |
| chr7  | 10966493  | 10967165  | 673 |
| chr12 | 83400595  | 83401267  | 673 |
| chr23 | 31444440  | 31445111  | 672 |
| chr4  | 78896458  | 78897127  | 670 |
| chr21 | 31054492  | 31055161  | 670 |
| chr15 | 26681268  | 26681936  | 669 |
| chr10 | 81689501  | 81690169  | 669 |
| chr15 | 26785736  | 26786403  | 668 |
| chr10 | 36824088  | 36824755  | 668 |
| chr19 | 40677247  | 40677912  | 666 |
| chr26 | 22809050  | 22809709  | 660 |
| chr17 | 69780983  | 69781641  | 659 |
| chr13 | 77680206  | 77680864  | 659 |

|       |           |           |     |
|-------|-----------|-----------|-----|
| chr7  | 44613289  | 44613946  | 658 |
| chr21 | 65888227  | 65888882  | 656 |
| chr29 | 11677486  | 11678139  | 654 |
| chr23 | 46614170  | 46614820  | 651 |
| chr5  | 28836903  | 28837552  | 650 |
| chr26 | 14545816  | 14546464  | 649 |
| chr6  | 121822955 | 121823601 | 647 |
| chr10 | 17019751  | 17020396  | 646 |
| chr3  | 4359424   | 4360068   | 645 |
| chr15 | 32274199  | 32274842  | 644 |
| chr22 | 29671301  | 29671943  | 643 |
| chr3  | 116345409 | 116346050 | 642 |
| chr19 | 26980521  | 26981161  | 641 |
| chr10 | 4918552   | 4919191   | 640 |
| chr1  | 85641930  | 85642569  | 640 |
| chr13 | 61193752  | 61194389  | 638 |
| chr10 | 48391787  | 48392424  | 638 |
| chr29 | 42918417  | 42919053  | 637 |
| chr9  | 52414495  | 52415130  | 636 |
| chr17 | 63507836  | 63508470  | 635 |
| chr15 | 58024493  | 58025127  | 635 |
| chr15 | 25595993  | 25596627  | 635 |
| chr3  | 15667065  | 15667698  | 634 |
| chr29 | 47918820  | 47919453  | 634 |
| chr26 | 51441702  | 51442335  | 634 |
| chr19 | 49383961  | 49384594  | 634 |
| chr11 | 93895516  | 93896149  | 634 |
| chr6  | 18477176  | 18477808  | 633 |
| chr20 | 74863767  | 74864398  | 632 |
| chr5  | 28877982  | 28878612  | 631 |
| chr2  | 138525047 | 138525677 | 631 |
| chr1  | 114232067 | 114232697 | 631 |
| chr8  | 23036079  | 23036708  | 630 |
| chr23 | 44803741  | 44804370  | 630 |
| chr29 | 34387788  | 34388416  | 629 |
| chr20 | 16599063  | 16599690  | 628 |
| chr28 | 40397433  | 40398059  | 627 |
| chr13 | 77697190  | 77697815  | 626 |
| chr7  | 46833920  | 46834542  | 623 |
| chr7  | 5157061   | 5157683   | 623 |
| chr2  | 136520658 | 136521280 | 623 |
| chr4  | 33412150  | 33412770  | 621 |
| chr13 | 75130748  | 75131368  | 621 |
| chr29 | 26509644  | 26510262  | 619 |
| chr12 | 82880049  | 82880667  | 619 |
| chr25 | 1284688   | 1285305   | 618 |
| chr16 | 46988814  | 46989431  | 618 |
| chr10 | 29542726  | 29543340  | 615 |
| chr19 | 49636680  | 49637292  | 613 |
| chr13 | 61294090  | 61294701  | 612 |

|       |           |           |     |
|-------|-----------|-----------|-----|
| chr13 | 40533510  | 40534121  | 612 |
| chr8  | 7550743   | 7551353   | 611 |
| chr7  | 45663388  | 45663998  | 611 |
| chr19 | 39977420  | 39978030  | 611 |
| chr26 | 22226385  | 22226994  | 610 |
| chr19 | 45126164  | 45126771  | 608 |
| chr11 | 103512793 | 103513399 | 607 |
| chr11 | 91582774  | 91583380  | 607 |
| chr17 | 63322888  | 63323493  | 606 |
| chr23 | 11847707  | 11848310  | 604 |
| chr2  | 134734017 | 134734620 | 604 |
| chr22 | 58632984  | 58633586  | 603 |
| chr15 | 61075344  | 61075946  | 603 |
| chr13 | 59542881  | 59543483  | 603 |
| chr24 | 22045410  | 22046011  | 602 |
| chr3  | 9182935   | 9183535   | 601 |
| chr11 | 81755380  | 81755979  | 600 |
| chr2  | 134893941 | 134894539 | 599 |
| chr11 | 69293182  | 69293780  | 599 |
| chr12 | 84685287  | 84685884  | 598 |
| chr5  | 111332737 | 111333333 | 597 |
| chr5  | 60161375  | 60161970  | 596 |
| chr8  | 5812866   | 5813460   | 595 |
| chr7  | 18435896  | 18436490  | 595 |
| chr3  | 117315529 | 117316123 | 595 |
| chr24 | 20419956  | 20420550  | 595 |
| chrX  | 29570078  | 29570671  | 594 |
| chr8  | 95560363  | 95560956  | 594 |
| chr9  | 90804101  | 90804693  | 593 |
| chr5  | 88033171  | 88033763  | 593 |
| chr21 | 20036510  | 20037102  | 593 |
| chrX  | 18949577  | 18950168  | 592 |
| chr23 | 23873534  | 23874125  | 592 |
| chr19 | 60502353  | 60502943  | 591 |
| chr7  | 94419855  | 94420442  | 588 |
| chr4  | 117756904 | 117757491 | 588 |
| chr16 | 1594013   | 1594600   | 588 |
| chr13 | 21887054  | 21887641  | 588 |
| chr8  | 60183667  | 60184253  | 587 |
| chr22 | 14928042  | 14928627  | 586 |
| chr29 | 18204908  | 18205492  | 585 |
| chr26 | 37622667  | 37623251  | 585 |
| chr1  | 157219773 | 157220357 | 585 |
| chr7  | 38213980  | 38214562  | 583 |
| chr25 | 42637416  | 42637998  | 583 |
| chr24 | 60597041  | 60597623  | 583 |
| chr6  | 59497321  | 59497902  | 582 |
| chr23 | 49972562  | 49973143  | 582 |
| chr17 | 61282718  | 61283299  | 582 |
| chr19 | 65218666  | 65219246  | 581 |

|       |               |           |     |
|-------|---------------|-----------|-----|
| chr18 | 52739183      | 52739763  | 581 |
| chr18 | 3312067       | 3312647   | 581 |
| chr20 | 3484704       | 3485282   | 579 |
| chr11 | 103810564     | 103811141 | 578 |
| chr25 | 828259 828835 | 577       |     |
| chr5  | 123004800     | 123005374 | 575 |
| chr28 | 5022831       | 5023405   | 575 |
| chr19 | 56509925      | 56510499  | 575 |
| chr19 | 47251945      | 47252519  | 575 |
| chr17 | 72964800      | 72965374  | 575 |
| chr12 | 68185486      | 68186060  | 575 |
| chr26 | 42223325      | 42223897  | 573 |
| chr15 | 27458312      | 27458883  | 572 |
| chr11 | 75139390      | 75139961  | 572 |
| chr16 | 57563624      | 57564193  | 570 |
| chr20 | 70574253      | 70574821  | 569 |
| chr21 | 20683506      | 20684073  | 568 |
| chr19 | 21743583      | 21744150  | 568 |
| chr5  | 28753210      | 28753776  | 567 |
| chr26 | 43956139      | 43956702  | 564 |
| chr7  | 46160799      | 46161361  | 563 |
| chr23 | 8795557       | 8796116   | 560 |
| chr8  | 78692481      | 78693039  | 559 |
| chr2  | 111655147     | 111655705 | 559 |
| chr17 | 76316962      | 76317520  | 559 |
| chr11 | 14255287      | 14255845  | 559 |
| chrX  | 78508595      | 78509151  | 557 |
| chr3  | 106547201     | 106547756 | 556 |
| chr19 | 58174876      | 58175431  | 556 |
| chr12 | 53063178      | 53063733  | 556 |
| chr5  | 33881978      | 33882532  | 555 |
| chrX  | 23161032      | 23161585  | 554 |
| chr21 | 13592468      | 13593021  | 554 |
| chr6  | 65878754      | 65879306  | 553 |
| chr24 | 43305630      | 43306182  | 553 |
| chr13 | 55378633      | 55379185  | 553 |
| chr8  | 111299755     | 111300306 | 552 |
| chrX  | 55581904      | 55582454  | 551 |
| chr14 | 23264107      | 23264657  | 551 |
| chr21 | 44299380      | 44299929  | 550 |
| chr21 | 6483424       | 6483973   | 550 |
| chr19 | 28238823      | 28239372  | 550 |
| chr5  | 75983004      | 75983551  | 548 |
| chr22 | 50783606      | 50784151  | 546 |
| chr21 | 31690498      | 31691043  | 546 |
| chr4  | 120604884     | 120605427 | 544 |
| chr2  | 134917455     | 134917998 | 544 |
| chr1  | 84561885      | 84562428  | 544 |
| chr7  | 6529388       | 6529930   | 543 |
| chr3  | 106534038     | 106534580 | 543 |

|       |               |           |     |
|-------|---------------|-----------|-----|
| chr23 | 18661174      | 18661714  | 541 |
| chr2  | 128592720     | 128593260 | 541 |
| chr7  | 18789424      | 18789962  | 539 |
| chr26 | 18433972      | 18434510  | 539 |
| chr2  | 135625449     | 135625986 | 538 |
| chr2  | 5365861       | 5366398   | 538 |
| chr2  | 136619173     | 136619709 | 537 |
| chr29 | 48297461      | 48297996  | 536 |
| chr25 | 40934425      | 40934958  | 534 |
| chr3  | 9139055       | 9139587   | 533 |
| chr19 | 58825869      | 58826401  | 533 |
| chr21 | 34642198      | 34642729  | 532 |
| chr22 | 52491585      | 52492115  | 531 |
| chr19 | 21318469      | 21318998  | 530 |
| chr16 | 38720120      | 38720649  | 530 |
| chr13 | 80832456      | 80832985  | 530 |
| chr5  | 113241371     | 113241899 | 529 |
| chr10 | 18334106      | 18334634  | 529 |
| chr11 | 100909368     | 100909895 | 528 |
| chr19 | 39098114      | 39098640  | 527 |
| chr16 | 47104860      | 47105386  | 527 |
| chr22 | 29683506      | 29684031  | 526 |
| chr19 | 56284377      | 56284902  | 526 |
| chr8  | 5784662       | 5785186   | 525 |
| chr7  | 38259124      | 38259648  | 525 |
| chr3  | 17294656      | 17295178  | 523 |
| chr11 | 1304453       | 1304975   | 523 |
| chr8  | 77233399      | 77233920  | 522 |
| chr5  | 115090104     | 115090625 | 522 |
| chr2  | 111299550     | 111300071 | 522 |
| chr19 | 63704679      | 63705200  | 522 |
| chr22 | 15047033      | 15047553  | 521 |
| chr2  | 111766928     | 111767448 | 521 |
| chr16 | 2351983       | 2352503   | 521 |
| chr1  | 154416375     | 154416895 | 521 |
| chr6  | 59500961      | 59501480  | 520 |
| chr26 | 23491602      | 23492121  | 520 |
| chr25 | 29292912      | 29293431  | 520 |
| chr19 | 46492444      | 46492963  | 520 |
| chr10 | 3529268       | 3529787   | 520 |
| chr14 | 947244 947762 | 519       |     |
| chr7  | 3687001       | 3687518   | 518 |
| chr28 | 6845007       | 6845524   | 518 |
| chr18 | 63026744      | 63027261  | 518 |
| chr9  | 50721535      | 50722051  | 517 |
| chr6  | 106985562     | 106986078 | 517 |
| chr8  | 65410813      | 65411328  | 516 |
| chr17 | 66129345      | 66129860  | 516 |
| chr23 | 8245975       | 8246489   | 515 |
| chr1  | 128584900     | 128585414 | 515 |

|       |           |           |     |
|-------|-----------|-----------|-----|
| chr9  | 47240685  | 47241198  | 514 |
| chr3  | 13610138  | 13610651  | 514 |
| chr22 | 58436906  | 58437419  | 514 |
| chr19 | 38120403  | 38120916  | 514 |
| chr2  | 132489560 | 132490072 | 513 |
| chr12 | 25694913  | 25695425  | 513 |
| chr22 | 60045586  | 60046097  | 512 |
| chr19 | 40440419  | 40440930  | 512 |
| chr18 | 62214913  | 62215423  | 511 |
| chr18 | 17922978  | 17923488  | 511 |
| chr13 | 60176317  | 60176827  | 511 |
| chr11 | 95222899  | 95223409  | 511 |
| chr22 | 56562812  | 56563321  | 510 |
| chr21 | 64489241  | 64489749  | 509 |
| chr19 | 59058248  | 59058756  | 509 |
| chr19 | 38755745  | 38756253  | 509 |
| chr18 | 57001136  | 57001644  | 509 |
| chr14 | 1583006   | 1583514   | 509 |
| chr29 | 44664911  | 44665417  | 507 |
| chr27 | 39091687  | 39092193  | 507 |
| chr2  | 111359097 | 111359603 | 507 |
| chr18 | 55212640  | 55213146  | 507 |
| chr1  | 69352826  | 69353332  | 507 |
| chr3  | 25751749  | 25752254  | 506 |
| chr23 | 10550078  | 10550583  | 506 |
| chr5  | 121057497 | 121058001 | 505 |
| chr13 | 41120011  | 41120515  | 505 |
| chr22 | 17495692  | 17496195  | 504 |
| chr21 | 47618473  | 47618976  | 504 |
| chr29 | 49971470  | 49971972  | 503 |
| chr19 | 46150195  | 46150697  | 503 |
| chr19 | 33447500  | 33448002  | 503 |
| chr12 | 31103725  | 31104227  | 503 |
| chr13 | 23674068  | 23674569  | 502 |
| chr29 | 25901973  | 25902473  | 501 |
| chr18 | 62747595  | 62748095  | 501 |
| chr15 | 45857646  | 45858146  | 501 |
| chr12 | 82755093  | 82755593  | 501 |
| chr12 | 32011885  | 32012385  | 501 |
| chr4  | 116714052 | 116714551 | 500 |
| chr2  | 115116512 | 115117011 | 500 |
| chr16 | 46812139  | 46812638  | 500 |
| chr13 | 11060842  | 11061341  | 500 |
| chr6  | 74548865  | 74549362  | 498 |
| chr12 | 32005305  | 32005802  | 498 |
| chr14 | 21252439  | 21252935  | 497 |
| chr11 | 80787365  | 80787861  | 497 |
| chr19 | 53049124  | 53049619  | 496 |
| chr27 | 46976448  | 46976941  | 494 |
| chr17 | 66277384  | 66277876  | 493 |



|       |               |           |     |
|-------|---------------|-----------|-----|
| chr16 | 71804347      | 71804839  | 493 |
| chr8  | 76016566      | 76017057  | 492 |
| chr28 | 30797118      | 30797609  | 492 |
| chr19 | 12129670      | 12130161  | 492 |
| chr13 | 23659103      | 23659594  | 492 |
| chr7  | 10822049      | 10822539  | 491 |
| chr6  | 31698632      | 31699122  | 491 |
| chr19 | 56640333      | 56640823  | 491 |
| chr27 | 34704115      | 34704604  | 490 |
| chr26 | 34971734      | 34972221  | 488 |
| chr19 | 56574221      | 56574708  | 488 |
| chr18 | 43148337      | 43148823  | 487 |
| chr1  | 144547578     | 144548064 | 487 |
| chr3  | 106552118     | 106552603 | 486 |
| chr10 | 50627908      | 50628393  | 486 |
| chr11 | 98903552      | 98904036  | 485 |
| chr14 | 3501501       | 3501984   | 484 |
| chr1  | 144318394     | 144318877 | 484 |
| chr6  | 108685389     | 108685871 | 483 |
| chr13 | 45324146      | 45324626  | 481 |
| chr8  | 5773324       | 5773801   | 478 |
| chr23 | 10968847      | 10969324  | 478 |
| chr8  | 5810152       | 5810628   | 477 |
| chr19 | 30569635      | 30570111  | 477 |
| chr8  | 24749551      | 24750025  | 475 |
| chr26 | 20128040      | 20128514  | 475 |
| chr20 | 66538706      | 66539180  | 475 |
| chr9  | 41873632      | 41874105  | 474 |
| chr15 | 21543650      | 21544123  | 474 |
| chr11 | 104701943     | 104702416 | 474 |
| chr8  | 24443763      | 24444234  | 472 |
| chr14 | 1927354       | 1927825   | 472 |
| chr14 | 947764 948235 | 472       |     |
| chr16 | 38557409      | 38557879  | 471 |
| chr6  | 41997671      | 41998140  | 470 |
| chr18 | 56531787      | 56532256  | 470 |
| chr26 | 22204879      | 22205347  | 469 |
| chr25 | 35688983      | 35689451  | 469 |
| chr19 | 7629191       | 7629659   | 469 |
| chr9  | 100327680     | 100328147 | 468 |
| chr29 | 26510993      | 26511459  | 467 |
| chr7  | 25668961      | 25669426  | 466 |
| chr25 | 1962005       | 1962470   | 466 |
| chr3  | 62178599      | 62179063  | 465 |
| chr3  | 15649229      | 15649693  | 465 |
| chr26 | 31908878      | 31909342  | 465 |
| chr17 | 63961213      | 63961677  | 465 |
| chr5  | 30489651      | 30490114  | 464 |
| chr22 | 30108164      | 30108627  | 464 |
| chr9  | 104901142     | 104901604 | 463 |

|       |           |           |     |
|-------|-----------|-----------|-----|
| chr3  | 125631779 | 125632241 | 463 |
| chr24 | 63381743  | 63382203  | 461 |
| chr21 | 65798172  | 65798632  | 461 |
| chr18 | 62021482  | 62021942  | 461 |
| chr17 | 15144150  | 15144610  | 461 |
| chr3  | 127900284 | 127900743 | 460 |
| chr16 | 48669580  | 48670039  | 460 |
| chr9  | 98917945  | 98918403  | 459 |
| chr21 | 13636401  | 13636859  | 459 |
| chr19 | 59060053  | 59060511  | 459 |
| chr17 | 74756778  | 74757236  | 459 |
| chr11 | 100950966 | 100951424 | 459 |
| chr14 | 31018964  | 31019421  | 458 |
| chr11 | 14105799  | 14106256  | 458 |
| chr4  | 72037513  | 72037969  | 457 |
| chr18 | 23263423  | 23263879  | 457 |
| chr10 | 32247765  | 32248221  | 457 |
| chr8  | 80218464  | 80218919  | 456 |
| chr6  | 6452917   | 6453372   | 456 |
| chr24 | 47673539  | 47673994  | 456 |
| chr19 | 60468262  | 60468717  | 456 |
| chr7  | 84460825  | 84461279  | 455 |
| chr21 | 30314724  | 30315178  | 455 |
| chr19 | 58565974  | 58566428  | 455 |
| chr18 | 13555279  | 13555733  | 455 |
| chr17 | 70260939  | 70261393  | 455 |
| chr16 | 2898301   | 2898755   | 455 |
| chr13 | 79645996  | 79646450  | 455 |
| chr11 | 98320039  | 98320493  | 455 |
| chr7  | 5043319   | 5043772   | 454 |
| chr6  | 106952283 | 106952736 | 454 |
| chr6  | 120954383 | 120954835 | 453 |
| chr5  | 64499301  | 64499753  | 453 |
| chr8  | 100264615 | 100265064 | 450 |
| chr3  | 117287727 | 117288176 | 450 |
| chr19 | 56507904  | 56508353  | 450 |
| chr15 | 55184147  | 55184596  | 450 |
| chr19 | 64696202  | 64696650  | 449 |
| chr10 | 25034248  | 25034696  | 449 |
| chr1  | 132102264 | 132102712 | 449 |
| chr20 | 75635903  | 75636350  | 448 |
| chr16 | 2215583   | 2216030   | 448 |
| chr19 | 52552732  | 52553178  | 447 |
| chr11 | 20456339  | 20456785  | 447 |
| chr1  | 112146460 | 112146906 | 447 |
| chr4  | 98891059  | 98891504  | 446 |
| chr28 | 12471198  | 12471643  | 446 |
| chr3  | 15562380  | 15562824  | 445 |
| chr17 | 63288362  | 63288806  | 445 |
| chr11 | 74428804  | 74429248  | 445 |

|       |               |           |     |
|-------|---------------|-----------|-----|
| chr3  | 126090363     | 126090806 | 444 |
| chr22 | 32760766      | 32761209  | 444 |
| chr20 | 794323 794766 | 444       |     |
| chr13 | 76278150      | 76278593  | 444 |
| chr1  | 156679540     | 156679983 | 444 |
| chr9  | 105142237     | 105142679 | 443 |
| chr27 | 27689957      | 27690399  | 443 |
| chr19 | 39106626      | 39107068  | 443 |
| chr16 | 1603159       | 1603601   | 443 |
| chr12 | 18236168      | 18236610  | 443 |
| chr3  | 118025412     | 118025853 | 442 |
| chr3  | 111477908     | 111478349 | 442 |
| chr29 | 18318813      | 18319254  | 442 |
| chr22 | 5342006       | 5342447   | 442 |
| chr15 | 36878012      | 36878452  | 441 |
| chr13 | 75778201      | 75778641  | 441 |
| chr11 | 70876229      | 70876669  | 441 |
| chr5  | 112233024     | 112233463 | 440 |
| chr29 | 51670871      | 51671310  | 440 |
| chr29 | 42929140      | 42929579  | 440 |
| chr22 | 51095282      | 51095721  | 440 |
| chr21 | 10794472      | 10794911  | 440 |
| chr2  | 111351826     | 111352265 | 440 |
| chr2  | 32728422      | 32728861  | 440 |
| chr10 | 46988606      | 46989045  | 440 |
| chr23 | 30289316      | 30289754  | 439 |
| chr17 | 73179053      | 73179490  | 438 |
| chr15 | 26888913      | 26889349  | 437 |
| chr14 | 61343917      | 61344353  | 437 |
| chr13 | 77234264      | 77234699  | 436 |
| chr12 | 15336933      | 15337368  | 436 |
| chr11 | 106746785     | 106747220 | 436 |
| chr2  | 138654965     | 138655399 | 435 |
| chr6  | 90166886      | 90167319  | 434 |
| chr5  | 123130164     | 123130597 | 434 |
| chr11 | 40331966      | 40332399  | 434 |
| chr21 | 66516637      | 66517069  | 433 |
| chr2  | 140653922     | 140654354 | 433 |
| chrX  | 47481920      | 47482351  | 432 |
| chr19 | 59002514      | 59002945  | 432 |
| chr19 | 43117985      | 43118416  | 432 |
| chr18 | 48451718      | 48452149  | 432 |
| chr14 | 34007943      | 34008374  | 432 |
| chr6  | 74020509      | 74020939  | 431 |
| chr13 | 15172696      | 15173126  | 431 |
| chr1  | 64867944      | 64868374  | 431 |
| chr25 | 38523738      | 38524167  | 430 |
| chr21 | 67767872      | 67768301  | 430 |
| chr20 | 3467956       | 3468385   | 430 |
| chr2  | 128451095     | 128451524 | 430 |

|       |           |           |     |
|-------|-----------|-----------|-----|
| chr11 | 100880801 | 100881230 | 430 |
| chr29 | 48374172  | 48374600  | 429 |
| chr10 | 4842548   | 4842976   | 429 |
| chr3  | 121385206 | 121385633 | 428 |
| chr23 | 28053858  | 28054285  | 428 |
| chr3  | 2495353   | 2495779   | 427 |
| chr17 | 49450028  | 49450454  | 427 |
| chr9  | 99934224  | 99934649  | 426 |
| chr6  | 69750428  | 69750853  | 426 |
| chr29 | 37301600  | 37302025  | 426 |
| chr11 | 106876443 | 106876868 | 426 |
| chr8  | 88617895  | 88618319  | 425 |
| chr6  | 74440460  | 74440884  | 425 |
| chr25 | 36472405  | 36472829  | 425 |
| chr22 | 32928591  | 32929015  | 425 |
| chr18 | 45645056  | 45645480  | 425 |
| chr29 | 23641880  | 23642303  | 424 |
| chr25 | 3111544   | 3111967   | 424 |
| chr26 | 39815320  | 39815742  | 423 |
| chr19 | 47273070  | 47273492  | 423 |
| chr11 | 99208183  | 99208605  | 423 |
| chr10 | 17151068  | 17151489  | 422 |
| chr1  | 82874548  | 82874968  | 421 |
| chr29 | 47917325  | 47917744  | 420 |
| chr9  | 47247841  | 47248259  | 419 |
| chr5  | 122134524 | 122134942 | 419 |
| chr27 | 40715263  | 40715681  | 419 |
| chr4  | 71860338  | 71860755  | 418 |
| chr29 | 48956608  | 48957025  | 418 |
| chr7  | 5294385   | 5294801   | 417 |
| chr28 | 42170037  | 42170453  | 417 |
| chr21 | 18169524  | 18169940  | 417 |
| chr20 | 8584612   | 8585028   | 417 |
| chr19 | 61805726  | 61806142  | 417 |
| chr18 | 23113375  | 23113791  | 417 |
| chr25 | 29152887  | 29153302  | 416 |
| chr22 | 54123932  | 54124347  | 416 |
| chr2  | 36089503  | 36089918  | 416 |
| chr29 | 34888170  | 34888584  | 415 |
| chr23 | 13597217  | 13597631  | 415 |
| chr21 | 65766433  | 65766847  | 415 |
| chr11 | 28500091  | 28500505  | 415 |
| chr8  | 65250785  | 65251198  | 414 |
| chr7  | 15331597  | 15332010  | 414 |
| chr3  | 33842305  | 33842718  | 414 |
| chr2  | 54399528  | 54399941  | 414 |
| chr17 | 63959838  | 63960251  | 414 |
| chr15 | 23912938  | 23913351  | 414 |
| chr11 | 99206645  | 99207058  | 414 |
| chr4  | 71605247  | 71605659  | 413 |

|       |           |           |     |
|-------|-----------|-----------|-----|
| chr10 | 35816845  | 35817257  | 413 |
| chr6  | 118184722 | 118185133 | 412 |
| chr2  | 46248318  | 46248729  | 412 |
| chr15 | 75843468  | 75843879  | 412 |
| chr15 | 51738911  | 51739322  | 412 |
| chr13 | 41352505  | 41352916  | 412 |
| chr19 | 46149710  | 46150120  | 411 |
| chr13 | 60401360  | 60401770  | 411 |
| chr12 | 36460392  | 36460802  | 411 |
| chr6  | 63388622  | 63389031  | 410 |
| chr26 | 25509947  | 25510356  | 410 |
| chr17 | 73003295  | 73003704  | 410 |
| chr14 | 32874714  | 32875123  | 410 |
| chr6  | 121759234 | 121759642 | 409 |
| chr26 | 48434654  | 48435062  | 409 |
| chr26 | 42901938  | 42902346  | 409 |
| chr24 | 60634305  | 60634713  | 409 |
| chr22 | 30225970  | 30226378  | 409 |
| chr6  | 118801493 | 118801900 | 408 |
| chr2  | 115075074 | 115075480 | 407 |
| chr19 | 61178116  | 61178522  | 407 |
| chr10 | 77490553  | 77490959  | 407 |
| chr9  | 53448612  | 53449017  | 406 |
| chr5  | 31267642  | 31268047  | 406 |
| chr4  | 122175990 | 122176395 | 406 |
| chr3  | 118029979 | 118030384 | 406 |
| chr26 | 33086696  | 33087101  | 406 |
| chr18 | 50985704  | 50986109  | 406 |
| chr4  | 89784181  | 89784585  | 405 |
| chr9  | 47052598  | 47053001  | 404 |
| chr2  | 139400809 | 139401212 | 404 |
| chr2  | 138680429 | 138680832 | 404 |
| chr19 | 54357899  | 54358302  | 404 |
| chr18 | 46018288  | 46018691  | 404 |
| chr11 | 85420743  | 85421146  | 404 |
| chr6  | 73763807  | 73764209  | 403 |
| chr5  | 72177827  | 72178229  | 403 |
| chr16 | 75199035  | 75199437  | 403 |
| chr12 | 83782104  | 83782506  | 403 |
| chr12 | 82362151  | 82362553  | 403 |
| chr11 | 104567845 | 104568247 | 403 |
| chr11 | 49771975  | 49772377  | 403 |
| chr10 | 62623734  | 62624136  | 403 |
| chr9  | 26980652  | 26981053  | 402 |
| chr3  | 97854129  | 97854530  | 402 |
| chr25 | 44013598  | 44013999  | 402 |
| chr22 | 50589541  | 50589942  | 402 |
| chr11 | 47367203  | 47367604  | 402 |
| chr10 | 28836876  | 28837277  | 402 |
| chr9  | 104930487 | 104930887 | 401 |

|       |           |           |     |
|-------|-----------|-----------|-----|
| chr4  | 72746364  | 72746764  | 401 |
| chr29 | 41754597  | 41754997  | 401 |
| chr25 | 4657369   | 4657769   | 401 |
| chr19 | 16214828  | 16215228  | 401 |
| chr10 | 86859341  | 86859741  | 401 |
| chr5  | 121200238 | 121200637 | 400 |
| chr29 | 41705147  | 41705546  | 400 |
| chr24 | 48913584  | 48913983  | 400 |
| chr24 | 31394013  | 31394412  | 400 |
| chr23 | 49915882  | 49916281  | 400 |
| chr19 | 54793773  | 54794172  | 400 |
| chr16 | 77494853  | 77495252  | 400 |
| chrX  | 78763067  | 78763465  | 399 |
| chr9  | 28638809  | 28639207  | 399 |
| chr8  | 72183327  | 72183725  | 399 |
| chr7  | 81897599  | 81897997  | 399 |
| chr7  | 42223445  | 42223843  | 399 |
| chr7  | 17386421  | 17386819  | 399 |
| chr7  | 15623578  | 15623976  | 399 |
| chr7  | 13113152  | 13113550  | 399 |
| chr6  | 72186982  | 72187380  | 399 |
| chr6  | 31699457  | 31699855  | 399 |
| chr5  | 122306935 | 122307333 | 399 |
| chr5  | 88755555  | 88755953  | 399 |
| chr5  | 81495832  | 81496230  | 399 |
| chr4  | 124316749 | 124317147 | 399 |
| chr4  | 123285978 | 123286376 | 399 |
| chr4  | 123184045 | 123184443 | 399 |
| chr4  | 90368121  | 90368519  | 399 |
| chr3  | 116390316 | 116390714 | 399 |
| chr3  | 54317057  | 54317455  | 399 |
| chr3  | 29281130  | 29281528  | 399 |
| chr29 | 51978201  | 51978599  | 399 |
| chr29 | 33705552  | 33705950  | 399 |
| chr29 | 25948388  | 25948786  | 399 |
| chr28 | 12471721  | 12472119  | 399 |
| chr26 | 51627758  | 51628156  | 399 |
| chr26 | 49303560  | 49303958  | 399 |
| chr26 | 46939291  | 46939689  | 399 |
| chr26 | 37673495  | 37673893  | 399 |
| chr25 | 38048355  | 38048753  | 399 |
| chr25 | 37812183  | 37812581  | 399 |
| chr25 | 3113186   | 3113584   | 399 |
| chr24 | 64989710  | 64990108  | 399 |
| chr24 | 60976370  | 60976768  | 399 |
| chr24 | 60780652  | 60781050  | 399 |
| chr24 | 60773666  | 60774064  | 399 |
| chr24 | 51802510  | 51802908  | 399 |
| chr23 | 51716997  | 51717395  | 399 |
| chr23 | 8072885   | 8073283   | 399 |

|       |           |           |     |
|-------|-----------|-----------|-----|
| chr22 | 60547852  | 60548250  | 399 |
| chr22 | 60197613  | 60198011  | 399 |
| chr22 | 59691467  | 59691865  | 399 |
| chr22 | 59428595  | 59428993  | 399 |
| chr22 | 16416468  | 16416866  | 399 |
| chr21 | 64526998  | 64527396  | 399 |
| chr21 | 64506843  | 64507241  | 399 |
| chr21 | 57084044  | 57084442  | 399 |
| chr21 | 47722050  | 47722448  | 399 |
| chr21 | 20626187  | 20626585  | 399 |
| chr21 | 9477242   | 9477640   | 399 |
| chr20 | 73405250  | 73405648  | 399 |
| chr20 | 59356671  | 59357069  | 399 |
| chr20 | 10862997  | 10863395  | 399 |
| chr2  | 137508350 | 137508748 | 399 |
| chr2  | 136724022 | 136724420 | 399 |
| chr2  | 135650834 | 135651232 | 399 |
| chr2  | 134430280 | 134430678 | 399 |
| chr19 | 60433190  | 60433588  | 399 |
| chr19 | 56283915  | 56284313  | 399 |
| chr19 | 44466769  | 44467167  | 399 |
| chr19 | 25420374  | 25420772  | 399 |
| chr19 | 12523613  | 12524011  | 399 |
| chr18 | 61932166  | 61932564  | 399 |
| chr18 | 47992671  | 47993069  | 399 |
| chr18 | 17439324  | 17439722  | 399 |
| chr18 | 12451460  | 12451858  | 399 |
| chr18 | 4009186   | 4009584   | 399 |
| chr17 | 70108653  | 70109051  | 399 |
| chr17 | 69489270  | 69489668  | 399 |
| chr16 | 48784544  | 48784942  | 399 |
| chr16 | 2256676   | 2257074   | 399 |
| chr15 | 41232184  | 41232582  | 399 |
| chr15 | 34591952  | 34592350  | 399 |
| chr15 | 30643456  | 30643854  | 399 |
| chr15 | 27272092  | 27272490  | 399 |
| chr15 | 26995699  | 26996097  | 399 |
| chr15 | 26714436  | 26714834  | 399 |
| chr15 | 25682589  | 25682987  | 399 |
| chr15 | 25585197  | 25585595  | 399 |
| chr14 | 36740255  | 36740653  | 399 |
| chr14 | 31497584  | 31497982  | 399 |
| chr14 | 16638021  | 16638419  | 399 |
| chr14 | 1766018   | 1766416   | 399 |
| chr14 | 1581060   | 1581458   | 399 |
| chr13 | 79994831  | 79995229  | 399 |
| chr13 | 67102677  | 67103075  | 399 |
| chr13 | 60187248  | 60187646  | 399 |
| chr13 | 34895605  | 34896003  | 399 |
| chr13 | 23641754  | 23642152  | 399 |

|       |           |           |     |
|-------|-----------|-----------|-----|
| chr13 | 18346541  | 18346939  | 399 |
| chr13 | 17762251  | 17762649  | 399 |
| chr13 | 15370294  | 15370692  | 399 |
| chr12 | 84231391  | 84231789  | 399 |
| chr12 | 82017039  | 82017437  | 399 |
| chr12 | 32923022  | 32923420  | 399 |
| chr12 | 32543516  | 32543914  | 399 |
| chr12 | 32261054  | 32261452  | 399 |
| chr12 | 31692458  | 31692856  | 399 |
| chr12 | 29826917  | 29827315  | 399 |
| chr11 | 110096568 | 110096966 | 399 |
| chr11 | 103886916 | 103887314 | 399 |
| chr11 | 70699373  | 70699771  | 399 |
| chr11 | 7050757   | 7051155   | 399 |
| chr10 | 68237754  | 68238152  | 399 |
| chr10 | 67034923  | 67035321  | 399 |
| chr10 | 16738054  | 16738452  | 399 |
| chr10 | 12124663  | 12125061  | 399 |
| chr1  | 121486164 | 121486562 | 399 |
| chr1  | 2165232   | 2165630   | 399 |
| chr7  | 10640745  | 10641142  | 398 |
| chr7  | 3391945   | 3392342   | 398 |
| chr6  | 94532102  | 94532499  | 398 |
| chr3  | 119274081 | 119274478 | 398 |
| chr26 | 22181471  | 22181868  | 398 |
| chr24 | 31251448  | 31251845  | 398 |
| chr2  | 134889833 | 134890230 | 398 |
| chr2  | 115118549 | 115118946 | 398 |
| chr19 | 13490466  | 13490863  | 398 |
| chr16 | 44103688  | 44104085  | 398 |
| chr15 | 21452286  | 21452683  | 398 |
| chr13 | 36766653  | 36767050  | 398 |
| chr12 | 14704419  | 14704816  | 398 |
| chr11 | 104994107 | 104994504 | 398 |
| chr11 | 81386622  | 81387019  | 398 |
| chr10 | 90945234  | 90945631  | 398 |
| chr1  | 75290771  | 75291168  | 398 |
| chr9  | 106707995 | 106708391 | 397 |
| chr7  | 15611940  | 15612336  | 397 |
| chr5  | 28829629  | 28830025  | 397 |
| chr3  | 92229023  | 92229419  | 397 |
| chr26 | 51743976  | 51744372  | 397 |
| chr25 | 37271552  | 37271948  | 397 |
| chr25 | 23843241  | 23843637  | 397 |
| chr21 | 34641406  | 34641802  | 397 |
| chr17 | 70732786  | 70733182  | 397 |
| chr17 | 68230930  | 68231326  | 397 |
| chr13 | 77302099  | 77302495  | 397 |
| chr11 | 13925628  | 13926024  | 397 |
| chr10 | 83573624  | 83574020  | 397 |



|       |               |           |     |
|-------|---------------|-----------|-----|
| chr7  | 18388471      | 18388866  | 396 |
| chr4  | 123596291     | 123596686 | 396 |
| chr4  | 117153875     | 117154270 | 396 |
| chr3  | 22931124      | 22931519  | 396 |
| chr28 | 40384084      | 40384479  | 396 |
| chr27 | 41847943      | 41848338  | 396 |
| chr19 | 38870467      | 38870862  | 396 |
| chr18 | 51156459      | 51156854  | 396 |
| chr1  | 74138211      | 74138606  | 396 |
| chr26 | 22414493      | 22414887  | 395 |
| chr24 | 40469225      | 40469619  | 395 |
| chr23 | 18746234      | 18746628  | 395 |
| chr23 | 11474792      | 11475186  | 395 |
| chr21 | 27951955      | 27952349  | 395 |
| chr20 | 2232620       | 2233014   | 395 |
| chr17 | 73194981      | 73195375  | 395 |
| chr16 | 70464063      | 70464457  | 395 |
| chr16 | 67443935      | 67444329  | 395 |
| chr16 | 44300625      | 44301019  | 395 |
| chr12 | 84952853      | 84953247  | 395 |
| chr9  | 77684337      | 77684730  | 394 |
| chr5  | 64789010      | 64789403  | 394 |
| chr3  | 22592681      | 22593074  | 394 |
| chr28 | 33810465      | 33810858  | 394 |
| chr26 | 18161822      | 18162215  | 394 |
| chr22 | 53593403      | 53593796  | 394 |
| chr20 | 770468 770861 |           | 394 |
| chr19 | 56005703      | 56006096  | 394 |
| chr16 | 39010558      | 39010951  | 394 |
| chr14 | 29194376      | 29194769  | 394 |
| chr12 | 30954100      | 30954493  | 394 |
| chr11 | 4587287       | 4587680   | 394 |
| chr1  | 149482852     | 149483245 | 394 |
| chr8  | 3712455       | 3712847   | 393 |
| chr5  | 60891973      | 60892365  | 393 |
| chr4  | 71550621      | 71551013  | 393 |
| chr3  | 117342008     | 117342400 | 393 |
| chr29 | 1490212       | 1490604   | 393 |
| chr28 | 43746656      | 43747048  | 393 |
| chr28 | 42900549      | 42900941  | 393 |
| chr27 | 1497562       | 1497954   | 393 |
| chr26 | 48898660      | 48899052  | 393 |
| chr25 | 34347658      | 34348050  | 393 |
| chr22 | 50739896      | 50740288  | 393 |
| chr2  | 136729321     | 136729713 | 393 |
| chr2  | 27651692      | 27652084  | 393 |
| chr19 | 54846794      | 54847186  | 393 |
| chr18 | 60135058      | 60135450  | 393 |
| chr17 | 66888009      | 66888401  | 393 |
| chr16 | 34183315      | 34183707  | 393 |

|       |           |           |     |
|-------|-----------|-----------|-----|
| chr15 | 65652323  | 65652715  | 393 |
| chr13 | 75545605  | 75545997  | 393 |
| chr11 | 108383799 | 108384191 | 393 |
| chr10 | 91767934  | 91768326  | 393 |
| chr10 | 8557975   | 8558367   | 393 |
| chr9  | 8178822   | 8179213   | 392 |
| chr4  | 117799655 | 117800046 | 392 |
| chr3  | 99273487  | 99273878  | 392 |
| chr3  | 23621228  | 23621619  | 392 |
| chr28 | 26829274  | 26829665  | 392 |
| chr25 | 4622777   | 4623168   | 392 |
| chr23 | 21235793  | 21236184  | 392 |
| chr2  | 122839871 | 122840262 | 392 |
| chr19 | 18376164  | 18376555  | 392 |
| chr18 | 47635563  | 47635954  | 392 |
| chr18 | 18718207  | 18718598  | 392 |
| chr17 | 73185857  | 73186248  | 392 |
| chr16 | 38717706  | 38718097  | 392 |
| chr13 | 60211732  | 60212123  | 392 |
| chr12 | 31978330  | 31978721  | 392 |
| chr11 | 81397127  | 81397518  | 392 |
| chr7  | 11030902  | 11031292  | 391 |
| chr29 | 44461728  | 44462118  | 391 |
| chr26 | 37097194  | 37097584  | 391 |
| chr22 | 45456769  | 45457159  | 391 |
| chr20 | 25596411  | 25596801  | 391 |
| chr2  | 101813825 | 101814215 | 391 |
| chr19 | 56014709  | 56015099  | 391 |
| chr19 | 54845995  | 54846385  | 391 |
| chr19 | 47320585  | 47320975  | 391 |
| chr18 | 52926667  | 52927057  | 391 |
| chr17 | 70086441  | 70086831  | 391 |
| chr14 | 26468867  | 26469257  | 391 |
| chr12 | 32923705  | 32924095  | 391 |
| chr9  | 91903762  | 91904151  | 390 |
| chr8  | 65748351  | 65748740  | 390 |
| chr6  | 120839803 | 120840192 | 390 |
| chr4  | 121715345 | 121715734 | 390 |
| chr3  | 22650986  | 22651375  | 390 |
| chr29 | 46971932  | 46972321  | 390 |
| chr26 | 48521660  | 48522049  | 390 |
| chr25 | 34355372  | 34355761  | 390 |
| chr19 | 45057247  | 45057636  | 390 |
| chr19 | 42064905  | 42065294  | 390 |
| chr19 | 30820379  | 30820768  | 390 |
| chr19 | 28534116  | 28534505  | 390 |
| chr18 | 54180357  | 54180746  | 390 |
| chr18 | 22722863  | 22723252  | 390 |
| chr16 | 46998342  | 46998731  | 390 |
| chr12 | 15433750  | 15434139  | 390 |

|       |           |           |     |
|-------|-----------|-----------|-----|
| chr11 | 107584674 | 107585063 | 390 |
| chr10 | 19612458  | 19612847  | 390 |
| chr9  | 90409015  | 90409403  | 389 |
| chr6  | 120723735 | 120724123 | 389 |
| chr5  | 60389739  | 60390127  | 389 |
| chr4  | 111948561 | 111948949 | 389 |
| chr3  | 115692292 | 115692680 | 389 |
| chr26 | 18197922  | 18198310  | 389 |
| chr23 | 18744564  | 18744952  | 389 |
| chr2  | 140746770 | 140747158 | 389 |
| chr19 | 58978662  | 58979050  | 389 |
| chr15 | 75511297  | 75511685  | 389 |
| chr10 | 88062354  | 88062742  | 389 |
| chr9  | 87725187  | 87725574  | 388 |
| chr8  | 23828643  | 23829030  | 388 |
| chr5  | 113185798 | 113186185 | 388 |
| chr5  | 91477855  | 91478242  | 388 |
| chr4  | 73434004  | 73434391  | 388 |
| chr29 | 37702813  | 37703200  | 388 |
| chr21 | 64472304  | 64472691  | 388 |
| chr19 | 21597236  | 21597623  | 388 |
| chr12 | 61830098  | 61830485  | 388 |
| chr10 | 36912617  | 36913004  | 388 |
| chr8  | 73760954  | 73761340  | 387 |
| chr7  | 19833743  | 19834129  | 387 |
| chr7  | 8840999   | 8841385   | 387 |
| chr6  | 115900553 | 115900939 | 387 |
| chr5  | 118471760 | 118472146 | 387 |
| chr5  | 10732667  | 10733053  | 387 |
| chr4  | 16847042  | 16847428  | 387 |
| chr3  | 55415991  | 55416377  | 387 |
| chr3  | 35563142  | 35563528  | 387 |
| chr27 | 26792291  | 26792677  | 387 |
| chr23 | 43387063  | 43387449  | 387 |
| chr21 | 25199933  | 25200319  | 387 |
| chr2  | 111300700 | 111301086 | 387 |
| chr19 | 59388491  | 59388877  | 387 |
| chr18 | 54348484  | 54348870  | 387 |
| chr18 | 13782228  | 13782614  | 387 |
| chr1  | 143795228 | 143795614 | 387 |
| chr1  | 67584881  | 67585267  | 387 |
| chr4  | 67705558  | 67705943  | 386 |
| chr28 | 44209635  | 44210020  | 386 |
| chr25 | 38832951  | 38833336  | 386 |
| chr21 | 30316732  | 30317117  | 386 |
| chr20 | 67089335  | 67089720  | 386 |
| chr20 | 25589431  | 25589816  | 386 |
| chr19 | 46830301  | 46830686  | 386 |
| chr18 | 4105353   | 4105738   | 386 |
| chr10 | 16829828  | 16830213  | 386 |

|       |           |           |     |
|-------|-----------|-----------|-----|
| chr8  | 22855954  | 22856338  | 385 |
| chr5  | 113558084 | 113558468 | 385 |
| chr4  | 118160029 | 118160413 | 385 |
| chr3  | 24594989  | 24595373  | 385 |
| chr3  | 20500590  | 20500974  | 385 |
| chr28 | 33379234  | 33379618  | 385 |
| chr27 | 17821290  | 17821674  | 385 |
| chr23 | 11334684  | 11335068  | 385 |
| chr22 | 17556120  | 17556504  | 385 |
| chr2  | 126905566 | 126905950 | 385 |
| chr19 | 59581330  | 59581714  | 385 |
| chr18 | 38676223  | 38676607  | 385 |
| chr18 | 23621206  | 23621590  | 385 |
| chr16 | 47610987  | 47611371  | 385 |
| chr14 | 77339479  | 77339863  | 385 |
| chr12 | 84671805  | 84672189  | 385 |
| chr11 | 102385613 | 102385997 | 385 |
| chr11 | 11729944  | 11730328  | 385 |
| chrX  | 13638230  | 13638613  | 384 |
| chr4  | 121717678 | 121718061 | 384 |
| chr4  | 118130295 | 118130678 | 384 |
| chr4  | 32164148  | 32164531  | 384 |
| chr3  | 22643408  | 22643791  | 384 |
| chr3  | 22496629  | 22497012  | 384 |
| chr26 | 33087342  | 33087725  | 384 |
| chr25 | 2982997   | 2983380   | 384 |
| chr18 | 39592565  | 39592948  | 384 |
| chr17 | 48211667  | 48212050  | 384 |
| chr14 | 3487757   | 3488140   | 384 |
| chr13 | 75843436  | 75843819  | 384 |
| chr12 | 84032721  | 84033104  | 384 |
| chrX  | 87716678  | 87717060  | 383 |
| chr6  | 57817118  | 57817500  | 383 |
| chr5  | 113467875 | 113468257 | 383 |
| chr5  | 30425771  | 30426153  | 383 |
| chr3  | 22920201  | 22920583  | 383 |
| chr27 | 23988946  | 23989328  | 383 |
| chr25 | 42209846  | 42210228  | 383 |
| chr21 | 47715395  | 47715777  | 383 |
| chr19 | 43139049  | 43139431  | 383 |
| chr19 | 20354967  | 20355349  | 383 |
| chr19 | 19642536  | 19642918  | 383 |
| chr17 | 70078759  | 70079141  | 383 |
| chr17 | 69381360  | 69381742  | 383 |
| chr17 | 68808194  | 68808576  | 383 |
| chr17 | 66885953  | 66886335  | 383 |
| chr11 | 81335613  | 81335995  | 383 |
| chr11 | 48563072  | 48563454  | 383 |
| chr1  | 152254679 | 152255061 | 383 |
| chr9  | 105734968 | 105735349 | 382 |

|       |               |           |     |
|-------|---------------|-----------|-----|
| chr4  | 121749417     | 121749798 | 382 |
| chr4  | 79269585      | 79269966  | 382 |
| chr25 | 43227936      | 43228317  | 382 |
| chr23 | 11343229      | 11343610  | 382 |
| chr21 | 10794089      | 10794470  | 382 |
| chr19 | 46719532      | 46719913  | 382 |
| chr19 | 45945308      | 45945689  | 382 |
| chr19 | 26001597      | 26001978  | 382 |
| chr17 | 49152274      | 49152655  | 382 |
| chr13 | 48464141      | 48464522  | 382 |
| chr5  | 123652754     | 123653134 | 381 |
| chr5  | 111841234     | 111841614 | 381 |
| chr25 | 34283840      | 34284220  | 381 |
| chr24 | 2945256       | 2945636   | 381 |
| chr23 | 27157657      | 27158037  | 381 |
| chr2  | 133066972     | 133067352 | 381 |
| chr19 | 41231218      | 41231598  | 381 |
| chr17 | 70024499      | 70024879  | 381 |
| chr14 | 59023853      | 59024233  | 381 |
| chr13 | 55112612      | 55112992  | 381 |
| chr8  | 106653813     | 106654192 | 380 |
| chr6  | 16240737      | 16241116  | 380 |
| chr5  | 73176469      | 73176848  | 380 |
| chr29 | 51270143      | 51270522  | 380 |
| chr24 | 271544 271923 | 380       |     |
| chr22 | 14057691      | 14058070  | 380 |
| chr20 | 3316759       | 3317138   | 380 |
| chr2  | 26560420      | 26560799  | 380 |
| chr19 | 45207166      | 45207545  | 380 |
| chr16 | 77499833      | 77500212  | 380 |
| chr13 | 70371597      | 70371976  | 380 |
| chr12 | 83601837      | 83602216  | 380 |
| chr8  | 65983028      | 65983406  | 379 |
| chr6  | 59501511      | 59501889  | 379 |
| chr4  | 123979748     | 123980126 | 379 |
| chr3  | 22497964      | 22498342  | 379 |
| chr28 | 25156765      | 25157143  | 379 |
| chr26 | 21974738      | 21975116  | 379 |
| chr2  | 108501354     | 108501732 | 379 |
| chr17 | 70389509      | 70389887  | 379 |
| chr15 | 19973311      | 19973689  | 379 |
| chr14 | 27989718      | 27990096  | 379 |
| chr13 | 61522657      | 61523035  | 379 |
| chr1  | 68823017      | 68823395  | 379 |
| chr6  | 121029872     | 121030249 | 378 |
| chr6  | 106790932     | 106791309 | 378 |
| chr3  | 105693479     | 105693856 | 378 |
| chr3  | 36955078      | 36955455  | 378 |
| chr27 | 35831198      | 35831575  | 378 |
| chr26 | 22009892      | 22010269  | 378 |

|       |           |           |     |
|-------|-----------|-----------|-----|
| chr25 | 39429559  | 39429936  | 378 |
| chr23 | 42921240  | 42921617  | 378 |
| chr21 | 28838352  | 28838729  | 378 |
| chr2  | 132411571 | 132411948 | 378 |
| chr18 | 56763099  | 56763476  | 378 |
| chr17 | 69494295  | 69494672  | 378 |
| chr13 | 59829570  | 59829947  | 378 |
| chr10 | 99923084  | 99923461  | 378 |
| chr10 | 36597891  | 36598268  | 378 |
| chr8  | 45764427  | 45764803  | 377 |
| chr23 | 52030623  | 52030999  | 377 |
| chr19 | 47854688  | 47855064  | 377 |
| chr18 | 10211869  | 10212245  | 377 |
| chr13 | 67392286  | 67392662  | 377 |
| chr13 | 22149568  | 22149944  | 377 |
| chr13 | 11416779  | 11417155  | 377 |
| chr12 | 70977236  | 70977612  | 377 |
| chr12 | 32012648  | 32013024  | 377 |
| chr25 | 33652430  | 33652805  | 376 |
| chr22 | 15242456  | 15242831  | 376 |
| chr2  | 139523910 | 139524285 | 376 |
| chr19 | 57181495  | 57181870  | 376 |
| chr18 | 51625441  | 51625816  | 376 |
| chr15 | 54027548  | 54027923  | 376 |
| chr13 | 76000814  | 76001189  | 376 |
| chr13 | 38869752  | 38870127  | 376 |
| chr6  | 58826327  | 58826701  | 375 |
| chr3  | 123944828 | 123945202 | 375 |
| chr3  | 116387137 | 116387511 | 375 |
| chr26 | 5871107   | 5871481   | 375 |
| chr2  | 140625860 | 140626234 | 375 |
| chr19 | 39338224  | 39338598  | 375 |
| chr19 | 38741088  | 38741462  | 375 |
| chr16 | 46918064  | 46918438  | 375 |
| chr16 | 44060209  | 44060583  | 375 |
| chr14 | 7800872   | 7801246   | 375 |
| chr11 | 109652663 | 109653037 | 375 |
| chr11 | 98911788  | 98912162  | 375 |
| chr11 | 13244514  | 13244888  | 375 |
| chr10 | 28294792  | 28295166  | 375 |
| chr10 | 13617553  | 13617927  | 375 |
| chr7  | 46276219  | 46276592  | 374 |
| chr7  | 14684670  | 14685043  | 374 |
| chr5  | 122667376 | 122667749 | 374 |
| chr27 | 8316879   | 8317252   | 374 |
| chr23 | 18821651  | 18822024  | 374 |
| chr19 | 40514636  | 40515009  | 374 |
| chr18 | 52833496  | 52833869  | 374 |
| chr13 | 35680827  | 35681200  | 374 |
| chr11 | 107095632 | 107096005 | 374 |

|       |           |           |     |
|-------|-----------|-----------|-----|
| chr6  | 121054678 | 121055050 | 373 |
| chr5  | 30047776  | 30048148  | 373 |
| chr3  | 121392004 | 121392376 | 373 |
| chr3  | 34800172  | 34800544  | 373 |
| chr29 | 34682399  | 34682771  | 373 |
| chr25 | 42059846  | 42060218  | 373 |
| chr2  | 138607279 | 138607651 | 373 |
| chr19 | 38356291  | 38356663  | 373 |
| chr18 | 5226861   | 5227233   | 373 |
| chr13 | 61823766  | 61824138  | 373 |
| chr12 | 30796755  | 30797127  | 373 |
| chr11 | 108033080 | 108033452 | 373 |
| chr11 | 14093625  | 14093997  | 373 |
| chr10 | 10989260  | 10989632  | 373 |
| chr1  | 75099444  | 75099816  | 373 |
| chr9  | 29833080  | 29833451  | 372 |
| chr6  | 109314212 | 109314583 | 372 |
| chr5  | 112076463 | 112076834 | 372 |
| chr5  | 30556756  | 30557127  | 372 |
| chr4  | 118230434 | 118230805 | 372 |
| chr4  | 64276519  | 64276890  | 372 |
| chr3  | 121578047 | 121578418 | 372 |
| chr28 | 1263994   | 1264365   | 372 |
| chr22 | 50799996  | 50800367  | 372 |
| chr2  | 137659104 | 137659475 | 372 |
| chr2  | 24061971  | 24062342  | 372 |
| chr18 | 53266800  | 53267171  | 372 |
| chr17 | 57850325  | 57850696  | 372 |
| chr15 | 26807138  | 26807509  | 372 |
| chr10 | 83526548  | 83526919  | 372 |
| chr8  | 63935082  | 63935452  | 371 |
| chr8  | 29196693  | 29197063  | 371 |
| chr5  | 121251346 | 121251716 | 371 |
| chr5  | 29140535  | 29140905  | 371 |
| chr3  | 88243910  | 88244280  | 371 |
| chr29 | 46678959  | 46679329  | 371 |
| chr29 | 34958896  | 34959266  | 371 |
| chr23 | 32703229  | 32703599  | 371 |
| chr22 | 55400129  | 55400499  | 371 |
| chr20 | 75180490  | 75180860  | 371 |
| chr19 | 8945829   | 8946199   | 371 |
| chr18 | 62501041  | 62501411  | 371 |
| chr18 | 14449531  | 14449901  | 371 |
| chr10 | 17510423  | 17510793  | 371 |
| chr1  | 3093858   | 3094228   | 371 |
| chrX  | 74876760  | 74877129  | 370 |
| chr7  | 4664980   | 4665349   | 370 |
| chr4  | 32858064  | 32858433  | 370 |
| chr29 | 18180160  | 18180529  | 370 |
| chr28 | 44851484  | 44851853  | 370 |

|       |               |           |     |
|-------|---------------|-----------|-----|
| chr26 | 33259005      | 33259374  | 370 |
| chr21 | 68942507      | 68942876  | 370 |
| chr21 | 66055017      | 66055386  | 370 |
| chr18 | 4867614       | 4867983   | 370 |
| chr10 | 17142599      | 17142968  | 370 |
| chr1  | 118647872     | 118648241 | 370 |
| chr8  | 73322396      | 73322764  | 369 |
| chr4  | 33246648      | 33247016  | 369 |
| chr23 | 10545741      | 10546109  | 369 |
| chr19 | 59227149      | 59227517  | 369 |
| chr19 | 23131893      | 23132261  | 369 |
| chr16 | 1345441       | 1345809   | 369 |
| chr13 | 54754386      | 54754754  | 369 |
| chr1  | 3096792       | 3097160   | 369 |
| chr8  | 24397786      | 24398153  | 368 |
| chr5  | 113329228     | 113329595 | 368 |
| chr5  | 10526742      | 10527109  | 368 |
| chr29 | 37630442      | 37630809  | 368 |
| chr22 | 58639188      | 58639555  | 368 |
| chr21 | 59693342      | 59693709  | 368 |
| chr20 | 636389 636756 | 368       |     |
| chr2  | 140024022     | 140024389 | 368 |
| chr2  | 111410995     | 111411362 | 368 |
| chr19 | 59084166      | 59084533  | 368 |
| chr18 | 12435078      | 12435445  | 368 |
| chr18 | 11723457      | 11723824  | 368 |
| chr17 | 70039774      | 70040141  | 368 |
| chr16 | 57020919      | 57021286  | 368 |
| chr11 | 109086164     | 109086531 | 368 |
| chr18 | 48699446      | 48699812  | 367 |
| chr13 | 23034255      | 23034621  | 367 |
| chr11 | 109614111     | 109614477 | 367 |
| chr11 | 77870899      | 77871265  | 367 |
| chr10 | 81645404      | 81645770  | 367 |
| chr8  | 76017172      | 76017537  | 366 |
| chr6  | 121796532     | 121796897 | 366 |
| chr5  | 108830145     | 108830510 | 366 |
| chr28 | 34052499      | 34052864  | 366 |
| chr27 | 40619076      | 40619441  | 366 |
| chr23 | 10253147      | 10253512  | 366 |
| chr18 | 17922439      | 17922804  | 366 |
| chr15 | 28894208      | 28894573  | 366 |
| chr14 | 6973799       | 6974164   | 366 |
| chr14 | 2891059       | 2891424   | 366 |
| chr13 | 53906272      | 53906637  | 366 |
| chr11 | 11044340      | 11044705  | 366 |
| chr1  | 74305078      | 74305443  | 366 |
| chr3  | 113425570     | 113425934 | 365 |
| chr3  | 8973301       | 8973665   | 365 |
| chr23 | 11792212      | 11792576  | 365 |



|       |           |           |     |
|-------|-----------|-----------|-----|
| chr22 | 56589801  | 56590165  | 365 |
| chr19 | 44340443  | 44340807  | 365 |
| chr15 | 26964977  | 26965341  | 365 |
| chr14 | 6378899   | 6379263   | 365 |
| chr10 | 17136394  | 17136758  | 365 |
| chr10 | 8737605   | 8737969   | 365 |
| chr7  | 50255459  | 50255822  | 364 |
| chr5  | 30196488  | 30196851  | 364 |
| chr3  | 16910871  | 16911234  | 364 |
| chr25 | 37273732  | 37274095  | 364 |
| chr21 | 18623380  | 18623743  | 364 |
| chr2  | 134668622 | 134668985 | 364 |
| chr18 | 34062476  | 34062839  | 364 |
| chr18 | 14684616  | 14684979  | 364 |
| chr16 | 43557586  | 43557949  | 364 |
| chr14 | 34011367  | 34011730  | 364 |
| chr6  | 105331820 | 105332182 | 363 |
| chr29 | 36733814  | 36734176  | 363 |
| chr25 | 40945354  | 40945716  | 363 |
| chr23 | 19614934  | 19615296  | 363 |
| chr22 | 59669560  | 59669922  | 363 |
| chr2  | 135946061 | 135946423 | 363 |
| chr19 | 46724288  | 46724650  | 363 |
| chr18 | 23942693  | 23943055  | 363 |
| chr17 | 76321806  | 76322168  | 363 |
| chr13 | 41763055  | 41763417  | 363 |
| chr12 | 46765836  | 46766198  | 363 |
| chr10 | 76056665  | 76057027  | 363 |
| chr1  | 154423156 | 154423518 | 363 |
| chr5  | 123144089 | 123144450 | 362 |
| chr21 | 20667094  | 20667455  | 362 |
| chr19 | 58824890  | 58825251  | 362 |
| chr18 | 7888855   | 7889216   | 362 |
| chr13 | 57620661  | 57621022  | 362 |
| chr10 | 48814367  | 48814728  | 362 |
| chr4  | 99361122  | 99361482  | 361 |
| chr3  | 15353459  | 15353819  | 361 |
| chr19 | 29752868  | 29753228  | 361 |
| chr19 | 29074613  | 29074973  | 361 |
| chr18 | 43380972  | 43381332  | 361 |
| chr18 | 22156697  | 22157057  | 361 |
| chr17 | 60297395  | 60297755  | 361 |
| chr16 | 55227076  | 55227436  | 361 |
| chr1  | 119938958 | 119939318 | 361 |
| chr7  | 3033098   | 3033457   | 360 |
| chr5  | 10533960  | 10534319  | 360 |
| chr28 | 11377550  | 11377909  | 360 |
| chr21 | 65683399  | 65683758  | 360 |
| chr21 | 32995109  | 32995468  | 360 |
| chr18 | 49521082  | 49521441  | 360 |

|       |           |           |     |
|-------|-----------|-----------|-----|
| chr18 | 45661021  | 45661380  | 360 |
| chr17 | 69947129  | 69947488  | 360 |
| chr9  | 90620006  | 90620364  | 359 |
| chr3  | 121212356 | 121212714 | 359 |
| chr3  | 17484418  | 17484776  | 359 |
| chr29 | 43998646  | 43999004  | 359 |
| chr23 | 49854087  | 49854445  | 359 |
| chr22 | 59501005  | 59501363  | 359 |
| chr22 | 11750414  | 11750772  | 359 |
| chr19 | 56024248  | 56024606  | 359 |
| chr18 | 53321054  | 53321412  | 359 |
| chr18 | 11759564  | 11759922  | 359 |
| chr13 | 80011226  | 80011584  | 359 |
| chr13 | 70035425  | 70035783  | 359 |
| chr12 | 46766221  | 46766579  | 359 |
| chr12 | 31487501  | 31487859  | 359 |
| chr11 | 10701785  | 10702143  | 359 |
| chr10 | 17229209  | 17229567  | 359 |
| chr10 | 17086145  | 17086503  | 359 |
| chr26 | 19740275  | 19740632  | 358 |
| chr2  | 43863663  | 43864020  | 358 |
| chr19 | 15075711  | 15076068  | 358 |
| chr18 | 62985502  | 62985859  | 358 |
| chr17 | 73216829  | 73217186  | 358 |
| chr16 | 57547742  | 57548099  | 358 |
| chr8  | 66669850  | 66670206  | 357 |
| chr8  | 65873112  | 65873468  | 357 |
| chr5  | 80847172  | 80847528  | 357 |
| chr4  | 123515850 | 123516206 | 357 |
| chr28 | 44519781  | 44520137  | 357 |
| chr28 | 12377705  | 12378061  | 357 |
| chr23 | 7050961   | 7051317   | 357 |
| chr21 | 64154337  | 64154693  | 357 |
| chr21 | 31059138  | 31059494  | 357 |
| chr19 | 6517360   | 6517716   | 357 |
| chr18 | 62190242  | 62190598  | 357 |
| chr16 | 3469683   | 3470039   | 357 |
| chr12 | 83828276  | 83828632  | 357 |
| chr7  | 12908380  | 12908735  | 356 |
| chr6  | 121070562 | 121070917 | 356 |
| chr5  | 111202138 | 111202493 | 356 |
| chr3  | 127868207 | 127868562 | 356 |
| chr19 | 23048125  | 23048480  | 356 |
| chr12 | 30618330  | 30618685  | 356 |
| chr9  | 45102027  | 45102381  | 355 |
| chr27 | 29346143  | 29346497  | 355 |
| chr26 | 21603683  | 21604037  | 355 |
| chr24 | 52341549  | 52341903  | 355 |
| chr24 | 35244353  | 35244707  | 355 |
| chr22 | 30575243  | 30575597  | 355 |

|       |               |           |     |
|-------|---------------|-----------|-----|
| chr21 | 29200817      | 29201171  | 355 |
| chr19 | 60549181      | 60549535  | 355 |
| chr3  | 29658695      | 29659048  | 354 |
| chr29 | 48327962      | 48328315  | 354 |
| chr26 | 43090848      | 43091201  | 354 |
| chr21 | 31664870      | 31665223  | 354 |
| chr2  | 122877594     | 122877947 | 354 |
| chr2  | 111123221     | 111123574 | 354 |
| chr19 | 51425622      | 51425975  | 354 |
| chr13 | 75828367      | 75828720  | 354 |
| chr10 | 88270282      | 88270635  | 354 |
| chr10 | 17395153      | 17395506  | 354 |
| chr8  | 77200113      | 77200465  | 353 |
| chr3  | 114222744     | 114223096 | 353 |
| chr18 | 51760653      | 51761005  | 353 |
| chr13 | 60181471      | 60181823  | 353 |
| chr8  | 77289648      | 77289999  | 352 |
| chr4  | 118229904     | 118230255 | 352 |
| chr3  | 117895465     | 117895816 | 352 |
| chr29 | 48175959      | 48176310  | 352 |
| chr24 | 35331487      | 35331838  | 352 |
| chr21 | 61662644      | 61662995  | 352 |
| chr21 | 44299012      | 44299363  | 352 |
| chr2  | 134893069     | 134893420 | 352 |
| chr16 | 44058932      | 44059283  | 352 |
| chr13 | 75986069      | 75986420  | 352 |
| chr13 | 66960401      | 66960752  | 352 |
| chr3  | 111684311     | 111684661 | 351 |
| chr18 | 49797914      | 49798264  | 351 |
| chr18 | 21197456      | 21197806  | 351 |
| chr17 | 70333908      | 70334258  | 351 |
| chr15 | 25733062      | 25733412  | 351 |
| chr13 | 22891302      | 22891652  | 351 |
| chr11 | 109641674     | 109642024 | 351 |
| chr11 | 104923009     | 104923359 | 351 |
| chr1  | 672089 672439 | 351       |     |
| chr23 | 15966137      | 15966486  | 350 |
| chr18 | 34640694      | 34641043  | 350 |
| chr11 | 104696780     | 104697129 | 350 |
| chr10 | 99316826      | 99317175  | 350 |
| chr6  | 121888052     | 121888400 | 349 |
| chr5  | 69091130      | 69091478  | 349 |
| chr24 | 39069618      | 39069966  | 349 |
| chr2  | 134891607     | 134891955 | 349 |
| chr2  | 75600969      | 75601317  | 349 |
| chr19 | 10882190      | 10882538  | 349 |
| chr18 | 58824448      | 58824796  | 349 |
| chr15 | 21392012      | 21392360  | 349 |
| chr13 | 70137710      | 70138058  | 349 |
| chr13 | 56276409      | 56276757  | 349 |

|       |           |           |     |
|-------|-----------|-----------|-----|
| chr12 | 82293410  | 82293758  | 349 |
| chr11 | 47794613  | 47794961  | 349 |
| chr10 | 16865265  | 16865613  | 349 |
| chr7  | 50548011  | 50548358  | 348 |
| chr5  | 113605261 | 113605608 | 348 |
| chr5  | 28940142  | 28940489  | 348 |
| chr23 | 15139613  | 15139960  | 348 |
| chr22 | 61201689  | 61202036  | 348 |
| chr21 | 13648030  | 13648377  | 348 |
| chr21 | 6552642   | 6552989   | 348 |
| chr20 | 73261941  | 73262288  | 348 |
| chr19 | 7532062   | 7532409   | 348 |
| chr10 | 20453498  | 20453845  | 348 |
| chrX  | 21087712  | 21088058  | 347 |
| chr9  | 67342404  | 67342750  | 347 |
| chr6  | 14226547  | 14226893  | 347 |
| chr3  | 126889595 | 126889941 | 347 |
| chr29 | 29681602  | 29681948  | 347 |
| chr26 | 20298650  | 20298996  | 347 |
| chr23 | 44267628  | 44267974  | 347 |
| chr21 | 28222233  | 28222579  | 347 |
| chr21 | 27437952  | 27438298  | 347 |
| chr2  | 138629484 | 138629830 | 347 |
| chr17 | 74412892  | 74413238  | 347 |
| chr17 | 4814744   | 4815090   | 347 |
| chr13 | 77411378  | 77411724  | 347 |
| chr12 | 81929049  | 81929395  | 347 |
| chr11 | 108245214 | 108245560 | 347 |
| chr11 | 106307038 | 106307384 | 347 |
| chr7  | 96284475  | 96284820  | 346 |
| chr7  | 42282156  | 42282501  | 346 |
| chr7  | 18482336  | 18482681  | 346 |
| chr6  | 121884537 | 121884882 | 346 |
| chr25 | 36474367  | 36474712  | 346 |
| chr21 | 65651038  | 65651383  | 346 |
| chr18 | 32959732  | 32960077  | 346 |
| chr17 | 63958325  | 63958670  | 346 |
| chr9  | 51602132  | 51602476  | 345 |
| chr18 | 47671716  | 47672060  | 345 |
| chr10 | 59217973  | 59218317  | 345 |
| chr1  | 132109248 | 132109592 | 345 |
| chr9  | 90543967  | 90544310  | 344 |
| chr4  | 121857298 | 121857641 | 344 |
| chr3  | 15956470  | 15956813  | 344 |
| chr16 | 43085774  | 43086117  | 344 |
| chr13 | 57211053  | 57211396  | 344 |
| chr13 | 10977090  | 10977433  | 344 |
| chr10 | 102675811 | 102676154 | 344 |
| chr1  | 61279271  | 61279614  | 344 |
| chr9  | 106568074 | 106568416 | 343 |

|       |           |           |     |
|-------|-----------|-----------|-----|
| chr9  | 105889093 | 105889435 | 343 |
| chr7  | 18503670  | 18504012  | 343 |
| chr29 | 34367070  | 34367412  | 343 |
| chr2  | 73032884  | 73033226  | 343 |
| chr19 | 39032894  | 39033236  | 343 |
| chr19 | 38266049  | 38266391  | 343 |
| chr19 | 8563262   | 8563604   | 343 |
| chr15 | 81356841  | 81357183  | 343 |
| chr15 | 54028220  | 54028562  | 343 |
| chr13 | 53850071  | 53850413  | 343 |
| chr9  | 89859156  | 89859497  | 342 |
| chr5  | 112214565 | 112214906 | 342 |
| chr28 | 33779732  | 33780073  | 342 |
| chr25 | 36473810  | 36474151  | 342 |
| chr22 | 52908227  | 52908568  | 342 |
| chr19 | 29747128  | 29747469  | 342 |
| chr15 | 75316020  | 75316361  | 342 |
| chr11 | 76373865  | 76374206  | 342 |
| chr26 | 20934530  | 20934870  | 341 |
| chr24 | 7026237   | 7026577   | 341 |
| chr22 | 55537699  | 55538039  | 341 |
| chr21 | 25254238  | 25254578  | 341 |
| chr10 | 25846099  | 25846439  | 341 |
| chr9  | 44304643  | 44304982  | 340 |
| chr3  | 86668954  | 86669293  | 340 |
| chr16 | 1867881   | 1868220   | 340 |
| chr1  | 8722427   | 8722766   | 340 |
| chr3  | 127375924 | 127376262 | 339 |
| chr21 | 34054796  | 34055134  | 339 |
| chr2  | 136971509 | 136971847 | 339 |
| chr18 | 23216778  | 23217116  | 339 |
| chr13 | 70048100  | 70048438  | 339 |
| chr12 | 74561353  | 74561691  | 339 |
| chr10 | 84689430  | 84689768  | 339 |
| chr8  | 87110625  | 87110962  | 338 |
| chr5  | 35292891  | 35293228  | 338 |
| chr3  | 99565967  | 99566304  | 338 |
| chr25 | 2983787   | 2984124   | 338 |
| chr21 | 57827043  | 57827380  | 338 |
| chr18 | 48687829  | 48688166  | 338 |
| chr16 | 2048724   | 2049061   | 338 |
| chr15 | 21515823  | 21516160  | 338 |
| chr13 | 65941319  | 65941656  | 338 |
| chr13 | 11225097  | 11225434  | 338 |
| chr12 | 54230160  | 54230497  | 338 |
| chr12 | 33318798  | 33319135  | 338 |
| chr7  | 5153898   | 5154234   | 337 |
| chr6  | 63389071  | 63389407  | 337 |
| chr5  | 114115568 | 114115904 | 337 |
| chr29 | 34733148  | 34733484  | 337 |

|       |           |           |     |
|-------|-----------|-----------|-----|
| chr23 | 45888190  | 45888526  | 337 |
| chr23 | 28202226  | 28202562  | 337 |
| chr14 | 61502594  | 61502930  | 337 |
| chr8  | 24656300  | 24656635  | 336 |
| chr29 | 33918782  | 33919117  | 336 |
| chr2  | 25902252  | 25902587  | 336 |
| chr18 | 13538488  | 13538823  | 336 |
| chr11 | 70696835  | 70697170  | 336 |
| chr11 | 12887989  | 12888324  | 336 |
| chr5  | 112404919 | 112405253 | 335 |
| chr2  | 140271351 | 140271685 | 335 |
| chr17 | 74380751  | 74381085  | 335 |
| chr17 | 70141655  | 70141989  | 335 |
| chr15 | 26741684  | 26742018  | 335 |
| chr15 | 24932904  | 24933238  | 335 |
| chr13 | 80907871  | 80908205  | 335 |
| chr13 | 14722392  | 14722726  | 335 |
| chr11 | 47414182  | 47414516  | 335 |
| chr7  | 43739868  | 43740201  | 334 |
| chr3  | 106506546 | 106506879 | 334 |
| chr28 | 33767520  | 33767853  | 334 |
| chr23 | 11458718  | 11459051  | 334 |
| chr23 | 8440424   | 8440757   | 334 |
| chr19 | 57693750  | 57694083  | 334 |
| chr18 | 56051779  | 56052112  | 334 |
| chr18 | 11941199  | 11941532  | 334 |
| chr16 | 38876970  | 38877303  | 334 |
| chr14 | 1728784   | 1729117   | 334 |
| chr7  | 51856938  | 51857270  | 333 |
| chr7  | 24585553  | 24585885  | 333 |
| chr28 | 33725868  | 33726200  | 333 |
| chr19 | 37923019  | 37923351  | 333 |
| chr1  | 137353773 | 137354105 | 333 |
| chr5  | 28881249  | 28881580  | 332 |
| chr2  | 111851366 | 111851697 | 332 |
| chr15 | 32707901  | 32708232  | 332 |
| chr14 | 29191899  | 29192230  | 332 |
| chr8  | 77217993  | 77218323  | 331 |
| chr6  | 94522196  | 94522526  | 331 |
| chr4  | 121439527 | 121439857 | 331 |
| chr24 | 58630166  | 58630496  | 331 |
| chr18 | 18423611  | 18423941  | 331 |
| chr5  | 30200580  | 30200909  | 330 |
| chr25 | 39399679  | 39400008  | 330 |
| chr24 | 60736743  | 60737072  | 330 |
| chr23 | 9720425   | 9720754   | 330 |
| chr22 | 30381120  | 30381449  | 330 |
| chr2  | 140734325 | 140734654 | 330 |
| chr18 | 53123995  | 53124324  | 330 |
| chr11 | 71077345  | 71077674  | 330 |

|       |           |           |     |
|-------|-----------|-----------|-----|
| chr7  | 37397224  | 37397552  | 329 |
| chr23 | 7626395   | 7626723   | 329 |
| chr19 | 54152797  | 54153125  | 329 |
| chr19 | 14751729  | 14752057  | 329 |
| chr17 | 63279740  | 63280068  | 329 |
| chr11 | 103031530 | 103031858 | 329 |
| chr11 | 25620015  | 25620343  | 329 |
| chr1  | 68818575  | 68818903  | 329 |
| chr7  | 43724761  | 43725088  | 328 |
| chr23 | 31443737  | 31444064  | 328 |
| chr22 | 54564841  | 54565168  | 328 |
| chr20 | 5046198   | 5046525   | 328 |
| chr2  | 126700363 | 126700690 | 328 |
| chr16 | 1553168   | 1553495   | 328 |
| chr9  | 104985192 | 104985518 | 327 |
| chr5  | 28852704  | 28853030  | 327 |
| chr3  | 121863490 | 121863816 | 327 |
| chr29 | 29704802  | 29705128  | 327 |
| chr19 | 19791896  | 19792222  | 327 |
| chr11 | 104924304 | 104924630 | 327 |
| chr8  | 78485716  | 78486041  | 326 |
| chr7  | 42181149  | 42181474  | 326 |
| chr7  | 38205661  | 38205986  | 326 |
| chr4  | 110048312 | 110048637 | 326 |
| chr25 | 38094605  | 38094930  | 326 |
| chr19 | 40905760  | 40906085  | 326 |
| chr15 | 80854858  | 80855183  | 326 |
| chr13 | 74415974  | 74416299  | 326 |
| chr13 | 55378140  | 55378465  | 326 |
| chr11 | 92240307  | 92240632  | 326 |
| chr11 | 2794521   | 2794846   | 326 |
| chr10 | 75484366  | 75484691  | 326 |
| chr25 | 33286963  | 33287287  | 325 |
| chr18 | 57376042  | 57376366  | 325 |
| chr11 | 70956972  | 70957296  | 325 |
| chr8  | 47980866  | 47981189  | 324 |
| chr4  | 67864551  | 67864874  | 324 |
| chr3  | 22540769  | 22541092  | 324 |
| chr3  | 20517203  | 20517526  | 324 |
| chr22 | 59513174  | 59513497  | 324 |
| chr18 | 56227065  | 56227388  | 324 |
| chr18 | 38180623  | 38180946  | 324 |
| chr16 | 39532534  | 39532857  | 324 |
| chr11 | 40060123  | 40060446  | 324 |
| chr3  | 125194167 | 125194489 | 323 |
| chr3  | 120942954 | 120943276 | 323 |
| chr22 | 50854376  | 50854698  | 323 |
| chr11 | 108403484 | 108403806 | 323 |
| chr1  | 1622199   | 1622521   | 323 |
| chr6  | 70482108  | 70482429  | 322 |

|       |               |           |     |
|-------|---------------|-----------|-----|
| chr5  | 113204012     | 113204333 | 322 |
| chr21 | 25185985      | 25186306  | 322 |
| chr17 | 74017507      | 74017828  | 322 |
| chr1  | 146924903     | 146925224 | 322 |
| chr7  | 11037719      | 11038039  | 321 |
| chr3  | 119676813     | 119677133 | 321 |
| chr3  | 31683181      | 31683501  | 321 |
| chr24 | 43701684      | 43702004  | 321 |
| chr23 | 33026634      | 33026954  | 321 |
| chr19 | 27095188      | 27095508  | 321 |
| chr11 | 104491561     | 104491881 | 321 |
| chr7  | 43971230      | 43971549  | 320 |
| chr4  | 121476551     | 121476870 | 320 |
| chr24 | 40996982      | 40997301  | 320 |
| chr19 | 47351516      | 47351835  | 320 |
| chr13 | 55965373      | 55965692  | 320 |
| chr1  | 145693973     | 145694292 | 320 |
| chr7  | 50286892      | 50287210  | 319 |
| chr28 | 32816504      | 32816822  | 319 |
| chr23 | 6792108       | 6792426   | 319 |
| chr19 | 12283738      | 12284056  | 319 |
| chr15 | 51738464      | 51738782  | 319 |
| chr7  | 3961260       | 3961577   | 318 |
| chr5  | 120523787     | 120524104 | 318 |
| chr25 | 42045420      | 42045737  | 318 |
| chr15 | 74889112      | 74889429  | 318 |
| chr13 | 84226705      | 84227022  | 318 |
| chr7  | 51849768      | 51850084  | 317 |
| chr5  | 81599976      | 81600292  | 317 |
| chr11 | 51889142      | 51889458  | 317 |
| chr10 | 81737344      | 81737660  | 317 |
| chr1  | 147989822     | 147990138 | 317 |
| chr1  | 130512584     | 130512900 | 317 |
| chr5  | 125293853     | 125294168 | 316 |
| chr29 | 41470195      | 41470510  | 316 |
| chr2  | 136663525     | 136663840 | 316 |
| chr13 | 75776017      | 75776332  | 316 |
| chr11 | 99202868      | 99203183  | 316 |
| chr11 | 44987874      | 44988189  | 316 |
| chr7  | 17121680      | 17121994  | 315 |
| chr4  | 67941431      | 67941745  | 315 |
| chr27 | 827583 827897 | 315       |     |
| chr26 | 39277294      | 39277608  | 315 |
| chr26 | 37901425      | 37901739  | 315 |
| chr14 | 61132457      | 61132771  | 315 |
| chr14 | 30837639      | 30837953  | 315 |
| chr13 | 68449879      | 68450193  | 315 |
| chr11 | 72585007      | 72585321  | 315 |
| chr11 | 1195699       | 1196013   | 315 |
| chr5  | 81501709      | 81502022  | 314 |



|       |           |           |     |
|-------|-----------|-----------|-----|
| chr5  | 28832148  | 28832461  | 314 |
| chr19 | 25420862  | 25421175  | 314 |
| chr18 | 54334458  | 54334771  | 314 |
| chr16 | 59672685  | 59672998  | 314 |
| chr16 | 47062714  | 47063027  | 314 |
| chr14 | 5978526   | 5978839   | 314 |
| chr11 | 100416737 | 100417050 | 314 |
| chr24 | 34984084  | 34984396  | 313 |
| chr29 | 46348418  | 46348729  | 312 |
| chr27 | 36058533  | 36058844  | 312 |
| chr26 | 44384883  | 44385194  | 312 |
| chr25 | 8697161   | 8697472   | 312 |
| chr13 | 60755380  | 60755691  | 312 |
| chr13 | 55115278  | 55115589  | 312 |
| chr12 | 84320120  | 84320431  | 312 |
| chr3  | 15558412  | 15558722  | 311 |
| chr19 | 41268285  | 41268595  | 311 |
| chr17 | 69451104  | 69451414  | 311 |
| chr17 | 60569029  | 60569339  | 311 |
| chr12 | 84209464  | 84209774  | 311 |
| chr9  | 87776206  | 87776515  | 310 |
| chr3  | 34135217  | 34135526  | 310 |
| chr2  | 136615540 | 136615849 | 310 |
| chr2  | 135592989 | 135593298 | 310 |
| chr13 | 67449153  | 67449462  | 310 |
| chr9  | 44452389  | 44452697  | 309 |
| chr5  | 120491508 | 120491816 | 309 |
| chr5  | 29208451  | 29208759  | 309 |
| chr25 | 39163226  | 39163534  | 309 |
| chr25 | 38038755  | 38039063  | 309 |
| chr24 | 59473372  | 59473680  | 309 |
| chr23 | 14271727  | 14272035  | 309 |
| chr16 | 44067311  | 44067619  | 309 |
| chr14 | 7610564   | 7610872   | 309 |
| chr12 | 20799748  | 20800056  | 309 |
| chr1  | 84483500  | 84483808  | 309 |
| chr6  | 121071931 | 121072238 | 308 |
| chr29 | 44385649  | 44385956  | 308 |
| chr25 | 38359490  | 38359797  | 308 |
| chr25 | 37499389  | 37499696  | 308 |
| chr14 | 36743133  | 36743440  | 308 |
| chr11 | 84430682  | 84430989  | 308 |
| chr3  | 15428595  | 15428901  | 307 |
| chr25 | 11590547  | 11590853  | 307 |
| chr13 | 76108338  | 76108644  | 307 |
| chr1  | 145693624 | 145693930 | 307 |
| chr5  | 112765504 | 112765809 | 306 |
| chr22 | 52236935  | 52237240  | 306 |
| chr2  | 126963631 | 126963936 | 306 |
| chr19 | 7541833   | 7542138   | 306 |

|       |               |           |     |
|-------|---------------|-----------|-----|
| chr10 | 24170818      | 24171123  | 306 |
| chr22 | 52850663      | 52850967  | 305 |
| chr20 | 4406604       | 4406908   | 305 |
| chr18 | 45985955      | 45986259  | 305 |
| chr4  | 118288683     | 118288986 | 304 |
| chr20 | 8554120       | 8554423   | 304 |
| chr19 | 18862071      | 18862374  | 304 |
| chr17 | 55886415      | 55886718  | 304 |
| chr11 | 106009091     | 106009394 | 304 |
| chr10 | 7186421       | 7186724   | 304 |
| chr9  | 98512403      | 98512705  | 303 |
| chr3  | 4521051       | 4521353   | 303 |
| chr23 | 19803076      | 19803378  | 303 |
| chr19 | 43153987      | 43154289  | 303 |
| chr3  | 127239632     | 127239933 | 302 |
| chr26 | 20217456      | 20217757  | 302 |
| chr25 | 22883063      | 22883364  | 302 |
| chr3  | 114299975     | 114300275 | 301 |
| chr29 | 36958811      | 36959111  | 301 |
| chr28 | 25150605      | 25150905  | 301 |
| chr25 | 38030526      | 38030826  | 301 |
| chr21 | 60440489      | 60440789  | 301 |
| chr19 | 15153765      | 15154065  | 301 |
| chr17 | 64179274      | 64179574  | 301 |
| chr16 | 44924941      | 44925241  | 301 |
| chr15 | 22837436      | 22837736  | 301 |
| chr10 | 74706296      | 74706596  | 301 |
| chr1  | 151603450     | 151603750 | 301 |
| chr20 | 6626955       | 6627254   | 300 |
| chr19 | 30348315      | 30348613  | 299 |
| chr16 | 47218175      | 47218473  | 299 |
| chr27 | 808185 808482 | 298       |     |
| chr18 | 24314264      | 24314561  | 298 |
| chr16 | 40932512      | 40932809  | 298 |
| chr5  | 121211663     | 121211959 | 297 |
| chr3  | 126869179     | 126869475 | 297 |
| chr26 | 30329672      | 30329968  | 297 |
| chr24 | 11511116      | 11511412  | 297 |
| chr22 | 1952654       | 1952950   | 297 |
| chr21 | 67890333      | 67890629  | 297 |
| chr10 | 70037679      | 70037975  | 297 |
| chr10 | 4180881       | 4181177   | 297 |
| chr7  | 43512468      | 43512763  | 296 |
| chr3  | 35990744      | 35991039  | 296 |
| chr16 | 69048245      | 69048540  | 296 |
| chr3  | 116949336     | 116949630 | 295 |
| chr3  | 115073864     | 115074157 | 294 |
| chr28 | 26060334      | 26060627  | 294 |
| chr23 | 8290011       | 8290304   | 294 |
| chr13 | 73595430      | 73595723  | 294 |

|       |           |           |     |
|-------|-----------|-----------|-----|
| chr4  | 110121689 | 110121981 | 293 |
| chr21 | 13904838  | 13905130  | 293 |
| chr16 | 3714811   | 3715103   | 293 |
| chr15 | 43437705  | 43437997  | 293 |
| chr11 | 14106858  | 14107150  | 293 |
| chr1  | 63805951  | 63806243  | 293 |
| chr3  | 110184290 | 110184580 | 291 |
| chr29 | 44725466  | 44725756  | 291 |
| chr29 | 44639938  | 44640228  | 291 |
| chr21 | 69015711  | 69016001  | 291 |
| chr2  | 132165014 | 132165304 | 291 |
| chr18 | 12135458  | 12135748  | 291 |
| chr10 | 13319499  | 13319789  | 291 |
| chr3  | 116463020 | 116463309 | 290 |
| chr24 | 26734092  | 26734381  | 290 |
| chr18 | 10938571  | 10938860  | 290 |
| chr16 | 58574987  | 58575276  | 290 |
| chr13 | 54760177  | 54760465  | 289 |
| chr26 | 50648756  | 50649043  | 288 |
| chr21 | 65801920  | 65802207  | 288 |
| chr11 | 89476188  | 89476474  | 287 |
| chr3  | 126050955 | 126051240 | 286 |
| chr27 | 21494968  | 21495253  | 286 |
| chr26 | 37982429  | 37982714  | 286 |
| chr19 | 54332127  | 54332412  | 286 |
| chr18 | 43065987  | 43066272  | 286 |
| chr12 | 84310294  | 84310579  | 286 |
| chr23 | 13411897  | 13412181  | 285 |
| chr2  | 127089826 | 127090110 | 285 |
| chr2  | 75952899  | 75953182  | 284 |
| chr15 | 29106336  | 29106619  | 284 |
| chr1  | 149732813 | 149733096 | 284 |
| chr25 | 2967708   | 2967990   | 283 |
| chr5  | 30372957  | 30373238  | 282 |
| chr2  | 124972107 | 124972388 | 282 |
| chr18 | 49976665  | 49976945  | 281 |
| chr24 | 49215928  | 49216207  | 280 |
| chr7  | 4522755   | 4523033   | 279 |
| chr6  | 106984212 | 106984489 | 278 |
| chr5  | 33575744  | 33576021  | 278 |
| chr23 | 41685156  | 41685433  | 278 |
| chr18 | 64273232  | 64273509  | 278 |
| chr18 | 62365571  | 62365848  | 278 |
| chr4  | 104612353 | 104612629 | 277 |
| chr13 | 66963441  | 66963716  | 276 |
| chr7  | 17476903  | 17477177  | 275 |
| chr21 | 6463247   | 6463521   | 275 |
| chr19 | 27941484  | 27941758  | 275 |
| chr13 | 66896577  | 66896851  | 275 |
| chr12 | 53571420  | 53571694  | 275 |

|       |           |           |     |
|-------|-----------|-----------|-----|
| chr4  | 116423095 | 116423368 | 274 |
| chr22 | 53486920  | 53487193  | 274 |
| chr21 | 26644061  | 26644334  | 274 |
| chr18 | 33630695  | 33630968  | 274 |
| chr29 | 35157724  | 35157996  | 273 |
| chr18 | 22416937  | 22417209  | 273 |
| chr8  | 107919156 | 107919427 | 272 |
| chr28 | 26623800  | 26624070  | 271 |
| chr13 | 41279100  | 41279370  | 271 |
| chr3  | 22932896  | 22933165  | 270 |
| chr28 | 33284239  | 33284508  | 270 |
| chr23 | 18453361  | 18453630  | 270 |
| chr19 | 7607151   | 7607420   | 270 |
| chr18 | 55419922  | 55420191  | 270 |
| chr1  | 81361253  | 81361522  | 270 |
| chr6  | 72195457  | 72195725  | 269 |
| chr16 | 27578184  | 27578452  | 269 |
| chrX  | 52816596  | 52816863  | 268 |
| chr12 | 35607270  | 35607535  | 266 |
| chr7  | 5045068   | 5045332   | 265 |
| chr29 | 43124660  | 43124924  | 265 |
| chr2  | 26584090  | 26584354  | 265 |
| chr19 | 36467858  | 36468122  | 265 |
| chr11 | 100885971 | 100886235 | 265 |
| chr29 | 33578057  | 33578320  | 264 |
| chr29 | 12614290  | 12614553  | 264 |
| chr27 | 46014897  | 46015160  | 264 |
| chr16 | 31819996  | 31820259  | 264 |
| chr11 | 100884155 | 100884418 | 264 |
| chr11 | 9439792   | 9440055   | 264 |
| chr29 | 41639752  | 41640014  | 263 |
| chr25 | 2028344   | 2028605   | 262 |
| chr23 | 45973324  | 45973585  | 262 |
| chr20 | 33379344  | 33379605  | 262 |
| chr28 | 12193683  | 12193943  | 261 |
| chr2  | 110554207 | 110554467 | 261 |
| chr19 | 16719266  | 16719526  | 261 |
| chr13 | 17314203  | 17314463  | 261 |
| chr27 | 35832158  | 35832417  | 260 |
| chr13 | 54984752  | 54985011  | 260 |
| chr1  | 149725463 | 149725722 | 260 |
| chr3  | 55851084  | 55851342  | 259 |
| chr18 | 57302106  | 57302364  | 259 |
| chr4  | 81964801  | 81965058  | 258 |
| chr23 | 10496758  | 10497015  | 258 |
| chr2  | 92442616  | 92442873  | 258 |
| chr18 | 62955667  | 62955923  | 257 |
| chr6  | 118644781 | 118645036 | 256 |
| chr24 | 1205145   | 1205400   | 256 |
| chr19 | 51664415  | 51664670  | 256 |

|       |           |           |     |
|-------|-----------|-----------|-----|
| chr19 | 26978855  | 26979110  | 256 |
| chr26 | 41545989  | 41546242  | 254 |
| chr21 | 65868102  | 65868355  | 254 |
| chr28 | 25132412  | 25132664  | 253 |
| chr19 | 39167506  | 39167757  | 252 |
| chr16 | 1441326   | 1441577   | 252 |
| chr13 | 35933761  | 35934012  | 252 |
| chr10 | 21377736  | 21377987  | 252 |
| chr11 | 2450438   | 2450688   | 251 |
| chr8  | 46620040  | 46620289  | 250 |
| chr21 | 11792230  | 11792479  | 250 |
| chr5  | 29802757  | 29803005  | 249 |
| chr29 | 42936296  | 42936544  | 249 |
| chr10 | 90000215  | 90000463  | 249 |
| chr8  | 72235982  | 72236229  | 248 |
| chr14 | 15477024  | 15477271  | 248 |
| chr10 | 74865763  | 74866010  | 248 |
| chr5  | 81601603  | 81601849  | 247 |
| chr20 | 4240332   | 4240578   | 247 |
| chr19 | 65243548  | 65243794  | 247 |
| chr29 | 44923380  | 44923625  | 246 |
| chr22 | 48430456  | 48430701  | 246 |
| chr1  | 125382273 | 125382518 | 246 |
| chr23 | 52725725  | 52725968  | 244 |
| chr24 | 20889434  | 20889675  | 242 |
| chr29 | 36734525  | 36734765  | 241 |
| chr26 | 20502843  | 20503082  | 240 |
| chr7  | 6524892   | 6525130   | 239 |
| chr18 | 57422293  | 57422530  | 238 |
| chr3  | 115494380 | 115494615 | 236 |
| chr23 | 53267389  | 53267624  | 236 |
| chr26 | 20282188  | 20282418  | 231 |
| chr17 | 74484093  | 74484322  | 230 |
| chr1  | 74893038  | 74893267  | 230 |
| chr24 | 64993195  | 64993423  | 229 |
| chr7  | 111192473 | 111192697 | 225 |
| chr14 | 6747198   | 6747421   | 224 |
| chr6  | 45977025  | 45977247  | 223 |
| chr8  | 46616220  | 46616605  | 386 |
| chr19 | 49382678  | 49383395  | 718 |
| chr19 | 57694246  | 57694962  | 717 |
| chr9  | 90230291  | 90230913  | 623 |
| chr19 | 41232230  | 41232850  | 621 |
| chr21 | 28185633  | 28186237  | 605 |
| chr26 | 50411713  | 50412302  | 590 |
| chr5  | 102224195 | 102224752 | 558 |
| chr13 | 77428434  | 77428900  | 467 |
| chr23 | 27744264  | 27744662  | 399 |
| chr2  | 126408775 | 126409172 | 398 |
| chr26 | 22031726  | 22032113  | 388 |

|       |               |           |     |
|-------|---------------|-----------|-----|
| chr19 | 42265858      | 42266244  | 387 |
| chr22 | 57377979      | 57378361  | 383 |
| chr18 | 653629 653981 | 353       |     |
| chr24 | 45136701      | 45137036  | 336 |
| chr2  | 139316675     | 139317483 | 809 |
| chr17 | 70492431      | 70493084  | 654 |
| chr26 | 17920819      | 17921452  | 634 |
| chr29 | 49972123      | 49972712  | 590 |
| chr21 | 61029713      | 61030301  | 589 |
| chr2  | 111324048     | 111324595 | 548 |
| chr4  | 5616919       | 5617412   | 494 |
| chr23 | 48764833      | 48765304  | 472 |
| chr3  | 125193764     | 125194162 | 399 |
| chr1  | 120591148     | 120591544 | 397 |
| chr2  | 111236169     | 111236555 | 387 |
| chr11 | 44778006      | 44778383  | 378 |
| chr23 | 31887693      | 31888062  | 370 |
| chr9  | 82555494      | 82555761  | 268 |
| chr25 | 40431301      | 40432294  | 994 |
| chr28 | 41787504      | 41788389  | 886 |
| chr3  | 116416898     | 116417677 | 780 |
| chr18 | 11517625      | 11518243  | 619 |
| chr7  | 14364972      | 14365509  | 538 |
| chr3  | 105457357     | 105457891 | 535 |
| chr19 | 51927405      | 51927904  | 500 |
| chr13 | 75674064      | 75674540  | 477 |
| chr29 | 34634832      | 34635283  | 452 |
| chr2  | 117721992     | 117722428 | 437 |
| chr7  | 4520553       | 4520930   | 378 |
| chr4  | 118016628     | 118016996 | 369 |
| chr7  | 19373941      | 19374266  | 326 |
| chr5  | 64789519      | 64789837  | 319 |
| chr18 | 3433915       | 3434825   | 911 |
| chr11 | 80562154      | 80563032  | 879 |
| chr24 | 44251340      | 44251923  | 584 |
| chr4  | 16845501      | 16846081  | 581 |
| chr29 | 34890401      | 34890978  | 578 |
| chr18 | 62191147      | 62191697  | 551 |
| chr9  | 108056625     | 108057130 | 506 |
| chr12 | 32872293      | 32872770  | 478 |
| chr21 | 6556717       | 6557171   | 455 |
| chr18 | 11649931      | 11650321  | 391 |
| chr13 | 57776291      | 57776667  | 377 |
| chr24 | 64955813      | 64956184  | 372 |
| chr5  | 111212018     | 111212595 | 578 |
| chr18 | 26283446      | 26283999  | 554 |
| chr29 | 44743050      | 44743498  | 449 |
| chr19 | 59032497      | 59032932  | 436 |
| chr7  | 18790865      | 18791292  | 428 |
| chr28 | 26477503      | 26477894  | 392 |

|       |           |           |     |
|-------|-----------|-----------|-----|
| chr21 | 2031929   | 2032306   | 378 |
| chr8  | 73797177  | 73797529  | 353 |
| chr21 | 67977792  | 67978128  | 337 |
| chr21 | 33662956  | 33663236  | 281 |
| chr18 | 13575039  | 13575572  | 534 |
| chr13 | 73997392  | 73997834  | 443 |
| chr2  | 136649080 | 136649491 | 412 |
| chr21 | 68025566  | 68025964  | 399 |
| chr13 | 34936864  | 34937257  | 394 |
| chr28 | 13491078  | 13491443  | 366 |
| chr15 | 52644707  | 52645067  | 361 |
| chr8  | 73745592  | 73745941  | 350 |
| chr29 | 31727438  | 31727760  | 323 |
| chr6  | 65879553  | 65879847  | 295 |
| chr15 | 22809889  | 22810522  | 634 |
| chr19 | 37893586  | 37894169  | 584 |
| chr2  | 74021077  | 74021626  | 550 |
| chr5  | 122098243 | 122098746 | 504 |
| chr13 | 57774816  | 57775236  | 421 |
| chr23 | 17190338  | 17190748  | 411 |
| chr19 | 54778353  | 54778704  | 352 |
| chr11 | 93760134  | 93760475  | 342 |
| chr7  | 38253073  | 38253764  | 692 |
| chr18 | 9701341   | 9701787   | 447 |
| chr8  | 73763873  | 73764271  | 399 |
| chr19 | 25283829  | 25284227  | 399 |
| chr12 | 9642223   | 9642620   | 398 |
| chr23 | 13421759  | 13422155  | 397 |
| chr23 | 52719634  | 52720017  | 384 |
| chr11 | 80632636  | 80633017  | 382 |
| chr19 | 21729423  | 21729785  | 363 |
| chr1  | 3090621   | 3090981   | 361 |
| chr18 | 39905740  | 39906097  | 358 |
| chr8  | 85440152  | 85440497  | 346 |
| chr8  | 100263510 | 100264308 | 799 |
| chr10 | 68219192  | 68219924  | 733 |
| chr7  | 3925840   | 3926408   | 569 |
| chr28 | 43738811  | 43739357  | 547 |
| chr22 | 51294146  | 51294544  | 399 |
| chr23 | 17430599  | 17430993  | 395 |
| chr19 | 21740128  | 21740508  | 381 |
| chr10 | 13542374  | 13542727  | 354 |
| chr17 | 64903465  | 64904019  | 555 |
| chr29 | 30044919  | 30045348  | 430 |
| chr29 | 49712172  | 49712580  | 409 |
| chr18 | 23618021  | 23618399  | 379 |
| chr23 | 28015490  | 28016137  | 648 |
| chr23 | 10051446  | 10052015  | 570 |
| chr17 | 48724501  | 48725013  | 513 |
| chr19 | 60530108  | 60530567  | 460 |

|       |           |           |      |
|-------|-----------|-----------|------|
| chr26 | 18761126  | 18761544  | 419  |
| chr16 | 1086140   | 1086557   | 418  |
| chr19 | 45208195  | 45208593  | 399  |
| chr19 | 21738538  | 21738933  | 396  |
| chr13 | 73910999  | 73911392  | 394  |
| chr22 | 7258093   | 7258481   | 389  |
| chr17 | 72629413  | 72629801  | 389  |
| chr6  | 119377177 | 119377562 | 386  |
| chr2  | 125927442 | 125927825 | 384  |
| chr8  | 73925975  | 73926346  | 372  |
| chr16 | 1621451   | 1621819   | 369  |
| chr13 | 77334670  | 77335027  | 358  |
| chr1  | 82898321  | 82898678  | 358  |
| chr25 | 3504511   | 3504863   | 353  |
| chr24 | 44347610  | 44347954  | 345  |
| chr19 | 21765690  | 21766033  | 344  |
| chr17 | 66849428  | 66849770  | 343  |
| chr22 | 52819363  | 52819696  | 334  |
| chr9  | 10498648  | 10498976  | 329  |
| chr20 | 3247567   | 3247891   | 325  |
| chr19 | 40424669  | 40424989  | 321  |
| chr19 | 39011721  | 39012041  | 321  |
| chr25 | 37259528  | 37259841  | 314  |
| chr17 | 64596935  | 64597238  | 304  |
| chr5  | 112134478 | 112134756 | 279  |
| chr6  | 107494411 | 107494661 | 251  |
| chr9  | 106062672 | 106062894 | 223  |
| chr17 | 67113593  | 67113805  | 213  |
| chr8  | 73842598  | 73842932  | 335  |
| chr21 | 2035868   | 2036213   | 346  |
| chr8  | 73504332  | 73504674  | 343  |
| chr24 | 64972633  | 64973228  | 596  |
| chr9  | 87765176  | 87765686  | 511  |
| chr19 | 65311405  | 65311789  | 385  |
| chr8  | 24496154  | 24496526  | 373  |
| chr18 | 48785960  | 48786246  | 287  |
| chr26 | 48707595  | 48708976  | 1382 |
| chr8  | 53289886  | 53291023  | 1138 |
| chr15 | 32951478  | 32952588  | 1111 |
| chr23 | 18416448  | 18417557  | 1110 |
| chr2  | 134745774 | 134746658 | 885  |
| chr13 | 77197119  | 77197970  | 852  |
| chr2  | 134066326 | 134067139 | 814  |
| chr18 | 11589225  | 11590013  | 789  |
| chr24 | 42713451  | 42714227  | 777  |
| chr25 | 4004389   | 4005145   | 757  |
| chr19 | 43198545  | 43199298  | 754  |
| chr28 | 26753559  | 26754310  | 752  |
| chr2  | 99344990  | 99345705  | 716  |
| chr18 | 56535254  | 56535965  | 712  |



|       |                   |           |     |
|-------|-------------------|-----------|-----|
| chr24 | 778074 778758 685 |           |     |
| chr13 | 48464565          | 48465243  | 679 |
| chr23 | 18663584          | 18664240  | 657 |
| chr1  | 84783430          | 84784074  | 645 |
| chr13 | 55370443          | 55371086  | 644 |
| chr25 | 37520146          | 37520772  | 627 |
| chr11 | 98963388          | 98964011  | 624 |
| chr17 | 76115539          | 76116157  | 619 |
| chr17 | 64141562          | 64142150  | 589 |
| chr5  | 114284774         | 114285355 | 582 |
| chr1  | 123089229         | 123089794 | 566 |
| chr19 | 56549285          | 56549842  | 558 |
| chr10 | 66924740          | 66925294  | 555 |
| chr19 | 54701656          | 54702205  | 550 |
| chr27 | 34830425          | 34830968  | 544 |
| chr26 | 22317288          | 22317828  | 541 |
| chr13 | 35961021          | 35961560  | 540 |
| chr5  | 112085404         | 112085940 | 537 |
| chr8  | 7724768           | 7725276   | 509 |
| chr13 | 79687793          | 79688298  | 506 |
| chr3  | 112511389         | 112511893 | 505 |
| chr18 | 11939304          | 11939806  | 503 |
| chr13 | 54922137          | 54922627  | 491 |
| chr2  | 134747152         | 134747641 | 490 |
| chr7  | 46241718          | 46242196  | 479 |
| chr5  | 122280233         | 122280706 | 474 |
| chr10 | 74850268          | 74850735  | 468 |
| chr17 | 75092991          | 75093442  | 452 |
| chr3  | 111793740         | 111794187 | 448 |
| chr7  | 46573871          | 46574308  | 438 |
| chr5  | 33566014          | 33566448  | 435 |
| chr25 | 29427579          | 29428010  | 432 |
| chr5  | 111690261         | 111690691 | 431 |
| chr2  | 92349129          | 92349555  | 427 |
| chr28 | 34177238          | 34177650  | 413 |
| chr7  | 15106686          | 15107095  | 410 |
| chr1  | 159915690         | 159916093 | 404 |
| chr18 | 11306677          | 11307079  | 403 |
| chr7  | 50041347          | 50041745  | 399 |
| chr4  | 119336187         | 119336585 | 399 |
| chr2  | 115122212         | 115122610 | 399 |
| chr19 | 58980156          | 58980554  | 399 |
| chr19 | 56097009          | 56097407  | 399 |
| chr17 | 57811386          | 57811784  | 399 |
| chr22 | 16139997          | 16140392  | 396 |
| chr14 | 66283830          | 66284225  | 396 |
| chr1  | 123141056         | 123141451 | 396 |
| chr25 | 34376033          | 34376425  | 393 |
| chr13 | 58621162          | 58621553  | 392 |
| chr13 | 60155899          | 60156289  | 391 |

|       |           |           |      |
|-------|-----------|-----------|------|
| chr5  | 77000974  | 77001363  | 390  |
| chr5  | 119145844 | 119146231 | 388  |
| chr18 | 11092958  | 11093343  | 386  |
| chr20 | 21201891  | 21202275  | 385  |
| chr17 | 71730949  | 71731331  | 383  |
| chr21 | 20191837  | 20192217  | 381  |
| chr3  | 116177202 | 116177580 | 379  |
| chr29 | 39121319  | 39121697  | 379  |
| chr28 | 25440154  | 25440532  | 379  |
| chr3  | 111912771 | 111913140 | 370  |
| chr12 | 32848306  | 32848673  | 368  |
| chr13 | 57416723  | 57417087  | 365  |
| chr7  | 43731702  | 43732064  | 363  |
| chr3  | 88606307  | 88606668  | 362  |
| chr3  | 7572850   | 7573211   | 362  |
| chr22 | 48555659  | 48556019  | 361  |
| chr22 | 55762260  | 55762617  | 358  |
| chr14 | 12683030  | 12683386  | 357  |
| chr11 | 49405808  | 49406162  | 355  |
| chr8  | 74017803  | 74018154  | 352  |
| chr19 | 38632458  | 38632807  | 350  |
| chr19 | 6559930   | 6560271   | 342  |
| chr8  | 23074317  | 23074653  | 337  |
| chr9  | 90433521  | 90433837  | 317  |
| chr10 | 70844389  | 70844689  | 301  |
| chr12 | 35786439  | 35786724  | 286  |
| chr5  | 113556098 | 113556373 | 276  |
| chr13 | 80404359  | 80404616  | 258  |
| chr7  | 51372730  | 51372971  | 242  |
| chr19 | 58332412  | 58333441  | 1030 |
| chr23 | 12337813  | 12338763  | 951  |
| chr5  | 28506582  | 28507502  | 921  |
| chr29 | 39030674  | 39031548  | 875  |
| chr10 | 81587795  | 81588652  | 858  |
| chr16 | 23840503  | 23841314  | 812  |
| chr11 | 96172989  | 96173759  | 771  |
| chr23 | 15079907  | 15080658  | 752  |
| chr2  | 124324951 | 124325666 | 716  |
| chr11 | 47363654  | 47364366  | 713  |
| chr3  | 73958130  | 73958780  | 651  |
| chr18 | 50915026  | 50915657  | 632  |
| chr23 | 8246858   | 8247481   | 624  |
| chr13 | 41686161  | 41686784  | 624  |
| chr5  | 61800239  | 61800841  | 603  |
| chr19 | 38735299  | 38735888  | 590  |
| chr19 | 20401344  | 20401924  | 581  |
| chr11 | 103741506 | 103742071 | 566  |
| chr5  | 117529000 | 117529549 | 550  |
| chr8  | 8435996   | 8436544   | 549  |
| chr23 | 10495074  | 10495618  | 545  |

|       |               |           |      |
|-------|---------------|-----------|------|
| chr8  | 9297550       | 9298086   | 537  |
| chr18 | 11779395      | 11779931  | 537  |
| chr19 | 37872133      | 37872663  | 531  |
| chr22 | 57246639      | 57247143  | 505  |
| chr5  | 116332282     | 116332781 | 500  |
| chr2  | 32727669      | 32728147  | 479  |
| chr25 | 35402701      | 35403175  | 475  |
| chr13 | 40871788      | 40872261  | 474  |
| chr11 | 103756920     | 103757384 | 465  |
| chr13 | 41719955      | 41720400  | 446  |
| chr25 | 645911 646352 | 442       |      |
| chr4  | 94699714      | 94700141  | 428  |
| chr5  | 60920975      | 60921400  | 426  |
| chr13 | 54853050      | 54853474  | 425  |
| chr29 | 33922948      | 33923352  | 405  |
| chr18 | 24015968      | 24016371  | 404  |
| chr19 | 34053836      | 34054235  | 400  |
| chr10 | 22092282      | 22092680  | 399  |
| chr26 | 51366887      | 51367284  | 398  |
| chr2  | 14084479      | 14084874  | 396  |
| chr18 | 24015346      | 24015741  | 396  |
| chr13 | 70198113      | 70198508  | 396  |
| chr25 | 37779670      | 37780062  | 393  |
| chr19 | 41565724      | 41566116  | 393  |
| chr9  | 104901726     | 104902117 | 392  |
| chr4  | 116921305     | 116921693 | 389  |
| chr6  | 90622474      | 90622847  | 374  |
| chr8  | 74016338      | 74016709  | 372  |
| chr17 | 70493675      | 70494028  | 354  |
| chr4  | 124414904     | 124415252 | 349  |
| chr19 | 39143875      | 39144205  | 331  |
| chr17 | 63113416      | 63113727  | 312  |
| chr22 | 56459347      | 56459649  | 303  |
| chr9  | 90238600      | 90238901  | 302  |
| chr19 | 20403523      | 20403812  | 290  |
| chr7  | 19223590      | 19223872  | 283  |
| chr19 | 33095853      | 33096892  | 1040 |
| chr7  | 17970362      | 17971296  | 935  |
| chr5  | 29634609      | 29635359  | 751  |
| chr5  | 29753196      | 29753936  | 741  |
| chr3  | 114922262     | 114922997 | 736  |
| chr18 | 56923745      | 56924447  | 703  |
| chr12 | 32103335      | 32104037  | 703  |
| chr13 | 67163877      | 67164561  | 685  |
| chr23 | 13643616      | 13644273  | 658  |
| chr19 | 20326362      | 20326971  | 610  |
| chr13 | 65351025      | 65351631  | 607  |
| chr10 | 21180422      | 21181005  | 584  |
| chr18 | 10212891      | 10213464  | 574  |
| chr12 | 24623442      | 24623989  | 548  |

|       |               |           |     |
|-------|---------------|-----------|-----|
| chr19 | 12294541      | 12295077  | 537 |
| chr1  | 8723306       | 8723841   | 536 |
| chr29 | 48834809      | 48835328  | 520 |
| chr11 | 1303014       | 1303515   | 502 |
| chr9  | 104921199     | 104921680 | 482 |
| chr18 | 39916159      | 39916627  | 469 |
| chr23 | 11342430      | 11342895  | 466 |
| chr11 | 81410078      | 81410539  | 462 |
| chr22 | 59504428      | 59504888  | 461 |
| chr29 | 2683578       | 2684032   | 455 |
| chr19 | 22362174      | 22362626  | 453 |
| chr25 | 39327694      | 39328141  | 448 |
| chr3  | 114532318     | 114532763 | 446 |
| chr15 | 83158197      | 83158640  | 444 |
| chr19 | 28530810      | 28531249  | 440 |
| chr11 | 107558780     | 107559219 | 440 |
| chr8  | 47982318      | 47982753  | 436 |
| chr17 | 64312327      | 64312761  | 435 |
| chr10 | 89421605      | 89422037  | 433 |
| chr22 | 16414910      | 16415335  | 426 |
| chr19 | 41219070      | 41219487  | 418 |
| chr23 | 31386743      | 31387159  | 417 |
| chr3  | 22669952      | 22670362  | 411 |
| chr7  | 42466877      | 42467275  | 399 |
| chr19 | 26005390      | 26005788  | 399 |
| chr12 | 32229503      | 32229901  | 399 |
| chr11 | 70656712      | 70657110  | 399 |
| chr29 | 48351905      | 48352302  | 398 |
| chr18 | 44053353      | 44053743  | 391 |
| chr7  | 14369659      | 14370046  | 388 |
| chr18 | 18571840      | 18572225  | 386 |
| chr26 | 39828316      | 39828696  | 381 |
| chr4  | 123980394     | 123980772 | 379 |
| chr26 | 41431297      | 41431675  | 379 |
| chr4  | 34298455      | 34298831  | 377 |
| chr27 | 1363867       | 1364243   | 377 |
| chr13 | 41004963      | 41005339  | 377 |
| chr1  | 144386956     | 144387332 | 377 |
| chr2  | 132425230     | 132425604 | 375 |
| chr14 | 36736609      | 36736983  | 375 |
| chr1  | 123130607     | 123130976 | 370 |
| chr21 | 61704440      | 61704806  | 367 |
| chr8  | 24428203      | 24428568  | 366 |
| chr29 | 31726351      | 31726707  | 357 |
| chr22 | 16288448      | 16288793  | 346 |
| chr15 | 26598482      | 26598811  | 330 |
| chr4  | 121526632     | 121526934 | 303 |
| chr19 | 54199362      | 54199664  | 303 |
| chr12 | 32501288      | 32501584  | 297 |
| chr27 | 852144 852402 | 259       |     |

|       |           |           |     |
|-------|-----------|-----------|-----|
| chr18 | 62947216  | 62947469  | 254 |
| chr19 | 29750267  | 29750989  | 723 |
| chr10 | 17231455  | 17232131  | 677 |
| chr21 | 7071975   | 7072611   | 637 |
| chr25 | 14688373  | 14688996  | 624 |
| chr18 | 63528431  | 63529048  | 618 |
| chr11 | 49324671  | 49325258  | 588 |
| chr13 | 79917814  | 79918371  | 558 |
| chr12 | 15863673  | 15864219  | 547 |
| chr21 | 19209700  | 19210237  | 538 |
| chr25 | 39434268  | 39434801  | 534 |
| chr26 | 22810362  | 22810890  | 529 |
| chr2  | 131199321 | 131199849 | 529 |
| chr19 | 45059263  | 45059786  | 524 |
| chr7  | 20131641  | 20132148  | 508 |
| chr11 | 45744459  | 45744966  | 508 |
| chr24 | 40231649  | 40232148  | 500 |
| chr24 | 35315252  | 35315740  | 489 |
| chr7  | 19983498  | 19983980  | 483 |
| chr3  | 55888818  | 55889294  | 477 |
| chr21 | 24355833  | 24356308  | 476 |
| chr15 | 8621206   | 8621678   | 473 |
| chr2  | 138645634 | 138646090 | 457 |
| chr6  | 94683661  | 94684096  | 436 |
| chr21 | 11901660  | 11902091  | 432 |
| chr14 | 1150094   | 1150511   | 418 |
| chr7  | 52386985  | 52387383  | 399 |
| chr25 | 11400003  | 11400401  | 399 |
| chr20 | 29965532  | 29965930  | 399 |
| chr2  | 125916358 | 125916756 | 399 |
| chr19 | 7297225   | 7297612   | 388 |
| chr7  | 51941067  | 51941452  | 386 |
| chr8  | 99356614  | 99356997  | 384 |
| chr10 | 75519980  | 75520354  | 375 |
| chr23 | 19781535  | 19781907  | 373 |
| chr14 | 9198805   | 9199176   | 372 |
| chr8  | 24437598  | 24437967  | 370 |
| chr2  | 128838430 | 128838790 | 361 |
| chr7  | 51857603  | 51857961  | 359 |
| chr5  | 91867157  | 91867511  | 355 |
| chr11 | 10488431  | 10488785  | 355 |
| chr5  | 29000408  | 29000761  | 354 |
| chr19 | 38831905  | 38832253  | 349 |
| chr12 | 48064691  | 48065030  | 340 |
| chr7  | 53257464  | 53257797  | 334 |
| chr23 | 49940368  | 49941003  | 636 |
| chr19 | 20345841  | 20346401  | 561 |
| chr24 | 48969153  | 48969710  | 558 |
| chr26 | 22306422  | 22306974  | 553 |
| chr3  | 29146500  | 29147032  | 533 |

|       |           |           |     |
|-------|-----------|-----------|-----|
| chr7  | 11203057  | 11203584  | 528 |
| chr29 | 44670631  | 44671139  | 509 |
| chr21 | 65549000  | 65549500  | 501 |
| chr10 | 81682874  | 81683368  | 495 |
| chr28 | 34153448  | 34153923  | 476 |
| chr11 | 89524830  | 89525304  | 475 |
| chr3  | 15434679  | 15435149  | 471 |
| chr4  | 116982735 | 116983203 | 469 |
| chr23 | 51688627  | 51689095  | 469 |
| chr25 | 36461188  | 36461647  | 460 |
| chr8  | 73734544  | 73734980  | 437 |
| chr11 | 70663103  | 70663537  | 435 |
| chr26 | 18294983  | 18295414  | 432 |
| chr18 | 57001951  | 57002368  | 418 |
| chr23 | 49712848  | 49713264  | 417 |
| chr2  | 131473802 | 131474200 | 399 |
| chr18 | 11066237  | 11066635  | 399 |
| chr24 | 59385940  | 59386336  | 397 |
| chr13 | 40101599  | 40101988  | 390 |
| chr29 | 44378196  | 44378582  | 387 |
| chr3  | 55980141  | 55980526  | 386 |
| chr5  | 116336657 | 116337041 | 385 |
| chr5  | 113227843 | 113228219 | 377 |
| chr19 | 12500574  | 12500949  | 376 |
| chr26 | 18493925  | 18494298  | 374 |
| chr1  | 74963425  | 74963796  | 372 |
| chr1  | 1740004   | 1740375   | 372 |
| chr23 | 11451278  | 11451645  | 368 |
| chr18 | 11947112  | 11947479  | 368 |
| chr7  | 29493154  | 29493508  | 355 |
| chr18 | 64338561  | 64338904  | 344 |
| chr17 | 73244201  | 73244544  | 344 |
| chr3  | 123217449 | 123217785 | 337 |
| chr20 | 7424012   | 7424324   | 313 |
| chr19 | 17852884  | 17853182  | 299 |
| chr3  | 127883172 | 127883466 | 295 |
| chr3  | 121146748 | 121146978 | 231 |
| chr18 | 62034492  | 62035203  | 712 |
| chr6  | 16247773  | 16248467  | 695 |
| chr17 | 63939584  | 63940268  | 685 |
| chr15 | 62377154  | 62377825  | 672 |
| chr2  | 134682644 | 134683268 | 625 |
| chr11 | 70850065  | 70850687  | 623 |
| chr10 | 21410276  | 21410890  | 615 |
| chr11 | 98904564  | 98905163  | 600 |
| chr17 | 63489477  | 63490064  | 588 |
| chr6  | 79722288  | 79722863  | 576 |
| chr2  | 124233287 | 124233859 | 573 |
| chr8  | 65726406  | 65726968  | 563 |
| chr18 | 24342992  | 24343545  | 554 |

|       |           |           |     |
|-------|-----------|-----------|-----|
| chr2  | 125901846 | 125902394 | 549 |
| chr6  | 121771606 | 121772144 | 539 |
| chr19 | 39671155  | 39671686  | 532 |
| chr13 | 75788128  | 75788655  | 528 |
| chr15 | 28281472  | 28281997  | 526 |
| chr16 | 47296228  | 47296751  | 524 |
| chr12 | 32840899  | 32841415  | 517 |
| chr19 | 12691762  | 12692274  | 513 |
| chr16 | 34706200  | 34706708  | 509 |
| chr3  | 9405217   | 9405721   | 505 |
| chr21 | 68017184  | 68017651  | 468 |
| chr18 | 11679776  | 11680242  | 467 |
| chr11 | 105626072 | 105626538 | 467 |
| chr16 | 73696947  | 73697400  | 454 |
| chr8  | 73306002  | 73306454  | 453 |
| chr19 | 25295574  | 25296025  | 452 |
| chr7  | 3709824   | 3710269   | 446 |
| chr24 | 53853191  | 53853626  | 436 |
| chr23 | 27091871  | 27092306  | 436 |
| chr3  | 105761254 | 105761688 | 435 |
| chr17 | 73430647  | 73431081  | 435 |
| chr7  | 38315622  | 38316055  | 434 |
| chr9  | 90600642  | 90601072  | 431 |
| chr4  | 67944376  | 67944805  | 430 |
| chr13 | 61554448  | 61554877  | 430 |
| chr25 | 37658510  | 37658938  | 429 |
| chr3  | 29967507  | 29967933  | 427 |
| chr21 | 64508008  | 64508433  | 426 |
| chr5  | 60159871  | 60160293  | 423 |
| chr4  | 117606861 | 117607283 | 423 |
| chr16 | 48399567  | 48399987  | 421 |
| chr13 | 80151432  | 80151851  | 420 |
| chr16 | 46845904  | 46846322  | 419 |
| chr23 | 52721409  | 52721825  | 417 |
| chr12 | 74530369  | 74530785  | 417 |
| chr23 | 44102326  | 44102738  | 413 |
| chr10 | 17143117  | 17143525  | 409 |
| chr28 | 42171869  | 42172276  | 408 |
| chr19 | 61751434  | 61751839  | 406 |
| chr14 | 67998682  | 67999083  | 402 |
| chr5  | 112059882 | 112060280 | 399 |
| chr5  | 28805094  | 28805492  | 399 |
| chr5  | 12275654  | 12276052  | 399 |
| chr28 | 33885986  | 33886384  | 399 |
| chr26 | 48471680  | 48472078  | 399 |
| chr23 | 51288011  | 51288409  | 399 |
| chr19 | 56066732  | 56067130  | 399 |
| chr16 | 75226522  | 75226920  | 399 |
| chr1  | 71954428  | 71954826  | 399 |
| chr19 | 45202568  | 45202965  | 398 |

|       |           |           |     |
|-------|-----------|-----------|-----|
| chr12 | 32554644  | 32555041  | 398 |
| chr10 | 16976841  | 16977238  | 398 |
| chr17 | 74566485  | 74566881  | 397 |
| chr12 | 32222718  | 32223114  | 397 |
| chr5  | 107739725 | 107740120 | 396 |
| chr3  | 115776296 | 115776691 | 396 |
| chr21 | 28325069  | 28325464  | 396 |
| chr2  | 56044549  | 56044944  | 396 |
| chr10 | 17547105  | 17547500  | 396 |
| chr25 | 1053791   | 1054185   | 395 |
| chr19 | 59370548  | 59370942  | 395 |
| chr14 | 59529717  | 59530111  | 395 |
| chr26 | 25510449  | 25510842  | 394 |
| chr22 | 56137554  | 56137947  | 394 |
| chr7  | 57291817  | 57292209  | 393 |
| chr7  | 19501561  | 19501953  | 393 |
| chr21 | 69097645  | 69098037  | 393 |
| chr2  | 111355128 | 111355520 | 393 |
| chrX  | 65740346  | 65740737  | 392 |
| chr5  | 32909553  | 32909944  | 392 |
| chr3  | 120820673 | 120821064 | 392 |
| chr29 | 30680369  | 30680760  | 392 |
| chr11 | 102426181 | 102426572 | 392 |
| chr5  | 120458981 | 120459371 | 391 |
| chr3  | 127372850 | 127373240 | 391 |
| chr16 | 61233979  | 61234369  | 391 |
| chr8  | 63759316  | 63759705  | 390 |
| chr5  | 111335024 | 111335413 | 390 |
| chr18 | 9857836   | 9858225   | 390 |
| chr15 | 37878670  | 37879059  | 390 |
| chr10 | 24175785  | 24176174  | 390 |
| chr25 | 30110290  | 30110678  | 389 |
| chr23 | 31056797  | 31057185  | 389 |
| chr13 | 77259580  | 77259967  | 388 |
| chr4  | 117966268 | 117966654 | 387 |
| chr24 | 20682839  | 20683225  | 387 |
| chr18 | 13534816  | 13535201  | 386 |
| chr3  | 124564309 | 124564693 | 385 |
| chr16 | 47115554  | 47115937  | 384 |
| chr11 | 93320175  | 93320558  | 384 |
| chr10 | 5255850   | 5256232   | 383 |
| chr11 | 104700619 | 104700999 | 381 |
| chr23 | 18151957  | 18152336  | 380 |
| chr10 | 12660387  | 12660765  | 379 |
| chr19 | 23097985  | 23098362  | 378 |
| chr14 | 8247038   | 8247415   | 378 |
| chr24 | 41098015  | 41098391  | 377 |
| chr19 | 56113353  | 56113729  | 377 |
| chr19 | 24360734  | 24361110  | 377 |
| chrX  | 54353242  | 54353616  | 375 |



|       |               |           |     |
|-------|---------------|-----------|-----|
| chr8  | 26042591      | 26042963  | 373 |
| chr18 | 3883016       | 3883388   | 373 |
| chr1  | 123103760     | 123104132 | 373 |
| chr2  | 139149048     | 139149418 | 371 |
| chr13 | 37166405      | 37166775  | 371 |
| chr21 | 32958599      | 32958968  | 370 |
| chr4  | 79047596      | 79047964  | 369 |
| chr22 | 60251464      | 60251832  | 369 |
| chr18 | 33819825      | 33820193  | 369 |
| chr12 | 34044629      | 34044997  | 369 |
| chr1  | 99266128      | 99266496  | 369 |
| chr2  | 100910474     | 100910841 | 368 |
| chr17 | 66427732      | 66428099  | 368 |
| chr26 | 22249303      | 22249669  | 367 |
| chr21 | 61702804      | 61703170  | 367 |
| chr16 | 32740871      | 32741236  | 366 |
| chr18 | 62740437      | 62740801  | 365 |
| chr16 | 2266171       | 2266534   | 364 |
| chr12 | 28796160      | 28796523  | 364 |
| chr24 | 59017200      | 59017562  | 363 |
| chr2  | 127006331     | 127006693 | 363 |
| chr17 | 73124846      | 73125207  | 362 |
| chr5  | 117516797     | 117517157 | 361 |
| chr17 | 64178688      | 64179047  | 360 |
| chr15 | 32663276      | 32663635  | 360 |
| chr26 | 51188436      | 51188794  | 359 |
| chr20 | 29501952      | 29502310  | 359 |
| chr13 | 129851 130209 | 359       |     |
| chr26 | 20904105      | 20904462  | 358 |
| chr19 | 12593035      | 12593391  | 357 |
| chr15 | 37127045      | 37127401  | 357 |
| chr13 | 75516182      | 75516538  | 357 |
| chr14 | 1956528       | 1956883   | 356 |
| chr3  | 112253590     | 112253944 | 355 |
| chr22 | 30040266      | 30040620  | 355 |
| chr10 | 66905993      | 66906347  | 355 |
| chr22 | 60371028      | 60371381  | 354 |
| chr14 | 946463 946816 | 354       |     |
| chr22 | 30009492      | 30009844  | 353 |
| chr5  | 30606799      | 30607150  | 352 |
| chr21 | 61660632      | 61660983  | 352 |
| chr13 | 61480514      | 61480865  | 352 |
| chr9  | 89563666      | 89564014  | 349 |
| chr29 | 48695713      | 48696059  | 347 |
| chr29 | 49370228      | 49370571  | 344 |
| chr17 | 64144068      | 64144410  | 343 |
| chr14 | 3607112       | 3607454   | 343 |
| chr8  | 23880548      | 23880889  | 342 |
| chr19 | 12500960      | 12501301  | 342 |
| chr11 | 25601234      | 25601575  | 342 |

|       |               |           |     |
|-------|---------------|-----------|-----|
| chr23 | 10619351      | 10619691  | 341 |
| chr15 | 28968721      | 28969059  | 339 |
| chr7  | 25666799      | 25667136  | 338 |
| chr23 | 21511388      | 21511725  | 338 |
| chr11 | 70966189      | 70966525  | 337 |
| chr24 | 461243 461578 | 336       |     |
| chr21 | 66415166      | 66415501  | 336 |
| chr21 | 20040198      | 20040533  | 336 |
| chr25 | 28186069      | 28186402  | 334 |
| chr3  | 122330353     | 122330685 | 333 |
| chr19 | 29771968      | 29772300  | 333 |
| chr25 | 43536054      | 43536384  | 331 |
| chr2  | 139240212     | 139240541 | 330 |
| chr18 | 56530056      | 56530385  | 330 |
| chr29 | 35016838      | 35017166  | 329 |
| chr18 | 51335094      | 51335421  | 328 |
| chr17 | 44383096      | 44383423  | 328 |
| chr11 | 72293238      | 72293565  | 328 |
| chr13 | 61225259      | 61225585  | 327 |
| chr22 | 55897524      | 55897846  | 323 |
| chr5  | 113190139     | 113190460 | 322 |
| chr1  | 130512029     | 130512350 | 322 |
| chr29 | 34925300      | 34925620  | 321 |
| chr18 | 49978200      | 49978520  | 321 |
| chr7  | 2428438       | 2428757   | 320 |
| chr3  | 15702463      | 15702782  | 320 |
| chr22 | 57386289      | 57386608  | 320 |
| chr19 | 12121664      | 12121983  | 320 |
| chr29 | 27290285      | 27290603  | 319 |
| chr6  | 107038252     | 107038567 | 316 |
| chr5  | 60718901      | 60719216  | 316 |
| chr20 | 21953729      | 21954043  | 315 |
| chr7  | 14700064      | 14700377  | 314 |
| chr27 | 28116345      | 28116658  | 314 |
| chr25 | 3386674       | 3386986   | 313 |
| chr23 | 19349041      | 19349351  | 311 |
| chr22 | 48292544      | 48292854  | 311 |
| chr22 | 50870896      | 50871205  | 310 |
| chr3  | 114930773     | 114931081 | 309 |
| chr11 | 48676504      | 48676812  | 309 |
| chr3  | 125717174     | 125717481 | 308 |
| chr4  | 31333027      | 31333333  | 307 |
| chr13 | 3371638       | 3371939   | 302 |
| chr11 | 70772341      | 70772642  | 302 |
| chr10 | 21054665      | 21054965  | 301 |
| chr4  | 118015901     | 118016200 | 300 |
| chr3  | 15542947      | 15543246  | 300 |
| chr19 | 54795348      | 54795647  | 300 |
| chr11 | 108394292     | 108394591 | 300 |
| chr18 | 62127814      | 62128112  | 299 |

|       |           |           |      |
|-------|-----------|-----------|------|
| chr3  | 15101244  | 15101537  | 294  |
| chr16 | 49482202  | 49482495  | 294  |
| chr15 | 27456852  | 27457144  | 293  |
| chr24 | 50306066  | 50306357  | 292  |
| chr8  | 8110301   | 8110591   | 291  |
| chr5  | 112980526 | 112980816 | 291  |
| chr27 | 40766993  | 40767282  | 290  |
| chr18 | 56875716  | 56876005  | 290  |
| chr3  | 105460201 | 105460489 | 289  |
| chr23 | 15823434  | 15823722  | 289  |
| chr18 | 39905441  | 39905729  | 289  |
| chr4  | 68209171  | 68209456  | 286  |
| chr7  | 18412122  | 18412406  | 285  |
| chr5  | 10540814  | 10541097  | 284  |
| chr20 | 71605401  | 71605682  | 282  |
| chr26 | 44223071  | 44223351  | 281  |
| chr26 | 37098216  | 37098496  | 281  |
| chr18 | 57327090  | 57327370  | 281  |
| chr23 | 18747733  | 18748012  | 280  |
| chr13 | 70284298  | 70284577  | 280  |
| chr6  | 118502798 | 118503076 | 279  |
| chr12 | 82828661  | 82828937  | 277  |
| chr5  | 60377021  | 60377293  | 273  |
| chr8  | 73409715  | 73409983  | 269  |
| chr19 | 40869148  | 40869414  | 267  |
| chr18 | 53238056  | 53238318  | 263  |
| chr29 | 44745861  | 44746120  | 260  |
| chr13 | 59681983  | 59682241  | 259  |
| chr2  | 74029834  | 74030090  | 257  |
| chr16 | 2097157   | 2097413   | 257  |
| chr7  | 18794696  | 18794950  | 255  |
| chr10 | 86407716  | 86407967  | 252  |
| chr28 | 33916081  | 33916327  | 247  |
| chr13 | 31476333  | 31476575  | 243  |
| chr8  | 73466051  | 73466290  | 240  |
| chr2  | 131304639 | 131304875 | 237  |
| chr3  | 126102835 | 126103066 | 232  |
| chr9  | 63424199  | 63424429  | 231  |
| chr5  | 53612436  | 53612659  | 224  |
| chr5  | 10527210  | 10527428  | 219  |
| chr22 | 4752118   | 4752336   | 219  |
| chr11 | 4335164   | 4335379   | 216  |
| chr22 | 54217915  | 54218357  | 443  |
| chr18 | 49958787  | 49959629  | 843  |
| chr7  | 65572707  | 65573296  | 590  |
| chr27 | 38668900  | 38669237  | 338  |
| chr7  | 51337722  | 51338030  | 309  |
| chr7  | 38260426  | 38261509  | 1084 |
| chr18 | 57398772  | 57399222  | 451  |
| chr21 | 7777829   | 7778179   | 351  |

|       |               |           |     |
|-------|---------------|-----------|-----|
| chr8  | 63661513      | 63662237  | 725 |
| chr14 | 2890123       | 2890538   | 416 |
| chr21 | 26543816      | 26544213  | 398 |
| chr10 | 9730584       | 9730968   | 385 |
| chr7  | 42186804      | 42187225  | 422 |
| chr25 | 3213077       | 3213488   | 412 |
| chr11 | 91383007      | 91383438  | 432 |
| chr25 | 37645866      | 37646235  | 370 |
| chr26 | 44122289      | 44122704  | 416 |
| chr8  | 73522520      | 73522866  | 347 |
| chr15 | 22544633      | 22544920  | 288 |
| chr10 | 42634076      | 42634362  | 287 |
| chr6  | 59504251      | 59504655  | 405 |
| chr2  | 37672726      | 37673101  | 376 |
| chr18 | 55469006      | 55469354  | 349 |
| chr9  | 90472156      | 90472417  | 262 |
| chr19 | 19120578      | 19120820  | 243 |
| chr25 | 1976442       | 1976763   | 322 |
| chr8  | 23965390      | 23965836  | 447 |
| chr29 | 27292576      | 27293009  | 434 |
| chr10 | 71245504      | 71245910  | 407 |
| chr3  | 119675956     | 119676351 | 396 |
| chr18 | 51523426      | 51523761  | 336 |
| chr10 | 56613864      | 56614129  | 266 |
| chr13 | 70515870      | 70516414  | 545 |
| chr8  | 73867922      | 73868699  | 778 |
| chr19 | 27914281      | 27915275  | 995 |
| chr22 | 52231031      | 52231866  | 836 |
| chr3  | 106513577     | 106514331 | 755 |
| chr7  | 94359572      | 94360235  | 664 |
| chr29 | 31979369      | 31980024  | 656 |
| chr5  | 64694060      | 64694702  | 643 |
| chr23 | 28000375      | 28000906  | 532 |
| chr15 | 76729936      | 76730458  | 523 |
| chr7  | 479035 479543 | 509       |     |
| chr19 | 44897855      | 44898358  | 504 |
| chr7  | 37498941      | 37499344  | 404 |
| chr23 | 15911771      | 15912169  | 399 |
| chr5  | 113564987     | 113565368 | 382 |
| chr4  | 106659036     | 106659404 | 369 |
| chr16 | 59061171      | 59061944  | 774 |
| chr3  | 127255605     | 127256265 | 661 |
| chr13 | 75688317      | 75688975  | 659 |
| chr5  | 68967684      | 68968263  | 580 |
| chr23 | 9450904       | 9451478   | 575 |
| chr23 | 15818709      | 15819218  | 510 |
| chr6  | 59509256      | 59509744  | 489 |
| chr7  | 19939060      | 19939537  | 478 |
| chr1  | 5322841       | 5323298   | 458 |
| chr7  | 37151019      | 37151464  | 446 |

|       |           |           |     |
|-------|-----------|-----------|-----|
| chr23 | 53006747  | 53007125  | 379 |
| chr8  | 80996996  | 80997348  | 353 |
| chr15 | 81382624  | 81382952  | 329 |
| chr4  | 69315330  | 69315907  | 578 |
| chr17 | 63935348  | 63935875  | 528 |
| chr24 | 40263713  | 40264239  | 527 |
| chr2  | 126965436 | 126965925 | 490 |
| chr18 | 1193819   | 1194306   | 488 |
| chr23 | 33464167  | 33464637  | 471 |
| chr3  | 22700700  | 22701144  | 445 |
| chr19 | 44344787  | 44345214  | 428 |
| chr15 | 26774740  | 26775137  | 398 |
| chr20 | 74707157  | 74707544  | 388 |
| chr3  | 33828141  | 33828515  | 375 |
| chr14 | 61319973  | 61320334  | 362 |
| chr26 | 34983740  | 34984087  | 348 |
| chr19 | 38740097  | 38740896  | 800 |
| chr10 | 84200387  | 84201120  | 734 |
| chr8  | 95562149  | 95562853  | 705 |
| chr20 | 3277702   | 3278237   | 536 |
| chr29 | 41680522  | 41681034  | 513 |
| chr7  | 43519042  | 43519547  | 506 |
| chr5  | 50850142  | 50850620  | 479 |
| chr26 | 44069450  | 44069907  | 458 |
| chr24 | 1954339   | 1954736   | 398 |
| chr7  | 17488284  | 17488665  | 382 |
| chr25 | 42169249  | 42169628  | 380 |
| chr22 | 48553665  | 48554039  | 375 |
| chr23 | 31266285  | 31266642  | 358 |
| chr13 | 1894742   | 1894982   | 241 |
| chr21 | 26826847  | 26827502  | 656 |
| chr18 | 17988616  | 17989269  | 654 |
| chr16 | 2081903   | 2082269   | 367 |
| chr22 | 16421364  | 16421685  | 322 |
| chr3  | 62209882  | 62210119  | 238 |
| chr3  | 105115445 | 105116179 | 735 |
| chr24 | 62456909  | 62457307  | 399 |
| chr10 | 21112617  | 21112978  | 362 |
| chr2  | 123019852 | 123020211 | 360 |
| chr22 | 57370015  | 57370336  | 322 |
| chr16 | 41368390  | 41368872  | 483 |
| chr2  | 140362267 | 140362724 | 458 |
| chr13 | 62869854  | 62870300  | 447 |
| chr4  | 7577640   | 7578082   | 443 |
| chr6  | 113362037 | 113362458 | 422 |
| chr3  | 38689070  | 38689465  | 396 |
| chr22 | 17565159  | 17565552  | 394 |
| chr11 | 77910816  | 77911192  | 377 |
| chr23 | 52709817  | 52710179  | 363 |
| chr19 | 54270374  | 54270724  | 351 |

|       |               |           |     |
|-------|---------------|-----------|-----|
| chr17 | 57507816      | 57508166  | 351 |
| chr3  | 25607337      | 25607941  | 605 |
| chr14 | 1926751       | 1927318   | 568 |
| chr1  | 128119750     | 128120310 | 561 |
| chr11 | 96272756      | 96273152  | 397 |
| chr17 | 67190774      | 67191169  | 396 |
| chr18 | 55073574      | 55073952  | 379 |
| chr18 | 55070774      | 55071135  | 362 |
| chr2  | 140006681     | 140007022 | 342 |
| chr13 | 63384227      | 63384511  | 285 |
| chr19 | 25421304      | 25421825  | 522 |
| chr20 | 6600345       | 6600805   | 461 |
| chr23 | 8866193       | 8866642   | 450 |
| chr13 | 77231007      | 77231434  | 428 |
| chr8  | 77755040      | 77755455  | 416 |
| chr5  | 120113925     | 120114277 | 353 |
| chr22 | 14921863      | 14922191  | 329 |
| chr5  | 120241523     | 120241844 | 322 |
| chr19 | 27363514      | 27363833  | 320 |
| chr5  | 29631205      | 29631504  | 300 |
| chr18 | 7609930       | 7610203   | 274 |
| chr25 | 480190 480615 | 426       |     |
| chr17 | 69750931      | 69751353  | 423 |
| chr16 | 41445956      | 41446369  | 414 |
| chr7  | 18411091      | 18411487  | 397 |
| chr4  | 121417615     | 121417998 | 384 |
| chr3  | 105681560     | 105681922 | 363 |
| chr25 | 37647053      | 37647400  | 348 |
| chr23 | 23872688      | 23873514  | 827 |
| chr7  | 43761879      | 43762447  | 569 |
| chr3  | 119683843     | 119684359 | 517 |
| chr19 | 41264476      | 41264929  | 454 |
| chr20 | 8717715       | 8718160   | 446 |
| chr6  | 121059922     | 121060358 | 437 |
| chr3  | 22941622      | 22942020  | 399 |
| chr25 | 29298754      | 29299151  | 398 |
| chr19 | 65199429      | 65199824  | 396 |
| chr25 | 3080406       | 3080800   | 395 |
| chr19 | 54467830      | 54468224  | 395 |
| chr25 | 2081154       | 2081544   | 391 |
| chr15 | 21509911      | 21510299  | 389 |
| chr13 | 38817699      | 38818087  | 389 |
| chr4  | 29011904      | 29012289  | 386 |
| chr12 | 83965565      | 83965949  | 385 |
| chr7  | 52366260      | 52366638  | 379 |
| chr28 | 40378731      | 40379109  | 379 |
| chr3  | 35678402      | 35678770  | 369 |
| chr22 | 50735866      | 50736233  | 368 |
| chr11 | 48670310      | 48670673  | 364 |
| chr19 | 38302045      | 38302406  | 362 |

|       |           |           |      |
|-------|-----------|-----------|------|
| chr23 | 28657103  | 28657450  | 348  |
| chr5  | 29752537  | 29752880  | 344  |
| chr23 | 13408650  | 13408991  | 342  |
| chr19 | 64761902  | 64762226  | 325  |
| chr8  | 73740716  | 73741038  | 323  |
| chr5  | 28754681  | 28755001  | 321  |
| chr4  | 123129029 | 123129348 | 320  |
| chr19 | 12508516  | 12508822  | 307  |
| chr21 | 69118067  | 69118370  | 304  |
| chr18 | 47531022  | 47531325  | 304  |
| chr18 | 48764089  | 48764390  | 302  |
| chr25 | 21041336  | 21041624  | 289  |
| chr6  | 34430522  | 34430809  | 288  |
| chr12 | 74462371  | 74462654  | 284  |
| chr26 | 38237758  | 38238040  | 283  |
| chr25 | 30874740  | 30875015  | 276  |
| chr19 | 60743162  | 60743435  | 274  |
| chr7  | 15760653  | 15760914  | 262  |
| chr6  | 109907923 | 109908182 | 260  |
| chr19 | 23066240  | 23066495  | 256  |
| chr22 | 15017286  | 15017536  | 251  |
| chr6  | 6453925   | 6454173   | 249  |
| chr16 | 41474415  | 41474661  | 247  |
| chr3  | 26127040  | 26127281  | 242  |
| chr8  | 73385847  | 73386071  | 225  |
| chr25 | 37417438  | 37417661  | 224  |
| chr14 | 7612850   | 7613070   | 221  |
| chr21 | 52079769  | 52079986  | 218  |
| chr11 | 70862544  | 70862760  | 217  |
| chr13 | 75659860  | 75660072  | 213  |
| chr21 | 2052375   | 2052688   | 314  |
| chr4  | 124423510 | 124423770 | 261  |
| chr11 | 48679797  | 48681169  | 1373 |
| chr5  | 112191100 | 112192335 | 1236 |
| chr6  | 119557500 | 119558567 | 1068 |
| chr15 | 75512830  | 75513872  | 1043 |
| chr4  | 47032425  | 47033462  | 1038 |
| chr4  | 90364457  | 90365462  | 1006 |
| chr13 | 75752855  | 75753842  | 988  |
| chr11 | 80983330  | 80984292  | 963  |
| chr23 | 49316279  | 49317181  | 903  |
| chr11 | 108389861 | 108390763 | 903  |
| chr3  | 127440409 | 127441308 | 900  |
| chr23 | 31146211  | 31147108  | 898  |
| chr7  | 45703743  | 45704637  | 895  |
| chr4  | 98481061  | 98481955  | 895  |
| chr14 | 67847186  | 67848059  | 874  |
| chr13 | 58973407  | 58974270  | 864  |
| chr13 | 80584478  | 80585331  | 854  |
| chr8  | 80182710  | 80183560  | 851  |

|       |           |           |     |
|-------|-----------|-----------|-----|
| chr3  | 105961790 | 105962640 | 851 |
| chr2  | 139943711 | 139944557 | 847 |
| chr26 | 21887574  | 21888414  | 841 |
| chr9  | 52386643  | 52387475  | 833 |
| chr19 | 26645503  | 26646332  | 830 |
| chr9  | 106514371 | 106515199 | 829 |
| chr18 | 62030658  | 62031474  | 817 |
| chr25 | 34508374  | 34509180  | 807 |
| chr19 | 29122988  | 29123788  | 801 |
| chr3  | 54332938  | 54333737  | 800 |
| chr18 | 18697006  | 18697803  | 798 |
| chr2  | 110534302 | 110535097 | 796 |
| chr7  | 15310417  | 15311210  | 794 |
| chr19 | 54640971  | 54641759  | 789 |
| chr13 | 70292667  | 70293453  | 787 |
| chr8  | 7560802   | 7561584   | 783 |
| chr8  | 57673046  | 57673819  | 774 |
| chr13 | 36768533  | 36769299  | 767 |
| chr3  | 33108742  | 33109507  | 766 |
| chr22 | 30025663  | 30026428  | 766 |
| chr19 | 45284321  | 45285084  | 764 |
| chr3  | 22531867  | 22532628  | 762 |
| chr4  | 71858447  | 71859206  | 760 |
| chr6  | 120639038 | 120639796 | 759 |
| chr29 | 26879208  | 26879966  | 759 |
| chr23 | 17497615  | 17498372  | 758 |
| chr20 | 6616974   | 6617731   | 758 |
| chr18 | 24014575  | 24015328  | 754 |
| chr17 | 72349023  | 72349776  | 754 |
| chr6  | 72296053  | 72296805  | 753 |
| chr19 | 58823907  | 58824659  | 753 |
| chr4  | 121491773 | 121492524 | 752 |
| chr16 | 77646134  | 77646885  | 752 |
| chr19 | 31272101  | 31272848  | 748 |
| chr16 | 38718536  | 38719282  | 747 |
| chr5  | 28868128  | 28868871  | 744 |
| chr23 | 31137120  | 31137859  | 740 |
| chr1  | 109023126 | 109023861 | 736 |
| chr11 | 107559704 | 107560434 | 731 |
| chr18 | 48685143  | 48685872  | 730 |
| chr13 | 39956988  | 39957714  | 727 |
| chr8  | 108213976 | 108214698 | 723 |
| chr20 | 8605490   | 8606212   | 723 |
| chr3  | 109745936 | 109746655 | 720 |
| chr25 | 43524444  | 43525163  | 720 |
| chr1  | 57554086  | 57554805  | 720 |
| chr16 | 72158517  | 72159233  | 717 |
| chr14 | 22084240  | 22084955  | 716 |
| chr3  | 113476846 | 113477560 | 715 |
| chr7  | 15696596  | 15697308  | 713 |



|       |           |           |     |
|-------|-----------|-----------|-----|
| chr15 | 32284407  | 32285118  | 712 |
| chr11 | 70857432  | 70858137  | 706 |
| chr26 | 42168287  | 42168991  | 705 |
| chr10 | 17223219  | 17223922  | 704 |
| chr5  | 73072143  | 73072844  | 702 |
| chr7  | 42932397  | 42933096  | 700 |
| chr27 | 45256478  | 45257177  | 700 |
| chr19 | 46882424  | 46883122  | 699 |
| chr21 | 18887924  | 18888620  | 697 |
| chr17 | 72766688  | 72767383  | 696 |
| chr9  | 47012683  | 47013377  | 695 |
| chr5  | 30837069  | 30837762  | 694 |
| chr29 | 27220797  | 27221490  | 694 |
| chr15 | 74535083  | 74535774  | 692 |
| chr11 | 83253781  | 83254472  | 692 |
| chr10 | 11814527  | 11815216  | 690 |
| chr17 | 74555224  | 74555910  | 687 |
| chr22 | 59463546  | 59464231  | 686 |
| chr25 | 35553000  | 35553684  | 685 |
| chr21 | 14607827  | 14608511  | 685 |
| chr15 | 21553253  | 21553937  | 685 |
| chr2  | 126128635 | 126129318 | 684 |
| chr23 | 20687463  | 20688133  | 671 |
| chr19 | 45199201  | 45199871  | 671 |
| chr25 | 36450331  | 36450996  | 666 |
| chrX  | 21084435  | 21085099  | 665 |
| chr8  | 44045021  | 44045683  | 663 |
| chr19 | 61731580  | 61732242  | 663 |
| chr5  | 38513168  | 38513827  | 660 |
| chr27 | 36343959  | 36344617  | 659 |
| chr23 | 28044844  | 28045502  | 659 |
| chr5  | 60714814  | 60715469  | 656 |
| chr19 | 21694922  | 21695577  | 656 |
| chr24 | 20677965  | 20678619  | 655 |
| chr12 | 66633081  | 66633734  | 654 |
| chr10 | 36372480  | 36373132  | 653 |
| chr5  | 28961779  | 28962430  | 652 |
| chr26 | 20286968  | 20287619  | 652 |
| chr8  | 95047043  | 95047693  | 651 |
| chr10 | 83865229  | 83865877  | 649 |
| chr14 | 67991676  | 67992323  | 648 |
| chr7  | 45683748  | 45684394  | 647 |
| chr15 | 75259255  | 75259898  | 644 |
| chr11 | 46745584  | 46746227  | 644 |
| chr11 | 9466552   | 9467195   | 644 |
| chr18 | 33132060  | 33132702  | 643 |
| chr12 | 20957080  | 20957722  | 643 |
| chr26 | 24653198  | 24653838  | 641 |
| chr15 | 74586569  | 74587209  | 641 |
| chr17 | 5059134   | 5059773   | 640 |

|       |               |           |     |
|-------|---------------|-----------|-----|
| chr4  | 6111097       | 6111735   | 639 |
| chr11 | 98897092      | 98897729  | 638 |
| chr3  | 10589764      | 10590400  | 637 |
| chr29 | 29693912      | 29694547  | 636 |
| chr26 | 18170527      | 18171161  | 635 |
| chr22 | 60075714      | 60076348  | 635 |
| chr7  | 24213533      | 24214165  | 633 |
| chr5  | 28691986      | 28692618  | 633 |
| chr4  | 68296020      | 68296652  | 633 |
| chr21 | 30793249      | 30793881  | 633 |
| chr11 | 105009216     | 105009847 | 632 |
| chr2  | 92348307      | 92348937  | 631 |
| chr19 | 40416852      | 40417482  | 631 |
| chr17 | 70609402      | 70610031  | 630 |
| chr4  | 118009350     | 118009978 | 629 |
| chr25 | 828943 829571 | 629       |     |
| chr11 | 105649878     | 105650506 | 629 |
| chr22 | 47862552      | 47863179  | 628 |
| chr19 | 63488419      | 63489046  | 628 |
| chr24 | 47443465      | 47444088  | 624 |
| chr23 | 31338055      | 31338678  | 624 |
| chr3  | 127375176     | 127375798 | 623 |
| chr13 | 55084178      | 55084800  | 623 |
| chr26 | 21767284      | 21767904  | 621 |
| chr5  | 91866316      | 91866935  | 620 |
| chr3  | 121240573     | 121241192 | 620 |
| chr24 | 60576628      | 60577246  | 619 |
| chr17 | 70491189      | 70491807  | 619 |
| chr24 | 44252185      | 44252802  | 618 |
| chr20 | 74661304      | 74661919  | 616 |
| chr10 | 83519852      | 83520467  | 616 |
| chrX  | 10425740      | 10426354  | 615 |
| chr24 | 1951243       | 1951855   | 613 |
| chr14 | 1135710       | 1136322   | 613 |
| chr18 | 25890955      | 25891565  | 611 |
| chr4  | 71595792      | 71596401  | 610 |
| chr12 | 24620471      | 24621079  | 609 |
| chr7  | 84423947      | 84424554  | 608 |
| chr12 | 22969381      | 22969987  | 607 |
| chr8  | 108816565     | 108817169 | 605 |
| chr18 | 23612347      | 23612950  | 604 |
| chr14 | 24234758      | 24235360  | 603 |
| chr22 | 12199498      | 12200095  | 598 |
| chr13 | 59926198      | 59926794  | 597 |
| chr23 | 17467378      | 17467973  | 596 |
| chr1  | 154403784     | 154404379 | 596 |
| chr8  | 108789890     | 108790484 | 595 |
| chr19 | 59407305      | 59407898  | 594 |
| chr26 | 22243871      | 22244463  | 593 |
| chr7  | 19191697      | 19192288  | 592 |

|       |           |           |     |
|-------|-----------|-----------|-----|
| chr2  | 93394026  | 93394617  | 592 |
| chr4  | 33741733  | 33742323  | 591 |
| chr21 | 28682896  | 28683485  | 590 |
| chr18 | 29579978  | 29580567  | 590 |
| chr25 | 42032532  | 42033118  | 587 |
| chr20 | 43471375  | 43471960  | 586 |
| chr20 | 39745681  | 39746266  | 586 |
| chr13 | 29975973  | 29976557  | 585 |
| chr3  | 88606961  | 88607544  | 584 |
| chr8  | 23035299  | 23035880  | 582 |
| chr2  | 140360452 | 140361033 | 582 |
| chr13 | 35968242  | 35968823  | 582 |
| chr5  | 120427002 | 120427581 | 580 |
| chr28 | 34011263  | 34011842  | 580 |
| chr17 | 63962162  | 63962741  | 580 |
| chr2  | 75827954  | 75828530  | 577 |
| chr24 | 2345679   | 2346254   | 576 |
| chr2  | 134384838 | 134385413 | 576 |
| chr20 | 5295657   | 5296231   | 575 |
| chr15 | 32273495  | 32274069  | 575 |
| chr19 | 39009252  | 39009824  | 573 |
| chr19 | 28007745  | 28008317  | 573 |
| chr2  | 38865692  | 38866263  | 572 |
| chr7  | 71375465  | 71376035  | 571 |
| chr6  | 16245074  | 16245644  | 571 |
| chr6  | 119516426 | 119516995 | 570 |
| chr5  | 29142968  | 29143537  | 570 |
| chr24 | 45162279  | 45162848  | 570 |
| chr15 | 26245614  | 26246183  | 570 |
| chr21 | 66416503  | 66417071  | 569 |
| chr3  | 17394746  | 17395312  | 567 |
| chr21 | 6524095   | 6524661   | 567 |
| chr8  | 8716612   | 8717177   | 566 |
| chr18 | 62744118  | 62744683  | 566 |
| chr8  | 60188542  | 60189106  | 565 |
| chr13 | 75669755  | 75670319  | 565 |
| chr10 | 88373865  | 88374429  | 565 |
| chr27 | 38973934  | 38974497  | 564 |
| chr27 | 31450912  | 31451475  | 564 |
| chr7  | 109708873 | 109709435 | 563 |
| chr5  | 124709580 | 124710142 | 563 |
| chr4  | 67988242  | 67988804  | 563 |
| chr3  | 124885173 | 124885735 | 563 |
| chr29 | 33711667  | 33712229  | 563 |
| chr17 | 70003218  | 70003780  | 563 |
| chr5  | 111334423 | 111334984 | 562 |
| chr7  | 18711871  | 18712431  | 561 |
| chr28 | 33883840  | 33884399  | 560 |
| chr21 | 24443610  | 24444169  | 560 |
| chr14 | 7718042   | 7718601   | 560 |

|       |           |           |     |
|-------|-----------|-----------|-----|
| chr29 | 17699983  | 17700541  | 559 |
| chr5  | 10607483  | 10608040  | 558 |
| chr3  | 86201986  | 86202543  | 558 |
| chr10 | 23566855  | 23567412  | 558 |
| chr17 | 75058652  | 75059208  | 557 |
| chr9  | 24141951  | 24142506  | 556 |
| chr11 | 99688270  | 99688825  | 556 |
| chr22 | 13576914  | 13577468  | 555 |
| chr14 | 1917494   | 1918048   | 555 |
| chr28 | 25141430  | 25141983  | 554 |
| chr24 | 41579090  | 41579643  | 554 |
| chr18 | 18015880  | 18016433  | 554 |
| chr15 | 55179028  | 55179580  | 553 |
| chr1  | 101589571 | 101590123 | 553 |
| chr23 | 19328117  | 19328668  | 552 |
| chr18 | 62028586  | 62029137  | 552 |
| chr18 | 11596098  | 11596649  | 552 |
| chr20 | 8715550   | 8716100   | 551 |
| chr7  | 17981208  | 17981757  | 550 |
| chr3  | 116497460 | 116498009 | 550 |
| chr21 | 6489371   | 6489920   | 550 |
| chr19 | 41257446  | 41257995  | 550 |
| chr18 | 53252389  | 53252937  | 549 |
| chr25 | 7033838   | 7034385   | 548 |
| chr17 | 68665535  | 68666082  | 548 |
| chr16 | 47530391  | 47530938  | 548 |
| chr19 | 12547682  | 12548228  | 547 |
| chr29 | 45765756  | 45766301  | 546 |
| chr23 | 14796471  | 14797016  | 546 |
| chr18 | 9527872   | 9528417   | 546 |
| chr11 | 28333179  | 28333724  | 546 |
| chr10 | 74857988  | 74858533  | 546 |
| chr9  | 105469381 | 105469924 | 544 |
| chr18 | 47669120  | 47669663  | 544 |
| chr3  | 23256884  | 23257426  | 543 |
| chr28 | 42788583  | 42789125  | 543 |
| chr26 | 22197543  | 22198085  | 543 |
| chr1  | 159081405 | 159081947 | 543 |
| chr7  | 44951108  | 44951647  | 540 |
| chr13 | 65270191  | 65270730  | 540 |
| chr6  | 120488593 | 120489131 | 539 |
| chr26 | 18714330  | 18714868  | 539 |
| chr11 | 98902270  | 98902808  | 539 |
| chr4  | 99726089  | 99726626  | 538 |
| chr3  | 30431742  | 30432279  | 538 |
| chr5  | 120502575 | 120503111 | 537 |
| chr12 | 31734850  | 31735386  | 537 |
| chr27 | 35861119  | 35861654  | 536 |
| chr15 | 26757781  | 26758316  | 536 |
| chr29 | 44747659  | 44748193  | 535 |

|       |           |           |     |
|-------|-----------|-----------|-----|
| chr15 | 32271958  | 32272492  | 535 |
| chr12 | 17198673  | 17199206  | 534 |
| chr11 | 21626864  | 21627395  | 532 |
| chr4  | 116933772 | 116934302 | 531 |
| chr15 | 75623539  | 75624069  | 531 |
| chr12 | 12226834  | 12227364  | 531 |
| chr8  | 73909347  | 73909876  | 530 |
| chr5  | 114983318 | 114983847 | 530 |
| chr2  | 134664403 | 134664932 | 530 |
| chr15 | 75791177  | 75791706  | 530 |
| chr9  | 75442278  | 75442805  | 528 |
| chr25 | 35512403  | 35512930  | 528 |
| chr3  | 10572145  | 10572671  | 527 |
| chr19 | 59083206  | 59083731  | 526 |
| chr5  | 28823383  | 28823907  | 525 |
| chr23 | 18452815  | 18453339  | 525 |
| chr26 | 18794616  | 18795139  | 524 |
| chr23 | 8249075   | 8249597   | 523 |
| chr22 | 59789843  | 59790365  | 523 |
| chr2  | 139851595 | 139852117 | 523 |
| chr13 | 75823574  | 75824096  | 523 |
| chr11 | 44972711  | 44973233  | 523 |
| chr2  | 134679886 | 134680407 | 522 |
| chr18 | 12041835  | 12042356  | 522 |
| chr13 | 77578066  | 77578587  | 522 |
| chr1  | 67585280  | 67585801  | 522 |
| chr5  | 28807345  | 28807865  | 521 |
| chr25 | 2731328   | 2731848   | 521 |
| chr20 | 67511449  | 67511969  | 521 |
| chr19 | 28535427  | 28535947  | 521 |
| chr7  | 3968290   | 3968809   | 520 |
| chr5  | 71713494  | 71714012  | 519 |
| chr24 | 48608087  | 48608605  | 519 |
| chr24 | 40512469  | 40512986  | 518 |
| chr13 | 77591786  | 77592303  | 518 |
| chr19 | 37339327  | 37339842  | 516 |
| chr5  | 30896368  | 30896882  | 515 |
| chr29 | 25902534  | 25903046  | 513 |
| chr19 | 54797497  | 54798009  | 513 |
| chr2  | 99035697  | 99036208  | 512 |
| chr19 | 42003404  | 42003915  | 512 |
| chr19 | 23974263  | 23974774  | 512 |
| chr16 | 41463186  | 41463697  | 512 |
| chr24 | 61109937  | 61110447  | 511 |
| chr19 | 26104955  | 26105465  | 511 |
| chr25 | 22685255  | 22685764  | 510 |
| chr18 | 7175483   | 7175992   | 510 |
| chr14 | 61128964  | 61129473  | 510 |
| chr1  | 74998577  | 74999086  | 510 |
| chr5  | 113196803 | 113197311 | 509 |

|       |           |           |     |
|-------|-----------|-----------|-----|
| chr3  | 115785059 | 115785567 | 509 |
| chr3  | 4367812   | 4368318   | 507 |
| chr23 | 7653054   | 7653560   | 507 |
| chr19 | 27903876  | 27904382  | 507 |
| chr10 | 7685555   | 7686061   | 507 |
| chr8  | 102278075 | 102278579 | 505 |
| chr6  | 121813535 | 121814039 | 505 |
| chr4  | 71684559  | 71685063  | 505 |
| chr29 | 36954386  | 36954890  | 505 |
| chr23 | 8243667   | 8244171   | 505 |
| chr2  | 126026242 | 126026746 | 505 |
| chr4  | 120806499 | 120807002 | 504 |
| chr13 | 75813629  | 75814132  | 504 |
| chrX  | 72251206  | 72251708  | 503 |
| chr7  | 50522023  | 50522522  | 500 |
| chr7  | 18345662  | 18346161  | 500 |
| chr5  | 115160054 | 115160553 | 500 |
| chr26 | 50062939  | 50063438  | 500 |
| chr10 | 4180227   | 4180726   | 500 |
| chr9  | 104828408 | 104828906 | 499 |
| chr5  | 29134442  | 29134939  | 498 |
| chr29 | 48895264  | 48895761  | 498 |
| chr21 | 59904404  | 59904901  | 498 |
| chr15 | 41250652  | 41251149  | 498 |
| chr18 | 53267734  | 53268230  | 497 |
| chr4  | 121716632 | 121717127 | 496 |
| chr20 | 43694012  | 43694507  | 496 |
| chr13 | 66014603  | 66015098  | 496 |
| chr5  | 110782986 | 110783480 | 495 |
| chr11 | 21646645  | 21647139  | 495 |
| chr5  | 121809007 | 121809499 | 493 |
| chr26 | 20871482  | 20871974  | 493 |
| chr19 | 59425060  | 59425552  | 493 |
| chr19 | 20323405  | 20323896  | 492 |
| chr18 | 45819219  | 45819710  | 492 |
| chr9  | 37893361  | 37893850  | 490 |
| chr2  | 134302237 | 134302726 | 490 |
| chr1  | 153228401 | 153228889 | 489 |
| chrX  | 30828946  | 30829433  | 488 |
| chr15 | 29705234  | 29705721  | 488 |
| chr19 | 59094447  | 59094933  | 487 |
| chr22 | 39297495  | 39297980  | 486 |
| chr17 | 4514505   | 4514990   | 486 |
| chr29 | 51260970  | 51261453  | 484 |
| chr24 | 64975500  | 64975983  | 484 |
| chr23 | 1304052   | 1304535   | 484 |
| chr4  | 107354604 | 107355086 | 483 |
| chr23 | 28054405  | 28054887  | 483 |
| chr24 | 33487955  | 33488436  | 482 |
| chr23 | 20862721  | 20863202  | 482 |

|       |           |           |     |
|-------|-----------|-----------|-----|
| chr22 | 38886876  | 38887357  | 482 |
| chr18 | 49261710  | 49262191  | 482 |
| chr18 | 53492005  | 53492485  | 481 |
| chr15 | 36260551  | 36261031  | 481 |
| chr10 | 17066136  | 17066616  | 481 |
| chr26 | 37543664  | 37544143  | 480 |
| chr21 | 34411395  | 34411874  | 480 |
| chr26 | 38408077  | 38408555  | 479 |
| chr5  | 81605035  | 81605512  | 478 |
| chr25 | 42254151  | 42254627  | 477 |
| chr16 | 47981694  | 47982170  | 477 |
| chr11 | 104332551 | 104333026 | 476 |
| chr10 | 36911482  | 36911957  | 476 |
| chr23 | 52736142  | 52736616  | 475 |
| chr22 | 10776699  | 10777173  | 475 |
| chr18 | 8072128   | 8072601   | 474 |
| chr16 | 51088214  | 51088687  | 474 |
| chr13 | 81330646  | 81331119  | 474 |
| chr7  | 13482549  | 13483020  | 472 |
| chr3  | 35996198  | 35996668  | 471 |
| chr23 | 48777053  | 48777523  | 471 |
| chr7  | 80748213  | 80748682  | 470 |
| chr2  | 136732652 | 136733121 | 470 |
| chr17 | 73155576  | 73156045  | 470 |
| chr11 | 6427976   | 6428445   | 470 |
| chr3  | 20448333  | 20448801  | 469 |
| chr18 | 13546641  | 13547109  | 469 |
| chr25 | 37519466  | 37519933  | 468 |
| chr13 | 41021335  | 41021802  | 468 |
| chr7  | 57593692  | 57594158  | 467 |
| chr7  | 42659921  | 42660387  | 467 |
| chrX  | 10426636  | 10427101  | 466 |
| chr4  | 72502033  | 72502498  | 466 |
| chr23 | 15989803  | 15990268  | 466 |
| chr20 | 6832100   | 6832565   | 466 |
| chr7  | 15051457  | 15051920  | 464 |
| chr22 | 52804166  | 52804629  | 464 |
| chr20 | 67490115  | 67490578  | 464 |
| chr19 | 60379601  | 60380063  | 463 |
| chr18 | 11087427  | 11087888  | 462 |
| chr29 | 46203110  | 46203570  | 461 |
| chr17 | 64290370  | 64290830  | 461 |
| chr15 | 53624357  | 53624817  | 461 |
| chr11 | 49844146  | 49844605  | 460 |
| chr18 | 63584635  | 63585093  | 459 |
| chr26 | 22349784  | 22350241  | 458 |
| chr5  | 71714230  | 71714686  | 457 |
| chr23 | 27118829  | 27119285  | 457 |
| chr11 | 76476362  | 76476818  | 457 |
| chr25 | 29597144  | 29597599  | 456 |

|       |           |           |     |
|-------|-----------|-----------|-----|
| chr17 | 64380056  | 64380511  | 456 |
| chr9  | 106786514 | 106786968 | 455 |
| chr7  | 15685119  | 15685573  | 455 |
| chr21 | 44300255  | 44300709  | 455 |
| chr21 | 34795092  | 34795546  | 455 |
| chr12 | 84246295  | 84246749  | 455 |
| chr10 | 36840628  | 36841082  | 455 |
| chr5  | 28891085  | 28891538  | 454 |
| chr4  | 96092937  | 96093390  | 454 |
| chr24 | 31253063  | 31253516  | 454 |
| chr4  | 68223537  | 68223989  | 453 |
| chr18 | 57030111  | 57030563  | 453 |
| chr5  | 28866078  | 28866529  | 452 |
| chr18 | 56445592  | 56446043  | 452 |
| chr13 | 40892225  | 40892675  | 451 |
| chr3  | 55872177  | 55872626  | 450 |
| chr19 | 40447912  | 40448361  | 450 |
| chr17 | 66176282  | 66176731  | 450 |
| chr16 | 40897919  | 40898368  | 450 |
| chr25 | 1962576   | 1963024   | 449 |
| chr19 | 38603625  | 38604073  | 449 |
| chr13 | 55355468  | 55355916  | 449 |
| chr20 | 73339862  | 73340309  | 448 |
| chr7  | 14382142  | 14382588  | 447 |
| chr5  | 122358121 | 122358567 | 447 |
| chr18 | 50853672  | 50854118  | 447 |
| chr11 | 96166797  | 96167243  | 447 |
| chr1  | 67583196  | 67583642  | 447 |
| chr8  | 108822902 | 108823347 | 446 |
| chr4  | 118689911 | 118690356 | 446 |
| chr18 | 22771785  | 22772230  | 446 |
| chr18 | 11830115  | 11830560  | 446 |
| chr10 | 22093344  | 22093788  | 445 |
| chr5  | 113465900 | 113466343 | 444 |
| chr22 | 48494400  | 48494843  | 444 |
| chr21 | 6482872   | 6483315   | 444 |
| chr2  | 5045472   | 5045915   | 444 |
| chr3  | 8152302   | 8152744   | 443 |
| chr19 | 46821005  | 46821447  | 443 |
| chr19 | 41254726  | 41255168  | 443 |
| chr19 | 20385880  | 20386322  | 443 |
| chr2  | 126141655 | 126142096 | 442 |
| chr25 | 21029667  | 21030106  | 440 |
| chr12 | 74461131  | 74461569  | 439 |
| chr4  | 30313228  | 30313665  | 438 |
| chr11 | 99190782  | 99191219  | 438 |
| chr21 | 65211577  | 65212013  | 437 |
| chr19 | 47178050  | 47178486  | 437 |
| chr5  | 34016290  | 34016725  | 436 |
| chr4  | 69314696  | 69315131  | 436 |



|       |           |           |     |
|-------|-----------|-----------|-----|
| chr4  | 6107511   | 6107946   | 436 |
| chr23 | 8359894   | 8360329   | 436 |
| chr21 | 6550617   | 6551052   | 436 |
| chr13 | 22826038  | 22826473  | 436 |
| chr1  | 128117699 | 128118134 | 436 |
| chr21 | 69014876  | 69015310  | 435 |
| chr16 | 51483737  | 51484171  | 435 |
| chr3  | 106519750 | 106520183 | 434 |
| chr19 | 46147552  | 46147985  | 434 |
| chr2  | 134709467 | 134709899 | 433 |
| chr19 | 32595769  | 32596201  | 433 |
| chr21 | 65547483  | 65547914  | 432 |
| chr18 | 56558288  | 56558719  | 432 |
| chr25 | 4092377   | 4092807   | 431 |
| chr17 | 64105128  | 64105558  | 431 |
| chr11 | 104961869 | 104962299 | 431 |
| chr6  | 122221502 | 122221931 | 430 |
| chr3  | 34797265  | 34797694  | 430 |
| chr7  | 50529198  | 50529626  | 429 |
| chr4  | 104694230 | 104694658 | 429 |
| chr21 | 4287675   | 4288103   | 429 |
| chr20 | 73303875  | 73304303  | 429 |
| chr18 | 49478568  | 49478996  | 429 |
| chr16 | 44130619  | 44131047  | 429 |
| chr29 | 45769513  | 45769940  | 428 |
| chr24 | 60753830  | 60754257  | 428 |
| chr23 | 49968358  | 49968785  | 428 |
| chr25 | 33291432  | 33291858  | 427 |
| chr1  | 111304716 | 111305142 | 427 |
| chr4  | 97713297  | 97713721  | 425 |
| chr29 | 49976954  | 49977378  | 425 |
| chr18 | 11380391  | 11380815  | 425 |
| chr17 | 2170070   | 2170494   | 425 |
| chr2  | 136730077 | 136730500 | 424 |
| chr13 | 22892315  | 22892738  | 424 |
| chr5  | 120389105 | 120389527 | 423 |
| chr25 | 27880020  | 27880442  | 423 |
| chr22 | 39756883  | 39757305  | 423 |
| chr19 | 47321148  | 47321570  | 423 |
| chr19 | 38775338  | 38775760  | 423 |
| chr18 | 54298721  | 54299143  | 423 |
| chr12 | 32107103  | 32107525  | 423 |
| chr1  | 96192754  | 96193176  | 423 |
| chr4  | 104693776 | 104694197 | 422 |
| chr14 | 1807411   | 1807832   | 422 |
| chr4  | 66883805  | 66884224  | 420 |
| chr24 | 30914882  | 30915301  | 420 |
| chr19 | 29767914  | 29768333  | 420 |
| chr11 | 108246081 | 108246500 | 420 |
| chr24 | 60514665  | 60515083  | 419 |

|       |               |           |     |
|-------|---------------|-----------|-----|
| chr12 | 32945047      | 32945465  | 419 |
| chr6  | 109417465     | 109417882 | 418 |
| chr22 | 30067446      | 30067863  | 418 |
| chr17 | 56188974      | 56189391  | 418 |
| chr10 | 66915187      | 66915604  | 418 |
| chr18 | 24345441      | 24345857  | 417 |
| chr23 | 49569582      | 49569997  | 416 |
| chr17 | 4152173       | 4152588   | 416 |
| chr11 | 303795 304210 | 416       |     |
| chr5  | 124368673     | 124369087 | 415 |
| chr25 | 8598272       | 8598686   | 415 |
| chr23 | 10556785      | 10557198  | 414 |
| chr15 | 66094296      | 66094709  | 414 |
| chr7  | 51850106      | 51850518  | 413 |
| chr25 | 27411389      | 27411801  | 413 |
| chr19 | 16985519      | 16985931  | 413 |
| chr18 | 54225236      | 54225648  | 413 |
| chr11 | 104997950     | 104998362 | 413 |
| chr3  | 123196325     | 123196736 | 412 |
| chr14 | 8246469       | 8246879   | 411 |
| chr13 | 57587076      | 57587486  | 411 |
| chr23 | 32680191      | 32680600  | 410 |
| chr23 | 31115388      | 31115797  | 410 |
| chr13 | 65093561      | 65093970  | 410 |
| chr7  | 9628006       | 9628414   | 409 |
| chr17 | 58831471      | 58831879  | 409 |
| chr11 | 93761655      | 93762063  | 409 |
| chr4  | 34474595      | 34475002  | 408 |
| chr3  | 113980108     | 113980515 | 408 |
| chr15 | 64642388      | 64642795  | 408 |
| chr7  | 44001421      | 44001827  | 407 |
| chr4  | 98827623      | 98828029  | 407 |
| chr14 | 31986105      | 31986511  | 407 |
| chr23 | 43252061      | 43252466  | 406 |
| chr8  | 7589333       | 7589737   | 405 |
| chr27 | 35146099      | 35146503  | 405 |
| chr13 | 26330306      | 26330710  | 405 |
| chr25 | 29122950      | 29123353  | 404 |
| chr23 | 3311036       | 3311439   | 404 |
| chr4  | 121738211     | 121738613 | 403 |
| chr18 | 11382660      | 11383061  | 402 |
| chr16 | 44111164      | 44111565  | 402 |
| chr1  | 123123480     | 123123881 | 402 |
| chr7  | 5195579       | 5195979   | 401 |
| chr3  | 33848392      | 33848792  | 401 |
| chr24 | 52627217      | 52627617  | 401 |
| chr21 | 27812406      | 27812806  | 401 |
| chr7  | 17315487      | 17315886  | 400 |
| chr3  | 23071642      | 23072041  | 400 |
| chr29 | 44701230      | 44701629  | 400 |

|       |           |           |     |
|-------|-----------|-----------|-----|
| chr28 | 15318530  | 15318929  | 400 |
| chr2  | 72869821  | 72870220  | 400 |
| chrX  | 87729734  | 87730132  | 399 |
| chr9  | 89630790  | 89631188  | 399 |
| chr8  | 116708794 | 116709192 | 399 |
| chr8  | 11394227  | 11394625  | 399 |
| chr6  | 120769427 | 120769825 | 399 |
| chr6  | 108679931 | 108680329 | 399 |
| chr5  | 121795001 | 121795399 | 399 |
| chr5  | 121681571 | 121681969 | 399 |
| chr5  | 33770620  | 33771018  | 399 |
| chr4  | 123626138 | 123626536 | 399 |
| chr4  | 123005442 | 123005840 | 399 |
| chr4  | 121055429 | 121055827 | 399 |
| chr4  | 119309399 | 119309797 | 399 |
| chr4  | 115955046 | 115955444 | 399 |
| chr4  | 111787058 | 111787456 | 399 |
| chr3  | 105486915 | 105487313 | 399 |
| chr3  | 56833814  | 56834212  | 399 |
| chr3  | 55838627  | 55839025  | 399 |
| chr3  | 22235559  | 22235957  | 399 |
| chr29 | 51811444  | 51811842  | 399 |
| chr29 | 49970077  | 49970475  | 399 |
| chr29 | 49636673  | 49637071  | 399 |
| chr29 | 42383776  | 42384174  | 399 |
| chr29 | 41619214  | 41619612  | 399 |
| chr28 | 41728115  | 41728513  | 399 |
| chr28 | 33614817  | 33615215  | 399 |
| chr28 | 26078142  | 26078540  | 399 |
| chr26 | 51624997  | 51625395  | 399 |
| chr26 | 18718806  | 18719204  | 399 |
| chr25 | 43483529  | 43483927  | 399 |
| chr23 | 52693508  | 52693906  | 399 |
| chr23 | 17190937  | 17191335  | 399 |
| chr23 | 15990369  | 15990767  | 399 |
| chr23 | 15790327  | 15790725  | 399 |
| chr22 | 56369640  | 56370038  | 399 |
| chr22 | 56078121  | 56078519  | 399 |
| chr22 | 55917270  | 55917668  | 399 |
| chr22 | 50873410  | 50873808  | 399 |
| chr22 | 47856228  | 47856626  | 399 |
| chr22 | 30351296  | 30351694  | 399 |
| chr22 | 16418824  | 16419222  | 399 |
| chr22 | 14920373  | 14920771  | 399 |
| chr22 | 1951883   | 1952281   | 399 |
| chr21 | 57503810  | 57504208  | 399 |
| chr21 | 21081347  | 21081745  | 399 |
| chr21 | 13962852  | 13963250  | 399 |
| chr20 | 37571246  | 37571644  | 399 |
| chr20 | 4941221   | 4941619   | 399 |

|       |           |           |     |
|-------|-----------|-----------|-----|
| chr2  | 138571847 | 138572245 | 399 |
| chr2  | 134758298 | 134758696 | 399 |
| chr2  | 123741291 | 123741689 | 399 |
| chr19 | 60912177  | 60912575  | 399 |
| chr19 | 59331794  | 59332192  | 399 |
| chr19 | 58993068  | 58993466  | 399 |
| chr19 | 58988457  | 58988855  | 399 |
| chr19 | 41567143  | 41567541  | 399 |
| chr19 | 40464966  | 40465364  | 399 |
| chr19 | 31840504  | 31840902  | 399 |
| chr19 | 30270478  | 30270876  | 399 |
| chr19 | 27531650  | 27532048  | 399 |
| chr19 | 25493907  | 25494305  | 399 |
| chr19 | 25492037  | 25492435  | 399 |
| chr19 | 22373482  | 22373880  | 399 |
| chr19 | 15305098  | 15305496  | 399 |
| chr19 | 7799016   | 7799414   | 399 |
| chr18 | 56417738  | 56418136  | 399 |
| chr18 | 52596869  | 52597267  | 399 |
| chr18 | 51614142  | 51614540  | 399 |
| chr18 | 9709747   | 9710145   | 399 |
| chr17 | 75291958  | 75292356  | 399 |
| chr17 | 70253735  | 70254133  | 399 |
| chr17 | 66830449  | 66830847  | 399 |
| chr17 | 61282027  | 61282425  | 399 |
| chr17 | 15951606  | 15952004  | 399 |
| chr16 | 49483382  | 49483780  | 399 |
| chr16 | 2461635   | 2462033   | 399 |
| chr15 | 81155938  | 81156336  | 399 |
| chr15 | 74587807  | 74588205  | 399 |
| chr15 | 66125075  | 66125473  | 399 |
| chr15 | 62752894  | 62753292  | 399 |
| chr15 | 55810155  | 55810553  | 399 |
| chr15 | 43438147  | 43438545  | 399 |
| chr15 | 22318112  | 22318510  | 399 |
| chr15 | 22144366  | 22144764  | 399 |
| chr15 | 21541664  | 21542062  | 399 |
| chr14 | 59525295  | 59525693  | 399 |
| chr14 | 1454714   | 1455112   | 399 |
| chr13 | 80608004  | 80608402  | 399 |
| chr13 | 77604546  | 77604944  | 399 |
| chr13 | 75701731  | 75702129  | 399 |
| chr13 | 74407673  | 74408071  | 399 |
| chr13 | 61504801  | 61505199  | 399 |
| chr13 | 55315206  | 55315604  | 399 |
| chr13 | 42400789  | 42401187  | 399 |
| chr13 | 41660981  | 41661379  | 399 |
| chr13 | 31727176  | 31727574  | 399 |
| chr13 | 9940826   | 9941224   | 399 |
| chr12 | 31318736  | 31319134  | 399 |

|       |           |           |     |
|-------|-----------|-----------|-----|
| chr12 | 24513047  | 24513445  | 399 |
| chr12 | 20915263  | 20915661  | 399 |
| chr11 | 92483163  | 92483561  | 399 |
| chr11 | 91470290  | 91470688  | 399 |
| chr11 | 28638060  | 28638458  | 399 |
| chr10 | 90321923  | 90322321  | 399 |
| chr10 | 17319982  | 17320380  | 399 |
| chr10 | 17303477  | 17303875  | 399 |
| chr1  | 147306973 | 147307371 | 399 |
| chr1  | 144811130 | 144811528 | 399 |
| chr1  | 74630032  | 74630430  | 399 |
| chr9  | 104954077 | 104954474 | 398 |
| chr8  | 23074845  | 23075242  | 398 |
| chr6  | 120973012 | 120973409 | 398 |
| chr4  | 95682419  | 95682816  | 398 |
| chr29 | 50606555  | 50606952  | 398 |
| chr26 | 37589451  | 37589848  | 398 |
| chr23 | 27948439  | 27948836  | 398 |
| chr23 | 11062082  | 11062479  | 398 |
| chr22 | 16315324  | 16315721  | 398 |
| chr21 | 13898785  | 13899182  | 398 |
| chr2  | 134676151 | 134676548 | 398 |
| chr19 | 40675044  | 40675441  | 398 |
| chr19 | 40674334  | 40674731  | 398 |
| chr19 | 39153500  | 39153897  | 398 |
| chr19 | 31917465  | 31917862  | 398 |
| chr18 | 9788833   | 9789230   | 398 |
| chr17 | 68111498  | 68111895  | 398 |
| chr15 | 51348334  | 51348731  | 398 |
| chr15 | 32706615  | 32707012  | 398 |
| chr14 | 31006345  | 31006742  | 398 |
| chr13 | 70206626  | 70207023  | 398 |
| chr13 | 42009919  | 42010316  | 398 |
| chr11 | 98366386  | 98366783  | 398 |
| chr10 | 71267163  | 71267560  | 398 |
| chrX  | 23346156  | 23346552  | 397 |
| chr7  | 13048349  | 13048745  | 397 |
| chr5  | 11226066  | 11226462  | 397 |
| chr4  | 121456850 | 121457246 | 397 |
| chr29 | 31450995  | 31451391  | 397 |
| chr28 | 13889249  | 13889645  | 397 |
| chr26 | 17994951  | 17995347  | 397 |
| chr25 | 34515190  | 34515586  | 397 |
| chr2  | 131764059 | 131764455 | 397 |
| chr17 | 70325053  | 70325449  | 397 |
| chr16 | 75228441  | 75228837  | 397 |
| chr13 | 23753707  | 23754103  | 397 |
| chr11 | 104196860 | 104197256 | 397 |
| chr9  | 29473032  | 29473427  | 396 |
| chr8  | 63757581  | 63757976  | 396 |

|       |           |           |     |
|-------|-----------|-----------|-----|
| chr7  | 3629667   | 3630062   | 396 |
| chr5  | 30799376  | 30799771  | 396 |
| chr5  | 29717650  | 29718045  | 396 |
| chr27 | 35432838  | 35433233  | 396 |
| chr26 | 37965848  | 37966243  | 396 |
| chr24 | 33500299  | 33500694  | 396 |
| chr23 | 19802622  | 19803017  | 396 |
| chr21 | 68477639  | 68478034  | 396 |
| chr21 | 58721814  | 58722209  | 396 |
| chr21 | 22617030  | 22617425  | 396 |
| chr21 | 13589919  | 13590314  | 396 |
| chr21 | 2034253   | 2034648   | 396 |
| chr2  | 135614975 | 135615370 | 396 |
| chr19 | 56584708  | 56585103  | 396 |
| chr19 | 30480696  | 30481091  | 396 |
| chr19 | 22331254  | 22331649  | 396 |
| chr18 | 61964512  | 61964907  | 396 |
| chr17 | 70539325  | 70539720  | 396 |
| chr17 | 70123120  | 70123515  | 396 |
| chr17 | 68438049  | 68438444  | 396 |
| chr15 | 58841247  | 58841642  | 396 |
| chr14 | 59530695  | 59531090  | 396 |
| chr7  | 1686677   | 1687071   | 395 |
| chr5  | 113601878 | 113602272 | 395 |
| chr5  | 10777765  | 10778159  | 395 |
| chr4  | 71546249  | 71546643  | 395 |
| chr23 | 23853693  | 23854087  | 395 |
| chr21 | 66370990  | 66371384  | 395 |
| chr2  | 140772719 | 140773113 | 395 |
| chr19 | 52858893  | 52859287  | 395 |
| chr13 | 41760523  | 41760917  | 395 |
| chr12 | 32104819  | 32105213  | 395 |
| chr11 | 50894477  | 50894871  | 395 |
| chr11 | 28343014  | 28343408  | 395 |
| chr11 | 13149712  | 13150106  | 395 |
| chr10 | 48392599  | 48392993  | 395 |
| chr1  | 43813536  | 43813930  | 395 |
| chr8  | 25792456  | 25792849  | 394 |
| chr7  | 15407581  | 15407974  | 394 |
| chr3  | 127432479 | 127432872 | 394 |
| chr3  | 25798730  | 25799123  | 394 |
| chr26 | 37675539  | 37675932  | 394 |
| chr2  | 140624168 | 140624561 | 394 |
| chr19 | 39251184  | 39251577  | 394 |
| chr13 | 60704966  | 60705359  | 394 |
| chr13 | 55425215  | 55425608  | 394 |
| chr12 | 27891471  | 27891864  | 394 |
| chr11 | 20992165  | 20992558  | 394 |
| chr10 | 60555966  | 60556359  | 394 |
| chr10 | 12118393  | 12118786  | 394 |

|       |           |           |     |
|-------|-----------|-----------|-----|
| chr1  | 152263050 | 152263443 | 394 |
| chr7  | 52245721  | 52246113  | 393 |
| chr5  | 114968993 | 114969385 | 393 |
| chr25 | 31871856  | 31872248  | 393 |
| chr25 | 2707484   | 2707876   | 393 |
| chr23 | 23748779  | 23749171  | 393 |
| chr20 | 19415438  | 19415830  | 393 |
| chr19 | 58390674  | 58391066  | 393 |
| chr19 | 55994989  | 55995381  | 393 |
| chr19 | 23742041  | 23742433  | 393 |
| chr18 | 52327027  | 52327419  | 393 |
| chr13 | 77561060  | 77561452  | 393 |
| chr13 | 55105975  | 55106367  | 393 |
| chr3  | 127062448 | 127062839 | 392 |
| chr3  | 115693547 | 115693938 | 392 |
| chr26 | 44619167  | 44619558  | 392 |
| chr23 | 45876703  | 45877094  | 392 |
| chr23 | 27229591  | 27229982  | 392 |
| chr21 | 46612054  | 46612445  | 392 |
| chr20 | 5042526   | 5042917   | 392 |
| chr2  | 134707107 | 134707498 | 392 |
| chr2  | 111369254 | 111369645 | 392 |
| chr19 | 60450181  | 60450572  | 392 |
| chr19 | 54155617  | 54156008  | 392 |
| chr16 | 19106084  | 19106475  | 392 |
| chr15 | 75168781  | 75169172  | 392 |
| chr14 | 61511646  | 61512037  | 392 |
| chr13 | 54984164  | 54984555  | 392 |
| chr10 | 87429491  | 87429882  | 392 |
| chr10 | 74867162  | 74867553  | 392 |
| chr10 | 17624177  | 17624568  | 392 |
| chr1  | 74761473  | 74761864  | 392 |
| chr1  | 74557146  | 74557537  | 392 |
| chrX  | 28705382  | 28705772  | 391 |
| chr3  | 26139728  | 26140118  | 391 |
| chr29 | 25944374  | 25944764  | 391 |
| chr26 | 48445270  | 48445660  | 391 |
| chr26 | 38129253  | 38129643  | 391 |
| chr23 | 51055585  | 51055975  | 391 |
| chr23 | 31445161  | 31445551  | 391 |
| chr15 | 27278911  | 27279301  | 391 |
| chr13 | 80699590  | 80699980  | 391 |
| chr12 | 72577034  | 72577424  | 391 |
| chr11 | 46194089  | 46194479  | 391 |
| chr10 | 67055748  | 67056138  | 391 |
| chr10 | 44030508  | 44030898  | 391 |
| chr10 | 20841819  | 20842209  | 391 |
| chr9  | 74193008  | 74193397  | 390 |
| chr6  | 121778416 | 121778805 | 390 |
| chr6  | 120756406 | 120756795 | 390 |

|       |           |           |     |
|-------|-----------|-----------|-----|
| chr6  | 72198281  | 72198670  | 390 |
| chr3  | 109420223 | 109420612 | 390 |
| chr28 | 41277718  | 41278107  | 390 |
| chr26 | 31373103  | 31373492  | 390 |
| chr25 | 42143900  | 42144289  | 390 |
| chr25 | 29084967  | 29085356  | 390 |
| chr25 | 1057776   | 1058165   | 390 |
| chr23 | 31759101  | 31759490  | 390 |
| chr21 | 64455818  | 64456207  | 390 |
| chr19 | 37909892  | 37910281  | 390 |
| chr18 | 49555558  | 49555947  | 390 |
| chr18 | 12004375  | 12004764  | 390 |
| chr16 | 64453958  | 64454347  | 390 |
| chr15 | 75277780  | 75278169  | 390 |
| chr14 | 1953923   | 1954312   | 390 |
| chr12 | 21524475  | 21524864  | 390 |
| chr11 | 49399981  | 49400370  | 390 |
| chr11 | 30901580  | 30901969  | 390 |
| chr10 | 16860215  | 16860604  | 390 |
| chr8  | 8588779   | 8589167   | 389 |
| chr6  | 122257879 | 122258267 | 389 |
| chr5  | 33885618  | 33886006  | 389 |
| chr29 | 51006331  | 51006719  | 389 |
| chr27 | 36052628  | 36053016  | 389 |
| chr23 | 16045877  | 16046265  | 389 |
| chr20 | 71584410  | 71584798  | 389 |
| chr2  | 4930882   | 4931270   | 389 |
| chr19 | 55898633  | 55899021  | 389 |
| chr19 | 37532210  | 37532598  | 389 |
| chr18 | 49884808  | 49885196  | 389 |
| chr18 | 22757160  | 22757548  | 389 |
| chr15 | 22153874  | 22154262  | 389 |
| chr14 | 79849610  | 79849998  | 389 |
| chr13 | 78420165  | 78420553  | 389 |
| chr11 | 99185919  | 99186307  | 389 |
| chr10 | 35770818  | 35771206  | 389 |
| chr9  | 6680446   | 6680833   | 388 |
| chr7  | 45692643  | 45693030  | 388 |
| chr6  | 120813794 | 120814181 | 388 |
| chr5  | 125702696 | 125703083 | 388 |
| chr5  | 121343296 | 121343683 | 388 |
| chr5  | 117589555 | 117589942 | 388 |
| chr4  | 120191517 | 120191904 | 388 |
| chr4  | 71508781  | 71509168  | 388 |
| chr29 | 48276652  | 48277039  | 388 |
| chr29 | 31526922  | 31527309  | 388 |
| chr22 | 59497619  | 59498006  | 388 |
| chr22 | 30125328  | 30125715  | 388 |
| chr21 | 65658219  | 65658606  | 388 |
| chr21 | 27574619  | 27575006  | 388 |



|       |           |           |     |
|-------|-----------|-----------|-----|
| chr20 | 74785728  | 74786115  | 388 |
| chr20 | 8604021   | 8604408   | 388 |
| chr2  | 125902735 | 125903122 | 388 |
| chr19 | 18377036  | 18377423  | 388 |
| chr18 | 37156329  | 37156716  | 388 |
| chr18 | 11084785  | 11085172  | 388 |
| chr17 | 63408555  | 63408942  | 388 |
| chr16 | 3351264   | 3351651   | 388 |
| chr15 | 39806025  | 39806412  | 388 |
| chr13 | 75800442  | 75800829  | 388 |
| chr13 | 41085441  | 41085828  | 388 |
| chr11 | 96398168  | 96398555  | 388 |
| chr10 | 17369403  | 17369790  | 388 |
| chr10 | 17335134  | 17335521  | 388 |
| chr8  | 65253003  | 65253389  | 387 |
| chr7  | 46159941  | 46160327  | 387 |
| chr7  | 19244706  | 19245092  | 387 |
| chr5  | 111712267 | 111712653 | 387 |
| chr3  | 111630449 | 111630835 | 387 |
| chr26 | 22781912  | 22782298  | 387 |
| chr24 | 60545818  | 60546204  | 387 |
| chr23 | 27904533  | 27904919  | 387 |
| chr22 | 60654181  | 60654567  | 387 |
| chr21 | 28336602  | 28336988  | 387 |
| chr2  | 135681726 | 135682112 | 387 |
| chr19 | 64330155  | 64330541  | 387 |
| chr19 | 55746350  | 55746736  | 387 |
| chr19 | 17110818  | 17111204  | 387 |
| chr11 | 81494004  | 81494390  | 387 |
| chr11 | 76259463  | 76259849  | 387 |
| chr10 | 59998490  | 59998876  | 387 |
| chr1  | 145537109 | 145537495 | 387 |
| chr8  | 76252479  | 76252864  | 386 |
| chr8  | 26020742  | 26021127  | 386 |
| chr8  | 7650197   | 7650582   | 386 |
| chr6  | 101855516 | 101855901 | 386 |
| chr4  | 74128507  | 74128892  | 386 |
| chr4  | 7579550   | 7579935   | 386 |
| chr3  | 11535747  | 11536132  | 386 |
| chr29 | 26526454  | 26526839  | 386 |
| chr24 | 51579006  | 51579391  | 386 |
| chr23 | 13605552  | 13605937  | 386 |
| chr22 | 16295987  | 16296372  | 386 |
| chr16 | 44407748  | 44408133  | 386 |
| chr15 | 83638728  | 83639113  | 386 |
| chr13 | 25536292  | 25536677  | 386 |
| chr13 | 13597176  | 13597561  | 386 |
| chr1  | 1590119   | 1590504   | 386 |
| chr5  | 118177684 | 118178068 | 385 |
| chr5  | 111379909 | 111380293 | 385 |

|       |           |           |     |
|-------|-----------|-----------|-----|
| chr4  | 124240674 | 124241058 | 385 |
| chr3  | 105722318 | 105722702 | 385 |
| chr29 | 29779378  | 29779762  | 385 |
| chr25 | 1301895   | 1302279   | 385 |
| chr23 | 49905263  | 49905647  | 385 |
| chr23 | 18066939  | 18067323  | 385 |
| chr22 | 60407880  | 60408264  | 385 |
| chr22 | 60071338  | 60071722  | 385 |
| chr21 | 34362053  | 34362437  | 385 |
| chr20 | 8619366   | 8619750   | 385 |
| chr2  | 128188746 | 128189130 | 385 |
| chr2  | 122864597 | 122864981 | 385 |
| chr2  | 122824412 | 122824796 | 385 |
| chr19 | 42267122  | 42267506  | 385 |
| chr19 | 42026730  | 42027114  | 385 |
| chr19 | 40841410  | 40841794  | 385 |
| chr19 | 38667137  | 38667521  | 385 |
| chr19 | 37762353  | 37762737  | 385 |
| chr18 | 62023536  | 62023920  | 385 |
| chr17 | 69142195  | 69142579  | 385 |
| chr17 | 63104090  | 63104474  | 385 |
| chr13 | 42012998  | 42013382  | 385 |
| chr12 | 74549733  | 74550117  | 385 |
| chr11 | 107187888 | 107188272 | 385 |
| chr11 | 77586784  | 77587168  | 385 |
| chr11 | 11710954  | 11711338  | 385 |
| chr5  | 112234398 | 112234781 | 384 |
| chr4  | 118687937 | 118688320 | 384 |
| chr3  | 35500764  | 35501147  | 384 |
| chr28 | 42769520  | 42769903  | 384 |
| chr27 | 26461362  | 26461745  | 384 |
| chr26 | 22214657  | 22215040  | 384 |
| chr25 | 3204972   | 3205355   | 384 |
| chr25 | 1482192   | 1482575   | 384 |
| chr23 | 33652532  | 33652915  | 384 |
| chr23 | 11932050  | 11932433  | 384 |
| chr21 | 25300350  | 25300733  | 384 |
| chr2  | 110519942 | 110520325 | 384 |
| chr2  | 76365649  | 76366032  | 384 |
| chr19 | 54473752  | 54474135  | 384 |
| chr15 | 76434448  | 76434831  | 384 |
| chr15 | 28923007  | 28923390  | 384 |
| chr11 | 91557814  | 91558197  | 384 |
| chr10 | 74722093  | 74722476  | 384 |
| chr10 | 28398350  | 28398733  | 384 |
| chr10 | 11045900  | 11046283  | 384 |
| chr8  | 73341001  | 73341383  | 383 |
| chr8  | 8334487   | 8334869   | 383 |
| chr7  | 45693217  | 45693599  | 383 |
| chr7  | 2963684   | 2964066   | 383 |

|       |           |           |     |
|-------|-----------|-----------|-----|
| chr5  | 29996376  | 29996758  | 383 |
| chr4  | 116946437 | 116946819 | 383 |
| chr4  | 79184260  | 79184642  | 383 |
| chr4  | 72744849  | 72745231  | 383 |
| chr29 | 36818117  | 36818499  | 383 |
| chr29 | 29774683  | 29775065  | 383 |
| chr26 | 43252539  | 43252921  | 383 |
| chr25 | 17864158  | 17864540  | 383 |
| chr22 | 57966694  | 57967076  | 383 |
| chr20 | 22411711  | 22412093  | 383 |
| chr19 | 38995164  | 38995546  | 383 |
| chr18 | 62127008  | 62127390  | 383 |
| chr17 | 70326188  | 70326570  | 383 |
| chr15 | 75298151  | 75298533  | 383 |
| chr15 | 30412626  | 30413008  | 383 |
| chr13 | 52537073  | 52537455  | 383 |
| chr13 | 29272367  | 29272749  | 383 |
| chr13 | 23641234  | 23641616  | 383 |
| chr12 | 74466310  | 74466692  | 383 |
| chr12 | 53059953  | 53060335  | 383 |
| chr12 | 11443884  | 11444266  | 383 |
| chr11 | 104699775 | 104700157 | 383 |
| chr7  | 94373641  | 94374022  | 382 |
| chr7  | 5246790   | 5247171   | 382 |
| chr5  | 121819713 | 121820094 | 382 |
| chr5  | 111325461 | 111325842 | 382 |
| chr4  | 96092214  | 96092595  | 382 |
| chr3  | 119475603 | 119475984 | 382 |
| chr3  | 98318127  | 98318508  | 382 |
| chr3  | 35952202  | 35952583  | 382 |
| chr25 | 43249802  | 43250183  | 382 |
| chr23 | 15068741  | 15069122  | 382 |
| chr23 | 12344130  | 12344511  | 382 |
| chr22 | 50813009  | 50813390  | 382 |
| chr20 | 3175604   | 3175985   | 382 |
| chr2  | 139618657 | 139619038 | 382 |
| chr19 | 21591375  | 21591756  | 382 |
| chr17 | 56126629  | 56127010  | 382 |
| chr13 | 68910129  | 68910510  | 382 |
| chr12 | 31281820  | 31282201  | 382 |
| chr11 | 94118283  | 94118664  | 382 |
| chr10 | 28900665  | 28901046  | 382 |
| chr10 | 21133994  | 21134375  | 382 |
| chr9  | 105060419 | 105060799 | 381 |
| chr8  | 73440359  | 73440739  | 381 |
| chr8  | 49998234  | 49998614  | 381 |
| chr6  | 119205112 | 119205492 | 381 |
| chr5  | 71672587  | 71672967  | 381 |
| chr4  | 117150441 | 117150821 | 381 |
| chr28 | 33495352  | 33495732  | 381 |

|       |           |           |     |
|-------|-----------|-----------|-----|
| chr24 | 48615267  | 48615647  | 381 |
| chr24 | 21965297  | 21965677  | 381 |
| chr24 | 1028791   | 1029171   | 381 |
| chr23 | 18575672  | 18576052  | 381 |
| chr22 | 59678101  | 59678481  | 381 |
| chr21 | 7777195   | 7777575   | 381 |
| chr2  | 111299168 | 111299548 | 381 |
| chr19 | 59238564  | 59238944  | 381 |
| chr14 | 69031180  | 69031560  | 381 |
| chr13 | 71114011  | 71114391  | 381 |
| chr13 | 22150251  | 22150631  | 381 |
| chr11 | 106030290 | 106030670 | 381 |
| chr11 | 89880713  | 89881093  | 381 |
| chr1  | 85175830  | 85176210  | 381 |
| chr7  | 52280403  | 52280782  | 380 |
| chr6  | 72743672  | 72744051  | 380 |
| chr6  | 70485509  | 70485888  | 380 |
| chr5  | 60446192  | 60446571  | 380 |
| chr5  | 28697210  | 28697589  | 380 |
| chr3  | 126084122 | 126084501 | 380 |
| chr27 | 17890492  | 17890871  | 380 |
| chr26 | 20292373  | 20292752  | 380 |
| chr25 | 42632700  | 42633079  | 380 |
| chr22 | 55858444  | 55858823  | 380 |
| chr22 | 53488402  | 53488781  | 380 |
| chr22 | 16901746  | 16902125  | 380 |
| chr21 | 22723583  | 22723962  | 380 |
| chr2  | 115215205 | 115215584 | 380 |
| chr17 | 73126174  | 73126553  | 380 |
| chr17 | 71961182  | 71961561  | 380 |
| chr17 | 70710279  | 70710658  | 380 |
| chr15 | 80855272  | 80855651  | 380 |
| chr15 | 62525066  | 62525445  | 380 |
| chr12 | 31221830  | 31222209  | 380 |
| chr11 | 10775871  | 10776250  | 380 |
| chr8  | 73275683  | 73276061  | 379 |
| chr4  | 72324549  | 72324927  | 379 |
| chr3  | 125202810 | 125203188 | 379 |
| chr29 | 50216274  | 50216652  | 379 |
| chr28 | 33780817  | 33781195  | 379 |
| chr25 | 3964638   | 3965016   | 379 |
| chr23 | 49759689  | 49760067  | 379 |
| chr23 | 27956554  | 27956932  | 379 |
| chr22 | 13362871  | 13363249  | 379 |
| chr21 | 66526532  | 66526910  | 379 |
| chr2  | 131306328 | 131306706 | 379 |
| chr18 | 53013272  | 53013650  | 379 |
| chr18 | 51216012  | 51216390  | 379 |
| chr15 | 73715601  | 73715979  | 379 |
| chr15 | 24395164  | 24395542  | 379 |

|       |           |           |     |
|-------|-----------|-----------|-----|
| chr13 | 76109760  | 76110138  | 379 |
| chr10 | 19511453  | 19511831  | 379 |
| chr1  | 100067816 | 100068194 | 379 |
| chr9  | 106410353 | 106410730 | 378 |
| chr9  | 86921504  | 86921881  | 378 |
| chr8  | 65915088  | 65915465  | 378 |
| chr8  | 45669510  | 45669887  | 378 |
| chr5  | 112659163 | 112659540 | 378 |
| chr4  | 117804196 | 117804573 | 378 |
| chr29 | 25949093  | 25949470  | 378 |
| chr26 | 18171228  | 18171605  | 378 |
| chr25 | 8199947   | 8200324   | 378 |
| chr23 | 13526225  | 13526602  | 378 |
| chr21 | 68058719  | 68059096  | 378 |
| chr20 | 2366860   | 2367237   | 378 |
| chr18 | 12418201  | 12418578  | 378 |
| chr18 | 10048260  | 10048637  | 378 |
| chr16 | 2221798   | 2222175   | 378 |
| chr15 | 27271713  | 27272090  | 378 |
| chr13 | 58666969  | 58667346  | 378 |
| chr10 | 70023401  | 70023778  | 378 |
| chr10 | 20196984  | 20197361  | 378 |
| chr1  | 74997391  | 74997768  | 378 |
| chr1  | 70378599  | 70378976  | 378 |
| chrX  | 29566904  | 29567280  | 377 |
| chr5  | 30324038  | 30324414  | 377 |
| chr5  | 28856206  | 28856582  | 377 |
| chr4  | 29026513  | 29026889  | 377 |
| chr24 | 36025876  | 36026252  | 377 |
| chr2  | 135040297 | 135040673 | 377 |
| chr19 | 60421356  | 60421732  | 377 |
| chr18 | 39575947  | 39576323  | 377 |
| chr15 | 38536585  | 38536961  | 377 |
| chr1  | 132109964 | 132110340 | 377 |
| chr1  | 67812582  | 67812958  | 377 |
| chr9  | 105734433 | 105734808 | 376 |
| chr8  | 60104176  | 60104551  | 376 |
| chr7  | 52388411  | 52388786  | 376 |
| chr6  | 117849789 | 117850164 | 376 |
| chr6  | 107047708 | 107048083 | 376 |
| chr5  | 113500509 | 113500884 | 376 |
| chr5  | 10721498  | 10721873  | 376 |
| chr3  | 115780492 | 115780867 | 376 |
| chr3  | 105164170 | 105164545 | 376 |
| chr29 | 34853552  | 34853927  | 376 |
| chr27 | 40764755  | 40765130  | 376 |
| chr23 | 32013677  | 32014052  | 376 |
| chr23 | 23761891  | 23762266  | 376 |
| chr19 | 29040955  | 29041330  | 376 |
| chr18 | 43580229  | 43580604  | 376 |

|       |               |           |     |
|-------|---------------|-----------|-----|
| chr16 | 38776194      | 38776569  | 376 |
| chr14 | 80803649      | 80804024  | 376 |
| chr13 | 36529899      | 36530274  | 376 |
| chr13 | 36243340      | 36243715  | 376 |
| chr11 | 91539868      | 91540243  | 376 |
| chr10 | 16667747      | 16668122  | 376 |
| chr1  | 9057768       | 9058143   | 376 |
| chr29 | 46656324      | 46656698  | 375 |
| chr26 | 22162736      | 22163110  | 375 |
| chr23 | 28028101      | 28028475  | 375 |
| chr22 | 13782088      | 13782462  | 375 |
| chr19 | 58582333      | 58582707  | 375 |
| chr15 | 81158595      | 81158969  | 375 |
| chr12 | 83827511      | 83827885  | 375 |
| chr8  | 92208698      | 92209071  | 374 |
| chr6  | 101606824     | 101607197 | 374 |
| chr5  | 35462795      | 35463168  | 374 |
| chr5  | 29020384      | 29020757  | 374 |
| chr29 | 30670975      | 30671348  | 374 |
| chr26 | 44523623      | 44523996  | 374 |
| chr22 | 43196689      | 43197062  | 374 |
| chr21 | 33119481      | 33119854  | 374 |
| chr21 | 30784811      | 30785184  | 374 |
| chr2  | 110553538     | 110553911 | 374 |
| chr19 | 60758505      | 60758878  | 374 |
| chr19 | 10885531      | 10885904  | 374 |
| chr18 | 31845374      | 31845747  | 374 |
| chr17 | 59138468      | 59138841  | 374 |
| chr17 | 46056759      | 46057132  | 374 |
| chr15 | 62421221      | 62421594  | 374 |
| chr14 | 1418578       | 1418951   | 374 |
| chr13 | 74365039      | 74365412  | 374 |
| chr13 | 42256094      | 42256467  | 374 |
| chr5  | 118505925     | 118506297 | 373 |
| chr4  | 118023355     | 118023727 | 373 |
| chr3  | 123170633     | 123171005 | 373 |
| chr3  | 25720088      | 25720460  | 373 |
| chr3  | 17451386      | 17451758  | 373 |
| chr29 | 930311 930683 | 373       |     |
| chr21 | 65546206      | 65546578  | 373 |
| chr19 | 57048338      | 57048710  | 373 |
| chr18 | 47768162      | 47768534  | 373 |
| chr17 | 73600010      | 73600382  | 373 |
| chr15 | 39618624      | 39618996  | 373 |
| chr15 | 39572430      | 39572802  | 373 |
| chr14 | 753937 754309 | 373       |     |
| chr13 | 61168597      | 61168969  | 373 |
| chr12 | 84613807      | 84614179  | 373 |
| chr12 | 83801690      | 83802062  | 373 |
| chr11 | 80563214      | 80563586  | 373 |

|       |               |           |     |
|-------|---------------|-----------|-----|
| chr9  | 82554976      | 82555347  | 372 |
| chr7  | 477731 478102 | 372       |     |
| chr6  | 4026719       | 4027090   | 372 |
| chr5  | 122806560     | 122806931 | 372 |
| chr5  | 121241434     | 121241805 | 372 |
| chr29 | 49568859      | 49569230  | 372 |
| chr28 | 25218870      | 25219241  | 372 |
| chr24 | 41734903      | 41735274  | 372 |
| chr23 | 10396556      | 10396927  | 372 |
| chr23 | 9431919       | 9432290   | 372 |
| chr22 | 60073983      | 60074354  | 372 |
| chr21 | 915617 915988 | 372       |     |
| chr2  | 132029506     | 132029877 | 372 |
| chr2  | 32468457      | 32468828  | 372 |
| chr19 | 45209448      | 45209819  | 372 |
| chr17 | 69837106      | 69837477  | 372 |
| chr16 | 77527340      | 77527711  | 372 |
| chr16 | 68899624      | 68899995  | 372 |
| chr15 | 57782946      | 57783317  | 372 |
| chr13 | 77535035      | 77535406  | 372 |
| chr11 | 105661342     | 105661713 | 372 |
| chr11 | 104552402     | 104552773 | 372 |
| chr11 | 103739957     | 103740328 | 372 |
| chr11 | 100344624     | 100344995 | 372 |
| chr11 | 77649181      | 77649552  | 372 |
| chr3  | 117322032     | 117322402 | 371 |
| chr3  | 105297010     | 105297380 | 371 |
| chr29 | 48939233      | 48939603  | 371 |
| chr28 | 42348733      | 42349103  | 371 |
| chr27 | 29092977      | 29093347  | 371 |
| chr24 | 20859826      | 20860196  | 371 |
| chr2  | 136630294     | 136630664 | 371 |
| chr2  | 127163094     | 127163464 | 371 |
| chr19 | 60266840      | 60267210  | 371 |
| chr18 | 14683250      | 14683620  | 371 |
| chr14 | 8327562       | 8327932   | 371 |
| chr13 | 75535070      | 75535440  | 371 |
| chr11 | 34848014      | 34848384  | 371 |
| chr10 | 53497861      | 53498231  | 371 |
| chr1  | 68414654      | 68415024  | 371 |
| chrX  | 29572184      | 29572553  | 370 |
| chr4  | 4544110       | 4544479   | 370 |
| chr20 | 71866901      | 71867270  | 370 |
| chr19 | 33103838      | 33104207  | 370 |
| chr18 | 47686674      | 47687043  | 370 |
| chr14 | 64389319      | 64389688  | 370 |
| chr14 | 26658458      | 26658827  | 370 |
| chr11 | 107532915     | 107533284 | 370 |
| chr11 | 104932174     | 104932543 | 370 |
| chr10 | 66920660      | 66921029  | 370 |

|       |           |           |     |
|-------|-----------|-----------|-----|
| chr10 | 66778877  | 66779246  | 370 |
| chr10 | 5027692   | 5028061   | 370 |
| chr7  | 110344659 | 110345027 | 369 |
| chr6  | 121690135 | 121690503 | 369 |
| chr5  | 33327446  | 33327814  | 369 |
| chr29 | 49744502  | 49744870  | 369 |
| chr26 | 51493149  | 51493517  | 369 |
| chr23 | 10397739  | 10398107  | 369 |
| chr2  | 134415744 | 134416112 | 369 |
| chr2  | 133652225 | 133652593 | 369 |
| chr2  | 3871197   | 3871565   | 369 |
| chr19 | 56498829  | 56499197  | 369 |
| chr19 | 43219761  | 43220129  | 369 |
| chr18 | 49463680  | 49464048  | 369 |
| chr17 | 73125228  | 73125596  | 369 |
| chr17 | 65957202  | 65957570  | 369 |
| chr15 | 26898392  | 26898760  | 369 |
| chr14 | 68060514  | 68060882  | 369 |
| chr14 | 1511860   | 1512228   | 369 |
| chr12 | 32812150  | 32812518  | 369 |
| chr11 | 48552035  | 48552403  | 369 |
| chr1  | 74545488  | 74545856  | 369 |
| chr5  | 51812919  | 51813286  | 368 |
| chr29 | 37105255  | 37105622  | 368 |
| chr28 | 33782350  | 33782717  | 368 |
| chr26 | 22224725  | 22225092  | 368 |
| chr23 | 10404570  | 10404937  | 368 |
| chr22 | 60442689  | 60443056  | 368 |
| chr2  | 140745501 | 140745868 | 368 |
| chr19 | 54459843  | 54460210  | 368 |
| chr19 | 36418290  | 36418657  | 368 |
| chr17 | 70156638  | 70157005  | 368 |
| chr14 | 67994552  | 67994919  | 368 |
| chr13 | 26213871  | 26214238  | 368 |
| chr12 | 9559235   | 9559602   | 368 |
| chr10 | 66915800  | 66916167  | 368 |
| chr10 | 59655883  | 59656250  | 368 |
| chr1  | 74576057  | 74576424  | 368 |
| chr1  | 68394608  | 68394975  | 368 |
| chr7  | 53419989  | 53420355  | 367 |
| chr6  | 94797290  | 94797656  | 367 |
| chr29 | 48790501  | 48790867  | 367 |
| chr29 | 45766923  | 45767289  | 367 |
| chr23 | 8793059   | 8793425   | 367 |
| chr22 | 55755618  | 55755984  | 367 |
| chr21 | 67765932  | 67766298  | 367 |
| chr21 | 56290168  | 56290534  | 367 |
| chr15 | 56053086  | 56053452  | 367 |
| chr15 | 37555416  | 37555782  | 367 |
| chr15 | 23625219  | 23625585  | 367 |



|       |               |           |     |
|-------|---------------|-----------|-----|
| chr13 | 63129112      | 63129478  | 367 |
| chr13 | 10596331      | 10596697  | 367 |
| chr12 | 20790200      | 20790566  | 367 |
| chr10 | 46190491      | 46190857  | 367 |
| chr10 | 21816225      | 21816591  | 367 |
| chr5  | 75030495      | 75030860  | 366 |
| chr29 | 31407011      | 31407376  | 366 |
| chr27 | 27694896      | 27695261  | 366 |
| chr26 | 35205694      | 35206059  | 366 |
| chr25 | 28646753      | 28647118  | 366 |
| chr24 | 59948268      | 59948633  | 366 |
| chr23 | 28555248      | 28555613  | 366 |
| chr21 | 34026444      | 34026809  | 366 |
| chr19 | 62075108      | 62075473  | 366 |
| chr19 | 46875404      | 46875769  | 366 |
| chr18 | 32933569      | 32933934  | 366 |
| chr16 | 44929435      | 44929800  | 366 |
| chr16 | 2350364       | 2350729   | 366 |
| chr15 | 52645069      | 52645434  | 366 |
| chr15 | 10154321      | 10154686  | 366 |
| chr11 | 7260544       | 7260909   | 366 |
| chr7  | 46226797      | 46227161  | 365 |
| chr3  | 115675561     | 115675925 | 365 |
| chr29 | 23331059      | 23331423  | 365 |
| chr26 | 44037974      | 44038338  | 365 |
| chr23 | 10493783      | 10494147  | 365 |
| chr22 | 54070048      | 54070412  | 365 |
| chr21 | 27059487      | 27059851  | 365 |
| chr20 | 8618571       | 8618935   | 365 |
| chr2  | 131193775     | 131194139 | 365 |
| chr18 | 53014930      | 53015294  | 365 |
| chr7  | 43772935      | 43773298  | 364 |
| chr4  | 123253326     | 123253689 | 364 |
| chr28 | 185402 185765 | 364       |     |
| chr25 | 42657373      | 42657736  | 364 |
| chr19 | 56058747      | 56059110  | 364 |
| chr19 | 28300461      | 28300824  | 364 |
| chr17 | 12566836      | 12567199  | 364 |
| chr16 | 77610719      | 77611082  | 364 |
| chr14 | 62355143      | 62355506  | 364 |
| chr12 | 9569186       | 9569549   | 364 |
| chr6  | 18376621      | 18376983  | 363 |
| chr5  | 113623001     | 113623363 | 363 |
| chr5  | 43086720      | 43087082  | 363 |
| chr25 | 645409 645771 | 363       |     |
| chr21 | 20172793      | 20173155  | 363 |
| chr19 | 59349454      | 59349816  | 363 |
| chr19 | 7777552       | 7777914   | 363 |
| chr18 | 7152501       | 7152863   | 363 |
| chr17 | 68370354      | 68370716  | 363 |

|       |           |           |     |
|-------|-----------|-----------|-----|
| chr13 | 65269748  | 65270110  | 363 |
| chr11 | 28516325  | 28516687  | 363 |
| chr9  | 106431073 | 106431434 | 362 |
| chr9  | 104529463 | 104529824 | 362 |
| chr26 | 48708992  | 48709353  | 362 |
| chr26 | 39814098  | 39814459  | 362 |
| chr23 | 52735623  | 52735984  | 362 |
| chr23 | 10963291  | 10963652  | 362 |
| chr22 | 61475602  | 61475963  | 362 |
| chr2  | 132301452 | 132301813 | 362 |
| chr2  | 61109844  | 61110205  | 362 |
| chr19 | 61204043  | 61204404  | 362 |
| chr19 | 444065    | 444426    | 362 |
| chr17 | 69478989  | 69479350  | 362 |
| chr12 | 84324433  | 84324794  | 362 |
| chr10 | 35959217  | 35959578  | 362 |
| chr10 | 17392149  | 17392510  | 362 |
| chr7  | 5453743   | 5454103   | 361 |
| chr6  | 74242838  | 74243198  | 361 |
| chr3  | 98316648  | 98317008  | 361 |
| chr25 | 41651582  | 41651942  | 361 |
| chr25 | 4620933   | 4621293   | 361 |
| chr19 | 28308428  | 28308788  | 361 |
| chr19 | 24641331  | 24641691  | 361 |
| chr19 | 17668907  | 17669267  | 361 |
| chr16 | 48448454  | 48448814  | 361 |
| chr16 | 41373159  | 41373519  | 361 |
| chr12 | 83979395  | 83979755  | 361 |
| chr7  | 54941738  | 54942097  | 360 |
| chr6  | 121621974 | 121622333 | 360 |
| chr5  | 29127666  | 29128025  | 360 |
| chr3  | 123220007 | 123220366 | 360 |
| chr29 | 963329    | 963688    | 360 |
| chr22 | 56702474  | 56702833  | 360 |
| chr21 | 20675246  | 20675605  | 360 |
| chr18 | 63491897  | 63492256  | 360 |
| chr1  | 68892975  | 68893334  | 360 |
| chr5  | 115312694 | 115313052 | 359 |
| chr4  | 72803954  | 72804312  | 359 |
| chr4  | 33243000  | 33243358  | 359 |
| chr26 | 44206379  | 44206737  | 359 |
| chr26 | 14918235  | 14918593  | 359 |
| chr21 | 67764525  | 67764883  | 359 |
| chr21 | 24444326  | 24444684  | 359 |
| chr21 | 19441759  | 19442117  | 359 |
| chr20 | 8593592   | 8593950   | 359 |
| chr2  | 5041908   | 5042266   | 359 |
| chr16 | 38818577  | 38818935  | 359 |
| chr15 | 75332241  | 75332599  | 359 |
| chr13 | 15660939  | 15661297  | 359 |

|       |           |           |     |
|-------|-----------|-----------|-----|
| chr11 | 105994746 | 105995104 | 359 |
| chr11 | 71595305  | 71595663  | 359 |
| chr11 | 4337959   | 4338317   | 359 |
| chr10 | 90932082  | 90932440  | 359 |
| chr10 | 81652889  | 81653247  | 359 |
| chr7  | 18766072  | 18766429  | 358 |
| chr6  | 122260213 | 122260570 | 358 |
| chr5  | 28894591  | 28894948  | 358 |
| chr26 | 21796508  | 21796865  | 358 |
| chr23 | 15884927  | 15885284  | 358 |
| chr21 | 31042636  | 31042993  | 358 |
| chr2  | 127201664 | 127202021 | 358 |
| chr19 | 23967401  | 23967758  | 358 |
| chr19 | 7651276   | 7651633   | 358 |
| chr17 | 66164444  | 66164801  | 358 |
| chr17 | 63464266  | 63464623  | 358 |
| chr17 | 62070109  | 62070466  | 358 |
| chr16 | 2465809   | 2466166   | 358 |
| chr13 | 61466332  | 61466689  | 358 |
| chr10 | 35662652  | 35663009  | 358 |
| chr9  | 105890890 | 105891246 | 357 |
| chr9  | 87733036  | 87733392  | 357 |
| chr9  | 35446527  | 35446883  | 357 |
| chr8  | 93196313  | 93196669  | 357 |
| chr24 | 29701407  | 29701763  | 357 |
| chr23 | 48766641  | 48766997  | 357 |
| chr23 | 27945576  | 27945932  | 357 |
| chr23 | 18629466  | 18629822  | 357 |
| chr22 | 51093424  | 51093780  | 357 |
| chr2  | 36088628  | 36088984  | 357 |
| chr15 | 62595609  | 62595965  | 357 |
| chr15 | 29213581  | 29213937  | 357 |
| chr13 | 42253038  | 42253394  | 357 |
| chr7  | 13104140  | 13104495  | 356 |
| chr4  | 106594216 | 106594571 | 356 |
| chr3  | 125753299 | 125753654 | 356 |
| chr25 | 29293449  | 29293804  | 356 |
| chr20 | 4990067   | 4990422   | 356 |
| chr2  | 134472593 | 134472948 | 356 |
| chr2  | 131170446 | 131170801 | 356 |
| chr19 | 43135858  | 43136213  | 356 |
| chr18 | 54650445  | 54650800  | 356 |
| chr18 | 53519773  | 53520128  | 356 |
| chr16 | 77728522  | 77728877  | 356 |
| chr15 | 75787104  | 75787459  | 356 |
| chr13 | 69902007  | 69902362  | 356 |
| chr11 | 28639612  | 28639967  | 356 |
| chr10 | 4848714   | 4849069   | 356 |
| chr7  | 20321028  | 20321382  | 355 |
| chr7  | 17321029  | 17321383  | 355 |

|       |               |           |     |
|-------|---------------|-----------|-----|
| chr6  | 59504941      | 59505295  | 355 |
| chr3  | 4355645       | 4355999   | 355 |
| chr26 | 15574475      | 15574829  | 355 |
| chr25 | 10597066      | 10597420  | 355 |
| chr24 | 41740761      | 41741115  | 355 |
| chr23 | 15955818      | 15956172  | 355 |
| chr2  | 133449839     | 133450193 | 355 |
| chr19 | 42048255      | 42048609  | 355 |
| chr19 | 21681580      | 21681934  | 355 |
| chr16 | 964558 964912 | 355       |     |
| chr11 | 74208957      | 74209311  | 355 |
| chr10 | 81643944      | 81644298  | 355 |
| chr10 | 67036676      | 67037030  | 355 |
| chr10 | 17668867      | 17669221  | 355 |
| chrX  | 20419433      | 20419786  | 354 |
| chr9  | 104808383     | 104808736 | 354 |
| chr8  | 8717911       | 8718264   | 354 |
| chr6  | 109073463     | 109073816 | 354 |
| chr25 | 3037959       | 3038312   | 354 |
| chr24 | 43702549      | 43702902  | 354 |
| chr24 | 34508256      | 34508609  | 354 |
| chr20 | 71867885      | 71868238  | 354 |
| chr20 | 649617 649970 | 354       |     |
| chr2  | 110521943     | 110522296 | 354 |
| chr15 | 60876361      | 60876714  | 354 |
| chr13 | 80065605      | 80065958  | 354 |
| chr12 | 84232651      | 84233004  | 354 |
| chr12 | 34069241      | 34069594  | 354 |
| chr10 | 16912988      | 16913341  | 354 |
| chr8  | 65753750      | 65754102  | 353 |
| chr7  | 71318204      | 71318556  | 353 |
| chr4  | 124349701     | 124350053 | 353 |
| chr25 | 1963377       | 1963729   | 353 |
| chr23 | 18814005      | 18814357  | 353 |
| chr21 | 13903917      | 13904269  | 353 |
| chr17 | 63416874      | 63417226  | 353 |
| chr15 | 75537863      | 75538215  | 353 |
| chr12 | 14502029      | 14502381  | 353 |
| chr1  | 153893631     | 153893983 | 353 |
| chr1  | 1616258       | 1616610   | 353 |
| chrX  | 36651699      | 36652050  | 352 |
| chr9  | 107036589     | 107036940 | 352 |
| chr5  | 120686956     | 120687307 | 352 |
| chr5  | 75018565      | 75018916  | 352 |
| chr3  | 109419274     | 109419625 | 352 |
| chr29 | 44570813      | 44571164  | 352 |
| chr21 | 26544613      | 26544964  | 352 |
| chr20 | 40250621      | 40250972  | 352 |
| chr2  | 139323530     | 139323881 | 352 |
| chr19 | 60468735      | 60469086  | 352 |

|       |           |           |     |
|-------|-----------|-----------|-----|
| chr18 | 56457542  | 56457893  | 352 |
| chr18 | 46070266  | 46070617  | 352 |
| chr17 | 71965336  | 71965687  | 352 |
| chr17 | 70038676  | 70039027  | 352 |
| chr11 | 104287843 | 104288194 | 352 |
| chr10 | 21113269  | 21113620  | 352 |
| chr6  | 120926646 | 120926996 | 351 |
| chr6  | 119360068 | 119360418 | 351 |
| chr5  | 33999718  | 34000068  | 351 |
| chr3  | 74452880  | 74453230  | 351 |
| chr3  | 17471935  | 17472285  | 351 |
| chr24 | 49212082  | 49212432  | 351 |
| chr23 | 50794220  | 50794570  | 351 |
| chr23 | 28821223  | 28821573  | 351 |
| chr21 | 32957024  | 32957374  | 351 |
| chr19 | 27116386  | 27116736  | 351 |
| chr18 | 55471973  | 55472323  | 351 |
| chr17 | 62214004  | 62214354  | 351 |
| chr15 | 64555544  | 64555894  | 351 |
| chr11 | 70684304  | 70684654  | 351 |
| chr9  | 90429467  | 90429816  | 350 |
| chr7  | 18835980  | 18836329  | 350 |
| chr7  | 4506156   | 4506505   | 350 |
| chr3  | 35960094  | 35960443  | 350 |
| chr26 | 51533750  | 51534099  | 350 |
| chr23 | 10603077  | 10603426  | 350 |
| chr2  | 128452319 | 128452668 | 350 |
| chr2  | 7379930   | 7380279   | 350 |
| chr19 | 54169501  | 54169850  | 350 |
| chr16 | 74049071  | 74049420  | 350 |
| chr11 | 14067325  | 14067674  | 350 |
| chr10 | 25340773  | 25341122  | 350 |
| chr8  | 60101722  | 60102070  | 349 |
| chr25 | 29123699  | 29124047  | 349 |
| chr23 | 31440608  | 31440956  | 349 |
| chr23 | 30517219  | 30517567  | 349 |
| chr22 | 56253917  | 56254265  | 349 |
| chr2  | 54402780  | 54403128  | 349 |
| chr19 | 41399191  | 41399539  | 349 |
| chr19 | 34392370  | 34392718  | 349 |
| chr18 | 64398972  | 64399320  | 349 |
| chr16 | 47227613  | 47227961  | 349 |
| chr16 | 46960668  | 46961016  | 349 |
| chr11 | 106353867 | 106354215 | 349 |
| chr7  | 46492657  | 46493004  | 348 |
| chr6  | 115764802 | 115765149 | 348 |
| chr5  | 112235037 | 112235384 | 348 |
| chr5  | 46572702  | 46573049  | 348 |
| chr5  | 28762944  | 28763291  | 348 |
| chr3  | 111671103 | 111671450 | 348 |

|       |               |           |     |
|-------|---------------|-----------|-----|
| chr26 | 42175559      | 42175906  | 348 |
| chr21 | 67890818      | 67891165  | 348 |
| chr21 | 33019339      | 33019686  | 348 |
| chr18 | 52423512      | 52423859  | 348 |
| chr18 | 22300457      | 22300804  | 348 |
| chr17 | 72758868      | 72759215  | 348 |
| chr17 | 60740798      | 60741145  | 348 |
| chr16 | 48726405      | 48726752  | 348 |
| chr15 | 75333183      | 75333530  | 348 |
| chr13 | 75526595      | 75526942  | 348 |
| chr13 | 22169014      | 22169361  | 348 |
| chr11 | 28449508      | 28449855  | 348 |
| chr10 | 12730775      | 12731122  | 348 |
| chr8  | 115803771     | 115804117 | 347 |
| chr5  | 112583728     | 112584074 | 347 |
| chr4  | 121982839     | 121983185 | 347 |
| chr28 | 7613760       | 7614106   | 347 |
| chr21 | 49255767      | 49256113  | 347 |
| chr2  | 111642965     | 111643311 | 347 |
| chr2  | 70241155      | 70241501  | 347 |
| chr19 | 54200941      | 54201287  | 347 |
| chr19 | 12400007      | 12400353  | 347 |
| chr18 | 11839703      | 11840049  | 347 |
| chr16 | 38779044      | 38779390  | 347 |
| chr13 | 60733614      | 60733960  | 347 |
| chr1  | 67723987      | 67724333  | 347 |
| chr6  | 59284755      | 59285100  | 346 |
| chr25 | 40829813      | 40830158  | 346 |
| chr24 | 40815694      | 40816039  | 346 |
| chr24 | 8048193       | 8048538   | 346 |
| chr21 | 4288326       | 4288671   | 346 |
| chr20 | 784541 784886 | 346       |     |
| chr2  | 111674152     | 111674497 | 346 |
| chr18 | 45535861      | 45536206  | 346 |
| chr18 | 34642242      | 34642587  | 346 |
| chr18 | 32466377      | 32466722  | 346 |
| chr17 | 57864504      | 57864849  | 346 |
| chr16 | 48000036      | 48000381  | 346 |
| chr16 | 3253318       | 3253663   | 346 |
| chr16 | 1785764       | 1786109   | 346 |
| chr15 | 56117807      | 56118152  | 346 |
| chr14 | 9204072       | 9204417   | 346 |
| chr10 | 67013070      | 67013415  | 346 |
| chr8  | 94370847      | 94371191  | 345 |
| chr6  | 69505529      | 69505873  | 345 |
| chr23 | 10609812      | 10610156  | 345 |
| chr19 | 43084281      | 43084625  | 345 |
| chr19 | 13674242      | 13674586  | 345 |
| chr15 | 24721961      | 24722305  | 345 |
| chr13 | 76273454      | 76273798  | 345 |

|       |           |           |     |
|-------|-----------|-----------|-----|
| chr10 | 74581795  | 74582139  | 345 |
| chr10 | 50519418  | 50519762  | 345 |
| chr9  | 104519495 | 104519838 | 344 |
| chr4  | 118255716 | 118256059 | 344 |
| chr3  | 105171191 | 105171534 | 344 |
| chr21 | 8885570   | 8885913   | 344 |
| chr20 | 33364270  | 33364613  | 344 |
| chr19 | 29684376  | 29684719  | 344 |
| chr19 | 7650006   | 7650349   | 344 |
| chr17 | 15145324  | 15145667  | 344 |
| chr15 | 76607109  | 76607452  | 344 |
| chr13 | 70704819  | 70705162  | 344 |
| chr13 | 62870607  | 62870950  | 344 |
| chr11 | 30927034  | 30927377  | 344 |
| chr5  | 29911712  | 29912054  | 343 |
| chr3  | 28910843  | 28911185  | 343 |
| chr28 | 42372948  | 42373290  | 343 |
| chr23 | 51977027  | 51977369  | 343 |
| chr23 | 18472946  | 18473288  | 343 |
| chr23 | 10341606  | 10341948  | 343 |
| chr21 | 32867633  | 32867975  | 343 |
| chr21 | 30283588  | 30283930  | 343 |
| chr21 | 6484740   | 6485082   | 343 |
| chr19 | 27208854  | 27209196  | 343 |
| chr18 | 62065631  | 62065973  | 343 |
| chr15 | 84545372  | 84545714  | 343 |
| chr15 | 24444982  | 24445324  | 343 |
| chr7  | 3689684   | 3690025   | 342 |
| chr25 | 34482732  | 34483073  | 342 |
| chr22 | 59860725  | 59861066  | 342 |
| chr19 | 55998108  | 55998449  | 342 |
| chr19 | 37955035  | 37955376  | 342 |
| chr18 | 23601147  | 23601488  | 342 |
| chr16 | 46387486  | 46387827  | 342 |
| chr16 | 38790322  | 38790663  | 342 |
| chr13 | 60181129  | 60181470  | 342 |
| chr13 | 10930386  | 10930727  | 342 |
| chr11 | 48702500  | 48702841  | 342 |
| chr8  | 35969619  | 35969959  | 341 |
| chr7  | 15495132  | 15495472  | 341 |
| chr6  | 20764797  | 20765137  | 341 |
| chr28 | 27187521  | 27187861  | 341 |
| chr26 | 20844834  | 20845174  | 341 |
| chr23 | 27600510  | 27600850  | 341 |
| chr22 | 60021771  | 60022111  | 341 |
| chr22 | 54110994  | 54111334  | 341 |
| chr22 | 48296574  | 48296914  | 341 |
| chr21 | 67969409  | 67969749  | 341 |
| chr21 | 22689885  | 22690225  | 341 |
| chr20 | 74516609  | 74516949  | 341 |

|       |           |           |     |
|-------|-----------|-----------|-----|
| chr2  | 133038843 | 133039183 | 341 |
| chr2  | 75720753  | 75721093  | 341 |
| chr16 | 47606443  | 47606783  | 341 |
| chr14 | 8242079   | 8242419   | 341 |
| chr12 | 35633326  | 35633666  | 341 |
| chr11 | 88927886  | 88928226  | 341 |
| chr10 | 35480667  | 35481007  | 341 |
| chr3  | 110979291 | 110979630 | 340 |
| chr28 | 25903158  | 25903497  | 340 |
| chr21 | 69106058  | 69106397  | 340 |
| chr20 | 61820262  | 61820601  | 340 |
| chr19 | 10240901  | 10241240  | 340 |
| chr18 | 49466242  | 49466581  | 340 |
| chr18 | 33219975  | 33220314  | 340 |
| chr18 | 9836866   | 9837205   | 340 |
| chr16 | 49673286  | 49673625  | 340 |
| chr16 | 47127836  | 47128175  | 340 |
| chr15 | 75559641  | 75559980  | 340 |
| chr11 | 28435521  | 28435860  | 340 |
| chr9  | 78272439  | 78272777  | 339 |
| chr8  | 74323245  | 74323583  | 339 |
| chr6  | 69243428  | 69243766  | 339 |
| chr3  | 25815455  | 25815793  | 339 |
| chr25 | 36440699  | 36441037  | 339 |
| chr25 | 35595954  | 35596292  | 339 |
| chr23 | 46000015  | 46000353  | 339 |
| chr19 | 54472976  | 54473314  | 339 |
| chr17 | 58971899  | 58972237  | 339 |
| chr13 | 11373206  | 11373544  | 339 |
| chr11 | 12002917  | 12003255  | 339 |
| chr10 | 21977096  | 21977434  | 339 |
| chr9  | 8177919   | 8178256   | 338 |
| chr7  | 89468736  | 89469073  | 338 |
| chr26 | 20238579  | 20238916  | 338 |
| chr25 | 2708172   | 2708509   | 338 |
| chr23 | 27946179  | 27946516  | 338 |
| chr23 | 10601079  | 10601416  | 338 |
| chr22 | 56177137  | 56177474  | 338 |
| chr22 | 54500829  | 54501166  | 338 |
| chr20 | 64885459  | 64885796  | 338 |
| chr14 | 1961681   | 1962018   | 338 |
| chr13 | 59103628  | 59103965  | 338 |
| chr11 | 10500477  | 10500814  | 338 |
| chr1  | 119137038 | 119137375 | 338 |
| chr8  | 103930508 | 103930844 | 337 |
| chr8  | 26041776  | 26042112  | 337 |
| chr5  | 119382307 | 119382643 | 337 |
| chr5  | 28900066  | 28900402  | 337 |
| chr4  | 123230623 | 123230959 | 337 |
| chr3  | 8821172   | 8821508   | 337 |



|       |           |           |     |
|-------|-----------|-----------|-----|
| chr29 | 44659529  | 44659865  | 337 |
| chr25 | 43491085  | 43491421  | 337 |
| chr21 | 61787401  | 61787737  | 337 |
| chr19 | 41301117  | 41301453  | 337 |
| chr19 | 39843140  | 39843476  | 337 |
| chr19 | 14996468  | 14996804  | 337 |
| chr17 | 64362147  | 64362483  | 337 |
| chr13 | 77540753  | 77541089  | 337 |
| chr10 | 53290595  | 53290931  | 337 |
| chr10 | 48289103  | 48289439  | 337 |
| chr1  | 84500353  | 84500689  | 337 |
| chr9  | 47256174  | 47256509  | 336 |
| chr8  | 73763283  | 73763618  | 336 |
| chr5  | 125550789 | 125551124 | 336 |
| chr5  | 80846342  | 80846677  | 336 |
| chr5  | 28375871  | 28376206  | 336 |
| chr3  | 105764152 | 105764487 | 336 |
| chr3  | 33821838  | 33822173  | 336 |
| chr28 | 24816370  | 24816705  | 336 |
| chr25 | 38239093  | 38239428  | 336 |
| chr24 | 50877939  | 50878274  | 336 |
| chr23 | 41210523  | 41210858  | 336 |
| chr2  | 132107266 | 132107601 | 336 |
| chr17 | 70294692  | 70295027  | 336 |
| chr16 | 39523240  | 39523575  | 336 |
| chr15 | 64203482  | 64203817  | 336 |
| chr13 | 79981741  | 79982076  | 336 |
| chr13 | 57903453  | 57903788  | 336 |
| chr13 | 17737787  | 17738122  | 336 |
| chr24 | 60754312  | 60754646  | 335 |
| chr22 | 10775804  | 10776138  | 335 |
| chr21 | 27993093  | 27993427  | 335 |
| chr18 | 54322876  | 54323210  | 335 |
| chr13 | 69266885  | 69267219  | 335 |
| chr12 | 82562999  | 82563333  | 335 |
| chr11 | 84415507  | 84415841  | 335 |
| chr8  | 46605977  | 46606310  | 334 |
| chr4  | 75322094  | 75322427  | 334 |
| chr3  | 125627206 | 125627539 | 334 |
| chr3  | 30222668  | 30223001  | 334 |
| chr29 | 51660976  | 51661309  | 334 |
| chr26 | 14555094  | 14555427  | 334 |
| chr14 | 13383031  | 13383364  | 334 |
| chr10 | 74853871  | 74854204  | 334 |
| chr1  | 141492079 | 141492412 | 334 |
| chr7  | 3635149   | 3635481   | 333 |
| chr29 | 37629480  | 37629812  | 333 |
| chr29 | 6655935   | 6656267   | 333 |
| chr14 | 5906556   | 5906888   | 333 |
| chr13 | 59409851  | 59410183  | 333 |

|       |           |           |     |
|-------|-----------|-----------|-----|
| chr13 | 28497575  | 28497907  | 333 |
| chr12 | 80140446  | 80140778  | 333 |
| chr7  | 1913144   | 1913475   | 332 |
| chr5  | 50542344  | 50542675  | 332 |
| chr24 | 59392096  | 59392427  | 332 |
| chr22 | 56621622  | 56621953  | 332 |
| chr17 | 70243875  | 70244206  | 332 |
| chr15 | 26984613  | 26984944  | 332 |
| chr12 | 20029933  | 20030264  | 332 |
| chr11 | 100447098 | 100447429 | 332 |
| chr11 | 28533954  | 28534285  | 332 |
| chr7  | 10946654  | 10946984  | 331 |
| chr5  | 117490874 | 117491204 | 331 |
| chr4  | 11988111  | 11988441  | 331 |
| chr3  | 118024396 | 118024726 | 331 |
| chr3  | 54332108  | 54332438  | 331 |
| chr29 | 41693932  | 41694262  | 331 |
| chr28 | 34344461  | 34344791  | 331 |
| chr28 | 1264641   | 1264971   | 331 |
| chr26 | 23085887  | 23086217  | 331 |
| chr22 | 30007935  | 30008265  | 331 |
| chr19 | 30821866  | 30822196  | 331 |
| chr19 | 23704054  | 23704384  | 331 |
| chr18 | 10836067  | 10836397  | 331 |
| chr16 | 77586307  | 77586637  | 331 |
| chr16 | 47292397  | 47292727  | 331 |
| chr15 | 29688626  | 29688956  | 331 |
| chr13 | 62384558  | 62384888  | 331 |
| chr12 | 74563612  | 74563942  | 331 |
| chr12 | 17984442  | 17984772  | 331 |
| chr29 | 17840227  | 17840556  | 330 |
| chr20 | 70918258  | 70918587  | 330 |
| chr2  | 126048594 | 126048923 | 330 |
| chr2  | 28862903  | 28863232  | 330 |
| chr19 | 43081574  | 43081903  | 330 |
| chr19 | 25212023  | 25212352  | 330 |
| chr17 | 54291861  | 54292190  | 330 |
| chr16 | 67447179  | 67447508  | 330 |
| chr15 | 29442974  | 29443303  | 330 |
| chr15 | 29131374  | 29131703  | 330 |
| chr9  | 106555991 | 106556319 | 329 |
| chr5  | 113921102 | 113921430 | 329 |
| chr3  | 125475314 | 125475642 | 329 |
| chr24 | 20545391  | 20545719  | 329 |
| chr21 | 65882385  | 65882713  | 329 |
| chr19 | 59088156  | 59088484  | 329 |
| chr18 | 56616593  | 56616921  | 329 |
| chr13 | 59586245  | 59586573  | 329 |
| chr12 | 76543993  | 76544321  | 329 |
| chr11 | 100918189 | 100918517 | 329 |

|       |           |           |     |
|-------|-----------|-----------|-----|
| chr10 | 16844389  | 16844717  | 329 |
| chr1  | 70854183  | 70854511  | 329 |
| chr8  | 72539649  | 72539976  | 328 |
| chr5  | 112050986 | 112051313 | 328 |
| chr5  | 84675387  | 84675714  | 328 |
| chr2  | 138610687 | 138611014 | 328 |
| chr18 | 55207192  | 55207519  | 328 |
| chr18 | 40109109  | 40109436  | 328 |
| chr11 | 106245231 | 106245558 | 328 |
| chr11 | 72300429  | 72300756  | 328 |
| chr9  | 98824520  | 98824846  | 327 |
| chr9  | 94865731  | 94866057  | 327 |
| chr7  | 3698857   | 3699183   | 327 |
| chr6  | 120747621 | 120747947 | 327 |
| chr5  | 113239989 | 113240315 | 327 |
| chr28 | 43868208  | 43868534  | 327 |
| chr18 | 62035216  | 62035542  | 327 |
| chr18 | 33222853  | 33223179  | 327 |
| chr7  | 37570154  | 37570479  | 326 |
| chr5  | 125216519 | 125216844 | 326 |
| chr3  | 35334095  | 35334420  | 326 |
| chr19 | 45147224  | 45147549  | 326 |
| chr18 | 33312723  | 33313048  | 326 |
| chr15 | 19791314  | 19791639  | 326 |
| chr15 | 13619531  | 13619856  | 326 |
| chr12 | 69031272  | 69031597  | 326 |
| chr11 | 1632737   | 1633062   | 326 |
| chr1  | 74294352  | 74294677  | 326 |
| chr5  | 35232789  | 35233113  | 325 |
| chr4  | 116044550 | 116044874 | 325 |
| chr4  | 71623753  | 71624077  | 325 |
| chr28 | 33434077  | 33434401  | 325 |
| chr24 | 35423071  | 35423395  | 325 |
| chr22 | 39756557  | 39756881  | 325 |
| chr22 | 6472679   | 6473003   | 325 |
| chr18 | 24320649  | 24320973  | 325 |
| chr13 | 77385211  | 77385535  | 325 |
| chr13 | 55084898  | 55085222  | 325 |
| chr8  | 88618396  | 88618719  | 324 |
| chr7  | 17100624  | 17100947  | 324 |
| chr5  | 121078806 | 121079129 | 324 |
| chr3  | 126942289 | 126942612 | 324 |
| chr3  | 111485660 | 111485983 | 324 |
| chr3  | 29965051  | 29965374  | 324 |
| chr22 | 56496322  | 56496645  | 324 |
| chr21 | 59517772  | 59518095  | 324 |
| chr2  | 128245256 | 128245579 | 324 |
| chr17 | 66703222  | 66703545  | 324 |
| chr7  | 57325247  | 57325569  | 323 |
| chr3  | 33098686  | 33099008  | 323 |

|       |               |           |     |
|-------|---------------|-----------|-----|
| chr26 | 50808145      | 50808467  | 323 |
| chr26 | 35724042      | 35724364  | 323 |
| chr24 | 21962152      | 21962474  | 323 |
| chr20 | 2470951       | 2471273   | 323 |
| chr10 | 16931969      | 16932291  | 323 |
| chr8  | 108215047     | 108215368 | 322 |
| chr8  | 5326987       | 5327308   | 322 |
| chr4  | 101414410     | 101414731 | 322 |
| chr24 | 60748363      | 60748684  | 322 |
| chr24 | 60513382      | 60513703  | 322 |
| chr23 | 50798541      | 50798862  | 322 |
| chr23 | 11493698      | 11494019  | 322 |
| chr15 | 64767613      | 64767934  | 322 |
| chr9  | 45099564      | 45099884  | 321 |
| chr8  | 66669379      | 66669699  | 321 |
| chr21 | 59711882      | 59712202  | 321 |
| chr20 | 74770151      | 74770471  | 321 |
| chr19 | 38777656      | 38777976  | 321 |
| chr18 | 56874431      | 56874751  | 321 |
| chr18 | 25325826      | 25326146  | 321 |
| chr17 | 59166423      | 59166743  | 321 |
| chr15 | 54213118      | 54213438  | 321 |
| chr11 | 20458288      | 20458608  | 321 |
| chr8  | 63938045      | 63938364  | 320 |
| chr7  | 42221997      | 42222316  | 320 |
| chr29 | 34582527      | 34582846  | 320 |
| chr28 | 34035280      | 34035599  | 320 |
| chr23 | 8864196       | 8864515   | 320 |
| chr22 | 61197781      | 61198100  | 320 |
| chr18 | 64633534      | 64633853  | 320 |
| chr14 | 61324374      | 61324693  | 320 |
| chr12 | 34365582      | 34365901  | 320 |
| chr11 | 106308250     | 106308569 | 320 |
| chr9  | 45946488      | 45946806  | 319 |
| chr7  | 51699220      | 51699538  | 319 |
| chr26 | 20185418      | 20185736  | 319 |
| chr22 | 54216826      | 54217144  | 319 |
| chr20 | 831514 831832 | 319       |     |
| chr10 | 36834166      | 36834484  | 319 |
| chr28 | 42783964      | 42784281  | 318 |
| chr27 | 28119161      | 28119478  | 318 |
| chr25 | 18016597      | 18016914  | 318 |
| chr21 | 25974074      | 25974391  | 318 |
| chr21 | 22731481      | 22731798  | 318 |
| chr2  | 127203728     | 127204045 | 318 |
| chr18 | 24335420      | 24335737  | 318 |
| chr16 | 69673851      | 69674168  | 318 |
| chr13 | 75665507      | 75665824  | 318 |
| chr13 | 53215540      | 53215857  | 318 |
| chr13 | 9939736       | 9940053   | 318 |

|       |           |           |     |
|-------|-----------|-----------|-----|
| chr7  | 10643297  | 10643613  | 317 |
| chr6  | 121015393 | 121015709 | 317 |
| chr3  | 102648316 | 102648632 | 317 |
| chr3  | 33815666  | 33815982  | 317 |
| chr29 | 31406551  | 31406867  | 317 |
| chr23 | 51973368  | 51973684  | 317 |
| chr19 | 60825367  | 60825683  | 317 |
| chr15 | 75327891  | 75328207  | 317 |
| chr9  | 34938373  | 34938688  | 316 |
| chr8  | 7557481   | 7557796   | 316 |
| chr29 | 36687019  | 36687334  | 316 |
| chr29 | 7319570   | 7319885   | 316 |
| chr25 | 37874030  | 37874345  | 316 |
| chr19 | 39139746  | 39140061  | 316 |
| chr18 | 22337253  | 22337568  | 316 |
| chr16 | 59037248  | 59037563  | 316 |
| chr14 | 23430910  | 23431225  | 316 |
| chr12 | 32919575  | 32919890  | 316 |
| chr11 | 104705007 | 104705322 | 316 |
| chr11 | 104199197 | 104199512 | 316 |
| chr5  | 113186453 | 113186767 | 315 |
| chr5  | 111897622 | 111897936 | 315 |
| chr5  | 29960373  | 29960687  | 315 |
| chr4  | 121470922 | 121471236 | 315 |
| chr26 | 44317138  | 44317452  | 315 |
| chr18 | 15788260  | 15788574  | 315 |
| chr13 | 15464849  | 15465163  | 315 |
| chr5  | 112045851 | 112046164 | 314 |
| chr4  | 47360657  | 47360970  | 314 |
| chr25 | 2752115   | 2752428   | 314 |
| chr24 | 53852408  | 53852721  | 314 |
| chr17 | 68420745  | 68421058  | 314 |
| chr14 | 34074853  | 34075166  | 314 |
| chr13 | 58904886  | 58905199  | 314 |
| chr11 | 100893685 | 100893998 | 314 |
| chr5  | 30145388  | 30145700  | 313 |
| chr24 | 1129280   | 1129592   | 313 |
| chr22 | 4700129   | 4700441   | 313 |
| chr21 | 13967943  | 13968255  | 313 |
| chr13 | 52662081  | 52662393  | 313 |
| chr13 | 6925811   | 6926123   | 313 |
| chr10 | 17085802  | 17086114  | 313 |
| chr7  | 15037662  | 15037973  | 312 |
| chr24 | 59573022  | 59573333  | 312 |
| chr18 | 56431212  | 56431523  | 312 |
| chr15 | 32174481  | 32174792  | 312 |
| chr9  | 35891931  | 35892241  | 311 |
| chr4  | 68286578  | 68286888  | 311 |
| chr3  | 33852918  | 33853228  | 311 |
| chr27 | 5839216   | 5839526   | 311 |

|       |               |           |     |
|-------|---------------|-----------|-----|
| chr23 | 52805220      | 52805530  | 311 |
| chr22 | 51418585      | 51418895  | 311 |
| chr21 | 66416004      | 66416314  | 311 |
| chr19 | 7544768       | 7545078   | 311 |
| chr11 | 104961189     | 104961499 | 311 |
| chr10 | 20849783      | 20850093  | 311 |
| chr9  | 12681756      | 12682065  | 310 |
| chr4  | 115954269     | 115954578 | 310 |
| chr26 | 45654454      | 45654763  | 310 |
| chr23 | 7050128       | 7050437   | 310 |
| chr21 | 34475944      | 34476253  | 310 |
| chr21 | 6520118       | 6520427   | 310 |
| chr11 | 9441337       | 9441646   | 310 |
| chr10 | 90201080      | 90201389  | 310 |
| chr7  | 6631376       | 6631684   | 309 |
| chr25 | 41598382      | 41598690  | 309 |
| chr21 | 13647620      | 13647928  | 309 |
| chr19 | 53552384      | 53552692  | 309 |
| chr16 | 67203115      | 67203423  | 309 |
| chr7  | 7246542       | 7246849   | 308 |
| chr6  | 121019578     | 121019885 | 308 |
| chr29 | 36952156      | 36952463  | 308 |
| chr23 | 27816177      | 27816484  | 308 |
| chr23 | 18732401      | 18732708  | 308 |
| chr23 | 16521963      | 16522270  | 308 |
| chr21 | 65807407      | 65807714  | 308 |
| chr13 | 37641009      | 37641316  | 308 |
| chr13 | 22176713      | 22177020  | 308 |
| chr10 | 81883369      | 81883676  | 308 |
| chr8  | 45663185      | 45663491  | 307 |
| chr7  | 37389612      | 37389918  | 307 |
| chr7  | 17096368      | 17096674  | 307 |
| chr4  | 66657603      | 66657909  | 307 |
| chr28 | 33810153      | 33810459  | 307 |
| chr27 | 665002 665308 | 307       |     |
| chr14 | 17064899      | 17065205  | 307 |
| chr13 | 66971965      | 66972271  | 307 |
| chr11 | 107531676     | 107531982 | 307 |
| chr10 | 8365916       | 8366222   | 307 |
| chr6  | 120783540     | 120783845 | 306 |
| chr5  | 121224925     | 121225230 | 306 |
| chr4  | 111870317     | 111870622 | 306 |
| chr24 | 60264613      | 60264918  | 306 |
| chr19 | 56601860      | 56602165  | 306 |
| chr13 | 79642979      | 79643284  | 306 |
| chr1  | 74524508      | 74524813  | 306 |
| chrX  | 78581390      | 78581694  | 305 |
| chr3  | 18480669      | 18480973  | 305 |
| chr25 | 36479611      | 36479915  | 305 |
| chr23 | 27405115      | 27405419  | 305 |

|       |               |           |     |
|-------|---------------|-----------|-----|
| chr23 | 15858661      | 15858965  | 305 |
| chr21 | 33123285      | 33123589  | 305 |
| chr20 | 10228070      | 10228374  | 305 |
| chr19 | 27904684      | 27904988  | 305 |
| chr19 | 18418275      | 18418579  | 305 |
| chr16 | 57110466      | 57110770  | 305 |
| chr15 | 43592416      | 43592720  | 305 |
| chr14 | 42555763      | 42556067  | 305 |
| chr13 | 42588372      | 42588676  | 305 |
| chr3  | 34134554      | 34134857  | 304 |
| chr3  | 4112009       | 4112312   | 304 |
| chr2  | 138674725     | 138675028 | 304 |
| chr2  | 68156375      | 68156678  | 304 |
| chr19 | 45149330      | 45149633  | 304 |
| chr18 | 62509734      | 62510037  | 304 |
| chr17 | 63499475      | 63499778  | 304 |
| chr15 | 64476710      | 64477013  | 304 |
| chr11 | 50900978      | 50901281  | 304 |
| chr11 | 50869751      | 50870054  | 304 |
| chrX  | 23036302      | 23036604  | 303 |
| chr7  | 48473862      | 48474164  | 303 |
| chr6  | 121079480     | 121079782 | 303 |
| chr5  | 111259000     | 111259302 | 303 |
| chr4  | 116959317     | 116959619 | 303 |
| chr27 | 35230382      | 35230684  | 303 |
| chr25 | 41191903      | 41192205  | 303 |
| chr25 | 39214630      | 39214932  | 303 |
| chr25 | 39209760      | 39210062  | 303 |
| chr21 | 68937875      | 68938177  | 303 |
| chr19 | 28206571      | 28206873  | 303 |
| chr18 | 56381926      | 56382228  | 303 |
| chr18 | 43150817      | 43151119  | 303 |
| chr17 | 69201952      | 69202254  | 303 |
| chr13 | 41702522      | 41702824  | 303 |
| chr12 | 32547457      | 32547759  | 303 |
| chr12 | 32147776      | 32148078  | 303 |
| chr11 | 100280945     | 100281247 | 303 |
| chr11 | 25608020      | 25608322  | 303 |
| chr1  | 147085470     | 147085772 | 303 |
| chr7  | 32284397      | 32284698  | 302 |
| chr7  | 817818 818119 |           | 302 |
| chr6  | 75003848      | 75004149  | 302 |
| chr26 | 18796219      | 18796520  | 302 |
| chr24 | 59574423      | 59574724  | 302 |
| chr2  | 133181553     | 133181854 | 302 |
| chr2  | 75590908      | 75591209  | 302 |
| chr19 | 63708638      | 63708939  | 302 |
| chr14 | 25075013      | 25075314  | 302 |
| chr14 | 7838973       | 7839274   | 302 |
| chr12 | 20087889      | 20088190  | 302 |

|       |           |           |     |
|-------|-----------|-----------|-----|
| chr11 | 75072774  | 75073075  | 302 |
| chr10 | 81719557  | 81719858  | 302 |
| chr24 | 60941574  | 60941874  | 301 |
| chr22 | 12161004  | 12161304  | 301 |
| chr19 | 60798070  | 60798370  | 301 |
| chr19 | 45054890  | 45055190  | 301 |
| chr23 | 28047841  | 28048140  | 300 |
| chr19 | 60087951  | 60088250  | 300 |
| chr15 | 31008310  | 31008609  | 300 |
| chr14 | 7994907   | 7995206   | 300 |
| chr13 | 57580753  | 57581052  | 300 |
| chr5  | 115510753 | 115511051 | 299 |
| chr3  | 118278004 | 118278302 | 299 |
| chr29 | 47307266  | 47307564  | 299 |
| chr26 | 48510039  | 48510337  | 299 |
| chr25 | 43489557  | 43489855  | 299 |
| chr20 | 4903030   | 4903328   | 299 |
| chr18 | 64534828  | 64535126  | 299 |
| chr18 | 43581799  | 43582097  | 299 |
| chr13 | 38763803  | 38764101  | 299 |
| chr1  | 149247275 | 149247573 | 299 |
| chr7  | 17978409  | 17978706  | 298 |
| chr5  | 28721613  | 28721910  | 298 |
| chr4  | 107347189 | 107347486 | 298 |
| chr3  | 126841066 | 126841363 | 298 |
| chr3  | 119660140 | 119660437 | 298 |
| chr29 | 29942798  | 29943095  | 298 |
| chr22 | 56224890  | 56225187  | 298 |
| chr22 | 11569860  | 11570157  | 298 |
| chr18 | 45040631  | 45040928  | 298 |
| chr14 | 34008509  | 34008806  | 298 |
| chr13 | 42417889  | 42418186  | 298 |
| chr11 | 72849833  | 72850130  | 298 |
| chr10 | 20819584  | 20819881  | 298 |
| chr3  | 106639760 | 106640056 | 297 |
| chr29 | 38367335  | 38367631  | 297 |
| chr23 | 27398432  | 27398728  | 297 |
| chr19 | 39833299  | 39833595  | 297 |
| chr19 | 25419423  | 25419719  | 297 |
| chr3  | 106804204 | 106804499 | 296 |
| chr29 | 26552175  | 26552470  | 296 |
| chr26 | 50282365  | 50282660  | 296 |
| chr16 | 74238915  | 74239210  | 296 |
| chr13 | 74656448  | 74656743  | 296 |
| chr13 | 58269462  | 58269757  | 296 |
| chr13 | 22153182  | 22153477  | 296 |
| chr12 | 82704086  | 82704381  | 296 |
| chr11 | 100933852 | 100934147 | 296 |
| chr1  | 141485610 | 141485905 | 296 |
| chr6  | 121767476 | 121767770 | 295 |



|       |               |           |     |
|-------|---------------|-----------|-----|
| chr20 | 3276535       | 3276829   | 295 |
| chr19 | 59027339      | 59027633  | 295 |
| chr15 | 80950816      | 80951110  | 295 |
| chr15 | 24599760      | 24600054  | 295 |
| chr14 | 39051217      | 39051511  | 295 |
| chrX  | 86240447      | 86240740  | 294 |
| chr8  | 94962169      | 94962462  | 294 |
| chr4  | 121748892     | 121749185 | 294 |
| chr28 | 26838226      | 26838519  | 294 |
| chr22 | 59507026      | 59507319  | 294 |
| chr21 | 30352944      | 30353237  | 294 |
| chr15 | 55637580      | 55637873  | 294 |
| chr13 | 21889150      | 21889443  | 294 |
| chr11 | 104661348     | 104661641 | 294 |
| chr29 | 26772017      | 26772309  | 293 |
| chr19 | 61330506      | 61330798  | 293 |
| chr17 | 64076492      | 64076784  | 293 |
| chr10 | 66637562      | 66637854  | 293 |
| chr1  | 82821875      | 82822167  | 293 |
| chr8  | 838300 838591 |           | 292 |
| chr7  | 8916668       | 8916959   | 292 |
| chr7  | 3693138       | 3693429   | 292 |
| chr5  | 117693679     | 117693970 | 292 |
| chr3  | 105937811     | 105938102 | 292 |
| chr27 | 35354317      | 35354608  | 292 |
| chr22 | 57366194      | 57366485  | 292 |
| chr2  | 66460485      | 66460776  | 292 |
| chr14 | 6372113       | 6372404   | 292 |
| chr10 | 7741014       | 7741305   | 292 |
| chr3  | 26140169      | 26140459  | 291 |
| chr29 | 51232885      | 51233175  | 291 |
| chr26 | 44121317      | 44121607  | 291 |
| chr23 | 10024581      | 10024871  | 291 |
| chr13 | 80739072      | 80739362  | 291 |
| chr11 | 93797561      | 93797851  | 291 |
| chr5  | 113234859     | 113235148 | 290 |
| chr5  | 47852254      | 47852543  | 290 |
| chr3  | 17390883      | 17391172  | 290 |
| chr24 | 20353170      | 20353459  | 290 |
| chr22 | 60568961      | 60569250  | 290 |
| chr2  | 136506719     | 136507008 | 290 |
| chr2  | 1707141       | 1707430   | 290 |
| chr18 | 55015042      | 55015331  | 290 |
| chr18 | 54955176      | 54955465  | 290 |
| chr11 | 107578199     | 107578488 | 290 |
| chr11 | 98346602      | 98346891  | 290 |
| chr10 | 12139550      | 12139839  | 290 |
| chr7  | 4934789       | 4935077   | 289 |
| chr5  | 29205411      | 29205699  | 289 |
| chr24 | 58963916      | 58964204  | 289 |

|       |           |           |     |
|-------|-----------|-----------|-----|
| chr23 | 11819657  | 11819945  | 289 |
| chr16 | 48309385  | 48309673  | 289 |
| chr15 | 65361567  | 65361855  | 289 |
| chr11 | 89049391  | 89049679  | 289 |
| chr5  | 28551933  | 28552220  | 288 |
| chr4  | 117999531 | 117999818 | 288 |
| chr3  | 105273319 | 105273606 | 288 |
| chr29 | 38311146  | 38311433  | 288 |
| chr24 | 58937680  | 58937967  | 288 |
| chr19 | 12136873  | 12137160  | 288 |
| chr17 | 65960712  | 65960999  | 288 |
| chr14 | 68030610  | 68030897  | 288 |
| chr14 | 64315440  | 64315727  | 288 |
| chr13 | 55036406  | 55036693  | 288 |
| chr12 | 9563825   | 9564112   | 288 |
| chr11 | 100378481 | 100378768 | 288 |
| chr11 | 10525126  | 10525413  | 288 |
| chr5  | 115461247 | 115461533 | 287 |
| chr25 | 37238431  | 37238717  | 287 |
| chr16 | 3311122   | 3311408   | 287 |
| chr11 | 109574057 | 109574343 | 287 |
| chr29 | 33668296  | 33668581  | 286 |
| chr20 | 61777305  | 61777590  | 286 |
| chr19 | 58473149  | 58473434  | 286 |
| chr19 | 33551781  | 33552066  | 286 |
| chr15 | 81667458  | 81667743  | 286 |
| chr7  | 51395996  | 51396280  | 285 |
| chr5  | 113544987 | 113545271 | 285 |
| chr2  | 136617402 | 136617686 | 285 |
| chr19 | 54461349  | 54461633  | 285 |
| chr19 | 33550545  | 33550829  | 285 |
| chr12 | 30574819  | 30575103  | 285 |
| chr9  | 100047608 | 100047891 | 284 |
| chr27 | 38658351  | 38658634  | 284 |
| chr26 | 19839660  | 19839943  | 284 |
| chr24 | 20687638  | 20687921  | 284 |
| chr22 | 56469644  | 56469927  | 284 |
| chr22 | 5665553   | 5665836   | 284 |
| chr18 | 64605137  | 64605420  | 284 |
| chr18 | 62443553  | 62443836  | 284 |
| chr11 | 1973980   | 1974263   | 284 |
| chr4  | 122311158 | 122311440 | 283 |
| chr14 | 79855706  | 79855988  | 283 |
| chr13 | 77309316  | 77309598  | 283 |
| chr7  | 13486789  | 13487070  | 282 |
| chr5  | 123482737 | 123483018 | 282 |
| chr5  | 30446999  | 30447280  | 282 |
| chr20 | 4986877   | 4987158   | 282 |
| chr14 | 21191621  | 21191902  | 282 |
| chr11 | 1642505   | 1642786   | 282 |

|       |           |           |     |
|-------|-----------|-----------|-----|
| chr19 | 46873872  | 46874152  | 281 |
| chr18 | 21961320  | 21961600  | 281 |
| chr1  | 76416407  | 76416687  | 281 |
| chr5  | 113444857 | 113445136 | 280 |
| chr5  | 8967015   | 8967294   | 280 |
| chr4  | 105072862 | 105073141 | 280 |
| chr3  | 118029260 | 118029539 | 280 |
| chr3  | 112874652 | 112874931 | 280 |
| chr29 | 46302320  | 46302599  | 280 |
| chr28 | 33862569  | 33862848  | 280 |
| chr25 | 40842266  | 40842545  | 280 |
| chr19 | 25459406  | 25459685  | 280 |
| chr16 | 44066466  | 44066745  | 280 |
| chr15 | 25324522  | 25324801  | 280 |
| chr8  | 93080815  | 93081093  | 279 |
| chr26 | 44438665  | 44438943  | 279 |
| chr25 | 4619611   | 4619889   | 279 |
| chr23 | 29102843  | 29103121  | 279 |
| chr21 | 65792617  | 65792895  | 279 |
| chr21 | 20926378  | 20926656  | 279 |
| chr19 | 60795514  | 60795792  | 279 |
| chr17 | 66448731  | 66449009  | 279 |
| chr14 | 10307531  | 10307809  | 279 |
| chr13 | 40337260  | 40337538  | 279 |
| chr10 | 32495164  | 32495442  | 279 |
| chr28 | 33466619  | 33466896  | 278 |
| chr24 | 48628522  | 48628799  | 278 |
| chr24 | 1733149   | 1733426   | 278 |
| chr23 | 36832796  | 36833073  | 278 |
| chr20 | 5902525   | 5902802   | 278 |
| chr17 | 72736229  | 72736506  | 278 |
| chr16 | 2280022   | 2280299   | 278 |
| chr15 | 19969924  | 19970201  | 278 |
| chr10 | 68225322  | 68225599  | 278 |
| chr5  | 112239328 | 112239603 | 276 |
| chr20 | 32405063  | 32405338  | 276 |
| chr19 | 54041010  | 54041285  | 276 |
| chr18 | 38803667  | 38803942  | 276 |
| chr16 | 47337036  | 47337311  | 276 |
| chr12 | 32811294  | 32811569  | 276 |
| chr10 | 103069928 | 103070203 | 276 |
| chr9  | 43807151  | 43807425  | 275 |
| chr28 | 33730004  | 33730278  | 275 |
| chr27 | 28131737  | 28132011  | 275 |
| chr25 | 3009906   | 3010180   | 275 |
| chr23 | 10470373  | 10470647  | 275 |
| chr2  | 117719260 | 117719534 | 275 |
| chr18 | 40048168  | 40048442  | 275 |
| chr18 | 35074849  | 35075123  | 275 |
| chr5  | 111306316 | 111306589 | 274 |

|       |               |           |     |
|-------|---------------|-----------|-----|
| chr25 | 29272043      | 29272316  | 274 |
| chr20 | 35135001      | 35135274  | 274 |
| chr19 | 29580038      | 29580311  | 274 |
| chr18 | 62126144      | 62126417  | 274 |
| chr28 | 33667847      | 33668119  | 273 |
| chr26 | 34935536      | 34935808  | 273 |
| chr2  | 111358549     | 111358821 | 273 |
| chr18 | 13160587      | 13160859  | 273 |
| chr17 | 63279036      | 63279308  | 273 |
| chr15 | 42679213      | 42679485  | 273 |
| chr15 | 27221182      | 27221454  | 273 |
| chr1  | 209610 209882 | 273       |     |
| chr6  | 75141064      | 75141335  | 272 |
| chr6  | 30812173      | 30812444  | 272 |
| chr3  | 123154459     | 123154730 | 272 |
| chr3  | 22557989      | 22558260  | 272 |
| chr28 | 26767309      | 26767580  | 272 |
| chr23 | 52772078      | 52772349  | 272 |
| chr22 | 13295256      | 13295527  | 272 |
| chr19 | 56599023      | 56599294  | 272 |
| chr5  | 53446501      | 53446771  | 271 |
| chr18 | 25343606      | 25343876  | 271 |
| chr15 | 22854886      | 22855156  | 271 |
| chr14 | 26705785      | 26706055  | 271 |
| chr5  | 116834152     | 116834421 | 270 |
| chr2  | 74257939      | 74258208  | 270 |
| chr16 | 71534939      | 71535208  | 270 |
| chr15 | 26669369      | 26669638  | 270 |
| chr14 | 64002084      | 64002353  | 270 |
| chr1  | 145865783     | 145866052 | 270 |
| chr7  | 42787670      | 42787938  | 269 |
| chr5  | 60172058      | 60172326  | 269 |
| chr25 | 15247446      | 15247714  | 269 |
| chr15 | 70503044      | 70503312  | 269 |
| chr26 | 22224072      | 22224339  | 268 |
| chr21 | 64274847      | 64275114  | 268 |
| chr2  | 102283059     | 102283326 | 268 |
| chr19 | 29717133      | 29717400  | 268 |
| chr15 | 24978768      | 24979035  | 268 |
| chr19 | 19193710      | 19193976  | 267 |
| chr18 | 63754883      | 63755149  | 267 |
| chr18 | 23471838      | 23472104  | 267 |
| chr18 | 14018845      | 14019111  | 267 |
| chr14 | 29051813      | 29052079  | 267 |
| chr13 | 30143653      | 30143919  | 267 |
| chr6  | 120786476     | 120786741 | 266 |
| chr23 | 19296060      | 19296325  | 266 |
| chr21 | 20864829      | 20865094  | 266 |
| chr19 | 44764355      | 44764620  | 266 |
| chr19 | 38971414      | 38971679  | 266 |

|       |               |           |     |
|-------|---------------|-----------|-----|
| chr17 | 75718091      | 75718356  | 266 |
| chr11 | 75406945      | 75407210  | 266 |
| chr21 | 56377122      | 56377386  | 265 |
| chr19 | 29896030      | 29896293  | 264 |
| chr18 | 7228468       | 7228731   | 264 |
| chr3  | 95458323      | 95458585  | 263 |
| chr15 | 33837732      | 33837994  | 263 |
| chr29 | 36492392      | 36492653  | 262 |
| chr10 | 17565799      | 17566060  | 262 |
| chr2  | 139441709     | 139441969 | 261 |
| chr18 | 12634494      | 12634754  | 261 |
| chr10 | 8532040       | 8532300   | 261 |
| chr3  | 24827497      | 24827756  | 260 |
| chr25 | 35587186      | 35587445  | 260 |
| chr23 | 10351628      | 10351887  | 260 |
| chr11 | 84583638      | 84583897  | 260 |
| chr11 | 1642237       | 1642496   | 260 |
| chr9  | 22762788      | 22763046  | 259 |
| chr4  | 121481797     | 121482055 | 259 |
| chr27 | 7937155       | 7937413   | 259 |
| chr2  | 125917550     | 125917808 | 259 |
| chr17 | 67965230      | 67965488  | 259 |
| chr16 | 46653227      | 46653485  | 259 |
| chr16 | 26603596      | 26603854  | 259 |
| chr11 | 70873240      | 70873498  | 259 |
| chr29 | 49823154      | 49823411  | 258 |
| chr2  | 131314105     | 131314362 | 258 |
| chr18 | 10208539      | 10208796  | 258 |
| chr16 | 3313763       | 3314020   | 258 |
| chr22 | 16355242      | 16355498  | 257 |
| chr20 | 537856 538112 | 257       |     |
| chr17 | 6376307       | 6376563   | 257 |
| chr9  | 107093525     | 107093780 | 256 |
| chr7  | 19888625      | 19888880  | 256 |
| chr3  | 15549939      | 15550193  | 255 |
| chr19 | 14993939      | 14994193  | 255 |
| chr17 | 12573485      | 12573739  | 255 |
| chr16 | 73356792      | 73357046  | 255 |
| chr13 | 80738546      | 80738800  | 255 |
| chr4  | 7607315       | 7607568   | 254 |
| chr12 | 74535292      | 74535545  | 254 |
| chr10 | 36823646      | 36823899  | 254 |
| chr29 | 38380757      | 38381009  | 253 |
| chr15 | 73759629      | 73759881  | 253 |
| chr14 | 63485812      | 63486064  | 253 |
| chr11 | 100885060     | 100885312 | 253 |
| chr7  | 50544660      | 50544911  | 252 |
| chr3  | 105403438     | 105403689 | 252 |
| chr28 | 33459681      | 33459932  | 252 |
| chr17 | 66886823      | 66887074  | 252 |

|       |           |           |     |
|-------|-----------|-----------|-----|
| chr28 | 26793496  | 26793746  | 251 |
| chr23 | 13439727  | 13439977  | 251 |
| chr21 | 16058706  | 16058956  | 251 |
| chr13 | 22158643  | 22158893  | 251 |
| chr10 | 12901476  | 12901726  | 251 |
| chr1  | 86357277  | 86357527  | 251 |
| chr11 | 84503455  | 84503704  | 250 |
| chr6  | 41665009  | 41665257  | 249 |
| chr26 | 44875464  | 44875712  | 249 |
| chr26 | 31479203  | 31479451  | 249 |
| chr24 | 42040468  | 42040716  | 249 |
| chr3  | 123174909 | 123175156 | 248 |
| chr1  | 73584339  | 73584586  | 248 |
| chr8  | 95943906  | 95944152  | 247 |
| chr19 | 26919037  | 26919283  | 247 |
| chr4  | 87711474  | 87711719  | 246 |
| chr18 | 56734412  | 56734657  | 246 |
| chr9  | 87762934  | 87763178  | 245 |
| chr7  | 13374056  | 13374300  | 245 |
| chr18 | 11494522  | 11494766  | 245 |
| chr15 | 25622647  | 25622891  | 245 |
| chr13 | 71416718  | 71416962  | 245 |
| chr13 | 55320923  | 55321167  | 245 |
| chr20 | 11193392  | 11193635  | 244 |
| chr2  | 26455143  | 26455386  | 244 |
| chr14 | 1650179   | 1650422   | 244 |
| chr13 | 75968682  | 75968925  | 244 |
| chr2  | 139371569 | 139371810 | 242 |
| chr19 | 58714826  | 58715067  | 242 |
| chr10 | 16829449  | 16829690  | 242 |
| chr29 | 38047513  | 38047753  | 241 |
| chr11 | 73116572  | 73116812  | 241 |
| chr7  | 50523024  | 50523263  | 240 |
| chr19 | 47377657  | 47377895  | 239 |
| chr18 | 56912074  | 56912312  | 239 |
| chr14 | 42906000  | 42906238  | 239 |
| chr25 | 34437388  | 34437625  | 238 |
| chr18 | 62010261  | 62010498  | 238 |
| chr16 | 40912541  | 40912778  | 238 |
| chr11 | 70839663  | 70839900  | 238 |
| chr8  | 1630094   | 1630329   | 236 |
| chr5  | 120119307 | 120119542 | 236 |
| chr28 | 34013294  | 34013529  | 236 |
| chr22 | 50734545  | 50734780  | 236 |
| chr11 | 81389271  | 81389506  | 236 |
| chr26 | 20288395  | 20288628  | 234 |
| chr15 | 23582855  | 23583088  | 234 |
| chr22 | 46411055  | 46411287  | 233 |
| chr11 | 107245832 | 107246064 | 233 |
| chr4  | 123496603 | 123496834 | 232 |

|       |               |           |      |
|-------|---------------|-----------|------|
| chr11 | 104575908     | 104576139 | 232  |
| chr5  | 124803925     | 124804155 | 231  |
| chr17 | 54326890      | 54327120  | 231  |
| chr15 | 29823536      | 29823764  | 229  |
| chr3  | 119553399     | 119553626 | 228  |
| chr2  | 65517806      | 65518033  | 228  |
| chr23 | 11332637      | 11332863  | 227  |
| chr16 | 19555637      | 19555863  | 227  |
| chr3  | 120359579     | 120359804 | 226  |
| chr19 | 56513134      | 56513356  | 223  |
| chr10 | 8366224       | 8366446   | 223  |
| chr23 | 28016671      | 28016891  | 221  |
| chr10 | 48276616      | 48276836  | 221  |
| chr3  | 55570891      | 55571108  | 218  |
| chr18 | 48198803      | 48199020  | 218  |
| chr1  | 2721154       | 2721371   | 218  |
| chr13 | 77722147      | 77722363  | 217  |
| chr14 | 22101952      | 22102163  | 212  |
| chr12 | 11144364      | 11144567  | 204  |
| chr16 | 45457536      | 45457797  | 262  |
| chr18 | 13150293      | 13150705  | 413  |
| chr4  | 73385785      | 73386186  | 402  |
| chr11 | 76255997      | 76256510  | 514  |
| chr18 | 57302433      | 57302895  | 463  |
| chr18 | 45977751      | 45978149  | 399  |
| chr18 | 52684125      | 52684544  | 420  |
| chr25 | 30901150      | 30901520  | 371  |
| chr1  | 113054019     | 113054338 | 320  |
| chr11 | 44973408      | 44973719  | 312  |
| chr19 | 65237669      | 65238082  | 414  |
| chr11 | 98323755      | 98324118  | 364  |
| chr25 | 33524192      | 33524584  | 393  |
| chr24 | 49216397      | 49216748  | 352  |
| chr4  | 124150411     | 124150917 | 507  |
| chr8  | 73836887      | 73837276  | 390  |
| chr5  | 60890396      | 60890779  | 384  |
| chr1  | 67354979      | 67355327  | 349  |
| chr18 | 50470812      | 50471150  | 339  |
| chr19 | 42044506      | 42044842  | 337  |
| chr21 | 46611107      | 46611434  | 328  |
| chr15 | 26729896      | 26730196  | 301  |
| chr22 | 30015195      | 30015489  | 295  |
| chr6  | 72196644      | 72196886  | 243  |
| chr20 | 704155 705340 | 1186      |      |
| chr23 | 17482417      | 17483593  | 1177 |
| chr12 | 20788547      | 20789660  | 1114 |
| chr28 | 8225702       | 8226602   | 901  |
| chr16 | 44304329      | 44305163  | 835  |
| chr18 | 11763608      | 11764363  | 756  |
| chr19 | 12498125      | 12498869  | 745  |

|       |               |           |     |
|-------|---------------|-----------|-----|
| chr3  | 105193331     | 105194065 | 735 |
| chr16 | 50272923      | 50273634  | 712 |
| chr3  | 45695683      | 45696388  | 706 |
| chrX  | 13134545      | 13135240  | 696 |
| chr24 | 59604633      | 59605320  | 688 |
| chr20 | 59411416      | 59412101  | 686 |
| chr1  | 84822521      | 84823182  | 662 |
| chr24 | 36031974      | 36032600  | 627 |
| chr4  | 89779104      | 89779726  | 623 |
| chr27 | 30514195      | 30514815  | 621 |
| chr25 | 43415084      | 43415701  | 618 |
| chr18 | 22693062      | 22693678  | 617 |
| chr26 | 19743237      | 19743837  | 601 |
| chr21 | 20834307      | 20834900  | 594 |
| chr15 | 74539023      | 74539606  | 584 |
| chr15 | 29290774      | 29291346  | 573 |
| chr16 | 44147659      | 44148225  | 567 |
| chr23 | 31112657      | 31113219  | 563 |
| chr20 | 766542 767103 | 562       |     |
| chr9  | 98299216      | 98299759  | 544 |
| chr18 | 56771648      | 56772189  | 542 |
| chr19 | 39112337      | 39112877  | 541 |
| chr11 | 96180794      | 96181326  | 533 |
| chr2  | 135641359     | 135641889 | 531 |
| chr14 | 2887220       | 2887748   | 529 |
| chr21 | 34361438      | 34361965  | 528 |
| chr13 | 75725598      | 75726117  | 520 |
| chr1  | 132660323     | 132660835 | 513 |
| chr2  | 101176620     | 101177128 | 509 |
| chr27 | 39119598      | 39120102  | 505 |
| chr5  | 28902456      | 28902958  | 503 |
| chr13 | 57414738      | 57415225  | 488 |
| chr25 | 39165730      | 39166215  | 486 |
| chr10 | 81703698      | 81704180  | 483 |
| chr24 | 51441499      | 51441957  | 459 |
| chr1  | 141992421     | 141992866 | 446 |
| chr7  | 43729344      | 43729784  | 441 |
| chr13 | 11098981      | 11099420  | 440 |
| chr24 | 894949 895381 | 433       |     |
| chr13 | 54472176      | 54472602  | 427 |
| chr11 | 97745712      | 97746138  | 427 |
| chr15 | 27446813      | 27447233  | 421 |
| chr4  | 118015130     | 118015549 | 420 |
| chr8  | 7656064       | 7656474   | 411 |
| chr12 | 32014169      | 32014579  | 411 |
| chr18 | 64349569      | 64349970  | 402 |
| chr1  | 152263718     | 152264118 | 401 |
| chr26 | 20240670      | 20241068  | 399 |
| chr22 | 53368404      | 53368802  | 399 |
| chr22 | 30015753      | 30016151  | 399 |



|       |           |           |     |
|-------|-----------|-----------|-----|
| chr21 | 20615829  | 20616227  | 399 |
| chr13 | 39199334  | 39199732  | 399 |
| chr8  | 108819276 | 108819673 | 398 |
| chr29 | 41677709  | 41678106  | 398 |
| chr15 | 14271485  | 14271882  | 398 |
| chr3  | 125581856 | 125582250 | 395 |
| chr25 | 43277778  | 43278171  | 394 |
| chr19 | 47233556  | 47233948  | 393 |
| chr19 | 32585927  | 32586319  | 393 |
| chr18 | 52326392  | 52326784  | 393 |
| chr26 | 37095140  | 37095527  | 388 |
| chr18 | 47496278  | 47496662  | 385 |
| chr17 | 63517133  | 63517515  | 383 |
| chr8  | 60193205  | 60193585  | 381 |
| chr13 | 77426982  | 77427362  | 381 |
| chr26 | 45665607  | 45665985  | 379 |
| chr11 | 28790652  | 28791030  | 379 |
| chr13 | 80007015  | 80007389  | 375 |
| chr23 | 30524784  | 30525157  | 374 |
| chr13 | 57625433  | 57625802  | 370 |
| chr13 | 68447320  | 68447688  | 369 |
| chr2  | 111472294 | 111472661 | 368 |
| chr14 | 22093804  | 22094170  | 367 |
| chr28 | 26831399  | 26831761  | 363 |
| chr15 | 66208874  | 66209235  | 362 |
| chr2  | 99370805  | 99371164  | 360 |
| chr7  | 24212869  | 24213226  | 358 |
| chr7  | 2065185   | 2065541   | 357 |
| chr5  | 1101960   | 1102316   | 357 |
| chr25 | 34514783  | 34515135  | 353 |
| chr11 | 74864645  | 74864994  | 350 |
| chr29 | 48176524  | 48176870  | 347 |
| chr19 | 55768190  | 55768536  | 347 |
| chr19 | 15781891  | 15782236  | 346 |
| chr3  | 125488520 | 125488861 | 342 |
| chr2  | 132173463 | 132173803 | 341 |
| chr12 | 15864725  | 15865060  | 336 |
| chr29 | 44925153  | 44925487  | 335 |
| chr13 | 82957942  | 82958266  | 325 |
| chr3  | 24598544  | 24598865  | 322 |
| chr10 | 20456851  | 20457168  | 318 |
| chr3  | 126200672 | 126200984 | 313 |
| chr3  | 115329357 | 115329658 | 302 |
| chr9  | 106562963 | 106563249 | 287 |
| chr4  | 110044629 | 110044907 | 279 |
| chr17 | 15207855  | 15208107  | 253 |
| chr28 | 11900164  | 11901048  | 885 |
| chr19 | 20794405  | 20795258  | 854 |
| chr3  | 115464963 | 115465739 | 777 |
| chr18 | 39912730  | 39913496  | 767 |

|       |           |           |     |
|-------|-----------|-----------|-----|
| chr2  | 131022136 | 131022897 | 762 |
| chr11 | 9239284   | 9240037   | 754 |
| chr25 | 36477405  | 36478128  | 724 |
| chr16 | 38724447  | 38725138  | 692 |
| chr28 | 42376392  | 42377062  | 671 |
| chr11 | 77872208  | 77872876  | 669 |
| chr26 | 15371009  | 15371653  | 645 |
| chr2  | 111339988 | 111340631 | 644 |
| chr1  | 74604720  | 74605291  | 572 |
| chr23 | 23866057  | 23866598  | 542 |
| chr7  | 43515979  | 43516517  | 539 |
| chr25 | 2681491   | 2682029   | 539 |
| chr10 | 81722221  | 81722751  | 531 |
| chr21 | 20615033  | 20615557  | 525 |
| chr29 | 11678140  | 11678663  | 524 |
| chr11 | 4330272   | 4330779   | 508 |
| chr16 | 47603122  | 47603626  | 505 |
| chr9  | 104997281 | 104997779 | 499 |
| chr12 | 32553558  | 32554050  | 493 |
| chr25 | 23560224  | 23560707  | 484 |
| chr21 | 30792231  | 30792711  | 481 |
| chr24 | 22320749  | 22321209  | 461 |
| chr25 | 40592171  | 40592613  | 443 |
| chr23 | 23871881  | 23872317  | 437 |
| chr15 | 14234720  | 14235154  | 435 |
| chr17 | 76314931  | 76315357  | 427 |
| chr22 | 16731748  | 16732171  | 424 |
| chr18 | 53884242  | 53884663  | 422 |
| chr25 | 41644073  | 41644490  | 418 |
| chr19 | 56658059  | 56658475  | 417 |
| chr15 | 39953838  | 39954253  | 416 |
| chr1  | 149232958 | 149233368 | 411 |
| chr12 | 11448872  | 11449275  | 404 |
| chr3  | 22915877  | 22916275  | 399 |
| chr19 | 40443402  | 40443800  | 399 |
| chr19 | 15780724  | 15781122  | 399 |
| chr14 | 1951657   | 1952055   | 399 |
| chr13 | 41763580  | 41763978  | 399 |
| chr11 | 44935209  | 44935607  | 399 |
| chr13 | 6668173   | 6668569   | 397 |
| chr26 | 22245728  | 22246122  | 395 |
| chr21 | 55797802  | 55798196  | 395 |
| chr15 | 74597838  | 74598232  | 395 |
| chr9  | 45705145  | 45705537  | 393 |
| chr3  | 127019758 | 127020149 | 392 |
| chr20 | 39747506  | 39747896  | 391 |
| chr18 | 11377780  | 11378169  | 390 |
| chr3  | 20528282  | 20528670  | 389 |
| chr24 | 24718334  | 24718722  | 389 |
| chr19 | 34052934  | 34053322  | 389 |

|       |               |           |     |
|-------|---------------|-----------|-----|
| chr5  | 121225245     | 121225631 | 387 |
| chr3  | 51567868      | 51568254  | 387 |
| chr22 | 50724850      | 50725235  | 386 |
| chr2  | 134692030     | 134692414 | 385 |
| chr24 | 1591644       | 1592027   | 384 |
| chr17 | 49522375      | 49522758  | 384 |
| chr10 | 12356597      | 12356979  | 383 |
| chr3  | 124885786     | 124886167 | 382 |
| chr23 | 28010856      | 28011237  | 382 |
| chr29 | 25951145      | 25951523  | 379 |
| chr20 | 796345 796723 | 379       |     |
| chr5  | 114239550     | 114239926 | 377 |
| chr28 | 41023061      | 41023437  | 377 |
| chr25 | 34532529      | 34532905  | 377 |
| chr7  | 15357284      | 15357657  | 374 |
| chr19 | 28473273      | 28473646  | 374 |
| chr8  | 24477415      | 24477786  | 372 |
| chr7  | 62883068      | 62883434  | 367 |
| chr19 | 33124768      | 33125133  | 366 |
| chr20 | 20841649      | 20842013  | 365 |
| chr11 | 75097807      | 75098170  | 364 |
| chr15 | 81384531      | 81384892  | 362 |
| chr21 | 24472297      | 24472656  | 360 |
| chr3  | 88261854      | 88262212  | 359 |
| chr14 | 828801 829157 | 357       |     |
| chr25 | 38343825      | 38344176  | 352 |
| chr1  | 36233391      | 36233736  | 346 |
| chr7  | 45123710      | 45124053  | 344 |
| chr26 | 49013513      | 49013852  | 340 |
| chr19 | 19412514      | 19412832  | 319 |
| chr10 | 23451879      | 23452196  | 318 |
| chr12 | 35065935      | 35066246  | 312 |
| chr5  | 29144645      | 29144955  | 311 |
| chr7  | 37440318      | 37440625  | 308 |
| chr4  | 33743891      | 33744198  | 308 |
| chr8  | 7766452       | 7766758   | 307 |
| chr28 | 25529420      | 25529716  | 297 |
| chr13 | 41393577      | 41393873  | 297 |
| chr3  | 116202861     | 116203141 | 281 |
| chr21 | 57149172      | 57149439  | 268 |
| chr24 | 50878749      | 50879672  | 924 |
| chr23 | 31193727      | 31194578  | 852 |
| chr20 | 6607238       | 6608071   | 834 |
| chr12 | 68182862      | 68183645  | 784 |
| chr15 | 75339146      | 75339797  | 652 |
| chr11 | 9210549       | 9211194   | 646 |
| chr18 | 55066161      | 55066803  | 643 |
| chr1  | 74999675      | 75000296  | 622 |
| chr14 | 13998853      | 13999466  | 614 |
| chr2  | 105795301     | 105795911 | 611 |

|       |           |           |     |
|-------|-----------|-----------|-----|
| chr5  | 29207368  | 29207975  | 608 |
| chr5  | 114238945 | 114239548 | 604 |
| chr7  | 81252847  | 81253440  | 594 |
| chr5  | 115351875 | 115352449 | 575 |
| chr13 | 24027375  | 24027939  | 565 |
| chr2  | 124303496 | 124304059 | 564 |
| chr17 | 57848815  | 57849363  | 549 |
| chr7  | 15003717  | 15004256  | 540 |
| chr7  | 13101841  | 13102377  | 537 |
| chr25 | 1046171   | 1046706   | 536 |
| chr3  | 9532095   | 9532609   | 515 |
| chr16 | 48824134  | 48824642  | 509 |
| chr3  | 116034647 | 116035153 | 507 |
| chr1  | 74524827  | 74525325  | 499 |
| chr28 | 33996970  | 33997464  | 495 |
| chr21 | 20916760  | 20917245  | 486 |
| chr28 | 41281721  | 41282194  | 474 |
| chr22 | 59662896  | 59663347  | 452 |
| chrX  | 51881035  | 51881475  | 441 |
| chr13 | 31719802  | 31720242  | 441 |
| chr5  | 117632183 | 117632609 | 427 |
| chr8  | 63930538  | 63930949  | 412 |
| chr7  | 3924218   | 3924629   | 412 |
| chr3  | 26134626  | 26135036  | 411 |
| chr12 | 30548840  | 30549248  | 409 |
| chr7  | 19923671  | 19924072  | 402 |
| chr12 | 82480538  | 82480936  | 399 |
| chr1  | 100065164 | 100065562 | 399 |
| chr23 | 48751022  | 48751419  | 398 |
| chr27 | 48383324  | 48383720  | 397 |
| chr3  | 22859551  | 22859946  | 396 |
| chr24 | 58801078  | 58801473  | 396 |
| chr5  | 113947497 | 113947891 | 395 |
| chr26 | 44121773  | 44122165  | 393 |
| chr23 | 49999293  | 49999682  | 390 |
| chr21 | 59278628  | 59279017  | 390 |
| chr14 | 7033512   | 7033895   | 384 |
| chr3  | 113515376 | 113515755 | 380 |
| chr8  | 93695696  | 93696071  | 376 |
| chr15 | 64502836  | 64503210  | 375 |
| chr6  | 45442476  | 45442849  | 374 |
| chr7  | 11031294  | 11031663  | 370 |
| chr6  | 17412631  | 17412999  | 369 |
| chr7  | 14698525  | 14698892  | 368 |
| chr19 | 47316470  | 47316837  | 368 |
| chr12 | 32552271  | 32552637  | 367 |
| chr19 | 51923633  | 51923998  | 366 |
| chr29 | 49108622  | 49108985  | 364 |
| chr4  | 16844742  | 16845103  | 362 |
| chr1  | 8941416   | 8941776   | 361 |

|       |               |           |     |
|-------|---------------|-----------|-----|
| chr19 | 27264075      | 27264426  | 352 |
| chr13 | 79904915      | 79905263  | 349 |
| chr4  | 118165585     | 118165932 | 348 |
| chr22 | 52235000      | 52235346  | 347 |
| chr17 | 70331374      | 70331716  | 343 |
| chr7  | 30482016      | 30482355  | 340 |
| chr3  | 113469859     | 113470196 | 338 |
| chr1  | 68853989      | 68854319  | 331 |
| chr14 | 7664168       | 7664497   | 330 |
| chr3  | 20431916      | 20432239  | 324 |
| chr13 | 54852560      | 54852878  | 319 |
| chr24 | 11510800      | 11511114  | 315 |
| chr26 | 20931501      | 20931814  | 314 |
| chr22 | 7526336       | 7526647   | 312 |
| chr15 | 26786650      | 26786899  | 250 |
| chr8  | 73465310      | 73465554  | 245 |
| chr13 | 57397016      | 57397915  | 900 |
| chr4  | 118695593     | 118696411 | 819 |
| chr3  | 121373075     | 121373656 | 582 |
| chr11 | 103737538     | 103738118 | 581 |
| chr16 | 48802246      | 48802806  | 561 |
| chr3  | 115686850     | 115687397 | 548 |
| chr25 | 27879314      | 27879861  | 548 |
| chr11 | 9240082       | 9240606   | 525 |
| chr8  | 73314333      | 73314847  | 515 |
| chr17 | 5378524       | 5379035   | 512 |
| chr12 | 21869850      | 21870361  | 512 |
| chr18 | 682589 683068 | 480       |     |
| chr24 | 49123287      | 49123761  | 475 |
| chr21 | 33068631      | 33069099  | 469 |
| chr28 | 42166187      | 42166652  | 466 |
| chr19 | 58323509      | 58323954  | 446 |
| chr19 | 6522766       | 6523211   | 446 |
| chr11 | 105984571     | 105985013 | 443 |
| chr7  | 37487034      | 37487466  | 433 |
| chr1  | 128113042     | 128113465 | 424 |
| chr18 | 55592499      | 55592918  | 420 |
| chr9  | 90611411      | 90611827  | 417 |
| chr29 | 39084438      | 39084849  | 412 |
| chr13 | 61481996      | 61482402  | 407 |
| chr29 | 51235147      | 51235545  | 399 |
| chr9  | 63422729      | 63423125  | 397 |
| chr19 | 47273695      | 47274085  | 391 |
| chr8  | 7550021       | 7550410   | 390 |
| chr22 | 60195777      | 60196166  | 390 |
| chr18 | 54300649      | 54301036  | 388 |
| chr18 | 48265517      | 48265904  | 388 |
| chr16 | 2434736       | 2435120   | 385 |
| chr19 | 12127326      | 12127708  | 383 |
| chr21 | 56443748      | 56444129  | 382 |

|       |               |           |     |
|-------|---------------|-----------|-----|
| chr12 | 25692137      | 25692514  | 378 |
| chr10 | 17277181      | 17277558  | 378 |
| chr21 | 6528096       | 6528472   | 377 |
| chr10 | 66720090      | 66720459  | 370 |
| chr9  | 105882025     | 105882391 | 367 |
| chr19 | 58651996      | 58652361  | 366 |
| chr12 | 84017725      | 84018086  | 362 |
| chr5  | 30218360      | 30218713  | 354 |
| chr1  | 477561 477914 | 354       |     |
| chr29 | 31484113      | 31484461  | 349 |
| chr29 | 41705568      | 41705910  | 343 |
| chr20 | 38405861      | 38406203  | 343 |
| chr19 | 44999934      | 45000276  | 343 |
| chr15 | 26719986      | 26720324  | 339 |
| chr13 | 65982754      | 65983091  | 338 |
| chr4  | 34037157      | 34037492  | 336 |
| chr8  | 93167984      | 93168305  | 322 |
| chr12 | 32197370      | 32197676  | 307 |
| chr22 | 44866583      | 44866870  | 288 |
| chr18 | 11298277      | 11298558  | 282 |
| chr19 | 45555724      | 45556004  | 281 |
| chr25 | 40424054      | 40424323  | 270 |
| chr16 | 40905320      | 40905587  | 268 |
| chr16 | 46151192      | 46151427  | 236 |
| chr5  | 28886212      | 28886444  | 233 |
| chr27 | 35430189      | 35430921  | 733 |
| chr18 | 48678218      | 48678895  | 678 |
| chr13 | 57579416      | 57580078  | 663 |
| chr11 | 106294889     | 106295528 | 640 |
| chr26 | 23486479      | 23487078  | 600 |
| chr9  | 90474197      | 90474770  | 574 |
| chr23 | 28018586      | 28019140  | 555 |
| chr5  | 125493985     | 125494533 | 549 |
| chr3  | 108267695     | 108268222 | 528 |
| chr8  | 77124115      | 77124636  | 522 |
| chr2  | 135593941     | 135594458 | 518 |
| chr4  | 53020442      | 53020955  | 514 |
| chr26 | 50845655      | 50846166  | 512 |
| chr7  | 45705674      | 45706183  | 510 |
| chr17 | 63466033      | 63466536  | 504 |
| chr12 | 68184235      | 68184733  | 499 |
| chr18 | 62948715      | 62949208  | 494 |
| chr1  | 147088447     | 147088938 | 492 |
| chr12 | 82704477      | 82704967  | 491 |
| chr13 | 53765176      | 53765660  | 485 |
| chr21 | 56513826      | 56514308  | 483 |
| chr3  | 33821327      | 33821807  | 481 |
| chr23 | 31289020      | 31289499  | 480 |
| chr1  | 146930492     | 146930970 | 479 |
| chr18 | 50670428      | 50670896  | 469 |

|       |               |           |     |
|-------|---------------|-----------|-----|
| chr23 | 10509839      | 10510297  | 459 |
| chr7  | 15102545      | 15103000  | 456 |
| chr6  | 118499050     | 118499503 | 454 |
| chr26 | 23487131      | 23487578  | 448 |
| chr3  | 116164696     | 116165138 | 443 |
| chr8  | 89423291      | 89423732  | 442 |
| chr24 | 20365951      | 20366389  | 439 |
| chr22 | 53331979      | 53332416  | 438 |
| chr12 | 84611947      | 84612382  | 436 |
| chr13 | 73531062      | 73531495  | 434 |
| chr25 | 21393595      | 21394023  | 429 |
| chr3  | 115986537     | 115986964 | 428 |
| chr16 | 68893262      | 68893683  | 422 |
| chr5  | 118253649     | 118254067 | 419 |
| chr10 | 21354061      | 21354475  | 415 |
| chr21 | 1792145       | 1792557   | 413 |
| chr26 | 51592045      | 51592456  | 412 |
| chr15 | 64132891      | 64133302  | 412 |
| chr15 | 74533921      | 74534330  | 410 |
| chr23 | 3315146       | 3315552   | 407 |
| chr11 | 65720251      | 65720652  | 402 |
| chr6  | 121689051     | 121689449 | 399 |
| chr5  | 26710458      | 26710856  | 399 |
| chr4  | 79260266      | 79260664  | 399 |
| chr3  | 31681839      | 31682237  | 399 |
| chr29 | 48889984      | 48890382  | 399 |
| chr25 | 4006653       | 4007051   | 399 |
| chr21 | 28468619      | 28469017  | 399 |
| chr20 | 38407476      | 38407874  | 399 |
| chr2  | 111334413     | 111334811 | 399 |
| chr13 | 57193599      | 57193997  | 399 |
| chr10 | 36842289      | 36842687  | 399 |
| chr1  | 1547759       | 1548157   | 399 |
| chr18 | 47502088      | 47502485  | 398 |
| chr5  | 29252021      | 29252417  | 397 |
| chr3  | 123197213     | 123197609 | 397 |
| chr25 | 43205907      | 43206302  | 396 |
| chr22 | 12201445      | 12201840  | 396 |
| chr19 | 12334555      | 12334950  | 396 |
| chr18 | 50852518      | 50852913  | 396 |
| chr4  | 99597044      | 99597438  | 395 |
| chr4  | 33242421      | 33242815  | 395 |
| chr3  | 119662332     | 119662726 | 395 |
| chr21 | 24355223      | 24355617  | 395 |
| chr14 | 2879217       | 2879611   | 395 |
| chr16 | 49835564      | 49835957  | 394 |
| chr1  | 87361500      | 87361893  | 394 |
| chr21 | 11886525      | 11886917  | 393 |
| chr20 | 780806 781198 | 393       |     |
| chr5  | 113915773     | 113916164 | 392 |

|       |               |           |     |
|-------|---------------|-----------|-----|
| chr1  | 82572501      | 82572891  | 391 |
| chr7  | 42225367      | 42225756  | 390 |
| chr3  | 36011686      | 36012075  | 390 |
| chr21 | 59042484      | 59042873  | 390 |
| chr19 | 47316966      | 47317355  | 390 |
| chr1  | 148277604     | 148277992 | 389 |
| chrX  | 11008236      | 11008623  | 388 |
| chr6  | 16232336      | 16232723  | 388 |
| chr5  | 31556116      | 31556503  | 388 |
| chr4  | 98468960      | 98469347  | 388 |
| chr18 | 39962563      | 39962949  | 387 |
| chr15 | 81154016      | 81154402  | 387 |
| chr7  | 17945741      | 17946126  | 386 |
| chr5  | 27247599      | 27247984  | 386 |
| chr27 | 664458 664843 | 386       |     |
| chr19 | 46329999      | 46330384  | 386 |
| chr19 | 14078921      | 14079306  | 386 |
| chr21 | 6484080       | 6484464   | 385 |
| chr15 | 29971725      | 29972109  | 385 |
| chr19 | 38738047      | 38738430  | 384 |
| chr10 | 17667438      | 17667821  | 384 |
| chr26 | 38224508      | 38224890  | 383 |
| chr22 | 59876125      | 59876507  | 383 |
| chr7  | 46199991      | 46200372  | 382 |
| chr26 | 28145536      | 28145917  | 382 |
| chr19 | 48931893      | 48932274  | 382 |
| chr18 | 54970457      | 54970838  | 382 |
| chr16 | 377468 377849 | 382       |     |
| chr15 | 25594345      | 25594726  | 382 |
| chr28 | 26974481      | 26974861  | 381 |
| chr26 | 21794891      | 21795271  | 381 |
| chr29 | 36735032      | 36735411  | 380 |
| chr26 | 48706581      | 48706960  | 380 |
| chr12 | 34326574      | 34326953  | 380 |
| chr7  | 65625904      | 65626282  | 379 |
| chr5  | 26684601      | 26684978  | 378 |
| chr4  | 95786512      | 95786889  | 378 |
| chr4  | 79311620      | 79311997  | 378 |
| chr21 | 65573422      | 65573799  | 378 |
| chr21 | 61630601      | 61630978  | 378 |
| chr13 | 62243794      | 62244170  | 377 |
| chr11 | 109678546     | 109678922 | 377 |
| chr15 | 29833910      | 29834285  | 376 |
| chr12 | 80842455      | 80842830  | 376 |
| chr13 | 77537882      | 77538256  | 375 |
| chr19 | 46888186      | 46888559  | 374 |
| chr23 | 18733692      | 18734064  | 373 |
| chr23 | 13524580      | 13524952  | 373 |
| chr19 | 47243706      | 47244078  | 373 |
| chr4  | 95777010      | 95777381  | 372 |



|       |           |           |     |
|-------|-----------|-----------|-----|
| chr22 | 30085010  | 30085381  | 372 |
| chr18 | 62463057  | 62463428  | 372 |
| chr16 | 73683608  | 73683979  | 372 |
| chr15 | 45857180  | 45857551  | 372 |
| chr11 | 70661205  | 70661576  | 372 |
| chr5  | 112014638 | 112015008 | 371 |
| chr5  | 94239125  | 94239495  | 371 |
| chr25 | 14963157  | 14963527  | 371 |
| chr19 | 55511311  | 55511681  | 371 |
| chr16 | 44089569  | 44089939  | 371 |
| chr7  | 53419046  | 53419415  | 370 |
| chr5  | 118222909 | 118223278 | 370 |
| chr21 | 64813274  | 64813643  | 370 |
| chr18 | 54562173  | 54562542  | 370 |
| chrX  | 23158349  | 23158717  | 369 |
| chr8  | 73516129  | 73516497  | 369 |
| chr25 | 38048755  | 38049123  | 369 |
| chr28 | 26922733  | 26923100  | 368 |
| chr25 | 21648778  | 21649145  | 368 |
| chr25 | 3074212   | 3074579   | 368 |
| chr2  | 26589592  | 26589959  | 368 |
| chr4  | 29023811  | 29024177  | 367 |
| chr25 | 1953952   | 1954318   | 367 |
| chr19 | 59457554  | 59457920  | 367 |
| chr13 | 75657211  | 75657577  | 367 |
| chr13 | 61763094  | 61763460  | 367 |
| chr11 | 65366250  | 65366616  | 367 |
| chr18 | 32929232  | 32929597  | 366 |
| chr12 | 74522165  | 74522530  | 366 |
| chr11 | 1313918   | 1314283   | 366 |
| chr3  | 123201274 | 123201638 | 365 |
| chr3  | 82793877  | 82794241  | 365 |
| chr21 | 26044667  | 26045031  | 365 |
| chr9  | 24458538  | 24458901  | 364 |
| chr4  | 95635251  | 95635614  | 364 |
| chr22 | 30031233  | 30031596  | 364 |
| chr18 | 11010971  | 11011334  | 364 |
| chr15 | 28864612  | 28864975  | 364 |
| chr4  | 122703275 | 122703637 | 363 |
| chr25 | 34822453  | 34822815  | 363 |
| chr13 | 17716991  | 17717353  | 363 |
| chr22 | 17574289  | 17574650  | 362 |
| chr17 | 72335992  | 72336353  | 362 |
| chr18 | 64534291  | 64534651  | 361 |
| chr11 | 14161254  | 14161614  | 361 |
| chr26 | 45618316  | 45618675  | 360 |
| chr21 | 34541764  | 34542123  | 360 |
| chr3  | 119173415 | 119173773 | 359 |
| chr23 | 50963294  | 50963652  | 359 |
| chr23 | 18421209  | 18421567  | 359 |

|       |           |           |     |
|-------|-----------|-----------|-----|
| chr19 | 37874031  | 37874389  | 359 |
| chr19 | 23729574  | 23729932  | 359 |
| chr3  | 35581127  | 35581484  | 358 |
| chr26 | 38254150  | 38254507  | 358 |
| chr23 | 15871965  | 15872322  | 358 |
| chr16 | 75335927  | 75336284  | 358 |
| chr8  | 77679779  | 77680133  | 355 |
| chr20 | 30954891  | 30955244  | 354 |
| chr9  | 55291737  | 55292089  | 353 |
| chr2  | 110529950 | 110530302 | 353 |
| chr1  | 141659890 | 141660240 | 351 |
| chr23 | 27878592  | 27878941  | 350 |
| chr18 | 11802953  | 11803302  | 350 |
| chr8  | 72817351  | 72817697  | 347 |
| chr20 | 5248092   | 5248438   | 347 |
| chr17 | 1567369   | 1567715   | 347 |
| chr5  | 60918001  | 60918346  | 346 |
| chr25 | 39264609  | 39264954  | 346 |
| chr16 | 67215861  | 67216206  | 346 |
| chr11 | 106256558 | 106256903 | 346 |
| chr6  | 73194183  | 73194527  | 345 |
| chr6  | 59145444  | 59145788  | 345 |
| chr29 | 49626696  | 49627040  | 345 |
| chr26 | 23074594  | 23074938  | 345 |
| chr10 | 8711718   | 8712062   | 345 |
| chr29 | 41609265  | 41609608  | 344 |
| chr1  | 69353403  | 69353746  | 344 |
| chr15 | 22793999  | 22794341  | 343 |
| chr15 | 81656979  | 81657320  | 342 |
| chr12 | 36416652  | 36416993  | 342 |
| chr9  | 92182072  | 92182412  | 341 |
| chr11 | 106011850 | 106012190 | 341 |
| chr28 | 43867189  | 43867528  | 340 |
| chr1  | 144517659 | 144517998 | 340 |
| chr1  | 57532694  | 57533033  | 340 |
| chr16 | 19507875  | 19508213  | 339 |
| chr23 | 11783720  | 11784057  | 338 |
| chr9  | 45714706  | 45715042  | 337 |
| chr24 | 2035810   | 2036146   | 337 |
| chr11 | 9551150   | 9551486   | 337 |
| chr7  | 2964182   | 2964517   | 336 |
| chr29 | 51841372  | 51841707  | 336 |
| chr5  | 28864906  | 28865239  | 334 |
| chr21 | 66478180  | 66478513  | 334 |
| chr28 | 40383140  | 40383472  | 333 |
| chr2  | 127118784 | 127119116 | 333 |
| chr18 | 49942619  | 49942951  | 333 |
| chr22 | 52876563  | 52876894  | 332 |
| chr11 | 109507287 | 109507618 | 332 |
| chr13 | 75773878  | 75774208  | 331 |

|       |               |           |     |
|-------|---------------|-----------|-----|
| chr8  | 73472793      | 73473122  | 330 |
| chr23 | 27233478      | 27233807  | 330 |
| chr15 | 64503527      | 64503856  | 330 |
| chr1  | 123084807     | 123085136 | 330 |
| chrX  | 7894678       | 7895006   | 329 |
| chr3  | 121372736     | 121373062 | 327 |
| chr21 | 67980632      | 67980957  | 326 |
| chr19 | 15003788      | 15004113  | 326 |
| chr12 | 32499357      | 32499682  | 326 |
| chr5  | 118054512     | 118054836 | 325 |
| chr23 | 43252926      | 43253250  | 325 |
| chr23 | 48676295      | 48676618  | 324 |
| chr22 | 10752590      | 10752913  | 324 |
| chr14 | 36734816      | 36735139  | 324 |
| chr12 | 20091473      | 20091796  | 324 |
| chr19 | 24151293      | 24151615  | 323 |
| chr28 | 41274220      | 41274540  | 321 |
| chr3  | 104653602     | 104653921 | 320 |
| chr28 | 25329751      | 25330070  | 320 |
| chr15 | 36293714      | 36294033  | 320 |
| chr12 | 14812918      | 14813237  | 320 |
| chr16 | 42897472      | 42897790  | 319 |
| chr3  | 105957588     | 105957905 | 318 |
| chr3  | 8575631       | 8575948   | 318 |
| chr26 | 20379019      | 20379336  | 318 |
| chr24 | 777413 777730 | 318       |     |
| chr13 | 36765384      | 36765701  | 318 |
| chr16 | 70101790      | 70102106  | 317 |
| chr9  | 65597391      | 65597705  | 315 |
| chr7  | 5399552       | 5399866   | 315 |
| chr17 | 59139927      | 59140241  | 315 |
| chr13 | 38283968      | 38284282  | 315 |
| chr2  | 130381406     | 130381719 | 314 |
| chr19 | 25997054      | 25997366  | 313 |
| chr11 | 89688100      | 89688411  | 312 |
| chr25 | 29124890      | 29125200  | 311 |
| chr20 | 3250738       | 3251048   | 311 |
| chr19 | 59376389      | 59376699  | 311 |
| chr26 | 44017456      | 44017765  | 310 |
| chr2  | 32337220      | 32337529  | 310 |
| chr17 | 69499919      | 69500228  | 310 |
| chr16 | 38726349      | 38726658  | 310 |
| chr5  | 111703408     | 111703716 | 309 |
| chr26 | 43661008      | 43661316  | 309 |
| chr7  | 14244952      | 14245259  | 308 |
| chr28 | 34014720      | 34015027  | 308 |
| chr1  | 154620152     | 154620459 | 308 |
| chr8  | 63942803      | 63943109  | 307 |
| chr2  | 74695781      | 74696087  | 307 |
| chr13 | 42399892      | 42400198  | 307 |

|       |               |           |     |
|-------|---------------|-----------|-----|
| chr19 | 56489176      | 56489481  | 306 |
| chr18 | 49951298      | 49951600  | 303 |
| chr14 | 16514855      | 16515157  | 303 |
| chr10 | 22347364      | 22347666  | 303 |
| chr8  | 73482597      | 73482898  | 302 |
| chr4  | 117906412     | 117906712 | 301 |
| chr23 | 36831742      | 36832042  | 301 |
| chr18 | 62957523      | 62957822  | 300 |
| chr14 | 242681 242980 | 300       |     |
| chr13 | 60434141      | 60434439  | 299 |
| chr7  | 2965656       | 2965952   | 297 |
| chr5  | 118050986     | 118051281 | 296 |
| chr2  | 132244867     | 132245162 | 296 |
| chr15 | 56052456      | 56052751  | 296 |
| chr6  | 72182487      | 72182780  | 294 |
| chr10 | 53044302      | 53044595  | 294 |
| chr5  | 30214976      | 30215268  | 293 |
| chr24 | 1653057       | 1653349   | 293 |
| chr2  | 135031119     | 135031411 | 293 |
| chr19 | 45919710      | 45920001  | 292 |
| chr29 | 17490442      | 17490732  | 291 |
| chr7  | 42207772      | 42208060  | 289 |
| chr6  | 37071539      | 37071827  | 289 |
| chr18 | 39773455      | 39773742  | 288 |
| chr16 | 47135186      | 47135473  | 288 |
| chr14 | 36739949      | 36740236  | 288 |
| chr7  | 38252661      | 38252947  | 287 |
| chr24 | 35370746      | 35371032  | 287 |
| chr5  | 79242996      | 79243280  | 285 |
| chr3  | 4491095       | 4491379   | 285 |
| chr27 | 34643063      | 34643347  | 285 |
| chr24 | 20771150      | 20771432  | 283 |
| chr16 | 67445469      | 67445751  | 283 |
| chr5  | 122308418     | 122308697 | 280 |
| chr7  | 12970301      | 12970578  | 278 |
| chr7  | 4667402       | 4667679   | 278 |
| chr5  | 29636728      | 29637005  | 278 |
| chr24 | 1865141       | 1865418   | 278 |
| chr10 | 6577144       | 6577421   | 278 |
| chr20 | 33567884      | 33568159  | 276 |
| chr17 | 57702370      | 57702645  | 276 |
| chr17 | 63819195      | 63819469  | 275 |
| chr17 | 6995451       | 6995725   | 275 |
| chr19 | 54854849      | 54855122  | 274 |
| chr17 | 57301009      | 57301282  | 274 |
| chr13 | 76597468      | 76597741  | 274 |
| chr8  | 108653396     | 108653667 | 272 |
| chr27 | 38660416      | 38660687  | 272 |
| chr4  | 72811805      | 72812075  | 271 |
| chr5  | 114247639     | 114247908 | 270 |

|       |           |           |     |
|-------|-----------|-----------|-----|
| chr13 | 67882637  | 67882906  | 270 |
| chr26 | 50665931  | 50666199  | 269 |
| chr9  | 100172773 | 100173040 | 268 |
| chr1  | 74518523  | 74518790  | 268 |
| chr3  | 9422549   | 9422814   | 266 |
| chr4  | 68076027  | 68076289  | 263 |
| chr16 | 2134681   | 2134943   | 263 |
| chr6  | 92968274  | 92968535  | 262 |
| chr7  | 51930891  | 51931151  | 261 |
| chr15 | 75268206  | 75268466  | 261 |
| chr12 | 34257346  | 34257606  | 261 |
| chr3  | 121209967 | 121210226 | 260 |
| chr23 | 27230605  | 27230864  | 260 |
| chr18 | 61108458  | 61108717  | 260 |
| chr14 | 7611019   | 7611277   | 259 |
| chr10 | 17392711  | 17392968  | 258 |
| chr9  | 106453423 | 106453679 | 257 |
| chr5  | 112576945 | 112577200 | 256 |
| chr3  | 35999526  | 35999780  | 255 |
| chr9  | 92185196  | 92185449  | 254 |
| chr3  | 97865143  | 97865396  | 254 |
| chr19 | 60234560  | 60234813  | 254 |
| chr7  | 52228656  | 52228908  | 253 |
| chr2  | 131201627 | 131201878 | 252 |
| chr29 | 30828421  | 30828671  | 251 |
| chr23 | 37288740  | 37288987  | 248 |
| chr5  | 111834245 | 111834491 | 247 |
| chr18 | 13541546  | 13541792  | 247 |
| chr1  | 2550261   | 2550507   | 247 |
| chr21 | 34631385  | 34631629  | 245 |
| chr19 | 37590713  | 37590957  | 245 |
| chr4  | 121074476 | 121074718 | 243 |
| chr15 | 36574328  | 36574570  | 243 |
| chr3  | 121078468 | 121078708 | 241 |
| chr9  | 75441977  | 75442216  | 240 |
| chr29 | 37073157  | 37073396  | 240 |
| chr21 | 34851496  | 34851735  | 240 |
| chr26 | 20180777  | 20181015  | 239 |
| chr13 | 66964335  | 66964573  | 239 |
| chr18 | 25477208  | 25477445  | 238 |
| chr9  | 24602107  | 24602341  | 235 |
| chr6  | 65879311  | 65879545  | 235 |
| chr22 | 50818728  | 50818962  | 235 |
| chr2  | 119578052 | 119578286 | 235 |
| chr19 | 22562866  | 22563098  | 233 |
| chr22 | 60130340  | 60130571  | 232 |
| chr3  | 120951160 | 120951389 | 230 |
| chr22 | 7221002   | 7221231   | 230 |
| chr13 | 37660239  | 37660467  | 229 |
| chr5  | 115509315 | 115509541 | 227 |

|       |           |           |     |
|-------|-----------|-----------|-----|
| chr7  | 14495773  | 14495997  | 225 |
| chr3  | 20114176  | 20114399  | 224 |
| chr10 | 14968630  | 14968851  | 222 |
| chr21 | 65721278  | 65721497  | 220 |
| chr21 | 27951728  | 27951941  | 214 |
| chr9  | 90352626  | 90352837  | 212 |
| chr23 | 17406352  | 17406863  | 512 |
| chr14 | 20760376  | 20760773  | 398 |
| chr7  | 49159616  | 49160597  | 982 |
| chr25 | 37983480  | 37984251  | 772 |
| chr19 | 57833248  | 57833792  | 545 |
| chr7  | 51662215  | 51662540  | 326 |
| chr2  | 111252770 | 111253581 | 812 |
| chr23 | 27758414  | 27759117  | 704 |
| chr22 | 17588167  | 17588603  | 437 |
| chr25 | 3271961   | 3272642   | 682 |
| chr19 | 23984718  | 23985389  | 672 |
| chr1  | 128608947 | 128609291 | 345 |
| chr2  | 122974769 | 122975164 | 396 |
| chr6  | 107494682 | 107495044 | 363 |
| chr15 | 15135271  | 15135473  | 203 |
| chr20 | 38407026  | 38407358  | 333 |
| chr19 | 45539686  | 45540072  | 387 |
| chr22 | 50871503  | 50871853  | 351 |
| chr5  | 116732643 | 116733041 | 399 |
| chr2  | 22167724  | 22168100  | 377 |
| chr6  | 115898590 | 115898936 | 347 |
| chr29 | 46230497  | 46230843  | 347 |
| chr18 | 37155993  | 37156311  | 319 |
| chr18 | 54953062  | 54953346  | 285 |
| chr8  | 73279682  | 73279927  | 246 |
| chr5  | 116699375 | 116699612 | 238 |
| chr7  | 16552769  | 16552999  | 231 |
| chr10 | 104874497 | 104874923 | 427 |
| chr25 | 40219531  | 40219923  | 393 |
| chr23 | 16116054  | 16116389  | 336 |
| chr1  | 126128542 | 126128851 | 310 |
| chr26 | 18760720  | 18761005  | 286 |
| chr28 | 46051787  | 46052105  | 319 |
| chr23 | 23860708  | 23860976  | 269 |
| chr19 | 20333166  | 20334057  | 892 |
| chr14 | 21776331  | 21776978  | 648 |
| chr18 | 23264062  | 23264703  | 642 |
| chr13 | 12895675  | 12896254  | 580 |
| chr18 | 24326803  | 24327373  | 571 |
| chr13 | 65144856  | 65145348  | 493 |
| chr1  | 1583143   | 1583604   | 462 |
| chr10 | 23585400  | 23585791  | 392 |
| chr19 | 58673353  | 58673732  | 380 |
| chr12 | 20906291  | 20906656  | 366 |

|       |           |           |     |
|-------|-----------|-----------|-----|
| chr1  | 66114150  | 66114503  | 354 |
| chr19 | 12500169  | 12500481  | 313 |
| chr29 | 41878443  | 41879293  | 851 |
| chr15 | 33493804  | 33494563  | 760 |
| chr6  | 37119808  | 37120474  | 667 |
| chr1  | 82744594  | 82745231  | 638 |
| chr5  | 2022401   | 2023023   | 623 |
| chr16 | 48058482  | 48059012  | 531 |
| chr21 | 61621224  | 61621700  | 477 |
| chr3  | 125093123 | 125093585 | 463 |
| chr13 | 74557537  | 74557999  | 463 |
| chr13 | 63312446  | 63312891  | 446 |
| chr21 | 34057122  | 34057562  | 441 |
| chr28 | 33766498  | 33766933  | 436 |
| chr22 | 56177921  | 56178330  | 410 |
| chr9  | 21901436  | 21901827  | 392 |
| chr19 | 23054029  | 23054419  | 391 |
| chr19 | 54758545  | 54758922  | 378 |
| chr5  | 113194001 | 113194375 | 375 |
| chr19 | 24683960  | 24684333  | 374 |
| chr7  | 51661243  | 51661601  | 359 |
| chr4  | 123257882 | 123258199 | 318 |
| chr26 | 18171606  | 18171859  | 254 |
| chr26 | 43041008  | 43041248  | 241 |
| chr17 | 73199685  | 73200224  | 540 |
| chr19 | 35054570  | 35055031  | 462 |
| chr29 | 49126444  | 49126897  | 454 |
| chr18 | 17965209  | 17965591  | 383 |
| chr25 | 37871882  | 37872238  | 357 |
| chr1  | 68856402  | 68856757  | 356 |
| chr21 | 6995959   | 6996310   | 352 |
| chr25 | 35092926  | 35093271  | 346 |
| chr21 | 65720344  | 65720948  | 605 |
| chr19 | 51899239  | 51899788  | 550 |
| chr3  | 10713427  | 10713971  | 545 |
| chr2  | 84790409  | 84790873  | 465 |
| chr5  | 120508178 | 120508613 | 436 |
| chr13 | 41704318  | 41704727  | 410 |
| chr9  | 44917476  | 44917883  | 408 |
| chr25 | 37391708  | 37392079  | 372 |
| chr29 | 41679944  | 41680296  | 353 |
| chr3  | 113381971 | 113382289 | 319 |
| chr8  | 78683835  | 78684115  | 281 |
| chr3  | 22902839  | 22903066  | 228 |
| chr4  | 121462748 | 121463243 | 496 |
| chr2  | 92326303  | 92326760  | 458 |
| chr7  | 71317301  | 71317735  | 435 |
| chr5  | 69596557  | 69596982  | 426 |
| chr18 | 55018438  | 55018848  | 411 |
| chr5  | 32907747  | 32908156  | 410 |

|       |               |           |     |
|-------|---------------|-----------|-----|
| chr17 | 74755875      | 74756266  | 392 |
| chr19 | 13504573      | 13504960  | 388 |
| chr25 | 37982954      | 37983329  | 376 |
| chr28 | 46052867      | 46053221  | 355 |
| chr13 | 40832567      | 40832916  | 350 |
| chr27 | 39221316      | 39221644  | 329 |
| chr23 | 14260130      | 14260457  | 328 |
| chr13 | 63397196      | 63397514  | 319 |
| chr10 | 17309543      | 17309851  | 309 |
| chr29 | 26768791      | 26769091  | 301 |
| chr18 | 49489430      | 49489728  | 299 |
| chr25 | 2078660       | 2078957   | 298 |
| chr5  | 113224598     | 113224890 | 293 |
| chr13 | 75085996      | 75086265  | 270 |
| chr18 | 43159706      | 43159971  | 266 |
| chr7  | 15684351      | 15684938  | 588 |
| chr2  | 136779291     | 136779741 | 451 |
| chr22 | 7287036       | 7287479   | 444 |
| chr19 | 26344689      | 26345099  | 411 |
| chr11 | 28535772      | 28536177  | 406 |
| chr27 | 11601359      | 11601747  | 389 |
| chrX  | 75939126      | 75939483  | 358 |
| chr19 | 38967402      | 38967749  | 348 |
| chr5  | 115527456     | 115527787 | 332 |
| chr17 | 64582289      | 64582615  | 327 |
| chr14 | 612872 613447 | 576       |     |
| chr18 | 13559653      | 13560051  | 399 |
| chr15 | 43592920      | 43593318  | 399 |
| chr24 | 3375049       | 3375434   | 386 |
| chr16 | 47258508      | 47258890  | 383 |
| chr13 | 75759050      | 75759412  | 363 |
| chr3  | 125632362     | 125632721 | 360 |
| chr16 | 38782509      | 38782865  | 357 |
| chr17 | 61287567      | 61287922  | 356 |
| chr6  | 121018775     | 121019116 | 342 |
| chr11 | 107174392     | 107174733 | 342 |
| chr4  | 68021584      | 68021912  | 329 |
| chr13 | 75630381      | 75630690  | 310 |
| chr18 | 54943681      | 54943986  | 306 |
| chr8  | 7659972       | 7660399   | 428 |
| chr21 | 47533616      | 47534041  | 426 |
| chr14 | 1449945       | 1450326   | 382 |
| chr25 | 10913893      | 10914264  | 372 |
| chr19 | 38535199      | 38535568  | 370 |
| chr7  | 51338978      | 51339313  | 336 |
| chr26 | 18197525      | 18197859  | 335 |
| chr18 | 64343966      | 64344296  | 331 |
| chr18 | 11768357      | 11768660  | 304 |
| chr8  | 61835624      | 61835907  | 284 |
| chr3  | 118864988     | 118865664 | 677 |



|       |           |           |     |
|-------|-----------|-----------|-----|
| chr25 | 35688228  | 35688860  | 633 |
| chr18 | 24009185  | 24009715  | 531 |
| chr26 | 22312792  | 22313294  | 503 |
| chr8  | 24746499  | 24746982  | 484 |
| chr25 | 40404586  | 40405048  | 463 |
| chr14 | 1455425   | 1455880   | 456 |
| chr25 | 3089458   | 3089887   | 430 |
| chr8  | 23884950  | 23885369  | 420 |
| chr2  | 134755066 | 134755476 | 411 |
| chr4  | 14631172  | 14631559  | 388 |
| chr2  | 111401931 | 111402317 | 387 |
| chr8  | 73309856  | 73310238  | 383 |
| chr7  | 51693752  | 51694128  | 377 |
| chr15 | 75256152  | 75256525  | 374 |
| chr28 | 33724234  | 33724605  | 372 |
| chr7  | 57678598  | 57678968  | 371 |
| chr3  | 15350724  | 15351094  | 371 |
| chr3  | 15702070  | 15702437  | 368 |
| chr24 | 2520758   | 2521122   | 365 |
| chr18 | 62032946  | 62033310  | 365 |
| chr7  | 40407331  | 40407694  | 364 |
| chr25 | 39376805  | 39377168  | 364 |
| chr29 | 34328538  | 34328898  | 361 |
| chr23 | 27781379  | 27781737  | 359 |
| chr6  | 119556195 | 119556551 | 357 |
| chr14 | 52547339  | 52547694  | 356 |
| chr25 | 4621569   | 4621915   | 347 |
| chr2  | 134746660 | 134747006 | 347 |
| chr4  | 118057990 | 118058331 | 342 |
| chr23 | 15089305  | 15089646  | 342 |
| chr8  | 92982410  | 92982750  | 341 |
| chr22 | 54063810  | 54064145  | 336 |
| chr21 | 64436630  | 64436965  | 336 |
| chr3  | 115413205 | 115413537 | 333 |
| chr8  | 24473445  | 24473776  | 332 |
| chr17 | 66496978  | 66497305  | 328 |
| chr27 | 5682776   | 5683095   | 320 |
| chr13 | 37692945  | 37693261  | 317 |
| chr23 | 28656783  | 28657085  | 303 |
| chr16 | 3304803   | 3305105   | 303 |
| chr12 | 34271577  | 34271877  | 301 |
| chr17 | 75532616  | 75532914  | 299 |
| chr16 | 3821986   | 3822283   | 298 |
| chr14 | 19608234  | 19608530  | 297 |
| chr11 | 28554682  | 28554977  | 296 |
| chr29 | 17879332  | 17879626  | 295 |
| chr8  | 24657637  | 24657930  | 294 |
| chr11 | 81752286  | 81752575  | 290 |
| chr25 | 27289173  | 27289451  | 279 |
| chr21 | 48698631  | 48698908  | 278 |

|       |             |           |     |
|-------|-------------|-----------|-----|
| chr9  | 104825809   | 104826084 | 276 |
| chr3  | 114212214   | 114212487 | 274 |
| chr13 | 55120788    | 55121059  | 272 |
| chr25 | 43233003    | 43233270  | 268 |
| chr22 | 50997328    | 50997595  | 268 |
| chr5  | 28755631    | 28755896  | 266 |
| chr16 | 44058285    | 44058550  | 266 |
| chr24 | 36940052    | 36940310  | 259 |
| chr24 | 48913138    | 48913395  | 258 |
| chr13 | 67102394    | 67102646  | 253 |
| chr27 | 35912007    | 35912255  | 249 |
| chr22 | 30225636    | 30225884  | 249 |
| chr18 | 24323636    | 24323884  | 249 |
| chr11 | 28530774    | 28531022  | 249 |
| chr27 | 25541 25788 | 248       |     |
| chr23 | 31107318    | 31107565  | 248 |
| chr7  | 80366209    | 80366455  | 247 |
| chr3  | 127000352   | 127000598 | 247 |
| chr19 | 44296175    | 44296420  | 246 |
| chr26 | 22368880    | 22369121  | 242 |
| chr12 | 15435060    | 15435300  | 241 |
| chr2  | 130126113   | 130126352 | 240 |
| chr6  | 6418153     | 6418390   | 238 |
| chr27 | 11618817    | 11619053  | 237 |
| chr20 | 8771213     | 8771446   | 234 |
| chr13 | 56354878    | 56355111  | 234 |
| chr23 | 10540170    | 10540402  | 233 |
| chr10 | 24178065    | 24178294  | 230 |
| chr23 | 51924805    | 51925029  | 225 |
| chr18 | 62954563    | 62954787  | 225 |
| chr14 | 5912650     | 5912873   | 224 |
| chr6  | 59145914    | 59146135  | 222 |
| chr11 | 23579728    | 23579945  | 218 |
| chr21 | 34539816    | 34540030  | 215 |
| chr13 | 63229430    | 63229644  | 215 |
| chr19 | 42463563    | 42463773  | 211 |
| chr23 | 52678282    | 52678657  | 376 |
| chr8  | 73335647    | 73335955  | 309 |
| chr3  | 126976446   | 126976753 | 308 |
| chr23 | 15799526    | 15799790  | 265 |
| chr3  | 116033870   | 116034572 | 703 |
| chr7  | 46468367    | 46468844  | 478 |
| chr18 | 64339897    | 64340640  | 744 |
| chr17 | 9965655     | 9966031   | 377 |
| chr2  | 131058385   | 131058690 | 306 |
| chr20 | 61430804    | 61431197  | 394 |
| chr21 | 1948042     | 1948381   | 340 |
| chr12 | 49977757    | 49978142  | 386 |
| chr7  | 10966071    | 10966308  | 238 |
| chr21 | 27374915    | 27375216  | 302 |

|       |           |           |      |
|-------|-----------|-----------|------|
| chr16 | 2130045   | 2130347   | 303  |
| chr29 | 26579981  | 26580330  | 350  |
| chr18 | 51505140  | 51505451  | 312  |
| chr13 | 14690387  | 14690602  | 216  |
| chr7  | 46528317  | 46528529  | 213  |
| chr8  | 23825374  | 23825624  | 251  |
| chr8  | 73779260  | 73779644  | 385  |
| chr21 | 52060304  | 52060511  | 208  |
| chr15 | 57434115  | 57434462  | 348  |
| chr29 | 51950114  | 51950455  | 342  |
| chr19 | 19140551  | 19140850  | 300  |
| chr19 | 12321724  | 12322946  | 1223 |
| chr13 | 55507724  | 55508801  | 1078 |
| chr22 | 58643341  | 58644361  | 1021 |
| chr15 | 64799426  | 64800363  | 938  |
| chr3  | 22854044  | 22854975  | 932  |
| chr8  | 8300083   | 8301013   | 931  |
| chr17 | 70097053  | 70097973  | 921  |
| chr16 | 77492181  | 77493059  | 879  |
| chr25 | 37270112  | 37270986  | 875  |
| chr5  | 10608199  | 10609053  | 855  |
| chr21 | 59902383  | 59903235  | 853  |
| chr17 | 63492154  | 63492996  | 843  |
| chr10 | 71246192  | 71247028  | 837  |
| chr29 | 30806767  | 30807587  | 821  |
| chr10 | 8518380   | 8519196   | 817  |
| chr12 | 32213865  | 32214666  | 802  |
| chr19 | 56841920  | 56842712  | 793  |
| chr29 | 44135138  | 44135920  | 783  |
| chr16 | 62075789  | 62076571  | 783  |
| chr23 | 28110073  | 28110846  | 774  |
| chr18 | 22086371  | 22087140  | 770  |
| chr19 | 39920536  | 39921294  | 759  |
| chr18 | 52653980  | 52654735  | 756  |
| chr18 | 53568653  | 53569405  | 753  |
| chr8  | 8719072   | 8719818   | 747  |
| chr16 | 50272080  | 50272825  | 746  |
| chr15 | 22265926  | 22266669  | 744  |
| chr12 | 36420852  | 36421594  | 743  |
| chr7  | 5513896   | 5514634   | 739  |
| chr29 | 23189895  | 23190633  | 739  |
| chr29 | 47386076  | 47386812  | 737  |
| chr2  | 130474555 | 130475291 | 737  |
| chr3  | 119963158 | 119963891 | 734  |
| chr24 | 20551485  | 20552214  | 730  |
| chr8  | 23027142  | 23027868  | 727  |
| chr19 | 14067233  | 14067956  | 724  |
| chr14 | 61334407  | 61335130  | 724  |
| chr22 | 56075922  | 56076644  | 723  |
| chr14 | 66281729  | 66282450  | 722  |

|       |           |           |     |
|-------|-----------|-----------|-----|
| chr4  | 52523970  | 52524690  | 721 |
| chr29 | 51852063  | 51852782  | 720 |
| chr5  | 30161402  | 30162117  | 716 |
| chr2  | 140743302 | 140744017 | 716 |
| chr13 | 61224204  | 61224919  | 716 |
| chr3  | 105154823 | 105155537 | 715 |
| chr19 | 21787687  | 21788399  | 713 |
| chr19 | 39120978  | 39121689  | 712 |
| chr29 | 17461436  | 17462146  | 711 |
| chr21 | 20233231  | 20233939  | 709 |
| chr19 | 57695930  | 57696638  | 709 |
| chr17 | 37620708  | 37621415  | 708 |
| chr27 | 38661775  | 38662481  | 707 |
| chr25 | 40199057  | 40199763  | 707 |
| chr24 | 50882735  | 50883433  | 699 |
| chr19 | 61216403  | 61217100  | 698 |
| chr23 | 11893076  | 11893771  | 696 |
| chr25 | 1922461   | 1923154   | 694 |
| chr10 | 83322561  | 83323252  | 692 |
| chr1  | 109484481 | 109485169 | 689 |
| chr19 | 29002186  | 29002869  | 684 |
| chr18 | 55832072  | 55832753  | 682 |
| chr18 | 12606472  | 12607151  | 680 |
| chr17 | 72898628  | 72899307  | 680 |
| chr13 | 38260472  | 38261151  | 680 |
| chr19 | 57985755  | 57986433  | 679 |
| chr5  | 30500509  | 30501184  | 676 |
| chr27 | 26467909  | 26468582  | 674 |
| chr26 | 22227682  | 22228355  | 674 |
| chr13 | 42606583  | 42607255  | 673 |
| chr4  | 121505421 | 121506091 | 671 |
| chr10 | 77487414  | 77488083  | 670 |
| chr8  | 116753738 | 116754404 | 667 |
| chr15 | 52331286  | 52331952  | 667 |
| chr5  | 122708251 | 122708915 | 665 |
| chr13 | 73888078  | 73888742  | 665 |
| chr5  | 10532390  | 10533053  | 664 |
| chr3  | 109387112 | 109387773 | 662 |
| chr13 | 75657756  | 75658417  | 662 |
| chr18 | 11594025  | 11594681  | 657 |
| chr10 | 17006003  | 17006658  | 656 |
| chr11 | 91376202  | 91376855  | 654 |
| chrX  | 55581123  | 55581774  | 652 |
| chr3  | 15354998  | 15355649  | 652 |
| chr14 | 1636105   | 1636756   | 652 |
| chr23 | 31118613  | 31119262  | 650 |
| chr25 | 35480118  | 35480766  | 649 |
| chr22 | 50725335  | 50725982  | 648 |
| chr1  | 149919652 | 149920299 | 648 |
| chr23 | 28834411  | 28835057  | 647 |

|       |           |           |     |
|-------|-----------|-----------|-----|
| chr23 | 8567963   | 8568609   | 647 |
| chr15 | 33517530  | 33518176  | 647 |
| chr23 | 17496820  | 17497464  | 645 |
| chr11 | 107397064 | 107397708 | 645 |
| chr2  | 140046157 | 140046799 | 643 |
| chr2  | 105797047 | 105797688 | 642 |
| chr15 | 65742389  | 65743030  | 642 |
| chr1  | 19193884  | 19194524  | 641 |
| chr23 | 7893706   | 7894345   | 640 |
| chr19 | 43090707  | 43091345  | 639 |
| chr11 | 10439521  | 10440159  | 639 |
| chr19 | 54490014  | 54490651  | 638 |
| chr12 | 74433867  | 74434504  | 638 |
| chr4  | 117841759 | 117842395 | 637 |
| chr10 | 36844505  | 36845138  | 634 |
| chr19 | 44885361  | 44885993  | 633 |
| chr24 | 39747388  | 39748019  | 632 |
| chr3  | 115485790 | 115486418 | 629 |
| chr26 | 50754267  | 50754895  | 629 |
| chr19 | 7783606   | 7784233   | 628 |
| chr15 | 76725314  | 76725940  | 627 |
| chr11 | 70698677  | 70699303  | 627 |
| chr19 | 27442509  | 27443133  | 625 |
| chr25 | 6791358   | 6791980   | 623 |
| chr24 | 26266110  | 26266732  | 623 |
| chr3  | 117292050 | 117292671 | 622 |
| chr6  | 109068693 | 109069313 | 621 |
| chr16 | 58579021  | 58579640  | 620 |
| chr9  | 50715198  | 50715815  | 618 |
| chr15 | 77200091  | 77200707  | 617 |
| chr18 | 54109476  | 54110091  | 616 |
| chr17 | 70027413  | 70028028  | 616 |
| chr21 | 29199852  | 29200466  | 615 |
| chr19 | 46791051  | 46791664  | 614 |
| chr6  | 109072556 | 109073168 | 613 |
| chr10 | 16757329  | 16757941  | 613 |
| chr1  | 68804488  | 68805100  | 613 |
| chr19 | 32592277  | 32592887  | 611 |
| chr19 | 46105689  | 46106295  | 607 |
| chr5  | 125491108 | 125491713 | 606 |
| chr9  | 34929291  | 34929895  | 605 |
| chr29 | 48777903  | 48778506  | 604 |
| chr11 | 106072708 | 106073311 | 604 |
| chr16 | 2353738   | 2354340   | 603 |
| chr5  | 38512256  | 38512857  | 602 |
| chr6  | 109066791 | 109067391 | 601 |
| chr19 | 41370262  | 41370862  | 601 |
| chr2  | 126739785 | 126740384 | 600 |
| chr19 | 41217587  | 41218183  | 597 |
| chr19 | 54633178  | 54633770  | 593 |

|       |           |           |     |
|-------|-----------|-----------|-----|
| chr17 | 70115328  | 70115920  | 593 |
| chr17 | 73966731  | 73967322  | 592 |
| chr13 | 46215989  | 46216580  | 592 |
| chr1  | 72376984  | 72377574  | 591 |
| chr19 | 64373346  | 64373934  | 589 |
| chr10 | 69402514  | 69403102  | 589 |
| chr18 | 49494419  | 49495006  | 588 |
| chr22 | 50883624  | 50884210  | 587 |
| chr8  | 74361631  | 74362216  | 586 |
| chr4  | 124250468 | 124251053 | 586 |
| chr18 | 53264755  | 53265340  | 586 |
| chr15 | 74609801  | 74610386  | 586 |
| chr17 | 73209765  | 73210349  | 585 |
| chr10 | 90421522  | 90422105  | 584 |
| chr13 | 68315175  | 68315757  | 583 |
| chr19 | 45199999  | 45200579  | 581 |
| chr15 | 28631592  | 28632172  | 581 |
| chr3  | 127794255 | 127794834 | 580 |
| chr18 | 19366934  | 19367513  | 580 |
| chr2  | 132174078 | 132174656 | 579 |
| chr18 | 62697239  | 62697817  | 579 |
| chr16 | 47551965  | 47552543  | 579 |
| chr18 | 57841016  | 57841593  | 578 |
| chr25 | 43201429  | 43202004  | 576 |
| chr22 | 50746266  | 50746840  | 575 |
| chr18 | 24311070  | 24311644  | 575 |
| chr3  | 125201568 | 125202140 | 573 |
| chr23 | 10342959  | 10343531  | 573 |
| chr18 | 55455289  | 55455861  | 573 |
| chr11 | 2537881   | 2538453   | 573 |
| chr17 | 67309764  | 67310335  | 572 |
| chr16 | 47950574  | 47951145  | 572 |
| chr13 | 21889526  | 21890096  | 571 |
| chr23 | 15882066  | 15882635  | 570 |
| chr13 | 70239835  | 70240403  | 569 |
| chr22 | 29666562  | 29667128  | 567 |
| chr11 | 9053828   | 9054394   | 567 |
| chr1  | 159917898 | 159918464 | 567 |
| chr5  | 62076697  | 62077262  | 566 |
| chr3  | 22875199  | 22875764  | 566 |
| chr2  | 75947820  | 75948385  | 566 |
| chr13 | 11374074  | 11374639  | 566 |
| chr19 | 54613181  | 54613745  | 565 |
| chr19 | 47856786  | 47857350  | 565 |
| chr19 | 8090835   | 8091399   | 565 |
| chr22 | 50119624  | 50120187  | 564 |
| chr15 | 26682839  | 26683402  | 564 |
| chr4  | 71861903  | 71862465  | 563 |
| chr22 | 51508372  | 51508934  | 563 |
| chr7  | 43746363  | 43746924  | 562 |

|       |           |           |     |
|-------|-----------|-----------|-----|
| chr19 | 19276978  | 19277539  | 562 |
| chr2  | 134559972 | 134560532 | 561 |
| chr13 | 55312463  | 55313023  | 561 |
| chr10 | 20429050  | 20429610  | 561 |
| chr13 | 52087976  | 52088535  | 560 |
| chr22 | 60025242  | 60025800  | 559 |
| chr21 | 6542624   | 6543182   | 559 |
| chr21 | 30353770  | 30354323  | 554 |
| chr26 | 51187289  | 51187841  | 553 |
| chr23 | 31443150  | 31443701  | 552 |
| chr23 | 20455031  | 20455582  | 552 |
| chr7  | 5054459   | 5055009   | 551 |
| chr10 | 5342777   | 5343326   | 550 |
| chr4  | 117122994 | 117123542 | 549 |
| chr3  | 113366233 | 113366781 | 549 |
| chr2  | 75978260  | 75978808  | 549 |
| chr2  | 74008326  | 74008874  | 549 |
| chr13 | 60150613  | 60151161  | 549 |
| chr28 | 34436528  | 34437075  | 548 |
| chr11 | 100901205 | 100901751 | 547 |
| chr4  | 72289012  | 72289557  | 546 |
| chr29 | 47336260  | 47336805  | 546 |
| chr2  | 123020702 | 123021247 | 546 |
| chr18 | 7220524   | 7221069   | 546 |
| chr5  | 28763334  | 28763878  | 545 |
| chr7  | 60981365  | 60981907  | 543 |
| chr6  | 106816150 | 106816692 | 543 |
| chr19 | 24266483  | 24267025  | 543 |
| chr4  | 106676791 | 106677330 | 540 |
| chr23 | 7382751   | 7383290   | 540 |
| chr17 | 73951882  | 73952421  | 540 |
| chr8  | 116708123 | 116708661 | 539 |
| chr3  | 105297517 | 105298055 | 539 |
| chr22 | 60501383  | 60501921  | 539 |
| chr9  | 106394221 | 106394758 | 538 |
| chr7  | 45656822  | 45657359  | 538 |
| chr25 | 40593673  | 40594210  | 538 |
| chr18 | 11775192  | 11775729  | 538 |
| chr11 | 44940145  | 44940681  | 537 |
| chr3  | 127869283 | 127869816 | 534 |
| chr29 | 26543770  | 26544303  | 534 |
| chr8  | 63980069  | 63980601  | 533 |
| chr7  | 46574899  | 46575431  | 533 |
| chr17 | 70431382  | 70431913  | 532 |
| chr13 | 70220772  | 70221302  | 531 |
| chr9  | 47053048  | 47053577  | 530 |
| chr18 | 45642195  | 45642724  | 530 |
| chr10 | 28403145  | 28403674  | 530 |
| chr6  | 115903035 | 115903562 | 528 |
| chr22 | 48549059  | 48549586  | 528 |

|       |               |           |     |
|-------|---------------|-----------|-----|
| chr29 | 46242060      | 46242586  | 527 |
| chr3  | 97853553      | 97854078  | 526 |
| chr27 | 15537202      | 15537727  | 526 |
| chr14 | 852062 852587 | 526       |     |
| chr1  | 68856950      | 68857475  | 526 |
| chr6  | 103283917     | 103284441 | 525 |
| chr29 | 50557301      | 50557825  | 525 |
| chr24 | 1933059       | 1933583   | 525 |
| chr17 | 72343708      | 72344232  | 525 |
| chr19 | 41222365      | 41222888  | 524 |
| chr13 | 70148702      | 70149225  | 524 |
| chr14 | 34034508      | 34035030  | 523 |
| chr13 | 63988775      | 63989296  | 522 |
| chr2  | 138247592     | 138248112 | 521 |
| chr15 | 42601916      | 42602436  | 521 |
| chr10 | 106078679     | 106079199 | 521 |
| chr17 | 70411438      | 70411956  | 519 |
| chrX  | 36650889      | 36651406  | 518 |
| chr16 | 44105865      | 44106382  | 518 |
| chr8  | 24709303      | 24709819  | 517 |
| chr3  | 15799256      | 15799772  | 517 |
| chr15 | 26755259      | 26755775  | 517 |
| chr1  | 112145601     | 112146117 | 517 |
| chr15 | 75276748      | 75277263  | 516 |
| chr11 | 11241641      | 11242156  | 516 |
| chr5  | 29255063      | 29255577  | 515 |
| chr29 | 41692606      | 41693120  | 515 |
| chr17 | 4294325       | 4294839   | 515 |
| chr26 | 22017444      | 22017957  | 514 |
| chr24 | 60870791      | 60871304  | 514 |
| chr19 | 60743490      | 60744003  | 514 |
| chr16 | 1440643       | 1441156   | 514 |
| chr12 | 36425453      | 36425966  | 514 |
| chr10 | 81733752      | 81734265  | 514 |
| chr10 | 25563464      | 25563977  | 514 |
| chr19 | 14236743      | 14237255  | 513 |
| chr18 | 50049392      | 50049904  | 513 |
| chr3  | 27936200      | 27936711  | 512 |
| chr14 | 2881086       | 2881597   | 512 |
| chr13 | 57774208      | 57774719  | 512 |
| chr11 | 1606860       | 1607371   | 512 |
| chr22 | 61137414      | 61137924  | 511 |
| chr15 | 75305814      | 75306324  | 511 |
| chr15 | 24398692      | 24399201  | 510 |
| chr5  | 112135949     | 112136457 | 509 |
| chr16 | 60343638      | 60344146  | 509 |
| chr15 | 75518702      | 75519210  | 509 |
| chr26 | 44147901      | 44148408  | 508 |
| chr23 | 8059301       | 8059808   | 508 |
| chr18 | 51709755      | 51710262  | 508 |



|       |           |           |     |
|-------|-----------|-----------|-----|
| chr9  | 47240177  | 47240682  | 506 |
| chr6  | 69743924  | 69744429  | 506 |
| chr5  | 72149429  | 72149933  | 505 |
| chr21 | 60107825  | 60108328  | 504 |
| chr21 | 66585543  | 66586045  | 503 |
| chr24 | 43698903  | 43699403  | 501 |
| chr5  | 122472208 | 122472706 | 499 |
| chr18 | 18709150  | 18709648  | 499 |
| chr16 | 72122353  | 72122851  | 499 |
| chr19 | 13581512  | 13582008  | 497 |
| chr16 | 47326091  | 47326587  | 497 |
| chr3  | 61096271  | 61096766  | 496 |
| chr29 | 44571776  | 44572271  | 496 |
| chr15 | 33494698  | 33495193  | 496 |
| chr11 | 109673515 | 109674010 | 496 |
| chr5  | 74082610  | 74083104  | 495 |
| chr21 | 65681794  | 65682288  | 495 |
| chr17 | 69513766  | 69514260  | 495 |
| chr16 | 26793671  | 26794165  | 495 |
| chr10 | 52986793  | 52987287  | 495 |
| chr9  | 67285322  | 67285815  | 494 |
| chr7  | 44766106  | 44766599  | 494 |
| chr19 | 57056493  | 57056986  | 494 |
| chr15 | 74585032  | 74585524  | 493 |
| chr18 | 34061949  | 34062440  | 492 |
| chr8  | 73488272  | 73488762  | 491 |
| chr13 | 68059780  | 68060270  | 491 |
| chr14 | 35496078  | 35496567  | 490 |
| chr22 | 59182308  | 59182795  | 488 |
| chr10 | 74121272  | 74121759  | 488 |
| chr10 | 29114297  | 29114784  | 488 |
| chr20 | 8604585   | 8605071   | 487 |
| chr9  | 105483438 | 105483923 | 486 |
| chr9  | 77685230  | 77685715  | 486 |
| chr19 | 56088846  | 56089331  | 486 |
| chr11 | 102424908 | 102425393 | 486 |
| chr25 | 3043204   | 3043688   | 485 |
| chr19 | 39152904  | 39153388  | 485 |
| chr18 | 12779095  | 12779579  | 485 |
| chr14 | 1180583   | 1181067   | 485 |
| chr10 | 77488658  | 77489142  | 485 |
| chr7  | 24215926  | 24216409  | 484 |
| chr19 | 58641864  | 58642346  | 483 |
| chr24 | 20863602  | 20864083  | 482 |
| chr17 | 75293394  | 75293875  | 482 |
| chr15 | 28999558  | 29000038  | 481 |
| chr21 | 9527827   | 9528306   | 480 |
| chr1  | 143833033 | 143833512 | 480 |
| chr8  | 7391423   | 7391900   | 478 |
| chr3  | 115411701 | 115412178 | 478 |

|       |           |           |     |
|-------|-----------|-----------|-----|
| chr7  | 37467342  | 37467817  | 476 |
| chr5  | 104517847 | 104518322 | 476 |
| chr29 | 37071517  | 37071992  | 476 |
| chr25 | 24850533  | 24851008  | 476 |
| chr5  | 29131509  | 29131983  | 475 |
| chr22 | 59903316  | 59903790  | 475 |
| chr16 | 44118154  | 44118628  | 475 |
| chr3  | 9423198   | 9423669   | 472 |
| chr3  | 4356395   | 4356865   | 471 |
| chr2  | 110520903 | 110521373 | 471 |
| chr15 | 41243888  | 41244358  | 471 |
| chr9  | 104929987 | 104930456 | 470 |
| chr24 | 43638531  | 43639000  | 470 |
| chr8  | 65170996  | 65171464  | 469 |
| chr4  | 65386139  | 65386607  | 469 |
| chr19 | 64762821  | 64763289  | 469 |
| chr9  | 90686863  | 90687330  | 468 |
| chr4  | 118012732 | 118013198 | 467 |
| chr3  | 15638677  | 15639143  | 467 |
| chr9  | 74193570  | 74194035  | 466 |
| chr28 | 33767009  | 33767474  | 466 |
| chr5  | 28892507  | 28892971  | 465 |
| chr26 | 42900621  | 42901085  | 465 |
| chr19 | 23745064  | 23745528  | 465 |
| chr5  | 60463773  | 60464236  | 464 |
| chr22 | 59330613  | 59331075  | 463 |
| chr3  | 33337224  | 33337685  | 462 |
| chr25 | 37491872  | 37492332  | 461 |
| chr13 | 77543491  | 77543951  | 461 |
| chr18 | 23924012  | 23924471  | 460 |
| chr26 | 20903623  | 20904081  | 459 |
| chr18 | 11535760  | 11536217  | 458 |
| chr17 | 72762945  | 72763401  | 457 |
| chr28 | 25264087  | 25264542  | 456 |
| chr25 | 42203154  | 42203609  | 456 |
| chr11 | 84852870  | 84853325  | 456 |
| chr1  | 69352300  | 69352755  | 456 |
| chr18 | 49992551  | 49993005  | 455 |
| chr6  | 109420503 | 109420955 | 453 |
| chr6  | 120409547 | 120409998 | 452 |
| chr4  | 98879224  | 98879675  | 452 |
| chr1  | 74757185  | 74757636  | 452 |
| chr7  | 19230321  | 19230771  | 451 |
| chr27 | 31451590  | 31452040  | 451 |
| chr19 | 23745609  | 23746059  | 451 |
| chr11 | 28543761  | 28544211  | 451 |
| chr10 | 17641033  | 17641482  | 450 |
| chr6  | 72353282  | 72353729  | 448 |
| chr2  | 125925821 | 125926266 | 446 |
| chr26 | 44792058  | 44792502  | 445 |

|       |           |           |     |
|-------|-----------|-----------|-----|
| chr18 | 18066298  | 18066742  | 445 |
| chr15 | 24023053  | 24023496  | 444 |
| chr5  | 88756098  | 88756540  | 443 |
| chr29 | 29796664  | 29797106  | 443 |
| chr22 | 14969060  | 14969502  | 443 |
| chr19 | 56578774  | 56579216  | 443 |
| chr28 | 30798421  | 30798862  | 442 |
| chr23 | 52684998  | 52685438  | 441 |
| chr20 | 66665431  | 66665870  | 440 |
| chr1  | 153973832 | 153974271 | 440 |
| chr1  | 149724967 | 149725406 | 440 |
| chr7  | 12953506  | 12953944  | 439 |
| chr6  | 119386143 | 119386581 | 439 |
| chr10 | 36026938  | 36027375  | 438 |
| chr7  | 46205063  | 46205499  | 437 |
| chr25 | 22612316  | 22612752  | 437 |
| chr13 | 73911778  | 73912213  | 436 |
| chr10 | 60000607  | 60001040  | 434 |
| chr5  | 28370603  | 28371034  | 432 |
| chr3  | 23027899  | 23028330  | 432 |
| chr27 | 35442664  | 35443095  | 432 |
| chr7  | 4356904   | 4357334   | 431 |
| chr2  | 99792235  | 99792665  | 431 |
| chr7  | 14232983  | 14233412  | 430 |
| chr5  | 10775263  | 10775692  | 430 |
| chr17 | 70458624  | 70459052  | 429 |
| chr8  | 111144256 | 111144683 | 428 |
| chr8  | 24666369  | 24666796  | 428 |
| chr25 | 31396293  | 31396720  | 428 |
| chrX  | 10884783  | 10885209  | 427 |
| chr5  | 114984931 | 114985357 | 427 |
| chr3  | 121533587 | 121534013 | 427 |
| chr23 | 13626326  | 13626752  | 427 |
| chr22 | 60372895  | 60373321  | 427 |
| chr22 | 55943689  | 55944115  | 427 |
| chr19 | 54739050  | 54739476  | 427 |
| chr10 | 15034383  | 15034809  | 427 |
| chr26 | 48687033  | 48687458  | 426 |
| chr7  | 19969922  | 19970346  | 425 |
| chr2  | 135471545 | 135471969 | 425 |
| chr18 | 48368914  | 48369338  | 425 |
| chr19 | 33133169  | 33133592  | 424 |
| chr16 | 47002019  | 47002442  | 424 |
| chr1  | 123079621 | 123080044 | 424 |
| chr18 | 11354925  | 11355347  | 423 |
| chr10 | 29822363  | 29822785  | 423 |
| chr18 | 18420753  | 18421173  | 421 |
| chr5  | 117218517 | 117218934 | 418 |
| chr23 | 30149405  | 30149822  | 418 |
| chr19 | 42038300  | 42038717  | 418 |

|       |           |           |     |
|-------|-----------|-----------|-----|
| chr16 | 77710422  | 77710838  | 417 |
| chr5  | 111141613 | 111142028 | 416 |
| chr26 | 42179004  | 42179419  | 416 |
| chr6  | 63188375  | 63188789  | 415 |
| chr5  | 31312384  | 31312798  | 415 |
| chr29 | 29882655  | 29883069  | 415 |
| chr19 | 33397113  | 33397527  | 415 |
| chr23 | 31281452  | 31281865  | 414 |
| chr13 | 76608188  | 76608601  | 414 |
| chr3  | 112793116 | 112793528 | 413 |
| chr22 | 59425504  | 59425916  | 413 |
| chr19 | 15785781  | 15786192  | 412 |
| chr12 | 44610307  | 44610718  | 412 |
| chr10 | 21429456  | 21429867  | 412 |
| chr6  | 91876551  | 91876961  | 411 |
| chr3  | 15550221  | 15550631  | 411 |
| chr17 | 4293239   | 4293649   | 411 |
| chr8  | 93914920  | 93915329  | 410 |
| chr15 | 74933014  | 74933423  | 410 |
| chr27 | 40714539  | 40714947  | 409 |
| chr2  | 140758828 | 140759236 | 409 |
| chr25 | 39400364  | 39400771  | 408 |
| chr24 | 48171777  | 48172184  | 408 |
| chr2  | 139471780 | 139472187 | 408 |
| chr15 | 24561481  | 24561888  | 408 |
| chr13 | 3940957   | 3941364   | 408 |
| chr11 | 108385865 | 108386272 | 408 |
| chr10 | 36839534  | 36839941  | 408 |
| chr7  | 51416082  | 51416488  | 407 |
| chr18 | 45446965  | 45447370  | 406 |
| chr25 | 33799107  | 33799511  | 405 |
| chr7  | 21251385  | 21251788  | 404 |
| chr4  | 121738720 | 121739123 | 404 |
| chr18 | 61959596  | 61959999  | 404 |
| chr16 | 41372684  | 41373086  | 403 |
| chr18 | 52019730  | 52020131  | 402 |
| chr17 | 72724922  | 72725323  | 402 |
| chr10 | 90924295  | 90924696  | 402 |
| chr3  | 113238803 | 113239202 | 400 |
| chr13 | 35561536  | 35561935  | 400 |
| chrX  | 11008725  | 11009123  | 399 |
| chr9  | 100512761 | 100513159 | 399 |
| chr9  | 90687370  | 90687768  | 399 |
| chr9  | 90357269  | 90357667  | 399 |
| chr9  | 29466195  | 29466593  | 399 |
| chr8  | 92992855  | 92993253  | 399 |
| chr8  | 60419526  | 60419924  | 399 |
| chr7  | 38261624  | 38262022  | 399 |
| chr7  | 13111650  | 13112048  | 399 |
| chr7  | 8841455   | 8841853   | 399 |

|       |           |           |     |
|-------|-----------|-----------|-----|
| chr6  | 121056869 | 121057267 | 399 |
| chr5  | 120138947 | 120139345 | 399 |
| chr5  | 118506429 | 118506827 | 399 |
| chr5  | 71674894  | 71675292  | 399 |
| chr5  | 28824503  | 28824901  | 399 |
| chr4  | 123231635 | 123232033 | 399 |
| chr4  | 65381267  | 65381665  | 399 |
| chr4  | 29012302  | 29012700  | 399 |
| chr3  | 114841253 | 114841651 | 399 |
| chr3  | 73929680  | 73930078  | 399 |
| chr3  | 71312999  | 71313397  | 399 |
| chr29 | 50605252  | 50605650  | 399 |
| chr29 | 48850479  | 48850877  | 399 |
| chr28 | 40402516  | 40402914  | 399 |
| chr28 | 26832170  | 26832568  | 399 |
| chr28 | 25732359  | 25732757  | 399 |
| chr26 | 20968774  | 20969172  | 399 |
| chr25 | 39169042  | 39169440  | 399 |
| chr25 | 36480505  | 36480903  | 399 |
| chr25 | 34532013  | 34532411  | 399 |
| chr25 | 33248991  | 33249389  | 399 |
| chr25 | 11577712  | 11578110  | 399 |
| chr25 | 4007543   | 4007941   | 399 |
| chr25 | 1250516   | 1250914   | 399 |
| chr24 | 49179472  | 49179870  | 399 |
| chr24 | 33802002  | 33802400  | 399 |
| chr23 | 31152956  | 31153354  | 399 |
| chr23 | 18817186  | 18817584  | 399 |
| chr23 | 18457887  | 18458285  | 399 |
| chr23 | 15875815  | 15876213  | 399 |
| chr23 | 11968011  | 11968409  | 399 |
| chr22 | 59109800  | 59110198  | 399 |
| chr22 | 56459914  | 56460312  | 399 |
| chr22 | 16418315  | 16418713  | 399 |
| chr22 | 13534964  | 13535362  | 399 |
| chr22 | 13453571  | 13453969  | 399 |
| chr22 | 9613070   | 9613468   | 399 |
| chr21 | 64485072  | 64485470  | 399 |
| chr21 | 47611101  | 47611499  | 399 |
| chr21 | 26046042  | 26046440  | 399 |
| chr21 | 25928552  | 25928950  | 399 |
| chr21 | 24501489  | 24501887  | 399 |
| chr21 | 20625596  | 20625994  | 399 |
| chr21 | 11904740  | 11905138  | 399 |
| chr20 | 75038348  | 75038746  | 399 |
| chr2  | 136777342 | 136777740 | 399 |
| chr2  | 133738872 | 133739270 | 399 |
| chr2  | 129214206 | 129214604 | 399 |
| chr2  | 111849378 | 111849776 | 399 |
| chr2  | 63869345  | 63869743  | 399 |

|       |               |           |     |
|-------|---------------|-----------|-----|
| chr2  | 24077642      | 24078040  | 399 |
| chr2  | 19391530      | 19391928  | 399 |
| chr19 | 60832129      | 60832527  | 399 |
| chr19 | 60409148      | 60409546  | 399 |
| chr19 | 58654722      | 58655120  | 399 |
| chr19 | 54264795      | 54265193  | 399 |
| chr19 | 46717703      | 46718101  | 399 |
| chr19 | 43305039      | 43305437  | 399 |
| chr19 | 42264923      | 42265321  | 399 |
| chr19 | 39898540      | 39898938  | 399 |
| chr19 | 39257533      | 39257931  | 399 |
| chr19 | 35053285      | 35053683  | 399 |
| chr19 | 34059621      | 34060019  | 399 |
| chr19 | 29462182      | 29462580  | 399 |
| chr19 | 24667890      | 24668288  | 399 |
| chr19 | 21766525      | 21766923  | 399 |
| chr17 | 69881422      | 69881820  | 399 |
| chr17 | 64373094      | 64373492  | 399 |
| chr17 | 64107652      | 64108050  | 399 |
| chr17 | 63808354      | 63808752  | 399 |
| chr17 | 58841717      | 58842115  | 399 |
| chr17 | 557464 557862 |           | 399 |
| chr16 | 74046040      | 74046438  | 399 |
| chr16 | 48785651      | 48786049  | 399 |
| chr16 | 47464964      | 47465362  | 399 |
| chr16 | 46845359      | 46845757  | 399 |
| chr16 | 2101263       | 2101661   | 399 |
| chr15 | 74634905      | 74635303  | 399 |
| chr15 | 64480713      | 64481111  | 399 |
| chr15 | 54032972      | 54033370  | 399 |
| chr15 | 29994761      | 29995159  | 399 |
| chr14 | 23256795      | 23257193  | 399 |
| chr14 | 7608548       | 7608946   | 399 |
| chr14 | 1905187       | 1905585   | 399 |
| chr13 | 76474211      | 76474609  | 399 |
| chr13 | 41540482      | 41540880  | 399 |
| chr13 | 40983646      | 40984044  | 399 |
| chr13 | 26301422      | 26301820  | 399 |
| chr12 | 76542894      | 76543292  | 399 |
| chr12 | 73448047      | 73448445  | 399 |
| chr12 | 54232548      | 54232946  | 399 |
| chr12 | 11463419      | 11463817  | 399 |
| chr12 | 11320539      | 11320937  | 399 |
| chr11 | 106369783     | 106370181 | 399 |
| chr11 | 104705413     | 104705811 | 399 |
| chr11 | 93711515      | 93711913  | 399 |
| chr11 | 90419901      | 90420299  | 399 |
| chr11 | 44952502      | 44952900  | 399 |
| chr11 | 13280183      | 13280581  | 399 |
| chr11 | 11979592      | 11979990  | 399 |

|       |           |           |     |
|-------|-----------|-----------|-----|
| chr10 | 74720062  | 74720460  | 399 |
| chr10 | 20150489  | 20150887  | 399 |
| chr9  | 34925710  | 34926107  | 398 |
| chr8  | 80992848  | 80993245  | 398 |
| chr8  | 8838420   | 8838817   | 398 |
| chr7  | 11134524  | 11134921  | 398 |
| chr6  | 16252523  | 16252920  | 398 |
| chr4  | 121128438 | 121128835 | 398 |
| chr27 | 34786991  | 34787388  | 398 |
| chr25 | 1308921   | 1309318   | 398 |
| chr2  | 15653671  | 15654068  | 398 |
| chr19 | 60324402  | 60324799  | 398 |
| chr19 | 32896425  | 32896822  | 398 |
| chr18 | 56576596  | 56576993  | 398 |
| chr15 | 32718675  | 32719072  | 398 |
| chr14 | 30832097  | 30832494  | 398 |
| chr13 | 15137038  | 15137435  | 398 |
| chr12 | 36443421  | 36443818  | 398 |
| chr11 | 103349460 | 103349857 | 398 |
| chr1  | 136933856 | 136934253 | 398 |
| chr7  | 73520120  | 73520516  | 397 |
| chr5  | 29195812  | 29196208  | 397 |
| chr29 | 31554629  | 31555025  | 397 |
| chr25 | 2969733   | 2970129   | 397 |
| chr19 | 13788389  | 13788785  | 397 |
| chr18 | 62021994  | 62022390  | 397 |
| chr17 | 64335536  | 64335932  | 397 |
| chr16 | 71098714  | 71099110  | 397 |
| chr15 | 75526768  | 75527164  | 397 |
| chr14 | 1905610   | 1906006   | 397 |
| chr13 | 61257533  | 61257929  | 397 |
| chr11 | 92233430  | 92233826  | 397 |
| chr11 | 24011067  | 24011463  | 397 |
| chr8  | 108628544 | 108628939 | 396 |
| chr7  | 52394030  | 52394425  | 396 |
| chr7  | 42787175  | 42787570  | 396 |
| chr4  | 72751183  | 72751578  | 396 |
| chr3  | 108859863 | 108860258 | 396 |
| chr3  | 22565518  | 22565913  | 396 |
| chr26 | 15632612  | 15633007  | 396 |
| chr25 | 40226800  | 40227195  | 396 |
| chr25 | 760248    | 760643    | 396 |
| chr24 | 42778571  | 42778966  | 396 |
| chr20 | 27304011  | 27304406  | 396 |
| chr2  | 111852782 | 111853177 | 396 |
| chr19 | 58883972  | 58884367  | 396 |
| chr19 | 20331271  | 20331666  | 396 |
| chr17 | 64290941  | 64291336  | 396 |
| chr15 | 55795518  | 55795913  | 396 |
| chr13 | 53054921  | 53055316  | 396 |

|       |               |           |     |
|-------|---------------|-----------|-----|
| chr12 | 11716993      | 11717388  | 396 |
| chr11 | 71612053      | 71612448  | 396 |
| chr10 | 81670796      | 81671191  | 396 |
| chr10 | 20455202      | 20455597  | 396 |
| chr1  | 67761193      | 67761588  | 396 |
| chr8  | 24480786      | 24481180  | 395 |
| chr8  | 8107079       | 8107473   | 395 |
| chr5  | 113325331     | 113325725 | 395 |
| chr5  | 112661459     | 112661853 | 395 |
| chr3  | 106521738     | 106522132 | 395 |
| chr29 | 34918698      | 34919092  | 395 |
| chr22 | 54565732      | 54566126  | 395 |
| chr2  | 26553796      | 26554190  | 395 |
| chr18 | 56626512      | 56626906  | 395 |
| chr18 | 55836032      | 55836426  | 395 |
| chr18 | 53126352      | 53126746  | 395 |
| chr15 | 32738001      | 32738395  | 395 |
| chr15 | 26736081      | 26736475  | 395 |
| chr13 | 55379271      | 55379665  | 395 |
| chr12 | 20780647      | 20781041  | 395 |
| chr12 | 166685 167079 |           | 395 |
| chr8  | 108650954     | 108651347 | 394 |
| chr7  | 44914209      | 44914602  | 394 |
| chr7  | 18948483      | 18948876  | 394 |
| chr7  | 5240569       | 5240962   | 394 |
| chr5  | 112403780     | 112404173 | 394 |
| chr5  | 43084771      | 43085164  | 394 |
| chr3  | 29655556      | 29655949  | 394 |
| chr28 | 33821214      | 33821607  | 394 |
| chr23 | 45785334      | 45785727  | 394 |
| chr2  | 95412409      | 95412802  | 394 |
| chr19 | 46108810      | 46109203  | 394 |
| chr18 | 4830551       | 4830944   | 394 |
| chr16 | 23824621      | 23825014  | 394 |
| chr15 | 76026931      | 76027324  | 394 |
| chr13 | 79922148      | 79922541  | 394 |
| chr13 | 77426480      | 77426873  | 394 |
| chr10 | 7565841       | 7566234   | 394 |
| chr9  | 89173748      | 89174140  | 393 |
| chr6  | 119390084     | 119390476 | 393 |
| chr5  | 28720816      | 28721208  | 393 |
| chr26 | 51184494      | 51184886  | 393 |
| chr25 | 4662513       | 4662905   | 393 |
| chr23 | 31337231      | 31337623  | 393 |
| chr23 | 11937030      | 11937422  | 393 |
| chr23 | 9787464       | 9787856   | 393 |
| chr20 | 29963857      | 29964249  | 393 |
| chr14 | 61503196      | 61503588  | 393 |
| chr13 | 54832063      | 54832455  | 393 |
| chr1  | 74924756      | 74925148  | 393 |



|       |           |           |     |
|-------|-----------|-----------|-----|
| chr9  | 74199962  | 74200353  | 392 |
| chr8  | 112056939 | 112057330 | 392 |
| chr5  | 111335784 | 111336175 | 392 |
| chr4  | 71556629  | 71557020  | 392 |
| chr3  | 124615210 | 124615601 | 392 |
| chr29 | 44017845  | 44018236  | 392 |
| chr26 | 50353868  | 50354259  | 392 |
| chr26 | 42793848  | 42794239  | 392 |
| chr26 | 34282740  | 34283131  | 392 |
| chr26 | 20378054  | 20378445  | 392 |
| chr20 | 29519618  | 29520009  | 392 |
| chr18 | 45572374  | 45572765  | 392 |
| chr17 | 62933994  | 62934385  | 392 |
| chr15 | 20503950  | 20504341  | 392 |
| chr1  | 74785038  | 74785429  | 392 |
| chrX  | 34102990  | 34103380  | 391 |
| chr5  | 75533458  | 75533848  | 391 |
| chr29 | 34991950  | 34992340  | 391 |
| chr26 | 5872966   | 5873356   | 391 |
| chr23 | 16002077  | 16002467  | 391 |
| chr18 | 53516164  | 53516554  | 391 |
| chr15 | 75972800  | 75973190  | 391 |
| chr14 | 8050655   | 8051045   | 391 |
| chr13 | 75705691  | 75706081  | 391 |
| chr12 | 83823015  | 83823405  | 391 |
| chr10 | 20917471  | 20917861  | 391 |
| chr1  | 3089173   | 3089563   | 391 |
| chr9  | 90633821  | 90634210  | 390 |
| chr9  | 69980729  | 69981118  | 390 |
| chr8  | 24461144  | 24461533  | 390 |
| chr8  | 8338273   | 8338662   | 390 |
| chr7  | 20623524  | 20623913  | 390 |
| chr29 | 37335025  | 37335414  | 390 |
| chr27 | 32885676  | 32886065  | 390 |
| chr22 | 60003367  | 60003756  | 390 |
| chr22 | 59405978  | 59406367  | 390 |
| chr22 | 52446494  | 52446883  | 390 |
| chr22 | 50731427  | 50731816  | 390 |
| chr2  | 137226896 | 137227285 | 390 |
| chr18 | 56363362  | 56363751  | 390 |
| chr17 | 73438473  | 73438862  | 390 |
| chr15 | 22786325  | 22786714  | 390 |
| chr13 | 23637105  | 23637494  | 390 |
| chr10 | 81700488  | 81700877  | 390 |
| chr1  | 69853354  | 69853743  | 390 |
| chr8  | 65401027  | 65401415  | 389 |
| chr7  | 5432613   | 5433001   | 389 |
| chr6  | 108687041 | 108687429 | 389 |
| chr5  | 123005737 | 123006125 | 389 |
| chr5  | 28965393  | 28965781  | 389 |

|       |           |           |     |
|-------|-----------|-----------|-----|
| chr3  | 15774181  | 15774569  | 389 |
| chr23 | 8339762   | 8340150   | 389 |
| chr2  | 111394328 | 111394716 | 389 |
| chr18 | 56606426  | 56606814  | 389 |
| chr16 | 44155356  | 44155744  | 389 |
| chr11 | 102192168 | 102192556 | 389 |
| chr11 | 4352501   | 4352889   | 389 |
| chr10 | 20892479  | 20892867  | 389 |
| chr9  | 52376939  | 52377326  | 388 |
| chr8  | 60399075  | 60399462  | 388 |
| chr8  | 9350472   | 9350859   | 388 |
| chr7  | 71683430  | 71683817  | 388 |
| chr6  | 93959074  | 93959461  | 388 |
| chr5  | 38515072  | 38515459  | 388 |
| chr4  | 57719915  | 57720302  | 388 |
| chr29 | 46678351  | 46678738  | 388 |
| chr24 | 61044638  | 61045025  | 388 |
| chr22 | 59449858  | 59450245  | 388 |
| chr21 | 11893123  | 11893510  | 388 |
| chr20 | 22411277  | 22411664  | 388 |
| chr2  | 133446792 | 133447179 | 388 |
| chr2  | 25231557  | 25231944  | 388 |
| chr2  | 21880921  | 21881308  | 388 |
| chr18 | 39958290  | 39958677  | 388 |
| chr17 | 64064711  | 64065098  | 388 |
| chr16 | 62076739  | 62077126  | 388 |
| chr14 | 10324274  | 10324661  | 388 |
| chr9  | 64803991  | 64804377  | 387 |
| chr9  | 19637045  | 19637431  | 387 |
| chr7  | 53231772  | 53232158  | 387 |
| chr4  | 122982719 | 122983105 | 387 |
| chr4  | 71618069  | 71618455  | 387 |
| chr4  | 16843201  | 16843587  | 387 |
| chr3  | 121347276 | 121347662 | 387 |
| chr29 | 37328319  | 37328705  | 387 |
| chr29 | 6656572   | 6656958   | 387 |
| chr28 | 25318391  | 25318777  | 387 |
| chr26 | 21808673  | 21809059  | 387 |
| chr23 | 50793659  | 50794045  | 387 |
| chr23 | 48772050  | 48772436  | 387 |
| chr22 | 59438471  | 59438857  | 387 |
| chr20 | 73658394  | 73658780  | 387 |
| chr2  | 140716270 | 140716656 | 387 |
| chr2  | 115054763 | 115055149 | 387 |
| chr19 | 58207711  | 58208097  | 387 |
| chr19 | 39242695  | 39243081  | 387 |
| chr19 | 38534774  | 38535160  | 387 |
| chr15 | 27273005  | 27273391  | 387 |
| chr12 | 34250976  | 34251362  | 387 |
| chr11 | 109073157 | 109073543 | 387 |

|       |               |           |     |
|-------|---------------|-----------|-----|
| chr11 | 103751873     | 103752259 | 387 |
| chr9  | 62605726      | 62606111  | 386 |
| chr9  | 26606153      | 26606538  | 386 |
| chr6  | 103146072     | 103146457 | 386 |
| chr6  | 101067449     | 101067834 | 386 |
| chr3  | 119275836     | 119276221 | 386 |
| chr3  | 22645351      | 22645736  | 386 |
| chr3  | 15431598      | 15431983  | 386 |
| chr28 | 7293052       | 7293437   | 386 |
| chr24 | 839598 839983 | 386       |     |
| chr21 | 56005399      | 56005784  | 386 |
| chr20 | 73385734      | 73386119  | 386 |
| chr19 | 58232326      | 58232711  | 386 |
| chr18 | 51591265      | 51591650  | 386 |
| chr17 | 72645177      | 72645562  | 386 |
| chr10 | 28838530      | 28838915  | 386 |
| chr1  | 149423639     | 149424024 | 386 |
| chr1  | 75257102      | 75257487  | 386 |
| chr9  | 90651015      | 90651399  | 385 |
| chr7  | 50343304      | 50343688  | 385 |
| chr7  | 17487576      | 17487960  | 385 |
| chr5  | 28909566      | 28909950  | 385 |
| chr27 | 39120512      | 39120896  | 385 |
| chr27 | 26467479      | 26467863  | 385 |
| chr23 | 31155232      | 31155616  | 385 |
| chr23 | 27869582      | 27869966  | 385 |
| chr22 | 61197070      | 61197454  | 385 |
| chr2  | 136382322     | 136382706 | 385 |
| chr19 | 63963199      | 63963583  | 385 |
| chr19 | 12443263      | 12443647  | 385 |
| chr18 | 55064823      | 55065207  | 385 |
| chr13 | 72702111      | 72702495  | 385 |
| chr13 | 60775804      | 60776188  | 385 |
| chr12 | 82423326      | 82423710  | 385 |
| chr9  | 104811056     | 104811439 | 384 |
| chr9  | 90631685      | 90632068  | 384 |
| chr8  | 9296475       | 9296858   | 384 |
| chr6  | 120777208     | 120777591 | 384 |
| chr5  | 120381458     | 120381841 | 384 |
| chr5  | 52160508      | 52160891  | 384 |
| chr3  | 125778519     | 125778902 | 384 |
| chr22 | 48005873      | 48006256  | 384 |
| chr22 | 47865252      | 47865635  | 384 |
| chr22 | 44845351      | 44845734  | 384 |
| chr20 | 67510379      | 67510762  | 384 |
| chr20 | 3176660       | 3177043   | 384 |
| chr2  | 10214286      | 10214669  | 384 |
| chr19 | 59248242      | 59248625  | 384 |
| chr19 | 56497059      | 56497442  | 384 |
| chr19 | 22563801      | 22564184  | 384 |

|       |           |           |     |
|-------|-----------|-----------|-----|
| chr19 | 12432404  | 12432787  | 384 |
| chr18 | 7380096   | 7380479   | 384 |
| chr14 | 22082077  | 22082460  | 384 |
| chr14 | 1408386   | 1408769   | 384 |
| chr10 | 81680875  | 81681258  | 384 |
| chr9  | 77714581  | 77714963  | 383 |
| chr8  | 110908965 | 110909347 | 383 |
| chr8  | 89557234  | 89557616  | 383 |
| chr5  | 71665472  | 71665854  | 383 |
| chr3  | 111008207 | 111008589 | 383 |
| chr28 | 34129026  | 34129408  | 383 |
| chr25 | 42634671  | 42635053  | 383 |
| chr23 | 46393896  | 46394278  | 383 |
| chr23 | 45444444  | 45444826  | 383 |
| chr21 | 64868135  | 64868517  | 383 |
| chr19 | 27933945  | 27934327  | 383 |
| chr18 | 12125465  | 12125847  | 383 |
| chr17 | 75886546  | 75886928  | 383 |
| chr17 | 70392554  | 70392936  | 383 |
| chr17 | 67310646  | 67311028  | 383 |
| chr17 | 62142770  | 62143152  | 383 |
| chr11 | 103458692 | 103459074 | 383 |
| chr11 | 103420223 | 103420605 | 383 |
| chr11 | 21648763  | 21649145  | 383 |
| chr10 | 90929825  | 90930207  | 383 |
| chr7  | 45749865  | 45750246  | 382 |
| chr6  | 120819416 | 120819797 | 382 |
| chr5  | 94236773  | 94237154  | 382 |
| chr5  | 76847105  | 76847486  | 382 |
| chr4  | 123260491 | 123260872 | 382 |
| chr4  | 66895550  | 66895931  | 382 |
| chr25 | 43278343  | 43278724  | 382 |
| chr18 | 54203565  | 54203946  | 382 |
| chr17 | 36952849  | 36953230  | 382 |
| chr16 | 47473664  | 47474045  | 382 |
| chr16 | 39448810  | 39449191  | 382 |
| chr11 | 72625974  | 72626355  | 382 |
| chr10 | 16643994  | 16644375  | 382 |
| chr1  | 84782812  | 84783193  | 382 |
| chr8  | 108786686 | 108787066 | 381 |
| chr5  | 32993702  | 32994082  | 381 |
| chr3  | 111657933 | 111658313 | 381 |
| chr3  | 105140238 | 105140618 | 381 |
| chr3  | 20806535  | 20806915  | 381 |
| chr29 | 37327934  | 37328314  | 381 |
| chr29 | 34736176  | 34736556  | 381 |
| chr25 | 37954751  | 37955131  | 381 |
| chr18 | 55588134  | 55588514  | 381 |
| chr17 | 69388642  | 69389022  | 381 |
| chr17 | 56063050  | 56063430  | 381 |

|       |               |           |     |
|-------|---------------|-----------|-----|
| chr15 | 24964282      | 24964662  | 381 |
| chr12 | 82697312      | 82697692  | 381 |
| chr12 | 32091183      | 32091563  | 381 |
| chr11 | 63077742      | 63078122  | 381 |
| chr1  | 75100266      | 75100646  | 381 |
| chr1  | 74101366      | 74101746  | 381 |
| chrX  | 87715862      | 87716241  | 380 |
| chr9  | 90812647      | 90813026  | 380 |
| chr8  | 7609073       | 7609452   | 380 |
| chr7  | 4515256       | 4515635   | 380 |
| chr6  | 122145963     | 122146342 | 380 |
| chr6  | 120782234     | 120782613 | 380 |
| chr5  | 124924689     | 124925068 | 380 |
| chr5  | 118439029     | 118439408 | 380 |
| chr4  | 68129206      | 68129585  | 380 |
| chr3  | 55870735      | 55871114  | 380 |
| chr22 | 6485759       | 6486138   | 380 |
| chr2  | 135583522     | 135583901 | 380 |
| chr19 | 6505080       | 6505459   | 380 |
| chr16 | 3788426       | 3788805   | 380 |
| chr14 | 25073552      | 25073931  | 380 |
| chr13 | 61231277      | 61231656  | 380 |
| chr10 | 81589183      | 81589562  | 380 |
| chr10 | 77489279      | 77489658  | 380 |
| chr1  | 1591928       | 1592307   | 380 |
| chr7  | 5411732       | 5412110   | 379 |
| chr4  | 122871752     | 122872130 | 379 |
| chr3  | 106501990     | 106502368 | 379 |
| chr3  | 105188805     | 105189183 | 379 |
| chr26 | 43484915      | 43485293  | 379 |
| chr24 | 35307732      | 35308110  | 379 |
| chr23 | 53015647      | 53016025  | 379 |
| chr22 | 59526252      | 59526630  | 379 |
| chr22 | 30110267      | 30110645  | 379 |
| chr2  | 111856997     | 111857375 | 379 |
| chr19 | 58373029      | 58373407  | 379 |
| chr19 | 10886373      | 10886751  | 379 |
| chr16 | 1865777       | 1866155   | 379 |
| chr14 | 26115519      | 26115897  | 379 |
| chr14 | 858198 858576 |           | 379 |
| chr13 | 75616398      | 75616776  | 379 |
| chr13 | 59596391      | 59596769  | 379 |
| chr12 | 83595729      | 83596107  | 379 |
| chr12 | 20800157      | 20800535  | 379 |
| chr11 | 108085795     | 108086173 | 379 |
| chr1  | 152633531     | 152633909 | 379 |
| chr9  | 35565998      | 35566375  | 378 |
| chr8  | 73836440      | 73836817  | 378 |
| chr8  | 23040405      | 23040782  | 378 |
| chr5  | 28866597      | 28866974  | 378 |

|       |           |           |     |
|-------|-----------|-----------|-----|
| chr26 | 44867184  | 44867561  | 378 |
| chr23 | 15918083  | 15918460  | 378 |
| chr19 | 45148529  | 45148906  | 378 |
| chr18 | 56830894  | 56831271  | 378 |
| chr15 | 21203259  | 21203636  | 378 |
| chr13 | 77388472  | 77388849  | 378 |
| chr12 | 32523042  | 32523419  | 378 |
| chr11 | 100923531 | 100923908 | 378 |
| chrX  | 62804840  | 62805216  | 377 |
| chr9  | 108065273 | 108065649 | 377 |
| chr8  | 95563364  | 95563740  | 377 |
| chr7  | 43972506  | 43972882  | 377 |
| chr6  | 72295649  | 72296025  | 377 |
| chr5  | 118531393 | 118531769 | 377 |
| chr5  | 33931546  | 33931922  | 377 |
| chr4  | 123181268 | 123181644 | 377 |
| chr3  | 123342900 | 123343276 | 377 |
| chr3  | 88263137  | 88263513  | 377 |
| chr3  | 27912650  | 27913026  | 377 |
| chr29 | 45775319  | 45775695  | 377 |
| chr26 | 15555327  | 15555703  | 377 |
| chr25 | 29067226  | 29067602  | 377 |
| chr23 | 52940695  | 52941071  | 377 |
| chr2  | 115707686 | 115708062 | 377 |
| chr17 | 2169684   | 2170060   | 377 |
| chr16 | 38716548  | 38716924  | 377 |
| chr15 | 78095076  | 78095452  | 377 |
| chr14 | 67990950  | 67991326  | 377 |
| chr10 | 20483948  | 20484324  | 377 |
| chr1  | 83018920  | 83019296  | 377 |
| chr9  | 104801183 | 104801558 | 376 |
| chr6  | 73793978  | 73794353  | 376 |
| chr3  | 125204046 | 125204421 | 376 |
| chr29 | 49512806  | 49513181  | 376 |
| chr25 | 3060838   | 3061213   | 376 |
| chr22 | 59342354  | 59342729  | 376 |
| chr22 | 55278015  | 55278390  | 376 |
| chr20 | 75728194  | 75728569  | 376 |
| chr2  | 139111859 | 139112234 | 376 |
| chr2  | 132186816 | 132187191 | 376 |
| chr2  | 72869192  | 72869567  | 376 |
| chr16 | 2235046   | 2235421   | 376 |
| chr14 | 7633449   | 7633824   | 376 |
| chr12 | 84837514  | 84837889  | 376 |
| chr12 | 32201035  | 32201410  | 376 |
| chr10 | 17109788  | 17110163  | 376 |
| chr7  | 42935276  | 42935650  | 375 |
| chr3  | 105150104 | 105150478 | 375 |
| chr28 | 34056235  | 34056609  | 375 |
| chr2  | 75848968  | 75849342  | 375 |

|       |               |           |     |
|-------|---------------|-----------|-----|
| chr16 | 46841892      | 46842266  | 375 |
| chr13 | 67104695      | 67105069  | 375 |
| chr12 | 82676082      | 82676456  | 375 |
| chr11 | 31142055      | 31142429  | 375 |
| chr7  | 80920549      | 80920922  | 374 |
| chr7  | 46234772      | 46235145  | 374 |
| chr4  | 121504249     | 121504622 | 374 |
| chr3  | 15791700      | 15792073  | 374 |
| chr28 | 25104593      | 25104966  | 374 |
| chr27 | 827016 827389 | 374       |     |
| chr25 | 8706773       | 8707146   | 374 |
| chr25 | 4008969       | 4009342   | 374 |
| chr25 | 3163784       | 3164157   | 374 |
| chr24 | 52339499      | 52339872  | 374 |
| chr23 | 31154691      | 31155064  | 374 |
| chr20 | 19813368      | 19813741  | 374 |
| chr19 | 60270197      | 60270570  | 374 |
| chr19 | 56606369      | 56606742  | 374 |
| chr18 | 47861761      | 47862134  | 374 |
| chr18 | 11342178      | 11342551  | 374 |
| chr16 | 34680838      | 34681211  | 374 |
| chr15 | 75262918      | 75263291  | 374 |
| chr12 | 82804291      | 82804664  | 374 |
| chr11 | 109765862     | 109766235 | 374 |
| chr1  | 133337733     | 133338106 | 374 |
| chr8  | 63513956      | 63514328  | 373 |
| chr8  | 47600672      | 47601044  | 373 |
| chr5  | 124710302     | 124710674 | 373 |
| chr5  | 121237667     | 121238039 | 373 |
| chr3  | 31682396      | 31682768  | 373 |
| chr29 | 41667124      | 41667496  | 373 |
| chr28 | 33403225      | 33403597  | 373 |
| chr27 | 44651281      | 44651653  | 373 |
| chr25 | 38770 39142   | 373       |     |
| chr24 | 44049938      | 44050310  | 373 |
| chr23 | 7698645       | 7699017   | 373 |
| chr21 | 67891368      | 67891740  | 373 |
| chr2  | 136555809     | 136556181 | 373 |
| chr19 | 14802830      | 14803202  | 373 |
| chr17 | 70030853      | 70031225  | 373 |
| chr17 | 69727327      | 69727699  | 373 |
| chr17 | 66010673      | 66011045  | 373 |
| chr15 | 83135457      | 83135829  | 373 |
| chr15 | 45865216      | 45865588  | 373 |
| chr13 | 54423185      | 54423557  | 373 |
| chr11 | 4349651       | 4350023   | 373 |
| chr10 | 36898716      | 36899088  | 373 |
| chr1  | 26540592      | 26540964  | 373 |
| chr9  | 52977983      | 52978354  | 372 |
| chr9  | 43960039      | 43960410  | 372 |

|       |           |           |     |
|-------|-----------|-----------|-----|
| chr8  | 73184688  | 73185059  | 372 |
| chr8  | 23049788  | 23050159  | 372 |
| chr7  | 19936184  | 19936555  | 372 |
| chr5  | 35290162  | 35290533  | 372 |
| chr4  | 109550844 | 109551215 | 372 |
| chr3  | 108747854 | 108748225 | 372 |
| chr29 | 26741811  | 26742182  | 372 |
| chr27 | 47609607  | 47609978  | 372 |
| chr21 | 25301779  | 25302150  | 372 |
| chr19 | 25517606  | 25517977  | 372 |
| chr19 | 12311233  | 12311604  | 372 |
| chr18 | 11374146  | 11374517  | 372 |
| chr17 | 74486359  | 74486730  | 372 |
| chr17 | 56766444  | 56766815  | 372 |
| chr13 | 73625481  | 73625852  | 372 |
| chr12 | 75122152  | 75122523  | 372 |
| chr11 | 2255074   | 2255445   | 372 |
| chr7  | 3677051   | 3677421   | 371 |
| chr6  | 120791798 | 120792168 | 371 |
| chr3  | 127238986 | 127239356 | 371 |
| chr3  | 35536076  | 35536446  | 371 |
| chr3  | 20573457  | 20573827  | 371 |
| chr28 | 35630659  | 35631029  | 371 |
| chr27 | 36027299  | 36027669  | 371 |
| chr26 | 34369386  | 34369756  | 371 |
| chr23 | 51940779  | 51941149  | 371 |
| chr22 | 30056416  | 30056786  | 371 |
| chr21 | 23033055  | 23033425  | 371 |
| chr20 | 5221512   | 5221882   | 371 |
| chr19 | 59387536  | 59387906  | 371 |
| chr19 | 46094846  | 46095216  | 371 |
| chr19 | 23170075  | 23170445  | 371 |
| chr17 | 64718618  | 64718988  | 371 |
| chr16 | 2252944   | 2253314   | 371 |
| chr15 | 65644593  | 65644963  | 371 |
| chr15 | 60442202  | 60442572  | 371 |
| chr14 | 6359004   | 6359374   | 371 |
| chr12 | 24665072  | 24665442  | 371 |
| chr11 | 103883835 | 103884205 | 371 |
| chr11 | 4835973   | 4836343   | 371 |
| chr10 | 28402745  | 28403115  | 371 |
| chr8  | 47121141  | 47121510  | 370 |
| chr7  | 42218886  | 42219255  | 370 |
| chr7  | 14374785  | 14375154  | 370 |
| chr4  | 5615559   | 5615928   | 370 |
| chr3  | 56493072  | 56493441  | 370 |
| chr27 | 7127180   | 7127549   | 370 |
| chr26 | 48413684  | 48414053  | 370 |
| chr26 | 21889280  | 21889649  | 370 |
| chr21 | 65207672  | 65208041  | 370 |



|       |               |           |     |
|-------|---------------|-----------|-----|
| chr21 | 11667229      | 11667598  | 370 |
| chr2  | 139160074     | 139160443 | 370 |
| chr19 | 36417670      | 36418039  | 370 |
| chr19 | 23097181      | 23097550  | 370 |
| chr18 | 18688601      | 18688970  | 370 |
| chr17 | 76316577      | 76316946  | 370 |
| chr15 | 27263101      | 27263470  | 370 |
| chr13 | 40479589      | 40479958  | 370 |
| chr11 | 14403143      | 14403512  | 370 |
| chr10 | 36545468      | 36545837  | 370 |
| chr10 | 32260159      | 32260528  | 370 |
| chr1  | 193302 193671 | 370       |     |
| chr7  | 18732063      | 18732431  | 369 |
| chr7  | 5320335       | 5320703   | 369 |
| chr6  | 115907664     | 115908032 | 369 |
| chr6  | 107100000     | 107100368 | 369 |
| chr26 | 22799072      | 22799440  | 369 |
| chr26 | 22780711      | 22781079  | 369 |
| chr25 | 41547169      | 41547537  | 369 |
| chr24 | 61066385      | 61066753  | 369 |
| chr24 | 60562071      | 60562439  | 369 |
| chr24 | 39742539      | 39742907  | 369 |
| chr23 | 49660573      | 49660941  | 369 |
| chr23 | 42402138      | 42402506  | 369 |
| chr23 | 31177686      | 31178054  | 369 |
| chr23 | 8495619       | 8495987   | 369 |
| chr21 | 68971155      | 68971523  | 369 |
| chr21 | 6535133       | 6535501   | 369 |
| chr20 | 2474508       | 2474876   | 369 |
| chr2  | 112046802     | 112047170 | 369 |
| chr2  | 99676247      | 99676615  | 369 |
| chr19 | 55295000      | 55295368  | 369 |
| chr18 | 11718469      | 11718837  | 369 |
| chr17 | 69850600      | 69850968  | 369 |
| chr15 | 25596913      | 25597281  | 369 |
| chr14 | 63510056      | 63510424  | 369 |
| chr13 | 67163367      | 67163735  | 369 |
| chr11 | 104381878     | 104382246 | 369 |
| chr11 | 81435281      | 81435649  | 369 |
| chr11 | 44964918      | 44965286  | 369 |
| chr11 | 27809492      | 27809860  | 369 |
| chr10 | 90322359      | 90322727  | 369 |
| chr10 | 71228900      | 71229268  | 369 |
| chr8  | 72228501      | 72228868  | 368 |
| chr7  | 10058798      | 10059165  | 368 |
| chr27 | 38906902      | 38907269  | 368 |
| chr21 | 65657733      | 65658100  | 368 |
| chr20 | 67510914      | 67511281  | 368 |
| chr2  | 99664976      | 99665343  | 368 |
| chr19 | 54598940      | 54599307  | 368 |

|       |           |           |     |
|-------|-----------|-----------|-----|
| chr18 | 53575628  | 53575995  | 368 |
| chr18 | 40278770  | 40279137  | 368 |
| chr13 | 49393460  | 49393827  | 368 |
| chr12 | 76978135  | 76978502  | 368 |
| chr11 | 107594631 | 107594998 | 368 |
| chr9  | 107558479 | 107558845 | 367 |
| chr9  | 106826155 | 106826521 | 367 |
| chr9  | 93649823  | 93650189  | 367 |
| chr8  | 46163118  | 46163484  | 367 |
| chr5  | 79202454  | 79202820  | 367 |
| chr4  | 124182790 | 124183156 | 367 |
| chr29 | 51273498  | 51273864  | 367 |
| chr29 | 35169713  | 35170079  | 367 |
| chr29 | 33921822  | 33922188  | 367 |
| chr25 | 37804477  | 37804843  | 367 |
| chr23 | 8484693   | 8485059   | 367 |
| chr22 | 56087276  | 56087642  | 367 |
| chr22 | 32818347  | 32818713  | 367 |
| chr22 | 17237453  | 17237819  | 367 |
| chr2  | 128190014 | 128190380 | 367 |
| chr19 | 56075105  | 56075471  | 367 |
| chr19 | 56062668  | 56063034  | 367 |
| chr19 | 23863963  | 23864329  | 367 |
| chr19 | 21620011  | 21620377  | 367 |
| chr19 | 6536498   | 6536864   | 367 |
| chr17 | 75561883  | 75562249  | 367 |
| chr17 | 70387523  | 70387889  | 367 |
| chr16 | 2189682   | 2190048   | 367 |
| chr13 | 77572155  | 77572521  | 367 |
| chr13 | 59933504  | 59933870  | 367 |
| chr11 | 5540457   | 5540823   | 367 |
| chr9  | 105999664 | 106000029 | 366 |
| chr9  | 91239138  | 91239503  | 366 |
| chr6  | 121045097 | 121045462 | 366 |
| chr3  | 36950306  | 36950671  | 366 |
| chr28 | 33865723  | 33866088  | 366 |
| chr26 | 35198123  | 35198488  | 366 |
| chr23 | 48332941  | 48333306  | 366 |
| chr23 | 46417987  | 46418352  | 366 |
| chr23 | 22775637  | 22776002  | 366 |
| chr22 | 60186038  | 60186403  | 366 |
| chr22 | 30571555  | 30571920  | 366 |
| chr19 | 60829880  | 60830245  | 366 |
| chr18 | 56766881  | 56767246  | 366 |
| chr18 | 11249677  | 11250042  | 366 |
| chr13 | 54465120  | 54465485  | 366 |
| chr13 | 28319928  | 28320293  | 366 |
| chr12 | 36457999  | 36458364  | 366 |
| chr11 | 105657172 | 105657537 | 366 |
| chr8  | 63990263  | 63990627  | 365 |

|       |               |           |     |
|-------|---------------|-----------|-----|
| chr7  | 70781378      | 70781742  | 365 |
| chr7  | 11371701      | 11372065  | 365 |
| chr4  | 80752225      | 80752589  | 365 |
| chr4  | 71878259      | 71878623  | 365 |
| chr3  | 123196811     | 123197175 | 365 |
| chr25 | 1305794       | 1306158   | 365 |
| chr20 | 72036987      | 72037351  | 365 |
| chr2  | 134885772     | 134886136 | 365 |
| chr19 | 46857177      | 46857541  | 365 |
| chr19 | 23686500      | 23686864  | 365 |
| chr18 | 12123310      | 12123674  | 365 |
| chr17 | 62985148      | 62985512  | 365 |
| chr16 | 77448475      | 77448839  | 365 |
| chr16 | 43316996      | 43317360  | 365 |
| chr15 | 29839620      | 29839984  | 365 |
| chr13 | 80158644      | 80159008  | 365 |
| chr13 | 59016792      | 59017156  | 365 |
| chr12 | 84016525      | 84016889  | 365 |
| chr9  | 24643463      | 24643826  | 364 |
| chr7  | 18712600      | 18712963  | 364 |
| chr4  | 123250786     | 123251149 | 364 |
| chr4  | 72801282      | 72801645  | 364 |
| chr25 | 37696821      | 37697184  | 364 |
| chr24 | 40260425      | 40260788  | 364 |
| chr22 | 60196468      | 60196831  | 364 |
| chr22 | 51053696      | 51054059  | 364 |
| chr21 | 2145179       | 2145542   | 364 |
| chr20 | 468730 469093 | 364       |     |
| chr19 | 27386535      | 27386898  | 364 |
| chr18 | 14679854      | 14680217  | 364 |
| chr15 | 81300572      | 81300935  | 364 |
| chr13 | 79204505      | 79204868  | 364 |
| chr12 | 82593044      | 82593407  | 364 |
| chrX  | 35761867      | 35762229  | 363 |
| chr7  | 17456206      | 17456568  | 363 |
| chr7  | 13407207      | 13407569  | 363 |
| chr3  | 127439740     | 127440102 | 363 |
| chr3  | 102695738     | 102696100 | 363 |
| chr3  | 29264181      | 29264543  | 363 |
| chr22 | 43631527      | 43631889  | 363 |
| chr22 | 36048359      | 36048721  | 363 |
| chr21 | 23445649      | 23446011  | 363 |
| chr21 | 15184994      | 15185356  | 363 |
| chr2  | 19644690      | 19645052  | 363 |
| chr19 | 8298215       | 8298577   | 363 |
| chr16 | 77483820      | 77484182  | 363 |
| chr16 | 47605193      | 47605555  | 363 |
| chr15 | 54375683      | 54376045  | 363 |
| chr15 | 22781161      | 22781523  | 363 |
| chr13 | 75625718      | 75626080  | 363 |

|       |               |           |     |
|-------|---------------|-----------|-----|
| chr11 | 102247352     | 102247714 | 363 |
| chr11 | 100901795     | 100902157 | 363 |
| chr11 | 11750757      | 11751119  | 363 |
| chr10 | 104423983     | 104424345 | 363 |
| chrX  | 11021063      | 11021424  | 362 |
| chr9  | 47112639      | 47113000  | 362 |
| chr8  | 5379794       | 5380155   | 362 |
| chr5  | 118267401     | 118267762 | 362 |
| chr5  | 112784603     | 112784964 | 362 |
| chr4  | 121105087     | 121105448 | 362 |
| chr4  | 71866937      | 71867298  | 362 |
| chr23 | 11766917      | 11767278  | 362 |
| chr23 | 11079480      | 11079841  | 362 |
| chr22 | 55827189      | 55827550  | 362 |
| chr20 | 8613632       | 8613993   | 362 |
| chr19 | 8061091       | 8061452   | 362 |
| chr18 | 3826404       | 3826765   | 362 |
| chr16 | 41530113      | 41530474  | 362 |
| chr15 | 41296078      | 41296439  | 362 |
| chr13 | 70290449      | 70290810  | 362 |
| chr13 | 59832114      | 59832475  | 362 |
| chr13 | 59707708      | 59708069  | 362 |
| chr12 | 82902188      | 82902549  | 362 |
| chr11 | 10738143      | 10738504  | 362 |
| chr11 | 7042729       | 7043090   | 362 |
| chr1  | 156680258     | 156680619 | 362 |
| chr1  | 1629690       | 1630051   | 362 |
| chr6  | 94530768      | 94531128  | 361 |
| chr4  | 110041312     | 110041672 | 361 |
| chr4  | 79042048      | 79042408  | 361 |
| chr29 | 26766277      | 26766637  | 361 |
| chr24 | 473421 473781 | 361       |     |
| chr23 | 46033381      | 46033741  | 361 |
| chr23 | 11053215      | 11053575  | 361 |
| chr2  | 108247555     | 108247915 | 361 |
| chr19 | 17085389      | 17085749  | 361 |
| chr17 | 75047925      | 75048285  | 361 |
| chr14 | 14670189      | 14670549  | 361 |
| chr13 | 79993600      | 79993960  | 361 |
| chr12 | 76746258      | 76746618  | 361 |
| chr10 | 88061895      | 88062255  | 361 |
| chr5  | 103508702     | 103509061 | 360 |
| chr3  | 127899623     | 127899982 | 360 |
| chr29 | 36560837      | 36561196  | 360 |
| chr29 | 33913336      | 33913695  | 360 |
| chr27 | 4193297       | 4193656   | 360 |
| chr25 | 2190255       | 2190614   | 360 |
| chr24 | 60572531      | 60572890  | 360 |
| chr23 | 51945323      | 51945682  | 360 |
| chr2  | 137102864     | 137103223 | 360 |

|       |               |           |     |
|-------|---------------|-----------|-----|
| chr18 | 50838842      | 50839201  | 360 |
| chr11 | 103459293     | 103459652 | 360 |
| chr1  | 75125799      | 75126158  | 360 |
| chr1  | 75057539      | 75057898  | 360 |
| chr9  | 106630740     | 106631098 | 359 |
| chr9  | 90652779      | 90653137  | 359 |
| chr8  | 63762411      | 63762769  | 359 |
| chr8  | 5796746       | 5797104   | 359 |
| chr7  | 5449628       | 5449986   | 359 |
| chr5  | 123681261     | 123681619 | 359 |
| chr3  | 29249710      | 29250068  | 359 |
| chr29 | 50230372      | 50230730  | 359 |
| chr25 | 40602004      | 40602362  | 359 |
| chr24 | 60572892      | 60573250  | 359 |
| chr20 | 65531905      | 65532263  | 359 |
| chr19 | 47236847      | 47237205  | 359 |
| chr18 | 52682577      | 52682935  | 359 |
| chr18 | 49794797      | 49795155  | 359 |
| chr17 | 70097990      | 70098348  | 359 |
| chr17 | 63409981      | 63410339  | 359 |
| chr15 | 35396534      | 35396892  | 359 |
| chr14 | 22067537      | 22067895  | 359 |
| chr13 | 16136362      | 16136720  | 359 |
| chr12 | 82744623      | 82744981  | 359 |
| chr11 | 89050271      | 89050629  | 359 |
| chr11 | 65711847      | 65712205  | 359 |
| chr1  | 84461940      | 84462298  | 359 |
| chr9  | 46036089      | 46036446  | 358 |
| chr7  | 2966464       | 2966821   | 358 |
| chr5  | 29251607      | 29251964  | 358 |
| chr5  | 29150787      | 29151144  | 358 |
| chr4  | 123088292     | 123088649 | 358 |
| chr4  | 122605614     | 122605971 | 358 |
| chr4  | 121432056     | 121432413 | 358 |
| chr4  | 95666452      | 95666809  | 358 |
| chr28 | 26821210      | 26821567  | 358 |
| chr27 | 297837 298194 |           | 358 |
| chr21 | 20575486      | 20575843  | 358 |
| chr2  | 139155851     | 139156208 | 358 |
| chr7  | 43510257      | 43510613  | 357 |
| chr6  | 17216950      | 17217306  | 357 |
| chr5  | 36609786      | 36610142  | 357 |
| chr3  | 119305428     | 119305784 | 357 |
| chr3  | 64490853      | 64491209  | 357 |
| chr3  | 33327738      | 33328094  | 357 |
| chr3  | 4684282       | 4684638   | 357 |
| chr29 | 36908954      | 36909310  | 357 |
| chr26 | 48457035      | 48457391  | 357 |
| chr25 | 37390416      | 37390772  | 357 |
| chr24 | 61379939      | 61380295  | 357 |

|       |           |           |     |
|-------|-----------|-----------|-----|
| chr24 | 35140437  | 35140793  | 357 |
| chr23 | 53269422  | 53269778  | 357 |
| chr22 | 9611440   | 9611796   | 357 |
| chr20 | 24957876  | 24958232  | 357 |
| chr2  | 136413063 | 136413419 | 357 |
| chr19 | 52431439  | 52431795  | 357 |
| chr19 | 7797152   | 7797508   | 357 |
| chr18 | 52022574  | 52022930  | 357 |
| chr13 | 62348386  | 62348742  | 357 |
| chr12 | 10831796  | 10832152  | 357 |
| chr11 | 14332978  | 14333334  | 357 |
| chr8  | 74375431  | 74375786  | 356 |
| chr8  | 7552073   | 7552428   | 356 |
| chr6  | 121959312 | 121959667 | 356 |
| chr6  | 109600266 | 109600621 | 356 |
| chr5  | 116926966 | 116927321 | 356 |
| chr28 | 10781324  | 10781679  | 356 |
| chr26 | 24399276  | 24399631  | 356 |
| chr25 | 33830014  | 33830369  | 356 |
| chr25 | 3166103   | 3166458   | 356 |
| chr24 | 1156203   | 1156558   | 356 |
| chr22 | 55393672  | 55394027  | 356 |
| chr22 | 18043678  | 18044033  | 356 |
| chr21 | 64435327  | 64435682  | 356 |
| chr19 | 60715178  | 60715533  | 356 |
| chr19 | 58831481  | 58831836  | 356 |
| chr19 | 39131363  | 39131718  | 356 |
| chr19 | 38734005  | 38734360  | 356 |
| chr19 | 12302226  | 12302581  | 356 |
| chr18 | 24009773  | 24010128  | 356 |
| chr18 | 9802874   | 9803229   | 356 |
| chr17 | 75538381  | 75538736  | 356 |
| chr16 | 70097121  | 70097476  | 356 |
| chr16 | 2456888   | 2457243   | 356 |
| chr14 | 63486148  | 63486503  | 356 |
| chr14 | 30827244  | 30827599  | 356 |
| chr11 | 69165917  | 69166272  | 356 |
| chr11 | 2289797   | 2290152   | 356 |
| chr10 | 73958962  | 73959317  | 356 |
| chr9  | 104817093 | 104817447 | 355 |
| chr4  | 124292736 | 124293090 | 355 |
| chr26 | 46793529  | 46793883  | 355 |
| chr23 | 52629819  | 52630173  | 355 |
| chr19 | 21799983  | 21800337  | 355 |
| chr18 | 65385361  | 65385715  | 355 |
| chr17 | 70120441  | 70120795  | 355 |
| chr17 | 69251295  | 69251649  | 355 |
| chr16 | 77501313  | 77501667  | 355 |
| chr16 | 20656206  | 20656560  | 355 |
| chr15 | 42998900  | 42999254  | 355 |

|       |           |           |     |
|-------|-----------|-----------|-----|
| chr15 | 30635115  | 30635469  | 355 |
| chr13 | 45470413  | 45470767  | 355 |
| chr12 | 32125346  | 32125700  | 355 |
| chr11 | 107587963 | 107588317 | 355 |
| chr6  | 6427508   | 6427861   | 354 |
| chr5  | 111833273 | 111833626 | 354 |
| chr4  | 32274891  | 32275244  | 354 |
| chr4  | 5628859   | 5629212   | 354 |
| chr3  | 106565335 | 106565688 | 354 |
| chr29 | 44693061  | 44693414  | 354 |
| chr25 | 1508662   | 1509015   | 354 |
| chr2  | 130477045 | 130477398 | 354 |
| chr19 | 21829008  | 21829361  | 354 |
| chr19 | 6673361   | 6673714   | 354 |
| chr18 | 57357655  | 57358008  | 354 |
| chr11 | 1346323   | 1346676   | 354 |
| chr10 | 88350555  | 88350908  | 354 |
| chrX  | 75937466  | 75937818  | 353 |
| chr9  | 90535232  | 90535584  | 353 |
| chr7  | 17317158  | 17317510  | 353 |
| chr5  | 118179231 | 118179583 | 353 |
| chr5  | 117588451 | 117588803 | 353 |
| chr3  | 22497610  | 22497962  | 353 |
| chr26 | 51370577  | 51370929  | 353 |
| chr25 | 8600875   | 8601227   | 353 |
| chr2  | 134711121 | 134711473 | 353 |
| chr2  | 127667862 | 127668214 | 353 |
| chr2  | 111216537 | 111216889 | 353 |
| chr2  | 66019862  | 66020214  | 353 |
| chr18 | 53310164  | 53310516  | 353 |
| chr18 | 4607335   | 4607687   | 353 |
| chr15 | 83920535  | 83920887  | 353 |
| chr15 | 45776064  | 45776416  | 353 |
| chr15 | 24010123  | 24010475  | 353 |
| chr14 | 63487470  | 63487822  | 353 |
| chr14 | 13381917  | 13382269  | 353 |
| chr13 | 66876983  | 66877335  | 353 |
| chr11 | 98384507  | 98384859  | 353 |
| chr11 | 7365060   | 7365412   | 353 |
| chr10 | 89235474  | 89235826  | 353 |
| chr10 | 71241958  | 71242310  | 353 |
| chr1  | 82949917  | 82950269  | 353 |
| chrX  | 23389544  | 23389895  | 352 |
| chr8  | 74433780  | 74434131  | 352 |
| chr7  | 71314171  | 71314522  | 352 |
| chr7  | 43051061  | 43051412  | 352 |
| chr6  | 59317302  | 59317653  | 352 |
| chr5  | 71661962  | 71662313  | 352 |
| chr4  | 121407681 | 121408032 | 352 |
| chr4  | 32297753  | 32298104  | 352 |

|       |               |           |     |
|-------|---------------|-----------|-----|
| chr3  | 102715036     | 102715387 | 352 |
| chr3  | 36032986      | 36033337  | 352 |
| chr3  | 4071822       | 4072173   | 352 |
| chr26 | 51398724      | 51399075  | 352 |
| chr24 | 60547372      | 60547723  | 352 |
| chr24 | 49177774      | 49178125  | 352 |
| chr23 | 15797559      | 15797910  | 352 |
| chr22 | 48539530      | 48539881  | 352 |
| chr22 | 14982651      | 14983002  | 352 |
| chr21 | 68914843      | 68915194  | 352 |
| chr2  | 127263109     | 127263460 | 352 |
| chr19 | 56575849      | 56576200  | 352 |
| chr18 | 3776372       | 3776723   | 352 |
| chr16 | 44816245      | 44816596  | 352 |
| chr15 | 27286784      | 27287135  | 352 |
| chr11 | 102259374     | 102259725 | 352 |
| chr10 | 68223647      | 68223998  | 352 |
| chr10 | 16853915      | 16854266  | 352 |
| chr1  | 146329403     | 146329754 | 352 |
| chr9  | 40264206      | 40264556  | 351 |
| chr5  | 112981550     | 112981900 | 351 |
| chr5  | 28843664      | 28844014  | 351 |
| chr4  | 79959140      | 79959490  | 351 |
| chr3  | 77662812      | 77663162  | 351 |
| chr29 | 31543898      | 31544248  | 351 |
| chr27 | 653857 654207 | 351       |     |
| chr25 | 22541986      | 22542336  | 351 |
| chr24 | 44904583      | 44904933  | 351 |
| chr23 | 52611662      | 52612012  | 351 |
| chr21 | 69074757      | 69075107  | 351 |
| chr2  | 131836829     | 131837179 | 351 |
| chr19 | 56488210      | 56488560  | 351 |
| chr17 | 61660255      | 61660605  | 351 |
| chr13 | 80652341      | 80652691  | 351 |
| chr10 | 21778942      | 21779292  | 351 |
| chr10 | 8697644       | 8697994   | 351 |
| chr1  | 146735263     | 146735613 | 351 |
| chr5  | 121772789     | 121773138 | 350 |
| chr4  | 108695459     | 108695808 | 350 |
| chr4  | 99296777      | 99297126  | 350 |
| chr4  | 87713348      | 87713697  | 350 |
| chr3  | 125626330     | 125626679 | 350 |
| chr3  | 121145618     | 121145967 | 350 |
| chr29 | 36899484      | 36899833  | 350 |
| chr29 | 31517490      | 31517839  | 350 |
| chr29 | 30994526      | 30994875  | 350 |
| chr28 | 26058909      | 26059258  | 350 |
| chr25 | 28578194      | 28578543  | 350 |
| chr24 | 43668458      | 43668807  | 350 |
| chr23 | 30496277      | 30496626  | 350 |



|       |               |           |     |
|-------|---------------|-----------|-----|
| chr22 | 14934088      | 14934437  | 350 |
| chr21 | 68915318      | 68915667  | 350 |
| chr19 | 46840407      | 46840756  | 350 |
| chr19 | 45148072      | 45148421  | 350 |
| chr19 | 26946365      | 26946714  | 350 |
| chr19 | 25285464      | 25285813  | 350 |
| chr18 | 25341280      | 25341629  | 350 |
| chr18 | 9816893       | 9817242   | 350 |
| chr16 | 49429863      | 49430212  | 350 |
| chr13 | 80592074      | 80592423  | 350 |
| chr12 | 69977995      | 69978344  | 350 |
| chr11 | 104891422     | 104891771 | 350 |
| chr11 | 100875292     | 100875641 | 350 |
| chr10 | 22534389      | 22534738  | 350 |
| chr9  | 105002305     | 105002653 | 349 |
| chr7  | 5043774       | 5044122   | 349 |
| chr5  | 111220999     | 111221347 | 349 |
| chr5  | 35472987      | 35473335  | 349 |
| chr4  | 121478644     | 121478992 | 349 |
| chr29 | 27074182      | 27074530  | 349 |
| chr26 | 20178983      | 20179331  | 349 |
| chr26 | 8720823       | 8721171   | 349 |
| chr23 | 31290197      | 31290545  | 349 |
| chr20 | 41247205      | 41247553  | 349 |
| chr20 | 19401917      | 19402265  | 349 |
| chr20 | 605735 606083 |           | 349 |
| chr2  | 130449869     | 130450217 | 349 |
| chr2  | 38890009      | 38890357  | 349 |
| chr19 | 53142835      | 53143183  | 349 |
| chr18 | 42956948      | 42957296  | 349 |
| chr18 | 6960887       | 6961235   | 349 |
| chr18 | 3024894       | 3025242   | 349 |
| chr17 | 68463888      | 68464236  | 349 |
| chr14 | 7577396       | 7577744   | 349 |
| chr12 | 25413934      | 25414282  | 349 |
| chr12 | 15261784      | 15262132  | 349 |
| chr10 | 22961143      | 22961491  | 349 |
| chr10 | 15072110      | 15072458  | 349 |
| chr1  | 152017074     | 152017422 | 349 |
| chr1  | 141722320     | 141722668 | 349 |
| chr8  | 108806415     | 108806762 | 348 |
| chr8  | 80138853      | 80139200  | 348 |
| chr6  | 103307004     | 103307351 | 348 |
| chr29 | 36992003      | 36992350  | 348 |
| chr25 | 27846186      | 27846533  | 348 |
| chr25 | 1977958       | 1978305   | 348 |
| chr25 | 1284277       | 1284624   | 348 |
| chr23 | 51244428      | 51244775  | 348 |
| chr23 | 40555933      | 40556280  | 348 |
| chr22 | 59537614      | 59537961  | 348 |

|       |           |           |     |
|-------|-----------|-----------|-----|
| chr22 | 30295804  | 30296151  | 348 |
| chr20 | 73248538  | 73248885  | 348 |
| chr2  | 132243532 | 132243879 | 348 |
| chr19 | 64367952  | 64368299  | 348 |
| chr19 | 40441356  | 40441703  | 348 |
| chr19 | 38348688  | 38349035  | 348 |
| chr17 | 66887133  | 66887480  | 348 |
| chr16 | 67194677  | 67195024  | 348 |
| chr16 | 3343786   | 3344133   | 348 |
| chr15 | 75742076  | 75742423  | 348 |
| chr13 | 17562727  | 17563074  | 348 |
| chr12 | 82870225  | 82870572  | 348 |
| chr11 | 28512132  | 28512479  | 348 |
| chr11 | 10693329  | 10693676  | 348 |
| chr5  | 116847943 | 116848289 | 347 |
| chr5  | 60312027  | 60312373  | 347 |
| chr4  | 99036431  | 99036777  | 347 |
| chr3  | 13480375  | 13480721  | 347 |
| chr25 | 42257437  | 42257783  | 347 |
| chr23 | 8237883   | 8238229   | 347 |
| chr2  | 138646566 | 138646912 | 347 |
| chr2  | 123467871 | 123468217 | 347 |
| chr19 | 20353647  | 20353993  | 347 |
| chr19 | 12583732  | 12584078  | 347 |
| chr19 | 8701531   | 8701877   | 347 |
| chr13 | 79666822  | 79667168  | 347 |
| chr11 | 109305079 | 109305425 | 347 |
| chr11 | 100747590 | 100747936 | 347 |
| chr11 | 100434087 | 100434433 | 347 |
| chr11 | 90417980  | 90418326  | 347 |
| chr7  | 44911126  | 44911471  | 346 |
| chr5  | 123172863 | 123173208 | 346 |
| chr5  | 33771582  | 33771927  | 346 |
| chr5  | 27937365  | 27937710  | 346 |
| chr5  | 10387426  | 10387771  | 346 |
| chr3  | 33075622  | 33075967  | 346 |
| chr22 | 5903831   | 5904176   | 346 |
| chr20 | 8713826   | 8714171   | 346 |
| chr20 | 5248879   | 5249224   | 346 |
| chr2  | 140625301 | 140625646 | 346 |
| chr19 | 45733619  | 45733964  | 346 |
| chr19 | 42705121  | 42705466  | 346 |
| chr18 | 54862007  | 54862352  | 346 |
| chr16 | 49529758  | 49530103  | 346 |
| chr16 | 23833984  | 23834329  | 346 |
| chr15 | 30825652  | 30825997  | 346 |
| chr13 | 77236066  | 77236411  | 346 |
| chr11 | 70703942  | 70704287  | 346 |
| chr10 | 17070076  | 17070421  | 346 |
| chr1  | 74682142  | 74682487  | 346 |

|       |               |           |     |
|-------|---------------|-----------|-----|
| chr5  | 71678773      | 71679117  | 345 |
| chr5  | 30261710      | 30262054  | 345 |
| chr5  | 28695436      | 28695780  | 345 |
| chr4  | 99720918      | 99721262  | 345 |
| chr4  | 96835019      | 96835363  | 345 |
| chr3  | 52149639      | 52149983  | 345 |
| chr3  | 28384260      | 28384604  | 345 |
| chr29 | 51785963      | 51786307  | 345 |
| chr27 | 763541 763885 |           | 345 |
| chr26 | 21305027      | 21305371  | 345 |
| chr26 | 20938133      | 20938477  | 345 |
| chr25 | 43854386      | 43854730  | 345 |
| chr25 | 43527167      | 43527511  | 345 |
| chr23 | 18469303      | 18469647  | 345 |
| chr22 | 48247046      | 48247390  | 345 |
| chr22 | 12304685      | 12305029  | 345 |
| chr21 | 56283762      | 56284106  | 345 |
| chr2  | 136995189     | 136995533 | 345 |
| chr2  | 134302931     | 134303275 | 345 |
| chr18 | 29581141      | 29581485  | 345 |
| chr17 | 72774530      | 72774874  | 345 |
| chr12 | 10755670      | 10756014  | 345 |
| chr11 | 109613633     | 109613977 | 345 |
| chr11 | 14502898      | 14503242  | 345 |
| chr10 | 50557090      | 50557434  | 345 |
| chr10 | 35891567      | 35891911  | 345 |
| chr10 | 28839012      | 28839356  | 345 |
| chr1  | 99827749      | 99828093  | 345 |
| chr1  | 82923325      | 82923669  | 345 |
| chrX  | 19095933      | 19096276  | 344 |
| chr9  | 106580098     | 106580441 | 344 |
| chr7  | 69058993      | 69059336  | 344 |
| chr29 | 30741122      | 30741465  | 344 |
| chr28 | 33469381      | 33469724  | 344 |
| chr26 | 22303557      | 22303900  | 344 |
| chr26 | 14554688      | 14555031  | 344 |
| chr25 | 22544896      | 22545239  | 344 |
| chr24 | 22046962      | 22047305  | 344 |
| chr23 | 8482533       | 8482876   | 344 |
| chr21 | 69149991      | 69150334  | 344 |
| chr19 | 61253823      | 61254166  | 344 |
| chr19 | 37892610      | 37892953  | 344 |
| chr18 | 54289217      | 54289560  | 344 |
| chr17 | 54615150      | 54615493  | 344 |
| chr16 | 49835009      | 49835352  | 344 |
| chr11 | 48678103      | 48678446  | 344 |
| chr9  | 100172425     | 100172767 | 343 |
| chr3  | 106865994     | 106866336 | 343 |
| chr3  | 105409021     | 105409363 | 343 |
| chr28 | 34020138      | 34020480  | 343 |

|       |           |           |     |
|-------|-----------|-----------|-----|
| chr25 | 41566165  | 41566507  | 343 |
| chr23 | 49796213  | 49796555  | 343 |
| chr23 | 11436127  | 11436469  | 343 |
| chr2  | 26981141  | 26981483  | 343 |
| chr19 | 46094134  | 46094476  | 343 |
| chr19 | 23773025  | 23773367  | 343 |
| chr18 | 56431717  | 56432059  | 343 |
| chr18 | 9804725   | 9805067   | 343 |
| chr18 | 3549631   | 3549973   | 343 |
| chr16 | 75654827  | 75655169  | 343 |
| chr16 | 71139742  | 71140084  | 343 |
| chr16 | 40611505  | 40611847  | 343 |
| chr16 | 23732238  | 23732580  | 343 |
| chr16 | 3306337   | 3306679   | 343 |
| chr15 | 23214285  | 23214627  | 343 |
| chr13 | 42011175  | 42011517  | 343 |
| chr13 | 41649659  | 41650001  | 343 |
| chr12 | 36411070  | 36411412  | 343 |
| chr12 | 15862254  | 15862596  | 343 |
| chr11 | 103880943 | 103881285 | 343 |
| chr11 | 16112494  | 16112836  | 343 |
| chr10 | 28353309  | 28353651  | 343 |
| chr10 | 17224133  | 17224475  | 343 |
| chr10 | 10502210  | 10502552  | 343 |
| chr6  | 115763898 | 115764239 | 342 |
| chr5  | 113187399 | 113187740 | 342 |
| chr5  | 111213919 | 111214260 | 342 |
| chr29 | 51833592  | 51833933  | 342 |
| chr28 | 11738163  | 11738504  | 342 |
| chr23 | 10029770  | 10030111  | 342 |
| chr20 | 4992473   | 4992814   | 342 |
| chr19 | 40440064  | 40440405  | 342 |
| chr19 | 29124371  | 29124712  | 342 |
| chr18 | 62454047  | 62454388  | 342 |
| chr18 | 33209752  | 33210093  | 342 |
| chr13 | 80415731  | 80416072  | 342 |
| chr13 | 54853618  | 54853959  | 342 |
| chr11 | 108399277 | 108399618 | 342 |
| chr1  | 128138704 | 128139045 | 342 |
| chr9  | 59371519  | 59371859  | 341 |
| chr9  | 46024885  | 46025225  | 341 |
| chr8  | 67027285  | 67027625  | 341 |
| chr7  | 7324524   | 7324864   | 341 |
| chr6  | 69106186  | 69106526  | 341 |
| chr5  | 121223338 | 121223678 | 341 |
| chr5  | 112043807 | 112044147 | 341 |
| chr4  | 123015988 | 123016328 | 341 |
| chr3  | 115993479 | 115993819 | 341 |
| chr3  | 51563458  | 51563798  | 341 |
| chr29 | 34965750  | 34966090  | 341 |

|       |               |           |     |
|-------|---------------|-----------|-----|
| chr28 | 42359587      | 42359927  | 341 |
| chr24 | 20835870      | 20836210  | 341 |
| chr2  | 133042717     | 133043057 | 341 |
| chr19 | 59521293      | 59521633  | 341 |
| chr18 | 63700041      | 63700381  | 341 |
| chr18 | 7217081       | 7217421   | 341 |
| chr17 | 58476898      | 58477238  | 341 |
| chr16 | 38566486      | 38566826  | 341 |
| chr16 | 954902 955242 | 341       |     |
| chr15 | 25340715      | 25341055  | 341 |
| chr15 | 24660274      | 24660614  | 341 |
| chr12 | 31192438      | 31192778  | 341 |
| chr12 | 22140798      | 22141138  | 341 |
| chr11 | 27686189      | 27686529  | 341 |
| chr10 | 58777826      | 58778166  | 341 |
| chr10 | 13585206      | 13585546  | 341 |
| chr10 | 12711101      | 12711441  | 341 |
| chr3  | 10575033      | 10575372  | 340 |
| chr3  | 4426160       | 4426499   | 340 |
| chr26 | 51534883      | 51535222  | 340 |
| chr25 | 22821474      | 22821813  | 340 |
| chr19 | 44895769      | 44896108  | 340 |
| chr18 | 55454739      | 55455078  | 340 |
| chr18 | 11325590      | 11325929  | 340 |
| chr17 | 60986048      | 60986387  | 340 |
| chr15 | 58006101      | 58006440  | 340 |
| chr11 | 9466096       | 9466435   | 340 |
| chr10 | 103059786     | 103060125 | 340 |
| chr9  | 108137285     | 108137623 | 339 |
| chr7  | 50611214      | 50611552  | 339 |
| chr5  | 111859223     | 111859561 | 339 |
| chr28 | 42365276      | 42365614  | 339 |
| chr28 | 4794599       | 4794937   | 339 |
| chr2  | 135175010     | 135175348 | 339 |
| chr2  | 128834711     | 128835049 | 339 |
| chr19 | 56457537      | 56457875  | 339 |
| chr19 | 39527633      | 39527971  | 339 |
| chr19 | 31267472      | 31267810  | 339 |
| chr19 | 29480875      | 29481213  | 339 |
| chr16 | 60233340      | 60233678  | 339 |
| chr15 | 76722758      | 76723096  | 339 |
| chr15 | 75283628      | 75283966  | 339 |
| chr13 | 77612642      | 77612980  | 339 |
| chr13 | 75755981      | 75756319  | 339 |
| chr13 | 2439900       | 2440238   | 339 |
| chr11 | 106076162     | 106076500 | 339 |
| chr11 | 103314370     | 103314708 | 339 |
| chr11 | 92616454      | 92616792  | 339 |
| chr8  | 40329523      | 40329860  | 338 |
| chr8  | 40303967      | 40304304  | 338 |

|       |           |           |     |
|-------|-----------|-----------|-----|
| chr5  | 118060488 | 118060825 | 338 |
| chr22 | 38938342  | 38938679  | 338 |
| chr21 | 19983873  | 19984210  | 338 |
| chr19 | 7795674   | 7796011   | 338 |
| chr18 | 64516402  | 64516739  | 338 |
| chr17 | 26907251  | 26907588  | 338 |
| chr16 | 47266822  | 47267159  | 338 |
| chr15 | 38526858  | 38527195  | 338 |
| chr13 | 59694743  | 59695080  | 338 |
| chr1  | 148205389 | 148205726 | 338 |
| chr5  | 122827111 | 122827447 | 337 |
| chr5  | 71539302  | 71539638  | 337 |
| chr3  | 33505534  | 33505870  | 337 |
| chr3  | 30225143  | 30225479  | 337 |
| chr3  | 20487972  | 20488308  | 337 |
| chr3  | 8966517   | 8966853   | 337 |
| chr29 | 34975832  | 34976168  | 337 |
| chr27 | 39114644  | 39114980  | 337 |
| chr26 | 24587530  | 24587866  | 337 |
| chr26 | 23520851  | 23521187  | 337 |
| chr23 | 50724166  | 50724502  | 337 |
| chr22 | 56429932  | 56430268  | 337 |
| chr22 | 16123660  | 16123996  | 337 |
| chr21 | 47611821  | 47612157  | 337 |
| chr21 | 32970164  | 32970500  | 337 |
| chr20 | 1284509   | 1284845   | 337 |
| chr2  | 127243490 | 127243826 | 337 |
| chr13 | 66847046  | 66847382  | 337 |
| chr11 | 74426673  | 74427009  | 337 |
| chr10 | 90747961  | 90748297  | 337 |
| chr6  | 121644551 | 121644886 | 336 |
| chr5  | 121347450 | 121347785 | 336 |
| chr5  | 115028415 | 115028750 | 336 |
| chr4  | 121716187 | 121716522 | 336 |
| chr4  | 116156016 | 116156351 | 336 |
| chr3  | 109000221 | 109000556 | 336 |
| chr3  | 30436704  | 30437039  | 336 |
| chr26 | 21969162  | 21969497  | 336 |
| chr25 | 28061806  | 28062141  | 336 |
| chr25 | 10576680  | 10577015  | 336 |
| chr25 | 3169561   | 3169896   | 336 |
| chr20 | 61776945  | 61777280  | 336 |
| chr2  | 23112711  | 23113046  | 336 |
| chr19 | 39363556  | 39363891  | 336 |
| chr19 | 13435483  | 13435818  | 336 |
| chr18 | 58899701  | 58900036  | 336 |
| chr16 | 38949276  | 38949611  | 336 |
| chr14 | 26118872  | 26119207  | 336 |
| chr13 | 68898213  | 68898548  | 336 |
| chr12 | 32148785  | 32149120  | 336 |

|       |           |           |     |
|-------|-----------|-----------|-----|
| chr9  | 45520447  | 45520781  | 335 |
| chr8  | 9365032   | 9365366   | 335 |
| chr7  | 18470629  | 18470963  | 335 |
| chr6  | 63033478  | 63033812  | 335 |
| chr5  | 125379677 | 125380011 | 335 |
| chr4  | 95475020  | 95475354  | 335 |
| chr4  | 69318361  | 69318695  | 335 |
| chr3  | 116395795 | 116396129 | 335 |
| chr3  | 30432363  | 30432697  | 335 |
| chr29 | 33968141  | 33968475  | 335 |
| chr27 | 17471564  | 17471898  | 335 |
| chr24 | 14765623  | 14765957  | 335 |
| chr23 | 48756766  | 48757100  | 335 |
| chr22 | 56179052  | 56179386  | 335 |
| chr19 | 27868877  | 27869211  | 335 |
| chr19 | 17673276  | 17673610  | 335 |
| chr18 | 56976523  | 56976857  | 335 |
| chr18 | 50610942  | 50611276  | 335 |
| chr18 | 23596377  | 23596711  | 335 |
| chr13 | 37662824  | 37663158  | 335 |
| chr13 | 35970645  | 35970979  | 335 |
| chr13 | 16322908  | 16323242  | 335 |
| chr12 | 31205567  | 31205901  | 335 |
| chr10 | 16726343  | 16726677  | 335 |
| chr1  | 74894352  | 74894686  | 335 |
| chrX  | 62918823  | 62919156  | 334 |
| chr9  | 53307868  | 53308201  | 334 |
| chr8  | 24395678  | 24396011  | 334 |
| chr7  | 18416061  | 18416394  | 334 |
| chr4  | 72533196  | 72533529  | 334 |
| chr3  | 115941559 | 115941892 | 334 |
| chr3  | 105485488 | 105485821 | 334 |
| chr3  | 29254294  | 29254627  | 334 |
| chr27 | 34743889  | 34744222  | 334 |
| chr22 | 43943797  | 43944130  | 334 |
| chr2  | 135626101 | 135626434 | 334 |
| chr2  | 134970285 | 134970618 | 334 |
| chr2  | 21542934  | 21543267  | 334 |
| chr19 | 54153167  | 54153500  | 334 |
| chr19 | 25416553  | 25416886  | 334 |
| chr19 | 25413782  | 25414115  | 334 |
| chr18 | 50663404  | 50663737  | 334 |
| chr17 | 15204995  | 15205328  | 334 |
| chr16 | 56112700  | 56113033  | 334 |
| chr16 | 3273956   | 3274289   | 334 |
| chr15 | 26748659  | 26748992  | 334 |
| chr13 | 69265457  | 69265790  | 334 |
| chr13 | 68061410  | 68061743  | 334 |
| chr9  | 26648267  | 26648599  | 333 |
| chr7  | 4663955   | 4664287   | 333 |

|       |           |           |     |
|-------|-----------|-----------|-----|
| chr3  | 13626362  | 13626694  | 333 |
| chr29 | 49861657  | 49861989  | 333 |
| chr29 | 44136913  | 44137245  | 333 |
| chr28 | 42371834  | 42372166  | 333 |
| chr25 | 1254061   | 1254393   | 333 |
| chr22 | 10947475  | 10947807  | 333 |
| chr2  | 138244492 | 138244824 | 333 |
| chr2  | 135752117 | 135752449 | 333 |
| chr2  | 99662047  | 99662379  | 333 |
| chr19 | 59514927  | 59515259  | 333 |
| chr19 | 23990914  | 23991246  | 333 |
| chr19 | 14826640  | 14826972  | 333 |
| chr18 | 40274108  | 40274440  | 333 |
| chr17 | 64287999  | 64288331  | 333 |
| chr16 | 50281239  | 50281571  | 333 |
| chr16 | 47666502  | 47666834  | 333 |
| chr16 | 46969085  | 46969417  | 333 |
| chr16 | 2229372   | 2229704   | 333 |
| chr12 | 84192986  | 84193318  | 333 |
| chr11 | 3887533   | 3887865   | 333 |
| chr10 | 67102679  | 67103011  | 333 |
| chrX  | 10430466  | 10430797  | 332 |
| chr8  | 93915663  | 93915994  | 332 |
| chr8  | 85439778  | 85440109  | 332 |
| chr8  | 23896139  | 23896470  | 332 |
| chr4  | 124288120 | 124288451 | 332 |
| chr3  | 116021044 | 116021375 | 332 |
| chr28 | 33429080  | 33429411  | 332 |
| chr26 | 14556442  | 14556773  | 332 |
| chr25 | 39176672  | 39177003  | 332 |
| chr25 | 29850065  | 29850396  | 332 |
| chr25 | 10914291  | 10914622  | 332 |
| chr24 | 58895897  | 58896228  | 332 |
| chr24 | 43721849  | 43722180  | 332 |
| chr21 | 65810219  | 65810550  | 332 |
| chr21 | 61778758  | 61779089  | 332 |
| chr20 | 67498437  | 67498768  | 332 |
| chr2  | 128600536 | 128600867 | 332 |
| chr2  | 111354206 | 111354537 | 332 |
| chr18 | 47497148  | 47497479  | 332 |
| chr18 | 45576549  | 45576880  | 332 |
| chr18 | 11643092  | 11643423  | 332 |
| chr11 | 74274646  | 74274977  | 332 |
| chr11 | 11740877  | 11741208  | 332 |
| chr10 | 68221670  | 68222001  | 332 |
| chr9  | 98751280  | 98751610  | 331 |
| chr8  | 89592638  | 89592968  | 331 |
| chr5  | 79242476  | 79242806  | 331 |
| chr4  | 77371134  | 77371464  | 331 |
| chr29 | 31408515  | 31408845  | 331 |



|       |               |           |     |
|-------|---------------|-----------|-----|
| chr26 | 45841599      | 45841929  | 331 |
| chr2  | 1496594       | 1496924   | 331 |
| chr19 | 37633902      | 37634232  | 331 |
| chr18 | 57606809      | 57607139  | 331 |
| chr18 | 45055603      | 45055933  | 331 |
| chr18 | 362560 362890 | 331       |     |
| chr11 | 96163446      | 96163776  | 331 |
| chr1  | 32934591      | 32934921  | 331 |
| chr7  | 19885928      | 19886257  | 330 |
| chr7  | 10020123      | 10020452  | 330 |
| chr5  | 119389631     | 119389960 | 330 |
| chr3  | 113977982     | 113978311 | 330 |
| chr29 | 30663099      | 30663428  | 330 |
| chr29 | 26880492      | 26880821  | 330 |
| chr25 | 16592395      | 16592724  | 330 |
| chr21 | 13693794      | 13694123  | 330 |
| chr19 | 47114710      | 47115039  | 330 |
| chr19 | 38780748      | 38781077  | 330 |
| chr17 | 53520104      | 53520433  | 330 |
| chr16 | 38983135      | 38983464  | 330 |
| chr13 | 59632644      | 59632973  | 330 |
| chr12 | 32224454      | 32224783  | 330 |
| chr11 | 70855426      | 70855755  | 330 |
| chr8  | 64490446      | 64490774  | 329 |
| chr8  | 7847915       | 7848243   | 329 |
| chr7  | 3937815       | 3938143   | 329 |
| chr5  | 75030001      | 75030329  | 329 |
| chr4  | 71861208      | 71861536  | 329 |
| chr4  | 13671372      | 13671700  | 329 |
| chr26 | 20191916      | 20192244  | 329 |
| chr22 | 60411534      | 60411862  | 329 |
| chr21 | 69146006      | 69146334  | 329 |
| chr21 | 65544659      | 65544987  | 329 |
| chr21 | 60743698      | 60744026  | 329 |
| chr19 | 30289212      | 30289540  | 329 |
| chr18 | 62533369      | 62533697  | 329 |
| chr18 | 54327905      | 54328233  | 329 |
| chr18 | 6969098       | 6969426   | 329 |
| chr17 | 70433120      | 70433448  | 329 |
| chr14 | 30395671      | 30395999  | 329 |
| chr13 | 40906748      | 40907076  | 329 |
| chr12 | 74239906      | 74240234  | 329 |
| chr10 | 21933804      | 21934132  | 329 |
| chr10 | 17328330      | 17328658  | 329 |
| chr10 | 8360280       | 8360608   | 329 |
| chr9  | 104911697     | 104912024 | 328 |
| chr8  | 106713438     | 106713765 | 328 |
| chr8  | 10298222      | 10298549  | 328 |
| chr7  | 50883863      | 50884190  | 328 |
| chr6  | 107495344     | 107495671 | 328 |

|       |           |           |     |
|-------|-----------|-----------|-----|
| chr3  | 33822337  | 33822664  | 328 |
| chr29 | 33670406  | 33670733  | 328 |
| chr27 | 14739941  | 14740268  | 328 |
| chr24 | 23957078  | 23957405  | 328 |
| chr20 | 37573521  | 37573848  | 328 |
| chr18 | 39492677  | 39493004  | 328 |
| chr17 | 64017093  | 64017420  | 328 |
| chr13 | 40586960  | 40587287  | 328 |
| chr11 | 104330817 | 104331144 | 328 |
| chr7  | 46530914  | 46531240  | 327 |
| chr5  | 102223684 | 102224010 | 327 |
| chr5  | 30611319  | 30611645  | 327 |
| chr26 | 49302516  | 49302842  | 327 |
| chr26 | 44041019  | 44041345  | 327 |
| chr20 | 8567077   | 8567403   | 327 |
| chr2  | 111605691 | 111606017 | 327 |
| chr19 | 25432723  | 25433049  | 327 |
| chr17 | 58384736  | 58385062  | 327 |
| chr16 | 46475852  | 46476178  | 327 |
| chr10 | 66606024  | 66606350  | 327 |
| chr10 | 16175003  | 16175329  | 327 |
| chr1  | 147635284 | 147635610 | 327 |
| chr9  | 35970243  | 35970568  | 326 |
| chr7  | 43730514  | 43730839  | 326 |
| chr26 | 18168227  | 18168552  | 326 |
| chr23 | 9728737   | 9729062   | 326 |
| chr21 | 7333105   | 7333430   | 326 |
| chr17 | 72460648  | 72460973  | 326 |
| chr17 | 70716100  | 70716425  | 326 |
| chr16 | 72310957  | 72311282  | 326 |
| chr13 | 42417168  | 42417493  | 326 |
| chrX  | 13648149  | 13648473  | 325 |
| chr3  | 123466462 | 123466786 | 325 |
| chr3  | 120940757 | 120941081 | 325 |
| chr3  | 39118698  | 39119022  | 325 |
| chr29 | 41644488  | 41644812  | 325 |
| chr26 | 21987037  | 21987361  | 325 |
| chr25 | 43204740  | 43205064  | 325 |
| chr23 | 50962739  | 50963063  | 325 |
| chr21 | 28681147  | 28681471  | 325 |
| chr21 | 19243454  | 19243778  | 325 |
| chr20 | 72561295  | 72561619  | 325 |
| chr20 | 1141646   | 1141970   | 325 |
| chr19 | 60718471  | 60718795  | 325 |
| chr18 | 51774313  | 51774637  | 325 |
| chr15 | 65737910  | 65738234  | 325 |
| chr14 | 76302208  | 76302532  | 325 |
| chr11 | 89503580  | 89503904  | 325 |
| chr11 | 82660019  | 82660343  | 325 |
| chr10 | 17153383  | 17153707  | 325 |

|       |               |           |     |
|-------|---------------|-----------|-----|
| chrX  | 78511193      | 78511516  | 324 |
| chr8  | 72354003      | 72354326  | 324 |
| chr8  | 63737509      | 63737832  | 324 |
| chr3  | 114676798     | 114677121 | 324 |
| chr3  | 106582043     | 106582366 | 324 |
| chr22 | 48223983      | 48224306  | 324 |
| chr22 | 16606686      | 16607009  | 324 |
| chr21 | 64819811      | 64820134  | 324 |
| chr20 | 35134646      | 35134969  | 324 |
| chr2  | 5040082       | 5040405   | 324 |
| chr19 | 59518172      | 59518495  | 324 |
| chr19 | 54794525      | 54794848  | 324 |
| chr19 | 38289862      | 38290185  | 324 |
| chr18 | 17982934      | 17983257  | 324 |
| chr18 | 11790871      | 11791194  | 324 |
| chr17 | 57694657      | 57694980  | 324 |
| chr16 | 47220304      | 47220627  | 324 |
| chr13 | 39817412      | 39817735  | 324 |
| chr10 | 79256347      | 79256670  | 324 |
| chr10 | 74687002      | 74687325  | 324 |
| chr1  | 75268683      | 75269006  | 324 |
| chr8  | 44143448      | 44143770  | 323 |
| chr6  | 121055822     | 121056144 | 323 |
| chr24 | 60832923      | 60833245  | 323 |
| chr22 | 54580339      | 54580661  | 323 |
| chr22 | 30304751      | 30305073  | 323 |
| chr19 | 45275948      | 45276270  | 323 |
| chr18 | 11696625      | 11696947  | 323 |
| chr17 | 68483590      | 68483912  | 323 |
| chr16 | 947072 947394 | 323       |     |
| chr15 | 33730208      | 33730530  | 323 |
| chr13 | 75838655      | 75838977  | 323 |
| chr13 | 40338527      | 40338849  | 323 |
| chr11 | 109670929     | 109671251 | 323 |
| chr11 | 104903813     | 104904135 | 323 |
| chr1  | 142741899     | 142742221 | 323 |
| chr7  | 38188409      | 38188730  | 322 |
| chr5  | 60168385      | 60168706  | 322 |
| chr5  | 51814372      | 51814693  | 322 |
| chr4  | 116683736     | 116684057 | 322 |
| chr3  | 121534412     | 121534733 | 322 |
| chr28 | 193693 194014 | 322       |     |
| chr26 | 48455518      | 48455839  | 322 |
| chr26 | 18794274      | 18794595  | 322 |
| chr2  | 31662811      | 31663132  | 322 |
| chr17 | 73902470      | 73902791  | 322 |
| chr16 | 38941303      | 38941624  | 322 |
| chr13 | 53333208      | 53333529  | 322 |
| chr11 | 28496929      | 28497250  | 322 |
| chr1  | 149419125     | 149419446 | 322 |

|       |           |           |     |
|-------|-----------|-----------|-----|
| chr9  | 100173770 | 100174090 | 321 |
| chr8  | 99569820  | 99570140  | 321 |
| chr5  | 117212160 | 117212480 | 321 |
| chr24 | 44641763  | 44642083  | 321 |
| chr21 | 64454048  | 64454368  | 321 |
| chr21 | 6557766   | 6558086   | 321 |
| chr2  | 136700190 | 136700510 | 321 |
| chr19 | 64686928  | 64687248  | 321 |
| chr18 | 6255812   | 6256132   | 321 |
| chr16 | 43867126  | 43867446  | 321 |
| chr15 | 64556850  | 64557170  | 321 |
| chr15 | 33729486  | 33729806  | 321 |
| chr14 | 21590944  | 21591264  | 321 |
| chr14 | 7755326   | 7755646   | 321 |
| chr13 | 79711498  | 79711818  | 321 |
| chr11 | 21673808  | 21674128  | 321 |
| chr10 | 16876244  | 16876564  | 321 |
| chr7  | 18451542  | 18451861  | 320 |
| chr27 | 26642219  | 26642538  | 320 |
| chr26 | 20850787  | 20851106  | 320 |
| chr24 | 64992338  | 64992657  | 320 |
| chr23 | 27272732  | 27273051  | 320 |
| chr23 | 8360560   | 8360879   | 320 |
| chr22 | 17799396  | 17799715  | 320 |
| chr22 | 7235991   | 7236310   | 320 |
| chr21 | 55734970  | 55735289  | 320 |
| chr21 | 18914525  | 18914844  | 320 |
| chr21 | 6493269   | 6493588   | 320 |
| chr19 | 63618980  | 63619299  | 320 |
| chr19 | 58180217  | 58180536  | 320 |
| chr19 | 54170696  | 54171015  | 320 |
| chr19 | 38315308  | 38315627  | 320 |
| chr13 | 77549860  | 77550179  | 320 |
| chr11 | 7248079   | 7248398   | 320 |
| chr10 | 16735726  | 16736045  | 320 |
| chr1  | 123092147 | 123092466 | 320 |
| chr9  | 35999732  | 36000050  | 319 |
| chr6  | 99449815  | 99450133  | 319 |
| chr5  | 118055519 | 118055837 | 319 |
| chr4  | 121731267 | 121731585 | 319 |
| chr3  | 116630935 | 116631253 | 319 |
| chr29 | 26576868  | 26577186  | 319 |
| chr24 | 60082698  | 60083016  | 319 |
| chr23 | 30358999  | 30359317  | 319 |
| chr23 | 28887021  | 28887339  | 319 |
| chr23 | 27823233  | 27823551  | 319 |
| chr2  | 135588002 | 135588320 | 319 |
| chr19 | 59396588  | 59396906  | 319 |
| chr17 | 69817927  | 69818245  | 319 |
| chr16 | 23958030  | 23958348  | 319 |

|       |           |           |     |
|-------|-----------|-----------|-----|
| chr15 | 34592546  | 34592864  | 319 |
| chr13 | 55340294  | 55340612  | 319 |
| chr13 | 42393199  | 42393517  | 319 |
| chr13 | 41005890  | 41006208  | 319 |
| chr10 | 18062972  | 18063290  | 319 |
| chr8  | 109043577 | 109043894 | 318 |
| chr5  | 103603341 | 103603658 | 318 |
| chr4  | 71607760  | 71608077  | 318 |
| chr4  | 69213662  | 69213979  | 318 |
| chr3  | 112282229 | 112282546 | 318 |
| chr29 | 41755285  | 41755602  | 318 |
| chr28 | 12426072  | 12426389  | 318 |
| chr27 | 35368137  | 35368454  | 318 |
| chr26 | 43684663  | 43684980  | 318 |
| chr24 | 59039074  | 59039391  | 318 |
| chr19 | 54158405  | 54158722  | 318 |
| chr18 | 11532799  | 11533116  | 318 |
| chr17 | 61284933  | 61285250  | 318 |
| chr15 | 20481641  | 20481958  | 318 |
| chr14 | 63486728  | 63487045  | 318 |
| chr13 | 56032658  | 56032975  | 318 |
| chr13 | 42478959  | 42479276  | 318 |
| chr11 | 106247707 | 106248024 | 318 |
| chrX  | 11023183  | 11023499  | 317 |
| chr7  | 5695628   | 5695944   | 317 |
| chr3  | 36041311  | 36041627  | 317 |
| chr3  | 22572513  | 22572829  | 317 |
| chr3  | 15563342  | 15563658  | 317 |
| chr29 | 36389749  | 36390065  | 317 |
| chr28 | 33567287  | 33567603  | 317 |
| chr27 | 35832419  | 35832735  | 317 |
| chr24 | 64476971  | 64477287  | 317 |
| chr23 | 8284972   | 8285288   | 317 |
| chr22 | 51501376  | 51501692  | 317 |
| chr21 | 34540065  | 34540381  | 317 |
| chr20 | 74769337  | 74769653  | 317 |
| chr20 | 29506967  | 29507283  | 317 |
| chr2  | 134607461 | 134607777 | 317 |
| chr2  | 95025944  | 95026260  | 317 |
| chr19 | 59461496  | 59461812  | 317 |
| chr19 | 53143615  | 53143931  | 317 |
| chr6  | 121459364 | 121459679 | 316 |
| chr4  | 96308466  | 96308781  | 316 |
| chr3  | 121267118 | 121267433 | 316 |
| chr28 | 25529997  | 25530312  | 316 |
| chr26 | 22288727  | 22289042  | 316 |
| chr26 | 20203289  | 20203604  | 316 |
| chr25 | 40897534  | 40897849  | 316 |
| chr24 | 61102115  | 61102430  | 316 |
| chr24 | 44642827  | 44643142  | 316 |

|       |           |           |     |
|-------|-----------|-----------|-----|
| chr22 | 60182424  | 60182739  | 316 |
| chr20 | 13796118  | 13796433  | 316 |
| chr2  | 99683245  | 99683560  | 316 |
| chr19 | 15004408  | 15004723  | 316 |
| chr13 | 57480379  | 57480694  | 316 |
| chr12 | 31291803  | 31292118  | 316 |
| chr12 | 25038704  | 25039019  | 316 |
| chr10 | 2406971   | 2407286   | 316 |
| chr7  | 15102229  | 15102543  | 315 |
| chr5  | 120099030 | 120099344 | 315 |
| chr5  | 115526122 | 115526436 | 315 |
| chr5  | 113112174 | 113112488 | 315 |
| chr5  | 30865415  | 30865729  | 315 |
| chr4  | 72323828  | 72324142  | 315 |
| chr3  | 97900230  | 97900544  | 315 |
| chr28 | 36455909  | 36456223  | 315 |
| chr20 | 66541802  | 66542116  | 315 |
| chr19 | 52777970  | 52778284  | 315 |
| chr18 | 52596064  | 52596378  | 315 |
| chr18 | 9465263   | 9465577   | 315 |
| chr16 | 76356150  | 76356464  | 315 |
| chr16 | 39474031  | 39474345  | 315 |
| chr5  | 40129188  | 40129501  | 314 |
| chr5  | 28672981  | 28673294  | 314 |
| chr4  | 116859858 | 116860171 | 314 |
| chr28 | 25526976  | 25527289  | 314 |
| chr25 | 35350865  | 35351178  | 314 |
| chr24 | 44906122  | 44906435  | 314 |
| chr22 | 14919009  | 14919322  | 314 |
| chr19 | 13418797  | 13419110  | 314 |
| chr18 | 43381460  | 43381773  | 314 |
| chr16 | 77390475  | 77390788  | 314 |
| chr13 | 58265819  | 58266132  | 314 |
| chr13 | 46430171  | 46430484  | 314 |
| chr5  | 115903451 | 115903763 | 313 |
| chr4  | 4594671   | 4594983   | 313 |
| chr28 | 30807865  | 30808177  | 313 |
| chr27 | 35369856  | 35370168  | 313 |
| chr22 | 16385044  | 16385356  | 313 |
| chr22 | 10169364  | 10169676  | 313 |
| chr2  | 132506027 | 132506339 | 313 |
| chr2  | 125116006 | 125116318 | 313 |
| chr19 | 27905004  | 27905316  | 313 |
| chr19 | 7784257   | 7784569   | 313 |
| chr18 | 50864543  | 50864855  | 313 |
| chr16 | 3251131   | 3251443   | 313 |
| chr14 | 65127942  | 65128254  | 313 |
| chr13 | 41670675  | 41670987  | 313 |
| chr12 | 31364807  | 31365119  | 313 |
| chr11 | 98426592  | 98426904  | 313 |

|       |           |           |     |
|-------|-----------|-----------|-----|
| chr11 | 44988369  | 44988681  | 313 |
| chr10 | 24175383  | 24175695  | 313 |
| chr5  | 111555231 | 111555542 | 312 |
| chr29 | 41610639  | 41610950  | 312 |
| chr26 | 20856682  | 20856993  | 312 |
| chr24 | 60910731  | 60911042  | 312 |
| chr24 | 47674027  | 47674338  | 312 |
| chr23 | 43491458  | 43491769  | 312 |
| chr23 | 27967084  | 27967395  | 312 |
| chr21 | 28327757  | 28328068  | 312 |
| chr21 | 26790019  | 26790330  | 312 |
| chr20 | 6592241   | 6592552   | 312 |
| chr2  | 132173101 | 132173412 | 312 |
| chr2  | 61111686  | 61111997  | 312 |
| chr19 | 6527645   | 6527956   | 312 |
| chr18 | 20249819  | 20250130  | 312 |
| chr16 | 48279297  | 48279608  | 312 |
| chr15 | 21453703  | 21454014  | 312 |
| chr13 | 73350365  | 73350676  | 312 |
| chr10 | 17069763  | 17070074  | 312 |
| chr8  | 7769877   | 7770187   | 311 |
| chr7  | 51365981  | 51366291  | 311 |
| chr4  | 98484644  | 98484954  | 311 |
| chr29 | 36824937  | 36825247  | 311 |
| chr26 | 50346476  | 50346786  | 311 |
| chr26 | 43677380  | 43677690  | 311 |
| chr26 | 31871249  | 31871559  | 311 |
| chr24 | 20680781  | 20681091  | 311 |
| chr22 | 10172069  | 10172379  | 311 |
| chr2  | 134424489 | 134424799 | 311 |
| chr19 | 46329348  | 46329658  | 311 |
| chr19 | 38270687  | 38270997  | 311 |
| chr18 | 50714796  | 50715106  | 311 |
| chr18 | 47701715  | 47702025  | 311 |
| chr13 | 59095151  | 59095461  | 311 |
| chr13 | 45357611  | 45357921  | 311 |
| chr13 | 17815924  | 17816234  | 311 |
| chr10 | 7641602   | 7641912   | 311 |
| chr6  | 122451891 | 122452200 | 310 |
| chr6  | 108652881 | 108653190 | 310 |
| chr4  | 63978868  | 63979177  | 310 |
| chr3  | 106609090 | 106609399 | 310 |
| chr3  | 51879999  | 51880308  | 310 |
| chr29 | 34292375  | 34292684  | 310 |
| chr28 | 42322161  | 42322470  | 310 |
| chr25 | 37214202  | 37214511  | 310 |
| chr25 | 26712270  | 26712579  | 310 |
| chr20 | 74779595  | 74779904  | 310 |
| chr14 | 8053639   | 8053948   | 310 |
| chr13 | 60385852  | 60386161  | 310 |

|       |           |           |     |
|-------|-----------|-----------|-----|
| chr13 | 59755883  | 59756192  | 310 |
| chr11 | 43176620  | 43176929  | 310 |
| chr11 | 31121795  | 31122104  | 310 |
| chr11 | 12870133  | 12870442  | 310 |
| chr11 | 9217395   | 9217704   | 310 |
| chr11 | 7074639   | 7074948   | 310 |
| chr11 | 4199553   | 4199862   | 310 |
| chr10 | 47326812  | 47327121  | 310 |
| chr1  | 82862707  | 82863016  | 310 |
| chr7  | 51897258  | 51897566  | 309 |
| chr5  | 30279509  | 30279817  | 309 |
| chr4  | 79088993  | 79089301  | 309 |
| chr3  | 121910458 | 121910766 | 309 |
| chr25 | 39386191  | 39386499  | 309 |
| chr22 | 50826907  | 50827215  | 309 |
| chr22 | 44123250  | 44123558  | 309 |
| chr21 | 64461374  | 64461682  | 309 |
| chr2  | 139368681 | 139368989 | 309 |
| chr2  | 98994100  | 98994408  | 309 |
| chr19 | 38673109  | 38673417  | 309 |
| chr16 | 74658279  | 74658587  | 309 |
| chr14 | 36737541  | 36737849  | 309 |
| chr14 | 20762145  | 20762453  | 309 |
| chr13 | 75998669  | 75998977  | 309 |
| chr13 | 60665433  | 60665741  | 309 |
| chr13 | 59697994  | 59698302  | 309 |
| chr11 | 97744263  | 97744571  | 309 |
| chr10 | 69101438  | 69101746  | 309 |
| chr1  | 131395605 | 131395913 | 309 |
| chr3  | 98614528  | 98614835  | 308 |
| chr28 | 33632823  | 33633130  | 308 |
| chr26 | 40639994  | 40640301  | 308 |
| chr23 | 48762107  | 48762414  | 308 |
| chr23 | 27952725  | 27953032  | 308 |
| chr23 | 27938484  | 27938791  | 308 |
| chr22 | 18288647  | 18288954  | 308 |
| chr21 | 48675334  | 48675641  | 308 |
| chr21 | 18436431  | 18436738  | 308 |
| chr2  | 136611177 | 136611484 | 308 |
| chr2  | 131016902 | 131017209 | 308 |
| chr19 | 56063498  | 56063805  | 308 |
| chr17 | 59495734  | 59496041  | 308 |
| chr12 | 29898663  | 29898970  | 308 |
| chr12 | 14189846  | 14190153  | 308 |
| chr10 | 17220443  | 17220750  | 308 |
| chr9  | 98097770  | 98098076  | 307 |
| chr8  | 8109481   | 8109787   | 307 |
| chr7  | 96499132  | 96499438  | 307 |
| chr7  | 51373171  | 51373477  | 307 |
| chr3  | 121387699 | 121388005 | 307 |



|       |           |           |     |
|-------|-----------|-----------|-----|
| chr3  | 20759593  | 20759899  | 307 |
| chr26 | 18494348  | 18494654  | 307 |
| chr23 | 8805095   | 8805401   | 307 |
| chr20 | 71601220  | 71601526  | 307 |
| chr19 | 60530730  | 60531036  | 307 |
| chr18 | 4613400   | 4613706   | 307 |
| chr17 | 73171102  | 73171408  | 307 |
| chr16 | 67309666  | 67309972  | 307 |
| chr15 | 29997004  | 29997310  | 307 |
| chr12 | 83768054  | 83768360  | 307 |
| chr10 | 68226105  | 68226411  | 307 |
| chr10 | 15071121  | 15071427  | 307 |
| chr9  | 100781288 | 100781593 | 306 |
| chr7  | 10408616  | 10408921  | 306 |
| chr5  | 10606333  | 10606638  | 306 |
| chr4  | 115876553 | 115876858 | 306 |
| chr3  | 111506703 | 111507008 | 306 |
| chr26 | 49300575  | 49300880  | 306 |
| chr23 | 11258329  | 11258634  | 306 |
| chr20 | 2367292   | 2367597   | 306 |
| chr18 | 11811412  | 11811717  | 306 |
| chr18 | 7268052   | 7268357   | 306 |
| chr17 | 70256656  | 70256961  | 306 |
| chr13 | 66845551  | 66845856  | 306 |
| chr11 | 102151737 | 102152042 | 306 |
| chr10 | 25956004  | 25956309  | 306 |
| chr8  | 60224124  | 60224428  | 305 |
| chr3  | 127860803 | 127861107 | 305 |
| chr29 | 41970110  | 41970414  | 305 |
| chr25 | 3272644   | 3272948   | 305 |
| chr17 | 75893910  | 75894214  | 305 |
| chr17 | 69486517  | 69486821  | 305 |
| chr17 | 63413660  | 63413964  | 305 |
| chr15 | 65669220  | 65669524  | 305 |
| chr13 | 66990298  | 66990602  | 305 |
| chr11 | 90205161  | 90205465  | 305 |
| chr8  | 104642866 | 104643169 | 304 |
| chr7  | 39664869  | 39665172  | 304 |
| chr7  | 10969249  | 10969552  | 304 |
| chr6  | 36503006  | 36503309  | 304 |
| chr5  | 28693259  | 28693562  | 304 |
| chr4  | 53165621  | 53165924  | 304 |
| chr26 | 18733640  | 18733943  | 304 |
| chr22 | 53966283  | 53966586  | 304 |
| chr21 | 19210527  | 19210830  | 304 |
| chr2  | 10214678  | 10214981  | 304 |
| chr19 | 43166358  | 43166661  | 304 |
| chr19 | 42687041  | 42687344  | 304 |
| chr18 | 56735894  | 56736197  | 304 |
| chr18 | 7251068   | 7251371   | 304 |

|       |               |           |     |
|-------|---------------|-----------|-----|
| chr14 | 857128 857431 | 304       |     |
| chr12 | 20028560      | 20028863  | 304 |
| chr11 | 99699397      | 99699700  | 304 |
| chr1  | 75059035      | 75059338  | 304 |
| chr8  | 78500721      | 78501023  | 303 |
| chr8  | 45767774      | 45768076  | 303 |
| chr8  | 1627652       | 1627954   | 303 |
| chr3  | 115493013     | 115493315 | 303 |
| chr29 | 45779701      | 45780003  | 303 |
| chr25 | 28189832      | 28190134  | 303 |
| chr25 | 3082384       | 3082686   | 303 |
| chr24 | 20762425      | 20762727  | 303 |
| chr19 | 30695675      | 30695977  | 303 |
| chr16 | 41509505      | 41509807  | 303 |
| chr15 | 37128992      | 37129294  | 303 |
| chr11 | 107189841     | 107190143 | 303 |
| chr9  | 29470319      | 29470620  | 302 |
| chr6  | 99804451      | 99804752  | 302 |
| chr4  | 121563264     | 121563565 | 302 |
| chr4  | 79192133      | 79192434  | 302 |
| chr4  | 51267188      | 51267489  | 302 |
| chr3  | 111488542     | 111488843 | 302 |
| chr3  | 111329263     | 111329564 | 302 |
| chr28 | 26087428      | 26087729  | 302 |
| chr26 | 50751828      | 50752129  | 302 |
| chr22 | 60780385      | 60780686  | 302 |
| chr2  | 111754295     | 111754596 | 302 |
| chr19 | 47270598      | 47270899  | 302 |
| chr19 | 29694692      | 29694993  | 302 |
| chr18 | 45990867      | 45991168  | 302 |
| chr18 | 39480297      | 39480598  | 302 |
| chr16 | 42943625      | 42943926  | 302 |
| chr13 | 59059951      | 59060252  | 302 |
| chr12 | 15866023      | 15866324  | 302 |
| chr11 | 105929310     | 105929611 | 302 |
| chr8  | 108711546     | 108711846 | 301 |
| chr7  | 5450593       | 5450893   | 301 |
| chr5  | 33567279      | 33567579  | 301 |
| chr29 | 17792595      | 17792895  | 301 |
| chr28 | 38965737      | 38966037  | 301 |
| chr27 | 39491903      | 39492203  | 301 |
| chr26 | 19897024      | 19897324  | 301 |
| chr23 | 14263096      | 14263396  | 301 |
| chr21 | 68939814      | 68940114  | 301 |
| chr21 | 64455339      | 64455639  | 301 |
| chr2  | 140633376     | 140633676 | 301 |
| chr18 | 62705329      | 62705629  | 301 |
| chr18 | 49264580      | 49264880  | 301 |
| chr17 | 64719407      | 64719707  | 301 |
| chr15 | 33722068      | 33722368  | 301 |

|       |           |           |     |
|-------|-----------|-----------|-----|
| chr15 | 22763058  | 22763358  | 301 |
| chr15 | 19791872  | 19792172  | 301 |
| chr14 | 7274737   | 7275037   | 301 |
| chr1  | 68431785  | 68432085  | 301 |
| chrX  | 9096914   | 9097213   | 300 |
| chr9  | 105845622 | 105845921 | 300 |
| chr6  | 106947868 | 106948167 | 300 |
| chr6  | 51514688  | 51514987  | 300 |
| chr5  | 123680960 | 123681259 | 300 |
| chr5  | 112183835 | 112184134 | 300 |
| chr3  | 99180267  | 99180566  | 300 |
| chr3  | 51846268  | 51846567  | 300 |
| chr3  | 26122474  | 26122773  | 300 |
| chr26 | 39284056  | 39284355  | 300 |
| chr23 | 20461725  | 20462024  | 300 |
| chr20 | 8757139   | 8757438   | 300 |
| chr2  | 108803736 | 108804035 | 300 |
| chr19 | 58944024  | 58944323  | 300 |
| chr19 | 27096931  | 27097230  | 300 |
| chr18 | 58544129  | 58544428  | 300 |
| chr18 | 57361066  | 57361365  | 300 |
| chr18 | 11151839  | 11152138  | 300 |
| chr16 | 61280660  | 61280959  | 300 |
| chr16 | 46542196  | 46542495  | 300 |
| chr15 | 33495473  | 33495772  | 300 |
| chr13 | 54792889  | 54793188  | 300 |
| chr13 | 51462889  | 51463188  | 300 |
| chr11 | 100877709 | 100878008 | 300 |
| chr11 | 28494228  | 28494527  | 300 |
| chrX  | 52961932  | 52962230  | 299 |
| chr9  | 77196022  | 77196320  | 299 |
| chr8  | 60099111  | 60099409  | 299 |
| chr5  | 94855207  | 94855505  | 299 |
| chr5  | 94235871  | 94236169  | 299 |
| chr4  | 121344215 | 121344513 | 299 |
| chr25 | 12714447  | 12714745  | 299 |
| chr18 | 49487504  | 49487802  | 299 |
| chr17 | 56148941  | 56149239  | 299 |
| chr15 | 74547654  | 74547952  | 299 |
| chr13 | 77693171  | 77693469  | 299 |
| chr13 | 76419965  | 76420263  | 299 |
| chr13 | 75664609  | 75664907  | 299 |
| chr13 | 53886942  | 53887240  | 299 |
| chr4  | 67931033  | 67931330  | 298 |
| chr3  | 127183696 | 127183993 | 298 |
| chr29 | 42899516  | 42899813  | 298 |
| chr29 | 27756176  | 27756473  | 298 |
| chr19 | 56609810  | 56610107  | 298 |
| chr19 | 38609006  | 38609303  | 298 |
| chr17 | 57801758  | 57802055  | 298 |

|       |           |           |     |
|-------|-----------|-----------|-----|
| chr16 | 38775136  | 38775433  | 298 |
| chr10 | 7599539   | 7599836   | 298 |
| chr9  | 104902567 | 104902863 | 297 |
| chr5  | 122275941 | 122276237 | 297 |
| chr4  | 96073544  | 96073840  | 297 |
| chr25 | 3960717   | 3961013   | 297 |
| chr24 | 61116258  | 61116554  | 297 |
| chr23 | 52598116  | 52598412  | 297 |
| chr22 | 29797754  | 29798050  | 297 |
| chr19 | 59123397  | 59123693  | 297 |
| chr16 | 43113547  | 43113843  | 297 |
| chr16 | 39452935  | 39453231  | 297 |
| chr14 | 21396907  | 21397203  | 297 |
| chr11 | 88097835  | 88098131  | 297 |
| chr11 | 2338980   | 2339276   | 297 |
| chr10 | 47325647  | 47325943  | 297 |
| chr8  | 65247859  | 65248154  | 296 |
| chr5  | 116837606 | 116837901 | 296 |
| chr5  | 111674439 | 111674734 | 296 |
| chr5  | 30229837  | 30230132  | 296 |
| chr5  | 10363717  | 10364012  | 296 |
| chr3  | 98229380  | 98229675  | 296 |
| chr3  | 36030986  | 36031281  | 296 |
| chr25 | 4643999   | 4644294   | 296 |
| chr23 | 45249666  | 45249961  | 296 |
| chr22 | 50782364  | 50782659  | 296 |
| chr21 | 59415756  | 59416051  | 296 |
| chr19 | 57686243  | 57686538  | 296 |
| chr18 | 11817412  | 11817707  | 296 |
| chr17 | 18379754  | 18380049  | 296 |
| chr14 | 63516030  | 63516325  | 296 |
| chr14 | 7843598   | 7843893   | 296 |
| chr1  | 64955967  | 64956262  | 296 |
| chr9  | 106563290 | 106563584 | 295 |
| chr5  | 121344740 | 121345034 | 295 |
| chr3  | 126917872 | 126918166 | 295 |
| chr29 | 43170094  | 43170388  | 295 |
| chr23 | 13642372  | 13642666  | 295 |
| chr22 | 29779491  | 29779785  | 295 |
| chr19 | 64352198  | 64352492  | 295 |
| chr19 | 56458878  | 56459172  | 295 |
| chr16 | 3373628   | 3373922   | 295 |
| chr13 | 55004195  | 55004489  | 295 |
| chr12 | 79975630  | 79975924  | 295 |
| chr11 | 104447836 | 104448130 | 295 |
| chr11 | 81329798  | 81330092  | 295 |
| chr11 | 28548391  | 28548685  | 295 |
| chr1  | 124059201 | 124059495 | 295 |
| chr5  | 120107311 | 120107604 | 294 |
| chr5  | 113133484 | 113133777 | 294 |

|       |           |           |     |
|-------|-----------|-----------|-----|
| chr4  | 123293601 | 123293894 | 294 |
| chr4  | 123125009 | 123125302 | 294 |
| chr26 | 22336809  | 22337102  | 294 |
| chr23 | 8359082   | 8359375   | 294 |
| chr19 | 23748035  | 23748328  | 294 |
| chr19 | 15277697  | 15277990  | 294 |
| chr18 | 23011636  | 23011929  | 294 |
| chr17 | 68586348  | 68586641  | 294 |
| chr16 | 47523190  | 47523483  | 294 |
| chr15 | 74519675  | 74519968  | 294 |
| chr15 | 22267409  | 22267702  | 294 |
| chr12 | 12094236  | 12094529  | 294 |
| chr11 | 66567206  | 66567499  | 294 |
| chr8  | 90193989  | 90194281  | 293 |
| chr6  | 106945133 | 106945425 | 293 |
| chr4  | 121464515 | 121464807 | 293 |
| chr3  | 105154368 | 105154660 | 293 |
| chr27 | 15266925  | 15267217  | 293 |
| chr22 | 60208342  | 60208634  | 293 |
| chr22 | 51446573  | 51446865  | 293 |
| chr2  | 126154989 | 126155281 | 293 |
| chr2  | 20892031  | 20892323  | 293 |
| chr19 | 64032845  | 64033137  | 293 |
| chr18 | 52759527  | 52759819  | 293 |
| chr16 | 76356839  | 76357131  | 293 |
| chr16 | 58602332  | 58602624  | 293 |
| chr15 | 31958411  | 31958703  | 293 |
| chr14 | 23233794  | 23234086  | 293 |
| chr11 | 105030904 | 105031196 | 293 |
| chr11 | 70644209  | 70644501  | 293 |
| chr10 | 88363756  | 88364048  | 293 |
| chr9  | 35565626  | 35565917  | 292 |
| chr7  | 61086243  | 61086534  | 292 |
| chr5  | 61495558  | 61495849  | 292 |
| chr5  | 28884023  | 28884314  | 292 |
| chr4  | 85444687  | 85444978  | 292 |
| chr28 | 15325855  | 15326146  | 292 |
| chr26 | 41022851  | 41023142  | 292 |
| chr25 | 3235769   | 3236060   | 292 |
| chr24 | 60587074  | 60587365  | 292 |
| chr23 | 10611006  | 10611297  | 292 |
| chr22 | 50597358  | 50597649  | 292 |
| chr21 | 26623908  | 26624199  | 292 |
| chr19 | 54850983  | 54851274  | 292 |
| chr18 | 11726099  | 11726390  | 292 |
| chr17 | 65923770  | 65924061  | 292 |
| chr13 | 67454225  | 67454516  | 292 |
| chr13 | 61908650  | 61908941  | 292 |
| chr11 | 106781984 | 106782275 | 292 |
| chr1  | 136934668 | 136934959 | 292 |

|       |               |           |     |
|-------|---------------|-----------|-----|
| chr1  | 82914520      | 82914811  | 292 |
| chr7  | 42571757      | 42572047  | 291 |
| chr7  | 38517069      | 38517359  | 291 |
| chr6  | 119363577     | 119363867 | 291 |
| chr5  | 115165631     | 115165921 | 291 |
| chr5  | 113922017     | 113922307 | 291 |
| chr5  | 29138947      | 29139237  | 291 |
| chr4  | 48873788      | 48874078  | 291 |
| chr4  | 31607693      | 31607983  | 291 |
| chr3  | 119276632     | 119276922 | 291 |
| chr22 | 15963618      | 15963908  | 291 |
| chr22 | 7238248       | 7238538   | 291 |
| chr21 | 47526591      | 47526881  | 291 |
| chr21 | 24396422      | 24396712  | 291 |
| chr19 | 40535906      | 40536196  | 291 |
| chr18 | 65965066      | 65965356  | 291 |
| chr18 | 4045547       | 4045837   | 291 |
| chr18 | 2244267       | 2244557   | 291 |
| chr13 | 41311541      | 41311831  | 291 |
| chr12 | 21569322      | 21569612  | 291 |
| chr11 | 72299683      | 72299973  | 291 |
| chr5  | 118452031     | 118452320 | 290 |
| chr4  | 121471252     | 121471541 | 290 |
| chr29 | 17648671      | 17648960  | 290 |
| chr27 | 35834266      | 35834555  | 290 |
| chr23 | 49572024      | 49572313  | 290 |
| chr21 | 47531004      | 47531293  | 290 |
| chr21 | 26549222      | 26549511  | 290 |
| chr20 | 38851706      | 38851995  | 290 |
| chr2  | 138305794     | 138306083 | 290 |
| chr2  | 124324189     | 124324478 | 290 |
| chr2  | 65514342      | 65514631  | 290 |
| chr19 | 29122592      | 29122881  | 290 |
| chr19 | 13415975      | 13416264  | 290 |
| chr18 | 47665091      | 47665380  | 290 |
| chr12 | 77379138      | 77379427  | 290 |
| chr11 | 106352902     | 106353191 | 290 |
| chr8  | 72145918      | 72146206  | 289 |
| chr7  | 4345677       | 4345965   | 289 |
| chr7  | 3018534       | 3018822   | 289 |
| chr26 | 46975283      | 46975571  | 289 |
| chr24 | 60997424      | 60997712  | 289 |
| chr21 | 67907174      | 67907462  | 289 |
| chr20 | 629265 629553 |           | 289 |
| chr19 | 44997652      | 44997940  | 289 |
| chr19 | 26266014      | 26266302  | 289 |
| chr19 | 22370888      | 22371176  | 289 |
| chr16 | 77493259      | 77493547  | 289 |
| chr14 | 42139515      | 42139803  | 289 |
| chr10 | 8360800       | 8361088   | 289 |

|       |             |           |     |
|-------|-------------|-----------|-----|
| chr4  | 118155657   | 118155944 | 288 |
| chr3  | 45696701    | 45696988  | 288 |
| chr29 | 36630549    | 36630836  | 288 |
| chr27 | 57228 57515 | 288       |     |
| chr26 | 18805960    | 18806247  | 288 |
| chr20 | 74818466    | 74818753  | 288 |
| chr2  | 111842114   | 111842401 | 288 |
| chr16 | 43418587    | 43418874  | 288 |
| chr16 | 41466425    | 41466712  | 288 |
| chr15 | 32625579    | 32625866  | 288 |
| chr14 | 29196647    | 29196934  | 288 |
| chr1  | 73150883    | 73151170  | 288 |
| chr5  | 123478007   | 123478293 | 287 |
| chr5  | 117602489   | 117602775 | 287 |
| chr5  | 111203017   | 111203303 | 287 |
| chr5  | 80246458    | 80246744  | 287 |
| chr4  | 33793668    | 33793954  | 287 |
| chr3  | 127881646   | 127881932 | 287 |
| chr28 | 26081307    | 26081593  | 287 |
| chr28 | 25431426    | 25431712  | 287 |
| chr27 | 26792709    | 26792995  | 287 |
| chr25 | 35421825    | 35422111  | 287 |
| chr23 | 38287931    | 38288217  | 287 |
| chr23 | 10359154    | 10359440  | 287 |
| chr18 | 43587808    | 43588094  | 287 |
| chr17 | 70269659    | 70269945  | 287 |
| chr17 | 15958338    | 15958624  | 287 |
| chr16 | 39063478    | 39063764  | 287 |
| chr12 | 31206299    | 31206585  | 287 |
| chr10 | 29860755    | 29861041  | 287 |
| chr1  | 76552358    | 76552644  | 287 |
| chr5  | 120096062   | 120096347 | 286 |
| chr3  | 15635720    | 15636005  | 286 |
| chr26 | 51593002    | 51593287  | 286 |
| chr23 | 44267210    | 44267495  | 286 |
| chr23 | 8576277     | 8576562   | 286 |
| chr21 | 61660112    | 61660397  | 286 |
| chr21 | 24449184    | 24449469  | 286 |
| chr20 | 64881976    | 64882261  | 286 |
| chr2  | 125422911   | 125423196 | 286 |
| chr19 | 38709198    | 38709483  | 286 |
| chr16 | 68999240    | 68999525  | 286 |
| chr16 | 38774239    | 38774524  | 286 |
| chr15 | 24495429    | 24495714  | 286 |
| chr15 | 22799144    | 22799429  | 286 |
| chr11 | 93760555    | 93760840  | 286 |
| chr10 | 66916208    | 66916493  | 286 |
| chr10 | 35481175    | 35481460  | 286 |
| chr10 | 5186097     | 5186382   | 286 |
| chr5  | 121244698   | 121244982 | 285 |

|       |           |           |     |
|-------|-----------|-----------|-----|
| chr5  | 111395860 | 111396144 | 285 |
| chr5  | 32841879  | 32842163  | 285 |
| chr5  | 30529209  | 30529493  | 285 |
| chr3  | 113383665 | 113383949 | 285 |
| chr29 | 38854419  | 38854703  | 285 |
| chr22 | 16302308  | 16302592  | 285 |
| chr19 | 43637833  | 43638117  | 285 |
| chr18 | 11725615  | 11725899  | 285 |
| chr18 | 8076338   | 8076622   | 285 |
| chr13 | 10982036  | 10982320  | 285 |
| chr7  | 5314598   | 5314881   | 284 |
| chr6  | 61755869  | 61756152  | 284 |
| chr4  | 120606516 | 120606799 | 284 |
| chr4  | 87712403  | 87712686  | 284 |
| chr4  | 13149455  | 13149738  | 284 |
| chr3  | 123247702 | 123247985 | 284 |
| chr3  | 16739122  | 16739405  | 284 |
| chr3  | 9198180   | 9198463   | 284 |
| chr28 | 34057018  | 34057301  | 284 |
| chr28 | 11374790  | 11375073  | 284 |
| chr25 | 37458132  | 37458415  | 284 |
| chr20 | 4987904   | 4988187   | 284 |
| chr18 | 51023912  | 51024195  | 284 |
| chr16 | 44149452  | 44149735  | 284 |
| chr14 | 40046092  | 40046375  | 284 |
| chr10 | 20899421  | 20899704  | 284 |
| chr7  | 15027541  | 15027823  | 283 |
| chr4  | 79038586  | 79038868  | 283 |
| chr4  | 26476195  | 26476477  | 283 |
| chr3  | 89888934  | 89889216  | 283 |
| chr23 | 15842500  | 15842782  | 283 |
| chr22 | 48313178  | 48313460  | 283 |
| chr22 | 30018787  | 30019069  | 283 |
| chr19 | 32595482  | 32595764  | 283 |
| chr13 | 79647204  | 79647486  | 283 |
| chr13 | 40332110  | 40332392  | 283 |
| chr13 | 21885683  | 21885965  | 283 |
| chr5  | 29150323  | 29150604  | 282 |
| chr28 | 34045521  | 34045802  | 282 |
| chr26 | 19928471  | 19928752  | 282 |
| chr24 | 48172551  | 48172832  | 282 |
| chr23 | 27856525  | 27856806  | 282 |
| chr19 | 25596461  | 25596742  | 282 |
| chr11 | 75149474  | 75149755  | 282 |
| chr1  | 148009527 | 148009808 | 282 |
| chr29 | 33068045  | 33068325  | 281 |
| chr27 | 1474541   | 1474821   | 281 |
| chr23 | 7593455   | 7593735   | 281 |
| chr22 | 56093366  | 56093646  | 281 |
| chr21 | 65807094  | 65807374  | 281 |



|       |               |           |     |
|-------|---------------|-----------|-----|
| chr2  | 138414871     | 138415151 | 281 |
| chr15 | 74694272      | 74694552  | 281 |
| chr12 | 82916561      | 82916841  | 281 |
| chr11 | 100325731     | 100326011 | 281 |
| chr11 | 89846515      | 89846795  | 281 |
| chr10 | 72500677      | 72500957  | 281 |
| chr7  | 52250474      | 52250753  | 280 |
| chr4  | 123373784     | 123374063 | 280 |
| chr3  | 115420982     | 115421261 | 280 |
| chr25 | 39325253      | 39325532  | 280 |
| chr24 | 45137082      | 45137361  | 280 |
| chr21 | 28152602      | 28152881  | 280 |
| chr20 | 75192248      | 75192527  | 280 |
| chr2  | 123712308     | 123712587 | 280 |
| chr16 | 2252634       | 2252913   | 280 |
| chr15 | 51737103      | 51737382  | 280 |
| chr14 | 30807544      | 30807823  | 280 |
| chr13 | 68207483      | 68207762  | 280 |
| chr13 | 66723551      | 66723830  | 280 |
| chr12 | 34327290      | 34327569  | 280 |
| chr11 | 108401218     | 108401497 | 280 |
| chr11 | 71078417      | 71078696  | 280 |
| chr10 | 32490283      | 32490562  | 280 |
| chr1  | 1672804       | 1673083   | 280 |
| chr3  | 105409996     | 105410274 | 279 |
| chr3  | 15651173      | 15651451  | 279 |
| chr2  | 21136590      | 21136868  | 279 |
| chr19 | 23058746      | 23059024  | 279 |
| chr13 | 41994356      | 41994634  | 279 |
| chr10 | 77489998      | 77490276  | 279 |
| chr5  | 112578011     | 112578288 | 278 |
| chr3  | 54808779      | 54809056  | 278 |
| chr3  | 35327269      | 35327546  | 278 |
| chr26 | 47932631      | 47932908  | 278 |
| chr22 | 30454134      | 30454411  | 278 |
| chr21 | 33123686      | 33123963  | 278 |
| chr2  | 130159552     | 130159829 | 278 |
| chr2  | 111948579     | 111948856 | 278 |
| chr19 | 59305624      | 59305901  | 278 |
| chr19 | 25212506      | 25212783  | 278 |
| chr19 | 14565126      | 14565403  | 278 |
| chr16 | 42868903      | 42869180  | 278 |
| chr15 | 73743902      | 73744179  | 278 |
| chr11 | 28495763      | 28496040  | 278 |
| chr11 | 303019 303296 |           | 278 |
| chr10 | 84299504      | 84299781  | 278 |
| chr7  | 51861467      | 51861743  | 277 |
| chr5  | 33562409      | 33562685  | 277 |
| chr5  | 30025975      | 30026251  | 277 |
| chr28 | 12432619      | 12432895  | 277 |

|       |           |           |     |
|-------|-----------|-----------|-----|
| chr25 | 42748572  | 42748848  | 277 |
| chr23 | 27821204  | 27821480  | 277 |
| chr22 | 12173376  | 12173652  | 277 |
| chr21 | 25141946  | 25142222  | 277 |
| chr19 | 53550780  | 53551056  | 277 |
| chr18 | 57013882  | 57014158  | 277 |
| chr18 | 56461165  | 56461441  | 277 |
| chr15 | 36590895  | 36591171  | 277 |
| chr13 | 74546565  | 74546841  | 277 |
| chr13 | 59226747  | 59227023  | 277 |
| chr10 | 88196866  | 88197142  | 277 |
| chr5  | 71657142  | 71657417  | 276 |
| chr26 | 42219911  | 42220186  | 276 |
| chr22 | 61139714  | 61139989  | 276 |
| chr21 | 65806233  | 65806508  | 276 |
| chr2  | 135050958 | 135051233 | 276 |
| chr2  | 115335394 | 115335669 | 276 |
| chr19 | 42700870  | 42701145  | 276 |
| chr19 | 17854218  | 17854493  | 276 |
| chr16 | 68729401  | 68729676  | 276 |
| chr16 | 20242246  | 20242521  | 276 |
| chr15 | 27933986  | 27934261  | 276 |
| chr1  | 157252183 | 157252458 | 276 |
| chrX  | 30968636  | 30968910  | 275 |
| chr7  | 60912624  | 60912898  | 275 |
| chr5  | 62074962  | 62075236  | 275 |
| chr4  | 122606062 | 122606336 | 275 |
| chr21 | 31010179  | 31010453  | 275 |
| chr2  | 99664099  | 99664373  | 275 |
| chr2  | 99167619  | 99167893  | 275 |
| chr15 | 75801337  | 75801611  | 275 |
| chr11 | 105651798 | 105652072 | 275 |
| chr10 | 36376382  | 36376656  | 275 |
| chr7  | 3019050   | 3019323   | 274 |
| chr6  | 92305393  | 92305666  | 274 |
| chr6  | 69744445  | 69744718  | 274 |
| chr28 | 11369105  | 11369378  | 274 |
| chr23 | 49674561  | 49674834  | 274 |
| chr20 | 73551758  | 73552031  | 274 |
| chr19 | 54864540  | 54864813  | 274 |
| chr19 | 54485294  | 54485567  | 274 |
| chr18 | 11548708  | 11548981  | 274 |
| chr14 | 7393107   | 7393380   | 274 |
| chr1  | 113589517 | 113589790 | 274 |
| chr6  | 26200035  | 26200307  | 273 |
| chr5  | 28765553  | 28765825  | 273 |
| chr25 | 42152562  | 42152834  | 273 |
| chr25 | 2967389   | 2967661   | 273 |
| chr16 | 30559876  | 30560148  | 273 |
| chr15 | 30055496  | 30055768  | 273 |

|       |           |           |     |
|-------|-----------|-----------|-----|
| chr11 | 74451281  | 74451553  | 273 |
| chr8  | 47602718  | 47602989  | 272 |
| chr6  | 47229065  | 47229336  | 272 |
| chr3  | 105193030 | 105193301 | 272 |
| chr29 | 36693188  | 36693459  | 272 |
| chr26 | 50762587  | 50762858  | 272 |
| chr23 | 31773752  | 31774023  | 272 |
| chr23 | 13686118  | 13686389  | 272 |
| chr23 | 8276188   | 8276459   | 272 |
| chr21 | 34904627  | 34904898  | 272 |
| chr19 | 26965749  | 26966020  | 272 |
| chr18 | 64343693  | 64343964  | 272 |
| chr16 | 39449489  | 39449760  | 272 |
| chr7  | 13253993  | 13254263  | 271 |
| chr5  | 121343692 | 121343962 | 271 |
| chr5  | 80708567  | 80708837  | 271 |
| chr4  | 29017162  | 29017432  | 271 |
| chr28 | 41299528  | 41299798  | 271 |
| chr28 | 26953000  | 26953270  | 271 |
| chr26 | 21960683  | 21960953  | 271 |
| chr26 | 20973109  | 20973379  | 271 |
| chr25 | 2365849   | 2366119   | 271 |
| chr23 | 15705633  | 15705903  | 271 |
| chr2  | 134961444 | 134961714 | 271 |
| chr17 | 69700650  | 69700920  | 271 |
| chr15 | 28500954  | 28501224  | 271 |
| chr10 | 81672953  | 81673223  | 271 |
| chr1  | 74963881  | 74964151  | 271 |
| chr4  | 7607670   | 7607939   | 270 |
| chr26 | 22416939  | 22417208  | 270 |
| chr23 | 31312655  | 31312924  | 270 |
| chr21 | 6475732   | 6476001   | 270 |
| chr16 | 75361599  | 75361868  | 270 |
| chr15 | 43208314  | 43208583  | 270 |
| chr15 | 36410676  | 36410945  | 270 |
| chr13 | 77548682  | 77548951  | 270 |
| chr13 | 29642952  | 29643221  | 270 |
| chr8  | 114056585 | 114056853 | 269 |
| chr8  | 24352054  | 24352322  | 269 |
| chr7  | 50553766  | 50554034  | 269 |
| chr7  | 21187537  | 21187805  | 269 |
| chr6  | 68950712  | 68950980  | 269 |
| chr5  | 110724092 | 110724360 | 269 |
| chr5  | 30589570  | 30589838  | 269 |
| chr4  | 14672177  | 14672445  | 269 |
| chr28 | 33463199  | 33463467  | 269 |
| chr20 | 3275792   | 3276060   | 269 |
| chr2  | 131145189 | 131145457 | 269 |
| chr2  | 111848489 | 111848757 | 269 |
| chr19 | 49667600  | 49667868  | 269 |

|       |               |           |     |
|-------|---------------|-----------|-----|
| chr18 | 47491818      | 47492086  | 269 |
| chr17 | 67119154      | 67119422  | 269 |
| chr16 | 61078133      | 61078401  | 269 |
| chr15 | 62405150      | 62405418  | 269 |
| chr10 | 20931418      | 20931686  | 269 |
| chr9  | 107599705     | 107599972 | 268 |
| chr5  | 80722354      | 80722621  | 268 |
| chr4  | 12304999      | 12305266  | 268 |
| chr25 | 11356308      | 11356575  | 268 |
| chr24 | 61006182      | 61006449  | 268 |
| chr22 | 50719709      | 50719976  | 268 |
| chr18 | 53306305      | 53306572  | 268 |
| chr14 | 64391637      | 64391904  | 268 |
| chr13 | 53818143      | 53818410  | 268 |
| chr9  | 100230443     | 100230709 | 267 |
| chr9  | 52386277      | 52386543  | 267 |
| chr9  | 51606726      | 51606992  | 267 |
| chr8  | 61902812      | 61903078  | 267 |
| chr6  | 27296250      | 27296516  | 267 |
| chr5  | 115489153     | 115489419 | 267 |
| chr3  | 22657660      | 22657926  | 267 |
| chr3  | 22474428      | 22474694  | 267 |
| chr26 | 22322307      | 22322573  | 267 |
| chr25 | 27138710      | 27138976  | 267 |
| chr22 | 56685127      | 56685393  | 267 |
| chr21 | 48695815      | 48696081  | 267 |
| chr20 | 37570303      | 37570569  | 267 |
| chr19 | 41232989      | 41233255  | 267 |
| chr19 | 29831967      | 29832233  | 267 |
| chr17 | 66490030      | 66490296  | 267 |
| chr13 | 70158648      | 70158914  | 267 |
| chr12 | 12215450      | 12215716  | 267 |
| chr11 | 98322117      | 98322383  | 267 |
| chr11 | 19899664      | 19899930  | 267 |
| chr1  | 123081332     | 123081598 | 267 |
| chr5  | 112012764     | 112013029 | 266 |
| chr28 | 25524203      | 25524468  | 266 |
| chr28 | 8229009       | 8229274   | 266 |
| chr21 | 25043839      | 25044104  | 266 |
| chr20 | 623550 623815 | 266       |     |
| chr20 | 530975 531240 | 266       |     |
| chr2  | 26588817      | 26589082  | 266 |
| chr2  | 23945142      | 23945407  | 266 |
| chr19 | 38706407      | 38706672  | 266 |
| chr11 | 2557096       | 2557361   | 266 |
| chr3  | 127882820     | 127883084 | 265 |
| chr29 | 46030579      | 46030843  | 265 |
| chr29 | 30701000      | 30701264  | 265 |
| chr28 | 34021474      | 34021738  | 265 |
| chr26 | 21622966      | 21623230  | 265 |

|       |           |           |     |
|-------|-----------|-----------|-----|
| chr23 | 27393351  | 27393615  | 265 |
| chr23 | 15209729  | 15209993  | 265 |
| chr22 | 12283433  | 12283697  | 265 |
| chr21 | 26297539  | 26297803  | 265 |
| chr2  | 136992598 | 136992862 | 265 |
| chr2  | 134384137 | 134384401 | 265 |
| chr2  | 99114638  | 99114902  | 265 |
| chr19 | 46811345  | 46811609  | 265 |
| chr17 | 68419742  | 68420006  | 265 |
| chr12 | 15335323  | 15335587  | 265 |
| chr11 | 44934445  | 44934709  | 265 |
| chr7  | 14244098  | 14244361  | 264 |
| chr5  | 29147378  | 29147641  | 264 |
| chr21 | 9435008   | 9435271   | 264 |
| chr2  | 136396490 | 136396753 | 264 |
| chr19 | 39677487  | 39677750  | 264 |
| chr18 | 11719720  | 11719983  | 264 |
| chr11 | 103309092 | 103309355 | 264 |
| chr10 | 2017051   | 2017314   | 264 |
| chr1  | 109485225 | 109485488 | 264 |
| chr7  | 40314949  | 40315211  | 263 |
| chr7  | 38217923  | 38218185  | 263 |
| chr3  | 26141493  | 26141755  | 263 |
| chr22 | 57212513  | 57212775  | 263 |
| chr22 | 54830797  | 54831059  | 263 |
| chr22 | 6471099   | 6471361   | 263 |
| chr19 | 30775082  | 30775344  | 263 |
| chr19 | 29701929  | 29702191  | 263 |
| chr19 | 27376026  | 27376288  | 263 |
| chr19 | 17132081  | 17132343  | 263 |
| chr18 | 11435821  | 11436083  | 263 |
| chr18 | 7597529   | 7597791   | 263 |
| chr16 | 58544320  | 58544582  | 263 |
| chr15 | 30131289  | 30131551  | 263 |
| chr13 | 74538430  | 74538692  | 263 |
| chr10 | 17247063  | 17247325  | 263 |
| chr5  | 122657433 | 122657694 | 262 |
| chr5  | 27467718  | 27467979  | 262 |
| chr29 | 48938898  | 48939159  | 262 |
| chr2  | 139855697 | 139855958 | 262 |
| chr2  | 74784109  | 74784370  | 262 |
| chr19 | 45147590  | 45147851  | 262 |
| chr17 | 69277626  | 69277887  | 262 |
| chr17 | 62507033  | 62507294  | 262 |
| chr16 | 77057571  | 77057832  | 262 |
| chr11 | 84466219  | 84466480  | 262 |
| chr8  | 107628526 | 107628786 | 261 |
| chr8  | 24497790  | 24498050  | 261 |
| chr7  | 49978139  | 49978399  | 261 |
| chr7  | 19300074  | 19300334  | 261 |

|       |           |           |     |
|-------|-----------|-----------|-----|
| chr5  | 30265396  | 30265656  | 261 |
| chr3  | 18614418  | 18614678  | 261 |
| chr27 | 20823012  | 20823272  | 261 |
| chr2  | 119949478 | 119949738 | 261 |
| chr19 | 56097653  | 56097913  | 261 |
| chr19 | 7532755   | 7533015   | 261 |
| chr14 | 22101302  | 22101562  | 261 |
| chr7  | 10408216  | 10408475  | 260 |
| chr7  | 5144010   | 5144269   | 260 |
| chr3  | 116021581 | 116021840 | 260 |
| chr22 | 30185704  | 30185963  | 260 |
| chr12 | 33705399  | 33705658  | 260 |
| chr11 | 14504930  | 14505189  | 260 |
| chr1  | 138156662 | 138156921 | 260 |
| chr29 | 34925643  | 34925901  | 259 |
| chr25 | 36746862  | 36747120  | 259 |
| chr25 | 1279891   | 1280149   | 259 |
| chr22 | 12088477  | 12088735  | 259 |
| chr20 | 33635950  | 33636208  | 259 |
| chr19 | 15249032  | 15249290  | 259 |
| chr14 | 10307072  | 10307330  | 259 |
| chr14 | 6359798   | 6360056   | 259 |
| chr11 | 106378536 | 106378794 | 259 |
| chr1  | 133441799 | 133442057 | 259 |
| chrX  | 59682118  | 59682375  | 258 |
| chr3  | 33847151  | 33847408  | 258 |
| chr21 | 64147841  | 64148098  | 258 |
| chr2  | 119574443 | 119574700 | 258 |
| chr19 | 39357786  | 39358043  | 258 |
| chr16 | 25414894  | 25415151  | 258 |
| chr11 | 14109441  | 14109698  | 258 |
| chrX  | 86526853  | 86527109  | 257 |
| chr8  | 7739947   | 7740203   | 257 |
| chr7  | 45887999  | 45888255  | 257 |
| chr6  | 121835785 | 121836041 | 257 |
| chr6  | 99479953  | 99480209  | 257 |
| chr4  | 123250117 | 123250373 | 257 |
| chr26 | 37938312  | 37938568  | 257 |
| chr18 | 12605765  | 12606021  | 257 |
| chr13 | 62412675  | 62412931  | 257 |
| chr11 | 46227014  | 46227270  | 257 |
| chr3  | 26142841  | 26143096  | 256 |
| chr3  | 25129023  | 25129278  | 256 |
| chr20 | 61821512  | 61821767  | 256 |
| chr20 | 6739732   | 6739987   | 256 |
| chr2  | 139850111 | 139850366 | 256 |
| chr18 | 62092002  | 62092257  | 256 |
| chr18 | 42059367  | 42059622  | 256 |
| chr17 | 72046454  | 72046709  | 256 |
| chr15 | 77740714  | 77740969  | 256 |

|       |               |           |     |
|-------|---------------|-----------|-----|
| chr10 | 72665307      | 72665562  | 256 |
| chrX  | 5647500       | 5647754   | 255 |
| chr5  | 80747079      | 80747333  | 255 |
| chr5  | 28857672      | 28857926  | 255 |
| chr23 | 12343177      | 12343431  | 255 |
| chr21 | 6432324       | 6432578   | 255 |
| chr19 | 38755317      | 38755571  | 255 |
| chr19 | 24363813      | 24364067  | 255 |
| chr19 | 12398836      | 12399090  | 255 |
| chr17 | 46710372      | 46710626  | 255 |
| chr15 | 29439721      | 29439975  | 255 |
| chr13 | 14943086      | 14943340  | 255 |
| chr12 | 74476016      | 74476270  | 255 |
| chr12 | 35669869      | 35670123  | 255 |
| chr12 | 14242858      | 14243112  | 255 |
| chr11 | 48642874      | 48643128  | 255 |
| chr10 | 81587534      | 81587788  | 255 |
| chr8  | 7612001       | 7612254   | 254 |
| chr3  | 105608135     | 105608388 | 254 |
| chr3  | 102649867     | 102650120 | 254 |
| chr28 | 41718877      | 41719130  | 254 |
| chr23 | 52636797      | 52637050  | 254 |
| chr23 | 28753982      | 28754235  | 254 |
| chr18 | 38814831      | 38815084  | 254 |
| chr18 | 647221 647474 | 254       |     |
| chr16 | 47761347      | 47761600  | 254 |
| chr14 | 21794103      | 21794356  | 254 |
| chr11 | 93049992      | 93050245  | 254 |
| chr10 | 19576455      | 19576708  | 254 |
| chr5  | 120378818     | 120379070 | 253 |
| chr25 | 43523977      | 43524229  | 253 |
| chr23 | 15855430      | 15855682  | 253 |
| chr21 | 4279679       | 4279931   | 253 |
| chr17 | 4302145       | 4302397   | 253 |
| chr15 | 25323384      | 25323636  | 253 |
| chr1  | 123141479     | 123141731 | 253 |
| chr5  | 29245853      | 29246104  | 252 |
| chr4  | 5074572       | 5074823   | 252 |
| chr3  | 33822666      | 33822917  | 252 |
| chr24 | 20772119      | 20772370  | 252 |
| chr19 | 38712333      | 38712584  | 252 |
| chr17 | 66891981      | 66892232  | 252 |
| chr16 | 23948368      | 23948619  | 252 |
| chr14 | 31501293      | 31501544  | 252 |
| chr11 | 14105011      | 14105262  | 252 |
| chrX  | 10557450      | 10557700  | 251 |
| chr9  | 93653478      | 93653728  | 251 |
| chr7  | 20240800      | 20241050  | 251 |
| chr6  | 108667236     | 108667486 | 251 |
| chr3  | 23643822      | 23644072  | 251 |

|       |               |           |     |
|-------|---------------|-----------|-----|
| chr25 | 34410806      | 34411056  | 251 |
| chr23 | 45548700      | 45548950  | 251 |
| chr21 | 59885060      | 59885310  | 251 |
| chr21 | 27993827      | 27994077  | 251 |
| chr20 | 75636705      | 75636955  | 251 |
| chr19 | 30628156      | 30628406  | 251 |
| chr17 | 48537717      | 48537967  | 251 |
| chr12 | 29389673      | 29389923  | 251 |
| chr7  | 44544479      | 44544728  | 250 |
| chr6  | 122455016     | 122455265 | 250 |
| chr5  | 113952215     | 113952464 | 250 |
| chr29 | 31675048      | 31675297  | 250 |
| chr15 | 22218275      | 22218524  | 250 |
| chr14 | 21033987      | 21034236  | 250 |
| chr12 | 11448340      | 11448589  | 250 |
| chr11 | 104919213     | 104919462 | 250 |
| chr11 | 100748047     | 100748296 | 250 |
| chr11 | 75309149      | 75309398  | 250 |
| chr8  | 85317065      | 85317313  | 249 |
| chr7  | 84678474      | 84678722  | 249 |
| chr7  | 21189622      | 21189870  | 249 |
| chr6  | 108557773     | 108558021 | 249 |
| chr29 | 33867965      | 33868213  | 249 |
| chr24 | 47897868      | 47898116  | 249 |
| chr18 | 47669682      | 47669930  | 249 |
| chr12 | 30983626      | 30983874  | 249 |
| chr10 | 85923276      | 85923524  | 249 |
| chr10 | 3525972       | 3526220   | 249 |
| chr1  | 147113786     | 147114034 | 249 |
| chr4  | 121580078     | 121580325 | 248 |
| chr22 | 36553338      | 36553585  | 248 |
| chr17 | 66174875      | 66175122  | 248 |
| chr15 | 25562641      | 25562888  | 248 |
| chr1  | 119181703     | 119181950 | 248 |
| chr8  | 72068196      | 72068442  | 247 |
| chr4  | 117760708     | 117760954 | 247 |
| chr3  | 105172858     | 105173104 | 247 |
| chr3  | 9186262       | 9186508   | 247 |
| chr27 | 856279 856525 | 247       | 247 |
| chr18 | 18039506      | 18039752  | 247 |
| chr18 | 7176498       | 7176744   | 247 |
| chr16 | 77719432      | 77719678  | 247 |
| chr13 | 55121735      | 55121981  | 247 |
| chr13 | 39049524      | 39049770  | 247 |
| chr1  | 82932261      | 82932507  | 247 |
| chr9  | 11540725      | 11540970  | 246 |
| chr7  | 17075389      | 17075634  | 246 |
| chr6  | 107357946     | 107358191 | 246 |
| chr5  | 81375288      | 81375533  | 246 |
| chr4  | 124339840     | 124340085 | 246 |



|       |               |           |     |
|-------|---------------|-----------|-----|
| chr3  | 24966852      | 24967097  | 246 |
| chr23 | 20003000      | 20003245  | 246 |
| chr2  | 136396984     | 136397229 | 246 |
| chr18 | 48671602      | 48671847  | 246 |
| chr17 | 59604102      | 59604347  | 246 |
| chr13 | 39692724      | 39692969  | 246 |
| chr3  | 116175035     | 116175279 | 245 |
| chr29 | 27020587      | 27020831  | 245 |
| chr24 | 20851951      | 20852195  | 245 |
| chr24 | 1218888       | 1219132   | 245 |
| chr19 | 25798096      | 25798340  | 245 |
| chr16 | 964312 964556 |           | 245 |
| chr13 | 80636827      | 80637071  | 245 |
| chr12 | 34297356      | 34297600  | 245 |
| chr12 | 34007707      | 34007951  | 245 |
| chr10 | 32529298      | 32529542  | 245 |
| chr8  | 73883047      | 73883290  | 244 |
| chr5  | 111846331     | 111846574 | 244 |
| chr24 | 5109206       | 5109449   | 244 |
| chr17 | 68540014      | 68540257  | 244 |
| chr17 | 63957212      | 63957455  | 244 |
| chr11 | 106746376     | 106746619 | 244 |
| chr10 | 90218897      | 90219140  | 244 |
| chr8  | 105126383     | 105126625 | 243 |
| chr3  | 111795058     | 111795300 | 243 |
| chr28 | 34176994      | 34177236  | 243 |
| chr20 | 66537033      | 66537275  | 243 |
| chr18 | 62702891      | 62703133  | 243 |
| chr18 | 53239220      | 53239462  | 243 |
| chr16 | 2291567       | 2291809   | 243 |
| chr14 | 66294824      | 66295066  | 243 |
| chr11 | 9418090       | 9418332   | 243 |
| chr5  | 81600299      | 81600540  | 242 |
| chr4  | 29022763      | 29023004  | 242 |
| chr29 | 36683856      | 36684097  | 242 |
| chr15 | 81355375      | 81355616  | 242 |
| chr13 | 53845399      | 53845640  | 242 |
| chr10 | 102664301     | 102664542 | 242 |
| chr26 | 50348574      | 50348814  | 241 |
| chr25 | 34460891      | 34461131  | 241 |
| chr25 | 17452599      | 17452839  | 241 |
| chr23 | 50771407      | 50771647  | 241 |
| chr2  | 129683818     | 129684058 | 241 |
| chr19 | 39401155      | 39401395  | 241 |
| chr13 | 74548718      | 74548958  | 241 |
| chr6  | 109639655     | 109639894 | 240 |
| chr6  | 107241258     | 107241497 | 240 |
| chr22 | 7214309       | 7214548   | 240 |
| chr21 | 34764775      | 34765014  | 240 |
| chr19 | 55751580      | 55751819  | 240 |

|       |               |           |     |
|-------|---------------|-----------|-----|
| chr18 | 11297016      | 11297255  | 240 |
| chr14 | 27989133      | 27989372  | 240 |
| chr13 | 41758108      | 41758347  | 240 |
| chr8  | 272463 272701 |           | 239 |
| chr5  | 119900883     | 119901121 | 239 |
| chr3  | 27921635      | 27921873  | 239 |
| chr25 | 20981301      | 20981539  | 239 |
| chr24 | 48597016      | 48597254  | 239 |
| chr23 | 13763723      | 13763961  | 239 |
| chr2  | 127527301     | 127527539 | 239 |
| chr19 | 59053760      | 59053998  | 239 |
| chr18 | 11312010      | 11312248  | 239 |
| chr22 | 16318134      | 16318371  | 238 |
| chr2  | 138693232     | 138693469 | 238 |
| chr2  | 132164771     | 132165008 | 238 |
| chr18 | 34786101      | 34786338  | 238 |
| chr17 | 68171824      | 68172061  | 238 |
| chr16 | 39335226      | 39335463  | 238 |
| chr12 | 17150552      | 17150789  | 238 |
| chr8  | 73845572      | 73845808  | 237 |
| chr7  | 57676988      | 57677224  | 237 |
| chr7  | 25378103      | 25378339  | 237 |
| chr5  | 114076910     | 114077146 | 237 |
| chr29 | 31459219      | 31459455  | 237 |
| chr24 | 44216463      | 44216699  | 237 |
| chr22 | 51263534      | 51263770  | 237 |
| chr18 | 51154460      | 51154696  | 237 |
| chr18 | 12435447      | 12435683  | 237 |
| chr17 | 5051078       | 5051314   | 237 |
| chr5  | 123619181     | 123619416 | 236 |
| chr4  | 104739458     | 104739693 | 236 |
| chr10 | 33170272      | 33170507  | 236 |
| chr3  | 30438450      | 30438684  | 235 |
| chr22 | 52718670      | 52718904  | 235 |
| chr2  | 26980415      | 26980649  | 235 |
| chr19 | 60847278      | 60847512  | 235 |
| chr19 | 41542855      | 41543089  | 235 |
| chr19 | 12379884      | 12380118  | 235 |
| chr10 | 25229940      | 25230174  | 235 |
| chr10 | 23771408      | 23771642  | 235 |
| chr7  | 18504027      | 18504260  | 234 |
| chr26 | 42506804      | 42507037  | 234 |
| chr22 | 3207138       | 3207371   | 234 |
| chr3  | 119708188     | 119708420 | 233 |
| chr3  | 119679345     | 119679577 | 233 |
| chr14 | 6776234       | 6776466   | 233 |
| chr13 | 22159917      | 22160149  | 233 |
| chr7  | 50654664      | 50654895  | 232 |
| chr29 | 41741777      | 41742008  | 232 |
| chr12 | 84217402      | 84217633  | 232 |

|       |           |           |     |
|-------|-----------|-----------|-----|
| chr10 | 17438315  | 17438546  | 232 |
| chr1  | 1525962   | 1526193   | 232 |
| chr6  | 115897964 | 115898194 | 231 |
| chr22 | 56231519  | 56231749  | 231 |
| chr9  | 23437933  | 23438162  | 230 |
| chr22 | 50852935  | 50853164  | 230 |
| chr22 | 16420176  | 16420405  | 230 |
| chr21 | 63278097  | 63278326  | 230 |
| chr12 | 30545990  | 30546219  | 230 |
| chr8  | 104239569 | 104239797 | 229 |
| chr5  | 28698293  | 28698521  | 229 |
| chr21 | 34558782  | 34559010  | 229 |
| chr8  | 10560463  | 10560690  | 228 |
| chr27 | 40780491  | 40780718  | 228 |
| chr21 | 68033573  | 68033800  | 228 |
| chr2  | 115109398 | 115109625 | 228 |
| chr19 | 58814424  | 58814651  | 228 |
| chr19 | 49669772  | 49669999  | 228 |
| chr3  | 33485474  | 33485700  | 227 |
| chr28 | 46083002  | 46083228  | 227 |
| chr2  | 138891836 | 138892062 | 227 |
| chr19 | 25411933  | 25412159  | 227 |
| chr16 | 60780217  | 60780443  | 227 |
| chr16 | 47121488  | 47121714  | 227 |
| chr11 | 70701289  | 70701515  | 227 |
| chr1  | 84796453  | 84796677  | 225 |
| chr4  | 99727025  | 99727248  | 224 |
| chr5  | 97534065  | 97534287  | 223 |
| chr3  | 36017067  | 36017289  | 223 |
| chr23 | 27220238  | 27220460  | 223 |
| chr18 | 53128390  | 53128612  | 223 |
| chr17 | 70512569  | 70512791  | 223 |
| chr11 | 100908569 | 100908791 | 223 |
| chr8  | 63944615  | 63944836  | 222 |
| chr21 | 33928471  | 33928692  | 222 |
| chr19 | 22330692  | 22330913  | 222 |
| chr7  | 43402172  | 43402392  | 221 |
| chr21 | 24472946  | 24473166  | 221 |
| chr19 | 54502810  | 54503030  | 221 |
| chr19 | 30341238  | 30341458  | 221 |
| chr22 | 50715892  | 50716111  | 220 |
| chr22 | 30276048  | 30276267  | 220 |
| chr2  | 25459569  | 25459788  | 220 |
| chr7  | 42595480  | 42595698  | 219 |
| chr23 | 23871226  | 23871443  | 218 |
| chr21 | 7108960   | 7109175   | 216 |
| chr3  | 11562612  | 11562826  | 215 |
| chr2  | 111848943 | 111849157 | 215 |
| chr19 | 23782703  | 23782917  | 215 |
| chr27 | 35396268  | 35396481  | 214 |

|       |               |           |     |
|-------|---------------|-----------|-----|
| chr18 | 27441969      | 27442180  | 212 |
| chr26 | 34891205      | 34891415  | 211 |
| chr22 | 48553206      | 48553415  | 210 |
| chr18 | 17821957      | 17822166  | 210 |
| chr19 | 57060432      | 57060640  | 209 |
| chr3  | 115080198     | 115080405 | 208 |
| chr5  | 112587976     | 112588180 | 205 |
| chr15 | 52707414      | 52707613  | 200 |
| chr12 | 85357264      | 85357463  | 200 |
| chr16 | 21271538      | 21271899  | 362 |
| chr8  | 24769821      | 24770130  | 310 |
| chr3  | 8819962       | 8820178   | 217 |
| chr8  | 73759398      | 73759671  | 274 |
| chr8  | 73308367      | 73308631  | 265 |
| chr9  | 87722603      | 87723013  | 411 |
| chr8  | 73848192      | 73848483  | 292 |
| chr21 | 52062438      | 52062642  | 205 |
| chr8  | 73734062      | 73734326  | 265 |
| chr13 | 68925505      | 68925920  | 416 |
| chr23 | 51681308      | 51681687  | 380 |
| chr13 | 42606303      | 42606576  | 274 |
| chr25 | 465491 465740 | 250       |     |
| chr13 | 58893562      | 58894378  | 817 |
| chr23 | 10525509      | 10526321  | 813 |
| chr3  | 102697209     | 102697936 | 728 |
| chr23 | 9461303       | 9462012   | 710 |
| chr9  | 106898569     | 106899226 | 658 |
| chr26 | 37960816      | 37961450  | 635 |
| chr29 | 49895718      | 49896341  | 624 |
| chr16 | 48573438      | 48574036  | 599 |
| chr14 | 852672 853257 | 586       |     |
| chr19 | 54823463      | 54824038  | 576 |
| chr2  | 1497318       | 1497890   | 573 |
| chr24 | 1719426       | 1719990   | 565 |
| chr16 | 59039817      | 59040374  | 558 |
| chr25 | 31872451      | 31872999  | 549 |
| chrX  | 61303061      | 61303608  | 548 |
| chr13 | 62348880      | 62349427  | 548 |
| chr22 | 30115697      | 30116240  | 544 |
| chr26 | 18295801      | 18296337  | 537 |
| chr22 | 30085435      | 30085966  | 532 |
| chr11 | 44966554      | 44967078  | 525 |
| chr14 | 76894105      | 76894627  | 523 |
| chr29 | 29703753      | 29704274  | 522 |
| chr25 | 33273278      | 33273796  | 519 |
| chr15 | 29242786      | 29243304  | 519 |
| chr23 | 27782058      | 27782571  | 514 |
| chr18 | 49474363      | 49474874  | 512 |
| chr17 | 72332910      | 72333419  | 510 |
| chr22 | 59663988      | 59664486  | 499 |

|       |               |           |     |
|-------|---------------|-----------|-----|
| chr11 | 44983012      | 44983497  | 486 |
| chr23 | 46392174      | 46392651  | 478 |
| chr3  | 15634654      | 15635129  | 476 |
| chr13 | 80078881      | 80079354  | 474 |
| chr19 | 44177028      | 44177489  | 462 |
| chr26 | 24958028      | 24958484  | 457 |
| chr21 | 65211024      | 65211478  | 455 |
| chr6  | 46669417      | 46669870  | 454 |
| chr2  | 132504743     | 132505196 | 454 |
| chr26 | 21768022      | 21768474  | 453 |
| chr4  | 118626636     | 118627087 | 452 |
| chr14 | 59390533      | 59390982  | 450 |
| chr11 | 103312531     | 103312980 | 450 |
| chr18 | 51524753      | 51525199  | 447 |
| chr4  | 81965219      | 81965661  | 443 |
| chr14 | 242133 242575 | 443       |     |
| chr9  | 106554966     | 106555407 | 442 |
| chr22 | 39295892      | 39296333  | 442 |
| chr7  | 15654768      | 15655207  | 440 |
| chr5  | 27466768      | 27467200  | 433 |
| chr22 | 50744502      | 50744933  | 432 |
| chr1  | 1649417       | 1649847   | 431 |
| chr22 | 50603407      | 50603833  | 427 |
| chr10 | 68234332      | 68234756  | 425 |
| chr17 | 56089350      | 56089768  | 419 |
| chrX  | 30642261      | 30642669  | 409 |
| chr6  | 96165271      | 96165679  | 409 |
| chr3  | 15390856      | 15391264  | 409 |
| chr2  | 131324177     | 131324582 | 406 |
| chr12 | 35607575      | 35607978  | 404 |
| chr23 | 52664018      | 52664420  | 403 |
| chr17 | 57836561      | 57836963  | 403 |
| chr7  | 43736376      | 43736774  | 399 |
| chr3  | 17297239      | 17297637  | 399 |
| chr18 | 12340804      | 12341202  | 399 |
| chr14 | 23256321      | 23256719  | 399 |
| chr27 | 35859367      | 35859763  | 397 |
| chr19 | 60715889      | 60716285  | 397 |
| chr21 | 11796563      | 11796958  | 396 |
| chr5  | 28550739      | 28551133  | 395 |
| chr26 | 50909700      | 50910094  | 395 |
| chr17 | 73211428      | 73211822  | 395 |
| chr17 | 70516771      | 70517165  | 395 |
| chr17 | 71960705      | 71961095  | 391 |
| chr21 | 5063558       | 5063946   | 389 |
| chr29 | 41615393      | 41615779  | 387 |
| chr25 | 2537328       | 2537713   | 386 |
| chr2  | 111753742     | 111754127 | 386 |
| chr18 | 17838282      | 17838667  | 386 |
| chr10 | 14994512      | 14994895  | 384 |

|       |           |           |     |
|-------|-----------|-----------|-----|
| chr12 | 82907447  | 82907829  | 383 |
| chr16 | 46463687  | 46464068  | 382 |
| chr24 | 59570705  | 59571085  | 381 |
| chr3  | 126087612 | 126087991 | 380 |
| chrX  | 87663462  | 87663840  | 379 |
| chr7  | 17399011  | 17399388  | 378 |
| chr15 | 81159063  | 81159440  | 378 |
| chr11 | 94370036  | 94370412  | 377 |
| chr28 | 41719229  | 41719604  | 376 |
| chr5  | 30838012  | 30838386  | 375 |
| chr19 | 29604351  | 29604724  | 374 |
| chr10 | 90945732  | 90946104  | 373 |
| chr11 | 76360784  | 76361155  | 372 |
| chr13 | 65745459  | 65745829  | 371 |
| chr3  | 118153376 | 118153742 | 367 |
| chr18 | 56822721  | 56823087  | 367 |
| chr14 | 39878676  | 39879042  | 367 |
| chr7  | 42188510  | 42188875  | 366 |
| chr7  | 15011609  | 15011971  | 363 |
| chr10 | 12841349  | 12841710  | 362 |
| chr15 | 51733548  | 51733908  | 361 |
| chr29 | 36474841  | 36475200  | 360 |
| chr26 | 18739289  | 18739644  | 356 |
| chr23 | 28788616  | 28788970  | 355 |
| chr16 | 44090121  | 44090473  | 353 |
| chr10 | 36840047  | 36840399  | 353 |
| chr4  | 71615536  | 71615883  | 348 |
| chr11 | 51007742  | 51008089  | 348 |
| chr1  | 57370870  | 57371216  | 347 |
| chr8  | 88721602  | 88721947  | 346 |
| chr3  | 35665270  | 35665614  | 345 |
| chr18 | 47878288  | 47878632  | 345 |
| chr19 | 47823084  | 47823427  | 344 |
| chr24 | 60783228  | 60783570  | 343 |
| chr13 | 80637827  | 80638169  | 343 |
| chr5  | 121424806 | 121425147 | 342 |
| chr13 | 57398684  | 57399025  | 342 |
| chr8  | 70825813  | 70826153  | 341 |
| chr8  | 102279121 | 102279460 | 340 |
| chr7  | 5153404   | 5153734   | 331 |
| chr10 | 88366310  | 88366639  | 330 |
| chr22 | 56229555  | 56229883  | 329 |
| chr9  | 29660221  | 29660546  | 326 |
| chr7  | 5678964   | 5679289   | 326 |
| chr23 | 16197277  | 16197602  | 326 |
| chr1  | 3090982   | 3091306   | 325 |
| chr21 | 47716100  | 47716423  | 324 |
| chr11 | 98477448  | 98477771  | 324 |
| chr19 | 17864100  | 17864418  | 319 |
| chr11 | 14504468  | 14504786  | 319 |

|       |           |           |     |
|-------|-----------|-----------|-----|
| chr2  | 37514693  | 37515010  | 318 |
| chr23 | 20454311  | 20454626  | 316 |
| chr2  | 21883472  | 21883787  | 316 |
| chr27 | 38505392  | 38505706  | 315 |
| chr28 | 34053432  | 34053740  | 309 |
| chr4  | 98563426  | 98563731  | 306 |
| chr13 | 60465549  | 60465852  | 304 |
| chr21 | 18411271  | 18411573  | 303 |
| chr8  | 80182217  | 80182516  | 300 |
| chr9  | 90585661  | 90585956  | 296 |
| chr19 | 54746981  | 54747273  | 293 |
| chr18 | 56580582  | 56580872  | 291 |
| chr22 | 50908493  | 50908780  | 288 |
| chr19 | 19360097  | 19360378  | 282 |
| chr17 | 63446233  | 63446502  | 270 |
| chr23 | 13642947  | 13643209  | 263 |
| chr25 | 37242603  | 37242863  | 261 |
| chr13 | 40949293  | 40949550  | 258 |
| chr10 | 81679330  | 81679570  | 241 |
| chr25 | 3164228   | 3165085   | 858 |
| chr4  | 123259150 | 123259857 | 708 |
| chr5  | 120047100 | 120047796 | 697 |
| chr5  | 28796723  | 28797418  | 696 |
| chr7  | 54942324  | 54943003  | 680 |
| chr19 | 59190709  | 59191360  | 652 |
| chr17 | 66512407  | 66513049  | 643 |
| chr14 | 8185270   | 8185910   | 641 |
| chr3  | 82608252  | 82608883  | 632 |
| chr1  | 145979702 | 145980333 | 632 |
| chr8  | 108812162 | 108812790 | 629 |
| chr13 | 35579066  | 35579685  | 620 |
| chr13 | 14985688  | 14986299  | 612 |
| chr19 | 34797439  | 34798048  | 610 |
| chr17 | 61000511  | 61001110  | 600 |
| chr3  | 20489030  | 20489628  | 599 |
| chr5  | 114080332 | 114080928 | 597 |
| chr22 | 14927107  | 14927696  | 590 |
| chr6  | 118501780 | 118502368 | 589 |
| chr13 | 54926767  | 54927345  | 579 |
| chr24 | 44056761  | 44057333  | 573 |
| chr11 | 90300880  | 90301449  | 570 |
| chr14 | 61512143  | 61512709  | 567 |
| chr2  | 108449779 | 108450341 | 563 |
| chr3  | 127794906 | 127795459 | 554 |
| chr25 | 38049261  | 38049792  | 532 |
| chr18 | 56531222  | 56531753  | 532 |
| chr24 | 53853649  | 53854178  | 530 |
| chr28 | 6846273   | 6846801   | 529 |
| chr29 | 31429485  | 31430008  | 524 |
| chr19 | 55304711  | 55305221  | 511 |

|       |               |           |     |
|-------|---------------|-----------|-----|
| chr3  | 8219402       | 8219910   | 509 |
| chr3  | 105605000     | 105605507 | 508 |
| chr16 | 77719894      | 77720399  | 506 |
| chr15 | 5862903       | 5863401   | 499 |
| chr29 | 49751970      | 49752462  | 493 |
| chr21 | 65548480      | 65548965  | 486 |
| chr4  | 21345870      | 21346351  | 482 |
| chr13 | 84227196      | 84227675  | 480 |
| chr13 | 59695271      | 59695750  | 480 |
| chr15 | 22797382      | 22797860  | 479 |
| chr29 | 42397737      | 42398210  | 474 |
| chr12 | 69084920      | 69085388  | 469 |
| chr13 | 54207210      | 54207671  | 462 |
| chr21 | 22721682      | 22722140  | 459 |
| chr25 | 43248188      | 43248645  | 458 |
| chr18 | 54553064      | 54553511  | 448 |
| chr2  | 134560899     | 134561344 | 446 |
| chr11 | 106291930     | 106292373 | 444 |
| chr22 | 53963150      | 53963589  | 440 |
| chr13 | 46655659      | 46656089  | 431 |
| chr28 | 1052009       | 1052438   | 430 |
| chr17 | 72710918      | 72711346  | 429 |
| chr3  | 113239459     | 113239881 | 423 |
| chr18 | 33709268      | 33709674  | 407 |
| chr23 | 6975291       | 6975689   | 399 |
| chr18 | 53311055      | 53311453  | 399 |
| chr1  | 67808913      | 67809310  | 398 |
| chr24 | 503703 504098 | 396       |     |
| chr7  | 46204491      | 46204884  | 394 |
| chr5  | 103810228     | 103810620 | 393 |
| chr29 | 41700486      | 41700878  | 393 |
| chr19 | 23725055      | 23725447  | 393 |
| chr4  | 101415090     | 101415481 | 392 |
| chr23 | 23755913      | 23756304  | 392 |
| chr19 | 54790413      | 54790801  | 389 |
| chr19 | 18430217      | 18430601  | 385 |
| chr10 | 12131040      | 12131424  | 385 |
| chr10 | 90464767      | 90465148  | 382 |
| chr26 | 39156641      | 39157021  | 381 |
| chr23 | 27859371      | 27859750  | 380 |
| chr17 | 73208930      | 73209307  | 378 |
| chr10 | 14995154      | 14995531  | 378 |
| chr6  | 109910748     | 109911122 | 375 |
| chr26 | 34192512      | 34192886  | 375 |
| chr12 | 31553187      | 31553561  | 375 |
| chr3  | 125574190     | 125574558 | 369 |
| chr7  | 80884069      | 80884429  | 361 |
| chr2  | 135640220     | 135640580 | 361 |
| chr19 | 26984123      | 26984481  | 359 |
| chr25 | 10399022      | 10399379  | 358 |



|       |               |           |     |
|-------|---------------|-----------|-----|
| chr23 | 30293069      | 30293426  | 358 |
| chr12 | 82615754      | 82616111  | 358 |
| chr11 | 48660862      | 48661218  | 357 |
| chr14 | 6385685       | 6386040   | 356 |
| chr3  | 22693129      | 22693481  | 353 |
| chr17 | 72962288      | 72962639  | 352 |
| chr16 | 34740388      | 34740739  | 352 |
| chr16 | 31701568      | 31701919  | 352 |
| chr8  | 77632569      | 77632914  | 346 |
| chr3  | 17392357      | 17392697  | 341 |
| chr26 | 37096789      | 37097128  | 340 |
| chr14 | 1918930       | 1919265   | 336 |
| chr10 | 20486351      | 20486686  | 336 |
| chr21 | 69036477      | 69036811  | 335 |
| chr7  | 52367298      | 52367630  | 333 |
| chr25 | 38550911      | 38551236  | 326 |
| chr2  | 136684687     | 136685012 | 326 |
| chr11 | 31053385      | 31053709  | 325 |
| chr11 | 11628406      | 11628728  | 323 |
| chr19 | 38600784      | 38601105  | 322 |
| chr26 | 51562780      | 51563100  | 321 |
| chr16 | 39470453      | 39470773  | 321 |
| chr17 | 53479216      | 53479534  | 319 |
| chr9  | 35463981      | 35464298  | 318 |
| chr25 | 11585583      | 11585894  | 312 |
| chr3  | 115096753     | 115097063 | 311 |
| chr26 | 37675228      | 37675536  | 309 |
| chr13 | 52091124      | 52091421  | 298 |
| chr26 | 21797254      | 21797549  | 296 |
| chr5  | 73849561      | 73849850  | 290 |
| chr5  | 30602160      | 30602444  | 285 |
| chr21 | 29891414      | 29891690  | 277 |
| chr10 | 36899123      | 36899394  | 272 |
| chr5  | 111222547     | 111222796 | 250 |
| chr3  | 123977073     | 123977312 | 240 |
| chr20 | 16813908      | 16814570  | 663 |
| chr4  | 68282249      | 68282835  | 587 |
| chr9  | 99308178      | 99308759  | 582 |
| chr22 | 18283241      | 18283810  | 570 |
| chr18 | 656842 657400 | 559       |     |
| chr8  | 63822799      | 63823353  | 555 |
| chr19 | 57301221      | 57301770  | 550 |
| chr14 | 21779856      | 21780400  | 545 |
| chr3  | 115987149     | 115987681 | 533 |
| chr19 | 63940839      | 63941367  | 529 |
| chr10 | 28400042      | 28400570  | 529 |
| chr4  | 118599250     | 118599756 | 507 |
| chr19 | 59078139      | 59078642  | 504 |
| chr24 | 34063092      | 34063589  | 498 |
| chr10 | 83848291      | 83848776  | 486 |

|       |               |           |     |
|-------|---------------|-----------|-----|
| chr3  | 26147170      | 26147648  | 479 |
| chr10 | 90033928      | 90034398  | 471 |
| chr11 | 98358133      | 98358596  | 464 |
| chr29 | 48812036      | 48812498  | 463 |
| chr26 | 50062453      | 50062915  | 463 |
| chr19 | 50706911      | 50707367  | 457 |
| chr22 | 7220183       | 7220637   | 455 |
| chr22 | 56421211      | 56421663  | 453 |
| chr9  | 106429543     | 106429992 | 450 |
| chr18 | 13560974      | 13561423  | 450 |
| chr11 | 34848593      | 34849038  | 446 |
| chr27 | 28112647      | 28113091  | 445 |
| chr23 | 50749926      | 50750367  | 442 |
| chr16 | 61280218      | 61280658  | 441 |
| chr23 | 44404406      | 44404832  | 427 |
| chr2  | 32727024      | 32727446  | 423 |
| chr23 | 48366057      | 48366463  | 407 |
| chr23 | 8414913       | 8415308   | 396 |
| chr2  | 139410068     | 139410462 | 395 |
| chr1  | 183576 183967 | 392       |     |
| chr1  | 146922585     | 146922975 | 391 |
| chr3  | 111651229     | 111651615 | 387 |
| chr15 | 26607504      | 26607887  | 384 |
| chr13 | 58966240      | 58966622  | 383 |
| chr21 | 66599333      | 66599710  | 378 |
| chr25 | 35565993      | 35566368  | 376 |
| chr8  | 24508176      | 24508549  | 374 |
| chr13 | 75647181      | 75647552  | 372 |
| chr8  | 104377185     | 104377555 | 371 |
| chr1  | 153530745     | 153531115 | 371 |
| chr15 | 27457859      | 27458227  | 369 |
| chr7  | 16510140      | 16510507  | 368 |
| chr19 | 59108435      | 59108802  | 368 |
| chr1  | 87334795      | 87335160  | 366 |
| chr28 | 27433068      | 27433432  | 365 |
| chr25 | 34214649      | 34215012  | 364 |
| chr21 | 27985448      | 27985811  | 364 |
| chr2  | 75821957      | 75822320  | 364 |
| chr7  | 37571448      | 37571808  | 361 |
| chr14 | 21253667      | 21254027  | 361 |
| chr10 | 86179064      | 86179422  | 359 |
| chr6  | 68055911      | 68056266  | 356 |
| chr6  | 121838572     | 121838925 | 354 |
| chr18 | 23565441      | 23565792  | 352 |
| chr25 | 2925879       | 2926229   | 351 |
| chr10 | 7316919       | 7317269   | 351 |
| chr5  | 117580690     | 117581039 | 350 |
| chr3  | 20579079      | 20579426  | 348 |
| chr19 | 41925550      | 41925894  | 345 |
| chr25 | 3236937       | 3237280   | 344 |

|       |           |           |     |
|-------|-----------|-----------|-----|
| chr16 | 2286122   | 2286463   | 342 |
| chr19 | 56488833  | 56489172  | 340 |
| chr7  | 3031022   | 3031359   | 338 |
| chr17 | 42744271  | 42744608  | 338 |
| chr29 | 36617574  | 36617909  | 336 |
| chr15 | 22183306  | 22183631  | 326 |
| chr23 | 8402621   | 8402945   | 325 |
| chr19 | 41265386  | 41265710  | 325 |
| chr10 | 5197219   | 5197542   | 324 |
| chr23 | 16521365  | 16521687  | 323 |
| chr11 | 104888029 | 104888348 | 320 |
| chr18 | 50587938  | 50588256  | 319 |
| chr17 | 66493686  | 66494000  | 315 |
| chr23 | 28056034  | 28056345  | 312 |
| chr17 | 69319362  | 69319671  | 310 |
| chr14 | 77342251  | 77342553  | 303 |
| chr10 | 16791367  | 16791668  | 302 |
| chr13 | 57400927  | 57401216  | 290 |
| chr23 | 12347889  | 12348176  | 288 |
| chr2  | 128155766 | 128156049 | 284 |
| chr4  | 117154278 | 117154560 | 283 |
| chr7  | 50426612  | 50426891  | 280 |
| chr21 | 6557456   | 6557730   | 275 |
| chr7  | 10171788  | 10172055  | 268 |
| chrX  | 77006042  | 77006296  | 255 |
| chr1  | 57550289  | 57550532  | 244 |
| chr29 | 34961304  | 34961956  | 653 |
| chr11 | 74425712  | 74426363  | 652 |
| chr10 | 36833488  | 36834107  | 620 |
| chr19 | 65261467  | 65262080  | 614 |
| chr15 | 25584000  | 25584609  | 610 |
| chr18 | 65322408  | 65323013  | 606 |
| chr25 | 34481719  | 34482304  | 586 |
| chr13 | 55470466  | 55471049  | 584 |
| chr17 | 64595668  | 64596248  | 581 |
| chr7  | 10939416  | 10939991  | 576 |
| chr2  | 68156733  | 68157292  | 560 |
| chr6  | 106946041 | 106946598 | 558 |
| chr3  | 18094874  | 18095419  | 546 |
| chr22 | 47831804  | 47832346  | 543 |
| chr23 | 17892141  | 17892681  | 541 |
| chr17 | 64025568  | 64026098  | 531 |
| chr16 | 46784114  | 46784635  | 522 |
| chr19 | 38598602  | 38599115  | 514 |
| chr19 | 23862132  | 23862643  | 512 |
| chr18 | 54209460  | 54209970  | 511 |
| chr7  | 16329196  | 16329699  | 504 |
| chr23 | 11015777  | 11016277  | 501 |
| chr18 | 53507326  | 53507814  | 489 |
| chr16 | 3670197   | 3670684   | 488 |

|       |           |           |     |
|-------|-----------|-----------|-----|
| chr15 | 28529653  | 28530139  | 487 |
| chr28 | 41180000  | 41180483  | 484 |
| chr13 | 61188171  | 61188652  | 482 |
| chr2  | 111385215 | 111385695 | 481 |
| chr13 | 42638274  | 42638748  | 475 |
| chr24 | 8046300   | 8046764   | 465 |
| chr16 | 2237935   | 2238396   | 462 |
| chr12 | 15336279  | 15336739  | 461 |
| chr1  | 87368523  | 87368973  | 451 |
| chr16 | 23970847  | 23971296  | 450 |
| chr19 | 39840302  | 39840745  | 444 |
| chr8  | 60192666  | 60193108  | 443 |
| chr23 | 15777819  | 15778255  | 437 |
| chr23 | 8260600   | 8261027   | 428 |
| chr15 | 38527484  | 38527911  | 428 |
| chr2  | 136946503 | 136946929 | 427 |
| chr21 | 69016213  | 69016638  | 426 |
| chr19 | 32593121  | 32593544  | 424 |
| chr4  | 122985105 | 122985526 | 422 |
| chr11 | 81754900  | 81755320  | 421 |
| chr19 | 52477971  | 52478390  | 420 |
| chr16 | 49363771  | 49364188  | 418 |
| chr19 | 43078243  | 43078657  | 415 |
| chr3  | 28678667  | 28679073  | 407 |
| chr25 | 8600020   | 8600426   | 407 |
| chr23 | 20637669  | 20638075  | 407 |
| chr26 | 22203714  | 22204118  | 405 |
| chr27 | 35933642  | 35934042  | 401 |
| chr28 | 43865709  | 43866108  | 400 |
| chr8  | 29196263  | 29196661  | 399 |
| chr7  | 16447339  | 16447737  | 399 |
| chr4  | 82138050  | 82138448  | 399 |
| chr3  | 8820236   | 8820634   | 399 |
| chr28 | 26077165  | 26077563  | 399 |
| chr24 | 56403835  | 56404233  | 399 |
| chr2  | 101815752 | 101816150 | 399 |
| chr19 | 45183050  | 45183448  | 399 |
| chr19 | 37929470  | 37929868  | 399 |
| chr19 | 31951293  | 31951691  | 399 |
| chr13 | 66989415  | 66989813  | 399 |
| chr11 | 92467734  | 92468132  | 399 |
| chr8  | 11525955  | 11526351  | 397 |
| chr5  | 80747361  | 80747757  | 397 |
| chr18 | 24334489  | 24334884  | 396 |
| chr22 | 58433900  | 58434294  | 395 |
| chr2  | 139075961 | 139076355 | 395 |
| chr2  | 130450689 | 130451083 | 395 |
| chr19 | 45125021  | 45125415  | 395 |
| chr29 | 41727465  | 41727858  | 394 |
| chr2  | 140272237 | 140272630 | 394 |

|       |           |           |     |
|-------|-----------|-----------|-----|
| chr18 | 11283958  | 11284351  | 394 |
| chr15 | 26862416  | 26862809  | 394 |
| chr11 | 76255560  | 76255953  | 394 |
| chr1  | 74066843  | 74067236  | 394 |
| chr5  | 111675532 | 111675924 | 393 |
| chr21 | 67763727  | 67764119  | 393 |
| chr18 | 63771157  | 63771549  | 393 |
| chr19 | 56317340  | 56317731  | 392 |
| chr18 | 38345963  | 38346354  | 392 |
| chr17 | 47766550  | 47766941  | 392 |
| chr12 | 4727064   | 4727455   | 392 |
| chr19 | 47387748  | 47388138  | 391 |
| chr5  | 60376494  | 60376883  | 390 |
| chr19 | 60511935  | 60512324  | 390 |
| chr8  | 24216596  | 24216984  | 389 |
| chr24 | 20394785  | 20395173  | 389 |
| chr13 | 11413705  | 11414093  | 389 |
| chr20 | 25686968  | 25687355  | 388 |
| chr19 | 38232607  | 38232994  | 388 |
| chr4  | 32114383  | 32114769  | 387 |
| chr24 | 44278333  | 44278719  | 387 |
| chr21 | 20712395  | 20712781  | 387 |
| chr18 | 55206708  | 55207094  | 387 |
| chr17 | 68667488  | 68667874  | 387 |
| chr26 | 20241552  | 20241937  | 386 |
| chr22 | 50613959  | 50614344  | 386 |
| chr10 | 17105331  | 17105716  | 386 |
| chr7  | 17926232  | 17926616  | 385 |
| chr29 | 50588128  | 50588512  | 385 |
| chr15 | 64144203  | 64144587  | 385 |
| chr13 | 53902268  | 53902652  | 385 |
| chr18 | 54179904  | 54180287  | 384 |
| chr11 | 104701336 | 104701719 | 384 |
| chr5  | 111651440 | 111651822 | 383 |
| chr13 | 59703968  | 59704350  | 383 |
| chr11 | 84459569  | 84459951  | 383 |
| chr29 | 30827978  | 30828359  | 382 |
| chr28 | 11622575  | 11622956  | 382 |
| chr19 | 63908090  | 63908471  | 382 |
| chr20 | 4201411   | 4201791   | 381 |
| chr19 | 12544479  | 12544859  | 381 |
| chr13 | 53208633  | 53209013  | 381 |
| chr7  | 42193910  | 42194289  | 380 |
| chr1  | 69471424  | 69471803  | 380 |
| chr7  | 19375186  | 19375564  | 379 |
| chr3  | 63256872  | 63257249  | 378 |
| chr17 | 74565927  | 74566304  | 378 |
| chr21 | 1975026   | 1975401   | 376 |
| chr8  | 8584587   | 8584961   | 375 |
| chr8  | 7555993   | 7556367   | 375 |

|       |           |           |     |
|-------|-----------|-----------|-----|
| chr22 | 55358213  | 55358587  | 375 |
| chr10 | 33927526  | 33927900  | 375 |
| chr19 | 56084939  | 56085312  | 374 |
| chr19 | 13478499  | 13478872  | 374 |
| chr21 | 6468655   | 6469027   | 373 |
| chr13 | 40496456  | 40496828  | 373 |
| chr10 | 11089909  | 11090281  | 373 |
| chr6  | 108667900 | 108668271 | 372 |
| chr5  | 115802578 | 115802949 | 372 |
| chr7  | 57581193  | 57581563  | 371 |
| chr23 | 20011399  | 20011769  | 371 |
| chr6  | 103278769 | 103279138 | 370 |
| chr18 | 45844347  | 45844716  | 370 |
| chr26 | 23889662  | 23890030  | 369 |
| chr8  | 93140101  | 93140467  | 367 |
| chr19 | 37704134  | 37704500  | 367 |
| chr5  | 113928118 | 113928483 | 366 |
| chr14 | 1825845   | 1826210   | 366 |
| chr11 | 70875009  | 70875374  | 366 |
| chr3  | 115053979 | 115054343 | 365 |
| chr24 | 50991858  | 50992222  | 365 |
| chr19 | 26983434  | 26983797  | 364 |
| chr24 | 58628688  | 58629050  | 363 |
| chr10 | 69523919  | 69524281  | 363 |
| chr28 | 33769173  | 33769534  | 362 |
| chr19 | 59519142  | 59519503  | 362 |
| chr8  | 63813188  | 63813548  | 361 |
| chr2  | 111243536 | 111243896 | 361 |
| chr14 | 20956265  | 20956625  | 361 |
| chr25 | 22884276  | 22884635  | 360 |
| chr19 | 37808873  | 37809232  | 360 |
| chr18 | 56413011  | 56413370  | 360 |
| chr1  | 87369835  | 87370194  | 360 |
| chr6  | 94803188  | 94803546  | 359 |
| chr21 | 65789146  | 65789504  | 359 |
| chr19 | 32910833  | 32911191  | 359 |
| chr3  | 123174550 | 123174907 | 358 |
| chr19 | 58634691  | 58635048  | 358 |
| chr18 | 11392976  | 11393333  | 358 |
| chr13 | 60789048  | 60789405  | 358 |
| chr5  | 114338579 | 114338935 | 357 |
| chr10 | 25043189  | 25043545  | 357 |
| chr5  | 29195429  | 29195783  | 355 |
| chr29 | 48273865  | 48274219  | 355 |
| chr24 | 64481971  | 64482325  | 355 |
| chr19 | 41395764  | 41396118  | 355 |
| chr19 | 28239538  | 28239892  | 355 |
| chr18 | 6054223   | 6054577   | 355 |
| chr17 | 4811390   | 4811744   | 355 |
| chr15 | 33479644  | 33479998  | 355 |

|       |           |           |     |
|-------|-----------|-----------|-----|
| chr11 | 102418350 | 102418704 | 355 |
| chr28 | 26837649  | 26838002  | 354 |
| chr2  | 111606145 | 111606498 | 354 |
| chr13 | 42865623  | 42865976  | 354 |
| chr23 | 15961284  | 15961636  | 353 |
| chr20 | 8644296   | 8644648   | 353 |
| chr1  | 74630529  | 74630881  | 353 |
| chr18 | 55881922  | 55882273  | 352 |
| chr1  | 96924702  | 96925053  | 352 |
| chr9  | 41986399  | 41986749  | 351 |
| chr19 | 38372157  | 38372506  | 350 |
| chr19 | 48437905  | 48438253  | 349 |
| chr18 | 56943579  | 56943927  | 349 |
| chr4  | 110120962 | 110121309 | 348 |
| chr19 | 12409671  | 12410017  | 347 |
| chr17 | 75667025  | 75667370  | 346 |
| chr29 | 34664529  | 34664873  | 345 |
| chr16 | 32739710  | 32740054  | 345 |
| chr3  | 113977552 | 113977895 | 344 |
| chr16 | 1785302   | 1785645   | 344 |
| chr5  | 80744531  | 80744873  | 343 |
| chr11 | 104930701 | 104931043 | 343 |
| chr2  | 29977128  | 29977469  | 342 |
| chr19 | 54655130  | 54655471  | 342 |
| chr13 | 66948843  | 66949184  | 342 |
| chr12 | 81678537  | 81678878  | 342 |
| chr2  | 64447465  | 64447805  | 341 |
| chr19 | 28779869  | 28780209  | 341 |
| chr1  | 147113398 | 147113738 | 341 |
| chr28 | 38966670  | 38967009  | 340 |
| chr17 | 67973531  | 67973870  | 340 |
| chr25 | 43461920  | 43462258  | 339 |
| chr2  | 140049551 | 140049889 | 339 |
| chr5  | 35300586  | 35300923  | 338 |
| chr29 | 44589308  | 44589645  | 338 |
| chr15 | 62417007  | 62417344  | 338 |
| chr6  | 118654942 | 118655278 | 337 |
| chr25 | 28070445  | 28070781  | 337 |
| chr24 | 40880765  | 40881101  | 337 |
| chr16 | 47599430  | 47599766  | 337 |
| chr15 | 31338351  | 31338687  | 337 |
| chr15 | 25505306  | 25505642  | 337 |
| chr10 | 81609922  | 81610258  | 337 |
| chr28 | 46069825  | 46070160  | 336 |
| chr16 | 38377844  | 38378179  | 336 |
| chr13 | 37685612  | 37685947  | 336 |
| chr10 | 16803570  | 16803905  | 336 |
| chr8  | 108707303 | 108707636 | 334 |
| chr29 | 35600682  | 35601015  | 334 |
| chr23 | 28764848  | 28765181  | 334 |

|       |           |           |     |
|-------|-----------|-----------|-----|
| chr19 | 54730598  | 54730931  | 334 |
| chr19 | 43968921  | 43969254  | 334 |
| chr15 | 76026003  | 76026336  | 334 |
| chr11 | 104998589 | 104998922 | 334 |
| chr7  | 19232105  | 19232437  | 333 |
| chr26 | 31479623  | 31479955  | 333 |
| chr24 | 50302844  | 50303176  | 333 |
| chr13 | 70238462  | 70238794  | 333 |
| chr10 | 12681806  | 12682138  | 333 |
| chr28 | 42178187  | 42178517  | 331 |
| chr25 | 30117774  | 30118104  | 331 |
| chr2  | 130126355 | 130126685 | 331 |
| chr2  | 119950233 | 119950563 | 331 |
| chr19 | 24389265  | 24389595  | 331 |
| chr10 | 74923317  | 74923647  | 331 |
| chr22 | 41733662  | 41733991  | 330 |
| chr20 | 30950714  | 30951043  | 330 |
| chr2  | 127188336 | 127188665 | 330 |
| chr19 | 39140719  | 39141048  | 330 |
| chr29 | 17460731  | 17461059  | 329 |
| chr18 | 50857366  | 50857694  | 329 |
| chr8  | 73867572  | 73867899  | 328 |
| chr3  | 116036440 | 116036767 | 328 |
| chr23 | 10005676  | 10006003  | 328 |
| chr20 | 8610914   | 8611241   | 328 |
| chr18 | 50516168  | 50516495  | 328 |
| chr5  | 122700704 | 122701030 | 327 |
| chr4  | 79959748  | 79960074  | 327 |
| chr28 | 43738444  | 43738769  | 326 |
| chr22 | 15045758  | 15046082  | 325 |
| chr12 | 69888751  | 69889075  | 325 |
| chr6  | 121887153 | 121887476 | 324 |
| chr2  | 134930528 | 134930851 | 324 |
| chr19 | 49386587  | 49386910  | 324 |
| chr13 | 59654491  | 59654814  | 324 |
| chr11 | 75104273  | 75104596  | 324 |
| chr9  | 90687979  | 90688301  | 323 |
| chr12 | 36278913  | 36279235  | 323 |
| chr8  | 80072614  | 80072935  | 322 |
| chr7  | 46225301  | 46225622  | 322 |
| chr4  | 118287985 | 118288306 | 322 |
| chr13 | 80211592  | 80211913  | 322 |
| chr18 | 62935276  | 62935596  | 321 |
| chr13 | 80770369  | 80770689  | 321 |
| chr13 | 55380774  | 55381094  | 321 |
| chr18 | 11730785  | 11731104  | 320 |
| chr17 | 72336435  | 72336754  | 320 |
| chr10 | 16920346  | 16920665  | 320 |
| chr7  | 17089018  | 17089336  | 319 |
| chr7  | 2536954   | 2537272   | 319 |



|       |           |           |     |
|-------|-----------|-----------|-----|
| chr19 | 33086754  | 33087072  | 319 |
| chr8  | 7551475   | 7551792   | 318 |
| chr14 | 36745986  | 36746303  | 318 |
| chr10 | 105014674 | 105014991 | 318 |
| chr10 | 60319805  | 60320122  | 318 |
| chr2  | 115539347 | 115539663 | 317 |
| chr8  | 116891317 | 116891632 | 316 |
| chr21 | 57503227  | 57503542  | 316 |
| chr18 | 6200776   | 6201091   | 316 |
| chr10 | 52921729  | 52922044  | 316 |
| chr22 | 59853524  | 59853838  | 315 |
| chr19 | 21693248  | 21693562  | 315 |
| chr13 | 75743355  | 75743669  | 315 |
| chr17 | 56064226  | 56064539  | 314 |
| chr25 | 1065555   | 1065867   | 313 |
| chr7  | 45831620  | 45831931  | 312 |
| chr3  | 33845089  | 33845400  | 312 |
| chr25 | 35368383  | 35368694  | 312 |
| chr19 | 47374062  | 47374373  | 312 |
| chr1  | 118783916 | 118784227 | 312 |
| chr19 | 38636348  | 38636657  | 310 |
| chr29 | 51724647  | 51724955  | 309 |
| chr5  | 28896322  | 28896629  | 308 |
| chr18 | 12778018  | 12778325  | 308 |
| chr15 | 75257166  | 75257473  | 308 |
| chr10 | 20927765  | 20928072  | 308 |
| chr21 | 47722527  | 47722833  | 307 |
| chr2  | 126723660 | 126723966 | 307 |
| chr6  | 94815011  | 94815316  | 306 |
| chr22 | 10610065  | 10610370  | 306 |
| chr7  | 52384886  | 52385190  | 305 |
| chr7  | 52279757  | 52280061  | 305 |
| chr6  | 72303932  | 72304236  | 305 |
| chr3  | 120960397 | 120960701 | 305 |
| chr25 | 40897866  | 40898170  | 305 |
| chr19 | 54550936  | 54551240  | 305 |
| chr19 | 38303625  | 38303929  | 305 |
| chr12 | 31174070  | 31174374  | 305 |
| chr11 | 66560786  | 66561090  | 305 |
| chr9  | 90814314  | 90814617  | 304 |
| chr21 | 20924753  | 20925056  | 304 |
| chr12 | 9548144   | 9548447   | 304 |
| chr11 | 100476178 | 100476481 | 304 |
| chr6  | 84625783  | 84626085  | 303 |
| chr19 | 29053492  | 29053794  | 303 |
| chr18 | 54196687  | 54196989  | 303 |
| chr5  | 79794848  | 79795149  | 302 |
| chr23 | 7594264   | 7594565   | 302 |
| chr16 | 41064008  | 41064309  | 302 |
| chr13 | 75524153  | 75524454  | 302 |

|       |             |           |     |
|-------|-------------|-----------|-----|
| chr27 | 14400722    | 14401022  | 301 |
| chr25 | 39188570    | 39188870  | 301 |
| chr11 | 21638100    | 21638400  | 301 |
| chr10 | 89185774    | 89186074  | 301 |
| chr23 | 25102517    | 25102816  | 300 |
| chr19 | 46113425    | 46113724  | 300 |
| chr18 | 48522998    | 48523297  | 300 |
| chr5  | 113499074   | 113499372 | 299 |
| chr27 | 17893145    | 17893443  | 299 |
| chr18 | 62002801    | 62003099  | 299 |
| chr18 | 23630045    | 23630343  | 299 |
| chr2  | 111672241   | 111672538 | 298 |
| chr13 | 40830081    | 40830378  | 298 |
| chr11 | 47543324    | 47543621  | 298 |
| chr21 | 6481069     | 6481365   | 297 |
| chr19 | 45557633    | 45557929  | 297 |
| chr19 | 38948624    | 38948920  | 297 |
| chr18 | 13178886    | 13179182  | 297 |
| chr15 | 29801522    | 29801818  | 297 |
| chr13 | 55545699    | 55545995  | 297 |
| chr4  | 16850806    | 16851101  | 296 |
| chr26 | 44861470    | 44861765  | 296 |
| chr22 | 54126393    | 54126688  | 296 |
| chr6  | 118800627   | 118800921 | 295 |
| chr4  | 90997716    | 90998010  | 295 |
| chr3  | 24000311    | 24000605  | 295 |
| chr23 | 48828463    | 48828757  | 295 |
| chr15 | 61078539    | 61078833  | 295 |
| chr1  | 72556286    | 72556580  | 295 |
| chr5  | 113236476   | 113236769 | 294 |
| chr7  | 5695244     | 5695536   | 293 |
| chr5  | 10533120    | 10533412  | 293 |
| chr3  | 36028444    | 36028736  | 293 |
| chr23 | 31206972    | 31207264  | 293 |
| chr2  | 110015783   | 110016075 | 293 |
| chr17 | 66004343    | 66004635  | 293 |
| chr9  | 100245194   | 100245484 | 291 |
| chr23 | 48601593    | 48601883  | 291 |
| chr21 | 60698417    | 60698707  | 291 |
| chr19 | 23854745    | 23855035  | 291 |
| chr3  | 51913110    | 51913399  | 290 |
| chr7  | 5465140     | 5465428   | 289 |
| chr19 | 23860846    | 23861134  | 289 |
| chr2  | 134933084   | 134933371 | 288 |
| chr18 | 33313754    | 33314041  | 288 |
| chr16 | 74001429    | 74001716  | 288 |
| chr20 | 66443990    | 66444276  | 287 |
| chr16 | 75257724    | 75258010  | 287 |
| chr14 | 55906 56192 | 287       |     |
| chr13 | 42399255    | 42399541  | 287 |

|       |           |           |     |
|-------|-----------|-----------|-----|
| chr11 | 106045822 | 106046108 | 287 |
| chr11 | 84636506  | 84636792  | 287 |
| chr10 | 8708468   | 8708754   | 287 |
| chr1  | 74871745  | 74872031  | 287 |
| chr13 | 75797102  | 75797387  | 286 |
| chr23 | 13593097  | 13593381  | 285 |
| chr11 | 105668923 | 105669207 | 285 |
| chr19 | 58359435  | 58359718  | 284 |
| chr10 | 70137433  | 70137716  | 284 |
| chr10 | 28992356  | 28992639  | 284 |
| chr7  | 61015074  | 61015356  | 283 |
| chr29 | 17713434  | 17713716  | 283 |
| chr2  | 130986899 | 130987181 | 283 |
| chr18 | 24321167  | 24321448  | 282 |
| chr17 | 57630545  | 57630826  | 282 |
| chr16 | 67445944  | 67446225  | 282 |
| chr11 | 95223655  | 95223936  | 282 |
| chr18 | 11214757  | 11215037  | 281 |
| chr11 | 105648234 | 105648514 | 281 |
| chr1  | 100649165 | 100649445 | 281 |
| chr15 | 25203797  | 25204076  | 280 |
| chr25 | 38417701  | 38417979  | 279 |
| chr21 | 27952719  | 27952997  | 279 |
| chr5  | 28850655  | 28850932  | 278 |
| chr27 | 35293578  | 35293855  | 278 |
| chr22 | 51094640  | 51094917  | 278 |
| chr15 | 75268572  | 75268849  | 278 |
| chr28 | 42887867  | 42888143  | 277 |
| chr26 | 48791893  | 48792169  | 277 |
| chr25 | 40222921  | 40223197  | 277 |
| chr13 | 53823038  | 53823314  | 277 |
| chr5  | 124682312 | 124682587 | 276 |
| chr28 | 40394210  | 40394485  | 276 |
| chr22 | 51054977  | 51055252  | 276 |
| chr25 | 29112418  | 29112692  | 275 |
| chr18 | 18663974  | 18664248  | 275 |
| chr9  | 52837228  | 52837501  | 274 |
| chr19 | 61512170  | 61512443  | 274 |
| chr19 | 42256996  | 42257269  | 274 |
| chr18 | 7088342   | 7088615   | 274 |
| chr9  | 100430433 | 100430705 | 273 |
| chr5  | 117217934 | 117218206 | 273 |
| chr21 | 28324017  | 28324289  | 273 |
| chr19 | 56582233  | 56582505  | 273 |
| chr19 | 54478312  | 54478584  | 273 |
| chr12 | 82293785  | 82294057  | 273 |
| chr5  | 115674087 | 115674358 | 272 |
| chr28 | 25137277  | 25137548  | 272 |
| chr22 | 30384043  | 30384314  | 272 |
| chr18 | 11345824  | 11346095  | 272 |

|       |               |           |     |
|-------|---------------|-----------|-----|
| chr17 | 69201325      | 69201596  | 272 |
| chr1  | 146784078     | 146784349 | 272 |
| chr7  | 46245488      | 46245758  | 271 |
| chr7  | 19371208      | 19371478  | 271 |
| chr22 | 52230701      | 52230971  | 271 |
| chr20 | 32403356      | 32403626  | 271 |
| chr5  | 60136236      | 60136505  | 270 |
| chr22 | 13546262      | 13546530  | 269 |
| chr2  | 74030878      | 74031146  | 269 |
| chr18 | 49521977      | 49522245  | 269 |
| chr13 | 56028795      | 56029063  | 269 |
| chr3  | 116019769     | 116020036 | 268 |
| chr14 | 7590396       | 7590663   | 268 |
| chr11 | 14498496      | 14498763  | 268 |
| chr29 | 47910739      | 47911005  | 267 |
| chr18 | 11303543      | 11303809  | 267 |
| chr18 | 48839807      | 48840072  | 266 |
| chr17 | 49462466      | 49462731  | 266 |
| chr13 | 46431316      | 46431581  | 266 |
| chr11 | 70789568      | 70789833  | 266 |
| chr6  | 120838287     | 120838550 | 264 |
| chr5  | 118242633     | 118242896 | 264 |
| chr17 | 69316606      | 69316869  | 264 |
| chr16 | 47198717      | 47198980  | 264 |
| chr7  | 16838246      | 16838508  | 263 |
| chr26 | 38896524      | 38896786  | 263 |
| chr21 | 914404 914666 | 263       |     |
| chr19 | 59062331      | 59062593  | 263 |
| chr18 | 45961986      | 45962248  | 263 |
| chr11 | 80356032      | 80356294  | 263 |
| chr28 | 40374231      | 40374492  | 262 |
| chr2  | 136556265     | 136556526 | 262 |
| chr13 | 58902236      | 58902497  | 262 |
| chr3  | 33932190      | 33932450  | 261 |
| chr23 | 8297557       | 8297817   | 261 |
| chr23 | 34838530      | 34838789  | 260 |
| chr16 | 38706009      | 38706268  | 260 |
| chr29 | 46032766      | 46033024  | 259 |
| chr25 | 35687447      | 35687705  | 259 |
| chr19 | 24622123      | 24622381  | 259 |
| chr5  | 29748993      | 29749250  | 258 |
| chr3  | 55889593      | 55889850  | 258 |
| chr20 | 6782148       | 6782405   | 258 |
| chr7  | 95941566      | 95941822  | 257 |
| chr6  | 51517858      | 51518114  | 257 |
| chr19 | 19140966      | 19141222  | 257 |
| chr16 | 40900337      | 40900593  | 257 |
| chr12 | 14813561      | 14813817  | 257 |
| chr23 | 27901745      | 27902000  | 256 |
| chr23 | 8398896       | 8399151   | 256 |

|       |               |           |     |
|-------|---------------|-----------|-----|
| chr11 | 93756280      | 93756535  | 256 |
| chr7  | 57165888      | 57166142  | 255 |
| chr11 | 74467208      | 74467462  | 255 |
| chr22 | 52237330      | 52237583  | 254 |
| chr16 | 77061112      | 77061365  | 254 |
| chr19 | 43169840      | 43170092  | 253 |
| chr10 | 21863811      | 21864063  | 253 |
| chr7  | 42181476      | 42181727  | 252 |
| chr6  | 99219880      | 99220131  | 252 |
| chr24 | 50886617      | 50886868  | 252 |
| chr15 | 29377287      | 29377538  | 252 |
| chr15 | 21516841      | 21517092  | 252 |
| chr13 | 57592232      | 57592483  | 252 |
| chr25 | 405038 405287 |           | 250 |
| chr21 | 65881495      | 65881744  | 250 |
| chr19 | 23064519      | 23064768  | 250 |
| chr6  | 71170086      | 71170334  | 249 |
| chr19 | 21857932      | 21858180  | 249 |
| chr7  | 19171222      | 19171469  | 248 |
| chr16 | 47116837      | 47117083  | 247 |
| chr5  | 111842825     | 111843070 | 246 |
| chr26 | 51451437      | 51451682  | 246 |
| chr25 | 42030277      | 42030522  | 246 |
| chrX  | 47482559      | 47482803  | 245 |
| chr3  | 82836371      | 82836615  | 245 |
| chr3  | 51770278      | 51770522  | 245 |
| chr19 | 19125819      | 19126063  | 245 |
| chr13 | 75783510      | 75783754  | 245 |
| chr29 | 48717279      | 48717522  | 244 |
| chr26 | 20184859      | 20185102  | 244 |
| chr25 | 4618507       | 4618750   | 244 |
| chr20 | 3192989       | 3193232   | 244 |
| chr10 | 14080862      | 14081105  | 244 |
| chr9  | 19636609      | 19636851  | 243 |
| chr26 | 22353133      | 22353375  | 243 |
| chr21 | 34986737      | 34986979  | 243 |
| chr13 | 79645582      | 79645824  | 243 |
| chr13 | 60767987      | 60768229  | 243 |
| chr12 | 74488679      | 74488920  | 242 |
| chr19 | 39978568      | 39978808  | 241 |
| chr19 | 29727043      | 29727283  | 241 |
| chr7  | 44913625      | 44913864  | 240 |
| chr11 | 70691371      | 70691610  | 240 |
| chr28 | 26841299      | 26841535  | 237 |
| chr3  | 126946832     | 126947067 | 236 |
| chr1  | 123087419     | 123087654 | 236 |
| chr3  | 115330888     | 115331122 | 235 |
| chr11 | 100406658     | 100406892 | 235 |
| chr13 | 69269761      | 69269994  | 234 |
| chr1  | 74608469      | 74608702  | 234 |

|       |               |           |     |
|-------|---------------|-----------|-----|
| chr5  | 60973280      | 60973512  | 233 |
| chr20 | 8570543       | 8570774   | 232 |
| chr8  | 24496593      | 24496823  | 231 |
| chr3  | 125722655     | 125722885 | 231 |
| chr25 | 412322 412552 | 231       |     |
| chr24 | 25457132      | 25457362  | 231 |
| chr22 | 23094208      | 23094438  | 231 |
| chr18 | 56277863      | 56278093  | 231 |
| chr12 | 84178961      | 84179191  | 231 |
| chr13 | 63266183      | 63266412  | 230 |
| chr7  | 15622707      | 15622934  | 228 |
| chr24 | 43600253      | 43600480  | 228 |
| chr23 | 43181264      | 43181490  | 227 |
| chr19 | 42951806      | 42952032  | 227 |
| chr3  | 35580137      | 35580362  | 226 |
| chr19 | 37951444      | 37951669  | 226 |
| chr19 | 60827518      | 60827742  | 225 |
| chr5  | 32851408      | 32851628  | 221 |
| chr7  | 43707059      | 43707278  | 220 |
| chr25 | 3403047       | 3403266   | 220 |
| chr13 | 62038765      | 62038984  | 220 |
| chr8  | 24443456      | 24443674  | 219 |
| chr26 | 22367958      | 22368176  | 219 |
| chr21 | 30244294      | 30244512  | 219 |
| chr9  | 90479318      | 90479534  | 217 |
| chr5  | 28884431      | 28884646  | 216 |
| chr18 | 51155208      | 51155423  | 216 |
| chr8  | 5772701       | 5772915   | 215 |
| chr28 | 46055538      | 46055752  | 215 |
| chr26 | 20893671      | 20893879  | 209 |
| chr26 | 50650948      | 50651155  | 208 |
| chr19 | 6195890       | 6196090   | 201 |
| chr22 | 61192973      | 61193443  | 471 |
| chr5  | 29097542      | 29097940  | 399 |
| chr5  | 60388966      | 60389317  | 352 |
| chr22 | 46577299      | 46577882  | 584 |
| chr18 | 62221620      | 62222075  | 456 |
| chr10 | 66775559      | 66775996  | 438 |
| chr13 | 55313168      | 55313554  | 387 |
| chr23 | 53018244      | 53018579  | 336 |
| chr18 | 47693653      | 47694346  | 694 |
| chr17 | 58770075      | 58770562  | 488 |
| chr19 | 58979728      | 58980098  | 371 |
| chr21 | 25971973      | 25972368  | 396 |
| chr2  | 116699393     | 116699786 | 394 |
| chr23 | 27826601      | 27826999  | 399 |
| chr18 | 22213126      | 22213522  | 397 |
| chr11 | 46006038      | 46006427  | 390 |
| chr19 | 40433181      | 40433691  | 511 |
| chr18 | 52973638      | 52973989  | 352 |

|       |               |           |      |
|-------|---------------|-----------|------|
| chr26 | 21760315      | 21760661  | 347  |
| chr8  | 72614958      | 72615356  | 399  |
| chr13 | 64036305      | 64036688  | 384  |
| chr16 | 48278862      | 48279230  | 369  |
| chr18 | 61960018      | 61960380  | 363  |
| chr8  | 5309988       | 5310343   | 356  |
| chr8  | 73892055      | 73892345  | 291  |
| chr22 | 50604830      | 50605202  | 373  |
| chr10 | 35616118      | 35616489  | 372  |
| chr3  | 108095705     | 108096037 | 333  |
| chr28 | 33874391      | 33874723  | 333  |
| chr23 | 38607693      | 38607972  | 280  |
| chr7  | 84678001      | 84678357  | 357  |
| chr8  | 63757064      | 63757527  | 464  |
| chr23 | 23860262      | 23860686  | 425  |
| chr2  | 134906935     | 134907359 | 425  |
| chr3  | 111185673     | 111186064 | 392  |
| chr8  | 73727212      | 73727594  | 383  |
| chr23 | 19864608      | 19864961  | 354  |
| chr24 | 49364667      | 49364991  | 325  |
| chr8  | 73514621      | 73514939  | 319  |
| chr13 | 42873231      | 42873543  | 313  |
| chr13 | 55462257      | 55462559  | 303  |
| chr17 | 73194622      | 73194920  | 299  |
| chr19 | 34634415      | 34634697  | 283  |
| chr11 | 31054256      | 31054529  | 274  |
| chr8  | 10473124      | 10473392  | 269  |
| chr14 | 6378528       | 6378779   | 252  |
| chr25 | 40889228      | 40889459  | 232  |
| chr15 | 24394290      | 24394521  | 232  |
| chr3  | 126964714     | 126964942 | 229  |
| chr25 | 3093318       | 3093545   | 228  |
| chr4  | 124285046     | 124285269 | 224  |
| chr4  | 121723144     | 121723366 | 223  |
| chr29 | 48891074      | 48891295  | 222  |
| chr10 | 81726131      | 81726348  | 218  |
| chr1  | 85656663      | 85656880  | 218  |
| chr3  | 105729703     | 105729918 | 216  |
| chr25 | 385497 385698 | 202       |      |
| chr4  | 118163450     | 118164650 | 1201 |
| chr10 | 15012077      | 15012960  | 884  |
| chr18 | 12736313      | 12737136  | 824  |
| chr5  | 61477286      | 61477863  | 578  |
| chr2  | 138647646     | 138648040 | 395  |
| chr1  | 98893667      | 98894055  | 389  |
| chr13 | 55081340      | 55081723  | 384  |
| chr15 | 26608092      | 26608461  | 370  |
| chr26 | 50796310      | 50796648  | 339  |
| chr26 | 21970410      | 21970713  | 304  |
| chr13 | 67719904      | 67720151  | 248  |

|       |               |           |     |
|-------|---------------|-----------|-----|
| chr2  | 111259274     | 111259863 | 590 |
| chr9  | 76814051      | 76814615  | 565 |
| chr7  | 50474493      | 50475043  | 551 |
| chr1  | 68848493      | 68849041  | 549 |
| chr11 | 100750500     | 100751024 | 525 |
| chr8  | 60187935      | 60188447  | 513 |
| chr18 | 22218033      | 22218512  | 480 |
| chr13 | 54434710      | 54435156  | 447 |
| chrX  | 62803187      | 62803553  | 367 |
| chr8  | 115124926     | 115125251 | 326 |
| chr11 | 14161968      | 14162566  | 599 |
| chr19 | 46822202      | 46822793  | 592 |
| chr9  | 107093816     | 107094303 | 488 |
| chr23 | 15981850      | 15982320  | 471 |
| chr8  | 65880267      | 65880697  | 431 |
| chr10 | 91047772      | 91048173  | 402 |
| chr8  | 64926533      | 64926931  | 399 |
| chr20 | 74710000      | 74710385  | 386 |
| chr3  | 124922521     | 124922904 | 384 |
| chr3  | 121234999     | 121235377 | 379 |
| chr18 | 23124316      | 23124678  | 363 |
| chr12 | 84964875      | 84965228  | 354 |
| chr19 | 41369576      | 41369910  | 335 |
| chr15 | 19972364      | 19972674  | 311 |
| chr4  | 124204829     | 124205130 | 302 |
| chr5  | 30384589      | 30385333  | 745 |
| chr25 | 759372 759831 | 460       |     |
| chr6  | 72333243      | 72333677  | 435 |
| chr3  | 112521986     | 112522384 | 399 |
| chr2  | 76307001      | 76307389  | 389 |
| chr19 | 51906090      | 51906463  | 374 |
| chr17 | 67960849      | 67961219  | 371 |
| chr11 | 11546266      | 11546625  | 360 |
| chr8  | 65814697      | 65815045  | 349 |
| chr19 | 38360602      | 38360947  | 346 |
| chr18 | 57352821      | 57353161  | 341 |
| chr9  | 16965809      | 16966148  | 340 |
| chr21 | 32954654      | 32954992  | 339 |
| chr25 | 22581416      | 22581745  | 330 |
| chr1  | 160709896     | 160710217 | 322 |
| chr21 | 20008591      | 20008904  | 314 |
| chr7  | 13276691      | 13276984  | 294 |
| chr2  | 135624112     | 135624399 | 288 |
| chr11 | 84533946      | 84534231  | 286 |
| chr20 | 6786204       | 6786483   | 280 |
| chr7  | 192164 192368 | 205       |     |
| chr1  | 1545274       | 1545905   | 632 |
| chr13 | 58587941      | 58588362  | 422 |
| chr15 | 75922973      | 75923372  | 400 |
| chr20 | 4973492       | 4973885   | 394 |



|       |           |           |     |
|-------|-----------|-----------|-----|
| chr7  | 19503332  | 19503721  | 390 |
| chr17 | 4207880   | 4208262   | 383 |
| chr9  | 74515950  | 74516328  | 379 |
| chr19 | 37974572  | 37974941  | 370 |
| chr17 | 64335136  | 64335501  | 366 |
| chr2  | 44185680  | 44186039  | 360 |
| chr5  | 29636338  | 29636692  | 355 |
| chr19 | 54802386  | 54802726  | 341 |
| chr1  | 157328459 | 157328795 | 337 |
| chr2  | 131148322 | 131148628 | 307 |
| chr1  | 128119368 | 128119672 | 305 |
| chr16 | 45907390  | 45907690  | 301 |
| chr9  | 21983259  | 21983532  | 274 |
| chr4  | 122600860 | 122601120 | 261 |
| chr24 | 38474022  | 38474521  | 500 |
| chr7  | 51395066  | 51395551  | 486 |
| chr16 | 47109372  | 47109795  | 424 |
| chr25 | 28189391  | 28189798  | 408 |
| chr9  | 62316196  | 62316594  | 399 |
| chr26 | 43993531  | 43993929  | 399 |
| chr26 | 5861213   | 5861606   | 394 |
| chr21 | 28327291  | 28327674  | 384 |
| chr16 | 29422648  | 29423031  | 384 |
| chr17 | 64552214  | 64552579  | 366 |
| chr7  | 17958573  | 17958937  | 365 |
| chr3  | 123344334 | 123344695 | 362 |
| chr18 | 11820621  | 11820982  | 362 |
| chr10 | 17281175  | 17281520  | 346 |
| chr16 | 1593647   | 1593991   | 345 |
| chr6  | 16239054  | 16239394  | 341 |
| chr25 | 11582577  | 11582916  | 340 |
| chr23 | 18728673  | 18729005  | 333 |
| chr23 | 49970072  | 49970394  | 323 |
| chr13 | 53212329  | 53212650  | 322 |
| chr16 | 1469753   | 1470060   | 308 |
| chr25 | 35677257  | 35677522  | 266 |
| chr10 | 52942417  | 52942675  | 259 |
| chr23 | 28535494  | 28535988  | 495 |
| chr17 | 64210277  | 64210570  | 294 |
| chr13 | 26216193  | 26216475  | 283 |
| chr22 | 29705608  | 29705878  | 271 |
| chr1  | 137871857 | 137872415 | 559 |
| chr21 | 27959486  | 27960002  | 517 |
| chr5  | 112015042 | 112015524 | 483 |
| chr18 | 45434621  | 45435077  | 457 |
| chr16 | 75236100  | 75236481  | 382 |
| chr16 | 44150718  | 44151094  | 377 |
| chr10 | 35845352  | 35845723  | 372 |
| chr13 | 82662836  | 82663203  | 368 |
| chr18 | 55204074  | 55204436  | 363 |

|       |               |           |     |
|-------|---------------|-----------|-----|
| chr19 | 19225964      | 19226325  | 362 |
| chr21 | 9441529       | 9441887   | 359 |
| chr5  | 120120575     | 120120930 | 356 |
| chr11 | 4357510       | 4357862   | 353 |
| chr19 | 57592469      | 57592819  | 351 |
| chr23 | 28536244      | 28536592  | 349 |
| chr13 | 40605343      | 40605691  | 349 |
| chr1  | 84503960      | 84504308  | 349 |
| chr8  | 7624381       | 7624728   | 348 |
| chr17 | 52484235      | 52484581  | 347 |
| chr14 | 21784760      | 21785105  | 346 |
| chr10 | 5209535       | 5209878   | 344 |
| chr3  | 119717588     | 119717930 | 343 |
| chr11 | 100740804     | 100741145 | 342 |
| chr7  | 17132698      | 17133036  | 339 |
| chr18 | 56592820      | 56593155  | 336 |
| chr18 | 43154337      | 43154669  | 333 |
| chr15 | 64478902      | 64479232  | 331 |
| chr10 | 35958795      | 35959125  | 331 |
| chr23 | 27839287      | 27839616  | 330 |
| chr19 | 58563692      | 58564021  | 330 |
| chr10 | 20632185      | 20632513  | 329 |
| chr24 | 40238402      | 40238729  | 328 |
| chr19 | 13479582      | 13479906  | 325 |
| chr16 | 41499763      | 41500087  | 325 |
| chr2  | 135728798     | 135729121 | 324 |
| chr6  | 108665527     | 108665849 | 323 |
| chr22 | 56032468      | 56032786  | 319 |
| chr2  | 134941775     | 134942081 | 307 |
| chr17 | 72762569      | 72762874  | 306 |
| chr10 | 12869060      | 12869364  | 305 |
| chr7  | 479765 480068 | 304       |     |
| chr17 | 73428190      | 73428493  | 304 |
| chr10 | 24672726      | 24673029  | 304 |
| chr1  | 1614361       | 1614660   | 300 |
| chr21 | 34810653      | 34810947  | 295 |
| chr12 | 36410081      | 36410373  | 293 |
| chr1  | 84817673      | 84817965  | 293 |
| chr19 | 39119423      | 39119713  | 291 |
| chr3  | 115652481     | 115652770 | 290 |
| chr8  | 61901690      | 61901978  | 289 |
| chr4  | 71616822      | 71617109  | 288 |
| chr14 | 1383977       | 1384263   | 287 |
| chr11 | 1646361       | 1646645   | 285 |
| chr6  | 94837251      | 94837534  | 284 |
| chr19 | 54469596      | 54469879  | 284 |
| chr3  | 121478299     | 121478578 | 280 |
| chr12 | 31546493      | 31546772  | 280 |
| chr27 | 35395890      | 35396161  | 272 |
| chr8  | 837913 838180 | 268       |     |

|       |               |           |     |
|-------|---------------|-----------|-----|
| chr14 | 64336443      | 64336710  | 268 |
| chr13 | 60188602      | 60188869  | 268 |
| chr24 | 58894443      | 58894709  | 267 |
| chr19 | 49660117      | 49660381  | 265 |
| chr7  | 19231162      | 19231423  | 262 |
| chr7  | 15109350      | 15109611  | 262 |
| chr19 | 7867580       | 7867841   | 262 |
| chr18 | 49482045      | 49482306  | 262 |
| chr18 | 11478348      | 11478609  | 262 |
| chr18 | 62457037      | 62457296  | 260 |
| chr4  | 99059025      | 99059282  | 258 |
| chr16 | 47181337      | 47181594  | 258 |
| chr16 | 44059294      | 44059548  | 255 |
| chr26 | 22616978      | 22617230  | 253 |
| chr7  | 13297401      | 13297652  | 252 |
| chr19 | 60794085      | 60794336  | 252 |
| chr3  | 126994097     | 126994347 | 251 |
| chr22 | 30002973      | 30003221  | 249 |
| chr15 | 43334039      | 43334287  | 249 |
| chr13 | 63478842      | 63479089  | 248 |
| chr13 | 77417356      | 77417596  | 241 |
| chr16 | 49363426      | 49363663  | 238 |
| chr11 | 104883964     | 104884201 | 238 |
| chr4  | 123254123     | 123254358 | 236 |
| chr23 | 7397592       | 7397826   | 235 |
| chr18 | 55203718      | 55203952  | 235 |
| chr23 | 27840288      | 27840521  | 234 |
| chr10 | 68222631      | 68222863  | 233 |
| chr23 | 28045812      | 28046043  | 232 |
| chr21 | 19997200      | 19997431  | 232 |
| chr9  | 90685741      | 90685963  | 223 |
| chr11 | 53019766      | 53019987  | 222 |
| chr18 | 12635552      | 12635770  | 219 |
| chr27 | 38621219      | 38621433  | 215 |
| chr19 | 19182744      | 19182958  | 215 |
| chr3  | 116419486     | 116419698 | 213 |
| chr8  | 78539297      | 78539507  | 211 |
| chr8  | 23825642      | 23825850  | 209 |
| chr19 | 19137766      | 19137974  | 209 |
| chr8  | 24691662      | 24692036  | 375 |
| chr5  | 30487330      | 30487714  | 385 |
| chr8  | 7564751       | 7565098   | 348 |
| chr28 | 33872161      | 33872521  | 361 |
| chr1  | 148196914     | 148197145 | 232 |
| chr13 | 153056 153413 | 358       |     |
| chr9  | 90297254      | 90297551  | 298 |
| chr25 | 34193238      | 34193609  | 372 |
| chr17 | 74092033      | 74092377  | 345 |
| chr25 | 37646713      | 37646962  | 250 |
| chr29 | 43023984      | 43024218  | 235 |

|       |               |           |     |
|-------|---------------|-----------|-----|
| chr3  | 115412841     | 115413072 | 232 |
| chr19 | 51925325      | 51925553  | 229 |
| chr8  | 24399230      | 24399456  | 227 |
| chr1  | 153895014     | 153895229 | 216 |
| chr8  | 73814537      | 73814786  | 250 |
| chr10 | 7834604       | 7834930   | 327 |
| chr11 | 100917173     | 100917470 | 298 |
| chr21 | 30585764      | 30585985  | 222 |
| chr18 | 47768587      | 47768791  | 205 |
| chr23 | 23752236      | 23753139  | 904 |
| chr6  | 73192501      | 73193261  | 761 |
| chr3  | 35560007      | 35560713  | 707 |
| chr15 | 41242639      | 41243318  | 680 |
| chr2  | 75908276      | 75908950  | 675 |
| chr13 | 58627876      | 58628533  | 658 |
| chr3  | 114099127     | 114099772 | 646 |
| chr18 | 62228046      | 62228689  | 644 |
| chr5  | 108826107     | 108826749 | 643 |
| chr15 | 54031180      | 54031821  | 642 |
| chr29 | 48955835      | 48956470  | 636 |
| chr18 | 11980753      | 11981387  | 635 |
| chr25 | 35696924      | 35697547  | 624 |
| chr25 | 36437569      | 36438182  | 614 |
| chr2  | 138839416     | 138840027 | 612 |
| chr26 | 18187404      | 18188011  | 608 |
| chr7  | 18719888      | 18720492  | 605 |
| chr26 | 37626431      | 37627024  | 594 |
| chr18 | 23240679      | 23241271  | 593 |
| chr12 | 14812188      | 14812776  | 589 |
| chr19 | 59531684      | 59532269  | 586 |
| chr10 | 21411417      | 21412002  | 586 |
| chr7  | 42192732      | 42193315  | 584 |
| chr13 | 66491183      | 66491743  | 561 |
| chr18 | 56532352      | 56532909  | 558 |
| chr11 | 100739914     | 100740468 | 555 |
| chr18 | 50714049      | 50714595  | 547 |
| chr11 | 72627202      | 72627748  | 547 |
| chr19 | 24360119      | 24360651  | 533 |
| chr14 | 23440176      | 23440706  | 531 |
| chr11 | 48571835      | 48572363  | 529 |
| chr12 | 34269440      | 34269967  | 528 |
| chr27 | 35929591      | 35930116  | 526 |
| chr18 | 755255 755766 | 512       |     |
| chr29 | 44707206      | 44707712  | 507 |
| chr2  | 74035214      | 74035714  | 501 |
| chr18 | 43367296      | 43367792  | 497 |
| chr1  | 84482929      | 84483425  | 497 |
| chr6  | 119556847     | 119557340 | 494 |
| chr26 | 20312783      | 20313273  | 491 |
| chr5  | 32867559      | 32868047  | 489 |

|       |           |           |     |
|-------|-----------|-----------|-----|
| chr18 | 39499280  | 39499759  | 480 |
| chr4  | 98877951  | 98878422  | 472 |
| chr15 | 43331911  | 43332381  | 471 |
| chr16 | 41527207  | 41527673  | 467 |
| chrX  | 13624694  | 13625159  | 466 |
| chr13 | 43425462  | 43425926  | 465 |
| chr7  | 5198352   | 5198810   | 459 |
| chr21 | 61664046  | 61664504  | 459 |
| chr5  | 113356045 | 113356496 | 452 |
| chr7  | 4521693   | 4522141   | 449 |
| chr1  | 147114273 | 147114720 | 448 |
| chr29 | 38055372  | 38055810  | 439 |
| chr15 | 30623674  | 30624112  | 439 |
| chr9  | 105993155 | 105993592 | 438 |
| chr25 | 2484945   | 2485376   | 432 |
| chr3  | 2494008   | 2494425   | 418 |
| chr6  | 121051841 | 121052254 | 414 |
| chr12 | 81826026  | 81826437  | 412 |
| chr29 | 35012309  | 35012718  | 410 |
| chr8  | 66131670  | 66132075  | 406 |
| chr19 | 39124442  | 39124841  | 400 |
| chr5  | 32923146  | 32923544  | 399 |
| chr25 | 39211331  | 39211729  | 399 |
| chr2  | 134692533 | 134692931 | 399 |
| chr18 | 40047398  | 40047796  | 399 |
| chr13 | 61482911  | 61483309  | 399 |
| chr3  | 105455685 | 105456081 | 397 |
| chr20 | 8612113   | 8612509   | 397 |
| chr9  | 105512815 | 105513210 | 396 |
| chr8  | 9343033   | 9343428   | 396 |
| chr22 | 30131940  | 30132335  | 396 |
| chr18 | 12631555  | 12631950  | 396 |
| chr22 | 7251377   | 7251771   | 395 |
| chr24 | 20856614  | 20857007  | 394 |
| chr18 | 50993798  | 50994190  | 393 |
| chr11 | 104883077 | 104883467 | 391 |
| chr8  | 72533475  | 72533864  | 390 |
| chr26 | 37474572  | 37474961  | 390 |
| chr13 | 76005441  | 76005830  | 390 |
| chr2  | 136557851 | 136558239 | 389 |
| chr17 | 56144699  | 56145087  | 389 |
| chr1  | 145700509 | 145700897 | 389 |
| chr12 | 32238051  | 32238438  | 388 |
| chr8  | 1625180   | 1625566   | 387 |
| chr5  | 76650843  | 76651229  | 387 |
| chr6  | 24031485  | 24031868  | 384 |
| chr27 | 6004023   | 6004406   | 384 |
| chr13 | 58626938  | 58627321  | 384 |
| chr11 | 109404760 | 109405143 | 384 |
| chr21 | 1773370   | 1773752   | 383 |

|       |               |           |     |
|-------|---------------|-----------|-----|
| chr7  | 19247685      | 19248066  | 382 |
| chr19 | 58730400      | 58730781  | 382 |
| chr8  | 94376461      | 94376841  | 381 |
| chr2  | 122257581     | 122257961 | 381 |
| chr16 | 47297050      | 47297430  | 381 |
| chr23 | 17466870      | 17467248  | 379 |
| chr18 | 11488429      | 11488806  | 378 |
| chr10 | 99925707      | 99926084  | 378 |
| chr20 | 874308 874684 | 377       |     |
| chr19 | 33493796      | 33494172  | 377 |
| chr9  | 12653899      | 12654274  | 376 |
| chr3  | 105728327     | 105728702 | 376 |
| chr27 | 46014104      | 46014479  | 376 |
| chr24 | 44279282      | 44279657  | 376 |
| chr13 | 80433457      | 80433832  | 376 |
| chr11 | 769401 769774 | 374       |     |
| chr14 | 7580913       | 7581285   | 373 |
| chr1  | 26541357      | 26541729  | 373 |
| chr13 | 70250464      | 70250835  | 372 |
| chr11 | 89373931      | 89374302  | 372 |
| chr21 | 31420723      | 31421092  | 370 |
| chr15 | 28991365      | 28991734  | 370 |
| chr21 | 6560267       | 6560635   | 369 |
| chr13 | 17780212      | 17780580  | 369 |
| chr3  | 121341229     | 121341596 | 368 |
| chr3  | 120956921     | 120957288 | 368 |
| chr24 | 62686580      | 62686947  | 368 |
| chr28 | 26985885      | 26986251  | 367 |
| chr17 | 64304085      | 64304451  | 367 |
| chr11 | 106752381     | 106752747 | 367 |
| chr16 | 46512049      | 46512412  | 364 |
| chr16 | 47248167      | 47248529  | 363 |
| chr17 | 73808256      | 73808617  | 362 |
| chr5  | 111326392     | 111326752 | 361 |
| chr19 | 42247604      | 42247964  | 361 |
| chr19 | 17675595      | 17675955  | 361 |
| chr15 | 51659942      | 51660302  | 361 |
| chr8  | 80125955      | 80126311  | 357 |
| chr18 | 2866416       | 2866771   | 356 |
| chr7  | 15309664      | 15310018  | 355 |
| chr24 | 60806103      | 60806457  | 355 |
| chr13 | 57596209      | 57596563  | 355 |
| chr24 | 61108523      | 61108876  | 354 |
| chr28 | 33747516      | 33747868  | 353 |
| chr10 | 70417974      | 70418326  | 353 |
| chr17 | 75035602      | 75035953  | 352 |
| chr1  | 141690843     | 141691194 | 352 |
| chr29 | 49304174      | 49304524  | 351 |
| chr23 | 11033402      | 11033752  | 351 |
| chr22 | 30045581      | 30045930  | 350 |

|       |           |           |     |
|-------|-----------|-----------|-----|
| chr11 | 2132566   | 2132915   | 350 |
| chr29 | 45893303  | 45893651  | 349 |
| chr3  | 77665600  | 77665947  | 348 |
| chr22 | 52851300  | 52851647  | 348 |
| chr21 | 56495936  | 56496283  | 348 |
| chr13 | 37674977  | 37675322  | 346 |
| chr29 | 29658276  | 29658619  | 344 |
| chr12 | 36281107  | 36281450  | 344 |
| chr26 | 31480172  | 31480514  | 343 |
| chr11 | 44937861  | 44938202  | 342 |
| chr24 | 20885402  | 20885740  | 339 |
| chr1  | 101591783 | 101592121 | 339 |
| chr12 | 80140013  | 80140350  | 338 |
| chr1  | 123103248 | 123103585 | 338 |
| chr3  | 46955498  | 46955834  | 337 |
| chr11 | 101432895 | 101433231 | 337 |
| chr3  | 126888932 | 126889267 | 336 |
| chr18 | 22217636  | 22217971  | 336 |
| chr24 | 48613191  | 48613524  | 334 |
| chr23 | 28684688  | 28685021  | 334 |
| chr2  | 23090034  | 23090367  | 334 |
| chr15 | 38293574  | 38293907  | 334 |
| chr10 | 17236674  | 17237007  | 334 |
| chr7  | 19671447  | 19671779  | 333 |
| chr22 | 50882811  | 50883142  | 332 |
| chr15 | 62858971  | 62859302  | 332 |
| chr4  | 121518941 | 121519269 | 329 |
| chr28 | 25373168  | 25373495  | 328 |
| chr22 | 53940932  | 53941259  | 328 |
| chr16 | 48282377  | 48282704  | 328 |
| chr11 | 90392893  | 90393220  | 328 |
| chr7  | 10822958  | 10823284  | 327 |
| chr18 | 56739267  | 56739593  | 327 |
| chr4  | 69678926  | 69679251  | 326 |
| chr27 | 15409499  | 15409824  | 326 |
| chr19 | 23133790  | 23134115  | 326 |
| chr3  | 33837849  | 33838173  | 325 |
| chr16 | 46993094  | 46993418  | 325 |
| chr5  | 60893977  | 60894296  | 320 |
| chr19 | 40431636  | 40431955  | 320 |
| chr5  | 35492027  | 35492343  | 317 |
| chr12 | 84573224  | 84573540  | 317 |
| chr18 | 23074274  | 23074589  | 316 |
| chr15 | 45860864  | 45861179  | 316 |
| chr24 | 61118303  | 61118614  | 312 |
| chr5  | 10364455  | 10364764  | 310 |
| chr15 | 63098270  | 63098579  | 310 |
| chr28 | 25296417  | 25296725  | 309 |
| chr21 | 65799214  | 65799522  | 309 |
| chr19 | 39164034  | 39164341  | 308 |

|       |               |           |     |
|-------|---------------|-----------|-----|
| chr19 | 22332915      | 22333221  | 307 |
| chr11 | 48756004      | 48756310  | 307 |
| chr8  | 63928938      | 63929243  | 306 |
| chr2  | 138591683     | 138591985 | 303 |
| chr10 | 14988963      | 14989265  | 303 |
| chr13 | 2465590       | 2465891   | 302 |
| chr25 | 35459593      | 35459893  | 301 |
| chr23 | 11034581      | 11034881  | 301 |
| chr13 | 75567796      | 75568096  | 301 |
| chr25 | 37780524      | 37780823  | 300 |
| chr10 | 16752240      | 16752539  | 300 |
| chr29 | 9424593       | 9424891   | 299 |
| chr19 | 23703691      | 23703989  | 299 |
| chr18 | 52755668      | 52755965  | 298 |
| chr9  | 35913753      | 35914049  | 297 |
| chr19 | 16042927      | 16043223  | 297 |
| chr19 | 61753282      | 61753573  | 292 |
| chr22 | 56537390      | 56537677  | 288 |
| chr25 | 34577912      | 34578197  | 286 |
| chr10 | 53278380      | 53278665  | 286 |
| chr4  | 98830595      | 98830876  | 282 |
| chr11 | 12873430      | 12873708  | 279 |
| chr21 | 67987023      | 67987300  | 278 |
| chr18 | 24330462      | 24330738  | 277 |
| chr14 | 63516612      | 63516887  | 276 |
| chr28 | 29994447      | 29994721  | 275 |
| chr11 | 1305297       | 1305567   | 271 |
| chr7  | 81255247      | 81255516  | 270 |
| chr4  | 94700495      | 94700762  | 268 |
| chr3  | 36034213      | 36034478  | 266 |
| chr5  | 114078759     | 114079022 | 264 |
| chr24 | 41573330      | 41573589  | 260 |
| chr1  | 18874252      | 18874507  | 256 |
| chr19 | 41264935      | 41265181  | 247 |
| chr11 | 100917805     | 100918051 | 247 |
| chr13 | 66986669      | 66986905  | 237 |
| chr27 | 846718 846953 | 236       |     |
| chr1  | 147245914     | 147246708 | 795 |
| chr5  | 30081452      | 30082208  | 757 |
| chr4  | 71596555      | 71597291  | 737 |
| chr23 | 8559237       | 8559953   | 717 |
| chr8  | 20933198      | 20933913  | 716 |
| chr8  | 7611239       | 7611948   | 710 |
| chr23 | 20637001      | 20637667  | 667 |
| chr27 | 35438340      | 35438981  | 642 |
| chr19 | 51897273      | 51897900  | 628 |
| chr13 | 59769893      | 59770508  | 616 |
| chr18 | 39908008      | 39908589  | 582 |
| chr18 | 1832309       | 1832890   | 582 |
| chr3  | 62453134      | 62453708  | 575 |



|       |           |           |     |
|-------|-----------|-----------|-----|
| chr1  | 1788561   | 1789130   | 570 |
| chr2  | 134710343 | 134710902 | 560 |
| chr4  | 27844614  | 27845166  | 553 |
| chr14 | 22100444  | 22100995  | 552 |
| chr29 | 49483149  | 49483683  | 535 |
| chr23 | 27738064  | 27738595  | 532 |
| chr19 | 56102164  | 56102692  | 529 |
| chr3  | 122335786 | 122336299 | 514 |
| chr25 | 2981774   | 2982275   | 502 |
| chr3  | 33965667  | 33966162  | 496 |
| chr17 | 41487652  | 41488146  | 495 |
| chr11 | 103459691 | 103460182 | 492 |
| chr14 | 6984367   | 6984856   | 490 |
| chr2  | 132249331 | 132249816 | 486 |
| chr19 | 37892091  | 37892572  | 482 |
| chr5  | 30570381  | 30570861  | 481 |
| chr13 | 41344495  | 41344963  | 469 |
| chr14 | 1972561   | 1973023   | 463 |
| chr3  | 114218907 | 114219367 | 461 |
| chr4  | 33205265  | 33205713  | 449 |
| chr23 | 48758700  | 48759130  | 431 |
| chr13 | 62346393  | 62346810  | 418 |
| chr18 | 22069469  | 22069884  | 416 |
| chr24 | 48912692  | 48913090  | 399 |
| chr12 | 31239427  | 31239825  | 399 |
| chr18 | 23123183  | 23123580  | 398 |
| chr22 | 29700997  | 29701389  | 393 |
| chr14 | 6416233   | 6416625   | 393 |
| chr17 | 73001413  | 73001803  | 391 |
| chr3  | 111647114 | 111647503 | 390 |
| chr1  | 141491598 | 141491987 | 390 |
| chr11 | 84593215  | 84593601  | 387 |
| chr13 | 15496017  | 15496400  | 384 |
| chr22 | 59188255  | 59188637  | 383 |
| chr1  | 82992670  | 82993052  | 383 |
| chr21 | 48696616  | 48696997  | 382 |
| chr18 | 56776433  | 56776814  | 382 |
| chr3  | 111486114 | 111486494 | 381 |
| chr21 | 67771225  | 67771605  | 381 |
| chr18 | 51126301  | 51126680  | 380 |
| chr6  | 14205080  | 14205458  | 379 |
| chr14 | 64533750  | 64534128  | 379 |
| chr10 | 99593090  | 99593467  | 378 |
| chr26 | 23880400  | 23880776  | 377 |
| chr2  | 75695867  | 75696243  | 377 |
| chr13 | 47743033  | 47743409  | 377 |
| chr11 | 65719238  | 65719614  | 377 |
| chr21 | 59886391  | 59886766  | 376 |
| chr17 | 69882766  | 69883141  | 376 |
| chr24 | 34735352  | 34735726  | 375 |

|       |           |           |     |
|-------|-----------|-----------|-----|
| chr3  | 121358862 | 121359235 | 374 |
| chr7  | 50656038  | 50656410  | 373 |
| chr24 | 59048358  | 59048728  | 371 |
| chr1  | 149696824 | 149697193 | 370 |
| chr11 | 107854539 | 107854907 | 369 |
| chr8  | 7558620   | 7558987   | 368 |
| chr18 | 40278383  | 40278750  | 368 |
| chr1  | 154400395 | 154400759 | 365 |
| chr9  | 46015449  | 46015812  | 364 |
| chr11 | 104289805 | 104290166 | 362 |
| chr19 | 46704152  | 46704512  | 361 |
| chr16 | 68761807  | 68762167  | 361 |
| chr8  | 6464872   | 6465231   | 360 |
| chr20 | 66537422  | 66537781  | 360 |
| chr13 | 66941855  | 66942214  | 360 |
| chr5  | 120493917 | 120494275 | 359 |
| chr27 | 30622968  | 30623326  | 359 |
| chr17 | 69738732  | 69739090  | 359 |
| chr16 | 36929004  | 36929362  | 359 |
| chr15 | 75704876  | 75705234  | 359 |
| chr7  | 60987295  | 60987652  | 358 |
| chr25 | 40423035  | 40423392  | 358 |
| chr2  | 36082224  | 36082581  | 358 |
| chr2  | 129247831 | 129248187 | 357 |
| chr10 | 75481335  | 75481691  | 357 |
| chr16 | 34183874  | 34184229  | 356 |
| chr11 | 98411516  | 98411870  | 355 |
| chr23 | 11014133  | 11014486  | 354 |
| chr2  | 135160684 | 135161037 | 354 |
| chr18 | 56670616  | 56670969  | 354 |
| chr5  | 81376383  | 81376735  | 353 |
| chr11 | 106070078 | 106070430 | 353 |
| chr15 | 24867656  | 24868005  | 350 |
| chr14 | 30904477  | 30904826  | 350 |
| chr26 | 41461513  | 41461858  | 346 |
| chr22 | 50740787  | 50741132  | 346 |
| chr18 | 23589490  | 23589833  | 344 |
| chr18 | 11478744  | 11479087  | 344 |
| chr21 | 64783175  | 64783517  | 343 |
| chr5  | 28723099  | 28723440  | 342 |
| chr3  | 113593366 | 113593705 | 340 |
| chr2  | 140204343 | 140204681 | 339 |
| chr19 | 61765942  | 61766278  | 337 |
| chr17 | 63956175  | 63956510  | 336 |
| chr16 | 75655331  | 75655665  | 335 |
| chr13 | 22157869  | 22158203  | 335 |
| chr11 | 46225591  | 46225924  | 334 |
| chr10 | 17711642  | 17711973  | 332 |
| chr25 | 3834972   | 3835302   | 331 |
| chr2  | 110531233 | 110531563 | 331 |

|       |           |           |     |
|-------|-----------|-----------|-----|
| chr15 | 75803432  | 75803762  | 331 |
| chr11 | 81042832  | 81043162  | 331 |
| chr18 | 11531414  | 11531743  | 330 |
| chr18 | 39583034  | 39583360  | 327 |
| chr3  | 115470164 | 115470489 | 326 |
| chr23 | 8474424   | 8474748   | 325 |
| chr22 | 17573842  | 17574166  | 325 |
| chr12 | 32538836  | 32539159  | 324 |
| chr23 | 15878322  | 15878642  | 321 |
| chr9  | 43811318  | 43811637  | 320 |
| chr18 | 62687624  | 62687943  | 320 |
| chr19 | 61336412  | 61336730  | 319 |
| chr14 | 1394766   | 1395083   | 318 |
| chr13 | 75766128  | 75766444  | 317 |
| chr13 | 55088445  | 55088760  | 316 |
| chr8  | 7537725   | 7538038   | 314 |
| chr11 | 28548912  | 28549224  | 313 |
| chr5  | 29958396  | 29958707  | 312 |
| chr5  | 60365352  | 60365662  | 311 |
| chr13 | 53809356  | 53809662  | 307 |
| chr26 | 31888252  | 31888557  | 306 |
| chr19 | 56075914  | 56076216  | 303 |
| chr7  | 44903121  | 44903422  | 302 |
| chr8  | 80140062  | 80140362  | 301 |
| chr26 | 22379234  | 22379533  | 300 |
| chr19 | 58468386  | 58468684  | 299 |
| chr11 | 71466305  | 71466603  | 299 |
| chr4  | 122599074 | 122599371 | 298 |
| chr8  | 24326868  | 24327164  | 297 |
| chr22 | 55962915  | 55963209  | 295 |
| chr11 | 28795509  | 28795803  | 295 |
| chr17 | 60195419  | 60195712  | 294 |
| chr23 | 15934829  | 15935120  | 292 |
| chr14 | 19338631  | 19338922  | 292 |
| chr2  | 102761134 | 102761424 | 291 |
| chr23 | 43311805  | 43312092  | 288 |
| chr17 | 56063717  | 56064003  | 287 |
| chr6  | 118652160 | 118652445 | 286 |
| chr2  | 110621099 | 110621381 | 283 |
| chr5  | 33883442  | 33883722  | 281 |
| chr24 | 35401397  | 35401676  | 280 |
| chr9  | 90416241  | 90416518  | 278 |
| chr26 | 50751136  | 50751412  | 277 |
| chr7  | 14245858  | 14246131  | 274 |
| chr21 | 20680078  | 20680351  | 274 |
| chr3  | 36845936  | 36846207  | 272 |
| chr2  | 134695952 | 134696222 | 271 |
| chr18 | 55631391  | 55631661  | 271 |
| chr26 | 18288327  | 18288595  | 269 |
| chr5  | 33772420  | 33772681  | 262 |

|       |               |           |     |
|-------|---------------|-----------|-----|
| chr14 | 8186213       | 8186474   | 262 |
| chr26 | 15714157      | 15714415  | 259 |
| chr2  | 135760662     | 135760920 | 259 |
| chr5  | 118412745     | 118413002 | 258 |
| chr13 | 38834504      | 38834760  | 257 |
| chr22 | 30121890      | 30122139  | 250 |
| chr9  | 90294641      | 90294877  | 237 |
| chr10 | 8700006       | 8700237   | 232 |
| chr13 | 65350615      | 65350845  | 231 |
| chr15 | 23132528      | 23133184  | 657 |
| chr4  | 72736363      | 72737017  | 655 |
| chr5  | 79216620      | 79217272  | 653 |
| chr19 | 59355378      | 59355988  | 611 |
| chr27 | 39172519      | 39173105  | 587 |
| chr25 | 38265431      | 38266009  | 579 |
| chr25 | 43535193      | 43535763  | 571 |
| chr8  | 60194700      | 60195260  | 561 |
| chr8  | 45735015      | 45735562  | 548 |
| chr16 | 71117780      | 71118312  | 533 |
| chr25 | 39871710      | 39872227  | 518 |
| chr6  | 107329917     | 107330423 | 507 |
| chr1  | 131393249     | 131393729 | 481 |
| chr8  | 8726236       | 8726714   | 479 |
| chr5  | 64694939      | 64695414  | 476 |
| chr4  | 123210195     | 123210657 | 463 |
| chr16 | 2349308       | 2349768   | 461 |
| chr13 | 42453320      | 42453779  | 460 |
| chr11 | 104901878     | 104902330 | 453 |
| chr29 | 49771084      | 49771535  | 452 |
| chr3  | 118151745     | 118152182 | 438 |
| chr15 | 25585674      | 25586105  | 432 |
| chr24 | 41098400      | 41098821  | 422 |
| chr20 | 3522986       | 3523403   | 418 |
| chr18 | 11988459      | 11988871  | 413 |
| chr15 | 21480026      | 21480426  | 401 |
| chr13 | 53812439      | 53812837  | 399 |
| chr18 | 50861031      | 50861428  | 398 |
| chr7  | 10633804      | 10634197  | 394 |
| chr11 | 100951725     | 100952115 | 391 |
| chr9  | 90341360      | 90341749  | 390 |
| chr3  | 119660861     | 119661246 | 386 |
| chr23 | 17492937      | 17493322  | 386 |
| chr23 | 13537333      | 13537718  | 386 |
| chr3  | 126843572     | 126843956 | 385 |
| chr14 | 39883710      | 39884092  | 383 |
| chr5  | 61051527      | 61051908  | 382 |
| chr5  | 31223663      | 31224044  | 382 |
| chr24 | 188760 189141 | 382       |     |
| chr17 | 74606661      | 74607040  | 380 |
| chr20 | 4972241       | 4972619   | 379 |

|       |           |           |     |
|-------|-----------|-----------|-----|
| chr19 | 54933635  | 54934012  | 378 |
| chr18 | 56834083  | 56834460  | 378 |
| chr11 | 14332247  | 14332623  | 377 |
| chr15 | 23941238  | 23941613  | 376 |
| chr7  | 18791340  | 18791714  | 375 |
| chr11 | 96398937  | 96399311  | 375 |
| chr12 | 18066822  | 18067195  | 374 |
| chr6  | 46619963  | 46620332  | 370 |
| chr29 | 44732691  | 44733059  | 369 |
| chr12 | 31971741  | 31972109  | 369 |
| chr8  | 73321300  | 73321667  | 368 |
| chr17 | 70479688  | 70480055  | 368 |
| chr16 | 34181212  | 34181578  | 367 |
| chr19 | 54739952  | 54740316  | 365 |
| chr1  | 148039734 | 148040097 | 364 |
| chr29 | 49974145  | 49974507  | 363 |
| chr29 | 37262180  | 37262541  | 362 |
| chr12 | 54230683  | 54231043  | 361 |
| chr26 | 18168956  | 18169315  | 360 |
| chr22 | 59898093  | 59898452  | 360 |
| chr29 | 50259711  | 50260069  | 359 |
| chr23 | 8060282   | 8060640   | 359 |
| chr17 | 63940504  | 63940861  | 358 |
| chr4  | 13305088  | 13305442  | 355 |
| chr11 | 71952107  | 71952460  | 354 |
| chr16 | 49524494  | 49524846  | 353 |
| chr17 | 69836138  | 69836489  | 352 |
| chr29 | 38283566  | 38283914  | 349 |
| chr12 | 68229721  | 68230067  | 347 |
| chr1  | 129980444 | 129980787 | 344 |
| chr3  | 33846568  | 33846907  | 340 |
| chr22 | 60416217  | 60416555  | 339 |
| chr3  | 30015682  | 30016019  | 338 |
| chr17 | 69325683  | 69326020  | 338 |
| chr8  | 80143511  | 80143847  | 337 |
| chr17 | 60280007  | 60280342  | 336 |
| chr29 | 48329888  | 48330222  | 335 |
| chr1  | 145838637 | 145838969 | 333 |
| chr19 | 63910403  | 63910732  | 330 |
| chr13 | 68060469  | 68060798  | 330 |
| chr15 | 27288335  | 27288662  | 328 |
| chr7  | 37894883  | 37895209  | 327 |
| chr17 | 1569029   | 1569354   | 326 |
| chr20 | 6579417   | 6579741   | 325 |
| chr19 | 58954117  | 58954438  | 322 |
| chr11 | 86248537  | 86248856  | 320 |
| chr9  | 95326546  | 95326863  | 318 |
| chr25 | 2687585   | 2687902   | 318 |
| chr17 | 72728869  | 72729186  | 318 |
| chr17 | 70102742  | 70103059  | 318 |

|       |           |           |     |
|-------|-----------|-----------|-----|
| chrX  | 87518947  | 87519263  | 317 |
| chr2  | 110031407 | 110031721 | 315 |
| chr3  | 127851753 | 127852066 | 314 |
| chr15 | 22801235  | 22801548  | 314 |
| chr28 | 27032999  | 27033311  | 313 |
| chr19 | 38312648  | 38312959  | 312 |
| chr29 | 19542319  | 19542629  | 311 |
| chr23 | 52694471  | 52694780  | 310 |
| chr19 | 54186285  | 54186594  | 310 |
| chr15 | 43335765  | 43336072  | 308 |
| chr26 | 20857227  | 20857533  | 307 |
| chr11 | 2828439   | 2828744   | 306 |
| chr25 | 39408149  | 39408452  | 304 |
| chr19 | 29708425  | 29708726  | 302 |
| chr16 | 44196803  | 44197104  | 302 |
| chr7  | 13400870  | 13401166  | 297 |
| chr5  | 111690726 | 111691020 | 295 |
| chr19 | 41398888  | 41399182  | 295 |
| chr19 | 59519963  | 59520252  | 290 |
| chr17 | 70277160  | 70277447  | 288 |
| chr6  | 107348538 | 107348822 | 285 |
| chr13 | 56234295  | 56234579  | 285 |
| chr15 | 65647190  | 65647471  | 282 |
| chr19 | 55963668  | 55963944  | 277 |
| chr19 | 29007815  | 29008091  | 277 |
| chr5  | 60374543  | 60374818  | 276 |
| chr25 | 34401257  | 34401527  | 271 |
| chr10 | 90509481  | 90509751  | 271 |
| chr3  | 124549114 | 124549383 | 270 |
| chr18 | 18698741  | 18699009  | 269 |
| chr10 | 83639074  | 83639341  | 268 |
| chr19 | 55935540  | 55935806  | 267 |
| chr29 | 31976990  | 31977255  | 266 |
| chr18 | 22167638  | 22167903  | 266 |
| chr18 | 46050392  | 46050655  | 264 |
| chr11 | 47314675  | 47314937  | 263 |
| chr19 | 17106144  | 17106405  | 262 |
| chr23 | 27822877  | 27823137  | 261 |
| chr26 | 22312345  | 22312594  | 250 |
| chr18 | 48629300  | 48629549  | 250 |
| chr13 | 58628653  | 58628895  | 243 |
| chr16 | 43847567  | 43847807  | 241 |
| chr7  | 13050058  | 13050293  | 236 |
| chr3  | 23010645  | 23010868  | 224 |
| chr12 | 25036493  | 25036705  | 213 |
| chr9  | 25143806  | 25144578  | 773 |
| chr3  | 112902236 | 112902970 | 735 |
| chr4  | 95836775  | 95837465  | 691 |
| chr19 | 25995195  | 25995875  | 681 |
| chr25 | 33285794  | 33286413  | 620 |

|       |           |           |     |
|-------|-----------|-----------|-----|
| chr29 | 38310394  | 38311000  | 607 |
| chr8  | 73806477  | 73807059  | 583 |
| chr22 | 60006588  | 60007167  | 580 |
| chr11 | 105657953 | 105658472 | 520 |
| chr19 | 31840910  | 31841423  | 514 |
| chr11 | 104897788 | 104898299 | 512 |
| chr7  | 96498062  | 96498566  | 505 |
| chr9  | 105733902 | 105734404 | 503 |
| chr3  | 115092363 | 115092854 | 492 |
| chr8  | 109037825 | 109038299 | 475 |
| chr25 | 21906913  | 21907382  | 470 |
| chr5  | 20852117  | 20852582  | 466 |
| chr15 | 75311308  | 75311772  | 465 |
| chr7  | 43721005  | 43721468  | 464 |
| chr16 | 48275934  | 48276394  | 461 |
| chr19 | 57687167  | 57687617  | 451 |
| chr26 | 21761569  | 21762018  | 450 |
| chr19 | 12282572  | 12283018  | 447 |
| chr17 | 70273729  | 70274175  | 447 |
| chr1  | 147301011 | 147301454 | 444 |
| chr1  | 107886765 | 107887194 | 430 |
| chr16 | 38772831  | 38773254  | 424 |
| chr5  | 100130150 | 100130572 | 423 |
| chr4  | 98755784  | 98756203  | 420 |
| chr4  | 65382205  | 65382621  | 417 |
| chr12 | 36431226  | 36431641  | 416 |
| chr6  | 120900891 | 120901301 | 411 |
| chr18 | 43152631  | 43153040  | 410 |
| chr5  | 114082447 | 114082855 | 409 |
| chr8  | 65077743  | 65078141  | 399 |
| chr5  | 81371625  | 81372023  | 399 |
| chr3  | 116632053 | 116632451 | 399 |
| chr3  | 111779479 | 111779877 | 399 |
| chr3  | 55177652  | 55178050  | 399 |
| chr2  | 49564961  | 49565359  | 399 |
| chr13 | 80650767  | 80651165  | 399 |
| chr1  | 133440196 | 133440594 | 399 |
| chr8  | 74376081  | 74376478  | 398 |
| chr29 | 48814445  | 48814842  | 398 |
| chr10 | 9755612   | 9756009   | 398 |
| chr7  | 80923906  | 80924302  | 397 |
| chr13 | 67391211  | 67391607  | 397 |
| chr11 | 83222088  | 83222484  | 397 |
| chr19 | 49385300  | 49385695  | 396 |
| chr28 | 42784889  | 42785283  | 395 |
| chr20 | 8569145   | 8569539   | 395 |
| chr2  | 43864094  | 43864486  | 393 |
| chr25 | 39422452  | 39422843  | 392 |
| chr13 | 75845707  | 75846098  | 392 |
| chr23 | 52811278  | 52811668  | 391 |

|       |           |           |     |
|-------|-----------|-----------|-----|
| chr22 | 54315475  | 54315865  | 391 |
| chr18 | 63748847  | 63749237  | 391 |
| chr15 | 43396630  | 43397020  | 391 |
| chr2  | 111860474 | 111860863 | 390 |
| chr16 | 73683024  | 73683413  | 390 |
| chr12 | 35608932  | 35609321  | 390 |
| chr3  | 122052745 | 122053132 | 388 |
| chr3  | 55924876  | 55925262  | 387 |
| chr3  | 22424807  | 22425193  | 387 |
| chr19 | 56532257  | 56532643  | 387 |
| chr15 | 51008124  | 51008510  | 387 |
| chr8  | 112476067 | 112476452 | 386 |
| chr28 | 46056588  | 46056973  | 386 |
| chr26 | 42195926  | 42196311  | 386 |
| chr18 | 5668442   | 5668827   | 386 |
| chr9  | 90654517  | 90654901  | 385 |
| chr19 | 8556215   | 8556599   | 385 |
| chr10 | 36549100  | 36549484  | 385 |
| chr7  | 2064614   | 2064997   | 384 |
| chr5  | 60305000  | 60305383  | 384 |
| chr14 | 22081621  | 22082004  | 384 |
| chr23 | 7703665   | 7704047   | 383 |
| chr20 | 33372253  | 33372635  | 383 |
| chrX  | 75401411  | 75401792  | 382 |
| chr6  | 101412623 | 101413004 | 382 |
| chr21 | 66133258  | 66133639  | 382 |
| chr16 | 75724779  | 75725160  | 382 |
| chr3  | 83135689  | 83136069  | 381 |
| chr7  | 37816330  | 37816709  | 380 |
| chr3  | 33106202  | 33106581  | 380 |
| chr16 | 41436013  | 41436392  | 380 |
| chr12 | 33091593  | 33091972  | 380 |
| chr7  | 4503284   | 4503662   | 379 |
| chr22 | 56124983  | 56125361  | 379 |
| chr18 | 42245234  | 42245612  | 379 |
| chr11 | 14242507  | 14242885  | 379 |
| chr18 | 45640213  | 45640590  | 378 |
| chr11 | 70703350  | 70703727  | 378 |
| chr4  | 118240668 | 118241044 | 377 |
| chr25 | 37646302  | 37646678  | 377 |
| chr18 | 51050177  | 51050553  | 377 |
| chr16 | 48799837  | 48800213  | 377 |
| chr7  | 3691952   | 3692327   | 376 |
| chr5  | 29987939  | 29988314  | 376 |
| chr2  | 137083375 | 137083750 | 376 |
| chr1  | 76358553  | 76358927  | 375 |
| chr4  | 117882244 | 117882617 | 374 |
| chr1  | 74633669  | 74634042  | 374 |
| chr6  | 59320402  | 59320774  | 373 |
| chr26 | 44236939  | 44237311  | 373 |



|       |               |           |     |
|-------|---------------|-----------|-----|
| chr3  | 22973364      | 22973735  | 372 |
| chr15 | 51347712      | 51348083  | 372 |
| chr13 | 80403083      | 80403454  | 372 |
| chr8  | 108774789     | 108775159 | 371 |
| chr8  | 73724572      | 73724941  | 370 |
| chr4  | 106595369     | 106595738 | 370 |
| chr21 | 6958451       | 6958820   | 370 |
| chr8  | 107625799     | 107626167 | 369 |
| chr7  | 4989616       | 4989984   | 369 |
| chr22 | 12184057      | 12184425  | 369 |
| chr21 | 6471977       | 6472345   | 369 |
| chr18 | 33326166      | 33326534  | 369 |
| chr13 | 39697057      | 39697425  | 369 |
| chr8  | 77219401      | 77219768  | 368 |
| chr3  | 115113841     | 115114208 | 368 |
| chr29 | 36352712      | 36353079  | 368 |
| chr28 | 38902080      | 38902447  | 368 |
| chr3  | 29349386      | 29349752  | 367 |
| chr29 | 51851442      | 51851808  | 367 |
| chr15 | 64487773      | 64488139  | 367 |
| chr8  | 1626088       | 1626453   | 366 |
| chr19 | 43355180      | 43355545  | 366 |
| chr18 | 11551293      | 11551658  | 366 |
| chr16 | 38787243      | 38787608  | 366 |
| chr8  | 74371220      | 74371584  | 365 |
| chr15 | 68026624      | 68026988  | 365 |
| chr13 | 77771201      | 77771565  | 365 |
| chr26 | 37629216      | 37629579  | 364 |
| chr2  | 76672272      | 76672635  | 364 |
| chr15 | 64643581      | 64643944  | 364 |
| chr13 | 75555100      | 75555463  | 364 |
| chr19 | 58408510      | 58408872  | 363 |
| chr13 | 57425800      | 57426162  | 363 |
| chr10 | 90506794      | 90507156  | 363 |
| chr10 | 6674017       | 6674379   | 363 |
| chr3  | 124097381     | 124097742 | 362 |
| chr25 | 42140287      | 42140648  | 362 |
| chr18 | 9793662       | 9794023   | 362 |
| chr14 | 825029 825390 |           | 362 |
| chr12 | 33624559      | 33624920  | 362 |
| chr10 | 14624317      | 14624678  | 362 |
| chr7  | 50365570      | 50365930  | 361 |
| chr29 | 49734988      | 49735348  | 361 |
| chr27 | 732206 732566 |           | 361 |
| chr25 | 22110429      | 22110789  | 361 |
| chr23 | 18492345      | 18492705  | 361 |
| chr19 | 46773157      | 46773517  | 361 |
| chr11 | 68920918      | 68921278  | 361 |
| chr26 | 48742883      | 48743242  | 360 |
| chr26 | 22808680      | 22809039  | 360 |

|       |               |           |     |
|-------|---------------|-----------|-----|
| chr22 | 56607594      | 56607953  | 360 |
| chr13 | 40815806      | 40816165  | 360 |
| chr11 | 75013173      | 75013532  | 360 |
| chr9  | 91084285      | 91084643  | 359 |
| chr5  | 83616376      | 83616734  | 359 |
| chr2  | 99373824      | 99374182  | 359 |
| chr14 | 1384631       | 1384989   | 359 |
| chr29 | 17612540      | 17612897  | 358 |
| chr27 | 34734912      | 34735269  | 358 |
| chr26 | 31242513      | 31242870  | 358 |
| chr25 | 18131434      | 18131791  | 358 |
| chr2  | 139212010     | 139212367 | 358 |
| chr18 | 54651253      | 54651610  | 358 |
| chr16 | 1105137       | 1105494   | 358 |
| chr28 | 33725270      | 33725626  | 357 |
| chr28 | 12162063      | 12162419  | 357 |
| chr21 | 64625442      | 64625798  | 357 |
| chr21 | 64430300      | 64430656  | 357 |
| chr21 | 2916731       | 2917087   | 357 |
| chr15 | 25672474      | 25672830  | 357 |
| chr9  | 90808443      | 90808798  | 356 |
| chr19 | 46139721      | 46140076  | 356 |
| chr19 | 23718848      | 23719203  | 356 |
| chr12 | 82590166      | 82590521  | 356 |
| chr12 | 82031212      | 82031567  | 356 |
| chr5  | 113286863     | 113287217 | 355 |
| chr5  | 29025746      | 29026100  | 355 |
| chr3  | 121432410     | 121432764 | 355 |
| chr28 | 33925046      | 33925400  | 355 |
| chr2  | 75560496      | 75560850  | 355 |
| chr11 | 28505474      | 28505828  | 355 |
| chr5  | 12274794      | 12275147  | 354 |
| chr18 | 33211689      | 33212042  | 354 |
| chr13 | 40310730      | 40311083  | 354 |
| chr9  | 24460487      | 24460839  | 353 |
| chr3  | 18525045      | 18525397  | 353 |
| chr18 | 11753599      | 11753951  | 353 |
| chr17 | 4887641       | 4887993   | 353 |
| chr12 | 30784391      | 30784743  | 353 |
| chr23 | 51678690      | 51679041  | 352 |
| chr22 | 29797209      | 29797560  | 352 |
| chr2  | 131150411     | 131150762 | 352 |
| chr17 | 74698127      | 74698478  | 352 |
| chr26 | 51219983      | 51220333  | 351 |
| chr5  | 120490252     | 120490601 | 350 |
| chr3  | 52142933      | 52143282  | 350 |
| chr27 | 848947 849296 | 350       |     |
| chr20 | 72059236      | 72059585  | 350 |
| chr13 | 56364675      | 56365024  | 350 |
| chr25 | 38291411      | 38291759  | 349 |

|       |           |           |     |
|-------|-----------|-----------|-----|
| chr23 | 31342849  | 31343197  | 349 |
| chr19 | 54335968  | 54336316  | 349 |
| chr8  | 24400237  | 24400584  | 348 |
| chr28 | 33692469  | 33692816  | 348 |
| chr2  | 140619255 | 140619602 | 348 |
| chr2  | 123754421 | 123754768 | 348 |
| chr19 | 59534420  | 59534767  | 348 |
| chr13 | 54472845  | 54473192  | 348 |
| chr3  | 22518555  | 22518901  | 347 |
| chr18 | 61965656  | 61966002  | 347 |
| chr8  | 109618368 | 109618713 | 346 |
| chr21 | 65672864  | 65673209  | 346 |
| chr9  | 12617590  | 12617934  | 345 |
| chr25 | 40213330  | 40213674  | 345 |
| chr19 | 29135199  | 29135543  | 345 |
| chr26 | 34937668  | 34938011  | 344 |
| chr26 | 21973722  | 21974065  | 344 |
| chr13 | 63642246  | 63642589  | 344 |
| chr8  | 115151679 | 115152021 | 343 |
| chr8  | 72616716  | 72617058  | 343 |
| chr8  | 66199226  | 66199568  | 343 |
| chr3  | 105641721 | 105642063 | 343 |
| chr15 | 33639455  | 33639797  | 343 |
| chr5  | 120491831 | 120492172 | 342 |
| chr19 | 29676783  | 29677124  | 342 |
| chr13 | 80012987  | 80013328  | 342 |
| chr13 | 10174982  | 10175323  | 342 |
| chr1  | 67584538  | 67584879  | 342 |
| chr17 | 62074580  | 62074920  | 341 |
| chr28 | 33534489  | 33534828  | 340 |
| chr26 | 22214196  | 22214535  | 340 |
| chr18 | 51541090  | 51541428  | 339 |
| chr17 | 57820323  | 57820661  | 339 |
| chr6  | 46496632  | 46496969  | 338 |
| chr3  | 116912622 | 116912959 | 338 |
| chr26 | 37647642  | 37647979  | 338 |
| chr13 | 60774584  | 60774921  | 338 |
| chr25 | 3020981   | 3021317   | 337 |
| chr18 | 23511952  | 23512288  | 337 |
| chr16 | 58427645  | 58427981  | 337 |
| chr11 | 28332265  | 28332601  | 337 |
| chr2  | 139190062 | 139190397 | 336 |
| chr14 | 31005054  | 31005389  | 336 |
| chr1  | 75095294  | 75095629  | 336 |
| chr8  | 108660655 | 108660989 | 335 |
| chr5  | 35462284  | 35462618  | 335 |
| chr28 | 26084608  | 26084942  | 335 |
| chr21 | 55798385  | 55798719  | 335 |
| chr14 | 1522810   | 1523144   | 335 |
| chr11 | 28638650  | 28638984  | 335 |

|       |               |           |     |
|-------|---------------|-----------|-----|
| chr1  | 72537578      | 72537912  | 335 |
| chr4  | 76854394      | 76854727  | 334 |
| chr22 | 58695558      | 58695891  | 334 |
| chr22 | 30187304      | 30187637  | 334 |
| chr19 | 58652747      | 58653080  | 334 |
| chr17 | 70175877      | 70176210  | 334 |
| chr13 | 55542671      | 55543004  | 334 |
| chr10 | 67027427      | 67027760  | 334 |
| chr29 | 34863198      | 34863530  | 333 |
| chr11 | 63318791      | 63319123  | 333 |
| chr10 | 29855558      | 29855890  | 333 |
| chr7  | 51911814      | 51912145  | 332 |
| chr23 | 10486377      | 10486708  | 332 |
| chr21 | 65760545      | 65760876  | 332 |
| chr19 | 7620656       | 7620987   | 332 |
| chr10 | 81710811      | 81711142  | 332 |
| chr1  | 68849132      | 68849463  | 332 |
| chr5  | 79216100      | 79216430  | 331 |
| chr5  | 42074185      | 42074515  | 331 |
| chr18 | 39580520      | 39580850  | 331 |
| chr17 | 63278355      | 63278685  | 331 |
| chr11 | 44937342      | 44937672  | 331 |
| chr3  | 17446621      | 17446950  | 330 |
| chr24 | 1322184       | 1322513   | 330 |
| chr2  | 111767619     | 111767948 | 330 |
| chr19 | 25734340      | 25734669  | 330 |
| chr19 | 23074060      | 23074389  | 330 |
| chr17 | 70125062      | 70125391  | 330 |
| chr15 | 81176786      | 81177115  | 330 |
| chr29 | 43056772      | 43057100  | 329 |
| chr27 | 658522 658850 |           | 329 |
| chr21 | 1787374       | 1787702   | 329 |
| chr13 | 70363853      | 70364181  | 329 |
| chr13 | 57395880      | 57396208  | 329 |
| chr10 | 24668109      | 24668437  | 329 |
| chr9  | 105441786     | 105442113 | 328 |
| chr5  | 113202185     | 113202512 | 328 |
| chr5  | 28976519      | 28976846  | 328 |
| chr28 | 2079249       | 2079576   | 328 |
| chr27 | 34878216      | 34878543  | 328 |
| chr13 | 35564535      | 35564862  | 328 |
| chr11 | 100280613     | 100280940 | 328 |
| chr10 | 70034707      | 70035034  | 328 |
| chr3  | 111650264     | 111650590 | 327 |
| chr27 | 35837662      | 35837988  | 327 |
| chr11 | 75113847      | 75114173  | 327 |
| chr8  | 74002516      | 74002841  | 326 |
| chr17 | 72703156      | 72703481  | 326 |
| chr17 | 58840245      | 58840570  | 326 |
| chr12 | 32027704      | 32028029  | 326 |

|       |               |           |     |
|-------|---------------|-----------|-----|
| chr6  | 119361357     | 119361681 | 325 |
| chr29 | 18196122      | 18196446  | 325 |
| chr24 | 44280085      | 44280409  | 325 |
| chr18 | 11676983      | 11677307  | 325 |
| chr7  | 29479546      | 29479869  | 324 |
| chr25 | 37493239      | 37493562  | 324 |
| chr2  | 130115562     | 130115885 | 324 |
| chr11 | 4798108       | 4798431   | 324 |
| chr10 | 17227804      | 17228127  | 324 |
| chr23 | 7271271       | 7271593   | 323 |
| chr2  | 135163293     | 135163615 | 323 |
| chr19 | 54502288      | 54502610  | 323 |
| chr18 | 37203524      | 37203846  | 323 |
| chr18 | 3546444       | 3546766   | 323 |
| chr17 | 58923773      | 58924095  | 323 |
| chr16 | 75237242      | 75237564  | 323 |
| chr10 | 53068644      | 53068966  | 323 |
| chr9  | 106589956     | 106590277 | 322 |
| chr7  | 13098107      | 13098428  | 322 |
| chr5  | 30512473      | 30512794  | 322 |
| chr5  | 28614682      | 28615003  | 322 |
| chr23 | 8791239       | 8791560   | 322 |
| chr16 | 49431201      | 49431522  | 322 |
| chr13 | 41190609      | 41190930  | 322 |
| chr10 | 24182025      | 24182346  | 322 |
| chr8  | 65071926      | 65072246  | 321 |
| chr24 | 65018243      | 65018563  | 321 |
| chr20 | 705640 705960 | 321       |     |
| chr22 | 29698670      | 29698989  | 320 |
| chr17 | 63129369      | 63129688  | 320 |
| chr18 | 45966536      | 45966854  | 319 |
| chr16 | 38854049      | 38854367  | 319 |
| chr14 | 18685704      | 18686022  | 319 |
| chr13 | 59617388      | 59617706  | 319 |
| chr5  | 113436305     | 113436622 | 318 |
| chr29 | 51768646      | 51768963  | 318 |
| chr23 | 27801796      | 27802113  | 318 |
| chr21 | 33794168      | 33794485  | 318 |
| chr2  | 110548261     | 110548578 | 318 |
| chr19 | 44802519      | 44802836  | 318 |
| chr18 | 63579491      | 63579808  | 318 |
| chr15 | 81030569      | 81030886  | 318 |
| chr12 | 32502430      | 32502747  | 318 |
| chr12 | 32164845      | 32165162  | 318 |
| chr5  | 71193097      | 71193413  | 317 |
| chr3  | 105184446     | 105184762 | 317 |
| chr19 | 26921253      | 26921569  | 317 |
| chr8  | 80217615      | 80217930  | 316 |
| chr26 | 21838196      | 21838511  | 316 |
| chr20 | 5797180       | 5797495   | 316 |

|       |               |           |     |
|-------|---------------|-----------|-----|
| chr17 | 41987932      | 41988247  | 316 |
| chr7  | 51861045      | 51861358  | 314 |
| chr21 | 27260664      | 27260977  | 314 |
| chr2  | 125923643     | 125923956 | 314 |
| chr2  | 19391081      | 19391394  | 314 |
| chr18 | 9701949       | 9702261   | 313 |
| chr15 | 75508868      | 75509180  | 313 |
| chr13 | 80607215      | 80607527  | 313 |
| chr13 | 62410414      | 62410726  | 313 |
| chr13 | 42259304      | 42259616  | 313 |
| chr12 | 32127787      | 32128099  | 313 |
| chr9  | 77195092      | 77195403  | 312 |
| chr5  | 28742291      | 28742602  | 312 |
| chr3  | 111182348     | 111182659 | 312 |
| chr18 | 52011943      | 52012254  | 312 |
| chr7  | 17386101      | 17386411  | 311 |
| chr2  | 92286988      | 92287298  | 311 |
| chr18 | 707850 708160 | 311       |     |
| chr15 | 74661227      | 74661537  | 311 |
| chr15 | 29173668      | 29173978  | 311 |
| chr15 | 28629560      | 28629870  | 311 |
| chr26 | 20959862      | 20960171  | 310 |
| chr13 | 40090962      | 40091271  | 310 |
| chr8  | 116913563     | 116913871 | 309 |
| chr7  | 94370517      | 94370825  | 309 |
| chr4  | 121490707     | 121491015 | 309 |
| chr18 | 55591895      | 55592203  | 309 |
| chr16 | 40853515      | 40853823  | 309 |
| chr14 | 80585056      | 80585364  | 309 |
| chr1  | 2721512       | 2721820   | 309 |
| chr17 | 57630050      | 57630357  | 308 |
| chr13 | 52940936      | 52941243  | 308 |
| chr8  | 24219245      | 24219551  | 307 |
| chr27 | 47643765      | 47644071  | 307 |
| chr20 | 5247071       | 5247377   | 307 |
| chr11 | 77838519      | 77838825  | 307 |
| chr11 | 70863317      | 70863623  | 307 |
| chr3  | 110313364     | 110313669 | 306 |
| chr25 | 1952945       | 1953250   | 306 |
| chr23 | 18470268      | 18470573  | 306 |
| chr20 | 19409619      | 19409924  | 306 |
| chr11 | 103735684     | 103735989 | 306 |
| chr7  | 16547322      | 16547626  | 305 |
| chr20 | 70568050      | 70568354  | 305 |
| chr18 | 12395581      | 12395885  | 305 |
| chr17 | 58881858      | 58882162  | 305 |
| chr16 | 46997226      | 46997530  | 305 |
| chr5  | 125699850     | 125700153 | 304 |
| chr18 | 11980261      | 11980564  | 304 |
| chr11 | 14403809      | 14404112  | 304 |

|       |           |           |     |
|-------|-----------|-----------|-----|
| chr1  | 148222415 | 148222718 | 304 |
| chr19 | 27942251  | 27942553  | 303 |
| chr16 | 38185304  | 38185606  | 303 |
| chr15 | 5464153   | 5464455   | 303 |
| chr4  | 69317960  | 69318261  | 302 |
| chr29 | 12836142  | 12836443  | 302 |
| chr19 | 15155730  | 15156031  | 302 |
| chr1  | 1645707   | 1646008   | 302 |
| chr4  | 8764865   | 8765165   | 301 |
| chr26 | 48615640  | 48615940  | 301 |
| chr24 | 48173023  | 48173323  | 301 |
| chr23 | 18380104  | 18380404  | 301 |
| chr13 | 61856606  | 61856906  | 301 |
| chr10 | 104328396 | 104328696 | 301 |
| chr26 | 24600988  | 24601287  | 300 |
| chr11 | 100952117 | 100952416 | 300 |
| chr11 | 70719081  | 70719380  | 300 |
| chr6  | 120591951 | 120592249 | 299 |
| chr3  | 105607483 | 105607781 | 299 |
| chr3  | 15581901  | 15582199  | 299 |
| chr22 | 53964898  | 53965196  | 299 |
| chr21 | 34055166  | 34055464  | 299 |
| chr16 | 47065125  | 47065423  | 299 |
| chr16 | 953666    | 953964    | 299 |
| chr11 | 81295781  | 81296079  | 299 |
| chr3  | 81169272  | 81169569  | 298 |
| chr29 | 41709677  | 41709974  | 298 |
| chr25 | 34290779  | 34291076  | 298 |
| chr2  | 139855268 | 139855565 | 298 |
| chr11 | 14110168  | 14110465  | 298 |
| chr7  | 18787171  | 18787467  | 297 |
| chr3  | 123342045 | 123342341 | 297 |
| chr29 | 49976307  | 49976603  | 297 |
| chr21 | 25187817  | 25188113  | 297 |
| chr19 | 29701216  | 29701512  | 297 |
| chr15 | 66388595  | 66388891  | 297 |
| chr15 | 60444847  | 60445143  | 297 |
| chr17 | 70401552  | 70401847  | 296 |
| chr16 | 47515130  | 47515425  | 296 |
| chr29 | 47269489  | 47269783  | 295 |
| chr29 | 36953859  | 36954153  | 295 |
| chr26 | 22357143  | 22357437  | 295 |
| chr19 | 44751221  | 44751515  | 295 |
| chr17 | 70390600  | 70390894  | 295 |
| chr15 | 75534647  | 75534941  | 295 |
| chr10 | 51441057  | 51441351  | 295 |
| chr10 | 21135188  | 21135482  | 295 |
| chr1  | 109105618 | 109105912 | 295 |
| chr19 | 47201057  | 47201350  | 294 |
| chr19 | 46840851  | 46841144  | 294 |

|       |               |           |     |
|-------|---------------|-----------|-----|
| chr11 | 75415160      | 75415453  | 294 |
| chr10 | 17161463      | 17161756  | 294 |
| chr29 | 49304648      | 49304940  | 293 |
| chr28 | 34171448      | 34171740  | 293 |
| chr28 | 26095378      | 26095670  | 293 |
| chr2  | 138593495     | 138593787 | 293 |
| chr19 | 6604584       | 6604876   | 293 |
| chr21 | 32987900      | 32988191  | 292 |
| chr19 | 60515965      | 60516256  | 292 |
| chr19 | 52832739      | 52833030  | 292 |
| chr18 | 52972634      | 52972925  | 292 |
| chr15 | 74931964      | 74932255  | 292 |
| chr15 | 40584489      | 40584780  | 292 |
| chr8  | 85049342      | 85049632  | 291 |
| chr21 | 6412516       | 6412806   | 291 |
| chr5  | 113621702     | 113621991 | 290 |
| chr18 | 10212315      | 10212604  | 290 |
| chr11 | 100380073     | 100380362 | 290 |
| chr5  | 31311121      | 31311409  | 289 |
| chr29 | 49516168      | 49516456  | 289 |
| chr27 | 17754615      | 17754903  | 289 |
| chr23 | 10921110      | 10921398  | 289 |
| chr22 | 60366035      | 60366323  | 289 |
| chr1  | 27349377      | 27349665  | 289 |
| chr1  | 155469 155757 |           | 289 |
| chr9  | 22766101      | 22766388  | 288 |
| chr29 | 44602998      | 44603285  | 288 |
| chr26 | 7005120       | 7005407   | 288 |
| chr12 | 35573505      | 35573792  | 288 |
| chr7  | 80765785      | 80766071  | 287 |
| chr21 | 65852994      | 65853280  | 287 |
| chr19 | 13450796      | 13451082  | 287 |
| chr18 | 11957700      | 11957986  | 287 |
| chr7  | 89473755      | 89474040  | 286 |
| chr5  | 121332608     | 121332893 | 286 |
| chr25 | 33541857      | 33542142  | 286 |
| chr18 | 58900627      | 58900912  | 286 |
| chr5  | 115539750     | 115540034 | 285 |
| chr3  | 124584965     | 124585249 | 285 |
| chr19 | 40675944      | 40676228  | 285 |
| chr19 | 36659110      | 36659394  | 285 |
| chr18 | 6786673       | 6786957   | 285 |
| chr13 | 65094988      | 65095272  | 285 |
| chr13 | 55368931      | 55369215  | 285 |
| chr18 | 56602160      | 56602443  | 284 |
| chr18 | 56486946      | 56487229  | 284 |
| chr7  | 108288823     | 108289105 | 283 |
| chr7  | 5242421       | 5242703   | 283 |
| chr22 | 44842681      | 44842963  | 283 |
| chr17 | 47406391      | 47406673  | 283 |



|       |               |           |     |
|-------|---------------|-----------|-----|
| chr16 | 46889369      | 46889651  | 283 |
| chr11 | 104567548     | 104567830 | 283 |
| chr3  | 111750771     | 111751052 | 282 |
| chr27 | 38669629      | 38669910  | 282 |
| chr27 | 734974 735255 | 282       |     |
| chr20 | 3277132       | 3277413   | 282 |
| chr19 | 40249143      | 40249424  | 282 |
| chr18 | 62221327      | 62221608  | 282 |
| chr13 | 77230213      | 77230494  | 282 |
| chr28 | 42367580      | 42367860  | 281 |
| chr24 | 50300482      | 50300762  | 281 |
| chr3  | 30727000      | 30727279  | 280 |
| chr22 | 56068052      | 56068331  | 280 |
| chr15 | 24946266      | 24946545  | 280 |
| chr14 | 7857877       | 7858156   | 280 |
| chr13 | 46219453      | 46219732  | 280 |
| chr9  | 77671897      | 77672175  | 279 |
| chr7  | 17367823      | 17368101  | 279 |
| chr25 | 1287984       | 1288262   | 279 |
| chr23 | 7262335       | 7262613   | 279 |
| chr16 | 46909067      | 46909345  | 279 |
| chr13 | 62913856      | 62914134  | 279 |
| chr10 | 21116777      | 21117055  | 279 |
| chr26 | 22338122      | 22338399  | 278 |
| chr25 | 3214522       | 3214799   | 278 |
| chr24 | 11509393      | 11509670  | 278 |
| chr21 | 64431711      | 64431988  | 278 |
| chr19 | 34949048      | 34949325  | 278 |
| chr10 | 20159150      | 20159427  | 278 |
| chr19 | 12428479      | 12428755  | 277 |
| chr16 | 60344262      | 60344538  | 277 |
| chr15 | 30799708      | 30799984  | 277 |
| chr10 | 36833112      | 36833388  | 277 |
| chrX  | 10875870      | 10876145  | 276 |
| chr9  | 106423367     | 106423642 | 276 |
| chr9  | 25144976      | 25145251  | 276 |
| chr8  | 104100140     | 104100415 | 276 |
| chr7  | 38576447      | 38576722  | 276 |
| chr6  | 108858583     | 108858858 | 276 |
| chr5  | 28990681      | 28990956  | 276 |
| chr24 | 61086251      | 61086526  | 276 |
| chr21 | 25248662      | 25248937  | 276 |
| chr19 | 34055582      | 34055857  | 276 |
| chr19 | 12310062      | 12310337  | 276 |
| chr18 | 11304929      | 11305204  | 276 |
| chr17 | 69819329      | 69819604  | 276 |
| chr15 | 75802704      | 75802979  | 276 |
| chr21 | 61645649      | 61645923  | 275 |
| chr17 | 61073677      | 61073951  | 275 |
| chr16 | 47262426      | 47262700  | 275 |

|       |           |           |     |
|-------|-----------|-----------|-----|
| chr13 | 55249502  | 55249776  | 275 |
| chr13 | 34798509  | 34798783  | 275 |
| chr11 | 103330487 | 103330761 | 275 |
| chr28 | 41737923  | 41738196  | 274 |
| chr18 | 39779304  | 39779577  | 274 |
| chr13 | 66874345  | 66874618  | 274 |
| chr13 | 17729204  | 17729477  | 274 |
| chr5  | 75985343  | 75985615  | 273 |
| chr19 | 51849591  | 51849863  | 273 |
| chr13 | 56005468  | 56005740  | 273 |
| chr11 | 74808636  | 74808908  | 273 |
| chr7  | 42747557  | 42747828  | 272 |
| chr25 | 39406398  | 39406669  | 272 |
| chr22 | 50039094  | 50039365  | 272 |
| chr5  | 117531399 | 117531669 | 271 |
| chr26 | 48498557  | 48498827  | 271 |
| chr18 | 45992068  | 45992338  | 271 |
| chr7  | 19968507  | 19968776  | 270 |
| chr21 | 65885280  | 65885549  | 270 |
| chr21 | 34470752  | 34471021  | 270 |
| chr19 | 48586426  | 48586695  | 270 |
| chr17 | 57663493  | 57663762  | 270 |
| chr17 | 56188409  | 56188678  | 270 |
| chr13 | 66949186  | 66949455  | 270 |
| chr10 | 35965429  | 35965698  | 270 |
| chr1  | 84567351  | 84567620  | 270 |
| chr5  | 113173505 | 113173773 | 269 |
| chr5  | 28795106  | 28795374  | 269 |
| chr10 | 88049659  | 88049927  | 269 |
| chr5  | 113237691 | 113237958 | 268 |
| chr2  | 136383645 | 136383912 | 268 |
| chr11 | 98908335  | 98908602  | 268 |
| chr10 | 12122688  | 12122955  | 268 |
| chr9  | 100486952 | 100487218 | 267 |
| chr15 | 75370645  | 75370911  | 267 |
| chr1  | 82925055  | 82925321  | 267 |
| chr7  | 62281455  | 62281720  | 266 |
| chr3  | 35574941  | 35575206  | 266 |
| chr23 | 15870014  | 15870279  | 266 |
| chr23 | 1303764   | 1304029   | 266 |
| chr18 | 49791466  | 49791731  | 266 |
| chr11 | 85332237  | 85332502  | 266 |
| chr1  | 152097256 | 152097521 | 266 |
| chr25 | 37522320  | 37522584  | 265 |
| chr2  | 131024857 | 131025121 | 265 |
| chr18 | 61965377  | 61965641  | 265 |
| chr17 | 42238301  | 42238565  | 265 |
| chr25 | 1513878   | 1514141   | 264 |
| chr21 | 59748152  | 59748415  | 264 |
| chr18 | 62987306  | 62987569  | 264 |

|       |               |           |     |
|-------|---------------|-----------|-----|
| chr8  | 45759944      | 45760206  | 263 |
| chr4  | 67988806      | 67989068  | 263 |
| chr23 | 15868058      | 15868320  | 263 |
| chr2  | 124233935     | 124234197 | 263 |
| chr17 | 57753356      | 57753618  | 263 |
| chr16 | 41495327      | 41495589  | 263 |
| chr14 | 79851349      | 79851611  | 263 |
| chr25 | 36436768      | 36437029  | 262 |
| chr25 | 36117561      | 36117822  | 262 |
| chr25 | 34498830      | 34499091  | 262 |
| chr24 | 58730305      | 58730566  | 262 |
| chr22 | 55477161      | 55477422  | 262 |
| chr18 | 54961476      | 54961737  | 262 |
| chr16 | 72048412      | 72048673  | 262 |
| chr10 | 17386747      | 17387008  | 262 |
| chr8  | 103958917     | 103959177 | 261 |
| chr26 | 35377488      | 35377748  | 261 |
| chr22 | 14988082      | 14988342  | 261 |
| chr17 | 70550767      | 70551027  | 261 |
| chr10 | 88202542      | 88202802  | 261 |
| chr7  | 57625404      | 57625663  | 260 |
| chr15 | 37558191      | 37558450  | 260 |
| chr7  | 5044805       | 5045063   | 259 |
| chr3  | 25816864      | 25817122  | 259 |
| chr14 | 36742589      | 36742847  | 259 |
| chr4  | 99348244      | 99348501  | 258 |
| chr29 | 44606835      | 44607092  | 258 |
| chr19 | 37574958      | 37575215  | 258 |
| chr19 | 14639883      | 14640140  | 258 |
| chr13 | 35661342      | 35661599  | 258 |
| chr1  | 82919226      | 82919483  | 258 |
| chr3  | 106527204     | 106527460 | 257 |
| chr23 | 50045197      | 50045453  | 257 |
| chr19 | 37925539      | 37925795  | 257 |
| chr18 | 55630455      | 55630711  | 257 |
| chr17 | 72951330      | 72951586  | 257 |
| chr16 | 2150803       | 2151059   | 257 |
| chr7  | 10975243      | 10975498  | 256 |
| chr5  | 73099349      | 73099604  | 256 |
| chr26 | 22237879      | 22238134  | 256 |
| chr24 | 13105808      | 13106063  | 256 |
| chr7  | 43059439      | 43059693  | 255 |
| chr5  | 35299578      | 35299832  | 255 |
| chr3  | 117327217     | 117327471 | 255 |
| chr15 | 28287167      | 28287421  | 255 |
| chr9  | 90410489      | 90410742  | 254 |
| chr8  | 108838064     | 108838317 | 254 |
| chr7  | 21101145      | 21101398  | 254 |
| chr25 | 35676110      | 35676363  | 254 |
| chr24 | 498094 498347 | 254       |     |

|       |               |           |     |
|-------|---------------|-----------|-----|
| chr19 | 12333776      | 12334029  | 254 |
| chr15 | 25322693      | 25322946  | 254 |
| chr5  | 29710972      | 29711224  | 253 |
| chr3  | 126835560     | 126835812 | 253 |
| chr19 | 57564714      | 57564966  | 253 |
| chr19 | 33134381      | 33134633  | 253 |
| chr5  | 115039453     | 115039704 | 252 |
| chr5  | 81565498      | 81565749  | 252 |
| chr3  | 424415 424666 | 252       |     |
| chr19 | 57346792      | 57347043  | 252 |
| chr7  | 101690628     | 101690878 | 251 |
| chr23 | 27899910      | 27900160  | 251 |
| chr19 | 53976948      | 53977198  | 251 |
| chr18 | 57401021      | 57401271  | 251 |
| chr11 | 108268547     | 108268797 | 251 |
| chr10 | 28839885      | 28840135  | 251 |
| chr7  | 51935757      | 51936006  | 250 |
| chr7  | 38457786      | 38458035  | 250 |
| chr7  | 37589959      | 37590208  | 250 |
| chr25 | 10633560      | 10633809  | 250 |
| chr2  | 22170087      | 22170336  | 250 |
| chr17 | 67973163      | 67973412  | 250 |
| chr17 | 63266767      | 63267016  | 250 |
| chr16 | 57546485      | 57546734  | 250 |
| chr16 | 38770424      | 38770673  | 250 |
| chr12 | 33980793      | 33981042  | 250 |
| chr12 | 32502145      | 32502394  | 250 |
| chr10 | 21260872      | 21261121  | 250 |
| chr1  | 68328507      | 68328756  | 250 |
| chr7  | 42222548      | 42222796  | 249 |
| chr4  | 5621559       | 5621807   | 249 |
| chr19 | 40432041      | 40432289  | 249 |
| chr18 | 24304792      | 24305040  | 249 |
| chr15 | 75800671      | 75800919  | 249 |
| chr11 | 109614558     | 109614806 | 249 |
| chr28 | 41023712      | 41023959  | 248 |
| chr27 | 5683123       | 5683370   | 248 |
| chr24 | 58632698      | 58632945  | 248 |
| chr21 | 19979529      | 19979776  | 248 |
| chr21 | 1924047       | 1924294   | 248 |
| chr10 | 12789038      | 12789285  | 248 |
| chr2  | 130294264     | 130294510 | 247 |
| chr11 | 49703333      | 49703579  | 247 |
| chr16 | 61135575      | 61135820  | 246 |
| chr29 | 33655678      | 33655922  | 245 |
| chr24 | 21964869      | 21965113  | 245 |
| chr19 | 55511683      | 55511927  | 245 |
| chr29 | 27220293      | 27220536  | 244 |
| chr20 | 66532554      | 66532797  | 244 |
| chr18 | 51077625      | 51077868  | 244 |

|       |           |           |     |
|-------|-----------|-----------|-----|
| chr14 | 6959254   | 6959497   | 244 |
| chr2  | 140429480 | 140429722 | 243 |
| chr19 | 44879461  | 44879703  | 243 |
| chr19 | 38304359  | 38304601  | 243 |
| chr18 | 53486088  | 53486330  | 243 |
| chr18 | 18009260  | 18009502  | 243 |
| chr13 | 66949478  | 66949720  | 243 |
| chr13 | 17715708  | 17715950  | 243 |
| chr5  | 61496081  | 61496322  | 242 |
| chr18 | 12051976  | 12052217  | 242 |
| chr16 | 45907692  | 45907933  | 242 |
| chr10 | 103641630 | 103641871 | 242 |
| chr10 | 52945002  | 52945243  | 242 |
| chr8  | 89535741  | 89535981  | 241 |
| chr6  | 51516683  | 51516923  | 241 |
| chr29 | 31635588  | 31635828  | 241 |
| chr21 | 24822552  | 24822792  | 241 |
| chr2  | 134759076 | 134759316 | 241 |
| chr2  | 122979044 | 122979284 | 241 |
| chr17 | 66277020  | 66277260  | 241 |
| chr11 | 4330881   | 4331121   | 241 |
| chr22 | 60416873  | 60417112  | 240 |
| chr2  | 80018926  | 80019165  | 240 |
| chr19 | 54849089  | 54849328  | 240 |
| chr16 | 47610747  | 47610986  | 240 |
| chr13 | 60103566  | 60103805  | 240 |
| chr11 | 50824371  | 50824610  | 240 |
| chr3  | 121362369 | 121362607 | 239 |
| chr26 | 38227334  | 38227572  | 239 |
| chr25 | 40423394  | 40423632  | 239 |
| chr21 | 66548979  | 66549217  | 239 |
| chr2  | 134419276 | 134419514 | 239 |
| chr19 | 54437055  | 54437293  | 239 |
| chr4  | 117874050 | 117874287 | 238 |
| chr20 | 4406239   | 4406476   | 238 |
| chr18 | 23611494  | 23611731  | 238 |
| chr17 | 47082587  | 47082824  | 238 |
| chr11 | 74916053  | 74916290  | 238 |
| chr22 | 44332461  | 44332697  | 237 |
| chr21 | 32964357  | 32964593  | 237 |
| chr19 | 28253636  | 28253872  | 237 |
| chr24 | 58683526  | 58683761  | 236 |
| chr16 | 58179785  | 58180020  | 236 |
| chr7  | 51935455  | 51935689  | 235 |
| chr23 | 51060383  | 51060617  | 235 |
| chr23 | 27845182  | 27845416  | 235 |
| chr13 | 62872325  | 62872559  | 235 |
| chr11 | 106409958 | 106410192 | 235 |
| chr11 | 28456355  | 28456589  | 235 |
| chr8  | 73307730  | 73307963  | 234 |

|       |               |           |     |
|-------|---------------|-----------|-----|
| chr7  | 4505408       | 4505641   | 234 |
| chr20 | 13812217      | 13812450  | 234 |
| chr19 | 54464278      | 54464511  | 234 |
| chr19 | 46821921      | 46822154  | 234 |
| chr3  | 105718667     | 105718899 | 233 |
| chr28 | 41219385      | 41219617  | 233 |
| chr23 | 48600781      | 48601013  | 233 |
| chr22 | 7574001       | 7574233   | 233 |
| chr19 | 39073865      | 39074097  | 233 |
| chr14 | 26478166      | 26478397  | 232 |
| chr14 | 439203 439434 | 232       |     |
| chr13 | 59990925      | 59991156  | 232 |
| chr12 | 67757428      | 67757659  | 232 |
| chr11 | 103312179     | 103312410 | 232 |
| chr26 | 5863815       | 5864045   | 231 |
| chr21 | 24584236      | 24584466  | 231 |
| chr18 | 43455795      | 43456025  | 231 |
| chr23 | 11676781      | 11677010  | 230 |
| chr21 | 67957979      | 67958208  | 230 |
| chr21 | 11957421      | 11957650  | 230 |
| chr17 | 64296671      | 64296900  | 230 |
| chr14 | 961950 962179 | 230       |     |
| chr11 | 10453404      | 10453633  | 230 |
| chr8  | 5310469       | 5310697   | 229 |
| chr22 | 16100898      | 16101126  | 229 |
| chr2  | 132175606     | 132175834 | 229 |
| chr11 | 107535899     | 107536127 | 229 |
| chr3  | 14149050      | 14149277  | 228 |
| chr26 | 19754267      | 19754494  | 228 |
| chr16 | 59709392      | 59709619  | 228 |
| chr27 | 765809 766035 | 227       |     |
| chr23 | 52724227      | 52724453  | 227 |
| chr22 | 44869920      | 44870146  | 227 |
| chr19 | 45144287      | 45144513  | 227 |
| chr17 | 70534811      | 70535037  | 227 |
| chr10 | 88352987      | 88353213  | 227 |
| chr4  | 124422566     | 124422791 | 226 |
| chr29 | 44668252      | 44668477  | 226 |
| chr27 | 11591440      | 11591665  | 226 |
| chr2  | 131415075     | 131415300 | 226 |
| chr2  | 130104006     | 130104230 | 225 |
| chr11 | 94194817      | 94195041  | 225 |
| chr11 | 51888116      | 51888340  | 225 |
| chr10 | 16925770      | 16925994  | 225 |
| chr8  | 23000288      | 23000511  | 224 |
| chr19 | 44367507      | 44367729  | 223 |
| chr19 | 39842723      | 39842945  | 223 |
| chr18 | 23497332      | 23497554  | 223 |
| chr10 | 21356061      | 21356283  | 223 |
| chr1  | 137308017     | 137308239 | 223 |

|       |               |           |      |
|-------|---------------|-----------|------|
| chr3  | 15100955      | 15101176  | 222  |
| chr2  | 128461067     | 128461288 | 222  |
| chr13 | 73622318      | 73622539  | 222  |
| chr5  | 91480770      | 91480990  | 221  |
| chr26 | 37954371      | 37954591  | 221  |
| chr22 | 52848860      | 52849079  | 220  |
| chr21 | 65799558      | 65799777  | 220  |
| chr13 | 55523983      | 55524202  | 220  |
| chr29 | 41727202      | 41727420  | 219  |
| chr26 | 48161263      | 48161481  | 219  |
| chr25 | 8175100       | 8175318   | 219  |
| chr24 | 2017209       | 2017427   | 219  |
| chr11 | 9353551       | 9353769   | 219  |
| chr29 | 33694000      | 33694217  | 218  |
| chr11 | 106002637     | 106002854 | 218  |
| chr5  | 28904373      | 28904589  | 217  |
| chr18 | 26170446      | 26170662  | 217  |
| chr29 | 33928867      | 33929082  | 216  |
| chr19 | 26926400      | 26926615  | 216  |
| chr7  | 14363564      | 14363778  | 215  |
| chr3  | 121342189     | 121342403 | 215  |
| chr19 | 29719609      | 29719822  | 214  |
| chr12 | 29893014      | 29893227  | 214  |
| chr10 | 70144031      | 70144244  | 214  |
| chr15 | 75740362      | 75740574  | 213  |
| chr7  | 42764162      | 42764373  | 212  |
| chr5  | 28383912      | 28384123  | 212  |
| chr28 | 45150614      | 45150824  | 211  |
| chr26 | 48445750      | 48445960  | 211  |
| chr24 | 463376 463586 | 211       |      |
| chr3  | 24594188      | 24594396  | 209  |
| chr3  | 8636223       | 8636431   | 209  |
| chr19 | 21617316      | 21617524  | 209  |
| chr13 | 68023177      | 68023385  | 209  |
| chr18 | 48199174      | 48199380  | 207  |
| chr9  | 104896402     | 104896607 | 206  |
| chr1  | 85641714      | 85641915  | 202  |
| chr15 | 65126844      | 65127044  | 201  |
| chr19 | 46834886      | 46835972  | 1087 |
| chr24 | 48635786      | 48636773  | 988  |
| chr15 | 13629484      | 13630379  | 896  |
| chr10 | 19477879      | 19478741  | 863  |
| chr27 | 45270575      | 45271406  | 832  |
| chr23 | 28887491      | 28888316  | 826  |
| chr18 | 42167050      | 42167860  | 811  |
| chr24 | 64999141      | 64999950  | 810  |
| chr10 | 36373693      | 36374487  | 795  |
| chr19 | 56886529      | 56887301  | 773  |
| chr10 | 62901793      | 62902562  | 770  |
| chr13 | 81653193      | 81653939  | 747  |

|       |               |           |     |
|-------|---------------|-----------|-----|
| chr13 | 65809620      | 65810350  | 731 |
| chr9  | 106304028     | 106304746 | 719 |
| chr14 | 40040333      | 40041049  | 717 |
| chr28 | 26747236      | 26747947  | 712 |
| chr5  | 125493267     | 125493977 | 711 |
| chr22 | 59596357      | 59597063  | 707 |
| chr20 | 75033617      | 75034323  | 707 |
| chr15 | 51614538      | 51615242  | 705 |
| chr25 | 29369558      | 29370260  | 703 |
| chr18 | 13150817      | 13151518  | 702 |
| chr16 | 2451780       | 2452481   | 702 |
| chr25 | 40406791      | 40407490  | 700 |
| chr3  | 106866974     | 106867661 | 688 |
| chr23 | 51938052      | 51938739  | 688 |
| chr8  | 76004625      | 76005301  | 677 |
| chr3  | 118865669     | 118866343 | 675 |
| chr11 | 109774857     | 109775528 | 672 |
| chr19 | 39016669      | 39017334  | 666 |
| chr10 | 68224071      | 68224734  | 664 |
| chr5  | 70010413      | 70011074  | 662 |
| chr22 | 50812109      | 50812769  | 661 |
| chr14 | 842048 842703 | 656       |     |
| chr27 | 34732082      | 34732717  | 636 |
| chr23 | 15080758      | 15081392  | 635 |
| chrX  | 13133083      | 13133714  | 632 |
| chr14 | 22033616      | 22034245  | 630 |
| chr27 | 40757783      | 40758409  | 627 |
| chr10 | 55442566      | 55443190  | 625 |
| chr23 | 30340148      | 30340770  | 623 |
| chr19 | 54571804      | 54572424  | 621 |
| chr6  | 103145346     | 103145959 | 614 |
| chr10 | 17230580      | 17231193  | 614 |
| chr7  | 17482693      | 17483304  | 612 |
| chr26 | 11611607      | 11612216  | 610 |
| chr4  | 36671770      | 36672378  | 609 |
| chr14 | 1417506       | 1418111   | 606 |
| chr13 | 76362853      | 76363458  | 606 |
| chr24 | 20758767      | 20759364  | 598 |
| chr2  | 139131672     | 139132268 | 597 |
| chr1  | 152268161     | 152268755 | 595 |
| chr5  | 80619246      | 80619838  | 593 |
| chr18 | 62364772      | 62365362  | 591 |
| chr10 | 72901636      | 72902226  | 591 |
| chr5  | 29142231      | 29142818  | 588 |
| chr11 | 5359983       | 5360569   | 587 |
| chr2  | 75599762      | 75600345  | 584 |
| chr26 | 22241605      | 22242187  | 583 |
| chr24 | 20549706      | 20550288  | 583 |
| chr23 | 31391590      | 31392169  | 580 |
| chr4  | 71872229      | 71872807  | 579 |



|       |           |           |     |
|-------|-----------|-----------|-----|
| chr19 | 60426156  | 60426734  | 579 |
| chr18 | 6005273   | 6005846   | 574 |
| chr29 | 34639102  | 34639673  | 572 |
| chr18 | 11635931  | 11636502  | 572 |
| chr19 | 40463094  | 40463662  | 569 |
| chr18 | 62010900  | 62011465  | 566 |
| chr12 | 30570974  | 30571538  | 565 |
| chr2  | 138627366 | 138627929 | 564 |
| chr23 | 8468248   | 8468809   | 562 |
| chr8  | 81529475  | 81530035  | 561 |
| chr20 | 19410039  | 19410599  | 561 |
| chr17 | 69735884  | 69736444  | 561 |
| chrX  | 44937464  | 44938023  | 560 |
| chr22 | 60488392  | 60488951  | 560 |
| chr19 | 54377165  | 54377724  | 560 |
| chr29 | 48738315  | 48738873  | 559 |
| chr25 | 31873202  | 31873759  | 558 |
| chr11 | 70881843  | 70882400  | 558 |
| chr6  | 106986536 | 106987092 | 557 |
| chr19 | 38353966  | 38354522  | 557 |
| chr15 | 28054273  | 28054829  | 557 |
| chr12 | 84210523  | 84211078  | 556 |
| chr7  | 5408558   | 5409111   | 554 |
| chr2  | 135013380 | 135013933 | 554 |
| chr5  | 61054992  | 61055544  | 553 |
| chr19 | 46839464  | 46840016  | 553 |
| chr8  | 10186503  | 10187053  | 551 |
| chr23 | 17465458  | 17466008  | 551 |
| chr18 | 13181603  | 13182152  | 550 |
| chr12 | 20088596  | 20089144  | 549 |
| chr18 | 13138068  | 13138613  | 546 |
| chr6  | 121772682 | 121773225 | 544 |
| chr24 | 5103812   | 5104355   | 544 |
| chr13 | 76586384  | 76586925  | 542 |
| chr19 | 7876116   | 7876655   | 540 |
| chr22 | 46799638  | 46800176  | 539 |
| chr4  | 71558508  | 71559045  | 538 |
| chr5  | 54502792  | 54503328  | 537 |
| chr18 | 56904222  | 56904758  | 537 |
| chr7  | 42918935  | 42919470  | 536 |
| chr5  | 78887943  | 78888477  | 535 |
| chr26 | 44454218  | 44454752  | 535 |
| chr22 | 57366562  | 57367096  | 535 |
| chr5  | 10622163  | 10622695  | 533 |
| chr3  | 33504916  | 33505448  | 533 |
| chr21 | 2036314   | 2036846   | 533 |
| chr2  | 65513634  | 65514166  | 533 |
| chr18 | 55829255  | 55829783  | 529 |
| chr8  | 77215194  | 77215720  | 527 |
| chr2  | 74010158  | 74010684  | 527 |

|       |           |           |     |
|-------|-----------|-----------|-----|
| chr29 | 33689131  | 33689655  | 525 |
| chr13 | 42659840  | 42660364  | 525 |
| chr26 | 37894796  | 37895319  | 524 |
| chr17 | 64361371  | 64361894  | 524 |
| chr3  | 4441267   | 4441789   | 523 |
| chr27 | 35351579  | 35352101  | 523 |
| chr4  | 29007374  | 29007895  | 522 |
| chr17 | 74840769  | 74841290  | 522 |
| chr7  | 52361897  | 52362417  | 521 |
| chr28 | 33465812  | 33466332  | 521 |
| chr26 | 37956308  | 37956828  | 521 |
| chr2  | 111383255 | 111383775 | 521 |
| chr5  | 114090634 | 114091153 | 520 |
| chr13 | 75127974  | 75128492  | 519 |
| chr29 | 48947900  | 48948417  | 518 |
| chr7  | 19374349  | 19374865  | 517 |
| chr19 | 17674712  | 17675227  | 516 |
| chr10 | 59600812  | 59601327  | 516 |
| chr18 | 49521462  | 49521975  | 514 |
| chr15 | 25624327  | 25624840  | 514 |
| chr10 | 32247152  | 32247663  | 512 |
| chr24 | 1529252   | 1529762   | 511 |
| chr18 | 38087738  | 38088248  | 511 |
| chr16 | 39584872  | 39585381  | 510 |
| chr22 | 50777400  | 50777907  | 508 |
| chr6  | 72201409  | 72201915  | 507 |
| chr11 | 105004589 | 105005095 | 507 |
| chr16 | 77691673  | 77692178  | 506 |
| chr18 | 63705431  | 63705935  | 505 |
| chr15 | 81174555  | 81175058  | 504 |
| chr7  | 65684054  | 65684556  | 503 |
| chr25 | 44039184  | 44039686  | 503 |
| chr3  | 106490187 | 106490687 | 501 |
| chr17 | 14833829  | 14834329  | 501 |
| chr11 | 98904038  | 98904538  | 501 |
| chr3  | 121494691 | 121495190 | 500 |
| chr2  | 99677691  | 99678190  | 500 |
| chr13 | 73481386  | 73481884  | 499 |
| chr2  | 134602079 | 134602576 | 498 |
| chr12 | 31320374  | 31320871  | 498 |
| chr26 | 18266300  | 18266796  | 497 |
| chr6  | 118659349 | 118659844 | 496 |
| chr21 | 59416070  | 59416565  | 496 |
| chr20 | 8552094   | 8552589   | 496 |
| chr18 | 45579520  | 45580014  | 495 |
| chr12 | 31156365  | 31156859  | 495 |
| chr16 | 77476963  | 77477456  | 494 |
| chr9  | 51629675  | 51630166  | 492 |
| chr19 | 59469991  | 59470482  | 492 |
| chr17 | 66702709  | 66703200  | 492 |

|       |           |           |     |
|-------|-----------|-----------|-----|
| chr12 | 9695803   | 9696294   | 492 |
| chr7  | 4506872   | 4507362   | 491 |
| chr11 | 14121668  | 14122158  | 491 |
| chr4  | 5262291   | 5262780   | 490 |
| chr11 | 108436043 | 108436532 | 490 |
| chr16 | 43080171  | 43080659  | 489 |
| chr5  | 108826850 | 108827335 | 486 |
| chr18 | 48033708  | 48034193  | 486 |
| chr17 | 64027873  | 64028358  | 486 |
| chr13 | 70345494  | 70345979  | 486 |
| chr13 | 10972740  | 10973225  | 486 |
| chr5  | 117221934 | 117222418 | 485 |
| chr19 | 54362502  | 54362986  | 485 |
| chr11 | 2288044   | 2288527   | 484 |
| chr7  | 44912159  | 44912641  | 483 |
| chr19 | 64723502  | 64723984  | 483 |
| chr15 | 38529917  | 38530399  | 483 |
| chr7  | 4712571   | 4713051   | 481 |
| chr18 | 13568483  | 13568963  | 481 |
| chr5  | 125560244 | 125560723 | 480 |
| chr15 | 76616071  | 76616550  | 480 |
| chr8  | 24138513  | 24138990  | 478 |
| chr2  | 131838143 | 131838620 | 478 |
| chr4  | 121480480 | 121480956 | 477 |
| chr18 | 11674264  | 11674740  | 477 |
| chr13 | 57618319  | 57618794  | 476 |
| chr11 | 89526564  | 89527039  | 476 |
| chrX  | 35201010  | 35201484  | 475 |
| chr12 | 33269305  | 33269779  | 475 |
| chr11 | 49342548  | 49343022  | 475 |
| chr17 | 67940652  | 67941124  | 473 |
| chr5  | 112254824 | 112255295 | 472 |
| chr7  | 15308487  | 15308957  | 471 |
| chr19 | 40444975  | 40445445  | 471 |
| chr8  | 45662363  | 45662831  | 469 |
| chr27 | 31480361  | 31480826  | 466 |
| chrX  | 78510724  | 78511188  | 465 |
| chr19 | 47357732  | 47358196  | 465 |
| chr26 | 51660799  | 51661262  | 464 |
| chr15 | 34584600  | 34585063  | 464 |
| chr25 | 36340979  | 36341441  | 463 |
| chr5  | 119410457 | 119410918 | 462 |
| chr25 | 35095942  | 35096403  | 462 |
| chr25 | 27720881  | 27721341  | 461 |
| chr9  | 105537532 | 105537991 | 460 |
| chr6  | 59499223  | 59499682  | 460 |
| chr3  | 51568366  | 51568825  | 460 |
| chr22 | 53942850  | 53943309  | 460 |
| chr12 | 82830124  | 82830583  | 460 |
| chr29 | 37419926  | 37420383  | 458 |

|       |               |           |     |
|-------|---------------|-----------|-----|
| chr23 | 18824791      | 18825248  | 458 |
| chr2  | 15393233      | 15393690  | 458 |
| chr11 | 109767528     | 109767985 | 458 |
| chr12 | 11505770      | 11506226  | 457 |
| chr19 | 57831579      | 57832034  | 456 |
| chr5  | 118499674     | 118500128 | 455 |
| chr27 | 28581712      | 28582166  | 455 |
| chr20 | 650253 650707 | 455       |     |
| chr14 | 25975135      | 25975588  | 454 |
| chr28 | 42349106      | 42349556  | 451 |
| chr25 | 37256134      | 37256583  | 450 |
| chr4  | 72297124      | 72297571  | 448 |
| chr21 | 20142406      | 20142853  | 448 |
| chr15 | 39664770      | 39665217  | 448 |
| chr12 | 74529642      | 74530089  | 448 |
| chr11 | 104986622     | 104987068 | 447 |
| chr24 | 1132687       | 1133132   | 446 |
| chr23 | 8793890       | 8794334   | 445 |
| chr22 | 50826378      | 50826822  | 445 |
| chr7  | 53423807      | 53424250  | 444 |
| chr19 | 25409195      | 25409637  | 443 |
| chr15 | 63686880      | 63687322  | 443 |
| chr5  | 121342193     | 121342634 | 442 |
| chr19 | 12122031      | 12122472  | 442 |
| chr6  | 122430285     | 122430725 | 441 |
| chr8  | 104241968     | 104242407 | 440 |
| chr19 | 42039214      | 42039653  | 440 |
| chr9  | 98741309      | 98741747  | 439 |
| chr26 | 21847578      | 21848016  | 439 |
| chr3  | 105593156     | 105593593 | 438 |
| chr3  | 111630971     | 111631407 | 437 |
| chr26 | 23490980      | 23491416  | 437 |
| chr7  | 36638551      | 36638985  | 435 |
| chr25 | 4842855       | 4843289   | 435 |
| chr8  | 30013173      | 30013605  | 433 |
| chr22 | 29681217      | 29681649  | 433 |
| chr18 | 63777285      | 63777717  | 433 |
| chr17 | 69389275      | 69389707  | 433 |
| chr29 | 41628697      | 41629128  | 432 |
| chr11 | 109778815     | 109779246 | 432 |
| chr8  | 72510683      | 72511113  | 431 |
| chr6  | 68000290      | 68000720  | 431 |
| chr13 | 59018650      | 59019080  | 431 |
| chr6  | 121780647     | 121781076 | 430 |
| chr3  | 9182394       | 9182820   | 427 |
| chr26 | 9761267       | 9761693   | 427 |
| chr21 | 61629949      | 61630375  | 427 |
| chr15 | 36301074      | 36301500  | 427 |
| chr29 | 50313516      | 50313939  | 424 |
| chrX  | 72251807      | 72252229  | 423 |

|       |               |           |     |
|-------|---------------|-----------|-----|
| chr17 | 66870595      | 66871017  | 423 |
| chr5  | 28878841      | 28879262  | 422 |
| chr19 | 37332793      | 37333214  | 422 |
| chr8  | 7706654       | 7707072   | 419 |
| chr5  | 111912102     | 111912518 | 417 |
| chr23 | 16525466      | 16525882  | 417 |
| chr23 | 10570901      | 10571317  | 417 |
| chr13 | 66885278      | 66885694  | 417 |
| chr14 | 12549283      | 12549698  | 416 |
| chr29 | 12465743      | 12466156  | 414 |
| chr19 | 59406865      | 59407278  | 414 |
| chr5  | 123599879     | 123600290 | 412 |
| chr26 | 44849085      | 44849496  | 412 |
| chr18 | 51612672      | 51613082  | 411 |
| chr15 | 81143907      | 81144317  | 411 |
| chr5  | 120490925     | 120491334 | 410 |
| chr11 | 109643711     | 109644119 | 409 |
| chr1  | 2294062       | 2294470   | 409 |
| chr21 | 33924551      | 33924958  | 408 |
| chr22 | 30088248      | 30088652  | 405 |
| chr2  | 131763061     | 131763465 | 405 |
| chrX  | 11031435      | 11031838  | 404 |
| chr26 | 42178140      | 42178543  | 404 |
| chr11 | 66562652      | 66563055  | 404 |
| chr9  | 106857225     | 106857623 | 399 |
| chr8  | 116923875     | 116924273 | 399 |
| chr7  | 5433380       | 5433778   | 399 |
| chr6  | 122409274     | 122409672 | 399 |
| chr6  | 99621579      | 99621977  | 399 |
| chr5  | 113546062     | 113546460 | 399 |
| chr5  | 60246555      | 60246953  | 399 |
| chr5  | 29003414      | 29003812  | 399 |
| chr3  | 123634004     | 123634402 | 399 |
| chr3  | 111893207     | 111893605 | 399 |
| chr3  | 105161149     | 105161547 | 399 |
| chr3  | 33833918      | 33834316  | 399 |
| chr3  | 22544503      | 22544901  | 399 |
| chr29 | 33887517      | 33887915  | 399 |
| chr28 | 651589 651987 |           | 399 |
| chr26 | 50064560      | 50064958  | 399 |
| chr26 | 44698228      | 44698626  | 399 |
| chr26 | 31332141      | 31332539  | 399 |
| chr26 | 22331132      | 22331530  | 399 |
| chr26 | 18186676      | 18187074  | 399 |
| chr25 | 34391015      | 34391413  | 399 |
| chr25 | 22545824      | 22546222  | 399 |
| chr25 | 10259034      | 10259432  | 399 |
| chr24 | 2346404       | 2346802   | 399 |
| chr23 | 52865840      | 52866238  | 399 |
| chr22 | 60546828      | 60547226  | 399 |

|       |               |           |     |
|-------|---------------|-----------|-----|
| chr22 | 56295698      | 56296096  | 399 |
| chr22 | 54876191      | 54876589  | 399 |
| chr22 | 48219637      | 48220035  | 399 |
| chr22 | 30120699      | 30121097  | 399 |
| chr22 | 22001468      | 22001866  | 399 |
| chr21 | 47717554      | 47717952  | 399 |
| chr21 | 6561898       | 6562296   | 399 |
| chr20 | 67488487      | 67488885  | 399 |
| chr2  | 138550426     | 138550824 | 399 |
| chr2  | 110558896     | 110559294 | 399 |
| chr2  | 92325618      | 92326016  | 399 |
| chr2  | 30859686      | 30860084  | 399 |
| chr19 | 58848838      | 58849236  | 399 |
| chr19 | 43637274      | 43637672  | 399 |
| chr19 | 15124397      | 15124795  | 399 |
| chr19 | 12403836      | 12404234  | 399 |
| chr18 | 65966601      | 65966999  | 399 |
| chr18 | 43156707      | 43157105  | 399 |
| chr18 | 18683237      | 18683635  | 399 |
| chr18 | 637653 638051 |           | 399 |
| chr17 | 67031580      | 67031978  | 399 |
| chr16 | 54647871      | 54648269  | 399 |
| chr16 | 46782260      | 46782658  | 399 |
| chr14 | 61787203      | 61787601  | 399 |
| chr13 | 61220366      | 61220764  | 399 |
| chr13 | 14628893      | 14629291  | 399 |
| chr12 | 46767695      | 46768093  | 399 |
| chr11 | 106071727     | 106072125 | 399 |
| chr11 | 44977078      | 44977476  | 399 |
| chr10 | 84605852      | 84606250  | 399 |
| chr10 | 32250518      | 32250916  | 399 |
| chr10 | 20900591      | 20900989  | 399 |
| chr8  | 74367900      | 74368297  | 398 |
| chr7  | 88950210      | 88950607  | 398 |
| chr7  | 50619148      | 50619545  | 398 |
| chr6  | 120737467     | 120737864 | 398 |
| chr4  | 110151242     | 110151639 | 398 |
| chr26 | 20893249      | 20893646  | 398 |
| chr24 | 42713011      | 42713408  | 398 |
| chr2  | 130443889     | 130444286 | 398 |
| chr19 | 16700709      | 16701106  | 398 |
| chr14 | 8149941       | 8150338   | 398 |
| chr11 | 104564673     | 104565070 | 398 |
| chr10 | 17227262      | 17227659  | 398 |
| chr1  | 100633126     | 100633523 | 398 |
| chr4  | 8518261       | 8518657   | 397 |
| chr3  | 74458045      | 74458441  | 397 |
| chr29 | 34917917      | 34918313  | 397 |
| chr29 | 6659795       | 6660191   | 397 |
| chr25 | 410184 410580 |           | 397 |

|       |               |           |     |
|-------|---------------|-----------|-----|
| chr24 | 48662628      | 48663024  | 397 |
| chr23 | 28114466      | 28114862  | 397 |
| chr2  | 36086749      | 36087145  | 397 |
| chr16 | 49339665      | 49340061  | 397 |
| chr13 | 80784291      | 80784687  | 397 |
| chr11 | 51886760      | 51887156  | 397 |
| chr9  | 52407088      | 52407483  | 396 |
| chr8  | 62043572      | 62043967  | 396 |
| chr7  | 18839715      | 18840110  | 396 |
| chr6  | 120328635     | 120329030 | 396 |
| chr4  | 99569507      | 99569902  | 396 |
| chr3  | 111518758     | 111519153 | 396 |
| chr2  | 138497643     | 138498038 | 396 |
| chr19 | 58851402      | 58851797  | 396 |
| chr11 | 12874629      | 12875024  | 396 |
| chr10 | 88366753      | 88367148  | 396 |
| chr5  | 113514481     | 113514875 | 395 |
| chr3  | 115093372     | 115093766 | 395 |
| chr29 | 51270542      | 51270936  | 395 |
| chr26 | 22019944      | 22020338  | 395 |
| chr19 | 29741773      | 29742167  | 395 |
| chr15 | 21507875      | 21508269  | 395 |
| chr4  | 118253711     | 118254104 | 394 |
| chr23 | 10994595      | 10994988  | 394 |
| chr21 | 913982 914375 | 394       |     |
| chr12 | 11450426      | 11450819  | 394 |
| chr11 | 100914823     | 100915216 | 394 |
| chr11 | 2260104       | 2260497   | 394 |
| chr7  | 43057219      | 43057611  | 393 |
| chr5  | 115602559     | 115602951 | 393 |
| chr5  | 78905032      | 78905424  | 393 |
| chr5  | 30571405      | 30571797  | 393 |
| chr25 | 2810680       | 2811072   | 393 |
| chr2  | 140748087     | 140748479 | 393 |
| chr19 | 54642384      | 54642776  | 393 |
| chr19 | 27867604      | 27867996  | 393 |
| chr19 | 13546238      | 13546630  | 393 |
| chr16 | 31701126      | 31701518  | 393 |
| chr13 | 70709458      | 70709850  | 393 |
| chr12 | 84588044      | 84588436  | 393 |
| chr6  | 118162669     | 118163060 | 392 |
| chr4  | 121475847     | 121476238 | 392 |
| chr4  | 104746557     | 104746948 | 392 |
| chr24 | 40745485      | 40745876  | 392 |
| chr22 | 61223337      | 61223728  | 392 |
| chr21 | 24417756      | 24418147  | 392 |
| chr19 | 56452465      | 56452856  | 392 |
| chr16 | 20655157      | 20655548  | 392 |
| chr10 | 79336809      | 79337200  | 392 |
| chr8  | 7589813       | 7590203   | 391 |

|       |               |           |     |
|-------|---------------|-----------|-----|
| chr4  | 121332271     | 121332661 | 391 |
| chr27 | 35948720      | 35949110  | 391 |
| chr23 | 31343884      | 31344274  | 391 |
| chr16 | 20657531      | 20657921  | 391 |
| chr16 | 2678082       | 2678472   | 391 |
| chr14 | 840569 840959 |           | 391 |
| chr13 | 70197612      | 70198002  | 391 |
| chr11 | 106408452     | 106408842 | 391 |
| chr22 | 58509542      | 58509931  | 390 |
| chr20 | 73443813      | 73444202  | 390 |
| chr19 | 46732734      | 46733123  | 390 |
| chr15 | 65654042      | 65654431  | 390 |
| chr15 | 36412942      | 36413331  | 390 |
| chr14 | 9203666       | 9204055   | 390 |
| chr10 | 90972061      | 90972450  | 390 |
| chr9  | 106495203     | 106495591 | 389 |
| chr8  | 5815595       | 5815983   | 389 |
| chr4  | 116158398     | 116158786 | 389 |
| chr3  | 35539456      | 35539844  | 389 |
| chr29 | 34592924      | 34593312  | 389 |
| chr28 | 44517725      | 44518113  | 389 |
| chr26 | 28146577      | 28146965  | 389 |
| chr26 | 24555818      | 24556206  | 389 |
| chr24 | 60766863      | 60767251  | 389 |
| chr23 | 31915400      | 31915788  | 389 |
| chr19 | 25417616      | 25418004  | 389 |
| chr14 | 23432561      | 23432949  | 389 |
| chr1  | 67585861      | 67586249  | 389 |
| chr9  | 26591774      | 26592161  | 388 |
| chr28 | 33975751      | 33976138  | 388 |
| chr22 | 16901214      | 16901601  | 388 |
| chr2  | 136547647     | 136548034 | 388 |
| chr19 | 42991732      | 42992119  | 388 |
| chr17 | 76300084      | 76300471  | 388 |
| chr15 | 33476803      | 33477190  | 388 |
| chr13 | 80640588      | 80640975  | 388 |
| chr5  | 122453132     | 122453518 | 387 |
| chr5  | 88028550      | 88028936  | 387 |
| chr24 | 803143 803529 |           | 387 |
| chr23 | 8359469       | 8359855   | 387 |
| chr21 | 3045105       | 3045491   | 387 |
| chr20 | 8680150       | 8680536   | 387 |
| chr19 | 33670909      | 33671295  | 387 |
| chr18 | 11355426      | 11355812  | 387 |
| chr17 | 18371906      | 18372292  | 387 |
| chr12 | 14229202      | 14229588  | 387 |
| chr11 | 80265056      | 80265442  | 387 |
| chr11 | 73305595      | 73305981  | 387 |
| chr11 | 46259065      | 46259451  | 387 |
| chr11 | 30924969      | 30925355  | 387 |



|       |           |           |     |
|-------|-----------|-----------|-----|
| chr10 | 17140845  | 17141231  | 387 |
| chr7  | 42926901  | 42927286  | 386 |
| chr5  | 61799597  | 61799982  | 386 |
| chr3  | 116281853 | 116282238 | 386 |
| chr22 | 60039517  | 60039902  | 386 |
| chr22 | 50252119  | 50252504  | 386 |
| chr21 | 64470114  | 64470499  | 386 |
| chr21 | 39966836  | 39967221  | 386 |
| chr21 | 34474550  | 34474935  | 386 |
| chr21 | 28722040  | 28722425  | 386 |
| chr21 | 6563270   | 6563655   | 386 |
| chr20 | 5239592   | 5239977   | 386 |
| chr19 | 54618850  | 54619235  | 386 |
| chr1  | 10770042  | 10770427  | 386 |
| chr1  | 1604022   | 1604407   | 386 |
| chr8  | 72064962  | 72065346  | 385 |
| chr7  | 50259551  | 50259935  | 385 |
| chr4  | 66693927  | 66694311  | 385 |
| chr4  | 66690962  | 66691346  | 385 |
| chr3  | 125451396 | 125451780 | 385 |
| chr27 | 4189881   | 4190265   | 385 |
| chr26 | 19933696  | 19934080  | 385 |
| chr25 | 43435623  | 43436007  | 385 |
| chr22 | 56220279  | 56220663  | 385 |
| chr20 | 56572852  | 56573236  | 385 |
| chr2  | 66023769  | 66024153  | 385 |
| chr11 | 107565704 | 107566088 | 385 |
| chr5  | 119147233 | 119147616 | 384 |
| chr25 | 1349249   | 1349632   | 384 |
| chr23 | 15885404  | 15885787  | 384 |
| chr21 | 26559699  | 26560082  | 384 |
| chr2  | 138634627 | 138635010 | 384 |
| chr19 | 25439224  | 25439607  | 384 |
| chr19 | 20522552  | 20522935  | 384 |
| chr18 | 45991254  | 45991637  | 384 |
| chr17 | 44381202  | 44381585  | 384 |
| chr13 | 60154344  | 60154727  | 384 |
| chr13 | 17680950  | 17681333  | 384 |
| chr11 | 47368181  | 47368564  | 384 |
| chr7  | 19503791  | 19504173  | 383 |
| chr7  | 14674591  | 14674973  | 383 |
| chr6  | 119540718 | 119541100 | 383 |
| chr4  | 33743403  | 33743785  | 383 |
| chr3  | 126591278 | 126591660 | 383 |
| chr29 | 30771232  | 30771614  | 383 |
| chr28 | 40385109  | 40385491  | 383 |
| chr24 | 44775704  | 44776086  | 383 |
| chr22 | 60281337  | 60281719  | 383 |
| chr21 | 47626721  | 47627103  | 383 |
| chr21 | 30324024  | 30324406  | 383 |

|       |           |           |     |
|-------|-----------|-----------|-----|
| chr17 | 57664464  | 57664846  | 383 |
| chr11 | 10332392  | 10332774  | 383 |
| chr10 | 104496635 | 104497017 | 383 |
| chr10 | 16852074  | 16852456  | 383 |
| chr5  | 117526517 | 117526898 | 382 |
| chr5  | 113549302 | 113549683 | 382 |
| chr5  | 28380257  | 28380638  | 382 |
| chr29 | 48594091  | 48594472  | 382 |
| chr22 | 59608311  | 59608692  | 382 |
| chr2  | 130776596 | 130776977 | 382 |
| chr2  | 128584321 | 128584702 | 382 |
| chr3  | 111196860 | 111197240 | 381 |
| chr29 | 51365256  | 51365636  | 381 |
| chr26 | 10126668  | 10127048  | 381 |
| chr22 | 48581294  | 48581674  | 381 |
| chr20 | 38403348  | 38403728  | 381 |
| chr18 | 52536159  | 52536539  | 381 |
| chr15 | 39985811  | 39986191  | 381 |
| chr14 | 22068731  | 22069111  | 381 |
| chr13 | 40561611  | 40561991  | 381 |
| chr12 | 82630674  | 82631054  | 381 |
| chr1  | 147253316 | 147253696 | 381 |
| chr1  | 145845244 | 145845624 | 381 |
| chr5  | 120502175 | 120502554 | 380 |
| chr4  | 72300740  | 72301119  | 380 |
| chr3  | 55414520  | 55414899  | 380 |
| chr24 | 38474637  | 38475016  | 380 |
| chr23 | 9035509   | 9035888   | 380 |
| chr21 | 9469404   | 9469783   | 380 |
| chr19 | 61765510  | 61765889  | 380 |
| chr18 | 56362163  | 56362542  | 380 |
| chr18 | 45436388  | 45436767  | 380 |
| chr17 | 70117544  | 70117923  | 380 |
| chr17 | 69421166  | 69421545  | 380 |
| chr15 | 74936039  | 74936418  | 380 |
| chr1  | 8721834   | 8722213   | 380 |
| chr5  | 111259627 | 111260005 | 379 |
| chr4  | 7576761   | 7577139   | 379 |
| chr3  | 55953414  | 55953792  | 379 |
| chr26 | 51744999  | 51745377  | 379 |
| chr23 | 51914809  | 51915187  | 379 |
| chr19 | 59749722  | 59750100  | 379 |
| chr19 | 34081117  | 34081495  | 379 |
| chr19 | 19133359  | 19133737  | 379 |
| chr18 | 47213361  | 47213739  | 379 |
| chr18 | 23072514  | 23072892  | 379 |
| chr17 | 70581018  | 70581396  | 379 |
| chr14 | 26495254  | 26495632  | 379 |
| chr13 | 56272125  | 56272503  | 379 |
| chr13 | 11083024  | 11083402  | 379 |

|       |           |           |     |
|-------|-----------|-----------|-----|
| chr12 | 84237818  | 84238196  | 379 |
| chr11 | 77172528  | 77172906  | 379 |
| chr8  | 26042970  | 26043347  | 378 |
| chr4  | 122677149 | 122677526 | 378 |
| chr3  | 117320196 | 117320573 | 378 |
| chr3  | 79689733  | 79690110  | 378 |
| chr26 | 50807423  | 50807800  | 378 |
| chr23 | 10991658  | 10992035  | 378 |
| chr23 | 8063536   | 8063913   | 378 |
| chr19 | 47457666  | 47458043  | 378 |
| chr18 | 53121215  | 53121592  | 378 |
| chr12 | 74437027  | 74437404  | 378 |
| chr8  | 23047407  | 23047783  | 377 |
| chr5  | 52623262  | 52623638  | 377 |
| chr29 | 37019686  | 37020062  | 377 |
| chr25 | 42676275  | 42676651  | 377 |
| chr22 | 59330137  | 59330513  | 377 |
| chr2  | 121544828 | 121545204 | 377 |
| chr19 | 29885610  | 29885986  | 377 |
| chr19 | 7830618   | 7830994   | 377 |
| chr17 | 72688866  | 72689242  | 377 |
| chr13 | 77398513  | 77398889  | 377 |
| chr10 | 16859509  | 16859885  | 377 |
| chr1  | 115888212 | 115888588 | 377 |
| chr9  | 100067431 | 100067806 | 376 |
| chr7  | 89472801  | 89473176  | 376 |
| chr7  | 14257542  | 14257917  | 376 |
| chr3  | 39119038  | 39119413  | 376 |
| chr26 | 22229131  | 22229506  | 376 |
| chr25 | 34107800  | 34108175  | 376 |
| chr25 | 33208216  | 33208591  | 376 |
| chr25 | 28067660  | 28068035  | 376 |
| chr21 | 61121088  | 61121463  | 376 |
| chr21 | 18879695  | 18880070  | 376 |
| chr2  | 99655451  | 99655826  | 376 |
| chr19 | 58330325  | 58330700  | 376 |
| chr19 | 27243402  | 27243777  | 376 |
| chr17 | 64110725  | 64111100  | 376 |
| chr17 | 26906001  | 26906376  | 376 |
| chr11 | 74209350  | 74209725  | 376 |
| chr9  | 107558937 | 107559311 | 375 |
| chr9  | 105816749 | 105817123 | 375 |
| chr9  | 87726784  | 87727158  | 375 |
| chr8  | 116777098 | 116777472 | 375 |
| chr6  | 63156897  | 63157271  | 375 |
| chr5  | 123600323 | 123600697 | 375 |
| chr5  | 103821128 | 103821502 | 375 |
| chr29 | 44539434  | 44539808  | 375 |
| chr26 | 22272762  | 22273136  | 375 |
| chr18 | 52919113  | 52919487  | 375 |

|       |               |           |     |
|-------|---------------|-----------|-----|
| chr1  | 74670434      | 74670808  | 375 |
| chr1  | 74610402      | 74610776  | 375 |
| chrX  | 49821375      | 49821748  | 374 |
| chr6  | 121712674     | 121713047 | 374 |
| chr5  | 122052726     | 122053099 | 374 |
| chr29 | 44725784      | 44726157  | 374 |
| chr24 | 31568197      | 31568570  | 374 |
| chr20 | 72351784      | 72352157  | 374 |
| chr13 | 59616711      | 59617084  | 374 |
| chr13 | 139466 139839 | 374       |     |
| chr11 | 108856140     | 108856513 | 374 |
| chr29 | 44691487      | 44691859  | 373 |
| chr29 | 17878922      | 17879294  | 373 |
| chr28 | 42564775      | 42565147  | 373 |
| chr27 | 44650812      | 44651184  | 373 |
| chr23 | 25239024      | 25239396  | 373 |
| chr2  | 94787124      | 94787496  | 373 |
| chr2  | 28732505      | 28732877  | 373 |
| chr19 | 51924643      | 51925015  | 373 |
| chr19 | 25445400      | 25445772  | 373 |
| chr18 | 56432610      | 56432982  | 373 |
| chr11 | 13728918      | 13729290  | 373 |
| chr10 | 67017451      | 67017823  | 373 |
| chr7  | 21194101      | 21194472  | 372 |
| chr5  | 60156823      | 60157194  | 372 |
| chr3  | 127884275     | 127884646 | 372 |
| chr3  | 125782590     | 125782961 | 372 |
| chr29 | 31980659      | 31981030  | 372 |
| chr2  | 140044884     | 140045255 | 372 |
| chr2  | 26493497      | 26493868  | 372 |
| chr19 | 21377900      | 21378271  | 372 |
| chr17 | 68831764      | 68832135  | 372 |
| chr16 | 46783084      | 46783455  | 372 |
| chr15 | 21423487      | 21423858  | 372 |
| chr14 | 9528674       | 9529045   | 372 |
| chr11 | 106369381     | 106369752 | 372 |
| chr10 | 5345692       | 5346063   | 372 |
| chr1  | 2166734       | 2167105   | 372 |
| chrX  | 13650679      | 13651049  | 371 |
| chr8  | 7605287       | 7605657   | 371 |
| chr3  | 123540710     | 123541080 | 371 |
| chr29 | 31679904      | 31680274  | 371 |
| chr28 | 26441087      | 26441457  | 371 |
| chr26 | 49151726      | 49152096  | 371 |
| chr26 | 22019374      | 22019744  | 371 |
| chr25 | 27152497      | 27152867  | 371 |
| chr24 | 1025641       | 1026011   | 371 |
| chr23 | 28781314      | 28781684  | 371 |
| chr17 | 61011363      | 61011733  | 371 |
| chr15 | 20034136      | 20034506  | 371 |

|       |           |           |     |
|-------|-----------|-----------|-----|
| chr14 | 64244900  | 64245270  | 371 |
| chr8  | 102263258 | 102263627 | 370 |
| chr7  | 50581707  | 50582076  | 370 |
| chr5  | 112220280 | 112220649 | 370 |
| chr25 | 43407506  | 43407875  | 370 |
| chr23 | 42757576  | 42757945  | 370 |
| chr23 | 13641593  | 13641962  | 370 |
| chr23 | 8493378   | 8493747   | 370 |
| chr19 | 54614309  | 54614678  | 370 |
| chr19 | 20374767  | 20375136  | 370 |
| chr17 | 70231634  | 70232003  | 370 |
| chr17 | 63498371  | 63498740  | 370 |
| chr15 | 66196099  | 66196468  | 370 |
| chr15 | 22731468  | 22731837  | 370 |
| chr14 | 62327566  | 62327935  | 370 |
| chr13 | 80151856  | 80152225  | 370 |
| chr13 | 79694941  | 79695310  | 370 |
| chr13 | 60853293  | 60853662  | 370 |
| chr12 | 32467944  | 32468313  | 370 |
| chr10 | 52937431  | 52937800  | 370 |
| chr10 | 8717080   | 8717449   | 370 |
| chr1  | 53177966  | 53178335  | 370 |
| chr9  | 35463091  | 35463459  | 369 |
| chr8  | 24336918  | 24337286  | 369 |
| chr7  | 45694820  | 45695188  | 369 |
| chr4  | 123966346 | 123966714 | 369 |
| chr3  | 105924495 | 105924863 | 369 |
| chr28 | 33474315  | 33474683  | 369 |
| chr27 | 45977117  | 45977485  | 369 |
| chr26 | 50065351  | 50065719  | 369 |
| chr22 | 59649908  | 59650276  | 369 |
| chr22 | 52742493  | 52742861  | 369 |
| chr21 | 64782163  | 64782531  | 369 |
| chr21 | 61783446  | 61783814  | 369 |
| chr20 | 7615675   | 7616043   | 369 |
| chr19 | 59432574  | 59432942  | 369 |
| chr19 | 54571371  | 54571739  | 369 |
| chr18 | 53487195  | 53487563  | 369 |
| chr18 | 17965687  | 17966055  | 369 |
| chr18 | 11033757  | 11034125  | 369 |
| chr17 | 63416111  | 63416479  | 369 |
| chr11 | 104188430 | 104188798 | 369 |
| chr1  | 74109208  | 74109576  | 369 |
| chr4  | 118253227 | 118253594 | 368 |
| chr4  | 30782897  | 30783264  | 368 |
| chr29 | 36946319  | 36946686  | 368 |
| chr25 | 40194232  | 40194599  | 368 |
| chr24 | 59051509  | 59051876  | 368 |
| chr22 | 45457504  | 45457871  | 368 |
| chr19 | 58946405  | 58946772  | 368 |

|       |               |           |     |
|-------|---------------|-----------|-----|
| chr19 | 54792906      | 54793273  | 368 |
| chr18 | 12341614      | 12341981  | 368 |
| chr17 | 60569898      | 60570265  | 368 |
| chr17 | 47087949      | 47088316  | 368 |
| chr11 | 108919636     | 108920003 | 368 |
| chr11 | 99187224      | 99187591  | 368 |
| chr11 | 64802716      | 64803083  | 368 |
| chr10 | 83544591      | 83544958  | 368 |
| chr10 | 71264688      | 71265055  | 368 |
| chr1  | 610656 611023 | 368       |     |
| chr9  | 93650683      | 93651049  | 367 |
| chr8  | 65060102      | 65060468  | 367 |
| chr8  | 50985268      | 50985634  | 367 |
| chr8  | 47602294      | 47602660  | 367 |
| chr7  | 49143061      | 49143427  | 367 |
| chr7  | 5048967       | 5049333   | 367 |
| chr5  | 120513044     | 120513410 | 367 |
| chr5  | 118440890     | 118441256 | 367 |
| chr3  | 35988968      | 35989334  | 367 |
| chr28 | 27309971      | 27310337  | 367 |
| chr28 | 7460818       | 7461184   | 367 |
| chr26 | 47997632      | 47997998  | 367 |
| chr25 | 3402339       | 3402705   | 367 |
| chr24 | 35092573      | 35092939  | 367 |
| chr23 | 10349452      | 10349818  | 367 |
| chr22 | 17235031      | 17235397  | 367 |
| chr21 | 60107457      | 60107823  | 367 |
| chr18 | 11977055      | 11977421  | 367 |
| chr15 | 23105480      | 23105846  | 367 |
| chr11 | 98347147      | 98347513  | 367 |
| chr10 | 83868341      | 83868707  | 367 |
| chr9  | 70497222      | 70497587  | 366 |
| chr8  | 23059012      | 23059377  | 366 |
| chr5  | 115525410     | 115525775 | 366 |
| chr3  | 125425168     | 125425533 | 366 |
| chr3  | 121241627     | 121241992 | 366 |
| chr3  | 2493640       | 2494005   | 366 |
| chr29 | 46248106      | 46248471  | 366 |
| chr29 | 1789742       | 1790107   | 366 |
| chr25 | 27720284      | 27720649  | 366 |
| chr22 | 59502266      | 59502631  | 366 |
| chr22 | 59422782      | 59423147  | 366 |
| chr21 | 65848546      | 65848911  | 366 |
| chr2  | 125903124     | 125903489 | 366 |
| chr2  | 100909894     | 100910259 | 366 |
| chr19 | 25516150      | 25516515  | 366 |
| chr15 | 53905774      | 53906139  | 366 |
| chr13 | 54791295      | 54791660  | 366 |
| chr8  | 108657028     | 108657392 | 365 |
| chr8  | 65024431      | 65024795  | 365 |

|       |           |           |     |
|-------|-----------|-----------|-----|
| chr8  | 55391875  | 55392239  | 365 |
| chr7  | 84418758  | 84419122  | 365 |
| chr7  | 70802759  | 70803123  | 365 |
| chr5  | 125342299 | 125342663 | 365 |
| chr4  | 73278990  | 73279354  | 365 |
| chr26 | 37959452  | 37959816  | 365 |
| chr21 | 22688965  | 22689329  | 365 |
| chr20 | 74520256  | 74520620  | 365 |
| chr2  | 131854141 | 131854505 | 365 |
| chr17 | 64066764  | 64067128  | 365 |
| chr17 | 47358723  | 47359087  | 365 |
| chr15 | 24512514  | 24512878  | 365 |
| chr13 | 46275816  | 46276180  | 365 |
| chr11 | 104189131 | 104189495 | 365 |
| chr11 | 8044981   | 8045345   | 365 |
| chr10 | 74921748  | 74922112  | 365 |
| chr10 | 45413126  | 45413490  | 365 |
| chr10 | 13720247  | 13720611  | 365 |
| chr7  | 81016163  | 81016526  | 364 |
| chr7  | 44000411  | 44000774  | 364 |
| chr6  | 94531573  | 94531936  | 364 |
| chr6  | 91927259  | 91927622  | 364 |
| chr5  | 26734935  | 26735298  | 364 |
| chr3  | 105126429 | 105126792 | 364 |
| chr28 | 3659033   | 3659396   | 364 |
| chr26 | 43466882  | 43467245  | 364 |
| chr25 | 35521385  | 35521748  | 364 |
| chr24 | 59585309  | 59585672  | 364 |
| chr20 | 3247922   | 3248285   | 364 |
| chr19 | 54860141  | 54860504  | 364 |
| chr16 | 74192721  | 74193084  | 364 |
| chr15 | 38530463  | 38530826  | 364 |
| chr15 | 24440246  | 24440609  | 364 |
| chr13 | 77172487  | 77172850  | 364 |
| chr13 | 60752838  | 60753201  | 364 |
| chr12 | 84213933  | 84214296  | 364 |
| chr11 | 16132664  | 16133027  | 364 |
| chr11 | 1303972   | 1304335   | 364 |
| chr10 | 15070724  | 15071087  | 364 |
| chr10 | 7425647   | 7426010   | 364 |
| chr7  | 19174032  | 19174394  | 363 |
| chr7  | 10020491  | 10020853  | 363 |
| chr5  | 86513699  | 86514061  | 363 |
| chr5  | 61802517  | 61802879  | 363 |
| chr5  | 28378129  | 28378491  | 363 |
| chr22 | 59864859  | 59865221  | 363 |
| chr22 | 29203281  | 29203643  | 363 |
| chr22 | 11570447  | 11570809  | 363 |
| chr18 | 11556439  | 11556801  | 363 |
| chr11 | 72746679  | 72747041  | 363 |

|       |           |           |     |
|-------|-----------|-----------|-----|
| chr10 | 8722685   | 8723047   | 363 |
| chr9  | 77299051  | 77299412  | 362 |
| chr8  | 108673050 | 108673411 | 362 |
| chr6  | 102179948 | 102180309 | 362 |
| chr5  | 76848518  | 76848879  | 362 |
| chr4  | 90366051  | 90366412  | 362 |
| chr4  | 12829631  | 12829992  | 362 |
| chr3  | 105668961 | 105669322 | 362 |
| chr3  | 47197965  | 47198326  | 362 |
| chr28 | 31313754  | 31314115  | 362 |
| chr24 | 36050674  | 36051035  | 362 |
| chr21 | 64484103  | 64484464  | 362 |
| chr19 | 46144713  | 46145074  | 362 |
| chr19 | 12496267  | 12496628  | 362 |
| chr15 | 24422458  | 24422819  | 362 |
| chr14 | 21590337  | 21590698  | 362 |
| chr13 | 12167755  | 12168116  | 362 |
| chr11 | 98456058  | 98456419  | 362 |
| chr9  | 70968916  | 70969276  | 361 |
| chr9  | 46721744  | 46722104  | 361 |
| chr7  | 94365834  | 94366194  | 361 |
| chr7  | 17942429  | 17942789  | 361 |
| chr5  | 29254492  | 29254852  | 361 |
| chr3  | 97860052  | 97860412  | 361 |
| chr28 | 42889577  | 42889937  | 361 |
| chr27 | 39227751  | 39228111  | 361 |
| chr26 | 21782585  | 21782945  | 361 |
| chr25 | 29129522  | 29129882  | 361 |
| chr23 | 45599464  | 45599824  | 361 |
| chr2  | 99039979  | 99040339  | 361 |
| chr2  | 21519121  | 21519481  | 361 |
| chr19 | 21735705  | 21736065  | 361 |
| chr18 | 64515482  | 64515842  | 361 |
| chr15 | 75604774  | 75605134  | 361 |
| chr13 | 78423217  | 78423577  | 361 |
| chr13 | 40102113  | 40102473  | 361 |
| chr13 | 17704106  | 17704466  | 361 |
| chr12 | 84207938  | 84208298  | 361 |
| chr12 | 74036457  | 74036817  | 361 |
| chr11 | 32258215  | 32258575  | 361 |
| chr11 | 1650079   | 1650439   | 361 |
| chr10 | 17035012  | 17035372  | 361 |
| chr1  | 99809609  | 99809969  | 361 |
| chr9  | 90817483  | 90817842  | 360 |
| chr9  | 77257580  | 77257939  | 360 |
| chr7  | 18152503  | 18152862  | 360 |
| chr3  | 115988198 | 115988557 | 360 |
| chr24 | 61106194  | 61106553  | 360 |
| chr23 | 49733690  | 49734049  | 360 |
| chr21 | 64328379  | 64328738  | 360 |



|       |           |           |     |
|-------|-----------|-----------|-----|
| chr2  | 140741478 | 140741837 | 360 |
| chr19 | 8703562   | 8703921   | 360 |
| chr13 | 3055903   | 3056262   | 360 |
| chr11 | 103636742 | 103637101 | 360 |
| chr11 | 99207255  | 99207614  | 360 |
| chr11 | 19893832  | 19894191  | 360 |
| chr1  | 153614879 | 153615238 | 360 |
| chr9  | 108134385 | 108134743 | 359 |
| chr8  | 23062460  | 23062818  | 359 |
| chr5  | 111236391 | 111236749 | 359 |
| chr4  | 106658504 | 106658862 | 359 |
| chr27 | 38613845  | 38614203  | 359 |
| chr25 | 33276317  | 33276675  | 359 |
| chr24 | 1068160   | 1068518   | 359 |
| chr22 | 30264340  | 30264698  | 359 |
| chr22 | 6830852   | 6831210   | 359 |
| chr21 | 19212062  | 19212420  | 359 |
| chr2  | 136633280 | 136633638 | 359 |
| chr19 | 39449425  | 39449783  | 359 |
| chr19 | 21623098  | 21623456  | 359 |
| chr18 | 48199382  | 48199740  | 359 |
| chr17 | 64313055  | 64313413  | 359 |
| chr15 | 57781249  | 57781607  | 359 |
| chr14 | 59656380  | 59656738  | 359 |
| chr13 | 40557493  | 40557851  | 359 |
| chr12 | 10747144  | 10747502  | 359 |
| chr11 | 21642127  | 21642485  | 359 |
| chr11 | 2284404   | 2284762   | 359 |
| chr10 | 104992155 | 104992513 | 359 |
| chr10 | 20147190  | 20147548  | 359 |
| chr1  | 152032775 | 152033133 | 359 |
| chr9  | 106573802 | 106574159 | 358 |
| chr7  | 73165168  | 73165525  | 358 |
| chr7  | 52387893  | 52388250  | 358 |
| chr7  | 46236431  | 46236788  | 358 |
| chr7  | 43704604  | 43704961  | 358 |
| chr6  | 37930096  | 37930453  | 358 |
| chr5  | 73009308  | 73009665  | 358 |
| chr3  | 106579576 | 106579933 | 358 |
| chr29 | 37268675  | 37269032  | 358 |
| chr28 | 33948591  | 33948948  | 358 |
| chr25 | 39141628  | 39141985  | 358 |
| chr23 | 10458628  | 10458985  | 358 |
| chr21 | 20697833  | 20698190  | 358 |
| chr19 | 49659402  | 49659759  | 358 |
| chr17 | 67194765  | 67195122  | 358 |
| chr14 | 68076177  | 68076534  | 358 |
| chr14 | 19343552  | 19343909  | 358 |
| chr13 | 79076514  | 79076871  | 358 |
| chr13 | 40090518  | 40090875  | 358 |

|       |           |           |     |
|-------|-----------|-----------|-----|
| chr11 | 104888538 | 104888895 | 358 |
| chr10 | 16870133  | 16870490  | 358 |
| chr7  | 17378026  | 17378382  | 357 |
| chr7  | 3924810   | 3925166   | 357 |
| chr5  | 113585833 | 113586189 | 357 |
| chr5  | 112258007 | 112258363 | 357 |
| chr4  | 123025150 | 123025506 | 357 |
| chr29 | 34634341  | 34634697  | 357 |
| chr25 | 33247814  | 33248170  | 357 |
| chr23 | 31296638  | 31296994  | 357 |
| chr23 | 10460126  | 10460482  | 357 |
| chr21 | 24811071  | 24811427  | 357 |
| chr2  | 137656561 | 137656917 | 357 |
| chr2  | 129270879 | 129271235 | 357 |
| chr19 | 44876555  | 44876911  | 357 |
| chr19 | 39144820  | 39145176  | 357 |
| chr16 | 75377749  | 75378105  | 357 |
| chr16 | 44374158  | 44374514  | 357 |
| chr13 | 62886999  | 62887355  | 357 |
| chr13 | 54420249  | 54420605  | 357 |
| chr13 | 36768076  | 36768432  | 357 |
| chr12 | 74582790  | 74583146  | 357 |
| chr1  | 145855978 | 145856334 | 357 |
| chrX  | 21082333  | 21082688  | 356 |
| chr8  | 116750193 | 116750548 | 356 |
| chr5  | 121809513 | 121809868 | 356 |
| chr5  | 113240419 | 113240774 | 356 |
| chr4  | 96850381  | 96850736  | 356 |
| chr3  | 115782522 | 115782877 | 356 |
| chr3  | 105188446 | 105188801 | 356 |
| chr29 | 49459770  | 49460125  | 356 |
| chr28 | 26595907  | 26596262  | 356 |
| chr27 | 28188078  | 28188433  | 356 |
| chr25 | 37330885  | 37331240  | 356 |
| chr23 | 31024128  | 31024483  | 356 |
| chr20 | 8680896   | 8681251   | 356 |
| chr20 | 5901392   | 5901747   | 356 |
| chr20 | 3271004   | 3271359   | 356 |
| chr19 | 56607461  | 56607816  | 356 |
| chr18 | 25586225  | 25586580  | 356 |
| chr16 | 44785623  | 44785978  | 356 |
| chr15 | 29677198  | 29677553  | 356 |
| chr14 | 80790154  | 80790509  | 356 |
| chr14 | 72123469  | 72123824  | 356 |
| chr13 | 70055330  | 70055685  | 356 |
| chr12 | 84183795  | 84184150  | 356 |
| chr11 | 104288778 | 104289133 | 356 |
| chr11 | 100282409 | 100282764 | 356 |
| chr10 | 69403346  | 69403701  | 356 |
| chr5  | 122828489 | 122828843 | 355 |

|       |           |           |     |
|-------|-----------|-----------|-----|
| chr5  | 113950896 | 113951250 | 355 |
| chr5  | 112889198 | 112889552 | 355 |
| chr26 | 22007387  | 22007741  | 355 |
| chr25 | 8111330   | 8111684   | 355 |
| chr22 | 50649592  | 50649946  | 355 |
| chr2  | 131038773 | 131039127 | 355 |
| chr18 | 48790362  | 48790716  | 355 |
| chr13 | 53826795  | 53827149  | 355 |
| chr12 | 55234799  | 55235153  | 355 |
| chr12 | 33361404  | 33361758  | 355 |
| chr11 | 70936196  | 70936550  | 355 |
| chr1  | 3096173   | 3096527   | 355 |
| chrX  | 20420092  | 20420445  | 354 |
| chr9  | 106860559 | 106860912 | 354 |
| chr8  | 76254437  | 76254790  | 354 |
| chr8  | 49141159  | 49141512  | 354 |
| chr4  | 121436185 | 121436538 | 354 |
| chr29 | 48996678  | 48997031  | 354 |
| chr23 | 48506684  | 48507037  | 354 |
| chr2  | 21521519  | 21521872  | 354 |
| chr19 | 54862616  | 54862969  | 354 |
| chr19 | 39320401  | 39320754  | 354 |
| chr18 | 56670138  | 56670491  | 354 |
| chr18 | 48392679  | 48393032  | 354 |
| chr15 | 77536980  | 77537333  | 354 |
| chr13 | 75782555  | 75782908  | 354 |
| chr13 | 59836467  | 59836820  | 354 |
| chr13 | 53337654  | 53338007  | 354 |
| chr11 | 6945049   | 6945402   | 354 |
| chr8  | 114496426 | 114496778 | 353 |
| chr8  | 74331382  | 74331734  | 353 |
| chr7  | 46255421  | 46255773  | 353 |
| chr29 | 44699574  | 44699926  | 353 |
| chr24 | 57946002  | 57946354  | 353 |
| chr24 | 43618551  | 43618903  | 353 |
| chr23 | 15971735  | 15972087  | 353 |
| chr16 | 47678399  | 47678751  | 353 |
| chr15 | 6404912   | 6405264   | 353 |
| chr13 | 22916571  | 22916923  | 353 |
| chr10 | 83575904  | 83576256  | 353 |
| chr1  | 123090874 | 123091226 | 353 |
| chrX  | 6896930   | 6897281   | 352 |
| chr8  | 104104579 | 104104930 | 352 |
| chr7  | 38573599  | 38573950  | 352 |
| chr7  | 15005592  | 15005943  | 352 |
| chr5  | 81798328  | 81798679  | 352 |
| chr5  | 33561845  | 33562196  | 352 |
| chr3  | 93808155  | 93808506  | 352 |
| chr27 | 26746848  | 26747199  | 352 |
| chr26 | 43801003  | 43801354  | 352 |

|       |           |           |     |
|-------|-----------|-----------|-----|
| chr2  | 131000121 | 131000472 | 352 |
| chr2  | 95146886  | 95147237  | 352 |
| chr2  | 92328913  | 92329264  | 352 |
| chr18 | 8072908   | 8073259   | 352 |
| chr17 | 70042254  | 70042605  | 352 |
| chr16 | 46643442  | 46643793  | 352 |
| chr15 | 74145890  | 74146241  | 352 |
| chr5  | 28813492  | 28813842  | 351 |
| chr4  | 19469130  | 19469480  | 351 |
| chr3  | 110340285 | 110340635 | 351 |
| chr3  | 34786880  | 34787230  | 351 |
| chr27 | 39231234  | 39231584  | 351 |
| chr26 | 48670929  | 48671279  | 351 |
| chr25 | 43475752  | 43476102  | 351 |
| chr24 | 58693175  | 58693525  | 351 |
| chr24 | 5445788   | 5446138   | 351 |
| chr24 | 1954880   | 1955230   | 351 |
| chr23 | 18141956  | 18142306  | 351 |
| chr2  | 134743135 | 134743485 | 351 |
| chr2  | 85643995  | 85644345  | 351 |
| chr19 | 37869559  | 37869909  | 351 |
| chr17 | 47901487  | 47901837  | 351 |
| chr15 | 29347593  | 29347943  | 351 |
| chr9  | 12683252  | 12683601  | 350 |
| chr8  | 7781476   | 7781825   | 350 |
| chr7  | 21115662  | 21116011  | 350 |
| chr5  | 29143968  | 29144317  | 350 |
| chr5  | 1147345   | 1147694   | 350 |
| chr4  | 71510596  | 71510945  | 350 |
| chr3  | 116036089 | 116036438 | 350 |
| chr28 | 34133277  | 34133626  | 350 |
| chr27 | 39491048  | 39491397  | 350 |
| chr26 | 37542878  | 37543227  | 350 |
| chr23 | 7892675   | 7893024   | 350 |
| chr21 | 47698464  | 47698813  | 350 |
| chr20 | 7433391   | 7433740   | 350 |
| chr2  | 5177385   | 5177734   | 350 |
| chr19 | 27241248  | 27241597  | 350 |
| chr19 | 12306602  | 12306951  | 350 |
| chr18 | 32865814  | 32866163  | 350 |
| chr17 | 68051867  | 68052216  | 350 |
| chr16 | 46985277  | 46985626  | 350 |
| chr13 | 17652414  | 17652763  | 350 |
| chr12 | 34242844  | 34243193  | 350 |
| chr10 | 71760680  | 71761029  | 350 |
| chr10 | 20194429  | 20194778  | 350 |
| chr10 | 12785198  | 12785547  | 350 |
| chr7  | 46216098  | 46216446  | 349 |
| chr3  | 123627378 | 123627726 | 349 |
| chr3  | 122616792 | 122617140 | 349 |

|       |               |           |     |
|-------|---------------|-----------|-----|
| chr3  | 118882717     | 118883065 | 349 |
| chr3  | 33814234      | 33814582  | 349 |
| chr28 | 25496190      | 25496538  | 349 |
| chr26 | 40184364      | 40184712  | 349 |
| chr26 | 17916830      | 17917178  | 349 |
| chr25 | 31001747      | 31002095  | 349 |
| chr23 | 52741714      | 52742062  | 349 |
| chr21 | 7052948       | 7053296   | 349 |
| chr20 | 616904 617252 |           | 349 |
| chr2  | 126734539     | 126734887 | 349 |
| chr2  | 56953232      | 56953580  | 349 |
| chr17 | 71869097      | 71869445  | 349 |
| chr16 | 49379770      | 49380118  | 349 |
| chr15 | 75585817      | 75586165  | 349 |
| chr15 | 21506255      | 21506603  | 349 |
| chr13 | 46348110      | 46348458  | 349 |
| chr10 | 74127052      | 74127400  | 349 |
| chr1  | 84648984      | 84649332  | 349 |
| chr8  | 823238 823585 |           | 348 |
| chr4  | 99360730      | 99361077  | 348 |
| chr3  | 33814902      | 33815249  | 348 |
| chr27 | 40825320      | 40825667  | 348 |
| chr26 | 49418768      | 49419115  | 348 |
| chr23 | 23760969      | 23761316  | 348 |
| chr22 | 14995761      | 14996108  | 348 |
| chr21 | 11892452      | 11892799  | 348 |
| chr19 | 47365603      | 47365950  | 348 |
| chr18 | 56976134      | 56976481  | 348 |
| chr18 | 55457428      | 55457775  | 348 |
| chr16 | 77326150      | 77326497  | 348 |
| chr16 | 39603179      | 39603526  | 348 |
| chr10 | 75483501      | 75483848  | 348 |
| chr10 | 20443611      | 20443958  | 348 |
| chr10 | 8698873       | 8699220   | 348 |
| chr1  | 150085468     | 150085815 | 348 |
| chr1  | 132974316     | 132974663 | 348 |
| chr1  | 1663137       | 1663484   | 348 |
| chr9  | 99312408      | 99312754  | 347 |
| chr9  | 51644427      | 51644773  | 347 |
| chr7  | 65641941      | 65642287  | 347 |
| chr7  | 57576129      | 57576475  | 347 |
| chr7  | 43695648      | 43695994  | 347 |
| chr5  | 51826828      | 51827174  | 347 |
| chr4  | 123232297     | 123232643 | 347 |
| chr27 | 17755892      | 17756238  | 347 |
| chr25 | 33390518      | 33390864  | 347 |
| chr25 | 14742809      | 14743155  | 347 |
| chr20 | 858290 858636 |           | 347 |
| chr2  | 75693335      | 75693681  | 347 |
| chr13 | 54854056      | 54854402  | 347 |

|       |           |           |     |
|-------|-----------|-----------|-----|
| chr12 | 82016409  | 82016755  | 347 |
| chr7  | 43285044  | 43285389  | 346 |
| chr5  | 61496906  | 61497251  | 346 |
| chr5  | 35485699  | 35486044  | 346 |
| chr4  | 121280522 | 121280867 | 346 |
| chr4  | 120874380 | 120874725 | 346 |
| chr4  | 79922240  | 79922585  | 346 |
| chr3  | 126881187 | 126881532 | 346 |
| chr3  | 112291750 | 112292095 | 346 |
| chr26 | 37596359  | 37596704  | 346 |
| chr26 | 20893933  | 20894278  | 346 |
| chr23 | 18686356  | 18686701  | 346 |
| chr21 | 26555793  | 26556138  | 346 |
| chr2  | 140629762 | 140630107 | 346 |
| chr17 | 56050958  | 56051303  | 346 |
| chr11 | 96396911  | 96397256  | 346 |
| chr11 | 77861109  | 77861454  | 346 |
| chr10 | 71262136  | 71262481  | 346 |
| chr10 | 67037677  | 67038022  | 346 |
| chr10 | 43556876  | 43557221  | 346 |
| chr7  | 25408025  | 25408369  | 345 |
| chr6  | 57815302  | 57815646  | 345 |
| chr4  | 121477806 | 121478150 | 345 |
| chr4  | 117796477 | 117796821 | 345 |
| chr4  | 68057526  | 68057870  | 345 |
| chr29 | 38882380  | 38882724  | 345 |
| chr27 | 28194282  | 28194626  | 345 |
| chr24 | 34500845  | 34501189  | 345 |
| chr23 | 50908366  | 50908710  | 345 |
| chr22 | 30013693  | 30014037  | 345 |
| chr2  | 131052997 | 131053341 | 345 |
| chr2  | 49415885  | 49416229  | 345 |
| chr19 | 58179055  | 58179399  | 345 |
| chr19 | 24026674  | 24027018  | 345 |
| chr18 | 22158930  | 22159274  | 345 |
| chr18 | 17840316  | 17840660  | 345 |
| chr17 | 63101774  | 63102118  | 345 |
| chr14 | 1156328   | 1156672   | 345 |
| chr13 | 79698329  | 79698673  | 345 |
| chr12 | 80835834  | 80836178  | 345 |
| chr12 | 20027729  | 20028073  | 345 |
| chr7  | 43060227  | 43060570  | 344 |
| chr6  | 109908291 | 109908634 | 344 |
| chr6  | 107056595 | 107056938 | 344 |
| chr5  | 67666905  | 67667248  | 344 |
| chr5  | 30593688  | 30594031  | 344 |
| chr3  | 125626800 | 125627143 | 344 |
| chr3  | 105757582 | 105757925 | 344 |
| chr26 | 43491636  | 43491979  | 344 |
| chr26 | 22398860  | 22399203  | 344 |

|       |           |           |     |
|-------|-----------|-----------|-----|
| chr24 | 51558757  | 51559100  | 344 |
| chr24 | 36030710  | 36031053  | 344 |
| chr24 | 35298896  | 35299239  | 344 |
| chr24 | 20830032  | 20830375  | 344 |
| chr20 | 70573141  | 70573484  | 344 |
| chr2  | 131194790 | 131195133 | 344 |
| chr19 | 35792111  | 35792454  | 344 |
| chr19 | 35271473  | 35271816  | 344 |
| chr19 | 35057650  | 35057993  | 344 |
| chr19 | 29705696  | 29706039  | 344 |
| chr19 | 19358338  | 19358681  | 344 |
| chr18 | 63229274  | 63229617  | 344 |
| chr18 | 33708112  | 33708455  | 344 |
| chr18 | 11976244  | 11976587  | 344 |
| chr17 | 60882720  | 60883063  | 344 |
| chr17 | 57896736  | 57897079  | 344 |
| chr14 | 22081238  | 22081581  | 344 |
| chr13 | 79932327  | 79932670  | 344 |
| chr11 | 85337317  | 85337660  | 344 |
| chr11 | 3286381   | 3286724   | 344 |
| chr1  | 7339989   | 7340332   | 344 |
| chr9  | 90542906  | 90543248  | 343 |
| chr8  | 7609708   | 7610050   | 343 |
| chr6  | 108668987 | 108669329 | 343 |
| chr5  | 118073775 | 118074117 | 343 |
| chr5  | 117601325 | 117601667 | 343 |
| chr29 | 48856030  | 48856372  | 343 |
| chr27 | 26152328  | 26152670  | 343 |
| chr26 | 18878616  | 18878958  | 343 |
| chr26 | 5888945   | 5889287   | 343 |
| chr25 | 8172187   | 8172529   | 343 |
| chr23 | 25658974  | 25659316  | 343 |
| chr20 | 41246456  | 41246798  | 343 |
| chr2  | 135597081 | 135597423 | 343 |
| chr19 | 63497738  | 63498080  | 343 |
| chr19 | 53139157  | 53139499  | 343 |
| chr19 | 18161574  | 18161916  | 343 |
| chr18 | 43655073  | 43655415  | 343 |
| chr15 | 74931330  | 74931672  | 343 |
| chr15 | 5650875   | 5651217   | 343 |
| chr14 | 1491886   | 1492228   | 343 |
| chr13 | 54550423  | 54550765  | 343 |
| chr13 | 28354849  | 28355191  | 343 |
| chr12 | 74533141  | 74533483  | 343 |
| chr8  | 8107486   | 8107827   | 342 |
| chr7  | 19239448  | 19239789  | 342 |
| chr7  | 5515041   | 5515382   | 342 |
| chr3  | 118229990 | 118230331 | 342 |
| chr29 | 48180572  | 48180913  | 342 |
| chr29 | 36738098  | 36738439  | 342 |

|       |               |           |     |
|-------|---------------|-----------|-----|
| chr26 | 51300288      | 51300629  | 342 |
| chr26 | 44681972      | 44682313  | 342 |
| chr23 | 16523654      | 16523995  | 342 |
| chr23 | 10470959      | 10471300  | 342 |
| chr21 | 9479285       | 9479626   | 342 |
| chr19 | 29191329      | 29191670  | 342 |
| chr18 | 56877735      | 56878076  | 342 |
| chr13 | 64378827      | 64379168  | 342 |
| chr11 | 103748170     | 103748511 | 342 |
| chr10 | 44184012      | 44184353  | 342 |
| chr10 | 13589315      | 13589656  | 342 |
| chr1  | 123090435     | 123090776 | 342 |
| chr9  | 83793888      | 83794228  | 341 |
| chr7  | 89468026      | 89468366  | 341 |
| chr4  | 117765262     | 117765602 | 341 |
| chr3  | 112249223     | 112249563 | 341 |
| chr26 | 44123240      | 44123580  | 341 |
| chr25 | 39282615      | 39282955  | 341 |
| chr25 | 2537804       | 2538144   | 341 |
| chr23 | 51690911      | 51691251  | 341 |
| chr23 | 10525049      | 10525389  | 341 |
| chr23 | 8263080       | 8263420   | 341 |
| chr21 | 67928092      | 67928432  | 341 |
| chr20 | 687961 688301 | 341       |     |
| chr2  | 139354939     | 139355279 | 341 |
| chr19 | 60722500      | 60722840  | 341 |
| chr18 | 17988260      | 17988600  | 341 |
| chr17 | 67393011      | 67393351  | 341 |
| chr14 | 27080059      | 27080399  | 341 |
| chr13 | 41671882      | 41672222  | 341 |
| chr12 | 35424239      | 35424579  | 341 |
| chr12 | 29966154      | 29966494  | 341 |
| chr10 | 29625518      | 29625858  | 341 |
| chr10 | 4384292       | 4384632   | 341 |
| chr1  | 69512168      | 69512508  | 341 |
| chr1  | 1599156       | 1599496   | 341 |
| chr6  | 120900529     | 120900868 | 340 |
| chr6  | 118183522     | 118183861 | 340 |
| chr4  | 84347007      | 84347346  | 340 |
| chr4  | 32148857      | 32149196  | 340 |
| chr29 | 48807078      | 48807417  | 340 |
| chr29 | 36535757      | 36536096  | 340 |
| chr27 | 39878445      | 39878784  | 340 |
| chr25 | 2076308       | 2076647   | 340 |
| chr23 | 51152469      | 51152808  | 340 |
| chr23 | 46884878      | 46885217  | 340 |
| chr23 | 28048588      | 28048927  | 340 |
| chr19 | 15173026      | 15173365  | 340 |
| chr18 | 40384394      | 40384733  | 340 |
| chr18 | 18064658      | 18064997  | 340 |



|       |           |           |     |
|-------|-----------|-----------|-----|
| chr18 | 12406980  | 12407319  | 340 |
| chr17 | 68224180  | 68224519  | 340 |
| chr15 | 75352453  | 75352792  | 340 |
| chr13 | 48548400  | 48548739  | 340 |
| chr13 | 41224981  | 41225320  | 340 |
| chr13 | 22825562  | 22825901  | 340 |
| chr12 | 64659468  | 64659807  | 340 |
| chr11 | 77207153  | 77207492  | 340 |
| chr11 | 51886228  | 51886567  | 340 |
| chr11 | 4362469   | 4362808   | 340 |
| chr11 | 4356097   | 4356436   | 340 |
| chr9  | 33733985  | 33734323  | 339 |
| chr6  | 18267818  | 18268156  | 339 |
| chr5  | 124681857 | 124682195 | 339 |
| chr4  | 98468220  | 98468558  | 339 |
| chr29 | 48274831  | 48275169  | 339 |
| chr28 | 41717037  | 41717375  | 339 |
| chr26 | 38195844  | 38196182  | 339 |
| chr26 | 33873605  | 33873943  | 339 |
| chr25 | 36835727  | 36836065  | 339 |
| chr25 | 29290419  | 29290757  | 339 |
| chr23 | 52901034  | 52901372  | 339 |
| chr23 | 26336740  | 26337078  | 339 |
| chr22 | 7218639   | 7218977   | 339 |
| chr20 | 33684572  | 33684910  | 339 |
| chr20 | 7014465   | 7014803   | 339 |
| chr2  | 93510043  | 93510381  | 339 |
| chr19 | 39250483  | 39250821  | 339 |
| chr18 | 48345566  | 48345904  | 339 |
| chr17 | 67088470  | 67088808  | 339 |
| chr17 | 12576709  | 12577047  | 339 |
| chr16 | 47129218  | 47129556  | 339 |
| chr15 | 75511843  | 75512181  | 339 |
| chr15 | 74536107  | 74536445  | 339 |
| chr15 | 26672114  | 26672452  | 339 |
| chr13 | 60211149  | 60211487  | 339 |
| chr13 | 56079760  | 56080098  | 339 |
| chr13 | 55713858  | 55714196  | 339 |
| chr11 | 105638947 | 105639285 | 339 |
| chr11 | 72306043  | 72306381  | 339 |
| chrX  | 21033377  | 21033714  | 338 |
| chr9  | 77713920  | 77714257  | 338 |
| chr5  | 113628372 | 113628709 | 338 |
| chr5  | 112054216 | 112054553 | 338 |
| chr3  | 123620336 | 123620673 | 338 |
| chr3  | 110691664 | 110692001 | 338 |
| chr3  | 34794684  | 34795021  | 338 |
| chr28 | 11905533  | 11905870  | 338 |
| chr27 | 40801767  | 40802104  | 338 |
| chr27 | 15769338  | 15769675  | 338 |

|       |           |           |     |
|-------|-----------|-----------|-----|
| chr26 | 50763839  | 50764176  | 338 |
| chr26 | 48146835  | 48147172  | 338 |
| chr26 | 34962963  | 34963300  | 338 |
| chr24 | 1682236   | 1682573   | 338 |
| chr22 | 50888649  | 50888986  | 338 |
| chr21 | 20942348  | 20942685  | 338 |
| chr20 | 74768752  | 74769089  | 338 |
| chr19 | 54636643  | 54636980  | 338 |
| chr18 | 10294474  | 10294811  | 338 |
| chr17 | 69401264  | 69401601  | 338 |
| chr16 | 37911455  | 37911792  | 338 |
| chr16 | 20653646  | 20653983  | 338 |
| chr15 | 75158719  | 75159056  | 338 |
| chr15 | 27118154  | 27118491  | 338 |
| chr13 | 80050885  | 80051222  | 338 |
| chr11 | 109824002 | 109824339 | 338 |
| chr11 | 90302522  | 90302859  | 338 |
| chr10 | 47604668  | 47605005  | 338 |
| chr10 | 7515454   | 7515791   | 338 |
| chr8  | 7726827   | 7727163   | 337 |
| chr4  | 118251464 | 118251800 | 337 |
| chr3  | 16822765  | 16823101  | 337 |
| chr3  | 8985266   | 8985602   | 337 |
| chr27 | 15516626  | 15516962  | 337 |
| chr23 | 50044788  | 50045124  | 337 |
| chr23 | 45805565  | 45805901  | 337 |
| chr23 | 8445971   | 8446307   | 337 |
| chr22 | 56377954  | 56378290  | 337 |
| chr21 | 19008765  | 19009101  | 337 |
| chr21 | 18887303  | 18887639  | 337 |
| chr21 | 16040002  | 16040338  | 337 |
| chr19 | 60948877  | 60949213  | 337 |
| chr19 | 37891138  | 37891474  | 337 |
| chr19 | 36367950  | 36368286  | 337 |
| chr19 | 14237970  | 14238306  | 337 |
| chr17 | 72686288  | 72686624  | 337 |
| chr14 | 61272860  | 61273196  | 337 |
| chr13 | 59114373  | 59114709  | 337 |
| chr13 | 54427008  | 54427344  | 337 |
| chr12 | 34513738  | 34514074  | 337 |
| chr11 | 107159748 | 107160084 | 337 |
| chr10 | 103501134 | 103501470 | 337 |
| chr10 | 25031808  | 25032144  | 337 |
| chr10 | 19496424  | 19496760  | 337 |
| chr10 | 17589720  | 17590056  | 337 |
| chr8  | 110923325 | 110923660 | 336 |
| chr5  | 125650534 | 125650869 | 336 |
| chr3  | 120950493 | 120950828 | 336 |
| chr3  | 115760990 | 115761325 | 336 |
| chr26 | 24602639  | 24602974  | 336 |

|       |           |           |     |
|-------|-----------|-----------|-----|
| chr26 | 20265977  | 20266312  | 336 |
| chr25 | 43155709  | 43156044  | 336 |
| chr25 | 34348053  | 34348388  | 336 |
| chr23 | 49939142  | 49939477  | 336 |
| chr22 | 7219189   | 7219524   | 336 |
| chr21 | 69150594  | 69150929  | 336 |
| chr19 | 40459173  | 40459508  | 336 |
| chr18 | 39822232  | 39822567  | 336 |
| chr16 | 73776792  | 73777127  | 336 |
| chr16 | 73355642  | 73355977  | 336 |
| chr15 | 28607543  | 28607878  | 336 |
| chr14 | 19409045  | 19409380  | 336 |
| chr11 | 71426617  | 71426952  | 336 |
| chr10 | 3257161   | 3257496   | 336 |
| chr9  | 106828322 | 106828656 | 335 |
| chr7  | 17373878  | 17374212  | 335 |
| chr5  | 115160730 | 115161064 | 335 |
| chr5  | 111874832 | 111875166 | 335 |
| chr4  | 121564186 | 121564520 | 335 |
| chr3  | 125658123 | 125658457 | 335 |
| chr29 | 46202624  | 46202958  | 335 |
| chr29 | 17851316  | 17851650  | 335 |
| chr28 | 33798554  | 33798888  | 335 |
| chr25 | 3108083   | 3108417   | 335 |
| chr24 | 23956715  | 23957049  | 335 |
| chr21 | 66375124  | 66375458  | 335 |
| chr2  | 111857857 | 111858191 | 335 |
| chr19 | 60529767  | 60530101  | 335 |
| chr19 | 39373248  | 39373582  | 335 |
| chr19 | 33090858  | 33091192  | 335 |
| chr19 | 24367392  | 24367726  | 335 |
| chr19 | 23102616  | 23102950  | 335 |
| chr19 | 6532463   | 6532797   | 335 |
| chr18 | 25603315  | 25603649  | 335 |
| chr17 | 62456705  | 62457039  | 335 |
| chr17 | 62169859  | 62170193  | 335 |
| chr14 | 44636716  | 44637050  | 335 |
| chr13 | 59643770  | 59644104  | 335 |
| chr13 | 54845072  | 54845406  | 335 |
| chr12 | 84238206  | 84238540  | 335 |
| chr12 | 24429504  | 24429838  | 335 |
| chr11 | 107579524 | 107579858 | 335 |
| chr11 | 107009316 | 107009650 | 335 |
| chr11 | 77898332  | 77898666  | 335 |
| chr1  | 81359291  | 81359625  | 335 |
| chr1  | 73786405  | 73786739  | 335 |
| chr9  | 107181036 | 107181369 | 334 |
| chr7  | 52362553  | 52362886  | 334 |
| chr7  | 44054458  | 44054791  | 334 |
| chr6  | 121867057 | 121867390 | 334 |

|       |               |           |     |
|-------|---------------|-----------|-----|
| chr4  | 72554080      | 72554413  | 334 |
| chr27 | 39885707      | 39886040  | 334 |
| chr26 | 43932152      | 43932485  | 334 |
| chr25 | 361736 362069 | 334       |     |
| chr24 | 35334652      | 35334985  | 334 |
| chr23 | 51990207      | 51990540  | 334 |
| chr21 | 4256470       | 4256803   | 334 |
| chr2  | 110570670     | 110571003 | 334 |
| chr18 | 55208294      | 55208627  | 334 |
| chr18 | 39643689      | 39644022  | 334 |
| chr18 | 12446901      | 12447234  | 334 |
| chr17 | 31717142      | 31717475  | 334 |
| chr16 | 68930266      | 68930599  | 334 |
| chr13 | 59994013      | 59994346  | 334 |
| chr12 | 82621767      | 82622100  | 334 |
| chr11 | 84583074      | 84583407  | 334 |
| chr11 | 74970857      | 74971190  | 334 |
| chr10 | 21863372      | 21863705  | 334 |
| chr10 | 17591836      | 17592169  | 334 |
| chr8  | 7814127       | 7814459   | 333 |
| chr6  | 120778924     | 120779256 | 333 |
| chr5  | 122356025     | 122356357 | 333 |
| chr4  | 121267695     | 121268027 | 333 |
| chr26 | 42173540      | 42173872  | 333 |
| chr26 | 17883186      | 17883518  | 333 |
| chr24 | 41785088      | 41785420  | 333 |
| chr24 | 35392169      | 35392501  | 333 |
| chr24 | 30916705      | 30917037  | 333 |
| chr21 | 65754772      | 65755104  | 333 |
| chr21 | 47697499      | 47697831  | 333 |
| chr20 | 8566613       | 8566945   | 333 |
| chr20 | 5156405       | 5156737   | 333 |
| chr19 | 46105153      | 46105485  | 333 |
| chr19 | 31648162      | 31648494  | 333 |
| chr19 | 7623794       | 7624126   | 333 |
| chr17 | 74461154      | 74461486  | 333 |
| chr15 | 25506164      | 25506496  | 333 |
| chr14 | 44634572      | 44634904  | 333 |
| chr13 | 73946702      | 73947034  | 333 |
| chr13 | 51461999      | 51462331  | 333 |
| chr13 | 22187412      | 22187744  | 333 |
| chr12 | 84933628      | 84933960  | 333 |
| chr10 | 66921116      | 66921448  | 333 |
| chr10 | 36826058      | 36826390  | 333 |
| chr1  | 73756618      | 73756950  | 333 |
| chr1  | 69108205      | 69108537  | 333 |
| chr8  | 5328431       | 5328762   | 332 |
| chr7  | 4926406       | 4926737   | 332 |
| chr6  | 113362678     | 113363009 | 332 |
| chr5  | 30932206      | 30932537  | 332 |

|       |               |           |     |
|-------|---------------|-----------|-----|
| chr5  | 28502307      | 28502638  | 332 |
| chr5  | 28491954      | 28492285  | 332 |
| chr4  | 124203812     | 124204143 | 332 |
| chr4  | 99606264      | 99606595  | 332 |
| chr4  | 32179748      | 32180079  | 332 |
| chr29 | 50558890      | 50559221  | 332 |
| chr29 | 45788599      | 45788930  | 332 |
| chr28 | 33955858      | 33956189  | 332 |
| chr28 | 6847434       | 6847765   | 332 |
| chr26 | 48298250      | 48298581  | 332 |
| chr26 | 44085907      | 44086238  | 332 |
| chr26 | 31376068      | 31376399  | 332 |
| chr24 | 27094835      | 27095166  | 332 |
| chr23 | 48493014      | 48493345  | 332 |
| chr23 | 27899287      | 27899618  | 332 |
| chr23 | 15958295      | 15958626  | 332 |
| chr22 | 30121350      | 30121681  | 332 |
| chr22 | 198889 199220 | 332       |     |
| chr21 | 6493606       | 6493937   | 332 |
| chr20 | 4212565       | 4212896   | 332 |
| chr20 | 991408 991739 | 332       |     |
| chr19 | 41479912      | 41480243  | 332 |
| chr19 | 1991742       | 1992073   | 332 |
| chr17 | 26907610      | 26907941  | 332 |
| chr13 | 58337077      | 58337408  | 332 |
| chr11 | 84264626      | 84264957  | 332 |
| chr11 | 38615628      | 38615959  | 332 |
| chr10 | 102977117     | 102977448 | 332 |
| chr8  | 94957242      | 94957572  | 331 |
| chr7  | 50587014      | 50587344  | 331 |
| chr7  | 38685551      | 38685881  | 331 |
| chr6  | 70887718      | 70888048  | 331 |
| chr5  | 122636053     | 122636383 | 331 |
| chr5  | 112861911     | 112862241 | 331 |
| chr4  | 122672590     | 122672920 | 331 |
| chr3  | 121468396     | 121468726 | 331 |
| chr3  | 118036435     | 118036765 | 331 |
| chr27 | 35861731      | 35862061  | 331 |
| chr26 | 50752402      | 50752732  | 331 |
| chr25 | 39167139      | 39167469  | 331 |
| chr25 | 36819972      | 36820302  | 331 |
| chr25 | 22533897      | 22534227  | 331 |
| chr25 | 1965134       | 1965464   | 331 |
| chr22 | 61196559      | 61196889  | 331 |
| chr22 | 56135816      | 56136146  | 331 |
| chr21 | 57463356      | 57463686  | 331 |
| chr19 | 13500991      | 13501321  | 331 |
| chr16 | 77544786      | 77545116  | 331 |
| chr16 | 74457085      | 74457415  | 331 |
| chr13 | 36239525      | 36239855  | 331 |

|       |               |           |     |
|-------|---------------|-----------|-----|
| chr11 | 95197138      | 95197468  | 331 |
| chr10 | 88176144      | 88176474  | 331 |
| chr10 | 12128827      | 12129157  | 331 |
| chr1  | 58613062      | 58613392  | 331 |
| chr5  | 112189257     | 112189586 | 330 |
| chr3  | 34009230      | 34009559  | 330 |
| chr29 | 45784086      | 45784415  | 330 |
| chr29 | 33572085      | 33572414  | 330 |
| chr28 | 33313390      | 33313719  | 330 |
| chr27 | 47166598      | 47166927  | 330 |
| chr27 | 14404390      | 14404719  | 330 |
| chr26 | 20960484      | 20960813  | 330 |
| chr24 | 59360426      | 59360755  | 330 |
| chr23 | 50963660      | 50963989  | 330 |
| chr22 | 59637495      | 59637824  | 330 |
| chr21 | 9521735       | 9522064   | 330 |
| chr20 | 490811 491140 | 330       | 330 |
| chr2  | 139599004     | 139599333 | 330 |
| chr19 | 39396245      | 39396574  | 330 |
| chr19 | 21612310      | 21612639  | 330 |
| chr18 | 23516983      | 23517312  | 330 |
| chr18 | 11993392      | 11993721  | 330 |
| chr16 | 43078907      | 43079236  | 330 |
| chr15 | 36665820      | 36666149  | 330 |
| chr13 | 58281692      | 58282021  | 330 |
| chr13 | 57620150      | 57620479  | 330 |
| chr13 | 57280229      | 57280558  | 330 |
| chr11 | 100468836     | 100469165 | 330 |
| chr10 | 17378634      | 17378963  | 330 |
| chr1  | 75119468      | 75119797  | 330 |
| chr8  | 107416311     | 107416639 | 329 |
| chr8  | 20932215      | 20932543  | 329 |
| chr5  | 115508276     | 115508604 | 329 |
| chr5  | 113097106     | 113097434 | 329 |
| chr27 | 15765987      | 15766315  | 329 |
| chr24 | 63032005      | 63032333  | 329 |
| chr24 | 40359082      | 40359410  | 329 |
| chr2  | 126049314     | 126049642 | 329 |
| chr2  | 123761056     | 123761384 | 329 |
| chr19 | 7869464       | 7869792   | 329 |
| chr18 | 54835152      | 54835480  | 329 |
| chr16 | 47206688      | 47207016  | 329 |
| chr16 | 20654707      | 20655035  | 329 |
| chr15 | 76583042      | 76583370  | 329 |
| chr15 | 29975222      | 29975550  | 329 |
| chr13 | 11389202      | 11389530  | 329 |
| chr1  | 153104701     | 153105029 | 329 |
| chr1  | 68904368      | 68904696  | 329 |
| chr9  | 33735193      | 33735520  | 328 |
| chr6  | 121847108     | 121847435 | 328 |

|       |               |           |     |
|-------|---------------|-----------|-----|
| chr29 | 17884377      | 17884704  | 328 |
| chr28 | 426613 426940 |           | 328 |
| chr27 | 21891153      | 21891480  | 328 |
| chr26 | 22249870      | 22250197  | 328 |
| chr21 | 42445931      | 42446258  | 328 |
| chr21 | 25976777      | 25977104  | 328 |
| chr21 | 13586848      | 13587175  | 328 |
| chr19 | 56581881      | 56582208  | 328 |
| chr19 | 24688834      | 24689161  | 328 |
| chr18 | 65967728      | 65968055  | 328 |
| chr18 | 56753140      | 56753467  | 328 |
| chr17 | 53985688      | 53986015  | 328 |
| chr17 | 4798026       | 4798353   | 328 |
| chr16 | 44112495      | 44112822  | 328 |
| chr16 | 38852279      | 38852606  | 328 |
| chr15 | 32738403      | 32738730  | 328 |
| chr15 | 29096073      | 29096400  | 328 |
| chr15 | 27288885      | 27289212  | 328 |
| chr13 | 32071065      | 32071392  | 328 |
| chr12 | 31734224      | 31734551  | 328 |
| chr12 | 23000673      | 23001000  | 328 |
| chrX  | 36633533      | 36633859  | 327 |
| chrX  | 17125796      | 17126122  | 327 |
| chr9  | 42095866      | 42096192  | 327 |
| chr7  | 69207394      | 69207720  | 327 |
| chr6  | 119120625     | 119120951 | 327 |
| chr5  | 48180870      | 48181196  | 327 |
| chr4  | 67825752      | 67826078  | 327 |
| chr3  | 117892633     | 117892959 | 327 |
| chr3  | 107735712     | 107736038 | 327 |
| chr27 | 43918250      | 43918576  | 327 |
| chr25 | 42747069      | 42747395  | 327 |
| chr25 | 26681702      | 26682028  | 327 |
| chr25 | 1460450       | 1460776   | 327 |
| chr22 | 55933225      | 55933551  | 327 |
| chr2  | 26454530      | 26454856  | 327 |
| chr19 | 37567874      | 37568200  | 327 |
| chr18 | 37173845      | 37174171  | 327 |
| chr18 | 23514377      | 23514703  | 327 |
| chr17 | 72717830      | 72718156  | 327 |
| chr17 | 53519595      | 53519921  | 327 |
| chr16 | 54517737      | 54518063  | 327 |
| chr15 | 24567836      | 24568162  | 327 |
| chr14 | 621454 621780 |           | 327 |
| chr13 | 82309930      | 82310256  | 327 |
| chr13 | 35491276      | 35491602  | 327 |
| chr12 | 82752488      | 82752814  | 327 |
| chr12 | 14940761      | 14941087  | 327 |
| chr11 | 81177576      | 81177902  | 327 |
| chr11 | 68907260      | 68907586  | 327 |

|       |           |           |     |
|-------|-----------|-----------|-----|
| chr11 | 3149073   | 3149399   | 327 |
| chr10 | 79143692  | 79144018  | 327 |
| chrX  | 35791433  | 35791758  | 326 |
| chr6  | 59139911  | 59140236  | 326 |
| chr5  | 82888016  | 82888341  | 326 |
| chr4  | 72307451  | 72307776  | 326 |
| chr3  | 52141804  | 52142129  | 326 |
| chr24 | 20402689  | 20403014  | 326 |
| chr23 | 28879241  | 28879566  | 326 |
| chr21 | 47529071  | 47529396  | 326 |
| chr21 | 6554112   | 6554437   | 326 |
| chr2  | 138901219 | 138901544 | 326 |
| chr2  | 131309627 | 131309952 | 326 |
| chr2  | 131199962 | 131200287 | 326 |
| chr19 | 60817634  | 60817959  | 326 |
| chr19 | 58472690  | 58473015  | 326 |
| chr19 | 58421025  | 58421350  | 326 |
| chr19 | 7631621   | 7631946   | 326 |
| chr16 | 26533864  | 26534189  | 326 |
| chr16 | 2365092   | 2365417   | 326 |
| chr15 | 26900666  | 26900991  | 326 |
| chr15 | 24193974  | 24194299  | 326 |
| chr14 | 1516201   | 1516526   | 326 |
| chr14 | 1388806   | 1389131   | 326 |
| chr13 | 45341875  | 45342200  | 326 |
| chr13 | 42864724  | 42865049  | 326 |
| chr12 | 73785957  | 73786282  | 326 |
| chr10 | 8734787   | 8735112   | 326 |
| chr7  | 44070033  | 44070357  | 325 |
| chr7  | 10641892  | 10642216  | 325 |
| chr5  | 60384819  | 60385143  | 325 |
| chr4  | 79272357  | 79272681  | 325 |
| chr25 | 18132381  | 18132705  | 325 |
| chr25 | 3042763   | 3043087   | 325 |
| chr24 | 51817861  | 51818185  | 325 |
| chr23 | 30684912  | 30685236  | 325 |
| chr23 | 19547888  | 19548212  | 325 |
| chr21 | 27936925  | 27937249  | 325 |
| chr21 | 6543221   | 6543545   | 325 |
| chr20 | 67509664  | 67509988  | 325 |
| chr2  | 132168025 | 132168349 | 325 |
| chr19 | 47218476  | 47218800  | 325 |
| chr19 | 37620186  | 37620510  | 325 |
| chr18 | 51610975  | 51611299  | 325 |
| chr17 | 63812246  | 63812570  | 325 |
| chr16 | 59018027  | 59018351  | 325 |
| chr16 | 42573038  | 42573362  | 325 |
| chr11 | 100253764 | 100254088 | 325 |
| chr11 | 72820096  | 72820420  | 325 |
| chr1  | 47180654  | 47180978  | 325 |



|       |           |           |     |
|-------|-----------|-----------|-----|
| chr5  | 113262474 | 113262797 | 324 |
| chr4  | 122569150 | 122569473 | 324 |
| chr4  | 30314833  | 30315156  | 324 |
| chr3  | 117802304 | 117802627 | 324 |
| chr3  | 84658720  | 84659043  | 324 |
| chr28 | 42951299  | 42951622  | 324 |
| chr25 | 39281108  | 39281431  | 324 |
| chr25 | 4639954   | 4640277   | 324 |
| chr24 | 58914519  | 58914842  | 324 |
| chr23 | 38343073  | 38343396  | 324 |
| chr21 | 19298705  | 19299028  | 324 |
| chr20 | 75738469  | 75738792  | 324 |
| chr19 | 56574714  | 56575037  | 324 |
| chr19 | 34062168  | 34062491  | 324 |
| chr18 | 62706323  | 62706646  | 324 |
| chr18 | 11716616  | 11716939  | 324 |
| chr16 | 2259912   | 2260235   | 324 |
| chr15 | 56061874  | 56062197  | 324 |
| chr13 | 73922955  | 73923278  | 324 |
| chr13 | 10236923  | 10237246  | 324 |
| chr11 | 10736248  | 10736571  | 324 |
| chr10 | 83987853  | 83988176  | 324 |
| chr1  | 147104903 | 147105226 | 324 |
| chr7  | 38204074  | 38204396  | 323 |
| chr7  | 17360096  | 17360418  | 323 |
| chr7  | 5226838   | 5227160   | 323 |
| chr6  | 72292020  | 72292342  | 323 |
| chr5  | 5828866   | 5829188   | 323 |
| chr3  | 114468029 | 114468351 | 323 |
| chr27 | 15411300  | 15411622  | 323 |
| chr23 | 17626164  | 17626486  | 323 |
| chr21 | 20927920  | 20928242  | 323 |
| chr21 | 9490210   | 9490532   | 323 |
| chr19 | 59081960  | 59082282  | 323 |
| chr19 | 56122394  | 56122716  | 323 |
| chr19 | 36369788  | 36370110  | 323 |
| chr19 | 14750044  | 14750366  | 323 |
| chr15 | 65580957  | 65581279  | 323 |
| chr15 | 14581392  | 14581714  | 323 |
| chr14 | 57316048  | 57316370  | 323 |
| chr14 | 6956987   | 6957309   | 323 |
| chr13 | 76092439  | 76092761  | 323 |
| chr13 | 62417195  | 62417517  | 323 |
| chr13 | 57616856  | 57617178  | 323 |
| chr11 | 91373760  | 91374082  | 323 |
| chr10 | 83521669  | 83521991  | 323 |
| chr10 | 21849523  | 21849845  | 323 |
| chr10 | 17429914  | 17430236  | 323 |
| chrX  | 72207736  | 72208057  | 322 |
| chr9  | 90540952  | 90541273  | 322 |

|       |           |           |     |
|-------|-----------|-----------|-----|
| chr8  | 103914585 | 103914906 | 322 |
| chr8  | 44140831  | 44141152  | 322 |
| chr5  | 113520318 | 113520639 | 322 |
| chr5  | 30344442  | 30344763  | 322 |
| chr3  | 26140564  | 26140885  | 322 |
| chr29 | 42075903  | 42076224  | 322 |
| chr28 | 3539885   | 3540206   | 322 |
| chr25 | 38762462  | 38762783  | 322 |
| chr22 | 54218788  | 54219109  | 322 |
| chr20 | 11226377  | 11226698  | 322 |
| chr20 | 3006560   | 3006881   | 322 |
| chr2  | 137507161 | 137507482 | 322 |
| chr2  | 133073671 | 133073992 | 322 |
| chr2  | 127533895 | 127534216 | 322 |
| chr19 | 41925151  | 41925472  | 322 |
| chr18 | 57311245  | 57311566  | 322 |
| chr18 | 4836759   | 4837080   | 322 |
| chr16 | 46996393  | 46996714  | 322 |
| chr15 | 75252588  | 75252909  | 322 |
| chr10 | 7514119   | 7514440   | 322 |
| chr10 | 4919210   | 4919531   | 322 |
| chr1  | 145822588 | 145822909 | 322 |
| chr9  | 107704388 | 107704708 | 321 |
| chr8  | 101704121 | 101704441 | 321 |
| chr8  | 64486016  | 64486336  | 321 |
| chr5  | 124716713 | 124717033 | 321 |
| chr5  | 112981068 | 112981388 | 321 |
| chr3  | 105720254 | 105720574 | 321 |
| chr3  | 97878194  | 97878514  | 321 |
| chr26 | 48902878  | 48903198  | 321 |
| chr26 | 43830596  | 43830916  | 321 |
| chr24 | 61105669  | 61105989  | 321 |
| chr23 | 19861711  | 19862031  | 321 |
| chr22 | 60654902  | 60655222  | 321 |
| chr22 | 55762627  | 55762947  | 321 |
| chr22 | 44848630  | 44848950  | 321 |
| chr21 | 68937164  | 68937484  | 321 |
| chr21 | 24813133  | 24813453  | 321 |
| chr20 | 37571944  | 37572264  | 321 |
| chr20 | 4896392   | 4896712   | 321 |
| chr2  | 140765317 | 140765637 | 321 |
| chr18 | 62746560  | 62746880  | 321 |
| chr17 | 72338685  | 72339005  | 321 |
| chr14 | 23512896  | 23513216  | 321 |
| chr13 | 11775190  | 11775510  | 321 |
| chr12 | 32106554  | 32106874  | 321 |
| chr11 | 107567122 | 107567442 | 321 |
| chr10 | 88642257  | 88642577  | 321 |
| chr10 | 25029384  | 25029704  | 321 |
| chr10 | 17104780  | 17105100  | 321 |

|       |           |           |     |
|-------|-----------|-----------|-----|
| chr10 | 13342610  | 13342930  | 321 |
| chr1  | 83010743  | 83011063  | 321 |
| chrX  | 23362448  | 23362767  | 320 |
| chr7  | 71637701  | 71638020  | 320 |
| chr7  | 44691909  | 44692228  | 320 |
| chr6  | 103290621 | 103290940 | 320 |
| chr5  | 113205031 | 113205350 | 320 |
| chr5  | 28872372  | 28872691  | 320 |
| chr27 | 21641366  | 21641685  | 320 |
| chr26 | 48329049  | 48329368  | 320 |
| chr26 | 34315546  | 34315865  | 320 |
| chr25 | 41283487  | 41283806  | 320 |
| chr25 | 40830547  | 40830866  | 320 |
| chr25 | 37387458  | 37387777  | 320 |
| chr21 | 67765455  | 67765774  | 320 |
| chr21 | 61780287  | 61780606  | 320 |
| chr2  | 134481704 | 134482023 | 320 |
| chr2  | 127194421 | 127194740 | 320 |
| chr19 | 39861828  | 39862147  | 320 |
| chr19 | 7875291   | 7875610   | 320 |
| chr17 | 66541944  | 66542263  | 320 |
| chr17 | 63375821  | 63376140  | 320 |
| chr15 | 78161756  | 78162075  | 320 |
| chr15 | 74594611  | 74594930  | 320 |
| chr15 | 39229286  | 39229605  | 320 |
| chr13 | 43418892  | 43419211  | 320 |
| chr10 | 70417429  | 70417748  | 320 |
| chr10 | 20472983  | 20473302  | 320 |
| chr1  | 148004728 | 148005047 | 320 |
| chr1  | 1578826   | 1579145   | 320 |
| chr8  | 45729141  | 45729459  | 319 |
| chr5  | 113553815 | 113554133 | 319 |
| chr29 | 46391268  | 46391586  | 319 |
| chr25 | 37794014  | 37794332  | 319 |
| chr25 | 27877337  | 27877655  | 319 |
| chr23 | 49874459  | 49874777  | 319 |
| chr23 | 18822948  | 18823266  | 319 |
| chr19 | 11827588  | 11827906  | 319 |
| chr18 | 62520042  | 62520360  | 319 |
| chr17 | 70518615  | 70518933  | 319 |
| chr16 | 44931964  | 44932282  | 319 |
| chr15 | 65365728  | 65366046  | 319 |
| chr13 | 79278829  | 79279147  | 319 |
| chr13 | 54865054  | 54865372  | 319 |
| chr9  | 35967039  | 35967356  | 318 |
| chr8  | 108768069 | 108768386 | 318 |
| chr6  | 109481269 | 109481586 | 318 |
| chr6  | 74454171  | 74454488  | 318 |
| chr6  | 72202973  | 72203290  | 318 |
| chr4  | 79217488  | 79217805  | 318 |

|       |               |           |     |
|-------|---------------|-----------|-----|
| chr3  | 62884957      | 62885274  | 318 |
| chr29 | 49150183      | 49150500  | 318 |
| chr29 | 1709126       | 1709443   | 318 |
| chr25 | 8735521       | 8735838   | 318 |
| chr2  | 75675551      | 75675868  | 318 |
| chr19 | 56463947      | 56464264  | 318 |
| chr19 | 45832768      | 45833085  | 318 |
| chr19 | 38308773      | 38309090  | 318 |
| chr19 | 10237763      | 10238080  | 318 |
| chr18 | 35062539      | 35062856  | 318 |
| chr17 | 53541851      | 53542168  | 318 |
| chr16 | 51480049      | 51480366  | 318 |
| chr15 | 63090077      | 63090394  | 318 |
| chr13 | 71076634      | 71076951  | 318 |
| chr10 | 17034539      | 17034856  | 318 |
| chr7  | 51856138      | 51856454  | 317 |
| chr7  | 3944012       | 3944328   | 317 |
| chr6  | 121865867     | 121866183 | 317 |
| chr4  | 99010929      | 99011245  | 317 |
| chr4  | 55201344      | 55201660  | 317 |
| chr3  | 105435435     | 105435751 | 317 |
| chr29 | 36381300      | 36381616  | 317 |
| chr29 | 31559800      | 31560116  | 317 |
| chr28 | 43720658      | 43720974  | 317 |
| chr25 | 3274914       | 3275230   | 317 |
| chr25 | 1900430       | 1900746   | 317 |
| chr22 | 56663655      | 56663971  | 317 |
| chr20 | 5271092       | 5271408   | 317 |
| chr2  | 134681432     | 134681748 | 317 |
| chr19 | 22331753      | 22332069  | 317 |
| chr19 | 13980808      | 13981124  | 317 |
| chr17 | 72784962      | 72785278  | 317 |
| chr17 | 14832195      | 14832511  | 317 |
| chr16 | 44381289      | 44381605  | 317 |
| chr15 | 64264181      | 64264497  | 317 |
| chr12 | 84419966      | 84420282  | 317 |
| chr10 | 36323198      | 36323514  | 317 |
| chr1  | 123079299     | 123079615 | 317 |
| chr9  | 105996558     | 105996873 | 316 |
| chr9  | 90825051      | 90825366  | 316 |
| chr9  | 75447082      | 75447397  | 316 |
| chr6  | 119064984     | 119065299 | 316 |
| chr4  | 67876205      | 67876520  | 316 |
| chr4  | 12885724      | 12886039  | 316 |
| chr3  | 83728283      | 83728598  | 316 |
| chr3  | 22518041      | 22518356  | 316 |
| chr27 | 761666 761981 | 316       |     |
| chr26 | 47955801      | 47956116  | 316 |
| chr26 | 22032367      | 22032682  | 316 |
| chr25 | 40417140      | 40417455  | 316 |

|       |               |           |     |
|-------|---------------|-----------|-----|
| chr25 | 35391911      | 35392226  | 316 |
| chr24 | 48969718      | 48970033  | 316 |
| chr24 | 1236932       | 1237247   | 316 |
| chr20 | 594170 594485 | 316       |     |
| chr2  | 138875004     | 138875319 | 316 |
| chr2  | 134920985     | 134921300 | 316 |
| chr2  | 124982859     | 124983174 | 316 |
| chr19 | 47274579      | 47274894  | 316 |
| chr19 | 47235987      | 47236302  | 316 |
| chr18 | 45650385      | 45650700  | 316 |
| chr18 | 38537477      | 38537792  | 316 |
| chr18 | 12011899      | 12012214  | 316 |
| chr15 | 25332805      | 25333120  | 316 |
| chr14 | 22787940      | 22788255  | 316 |
| chr14 | 1933096       | 1933411   | 316 |
| chr13 | 42425591      | 42425906  | 316 |
| chr12 | 80603413      | 80603728  | 316 |
| chr12 | 54257170      | 54257485  | 316 |
| chr11 | 48810868      | 48811183  | 316 |
| chr1  | 137998574     | 137998889 | 316 |
| chr5  | 113502847     | 113503161 | 315 |
| chr5  | 10207848      | 10208162  | 315 |
| chr3  | 106518964     | 106519278 | 315 |
| chr3  | 33134770      | 33135084  | 315 |
| chr29 | 43170719      | 43171033  | 315 |
| chr22 | 45071993      | 45072307  | 315 |
| chr21 | 55732179      | 55732493  | 315 |
| chr21 | 31159790      | 31160104  | 315 |
| chr2  | 133665707     | 133666021 | 315 |
| chr19 | 56102978      | 56103292  | 315 |
| chr18 | 12348352      | 12348666  | 315 |
| chr17 | 75928254      | 75928568  | 315 |
| chr16 | 52663803      | 52664117  | 315 |
| chr16 | 47436301      | 47436615  | 315 |
| chr13 | 31475460      | 31475774  | 315 |
| chr12 | 74470468      | 74470782  | 315 |
| chr11 | 75710160      | 75710474  | 315 |
| chr10 | 81709417      | 81709731  | 315 |
| chr1  | 123092689     | 123093003 | 315 |
| chrX  | 75941515      | 75941828  | 314 |
| chr8  | 63802299      | 63802612  | 314 |
| chr3  | 30179614      | 30179927  | 314 |
| chr29 | 50484981      | 50485294  | 314 |
| chr29 | 47905685      | 47905998  | 314 |
| chr29 | 41707858      | 41708171  | 314 |
| chr29 | 33571038      | 33571351  | 314 |
| chr23 | 10747856      | 10748169  | 314 |
| chr23 | 8322809       | 8323122   | 314 |
| chr21 | 18971753      | 18972066  | 314 |
| chr21 | 15562980      | 15563293  | 314 |

|       |           |           |     |
|-------|-----------|-----------|-----|
| chr2  | 26556136  | 26556449  | 314 |
| chr19 | 14062301  | 14062614  | 314 |
| chr17 | 68790862  | 68791175  | 314 |
| chr17 | 66178159  | 66178472  | 314 |
| chr13 | 61874594  | 61874907  | 314 |
| chr13 | 61219932  | 61220245  | 314 |
| chr13 | 41133709  | 41134022  | 314 |
| chr1  | 82256251  | 82256564  | 314 |
| chr9  | 106323086 | 106323398 | 313 |
| chr8  | 116365269 | 116365581 | 313 |
| chr8  | 86712826  | 86713138  | 313 |
| chr7  | 2274900   | 2275212   | 313 |
| chr6  | 14469038  | 14469350  | 313 |
| chr5  | 111291010 | 111291322 | 313 |
| chr5  | 32908278  | 32908590  | 313 |
| chr4  | 122352286 | 122352598 | 313 |
| chr3  | 119677200 | 119677512 | 313 |
| chr28 | 33868580  | 33868892  | 313 |
| chr26 | 20864835  | 20865147  | 313 |
| chr24 | 61122782  | 61123094  | 313 |
| chr23 | 30290466  | 30290778  | 313 |
| chr22 | 60363233  | 60363545  | 313 |
| chr21 | 26140235  | 26140547  | 313 |
| chr2  | 92353846  | 92354158  | 313 |
| chr19 | 47361274  | 47361586  | 313 |
| chr19 | 18380739  | 18381051  | 313 |
| chr10 | 36325578  | 36325890  | 313 |
| chr1  | 68363171  | 68363483  | 313 |
| chr9  | 105482060 | 105482371 | 312 |
| chr7  | 17123474  | 17123785  | 312 |
| chr7  | 16510861  | 16511172  | 312 |
| chr29 | 44499263  | 44499574  | 312 |
| chr29 | 34380528  | 34380839  | 312 |
| chr28 | 26985198  | 26985509  | 312 |
| chr26 | 48338745  | 48339056  | 312 |
| chr24 | 35371638  | 35371949  | 312 |
| chr22 | 51502152  | 51502463  | 312 |
| chr2  | 21065363  | 21065674  | 312 |
| chr19 | 60415359  | 60415670  | 312 |
| chr19 | 59088981  | 59089292  | 312 |
| chr19 | 54365838  | 54366149  | 312 |
| chr19 | 10910423  | 10910734  | 312 |
| chr18 | 1578022   | 1578333   | 312 |
| chr17 | 63412976  | 63413287  | 312 |
| chr16 | 72289764  | 72290075  | 312 |
| chr16 | 39501935  | 39502246  | 312 |
| chr15 | 45818845  | 45819156  | 312 |
| chr15 | 39560866  | 39561177  | 312 |
| chr15 | 28634973  | 28635284  | 312 |
| chr14 | 79857774  | 79858085  | 312 |

|       |           |           |     |
|-------|-----------|-----------|-----|
| chr14 | 2978838   | 2979149   | 312 |
| chr12 | 82764694  | 82765005  | 312 |
| chr7  | 19218483  | 19218793  | 311 |
| chr6  | 108558363 | 108558673 | 311 |
| chr5  | 123151589 | 123151899 | 311 |
| chr5  | 115216714 | 115217024 | 311 |
| chr5  | 28533194  | 28533504  | 311 |
| chr4  | 124000941 | 124001251 | 311 |
| chr4  | 108704290 | 108704600 | 311 |
| chr3  | 124134098 | 124134408 | 311 |
| chr3  | 115805315 | 115805625 | 311 |
| chr3  | 9272297   | 9272607   | 311 |
| chr29 | 36358147  | 36358457  | 311 |
| chr29 | 17867318  | 17867628  | 311 |
| chr28 | 26922080  | 26922390  | 311 |
| chr25 | 10521365  | 10521675  | 311 |
| chr21 | 59888571  | 59888881  | 311 |
| chr21 | 29881429  | 29881739  | 311 |
| chr2  | 130987414 | 130987724 | 311 |
| chr2  | 114158327 | 114158637 | 311 |
| chr2  | 26495226  | 26495536  | 311 |
| chr17 | 15145683  | 15145993  | 311 |
| chr13 | 59651415  | 59651725  | 311 |
| chr13 | 10966483  | 10966793  | 311 |
| chr11 | 70709426  | 70709736  | 311 |
| chr9  | 105836624 | 105836933 | 310 |
| chr9  | 100338422 | 100338731 | 310 |
| chr8  | 65074649  | 65074958  | 310 |
| chr5  | 124780618 | 124780927 | 310 |
| chr5  | 112289421 | 112289730 | 310 |
| chr4  | 44849001  | 44849310  | 310 |
| chr3  | 122351476 | 122351785 | 310 |
| chr3  | 114203700 | 114204009 | 310 |
| chr29 | 34915497  | 34915806  | 310 |
| chr25 | 40885885  | 40886194  | 310 |
| chr24 | 46372958  | 46373267  | 310 |
| chr23 | 46139829  | 46140138  | 310 |
| chr23 | 27068988  | 27069297  | 310 |
| chr22 | 59691886  | 59692195  | 310 |
| chr18 | 33004548  | 33004857  | 310 |
| chr18 | 20254466  | 20254775  | 310 |
| chr17 | 65987607  | 65987916  | 310 |
| chr16 | 61011315  | 61011624  | 310 |
| chr16 | 46850819  | 46851128  | 310 |
| chr13 | 58359646  | 58359955  | 310 |
| chr12 | 31058238  | 31058547  | 310 |
| chr11 | 104378030 | 104378339 | 310 |
| chr11 | 4807181   | 4807490   | 310 |
| chr10 | 103008089 | 103008398 | 310 |
| chr1  | 123077310 | 123077619 | 310 |

|       |           |           |     |
|-------|-----------|-----------|-----|
| chr8  | 80087036  | 80087344  | 309 |
| chr7  | 48298583  | 48298891  | 309 |
| chr5  | 30663212  | 30663520  | 309 |
| chr4  | 107100097 | 107100405 | 309 |
| chr24 | 43691754  | 43692062  | 309 |
| chr24 | 1953755   | 1954063   | 309 |
| chr22 | 13578040  | 13578348  | 309 |
| chr21 | 20602245  | 20602553  | 309 |
| chr21 | 13645162  | 13645470  | 309 |
| chr20 | 74975397  | 74975705  | 309 |
| chr20 | 62158111  | 62158419  | 309 |
| chr2  | 122826947 | 122827255 | 309 |
| chr19 | 55803486  | 55803794  | 309 |
| chr19 | 46326056  | 46326364  | 309 |
| chr18 | 53085833  | 53086141  | 309 |
| chr17 | 68053207  | 68053515  | 309 |
| chr16 | 44765740  | 44766048  | 309 |
| chr16 | 26447620  | 26447928  | 309 |
| chr14 | 7847585   | 7847893   | 309 |
| chr13 | 65349920  | 65350228  | 309 |
| chr12 | 83401626  | 83401934  | 309 |
| chr11 | 74838794  | 74839102  | 309 |
| chr11 | 11746414  | 11746722  | 309 |
| chr11 | 1975984   | 1976292   | 309 |
| chr10 | 29857616  | 29857924  | 309 |
| chr1  | 82875124  | 82875432  | 309 |
| chrX  | 31431269  | 31431576  | 308 |
| chrX  | 13223299  | 13223606  | 308 |
| chr7  | 38175608  | 38175915  | 308 |
| chr5  | 113557653 | 113557960 | 308 |
| chr5  | 111839730 | 111840037 | 308 |
| chr3  | 121169551 | 121169858 | 308 |
| chr3  | 114852629 | 114852936 | 308 |
| chr29 | 29703302  | 29703609  | 308 |
| chr26 | 45309006  | 45309313  | 308 |
| chr23 | 25160622  | 25160929  | 308 |
| chr23 | 7393921   | 7394228   | 308 |
| chr22 | 55946373  | 55946680  | 308 |
| chr22 | 48641464  | 48641771  | 308 |
| chr22 | 16130267  | 16130574  | 308 |
| chr21 | 57598369  | 57598676  | 308 |
| chr2  | 75701309  | 75701616  | 308 |
| chr2  | 23111228  | 23111535  | 308 |
| chr19 | 63951355  | 63951662  | 308 |
| chr19 | 59357526  | 59357833  | 308 |
| chr18 | 52789642  | 52789949  | 308 |
| chr18 | 11334932  | 11335239  | 308 |
| chr17 | 68152712  | 68153019  | 308 |
| chr17 | 67075505  | 67075812  | 308 |
| chr16 | 50271024  | 50271331  | 308 |



|       |               |           |     |
|-------|---------------|-----------|-----|
| chr14 | 61790664      | 61790971  | 308 |
| chr13 | 75700096      | 75700403  | 308 |
| chr12 | 82745839      | 82746146  | 308 |
| chr12 | 34264434      | 34264741  | 308 |
| chr11 | 105969817     | 105970124 | 308 |
| chr10 | 17247782      | 17248089  | 308 |
| chr9  | 107096042     | 107096348 | 307 |
| chr9  | 12618098      | 12618404  | 307 |
| chr9  | 9362756       | 9363062   | 307 |
| chr7  | 97352002      | 97352308  | 307 |
| chr7  | 61260082      | 61260388  | 307 |
| chr5  | 100124107     | 100124413 | 307 |
| chr5  | 29128194      | 29128500  | 307 |
| chr4  | 117122631     | 117122937 | 307 |
| chr3  | 115483822     | 115484128 | 307 |
| chr29 | 896255 896561 | 307       |     |
| chr26 | 47863280      | 47863586  | 307 |
| chr26 | 21970728      | 21971034  | 307 |
| chr25 | 28489073      | 28489379  | 307 |
| chr25 | 1326903       | 1327209   | 307 |
| chr22 | 61440657      | 61440963  | 307 |
| chr21 | 34498335      | 34498641  | 307 |
| chr2  | 108749104     | 108749410 | 307 |
| chr19 | 24675918      | 24676224  | 307 |
| chr18 | 51168630      | 51168936  | 307 |
| chr18 | 33655483      | 33655789  | 307 |
| chr18 | 22334596      | 22334902  | 307 |
| chr18 | 17694106      | 17694412  | 307 |
| chr17 | 64063634      | 64063940  | 307 |
| chr15 | 29036521      | 29036827  | 307 |
| chr14 | 59644811      | 59645117  | 307 |
| chr14 | 52617544      | 52617850  | 307 |
| chr13 | 70983374      | 70983680  | 307 |
| chr13 | 29295212      | 29295518  | 307 |
| chr1  | 84782173      | 84782479  | 307 |
| chr5  | 124754755     | 124755060 | 306 |
| chr5  | 52619122      | 52619427  | 306 |
| chr4  | 121504965     | 121505270 | 306 |
| chr4  | 106690995     | 106691300 | 306 |
| chr3  | 123815642     | 123815947 | 306 |
| chr3  | 111183863     | 111184168 | 306 |
| chr29 | 46340948      | 46341253  | 306 |
| chr27 | 35374828      | 35375133  | 306 |
| chr26 | 46102844      | 46103149  | 306 |
| chr26 | 42778324      | 42778629  | 306 |
| chr25 | 43526858      | 43527163  | 306 |
| chr24 | 33982794      | 33983099  | 306 |
| chr24 | 1198236       | 1198541   | 306 |
| chr22 | 50839998      | 50840303  | 306 |
| chr2  | 110130239     | 110130544 | 306 |

|       |           |           |     |
|-------|-----------|-----------|-----|
| chr19 | 41929045  | 41929350  | 306 |
| chr18 | 12438193  | 12438498  | 306 |
| chr16 | 58165098  | 58165403  | 306 |
| chr16 | 44144439  | 44144744  | 306 |
| chr15 | 77954325  | 77954630  | 306 |
| chr13 | 80705465  | 80705770  | 306 |
| chr13 | 79904045  | 79904350  | 306 |
| chr13 | 76016468  | 76016773  | 306 |
| chr13 | 40905415  | 40905720  | 306 |
| chr12 | 75305707  | 75306012  | 306 |
| chr12 | 33363213  | 33363518  | 306 |
| chr11 | 104695463 | 104695768 | 306 |
| chr11 | 104479350 | 104479655 | 306 |
| chr11 | 4617003   | 4617308   | 306 |
| chr1  | 134449835 | 134450140 | 306 |
| chr1  | 62293930  | 62294235  | 306 |
| chr9  | 89392119  | 89392423  | 305 |
| chr8  | 62581749  | 62582053  | 305 |
| chr6  | 94869333  | 94869637  | 305 |
| chr6  | 74018981  | 74019285  | 305 |
| chr6  | 32568054  | 32568358  | 305 |
| chr5  | 84625481  | 84625785  | 305 |
| chr5  | 60899877  | 60900181  | 305 |
| chr5  | 10392761  | 10393065  | 305 |
| chr27 | 35364247  | 35364551  | 305 |
| chr25 | 8764758   | 8765062   | 305 |
| chr23 | 8278905   | 8279209   | 305 |
| chr22 | 54060732  | 54061036  | 305 |
| chr22 | 7264542   | 7264846   | 305 |
| chr21 | 65813749  | 65814053  | 305 |
| chr21 | 63931561  | 63931865  | 305 |
| chr2  | 139013328 | 139013632 | 305 |
| chr2  | 135022738 | 135023042 | 305 |
| chr19 | 60748081  | 60748385  | 305 |
| chr19 | 54331477  | 54331781  | 305 |
| chr19 | 30398721  | 30399025  | 305 |
| chr17 | 73454546  | 73454850  | 305 |
| chr16 | 46999701  | 47000005  | 305 |
| chr16 | 3314966   | 3315270   | 305 |
| chr14 | 36744302  | 36744606  | 305 |
| chr13 | 75531488  | 75531792  | 305 |
| chr13 | 73917971  | 73918275  | 305 |
| chr13 | 45502535  | 45502839  | 305 |
| chr10 | 50626592  | 50626896  | 305 |
| chr10 | 14953311  | 14953615  | 305 |
| chr9  | 63889352  | 63889655  | 304 |
| chr6  | 120590002 | 120590305 | 304 |
| chr6  | 115603316 | 115603619 | 304 |
| chr5  | 62116308  | 62116611  | 304 |
| chr5  | 29143569  | 29143872  | 304 |

|       |               |           |     |
|-------|---------------|-----------|-----|
| chr4  | 118174120     | 118174423 | 304 |
| chr4  | 72725712      | 72726015  | 304 |
| chr3  | 121392400     | 121392703 | 304 |
| chr3  | 87838560      | 87838863  | 304 |
| chr26 | 44763666      | 44763969  | 304 |
| chr23 | 7694116       | 7694419   | 304 |
| chr2  | 99390400      | 99390703  | 304 |
| chr19 | 56094888      | 56095191  | 304 |
| chr19 | 33109036      | 33109339  | 304 |
| chr19 | 16191918      | 16192221  | 304 |
| chr18 | 65585168      | 65585471  | 304 |
| chr17 | 54362780      | 54363083  | 304 |
| chr15 | 75574496      | 75574799  | 304 |
| chr13 | 54372289      | 54372592  | 304 |
| chr13 | 43421668      | 43421971  | 304 |
| chr13 | 40972889      | 40973192  | 304 |
| chr13 | 14956542      | 14956845  | 304 |
| chr13 | 11064176      | 11064479  | 304 |
| chr11 | 108006619     | 108006922 | 304 |
| chr11 | 84626342      | 84626645  | 304 |
| chr11 | 72753493      | 72753796  | 304 |
| chrX  | 87042227      | 87042529  | 303 |
| chrX  | 23348585      | 23348887  | 303 |
| chr7  | 15697555      | 15697857  | 303 |
| chr5  | 79200277      | 79200579  | 303 |
| chr3  | 125573798     | 125574100 | 303 |
| chr3  | 15654841      | 15655143  | 303 |
| chr3  | 13656259      | 13656561  | 303 |
| chr27 | 15160853      | 15161155  | 303 |
| chr27 | 652963 653265 | 303       | 303 |
| chr22 | 17910543      | 17910845  | 303 |
| chr2  | 75692057      | 75692359  | 303 |
| chr18 | 63008143      | 63008445  | 303 |
| chr18 | 24344499      | 24344801  | 303 |
| chr17 | 69504594      | 69504896  | 303 |
| chr17 | 37617885      | 37618187  | 303 |
| chr15 | 75917200      | 75917502  | 303 |
| chr13 | 66047527      | 66047829  | 303 |
| chr13 | 39954566      | 39954868  | 303 |
| chr12 | 73390945      | 73391247  | 303 |
| chr1  | 147306466     | 147306768 | 303 |
| chr9  | 107037672     | 107037973 | 302 |
| chr9  | 100068014     | 100068315 | 302 |
| chr6  | 67998416      | 67998717  | 302 |
| chr5  | 111340934     | 111341235 | 302 |
| chr4  | 64222730      | 64223031  | 302 |
| chr3  | 117325878     | 117326179 | 302 |
| chr3  | 116119392     | 116119693 | 302 |
| chr28 | 11380949      | 11381250  | 302 |
| chr25 | 40047690      | 40047991  | 302 |

|       |               |           |     |
|-------|---------------|-----------|-----|
| chr25 | 1054644       | 1054945   | 302 |
| chr23 | 48786076      | 48786377  | 302 |
| chr23 | 23880267      | 23880568  | 302 |
| chr23 | 10529900      | 10530201  | 302 |
| chr22 | 53958289      | 53958590  | 302 |
| chr22 | 13934063      | 13934364  | 302 |
| chr21 | 58663619      | 58663920  | 302 |
| chr2  | 126174190     | 126174491 | 302 |
| chr2  | 40472225      | 40472526  | 302 |
| chr19 | 41936601      | 41936902  | 302 |
| chr18 | 63768187      | 63768488  | 302 |
| chr18 | 11229152      | 11229453  | 302 |
| chr18 | 6320286       | 6320587   | 302 |
| chr17 | 74357229      | 74357530  | 302 |
| chr17 | 70061416      | 70061717  | 302 |
| chr17 | 66536705      | 66537006  | 302 |
| chr16 | 46792426      | 46792727  | 302 |
| chr15 | 22805908      | 22806209  | 302 |
| chr14 | 22096545      | 22096846  | 302 |
| chr12 | 83602534      | 83602835  | 302 |
| chr11 | 99046127      | 99046428  | 302 |
| chr11 | 90407484      | 90407785  | 302 |
| chr11 | 83252571      | 83252872  | 302 |
| chr11 | 72831579      | 72831880  | 302 |
| chr11 | 27226568      | 27226869  | 302 |
| chr10 | 28840628      | 28840929  | 302 |
| chr10 | 25898014      | 25898315  | 302 |
| chr1  | 376157 376458 |           | 302 |
| chr5  | 119908735     | 119909035 | 301 |
| chr5  | 28901147      | 28901447  | 301 |
| chr5  | 28536255      | 28536555  | 301 |
| chr3  | 125634620     | 125634920 | 301 |
| chr3  | 113365712     | 113366012 | 301 |
| chr3  | 26135101      | 26135401  | 301 |
| chr29 | 48145572      | 48145872  | 301 |
| chr27 | 38976937      | 38977237  | 301 |
| chr26 | 38187651      | 38187951  | 301 |
| chr25 | 18707050      | 18707350  | 301 |
| chr23 | 7789185       | 7789485   | 301 |
| chr2  | 99035279      | 99035579  | 301 |
| chr19 | 63415495      | 63415795  | 301 |
| chr19 | 55815737      | 55816037  | 301 |
| chr19 | 6577178       | 6577478   | 301 |
| chr18 | 43599557      | 43599857  | 301 |
| chr18 | 40277425      | 40277725  | 301 |
| chr18 | 18423948      | 18424248  | 301 |
| chr18 | 11424656      | 11424956  | 301 |
| chr16 | 44136041      | 44136341  | 301 |
| chr16 | 38932187      | 38932487  | 301 |
| chr13 | 80185694      | 80185994  | 301 |

|       |           |           |     |
|-------|-----------|-----------|-----|
| chr11 | 108215228 | 108215528 | 301 |
| chr10 | 13614113  | 13614413  | 301 |
| chr1  | 57314213  | 57314513  | 301 |
| chrX  | 12533233  | 12533532  | 300 |
| chr6  | 22907686  | 22907985  | 300 |
| chr4  | 121713922 | 121714221 | 300 |
| chr4  | 110060955 | 110061254 | 300 |
| chr3  | 55245947  | 55246246  | 300 |
| chr29 | 45734449  | 45734748  | 300 |
| chr29 | 41694848  | 41695147  | 300 |
| chr29 | 17827108  | 17827407  | 300 |
| chr28 | 26723185  | 26723484  | 300 |
| chr27 | 47162843  | 47163142  | 300 |
| chr27 | 26871155  | 26871454  | 300 |
| chr26 | 34266928  | 34267227  | 300 |
| chr25 | 29152486  | 29152785  | 300 |
| chr23 | 31205825  | 31206124  | 300 |
| chr23 | 27958115  | 27958414  | 300 |
| chr21 | 31484408  | 31484707  | 300 |
| chr21 | 11670329  | 11670628  | 300 |
| chr21 | 6498795   | 6499094   | 300 |
| chr2  | 111412171 | 111412470 | 300 |
| chr19 | 25553694  | 25553993  | 300 |
| chr18 | 54770393  | 54770692  | 300 |
| chr13 | 70099061  | 70099360  | 300 |
| chr13 | 58985191  | 58985490  | 300 |
| chr13 | 54468683  | 54468982  | 300 |
| chr13 | 46217748  | 46218047  | 300 |
| chr12 | 74546541  | 74546840  | 300 |
| chr11 | 103743907 | 103744206 | 300 |
| chr11 | 11161396  | 11161695  | 300 |
| chr10 | 90603090  | 90603389  | 300 |
| chr10 | 89185446  | 89185745  | 300 |
| chr10 | 20138191  | 20138490  | 300 |
| chr10 | 16970122  | 16970421  | 300 |
| chr9  | 59372094  | 59372392  | 299 |
| chr7  | 43515014  | 43515312  | 299 |
| chr7  | 1635007   | 1635305   | 299 |
| chr6  | 108750113 | 108750411 | 299 |
| chr5  | 122673604 | 122673902 | 299 |
| chr5  | 10656272  | 10656570  | 299 |
| chr5  | 2021092   | 2021390   | 299 |
| chr4  | 95787001  | 95787299  | 299 |
| chr3  | 112288158 | 112288456 | 299 |
| chr27 | 40788065  | 40788363  | 299 |
| chr25 | 37851154  | 37851452  | 299 |
| chr25 | 1055911   | 1056209   | 299 |
| chr22 | 58028342  | 58028640  | 299 |
| chr22 | 17798244  | 17798542  | 299 |
| chr19 | 60422768  | 60423066  | 299 |

|       |           |           |     |
|-------|-----------|-----------|-----|
| chr19 | 23413110  | 23413408  | 299 |
| chr16 | 71918474  | 71918772  | 299 |
| chr13 | 68505419  | 68505717  | 299 |
| chr13 | 23671950  | 23672248  | 299 |
| chr10 | 88193142  | 88193440  | 299 |
| chr5  | 116337045 | 116337342 | 298 |
| chr5  | 112097618 | 112097915 | 298 |
| chr29 | 1590911   | 1591208   | 298 |
| chr26 | 51462397  | 51462694  | 298 |
| chr25 | 41273593  | 41273890  | 298 |
| chr25 | 34089598  | 34089895  | 298 |
| chr25 | 16964129  | 16964426  | 298 |
| chr23 | 27892745  | 27893042  | 298 |
| chr2  | 124813197 | 124813494 | 298 |
| chr2  | 119912652 | 119912949 | 298 |
| chr19 | 63756725  | 63757022  | 298 |
| chr13 | 66940186  | 66940483  | 298 |
| chr13 | 41192452  | 41192749  | 298 |
| chr12 | 83851002  | 83851299  | 298 |
| chr10 | 88202835  | 88203132  | 298 |
| chr10 | 29539173  | 29539470  | 298 |
| chr9  | 66077002  | 66077298  | 297 |
| chr3  | 73929326  | 73929622  | 297 |
| chr28 | 42173973  | 42174269  | 297 |
| chr28 | 30527738  | 30528034  | 297 |
| chr28 | 16212817  | 16213113  | 297 |
| chr22 | 60517217  | 60517513  | 297 |
| chr21 | 58016352  | 58016648  | 297 |
| chr21 | 20608201  | 20608497  | 297 |
| chr2  | 127296989 | 127297285 | 297 |
| chr19 | 45058890  | 45059186  | 297 |
| chr18 | 39489735  | 39490031  | 297 |
| chr18 | 18503945  | 18504241  | 297 |
| chr17 | 58769760  | 58770056  | 297 |
| chr15 | 31889859  | 31890155  | 297 |
| chr15 | 25651771  | 25652067  | 297 |
| chr14 | 26645062  | 26645358  | 297 |
| chr13 | 61719799  | 61720095  | 297 |
| chr11 | 87910433  | 87910729  | 297 |
| chr11 | 77207881  | 77208177  | 297 |
| chr10 | 90178130  | 90178426  | 297 |
| chr10 | 35957592  | 35957888  | 297 |
| chr1  | 157329487 | 157329783 | 297 |
| chr1  | 82486029  | 82486325  | 297 |
| chr7  | 19381806  | 19382101  | 296 |
| chr7  | 14663869  | 14664164  | 296 |
| chr7  | 4357571   | 4357866   | 296 |
| chr6  | 118162295 | 118162590 | 296 |
| chr3  | 127772582 | 127772877 | 296 |
| chr3  | 56588791  | 56589086  | 296 |

|       |               |           |     |
|-------|---------------|-----------|-----|
| chr3  | 34564507      | 34564802  | 296 |
| chr3  | 22469216      | 22469511  | 296 |
| chr25 | 39391672      | 39391967  | 296 |
| chr23 | 16495322      | 16495617  | 296 |
| chr21 | 56508667      | 56508962  | 296 |
| chr21 | 22586059      | 22586354  | 296 |
| chr20 | 828364 828659 | 296       |     |
| chr2  | 139198688     | 139198983 | 296 |
| chr17 | 70223416      | 70223711  | 296 |
| chr15 | 75377989      | 75378284  | 296 |
| chr15 | 45586296      | 45586591  | 296 |
| chr15 | 29131761      | 29132056  | 296 |
| chr12 | 84916520      | 84916815  | 296 |
| chr12 | 32519019      | 32519314  | 296 |
| chr12 | 30807618      | 30807913  | 296 |
| chr11 | 12862463      | 12862758  | 296 |
| chr11 | 2568944       | 2569239   | 296 |
| chr10 | 88074948      | 88075243  | 296 |
| chr1  | 68853073      | 68853368  | 296 |
| chr8  | 109808327     | 109808621 | 295 |
| chr8  | 24484334      | 24484628  | 295 |
| chr7  | 81430536      | 81430830  | 295 |
| chr7  | 4513249       | 4513543   | 295 |
| chr5  | 81507625      | 81507919  | 295 |
| chr5  | 35293495      | 35293789  | 295 |
| chr5  | 30434806      | 30435100  | 295 |
| chr4  | 117122238     | 117122532 | 295 |
| chr3  | 105590957     | 105591251 | 295 |
| chr3  | 105156877     | 105157171 | 295 |
| chr29 | 29654726      | 29655020  | 295 |
| chr26 | 51489566      | 51489860  | 295 |
| chr26 | 40693506      | 40693800  | 295 |
| chr26 | 20951005      | 20951299  | 295 |
| chr25 | 33364571      | 33364865  | 295 |
| chr24 | 35502507      | 35502801  | 295 |
| chr23 | 51572757      | 51573051  | 295 |
| chr23 | 44374133      | 44374427  | 295 |
| chr22 | 59396807      | 59397101  | 295 |
| chr19 | 52918013      | 52918307  | 295 |
| chr19 | 29909980      | 29910274  | 295 |
| chr19 | 18361990      | 18362284  | 295 |
| chr19 | 12378949      | 12379243  | 295 |
| chr18 | 55203255      | 55203549  | 295 |
| chr18 | 39581138      | 39581432  | 295 |
| chr18 | 11765190      | 11765484  | 295 |
| chr17 | 59250238      | 59250532  | 295 |
| chr16 | 47113992      | 47114286  | 295 |
| chr15 | 65743354      | 65743648  | 295 |
| chr15 | 52271052      | 52271346  | 295 |
| chr15 | 34587896      | 34588190  | 295 |

|       |               |           |     |
|-------|---------------|-----------|-----|
| chr15 | 27921893      | 27922187  | 295 |
| chr14 | 20739022      | 20739316  | 295 |
| chr13 | 77233818      | 77234112  | 295 |
| chr13 | 60457942      | 60458236  | 295 |
| chr13 | 57402182      | 57402476  | 295 |
| chr11 | 109673172     | 109673466 | 295 |
| chr7  | 71157350      | 71157643  | 294 |
| chr7  | 46466209      | 46466502  | 294 |
| chr7  | 14383587      | 14383880  | 294 |
| chr3  | 11538016      | 11538309  | 294 |
| chr3  | 10700055      | 10700348  | 294 |
| chr29 | 46398524      | 46398817  | 294 |
| chr29 | 17736969      | 17737262  | 294 |
| chr26 | 50649054      | 50649347  | 294 |
| chr25 | 42351592      | 42351885  | 294 |
| chr23 | 29028328      | 29028621  | 294 |
| chr22 | 48291423      | 48291716  | 294 |
| chr22 | 11561651      | 11561944  | 294 |
| chr20 | 929295 929588 | 294       |     |
| chr2  | 75567347      | 75567640  | 294 |
| chr19 | 46145145      | 46145438  | 294 |
| chr18 | 51222898      | 51223191  | 294 |
| chr18 | 35340519      | 35340812  | 294 |
| chr17 | 69324628      | 69324921  | 294 |
| chr14 | 20896747      | 20897040  | 294 |
| chr14 | 1863258       | 1863551   | 294 |
| chr13 | 60872265      | 60872558  | 294 |
| chr12 | 56039843      | 56040136  | 294 |
| chr11 | 91376884      | 91377177  | 294 |
| chr10 | 66939493      | 66939786  | 294 |
| chr1  | 136955527     | 136955820 | 294 |
| chr7  | 49154534      | 49154826  | 293 |
| chr3  | 106551515     | 106551807 | 293 |
| chr3  | 48210652      | 48210944  | 293 |
| chr3  | 8218710       | 8219002   | 293 |
| chr29 | 37316612      | 37316904  | 293 |
| chr29 | 33669111      | 33669403  | 293 |
| chr28 | 26188184      | 26188476  | 293 |
| chr27 | 38697062      | 38697354  | 293 |
| chr26 | 51185879      | 51186171  | 293 |
| chr26 | 42046549      | 42046841  | 293 |
| chr26 | 7007887       | 7008179   | 293 |
| chr24 | 58790769      | 58791061  | 293 |
| chr24 | 1359700       | 1359992   | 293 |
| chr22 | 48235399      | 48235691  | 293 |
| chr20 | 61815535      | 61815827  | 293 |
| chr19 | 59405625      | 59405917  | 293 |
| chr19 | 24661548      | 24661840  | 293 |
| chr16 | 46780676      | 46780968  | 293 |
| chr14 | 34088807      | 34089099  | 293 |



|       |           |           |     |
|-------|-----------|-----------|-----|
| chr14 | 31017994  | 31018286  | 293 |
| chr13 | 73065490  | 73065782  | 293 |
| chr12 | 84211838  | 84212130  | 293 |
| chr11 | 6456005   | 6456297   | 293 |
| chr11 | 2550209   | 2550501   | 293 |
| chr10 | 84543484  | 84543776  | 293 |
| chrX  | 11002510  | 11002801  | 292 |
| chr7  | 42431684  | 42431975  | 292 |
| chr7  | 9680545   | 9680836   | 292 |
| chr7  | 5386612   | 5386903   | 292 |
| chr5  | 124948457 | 124948748 | 292 |
| chr5  | 118453862 | 118454153 | 292 |
| chr3  | 127180890 | 127181181 | 292 |
| chr3  | 115036112 | 115036403 | 292 |
| chr3  | 29450724  | 29451015  | 292 |
| chr29 | 49753572  | 49753863  | 292 |
| chr28 | 5654652   | 5654943   | 292 |
| chr27 | 8318190   | 8318481   | 292 |
| chr26 | 46075577  | 46075868  | 292 |
| chr25 | 30461841  | 30462132  | 292 |
| chr25 | 15352912  | 15353203  | 292 |
| chr24 | 59047903  | 59048194  | 292 |
| chr24 | 48073269  | 48073560  | 292 |
| chr24 | 43581546  | 43581837  | 292 |
| chr22 | 59521186  | 59521477  | 292 |
| chr21 | 62245172  | 62245463  | 292 |
| chr21 | 20692339  | 20692630  | 292 |
| chr21 | 15967131  | 15967422  | 292 |
| chr2  | 134461567 | 134461858 | 292 |
| chr19 | 59227735  | 59228026  | 292 |
| chr19 | 54525911  | 54526202  | 292 |
| chr19 | 26265451  | 26265742  | 292 |
| chr19 | 19813864  | 19814155  | 292 |
| chr18 | 63900244  | 63900535  | 292 |
| chr18 | 48795106  | 48795397  | 292 |
| chr18 | 9339838   | 9340129   | 292 |
| chr17 | 74604283  | 74604574  | 292 |
| chr16 | 56112285  | 56112576  | 292 |
| chr14 | 7811003   | 7811294   | 292 |
| chr13 | 77328058  | 77328349  | 292 |
| chr13 | 63429697  | 63429988  | 292 |
| chr1  | 144713728 | 144714019 | 292 |
| chr1  | 81430517  | 81430808  | 292 |
| chr5  | 125832218 | 125832508 | 291 |
| chr5  | 114337034 | 114337324 | 291 |
| chr4  | 73454516  | 73454806  | 291 |
| chr3  | 122068164 | 122068454 | 291 |
| chr3  | 99628591  | 99628881  | 291 |
| chr29 | 51862001  | 51862291  | 291 |
| chr29 | 49623165  | 49623455  | 291 |

|       |           |           |     |
|-------|-----------|-----------|-----|
| chr28 | 26438194  | 26438484  | 291 |
| chr26 | 43253262  | 43253552  | 291 |
| chr25 | 11114293  | 11114583  | 291 |
| chr22 | 59536521  | 59536811  | 291 |
| chr21 | 47632891  | 47633181  | 291 |
| chr21 | 11741067  | 11741357  | 291 |
| chr2  | 126812088 | 126812378 | 291 |
| chr18 | 5632696   | 5632986   | 291 |
| chr16 | 3302709   | 3302999   | 291 |
| chr13 | 17681388  | 17681678  | 291 |
| chr13 | 11377672  | 11377962  | 291 |
| chr12 | 9117915   | 9118205   | 291 |
| chr11 | 102193288 | 102193578 | 291 |
| chr10 | 15231837  | 15232127  | 291 |
| chr6  | 121733340 | 121733629 | 290 |
| chr6  | 121071637 | 121071926 | 290 |
| chr5  | 60988321  | 60988610  | 290 |
| chr4  | 99567225  | 99567514  | 290 |
| chr3  | 29182865  | 29183154  | 290 |
| chr29 | 46317045  | 46317334  | 290 |
| chr27 | 46948570  | 46948859  | 290 |
| chr25 | 36341788  | 36342077  | 290 |
| chr23 | 52726611  | 52726900  | 290 |
| chr23 | 49698411  | 49698700  | 290 |
| chr22 | 59904641  | 59904930  | 290 |
| chr22 | 36608336  | 36608625  | 290 |
| chr2  | 132366462 | 132366751 | 290 |
| chr2  | 130807017 | 130807306 | 290 |
| chr2  | 128493769 | 128494058 | 290 |
| chr2  | 21547903  | 21548192  | 290 |
| chr19 | 37942332  | 37942621  | 290 |
| chr19 | 29881512  | 29881801  | 290 |
| chr19 | 6508865   | 6509154   | 290 |
| chr18 | 51190120  | 51190409  | 290 |
| chr18 | 22016632  | 22016921  | 290 |
| chr18 | 20755259  | 20755548  | 290 |
| chr18 | 12433086  | 12433375  | 290 |
| chr18 | 11148681  | 11148970  | 290 |
| chr16 | 54620981  | 54621270  | 290 |
| chr16 | 40944934  | 40945223  | 290 |
| chr15 | 21184001  | 21184290  | 290 |
| chr15 | 20949729  | 20950018  | 290 |
| chr14 | 21168757  | 21169046  | 290 |
| chr14 | 7807204   | 7807493   | 290 |
| chr13 | 59630238  | 59630527  | 290 |
| chr13 | 35759683  | 35759972  | 290 |
| chr12 | 32263305  | 32263594  | 290 |
| chr11 | 108931249 | 108931538 | 290 |
| chr1  | 147073411 | 147073700 | 290 |
| chr9  | 104875304 | 104875592 | 289 |

|       |           |           |     |
|-------|-----------|-----------|-----|
| chr8  | 10823153  | 10823441  | 289 |
| chr7  | 15769165  | 15769453  | 289 |
| chr7  | 14367312  | 14367600  | 289 |
| chr7  | 7519645   | 7519933   | 289 |
| chr5  | 116950288 | 116950576 | 289 |
| chr5  | 83346545  | 83346833  | 289 |
| chr5  | 76598572  | 76598860  | 289 |
| chr4  | 104221116 | 104221404 | 289 |
| chr4  | 34302352  | 34302640  | 289 |
| chr3  | 121133577 | 121133865 | 289 |
| chr3  | 15415705  | 15415993  | 289 |
| chr29 | 46967781  | 46968069  | 289 |
| chr26 | 48336506  | 48336794  | 289 |
| chr26 | 37887387  | 37887675  | 289 |
| chr25 | 3012708   | 3012996   | 289 |
| chr22 | 7200567   | 7200855   | 289 |
| chr21 | 65825879  | 65826167  | 289 |
| chr21 | 64585730  | 64586018  | 289 |
| chr19 | 63980101  | 63980389  | 289 |
| chr18 | 51597859  | 51598147  | 289 |
| chr18 | 40327685  | 40327973  | 289 |
| chr16 | 51111258  | 51111546  | 289 |
| chr16 | 46922949  | 46923237  | 289 |
| chr16 | 44865213  | 44865501  | 289 |
| chr16 | 39473150  | 39473438  | 289 |
| chr15 | 54715201  | 54715489  | 289 |
| chr15 | 23134702  | 23134990  | 289 |
| chr15 | 13647651  | 13647939  | 289 |
| chr13 | 17791585  | 17791873  | 289 |
| chr13 | 12583239  | 12583527  | 289 |
| chr12 | 15435471  | 15435759  | 289 |
| chr11 | 105968881 | 105969169 | 289 |
| chr11 | 103577690 | 103577978 | 289 |
| chr11 | 99200888  | 99201176  | 289 |
| chr11 | 92362719  | 92363007  | 289 |
| chr10 | 17154933  | 17155221  | 289 |
| chr1  | 74228364  | 74228652  | 289 |
| chrX  | 84962772  | 84963059  | 288 |
| chr9  | 106413328 | 106413615 | 288 |
| chr9  | 106185027 | 106185314 | 288 |
| chr9  | 98071008  | 98071295  | 288 |
| chr8  | 23829845  | 23830132  | 288 |
| chr6  | 121800937 | 121801224 | 288 |
| chr6  | 120971367 | 120971654 | 288 |
| chr6  | 68559335  | 68559622  | 288 |
| chr5  | 29172611  | 29172898  | 288 |
| chr3  | 127790895 | 127791182 | 288 |
| chr3  | 116514798 | 116515085 | 288 |
| chr29 | 33800730  | 33801017  | 288 |
| chr27 | 35229012  | 35229299  | 288 |

|       |           |           |     |
|-------|-----------|-----------|-----|
| chr23 | 14832306  | 14832593  | 288 |
| chr21 | 57089172  | 57089459  | 288 |
| chr20 | 71569565  | 71569852  | 288 |
| chr19 | 45808269  | 45808556  | 288 |
| chr19 | 38557320  | 38557607  | 288 |
| chr18 | 51706511  | 51706798  | 288 |
| chr16 | 47470641  | 47470928  | 288 |
| chr16 | 3709512   | 3709799   | 288 |
| chr15 | 62457562  | 62457849  | 288 |
| chr15 | 38522028  | 38522315  | 288 |
| chr13 | 77596966  | 77597253  | 288 |
| chr12 | 48061935  | 48062222  | 288 |
| chr11 | 96394206  | 96394493  | 288 |
| chr1  | 74965239  | 74965526  | 288 |
| chr1  | 74109827  | 74110114  | 288 |
| chr9  | 106486463 | 106486749 | 287 |
| chr7  | 111045891 | 111046177 | 287 |
| chr5  | 88759265  | 88759551  | 287 |
| chr5  | 30230171  | 30230457  | 287 |
| chr4  | 79654137  | 79654423  | 287 |
| chr3  | 35809627  | 35809913  | 287 |
| chr3  | 18091412  | 18091698  | 287 |
| chr29 | 44626485  | 44626771  | 287 |
| chr29 | 34910684  | 34910970  | 287 |
| chr29 | 17422972  | 17423258  | 287 |
| chr27 | 34729937  | 34730223  | 287 |
| chr23 | 49538747  | 49539033  | 287 |
| chr23 | 46613822  | 46614108  | 287 |
| chr22 | 16103461  | 16103747  | 287 |
| chr21 | 60108559  | 60108845  | 287 |
| chr20 | 3175303   | 3175589   | 287 |
| chr2  | 135155952 | 135156238 | 287 |
| chr19 | 39125027  | 39125313  | 287 |
| chr19 | 33295952  | 33296238  | 287 |
| chr18 | 11237644  | 11237930  | 287 |
| chr16 | 1871184   | 1871470   | 287 |
| chr13 | 42660406  | 42660692  | 287 |
| chr13 | 38761847  | 38762133  | 287 |
| chr12 | 34248193  | 34248479  | 287 |
| chr11 | 98324836  | 98325122  | 287 |
| chr11 | 13251373  | 13251659  | 287 |
| chr9  | 105060801 | 105061086 | 286 |
| chr8  | 108656103 | 108656388 | 286 |
| chr7  | 50658391  | 50658676  | 286 |
| chr7  | 18179727  | 18180012  | 286 |
| chr5  | 114285898 | 114286183 | 286 |
| chr5  | 31083838  | 31084123  | 286 |
| chr4  | 117833927 | 117834212 | 286 |
| chr3  | 116342847 | 116343132 | 286 |
| chr3  | 55846303  | 55846588  | 286 |

|       |           |           |     |
|-------|-----------|-----------|-----|
| chr3  | 35897095  | 35897380  | 286 |
| chr26 | 21789733  | 21790018  | 286 |
| chr23 | 15933864  | 15934149  | 286 |
| chr22 | 55852279  | 55852564  | 286 |
| chr21 | 24407361  | 24407646  | 286 |
| chr20 | 73871277  | 73871562  | 286 |
| chr19 | 24689174  | 24689459  | 286 |
| chr18 | 49498187  | 49498472  | 286 |
| chr18 | 10433280  | 10433565  | 286 |
| chr17 | 70124021  | 70124306  | 286 |
| chr15 | 64479978  | 64480263  | 286 |
| chr15 | 32702723  | 32703008  | 286 |
| chr13 | 59905817  | 59906102  | 286 |
| chr13 | 11409935  | 11410220  | 286 |
| chr12 | 32098013  | 32098298  | 286 |
| chr11 | 110098266 | 110098551 | 286 |
| chr10 | 58775679  | 58775964  | 286 |
| chr8  | 77723312  | 77723596  | 285 |
| chr7  | 51694242  | 51694526  | 285 |
| chr7  | 4929171   | 4929455   | 285 |
| chr6  | 118786963 | 118787247 | 285 |
| chr6  | 108658783 | 108659067 | 285 |
| chr29 | 27294828  | 27295112  | 285 |
| chr27 | 37873992  | 37874276  | 285 |
| chr26 | 18768443  | 18768727  | 285 |
| chr24 | 44125225  | 44125509  | 285 |
| chr24 | 1141566   | 1141850   | 285 |
| chr23 | 10343540  | 10343824  | 285 |
| chr21 | 15227805  | 15228089  | 285 |
| chr19 | 28800953  | 28801237  | 285 |
| chr18 | 34823185  | 34823469  | 285 |
| chr17 | 75140121  | 75140405  | 285 |
| chr15 | 78144319  | 78144603  | 285 |
| chr15 | 28740019  | 28740303  | 285 |
| chr13 | 61296955  | 61297239  | 285 |
| chr12 | 68049407  | 68049691  | 285 |
| chr12 | 32124926  | 32125210  | 285 |
| chr11 | 93675667  | 93675951  | 285 |
| chr11 | 47415621  | 47415905  | 285 |
| chr1  | 41778412  | 41778696  | 285 |
| chrX  | 30643089  | 30643372  | 284 |
| chr4  | 71622787  | 71623070  | 284 |
| chr3  | 105439752 | 105440035 | 284 |
| chr3  | 22659379  | 22659662  | 284 |
| chr29 | 31418548  | 31418831  | 284 |
| chr29 | 1708545   | 1708828   | 284 |
| chr28 | 33876985  | 33877268  | 284 |
| chr26 | 50072397  | 50072680  | 284 |
| chr26 | 43780541  | 43780824  | 284 |
| chr25 | 10618431  | 10618714  | 284 |

|       |             |           |     |
|-------|-------------|-----------|-----|
| chr25 | 10475238    | 10475521  | 284 |
| chr25 | 1313996     | 1314279   | 284 |
| chr25 | 1253650     | 1253933   | 284 |
| chr23 | 10495822    | 10496105  | 284 |
| chr22 | 30133544    | 30133827  | 284 |
| chr22 | 17238916    | 17239199  | 284 |
| chr21 | 24496651    | 24496934  | 284 |
| chr21 | 20982301    | 20982584  | 284 |
| chr2  | 132176287   | 132176570 | 284 |
| chr2  | 24731318    | 24731601  | 284 |
| chr19 | 59125477    | 59125760  | 284 |
| chr17 | 47298651    | 47298934  | 284 |
| chr15 | 39976459    | 39976742  | 284 |
| chr14 | 6980309     | 6980592   | 284 |
| chr13 | 76107930    | 76108213  | 284 |
| chr13 | 41191709    | 41191992  | 284 |
| chr11 | 109688392   | 109688675 | 284 |
| chr11 | 66180226    | 66180509  | 284 |
| chr11 | 10499018    | 10499301  | 284 |
| chr5  | 36378493    | 36378775  | 283 |
| chr3  | 112302020   | 112302302 | 283 |
| chr3  | 52148063    | 52148345  | 283 |
| chr3  | 15102983    | 15103265  | 283 |
| chr3  | 4350011     | 4350293   | 283 |
| chr27 | 34990531    | 34990813  | 283 |
| chr26 | 41538990    | 41539272  | 283 |
| chr25 | 33351754    | 33352036  | 283 |
| chr25 | 21906545    | 21906827  | 283 |
| chr25 | 10522193    | 10522475  | 283 |
| chr23 | 31071661    | 31071943  | 283 |
| chr22 | 30024251    | 30024533  | 283 |
| chr20 | 44367193    | 44367475  | 283 |
| chr2  | 125900380   | 125900662 | 283 |
| chr19 | 60705600    | 60705882  | 283 |
| chr19 | 46724861    | 46725143  | 283 |
| chr19 | 44078500    | 44078782  | 283 |
| chr19 | 27934668    | 27934950  | 283 |
| chr18 | 50920986    | 50921268  | 283 |
| chr18 | 50715506    | 50715788  | 283 |
| chr18 | 22778205    | 22778487  | 283 |
| chr18 | 18663690    | 18663972  | 283 |
| chr17 | 73975964    | 73976246  | 283 |
| chr17 | 70398161    | 70398443  | 283 |
| chr17 | 64308411    | 64308693  | 283 |
| chr17 | 48899691    | 48899973  | 283 |
| chr16 | 42518 42800 | 283       |     |
| chr13 | 79693520    | 79693802  | 283 |
| chr13 | 75999299    | 75999581  | 283 |
| chr12 | 81927354    | 81927636  | 283 |
| chr11 | 105034821   | 105035103 | 283 |

|       |               |           |     |
|-------|---------------|-----------|-----|
| chr11 | 90414724      | 90415006  | 283 |
| chr11 | 70840788      | 70841070  | 283 |
| chr10 | 83837749      | 83838031  | 283 |
| chr8  | 55411412      | 55411693  | 282 |
| chr7  | 37112376      | 37112657  | 282 |
| chr4  | 116376940     | 116377221 | 282 |
| chr3  | 116209678     | 116209959 | 282 |
| chr3  | 115053287     | 115053568 | 282 |
| chr29 | 10041945      | 10042226  | 282 |
| chr28 | 42195013      | 42195294  | 282 |
| chr24 | 48601196      | 48601477  | 282 |
| chr23 | 12299050      | 12299331  | 282 |
| chr23 | 9363924       | 9364205   | 282 |
| chr21 | 59874780      | 59875061  | 282 |
| chr19 | 46056116      | 46056397  | 282 |
| chr19 | 43175849      | 43176130  | 282 |
| chr19 | 35799125      | 35799406  | 282 |
| chr16 | 71092893      | 71093174  | 282 |
| chr16 | 60387954      | 60388235  | 282 |
| chr16 | 1786714       | 1786995   | 282 |
| chr13 | 64766195      | 64766476  | 282 |
| chr13 | 24123815      | 24124096  | 282 |
| chr10 | 80622205      | 80622486  | 282 |
| chr10 | 63869924      | 63870205  | 282 |
| chr9  | 107190104     | 107190384 | 281 |
| chr6  | 120418920     | 120419200 | 281 |
| chr5  | 121098494     | 121098774 | 281 |
| chr4  | 71876506      | 71876786  | 281 |
| chr3  | 123303377     | 123303657 | 281 |
| chr3  | 107744830     | 107745110 | 281 |
| chr28 | 33877843      | 33878123  | 281 |
| chr26 | 49157248      | 49157528  | 281 |
| chr23 | 10555899      | 10556179  | 281 |
| chr22 | 53953778      | 53954058  | 281 |
| chr19 | 46652653      | 46652933  | 281 |
| chr19 | 44179162      | 44179442  | 281 |
| chr19 | 37813566      | 37813846  | 281 |
| chr19 | 33318331      | 33318611  | 281 |
| chr18 | 61472709      | 61472989  | 281 |
| chr18 | 55009073      | 55009353  | 281 |
| chr18 | 54053457      | 54053737  | 281 |
| chr17 | 70511305      | 70511585  | 281 |
| chr17 | 48494489      | 48494769  | 281 |
| chr14 | 607978 608258 | 281       |     |
| chr13 | 66870516      | 66870796  | 281 |
| chr11 | 75051106      | 75051386  | 281 |
| chr10 | 88054967      | 88055247  | 281 |
| chr1  | 69846167      | 69846447  | 281 |
| chr9  | 100173240     | 100173519 | 280 |
| chr8  | 80993859      | 80994138  | 280 |

|       |           |           |     |
|-------|-----------|-----------|-----|
| chr7  | 48981479  | 48981758  | 280 |
| chr6  | 122459741 | 122460020 | 280 |
| chr6  | 108792940 | 108793219 | 280 |
| chr5  | 125565603 | 125565882 | 280 |
| chr5  | 111893815 | 111894094 | 280 |
| chr4  | 26382135  | 26382414  | 280 |
| chr3  | 115775331 | 115775610 | 280 |
| chr27 | 17829835  | 17830114  | 280 |
| chr26 | 44522950  | 44523229  | 280 |
| chr24 | 58895467  | 58895746  | 280 |
| chr24 | 48392556  | 48392835  | 280 |
| chr24 | 43627317  | 43627596  | 280 |
| chr24 | 38499912  | 38500191  | 280 |
| chr22 | 12460035  | 12460314  | 280 |
| chr20 | 73576466  | 73576745  | 280 |
| chr19 | 29125493  | 29125772  | 280 |
| chr19 | 27263065  | 27263344  | 280 |
| chr19 | 23719495  | 23719774  | 280 |
| chr18 | 62782406  | 62782685  | 280 |
| chr18 | 49955978  | 49956257  | 280 |
| chr18 | 26284828  | 26285107  | 280 |
| chr17 | 63502615  | 63502894  | 280 |
| chr16 | 47096990  | 47097269  | 280 |
| chr14 | 1976879   | 1977158   | 280 |
| chr13 | 65268009  | 65268288  | 280 |
| chr13 | 59198300  | 59198579  | 280 |
| chr11 | 106049650 | 106049929 | 280 |
| chr11 | 28593545  | 28593824  | 280 |
| chr10 | 17156641  | 17156920  | 280 |
| chr1  | 57314631  | 57314910  | 280 |
| chr1  | 2669633   | 2669912   | 280 |
| chr8  | 116890684 | 116890962 | 279 |
| chr7  | 81322702  | 81322980  | 279 |
| chr5  | 120419358 | 120419636 | 279 |
| chr4  | 108000630 | 108000908 | 279 |
| chr3  | 99891810  | 99892088  | 279 |
| chr3  | 35828850  | 35829128  | 279 |
| chr3  | 3996675   | 3996953   | 279 |
| chr29 | 30628807  | 30629085  | 279 |
| chr26 | 35036869  | 35037147  | 279 |
| chr26 | 34984736  | 34985014  | 279 |
| chr25 | 4593930   | 4594208   | 279 |
| chr22 | 50794552  | 50794830  | 279 |
| chr22 | 38025950  | 38026228  | 279 |
| chr21 | 61841658  | 61841936  | 279 |
| chr21 | 58003541  | 58003819  | 279 |
| chr20 | 8608776   | 8609054   | 279 |
| chr2  | 140020801 | 140021079 | 279 |
| chr19 | 59003185  | 59003463  | 279 |
| chr19 | 30449149  | 30449427  | 279 |



|       |           |           |     |
|-------|-----------|-----------|-----|
| chr19 | 26354740  | 26355018  | 279 |
| chr18 | 62953941  | 62954219  | 279 |
| chr18 | 39512091  | 39512369  | 279 |
| chr18 | 11848155  | 11848433  | 279 |
| chr17 | 72134563  | 72134841  | 279 |
| chr17 | 60877311  | 60877589  | 279 |
| chr17 | 56766050  | 56766328  | 279 |
| chr16 | 49818790  | 49819068  | 279 |
| chr15 | 64641580  | 64641858  | 279 |
| chr15 | 51656106  | 51656384  | 279 |
| chr15 | 25288898  | 25289176  | 279 |
| chr14 | 26695326  | 26695604  | 279 |
| chr12 | 33071562  | 33071840  | 279 |
| chr12 | 31717400  | 31717678  | 279 |
| chr11 | 46675515  | 46675793  | 279 |
| chr11 | 28342396  | 28342674  | 279 |
| chr10 | 105003986 | 105004264 | 279 |
| chr10 | 67038574  | 67038852  | 279 |
| chr1  | 84432736  | 84433014  | 279 |
| chr1  | 83511261  | 83511539  | 279 |
| chr8  | 47601915  | 47602192  | 278 |
| chr7  | 46129817  | 46130094  | 278 |
| chr6  | 107093810 | 107094087 | 278 |
| chr5  | 112135365 | 112135642 | 278 |
| chr4  | 72726512  | 72726789  | 278 |
| chr3  | 35675055  | 35675332  | 278 |
| chr3  | 13478734  | 13479011  | 278 |
| chr29 | 45587651  | 45587928  | 278 |
| chr29 | 38092326  | 38092603  | 278 |
| chr29 | 37484678  | 37484955  | 278 |
| chr29 | 31995699  | 31995976  | 278 |
| chr28 | 26344620  | 26344897  | 278 |
| chr26 | 47955486  | 47955763  | 278 |
| chr25 | 35386872  | 35387149  | 278 |
| chr23 | 28296533  | 28296810  | 278 |
| chr22 | 59903849  | 59904126  | 278 |
| chr21 | 63958164  | 63958441  | 278 |
| chr21 | 46041697  | 46041974  | 278 |
| chr21 | 26580102  | 26580379  | 278 |
| chr2  | 139369633 | 139369910 | 278 |
| chr2  | 36105853  | 36106130  | 278 |
| chr19 | 12398106  | 12398383  | 278 |
| chr17 | 69325111  | 69325388  | 278 |
| chr17 | 47487824  | 47488101  | 278 |
| chr16 | 38506421  | 38506698  | 278 |
| chr15 | 75703607  | 75703884  | 278 |
| chr15 | 27022926  | 27023203  | 278 |
| chr15 | 24589246  | 24589523  | 278 |
| chr14 | 41572940  | 41573217  | 278 |
| chr14 | 1943060   | 1943337   | 278 |

|       |               |           |     |
|-------|---------------|-----------|-----|
| chr13 | 42849030      | 42849307  | 278 |
| chr12 | 83923853      | 83924130  | 278 |
| chr10 | 13608144      | 13608421  | 278 |
| chr1  | 146801933     | 146802210 | 278 |
| chr1  | 123106275     | 123106552 | 278 |
| chr9  | 106723550     | 106723826 | 277 |
| chr8  | 7698857       | 7699133   | 277 |
| chr7  | 14413217      | 14413493  | 277 |
| chr6  | 120923538     | 120923814 | 277 |
| chr6  | 16262645      | 16262921  | 277 |
| chr5  | 29002968      | 29003244  | 277 |
| chr3  | 118454221     | 118454497 | 277 |
| chr29 | 34741273      | 34741549  | 277 |
| chr26 | 21805082      | 21805358  | 277 |
| chr26 | 17843839      | 17844115  | 277 |
| chr24 | 1323361       | 1323637   | 277 |
| chr23 | 26338592      | 26338868  | 277 |
| chr23 | 19872608      | 19872884  | 277 |
| chr22 | 21970499      | 21970775  | 277 |
| chr21 | 19831211      | 19831487  | 277 |
| chr19 | 52550769      | 52551045  | 277 |
| chr19 | 21317001      | 21317277  | 277 |
| chr18 | 47670722      | 47670998  | 277 |
| chr18 | 509204 509480 | 277       |     |
| chr12 | 34855207      | 34855483  | 277 |
| chr11 | 100746976     | 100747252 | 277 |
| chr11 | 4566565       | 4566841   | 277 |
| chr11 | 2942436       | 2942712   | 277 |
| chr10 | 75521875      | 75522151  | 277 |
| chr10 | 17105954      | 17106230  | 277 |
| chr1  | 147991957     | 147992233 | 277 |
| chr1  | 74496091      | 74496367  | 277 |
| chr7  | 43980428      | 43980703  | 276 |
| chr7  | 19303051      | 19303326  | 276 |
| chr5  | 118072589     | 118072864 | 276 |
| chr4  | 121438298     | 121438573 | 276 |
| chr4  | 117609359     | 117609634 | 276 |
| chr4  | 99608506      | 99608781  | 276 |
| chr3  | 111812132     | 111812407 | 276 |
| chr26 | 51550830      | 51551105  | 276 |
| chr25 | 42125714      | 42125989  | 276 |
| chr25 | 40220099      | 40220374  | 276 |
| chr24 | 44044951      | 44045226  | 276 |
| chr23 | 18151053      | 18151328  | 276 |
| chr23 | 18149808      | 18150083  | 276 |
| chr20 | 797876 798151 | 276       |     |
| chr2  | 138472070     | 138472345 | 276 |
| chr2  | 76392465      | 76392740  | 276 |
| chr2  | 26843997      | 26844272  | 276 |
| chr19 | 60695994      | 60696269  | 276 |

|       |           |           |     |
|-------|-----------|-----------|-----|
| chr19 | 6650093   | 6650368   | 276 |
| chr18 | 62946754  | 62947029  | 276 |
| chr18 | 38347315  | 38347590  | 276 |
| chr18 | 11815016  | 11815291  | 276 |
| chr16 | 44107729  | 44108004  | 276 |
| chr15 | 74877484  | 74877759  | 276 |
| chr13 | 19123428  | 19123703  | 276 |
| chr11 | 89068403  | 89068678  | 276 |
| chr10 | 21134595  | 21134870  | 276 |
| chrX  | 18949301  | 18949575  | 275 |
| chr9  | 105509899 | 105510173 | 275 |
| chr8  | 63656858  | 63657132  | 275 |
| chr7  | 43307711  | 43307985  | 275 |
| chr6  | 120593754 | 120594028 | 275 |
| chr6  | 108636630 | 108636904 | 275 |
| chr5  | 113219577 | 113219851 | 275 |
| chr3  | 16912766  | 16913040  | 275 |
| chr24 | 2018261   | 2018535   | 275 |
| chr22 | 60129198  | 60129472  | 275 |
| chr21 | 56003533  | 56003807  | 275 |
| chr2  | 131791095 | 131791369 | 275 |
| chr2  | 111647910 | 111648184 | 275 |
| chr18 | 57277048  | 57277322  | 275 |
| chr18 | 24333535  | 24333809  | 275 |
| chr16 | 47100143  | 47100417  | 275 |
| chr16 | 42668086  | 42668360  | 275 |
| chr16 | 1334915   | 1335189   | 275 |
| chr15 | 25205894  | 25206168  | 275 |
| chr13 | 72656128  | 72656402  | 275 |
| chr13 | 15528565  | 15528839  | 275 |
| chr12 | 10296159  | 10296433  | 275 |
| chr11 | 92682618  | 92682892  | 275 |
| chr11 | 49408344  | 49408618  | 275 |
| chr10 | 84181583  | 84181857  | 275 |
| chr10 | 17592496  | 17592770  | 275 |
| chr1  | 147330302 | 147330576 | 275 |
| chr1  | 74585376  | 74585650  | 275 |
| chr9  | 106856860 | 106857133 | 274 |
| chr8  | 101906523 | 101906796 | 274 |
| chr8  | 51730471  | 51730744  | 274 |
| chr8  | 24379092  | 24379365  | 274 |
| chr5  | 122287452 | 122287725 | 274 |
| chr5  | 115457629 | 115457902 | 274 |
| chr4  | 98042007  | 98042280  | 274 |
| chr3  | 116917951 | 116918224 | 274 |
| chr3  | 83109413  | 83109686  | 274 |
| chr29 | 47335445  | 47335718  | 274 |
| chr26 | 51439324  | 51439597  | 274 |
| chr25 | 36460051  | 36460324  | 274 |
| chr23 | 52136159  | 52136432  | 274 |

|       |           |           |     |
|-------|-----------|-----------|-----|
| chr23 | 29083982  | 29084255  | 274 |
| chr21 | 67976397  | 67976670  | 274 |
| chr2  | 111735586 | 111735859 | 274 |
| chr2  | 21392990  | 21393263  | 274 |
| chr19 | 31271146  | 31271419  | 274 |
| chr19 | 23805737  | 23806010  | 274 |
| chr19 | 16216127  | 16216400  | 274 |
| chr18 | 64418907  | 64419180  | 274 |
| chr18 | 57312338  | 57312611  | 274 |
| chr18 | 40853002  | 40853275  | 274 |
| chr16 | 49367925  | 49368198  | 274 |
| chr13 | 75737377  | 75737650  | 274 |
| chr13 | 57248386  | 57248659  | 274 |
| chr12 | 31209075  | 31209348  | 274 |
| chr11 | 85786754  | 85787027  | 274 |
| chr11 | 47565665  | 47565938  | 274 |
| chr10 | 47392887  | 47393160  | 274 |
| chr1  | 76370551  | 76370824  | 274 |
| chr8  | 45736596  | 45736868  | 273 |
| chr7  | 43045121  | 43045393  | 273 |
| chr6  | 32573672  | 32573944  | 273 |
| chr5  | 112685858 | 112686130 | 273 |
| chr5  | 112088262 | 112088534 | 273 |
| chr4  | 123014248 | 123014520 | 273 |
| chr3  | 15957608  | 15957880  | 273 |
| chr3  | 7701173   | 7701445   | 273 |
| chr29 | 44546176  | 44546448  | 273 |
| chr29 | 34689397  | 34689669  | 273 |
| chr29 | 25940417  | 25940689  | 273 |
| chr27 | 1337128   | 1337400   | 273 |
| chr26 | 50597406  | 50597678  | 273 |
| chr23 | 8399984   | 8400256   | 273 |
| chr20 | 75793641  | 75793913  | 273 |
| chr19 | 55981519  | 55981791  | 273 |
| chr19 | 41302967  | 41303239  | 273 |
| chr19 | 29818197  | 29818469  | 273 |
| chr19 | 11827973  | 11828245  | 273 |
| chr18 | 55194750  | 55195022  | 273 |
| chr18 | 34830395  | 34830667  | 273 |
| chr16 | 47607379  | 47607651  | 273 |
| chr16 | 47199422  | 47199694  | 273 |
| chr15 | 42519584  | 42519856  | 273 |
| chr14 | 6388457   | 6388729   | 273 |
| chr13 | 62395293  | 62395565  | 273 |
| chr13 | 52082314  | 52082586  | 273 |
| chr13 | 30845599  | 30845871  | 273 |
| chr11 | 99687673  | 99687945  | 273 |
| chr11 | 93759619  | 93759891  | 273 |
| chr11 | 81408539  | 81408811  | 273 |
| chr10 | 35451135  | 35451407  | 273 |

|       |               |           |     |
|-------|---------------|-----------|-----|
| chr10 | 5194709       | 5194981   | 273 |
| chr8  | 116755312     | 116755583 | 272 |
| chr8  | 74014760      | 74015031  | 272 |
| chr8  | 64788001      | 64788272  | 272 |
| chr7  | 42515537      | 42515808  | 272 |
| chr7  | 29465401      | 29465672  | 272 |
| chr5  | 122485621     | 122485892 | 272 |
| chr5  | 27970626      | 27970897  | 272 |
| chr3  | 15637737      | 15638008  | 272 |
| chr28 | 33896733      | 33897004  | 272 |
| chr27 | 29118078      | 29118349  | 272 |
| chr26 | 51591558      | 51591829  | 272 |
| chr26 | 34972993      | 34973264  | 272 |
| chr26 | 34490175      | 34490446  | 272 |
| chr24 | 20871750      | 20872021  | 272 |
| chr23 | 27154312      | 27154583  | 272 |
| chr23 | 11969288      | 11969559  | 272 |
| chr21 | 57090596      | 57090867  | 272 |
| chr2  | 135774867     | 135775138 | 272 |
| chr2  | 131031318     | 131031589 | 272 |
| chr2  | 111737184     | 111737455 | 272 |
| chr19 | 54786103      | 54786374  | 272 |
| chr19 | 37903551      | 37903822  | 272 |
| chr18 | 39501504      | 39501775  | 272 |
| chr18 | 11449056      | 11449327  | 272 |
| chr17 | 57512605      | 57512876  | 272 |
| chr16 | 44703687      | 44703958  | 272 |
| chr13 | 84369492      | 84369763  | 272 |
| chr13 | 57204811      | 57205082  | 272 |
| chr12 | 36459864      | 36460135  | 272 |
| chr11 | 98907937      | 98908208  | 272 |
| chr11 | 28542784      | 28543055  | 272 |
| chr10 | 22348890      | 22349161  | 272 |
| chr1  | 144103160     | 144103431 | 272 |
| chrX  | 23614048      | 23614318  | 271 |
| chr8  | 539044 539314 |           | 271 |
| chr7  | 6548798       | 6549068   | 271 |
| chr5  | 117608276     | 117608546 | 271 |
| chr5  | 28691007      | 28691277  | 271 |
| chr3  | 115094905     | 115095175 | 271 |
| chr3  | 27907817      | 27908087  | 271 |
| chr26 | 20951454      | 20951724  | 271 |
| chr25 | 43804773      | 43805043  | 271 |
| chr25 | 37429651      | 37429921  | 271 |
| chr23 | 17981241      | 17981511  | 271 |
| chr22 | 15956990      | 15957260  | 271 |
| chr21 | 65802880      | 65803150  | 271 |
| chr20 | 8552838       | 8553108   | 271 |
| chr19 | 20379911      | 20380181  | 271 |
| chr19 | 18355235      | 18355505  | 271 |

|       |               |           |     |
|-------|---------------|-----------|-----|
| chr19 | 14990035      | 14990305  | 271 |
| chr17 | 58470392      | 58470662  | 271 |
| chr16 | 44176053      | 44176323  | 271 |
| chr13 | 83005322      | 83005592  | 271 |
| chr13 | 40526941      | 40527211  | 271 |
| chr11 | 104873829     | 104874099 | 271 |
| chr11 | 1643278       | 1643548   | 271 |
| chr1  | 153832092     | 153832362 | 271 |
| chr9  | 90547905      | 90548174  | 270 |
| chr8  | 103809018     | 103809287 | 270 |
| chr7  | 15326459      | 15326728  | 270 |
| chr6  | 69244365      | 69244634  | 270 |
| chr5  | 111985624     | 111985893 | 270 |
| chr4  | 116192159     | 116192428 | 270 |
| chr29 | 897066 897335 | 270       |     |
| chr25 | 37775068      | 37775337  | 270 |
| chr24 | 51576437      | 51576706  | 270 |
| chr24 | 20727253      | 20727522  | 270 |
| chr23 | 28057984      | 28058253  | 270 |
| chr23 | 8455919       | 8456188   | 270 |
| chr23 | 8244560       | 8244829   | 270 |
| chr22 | 60417562      | 60417831  | 270 |
| chr22 | 32627794      | 32628063  | 270 |
| chr21 | 21291336      | 21291605  | 270 |
| chr21 | 20926008      | 20926277  | 270 |
| chr20 | 44434661      | 44434930  | 270 |
| chr20 | 8570846       | 8571115   | 270 |
| chr2  | 119576121     | 119576390 | 270 |
| chr19 | 32783940      | 32784209  | 270 |
| chr18 | 22688681      | 22688950  | 270 |
| chr13 | 54421833      | 54422102  | 270 |
| chr12 | 34269001      | 34269270  | 270 |
| chr10 | 16468601      | 16468870  | 270 |
| chr1  | 3094881       | 3095150   | 270 |
| chr5  | 71207732      | 71208000  | 269 |
| chr3  | 123623483     | 123623751 | 269 |
| chr3  | 17469109      | 17469377  | 269 |
| chr29 | 29777579      | 29777847  | 269 |
| chr27 | 34785608      | 34785876  | 269 |
| chr25 | 36469461      | 36469729  | 269 |
| chr23 | 15875193      | 15875461  | 269 |
| chr2  | 140706142     | 140706410 | 269 |
| chr19 | 25078806      | 25079074  | 269 |
| chr19 | 18351125      | 18351393  | 269 |
| chr19 | 15287240      | 15287508  | 269 |
| chr18 | 53548740      | 53549008  | 269 |
| chr18 | 51589350      | 51589618  | 269 |
| chr13 | 80244479      | 80244747  | 269 |
| chr13 | 73891778      | 73892046  | 269 |
| chr11 | 100433174     | 100433442 | 269 |

|       |           |           |     |
|-------|-----------|-----------|-----|
| chr11 | 98920068  | 98920336  | 269 |
| chr10 | 88222761  | 88223029  | 269 |
| chr10 | 71330304  | 71330572  | 269 |
| chr7  | 57597518  | 57597785  | 268 |
| chr6  | 121062082 | 121062349 | 268 |
| chr5  | 125030148 | 125030415 | 268 |
| chr5  | 115159782 | 115160049 | 268 |
| chr5  | 83346149  | 83346416  | 268 |
| chr5  | 28350711  | 28350978  | 268 |
| chr3  | 121353958 | 121354225 | 268 |
| chr29 | 49467124  | 49467391  | 268 |
| chr28 | 42956117  | 42956384  | 268 |
| chr25 | 2970515   | 2970782   | 268 |
| chr23 | 13654610  | 13654877  | 268 |
| chr21 | 6562972   | 6563239   | 268 |
| chr2  | 75746804  | 75747071  | 268 |
| chr19 | 25426412  | 25426679  | 268 |
| chr18 | 46076174  | 46076441  | 268 |
| chr18 | 6986347   | 6986614   | 268 |
| chr16 | 61187760  | 61188027  | 268 |
| chr16 | 47146934  | 47147201  | 268 |
| chr14 | 33888947  | 33889214  | 268 |
| chr14 | 7844097   | 7844364   | 268 |
| chr12 | 76055949  | 76056216  | 268 |
| chr12 | 30556562  | 30556829  | 268 |
| chr10 | 106195342 | 106195609 | 268 |
| chr1  | 1549217   | 1549484   | 268 |
| chr9  | 90233510  | 90233776  | 267 |
| chr9  | 63540987  | 63541253  | 267 |
| chr8  | 110763902 | 110764168 | 267 |
| chr8  | 60311245  | 60311511  | 267 |
| chr6  | 119148414 | 119148680 | 267 |
| chr6  | 116832259 | 116832525 | 267 |
| chr6  | 4027191   | 4027457   | 267 |
| chr4  | 15754514  | 15754780  | 267 |
| chr3  | 9187232   | 9187498   | 267 |
| chr29 | 37238734  | 37239000  | 267 |
| chr27 | 40798372  | 40798638  | 267 |
| chr26 | 45957378  | 45957644  | 267 |
| chr25 | 3024914   | 3025180   | 267 |
| chr24 | 57358522  | 57358788  | 267 |
| chr23 | 43285188  | 43285454  | 267 |
| chr23 | 28786028  | 28786294  | 267 |
| chr22 | 47858518  | 47858784  | 267 |
| chr22 | 30130730  | 30130996  | 267 |
| chr22 | 15047560  | 15047826  | 267 |
| chr21 | 59075546  | 59075812  | 267 |
| chr2  | 139832700 | 139832966 | 267 |
| chr18 | 38679678  | 38679944  | 267 |
| chr18 | 5098673   | 5098939   | 267 |

|       |           |           |     |
|-------|-----------|-----------|-----|
| chr16 | 2199147   | 2199413   | 267 |
| chr15 | 29006501  | 29006767  | 267 |
| chr15 | 26615611  | 26615877  | 267 |
| chr12 | 25416446  | 25416712  | 267 |
| chr12 | 14957325  | 14957591  | 267 |
| chr10 | 106076794 | 106077060 | 267 |
| chr10 | 35635751  | 35636017  | 267 |
| chr8  | 108826240 | 108826505 | 266 |
| chr7  | 81261755  | 81262020  | 266 |
| chr5  | 112845780 | 112846045 | 266 |
| chr28 | 35284045  | 35284310  | 266 |
| chr28 | 12163804  | 12164069  | 266 |
| chr27 | 6070164   | 6070429   | 266 |
| chr22 | 59613889  | 59614154  | 266 |
| chr22 | 56107796  | 56108061  | 266 |
| chr2  | 121896995 | 121897260 | 266 |
| chr19 | 58172243  | 58172508  | 266 |
| chr19 | 44802056  | 44802321  | 266 |
| chr18 | 53490354  | 53490619  | 266 |
| chr18 | 45512341  | 45512606  | 266 |
| chr18 | 11941686  | 11941951  | 266 |
| chr17 | 57571189  | 57571454  | 266 |
| chr14 | 12204023  | 12204288  | 266 |
| chr11 | 107084000 | 107084265 | 266 |
| chr10 | 16993605  | 16993870  | 266 |
| chr10 | 10175844  | 10176109  | 266 |
| chr8  | 79973327  | 79973591  | 265 |
| chr7  | 11030511  | 11030775  | 265 |
| chr5  | 117499394 | 117499658 | 265 |
| chr5  | 80736115  | 80736379  | 265 |
| chr3  | 48213971  | 48214235  | 265 |
| chr27 | 38395438  | 38395702  | 265 |
| chr26 | 50804111  | 50804375  | 265 |
| chr25 | 27586446  | 27586710  | 265 |
| chr22 | 14942998  | 14943262  | 265 |
| chr21 | 66335793  | 66336057  | 265 |
| chr21 | 64196215  | 64196479  | 265 |
| chr20 | 73580986  | 73581250  | 265 |
| chr2  | 21536504  | 21536768  | 265 |
| chr19 | 41867727  | 41867991  | 265 |
| chr19 | 26337221  | 26337485  | 265 |
| chr19 | 23741195  | 23741459  | 265 |
| chr19 | 23705882  | 23706146  | 265 |
| chr18 | 11099955  | 11100219  | 265 |
| chr17 | 73212385  | 73212649  | 265 |
| chr17 | 73179946  | 73180210  | 265 |
| chr17 | 4314734   | 4314998   | 265 |
| chr16 | 44149977  | 44150241  | 265 |
| chr16 | 506404    | 506668    | 265 |
| chr15 | 75922482  | 75922746  | 265 |



|       |           |           |     |
|-------|-----------|-----------|-----|
| chr15 | 60443990  | 60444254  | 265 |
| chr15 | 20041285  | 20041549  | 265 |
| chr13 | 67381822  | 67382086  | 265 |
| chr12 | 83459642  | 83459906  | 265 |
| chr11 | 105387995 | 105388259 | 265 |
| chr11 | 105384091 | 105384355 | 265 |
| chr10 | 16848940  | 16849204  | 265 |
| chr8  | 108782439 | 108782702 | 264 |
| chr8  | 80168405  | 80168668  | 264 |
| chr7  | 46233396  | 46233659  | 264 |
| chr5  | 111342859 | 111343122 | 264 |
| chr5  | 35465199  | 35465462  | 264 |
| chr4  | 53134665  | 53134928  | 264 |
| chr3  | 123353202 | 123353465 | 264 |
| chr29 | 45913731  | 45913994  | 264 |
| chr29 | 35604850  | 35605113  | 264 |
| chr29 | 30035969  | 30036232  | 264 |
| chr28 | 41315219  | 41315482  | 264 |
| chr27 | 34733699  | 34733962  | 264 |
| chr27 | 15160063  | 15160326  | 264 |
| chr26 | 18235764  | 18236027  | 264 |
| chr25 | 2985737   | 2986000   | 264 |
| chr23 | 30530721  | 30530984  | 264 |
| chr22 | 59602699  | 59602962  | 264 |
| chr22 | 48435784  | 48436047  | 264 |
| chr2  | 126980718 | 126980981 | 264 |
| chr2  | 124960390 | 124960653 | 264 |
| chr2  | 108725590 | 108725853 | 264 |
| chr17 | 56094929  | 56095192  | 264 |
| chr16 | 42389321  | 42389584  | 264 |
| chr16 | 2291846   | 2292109   | 264 |
| chr14 | 29386732  | 29386995  | 264 |
| chr14 | 21096594  | 21096857  | 264 |
| chr11 | 72828653  | 72828916  | 264 |
| chr11 | 28640184  | 28640447  | 264 |
| chr10 | 12828522  | 12828785  | 264 |
| chr8  | 23828079  | 23828341  | 263 |
| chr8  | 7811036   | 7811298   | 263 |
| chr7  | 48181457  | 48181719  | 263 |
| chr5  | 123016145 | 123016407 | 263 |
| chr5  | 32839162  | 32839424  | 263 |
| chr4  | 118004790 | 118005052 | 263 |
| chr4  | 6105813   | 6106075   | 263 |
| chr3  | 102795217 | 102795479 | 263 |
| chr29 | 17636359  | 17636621  | 263 |
| chr28 | 38962157  | 38962419  | 263 |
| chr27 | 46977690  | 46977952  | 263 |
| chr24 | 55941249  | 55941511  | 263 |
| chr23 | 8789591   | 8789853   | 263 |
| chr22 | 56288616  | 56288878  | 263 |

|       |           |           |     |
|-------|-----------|-----------|-----|
| chr21 | 65884708  | 65884970  | 263 |
| chr19 | 56310750  | 56311012  | 263 |
| chr19 | 31266668  | 31266930  | 263 |
| chr19 | 18438598  | 18438860  | 263 |
| chr19 | 13761439  | 13761701  | 263 |
| chr18 | 25615668  | 25615930  | 263 |
| chr17 | 66854919  | 66855181  | 263 |
| chr14 | 64387484  | 64387746  | 263 |
| chr13 | 42410220  | 42410482  | 263 |
| chr11 | 11045644  | 11045906  | 263 |
| chr1  | 68816718  | 68816980  | 263 |
| chr9  | 102580338 | 102580599 | 262 |
| chr7  | 81251371  | 81251632  | 262 |
| chr6  | 14205521  | 14205782  | 262 |
| chr5  | 112396730 | 112396991 | 262 |
| chr4  | 72735204  | 72735465  | 262 |
| chr3  | 125139462 | 125139723 | 262 |
| chr3  | 33128595  | 33128856  | 262 |
| chr29 | 42077343  | 42077604  | 262 |
| chr26 | 43600078  | 43600339  | 262 |
| chr25 | 39178529  | 39178790  | 262 |
| chr24 | 38887677  | 38887938  | 262 |
| chr21 | 67930358  | 67930619  | 262 |
| chr20 | 8574511   | 8574772   | 262 |
| chr18 | 54186620  | 54186881  | 262 |
| chr18 | 33704176  | 33704437  | 262 |
| chr17 | 69299846  | 69300107  | 262 |
| chr17 | 56037315  | 56037576  | 262 |
| chr17 | 54242489  | 54242750  | 262 |
| chr15 | 76617697  | 76617958  | 262 |
| chr15 | 22801677  | 22801938  | 262 |
| chr12 | 21942356  | 21942617  | 262 |
| chr10 | 2407328   | 2407589   | 262 |
| chr1  | 68809177  | 68809438  | 262 |
| chr8  | 102565945 | 102566205 | 261 |
| chr5  | 120513472 | 120513732 | 261 |
| chr4  | 123510542 | 123510802 | 261 |
| chr29 | 48145880  | 48146140  | 261 |
| chr28 | 25437887  | 25438147  | 261 |
| chr26 | 38897096  | 38897356  | 261 |
| chr26 | 34310485  | 34310745  | 261 |
| chr24 | 22047485  | 22047745  | 261 |
| chr23 | 46101106  | 46101366  | 261 |
| chr23 | 19559629  | 19559889  | 261 |
| chr22 | 7235516   | 7235776   | 261 |
| chr2  | 139207510 | 139207770 | 261 |
| chr2  | 38879202  | 38879462  | 261 |
| chr19 | 43061245  | 43061505  | 261 |
| chr19 | 7744836   | 7745096   | 261 |
| chr17 | 74554849  | 74555109  | 261 |

|       |               |           |     |
|-------|---------------|-----------|-----|
| chr16 | 71131789      | 71132049  | 261 |
| chr16 | 71121110      | 71121370  | 261 |
| chr15 | 55747089      | 55747349  | 261 |
| chr15 | 53591691      | 53591951  | 261 |
| chr15 | 19789335      | 19789595  | 261 |
| chr14 | 23659887      | 23660147  | 261 |
| chr13 | 54842884      | 54843144  | 261 |
| chr12 | 32174286      | 32174546  | 261 |
| chr11 | 106242615     | 106242875 | 261 |
| chr11 | 82906991      | 82907251  | 261 |
| chr10 | 81681512      | 81681772  | 261 |
| chr1  | 641399 641659 | 261       |     |
| chr9  | 12800691      | 12800950  | 260 |
| chr6  | 102179618     | 102179877 | 260 |
| chr5  | 118094077     | 118094336 | 260 |
| chr5  | 30402000      | 30402259  | 260 |
| chr4  | 106557150     | 106557409 | 260 |
| chr3  | 125380787     | 125381046 | 260 |
| chr29 | 43442373      | 43442632  | 260 |
| chr29 | 42395757      | 42396016  | 260 |
| chr29 | 41731616      | 41731875  | 260 |
| chr29 | 37253344      | 37253603  | 260 |
| chr29 | 29937104      | 29937363  | 260 |
| chr29 | 17704000      | 17704259  | 260 |
| chr26 | 10103275      | 10103534  | 260 |
| chr25 | 30485371      | 30485630  | 260 |
| chr23 | 27860105      | 27860364  | 260 |
| chr23 | 11860906      | 11861165  | 260 |
| chr22 | 60504102      | 60504361  | 260 |
| chr22 | 34224396      | 34224655  | 260 |
| chr19 | 45064468      | 45064727  | 260 |
| chr19 | 14923085      | 14923344  | 260 |
| chr16 | 57562754      | 57563013  | 260 |
| chr16 | 19562953      | 19563212  | 260 |
| chr13 | 35975231      | 35975490  | 260 |
| chr13 | 33300988      | 33301247  | 260 |
| chr12 | 20029551      | 20029810  | 260 |
| chr8  | 93183353      | 93183611  | 259 |
| chr5  | 121333593     | 121333851 | 259 |
| chr3  | 115349258     | 115349516 | 259 |
| chr3  | 16740342      | 16740600  | 259 |
| chr25 | 35455664      | 35455922  | 259 |
| chr25 | 21513135      | 21513393  | 259 |
| chr24 | 50304658      | 50304916  | 259 |
| chr23 | 43416289      | 43416547  | 259 |
| chr23 | 31292894      | 31293152  | 259 |
| chr23 | 27944142      | 27944400  | 259 |
| chr23 | 11451830      | 11452088  | 259 |
| chr22 | 53964239      | 53964497  | 259 |
| chr21 | 27347135      | 27347393  | 259 |

|       |           |           |     |
|-------|-----------|-----------|-----|
| chr20 | 74812827  | 74813085  | 259 |
| chr18 | 51709048  | 51709306  | 259 |
| chr18 | 18050931  | 18051189  | 259 |
| chr18 | 12432679  | 12432937  | 259 |
| chr17 | 64043119  | 64043377  | 259 |
| chr13 | 70190140  | 70190398  | 259 |
| chr13 | 53886494  | 53886752  | 259 |
| chr11 | 76486720  | 76486978  | 259 |
| chr1  | 146927630 | 146927888 | 259 |
| chrX  | 30001029  | 30001286  | 258 |
| chr8  | 74348121  | 74348378  | 258 |
| chr4  | 124394793 | 124395050 | 258 |
| chr4  | 119254113 | 119254370 | 258 |
| chr4  | 29018684  | 29018941  | 258 |
| chr4  | 14692321  | 14692578  | 258 |
| chr3  | 17389327  | 17389584  | 258 |
| chr29 | 45607999  | 45608256  | 258 |
| chr24 | 1211335   | 1211592   | 258 |
| chr22 | 30312790  | 30313047  | 258 |
| chr2  | 138653466 | 138653723 | 258 |
| chr2  | 138519686 | 138519943 | 258 |
| chr2  | 92352617  | 92352874  | 258 |
| chr18 | 53885809  | 53886066  | 258 |
| chr18 | 51287817  | 51288074  | 258 |
| chr16 | 55136370  | 55136627  | 258 |
| chr15 | 32666194  | 32666451  | 258 |
| chr13 | 59095521  | 59095778  | 258 |
| chr13 | 42600674  | 42600931  | 258 |
| chr13 | 17652995  | 17653252  | 258 |
| chr12 | 82814739  | 82814996  | 258 |
| chr8  | 80487056  | 80487312  | 257 |
| chr7  | 11503898  | 11504154  | 257 |
| chr5  | 125217262 | 125217518 | 257 |
| chr4  | 11124737  | 11124993  | 257 |
| chr3  | 126136787 | 126137043 | 257 |
| chr3  | 114594056 | 114594312 | 257 |
| chr3  | 105444546 | 105444802 | 257 |
| chr3  | 35567461  | 35567717  | 257 |
| chr25 | 40407959  | 40408215  | 257 |
| chr24 | 50242649  | 50242905  | 257 |
| chr24 | 2628984   | 2629240   | 257 |
| chr23 | 52050773  | 52051029  | 257 |
| chr23 | 26988711  | 26988967  | 257 |
| chr20 | 75149586  | 75149842  | 257 |
| chr19 | 20373279  | 20373535  | 257 |
| chr18 | 13278139  | 13278395  | 257 |
| chr16 | 3477463   | 3477719   | 257 |
| chr15 | 25328206  | 25328462  | 257 |
| chr15 | 22811085  | 22811341  | 257 |
| chr14 | 9663239   | 9663495   | 257 |

|       |           |           |     |
|-------|-----------|-----------|-----|
| chr11 | 109575933 | 109576189 | 257 |
| chr11 | 2558325   | 2558581   | 257 |
| chr11 | 1364013   | 1364269   | 257 |
| chr1  | 74582534  | 74582790  | 257 |
| chr9  | 50714833  | 50715088  | 256 |
| chr9  | 43893880  | 43894135  | 256 |
| chr9  | 14598840  | 14599095  | 256 |
| chr8  | 53291139  | 53291394  | 256 |
| chr7  | 17321923  | 17322178  | 256 |
| chr7  | 12727170  | 12727425  | 256 |
| chr6  | 118640256 | 118640511 | 256 |
| chr3  | 26145448  | 26145703  | 256 |
| chr26 | 44329239  | 44329494  | 256 |
| chr26 | 22409424  | 22409679  | 256 |
| chr26 | 20845948  | 20846203  | 256 |
| chr25 | 29344224  | 29344479  | 256 |
| chr25 | 19097842  | 19098097  | 256 |
| chr2  | 23086624  | 23086879  | 256 |
| chr19 | 38379431  | 38379686  | 256 |
| chr18 | 62506189  | 62506444  | 256 |
| chr17 | 21442230  | 21442485  | 256 |
| chr16 | 76997154  | 76997409  | 256 |
| chr16 | 47523949  | 47524204  | 256 |
| chr16 | 42867165  | 42867420  | 256 |
| chr15 | 73759883  | 73760138  | 256 |
| chr15 | 38322492  | 38322747  | 256 |
| chr13 | 54873786  | 54874041  | 256 |
| chr13 | 17864338  | 17864593  | 256 |
| chr11 | 104944191 | 104944446 | 256 |
| chrX  | 3715197   | 3715451   | 255 |
| chr8  | 110725073 | 110725327 | 255 |
| chr5  | 118178271 | 118178525 | 255 |
| chr5  | 114075362 | 114075616 | 255 |
| chr5  | 112767635 | 112767889 | 255 |
| chr5  | 28740607  | 28740861  | 255 |
| chr29 | 45192283  | 45192537  | 255 |
| chr27 | 38796417  | 38796671  | 255 |
| chr21 | 7807985   | 7808239   | 255 |
| chr20 | 4934892   | 4935146   | 255 |
| chr19 | 58691771  | 58692025  | 255 |
| chr17 | 66869406  | 66869660  | 255 |
| chr16 | 67492509  | 67492763  | 255 |
| chr16 | 38566875  | 38567129  | 255 |
| chr14 | 5913343   | 5913597   | 255 |
| chr12 | 21882032  | 21882286  | 255 |
| chr10 | 103501474 | 103501728 | 255 |
| chr10 | 58829372  | 58829626  | 255 |
| chr1  | 69854777  | 69855031  | 255 |
| chr9  | 34923519  | 34923772  | 254 |
| chr7  | 1767024   | 1767277   | 254 |

|       |           |           |     |
|-------|-----------|-----------|-----|
| chr3  | 127015225 | 127015478 | 254 |
| chr3  | 109404955 | 109405208 | 254 |
| chr3  | 28926317  | 28926570  | 254 |
| chr26 | 44850270  | 44850523  | 254 |
| chr24 | 33927030  | 33927283  | 254 |
| chr23 | 18065311  | 18065564  | 254 |
| chr22 | 57205735  | 57205988  | 254 |
| chr22 | 30113151  | 30113404  | 254 |
| chr2  | 139230838 | 139231091 | 254 |
| chr19 | 60827930  | 60828183  | 254 |
| chr19 | 47283796  | 47284049  | 254 |
| chr19 | 29683364  | 29683617  | 254 |
| chr19 | 25423095  | 25423348  | 254 |
| chr18 | 53087249  | 53087502  | 254 |
| chr18 | 52979886  | 52980139  | 254 |
| chr18 | 51501898  | 51502151  | 254 |
| chr16 | 46650052  | 46650305  | 254 |
| chr15 | 66189734  | 66189987  | 254 |
| chr13 | 75666537  | 75666790  | 254 |
| chr13 | 56018443  | 56018696  | 254 |
| chr12 | 54227968  | 54228221  | 254 |
| chr11 | 71063798  | 71064051  | 254 |
| chr11 | 40301144  | 40301397  | 254 |
| chr8  | 24435263  | 24435515  | 253 |
| chr5  | 115281876 | 115282128 | 253 |
| chr5  | 71638439  | 71638691  | 253 |
| chr5  | 60444450  | 60444702  | 253 |
| chr4  | 103105311 | 103105563 | 253 |
| chr3  | 118239127 | 118239379 | 253 |
| chr3  | 110314339 | 110314591 | 253 |
| chr3  | 102721621 | 102721873 | 253 |
| chr3  | 22935113  | 22935365  | 253 |
| chr25 | 18126478  | 18126730  | 253 |
| chr23 | 43234386  | 43234638  | 253 |
| chr2  | 134070661 | 134070913 | 253 |
| chr2  | 125939104 | 125939356 | 253 |
| chr19 | 59230162  | 59230414  | 253 |
| chr16 | 47500091  | 47500343  | 253 |
| chr16 | 47095242  | 47095494  | 253 |
| chr14 | 1975801   | 1976053   | 253 |
| chr13 | 11118325  | 11118577  | 253 |
| chr11 | 101007117 | 101007369 | 253 |
| chr10 | 90480033  | 90480285  | 253 |
| chr8  | 11387656  | 11387907  | 252 |
| chr7  | 9338000   | 9338251   | 252 |
| chr6  | 121794756 | 121795007 | 252 |
| chr3  | 115694189 | 115694440 | 252 |
| chr3  | 8152764   | 8153015   | 252 |
| chr29 | 41881585  | 41881836  | 252 |
| chr29 | 38887300  | 38887551  | 252 |

|       |               |           |     |
|-------|---------------|-----------|-----|
| chr24 | 51695996      | 51696247  | 252 |
| chr23 | 10541715      | 10541966  | 252 |
| chr2  | 127344210     | 127344461 | 252 |
| chr2  | 74037189      | 74037440  | 252 |
| chr2  | 36074509      | 36074760  | 252 |
| chr19 | 62530507      | 62530758  | 252 |
| chr19 | 58617226      | 58617477  | 252 |
| chr19 | 38270101      | 38270352  | 252 |
| chr19 | 30342997      | 30343248  | 252 |
| chr18 | 23154676      | 23154927  | 252 |
| chr18 | 4020222       | 4020473   | 252 |
| chr17 | 70109457      | 70109708  | 252 |
| chr17 | 64324203      | 64324454  | 252 |
| chr17 | 64322741      | 64322992  | 252 |
| chr16 | 45078925      | 45079176  | 252 |
| chr16 | 38784194      | 38784445  | 252 |
| chr14 | 31503296      | 31503547  | 252 |
| chr14 | 438872 439123 | 252       |     |
| chr13 | 63220947      | 63221198  | 252 |
| chr13 | 2824616       | 2824867   | 252 |
| chr10 | 81668035      | 81668286  | 252 |
| chr1  | 152266520     | 152266771 | 252 |
| chr9  | 78641237      | 78641487  | 251 |
| chr8  | 29197643      | 29197893  | 251 |
| chr7  | 43513015      | 43513265  | 251 |
| chr6  | 63985375      | 63985625  | 251 |
| chr5  | 30512834      | 30513084  | 251 |
| chr4  | 49322067      | 49322317  | 251 |
| chr3  | 123674532     | 123674782 | 251 |
| chr3  | 111659445     | 111659695 | 251 |
| chr3  | 18482875      | 18483125  | 251 |
| chr26 | 41445634      | 41445884  | 251 |
| chr21 | 68919973      | 68920223  | 251 |
| chr21 | 15578143      | 15578393  | 251 |
| chr2  | 131063255     | 131063505 | 251 |
| chr2  | 75805152      | 75805402  | 251 |
| chr19 | 60388319      | 60388569  | 251 |
| chr19 | 58431742      | 58431992  | 251 |
| chr19 | 43630596      | 43630846  | 251 |
| chr19 | 37887358      | 37887608  | 251 |
| chr19 | 24698866      | 24699116  | 251 |
| chr18 | 55210284      | 55210534  | 251 |
| chr18 | 54291984      | 54292234  | 251 |
| chr18 | 53020085      | 53020335  | 251 |
| chr18 | 47860240      | 47860490  | 251 |
| chr15 | 51016657      | 51016907  | 251 |
| chr11 | 2794269       | 2794519   | 251 |
| chr1  | 9244632       | 9244882   | 251 |
| chr9  | 89447344      | 89447593  | 250 |
| chr8  | 7714770       | 7715019   | 250 |

|       |           |           |     |
|-------|-----------|-----------|-----|
| chr7  | 50658090  | 50658339  | 250 |
| chr5  | 123126735 | 123126984 | 250 |
| chr4  | 123491827 | 123492076 | 250 |
| chr4  | 95066654  | 95066903  | 250 |
| chr29 | 34395690  | 34395939  | 250 |
| chr28 | 12326022  | 12326271  | 250 |
| chr21 | 65844860  | 65845109  | 250 |
| chr21 | 15622388  | 15622637  | 250 |
| chr20 | 74721180  | 74721429  | 250 |
| chr20 | 23892933  | 23893182  | 250 |
| chr2  | 136400292 | 136400541 | 250 |
| chr18 | 22174003  | 22174252  | 250 |
| chr18 | 11748821  | 11749070  | 250 |
| chr16 | 69746831  | 69747080  | 250 |
| chr16 | 41168426  | 41168675  | 250 |
| chr16 | 3715153   | 3715402   | 250 |
| chr15 | 28903584  | 28903833  | 250 |
| chr14 | 27990695  | 27990944  | 250 |
| chr14 | 12088372  | 12088621  | 250 |
| chr13 | 75654696  | 75654945  | 250 |
| chr12 | 30975814  | 30976063  | 250 |
| chr10 | 13341674  | 13341923  | 250 |
| chr1  | 137054764 | 137055013 | 250 |
| chr9  | 108137033 | 108137281 | 249 |
| chr8  | 65143583  | 65143831  | 249 |
| chr8  | 59828969  | 59829217  | 249 |
| chr7  | 52395953  | 52396201  | 249 |
| chr6  | 120781780 | 120782028 | 249 |
| chr5  | 123127299 | 123127547 | 249 |
| chr4  | 104685047 | 104685295 | 249 |
| chr4  | 65409856  | 65410104  | 249 |
| chr29 | 49032338  | 49032586  | 249 |
| chr29 | 45791245  | 45791493  | 249 |
| chr29 | 30862990  | 30863238  | 249 |
| chr23 | 19327645  | 19327893  | 249 |
| chr23 | 7254927   | 7255175   | 249 |
| chr2  | 75952581  | 75952829  | 249 |
| chr19 | 35108528  | 35108776  | 249 |
| chr19 | 16984988  | 16985236  | 249 |
| chr18 | 55151498  | 55151746  | 249 |
| chr18 | 50057618  | 50057866  | 249 |
| chr17 | 19012954  | 19013202  | 249 |
| chr13 | 43830433  | 43830681  | 249 |
| chr12 | 9569722   | 9569970   | 249 |
| chr11 | 45842281  | 45842529  | 249 |
| chr10 | 64022061  | 64022309  | 249 |
| chr1  | 82971095  | 82971343  | 249 |
| chr9  | 100097180 | 100097427 | 248 |
| chr5  | 113431687 | 113431934 | 248 |
| chr5  | 61054489  | 61054736  | 248 |



|       |           |           |     |
|-------|-----------|-----------|-----|
| chr3  | 119563481 | 119563728 | 248 |
| chr27 | 35946719  | 35946966  | 248 |
| chr24 | 50220091  | 50220338  | 248 |
| chr24 | 5105318   | 5105565   | 248 |
| chr23 | 13694674  | 13694921  | 248 |
| chr2  | 130969641 | 130969888 | 248 |
| chr19 | 60411537  | 60411784  | 248 |
| chr19 | 58196233  | 58196480  | 248 |
| chr19 | 9666857   | 9667104   | 248 |
| chr19 | 7205455   | 7205702   | 248 |
| chr18 | 64640007  | 64640254  | 248 |
| chr17 | 75669299  | 75669546  | 248 |
| chr14 | 1965888   | 1966135   | 248 |
| chr13 | 75676033  | 75676280  | 248 |
| chr13 | 66066656  | 66066903  | 248 |
| chr11 | 19747354  | 19747601  | 248 |
| chr10 | 102662171 | 102662418 | 248 |
| chr1  | 80153232  | 80153479  | 248 |
| chr8  | 100280192 | 100280438 | 247 |
| chr7  | 52384103  | 52384349  | 247 |
| chr5  | 113561171 | 113561417 | 247 |
| chr5  | 112099432 | 112099678 | 247 |
| chr5  | 80745425  | 80745671  | 247 |
| chr28 | 26916923  | 26917169  | 247 |
| chr25 | 36440355  | 36440601  | 247 |
| chr23 | 18660059  | 18660305  | 247 |
| chr22 | 29662199  | 29662445  | 247 |
| chr20 | 5118263   | 5118509   | 247 |
| chr2  | 139216359 | 139216605 | 247 |
| chr2  | 15366214  | 15366460  | 247 |
| chr19 | 55810503  | 55810749  | 247 |
| chr19 | 38626027  | 38626273  | 247 |
| chr19 | 13542468  | 13542714  | 247 |
| chr18 | 12623369  | 12623615  | 247 |
| chr17 | 73809340  | 73809586  | 247 |
| chr17 | 59055459  | 59055705  | 247 |
| chr17 | 48558094  | 48558340  | 247 |
| chr12 | 14932338  | 14932584  | 247 |
| chr11 | 7053135   | 7053381   | 247 |
| chr10 | 8691950   | 8692196   | 247 |
| chr7  | 37460169  | 37460414  | 246 |
| chr4  | 8606995   | 8607240   | 246 |
| chr3  | 123269078 | 123269323 | 246 |
| chr3  | 114787560 | 114787805 | 246 |
| chr3  | 99111411  | 99111656  | 246 |
| chr3  | 22616179  | 22616424  | 246 |
| chr3  | 15212177  | 15212422  | 246 |
| chr26 | 51366260  | 51366505  | 246 |
| chr24 | 36949491  | 36949736  | 246 |
| chr23 | 15105324  | 15105569  | 246 |

|       |               |           |     |
|-------|---------------|-----------|-----|
| chr22 | 60324944      | 60325189  | 246 |
| chr21 | 47525947      | 47526192  | 246 |
| chr2  | 135774078     | 135774323 | 246 |
| chr2  | 111342551     | 111342796 | 246 |
| chr2  | 74271814      | 74272059  | 246 |
| chr19 | 63952537      | 63952782  | 246 |
| chr18 | 63808484      | 63808729  | 246 |
| chr18 | 55073150      | 55073395  | 246 |
| chr16 | 73138975      | 73139220  | 246 |
| chr16 | 60268204      | 60268449  | 246 |
| chr15 | 75600682      | 75600927  | 246 |
| chr15 | 29175833      | 29176078  | 246 |
| chr14 | 6384277       | 6384522   | 246 |
| chr13 | 79903171      | 79903416  | 246 |
| chr13 | 60966791      | 60967036  | 246 |
| chr12 | 82628633      | 82628878  | 246 |
| chr11 | 81490105      | 81490350  | 246 |
| chr9  | 100348951     | 100349195 | 245 |
| chr8  | 108835372     | 108835616 | 245 |
| chr6  | 106755615     | 106755859 | 245 |
| chr3  | 127028683     | 127028927 | 245 |
| chr3  | 123219754     | 123219998 | 245 |
| chr3  | 33539772      | 33540016  | 245 |
| chr28 | 43583396      | 43583640  | 245 |
| chr28 | 25140455      | 25140699  | 245 |
| chr27 | 22185417      | 22185661  | 245 |
| chr21 | 47608896      | 47609140  | 245 |
| chr20 | 708242 708486 | 245       |     |
| chr2  | 129260407     | 129260651 | 245 |
| chr2  | 122166904     | 122167148 | 245 |
| chr2  | 115069408     | 115069652 | 245 |
| chr2  | 76028894      | 76029138  | 245 |
| chr19 | 13483659      | 13483903  | 245 |
| chr17 | 70390281      | 70390525  | 245 |
| chr17 | 63328862      | 63329106  | 245 |
| chr17 | 14833231      | 14833475  | 245 |
| chr16 | 3572084       | 3572328   | 245 |
| chr15 | 73832489      | 73832733  | 245 |
| chr13 | 74335207      | 74335451  | 245 |
| chr13 | 40103401      | 40103645  | 245 |
| chr13 | 38770729      | 38770973  | 245 |
| chr12 | 32524607      | 32524851  | 245 |
| chr11 | 100920327     | 100920571 | 245 |
| chr11 | 92150792      | 92151036  | 245 |
| chr11 | 44949128      | 44949372  | 245 |
| chr10 | 17579778      | 17580022  | 245 |
| chrX  | 62919243      | 62919486  | 244 |
| chr9  | 43823477      | 43823720  | 244 |
| chr8  | 63510472      | 63510715  | 244 |
| chr7  | 89477613      | 89477856  | 244 |

|       |               |           |     |
|-------|---------------|-----------|-----|
| chr7  | 10168983      | 10169226  | 244 |
| chr5  | 119360042     | 119360285 | 244 |
| chr5  | 30542880      | 30543123  | 244 |
| chr4  | 121480109     | 121480352 | 244 |
| chr3  | 127793094     | 127793337 | 244 |
| chr28 | 25166189      | 25166432  | 244 |
| chr23 | 52761793      | 52762036  | 244 |
| chr23 | 11893798      | 11894041  | 244 |
| chr21 | 25077388      | 25077631  | 244 |
| chr20 | 70576484      | 70576727  | 244 |
| chr19 | 11005477      | 11005720  | 244 |
| chr17 | 72713435      | 72713678  | 244 |
| chr17 | 54489687      | 54489930  | 244 |
| chr15 | 27263981      | 27264224  | 244 |
| chr11 | 92506670      | 92506913  | 244 |
| chr11 | 91588438      | 91588681  | 244 |
| chr11 | 89026283      | 89026526  | 244 |
| chr8  | 93080176      | 93080418  | 243 |
| chr6  | 107278017     | 107278259 | 243 |
| chr5  | 33999070      | 33999312  | 243 |
| chr3  | 33841984      | 33842226  | 243 |
| chr29 | 11887943      | 11888185  | 243 |
| chr26 | 51255746      | 51255988  | 243 |
| chr22 | 56291941      | 56292183  | 243 |
| chr2  | 123018207     | 123018449 | 243 |
| chr19 | 20347482      | 20347724  | 243 |
| chr17 | 50199523      | 50199765  | 243 |
| chr15 | 27853717      | 27853959  | 243 |
| chr14 | 16643533      | 16643775  | 243 |
| chr13 | 80043933      | 80044175  | 243 |
| chr13 | 35564974      | 35565216  | 243 |
| chr11 | 70883138      | 70883380  | 243 |
| chr10 | 36275378      | 36275620  | 243 |
| chr9  | 92058464      | 92058705  | 242 |
| chr8  | 241063 241304 | 242       |     |
| chr7  | 75400535      | 75400776  | 242 |
| chr6  | 117548977     | 117549218 | 242 |
| chr4  | 120609070     | 120609311 | 242 |
| chr4  | 68111070      | 68111311  | 242 |
| chr4  | 50705129      | 50705370  | 242 |
| chr29 | 37188686      | 37188927  | 242 |
| chr27 | 26634747      | 26634988  | 242 |
| chr25 | 37520910      | 37521151  | 242 |
| chr25 | 2964171       | 2964412   | 242 |
| chr25 | 1306790       | 1307031   | 242 |
| chr24 | 49524160      | 49524401  | 242 |
| chr24 | 20415808      | 20416049  | 242 |
| chr23 | 21488129      | 21488370  | 242 |
| chr21 | 28949260      | 28949501  | 242 |
| chr2  | 136633742     | 136633983 | 242 |

|       |           |           |     |
|-------|-----------|-----------|-----|
| chr19 | 40469643  | 40469884  | 242 |
| chr19 | 27444851  | 27445092  | 242 |
| chr19 | 15074415  | 15074656  | 242 |
| chr15 | 26897653  | 26897894  | 242 |
| chr13 | 75660147  | 75660388  | 242 |
| chr11 | 2563422   | 2563663   | 242 |
| chr1  | 57502362  | 57502603  | 242 |
| chr8  | 11425516  | 11425756  | 241 |
| chr7  | 45733291  | 45733531  | 241 |
| chr6  | 74277975  | 74278215  | 241 |
| chr6  | 46667539  | 46667779  | 241 |
| chr5  | 115614545 | 115614785 | 241 |
| chr4  | 14669870  | 14670110  | 241 |
| chr4  | 7578171   | 7578411   | 241 |
| chr3  | 95732330  | 95732570  | 241 |
| chr29 | 46676391  | 46676631  | 241 |
| chr25 | 40239966  | 40240206  | 241 |
| chr24 | 20361670  | 20361910  | 241 |
| chr24 | 1212484   | 1212724   | 241 |
| chr23 | 51936153  | 51936393  | 241 |
| chr20 | 19812664  | 19812904  | 241 |
| chr18 | 63514884  | 63515124  | 241 |
| chr17 | 66165657  | 66165897  | 241 |
| chr16 | 46399707  | 46399947  | 241 |
| chr15 | 28681971  | 28682211  | 241 |
| chr14 | 63508057  | 63508297  | 241 |
| chr11 | 80257069  | 80257309  | 241 |
| chr10 | 8337409   | 8337649   | 241 |
| chr9  | 93208158  | 93208397  | 240 |
| chr8  | 108825027 | 108825266 | 240 |
| chr7  | 51357498  | 51357737  | 240 |
| chr7  | 46175176  | 46175415  | 240 |
| chr5  | 104050121 | 104050360 | 240 |
| chr4  | 12827045  | 12827284  | 240 |
| chr29 | 41695629  | 41695868  | 240 |
| chr28 | 34048224  | 34048463  | 240 |
| chr27 | 26055966  | 26056205  | 240 |
| chr22 | 56705051  | 56705290  | 240 |
| chr21 | 1922047   | 1922286   | 240 |
| chr2  | 134336155 | 134336394 | 240 |
| chr17 | 69819074  | 69819313  | 240 |
| chr16 | 44057422  | 44057661  | 240 |
| chr14 | 57271319  | 57271558  | 240 |
| chr13 | 63626361  | 63626600  | 240 |
| chr11 | 90181699  | 90181938  | 240 |
| chr11 | 3615188   | 3615427   | 240 |
| chr1  | 58696082  | 58696321  | 240 |
| chr8  | 75886994  | 75887232  | 239 |
| chr7  | 106621722 | 106621960 | 239 |
| chr5  | 113444515 | 113444753 | 239 |

|       |               |           |     |
|-------|---------------|-----------|-----|
| chr4  | 117849410     | 117849648 | 239 |
| chr3  | 63048483      | 63048721  | 239 |
| chr29 | 46389316      | 46389554  | 239 |
| chr29 | 44722170      | 44722408  | 239 |
| chr24 | 44282039      | 44282277  | 239 |
| chr24 | 42589841      | 42590079  | 239 |
| chr21 | 65697525      | 65697763  | 239 |
| chr20 | 15474561      | 15474799  | 239 |
| chr19 | 14083127      | 14083365  | 239 |
| chr15 | 25459927      | 25460165  | 239 |
| chr14 | 7859902       | 7860140   | 239 |
| chr13 | 77663940      | 77664178  | 239 |
| chr13 | 59446650      | 59446888  | 239 |
| chr11 | 102403280     | 102403518 | 239 |
| chr10 | 30380152      | 30380390  | 239 |
| chr1  | 114957623     | 114957861 | 239 |
| chr5  | 113570665     | 113570902 | 238 |
| chr3  | 105924882     | 105925119 | 238 |
| chr29 | 32067024      | 32067261  | 238 |
| chr27 | 720815 721052 |           | 238 |
| chr24 | 63032871      | 63033108  | 238 |
| chr24 | 1036461       | 1036698   | 238 |
| chr23 | 7255251       | 7255488   | 238 |
| chr22 | 5022508       | 5022745   | 238 |
| chr21 | 26450975      | 26451212  | 238 |
| chr2  | 131171717     | 131171954 | 238 |
| chr19 | 39456533      | 39456770  | 238 |
| chr19 | 32832728      | 32832965  | 238 |
| chr19 | 27159164      | 27159401  | 238 |
| chr17 | 61305962      | 61306199  | 238 |
| chr17 | 55505225      | 55505462  | 238 |
| chr15 | 29442353      | 29442590  | 238 |
| chr14 | 16514301      | 16514538  | 238 |
| chr13 | 69038053      | 69038290  | 238 |
| chr13 | 59857135      | 59857372  | 238 |
| chr13 | 55119023      | 55119260  | 238 |
| chr12 | 31644002      | 31644239  | 238 |
| chr11 | 49405340      | 49405577  | 238 |
| chr11 | 31120499      | 31120736  | 238 |
| chr11 | 5634068       | 5634305   | 238 |
| chr10 | 90544353      | 90544590  | 238 |
| chr9  | 62312803      | 62313039  | 237 |
| chr7  | 16320557      | 16320793  | 237 |
| chr7  | 13491708      | 13491944  | 237 |
| chr5  | 119384616     | 119384852 | 237 |
| chr5  | 113743868     | 113744104 | 237 |
| chr27 | 27695441      | 27695677  | 237 |
| chr26 | 50842731      | 50842967  | 237 |
| chr26 | 18132789      | 18133025  | 237 |
| chr25 | 37369203      | 37369439  | 237 |

|       |           |           |     |
|-------|-----------|-----------|-----|
| chr25 | 3380431   | 3380667   | 237 |
| chr24 | 64987809  | 64988045  | 237 |
| chr24 | 58938726  | 58938962  | 237 |
| chr24 | 3936674   | 3936910   | 237 |
| chr24 | 2223232   | 2223468   | 237 |
| chr23 | 7394295   | 7394531   | 237 |
| chr22 | 56339220  | 56339456  | 237 |
| chr22 | 50764194  | 50764430  | 237 |
| chr21 | 20715796  | 20716032  | 237 |
| chr2  | 131310626 | 131310862 | 237 |
| chr2  | 123031577 | 123031813 | 237 |
| chr19 | 64715491  | 64715727  | 237 |
| chr19 | 31950767  | 31951003  | 237 |
| chr18 | 35064445  | 35064681  | 237 |
| chr18 | 25344587  | 25344823  | 237 |
| chr18 | 11692339  | 11692575  | 237 |
| chr17 | 75730179  | 75730415  | 237 |
| chr17 | 48464127  | 48464363  | 237 |
| chr17 | 48162052  | 48162288  | 237 |
| chr16 | 47066823  | 47067059  | 237 |
| chr16 | 957444    | 957680    | 237 |
| chr14 | 1047620   | 1047856   | 237 |
| chr13 | 70062863  | 70063099  | 237 |
| chr13 | 14680891  | 14681127  | 237 |
| chr12 | 34236416  | 34236652  | 237 |
| chr11 | 96407624  | 96407860  | 237 |
| chr11 | 21641236  | 21641472  | 237 |
| chr10 | 44051839  | 44052075  | 237 |
| chr9  | 106673787 | 106674022 | 236 |
| chr6  | 109815844 | 109816079 | 236 |
| chr5  | 122687271 | 122687506 | 236 |
| chr4  | 98639404  | 98639639  | 236 |
| chr26 | 20872083  | 20872318  | 236 |
| chr25 | 37434262  | 37434497  | 236 |
| chr23 | 27905698  | 27905933  | 236 |
| chr20 | 67495753  | 67495988  | 236 |
| chr19 | 63979472  | 63979707  | 236 |
| chr19 | 20373013  | 20373248  | 236 |
| chr18 | 53322724  | 53322959  | 236 |
| chr18 | 11801420  | 11801655  | 236 |
| chr17 | 63394296  | 63394531  | 236 |
| chr1  | 151666813 | 151667048 | 236 |
| chr1  | 147296429 | 147296664 | 236 |
| chr1  | 2328158   | 2328393   | 236 |
| chr3  | 121709854 | 121710088 | 235 |
| chr3  | 109751737 | 109751971 | 235 |
| chr25 | 1049873   | 1050107   | 235 |
| chr23 | 17959892  | 17960126  | 235 |
| chr22 | 5377650   | 5377884   | 235 |
| chr19 | 46892814  | 46893048  | 235 |

|       |           |           |     |
|-------|-----------|-----------|-----|
| chr18 | 1201931   | 1202165   | 235 |
| chr17 | 73036504  | 73036738  | 235 |
| chr17 | 72342758  | 72342992  | 235 |
| chr17 | 67962383  | 67962617  | 235 |
| chr16 | 34685586  | 34685820  | 235 |
| chr13 | 84060144  | 84060378  | 235 |
| chr13 | 41769996  | 41770230  | 235 |
| chr11 | 10676886  | 10677120  | 235 |
| chr10 | 17118458  | 17118692  | 235 |
| chr10 | 17061946  | 17062180  | 235 |
| chr10 | 7205383   | 7205617   | 235 |
| chr7  | 95995841  | 95996074  | 234 |
| chr6  | 47256628  | 47256861  | 234 |
| chr5  | 81566535  | 81566768  | 234 |
| chr5  | 30386619  | 30386852  | 234 |
| chr4  | 118287304 | 118287537 | 234 |
| chr29 | 36731704  | 36731937  | 234 |
| chr28 | 11383307  | 11383540  | 234 |
| chr27 | 35336975  | 35337208  | 234 |
| chr26 | 21768849  | 21769082  | 234 |
| chr23 | 31412961  | 31413194  | 234 |
| chr23 | 18463271  | 18463504  | 234 |
| chr22 | 29697724  | 29697957  | 234 |
| chr21 | 58997991  | 58998224  | 234 |
| chr18 | 1192516   | 1192749   | 234 |
| chr14 | 21031940  | 21032173  | 234 |
| chr11 | 104571470 | 104571703 | 234 |
| chr9  | 106958691 | 106958923 | 233 |
| chr8  | 93038233  | 93038465  | 233 |
| chr8  | 7836980   | 7837212   | 233 |
| chr6  | 121912487 | 121912719 | 233 |
| chr6  | 121868866 | 121869098 | 233 |
| chr4  | 123336286 | 123336518 | 233 |
| chr4  | 32193692  | 32193924  | 233 |
| chr3  | 47846624  | 47846856  | 233 |
| chr29 | 34955479  | 34955711  | 233 |
| chr26 | 43038147  | 43038379  | 233 |
| chr26 | 43008479  | 43008711  | 233 |
| chr21 | 66368782  | 66369014  | 233 |
| chr21 | 33138023  | 33138255  | 233 |
| chr20 | 42193631  | 42193863  | 233 |
| chr2  | 136972320 | 136972552 | 233 |
| chr2  | 127792315 | 127792547 | 233 |
| chr2  | 126702748 | 126702980 | 233 |
| chr19 | 61212989  | 61213221  | 233 |
| chr19 | 41241129  | 41241361  | 233 |
| chr19 | 6725010   | 6725242   | 233 |
| chr18 | 12779959  | 12780191  | 233 |
| chr16 | 29021684  | 29021916  | 233 |
| chr15 | 27306395  | 27306627  | 233 |

|       |               |           |     |
|-------|---------------|-----------|-----|
| chr15 | 24623348      | 24623580  | 233 |
| chr13 | 59817213      | 59817445  | 233 |
| chr13 | 59345316      | 59345548  | 233 |
| chr11 | 74972591      | 74972823  | 233 |
| chr10 | 22008507      | 22008739  | 233 |
| chr1  | 136885489     | 136885721 | 233 |
| chr1  | 110652725     | 110652957 | 233 |
| chr1  | 128224 128456 | 233       |     |
| chr5  | 32829869      | 32830100  | 232 |
| chr5  | 29130966      | 29131197  | 232 |
| chr4  | 4879863       | 4880094   | 232 |
| chr29 | 34913489      | 34913720  | 232 |
| chr27 | 45608882      | 45609113  | 232 |
| chr27 | 767290 767521 | 232       |     |
| chr26 | 21960118      | 21960349  | 232 |
| chr25 | 39215501      | 39215732  | 232 |
| chr24 | 48455774      | 48456005  | 232 |
| chr19 | 38356894      | 38357125  | 232 |
| chr18 | 55151150      | 55151381  | 232 |
| chr18 | 26117612      | 26117843  | 232 |
| chr18 | 18719009      | 18719240  | 232 |
| chr18 | 511795 512026 | 232       |     |
| chr17 | 69202967      | 69203198  | 232 |
| chr16 | 75618505      | 75618736  | 232 |
| chr16 | 58436449      | 58436680  | 232 |
| chr15 | 29334986      | 29335217  | 232 |
| chr11 | 26471332      | 26471563  | 232 |
| chr10 | 86269194      | 86269425  | 232 |
| chr10 | 7753684       | 7753915   | 232 |
| chr7  | 19181499      | 19181729  | 231 |
| chr7  | 13222965      | 13223195  | 231 |
| chr5  | 29633964      | 29634194  | 231 |
| chr4  | 116173254     | 116173484 | 231 |
| chr4  | 71617578      | 71617808  | 231 |
| chr4  | 68121404      | 68121634  | 231 |
| chr3  | 117289049     | 117289279 | 231 |
| chr28 | 33252196      | 33252426  | 231 |
| chr25 | 27583663      | 27583893  | 231 |
| chr22 | 50732770      | 50733000  | 231 |
| chr19 | 41402240      | 41402470  | 231 |
| chr18 | 45433160      | 45433390  | 231 |
| chr18 | 38191149      | 38191379  | 231 |
| chr17 | 61282447      | 61282677  | 231 |
| chr17 | 49461666      | 49461896  | 231 |
| chr13 | 35453096      | 35453326  | 231 |
| chr1  | 133442806     | 133443036 | 231 |
| chr8  | 1627074       | 1627303   | 230 |
| chr7  | 3696661       | 3696890   | 230 |
| chr5  | 121395640     | 121395869 | 230 |
| chr5  | 33852289      | 33852518  | 230 |



|       |               |           |     |
|-------|---------------|-----------|-----|
| chr3  | 36954821      | 36955050  | 230 |
| chr3  | 22512903      | 22513132  | 230 |
| chr29 | 48957093      | 48957322  | 230 |
| chr27 | 26852353      | 26852582  | 230 |
| chr25 | 34404665      | 34404894  | 230 |
| chr23 | 15807071      | 15807300  | 230 |
| chr22 | 50813568      | 50813797  | 230 |
| chr2  | 136705016     | 136705245 | 230 |
| chr19 | 54643290      | 54643519  | 230 |
| chr14 | 1842478       | 1842707   | 230 |
| chr14 | 1619934       | 1620163   | 230 |
| chr13 | 75796740      | 75796969  | 230 |
| chr13 | 68941826      | 68942055  | 230 |
| chr13 | 65809175      | 65809404  | 230 |
| chr11 | 68241943      | 68242172  | 230 |
| chr10 | 74590487      | 74590716  | 230 |
| chr10 | 34204723      | 34204952  | 230 |
| chr10 | 17701977      | 17702206  | 230 |
| chr10 | 17343404      | 17343633  | 230 |
| chr1  | 152076751     | 152076980 | 230 |
| chr6  | 14206773      | 14207001  | 229 |
| chr6  | 5517971       | 5518199   | 229 |
| chr5  | 113059297     | 113059525 | 229 |
| chr4  | 123128799     | 123129027 | 229 |
| chr4  | 56785294      | 56785522  | 229 |
| chr3  | 26149449      | 26149677  | 229 |
| chr25 | 16573122      | 16573350  | 229 |
| chr25 | 4837996       | 4838224   | 229 |
| chr23 | 31791216      | 31791444  | 229 |
| chr22 | 15421733      | 15421961  | 229 |
| chr21 | 26045476      | 26045704  | 229 |
| chr2  | 131031686     | 131031914 | 229 |
| chr2  | 122199154     | 122199382 | 229 |
| chr2  | 92358349      | 92358577  | 229 |
| chr19 | 55942730      | 55942958  | 229 |
| chr19 | 15078373      | 15078601  | 229 |
| chr17 | 73935539      | 73935767  | 229 |
| chr15 | 29037675      | 29037903  | 229 |
| chr15 | 26912819      | 26913047  | 229 |
| chr11 | 104692788     | 104693016 | 229 |
| chr11 | 46195584      | 46195812  | 229 |
| chr11 | 5399197       | 5399425   | 229 |
| chr8  | 77622748      | 77622975  | 228 |
| chr7  | 18437130      | 18437357  | 228 |
| chr6  | 685662 685889 |           | 228 |
| chr5  | 72349473      | 72349700  | 228 |
| chr5  | 28870581      | 28870808  | 228 |
| chr4  | 71441588      | 71441815  | 228 |
| chr3  | 99655873      | 99656100  | 228 |
| chr28 | 26813018      | 26813245  | 228 |

|       |               |           |     |
|-------|---------------|-----------|-----|
| chr27 | 47097892      | 47098119  | 228 |
| chr25 | 358881 359108 |           | 228 |
| chr23 | 18574844      | 18575071  | 228 |
| chr23 | 18159120      | 18159347  | 228 |
| chr21 | 19857490      | 19857717  | 228 |
| chr2  | 134419023     | 134419250 | 228 |
| chr18 | 11755186      | 11755413  | 228 |
| chr16 | 54635564      | 54635791  | 228 |
| chr14 | 23778073      | 23778300  | 228 |
| chr13 | 66987104      | 66987331  | 228 |
| chr13 | 40984187      | 40984414  | 228 |
| chr13 | 40816808      | 40817035  | 228 |
| chr1  | 77995184      | 77995411  | 228 |
| chr1  | 68858172      | 68858399  | 228 |
| chr8  | 82098031      | 82098257  | 227 |
| chr3  | 126205435     | 126205661 | 227 |
| chr29 | 49714139      | 49714365  | 227 |
| chr29 | 44563626      | 44563852  | 227 |
| chr24 | 1693612       | 1693838   | 227 |
| chr22 | 60003758      | 60003984  | 227 |
| chr2  | 127573939     | 127574165 | 227 |
| chr19 | 59120200      | 59120426  | 227 |
| chr18 | 50263789      | 50264015  | 227 |
| chr18 | 43148881      | 43149107  | 227 |
| chr12 | 29750424      | 29750650  | 227 |
| chrX  | 23160664      | 23160889  | 226 |
| chrX  | 11024194      | 11024419  | 226 |
| chr8  | 103805946     | 103806171 | 226 |
| chr8  | 57671239      | 57671464  | 226 |
| chr5  | 120498551     | 120498776 | 226 |
| chr5  | 30487096      | 30487321  | 226 |
| chr5  | 29139920      | 29140145  | 226 |
| chr3  | 116151276     | 116151501 | 226 |
| chr26 | 7005412       | 7005637   | 226 |
| chr25 | 34533506      | 34533731  | 226 |
| chr24 | 41099433      | 41099658  | 226 |
| chr2  | 134333593     | 134333818 | 226 |
| chr2  | 127972437     | 127972662 | 226 |
| chr2  | 125423332     | 125423557 | 226 |
| chr19 | 39912116      | 39912341  | 226 |
| chr18 | 17364369      | 17364594  | 226 |
| chr16 | 54163330      | 54163555  | 226 |
| chr13 | 75749204      | 75749429  | 226 |
| chr11 | 89524344      | 89524569  | 226 |
| chr10 | 21438846      | 21439071  | 226 |
| chr5  | 112520417     | 112520641 | 225 |
| chr28 | 34023447      | 34023671  | 225 |
| chr26 | 51532387      | 51532611  | 225 |
| chr26 | 45692626      | 45692850  | 225 |
| chr18 | 63775374      | 63775598  | 225 |

|       |               |           |     |
|-------|---------------|-----------|-----|
| chr17 | 66180505      | 66180729  | 225 |
| chr13 | 66949829      | 66950053  | 225 |
| chr1  | 136907518     | 136907742 | 225 |
| chr7  | 42191073      | 42191296  | 224 |
| chr7  | 37567379      | 37567602  | 224 |
| chr6  | 92071863      | 92072086  | 224 |
| chr3  | 20581131      | 20581354  | 224 |
| chr28 | 25438149      | 25438372  | 224 |
| chr28 | 185164 185387 | 224       |     |
| chr26 | 22286346      | 22286569  | 224 |
| chr25 | 43662536      | 43662759  | 224 |
| chr25 | 43154670      | 43154893  | 224 |
| chr25 | 41555809      | 41556032  | 224 |
| chr22 | 12051212      | 12051435  | 224 |
| chr19 | 54597556      | 54597779  | 224 |
| chr19 | 47269951      | 47270174  | 224 |
| chr16 | 61281220      | 61281443  | 224 |
| chr13 | 73316479      | 73316702  | 224 |
| chr13 | 59860702      | 59860925  | 224 |
| chr13 | 18361904      | 18362127  | 224 |
| chr12 | 32161762      | 32161985  | 224 |
| chr10 | 20964182      | 20964405  | 224 |
| chr8  | 1621732       | 1621954   | 223 |
| chr4  | 27439247      | 27439469  | 223 |
| chr3  | 113083276     | 113083498 | 223 |
| chr3  | 23000011      | 23000233  | 223 |
| chr26 | 20917843      | 20918065  | 223 |
| chr21 | 31164165      | 31164387  | 223 |
| chr2  | 140006309     | 140006531 | 223 |
| chr19 | 41474170      | 41474392  | 223 |
| chr18 | 54937005      | 54937227  | 223 |
| chr17 | 66144606      | 66144828  | 223 |
| chr13 | 66883475      | 66883697  | 223 |
| chr12 | 84127184      | 84127406  | 223 |
| chr11 | 76387816      | 76388038  | 223 |
| chr10 | 84391080      | 84391302  | 223 |
| chr10 | 28944919      | 28945141  | 223 |
| chr1  | 1600564       | 1600786   | 223 |
| chr3  | 113237497     | 113237718 | 222 |
| chr29 | 37124195      | 37124416  | 222 |
| chr25 | 29403062      | 29403283  | 222 |
| chr24 | 43787104      | 43787325  | 222 |
| chr22 | 59880698      | 59880919  | 222 |
| chr22 | 51499945      | 51500166  | 222 |
| chr21 | 58764344      | 58764565  | 222 |
| chr19 | 55408326      | 55408547  | 222 |
| chr17 | 69366250      | 69366471  | 222 |
| chr16 | 73271738      | 73271959  | 222 |
| chr13 | 33988541      | 33988762  | 222 |
| chr6  | 122456353     | 122456573 | 221 |

|       |               |           |     |
|-------|---------------|-----------|-----|
| chr4  | 72293244      | 72293464  | 221 |
| chr4  | 32173647      | 32173867  | 221 |
| chr29 | 17818935      | 17819155  | 221 |
| chr26 | 11611276      | 11611496  | 221 |
| chr22 | 54594619      | 54594839  | 221 |
| chr15 | 43392419      | 43392639  | 221 |
| chr13 | 83279291      | 83279511  | 221 |
| chr13 | 38264299      | 38264519  | 221 |
| chr12 | 68759717      | 68759937  | 221 |
| chr11 | 70885702      | 70885922  | 221 |
| chr1  | 141309816     | 141310036 | 221 |
| chr25 | 37689645      | 37689864  | 220 |
| chr23 | 20636575      | 20636794  | 220 |
| chr18 | 11759253      | 11759472  | 220 |
| chr18 | 584213 584432 | 220       |     |
| chr13 | 54022456      | 54022675  | 220 |
| chr9  | 105512546     | 105512764 | 219 |
| chr25 | 30669040      | 30669258  | 219 |
| chr22 | 56562484      | 56562702  | 219 |
| chr2  | 75949503      | 75949721  | 219 |
| chr19 | 54459495      | 54459713  | 219 |
| chr18 | 61975190      | 61975408  | 219 |
| chr11 | 9051785       | 9052003   | 219 |
| chr10 | 66896647      | 66896865  | 219 |
| chr1  | 118837674     | 118837892 | 219 |
| chr9  | 55428877      | 55429094  | 218 |
| chr8  | 45726381      | 45726598  | 218 |
| chr6  | 45444033      | 45444250  | 218 |
| chr5  | 30205172      | 30205389  | 218 |
| chr3  | 125638704     | 125638921 | 218 |
| chr29 | 25551233      | 25551450  | 218 |
| chr28 | 42848486      | 42848703  | 218 |
| chr24 | 58652059      | 58652276  | 218 |
| chr22 | 30167115      | 30167332  | 218 |
| chr22 | 747235 747452 | 218       |     |
| chr2  | 22709444      | 22709661  | 218 |
| chr18 | 62010612      | 62010829  | 218 |
| chr18 | 48438305      | 48438522  | 218 |
| chr14 | 61211186      | 61211403  | 218 |
| chr13 | 75659628      | 75659845  | 218 |
| chr11 | 14211521      | 14211738  | 218 |
| chr1  | 82873203      | 82873420  | 218 |
| chr9  | 105989004     | 105989220 | 217 |
| chr8  | 73185492      | 73185708  | 217 |
| chr5  | 121220028     | 121220244 | 217 |
| chr29 | 45627597      | 45627813  | 217 |
| chr27 | 34765732      | 34765948  | 217 |
| chr17 | 70127185      | 70127401  | 217 |
| chr12 | 32180683      | 32180899  | 217 |
| chr10 | 28840226      | 28840442  | 217 |

|       |           |           |     |
|-------|-----------|-----------|-----|
| chr10 | 21076730  | 21076946  | 217 |
| chrX  | 48284473  | 48284688  | 216 |
| chr9  | 106018088 | 106018303 | 216 |
| chr6  | 63985635  | 63985850  | 216 |
| chr5  | 60902368  | 60902583  | 216 |
| chr3  | 115769466 | 115769681 | 216 |
| chr29 | 51221613  | 51221828  | 216 |
| chr23 | 51912878  | 51913093  | 216 |
| chr22 | 56618865  | 56619080  | 216 |
| chr20 | 8712391   | 8712606   | 216 |
| chr2  | 111297013 | 111297228 | 216 |
| chr13 | 70260634  | 70260849  | 216 |
| chr13 | 40343619  | 40343834  | 216 |
| chr11 | 103808017 | 103808232 | 216 |
| chr11 | 10361314  | 10361529  | 216 |
| chr10 | 17732361  | 17732576  | 216 |
| chr7  | 17934051  | 17934265  | 215 |
| chr6  | 115647178 | 115647392 | 215 |
| chr5  | 31087882  | 31088096  | 215 |
| chr26 | 43467619  | 43467833  | 215 |
| chr25 | 3063996   | 3064210   | 215 |
| chr19 | 31635212  | 31635426  | 215 |
| chr19 | 13684479  | 13684693  | 215 |
| chr17 | 76289866  | 76290080  | 215 |
| chr17 | 61288083  | 61288297  | 215 |
| chr13 | 60384489  | 60384703  | 215 |
| chr13 | 34811254  | 34811468  | 215 |
| chr10 | 86536266  | 86536480  | 215 |
| chr10 | 46989253  | 46989467  | 215 |
| chr7  | 46245031  | 46245244  | 214 |
| chr25 | 38254961  | 38255174  | 214 |
| chr19 | 59538002  | 59538215  | 214 |
| chr18 | 13537742  | 13537955  | 214 |
| chr13 | 26657946  | 26658159  | 214 |
| chr11 | 10367649  | 10367862  | 214 |
| chr10 | 7598741   | 7598954   | 214 |
| chr1  | 143792421 | 143792634 | 214 |
| chr8  | 7589098   | 7589310   | 213 |
| chr5  | 125824062 | 125824274 | 213 |
| chr5  | 114966248 | 114966460 | 213 |
| chr3  | 105959141 | 105959353 | 213 |
| chr24 | 64960430  | 64960642  | 213 |
| chr20 | 16812402  | 16812614  | 213 |
| chr18 | 62380243  | 62380455  | 213 |
| chr13 | 70236319  | 70236531  | 213 |
| chr13 | 54422611  | 54422823  | 213 |
| chr11 | 106023662 | 106023874 | 213 |
| chr8  | 108758305 | 108758516 | 212 |
| chr5  | 102851810 | 102852021 | 212 |
| chr3  | 125637991 | 125638202 | 212 |

|       |               |           |     |
|-------|---------------|-----------|-----|
| chr19 | 33436963      | 33437174  | 212 |
| chr18 | 12391580      | 12391791  | 212 |
| chr12 | 84307720      | 84307931  | 212 |
| chr11 | 74206140      | 74206351  | 212 |
| chr11 | 66178414      | 66178625  | 212 |
| chr22 | 50729271      | 50729481  | 211 |
| chr18 | 48684739      | 48684949  | 211 |
| chr13 | 56224759      | 56224969  | 211 |
| chr8  | 5820854       | 5821063   | 210 |
| chr5  | 121240803     | 121241012 | 210 |
| chr5  | 103617209     | 103617418 | 210 |
| chr4  | 121042488     | 121042697 | 210 |
| chr3  | 123275654     | 123275863 | 210 |
| chr24 | 59345714      | 59345923  | 210 |
| chr2  | 111349375     | 111349584 | 210 |
| chr13 | 41399948      | 41400157  | 210 |
| chr13 | 40350104      | 40350313  | 210 |
| chr10 | 14522530      | 14522739  | 210 |
| chr1  | 146461628     | 146461837 | 210 |
| chr3  | 115014798     | 115015006 | 209 |
| chr29 | 48177547      | 48177755  | 209 |
| chr24 | 59587561      | 59587769  | 209 |
| chr23 | 995509 995717 |           | 209 |
| chr20 | 74927360      | 74927568  | 209 |
| chr2  | 75587236      | 75587444  | 209 |
| chr2  | 49418210      | 49418418  | 209 |
| chr17 | 63401187      | 63401395  | 209 |
| chr16 | 48696328      | 48696536  | 209 |
| chr7  | 93984656      | 93984863  | 208 |
| chr28 | 7293823       | 7294030   | 208 |
| chr11 | 89024228      | 89024435  | 208 |
| chr6  | 63388266      | 63388472  | 207 |
| chr29 | 27219577      | 27219783  | 207 |
| chr19 | 43254775      | 43254981  | 207 |
| chr18 | 33820341      | 33820547  | 207 |
| chr17 | 70049251      | 70049457  | 207 |
| chr16 | 38539259      | 38539465  | 207 |
| chr11 | 14092696      | 14092902  | 207 |
| chr5  | 28741807      | 28742012  | 206 |
| chr25 | 37493940      | 37494145  | 206 |
| chr21 | 33825711      | 33825916  | 206 |
| chr2  | 134468557     | 134468762 | 206 |
| chr19 | 24034626      | 24034831  | 206 |
| chr17 | 68736894      | 68737099  | 206 |
| chr1  | 82488411      | 82488616  | 206 |
| chr5  | 112587561     | 112587765 | 205 |
| chr24 | 43547741      | 43547945  | 205 |
| chr18 | 55802272      | 55802476  | 205 |
| chr18 | 52298766      | 52298970  | 205 |
| chr17 | 70406428      | 70406632  | 205 |

|       |               |           |     |
|-------|---------------|-----------|-----|
| chr12 | 84581360      | 84581564  | 205 |
| chr5  | 121808606     | 121808809 | 204 |
| chr3  | 22533951      | 22534154  | 204 |
| chr28 | 33873190      | 33873393  | 204 |
| chr22 | 47863834      | 47864037  | 204 |
| chr11 | 40331667      | 40331870  | 204 |
| chr19 | 52779557      | 52779759  | 203 |
| chr25 | 34415491      | 34415692  | 202 |
| chr4  | 116045665     | 116045865 | 201 |
| chr16 | 2900431       | 2901158   | 728 |
| chr4  | 121466633     | 121467183 | 551 |
| chr25 | 35515242      | 35515651  | 410 |
| chr19 | 39133410      | 39133723  | 314 |
| chr21 | 2016371       | 2016861   | 491 |
| chr8  | 7426352       | 7426790   | 439 |
| chr6  | 40949606      | 40949987  | 382 |
| chr13 | 130841 131239 | 399       |     |
| chr9  | 90269899      | 90270260  | 362 |
| chr23 | 51288829      | 51289184  | 356 |
| chr1  | 32933913      | 32934255  | 343 |
| chr26 | 22248072      | 22248549  | 478 |
| chr19 | 37955672      | 37956003  | 332 |
| chr16 | 41469045      | 41469368  | 324 |
| chr29 | 44568481      | 44568803  | 323 |
| chr18 | 51413477      | 51413990  | 514 |
| chr2  | 74030223      | 74030637  | 415 |
| chr3  | 105466902     | 105467309 | 408 |
| chr23 | 52696692      | 52696951  | 260 |
| chr18 | 64293506      | 64293802  | 297 |
| chr16 | 47054001      | 47054276  | 276 |
| chr2  | 74015741      | 74016013  | 273 |
| chr6  | 63387476      | 63387817  | 342 |
| chr23 | 52645107      | 52645533  | 427 |
| chr17 | 70330360      | 70330738  | 379 |
| chr12 | 13307490      | 13307840  | 351 |
| chr18 | 49958164      | 49958496  | 333 |
| chr13 | 47305954      | 47306279  | 326 |
| chr28 | 1344461       | 1344770   | 310 |
| chr16 | 2446401       | 2446709   | 309 |
| chr10 | 15028384      | 15028675  | 292 |
| chr19 | 19133899      | 19134183  | 285 |
| chr29 | 37678620      | 37678901  | 282 |
| chr16 | 41491323      | 41491602  | 280 |
| chr10 | 76057150      | 76057427  | 278 |
| chr5  | 48465544      | 48465803  | 260 |
| chr23 | 52762700      | 52762959  | 260 |
| chr7  | 51339620      | 51339874  | 255 |
| chr4  | 71556151      | 71556400  | 250 |
| chr8  | 73748236      | 73748477  | 242 |
| chr13 | 41017311      | 41017552  | 242 |

|       |               |           |      |
|-------|---------------|-----------|------|
| chr14 | 34073710      | 34073947  | 238  |
| chr19 | 17023349      | 17023580  | 232  |
| chr5  | 60734876      | 60735103  | 228  |
| chr25 | 33176490      | 33176712  | 223  |
| chr1  | 74577106      | 74577325  | 220  |
| chr1  | 135146510     | 135146716 | 207  |
| chr18 | 49930879      | 49931080  | 202  |
| chr21 | 52078019      | 52078219  | 201  |
| chr8  | 73738022      | 73738247  | 226  |
| chr9  | 90475710      | 90475910  | 201  |
| chr2  | 138812773     | 138813809 | 1037 |
| chr3  | 127875540     | 127876290 | 751  |
| chr22 | 54215781      | 54216220  | 440  |
| chr26 | 7012361       | 7012784   | 424  |
| chr13 | 61481043      | 61481465  | 423  |
| chr18 | 52423022      | 52423429  | 408  |
| chr11 | 98414847      | 98415222  | 376  |
| chr24 | 4208537       | 4208911   | 375  |
| chr25 | 3185093       | 3185462   | 370  |
| chr8  | 93697491      | 93697850  | 360  |
| chr10 | 8516233       | 8516583   | 351  |
| chr23 | 49888561      | 49888899  | 339  |
| chr25 | 3025959       | 3026277   | 319  |
| chr6  | 121018027     | 121018343 | 317  |
| chr29 | 48854303      | 48854591  | 289  |
| chr25 | 665523 666288 | 766       |      |
| chr16 | 44425248      | 44425911  | 664  |
| chr7  | 10823609      | 10824191  | 583  |
| chr24 | 34967276      | 34967857  | 582  |
| chr23 | 10352109      | 10352683  | 575  |
| chr20 | 24959384      | 24959929  | 546  |
| chr22 | 46582815      | 46583316  | 502  |
| chr3  | 113595324     | 113595801 | 478  |
| chr3  | 109660033     | 109660509 | 477  |
| chr7  | 19222064      | 19222414  | 351  |
| chr8  | 78837118      | 78837457  | 340  |
| chr12 | 34515101      | 34515440  | 340  |
| chr15 | 74639296      | 74639629  | 334  |
| chr17 | 63479672      | 63479992  | 321  |
| chr13 | 77732934      | 77733243  | 310  |
| chr5  | 31264357      | 31264646  | 290  |
| chr29 | 17812185      | 17812463  | 279  |
| chr7  | 53423287      | 53423553  | 267  |
| chr23 | 53265934      | 53266197  | 264  |
| chr1  | 74918770      | 74919025  | 256  |
| chr18 | 50052031      | 50052529  | 499  |
| chr3  | 116027735     | 116028192 | 458  |
| chr26 | 37096129      | 37096577  | 449  |
| chr7  | 5600506       | 5600904   | 399  |
| chr22 | 50788589      | 50788987  | 399  |



|       |               |           |     |
|-------|---------------|-----------|-----|
| chr24 | 43786456      | 43786851  | 396 |
| chr16 | 965588 965983 |           | 396 |
| chr1  | 74622004      | 74622397  | 394 |
| chr13 | 77683846      | 77684230  | 385 |
| chr5  | 28879384      | 28879766  | 383 |
| chr19 | 64759416      | 64759797  | 382 |
| chr19 | 25806235      | 25806607  | 373 |
| chr8  | 43600476      | 43600845  | 370 |
| chr25 | 39431393      | 39431762  | 370 |
| chr16 | 38789096      | 38789461  | 366 |
| chr3  | 117402604     | 117402965 | 362 |
| chr18 | 55584981      | 55585342  | 362 |
| chr2  | 123348319     | 123348661 | 343 |
| chr18 | 48753216      | 48753558  | 343 |
| chr10 | 8557125       | 8557453   | 329 |
| chr15 | 74611632      | 74611959  | 328 |
| chr21 | 66652398      | 66652722  | 325 |
| chr9  | 38368901      | 38369214  | 314 |
| chr8  | 24392618      | 24392923  | 306 |
| chr21 | 28906514      | 28906806  | 293 |
| chr1  | 82911599      | 82911888  | 290 |
| chr23 | 10537811      | 10538097  | 287 |
| chr26 | 41450546      | 41450819  | 274 |
| chr25 | 37972917      | 37973185  | 269 |
| chr27 | 34775627      | 34776164  | 538 |
| chr24 | 1220385       | 1220857   | 473 |
| chr13 | 63495617      | 63496067  | 451 |
| chr22 | 59674490      | 59674934  | 445 |
| chr16 | 2224255       | 2224695   | 441 |
| chr29 | 48888996      | 48889424  | 429 |
| chr14 | 64006558      | 64006982  | 425 |
| chr1  | 99777366      | 99777760  | 395 |
| chr13 | 63655092      | 63655485  | 394 |
| chr21 | 1771871       | 1772261   | 391 |
| chr3  | 56435149      | 56435537  | 389 |
| chr4  | 122987359     | 122987745 | 387 |
| chr21 | 61663203      | 61663585  | 383 |
| chr25 | 36593975      | 36594351  | 377 |
| chr23 | 44421642      | 44422016  | 375 |
| chr11 | 104898854     | 104899221 | 368 |
| chr10 | 24177283      | 24177650  | 368 |
| chr2  | 111840896     | 111841258 | 363 |
| chr10 | 20896336      | 20896698  | 363 |
| chr11 | 109707244     | 109707591 | 348 |
| chr17 | 59297471      | 59297808  | 338 |
| chr25 | 38292351      | 38292687  | 337 |
| chr23 | 8816491       | 8816824   | 334 |
| chr15 | 25683841      | 25684173  | 333 |
| chr21 | 18859580      | 18859908  | 329 |
| chr7  | 3926791       | 3927100   | 310 |

|       |             |           |     |
|-------|-------------|-----------|-----|
| chr26 | 22334731    | 22335016  | 286 |
| chr29 | 51168885    | 51169161  | 277 |
| chr27 | 36114334    | 36114594  | 261 |
| chr27 | 11586340    | 11586818  | 479 |
| chr8  | 74074830    | 74075292  | 463 |
| chr23 | 52809718    | 52810116  | 399 |
| chr26 | 5867081     | 5867469   | 389 |
| chr25 | 31893 32277 | 385       |     |
| chr1  | 82236154    | 82236536  | 383 |
| chr21 | 20922078    | 20922444  | 367 |
| chr26 | 41885963    | 41886324  | 362 |
| chr1  | 69545739    | 69546083  | 345 |
| chr12 | 21720604    | 21720945  | 342 |
| chr27 | 35831657    | 35831979  | 323 |
| chr21 | 23987524    | 23987814  | 291 |
| chr5  | 33938520    | 33938801  | 282 |
| chr25 | 38836298    | 38836543  | 246 |
| chr29 | 29684670    | 29685089  | 420 |
| chr11 | 100953971   | 100954390 | 420 |
| chr25 | 38343350    | 38343743  | 394 |
| chr19 | 44177616    | 44178009  | 394 |
| chr13 | 68920527    | 68920910  | 384 |
| chr23 | 43255042    | 43255417  | 376 |
| chr24 | 20394411    | 20394783  | 373 |
| chr11 | 3876172     | 3876543   | 372 |
| chr23 | 36834311    | 36834679  | 369 |
| chr9  | 90471082    | 90471447  | 366 |
| chr16 | 44291726    | 44292087  | 362 |
| chr5  | 80251049    | 80251404  | 356 |
| chr3  | 22550145    | 22550500  | 356 |
| chr19 | 65216486    | 65216841  | 356 |
| chr15 | 27446158    | 27446510  | 353 |
| chr16 | 38723772    | 38724121  | 350 |
| chr19 | 39837667    | 39838005  | 339 |
| chr5  | 60316365    | 60316702  | 338 |
| chr6  | 118653459   | 118653795 | 337 |
| chr20 | 6598063     | 6598395   | 333 |
| chr8  | 73329383    | 73329714  | 332 |
| chr11 | 104899460   | 104899791 | 332 |
| chr16 | 1589718     | 1590048   | 331 |
| chr8  | 24309616    | 24309942  | 327 |
| chr7  | 9131123     | 9131444   | 322 |
| chr12 | 14989484    | 14989804  | 321 |
| chr7  | 10409317    | 10409635  | 319 |
| chr3  | 35649679    | 35649997  | 319 |
| chr21 | 69011286    | 69011602  | 317 |
| chr12 | 84194628    | 84194942  | 315 |
| chr19 | 38661331    | 38661642  | 312 |
| chr25 | 38038096    | 38038406  | 311 |
| chr23 | 18854476    | 18854785  | 310 |

|       |               |           |     |
|-------|---------------|-----------|-----|
| chr17 | 70282489      | 70282793  | 305 |
| chr2  | 127631206     | 127631509 | 304 |
| chr12 | 35071527      | 35071830  | 304 |
| chr24 | 60566268      | 60566570  | 303 |
| chr23 | 27092308      | 27092609  | 302 |
| chr4  | 79922843      | 79923142  | 300 |
| chr19 | 23067160      | 23067458  | 299 |
| chr14 | 1585589       | 1585886   | 298 |
| chr10 | 43843537      | 43843833  | 297 |
| chr19 | 25494796      | 25495090  | 295 |
| chr2  | 30859114      | 30859407  | 294 |
| chr1  | 148003536     | 148003829 | 294 |
| chr16 | 46784957      | 46785247  | 291 |
| chr10 | 25034785      | 25035074  | 290 |
| chr13 | 2586424       | 2586711   | 288 |
| chr28 | 34025792      | 34026078  | 287 |
| chr27 | 655733 656017 | 285       |     |
| chr21 | 57826750      | 57827034  | 285 |
| chr8  | 78841891      | 78842174  | 284 |
| chr8  | 103922114     | 103922395 | 282 |
| chr21 | 33092136      | 33092417  | 282 |
| chr18 | 13205602      | 13205878  | 277 |
| chr13 | 77280943      | 77281219  | 277 |
| chr17 | 47074104      | 47074379  | 276 |
| chr7  | 43774130      | 43774404  | 275 |
| chr6  | 119403667     | 119403941 | 275 |
| chr15 | 24489424      | 24489698  | 275 |
| chr12 | 34237631      | 34237905  | 275 |
| chr11 | 104890685     | 104890959 | 275 |
| chr4  | 70481315      | 70481587  | 273 |
| chr19 | 23940816      | 23941084  | 269 |
| chr18 | 56920995      | 56921262  | 268 |
| chr19 | 21788618      | 21788884  | 267 |
| chr3  | 116680171     | 116680435 | 265 |
| chr13 | 11416371      | 11416635  | 265 |
| chr22 | 59109314      | 59109575  | 262 |
| chr3  | 127825329     | 127825589 | 261 |
| chr5  | 114247307     | 114247566 | 260 |
| chr23 | 8441489       | 8441748   | 260 |
| chr17 | 72999545      | 72999802  | 258 |
| chr21 | 20629838      | 20630092  | 255 |
| chr15 | 78007383      | 78007637  | 255 |
| chr11 | 12871026      | 12871280  | 255 |
| chr25 | 42042372      | 42042625  | 254 |
| chr9  | 90306807      | 90307059  | 253 |
| chr18 | 54951975      | 54952225  | 251 |
| chr8  | 72538596      | 72538843  | 248 |
| chr7  | 13099979      | 13100226  | 248 |
| chr18 | 25545123      | 25545369  | 247 |
| chr4  | 73691875      | 73692120  | 246 |

|       |           |           |     |
|-------|-----------|-----------|-----|
| chr19 | 40503650  | 40503895  | 246 |
| chr13 | 41698338  | 41698581  | 244 |
| chr15 | 21853525  | 21853766  | 242 |
| chr3  | 120633941 | 120634181 | 241 |
| chr26 | 21810247  | 21810487  | 241 |
| chr19 | 46725276  | 46725516  | 241 |
| chr19 | 37930300  | 37930540  | 241 |
| chr29 | 45766355  | 45766594  | 240 |
| chr13 | 75665266  | 75665505  | 240 |
| chr8  | 24162790  | 24163028  | 239 |
| chr18 | 11183903  | 11184141  | 239 |
| chr3  | 15766018  | 15766254  | 237 |
| chr18 | 63582046  | 63582282  | 237 |
| chr12 | 32553140  | 32553375  | 236 |
| chr29 | 34914627  | 34914860  | 234 |
| chr11 | 14502022  | 14502255  | 234 |
| chr25 | 33219059  | 33219291  | 233 |
| chr29 | 39030101  | 39030332  | 232 |
| chr28 | 26468283  | 26468513  | 231 |
| chr1  | 158506420 | 158506650 | 231 |
| chr13 | 54927392  | 54927620  | 229 |
| chr21 | 34145921  | 34146147  | 227 |
| chr19 | 54772337  | 54772562  | 226 |
| chr13 | 37648114  | 37648338  | 225 |
| chr8  | 24752638  | 24752860  | 223 |
| chr19 | 56112715  | 56112936  | 222 |
| chr19 | 54861983  | 54862204  | 222 |
| chr29 | 27290028  | 27290248  | 221 |
| chr3  | 22624887  | 22625106  | 220 |
| chr23 | 18569338  | 18569555  | 218 |
| chr8  | 73879035  | 73879250  | 216 |
| chr4  | 122978803 | 122979017 | 215 |
| chr5  | 30323681  | 30323894  | 214 |
| chr5  | 79199852  | 79200064  | 213 |
| chr23 | 52792249  | 52792459  | 211 |
| chr16 | 48715609  | 48715819  | 211 |
| chr12 | 32184089  | 32184297  | 209 |
| chr5  | 113522729 | 113522935 | 207 |
| chr5  | 80744921  | 80745127  | 207 |
| chr17 | 74271443  | 74271649  | 207 |
| chr23 | 46380516  | 46380720  | 205 |
| chr2  | 134334424 | 134334628 | 205 |
| chr1  | 58951101  | 58951305  | 205 |
| chr21 | 23256380  | 23256581  | 202 |
| chr19 | 54577919  | 54578119  | 201 |
| chr2  | 136980430 | 136980629 | 200 |
| chr9  | 90276415  | 90276662  | 248 |
| chr19 | 6196102   | 6196398   | 297 |
| chr8  | 73727671  | 73727908  | 238 |
| chr2  | 15731473  | 15731673  | 201 |

|       |               |           |     |
|-------|---------------|-----------|-----|
| chr8  | 73821392      | 73821606  | 215 |
| chr19 | 19132700      | 19132900  | 201 |
| chr18 | 58382315      | 58383048  | 734 |
| chr25 | 13376822      | 13377145  | 324 |
| chr17 | 5019343       | 5019659   | 317 |
| chr6  | 118658665     | 118659108 | 444 |
| chr5  | 120367827     | 120368213 | 387 |
| chr1  | 77831140      | 77831430  | 291 |
| chr16 | 38563397      | 38563676  | 280 |
| chr8  | 24739499      | 24739771  | 273 |
| chr23 | 8242456       | 8242727   | 272 |
| chr10 | 8565594       | 8565829   | 236 |
| chr10 | 36577257      | 36577491  | 235 |
| chr22 | 52838241      | 52838459  | 219 |
| chrX  | 39071147      | 39071361  | 215 |
| chr19 | 39150031      | 39150235  | 205 |
| chr8  | 73858456      | 73858659  | 204 |
| chr9  | 66530589      | 66530788  | 200 |
| chr18 | 51157295      | 51157715  | 421 |
| chr6  | 121779565     | 121780060 | 496 |
| chr9  | 90237831      | 90238187  | 357 |
| chr8  | 24128192      | 24128432  | 241 |
| chr13 | 136155 136378 | 224       |     |
| chr8  | 73344344      | 73344641  | 298 |
| chr8  | 73332767      | 73333084  | 318 |
| chr8  | 73813658      | 73813882  | 225 |
| chr8  | 73866866      | 73867068  | 203 |
| chr21 | 52085935      | 52086209  | 275 |
| chr3  | 24655785      | 24656000  | 216 |
| chr17 | 44248663      | 44248862  | 200 |
| chr8  | 73776428      | 73776627  | 200 |
| chr24 | 38521286      | 38521487  | 202 |
| chr4  | 72729845      | 72730051  | 207 |
| chr25 | 266661 266865 | 205       |     |
| chr29 | 49306552      | 49306755  | 204 |
| chr19 | 65236032      | 65236255  | 224 |
| chr4  | 108054675     | 108055022 | 348 |
| chrX  | 61626151      | 61626353  | 203 |
| chr25 | 14651 15018   | 368       |     |
| chr13 | 127622 127941 | 320       |     |
| chr19 | 26288585      | 26288819  | 235 |
| chr4  | 124453703     | 124453910 | 208 |
| chr21 | 9492491       | 9492698   | 208 |
| chr4  | 124451968     | 124452187 | 220 |
| chr18 | 11380843      | 11381076  | 234 |
| chr12 | 33360769      | 33361254  | 486 |
| chr11 | 80340657      | 80340979  | 323 |
| chr14 | 30835228      | 30835989  | 762 |
| chr22 | 48751359      | 48752107  | 749 |
| chr11 | 108005306     | 108005625 | 320 |

|       |               |           |     |
|-------|---------------|-----------|-----|
| chr8  | 73483090      | 73483345  | 256 |
| chr19 | 24072629      | 24073150  | 522 |
| chr24 | 49365793      | 49366161  | 369 |
| chr11 | 70936676      | 70937010  | 335 |
| chr25 | 43416608      | 43416926  | 319 |
| chr29 | 287393 287707 | 315       |     |
| chr18 | 64295061      | 64295362  | 302 |
| chr23 | 52737658      | 52737950  | 293 |
| chr29 | 44606014      | 44606391  | 378 |
| chr18 | 11416544      | 11416899  | 356 |
| chr10 | 48292023      | 48292372  | 350 |
| chr25 | 1161542       | 1161861   | 320 |
| chr17 | 66882786      | 66883095  | 310 |
| chr8  | 7608506       | 7608952   | 447 |
| chr15 | 24943142      | 24943532  | 391 |
| chr3  | 108998028     | 108998284 | 257 |
| chr16 | 38795982      | 38796332  | 351 |
| chr4  | 117151104     | 117151398 | 295 |
| chr21 | 9478409       | 9478672   | 264 |
| chr7  | 46197365      | 46197593  | 229 |
| chr17 | 64217764      | 64218108  | 345 |
| chr17 | 59089498      | 59089775  | 278 |
| chr16 | 2125600       | 2125915   | 316 |
| chr25 | 3220078       | 3220355   | 278 |
| chr18 | 48840177      | 48840393  | 217 |
| chr4  | 124168012     | 124168226 | 215 |
| chr21 | 67983965      | 67984383  | 419 |
| chr18 | 40337061      | 40337421  | 361 |
| chr10 | 7962741       | 7963101   | 361 |
| chr3  | 105734155     | 105734504 | 350 |
| chr23 | 7429372       | 7429715   | 344 |
| chr12 | 74457648      | 74457975  | 328 |
| chr25 | 35846071      | 35846396  | 326 |
| chr16 | 46781054      | 46781363  | 310 |
| chr29 | 31484543      | 31484842  | 300 |
| chr8  | 23942742      | 23943033  | 292 |
| chr8  | 73851483      | 73851771  | 289 |
| chr19 | 56499234      | 56499513  | 280 |
| chr2  | 132505263     | 132505533 | 271 |
| chr3  | 105129269     | 105129537 | 269 |
| chr11 | 109690503     | 109690770 | 268 |
| chr18 | 62211885      | 62212150  | 266 |
| chr21 | 1786045       | 1786306   | 262 |
| chr10 | 12103026      | 12103275  | 250 |
| chr5  | 40128474      | 40128722  | 249 |
| chr26 | 20379382      | 20379629  | 248 |
| chr10 | 24714224      | 24714466  | 243 |
| chr9  | 44105660      | 44105895  | 236 |
| chr2  | 35501764      | 35501997  | 234 |
| chr19 | 12617242      | 12617474  | 233 |

|       |                   |           |     |
|-------|-------------------|-----------|-----|
| chr19 | 12411176          | 12411402  | 227 |
| chr20 | 7062412           | 7062636   | 225 |
| chr19 | 19125248          | 19125470  | 223 |
| chr17 | 73429764          | 73429982  | 219 |
| chr9  | 91713409          | 91713625  | 217 |
| chr9  | 90226666          | 90226882  | 217 |
| chr8  | 73222687          | 73222903  | 217 |
| chr26 | 51658965          | 51659181  | 217 |
| chr17 | 75289853          | 75290069  | 217 |
| chr27 | 33441644          | 33441854  | 211 |
| chr15 | 66200768          | 66200974  | 207 |
| chr12 | 32192594          | 32192800  | 207 |
| chr19 | 20375887          | 20376536  | 650 |
| chr21 | 2037782           | 2038426   | 645 |
| chr22 | 47859918          | 47860530  | 613 |
| chr7  | 1886061           | 1886655   | 595 |
| chr16 | 71120427          | 71121020  | 594 |
| chr11 | 74448087          | 74448657  | 571 |
| chr16 | 134576 135125 550 |           |     |
| chr7  | 19668073          | 19668599  | 527 |
| chr20 | 5003268           | 5003767   | 500 |
| chr21 | 6539737           | 6540213   | 477 |
| chr14 | 31498116          | 31498542  | 427 |
| chr15 | 29188928          | 29189324  | 397 |
| chr10 | 38306685          | 38307075  | 391 |
| chr18 | 12631076          | 12631458  | 383 |
| chr28 | 40377909          | 40378289  | 381 |
| chr10 | 70132392          | 70132767  | 376 |
| chr18 | 50461414          | 50461787  | 374 |
| chr25 | 10355773          | 10356145  | 373 |
| chr9  | 36072927          | 36073295  | 369 |
| chr24 | 25685402          | 25685769  | 368 |
| chr16 | 61646772          | 61647138  | 367 |
| chr15 | 28634063          | 28634421  | 359 |
| chr22 | 4698773           | 4699123   | 351 |
| chr7  | 50458079          | 50458416  | 338 |
| chr5  | 47549736          | 47550072  | 337 |
| chr18 | 56784944          | 56785280  | 337 |
| chr18 | 55629381          | 55629714  | 334 |
| chr3  | 115412195         | 115412519 | 325 |
| chr14 | 6709049           | 6709365   | 317 |
| chr5  | 123480603         | 123480917 | 315 |
| chr19 | 55931033          | 55931338  | 306 |
| chr7  | 19208945          | 19209243  | 299 |
| chr9  | 100079086         | 100079377 | 292 |
| chr29 | 38066957          | 38067230  | 274 |
| chr21 | 33826732          | 33827001  | 270 |
| chr2  | 111271961         | 111272200 | 240 |
| chr26 | 47994101          | 47994847  | 747 |
| chr10 | 26016016          | 26016575  | 560 |

|       |           |           |     |
|-------|-----------|-----------|-----|
| chr5  | 123002663 | 123003219 | 557 |
| chr17 | 68459723  | 68460271  | 549 |
| chr5  | 114077797 | 114078339 | 543 |
| chr19 | 56647054  | 56647595  | 542 |
| chr18 | 64294426  | 64294936  | 511 |
| chr3  | 109629956 | 109630422 | 467 |
| chr4  | 95089684  | 95090135  | 452 |
| chr22 | 51343496  | 51343937  | 442 |
| chr17 | 18102057  | 18102493  | 437 |
| chr22 | 60434840  | 60435272  | 433 |
| chr16 | 47038608  | 47039036  | 429 |
| chr15 | 21502858  | 21503280  | 423 |
| chr9  | 24600133  | 24600526  | 394 |
| chr19 | 54298251  | 54298640  | 390 |
| chr23 | 52007407  | 52007790  | 384 |
| chr17 | 66440096  | 66440472  | 377 |
| chr26 | 20281755  | 20282128  | 374 |
| chr6  | 122429784 | 122430154 | 371 |
| chr9  | 90458606  | 90458973  | 368 |
| chr25 | 3071821   | 3072188   | 368 |
| chr11 | 70922211  | 70922577  | 367 |
| chr1  | 108572130 | 108572489 | 360 |
| chr3  | 114448654 | 114448991 | 338 |
| chr17 | 53412249  | 53412586  | 338 |
| chr5  | 80003617  | 80003907  | 291 |
| chr13 | 77347109  | 77347387  | 279 |
| chr3  | 15127554  | 15127823  | 270 |
| chr21 | 48667386  | 48667646  | 261 |
| chr5  | 118266319 | 118266575 | 257 |
| chr3  | 22930867  | 22931097  | 231 |
| chr26 | 24339192  | 24339839  | 648 |
| chr11 | 89068972  | 89069477  | 506 |
| chr3  | 31674541  | 31674996  | 456 |
| chr8  | 10885136  | 10885588  | 453 |
| chr8  | 24505028  | 24505463  | 436 |
| chr23 | 53022023  | 53022410  | 388 |
| chr18 | 17837412  | 17837799  | 388 |
| chr1  | 64869071  | 64869455  | 385 |
| chr7  | 18926191  | 18926573  | 383 |
| chr2  | 138610026 | 138610408 | 383 |
| chr10 | 14993133  | 14993514  | 382 |
| chr13 | 22177112  | 22177488  | 377 |
| chr10 | 20901170  | 20901545  | 376 |
| chr2  | 126027317 | 126027690 | 374 |
| chr14 | 63513819  | 63514180  | 362 |
| chr15 | 64925326  | 64925684  | 359 |
| chr13 | 60528398  | 60528744  | 347 |
| chr19 | 13572519  | 13572864  | 346 |
| chr18 | 6982361   | 6982702   | 342 |
| chr11 | 105031868 | 105032208 | 341 |



|       |           |           |     |
|-------|-----------|-----------|-----|
| chr21 | 42444610  | 42444943  | 334 |
| chr19 | 38730652  | 38730985  | 334 |
| chr14 | 61490158  | 61490488  | 331 |
| chr12 | 74450345  | 74450673  | 329 |
| chr3  | 105197457 | 105197782 | 326 |
| chr25 | 8198140   | 8198464   | 325 |
| chr13 | 75564486  | 75564810  | 325 |
| chr16 | 47354560  | 47354883  | 324 |
| chr2  | 101517634 | 101517954 | 321 |
| chr24 | 45806925  | 45807244  | 320 |
| chr5  | 30410188  | 30410498  | 311 |
| chr22 | 44836184  | 44836493  | 310 |
| chr16 | 38774532  | 38774840  | 309 |
| chr22 | 12108612  | 12108916  | 305 |
| chr23 | 22774970  | 22775273  | 304 |
| chr19 | 24016309  | 24016601  | 293 |
| chr19 | 28811504  | 28811792  | 289 |
| chr9  | 84195282  | 84195567  | 286 |
| chr26 | 38128296  | 38128580  | 285 |
| chr6  | 121758154 | 121758434 | 281 |
| chr19 | 57987963  | 57988241  | 279 |
| chr22 | 39836729  | 39837004  | 276 |
| chr16 | 58557536  | 58557806  | 271 |
| chr12 | 83824612  | 83824879  | 268 |
| chr8  | 108825943 | 108826202 | 260 |
| chr13 | 62848181  | 62848436  | 256 |
| chr1  | 1553887   | 1554140   | 254 |
| chr9  | 43844951  | 43845200  | 250 |
| chr2  | 132393771 | 132394019 | 249 |
| chr21 | 34862620  | 34862867  | 248 |
| chr10 | 81697116  | 81697363  | 248 |
| chr4  | 123251782 | 123252026 | 245 |
| chr29 | 51748651  | 51748893  | 243 |
| chr2  | 124944993 | 124945231 | 239 |
| chr19 | 56001513  | 56001746  | 234 |
| chr12 | 74566857  | 74567089  | 233 |
| chr19 | 38971042  | 38971273  | 232 |
| chr25 | 35376878  | 35377097  | 220 |
| chr23 | 10425618  | 10425836  | 219 |
| chr18 | 56863523  | 56864111  | 589 |
| chr5  | 112657653 | 112658048 | 396 |
| chr19 | 39015070  | 39015447  | 378 |
| chr19 | 7795286   | 7795663   | 378 |
| chr22 | 56711309  | 56711682  | 374 |
| chr13 | 17714793  | 17715165  | 373 |
| chr17 | 57758809  | 57759176  | 368 |
| chr5  | 113189664 | 113190029 | 366 |
| chr29 | 35014162  | 35014525  | 364 |
| chr14 | 21034907  | 21035264  | 358 |
| chr17 | 66009893  | 66010244  | 352 |

|       |           |           |     |
|-------|-----------|-----------|-----|
| chr8  | 73505688  | 73506029  | 342 |
| chr3  | 116166172 | 116166506 | 335 |
| chr17 | 60601869  | 60602202  | 334 |
| chr29 | 35424562  | 35424894  | 333 |
| chr3  | 33660781  | 33661110  | 330 |
| chr10 | 83324122  | 83324447  | 326 |
| chr13 | 73908798  | 73909118  | 321 |
| chr21 | 27122955  | 27123271  | 317 |
| chr19 | 45556962  | 45557276  | 315 |
| chr10 | 74758425  | 74758728  | 304 |
| chr3  | 105159399 | 105159701 | 303 |
| chr19 | 29832430  | 29832727  | 298 |
| chr21 | 64462342  | 64462637  | 296 |
| chr10 | 17528500  | 17528795  | 296 |
| chr28 | 42195549  | 42195836  | 288 |
| chr4  | 5527493   | 5527775   | 283 |
| chr3  | 105166659 | 105166941 | 283 |
| chr25 | 42413281  | 42413563  | 283 |
| chr20 | 5118963   | 5119233   | 271 |
| chr22 | 50750008  | 50750275  | 268 |
| chr13 | 59865017  | 59865282  | 266 |
| chr8  | 74376523  | 74376783  | 261 |
| chr16 | 48446674  | 48446927  | 254 |
| chr21 | 32968138  | 32968388  | 251 |
| chr14 | 17666787  | 17667032  | 246 |
| chr3  | 28680722  | 28680963  | 242 |
| chr10 | 59996612  | 59996851  | 240 |
| chr8  | 65071664  | 65071893  | 230 |
| chr13 | 77392592  | 77392819  | 228 |
| chr2  | 130450437 | 130450660 | 224 |
| chr19 | 54269216  | 54269435  | 220 |
| chr3  | 112513086 | 112513610 | 525 |
| chr3  | 108910600 | 108911022 | 423 |
| chr10 | 28841170  | 28841589  | 420 |
| chr22 | 60031395  | 60031788  | 394 |
| chr19 | 19130798  | 19131168  | 371 |
| chr2  | 110532497 | 110532864 | 368 |
| chr3  | 121848885 | 121849227 | 343 |
| chr18 | 11312856  | 11313188  | 333 |
| chr18 | 51158571  | 51158899  | 329 |
| chr19 | 63960042  | 63960363  | 322 |
| chr7  | 21173711  | 21174028  | 318 |
| chr11 | 71465725  | 71466040  | 316 |
| chr18 | 24328909  | 24329223  | 315 |
| chr11 | 10492553  | 10492861  | 309 |
| chr5  | 30676686  | 30676986  | 301 |
| chr13 | 54425998  | 54426298  | 301 |
| chr2  | 135090541 | 135090838 | 298 |
| chr19 | 35021492  | 35021788  | 297 |
| chr11 | 50899244  | 50899538  | 295 |

|       |           |           |     |
|-------|-----------|-----------|-----|
| chr11 | 46225002  | 46225293  | 292 |
| chr29 | 36576124  | 36576405  | 282 |
| chr5  | 28507588  | 28507860  | 273 |
| chr22 | 16328944  | 16329216  | 273 |
| chr7  | 51845384  | 51845636  | 253 |
| chr24 | 60725105  | 60725352  | 248 |
| chr28 | 41788412  | 41788651  | 240 |
| chr19 | 26004841  | 26005259  | 419 |
| chr2  | 140134612 | 140134987 | 376 |
| chr15 | 39887941  | 39888313  | 373 |
| chr13 | 81677100  | 81677472  | 373 |
| chr25 | 37491241  | 37491600  | 360 |
| chr18 | 11227970  | 11228324  | 355 |
| chr24 | 48609730  | 48610083  | 354 |
| chr5  | 28880524  | 28880871  | 348 |
| chr22 | 37558348  | 37558695  | 348 |
| chr3  | 127047319 | 127047665 | 347 |
| chr19 | 61888761  | 61889105  | 345 |
| chr13 | 63165546  | 63165888  | 343 |
| chr3  | 8577878   | 8578219   | 342 |
| chr3  | 116404742 | 116405082 | 341 |
| chr29 | 44748732  | 44749067  | 336 |
| chr21 | 9484994   | 9485329   | 336 |
| chr3  | 123598478 | 123598810 | 333 |
| chr14 | 1970222   | 1970551   | 330 |
| chr18 | 33215617  | 33215945  | 329 |
| chr15 | 31051881  | 31052208  | 328 |
| chr14 | 3487104   | 3487428   | 325 |
| chr12 | 31304416  | 31304740  | 325 |
| chr27 | 28125308  | 28125627  | 320 |
| chr19 | 44879705  | 44880023  | 319 |
| chr26 | 18296691  | 18297007  | 317 |
| chr20 | 33685530  | 33685845  | 316 |
| chr17 | 69199844  | 69200158  | 315 |
| chr12 | 74479372  | 74479686  | 315 |
| chr1  | 147056390 | 147056704 | 315 |
| chr29 | 27292238  | 27292551  | 314 |
| chr27 | 40713100  | 40713413  | 314 |
| chr4  | 85445579  | 85445890  | 312 |
| chr3  | 127443780 | 127444091 | 312 |
| chr3  | 105298340 | 105298651 | 312 |
| chr17 | 47100650  | 47100960  | 311 |
| chr5  | 10523048  | 10523353  | 306 |
| chr1  | 123096831 | 123097136 | 306 |
| chr18 | 56821781  | 56822085  | 305 |
| chr10 | 83768952  | 83769256  | 305 |
| chr19 | 39125639  | 39125941  | 303 |
| chr6  | 103144869 | 103145170 | 302 |
| chr24 | 36917478  | 36917778  | 301 |
| chr8  | 114249684 | 114249983 | 300 |

|       |               |           |     |
|-------|---------------|-----------|-----|
| chr23 | 27773495      | 27773794  | 300 |
| chr13 | 42286613      | 42286912  | 300 |
| chr19 | 60342827      | 60343125  | 299 |
| chr19 | 43621415      | 43621713  | 299 |
| chr6  | 72332932      | 72333228  | 297 |
| chr9  | 106388766     | 106389059 | 294 |
| chr21 | 6524669       | 6524962   | 294 |
| chr2  | 122887228     | 122887521 | 294 |
| chr18 | 11453900      | 11454192  | 293 |
| chr26 | 38360531      | 38360822  | 292 |
| chr19 | 22562201      | 22562492  | 292 |
| chr13 | 77616099      | 77616389  | 291 |
| chr8  | 28512697      | 28512984  | 288 |
| chr8  | 858379 858666 | 288       |     |
| chr5  | 115051192     | 115051477 | 286 |
| chr19 | 54603040      | 54603325  | 286 |
| chr26 | 20180072      | 20180355  | 284 |
| chr17 | 72685374      | 72685657  | 284 |
| chr1  | 145570399     | 145570682 | 284 |
| chr1  | 59152341      | 59152624  | 284 |
| chr13 | 17705138      | 17705420  | 283 |
| chr22 | 52856161      | 52856441  | 281 |
| chr8  | 1611483       | 1611762   | 280 |
| chr7  | 42340665      | 42340944  | 280 |
| chr24 | 30894140      | 30894419  | 280 |
| chr21 | 27793769      | 27794045  | 277 |
| chr13 | 62826821      | 62827095  | 275 |
| chr5  | 118492550     | 118492823 | 274 |
| chr4  | 105063701     | 105063973 | 273 |
| chr25 | 18649365      | 18649637  | 273 |
| chr21 | 13648399      | 13648669  | 271 |
| chr8  | 24683212      | 24683481  | 270 |
| chr19 | 56108473      | 56108742  | 270 |
| chr14 | 7846388       | 7846656   | 269 |
| chr10 | 83569707      | 83569975  | 269 |
| chr3  | 15417805      | 15418072  | 268 |
| chr3  | 13561513      | 13561780  | 268 |
| chr22 | 50799685      | 50799951  | 267 |
| chr5  | 30558273      | 30558538  | 266 |
| chr19 | 7774123       | 7774388   | 266 |
| chr14 | 9581486       | 9581751   | 266 |
| chr2  | 124232930     | 124233194 | 265 |
| chr17 | 7832731       | 7832995   | 265 |
| chr5  | 28767056      | 28767319  | 264 |
| chr8  | 73386378      | 73386640  | 263 |
| chr7  | 37395868      | 37396130  | 263 |
| chr19 | 54441062      | 54441323  | 262 |
| chr10 | 32467051      | 32467311  | 261 |
| chr18 | 51175911      | 51176170  | 260 |
| chr13 | 63431545      | 63431804  | 260 |

|       |               |           |     |
|-------|---------------|-----------|-----|
| chr13 | 60056280      | 60056539  | 260 |
| chr29 | 17835103      | 17835361  | 259 |
| chr15 | 420664 420922 | 259       |     |
| chr16 | 44057663      | 44057920  | 258 |
| chr12 | 29725168      | 29725424  | 257 |
| chr8  | 77282019      | 77282274  | 256 |
| chr19 | 20323979      | 20324234  | 256 |
| chr17 | 64020889      | 64021144  | 256 |
| chr13 | 54019828      | 54020082  | 255 |
| chr29 | 37096226      | 37096479  | 254 |
| chr26 | 21650097      | 21650350  | 254 |
| chr13 | 41338424      | 41338677  | 254 |
| chr25 | 36672832      | 36673084  | 253 |
| chr11 | 89596586      | 89596838  | 253 |
| chr5  | 30498480      | 30498729  | 250 |
| chr25 | 40318721      | 40318970  | 250 |
| chr20 | 16145369      | 16145618  | 250 |
| chr2  | 127990000     | 127990249 | 250 |
| chr19 | 39161772      | 39162021  | 250 |
| chr29 | 49076595      | 49076843  | 249 |
| chr21 | 59893637      | 59893885  | 249 |
| chr21 | 59322420      | 59322668  | 249 |
| chr3  | 22473567      | 22473814  | 248 |
| chr20 | 5006443       | 5006690   | 248 |
| chr19 | 41231919      | 41232166  | 248 |
| chr3  | 126091083     | 126091329 | 247 |
| chr23 | 13691300      | 13691546  | 247 |
| chr10 | 32260762      | 32261008  | 247 |
| chr8  | 89560103      | 89560348  | 246 |
| chr11 | 74467499      | 74467744  | 246 |
| chr8  | 65298237      | 65298481  | 245 |
| chr5  | 103999917     | 104000161 | 245 |
| chr3  | 31629902      | 31630146  | 245 |
| chr12 | 82753120      | 82753364  | 245 |
| chr12 | 32862823      | 32863067  | 245 |
| chr1  | 141775880     | 141776124 | 245 |
| chr3  | 127037932     | 127038174 | 243 |
| chr29 | 49482792      | 49483034  | 243 |
| chr22 | 59911874      | 59912116  | 243 |
| chr15 | 28872985      | 28873227  | 243 |
| chr16 | 67441839      | 67442080  | 242 |
| chr12 | 32170220      | 32170460  | 241 |
| chr23 | 10967042      | 10967280  | 239 |
| chr13 | 59111316      | 59111553  | 238 |
| chr2  | 129263948     | 129264184 | 237 |
| chr29 | 37221786      | 37222021  | 236 |
| chr3  | 125700756     | 125700990 | 235 |
| chr7  | 57611368      | 57611601  | 234 |
| chr26 | 37874455      | 37874688  | 234 |
| chr22 | 56669075      | 56669308  | 234 |

|       |           |           |     |
|-------|-----------|-----------|-----|
| chr17 | 73188999  | 73189232  | 234 |
| chr17 | 66842206  | 66842439  | 234 |
| chr16 | 54283810  | 54284043  | 234 |
| chr3  | 109000740 | 109000972 | 233 |
| chr23 | 52725042  | 52725274  | 233 |
| chr21 | 44298715  | 44298947  | 233 |
| chr29 | 45781778  | 45782009  | 232 |
| chr2  | 75695292  | 75695523  | 232 |
| chr19 | 34600699  | 34600930  | 232 |
| chr17 | 72356354  | 72356585  | 232 |
| chr18 | 49982666  | 49982896  | 231 |
| chr15 | 24393990  | 24394220  | 231 |
| chr6  | 5558271   | 5558499   | 229 |
| chr7  | 45706365  | 45706592  | 228 |
| chr6  | 5583199   | 5583426   | 228 |
| chr24 | 30925014  | 30925241  | 228 |
| chr21 | 7145470   | 7145697   | 228 |
| chr22 | 58437453  | 58437679  | 227 |
| chr19 | 13443022  | 13443248  | 227 |
| chr14 | 1807841   | 1808067   | 227 |
| chr10 | 21377377  | 21377601  | 225 |
| chr18 | 46032747  | 46032970  | 224 |
| chr16 | 73347842  | 73348065  | 224 |
| chr16 | 44425956  | 44426179  | 224 |
| chr4  | 72669125  | 72669347  | 223 |
| chr19 | 54271452  | 54271674  | 223 |
| chr16 | 25978763  | 25978985  | 223 |
| chr16 | 24764239  | 24764461  | 223 |
| chr12 | 52442343  | 52442565  | 223 |
| chr11 | 106012703 | 106012925 | 223 |
| chr23 | 15972419  | 15972640  | 222 |
| chr13 | 66838770  | 66838991  | 222 |
| chr11 | 105000947 | 105001168 | 222 |
| chr12 | 33981397  | 33981617  | 221 |
| chr28 | 38895732  | 38895951  | 220 |
| chr9  | 90428245  | 90428463  | 219 |
| chr18 | 24310778  | 24310996  | 219 |
| chr17 | 64290101  | 64290318  | 218 |
| chr10 | 17488931  | 17489148  | 218 |
| chr8  | 73892652  | 73892868  | 217 |
| chr4  | 81967839  | 81968055  | 217 |
| chr23 | 3310819   | 3311035   | 217 |
| chr22 | 14927786  | 14928002  | 217 |
| chr16 | 3312863   | 3313079   | 217 |
| chr10 | 28837372  | 28837588  | 217 |
| chr9  | 99937341  | 99937556  | 216 |
| chr8  | 45671921  | 45672136  | 216 |
| chr5  | 115317782 | 115317997 | 216 |
| chr5  | 112046221 | 112046436 | 216 |
| chr25 | 1369301   | 1369516   | 216 |

|       |           |           |     |
|-------|-----------|-----------|-----|
| chr22 | 53955360  | 53955575  | 216 |
| chr20 | 4577343   | 4577558   | 216 |
| chr24 | 47840926  | 47841140  | 215 |
| chr17 | 69254098  | 69254312  | 215 |
| chr9  | 90597160  | 90597373  | 214 |
| chr22 | 59802383  | 59802596  | 214 |
| chr22 | 7547321   | 7547533   | 213 |
| chr19 | 27242726  | 27242938  | 213 |
| chr16 | 44301575  | 44301787  | 213 |
| chr15 | 21528203  | 21528415  | 213 |
| chr7  | 5450959   | 5451170   | 212 |
| chr21 | 59017956  | 59018167  | 212 |
| chr7  | 42521414  | 42521624  | 211 |
| chr26 | 18202739  | 18202949  | 211 |
| chr2  | 17384676  | 17384886  | 211 |
| chr11 | 70908454  | 70908664  | 211 |
| chr11 | 2954550   | 2954760   | 211 |
| chr1  | 45995401  | 45995611  | 211 |
| chr28 | 33530603  | 33530811  | 209 |
| chr21 | 59740571  | 59740779  | 209 |
| chr19 | 46327691  | 46327899  | 209 |
| chr28 | 27135283  | 27135490  | 208 |
| chr17 | 70055410  | 70055617  | 208 |
| chr8  | 73464200  | 73464406  | 207 |
| chr29 | 34584070  | 34584276  | 207 |
| chr23 | 51683284  | 51683490  | 207 |
| chr23 | 16043591  | 16043797  | 207 |
| chr2  | 140735243 | 140735449 | 207 |
| chr17 | 57796869  | 57797075  | 207 |
| chr17 | 46124600  | 46124806  | 207 |
| chr3  | 33810312  | 33810517  | 206 |
| chr1  | 84499827  | 84500032  | 206 |
| chr7  | 19216624  | 19216828  | 205 |
| chr21 | 57508049  | 57508253  | 205 |
| chr17 | 74043206  | 74043410  | 205 |
| chr15 | 25595489  | 25595692  | 204 |
| chr13 | 77751733  | 77751935  | 203 |
| chr13 | 54429432  | 54429634  | 203 |
| chr7  | 12940847  | 12941048  | 202 |
| chr15 | 26723902  | 26724103  | 202 |
| chr1  | 68918175  | 68918376  | 202 |
| chr26 | 18777151  | 18777351  | 201 |
| chr10 | 40999858  | 41000058  | 201 |
| chr19 | 54853895  | 54854094  | 200 |
| chr2  | 5041074   | 5041902   | 829 |
| chr11 | 9742039   | 9742850   | 812 |
| chr22 | 13769451  | 13770153  | 703 |
| chr23 | 15837914  | 15838601  | 688 |
| chr22 | 56172646  | 56173269  | 624 |
| chr11 | 50322499  | 50323112  | 614 |

|       |           |           |     |
|-------|-----------|-----------|-----|
| chr2  | 139217906 | 139218515 | 610 |
| chr28 | 33667139  | 33667728  | 590 |
| chr20 | 73403772  | 73404357  | 586 |
| chr19 | 39134278  | 39134862  | 585 |
| chr16 | 3308160   | 3308740   | 581 |
| chr6  | 63036222  | 63036797  | 576 |
| chr24 | 27149686  | 27150254  | 569 |
| chr23 | 38544600  | 38545167  | 568 |
| chr29 | 51163430  | 51163982  | 553 |
| chr23 | 17490677  | 17491223  | 547 |
| chr19 | 54619820  | 54620364  | 545 |
| chr23 | 27836997  | 27837533  | 537 |
| chr19 | 38596595  | 38597127  | 533 |
| chr5  | 10610787  | 10611314  | 528 |
| chr15 | 75245173  | 75245697  | 525 |
| chr23 | 30528875  | 30529395  | 521 |
| chr19 | 23863439  | 23863954  | 516 |
| chr7  | 9637685   | 9638196   | 512 |
| chr2  | 131171116 | 131171621 | 506 |
| chr5  | 29160876  | 29161379  | 504 |
| chr29 | 17808861  | 17809358  | 498 |
| chr17 | 70272217  | 70272712  | 496 |
| chr6  | 118656742 | 118657235 | 494 |
| chr3  | 126088803 | 126089294 | 492 |
| chr23 | 9728197   | 9728681   | 485 |
| chr19 | 8939956   | 8940437   | 482 |
| chr7  | 16818471  | 16818950  | 480 |
| chr21 | 11955261  | 11955738  | 478 |
| chr3  | 25819307  | 25819778  | 472 |
| chr11 | 99189114  | 99189584  | 471 |
| chr19 | 27906196  | 27906665  | 470 |
| chr15 | 76146758  | 76147217  | 460 |
| chr27 | 38967431  | 38967884  | 454 |
| chr17 | 69318015  | 69318465  | 451 |
| chr17 | 55459283  | 55459727  | 445 |
| chr2  | 136976488 | 136976930 | 443 |
| chr18 | 53876454  | 53876891  | 438 |
| chr7  | 51686084  | 51686518  | 435 |
| chr2  | 125761989 | 125762417 | 429 |
| chr24 | 42590180  | 42590606  | 427 |
| chr21 | 66336603  | 66337029  | 427 |
| chr2  | 131569722 | 131570148 | 427 |
| chr19 | 45271265  | 45271681  | 417 |
| chr19 | 52835482  | 52835882  | 401 |
| chr19 | 23690224  | 23690623  | 400 |
| chr21 | 46042063  | 46042461  | 399 |
| chr18 | 65185703  | 65186101  | 399 |
| chr15 | 30098179  | 30098577  | 399 |
| chr8  | 86970764  | 86971161  | 398 |
| chr4  | 64278608  | 64279005  | 398 |



|       |           |           |     |
|-------|-----------|-----------|-----|
| chr29 | 49007535  | 49007932  | 398 |
| chr26 | 46041519  | 46041916  | 398 |
| chr18 | 57616583  | 57616980  | 398 |
| chr18 | 54080292  | 54080689  | 398 |
| chr1  | 100639472 | 100639868 | 397 |
| chr19 | 7639039   | 7639434   | 396 |
| chr19 | 58334726  | 58335120  | 395 |
| chr13 | 67721297  | 67721690  | 394 |
| chr18 | 60756619  | 60757011  | 393 |
| chr8  | 26042129  | 26042519  | 391 |
| chr19 | 54782504  | 54782893  | 390 |
| chr18 | 50916299  | 50916687  | 389 |
| chr14 | 57319324  | 57319712  | 389 |
| chr7  | 20814942  | 20815329  | 388 |
| chr7  | 38254919  | 38255305  | 387 |
| chr7  | 43154823  | 43155208  | 386 |
| chr22 | 16158357  | 16158741  | 385 |
| chr16 | 68907600  | 68907984  | 385 |
| chrX  | 13651103  | 13651486  | 384 |
| chr5  | 120709287 | 120709670 | 384 |
| chr21 | 65554449  | 65554832  | 384 |
| chr21 | 60220756  | 60221138  | 383 |
| chr22 | 58441117  | 58441498  | 382 |
| chr14 | 61325988  | 61326369  | 382 |
| chr13 | 63331447  | 63331828  | 382 |
| chr3  | 121485221 | 121485600 | 380 |
| chr21 | 11801117  | 11801496  | 380 |
| chr23 | 27296255  | 27296633  | 379 |
| chr23 | 7260213   | 7260590   | 378 |
| chr10 | 36011096  | 36011473  | 378 |
| chr12 | 72577545  | 72577921  | 377 |
| chr7  | 18072092  | 18072467  | 376 |
| chr19 | 31920090  | 31920465  | 376 |
| chr16 | 77624366  | 77624740  | 375 |
| chr22 | 14999447  | 14999820  | 374 |
| chr21 | 27135242  | 27135615  | 374 |
| chr5  | 110916440 | 110916812 | 373 |
| chr20 | 71952628  | 71952999  | 372 |
| chr18 | 22735086  | 22735457  | 372 |
| chr29 | 34884565  | 34884935  | 371 |
| chr15 | 75369068  | 75369437  | 370 |
| chr3  | 122209396 | 122209763 | 368 |
| chr4  | 68075588  | 68075954  | 367 |
| chr27 | 21887895  | 21888260  | 366 |
| chr14 | 1571855   | 1572219   | 365 |
| chr8  | 72537636  | 72537999  | 364 |
| chr2  | 115339190 | 115339553 | 364 |
| chr22 | 16101967  | 16102329  | 363 |
| chr19 | 56121282  | 56121644  | 363 |
| chr19 | 54570612  | 54570974  | 363 |

|       |               |           |     |
|-------|---------------|-----------|-----|
| chr7  | 73165598      | 73165959  | 362 |
| chr11 | 4353168       | 4353529   | 362 |
| chr25 | 28284023      | 28284383  | 361 |
| chr5  | 114241006     | 114241364 | 359 |
| chr10 | 17593565      | 17593923  | 359 |
| chr6  | 70510742      | 70511097  | 356 |
| chr26 | 20284327      | 20284682  | 356 |
| chr13 | 70249659      | 70250014  | 356 |
| chr26 | 21316844      | 21317198  | 355 |
| chr13 | 23848049      | 23848403  | 355 |
| chr16 | 60493114      | 60493467  | 354 |
| chr29 | 23564436      | 23564788  | 353 |
| chrX  | 10877541      | 10877890  | 350 |
| chr16 | 56115343      | 56115691  | 349 |
| chr14 | 66397881      | 66398229  | 349 |
| chr29 | 26349034      | 26349381  | 348 |
| chr21 | 25988166      | 25988512  | 347 |
| chr17 | 73036759      | 73037105  | 347 |
| chr8  | 89539044      | 89539389  | 346 |
| chr22 | 59646234      | 59646579  | 346 |
| chr15 | 25070182      | 25070527  | 346 |
| chr9  | 106415085     | 106415429 | 345 |
| chr5  | 113225608     | 113225952 | 345 |
| chr3  | 105470977     | 105471321 | 345 |
| chr24 | 20365258      | 20365602  | 345 |
| chr19 | 23047168      | 23047512  | 345 |
| chr21 | 25184139      | 25184482  | 344 |
| chr20 | 2534370       | 2534713   | 344 |
| chr2  | 108710999     | 108711342 | 344 |
| chr29 | 50606060      | 50606402  | 343 |
| chr24 | 64975079      | 64975421  | 343 |
| chr19 | 58243540      | 58243882  | 343 |
| chr1  | 84297176      | 84297518  | 343 |
| chr26 | 44096108      | 44096449  | 342 |
| chr19 | 59418921      | 59419262  | 342 |
| chr19 | 60810255      | 60810595  | 341 |
| chr5  | 81496805      | 81497144  | 340 |
| chr3  | 113454458     | 113454797 | 340 |
| chr16 | 947986 948325 | 340       |     |
| chr18 | 11226030      | 11226368  | 339 |
| chr17 | 70082923      | 70083261  | 339 |
| chr17 | 57768413      | 57768751  | 339 |
| chr11 | 9228376       | 9228713   | 338 |
| chr5  | 28893029      | 28893365  | 337 |
| chr29 | 34900922      | 34901258  | 337 |
| chr15 | 78181768      | 78182104  | 337 |
| chr12 | 31990956      | 31991292  | 337 |
| chrX  | 78304444      | 78304779  | 336 |
| chr26 | 38182873      | 38183208  | 336 |
| chr25 | 18694809      | 18695144  | 336 |

|       |           |           |     |
|-------|-----------|-----------|-----|
| chr18 | 55014208  | 55014543  | 336 |
| chr5  | 121402843 | 121403177 | 335 |
| chr16 | 47915178  | 47915512  | 335 |
| chr19 | 39107945  | 39108278  | 334 |
| chr17 | 57630886  | 57631219  | 334 |
| chr20 | 2396959   | 2397291   | 333 |
| chr9  | 106108371 | 106108702 | 332 |
| chr5  | 81509130  | 81509461  | 332 |
| chr5  | 115057154 | 115057484 | 331 |
| chr2  | 138507461 | 138507791 | 331 |
| chrX  | 10448399  | 10448726  | 328 |
| chr4  | 123717746 | 123718071 | 326 |
| chr19 | 56109952  | 56110277  | 326 |
| chr22 | 16396473  | 16396797  | 325 |
| chr19 | 21665054  | 21665378  | 325 |
| chr18 | 51768094  | 51768418  | 325 |
| chr5  | 81363738  | 81364061  | 324 |
| chr19 | 23067831  | 23068154  | 324 |
| chr19 | 7136457   | 7136779   | 323 |
| chr10 | 11011944  | 11012266  | 323 |
| chr17 | 65969029  | 65969350  | 322 |
| chr13 | 55534044  | 55534365  | 322 |
| chr24 | 48056050  | 48056370  | 321 |
| chr18 | 50211968  | 50212288  | 321 |
| chr21 | 34907640  | 34907959  | 320 |
| chr19 | 60777675  | 60777993  | 319 |
| chr19 | 7770454   | 7770771   | 318 |
| chr12 | 20787573  | 20787890  | 318 |
| chr5  | 123130605 | 123130921 | 317 |
| chr18 | 43202330  | 43202646  | 317 |
| chr4  | 99064976  | 99065291  | 316 |
| chr19 | 24036098  | 24036413  | 316 |
| chr18 | 48465609  | 48465924  | 316 |
| chr3  | 105163854 | 105164168 | 315 |
| chr6  | 121273394 | 121273707 | 314 |
| chr29 | 33856457  | 33856770  | 314 |
| chr26 | 48474398  | 48474711  | 314 |
| chr7  | 19215254  | 19215566  | 313 |
| chr22 | 7192368   | 7192680   | 313 |
| chr13 | 80965344  | 80965656  | 313 |
| chr3  | 111641171 | 111641482 | 312 |
| chr29 | 41425273  | 41425583  | 311 |
| chr19 | 37051632  | 37051942  | 311 |
| chr10 | 81680306  | 81680616  | 311 |
| chr19 | 33211385  | 33211694  | 310 |
| chr5  | 52923022  | 52923330  | 309 |
| chr21 | 19293003  | 19293311  | 309 |
| chr19 | 54701246  | 54701554  | 309 |
| chr25 | 35401386  | 35401693  | 308 |
| chr10 | 81678989  | 81679296  | 308 |

|       |               |           |     |
|-------|---------------|-----------|-----|
| chr2  | 1316561       | 1316867   | 307 |
| chr18 | 12129994      | 12130300  | 307 |
| chr8  | 77684356      | 77684661  | 306 |
| chr16 | 41488940      | 41489245  | 306 |
| chr4  | 79771900      | 79772204  | 305 |
| chr21 | 27120040      | 27120344  | 305 |
| chr9  | 99754204      | 99754507  | 304 |
| chr19 | 59193158      | 59193461  | 304 |
| chr23 | 13672202      | 13672504  | 303 |
| chr13 | 66969154      | 66969456  | 303 |
| chr29 | 35335883      | 35336184  | 302 |
| chr23 | 46110348      | 46110649  | 302 |
| chr16 | 49340770      | 49341071  | 302 |
| chr11 | 13236923      | 13237222  | 300 |
| chr17 | 62370397      | 62370694  | 298 |
| chr5  | 28799539      | 28799835  | 297 |
| chr24 | 60574863      | 60575158  | 296 |
| chr16 | 77818527      | 77818821  | 295 |
| chr10 | 12896051      | 12896345  | 295 |
| chr1  | 84397386      | 84397678  | 293 |
| chr21 | 15537822      | 15538113  | 292 |
| chr17 | 64215223      | 64215514  | 292 |
| chr5  | 113245927     | 113246217 | 291 |
| chr17 | 72751737      | 72752027  | 291 |
| chr4  | 122112217     | 122112505 | 289 |
| chr23 | 17190004      | 17190292  | 289 |
| chr5  | 113421009     | 113421295 | 287 |
| chr28 | 33916478      | 33916764  | 287 |
| chr4  | 5380743       | 5381028   | 286 |
| chr3  | 36008297      | 36008582  | 286 |
| chr14 | 1453889       | 1454174   | 286 |
| chr25 | 40897023      | 40897307  | 285 |
| chr17 | 62258777      | 62259059  | 283 |
| chr3  | 98168468      | 98168749  | 282 |
| chr24 | 44032054      | 44032335  | 282 |
| chr2  | 111647184     | 111647464 | 281 |
| chr1  | 152269594     | 152269873 | 280 |
| chr2  | 129270137     | 129270415 | 279 |
| chr1  | 1623715       | 1623993   | 279 |
| chr26 | 15586721      | 15586998  | 278 |
| chr4  | 81558247      | 81558523  | 277 |
| chrX  | 10427178      | 10427453  | 276 |
| chr23 | 15096892      | 15097167  | 276 |
| chr18 | 660864 661139 |           | 276 |
| chr15 | 29337448      | 29337722  | 275 |
| chr12 | 33058443      | 33058717  | 275 |
| chr15 | 29183774      | 29184044  | 271 |
| chr18 | 12130481      | 12130749  | 269 |
| chr2  | 17539589      | 17539856  | 268 |
| chr16 | 2252365       | 2252632   | 268 |

|       |           |           |     |
|-------|-----------|-----------|-----|
| chr29 | 33680451  | 33680717  | 267 |
| chr8  | 65394516  | 65394779  | 264 |
| chr18 | 62464932  | 62465195  | 264 |
| chr13 | 43615797  | 43616060  | 264 |
| chr29 | 47369375  | 47369637  | 263 |
| chr19 | 44897149  | 44897410  | 262 |
| chr3  | 105158929 | 105159189 | 261 |
| chr27 | 26650226  | 26650486  | 261 |
| chr26 | 44684052  | 44684310  | 259 |
| chr19 | 51688327  | 51688583  | 257 |
| chr18 | 20284224  | 20284479  | 256 |
| chr13 | 70995160  | 70995415  | 256 |
| chr19 | 39496377  | 39496631  | 255 |
| chr26 | 22248662  | 22248915  | 254 |
| chr19 | 20523792  | 20524045  | 254 |
| chr3  | 7728585   | 7728837   | 253 |
| chr5  | 121238303 | 121238552 | 250 |
| chr10 | 90293926  | 90294175  | 250 |
| chr15 | 20011190  | 20011438  | 249 |
| chr23 | 32689467  | 32689712  | 246 |
| chr9  | 45521134  | 45521377  | 244 |
| chr18 | 50857987  | 50858230  | 244 |
| chr2  | 120632626 | 120632867 | 242 |
| chr19 | 29748788  | 29749028  | 241 |
| chr17 | 68038535  | 68038766  | 232 |
| chr23 | 17980265  | 17980494  | 230 |
| chr5  | 118451365 | 118451582 | 218 |
| chr20 | 8764973   | 8765185   | 213 |
| chr8  | 7851620   | 7852257   | 638 |
| chr2  | 134713324 | 134713957 | 634 |
| chr19 | 36369062  | 36369659  | 598 |
| chr3  | 106603006 | 106603588 | 583 |
| chr15 | 75358449  | 75359026  | 578 |
| chr15 | 36590307  | 36590876  | 570 |
| chr5  | 62113974  | 62114536  | 563 |
| chr7  | 43146906  | 43147451  | 546 |
| chr17 | 63449801  | 63450345  | 545 |
| chr18 | 53234829  | 53235359  | 531 |
| chr25 | 28508432  | 28508955  | 524 |
| chr19 | 30712640  | 30713157  | 518 |
| chr3  | 106866465 | 106866971 | 507 |
| chr3  | 8982552   | 8983054   | 503 |
| chr25 | 42655890  | 42656385  | 496 |
| chr13 | 54390922  | 54391416  | 495 |
| chr10 | 79145163  | 79145647  | 485 |
| chrX  | 54350805  | 54351279  | 475 |
| chr17 | 75465067  | 75465532  | 466 |
| chr10 | 8363856   | 8364320   | 465 |
| chr18 | 45660552  | 45661010  | 459 |
| chr10 | 16921265  | 16921722  | 458 |

|       |               |           |     |
|-------|---------------|-----------|-----|
| chr11 | 100372179     | 100372635 | 457 |
| chr11 | 108433845     | 108434300 | 456 |
| chr10 | 19584430      | 19584885  | 456 |
| chr11 | 1196093       | 1196545   | 453 |
| chr24 | 59571584      | 59572024  | 441 |
| chr5  | 120417156     | 120417594 | 439 |
| chr15 | 74523125      | 74523560  | 436 |
| chr18 | 22071532      | 22071965  | 434 |
| chr6  | 118648551     | 118648983 | 433 |
| chr9  | 35977849      | 35978274  | 426 |
| chr27 | 35428309      | 35428726  | 418 |
| chr6  | 68056936      | 68057343  | 408 |
| chr19 | 19871137      | 19871539  | 403 |
| chr3  | 120831587     | 120831988 | 402 |
| chr8  | 24214194      | 24214592  | 399 |
| chr6  | 99215456      | 99215854  | 399 |
| chr18 | 57327416      | 57327814  | 399 |
| chr18 | 56628632      | 56629030  | 399 |
| chr3  | 36029290      | 36029685  | 396 |
| chr23 | 10573303      | 10573697  | 395 |
| chr3  | 121477306     | 121477698 | 393 |
| chr5  | 118469344     | 118469735 | 392 |
| chr4  | 72744436      | 72744827  | 392 |
| chr7  | 15593204      | 15593592  | 389 |
| chr21 | 60218729      | 60219117  | 389 |
| chr23 | 10526802      | 10527189  | 388 |
| chr18 | 37161436      | 37161821  | 386 |
| chr21 | 6475267       | 6475651   | 385 |
| chr11 | 100953347     | 100953730 | 384 |
| chr12 | 84022251      | 84022633  | 383 |
| chr11 | 106059580     | 106059960 | 381 |
| chr14 | 67965555      | 67965934  | 380 |
| chr18 | 460059 460436 | 378       |     |
| chr19 | 16914335      | 16914711  | 377 |
| chr14 | 2888000       | 2888376   | 377 |
| chr18 | 42618977      | 42619352  | 376 |
| chr10 | 104436875     | 104437249 | 375 |
| chr22 | 59634353      | 59634726  | 374 |
| chr24 | 47677184      | 47677556  | 373 |
| chr18 | 54870732      | 54871104  | 373 |
| chr23 | 14450519      | 14450890  | 372 |
| chr13 | 76322446      | 76322817  | 372 |
| chr8  | 80171106      | 80171475  | 370 |
| chr27 | 46987377      | 46987746  | 370 |
| chr27 | 27691591      | 27691960  | 370 |
| chr17 | 57760035      | 57760404  | 370 |
| chrX  | 78763511      | 78763878  | 368 |
| chr15 | 29856693      | 29857060  | 368 |
| chr11 | 48861976      | 48862343  | 368 |
| chr8  | 108708049     | 108708415 | 367 |

|       |               |           |     |
|-------|---------------|-----------|-----|
| chr29 | 38752119      | 38752485  | 367 |
| chr19 | 46111655      | 46112020  | 366 |
| chr10 | 102924180     | 102924545 | 366 |
| chr8  | 60398066      | 60398430  | 365 |
| chr22 | 2840357       | 2840721   | 365 |
| chr19 | 52895865      | 52896229  | 365 |
| chr6  | 106828359     | 106828721 | 363 |
| chr1  | 68846699      | 68847061  | 363 |
| chr11 | 44704564      | 44704925  | 362 |
| chrX  | 87718285      | 87718645  | 361 |
| chr26 | 38226181      | 38226541  | 361 |
| chr11 | 103765505     | 103765863 | 359 |
| chr8  | 116101473     | 116101829 | 357 |
| chr11 | 70867561      | 70867914  | 354 |
| chr3  | 113475960     | 113476312 | 353 |
| chr25 | 274836 275188 | 353       |     |
| chr17 | 60879137      | 60879489  | 353 |
| chr7  | 5390765       | 5391115   | 351 |
| chr3  | 116120785     | 116121135 | 351 |
| chr11 | 104955283     | 104955633 | 351 |
| chr9  | 78162001      | 78162350  | 350 |
| chr5  | 113102912     | 113103261 | 350 |
| chr29 | 38281687      | 38282036  | 350 |
| chr23 | 10583235      | 10583584  | 350 |
| chr18 | 11379795      | 11380144  | 350 |
| chr19 | 42494315      | 42494663  | 349 |
| chr3  | 125581165     | 125581512 | 348 |
| chr22 | 50749096      | 50749443  | 348 |
| chr16 | 2110529       | 2110876   | 348 |
| chr25 | 22885903      | 22886249  | 347 |
| chr17 | 47732126      | 47732472  | 347 |
| chr17 | 70516407      | 70516752  | 346 |
| chr13 | 77235486      | 77235831  | 346 |
| chr19 | 41870547      | 41870891  | 345 |
| chr19 | 23060586      | 23060930  | 345 |
| chr29 | 46235279      | 46235621  | 343 |
| chr18 | 49361774      | 49362116  | 343 |
| chr5  | 30177836      | 30178177  | 342 |
| chr13 | 28658993      | 28659334  | 342 |
| chr8  | 8836250       | 8836590   | 341 |
| chr28 | 26404613      | 26404952  | 340 |
| chr18 | 29579373      | 29579712  | 340 |
| chr5  | 113422549     | 113422886 | 338 |
| chr5  | 102832192     | 102832529 | 338 |
| chr27 | 45328815      | 45329151  | 337 |
| chr11 | 102386277     | 102386613 | 337 |
| chr13 | 59750904      | 59751239  | 336 |
| chr4  | 95601823      | 95602157  | 335 |
| chr28 | 33629940      | 33630274  | 335 |
| chr2  | 5161063       | 5161396   | 334 |

|       |           |           |     |
|-------|-----------|-----------|-----|
| chr12 | 82627754  | 82628087  | 334 |
| chr24 | 1585783   | 1586114   | 332 |
| chr8  | 103110988 | 103111318 | 331 |
| chr7  | 19295782  | 19296112  | 331 |
| chr2  | 4931297   | 4931627   | 331 |
| chr12 | 31555203  | 31555533  | 331 |
| chr20 | 8617156   | 8617485   | 330 |
| chr16 | 38961190  | 38961519  | 330 |
| chr1  | 123109461 | 123109790 | 330 |
| chr4  | 116370624 | 116370952 | 329 |
| chr5  | 111904787 | 111905114 | 328 |
| chr8  | 10811955  | 10812281  | 327 |
| chr3  | 121356511 | 121356837 | 327 |
| chr25 | 3826680   | 3827006   | 327 |
| chr10 | 53471263  | 53471589  | 327 |
| chr19 | 56471084  | 56471409  | 326 |
| chr20 | 75379248  | 75379572  | 325 |
| chr13 | 40873166  | 40873490  | 325 |
| chr1  | 82499096  | 82499420  | 325 |
| chr9  | 51605685  | 51606008  | 324 |
| chr6  | 118204312 | 118204635 | 324 |
| chr3  | 124077068 | 124077391 | 324 |
| chr14 | 7581290   | 7581613   | 324 |
| chr19 | 51921194  | 51921516  | 323 |
| chr9  | 104802196 | 104802517 | 322 |
| chr13 | 53872899  | 53873220  | 322 |
| chr10 | 13341086  | 13341406  | 321 |
| chr21 | 13936640  | 13936959  | 320 |
| chr17 | 72730990  | 72731309  | 320 |
| chr15 | 21316032  | 21316351  | 320 |
| chr11 | 104929444 | 104929763 | 320 |
| chr5  | 30321559  | 30321877  | 319 |
| chr22 | 32758734  | 32759052  | 319 |
| chr17 | 70101094  | 70101412  | 319 |
| chr19 | 60425825  | 60426142  | 318 |
| chr2  | 127092533 | 127092849 | 317 |
| chr1  | 85041553  | 85041869  | 317 |
| chr10 | 35781301  | 35781616  | 316 |
| chr19 | 59375619  | 59375933  | 315 |
| chr13 | 76175727  | 76176041  | 315 |
| chr3  | 108997602 | 108997915 | 314 |
| chr17 | 64355021  | 64355334  | 314 |
| chr13 | 61256897  | 61257209  | 313 |
| chr5  | 115303887 | 115304197 | 311 |
| chr19 | 41253890  | 41254200  | 311 |
| chr13 | 57155865  | 57156175  | 311 |
| chr22 | 60072892  | 60073201  | 310 |
| chr12 | 11242564  | 11242873  | 310 |
| chr3  | 10714105  | 10714410  | 306 |
| chr23 | 48734811  | 48735116  | 306 |



|       |               |           |     |
|-------|---------------|-----------|-----|
| chr12 | 30607309      | 30607614  | 306 |
| chr16 | 67238779      | 67239083  | 305 |
| chr1  | 142237363     | 142237666 | 304 |
| chr8  | 263726 264028 | 303       |     |
| chr3  | 105680674     | 105680976 | 303 |
| chr24 | 59309223      | 59309525  | 303 |
| chr28 | 33819649      | 33819950  | 302 |
| chr11 | 90415730      | 90416030  | 301 |
| chr11 | 72306406      | 72306706  | 301 |
| chr19 | 40417624      | 40417922  | 299 |
| chr12 | 20903673      | 20903970  | 298 |
| chr1  | 1520678       | 1520975   | 298 |
| chr29 | 37261882      | 37262178  | 297 |
| chr25 | 35623344      | 35623640  | 297 |
| chr17 | 73160797      | 73161093  | 297 |
| chr13 | 55073564      | 55073859  | 296 |
| chr22 | 58632568      | 58632862  | 295 |
| chr13 | 66972458      | 66972751  | 294 |
| chr11 | 4879332       | 4879625   | 294 |
| chr24 | 23952814      | 23953106  | 293 |
| chr2  | 138490635     | 138490925 | 291 |
| chr11 | 104472473     | 104472763 | 291 |
| chr11 | 94116006      | 94116296  | 291 |
| chr20 | 41249946      | 41250235  | 290 |
| chr21 | 11455293      | 11455581  | 289 |
| chr13 | 73315065      | 73315351  | 287 |
| chr3  | 114467407     | 114467691 | 285 |
| chr25 | 3238149       | 3238433   | 285 |
| chr7  | 42195794      | 42196077  | 284 |
| chr3  | 8749051       | 8749333   | 283 |
| chr20 | 2593864       | 2594146   | 283 |
| chr19 | 52043819      | 52044101  | 283 |
| chr15 | 24652799      | 24653081  | 283 |
| chr20 | 8677495       | 8677775   | 281 |
| chr11 | 9253093       | 9253373   | 281 |
| chr16 | 38860017      | 38860295  | 279 |
| chr13 | 70071493      | 70071770  | 278 |
| chr2  | 140003083     | 140003359 | 277 |
| chr17 | 75936756      | 75937032  | 277 |
| chr17 | 56084978      | 56085254  | 277 |
| chr13 | 65869222      | 65869497  | 276 |
| chr13 | 54985969      | 54986238  | 270 |
| chr18 | 47798311      | 47798578  | 268 |
| chr19 | 20354155      | 20354420  | 266 |
| chr5  | 120152410     | 120152673 | 264 |
| chr21 | 7799414       | 7799675   | 262 |
| chr1  | 144316467     | 144316728 | 262 |
| chr5  | 118478171     | 118478431 | 261 |
| chr18 | 7111321       | 7111581   | 261 |
| chr13 | 14489551      | 14489811  | 261 |

|       |           |           |     |
|-------|-----------|-----------|-----|
| chr26 | 51627113  | 51627369  | 257 |
| chr15 | 40991310  | 40991565  | 256 |
| chr16 | 32533658  | 32533911  | 254 |
| chr13 | 72863128  | 72863380  | 253 |
| chr23 | 7719615   | 7719866   | 252 |
| chr24 | 35395146  | 35395395  | 250 |
| chr11 | 77934993  | 77935241  | 249 |
| chr27 | 35852245  | 35852489  | 245 |
| chr17 | 74604021  | 74604265  | 245 |
| chr29 | 51168422  | 51168664  | 243 |
| chr23 | 15187952  | 15188194  | 243 |
| chr14 | 9712531   | 9712772   | 242 |
| chr10 | 20856119  | 20856354  | 236 |
| chr28 | 14098361  | 14098594  | 234 |
| chr19 | 56569401  | 56569633  | 233 |
| chr19 | 23757547  | 23757772  | 226 |
| chr18 | 64319120  | 64319341  | 222 |
| chr19 | 26003414  | 26003634  | 221 |
| chr2  | 133164315 | 133164532 | 218 |
| chr10 | 20181373  | 20181587  | 215 |
| chr10 | 83568874  | 83569536  | 663 |
| chr16 | 47562147  | 47562802  | 656 |
| chr2  | 110563321 | 110563876 | 556 |
| chr5  | 28848586  | 28849138  | 553 |
| chr23 | 27094654  | 27095195  | 542 |
| chr5  | 35281544  | 35282078  | 535 |
| chr12 | 36420077  | 36420607  | 531 |
| chr23 | 25856024  | 25856510  | 487 |
| chr7  | 38218740  | 38219220  | 481 |
| chr4  | 118540511 | 118540987 | 477 |
| chr19 | 45902225  | 45902698  | 474 |
| chr11 | 100906322 | 100906792 | 471 |
| chr1  | 154411799 | 154412260 | 462 |
| chr21 | 22724066  | 22724507  | 442 |
| chr17 | 21441533  | 21441972  | 440 |
| chr10 | 88167995  | 88168430  | 436 |
| chr5  | 121239150 | 121239576 | 427 |
| chr10 | 52934064  | 52934471  | 408 |
| chr26 | 21849520  | 21849920  | 401 |
| chr7  | 16527143  | 16527541  | 399 |
| chr27 | 17891947  | 17892345  | 399 |
| chr17 | 74391527  | 74391925  | 399 |
| chr2  | 139180491 | 139180888 | 398 |
| chr17 | 54334042  | 54334439  | 398 |
| chr2  | 108800689 | 108801083 | 395 |
| chr28 | 32336866  | 32337259  | 394 |
| chr25 | 24851719  | 24852112  | 394 |
| chr24 | 34702850  | 34703243  | 394 |
| chr17 | 64101403  | 64101796  | 394 |
| chr11 | 20627596  | 20627989  | 394 |

|       |               |           |     |
|-------|---------------|-----------|-----|
| chr18 | 12459985      | 12460376  | 392 |
| chr7  | 37541283      | 37541673  | 391 |
| chr14 | 1421717       | 1422107   | 391 |
| chr17 | 72995039      | 72995428  | 390 |
| chr18 | 47887117      | 47887505  | 389 |
| chr15 | 42307336      | 42307724  | 389 |
| chr6  | 121017538     | 121017925 | 388 |
| chr19 | 56952197      | 56952584  | 388 |
| chr19 | 10204537      | 10204924  | 388 |
| chr11 | 106373440     | 106373827 | 388 |
| chr2  | 135170583     | 135170969 | 387 |
| chr13 | 17836990      | 17837376  | 387 |
| chr6  | 108659354     | 108659739 | 386 |
| chr23 | 18818679      | 18819064  | 386 |
| chr19 | 48695499      | 48695884  | 386 |
| chr25 | 36442264      | 36442648  | 385 |
| chr2  | 139617478     | 139617862 | 385 |
| chr3  | 92256786      | 92257169  | 384 |
| chr26 | 18173794      | 18174177  | 384 |
| chr19 | 12405060      | 12405443  | 384 |
| chr15 | 25323978      | 25324361  | 384 |
| chr1  | 146957683     | 146958066 | 384 |
| chr11 | 14094766      | 14095148  | 383 |
| chr26 | 44236384      | 44236765  | 382 |
| chr28 | 42540694      | 42541074  | 381 |
| chr21 | 27307092      | 27307472  | 381 |
| chr10 | 105014032     | 105014411 | 380 |
| chr19 | 38301584      | 38301962  | 379 |
| chr17 | 70705879      | 70706257  | 379 |
| chr8  | 24389237      | 24389614  | 378 |
| chr11 | 254428 254805 | 378       |     |
| chr23 | 27742031      | 27742407  | 377 |
| chr19 | 52749096      | 52749472  | 377 |
| chr12 | 20799013      | 20799389  | 377 |
| chr1  | 75050060      | 75050436  | 377 |
| chr3  | 15132890      | 15133265  | 376 |
| chr17 | 68050916      | 68051291  | 376 |
| chr25 | 34094303      | 34094677  | 375 |
| chr19 | 6507065       | 6507439   | 375 |
| chr6  | 5536177       | 5536550   | 374 |
| chr8  | 75978188      | 75978559  | 372 |
| chr13 | 68501652      | 68502023  | 372 |
| chr11 | 88920742      | 88921113  | 372 |
| chr29 | 48931456      | 48931826  | 371 |
| chr16 | 2280320       | 2280690   | 371 |
| chr1  | 72570072      | 72570442  | 371 |
| chr19 | 32559225      | 32559594  | 370 |
| chr18 | 34057557      | 34057926  | 370 |
| chr10 | 17119172      | 17119541  | 370 |
| chr6  | 103146643     | 103147011 | 369 |

|       |           |           |     |
|-------|-----------|-----------|-----|
| chr3  | 125769243 | 125769611 | 369 |
| chr3  | 35564059  | 35564426  | 368 |
| chr20 | 65048751  | 65049118  | 368 |
| chr13 | 4789964   | 4790331   | 368 |
| chr23 | 13520652  | 13521018  | 367 |
| chr12 | 32218793  | 32219159  | 367 |
| chr15 | 16078691  | 16079055  | 365 |
| chr20 | 27805808  | 27806171  | 364 |
| chr18 | 62013252  | 62013615  | 364 |
| chr17 | 69785040  | 69785403  | 364 |
| chr3  | 4353983   | 4354345   | 363 |
| chr8  | 105126702 | 105127063 | 362 |
| chr23 | 8460568   | 8460929   | 362 |
| chr19 | 23779883  | 23780244  | 362 |
| chr14 | 5921678   | 5922039   | 362 |
| chr11 | 96081395  | 96081756  | 362 |
| chr22 | 50718938  | 50719297  | 360 |
| chr16 | 71130571  | 71130930  | 360 |
| chr15 | 73743090  | 73743449  | 360 |
| chr3  | 110138852 | 110139210 | 359 |
| chr2  | 134101091 | 134101449 | 359 |
| chr13 | 66137893  | 66138251  | 359 |
| chr1  | 82885113  | 82885471  | 359 |
| chr26 | 31470704  | 31471061  | 358 |
| chr25 | 41148275  | 41148632  | 358 |
| chr25 | 29386211  | 29386568  | 358 |
| chr15 | 31969079  | 31969436  | 358 |
| chr11 | 46893821  | 46894178  | 358 |
| chr6  | 20763852  | 20764208  | 357 |
| chr20 | 8597800   | 8598156   | 357 |
| chr13 | 73030178  | 73030534  | 357 |
| chr4  | 121472515 | 121472870 | 356 |
| chr4  | 79042683  | 79043038  | 356 |
| chr4  | 39494246  | 39494601  | 356 |
| chr26 | 21760666  | 21761021  | 356 |
| chr21 | 28712414  | 28712769  | 356 |
| chr7  | 96287595  | 96287949  | 355 |
| chr3  | 4491579   | 4491933   | 355 |
| chr19 | 58805425  | 58805779  | 355 |
| chr15 | 21324370  | 21324724  | 355 |
| chr4  | 123029858 | 123030211 | 354 |
| chr4  | 72303179  | 72303532  | 354 |
| chr26 | 44220204  | 44220557  | 354 |
| chr19 | 34595150  | 34595503  | 354 |
| chr10 | 16744819  | 16745172  | 354 |
| chr5  | 32924250  | 32924602  | 353 |
| chr5  | 32902693  | 32903045  | 353 |
| chr16 | 49346934  | 49347286  | 353 |
| chr16 | 44405819  | 44406171  | 353 |
| chr5  | 117194856 | 117195207 | 352 |

|       |               |           |     |
|-------|---------------|-----------|-----|
| chr28 | 43577583      | 43577934  | 352 |
| chr2  | 132781807     | 132782158 | 352 |
| chr7  | 38256442      | 38256792  | 351 |
| chr23 | 31173958      | 31174308  | 351 |
| chr16 | 49428851      | 49429201  | 351 |
| chr13 | 42868317      | 42868667  | 351 |
| chr9  | 90475981      | 90476330  | 350 |
| chr4  | 24772857      | 24773206  | 350 |
| chr28 | 12380342      | 12380691  | 350 |
| chr27 | 35334837      | 35335186  | 350 |
| chr22 | 7289276       | 7289625   | 350 |
| chr20 | 696681 697030 | 350       |     |
| chr16 | 61114951      | 61115300  | 350 |
| chr11 | 107160174     | 107160523 | 350 |
| chr5  | 33573734      | 33574082  | 349 |
| chr2  | 134744934     | 134745282 | 349 |
| chr2  | 111243127     | 111243475 | 349 |
| chr13 | 75650143      | 75650491  | 349 |
| chr8  | 74282799      | 74283146  | 348 |
| chr23 | 9452770       | 9453117   | 348 |
| chr19 | 45277798      | 45278145  | 348 |
| chr13 | 77769475      | 77769822  | 348 |
| chr13 | 70281490      | 70281837  | 348 |
| chr1  | 74069177      | 74069524  | 348 |
| chr2  | 25311015      | 25311361  | 347 |
| chr19 | 12496684      | 12497030  | 347 |
| chr13 | 74000620      | 74000966  | 347 |
| chr11 | 50883838      | 50884184  | 347 |
| chr29 | 38364016      | 38364361  | 346 |
| chr19 | 60239544      | 60239889  | 346 |
| chr13 | 55464680      | 55465025  | 346 |
| chr11 | 81558727      | 81559072  | 346 |
| chr25 | 39385014      | 39385358  | 345 |
| chr23 | 18066558      | 18066902  | 345 |
| chr18 | 63584114      | 63584458  | 345 |
| chr16 | 47282733      | 47283077  | 345 |
| chr16 | 28953377      | 28953721  | 345 |
| chr9  | 99984508      | 99984851  | 344 |
| chr7  | 50656577      | 50656920  | 344 |
| chr25 | 10576064      | 10576407  | 344 |
| chr2  | 30965017      | 30965360  | 344 |
| chr17 | 68074255      | 68074598  | 344 |
| chr16 | 47108156      | 47108499  | 344 |
| chr11 | 70907858      | 70908201  | 344 |
| chr10 | 21359809      | 21360152  | 344 |
| chr9  | 43849299      | 43849640  | 342 |
| chr5  | 76080035      | 76080376  | 342 |
| chr25 | 34418261      | 34418602  | 342 |
| chr23 | 49136973      | 49137314  | 342 |
| chr21 | 64481772      | 64482113  | 342 |

|       |               |           |     |
|-------|---------------|-----------|-----|
| chr18 | 32790543      | 32790884  | 342 |
| chr3  | 35981022      | 35981362  | 341 |
| chr3  | 10713063      | 10713403  | 341 |
| chr29 | 51988669      | 51989009  | 341 |
| chr25 | 36145754      | 36146094  | 341 |
| chr25 | 34247175      | 34247515  | 341 |
| chr20 | 33206534      | 33206874  | 341 |
| chr14 | 64444707      | 64445047  | 341 |
| chr11 | 2934738       | 2935078   | 341 |
| chr10 | 32475651      | 32475991  | 341 |
| chr7  | 15311648      | 15311987  | 340 |
| chr5  | 116838912     | 116839251 | 340 |
| chr27 | 26746061      | 26746400  | 340 |
| chr16 | 67458199      | 67458538  | 340 |
| chr7  | 18709511      | 18709849  | 339 |
| chr3  | 35599610      | 35599948  | 339 |
| chr13 | 73308552      | 73308890  | 339 |
| chr22 | 14015377      | 14015714  | 338 |
| chr2  | 130992046     | 130992383 | 338 |
| chr2  | 126731339     | 126731676 | 338 |
| chr15 | 54494906      | 54495243  | 338 |
| chr13 | 61874909      | 61875246  | 338 |
| chr10 | 88201603      | 88201940  | 338 |
| chr28 | 33665090      | 33665426  | 337 |
| chr25 | 37770524      | 37770860  | 337 |
| chr25 | 4704956       | 4705292   | 337 |
| chr23 | 19674954      | 19675289  | 336 |
| chr16 | 45184873      | 45185208  | 336 |
| chr22 | 7318382       | 7318716   | 335 |
| chr19 | 30170621      | 30170955  | 335 |
| chr18 | 55621679      | 55622013  | 335 |
| chr25 | 1249805       | 1250138   | 334 |
| chr20 | 3539835       | 3540168   | 334 |
| chr16 | 48056213      | 48056546  | 334 |
| chr11 | 2538888       | 2539221   | 334 |
| chr1  | 74555756      | 74556089  | 334 |
| chr8  | 89555608      | 89555940  | 333 |
| chr6  | 13428995      | 13429327  | 333 |
| chr27 | 843803 844135 | 333       |     |
| chr22 | 56290085      | 56290417  | 333 |
| chr2  | 136754744     | 136755076 | 333 |
| chr17 | 64042695      | 64043027  | 333 |
| chr11 | 14085966      | 14086298  | 333 |
| chr20 | 26554681      | 26555012  | 332 |
| chr9  | 90448145      | 90448475  | 331 |
| chr5  | 10623349      | 10623679  | 331 |
| chr28 | 30975297      | 30975627  | 331 |
| chr23 | 28026930      | 28027260  | 331 |
| chr12 | 33090154      | 33090484  | 331 |
| chr26 | 15398589      | 15398918  | 330 |

|       |               |           |     |
|-------|---------------|-----------|-----|
| chrX  | 62739676      | 62740004  | 329 |
| chr4  | 99307424      | 99307752  | 329 |
| chr29 | 36978479      | 36978807  | 329 |
| chr1  | 100176411     | 100176739 | 329 |
| chr21 | 20145166      | 20145493  | 328 |
| chr15 | 32615981      | 32616308  | 328 |
| chr27 | 41849322      | 41849648  | 327 |
| chr19 | 21859136      | 21859462  | 327 |
| chr18 | 13201619      | 13201945  | 327 |
| chr10 | 8558740       | 8559066   | 327 |
| chr8  | 9352156       | 9352481   | 326 |
| chr3  | 35995250      | 35995575  | 326 |
| chr26 | 39266174      | 39266499  | 326 |
| chr19 | 39138090      | 39138415  | 326 |
| chr18 | 53331520      | 53331845  | 326 |
| chr17 | 47357038      | 47357363  | 326 |
| chr16 | 34689858      | 34690183  | 326 |
| chr15 | 73738535      | 73738860  | 326 |
| chr13 | 59868951      | 59869276  | 326 |
| chr8  | 89506571      | 89506895  | 325 |
| chr19 | 54759077      | 54759401  | 325 |
| chr17 | 74612286      | 74612610  | 325 |
| chr17 | 74489994      | 74490318  | 325 |
| chr9  | 104920500     | 104920823 | 324 |
| chr5  | 32947596      | 32947919  | 324 |
| chr25 | 8193672       | 8193995   | 324 |
| chr20 | 8776016       | 8776339   | 324 |
| chr7  | 6575450       | 6575772   | 323 |
| chr5  | 34002312      | 34002634  | 323 |
| chr19 | 37569650      | 37569972  | 323 |
| chr17 | 68403849      | 68404171  | 323 |
| chr13 | 60433302      | 60433624  | 323 |
| chr9  | 90505926      | 90506247  | 322 |
| chr21 | 31052822      | 31053143  | 322 |
| chr18 | 11824037      | 11824358  | 322 |
| chr21 | 44299933      | 44300253  | 321 |
| chr20 | 73276479      | 73276799  | 321 |
| chr19 | 59335375      | 59335695  | 321 |
| chr19 | 30318481      | 30318801  | 321 |
| chr25 | 657521 657840 | 320       |     |
| chr11 | 98441053      | 98441372  | 320 |
| chr7  | 50473446      | 50473764  | 319 |
| chr3  | 8803196       | 8803514   | 319 |
| chr24 | 59864924      | 59865242  | 319 |
| chr19 | 39919381      | 39919699  | 319 |
| chr17 | 59145704      | 59146022  | 319 |
| chr23 | 51656983      | 51657300  | 318 |
| chr22 | 15233697      | 15234014  | 318 |
| chr11 | 106380945     | 106381262 | 318 |
| chr6  | 72328243      | 72328559  | 317 |

|       |               |           |     |
|-------|---------------|-----------|-----|
| chr19 | 51907516      | 51907832  | 317 |
| chr1  | 84794111      | 84794427  | 317 |
| chr29 | 45276873      | 45277188  | 316 |
| chr18 | 42225113      | 42225428  | 316 |
| chr16 | 929993 930308 | 316       |     |
| chr5  | 29959975      | 29960289  | 315 |
| chr3  | 111791580     | 111791894 | 315 |
| chr25 | 26203497      | 26203811  | 315 |
| chr19 | 38323061      | 38323375  | 315 |
| chr8  | 79391143      | 79391456  | 314 |
| chr21 | 6446196       | 6446509   | 314 |
| chr15 | 39648904      | 39649217  | 314 |
| chr15 | 29667452      | 29667765  | 314 |
| chrX  | 77952192      | 77952504  | 313 |
| chr4  | 5216317       | 5216629   | 313 |
| chr22 | 53941952      | 53942264  | 313 |
| chr21 | 30332424      | 30332736  | 313 |
| chr19 | 42702173      | 42702485  | 313 |
| chr18 | 45824184      | 45824496  | 313 |
| chr14 | 59028290      | 59028602  | 313 |
| chr12 | 32845759      | 32846071  | 313 |
| chr11 | 86248004      | 86248316  | 313 |
| chr4  | 101734700     | 101735011 | 312 |
| chr3  | 35662498      | 35662809  | 312 |
| chr27 | 23641255      | 23641566  | 312 |
| chr24 | 40989981      | 40990292  | 312 |
| chr18 | 36955666      | 36955977  | 312 |
| chr6  | 71160815      | 71161125  | 311 |
| chr5  | 43087111      | 43087421  | 311 |
| chr21 | 64521910      | 64522220  | 311 |
| chr18 | 12133352      | 12133662  | 311 |
| chr17 | 75048709      | 75049019  | 311 |
| chr15 | 64008180      | 64008490  | 311 |
| chr13 | 55462582      | 55462892  | 311 |
| chr8  | 77349458      | 77349767  | 310 |
| chr3  | 120049795     | 120050104 | 310 |
| chr29 | 49626001      | 49626310  | 310 |
| chr16 | 48663518      | 48663827  | 310 |
| chr15 | 33144277      | 33144586  | 310 |
| chr11 | 92125703      | 92126012  | 310 |
| chr7  | 5239248       | 5239556   | 309 |
| chr29 | 34884988      | 34885296  | 309 |
| chr24 | 20375202      | 20375510  | 309 |
| chr19 | 54664328      | 54664636  | 309 |
| chr17 | 69778744      | 69779052  | 309 |
| chr13 | 77620358      | 77620666  | 309 |
| chr10 | 102380204     | 102380512 | 309 |
| chr20 | 8611354       | 8611661   | 308 |
| chr2  | 115021213     | 115021520 | 308 |
| chr19 | 46829624      | 46829931  | 308 |



|       |           |           |     |
|-------|-----------|-----------|-----|
| chr19 | 445213    | 445520    | 308 |
| chr16 | 66330426  | 66330733  | 308 |
| chr11 | 31211903  | 31212210  | 308 |
| chr6  | 120879550 | 120879856 | 307 |
| chr24 | 62456391  | 62456697  | 307 |
| chr15 | 76432475  | 76432781  | 307 |
| chr13 | 59684531  | 59684837  | 307 |
| chr1  | 68852026  | 68852332  | 307 |
| chr9  | 100310828 | 100311133 | 306 |
| chr5  | 111972082 | 111972387 | 306 |
| chr2  | 135052464 | 135052769 | 306 |
| chr17 | 66837451  | 66837756  | 306 |
| chr11 | 12943268  | 12943573  | 306 |
| chr19 | 38704851  | 38705155  | 305 |
| chr16 | 40931229  | 40931533  | 305 |
| chr14 | 6962932   | 6963236   | 305 |
| chr11 | 1647265   | 1647569   | 305 |
| chr8  | 55402740  | 55403043  | 304 |
| chr7  | 52204886  | 52205189  | 304 |
| chr7  | 37575711  | 37576014  | 304 |
| chr5  | 112581415 | 112581718 | 304 |
| chr25 | 35599827  | 35600130  | 304 |
| chr2  | 49413458  | 49413761  | 304 |
| chr12 | 31352372  | 31352675  | 304 |
| chr9  | 43852207  | 43852509  | 303 |
| chr4  | 121280874 | 121281176 | 303 |
| chr17 | 63809767  | 63810069  | 303 |
| chr11 | 106812927 | 106813229 | 303 |
| chr5  | 60373804  | 60374105  | 302 |
| chr29 | 51680592  | 51680893  | 302 |
| chr22 | 58433316  | 58433617  | 302 |
| chr19 | 47875062  | 47875363  | 302 |
| chr17 | 63397052  | 63397353  | 302 |
| chr9  | 98298898  | 98299198  | 301 |
| chr22 | 59983878  | 59984178  | 301 |
| chr16 | 43136370  | 43136670  | 301 |
| chr14 | 31037229  | 31037528  | 300 |
| chr6  | 99220474  | 99220772  | 299 |
| chr3  | 115095229 | 115095527 | 299 |
| chr26 | 37095604  | 37095902  | 299 |
| chr22 | 61195827  | 61196125  | 299 |
| chr19 | 59189450  | 59189748  | 299 |
| chr17 | 63929904  | 63930202  | 299 |
| chr16 | 1592670   | 1592968   | 299 |
| chr15 | 34198730  | 34199028  | 299 |
| chr10 | 12088191  | 12088489  | 299 |
| chr9  | 89849007  | 89849304  | 298 |
| chr8  | 24319754  | 24320051  | 298 |
| chr13 | 54921702  | 54921999  | 298 |
| chr29 | 31980356  | 31980652  | 297 |

|       |           |           |     |
|-------|-----------|-----------|-----|
| chr28 | 7524224   | 7524520   | 297 |
| chr19 | 10806272  | 10806568  | 297 |
| chr18 | 11086981  | 11087277  | 297 |
| chr17 | 62103363  | 62103659  | 297 |
| chr11 | 106406676 | 106406972 | 297 |
| chr5  | 111738808 | 111739103 | 296 |
| chr5  | 96691726  | 96692021  | 296 |
| chr3  | 25747127  | 25747422  | 296 |
| chr26 | 39130589  | 39130884  | 296 |
| chr2  | 136607815 | 136608110 | 296 |
| chr15 | 80828482  | 80828777  | 296 |
| chr13 | 77799070  | 77799365  | 296 |
| chr13 | 66975865  | 66976160  | 296 |
| chr5  | 28960278  | 28960572  | 295 |
| chr2  | 139361416 | 139361710 | 295 |
| chr19 | 46861731  | 46862025  | 295 |
| chr10 | 103501892 | 103502186 | 295 |
| chr19 | 61217490  | 61217783  | 294 |
| chr13 | 37682384  | 37682677  | 294 |
| chr10 | 58997830  | 58998123  | 294 |
| chr10 | 62904394  | 62904686  | 293 |
| chr26 | 15575191  | 15575482  | 292 |
| chr23 | 8253785   | 8254076   | 292 |
| chr18 | 24347360  | 24347651  | 292 |
| chr13 | 82987702  | 82987993  | 292 |
| chr1  | 100066800 | 100067091 | 292 |
| chr8  | 73877080  | 73877370  | 291 |
| chr6  | 30816158  | 30816448  | 291 |
| chr5  | 35304371  | 35304661  | 291 |
| chr5  | 30191260  | 30191550  | 291 |
| chr28 | 26598010  | 26598300  | 291 |
| chr18 | 35069392  | 35069682  | 291 |
| chr15 | 30150781  | 30151071  | 291 |
| chr15 | 30080005  | 30080295  | 291 |
| chr11 | 77749682  | 77749972  | 291 |
| chr8  | 65297014  | 65297303  | 290 |
| chr5  | 75534309  | 75534598  | 290 |
| chr27 | 40305132  | 40305421  | 290 |
| chr26 | 22345905  | 22346194  | 290 |
| chr26 | 20978548  | 20978837  | 290 |
| chr25 | 37405467  | 37405756  | 290 |
| chr23 | 43422380  | 43422669  | 290 |
| chr22 | 51418919  | 51419208  | 290 |
| chr19 | 35854834  | 35855123  | 290 |
| chr16 | 39473732  | 39474021  | 290 |
| chr13 | 23673652  | 23673941  | 290 |
| chr9  | 43244325  | 43244613  | 289 |
| chr26 | 21832676  | 21832964  | 289 |
| chr13 | 77768874  | 77769162  | 289 |
| chr1  | 1598741   | 1599029   | 289 |

|       |           |           |     |
|-------|-----------|-----------|-----|
| chr7  | 42153492  | 42153779  | 288 |
| chr22 | 5451968   | 5452255   | 288 |
| chr20 | 15473122  | 15473409  | 288 |
| chr10 | 13393627  | 13393914  | 288 |
| chr8  | 7837288   | 7837574   | 287 |
| chr3  | 34078129  | 34078415  | 287 |
| chr23 | 52806568  | 52806854  | 287 |
| chr19 | 60758955  | 60759241  | 287 |
| chr19 | 38724921  | 38725207  | 287 |
| chr11 | 100913602 | 100913888 | 287 |
| chr10 | 59636053  | 59636339  | 287 |
| chr29 | 41713140  | 41713425  | 286 |
| chr29 | 31483610  | 31483895  | 286 |
| chr22 | 61220624  | 61220909  | 286 |
| chr19 | 54156694  | 54156979  | 286 |
| chr19 | 23983619  | 23983904  | 286 |
| chr18 | 26289260  | 26289545  | 286 |
| chr18 | 17909005  | 17909290  | 286 |
| chr16 | 46686791  | 46687076  | 286 |
| chr12 | 54226681  | 54226966  | 286 |
| chr11 | 2561317   | 2561602   | 286 |
| chr8  | 56615191  | 56615475  | 285 |
| chr3  | 119304897 | 119305181 | 285 |
| chr3  | 89888079  | 89888363  | 285 |
| chr23 | 7789896   | 7790180   | 285 |
| chr21 | 32841367  | 32841651  | 285 |
| chr19 | 54595848  | 54596132  | 285 |
| chr3  | 101743059 | 101743342 | 284 |
| chr29 | 46271625  | 46271908  | 284 |
| chr24 | 38478756  | 38479039  | 284 |
| chr23 | 7398399   | 7398682   | 284 |
| chr22 | 57207951  | 57208234  | 284 |
| chr22 | 48278555  | 48278838  | 284 |
| chr21 | 22059571  | 22059854  | 284 |
| chr20 | 33366096  | 33366379  | 284 |
| chr18 | 57433758  | 57434041  | 284 |
| chr15 | 30044623  | 30044906  | 284 |
| chr12 | 26785737  | 26786020  | 284 |
| chr1  | 87378785  | 87379068  | 284 |
| chr3  | 45695236  | 45695518  | 283 |
| chr29 | 41681591  | 41681873  | 283 |
| chr23 | 27844490  | 27844772  | 283 |
| chr21 | 66372547  | 66372829  | 283 |
| chr21 | 62450439  | 62450721  | 283 |
| chr14 | 61306938  | 61307220  | 283 |
| chr11 | 11622474  | 11622756  | 283 |
| chr10 | 21651277  | 21651559  | 283 |
| chr9  | 52976597  | 52976878  | 282 |
| chr5  | 113490695 | 113490976 | 282 |
| chr28 | 26763523  | 26763804  | 282 |

|       |               |           |     |
|-------|---------------|-----------|-----|
| chr25 | 40418633      | 40418914  | 282 |
| chr2  | 136731838     | 136732119 | 282 |
| chr2  | 125861729     | 125862010 | 282 |
| chr2  | 21507540      | 21507821  | 282 |
| chr19 | 56511619      | 56511900  | 282 |
| chr8  | 103777053     | 103777333 | 281 |
| chr5  | 31249148      | 31249428  | 281 |
| chr19 | 26287769      | 26288049  | 281 |
| chr18 | 10946874      | 10947154  | 281 |
| chr8  | 859535 859814 | 280       |     |
| chr5  | 119145547     | 119145826 | 280 |
| chr3  | 119910849     | 119911128 | 280 |
| chr23 | 31132235      | 31132514  | 280 |
| chr23 | 15879861      | 15880140  | 280 |
| chr19 | 43157209      | 43157488  | 280 |
| chr18 | 52116868      | 52117147  | 280 |
| chr18 | 11538640      | 11538919  | 280 |
| chr15 | 29672936      | 29673215  | 280 |
| chr15 | 76153274      | 76153552  | 279 |
| chr14 | 7849401       | 7849679   | 279 |
| chr13 | 82665550      | 82665828  | 279 |
| chr1  | 73787321      | 73787599  | 279 |
| chr8  | 80081001      | 80081278  | 278 |
| chr5  | 113209177     | 113209454 | 278 |
| chr3  | 121127447     | 121127724 | 278 |
| chr21 | 66375794      | 66376071  | 278 |
| chr21 | 9448875       | 9449152   | 278 |
| chr17 | 64283630      | 64283907  | 278 |
| chr13 | 75753916      | 75754193  | 278 |
| chr28 | 41269503      | 41269779  | 277 |
| chr22 | 51060188      | 51060464  | 277 |
| chr17 | 49439681      | 49439957  | 277 |
| chr12 | 32884589      | 32884865  | 277 |
| chr11 | 11722392      | 11722668  | 277 |
| chr11 | 7058524       | 7058800   | 277 |
| chr3  | 15768182      | 15768457  | 276 |
| chr26 | 39636007      | 39636282  | 276 |
| chr23 | 18066214      | 18066489  | 276 |
| chr19 | 58982623      | 58982898  | 276 |
| chr19 | 39559627      | 39559902  | 276 |
| chr19 | 37869162      | 37869437  | 276 |
| chr12 | 84295471      | 84295746  | 276 |
| chr3  | 15178231      | 15178505  | 275 |
| chr20 | 62785600      | 62785874  | 275 |
| chr19 | 16745417      | 16745691  | 275 |
| chr11 | 108863558     | 108863832 | 275 |
| chr11 | 14035111      | 14035385  | 275 |
| chr1  | 144521122     | 144521396 | 275 |
| chr6  | 37835661      | 37835934  | 274 |
| chr4  | 123226384     | 123226657 | 274 |

|       |           |           |     |
|-------|-----------|-----------|-----|
| chr3  | 26146012  | 26146285  | 274 |
| chr29 | 48325874  | 48326147  | 274 |
| chr29 | 36947196  | 36947469  | 274 |
| chr16 | 59083221  | 59083494  | 274 |
| chr11 | 103726306 | 103726579 | 274 |
| chr10 | 47011753  | 47012026  | 274 |
| chr10 | 37308161  | 37308434  | 274 |
| chr10 | 16925051  | 16925324  | 274 |
| chr9  | 52811884  | 52812156  | 273 |
| chr7  | 94370827  | 94371099  | 273 |
| chr6  | 105466780 | 105467052 | 273 |
| chr4  | 122667168 | 122667440 | 273 |
| chr16 | 49426872  | 49427144  | 273 |
| chr16 | 38792520  | 38792792  | 273 |
| chr12 | 32211966  | 32212238  | 273 |
| chr12 | 32002045  | 32002317  | 273 |
| chr10 | 29818532  | 29818804  | 273 |
| chr26 | 20853979  | 20854250  | 272 |
| chr22 | 44871507  | 44871778  | 272 |
| chr15 | 73757966  | 73758237  | 272 |
| chr14 | 17666099  | 17666370  | 272 |
| chr11 | 88665232  | 88665503  | 272 |
| chrX  | 13576060  | 13576330  | 271 |
| chr7  | 53383470  | 53383740  | 271 |
| chr21 | 68799238  | 68799508  | 271 |
| chr19 | 58175993  | 58176263  | 271 |
| chr17 | 12567502  | 12567772  | 271 |
| chr15 | 25792823  | 25793093  | 271 |
| chr14 | 64057199  | 64057469  | 271 |
| chr14 | 40044338  | 40044608  | 271 |
| chr13 | 70229151  | 70229421  | 271 |
| chr1  | 84822099  | 84822369  | 271 |
| chr9  | 75445192  | 75445461  | 270 |
| chr3  | 22648861  | 22649130  | 270 |
| chr2  | 139064021 | 139064290 | 270 |
| chr19 | 64355020  | 64355289  | 270 |
| chr18 | 24341272  | 24341541  | 270 |
| chr14 | 7834760   | 7835029   | 270 |
| chr12 | 32233242  | 32233511  | 270 |
| chr11 | 81493702  | 81493971  | 270 |
| chr11 | 49348374  | 49348643  | 270 |
| chr7  | 51858130  | 51858398  | 269 |
| chr3  | 62931525  | 62931793  | 269 |
| chr25 | 43431165  | 43431433  | 269 |
| chr22 | 20117428  | 20117696  | 269 |
| chr18 | 34883377  | 34883645  | 269 |
| chr17 | 70276306  | 70276574  | 269 |
| chr16 | 2698024   | 2698292   | 269 |
| chr15 | 56048808  | 56049076  | 269 |
| chr12 | 35570328  | 35570596  | 269 |

|       |           |           |     |
|-------|-----------|-----------|-----|
| chr12 | 12214444  | 12214712  | 269 |
| chr29 | 49086714  | 49086981  | 268 |
| chr19 | 6504289   | 6504556   | 268 |
| chr15 | 28871848  | 28872115  | 268 |
| chr11 | 28638986  | 28639253  | 268 |
| chr11 | 28341131  | 28341398  | 268 |
| chr8  | 7397095   | 7397361   | 267 |
| chr29 | 30663633  | 30663899  | 267 |
| chr24 | 1321802   | 1322068   | 267 |
| chr19 | 10934135  | 10934401  | 267 |
| chr18 | 11834716  | 11834982  | 267 |
| chr17 | 73424709  | 73424975  | 267 |
| chr13 | 79644532  | 79644798  | 267 |
| chr4  | 98599098  | 98599363  | 266 |
| chr3  | 13489549  | 13489814  | 266 |
| chr18 | 44990406  | 44990671  | 266 |
| chr13 | 61278210  | 61278475  | 266 |
| chr11 | 92677504  | 92677769  | 266 |
| chr27 | 38685973  | 38686237  | 265 |
| chr26 | 50840710  | 50840974  | 265 |
| chr26 | 50175166  | 50175430  | 265 |
| chr26 | 48649163  | 48649427  | 265 |
| chr26 | 18129910  | 18130174  | 265 |
| chr23 | 9379373   | 9379637   | 265 |
| chr23 | 8248118   | 8248382   | 265 |
| chr21 | 26162783  | 26163047  | 265 |
| chr16 | 39534533  | 39534797  | 265 |
| chr9  | 77189111  | 77189374  | 264 |
| chr7  | 45832239  | 45832502  | 264 |
| chr7  | 4490669   | 4490932   | 264 |
| chr6  | 121811902 | 121812165 | 264 |
| chr5  | 124741336 | 124741599 | 264 |
| chr5  | 28722587  | 28722850  | 264 |
| chr3  | 108798250 | 108798513 | 264 |
| chr25 | 41982452  | 41982715  | 264 |
| chr21 | 2029246   | 2029509   | 264 |
| chr5  | 121812736 | 121812998 | 263 |
| chr3  | 106608665 | 106608927 | 263 |
| chr24 | 1577183   | 1577445   | 263 |
| chr17 | 72720993  | 72721255  | 263 |
| chr15 | 25559629  | 25559891  | 263 |
| chr13 | 73033892  | 73034154  | 263 |
| chr13 | 55049805  | 55050067  | 263 |
| chr1  | 149231328 | 149231590 | 263 |
| chr7  | 13075092  | 13075353  | 262 |
| chr25 | 42412505  | 42412766  | 262 |
| chr23 | 27396429  | 27396690  | 262 |
| chr22 | 50819373  | 50819634  | 262 |
| chr2  | 126837836 | 126838097 | 262 |
| chr7  | 43670628  | 43670888  | 261 |

|       |               |           |     |
|-------|---------------|-----------|-----|
| chr4  | 107349455     | 107349715 | 261 |
| chr3  | 10567157      | 10567417  | 261 |
| chr24 | 1484454       | 1484714   | 261 |
| chr21 | 30287664      | 30287924  | 261 |
| chr21 | 7062623       | 7062883   | 261 |
| chr15 | 75312915      | 75313175  | 261 |
| chr13 | 79904393      | 79904653  | 261 |
| chr13 | 77413008      | 77413268  | 261 |
| chr10 | 21070290      | 21070550  | 261 |
| chr21 | 13827281      | 13827540  | 260 |
| chr18 | 56592488      | 56592747  | 260 |
| chr11 | 28347320      | 28347579  | 260 |
| chr10 | 25027857      | 25028116  | 260 |
| chr1  | 147085901     | 147086160 | 260 |
| chr4  | 73476196      | 73476454  | 259 |
| chr3  | 111900141     | 111900399 | 259 |
| chr3  | 26155089      | 26155347  | 259 |
| chr24 | 51560062      | 51560320  | 259 |
| chr24 | 43363532      | 43363790  | 259 |
| chr24 | 2009895       | 2010153   | 259 |
| chr24 | 947302 947560 | 259       |     |
| chr21 | 67908153      | 67908411  | 259 |
| chr20 | 44359529      | 44359787  | 259 |
| chr1  | 1627205       | 1627463   | 259 |
| chr3  | 35994667      | 35994924  | 258 |
| chr25 | 36115757      | 36116014  | 258 |
| chr21 | 58762082      | 58762339  | 258 |
| chr18 | 24315399      | 24315656  | 258 |
| chr16 | 38772366      | 38772623  | 258 |
| chr14 | 34048147      | 34048404  | 258 |
| chr12 | 70977787      | 70978044  | 258 |
| chr11 | 71467158      | 71467415  | 258 |
| chr6  | 59522833      | 59523089  | 257 |
| chr26 | 51449245      | 51449501  | 257 |
| chr21 | 60174461      | 60174717  | 257 |
| chr21 | 25597329      | 25597585  | 257 |
| chr19 | 46299674      | 46299930  | 257 |
| chr18 | 35093855      | 35094111  | 257 |
| chr18 | 13559232      | 13559488  | 257 |
| chr18 | 11675063      | 11675319  | 257 |
| chr16 | 2118036       | 2118292   | 257 |
| chr14 | 25784859      | 25785115  | 257 |
| chr11 | 72300075      | 72300331  | 257 |
| chr28 | 26080201      | 26080456  | 256 |
| chr23 | 31332280      | 31332535  | 256 |
| chr22 | 50024989      | 50025244  | 256 |
| chr22 | 48671745      | 48672000  | 256 |
| chr18 | 56360039      | 56360294  | 256 |
| chr18 | 45430308      | 45430563  | 256 |
| chr15 | 55808312      | 55808567  | 256 |

|       |               |           |     |
|-------|---------------|-----------|-----|
| chr1  | 68440583      | 68440838  | 256 |
| chr9  | 26590573      | 26590827  | 255 |
| chr2  | 124815030     | 124815284 | 255 |
| chr18 | 9708850       | 9709104   | 255 |
| chr11 | 14424215      | 14424469  | 255 |
| chr10 | 46923518      | 46923772  | 255 |
| chr7  | 52403289      | 52403542  | 254 |
| chr7  | 37580565      | 37580818  | 254 |
| chr3  | 121367387     | 121367640 | 254 |
| chr3  | 55144124      | 55144377  | 254 |
| chr3  | 34785703      | 34785956  | 254 |
| chr29 | 34926150      | 34926403  | 254 |
| chr25 | 36473121      | 36473374  | 254 |
| chr25 | 33232486      | 33232739  | 254 |
| chr19 | 61779934      | 61780187  | 254 |
| chr19 | 7819805       | 7820058   | 254 |
| chr16 | 25499194      | 25499447  | 254 |
| chr1  | 73148248      | 73148501  | 254 |
| chr7  | 7162086       | 7162338   | 253 |
| chr6  | 121735368     | 121735620 | 253 |
| chr5  | 33006095      | 33006347  | 253 |
| chr4  | 68209532      | 68209784  | 253 |
| chr29 | 38043746      | 38043998  | 253 |
| chr26 | 8707746       | 8707998   | 253 |
| chr24 | 60538998      | 60539250  | 253 |
| chr21 | 20901919      | 20902171  | 253 |
| chr20 | 19063873      | 19064125  | 253 |
| chr19 | 19825779      | 19826031  | 253 |
| chr19 | 13418384      | 13418636  | 253 |
| chr15 | 25102423      | 25102675  | 253 |
| chr6  | 120616141     | 120616392 | 252 |
| chr4  | 15744176      | 15744427  | 252 |
| chr20 | 5219241       | 5219492   | 252 |
| chr1  | 8942982       | 8943233   | 252 |
| chr9  | 8644392       | 8644642   | 251 |
| chr7  | 53347002      | 53347252  | 251 |
| chr7  | 14903750      | 14904000  | 251 |
| chr4  | 36671492      | 36671742  | 251 |
| chr23 | 33524319      | 33524569  | 251 |
| chr2  | 123755811     | 123756061 | 251 |
| chr17 | 54512238      | 54512488  | 251 |
| chr17 | 45955688      | 45955938  | 251 |
| chr15 | 29857104      | 29857354  | 251 |
| chr29 | 41710379      | 41710628  | 250 |
| chr24 | 790122 790371 | 250       |     |
| chr23 | 15888712      | 15888961  | 250 |
| chr21 | 16049988      | 16050237  | 250 |
| chr15 | 65582392      | 65582641  | 250 |
| chr13 | 9088569       | 9088818   | 250 |
| chr4  | 124326021     | 124326269 | 249 |



|       |           |           |     |
|-------|-----------|-----------|-----|
| chr4  | 33216077  | 33216325  | 249 |
| chr28 | 33673965  | 33674213  | 249 |
| chr28 | 33627530  | 33627778  | 249 |
| chr23 | 28822371  | 28822619  | 249 |
| chr2  | 130429178 | 130429426 | 249 |
| chr2  | 124309426 | 124309674 | 249 |
| chr19 | 30065182  | 30065430  | 249 |
| chr18 | 62660208  | 62660456  | 249 |
| chr17 | 70397877  | 70398125  | 249 |
| chr17 | 67055562  | 67055810  | 249 |
| chr13 | 55990715  | 55990963  | 249 |
| chr13 | 54398521  | 54398769  | 249 |
| chr12 | 32159697  | 32159945  | 249 |
| chr12 | 29930654  | 29930902  | 249 |
| chr11 | 75104933  | 75105181  | 249 |
| chr1  | 68819875  | 68820123  | 249 |
| chr7  | 13102461  | 13102708  | 248 |
| chr7  | 5310330   | 5310577   | 248 |
| chr3  | 115804295 | 115804542 | 248 |
| chr26 | 37597682  | 37597929  | 248 |
| chr25 | 24847351  | 24847598  | 248 |
| chr23 | 2565031   | 2565278   | 248 |
| chr22 | 30083356  | 30083603  | 248 |
| chr19 | 36484717  | 36484964  | 248 |
| chr19 | 6527258   | 6527505   | 248 |
| chr17 | 68193976  | 68194223  | 248 |
| chr13 | 29697430  | 29697677  | 248 |
| chr6  | 73193526  | 73193772  | 247 |
| chr5  | 123481356 | 123481602 | 247 |
| chr5  | 122701106 | 122701352 | 247 |
| chr23 | 20003247  | 20003493  | 247 |
| chr22 | 55876628  | 55876874  | 247 |
| chr2  | 126168182 | 126168428 | 247 |
| chr19 | 40249738  | 40249984  | 247 |
| chr19 | 27276165  | 27276411  | 247 |
| chr15 | 75430120  | 75430366  | 247 |
| chr13 | 77384591  | 77384837  | 247 |
| chr11 | 70689176  | 70689422  | 247 |
| chr8  | 3713909   | 3714154   | 246 |
| chr7  | 42180853  | 42181098  | 246 |
| chr5  | 28841009  | 28841254  | 246 |
| chr4  | 107346421 | 107346666 | 246 |
| chr21 | 27823635  | 27823880  | 246 |
| chr21 | 7177377   | 7177622   | 246 |
| chr2  | 134513149 | 134513394 | 246 |
| chr19 | 44787814  | 44788059  | 246 |
| chr18 | 56954908  | 56955153  | 246 |
| chr8  | 66132393  | 66132637  | 245 |
| chr7  | 50456835  | 50457079  | 245 |
| chr7  | 38206440  | 38206684  | 245 |

|       |           |           |     |
|-------|-----------|-----------|-----|
| chr28 | 36457112  | 36457356  | 245 |
| chr28 | 33383206  | 33383450  | 245 |
| chr26 | 8708052   | 8708296   | 245 |
| chr22 | 55761831  | 55762075  | 245 |
| chr21 | 34807658  | 34807902  | 245 |
| chr2  | 138630200 | 138630444 | 245 |
| chr2  | 123754882 | 123755126 | 245 |
| chr18 | 39919567  | 39919811  | 245 |
| chr15 | 26894845  | 26895089  | 245 |
| chr28 | 26180332  | 26180575  | 244 |
| chr26 | 18163917  | 18164160  | 244 |
| chr23 | 19627697  | 19627940  | 244 |
| chr22 | 56309909  | 56310152  | 244 |
| chr21 | 28128241  | 28128484  | 244 |
| chr19 | 39208948  | 39209191  | 244 |
| chr18 | 50004109  | 50004352  | 244 |
| chr16 | 75701254  | 75701497  | 244 |
| chr15 | 22320626  | 22320869  | 244 |
| chr13 | 68206011  | 68206254  | 244 |
| chr11 | 107247551 | 107247794 | 244 |
| chr11 | 90516319  | 90516562  | 244 |
| chr4  | 14676227  | 14676469  | 243 |
| chr29 | 2682665   | 2682907   | 243 |
| chr2  | 95159031  | 95159273  | 243 |
| chr19 | 21738177  | 21738419  | 243 |
| chr16 | 2916985   | 2917227   | 243 |
| chr12 | 36192304  | 36192546  | 243 |
| chr29 | 31967391  | 31967632  | 242 |
| chr26 | 41017402  | 41017643  | 242 |
| chr21 | 34984680  | 34984921  | 242 |
| chr19 | 7931954   | 7932195   | 242 |
| chr19 | 7624154   | 7624395   | 242 |
| chr18 | 35069696  | 35069937  | 242 |
| chr18 | 24121110  | 24121351  | 242 |
| chr14 | 21756671  | 21756912  | 242 |
| chr10 | 84415660  | 84415901  | 242 |
| chr1  | 157210555 | 157210796 | 242 |
| chr1  | 37556878  | 37557119  | 242 |
| chr5  | 53275637  | 53275877  | 241 |
| chr3  | 105458444 | 105458684 | 241 |
| chr26 | 44376435  | 44376675  | 241 |
| chr21 | 65875479  | 65875719  | 241 |
| chr2  | 134731121 | 134731361 | 241 |
| chr19 | 24364672  | 24364912  | 241 |
| chr17 | 49419420  | 49419660  | 241 |
| chr11 | 95226085  | 95226325  | 241 |
| chr11 | 71466829  | 71467069  | 241 |
| chr1  | 127951340 | 127951580 | 241 |
| chr6  | 117783026 | 117783265 | 240 |
| chr3  | 105504819 | 105505058 | 240 |

|       |           |           |     |
|-------|-----------|-----------|-----|
| chr28 | 33616126  | 33616365  | 240 |
| chr26 | 20060304  | 20060543  | 240 |
| chr19 | 38326962  | 38327201  | 240 |
| chr1  | 74617027  | 74617266  | 240 |
| chr3  | 82836131  | 82836369  | 239 |
| chr22 | 55417562  | 55417800  | 239 |
| chr21 | 66377162  | 66377400  | 239 |
| chr2  | 121894964 | 121895202 | 239 |
| chr19 | 47210140  | 47210378  | 239 |
| chr19 | 43194438  | 43194676  | 239 |
| chr10 | 52942900  | 52943138  | 239 |
| chr5  | 121155169 | 121155406 | 238 |
| chr21 | 1902477   | 1902714   | 238 |
| chr19 | 38839615  | 38839852  | 238 |
| chr16 | 46638276  | 46638513  | 238 |
| chr11 | 104880935 | 104881172 | 238 |
| chr10 | 90270065  | 90270302  | 238 |
| chr1  | 54059807  | 54060044  | 238 |
| chr5  | 32914711  | 32914947  | 237 |
| chr4  | 80355138  | 80355374  | 237 |
| chr12 | 84935833  | 84936069  | 237 |
| chr12 | 33357372  | 33357608  | 237 |
| chr2  | 134756972 | 134757207 | 236 |
| chr13 | 65867859  | 65868094  | 236 |
| chr13 | 56028124  | 56028359  | 236 |
| chr11 | 104954044 | 104954279 | 236 |
| chrX  | 2327957   | 2328191   | 235 |
| chr9  | 105945746 | 105945980 | 235 |
| chr8  | 61829228  | 61829462  | 235 |
| chr22 | 50808513  | 50808747  | 235 |
| chr2  | 126886686 | 126886920 | 235 |
| chr19 | 7931615   | 7931849   | 235 |
| chr16 | 47049290  | 47049524  | 235 |
| chr16 | 23312944  | 23313178  | 235 |
| chr13 | 38833182  | 38833416  | 235 |
| chr12 | 74489984  | 74490218  | 235 |
| chr11 | 1120983   | 1121217   | 235 |
| chr9  | 104768075 | 104768308 | 234 |
| chr8  | 60186279  | 60186512  | 234 |
| chr6  | 121081664 | 121081897 | 234 |
| chr3  | 116912263 | 116912496 | 234 |
| chr24 | 60737732  | 60737965  | 234 |
| chr24 | 43543591  | 43543824  | 234 |
| chr23 | 27311670  | 27311903  | 234 |
| chr21 | 59888051  | 59888284  | 234 |
| chr20 | 73430077  | 73430310  | 234 |
| chr2  | 138595302 | 138595535 | 234 |
| chr15 | 81382227  | 81382460  | 234 |
| chr15 | 23912692  | 23912925  | 234 |
| chr12 | 52444858  | 52445091  | 234 |

|       |           |           |     |
|-------|-----------|-----------|-----|
| chr11 | 106076897 | 106077130 | 234 |
| chr11 | 70872145  | 70872378  | 234 |
| chr8  | 63941588  | 63941820  | 233 |
| chr6  | 63035044  | 63035276  | 233 |
| chr3  | 30219242  | 30219474  | 233 |
| chr23 | 28856056  | 28856288  | 233 |
| chr20 | 70626641  | 70626873  | 233 |
| chr2  | 122895597 | 122895829 | 233 |
| chr2  | 25231243  | 25231475  | 233 |
| chr19 | 43089253  | 43089485  | 233 |
| chr14 | 5729502   | 5729734   | 233 |
| chr13 | 56439138  | 56439370  | 233 |
| chr12 | 17141923  | 17142155  | 233 |
| chr1  | 148275812 | 148276044 | 233 |
| chr8  | 65872349  | 65872580  | 232 |
| chr7  | 7150534   | 7150765   | 232 |
| chr3  | 122390279 | 122390510 | 232 |
| chr25 | 42037683  | 42037914  | 232 |
| chr18 | 23555430  | 23555661  | 232 |
| chr15 | 54472518  | 54472749  | 232 |
| chr10 | 91049872  | 91050103  | 232 |
| chr10 | 73958345  | 73958576  | 232 |
| chr1  | 156663329 | 156663560 | 232 |
| chr7  | 5201708   | 5201938   | 231 |
| chr5  | 16816295  | 16816525  | 231 |
| chr3  | 98285187  | 98285417  | 231 |
| chr3  | 9187934   | 9188164   | 231 |
| chr29 | 42353921  | 42354151  | 231 |
| chr27 | 39217864  | 39218094  | 231 |
| chr27 | 762696    | 762926    | 231 |
| chr25 | 7030666   | 7030896   | 231 |
| chr23 | 10417657  | 10417887  | 231 |
| chr2  | 136714469 | 136714699 | 231 |
| chr2  | 82033251  | 82033481  | 231 |
| chr18 | 55631820  | 55632050  | 231 |
| chr17 | 64358838  | 64359068  | 231 |
| chr12 | 82692649  | 82692879  | 231 |
| chr1  | 154931553 | 154931783 | 231 |
| chr1  | 8721110   | 8721340   | 231 |
| chr3  | 115094022 | 115094251 | 230 |
| chr25 | 38168438  | 38168667  | 230 |
| chr23 | 27777993  | 27778222  | 230 |
| chr22 | 29669952  | 29670181  | 230 |
| chr19 | 56479986  | 56480215  | 230 |
| chr19 | 25080922  | 25081151  | 230 |
| chr14 | 7695107   | 7695336   | 230 |
| chr11 | 9919271   | 9919500   | 230 |
| chr10 | 17425290  | 17425519  | 230 |
| chr9  | 33773856  | 33774084  | 229 |
| chr8  | 108754133 | 108754361 | 229 |

|       |           |           |     |
|-------|-----------|-----------|-----|
| chr6  | 118326968 | 118327196 | 229 |
| chr4  | 82130812  | 82131040  | 229 |
| chr29 | 50210890  | 50211118  | 229 |
| chr24 | 61114432  | 61114660  | 229 |
| chr20 | 21907538  | 21907766  | 229 |
| chr18 | 52683459  | 52683687  | 229 |
| chr15 | 66212942  | 66213170  | 229 |
| chr10 | 32475184  | 32475412  | 229 |
| chr3  | 111398888 | 111399115 | 228 |
| chr29 | 51976644  | 51976871  | 228 |
| chr28 | 43145005  | 43145232  | 228 |
| chr28 | 26766595  | 26766822  | 228 |
| chr23 | 49716293  | 49716520  | 228 |
| chr23 | 28167736  | 28167963  | 228 |
| chr21 | 34903550  | 34903777  | 228 |
| chr18 | 15919736  | 15919963  | 228 |
| chr16 | 47758447  | 47758674  | 228 |
| chr15 | 32672192  | 32672419  | 228 |
| chr13 | 45396527  | 45396754  | 228 |
| chr10 | 102956208 | 102956435 | 228 |
| chr9  | 106858343 | 106858569 | 227 |
| chr7  | 61089934  | 61090160  | 227 |
| chr7  | 50252648  | 50252874  | 227 |
| chr3  | 105656190 | 105656416 | 227 |
| chr27 | 27148003  | 27148229  | 227 |
| chr26 | 48568328  | 48568554  | 227 |
| chr26 | 22360658  | 22360884  | 227 |
| chr25 | 39290585  | 39290811  | 227 |
| chr24 | 13255521  | 13255747  | 227 |
| chr2  | 76400889  | 76401115  | 227 |
| chr19 | 54863866  | 54864092  | 227 |
| chr17 | 70276706  | 70276932  | 227 |
| chr16 | 26560346  | 26560572  | 227 |
| chr10 | 17247536  | 17247762  | 227 |
| chr29 | 48885574  | 48885799  | 226 |
| chr26 | 33814497  | 33814722  | 226 |
| chr24 | 26541366  | 26541591  | 226 |
| chr23 | 29077058  | 29077283  | 226 |
| chr22 | 44842280  | 44842505  | 226 |
| chr2  | 135834256 | 135834481 | 226 |
| chr18 | 53360064  | 53360289  | 226 |
| chr15 | 22322462  | 22322687  | 226 |
| chr12 | 31095715  | 31095940  | 226 |
| chr11 | 70807811  | 70808036  | 226 |
| chr7  | 48652280  | 48652504  | 225 |
| chr7  | 14822060  | 14822284  | 225 |
| chr6  | 120457786 | 120458010 | 225 |
| chr3  | 30725411  | 30725635  | 225 |
| chr28 | 16211891  | 16212115  | 225 |
| chr25 | 40209370  | 40209594  | 225 |

|       |           |           |     |
|-------|-----------|-----------|-----|
| chr23 | 7592601   | 7592825   | 225 |
| chr19 | 28738478  | 28738702  | 225 |
| chr18 | 33143780  | 33144004  | 225 |
| chr18 | 11802075  | 11802299  | 225 |
| chr17 | 74233258  | 74233482  | 225 |
| chr16 | 2293914   | 2294138   | 225 |
| chr13 | 15989591  | 15989815  | 225 |
| chr10 | 20845496  | 20845720  | 225 |
| chr3  | 15778740  | 15778963  | 224 |
| chr24 | 44376264  | 44376487  | 224 |
| chr23 | 13692039  | 13692262  | 224 |
| chr22 | 30104723  | 30104946  | 224 |
| chr19 | 7541349   | 7541572   | 224 |
| chr17 | 63163891  | 63164114  | 224 |
| chr17 | 49447665  | 49447888  | 224 |
| chr16 | 44467763  | 44467986  | 224 |
| chr10 | 13584531  | 13584754  | 224 |
| chr10 | 4982423   | 4982646   | 224 |
| chr7  | 21125030  | 21125252  | 223 |
| chr7  | 17489284  | 17489506  | 223 |
| chr27 | 35413857  | 35414079  | 223 |
| chr19 | 55766543  | 55766765  | 223 |
| chr18 | 54221412  | 54221634  | 223 |
| chr15 | 81656696  | 81656918  | 223 |
| chr13 | 40081940  | 40082162  | 223 |
| chr13 | 17817736  | 17817958  | 223 |
| chr1  | 74577642  | 74577864  | 223 |
| chr7  | 44910090  | 44910311  | 222 |
| chr5  | 118129056 | 118129277 | 222 |
| chr5  | 30561019  | 30561240  | 222 |
| chr3  | 122329955 | 122330176 | 222 |
| chr3  | 113977156 | 113977377 | 222 |
| chr24 | 65002976  | 65003197  | 222 |
| chr21 | 34982975  | 34983196  | 222 |
| chr15 | 39621127  | 39621348  | 222 |
| chr14 | 7587885   | 7588106   | 222 |
| chr10 | 14996611  | 14996832  | 222 |
| chr7  | 45701864  | 45702084  | 221 |
| chr7  | 15667494  | 15667714  | 221 |
| chr28 | 33753809  | 33754029  | 221 |
| chr25 | 1228025   | 1228245   | 221 |
| chr23 | 18602418  | 18602638  | 221 |
| chr21 | 69000999  | 69001219  | 221 |
| chr18 | 52666197  | 52666417  | 221 |
| chr16 | 54683006  | 54683226  | 221 |
| chr15 | 81061702  | 81061922  | 221 |
| chr10 | 74864623  | 74864843  | 221 |
| chr10 | 20824581  | 20824801  | 221 |
| chr1  | 134428535 | 134428755 | 221 |
| chr3  | 115423495 | 115423714 | 220 |

|       |               |           |     |
|-------|---------------|-----------|-----|
| chr27 | 38709435      | 38709654  | 220 |
| chr23 | 8577297       | 8577516   | 220 |
| chr18 | 11213115      | 11213334  | 220 |
| chr17 | 67191694      | 67191913  | 220 |
| chr11 | 3878084       | 3878303   | 220 |
| chr1  | 157331307     | 157331526 | 220 |
| chr27 | 661866 662084 | 219       |     |
| chr2  | 125905815     | 125906033 | 219 |
| chr15 | 24545151      | 24545369  | 219 |
| chr13 | 55494854      | 55495072  | 219 |
| chr11 | 105622235     | 105622453 | 219 |
| chr11 | 104199520     | 104199738 | 219 |
| chr10 | 46977346      | 46977564  | 219 |
| chr1  | 128373193     | 128373411 | 219 |
| chr7  | 44909735      | 44909952  | 218 |
| chr3  | 98128778      | 98128995  | 218 |
| chr24 | 40237667      | 40237884  | 218 |
| chr20 | 27297987      | 27298204  | 218 |
| chr19 | 58395381      | 58395598  | 218 |
| chr19 | 54732568      | 54732785  | 218 |
| chr16 | 57540711      | 57540928  | 218 |
| chr4  | 72170493      | 72170709  | 217 |
| chr14 | 7613841       | 7614057   | 217 |
| chr8  | 24685596      | 24685811  | 216 |
| chr8  | 255804 256019 | 216       |     |
| chr29 | 44563136      | 44563351  | 216 |
| chr26 | 37953882      | 37954097  | 216 |
| chr24 | 1082677       | 1082892   | 216 |
| chr22 | 50766839      | 50767054  | 216 |
| chr22 | 5612761       | 5612976   | 216 |
| chr18 | 31843929      | 31844144  | 216 |
| chr15 | 81588364      | 81588579  | 216 |
| chr13 | 75291158      | 75291373  | 216 |
| chr13 | 74446261      | 74446476  | 216 |
| chr13 | 22916057      | 22916272  | 216 |
| chr8  | 73817044      | 73817258  | 215 |
| chr4  | 38292675      | 38292889  | 215 |
| chr28 | 33290667      | 33290881  | 215 |
| chr18 | 51167388      | 51167602  | 215 |
| chr16 | 47000399      | 47000613  | 215 |
| chr15 | 22802908      | 22803122  | 215 |
| chr11 | 2536026       | 2536240   | 215 |
| chr10 | 16828963      | 16829177  | 215 |
| chr10 | 2405968       | 2406182   | 215 |
| chr1  | 83535491      | 83535705  | 215 |
| chr3  | 118167343     | 118167556 | 214 |
| chr25 | 40362541      | 40362754  | 214 |
| chr23 | 48584119      | 48584332  | 214 |
| chr19 | 26915015      | 26915228  | 214 |
| chr15 | 22150847      | 22151060  | 214 |

|       |           |           |     |
|-------|-----------|-----------|-----|
| chr28 | 33966581  | 33966793  | 213 |
| chr21 | 58819414  | 58819626  | 213 |
| chr19 | 53024644  | 53024856  | 213 |
| chr19 | 41231705  | 41231917  | 213 |
| chr16 | 47116467  | 47116679  | 213 |
| chr16 | 3637660   | 3637872   | 213 |
| chr15 | 25057695  | 25057907  | 213 |
| chr11 | 81347716  | 81347928  | 213 |
| chr10 | 74727178  | 74727390  | 213 |
| chr3  | 106557594 | 106557805 | 212 |
| chr28 | 26978608  | 26978819  | 212 |
| chr26 | 21971427  | 21971638  | 212 |
| chr25 | 2484715   | 2484926   | 212 |
| chr18 | 62464719  | 62464930  | 212 |
| chr17 | 48684209  | 48684420  | 212 |
| chr12 | 32007175  | 32007386  | 212 |
| chr12 | 21589406  | 21589617  | 212 |
| chr10 | 23766850  | 23767061  | 212 |
| chr1  | 1601596   | 1601807   | 212 |
| chr25 | 33492111  | 33492321  | 211 |
| chr22 | 48372963  | 48373173  | 211 |
| chr12 | 32551043  | 32551253  | 211 |
| chr2  | 123357471 | 123357680 | 210 |
| chr19 | 46120164  | 46120373  | 210 |
| chr19 | 13434033  | 13434242  | 210 |
| chr18 | 50844353  | 50844562  | 210 |
| chr17 | 72715291  | 72715500  | 210 |
| chr11 | 3290060   | 3290269   | 210 |
| chr29 | 30653540  | 30653748  | 209 |
| chr29 | 17655553  | 17655761  | 209 |
| chr25 | 43510678  | 43510886  | 209 |
| chr24 | 65000995  | 65001203  | 209 |
| chr24 | 43711386  | 43711594  | 209 |
| chr2  | 134752738 | 134752946 | 209 |
| chr2  | 43865005  | 43865213  | 209 |
| chr13 | 62463551  | 62463759  | 209 |
| chr7  | 17316684  | 17316891  | 208 |
| chr3  | 55840005  | 55840212  | 208 |
| chr25 | 29289913  | 29290120  | 208 |
| chr19 | 58646129  | 58646336  | 208 |
| chr11 | 77871791  | 77871998  | 208 |
| chr10 | 3465323   | 3465530   | 208 |
| chr8  | 65871443  | 65871649  | 207 |
| chr7  | 72321538  | 72321744  | 207 |
| chr3  | 30009807  | 30010013  | 207 |
| chr28 | 33988517  | 33988723  | 207 |
| chr18 | 25343915  | 25344121  | 207 |
| chr16 | 41480972  | 41481178  | 207 |
| chr13 | 54951140  | 54951346  | 207 |
| chr11 | 30816241  | 30816447  | 207 |



|       |               |           |     |
|-------|---------------|-----------|-----|
| chr5  | 117507434     | 117507639 | 206 |
| chr5  | 30280091      | 30280296  | 206 |
| chr3  | 113422452     | 113422657 | 206 |
| chr29 | 34293713      | 34293918  | 206 |
| chr19 | 53543881      | 53544086  | 206 |
| chr2  | 135637837     | 135638041 | 205 |
| chr19 | 37924708      | 37924912  | 205 |
| chr5  | 79226849      | 79227052  | 204 |
| chr19 | 37987693      | 37987896  | 204 |
| chr18 | 25051851      | 25052054  | 204 |
| chr18 | 18033378      | 18033581  | 204 |
| chr18 | 11714918      | 11715121  | 204 |
| chr7  | 13548526      | 13548728  | 203 |
| chr20 | 73404695      | 73404897  | 203 |
| chr11 | 95110220      | 95110422  | 203 |
| chr10 | 88146277      | 88146479  | 203 |
| chr6  | 117855173     | 117855374 | 202 |
| chr18 | 6401698       | 6401899   | 202 |
| chr15 | 29442056      | 29442257  | 202 |
| chr10 | 35891301      | 35891502  | 202 |
| chr5  | 30498222      | 30498422  | 201 |
| chr25 | 475976 476176 |           | 201 |
| chr11 | 104478186     | 104478386 | 201 |
| chr11 | 44887453      | 44887653  | 201 |
| chr9  | 106709319     | 106709518 | 200 |
| chr7  | 44058479      | 44058678  | 200 |
| chr7  | 13331304      | 13331503  | 200 |
| chr26 | 41864566      | 41864765  | 200 |
| chr15 | 33495933      | 33496132  | 200 |
| chr15 | 26895630      | 26895829  | 200 |
| chr13 | 63378361      | 63378560  | 200 |
| chr13 | 58474082      | 58474281  | 200 |
| chr3  | 114936752     | 114937482 | 731 |
| chr21 | 26043033      | 26043751  | 719 |
| chr5  | 121221933     | 121222633 | 701 |
| chr10 | 88207591      | 88208282  | 692 |
| chr9  | 87731834      | 87732472  | 639 |
| chr3  | 22873105      | 22873740  | 636 |
| chr16 | 74044285      | 74044908  | 624 |
| chr9  | 63407151      | 63407769  | 619 |
| chr11 | 84532610      | 84533220  | 611 |
| chr11 | 83224906      | 83225514  | 609 |
| chr7  | 101689964     | 101690564 | 601 |
| chr15 | 75239768      | 75240365  | 598 |
| chr7  | 96597163      | 96597757  | 595 |
| chr5  | 122285694     | 122286287 | 594 |
| chr19 | 20337474      | 20338066  | 593 |
| chr29 | 36691298      | 36691884  | 587 |
| chr8  | 55303826      | 55304411  | 586 |
| chr25 | 35367262      | 35367842  | 581 |

|       |           |           |     |
|-------|-----------|-----------|-----|
| chr3  | 113524925 | 113525502 | 578 |
| chr7  | 20814258  | 20814833  | 576 |
| chr13 | 35988282  | 35988856  | 575 |
| chr19 | 63630835  | 63631407  | 573 |
| chr4  | 98488514  | 98489082  | 569 |
| chr5  | 10788463  | 10789026  | 564 |
| chr10 | 20464196  | 20464759  | 564 |
| chr28 | 41746760  | 41747322  | 563 |
| chr12 | 84322644  | 84323201  | 558 |
| chr1  | 123083414 | 123083971 | 558 |
| chr16 | 71914088  | 71914644  | 557 |
| chr7  | 5309140   | 5309694   | 555 |
| chr15 | 77187170  | 77187724  | 555 |
| chr24 | 52624733  | 52625284  | 552 |
| chr19 | 24686246  | 24686794  | 549 |
| chr7  | 53422607  | 53423154  | 548 |
| chr6  | 121765085 | 121765632 | 548 |
| chr15 | 44751146  | 44751692  | 547 |
| chr13 | 70144554  | 70145100  | 547 |
| chr25 | 3381464   | 3382008   | 545 |
| chr20 | 29502984  | 29503528  | 545 |
| chr16 | 67216210  | 67216754  | 545 |
| chr10 | 72467503  | 72468047  | 545 |
| chr16 | 29424847  | 29425390  | 544 |
| chr7  | 46242934  | 46243476  | 543 |
| chr26 | 20290933  | 20291473  | 541 |
| chr1  | 145980693 | 145981232 | 540 |
| chr2  | 132177920 | 132178458 | 539 |
| chr17 | 52139466  | 52140000  | 535 |
| chr6  | 120871588 | 120872120 | 533 |
| chr26 | 43263135  | 43263665  | 531 |
| chr1  | 68854763  | 68855292  | 530 |
| chr4  | 56787596  | 56788123  | 528 |
| chr18 | 51176444  | 51176969  | 526 |
| chr3  | 104415749 | 104416272 | 524 |
| chr19 | 12493022  | 12493544  | 523 |
| chr13 | 38261260  | 38261782  | 523 |
| chr11 | 44970766  | 44971288  | 523 |
| chr5  | 113133875 | 113134396 | 522 |
| chr29 | 44733409  | 44733930  | 522 |
| chr2  | 75690629  | 75691150  | 522 |
| chr26 | 48337112  | 48337631  | 520 |
| chr13 | 74422083  | 74422602  | 520 |
| chr3  | 127252930 | 127253444 | 515 |
| chr21 | 61646438  | 61646952  | 515 |
| chr11 | 103768781 | 103769295 | 515 |
| chr18 | 63776272  | 63776783  | 512 |
| chr7  | 19202447  | 19202954  | 508 |
| chr16 | 60776807  | 60777314  | 508 |
| chr8  | 5374323   | 5374828   | 506 |

|       |           |           |     |
|-------|-----------|-----------|-----|
| chr6  | 57816343  | 57816848  | 506 |
| chr17 | 63299559  | 63300063  | 505 |
| chr11 | 70630380  | 70630884  | 505 |
| chr1  | 147635621 | 147636125 | 505 |
| chr24 | 60808305  | 60808808  | 504 |
| chr29 | 17800713  | 17801213  | 501 |
| chr11 | 81430081  | 81430581  | 501 |
| chr8  | 106652850 | 106653349 | 500 |
| chr2  | 136425669 | 136426168 | 500 |
| chr12 | 37025417  | 37025916  | 500 |
| chr1  | 123075082 | 123075581 | 500 |
| chr7  | 80883037  | 80883535  | 499 |
| chr17 | 12572986  | 12573483  | 498 |
| chr12 | 35588424  | 35588921  | 498 |
| chr4  | 64279309  | 64279804  | 496 |
| chr3  | 100447137 | 100447629 | 493 |
| chr28 | 26415505  | 26415997  | 493 |
| chr16 | 48829788  | 48830279  | 492 |
| chr6  | 96162689  | 96163179  | 491 |
| chr3  | 85595266  | 85595756  | 491 |
| chr12 | 83903178  | 83903667  | 490 |
| chr14 | 63522853  | 63523341  | 489 |
| chr8  | 57672443  | 57672930  | 488 |
| chr5  | 30412110  | 30412597  | 488 |
| chr29 | 29918770  | 29919257  | 488 |
| chr6  | 118821811 | 118822297 | 487 |
| chr3  | 35660598  | 35661084  | 487 |
| chr3  | 127850037 | 127850522 | 486 |
| chr5  | 113195675 | 113196159 | 485 |
| chr3  | 111186087 | 111186571 | 485 |
| chr19 | 52478497  | 52478979  | 483 |
| chr13 | 79619301  | 79619783  | 483 |
| chr28 | 34058403  | 34058883  | 481 |
| chr6  | 118803437 | 118803916 | 480 |
| chr17 | 63479191  | 63479670  | 480 |
| chr10 | 13586040  | 13586518  | 479 |
| chr18 | 10709262  | 10709739  | 478 |
| chr4  | 53161551  | 53162027  | 477 |
| chr16 | 42144261  | 42144737  | 477 |
| chr7  | 81249706  | 81250181  | 476 |
| chr15 | 76023586  | 76024061  | 476 |
| chr22 | 12057570  | 12058044  | 475 |
| chr15 | 75329060  | 75329534  | 475 |
| chr15 | 81160038  | 81160510  | 473 |
| chr16 | 46503514  | 46503985  | 472 |
| chr3  | 105129869 | 105130339 | 471 |
| chr26 | 22343480  | 22343950  | 471 |
| chr16 | 23969692  | 23970162  | 471 |
| chr29 | 51222886  | 51223354  | 469 |
| chr13 | 34374675  | 34375143  | 469 |

|       |           |           |     |
|-------|-----------|-----------|-----|
| chr3  | 121592354 | 121592821 | 468 |
| chr29 | 45775772  | 45776239  | 468 |
| chr18 | 50856884  | 50857351  | 468 |
| chr6  | 105526935 | 105527400 | 466 |
| chr19 | 60764598  | 60765061  | 464 |
| chr3  | 84266095  | 84266557  | 463 |
| chr1  | 154417263 | 154417724 | 462 |
| chr2  | 135028575 | 135029035 | 461 |
| chr19 | 56598529  | 56598989  | 461 |
| chr19 | 55934396  | 55934856  | 461 |
| chr18 | 51112581  | 51113041  | 461 |
| chr29 | 46233676  | 46234133  | 458 |
| chr29 | 49969037  | 49969493  | 457 |
| chr3  | 36899080  | 36899535  | 456 |
| chr16 | 48662622  | 48663076  | 455 |
| chr12 | 84213413  | 84213867  | 455 |
| chr19 | 12508972  | 12509423  | 452 |
| chr13 | 66234198  | 66234648  | 451 |
| chr18 | 51507446  | 51507895  | 450 |
| chr18 | 62507859  | 62508307  | 449 |
| chr29 | 46246833  | 46247280  | 448 |
| chr6  | 51515024  | 51515470  | 447 |
| chr13 | 35962152  | 35962597  | 446 |
| chr16 | 41071742  | 41072186  | 445 |
| chr11 | 10501582  | 10502026  | 445 |
| chr5  | 112308498 | 112308941 | 444 |
| chr2  | 114199184 | 114199626 | 443 |
| chr13 | 41638705  | 41639147  | 443 |
| chr14 | 18786419  | 18786860  | 442 |
| chr13 | 60435662  | 60436100  | 439 |
| chr4  | 107872282 | 107872719 | 438 |
| chr28 | 26181737  | 26182172  | 436 |
| chr16 | 23866949  | 23867384  | 436 |
| chr22 | 51113442  | 51113876  | 435 |
| chr19 | 57696908  | 57697342  | 435 |
| chr13 | 40528682  | 40529116  | 435 |
| chr2  | 111322505 | 111322938 | 434 |
| chr15 | 29208998  | 29209431  | 434 |
| chr5  | 115049995 | 115050426 | 432 |
| chr3  | 110217459 | 110217888 | 430 |
| chr19 | 57052824  | 57053252  | 429 |
| chr27 | 38704931  | 38705356  | 426 |
| chr19 | 13484114  | 13484538  | 425 |
| chr17 | 72341461  | 72341885  | 425 |
| chr19 | 24641840  | 24642263  | 424 |
| chr27 | 8831939   | 8832361   | 423 |
| chr17 | 69213072  | 69213491  | 420 |
| chr11 | 12870578  | 12870996  | 419 |
| chr11 | 74476484  | 74476900  | 417 |
| chr18 | 11495057  | 11495469  | 413 |

|       |               |           |     |
|-------|---------------|-----------|-----|
| chr11 | 104331876     | 104332288 | 413 |
| chr10 | 4841623       | 4842034   | 412 |
| chr13 | 54834266      | 54834675  | 410 |
| chr7  | 46203500      | 46203908  | 409 |
| chr19 | 14068835      | 14069243  | 409 |
| chr3  | 113514386     | 113514792 | 407 |
| chr13 | 79626990      | 79627396  | 407 |
| chr19 | 45558869      | 45559273  | 405 |
| chr18 | 45985549      | 45985953  | 405 |
| chr12 | 83767489      | 83767892  | 404 |
| chr18 | 57351582      | 57351984  | 403 |
| chr9  | 105444190     | 105444588 | 399 |
| chr7  | 43724356      | 43724754  | 399 |
| chr6  | 69338599      | 69338997  | 399 |
| chr4  | 71869650      | 71870048  | 399 |
| chr4  | 71610289      | 71610687  | 399 |
| chr28 | 40385842      | 40386240  | 399 |
| chr26 | 51527023      | 51527421  | 399 |
| chr25 | 27389300      | 27389698  | 399 |
| chr24 | 36032614      | 36033012  | 399 |
| chr20 | 73576834      | 73577232  | 399 |
| chr2  | 80927411      | 80927809  | 399 |
| chr19 | 6549516       | 6549914   | 399 |
| chr18 | 53872049      | 53872447  | 399 |
| chr18 | 52107108      | 52107506  | 399 |
| chr18 | 51590185      | 51590583  | 399 |
| chr17 | 74613770      | 74614168  | 399 |
| chr15 | 52313026      | 52313424  | 399 |
| chr14 | 6376422       | 6376820   | 399 |
| chr13 | 79666309      | 79666707  | 399 |
| chr13 | 139990 140388 | 399       |     |
| chr12 | 32094381      | 32094779  | 399 |
| chr12 | 14705009      | 14705407  | 399 |
| chr11 | 107257621     | 107258019 | 399 |
| chr11 | 91581930      | 91582328  | 399 |
| chr11 | 70884546      | 70884944  | 399 |
| chr1  | 68947427      | 68947825  | 399 |
| chr23 | 42465416      | 42465813  | 398 |
| chr20 | 529132 529529 | 398       |     |
| chr13 | 81012999      | 81013396  | 398 |
| chr7  | 16318524      | 16318920  | 397 |
| chr3  | 113382968     | 113383364 | 397 |
| chr25 | 3003394       | 3003790   | 397 |
| chr15 | 21519199      | 21519595  | 397 |
| chr12 | 32497297      | 32497693  | 397 |
| chr11 | 90270877      | 90271273  | 397 |
| chr18 | 56796689      | 56797084  | 396 |
| chr1  | 157251376     | 157251771 | 396 |
| chr1  | 68786798      | 68787193  | 396 |
| chr9  | 87742979      | 87743373  | 395 |

|       |               |           |     |
|-------|---------------|-----------|-----|
| chr29 | 31438785      | 31439179  | 395 |
| chr23 | 31441491      | 31441885  | 395 |
| chr2  | 111298708     | 111299102 | 395 |
| chr13 | 61062602      | 61062996  | 395 |
| chr11 | 97742329      | 97742723  | 395 |
| chr4  | 5226399       | 5226792   | 394 |
| chr19 | 54622142      | 54622535  | 394 |
| chr15 | 25731050      | 25731443  | 394 |
| chr9  | 78273063      | 78273455  | 393 |
| chr8  | 116642957     | 116643349 | 393 |
| chr8  | 8338926       | 8339318   | 393 |
| chr29 | 44603748      | 44604140  | 393 |
| chr23 | 27790070      | 27790462  | 393 |
| chr15 | 29999059      | 29999451  | 393 |
| chr12 | 32124523      | 32124915  | 393 |
| chr10 | 21386756      | 21387148  | 393 |
| chr5  | 7221055       | 7221446   | 392 |
| chr4  | 5625156       | 5625547   | 392 |
| chr27 | 38675223      | 38675614  | 392 |
| chr11 | 108118126     | 108118517 | 392 |
| chr5  | 31666758      | 31667148  | 391 |
| chr24 | 40609307      | 40609697  | 391 |
| chr2  | 111675008     | 111675398 | 391 |
| chr15 | 45871579      | 45871969  | 391 |
| chr7  | 51082699      | 51083088  | 390 |
| chr5  | 122132697     | 122133086 | 390 |
| chr5  | 114240222     | 114240611 | 390 |
| chr18 | 47504893      | 47505282  | 390 |
| chr17 | 64556015      | 64556404  | 390 |
| chr16 | 44083339      | 44083728  | 390 |
| chr11 | 108950666     | 108951055 | 390 |
| chr27 | 34696712      | 34697100  | 389 |
| chr2  | 130114294     | 130114682 | 389 |
| chr19 | 60243822      | 60244210  | 389 |
| chr15 | 13524723      | 13525111  | 389 |
| chr14 | 63517320      | 63517708  | 389 |
| chr8  | 108824284     | 108824671 | 388 |
| chr7  | 51693246      | 51693633  | 388 |
| chr5  | 120377948     | 120378335 | 388 |
| chr3  | 33334429      | 33334816  | 388 |
| chr28 | 10780816      | 10781203  | 388 |
| chr25 | 43505992      | 43506379  | 388 |
| chr2  | 136678610     | 136678997 | 388 |
| chr2  | 133198937     | 133199324 | 388 |
| chr2  | 124464834     | 124465221 | 388 |
| chr7  | 46226391      | 46226777  | 387 |
| chr5  | 124684372     | 124684758 | 387 |
| chr5  | 73069737      | 73070123  | 387 |
| chr20 | 717563 717949 | 387       |     |
| chr17 | 6964516       | 6964902   | 387 |

|       |               |           |     |
|-------|---------------|-----------|-----|
| chr3  | 17388882      | 17389267  | 386 |
| chr27 | 47642261      | 47642646  | 386 |
| chr25 | 43495202      | 43495587  | 386 |
| chr19 | 58340058      | 58340443  | 386 |
| chr12 | 82559490      | 82559875  | 386 |
| chr10 | 8335289       | 8335674   | 386 |
| chr10 | 5036048       | 5036433   | 386 |
| chr8  | 77180129      | 77180513  | 385 |
| chr6  | 72035130      | 72035514  | 385 |
| chr29 | 17805516      | 17805900  | 385 |
| chr24 | 49361058      | 49361442  | 385 |
| chr23 | 27802793      | 27803177  | 385 |
| chr19 | 29652239      | 29652623  | 385 |
| chr17 | 64295191      | 64295575  | 385 |
| chr1  | 3351143       | 3351527   | 385 |
| chr5  | 80746427      | 80746810  | 384 |
| chr28 | 26982484      | 26982867  | 384 |
| chr20 | 619780 620163 | 384       |     |
| chr19 | 64713612      | 64713995  | 384 |
| chr19 | 56597389      | 56597772  | 384 |
| chr15 | 20503479      | 20503862  | 384 |
| chr9  | 90289946      | 90290328  | 383 |
| chr5  | 123160707     | 123161089 | 383 |
| chr5  | 111020186     | 111020568 | 383 |
| chr3  | 34064289      | 34064671  | 383 |
| chr29 | 48934982      | 48935364  | 383 |
| chr23 | 40623962      | 40624344  | 383 |
| chr18 | 49791733      | 49792115  | 383 |
| chr13 | 55465522      | 55465904  | 383 |
| chr1  | 100086605     | 100086987 | 383 |
| chr4  | 117828955     | 117829336 | 382 |
| chr3  | 22683448      | 22683829  | 382 |
| chr29 | 31612559      | 31612940  | 382 |
| chr26 | 31377125      | 31377506  | 382 |
| chr19 | 45831073      | 45831454  | 382 |
| chr19 | 39151838      | 39152219  | 382 |
| chr13 | 59892704      | 59893085  | 382 |
| chr12 | 82550991      | 82551372  | 382 |
| chr9  | 104807694     | 104808074 | 381 |
| chr7  | 14213022      | 14213402  | 381 |
| chr6  | 120471056     | 120471436 | 381 |
| chr23 | 12355970      | 12356350  | 381 |
| chr2  | 132487142     | 132487522 | 381 |
| chr18 | 29580631      | 29581011  | 381 |
| chr17 | 57805261      | 57805641  | 381 |
| chr16 | 2024715       | 2025095   | 381 |
| chr13 | 74396857      | 74397237  | 381 |
| chr1  | 74692709      | 74693089  | 381 |
| chr7  | 43516735      | 43517114  | 380 |
| chr5  | 28697701      | 28698080  | 380 |

|       |           |           |     |
|-------|-----------|-----------|-----|
| chr4  | 33428200  | 33428579  | 380 |
| chr3  | 30003598  | 30003977  | 380 |
| chr26 | 50670237  | 50670616  | 380 |
| chr23 | 7030425   | 7030804   | 380 |
| chr19 | 23102046  | 23102425  | 380 |
| chr19 | 12377462  | 12377841  | 380 |
| chr18 | 11264720  | 11265099  | 380 |
| chr15 | 30106465  | 30106844  | 380 |
| chr12 | 82199389  | 82199768  | 380 |
| chr7  | 81021025  | 81021403  | 379 |
| chr4  | 121416755 | 121417133 | 379 |
| chr4  | 67943935  | 67944313  | 379 |
| chr29 | 26765811  | 26766189  | 379 |
| chr28 | 12425576  | 12425954  | 379 |
| chr23 | 18661964  | 18662342  | 379 |
| chr2  | 120106679 | 120107057 | 379 |
| chr2  | 111852337 | 111852715 | 379 |
| chr2  | 75641521  | 75641899  | 379 |
| chr18 | 52286219  | 52286597  | 379 |
| chr18 | 47829809  | 47830187  | 379 |
| chr16 | 2352909   | 2353287   | 379 |
| chr13 | 55726190  | 55726568  | 379 |
| chr13 | 22918121  | 22918499  | 379 |
| chr12 | 84585689  | 84586067  | 379 |
| chr11 | 21619373  | 21619751  | 379 |
| chr6  | 72744568  | 72744945  | 378 |
| chr5  | 74082090  | 74082467  | 378 |
| chr3  | 111426237 | 111426614 | 378 |
| chr24 | 48907707  | 48908084  | 378 |
| chr22 | 55942628  | 55943005  | 378 |
| chr19 | 54689138  | 54689515  | 378 |
| chr19 | 12446204  | 12446581  | 378 |
| chr15 | 25789888  | 25790265  | 378 |
| chr15 | 25586385  | 25586762  | 378 |
| chr13 | 77765381  | 77765758  | 378 |
| chr10 | 17280756  | 17281133  | 378 |
| chr7  | 19986723  | 19987099  | 377 |
| chr7  | 5115637   | 5116013   | 377 |
| chr26 | 43253706  | 43254082  | 377 |
| chr23 | 14991105  | 14991481  | 377 |
| chr23 | 10601443  | 10601819  | 377 |
| chr19 | 60266416  | 60266792  | 377 |
| chr19 | 43147635  | 43148011  | 377 |
| chr19 | 23112426  | 23112802  | 377 |
| chr13 | 60001005  | 60001381  | 377 |
| chr8  | 8592743   | 8593118   | 376 |
| chr5  | 118536590 | 118536965 | 376 |
| chr3  | 62455156  | 62455531  | 376 |
| chr3  | 20487018  | 20487393  | 376 |
| chr22 | 4701000   | 4701375   | 376 |



|       |           |           |     |
|-------|-----------|-----------|-----|
| chr21 | 48927501  | 48927876  | 376 |
| chr2  | 138632221 | 138632596 | 376 |
| chr19 | 61156992  | 61157367  | 376 |
| chr19 | 59605264  | 59605639  | 376 |
| chr18 | 57028271  | 57028646  | 376 |
| chr18 | 3988836   | 3989211   | 376 |
| chr17 | 65966752  | 65967127  | 376 |
| chr3  | 82793191  | 82793565  | 375 |
| chr22 | 50590105  | 50590479  | 375 |
| chr12 | 32849073  | 32849447  | 375 |
| chr12 | 31279967  | 31280341  | 375 |
| chr1  | 1717509   | 1717883   | 375 |
| chr9  | 83823917  | 83824290  | 374 |
| chr9  | 24604294  | 24604667  | 374 |
| chr7  | 45118254  | 45118627  | 374 |
| chr26 | 41014757  | 41015130  | 374 |
| chr19 | 58372516  | 58372889  | 374 |
| chr19 | 38973939  | 38974312  | 374 |
| chr18 | 63849112  | 63849485  | 374 |
| chr17 | 49449464  | 49449837  | 374 |
| chr16 | 47123962  | 47124335  | 374 |
| chr13 | 41003959  | 41004332  | 374 |
| chr4  | 110813299 | 110813671 | 373 |
| chr3  | 123666389 | 123666761 | 373 |
| chr27 | 29099360  | 29099732  | 373 |
| chr26 | 15706634  | 15707006  | 373 |
| chr20 | 75619991  | 75620363  | 373 |
| chr2  | 139268264 | 139268636 | 373 |
| chr19 | 54618030  | 54618402  | 373 |
| chr12 | 17977209  | 17977581  | 373 |
| chr7  | 3695633   | 3696004   | 372 |
| chr28 | 30516939  | 30517310  | 372 |
| chr28 | 25339912  | 25340283  | 372 |
| chr26 | 51630717  | 51631088  | 372 |
| chr22 | 14951004  | 14951375  | 372 |
| chr16 | 47549714  | 47550085  | 372 |
| chr16 | 38924675  | 38925046  | 372 |
| chr11 | 108053330 | 108053701 | 372 |
| chr10 | 12103390  | 12103761  | 372 |
| chr8  | 41050131  | 41050501  | 371 |
| chr5  | 121326962 | 121327332 | 371 |
| chr22 | 7269676   | 7270046   | 371 |
| chr2  | 139005691 | 139006061 | 371 |
| chr19 | 56044854  | 56045224  | 371 |
| chr14 | 34010768  | 34011138  | 371 |
| chr4  | 121409100 | 121409469 | 370 |
| chr29 | 36732586  | 36732955  | 370 |
| chr25 | 16505014  | 16505383  | 370 |
| chr24 | 33946854  | 33947223  | 370 |
| chr24 | 20858278  | 20858647  | 370 |

|       |           |           |     |
|-------|-----------|-----------|-----|
| chr15 | 84159862  | 84160231  | 370 |
| chr15 | 74597453  | 74597822  | 370 |
| chr15 | 74561566  | 74561935  | 370 |
| chr13 | 65811359  | 65811728  | 370 |
| chr11 | 106356047 | 106356416 | 370 |
| chr1  | 87364585  | 87364954  | 370 |
| chr7  | 37402031  | 37402399  | 369 |
| chr5  | 115062736 | 115063104 | 369 |
| chr3  | 82660797  | 82661165  | 369 |
| chr24 | 26539621  | 26539989  | 369 |
| chr22 | 29369563  | 29369931  | 369 |
| chr19 | 57299764  | 57300132  | 369 |
| chr19 | 41543349  | 41543717  | 369 |
| chr15 | 83918637  | 83919005  | 369 |
| chr15 | 51282894  | 51283262  | 369 |
| chr15 | 28684244  | 28684612  | 369 |
| chr13 | 77309983  | 77310351  | 369 |
| chr11 | 92952989  | 92953357  | 369 |
| chr11 | 86249219  | 86249587  | 369 |
| chr11 | 73312788  | 73313156  | 369 |
| chr9  | 45921990  | 45922357  | 368 |
| chr7  | 2063589   | 2063956   | 368 |
| chr6  | 113361420 | 113361787 | 368 |
| chr6  | 108580997 | 108581364 | 368 |
| chr3  | 105484836 | 105485203 | 368 |
| chr26 | 41422430  | 41422797  | 368 |
| chr24 | 1193543   | 1193910   | 368 |
| chr23 | 8883383   | 8883750   | 368 |
| chr21 | 65881752  | 65882119  | 368 |
| chr19 | 40967919  | 40968286  | 368 |
| chr19 | 7227795   | 7228162   | 368 |
| chr18 | 49971018  | 49971385  | 368 |
| chr17 | 66160560  | 66160927  | 368 |
| chr15 | 27108682  | 27109049  | 368 |
| chr14 | 19423749  | 19424116  | 368 |
| chr13 | 82863045  | 82863412  | 368 |
| chr13 | 59838260  | 59838627  | 368 |
| chr13 | 53799423  | 53799790  | 368 |
| chr13 | 45324838  | 45325205  | 368 |
| chr5  | 115668280 | 115668646 | 367 |
| chr5  | 111134187 | 111134553 | 367 |
| chr3  | 22935554  | 22935920  | 367 |
| chr28 | 34515261  | 34515627  | 367 |
| chr27 | 35859780  | 35860146  | 367 |
| chr2  | 135176590 | 135176956 | 367 |
| chr2  | 74697368  | 74697734  | 367 |
| chr18 | 38355264  | 38355630  | 367 |
| chr10 | 14983304  | 14983670  | 367 |
| chr9  | 89637556  | 89637921  | 366 |
| chr28 | 41322722  | 41323087  | 366 |

|       |               |           |     |
|-------|---------------|-----------|-----|
| chr27 | 1342530       | 1342895   | 366 |
| chr21 | 15583409      | 15583774  | 366 |
| chr16 | 56987070      | 56987435  | 366 |
| chr16 | 2456149       | 2456514   | 366 |
| chr13 | 80413023      | 80413388  | 366 |
| chr12 | 84680565      | 84680930  | 366 |
| chr11 | 101007745     | 101008110 | 366 |
| chr11 | 81754481      | 81754846  | 366 |
| chr11 | 48738518      | 48738883  | 366 |
| chr10 | 21827887      | 21828252  | 366 |
| chr9  | 8180778       | 8181142   | 365 |
| chr7  | 42526428      | 42526792  | 365 |
| chr4  | 123447956     | 123448320 | 365 |
| chr3  | 126911438     | 126911802 | 365 |
| chr3  | 121493436     | 121493800 | 365 |
| chr25 | 2815019       | 2815383   | 365 |
| chr23 | 31668701      | 31669065  | 365 |
| chr23 | 27893157      | 27893521  | 365 |
| chr22 | 59633259      | 59633623  | 365 |
| chr21 | 64302006      | 64302370  | 365 |
| chr21 | 21097657      | 21098021  | 365 |
| chr1  | 74525610      | 74525974  | 365 |
| chr9  | 44105964      | 44106327  | 364 |
| chr23 | 51059275      | 51059638  | 364 |
| chr23 | 10342546      | 10342909  | 364 |
| chr21 | 61669865      | 61670228  | 364 |
| chr20 | 469963 470326 | 364       |     |
| chr19 | 21723322      | 21723685  | 364 |
| chr18 | 45962289      | 45962652  | 364 |
| chr16 | 77321080      | 77321443  | 364 |
| chr11 | 4936379       | 4936742   | 364 |
| chr10 | 90925111      | 90925474  | 364 |
| chr7  | 17982788      | 17983150  | 363 |
| chr7  | 14288258      | 14288620  | 363 |
| chr5  | 125449472     | 125449834 | 363 |
| chr26 | 17917622      | 17917984  | 363 |
| chr25 | 42346236      | 42346598  | 363 |
| chr24 | 35306241      | 35306603  | 363 |
| chr23 | 30241642      | 30242004  | 363 |
| chr21 | 69102688      | 69103050  | 363 |
| chr21 | 15594708      | 15595070  | 363 |
| chr19 | 48751715      | 48752077  | 363 |
| chr18 | 36954088      | 36954450  | 363 |
| chr17 | 72949264      | 72949626  | 363 |
| chr17 | 18624507      | 18624869  | 363 |
| chr16 | 29424438      | 29424800  | 363 |
| chr14 | 12100240      | 12100602  | 363 |
| chr13 | 76161087      | 76161449  | 363 |
| chr11 | 84963101      | 84963463  | 363 |
| chr11 | 47396301      | 47396663  | 363 |

|       |               |           |     |
|-------|---------------|-----------|-----|
| chr8  | 68214712      | 68215073  | 362 |
| chr26 | 42174195      | 42174556  | 362 |
| chr26 | 21822340      | 21822701  | 362 |
| chr22 | 60116528      | 60116889  | 362 |
| chr2  | 134739769     | 134740130 | 362 |
| chr17 | 56775019      | 56775380  | 362 |
| chr17 | 53517539      | 53517900  | 362 |
| chr16 | 47062141      | 47062502  | 362 |
| chr15 | 73768533      | 73768894  | 362 |
| chr14 | 1626558       | 1626919   | 362 |
| chr11 | 109569438     | 109569799 | 362 |
| chr11 | 80341556      | 80341917  | 362 |
| chrX  | 9096300       | 9096660   | 361 |
| chr8  | 24666884      | 24667244  | 361 |
| chr6  | 30815515      | 30815875  | 361 |
| chr4  | 45567784      | 45568144  | 361 |
| chr3  | 33334029      | 33334389  | 361 |
| chr25 | 35538957      | 35539317  | 361 |
| chr25 | 34625969      | 34626329  | 361 |
| chr24 | 51553663      | 51554023  | 361 |
| chr24 | 44041850      | 44042210  | 361 |
| chr24 | 20758030      | 20758390  | 361 |
| chr22 | 59457027      | 59457387  | 361 |
| chr18 | 56815406      | 56815766  | 361 |
| chr16 | 56107453      | 56107813  | 361 |
| chr8  | 63943496      | 63943855  | 360 |
| chr8  | 860594 860953 | 360       |     |
| chr5  | 28837780      | 28838139  | 360 |
| chr2  | 111412999     | 111413358 | 360 |
| chr19 | 59061647      | 59062006  | 360 |
| chr18 | 11350087      | 11350446  | 360 |
| chr15 | 65366176      | 65366535  | 360 |
| chr15 | 25317708      | 25318067  | 360 |
| chr14 | 64335314      | 64335673  | 360 |
| chr13 | 84229686      | 84230045  | 360 |
| chr13 | 62340952      | 62341311  | 360 |
| chr11 | 3166795       | 3167154   | 360 |
| chr9  | 104800686     | 104801044 | 359 |
| chr27 | 35938596      | 35938954  | 359 |
| chr2  | 124322729     | 124323087 | 359 |
| chr18 | 22339359      | 22339717  | 359 |
| chr18 | 11844567      | 11844925  | 359 |
| chr13 | 55408839      | 55409197  | 359 |
| chr13 | 41151849      | 41152207  | 359 |
| chr12 | 84608890      | 84609248  | 359 |
| chr9  | 14598402      | 14598759  | 358 |
| chr6  | 118829441     | 118829798 | 358 |
| chr22 | 16297278      | 16297635  | 358 |
| chr2  | 138635039     | 138635396 | 358 |
| chr2  | 132509203     | 132509560 | 358 |

|       |           |           |     |
|-------|-----------|-----------|-----|
| chr19 | 58384906  | 58385263  | 358 |
| chr19 | 47855383  | 47855740  | 358 |
| chr17 | 72994444  | 72994801  | 358 |
| chr17 | 67986770  | 67987127  | 358 |
| chr16 | 23707177  | 23707534  | 358 |
| chr12 | 53339255  | 53339612  | 358 |
| chr11 | 104697862 | 104698219 | 358 |
| chr11 | 91477738  | 91478095  | 358 |
| chr11 | 47542130  | 47542487  | 358 |
| chr10 | 19439121  | 19439478  | 358 |
| chr1  | 84780884  | 84781241  | 358 |
| chr8  | 74402516  | 74402872  | 357 |
| chr3  | 86200955  | 86201311  | 357 |
| chr3  | 45694277  | 45694633  | 357 |
| chr29 | 44136118  | 44136474  | 357 |
| chr19 | 58384316  | 58384672  | 357 |
| chr19 | 54793332  | 54793688  | 357 |
| chr16 | 40930619  | 40930975  | 357 |
| chr13 | 70352659  | 70353015  | 357 |
| chr13 | 61175915  | 61176271  | 357 |
| chr10 | 12541849  | 12542205  | 357 |
| chr9  | 106142989 | 106143344 | 356 |
| chr4  | 103226483 | 103226838 | 356 |
| chr3  | 108141397 | 108141752 | 356 |
| chr3  | 33832868  | 33833223  | 356 |
| chr26 | 48558349  | 48558704  | 356 |
| chr25 | 27965277  | 27965632  | 356 |
| chr22 | 48305472  | 48305827  | 356 |
| chr22 | 29227781  | 29228136  | 356 |
| chr19 | 55414160  | 55414515  | 356 |
| chr19 | 29646501  | 29646856  | 356 |
| chr17 | 12566398  | 12566753  | 356 |
| chr9  | 104914012 | 104914366 | 355 |
| chr9  | 41640157  | 41640511  | 355 |
| chr8  | 72541981  | 72542335  | 355 |
| chr7  | 10824828  | 10825182  | 355 |
| chr6  | 109069384 | 109069738 | 355 |
| chr3  | 113979265 | 113979619 | 355 |
| chr3  | 110792371 | 110792725 | 355 |
| chr29 | 42371429  | 42371783  | 355 |
| chr25 | 2964742   | 2965096   | 355 |
| chr23 | 31393514  | 31393868  | 355 |
| chr22 | 50871911  | 50872265  | 355 |
| chr19 | 58953054  | 58953408  | 355 |
| chr19 | 25412851  | 25413205  | 355 |
| chr13 | 59772189  | 59772543  | 355 |
| chr12 | 11491195  | 11491549  | 355 |
| chr10 | 48277384  | 48277738  | 355 |
| chr9  | 45129029  | 45129382  | 354 |
| chr6  | 119067890 | 119068243 | 354 |

|       |           |           |     |
|-------|-----------|-----------|-----|
| chr5  | 113550461 | 113550814 | 354 |
| chr29 | 48272099  | 48272452  | 354 |
| chr23 | 51906658  | 51907011  | 354 |
| chr23 | 8361166   | 8361519   | 354 |
| chr22 | 54125112  | 54125465  | 354 |
| chr21 | 59834683  | 59835036  | 354 |
| chr21 | 27351280  | 27351633  | 354 |
| chr19 | 50711399  | 50711752  | 354 |
| chr19 | 34986660  | 34987013  | 354 |
| chr18 | 46077826  | 46078179  | 354 |
| chr18 | 4025112   | 4025465   | 354 |
| chr17 | 70706799  | 70707152  | 354 |
| chr17 | 70047883  | 70048236  | 354 |
| chr16 | 23746600  | 23746953  | 354 |
| chr13 | 65871296  | 65871649  | 354 |
| chr12 | 84276762  | 84277115  | 354 |
| chr1  | 2164868   | 2165221   | 354 |
| chr26 | 44252760  | 44253112  | 353 |
| chr25 | 1104558   | 1104910   | 353 |
| chr23 | 27962266  | 27962618  | 353 |
| chr19 | 47851427  | 47851779  | 353 |
| chr19 | 22336461  | 22336813  | 353 |
| chr16 | 43605857  | 43606209  | 353 |
| chr15 | 64639820  | 64640172  | 353 |
| chr11 | 108071735 | 108072087 | 353 |
| chr7  | 37395471  | 37395822  | 352 |
| chr5  | 121078438 | 121078789 | 352 |
| chr5  | 28701950  | 28702301  | 352 |
| chr4  | 55202635  | 55202986  | 352 |
| chr3  | 122735021 | 122735372 | 352 |
| chr3  | 62650196  | 62650547  | 352 |
| chr3  | 17470590  | 17470941  | 352 |
| chr29 | 44640936  | 44641287  | 352 |
| chr28 | 42790336  | 42790687  | 352 |
| chr26 | 42737826  | 42738177  | 352 |
| chr25 | 41642429  | 41642780  | 352 |
| chr23 | 30219726  | 30220077  | 352 |
| chr23 | 7625816   | 7626167   | 352 |
| chr21 | 28325759  | 28326110  | 352 |
| chr2  | 24076483  | 24076834  | 352 |
| chr19 | 63525458  | 63525809  | 352 |
| chr18 | 33220855  | 33221206  | 352 |
| chr18 | 23388188  | 23388539  | 352 |
| chr15 | 22189557  | 22189908  | 352 |
| chr13 | 75635804  | 75636155  | 352 |
| chr11 | 102585709 | 102586060 | 352 |
| chr10 | 10489048  | 10489399  | 352 |
| chrX  | 23157920  | 23158270  | 351 |
| chr9  | 100065578 | 100065928 | 351 |
| chr8  | 24496980  | 24497330  | 351 |

|       |               |           |     |
|-------|---------------|-----------|-----|
| chr5  | 68967194      | 68967544  | 351 |
| chr24 | 52614212      | 52614562  | 351 |
| chr23 | 31145622      | 31145972  | 351 |
| chr21 | 68800551      | 68800901  | 351 |
| chr21 | 65651404      | 65651754  | 351 |
| chr20 | 915010 915360 | 351       |     |
| chr2  | 136901737     | 136902087 | 351 |
| chr19 | 65233839      | 65234189  | 351 |
| chr16 | 44144936      | 44145286  | 351 |
| chr15 | 21459118      | 21459468  | 351 |
| chr13 | 77596209      | 77596559  | 351 |
| chr13 | 12313246      | 12313596  | 351 |
| chr9  | 107036954     | 107037303 | 350 |
| chr8  | 108838906     | 108839255 | 350 |
| chr5  | 28208189      | 28208538  | 350 |
| chr28 | 15591701      | 15592050  | 350 |
| chr22 | 55389826      | 55390175  | 350 |
| chr19 | 63498082      | 63498431  | 350 |
| chr1  | 74634250      | 74634599  | 350 |
| chr9  | 108130246     | 108130594 | 349 |
| chr7  | 53391870      | 53392218  | 349 |
| chr4  | 95644591      | 95644939  | 349 |
| chr4  | 52523153      | 52523501  | 349 |
| chr28 | 33364030      | 33364378  | 349 |
| chr21 | 30842643      | 30842991  | 349 |
| chr21 | 28019669      | 28020017  | 349 |
| chr19 | 59358032      | 59358380  | 349 |
| chr18 | 53253049      | 53253397  | 349 |
| chr11 | 106350658     | 106351006 | 349 |
| chrX  | 22948090      | 22948437  | 348 |
| chr8  | 102643269     | 102643616 | 348 |
| chr4  | 121059218     | 121059565 | 348 |
| chr3  | 115332314     | 115332661 | 348 |
| chr3  | 105445316     | 105445663 | 348 |
| chr26 | 44801858      | 44802205  | 348 |
| chr20 | 8810347       | 8810694   | 348 |
| chr2  | 21535746      | 21536093  | 348 |
| chr19 | 58949316      | 58949663  | 348 |
| chr19 | 55994620      | 55994967  | 348 |
| chr19 | 44751778      | 44752125  | 348 |
| chr19 | 39143143      | 39143490  | 348 |
| chr16 | 71115494      | 71115841  | 348 |
| chr16 | 46967996      | 46968343  | 348 |
| chr15 | 65580591      | 65580938  | 348 |
| chr15 | 28619761      | 28620108  | 348 |
| chr14 | 7799857       | 7800204   | 348 |
| chr10 | 55441707      | 55442054  | 348 |
| chr10 | 14332086      | 14332433  | 348 |
| chr10 | 4179608       | 4179955   | 348 |
| chr5  | 122013418     | 122013764 | 347 |

|       |               |           |     |
|-------|---------------|-----------|-----|
| chr4  | 68026653      | 68026999  | 347 |
| chr4  | 32147626      | 32147972  | 347 |
| chr24 | 58733984      | 58734330  | 347 |
| chr2  | 49564531      | 49564877  | 347 |
| chr19 | 60446327      | 60446673  | 347 |
| chr19 | 46484198      | 46484544  | 347 |
| chr19 | 31291170      | 31291516  | 347 |
| chr18 | 47598245      | 47598591  | 347 |
| chr16 | 75242847      | 75243193  | 347 |
| chr13 | 56345408      | 56345754  | 347 |
| chr13 | 18343679      | 18344025  | 347 |
| chr13 | 11225757      | 11226103  | 347 |
| chr11 | 91535886      | 91536232  | 347 |
| chr1  | 69351843      | 69352189  | 347 |
| chr7  | 51331686      | 51332031  | 346 |
| chr5  | 123683211     | 123683556 | 346 |
| chr5  | 113560241     | 113560586 | 346 |
| chr2  | 24078828      | 24079173  | 346 |
| chr18 | 55013591      | 55013936  | 346 |
| chr18 | 7251645       | 7251990   | 346 |
| chr17 | 75534169      | 75534514  | 346 |
| chr16 | 958302 958647 | 346       |     |
| chr13 | 76205742      | 76206087  | 346 |
| chr10 | 81646051      | 81646396  | 346 |
| chr1  | 68816340      | 68816685  | 346 |
| chr8  | 80138507      | 80138851  | 345 |
| chr8  | 10813479      | 10813823  | 345 |
| chr8  | 6464451       | 6464795   | 345 |
| chr7  | 42189047      | 42189391  | 345 |
| chr6  | 117894374     | 117894718 | 345 |
| chr4  | 53020967      | 53021311  | 345 |
| chr4  | 24354287      | 24354631  | 345 |
| chr26 | 51593295      | 51593639  | 345 |
| chr25 | 40617099      | 40617443  | 345 |
| chr2  | 16508427      | 16508771  | 345 |
| chr19 | 46825584      | 46825928  | 345 |
| chr19 | 40511708      | 40512052  | 345 |
| chr14 | 21030919      | 21031263  | 345 |
| chr11 | 104660990     | 104661334 | 345 |
| chr1  | 96010696      | 96011040  | 345 |
| chr7  | 45686425      | 45686768  | 344 |
| chr4  | 80021211      | 80021554  | 344 |
| chr4  | 72740141      | 72740484  | 344 |
| chr3  | 119659784     | 119660127 | 344 |
| chr27 | 36002157      | 36002500  | 344 |
| chr24 | 59054832      | 59055175  | 344 |
| chr24 | 3894532       | 3894875   | 344 |
| chr23 | 46368360      | 46368703  | 344 |
| chr23 | 38503793      | 38504136  | 344 |
| chr23 | 27863754      | 27864097  | 344 |



|       |           |           |     |
|-------|-----------|-----------|-----|
| chr21 | 27890069  | 27890412  | 344 |
| chr2  | 140000052 | 140000395 | 344 |
| chr2  | 49031514  | 49031857  | 344 |
| chr19 | 39244155  | 39244498  | 344 |
| chr15 | 54487530  | 54487873  | 344 |
| chr15 | 22218822  | 22219165  | 344 |
| chr14 | 34093358  | 34093701  | 344 |
| chr10 | 7184329   | 7184672   | 344 |
| chr1  | 82875501  | 82875844  | 344 |
| chr8  | 108708625 | 108708967 | 343 |
| chr7  | 15015034  | 15015376  | 343 |
| chr6  | 70182945  | 70183287  | 343 |
| chr5  | 113244588 | 113244930 | 343 |
| chr3  | 95800959  | 95801301  | 343 |
| chr29 | 34744456  | 34744798  | 343 |
| chr29 | 9394951   | 9395293   | 343 |
| chr28 | 33889869  | 33890211  | 343 |
| chr27 | 39115983  | 39116325  | 343 |
| chr27 | 35931238  | 35931580  | 343 |
| chr21 | 34460770  | 34461112  | 343 |
| chr2  | 130459340 | 130459682 | 343 |
| chr2  | 37670753  | 37671095  | 343 |
| chr19 | 53063630  | 53063972  | 343 |
| chr19 | 41397129  | 41397471  | 343 |
| chr19 | 33600370  | 33600712  | 343 |
| chr19 | 26338331  | 26338673  | 343 |
| chr18 | 51149992  | 51150334  | 343 |
| chr18 | 43164262  | 43164604  | 343 |
| chr17 | 63373228  | 63373570  | 343 |
| chr15 | 26685473  | 26685815  | 343 |
| chr14 | 19320737  | 19321079  | 343 |
| chr11 | 89374817  | 89375159  | 343 |
| chr8  | 23077969  | 23078310  | 342 |
| chr6  | 119132023 | 119132364 | 342 |
| chr5  | 114107713 | 114108054 | 342 |
| chr4  | 81297818  | 81298159  | 342 |
| chr4  | 67671687  | 67672028  | 342 |
| chr3  | 98036198  | 98036539  | 342 |
| chr26 | 22273724  | 22274065  | 342 |
| chr2  | 139479612 | 139479953 | 342 |
| chr2  | 138656833 | 138657174 | 342 |
| chr19 | 42055644  | 42055985  | 342 |
| chr15 | 74447643  | 74447984  | 342 |
| chr15 | 64492182  | 64492523  | 342 |
| chr14 | 77328911  | 77329252  | 342 |
| chr10 | 30028423  | 30028764  | 342 |
| chr1  | 144774263 | 144774604 | 342 |
| chr8  | 108312564 | 108312904 | 341 |
| chr4  | 8995149   | 8995489   | 341 |
| chr3  | 29238964  | 29239304  | 341 |

|       |           |           |     |
|-------|-----------|-----------|-----|
| chr28 | 42949156  | 42949496  | 341 |
| chr27 | 15595409  | 15595749  | 341 |
| chr26 | 44020169  | 44020509  | 341 |
| chr23 | 8293617   | 8293957   | 341 |
| chr22 | 32929483  | 32929823  | 341 |
| chr22 | 18002472  | 18002812  | 341 |
| chr19 | 40654320  | 40654660  | 341 |
| chr18 | 11160043  | 11160383  | 341 |
| chr17 | 54292442  | 54292782  | 341 |
| chr16 | 22955037  | 22955377  | 341 |
| chr13 | 58599995  | 58600335  | 341 |
| chr12 | 80139615  | 80139955  | 341 |
| chr12 | 31993580  | 31993920  | 341 |
| chr1  | 2124731   | 2125071   | 341 |
| chr7  | 43367013  | 43367352  | 340 |
| chr7  | 38500516  | 38500855  | 340 |
| chr6  | 101415504 | 101415843 | 340 |
| chr4  | 121439129 | 121439468 | 340 |
| chr3  | 8807035   | 8807374   | 340 |
| chr2  | 46205841  | 46206180  | 340 |
| chr19 | 59008729  | 59009068  | 340 |
| chr18 | 65324428  | 65324767  | 340 |
| chr17 | 70176298  | 70176637  | 340 |
| chr17 | 70021613  | 70021952  | 340 |
| chr17 | 57767602  | 57767941  | 340 |
| chr16 | 1441787   | 1442126   | 340 |
| chr13 | 42668010  | 42668349  | 340 |
| chr13 | 41703903  | 41704242  | 340 |
| chr12 | 82609674  | 82610013  | 340 |
| chr11 | 109301152 | 109301491 | 340 |
| chr11 | 5913788   | 5914127   | 340 |
| chr7  | 50464094  | 50464432  | 339 |
| chr5  | 117193020 | 117193358 | 339 |
| chr5  | 30634297  | 30634635  | 339 |
| chr4  | 123028043 | 123028381 | 339 |
| chr29 | 51003776  | 51004114  | 339 |
| chr26 | 43477519  | 43477857  | 339 |
| chr2  | 139208036 | 139208374 | 339 |
| chr2  | 138677782 | 138678120 | 339 |
| chr2  | 35502425  | 35502763  | 339 |
| chr19 | 65263140  | 65263478  | 339 |
| chr19 | 59060965  | 59061303  | 339 |
| chr18 | 33824651  | 33824989  | 339 |
| chr16 | 2689095   | 2689433   | 339 |
| chr13 | 77670140  | 77670478  | 339 |
| chr10 | 20843744  | 20844082  | 339 |
| chr8  | 108723469 | 108723806 | 338 |
| chr6  | 121783339 | 121783676 | 338 |
| chr6  | 121770695 | 121771032 | 338 |
| chr5  | 112313924 | 112314261 | 338 |

|       |               |           |     |
|-------|---------------|-----------|-----|
| chr3  | 17478288      | 17478625  | 338 |
| chr28 | 33636042      | 33636379  | 338 |
| chr28 | 25881218      | 25881555  | 338 |
| chr25 | 8738214       | 8738551   | 338 |
| chr23 | 27966335      | 27966672  | 338 |
| chr23 | 7431823       | 7432160   | 338 |
| chr2  | 25279078      | 25279415  | 338 |
| chr19 | 54801463      | 54801800  | 338 |
| chr18 | 54205396      | 54205733  | 338 |
| chr16 | 2127655       | 2127992   | 338 |
| chr14 | 40042249      | 40042586  | 338 |
| chr14 | 31031122      | 31031459  | 338 |
| chr11 | 28457335      | 28457672  | 338 |
| chr11 | 25652527      | 25652864  | 338 |
| chr10 | 17417689      | 17418026  | 338 |
| chr1  | 108604788     | 108605125 | 338 |
| chr6  | 22240546      | 22240882  | 337 |
| chr5  | 73139149      | 73139485  | 337 |
| chr4  | 105168894     | 105169230 | 337 |
| chr23 | 48568627      | 48568963  | 337 |
| chr21 | 65886041      | 65886377  | 337 |
| chr21 | 34787414      | 34787750  | 337 |
| chr20 | 75115046      | 75115382  | 337 |
| chr20 | 61256593      | 61256929  | 337 |
| chr2  | 123893798     | 123894134 | 337 |
| chr16 | 51481812      | 51482148  | 337 |
| chr13 | 62452229      | 62452565  | 337 |
| chr13 | 125307 125643 |           | 337 |
| chr11 | 81448077      | 81448413  | 337 |
| chr11 | 21145066      | 21145402  | 337 |
| chr10 | 16852458      | 16852794  | 337 |
| chr10 | 7185580       | 7185916   | 337 |
| chr1  | 146330181     | 146330517 | 337 |
| chr8  | 108314118     | 108314453 | 336 |
| chr8  | 78542910      | 78543245  | 336 |
| chr6  | 107103401     | 107103736 | 336 |
| chr5  | 70009368      | 70009703  | 336 |
| chr3  | 25004738      | 25005073  | 336 |
| chr3  | 20567925      | 20568260  | 336 |
| chr24 | 36383729      | 36384064  | 336 |
| chr20 | 11183988      | 11184323  | 336 |
| chr20 | 676088 676423 |           | 336 |
| chr19 | 8085514       | 8085849   | 336 |
| chr17 | 72899651      | 72899986  | 336 |
| chr13 | 41770488      | 41770823  | 336 |
| chr13 | 40817751      | 40818086  | 336 |
| chr9  | 105464668     | 105465002 | 335 |
| chr7  | 13091826      | 13092160  | 335 |
| chr3  | 114571825     | 114572159 | 335 |
| chr3  | 55836968      | 55837302  | 335 |

|       |           |           |     |
|-------|-----------|-----------|-----|
| chr29 | 36721261  | 36721595  | 335 |
| chr28 | 33658347  | 33658681  | 335 |
| chr26 | 22022690  | 22023024  | 335 |
| chr23 | 18472075  | 18472409  | 335 |
| chr22 | 59423907  | 59424241  | 335 |
| chr19 | 59087069  | 59087403  | 335 |
| chr18 | 11737250  | 11737584  | 335 |
| chr18 | 6945987   | 6946321   | 335 |
| chr17 | 66530887  | 66531221  | 335 |
| chr17 | 56048534  | 56048868  | 335 |
| chr13 | 17773649  | 17773983  | 335 |
| chr10 | 20931968  | 20932302  | 335 |
| chr1  | 108213339 | 108213673 | 335 |
| chr7  | 51741014  | 51741347  | 334 |
| chr7  | 18711454  | 18711787  | 334 |
| chr25 | 27876307  | 27876640  | 334 |
| chr22 | 16404835  | 16405168  | 334 |
| chr20 | 75637238  | 75637571  | 334 |
| chr2  | 134738936 | 134739269 | 334 |
| chr19 | 40850749  | 40851082  | 334 |
| chr19 | 12305002  | 12305335  | 334 |
| chr17 | 68399624  | 68399957  | 334 |
| chr16 | 71915719  | 71916052  | 334 |
| chr15 | 34273382  | 34273715  | 334 |
| chr14 | 25129383  | 25129716  | 334 |
| chr13 | 75449165  | 75449498  | 334 |
| chr13 | 41645622  | 41645955  | 334 |
| chr11 | 103780246 | 103780579 | 334 |
| chr10 | 59652733  | 59653066  | 334 |
| chr10 | 19510099  | 19510432  | 334 |
| chr1  | 2179553   | 2179886   | 334 |
| chrX  | 11017998  | 11018330  | 333 |
| chr7  | 1904221   | 1904553   | 333 |
| chr7  | 1855910   | 1856242   | 333 |
| chr6  | 121769864 | 121770196 | 333 |
| chr5  | 69516049  | 69516381  | 333 |
| chr3  | 117339444 | 117339776 | 333 |
| chr3  | 58922240  | 58922572  | 333 |
| chr28 | 44575389  | 44575721  | 333 |
| chr26 | 48464594  | 48464926  | 333 |
| chr26 | 20292772  | 20293104  | 333 |
| chr24 | 34481409  | 34481741  | 333 |
| chr23 | 33385802  | 33386134  | 333 |
| chr23 | 10356156  | 10356488  | 333 |
| chr22 | 55386643  | 55386975  | 333 |
| chr21 | 25247840  | 25248172  | 333 |
| chr20 | 3530440   | 3530772   | 333 |
| chr19 | 41934402  | 41934734  | 333 |
| chr18 | 46087704  | 46088036  | 333 |
| chr17 | 70247121  | 70247453  | 333 |

|       |               |           |     |
|-------|---------------|-----------|-----|
| chr16 | 57559789      | 57560121  | 333 |
| chr15 | 75510200      | 75510532  | 333 |
| chr15 | 43504090      | 43504422  | 333 |
| chr11 | 107570596     | 107570928 | 333 |
| chr10 | 17446752      | 17447084  | 333 |
| chrX  | 87517370      | 87517701  | 332 |
| chr9  | 52975599      | 52975930  | 332 |
| chr8  | 72078170      | 72078501  | 332 |
| chr8  | 6763040       | 6763371   | 332 |
| chr4  | 5386328       | 5386659   | 332 |
| chr3  | 121935275     | 121935606 | 332 |
| chr3  | 27405031      | 27405362  | 332 |
| chr3  | 4374674       | 4375005   | 332 |
| chr29 | 29704399      | 29704730  | 332 |
| chr29 | 17459851      | 17460182  | 332 |
| chr27 | 26715180      | 26715511  | 332 |
| chr25 | 37807760      | 37808091  | 332 |
| chr25 | 37283109      | 37283440  | 332 |
| chr25 | 29289242      | 29289573  | 332 |
| chr24 | 4163314       | 4163645   | 332 |
| chr22 | 52492543      | 52492874  | 332 |
| chr2  | 111370110     | 111370441 | 332 |
| chr2  | 54409488      | 54409819  | 332 |
| chr2  | 14056618      | 14056949  | 332 |
| chr19 | 39379082      | 39379413  | 332 |
| chr16 | 47998492      | 47998823  | 332 |
| chr16 | 38778070      | 38778401  | 332 |
| chr15 | 75083719      | 75084050  | 332 |
| chr13 | 57304999      | 57305330  | 332 |
| chr10 | 90529563      | 90529894  | 332 |
| chr10 | 16801821      | 16802152  | 332 |
| chr1  | 74533916      | 74534247  | 332 |
| chr3  | 114223345     | 114223675 | 331 |
| chr3  | 112889375     | 112889705 | 331 |
| chr3  | 20113019      | 20113349  | 331 |
| chr27 | 47055880      | 47056210  | 331 |
| chr25 | 40891279      | 40891609  | 331 |
| chr23 | 25244583      | 25244913  | 331 |
| chr22 | 48235004      | 48235334  | 331 |
| chr21 | 47719593      | 47719923  | 331 |
| chr20 | 777815 778145 | 331       |     |
| chr19 | 60439478      | 60439808  | 331 |
| chr19 | 58694362      | 58694692  | 331 |
| chr18 | 11009790      | 11010120  | 331 |
| chr17 | 71872807      | 71873137  | 331 |
| chr14 | 7762767       | 7763097   | 331 |
| chr12 | 9699064       | 9699394   | 331 |
| chr1  | 74732001      | 74732331  | 331 |
| chr1  | 74605894      | 74606224  | 331 |
| chr9  | 50711934      | 50712263  | 330 |

|       |           |           |     |
|-------|-----------|-----------|-----|
| chr7  | 51487193  | 51487522  | 330 |
| chr6  | 118511349 | 118511678 | 330 |
| chr6  | 99455142  | 99455471  | 330 |
| chr3  | 126032593 | 126032922 | 330 |
| chr3  | 105524584 | 105524913 | 330 |
| chr29 | 38857303  | 38857632  | 330 |
| chr27 | 35913497  | 35913826  | 330 |
| chr24 | 43549761  | 43550090  | 330 |
| chr24 | 2314031   | 2314360   | 330 |
| chr23 | 51698299  | 51698628  | 330 |
| chr23 | 10542924  | 10543253  | 330 |
| chr22 | 60207787  | 60208116  | 330 |
| chr21 | 46611516  | 46611845  | 330 |
| chr19 | 56003394  | 56003723  | 330 |
| chr16 | 72307679  | 72308008  | 330 |
| chr13 | 53817475  | 53817804  | 330 |
| chr10 | 17337432  | 17337761  | 330 |
| chr1  | 123088662 | 123088991 | 330 |
| chr1  | 74786891  | 74787220  | 330 |
| chr9  | 87752155  | 87752483  | 329 |
| chr9  | 86708809  | 86709137  | 329 |
| chr5  | 116893530 | 116893858 | 329 |
| chr29 | 4886535   | 4886863   | 329 |
| chr28 | 33926979  | 33927307  | 329 |
| chr27 | 35353393  | 35353721  | 329 |
| chr26 | 33257371  | 33257699  | 329 |
| chr25 | 4603261   | 4603589   | 329 |
| chr2  | 134377755 | 134378083 | 329 |
| chr18 | 55150051  | 55150379  | 329 |
| chr18 | 51017072  | 51017400  | 329 |
| chr16 | 47529502  | 47529830  | 329 |
| chr15 | 21509178  | 21509506  | 329 |
| chr13 | 23621361  | 23621689  | 329 |
| chr11 | 68911639  | 68911967  | 329 |
| chr8  | 63946571  | 63946898  | 328 |
| chr7  | 50341423  | 50341750  | 328 |
| chr7  | 42656991  | 42657318  | 328 |
| chr5  | 121215541 | 121215868 | 328 |
| chr5  | 29095430  | 29095757  | 328 |
| chr3  | 114217003 | 114217330 | 328 |
| chr3  | 35449336  | 35449663  | 328 |
| chr3  | 23038751  | 23039078  | 328 |
| chr29 | 44539809  | 44540136  | 328 |
| chr25 | 42054841  | 42055168  | 328 |
| chr23 | 10547312  | 10547639  | 328 |
| chr22 | 61479420  | 61479747  | 328 |
| chr19 | 54357461  | 54357788  | 328 |
| chr19 | 23936043  | 23936370  | 328 |
| chr19 | 23062238  | 23062565  | 328 |
| chr17 | 70277962  | 70278289  | 328 |

|       |           |           |     |
|-------|-----------|-----------|-----|
| chr16 | 2183883   | 2184210   | 328 |
| chr14 | 59024899  | 59025226  | 328 |
| chr13 | 55249048  | 55249375  | 328 |
| chr10 | 86537425  | 86537752  | 328 |
| chr10 | 66812260  | 66812587  | 328 |
| chr10 | 47450684  | 47451011  | 328 |
| chr10 | 6941455   | 6941782   | 328 |
| chr9  | 97723337  | 97723663  | 327 |
| chr7  | 66723767  | 66724093  | 327 |
| chr6  | 70649719  | 70650045  | 327 |
| chr6  | 45976439  | 45976765  | 327 |
| chr25 | 40434837  | 40435163  | 327 |
| chr25 | 21766945  | 21767271  | 327 |
| chr21 | 68936750  | 68937076  | 327 |
| chr20 | 22250885  | 22251211  | 327 |
| chr2  | 132311008 | 132311334 | 327 |
| chr18 | 45292082  | 45292408  | 327 |
| chr16 | 47687504  | 47687830  | 327 |
| chr15 | 74561062  | 74561388  | 327 |
| chr15 | 27915888  | 27916214  | 327 |
| chr15 | 20484323  | 20484649  | 327 |
| chr13 | 80356979  | 80357305  | 327 |
| chr13 | 77339602  | 77339928  | 327 |
| chr11 | 104288439 | 104288765 | 327 |
| chr11 | 99658625  | 99658951  | 327 |
| chr11 | 91382260  | 91382586  | 327 |
| chr10 | 68265532  | 68265858  | 327 |
| chr1  | 148039009 | 148039335 | 327 |
| chr1  | 111303424 | 111303750 | 327 |
| chr7  | 51855647  | 51855972  | 326 |
| chr7  | 19225156  | 19225481  | 326 |
| chr7  | 6743740   | 6744065   | 326 |
| chr4  | 121732075 | 121732400 | 326 |
| chr4  | 98822311  | 98822636  | 326 |
| chr29 | 48920462  | 48920787  | 326 |
| chr28 | 25713877  | 25714202  | 326 |
| chr26 | 15078003  | 15078328  | 326 |
| chr24 | 43561271  | 43561596  | 326 |
| chr23 | 28830895  | 28831220  | 326 |
| chr22 | 12975210  | 12975535  | 326 |
| chr2  | 135613966 | 135614291 | 326 |
| chr19 | 57595813  | 57596138  | 326 |
| chr19 | 54776961  | 54777286  | 326 |
| chr19 | 51411012  | 51411337  | 326 |
| chr19 | 47235203  | 47235528  | 326 |
| chr19 | 41935434  | 41935759  | 326 |
| chr17 | 72662937  | 72663262  | 326 |
| chr15 | 45499057  | 45499382  | 326 |
| chr12 | 33709645  | 33709970  | 326 |
| chr11 | 103752693 | 103753018 | 326 |

|       |               |           |     |
|-------|---------------|-----------|-----|
| chr1  | 144542337     | 144542662 | 326 |
| chr8  | 8297475       | 8297799   | 325 |
| chr6  | 74570676      | 74571000  | 325 |
| chr5  | 6912137       | 6912461   | 325 |
| chr29 | 44682994      | 44683318  | 325 |
| chr29 | 18200331      | 18200655  | 325 |
| chr29 | 17631741      | 17632065  | 325 |
| chr26 | 38261844      | 38262168  | 325 |
| chr25 | 44015164      | 44015488  | 325 |
| chr21 | 68556719      | 68557043  | 325 |
| chr21 | 28711989      | 28712313  | 325 |
| chr19 | 7271282       | 7271606   | 325 |
| chr18 | 43063649      | 43063973  | 325 |
| chr17 | 70519135      | 70519459  | 325 |
| chr17 | 69483628      | 69483952  | 325 |
| chr16 | 47641338      | 47641662  | 325 |
| chr14 | 7641937       | 7642261   | 325 |
| chr14 | 741979 742303 | 325       |     |
| chr13 | 78423909      | 78424233  | 325 |
| chr12 | 14243114      | 14243438  | 325 |
| chr11 | 74984792      | 74985116  | 325 |
| chr10 | 17315467      | 17315791  | 325 |
| chr1  | 74227556      | 74227880  | 325 |
| chr9  | 104805496     | 104805819 | 324 |
| chr9  | 98743430      | 98743753  | 324 |
| chr8  | 104241079     | 104241402 | 324 |
| chr7  | 43275254      | 43275577  | 324 |
| chr7  | 4707656       | 4707979   | 324 |
| chr4  | 108703369     | 108703692 | 324 |
| chr3  | 35413789      | 35414112  | 324 |
| chr29 | 44676035      | 44676358  | 324 |
| chr29 | 34905570      | 34905893  | 324 |
| chr22 | 48512562      | 48512885  | 324 |
| chr19 | 57056156      | 57056479  | 324 |
| chr19 | 38619519      | 38619842  | 324 |
| chr18 | 51234162      | 51234485  | 324 |
| chr18 | 50988895      | 50989218  | 324 |
| chr15 | 76632412      | 76632735  | 324 |
| chr13 | 82956586      | 82956909  | 324 |
| chr1  | 76278553      | 76278876  | 324 |
| chrX  | 62804501      | 62804823  | 323 |
| chr8  | 101702520     | 101702842 | 323 |
| chr8  | 42397635      | 42397957  | 323 |
| chr5  | 124650335     | 124650657 | 323 |
| chr4  | 72554867      | 72555189  | 323 |
| chr4  | 63974676      | 63974998  | 323 |
| chr3  | 112715696     | 112716018 | 323 |
| chr29 | 45274569      | 45274891  | 323 |
| chr28 | 41297612      | 41297934  | 323 |
| chr26 | 24574748      | 24575070  | 323 |



|       |           |           |     |
|-------|-----------|-----------|-----|
| chr25 | 1482668   | 1482990   | 323 |
| chr22 | 60647704  | 60648026  | 323 |
| chr21 | 33021316  | 33021638  | 323 |
| chr19 | 37775307  | 37775629  | 323 |
| chr19 | 22564428  | 22564750  | 323 |
| chr19 | 14077952  | 14078274  | 323 |
| chr18 | 25627708  | 25628030  | 323 |
| chr18 | 7340571   | 7340893   | 323 |
| chr13 | 55325275  | 55325597  | 323 |
| chr12 | 84326405  | 84326727  | 323 |
| chr1  | 158446893 | 158447215 | 323 |
| chr6  | 46786930  | 46787251  | 322 |
| chr5  | 111628254 | 111628575 | 322 |
| chr5  | 111333669 | 111333990 | 322 |
| chr5  | 30445309  | 30445630  | 322 |
| chr4  | 33749295  | 33749616  | 322 |
| chr3  | 119155307 | 119155628 | 322 |
| chr3  | 110219516 | 110219837 | 322 |
| chr3  | 105606038 | 105606359 | 322 |
| chr3  | 86117433  | 86117754  | 322 |
| chr3  | 55957104  | 55957425  | 322 |
| chr3  | 35936644  | 35936965  | 322 |
| chr29 | 34891480  | 34891801  | 322 |
| chr29 | 33570217  | 33570538  | 322 |
| chr29 | 18201762  | 18202083  | 322 |
| chr22 | 14940281  | 14940602  | 322 |
| chr20 | 4904055   | 4904376   | 322 |
| chr19 | 59419763  | 59420084  | 322 |
| chr18 | 62033547  | 62033868  | 322 |
| chr17 | 48820556  | 48820877  | 322 |
| chr14 | 76169896  | 76170217  | 322 |
| chr14 | 1971504   | 1971825   | 322 |
| chr1  | 141992090 | 141992411 | 322 |
| chr1  | 1702517   | 1702838   | 322 |
| chr8  | 9223738   | 9224058   | 321 |
| chr8  | 7820584   | 7820904   | 321 |
| chr7  | 80926433  | 80926753  | 321 |
| chr3  | 116391275 | 116391595 | 321 |
| chr3  | 4345533   | 4345853   | 321 |
| chr27 | 15752715  | 15753035  | 321 |
| chr20 | 8726124   | 8726444   | 321 |
| chr20 | 8487768   | 8488088   | 321 |
| chr13 | 70051885  | 70052205  | 321 |
| chr13 | 59763511  | 59763831  | 321 |
| chr12 | 35761213  | 35761533  | 321 |
| chr11 | 76364362  | 76364682  | 321 |
| chr11 | 75066181  | 75066501  | 321 |
| chr9  | 26755427  | 26755746  | 320 |
| chr8  | 102177005 | 102177324 | 320 |
| chr7  | 108575356 | 108575675 | 320 |

|       |               |           |     |
|-------|---------------|-----------|-----|
| chr5  | 117614796     | 117615115 | 320 |
| chr5  | 11225627      | 11225946  | 320 |
| chr5  | 10533609      | 10533928  | 320 |
| chr4  | 51084157      | 51084476  | 320 |
| chr3  | 97862878      | 97863197  | 320 |
| chr3  | 20574188      | 20574507  | 320 |
| chr28 | 26164180      | 26164499  | 320 |
| chr27 | 29089130      | 29089449  | 320 |
| chr24 | 60617030      | 60617349  | 320 |
| chr23 | 19349822      | 19350141  | 320 |
| chr23 | 13777835      | 13778154  | 320 |
| chr22 | 16320658      | 16320977  | 320 |
| chr19 | 44880077      | 44880396  | 320 |
| chr18 | 49475723      | 49476042  | 320 |
| chr17 | 70708695      | 70709014  | 320 |
| chr16 | 3766497       | 3766816   | 320 |
| chr15 | 29843960      | 29844279  | 320 |
| chr15 | 24407882      | 24408201  | 320 |
| chr13 | 33990361      | 33990680  | 320 |
| chr12 | 35324832      | 35325151  | 320 |
| chr11 | 108076355     | 108076674 | 320 |
| chr11 | 107071432     | 107071751 | 320 |
| chr1  | 141994150     | 141994469 | 320 |
| chr1  | 76551804      | 76552123  | 320 |
| chr9  | 92181307      | 92181625  | 319 |
| chr8  | 70531617      | 70531935  | 319 |
| chr5  | 31667435      | 31667753  | 319 |
| chr4  | 122684574     | 122684892 | 319 |
| chr4  | 68276376      | 68276694  | 319 |
| chr3  | 126844121     | 126844439 | 319 |
| chr3  | 111398475     | 111398793 | 319 |
| chr3  | 33503673      | 33503991  | 319 |
| chr29 | 45077983      | 45078301  | 319 |
| chr24 | 60773282      | 60773600  | 319 |
| chr24 | 34501342      | 34501660  | 319 |
| chr23 | 49814759      | 49815077  | 319 |
| chr23 | 26180340      | 26180658  | 319 |
| chr21 | 60791402      | 60791720  | 319 |
| chr18 | 46753943      | 46754261  | 319 |
| chr16 | 58986636      | 58986954  | 319 |
| chr15 | 21392722      | 21393040  | 319 |
| chr14 | 31986620      | 31986938  | 319 |
| chr14 | 5913740       | 5914058   | 319 |
| chr14 | 898375 898693 |           | 319 |
| chr13 | 71259958      | 71260276  | 319 |
| chr13 | 61665522      | 61665840  | 319 |
| chr9  | 90795954      | 90796271  | 318 |
| chr8  | 61817679      | 61817996  | 318 |
| chr7  | 81247688      | 81248005  | 318 |
| chr6  | 94977044      | 94977361  | 318 |

|       |           |           |     |
|-------|-----------|-----------|-----|
| chr29 | 46236129  | 46236446  | 318 |
| chr24 | 44083498  | 44083815  | 318 |
| chr23 | 19852641  | 19852958  | 318 |
| chr23 | 17840194  | 17840511  | 318 |
| chr21 | 13808558  | 13808875  | 318 |
| chr2  | 136635279 | 136635596 | 318 |
| chr2  | 122269168 | 122269485 | 318 |
| chr19 | 60427419  | 60427736  | 318 |
| chr19 | 44880539  | 44880856  | 318 |
| chr19 | 41384256  | 41384573  | 318 |
| chr17 | 57703057  | 57703374  | 318 |
| chr15 | 29790586  | 29790903  | 318 |
| chr14 | 2977229   | 2977546   | 318 |
| chr13 | 59594153  | 59594470  | 318 |
| chr13 | 21880440  | 21880757  | 318 |
| chr11 | 82904005  | 82904322  | 318 |
| chr11 | 10769456  | 10769773  | 318 |
| chr7  | 51382982  | 51383298  | 317 |
| chr7  | 4744907   | 4745223   | 317 |
| chr6  | 16286112  | 16286428  | 317 |
| chr6  | 16233619  | 16233935  | 317 |
| chr5  | 122773374 | 122773690 | 317 |
| chr5  | 116550530 | 116550846 | 317 |
| chr3  | 124499781 | 124500097 | 317 |
| chr3  | 121242228 | 121242544 | 317 |
| chr29 | 51258050  | 51258366  | 317 |
| chr29 | 17403965  | 17404281  | 317 |
| chr27 | 45610159  | 45610475  | 317 |
| chr27 | 6026888   | 6027204   | 317 |
| chr26 | 48465368  | 48465684  | 317 |
| chr23 | 20686818  | 20687134  | 317 |
| chr22 | 61075369  | 61075685  | 317 |
| chr19 | 16844791  | 16845107  | 317 |
| chr19 | 8105103   | 8105419   | 317 |
| chr18 | 62116243  | 62116559  | 317 |
| chr18 | 11518943  | 11519259  | 317 |
| chr17 | 72893026  | 72893342  | 317 |
| chr17 | 69734849  | 69735165  | 317 |
| chr17 | 66753520  | 66753836  | 317 |
| chr17 | 62020926  | 62021242  | 317 |
| chr15 | 62413843  | 62414159  | 317 |
| chr15 | 41260833  | 41261149  | 317 |
| chr15 | 29997393  | 29997709  | 317 |
| chr13 | 77279467  | 77279783  | 317 |
| chr11 | 77751502  | 77751818  | 317 |
| chr10 | 104830047 | 104830363 | 317 |
| chr10 | 20153468  | 20153784  | 317 |
| chr10 | 5188932   | 5189248   | 317 |
| chr1  | 158447850 | 158448166 | 317 |
| chr6  | 72295220  | 72295535  | 316 |

|       |           |           |     |
|-------|-----------|-----------|-----|
| chr5  | 30222868  | 30223183  | 316 |
| chr4  | 95804829  | 95805144  | 316 |
| chr3  | 44990986  | 44991301  | 316 |
| chr25 | 39362871  | 39363186  | 316 |
| chr25 | 34329350  | 34329665  | 316 |
| chr25 | 18641270  | 18641585  | 316 |
| chr24 | 40781863  | 40782178  | 316 |
| chr22 | 56615183  | 56615498  | 316 |
| chr21 | 33827931  | 33828246  | 316 |
| chr20 | 8705266   | 8705581   | 316 |
| chr2  | 135046991 | 135047306 | 316 |
| chr2  | 76382537  | 76382852  | 316 |
| chr19 | 39825145  | 39825460  | 316 |
| chr19 | 29768953  | 29769268  | 316 |
| chr16 | 50273706  | 50274021  | 316 |
| chr15 | 75329692  | 75330007  | 316 |
| chr15 | 54011380  | 54011695  | 316 |
| chr12 | 30769250  | 30769565  | 316 |
| chr12 | 30497476  | 30497791  | 316 |
| chr10 | 72470186  | 72470501  | 316 |
| chr8  | 72070983  | 72071297  | 315 |
| chr3  | 84265762  | 84266076  | 315 |
| chr29 | 48964727  | 48965041  | 315 |
| chr24 | 50099274  | 50099588  | 315 |
| chr24 | 43647231  | 43647545  | 315 |
| chr23 | 31025878  | 31026192  | 315 |
| chr23 | 15522137  | 15522451  | 315 |
| chr21 | 25956455  | 25956769  | 315 |
| chr20 | 73684841  | 73685155  | 315 |
| chr20 | 39644442  | 39644756  | 315 |
| chr19 | 59000344  | 59000658  | 315 |
| chr19 | 40464070  | 40464384  | 315 |
| chr19 | 35214431  | 35214745  | 315 |
| chr19 | 25829209  | 25829523  | 315 |
| chr16 | 67449427  | 67449741  | 315 |
| chr15 | 28274890  | 28275204  | 315 |
| chr13 | 68493830  | 68494144  | 315 |
| chr12 | 84672837  | 84673151  | 315 |
| chr12 | 32258519  | 32258833  | 315 |
| chr11 | 109638710 | 109639024 | 315 |
| chr11 | 81317665  | 81317979  | 315 |
| chr7  | 44611721  | 44612034  | 314 |
| chr6  | 94811538  | 94811851  | 314 |
| chr5  | 111973071 | 111973384 | 314 |
| chr3  | 124622129 | 124622442 | 314 |
| chr3  | 106003499 | 106003812 | 314 |
| chr3  | 8591840   | 8592153   | 314 |
| chr29 | 51998302  | 51998615  | 314 |
| chr28 | 36455495  | 36455808  | 314 |
| chr26 | 22349430  | 22349743  | 314 |

|       |           |           |     |
|-------|-----------|-----------|-----|
| chr24 | 7162741   | 7163054   | 314 |
| chr23 | 8193999   | 8194312   | 314 |
| chr20 | 73295761  | 73296074  | 314 |
| chr20 | 4058218   | 4058531   | 314 |
| chr2  | 23188451  | 23188764  | 314 |
| chr19 | 54747983  | 54748296  | 314 |
| chr19 | 23756098  | 23756411  | 314 |
| chr18 | 51535661  | 51535974  | 314 |
| chr17 | 58847478  | 58847791  | 314 |
| chr16 | 39599174  | 39599487  | 314 |
| chr16 | 1723289   | 1723602   | 314 |
| chr15 | 32676711  | 32677024  | 314 |
| chr13 | 62241602  | 62241915  | 314 |
| chr13 | 56210891  | 56211204  | 314 |
| chr9  | 106439140 | 106439452 | 313 |
| chr7  | 45657922  | 45658234  | 313 |
| chr5  | 113321860 | 113322172 | 313 |
| chr5  | 112133017 | 112133329 | 313 |
| chr3  | 4067841   | 4068153   | 313 |
| chr29 | 37333953  | 37334265  | 313 |
| chr25 | 36487061  | 36487373  | 313 |
| chr24 | 1946763   | 1947075   | 313 |
| chr23 | 8787659   | 8787971   | 313 |
| chr23 | 7701830   | 7702142   | 313 |
| chr22 | 30124996  | 30125308  | 313 |
| chr21 | 20027200  | 20027512  | 313 |
| chr21 | 18863015  | 18863327  | 313 |
| chr19 | 39388221  | 39388533  | 313 |
| chr19 | 8429249   | 8429561   | 313 |
| chr19 | 6423628   | 6423940   | 313 |
| chr18 | 37152208  | 37152520  | 313 |
| chr17 | 68150820  | 68151132  | 313 |
| chr16 | 48864073  | 48864385  | 313 |
| chr15 | 75575956  | 75576268  | 313 |
| chr14 | 14050308  | 14050620  | 313 |
| chr14 | 7582128   | 7582440   | 313 |
| chr13 | 56342779  | 56343091  | 313 |
| chr11 | 107214617 | 107214929 | 313 |
| chr11 | 29165150  | 29165462  | 313 |
| chr10 | 89344608  | 89344920  | 313 |
| chr8  | 26043749  | 26044060  | 312 |
| chr5  | 28337453  | 28337764  | 312 |
| chr3  | 112411846 | 112412157 | 312 |
| chr3  | 33647423  | 33647734  | 312 |
| chr28 | 33656819  | 33657130  | 312 |
| chr26 | 34681796  | 34682107  | 312 |
| chr26 | 19932173  | 19932484  | 312 |
| chr23 | 28786555  | 28786866  | 312 |
| chr23 | 19693277  | 19693588  | 312 |
| chr23 | 15883565  | 15883876  | 312 |

|       |           |           |     |
|-------|-----------|-----------|-----|
| chr23 | 15853432  | 15853743  | 312 |
| chr22 | 60039027  | 60039338  | 312 |
| chr20 | 5043382   | 5043693   | 312 |
| chr2  | 139239372 | 139239683 | 312 |
| chr18 | 40111232  | 40111543  | 312 |
| chr17 | 70410339  | 70410650  | 312 |
| chr17 | 56026561  | 56026872  | 312 |
| chr15 | 81174122  | 81174433  | 312 |
| chr13 | 25461624  | 25461935  | 312 |
| chr12 | 31974398  | 31974709  | 312 |
| chr11 | 70913521  | 70913832  | 312 |
| chr10 | 53269623  | 53269934  | 312 |
| chr10 | 51105696  | 51106007  | 312 |
| chr10 | 35957897  | 35958208  | 312 |
| chr10 | 29117392  | 29117703  | 312 |
| chr10 | 20495168  | 20495479  | 312 |
| chr1  | 1607429   | 1607740   | 312 |
| chr9  | 87743472  | 87743782  | 311 |
| chr6  | 32704231  | 32704541  | 311 |
| chr5  | 113246511 | 113246821 | 311 |
| chr4  | 98487820  | 98488130  | 311 |
| chr4  | 68083690  | 68084000  | 311 |
| chr4  | 13565953  | 13566263  | 311 |
| chr3  | 119714152 | 119714462 | 311 |
| chr3  | 55093026  | 55093336  | 311 |
| chr3  | 20526897  | 20527207  | 311 |
| chr29 | 34198006  | 34198316  | 311 |
| chr29 | 30137850  | 30138160  | 311 |
| chr28 | 33873449  | 33873759  | 311 |
| chr25 | 39385448  | 39385758  | 311 |
| chr25 | 37252920  | 37253230  | 311 |
| chr22 | 60249294  | 60249604  | 311 |
| chr22 | 52490803  | 52491113  | 311 |
| chr20 | 2724270   | 2724580   | 311 |
| chr2  | 136761861 | 136762171 | 311 |
| chr2  | 36082985  | 36083295  | 311 |
| chr18 | 51270502  | 51270812  | 311 |
| chr17 | 75515225  | 75515535  | 311 |
| chr16 | 77395758  | 77396068  | 311 |
| chr16 | 38836807  | 38837117  | 311 |
| chr14 | 79856981  | 79857291  | 311 |
| chr14 | 26695636  | 26695946  | 311 |
| chr14 | 1734906   | 1735216   | 311 |
| chr13 | 74542997  | 74543307  | 311 |
| chr13 | 70102736  | 70103046  | 311 |
| chr13 | 61781046  | 61781356  | 311 |
| chr12 | 30503013  | 30503323  | 311 |
| chr10 | 91105532  | 91105842  | 311 |
| chr1  | 64904947  | 64905257  | 311 |
| chr9  | 36073359  | 36073668  | 310 |

|       |               |           |     |
|-------|---------------|-----------|-----|
| chr5  | 81582376      | 81582685  | 310 |
| chr4  | 121460629     | 121460938 | 310 |
| chr3  | 121407953     | 121408262 | 310 |
| chr3  | 115805672     | 115805981 | 310 |
| chr28 | 33624303      | 33624612  | 310 |
| chr28 | 15323346      | 15323655  | 310 |
| chr27 | 31472850      | 31473159  | 310 |
| chr26 | 49309932      | 49310241  | 310 |
| chr26 | 14542814      | 14543123  | 310 |
| chr25 | 34344541      | 34344850  | 310 |
| chr25 | 28058283      | 28058592  | 310 |
| chr24 | 58650005      | 58650314  | 310 |
| chr23 | 45973759      | 45974068  | 310 |
| chr21 | 64820659      | 64820968  | 310 |
| chr19 | 33540318      | 33540627  | 310 |
| chr19 | 11058020      | 11058329  | 310 |
| chr18 | 25323652      | 25323961  | 310 |
| chr16 | 1720689       | 1720998   | 310 |
| chr13 | 71284426      | 71284735  | 310 |
| chr13 | 67387110      | 67387419  | 310 |
| chr13 | 60222696      | 60223005  | 310 |
| chr13 | 11061973      | 11062282  | 310 |
| chr11 | 108335807     | 108336116 | 310 |
| chr11 | 100907578     | 100907887 | 310 |
| chr1  | 123102147     | 123102456 | 310 |
| chr8  | 71182993      | 71183301  | 309 |
| chr5  | 125455902     | 125456210 | 309 |
| chr5  | 125060772     | 125061080 | 309 |
| chr4  | 123591884     | 123592192 | 309 |
| chr4  | 14614622      | 14614930  | 309 |
| chr3  | 55849137      | 55849445  | 309 |
| chr3  | 46954705      | 46955013  | 309 |
| chr29 | 25486770      | 25487078  | 309 |
| chr29 | 17809440      | 17809748  | 309 |
| chr27 | 817207 817515 |           | 309 |
| chr23 | 48503690      | 48503998  | 309 |
| chr23 | 31380902      | 31381210  | 309 |
| chr21 | 56493665      | 56493973  | 309 |
| chr2  | 133125525     | 133125833 | 309 |
| chr2  | 26493996      | 26494304  | 309 |
| chr19 | 30576141      | 30576449  | 309 |
| chr14 | 66239099      | 66239407  | 309 |
| chr13 | 70296405      | 70296713  | 309 |
| chr13 | 57655891      | 57656199  | 309 |
| chr13 | 54469868      | 54470176  | 309 |
| chr13 | 41667133      | 41667441  | 309 |
| chr12 | 75112625      | 75112933  | 309 |
| chr11 | 107414258     | 107414566 | 309 |
| chr11 | 107244262     | 107244570 | 309 |
| chr1  | 115602790     | 115603098 | 309 |

|       |           |           |     |
|-------|-----------|-----------|-----|
| chr9  | 9501849   | 9502156   | 308 |
| chr7  | 59505367  | 59505674  | 308 |
| chr5  | 97470241  | 97470548  | 308 |
| chr4  | 99375812  | 99376119  | 308 |
| chr4  | 12301506  | 12301813  | 308 |
| chr3  | 124564894 | 124565201 | 308 |
| chr3  | 93790609  | 93790916  | 308 |
| chr29 | 51335560  | 51335867  | 308 |
| chr25 | 35101945  | 35102252  | 308 |
| chr25 | 21396067  | 21396374  | 308 |
| chr25 | 1278080   | 1278387   | 308 |
| chr24 | 50997283  | 50997590  | 308 |
| chr22 | 13553050  | 13553357  | 308 |
| chr2  | 74785624  | 74785931  | 308 |
| chr19 | 15002554  | 15002861  | 308 |
| chr18 | 17429015  | 17429322  | 308 |
| chr16 | 77342555  | 77342862  | 308 |
| chr14 | 26129013  | 26129320  | 308 |
| chr13 | 42410667  | 42410974  | 308 |
| chr11 | 102157708 | 102158015 | 308 |
| chr11 | 10601734  | 10602041  | 308 |
| chr10 | 67029353  | 67029660  | 308 |
| chr5  | 121329139 | 121329445 | 307 |
| chr5  | 81342122  | 81342428  | 307 |
| chr5  | 51977574  | 51977880  | 307 |
| chr4  | 70715174  | 70715480  | 307 |
| chr4  | 68922813  | 68923119  | 307 |
| chr29 | 44562673  | 44562979  | 307 |
| chr29 | 37243422  | 37243728  | 307 |
| chr28 | 33511498  | 33511804  | 307 |
| chr27 | 38296859  | 38297165  | 307 |
| chr27 | 26311158  | 26311464  | 307 |
| chr25 | 4643411   | 4643717   | 307 |
| chr24 | 49092958  | 49093264  | 307 |
| chr23 | 10354169  | 10354475  | 307 |
| chr2  | 123457681 | 123457987 | 307 |
| chr2  | 120038884 | 120039190 | 307 |
| chr19 | 57677278  | 57677584  | 307 |
| chr19 | 45181150  | 45181456  | 307 |
| chr18 | 45428973  | 45429279  | 307 |
| chr17 | 68316413  | 68316719  | 307 |
| chr17 | 59017359  | 59017665  | 307 |
| chr16 | 2413424   | 2413730   | 307 |
| chr13 | 77787387  | 77787693  | 307 |
| chr11 | 108320016 | 108320322 | 307 |
| chr11 | 75007498  | 75007804  | 307 |
| chr1  | 82864128  | 82864434  | 307 |
| chr1  | 74589184  | 74589490  | 307 |
| chrX  | 20930185  | 20930490  | 306 |
| chr8  | 23003600  | 23003905  | 306 |



|       |           |           |     |
|-------|-----------|-----------|-----|
| chr7  | 16769480  | 16769785  | 306 |
| chr4  | 71872846  | 71873151  | 306 |
| chr4  | 51330062  | 51330367  | 306 |
| chr3  | 126240145 | 126240450 | 306 |
| chr29 | 51267238  | 51267543  | 306 |
| chr29 | 44607178  | 44607483  | 306 |
| chr29 | 31779501  | 31779806  | 306 |
| chr27 | 16707050  | 16707355  | 306 |
| chr26 | 20129122  | 20129427  | 306 |
| chr24 | 1608221   | 1608526   | 306 |
| chr23 | 11923586  | 11923891  | 306 |
| chr22 | 59897030  | 59897335  | 306 |
| chr21 | 11669786  | 11670091  | 306 |
| chr2  | 139341821 | 139342126 | 306 |
| chr2  | 132509666 | 132509971 | 306 |
| chr19 | 64714956  | 64715261  | 306 |
| chr19 | 56586292  | 56586597  | 306 |
| chr19 | 26202361  | 26202666  | 306 |
| chr18 | 23535864  | 23536169  | 306 |
| chr17 | 64016372  | 64016677  | 306 |
| chr15 | 55793914  | 55794219  | 306 |
| chr13 | 40336108  | 40336413  | 306 |
| chr12 | 84028189  | 84028494  | 306 |
| chr11 | 107987278 | 107987583 | 306 |
| chr11 | 23183802  | 23184107  | 306 |
| chr11 | 3219639   | 3219944   | 306 |
| chr9  | 106611131 | 106611435 | 305 |
| chr9  | 79064337  | 79064641  | 305 |
| chr6  | 122178479 | 122178783 | 305 |
| chr6  | 22243142  | 22243446  | 305 |
| chr5  | 123869448 | 123869752 | 305 |
| chr5  | 81688525  | 81688829  | 305 |
| chr5  | 31246350  | 31246654  | 305 |
| chr3  | 119082744 | 119083048 | 305 |
| chr3  | 10264969  | 10265273  | 305 |
| chr29 | 27188068  | 27188372  | 305 |
| chr28 | 30805616  | 30805920  | 305 |
| chr26 | 20426634  | 20426938  | 305 |
| chr25 | 33023453  | 33023757  | 305 |
| chr24 | 59587919  | 59588223  | 305 |
| chr24 | 1151461   | 1151765   | 305 |
| chr23 | 26065304  | 26065608  | 305 |
| chr22 | 59656461  | 59656765  | 305 |
| chr22 | 48674986  | 48675290  | 305 |
| chr2  | 122956828 | 122957132 | 305 |
| chr2  | 23944726  | 23945030  | 305 |
| chr19 | 54168957  | 54169261  | 305 |
| chr19 | 33539126  | 33539430  | 305 |
| chr18 | 25478144  | 25478448  | 305 |
| chr17 | 62368932  | 62369236  | 305 |

|       |           |           |     |
|-------|-----------|-----------|-----|
| chr17 | 5001045   | 5001349   | 305 |
| chr16 | 47506089  | 47506393  | 305 |
| chr16 | 31704590  | 31704894  | 305 |
| chr15 | 21856260  | 21856564  | 305 |
| chr15 | 19799248  | 19799552  | 305 |
| chr13 | 73905821  | 73906125  | 305 |
| chr13 | 62433521  | 62433825  | 305 |
| chr11 | 11244880  | 11245184  | 305 |
| chr11 | 10652885  | 10653189  | 305 |
| chr11 | 9551500   | 9551804   | 305 |
| chr9  | 44197110  | 44197413  | 304 |
| chr8  | 104180236 | 104180539 | 304 |
| chr7  | 80793557  | 80793860  | 304 |
| chr6  | 121895503 | 121895806 | 304 |
| chr5  | 123579485 | 123579788 | 304 |
| chr5  | 121332140 | 121332443 | 304 |
| chr4  | 120608484 | 120608787 | 304 |
| chr29 | 46385841  | 46386144  | 304 |
| chr29 | 43538188  | 43538491  | 304 |
| chr29 | 41818081  | 41818384  | 304 |
| chr28 | 45348687  | 45348990  | 304 |
| chr26 | 39639046  | 39639349  | 304 |
| chr24 | 60740339  | 60740642  | 304 |
| chr24 | 1674044   | 1674347   | 304 |
| chr2  | 139315730 | 139316033 | 304 |
| chr19 | 58339191  | 58339494  | 304 |
| chr19 | 29117618  | 29117921  | 304 |
| chr16 | 77485778  | 77486081  | 304 |
| chr11 | 2560309   | 2560612   | 304 |
| chr8  | 45744351  | 45744653  | 303 |
| chr7  | 11129283  | 11129585  | 303 |
| chr6  | 107133959 | 107134261 | 303 |
| chr5  | 115035022 | 115035324 | 303 |
| chr5  | 115004062 | 115004364 | 303 |
| chr5  | 113139183 | 113139485 | 303 |
| chr4  | 123357571 | 123357873 | 303 |
| chr3  | 127181807 | 127182109 | 303 |
| chr3  | 125719461 | 125719763 | 303 |
| chr3  | 115032881 | 115033183 | 303 |
| chr29 | 31524745  | 31525047  | 303 |
| chr28 | 26156710  | 26157012  | 303 |
| chr25 | 36654662  | 36654964  | 303 |
| chr25 | 30616290  | 30616592  | 303 |
| chr22 | 60375107  | 60375409  | 303 |
| chr22 | 51467412  | 51467714  | 303 |
| chr22 | 12010378  | 12010680  | 303 |
| chr21 | 61945501  | 61945803  | 303 |
| chr21 | 33233107  | 33233409  | 303 |
| chr21 | 17225544  | 17225846  | 303 |
| chr20 | 8617838   | 8618140   | 303 |

|       |           |           |     |
|-------|-----------|-----------|-----|
| chr20 | 6291988   | 6292290   | 303 |
| chr2  | 130398325 | 130398627 | 303 |
| chr2  | 23945833  | 23946135  | 303 |
| chr19 | 61496288  | 61496590  | 303 |
| chr19 | 31957527  | 31957829  | 303 |
| chr19 | 30347698  | 30348000  | 303 |
| chr19 | 6515130   | 6515432   | 303 |
| chr17 | 67044668  | 67044970  | 303 |
| chr17 | 18322826  | 18323128  | 303 |
| chr16 | 23928887  | 23929189  | 303 |
| chr15 | 75333611  | 75333913  | 303 |
| chr13 | 80660781  | 80661083  | 303 |
| chr13 | 76199136  | 76199438  | 303 |
| chr13 | 66993614  | 66993916  | 303 |
| chr12 | 11695342  | 11695644  | 303 |
| chr10 | 87484733  | 87485035  | 303 |
| chr5  | 115469439 | 115469740 | 302 |
| chr5  | 33782400  | 33782701  | 302 |
| chr5  | 20852587  | 20852888  | 302 |
| chr4  | 98443829  | 98444130  | 302 |
| chr4  | 4546609   | 4546910   | 302 |
| chr3  | 35689747  | 35690048  | 302 |
| chr28 | 26830222  | 26830523  | 302 |
| chr27 | 45451782  | 45452083  | 302 |
| chr26 | 34971216  | 34971517  | 302 |
| chr24 | 49362099  | 49362400  | 302 |
| chr23 | 50807488  | 50807789  | 302 |
| chr21 | 13655075  | 13655376  | 302 |
| chr20 | 74521520  | 74521821  | 302 |
| chr20 | 3279163   | 3279464   | 302 |
| chr2  | 129890383 | 129890684 | 302 |
| chr19 | 64695884  | 64696185  | 302 |
| chr19 | 25795470  | 25795771  | 302 |
| chr18 | 55830288  | 55830589  | 302 |
| chr18 | 48458636  | 48458937  | 302 |
| chr18 | 12627626  | 12627927  | 302 |
| chr17 | 63433536  | 63433837  | 302 |
| chr15 | 56124776  | 56125077  | 302 |
| chr14 | 31020567  | 31020868  | 302 |
| chr14 | 12248753  | 12249054  | 302 |
| chr11 | 81445263  | 81445564  | 302 |
| chr11 | 75400765  | 75401066  | 302 |
| chr11 | 24589388  | 24589689  | 302 |
| chr11 | 3886606   | 3886907   | 302 |
| chr1  | 81765649  | 81765950  | 302 |
| chr9  | 62314996  | 62315296  | 301 |
| chr8  | 10477010  | 10477310  | 301 |
| chr6  | 118510997 | 118511297 | 301 |
| chr5  | 120425911 | 120426211 | 301 |
| chr5  | 112533816 | 112534116 | 301 |

|       |           |           |     |
|-------|-----------|-----------|-----|
| chr4  | 110132365 | 110132665 | 301 |
| chr4  | 38776295  | 38776595  | 301 |
| chr4  | 5529155   | 5529455   | 301 |
| chr3  | 119940053 | 119940353 | 301 |
| chr3  | 114245717 | 114246017 | 301 |
| chr28 | 23936391  | 23936691  | 301 |
| chr28 | 13492289  | 13492589  | 301 |
| chr26 | 21783081  | 21783381  | 301 |
| chr24 | 40956023  | 40956323  | 301 |
| chr22 | 57323382  | 57323682  | 301 |
| chr22 | 44856499  | 44856799  | 301 |
| chr2  | 131401089 | 131401389 | 301 |
| chr19 | 45383004  | 45383304  | 301 |
| chr19 | 29008417  | 29008717  | 301 |
| chr16 | 41349122  | 41349422  | 301 |
| chr15 | 25223384  | 25223684  | 301 |
| chr13 | 80649790  | 80650090  | 301 |
| chr13 | 77528664  | 77528964  | 301 |
| chr13 | 60781431  | 60781731  | 301 |
| chr13 | 15602945  | 15603245  | 301 |
| chr12 | 81678235  | 81678535  | 301 |
| chr11 | 87912917  | 87913217  | 301 |
| chr11 | 82948003  | 82948303  | 301 |
| chr1  | 73122529  | 73122829  | 301 |
| chr1  | 55167986  | 55168286  | 301 |
| chr9  | 35463592  | 35463891  | 300 |
| chr8  | 103514296 | 103514595 | 300 |
| chr8  | 72524079  | 72524378  | 300 |
| chr7  | 19491817  | 19492116  | 300 |
| chr7  | 19295046  | 19295345  | 300 |
| chr7  | 10814739  | 10815038  | 300 |
| chr6  | 122398848 | 122399147 | 300 |
| chr6  | 109073891 | 109074190 | 300 |
| chr4  | 118683965 | 118684264 | 300 |
| chr4  | 79958170  | 79958469  | 300 |
| chr4  | 19464829  | 19465128  | 300 |
| chr3  | 15798115  | 15798414  | 300 |
| chr29 | 51264487  | 51264786  | 300 |
| chr26 | 44577405  | 44577704  | 300 |
| chr26 | 43849380  | 43849679  | 300 |
| chr25 | 15582766  | 15583065  | 300 |
| chr23 | 8462956   | 8463255   | 300 |
| chr21 | 67904106  | 67904405  | 300 |
| chr21 | 21078555  | 21078854  | 300 |
| chr2  | 136523872 | 136524171 | 300 |
| chr19 | 12618367  | 12618666  | 300 |
| chr19 | 8605277   | 8605576   | 300 |
| chr16 | 47358754  | 47359053  | 300 |
| chr15 | 28624250  | 28624549  | 300 |
| chr14 | 21186839  | 21187138  | 300 |

|       |           |           |     |
|-------|-----------|-----------|-----|
| chr13 | 10998285  | 10998584  | 300 |
| chr12 | 27886856  | 27887155  | 300 |
| chr11 | 105980371 | 105980670 | 300 |
| chr1  | 150228015 | 150228314 | 300 |
| chr6  | 120835815 | 120836113 | 299 |
| chr5  | 81625265  | 81625563  | 299 |
| chr5  | 28853072  | 28853370  | 299 |
| chr4  | 80095716  | 80096014  | 299 |
| chr3  | 98157521  | 98157819  | 299 |
| chr3  | 70575277  | 70575575  | 299 |
| chr29 | 36311740  | 36312038  | 299 |
| chr28 | 7314509   | 7314807   | 299 |
| chr26 | 49251977  | 49252275  | 299 |
| chr25 | 35887392  | 35887690  | 299 |
| chr23 | 46034093  | 46034391  | 299 |
| chr23 | 31441975  | 31442273  | 299 |
| chr23 | 27947491  | 27947789  | 299 |
| chr22 | 29669039  | 29669337  | 299 |
| chr2  | 134918740 | 134919038 | 299 |
| chr19 | 32597103  | 32597401  | 299 |
| chr19 | 20338375  | 20338673  | 299 |
| chr19 | 7874417   | 7874715   | 299 |
| chr18 | 24335739  | 24336037  | 299 |
| chr18 | 9709329   | 9709627   | 299 |
| chr15 | 81672972  | 81673270  | 299 |
| chr14 | 14256026  | 14256324  | 299 |
| chr14 | 14000069  | 14000367  | 299 |
| chr13 | 79043455  | 79043753  | 299 |
| chr13 | 60536421  | 60536719  | 299 |
| chr13 | 58279505  | 58279803  | 299 |
| chr11 | 108439155 | 108439453 | 299 |
| chr11 | 80353184  | 80353482  | 299 |
| chr11 | 28327185  | 28327483  | 299 |
| chr10 | 105730576 | 105730874 | 299 |
| chrX  | 21242799  | 21243096  | 298 |
| chr9  | 78274745  | 78275042  | 298 |
| chr6  | 118641074 | 118641371 | 298 |
| chr6  | 74025620  | 74025917  | 298 |
| chr5  | 52208003  | 52208300  | 298 |
| chr26 | 50496469  | 50496766  | 298 |
| chr26 | 34395581  | 34395878  | 298 |
| chr24 | 20403334  | 20403631  | 298 |
| chr23 | 11308019  | 11308316  | 298 |
| chr22 | 60224223  | 60224520  | 298 |
| chr22 | 59891819  | 59892116  | 298 |
| chr20 | 27260455  | 27260752  | 298 |
| chr2  | 56954546  | 56954843  | 298 |
| chr19 | 29707509  | 29707806  | 298 |
| chr18 | 52797150  | 52797447  | 298 |
| chr17 | 54464438  | 54464735  | 298 |

|       |           |           |     |
|-------|-----------|-----------|-----|
| chr16 | 47257819  | 47258116  | 298 |
| chr11 | 83150142  | 83150439  | 298 |
| chr11 | 1642913   | 1643210   | 298 |
| chr10 | 10572798  | 10573095  | 298 |
| chr1  | 148368181 | 148368478 | 298 |
| chr8  | 78598691  | 78598987  | 297 |
| chr8  | 63929759  | 63930055  | 297 |
| chr6  | 121623663 | 121623959 | 297 |
| chr6  | 63089820  | 63090116  | 297 |
| chr3  | 33332599  | 33332895  | 297 |
| chr27 | 26732634  | 26732930  | 297 |
| chr26 | 41329025  | 41329321  | 297 |
| chr25 | 36799706  | 36800002  | 297 |
| chr25 | 34284949  | 34285245  | 297 |
| chr24 | 58670195  | 58670491  | 297 |
| chr24 | 1771381   | 1771677   | 297 |
| chr22 | 18563562  | 18563858  | 297 |
| chr21 | 67765157  | 67765453  | 297 |
| chr21 | 57826011  | 57826307  | 297 |
| chr21 | 48669215  | 48669511  | 297 |
| chr21 | 26452401  | 26452697  | 297 |
| chr21 | 13054960  | 13055256  | 297 |
| chr20 | 41550403  | 41550699  | 297 |
| chr2  | 134559210 | 134559506 | 297 |
| chr19 | 57674359  | 57674655  | 297 |
| chr19 | 38849843  | 38850139  | 297 |
| chr19 | 13442064  | 13442360  | 297 |
| chr17 | 72733797  | 72734093  | 297 |
| chr17 | 68310455  | 68310751  | 297 |
| chr15 | 66193126  | 66193422  | 297 |
| chr15 | 28690828  | 28691124  | 297 |
| chr13 | 79914805  | 79915101  | 297 |
| chr13 | 70239176  | 70239472  | 297 |
| chr13 | 55318002  | 55318298  | 297 |
| chr12 | 77239095  | 77239391  | 297 |
| chr12 | 74506277  | 74506573  | 297 |
| chr11 | 90298835  | 90299131  | 297 |
| chr1  | 84684770  | 84685066  | 297 |
| chr1  | 81785834  | 81786130  | 297 |
| chr7  | 94372822  | 94373117  | 296 |
| chr6  | 95949158  | 95949453  | 296 |
| chr6  | 51513145  | 51513440  | 296 |
| chr4  | 123267847 | 123268142 | 296 |
| chr4  | 68280608  | 68280903  | 296 |
| chr3  | 124505336 | 124505631 | 296 |
| chr3  | 105754079 | 105754374 | 296 |
| chr3  | 33994963  | 33995258  | 296 |
| chr29 | 38627146  | 38627441  | 296 |
| chr29 | 17712484  | 17712779  | 296 |
| chr27 | 5499492   | 5499787   | 296 |

|       |               |           |     |
|-------|---------------|-----------|-----|
| chr26 | 18734825      | 18735120  | 296 |
| chr25 | 29371054      | 29371349  | 296 |
| chr24 | 34790011      | 34790306  | 296 |
| chr23 | 27956949      | 27957244  | 296 |
| chr22 | 28832458      | 28832753  | 296 |
| chr21 | 59824252      | 59824547  | 296 |
| chr21 | 20901315      | 20901610  | 296 |
| chr2  | 134644694     | 134644989 | 296 |
| chr2  | 123349976     | 123350271 | 296 |
| chr18 | 16529427      | 16529722  | 296 |
| chr18 | 362993 363288 | 296       |     |
| chr16 | 47969001      | 47969296  | 296 |
| chr15 | 75560230      | 75560525  | 296 |
| chr15 | 28133041      | 28133336  | 296 |
| chr15 | 25327511      | 25327806  | 296 |
| chr13 | 76434508      | 76434803  | 296 |
| chr13 | 54797933      | 54798228  | 296 |
| chr13 | 54019213      | 54019508  | 296 |
| chr12 | 32648366      | 32648661  | 296 |
| chr11 | 109848621     | 109848916 | 296 |
| chr10 | 103111881     | 103112176 | 296 |
| chr10 | 90942045      | 90942340  | 296 |
| chr7  | 23338804      | 23339098  | 295 |
| chr4  | 119075402     | 119075696 | 295 |
| chr3  | 116117902     | 116118196 | 295 |
| chr3  | 108999800     | 109000094 | 295 |
| chr28 | 44519273      | 44519567  | 295 |
| chr28 | 42319980      | 42320274  | 295 |
| chr28 | 41805947      | 41806241  | 295 |
| chr28 | 33238563      | 33238857  | 295 |
| chr25 | 42653168      | 42653462  | 295 |
| chr25 | 39325974      | 39326268  | 295 |
| chr25 | 39162846      | 39163140  | 295 |
| chr24 | 60588677      | 60588971  | 295 |
| chr24 | 60584666      | 60584960  | 295 |
| chr23 | 31326756      | 31327050  | 295 |
| chr23 | 15968194      | 15968488  | 295 |
| chr21 | 68941034      | 68941328  | 295 |
| chr21 | 46615215      | 46615509  | 295 |
| chr21 | 9402049       | 9402343   | 295 |
| chr20 | 75275045      | 75275339  | 295 |
| chr19 | 47284489      | 47284783  | 295 |
| chr19 | 46827233      | 46827527  | 295 |
| chr19 | 26336804      | 26337098  | 295 |
| chr18 | 55194373      | 55194667  | 295 |
| chr15 | 35396188      | 35396482  | 295 |
| chr15 | 21535224      | 21535518  | 295 |
| chr14 | 22788257      | 22788551  | 295 |
| chr12 | 84664799      | 84665093  | 295 |
| chr10 | 88367667      | 88367961  | 295 |

|       |           |           |     |
|-------|-----------|-----------|-----|
| chr1  | 83279043  | 83279337  | 295 |
| chr9  | 41877679  | 41877972  | 294 |
| chr7  | 14211017  | 14211310  | 294 |
| chr5  | 74742938  | 74743231  | 294 |
| chr3  | 127660052 | 127660345 | 294 |
| chr29 | 37021497  | 37021790  | 294 |
| chr29 | 29771435  | 29771728  | 294 |
| chr29 | 17834091  | 17834384  | 294 |
| chr27 | 40754716  | 40755009  | 294 |
| chr27 | 30513701  | 30513994  | 294 |
| chr25 | 10415894  | 10416187  | 294 |
| chr25 | 4008630   | 4008923   | 294 |
| chr23 | 50849286  | 50849579  | 294 |
| chr23 | 36142679  | 36142972  | 294 |
| chr22 | 30006496  | 30006789  | 294 |
| chr22 | 12104226  | 12104519  | 294 |
| chr21 | 9528926   | 9529219   | 294 |
| chr21 | 9526077   | 9526370   | 294 |
| chr20 | 2164868   | 2165161   | 294 |
| chr2  | 132702363 | 132702656 | 294 |
| chr19 | 58864103  | 58864396  | 294 |
| chr19 | 34120016  | 34120309  | 294 |
| chr19 | 24642904  | 24643197  | 294 |
| chr18 | 11979917  | 11980210  | 294 |
| chr16 | 73185866  | 73186159  | 294 |
| chr15 | 29448524  | 29448817  | 294 |
| chr15 | 29016482  | 29016775  | 294 |
| chr15 | 22251306  | 22251599  | 294 |
| chr13 | 66876600  | 66876893  | 294 |
| chr13 | 55105650  | 55105943  | 294 |
| chr13 | 11855245  | 11855538  | 294 |
| chr11 | 109708893 | 109709186 | 294 |
| chr11 | 46175819  | 46176112  | 294 |
| chr10 | 78659332  | 78659625  | 294 |
| chr1  | 148211464 | 148211757 | 294 |
| chr5  | 33772726  | 33773018  | 293 |
| chr5  | 29152301  | 29152593  | 293 |
| chr4  | 124425366 | 124425658 | 293 |
| chr29 | 43538981  | 43539273  | 293 |
| chr29 | 25559476  | 25559768  | 293 |
| chr28 | 24390116  | 24390408  | 293 |
| chr23 | 46508678  | 46508970  | 293 |
| chr23 | 28020887  | 28021179  | 293 |
| chr22 | 60225651  | 60225943  | 293 |
| chr22 | 23858302  | 23858594  | 293 |
| chr2  | 139402497 | 139402789 | 293 |
| chr2  | 136634584 | 136634876 | 293 |
| chr2  | 136632709 | 136633001 | 293 |
| chr2  | 132993682 | 132993974 | 293 |
| chr2  | 15375477  | 15375769  | 293 |



|       |           |           |     |
|-------|-----------|-----------|-----|
| chr19 | 39130479  | 39130771  | 293 |
| chr18 | 7193835   | 7194127   | 293 |
| chr17 | 49127923  | 49128215  | 293 |
| chr16 | 40934579  | 40934871  | 293 |
| chr15 | 76618432  | 76618724  | 293 |
| chr14 | 7454213   | 7454505   | 293 |
| chr13 | 79047533  | 79047825  | 293 |
| chr13 | 70037604  | 70037896  | 293 |
| chr13 | 63602028  | 63602320  | 293 |
| chr13 | 52957181  | 52957473  | 293 |
| chr12 | 74488296  | 74488588  | 293 |
| chr11 | 82434980  | 82435272  | 293 |
| chr10 | 59995483  | 59995775  | 293 |
| chr10 | 36330876  | 36331168  | 293 |
| chr1  | 80126514  | 80126806  | 293 |
| chr9  | 63290344  | 63290635  | 292 |
| chr7  | 19226223  | 19226514  | 292 |
| chr6  | 120446401 | 120446692 | 292 |
| chr6  | 63063912  | 63064203  | 292 |
| chr5  | 118175775 | 118176066 | 292 |
| chr5  | 115861048 | 115861339 | 292 |
| chr5  | 111619129 | 111619420 | 292 |
| chr4  | 46243164  | 46243455  | 292 |
| chr3  | 123904378 | 123904669 | 292 |
| chr3  | 33841618  | 33841909  | 292 |
| chr29 | 27308360  | 27308651  | 292 |
| chr26 | 44120973  | 44121264  | 292 |
| chr25 | 36483224  | 36483515  | 292 |
| chr22 | 31415110  | 31415401  | 292 |
| chr21 | 64465333  | 64465624  | 292 |
| chr2  | 134929302 | 134929593 | 292 |
| chr19 | 59804102  | 59804393  | 292 |
| chr18 | 34059900  | 34060191  | 292 |
| chr18 | 33024400  | 33024691  | 292 |
| chr18 | 18424825  | 18425116  | 292 |
| chr16 | 60781846  | 60782137  | 292 |
| chr15 | 84584047  | 84584338  | 292 |
| chr12 | 20941870  | 20942161  | 292 |
| chr11 | 74996371  | 74996662  | 292 |
| chr10 | 99591947  | 99592238  | 292 |
| chr1  | 145356483 | 145356774 | 292 |
| chr9  | 98741937  | 98742227  | 291 |
| chr8  | 89519938  | 89520228  | 291 |
| chr8  | 7952661   | 7952951   | 291 |
| chr7  | 89475503  | 89475793  | 291 |
| chr6  | 120434526 | 120434816 | 291 |
| chr6  | 12633235  | 12633525  | 291 |
| chr5  | 112048488 | 112048778 | 291 |
| chr4  | 98577732  | 98578022  | 291 |
| chr3  | 87808591  | 87808881  | 291 |

|       |           |           |     |
|-------|-----------|-----------|-----|
| chr3  | 15956086  | 15956376  | 291 |
| chr29 | 49549541  | 49549831  | 291 |
| chr29 | 36907023  | 36907313  | 291 |
| chr26 | 49651101  | 49651391  | 291 |
| chr25 | 3268907   | 3269197   | 291 |
| chr24 | 1383234   | 1383524   | 291 |
| chr22 | 52728660  | 52728950  | 291 |
| chr22 | 46587227  | 46587517  | 291 |
| chr20 | 41245864  | 41246154  | 291 |
| chr19 | 52836003  | 52836293  | 291 |
| chr17 | 69425380  | 69425670  | 291 |
| chr16 | 71126652  | 71126942  | 291 |
| chr15 | 29864049  | 29864339  | 291 |
| chr15 | 22179147  | 22179437  | 291 |
| chr15 | 21464177  | 21464467  | 291 |
| chr13 | 80712068  | 80712358  | 291 |
| chr12 | 34386238  | 34386528  | 291 |
| chr11 | 91381453  | 91381743  | 291 |
| chr11 | 71449790  | 71450080  | 291 |
| chr10 | 74722489  | 74722779  | 291 |
| chr10 | 16833321  | 16833611  | 291 |
| chr10 | 15010804  | 15011094  | 291 |
| chr1  | 136906678 | 136906968 | 291 |
| chr1  | 45799678  | 45799968  | 291 |
| chr9  | 106852482 | 106852771 | 290 |
| chr8  | 70536750  | 70537039  | 290 |
| chr5  | 81798689  | 81798978  | 290 |
| chr4  | 118626291 | 118626580 | 290 |
| chr4  | 79306915  | 79307204  | 290 |
| chr3  | 111601634 | 111601923 | 290 |
| chr28 | 11371087  | 11371376  | 290 |
| chr26 | 50069347  | 50069636  | 290 |
| chr26 | 15399626  | 15399915  | 290 |
| chr20 | 73277582  | 73277871  | 290 |
| chr20 | 38808194  | 38808483  | 290 |
| chr20 | 13727793  | 13728082  | 290 |
| chr20 | 8693013   | 8693302   | 290 |
| chr2  | 26456517  | 26456806  | 290 |
| chr2  | 24055575  | 24055864  | 290 |
| chr19 | 57682382  | 57682671  | 290 |
| chr19 | 29735734  | 29736023  | 290 |
| chr19 | 19359170  | 19359459  | 290 |
| chr19 | 18398902  | 18399191  | 290 |
| chr12 | 33090907  | 33091196  | 290 |
| chr12 | 9420482   | 9420771   | 290 |
| chr11 | 98434480  | 98434769  | 290 |
| chr11 | 90305369  | 90305658  | 290 |
| chr11 | 81304629  | 81304918  | 290 |
| chr11 | 14786500  | 14786789  | 290 |
| chr11 | 12874080  | 12874369  | 290 |

|       |           |           |     |
|-------|-----------|-----------|-----|
| chr10 | 102923163 | 102923452 | 290 |
| chr10 | 91023102  | 91023391  | 290 |
| chr10 | 90394730  | 90395019  | 290 |
| chr10 | 83087834  | 83088123  | 290 |
| chr10 | 50520480  | 50520769  | 290 |
| chr10 | 10174182  | 10174471  | 290 |
| chr1  | 69462380  | 69462669  | 290 |
| chr8  | 110722207 | 110722495 | 289 |
| chr8  | 93697150  | 93697438  | 289 |
| chr6  | 69244786  | 69245074  | 289 |
| chr5  | 28976868  | 28977156  | 289 |
| chr4  | 52528799  | 52529087  | 289 |
| chr3  | 113464588 | 113464876 | 289 |
| chr3  | 30478704  | 30478992  | 289 |
| chr3  | 30280732  | 30281020  | 289 |
| chr3  | 15944956  | 15945244  | 289 |
| chr3  | 15797615  | 15797903  | 289 |
| chr3  | 15438693  | 15438981  | 289 |
| chr29 | 51766972  | 51767260  | 289 |
| chr23 | 52020968  | 52021256  | 289 |
| chr20 | 66468947  | 66469235  | 289 |
| chr2  | 135726646 | 135726934 | 289 |
| chr19 | 55765449  | 55765737  | 289 |
| chr19 | 38299759  | 38300047  | 289 |
| chr19 | 23742702  | 23742990  | 289 |
| chr19 | 12420589  | 12420877  | 289 |
| chr16 | 3688942   | 3689230   | 289 |
| chr15 | 5477060   | 5477348   | 289 |
| chr12 | 84590364  | 84590652  | 289 |
| chr12 | 35782491  | 35782779  | 289 |
| chr12 | 32099884  | 32100172  | 289 |
| chr11 | 100228907 | 100229195 | 289 |
| chr11 | 98968976  | 98969264  | 289 |
| chr11 | 7203014   | 7203302   | 289 |
| chrX  | 3716699   | 3716986   | 288 |
| chr9  | 99605561  | 99605848  | 288 |
| chr9  | 21993387  | 21993674  | 288 |
| chr3  | 125701902 | 125702189 | 288 |
| chr3  | 99210765  | 99211052  | 288 |
| chr3  | 48216403  | 48216690  | 288 |
| chr3  | 29247804  | 29248091  | 288 |
| chr29 | 49052650  | 49052937  | 288 |
| chr23 | 48762481  | 48762768  | 288 |
| chr23 | 18202358  | 18202645  | 288 |
| chr22 | 58645763  | 58646050  | 288 |
| chr22 | 16131385  | 16131672  | 288 |
| chr22 | 14127995  | 14128282  | 288 |
| chr21 | 62085029  | 62085316  | 288 |
| chr21 | 30259224  | 30259511  | 288 |
| chr21 | 26763796  | 26764083  | 288 |

|       |           |           |     |
|-------|-----------|-----------|-----|
| chr19 | 57697515  | 57697802  | 288 |
| chr19 | 54589211  | 54589498  | 288 |
| chr19 | 35055111  | 35055398  | 288 |
| chr19 | 28332620  | 28332907  | 288 |
| chr18 | 56885943  | 56886230  | 288 |
| chr17 | 76130464  | 76130751  | 288 |
| chr17 | 72204321  | 72204608  | 288 |
| chr17 | 66442653  | 66442940  | 288 |
| chr16 | 46938874  | 46939161  | 288 |
| chr15 | 74716759  | 74717046  | 288 |
| chr14 | 25068905  | 25069192  | 288 |
| chr13 | 79887656  | 79887943  | 288 |
| chr13 | 73885829  | 73886116  | 288 |
| chr13 | 60197595  | 60197882  | 288 |
| chr11 | 74205089  | 74205376  | 288 |
| chr10 | 67957579  | 67957866  | 288 |
| chr1  | 141796989 | 141797276 | 288 |
| chr1  | 133441356 | 133441643 | 288 |
| chr1  | 37563968  | 37564255  | 288 |
| chr9  | 62431617  | 62431903  | 287 |
| chr5  | 113149491 | 113149777 | 287 |
| chr4  | 106698839 | 106699125 | 287 |
| chr4  | 10811155  | 10811441  | 287 |
| chr3  | 118164898 | 118165184 | 287 |
| chr3  | 111044210 | 111044496 | 287 |
| chr3  | 95077342  | 95077628  | 287 |
| chr29 | 46255300  | 46255586  | 287 |
| chr28 | 25388633  | 25388919  | 287 |
| chr27 | 40318560  | 40318846  | 287 |
| chr26 | 41720836  | 41721122  | 287 |
| chr26 | 40175114  | 40175400  | 287 |
| chr22 | 7277994   | 7278280   | 287 |
| chr21 | 30246550  | 30246836  | 287 |
| chr21 | 26975863  | 26976149  | 287 |
| chr2  | 130157726 | 130158012 | 287 |
| chr19 | 58328201  | 58328487  | 287 |
| chr19 | 30463112  | 30463398  | 287 |
| chr19 | 27305028  | 27305314  | 287 |
| chr19 | 14070340  | 14070626  | 287 |
| chr19 | 12290297  | 12290583  | 287 |
| chr18 | 56595550  | 56595836  | 287 |
| chr18 | 3705090   | 3705376   | 287 |
| chr17 | 73150865  | 73151151  | 287 |
| chr16 | 46990557  | 46990843  | 287 |
| chr16 | 44154804  | 44155090  | 287 |
| chr15 | 73781228  | 73781514  | 287 |
| chr15 | 21494803  | 21495089  | 287 |
| chr14 | 76169214  | 76169500  | 287 |
| chr14 | 61328686  | 61328972  | 287 |
| chr14 | 40096480  | 40096766  | 287 |

|       |           |           |     |
|-------|-----------|-----------|-----|
| chr13 | 81777561  | 81777847  | 287 |
| chr13 | 80741812  | 80742098  | 287 |
| chr13 | 61753846  | 61754132  | 287 |
| chr11 | 47895493  | 47895779  | 287 |
| chr10 | 81730205  | 81730491  | 287 |
| chr10 | 20866920  | 20867206  | 287 |
| chr10 | 20428416  | 20428702  | 287 |
| chr1  | 108844863 | 108845149 | 287 |
| chr7  | 13063795  | 13064080  | 286 |
| chr7  | 4022035   | 4022320   | 286 |
| chr6  | 121024552 | 121024837 | 286 |
| chr5  | 95940957  | 95941242  | 286 |
| chr4  | 68145624  | 68145909  | 286 |
| chr4  | 43276368  | 43276653  | 286 |
| chr3  | 25608072  | 25608357  | 286 |
| chr29 | 44490197  | 44490482  | 286 |
| chr28 | 34083123  | 34083408  | 286 |
| chr28 | 12098783  | 12099068  | 286 |
| chr27 | 35448675  | 35448960  | 286 |
| chr26 | 48416051  | 48416336  | 286 |
| chr26 | 24651284  | 24651569  | 286 |
| chr24 | 51584789  | 51585074  | 286 |
| chr23 | 7607049   | 7607334   | 286 |
| chr22 | 60275426  | 60275711  | 286 |
| chr20 | 13082841  | 13083126  | 286 |
| chr2  | 139391623 | 139391908 | 286 |
| chr2  | 137100661 | 137100946 | 286 |
| chr2  | 135586802 | 135587087 | 286 |
| chr2  | 25311992  | 25312277  | 286 |
| chr19 | 61908459  | 61908744  | 286 |
| chr19 | 56456834  | 56457119  | 286 |
| chr19 | 25794971  | 25795256  | 286 |
| chr19 | 7740356   | 7740641   | 286 |
| chr17 | 73974070  | 73974355  | 286 |
| chr17 | 49142996  | 49143281  | 286 |
| chr15 | 33519418  | 33519703  | 286 |
| chr14 | 12280364  | 12280649  | 286 |
| chr13 | 80591778  | 80592063  | 286 |
| chr13 | 36217079  | 36217364  | 286 |
| chr10 | 25827345  | 25827630  | 286 |
| chr10 | 19893597  | 19893882  | 286 |
| chr1  | 75138634  | 75138919  | 286 |
| chrX  | 87520220  | 87520504  | 285 |
| chr8  | 87111725  | 87112009  | 285 |
| chr7  | 10975613  | 10975897  | 285 |
| chr6  | 118498434 | 118498718 | 285 |
| chr5  | 111525834 | 111526118 | 285 |
| chr5  | 10355544  | 10355828  | 285 |
| chr29 | 49105194  | 49105478  | 285 |
| chr29 | 44531781  | 44532065  | 285 |

|       |               |           |     |
|-------|---------------|-----------|-----|
| chr29 | 35515366      | 35515650  | 285 |
| chr28 | 6025978       | 6026262   | 285 |
| chr28 | 4200012       | 4200296   | 285 |
| chr26 | 17923058      | 17923342  | 285 |
| chr25 | 36471433      | 36471717  | 285 |
| chr25 | 36147077      | 36147361  | 285 |
| chr22 | 48244746      | 48245030  | 285 |
| chr20 | 5902929       | 5903213   | 285 |
| chr2  | 111367459     | 111367743 | 285 |
| chr2  | 75805456      | 75805740  | 285 |
| chr19 | 38731643      | 38731927  | 285 |
| chr19 | 14057800      | 14058084  | 285 |
| chr18 | 51138557      | 51138841  | 285 |
| chr18 | 15863293      | 15863577  | 285 |
| chr17 | 64236636      | 64236920  | 285 |
| chr16 | 60224692      | 60224976  | 285 |
| chr16 | 44426337      | 44426621  | 285 |
| chr15 | 75251481      | 75251765  | 285 |
| chr13 | 62779148      | 62779432  | 285 |
| chr13 | 24025717      | 24026001  | 285 |
| chr13 | 14302780      | 14303064  | 285 |
| chr12 | 74498501      | 74498785  | 285 |
| chr12 | 35652897      | 35653181  | 285 |
| chr12 | 31285173      | 31285457  | 285 |
| chr11 | 65723184      | 65723468  | 285 |
| chr11 | 28666302      | 28666586  | 285 |
| chr11 | 820444 820728 |           | 285 |
| chr10 | 55408847      | 55409131  | 285 |
| chr9  | 100063101     | 100063384 | 284 |
| chr9  | 25143443      | 25143726  | 284 |
| chr8  | 108825580     | 108825863 | 284 |
| chr7  | 101688099     | 101688382 | 284 |
| chr6  | 116238937     | 116239220 | 284 |
| chr6  | 72314027      | 72314310  | 284 |
| chr3  | 115464490     | 115464773 | 284 |
| chr25 | 6792429       | 6792712   | 284 |
| chr24 | 35038744      | 35039027  | 284 |
| chr22 | 52574902      | 52575185  | 284 |
| chr21 | 65883800      | 65884083  | 284 |
| chr21 | 59315072      | 59315355  | 284 |
| chr20 | 75050438      | 75050721  | 284 |
| chr2  | 139959633     | 139959916 | 284 |
| chr2  | 115705836     | 115706119 | 284 |
| chr2  | 111306325     | 111306608 | 284 |
| chr2  | 99682878      | 99683161  | 284 |
| chr2  | 24670477      | 24670760  | 284 |
| chr19 | 47152550      | 47152833  | 284 |
| chr19 | 44882506      | 44882789  | 284 |
| chr19 | 6749405       | 6749688   | 284 |
| chr18 | 59748881      | 59749164  | 284 |

|       |               |           |     |
|-------|---------------|-----------|-----|
| chr18 | 26099262      | 26099545  | 284 |
| chr16 | 49504033      | 49504316  | 284 |
| chr16 | 44497896      | 44498179  | 284 |
| chr16 | 44144155      | 44144438  | 284 |
| chr16 | 26446915      | 26447198  | 284 |
| chr15 | 74655759      | 74656042  | 284 |
| chr13 | 22865788      | 22866071  | 284 |
| chr12 | 48060858      | 48061141  | 284 |
| chr12 | 20089301      | 20089584  | 284 |
| chr11 | 107090239     | 107090522 | 284 |
| chr11 | 75608162      | 75608445  | 284 |
| chr11 | 10452805      | 10453088  | 284 |
| chr11 | 5836893       | 5837176   | 284 |
| chr10 | 20922277      | 20922560  | 284 |
| chr10 | 17500870      | 17501153  | 284 |
| chr10 | 17077378      | 17077661  | 284 |
| chr1  | 156651164     | 156651447 | 284 |
| chr1  | 152009016     | 152009299 | 284 |
| chr1  | 104689776     | 104690059 | 284 |
| chr9  | 99847095      | 99847377  | 283 |
| chr8  | 80151922      | 80152204  | 283 |
| chr5  | 117840703     | 117840985 | 283 |
| chr5  | 10731549      | 10731831  | 283 |
| chr4  | 121265720     | 121266002 | 283 |
| chr4  | 74802782      | 74803064  | 283 |
| chr4  | 68160780      | 68161062  | 283 |
| chr3  | 126902742     | 126903024 | 283 |
| chr3  | 20527857      | 20528139  | 283 |
| chr29 | 48178107      | 48178389  | 283 |
| chr28 | 40757858      | 40758140  | 283 |
| chr28 | 33945609      | 33945891  | 283 |
| chr27 | 31592750      | 31593032  | 283 |
| chr27 | 26825750      | 26826032  | 283 |
| chr26 | 37937598      | 37937880  | 283 |
| chr25 | 33358016      | 33358298  | 283 |
| chr24 | 58904878      | 58905160  | 283 |
| chr24 | 20548244      | 20548526  | 283 |
| chr22 | 60171407      | 60171689  | 283 |
| chr21 | 47721616      | 47721898  | 283 |
| chr20 | 915821 916103 | 283       |     |
| chr19 | 43083344      | 43083626  | 283 |
| chr19 | 38753768      | 38754050  | 283 |
| chr18 | 12989403      | 12989685  | 283 |
| chr17 | 45953569      | 45953851  | 283 |
| chr16 | 43558302      | 43558584  | 283 |
| chr15 | 74567308      | 74567590  | 283 |
| chr14 | 870658 870940 | 283       |     |
| chr13 | 80225722      | 80226004  | 283 |
| chr13 | 80183992      | 80184274  | 283 |
| chr13 | 54428504      | 54428786  | 283 |

|       |           |           |     |
|-------|-----------|-----------|-----|
| chr11 | 104189560 | 104189842 | 283 |
| chr11 | 103291766 | 103292048 | 283 |
| chr10 | 90793504  | 90793786  | 283 |
| chr10 | 71258763  | 71259045  | 283 |
| chr10 | 25896865  | 25897147  | 283 |
| chrX  | 22428631  | 22428912  | 282 |
| chr9  | 99630563  | 99630844  | 282 |
| chr7  | 57595053  | 57595334  | 282 |
| chr7  | 51729678  | 51729959  | 282 |
| chr7  | 43701735  | 43702016  | 282 |
| chr5  | 122831777 | 122832058 | 282 |
| chr5  | 30309810  | 30310091  | 282 |
| chr4  | 104184126 | 104184407 | 282 |
| chr3  | 122103478 | 122103759 | 282 |
| chr3  | 121390458 | 121390739 | 282 |
| chr3  | 109420900 | 109421181 | 282 |
| chr27 | 17023100  | 17023381  | 282 |
| chr26 | 18184235  | 18184516  | 282 |
| chr24 | 35312409  | 35312690  | 282 |
| chr24 | 1991702   | 1991983   | 282 |
| chr23 | 33091885  | 33092166  | 282 |
| chr23 | 30396993  | 30397274  | 282 |
| chr22 | 60503345  | 60503626  | 282 |
| chr22 | 60422873  | 60423154  | 282 |
| chr20 | 33552032  | 33552313  | 282 |
| chr2  | 139935126 | 139935407 | 282 |
| chr2  | 139324158 | 139324439 | 282 |
| chr2  | 115116222 | 115116503 | 282 |
| chr19 | 60460004  | 60460285  | 282 |
| chr19 | 56602220  | 56602501  | 282 |
| chr19 | 43080557  | 43080838  | 282 |
| chr18 | 51611699  | 51611980  | 282 |
| chr17 | 73809726  | 73810007  | 282 |
| chr17 | 71953997  | 71954278  | 282 |
| chr17 | 68351119  | 68351400  | 282 |
| chr17 | 67398437  | 67398718  | 282 |
| chr16 | 77526090  | 77526371  | 282 |
| chr16 | 68727028  | 68727309  | 282 |
| chr16 | 38902984  | 38903265  | 282 |
| chr16 | 23840220  | 23840501  | 282 |
| chr13 | 48465466  | 48465747  | 282 |
| chr13 | 48463838  | 48464119  | 282 |
| chr13 | 23035456  | 23035737  | 282 |
| chr12 | 24627707  | 24627988  | 282 |
| chr11 | 46593871  | 46594152  | 282 |
| chr11 | 2327402   | 2327683   | 282 |
| chr10 | 53472372  | 53472653  | 282 |
| chr1  | 1621016   | 1621297   | 282 |
| chr8  | 102824888 | 102825168 | 281 |
| chr7  | 43494379  | 43494659  | 281 |



|       |           |           |     |
|-------|-----------|-----------|-----|
| chr6  | 99779011  | 99779291  | 281 |
| chr5  | 29019001  | 29019281  | 281 |
| chr4  | 121469459 | 121469739 | 281 |
| chr4  | 33430514  | 33430794  | 281 |
| chr3  | 77661430  | 77661710  | 281 |
| chr28 | 41858157  | 41858437  | 281 |
| chr23 | 52426559  | 52426839  | 281 |
| chr23 | 51787825  | 51788105  | 281 |
| chr23 | 27795365  | 27795645  | 281 |
| chr23 | 10539447  | 10539727  | 281 |
| chr22 | 59492734  | 59493014  | 281 |
| chr22 | 48669007  | 48669287  | 281 |
| chr21 | 19939173  | 19939453  | 281 |
| chr20 | 61757549  | 61757829  | 281 |
| chr2  | 138625868 | 138626148 | 281 |
| chr2  | 138226097 | 138226377 | 281 |
| chr2  | 118370731 | 118371011 | 281 |
| chr19 | 58856918  | 58857198  | 281 |
| chr19 | 58645167  | 58645447  | 281 |
| chr19 | 29880387  | 29880667  | 281 |
| chr18 | 33010120  | 33010400  | 281 |
| chr18 | 12729098  | 12729378  | 281 |
| chr17 | 66825046  | 66825326  | 281 |
| chr17 | 56080217  | 56080497  | 281 |
| chr16 | 24547348  | 24547628  | 281 |
| chr15 | 74598777  | 74599057  | 281 |
| chr13 | 82126387  | 82126667  | 281 |
| chr13 | 23385155  | 23385435  | 281 |
| chr13 | 22166129  | 22166409  | 281 |
| chr12 | 79961214  | 79961494  | 281 |
| chr12 | 11300460  | 11300740  | 281 |
| chr11 | 74992890  | 74993170  | 281 |
| chr10 | 3922765   | 3923045   | 281 |
| chr9  | 105835926 | 105836205 | 280 |
| chr8  | 101651940 | 101652219 | 280 |
| chr7  | 52397305  | 52397584  | 280 |
| chr5  | 121671964 | 121672243 | 280 |
| chr5  | 94853864  | 94854143  | 280 |
| chr4  | 71867469  | 71867748  | 280 |
| chr4  | 5549509   | 5549788   | 280 |
| chr3  | 119448747 | 119449026 | 280 |
| chr3  | 105444249 | 105444528 | 280 |
| chr29 | 34838668  | 34838947  | 280 |
| chr25 | 43205497  | 43205776  | 280 |
| chr25 | 42716933  | 42717212  | 280 |
| chr25 | 41645150  | 41645429  | 280 |
| chr25 | 39264307  | 39264586  | 280 |
| chr25 | 29412113  | 29412392  | 280 |
| chr25 | 27692487  | 27692766  | 280 |
| chr23 | 19878062  | 19878341  | 280 |

|       |           |           |     |
|-------|-----------|-----------|-----|
| chr21 | 15731265  | 15731544  | 280 |
| chr19 | 51685553  | 51685832  | 280 |
| chr19 | 47920694  | 47920973  | 280 |
| chr19 | 24702302  | 24702581  | 280 |
| chr18 | 22108620  | 22108899  | 280 |
| chr18 | 11715969  | 11716248  | 280 |
| chr12 | 85039904  | 85040183  | 280 |
| chr12 | 31970694  | 31970973  | 280 |
| chr11 | 75307429  | 75307708  | 280 |
| chr11 | 2263226   | 2263505   | 280 |
| chr10 | 83639512  | 83639791  | 280 |
| chr1  | 137314813 | 137315092 | 280 |
| chrX  | 62801357  | 62801635  | 279 |
| chr8  | 72311694  | 72311972  | 279 |
| chr8  | 25606449  | 25606727  | 279 |
| chr8  | 8587897   | 8588175   | 279 |
| chr7  | 19241843  | 19242121  | 279 |
| chr7  | 10611076  | 10611354  | 279 |
| chr6  | 99623051  | 99623329  | 279 |
| chr5  | 30616483  | 30616761  | 279 |
| chr3  | 110768552 | 110768830 | 279 |
| chr3  | 106639452 | 106639730 | 279 |
| chr3  | 26143129  | 26143407  | 279 |
| chr3  | 18278852  | 18279130  | 279 |
| chr3  | 13858072  | 13858350  | 279 |
| chr3  | 13464433  | 13464711  | 279 |
| chr29 | 31428855  | 31429133  | 279 |
| chr26 | 49213562  | 49213840  | 279 |
| chr26 | 45993162  | 45993440  | 279 |
| chr26 | 37589157  | 37589435  | 279 |
| chr25 | 36480960  | 36481238  | 279 |
| chr25 | 34207592  | 34207870  | 279 |
| chr25 | 29343875  | 29344153  | 279 |
| chr25 | 21657440  | 21657718  | 279 |
| chr24 | 58735517  | 58735795  | 279 |
| chr23 | 8244277   | 8244555   | 279 |
| chr22 | 49574550  | 49574828  | 279 |
| chr21 | 68031012  | 68031290  | 279 |
| chr21 | 62452193  | 62452471  | 279 |
| chr2  | 135094603 | 135094881 | 279 |
| chr2  | 135088227 | 135088505 | 279 |
| chr2  | 99389998  | 99390276  | 279 |
| chr2  | 74310529  | 74310807  | 279 |
| chr19 | 45585950  | 45586228  | 279 |
| chr19 | 17672639  | 17672917  | 279 |
| chr17 | 73162959  | 73163237  | 279 |
| chr17 | 64927204  | 64927482  | 279 |
| chr17 | 47102546  | 47102824  | 279 |
| chr17 | 13256248  | 13256526  | 279 |
| chr16 | 77325267  | 77325545  | 279 |

|       |           |           |     |
|-------|-----------|-----------|-----|
| chr16 | 57586466  | 57586744  | 279 |
| chr16 | 47699604  | 47699882  | 279 |
| chr15 | 78176496  | 78176774  | 279 |
| chr13 | 79069923  | 79070201  | 279 |
| chr13 | 22825044  | 22825322  | 279 |
| chr11 | 103313158 | 103313436 | 279 |
| chr11 | 31092196  | 31092474  | 279 |
| chr9  | 98920845  | 98921122  | 278 |
| chr9  | 45924265  | 45924542  | 278 |
| chr7  | 13006372  | 13006649  | 278 |
| chr6  | 107226468 | 107226745 | 278 |
| chr6  | 72098617  | 72098894  | 278 |
| chr5  | 115528933 | 115529210 | 278 |
| chr5  | 112300962 | 112301239 | 278 |
| chr4  | 43937765  | 43938042  | 278 |
| chr3  | 21666952  | 21667229  | 278 |
| chr3  | 20525332  | 20525609  | 278 |
| chr3  | 4323477   | 4323754   | 278 |
| chr26 | 35202264  | 35202541  | 278 |
| chr26 | 31366715  | 31366992  | 278 |
| chr25 | 43151334  | 43151611  | 278 |
| chr23 | 42489692  | 42489969  | 278 |
| chr23 | 9736991   | 9737268   | 278 |
| chr22 | 43197599  | 43197876  | 278 |
| chr21 | 20170856  | 20171133  | 278 |
| chr2  | 74037893  | 74038170  | 278 |
| chr19 | 58173656  | 58173933  | 278 |
| chr19 | 54877056  | 54877333  | 278 |
| chr19 | 25241285  | 25241562  | 278 |
| chr19 | 24636219  | 24636496  | 278 |
| chr19 | 21618782  | 21619059  | 278 |
| chr19 | 14042223  | 14042500  | 278 |
| chr17 | 74609848  | 74610125  | 278 |
| chr17 | 70505426  | 70505703  | 278 |
| chr16 | 71156619  | 71156896  | 278 |
| chr16 | 41510215  | 41510492  | 278 |
| chr13 | 71188585  | 71188862  | 278 |
| chr13 | 59859210  | 59859487  | 278 |
| chr13 | 53154088  | 53154365  | 278 |
| chr13 | 23522837  | 23523114  | 278 |
| chr12 | 35108122  | 35108399  | 278 |
| chr12 | 33389076  | 33389353  | 278 |
| chr9  | 104956513 | 104956789 | 277 |
| chr9  | 99970671  | 99970947  | 277 |
| chr9  | 45098997  | 45099273  | 277 |
| chr7  | 9631650   | 9631926   | 277 |
| chr6  | 122049306 | 122049582 | 277 |
| chr6  | 120743063 | 120743339 | 277 |
| chr5  | 122806271 | 122806547 | 277 |
| chr5  | 112653587 | 112653863 | 277 |

|       |               |           |     |
|-------|---------------|-----------|-----|
| chr5  | 29953221      | 29953497  | 277 |
| chr5  | 29032851      | 29033127  | 277 |
| chr4  | 106361428     | 106361704 | 277 |
| chr3  | 112407146     | 112407422 | 277 |
| chr3  | 111746709     | 111746985 | 277 |
| chr3  | 33065784      | 33066060  | 277 |
| chr28 | 33347097      | 33347373  | 277 |
| chr26 | 38409661      | 38409937  | 277 |
| chr25 | 37298299      | 37298575  | 277 |
| chr23 | 38492648      | 38492924  | 277 |
| chr2  | 100115109     | 100115385 | 277 |
| chr19 | 60278875      | 60279151  | 277 |
| chr19 | 21719231      | 21719507  | 277 |
| chr18 | 52101412      | 52101688  | 277 |
| chr18 | 52014320      | 52014596  | 277 |
| chr18 | 11552681      | 11552957  | 277 |
| chr18 | 377228 377504 |           | 277 |
| chr16 | 48445863      | 48446139  | 277 |
| chr16 | 44380326      | 44380602  | 277 |
| chr15 | 75913832      | 75914108  | 277 |
| chr15 | 28879719      | 28879995  | 277 |
| chr14 | 6068492       | 6068768   | 277 |
| chr13 | 77731004      | 77731280  | 277 |
| chr12 | 84683134      | 84683410  | 277 |
| chr12 | 79962941      | 79963217  | 277 |
| chr12 | 36301497      | 36301773  | 277 |
| chr11 | 98930242      | 98930518  | 277 |
| chr11 | 72308441      | 72308717  | 277 |
| chr11 | 44931222      | 44931498  | 277 |
| chr10 | 84202946      | 84203222  | 277 |
| chr10 | 37308816      | 37309092  | 277 |
| chr10 | 21427305      | 21427581  | 277 |
| chr10 | 20856797      | 20857073  | 277 |
| chr10 | 17228198      | 17228474  | 277 |
| chr10 | 4917225       | 4917501   | 277 |
| chr1  | 83273289      | 83273565  | 277 |
| chr1  | 74663608      | 74663884  | 277 |
| chrX  | 30968939      | 30969214  | 276 |
| chr9  | 12674666      | 12674941  | 276 |
| chr8  | 108242685     | 108242960 | 276 |
| chr7  | 46174871      | 46175146  | 276 |
| chr7  | 37394967      | 37395242  | 276 |
| chr7  | 16544982      | 16545257  | 276 |
| chr7  | 11371292      | 11371567  | 276 |
| chr7  | 10016747      | 10017022  | 276 |
| chr5  | 121796338     | 121796613 | 276 |
| chr5  | 116925441     | 116925716 | 276 |
| chr5  | 112519932     | 112520207 | 276 |
| chr5  | 30308635      | 30308910  | 276 |
| chr3  | 62019230      | 62019505  | 276 |

|       |           |           |     |
|-------|-----------|-----------|-----|
| chr3  | 15968362  | 15968637  | 276 |
| chr28 | 33674880  | 33675155  | 276 |
| chr26 | 48508287  | 48508562  | 276 |
| chr23 | 32898824  | 32899099  | 276 |
| chr23 | 15138448  | 15138723  | 276 |
| chr22 | 17799036  | 17799311  | 276 |
| chr22 | 15004744  | 15005019  | 276 |
| chr21 | 33006533  | 33006808  | 276 |
| chr21 | 20631321  | 20631596  | 276 |
| chr20 | 8030261   | 8030536   | 276 |
| chr19 | 56656581  | 56656856  | 276 |
| chr18 | 64331896  | 64332171  | 276 |
| chr18 | 56042396  | 56042671  | 276 |
| chr18 | 54208127  | 54208402  | 276 |
| chr18 | 40100192  | 40100467  | 276 |
| chr17 | 57877953  | 57878228  | 276 |
| chr16 | 57533562  | 57533837  | 276 |
| chr16 | 44372502  | 44372777  | 276 |
| chr16 | 41118831  | 41119106  | 276 |
| chr13 | 63104476  | 63104751  | 276 |
| chr12 | 68410732  | 68411007  | 276 |
| chr11 | 109776485 | 109776760 | 276 |
| chr11 | 100887492 | 100887767 | 276 |
| chr11 | 44993919  | 44994194  | 276 |
| chr11 | 11703715  | 11703990  | 276 |
| chr10 | 16720092  | 16720367  | 276 |
| chr1  | 144665711 | 144665986 | 276 |
| chr1  | 2716142   | 2716417   | 276 |
| chr9  | 90727433  | 90727707  | 275 |
| chr9  | 77566365  | 77566639  | 275 |
| chr7  | 3709242   | 3709516   | 275 |
| chr6  | 120629096 | 120629370 | 275 |
| chr5  | 80726522  | 80726796  | 275 |
| chr5  | 10220484  | 10220758  | 275 |
| chr3  | 124138366 | 124138640 | 275 |
| chr3  | 111667427 | 111667701 | 275 |
| chr3  | 105759157 | 105759431 | 275 |
| chr28 | 26783802  | 26784076  | 275 |
| chr26 | 51531876  | 51532150  | 275 |
| chr25 | 35404064  | 35404338  | 275 |
| chr24 | 51654494  | 51654768  | 275 |
| chr23 | 52279641  | 52279915  | 275 |
| chr23 | 32687271  | 32687545  | 275 |
| chr23 | 15987917  | 15988191  | 275 |
| chr23 | 10997872  | 10998146  | 275 |
| chr23 | 10558946  | 10559220  | 275 |
| chr22 | 48583510  | 48583784  | 275 |
| chr22 | 48414954  | 48415228  | 275 |
| chr21 | 27890476  | 27890750  | 275 |
| chr20 | 19377760  | 19378034  | 275 |

|       |           |           |     |
|-------|-----------|-----------|-----|
| chr2  | 139482394 | 139482668 | 275 |
| chr2  | 131281206 | 131281480 | 275 |
| chr19 | 54578566  | 54578840  | 275 |
| chr19 | 38964959  | 38965233  | 275 |
| chr19 | 32879713  | 32879987  | 275 |
| chr19 | 23058353  | 23058627  | 275 |
| chr18 | 23215269  | 23215543  | 275 |
| chr16 | 77007134  | 77007408  | 275 |
| chr14 | 21232960  | 21233234  | 275 |
| chr13 | 79689790  | 79690064  | 275 |
| chr13 | 70063462  | 70063736  | 275 |
| chr13 | 46342897  | 46343171  | 275 |
| chr12 | 36995697  | 36995971  | 275 |
| chr12 | 14223323  | 14223597  | 275 |
| chr11 | 76367644  | 76367918  | 275 |
| chr11 | 12975113  | 12975387  | 275 |
| chr10 | 20100831  | 20101105  | 275 |
| chr10 | 17411911  | 17412185  | 275 |
| chr1  | 68769435  | 68769709  | 275 |
| chr9  | 66238776  | 66239049  | 274 |
| chr9  | 44075120  | 44075393  | 274 |
| chr8  | 103352587 | 103352860 | 274 |
| chr8  | 77312514  | 77312787  | 274 |
| chr8  | 7776100   | 7776373   | 274 |
| chr7  | 39034507  | 39034780  | 274 |
| chr6  | 120927251 | 120927524 | 274 |
| chr6  | 75198929  | 75199202  | 274 |
| chr5  | 111340637 | 111340910 | 274 |
| chr5  | 32951850  | 32952123  | 274 |
| chr5  | 1096243   | 1096516   | 274 |
| chr4  | 117876127 | 117876400 | 274 |
| chr3  | 72523864  | 72524137  | 274 |
| chr29 | 29655935  | 29656208  | 274 |
| chr27 | 35190817  | 35191090  | 274 |
| chr26 | 22367535  | 22367808  | 274 |
| chr25 | 37331564  | 37331837  | 274 |
| chr25 | 37230939  | 37231212  | 274 |
| chr23 | 52008755  | 52009028  | 274 |
| chr22 | 59068441  | 59068714  | 274 |
| chr21 | 65699896  | 65700169  | 274 |
| chr21 | 29320037  | 29320310  | 274 |
| chr21 | 23652294  | 23652567  | 274 |
| chr20 | 73441279  | 73441552  | 274 |
| chr2  | 138882153 | 138882426 | 274 |
| chr19 | 58428607  | 58428880  | 274 |
| chr19 | 47065104  | 47065377  | 274 |
| chr17 | 69279200  | 69279473  | 274 |
| chr16 | 77450668  | 77450941  | 274 |
| chr16 | 42900953  | 42901226  | 274 |
| chr15 | 65536791  | 65537064  | 274 |

|       |           |           |     |
|-------|-----------|-----------|-----|
| chr15 | 51590488  | 51590761  | 274 |
| chr13 | 70172599  | 70172872  | 274 |
| chr13 | 41924851  | 41925124  | 274 |
| chr13 | 35603878  | 35604151  | 274 |
| chr12 | 30951389  | 30951662  | 274 |
| chr12 | 30766168  | 30766441  | 274 |
| chr12 | 9120804   | 9121077   | 274 |
| chr11 | 104919662 | 104919935 | 274 |
| chr10 | 88158077  | 88158350  | 274 |
| chr10 | 85783886  | 85784159  | 274 |
| chr10 | 17339220  | 17339493  | 274 |
| chr10 | 14956591  | 14956864  | 274 |
| chr10 | 14206158  | 14206431  | 274 |
| chr1  | 131988937 | 131989210 | 274 |
| chr1  | 74565987  | 74566260  | 274 |
| chr1  | 42712579  | 42712852  | 274 |
| chr8  | 8305550   | 8305822   | 273 |
| chr8  | 7588538   | 7588810   | 273 |
| chr5  | 80711521  | 80711793  | 273 |
| chr5  | 28859640  | 28859912  | 273 |
| chr4  | 98128279  | 98128551  | 273 |
| chr4  | 96871557  | 96871829  | 273 |
| chr4  | 51587332  | 51587604  | 273 |
| chr3  | 121120299 | 121120571 | 273 |
| chr3  | 116496324 | 116496596 | 273 |
| chr3  | 116382356 | 116382628 | 273 |
| chr3  | 115722315 | 115722587 | 273 |
| chr3  | 46266755  | 46267027  | 273 |
| chr29 | 42048324  | 42048596  | 273 |
| chr29 | 38324621  | 38324893  | 273 |
| chr29 | 34892960  | 34893232  | 273 |
| chr29 | 31723232  | 31723504  | 273 |
| chr29 | 17609552  | 17609824  | 273 |
| chr26 | 48860265  | 48860537  | 273 |
| chr26 | 38251943  | 38252215  | 273 |
| chr24 | 20695652  | 20695924  | 273 |
| chr23 | 18657737  | 18658009  | 273 |
| chr22 | 60366809  | 60367081  | 273 |
| chr21 | 64433537  | 64433809  | 273 |
| chr21 | 62449161  | 62449433  | 273 |
| chr19 | 58236144  | 58236416  | 273 |
| chr19 | 53543552  | 53543824  | 273 |
| chr19 | 19275131  | 19275403  | 273 |
| chr18 | 10685531  | 10685803  | 273 |
| chr17 | 69721487  | 69721759  | 273 |
| chr17 | 64328661  | 64328933  | 273 |
| chr16 | 68895917  | 68896189  | 273 |
| chr15 | 62736647  | 62736919  | 273 |
| chr15 | 32247689  | 32247961  | 273 |
| chr15 | 32242023  | 32242295  | 273 |

|       |           |           |     |
|-------|-----------|-----------|-----|
| chr15 | 29674155  | 29674427  | 273 |
| chr14 | 77338948  | 77339220  | 273 |
| chr14 | 10319953  | 10320225  | 273 |
| chr13 | 57581577  | 57581849  | 273 |
| chr13 | 40934340  | 40934612  | 273 |
| chr12 | 75031568  | 75031840  | 273 |
| chr12 | 32559941  | 32560213  | 273 |
| chr12 | 14933066  | 14933338  | 273 |
| chr11 | 105967910 | 105968182 | 273 |
| chr11 | 104466066 | 104466338 | 273 |
| chr11 | 76477124  | 76477396  | 273 |
| chr11 | 28776712  | 28776984  | 273 |
| chr10 | 33928558  | 33928830  | 273 |
| chr10 | 16953902  | 16954174  | 273 |
| chr1  | 161105509 | 161105781 | 273 |
| chr1  | 82881085  | 82881357  | 273 |
| chr1  | 82736979  | 82737251  | 273 |
| chr9  | 106853980 | 106854251 | 272 |
| chr8  | 102829385 | 102829656 | 272 |
| chr8  | 74305740  | 74306011  | 272 |
| chr7  | 15434527  | 15434798  | 272 |
| chr6  | 119401389 | 119401660 | 272 |
| chr5  | 81497372  | 81497643  | 272 |
| chr3  | 122587446 | 122587717 | 272 |
| chr3  | 114796941 | 114797212 | 272 |
| chr3  | 35679522  | 35679793  | 272 |
| chr3  | 30219482  | 30219753  | 272 |
| chr3  | 29237897  | 29238168  | 272 |
| chr29 | 46008777  | 46009048  | 272 |
| chr28 | 26830931  | 26831202  | 272 |
| chr27 | 38669294  | 38669565  | 272 |
| chr26 | 48466114  | 48466385  | 272 |
| chr26 | 14886899  | 14887170  | 272 |
| chr25 | 42587632  | 42587903  | 272 |
| chr25 | 37836884  | 37837155  | 272 |
| chr25 | 8714089   | 8714360   | 272 |
| chr23 | 28621859  | 28622130  | 272 |
| chr22 | 48445438  | 48445709  | 272 |
| chr21 | 13980652  | 13980923  | 272 |
| chr2  | 66038896  | 66039167  | 272 |
| chr18 | 62520362  | 62520633  | 272 |
| chr18 | 57617427  | 57617698  | 272 |
| chr18 | 56905317  | 56905588  | 272 |
| chr16 | 45776073  | 45776344  | 272 |
| chr15 | 29746500  | 29746771  | 272 |
| chr15 | 25600961  | 25601232  | 272 |
| chr15 | 24433553  | 24433824  | 272 |
| chr14 | 64790318  | 64790589  | 272 |
| chr13 | 77589797  | 77590068  | 272 |
| chr13 | 74012993  | 74013264  | 272 |



|       |           |           |     |
|-------|-----------|-----------|-----|
| chr10 | 105013349 | 105013620 | 272 |
| chr1  | 81604406  | 81604677  | 272 |
| chr9  | 91903282  | 91903552  | 271 |
| chr9  | 90568679  | 90568949  | 271 |
| chr8  | 63735012  | 63735282  | 271 |
| chr7  | 44629526  | 44629796  | 271 |
| chr7  | 43266185  | 43266455  | 271 |
| chr6  | 113489815 | 113490085 | 271 |
| chr5  | 120689416 | 120689686 | 271 |
| chr3  | 106865692 | 106865962 | 271 |
| chr3  | 33665888  | 33666158  | 271 |
| chr26 | 38236256  | 38236526  | 271 |
| chr26 | 24594927  | 24595197  | 271 |
| chr25 | 40411033  | 40411303  | 271 |
| chr25 | 34615616  | 34615886  | 271 |
| chr23 | 19626655  | 19626925  | 271 |
| chr20 | 5986397   | 5986667   | 271 |
| chr20 | 1558900   | 1559170   | 271 |
| chr2  | 135609289 | 135609559 | 271 |
| chr2  | 127134307 | 127134577 | 271 |
| chr2  | 124990240 | 124990510 | 271 |
| chr19 | 60795225  | 60795495  | 271 |
| chr19 | 60456449  | 60456719  | 271 |
| chr19 | 41130336  | 41130606  | 271 |
| chr19 | 30359722  | 30359992  | 271 |
| chr18 | 54224257  | 54224527  | 271 |
| chr17 | 72934560  | 72934830  | 271 |
| chr17 | 69745882  | 69746152  | 271 |
| chr17 | 23555339  | 23555609  | 271 |
| chr14 | 15451611  | 15451881  | 271 |
| chr14 | 7697636   | 7697906   | 271 |
| chr13 | 80364368  | 80364638  | 271 |
| chr11 | 105991309 | 105991579 | 271 |
| chr11 | 87154695  | 87154965  | 271 |
| chr11 | 76361491  | 76361761  | 271 |
| chr11 | 76358578  | 76358848  | 271 |
| chr11 | 11751142  | 11751412  | 271 |
| chr11 | 1162180   | 1162450   | 271 |
| chr10 | 12749486  | 12749756  | 271 |
| chr1  | 76552830  | 76553100  | 271 |
| chrX  | 29573082  | 29573351  | 270 |
| chr9  | 100361917 | 100362186 | 270 |
| chr9  | 74264265  | 74264534  | 270 |
| chr8  | 65409065  | 65409334  | 270 |
| chr7  | 14483442  | 14483711  | 270 |
| chr3  | 64410442  | 64410711  | 270 |
| chr3  | 35808775  | 35809044  | 270 |
| chr3  | 23665720  | 23665989  | 270 |
| chr29 | 48624100  | 48624369  | 270 |
| chr29 | 7652401   | 7652670   | 270 |

|       |               |           |     |
|-------|---------------|-----------|-----|
| chr27 | 35858388      | 35858657  | 270 |
| chr25 | 40885425      | 40885694  | 270 |
| chr24 | 48335260      | 48335529  | 270 |
| chr24 | 40814970      | 40815239  | 270 |
| chr22 | 53994348      | 53994617  | 270 |
| chr22 | 12307922      | 12308191  | 270 |
| chr20 | 60491073      | 60491342  | 270 |
| chr2  | 132486358     | 132486627 | 270 |
| chr2  | 76567279      | 76567548  | 270 |
| chr2  | 76547973      | 76548242  | 270 |
| chr19 | 31494660      | 31494929  | 270 |
| chr19 | 30405611      | 30405880  | 270 |
| chr19 | 24174468      | 24174737  | 270 |
| chr19 | 21602637      | 21602906  | 270 |
| chr19 | 13553465      | 13553734  | 270 |
| chr19 | 6532929       | 6533198   | 270 |
| chr18 | 57312999      | 57313268  | 270 |
| chr18 | 56887738      | 56888007  | 270 |
| chr17 | 63467256      | 63467525  | 270 |
| chr17 | 62216743      | 62217012  | 270 |
| chr17 | 53529452      | 53529721  | 270 |
| chr15 | 53941323      | 53941592  | 270 |
| chr15 | 21482882      | 21483151  | 270 |
| chr13 | 72593291      | 72593560  | 270 |
| chr13 | 58929787      | 58930056  | 270 |
| chr12 | 31020029      | 31020298  | 270 |
| chr11 | 109680536     | 109680805 | 270 |
| chr11 | 108035205     | 108035474 | 270 |
| chr11 | 98375889      | 98376158  | 270 |
| chr11 | 74963607      | 74963876  | 270 |
| chr11 | 49851397      | 49851666  | 270 |
| chr10 | 90438885      | 90439154  | 270 |
| chr10 | 16988181      | 16988450  | 270 |
| chr1  | 647265 647534 | 270       | 270 |
| chrX  | 55995746      | 55996014  | 269 |
| chr9  | 106853025     | 106853293 | 269 |
| chr9  | 106834283     | 106834551 | 269 |
| chr9  | 77334474      | 77334742  | 269 |
| chr9  | 52951017      | 52951285  | 269 |
| chr8  | 10830556      | 10830824  | 269 |
| chr8  | 8105753       | 8106021   | 269 |
| chr7  | 38401276      | 38401544  | 269 |
| chr7  | 18718401      | 18718669  | 269 |
| chr5  | 125343436     | 125343704 | 269 |
| chr5  | 118253042     | 118253310 | 269 |
| chr5  | 113568461     | 113568729 | 269 |
| chr5  | 61076926      | 61077194  | 269 |
| chr29 | 49600928      | 49601196  | 269 |
| chr29 | 48777628      | 48777896  | 269 |
| chr26 | 42184366      | 42184634  | 269 |

|       |           |           |     |
|-------|-----------|-----------|-----|
| chr25 | 37494334  | 37494602  | 269 |
| chr21 | 57148539  | 57148807  | 269 |
| chr20 | 39643402  | 39643670  | 269 |
| chr20 | 4962391   | 4962659   | 269 |
| chr19 | 61505971  | 61506239  | 269 |
| chr19 | 42149606  | 42149874  | 269 |
| chr19 | 23971131  | 23971399  | 269 |
| chr19 | 12136043  | 12136311  | 269 |
| chr18 | 39575510  | 39575778  | 269 |
| chr17 | 49586412  | 49586680  | 269 |
| chr15 | 81684895  | 81685163  | 269 |
| chr14 | 7404050   | 7404318   | 269 |
| chr13 | 60070111  | 60070379  | 269 |
| chr13 | 28358469  | 28358737  | 269 |
| chr13 | 22183747  | 22184015  | 269 |
| chr12 | 25117327  | 25117595  | 269 |
| chr12 | 15166589  | 15166857  | 269 |
| chr11 | 106409681 | 106409949 | 269 |
| chr11 | 768388    | 768656    | 269 |
| chr10 | 42651850  | 42652118  | 269 |
| chr1  | 101566012 | 101566280 | 269 |
| chr9  | 104884902 | 104885169 | 268 |
| chr8  | 29351686  | 29351953  | 268 |
| chr6  | 7715264   | 7715531   | 268 |
| chr5  | 111862474 | 111862741 | 268 |
| chr4  | 115912280 | 115912547 | 268 |
| chr4  | 98808183  | 98808450  | 268 |
| chr29 | 38826004  | 38826271  | 268 |
| chr29 | 36454723  | 36454990  | 268 |
| chr27 | 35367868  | 35368135  | 268 |
| chr27 | 26326631  | 26326898  | 268 |
| chr25 | 22234781  | 22235048  | 268 |
| chr25 | 2961222   | 2961489   | 268 |
| chr23 | 30354670  | 30354937  | 268 |
| chr22 | 61479934  | 61480201  | 268 |
| chr22 | 57310243  | 57310510  | 268 |
| chr21 | 28072156  | 28072423  | 268 |
| chr19 | 63878244  | 63878511  | 268 |
| chr19 | 46793626  | 46793893  | 268 |
| chr19 | 38556286  | 38556553  | 268 |
| chr19 | 37873643  | 37873910  | 268 |
| chr17 | 60579759  | 60580026  | 268 |
| chr16 | 60343189  | 60343456  | 268 |
| chr16 | 59048541  | 59048808  | 268 |
| chr15 | 74869722  | 74869989  | 268 |
| chr15 | 22199329  | 22199596  | 268 |
| chr11 | 13924935  | 13925202  | 268 |
| chr10 | 83568287  | 83568554  | 268 |
| chr10 | 47538188  | 47538455  | 268 |
| chr10 | 16924139  | 16924406  | 268 |

|       |               |           |     |
|-------|---------------|-----------|-----|
| chr1  | 147170079     | 147170346 | 268 |
| chr1  | 69596831      | 69597098  | 268 |
| chr1  | 68831379      | 68831646  | 268 |
| chr1  | 1612855       | 1613122   | 268 |
| chr9  | 105903471     | 105903737 | 267 |
| chr9  | 104472001     | 104472267 | 267 |
| chr8  | 92345880      | 92346146  | 267 |
| chr8  | 79966203      | 79966469  | 267 |
| chr5  | 114973132     | 114973398 | 267 |
| chr5  | 113942145     | 113942411 | 267 |
| chr5  | 81559512      | 81559778  | 267 |
| chr5  | 80629008      | 80629274  | 267 |
| chr5  | 47201183      | 47201449  | 267 |
| chr3  | 98035606      | 98035872  | 267 |
| chr29 | 51342761      | 51343027  | 267 |
| chr29 | 1557359       | 1557625   | 267 |
| chr28 | 27246554      | 27246820  | 267 |
| chr26 | 40500367      | 40500633  | 267 |
| chr26 | 37895714      | 37895980  | 267 |
| chr24 | 36874832      | 36875098  | 267 |
| chr23 | 13407765      | 13408031  | 267 |
| chr23 | 11811297      | 11811563  | 267 |
| chr21 | 66716542      | 66716808  | 267 |
| chr21 | 65723548      | 65723814  | 267 |
| chr21 | 64469382      | 64469648  | 267 |
| chr21 | 20721885      | 20722151  | 267 |
| chr21 | 20188765      | 20189031  | 267 |
| chr20 | 489918 490184 | 267       |     |
| chr2  | 136608151     | 136608417 | 267 |
| chr19 | 56315147      | 56315413  | 267 |
| chr19 | 39321184      | 39321450  | 267 |
| chr19 | 23126204      | 23126470  | 267 |
| chr18 | 51509005      | 51509271  | 267 |
| chr18 | 22709275      | 22709541  | 267 |
| chr18 | 18695910      | 18696176  | 267 |
| chr17 | 57783451      | 57783717  | 267 |
| chr16 | 73969965      | 73970231  | 267 |
| chr15 | 75233138      | 75233404  | 267 |
| chr15 | 74533086      | 74533352  | 267 |
| chr15 | 31964015      | 31964281  | 267 |
| chr14 | 76284786      | 76285052  | 267 |
| chr14 | 75290102      | 75290368  | 267 |
| chr14 | 61589949      | 61590215  | 267 |
| chr14 | 19324989      | 19325255  | 267 |
| chr14 | 6859243       | 6859509   | 267 |
| chr13 | 77685958      | 77686224  | 267 |
| chr13 | 75805955      | 75806221  | 267 |
| chr13 | 38254085      | 38254351  | 267 |
| chr12 | 33357883      | 33358149  | 267 |
| chr12 | 30768744      | 30769010  | 267 |

|       |           |           |     |
|-------|-----------|-----------|-----|
| chr11 | 108005638 | 108005904 | 267 |
| chr11 | 106349882 | 106350148 | 267 |
| chr11 | 100916739 | 100917005 | 267 |
| chr11 | 93770180  | 93770446  | 267 |
| chr11 | 71756428  | 71756694  | 267 |
| chr11 | 48617862  | 48618128  | 267 |
| chr10 | 80788104  | 80788370  | 267 |
| chr10 | 13029796  | 13030062  | 267 |
| chr1  | 145695306 | 145695572 | 267 |
| chr8  | 60200325  | 60200590  | 266 |
| chr7  | 46203993  | 46204258  | 266 |
| chr6  | 101899814 | 101900079 | 266 |
| chr4  | 106674383 | 106674648 | 266 |
| chr3  | 110217996 | 110218261 | 266 |
| chr3  | 105123225 | 105123490 | 266 |
| chr3  | 18289107  | 18289372  | 266 |
| chr28 | 43990273  | 43990538  | 266 |
| chr27 | 26133475  | 26133740  | 266 |
| chr26 | 48377184  | 48377449  | 266 |
| chr26 | 47953185  | 47953450  | 266 |
| chr26 | 43661820  | 43662085  | 266 |
| chr26 | 43441698  | 43441963  | 266 |
| chr26 | 22179192  | 22179457  | 266 |
| chr25 | 35813033  | 35813298  | 266 |
| chr25 | 35410531  | 35410796  | 266 |
| chr25 | 33609940  | 33610205  | 266 |
| chr24 | 49252127  | 49252392  | 266 |
| chr23 | 8062152   | 8062417   | 266 |
| chr22 | 51264092  | 51264357  | 266 |
| chr22 | 48113133  | 48113398  | 266 |
| chr21 | 58520460  | 58520725  | 266 |
| chr21 | 48669529  | 48669794  | 266 |
| chr21 | 32955518  | 32955783  | 266 |
| chr21 | 10000828  | 10001093  | 266 |
| chr20 | 8770189   | 8770454   | 266 |
| chr2  | 22507270  | 22507535  | 266 |
| chr19 | 39103997  | 39104262  | 266 |
| chr19 | 25430060  | 25430325  | 266 |
| chr19 | 6723344   | 6723609   | 266 |
| chr18 | 40772890  | 40773155  | 266 |
| chr18 | 24154437  | 24154702  | 266 |
| chr17 | 52166275  | 52166540  | 266 |
| chr16 | 2708470   | 2708735   | 266 |
| chr15 | 26772674  | 26772939  | 266 |
| chr13 | 15799817  | 15800082  | 266 |
| chr12 | 35107604  | 35107869  | 266 |
| chr11 | 96824053  | 96824318  | 266 |
| chr11 | 82355772  | 82356037  | 266 |
| chr11 | 14084479  | 14084744  | 266 |
| chr10 | 90139066  | 90139331  | 266 |

|       |               |           |     |
|-------|---------------|-----------|-----|
| chr10 | 36608480      | 36608745  | 266 |
| chr10 | 32245122      | 32245387  | 266 |
| chr1  | 82642831      | 82643096  | 266 |
| chrX  | 75444719      | 75444983  | 265 |
| chr9  | 84240508      | 84240772  | 265 |
| chr9  | 35995377      | 35995641  | 265 |
| chr8  | 108788493     | 108788757 | 265 |
| chr8  | 72509387      | 72509651  | 265 |
| chr8  | 7542870       | 7543134   | 265 |
| chr7  | 5297869       | 5298133   | 265 |
| chr6  | 32569490      | 32569754  | 265 |
| chr4  | 117039508     | 117039772 | 265 |
| chr3  | 114232374     | 114232638 | 265 |
| chr3  | 108041327     | 108041591 | 265 |
| chr3  | 36293300      | 36293564  | 265 |
| chr3  | 35591467      | 35591731  | 265 |
| chr3  | 8977020       | 8977284   | 265 |
| chr29 | 50000940      | 50001204  | 265 |
| chr28 | 12438950      | 12439214  | 265 |
| chr26 | 22807337      | 22807601  | 265 |
| chr25 | 26729833      | 26730097  | 265 |
| chr25 | 8609918       | 8610182   | 265 |
| chr23 | 13596008      | 13596272  | 265 |
| chr22 | 58642584      | 58642848  | 265 |
| chr22 | 12912335      | 12912599  | 265 |
| chr2  | 139236155     | 139236419 | 265 |
| chr2  | 132361098     | 132361362 | 265 |
| chr19 | 54309806      | 54310070  | 265 |
| chr19 | 37848021      | 37848285  | 265 |
| chr18 | 50050521      | 50050785  | 265 |
| chr18 | 3989243       | 3989507   | 265 |
| chr17 | 70360070      | 70360334  | 265 |
| chr17 | 70165050      | 70165314  | 265 |
| chr16 | 68891223      | 68891487  | 265 |
| chr16 | 39071859      | 39072123  | 265 |
| chr15 | 76178526      | 76178790  | 265 |
| chr15 | 74369217      | 74369481  | 265 |
| chr13 | 80816892      | 80817156  | 265 |
| chr13 | 43850746      | 43851010  | 265 |
| chr11 | 109674131     | 109674395 | 265 |
| chr11 | 44952901      | 44953165  | 265 |
| chr1  | 375869 376133 | 265       |     |
| chr9  | 89640897      | 89641160  | 264 |
| chr9  | 14568354      | 14568617  | 264 |
| chr8  | 108645730     | 108645993 | 264 |
| chr8  | 104049442     | 104049705 | 264 |
| chr8  | 60304609      | 60304872  | 264 |
| chr7  | 13092336      | 13092599  | 264 |
| chr6  | 120844855     | 120845118 | 264 |
| chr5  | 123140528     | 123140791 | 264 |

|       |               |           |     |
|-------|---------------|-----------|-----|
| chr4  | 95643269      | 95643532  | 264 |
| chr3  | 126851012     | 126851275 | 264 |
| chr3  | 121183926     | 121184189 | 264 |
| chr29 | 18207566      | 18207829  | 264 |
| chr27 | 34829512      | 34829775  | 264 |
| chr25 | 26316264      | 26316527  | 264 |
| chr24 | 64116838      | 64117101  | 264 |
| chr21 | 59479711      | 59479974  | 264 |
| chr21 | 19246076      | 19246339  | 264 |
| chr20 | 731996 732259 | 264       |     |
| chr2  | 110212589     | 110212852 | 264 |
| chr2  | 99040601      | 99040864  | 264 |
| chr2  | 75598776      | 75599039  | 264 |
| chr19 | 58698781      | 58699044  | 264 |
| chr19 | 46832579      | 46832842  | 264 |
| chr19 | 43362729      | 43362992  | 264 |
| chr19 | 39415888      | 39416151  | 264 |
| chr19 | 39209566      | 39209829  | 264 |
| chr19 | 30420019      | 30420282  | 264 |
| chr19 | 27937702      | 27937965  | 264 |
| chr19 | 15006151      | 15006414  | 264 |
| chr18 | 56674548      | 56674811  | 264 |
| chr18 | 42963325      | 42963588  | 264 |
| chr18 | 33570606      | 33570869  | 264 |
| chr17 | 75470454      | 75470717  | 264 |
| chr16 | 75159653      | 75159916  | 264 |
| chr16 | 47106011      | 47106274  | 264 |
| chr15 | 75168433      | 75168696  | 264 |
| chr15 | 27696980      | 27697243  | 264 |
| chr13 | 80582532      | 80582795  | 264 |
| chr13 | 68948317      | 68948580  | 264 |
| chr13 | 37407265      | 37407528  | 264 |
| chr13 | 34373950      | 34374213  | 264 |
| chr13 | 15965803      | 15966066  | 264 |
| chr13 | 14947643      | 14947906  | 264 |
| chr12 | 83923420      | 83923683  | 264 |
| chr12 | 68405442      | 68405705  | 264 |
| chr12 | 14702417      | 14702680  | 264 |
| chr12 | 10227814      | 10228077  | 264 |
| chr12 | 9118902       | 9119165   | 264 |
| chr11 | 48580837      | 48581100  | 264 |
| chr11 | 9237428       | 9237691   | 264 |
| chr10 | 12759107      | 12759370  | 264 |
| chr1  | 153298661     | 153298924 | 264 |
| chr1  | 133443363     | 133443626 | 264 |
| chr1  | 99069116      | 99069379  | 264 |
| chr8  | 24797827      | 24798089  | 263 |
| chr8  | 24338755      | 24339017  | 263 |
| chr8  | 23052395      | 23052657  | 263 |
| chr7  | 3126253       | 3126515   | 263 |

|       |           |           |     |
|-------|-----------|-----------|-----|
| chr6  | 109149266 | 109149528 | 263 |
| chr5  | 120361621 | 120361883 | 263 |
| chr5  | 113480154 | 113480416 | 263 |
| chr5  | 111403289 | 111403551 | 263 |
| chr5  | 35292024  | 35292286  | 263 |
| chr5  | 33875949  | 33876211  | 263 |
| chr5  | 29092916  | 29093178  | 263 |
| chr4  | 122730622 | 122730884 | 263 |
| chr3  | 123165313 | 123165575 | 263 |
| chr3  | 121136588 | 121136850 | 263 |
| chr3  | 105164638 | 105164900 | 263 |
| chr3  | 84523638  | 84523900  | 263 |
| chr3  | 29238265  | 29238527  | 263 |
| chr28 | 40381136  | 40381398  | 263 |
| chr26 | 40175459  | 40175721  | 263 |
| chr25 | 39430572  | 39430834  | 263 |
| chr25 | 39274093  | 39274355  | 263 |
| chr25 | 30649517  | 30649779  | 263 |
| chr25 | 23846087  | 23846349  | 263 |
| chr25 | 10401158  | 10401420  | 263 |
| chr23 | 7893220   | 7893482   | 263 |
| chr22 | 50716723  | 50716985  | 263 |
| chr2  | 134940489 | 134940751 | 263 |
| chr2  | 111372154 | 111372416 | 263 |
| chr2  | 76622640  | 76622902  | 263 |
| chr19 | 47321772  | 47322034  | 263 |
| chr19 | 13945831  | 13946093  | 263 |
| chr18 | 9733690   | 9733952   | 263 |
| chr17 | 70742520  | 70742782  | 263 |
| chr17 | 62377770  | 62378032  | 263 |
| chr17 | 5506753   | 5507015   | 263 |
| chr16 | 2283852   | 2284114   | 263 |
| chr15 | 28727961  | 28728223  | 263 |
| chr15 | 24973861  | 24974123  | 263 |
| chr15 | 22400671  | 22400933  | 263 |
| chr14 | 26693862  | 26694124  | 263 |
| chr13 | 54425368  | 54425630  | 263 |
| chr13 | 37738195  | 37738457  | 263 |
| chr12 | 31303246  | 31303508  | 263 |
| chr11 | 96396638  | 96396900  | 263 |
| chr11 | 76231456  | 76231718  | 263 |
| chr11 | 56739998  | 56740260  | 263 |
| chr11 | 10701283  | 10701545  | 263 |
| chr10 | 90023088  | 90023350  | 263 |
| chr10 | 80095963  | 80096225  | 263 |
| chr10 | 20142917  | 20143179  | 263 |
| chr10 | 8696011   | 8696273   | 263 |
| chr1  | 144013644 | 144013906 | 263 |
| chr1  | 139867161 | 139867423 | 263 |
| chr9  | 38371083  | 38371344  | 262 |



|       |               |           |     |
|-------|---------------|-----------|-----|
| chr8  | 7824647       | 7824908   | 262 |
| chr6  | 120462296     | 120462557 | 262 |
| chr6  | 117863982     | 117864243 | 262 |
| chr5  | 121191582     | 121191843 | 262 |
| chr5  | 91865745      | 91866006  | 262 |
| chr5  | 33931275      | 33931536  | 262 |
| chr4  | 72799467      | 72799728  | 262 |
| chr3  | 127377040     | 127377301 | 262 |
| chr3  | 110182757     | 110183018 | 262 |
| chr29 | 33609442      | 33609703  | 262 |
| chr29 | 17808591      | 17808852  | 262 |
| chr29 | 17230559      | 17230820  | 262 |
| chr28 | 43246462      | 43246723  | 262 |
| chr27 | 31137142      | 31137403  | 262 |
| chr26 | 44866868      | 44867129  | 262 |
| chr26 | 39493830      | 39494091  | 262 |
| chr24 | 59082033      | 59082294  | 262 |
| chr24 | 25453765      | 25454026  | 262 |
| chr24 | 3891054       | 3891315   | 262 |
| chr24 | 957991 958252 | 262       |     |
| chr23 | 31140128      | 31140389  | 262 |
| chr22 | 60433903      | 60434164  | 262 |
| chr21 | 65756435      | 65756696  | 262 |
| chr21 | 55798721      | 55798982  | 262 |
| chr20 | 19070979      | 19071240  | 262 |
| chr20 | 8600119       | 8600380   | 262 |
| chr2  | 139999542     | 139999803 | 262 |
| chr2  | 135120499     | 135120760 | 262 |
| chr2  | 111353753     | 111354014 | 262 |
| chr2  | 110208447     | 110208708 | 262 |
| chr19 | 60682476      | 60682737  | 262 |
| chr19 | 47271010      | 47271271  | 262 |
| chr19 | 46865973      | 46866234  | 262 |
| chr19 | 40652602      | 40652863  | 262 |
| chr19 | 34006359      | 34006620  | 262 |
| chr19 | 7938244       | 7938505   | 262 |
| chr18 | 51760310      | 51760571  | 262 |
| chr17 | 75739300      | 75739561  | 262 |
| chr16 | 46908257      | 46908518  | 262 |
| chr15 | 76415899      | 76416160  | 262 |
| chr15 | 56124255      | 56124516  | 262 |
| chr15 | 26609527      | 26609788  | 262 |
| chr13 | 76031197      | 76031458  | 262 |
| chr13 | 65275896      | 65276157  | 262 |
| chr13 | 62038368      | 62038629  | 262 |
| chr13 | 49390902      | 49391163  | 262 |
| chr13 | 42316872      | 42317133  | 262 |
| chr13 | 22156556      | 22156817  | 262 |
| chr12 | 9252318       | 9252579   | 262 |
| chr10 | 88682366      | 88682627  | 262 |

|       |           |           |     |
|-------|-----------|-----------|-----|
| chr10 | 17388850  | 17389111  | 262 |
| chr1  | 134146094 | 134146355 | 262 |
| chr1  | 99815741  | 99816002  | 262 |
| chrX  | 7052036   | 7052296   | 261 |
| chr9  | 94865394  | 94865654  | 261 |
| chr8  | 77294005  | 77294265  | 261 |
| chr8  | 11308577  | 11308837  | 261 |
| chr7  | 70780380  | 70780640  | 261 |
| chr7  | 51393029  | 51393289  | 261 |
| chr7  | 46674953  | 46675213  | 261 |
| chr7  | 3588328   | 3588588   | 261 |
| chr6  | 113360840 | 113361100 | 261 |
| chr6  | 101071173 | 101071433 | 261 |
| chr5  | 121606495 | 121606755 | 261 |
| chr4  | 69683425  | 69683685  | 261 |
| chr4  | 7594058   | 7594318   | 261 |
| chr3  | 115326470 | 115326730 | 261 |
| chr3  | 77665158  | 77665418  | 261 |
| chr3  | 55864783  | 55865043  | 261 |
| chr3  | 55089507  | 55089767  | 261 |
| chr3  | 33539119  | 33539379  | 261 |
| chr3  | 33044853  | 33045113  | 261 |
| chr29 | 37952621  | 37952881  | 261 |
| chr29 | 36174073  | 36174333  | 261 |
| chr28 | 34189419  | 34189679  | 261 |
| chr28 | 26350691  | 26350951  | 261 |
| chr26 | 43222593  | 43222853  | 261 |
| chr25 | 41207531  | 41207791  | 261 |
| chr25 | 30619728  | 30619988  | 261 |
| chr22 | 57979198  | 57979458  | 261 |
| chr21 | 65638821  | 65639081  | 261 |
| chr2  | 139338216 | 139338476 | 261 |
| chr2  | 124502379 | 124502639 | 261 |
| chr2  | 75685721  | 75685981  | 261 |
| chr2  | 63492042  | 63492302  | 261 |
| chr19 | 58327931  | 58328191  | 261 |
| chr19 | 31655921  | 31656181  | 261 |
| chr18 | 56363935  | 56364195  | 261 |
| chr18 | 56361633  | 56361893  | 261 |
| chr18 | 9811839   | 9812099   | 261 |
| chr16 | 75213740  | 75214000  | 261 |
| chr16 | 67446908  | 67447168  | 261 |
| chr16 | 49986723  | 49986983  | 261 |
| chr16 | 3767265   | 3767525   | 261 |
| chr16 | 1122631   | 1122891   | 261 |
| chr15 | 75287167  | 75287427  | 261 |
| chr15 | 60444531  | 60444791  | 261 |
| chr14 | 34073416  | 34073676  | 261 |
| chr14 | 7852260   | 7852520   | 261 |
| chr13 | 54885327  | 54885587  | 261 |

|       |           |           |     |
|-------|-----------|-----------|-----|
| chr13 | 2454464   | 2454724   | 261 |
| chr12 | 81828435  | 81828695  | 261 |
| chr12 | 30510717  | 30510977  | 261 |
| chr11 | 103659719 | 103659979 | 261 |
| chr11 | 98424151  | 98424411  | 261 |
| chr10 | 102373302 | 102373562 | 261 |
| chr10 | 66943213  | 66943473  | 261 |
| chr10 | 35838229  | 35838489  | 261 |
| chr1  | 62294283  | 62294543  | 261 |
| chr9  | 66536938  | 66537197  | 260 |
| chr9  | 47238556  | 47238815  | 260 |
| chr8  | 90055045  | 90055304  | 260 |
| chr7  | 45959040  | 45959299  | 260 |
| chr7  | 30482652  | 30482911  | 260 |
| chr6  | 122157938 | 122158197 | 260 |
| chr6  | 119375980 | 119376239 | 260 |
| chr5  | 29978798  | 29979057  | 260 |
| chr5  | 26054786  | 26055045  | 260 |
| chr3  | 124075761 | 124076020 | 260 |
| chr3  | 121370836 | 121371095 | 260 |
| chr3  | 113461410 | 113461669 | 260 |
| chr3  | 105548724 | 105548983 | 260 |
| chr3  | 28924350  | 28924609  | 260 |
| chr27 | 26963012  | 26963271  | 260 |
| chr26 | 48748269  | 48748528  | 260 |
| chr25 | 21511492  | 21511751  | 260 |
| chr24 | 48609413  | 48609672  | 260 |
| chr24 | 1154912   | 1155171   | 260 |
| chr23 | 28848101  | 28848360  | 260 |
| chr23 | 18161526  | 18161785  | 260 |
| chr23 | 8499968   | 8500227   | 260 |
| chr22 | 48556331  | 48556590  | 260 |
| chr21 | 67967678  | 67967937  | 260 |
| chr20 | 74032146  | 74032405  | 260 |
| chr2  | 134649970 | 134650229 | 260 |
| chr2  | 111601159 | 111601418 | 260 |
| chr2  | 48914279  | 48914538  | 260 |
| chr19 | 36332233  | 36332492  | 260 |
| chr19 | 30453176  | 30453435  | 260 |
| chr18 | 10686503  | 10686762  | 260 |
| chr17 | 60594742  | 60595001  | 260 |
| chr16 | 2312794   | 2313053   | 260 |
| chr15 | 30504650  | 30504909  | 260 |
| chr15 | 22785722  | 22785981  | 260 |
| chr14 | 12310097  | 12310356  | 260 |
| chr13 | 70015767  | 70016026  | 260 |
| chr13 | 55545113  | 55545372  | 260 |
| chr13 | 41057625  | 41057884  | 260 |
| chr11 | 106540984 | 106541243 | 260 |
| chr11 | 98446214  | 98446473  | 260 |

|       |           |           |     |
|-------|-----------|-----------|-----|
| chr11 | 75306802  | 75307061  | 260 |
| chr11 | 49237351  | 49237610  | 260 |
| chr11 | 30921057  | 30921316  | 260 |
| chrX  | 78510274  | 78510532  | 259 |
| chrX  | 22566115  | 22566373  | 259 |
| chr7  | 14338170  | 14338428  | 259 |
| chr6  | 63037970  | 63038228  | 259 |
| chr5  | 29802461  | 29802719  | 259 |
| chr3  | 109787337 | 109787595 | 259 |
| chr3  | 15380367  | 15380625  | 259 |
| chr29 | 36290957  | 36291215  | 259 |
| chr27 | 26474754  | 26475012  | 259 |
| chr27 | 1338672   | 1338930   | 259 |
| chr25 | 30622542  | 30622800  | 259 |
| chr23 | 6976615   | 6976873   | 259 |
| chr20 | 66473197  | 66473455  | 259 |
| chr2  | 139113485 | 139113743 | 259 |
| chr2  | 134415077 | 134415335 | 259 |
| chr2  | 56951793  | 56952051  | 259 |
| chr19 | 63908610  | 63908868  | 259 |
| chr19 | 58426016  | 58426274  | 259 |
| chr19 | 54693043  | 54693301  | 259 |
| chr19 | 44998458  | 44998716  | 259 |
| chr18 | 23617394  | 23617652  | 259 |
| chr18 | 18066812  | 18067070  | 259 |
| chr18 | 11716347  | 11716605  | 259 |
| chr17 | 66833228  | 66833486  | 259 |
| chr17 | 64302752  | 64303010  | 259 |
| chr16 | 48051179  | 48051437  | 259 |
| chr15 | 32784410  | 32784668  | 259 |
| chr15 | 29221526  | 29221784  | 259 |
| chr15 | 25022976  | 25023234  | 259 |
| chr14 | 32870728  | 32870986  | 259 |
| chr13 | 75372138  | 75372396  | 259 |
| chr13 | 72586620  | 72586878  | 259 |
| chr13 | 58472605  | 58472863  | 259 |
| chr13 | 6627549   | 6627807   | 259 |
| chr11 | 84474627  | 84474885  | 259 |
| chr11 | 74212974  | 74213232  | 259 |
| chr11 | 31086059  | 31086317  | 259 |
| chr11 | 7548475   | 7548733   | 259 |
| chr11 | 7029459   | 7029717   | 259 |
| chr10 | 86863422  | 86863680  | 259 |
| chr1  | 98706911  | 98707169  | 259 |
| chrX  | 13651520  | 13651777  | 258 |
| chr9  | 66931604  | 66931861  | 258 |
| chr8  | 70722296  | 70722553  | 258 |
| chr8  | 64482512  | 64482769  | 258 |
| chr6  | 120794452 | 120794709 | 258 |
| chr6  | 16250499  | 16250756  | 258 |

|       |               |           |     |
|-------|---------------|-----------|-----|
| chr4  | 123334078     | 123334335 | 258 |
| chr4  | 121988178     | 121988435 | 258 |
| chr4  | 119249252     | 119249509 | 258 |
| chr4  | 110857325     | 110857582 | 258 |
| chr4  | 110074531     | 110074788 | 258 |
| chr4  | 51770631      | 51770888  | 258 |
| chr3  | 124886507     | 124886764 | 258 |
| chr3  | 116928348     | 116928605 | 258 |
| chr3  | 115763664     | 115763921 | 258 |
| chr3  | 25719318      | 25719575  | 258 |
| chr29 | 37204117      | 37204374  | 258 |
| chr29 | 35214403      | 35214660  | 258 |
| chr26 | 41862068      | 41862325  | 258 |
| chr25 | 38236766      | 38237023  | 258 |
| chr25 | 2963727       | 2963984   | 258 |
| chr24 | 5538108       | 5538365   | 258 |
| chr23 | 31207508      | 31207765  | 258 |
| chr23 | 14825874      | 14826131  | 258 |
| chr23 | 3337665       | 3337922   | 258 |
| chr21 | 68925507      | 68925764  | 258 |
| chr21 | 64497838      | 64498095  | 258 |
| chr21 | 64453657      | 64453914  | 258 |
| chr21 | 62229642      | 62229899  | 258 |
| chr20 | 62689444      | 62689701  | 258 |
| chr20 | 8756746       | 8757003   | 258 |
| chr2  | 131003612     | 131003869 | 258 |
| chr2  | 75734476      | 75734733  | 258 |
| chr19 | 24701230      | 24701487  | 258 |
| chr19 | 20388241      | 20388498  | 258 |
| chr18 | 54619189      | 54619446  | 258 |
| chr18 | 39516749      | 39517006  | 258 |
| chr18 | 39223653      | 39223910  | 258 |
| chr18 | 11559662      | 11559919  | 258 |
| chr17 | 70503742      | 70503999  | 258 |
| chr17 | 34342614      | 34342871  | 258 |
| chr16 | 71096026      | 71096283  | 258 |
| chr16 | 38814491      | 38814748  | 258 |
| chr15 | 75211899      | 75212156  | 258 |
| chr15 | 26628805      | 26629062  | 258 |
| chr14 | 64389855      | 64390112  | 258 |
| chr14 | 9716668       | 9716925   | 258 |
| chr14 | 862764 863021 | 258       | 258 |
| chr13 | 54990367      | 54990624  | 258 |
| chr12 | 82550339      | 82550596  | 258 |
| chr12 | 32862367      | 32862624  | 258 |
| chr12 | 25010593      | 25010850  | 258 |
| chr11 | 74592936      | 74593193  | 258 |
| chr11 | 29239229      | 29239486  | 258 |
| chr10 | 83866377      | 83866634  | 258 |
| chr10 | 71889285      | 71889542  | 258 |

|       |               |           |     |
|-------|---------------|-----------|-----|
| chr1  | 152360820     | 152361077 | 258 |
| chr6  | 121785152     | 121785408 | 257 |
| chr6  | 121025395     | 121025651 | 257 |
| chr6  | 63741585      | 63741841  | 257 |
| chr6  | 59070660      | 59070916  | 257 |
| chr5  | 112442184     | 112442440 | 257 |
| chr4  | 121522114     | 121522370 | 257 |
| chr3  | 124435036     | 124435292 | 257 |
| chr3  | 124135473     | 124135729 | 257 |
| chr3  | 36906978      | 36907234  | 257 |
| chr29 | 46028712      | 46028968  | 257 |
| chr28 | 30535676      | 30535932  | 257 |
| chr28 | 25161076      | 25161332  | 257 |
| chr27 | 29103225      | 29103481  | 257 |
| chr26 | 48841774      | 48842030  | 257 |
| chr26 | 34841246      | 34841502  | 257 |
| chr25 | 37869115      | 37869371  | 257 |
| chr25 | 35385677      | 35385933  | 257 |
| chr25 | 22544280      | 22544536  | 257 |
| chr24 | 22047754      | 22048010  | 257 |
| chr24 | 1985267       | 1985523   | 257 |
| chr23 | 11883396      | 11883652  | 257 |
| chr22 | 53348357      | 53348613  | 257 |
| chr21 | 66765355      | 66765611  | 257 |
| chr21 | 57598825      | 57599081  | 257 |
| chr21 | 27269475      | 27269731  | 257 |
| chr19 | 58753163      | 58753419  | 257 |
| chr19 | 56510715      | 56510971  | 257 |
| chr19 | 43159886      | 43160142  | 257 |
| chr19 | 25412262      | 25412518  | 257 |
| chr19 | 25048524      | 25048780  | 257 |
| chr19 | 12499141      | 12499397  | 257 |
| chr18 | 13140893      | 13141149  | 257 |
| chr18 | 6983263       | 6983519   | 257 |
| chr16 | 47424383      | 47424639  | 257 |
| chr16 | 47204950      | 47205206  | 257 |
| chr15 | 28578037      | 28578293  | 257 |
| chr14 | 62355816      | 62356072  | 257 |
| chr13 | 70112200      | 70112456  | 257 |
| chr13 | 69692366      | 69692622  | 257 |
| chr13 | 57206187      | 57206443  | 257 |
| chr13 | 22165255      | 22165511  | 257 |
| chr12 | 31240190      | 31240446  | 257 |
| chr11 | 12873749      | 12874005  | 257 |
| chr11 | 799834 800090 | 257       |     |
| chr10 | 20011820      | 20012076  | 257 |
| chr1  | 158766948     | 158767204 | 257 |
| chr1  | 59611737      | 59611993  | 257 |
| chrX  | 42820428      | 42820683  | 256 |
| chr9  | 100485280     | 100485535 | 256 |

|       |           |           |     |
|-------|-----------|-----------|-----|
| chr9  | 52924563  | 52924818  | 256 |
| chr7  | 70784534  | 70784789  | 256 |
| chr7  | 50607525  | 50607780  | 256 |
| chr7  | 38204761  | 38205016  | 256 |
| chr5  | 118466873 | 118467128 | 256 |
| chr4  | 123280233 | 123280488 | 256 |
| chr4  | 24238824  | 24239079  | 256 |
| chr4  | 14630750  | 14631005  | 256 |
| chr3  | 123295053 | 123295308 | 256 |
| chr3  | 109786934 | 109787189 | 256 |
| chr3  | 22596481  | 22596736  | 256 |
| chr3  | 17467629  | 17467884  | 256 |
| chr27 | 48017602  | 48017857  | 256 |
| chr24 | 51462716  | 51462971  | 256 |
| chr24 | 48011409  | 48011664  | 256 |
| chr24 | 41732577  | 41732832  | 256 |
| chr22 | 50789990  | 50790245  | 256 |
| chr22 | 44837189  | 44837444  | 256 |
| chr21 | 34528015  | 34528270  | 256 |
| chr21 | 20651060  | 20651315  | 256 |
| chr20 | 4908957   | 4909212   | 256 |
| chr2  | 127244840 | 127245095 | 256 |
| chr2  | 126733299 | 126733554 | 256 |
| chr19 | 54987017  | 54987272  | 256 |
| chr19 | 52822726  | 52822981  | 256 |
| chr19 | 45177270  | 45177525  | 256 |
| chr19 | 40506009  | 40506264  | 256 |
| chr19 | 38285064  | 38285319  | 256 |
| chr19 | 37808570  | 37808825  | 256 |
| chr19 | 31490451  | 31490706  | 256 |
| chr19 | 25505468  | 25505723  | 256 |
| chr19 | 25298985  | 25299240  | 256 |
| chr19 | 10931037  | 10931292  | 256 |
| chr18 | 63580490  | 63580745  | 256 |
| chr18 | 53260645  | 53260900  | 256 |
| chr18 | 49118283  | 49118538  | 256 |
| chr18 | 7592950   | 7593205   | 256 |
| chr17 | 57569155  | 57569410  | 256 |
| chr16 | 46967739  | 46967994  | 256 |
| chr16 | 44364817  | 44365072  | 256 |
| chr15 | 33769687  | 33769942  | 256 |
| chr14 | 41749807  | 41750062  | 256 |
| chr13 | 61225002  | 61225257  | 256 |
| chr13 | 39282922  | 39283177  | 256 |
| chr13 | 31475203  | 31475458  | 256 |
| chr13 | 15896757  | 15897012  | 256 |
| chr11 | 88176806  | 88177061  | 256 |
| chr11 | 75105272  | 75105527  | 256 |
| chr11 | 66566408  | 66566663  | 256 |
| chr11 | 48780987  | 48781242  | 256 |

|       |               |           |     |
|-------|---------------|-----------|-----|
| chr11 | 29163748      | 29164003  | 256 |
| chr11 | 23130376      | 23130631  | 256 |
| chr11 | 10784340      | 10784595  | 256 |
| chr10 | 70150035      | 70150290  | 256 |
| chr10 | 36381900      | 36382155  | 256 |
| chr10 | 17246170      | 17246425  | 256 |
| chr10 | 17237377      | 17237632  | 256 |
| chr8  | 74342725      | 74342979  | 255 |
| chr8  | 54651541      | 54651795  | 255 |
| chr8  | 8157416       | 8157670   | 255 |
| chr5  | 117770917     | 117771171 | 255 |
| chr5  | 111084052     | 111084306 | 255 |
| chr4  | 110160338     | 110160592 | 255 |
| chr4  | 8909686       | 8909940   | 255 |
| chr3  | 29598000      | 29598254  | 255 |
| chr29 | 48868911      | 48869165  | 255 |
| chr29 | 44133704      | 44133958  | 255 |
| chr29 | 17789683      | 17789937  | 255 |
| chr26 | 48160970      | 48161224  | 255 |
| chr25 | 43253395      | 43253649  | 255 |
| chr24 | 63387700      | 63387954  | 255 |
| chr24 | 1957110       | 1957364   | 255 |
| chr23 | 28037818      | 28038072  | 255 |
| chr23 | 27840623      | 27840877  | 255 |
| chr23 | 22776606      | 22776860  | 255 |
| chr23 | 10516756      | 10517010  | 255 |
| chr22 | 56283002      | 56283256  | 255 |
| chr22 | 17586517      | 17586771  | 255 |
| chr21 | 61786350      | 61786604  | 255 |
| chr21 | 60384909      | 60385163  | 255 |
| chr21 | 29046107      | 29046361  | 255 |
| chr20 | 44301478      | 44301732  | 255 |
| chr20 | 3308615       | 3308869   | 255 |
| chr20 | 857936 858190 | 255       | 255 |
| chr19 | 61110230      | 61110484  | 255 |
| chr19 | 46693295      | 46693549  | 255 |
| chr19 | 41922983      | 41923237  | 255 |
| chr19 | 36355349      | 36355603  | 255 |
| chr19 | 31958931      | 31959185  | 255 |
| chr19 | 30818950      | 30819204  | 255 |
| chr19 | 11815741      | 11815995  | 255 |
| chr19 | 8396429       | 8396683   | 255 |
| chr18 | 45030715      | 45030969  | 255 |
| chr18 | 4042777       | 4043031   | 255 |
| chr17 | 70313895      | 70314149  | 255 |
| chr17 | 54370721      | 54370975  | 255 |
| chr16 | 47406334      | 47406588  | 255 |
| chr16 | 25958758      | 25959012  | 255 |
| chr15 | 75289790      | 75290044  | 255 |
| chr15 | 75210205      | 75210459  | 255 |



|       |               |           |     |
|-------|---------------|-----------|-----|
| chr15 | 56045677      | 56045931  | 255 |
| chr15 | 22250081      | 22250335  | 255 |
| chr15 | 6405320       | 6405574   | 255 |
| chr13 | 63253651      | 63253905  | 255 |
| chr13 | 46315631      | 46315885  | 255 |
| chr13 | 18503649      | 18503903  | 255 |
| chr12 | 84134161      | 84134415  | 255 |
| chr12 | 75465790      | 75466044  | 255 |
| chr12 | 32129100      | 32129354  | 255 |
| chr11 | 72006549      | 72006803  | 255 |
| chr11 | 11622918      | 11623172  | 255 |
| chr11 | 7320370       | 7320624   | 255 |
| chr10 | 103694375     | 103694629 | 255 |
| chr10 | 74684036      | 74684290  | 255 |
| chr1  | 145279339     | 145279593 | 255 |
| chr1  | 128260361     | 128260615 | 255 |
| chr1  | 3063696       | 3063950   | 255 |
| chrX  | 22949307      | 22949560  | 254 |
| chr9  | 36072151      | 36072404  | 254 |
| chr8  | 116704977     | 116705230 | 254 |
| chr8  | 103922440     | 103922693 | 254 |
| chr8  | 84967672      | 84967925  | 254 |
| chr8  | 24669725      | 24669978  | 254 |
| chr8  | 8116974       | 8117227   | 254 |
| chr7  | 111191210     | 111191463 | 254 |
| chr6  | 105330677     | 105330930 | 254 |
| chr6  | 59358447      | 59358700  | 254 |
| chr5  | 121376800     | 121377053 | 254 |
| chr5  | 112271201     | 112271454 | 254 |
| chr3  | 125662546     | 125662799 | 254 |
| chr3  | 123470587     | 123470840 | 254 |
| chr3  | 116925928     | 116926181 | 254 |
| chr3  | 114930226     | 114930479 | 254 |
| chr3  | 15772098      | 15772351  | 254 |
| chr27 | 21766512      | 21766765  | 254 |
| chr26 | 21817809      | 21818062  | 254 |
| chr23 | 41813555      | 41813808  | 254 |
| chr23 | 18452010      | 18452263  | 254 |
| chr22 | 14929184      | 14929437  | 254 |
| chr21 | 31147740      | 31147993  | 254 |
| chr2  | 134722725     | 134722978 | 254 |
| chr19 | 37964021      | 37964274  | 254 |
| chr19 | 26918772      | 26919025  | 254 |
| chr19 | 12377884      | 12378137  | 254 |
| chr18 | 11847739      | 11847992  | 254 |
| chr18 | 11474888      | 11475141  | 254 |
| chr18 | 647578 647831 | 254       |     |
| chr17 | 37620332      | 37620585  | 254 |
| chr17 | 6481247       | 6481500   | 254 |
| chr16 | 67764132      | 67764385  | 254 |

|       |               |           |     |
|-------|---------------|-----------|-----|
| chr16 | 47968372      | 47968625  | 254 |
| chr16 | 44525072      | 44525325  | 254 |
| chr15 | 81028983      | 81029236  | 254 |
| chr15 | 64766164      | 64766417  | 254 |
| chr15 | 29437739      | 29437992  | 254 |
| chr15 | 21229539      | 21229792  | 254 |
| chr14 | 1516550       | 1516803   | 254 |
| chr13 | 77790911      | 77791164  | 254 |
| chr13 | 77594999      | 77595252  | 254 |
| chr13 | 77226696      | 77226949  | 254 |
| chr13 | 75702898      | 75703151  | 254 |
| chr13 | 70049277      | 70049530  | 254 |
| chr12 | 84323972      | 84324225  | 254 |
| chr12 | 82307184      | 82307437  | 254 |
| chr12 | 74241640      | 74241893  | 254 |
| chr11 | 109779375     | 109779628 | 254 |
| chr11 | 102018984     | 102019237 | 254 |
| chr11 | 14226979      | 14227232  | 254 |
| chr11 | 2550943       | 2551196   | 254 |
| chr10 | 47393353      | 47393606  | 254 |
| chr1  | 133436662     | 133436915 | 254 |
| chr1  | 84400709      | 84400962  | 254 |
| chr1  | 68427672      | 68427925  | 254 |
| chr1  | 481851 482104 | 254       |     |
| chr9  | 99932811      | 99933063  | 253 |
| chr8  | 94377387      | 94377639  | 253 |
| chr7  | 44016901      | 44017153  | 253 |
| chr7  | 38516226      | 38516478  | 253 |
| chr7  | 21162183      | 21162435  | 253 |
| chr5  | 111322568     | 111322820 | 253 |
| chr5  | 108751710     | 108751962 | 253 |
| chr5  | 60312375      | 60312627  | 253 |
| chr4  | 95734918      | 95735170  | 253 |
| chr3  | 115015880     | 115016132 | 253 |
| chr29 | 35017769      | 35018021  | 253 |
| chr29 | 31967025      | 31967277  | 253 |
| chr29 | 29937638      | 29937890  | 253 |
| chr28 | 24779316      | 24779568  | 253 |
| chr26 | 44930727      | 44930979  | 253 |
| chr26 | 37937258      | 37937510  | 253 |
| chr26 | 31362462      | 31362714  | 253 |
| chr25 | 34378224      | 34378476  | 253 |
| chr23 | 15841915      | 15842167  | 253 |
| chr23 | 6793851       | 6794103   | 253 |
| chr22 | 30074252      | 30074504  | 253 |
| chr22 | 12364322      | 12364574  | 253 |
| chr21 | 30691911      | 30692163  | 253 |
| chr21 | 15364783      | 15365035  | 253 |
| chr20 | 74789926      | 74790178  | 253 |
| chr20 | 6213214       | 6213466   | 253 |

|       |           |           |     |
|-------|-----------|-----------|-----|
| chr2  | 134968987 | 134969239 | 253 |
| chr19 | 39949113  | 39949365  | 253 |
| chr19 | 15962806  | 15963058  | 253 |
| chr19 | 12522787  | 12523039  | 253 |
| chr18 | 14681522  | 14681774  | 253 |
| chr16 | 47999516  | 47999768  | 253 |
| chr16 | 42870733  | 42870985  | 253 |
| chr15 | 57825903  | 57826155  | 253 |
| chr15 | 51708899  | 51709151  | 253 |
| chr15 | 39576154  | 39576406  | 253 |
| chr15 | 21503313  | 21503565  | 253 |
| chr14 | 23188611  | 23188863  | 253 |
| chr13 | 77419903  | 77420155  | 253 |
| chr13 | 76176249  | 76176501  | 253 |
| chr13 | 75614274  | 75614526  | 253 |
| chr13 | 40321297  | 40321549  | 253 |
| chr11 | 77571050  | 77571302  | 253 |
| chr11 | 70870692  | 70870944  | 253 |
| chr11 | 14107175  | 14107427  | 253 |
| chr11 | 5916807   | 5917059   | 253 |
| chr10 | 21118168  | 21118420  | 253 |
| chr10 | 17733265  | 17733517  | 253 |
| chr10 | 7608682   | 7608934   | 253 |
| chr1  | 82924542  | 82924794  | 253 |
| chr9  | 107188026 | 107188277 | 252 |
| chr7  | 17333866  | 17334117  | 252 |
| chr6  | 121705414 | 121705665 | 252 |
| chr6  | 20762821  | 20763072  | 252 |
| chr5  | 123434509 | 123434760 | 252 |
| chr5  | 112219154 | 112219405 | 252 |
| chr5  | 67818018  | 67818269  | 252 |
| chr4  | 29029253  | 29029504  | 252 |
| chr3  | 85943310  | 85943561  | 252 |
| chr3  | 9191407   | 9191658   | 252 |
| chr29 | 45792165  | 45792416  | 252 |
| chr29 | 17694765  | 17695016  | 252 |
| chr28 | 25217156  | 25217407  | 252 |
| chr26 | 39618764  | 39619015  | 252 |
| chr25 | 40096400  | 40096651  | 252 |
| chr24 | 48628056  | 48628307  | 252 |
| chr23 | 48514726  | 48514977  | 252 |
| chr22 | 55327056  | 55327307  | 252 |
| chr22 | 44874087  | 44874338  | 252 |
| chr21 | 69104095  | 69104346  | 252 |
| chr2  | 4017675   | 4017926   | 252 |
| chr19 | 39380729  | 39380980  | 252 |
| chr19 | 25518459  | 25518710  | 252 |
| chr19 | 23969574  | 23969825  | 252 |
| chr19 | 12495693  | 12495944  | 252 |
| chr18 | 56080230  | 56080481  | 252 |

|       |           |           |     |
|-------|-----------|-----------|-----|
| chr18 | 2253174   | 2253425   | 252 |
| chr17 | 74460901  | 74461152  | 252 |
| chr13 | 77173013  | 77173264  | 252 |
| chr13 | 63648255  | 63648506  | 252 |
| chr12 | 74488922  | 74489173  | 252 |
| chr11 | 103789210 | 103789461 | 252 |
| chr11 | 97742048  | 97742299  | 252 |
| chr11 | 71099434  | 71099685  | 252 |
| chr10 | 15073443  | 15073694  | 252 |
| chr8  | 78487833  | 78488083  | 251 |
| chr8  | 7411777   | 7412027   | 251 |
| chr5  | 113479847 | 113480097 | 251 |
| chr5  | 60891671  | 60891921  | 251 |
| chr4  | 65383729  | 65383979  | 251 |
| chr4  | 53160741  | 53160991  | 251 |
| chr3  | 126155449 | 126155699 | 251 |
| chr3  | 123746646 | 123746896 | 251 |
| chr3  | 99815984  | 99816234  | 251 |
| chr3  | 35986601  | 35986851  | 251 |
| chr3  | 35650098  | 35650348  | 251 |
| chr3  | 23623017  | 23623267  | 251 |
| chr3  | 4487903   | 4488153   | 251 |
| chr29 | 38893214  | 38893464  | 251 |
| chr28 | 41293352  | 41293602  | 251 |
| chr28 | 31313472  | 31313722  | 251 |
| chr28 | 13221513  | 13221763  | 251 |
| chr28 | 3222843   | 3223093   | 251 |
| chr27 | 6193971   | 6194221   | 251 |
| chr26 | 48654675  | 48654925  | 251 |
| chr26 | 42001555  | 42001805  | 251 |
| chr26 | 22401370  | 22401620  | 251 |
| chr25 | 35698178  | 35698428  | 251 |
| chr25 | 31092137  | 31092387  | 251 |
| chr24 | 49364043  | 49364293  | 251 |
| chr24 | 49025923  | 49026173  | 251 |
| chr24 | 21922550  | 21922800  | 251 |
| chr23 | 14748813  | 14749063  | 251 |
| chr22 | 12986027  | 12986277  | 251 |
| chr21 | 20234075  | 20234325  | 251 |
| chr21 | 15602630  | 15602880  | 251 |
| chr20 | 60336880  | 60337130  | 251 |
| chr20 | 21009563  | 21009813  | 251 |
| chr2  | 110212232 | 110212482 | 251 |
| chr19 | 49394807  | 49395057  | 251 |
| chr18 | 53086474  | 53086724  | 251 |
| chr17 | 67038006  | 67038256  | 251 |
| chr16 | 67434716  | 67434966  | 251 |
| chr16 | 67204056  | 67204306  | 251 |
| chr15 | 74543520  | 74543770  | 251 |
| chr15 | 52289276  | 52289526  | 251 |

|       |           |           |     |
|-------|-----------|-----------|-----|
| chr15 | 29387568  | 29387818  | 251 |
| chr13 | 78066860  | 78067110  | 251 |
| chr13 | 77252011  | 77252261  | 251 |
| chr13 | 62930564  | 62930814  | 251 |
| chr13 | 59654917  | 59655167  | 251 |
| chr13 | 41495230  | 41495480  | 251 |
| chr12 | 33624207  | 33624457  | 251 |
| chr11 | 84107996  | 84108246  | 251 |
| chr10 | 79255664  | 79255914  | 251 |
| chr10 | 50556707  | 50556957  | 251 |
| chr10 | 16765272  | 16765522  | 251 |
| chr1  | 149248941 | 149249191 | 251 |
| chr1  | 119934417 | 119934667 | 251 |
| chr1  | 73122955  | 73123205  | 251 |
| chrX  | 30001628  | 30001877  | 250 |
| chr9  | 75093914  | 75094163  | 250 |
| chr8  | 10183348  | 10183597  | 250 |
| chr7  | 62560853  | 62561102  | 250 |
| chr5  | 122820323 | 122820572 | 250 |
| chr5  | 121340448 | 121340697 | 250 |
| chr5  | 28745104  | 28745353  | 250 |
| chr4  | 98747035  | 98747284  | 250 |
| chr4  | 96246088  | 96246337  | 250 |
| chr4  | 72799202  | 72799451  | 250 |
| chr3  | 125194721 | 125194970 | 250 |
| chr3  | 113238515 | 113238764 | 250 |
| chr3  | 106510680 | 106510929 | 250 |
| chr29 | 48839987  | 48840236  | 250 |
| chr28 | 26968323  | 26968572  | 250 |
| chr26 | 49107422  | 49107671  | 250 |
| chr25 | 37272425  | 37272674  | 250 |
| chr24 | 59058210  | 59058459  | 250 |
| chr23 | 7621237   | 7621486   | 250 |
| chr22 | 58551565  | 58551814  | 250 |
| chr22 | 30026785  | 30027034  | 250 |
| chr21 | 67631155  | 67631404  | 250 |
| chr21 | 34558331  | 34558580  | 250 |
| chr20 | 44419136  | 44419385  | 250 |
| chr2  | 138708148 | 138708397 | 250 |
| chr2  | 131310375 | 131310624 | 250 |
| chr19 | 58938140  | 58938389  | 250 |
| chr19 | 52052026  | 52052275  | 250 |
| chr19 | 51676158  | 51676407  | 250 |
| chr19 | 46725769  | 46726018  | 250 |
| chr18 | 51017821  | 51018070  | 250 |
| chr18 | 50833520  | 50833769  | 250 |
| chr18 | 45948826  | 45949075  | 250 |
| chr18 | 40709905  | 40710154  | 250 |
| chr18 | 12617502  | 12617751  | 250 |
| chr18 | 11846355  | 11846604  | 250 |

|       |               |           |     |
|-------|---------------|-----------|-----|
| chr18 | 7192134       | 7192383   | 250 |
| chr18 | 6313745       | 6313994   | 250 |
| chr17 | 64926836      | 64927085  | 250 |
| chr16 | 57110215      | 57110464  | 250 |
| chr16 | 47042413      | 47042662  | 250 |
| chr16 | 861194 861443 | 250       |     |
| chr15 | 62386152      | 62386401  | 250 |
| chr14 | 40822542      | 40822791  | 250 |
| chr13 | 84225632      | 84225881  | 250 |
| chr13 | 77290401      | 77290650  | 250 |
| chr13 | 57570505      | 57570754  | 250 |
| chr13 | 37533584      | 37533833  | 250 |
| chr12 | 74518974      | 74519223  | 250 |
| chr11 | 108414226     | 108414475 | 250 |
| chr11 | 106359891     | 106360140 | 250 |
| chr11 | 81021852      | 81022101  | 250 |
| chr11 | 10774323      | 10774572  | 250 |
| chr11 | 9592996       | 9593245   | 250 |
| chr10 | 79572776      | 79573025  | 250 |
| chr10 | 46969541      | 46969790  | 250 |
| chr10 | 20847974      | 20848223  | 250 |
| chr9  | 100487824     | 100488072 | 249 |
| chr9  | 90394356      | 90394604  | 249 |
| chr9  | 47254900      | 47255148  | 249 |
| chr8  | 73185072      | 73185320  | 249 |
| chr8  | 68033612      | 68033860  | 249 |
| chr7  | 57569841      | 57570089  | 249 |
| chr7  | 44065299      | 44065547  | 249 |
| chr7  | 19307680      | 19307928  | 249 |
| chr7  | 10568949      | 10569197  | 249 |
| chr7  | 2534820       | 2535068   | 249 |
| chr6  | 121739112     | 121739360 | 249 |
| chr6  | 121236692     | 121236940 | 249 |
| chr6  | 120772851     | 120773099 | 249 |
| chr5  | 121642237     | 121642485 | 249 |
| chr5  | 120246406     | 120246654 | 249 |
| chr5  | 118366814     | 118367062 | 249 |
| chr5  | 117527791     | 117528039 | 249 |
| chr5  | 113465259     | 113465507 | 249 |
| chr5  | 111677492     | 111677740 | 249 |
| chr5  | 30474993      | 30475241  | 249 |
| chr4  | 105072147     | 105072395 | 249 |
| chr4  | 95618140      | 95618388  | 249 |
| chr3  | 122329520     | 122329768 | 249 |
| chr3  | 118067462     | 118067710 | 249 |
| chr3  | 111672836     | 111673084 | 249 |
| chr3  | 29656144      | 29656392  | 249 |
| chr29 | 51170067      | 51170315  | 249 |
| chr29 | 46330707      | 46330955  | 249 |
| chr29 | 37266133      | 37266381  | 249 |

|       |               |           |     |
|-------|---------------|-----------|-----|
| chr26 | 41727527      | 41727775  | 249 |
| chr26 | 20120141      | 20120389  | 249 |
| chr25 | 44002357      | 44002605  | 249 |
| chr25 | 39476789      | 39477037  | 249 |
| chr24 | 29703062      | 29703310  | 249 |
| chr23 | 52045708      | 52045956  | 249 |
| chr23 | 44553585      | 44553833  | 249 |
| chr23 | 30545259      | 30545507  | 249 |
| chr23 | 8382458       | 8382706   | 249 |
| chr22 | 59270208      | 59270456  | 249 |
| chr22 | 52570262      | 52570510  | 249 |
| chr22 | 38495306      | 38495554  | 249 |
| chr21 | 65804613      | 65804861  | 249 |
| chr20 | 536168 536416 |           | 249 |
| chr2  | 111226363     | 111226611 | 249 |
| chr19 | 59064398      | 59064646  | 249 |
| chr19 | 58072463      | 58072711  | 249 |
| chr19 | 22838238      | 22838486  | 249 |
| chr18 | 62008578      | 62008826  | 249 |
| chr18 | 33643768      | 33644016  | 249 |
| chr18 | 32681500      | 32681748  | 249 |
| chr17 | 62079914      | 62080162  | 249 |
| chr16 | 77647365      | 77647613  | 249 |
| chr16 | 38649787      | 38650035  | 249 |
| chr16 | 31592085      | 31592333  | 249 |
| chr15 | 74149198      | 74149446  | 249 |
| chr15 | 32287744      | 32287992  | 249 |
| chr15 | 30488376      | 30488624  | 249 |
| chr13 | 60191148      | 60191396  | 249 |
| chr13 | 55709672      | 55709920  | 249 |
| chr13 | 55460118      | 55460366  | 249 |
| chr13 | 40808547      | 40808795  | 249 |
| chr13 | 40110254      | 40110502  | 249 |
| chr12 | 81954607      | 81954855  | 249 |
| chr12 | 32949729      | 32949977  | 249 |
| chr11 | 84641935      | 84642183  | 249 |
| chr11 | 25857711      | 25857959  | 249 |
| chr10 | 90944300      | 90944548  | 249 |
| chr10 | 89217183      | 89217431  | 249 |
| chr10 | 16996517      | 16996765  | 249 |
| chr1  | 150340644     | 150340892 | 249 |
| chr9  | 106183931     | 106184178 | 248 |
| chr9  | 78496124      | 78496371  | 248 |
| chr9  | 62525152      | 62525399  | 248 |
| chr8  | 65181799      | 65182046  | 248 |
| chr8  | 7780370       | 7780617   | 248 |
| chr8  | 7531823       | 7532070   | 248 |
| chr7  | 18788437      | 18788684  | 248 |
| chr5  | 113286428     | 113286675 | 248 |
| chr5  | 33049628      | 33049875  | 248 |

|       |               |           |     |
|-------|---------------|-----------|-----|
| chr3  | 56566329      | 56566576  | 248 |
| chr3  | 16044551      | 16044798  | 248 |
| chr29 | 48375454      | 48375701  | 248 |
| chr29 | 35480081      | 35480328  | 248 |
| chr29 | 10009343      | 10009590  | 248 |
| chr26 | 18153943      | 18154190  | 248 |
| chr25 | 36452093      | 36452340  | 248 |
| chr24 | 2956260       | 2956507   | 248 |
| chr24 | 785981 786228 | 248       | 248 |
| chr23 | 20001102      | 20001349  | 248 |
| chr23 | 9736621       | 9736868   | 248 |
| chr22 | 30073298      | 30073545  | 248 |
| chr21 | 64515223      | 64515470  | 248 |
| chr21 | 27928488      | 27928735  | 248 |
| chr2  | 136662930     | 136663177 | 248 |
| chr2  | 134446029     | 134446276 | 248 |
| chr2  | 75954384      | 75954631  | 248 |
| chr2  | 5582261       | 5582508   | 248 |
| chr19 | 54362242      | 54362489  | 248 |
| chr19 | 47371612      | 47371859  | 248 |
| chr19 | 21700681      | 21700928  | 248 |
| chr18 | 56820899      | 56821146  | 248 |
| chr18 | 51001480      | 51001727  | 248 |
| chr18 | 48859053      | 48859300  | 248 |
| chr18 | 23604342      | 23604589  | 248 |
| chr18 | 11826529      | 11826776  | 248 |
| chr17 | 62178974      | 62179221  | 248 |
| chr15 | 66117243      | 66117490  | 248 |
| chr15 | 29880115      | 29880362  | 248 |
| chr15 | 29449177      | 29449424  | 248 |
| chr15 | 29206350      | 29206597  | 248 |
| chr15 | 26764001      | 26764248  | 248 |
| chr13 | 75645882      | 75646129  | 248 |
| chr13 | 72600895      | 72601142  | 248 |
| chr13 | 59418184      | 59418431  | 248 |
| chr13 | 59208822      | 59209069  | 248 |
| chr13 | 58906582      | 58906829  | 248 |
| chr12 | 35582888      | 35583135  | 248 |
| chr12 | 33622742      | 33622989  | 248 |
| chr11 | 77612867      | 77613114  | 248 |
| chr11 | 50629214      | 50629461  | 248 |
| chr10 | 105265290     | 105265537 | 248 |
| chr10 | 7324596       | 7324843   | 248 |
| chr1  | 101564467     | 101564714 | 248 |
| chr9  | 70496738      | 70496984  | 247 |
| chr9  | 47256763      | 47257009  | 247 |
| chr8  | 11003674      | 11003920  | 247 |
| chr7  | 42226500      | 42226746  | 247 |
| chr5  | 116940040     | 116940286 | 247 |
| chr5  | 103607137     | 103607383 | 247 |



|       |           |           |     |
|-------|-----------|-----------|-----|
| chr5  | 35289115  | 35289361  | 247 |
| chr5  | 30553454  | 30553700  | 247 |
| chr4  | 117842989 | 117843235 | 247 |
| chr4  | 68011669  | 68011915  | 247 |
| chr3  | 116035184 | 116035430 | 247 |
| chr29 | 48783414  | 48783660  | 247 |
| chr29 | 48180109  | 48180355  | 247 |
| chr29 | 44641501  | 44641747  | 247 |
| chr28 | 43283431  | 43283677  | 247 |
| chr25 | 43500921  | 43501167  | 247 |
| chr25 | 36748604  | 36748850  | 247 |
| chr25 | 29126117  | 29126363  | 247 |
| chr24 | 35511271  | 35511517  | 247 |
| chr23 | 28777496  | 28777742  | 247 |
| chr23 | 13039016  | 13039262  | 247 |
| chr22 | 12185290  | 12185536  | 247 |
| chr21 | 59755834  | 59756080  | 247 |
| chr21 | 59242743  | 59242989  | 247 |
| chr21 | 25350535  | 25350781  | 247 |
| chr20 | 2567595   | 2567841   | 247 |
| chr2  | 41316828  | 41317074  | 247 |
| chr19 | 61285185  | 61285431  | 247 |
| chr19 | 39848715  | 39848961  | 247 |
| chr19 | 33440182  | 33440428  | 247 |
| chr19 | 21317397  | 21317643  | 247 |
| chr17 | 73118195  | 73118441  | 247 |
| chr17 | 70549451  | 70549697  | 247 |
| chr16 | 45906654  | 45906900  | 247 |
| chr15 | 29210227  | 29210473  | 247 |
| chr14 | 61319027  | 61319273  | 247 |
| chr14 | 10265324  | 10265570  | 247 |
| chr14 | 6806514   | 6806760   | 247 |
| chr14 | 1751067   | 1751313   | 247 |
| chr13 | 77169972  | 77170218  | 247 |
| chr13 | 74712729  | 74712975  | 247 |
| chr13 | 41788345  | 41788591  | 247 |
| chr13 | 40989425  | 40989671  | 247 |
| chr12 | 84953568  | 84953814  | 247 |
| chr12 | 30963065  | 30963311  | 247 |
| chr12 | 10831387  | 10831633  | 247 |
| chr11 | 14113970  | 14114216  | 247 |
| chr11 | 9291670   | 9291916   | 247 |
| chr10 | 50627020  | 50627266  | 247 |
| chr10 | 17265372  | 17265618  | 247 |
| chr9  | 106537248 | 106537493 | 246 |
| chr7  | 59631159  | 59631404  | 246 |
| chr7  | 51605784  | 51606029  | 246 |
| chr6  | 120901754 | 120901999 | 246 |
| chr6  | 63187151  | 63187396  | 246 |
| chr5  | 125337461 | 125337706 | 246 |

|       |           |           |     |
|-------|-----------|-----------|-----|
| chr5  | 113074222 | 113074467 | 246 |
| chr5  | 110783618 | 110783863 | 246 |
| chr5  | 32850896  | 32851141  | 246 |
| chr5  | 29154335  | 29154580  | 246 |
| chr4  | 99279551  | 99279796  | 246 |
| chr3  | 123223102 | 123223347 | 246 |
| chr3  | 34399408  | 34399653  | 246 |
| chr29 | 47306717  | 47306962  | 246 |
| chr28 | 27054564  | 27054809  | 246 |
| chr28 | 4978425   | 4978670   | 246 |
| chr27 | 46115166  | 46115411  | 246 |
| chr27 | 35359546  | 35359791  | 246 |
| chr25 | 34195481  | 34195726  | 246 |
| chr24 | 51574760  | 51575005  | 246 |
| chr24 | 48967540  | 48967785  | 246 |
| chr24 | 43639064  | 43639309  | 246 |
| chr21 | 26808274  | 26808519  | 246 |
| chr21 | 15843709  | 15843954  | 246 |
| chr20 | 1133424   | 1133669   | 246 |
| chr2  | 133661517 | 133661762 | 246 |
| chr2  | 131793216 | 131793461 | 246 |
| chr19 | 45807247  | 45807492  | 246 |
| chr19 | 37906979  | 37907224  | 246 |
| chr19 | 31229494  | 31229739  | 246 |
| chr19 | 27989550  | 27989795  | 246 |
| chr18 | 52693975  | 52694220  | 246 |
| chr18 | 50928044  | 50928289  | 246 |
| chr18 | 39988551  | 39988796  | 246 |
| chr17 | 63436468  | 63436713  | 246 |
| chr17 | 48993984  | 48994229  | 246 |
| chr17 | 44377276  | 44377521  | 246 |
| chr16 | 57533899  | 57534144  | 246 |
| chr16 | 26501327  | 26501572  | 246 |
| chr15 | 74904653  | 74904898  | 246 |
| chr15 | 74599721  | 74599966  | 246 |
| chr15 | 74453856  | 74454101  | 246 |
| chr15 | 21357350  | 21357595  | 246 |
| chr15 | 19800008  | 19800253  | 246 |
| chr14 | 9214164   | 9214409   | 246 |
| chr13 | 67851604  | 67851849  | 246 |
| chr13 | 59613852  | 59614097  | 246 |
| chr12 | 84261676  | 84261921  | 246 |
| chr12 | 80841165  | 80841410  | 246 |
| chr12 | 27588767  | 27589012  | 246 |
| chr11 | 72714958  | 72715203  | 246 |
| chr10 | 24181136  | 24181381  | 246 |
| chr10 | 18335799  | 18336044  | 246 |
| chr10 | 14889109  | 14889354  | 246 |
| chr10 | 7349109   | 7349354   | 246 |
| chr10 | 4849373   | 4849618   | 246 |

|       |               |           |     |
|-------|---------------|-----------|-----|
| chr9  | 100077236     | 100077480 | 245 |
| chr9  | 63343556      | 63343800  | 245 |
| chr8  | 74329722      | 74329966  | 245 |
| chr8  | 24708042      | 24708286  | 245 |
| chr6  | 59496375      | 59496619  | 245 |
| chr5  | 124641960     | 124642204 | 245 |
| chr5  | 124387229     | 124387473 | 245 |
| chr5  | 112181091     | 112181335 | 245 |
| chr5  | 79795649      | 79795893  | 245 |
| chr3  | 125559100     | 125559344 | 245 |
| chr3  | 123223536     | 123223780 | 245 |
| chr3  | 122047424     | 122047668 | 245 |
| chr29 | 36575152      | 36575396  | 245 |
| chr29 | 34293392      | 34293636  | 245 |
| chr29 | 26754860      | 26755104  | 245 |
| chr28 | 42572853      | 42573097  | 245 |
| chr28 | 7127796       | 7128040   | 245 |
| chr27 | 710238 710482 | 245       |     |
| chr26 | 20224061      | 20224305  | 245 |
| chr26 | 9543116       | 9543360   | 245 |
| chr25 | 37328711      | 37328955  | 245 |
| chr24 | 60823764      | 60824008  | 245 |
| chr24 | 21962684      | 21962928  | 245 |
| chr23 | 13654316      | 13654560  | 245 |
| chr23 | 8853896       | 8854140   | 245 |
| chr21 | 34001454      | 34001698  | 245 |
| chr19 | 59010663      | 59010907  | 245 |
| chr19 | 45772706      | 45772950  | 245 |
| chr19 | 44872083      | 44872327  | 245 |
| chr19 | 37956391      | 37956635  | 245 |
| chr19 | 16967404      | 16967648  | 245 |
| chr18 | 55201795      | 55202039  | 245 |
| chr18 | 52329841      | 52330085  | 245 |
| chr18 | 15580500      | 15580744  | 245 |
| chr18 | 11347729      | 11347973  | 245 |
| chr17 | 54463255      | 54463499  | 245 |
| chr16 | 49371245      | 49371489  | 245 |
| chr15 | 62574416      | 62574660  | 245 |
| chr14 | 42140304      | 42140548  | 245 |
| chr13 | 41032205      | 41032449  | 245 |
| chr13 | 37797566      | 37797810  | 245 |
| chr12 | 30768498      | 30768742  | 245 |
| chr12 | 11888831      | 11889075  | 245 |
| chr11 | 104898315     | 104898559 | 245 |
| chr11 | 83876933      | 83877177  | 245 |
| chr11 | 28667640      | 28667884  | 245 |
| chr11 | 2687538       | 2687782   | 245 |
| chr10 | 66521957      | 66522201  | 245 |
| chr10 | 36369550      | 36369794  | 245 |
| chr1  | 101478076     | 101478320 | 245 |

|       |           |           |     |
|-------|-----------|-----------|-----|
| chr1  | 1690110   | 1690354   | 245 |
| chr9  | 84354951  | 84355194  | 244 |
| chr7  | 42200272  | 42200515  | 244 |
| chr7  | 10207866  | 10208109  | 244 |
| chr6  | 107234905 | 107235148 | 244 |
| chr5  | 121675285 | 121675528 | 244 |
| chr5  | 121427854 | 121428097 | 244 |
| chr5  | 118241671 | 118241914 | 244 |
| chr5  | 117498406 | 117498649 | 244 |
| chr5  | 115754252 | 115754495 | 244 |
| chr4  | 116767743 | 116767986 | 244 |
| chr4  | 64297130  | 64297373  | 244 |
| chr3  | 121883751 | 121883994 | 244 |
| chr3  | 118027786 | 118028029 | 244 |
| chr3  | 35638268  | 35638511  | 244 |
| chr29 | 6562063   | 6562306   | 244 |
| chr28 | 26958904  | 26959147  | 244 |
| chr27 | 46044537  | 46044780  | 244 |
| chr27 | 23641824  | 23642067  | 244 |
| chr26 | 22021282  | 22021525  | 244 |
| chr26 | 21627828  | 21628071  | 244 |
| chr26 | 15398970  | 15399213  | 244 |
| chr26 | 8720105   | 8720348   | 244 |
| chr25 | 29672910  | 29673153  | 244 |
| chr24 | 43630714  | 43630957  | 244 |
| chr24 | 39305489  | 39305732  | 244 |
| chr24 | 31089110  | 31089353  | 244 |
| chr23 | 27061456  | 27061699  | 244 |
| chr23 | 25836894  | 25837137  | 244 |
| chr23 | 14830392  | 14830635  | 244 |
| chr21 | 25349805  | 25350048  | 244 |
| chr21 | 9435586   | 9435829   | 244 |
| chr20 | 74096811  | 74097054  | 244 |
| chr20 | 72733595  | 72733838  | 244 |
| chr20 | 67489325  | 67489568  | 244 |
| chr20 | 6591077   | 6591320   | 244 |
| chr2  | 134895073 | 134895316 | 244 |
| chr2  | 128016708 | 128016951 | 244 |
| chr2  | 74857650  | 74857893  | 244 |
| chr2  | 29494951  | 29495194  | 244 |
| chr19 | 38264085  | 38264328  | 244 |
| chr19 | 7635676   | 7635919   | 244 |
| chr18 | 63774988  | 63775231  | 244 |
| chr18 | 10422969  | 10423212  | 244 |
| chr16 | 45044691  | 45044934  | 244 |
| chr15 | 75864273  | 75864516  | 244 |
| chr15 | 25485894  | 25486137  | 244 |
| chr15 | 24961376  | 24961619  | 244 |
| chr14 | 61744541  | 61744784  | 244 |
| chr13 | 71482077  | 71482320  | 244 |

|       |           |           |     |
|-------|-----------|-----------|-----|
| chr12 | 75250596  | 75250839  | 244 |
| chr11 | 107259139 | 107259382 | 244 |
| chr11 | 75092239  | 75092482  | 244 |
| chr11 | 68917917  | 68918160  | 244 |
| chr11 | 21638975  | 21639218  | 244 |
| chr11 | 12907062  | 12907305  | 244 |
| chr10 | 20959074  | 20959317  | 244 |
| chr10 | 12897442  | 12897685  | 244 |
| chr1  | 149439812 | 149440055 | 244 |
| chr9  | 52829740  | 52829982  | 243 |
| chr7  | 48465136  | 48465378  | 243 |
| chr5  | 117209902 | 117210144 | 243 |
| chr5  | 112557733 | 112557975 | 243 |
| chr5  | 28801016  | 28801258  | 243 |
| chr3  | 62010314  | 62010556  | 243 |
| chr28 | 33881165  | 33881407  | 243 |
| chr27 | 46113659  | 46113901  | 243 |
| chr26 | 48367952  | 48368194  | 243 |
| chr26 | 19946823  | 19947065  | 243 |
| chr25 | 33609174  | 33609416  | 243 |
| chr24 | 59047455  | 59047697  | 243 |
| chr24 | 49365364  | 49365606  | 243 |
| chr24 | 49301803  | 49302045  | 243 |
| chr24 | 44374652  | 44374894  | 243 |
| chr23 | 49726339  | 49726581  | 243 |
| chr23 | 18608033  | 18608275  | 243 |
| chr23 | 18152883  | 18153125  | 243 |
| chr22 | 61137999  | 61138241  | 243 |
| chr22 | 60407087  | 60407329  | 243 |
| chr22 | 50604027  | 50604269  | 243 |
| chr22 | 50596639  | 50596881  | 243 |
| chr22 | 10747985  | 10748227  | 243 |
| chr21 | 59089530  | 59089772  | 243 |
| chr2  | 134535317 | 134535559 | 243 |
| chr2  | 132402113 | 132402355 | 243 |
| chr2  | 124969695 | 124969937 | 243 |
| chr2  | 115333933 | 115334175 | 243 |
| chr2  | 99789150  | 99789392  | 243 |
| chr19 | 60911628  | 60911870  | 243 |
| chr19 | 47318482  | 47318724  | 243 |
| chr19 | 23146151  | 23146393  | 243 |
| chr18 | 54937279  | 54937521  | 243 |
| chr18 | 48375005  | 48375247  | 243 |
| chr18 | 29579115  | 29579357  | 243 |
| chr18 | 18664250  | 18664492  | 243 |
| chr17 | 70165750  | 70165992  | 243 |
| chr17 | 63038978  | 63039220  | 243 |
| chr17 | 60968812  | 60969054  | 243 |
| chr16 | 32740154  | 32740396  | 243 |
| chr15 | 26863434  | 26863676  | 243 |

|       |           |           |     |
|-------|-----------|-----------|-----|
| chr15 | 21532285  | 21532527  | 243 |
| chr14 | 57318694  | 57318936  | 243 |
| chr14 | 22083860  | 22084102  | 243 |
| chr13 | 77408356  | 77408598  | 243 |
| chr13 | 54506140  | 54506382  | 243 |
| chr13 | 14366584  | 14366826  | 243 |
| chr12 | 12413666  | 12413908  | 243 |
| chr11 | 98932425  | 98932667  | 243 |
| chr11 | 81630361  | 81630603  | 243 |
| chr11 | 29136011  | 29136253  | 243 |
| chr10 | 81591279  | 81591521  | 243 |
| chr10 | 25583968  | 25584210  | 243 |
| chr10 | 15011231  | 15011473  | 243 |
| chr1  | 161078098 | 161078340 | 243 |
| chr1  | 6316297   | 6316539   | 243 |
| chr9  | 92061397  | 92061638  | 242 |
| chr8  | 80074588  | 80074829  | 242 |
| chr8  | 73813995  | 73814236  | 242 |
| chr7  | 51389835  | 51390076  | 242 |
| chr7  | 23343820  | 23344061  | 242 |
| chr7  | 16670783  | 16671024  | 242 |
| chr5  | 120098767 | 120099008 | 242 |
| chr5  | 113128001 | 113128242 | 242 |
| chr5  | 30206030  | 30206271  | 242 |
| chr4  | 121411457 | 121411698 | 242 |
| chr3  | 111421181 | 111421422 | 242 |
| chr3  | 55883510  | 55883751  | 242 |
| chr29 | 50561684  | 50561925  | 242 |
| chr29 | 48520519  | 48520760  | 242 |
| chr29 | 37246391  | 37246632  | 242 |
| chr29 | 25939806  | 25940047  | 242 |
| chr28 | 33733554  | 33733795  | 242 |
| chr27 | 35942203  | 35942444  | 242 |
| chr27 | 26723718  | 26723959  | 242 |
| chr25 | 1363521   | 1363762   | 242 |
| chr23 | 43151771  | 43152012  | 242 |
| chr22 | 60149076  | 60149317  | 242 |
| chr21 | 56004635  | 56004876  | 242 |
| chr2  | 140626718 | 140626959 | 242 |
| chr2  | 138621248 | 138621489 | 242 |
| chr2  | 136942467 | 136942708 | 242 |
| chr2  | 128367970 | 128368211 | 242 |
| chr2  | 126023456 | 126023697 | 242 |
| chr19 | 52860069  | 52860310  | 242 |
| chr18 | 57365447  | 57365688  | 242 |
| chr18 | 26118639  | 26118880  | 242 |
| chr17 | 74227683  | 74227924  | 242 |
| chr17 | 70538285  | 70538526  | 242 |
| chr16 | 47399790  | 47400031  | 242 |
| chr15 | 75732045  | 75732286  | 242 |

|       |           |           |     |
|-------|-----------|-----------|-----|
| chr15 | 66195823  | 66196064  | 242 |
| chr14 | 45349696  | 45349937  | 242 |
| chr14 | 20948909  | 20949150  | 242 |
| chr13 | 53881616  | 53881857  | 242 |
| chr12 | 58684809  | 58685050  | 242 |
| chr11 | 103608855 | 103609096 | 242 |
| chr11 | 70885194  | 70885435  | 242 |
| chr11 | 2328469   | 2328710   | 242 |
| chr10 | 103767311 | 103767552 | 242 |
| chr10 | 48278115  | 48278356  | 242 |
| chr10 | 42694356  | 42694597  | 242 |
| chr10 | 25821899  | 25822140  | 242 |
| chr1  | 147307878 | 147308119 | 242 |
| chr1  | 144502667 | 144502908 | 242 |
| chr1  | 82836387  | 82836628  | 242 |
| chr1  | 82821622  | 82821863  | 242 |
| chr9  | 104826554 | 104826794 | 241 |
| chr9  | 44922283  | 44922523  | 241 |
| chr8  | 7732292   | 7732532   | 241 |
| chr7  | 3962559   | 3962799   | 241 |
| chr6  | 63185980  | 63186220  | 241 |
| chr5  | 10705049  | 10705289  | 241 |
| chr4  | 68293862  | 68294102  | 241 |
| chr3  | 121364698 | 121364938 | 241 |
| chr3  | 118035978 | 118036218 | 241 |
| chr3  | 105153291 | 105153531 | 241 |
| chr28 | 25527730  | 25527970  | 241 |
| chr27 | 48075412  | 48075652  | 241 |
| chr27 | 34675667  | 34675907  | 241 |
| chr27 | 30623507  | 30623747  | 241 |
| chr26 | 48420707  | 48420947  | 241 |
| chr26 | 48335697  | 48335937  | 241 |
| chr26 | 44545235  | 44545475  | 241 |
| chr26 | 22764753  | 22764993  | 241 |
| chr23 | 7623874   | 7624114   | 241 |
| chr22 | 54409421  | 54409661  | 241 |
| chr21 | 47569302  | 47569542  | 241 |
| chr21 | 21080971  | 21081211  | 241 |
| chr20 | 59449905  | 59450145  | 241 |
| chr20 | 5298710   | 5298950   | 241 |
| chr20 | 4964604   | 4964844   | 241 |
| chr2  | 122258547 | 122258787 | 241 |
| chr2  | 116937767 | 116938007 | 241 |
| chr2  | 110785167 | 110785407 | 241 |
| chr2  | 92739293  | 92739533  | 241 |
| chr2  | 37514343  | 37514583  | 241 |
| chr19 | 51666061  | 51666301  | 241 |
| chr18 | 51152214  | 51152454  | 241 |
| chr18 | 43599914  | 43600154  | 241 |
| chr18 | 33086880  | 33087120  | 241 |

|       |           |           |     |
|-------|-----------|-----------|-----|
| chr18 | 13533983  | 13534223  | 241 |
| chr18 | 13260365  | 13260605  | 241 |
| chr17 | 64838748  | 64838988  | 241 |
| chr17 | 54526179  | 54526419  | 241 |
| chr16 | 54213688  | 54213928  | 241 |
| chr13 | 79901425  | 79901665  | 241 |
| chr13 | 71191196  | 71191436  | 241 |
| chr13 | 53812006  | 53812246  | 241 |
| chr13 | 45377956  | 45378196  | 241 |
| chr11 | 106276021 | 106276261 | 241 |
| chr11 | 105938059 | 105938299 | 241 |
| chr11 | 104996201 | 104996441 | 241 |
| chr11 | 28665556  | 28665796  | 241 |
| chr10 | 17068616  | 17068856  | 241 |
| chr10 | 5229834   | 5230074   | 241 |
| chr9  | 99992118  | 99992357  | 240 |
| chr9  | 99972286  | 99972525  | 240 |
| chr9  | 35669782  | 35670021  | 240 |
| chr8  | 5371780   | 5372019   | 240 |
| chr7  | 37510768  | 37511007  | 240 |
| chr6  | 117856238 | 117856477 | 240 |
| chr6  | 109307746 | 109307985 | 240 |
| chr5  | 113207295 | 113207534 | 240 |
| chr5  | 112759509 | 112759748 | 240 |
| chr5  | 108975391 | 108975630 | 240 |
| chr5  | 30419479  | 30419718  | 240 |
| chr5  | 29959702  | 29959941  | 240 |
| chr5  | 10777203  | 10777442  | 240 |
| chr4  | 72537640  | 72537879  | 240 |
| chr3  | 125718342 | 125718581 | 240 |
| chr3  | 109792702 | 109792941 | 240 |
| chr3  | 51916674  | 51916913  | 240 |
| chr29 | 44461028  | 44461267  | 240 |
| chr29 | 34260402  | 34260641  | 240 |
| chr26 | 43983767  | 43984006  | 240 |
| chr25 | 43853604  | 43853843  | 240 |
| chr23 | 52820996  | 52821235  | 240 |
| chr23 | 31400949  | 31401188  | 240 |
| chr23 | 27843269  | 27843508  | 240 |
| chr22 | 59601298  | 59601537  | 240 |
| chr22 | 59444208  | 59444447  | 240 |
| chr22 | 30229243  | 30229482  | 240 |
| chr21 | 42445282  | 42445521  | 240 |
| chr21 | 19179509  | 19179748  | 240 |
| chr21 | 6415694   | 6415933   | 240 |
| chr20 | 3538365   | 3538604   | 240 |
| chr2  | 131064305 | 131064544 | 240 |
| chr2  | 67093477  | 67093716  | 240 |
| chr19 | 61288918  | 61289157  | 240 |
| chr19 | 39374532  | 39374771  | 240 |



|       |           |           |     |
|-------|-----------|-----------|-----|
| chr19 | 26273520  | 26273759  | 240 |
| chr19 | 19272031  | 19272270  | 240 |
| chr18 | 35101584  | 35101823  | 240 |
| chr18 | 25303611  | 25303850  | 240 |
| chr18 | 11226509  | 11226748  | 240 |
| chr18 | 9532047   | 9532286   | 240 |
| chr18 | 6927141   | 6927380   | 240 |
| chr16 | 67262340  | 67262579  | 240 |
| chr16 | 39477443  | 39477682  | 240 |
| chr16 | 1443283   | 1443522   | 240 |
| chr15 | 54276327  | 54276566  | 240 |
| chr15 | 40137367  | 40137606  | 240 |
| chr15 | 34347448  | 34347687  | 240 |
| chr15 | 30622546  | 30622785  | 240 |
| chr15 | 26739451  | 26739690  | 240 |
| chr15 | 23213393  | 23213632  | 240 |
| chr13 | 59830552  | 59830791  | 240 |
| chr13 | 38864961  | 38865200  | 240 |
| chr12 | 82616397  | 82616636  | 240 |
| chr12 | 35113617  | 35113856  | 240 |
| chr12 | 32107890  | 32108129  | 240 |
| chr11 | 100876821 | 100877060 | 240 |
| chr11 | 14179206  | 14179445  | 240 |
| chr10 | 86536548  | 86536787  | 240 |
| chr10 | 16828520  | 16828759  | 240 |
| chr1  | 118652278 | 118652517 | 240 |
| chr8  | 92975784  | 92976022  | 239 |
| chr8  | 80608718  | 80608956  | 239 |
| chr7  | 53418444  | 53418682  | 239 |
| chr7  | 13112751  | 13112989  | 239 |
| chr6  | 63387927  | 63388165  | 239 |
| chr5  | 120255567 | 120255805 | 239 |
| chr5  | 35115418  | 35115656  | 239 |
| chr4  | 85074335  | 85074573  | 239 |
| chr3  | 122229588 | 122229826 | 239 |
| chr3  | 15402779  | 15403017  | 239 |
| chr29 | 49968745  | 49968983  | 239 |
| chr29 | 36830657  | 36830895  | 239 |
| chr28 | 40383787  | 40384025  | 239 |
| chr28 | 26837259  | 26837497  | 239 |
| chr26 | 42740593  | 42740831  | 239 |
| chr26 | 14885287  | 14885525  | 239 |
| chr23 | 52867228  | 52867466  | 239 |
| chr23 | 48821767  | 48822005  | 239 |
| chr23 | 48774951  | 48775189  | 239 |
| chr23 | 31430226  | 31430464  | 239 |
| chr23 | 16103391  | 16103629  | 239 |
| chr21 | 28906059  | 28906297  | 239 |
| chr21 | 26533085  | 26533323  | 239 |
| chr21 | 12000220  | 12000458  | 239 |

|       |           |           |     |
|-------|-----------|-----------|-----|
| chr20 | 73275748  | 73275986  | 239 |
| chr20 | 2597389   | 2597627   | 239 |
| chr2  | 21886473  | 21886711  | 239 |
| chr19 | 62593720  | 62593958  | 239 |
| chr19 | 59005143  | 59005381  | 239 |
| chr19 | 54384835  | 54385073  | 239 |
| chr19 | 21784587  | 21784825  | 239 |
| chr18 | 57311627  | 57311865  | 239 |
| chr18 | 49970636  | 49970874  | 239 |
| chr18 | 49466749  | 49466987  | 239 |
| chr18 | 2257589   | 2257827   | 239 |
| chr17 | 70438373  | 70438611  | 239 |
| chr17 | 53423044  | 53423282  | 239 |
| chr16 | 55229005  | 55229243  | 239 |
| chr16 | 39586229  | 39586467  | 239 |
| chr16 | 3114070   | 3114308   | 239 |
| chr15 | 63686301  | 63686539  | 239 |
| chr14 | 68005244  | 68005482  | 239 |
| chr14 | 6103601   | 6103839   | 239 |
| chr13 | 79075801  | 79076039  | 239 |
| chr13 | 62825875  | 62826113  | 239 |
| chr11 | 74968258  | 74968496  | 239 |
| chr11 | 70869079  | 70869317  | 239 |
| chr11 | 11245280  | 11245518  | 239 |
| chr10 | 83974709  | 83974947  | 239 |
| chr10 | 82972375  | 82972613  | 239 |
| chr1  | 84476236  | 84476474  | 239 |
| chr8  | 78820097  | 78820334  | 238 |
| chr8  | 74154241  | 74154478  | 238 |
| chr7  | 95940849  | 95941086  | 238 |
| chr7  | 50884347  | 50884584  | 238 |
| chr5  | 113547321 | 113547558 | 238 |
| chr5  | 69222167  | 69222404  | 238 |
| chr5  | 31230029  | 31230266  | 238 |
| chr5  | 28847694  | 28847931  | 238 |
| chr4  | 123517266 | 123517503 | 238 |
| chr3  | 121403176 | 121403413 | 238 |
| chr3  | 116914813 | 116915050 | 238 |
| chr3  | 108735327 | 108735564 | 238 |
| chr3  | 97899548  | 97899785  | 238 |
| chr3  | 36026727  | 36026964  | 238 |
| chr3  | 8756154   | 8756391   | 238 |
| chr29 | 35508818  | 35509055  | 238 |
| chr26 | 44063517  | 44063754  | 238 |
| chr26 | 20300383  | 20300620  | 238 |
| chr25 | 43538684  | 43538921  | 238 |
| chr25 | 43266474  | 43266711  | 238 |
| chr25 | 40696556  | 40696793  | 238 |
| chr25 | 35104278  | 35104515  | 238 |
| chr24 | 20754514  | 20754751  | 238 |

|       |           |           |     |
|-------|-----------|-----------|-----|
| chr23 | 38018358  | 38018595  | 238 |
| chr23 | 17956469  | 17956706  | 238 |
| chr23 | 13407230  | 13407467  | 238 |
| chr23 | 8265636   | 8265873   | 238 |
| chr23 | 8245713   | 8245950   | 238 |
| chr20 | 8816315   | 8816552   | 238 |
| chr2  | 111873233 | 111873470 | 238 |
| chr2  | 5173807   | 5174044   | 238 |
| chr19 | 45188214  | 45188451  | 238 |
| chr19 | 23746689  | 23746926  | 238 |
| chr19 | 16968036  | 16968273  | 238 |
| chr19 | 7769661   | 7769898   | 238 |
| chr18 | 52688633  | 52688870  | 238 |
| chr18 | 32995991  | 32996228  | 238 |
| chr18 | 22903276  | 22903513  | 238 |
| chr16 | 77605851  | 77606088  | 238 |
| chr16 | 47679200  | 47679437  | 238 |
| chr16 | 47492430  | 47492667  | 238 |
| chr16 | 47226210  | 47226447  | 238 |
| chr15 | 22430550  | 22430787  | 238 |
| chr13 | 77262108  | 77262345  | 238 |
| chr13 | 73911401  | 73911638  | 238 |
| chr13 | 42671591  | 42671828  | 238 |
| chr13 | 14700484  | 14700721  | 238 |
| chr11 | 81605995  | 81606232  | 238 |
| chr10 | 53069352  | 53069589  | 238 |
| chr10 | 17095503  | 17095740  | 238 |
| chr1  | 123121285 | 123121522 | 238 |
| chr1  | 100053207 | 100053444 | 238 |
| chrX  | 80808771  | 80809007  | 237 |
| chr9  | 105825306 | 105825542 | 237 |
| chr8  | 112046527 | 112046763 | 237 |
| chr8  | 72075047  | 72075283  | 237 |
| chr5  | 122136099 | 122136335 | 237 |
| chr5  | 115612787 | 115613023 | 237 |
| chr5  | 115545479 | 115545715 | 237 |
| chr4  | 123446801 | 123447037 | 237 |
| chr4  | 67863215  | 67863451  | 237 |
| chr3  | 116431317 | 116431553 | 237 |
| chr3  | 18097082  | 18097318  | 237 |
| chr29 | 51984234  | 51984470  | 237 |
| chr29 | 44500046  | 44500282  | 237 |
| chr29 | 33912651  | 33912887  | 237 |
| chr27 | 36051479  | 36051715  | 237 |
| chr27 | 27967270  | 27967506  | 237 |
| chr26 | 37880896  | 37881132  | 237 |
| chr24 | 62361109  | 62361345  | 237 |
| chr24 | 41779866  | 41780102  | 237 |
| chr24 | 40590799  | 40591035  | 237 |
| chr23 | 42483222  | 42483458  | 237 |

|       |           |           |     |
|-------|-----------|-----------|-----|
| chr23 | 13541825  | 13542061  | 237 |
| chr22 | 50605551  | 50605787  | 237 |
| chr22 | 49563014  | 49563250  | 237 |
| chr21 | 66207284  | 66207520  | 237 |
| chr21 | 55736495  | 55736731  | 237 |
| chr21 | 21719859  | 21720095  | 237 |
| chr2  | 132413509 | 132413745 | 237 |
| chr2  | 126707637 | 126707873 | 237 |
| chr19 | 54293798  | 54294034  | 237 |
| chr19 | 43630235  | 43630471  | 237 |
| chr19 | 42047858  | 42048094  | 237 |
| chr19 | 39142449  | 39142685  | 237 |
| chr19 | 32863679  | 32863915  | 237 |
| chr19 | 29178512  | 29178748  | 237 |
| chr19 | 23768104  | 23768340  | 237 |
| chr18 | 57378910  | 57379146  | 237 |
| chr18 | 41751402  | 41751638  | 237 |
| chr18 | 17995124  | 17995360  | 237 |
| chr18 | 7216405   | 7216641   | 237 |
| chr17 | 53882252  | 53882488  | 237 |
| chr13 | 82060446  | 82060682  | 237 |
| chr13 | 81083446  | 81083682  | 237 |
| chr12 | 82548843  | 82549079  | 237 |
| chr12 | 74543565  | 74543801  | 237 |
| chr11 | 80217256  | 80217492  | 237 |
| chr10 | 67099955  | 67100191  | 237 |
| chr10 | 45412118  | 45412354  | 237 |
| chr1  | 150937436 | 150937672 | 237 |
| chr9  | 66202275  | 66202510  | 236 |
| chr8  | 80084782  | 80085017  | 236 |
| chr6  | 121876495 | 121876730 | 236 |
| chr5  | 124418849 | 124419084 | 236 |
| chr5  | 118299655 | 118299890 | 236 |
| chr5  | 30282023  | 30282258  | 236 |
| chr4  | 98889015  | 98889250  | 236 |
| chr3  | 10678628  | 10678863  | 236 |
| chr29 | 32659192  | 32659427  | 236 |
| chr28 | 42223877  | 42224112  | 236 |
| chr28 | 33876461  | 33876696  | 236 |
| chr27 | 38492973  | 38493208  | 236 |
| chr26 | 48892929  | 48893164  | 236 |
| chr26 | 34413750  | 34413985  | 236 |
| chr25 | 3019767   | 3020002   | 236 |
| chr25 | 1348783   | 1349018   | 236 |
| chr22 | 57385659  | 57385894  | 236 |
| chr22 | 30421272  | 30421507  | 236 |
| chr22 | 29796160  | 29796395  | 236 |
| chr22 | 16347184  | 16347419  | 236 |
| chr21 | 68048896  | 68049131  | 236 |
| chr21 | 64470960  | 64471195  | 236 |

|       |           |           |     |
|-------|-----------|-----------|-----|
| chr20 | 33669828  | 33670063  | 236 |
| chr19 | 61341938  | 61342173  | 236 |
| chr19 | 58879533  | 58879768  | 236 |
| chr19 | 47106924  | 47107159  | 236 |
| chr19 | 46716526  | 46716761  | 236 |
| chr19 | 44975405  | 44975640  | 236 |
| chr19 | 41211576  | 41211811  | 236 |
| chr19 | 37565324  | 37565559  | 236 |
| chr19 | 27233614  | 27233849  | 236 |
| chr19 | 21317676  | 21317911  | 236 |
| chr19 | 20339261  | 20339496  | 236 |
| chr17 | 74077610  | 74077845  | 236 |
| chr16 | 44647830  | 44648065  | 236 |
| chr16 | 37879658  | 37879893  | 236 |
| chr15 | 83929310  | 83929545  | 236 |
| chr15 | 30361070  | 30361305  | 236 |
| chr14 | 34072469  | 34072704  | 236 |
| chr14 | 1536511   | 1536746   | 236 |
| chr13 | 80682411  | 80682646  | 236 |
| chr13 | 68308734  | 68308969  | 236 |
| chr12 | 84589673  | 84589908  | 236 |
| chr12 | 32137622  | 32137857  | 236 |
| chr12 | 14767302  | 14767537  | 236 |
| chr11 | 108001602 | 108001837 | 236 |
| chr11 | 106303493 | 106303728 | 236 |
| chr11 | 47892417  | 47892652  | 236 |
| chr10 | 37346844  | 37347079  | 236 |
| chr10 | 36287341  | 36287576  | 236 |
| chr10 | 36074213  | 36074448  | 236 |
| chr10 | 19483696  | 19483931  | 236 |
| chr10 | 6065613   | 6065848   | 236 |
| chr10 | 4383954   | 4384189   | 236 |
| chr1  | 146987002 | 146987237 | 236 |
| chr1  | 115686262 | 115686497 | 236 |
| chr9  | 90600036  | 90600270  | 235 |
| chr8  | 80181760  | 80181994  | 235 |
| chr7  | 95736282  | 95736516  | 235 |
| chr7  | 71399799  | 71400033  | 235 |
| chr7  | 19294805  | 19295039  | 235 |
| chr7  | 14678769  | 14679003  | 235 |
| chr7  | 5460442   | 5460676   | 235 |
| chr6  | 59159526  | 59159760  | 235 |
| chr5  | 124371864 | 124372098 | 235 |
| chr5  | 118155502 | 118155736 | 235 |
| chr5  | 113514008 | 113514242 | 235 |
| chr5  | 76732541  | 76732775  | 235 |
| chr3  | 109427310 | 109427544 | 235 |
| chr3  | 55864468  | 55864702  | 235 |
| chr29 | 47272635  | 47272869  | 235 |
| chr29 | 37241242  | 37241476  | 235 |

|       |           |           |     |
|-------|-----------|-----------|-----|
| chr29 | 26751345  | 26751579  | 235 |
| chr28 | 42110687  | 42110921  | 235 |
| chr25 | 27719125  | 27719359  | 235 |
| chr24 | 58761549  | 58761783  | 235 |
| chr23 | 32882412  | 32882646  | 235 |
| chr23 | 25611818  | 25612052  | 235 |
| chr23 | 11306488  | 11306722  | 235 |
| chr22 | 54584672  | 54584906  | 235 |
| chr22 | 49573242  | 49573476  | 235 |
| chr22 | 29721393  | 29721627  | 235 |
| chr22 | 16310988  | 16311222  | 235 |
| chr21 | 56285064  | 56285298  | 235 |
| chr21 | 15450729  | 15450963  | 235 |
| chr2  | 134546431 | 134546665 | 235 |
| chr19 | 42235009  | 42235243  | 235 |
| chr19 | 28006735  | 28006969  | 235 |
| chr19 | 7811882   | 7812116   | 235 |
| chr18 | 57291159  | 57291393  | 235 |
| chr18 | 56640445  | 56640679  | 235 |
| chr18 | 56530469  | 56530703  | 235 |
| chr18 | 56231012  | 56231246  | 235 |
| chr18 | 56083338  | 56083572  | 235 |
| chr18 | 39826840  | 39827074  | 235 |
| chr18 | 37162189  | 37162423  | 235 |
| chr18 | 22042947  | 22043181  | 235 |
| chr18 | 11123978  | 11124212  | 235 |
| chr18 | 5980203   | 5980437   | 235 |
| chr17 | 67222103  | 67222337  | 235 |
| chr17 | 57612420  | 57612654  | 235 |
| chr16 | 56114399  | 56114633  | 235 |
| chr16 | 47063937  | 47064171  | 235 |
| chr15 | 81401605  | 81401839  | 235 |
| chr15 | 75966427  | 75966661  | 235 |
| chr15 | 21323733  | 21323967  | 235 |
| chr13 | 77155994  | 77156228  | 235 |
| chr13 | 56009436  | 56009670  | 235 |
| chr13 | 42627401  | 42627635  | 235 |
| chr13 | 35375051  | 35375285  | 235 |
| chr13 | 34856767  | 34857001  | 235 |
| chr12 | 13308833  | 13309067  | 235 |
| chr11 | 103759976 | 103760210 | 235 |
| chr11 | 71418957  | 71419191  | 235 |
| chr11 | 14330765  | 14330999  | 235 |
| chr11 | 11988805  | 11989039  | 235 |
| chr10 | 50562712  | 50562946  | 235 |
| chr10 | 21192711  | 21192945  | 235 |
| chr10 | 16964247  | 16964481  | 235 |
| chr10 | 14974746  | 14974980  | 235 |
| chrX  | 80797342  | 80797575  | 234 |
| chr8  | 109076869 | 109077102 | 234 |

|       |           |           |     |
|-------|-----------|-----------|-----|
| chr8  | 65300000  | 65300233  | 234 |
| chr8  | 16944274  | 16944507  | 234 |
| chr7  | 19300670  | 19300903  | 234 |
| chr7  | 15341785  | 15342018  | 234 |
| chr7  | 5421270   | 5421503   | 234 |
| chr6  | 121659384 | 121659617 | 234 |
| chr5  | 123210311 | 123210544 | 234 |
| chr5  | 30405268  | 30405501  | 234 |
| chr3  | 121134136 | 121134369 | 234 |
| chr3  | 115481030 | 115481263 | 234 |
| chr3  | 110218681 | 110218914 | 234 |
| chr3  | 83072506  | 83072739  | 234 |
| chr3  | 34799474  | 34799707  | 234 |
| chr29 | 37124482  | 37124715  | 234 |
| chr29 | 36984498  | 36984731  | 234 |
| chr29 | 18113358  | 18113591  | 234 |
| chr29 | 17672793  | 17673026  | 234 |
| chr27 | 15856055  | 15856288  | 234 |
| chr26 | 48713661  | 48713894  | 234 |
| chr26 | 48637772  | 48638005  | 234 |
| chr26 | 44019027  | 44019260  | 234 |
| chr24 | 44265310  | 44265543  | 234 |
| chr24 | 7038072   | 7038305   | 234 |
| chr23 | 50869480  | 50869713  | 234 |
| chr23 | 31382276  | 31382509  | 234 |
| chr22 | 56706109  | 56706342  | 234 |
| chr22 | 12077206  | 12077439  | 234 |
| chr21 | 15449961  | 15450194  | 234 |
| chr20 | 74228018  | 74228251  | 234 |
| chr2  | 127118274 | 127118507 | 234 |
| chr2  | 111369840 | 111370073 | 234 |
| chr2  | 75843944  | 75844177  | 234 |
| chr2  | 15391143  | 15391376  | 234 |
| chr19 | 56308908  | 56309141  | 234 |
| chr19 | 46891528  | 46891761  | 234 |
| chr19 | 23778879  | 23779112  | 234 |
| chr18 | 3440543   | 3440776   | 234 |
| chr17 | 68076370  | 68076603  | 234 |
| chr17 | 66889442  | 66889675  | 234 |
| chr17 | 64284312  | 64284545  | 234 |
| chr17 | 63485065  | 63485298  | 234 |
| chr16 | 68634895  | 68635128  | 234 |
| chr16 | 54351943  | 54352176  | 234 |
| chr16 | 41462515  | 41462748  | 234 |
| chr16 | 39067728  | 39067961  | 234 |
| chr16 | 2125934   | 2126167   | 234 |
| chr15 | 84547012  | 84547245  | 234 |
| chr14 | 1387392   | 1387625   | 234 |
| chr13 | 57396574  | 57396807  | 234 |
| chr13 | 17810546  | 17810779  | 234 |

|       |               |           |     |
|-------|---------------|-----------|-----|
| chr12 | 34024475      | 34024708  | 234 |
| chr11 | 104251732     | 104251965 | 234 |
| chr11 | 12000066      | 12000299  | 234 |
| chr10 | 89157399      | 89157632  | 234 |
| chr1  | 111311809     | 111312042 | 234 |
| chr1  | 87375380      | 87375613  | 234 |
| chr1  | 83139445      | 83139678  | 234 |
| chr1  | 114186 114419 | 234       |     |
| chr8  | 8552285       | 8552517   | 233 |
| chr7  | 10020856      | 10021088  | 233 |
| chr6  | 122414952     | 122415184 | 233 |
| chr6  | 115544395     | 115544627 | 233 |
| chr5  | 115087817     | 115088049 | 233 |
| chr5  | 110915889     | 110916121 | 233 |
| chr5  | 60372020      | 60372252  | 233 |
| chr5  | 51787435      | 51787667  | 233 |
| chr5  | 10355835      | 10356067  | 233 |
| chr3  | 126099687     | 126099919 | 233 |
| chr3  | 116418305     | 116418537 | 233 |
| chr3  | 33990359      | 33990591  | 233 |
| chr3  | 33852461      | 33852693  | 233 |
| chr29 | 33067787      | 33068019  | 233 |
| chr28 | 26104321      | 26104553  | 233 |
| chr27 | 11617676      | 11617908  | 233 |
| chr26 | 39259311      | 39259543  | 233 |
| chr26 | 37588895      | 37589127  | 233 |
| chr26 | 35098342      | 35098574  | 233 |
| chr25 | 42196931      | 42197163  | 233 |
| chr24 | 61171748      | 61171980  | 233 |
| chr23 | 7430814       | 7431046   | 233 |
| chr22 | 59959761      | 59959993  | 233 |
| chr22 | 45159121      | 45159353  | 233 |
| chr21 | 56284557      | 56284789  | 233 |
| chr21 | 6571507       | 6571739   | 233 |
| chr2  | 134520779     | 134521011 | 233 |
| chr19 | 46318828      | 46319060  | 233 |
| chr19 | 24652489      | 24652721  | 233 |
| chr19 | 23990308      | 23990540  | 233 |
| chr18 | 23629723      | 23629955  | 233 |
| chr17 | 70073771      | 70074003  | 233 |
| chr17 | 15209004      | 15209236  | 233 |
| chr16 | 48068601      | 48068833  | 233 |
| chr16 | 47574381      | 47574613  | 233 |
| chr16 | 46900563      | 46900795  | 233 |
| chr16 | 40467937      | 40468169  | 233 |
| chr16 | 2772489       | 2772721   | 233 |
| chr14 | 68069117      | 68069349  | 233 |
| chr13 | 75770064      | 75770296  | 233 |
| chr13 | 59113960      | 59114192  | 233 |
| chr13 | 54883091      | 54883323  | 233 |



|       |           |           |     |
|-------|-----------|-----------|-----|
| chr13 | 41360929  | 41361161  | 233 |
| chr12 | 81695265  | 81695497  | 233 |
| chr11 | 109702643 | 109702875 | 233 |
| chr11 | 77759500  | 77759732  | 233 |
| chr10 | 90467207  | 90467439  | 233 |
| chr10 | 45526304  | 45526536  | 233 |
| chr10 | 20446143  | 20446375  | 233 |
| chr10 | 14625201  | 14625433  | 233 |
| chr1  | 150215742 | 150215974 | 233 |
| chr9  | 105483152 | 105483383 | 232 |
| chr8  | 86636871  | 86637102  | 232 |
| chr8  | 17153360  | 17153591  | 232 |
| chr7  | 101688860 | 101689091 | 232 |
| chr7  | 44498673  | 44498904  | 232 |
| chr5  | 105106097 | 105106328 | 232 |
| chr5  | 88035535  | 88035766  | 232 |
| chr5  | 77003480  | 77003711  | 232 |
| chr5  | 51977931  | 51978162  | 232 |
| chr3  | 120773862 | 120774093 | 232 |
| chr3  | 105389683 | 105389914 | 232 |
| chr3  | 16743431  | 16743662  | 232 |
| chr3  | 2556656   | 2556887   | 232 |
| chr29 | 36384751  | 36384982  | 232 |
| chr28 | 27135877  | 27136108  | 232 |
| chr26 | 49901396  | 49901627  | 232 |
| chr26 | 23487653  | 23487884  | 232 |
| chr25 | 37330379  | 37330610  | 232 |
| chr25 | 8600436   | 8600667   | 232 |
| chr24 | 60586212  | 60586443  | 232 |
| chr23 | 51836398  | 51836629  | 232 |
| chr23 | 30220835  | 30221066  | 232 |
| chr23 | 19934106  | 19934337  | 232 |
| chr23 | 15139090  | 15139321  | 232 |
| chr21 | 60426189  | 60426420  | 232 |
| chr21 | 55539869  | 55540100  | 232 |
| chr21 | 26626639  | 26626870  | 232 |
| chr21 | 13941653  | 13941884  | 232 |
| chr2  | 134737806 | 134738037 | 232 |
| chr2  | 127296736 | 127296967 | 232 |
| chr2  | 74269641  | 74269872  | 232 |
| chr2  | 72874078  | 72874309  | 232 |
| chr19 | 26184635  | 26184866  | 232 |
| chr18 | 34993067  | 34993298  | 232 |
| chr18 | 12174330  | 12174561  | 232 |
| chr18 | 11943885  | 11944116  | 232 |
| chr17 | 73002794  | 73003025  | 232 |
| chr17 | 61139824  | 61140055  | 232 |
| chr16 | 77345965  | 77346196  | 232 |
| chr16 | 47023124  | 47023355  | 232 |
| chr15 | 83132944  | 83133175  | 232 |

|       |               |           |     |
|-------|---------------|-----------|-----|
| chr15 | 56059380      | 56059611  | 232 |
| chr14 | 26485518      | 26485749  | 232 |
| chr13 | 77284765      | 77284996  | 232 |
| chr13 | 59711113      | 59711344  | 232 |
| chr13 | 57608793      | 57609024  | 232 |
| chr13 | 41022444      | 41022675  | 232 |
| chr11 | 93894324      | 93894555  | 232 |
| chr11 | 44968545      | 44968776  | 232 |
| chr10 | 81626174      | 81626405  | 232 |
| chr10 | 70840312      | 70840543  | 232 |
| chr10 | 13417953      | 13418184  | 232 |
| chrX  | 55576466      | 55576696  | 231 |
| chr8  | 106263485     | 106263715 | 231 |
| chr8  | 104376771     | 104377001 | 231 |
| chr8  | 87919131      | 87919361  | 231 |
| chr8  | 25637783      | 25638013  | 231 |
| chr7  | 14698156      | 14698386  | 231 |
| chr5  | 121142153     | 121142383 | 231 |
| chr5  | 113203416     | 113203646 | 231 |
| chr5  | 111093288     | 111093518 | 231 |
| chr5  | 30897271      | 30897501  | 231 |
| chr4  | 33423840      | 33424070  | 231 |
| chr4  | 7516097       | 7516327   | 231 |
| chr3  | 114230911     | 114231141 | 231 |
| chr3  | 55848692      | 55848922  | 231 |
| chr3  | 17450702      | 17450932  | 231 |
| chr29 | 48240917      | 48241147  | 231 |
| chr29 | 47919553      | 47919783  | 231 |
| chr29 | 34675561      | 34675791  | 231 |
| chr28 | 33691497      | 33691727  | 231 |
| chr27 | 27945110      | 27945340  | 231 |
| chr26 | 50450418      | 50450648  | 231 |
| chr26 | 50176790      | 50177020  | 231 |
| chr26 | 39814650      | 39814880  | 231 |
| chr26 | 10101808      | 10102038  | 231 |
| chr25 | 35482836      | 35483066  | 231 |
| chr25 | 26337486      | 26337716  | 231 |
| chr25 | 10937485      | 10937715  | 231 |
| chr25 | 10634595      | 10634825  | 231 |
| chr24 | 903123 903353 | 231       |     |
| chr23 | 52911417      | 52911647  | 231 |
| chr23 | 13637354      | 13637584  | 231 |
| chr22 | 12672047      | 12672277  | 231 |
| chr22 | 7234147       | 7234377   | 231 |
| chr21 | 65551214      | 65551444  | 231 |
| chr21 | 9833531       | 9833761   | 231 |
| chr2  | 131763735     | 131763965 | 231 |
| chr19 | 45183560      | 45183790  | 231 |
| chr19 | 8458238       | 8458468   | 231 |
| chr18 | 6927665       | 6927895   | 231 |

|       |           |           |     |
|-------|-----------|-----------|-----|
| chr17 | 76287457  | 76287687  | 231 |
| chr17 | 61637297  | 61637527  | 231 |
| chr17 | 58815143  | 58815373  | 231 |
| chr16 | 70936968  | 70937198  | 231 |
| chr16 | 42513763  | 42513993  | 231 |
| chr15 | 38444934  | 38445164  | 231 |
| chr15 | 34297207  | 34297437  | 231 |
| chr14 | 79854859  | 79855089  | 231 |
| chr14 | 67470648  | 67470878  | 231 |
| chr14 | 22062245  | 22062475  | 231 |
| chr12 | 80031908  | 80032138  | 231 |
| chr12 | 32156595  | 32156825  | 231 |
| chr11 | 108342389 | 108342619 | 231 |
| chr1  | 132111644 | 132111874 | 231 |
| chr9  | 105770536 | 105770765 | 230 |
| chr8  | 93204505  | 93204734  | 230 |
| chr6  | 72312104  | 72312333  | 230 |
| chr5  | 121220403 | 121220632 | 230 |
| chr5  | 31270194  | 31270423  | 230 |
| chr4  | 95947015  | 95947244  | 230 |
| chr4  | 32871594  | 32871823  | 230 |
| chr4  | 30782152  | 30782381  | 230 |
| chr3  | 15433534  | 15433763  | 230 |
| chr28 | 26060015  | 26060244  | 230 |
| chr27 | 27806659  | 27806888  | 230 |
| chr26 | 44390385  | 44390614  | 230 |
| chr26 | 41941203  | 41941432  | 230 |
| chr25 | 3982642   | 3982871   | 230 |
| chr24 | 64955340  | 64955569  | 230 |
| chr24 | 64500181  | 64500410  | 230 |
| chr24 | 51816481  | 51816710  | 230 |
| chr23 | 51445741  | 51445970  | 230 |
| chr23 | 50792030  | 50792259  | 230 |
| chr23 | 43152633  | 43152862  | 230 |
| chr21 | 58631329  | 58631558  | 230 |
| chr21 | 2058463   | 2058692   | 230 |
| chr2  | 136718972 | 136719201 | 230 |
| chr2  | 111755464 | 111755693 | 230 |
| chr2  | 111396186 | 111396415 | 230 |
| chr19 | 60453715  | 60453944  | 230 |
| chr19 | 55744278  | 55744507  | 230 |
| chr19 | 41960086  | 41960315  | 230 |
| chr19 | 8523477   | 8523706   | 230 |
| chr18 | 56433706  | 56433935  | 230 |
| chr18 | 45982244  | 45982473  | 230 |
| chr18 | 24351891  | 24352120  | 230 |
| chr18 | 18078929  | 18079158  | 230 |
| chr18 | 11836924  | 11837153  | 230 |
| chr17 | 73893552  | 73893781  | 230 |
| chr16 | 47667367  | 47667596  | 230 |

|       |           |           |     |
|-------|-----------|-----------|-----|
| chr15 | 64765026  | 64765255  | 230 |
| chr14 | 61131784  | 61132013  | 230 |
| chr14 | 11885964  | 11886193  | 230 |
| chr13 | 79076202  | 79076431  | 230 |
| chr13 | 78027040  | 78027269  | 230 |
| chr13 | 75952210  | 75952439  | 230 |
| chr13 | 52070339  | 52070568  | 230 |
| chr11 | 73312518  | 73312747  | 230 |
| chr11 | 70651065  | 70651294  | 230 |
| chr11 | 13355072  | 13355301  | 230 |
| chr10 | 13416820  | 13417049  | 230 |
| chr1  | 8942614   | 8942843   | 230 |
| chrX  | 13135277  | 13135505  | 229 |
| chr9  | 100330957 | 100331185 | 229 |
| chr9  | 100329966 | 100330194 | 229 |
| chr8  | 90740253  | 90740481  | 229 |
| chr7  | 51933732  | 51933960  | 229 |
| chr7  | 25880173  | 25880401  | 229 |
| chr7  | 5310912   | 5311140   | 229 |
| chr6  | 117847823 | 117848051 | 229 |
| chr5  | 116457247 | 116457475 | 229 |
| chr5  | 76240532  | 76240760  | 229 |
| chr5  | 28717147  | 28717375  | 229 |
| chr5  | 10654105  | 10654333  | 229 |
| chr3  | 116352224 | 116352452 | 229 |
| chr3  | 98167254  | 98167482  | 229 |
| chr3  | 98036665  | 98036893  | 229 |
| chr29 | 41707523  | 41707751  | 229 |
| chr29 | 36219638  | 36219866  | 229 |
| chr29 | 31555582  | 31555810  | 229 |
| chr29 | 29916316  | 29916544  | 229 |
| chr28 | 45122014  | 45122242  | 229 |
| chr27 | 22182822  | 22183050  | 229 |
| chr26 | 51528669  | 51528897  | 229 |
| chr26 | 44534584  | 44534812  | 229 |
| chr25 | 43548585  | 43548813  | 229 |
| chr25 | 42309519  | 42309747  | 229 |
| chr25 | 37376859  | 37377087  | 229 |
| chr24 | 33783429  | 33783657  | 229 |
| chr24 | 1934493   | 1934721   | 229 |
| chr23 | 10974789  | 10975017  | 229 |
| chr22 | 60499929  | 60500157  | 229 |
| chr22 | 56049993  | 56050221  | 229 |
| chr22 | 16361591  | 16361819  | 229 |
| chr21 | 58809964  | 58810192  | 229 |
| chr21 | 23247237  | 23247465  | 229 |
| chr20 | 70380252  | 70380480  | 229 |
| chr20 | 25762798  | 25763026  | 229 |
| chr20 | 7006058   | 7006286   | 229 |
| chr20 | 903120    | 903348    | 229 |

|       |           |           |     |
|-------|-----------|-----------|-----|
| chr2  | 132631497 | 132631725 | 229 |
| chr2  | 108732241 | 108732469 | 229 |
| chr2  | 38906052  | 38906280  | 229 |
| chr19 | 63930881  | 63931109  | 229 |
| chr19 | 57740734  | 57740962  | 229 |
| chr19 | 47332332  | 47332560  | 229 |
| chr19 | 44762692  | 44762920  | 229 |
| chr19 | 43199366  | 43199594  | 229 |
| chr19 | 40916263  | 40916491  | 229 |
| chr19 | 28256704  | 28256932  | 229 |
| chr18 | 54775954  | 54776182  | 229 |
| chr18 | 8052023   | 8052251   | 229 |
| chr17 | 44696738  | 44696966  | 229 |
| chr17 | 36953275  | 36953503  | 229 |
| chr16 | 58537071  | 58537299  | 229 |
| chr16 | 39457466  | 39457694  | 229 |
| chr15 | 74343436  | 74343664  | 229 |
| chr15 | 6407213   | 6407441   | 229 |
| chr14 | 8685440   | 8685668   | 229 |
| chr14 | 7368151   | 7368379   | 229 |
| chr14 | 1439105   | 1439333   | 229 |
| chr13 | 73973277  | 73973505  | 229 |
| chr13 | 54965309  | 54965537  | 229 |
| chr13 | 30831443  | 30831671  | 229 |
| chr13 | 10626396  | 10626624  | 229 |
| chr12 | 81458678  | 81458906  | 229 |
| chr11 | 104551126 | 104551354 | 229 |
| chr11 | 98510968  | 98511196  | 229 |
| chr10 | 83080460  | 83080688  | 229 |
| chr10 | 17558757  | 17558985  | 229 |
| chr10 | 17551158  | 17551386  | 229 |
| chr10 | 13638517  | 13638745  | 229 |
| chr1  | 7477768   | 7477996   | 229 |
| chr8  | 110724742 | 110724969 | 228 |
| chr8  | 103946835 | 103947062 | 228 |
| chr8  | 56698409  | 56698636  | 228 |
| chr6  | 106946628 | 106946855 | 228 |
| chr5  | 78736791  | 78737018  | 228 |
| chr5  | 60970501  | 60970728  | 228 |
| chr4  | 121419824 | 121420051 | 228 |
| chr4  | 118228285 | 118228512 | 228 |
| chr4  | 110860435 | 110860662 | 228 |
| chr4  | 108430042 | 108430269 | 228 |
| chr4  | 107674750 | 107674977 | 228 |
| chr4  | 101652766 | 101652993 | 228 |
| chr4  | 96036089  | 96036316  | 228 |
| chr4  | 71874398  | 71874625  | 228 |
| chr3  | 114864575 | 114864802 | 228 |
| chr3  | 30011233  | 30011460  | 228 |
| chr3  | 20503231  | 20503458  | 228 |

|       |           |           |     |
|-------|-----------|-----------|-----|
| chr29 | 47918012  | 47918239  | 228 |
| chr29 | 36415477  | 36415704  | 228 |
| chr29 | 35621962  | 35622189  | 228 |
| chr29 | 34589460  | 34589687  | 228 |
| chr29 | 32539522  | 32539749  | 228 |
| chr29 | 27878337  | 27878564  | 228 |
| chr29 | 17690066  | 17690293  | 228 |
| chr26 | 42226069  | 42226296  | 228 |
| chr24 | 48974148  | 48974375  | 228 |
| chr23 | 33301314  | 33301541  | 228 |
| chr22 | 56138115  | 56138342  | 228 |
| chr21 | 60046293  | 60046520  | 228 |
| chr21 | 13961789  | 13962016  | 228 |
| chr2  | 99303018  | 99303245  | 228 |
| chr19 | 64687381  | 64687608  | 228 |
| chr19 | 56472502  | 56472729  | 228 |
| chr19 | 43082686  | 43082913  | 228 |
| chr19 | 41939144  | 41939371  | 228 |
| chr19 | 38946412  | 38946639  | 228 |
| chr18 | 51077280  | 51077507  | 228 |
| chr18 | 47707088  | 47707315  | 228 |
| chr18 | 18052863  | 18053090  | 228 |
| chr17 | 63428344  | 63428571  | 228 |
| chr17 | 4159924   | 4160151   | 228 |
| chr16 | 26584151  | 26584378  | 228 |
| chr15 | 83134144  | 83134371  | 228 |
| chr15 | 75763674  | 75763901  | 228 |
| chr15 | 75576942  | 75577169  | 228 |
| chr15 | 75539004  | 75539231  | 228 |
| chr14 | 76171900  | 76172127  | 228 |
| chr13 | 73658105  | 73658332  | 228 |
| chr13 | 63422208  | 63422435  | 228 |
| chr12 | 74458609  | 74458836  | 228 |
| chr12 | 33043528  | 33043755  | 228 |
| chr12 | 19931651  | 19931878  | 228 |
| chr11 | 109494702 | 109494929 | 228 |
| chr11 | 100889446 | 100889673 | 228 |
| chr11 | 77895400  | 77895627  | 228 |
| chr11 | 75312917  | 75313144  | 228 |
| chr11 | 68602405  | 68602632  | 228 |
| chr11 | 28670043  | 28670270  | 228 |
| chr10 | 25238073  | 25238300  | 228 |
| chr10 | 5237618   | 5237845   | 228 |
| chr9  | 36074202  | 36074428  | 227 |
| chr8  | 108643332 | 108643558 | 227 |
| chr8  | 70685235  | 70685461  | 227 |
| chr7  | 108161864 | 108162090 | 227 |
| chr7  | 65184582  | 65184808  | 227 |
| chr6  | 118658057 | 118658283 | 227 |
| chr6  | 96166105  | 96166331  | 227 |

|       |               |           |     |
|-------|---------------|-----------|-----|
| chr5  | 86514065      | 86514291  | 227 |
| chr5  | 33558379      | 33558605  | 227 |
| chr4  | 121533727     | 121533953 | 227 |
| chr3  | 116605323     | 116605549 | 227 |
| chr3  | 116066598     | 116066824 | 227 |
| chr3  | 114238592     | 114238818 | 227 |
| chr29 | 48245520      | 48245746  | 227 |
| chr29 | 46011941      | 46012167  | 227 |
| chr28 | 41315558      | 41315784  | 227 |
| chr28 | 12403809      | 12404035  | 227 |
| chr27 | 35005481      | 35005707  | 227 |
| chr27 | 300549 300775 |           | 227 |
| chr25 | 38041005      | 38041231  | 227 |
| chr25 | 34611519      | 34611745  | 227 |
| chr25 | 29346918      | 29347144  | 227 |
| chr24 | 48906498      | 48906724  | 227 |
| chr24 | 26732961      | 26733187  | 227 |
| chr24 | 20920628      | 20920854  | 227 |
| chr24 | 1186399       | 1186625   | 227 |
| chr23 | 43255494      | 43255720  | 227 |
| chr23 | 12380554      | 12380780  | 227 |
| chr22 | 30354903      | 30355129  | 227 |
| chr21 | 59385610      | 59385836  | 227 |
| chr21 | 28189045      | 28189271  | 227 |
| chr21 | 13596857      | 13597083  | 227 |
| chr20 | 19400102      | 19400328  | 227 |
| chr20 | 7908494       | 7908720   | 227 |
| chr2  | 130973510     | 130973736 | 227 |
| chr2  | 126859840     | 126860066 | 227 |
| chr2  | 76577483      | 76577709  | 227 |
| chr19 | 38730995      | 38731221  | 227 |
| chr19 | 34637114      | 34637340  | 227 |
| chr19 | 33398442      | 33398668  | 227 |
| chr19 | 19143620      | 19143846  | 227 |
| chr19 | 8947311       | 8947537   | 227 |
| chr18 | 62926495      | 62926721  | 227 |
| chr18 | 47664458      | 47664684  | 227 |
| chr18 | 25880892      | 25881118  | 227 |
| chr18 | 18803610      | 18803836  | 227 |
| chr18 | 12794202      | 12794428  | 227 |
| chr17 | 64153461      | 64153687  | 227 |
| chr17 | 54284446      | 54284672  | 227 |
| chr16 | 48827332      | 48827558  | 227 |
| chr16 | 40613519      | 40613745  | 227 |
| chr16 | 2190522       | 2190748   | 227 |
| chr15 | 83164707      | 83164933  | 227 |
| chr15 | 81016485      | 81016711  | 227 |
| chr14 | 21759327      | 21759553  | 227 |
| chr13 | 73599854      | 73600080  | 227 |
| chr13 | 66991318      | 66991544  | 227 |

|       |           |           |     |
|-------|-----------|-----------|-----|
| chr13 | 42409287  | 42409513  | 227 |
| chr13 | 34996281  | 34996507  | 227 |
| chr12 | 32499846  | 32500072  | 227 |
| chr12 | 14707685  | 14707911  | 227 |
| chr11 | 75049364  | 75049590  | 227 |
| chr11 | 71885175  | 71885401  | 227 |
| chr11 | 44966145  | 44966371  | 227 |
| chr10 | 66619325  | 66619551  | 227 |
| chr10 | 63832154  | 63832380  | 227 |
| chr9  | 106662730 | 106662955 | 226 |
| chr9  | 90699612  | 90699837  | 226 |
| chr9  | 87729780  | 87730005  | 226 |
| chr7  | 60978961  | 60979186  | 226 |
| chr7  | 23695056  | 23695281  | 226 |
| chr7  | 16321441  | 16321666  | 226 |
| chr6  | 122394422 | 122394647 | 226 |
| chr6  | 109069754 | 109069979 | 226 |
| chr6  | 67337883  | 67338108  | 226 |
| chr3  | 116272008 | 116272233 | 226 |
| chr29 | 46680564  | 46680789  | 226 |
| chr29 | 34387322  | 34387547  | 226 |
| chr28 | 38963107  | 38963332  | 226 |
| chr26 | 44247278  | 44247503  | 226 |
| chr26 | 22204574  | 22204799  | 226 |
| chr25 | 40355885  | 40356110  | 226 |
| chr25 | 37245290  | 37245515  | 226 |
| chr23 | 52763252  | 52763477  | 226 |
| chr23 | 52031030  | 52031255  | 226 |
| chr23 | 27743247  | 27743472  | 226 |
| chr22 | 56250858  | 56251083  | 226 |
| chr22 | 50778620  | 50778845  | 226 |
| chr22 | 39825080  | 39825305  | 226 |
| chr22 | 12191476  | 12191701  | 226 |
| chr21 | 66575375  | 66575600  | 226 |
| chr21 | 65788383  | 65788608  | 226 |
| chr2  | 138245030 | 138245255 | 226 |
| chr2  | 135029189 | 135029414 | 226 |
| chr2  | 25163593  | 25163818  | 226 |
| chr19 | 60226680  | 60226905  | 226 |
| chr19 | 47240336  | 47240561  | 226 |
| chr19 | 38325334  | 38325559  | 226 |
| chr19 | 25809081  | 25809306  | 226 |
| chr18 | 62032667  | 62032892  | 226 |
| chr18 | 22088444  | 22088669  | 226 |
| chr18 | 22005879  | 22006104  | 226 |
| chr18 | 16436189  | 16436414  | 226 |
| chr18 | 10214212  | 10214437  | 226 |
| chr17 | 72908027  | 72908252  | 226 |
| chr17 | 64186139  | 64186364  | 226 |
| chr17 | 19309559  | 19309784  | 226 |



|       |           |           |     |
|-------|-----------|-----------|-----|
| chr16 | 77696233  | 77696458  | 226 |
| chr16 | 47569226  | 47569451  | 226 |
| chr13 | 79080271  | 79080496  | 226 |
| chr13 | 77263853  | 77264078  | 226 |
| chr13 | 70289428  | 70289653  | 226 |
| chr13 | 14685177  | 14685402  | 226 |
| chr12 | 83594956  | 83595181  | 226 |
| chr11 | 107550490 | 107550715 | 226 |
| chr11 | 90393592  | 90393817  | 226 |
| chr11 | 77867197  | 77867422  | 226 |
| chr11 | 47564065  | 47564290  | 226 |
| chr10 | 91881315  | 91881540  | 226 |
| chr10 | 89236208  | 89236433  | 226 |
| chr10 | 85011720  | 85011945  | 226 |
| chr10 | 67928097  | 67928322  | 226 |
| chr10 | 35955941  | 35956166  | 226 |
| chr10 | 13642599  | 13642824  | 226 |
| chr10 | 4385910   | 4386135   | 226 |
| chr1  | 112141801 | 112142026 | 226 |
| chr1  | 88448451  | 88448676  | 226 |
| chr1  | 74964914  | 74965139  | 226 |
| chr9  | 106834995 | 106835219 | 225 |
| chr9  | 106678131 | 106678355 | 225 |
| chr9  | 106193764 | 106193988 | 225 |
| chr9  | 79063253  | 79063477  | 225 |
| chr8  | 73743655  | 73743879  | 225 |
| chr8  | 10968672  | 10968896  | 225 |
| chr7  | 10056321  | 10056545  | 225 |
| chr7  | 10021663  | 10021887  | 225 |
| chr6  | 94857092  | 94857316  | 225 |
| chr5  | 120134625 | 120134849 | 225 |
| chr5  | 117210221 | 117210445 | 225 |
| chr5  | 115268732 | 115268956 | 225 |
| chr5  | 112768425 | 112768649 | 225 |
| chr4  | 12886093  | 12886317  | 225 |
| chr3  | 124569355 | 124569579 | 225 |
| chr3  | 116752198 | 116752422 | 225 |
| chr3  | 106524616 | 106524840 | 225 |
| chr3  | 64130087  | 64130311  | 225 |
| chr3  | 36847070  | 36847294  | 225 |
| chr3  | 20056756  | 20056980  | 225 |
| chr29 | 17681234  | 17681458  | 225 |
| chr28 | 33977443  | 33977667  | 225 |
| chr27 | 15410661  | 15410885  | 225 |
| chr26 | 42164926  | 42165150  | 225 |
| chr26 | 20846604  | 20846828  | 225 |
| chr25 | 34244120  | 34244344  | 225 |
| chr25 | 4636242   | 4636466   | 225 |
| chr23 | 50977207  | 50977431  | 225 |
| chr21 | 56376481  | 56376705  | 225 |

|       |           |           |     |
|-------|-----------|-----------|-----|
| chr21 | 13907668  | 13907892  | 225 |
| chr2  | 139851347 | 139851571 | 225 |
| chr2  | 138815191 | 138815415 | 225 |
| chr2  | 125320000 | 125320224 | 225 |
| chr2  | 108766314 | 108766538 | 225 |
| chr19 | 59171181  | 59171405  | 225 |
| chr19 | 38329713  | 38329937  | 225 |
| chr19 | 37969257  | 37969481  | 225 |
| chr19 | 26650810  | 26651034  | 225 |
| chr19 | 23064770  | 23064994  | 225 |
| chr18 | 48752330  | 48752554  | 225 |
| chr18 | 38805086  | 38805310  | 225 |
| chr18 | 37025212  | 37025436  | 225 |
| chr18 | 12413427  | 12413651  | 225 |
| chr17 | 72627101  | 72627325  | 225 |
| chr17 | 54268509  | 54268733  | 225 |
| chr16 | 26627900  | 26628124  | 225 |
| chr14 | 34062110  | 34062334  | 225 |
| chr14 | 19607524  | 19607748  | 225 |
| chr13 | 74347768  | 74347992  | 225 |
| chr13 | 69267954  | 69268178  | 225 |
| chr13 | 60785917  | 60786141  | 225 |
| chr12 | 9696328   | 9696552   | 225 |
| chr11 | 108447222 | 108447446 | 225 |
| chr11 | 87910978  | 87911202  | 225 |
| chr11 | 74833657  | 74833881  | 225 |
| chr10 | 90694768  | 90694992  | 225 |
| chr10 | 88372072  | 88372296  | 225 |
| chr10 | 62958110  | 62958334  | 225 |
| chr10 | 16726782  | 16727006  | 225 |
| chr1  | 147137297 | 147137521 | 225 |
| chr1  | 84499601  | 84499825  | 225 |
| chr9  | 35973875  | 35974098  | 224 |
| chr8  | 61152689  | 61152912  | 224 |
| chr7  | 61033291  | 61033514  | 224 |
| chr7  | 45653380  | 45653603  | 224 |
| chr7  | 3695339   | 3695562   | 224 |
| chr5  | 113280109 | 113280332 | 224 |
| chr5  | 30029290  | 30029513  | 224 |
| chr4  | 123015147 | 123015370 | 224 |
| chr4  | 101637292 | 101637515 | 224 |
| chr4  | 80029428  | 80029651  | 224 |
| chr3  | 62929590  | 62929813  | 224 |
| chr3  | 22890122  | 22890345  | 224 |
| chr29 | 49032087  | 49032310  | 224 |
| chr29 | 37160982  | 37161205  | 224 |
| chr29 | 36839467  | 36839690  | 224 |
| chr28 | 42167719  | 42167942  | 224 |
| chr25 | 39258970  | 39259193  | 224 |
| chr25 | 36799160  | 36799383  | 224 |

|       |           |           |     |
|-------|-----------|-----------|-----|
| chr25 | 2076961   | 2077184   | 224 |
| chr25 | 756292    | 756515    | 224 |
| chr23 | 18463747  | 18463970  | 224 |
| chr23 | 11484237  | 11484460  | 224 |
| chr22 | 58520392  | 58520615  | 224 |
| chr22 | 55391146  | 55391369  | 224 |
| chr22 | 47868799  | 47869022  | 224 |
| chr22 | 42535161  | 42535384  | 224 |
| chr21 | 15624035  | 15624258  | 224 |
| chr2  | 139401473 | 139401696 | 224 |
| chr2  | 110547435 | 110547658 | 224 |
| chr19 | 15973092  | 15973315  | 224 |
| chr19 | 7794819   | 7795042   | 224 |
| chr18 | 54290790  | 54291013  | 224 |
| chr18 | 51224010  | 51224233  | 224 |
| chr18 | 45845532  | 45845755  | 224 |
| chr18 | 26257829  | 26258052  | 224 |
| chr17 | 73121276  | 73121499  | 224 |
| chr17 | 2824674   | 2824897   | 224 |
| chr16 | 47064858  | 47065081  | 224 |
| chr15 | 32616416  | 32616639  | 224 |
| chr14 | 34076331  | 34076554  | 224 |
| chr14 | 3589188   | 3589411   | 224 |
| chr13 | 71520256  | 71520479  | 224 |
| chr13 | 59702757  | 59702980  | 224 |
| chr13 | 21952376  | 21952599  | 224 |
| chr12 | 12027797  | 12028020  | 224 |
| chr11 | 109796297 | 109796520 | 224 |
| chr11 | 109593173 | 109593396 | 224 |
| chr11 | 16114037  | 16114260  | 224 |
| chr11 | 12854751  | 12854974  | 224 |
| chr10 | 93067968  | 93068191  | 224 |
| chr1  | 148018189 | 148018412 | 224 |
| chr9  | 100089060 | 100089282 | 223 |
| chr9  | 99991560  | 99991782  | 223 |
| chr9  | 97911766  | 97911988  | 223 |
| chr7  | 50371112  | 50371334  | 223 |
| chr7  | 5414690   | 5414912   | 223 |
| chr6  | 122132173 | 122132395 | 223 |
| chr6  | 16265597  | 16265819  | 223 |
| chr5  | 30496378  | 30496600  | 223 |
| chr5  | 10616467  | 10616689  | 223 |
| chr4  | 121473647 | 121473869 | 223 |
| chr4  | 65386813  | 65387035  | 223 |
| chr3  | 122063001 | 122063223 | 223 |
| chr3  | 33985948  | 33986170  | 223 |
| chr29 | 36489806  | 36490028  | 223 |
| chr29 | 26520872  | 26521094  | 223 |
| chr29 | 25494244  | 25494466  | 223 |
| chr28 | 26813545  | 26813767  | 223 |

|       |               |           |     |
|-------|---------------|-----------|-----|
| chr26 | 47983102      | 47983324  | 223 |
| chr25 | 35420583      | 35420805  | 223 |
| chr24 | 58826305      | 58826527  | 223 |
| chr23 | 31298371      | 31298593  | 223 |
| chr22 | 55495783      | 55496005  | 223 |
| chr22 | 37808017      | 37808239  | 223 |
| chr21 | 66293298      | 66293520  | 223 |
| chr21 | 34844044      | 34844266  | 223 |
| chr20 | 66473734      | 66473956  | 223 |
| chr19 | 43253255      | 43253477  | 223 |
| chr18 | 63805505      | 63805727  | 223 |
| chr18 | 56581281      | 56581503  | 223 |
| chr18 | 41052542      | 41052764  | 223 |
| chr17 | 66539104      | 66539326  | 223 |
| chr17 | 54459294      | 54459516  | 223 |
| chr16 | 47589285      | 47589507  | 223 |
| chr16 | 44839014      | 44839236  | 223 |
| chr15 | 75400192      | 75400414  | 223 |
| chr14 | 34076811      | 34077033  | 223 |
| chr14 | 10316835      | 10317057  | 223 |
| chr13 | 76270849      | 76271071  | 223 |
| chr13 | 70219555      | 70219777  | 223 |
| chr13 | 60691902      | 60692124  | 223 |
| chr13 | 40925135      | 40925357  | 223 |
| chr13 | 37624486      | 37624708  | 223 |
| chr10 | 90471495      | 90471717  | 223 |
| chr1  | 68809440      | 68809662  | 223 |
| chr9  | 106524513     | 106524734 | 222 |
| chr9  | 104731270     | 104731491 | 222 |
| chr7  | 48983201      | 48983422  | 222 |
| chr6  | 118637160     | 118637381 | 222 |
| chr5  | 116875292     | 116875513 | 222 |
| chr5  | 112562513     | 112562734 | 222 |
| chr5  | 28234510      | 28234731  | 222 |
| chr3  | 125655691     | 125655912 | 222 |
| chr3  | 123292691     | 123292912 | 222 |
| chr3  | 121402110     | 121402331 | 222 |
| chr3  | 20482057      | 20482278  | 222 |
| chr3  | 17395863      | 17396084  | 222 |
| chr29 | 34633156      | 34633377  | 222 |
| chr29 | 9235886       | 9236107   | 222 |
| chr29 | 745872 746093 | 222       | 222 |
| chr27 | 45327537      | 45327758  | 222 |
| chr27 | 43804945      | 43805166  | 222 |
| chr26 | 49153748      | 49153969  | 222 |
| chr26 | 45852904      | 45853125  | 222 |
| chr26 | 37982155      | 37982376  | 222 |
| chr25 | 37821829      | 37822050  | 222 |
| chr24 | 49207282      | 49207503  | 222 |
| chr24 | 30904642      | 30904863  | 222 |

|       |           |           |     |
|-------|-----------|-----------|-----|
| chr23 | 31072514  | 31072735  | 222 |
| chr23 | 27962778  | 27962999  | 222 |
| chr23 | 18045251  | 18045472  | 222 |
| chr22 | 51342899  | 51343120  | 222 |
| chr22 | 3596301   | 3596522   | 222 |
| chr21 | 33569314  | 33569535  | 222 |
| chr20 | 3248453   | 3248674   | 222 |
| chr2  | 136410805 | 136411026 | 222 |
| chr2  | 111844471 | 111844692 | 222 |
| chr19 | 63952144  | 63952365  | 222 |
| chr19 | 48656405  | 48656626  | 222 |
| chr19 | 43305642  | 43305863  | 222 |
| chr19 | 16191420  | 16191641  | 222 |
| chr19 | 15958588  | 15958809  | 222 |
| chr18 | 62750264  | 62750485  | 222 |
| chr18 | 39502848  | 39503069  | 222 |
| chr16 | 24045426  | 24045647  | 222 |
| chr14 | 20749787  | 20750008  | 222 |
| chr14 | 1941691   | 1941912   | 222 |
| chr13 | 79690220  | 79690441  | 222 |
| chr13 | 54981930  | 54982151  | 222 |
| chr13 | 15168303  | 15168524  | 222 |
| chr11 | 103294072 | 103294293 | 222 |
| chr10 | 81887834  | 81888055  | 222 |
| chr1  | 142241195 | 142241416 | 222 |
| chr1  | 82486368  | 82486589  | 222 |
| chrX  | 30237689  | 30237909  | 221 |
| chr8  | 107680909 | 107681129 | 221 |
| chr7  | 32282327  | 32282547  | 221 |
| chr7  | 19667598  | 19667818  | 221 |
| chr7  | 14731861  | 14732081  | 221 |
| chr6  | 117916064 | 117916284 | 221 |
| chr5  | 123173242 | 123173462 | 221 |
| chr29 | 49660059  | 49660279  | 221 |
| chr29 | 49055644  | 49055864  | 221 |
| chr29 | 35828736  | 35828956  | 221 |
| chr27 | 39919960  | 39920180  | 221 |
| chr27 | 34704895  | 34705115  | 221 |
| chr27 | 26619390  | 26619610  | 221 |
| chr26 | 44247594  | 44247814  | 221 |
| chr26 | 43567896  | 43568116  | 221 |
| chr25 | 4004075   | 4004295   | 221 |
| chr24 | 56614242  | 56614462  | 221 |
| chr23 | 52880208  | 52880428  | 221 |
| chr23 | 16525177  | 16525397  | 221 |
| chr23 | 15880556  | 15880776  | 221 |
| chr22 | 55901854  | 55902074  | 221 |
| chr22 | 52719261  | 52719481  | 221 |
| chr22 | 47857151  | 47857371  | 221 |
| chr21 | 61781951  | 61782171  | 221 |

|       |           |           |     |
|-------|-----------|-----------|-----|
| chr21 | 58758195  | 58758415  | 221 |
| chr21 | 26452920  | 26453140  | 221 |
| chr20 | 8819321   | 8819541   | 221 |
| chr20 | 8764726   | 8764946   | 221 |
| chr2  | 139412813 | 139413033 | 221 |
| chr2  | 127974519 | 127974739 | 221 |
| chr2  | 124307445 | 124307665 | 221 |
| chr19 | 58381380  | 58381600  | 221 |
| chr19 | 56003841  | 56004061  | 221 |
| chr19 | 41233461  | 41233681  | 221 |
| chr18 | 54564876  | 54565096  | 221 |
| chr18 | 52680864  | 52681084  | 221 |
| chr18 | 39542779  | 39542999  | 221 |
| chr18 | 13778272  | 13778492  | 221 |
| chr18 | 11808862  | 11809082  | 221 |
| chr17 | 75884076  | 75884296  | 221 |
| chr16 | 68794202  | 68794422  | 221 |
| chr16 | 44750916  | 44751136  | 221 |
| chr15 | 25738690  | 25738910  | 221 |
| chr15 | 5861926   | 5862146   | 221 |
| chr14 | 61737886  | 61738106  | 221 |
| chr14 | 34051807  | 34052027  | 221 |
| chr14 | 1420230   | 1420450   | 221 |
| chr13 | 62447121  | 62447341  | 221 |
| chr13 | 53396639  | 53396859  | 221 |
| chr12 | 82762380  | 82762600  | 221 |
| chr11 | 104896237 | 104896457 | 221 |
| chr11 | 94362013  | 94362233  | 221 |
| chr11 | 77930704  | 77930924  | 221 |
| chr11 | 40332881  | 40333101  | 221 |
| chr10 | 75523925  | 75524145  | 221 |
| chr1  | 132063185 | 132063405 | 221 |
| chr1  | 81429207  | 81429427  | 221 |
| chrX  | 3013757   | 3013976   | 220 |
| chr9  | 43981624  | 43981843  | 220 |
| chr8  | 24146992  | 24147211  | 220 |
| chr7  | 53418794  | 53419013  | 220 |
| chr7  | 6532036   | 6532255   | 220 |
| chr7  | 5201954   | 5202173   | 220 |
| chr6  | 121013425 | 121013644 | 220 |
| chr6  | 59241800  | 59242019  | 220 |
| chr5  | 120362490 | 120362709 | 220 |
| chr5  | 35355868  | 35356087  | 220 |
| chr4  | 95776340  | 95776559  | 220 |
| chr3  | 33087660  | 33087879  | 220 |
| chr3  | 20471553  | 20471772  | 220 |
| chr29 | 38283103  | 38283322  | 220 |
| chr28 | 33577610  | 33577829  | 220 |
| chr28 | 3285066   | 3285285   | 220 |
| chr26 | 38927762  | 38927981  | 220 |

|       |           |           |     |
|-------|-----------|-----------|-----|
| chr25 | 43551615  | 43551834  | 220 |
| chr25 | 43246656  | 43246875  | 220 |
| chr25 | 7925089   | 7925308   | 220 |
| chr24 | 59425743  | 59425962  | 220 |
| chr24 | 2687218   | 2687437   | 220 |
| chr23 | 51250658  | 51250877  | 220 |
| chr23 | 18698760  | 18698979  | 220 |
| chr22 | 60500233  | 60500452  | 220 |
| chr22 | 48665017  | 48665236  | 220 |
| chr21 | 6518766   | 6518985   | 220 |
| chr21 | 1926343   | 1926562   | 220 |
| chr20 | 3254266   | 3254485   | 220 |
| chr2  | 139239073 | 139239292 | 220 |
| chr2  | 135116467 | 135116686 | 220 |
| chr19 | 38695663  | 38695882  | 220 |
| chr19 | 38337920  | 38338139  | 220 |
| chr19 | 14988387  | 14988606  | 220 |
| chr18 | 53885507  | 53885726  | 220 |
| chr18 | 51732489  | 51732708  | 220 |
| chr18 | 43228192  | 43228411  | 220 |
| chr18 | 35340205  | 35340424  | 220 |
| chr18 | 11230623  | 11230842  | 220 |
| chr17 | 76176758  | 76176977  | 220 |
| chr17 | 55892461  | 55892680  | 220 |
| chr16 | 69704802  | 69705021  | 220 |
| chr15 | 75533203  | 75533422  | 220 |
| chr15 | 33729985  | 33730204  | 220 |
| chr15 | 29673892  | 29674111  | 220 |
| chr14 | 23851105  | 23851324  | 220 |
| chr13 | 82818590  | 82818809  | 220 |
| chr13 | 66820526  | 66820745  | 220 |
| chr13 | 63249849  | 63250068  | 220 |
| chr13 | 53888067  | 53888286  | 220 |
| chr13 | 17766851  | 17767070  | 220 |
| chr13 | 2467368   | 2467587   | 220 |
| chr11 | 106394240 | 106394459 | 220 |
| chr11 | 77174730  | 77174949  | 220 |
| chr10 | 20432081  | 20432300  | 220 |
| chr1  | 109022136 | 109022355 | 220 |
| chr1  | 58950754  | 58950973  | 220 |
| chr8  | 77192736  | 77192954  | 219 |
| chr7  | 46567026  | 46567244  | 219 |
| chr5  | 113116072 | 113116290 | 219 |
| chr5  | 28832763  | 28832981  | 219 |
| chr4  | 7482638   | 7482856   | 219 |
| chr3  | 45694774  | 45694992  | 219 |
| chr3  | 30011884  | 30012102  | 219 |
| chr29 | 41850569  | 41850787  | 219 |
| chr29 | 18051058  | 18051276  | 219 |
| chr27 | 8585376   | 8585594   | 219 |

|       |           |           |     |
|-------|-----------|-----------|-----|
| chr26 | 38359392  | 38359610  | 219 |
| chr26 | 18297034  | 18297252  | 219 |
| chr24 | 44060820  | 44061038  | 219 |
| chr24 | 1037955   | 1038173   | 219 |
| chr23 | 52607348  | 52607566  | 219 |
| chr23 | 11494990  | 11495208  | 219 |
| chr20 | 27259286  | 27259504  | 219 |
| chr20 | 24935734  | 24935952  | 219 |
| chr2  | 131575560 | 131575778 | 219 |
| chr2  | 125914113 | 125914331 | 219 |
| chr2  | 111871360 | 111871578 | 219 |
| chr19 | 46878298  | 46878516  | 219 |
| chr19 | 45830766  | 45830984  | 219 |
| chr19 | 43631424  | 43631642  | 219 |
| chr18 | 62114707  | 62114925  | 219 |
| chr17 | 72726993  | 72727211  | 219 |
| chr17 | 70332451  | 70332669  | 219 |
| chr16 | 68898211  | 68898429  | 219 |
| chr16 | 41433022  | 41433240  | 219 |
| chr15 | 26668744  | 26668962  | 219 |
| chr14 | 40005248  | 40005466  | 219 |
| chr13 | 65808402  | 65808620  | 219 |
| chr13 | 39203450  | 39203668  | 219 |
| chr12 | 54965814  | 54966032  | 219 |
| chr11 | 108432034 | 108432252 | 219 |
| chr11 | 103408714 | 103408932 | 219 |
| chr10 | 23768121  | 23768339  | 219 |
| chr1  | 68803325  | 68803543  | 219 |
| chr9  | 56346771  | 56346988  | 218 |
| chr8  | 93306922  | 93307139  | 218 |
| chr8  | 81843905  | 81844122  | 218 |
| chr8  | 74070401  | 74070618  | 218 |
| chr7  | 3947871   | 3948088   | 218 |
| chr6  | 106984937 | 106985154 | 218 |
| chr6  | 46760792  | 46761009  | 218 |
| chr5  | 112844217 | 112844434 | 218 |
| chr5  | 33046929  | 33047146  | 218 |
| chr5  | 7222776   | 7222993   | 218 |
| chr4  | 115963439 | 115963656 | 218 |
| chr4  | 34034454  | 34034671  | 218 |
| chr4  | 32297252  | 32297469  | 218 |
| chr3  | 120832005 | 120832222 | 218 |
| chr3  | 117343519 | 117343736 | 218 |
| chr3  | 115110986 | 115111203 | 218 |
| chr29 | 36992883  | 36993100  | 218 |
| chr29 | 26661420  | 26661637  | 218 |
| chr27 | 7942493   | 7942710   | 218 |
| chr26 | 50632805  | 50633022  | 218 |
| chr26 | 24345142  | 24345359  | 218 |
| chr23 | 52917979  | 52918196  | 218 |



|       |               |           |     |
|-------|---------------|-----------|-----|
| chr23 | 48760192      | 48760409  | 218 |
| chr23 | 19339129      | 19339346  | 218 |
| chr22 | 12114148      | 12114365  | 218 |
| chr21 | 58721110      | 58721327  | 218 |
| chr21 | 15489871      | 15490088  | 218 |
| chr20 | 75069108      | 75069325  | 218 |
| chr2  | 134065692     | 134065909 | 218 |
| chr2  | 111225921     | 111226138 | 218 |
| chr2  | 5548781       | 5548998   | 218 |
| chr19 | 63995604      | 63995821  | 218 |
| chr19 | 60463171      | 60463388  | 218 |
| chr19 | 47117013      | 47117230  | 218 |
| chr19 | 46886564      | 46886781  | 218 |
| chr19 | 38371527      | 38371744  | 218 |
| chr18 | 56960103      | 56960320  | 218 |
| chr18 | 6988962       | 6989179   | 218 |
| chr16 | 34692638      | 34692855  | 218 |
| chr16 | 2698891       | 2699108   | 218 |
| chr15 | 74500299      | 74500516  | 218 |
| chr15 | 54213460      | 54213677  | 218 |
| chr15 | 33500874      | 33501091  | 218 |
| chr15 | 25724077      | 25724294  | 218 |
| chr14 | 70126383      | 70126600  | 218 |
| chr13 | 72791627      | 72791844  | 218 |
| chr13 | 68060871      | 68061088  | 218 |
| chr13 | 63499113      | 63499330  | 218 |
| chr12 | 82861471      | 82861688  | 218 |
| chr12 | 35606584      | 35606801  | 218 |
| chr11 | 109710654     | 109710871 | 218 |
| chr11 | 104346340     | 104346557 | 218 |
| chr11 | 92550707      | 92550924  | 218 |
| chr11 | 86353549      | 86353766  | 218 |
| chr11 | 70884043      | 70884260  | 218 |
| chr10 | 90258534      | 90258751  | 218 |
| chr10 | 13315827      | 13316044  | 218 |
| chr1  | 83125099      | 83125316  | 218 |
| chrX  | 3016901       | 3017117   | 217 |
| chr9  | 91927394      | 91927610  | 217 |
| chr8  | 72326968      | 72327184  | 217 |
| chr8  | 12257406      | 12257622  | 217 |
| chr8  | 865273 865489 |           | 217 |
| chr7  | 61167158      | 61167374  | 217 |
| chr7  | 60368282      | 60368498  | 217 |
| chr7  | 21286542      | 21286758  | 217 |
| chr7  | 21193243      | 21193459  | 217 |
| chr6  | 106973430     | 106973646 | 217 |
| chr6  | 92457271      | 92457487  | 217 |
| chr6  | 61949892      | 61950108  | 217 |
| chr5  | 117603549     | 117603765 | 217 |
| chr5  | 112190256     | 112190472 | 217 |

|       |               |           |     |
|-------|---------------|-----------|-----|
| chr5  | 112010657     | 112010873 | 217 |
| chr5  | 96036067      | 96036283  | 217 |
| chr5  | 30049538      | 30049754  | 217 |
| chr5  | 27341137      | 27341353  | 217 |
| chr4  | 117604549     | 117604765 | 217 |
| chr3  | 127240019     | 127240235 | 217 |
| chr3  | 122228924     | 122229140 | 217 |
| chr3  | 115940852     | 115941068 | 217 |
| chr3  | 113384413     | 113384629 | 217 |
| chr3  | 108346843     | 108347059 | 217 |
| chr3  | 83712010      | 83712226  | 217 |
| chr3  | 31662571      | 31662787  | 217 |
| chr29 | 50003525      | 50003741  | 217 |
| chr29 | 41642225      | 41642441  | 217 |
| chr29 | 26771208      | 26771424  | 217 |
| chr28 | 34105661      | 34105877  | 217 |
| chr27 | 45433845      | 45434061  | 217 |
| chr27 | 20598800      | 20599016  | 217 |
| chr27 | 690587 690803 |           | 217 |
| chr26 | 31477523      | 31477739  | 217 |
| chr25 | 37875567      | 37875783  | 217 |
| chr25 | 37281305      | 37281521  | 217 |
| chr25 | 34394841      | 34395057  | 217 |
| chr25 | 33469464      | 33469680  | 217 |
| chr25 | 1793486       | 1793702   | 217 |
| chr25 | 1514385       | 1514601   | 217 |
| chr24 | 51520159      | 51520375  | 217 |
| chr23 | 51260443      | 51260659  | 217 |
| chr23 | 27771582      | 27771798  | 217 |
| chr22 | 60480205      | 60480421  | 217 |
| chr22 | 46582498      | 46582714  | 217 |
| chr21 | 64447043      | 64447259  | 217 |
| chr21 | 62074959      | 62075175  | 217 |
| chr21 | 31520860      | 31521076  | 217 |
| chr20 | 3616483       | 3616699   | 217 |
| chr2  | 135156818     | 135157034 | 217 |
| chr2  | 134696483     | 134696699 | 217 |
| chr2  | 128026196     | 128026412 | 217 |
| chr2  | 109234595     | 109234811 | 217 |
| chr2  | 75693025      | 75693241  | 217 |
| chr19 | 60706080      | 60706296  | 217 |
| chr19 | 23943502      | 23943718  | 217 |
| chr19 | 21885863      | 21886079  | 217 |
| chr19 | 19104130      | 19104346  | 217 |
| chr18 | 18687660      | 18687876  | 217 |
| chr18 | 18455602      | 18455818  | 217 |
| chr17 | 68065708      | 68065924  | 217 |
| chr16 | 73367640      | 73367856  | 217 |
| chr16 | 3375309       | 3375525   | 217 |
| chr15 | 75231918      | 75232134  | 217 |

|       |           |           |     |
|-------|-----------|-----------|-----|
| chr15 | 53625119  | 53625335  | 217 |
| chr12 | 81690896  | 81691112  | 217 |
| chr12 | 75121496  | 75121712  | 217 |
| chr11 | 108262518 | 108262734 | 217 |
| chr11 | 104518645 | 104518861 | 217 |
| chr11 | 98426371  | 98426587  | 217 |
| chr10 | 103710657 | 103710873 | 217 |
| chr10 | 75524189  | 75524405  | 217 |
| chr10 | 15018943  | 15019159  | 217 |
| chr1  | 146408295 | 146408511 | 217 |
| chr1  | 65084545  | 65084761  | 217 |
| chr8  | 63175775  | 63175990  | 216 |
| chr8  | 1637487   | 1637702   | 216 |
| chr8  | 1559196   | 1559411   | 216 |
| chr7  | 53379037  | 53379252  | 216 |
| chr7  | 45820336  | 45820551  | 216 |
| chr7  | 45700969  | 45701184  | 216 |
| chr7  | 21115338  | 21115553  | 216 |
| chr7  | 19302208  | 19302423  | 216 |
| chr7  | 5513093   | 5513308   | 216 |
| chr6  | 121357044 | 121357259 | 216 |
| chr5  | 125342831 | 125343046 | 216 |
| chr4  | 123012446 | 123012661 | 216 |
| chr4  | 14009055  | 14009270  | 216 |
| chr3  | 106500791 | 106501006 | 216 |
| chr3  | 35787218  | 35787433  | 216 |
| chr3  | 28714035  | 28714250  | 216 |
| chr29 | 38717346  | 38717561  | 216 |
| chr29 | 25938362  | 25938577  | 216 |
| chr28 | 12465444  | 12465659  | 216 |
| chr26 | 41858538  | 41858753  | 216 |
| chr26 | 20971233  | 20971448  | 216 |
| chr24 | 50374325  | 50374540  | 216 |
| chr24 | 41735660  | 41735875  | 216 |
| chr24 | 33697408  | 33697623  | 216 |
| chr23 | 41874419  | 41874634  | 216 |
| chr21 | 58845035  | 58845250  | 216 |
| chr20 | 73018665  | 73018880  | 216 |
| chr2  | 114198088 | 114198303 | 216 |
| chr2  | 75692361  | 75692576  | 216 |
| chr19 | 39032135  | 39032350  | 216 |
| chr19 | 31953477  | 31953692  | 216 |
| chr19 | 14087978  | 14088193  | 216 |
| chr19 | 12347579  | 12347794  | 216 |
| chr18 | 51527444  | 51527659  | 216 |
| chr18 | 9393220   | 9393435   | 216 |
| chr15 | 77540641  | 77540856  | 216 |
| chr15 | 53601256  | 53601471  | 216 |
| chr14 | 64134988  | 64135203  | 216 |
| chr13 | 57536746  | 57536961  | 216 |

|       |           |           |     |
|-------|-----------|-----------|-----|
| chr13 | 56120512  | 56120727  | 216 |
| chr13 | 35654549  | 35654764  | 216 |
| chr12 | 84564501  | 84564716  | 216 |
| chr12 | 82550740  | 82550955  | 216 |
| chr11 | 85425099  | 85425314  | 216 |
| chr11 | 4355726   | 4355941   | 216 |
| chr10 | 66946247  | 66946462  | 216 |
| chr10 | 16763418  | 16763633  | 216 |
| chr1  | 144804540 | 144804755 | 216 |
| chr1  | 137998290 | 137998505 | 216 |
| chr9  | 43214595  | 43214809  | 215 |
| chr8  | 106689649 | 106689863 | 215 |
| chr7  | 42517534  | 42517748  | 215 |
| chr6  | 121892962 | 121893176 | 215 |
| chr5  | 113248920 | 113249134 | 215 |
| chr5  | 113090496 | 113090710 | 215 |
| chr5  | 10611319  | 10611533  | 215 |
| chr4  | 121567688 | 121567902 | 215 |
| chr4  | 95712107  | 95712321  | 215 |
| chr4  | 30809221  | 30809435  | 215 |
| chr3  | 116205998 | 116206212 | 215 |
| chr3  | 115769186 | 115769400 | 215 |
| chr3  | 26154336  | 26154550  | 215 |
| chr3  | 10728388  | 10728602  | 215 |
| chr29 | 34723213  | 34723427  | 215 |
| chr28 | 27561909  | 27562123  | 215 |
| chr27 | 45401520  | 45401734  | 215 |
| chr25 | 43156535  | 43156749  | 215 |
| chr25 | 37313801  | 37314015  | 215 |
| chr23 | 52687947  | 52688161  | 215 |
| chr22 | 59577656  | 59577870  | 215 |
| chr22 | 48350974  | 48351188  | 215 |
| chr21 | 60724042  | 60724256  | 215 |
| chr21 | 25273849  | 25274063  | 215 |
| chr2  | 140203729 | 140203943 | 215 |
| chr2  | 25683965  | 25684179  | 215 |
| chr19 | 20350990  | 20351204  | 215 |
| chr18 | 62956439  | 62956653  | 215 |
| chr18 | 53340129  | 53340343  | 215 |
| chr18 | 22726971  | 22727185  | 215 |
| chr18 | 6248696   | 6248910   | 215 |
| chr17 | 69205527  | 69205741  | 215 |
| chr17 | 65956826  | 65957040  | 215 |
| chr16 | 47933884  | 47934098  | 215 |
| chr16 | 47101943  | 47102157  | 215 |
| chr15 | 64764628  | 64764842  | 215 |
| chr15 | 25445911  | 25446125  | 215 |
| chr13 | 59702423  | 59702637  | 215 |
| chr13 | 57679593  | 57679807  | 215 |
| chr13 | 41512253  | 41512467  | 215 |

|       |           |           |     |
|-------|-----------|-----------|-----|
| chr12 | 84250236  | 84250450  | 215 |
| chr12 | 82664843  | 82665057  | 215 |
| chr11 | 44967111  | 44967325  | 215 |
| chr11 | 44813531  | 44813745  | 215 |
| chr10 | 90281810  | 90282024  | 215 |
| chr10 | 16892679  | 16892893  | 215 |
| chr10 | 12830169  | 12830383  | 215 |
| chr9  | 76815543  | 76815756  | 214 |
| chr8  | 82098484  | 82098697  | 214 |
| chr8  | 73301046  | 73301259  | 214 |
| chr7  | 53384664  | 53384877  | 214 |
| chr7  | 43711056  | 43711269  | 214 |
| chr7  | 42437505  | 42437718  | 214 |
| chr6  | 121593338 | 121593551 | 214 |
| chr6  | 121079835 | 121080048 | 214 |
| chr6  | 120749256 | 120749469 | 214 |
| chr6  | 107673829 | 107674042 | 214 |
| chr4  | 121726684 | 121726897 | 214 |
| chr4  | 117767595 | 117767808 | 214 |
| chr4  | 116686385 | 116686598 | 214 |
| chr4  | 99714068  | 99714281  | 214 |
| chr3  | 115758728 | 115758941 | 214 |
| chr3  | 105725011 | 105725224 | 214 |
| chr3  | 63048054  | 63048267  | 214 |
| chr3  | 29212203  | 29212416  | 214 |
| chr29 | 37090379  | 37090592  | 214 |
| chr27 | 40834042  | 40834255  | 214 |
| chr26 | 44539928  | 44540141  | 214 |
| chr26 | 20380531  | 20380744  | 214 |
| chr26 | 19757387  | 19757600  | 214 |
| chr26 | 14456623  | 14456836  | 214 |
| chr25 | 43544982  | 43545195  | 214 |
| chr24 | 49787083  | 49787296  | 214 |
| chr24 | 43705535  | 43705748  | 214 |
| chr22 | 50031682  | 50031895  | 214 |
| chr22 | 5380598   | 5380811   | 214 |
| chr20 | 73324807  | 73325020  | 214 |
| chr20 | 41647663  | 41647876  | 214 |
| chr2  | 138244222 | 138244435 | 214 |
| chr19 | 61015127  | 61015340  | 214 |
| chr19 | 54796295  | 54796508  | 214 |
| chr19 | 46876224  | 46876437  | 214 |
| chr18 | 48298455  | 48298668  | 214 |
| chr18 | 23519102  | 23519315  | 214 |
| chr18 | 11479415  | 11479628  | 214 |
| chr17 | 67033728  | 67033941  | 214 |
| chr16 | 70099559  | 70099772  | 214 |
| chr16 | 60556416  | 60556629  | 214 |
| chr16 | 34691691  | 34691904  | 214 |
| chr16 | 2690770   | 2690983   | 214 |

|       |           |           |     |
|-------|-----------|-----------|-----|
| chr15 | 55670505  | 55670718  | 214 |
| chr15 | 53886940  | 53887153  | 214 |
| chr15 | 26804260  | 26804473  | 214 |
| chr14 | 67981147  | 67981360  | 214 |
| chr13 | 54095024  | 54095237  | 214 |
| chr13 | 49393839  | 49394052  | 214 |
| chr13 | 43418457  | 43418670  | 214 |
| chr12 | 9661401   | 9661614   | 214 |
| chr11 | 109712348 | 109712561 | 214 |
| chr11 | 76380668  | 76380881  | 214 |
| chr1  | 150027340 | 150027553 | 214 |
| chr1  | 68866098  | 68866311  | 214 |
| chr9  | 104940477 | 104940689 | 213 |
| chr9  | 66540036  | 66540248  | 213 |
| chr8  | 89558974  | 89559186  | 213 |
| chr7  | 53386723  | 53386935  | 213 |
| chr5  | 112255430 | 112255642 | 213 |
| chr5  | 80717619  | 80717831  | 213 |
| chr5  | 73071698  | 73071910  | 213 |
| chr3  | 33773260  | 33773472  | 213 |
| chr3  | 15943478  | 15943690  | 213 |
| chr3  | 11515819  | 11516031  | 213 |
| chr29 | 38718821  | 38719033  | 213 |
| chr29 | 34293176  | 34293388  | 213 |
| chr29 | 29235830  | 29236042  | 213 |
| chr25 | 3181400   | 3181612   | 213 |
| chr23 | 31640059  | 31640271  | 213 |
| chr23 | 29034183  | 29034395  | 213 |
| chr23 | 14834216  | 14834428  | 213 |
| chr22 | 60649697  | 60649909  | 213 |
| chr22 | 50446020  | 50446232  | 213 |
| chr22 | 18293022  | 18293234  | 213 |
| chr21 | 66367057  | 66367269  | 213 |
| chr21 | 65850895  | 65851107  | 213 |
| chr21 | 34426280  | 34426492  | 213 |
| chr21 | 28890341  | 28890553  | 213 |
| chr2  | 75680107  | 75680319  | 213 |
| chr19 | 63508151  | 63508363  | 213 |
| chr19 | 59498963  | 59499175  | 213 |
| chr19 | 46790035  | 46790247  | 213 |
| chr18 | 40273426  | 40273638  | 213 |
| chr18 | 11699028  | 11699240  | 213 |
| chr17 | 57865088  | 57865300  | 213 |
| chr17 | 57300545  | 57300757  | 213 |
| chr16 | 55510525  | 55510737  | 213 |
| chr16 | 38378820  | 38379032  | 213 |
| chr14 | 11923830  | 11924042  | 213 |
| chr13 | 82591443  | 82591655  | 213 |
| chr13 | 55358762  | 55358974  | 213 |
| chr11 | 100882524 | 100882736 | 213 |

|       |           |           |     |
|-------|-----------|-----------|-----|
| chr10 | 4913733   | 4913945   | 213 |
| chr1  | 68860288  | 68860500  | 213 |
| chrX  | 87905580  | 87905791  | 212 |
| chr8  | 104101672 | 104101883 | 212 |
| chr7  | 52029546  | 52029757  | 212 |
| chr7  | 48862088  | 48862299  | 212 |
| chr5  | 30495326  | 30495537  | 212 |
| chr4  | 107111445 | 107111656 | 212 |
| chr3  | 116918299 | 116918510 | 212 |
| chr3  | 62177774  | 62177985  | 212 |
| chr3  | 20570890  | 20571101  | 212 |
| chr3  | 9862515   | 9862726   | 212 |
| chr29 | 17820409  | 17820620  | 212 |
| chr27 | 29601804  | 29602015  | 212 |
| chr26 | 48625345  | 48625556  | 212 |
| chr26 | 48465028  | 48465239  | 212 |
| chr25 | 40916220  | 40916431  | 212 |
| chr24 | 60984785  | 60984996  | 212 |
| chr23 | 11036811  | 11037022  | 212 |
| chr21 | 65736867  | 65737078  | 212 |
| chr21 | 57570920  | 57571131  | 212 |
| chr20 | 45424072  | 45424283  | 212 |
| chr20 | 11171424  | 11171635  | 212 |
| chr19 | 56476267  | 56476478  | 212 |
| chr19 | 53549229  | 53549440  | 212 |
| chr19 | 15120504  | 15120715  | 212 |
| chr18 | 54352961  | 54353172  | 212 |
| chr18 | 45653189  | 45653400  | 212 |
| chr18 | 18053794  | 18054005  | 212 |
| chr18 | 13557217  | 13557428  | 212 |
| chr17 | 67964880  | 67965091  | 212 |
| chr16 | 38778741  | 38778952  | 212 |
| chr15 | 76726779  | 76726990  | 212 |
| chr15 | 32176531  | 32176742  | 212 |
| chr14 | 1891909   | 1892120   | 212 |
| chr13 | 75646296  | 75646507  | 212 |
| chr13 | 75304399  | 75304610  | 212 |
| chr13 | 57420370  | 57420581  | 212 |
| chr13 | 53910423  | 53910634  | 212 |
| chr12 | 33625156  | 33625367  | 212 |
| chr11 | 49412352  | 49412563  | 212 |
| chr10 | 66940895  | 66941106  | 212 |
| chr1  | 84504400  | 84504611  | 212 |
| chr1  | 82835366  | 82835577  | 212 |
| chr9  | 106128840 | 106129050 | 211 |
| chr7  | 13078594  | 13078804  | 211 |
| chr6  | 63068659  | 63068869  | 211 |
| chr5  | 111371265 | 111371475 | 211 |
| chr5  | 60046482  | 60046692  | 211 |
| chr5  | 28835995  | 28836205  | 211 |

|       |           |           |     |
|-------|-----------|-----------|-----|
| chr3  | 114929807 | 114930017 | 211 |
| chr29 | 39101801  | 39102011  | 211 |
| chr28 | 33365772  | 33365982  | 211 |
| chr27 | 47160942  | 47161152  | 211 |
| chr27 | 35969493  | 35969703  | 211 |
| chr25 | 37258136  | 37258346  | 211 |
| chr25 | 34297674  | 34297884  | 211 |
| chr25 | 28059447  | 28059657  | 211 |
| chr25 | 18747464  | 18747674  | 211 |
| chr25 | 2373262   | 2373472   | 211 |
| chr23 | 49737878  | 49738088  | 211 |
| chr21 | 20024265  | 20024475  | 211 |
| chr2  | 111371799 | 111372009 | 211 |
| chr19 | 45773826  | 45774036  | 211 |
| chr19 | 34715834  | 34716044  | 211 |
| chr19 | 12399432  | 12399642  | 211 |
| chr18 | 49470623  | 49470833  | 211 |
| chr18 | 21191689  | 21191899  | 211 |
| chr18 | 10440693  | 10440903  | 211 |
| chr17 | 48528138  | 48528348  | 211 |
| chr16 | 75233294  | 75233504  | 211 |
| chr16 | 50351522  | 50351732  | 211 |
| chr16 | 48801483  | 48801693  | 211 |
| chr15 | 75808829  | 75809039  | 211 |
| chr15 | 75286667  | 75286877  | 211 |
| chr15 | 64866426  | 64866636  | 211 |
| chr14 | 14820631  | 14820841  | 211 |
| chr13 | 79917524  | 79917734  | 211 |
| chr13 | 68547554  | 68547764  | 211 |
| chr13 | 63495399  | 63495609  | 211 |
| chr13 | 44616230  | 44616440  | 211 |
| chr13 | 41697784  | 41697994  | 211 |
| chr13 | 19122751  | 19122961  | 211 |
| chr13 | 15049844  | 15050054  | 211 |
| chr11 | 108323712 | 108323922 | 211 |
| chr11 | 82949860  | 82950070  | 211 |
| chr11 | 76335782  | 76335992  | 211 |
| chr11 | 12871456  | 12871666  | 211 |
| chr10 | 89492542  | 89492752  | 211 |
| chr10 | 74848001  | 74848211  | 211 |
| chr10 | 18403649  | 18403859  | 211 |
| chr10 | 17228924  | 17229134  | 211 |
| chr1  | 153842292 | 153842502 | 211 |
| chr1  | 1581195   | 1581405   | 211 |
| chr8  | 108216561 | 108216770 | 210 |
| chr8  | 73927079  | 73927288  | 210 |
| chr8  | 65717023  | 65717232  | 210 |
| chr8  | 5347396   | 5347605   | 210 |
| chr7  | 51916590  | 51916799  | 210 |
| chr7  | 3931424   | 3931633   | 210 |



|       |           |           |     |
|-------|-----------|-----------|-----|
| chr6  | 114987887 | 114988096 | 210 |
| chr5  | 124659224 | 124659433 | 210 |
| chr5  | 112147263 | 112147472 | 210 |
| chr5  | 91672037  | 91672246  | 210 |
| chr5  | 28110485  | 28110694  | 210 |
| chr4  | 69933042  | 69933251  | 210 |
| chr29 | 27059315  | 27059524  | 210 |
| chr27 | 5681786   | 5681995   | 210 |
| chr26 | 48671362  | 48671571  | 210 |
| chr26 | 44958440  | 44958649  | 210 |
| chr26 | 37906175  | 37906384  | 210 |
| chr25 | 41206575  | 41206784  | 210 |
| chr25 | 36447832  | 36448041  | 210 |
| chr25 | 35364238  | 35364447  | 210 |
| chr25 | 26202167  | 26202376  | 210 |
| chr24 | 59867525  | 59867734  | 210 |
| chr24 | 43329994  | 43330203  | 210 |
| chr22 | 38155418  | 38155627  | 210 |
| chr22 | 15007845  | 15008054  | 210 |
| chr21 | 68024678  | 68024887  | 210 |
| chr2  | 135046673 | 135046882 | 210 |
| chr18 | 57365149  | 57365358  | 210 |
| chr18 | 50032929  | 50033138  | 210 |
| chr18 | 44112435  | 44112644  | 210 |
| chr18 | 32947775  | 32947984  | 210 |
| chr18 | 11539571  | 11539780  | 210 |
| chr17 | 76499296  | 76499505  | 210 |
| chr17 | 69501311  | 69501520  | 210 |
| chr16 | 60265036  | 60265245  | 210 |
| chr16 | 60075716  | 60075925  | 210 |
| chr15 | 55214339  | 55214548  | 210 |
| chr14 | 5926659   | 5926868   | 210 |
| chr13 | 77683170  | 77683379  | 210 |
| chr13 | 61264702  | 61264911  | 210 |
| chr12 | 52444630  | 52444839  | 210 |
| chr12 | 33087922  | 33088131  | 210 |
| chr11 | 10406044  | 10406253  | 210 |
| chr9  | 26943981  | 26944189  | 209 |
| chr8  | 7991347   | 7991555   | 209 |
| chr7  | 44621243  | 44621451  | 209 |
| chr7  | 17504329  | 17504537  | 209 |
| chr5  | 125829305 | 125829513 | 209 |
| chr4  | 120860450 | 120860658 | 209 |
| chr3  | 127655155 | 127655363 | 209 |
| chr3  | 35664368  | 35664576  | 209 |
| chr29 | 31788807  | 31789015  | 209 |
| chr26 | 44851086  | 44851294  | 209 |
| chr26 | 43471832  | 43472040  | 209 |
| chr26 | 31464186  | 31464394  | 209 |
| chr26 | 22334363  | 22334571  | 209 |

|       |           |           |     |
|-------|-----------|-----------|-----|
| chr25 | 35884966  | 35885174  | 209 |
| chr25 | 33285508  | 33285716  | 209 |
| chr23 | 32675505  | 32675713  | 209 |
| chr23 | 15969290  | 15969498  | 209 |
| chr22 | 29219897  | 29220105  | 209 |
| chr21 | 59710423  | 59710631  | 209 |
| chr2  | 126733791 | 126733999 | 209 |
| chr2  | 75954982  | 75955190  | 209 |
| chr19 | 59245823  | 59246031  | 209 |
| chr19 | 42540987  | 42541195  | 209 |
| chr19 | 41385518  | 41385726  | 209 |
| chr19 | 24031637  | 24031845  | 209 |
| chr19 | 23731878  | 23732086  | 209 |
| chr19 | 12604585  | 12604793  | 209 |
| chr17 | 70375868  | 70376076  | 209 |
| chr17 | 64156104  | 64156312  | 209 |
| chr17 | 63501120  | 63501328  | 209 |
| chr17 | 57768043  | 57768251  | 209 |
| chr16 | 26491028  | 26491236  | 209 |
| chr15 | 75622228  | 75622436  | 209 |
| chr15 | 74713948  | 74714156  | 209 |
| chr15 | 22849929  | 22850137  | 209 |
| chr14 | 68723496  | 68723704  | 209 |
| chr14 | 61147896  | 61148104  | 209 |
| chr14 | 26476674  | 26476882  | 209 |
| chr13 | 77538366  | 77538574  | 209 |
| chr13 | 73436639  | 73436847  | 209 |
| chr13 | 55103165  | 55103373  | 209 |
| chr13 | 39117392  | 39117600  | 209 |
| chr12 | 34294788  | 34294996  | 209 |
| chr11 | 70718026  | 70718234  | 209 |
| chr11 | 48988272  | 48988480  | 209 |
| chr11 | 34074293  | 34074501  | 209 |
| chr11 | 14167405  | 14167613  | 209 |
| chrX  | 41264384  | 41264591  | 208 |
| chr8  | 73777429  | 73777636  | 208 |
| chr6  | 120423948 | 120424155 | 208 |
| chr6  | 67343810  | 67344017  | 208 |
| chr5  | 125255832 | 125256039 | 208 |
| chr5  | 120516363 | 120516570 | 208 |
| chr5  | 114248738 | 114248945 | 208 |
| chr5  | 113294555 | 113294762 | 208 |
| chr5  | 31293337  | 31293544  | 208 |
| chr4  | 65087319  | 65087526  | 208 |
| chr3  | 117344291 | 117344498 | 208 |
| chr29 | 37481054  | 37481261  | 208 |
| chr29 | 37015094  | 37015301  | 208 |
| chr28 | 43886654  | 43886861  | 208 |
| chr26 | 32143420  | 32143627  | 208 |
| chr25 | 1266690   | 1266897   | 208 |

|       |           |           |     |
|-------|-----------|-----------|-----|
| chr24 | 48932282  | 48932489  | 208 |
| chr23 | 16868693  | 16868900  | 208 |
| chr23 | 8423183   | 8423390   | 208 |
| chr22 | 59983049  | 59983256  | 208 |
| chr22 | 50853362  | 50853569  | 208 |
| chr21 | 65551716  | 65551923  | 208 |
| chr21 | 34647204  | 34647411  | 208 |
| chr21 | 25608519  | 25608726  | 208 |
| chr20 | 74643375  | 74643582  | 208 |
| chr20 | 4498576   | 4498783   | 208 |
| chr2  | 139997804 | 139998011 | 208 |
| chr2  | 139613829 | 139614036 | 208 |
| chr19 | 54734095  | 54734302  | 208 |
| chr19 | 45734728  | 45734935  | 208 |
| chr19 | 39211144  | 39211351  | 208 |
| chr19 | 32852287  | 32852494  | 208 |
| chr18 | 51217408  | 51217615  | 208 |
| chr17 | 70338061  | 70338268  | 208 |
| chr15 | 64478089  | 64478296  | 208 |
| chr15 | 28715731  | 28715938  | 208 |
| chr14 | 63515305  | 63515512  | 208 |
| chr14 | 2881812   | 2882019   | 208 |
| chr12 | 32835481  | 32835688  | 208 |
| chr11 | 28790373  | 28790580  | 208 |
| chr11 | 14497008  | 14497215  | 208 |
| chr10 | 84036227  | 84036434  | 208 |
| chr10 | 20457969  | 20458176  | 208 |
| chr10 | 6061964   | 6062171   | 208 |
| chr1  | 74783777  | 74783984  | 208 |
| chr8  | 116250732 | 116250938 | 207 |
| chr8  | 8823152   | 8823358   | 207 |
| chr7  | 37875521  | 37875727  | 207 |
| chr5  | 112090140 | 112090346 | 207 |
| chr4  | 123943170 | 123943376 | 207 |
| chr3  | 71913089  | 71913295  | 207 |
| chr29 | 36561952  | 36562158  | 207 |
| chr29 | 1483480   | 1483686   | 207 |
| chr28 | 11370848  | 11371054  | 207 |
| chr27 | 26975060  | 26975266  | 207 |
| chr27 | 15987850  | 15988056  | 207 |
| chr26 | 31025520  | 31025726  | 207 |
| chr24 | 35333417  | 35333623  | 207 |
| chr24 | 14228735  | 14228941  | 207 |
| chr23 | 42624311  | 42624517  | 207 |
| chr23 | 36830988  | 36831194  | 207 |
| chr23 | 10570449  | 10570655  | 207 |
| chr21 | 28055625  | 28055831  | 207 |
| chr20 | 33564060  | 33564266  | 207 |
| chr19 | 53939601  | 53939807  | 207 |
| chr19 | 46833763  | 46833969  | 207 |

|       |               |           |     |
|-------|---------------|-----------|-----|
| chr19 | 19119790      | 19119996  | 207 |
| chr19 | 17093068      | 17093274  | 207 |
| chr17 | 70254855      | 70255061  | 207 |
| chr16 | 68980649      | 68980855  | 207 |
| chr16 | 2285370       | 2285576   | 207 |
| chr15 | 33731715      | 33731921  | 207 |
| chr13 | 54395457      | 54395663  | 207 |
| chr12 | 74515694      | 74515900  | 207 |
| chr12 | 14806121      | 14806327  | 207 |
| chr10 | 14020969      | 14021175  | 207 |
| chr9  | 18886979      | 18887184  | 206 |
| chr8  | 76954650      | 76954855  | 206 |
| chr7  | 111087575     | 111087780 | 206 |
| chr5  | 120461869     | 120462074 | 206 |
| chr5  | 115664951     | 115665156 | 206 |
| chr5  | 111325203     | 111325408 | 206 |
| chr3  | 123220393     | 123220598 | 206 |
| chr3  | 62948131      | 62948336  | 206 |
| chr3  | 35963259      | 35963464  | 206 |
| chr29 | 33572994      | 33573199  | 206 |
| chr27 | 31473248      | 31473453  | 206 |
| chr26 | 44017801      | 44018006  | 206 |
| chr25 | 41529310      | 41529515  | 206 |
| chr25 | 3172680       | 3172885   | 206 |
| chr24 | 61544219      | 61544424  | 206 |
| chr24 | 39748732      | 39748937  | 206 |
| chr22 | 48290429      | 48290634  | 206 |
| chr21 | 34022200      | 34022405  | 206 |
| chr21 | 20616576      | 20616781  | 206 |
| chr20 | 6132047       | 6132252   | 206 |
| chr20 | 2465079       | 2465284   | 206 |
| chr19 | 7768054       | 7768259   | 206 |
| chr18 | 43401378      | 43401583  | 206 |
| chr18 | 11779092      | 11779297  | 206 |
| chr17 | 70287784      | 70287989  | 206 |
| chr17 | 63467660      | 63467865  | 206 |
| chr17 | 58812387      | 58812592  | 206 |
| chr16 | 47606236      | 47606441  | 206 |
| chr15 | 52369627      | 52369832  | 206 |
| chr12 | 34368807      | 34369012  | 206 |
| chr12 | 14936311      | 14936516  | 206 |
| chr11 | 77572953      | 77573158  | 206 |
| chr11 | 50898355      | 50898560  | 206 |
| chr10 | 105121652     | 105121857 | 206 |
| chr1  | 108512556     | 108512761 | 206 |
| chr1  | 68096010      | 68096215  | 206 |
| chr7  | 18842225      | 18842429  | 205 |
| chr7  | 480153 480357 | 205       |     |
| chr4  | 7514856       | 7515060   | 205 |
| chr3  | 122617233     | 122617437 | 205 |

|       |           |           |     |
|-------|-----------|-----------|-----|
| chr3  | 115054944 | 115055148 | 205 |
| chr3  | 34007893  | 34008097  | 205 |
| chr3  | 15763931  | 15764135  | 205 |
| chr3  | 9110369   | 9110573   | 205 |
| chr29 | 48899972  | 48900176  | 205 |
| chr29 | 23091766  | 23091970  | 205 |
| chr29 | 17617024  | 17617228  | 205 |
| chr28 | 17355860  | 17356064  | 205 |
| chr25 | 30867947  | 30868151  | 205 |
| chr25 | 21765447  | 21765651  | 205 |
| chr24 | 52674479  | 52674683  | 205 |
| chr24 | 50130212  | 50130416  | 205 |
| chr23 | 22776050  | 22776254  | 205 |
| chr23 | 8394877   | 8395081   | 205 |
| chr22 | 53950828  | 53951032  | 205 |
| chr22 | 51118184  | 51118388  | 205 |
| chr21 | 58744890  | 58745094  | 205 |
| chr21 | 58632036  | 58632240  | 205 |
| chr21 | 20034056  | 20034260  | 205 |
| chr2  | 130117490 | 130117694 | 205 |
| chr2  | 76377709  | 76377913  | 205 |
| chr19 | 17853334  | 17853538  | 205 |
| chr19 | 7930971   | 7931175   | 205 |
| chr18 | 47767660  | 47767864  | 205 |
| chr18 | 45424430  | 45424634  | 205 |
| chr18 | 25526467  | 25526671  | 205 |
| chr17 | 66185939  | 66186143  | 205 |
| chr16 | 38563727  | 38563931  | 205 |
| chr14 | 1926431   | 1926635   | 205 |
| chr13 | 62825334  | 62825538  | 205 |
| chr13 | 58625071  | 58625275  | 205 |
| chr12 | 84565120  | 84565324  | 205 |
| chr11 | 3866207   | 3866411   | 205 |
| chr10 | 102998397 | 102998601 | 205 |
| chr10 | 22290657  | 22290861  | 205 |
| chr10 | 20973801  | 20974005  | 205 |
| chr8  | 109039592 | 109039795 | 204 |
| chr8  | 108707097 | 108707300 | 204 |
| chr8  | 86962189  | 86962392  | 204 |
| chr7  | 48175135  | 48175338  | 204 |
| chr6  | 121868171 | 121868374 | 204 |
| chr5  | 110918957 | 110919160 | 204 |
| chr5  | 32920313  | 32920516  | 204 |
| chr4  | 117155409 | 117155612 | 204 |
| chr3  | 33832013  | 33832216  | 204 |
| chr3  | 30009238  | 30009441  | 204 |
| chr28 | 46070601  | 46070804  | 204 |
| chr24 | 35213534  | 35213737  | 204 |
| chr23 | 8335698   | 8335901   | 204 |
| chr22 | 55766365  | 55766568  | 204 |

|       |           |           |     |
|-------|-----------|-----------|-----|
| chr21 | 33583953  | 33584156  | 204 |
| chr20 | 72061094  | 72061297  | 204 |
| chr20 | 62159691  | 62159894  | 204 |
| chr2  | 140784883 | 140785086 | 204 |
| chr19 | 58853503  | 58853706  | 204 |
| chr18 | 49850395  | 49850598  | 204 |
| chr17 | 69483347  | 69483550  | 204 |
| chr17 | 55459053  | 55459256  | 204 |
| chr17 | 54566939  | 54567142  | 204 |
| chr16 | 74622003  | 74622206  | 204 |
| chr12 | 82256215  | 82256418  | 204 |
| chr12 | 33994426  | 33994629  | 204 |
| chr11 | 90353490  | 90353693  | 204 |
| chr10 | 88180127  | 88180330  | 204 |
| chr10 | 47321376  | 47321579  | 204 |
| chr1  | 145985826 | 145986029 | 204 |
| chr9  | 94456461  | 94456663  | 203 |
| chr7  | 51850571  | 51850773  | 203 |
| chr7  | 14729812  | 14730014  | 203 |
| chr7  | 7250565   | 7250767   | 203 |
| chr6  | 106978567 | 106978769 | 203 |
| chr5  | 122129605 | 122129807 | 203 |
| chr5  | 115331457 | 115331659 | 203 |
| chr5  | 32855915  | 32856117  | 203 |
| chr5  | 30337636  | 30337838  | 203 |
| chr3  | 124566190 | 124566392 | 203 |
| chr3  | 124098082 | 124098284 | 203 |
| chr3  | 91767939  | 91768141  | 203 |
| chr3  | 77662243  | 77662445  | 203 |
| chr3  | 52188199  | 52188401  | 203 |
| chr26 | 44039248  | 44039450  | 203 |
| chr26 | 18877833  | 18878035  | 203 |
| chr26 | 18206937  | 18207139  | 203 |
| chr24 | 59937888  | 59938090  | 203 |
| chr23 | 18025523  | 18025725  | 203 |
| chr23 | 11028005  | 11028207  | 203 |
| chr22 | 12074678  | 12074880  | 203 |
| chr2  | 123458875 | 123459077 | 203 |
| chr19 | 58373615  | 58373817  | 203 |
| chr19 | 58169586  | 58169788  | 203 |
| chr18 | 53355656  | 53355858  | 203 |
| chr18 | 53326858  | 53327060  | 203 |
| chr18 | 22708731  | 22708933  | 203 |
| chr16 | 66924625  | 66924827  | 203 |
| chr16 | 26257669  | 26257871  | 203 |
| chr14 | 1416875   | 1417077   | 203 |
| chr13 | 79542213  | 79542415  | 203 |
| chr13 | 58598418  | 58598620  | 203 |
| chr13 | 55533777  | 55533979  | 203 |
| chr6  | 67343584  | 67343785  | 202 |

|       |               |           |     |
|-------|---------------|-----------|-----|
| chr5  | 115175577     | 115175778 | 202 |
| chr4  | 72501257      | 72501458  | 202 |
| chr27 | 17056470      | 17056671  | 202 |
| chr24 | 1543380       | 1543581   | 202 |
| chr23 | 52670238      | 52670439  | 202 |
| chr22 | 60485458      | 60485659  | 202 |
| chr22 | 38939022      | 38939223  | 202 |
| chr22 | 13979836      | 13980037  | 202 |
| chr2  | 41368444      | 41368645  | 202 |
| chr19 | 14058093      | 14058294  | 202 |
| chr18 | 50918396      | 50918597  | 202 |
| chr18 | 43474705      | 43474906  | 202 |
| chr17 | 75130051      | 75130252  | 202 |
| chr17 | 53497637      | 53497838  | 202 |
| chr10 | 52921313      | 52921514  | 202 |
| chr10 | 45694780      | 45694981  | 202 |
| chr10 | 17389525      | 17389726  | 202 |
| chr7  | 53383092      | 53383292  | 201 |
| chr7  | 17307889      | 17308089  | 201 |
| chr6  | 20763074      | 20763274  | 201 |
| chr5  | 117219375     | 117219575 | 201 |
| chr5  | 33010403      | 33010603  | 201 |
| chr29 | 36202558      | 36202758  | 201 |
| chr26 | 50651244      | 50651444  | 201 |
| chr24 | 20765379      | 20765579  | 201 |
| chr22 | 52811497      | 52811697  | 201 |
| chr22 | 44557046      | 44557246  | 201 |
| chr22 | 30017345      | 30017545  | 201 |
| chr20 | 654168 654368 | 201       |     |
| chr2  | 35503325      | 35503525  | 201 |
| chr19 | 61200963      | 61201163  | 201 |
| chr19 | 41216509      | 41216709  | 201 |
| chr19 | 38945657      | 38945857  | 201 |
| chr19 | 15829572      | 15829772  | 201 |
| chr19 | 12692521      | 12692721  | 201 |
| chr18 | 21940316      | 21940516  | 201 |
| chr17 | 64358035      | 64358235  | 201 |
| chr17 | 18378366      | 18378566  | 201 |
| chr15 | 76004979      | 76005179  | 201 |
| chr15 | 32665035      | 32665235  | 201 |
| chr14 | 36733271      | 36733471  | 201 |
| chr13 | 75781645      | 75781845  | 201 |
| chr13 | 65890355      | 65890555  | 201 |
| chr13 | 56864666      | 56864866  | 201 |
| chr11 | 81557689      | 81557889  | 201 |
| chr11 | 77717549      | 77717749  | 201 |
| chr10 | 90745473      | 90745673  | 201 |
| chr10 | 17406247      | 17406447  | 201 |
| chr10 | 5027321       | 5027521   | 201 |
| chr10 | 4179262       | 4179462   | 201 |

|       |           |           |     |
|-------|-----------|-----------|-----|
| chr1  | 67621752  | 67621952  | 201 |
| chr8  | 7693009   | 7693208   | 200 |
| chr5  | 125337883 | 125338082 | 200 |
| chr5  | 111968711 | 111968910 | 200 |
| chr4  | 18589175  | 18589374  | 200 |
| chr3  | 35997796  | 35997995  | 200 |
| chr3  | 8598823   | 8599022   | 200 |
| chr24 | 36370402  | 36370601  | 200 |
| chr24 | 1122268   | 1122467   | 200 |
| chr20 | 8809952   | 8810151   | 200 |
| chr2  | 131307106 | 131307305 | 200 |
| chr18 | 23263017  | 23263216  | 200 |
| chr17 | 74556949  | 74557148  | 200 |
| chr14 | 76284503  | 76284702  | 200 |
| chr13 | 42676627  | 42676826  | 200 |
| chr11 | 49364312  | 49364511  | 200 |
| chr11 | 3887194   | 3887393   | 200 |
| chr10 | 84378139  | 84378338  | 200 |
| chr8  | 73738326  | 73738648  | 323 |
| chr19 | 59348761  | 59349226  | 466 |
| chr19 | 38181764  | 38182134  | 371 |
| chr21 | 22693996  | 22694371  | 376 |
| chr18 | 23618401  | 23618740  | 340 |
| chr22 | 16290230  | 16290494  | 265 |
| chr20 | 33371850  | 33372193  | 344 |
| chr22 | 50742728  | 50743041  | 314 |
| chr19 | 63958559  | 63958850  | 292 |
| chr23 | 52669581  | 52669864  | 284 |
| chr9  | 35969828  | 35970107  | 280 |
| chr11 | 103730919 | 103731167 | 249 |
| chr18 | 12730529  | 12730773  | 245 |
| chr16 | 47128955  | 47129199  | 245 |
| chr7  | 10409056  | 10409294  | 239 |
| chr5  | 114233602 | 114233835 | 234 |
| chr15 | 36262726  | 36262957  | 232 |
| chr7  | 14212721  | 14212945  | 225 |
| chr24 | 5108034   | 5108256   | 223 |
| chr8  | 73866029  | 73866249  | 221 |
| chr8  | 73846995  | 73847211  | 217 |
| chr7  | 15688418  | 15688634  | 217 |
| chr9  | 90432833  | 90433036  | 204 |
| chr19 | 13691650  | 13691853  | 204 |
| chr7  | 51645801  | 51646001  | 201 |
| chr29 | 31977292  | 31977491  | 200 |
| chr26 | 18163353  | 18163621  | 269 |
| chr8  | 73336839  | 73337049  | 211 |
| chr16 | 38567828  | 38568341  | 514 |
| chr17 | 70407689  | 70408138  | 450 |
| chr8  | 77123643  | 77123979  | 337 |
| chr7  | 10642502  | 10642937  | 436 |



|       |               |           |     |
|-------|---------------|-----------|-----|
| chr29 | 29657500      | 29657928  | 429 |
| chr13 | 74407181      | 74407576  | 396 |
| chr5  | 10535714      | 10536098  | 385 |
| chr26 | 20981152      | 20981503  | 352 |
| chr12 | 82572842      | 82573135  | 294 |
| chr3  | 23075385      | 23075674  | 290 |
| chr29 | 49245390      | 49245773  | 384 |
| chr19 | 45541110      | 45541383  | 274 |
| chr3  | 105753056     | 105753449 | 394 |
| chr17 | 72938095      | 72938478  | 384 |
| chr25 | 38164875      | 38165232  | 358 |
| chr19 | 58208270      | 58208594  | 325 |
| chr17 | 62020190      | 62020504  | 315 |
| chr6  | 73764238      | 73764498  | 261 |
| chr8  | 23965839      | 23966089  | 251 |
| chr23 | 31044278      | 31044512  | 235 |
| chr1  | 153895980     | 153896203 | 224 |
| chr23 | 27973672      | 27974037  | 366 |
| chr13 | 76475106      | 76475432  | 327 |
| chr3  | 15426643      | 15426912  | 270 |
| chr11 | 14242252      | 14242500  | 249 |
| chr2  | 128596799     | 128597043 | 245 |
| chr18 | 49957796      | 49958018  | 223 |
| chr15 | 24672751      | 24672967  | 217 |
| chr5  | 119144767     | 119145095 | 329 |
| chr19 | 47375752      | 47376068  | 317 |
| chr10 | 83570429      | 83570723  | 295 |
| chr13 | 73887474      | 73887746  | 273 |
| chr7  | 46125027      | 46125286  | 260 |
| chr17 | 70255461      | 70255719  | 259 |
| chr9  | 503984 504234 | 251       |     |
| chr16 | 47200506      | 47200755  | 250 |
| chr1  | 151603045     | 151603291 | 247 |
| chr15 | 28646498      | 28646741  | 244 |
| chr2  | 111242287     | 111242528 | 242 |
| chr5  | 9593943       | 9594174   | 232 |
| chr13 | 55108908      | 55109136  | 229 |
| chr20 | 8615611       | 8615837   | 227 |
| chr19 | 39059421      | 39059645  | 225 |
| chr29 | 50417587      | 50417810  | 224 |
| chr8  | 65749541      | 65749760  | 220 |
| chr19 | 38777978      | 38778197  | 220 |
| chr3  | 36031811      | 36032029  | 219 |
| chr9  | 43851976      | 43852193  | 218 |
| chr14 | 59528348      | 59528565  | 218 |
| chr4  | 117155136     | 117155352 | 217 |
| chr7  | 38205018      | 38205232  | 215 |
| chr7  | 17401566      | 17401778  | 213 |
| chr24 | 20395726      | 20395937  | 212 |
| chr8  | 80219387      | 80219597  | 211 |

|       |           |           |     |
|-------|-----------|-----------|-----|
| chr3  | 125631381 | 125631591 | 211 |
| chr10 | 41872471  | 41872681  | 211 |
| chr26 | 21794593  | 21794801  | 209 |
| chr16 | 77707279  | 77707487  | 209 |
| chr1  | 96011114  | 96011322  | 209 |
| chr26 | 20847157  | 20847362  | 206 |
| chr8  | 73773782  | 73773986  | 205 |
| chr28 | 18890357  | 18890561  | 205 |
| chr18 | 24309044  | 24309246  | 203 |
| chr10 | 26171268  | 26171468  | 201 |
| chr8  | 73484488  | 73484748  | 261 |
| chr8  | 23625916  | 23626145  | 230 |
| chr1  | 153863575 | 153863802 | 228 |
| chr8  | 73731766  | 73731990  | 225 |
| chr8  | 73728740  | 73728957  | 218 |
| chr7  | 87967783  | 87967983  | 201 |
| chr3  | 113389068 | 113389506 | 439 |
| chr4  | 33880920  | 33881512  | 593 |
| chr13 | 2455053   | 2455591   | 539 |
| chr18 | 24011434  | 24011957  | 524 |
| chr23 | 17666321  | 17666805  | 485 |
| chr19 | 64760020  | 64760491  | 472 |
| chr25 | 40239493  | 40239962  | 470 |
| chr17 | 63306117  | 63306576  | 460 |
| chr19 | 60760387  | 60760842  | 456 |
| chr22 | 60650113  | 60650562  | 450 |
| chr17 | 72723918  | 72724366  | 449 |
| chr29 | 35157127  | 35157573  | 447 |
| chr24 | 48615929  | 48616366  | 438 |
| chr22 | 16196964  | 16197400  | 437 |
| chr10 | 20200332  | 20200767  | 436 |
| chr1  | 128139166 | 128139598 | 433 |
| chr29 | 18205550  | 18205980  | 431 |
| chr24 | 58618606  | 58619020  | 415 |
| chr19 | 12608891  | 12609289  | 399 |
| chr18 | 57601686  | 57602075  | 390 |
| chr7  | 14299368  | 14299751  | 384 |
| chr16 | 69243742  | 69244125  | 384 |
| chr12 | 9158466   | 9158848   | 383 |
| chr24 | 20687238  | 20687616  | 379 |
| chr13 | 68489196  | 68489570  | 375 |
| chr12 | 32498502  | 32498874  | 373 |
| chr19 | 19112424  | 19112794  | 371 |
| chr10 | 90297273  | 90297638  | 366 |
| chr25 | 28184866  | 28185224  | 359 |
| chr22 | 12836069  | 12836423  | 355 |
| chr28 | 34122258  | 34122604  | 347 |
| chr16 | 40903019  | 40903365  | 347 |
| chr29 | 50396901  | 50397246  | 346 |
| chr13 | 53876137  | 53876476  | 340 |

|       |               |           |     |
|-------|---------------|-----------|-----|
| chr10 | 33987034      | 33987372  | 339 |
| chr21 | 9483167       | 9483503   | 337 |
| chr6  | 105329839     | 105330174 | 336 |
| chr5  | 113466712     | 113467044 | 333 |
| chr8  | 24131481      | 24131812  | 332 |
| chr15 | 75550144      | 75550475  | 332 |
| chr13 | 41700626      | 41700957  | 332 |
| chr6  | 96163781      | 96164110  | 330 |
| chr27 | 35931644      | 35931972  | 329 |
| chr21 | 6999501       | 6999829   | 329 |
| chr2  | 134483739     | 134484059 | 321 |
| chr29 | 34988152      | 34988471  | 320 |
| chr27 | 853717 854027 | 311       |     |
| chr13 | 55722933      | 55723243  | 311 |
| chr8  | 65238281      | 65238590  | 310 |
| chr13 | 76162117      | 76162425  | 309 |
| chr5  | 50541749      | 50542051  | 303 |
| chr13 | 77655783      | 77656084  | 302 |
| chr12 | 36411852      | 36412151  | 300 |
| chr22 | 44908812      | 44909108  | 297 |
| chr22 | 52810933      | 52811228  | 296 |
| chr12 | 31532595      | 31532890  | 296 |
| chr10 | 13541774      | 13542066  | 293 |
| chr3  | 105733411     | 105733702 | 292 |
| chr10 | 13048951      | 13049239  | 289 |
| chr1  | 19196054      | 19196339  | 286 |
| chr2  | 75826786      | 75827065  | 280 |
| chr10 | 14991343      | 14991609  | 267 |
| chr26 | 23483247      | 23483501  | 255 |
| chr29 | 41469383      | 41469635  | 253 |
| chr10 | 69119442      | 69119685  | 244 |
| chr7  | 52315018      | 52315259  | 242 |
| chr10 | 20429675      | 20429916  | 242 |
| chr11 | 3167994       | 3168234   | 241 |
| chr28 | 34041238      | 34041463  | 226 |
| chr7  | 58198914      | 58199542  | 629 |
| chr3  | 125199552     | 125200101 | 550 |
| chr11 | 24009517      | 24009982  | 466 |
| chr23 | 28033374      | 28033836  | 463 |
| chr4  | 52526568      | 52526995  | 428 |
| chr18 | 63027820      | 63028216  | 397 |
| chr1  | 63805555      | 63805949  | 395 |
| chr4  | 121391044     | 121391437 | 394 |
| chr2  | 21881630      | 21882023  | 394 |
| chr18 | 43160013      | 43160400  | 388 |
| chr3  | 4349589       | 4349963   | 375 |
| chr21 | 33806244      | 33806618  | 375 |
| chr5  | 30476589      | 30476962  | 374 |
| chr14 | 53327 53700   | 374       |     |
| chr13 | 41745734      | 41746103  | 370 |

|       |               |           |     |
|-------|---------------|-----------|-----|
| chr17 | 64148748      | 64149114  | 367 |
| chr25 | 3269732       | 3270096   | 365 |
| chr15 | 421133 421495 | 363       |     |
| chr19 | 48438255      | 48438613  | 359 |
| chr2  | 137235332     | 137235685 | 354 |
| chr18 | 4075727       | 4076077   | 351 |
| chr5  | 73173309      | 73173657  | 349 |
| chr16 | 38735124      | 38735470  | 347 |
| chr3  | 89888388      | 89888724  | 337 |
| chr16 | 47981315      | 47981651  | 337 |
| chr29 | 46029427      | 46029761  | 335 |
| chr14 | 22491925      | 22492256  | 332 |
| chr23 | 27952190      | 27952519  | 330 |
| chr11 | 107181162     | 107181491 | 330 |
| chr25 | 38565107      | 38565434  | 328 |
| chr7  | 18731048      | 18731373  | 326 |
| chr6  | 61949048      | 61949372  | 325 |
| chr16 | 39533111      | 39533428  | 318 |
| chr15 | 28823090      | 28823403  | 314 |
| chr5  | 79801606      | 79801917  | 312 |
| chr5  | 115156531     | 115156840 | 310 |
| chr18 | 34062991      | 34063300  | 310 |
| chr1  | 148004070     | 148004377 | 308 |
| chr19 | 38719062      | 38719368  | 307 |
| chr11 | 14040077      | 14040380  | 304 |
| chr19 | 60684504      | 60684806  | 303 |
| chr25 | 38835916      | 38836216  | 301 |
| chr26 | 25207792      | 25208091  | 300 |
| chr24 | 59662659      | 59662957  | 299 |
| chr7  | 60979561      | 60979858  | 298 |
| chr23 | 8467348       | 8467645   | 298 |
| chr5  | 28747501      | 28747797  | 297 |
| chr25 | 37802629      | 37802925  | 297 |
| chr18 | 56626945      | 56627240  | 296 |
| chr3  | 33846184      | 33846478  | 295 |
| chr22 | 30301541      | 30301835  | 295 |
| chr11 | 84505414      | 84505707  | 294 |
| chr10 | 88152881      | 88153172  | 292 |
| chr18 | 7117234       | 7117524   | 291 |
| chr26 | 48498266      | 48498555  | 290 |
| chr7  | 38176864      | 38177151  | 288 |
| chr18 | 48792437      | 48792724  | 288 |
| chr7  | 12984708      | 12984991  | 284 |
| chr19 | 59189165      | 59189448  | 284 |
| chr16 | 73888119      | 73888397  | 279 |
| chr13 | 68501268      | 68501546  | 279 |
| chr11 | 51895527      | 51895804  | 278 |
| chr29 | 46517831      | 46518107  | 277 |
| chr19 | 12609728      | 12610004  | 277 |
| chr19 | 53976127      | 53976401  | 275 |

|       |           |           |     |
|-------|-----------|-----------|-----|
| chr15 | 64499133  | 64499406  | 274 |
| chr29 | 48299469  | 48299741  | 273 |
| chr15 | 53944487  | 53944758  | 272 |
| chr19 | 13507875  | 13508145  | 271 |
| chr11 | 70900570  | 70900837  | 268 |
| chr16 | 41447810  | 41448076  | 267 |
| chr29 | 48333211  | 48333472  | 262 |
| chr26 | 42049161  | 42049420  | 260 |
| chr2  | 123252429 | 123252686 | 258 |
| chr19 | 47854269  | 47854526  | 258 |
| chr22 | 12971800  | 12972055  | 256 |
| chr13 | 66489710  | 66489965  | 256 |
| chr18 | 6954318   | 6954572   | 255 |
| chr12 | 15304606  | 15304860  | 255 |
| chr22 | 55538170  | 55538423  | 254 |
| chr11 | 44985965  | 44986217  | 253 |
| chr18 | 54943182  | 54943432  | 251 |
| chr3  | 119300267 | 119300516 | 250 |
| chr16 | 38934475  | 38934724  | 250 |
| chr8  | 89535325  | 89535572  | 248 |
| chr14 | 5909111   | 5909355   | 245 |
| chr7  | 43310103  | 43310343  | 241 |
| chr29 | 37693839  | 37694067  | 229 |
| chr2  | 110551676 | 110551904 | 229 |
| chr21 | 27810962  | 27811187  | 226 |
| chr8  | 73339298  | 73339521  | 224 |
| chr21 | 67983336  | 67983558  | 223 |
| chr3  | 113616673 | 113617051 | 379 |
| chr11 | 74918067  | 74918444  | 378 |
| chr9  | 106825112 | 106825487 | 376 |
| chr21 | 25179529  | 25179904  | 376 |
| chr2  | 132408585 | 132408960 | 376 |
| chr17 | 56146392  | 56146756  | 365 |
| chr5  | 122666040 | 122666402 | 363 |
| chr23 | 48566381  | 48566739  | 359 |
| chr11 | 2538505   | 2538861   | 357 |
| chr2  | 111298269 | 111298622 | 354 |
| chr12 | 34070761  | 34071113  | 353 |
| chr28 | 34034717  | 34035065  | 349 |
| chr22 | 50763578  | 50763925  | 348 |
| chr20 | 70586527  | 70586873  | 347 |
| chr20 | 21012066  | 21012404  | 339 |
| chr21 | 34807921  | 34808257  | 337 |
| chr4  | 124319978 | 124320313 | 336 |
| chr11 | 109597515 | 109597848 | 334 |
| chr11 | 48676894  | 48677227  | 334 |
| chr29 | 49977387  | 49977713  | 327 |
| chr22 | 55475967  | 55476291  | 325 |
| chr28 | 33281882  | 33282205  | 324 |
| chr20 | 75033296  | 75033615  | 320 |

|       |           |           |     |
|-------|-----------|-----------|-----|
| chr17 | 72132688  | 72133007  | 320 |
| chr16 | 47972659  | 47972978  | 320 |
| chr7  | 51742545  | 51742862  | 318 |
| chr21 | 13954087  | 13954404  | 318 |
| chr11 | 9361917   | 9362232   | 316 |
| chr21 | 19442744  | 19443056  | 313 |
| chr19 | 59317560  | 59317872  | 313 |
| chr12 | 81712460  | 81712772  | 313 |
| chr16 | 39453695  | 39454005  | 311 |
| chr10 | 90289696  | 90290006  | 311 |
| chr17 | 66840003  | 66840311  | 309 |
| chr23 | 52734944  | 52735251  | 308 |
| chr2  | 115078160 | 115078467 | 308 |
| chr27 | 6036080   | 6036380   | 301 |
| chr4  | 110059592 | 110059891 | 300 |
| chr14 | 61259212  | 61259510  | 299 |
| chr19 | 20395933  | 20396230  | 298 |
| chr18 | 25478753  | 25479050  | 298 |
| chr22 | 50774505  | 50774801  | 297 |
| chr6  | 18296388  | 18296680  | 293 |
| chr25 | 37313216  | 37313508  | 293 |
| chr16 | 77533690  | 77533981  | 292 |
| chr3  | 88242625  | 88242914  | 290 |
| chr19 | 45256614  | 45256903  | 290 |
| chr8  | 72138074  | 72138362  | 289 |
| chr19 | 19846525  | 19846813  | 289 |
| chr2  | 126688320 | 126688607 | 288 |
| chr10 | 19486262  | 19486545  | 284 |
| chr19 | 26980207  | 26980489  | 283 |
| chr13 | 42629317  | 42629597  | 281 |
| chr12 | 82830619  | 82830897  | 279 |
| chr3  | 20519464  | 20519737  | 274 |
| chr26 | 22217560  | 22217832  | 273 |
| chr19 | 39163009  | 39163280  | 272 |
| chr8  | 108675763 | 108676033 | 271 |
| chr3  | 17392812  | 17393080  | 269 |
| chr17 | 75936450  | 75936710  | 261 |
| chr2  | 124292051 | 124292308 | 258 |
| chr9  | 100490623 | 100490879 | 257 |
| chr11 | 40060559  | 40060815  | 257 |
| chr19 | 51660655  | 51660906  | 252 |
| chr13 | 61824362  | 61824608  | 247 |
| chr7  | 19246111  | 19246355  | 245 |
| chr29 | 33599601  | 33599839  | 239 |
| chr27 | 16786512  | 16786749  | 238 |
| chr23 | 12347207  | 12347444  | 238 |
| chr17 | 6380046   | 6380279   | 234 |
| chr11 | 28485698  | 28485923  | 226 |
| chr25 | 35984049  | 35984271  | 223 |
| chr12 | 15864459  | 15864679  | 221 |

|       |               |           |     |
|-------|---------------|-----------|-----|
| chr3  | 22534235      | 22534454  | 220 |
| chrX  | 85689755      | 85689965  | 211 |
| chr1  | 132658871     | 132659256 | 386 |
| chr1  | 1467797       | 1468173   | 377 |
| chr14 | 5727549       | 5727914   | 366 |
| chr19 | 35106182      | 35106545  | 364 |
| chr8  | 80129460      | 80129815  | 356 |
| chr23 | 15869316      | 15869671  | 356 |
| chr18 | 11689797      | 11690151  | 355 |
| chr16 | 38704323      | 38704672  | 350 |
| chr29 | 29558900      | 29559242  | 343 |
| chr19 | 14068327      | 14068669  | 343 |
| chr4  | 124189460     | 124189795 | 336 |
| chr20 | 913712 914046 | 335       |     |
| chr22 | 50733151      | 50733480  | 330 |
| chr23 | 8382977       | 8383296   | 320 |
| chr14 | 64002371      | 64002689  | 319 |
| chr23 | 31301419      | 31301736  | 318 |
| chr23 | 10952030      | 10952341  | 312 |
| chr13 | 78080687      | 78080998  | 312 |
| chr11 | 75098962      | 75099272  | 311 |
| chr21 | 61642828      | 61643135  | 308 |
| chr18 | 39594338      | 39594641  | 304 |
| chr15 | 21680819      | 21681119  | 301 |
| chr12 | 32172435      | 32172735  | 301 |
| chr3  | 115647368     | 115647665 | 298 |
| chr11 | 105985493     | 105985790 | 298 |
| chr5  | 46029742      | 46030037  | 296 |
| chr3  | 124614882     | 124615177 | 296 |
| chr13 | 77820154      | 77820448  | 295 |
| chr7  | 61015613      | 61015906  | 294 |
| chr8  | 63925253      | 63925545  | 293 |
| chr23 | 18457280      | 18457570  | 291 |
| chr7  | 45173795      | 45174084  | 290 |
| chr11 | 81348740      | 81349029  | 290 |
| chr12 | 15433304      | 15433592  | 289 |
| chr25 | 30458008      | 30458295  | 288 |
| chr15 | 24960923      | 24961209  | 287 |
| chr7  | 13012983      | 13013266  | 284 |
| chr9  | 45428020      | 45428301  | 282 |
| chr3  | 18507762      | 18508043  | 282 |
| chr5  | 124630410     | 124630690 | 281 |
| chr11 | 47410708      | 47410988  | 281 |
| chr13 | 59146314      | 59146593  | 280 |
| chr21 | 49303029      | 49303306  | 278 |
| chr19 | 59320676      | 59320951  | 276 |
| chr16 | 51485296      | 51485569  | 274 |
| chr4  | 96243103      | 96243375  | 273 |
| chr23 | 44992416      | 44992688  | 273 |
| chr19 | 34615494      | 34615765  | 272 |

|       |           |           |     |
|-------|-----------|-----------|-----|
| chr15 | 64498650  | 64498921  | 272 |
| chr8  | 38071025  | 38071294  | 270 |
| chr18 | 64268421  | 64268689  | 269 |
| chr19 | 65255137  | 65255403  | 267 |
| chr5  | 84608432  | 84608697  | 266 |
| chr4  | 6110374   | 6110639   | 266 |
| chr11 | 1194860   | 1195125   | 266 |
| chr19 | 39841788  | 39842052  | 265 |
| chr7  | 13284170  | 13284432  | 263 |
| chr11 | 67429673  | 67429935  | 263 |
| chr5  | 33577753  | 33578013  | 261 |
| chr17 | 64904190  | 64904450  | 261 |
| chr12 | 83901916  | 83902175  | 260 |
| chr26 | 20852232  | 20852490  | 259 |
| chr1  | 149329765 | 149330023 | 259 |
| chr28 | 26918027  | 26918284  | 258 |
| chr10 | 70092310  | 70092567  | 258 |
| chr6  | 13979117  | 13979372  | 256 |
| chr19 | 18432780  | 18433035  | 256 |
| chr8  | 72285524  | 72285778  | 255 |
| chr5  | 112950232 | 112950486 | 255 |
| chr3  | 35494855  | 35495109  | 255 |
| chr13 | 79665981  | 79666235  | 255 |
| chr26 | 50512341  | 50512594  | 254 |
| chr18 | 50212466  | 50212719  | 254 |
| chr18 | 46805672  | 46805924  | 253 |
| chr1  | 149441869 | 149442121 | 253 |
| chr21 | 33089889  | 33090140  | 252 |
| chr18 | 62215640  | 62215891  | 252 |
| chr8  | 73101761  | 73102011  | 251 |
| chr20 | 38730269  | 38730518  | 250 |
| chr13 | 60189122  | 60189371  | 250 |
| chr13 | 2465952   | 2466201   | 250 |
| chr29 | 39083661  | 39083909  | 249 |
| chr3  | 34799171  | 34799417  | 247 |
| chr19 | 41229727  | 41229973  | 247 |
| chr7  | 16340976  | 16341221  | 246 |
| chr4  | 68147475  | 68147720  | 246 |
| chr26 | 22238350  | 22238595  | 246 |
| chr22 | 59578096  | 59578341  | 246 |
| chr28 | 26062249  | 26062493  | 245 |
| chr6  | 18977569  | 18977812  | 244 |
| chr16 | 44372242  | 44372485  | 244 |
| chr7  | 17472287  | 17472529  | 243 |
| chr19 | 56093164  | 56093406  | 243 |
| chr3  | 121624080 | 121624321 | 242 |
| chr26 | 44883911  | 44884152  | 242 |
| chr26 | 37882667  | 37882908  | 242 |
| chr17 | 63302292  | 63302533  | 242 |
| chr13 | 68920198  | 68920439  | 242 |



|       |               |           |     |
|-------|---------------|-----------|-----|
| chr2  | 140129051     | 140129290 | 240 |
| chr25 | 21428924      | 21429162  | 239 |
| chr15 | 22288189      | 22288427  | 239 |
| chr21 | 66548359      | 66548596  | 238 |
| chr18 | 49553783      | 49554020  | 238 |
| chr14 | 8553117       | 8553354   | 238 |
| chr8  | 65880746      | 65880982  | 237 |
| chr24 | 57282644      | 57282880  | 237 |
| chr19 | 14996837      | 14997073  | 237 |
| chr11 | 104907873     | 104908109 | 237 |
| chrX  | 49532261      | 49532496  | 236 |
| chr16 | 46774451      | 46774686  | 236 |
| chr1  | 76555249      | 76555484  | 236 |
| chr8  | 72404403      | 72404637  | 235 |
| chr28 | 26414000      | 26414234  | 235 |
| chr13 | 40832260      | 40832494  | 235 |
| chr4  | 68022619      | 68022852  | 234 |
| chr24 | 20404051      | 20404284  | 234 |
| chr19 | 18331626      | 18331859  | 234 |
| chr29 | 33920451      | 33920683  | 233 |
| chr23 | 8855404       | 8855636   | 233 |
| chr4  | 95689853      | 95690084  | 232 |
| chr26 | 43267354      | 43267584  | 231 |
| chr15 | 33837485      | 33837715  | 231 |
| chr1  | 147086473     | 147086703 | 231 |
| chr9  | 106586962     | 106587191 | 230 |
| chr23 | 15853785      | 15854014  | 230 |
| chr16 | 68549349      | 68549578  | 230 |
| chr7  | 45699201      | 45699429  | 229 |
| chr28 | 35241007      | 35241235  | 229 |
| chr26 | 22351892      | 22352120  | 229 |
| chr20 | 3692773       | 3693001   | 229 |
| chr19 | 53058563      | 53058791  | 229 |
| chr19 | 39128506      | 39128734  | 229 |
| chr19 | 12299512      | 12299740  | 229 |
| chr16 | 2912602       | 2912830   | 229 |
| chr26 | 25208968      | 25209195  | 228 |
| chr19 | 41249571      | 41249798  | 228 |
| chr18 | 675349 675576 |           | 228 |
| chr7  | 43772605      | 43772831  | 227 |
| chr25 | 1944651       | 1944877   | 227 |
| chr23 | 27404083      | 27404309  | 227 |
| chr11 | 90370222      | 90370448  | 227 |
| chr4  | 14689739      | 14689964  | 226 |
| chr10 | 90239127      | 90239352  | 226 |
| chr24 | 60612680      | 60612904  | 225 |
| chr19 | 18369341      | 18369565  | 225 |
| chr12 | 32100832      | 32101056  | 225 |
| chr11 | 105668588     | 105668812 | 225 |
| chr11 | 12869160      | 12869384  | 225 |

|       |           |           |     |
|-------|-----------|-----------|-----|
| chr8  | 73479196  | 73479419  | 224 |
| chr26 | 44079341  | 44079564  | 224 |
| chr25 | 37206761  | 37206984  | 224 |
| chr23 | 10950371  | 10950594  | 224 |
| chr17 | 69432098  | 69432321  | 224 |
| chr15 | 81396433  | 81396656  | 224 |
| chr10 | 16893390  | 16893613  | 224 |
| chr7  | 45099682  | 45099904  | 223 |
| chr1  | 159069101 | 159069323 | 223 |
| chr3  | 15182813  | 15183034  | 222 |
| chr18 | 22016131  | 22016352  | 222 |
| chr1  | 153892052 | 153892273 | 222 |
| chr7  | 42154495  | 42154715  | 221 |
| chr5  | 114239954 | 114240174 | 221 |
| chr20 | 42348961  | 42349181  | 221 |
| chr18 | 11688469  | 11688689  | 221 |
| chr11 | 87909717  | 87909937  | 221 |
| chr5  | 121240153 | 121240372 | 220 |
| chr2  | 111255096 | 111255315 | 220 |
| chr17 | 64099950  | 64100169  | 220 |
| chr17 | 63504796  | 63505015  | 220 |
| chr15 | 28665570  | 28665789  | 220 |
| chr5  | 80740879  | 80741097  | 219 |
| chr28 | 26792521  | 26792739  | 219 |
| chr26 | 44318233  | 44318451  | 219 |
| chr19 | 44364789  | 44365007  | 219 |
| chr13 | 41776720  | 41776938  | 219 |
| chr11 | 29960635  | 29960853  | 219 |
| chr1  | 75048065  | 75048283  | 219 |
| chr7  | 51357935  | 51358152  | 218 |
| chr3  | 83532341  | 83532558  | 218 |
| chr29 | 27281948  | 27282165  | 218 |
| chr24 | 63029423  | 63029640  | 218 |
| chr14 | 22075799  | 22076016  | 218 |
| chr13 | 18356278  | 18356495  | 218 |
| chr11 | 105032691 | 105032908 | 218 |
| chr3  | 113419970 | 113420186 | 217 |
| chr21 | 23241614  | 23241830  | 217 |
| chr17 | 48276065  | 48276281  | 217 |
| chr1  | 147112409 | 147112625 | 217 |
| chr4  | 122594753 | 122594968 | 216 |
| chr3  | 124415302 | 124415517 | 216 |
| chr3  | 15388045  | 15388260  | 216 |
| chr29 | 49262719  | 49262934  | 216 |
| chr20 | 42348681  | 42348896  | 216 |
| chr19 | 7199129   | 7199344   | 216 |
| chr16 | 48799581  | 48799796  | 216 |
| chr11 | 98364527  | 98364742  | 216 |
| chr9  | 35989546  | 35989760  | 215 |
| chr5  | 10778225  | 10778439  | 215 |

|       |               |           |     |
|-------|---------------|-----------|-----|
| chr3  | 125892734     | 125892948 | 215 |
| chr3  | 122336546     | 122336760 | 215 |
| chr20 | 3508325       | 3508539   | 215 |
| chr17 | 70405957      | 70406171  | 215 |
| chr16 | 46918672      | 46918886  | 215 |
| chr16 | 44301987      | 44302201  | 215 |
| chr11 | 108926673     | 108926887 | 215 |
| chr29 | 48795649      | 48795862  | 214 |
| chr13 | 11413117      | 11413330  | 214 |
| chr5  | 114990508     | 114990720 | 213 |
| chr23 | 11845487      | 11845699  | 213 |
| chr20 | 1277061       | 1277273   | 213 |
| chr11 | 44969938      | 44970150  | 213 |
| chr9  | 78652652      | 78652863  | 212 |
| chr3  | 15436427      | 15436638  | 212 |
| chr23 | 51288445      | 51288656  | 212 |
| chr21 | 22722180      | 22722391  | 212 |
| chr2  | 127006072     | 127006283 | 212 |
| chr2  | 68413709      | 68413920  | 212 |
| chr15 | 81081515      | 81081726  | 212 |
| chr19 | 44325559      | 44325769  | 211 |
| chr13 | 75557018      | 75557228  | 211 |
| chr1  | 68884061      | 68884271  | 211 |
| chr5  | 125469202     | 125469411 | 210 |
| chr3  | 115992456     | 115992665 | 210 |
| chr26 | 43874548      | 43874757  | 210 |
| chr26 | 20285093      | 20285302  | 210 |
| chr24 | 65016565      | 65016774  | 210 |
| chr24 | 830058 830267 | 210       |     |
| chr2  | 111848276     | 111848485 | 210 |
| chr19 | 13689112      | 13689321  | 210 |
| chr13 | 52670116      | 52670325  | 210 |
| chr11 | 104987497     | 104987706 | 210 |
| chr1  | 87340688      | 87340897  | 210 |
| chr8  | 64685259      | 64685467  | 209 |
| chr8  | 7535822       | 7536030   | 209 |
| chr7  | 10056772      | 10056980  | 209 |
| chr4  | 123334493     | 123334701 | 209 |
| chr22 | 53943597      | 53943805  | 209 |
| chr22 | 48308263      | 48308471  | 209 |
| chr21 | 34809262      | 34809470  | 209 |
| chr7  | 18436919      | 18437126  | 208 |
| chr5  | 10612112      | 10612319  | 208 |
| chr3  | 35969204      | 35969411  | 208 |
| chr24 | 40819466      | 40819673  | 208 |
| chr22 | 55476899      | 55477106  | 208 |
| chr2  | 139237182     | 139237389 | 208 |
| chr18 | 57352111      | 57352318  | 208 |
| chr14 | 34044266      | 34044473  | 208 |
| chr3  | 13455262      | 13455468  | 207 |

|       |           |           |     |
|-------|-----------|-----------|-----|
| chr25 | 44040542  | 44040748  | 207 |
| chr23 | 15873304  | 15873510  | 207 |
| chr21 | 27841092  | 27841298  | 207 |
| chr2  | 131004504 | 131004710 | 207 |
| chr2  | 123023808 | 123024014 | 207 |
| chr18 | 51000947  | 51001153  | 207 |
| chr18 | 24336837  | 24337043  | 207 |
| chr13 | 59372304  | 59372510  | 207 |
| chr11 | 74519854  | 74520060  | 207 |
| chr6  | 121906621 | 121906826 | 206 |
| chr23 | 27232372  | 27232577  | 206 |
| chr23 | 11846866  | 11847071  | 206 |
| chr22 | 49567116  | 49567321  | 206 |
| chr19 | 39026339  | 39026544  | 206 |
| chr11 | 88511746  | 88511951  | 206 |
| chr2  | 111871783 | 111871987 | 205 |
| chr19 | 12430592  | 12430796  | 205 |
| chr14 | 25849535  | 25849739  | 205 |
| chr11 | 10492943  | 10493147  | 205 |
| chr1  | 76216254  | 76216458  | 205 |
| chr3  | 124528275 | 124528478 | 204 |
| chr23 | 53270547  | 53270750  | 204 |
| chr23 | 19872019  | 19872222  | 204 |
| chr14 | 61319755  | 61319958  | 204 |
| chr11 | 96398599  | 96398802  | 204 |
| chr11 | 91587024  | 91587227  | 204 |
| chr10 | 24716082  | 24716285  | 204 |
| chr1  | 4705182   | 4705385   | 204 |
| chr5  | 60156151  | 60156353  | 203 |
| chr23 | 8290586   | 8290788   | 203 |
| chr19 | 25997480  | 25997682  | 203 |
| chr19 | 24291218  | 24291420  | 203 |
| chr10 | 4890920   | 4891122   | 203 |
| chr5  | 32850688  | 32850889  | 202 |
| chr26 | 23494530  | 23494731  | 202 |
| chr24 | 58963572  | 58963773  | 202 |
| chr19 | 16215594  | 16215795  | 202 |
| chr13 | 40994151  | 40994352  | 202 |
| chr10 | 3522191   | 3522392   | 202 |
| chr19 | 29754201  | 29754401  | 201 |
| chr19 | 26346879  | 26347079  | 201 |
| chr11 | 78789950  | 78790150  | 201 |
| chr1  | 58977458  | 58977658  | 201 |
| chr5  | 60740284  | 60740483  | 200 |
| chr28 | 46067695  | 46067894  | 200 |
| chr24 | 65016325  | 65016524  | 200 |
| chr24 | 40779385  | 40779584  | 200 |
| chr20 | 3349375   | 3349574   | 200 |
| chr18 | 4082953   | 4083152   | 200 |
| chr16 | 68547567  | 68547766  | 200 |

|       |           |           |     |
|-------|-----------|-----------|-----|
| chr16 | 47125696  | 47125895  | 200 |
| chr15 | 61075097  | 61075296  | 200 |
| chr15 | 54180019  | 54180218  | 200 |
| chr15 | 28652762  | 28652961  | 200 |
| chr18 | 16528465  | 16529094  | 630 |
| chr11 | 74208042  | 74208641  | 600 |
| chr11 | 98809502  | 98810080  | 579 |
| chr29 | 18226845  | 18227405  | 561 |
| chr12 | 48061149  | 48061708  | 560 |
| chr26 | 23890129  | 23890672  | 544 |
| chr18 | 17919578  | 17920106  | 529 |
| chr2  | 137658477 | 137658994 | 518 |
| chr13 | 67078153  | 67078665  | 513 |
| chr2  | 124330033 | 124330540 | 508 |
| chr19 | 6503154   | 6503661   | 508 |
| chr1  | 27348839  | 27349344  | 506 |
| chr16 | 49471994  | 49472496  | 503 |
| chr5  | 28869197  | 28869677  | 481 |
| chr27 | 26726741  | 26727217  | 477 |
| chr12 | 14926919  | 14927384  | 466 |
| chr14 | 42302396  | 42302860  | 465 |
| chr2  | 110248422 | 110248885 | 464 |
| chr4  | 110811182 | 110811643 | 462 |
| chr18 | 57313531  | 57313987  | 457 |
| chr23 | 9378803   | 9379254   | 452 |
| chr11 | 99650125  | 99650565  | 441 |
| chr4  | 99603969  | 99604407  | 439 |
| chr13 | 68059284  | 68059722  | 439 |
| chr11 | 103767029 | 103767463 | 435 |
| chr19 | 26950251  | 26950681  | 431 |
| chr16 | 44466863  | 44467288  | 426 |
| chr20 | 72734458  | 72734881  | 424 |
| chr18 | 18667929  | 18668349  | 421 |
| chr10 | 14980603  | 14981022  | 420 |
| chr21 | 6541407   | 6541824   | 418 |
| chr16 | 44116038  | 44116454  | 417 |
| chr12 | 9261327   | 9261741   | 415 |
| chr29 | 45784514  | 45784920  | 407 |
| chr29 | 33680758  | 33681156  | 399 |
| chr25 | 33498060  | 33498458  | 399 |
| chr22 | 50443827  | 50444225  | 399 |
| chr2  | 134675128 | 134675526 | 399 |
| chr15 | 13592340  | 13592738  | 399 |
| chr5  | 114967566 | 114967963 | 398 |
| chr11 | 100421502 | 100421899 | 398 |
| chr13 | 58902719  | 58903115  | 397 |
| chr19 | 59384948  | 59385342  | 395 |
| chr17 | 49450888  | 49451282  | 395 |
| chr1  | 147917408 | 147917800 | 393 |
| chr8  | 74366562  | 74366953  | 392 |

|       |             |           |     |
|-------|-------------|-----------|-----|
| chr18 | 11409868    | 11410258  | 391 |
| chr15 | 56054064    | 56054454  | 391 |
| chr7  | 11038057    | 11038446  | 390 |
| chr2  | 139224397   | 139224786 | 390 |
| chr5  | 30307655    | 30308043  | 389 |
| chr16 | 23823723    | 23824111  | 389 |
| chr3  | 116422265   | 116422652 | 388 |
| chr25 | 38336298    | 38336685  | 388 |
| chr5  | 122300244   | 122300630 | 387 |
| chr19 | 38639126    | 38639511  | 386 |
| chr21 | 65755864    | 65756248  | 385 |
| chr15 | 64477102    | 64477485  | 384 |
| chr7  | 5242819     | 5243200   | 382 |
| chr3  | 118048280   | 118048661 | 382 |
| chr23 | 8555281     | 8555662   | 382 |
| chr21 | 18886400    | 18886779  | 380 |
| chr9  | 104837474   | 104837852 | 379 |
| chr16 | 32991 33369 | 379       |     |
| chr26 | 31902925    | 31903302  | 378 |
| chr18 | 62959063    | 62959439  | 377 |
| chr7  | 15610818    | 15611192  | 375 |
| chr23 | 42011569    | 42011943  | 375 |
| chr22 | 52571902    | 52572276  | 375 |
| chr11 | 13367332    | 13367705  | 374 |
| chr8  | 7825908     | 7826280   | 373 |
| chr19 | 63938079    | 63938451  | 373 |
| chr13 | 15077001    | 15077373  | 373 |
| chr10 | 12731278    | 12731648  | 371 |
| chr21 | 57577909    | 57578278  | 370 |
| chr18 | 6999042     | 6999411   | 370 |
| chr18 | 6620027     | 6620396   | 370 |
| chr21 | 64435831    | 64436199  | 369 |
| chr2  | 135594594   | 135594962 | 369 |
| chr12 | 34856535    | 34856903  | 369 |
| chr27 | 34873761    | 34874128  | 368 |
| chr25 | 30910637    | 30911004  | 368 |
| chr22 | 50581612    | 50581979  | 368 |
| chr5  | 81388210    | 81388575  | 366 |
| chr19 | 34575238    | 34575602  | 365 |
| chr15 | 26913350    | 26913713  | 364 |
| chr9  | 44106814    | 44107176  | 363 |
| chr19 | 41376784    | 41377146  | 363 |
| chr13 | 45922875    | 45923237  | 363 |
| chr5  | 113280420   | 113280781 | 362 |
| chr19 | 41263626    | 41263987  | 362 |
| chr13 | 41287279    | 41287640  | 362 |
| chr28 | 40398747    | 40399107  | 361 |
| chr21 | 57385080    | 57385440  | 361 |
| chr3  | 117288249   | 117288608 | 360 |
| chr19 | 26979157    | 26979516  | 360 |

|       |           |           |     |
|-------|-----------|-----------|-----|
| chr19 | 10882560  | 10882919  | 360 |
| chr17 | 73198822  | 73199180  | 359 |
| chr23 | 18797116  | 18797473  | 358 |
| chr18 | 54971280  | 54971637  | 358 |
| chr25 | 38040408  | 38040764  | 357 |
| chr11 | 2547307   | 2547663   | 357 |
| chr8  | 10339989  | 10340343  | 355 |
| chr28 | 7523465   | 7523819   | 355 |
| chr21 | 57825089  | 57825443  | 355 |
| chr20 | 38404190  | 38404544  | 355 |
| chr19 | 39960348  | 39960702  | 355 |
| chr13 | 58043469  | 58043823  | 355 |
| chr11 | 28456899  | 28457253  | 355 |
| chr17 | 74485376  | 74485729  | 354 |
| chr14 | 66754705  | 66755058  | 354 |
| chr9  | 106695807 | 106696159 | 353 |
| chr29 | 30496772  | 30497124  | 353 |
| chr23 | 27540839  | 27541191  | 353 |
| chr18 | 62032238  | 62032590  | 353 |
| chr15 | 22503969  | 22504321  | 353 |
| chr24 | 24864751  | 24865102  | 352 |
| chr21 | 47621515  | 47621866  | 352 |
| chr19 | 54556026  | 54556377  | 352 |
| chr17 | 74060168  | 74060519  | 352 |
| chr6  | 51514201  | 51514551  | 351 |
| chr14 | 34049723  | 34050073  | 351 |
| chr21 | 32874066  | 32874415  | 350 |
| chr2  | 74329505  | 74329854  | 350 |
| chr23 | 11778062  | 11778410  | 349 |
| chr14 | 66254421  | 66254769  | 349 |
| chr18 | 12041364  | 12041711  | 348 |
| chr13 | 62386160  | 62386507  | 348 |
| chr10 | 17072850  | 17073197  | 348 |
| chr9  | 100050219 | 100050565 | 347 |
| chr5  | 1095448   | 1095794   | 347 |
| chr3  | 17422425  | 17422770  | 346 |
| chr15 | 66484432  | 66484777  | 346 |
| chr8  | 104185333 | 104185677 | 345 |
| chr8  | 102176611 | 102176955 | 345 |
| chr8  | 65343431  | 65343775  | 345 |
| chr7  | 4711827   | 4712171   | 345 |
| chr1  | 2818474   | 2818818   | 345 |
| chr24 | 39053639  | 39053982  | 344 |
| chr13 | 39804114  | 39804457  | 344 |
| chr6  | 67961049  | 67961391  | 343 |
| chr3  | 28870199  | 28870541  | 343 |
| chr2  | 139318767 | 139319109 | 343 |
| chr18 | 11828635  | 11828976  | 342 |
| chr17 | 70158648  | 70158989  | 342 |
| chr1  | 75718462  | 75718803  | 342 |

|       |               |           |     |
|-------|---------------|-----------|-----|
| chr5  | 111378674     | 111379014 | 341 |
| chr29 | 34560312      | 34560651  | 340 |
| chr29 | 26783191      | 26783530  | 340 |
| chr9  | 75441516      | 75441854  | 339 |
| chr7  | 21054994      | 21055332  | 339 |
| chr25 | 35678510      | 35678848  | 339 |
| chr9  | 100249722     | 100250059 | 338 |
| chr5  | 115611245     | 115611582 | 338 |
| chr18 | 62901174      | 62901511  | 338 |
| chr28 | 26772268      | 26772604  | 337 |
| chr24 | 31244330      | 31244666  | 337 |
| chr18 | 380121 380457 | 337       |     |
| chr17 | 53521534      | 53521870  | 337 |
| chr14 | 8428330       | 8428666   | 337 |
| chr28 | 38880887      | 38881222  | 336 |
| chr27 | 35837057      | 35837392  | 336 |
| chr25 | 28175421      | 28175756  | 336 |
| chr20 | 13125685      | 13126020  | 336 |
| chr15 | 26319934      | 26320269  | 336 |
| chr13 | 61830544      | 61830879  | 336 |
| chr17 | 68806330      | 68806664  | 335 |
| chr17 | 66541000      | 66541334  | 335 |
| chr17 | 51000954      | 51001288  | 335 |
| chr11 | 75399713      | 75400047  | 335 |
| chr4  | 116556928     | 116557261 | 334 |
| chr3  | 108387433     | 108387766 | 334 |
| chr2  | 139805594     | 139805927 | 334 |
| chr19 | 57673269      | 57673602  | 334 |
| chr19 | 39014596      | 39014929  | 334 |
| chr13 | 59668771      | 59669104  | 334 |
| chr11 | 104989154     | 104989487 | 334 |
| chr17 | 62507626      | 62507958  | 333 |
| chr4  | 123981595     | 123981926 | 332 |
| chr29 | 48628955      | 48629286  | 332 |
| chr21 | 66054384      | 66054715  | 332 |
| chr19 | 64047140      | 64047471  | 332 |
| chr10 | 10547478      | 10547809  | 332 |
| chr21 | 9477814       | 9478144   | 331 |
| chr13 | 66889202      | 66889532  | 331 |
| chr1  | 1553237       | 1553567   | 331 |
| chr5  | 113123568     | 113123897 | 330 |
| chr29 | 48809552      | 48809881  | 330 |
| chr3  | 126895679     | 126896007 | 329 |
| chr19 | 41267520      | 41267848  | 329 |
| chr13 | 55480453      | 55480781  | 329 |
| chr11 | 73302654      | 73302981  | 328 |
| chr25 | 34376921      | 34377247  | 327 |
| chr19 | 41867177      | 41867502  | 326 |
| chr17 | 63409646      | 63409971  | 326 |
| chr25 | 40361558      | 40361882  | 325 |



|       |           |           |     |
|-------|-----------|-----------|-----|
| chr23 | 8073869   | 8074193   | 325 |
| chr9  | 89869270  | 89869593  | 324 |
| chr22 | 55769096  | 55769418  | 323 |
| chr2  | 125905487 | 125905809 | 323 |
| chr19 | 27236885  | 27237207  | 323 |
| chr18 | 56235042  | 56235364  | 323 |
| chr7  | 62250041  | 62250362  | 322 |
| chr23 | 2558420   | 2558741   | 322 |
| chr22 | 56605597  | 56605918  | 322 |
| chr18 | 7095952   | 7096273   | 322 |
| chr1  | 68862240  | 68862561  | 322 |
| chr23 | 15806207  | 15806527  | 321 |
| chr13 | 77401257  | 77401577  | 321 |
| chr7  | 38163417  | 38163736  | 320 |
| chr24 | 58938360  | 58938679  | 320 |
| chr13 | 59689627  | 59689946  | 320 |
| chr9  | 45717212  | 45717530  | 319 |
| chr7  | 46836803  | 46837121  | 319 |
| chr19 | 54828377  | 54828695  | 319 |
| chr19 | 19778185  | 19778503  | 319 |
| chr18 | 32927412  | 32927730  | 319 |
| chr11 | 96395592  | 96395910  | 319 |
| chr22 | 7250477   | 7250794   | 318 |
| chr10 | 68220176  | 68220492  | 317 |
| chr10 | 11813743  | 11814059  | 317 |
| chr17 | 63091445  | 63091760  | 316 |
| chr16 | 75353724  | 75354039  | 316 |
| chr16 | 3108604   | 3108918   | 315 |
| chr7  | 16674195  | 16674507  | 313 |
| chr5  | 30455878  | 30456190  | 313 |
| chr2  | 138225778 | 138226090 | 313 |
| chr13 | 53513591  | 53513903  | 313 |
| chr12 | 35686638  | 35686950  | 313 |
| chr7  | 94366311  | 94366621  | 311 |
| chr19 | 33435308  | 33435618  | 311 |
| chr23 | 30530200  | 30530509  | 310 |
| chr22 | 56337121  | 56337430  | 310 |
| chr2  | 132244517 | 132244826 | 310 |
| chr17 | 68245938  | 68246247  | 310 |
| chr26 | 8707234   | 8707542   | 309 |
| chr14 | 7850453   | 7850761   | 309 |
| chr2  | 131477590 | 131477897 | 308 |
| chr14 | 9718892   | 9719199   | 308 |
| chr23 | 49877866  | 49878172  | 307 |
| chr19 | 56569709  | 56570015  | 307 |
| chr18 | 36844714  | 36845020  | 307 |
| chr12 | 82812840  | 82813146  | 307 |
| chr8  | 5809684   | 5809989   | 306 |
| chr29 | 30757931  | 30758236  | 306 |
| chr2  | 127007500 | 127007805 | 306 |

|       |           |           |     |
|-------|-----------|-----------|-----|
| chr18 | 33258828  | 33259133  | 306 |
| chr16 | 3122209   | 3122513   | 305 |
| chr16 | 2121337   | 2121641   | 305 |
| chr8  | 110912062 | 110912365 | 304 |
| chr10 | 52949273  | 52949576  | 304 |
| chr6  | 119387777 | 119388079 | 303 |
| chr3  | 26144238  | 26144540  | 303 |
| chr10 | 59995994  | 59996296  | 303 |
| chr9  | 75446063  | 75446364  | 302 |
| chr29 | 33902658  | 33902959  | 302 |
| chr23 | 30226749  | 30227050  | 302 |
| chr5  | 1183447   | 1183747   | 301 |
| chr10 | 28835822  | 28836122  | 301 |
| chrX  | 13648972  | 13649271  | 300 |
| chr26 | 18193119  | 18193418  | 300 |
| chr24 | 62675962  | 62676261  | 300 |
| chr24 | 50237196  | 50237495  | 300 |
| chr23 | 8210087   | 8210386   | 300 |
| chr18 | 3755514   | 3755813   | 300 |
| chr16 | 3641470   | 3641769   | 300 |
| chr15 | 19798591  | 19798890  | 300 |
| chr11 | 106327842 | 106328141 | 300 |
| chr24 | 33783830  | 33784127  | 298 |
| chr19 | 41252308  | 41252605  | 298 |
| chr13 | 17725502  | 17725799  | 298 |
| chr23 | 10940074  | 10940370  | 297 |
| chr25 | 36592850  | 36593145  | 296 |
| chr14 | 9583194   | 9583489   | 296 |
| chr13 | 14689091  | 14689386  | 296 |
| chr11 | 83893654  | 83893949  | 296 |
| chr5  | 113196316 | 113196610 | 295 |
| chr27 | 39089970  | 39090264  | 295 |
| chr26 | 34361109  | 34361403  | 295 |
| chr19 | 59251851  | 59252145  | 295 |
| chr17 | 62054443  | 62054737  | 295 |
| chr15 | 75938418  | 75938712  | 295 |
| chr12 | 84257902  | 84258196  | 295 |
| chr10 | 17011485  | 17011779  | 295 |
| chr26 | 31943485  | 31943778  | 294 |
| chr21 | 15487114  | 15487407  | 294 |
| chr15 | 74959798  | 74960091  | 294 |
| chr14 | 27317681  | 27317974  | 294 |
| chr9  | 52406599  | 52406891  | 293 |
| chr5  | 60916645  | 60916937  | 293 |
| chr16 | 30265722  | 30266014  | 293 |
| chr11 | 9236939   | 9237231   | 293 |
| chr3  | 28924876  | 28925167  | 292 |
| chr19 | 59204974  | 59205265  | 292 |
| chr2  | 108791665 | 108791954 | 290 |
| chr6  | 101881980 | 101882268 | 289 |

|       |           |           |     |
|-------|-----------|-----------|-----|
| chr15 | 27924211  | 27924499  | 289 |
| chr11 | 108415087 | 108415375 | 289 |
| chr27 | 39116561  | 39116848  | 288 |
| chr23 | 7830411   | 7830698   | 288 |
| chr2  | 97432551  | 97432838  | 288 |
| chr14 | 26471628  | 26471915  | 288 |
| chr25 | 38936353  | 38936639  | 287 |
| chr18 | 62213533  | 62213819  | 287 |
| chr18 | 12537009  | 12537294  | 286 |
| chr15 | 20945596  | 20945880  | 285 |
| chr24 | 20910352  | 20910635  | 284 |
| chr14 | 6389754   | 6390037   | 284 |
| chr12 | 84227332  | 84227615  | 284 |
| chr5  | 112288732 | 112289014 | 283 |
| chr22 | 60478378  | 60478660  | 283 |
| chr13 | 60401026  | 60401308  | 283 |
| chr15 | 29669651  | 29669932  | 282 |
| chr10 | 16234468  | 16234749  | 282 |
| chr8  | 75886314  | 75886594  | 281 |
| chr24 | 1153191   | 1153471   | 281 |
| chr9  | 104882413 | 104882692 | 280 |
| chr29 | 50012000  | 50012279  | 280 |
| chr2  | 108734233 | 108734511 | 279 |
| chr19 | 40973308  | 40973586  | 279 |
| chr12 | 82615411  | 82615689  | 279 |
| chr12 | 32525042  | 32525319  | 278 |
| chr8  | 10885645  | 10885921  | 277 |
| chr7  | 5294033   | 5294309   | 277 |
| chr7  | 5111260   | 5111536   | 277 |
| chr3  | 15960586  | 15960862  | 277 |
| chr24 | 36033318  | 36033594  | 277 |
| chr18 | 11845964  | 11846240  | 277 |
| chr17 | 66529406  | 66529682  | 277 |
| chr15 | 73804205  | 73804481  | 277 |
| chr3  | 113371724 | 113371997 | 274 |
| chr28 | 34064007  | 34064280  | 274 |
| chr26 | 48660283  | 48660556  | 274 |
| chr13 | 66953710  | 66953983  | 274 |
| chr11 | 103731180 | 103731453 | 274 |
| chr17 | 63301289  | 63301561  | 273 |
| chr29 | 44425918  | 44426189  | 272 |
| chr24 | 3952081   | 3952352   | 272 |
| chr15 | 74639766  | 74640037  | 272 |
| chr23 | 46017499  | 46017769  | 271 |
| chr8  | 23032784  | 23033053  | 270 |
| chr16 | 2441002   | 2441271   | 270 |
| chr1  | 137104453 | 137104722 | 270 |
| chr22 | 60365361  | 60365629  | 269 |
| chr2  | 138570617 | 138570885 | 269 |
| chr13 | 54950086  | 54950354  | 269 |

|       |               |           |     |
|-------|---------------|-----------|-----|
| chr12 | 32219835      | 32220103  | 269 |
| chr24 | 36422281      | 36422548  | 268 |
| chr10 | 17008162      | 17008429  | 268 |
| chr1  | 74092371      | 74092638  | 268 |
| chr5  | 29178794      | 29179060  | 267 |
| chr3  | 33934000      | 33934266  | 267 |
| chr2  | 131837546     | 131837812 | 267 |
| chr15 | 27094599      | 27094865  | 267 |
| chr26 | 42107887      | 42108152  | 266 |
| chr24 | 20554774      | 20555039  | 266 |
| chr2  | 48011371      | 48011636  | 266 |
| chr13 | 71360346      | 71360611  | 266 |
| chr10 | 12717983      | 12718248  | 266 |
| chr29 | 41722411      | 41722674  | 264 |
| chr24 | 41044043      | 41044306  | 264 |
| chr2  | 123023035     | 123023298 | 264 |
| chr19 | 64035250      | 64035513  | 264 |
| chr1  | 459497 459760 |           | 264 |
| chr27 | 34699225      | 34699487  | 263 |
| chr19 | 57054243      | 57054505  | 263 |
| chr13 | 53172021      | 53172283  | 263 |
| chr13 | 52919708      | 52919970  | 263 |
| chr27 | 15599770      | 15600031  | 262 |
| chr18 | 18454605      | 18454866  | 262 |
| chr13 | 59816048      | 59816309  | 262 |
| chr11 | 74473328      | 74473589  | 262 |
| chr10 | 20458500      | 20458761  | 262 |
| chr3  | 44990646      | 44990906  | 261 |
| chr27 | 28088517      | 28088776  | 260 |
| chr25 | 34494197      | 34494456  | 260 |
| chr11 | 46726288      | 46726547  | 260 |
| chrX  | 44939349      | 44939607  | 259 |
| chr3  | 22518985      | 22519243  | 259 |
| chr18 | 34058503      | 34058761  | 259 |
| chr16 | 48311777      | 48312035  | 259 |
| chr16 | 47148021      | 47148279  | 259 |
| chr16 | 43851609      | 43851866  | 258 |
| chr15 | 26538609      | 26538865  | 257 |
| chr17 | 67958494      | 67958748  | 255 |
| chr13 | 53033828      | 53034082  | 255 |
| chr12 | 20785376      | 20785630  | 255 |
| chr20 | 16814739      | 16814992  | 254 |
| chr3  | 113455476     | 113455728 | 253 |
| chr22 | 59422367      | 59422617  | 251 |
| chr15 | 64132150      | 64132400  | 251 |
| chr1  | 154760423     | 154760673 | 251 |
| chr22 | 30023863      | 30024112  | 250 |
| chr5  | 30541255      | 30541503  | 249 |
| chr26 | 21786862      | 21787110  | 249 |
| chr15 | 33491494      | 33491742  | 249 |

|       |               |           |     |
|-------|---------------|-----------|-----|
| chr21 | 26791226      | 26791473  | 248 |
| chr19 | 47309276      | 47309523  | 248 |
| chr3  | 115491222     | 115491468 | 247 |
| chr23 | 30219462      | 30219707  | 246 |
| chr8  | 72328729      | 72328973  | 245 |
| chr7  | 61081445      | 61081689  | 245 |
| chr18 | 56662512      | 56662755  | 244 |
| chr2  | 111745792     | 111746034 | 243 |
| chr12 | 25036733      | 25036974  | 242 |
| chr23 | 27232579      | 27232819  | 241 |
| chr16 | 47235443      | 47235683  | 241 |
| chr15 | 74608522      | 74608762  | 241 |
| chr25 | 41649930      | 41650168  | 239 |
| chr5  | 112651839     | 112652073 | 235 |
| chr13 | 66686943      | 66687177  | 235 |
| chr8  | 107679370     | 107679602 | 233 |
| chr21 | 27264209      | 27264441  | 233 |
| chr2  | 108770183     | 108770415 | 233 |
| chr5  | 123651697     | 123651928 | 232 |
| chr25 | 22582024      | 22582255  | 232 |
| chr12 | 15336011      | 15336242  | 232 |
| chr9  | 104917695     | 104917925 | 231 |
| chr7  | 38259650      | 38259880  | 231 |
| chr29 | 37329222      | 37329451  | 230 |
| chr27 | 27689206      | 27689434  | 229 |
| chr16 | 47402831      | 47403059  | 229 |
| chr3  | 31728382      | 31728609  | 228 |
| chr15 | 25792341      | 25792565  | 225 |
| chr16 | 48822391      | 48822605  | 215 |
| chr15 | 24028786      | 24028996  | 211 |
| chr19 | 60820361      | 60820567  | 207 |
| chr23 | 48755575      | 48755779  | 205 |
| chr5  | 29711496      | 29712015  | 520 |
| chr5  | 28772896      | 28773393  | 498 |
| chr29 | 49510909      | 49511389  | 481 |
| chr17 | 55865483      | 55865961  | 479 |
| chr18 | 11371456      | 11371932  | 477 |
| chr19 | 6529172       | 6529619   | 448 |
| chr8  | 65342758      | 65343200  | 443 |
| chr3  | 35952901      | 35953342  | 442 |
| chr11 | 98364779      | 98365220  | 442 |
| chr23 | 8074246       | 8074670   | 425 |
| chr23 | 27543248      | 27543643  | 396 |
| chr9  | 106037300     | 106037694 | 395 |
| chr5  | 122318861     | 122319255 | 395 |
| chr21 | 28939624      | 28940018  | 395 |
| chr6  | 121058331     | 121058722 | 392 |
| chr24 | 60611253      | 60611644  | 392 |
| chr27 | 302357 302742 | 386       |     |
| chr19 | 43127769      | 43128154  | 386 |

|       |           |           |     |
|-------|-----------|-----------|-----|
| chr11 | 28546249  | 28546634  | 386 |
| chr3  | 113981579 | 113981962 | 384 |
| chr2  | 22087224  | 22087607  | 384 |
| chr17 | 70271536  | 70271918  | 383 |
| chr18 | 22856473  | 22856854  | 382 |
| chr2  | 127173189 | 127173567 | 379 |
| chr21 | 57147619  | 57147995  | 377 |
| chr21 | 2771050   | 2771426   | 377 |
| chr13 | 26035513  | 26035888  | 376 |
| chr3  | 111669604 | 111669978 | 375 |
| chr18 | 55195105  | 55195478  | 374 |
| chr23 | 28823685  | 28824055  | 371 |
| chr13 | 41758858  | 41759228  | 371 |
| chr1  | 158448755 | 158449125 | 371 |
| chr19 | 13821508  | 13821877  | 370 |
| chr7  | 53421707  | 53422074  | 368 |
| chr5  | 116950776 | 116951143 | 368 |
| chr19 | 24265593  | 24265960  | 368 |
| chr24 | 35304017  | 35304383  | 367 |
| chr18 | 47486539  | 47486905  | 367 |
| chr15 | 33144963  | 33145329  | 367 |
| chr1  | 144520468 | 144520834 | 367 |
| chr19 | 51904039  | 51904404  | 366 |
| chr18 | 11841808  | 11842171  | 364 |
| chr17 | 63266037  | 63266400  | 364 |
| chr11 | 70844184  | 70844547  | 364 |
| chr10 | 67039947  | 67040309  | 363 |
| chr17 | 70704638  | 70704999  | 362 |
| chr16 | 61071155  | 61071516  | 362 |
| chr16 | 38577308  | 38577669  | 362 |
| chr12 | 33979334  | 33979694  | 361 |
| chr7  | 29493887  | 29494246  | 360 |
| chr28 | 41283602  | 41283961  | 360 |
| chr17 | 64202907  | 64203266  | 360 |
| chr7  | 94367934  | 94368292  | 359 |
| chr27 | 29101060  | 29101418  | 359 |
| chr7  | 15625004  | 15625360  | 357 |
| chr6  | 121739856 | 121740212 | 357 |
| chr18 | 54862741  | 54863095  | 355 |
| chr18 | 23607651  | 23608005  | 355 |
| chr19 | 46128047  | 46128400  | 354 |
| chr18 | 47517161  | 47517514  | 354 |
| chr18 | 47486179  | 47486532  | 354 |
| chr16 | 67428753  | 67429106  | 354 |
| chr11 | 48367619  | 48367972  | 354 |
| chr27 | 32882982  | 32883334  | 353 |
| chr13 | 46538530  | 46538882  | 353 |
| chr6  | 121053697 | 121054048 | 352 |
| chr3  | 4313701   | 4314052   | 352 |
| chr25 | 37960606  | 37960957  | 352 |

|       |           |           |     |
|-------|-----------|-----------|-----|
| chr11 | 107248029 | 107248380 | 352 |
| chr8  | 73883868  | 73884218  | 351 |
| chr29 | 29705433  | 29705783  | 351 |
| chr26 | 48661289  | 48661639  | 351 |
| chr25 | 1949681   | 1950031   | 351 |
| chr2  | 132465969 | 132466319 | 351 |
| chr17 | 56143468  | 56143818  | 351 |
| chr3  | 123234300 | 123234649 | 350 |
| chr15 | 30075306  | 30075654  | 349 |
| chr15 | 75921236  | 75921583  | 348 |
| chr4  | 104221520 | 104221866 | 347 |
| chr19 | 49384768  | 49385114  | 347 |
| chr18 | 5263648   | 5263994   | 347 |
| chr3  | 20466801  | 20467146  | 346 |
| chr5  | 113322520 | 113322864 | 345 |
| chr29 | 49988044  | 49988388  | 345 |
| chr23 | 48369662  | 48370006  | 345 |
| chr5  | 115542423 | 115542765 | 343 |
| chr13 | 42107886  | 42108228  | 343 |
| chr16 | 44301022  | 44301363  | 342 |
| chr12 | 73380308  | 73380649  | 342 |
| chr1  | 1595082   | 1595423   | 342 |
| chr26 | 18875251  | 18875591  | 341 |
| chr16 | 39072296  | 39072636  | 341 |
| chr5  | 125366195 | 125366534 | 340 |
| chr25 | 38095952  | 38096291  | 340 |
| chr23 | 25100363  | 25100702  | 340 |
| chr2  | 127973824 | 127974163 | 340 |
| chr10 | 17255590  | 17255929  | 340 |
| chr4  | 72226322  | 72226660  | 339 |
| chr3  | 121465777 | 121466115 | 339 |
| chr29 | 25776331  | 25776669  | 339 |
| chr20 | 8626144   | 8626482   | 339 |
| chr17 | 58812649  | 58812987  | 339 |
| chr12 | 77022556  | 77022894  | 339 |
| chr11 | 100414889 | 100415227 | 339 |
| chr19 | 60951810  | 60952147  | 338 |
| chr19 | 54640097  | 54640434  | 338 |
| chr16 | 2460548   | 2460885   | 338 |
| chr15 | 63689290  | 63689627  | 338 |
| chr14 | 30885044  | 30885381  | 338 |
| chr3  | 125587087 | 125587423 | 337 |
| chr7  | 45693602  | 45693937  | 336 |
| chr4  | 118013452 | 118013787 | 336 |
| chr29 | 51164321  | 51164656  | 336 |
| chr29 | 49173470  | 49173805  | 336 |
| chr26 | 51635663  | 51635998  | 336 |
| chr17 | 74605043  | 74605378  | 336 |
| chr6  | 18486451  | 18486785  | 335 |
| chr3  | 22899020  | 22899354  | 335 |

|       |               |           |     |
|-------|---------------|-----------|-----|
| chr25 | 37217862      | 37218196  | 335 |
| chr19 | 15848685      | 15849019  | 335 |
| chr11 | 71592820      | 71593154  | 335 |
| chr3  | 111677675     | 111678008 | 334 |
| chr24 | 843412 843745 | 334       |     |
| chr19 | 54863014      | 54863347  | 334 |
| chr19 | 54295493      | 54295826  | 334 |
| chr19 | 37654951      | 37655284  | 334 |
| chr16 | 44113561      | 44113894  | 334 |
| chr26 | 20937680      | 20938012  | 333 |
| chr24 | 64995607      | 64995939  | 333 |
| chr22 | 61184253      | 61184583  | 331 |
| chr2  | 125900917     | 125901247 | 331 |
| chr2  | 111351447     | 111351777 | 331 |
| chr11 | 107988038     | 107988368 | 331 |
| chr19 | 59286943      | 59287271  | 329 |
| chr16 | 48055711      | 48056039  | 329 |
| chr14 | 39050710      | 39051038  | 329 |
| chr13 | 59624689      | 59625017  | 329 |
| chr10 | 67025166      | 67025494  | 329 |
| chr8  | 73726448      | 73726775  | 328 |
| chr18 | 12789343      | 12789670  | 328 |
| chr15 | 27444816      | 27445143  | 328 |
| chr8  | 65877767      | 65878093  | 327 |
| chr23 | 27391623      | 27391949  | 327 |
| chr2  | 26612852      | 26613178  | 327 |
| chr17 | 70198505      | 70198831  | 327 |
| chr11 | 1129565       | 1129891   | 327 |
| chr22 | 61052817      | 61053142  | 326 |
| chr13 | 73927815      | 73928140  | 326 |
| chr13 | 59671677      | 59672002  | 326 |
| chr3  | 8219981       | 8220305   | 325 |
| chr25 | 8610537       | 8610861   | 325 |
| chr18 | 54647963      | 54648287  | 325 |
| chr17 | 70039279      | 70039603  | 325 |
| chr10 | 71234941      | 71235265  | 325 |
| chr7  | 54943437      | 54943760  | 324 |
| chr19 | 47851919      | 47852242  | 324 |
| chr10 | 66823521      | 66823844  | 324 |
| chr25 | 23562240      | 23562562  | 323 |
| chr22 | 60253018      | 60253340  | 323 |
| chr2  | 92350932      | 92351254  | 323 |
| chr19 | 41257067      | 41257389  | 323 |
| chr19 | 38598156      | 38598478  | 323 |
| chr13 | 77266433      | 77266755  | 323 |
| chr10 | 13586535      | 13586857  | 323 |
| chr3  | 35819244      | 35819565  | 322 |
| chr28 | 25381907      | 25382228  | 322 |
| chr25 | 37418735      | 37419056  | 322 |
| chr17 | 72960182      | 72960503  | 322 |



|       |               |           |     |
|-------|---------------|-----------|-----|
| chr7  | 5464592       | 5464912   | 321 |
| chr3  | 108998333     | 108998653 | 321 |
| chr23 | 49920033      | 49920353  | 321 |
| chr5  | 61555773      | 61556092  | 320 |
| chr4  | 34473105      | 34473424  | 320 |
| chr2  | 126367850     | 126368169 | 320 |
| chr12 | 37026209      | 37026528  | 320 |
| chr1  | 148462291     | 148462610 | 320 |
| chr19 | 38774209      | 38774527  | 319 |
| chr11 | 26721850      | 26722168  | 319 |
| chr9  | 87776820      | 87777137  | 318 |
| chr9  | 34930331      | 34930648  | 318 |
| chr5  | 81498547      | 81498864  | 318 |
| chr16 | 48000522      | 48000839  | 318 |
| chr13 | 80401218      | 80401535  | 318 |
| chr11 | 105245732     | 105246049 | 318 |
| chr8  | 85316490      | 85316806  | 317 |
| chr19 | 29693566      | 29693882  | 317 |
| chr18 | 51598169      | 51598485  | 317 |
| chr26 | 45863832      | 45864147  | 316 |
| chr21 | 59022800      | 59023115  | 316 |
| chr17 | 70133362      | 70133677  | 316 |
| chr5  | 28876592      | 28876906  | 315 |
| chr29 | 13618683      | 13618997  | 315 |
| chr23 | 10504557      | 10504871  | 315 |
| chr20 | 42313258      | 42313572  | 315 |
| chr20 | 33627884      | 33628198  | 315 |
| chr19 | 55483676      | 55483990  | 315 |
| chr10 | 12898623      | 12898937  | 315 |
| chr23 | 10984751      | 10985064  | 314 |
| chr23 | 7693515       | 7693828   | 314 |
| chr19 | 13582683      | 13582996  | 314 |
| chr19 | 47209571      | 47209883  | 313 |
| chr17 | 63419626      | 63419938  | 313 |
| chr13 | 59419260      | 59419572  | 313 |
| chr26 | 35019581      | 35019892  | 312 |
| chr26 | 18909361      | 18909672  | 312 |
| chr15 | 36357511      | 36357822  | 312 |
| chr8  | 80079479      | 80079789  | 311 |
| chr5  | 81085777      | 81086087  | 311 |
| chr26 | 17981859      | 17982169  | 311 |
| chr17 | 64917452      | 64917762  | 311 |
| chr11 | 104918461     | 104918771 | 311 |
| chr19 | 45026913      | 45027222  | 310 |
| chr8  | 104126576     | 104126884 | 309 |
| chr6  | 122431902     | 122432210 | 309 |
| chr3  | 11531174      | 11531482  | 309 |
| chr20 | 699664 699972 | 309       |     |
| chr13 | 62355448      | 62355756  | 309 |
| chr3  | 35603305      | 35603611  | 307 |

|       |           |           |     |
|-------|-----------|-----------|-----|
| chr29 | 46234496  | 46234802  | 307 |
| chr2  | 131671037 | 131671343 | 307 |
| chr11 | 97736470  | 97736776  | 307 |
| chr5  | 35492785  | 35493090  | 306 |
| chr21 | 67045074  | 67045379  | 306 |
| chr19 | 16700310  | 16700615  | 306 |
| chr18 | 51025903  | 51026208  | 306 |
| chr13 | 54202868  | 54203173  | 306 |
| chr11 | 11743074  | 11743379  | 306 |
| chr10 | 17701579  | 17701884  | 306 |
| chr10 | 7183641   | 7183946   | 306 |
| chr8  | 26282481  | 26282785  | 305 |
| chr28 | 30819436  | 30819740  | 305 |
| chr17 | 70522763  | 70523067  | 305 |
| chr10 | 92299720  | 92300024  | 305 |
| chr10 | 74859636  | 74859940  | 305 |
| chr7  | 43365057  | 43365360  | 304 |
| chr26 | 50065786  | 50066089  | 304 |
| chr19 | 45562841  | 45563144  | 304 |
| chr19 | 30022595  | 30022898  | 304 |
| chr27 | 1339405   | 1339707   | 303 |
| chr26 | 14886094  | 14886396  | 303 |
| chr25 | 39282087  | 39282389  | 303 |
| chr19 | 60535935  | 60536237  | 303 |
| chr15 | 81352103  | 81352405  | 303 |
| chr5  | 62111280  | 62111581  | 302 |
| chr29 | 33979622  | 33979923  | 302 |
| chr23 | 17573642  | 17573943  | 302 |
| chr20 | 67460072  | 67460373  | 302 |
| chr2  | 111983782 | 111984083 | 302 |
| chr18 | 54815082  | 54815383  | 302 |
| chr18 | 11347182  | 11347483  | 302 |
| chr13 | 38253190  | 38253491  | 302 |
| chr11 | 11721922  | 11722223  | 302 |
| chr29 | 27219894  | 27220194  | 301 |
| chr29 | 25552687  | 25552987  | 301 |
| chr2  | 74322394  | 74322694  | 301 |
| chr16 | 41068053  | 41068353  | 301 |
| chr15 | 75167766  | 75168066  | 301 |
| chr8  | 45760738  | 45761037  | 300 |
| chr25 | 37329025  | 37329324  | 300 |
| chr25 | 26711049  | 26711348  | 300 |
| chr20 | 20843813  | 20844112  | 300 |
| chr19 | 49388101  | 49388400  | 300 |
| chr16 | 44143787  | 44144086  | 300 |
| chr12 | 33387015  | 33387314  | 300 |
| chr5  | 115543219 | 115543517 | 299 |
| chr4  | 123292397 | 123292695 | 299 |
| chr3  | 4324235   | 4324533   | 299 |
| chr23 | 52758502  | 52758800  | 299 |

|       |           |           |     |
|-------|-----------|-----------|-----|
| chr2  | 23111791  | 23112089  | 299 |
| chr19 | 54428261  | 54428559  | 299 |
| chr18 | 64350454  | 64350752  | 299 |
| chr18 | 11285402  | 11285700  | 299 |
| chr14 | 1377259   | 1377557   | 299 |
| chr10 | 47393672  | 47393970  | 299 |
| chr1  | 70519409  | 70519707  | 299 |
| chr5  | 30243362  | 30243659  | 298 |
| chr3  | 29605135  | 29605432  | 298 |
| chr29 | 49448989  | 49449286  | 298 |
| chr25 | 38288861  | 38289158  | 298 |
| chr21 | 62447072  | 62447369  | 298 |
| chr20 | 3192257   | 3192554   | 298 |
| chr2  | 5175196   | 5175493   | 298 |
| chr13 | 60692335  | 60692632  | 298 |
| chr4  | 67940249  | 67940545  | 297 |
| chr3  | 99105661  | 99105957  | 297 |
| chr18 | 40361403  | 40361699  | 297 |
| chr14 | 76893679  | 76893975  | 297 |
| chr13 | 64037905  | 64038201  | 297 |
| chr11 | 100753150 | 100753446 | 297 |
| chr10 | 17410841  | 17411137  | 297 |
| chr6  | 73191139  | 73191434  | 296 |
| chr21 | 31662546  | 31662841  | 296 |
| chr11 | 98454904  | 98455199  | 296 |
| chr5  | 29165215  | 29165509  | 295 |
| chr4  | 90994448  | 90994742  | 295 |
| chr25 | 43564743  | 43565037  | 295 |
| chr23 | 11920330  | 11920624  | 295 |
| chr21 | 61659682  | 61659976  | 295 |
| chr19 | 58733939  | 58734233  | 295 |
| chr14 | 22076631  | 22076925  | 295 |
| chr1  | 88379933  | 88380227  | 295 |
| chr9  | 105443425 | 105443718 | 294 |
| chr8  | 108807833 | 108808126 | 294 |
| chr28 | 33735075  | 33735368  | 294 |
| chr17 | 21442832  | 21443125  | 294 |
| chr16 | 47069927  | 47070220  | 294 |
| chr14 | 6712232   | 6712525   | 294 |
| chr11 | 2262872   | 2263165   | 294 |
| chr25 | 34397924  | 34398216  | 293 |
| chr13 | 70709985  | 70710277  | 293 |
| chr1  | 145982017 | 145982309 | 293 |
| chr7  | 3927781   | 3928072   | 292 |
| chr6  | 22240079  | 22240370  | 292 |
| chr4  | 118577318 | 118577609 | 292 |
| chr3  | 111354954 | 111355245 | 292 |
| chr29 | 38341437  | 38341728  | 292 |
| chr26 | 50934719  | 50935010  | 292 |
| chr25 | 21038947  | 21039238  | 292 |

|       |               |           |     |
|-------|---------------|-----------|-----|
| chr21 | 18913620      | 18913911  | 292 |
| chr18 | 50053541      | 50053832  | 292 |
| chr27 | 46060173      | 46060463  | 291 |
| chr25 | 33493947      | 33494237  | 291 |
| chr24 | 770627 770917 | 291       |     |
| chr22 | 60173382      | 60173672  | 291 |
| chr18 | 9790596       | 9790886   | 291 |
| chr1  | 57459562      | 57459852  | 291 |
| chr8  | 63832952      | 63833241  | 290 |
| chr4  | 4811087       | 4811376   | 290 |
| chr28 | 41857375      | 41857664  | 290 |
| chr28 | 30808739      | 30809028  | 290 |
| chr24 | 49477803      | 49478092  | 290 |
| chr11 | 91840990      | 91841279  | 290 |
| chr9  | 52371973      | 52372261  | 289 |
| chr2  | 129886881     | 129887169 | 289 |
| chr19 | 59170259      | 59170547  | 289 |
| chr19 | 29718675      | 29718963  | 289 |
| chr17 | 67908546      | 67908834  | 289 |
| chr17 | 49396649      | 49396937  | 289 |
| chr15 | 39922235      | 39922523  | 289 |
| chr1  | 69548132      | 69548420  | 289 |
| chr23 | 42778790      | 42779077  | 288 |
| chr15 | 53578416      | 53578703  | 288 |
| chr15 | 43338438      | 43338725  | 288 |
| chr14 | 1650552       | 1650839   | 288 |
| chr11 | 6891245       | 6891532   | 288 |
| chr5  | 33858311      | 33858597  | 287 |
| chr4  | 69933681      | 69933967  | 287 |
| chr26 | 43060103      | 43060389  | 287 |
| chr22 | 16380888      | 16381174  | 287 |
| chr2  | 131587323     | 131587609 | 287 |
| chr19 | 56074065      | 56074351  | 287 |
| chr19 | 35289327      | 35289613  | 287 |
| chr19 | 10985051      | 10985337  | 287 |
| chr11 | 13925226      | 13925512  | 287 |
| chr6  | 120847684     | 120847969 | 286 |
| chr5  | 121666034     | 121666319 | 286 |
| chr27 | 27690452      | 27690737  | 286 |
| chr25 | 10626093      | 10626378  | 286 |
| chr23 | 46083190      | 46083475  | 286 |
| chr22 | 5708340       | 5708625   | 286 |
| chr12 | 32495651      | 32495936  | 286 |
| chr1  | 74568595      | 74568880  | 286 |
| chr8  | 62043249      | 62043533  | 285 |
| chr28 | 2328410       | 2328694   | 285 |
| chr16 | 47973367      | 47973651  | 285 |
| chr5  | 46477813      | 46478096  | 284 |
| chr24 | 59093273      | 59093556  | 284 |
| chr19 | 30359167      | 30359450  | 284 |

|       |               |           |     |
|-------|---------------|-----------|-----|
| chr17 | 70280597      | 70280880  | 284 |
| chr13 | 61507642      | 61507925  | 284 |
| chr26 | 43562417      | 43562699  | 283 |
| chr2  | 124978630     | 124978912 | 283 |
| chr2  | 124305464     | 124305746 | 283 |
| chr2  | 111967581     | 111967863 | 283 |
| chr18 | 52298482      | 52298764  | 283 |
| chr16 | 23299602      | 23299884  | 283 |
| chr15 | 25623532      | 25623814  | 283 |
| chr8  | 24362694      | 24362975  | 282 |
| chr4  | 99453469      | 99453750  | 282 |
| chr3  | 4351039       | 4351320   | 282 |
| chr29 | 33894867      | 33895148  | 282 |
| chr25 | 35368771      | 35369052  | 282 |
| chr7  | 52251440      | 52251720  | 281 |
| chr5  | 41413302      | 41413582  | 281 |
| chr3  | 31742844      | 31743124  | 281 |
| chr25 | 43243480      | 43243760  | 281 |
| chr23 | 48777811      | 48778091  | 281 |
| chr23 | 46615007      | 46615287  | 281 |
| chr22 | 13435274      | 13435554  | 281 |
| chr16 | 1041886       | 1042166   | 281 |
| chr13 | 55724509      | 55724789  | 281 |
| chr11 | 100726968     | 100727248 | 281 |
| chr4  | 121388429     | 121388708 | 280 |
| chr3  | 115022485     | 115022764 | 280 |
| chr17 | 70432120      | 70432399  | 280 |
| chr16 | 47094532      | 47094811  | 280 |
| chr15 | 53567577      | 53567856  | 280 |
| chr26 | 37596017      | 37596295  | 279 |
| chr25 | 37979651      | 37979929  | 279 |
| chr17 | 69302824      | 69303102  | 279 |
| chr17 | 63289488      | 63289766  | 279 |
| chr29 | 35215371      | 35215648  | 278 |
| chr21 | 30702335      | 30702612  | 278 |
| chr19 | 54472496      | 54472773  | 278 |
| chr16 | 755573 755850 |           | 278 |
| chr10 | 36025910      | 36026187  | 278 |
| chr7  | 13052129      | 13052405  | 277 |
| chr3  | 34725553      | 34725829  | 277 |
| chr29 | 44610614      | 44610890  | 277 |
| chr25 | 34326159      | 34326435  | 277 |
| chr24 | 60954417      | 60954693  | 277 |
| chr2  | 134416526     | 134416802 | 277 |
| chr19 | 45384456      | 45384732  | 277 |
| chr15 | 74601759      | 74602035  | 277 |
| chr26 | 44437376      | 44437651  | 276 |
| chr25 | 35552640      | 35552915  | 276 |
| chr24 | 1673207       | 1673482   | 276 |
| chr23 | 13407489      | 13407764  | 276 |

|       |           |           |     |
|-------|-----------|-----------|-----|
| chr2  | 137655465 | 137655740 | 276 |
| chr18 | 11434605  | 11434880  | 276 |
| chr17 | 66827999  | 66828274  | 276 |
| chr15 | 73725976  | 73726251  | 276 |
| chr15 | 32218296  | 32218571  | 276 |
| chr15 | 29706639  | 29706914  | 276 |
| chr13 | 72510232  | 72510507  | 276 |
| chr10 | 70570558  | 70570833  | 276 |
| chr9  | 100783596 | 100783870 | 275 |
| chr9  | 65835813  | 65836087  | 275 |
| chr7  | 3551342   | 3551616   | 275 |
| chr25 | 10602776  | 10603050  | 275 |
| chr25 | 1128110   | 1128384   | 275 |
| chr15 | 32626603  | 32626877  | 275 |
| chr8  | 80218927  | 80219200  | 274 |
| chr5  | 79196375  | 79196648  | 274 |
| chr29 | 33801300  | 33801573  | 274 |
| chr29 | 26545379  | 26545652  | 274 |
| chr27 | 46060893  | 46061166  | 274 |
| chr23 | 48781958  | 48782231  | 274 |
| chr15 | 22809498  | 22809771  | 274 |
| chr12 | 24518757  | 24519030  | 274 |
| chr11 | 2934010   | 2934283   | 274 |
| chr11 | 2387335   | 2387608   | 274 |
| chr10 | 24700728  | 24701001  | 274 |
| chr10 | 16839146  | 16839419  | 274 |
| chr9  | 52374958  | 52375230  | 273 |
| chr6  | 5538389   | 5538661   | 273 |
| chr4  | 121554127 | 121554399 | 273 |
| chr4  | 12830145  | 12830417  | 273 |
| chr28 | 33623885  | 33624157  | 273 |
| chr23 | 11018519  | 11018791  | 273 |
| chr22 | 56704716  | 56704988  | 273 |
| chr16 | 38351873  | 38352145  | 273 |
| chr7  | 18536304  | 18536575  | 272 |
| chr28 | 25112379  | 25112650  | 272 |
| chr25 | 22682753  | 22683024  | 272 |
| chr23 | 8400315   | 8400586   | 272 |
| chr2  | 135577953 | 135578224 | 272 |
| chr19 | 39678121  | 39678392  | 272 |
| chr19 | 13907464  | 13907735  | 272 |
| chr16 | 26582035  | 26582306  | 272 |
| chr13 | 59811530  | 59811801  | 272 |
| chr10 | 10487824  | 10488095  | 272 |
| chr5  | 28900769  | 28901039  | 271 |
| chr4  | 96245076  | 96245346  | 271 |
| chr3  | 26123439  | 26123709  | 271 |
| chr21 | 58018019  | 58018289  | 271 |
| chr18 | 56781100  | 56781370  | 271 |
| chr15 | 76011518  | 76011788  | 271 |

|       |               |           |     |
|-------|---------------|-----------|-----|
| chr13 | 62469175      | 62469445  | 271 |
| chr13 | 59538934      | 59539204  | 271 |
| chr12 | 34097270      | 34097540  | 271 |
| chr6  | 121079209     | 121079478 | 270 |
| chr5  | 103548643     | 103548912 | 270 |
| chr4  | 110120202     | 110120471 | 270 |
| chr3  | 108943398     | 108943667 | 270 |
| chr29 | 33592067      | 33592336  | 270 |
| chr26 | 22217945      | 22218214  | 270 |
| chr22 | 14939787      | 14940056  | 270 |
| chr20 | 72401645      | 72401914  | 270 |
| chr18 | 22720347      | 22720616  | 270 |
| chr11 | 30923792      | 30924061  | 270 |
| chr4  | 107107898     | 107108166 | 269 |
| chr18 | 56629103      | 56629371  | 269 |
| chr16 | 54618382      | 54618650  | 269 |
| chr10 | 15080597      | 15080865  | 269 |
| chr10 | 9556863       | 9557131   | 269 |
| chr7  | 51604295      | 51604562  | 268 |
| chr3  | 8966091       | 8966358   | 268 |
| chr29 | 29783276      | 29783543  | 268 |
| chr28 | 34002787      | 34003054  | 268 |
| chr26 | 18880961      | 18881228  | 268 |
| chr24 | 35484334      | 35484601  | 268 |
| chr21 | 30636627      | 30636894  | 268 |
| chr5  | 120499002     | 120499268 | 267 |
| chr3  | 82925141      | 82925407  | 267 |
| chr25 | 34422296      | 34422562  | 267 |
| chr24 | 1945274       | 1945540   | 267 |
| chr2  | 133053935     | 133054201 | 267 |
| chr18 | 55196223      | 55196489  | 267 |
| chr15 | 29892161      | 29892427  | 267 |
| chr15 | 13927986      | 13928252  | 267 |
| chr11 | 68709433      | 68709699  | 267 |
| chr10 | 66892428      | 66892694  | 267 |
| chr1  | 115602329     | 115602595 | 267 |
| chr6  | 61945970      | 61946235  | 266 |
| chr5  | 79185612      | 79185877  | 266 |
| chr29 | 21730350      | 21730615  | 266 |
| chr29 | 17649091      | 17649356  | 266 |
| chr28 | 26162329      | 26162594  | 266 |
| chr27 | 34831511      | 34831776  | 266 |
| chr25 | 34290163      | 34290428  | 266 |
| chr25 | 2988581       | 2988846   | 266 |
| chr24 | 823343 823608 | 266       |     |
| chr21 | 64602267      | 64602532  | 266 |
| chr16 | 30601394      | 30601659  | 266 |
| chr10 | 17170534      | 17170799  | 266 |
| chr3  | 36840273      | 36840537  | 265 |
| chr3  | 20495694      | 20495958  | 265 |

|       |           |           |     |
|-------|-----------|-----------|-----|
| chr3  | 15668021  | 15668285  | 265 |
| chr25 | 35845048  | 35845312  | 265 |
| chr2  | 138516132 | 138516396 | 265 |
| chr18 | 56433068  | 56433332  | 265 |
| chr18 | 49476151  | 49476415  | 265 |
| chr16 | 38963182  | 38963446  | 265 |
| chr15 | 60441834  | 60442098  | 265 |
| chr13 | 63506094  | 63506358  | 265 |
| chr9  | 105871726 | 105871989 | 264 |
| chr8  | 63934302  | 63934565  | 264 |
| chr7  | 13084396  | 13084659  | 264 |
| chr6  | 122074581 | 122074844 | 264 |
| chr6  | 63062887  | 63063150  | 264 |
| chr5  | 111347294 | 111347557 | 264 |
| chr3  | 11521566  | 11521829  | 264 |
| chr29 | 41756052  | 41756315  | 264 |
| chr26 | 42242013  | 42242276  | 264 |
| chr2  | 135601233 | 135601496 | 264 |
| chr2  | 111225440 | 111225703 | 264 |
| chr19 | 58875419  | 58875682  | 264 |
| chr16 | 42898302  | 42898565  | 264 |
| chr13 | 52661728  | 52661991  | 264 |
| chr9  | 44925820  | 44926082  | 263 |
| chr7  | 42479149  | 42479411  | 263 |
| chr3  | 8808165   | 8808427   | 263 |
| chr29 | 44736512  | 44736774  | 263 |
| chr26 | 24344448  | 24344710  | 263 |
| chr24 | 50376011  | 50376273  | 263 |
| chr24 | 1055758   | 1056020   | 263 |
| chr2  | 76634702  | 76634964  | 263 |
| chr19 | 60714841  | 60715103  | 263 |
| chr19 | 40453534  | 40453796  | 263 |
| chr19 | 12322948  | 12323210  | 263 |
| chr11 | 109702108 | 109702370 | 263 |
| chr11 | 81392844  | 81393106  | 263 |
| chr10 | 70309932  | 70310194  | 263 |
| chr1  | 74137745  | 74138007  | 263 |
| chr7  | 19905773  | 19906034  | 262 |
| chr3  | 29180605  | 29180866  | 262 |
| chr29 | 37074645  | 37074906  | 262 |
| chr21 | 68958799  | 68959060  | 262 |
| chr21 | 67987948  | 67988209  | 262 |
| chr18 | 32954524  | 32954785  | 262 |
| chr17 | 66181760  | 66182021  | 262 |
| chr16 | 44928092  | 44928353  | 262 |
| chr13 | 68448059  | 68448320  | 262 |
| chr11 | 96134982  | 96135243  | 262 |
| chr5  | 60051483  | 60051743  | 261 |
| chr24 | 48599645  | 48599905  | 261 |
| chr19 | 31644108  | 31644368  | 261 |



|       |           |           |     |
|-------|-----------|-----------|-----|
| chr18 | 22102431  | 22102691  | 261 |
| chr13 | 77200836  | 77201096  | 261 |
| chr9  | 98823629  | 98823888  | 260 |
| chr6  | 24706470  | 24706729  | 260 |
| chr3  | 120577937 | 120578196 | 260 |
| chr21 | 65622513  | 65622772  | 260 |
| chr19 | 59087516  | 59087775  | 260 |
| chr13 | 57592523  | 57592782  | 260 |
| chr11 | 109674720 | 109674979 | 260 |
| chr1  | 66465496  | 66465755  | 260 |
| chr9  | 90804991  | 90805249  | 259 |
| chr7  | 45806724  | 45806982  | 259 |
| chr4  | 84323531  | 84323789  | 259 |
| chr27 | 35546475  | 35546733  | 259 |
| chr26 | 37464326  | 37464584  | 259 |
| chr24 | 35465202  | 35465460  | 259 |
| chr22 | 60420812  | 60421070  | 259 |
| chr22 | 24917146  | 24917404  | 259 |
| chr19 | 59467942  | 59468200  | 259 |
| chr19 | 46795252  | 46795510  | 259 |
| chr18 | 43391904  | 43392162  | 259 |
| chr18 | 43369967  | 43370225  | 259 |
| chr13 | 76474764  | 76475022  | 259 |
| chr25 | 40210177  | 40210434  | 258 |
| chr23 | 15095252  | 15095509  | 258 |
| chr20 | 66459182  | 66459439  | 258 |
| chr2  | 63489602  | 63489859  | 258 |
| chr19 | 59231847  | 59232104  | 258 |
| chr18 | 11698240  | 11698497  | 258 |
| chr14 | 29625595  | 29625852  | 258 |
| chr13 | 66673487  | 66673744  | 258 |
| chr12 | 84446676  | 84446933  | 258 |
| chr11 | 74852133  | 74852390  | 258 |
| chr10 | 67035667  | 67035924  | 258 |
| chr5  | 115294364 | 115294620 | 257 |
| chr5  | 112420123 | 112420379 | 257 |
| chr5  | 32935478  | 32935734  | 257 |
| chr29 | 38810450  | 38810706  | 257 |
| chr26 | 17920422  | 17920678  | 257 |
| chr25 | 30121356  | 30121612  | 257 |
| chr24 | 51779660  | 51779916  | 257 |
| chr2  | 21886176  | 21886432  | 257 |
| chr18 | 10946235  | 10946491  | 257 |
| chr15 | 34316808  | 34317064  | 257 |
| chr15 | 24411870  | 24412126  | 257 |
| chr13 | 66870995  | 66871251  | 257 |
| chr13 | 62035037  | 62035293  | 257 |
| chr13 | 36761782  | 36762038  | 257 |
| chr3  | 120986779 | 120987034 | 256 |
| chr3  | 105459256 | 105459511 | 256 |

|       |           |           |     |
|-------|-----------|-----------|-----|
| chr29 | 27203877  | 27204132  | 256 |
| chr18 | 33150727  | 33150982  | 256 |
| chr18 | 11386300  | 11386555  | 256 |
| chr18 | 4784859   | 4785114   | 256 |
| chr15 | 66479025  | 66479280  | 256 |
| chr14 | 20893314  | 20893569  | 256 |
| chr1  | 10212201  | 10212456  | 256 |
| chr6  | 120822461 | 120822715 | 255 |
| chr29 | 35720701  | 35720955  | 255 |
| chr26 | 43840042  | 43840296  | 255 |
| chr25 | 36491080  | 36491334  | 255 |
| chr25 | 5071782   | 5072036   | 255 |
| chr24 | 59097564  | 59097818  | 255 |
| chr23 | 10611331  | 10611585  | 255 |
| chr22 | 55384794  | 55385048  | 255 |
| chr21 | 66587262  | 66587516  | 255 |
| chr21 | 6491740   | 6491994   | 255 |
| chr2  | 126367147 | 126367401 | 255 |
| chr17 | 74819417  | 74819671  | 255 |
| chr16 | 2251569   | 2251823   | 255 |
| chr15 | 13620012  | 13620266  | 255 |
| chr13 | 77281489  | 77281743  | 255 |
| chr13 | 41774236  | 41774490  | 255 |
| chr13 | 41130759  | 41131013  | 255 |
| chr12 | 36188445  | 36188699  | 255 |
| chr12 | 31090378  | 31090632  | 255 |
| chr11 | 89546504  | 89546758  | 255 |
| chr7  | 45871480  | 45871733  | 254 |
| chr7  | 3699291   | 3699544   | 254 |
| chr29 | 47914684  | 47914937  | 254 |
| chr29 | 35622607  | 35622860  | 254 |
| chr26 | 22219023  | 22219276  | 254 |
| chr24 | 44247438  | 44247691  | 254 |
| chr19 | 27951060  | 27951313  | 254 |
| chr19 | 22339314  | 22339567  | 254 |
| chr18 | 64251077  | 64251330  | 254 |
| chr18 | 25301838  | 25302091  | 254 |
| chr17 | 68371005  | 68371258  | 254 |
| chr15 | 76154080  | 76154333  | 254 |
| chr15 | 27462470  | 27462723  | 254 |
| chr12 | 31538508  | 31538761  | 254 |
| chr11 | 13923749  | 13924002  | 254 |
| chr10 | 5233165   | 5233418   | 254 |
| chr9  | 104764722 | 104764974 | 253 |
| chr8  | 23631325  | 23631577  | 253 |
| chr7  | 4346546   | 4346798   | 253 |
| chr22 | 39800726  | 39800978  | 253 |
| chr19 | 60343368  | 60343620  | 253 |
| chr19 | 24405768  | 24406020  | 253 |
| chr19 | 23561783  | 23562035  | 253 |

|       |           |           |     |
|-------|-----------|-----------|-----|
| chr18 | 48014706  | 48014958  | 253 |
| chr11 | 108396806 | 108397058 | 253 |
| chr10 | 20430387  | 20430639  | 253 |
| chr1  | 147243726 | 147243978 | 253 |
| chr8  | 114966297 | 114966548 | 252 |
| chr8  | 109819944 | 109820195 | 252 |
| chr8  | 79964933  | 79965184  | 252 |
| chr8  | 7678018   | 7678269   | 252 |
| chr7  | 15442265  | 15442516  | 252 |
| chr7  | 15109070  | 15109321  | 252 |
| chr4  | 72552517  | 72552768  | 252 |
| chr4  | 67902423  | 67902674  | 252 |
| chr3  | 115108319 | 115108570 | 252 |
| chr29 | 50586698  | 50586949  | 252 |
| chr29 | 45856572  | 45856823  | 252 |
| chr29 | 37258065  | 37258316  | 252 |
| chr26 | 48144711  | 48144962  | 252 |
| chr26 | 24589735  | 24589986  | 252 |
| chr24 | 44107102  | 44107353  | 252 |
| chr21 | 47523356  | 47523607  | 252 |
| chr20 | 42308687  | 42308938  | 252 |
| chr19 | 61907073  | 61907324  | 252 |
| chr19 | 61462890  | 61463141  | 252 |
| chr19 | 31281338  | 31281589  | 252 |
| chr19 | 8349617   | 8349868   | 252 |
| chr15 | 54604539  | 54604790  | 252 |
| chr15 | 28903973  | 28904224  | 252 |
| chr13 | 82705669  | 82705920  | 252 |
| chr13 | 64614342  | 64614593  | 252 |
| chr11 | 9255052   | 9255303   | 252 |
| chr5  | 113171299 | 113171549 | 251 |
| chr4  | 71611376  | 71611626  | 251 |
| chr29 | 49890139  | 49890389  | 251 |
| chr26 | 22225828  | 22226078  | 251 |
| chr26 | 20380151  | 20380401  | 251 |
| chr24 | 58633519  | 58633769  | 251 |
| chr23 | 18061035  | 18061285  | 251 |
| chr23 | 8374253   | 8374503   | 251 |
| chr23 | 3718359   | 3718609   | 251 |
| chr22 | 56496070  | 56496320  | 251 |
| chr21 | 27814868  | 27815118  | 251 |
| chr2  | 111771021 | 111771271 | 251 |
| chr19 | 60552109  | 60552359  | 251 |
| chr19 | 60340418  | 60340668  | 251 |
| chr19 | 47317910  | 47318160  | 251 |
| chr19 | 29124083  | 29124333  | 251 |
| chr19 | 13490874  | 13491124  | 251 |
| chr18 | 63522372  | 63522622  | 251 |
| chr14 | 41574042  | 41574292  | 251 |
| chr13 | 67880936  | 67881186  | 251 |

|       |           |           |     |
|-------|-----------|-----------|-----|
| chr12 | 14821843  | 14822093  | 251 |
| chr11 | 83253487  | 83253737  | 251 |
| chr10 | 87161714  | 87161964  | 251 |
| chr10 | 72892010  | 72892260  | 251 |
| chr8  | 65409901  | 65410150  | 250 |
| chr6  | 59917914  | 59918163  | 250 |
| chr5  | 121653793 | 121654042 | 250 |
| chr4  | 68160460  | 68160709  | 250 |
| chr4  | 10433803  | 10434052  | 250 |
| chr29 | 38717884  | 38718133  | 250 |
| chr25 | 36137052  | 36137301  | 250 |
| chr2  | 134337860 | 134338109 | 250 |
| chr18 | 56470550  | 56470799  | 250 |
| chr18 | 10213637  | 10213886  | 250 |
| chr17 | 59262624  | 59262873  | 250 |
| chr15 | 81676424  | 81676673  | 250 |
| chr15 | 28528464  | 28528713  | 250 |
| chr14 | 1978737   | 1978986   | 250 |
| chr13 | 77290941  | 77291190  | 250 |
| chr13 | 68928118  | 68928367  | 250 |
| chr10 | 81603573  | 81603822  | 250 |
| chr7  | 12967214  | 12967462  | 249 |
| chr6  | 122076272 | 122076520 | 249 |
| chr6  | 14231427  | 14231675  | 249 |
| chr4  | 95595777  | 95596025  | 249 |
| chr3  | 106589316 | 106589564 | 249 |
| chr3  | 31720390  | 31720638  | 249 |
| chr26 | 44887810  | 44888058  | 249 |
| chr26 | 41921189  | 41921437  | 249 |
| chr25 | 35475214  | 35475462  | 249 |
| chr22 | 59675887  | 59676135  | 249 |
| chr20 | 3325748   | 3325996   | 249 |
| chr19 | 39150305  | 39150553  | 249 |
| chr19 | 29440658  | 29440906  | 249 |
| chr19 | 26343778  | 26344026  | 249 |
| chr18 | 11781437  | 11781685  | 249 |
| chr16 | 46740563  | 46740811  | 249 |
| chr7  | 38372799  | 38373046  | 248 |
| chr5  | 121199731 | 121199978 | 248 |
| chr5  | 112518891 | 112519138 | 248 |
| chr4  | 110131669 | 110131916 | 248 |
| chr4  | 95691228  | 95691475  | 248 |
| chr19 | 17040687  | 17040934  | 248 |
| chr18 | 20248480  | 20248727  | 248 |
| chr16 | 46432418  | 46432665  | 248 |
| chr15 | 31007449  | 31007696  | 248 |
| chr15 | 22324124  | 22324371  | 248 |
| chr13 | 45376331  | 45376578  | 248 |
| chr10 | 12729208  | 12729455  | 248 |
| chr8  | 49633890  | 49634136  | 247 |

|       |               |           |     |
|-------|---------------|-----------|-----|
| chr5  | 113559867     | 113560113 | 247 |
| chr21 | 34843727      | 34843973  | 247 |
| chr2  | 130123732     | 130123978 | 247 |
| chr19 | 54467237      | 54467483  | 247 |
| chr19 | 25411410      | 25411656  | 247 |
| chr17 | 68667063      | 68667309  | 247 |
| chr15 | 75699934      | 75700180  | 247 |
| chr14 | 7502684       | 7502930   | 247 |
| chr10 | 36376692      | 36376938  | 247 |
| chr10 | 17147404      | 17147650  | 247 |
| chr1  | 152304434     | 152304680 | 247 |
| chr1  | 137374215     | 137374461 | 247 |
| chr8  | 72329028      | 72329273  | 246 |
| chr6  | 59498419      | 59498664  | 246 |
| chr5  | 29637279      | 29637524  | 246 |
| chr5  | 10771014      | 10771259  | 246 |
| chr4  | 122671801     | 122672046 | 246 |
| chr3  | 30009443      | 30009688  | 246 |
| chr3  | 14263246      | 14263491  | 246 |
| chr26 | 37979480      | 37979725  | 246 |
| chr25 | 21028589      | 21028834  | 246 |
| chr24 | 889492 889737 |           | 246 |
| chr22 | 53595992      | 53596237  | 246 |
| chr19 | 7225088       | 7225333   | 246 |
| chr18 | 12607936      | 12608181  | 246 |
| chr18 | 11388705      | 11388950  | 246 |
| chr17 | 66858540      | 66858785  | 246 |
| chr13 | 57197898      | 57198143  | 246 |
| chr12 | 68185021      | 68185266  | 246 |
| chr11 | 98448851      | 98449096  | 246 |
| chr11 | 68600541      | 68600786  | 246 |
| chr7  | 18418497      | 18418741  | 245 |
| chr5  | 120463145     | 120463389 | 245 |
| chr4  | 121445546     | 121445790 | 245 |
| chr3  | 120779561     | 120779805 | 245 |
| chr28 | 26830551      | 26830795  | 245 |
| chr26 | 21762558      | 21762802  | 245 |
| chr25 | 36339117      | 36339361  | 245 |
| chr25 | 35569598      | 35569842  | 245 |
| chr20 | 75196911      | 75197155  | 245 |
| chr19 | 33090499      | 33090743  | 245 |
| chr19 | 24291592      | 24291836  | 245 |
| chr18 | 50558564      | 50558808  | 245 |
| chr14 | 11551838      | 11552082  | 245 |
| chr11 | 5759044       | 5759288   | 245 |
| chr10 | 86496360      | 86496604  | 245 |
| chr7  | 17354376      | 17354619  | 244 |
| chr3  | 86116531      | 86116774  | 244 |
| chr23 | 19670739      | 19670982  | 244 |
| chr21 | 65532247      | 65532490  | 244 |

|       |               |           |     |
|-------|---------------|-----------|-----|
| chr2  | 72110784      | 72111027  | 244 |
| chr15 | 29373471      | 29373714  | 244 |
| chr13 | 41703152      | 41703395  | 244 |
| chr11 | 108337385     | 108337628 | 244 |
| chr10 | 91881721      | 91881964  | 244 |
| chr10 | 44384043      | 44384286  | 244 |
| chr8  | 9343540       | 9343782   | 243 |
| chr26 | 33088064      | 33088306  | 243 |
| chr25 | 43500464      | 43500706  | 243 |
| chr25 | 42042112      | 42042354  | 243 |
| chr25 | 38381945      | 38382187  | 243 |
| chr22 | 50839435      | 50839677  | 243 |
| chr21 | 34985309      | 34985551  | 243 |
| chr21 | 13960286      | 13960528  | 243 |
| chr20 | 985929 986171 | 243       |     |
| chr2  | 134338369     | 134338611 | 243 |
| chr16 | 60194818      | 60195060  | 243 |
| chr15 | 74615434      | 74615676  | 243 |
| chr15 | 73818858      | 73819100  | 243 |
| chr15 | 28752339      | 28752581  | 243 |
| chr14 | 31015055      | 31015297  | 243 |
| chr14 | 1826881       | 1827123   | 243 |
| chr12 | 29892186      | 29892428  | 243 |
| chr11 | 89460677      | 89460919  | 243 |
| chr10 | 81710539      | 81710781  | 243 |
| chr1  | 146681361     | 146681603 | 243 |
| chr7  | 46214754      | 46214995  | 242 |
| chr6  | 70511397      | 70511638  | 242 |
| chr4  | 69211859      | 69212100  | 242 |
| chr3  | 125253159     | 125253400 | 242 |
| chr3  | 36665170      | 36665411  | 242 |
| chr25 | 37971131      | 37971372  | 242 |
| chr25 | 28856034      | 28856275  | 242 |
| chr23 | 8254234       | 8254475   | 242 |
| chr22 | 52745329      | 52745570  | 242 |
| chr22 | 48481569      | 48481810  | 242 |
| chr21 | 20836542      | 20836783  | 242 |
| chr2  | 135141808     | 135142049 | 242 |
| chr2  | 125422603     | 125422844 | 242 |
| chr19 | 58389476      | 58389717  | 242 |
| chr19 | 54692338      | 54692579  | 242 |
| chr18 | 48836061      | 48836302  | 242 |
| chr14 | 8011223       | 8011464   | 242 |
| chr14 | 1156904       | 1157145   | 242 |
| chr13 | 67131375      | 67131616  | 242 |
| chr11 | 104886626     | 104886867 | 242 |
| chr11 | 100282097     | 100282338 | 242 |
| chr8  | 65830563      | 65830803  | 241 |
| chr7  | 46197664      | 46197904  | 241 |
| chr5  | 116832098     | 116832338 | 241 |

|       |               |           |     |
|-------|---------------|-----------|-----|
| chr4  | 98629880      | 98630120  | 241 |
| chr3  | 22870059      | 22870299  | 241 |
| chr28 | 26790174      | 26790414  | 241 |
| chr23 | 51998480      | 51998720  | 241 |
| chr22 | 48233924      | 48234164  | 241 |
| chr21 | 13960730      | 13960970  | 241 |
| chr2  | 124968988     | 124969228 | 241 |
| chr18 | 53238978      | 53239218  | 241 |
| chr16 | 47686013      | 47686253  | 241 |
| chr16 | 39015205      | 39015445  | 241 |
| chr16 | 25734488      | 25734728  | 241 |
| chr13 | 15766479      | 15766719  | 241 |
| chr12 | 73381548      | 73381788  | 241 |
| chr10 | 81603930      | 81604170  | 241 |
| chr8  | 79977855      | 79978094  | 240 |
| chr3  | 30753854      | 30754093  | 240 |
| chr29 | 48326594      | 48326833  | 240 |
| chr28 | 40759359      | 40759598  | 240 |
| chr28 | 34346939      | 34347178  | 240 |
| chr28 | 33962974      | 33963213  | 240 |
| chr25 | 15276774      | 15277013  | 240 |
| chr23 | 46401071      | 46401310  | 240 |
| chr23 | 18650355      | 18650594  | 240 |
| chr23 | 11852511      | 11852750  | 240 |
| chr21 | 24974224      | 24974463  | 240 |
| chr2  | 128096571     | 128096810 | 240 |
| chr19 | 54600712      | 54600951  | 240 |
| chr19 | 54204492      | 54204731  | 240 |
| chr19 | 38529057      | 38529296  | 240 |
| chr19 | 37871539      | 37871778  | 240 |
| chr19 | 13469914      | 13470153  | 240 |
| chr17 | 69012798      | 69013037  | 240 |
| chr16 | 43288003      | 43288242  | 240 |
| chr16 | 23651373      | 23651612  | 240 |
| chr13 | 57581127      | 57581366  | 240 |
| chr13 | 52920755      | 52920994  | 240 |
| chr12 | 34515599      | 34515838  | 240 |
| chr10 | 83570746      | 83570985  | 240 |
| chr8  | 7605733       | 7605971   | 239 |
| chr5  | 113177472     | 113177710 | 239 |
| chr5  | 31265056      | 31265294  | 239 |
| chr22 | 51058385      | 51058623  | 239 |
| chr20 | 2014047       | 2014285   | 239 |
| chr2  | 135088679     | 135088917 | 239 |
| chr2  | 63489047      | 63489285  | 239 |
| chr19 | 58387959      | 58388197  | 239 |
| chr19 | 54159822      | 54160060  | 239 |
| chr15 | 75694302      | 75694540  | 239 |
| chr15 | 55742284      | 55742522  | 239 |
| chr14 | 853615 853853 |           | 239 |

|       |           |           |     |
|-------|-----------|-----------|-----|
| chr13 | 59773499  | 59773737  | 239 |
| chr12 | 68723883  | 68724121  | 239 |
| chr11 | 100326790 | 100327028 | 239 |
| chr1  | 82903980  | 82904218  | 239 |
| chr5  | 76827572  | 76827809  | 238 |
| chr27 | 26469267  | 26469504  | 238 |
| chr25 | 37690608  | 37690845  | 238 |
| chr25 | 35542544  | 35542781  | 238 |
| chr24 | 34033391  | 34033628  | 238 |
| chr23 | 11951619  | 11951856  | 238 |
| chr22 | 60169615  | 60169852  | 238 |
| chr22 | 50827774  | 50828011  | 238 |
| chr22 | 13540829  | 13541066  | 238 |
| chr22 | 7554810   | 7555047   | 238 |
| chr21 | 34017975  | 34018212  | 238 |
| chr20 | 66656915  | 66657152  | 238 |
| chr19 | 52830434  | 52830671  | 238 |
| chr18 | 52026352  | 52026589  | 238 |
| chr15 | 27183668  | 27183905  | 238 |
| chr15 | 24649446  | 24649683  | 238 |
| chr10 | 89511487  | 89511724  | 238 |
| chr10 | 15072878  | 15073115  | 238 |
| chr1  | 132064405 | 132064642 | 238 |
| chr9  | 89411425  | 89411661  | 237 |
| chr9  | 37889378  | 37889614  | 237 |
| chr7  | 38196816  | 38197052  | 237 |
| chr6  | 63165116  | 63165352  | 237 |
| chr4  | 72081866  | 72082102  | 237 |
| chr3  | 34800785  | 34801021  | 237 |
| chr3  | 8665010   | 8665246   | 237 |
| chr29 | 47919928  | 47920164  | 237 |
| chr29 | 37283538  | 37283774  | 237 |
| chr26 | 49666279  | 49666515  | 237 |
| chr26 | 34314413  | 34314649  | 237 |
| chr25 | 28970786  | 28971022  | 237 |
| chr19 | 56129703  | 56129939  | 237 |
| chr16 | 47550953  | 47551189  | 237 |
| chr14 | 79693203  | 79693439  | 237 |
| chr14 | 1914054   | 1914290   | 237 |
| chr13 | 14722985  | 14723221  | 237 |
| chr11 | 96073172  | 96073408  | 237 |
| chr11 | 48225340  | 48225576  | 237 |
| chr9  | 8643404   | 8643639   | 236 |
| chr6  | 69365654  | 69365889  | 236 |
| chr5  | 10523760  | 10523995  | 236 |
| chr29 | 44748345  | 44748580  | 236 |
| chr28 | 25374858  | 25375093  | 236 |
| chr25 | 41278933  | 41279168  | 236 |
| chr23 | 52601074  | 52601309  | 236 |
| chr21 | 61662331  | 61662566  | 236 |



|       |               |           |     |
|-------|---------------|-----------|-----|
| chr2  | 93513310      | 93513545  | 236 |
| chr18 | 42207140      | 42207375  | 236 |
| chr17 | 73116850      | 73117085  | 236 |
| chr16 | 47251359      | 47251594  | 236 |
| chr15 | 81400464      | 81400699  | 236 |
| chr15 | 29378727      | 29378962  | 236 |
| chr11 | 106349594     | 106349829 | 236 |
| chr1  | 149743616     | 149743851 | 236 |
| chr7  | 61016524      | 61016758  | 235 |
| chr6  | 109488452     | 109488686 | 235 |
| chr5  | 26736770      | 26737004  | 235 |
| chr26 | 48376112      | 48376346  | 235 |
| chr25 | 27604999      | 27605233  | 235 |
| chr22 | 29660332      | 29660566  | 235 |
| chr20 | 9342386       | 9342620   | 235 |
| chr2  | 75956056      | 75956290  | 235 |
| chr2  | 20892459      | 20892693  | 235 |
| chr19 | 54654825      | 54655059  | 235 |
| chr19 | 35038805      | 35039039  | 235 |
| chr19 | 33671729      | 33671963  | 235 |
| chr16 | 74387828      | 74388062  | 235 |
| chr16 | 47279835      | 47280069  | 235 |
| chr12 | 34046983      | 34047217  | 235 |
| chr11 | 49782138      | 49782372  | 235 |
| chr11 | 47341885      | 47342119  | 235 |
| chr7  | 46457526      | 46457759  | 234 |
| chr6  | 118258253     | 118258486 | 234 |
| chr4  | 121410212     | 121410445 | 234 |
| chr4  | 110128599     | 110128832 | 234 |
| chr28 | 12400344      | 12400577  | 234 |
| chr26 | 18172737      | 18172970  | 234 |
| chr25 | 3212683       | 3212916   | 234 |
| chr20 | 8642768       | 8643001   | 234 |
| chr19 | 46147122      | 46147355  | 234 |
| chr19 | 45063205      | 45063438  | 234 |
| chr18 | 56599364      | 56599597  | 234 |
| chr17 | 26905444      | 26905677  | 234 |
| chr16 | 46961517      | 46961750  | 234 |
| chr15 | 64525843      | 64526076  | 234 |
| chr13 | 76000299      | 76000532  | 234 |
| chr11 | 49846099      | 49846332  | 234 |
| chr8  | 873930 874162 | 233       |     |
| chr5  | 51722456      | 51722688  | 233 |
| chr5  | 30446765      | 30446997  | 233 |
| chr4  | 79810404      | 79810636  | 233 |
| chr23 | 18217008      | 18217240  | 233 |
| chr23 | 8428141       | 8428373   | 233 |
| chr23 | 7694729       | 7694961   | 233 |
| chr22 | 48410859      | 48411091  | 233 |
| chr19 | 49665562      | 49665794  | 233 |

|       |           |           |     |
|-------|-----------|-----------|-----|
| chr18 | 13556603  | 13556835  | 233 |
| chr16 | 59073854  | 59074086  | 233 |
| chr16 | 43888446  | 43888678  | 233 |
| chr15 | 30352160  | 30352392  | 233 |
| chr13 | 77138991  | 77139223  | 233 |
| chr13 | 52928733  | 52928965  | 233 |
| chr11 | 100743929 | 100744161 | 233 |
| chr11 | 16085446  | 16085678  | 233 |
| chr11 | 7070230   | 7070462   | 233 |
| chr10 | 79541930  | 79542162  | 233 |
| chr10 | 69524383  | 69524615  | 233 |
| chr10 | 8550795   | 8551027   | 233 |
| chr4  | 72795547  | 72795778  | 232 |
| chr4  | 71624310  | 71624541  | 232 |
| chr3  | 31273608  | 31273839  | 232 |
| chr3  | 4326965   | 4327196   | 232 |
| chr25 | 1057439   | 1057670   | 232 |
| chr23 | 15870454  | 15870685  | 232 |
| chr21 | 65867251  | 65867482  | 232 |
| chr20 | 67539206  | 67539437  | 232 |
| chr2  | 25279960  | 25280191  | 232 |
| chr19 | 44303108  | 44303339  | 232 |
| chr18 | 33705398  | 33705629  | 232 |
| chr17 | 68462585  | 68462816  | 232 |
| chr16 | 47328507  | 47328738  | 232 |
| chr14 | 21945293  | 21945524  | 232 |
| chr13 | 54988266  | 54988497  | 232 |
| chr10 | 58786089  | 58786320  | 232 |
| chr10 | 17390983  | 17391214  | 232 |
| chr1  | 146468984 | 146469215 | 232 |
| chr1  | 74735411  | 74735642  | 232 |
| chr9  | 104998230 | 104998460 | 231 |
| chr5  | 10736155  | 10736385  | 231 |
| chr4  | 33215408  | 33215638  | 231 |
| chr28 | 41282938  | 41283168  | 231 |
| chr22 | 53958863  | 53959093  | 231 |
| chr2  | 135587588 | 135587818 | 231 |
| chr17 | 64551873  | 64552103  | 231 |
| chr16 | 77310694  | 77310924  | 231 |
| chr16 | 47117085  | 47117315  | 231 |
| chr16 | 41415435  | 41415665  | 231 |
| chr15 | 27231091  | 27231321  | 231 |
| chr11 | 14078369  | 14078599  | 231 |
| chr4  | 30313805  | 30314034  | 230 |
| chr3  | 122442178 | 122442407 | 230 |
| chr3  | 121187453 | 121187682 | 230 |
| chr3  | 113104223 | 113104452 | 230 |
| chr27 | 17819317  | 17819546  | 230 |
| chr26 | 39753643  | 39753872  | 230 |
| chr25 | 34492109  | 34492338  | 230 |

|       |               |           |     |
|-------|---------------|-----------|-----|
| chr24 | 43653007      | 43653236  | 230 |
| chr21 | 67916964      | 67917193  | 230 |
| chr2  | 124293479     | 124293708 | 230 |
| chr2  | 73268544      | 73268773  | 230 |
| chr19 | 42282600      | 42282829  | 230 |
| chr19 | 35815849      | 35816078  | 230 |
| chr18 | 11733027      | 11733256  | 230 |
| chr16 | 965144 965373 | 230       |     |
| chr15 | 29998662      | 29998891  | 230 |
| chr13 | 70048452      | 70048681  | 230 |
| chr13 | 59703014      | 59703243  | 230 |
| chr9  | 99933696      | 99933924  | 229 |
| chr7  | 80881197      | 80881425  | 229 |
| chr3  | 29228686      | 29228914  | 229 |
| chr3  | 24655392      | 24655620  | 229 |
| chr29 | 34778904      | 34779132  | 229 |
| chr29 | 27034495      | 27034723  | 229 |
| chr25 | 12716239      | 12716467  | 229 |
| chr24 | 44253044      | 44253272  | 229 |
| chr24 | 1399502       | 1399730   | 229 |
| chr21 | 34883379      | 34883607  | 229 |
| chr2  | 115630152     | 115630380 | 229 |
| chr19 | 43148047      | 43148275  | 229 |
| chr17 | 72396571      | 72396799  | 229 |
| chr16 | 41374349      | 41374577  | 229 |
| chr14 | 61335740      | 61335968  | 229 |
| chr13 | 69860600      | 69860828  | 229 |
| chr13 | 56271479      | 56271707  | 229 |
| chr13 | 51594381      | 51594609  | 229 |
| chr10 | 24172545      | 24172773  | 229 |
| chr1  | 150020818     | 150021046 | 229 |
| chr1  | 109058223     | 109058451 | 229 |
| chr7  | 71317966      | 71318193  | 228 |
| chr29 | 50405982      | 50406209  | 228 |
| chr29 | 48254031      | 48254258  | 228 |
| chr27 | 35373056      | 35373283  | 228 |
| chr26 | 21791880      | 21792107  | 228 |
| chr25 | 14306293      | 14306520  | 228 |
| chr24 | 31399129      | 31399356  | 228 |
| chr23 | 46403956      | 46404183  | 228 |
| chr23 | 8242227       | 8242454   | 228 |
| chr22 | 57827060      | 57827287  | 228 |
| chr19 | 61722699      | 61722926  | 228 |
| chr19 | 54855459      | 54855686  | 228 |
| chr19 | 54627918      | 54628145  | 228 |
| chr18 | 43590311      | 43590538  | 228 |
| chr18 | 3884482       | 3884709   | 228 |
| chr17 | 61296364      | 61296591  | 228 |
| chr17 | 3054566       | 3054793   | 228 |
| chr15 | 62412134      | 62412361  | 228 |

|       |           |           |     |
|-------|-----------|-----------|-----|
| chr13 | 70997585  | 70997812  | 228 |
| chr1  | 82743949  | 82744176  | 228 |
| chr9  | 77227934  | 77228160  | 227 |
| chr6  | 97087261  | 97087487  | 227 |
| chr5  | 28862283  | 28862509  | 227 |
| chr5  | 28851149  | 28851375  | 227 |
| chr4  | 5394117   | 5394343   | 227 |
| chr26 | 48311744  | 48311970  | 227 |
| chr25 | 4759947   | 4760173   | 227 |
| chr24 | 35163052  | 35163278  | 227 |
| chr23 | 8239676   | 8239902   | 227 |
| chr2  | 139439206 | 139439432 | 227 |
| chr2  | 135068594 | 135068820 | 227 |
| chr19 | 47282283  | 47282509  | 227 |
| chr19 | 19273462  | 19273688  | 227 |
| chr18 | 57392955  | 57393181  | 227 |
| chr17 | 62051024  | 62051250  | 227 |
| chr14 | 21767283  | 21767509  | 227 |
| chr14 | 2906532   | 2906758   | 227 |
| chr13 | 59390138  | 59390364  | 227 |
| chr13 | 55509389  | 55509615  | 227 |
| chr10 | 70842190  | 70842416  | 227 |
| chr1  | 152269199 | 152269425 | 227 |
| chr1  | 67775488  | 67775714  | 227 |
| chr9  | 12620353  | 12620578  | 226 |
| chr5  | 81597428  | 81597653  | 226 |
| chr5  | 62076112  | 62076337  | 226 |
| chr3  | 124538893 | 124539118 | 226 |
| chr3  | 123990051 | 123990276 | 226 |
| chr29 | 18825890  | 18826115  | 226 |
| chr24 | 20394110  | 20394335  | 226 |
| chr23 | 48159385  | 48159610  | 226 |
| chr23 | 19863016  | 19863241  | 226 |
| chr20 | 38402960  | 38403185  | 226 |
| chr20 | 19818252  | 19818477  | 226 |
| chr2  | 130430254 | 130430479 | 226 |
| chr19 | 59351689  | 59351914  | 226 |
| chr19 | 53536325  | 53536550  | 226 |
| chr19 | 41724754  | 41724979  | 226 |
| chr18 | 51738947  | 51739172  | 226 |
| chr18 | 12053667  | 12053892  | 226 |
| chr17 | 66755778  | 66756003  | 226 |
| chr14 | 14029152  | 14029377  | 226 |
| chr13 | 68922988  | 68923213  | 226 |
| chr10 | 90217155  | 90217380  | 226 |
| chr10 | 21426417  | 21426642  | 226 |
| chrX  | 34890400  | 34890624  | 225 |
| chr9  | 99103926  | 99104150  | 225 |
| chr8  | 63800603  | 63800827  | 225 |
| chr7  | 111177137 | 111177361 | 225 |

|       |           |           |     |
|-------|-----------|-----------|-----|
| chr7  | 17983420  | 17983644  | 225 |
| chr6  | 70513048  | 70513272  | 225 |
| chr5  | 121230022 | 121230246 | 225 |
| chr5  | 61046974  | 61047198  | 225 |
| chr3  | 111888204 | 111888428 | 225 |
| chr26 | 48608149  | 48608373  | 225 |
| chr23 | 26517854  | 26518078  | 225 |
| chr22 | 52835378  | 52835602  | 225 |
| chr20 | 6594309   | 6594533   | 225 |
| chr2  | 125906097 | 125906321 | 225 |
| chr19 | 60142457  | 60142681  | 225 |
| chr19 | 46097764  | 46097988  | 225 |
| chr18 | 24347677  | 24347901  | 225 |
| chr18 | 18017023  | 18017247  | 225 |
| chr16 | 77617318  | 77617542  | 225 |
| chr15 | 42678689  | 42678913  | 225 |
| chr15 | 39561996  | 39562220  | 225 |
| chr13 | 65875857  | 65876081  | 225 |
| chr12 | 84195337  | 84195561  | 225 |
| chr8  | 72145214  | 72145437  | 224 |
| chr7  | 46273410  | 46273633  | 224 |
| chr5  | 29131262  | 29131485  | 224 |
| chr3  | 110217150 | 110217373 | 224 |
| chr3  | 26142460  | 26142683  | 224 |
| chr27 | 48026287  | 48026510  | 224 |
| chr26 | 44445771  | 44445994  | 224 |
| chr26 | 22211939  | 22212162  | 224 |
| chr24 | 39748048  | 39748271  | 224 |
| chr23 | 49623028  | 49623251  | 224 |
| chr21 | 19966616  | 19966839  | 224 |
| chr21 | 6974213   | 6974436   | 224 |
| chr20 | 22391616  | 22391839  | 224 |
| chr2  | 111839340 | 111839563 | 224 |
| chr18 | 16605744  | 16605967  | 224 |
| chr18 | 15858565  | 15858788  | 224 |
| chr18 | 11690598  | 11690821  | 224 |
| chr15 | 43658510  | 43658733  | 224 |
| chr15 | 13522290  | 13522513  | 224 |
| chr14 | 61740167  | 61740390  | 224 |
| chr13 | 54759095  | 54759318  | 224 |
| chr11 | 75508466  | 75508689  | 224 |
| chr11 | 50251406  | 50251629  | 224 |
| chr10 | 103064359 | 103064582 | 224 |
| chr9  | 106454134 | 106454356 | 223 |
| chr8  | 108772600 | 108772822 | 223 |
| chr6  | 59496135  | 59496357  | 223 |
| chr5  | 121201740 | 121201962 | 223 |
| chr3  | 105767897 | 105768119 | 223 |
| chr29 | 34743357  | 34743579  | 223 |
| chr29 | 34677896  | 34678118  | 223 |

|       |           |           |     |
|-------|-----------|-----------|-----|
| chr28 | 44577628  | 44577850  | 223 |
| chr25 | 37276411  | 37276633  | 223 |
| chr25 | 35491689  | 35491911  | 223 |
| chr25 | 34027452  | 34027674  | 223 |
| chr25 | 4650356   | 4650578   | 223 |
| chr22 | 55391967  | 55392189  | 223 |
| chr21 | 18943117  | 18943339  | 223 |
| chr19 | 54197983  | 54198205  | 223 |
| chr19 | 32886047  | 32886269  | 223 |
| chr19 | 23067515  | 23067737  | 223 |
| chr19 | 14298752  | 14298974  | 223 |
| chr18 | 65965518  | 65965740  | 223 |
| chr18 | 57428182  | 57428404  | 223 |
| chr18 | 13550607  | 13550829  | 223 |
| chr18 | 11687286  | 11687508  | 223 |
| chr18 | 4075034   | 4075256   | 223 |
| chr17 | 58948079  | 58948301  | 223 |
| chr17 | 53477441  | 53477663  | 223 |
| chr16 | 47199124  | 47199346  | 223 |
| chr13 | 70184616  | 70184838  | 223 |
| chr11 | 4341867   | 4342089   | 223 |
| chr10 | 20839139  | 20839361  | 223 |
| chr7  | 21188197  | 21188418  | 222 |
| chr6  | 58825917  | 58826138  | 222 |
| chr6  | 5533732   | 5533953   | 222 |
| chr3  | 55840792  | 55841013  | 222 |
| chr28 | 12337534  | 12337755  | 222 |
| chr26 | 45796378  | 45796599  | 222 |
| chr26 | 37576936  | 37577157  | 222 |
| chr24 | 795514    | 795735    | 222 |
| chr24 | 789114    | 789335    | 222 |
| chr22 | 60017649  | 60017870  | 222 |
| chr20 | 71672549  | 71672770  | 222 |
| chr19 | 61956658  | 61956879  | 222 |
| chr17 | 57624941  | 57625162  | 222 |
| chr16 | 47014286  | 47014507  | 222 |
| chr15 | 74874491  | 74874712  | 222 |
| chr15 | 63687775  | 63687996  | 222 |
| chr15 | 33581780  | 33582001  | 222 |
| chr14 | 614212    | 614433    | 222 |
| chr13 | 66945011  | 66945232  | 222 |
| chr13 | 26216477  | 26216698  | 222 |
| chr11 | 70838808  | 70839029  | 222 |
| chr11 | 25616861  | 25617082  | 222 |
| chr10 | 17187674  | 17187895  | 222 |
| chr9  | 105851534 | 105851754 | 221 |
| chr7  | 9626412   | 9626632   | 221 |
| chr3  | 127240514 | 127240734 | 221 |
| chr29 | 36750741  | 36750961  | 221 |
| chr28 | 46055216  | 46055436  | 221 |

|       |           |           |     |
|-------|-----------|-----------|-----|
| chr26 | 23492344  | 23492564  | 221 |
| chr25 | 41376753  | 41376973  | 221 |
| chr24 | 41812729  | 41812949  | 221 |
| chr22 | 43568738  | 43568958  | 221 |
| chr21 | 67909217  | 67909437  | 221 |
| chr21 | 20172231  | 20172451  | 221 |
| chr2  | 122975249 | 122975469 | 221 |
| chr2  | 101175496 | 101175716 | 221 |
| chr2  | 74013867  | 74014087  | 221 |
| chr19 | 58806414  | 58806634  | 221 |
| chr19 | 54693438  | 54693658  | 221 |
| chr19 | 45536734  | 45536954  | 221 |
| chr19 | 41933472  | 41933692  | 221 |
| chr19 | 39162027  | 39162247  | 221 |
| chr18 | 53549031  | 53549251  | 221 |
| chr18 | 49909848  | 49910068  | 221 |
| chr18 | 45301334  | 45301554  | 221 |
| chr18 | 12375289  | 12375509  | 221 |
| chr18 | 11330499  | 11330719  | 221 |
| chr16 | 26506492  | 26506712  | 221 |
| chr14 | 34014245  | 34014465  | 221 |
| chr11 | 75140743  | 75140963  | 221 |
| chr11 | 28563559  | 28563779  | 221 |
| chr10 | 88350231  | 88350451  | 221 |
| chr10 | 36291066  | 36291286  | 221 |
| chr10 | 17007114  | 17007334  | 221 |
| chr7  | 70515811  | 70516030  | 220 |
| chr6  | 120395603 | 120395822 | 220 |
| chr5  | 106252086 | 106252305 | 220 |
| chr4  | 116850781 | 116851000 | 220 |
| chr3  | 35914164  | 35914383  | 220 |
| chr25 | 27960654  | 27960873  | 220 |
| chr23 | 52692101  | 52692320  | 220 |
| chr23 | 9455135   | 9455354   | 220 |
| chr22 | 9658858   | 9659077   | 220 |
| chr21 | 67968116  | 67968335  | 220 |
| chr20 | 6361924   | 6362143   | 220 |
| chr19 | 58694926  | 58695145  | 220 |
| chr18 | 51411204  | 51411423  | 220 |
| chr18 | 48732115  | 48732334  | 220 |
| chr17 | 64716210  | 64716429  | 220 |
| chr16 | 55216896  | 55217115  | 220 |
| chr16 | 44296013  | 44296232  | 220 |
| chr16 | 43279683  | 43279902  | 220 |
| chr16 | 2240030   | 2240249   | 220 |
| chr16 | 2110982   | 2111201   | 220 |
| chr15 | 25591282  | 25591501  | 220 |
| chr15 | 21299614  | 21299833  | 220 |
| chr13 | 60703130  | 60703349  | 220 |
| chr10 | 81600424  | 81600643  | 220 |

|       |               |           |     |
|-------|---------------|-----------|-----|
| chr10 | 51366818      | 51367037  | 220 |
| chr8  | 78797859      | 78798077  | 219 |
| chr6  | 109299081     | 109299299 | 219 |
| chr29 | 31667104      | 31667322  | 219 |
| chr29 | 27289572      | 27289790  | 219 |
| chr23 | 10545087      | 10545305  | 219 |
| chr22 | 59494280      | 59494498  | 219 |
| chr22 | 30070249      | 30070467  | 219 |
| chr20 | 70959886      | 70960104  | 219 |
| chr20 | 3507855       | 3508073   | 219 |
| chr19 | 47177158      | 47177376  | 219 |
| chr19 | 31387374      | 31387592  | 219 |
| chr19 | 19277666      | 19277884  | 219 |
| chr18 | 51733124      | 51733342  | 219 |
| chr18 | 34476702      | 34476920  | 219 |
| chr18 | 6937501       | 6937719   | 219 |
| chr15 | 54287612      | 54287830  | 219 |
| chr15 | 30822033      | 30822251  | 219 |
| chr14 | 21589643      | 21589861  | 219 |
| chr13 | 62777910      | 62778128  | 219 |
| chr13 | 57686145      | 57686363  | 219 |
| chr13 | 56356109      | 56356327  | 219 |
| chr12 | 32729257      | 32729475  | 219 |
| chr10 | 91039963      | 91040181  | 219 |
| chr1  | 68370053      | 68370271  | 219 |
| chr6  | 118645079     | 118645296 | 218 |
| chr5  | 121806548     | 121806765 | 218 |
| chr5  | 81565271      | 81565488  | 218 |
| chr4  | 116931861     | 116932078 | 218 |
| chr4  | 32174360      | 32174577  | 218 |
| chr3  | 105401511     | 105401728 | 218 |
| chr29 | 51679255      | 51679472  | 218 |
| chr29 | 37264727      | 37264944  | 218 |
| chr25 | 17760230      | 17760447  | 218 |
| chr22 | 60534192      | 60534409  | 218 |
| chr22 | 50736859      | 50737076  | 218 |
| chr22 | 46575782      | 46575999  | 218 |
| chr22 | 16334443      | 16334660  | 218 |
| chr20 | 785533 785750 |           | 218 |
| chr2  | 126640854     | 126641071 | 218 |
| chr19 | 41215058      | 41215275  | 218 |
| chr18 | 22408315      | 22408532  | 218 |
| chr18 | 2254343       | 2254560   | 218 |
| chr18 | 509688 509905 |           | 218 |
| chr17 | 66823728      | 66823945  | 218 |
| chr17 | 60554100      | 60554317  | 218 |
| chr16 | 59037951      | 59038168  | 218 |
| chr16 | 47155535      | 47155752  | 218 |
| chr15 | 22190574      | 22190791  | 218 |
| chr13 | 38354240      | 38354457  | 218 |



|       |               |           |     |
|-------|---------------|-----------|-----|
| chr10 | 87171242      | 87171459  | 218 |
| chr1  | 147041425     | 147041642 | 218 |
| chr6  | 18305185      | 18305401  | 217 |
| chr5  | 115542039     | 115542255 | 217 |
| chr4  | 117253438     | 117253654 | 217 |
| chr3  | 35786892      | 35787108  | 217 |
| chr29 | 51799144      | 51799360  | 217 |
| chr29 | 39088672      | 39088888  | 217 |
| chr27 | 39235769      | 39235985  | 217 |
| chr27 | 38696390      | 38696606  | 217 |
| chr27 | 5838478       | 5838694   | 217 |
| chr27 | 825121 825337 | 217       |     |
| chr26 | 22374705      | 22374921  | 217 |
| chr24 | 864316 864532 | 217       |     |
| chr23 | 27901495      | 27901711  | 217 |
| chr21 | 67978477      | 67978693  | 217 |
| chr21 | 64519125      | 64519341  | 217 |
| chr21 | 33078082      | 33078298  | 217 |
| chr2  | 139281860     | 139282076 | 217 |
| chr2  | 131742263     | 131742479 | 217 |
| chr2  | 124797533     | 124797749 | 217 |
| chr2  | 110216381     | 110216597 | 217 |
| chr19 | 54324421      | 54324637  | 217 |
| chr19 | 44102239      | 44102455  | 217 |
| chr18 | 18009717      | 18009933  | 217 |
| chr17 | 61283819      | 61284035  | 217 |
| chr17 | 49393538      | 49393754  | 217 |
| chr16 | 42985796      | 42986012  | 217 |
| chr16 | 3303623       | 3303839   | 217 |
| chr13 | 40332414      | 40332630  | 217 |
| chr12 | 84221364      | 84221580  | 217 |
| chr11 | 103554779     | 103554995 | 217 |
| chr11 | 70862195      | 70862411  | 217 |
| chr10 | 17065766      | 17065982  | 217 |
| chr7  | 51872458      | 51872673  | 216 |
| chr7  | 3681127       | 3681342   | 216 |
| chr3  | 117314784     | 117314999 | 216 |
| chr3  | 71914578      | 71914793  | 216 |
| chr28 | 27112152      | 27112367  | 216 |
| chr28 | 1262630       | 1262845   | 216 |
| chr26 | 41706522      | 41706737  | 216 |
| chr26 | 18198546      | 18198761  | 216 |
| chr24 | 60600461      | 60600676  | 216 |
| chr21 | 27106204      | 27106419  | 216 |
| chr20 | 44423270      | 44423485  | 216 |
| chr19 | 54452748      | 54452963  | 216 |
| chr19 | 46856543      | 46856758  | 216 |
| chr19 | 35857976      | 35858191  | 216 |
| chr18 | 51737635      | 51737850  | 216 |
| chr18 | 25667536      | 25667751  | 216 |

|       |           |           |     |
|-------|-----------|-----------|-----|
| chr18 | 12388501  | 12388716  | 216 |
| chr17 | 72730400  | 72730615  | 216 |
| chr17 | 57663997  | 57664212  | 216 |
| chr15 | 20915420  | 20915635  | 216 |
| chr11 | 107566320 | 107566535 | 216 |
| chr11 | 70896041  | 70896256  | 216 |
| chr11 | 70704297  | 70704512  | 216 |
| chr10 | 17495070  | 17495285  | 216 |
| chr10 | 17154714  | 17154929  | 216 |
| chr10 | 12871581  | 12871796  | 216 |
| chr1  | 82837127  | 82837342  | 216 |
| chr1  | 2163457   | 2163672   | 216 |
| chr9  | 99931960  | 99932174  | 215 |
| chr8  | 80168712  | 80168926  | 215 |
| chr8  | 24500940  | 24501154  | 215 |
| chr4  | 121265456 | 121265670 | 215 |
| chr4  | 106087622 | 106087836 | 215 |
| chr3  | 82793597  | 82793811  | 215 |
| chr29 | 48875068  | 48875282  | 215 |
| chr29 | 44557932  | 44558146  | 215 |
| chr26 | 48571405  | 48571619  | 215 |
| chr26 | 44200817  | 44201031  | 215 |
| chr22 | 52924403  | 52924617  | 215 |
| chr22 | 51049210  | 51049424  | 215 |
| chr2  | 140611102 | 140611316 | 215 |
| chr19 | 54931721  | 54931935  | 215 |
| chr19 | 47334476  | 47334690  | 215 |
| chr19 | 45207743  | 45207957  | 215 |
| chr18 | 63622503  | 63622717  | 215 |
| chr18 | 56779295  | 56779509  | 215 |
| chr18 | 22154471  | 22154685  | 215 |
| chr17 | 12948025  | 12948239  | 215 |
| chr16 | 54354150  | 54354364  | 215 |
| chr13 | 74859331  | 74859545  | 215 |
| chr13 | 59629593  | 59629807  | 215 |
| chr13 | 39803195  | 39803409  | 215 |
| chr13 | 39696707  | 39696921  | 215 |
| chr12 | 84196108  | 84196322  | 215 |
| chr11 | 96379965  | 96380179  | 215 |
| chr11 | 72817917  | 72818131  | 215 |
| chr11 | 48554164  | 48554378  | 215 |
| chr10 | 93413457  | 93413671  | 215 |
| chr10 | 12154834  | 12155048  | 215 |
| chr1  | 153196411 | 153196625 | 215 |
| chr1  | 68871086  | 68871300  | 215 |
| chr9  | 90374959  | 90375172  | 214 |
| chr7  | 4931469   | 4931682   | 214 |
| chr4  | 98577023  | 98577236  | 214 |
| chr4  | 11917899  | 11918112  | 214 |
| chr29 | 48299025  | 48299238  | 214 |

|       |               |           |     |
|-------|---------------|-----------|-----|
| chr29 | 44568039      | 44568252  | 214 |
| chr28 | 26071016      | 26071229  | 214 |
| chr23 | 38341913      | 38342126  | 214 |
| chr21 | 24269304      | 24269517  | 214 |
| chr18 | 7602090       | 7602303   | 214 |
| chr18 | 2244673       | 2244886   | 214 |
| chr17 | 66839454      | 66839667  | 214 |
| chr16 | 49404431      | 49404644  | 214 |
| chr14 | 7403658       | 7403871   | 214 |
| chr13 | 67073254      | 67073467  | 214 |
| chr11 | 70564150      | 70564363  | 214 |
| chr11 | 7770194       | 7770407   | 214 |
| chr10 | 88199674      | 88199887  | 214 |
| chr9  | 90457861      | 90458073  | 213 |
| chr9  | 10500056      | 10500268  | 213 |
| chr7  | 17360869      | 17361081  | 213 |
| chr6  | 59251055      | 59251267  | 213 |
| chr5  | 113170416     | 113170628 | 213 |
| chr5  | 111184947     | 111185159 | 213 |
| chr5  | 28863763      | 28863975  | 213 |
| chr4  | 120080436     | 120080648 | 213 |
| chr3  | 120951429     | 120951641 | 213 |
| chr3  | 116626751     | 116626963 | 213 |
| chr28 | 430700 430912 | 213       |     |
| chr26 | 34193050      | 34193262  | 213 |
| chr23 | 28780729      | 28780941  | 213 |
| chr22 | 23094510      | 23094722  | 213 |
| chr21 | 34461822      | 34462034  | 213 |
| chr21 | 6467727       | 6467939   | 213 |
| chr2  | 108928760     | 108928972 | 213 |
| chr19 | 41963640      | 41963852  | 213 |
| chr19 | 34958562      | 34958774  | 213 |
| chr18 | 24571530      | 24571742  | 213 |
| chr18 | 3913846       | 3914058   | 213 |
| chr13 | 80157596      | 80157808  | 213 |
| chr13 | 77191965      | 77192177  | 213 |
| chr13 | 58971337      | 58971549  | 213 |
| chr12 | 35317551      | 35317763  | 213 |
| chr11 | 44937122      | 44937334  | 213 |
| chr10 | 53534821      | 53535033  | 213 |
| chr10 | 7186201       | 7186413   | 213 |
| chr7  | 43735823      | 43736034  | 212 |
| chr5  | 124756732     | 124756943 | 212 |
| chr5  | 30020145      | 30020356  | 212 |
| chr4  | 54039948      | 54040159  | 212 |
| chr4  | 43263303      | 43263514  | 212 |
| chr3  | 116635765     | 116635976 | 212 |
| chr3  | 111735715     | 111735926 | 212 |
| chr3  | 62911363      | 62911574  | 212 |
| chr29 | 19412905      | 19413116  | 212 |

|       |           |           |     |
|-------|-----------|-----------|-----|
| chr27 | 26728200  | 26728411  | 212 |
| chr24 | 20396234  | 20396445  | 212 |
| chr23 | 28539596  | 28539807  | 212 |
| chr2  | 136776324 | 136776535 | 212 |
| chr2  | 131840081 | 131840292 | 212 |
| chr2  | 124341537 | 124341748 | 212 |
| chr2  | 75907792  | 75908003  | 212 |
| chr19 | 58674468  | 58674679  | 212 |
| chr19 | 47836792  | 47837003  | 212 |
| chr19 | 30259810  | 30260021  | 212 |
| chr19 | 14948956  | 14949167  | 212 |
| chr18 | 62938220  | 62938431  | 212 |
| chr17 | 74598752  | 74598963  | 212 |
| chr16 | 38816291  | 38816502  | 212 |
| chr14 | 2882525   | 2882736   | 212 |
| chr13 | 75536542  | 75536753  | 212 |
| chr13 | 30827790  | 30828001  | 212 |
| chr12 | 32194861  | 32195072  | 212 |
| chr1  | 152260796 | 152261007 | 212 |
| chr8  | 9329797   | 9330007   | 211 |
| chr3  | 125901310 | 125901520 | 211 |
| chr3  | 111859807 | 111860017 | 211 |
| chr26 | 48423165  | 48423375  | 211 |
| chr25 | 3809355   | 3809565   | 211 |
| chr24 | 64982097  | 64982307  | 211 |
| chr24 | 25341761  | 25341971  | 211 |
| chr23 | 19874973  | 19875183  | 211 |
| chr23 | 10450656  | 10450866  | 211 |
| chr2  | 138484014 | 138484224 | 211 |
| chr19 | 54777675  | 54777885  | 211 |
| chr19 | 39985270  | 39985480  | 211 |
| chr19 | 29027268  | 29027478  | 211 |
| chr19 | 27938757  | 27938967  | 211 |
| chr19 | 25418270  | 25418480  | 211 |
| chr19 | 18428706  | 18428916  | 211 |
| chr18 | 18664518  | 18664728  | 211 |
| chr17 | 63411716  | 63411926  | 211 |
| chr17 | 63113069  | 63113279  | 211 |
| chr16 | 48567739  | 48567949  | 211 |
| chr16 | 1594637   | 1594847   | 211 |
| chr15 | 27464724  | 27464934  | 211 |
| chr15 | 22198938  | 22199148  | 211 |
| chr13 | 79073398  | 79073608  | 211 |
| chr13 | 66973099  | 66973309  | 211 |
| chr13 | 55522907  | 55523117  | 211 |
| chr11 | 109772352 | 109772562 | 211 |
| chr8  | 78794980  | 78795189  | 210 |
| chr8  | 64940835  | 64941044  | 210 |
| chr6  | 122390716 | 122390925 | 210 |
| chr6  | 119202427 | 119202636 | 210 |

|       |           |           |     |
|-------|-----------|-----------|-----|
| chr6  | 116244279 | 116244488 | 210 |
| chr3  | 121086990 | 121087199 | 210 |
| chr29 | 38838240  | 38838449  | 210 |
| chr29 | 37678010  | 37678219  | 210 |
| chr29 | 37077801  | 37078010  | 210 |
| chr27 | 40476962  | 40477171  | 210 |
| chr26 | 37625697  | 37625906  | 210 |
| chr26 | 24575596  | 24575805  | 210 |
| chr25 | 39312473  | 39312682  | 210 |
| chr25 | 37793237  | 37793446  | 210 |
| chr24 | 62961325  | 62961534  | 210 |
| chr23 | 31009841  | 31010050  | 210 |
| chr22 | 55771180  | 55771389  | 210 |
| chr20 | 65904953  | 65905162  | 210 |
| chr20 | 25819952  | 25820161  | 210 |
| chr20 | 1284141   | 1284350   | 210 |
| chr2  | 135040722 | 135040931 | 210 |
| chr18 | 48519544  | 48519753  | 210 |
| chr18 | 11541900  | 11542109  | 210 |
| chr16 | 73351932  | 73352141  | 210 |
| chr15 | 77537896  | 77538105  | 210 |
| chr15 | 75173524  | 75173733  | 210 |
| chr14 | 7752763   | 7752972   | 210 |
| chr14 | 3499288   | 3499497   | 210 |
| chr13 | 54077569  | 54077778  | 210 |
| chr10 | 105069617 | 105069826 | 210 |
| chr10 | 37303885  | 37304094  | 210 |
| chr1  | 146677871 | 146678080 | 210 |
| chr1  | 128260720 | 128260929 | 210 |
| chr8  | 90740749  | 90740957  | 209 |
| chr7  | 37511062  | 37511270  | 209 |
| chr5  | 117520706 | 117520914 | 209 |
| chr5  | 30407122  | 30407330  | 209 |
| chr3  | 110968586 | 110968794 | 209 |
| chr3  | 16910246  | 16910454  | 209 |
| chr26 | 42187837  | 42188045  | 209 |
| chr26 | 20268467  | 20268675  | 209 |
| chr23 | 15910760  | 15910968  | 209 |
| chr23 | 10435189  | 10435397  | 209 |
| chr21 | 65847196  | 65847404  | 209 |
| chr21 | 20008010  | 20008218  | 209 |
| chr20 | 8618271   | 8618479   | 209 |
| chr20 | 5017166   | 5017374   | 209 |
| chr2  | 136716515 | 136716723 | 209 |
| chr2  | 135054581 | 135054789 | 209 |
| chr2  | 131061728 | 131061936 | 209 |
| chr2  | 126716082 | 126716290 | 209 |
| chr2  | 19392034  | 19392242  | 209 |
| chr19 | 56545755  | 56545963  | 209 |
| chr19 | 39984821  | 39985029  | 209 |

|       |               |           |     |
|-------|---------------|-----------|-----|
| chr19 | 38559818      | 38560026  | 209 |
| chr19 | 37930067      | 37930275  | 209 |
| chr19 | 23757306      | 23757514  | 209 |
| chr18 | 58835103      | 58835311  | 209 |
| chr18 | 24013699      | 24013907  | 209 |
| chr16 | 68551002      | 68551210  | 209 |
| chr16 | 47032359      | 47032567  | 209 |
| chr16 | 41472210      | 41472418  | 209 |
| chr12 | 22968060      | 22968268  | 209 |
| chr11 | 74938841      | 74939049  | 209 |
| chr11 | 37925372      | 37925580  | 209 |
| chr1  | 64904554      | 64904762  | 209 |
| chr5  | 33859913      | 33860120  | 208 |
| chr4  | 95774344      | 95774551  | 208 |
| chr3  | 121462028     | 121462235 | 208 |
| chr29 | 38858086      | 38858293  | 208 |
| chr26 | 48722098      | 48722305  | 208 |
| chr24 | 61120078      | 61120285  | 208 |
| chr23 | 16503244      | 16503451  | 208 |
| chr2  | 134956640     | 134956847 | 208 |
| chr19 | 29448484      | 29448691  | 208 |
| chr19 | 26646488      | 26646695  | 208 |
| chr17 | 68556557      | 68556764  | 208 |
| chr15 | 74683567      | 74683774  | 208 |
| chr15 | 39665239      | 39665446  | 208 |
| chr14 | 19510932      | 19511139  | 208 |
| chr10 | 37149796      | 37150003  | 208 |
| chr10 | 20908210      | 20908417  | 208 |
| chr8  | 40283948      | 40284154  | 207 |
| chr4  | 124237475     | 124237681 | 207 |
| chr4  | 107675969     | 107676175 | 207 |
| chr29 | 23782938      | 23783144  | 207 |
| chr26 | 31325700      | 31325906  | 207 |
| chr26 | 10128064      | 10128270  | 207 |
| chr25 | 35696308      | 35696514  | 207 |
| chr25 | 3113603       | 3113809   | 207 |
| chr25 | 479465 479671 |           | 207 |
| chr23 | 28010209      | 28010415  | 207 |
| chr23 | 10469915      | 10470121  | 207 |
| chr22 | 38867452      | 38867658  | 207 |
| chr21 | 19261455      | 19261661  | 207 |
| chr21 | 13941125      | 13941331  | 207 |
| chr18 | 25628273      | 25628479  | 207 |
| chr18 | 23877918      | 23878124  | 207 |
| chr18 | 7114077       | 7114283   | 207 |
| chr15 | 76153066      | 76153272  | 207 |
| chr13 | 75253221      | 75253427  | 207 |
| chr13 | 41611471      | 41611677  | 207 |
| chr11 | 28337744      | 28337950  | 207 |
| chr1  | 147894305     | 147894511 | 207 |

|       |           |           |     |
|-------|-----------|-----------|-----|
| chr9  | 90478463  | 90478668  | 206 |
| chr8  | 10188675  | 10188880  | 206 |
| chr7  | 51866564  | 51866769  | 206 |
| chr7  | 42209153  | 42209358  | 206 |
| chr7  | 12917743  | 12917948  | 206 |
| chr5  | 122772829 | 122773034 | 206 |
| chr5  | 113254296 | 113254501 | 206 |
| chr4  | 106963046 | 106963251 | 206 |
| chr4  | 62578062  | 62578267  | 206 |
| chr3  | 123633099 | 123633304 | 206 |
| chr3  | 20498189  | 20498394  | 206 |
| chr28 | 33290424  | 33290629  | 206 |
| chr26 | 50666634  | 50666839  | 206 |
| chr26 | 44396022  | 44396227  | 206 |
| chr26 | 20126785  | 20126990  | 206 |
| chr24 | 2347004   | 2347209   | 206 |
| chr22 | 56302390  | 56302595  | 206 |
| chr22 | 49582030  | 49582235  | 206 |
| chr22 | 48549597  | 48549802  | 206 |
| chr21 | 66640470  | 66640675  | 206 |
| chr21 | 64269078  | 64269283  | 206 |
| chr21 | 26457403  | 26457608  | 206 |
| chr2  | 132472186 | 132472391 | 206 |
| chr2  | 126044548 | 126044753 | 206 |
| chr19 | 54703034  | 54703239  | 206 |
| chr19 | 34799918  | 34800123  | 206 |
| chr19 | 11825927  | 11826132  | 206 |
| chr17 | 73187338  | 73187543  | 206 |
| chr17 | 68514347  | 68514552  | 206 |
| chr17 | 68440451  | 68440656  | 206 |
| chr17 | 47252597  | 47252802  | 206 |
| chr12 | 33743392  | 33743597  | 206 |
| chr10 | 21847195  | 21847400  | 206 |
| chr1  | 152631798 | 152632003 | 206 |
| chr1  | 68883077  | 68883282  | 206 |
| chr1  | 68385628  | 68385833  | 206 |
| chr8  | 78696701  | 78696905  | 205 |
| chr4  | 121583152 | 121583356 | 205 |
| chr4  | 72391925  | 72392129  | 205 |
| chr3  | 105927496 | 105927700 | 205 |
| chr28 | 1265696   | 1265900   | 205 |
| chr24 | 64982310  | 64982514  | 205 |
| chr24 | 43545184  | 43545388  | 205 |
| chr22 | 16319537  | 16319741  | 205 |
| chr19 | 23937979  | 23938183  | 205 |
| chr18 | 18965511  | 18965715  | 205 |
| chr18 | 12638392  | 12638596  | 205 |
| chr17 | 73026946  | 73027150  | 205 |
| chr17 | 62076033  | 62076237  | 205 |
| chr16 | 47226813  | 47227017  | 205 |

|       |           |           |     |
|-------|-----------|-----------|-----|
| chr15 | 51741412  | 51741616  | 205 |
| chr12 | 20794692  | 20794896  | 205 |
| chr10 | 24707281  | 24707485  | 205 |
| chr1  | 146775427 | 146775631 | 205 |
| chr1  | 61383991  | 61384195  | 205 |
| chr6  | 63984634  | 63984837  | 204 |
| chr5  | 10609318  | 10609521  | 204 |
| chr3  | 121231168 | 121231371 | 204 |
| chr25 | 2079011   | 2079214   | 204 |
| chr24 | 47871665  | 47871868  | 204 |
| chr23 | 30358636  | 30358839  | 204 |
| chr2  | 110524660 | 110524863 | 204 |
| chr19 | 60820976  | 60821179  | 204 |
| chr19 | 42513990  | 42514193  | 204 |
| chr19 | 40507715  | 40507918  | 204 |
| chr19 | 39124197  | 39124400  | 204 |
| chr19 | 19135541  | 19135744  | 204 |
| chr15 | 64286767  | 64286970  | 204 |
| chr15 | 28621430  | 28621633  | 204 |
| chr14 | 33434976  | 33435179  | 204 |
| chr14 | 8177688   | 8177891   | 204 |
| chr13 | 55311671  | 55311874  | 204 |
| chr12 | 74570671  | 74570874  | 204 |
| chr12 | 74506616  | 74506819  | 204 |
| chr12 | 31975759  | 31975962  | 204 |
| chr5  | 120390347 | 120390549 | 203 |
| chr5  | 30167191  | 30167393  | 203 |
| chr4  | 124188152 | 124188354 | 203 |
| chr3  | 118052220 | 118052422 | 203 |
| chr25 | 43479401  | 43479603  | 203 |
| chr23 | 30544603  | 30544805  | 203 |
| chr22 | 37786984  | 37787186  | 203 |
| chr2  | 14083306  | 14083508  | 203 |
| chr19 | 29701677  | 29701879  | 203 |
| chr15 | 32939786  | 32939988  | 203 |
| chr15 | 26895896  | 26896098  | 203 |
| chr13 | 63479772  | 63479974  | 203 |
| chr1  | 36787124  | 36787326  | 203 |
| chr8  | 23935286  | 23935487  | 202 |
| chr7  | 65650286  | 65650487  | 202 |
| chr6  | 75561576  | 75561777  | 202 |
| chr4  | 5236438   | 5236639   | 202 |
| chr3  | 111662425 | 111662626 | 202 |
| chr3  | 15434028  | 15434229  | 202 |
| chr25 | 34531164  | 34531365  | 202 |
| chr24 | 38573405  | 38573606  | 202 |
| chr19 | 39122766  | 39122967  | 202 |
| chr18 | 22134222  | 22134423  | 202 |
| chr18 | 7232877   | 7233078   | 202 |
| chr17 | 72345023  | 72345224  | 202 |



|       |               |           |     |
|-------|---------------|-----------|-----|
| chr17 | 64161325      | 64161526  | 202 |
| chr16 | 22673577      | 22673778  | 202 |
| chr13 | 70346111      | 70346312  | 202 |
| chr11 | 48675396      | 48675597  | 202 |
| chr10 | 16969918      | 16970119  | 202 |
| chr5  | 67313966      | 67314166  | 201 |
| chr3  | 9231465       | 9231665   | 201 |
| chr29 | 44696767      | 44696967  | 201 |
| chr28 | 42361580      | 42361780  | 201 |
| chr23 | 51685761      | 51685961  | 201 |
| chr2  | 73261611      | 73261811  | 201 |
| chr15 | 21072445      | 21072645  | 201 |
| chr13 | 146853 147053 | 201       |     |
| chr12 | 35763696      | 35763896  | 201 |
| chr11 | 73299532      | 73299732  | 201 |
| chr10 | 7345835       | 7346035   | 201 |
| chr7  | 5382733       | 5382932   | 200 |
| chr3  | 116295282     | 116295481 | 200 |
| chr29 | 45890128      | 45890327  | 200 |
| chr25 | 40202864      | 40203063  | 200 |
| chr25 | 33485333      | 33485532  | 200 |
| chr25 | 15066 15265   | 200       |     |
| chr23 | 10399097      | 10399296  | 200 |
| chr22 | 45223498      | 45223697  | 200 |
| chr18 | 7231982       | 7232181   | 200 |
| chr16 | 60417724      | 60417923  | 200 |
| chr16 | 49345026      | 49345225  | 200 |
| chr15 | 43391092      | 43391291  | 200 |
| chr10 | 29818866      | 29819065  | 200 |
| chr10 | 23589623      | 23589822  | 200 |
| chr27 | 11594267      | 11594466  | 200 |
| chr18 | 9527535       | 9527852   | 318 |
| chr28 | 26080834      | 26081138  | 305 |
| chr7  | 5385574       | 5385842   | 269 |
| chr15 | 42516992      | 42517253  | 262 |
| chr14 | 31015406      | 31015642  | 237 |
| chr21 | 67972279      | 67972502  | 224 |
| chr6  | 98560379      | 98560598  | 220 |
| chr15 | 25320520      | 25320737  | 218 |
| chr10 | 81588686      | 81588896  | 211 |
| chr26 | 51635065      | 51635274  | 210 |
| chr23 | 27769162      | 27769369  | 208 |
| chr8  | 80488923      | 80489129  | 207 |
| chr9  | 90294396      | 90294600  | 205 |
| chr8  | 24215987      | 24216190  | 204 |
| chr23 | 27819140      | 27819343  | 204 |
| chr7  | 38154439      | 38154640  | 202 |
| chr10 | 28951789      | 28952443  | 655 |
| chr13 | 62410826      | 62411425  | 600 |
| chr20 | 8810934       | 8811513   | 580 |

|       |           |           |     |
|-------|-----------|-----------|-----|
| chr26 | 50501846  | 50502417  | 572 |
| chr26 | 23076466  | 23076993  | 528 |
| chr23 | 7425852   | 7426377   | 526 |
| chr13 | 75668647  | 75669172  | 526 |
| chr11 | 91374793  | 91375314  | 522 |
| chr7  | 18417084  | 18417603  | 520 |
| chr16 | 68765663  | 68766182  | 520 |
| chr7  | 19201201  | 19201695  | 495 |
| chr13 | 2461415   | 2461907   | 493 |
| chr18 | 39622393  | 39622883  | 491 |
| chr23 | 10540436  | 10540920  | 485 |
| chr11 | 100113016 | 100113496 | 481 |
| chr22 | 55863845  | 55864320  | 476 |
| chr28 | 25494656  | 25495127  | 472 |
| chr19 | 29727956  | 29728427  | 472 |
| chr19 | 60278395  | 60278861  | 467 |
| chr9  | 52413800  | 52414260  | 461 |
| chr26 | 50767846  | 50768302  | 457 |
| chr11 | 2557754   | 2558206   | 453 |
| chr8  | 63694504  | 63694954  | 451 |
| chr23 | 52763586  | 52764033  | 448 |
| chr18 | 32570602  | 32571048  | 447 |
| chr4  | 95787313  | 95787756  | 444 |
| chr13 | 17560752  | 17561194  | 443 |
| chr19 | 37873119  | 37873555  | 437 |
| chr2  | 124309991 | 124310426 | 436 |
| chr7  | 17490984  | 17491416  | 433 |
| chr3  | 78294722  | 78295152  | 431 |
| chr14 | 3132743   | 3133169   | 427 |
| chr25 | 39322306  | 39322731  | 426 |
| chr19 | 6632060   | 6632484   | 425 |
| chr3  | 20460264  | 20460683  | 420 |
| chr5  | 10621626  | 10622040  | 415 |
| chr7  | 44052772  | 44053170  | 399 |
| chr4  | 32172830  | 32173228  | 399 |
| chr3  | 36042670  | 36043068  | 399 |
| chr24 | 26540863  | 26541261  | 399 |
| chr23 | 15896040  | 15896438  | 399 |
| chr14 | 7367542   | 7367940   | 399 |
| chr13 | 67411316  | 67411714  | 399 |
| chr13 | 22879304  | 22879702  | 399 |
| chr6  | 121822527 | 121822924 | 398 |
| chr23 | 18680430  | 18680827  | 398 |
| chr6  | 92835151  | 92835547  | 397 |
| chr19 | 60831337  | 60831733  | 397 |
| chr18 | 13545750  | 13546146  | 397 |
| chr1  | 85901076  | 85901471  | 396 |
| chr29 | 49715428  | 49715821  | 394 |
| chr22 | 52232402  | 52232793  | 392 |
| chr11 | 106256104 | 106256495 | 392 |

|       |           |           |     |
|-------|-----------|-----------|-----|
| chr21 | 69103303  | 69103693  | 391 |
| chr29 | 48269858  | 48270247  | 390 |
| chr8  | 23834128  | 23834516  | 389 |
| chr18 | 5300188   | 5300576   | 389 |
| chr15 | 29171825  | 29172213  | 389 |
| chr7  | 4932750   | 4933137   | 388 |
| chr21 | 64755432  | 64755819  | 388 |
| chr2  | 139411059 | 139411445 | 387 |
| chr4  | 122638630 | 122639015 | 386 |
| chr23 | 53007227  | 53007612  | 386 |
| chr19 | 14055160  | 14055545  | 386 |
| chr7  | 51490610  | 51490994  | 385 |
| chr3  | 22966572  | 22966956  | 385 |
| chr8  | 57992303  | 57992686  | 384 |
| chr3  | 26144655  | 26145038  | 384 |
| chr18 | 1542125   | 1542508   | 384 |
| chr28 | 5329692   | 5330074   | 383 |
| chr7  | 18843015  | 18843395  | 381 |
| chr6  | 121643572 | 121643952 | 381 |
| chr24 | 58639994  | 58640374  | 381 |
| chr28 | 43883778  | 43884156  | 379 |
| chr23 | 51444723  | 51445101  | 379 |
| chr22 | 14921200  | 14921578  | 379 |
| chr19 | 60453275  | 60453653  | 379 |
| chr13 | 73857691  | 73858069  | 379 |
| chr12 | 61820702  | 61821080  | 379 |
| chr24 | 20883520  | 20883896  | 377 |
| chr19 | 47317500  | 47317876  | 377 |
| chr18 | 56824325  | 56824701  | 377 |
| chr25 | 22684815  | 22685190  | 376 |
| chr18 | 43452158  | 43452533  | 376 |
| chr16 | 44131478  | 44131853  | 376 |
| chr11 | 90407841  | 90408216  | 376 |
| chr3  | 98141213  | 98141587  | 375 |
| chr25 | 1944043   | 1944417   | 375 |
| chr22 | 30064380  | 30064753  | 374 |
| chr21 | 61725348  | 61725721  | 374 |
| chr10 | 77488232  | 77488605  | 374 |
| chr2  | 134671287 | 134671659 | 373 |
| chr17 | 60580958  | 60581330  | 373 |
| chr13 | 41668429  | 41668801  | 373 |
| chr19 | 22353054  | 22353425  | 372 |
| chr6  | 121066414 | 121066784 | 371 |
| chr12 | 32498934  | 32499304  | 371 |
| chr12 | 15276068  | 15276438  | 371 |
| chr12 | 18239234  | 18239603  | 370 |
| chr8  | 105587311 | 105587679 | 369 |
| chr7  | 44060077  | 44060445  | 369 |
| chr27 | 27688630  | 27688998  | 369 |
| chr12 | 32005825  | 32006193  | 369 |

|       |           |           |     |
|-------|-----------|-----------|-----|
| chr13 | 40953699  | 40954066  | 368 |
| chr21 | 34471073  | 34471439  | 367 |
| chr27 | 36060909  | 36061274  | 366 |
| chr16 | 43355391  | 43355756  | 366 |
| chr12 | 18240644  | 18241009  | 366 |
| chr17 | 48726691  | 48727055  | 365 |
| chr16 | 44299445  | 44299809  | 365 |
| chr8  | 92992457  | 92992819  | 363 |
| chr5  | 29093741  | 29094103  | 363 |
| chr3  | 25002894  | 25003256  | 363 |
| chr28 | 28306707  | 28307069  | 363 |
| chr3  | 123412525 | 123412886 | 362 |
| chr28 | 34079331  | 34079692  | 362 |
| chr27 | 39881254  | 39881615  | 362 |
| chr18 | 57399333  | 57399694  | 362 |
| chr13 | 55003832  | 55004193  | 362 |
| chr7  | 3966515   | 3966875   | 361 |
| chr29 | 50217022  | 50217382  | 361 |
| chr13 | 60470694  | 60471054  | 361 |
| chr11 | 81326108  | 81326468  | 361 |
| chr4  | 123004872 | 123005231 | 360 |
| chr23 | 9422503   | 9422862   | 360 |
| chr7  | 66723268  | 66723626  | 359 |
| chr4  | 33241483  | 33241841  | 359 |
| chr23 | 40625162  | 40625520  | 359 |
| chr22 | 50729682  | 50730040  | 359 |
| chr19 | 25838248  | 25838606  | 359 |
| chr17 | 70387069  | 70387427  | 359 |
| chr28 | 26188882  | 26189239  | 358 |
| chr19 | 40394889  | 40395246  | 358 |
| chr15 | 54031942  | 54032299  | 358 |
| chr15 | 32219019  | 32219376  | 358 |
| chr1  | 134430136 | 134430493 | 358 |
| chr7  | 51382297  | 51382653  | 357 |
| chr22 | 39757641  | 39757996  | 356 |
| chr19 | 41254209  | 41254564  | 356 |
| chr14 | 39052569  | 39052924  | 356 |
| chr29 | 42906533  | 42906887  | 355 |
| chr23 | 19636939  | 19637293  | 355 |
| chr18 | 54200905  | 54201259  | 355 |
| chr17 | 57788676  | 57789030  | 355 |
| chr1  | 37558237  | 37558591  | 355 |
| chr3  | 8728303   | 8728656   | 354 |
| chr19 | 57683221  | 57683574  | 354 |
| chr18 | 40114799  | 40115152  | 354 |
| chr13 | 60214345  | 60214698  | 354 |
| chr7  | 17298909  | 17299261  | 353 |
| chr23 | 9446729   | 9447081   | 353 |
| chr19 | 38528539  | 38528891  | 353 |
| chr19 | 8104567   | 8104919   | 353 |

|       |           |           |     |
|-------|-----------|-----------|-----|
| chr16 | 67444410  | 67444762  | 353 |
| chr11 | 9330120   | 9330472   | 353 |
| chr1  | 68919901  | 68920253  | 353 |
| chr3  | 47197327  | 47197678  | 352 |
| chr19 | 29469697  | 29470048  | 352 |
| chr18 | 52700284  | 52700635  | 352 |
| chr10 | 91050707  | 91051058  | 352 |
| chr3  | 122736941 | 122737291 | 351 |
| chr3  | 22492007  | 22492357  | 351 |
| chr26 | 21807210  | 21807560  | 351 |
| chr22 | 59340905  | 59341255  | 351 |
| chr17 | 47779546  | 47779896  | 351 |
| chr10 | 2406577   | 2406927   | 351 |
| chr1  | 74975479  | 74975829  | 351 |
| chr25 | 8609401   | 8609750   | 350 |
| chr21 | 59303403  | 59303752  | 350 |
| chr18 | 24303990  | 24304339  | 350 |
| chr17 | 75021954  | 75022303  | 350 |
| chr15 | 75652624  | 75652973  | 350 |
| chr14 | 1389331   | 1389680   | 350 |
| chrX  | 55880897  | 55881245  | 349 |
| chr8  | 54241643  | 54241991  | 349 |
| chr25 | 39491438  | 39491786  | 349 |
| chr21 | 27380615  | 27380963  | 349 |
| chr2  | 116701608 | 116701956 | 349 |
| chr19 | 59095387  | 59095735  | 349 |
| chr13 | 71053114  | 71053462  | 349 |
| chr1  | 2494856   | 2495204   | 349 |
| chr7  | 4495556   | 4495903   | 348 |
| chr17 | 74657371  | 74657718  | 348 |
| chr10 | 14985916  | 14986263  | 348 |
| chr1  | 136319285 | 136319632 | 348 |
| chr4  | 65384202  | 65384548  | 347 |
| chr29 | 41778496  | 41778842  | 347 |
| chr18 | 56043041  | 56043387  | 347 |
| chr18 | 46785751  | 46786097  | 347 |
| chr1  | 108605479 | 108605825 | 347 |
| chr6  | 122256784 | 122257129 | 346 |
| chr3  | 26135624  | 26135969  | 346 |
| chr29 | 34914029  | 34914374  | 346 |
| chr23 | 52876086  | 52876431  | 346 |
| chr18 | 16751252  | 16751597  | 346 |
| chr11 | 7040213   | 7040558   | 346 |
| chr29 | 48526446  | 48526790  | 345 |
| chr24 | 20864520  | 20864864  | 345 |
| chr23 | 15950079  | 15950423  | 345 |
| chr18 | 56889659  | 56890003  | 345 |
| chr7  | 16768847  | 16769190  | 344 |
| chr4  | 124390139 | 124390482 | 344 |
| chr29 | 36695230  | 36695573  | 344 |

|       |           |           |     |
|-------|-----------|-----------|-----|
| chr25 | 10875863  | 10876206  | 344 |
| chr23 | 18240977  | 18241320  | 344 |
| chr20 | 8569620   | 8569963   | 344 |
| chr18 | 57559550  | 57559893  | 344 |
| chr18 | 57029679  | 57030022  | 344 |
| chr15 | 74642996  | 74643339  | 344 |
| chr15 | 22501547  | 22501890  | 344 |
| chr5  | 112909154 | 112909496 | 343 |
| chr28 | 24800446  | 24800788  | 343 |
| chr19 | 54788962  | 54789304  | 343 |
| chr19 | 25435057  | 25435399  | 343 |
| chr18 | 56604595  | 56604937  | 343 |
| chr10 | 14999790  | 15000132  | 343 |
| chr25 | 30375422  | 30375763  | 342 |
| chr2  | 134983946 | 134984287 | 342 |
| chr2  | 128426257 | 128426598 | 342 |
| chr18 | 18120552  | 18120893  | 342 |
| chr11 | 84374997  | 84375338  | 342 |
| chr8  | 102512025 | 102512365 | 341 |
| chr25 | 39393370  | 39393710  | 341 |
| chr20 | 74939781  | 74940121  | 341 |
| chr17 | 63339556  | 63339896  | 341 |
| chr14 | 59389958  | 59390298  | 341 |
| chr14 | 53422433  | 53422773  | 341 |
| chr11 | 107558150 | 107558490 | 341 |
| chr11 | 74449850  | 74450190  | 341 |
| chr9  | 63289391  | 63289730  | 340 |
| chr28 | 41289030  | 41289369  | 340 |
| chr27 | 39860597  | 39860936  | 340 |
| chr22 | 60462864  | 60463203  | 340 |
| chr2  | 126749226 | 126749565 | 340 |
| chr19 | 65211202  | 65211541  | 340 |
| chr18 | 21170858  | 21171197  | 340 |
| chr17 | 69750439  | 69750778  | 340 |
| chr11 | 93776639  | 93776978  | 340 |
| chr5  | 121426781 | 121427119 | 339 |
| chr3  | 16833879  | 16834217  | 339 |
| chr29 | 27293191  | 27293529  | 339 |
| chr26 | 18167015  | 18167353  | 339 |
| chr21 | 26806717  | 26807055  | 339 |
| chr18 | 57290529  | 57290867  | 339 |
| chr13 | 40904588  | 40904926  | 339 |
| chr11 | 92102417  | 92102755  | 339 |
| chr3  | 127830967 | 127831304 | 338 |
| chr29 | 34960353  | 34960690  | 338 |
| chr25 | 12677201  | 12677538  | 338 |
| chr17 | 76312867  | 76313204  | 338 |
| chr12 | 29563642  | 29563979  | 338 |
| chr1  | 74709894  | 74710231  | 338 |
| chr8  | 65867460  | 65867796  | 337 |

|       |           |           |     |
|-------|-----------|-----------|-----|
| chr4  | 72738871  | 72739207  | 337 |
| chr3  | 116914123 | 116914459 | 337 |
| chr3  | 22934394  | 22934730  | 337 |
| chr21 | 46606503  | 46606839  | 337 |
| chr19 | 22553741  | 22554077  | 337 |
| chr17 | 69401737  | 69402073  | 337 |
| chr10 | 20836157  | 20836493  | 337 |
| chr4  | 73015245  | 73015580  | 336 |
| chr23 | 16083601  | 16083936  | 336 |
| chr11 | 83226723  | 83227058  | 336 |
| chr11 | 47397443  | 47397778  | 336 |
| chr11 | 25606175  | 25606510  | 336 |
| chr10 | 23009377  | 23009712  | 336 |
| chr9  | 99832684  | 99833018  | 335 |
| chr29 | 29687367  | 29687701  | 335 |
| chr21 | 34765334  | 34765668  | 335 |
| chr2  | 134339657 | 134339991 | 335 |
| chr19 | 12351674  | 12352008  | 335 |
| chr17 | 68471605  | 68471939  | 335 |
| chr14 | 23171783  | 23172117  | 335 |
| chr14 | 21377194  | 21377528  | 335 |
| chr13 | 38357352  | 38357686  | 335 |
| chr10 | 103082139 | 103082473 | 335 |
| chr10 | 88078389  | 88078723  | 335 |
| chr5  | 118505299 | 118505632 | 334 |
| chr4  | 5391816   | 5392149   | 334 |
| chr20 | 73292033  | 73292366  | 334 |
| chr17 | 72705136  | 72705469  | 334 |
| chr12 | 82436338  | 82436671  | 334 |
| chr9  | 90542489  | 90542821  | 333 |
| chr8  | 8761428   | 8761760   | 333 |
| chr7  | 108573896 | 108574228 | 333 |
| chr5  | 31310404  | 31310736  | 333 |
| chr4  | 115992012 | 115992344 | 333 |
| chr24 | 1220013   | 1220345   | 333 |
| chr19 | 5962405   | 5962737   | 333 |
| chr15 | 26898987  | 26899319  | 333 |
| chr12 | 35779509  | 35779841  | 333 |
| chr1  | 84557953  | 84558285  | 333 |
| chr6  | 107235945 | 107236276 | 332 |
| chr6  | 63389989  | 63390320  | 332 |
| chr15 | 28853290  | 28853621  | 332 |
| chr13 | 66916321  | 66916652  | 332 |
| chr13 | 41039658  | 41039989  | 332 |
| chr11 | 82345660  | 82345991  | 332 |
| chr1  | 1508447   | 1508778   | 332 |
| chr7  | 18795640  | 18795970  | 331 |
| chr22 | 58364555  | 58364885  | 331 |
| chr22 | 30072862  | 30073192  | 331 |
| chr19 | 42506618  | 42506948  | 331 |

|       |           |           |     |
|-------|-----------|-----------|-----|
| chr18 | 51721651  | 51721981  | 331 |
| chr16 | 2119279   | 2119609   | 331 |
| chr15 | 39610146  | 39610476  | 331 |
| chr10 | 25894526  | 25894856  | 331 |
| chr8  | 73110492  | 73110821  | 330 |
| chr7  | 21184042  | 21184371  | 330 |
| chr7  | 5396419   | 5396748   | 330 |
| chr5  | 76650511  | 76650840  | 330 |
| chr24 | 38314140  | 38314469  | 330 |
| chr21 | 25189920  | 25190249  | 330 |
| chr20 | 44274093  | 44274422  | 330 |
| chr2  | 136616895 | 136617224 | 330 |
| chr18 | 34053738  | 34054067  | 330 |
| chr17 | 69413002  | 69413331  | 330 |
| chr16 | 69018544  | 69018873  | 330 |
| chr16 | 47134565  | 47134894  | 330 |
| chr13 | 70283088  | 70283417  | 330 |
| chr1  | 73779581  | 73779910  | 330 |
| chr8  | 60038520  | 60038848  | 329 |
| chr26 | 23489436  | 23489764  | 329 |
| chr23 | 8480994   | 8481322   | 329 |
| chr18 | 42970472  | 42970800  | 329 |
| chr14 | 20903900  | 20904228  | 329 |
| chr10 | 79258892  | 79259220  | 329 |
| chr6  | 16744423  | 16744750  | 328 |
| chr3  | 22904573  | 22904900  | 328 |
| chr25 | 1285807   | 1286134   | 328 |
| chr23 | 31149060  | 31149387  | 328 |
| chr23 | 19856917  | 19857244  | 328 |
| chr22 | 16430897  | 16431224  | 328 |
| chr2  | 132401171 | 132401498 | 328 |
| chr2  | 124285448 | 124285775 | 328 |
| chr18 | 53573394  | 53573721  | 328 |
| chr17 | 12578569  | 12578896  | 328 |
| chr13 | 77746512  | 77746839  | 328 |
| chr13 | 59113615  | 59113942  | 328 |
| chr7  | 5319230   | 5319556   | 327 |
| chr21 | 9525691   | 9526017   | 327 |
| chr12 | 72576220  | 72576546  | 327 |
| chr1  | 101588616 | 101588942 | 327 |
| chr5  | 118428238 | 118428563 | 326 |
| chr21 | 42446339  | 42446664  | 326 |
| chr2  | 1633990   | 1634315   | 326 |
| chr16 | 77697280  | 77697605  | 326 |
| chr5  | 30565153  | 30565477  | 325 |
| chr29 | 44749909  | 44750233  | 325 |
| chr25 | 29304575  | 29304899  | 325 |
| chr19 | 47305614  | 47305938  | 325 |
| chr19 | 46786554  | 46786878  | 325 |
| chr18 | 23597156  | 23597480  | 325 |



|       |           |           |     |
|-------|-----------|-----------|-----|
| chr17 | 75464621  | 75464945  | 325 |
| chr17 | 56065229  | 56065553  | 325 |
| chr15 | 73976710  | 73977034  | 325 |
| chr13 | 84225258  | 84225582  | 325 |
| chrX  | 15760939  | 15761262  | 324 |
| chr9  | 97043953  | 97044276  | 324 |
| chr28 | 26037540  | 26037863  | 324 |
| chr2  | 138853677 | 138854000 | 324 |
| chr18 | 18720642  | 18720965  | 324 |
| chr17 | 69500718  | 69501041  | 324 |
| chr16 | 38562016  | 38562339  | 324 |
| chr14 | 22099487  | 22099810  | 324 |
| chr13 | 59436014  | 59436337  | 324 |
| chr8  | 45756976  | 45757298  | 323 |
| chr5  | 122152991 | 122153313 | 323 |
| chr28 | 41305299  | 41305621  | 323 |
| chr28 | 27196014  | 27196336  | 323 |
| chr27 | 32881398  | 32881720  | 323 |
| chr2  | 108712312 | 108712634 | 323 |
| chr18 | 48865257  | 48865579  | 323 |
| chr18 | 48410001  | 48410323  | 323 |
| chr16 | 71928014  | 71928336  | 323 |
| chr14 | 34098611  | 34098933  | 323 |
| chr13 | 14679320  | 14679642  | 323 |
| chr10 | 103075132 | 103075454 | 323 |
| chr10 | 70158116  | 70158438  | 323 |
| chr10 | 17576150  | 17576472  | 323 |
| chr8  | 46615097  | 46615418  | 322 |
| chr6  | 115766959 | 115767280 | 322 |
| chr6  | 42768966  | 42769287  | 322 |
| chr5  | 69092868  | 69093189  | 322 |
| chr4  | 116006075 | 116006396 | 322 |
| chr29 | 51170861  | 51171182  | 322 |
| chr24 | 20349536  | 20349857  | 322 |
| chr21 | 64502209  | 64502530  | 322 |
| chr15 | 54717566  | 54717887  | 322 |
| chr10 | 50619797  | 50620118  | 322 |
| chr7  | 37439556  | 37439876  | 321 |
| chr6  | 117411645 | 117411965 | 321 |
| chr5  | 124902425 | 124902745 | 321 |
| chr26 | 22197048  | 22197368  | 321 |
| chr24 | 59868124  | 59868444  | 321 |
| chr21 | 66526105  | 66526425  | 321 |
| chr2  | 112211823 | 112212143 | 321 |
| chr2  | 99678489  | 99678809  | 321 |
| chr18 | 54563580  | 54563900  | 321 |
| chr25 | 10926530  | 10926849  | 320 |
| chr23 | 16488409  | 16488728  | 320 |
| chr19 | 14238356  | 14238675  | 320 |
| chr16 | 23003544  | 23003863  | 320 |

|       |           |           |     |
|-------|-----------|-----------|-----|
| chr16 | 2263193   | 2263512   | 320 |
| chr15 | 76155356  | 76155675  | 320 |
| chr11 | 104943745 | 104944064 | 320 |
| chr1  | 74687404  | 74687723  | 320 |
| chr8  | 7565108   | 7565426   | 319 |
| chr3  | 55208951  | 55209269  | 319 |
| chr3  | 51795644  | 51795962  | 319 |
| chr23 | 31399087  | 31399405  | 319 |
| chr18 | 53884821  | 53885139  | 319 |
| chr16 | 38354114  | 38354432  | 319 |
| chr13 | 76561328  | 76561646  | 319 |
| chr12 | 53334499  | 53334817  | 319 |
| chr11 | 1629390   | 1629708   | 319 |
| chr4  | 117121807 | 117122124 | 318 |
| chr29 | 46939811  | 46940128  | 318 |
| chr27 | 39183637  | 39183954  | 318 |
| chr23 | 52861828  | 52862145  | 318 |
| chr22 | 37805984  | 37806301  | 318 |
| chr2  | 132360452 | 132360769 | 318 |
| chr19 | 54558516  | 54558833  | 318 |
| chr19 | 16207552  | 16207869  | 318 |
| chr16 | 75280035  | 75280352  | 318 |
| chr16 | 49440441  | 49440758  | 318 |
| chr16 | 47678800  | 47679117  | 318 |
| chr15 | 58003861  | 58004178  | 318 |
| chr10 | 5043228   | 5043545   | 318 |
| chr4  | 123258201 | 123258517 | 317 |
| chr25 | 37805249  | 37805565  | 317 |
| chr2  | 136965094 | 136965410 | 317 |
| chr17 | 15209238  | 15209554  | 317 |
| chr15 | 20020320  | 20020636  | 317 |
| chr14 | 8180526   | 8180842   | 317 |
| chr11 | 72323716  | 72324032  | 317 |
| chr10 | 104328741 | 104329057 | 317 |
| chr1  | 83147469  | 83147785  | 317 |
| chr9  | 106704100 | 106704415 | 316 |
| chr3  | 33562952  | 33563267  | 316 |
| chr3  | 17517269  | 17517584  | 316 |
| chr21 | 4321959   | 4322274   | 316 |
| chr19 | 61709789  | 61710104  | 316 |
| chr19 | 37809273  | 37809588  | 316 |
| chr19 | 7199483   | 7199798   | 316 |
| chr11 | 3821597   | 3821912   | 316 |
| chr1  | 83271189  | 83271504  | 316 |
| chr8  | 73500931  | 73501245  | 315 |
| chr7  | 91307379  | 91307693  | 315 |
| chr5  | 111996967 | 111997281 | 315 |
| chr4  | 69677607  | 69677921  | 315 |
| chr3  | 115488538 | 115488852 | 315 |
| chr29 | 34287671  | 34287985  | 315 |

|       |           |           |     |
|-------|-----------|-----------|-----|
| chr28 | 36454552  | 36454866  | 315 |
| chr28 | 33702737  | 33703051  | 315 |
| chr25 | 35558111  | 35558425  | 315 |
| chr20 | 985312    | 985626    | 315 |
| chr13 | 45326160  | 45326474  | 315 |
| chr12 | 11472518  | 11472832  | 315 |
| chr4  | 98831953  | 98832266  | 314 |
| chr3  | 105185229 | 105185542 | 314 |
| chr3  | 20461882  | 20462195  | 314 |
| chr28 | 33705562  | 33705875  | 314 |
| chr26 | 14552681  | 14552994  | 314 |
| chr22 | 16134051  | 16134364  | 314 |
| chr22 | 15000932  | 15001245  | 314 |
| chr20 | 8498322   | 8498635   | 314 |
| chr16 | 44302385  | 44302698  | 314 |
| chr16 | 3722368   | 3722681   | 314 |
| chr13 | 67179017  | 67179330  | 314 |
| chr9  | 106102457 | 106102769 | 313 |
| chr9  | 19640747  | 19641059  | 313 |
| chr7  | 50910528  | 50910840  | 313 |
| chr5  | 60130413  | 60130725  | 313 |
| chr5  | 30645589  | 30645901  | 313 |
| chr4  | 71871027  | 71871339  | 313 |
| chr4  | 12258446  | 12258758  | 313 |
| chr3  | 53782921  | 53783233  | 313 |
| chr29 | 51579272  | 51579584  | 313 |
| chr24 | 46946438  | 46946750  | 313 |
| chr24 | 827508    | 827820    | 313 |
| chr21 | 19802142  | 19802454  | 313 |
| chr20 | 8721137   | 8721449   | 313 |
| chr2  | 73256501  | 73256813  | 313 |
| chr19 | 27532413  | 27532725  | 313 |
| chr10 | 7636682   | 7636994   | 313 |
| chr6  | 106854911 | 106855222 | 312 |
| chr5  | 125563067 | 125563378 | 312 |
| chr4  | 98813969  | 98814280  | 312 |
| chr4  | 98637233  | 98637544  | 312 |
| chr3  | 22500095  | 22500406  | 312 |
| chr22 | 56618258  | 56618569  | 312 |
| chr20 | 74082770  | 74083081  | 312 |
| chr16 | 47684576  | 47684887  | 312 |
| chr16 | 3656684   | 3656995   | 312 |
| chr14 | 30897660  | 30897971  | 312 |
| chr13 | 75908549  | 75908860  | 312 |
| chr13 | 55971583  | 55971894  | 312 |
| chr7  | 15015589  | 15015899  | 311 |
| chr6  | 107490271 | 107490581 | 311 |
| chr5  | 112241223 | 112241533 | 311 |
| chr27 | 45395032  | 45395342  | 311 |
| chr27 | 26743995  | 26744305  | 311 |

|       |           |           |     |
|-------|-----------|-----------|-----|
| chr21 | 15187028  | 15187338  | 311 |
| chr19 | 38560791  | 38561101  | 311 |
| chr17 | 63490123  | 63490433  | 311 |
| chr17 | 4999558   | 4999868   | 311 |
| chr16 | 37911932  | 37912242  | 311 |
| chr16 | 3275093   | 3275403   | 311 |
| chr12 | 84405077  | 84405387  | 311 |
| chr10 | 21506647  | 21506957  | 311 |
| chr5  | 122732842 | 122733151 | 310 |
| chr5  | 113106464 | 113106773 | 310 |
| chr3  | 21986974  | 21987283  | 310 |
| chr23 | 48760538  | 48760847  | 310 |
| chr21 | 26802239  | 26802548  | 310 |
| chr21 | 23542836  | 23543145  | 310 |
| chr18 | 12545703  | 12546012  | 310 |
| chr17 | 11271920  | 11272229  | 310 |
| chr14 | 1575180   | 1575489   | 310 |
| chr13 | 52933173  | 52933482  | 310 |
| chr11 | 106300391 | 106300700 | 310 |
| chr10 | 79155972  | 79156281  | 310 |
| chr10 | 33927901  | 33928210  | 310 |
| chr10 | 28839471  | 28839780  | 310 |
| chr6  | 73546446  | 73546754  | 309 |
| chr4  | 32158986  | 32159294  | 309 |
| chr21 | 61109870  | 61110178  | 309 |
| chr21 | 11887278  | 11887586  | 309 |
| chr17 | 63102771  | 63103079  | 309 |
| chr17 | 54512938  | 54513246  | 309 |
| chr16 | 47685247  | 47685555  | 309 |
| chr14 | 23258172  | 23258480  | 309 |
| chr13 | 40872429  | 40872737  | 309 |
| chr5  | 110828148 | 110828455 | 308 |
| chr3  | 106316850 | 106317157 | 308 |
| chr23 | 31428361  | 31428668  | 308 |
| chr2  | 124967331 | 124967638 | 308 |
| chr19 | 16989225  | 16989532  | 308 |
| chr16 | 70103550  | 70103857  | 308 |
| chr5  | 82082690  | 82082996  | 307 |
| chr4  | 29706486  | 29706792  | 307 |
| chr23 | 7160056   | 7160362   | 307 |
| chr18 | 51659136  | 51659442  | 307 |
| chr11 | 90410599  | 90410905  | 307 |
| chr6  | 113367514 | 113367819 | 306 |
| chr3  | 127774540 | 127774845 | 306 |
| chr29 | 49682333  | 49682638  | 306 |
| chr29 | 36490949  | 36491254  | 306 |
| chr25 | 1904909   | 1905214   | 306 |
| chr23 | 15891201  | 15891506  | 306 |
| chr22 | 44438456  | 44438761  | 306 |
| chr15 | 42307784  | 42308089  | 306 |

|       |           |           |     |
|-------|-----------|-----------|-----|
| chr15 | 40598093  | 40598398  | 306 |
| chr11 | 100281253 | 100281558 | 306 |
| chr7  | 97374653  | 97374957  | 305 |
| chr7  | 17306929  | 17307233  | 305 |
| chr6  | 122271180 | 122271484 | 305 |
| chr5  | 118280333 | 118280637 | 305 |
| chr3  | 110138284 | 110138588 | 305 |
| chr27 | 47002711  | 47003015  | 305 |
| chr22 | 58687247  | 58687551  | 305 |
| chr21 | 64504010  | 64504314  | 305 |
| chr19 | 22333947  | 22334251  | 305 |
| chr18 | 62508447  | 62508751  | 305 |
| chr17 | 57523731  | 57524035  | 305 |
| chr11 | 90399073  | 90399377  | 305 |
| chr3  | 113374579 | 113374882 | 304 |
| chr3  | 88262403  | 88262706  | 304 |
| chr29 | 33575698  | 33576001  | 304 |
| chr29 | 31626643  | 31626946  | 304 |
| chr28 | 26782948  | 26783251  | 304 |
| chr28 | 24803428  | 24803731  | 304 |
| chr25 | 38757901  | 38758204  | 304 |
| chr25 | 15808116  | 15808419  | 304 |
| chr23 | 7015379   | 7015682   | 304 |
| chr2  | 137194097 | 137194400 | 304 |
| chr2  | 24126347  | 24126650  | 304 |
| chr19 | 62223015  | 62223318  | 304 |
| chr19 | 14667330  | 14667633  | 304 |
| chr17 | 60290028  | 60290331  | 304 |
| chr16 | 46952011  | 46952314  | 304 |
| chr11 | 72762883  | 72763186  | 304 |
| chr10 | 29544712  | 29545015  | 304 |
| chr10 | 19479959  | 19480262  | 304 |
| chr10 | 8540324   | 8540627   | 304 |
| chr1  | 151456653 | 151456956 | 304 |
| chr8  | 24439907  | 24440209  | 303 |
| chr7  | 5176283   | 5176585   | 303 |
| chr5  | 67315933  | 67316235  | 303 |
| chr4  | 120079849 | 120080151 | 303 |
| chr4  | 79204292  | 79204594  | 303 |
| chr21 | 60687819  | 60688121  | 303 |
| chr18 | 62211209  | 62211511  | 303 |
| chr17 | 75540357  | 75540659  | 303 |
| chr15 | 74893835  | 74894137  | 303 |
| chr12 | 34246461  | 34246763  | 303 |
| chr12 | 33543113  | 33543415  | 303 |
| chr11 | 28499584  | 28499886  | 303 |
| chr10 | 14970467  | 14970769  | 303 |
| chr1  | 144542875 | 144543177 | 303 |
| chr6  | 45976104  | 45976405  | 302 |
| chr26 | 20243656  | 20243957  | 302 |

|       |               |           |     |
|-------|---------------|-----------|-----|
| chr23 | 14502951      | 14503252  | 302 |
| chr19 | 60444061      | 60444362  | 302 |
| chr19 | 13489020      | 13489321  | 302 |
| chr15 | 74534765      | 74535066  | 302 |
| chr15 | 28971096      | 28971397  | 302 |
| chr12 | 13310694      | 13310995  | 302 |
| chr11 | 27443044      | 27443345  | 302 |
| chr8  | 63939927      | 63940227  | 301 |
| chr5  | 113193069     | 113193369 | 301 |
| chr5  | 112192345     | 112192645 | 301 |
| chr4  | 79043898      | 79044198  | 301 |
| chr3  | 18335558      | 18335858  | 301 |
| chr28 | 15610078      | 15610378  | 301 |
| chr25 | 17452994      | 17453294  | 301 |
| chr23 | 51640316      | 51640616  | 301 |
| chr22 | 60475941      | 60476241  | 301 |
| chr2  | 138693684     | 138693984 | 301 |
| chr19 | 44897540      | 44897840  | 301 |
| chr19 | 38834502      | 38834802  | 301 |
| chr18 | 11821104      | 11821404  | 301 |
| chr16 | 26636979      | 26637279  | 301 |
| chr14 | 19456456      | 19456756  | 301 |
| chr13 | 60773466      | 60773766  | 301 |
| chr13 | 40578501      | 40578801  | 301 |
| chr10 | 16637189      | 16637489  | 301 |
| chr9  | 82553507      | 82553806  | 300 |
| chr6  | 36505650      | 36505949  | 300 |
| chr5  | 26738387      | 26738686  | 300 |
| chr4  | 101787537     | 101787836 | 300 |
| chr3  | 55952502      | 55952801  | 300 |
| chr23 | 48598192      | 48598491  | 300 |
| chr21 | 2794500       | 2794799   | 300 |
| chr2  | 130415105     | 130415404 | 300 |
| chr19 | 37638722      | 37639021  | 300 |
| chr18 | 11978463      | 11978762  | 300 |
| chr17 | 72710318      | 72710617  | 300 |
| chr13 | 55089200      | 55089499  | 300 |
| chr11 | 104289171     | 104289470 | 300 |
| chr1  | 82866915      | 82867214  | 300 |
| chr1  | 378239 378538 | 300       |     |
| chr5  | 50082953      | 50083251  | 299 |
| chr26 | 50069791      | 50070089  | 299 |
| chr26 | 44382032      | 44382330  | 299 |
| chr24 | 41099103      | 41099401  | 299 |
| chr21 | 22626647      | 22626945  | 299 |
| chr2  | 131588069     | 131588367 | 299 |
| chr2  | 49581842      | 49582140  | 299 |
| chr19 | 42021635      | 42021933  | 299 |
| chr13 | 73410990      | 73411288  | 299 |
| chr13 | 58269883      | 58270181  | 299 |

|       |               |           |     |
|-------|---------------|-----------|-----|
| chr13 | 55762865      | 55763163  | 299 |
| chr10 | 7734203       | 7734501   | 299 |
| chr8  | 106576859     | 106577156 | 298 |
| chr5  | 123140219     | 123140516 | 298 |
| chr5  | 117841890     | 117842187 | 298 |
| chr27 | 27950790      | 27951087  | 298 |
| chr25 | 35454367      | 35454664  | 298 |
| chr25 | 1251105       | 1251402   | 298 |
| chr21 | 66374711      | 66375008  | 298 |
| chr19 | 35363599      | 35363896  | 298 |
| chr18 | 45973172      | 45973469  | 298 |
| chr15 | 83595667      | 83595964  | 298 |
| chr15 | 64909588      | 64909885  | 298 |
| chr15 | 38575498      | 38575795  | 298 |
| chr13 | 39805228      | 39805525  | 298 |
| chr11 | 66561182      | 66561479  | 298 |
| chr10 | 17529531      | 17529828  | 298 |
| chr10 | 17065323      | 17065620  | 298 |
| chrX  | 7895508       | 7895804   | 297 |
| chr6  | 102161767     | 102162063 | 297 |
| chr5  | 30262899      | 30263195  | 297 |
| chr4  | 32125549      | 32125845  | 297 |
| chr26 | 44543536      | 44543832  | 297 |
| chr26 | 14974671      | 14974967  | 297 |
| chr24 | 60628978      | 60629274  | 297 |
| chr24 | 49363652      | 49363948  | 297 |
| chr23 | 46409315      | 46409611  | 297 |
| chr23 | 31627487      | 31627783  | 297 |
| chr21 | 15591341      | 15591637  | 297 |
| chr2  | 131029834     | 131030130 | 297 |
| chr19 | 39261112      | 39261408  | 297 |
| chr19 | 29812157      | 29812453  | 297 |
| chr18 | 11771317      | 11771613  | 297 |
| chr17 | 72753053      | 72753349  | 297 |
| chr16 | 38713675      | 38713971  | 297 |
| chr16 | 2459345       | 2459641   | 297 |
| chr13 | 59785210      | 59785506  | 297 |
| chr11 | 108859071     | 108859367 | 297 |
| chr10 | 81638778      | 81639074  | 297 |
| chr8  | 45758636      | 45758931  | 296 |
| chr7  | 17334173      | 17334468  | 296 |
| chr5  | 74343524      | 74343819  | 296 |
| chr5  | 33875360      | 33875655  | 296 |
| chr26 | 17854249      | 17854544  | 296 |
| chr24 | 829418 829713 |           | 296 |
| chr22 | 57617407      | 57617702  | 296 |
| chr22 | 30103980      | 30104275  | 296 |
| chr18 | 45956082      | 45956377  | 296 |
| chr18 | 11497780      | 11498075  | 296 |
| chr15 | 51728676      | 51728971  | 296 |

|       |           |           |     |
|-------|-----------|-----------|-----|
| chr11 | 103744208 | 103744503 | 296 |
| chr10 | 84459852  | 84460147  | 296 |
| chr10 | 8712581   | 8712876   | 296 |
| chr1  | 98943512  | 98943807  | 296 |
| chr1  | 74873361  | 74873656  | 296 |
| chr9  | 74452538  | 74452832  | 295 |
| chr7  | 43437561  | 43437855  | 295 |
| chr5  | 118494081 | 118494375 | 295 |
| chr5  | 110829174 | 110829468 | 295 |
| chr3  | 44991461  | 44991755  | 295 |
| chr25 | 11202213  | 11202507  | 295 |
| chr22 | 30371767  | 30372061  | 295 |
| chr21 | 61178382  | 61178676  | 295 |
| chr2  | 139202514 | 139202808 | 295 |
| chr2  | 22017471  | 22017765  | 295 |
| chr15 | 81403329  | 81403623  | 295 |
| chr13 | 79205796  | 79206090  | 295 |
| chr11 | 2476713   | 2477007   | 295 |
| chr10 | 52472968  | 52473262  | 295 |
| chr1  | 134429578 | 134429872 | 295 |
| chr8  | 24722541  | 24722834  | 294 |
| chr5  | 112538796 | 112539089 | 294 |
| chr3  | 109720044 | 109720337 | 294 |
| chr25 | 43487061  | 43487354  | 294 |
| chr25 | 42727981  | 42728274  | 294 |
| chr25 | 37456958  | 37457251  | 294 |
| chr25 | 33119439  | 33119732  | 294 |
| chr21 | 24356428  | 24356721  | 294 |
| chr2  | 135177528 | 135177821 | 294 |
| chr2  | 122960236 | 122960529 | 294 |
| chr2  | 63493366  | 63493659  | 294 |
| chr19 | 49381898  | 49382191  | 294 |
| chr13 | 43441850  | 43442143  | 294 |
| chr12 | 64520637  | 64520930  | 294 |
| chr1  | 148012842 | 148013135 | 294 |
| chr5  | 121674157 | 121674449 | 293 |
| chr5  | 120126239 | 120126531 | 293 |
| chr3  | 51841527  | 51841819  | 293 |
| chr28 | 3481171   | 3481463   | 293 |
| chr26 | 50275222  | 50275514  | 293 |
| chr22 | 1930467   | 1930759   | 293 |
| chr21 | 13013965  | 13014257  | 293 |
| chr2  | 124289481 | 124289773 | 293 |
| chr19 | 46153770  | 46154062  | 293 |
| chr18 | 17954022  | 17954314  | 293 |
| chr17 | 69467244  | 69467536  | 293 |
| chr13 | 80591251  | 80591543  | 293 |
| chr13 | 66953339  | 66953631  | 293 |
| chr11 | 6899184   | 6899476   | 293 |
| chr10 | 14951481  | 14951773  | 293 |



|       |           |           |     |
|-------|-----------|-----------|-----|
| chr7  | 45894250  | 45894541  | 292 |
| chr5  | 121704283 | 121704574 | 292 |
| chr5  | 121377497 | 121377788 | 292 |
| chr5  | 111961533 | 111961824 | 292 |
| chr5  | 110915000 | 110915291 | 292 |
| chr5  | 72525551  | 72525842  | 292 |
| chr3  | 124071003 | 124071294 | 292 |
| chr26 | 41417252  | 41417543  | 292 |
| chr25 | 21659927  | 21660218  | 292 |
| chr22 | 49580590  | 49580881  | 292 |
| chr21 | 68478858  | 68479149  | 292 |
| chr21 | 57488514  | 57488805  | 292 |
| chr19 | 53136889  | 53137180  | 292 |
| chr19 | 38231644  | 38231935  | 292 |
| chr18 | 61518444  | 61518735  | 292 |
| chr18 | 53864846  | 53865137  | 292 |
| chr18 | 12737750  | 12738041  | 292 |
| chr15 | 39871316  | 39871607  | 292 |
| chr13 | 80020449  | 80020740  | 292 |
| chr11 | 22467703  | 22467994  | 292 |
| chr11 | 13009351  | 13009642  | 292 |
| chr10 | 25895170  | 25895461  | 292 |
| chr1  | 81058080  | 81058371  | 292 |
| chr8  | 72159097  | 72159387  | 291 |
| chr7  | 70512590  | 70512880  | 291 |
| chr3  | 15582334  | 15582624  | 291 |
| chr29 | 46681269  | 46681559  | 291 |
| chr29 | 46218199  | 46218489  | 291 |
| chr28 | 12174111  | 12174401  | 291 |
| chr23 | 13627728  | 13628018  | 291 |
| chr23 | 10547938  | 10548228  | 291 |
| chr20 | 4384296   | 4384586   | 291 |
| chr19 | 61797561  | 61797851  | 291 |
| chr18 | 11331595  | 11331885  | 291 |
| chr13 | 59119505  | 59119795  | 291 |
| chr1  | 75032020  | 75032310  | 291 |
| chr8  | 110083649 | 110083938 | 290 |
| chr6  | 106832959 | 106833248 | 290 |
| chr5  | 79808299  | 79808588  | 290 |
| chr5  | 33962684  | 33962973  | 290 |
| chr5  | 1654101   | 1654390   | 290 |
| chr4  | 123136760 | 123137049 | 290 |
| chr3  | 22511208  | 22511497  | 290 |
| chr26 | 47955067  | 47955356  | 290 |
| chr24 | 43718370  | 43718659  | 290 |
| chr22 | 56514777  | 56515066  | 290 |
| chr20 | 43497914  | 43498203  | 290 |
| chr2  | 22207730  | 22208019  | 290 |
| chr2  | 5415794   | 5416083   | 290 |
| chr14 | 3547775   | 3548064   | 290 |

|       |           |           |     |
|-------|-----------|-----------|-----|
| chr13 | 19511685  | 19511974  | 290 |
| chr12 | 69045060  | 69045349  | 290 |
| chr12 | 31212555  | 31212844  | 290 |
| chr7  | 37231294  | 37231582  | 289 |
| chr7  | 16282002  | 16282290  | 289 |
| chr7  | 14241072  | 14241360  | 289 |
| chr5  | 118388360 | 118388648 | 289 |
| chr5  | 112218084 | 112218372 | 289 |
| chr5  | 111348987 | 111349275 | 289 |
| chr5  | 72248728  | 72249016  | 289 |
| chr5  | 29025070  | 29025358  | 289 |
| chr3  | 98831296  | 98831584  | 289 |
| chr25 | 37380276  | 37380564  | 289 |
| chr25 | 36036903  | 36037191  | 289 |
| chr24 | 26734884  | 26735172  | 289 |
| chr23 | 7292103   | 7292391   | 289 |
| chr20 | 3642640   | 3642928   | 289 |
| chr19 | 13687871  | 13688159  | 289 |
| chr16 | 38833586  | 38833874  | 289 |
| chr13 | 40583799  | 40584087  | 289 |
| chr11 | 11045908  | 11046196  | 289 |
| chr6  | 122399269 | 122399556 | 288 |
| chr5  | 112063657 | 112063944 | 288 |
| chr4  | 85446307  | 85446594  | 288 |
| chr3  | 33844623  | 33844910  | 288 |
| chr3  | 15404836  | 15405123  | 288 |
| chr29 | 48775705  | 48775992  | 288 |
| chr24 | 49510626  | 49510913  | 288 |
| chr22 | 14087213  | 14087500  | 288 |
| chr21 | 65532850  | 65533137  | 288 |
| chr21 | 26100151  | 26100438  | 288 |
| chr17 | 54293217  | 54293504  | 288 |
| chr16 | 59882109  | 59882396  | 288 |
| chr16 | 47966105  | 47966392  | 288 |
| chr16 | 2253475   | 2253762   | 288 |
| chr13 | 80010733  | 80011020  | 288 |
| chr13 | 18456058  | 18456345  | 288 |
| chr11 | 76229720  | 76230007  | 288 |
| chr11 | 74210279  | 74210566  | 288 |
| chr11 | 50900202  | 50900489  | 288 |
| chr10 | 36338588  | 36338875  | 288 |
| chr10 | 12902107  | 12902394  | 288 |
| chr1  | 148208296 | 148208583 | 288 |
| chrX  | 77006298  | 77006584  | 287 |
| chr8  | 108878043 | 108878329 | 287 |
| chr28 | 33739147  | 33739433  | 287 |
| chr24 | 1720456   | 1720742   | 287 |
| chr2  | 140754143 | 140754429 | 287 |
| chr19 | 46138700  | 46138986  | 287 |
| chr18 | 1535700   | 1535986   | 287 |

|       |           |           |     |
|-------|-----------|-----------|-----|
| chr16 | 47951320  | 47951606  | 287 |
| chr14 | 21262352  | 21262638  | 287 |
| chr12 | 32194125  | 32194411  | 287 |
| chr12 | 27888816  | 27889102  | 287 |
| chr10 | 77492172  | 77492458  | 287 |
| chr10 | 20901608  | 20901894  | 287 |
| chr10 | 17723389  | 17723675  | 287 |
| chr10 | 16846764  | 16847050  | 287 |
| chr9  | 99295791  | 99296076  | 286 |
| chr9  | 52936911  | 52937196  | 286 |
| chr8  | 60301800  | 60302085  | 286 |
| chr5  | 118178913 | 118179198 | 286 |
| chr3  | 33125838  | 33126123  | 286 |
| chr29 | 49115169  | 49115454  | 286 |
| chr28 | 17355284  | 17355569  | 286 |
| chr26 | 22415809  | 22416094  | 286 |
| chr26 | 20849003  | 20849288  | 286 |
| chr22 | 43924635  | 43924920  | 286 |
| chr2  | 125914412 | 125914697 | 286 |
| chr18 | 60135711  | 60135996  | 286 |
| chr16 | 73946867  | 73947152  | 286 |
| chr15 | 25790297  | 25790582  | 286 |
| chr14 | 79951035  | 79951320  | 286 |
| chr13 | 35580846  | 35581131  | 286 |
| chr11 | 107068029 | 107068314 | 286 |
| chr11 | 106252019 | 106252304 | 286 |
| chr11 | 89527630  | 89527915  | 286 |
| chr11 | 89511427  | 89511712  | 286 |
| chr11 | 7049860   | 7050145   | 286 |
| chr1  | 76555840  | 76556125  | 286 |
| chr6  | 16837400  | 16837684  | 285 |
| chr4  | 123025647 | 123025931 | 285 |
| chr3  | 35636623  | 35636907  | 285 |
| chr3  | 9424677   | 9424961   | 285 |
| chr25 | 36669774  | 36670058  | 285 |
| chr25 | 34119961  | 34120245  | 285 |
| chr24 | 40515595  | 40515879  | 285 |
| chr23 | 19331463  | 19331747  | 285 |
| chr21 | 69017594  | 69017878  | 285 |
| chr19 | 59094061  | 59094345  | 285 |
| chr19 | 29095582  | 29095866  | 285 |
| chr17 | 70558044  | 70558328  | 285 |
| chr16 | 71947184  | 71947468  | 285 |
| chr16 | 49691988  | 49692272  | 285 |
| chr13 | 40310211  | 40310495  | 285 |
| chr8  | 79964417  | 79964700  | 284 |
| chr8  | 9352827   | 9353110   | 284 |
| chr7  | 14416897  | 14417180  | 284 |
| chr7  | 9681459   | 9681742   | 284 |
| chr5  | 51795558  | 51795841  | 284 |

|       |           |           |     |
|-------|-----------|-----------|-----|
| chr3  | 110756087 | 110756370 | 284 |
| chr3  | 34135528  | 34135811  | 284 |
| chr29 | 35513419  | 35513702  | 284 |
| chr27 | 1353806   | 1354089   | 284 |
| chr25 | 35585767  | 35586050  | 284 |
| chr23 | 18459410  | 18459693  | 284 |
| chr22 | 48355691  | 48355974  | 284 |
| chr21 | 28023102  | 28023385  | 284 |
| chr21 | 27262963  | 27263246  | 284 |
| chr2  | 127214252 | 127214535 | 284 |
| chr2  | 102429836 | 102430119 | 284 |
| chr19 | 62054422  | 62054705  | 284 |
| chr19 | 54875402  | 54875685  | 284 |
| chr18 | 45299403  | 45299686  | 284 |
| chr18 | 13198237  | 13198520  | 284 |
| chr18 | 12135762  | 12136045  | 284 |
| chr15 | 62666126  | 62666409  | 284 |
| chr14 | 8179132   | 8179415   | 284 |
| chr13 | 58973083  | 58973366  | 284 |
| chr12 | 9545052   | 9545335   | 284 |
| chr11 | 49995881  | 49996164  | 284 |
| chr10 | 22477163  | 22477446  | 284 |
| chr10 | 8362642   | 8362925   | 284 |
| chr8  | 63176157  | 63176439  | 283 |
| chr7  | 5468001   | 5468283   | 283 |
| chr5  | 116552425 | 116552707 | 283 |
| chr3  | 9103035   | 9103317   | 283 |
| chr29 | 42992558  | 42992840  | 283 |
| chr26 | 48177900  | 48178182  | 283 |
| chr25 | 14298648  | 14298930  | 283 |
| chr25 | 10416550  | 10416832  | 283 |
| chr23 | 15709725  | 15710007  | 283 |
| chr19 | 32589064  | 32589346  | 283 |
| chr18 | 64255538  | 64255820  | 283 |
| chr18 | 22859723  | 22860005  | 283 |
| chr17 | 66145402  | 66145684  | 283 |
| chr15 | 23654564  | 23654846  | 283 |
| chr13 | 46207080  | 46207362  | 283 |
| chr13 | 40552729  | 40553011  | 283 |
| chr11 | 98909671  | 98909953  | 283 |
| chr11 | 84349424  | 84349706  | 283 |
| chr10 | 21429980  | 21430262  | 283 |
| chrX  | 23346808  | 23347089  | 282 |
| chr9  | 105034965 | 105035246 | 282 |
| chr8  | 8593496   | 8593777   | 282 |
| chr4  | 68161112  | 68161393  | 282 |
| chr29 | 48854910  | 48855191  | 282 |
| chr27 | 46070781  | 46071062  | 282 |
| chr27 | 26882264  | 26882545  | 282 |
| chr25 | 43537659  | 43537940  | 282 |

|       |               |           |     |
|-------|---------------|-----------|-----|
| chr24 | 60088573      | 60088854  | 282 |
| chr23 | 15101459      | 15101740  | 282 |
| chr23 | 11802733      | 11803014  | 282 |
| chr22 | 60387174      | 60387455  | 282 |
| chr19 | 51662978      | 51663259  | 282 |
| chr15 | 62753891      | 62754172  | 282 |
| chr15 | 18765432      | 18765713  | 282 |
| chr10 | 74859156      | 74859437  | 282 |
| chr10 | 12877707      | 12877988  | 282 |
| chr1  | 112052957     | 112053238 | 282 |
| chr8  | 72534269      | 72534549  | 281 |
| chr7  | 51086399      | 51086679  | 281 |
| chr7  | 13223862      | 13224142  | 281 |
| chr5  | 28877337      | 28877617  | 281 |
| chr3  | 119145169     | 119145449 | 281 |
| chr3  | 114208506     | 114208786 | 281 |
| chr3  | 62887390      | 62887670  | 281 |
| chr28 | 42219916      | 42220196  | 281 |
| chr27 | 45436899      | 45437179  | 281 |
| chr25 | 11029555      | 11029835  | 281 |
| chr25 | 10619111      | 10619391  | 281 |
| chr24 | 44224264      | 44224544  | 281 |
| chr23 | 9431132       | 9431412   | 281 |
| chr23 | 3217115       | 3217395   | 281 |
| chr2  | 112279953     | 112280233 | 281 |
| chr19 | 30055372      | 30055652  | 281 |
| chr19 | 12610831      | 12611111  | 281 |
| chr16 | 77558535      | 77558815  | 281 |
| chr16 | 1732040       | 1732320   | 281 |
| chr15 | 77189877      | 77190157  | 281 |
| chr15 | 27223618      | 27223898  | 281 |
| chr15 | 27220637      | 27220917  | 281 |
| chr15 | 22196922      | 22197202  | 281 |
| chr13 | 42420035      | 42420315  | 281 |
| chr11 | 108367820     | 108368100 | 281 |
| chr11 | 72626422      | 72626702  | 281 |
| chr11 | 44946453      | 44946733  | 281 |
| chr10 | 81696254      | 81696534  | 281 |
| chr10 | 24708483      | 24708763  | 281 |
| chr1  | 119949641     | 119949921 | 281 |
| chr1  | 2796457       | 2796737   | 281 |
| chr1  | 376842 377122 | 281       |     |
| chr8  | 60196949      | 60197228  | 280 |
| chr6  | 101072134     | 101072413 | 280 |
| chr4  | 73691442      | 73691721  | 280 |
| chr28 | 40381552      | 40381831  | 280 |
| chr25 | 37234030      | 37234309  | 280 |
| chr23 | 34953062      | 34953341  | 280 |
| chr23 | 8464075       | 8464354   | 280 |
| chr22 | 56034913      | 56035192  | 280 |

|       |           |           |     |
|-------|-----------|-----------|-----|
| chr21 | 24231657  | 24231936  | 280 |
| chr18 | 56772286  | 56772565  | 280 |
| chr17 | 66868811  | 66869090  | 280 |
| chr16 | 71906751  | 71907030  | 280 |
| chr15 | 56041734  | 56042013  | 280 |
| chr15 | 41394338  | 41394617  | 280 |
| chr14 | 66256792  | 66257071  | 280 |
| chr13 | 82825968  | 82826247  | 280 |
| chr13 | 59793747  | 59794026  | 280 |
| chr13 | 57425481  | 57425760  | 280 |
| chr10 | 11015132  | 11015411  | 280 |
| chr7  | 44649825  | 44650103  | 279 |
| chr4  | 15714857  | 15715135  | 279 |
| chr25 | 36539058  | 36539336  | 279 |
| chr24 | 3960686   | 3960964   | 279 |
| chr22 | 60531068  | 60531346  | 279 |
| chr22 | 59572304  | 59572582  | 279 |
| chr22 | 55938695  | 55938973  | 279 |
| chr2  | 21063344  | 21063622  | 279 |
| chr19 | 55464395  | 55464673  | 279 |
| chr18 | 11808580  | 11808858  | 279 |
| chr17 | 67308857  | 67309135  | 279 |
| chr16 | 20391481  | 20391759  | 279 |
| chr15 | 55260687  | 55260965  | 279 |
| chr13 | 80675941  | 80676219  | 279 |
| chr13 | 54202470  | 54202748  | 279 |
| chr12 | 35572462  | 35572740  | 279 |
| chr11 | 77760539  | 77760817  | 279 |
| chr10 | 91318378  | 91318656  | 279 |
| chr8  | 107624409 | 107624686 | 278 |
| chr8  | 102285275 | 102285552 | 278 |
| chr4  | 121525113 | 121525390 | 278 |
| chr3  | 112537648 | 112537925 | 278 |
| chr29 | 48363830  | 48364107  | 278 |
| chr29 | 41607492  | 41607769  | 278 |
| chr29 | 37324937  | 37325214  | 278 |
| chr27 | 35294293  | 35294570  | 278 |
| chr24 | 48109142  | 48109419  | 278 |
| chr2  | 111220370 | 111220647 | 278 |
| chr18 | 23963770  | 23964047  | 278 |
| chr18 | 12914114  | 12914391  | 278 |
| chr18 | 11491591  | 11491868  | 278 |
| chr16 | 46425386  | 46425663  | 278 |
| chr15 | 21515247  | 21515524  | 278 |
| chr15 | 20038757  | 20039034  | 278 |
| chr13 | 5093168   | 5093445   | 278 |
| chr12 | 83599439  | 83599716  | 278 |
| chr11 | 38720305  | 38720582  | 278 |
| chr9  | 106494407 | 106494683 | 277 |
| chr9  | 63421248  | 63421524  | 277 |

|       |           |           |     |
|-------|-----------|-----------|-----|
| chr8  | 102064183 | 102064459 | 277 |
| chr8  | 85441823  | 85442099  | 277 |
| chr7  | 57319090  | 57319366  | 277 |
| chr6  | 94814542  | 94814818  | 277 |
| chr6  | 27736868  | 27737144  | 277 |
| chr29 | 50232243  | 50232519  | 277 |
| chr29 | 49113755  | 49114031  | 277 |
| chr29 | 48547119  | 48547395  | 277 |
| chr24 | 45161099  | 45161375  | 277 |
| chr22 | 59981521  | 59981797  | 277 |
| chr22 | 16323660  | 16323936  | 277 |
| chr21 | 68796676  | 68796952  | 277 |
| chr21 | 60440106  | 60440382  | 277 |
| chr21 | 44303001  | 44303277  | 277 |
| chr2  | 125937345 | 125937621 | 277 |
| chr2  | 111950082 | 111950358 | 277 |
| chr19 | 54675406  | 54675682  | 277 |
| chr19 | 39016192  | 39016468  | 277 |
| chr19 | 7793082   | 7793358   | 277 |
| chr16 | 1351907   | 1352183   | 277 |
| chr12 | 82578471  | 82578747  | 277 |
| chr12 | 73814202  | 73814478  | 277 |
| chr11 | 106047937 | 106048213 | 277 |
| chr10 | 81702020  | 81702296  | 277 |
| chr1  | 74318714  | 74318990  | 277 |
| chr8  | 78699344  | 78699619  | 276 |
| chr8  | 46166348  | 46166623  | 276 |
| chr7  | 10826950  | 10827225  | 276 |
| chr3  | 106572880 | 106573155 | 276 |
| chr3  | 8574836   | 8575111   | 276 |
| chr25 | 42261896  | 42262171  | 276 |
| chr25 | 3025513   | 3025788   | 276 |
| chr22 | 47846224  | 47846499  | 276 |
| chr19 | 54785002  | 54785277  | 276 |
| chr18 | 48871198  | 48871473  | 276 |
| chr18 | 48484573  | 48484848  | 276 |
| chr17 | 57692800  | 57693075  | 276 |
| chr16 | 60782603  | 60782878  | 276 |
| chr16 | 59099987  | 59100262  | 276 |
| chr16 | 54491024  | 54491299  | 276 |
| chr16 | 49777173  | 49777448  | 276 |
| chr16 | 2128510   | 2128785   | 276 |
| chr15 | 27273431  | 27273706  | 276 |
| chr14 | 2879669   | 2879944   | 276 |
| chr13 | 80584154  | 80584429  | 276 |
| chr13 | 61751788  | 61752063  | 276 |
| chr13 | 35656124  | 35656399  | 276 |
| chr13 | 31728547  | 31728822  | 276 |
| chr11 | 100326062 | 100326337 | 276 |
| chr11 | 70961759  | 70962034  | 276 |

|       |           |           |     |
|-------|-----------|-----------|-----|
| chr11 | 44757583  | 44757858  | 276 |
| chr11 | 26236350  | 26236625  | 276 |
| chr10 | 17658154  | 17658429  | 276 |
| chr1  | 57458278  | 57458553  | 276 |
| chr9  | 105141340 | 105141614 | 275 |
| chr9  | 41879226  | 41879500  | 275 |
| chr8  | 78852544  | 78852818  | 275 |
| chr8  | 45733207  | 45733481  | 275 |
| chr7  | 65217467  | 65217741  | 275 |
| chr6  | 47932794  | 47933068  | 275 |
| chr5  | 28784013  | 28784287  | 275 |
| chr4  | 122713391 | 122713665 | 275 |
| chr4  | 106695243 | 106695517 | 275 |
| chr28 | 33814580  | 33814854  | 275 |
| chr25 | 40933418  | 40933692  | 275 |
| chr24 | 34030799  | 34031073  | 275 |
| chr23 | 29003230  | 29003504  | 275 |
| chr22 | 55950811  | 55951085  | 275 |
| chr22 | 7232541   | 7232815   | 275 |
| chr20 | 44427586  | 44427860  | 275 |
| chr19 | 29901823  | 29902097  | 275 |
| chr15 | 75588693  | 75588967  | 275 |
| chr14 | 63531066  | 63531340  | 275 |
| chr13 | 63273149  | 63273423  | 275 |
| chr13 | 33473982  | 33474256  | 275 |
| chr13 | 15662792  | 15663066  | 275 |
| chr12 | 20799410  | 20799684  | 275 |
| chr11 | 84502140  | 84502414  | 275 |
| chr11 | 14497275  | 14497549  | 275 |
| chr10 | 13371925  | 13372199  | 275 |
| chr1  | 132973120 | 132973394 | 275 |
| chr7  | 51402331  | 51402604  | 274 |
| chr7  | 18452817  | 18453090  | 274 |
| chr4  | 71574312  | 71574585  | 274 |
| chr4  | 5589001   | 5589274   | 274 |
| chr3  | 99892217  | 99892490  | 274 |
| chr3  | 37394885  | 37395158  | 274 |
| chr25 | 26685224  | 26685497  | 274 |
| chr24 | 61123108  | 61123381  | 274 |
| chr24 | 34474298  | 34474571  | 274 |
| chr23 | 52758171  | 52758444  | 274 |
| chr23 | 18462660  | 18462933  | 274 |
| chr2  | 134983109 | 134983382 | 274 |
| chr19 | 10855431  | 10855704  | 274 |
| chr17 | 48279047  | 48279320  | 274 |
| chr16 | 1242404   | 1242677   | 274 |
| chr14 | 16755788  | 16756061  | 274 |
| chr13 | 54425703  | 54425976  | 274 |
| chr1  | 129845758 | 129846031 | 274 |
| chr1  | 68422084  | 68422357  | 274 |



|       |               |           |     |
|-------|---------------|-----------|-----|
| chr8  | 60219047      | 60219319  | 273 |
| chr7  | 81228010      | 81228282  | 273 |
| chr4  | 117766416     | 117766688 | 273 |
| chr4  | 110770496     | 110770768 | 273 |
| chr3  | 126930276     | 126930548 | 273 |
| chr3  | 111395784     | 111396056 | 273 |
| chr29 | 38058200      | 38058472  | 273 |
| chr27 | 31582379      | 31582651  | 273 |
| chr24 | 20739298      | 20739570  | 273 |
| chr23 | 28764270      | 28764542  | 273 |
| chr20 | 60982757      | 60983029  | 273 |
| chr19 | 54263182      | 54263454  | 273 |
| chr19 | 25976268      | 25976540  | 273 |
| chr19 | 19779655      | 19779927  | 273 |
| chr18 | 56363050      | 56363322  | 273 |
| chr18 | 12412435      | 12412707  | 273 |
| chr18 | 6282146       | 6282418   | 273 |
| chr15 | 64307627      | 64307899  | 273 |
| chr15 | 53692305      | 53692577  | 273 |
| chr14 | 19442185      | 19442457  | 273 |
| chr14 | 1204719       | 1204991   | 273 |
| chr11 | 14501074      | 14501346  | 273 |
| chr10 | 91109491      | 91109763  | 273 |
| chr10 | 13033719      | 13033991  | 273 |
| chr9  | 90301945      | 90302216  | 272 |
| chr8  | 64947456      | 64947727  | 272 |
| chr8  | 60416986      | 60417257  | 272 |
| chr5  | 118546637     | 118546908 | 272 |
| chr4  | 117860450     | 117860721 | 272 |
| chr3  | 15785535      | 15785806  | 272 |
| chr29 | 51996482      | 51996753  | 272 |
| chr25 | 11006964      | 11007235  | 272 |
| chr23 | 27895617      | 27895888  | 272 |
| chr22 | 704132 704403 | 272       |     |
| chr2  | 49761816      | 49762087  | 272 |
| chr2  | 19711328      | 19711599  | 272 |
| chr19 | 52837049      | 52837320  | 272 |
| chr19 | 51903130      | 51903401  | 272 |
| chr19 | 46699591      | 46699862  | 272 |
| chr19 | 23687348      | 23687619  | 272 |
| chr18 | 63524626      | 63524897  | 272 |
| chr18 | 53119308      | 53119579  | 272 |
| chr17 | 69853000      | 69853271  | 272 |
| chr17 | 58820575      | 58820846  | 272 |
| chr14 | 34043073      | 34043344  | 272 |
| chr12 | 30532317      | 30532588  | 272 |
| chr10 | 59997033      | 59997304  | 272 |
| chr10 | 16820709      | 16820980  | 272 |
| chr9  | 100918263     | 100918533 | 271 |
| chr9  | 42060634      | 42060904  | 271 |

|       |               |           |     |
|-------|---------------|-----------|-----|
| chr8  | 56864845      | 56865115  | 271 |
| chr6  | 118498043     | 118498313 | 271 |
| chr3  | 22474894      | 22475164  | 271 |
| chr29 | 17778047      | 17778317  | 271 |
| chr25 | 38094181      | 38094451  | 271 |
| chr25 | 37644570      | 37644840  | 271 |
| chr23 | 15777299      | 15777569  | 271 |
| chr22 | 59984348      | 59984618  | 271 |
| chr22 | 58526671      | 58526941  | 271 |
| chr22 | 56466961      | 56467231  | 271 |
| chr22 | 746711 746981 | 271       |     |
| chr2  | 130983036     | 130983306 | 271 |
| chr2  | 115888138     | 115888408 | 271 |
| chr12 | 64654907      | 64655177  | 271 |
| chr11 | 28641109      | 28641379  | 271 |
| chr10 | 10208694      | 10208964  | 271 |
| chr7  | 29474759      | 29475028  | 270 |
| chr7  | 16522176      | 16522445  | 270 |
| chr6  | 59242170      | 59242439  | 270 |
| chr5  | 112709960     | 112710229 | 270 |
| chr5  | 31561998      | 31562267  | 270 |
| chr4  | 106655069     | 106655338 | 270 |
| chr3  | 123711018     | 123711287 | 270 |
| chr3  | 112717284     | 112717553 | 270 |
| chr3  | 35664751      | 35665020  | 270 |
| chr26 | 46570121      | 46570390  | 270 |
| chr24 | 35357726      | 35357995  | 270 |
| chr24 | 32961383      | 32961652  | 270 |
| chr23 | 32681838      | 32682107  | 270 |
| chr23 | 15013076      | 15013345  | 270 |
| chr2  | 119417841     | 119418110 | 270 |
| chr2  | 65528192      | 65528461  | 270 |
| chr19 | 55600097      | 55600366  | 270 |
| chr19 | 47239250      | 47239519  | 270 |
| chr19 | 47238964      | 47239233  | 270 |
| chr19 | 25808171      | 25808440  | 270 |
| chr18 | 22779051      | 22779320  | 270 |
| chr18 | 11699789      | 11700058  | 270 |
| chr17 | 62756141      | 62756410  | 270 |
| chr16 | 48449735      | 48450004  | 270 |
| chr16 | 24768419      | 24768688  | 270 |
| chr15 | 45864287      | 45864556  | 270 |
| chr15 | 25069389      | 25069658  | 270 |
| chr11 | 105621934     | 105622203 | 270 |
| chr11 | 74214572      | 74214841  | 270 |
| chr10 | 53279880      | 53280149  | 270 |
| chrX  | 9097270       | 9097538   | 269 |
| chr7  | 29340366      | 29340634  | 269 |
| chr4  | 98482065      | 98482333  | 269 |
| chr3  | 121529168     | 121529436 | 269 |

|       |           |           |     |
|-------|-----------|-----------|-----|
| chr3  | 30255690  | 30255958  | 269 |
| chr3  | 22939740  | 22940008  | 269 |
| chr29 | 45909302  | 45909570  | 269 |
| chr27 | 35848679  | 35848947  | 269 |
| chr25 | 29286155  | 29286423  | 269 |
| chr24 | 49178448  | 49178716  | 269 |
| chr24 | 48136467  | 48136735  | 269 |
| chr23 | 19858955  | 19859223  | 269 |
| chr23 | 7263124   | 7263392   | 269 |
| chr22 | 51503014  | 51503282  | 269 |
| chr21 | 58813690  | 58813958  | 269 |
| chr2  | 138633163 | 138633431 | 269 |
| chr2  | 132326513 | 132326781 | 269 |
| chr2  | 127085015 | 127085283 | 269 |
| chr2  | 123893050 | 123893318 | 269 |
| chr2  | 122875015 | 122875283 | 269 |
| chr2  | 74276129  | 74276397  | 269 |
| chr19 | 47240986  | 47241254  | 269 |
| chr19 | 41996425  | 41996693  | 269 |
| chr19 | 29715104  | 29715372  | 269 |
| chr18 | 39524752  | 39525020  | 269 |
| chr17 | 58832720  | 58832988  | 269 |
| chr16 | 40613142  | 40613410  | 269 |
| chr15 | 22315723  | 22315991  | 269 |
| chr14 | 22201401  | 22201669  | 269 |
| chr14 | 7652157   | 7652425   | 269 |
| chr11 | 106309320 | 106309588 | 269 |
| chr11 | 14168878  | 14169146  | 269 |
| chr8  | 63918200  | 63918467  | 268 |
| chr7  | 37503337  | 37503604  | 268 |
| chr3  | 123736918 | 123737185 | 268 |
| chr29 | 44591598  | 44591865  | 268 |
| chr26 | 34500945  | 34501212  | 268 |
| chr25 | 27806258  | 27806525  | 268 |
| chr24 | 2374755   | 2375022   | 268 |
| chr23 | 27837752  | 27838019  | 268 |
| chr23 | 11075353  | 11075620  | 268 |
| chr21 | 9142795   | 9143062   | 268 |
| chr2  | 126423945 | 126424212 | 268 |
| chr2  | 115071589 | 115071856 | 268 |
| chr2  | 17334210  | 17334477  | 268 |
| chr17 | 69495282  | 69495549  | 268 |
| chr17 | 58457902  | 58458169  | 268 |
| chr16 | 56105747  | 56106014  | 268 |
| chr16 | 44790107  | 44790374  | 268 |
| chr14 | 59391531  | 59391798  | 268 |
| chr14 | 36744845  | 36745112  | 268 |
| chr14 | 5937310   | 5937577   | 268 |
| chr11 | 101881239 | 101881506 | 268 |
| chr11 | 49828775  | 49829042  | 268 |

|       |           |           |     |
|-------|-----------|-----------|-----|
| chr9  | 44102229  | 44102495  | 267 |
| chr8  | 73351002  | 73351268  | 267 |
| chr7  | 14815083  | 14815349  | 267 |
| chr6  | 14382708  | 14382974  | 267 |
| chr6  | 13429782  | 13430048  | 267 |
| chr5  | 113498591 | 113498857 | 267 |
| chr5  | 111621362 | 111621628 | 267 |
| chr5  | 28681490  | 28681756  | 267 |
| chr3  | 118188257 | 118188523 | 267 |
| chr3  | 94154636  | 94154902  | 267 |
| chr3  | 16910600  | 16910866  | 267 |
| chr3  | 15802682  | 15802948  | 267 |
| chr3  | 10677478  | 10677744  | 267 |
| chr29 | 30044252  | 30044518  | 267 |
| chr28 | 26859441  | 26859707  | 267 |
| chr27 | 26544749  | 26545015  | 267 |
| chr25 | 34040901  | 34041167  | 267 |
| chr25 | 26317125  | 26317391  | 267 |
| chr23 | 17883181  | 17883447  | 267 |
| chr23 | 7849019   | 7849285   | 267 |
| chr22 | 39815246  | 39815512  | 267 |
| chr22 | 33359687  | 33359953  | 267 |
| chr21 | 68917680  | 68917946  | 267 |
| chr21 | 47297568  | 47297834  | 267 |
| chr2  | 19822491  | 19822757  | 267 |
| chr19 | 63434135  | 63434401  | 267 |
| chr19 | 38560318  | 38560584  | 267 |
| chr18 | 45086332  | 45086598  | 267 |
| chr17 | 63960620  | 63960886  | 267 |
| chr17 | 63112321  | 63112587  | 267 |
| chr16 | 75830413  | 75830679  | 267 |
| chr16 | 60534633  | 60534899  | 267 |
| chr16 | 23971677  | 23971943  | 267 |
| chr15 | 38579168  | 38579434  | 267 |
| chr13 | 41695290  | 41695556  | 267 |
| chr13 | 22184960  | 22185226  | 267 |
| chr11 | 107401191 | 107401457 | 267 |
| chr11 | 28663617  | 28663883  | 267 |
| chr1  | 146942793 | 146943059 | 267 |
| chrX  | 13835627  | 13835892  | 266 |
| chr8  | 78538127  | 78538392  | 266 |
| chr8  | 44044710  | 44044975  | 266 |
| chr7  | 46434352  | 46434617  | 266 |
| chr7  | 14372372  | 14372637  | 266 |
| chr6  | 109421570 | 109421835 | 266 |
| chr4  | 32537592  | 32537857  | 266 |
| chr3  | 111646752 | 111647017 | 266 |
| chr29 | 50313218  | 50313483  | 266 |
| chr26 | 37925269  | 37925534  | 266 |
| chr25 | 8736921   | 8737186   | 266 |

|       |           |           |     |
|-------|-----------|-----------|-----|
| chr23 | 43203450  | 43203715  | 266 |
| chr20 | 70958841  | 70959106  | 266 |
| chr2  | 82961533  | 82961798  | 266 |
| chr2  | 75852707  | 75852972  | 266 |
| chr19 | 56567498  | 56567763  | 266 |
| chr18 | 62497950  | 62498215  | 266 |
| chr18 | 33099815  | 33100080  | 266 |
| chr18 | 20246128  | 20246393  | 266 |
| chr18 | 11662009  | 11662274  | 266 |
| chr17 | 70023926  | 70024191  | 266 |
| chr17 | 56067369  | 56067634  | 266 |
| chr16 | 77562197  | 77562462  | 266 |
| chr15 | 22271724  | 22271989  | 266 |
| chr15 | 19772909  | 19773174  | 266 |
| chr12 | 11531133  | 11531398  | 266 |
| chr11 | 25755230  | 25755495  | 266 |
| chr10 | 37387021  | 37387286  | 266 |
| chr1  | 88301907  | 88302172  | 266 |
| chr1  | 68417549  | 68417814  | 266 |
| chr9  | 99712363  | 99712627  | 265 |
| chr9  | 90603966  | 90604230  | 265 |
| chr7  | 42730072  | 42730336  | 265 |
| chr5  | 118412437 | 118412701 | 265 |
| chr4  | 72937731  | 72937995  | 265 |
| chr3  | 126104321 | 126104585 | 265 |
| chr3  | 113297883 | 113298147 | 265 |
| chr3  | 56835384  | 56835648  | 265 |
| chr29 | 48238005  | 48238269  | 265 |
| chr29 | 46679630  | 46679894  | 265 |
| chr29 | 31588960  | 31589224  | 265 |
| chr28 | 45395707  | 45395971  | 265 |
| chr28 | 33391105  | 33391369  | 265 |
| chr26 | 49274069  | 49274333  | 265 |
| chr26 | 18942579  | 18942843  | 265 |
| chr25 | 11089799  | 11090063  | 265 |
| chr24 | 61559002  | 61559266  | 265 |
| chr21 | 58691986  | 58692250  | 265 |
| chr21 | 34630880  | 34631144  | 265 |
| chr20 | 6653602   | 6653866   | 265 |
| chr2  | 136724462 | 136724726 | 265 |
| chr2  | 113727104 | 113727368 | 265 |
| chr2  | 73200214  | 73200478  | 265 |
| chr19 | 56457235  | 56457499  | 265 |
| chr19 | 53524177  | 53524441  | 265 |
| chr19 | 13739924  | 13740188  | 265 |
| chr19 | 13484875  | 13485139  | 265 |
| chr18 | 6930985   | 6931249   | 265 |
| chr14 | 53420403  | 53420667  | 265 |
| chr13 | 84340207  | 84340471  | 265 |
| chr13 | 41208515  | 41208779  | 265 |

|       |           |           |     |
|-------|-----------|-----------|-----|
| chr12 | 9563228   | 9563492   | 265 |
| chr11 | 75075212  | 75075476  | 265 |
| chr11 | 46741619  | 46741883  | 265 |
| chr11 | 13331057  | 13331321  | 265 |
| chr11 | 1331152   | 1331416   | 265 |
| chr10 | 88994545  | 88994809  | 265 |
| chr10 | 52948911  | 52949175  | 265 |
| chr9  | 106724590 | 106724853 | 264 |
| chr9  | 90478145  | 90478408  | 264 |
| chr7  | 103086735 | 103086998 | 264 |
| chr7  | 46223703  | 46223966  | 264 |
| chr7  | 10957074  | 10957337  | 264 |
| chr7  | 4331923   | 4332186   | 264 |
| chr6  | 122457290 | 122457553 | 264 |
| chr4  | 121465782 | 121466045 | 264 |
| chr4  | 96348095  | 96348358  | 264 |
| chr3  | 113599099 | 113599362 | 264 |
| chr3  | 109660758 | 109661021 | 264 |
| chr29 | 17868198  | 17868461  | 264 |
| chr26 | 43256264  | 43256527  | 264 |
| chr25 | 34072212  | 34072475  | 264 |
| chr25 | 8732529   | 8732792   | 264 |
| chr23 | 52800271  | 52800534  | 264 |
| chr23 | 51641990  | 51642253  | 264 |
| chr23 | 7375462   | 7375725   | 264 |
| chr21 | 18554315  | 18554578  | 264 |
| chr2  | 24079314  | 24079577  | 264 |
| chr19 | 24245337  | 24245600  | 264 |
| chr17 | 73807515  | 73807778  | 264 |
| chr16 | 68884126  | 68884389  | 264 |
| chr16 | 45956391  | 45956654  | 264 |
| chr15 | 26566659  | 26566922  | 264 |
| chr14 | 76186905  | 76187168  | 264 |
| chr13 | 79696385  | 79696648  | 264 |
| chr13 | 31536181  | 31536444  | 264 |
| chr11 | 49596740  | 49597003  | 264 |
| chrX  | 13545749  | 13546011  | 263 |
| chr9  | 90545739  | 90546001  | 263 |
| chr8  | 94674980  | 94675242  | 263 |
| chr8  | 94139899  | 94140161  | 263 |
| chr7  | 52282848  | 52283110  | 263 |
| chr6  | 102180384 | 102180646 | 263 |
| chr6  | 45913942  | 45914204  | 263 |
| chr5  | 115827719 | 115827981 | 263 |
| chr5  | 78866890  | 78867152  | 263 |
| chr5  | 27157727  | 27157989  | 263 |
| chr4  | 97710853  | 97711115  | 263 |
| chr4  | 15362486  | 15362748  | 263 |
| chr3  | 116596910 | 116597172 | 263 |
| chr3  | 60412477  | 60412739  | 263 |

|       |               |           |     |
|-------|---------------|-----------|-----|
| chr29 | 49857705      | 49857967  | 263 |
| chr27 | 34757173      | 34757435  | 263 |
| chr26 | 51491875      | 51492137  | 263 |
| chr26 | 48429475      | 48429737  | 263 |
| chr26 | 43252026      | 43252288  | 263 |
| chr26 | 18744019      | 18744281  | 263 |
| chr24 | 40819895      | 40820157  | 263 |
| chr24 | 36038248      | 36038510  | 263 |
| chr21 | 61712687      | 61712949  | 263 |
| chr21 | 59442130      | 59442392  | 263 |
| chr20 | 70548765      | 70549027  | 263 |
| chr20 | 41949015      | 41949277  | 263 |
| chr2  | 99687064      | 99687326  | 263 |
| chr2  | 46207138      | 46207400  | 263 |
| chr19 | 39821732      | 39821994  | 263 |
| chr18 | 45067701      | 45067963  | 263 |
| chr17 | 76302986      | 76303248  | 263 |
| chr16 | 72305208      | 72305470  | 263 |
| chr16 | 48307267      | 48307529  | 263 |
| chr15 | 39199972      | 39200234  | 263 |
| chr15 | 32971101      | 32971363  | 263 |
| chr14 | 19723313      | 19723575  | 263 |
| chr13 | 78827263      | 78827525  | 263 |
| chr13 | 55991020      | 55991282  | 263 |
| chr12 | 34298399      | 34298661  | 263 |
| chr11 | 108266435     | 108266697 | 263 |
| chr10 | 88179742      | 88180004  | 263 |
| chr10 | 61390712      | 61390974  | 263 |
| chr10 | 8710820       | 8711082   | 263 |
| chr1  | 110661814     | 110662076 | 263 |
| chr6  | 116831774     | 116832035 | 262 |
| chr3  | 88225953      | 88226214  | 262 |
| chr3  | 35307197      | 35307458  | 262 |
| chr29 | 51223723      | 51223984  | 262 |
| chr29 | 50723773      | 50724034  | 262 |
| chr29 | 34886119      | 34886380  | 262 |
| chr28 | 34055934      | 34056195  | 262 |
| chr27 | 38749539      | 38749800  | 262 |
| chr26 | 51205959      | 51206220  | 262 |
| chr25 | 34377580      | 34377841  | 262 |
| chr25 | 29599724      | 29599985  | 262 |
| chr25 | 29113623      | 29113884  | 262 |
| chr24 | 48956098      | 48956359  | 262 |
| chr22 | 59907765      | 59908026  | 262 |
| chr21 | 19668474      | 19668735  | 262 |
| chr2  | 26600118      | 26600379  | 262 |
| chr2  | 15653001      | 15653262  | 262 |
| chr19 | 52308152      | 52308413  | 262 |
| chr17 | 64309978      | 64310239  | 262 |
| chr16 | 204502 204763 | 262       |     |

|       |           |           |     |
|-------|-----------|-----------|-----|
| chr15 | 81157047  | 81157308  | 262 |
| chr14 | 42141629  | 42141890  | 262 |
| chr13 | 72618184  | 72618445  | 262 |
| chr13 | 56355125  | 56355386  | 262 |
| chr13 | 40107637  | 40107898  | 262 |
| chr11 | 74772706  | 74772967  | 262 |
| chr10 | 36021834  | 36022095  | 262 |
| chr10 | 35784513  | 35784774  | 262 |
| chr9  | 106962579 | 106962839 | 261 |
| chr8  | 23058058  | 23058318  | 261 |
| chr6  | 120773455 | 120773715 | 261 |
| chr29 | 51632525  | 51632785  | 261 |
| chr26 | 44355719  | 44355979  | 261 |
| chr25 | 37239048  | 37239308  | 261 |
| chr24 | 58959626  | 58959886  | 261 |
| chr21 | 25983008  | 25983268  | 261 |
| chr21 | 6962330   | 6962590   | 261 |
| chr2  | 136575673 | 136575933 | 261 |
| chr19 | 59525578  | 59525838  | 261 |
| chr19 | 52831781  | 52832041  | 261 |
| chr19 | 41267187  | 41267447  | 261 |
| chr19 | 31769759  | 31770019  | 261 |
| chr19 | 24674511  | 24674771  | 261 |
| chr19 | 17102725  | 17102985  | 261 |
| chr18 | 54104978  | 54105238  | 261 |
| chr18 | 40281225  | 40281485  | 261 |
| chr18 | 17967676  | 17967936  | 261 |
| chr16 | 40932092  | 40932352  | 261 |
| chr15 | 63890382  | 63890642  | 261 |
| chr13 | 70161533  | 70161793  | 261 |
| chr13 | 59683829  | 59684089  | 261 |
| chr13 | 35088277  | 35088537  | 261 |
| chr12 | 34265455  | 34265715  | 261 |
| chr11 | 66704154  | 66704414  | 261 |
| chr11 | 9215105   | 9215365   | 261 |
| chr10 | 68115005  | 68115265  | 261 |
| chr10 | 8742996   | 8743256   | 261 |
| chr1  | 28606577  | 28606837  | 261 |
| chr8  | 107179843 | 107180102 | 260 |
| chr8  | 99647755  | 99648014  | 260 |
| chr7  | 14492688  | 14492947  | 260 |
| chr7  | 5598944   | 5599203   | 260 |
| chr6  | 121817933 | 121818192 | 260 |
| chr5  | 116339132 | 116339391 | 260 |
| chr5  | 111331071 | 111331330 | 260 |
| chr5  | 72176996  | 72177255  | 260 |
| chr4  | 121060191 | 121060450 | 260 |
| chr3  | 121424178 | 121424437 | 260 |
| chr3  | 30256323  | 30256582  | 260 |
| chr3  | 23088101  | 23088360  | 260 |



|       |               |           |     |
|-------|---------------|-----------|-----|
| chr25 | 14735052      | 14735311  | 260 |
| chr23 | 30576366      | 30576625  | 260 |
| chr23 | 993641 993900 | 260       |     |
| chr22 | 60023147      | 60023406  | 260 |
| chr22 | 48545737      | 48545996  | 260 |
| chr21 | 47670991      | 47671250  | 260 |
| chr18 | 38770997      | 38771256  | 260 |
| chr18 | 496571 496830 | 260       |     |
| chr17 | 68052663      | 68052922  | 260 |
| chr17 | 42233442      | 42233701  | 260 |
| chr16 | 60378716      | 60378975  | 260 |
| chr15 | 33838014      | 33838273  | 260 |
| chr13 | 66921330      | 66921589  | 260 |
| chr13 | 41769055      | 41769314  | 260 |
| chr13 | 14659854      | 14660113  | 260 |
| chr12 | 37023264      | 37023523  | 260 |
| chr11 | 109636853     | 109637112 | 260 |
| chr11 | 77843288      | 77843547  | 260 |
| chr1  | 147245353     | 147245612 | 260 |
| chr1  | 145513949     | 145514208 | 260 |
| chr1  | 110524860     | 110525119 | 260 |
| chr7  | 1938159       | 1938417   | 259 |
| chr6  | 70182548      | 70182806  | 259 |
| chr5  | 118462717     | 118462975 | 259 |
| chr5  | 117630070     | 117630328 | 259 |
| chr3  | 126887770     | 126888028 | 259 |
| chr3  | 122056719     | 122056977 | 259 |
| chr3  | 116417725     | 116417983 | 259 |
| chr3  | 105436073     | 105436331 | 259 |
| chr29 | 37340346      | 37340604  | 259 |
| chr24 | 43762380      | 43762638  | 259 |
| chr23 | 51929723      | 51929981  | 259 |
| chr23 | 44103859      | 44104117  | 259 |
| chr23 | 11366186      | 11366444  | 259 |
| chr20 | 8457058       | 8457316   | 259 |
| chr16 | 64453010      | 64453268  | 259 |
| chr16 | 2131663       | 2131921   | 259 |
| chr15 | 75212436      | 75212694  | 259 |
| chr15 | 33692513      | 33692771  | 259 |
| chr13 | 76580540      | 76580798  | 259 |
| chr13 | 55377231      | 55377489  | 259 |
| chr11 | 102416488     | 102416746 | 259 |
| chr11 | 84505727      | 84505985  | 259 |
| chr11 | 10453756      | 10454014  | 259 |
| chr10 | 9443741       | 9443999   | 259 |
| chr9  | 89617807      | 89618064  | 258 |
| chr9  | 44449857      | 44450114  | 258 |
| chr8  | 612885 613142 | 258       |     |
| chr7  | 46124667      | 46124924  | 258 |
| chr6  | 59254907      | 59255164  | 258 |

|       |           |           |     |
|-------|-----------|-----------|-----|
| chr4  | 123042084 | 123042341 | 258 |
| chr3  | 113405369 | 113405626 | 258 |
| chr28 | 33989069  | 33989326  | 258 |
| chr27 | 1486961   | 1487218   | 258 |
| chr25 | 40416267  | 40416524  | 258 |
| chr23 | 8284182   | 8284439   | 258 |
| chr21 | 28323184  | 28323441  | 258 |
| chr21 | 5363893   | 5364150   | 258 |
| chr2  | 137757788 | 137758045 | 258 |
| chr2  | 127682616 | 127682873 | 258 |
| chr2  | 124320573 | 124320830 | 258 |
| chr2  | 108236748 | 108237005 | 258 |
| chr19 | 64791087  | 64791344  | 258 |
| chr19 | 54557953  | 54558210  | 258 |
| chr18 | 55296135  | 55296392  | 258 |
| chr18 | 26390955  | 26391212  | 258 |
| chr17 | 73212848  | 73213105  | 258 |
| chr17 | 72988482  | 72988739  | 258 |
| chr16 | 58435687  | 58435944  | 258 |
| chr15 | 75851960  | 75852217  | 258 |
| chr15 | 51740315  | 51740572  | 258 |
| chr15 | 28720946  | 28721203  | 258 |
| chr15 | 26574871  | 26575128  | 258 |
| chr13 | 26297423  | 26297680  | 258 |
| chr11 | 109604975 | 109605232 | 258 |
| chr9  | 63552499  | 63552755  | 257 |
| chr8  | 70675413  | 70675669  | 257 |
| chr8  | 65202546  | 65202802  | 257 |
| chr4  | 29022461  | 29022717  | 257 |
| chr3  | 114773862 | 114774118 | 257 |
| chr29 | 41618355  | 41618611  | 257 |
| chr28 | 33642518  | 33642774  | 257 |
| chr26 | 43167040  | 43167296  | 257 |
| chr25 | 33799988  | 33800244  | 257 |
| chr25 | 8696814   | 8697070   | 257 |
| chr24 | 51578489  | 51578745  | 257 |
| chr24 | 48885018  | 48885274  | 257 |
| chr23 | 7889112   | 7889368   | 257 |
| chr23 | 2081465   | 2081721   | 257 |
| chr22 | 56057894  | 56058150  | 257 |
| chr22 | 55332173  | 55332429  | 257 |
| chr22 | 36033993  | 36034249  | 257 |
| chr21 | 59306041  | 59306297  | 257 |
| chr20 | 26081696  | 26081952  | 257 |
| chr20 | 6409409   | 6409665   | 257 |
| chr2  | 139111457 | 139111713 | 257 |
| chr2  | 134331626 | 134331882 | 257 |
| chr2  | 23206565  | 23206821  | 257 |
| chr19 | 46122584  | 46122840  | 257 |
| chr19 | 10932753  | 10933009  | 257 |

|       |           |           |     |
|-------|-----------|-----------|-----|
| chr18 | 18533254  | 18533510  | 257 |
| chr18 | 11733331  | 11733587  | 257 |
| chr17 | 75890755  | 75891011  | 257 |
| chr17 | 68475033  | 68475289  | 257 |
| chr16 | 46890997  | 46891253  | 257 |
| chr15 | 74870002  | 74870258  | 257 |
| chr15 | 29673622  | 29673878  | 257 |
| chr13 | 82390334  | 82390590  | 257 |
| chr13 | 70175587  | 70175843  | 257 |
| chr13 | 53900890  | 53901146  | 257 |
| chr13 | 36859424  | 36859680  | 257 |
| chr12 | 50785949  | 50786205  | 257 |
| chr11 | 104893442 | 104893698 | 257 |
| chr11 | 102022126 | 102022382 | 257 |
| chr11 | 49646712  | 49646968  | 257 |
| chr10 | 6939239   | 6939495   | 257 |
| chr1  | 147920404 | 147920660 | 257 |
| chr7  | 18073803  | 18074058  | 256 |
| chr6  | 121909666 | 121909921 | 256 |
| chr5  | 122207919 | 122208174 | 256 |
| chr3  | 29638956  | 29639211  | 256 |
| chr28 | 32814380  | 32814635  | 256 |
| chr28 | 4170878   | 4171133   | 256 |
| chr27 | 21886897  | 21887152  | 256 |
| chr27 | 21090406  | 21090661  | 256 |
| chr26 | 25115905  | 25116160  | 256 |
| chr25 | 39193880  | 39194135  | 256 |
| chr20 | 11175151  | 11175406  | 256 |
| chr19 | 6548823   | 6549078   | 256 |
| chr18 | 41802370  | 41802625  | 256 |
| chr18 | 39958931  | 39959186  | 256 |
| chr18 | 11217942  | 11218197  | 256 |
| chr18 | 5446664   | 5446919   | 256 |
| chr17 | 74552584  | 74552839  | 256 |
| chr17 | 60571843  | 60572098  | 256 |
| chr17 | 49192426  | 49192681  | 256 |
| chr15 | 66103741  | 66103996  | 256 |
| chr15 | 38530909  | 38531164  | 256 |
| chr13 | 61292067  | 61292322  | 256 |
| chr13 | 59072018  | 59072273  | 256 |
| chr12 | 84672197  | 84672452  | 256 |
| chr11 | 104284885 | 104285140 | 256 |
| chr10 | 66904281  | 66904536  | 256 |
| chr1  | 147042333 | 147042588 | 256 |
| chr9  | 106660680 | 106660934 | 255 |
| chr8  | 110979290 | 110979544 | 255 |
| chr8  | 47601338  | 47601592  | 255 |
| chr7  | 10637973  | 10638227  | 255 |
| chr7  | 6542035   | 6542289   | 255 |
| chr7  | 5114245   | 5114499   | 255 |

|       |               |           |     |
|-------|---------------|-----------|-----|
| chr7  | 3733081       | 3733335   | 255 |
| chr4  | 53164887      | 53165141  | 255 |
| chr3  | 115633677     | 115633931 | 255 |
| chr3  | 35801624      | 35801878  | 255 |
| chr29 | 51579669      | 51579923  | 255 |
| chr29 | 47447839      | 47448093  | 255 |
| chr29 | 30054811      | 30055065  | 255 |
| chr25 | 43495686      | 43495940  | 255 |
| chr24 | 40797752      | 40798006  | 255 |
| chr22 | 45455344      | 45455598  | 255 |
| chr22 | 16784548      | 16784802  | 255 |
| chr21 | 61030967      | 61031221  | 255 |
| chr21 | 30352685      | 30352939  | 255 |
| chr20 | 9169381       | 9169635   | 255 |
| chr2  | 132703243     | 132703497 | 255 |
| chr19 | 47385093      | 47385347  | 255 |
| chr19 | 41480505      | 41480759  | 255 |
| chr19 | 32056086      | 32056340  | 255 |
| chr18 | 56830180      | 56830434  | 255 |
| chr18 | 47177475      | 47177729  | 255 |
| chr15 | 74560594      | 74560848  | 255 |
| chr15 | 21177407      | 21177661  | 255 |
| chr14 | 59644369      | 59644623  | 255 |
| chr13 | 61291222      | 61291476  | 255 |
| chr13 | 55424829      | 55425083  | 255 |
| chr11 | 70928158      | 70928412  | 255 |
| chr11 | 22504629      | 22504883  | 255 |
| chr10 | 81688764      | 81689018  | 255 |
| chr1  | 84499260      | 84499514  | 255 |
| chrX  | 34239423      | 34239676  | 254 |
| chr9  | 90409712      | 90409965  | 254 |
| chr9  | 77222800      | 77223053  | 254 |
| chr8  | 108219160     | 108219413 | 254 |
| chr8  | 80652169      | 80652422  | 254 |
| chr7  | 71679109      | 71679362  | 254 |
| chr7  | 42755556      | 42755809  | 254 |
| chr7  | 4911324       | 4911577   | 254 |
| chr4  | 121222726     | 121222979 | 254 |
| chr4  | 99056504      | 99056757  | 254 |
| chr4  | 96830945      | 96831198  | 254 |
| chr3  | 108798901     | 108799154 | 254 |
| chr28 | 42588776      | 42589029  | 254 |
| chr27 | 46980238      | 46980491  | 254 |
| chr27 | 17827836      | 17828089  | 254 |
| chr27 | 847977 848230 |           | 254 |
| chr26 | 51630262      | 51630515  | 254 |
| chr26 | 22619226      | 22619479  | 254 |
| chr25 | 42030014      | 42030267  | 254 |
| chr25 | 36118199      | 36118452  | 254 |
| chr25 | 3885301       | 3885554   | 254 |

|       |               |           |     |
|-------|---------------|-----------|-----|
| chr24 | 40239008      | 40239261  | 254 |
| chr23 | 51250018      | 51250271  | 254 |
| chr23 | 49748958      | 49749211  | 254 |
| chr22 | 47830386      | 47830639  | 254 |
| chr22 | 12188852      | 12189105  | 254 |
| chr21 | 64432564      | 64432817  | 254 |
| chr21 | 24440179      | 24440432  | 254 |
| chr21 | 6983635       | 6983888   | 254 |
| chr20 | 19376799      | 19377052  | 254 |
| chr2  | 139071525     | 139071778 | 254 |
| chr2  | 126967002     | 126967255 | 254 |
| chr19 | 54876787      | 54877040  | 254 |
| chr19 | 13532340      | 13532593  | 254 |
| chr17 | 63402029      | 63402282  | 254 |
| chr17 | 59265002      | 59265255  | 254 |
| chr16 | 47439130      | 47439383  | 254 |
| chr15 | 62759478      | 62759731  | 254 |
| chr15 | 32285422      | 32285675  | 254 |
| chr15 | 22176161      | 22176414  | 254 |
| chr13 | 67134243      | 67134496  | 254 |
| chr13 | 60736741      | 60736994  | 254 |
| chr13 | 40818968      | 40819221  | 254 |
| chr13 | 35494262      | 35494515  | 254 |
| chr12 | 30555707      | 30555960  | 254 |
| chr11 | 105966332     | 105966585 | 254 |
| chr11 | 98372323      | 98372576  | 254 |
| chr11 | 70842328      | 70842581  | 254 |
| chr11 | 49397629      | 49397882  | 254 |
| chr11 | 48319779      | 48320032  | 254 |
| chr11 | 28316018      | 28316271  | 254 |
| chr11 | 14888631      | 14888884  | 254 |
| chr10 | 12675745      | 12675998  | 254 |
| chr9  | 34934633      | 34934885  | 253 |
| chr8  | 52920173      | 52920425  | 253 |
| chr7  | 109701134     | 109701386 | 253 |
| chr7  | 45643214      | 45643466  | 253 |
| chr7  | 10821043      | 10821295  | 253 |
| chr6  | 120612621     | 120612873 | 253 |
| chr6  | 46668529      | 46668781  | 253 |
| chr4  | 98879863      | 98880115  | 253 |
| chr4  | 51771357      | 51771609  | 253 |
| chr3  | 25768300      | 25768552  | 253 |
| chr26 | 43245427      | 43245679  | 253 |
| chr26 | 21600719      | 21600971  | 253 |
| chr25 | 41281152      | 41281404  | 253 |
| chr25 | 40232434      | 40232686  | 253 |
| chr25 | 40193847      | 40194099  | 253 |
| chr24 | 503410 503662 |           | 253 |
| chr23 | 30226091      | 30226343  | 253 |
| chr23 | 19624254      | 19624506  | 253 |

|       |               |           |     |
|-------|---------------|-----------|-----|
| chr22 | 58279217      | 58279469  | 253 |
| chr22 | 13979138      | 13979390  | 253 |
| chr21 | 65565880      | 65566132  | 253 |
| chr20 | 33621145      | 33621397  | 253 |
| chr2  | 135695541     | 135695793 | 253 |
| chr2  | 135621617     | 135621869 | 253 |
| chr2  | 134684923     | 134685175 | 253 |
| chr2  | 124763824     | 124764076 | 253 |
| chr2  | 124329139     | 124329391 | 253 |
| chr18 | 21960542      | 21960794  | 253 |
| chr18 | 11979185      | 11979437  | 253 |
| chr17 | 74554566      | 74554818  | 253 |
| chr16 | 44152274      | 44152526  | 253 |
| chr16 | 43877195      | 43877447  | 253 |
| chr14 | 67962864      | 67963116  | 253 |
| chr13 | 67063531      | 67063783  | 253 |
| chr13 | 34474211      | 34474463  | 253 |
| chr12 | 32821109      | 32821361  | 253 |
| chr11 | 66160685      | 66160937  | 253 |
| chr10 | 17659402      | 17659654  | 253 |
| chr8  | 78809933      | 78810184  | 252 |
| chr8  | 64489686      | 64489937  | 252 |
| chr7  | 44531408      | 44531659  | 252 |
| chr7  | 17088765      | 17089016  | 252 |
| chr6  | 122216711     | 122216962 | 252 |
| chr4  | 116551458     | 116551709 | 252 |
| chr4  | 46281126      | 46281377  | 252 |
| chr3  | 124520225     | 124520476 | 252 |
| chr3  | 119641371     | 119641622 | 252 |
| chr3  | 99458992      | 99459243  | 252 |
| chr3  | 21363546      | 21363797  | 252 |
| chr28 | 5625901       | 5626152   | 252 |
| chr26 | 50467484      | 50467735  | 252 |
| chr26 | 18159148      | 18159399  | 252 |
| chr26 | 15365074      | 15365325  | 252 |
| chr25 | 44007604      | 44007855  | 252 |
| chr25 | 27693483      | 27693734  | 252 |
| chr25 | 11583742      | 11583993  | 252 |
| chr24 | 42920690      | 42920941  | 252 |
| chr24 | 35533840      | 35534091  | 252 |
| chr24 | 880598 880849 | 252       |     |
| chr23 | 49941421      | 49941672  | 252 |
| chr23 | 31102441      | 31102692  | 252 |
| chr23 | 11073240      | 11073491  | 252 |
| chr22 | 14108674      | 14108925  | 252 |
| chr2  | 21399629      | 21399880  | 252 |
| chr19 | 64055474      | 64055725  | 252 |
| chr19 | 46862133      | 46862384  | 252 |
| chr19 | 43464841      | 43465092  | 252 |
| chr18 | 56618555      | 56618806  | 252 |

|       |           |           |     |
|-------|-----------|-----------|-----|
| chr18 | 23492395  | 23492646  | 252 |
| chr18 | 12394235  | 12394486  | 252 |
| chr18 | 1545485   | 1545736   | 252 |
| chr16 | 75615472  | 75615723  | 252 |
| chr15 | 30367892  | 30368143  | 252 |
| chr15 | 25183023  | 25183274  | 252 |
| chr14 | 66212419  | 66212670  | 252 |
| chr14 | 26419392  | 26419643  | 252 |
| chr14 | 26115266  | 26115517  | 252 |
| chr13 | 56172231  | 56172482  | 252 |
| chr10 | 91316748  | 91316999  | 252 |
| chr10 | 81652150  | 81652401  | 252 |
| chr10 | 58736206  | 58736457  | 252 |
| chr10 | 44346554  | 44346805  | 252 |
| chr10 | 13319060  | 13319311  | 252 |
| chr1  | 130335619 | 130335870 | 252 |
| chr1  | 99796282  | 99796533  | 252 |
| chr9  | 70862270  | 70862520  | 251 |
| chr9  | 29624542  | 29624792  | 251 |
| chr8  | 107677886 | 107678136 | 251 |
| chr8  | 102825963 | 102826213 | 251 |
| chr8  | 88726987  | 88727237  | 251 |
| chr7  | 45807419  | 45807669  | 251 |
| chr7  | 13548730  | 13548980  | 251 |
| chr7  | 13108112  | 13108362  | 251 |
| chr6  | 113384599 | 113384849 | 251 |
| chr5  | 41309216  | 41309466  | 251 |
| chr5  | 30354580  | 30354830  | 251 |
| chr4  | 122986993 | 122987243 | 251 |
| chr4  | 99478722  | 99478972  | 251 |
| chr4  | 74518079  | 74518329  | 251 |
| chr4  | 68159581  | 68159831  | 251 |
| chr4  | 67985857  | 67986107  | 251 |
| chr3  | 116116470 | 116116720 | 251 |
| chr28 | 26833719  | 26833969  | 251 |
| chr27 | 36042384  | 36042634  | 251 |
| chr24 | 60651635  | 60651885  | 251 |
| chr23 | 19999466  | 19999716  | 251 |
| chr23 | 18619768  | 18620018  | 251 |
| chr23 | 14785592  | 14785842  | 251 |
| chr23 | 9993022   | 9993272   | 251 |
| chr23 | 7171003   | 7171253   | 251 |
| chr22 | 56383330  | 56383580  | 251 |
| chr21 | 68916606  | 68916856  | 251 |
| chr21 | 65575841  | 65576091  | 251 |
| chr2  | 74007595  | 74007845  | 251 |
| chr19 | 47302923  | 47303173  | 251 |
| chr19 | 17674453  | 17674703  | 251 |
| chr19 | 7542324   | 7542574   | 251 |
| chr18 | 54776580  | 54776830  | 251 |

|       |               |           |     |
|-------|---------------|-----------|-----|
| chr18 | 54643048      | 54643298  | 251 |
| chr18 | 11945981      | 11946231  | 251 |
| chr18 | 11218599      | 11218849  | 251 |
| chr17 | 63415487      | 63415737  | 251 |
| chr17 | 4779711       | 4779961   | 251 |
| chr15 | 81668114      | 81668364  | 251 |
| chr15 | 56127308      | 56127558  | 251 |
| chr15 | 25392693      | 25392943  | 251 |
| chr14 | 43076140      | 43076390  | 251 |
| chr14 | 21664205      | 21664455  | 251 |
| chr14 | 239470 239720 | 251       |     |
| chr13 | 59323570      | 59323820  | 251 |
| chr12 | 20031160      | 20031410  | 251 |
| chr12 | 16995782      | 16996032  | 251 |
| chr12 | 13303241      | 13303491  | 251 |
| chr11 | 70920699      | 70920949  | 251 |
| chr11 | 4814313       | 4814563   | 251 |
| chr10 | 16910329      | 16910579  | 251 |
| chr10 | 7601414       | 7601664   | 251 |
| chr8  | 72220323      | 72220572  | 250 |
| chr6  | 122453886     | 122454135 | 250 |
| chr5  | 60172708      | 60172957  | 250 |
| chr5  | 30462667      | 30462916  | 250 |
| chr5  | 30155741      | 30155990  | 250 |
| chr4  | 99362297      | 99362546  | 250 |
| chr4  | 95625198      | 95625447  | 250 |
| chr3  | 126902427     | 126902676 | 250 |
| chr3  | 123275390     | 123275639 | 250 |
| chr25 | 42727668      | 42727917  | 250 |
| chr25 | 35399467      | 35399716  | 250 |
| chr25 | 33473252      | 33473501  | 250 |
| chr24 | 60566900      | 60567149  | 250 |
| chr21 | 24875422      | 24875671  | 250 |
| chr20 | 37249519      | 37249768  | 250 |
| chr2  | 127122716     | 127122965 | 250 |
| chr2  | 110188645     | 110188894 | 250 |
| chr19 | 56562920      | 56563169  | 250 |
| chr19 | 54435810      | 54436059  | 250 |
| chr19 | 43304614      | 43304863  | 250 |
| chr19 | 25296360      | 25296609  | 250 |
| chr18 | 63007724      | 63007973  | 250 |
| chr18 | 45987796      | 45988045  | 250 |
| chr18 | 45429410      | 45429659  | 250 |
| chr18 | 25472571      | 25472820  | 250 |
| chr18 | 12136101      | 12136350  | 250 |
| chr18 | 6124880       | 6125129   | 250 |
| chr18 | 5542412       | 5542661   | 250 |
| chr17 | 69854074      | 69854323  | 250 |
| chr16 | 38719522      | 38719771  | 250 |
| chr15 | 75391517      | 75391766  | 250 |



|       |               |           |     |
|-------|---------------|-----------|-----|
| chr14 | 3209368       | 3209617   | 250 |
| chr13 | 42851153      | 42851402  | 250 |
| chr12 | 15386333      | 15386582  | 250 |
| chr11 | 106899973     | 106900222 | 250 |
| chr11 | 102427464     | 102427713 | 250 |
| chr10 | 35812542      | 35812791  | 250 |
| chr1  | 73789562      | 73789811  | 250 |
| chr1  | 157528 157777 | 250       |     |
| chrX  | 10883779      | 10884027  | 249 |
| chr9  | 107094533     | 107094781 | 249 |
| chr9  | 104799833     | 104800081 | 249 |
| chr8  | 102506377     | 102506625 | 249 |
| chr8  | 93116131      | 93116379  | 249 |
| chr8  | 5371085       | 5371333   | 249 |
| chr7  | 57538041      | 57538289  | 249 |
| chr7  | 5692580       | 5692828   | 249 |
| chr6  | 121029449     | 121029697 | 249 |
| chr5  | 43084273      | 43084521  | 249 |
| chr5  | 35292368      | 35292616  | 249 |
| chr5  | 29960896      | 29961144  | 249 |
| chr4  | 121486419     | 121486667 | 249 |
| chr4  | 118056150     | 118056398 | 249 |
| chr4  | 96084540      | 96084788  | 249 |
| chr4  | 95064310      | 95064558  | 249 |
| chr4  | 68074112      | 68074360  | 249 |
| chr3  | 106513081     | 106513329 | 249 |
| chr3  | 22467831      | 22468079  | 249 |
| chr29 | 49565321      | 49565569  | 249 |
| chr27 | 27388039      | 27388287  | 249 |
| chr27 | 15229947      | 15230195  | 249 |
| chr27 | 543125 543373 | 249       |     |
| chr26 | 22216070      | 22216318  | 249 |
| chr25 | 2963343       | 2963591   | 249 |
| chr24 | 60901224      | 60901472  | 249 |
| chr24 | 48026397      | 48026645  | 249 |
| chr24 | 26025108      | 26025356  | 249 |
| chr23 | 18159775      | 18160023  | 249 |
| chr23 | 11494295      | 11494543  | 249 |
| chr22 | 53966909      | 53967157  | 249 |
| chr22 | 50859024      | 50859272  | 249 |
| chr22 | 16782655      | 16782903  | 249 |
| chr21 | 67766833      | 67767081  | 249 |
| chr21 | 65679880      | 65680128  | 249 |
| chr21 | 61194596      | 61194844  | 249 |
| chr21 | 20694561      | 20694809  | 249 |
| chr21 | 20027574      | 20027822  | 249 |
| chr21 | 6473956       | 6474204   | 249 |
| chr21 | 714131 714379 | 249       |     |
| chr20 | 43806150      | 43806398  | 249 |
| chr20 | 8546063       | 8546311   | 249 |

|       |           |           |     |
|-------|-----------|-----------|-----|
| chr2  | 125319750 | 125319998 | 249 |
| chr19 | 56588948  | 56589196  | 249 |
| chr19 | 55957950  | 55958198  | 249 |
| chr19 | 42978544  | 42978792  | 249 |
| chr18 | 56603031  | 56603279  | 249 |
| chr18 | 55828655  | 55828903  | 249 |
| chr17 | 76299329  | 76299577  | 249 |
| chr17 | 75560944  | 75561192  | 249 |
| chr17 | 72894442  | 72894690  | 249 |
| chr17 | 70204027  | 70204275  | 249 |
| chr17 | 53473004  | 53473252  | 249 |
| chr17 | 18772591  | 18772839  | 249 |
| chr15 | 81402065  | 81402313  | 249 |
| chr15 | 64143505  | 64143753  | 249 |
| chr15 | 29705782  | 29706030  | 249 |
| chr14 | 44243251  | 44243499  | 249 |
| chr14 | 7578573   | 7578821   | 249 |
| chr14 | 1971990   | 1972238   | 249 |
| chr14 | 1493570   | 1493818   | 249 |
| chr13 | 74328497  | 74328745  | 249 |
| chr13 | 73564582  | 73564830  | 249 |
| chr13 | 66952030  | 66952278  | 249 |
| chr13 | 66682553  | 66682801  | 249 |
| chr13 | 22164670  | 22164918  | 249 |
| chr11 | 107541308 | 107541556 | 249 |
| chr11 | 106410772 | 106411020 | 249 |
| chr11 | 104523007 | 104523255 | 249 |
| chr11 | 103600208 | 103600456 | 249 |
| chr11 | 76360240  | 76360488  | 249 |
| chr11 | 70848834  | 70849082  | 249 |
| chr11 | 2993574   | 2993822   | 249 |
| chr10 | 68251666  | 68251914  | 249 |
| chr10 | 17229754  | 17230002  | 249 |
| chr1  | 72377924  | 72378172  | 249 |
| chr1  | 69847035  | 69847283  | 249 |
| chr9  | 84238885  | 84239132  | 248 |
| chr9  | 45962231  | 45962478  | 248 |
| chr9  | 44101132  | 44101379  | 248 |
| chr8  | 57989004  | 57989251  | 248 |
| chr7  | 57311518  | 57311765  | 248 |
| chr7  | 13544767  | 13545014  | 248 |
| chr7  | 4940323   | 4940570   | 248 |
| chr5  | 124324282 | 124324529 | 248 |
| chr5  | 120447918 | 120448165 | 248 |
| chr5  | 113494967 | 113495214 | 248 |
| chr5  | 30990255  | 30990502  | 248 |
| chr4  | 71542319  | 71542566  | 248 |
| chr3  | 111520033 | 111520280 | 248 |
| chr3  | 110766769 | 110767016 | 248 |
| chr3  | 105613707 | 105613954 | 248 |

|       |           |           |     |
|-------|-----------|-----------|-----|
| chr3  | 35562405  | 35562652  | 248 |
| chr29 | 50622873  | 50623120  | 248 |
| chr29 | 49708853  | 49709100  | 248 |
| chr29 | 29799851  | 29800098  | 248 |
| chr27 | 39882720  | 39882967  | 248 |
| chr27 | 35022288  | 35022535  | 248 |
| chr26 | 43828895  | 43829142  | 248 |
| chr25 | 39349846  | 39350093  | 248 |
| chr25 | 2741649   | 2741896   | 248 |
| chr23 | 52806263  | 52806510  | 248 |
| chr23 | 51923132  | 51923379  | 248 |
| chr23 | 51728025  | 51728272  | 248 |
| chr23 | 31730466  | 31730713  | 248 |
| chr23 | 2580466   | 2580713   | 248 |
| chr22 | 61480562  | 61480809  | 248 |
| chr22 | 51506212  | 51506459  | 248 |
| chr22 | 5683429   | 5683676   | 248 |
| chr21 | 19723218  | 19723465  | 248 |
| chr21 | 13253328  | 13253575  | 248 |
| chr2  | 127192000 | 127192247 | 248 |
| chr2  | 124335149 | 124335396 | 248 |
| chr2  | 123891576 | 123891823 | 248 |
| chr2  | 111252288 | 111252535 | 248 |
| chr2  | 105794485 | 105794732 | 248 |
| chr19 | 35055984  | 35056231  | 248 |
| chr19 | 31326303  | 31326550  | 248 |
| chr18 | 62125519  | 62125766  | 248 |
| chr18 | 57378038  | 57378285  | 248 |
| chr17 | 66130134  | 66130381  | 248 |
| chr16 | 77455045  | 77455292  | 248 |
| chr16 | 46995885  | 46996132  | 248 |
| chr15 | 55668421  | 55668668  | 248 |
| chr15 | 39634432  | 39634679  | 248 |
| chr14 | 80587468  | 80587715  | 248 |
| chr13 | 82708155  | 82708402  | 248 |
| chr13 | 72516343  | 72516590  | 248 |
| chr13 | 70711048  | 70711295  | 248 |
| chr13 | 52944446  | 52944693  | 248 |
| chr13 | 11418879  | 11419126  | 248 |
| chr11 | 109643280 | 109643527 | 248 |
| chr11 | 92153249  | 92153496  | 248 |
| chr11 | 14190817  | 14191064  | 248 |
| chr10 | 103709886 | 103710133 | 248 |
| chr10 | 25900543  | 25900790  | 248 |
| chr1  | 82986650  | 82986897  | 248 |
| chrX  | 10884053  | 10884299  | 247 |
| chr8  | 77195599  | 77195845  | 247 |
| chr7  | 79736384  | 79736630  | 247 |
| chr7  | 65856914  | 65857160  | 247 |
| chr5  | 114090313 | 114090559 | 247 |

|       |           |           |     |
|-------|-----------|-----------|-----|
| chr5  | 113435023 | 113435269 | 247 |
| chr5  | 111860582 | 111860828 | 247 |
| chr5  | 81490111  | 81490357  | 247 |
| chr5  | 71658959  | 71659205  | 247 |
| chr5  | 32831302  | 32831548  | 247 |
| chr4  | 94706584  | 94706830  | 247 |
| chr3  | 123639908 | 123640154 | 247 |
| chr3  | 118033254 | 118033500 | 247 |
| chr3  | 51567023  | 51567269  | 247 |
| chr3  | 23748423  | 23748669  | 247 |
| chr3  | 22608914  | 22609160  | 247 |
| chr29 | 46633491  | 46633737  | 247 |
| chr29 | 35198491  | 35198737  | 247 |
| chr28 | 25523577  | 25523823  | 247 |
| chr27 | 15856939  | 15857185  | 247 |
| chr26 | 35724385  | 35724631  | 247 |
| chr26 | 31486878  | 31487124  | 247 |
| chr25 | 18691913  | 18692159  | 247 |
| chr23 | 49332080  | 49332326  | 247 |
| chr22 | 7239580   | 7239826   | 247 |
| chr21 | 61627142  | 61627388  | 247 |
| chr21 | 47716493  | 47716739  | 247 |
| chr20 | 25598914  | 25599160  | 247 |
| chr20 | 3004681   | 3004927   | 247 |
| chr2  | 126139692 | 126139938 | 247 |
| chr2  | 5370335   | 5370581   | 247 |
| chr19 | 37535338  | 37535584  | 247 |
| chr19 | 21706318  | 21706564  | 247 |
| chr19 | 13977254  | 13977500  | 247 |
| chr19 | 10794327  | 10794573  | 247 |
| chr18 | 35129564  | 35129810  | 247 |
| chr17 | 76321042  | 76321288  | 247 |
| chr17 | 75152575  | 75152821  | 247 |
| chr17 | 69447157  | 69447403  | 247 |
| chr17 | 62036325  | 62036571  | 247 |
| chr17 | 57545246  | 57545492  | 247 |
| chr15 | 52807688  | 52807934  | 247 |
| chr15 | 30084530  | 30084776  | 247 |
| chr13 | 70971446  | 70971692  | 247 |
| chr13 | 62928171  | 62928417  | 247 |
| chr13 | 61223860  | 61224106  | 247 |
| chr13 | 60614163  | 60614409  | 247 |
| chr13 | 55103727  | 55103973  | 247 |
| chr13 | 41645302  | 41645548  | 247 |
| chr13 | 41095146  | 41095392  | 247 |
| chr12 | 76487298  | 76487544  | 247 |
| chr11 | 102409970 | 102410216 | 247 |
| chr11 | 23564351  | 23564597  | 247 |
| chr10 | 90320293  | 90320539  | 247 |
| chr10 | 6066216   | 6066462   | 247 |

|       |           |           |     |
|-------|-----------|-----------|-----|
| chr1  | 75093899  | 75094145  | 247 |
| chr1  | 19193382  | 19193628  | 247 |
| chrX  | 47722666  | 47722911  | 246 |
| chr9  | 100783058 | 100783303 | 246 |
| chr9  | 27050343  | 27050588  | 246 |
| chr8  | 79102365  | 79102610  | 246 |
| chr8  | 5460223   | 5460468   | 246 |
| chr7  | 5117861   | 5118106   | 246 |
| chr6  | 8016007   | 8016252   | 246 |
| chr5  | 60444799  | 60445044  | 246 |
| chr4  | 123026881 | 123027126 | 246 |
| chr4  | 71682822  | 71683067  | 246 |
| chr3  | 106803223 | 106803468 | 246 |
| chr3  | 106554464 | 106554709 | 246 |
| chr29 | 42975168  | 42975413  | 246 |
| chr29 | 37256989  | 37257234  | 246 |
| chr28 | 42154784  | 42155029  | 246 |
| chr28 | 26754488  | 26754733  | 246 |
| chr28 | 26457859  | 26458104  | 246 |
| chr26 | 23509630  | 23509875  | 246 |
| chr25 | 40968270  | 40968515  | 246 |
| chr22 | 60548390  | 60548635  | 246 |
| chr22 | 60069838  | 60070083  | 246 |
| chr21 | 64844850  | 64845095  | 246 |
| chr21 | 64430025  | 64430270  | 246 |
| chr21 | 63888677  | 63888922  | 246 |
| chr20 | 74546208  | 74546453  | 246 |
| chr20 | 71424861  | 71425106  | 246 |
| chr2  | 139408499 | 139408744 | 246 |
| chr2  | 134067852 | 134068097 | 246 |
| chr19 | 61140932  | 61141177  | 246 |
| chr18 | 56476991  | 56477236  | 246 |
| chr18 | 34844429  | 34844674  | 246 |
| chr18 | 26151258  | 26151503  | 246 |
| chr18 | 10235141  | 10235386  | 246 |
| chr17 | 72684500  | 72684745  | 246 |
| chr17 | 55875137  | 55875382  | 246 |
| chr17 | 47099639  | 47099884  | 246 |
| chr16 | 54552685  | 54552930  | 246 |
| chr16 | 38925303  | 38925548  | 246 |
| chr16 | 26434043  | 26434288  | 246 |
| chr13 | 80235977  | 80236222  | 246 |
| chr13 | 16291986  | 16292231  | 246 |
| chr12 | 10189561  | 10189806  | 246 |
| chr11 | 104994649 | 104994894 | 246 |
| chr11 | 72168466  | 72168711  | 246 |
| chr11 | 5672300   | 5672545   | 246 |
| chr11 | 3214806   | 3215051   | 246 |
| chr11 | 1528062   | 1528307   | 246 |
| chr10 | 81885680  | 81885925  | 246 |

|       |           |           |     |
|-------|-----------|-----------|-----|
| chr10 | 79263413  | 79263658  | 246 |
| chr10 | 74574745  | 74574990  | 246 |
| chr10 | 36614124  | 36614369  | 246 |
| chr10 | 21788965  | 21789210  | 246 |
| chr10 | 20148666  | 20148911  | 246 |
| chr1  | 128115230 | 128115475 | 246 |
| chr1  | 124391482 | 124391727 | 246 |
| chr1  | 118643918 | 118644163 | 246 |
| chr9  | 75089294  | 75089538  | 245 |
| chr9  | 19472022  | 19472266  | 245 |
| chr9  | 12696062  | 12696306  | 245 |
| chr8  | 45661978  | 45662222  | 245 |
| chr8  | 5456383   | 5456627   | 245 |
| chr7  | 53432930  | 53433174  | 245 |
| chr5  | 115470389 | 115470633 | 245 |
| chr5  | 91639166  | 91639410  | 245 |
| chr5  | 28863108  | 28863352  | 245 |
| chr4  | 26908203  | 26908447  | 245 |
| chr3  | 125534517 | 125534761 | 245 |
| chr3  | 120323429 | 120323673 | 245 |
| chr3  | 25778897  | 25779141  | 245 |
| chr29 | 51705753  | 51705997  | 245 |
| chr29 | 48905704  | 48905948  | 245 |
| chr29 | 39088123  | 39088367  | 245 |
| chr26 | 48684865  | 48685109  | 245 |
| chr26 | 46379562  | 46379806  | 245 |
| chr26 | 41642166  | 41642410  | 245 |
| chr25 | 39179927  | 39180171  | 245 |
| chr25 | 21043672  | 21043916  | 245 |
| chr23 | 45985045  | 45985289  | 245 |
| chr23 | 43444704  | 43444948  | 245 |
| chr23 | 23762518  | 23762762  | 245 |
| chr23 | 15943603  | 15943847  | 245 |
| chr22 | 5469533   | 5469777   | 245 |
| chr21 | 64753326  | 64753570  | 245 |
| chr20 | 4987160   | 4987404   | 245 |
| chr2  | 139184018 | 139184262 | 245 |
| chr2  | 131588388 | 131588632 | 245 |
| chr19 | 63077240  | 63077484  | 245 |
| chr19 | 53059953  | 53060197  | 245 |
| chr19 | 29650522  | 29650766  | 245 |
| chr19 | 6544162   | 6544406   | 245 |
| chr18 | 55747281  | 55747525  | 245 |
| chr16 | 3260195   | 3260439   | 245 |
| chr16 | 2151706   | 2151950   | 245 |
| chr16 | 1777680   | 1777924   | 245 |
| chr15 | 63689652  | 63689896  | 245 |
| chr15 | 28689024  | 28689268  | 245 |
| chr13 | 37678294  | 37678538  | 245 |
| chr12 | 32869912  | 32870156  | 245 |

|       |           |           |     |
|-------|-----------|-----------|-----|
| chr11 | 109547759 | 109548003 | 245 |
| chr11 | 103882677 | 103882921 | 245 |
| chr10 | 68419210  | 68419454  | 245 |
| chr10 | 10743007  | 10743251  | 245 |
| chr9  | 62617080  | 62617323  | 244 |
| chr8  | 65930227  | 65930470  | 244 |
| chr7  | 17370179  | 17370422  | 244 |
| chr6  | 121461318 | 121461561 | 244 |
| chr6  | 69342999  | 69343242  | 244 |
| chr5  | 116926717 | 116926960 | 244 |
| chr5  | 94653926  | 94654169  | 244 |
| chr4  | 97795186  | 97795429  | 244 |
| chr4  | 71515428  | 71515671  | 244 |
| chr4  | 46240634  | 46240877  | 244 |
| chr3  | 107734581 | 107734824 | 244 |
| chr29 | 49740439  | 49740682  | 244 |
| chr29 | 44680076  | 44680319  | 244 |
| chr29 | 38315705  | 38315948  | 244 |
| chr27 | 46069925  | 46070168  | 244 |
| chr27 | 40770752  | 40770995  | 244 |
| chr27 | 21495968  | 21496211  | 244 |
| chr26 | 50580138  | 50580381  | 244 |
| chr25 | 26711524  | 26711767  | 244 |
| chr25 | 2241617   | 2241860   | 244 |
| chr24 | 51870797  | 51871040  | 244 |
| chr24 | 36749310  | 36749553  | 244 |
| chr24 | 35053032  | 35053275  | 244 |
| chr23 | 38499593  | 38499836  | 244 |
| chr23 | 31023661  | 31023904  | 244 |
| chr22 | 48382887  | 48383130  | 244 |
| chr21 | 68922842  | 68923085  | 244 |
| chr21 | 56281538  | 56281781  | 244 |
| chr21 | 13802790  | 13803033  | 244 |
| chr20 | 60274344  | 60274587  | 244 |
| chr2  | 139911757 | 139912000 | 244 |
| chr2  | 128585825 | 128586068 | 244 |
| chr2  | 99304315  | 99304558  | 244 |
| chr2  | 41315931  | 41316174  | 244 |
| chr2  | 26598204  | 26598447  | 244 |
| chr19 | 62433637  | 62433880  | 244 |
| chr19 | 58163980  | 58164223  | 244 |
| chr19 | 53048523  | 53048766  | 244 |
| chr19 | 31279781  | 31280024  | 244 |
| chr19 | 25502634  | 25502877  | 244 |
| chr18 | 63753320  | 63753563  | 244 |
| chr18 | 11594914  | 11595157  | 244 |
| chr18 | 10270350  | 10270593  | 244 |
| chr17 | 48589951  | 48590194  | 244 |
| chr17 | 18379317  | 18379560  | 244 |
| chr16 | 47564539  | 47564782  | 244 |

|       |           |           |     |
|-------|-----------|-----------|-----|
| chr16 | 38933808  | 38934051  | 244 |
| chr15 | 81146275  | 81146518  | 244 |
| chr15 | 64757765  | 64758008  | 244 |
| chr14 | 66284774  | 66285017  | 244 |
| chr14 | 66247535  | 66247778  | 244 |
| chr13 | 80071210  | 80071453  | 244 |
| chr13 | 76559246  | 76559489  | 244 |
| chr13 | 73470625  | 73470868  | 244 |
| chr13 | 71390135  | 71390378  | 244 |
| chr13 | 68927452  | 68927695  | 244 |
| chr13 | 41757264  | 41757507  | 244 |
| chr13 | 35492747  | 35492990  | 244 |
| chr12 | 81688300  | 81688543  | 244 |
| chr12 | 75094559  | 75094802  | 244 |
| chr12 | 53239559  | 53239802  | 244 |
| chr12 | 31504522  | 31504765  | 244 |
| chr12 | 24512711  | 24512954  | 244 |
| chr11 | 99199331  | 99199574  | 244 |
| chr11 | 12860016  | 12860259  | 244 |
| chr10 | 72468087  | 72468330  | 244 |
| chr10 | 14918762  | 14919005  | 244 |
| chr1  | 153295984 | 153296227 | 244 |
| chr1  | 150070497 | 150070740 | 244 |
| chr1  | 146235337 | 146235580 | 244 |
| chr1  | 87329379  | 87329622  | 244 |
| chr9  | 52378285  | 52378527  | 243 |
| chr8  | 80996614  | 80996856  | 243 |
| chr8  | 73995533  | 73995775  | 243 |
| chr8  | 56614233  | 56614475  | 243 |
| chr8  | 7984846   | 7985088   | 243 |
| chr7  | 50463239  | 50463481  | 243 |
| chr7  | 43697351  | 43697593  | 243 |
| chr7  | 13109448  | 13109690  | 243 |
| chr7  | 9133499   | 9133741   | 243 |
| chr5  | 113150417 | 113150659 | 243 |
| chr5  | 32941979  | 32942221  | 243 |
| chr5  | 32922720  | 32922962  | 243 |
| chr4  | 14670332  | 14670574  | 243 |
| chr3  | 121786593 | 121786835 | 243 |
| chr29 | 42935566  | 42935808  | 243 |
| chr28 | 25262077  | 25262319  | 243 |
| chr27 | 38901805  | 38902047  | 243 |
| chr27 | 35142008  | 35142250  | 243 |
| chr26 | 23079235  | 23079477  | 243 |
| chr26 | 22296843  | 22297085  | 243 |
| chr23 | 52717351  | 52717593  | 243 |
| chr23 | 17478198  | 17478440  | 243 |
| chr23 | 16524878  | 16525120  | 243 |
| chr21 | 13724999  | 13725241  | 243 |
| chr20 | 33546681  | 33546923  | 243 |



|       |           |           |     |
|-------|-----------|-----------|-----|
| chr20 | 8667781   | 8668023   | 243 |
| chr2  | 140654826 | 140655068 | 243 |
| chr2  | 125125557 | 125125799 | 243 |
| chr2  | 73038420  | 73038662  | 243 |
| chr2  | 36110788  | 36111030  | 243 |
| chr19 | 51671473  | 51671715  | 243 |
| chr19 | 45208697  | 45208939  | 243 |
| chr19 | 40864094  | 40864336  | 243 |
| chr19 | 24071006  | 24071248  | 243 |
| chr19 | 14698801  | 14699043  | 243 |
| chr19 | 6544739   | 6544981   | 243 |
| chr18 | 56581605  | 56581847  | 243 |
| chr18 | 22046201  | 22046443  | 243 |
| chr17 | 72770392  | 72770634  | 243 |
| chr17 | 66751457  | 66751699  | 243 |
| chr17 | 48598879  | 48599121  | 243 |
| chr17 | 18479597  | 18479839  | 243 |
| chr16 | 38576393  | 38576635  | 243 |
| chr16 | 2180893   | 2181135   | 243 |
| chr15 | 52957610  | 52957852  | 243 |
| chr15 | 43269996  | 43270238  | 243 |
| chr13 | 75720105  | 75720347  | 243 |
| chr13 | 42475349  | 42475591  | 243 |
| chr13 | 15145044  | 15145286  | 243 |
| chr11 | 106898273 | 106898515 | 243 |
| chr11 | 104200506 | 104200748 | 243 |
| chr11 | 14213117  | 14213359  | 243 |
| chr11 | 10652269  | 10652511  | 243 |
| chr11 | 5544218   | 5544460   | 243 |
| chr11 | 2804972   | 2805214   | 243 |
| chr10 | 83880620  | 83880862  | 243 |
| chr10 | 36613774  | 36614016  | 243 |
| chr10 | 29744483  | 29744725  | 243 |
| chr10 | 21614551  | 21614793  | 243 |
| chr1  | 146461148 | 146461390 | 243 |
| chr1  | 84789753  | 84789995  | 243 |
| chr1  | 68860028  | 68860270  | 243 |
| chr9  | 105814680 | 105814921 | 242 |
| chr9  | 89169930  | 89170171  | 242 |
| chr9  | 43787879  | 43788120  | 242 |
| chr9  | 43305070  | 43305311  | 242 |
| chr9  | 41974357  | 41974598  | 242 |
| chr8  | 77136483  | 77136724  | 242 |
| chr7  | 65260517  | 65260758  | 242 |
| chr7  | 43503919  | 43504160  | 242 |
| chr7  | 37440066  | 37440307  | 242 |
| chr6  | 122111202 | 122111443 | 242 |
| chr6  | 109917481 | 109917722 | 242 |
| chr5  | 115299291 | 115299532 | 242 |
| chr5  | 112087870 | 112088111 | 242 |

|       |               |           |     |
|-------|---------------|-----------|-----|
| chr5  | 111634406     | 111634647 | 242 |
| chr5  | 67238885      | 67239126  | 242 |
| chr5  | 60889434      | 60889675  | 242 |
| chr4  | 123975279     | 123975520 | 242 |
| chr4  | 123138921     | 123139162 | 242 |
| chr4  | 116731219     | 116731460 | 242 |
| chr4  | 95061316      | 95061557  | 242 |
| chr3  | 35505123      | 35505364  | 242 |
| chr3  | 30438141      | 30438382  | 242 |
| chr25 | 40196172      | 40196413  | 242 |
| chr25 | 36670457      | 36670698  | 242 |
| chr25 | 35451663      | 35451904  | 242 |
| chr25 | 18719928      | 18720169  | 242 |
| chr23 | 28820481      | 28820722  | 242 |
| chr23 | 19805717      | 19805958  | 242 |
| chr22 | 29660761      | 29661002  | 242 |
| chr22 | 563515 563756 |           | 242 |
| chr21 | 65877943      | 65878184  | 242 |
| chr19 | 54417299      | 54417540  | 242 |
| chr19 | 39353177      | 39353418  | 242 |
| chr19 | 30287459      | 30287700  | 242 |
| chr19 | 29793914      | 29794155  | 242 |
| chr18 | 48522065      | 48522306  | 242 |
| chr18 | 39927493      | 39927734  | 242 |
| chr18 | 33351070      | 33351311  | 242 |
| chr18 | 11758563      | 11758804  | 242 |
| chr17 | 75887852      | 75888093  | 242 |
| chr17 | 72948052      | 72948293  | 242 |
| chr16 | 61137202      | 61137443  | 242 |
| chr16 | 44930496      | 44930737  | 242 |
| chr16 | 43524997      | 43525238  | 242 |
| chr15 | 75337932      | 75338173  | 242 |
| chr15 | 28464792      | 28465033  | 242 |
| chr15 | 25538291      | 25538532  | 242 |
| chr15 | 22257590      | 22257831  | 242 |
| chr13 | 77313817      | 77314058  | 242 |
| chr13 | 76556602      | 76556843  | 242 |
| chr13 | 63414855      | 63415096  | 242 |
| chr13 | 58369261      | 58369502  | 242 |
| chr13 | 57288898      | 57289139  | 242 |
| chr13 | 53721967      | 53722208  | 242 |
| chr12 | 75160102      | 75160343  | 242 |
| chr12 | 14752007      | 14752248  | 242 |
| chr11 | 100425465     | 100425706 | 242 |
| chr11 | 27598795      | 27599036  | 242 |
| chr1  | 86359862      | 86360103  | 242 |
| chr1  | 84667196      | 84667437  | 242 |
| chr1  | 69523183      | 69523424  | 242 |
| chrX  | 18944034      | 18944274  | 241 |
| chr9  | 106451370     | 106451610 | 241 |

|       |           |           |     |
|-------|-----------|-----------|-----|
| chr9  | 106444391 | 106444631 | 241 |
| chr8  | 7704103   | 7704343   | 241 |
| chr7  | 51871847  | 51872087  | 241 |
| chr6  | 109466432 | 109466672 | 241 |
| chr6  | 103405598 | 103405838 | 241 |
| chr6  | 63060627  | 63060867  | 241 |
| chr6  | 5826740   | 5826980   | 241 |
| chr5  | 116834969 | 116835209 | 241 |
| chr5  | 111292650 | 111292890 | 241 |
| chr5  | 104024440 | 104024680 | 241 |
| chr5  | 28238276  | 28238516  | 241 |
| chr5  | 28237419  | 28237659  | 241 |
| chr4  | 108466046 | 108466286 | 241 |
| chr4  | 15802048  | 15802288  | 241 |
| chr4  | 12014625  | 12014865  | 241 |
| chr4  | 8749736   | 8749976   | 241 |
| chr3  | 115656029 | 115656269 | 241 |
| chr3  | 55927393  | 55927633  | 241 |
| chr3  | 33988476  | 33988716  | 241 |
| chr3  | 33086426  | 33086666  | 241 |
| chr29 | 49131625  | 49131865  | 241 |
| chr29 | 45588343  | 45588583  | 241 |
| chr29 | 9098029   | 9098269   | 241 |
| chr28 | 26587995  | 26588235  | 241 |
| chr26 | 44198844  | 44199084  | 241 |
| chr26 | 43832512  | 43832752  | 241 |
| chr26 | 39665188  | 39665428  | 241 |
| chr26 | 33830554  | 33830794  | 241 |
| chr26 | 32080363  | 32080603  | 241 |
| chr26 | 22009192  | 22009432  | 241 |
| chr26 | 18703940  | 18704180  | 241 |
| chr25 | 41537105  | 41537345  | 241 |
| chr25 | 8412277   | 8412517   | 241 |
| chr24 | 59016871  | 59017111  | 241 |
| chr24 | 20545966  | 20546206  | 241 |
| chr23 | 43267137  | 43267377  | 241 |
| chr23 | 33249380  | 33249620  | 241 |
| chr23 | 28295752  | 28295992  | 241 |
| chr23 | 7838911   | 7839151   | 241 |
| chr22 | 60386137  | 60386377  | 241 |
| chr21 | 27575388  | 27575628  | 241 |
| chr20 | 44294837  | 44295077  | 241 |
| chr2  | 120524210 | 120524450 | 241 |
| chr2  | 4593723   | 4593963   | 241 |
| chr19 | 12512094  | 12512334  | 241 |
| chr18 | 56873591  | 56873831  | 241 |
| chr18 | 25278378  | 25278618  | 241 |
| chr18 | 24114555  | 24114795  | 241 |
| chr18 | 23123637  | 23123877  | 241 |
| chr18 | 22767785  | 22768025  | 241 |

|       |           |           |     |
|-------|-----------|-----------|-----|
| chr18 | 6024861   | 6025101   | 241 |
| chr17 | 7826906   | 7827146   | 241 |
| chr16 | 74121885  | 74122125  | 241 |
| chr16 | 44650167  | 44650407  | 241 |
| chr16 | 39071618  | 39071858  | 241 |
| chr15 | 76154575  | 76154815  | 241 |
| chr15 | 29184918  | 29185158  | 241 |
| chr14 | 25997254  | 25997494  | 241 |
| chr13 | 38135805  | 38136045  | 241 |
| chr11 | 105388597 | 105388837 | 241 |
| chr11 | 31102935  | 31103175  | 241 |
| chr11 | 10297799  | 10298039  | 241 |
| chr11 | 5979482   | 5979722   | 241 |
| chr10 | 74919254  | 74919494  | 241 |
| chr1  | 148458832 | 148459072 | 241 |
| chr1  | 86357610  | 86357850  | 241 |
| chr5  | 117841234 | 117841473 | 240 |
| chr5  | 112898546 | 112898785 | 240 |
| chr5  | 30436342  | 30436581  | 240 |
| chr5  | 10775985  | 10776224  | 240 |
| chr4  | 95660601  | 95660840  | 240 |
| chr4  | 50926013  | 50926252  | 240 |
| chr3  | 105908990 | 105909229 | 240 |
| chr3  | 100031081 | 100031320 | 240 |
| chr29 | 46187257  | 46187496  | 240 |
| chr29 | 43016794  | 43017033  | 240 |
| chr29 | 38808642  | 38808881  | 240 |
| chr29 | 31650197  | 31650436  | 240 |
| chr29 | 17220903  | 17221142  | 240 |
| chr28 | 45181424  | 45181663  | 240 |
| chr28 | 3556627   | 3556866   | 240 |
| chr27 | 32834751  | 32834990  | 240 |
| chr26 | 48426357  | 48426596  | 240 |
| chr25 | 30383445  | 30383684  | 240 |
| chr24 | 60636621  | 60636860  | 240 |
| chr23 | 53036994  | 53037233  | 240 |
| chr23 | 51736442  | 51736681  | 240 |
| chr23 | 8268449   | 8268688   | 240 |
| chr22 | 54479011  | 54479250  | 240 |
| chr20 | 73444313  | 73444552  | 240 |
| chr2  | 134006400 | 134006639 | 240 |
| chr2  | 131584330 | 131584569 | 240 |
| chr2  | 111387982 | 111388221 | 240 |
| chr19 | 62017560  | 62017799  | 240 |
| chr19 | 52477564  | 52477803  | 240 |
| chr19 | 45221503  | 45221742  | 240 |
| chr19 | 41396168  | 41396407  | 240 |
| chr19 | 38922629  | 38922868  | 240 |
| chr19 | 38223516  | 38223755  | 240 |
| chr18 | 62607598  | 62607837  | 240 |

|       |               |           |     |
|-------|---------------|-----------|-----|
| chr18 | 56438980      | 56439219  | 240 |
| chr18 | 18071270      | 18071509  | 240 |
| chr17 | 70088506      | 70088745  | 240 |
| chr16 | 36793467      | 36793706  | 240 |
| chr16 | 3354814       | 3355053   | 240 |
| chr15 | 56114766      | 56115005  | 240 |
| chr15 | 54679542      | 54679781  | 240 |
| chr15 | 53568685      | 53568924  | 240 |
| chr15 | 30627352      | 30627591  | 240 |
| chr13 | 83630621      | 83630860  | 240 |
| chr11 | 48722129      | 48722368  | 240 |
| chr1  | 158503960     | 158504199 | 240 |
| chr1  | 1595823       | 1596062   | 240 |
| chr1  | 498400 498639 | 240       |     |
| chrX  | 82570727      | 82570965  | 239 |
| chrX  | 31382647      | 31382885  | 239 |
| chr9  | 106063475     | 106063713 | 239 |
| chr8  | 75978762      | 75979000  | 239 |
| chr7  | 15153691      | 15153929  | 239 |
| chr5  | 111693253     | 111693491 | 239 |
| chr5  | 61478353      | 61478591  | 239 |
| chr5  | 20854160      | 20854398  | 239 |
| chr3  | 127381806     | 127382044 | 239 |
| chr3  | 123563298     | 123563536 | 239 |
| chr3  | 108042268     | 108042506 | 239 |
| chr3  | 98612459      | 98612697  | 239 |
| chr3  | 22377949      | 22378187  | 239 |
| chr3  | 9010218       | 9010456   | 239 |
| chr29 | 37269688      | 37269926  | 239 |
| chr27 | 36327227      | 36327465  | 239 |
| chr27 | 26765275      | 26765513  | 239 |
| chr26 | 38106673      | 38106911  | 239 |
| chr25 | 40611017      | 40611255  | 239 |
| chr25 | 36444067      | 36444305  | 239 |
| chr25 | 33095554      | 33095792  | 239 |
| chr25 | 4840625       | 4840863   | 239 |
| chr24 | 47636127      | 47636365  | 239 |
| chr24 | 44183429      | 44183667  | 239 |
| chr23 | 51984288      | 51984526  | 239 |
| chr23 | 51805979      | 51806217  | 239 |
| chr23 | 27759941      | 27760179  | 239 |
| chr23 | 18003664      | 18003902  | 239 |
| chr23 | 13775169      | 13775407  | 239 |
| chr23 | 11785562      | 11785800  | 239 |
| chr23 | 8329098       | 8329336   | 239 |
| chr22 | 29379800      | 29380038  | 239 |
| chr21 | 57578894      | 57579132  | 239 |
| chr21 | 55790129      | 55790367  | 239 |
| chr21 | 31105132      | 31105370  | 239 |
| chr21 | 20839913      | 20840151  | 239 |

|       |           |           |     |
|-------|-----------|-----------|-----|
| chr2  | 110130595 | 110130833 | 239 |
| chr19 | 65220561  | 65220799  | 239 |
| chr19 | 23101018  | 23101256  | 239 |
| chr19 | 14973062  | 14973300  | 239 |
| chr19 | 7612526   | 7612764   | 239 |
| chr18 | 63710514  | 63710752  | 239 |
| chr18 | 53336627  | 53336865  | 239 |
| chr18 | 45493782  | 45494020  | 239 |
| chr18 | 13142217  | 13142455  | 239 |
| chr16 | 70095642  | 70095880  | 239 |
| chr16 | 2966552   | 2966790   | 239 |
| chr15 | 66111853  | 66112091  | 239 |
| chr15 | 32604263  | 32604501  | 239 |
| chr14 | 53211886  | 53212124  | 239 |
| chr13 | 75369929  | 75370167  | 239 |
| chr13 | 70294975  | 70295213  | 239 |
| chr13 | 64868218  | 64868456  | 239 |
| chr13 | 59639504  | 59639742  | 239 |
| chr13 | 42255252  | 42255490  | 239 |
| chr13 | 14955657  | 14955895  | 239 |
| chr12 | 24628112  | 24628350  | 239 |
| chr11 | 71024947  | 71025185  | 239 |
| chr11 | 50872596  | 50872834  | 239 |
| chr11 | 28531279  | 28531517  | 239 |
| chr10 | 73915285  | 73915523  | 239 |
| chr10 | 67037213  | 67037451  | 239 |
| chr10 | 36615340  | 36615578  | 239 |
| chr10 | 35891952  | 35892190  | 239 |
| chr10 | 5332027   | 5332265   | 239 |
| chr10 | 4534847   | 4535085   | 239 |
| chr1  | 146755297 | 146755535 | 239 |
| chr1  | 145648690 | 145648928 | 239 |
| chr1  | 74528532  | 74528770  | 239 |
| chrX  | 83027751  | 83027988  | 238 |
| chr9  | 104504962 | 104505199 | 238 |
| chr8  | 65140106  | 65140343  | 238 |
| chr6  | 122416056 | 122416293 | 238 |
| chr5  | 120497861 | 120498098 | 238 |
| chr3  | 105597035 | 105597272 | 238 |
| chr3  | 15966054  | 15966291  | 238 |
| chr29 | 51984743  | 51984980  | 238 |
| chr29 | 51250637  | 51250874  | 238 |
| chr29 | 36616234  | 36616471  | 238 |
| chr29 | 36547646  | 36547883  | 238 |
| chr29 | 25766512  | 25766749  | 238 |
| chr28 | 26456141  | 26456378  | 238 |
| chr26 | 20050492  | 20050729  | 238 |
| chr26 | 18819612  | 18819849  | 238 |
| chr26 | 17880260  | 17880497  | 238 |
| chr24 | 4233794   | 4234031   | 238 |

|       |           |           |     |
|-------|-----------|-----------|-----|
| chr23 | 45823207  | 45823444  | 238 |
| chr23 | 27825572  | 27825809  | 238 |
| chr23 | 11812419  | 11812656  | 238 |
| chr22 | 58508364  | 58508601  | 238 |
| chr22 | 55395620  | 55395857  | 238 |
| chr22 | 50853741  | 50853978  | 238 |
| chr22 | 17797932  | 17798169  | 238 |
| chr21 | 59515625  | 59515862  | 238 |
| chr21 | 19211566  | 19211803  | 238 |
| chr21 | 13710149  | 13710386  | 238 |
| chr20 | 67497824  | 67498061  | 238 |
| chr20 | 66817324  | 66817561  | 238 |
| chr2  | 138646327 | 138646564 | 238 |
| chr19 | 59541025  | 59541262  | 238 |
| chr19 | 49349626  | 49349863  | 238 |
| chr19 | 12302839  | 12303076  | 238 |
| chr18 | 55821327  | 55821564  | 238 |
| chr18 | 13562183  | 13562420  | 238 |
| chr18 | 12460501  | 12460738  | 238 |
| chr17 | 75719280  | 75719517  | 238 |
| chr17 | 66892397  | 66892634  | 238 |
| chr17 | 57789444  | 57789681  | 238 |
| chr17 | 57624444  | 57624681  | 238 |
| chr16 | 49362779  | 49363016  | 238 |
| chr16 | 46686172  | 46686409  | 238 |
| chr15 | 74471315  | 74471552  | 238 |
| chr15 | 44253956  | 44254193  | 238 |
| chr13 | 75190747  | 75190984  | 238 |
| chr13 | 66965496  | 66965733  | 238 |
| chr13 | 40809027  | 40809264  | 238 |
| chr12 | 82519477  | 82519714  | 238 |
| chr12 | 35332828  | 35333065  | 238 |
| chr12 | 34267128  | 34267365  | 238 |
| chr11 | 91664974  | 91665211  | 238 |
| chr11 | 82906186  | 82906423  | 238 |
| chr11 | 75175876  | 75176113  | 238 |
| chr11 | 7204803   | 7205040   | 238 |
| chr10 | 74584516  | 74584753  | 238 |
| chr10 | 70839249  | 70839486  | 238 |
| chr10 | 28952555  | 28952792  | 238 |
| chr10 | 25826681  | 25826918  | 238 |
| chr10 | 20875979  | 20876216  | 238 |
| chr10 | 4797149   | 4797386   | 238 |
| chr1  | 148224005 | 148224242 | 238 |
| chr1  | 55120701  | 55120938  | 238 |
| chr8  | 101705614 | 101705850 | 237 |
| chr7  | 81355114  | 81355350  | 237 |
| chr7  | 44193102  | 44193338  | 237 |
| chr6  | 74859716  | 74859952  | 237 |
| chr6  | 21994773  | 21995009  | 237 |

|       |           |           |     |
|-------|-----------|-----------|-----|
| chr5  | 113573785 | 113574021 | 237 |
| chr5  | 33008810  | 33009046  | 237 |
| chr4  | 118163071 | 118163307 | 237 |
| chr4  | 99061949  | 99062185  | 237 |
| chr4  | 98750172  | 98750408  | 237 |
| chr3  | 122458116 | 122458352 | 237 |
| chr3  | 105777888 | 105778124 | 237 |
| chr3  | 79685399  | 79685635  | 237 |
| chr29 | 44742800  | 44743036  | 237 |
| chr29 | 34900343  | 34900579  | 237 |
| chr29 | 17714118  | 17714354  | 237 |
| chr28 | 26090526  | 26090762  | 237 |
| chr28 | 12390247  | 12390483  | 237 |
| chr26 | 51365612  | 51365848  | 237 |
| chr26 | 48678032  | 48678268  | 237 |
| chr26 | 25412284  | 25412520  | 237 |
| chr26 | 21807903  | 21808139  | 237 |
| chr25 | 38828749  | 38828985  | 237 |
| chr25 | 3799972   | 3800208   | 237 |
| chr24 | 61061155  | 61061391  | 237 |
| chr24 | 1017979   | 1018215   | 237 |
| chr23 | 33270097  | 33270333  | 237 |
| chr23 | 18660505  | 18660741  | 237 |
| chr23 | 15587432  | 15587668  | 237 |
| chr21 | 34556110  | 34556346  | 237 |
| chr21 | 13700398  | 13700634  | 237 |
| chr20 | 3221339   | 3221575   | 237 |
| chr2  | 132392445 | 132392681 | 237 |
| chr19 | 45924662  | 45924898  | 237 |
| chr19 | 41466973  | 41467209  | 237 |
| chr19 | 26358517  | 26358753  | 237 |
| chr18 | 47692874  | 47693110  | 237 |
| chr18 | 23073687  | 23073923  | 237 |
| chr18 | 22375510  | 22375746  | 237 |
| chr17 | 69195832  | 69196068  | 237 |
| chr17 | 68119967  | 68120203  | 237 |
| chr17 | 64916684  | 64916920  | 237 |
| chr16 | 77495437  | 77495673  | 237 |
| chr16 | 47655624  | 47655860  | 237 |
| chr16 | 38556238  | 38556474  | 237 |
| chr16 | 2427467   | 2427703   | 237 |
| chr15 | 14581122  | 14581358  | 237 |
| chr15 | 11906289  | 11906525  | 237 |
| chr14 | 1947981   | 1948217   | 237 |
| chr13 | 76203993  | 76204229  | 237 |
| chr13 | 59437171  | 59437407  | 237 |
| chr13 | 58281160  | 58281396  | 237 |
| chr13 | 57413491  | 57413727  | 237 |
| chr13 | 36872856  | 36873092  | 237 |
| chr12 | 75161473  | 75161709  | 237 |



|       |           |           |     |
|-------|-----------|-----------|-----|
| chr12 | 33093366  | 33093602  | 237 |
| chr12 | 32831812  | 32832048  | 237 |
| chr12 | 32515210  | 32515446  | 237 |
| chr12 | 3676281   | 3676517   | 237 |
| chr11 | 110091341 | 110091577 | 237 |
| chr11 | 90413150  | 90413386  | 237 |
| chr11 | 90406191  | 90406427  | 237 |
| chr11 | 89516443  | 89516679  | 237 |
| chr11 | 83219946  | 83220182  | 237 |
| chr11 | 48377704  | 48377940  | 237 |
| chr1  | 146944108 | 146944344 | 237 |
| chr1  | 133335628 | 133335864 | 237 |
| chr1  | 84485191  | 84485427  | 237 |
| chr1  | 82842311  | 82842547  | 237 |
| chr1  | 81746385  | 81746621  | 237 |
| chr1  | 68755607  | 68755843  | 237 |
| chr1  | 2817871   | 2818107   | 237 |
| chrX  | 21086046  | 21086281  | 236 |
| chr9  | 106540180 | 106540415 | 236 |
| chr9  | 104932042 | 104932277 | 236 |
| chr9  | 51635122  | 51635357  | 236 |
| chr9  | 25147853  | 25148088  | 236 |
| chr8  | 108750249 | 108750484 | 236 |
| chr8  | 72187034  | 72187269  | 236 |
| chr7  | 50252215  | 50252450  | 236 |
| chr7  | 43726568  | 43726803  | 236 |
| chr7  | 28069167  | 28069402  | 236 |
| chr6  | 105466318 | 105466553 | 236 |
| chr5  | 124951865 | 124952100 | 236 |
| chr5  | 114977450 | 114977685 | 236 |
| chr5  | 112522194 | 112522429 | 236 |
| chr5  | 79225201  | 79225436  | 236 |
| chr5  | 35268454  | 35268689  | 236 |
| chr5  | 33596140  | 33596375  | 236 |
| chr5  | 10606716  | 10606951  | 236 |
| chr4  | 124315926 | 124316161 | 236 |
| chr3  | 109868950 | 109869185 | 236 |
| chr3  | 55120420  | 55120655  | 236 |
| chr3  | 45692190  | 45692425  | 236 |
| chr3  | 35938790  | 35939025  | 236 |
| chr3  | 15382355  | 15382590  | 236 |
| chr29 | 51370106  | 51370341  | 236 |
| chr29 | 49016092  | 49016327  | 236 |
| chr29 | 48706895  | 48707130  | 236 |
| chr29 | 38859254  | 38859489  | 236 |
| chr29 | 30828986  | 30829221  | 236 |
| chr28 | 42240387  | 42240622  | 236 |
| chr28 | 34074099  | 34074334  | 236 |
| chr27 | 47333889  | 47334124  | 236 |
| chr27 | 22111960  | 22112195  | 236 |

|       |               |           |     |
|-------|---------------|-----------|-----|
| chr26 | 35861320      | 35861555  | 236 |
| chr25 | 42201298      | 42201533  | 236 |
| chr24 | 48703495      | 48703730  | 236 |
| chr24 | 46419061      | 46419296  | 236 |
| chr24 | 39257676      | 39257911  | 236 |
| chr24 | 31396977      | 31397212  | 236 |
| chr24 | 1037365       | 1037600   | 236 |
| chr24 | 346984 347219 | 236       |     |
| chr23 | 52956970      | 52957205  | 236 |
| chr23 | 8309949       | 8310184   | 236 |
| chr22 | 55799439      | 55799674  | 236 |
| chr21 | 13995016      | 13995251  | 236 |
| chr20 | 5330433       | 5330668   | 236 |
| chr19 | 56596624      | 56596859  | 236 |
| chr19 | 54454790      | 54455025  | 236 |
| chr19 | 54159085      | 54159320  | 236 |
| chr19 | 45813254      | 45813489  | 236 |
| chr19 | 21596350      | 21596585  | 236 |
| chr18 | 64602077      | 64602312  | 236 |
| chr18 | 12102526      | 12102761  | 236 |
| chr18 | 11692742      | 11692977  | 236 |
| chr18 | 11404013      | 11404248  | 236 |
| chr18 | 6976031       | 6976266   | 236 |
| chr17 | 57633143      | 57633378  | 236 |
| chr16 | 68518134      | 68518369  | 236 |
| chr16 | 48279984      | 48280219  | 236 |
| chr16 | 3642755       | 3642990   | 236 |
| chr16 | 3350979       | 3351214   | 236 |
| chr15 | 75675018      | 75675253  | 236 |
| chr15 | 75173848      | 75174083  | 236 |
| chr15 | 40186861      | 40187096  | 236 |
| chr15 | 33154773      | 33155008  | 236 |
| chr15 | 25045421      | 25045656  | 236 |
| chr14 | 27183507      | 27183742  | 236 |
| chr13 | 73620921      | 73621156  | 236 |
| chr13 | 60183368      | 60183603  | 236 |
| chr13 | 54850893      | 54851128  | 236 |
| chr12 | 80236113      | 80236348  | 236 |
| chr12 | 21719663      | 21719898  | 236 |
| chr11 | 107396501     | 107396736 | 236 |
| chr11 | 107226915     | 107227150 | 236 |
| chr11 | 71462278      | 71462513  | 236 |
| chr10 | 77482826      | 77483061  | 236 |
| chr10 | 71625030      | 71625265  | 236 |
| chr10 | 70284406      | 70284641  | 236 |
| chr10 | 49007462      | 49007697  | 236 |
| chr10 | 35482038      | 35482273  | 236 |
| chr10 | 19507934      | 19508169  | 236 |
| chr10 | 17006762      | 17006997  | 236 |
| chr10 | 7575664       | 7575899   | 236 |

|       |               |           |     |
|-------|---------------|-----------|-----|
| chr1  | 144815503     | 144815738 | 236 |
| chr1  | 68329570      | 68329805  | 236 |
| chr9  | 77050315      | 77050549  | 235 |
| chr8  | 78679941      | 78680175  | 235 |
| chr8  | 72743823      | 72744057  | 235 |
| chr7  | 50430034      | 50430268  | 235 |
| chr7  | 48144802      | 48145036  | 235 |
| chr7  | 42189628      | 42189862  | 235 |
| chr7  | 2573048       | 2573282   | 235 |
| chr5  | 117581356     | 117581590 | 235 |
| chr4  | 80309652      | 80309886  | 235 |
| chr4  | 27476008      | 27476242  | 235 |
| chr3  | 121853888     | 121854122 | 235 |
| chr3  | 24436105      | 24436339  | 235 |
| chr3  | 18563567      | 18563801  | 235 |
| chr28 | 34738010      | 34738244  | 235 |
| chr28 | 34019089      | 34019323  | 235 |
| chr27 | 1047621       | 1047855   | 235 |
| chr26 | 44401248      | 44401482  | 235 |
| chr26 | 25381154      | 25381388  | 235 |
| chr26 | 21968346      | 21968580  | 235 |
| chr25 | 40591525      | 40591759  | 235 |
| chr25 | 30865364      | 30865598  | 235 |
| chr25 | 28653221      | 28653455  | 235 |
| chr24 | 20419326      | 20419560  | 235 |
| chr24 | 895558 895792 | 235       |     |
| chr23 | 48616007      | 48616241  | 235 |
| chr23 | 48487420      | 48487654  | 235 |
| chr23 | 15803333      | 15803567  | 235 |
| chr23 | 7890756       | 7890990   | 235 |
| chr22 | 59500318      | 59500552  | 235 |
| chr22 | 59333629      | 59333863  | 235 |
| chr22 | 48265497      | 48265731  | 235 |
| chr22 | 30102984      | 30103218  | 235 |
| chr21 | 61832305      | 61832539  | 235 |
| chr21 | 33971494      | 33971728  | 235 |
| chr21 | 32935957      | 32936191  | 235 |
| chr21 | 9705410       | 9705644   | 235 |
| chr20 | 70573537      | 70573771  | 235 |
| chr20 | 5927872       | 5928106   | 235 |
| chr2  | 126754576     | 126754810 | 235 |
| chr2  | 124523447     | 124523681 | 235 |
| chr2  | 122278361     | 122278595 | 235 |
| chr2  | 90501684      | 90501918  | 235 |
| chr2  | 5785507       | 5785741   | 235 |
| chr19 | 64714515      | 64714749  | 235 |
| chr19 | 47288385      | 47288619  | 235 |
| chr18 | 55068700      | 55068934  | 235 |
| chr18 | 11835114      | 11835348  | 235 |
| chr17 | 72701875      | 72702109  | 235 |

|       |               |           |     |
|-------|---------------|-----------|-----|
| chr17 | 69442907      | 69443141  | 235 |
| chr17 | 64602232      | 64602466  | 235 |
| chr17 | 62262686      | 62262920  | 235 |
| chr17 | 57224376      | 57224610  | 235 |
| chr15 | 74711462      | 74711696  | 235 |
| chr15 | 54025054      | 54025288  | 235 |
| chr15 | 26759115      | 26759349  | 235 |
| chr15 | 26751668      | 26751902  | 235 |
| chr15 | 19968395      | 19968629  | 235 |
| chr14 | 19537171      | 19537405  | 235 |
| chr13 | 79199139      | 79199373  | 235 |
| chr13 | 70067386      | 70067620  | 235 |
| chr13 | 66991943      | 66992177  | 235 |
| chr13 | 66499413      | 66499647  | 235 |
| chr13 | 38255260      | 38255494  | 235 |
| chr12 | 84249039      | 84249273  | 235 |
| chr12 | 74308237      | 74308471  | 235 |
| chr12 | 20070977      | 20071211  | 235 |
| chr11 | 51067093      | 51067327  | 235 |
| chr11 | 49457154      | 49457388  | 235 |
| chr10 | 103059246     | 103059480 | 235 |
| chr1  | 96197047      | 96197281  | 235 |
| chr1  | 81475340      | 81475574  | 235 |
| chr1  | 75719136      | 75719370  | 235 |
| chrX  | 60395589      | 60395822  | 234 |
| chrX  | 54352665      | 54352898  | 234 |
| chr9  | 105004931     | 105005164 | 234 |
| chr9  | 45505955      | 45506188  | 234 |
| chr8  | 93386404      | 93386637  | 234 |
| chr8  | 92989430      | 92989663  | 234 |
| chr8  | 86960264      | 86960497  | 234 |
| chr8  | 5354584       | 5354817   | 234 |
| chr7  | 60727843      | 60728076  | 234 |
| chr7  | 46272023      | 46272256  | 234 |
| chr7  | 38260057      | 38260290  | 234 |
| chr4  | 68089000      | 68089233  | 234 |
| chr3  | 120926887     | 120927120 | 234 |
| chr3  | 115942409     | 115942642 | 234 |
| chr3  | 99360812      | 99361045  | 234 |
| chr3  | 15789499      | 15789732  | 234 |
| chr3  | 7825426       | 7825659   | 234 |
| chr29 | 39297396      | 39297629  | 234 |
| chr29 | 37257738      | 37257971  | 234 |
| chr27 | 46972393      | 46972626  | 234 |
| chr27 | 39088768      | 39089001  | 234 |
| chr27 | 29094957      | 29095190  | 234 |
| chr27 | 17597571      | 17597804  | 234 |
| chr27 | 702632 702865 | 234       |     |
| chr26 | 48726387      | 48726620  | 234 |
| chr26 | 47759858      | 47760091  | 234 |

|       |           |           |     |
|-------|-----------|-----------|-----|
| chr26 | 43906822  | 43907055  | 234 |
| chr26 | 21783434  | 21783667  | 234 |
| chr26 | 14897197  | 14897430  | 234 |
| chr25 | 35689709  | 35689942  | 234 |
| chr25 | 33447021  | 33447254  | 234 |
| chr25 | 21037927  | 21038160  | 234 |
| chr24 | 60625331  | 60625564  | 234 |
| chr24 | 33786425  | 33786658  | 234 |
| chr23 | 52355103  | 52355336  | 234 |
| chr23 | 45419631  | 45419864  | 234 |
| chr23 | 30217832  | 30218065  | 234 |
| chr23 | 23745639  | 23745872  | 234 |
| chr22 | 58639864  | 58640097  | 234 |
| chr22 | 6486856   | 6487089   | 234 |
| chr21 | 65754385  | 65754618  | 234 |
| chr21 | 64523847  | 64524080  | 234 |
| chr21 | 25256819  | 25257052  | 234 |
| chr21 | 13981697  | 13981930  | 234 |
| chr21 | 9527555   | 9527788   | 234 |
| chr2  | 140112364 | 140112597 | 234 |
| chr2  | 138655765 | 138655998 | 234 |
| chr2  | 135597658 | 135597891 | 234 |
| chr2  | 111142577 | 111142810 | 234 |
| chr2  | 5742142   | 5742375   | 234 |
| chr19 | 63982986  | 63983219  | 234 |
| chr19 | 57660035  | 57660268  | 234 |
| chr19 | 56274516  | 56274749  | 234 |
| chr19 | 38320533  | 38320766  | 234 |
| chr19 | 21799538  | 21799771  | 234 |
| chr18 | 65127890  | 65128123  | 234 |
| chr18 | 62612761  | 62612994  | 234 |
| chr17 | 73170316  | 73170549  | 234 |
| chr17 | 70308669  | 70308902  | 234 |
| chr17 | 70298773  | 70299006  | 234 |
| chr17 | 66449864  | 66450097  | 234 |
| chr17 | 62052698  | 62052931  | 234 |
| chr17 | 18380502  | 18380735  | 234 |
| chr15 | 81150285  | 81150518  | 234 |
| chr15 | 36497191  | 36497424  | 234 |
| chr15 | 33141184  | 33141417  | 234 |
| chr15 | 29462113  | 29462346  | 234 |
| chr15 | 27447964  | 27448197  | 234 |
| chr15 | 27268210  | 27268443  | 234 |
| chr14 | 1229471   | 1229704   | 234 |
| chr13 | 66912232  | 66912465  | 234 |
| chr13 | 32405625  | 32405858  | 234 |
| chr13 | 11079117  | 11079350  | 234 |
| chr12 | 82551801  | 82552034  | 234 |
| chr12 | 34487387  | 34487620  | 234 |
| chr12 | 32222231  | 32222464  | 234 |

|       |               |           |     |
|-------|---------------|-----------|-----|
| chr11 | 107625138     | 107625371 | 234 |
| chr11 | 107537958     | 107538191 | 234 |
| chr11 | 26131097      | 26131330  | 234 |
| chr11 | 7256518       | 7256751   | 234 |
| chr10 | 90925832      | 90926065  | 234 |
| chr10 | 50597703      | 50597936  | 234 |
| chr10 | 46988155      | 46988388  | 234 |
| chr10 | 16859274      | 16859507  | 234 |
| chr10 | 15026081      | 15026314  | 234 |
| chr10 | 7491691       | 7491924   | 234 |
| chr1  | 160998238     | 160998471 | 234 |
| chr1  | 82872504      | 82872737  | 234 |
| chr9  | 106541436     | 106541668 | 233 |
| chr9  | 106379087     | 106379319 | 233 |
| chr9  | 90533639      | 90533871  | 233 |
| chr8  | 65723996      | 65724228  | 233 |
| chr8  | 7618296       | 7618528   | 233 |
| chr7  | 91310671      | 91310903  | 233 |
| chr7  | 81428143      | 81428375  | 233 |
| chr7  | 38998151      | 38998383  | 233 |
| chr7  | 16852804      | 16853036  | 233 |
| chr6  | 122156288     | 122156520 | 233 |
| chr6  | 118297145     | 118297377 | 233 |
| chr6  | 31773973      | 31774205  | 233 |
| chr5  | 122830943     | 122831175 | 233 |
| chr5  | 121069967     | 121070199 | 233 |
| chr5  | 1149310       | 1149542   | 233 |
| chr4  | 116386329     | 116386561 | 233 |
| chr3  | 122092912     | 122093144 | 233 |
| chr3  | 121435302     | 121435534 | 233 |
| chr3  | 113289435     | 113289667 | 233 |
| chr3  | 35677124      | 35677356  | 233 |
| chr3  | 22454099      | 22454331  | 233 |
| chr3  | 20437910      | 20438142  | 233 |
| chr29 | 51835483      | 51835715  | 233 |
| chr29 | 18199279      | 18199511  | 233 |
| chr27 | 847582 847814 |           | 233 |
| chr26 | 17832659      | 17832891  | 233 |
| chr25 | 39398996      | 39399228  | 233 |
| chr25 | 31852333      | 31852565  | 233 |
| chr25 | 21710949      | 21711181  | 233 |
| chr24 | 48588696      | 48588928  | 233 |
| chr24 | 41484385      | 41484617  | 233 |
| chr23 | 51685244      | 51685476  | 233 |
| chr23 | 49119983      | 49120215  | 233 |
| chr23 | 27533641      | 27533873  | 233 |
| chr23 | 18426642      | 18426874  | 233 |
| chr23 | 16097806      | 16098038  | 233 |
| chr23 | 7890231       | 7890463   | 233 |
| chr22 | 30099900      | 30100132  | 233 |

|       |               |           |     |
|-------|---------------|-----------|-----|
| chr20 | 27266873      | 27267105  | 233 |
| chr2  | 37562380      | 37562612  | 233 |
| chr2  | 23206053      | 23206285  | 233 |
| chr2  | 22294100      | 22294332  | 233 |
| chr19 | 49659064      | 49659296  | 233 |
| chr19 | 30538068      | 30538300  | 233 |
| chr18 | 54231767      | 54231999  | 233 |
| chr18 | 53017775      | 53018007  | 233 |
| chr18 | 34636742      | 34636974  | 233 |
| chr18 | 33317433      | 33317665  | 233 |
| chr18 | 5172195       | 5172427   | 233 |
| chr17 | 4149424       | 4149656   | 233 |
| chr16 | 74046881      | 74047113  | 233 |
| chr16 | 59877855      | 59878087  | 233 |
| chr16 | 48668793      | 48669025  | 233 |
| chr16 | 44986340      | 44986572  | 233 |
| chr16 | 40608861      | 40609093  | 233 |
| chr16 | 2138706       | 2138938   | 233 |
| chr16 | 944105 944337 | 233       |     |
| chr15 | 81377299      | 81377531  | 233 |
| chr15 | 81017451      | 81017683  | 233 |
| chr15 | 75316998      | 75317230  | 233 |
| chr15 | 22316949      | 22317181  | 233 |
| chr15 | 19855501      | 19855733  | 233 |
| chr14 | 58209415      | 58209647  | 233 |
| chr14 | 22093356      | 22093588  | 233 |
| chr14 | 7502318       | 7502550   | 233 |
| chr14 | 6993382       | 6993614   | 233 |
| chr14 | 842781 843013 | 233       |     |
| chr13 | 66874718      | 66874950  | 233 |
| chr13 | 65853701      | 65853933  | 233 |
| chr13 | 61297267      | 61297499  | 233 |
| chr13 | 42640239      | 42640471  | 233 |
| chr13 | 7539145       | 7539377   | 233 |
| chr12 | 72717342      | 72717574  | 233 |
| chr12 | 34891642      | 34891874  | 233 |
| chr12 | 9999153       | 9999385   | 233 |
| chr11 | 77723121      | 77723353  | 233 |
| chr11 | 48711103      | 48711335  | 233 |
| chr11 | 28816311      | 28816543  | 233 |
| chr11 | 10122775      | 10123007  | 233 |
| chr11 | 5532795       | 5533027   | 233 |
| chr10 | 13339050      | 13339282  | 233 |
| chr10 | 12744323      | 12744555  | 233 |
| chr10 | 2014456       | 2014688   | 233 |
| chr1  | 151466328     | 151466560 | 233 |
| chr9  | 70969354      | 70969585  | 232 |
| chr8  | 108823911     | 108824142 | 232 |
| chr8  | 73925619      | 73925850  | 232 |
| chr8  | 7602660       | 7602891   | 232 |

|       |               |           |     |
|-------|---------------|-----------|-----|
| chr7  | 44386647      | 44386878  | 232 |
| chr7  | 37118791      | 37119022  | 232 |
| chr7  | 13420719      | 13420950  | 232 |
| chr6  | 120756125     | 120756356 | 232 |
| chr6  | 99456284      | 99456515  | 232 |
| chr6  | 74019595      | 74019826  | 232 |
| chr5  | 118095162     | 118095393 | 232 |
| chr5  | 51810934      | 51811165  | 232 |
| chr5  | 33582818      | 33583049  | 232 |
| chr5  | 29154657      | 29154888  | 232 |
| chr5  | 28902190      | 28902421  | 232 |
| chr5  | 28821916      | 28822147  | 232 |
| chr4  | 122110441     | 122110672 | 232 |
| chr4  | 116047003     | 116047234 | 232 |
| chr3  | 115778906     | 115779137 | 232 |
| chr3  | 115686585     | 115686816 | 232 |
| chr3  | 115680343     | 115680574 | 232 |
| chr3  | 112383130     | 112383361 | 232 |
| chr3  | 111904165     | 111904396 | 232 |
| chr3  | 85723436      | 85723667  | 232 |
| chr3  | 25133152      | 25133383  | 232 |
| chr3  | 22973102      | 22973333  | 232 |
| chr3  | 10636460      | 10636691  | 232 |
| chr29 | 41868258      | 41868489  | 232 |
| chr29 | 33601910      | 33602141  | 232 |
| chr29 | 17705007      | 17705238  | 232 |
| chr29 | 547673 547904 |           | 232 |
| chr28 | 44514905      | 44515136  | 232 |
| chr28 | 34528312      | 34528543  | 232 |
| chr27 | 38660750      | 38660981  | 232 |
| chr26 | 48902142      | 48902373  | 232 |
| chr26 | 22362458      | 22362689  | 232 |
| chr26 | 14966685      | 14966916  | 232 |
| chr25 | 40205686      | 40205917  | 232 |
| chr25 | 36156309      | 36156540  | 232 |
| chr25 | 30670566      | 30670797  | 232 |
| chr24 | 1089602       | 1089833   | 232 |
| chr21 | 59738386      | 59738617  | 232 |
| chr21 | 47522632      | 47522863  | 232 |
| chr21 | 7609644       | 7609875   | 232 |
| chr20 | 67490611      | 67490842  | 232 |
| chr20 | 37487697      | 37487928  | 232 |
| chr20 | 6546291       | 6546522   | 232 |
| chr2  | 135078702     | 135078933 | 232 |
| chr2  | 114189719     | 114189950 | 232 |
| chr2  | 84790942      | 84791173  | 232 |
| chr19 | 38314315      | 38314546  | 232 |
| chr19 | 34594908      | 34595139  | 232 |
| chr19 | 33596755      | 33596986  | 232 |
| chr19 | 33296240      | 33296471  | 232 |



|       |               |           |     |
|-------|---------------|-----------|-----|
| chr18 | 65319166      | 65319397  | 232 |
| chr18 | 50987149      | 50987380  | 232 |
| chr18 | 7667368       | 7667599   | 232 |
| chr17 | 70268960      | 70269191  | 232 |
| chr17 | 70163096      | 70163327  | 232 |
| chr17 | 48231407      | 48231638  | 232 |
| chr17 | 47339528      | 47339759  | 232 |
| chr16 | 77720401      | 77720632  | 232 |
| chr16 | 77531933      | 77532164  | 232 |
| chr16 | 68162041      | 68162272  | 232 |
| chr16 | 49730074      | 49730305  | 232 |
| chr16 | 47218531      | 47218762  | 232 |
| chr16 | 41577829      | 41578060  | 232 |
| chr16 | 23644475      | 23644706  | 232 |
| chr15 | 64830645      | 64830876  | 232 |
| chr15 | 62746846      | 62747077  | 232 |
| chr13 | 41299444      | 41299675  | 232 |
| chr13 | 41222000      | 41222231  | 232 |
| chr13 | 39954305      | 39954536  | 232 |
| chr13 | 14725497      | 14725728  | 232 |
| chr12 | 22260545      | 22260776  | 232 |
| chr11 | 107973199     | 107973430 | 232 |
| chr11 | 90073957      | 90074188  | 232 |
| chr11 | 89064662      | 89064893  | 232 |
| chr11 | 84984058      | 84984289  | 232 |
| chr11 | 66455137      | 66455368  | 232 |
| chr11 | 10761644      | 10761875  | 232 |
| chr11 | 9092835       | 9093066   | 232 |
| chr11 | 5548677       | 5548908   | 232 |
| chr10 | 82294281      | 82294512  | 232 |
| chr10 | 79200014      | 79200245  | 232 |
| chr10 | 59220795      | 59221026  | 232 |
| chr10 | 35479973      | 35480204  | 232 |
| chr10 | 6903187       | 6903418   | 232 |
| chr1  | 156992481     | 156992712 | 232 |
| chr1  | 81427155      | 81427386  | 232 |
| chrX  | 54354965      | 54355195  | 231 |
| chr9  | 105475311     | 105475541 | 231 |
| chr9  | 90726099      | 90726329  | 231 |
| chr9  | 47239233      | 47239463  | 231 |
| chr9  | 47112172      | 47112402  | 231 |
| chr8  | 106655582     | 106655812 | 231 |
| chr8  | 60301153      | 60301383  | 231 |
| chr8  | 248461 248691 | 231       |     |
| chr7  | 37566012      | 37566242  | 231 |
| chr7  | 4977691       | 4977921   | 231 |
| chr6  | 106982057     | 106982287 | 231 |
| chr6  | 46669139      | 46669369  | 231 |
| chr5  | 122129286     | 122129516 | 231 |
| chr5  | 115310765     | 115310995 | 231 |

|       |           |           |     |
|-------|-----------|-----------|-----|
| chr5  | 111798121 | 111798351 | 231 |
| chr5  | 28236934  | 28237164  | 231 |
| chr4  | 103185947 | 103186177 | 231 |
| chr4  | 99037284  | 99037514  | 231 |
| chr4  | 71615174  | 71615404  | 231 |
| chr4  | 68283232  | 68283462  | 231 |
| chr4  | 57717449  | 57717679  | 231 |
| chr4  | 14445111  | 14445341  | 231 |
| chr3  | 126082080 | 126082310 | 231 |
| chr3  | 116147642 | 116147872 | 231 |
| chr3  | 115471426 | 115471656 | 231 |
| chr3  | 18513300  | 18513530  | 231 |
| chr3  | 13683633  | 13683863  | 231 |
| chr29 | 42429045  | 42429275  | 231 |
| chr29 | 37480379  | 37480609  | 231 |
| chr29 | 32547874  | 32548104  | 231 |
| chr29 | 17689791  | 17690021  | 231 |
| chr28 | 35509148  | 35509378  | 231 |
| chr27 | 39431954  | 39432184  | 231 |
| chr27 | 15091441  | 15091671  | 231 |
| chr26 | 51491364  | 51491594  | 231 |
| chr26 | 48570094  | 48570324  | 231 |
| chr26 | 22381119  | 22381349  | 231 |
| chr25 | 39230605  | 39230835  | 231 |
| chr24 | 58656965  | 58657195  | 231 |
| chr24 | 4163668   | 4163898   | 231 |
| chr23 | 49947521  | 49947751  | 231 |
| chr22 | 59585532  | 59585762  | 231 |
| chr22 | 56535068  | 56535298  | 231 |
| chr22 | 40907698  | 40907928  | 231 |
| chr22 | 32941423  | 32941653  | 231 |
| chr22 | 23097318  | 23097548  | 231 |
| chr22 | 16445700  | 16445930  | 231 |
| chr21 | 58802678  | 58802908  | 231 |
| chr21 | 9488098   | 9488328   | 231 |
| chr2  | 121158671 | 121158901 | 231 |
| chr2  | 75829574  | 75829804  | 231 |
| chr2  | 26997722  | 26997952  | 231 |
| chr2  | 21521142  | 21521372  | 231 |
| chr19 | 31782719  | 31782949  | 231 |
| chr19 | 21733867  | 21734097  | 231 |
| chr18 | 61980818  | 61981048  | 231 |
| chr18 | 54627870  | 54628100  | 231 |
| chr18 | 54349060  | 54349290  | 231 |
| chr18 | 17434796  | 17435026  | 231 |
| chr17 | 70643956  | 70644186  | 231 |
| chr17 | 49388596  | 49388826  | 231 |
| chr16 | 47456076  | 47456306  | 231 |
| chr15 | 73836961  | 73837191  | 231 |
| chr15 | 73776901  | 73777131  | 231 |

|       |           |           |     |
|-------|-----------|-----------|-----|
| chr15 | 73728174  | 73728404  | 231 |
| chr14 | 6390467   | 6390697   | 231 |
| chr14 | 3906124   | 3906354   | 231 |
| chr14 | 3415085   | 3415315   | 231 |
| chr13 | 75844976  | 75845206  | 231 |
| chr13 | 66985363  | 66985593  | 231 |
| chr13 | 61908351  | 61908581  | 231 |
| chr13 | 59597486  | 59597716  | 231 |
| chr13 | 54390441  | 54390671  | 231 |
| chr13 | 41740319  | 41740549  | 231 |
| chr11 | 110170359 | 110170589 | 231 |
| chr11 | 105652494 | 105652724 | 231 |
| chr11 | 65070318  | 65070548  | 231 |
| chr11 | 22450654  | 22450884  | 231 |
| chr10 | 88204253  | 88204483  | 231 |
| chr10 | 14956308  | 14956538  | 231 |
| chr1  | 74964346  | 74964576  | 231 |
| chr1  | 74578166  | 74578396  | 231 |
| chr1  | 74178049  | 74178279  | 231 |
| chr1  | 1748864   | 1749094   | 231 |
| chr9  | 100213757 | 100213986 | 230 |
| chr9  | 44277958  | 44278187  | 230 |
| chr8  | 44046076  | 44046305  | 230 |
| chr7  | 42768087  | 42768316  | 230 |
| chr7  | 19224823  | 19225052  | 230 |
| chr7  | 18795342  | 18795571  | 230 |
| chr5  | 120123008 | 120123237 | 230 |
| chr5  | 116900572 | 116900801 | 230 |
| chr5  | 78736376  | 78736605  | 230 |
| chr5  | 35309218  | 35309447  | 230 |
| chr5  | 10386085  | 10386314  | 230 |
| chr4  | 124001556 | 124001785 | 230 |
| chr4  | 95078555  | 95078784  | 230 |
| chr3  | 105923244 | 105923473 | 230 |
| chr3  | 75036441  | 75036670  | 230 |
| chr3  | 34784854  | 34785083  | 230 |
| chr3  | 33743726  | 33743955  | 230 |
| chr3  | 10630234  | 10630463  | 230 |
| chr29 | 46182938  | 46183167  | 230 |
| chr29 | 44658770  | 44658999  | 230 |
| chr29 | 44538281  | 44538510  | 230 |
| chr29 | 37089952  | 37090181  | 230 |
| chr28 | 35483275  | 35483504  | 230 |
| chr27 | 35367562  | 35367791  | 230 |
| chr27 | 34633236  | 34633465  | 230 |
| chr27 | 17889742  | 17889971  | 230 |
| chr27 | 1496671   | 1496900   | 230 |
| chr26 | 48311135  | 48311364  | 230 |
| chr26 | 47956216  | 47956445  | 230 |
| chr26 | 44382864  | 44383093  | 230 |

|       |               |           |     |
|-------|---------------|-----------|-----|
| chr25 | 43441114      | 43441343  | 230 |
| chr25 | 29115253      | 29115482  | 230 |
| chr25 | 14292313      | 14292542  | 230 |
| chr24 | 35491567      | 35491796  | 230 |
| chr24 | 35448638      | 35448867  | 230 |
| chr24 | 33902626      | 33902855  | 230 |
| chr24 | 1946482       | 1946711   | 230 |
| chr23 | 48791317      | 48791546  | 230 |
| chr23 | 28931831      | 28932060  | 230 |
| chr23 | 11072357      | 11072586  | 230 |
| chr22 | 23814529      | 23814758  | 230 |
| chr22 | 10800714      | 10800943  | 230 |
| chr21 | 27258051      | 27258280  | 230 |
| chr21 | 24233543      | 24233772  | 230 |
| chr20 | 74368910      | 74369139  | 230 |
| chr20 | 27302565      | 27302794  | 230 |
| chr20 | 3764881       | 3765110   | 230 |
| chr20 | 827597 827826 | 230       |     |
| chr2  | 132218688     | 132218917 | 230 |
| chr2  | 125931403     | 125931632 | 230 |
| chr2  | 111780645     | 111780874 | 230 |
| chr2  | 46206300      | 46206529  | 230 |
| chr2  | 21972581      | 21972810  | 230 |
| chr2  | 20763683      | 20763912  | 230 |
| chr19 | 63979773      | 63980002  | 230 |
| chr19 | 61142806      | 61143035  | 230 |
| chr19 | 58962736      | 58962965  | 230 |
| chr19 | 35374566      | 35374795  | 230 |
| chr19 | 29816121      | 29816350  | 230 |
| chr19 | 25517129      | 25517358  | 230 |
| chr18 | 64604407      | 64604636  | 230 |
| chr18 | 53573783      | 53574012  | 230 |
| chr18 | 39234423      | 39234652  | 230 |
| chr18 | 11938414      | 11938643  | 230 |
| chr17 | 72735984      | 72736213  | 230 |
| chr17 | 66496234      | 66496463  | 230 |
| chr16 | 24055881      | 24056110  | 230 |
| chr16 | 24028831      | 24029060  | 230 |
| chr16 | 3344830       | 3345059   | 230 |
| chr15 | 28281037      | 28281266  | 230 |
| chr15 | 26905147      | 26905376  | 230 |
| chr14 | 19633600      | 19633829  | 230 |
| chr13 | 80404129      | 80404358  | 230 |
| chr13 | 80029238      | 80029467  | 230 |
| chr13 | 72757153      | 72757382  | 230 |
| chr13 | 55273186      | 55273415  | 230 |
| chr13 | 41363893      | 41364122  | 230 |
| chr12 | 31468984      | 31469213  | 230 |
| chr12 | 17165984      | 17166213  | 230 |
| chr11 | 105646347     | 105646576 | 230 |

|       |               |           |     |
|-------|---------------|-----------|-----|
| chr11 | 104657752     | 104657981 | 230 |
| chr11 | 46742822      | 46743051  | 230 |
| chr10 | 9373830       | 9374059   | 230 |
| chr1  | 144085556     | 144085785 | 230 |
| chrX  | 65012202      | 65012430  | 229 |
| chr9  | 106993143     | 106993371 | 229 |
| chr9  | 90244009      | 90244237  | 229 |
| chr9  | 27129039      | 27129267  | 229 |
| chr8  | 89535009      | 89535237  | 229 |
| chr8  | 84640405      | 84640633  | 229 |
| chr8  | 63816262      | 63816490  | 229 |
| chr8  | 23033364      | 23033592  | 229 |
| chr8  | 1435588       | 1435816   | 229 |
| chr7  | 43297179      | 43297407  | 229 |
| chr7  | 16271324      | 16271552  | 229 |
| chr6  | 120837356     | 120837584 | 229 |
| chr5  | 123001421     | 123001649 | 229 |
| chr5  | 121233287     | 121233515 | 229 |
| chr5  | 115692047     | 115692275 | 229 |
| chr5  | 81386700      | 81386928  | 229 |
| chr5  | 26738760      | 26738988  | 229 |
| chr4  | 95995609      | 95995837  | 229 |
| chr4  | 76852048      | 76852276  | 229 |
| chr4  | 13673182      | 13673410  | 229 |
| chr3  | 126067616     | 126067844 | 229 |
| chr3  | 121147726     | 121147954 | 229 |
| chr3  | 106483081     | 106483309 | 229 |
| chr3  | 98135161      | 98135389  | 229 |
| chr3  | 84672816      | 84673044  | 229 |
| chr3  | 54032700      | 54032928  | 229 |
| chr3  | 25824204      | 25824432  | 229 |
| chr29 | 48717651      | 48717879  | 229 |
| chr29 | 36337815      | 36338043  | 229 |
| chr29 | 26813520      | 26813748  | 229 |
| chr28 | 32527367      | 32527595  | 229 |
| chr28 | 11350033      | 11350261  | 229 |
| chr27 | 15560717      | 15560945  | 229 |
| chr24 | 60548148      | 60548376  | 229 |
| chr24 | 56611790      | 56612018  | 229 |
| chr24 | 43593195      | 43593423  | 229 |
| chr24 | 38524188      | 38524416  | 229 |
| chr23 | 45420663      | 45420891  | 229 |
| chr23 | 27220617      | 27220845  | 229 |
| chr22 | 55884540      | 55884768  | 229 |
| chr22 | 50019475      | 50019703  | 229 |
| chr21 | 58662615      | 58662843  | 229 |
| chr20 | 913115 913343 |           | 229 |
| chr2  | 139303919     | 139304147 | 229 |
| chr2  | 127628100     | 127628328 | 229 |
| chr2  | 21548418      | 21548646  | 229 |

|       |               |           |     |
|-------|---------------|-----------|-----|
| chr19 | 59351391      | 59351619  | 229 |
| chr19 | 45184274      | 45184502  | 229 |
| chr19 | 41375224      | 41375452  | 229 |
| chr19 | 38322670      | 38322898  | 229 |
| chr19 | 37572464      | 37572692  | 229 |
| chr19 | 21645925      | 21646153  | 229 |
| chr19 | 14050934      | 14051162  | 229 |
| chr18 | 62685674      | 62685902  | 229 |
| chr18 | 57848172      | 57848400  | 229 |
| chr18 | 49260768      | 49260996  | 229 |
| chr18 | 45549877      | 45550105  | 229 |
| chr18 | 45292758      | 45292986  | 229 |
| chr18 | 5581749       | 5581977   | 229 |
| chr17 | 70264903      | 70265131  | 229 |
| chr17 | 68419257      | 68419485  | 229 |
| chr17 | 63268186      | 63268414  | 229 |
| chr17 | 60740428      | 60740656  | 229 |
| chr17 | 55496386      | 55496614  | 229 |
| chr16 | 48113048      | 48113276  | 229 |
| chr16 | 44694382      | 44694610  | 229 |
| chr16 | 44385573      | 44385801  | 229 |
| chr16 | 41535510      | 41535738  | 229 |
| chr16 | 24073145      | 24073373  | 229 |
| chr16 | 2351537       | 2351765   | 229 |
| chr15 | 30084185      | 30084413  | 229 |
| chr14 | 52282994      | 52283222  | 229 |
| chr13 | 81082968      | 81083196  | 229 |
| chr13 | 41008291      | 41008519  | 229 |
| chr12 | 82290767      | 82290995  | 229 |
| chr12 | 74579678      | 74579906  | 229 |
| chr12 | 32560465      | 32560693  | 229 |
| chr12 | 31091529      | 31091757  | 229 |
| chr11 | 101618506     | 101618734 | 229 |
| chr11 | 98529557      | 98529785  | 229 |
| chr11 | 85335006      | 85335234  | 229 |
| chr11 | 43179383      | 43179611  | 229 |
| chr11 | 26871829      | 26872057  | 229 |
| chr11 | 2851729       | 2851957   | 229 |
| chr11 | 1389877       | 1390105   | 229 |
| chr11 | 829009 829237 | 229       |     |
| chr10 | 17394205      | 17394433  | 229 |
| chr10 | 11810605      | 11810833  | 229 |
| chr1  | 147082437     | 147082665 | 229 |
| chr1  | 73796510      | 73796738  | 229 |
| chrX  | 77005090      | 77005317  | 228 |
| chrX  | 52962665      | 52962892  | 228 |
| chr9  | 106721929     | 106722156 | 228 |
| chr9  | 100049928     | 100050155 | 228 |
| chr9  | 28617290      | 28617517  | 228 |
| chr8  | 74075750      | 74075977  | 228 |

|       |               |           |     |
|-------|---------------|-----------|-----|
| chr8  | 61158883      | 61159110  | 228 |
| chr8  | 265876 266103 |           | 228 |
| chr7  | 42220379      | 42220606  | 228 |
| chr7  | 20132544      | 20132771  | 228 |
| chr7  | 17983958      | 17984185  | 228 |
| chr6  | 117913936     | 117914163 | 228 |
| chr6  | 107055485     | 107055712 | 228 |
| chr6  | 106900513     | 106900740 | 228 |
| chr5  | 120137421     | 120137648 | 228 |
| chr5  | 112089724     | 112089951 | 228 |
| chr5  | 29931901      | 29932128  | 228 |
| chr4  | 108663209     | 108663436 | 228 |
| chr4  | 99709034      | 99709261  | 228 |
| chr4  | 89785114      | 89785341  | 228 |
| chr4  | 13352642      | 13352869  | 228 |
| chr3  | 116125074     | 116125301 | 228 |
| chr3  | 36032538      | 36032765  | 228 |
| chr3  | 26152091      | 26152318  | 228 |
| chr3  | 10573072      | 10573299  | 228 |
| chr29 | 51836150      | 51836377  | 228 |
| chr29 | 27739499      | 27739726  | 228 |
| chr26 | 39221302      | 39221529  | 228 |
| chr26 | 18173561      | 18173788  | 228 |
| chr26 | 15989525      | 15989752  | 228 |
| chr25 | 37258779      | 37259006  | 228 |
| chr25 | 33265753      | 33265980  | 228 |
| chr25 | 28480249      | 28480476  | 228 |
| chr25 | 26694118      | 26694345  | 228 |
| chr25 | 24016693      | 24016920  | 228 |
| chr24 | 2831267       | 2831494   | 228 |
| chr23 | 38505682      | 38505909  | 228 |
| chr23 | 8292883       | 8293110   | 228 |
| chr22 | 60278240      | 60278467  | 228 |
| chr22 | 59495494      | 59495721  | 228 |
| chr22 | 58651625      | 58651852  | 228 |
| chr21 | 65504396      | 65504623  | 228 |
| chr21 | 23227359      | 23227586  | 228 |
| chr21 | 9484265       | 9484492   | 228 |
| chr20 | 73542652      | 73542879  | 228 |
| chr2  | 138452516     | 138452743 | 228 |
| chr2  | 132318405     | 132318632 | 228 |
| chr2  | 125761670     | 125761897 | 228 |
| chr2  | 111426153     | 111426380 | 228 |
| chr2  | 110199271     | 110199498 | 228 |
| chr2  | 25786728      | 25786955  | 228 |
| chr19 | 56452958      | 56453185  | 228 |
| chr19 | 43626608      | 43626835  | 228 |
| chr19 | 43074631      | 43074858  | 228 |
| chr19 | 40300468      | 40300695  | 228 |
| chr19 | 39397994      | 39398221  | 228 |

|       |               |           |     |
|-------|---------------|-----------|-----|
| chr19 | 30771123      | 30771350  | 228 |
| chr19 | 26172954      | 26173181  | 228 |
| chr18 | 49495876      | 49496103  | 228 |
| chr18 | 23209354      | 23209581  | 228 |
| chr17 | 57866453      | 57866680  | 228 |
| chr17 | 26900621      | 26900848  | 228 |
| chr16 | 71877290      | 71877517  | 228 |
| chr16 | 68181512      | 68181739  | 228 |
| chr16 | 54649397      | 54649624  | 228 |
| chr16 | 49381197      | 49381424  | 228 |
| chr16 | 34792230      | 34792457  | 228 |
| chr16 | 3588546       | 3588773   | 228 |
| chr15 | 74467122      | 74467349  | 228 |
| chr15 | 24194559      | 24194786  | 228 |
| chr15 | 420169 420396 | 228       |     |
| chr14 | 60931364      | 60931591  | 228 |
| chr13 | 59018372      | 59018599  | 228 |
| chr13 | 58602778      | 58603005  | 228 |
| chr13 | 35570866      | 35571093  | 228 |
| chr13 | 14724209      | 14724436  | 228 |
| chr12 | 32875688      | 32875915  | 228 |
| chr12 | 32640304      | 32640531  | 228 |
| chr11 | 107693858     | 107694085 | 228 |
| chr11 | 104464981     | 104465208 | 228 |
| chr11 | 100274008     | 100274235 | 228 |
| chr11 | 93710992      | 93711219  | 228 |
| chr11 | 47886851      | 47887078  | 228 |
| chr10 | 90458583      | 90458810  | 228 |
| chr10 | 84054525      | 84054752  | 228 |
| chr1  | 152358594     | 152358821 | 228 |
| chr1  | 123078823     | 123079050 | 228 |
| chr1  | 72593035      | 72593262  | 228 |
| chr9  | 43811702      | 43811928  | 227 |
| chr9  | 12559566      | 12559792  | 227 |
| chr9  | 9705630       | 9705856   | 227 |
| chr8  | 108252125     | 108252351 | 227 |
| chr8  | 106686447     | 106686673 | 227 |
| chr8  | 72143819      | 72144045  | 227 |
| chr8  | 61121113      | 61121339  | 227 |
| chr7  | 50475684      | 50475910  | 227 |
| chr7  | 44940665      | 44940891  | 227 |
| chr7  | 15045218      | 15045444  | 227 |
| chr7  | 5788770       | 5788996   | 227 |
| chr5  | 117173560     | 117173786 | 227 |
| chr5  | 64829691      | 64829917  | 227 |
| chr5  | 6951959       | 6952185   | 227 |
| chr5  | 1647114       | 1647340   | 227 |
| chr4  | 121391515     | 121391741 | 227 |
| chr4  | 73690874      | 73691100  | 227 |
| chr4  | 72570440      | 72570666  | 227 |



|       |           |           |     |
|-------|-----------|-----------|-----|
| chr3  | 116928864 | 116929090 | 227 |
| chr3  | 89151508  | 89151734  | 227 |
| chr3  | 35582348  | 35582574  | 227 |
| chr29 | 37383266  | 37383492  | 227 |
| chr29 | 12615180  | 12615406  | 227 |
| chr29 | 7661107   | 7661333   | 227 |
| chr26 | 51205645  | 51205871  | 227 |
| chr26 | 22809720  | 22809946  | 227 |
| chr25 | 40405168  | 40405394  | 227 |
| chr25 | 39337736  | 39337962  | 227 |
| chr25 | 33474261  | 33474487  | 227 |
| chr25 | 11186608  | 11186834  | 227 |
| chr25 | 4361992   | 4362218   | 227 |
| chr25 | 2538508   | 2538734   | 227 |
| chr24 | 56579167  | 56579393  | 227 |
| chr24 | 51568722  | 51568948  | 227 |
| chr24 | 51215901  | 51216127  | 227 |
| chr24 | 44145038  | 44145264  | 227 |
| chr24 | 40204031  | 40204257  | 227 |
| chr24 | 3206146   | 3206372   | 227 |
| chr23 | 32671042  | 32671268  | 227 |
| chr23 | 30527438  | 30527664  | 227 |
| chr23 | 7450571   | 7450797   | 227 |
| chr22 | 39857087  | 39857313  | 227 |
| chr22 | 37787490  | 37787716  | 227 |
| chr20 | 25855969  | 25856195  | 227 |
| chr20 | 8692786   | 8693012   | 227 |
| chr20 | 6781570   | 6781796   | 227 |
| chr2  | 136510292 | 136510518 | 227 |
| chr19 | 59382499  | 59382725  | 227 |
| chr19 | 55997291  | 55997517  | 227 |
| chr19 | 43067422  | 43067648  | 227 |
| chr19 | 38554711  | 38554937  | 227 |
| chr19 | 24370967  | 24371193  | 227 |
| chr19 | 14565540  | 14565766  | 227 |
| chr18 | 51641651  | 51641877  | 227 |
| chr18 | 48517095  | 48517321  | 227 |
| chr18 | 45989932  | 45990158  | 227 |
| chr18 | 43602315  | 43602541  | 227 |
| chr18 | 41235441  | 41235667  | 227 |
| chr18 | 39496660  | 39496886  | 227 |
| chr18 | 33823033  | 33823259  | 227 |
| chr18 | 9537933   | 9538159   | 227 |
| chr18 | 3658552   | 3658778   | 227 |
| chr17 | 73141420  | 73141646  | 227 |
| chr17 | 48389554  | 48389780  | 227 |
| chr17 | 47893998  | 47894224  | 227 |
| chr17 | 6461747   | 6461973   | 227 |
| chr16 | 71567692  | 71567918  | 227 |
| chr16 | 68792166  | 68792392  | 227 |

|       |           |           |     |
|-------|-----------|-----------|-----|
| chr16 | 47559851  | 47560077  | 227 |
| chr16 | 44077857  | 44078083  | 227 |
| chr16 | 2005765   | 2005991   | 227 |
| chr15 | 76431295  | 76431521  | 227 |
| chr15 | 74939990  | 74940216  | 227 |
| chr15 | 64748545  | 64748771  | 227 |
| chr15 | 64200735  | 64200961  | 227 |
| chr15 | 45842532  | 45842758  | 227 |
| chr15 | 30727669  | 30727895  | 227 |
| chr15 | 28571000  | 28571226  | 227 |
| chr15 | 27276037  | 27276263  | 227 |
| chr15 | 20888459  | 20888685  | 227 |
| chr14 | 21227940  | 21228166  | 227 |
| chr14 | 7753604   | 7753830   | 227 |
| chr13 | 75510392  | 75510618  | 227 |
| chr13 | 72846129  | 72846355  | 227 |
| chr13 | 70294113  | 70294339  | 227 |
| chr13 | 58630320  | 58630546  | 227 |
| chr13 | 17756563  | 17756789  | 227 |
| chr12 | 85024322  | 85024548  | 227 |
| chr12 | 32135699  | 32135925  | 227 |
| chr12 | 15301295  | 15301521  | 227 |
| chr11 | 68756057  | 68756283  | 227 |
| chr11 | 14125764  | 14125990  | 227 |
| chr11 | 2327950   | 2328176   | 227 |
| chr10 | 103017338 | 103017564 | 227 |
| chr10 | 60557128  | 60557354  | 227 |
| chr10 | 48758594  | 48758820  | 227 |
| chr10 | 16866623  | 16866849  | 227 |
| chr1  | 156732632 | 156732858 | 227 |
| chr1  | 146934290 | 146934516 | 227 |
| chr1  | 128256414 | 128256640 | 227 |
| chr1  | 104695365 | 104695591 | 227 |
| chr1  | 88212185  | 88212411  | 227 |
| chr1  | 83115310  | 83115536  | 227 |
| chr1  | 81399601  | 81399827  | 227 |
| chrX  | 17127551  | 17127776  | 226 |
| chr9  | 107566000 | 107566225 | 226 |
| chr9  | 105538257 | 105538482 | 226 |
| chr9  | 78226565  | 78226790  | 226 |
| chr9  | 25003512  | 25003737  | 226 |
| chr8  | 116740563 | 116740788 | 226 |
| chr7  | 43864728  | 43864953  | 226 |
| chr5  | 122185651 | 122185876 | 226 |
| chr5  | 109195105 | 109195330 | 226 |
| chr5  | 33009404  | 33009629  | 226 |
| chr5  | 27353582  | 27353807  | 226 |
| chr4  | 124314696 | 124314921 | 226 |
| chr4  | 106593191 | 106593416 | 226 |
| chr4  | 104898326 | 104898551 | 226 |

|       |           |           |     |
|-------|-----------|-----------|-----|
| chr4  | 98773187  | 98773412  | 226 |
| chr4  | 95476020  | 95476245  | 226 |
| chr4  | 72741511  | 72741736  | 226 |
| chr4  | 15772075  | 15772300  | 226 |
| chr3  | 122280795 | 122281020 | 226 |
| chr3  | 113392765 | 113392990 | 226 |
| chr3  | 99100625  | 99100850  | 226 |
| chr3  | 34025228  | 34025453  | 226 |
| chr3  | 8724667   | 8724892   | 226 |
| chr3  | 4357737   | 4357962   | 226 |
| chr29 | 51368971  | 51369196  | 226 |
| chr29 | 48918240  | 48918465  | 226 |
| chr29 | 48832188  | 48832413  | 226 |
| chr29 | 36923353  | 36923578  | 226 |
| chr29 | 29943352  | 29943577  | 226 |
| chr28 | 40369300  | 40369525  | 226 |
| chr27 | 40824447  | 40824672  | 226 |
| chr27 | 1366939   | 1367164   | 226 |
| chr26 | 50824061  | 50824286  | 226 |
| chr26 | 43953447  | 43953672  | 226 |
| chr26 | 39261218  | 39261443  | 226 |
| chr26 | 37473968  | 37474193  | 226 |
| chr26 | 31373645  | 31373870  | 226 |
| chr25 | 42186723  | 42186948  | 226 |
| chr25 | 39175635  | 39175860  | 226 |
| chr25 | 4069290   | 4069515   | 226 |
| chr25 | 3034087   | 3034312   | 226 |
| chr24 | 59466312  | 59466537  | 226 |
| chr23 | 14796156  | 14796381  | 226 |
| chr23 | 13448457  | 13448682  | 226 |
| chr22 | 58509026  | 58509251  | 226 |
| chr22 | 55779119  | 55779344  | 226 |
| chr22 | 53945889  | 53946114  | 226 |
| chr22 | 36141581  | 36141806  | 226 |
| chr21 | 68833139  | 68833364  | 226 |
| chr21 | 65878706  | 65878931  | 226 |
| chr21 | 59309121  | 59309346  | 226 |
| chr21 | 26163636  | 26163861  | 226 |
| chr21 | 13914567  | 13914792  | 226 |
| chr20 | 73445293  | 73445518  | 226 |
| chr20 | 27303131  | 27303356  | 226 |
| chr20 | 8826924   | 8827149   | 226 |
| chr20 | 3205280   | 3205505   | 226 |
| chr20 | 3193639   | 3193864   | 226 |
| chr2  | 136771652 | 136771877 | 226 |
| chr2  | 131046752 | 131046977 | 226 |
| chr2  | 130975024 | 130975249 | 226 |
| chr2  | 97379689  | 97379914  | 226 |
| chr2  | 76631351  | 76631576  | 226 |
| chr2  | 67371388  | 67371613  | 226 |

|       |               |           |     |
|-------|---------------|-----------|-----|
| chr2  | 24966914      | 24967139  | 226 |
| chr19 | 63504327      | 63504552  | 226 |
| chr19 | 62584753      | 62584978  | 226 |
| chr19 | 59564828      | 59565053  | 226 |
| chr19 | 54626067      | 54626292  | 226 |
| chr19 | 44961191      | 44961416  | 226 |
| chr19 | 15433997      | 15434222  | 226 |
| chr18 | 53502697      | 53502922  | 226 |
| chr18 | 50842377      | 50842602  | 226 |
| chr18 | 45508924      | 45509149  | 226 |
| chr18 | 23895249      | 23895474  | 226 |
| chr17 | 75546217      | 75546442  | 226 |
| chr17 | 66175255      | 66175480  | 226 |
| chr16 | 61279331      | 61279556  | 226 |
| chr16 | 53916282      | 53916507  | 226 |
| chr15 | 77744381      | 77744606  | 226 |
| chr13 | 77739491      | 77739716  | 226 |
| chr13 | 77275007      | 77275232  | 226 |
| chr13 | 73122046      | 73122271  | 226 |
| chr13 | 72921804      | 72922029  | 226 |
| chr13 | 72260015      | 72260240  | 226 |
| chr13 | 55531777      | 55532002  | 226 |
| chr13 | 37880149      | 37880374  | 226 |
| chr13 | 29975596      | 29975821  | 226 |
| chr13 | 11405365      | 11405590  | 226 |
| chr13 | 450754 450979 | 226       | 226 |
| chr12 | 34513105      | 34513330  | 226 |
| chr12 | 33704105      | 33704330  | 226 |
| chr12 | 16855232      | 16855457  | 226 |
| chr11 | 81396331      | 81396556  | 226 |
| chr11 | 76407338      | 76407563  | 226 |
| chr11 | 28543501      | 28543726  | 226 |
| chr10 | 102792226     | 102792451 | 226 |
| chr10 | 88182240      | 88182465  | 226 |
| chr10 | 71265567      | 71265792  | 226 |
| chr10 | 37444375      | 37444600  | 226 |
| chr10 | 21862909      | 21863134  | 226 |
| chr1  | 154204647     | 154204872 | 226 |
| chr1  | 146404921     | 146405146 | 226 |
| chrX  | 47480919      | 47481143  | 225 |
| chr9  | 106861610     | 106861834 | 225 |
| chr9  | 100062267     | 100062491 | 225 |
| chr9  | 27099622      | 27099846  | 225 |
| chr8  | 63669629      | 63669853  | 225 |
| chr8  | 7741933       | 7742157   | 225 |
| chr7  | 50565425      | 50565649  | 225 |
| chr6  | 106896416     | 106896640 | 225 |
| chr6  | 17413420      | 17413644  | 225 |
| chr5  | 121409735     | 121409959 | 225 |
| chr5  | 115047098     | 115047322 | 225 |

|       |               |           |     |
|-------|---------------|-----------|-----|
| chr5  | 91482258      | 91482482  | 225 |
| chr5  | 28897468      | 28897692  | 225 |
| chr4  | 124225590     | 124225814 | 225 |
| chr4  | 115521162     | 115521386 | 225 |
| chr4  | 96345998      | 96346222  | 225 |
| chr4  | 96129134      | 96129358  | 225 |
| chr4  | 68038697      | 68038921  | 225 |
| chr4  | 27443730      | 27443954  | 225 |
| chr3  | 125107667     | 125107891 | 225 |
| chr3  | 116151933     | 116152157 | 225 |
| chr3  | 111672269     | 111672493 | 225 |
| chr3  | 110315337     | 110315561 | 225 |
| chr3  | 109440066     | 109440290 | 225 |
| chr3  | 62934302      | 62934526  | 225 |
| chr3  | 28680035      | 28680259  | 225 |
| chr3  | 25791522      | 25791746  | 225 |
| chr3  | 22575893      | 22576117  | 225 |
| chr29 | 50582417      | 50582641  | 225 |
| chr29 | 12803650      | 12803874  | 225 |
| chr28 | 43704410      | 43704634  | 225 |
| chr28 | 26516277      | 26516501  | 225 |
| chr26 | 50809417      | 50809641  | 225 |
| chr26 | 43037720      | 43037944  | 225 |
| chr26 | 23875096      | 23875320  | 225 |
| chr25 | 30875828      | 30876052  | 225 |
| chr25 | 27208232      | 27208456  | 225 |
| chr25 | 3063765       | 3063989   | 225 |
| chr24 | 1131987       | 1132211   | 225 |
| chr24 | 1025294       | 1025518   | 225 |
| chr23 | 25498513      | 25498737  | 225 |
| chr23 | 17879518      | 17879742  | 225 |
| chr23 | 14811979      | 14812203  | 225 |
| chr22 | 56517515      | 56517739  | 225 |
| chr22 | 42536145      | 42536369  | 225 |
| chr22 | 731060 731284 | 225       |     |
| chr21 | 13902069      | 13902293  | 225 |
| chr2  | 127638680     | 127638904 | 225 |
| chr2  | 123887040     | 123887264 | 225 |
| chr2  | 110529322     | 110529546 | 225 |
| chr2  | 99036283      | 99036507  | 225 |
| chr2  | 91066035      | 91066259  | 225 |
| chr2  | 23186835      | 23187059  | 225 |
| chr2  | 22501192      | 22501416  | 225 |
| chr19 | 60910777      | 60911001  | 225 |
| chr19 | 60825845      | 60826069  | 225 |
| chr19 | 56595752      | 56595976  | 225 |
| chr19 | 45804255      | 45804479  | 225 |
| chr19 | 40472662      | 40472886  | 225 |
| chr19 | 39525417      | 39525641  | 225 |
| chr19 | 39347751      | 39347975  | 225 |

|       |           |           |     |
|-------|-----------|-----------|-----|
| chr19 | 37886998  | 37887222  | 225 |
| chr19 | 34711968  | 34712192  | 225 |
| chr19 | 23095501  | 23095725  | 225 |
| chr19 | 21700257  | 21700481  | 225 |
| chr19 | 14921882  | 14922106  | 225 |
| chr19 | 12304701  | 12304925  | 225 |
| chr18 | 65620268  | 65620492  | 225 |
| chr18 | 64337421  | 64337645  | 225 |
| chr18 | 64309174  | 64309398  | 225 |
| chr18 | 54113850  | 54114074  | 225 |
| chr18 | 50945590  | 50945814  | 225 |
| chr17 | 75521217  | 75521441  | 225 |
| chr17 | 69834540  | 69834764  | 225 |
| chr16 | 68783046  | 68783270  | 225 |
| chr16 | 59076148  | 59076372  | 225 |
| chr16 | 57596877  | 57597101  | 225 |
| chr16 | 51309528  | 51309752  | 225 |
| chr16 | 48793101  | 48793325  | 225 |
| chr16 | 47605852  | 47606076  | 225 |
| chr16 | 2056599   | 2056823   | 225 |
| chr15 | 62752279  | 62752503  | 225 |
| chr15 | 31971247  | 31971471  | 225 |
| chr15 | 28055833  | 28056057  | 225 |
| chr15 | 24542304  | 24542528  | 225 |
| chr14 | 7783770   | 7783994   | 225 |
| chr13 | 62783258  | 62783482  | 225 |
| chr13 | 58371349  | 58371573  | 225 |
| chr13 | 22184611  | 22184835  | 225 |
| chr13 | 22153789  | 22154013  | 225 |
| chr13 | 6942342   | 6942566   | 225 |
| chr12 | 82311959  | 82312183  | 225 |
| chr12 | 34357816  | 34358040  | 225 |
| chr12 | 31258958  | 31259182  | 225 |
| chr12 | 14703046  | 14703270  | 225 |
| chr11 | 108338831 | 108339055 | 225 |
| chr11 | 107396208 | 107396432 | 225 |
| chr11 | 84585526  | 84585750  | 225 |
| chr11 | 81541665  | 81541889  | 225 |
| chr11 | 81281503  | 81281727  | 225 |
| chr11 | 46228363  | 46228587  | 225 |
| chr11 | 44918272  | 44918496  | 225 |
| chr10 | 66619603  | 66619827  | 225 |
| chr10 | 23732494  | 23732718  | 225 |
| chr10 | 21007647  | 21007871  | 225 |
| chr10 | 16863791  | 16864015  | 225 |
| chr1  | 138195434 | 138195658 | 225 |
| chr1  | 74606243  | 74606467  | 225 |
| chr9  | 106359086 | 106359309 | 224 |
| chr9  | 105858079 | 105858302 | 224 |
| chr9  | 90582623  | 90582846  | 224 |

|       |           |           |     |
|-------|-----------|-----------|-----|
| chr9  | 90544489  | 90544712  | 224 |
| chr9  | 90264886  | 90265109  | 224 |
| chr9  | 69983152  | 69983375  | 224 |
| chr9  | 69981452  | 69981675  | 224 |
| chr8  | 115114788 | 115115011 | 224 |
| chr8  | 112064568 | 112064791 | 224 |
| chr8  | 104081692 | 104081915 | 224 |
| chr8  | 91390551  | 91390774  | 224 |
| chr8  | 78780068  | 78780291  | 224 |
| chr8  | 58330743  | 58330966  | 224 |
| chr7  | 81226190  | 81226413  | 224 |
| chr7  | 44805932  | 44806155  | 224 |
| chr7  | 18454739  | 18454962  | 224 |
| chr7  | 14709716  | 14709939  | 224 |
| chr6  | 121777944 | 121778167 | 224 |
| chr6  | 100725722 | 100725945 | 224 |
| chr6  | 18464434  | 18464657  | 224 |
| chr5  | 120388338 | 120388561 | 224 |
| chr5  | 118445564 | 118445787 | 224 |
| chr5  | 116702388 | 116702611 | 224 |
| chr5  | 113707161 | 113707384 | 224 |
| chr5  | 113068142 | 113068365 | 224 |
| chr5  | 103360992 | 103361215 | 224 |
| chr5  | 60375824  | 60376047  | 224 |
| chr5  | 31265583  | 31265806  | 224 |
| chr5  | 31230284  | 31230507  | 224 |
| chr5  | 27340010  | 27340233  | 224 |
| chr5  | 7220375   | 7220598   | 224 |
| chr4  | 99394618  | 99394841  | 224 |
| chr4  | 8841893   | 8842116   | 224 |
| chr3  | 123198614 | 123198837 | 224 |
| chr3  | 121386233 | 121386456 | 224 |
| chr3  | 118154092 | 118154315 | 224 |
| chr3  | 111597948 | 111598171 | 224 |
| chr3  | 109788855 | 109789078 | 224 |
| chr29 | 48991416  | 48991639  | 224 |
| chr29 | 45778541  | 45778764  | 224 |
| chr29 | 36839101  | 36839324  | 224 |
| chr29 | 17692594  | 17692817  | 224 |
| chr28 | 41024068  | 41024291  | 224 |
| chr28 | 38967447  | 38967670  | 224 |
| chr28 | 27081151  | 27081374  | 224 |
| chr28 | 26405397  | 26405620  | 224 |
| chr28 | 25431823  | 25432046  | 224 |
| chr26 | 24626546  | 24626769  | 224 |
| chr25 | 43229317  | 43229540  | 224 |
| chr25 | 42646664  | 42646887  | 224 |
| chr25 | 39189848  | 39190071  | 224 |
| chr24 | 40806133  | 40806356  | 224 |
| chr24 | 34971430  | 34971653  | 224 |

|       |          |          |     |
|-------|----------|----------|-----|
| chr24 | 22275778 | 22276001 | 224 |
| chr23 | 32613782 | 32614005 | 224 |
| chr23 | 31689341 | 31689564 | 224 |
| chr23 | 16101603 | 16101826 | 224 |
| chr23 | 14254215 | 14254438 | 224 |
| chr23 | 8563698  | 8563921  | 224 |
| chr22 | 59576811 | 59577034 | 224 |
| chr22 | 56702967 | 56703190 | 224 |
| chr22 | 48493389 | 48493612 | 224 |
| chr22 | 17554272 | 17554495 | 224 |
| chr22 | 14946176 | 14946399 | 224 |
| chr22 | 7286755  | 7286978  | 224 |
| chr21 | 68055591 | 68055814 | 224 |
| chr21 | 34736120 | 34736343 | 224 |
| chr21 | 27919465 | 27919688 | 224 |
| chr20 | 67540313 | 67540536 | 224 |
| chr20 | 27257005 | 27257228 | 224 |
| chr2  | 75830056 | 75830279 | 224 |
| chr2  | 66987849 | 66988072 | 224 |
| chr2  | 49762799 | 49763022 | 224 |
| chr19 | 59030463 | 59030686 | 224 |
| chr19 | 54783998 | 54784221 | 224 |
| chr19 | 38863507 | 38863730 | 224 |
| chr19 | 38367758 | 38367981 | 224 |
| chr19 | 34635488 | 34635711 | 224 |
| chr19 | 26356543 | 26356766 | 224 |
| chr18 | 56225355 | 56225578 | 224 |
| chr18 | 53021878 | 53022101 | 224 |
| chr18 | 52759844 | 52760067 | 224 |
| chr18 | 51142486 | 51142709 | 224 |
| chr18 | 49728205 | 49728428 | 224 |
| chr18 | 45722361 | 45722584 | 224 |
| chr18 | 33225108 | 33225331 | 224 |
| chr18 | 26543213 | 26543436 | 224 |
| chr18 | 23123999 | 23124222 | 224 |
| chr18 | 18671385 | 18671608 | 224 |
| chr18 | 11415800 | 11416023 | 224 |
| chr18 | 6198602  | 6198825  | 224 |
| chr17 | 49524294 | 49524517 | 224 |
| chr17 | 49441979 | 49442202 | 224 |
| chr17 | 9389797  | 9390020  | 224 |
| chr16 | 68865418 | 68865641 | 224 |
| chr16 | 57704876 | 57705099 | 224 |
| chr15 | 75306534 | 75306757 | 224 |
| chr15 | 36299108 | 36299331 | 224 |
| chr15 | 33768237 | 33768460 | 224 |
| chr15 | 30646947 | 30647170 | 224 |
| chr15 | 21474823 | 21475046 | 224 |
| chr14 | 13988407 | 13988630 | 224 |
| chr14 | 7759332  | 7759555  | 224 |



|       |           |           |     |
|-------|-----------|-----------|-----|
| chr13 | 77678494  | 77678717  | 224 |
| chr13 | 63774522  | 63774745  | 224 |
| chr13 | 62871577  | 62871800  | 224 |
| chr13 | 56017091  | 56017314  | 224 |
| chr13 | 55312104  | 55312327  | 224 |
| chr13 | 41413038  | 41413261  | 224 |
| chr12 | 33804838  | 33805061  | 224 |
| chr12 | 11399204  | 11399427  | 224 |
| chr11 | 107551059 | 107551282 | 224 |
| chr11 | 84464595  | 84464818  | 224 |
| chr11 | 75036925  | 75037148  | 224 |
| chr11 | 27408040  | 27408263  | 224 |
| chr11 | 23182004  | 23182227  | 224 |
| chr11 | 20450822  | 20451045  | 224 |
| chr11 | 3211450   | 3211673   | 224 |
| chr11 | 2947406   | 2947629   | 224 |
| chr10 | 81736215  | 81736438  | 224 |
| chr10 | 81717576  | 81717799  | 224 |
| chr10 | 69181777  | 69182000  | 224 |
| chr10 | 28404363  | 28404586  | 224 |
| chr10 | 9763745   | 9763968   | 224 |
| chr1  | 147170510 | 147170733 | 224 |
| chr1  | 147125958 | 147126181 | 224 |
| chr1  | 1848055   | 1848278   | 224 |
| chrX  | 33522909  | 33523131  | 223 |
| chr9  | 107241262 | 107241484 | 223 |
| chr9  | 106589649 | 106589871 | 223 |
| chr9  | 34979823  | 34980045  | 223 |
| chr8  | 102417648 | 102417870 | 223 |
| chr8  | 10990573  | 10990795  | 223 |
| chr7  | 71316112  | 71316334  | 223 |
| chr7  | 20888144  | 20888366  | 223 |
| chr7  | 19229947  | 19230169  | 223 |
| chr7  | 12960400  | 12960622  | 223 |
| chr6  | 107669677 | 107669899 | 223 |
| chr5  | 114076302 | 114076524 | 223 |
| chr5  | 80689318  | 80689540  | 223 |
| chr5  | 79194944  | 79195166  | 223 |
| chr5  | 60989497  | 60989719  | 223 |
| chr4  | 116043736 | 116043958 | 223 |
| chr4  | 106688824 | 106689046 | 223 |
| chr3  | 125660468 | 125660690 | 223 |
| chr3  | 125594025 | 125594247 | 223 |
| chr3  | 125199120 | 125199342 | 223 |
| chr3  | 124900587 | 124900809 | 223 |
| chr3  | 124477100 | 124477322 | 223 |
| chr3  | 123653941 | 123654163 | 223 |
| chr3  | 123526161 | 123526383 | 223 |
| chr3  | 118364924 | 118365146 | 223 |
| chr3  | 114094572 | 114094794 | 223 |

|       |           |           |     |
|-------|-----------|-----------|-----|
| chr3  | 110753795 | 110754017 | 223 |
| chr3  | 101750714 | 101750936 | 223 |
| chr3  | 15144924  | 15145146  | 223 |
| chr29 | 35118002  | 35118224  | 223 |
| chr29 | 33571861  | 33572083  | 223 |
| chr28 | 44236659  | 44236881  | 223 |
| chr28 | 40853437  | 40853659  | 223 |
| chr28 | 30700377  | 30700599  | 223 |
| chr27 | 44785038  | 44785260  | 223 |
| chr26 | 42743556  | 42743778  | 223 |
| chr25 | 35424831  | 35425053  | 223 |
| chr25 | 34613488  | 34613710  | 223 |
| chr24 | 59021681  | 59021903  | 223 |
| chr24 | 13147980  | 13148202  | 223 |
| chr24 | 2832213   | 2832435   | 223 |
| chr23 | 48753662  | 48753884  | 223 |
| chr23 | 39754276  | 39754498  | 223 |
| chr23 | 31183357  | 31183579  | 223 |
| chr23 | 28802368  | 28802590  | 223 |
| chr23 | 18436136  | 18436358  | 223 |
| chr23 | 17928074  | 17928296  | 223 |
| chr22 | 55918903  | 55919125  | 223 |
| chr22 | 18032864  | 18033086  | 223 |
| chr22 | 13393043  | 13393265  | 223 |
| chr22 | 12357256  | 12357478  | 223 |
| chr21 | 47095631  | 47095853  | 223 |
| chr21 | 24490884  | 24491106  | 223 |
| chr20 | 73276256  | 73276478  | 223 |
| chr20 | 6597651   | 6597873   | 223 |
| chr2  | 136933747 | 136933969 | 223 |
| chr2  | 129462226 | 129462448 | 223 |
| chr2  | 75846269  | 75846491  | 223 |
| chr2  | 74777544  | 74777766  | 223 |
| chr2  | 74227528  | 74227750  | 223 |
| chr2  | 73255588  | 73255810  | 223 |
| chr2  | 12227374  | 12227596  | 223 |
| chr19 | 53541589  | 53541811  | 223 |
| chr19 | 42250219  | 42250441  | 223 |
| chr19 | 35105485  | 35105707  | 223 |
| chr19 | 30054338  | 30054560  | 223 |
| chr19 | 28812208  | 28812430  | 223 |
| chr19 | 7303632   | 7303854   | 223 |
| chr18 | 52326149  | 52326371  | 223 |
| chr18 | 18670989  | 18671211  | 223 |
| chr18 | 17438835  | 17439057  | 223 |
| chr18 | 11257580  | 11257802  | 223 |
| chr17 | 72336834  | 72337056  | 223 |
| chr16 | 61060194  | 61060416  | 223 |
| chr16 | 47587653  | 47587875  | 223 |
| chr16 | 47147527  | 47147749  | 223 |

|       |           |           |     |
|-------|-----------|-----------|-----|
| chr16 | 39739567  | 39739789  | 223 |
| chr16 | 24021855  | 24022077  | 223 |
| chr16 | 1804240   | 1804462   | 223 |
| chr15 | 32676033  | 32676255  | 223 |
| chr15 | 29327341  | 29327563  | 223 |
| chr15 | 24657782  | 24658004  | 223 |
| chr14 | 61507952  | 61508174  | 223 |
| chr14 | 59428107  | 59428329  | 223 |
| chr14 | 30885588  | 30885810  | 223 |
| chr14 | 21237255  | 21237477  | 223 |
| chr14 | 20946897  | 20947119  | 223 |
| chr14 | 19434368  | 19434590  | 223 |
| chr14 | 1907009   | 1907231   | 223 |
| chr14 | 599766    | 599988    | 223 |
| chr13 | 77690089  | 77690311  | 223 |
| chr13 | 77540504  | 77540726  | 223 |
| chr13 | 65808018  | 65808240  | 223 |
| chr13 | 65737698  | 65737920  | 223 |
| chr13 | 62953464  | 62953686  | 223 |
| chr13 | 55337162  | 55337384  | 223 |
| chr13 | 40021654  | 40021876  | 223 |
| chr13 | 30828530  | 30828752  | 223 |
| chr13 | 28821753  | 28821975  | 223 |
| chr13 | 18774839  | 18775061  | 223 |
| chr12 | 84128487  | 84128709  | 223 |
| chr11 | 108326037 | 108326259 | 223 |
| chr11 | 100254848 | 100255070 | 223 |
| chr11 | 72292278  | 72292500  | 223 |
| chr11 | 71721421  | 71721643  | 223 |
| chr10 | 36288472  | 36288694  | 223 |
| chr1  | 154760913 | 154761135 | 223 |
| chr1  | 144813395 | 144813617 | 223 |
| chr1  | 136272194 | 136272416 | 223 |
| chr1  | 118652884 | 118653106 | 223 |
| chr1  | 114957359 | 114957581 | 223 |
| chr1  | 83011065  | 83011287  | 223 |
| chr1  | 74922468  | 74922690  | 223 |
| chr1  | 74119612  | 74119834  | 223 |
| chr1  | 56218800  | 56219022  | 223 |
| chr9  | 105015463 | 105015684 | 222 |
| chr9  | 74216660  | 74216881  | 222 |
| chr9  | 62545206  | 62545427  | 222 |
| chr8  | 89482523  | 89482744  | 222 |
| chr8  | 72161276  | 72161497  | 222 |
| chr8  | 45732807  | 45733028  | 222 |
| chr7  | 80989763  | 80989984  | 222 |
| chr7  | 46473908  | 46474129  | 222 |
| chr7  | 44047915  | 44048136  | 222 |
| chr7  | 16504717  | 16504938  | 222 |
| chr7  | 10320898  | 10321119  | 222 |

|       |               |           |     |
|-------|---------------|-----------|-----|
| chr6  | 107455608     | 107455829 | 222 |
| chr6  | 46975398      | 46975619  | 222 |
| chr5  | 121187386     | 121187607 | 222 |
| chr5  | 121050269     | 121050490 | 222 |
| chr5  | 116551274     | 116551495 | 222 |
| chr5  | 115061244     | 115061465 | 222 |
| chr5  | 80127040      | 80127261  | 222 |
| chr5  | 60288749      | 60288970  | 222 |
| chr5  | 10195687      | 10195908  | 222 |
| chr4  | 115867256     | 115867477 | 222 |
| chr4  | 72040163      | 72040384  | 222 |
| chr3  | 122256614     | 122256835 | 222 |
| chr3  | 115781110     | 115781331 | 222 |
| chr3  | 105680217     | 105680438 | 222 |
| chr3  | 25717678      | 25717899  | 222 |
| chr3  | 22403183      | 22403404  | 222 |
| chr3  | 4395791       | 4396012   | 222 |
| chr29 | 41699852      | 41700073  | 222 |
| chr29 | 35667363      | 35667584  | 222 |
| chr29 | 35509711      | 35509932  | 222 |
| chr29 | 31671126      | 31671347  | 222 |
| chr29 | 31631965      | 31632186  | 222 |
| chr28 | 23937707      | 23937928  | 222 |
| chr28 | 23534154      | 23534375  | 222 |
| chr27 | 39156501      | 39156722  | 222 |
| chr27 | 36038136      | 36038357  | 222 |
| chr27 | 26551455      | 26551676  | 222 |
| chr26 | 41017884      | 41018105  | 222 |
| chr26 | 37903085      | 37903306  | 222 |
| chr26 | 15316659      | 15316880  | 222 |
| chr26 | 5890819       | 5891040   | 222 |
| chr25 | 39241218      | 39241439  | 222 |
| chr25 | 37340840      | 37341061  | 222 |
| chr25 | 146644 146865 | 222       | 222 |
| chr24 | 5106001       | 5106222   | 222 |
| chr23 | 48775262      | 48775483  | 222 |
| chr23 | 44281899      | 44282120  | 222 |
| chr23 | 43389182      | 43389403  | 222 |
| chr23 | 17886325      | 17886546  | 222 |
| chr22 | 56110002      | 56110223  | 222 |
| chr22 | 55924621      | 55924842  | 222 |
| chr22 | 50077987      | 50078208  | 222 |
| chr22 | 39295620      | 39295841  | 222 |
| chr22 | 30420914      | 30421135  | 222 |
| chr22 | 18388895      | 18389116  | 222 |
| chr21 | 59821867      | 59822088  | 222 |
| chr21 | 24385446      | 24385667  | 222 |
| chr21 | 22367349      | 22367570  | 222 |
| chr21 | 20637500      | 20637721  | 222 |
| chr21 | 18389984      | 18390205  | 222 |

|       |           |           |     |
|-------|-----------|-----------|-----|
| chr21 | 15594157  | 15594378  | 222 |
| chr2  | 137406128 | 137406349 | 222 |
| chr2  | 135622540 | 135622761 | 222 |
| chr2  | 135170296 | 135170517 | 222 |
| chr2  | 116848139 | 116848360 | 222 |
| chr2  | 116511869 | 116512090 | 222 |
| chr2  | 100185575 | 100185796 | 222 |
| chr19 | 59075175  | 59075396  | 222 |
| chr19 | 59051351  | 59051572  | 222 |
| chr19 | 58335573  | 58335794  | 222 |
| chr19 | 56533580  | 56533801  | 222 |
| chr19 | 53141758  | 53141979  | 222 |
| chr19 | 48653184  | 48653405  | 222 |
| chr19 | 47484304  | 47484525  | 222 |
| chr19 | 38945174  | 38945395  | 222 |
| chr19 | 30121451  | 30121672  | 222 |
| chr19 | 27380124  | 27380345  | 222 |
| chr19 | 23138866  | 23139087  | 222 |
| chr19 | 16186269  | 16186490  | 222 |
| chr19 | 14084498  | 14084719  | 222 |
| chr18 | 65957703  | 65957924  | 222 |
| chr18 | 57294750  | 57294971  | 222 |
| chr18 | 45037135  | 45037356  | 222 |
| chr18 | 39959764  | 39959985  | 222 |
| chr18 | 25761729  | 25761950  | 222 |
| chr18 | 23572450  | 23572671  | 222 |
| chr18 | 10691965  | 10692186  | 222 |
| chr18 | 9703907   | 9704128   | 222 |
| chr18 | 9491946   | 9492167   | 222 |
| chr17 | 76114680  | 76114901  | 222 |
| chr17 | 73037668  | 73037889  | 222 |
| chr17 | 67973915  | 67974136  | 222 |
| chr17 | 66540731  | 66540952  | 222 |
| chr17 | 57758366  | 57758587  | 222 |
| chr17 | 56134842  | 56135063  | 222 |
| chr16 | 73045809  | 73046030  | 222 |
| chr16 | 68763878  | 68764099  | 222 |
| chr16 | 60231242  | 60231463  | 222 |
| chr16 | 59656219  | 59656440  | 222 |
| chr16 | 47124535  | 47124756  | 222 |
| chr16 | 42899358  | 42899579  | 222 |
| chr16 | 38933430  | 38933651  | 222 |
| chr16 | 30415860  | 30416081  | 222 |
| chr16 | 26561775  | 26561996  | 222 |
| chr15 | 83931023  | 83931244  | 222 |
| chr15 | 75532887  | 75533108  | 222 |
| chr15 | 60918865  | 60919086  | 222 |
| chr15 | 33548722  | 33548943  | 222 |
| chr15 | 30968697  | 30968918  | 222 |
| chr14 | 40010109  | 40010330  | 222 |

|       |               |           |     |
|-------|---------------|-----------|-----|
| chr14 | 22019556      | 22019777  | 222 |
| chr13 | 77586352      | 77586573  | 222 |
| chr13 | 77345352      | 77345573  | 222 |
| chr13 | 76354643      | 76354864  | 222 |
| chr13 | 76220709      | 76220930  | 222 |
| chr13 | 75745919      | 75746140  | 222 |
| chr13 | 72720783      | 72721004  | 222 |
| chr13 | 66679943      | 66680164  | 222 |
| chr13 | 60177621      | 60177842  | 222 |
| chr13 | 55408560      | 55408781  | 222 |
| chr13 | 55049259      | 55049480  | 222 |
| chr13 | 54399565      | 54399786  | 222 |
| chr13 | 38418859      | 38419080  | 222 |
| chr12 | 82665465      | 82665686  | 222 |
| chr12 | 79962711      | 79962932  | 222 |
| chr11 | 108409697     | 108409918 | 222 |
| chr11 | 106389118     | 106389339 | 222 |
| chr11 | 100320222     | 100320443 | 222 |
| chr11 | 75115719      | 75115940  | 222 |
| chr11 | 70776148      | 70776369  | 222 |
| chr11 | 69214446      | 69214667  | 222 |
| chr11 | 4869420       | 4869641   | 222 |
| chr10 | 52236202      | 52236423  | 222 |
| chr10 | 48640551      | 48640772  | 222 |
| chr10 | 25690866      | 25691087  | 222 |
| chr10 | 17802917      | 17803138  | 222 |
| chr1  | 152154360     | 152154581 | 222 |
| chr1  | 108844391     | 108844612 | 222 |
| chr1  | 81745997      | 81746218  | 222 |
| chr9  | 95541432      | 95541652  | 221 |
| chr8  | 108785499     | 108785719 | 221 |
| chr8  | 104189622     | 104189842 | 221 |
| chr8  | 57993390      | 57993610  | 221 |
| chr8  | 865012 865232 | 221       |     |
| chr7  | 15352540      | 15352760  | 221 |
| chr7  | 4963066       | 4963286   | 221 |
| chr6  | 107332118     | 107332338 | 221 |
| chr6  | 74860670      | 74860890  | 221 |
| chr6  | 70629582      | 70629802  | 221 |
| chr6  | 27736375      | 27736595  | 221 |
| chr6  | 18094754      | 18094974  | 221 |
| chr5  | 123717399     | 123717619 | 221 |
| chr5  | 67309843      | 67310063  | 221 |
| chr5  | 33867712      | 33867932  | 221 |
| chr5  | 28795880      | 28796100  | 221 |
| chr5  | 10386644      | 10386864  | 221 |
| chr5  | 10221501      | 10221721  | 221 |
| chr4  | 121517530     | 121517750 | 221 |
| chr4  | 118111166     | 118111386 | 221 |
| chr4  | 77309790      | 77310010  | 221 |

|       |               |           |     |
|-------|---------------|-----------|-----|
| chr4  | 68444913      | 68445133  | 221 |
| chr3  | 126096719     | 126096939 | 221 |
| chr3  | 115772666     | 115772886 | 221 |
| chr3  | 112325354     | 112325574 | 221 |
| chr3  | 111672547     | 111672767 | 221 |
| chr3  | 106499612     | 106499832 | 221 |
| chr3  | 55878451      | 55878671  | 221 |
| chr3  | 24966385      | 24966605  | 221 |
| chr3  | 20055611      | 20055831  | 221 |
| chr29 | 49852356      | 49852576  | 221 |
| chr29 | 48662268      | 48662488  | 221 |
| chr29 | 41856764      | 41856984  | 221 |
| chr29 | 30112345      | 30112565  | 221 |
| chr28 | 41716376      | 41716596  | 221 |
| chr28 | 32848214      | 32848434  | 221 |
| chr26 | 48479450      | 48479670  | 221 |
| chr26 | 44739536      | 44739756  | 221 |
| chr26 | 37903592      | 37903812  | 221 |
| chr26 | 37815720      | 37815940  | 221 |
| chr26 | 14922652      | 14922872  | 221 |
| chr25 | 2681129       | 2681349   | 221 |
| chr24 | 61121488      | 61121708  | 221 |
| chr24 | 51586806      | 51587026  | 221 |
| chr24 | 49490901      | 49491121  | 221 |
| chr24 | 38489300      | 38489520  | 221 |
| chr24 | 1041903       | 1042123   | 221 |
| chr24 | 484580 484800 | 221       |     |
| chr23 | 50043886      | 50044106  | 221 |
| chr23 | 49918474      | 49918694  | 221 |
| chr22 | 55895342      | 55895562  | 221 |
| chr22 | 50817139      | 50817359  | 221 |
| chr22 | 50612988      | 50613208  | 221 |
| chr22 | 50102272      | 50102492  | 221 |
| chr22 | 38653013      | 38653233  | 221 |
| chr22 | 32928272      | 32928492  | 221 |
| chr21 | 65575078      | 65575298  | 221 |
| chr21 | 64452864      | 64453084  | 221 |
| chr21 | 62233982      | 62234202  | 221 |
| chr21 | 34497831      | 34498051  | 221 |
| chr21 | 22736930      | 22737150  | 221 |
| chr20 | 74662685      | 74662905  | 221 |
| chr20 | 8519112       | 8519332   | 221 |
| chr20 | 7004159       | 7004379   | 221 |
| chr20 | 3402265       | 3402485   | 221 |
| chr2  | 140005061     | 140005281 | 221 |
| chr2  | 139969468     | 139969688 | 221 |
| chr2  | 139017105     | 139017325 | 221 |
| chr2  | 111333931     | 111334151 | 221 |
| chr19 | 64680658      | 64680878  | 221 |
| chr19 | 60840820      | 60841040  | 221 |

|       |           |           |     |
|-------|-----------|-----------|-----|
| chr19 | 58432917  | 58433137  | 221 |
| chr19 | 58195229  | 58195449  | 221 |
| chr19 | 46770183  | 46770403  | 221 |
| chr19 | 45056801  | 45057021  | 221 |
| chr19 | 44992412  | 44992632  | 221 |
| chr19 | 38362606  | 38362826  | 221 |
| chr19 | 37519135  | 37519355  | 221 |
| chr18 | 56835960  | 56836180  | 221 |
| chr18 | 49763718  | 49763938  | 221 |
| chr18 | 49543917  | 49544137  | 221 |
| chr18 | 33004080  | 33004300  | 221 |
| chr18 | 11467540  | 11467760  | 221 |
| chr18 | 515656    | 515876    | 221 |
| chr17 | 75469909  | 75470129  | 221 |
| chr17 | 74395779  | 74395999  | 221 |
| chr16 | 47895396  | 47895616  | 221 |
| chr16 | 23692331  | 23692551  | 221 |
| chr16 | 388155    | 388375    | 221 |
| chr15 | 81386855  | 81387075  | 221 |
| chr15 | 63719217  | 63719437  | 221 |
| chr15 | 32281891  | 32282111  | 221 |
| chr15 | 25908382  | 25908602  | 221 |
| chr14 | 61292904  | 61293124  | 221 |
| chr14 | 1973551   | 1973771   | 221 |
| chr13 | 82343911  | 82344131  | 221 |
| chr13 | 80292017  | 80292237  | 221 |
| chr13 | 75648690  | 75648910  | 221 |
| chr13 | 73338421  | 73338641  | 221 |
| chr13 | 65148936  | 65149156  | 221 |
| chr13 | 59664224  | 59664444  | 221 |
| chr13 | 59631056  | 59631276  | 221 |
| chr13 | 57284451  | 57284671  | 221 |
| chr13 | 42581135  | 42581355  | 221 |
| chr12 | 30638798  | 30639018  | 221 |
| chr12 | 30548049  | 30548269  | 221 |
| chr11 | 92888206  | 92888426  | 221 |
| chr11 | 49337147  | 49337367  | 221 |
| chr11 | 25610470  | 25610690  | 221 |
| chr11 | 22438141  | 22438361  | 221 |
| chr10 | 59923168  | 59923388  | 221 |
| chr10 | 21992751  | 21992971  | 221 |
| chr10 | 17782677  | 17782897  | 221 |
| chr10 | 13578573  | 13578793  | 221 |
| chr1  | 147930506 | 147930726 | 221 |
| chr1  | 118837199 | 118837419 | 221 |
| chr1  | 74496415  | 74496635  | 221 |
| chr9  | 106338400 | 106338619 | 220 |
| chr9  | 93427317  | 93427536  | 220 |
| chr8  | 73186321  | 73186540  | 220 |
| chr8  | 65731424  | 65731643  | 220 |



|       |           |           |     |
|-------|-----------|-----------|-----|
| chr8  | 41046443  | 41046662  | 220 |
| chr8  | 23061976  | 23062195  | 220 |
| chr8  | 5311056   | 5311275   | 220 |
| chr7  | 47374123  | 47374342  | 220 |
| chr7  | 46506503  | 46506722  | 220 |
| chr7  | 42920807  | 42921026  | 220 |
| chr7  | 42488295  | 42488514  | 220 |
| chr7  | 17429280  | 17429499  | 220 |
| chr7  | 3524553   | 3524772   | 220 |
| chr7  | 2946140   | 2946359   | 220 |
| chr7  | 1079260   | 1079479   | 220 |
| chr6  | 122224056 | 122224275 | 220 |
| chr6  | 121761263 | 121761482 | 220 |
| chr6  | 121730527 | 121730746 | 220 |
| chr6  | 79721834  | 79722053  | 220 |
| chr6  | 63808499  | 63808718  | 220 |
| chr6  | 45441917  | 45442136  | 220 |
| chr5  | 117615672 | 117615891 | 220 |
| chr5  | 112769703 | 112769922 | 220 |
| chr5  | 103197866 | 103198085 | 220 |
| chr5  | 75596973  | 75597192  | 220 |
| chr5  | 33534230  | 33534449  | 220 |
| chr5  | 10197545  | 10197764  | 220 |
| chr4  | 121494249 | 121494468 | 220 |
| chr4  | 118287637 | 118287856 | 220 |
| chr4  | 107548828 | 107549047 | 220 |
| chr4  | 99245728  | 99245947  | 220 |
| chr4  | 98063962  | 98064181  | 220 |
| chr4  | 73691189  | 73691408  | 220 |
| chr3  | 127344035 | 127344254 | 220 |
| chr3  | 126164132 | 126164351 | 220 |
| chr3  | 119623217 | 119623436 | 220 |
| chr3  | 115490893 | 115491112 | 220 |
| chr3  | 111679397 | 111679616 | 220 |
| chr3  | 109666864 | 109667083 | 220 |
| chr3  | 105099720 | 105099939 | 220 |
| chr3  | 85723986  | 85724205  | 220 |
| chr3  | 30178992  | 30179211  | 220 |
| chr3  | 10573386  | 10573605  | 220 |
| chr29 | 46202259  | 46202478  | 220 |
| chr29 | 44688620  | 44688839  | 220 |
| chr29 | 8994054   | 8994273   | 220 |
| chr28 | 45150879  | 45151098  | 220 |
| chr28 | 34043074  | 34043293  | 220 |
| chr28 | 27056526  | 27056745  | 220 |
| chr28 | 12003529  | 12003748  | 220 |
| chr27 | 46981592  | 46981811  | 220 |
| chr26 | 51627462  | 51627681  | 220 |
| chr26 | 44840536  | 44840755  | 220 |
| chr26 | 44708624  | 44708843  | 220 |

|       |           |           |     |
|-------|-----------|-----------|-----|
| chr26 | 44517777  | 44517996  | 220 |
| chr26 | 14675172  | 14675391  | 220 |
| chr25 | 4791742   | 4791961   | 220 |
| chr24 | 31246203  | 31246422  | 220 |
| chr23 | 7846440   | 7846659   | 220 |
| chr23 | 7622270   | 7622489   | 220 |
| chr22 | 55889230  | 55889449  | 220 |
| chr22 | 10777537  | 1077756   | 220 |
| chr21 | 65698185  | 65698404  | 220 |
| chr21 | 32899190  | 32899409  | 220 |
| chr21 | 22362830  | 22363049  | 220 |
| chr21 | 20149036  | 20149255  | 220 |
| chr21 | 18875789  | 18876008  | 220 |
| chr21 | 10838130  | 10838349  | 220 |
| chr20 | 8655561   | 8655780   | 220 |
| chr20 | 4367782   | 4368001   | 220 |
| chr2  | 139293665 | 139293884 | 220 |
| chr2  | 139063203 | 139063422 | 220 |
| chr2  | 127135997 | 127136216 | 220 |
| chr2  | 115129968 | 115130187 | 220 |
| chr2  | 111411558 | 111411777 | 220 |
| chr2  | 100118127 | 100118346 | 220 |
| chr2  | 22039808  | 22040027  | 220 |
| chr19 | 42975390  | 42975609  | 220 |
| chr19 | 30824561  | 30824780  | 220 |
| chr19 | 29041431  | 29041650  | 220 |
| chr19 | 21740768  | 21740987  | 220 |
| chr19 | 15250281  | 15250500  | 220 |
| chr19 | 15118891  | 15119110  | 220 |
| chr18 | 63904266  | 63904485  | 220 |
| chr18 | 24005896  | 24006115  | 220 |
| chr18 | 22777696  | 22777915  | 220 |
| chr18 | 6353606   | 6353825   | 220 |
| chr17 | 70478081  | 70478300  | 220 |
| chr17 | 68603946  | 68604165  | 220 |
| chr17 | 56145126  | 56145345  | 220 |
| chr17 | 49153107  | 49153326  | 220 |
| chr16 | 77342303  | 77342522  | 220 |
| chr16 | 59000753  | 59000972  | 220 |
| chr16 | 47217294  | 47217513  | 220 |
| chr15 | 74643451  | 74643670  | 220 |
| chr15 | 51714130  | 51714349  | 220 |
| chr15 | 30126002  | 30126221  | 220 |
| chr14 | 21759660  | 21759879  | 220 |
| chr14 | 16586880  | 16587099  | 220 |
| chr14 | 1463129   | 1463348   | 220 |
| chr13 | 80409456  | 80409675  | 220 |
| chr13 | 77435446  | 77435665  | 220 |
| chr13 | 76388878  | 76389097  | 220 |
| chr13 | 23845422  | 23845641  | 220 |

|       |           |           |     |
|-------|-----------|-----------|-----|
| chr12 | 82754121  | 82754340  | 220 |
| chr12 | 54245079  | 54245298  | 220 |
| chr12 | 32799233  | 32799452  | 220 |
| chr12 | 22608923  | 22609142  | 220 |
| chr12 | 15302999  | 15303218  | 220 |
| chr12 | 10292092  | 10292311  | 220 |
| chr11 | 104914783 | 104915002 | 220 |
| chr11 | 91581605  | 91581824  | 220 |
| chr11 | 2568044   | 2568263   | 220 |
| chr10 | 104793698 | 104793917 | 220 |
| chr10 | 102960842 | 102961061 | 220 |
| chr10 | 36874864  | 36875083  | 220 |
| chr10 | 16744092  | 16744311  | 220 |
| chr10 | 16229094  | 16229313  | 220 |
| chr10 | 13038443  | 13038662  | 220 |
| chr10 | 12122259  | 12122478  | 220 |
| chr8  | 60308321  | 60308539  | 219 |
| chr8  | 8557827   | 8558045   | 219 |
| chr7  | 81900333  | 81900551  | 219 |
| chr7  | 37505921  | 37506139  | 219 |
| chr7  | 15678854  | 15679072  | 219 |
| chr7  | 14699473  | 14699691  | 219 |
| chr6  | 118268986 | 118269204 | 219 |
| chr6  | 62536290  | 62536508  | 219 |
| chr5  | 123004572 | 123004790 | 219 |
| chr5  | 120489086 | 120489304 | 219 |
| chr5  | 113930422 | 113930640 | 219 |
| chr5  | 112132256 | 112132474 | 219 |
| chr5  | 75164559  | 75164777  | 219 |
| chr5  | 30476187  | 30476405  | 219 |
| chr4  | 109533522 | 109533740 | 219 |
| chr4  | 80874883  | 80875101  | 219 |
| chr4  | 33760670  | 33760888  | 219 |
| chr4  | 13673487  | 13673705  | 219 |
| chr3  | 127866364 | 127866582 | 219 |
| chr3  | 124004647 | 124004865 | 219 |
| chr3  | 123396414 | 123396632 | 219 |
| chr3  | 122128081 | 122128299 | 219 |
| chr3  | 116010700 | 116010918 | 219 |
| chr3  | 112881907 | 112882125 | 219 |
| chr3  | 105775851 | 105776069 | 219 |
| chr3  | 55137338  | 55137556  | 219 |
| chr3  | 4172907   | 4173125   | 219 |
| chr29 | 41678375  | 41678593  | 219 |
| chr29 | 34381771  | 34381989  | 219 |
| chr29 | 17614745  | 17614963  | 219 |
| chr28 | 34731934  | 34732152  | 219 |
| chr28 | 33694439  | 33694657  | 219 |
| chr26 | 49801566  | 49801784  | 219 |
| chr26 | 44942648  | 44942866  | 219 |

|       |           |           |     |
|-------|-----------|-----------|-----|
| chr26 | 35026613  | 35026831  | 219 |
| chr25 | 38938104  | 38938322  | 219 |
| chr25 | 37866970  | 37867188  | 219 |
| chr25 | 33369725  | 33369943  | 219 |
| chr25 | 23106633  | 23106851  | 219 |
| chr25 | 8930305   | 8930523   | 219 |
| chr25 | 1926999   | 1927217   | 219 |
| chr24 | 40970093  | 40970311  | 219 |
| chr24 | 39039720  | 39039938  | 219 |
| chr23 | 43421695  | 43421913  | 219 |
| chr23 | 38505925  | 38506143  | 219 |
| chr23 | 28543267  | 28543485  | 219 |
| chr22 | 57640205  | 57640423  | 219 |
| chr22 | 50998910  | 50999128  | 219 |
| chr22 | 16376197  | 16376415  | 219 |
| chr22 | 10947855  | 10948073  | 219 |
| chr21 | 65596908  | 65597126  | 219 |
| chr20 | 73214486  | 73214704  | 219 |
| chr2  | 139001165 | 139001383 | 219 |
| chr2  | 138895301 | 138895519 | 219 |
| chr2  | 134651354 | 134651572 | 219 |
| chr2  | 132447829 | 132448047 | 219 |
| chr2  | 115109039 | 115109257 | 219 |
| chr2  | 111231719 | 111231937 | 219 |
| chr2  | 55692052  | 55692270  | 219 |
| chr2  | 36105382  | 36105600  | 219 |
| chr19 | 54462159  | 54462377  | 219 |
| chr19 | 44179552  | 44179770  | 219 |
| chr19 | 40426472  | 40426690  | 219 |
| chr19 | 26199561  | 26199779  | 219 |
| chr19 | 14868569  | 14868787  | 219 |
| chr19 | 12563690  | 12563908  | 219 |
| chr19 | 12283217  | 12283435  | 219 |
| chr19 | 8943698   | 8943916   | 219 |
| chr18 | 62699431  | 62699649  | 219 |
| chr18 | 56492399  | 56492617  | 219 |
| chr18 | 56463288  | 56463506  | 219 |
| chr18 | 52681933  | 52682151  | 219 |
| chr18 | 45063858  | 45064076  | 219 |
| chr18 | 42223193  | 42223411  | 219 |
| chr18 | 11846834  | 11847052  | 219 |
| chr18 | 2256250   | 2256468   | 219 |
| chr17 | 75020142  | 75020360  | 219 |
| chr17 | 70135732  | 70135950  | 219 |
| chr17 | 68028287  | 68028505  | 219 |
| chr17 | 57525702  | 57525920  | 219 |
| chr17 | 49452303  | 49452521  | 219 |
| chr17 | 47087142  | 47087360  | 219 |
| chr16 | 74120277  | 74120495  | 219 |
| chr16 | 49446274  | 49446492  | 219 |

|       |               |           |     |
|-------|---------------|-----------|-----|
| chr16 | 47404312      | 47404530  | 219 |
| chr16 | 43102402      | 43102620  | 219 |
| chr16 | 1765920       | 1766138   | 219 |
| chr15 | 81397044      | 81397262  | 219 |
| chr15 | 51735237      | 51735455  | 219 |
| chr15 | 37340449      | 37340667  | 219 |
| chr15 | 21313189      | 21313407  | 219 |
| chr14 | 21791272      | 21791490  | 219 |
| chr14 | 7402737       | 7402955   | 219 |
| chr14 | 6385027       | 6385245   | 219 |
| chr14 | 192334 192552 |           | 219 |
| chr13 | 71417911      | 71418129  | 219 |
| chr13 | 60448780      | 60448998  | 219 |
| chr13 | 57463309      | 57463527  | 219 |
| chr13 | 42664314      | 42664532  | 219 |
| chr13 | 42395291      | 42395509  | 219 |
| chr13 | 11083534      | 11083752  | 219 |
| chr13 | 10319630      | 10319848  | 219 |
| chr12 | 52475648      | 52475866  | 219 |
| chr12 | 10754652      | 10754870  | 219 |
| chr11 | 109647898     | 109648116 | 219 |
| chr11 | 105023902     | 105024120 | 219 |
| chr11 | 70886097      | 70886315  | 219 |
| chr11 | 70849453      | 70849671  | 219 |
| chr11 | 47369132      | 47369350  | 219 |
| chr11 | 1361263       | 1361481   | 219 |
| chr10 | 103053690     | 103053908 | 219 |
| chr10 | 91106273      | 91106491  | 219 |
| chr10 | 88336040      | 88336258  | 219 |
| chr10 | 88033465      | 88033683  | 219 |
| chr10 | 80154340      | 80154558  | 219 |
| chr10 | 48265692      | 48265910  | 219 |
| chr10 | 16948335      | 16948553  | 219 |
| chr10 | 16445640      | 16445858  | 219 |
| chr1  | 147491357     | 147491575 | 219 |
| chr1  | 74703273      | 74703491  | 219 |
| chr1  | 74071976      | 74072194  | 219 |
| chr1  | 1731736       | 1731954   | 219 |
| chrX  | 21064535      | 21064752  | 218 |
| chrX  | 18948075      | 18948292  | 218 |
| chr9  | 105478811     | 105479028 | 218 |
| chr9  | 102632953     | 102633170 | 218 |
| chr9  | 90431792      | 90432009  | 218 |
| chr9  | 44306223      | 44306440  | 218 |
| chr9  | 12683680      | 12683897  | 218 |
| chr8  | 108820936     | 108821153 | 218 |
| chr8  | 108746660     | 108746877 | 218 |
| chr8  | 93034064      | 93034281  | 218 |
| chr8  | 92303951      | 92304168  | 218 |
| chr8  | 7564431       | 7564648   | 218 |

|       |               |           |     |
|-------|---------------|-----------|-----|
| chr7  | 89173938      | 89174155  | 218 |
| chr7  | 62842202      | 62842419  | 218 |
| chr7  | 43240465      | 43240682  | 218 |
| chr7  | 42148299      | 42148516  | 218 |
| chr7  | 17384634      | 17384851  | 218 |
| chr7  | 15697323      | 15697540  | 218 |
| chr7  | 15037039      | 15037256  | 218 |
| chr7  | 10947207      | 10947424  | 218 |
| chr7  | 5117165       | 5117382   | 218 |
| chr5  | 118541316     | 118541533 | 218 |
| chr5  | 52621729      | 52621946  | 218 |
| chr5  | 1601654       | 1601871   | 218 |
| chr4  | 95780065      | 95780282  | 218 |
| chr4  | 47036211      | 47036428  | 218 |
| chr3  | 122256360     | 122256577 | 218 |
| chr3  | 121550334     | 121550551 | 218 |
| chr3  | 111196275     | 111196492 | 218 |
| chr3  | 89430643      | 89430860  | 218 |
| chr3  | 20057055      | 20057272  | 218 |
| chr29 | 45272649      | 45272866  | 218 |
| chr29 | 37258604      | 37258821  | 218 |
| chr29 | 36460870      | 36461087  | 218 |
| chr28 | 40361960      | 40362177  | 218 |
| chr28 | 25442424      | 25442641  | 218 |
| chr27 | 38736321      | 38736538  | 218 |
| chr27 | 26354928      | 26355145  | 218 |
| chr26 | 50179741      | 50179958  | 218 |
| chr26 | 48415041      | 48415258  | 218 |
| chr26 | 43481822      | 43482039  | 218 |
| chr26 | 15083099      | 15083316  | 218 |
| chr25 | 42727154      | 42727371  | 218 |
| chr25 | 37428043      | 37428260  | 218 |
| chr25 | 33601018      | 33601235  | 218 |
| chr25 | 27869790      | 27870007  | 218 |
| chr24 | 58650755      | 58650972  | 218 |
| chr24 | 1321053       | 1321270   | 218 |
| chr24 | 478846 479063 |           | 218 |
| chr23 | 27799620      | 27799837  | 218 |
| chr23 | 10422143      | 10422360  | 218 |
| chr23 | 3655250       | 3655467   | 218 |
| chr22 | 59458303      | 59458520  | 218 |
| chr22 | 54090124      | 54090341  | 218 |
| chr22 | 50426705      | 50426922  | 218 |
| chr22 | 48546949      | 48547166  | 218 |
| chr22 | 44832571      | 44832788  | 218 |
| chr22 | 30449464      | 30449681  | 218 |
| chr22 | 16782174      | 16782391  | 218 |
| chr22 | 10632835      | 10633052  | 218 |
| chr21 | 65803834      | 65804051  | 218 |
| chr21 | 34779507      | 34779724  | 218 |

|       |           |           |     |
|-------|-----------|-----------|-----|
| chr21 | 26045217  | 26045434  | 218 |
| chr20 | 5068307   | 5068524   | 218 |
| chr20 | 3266226   | 3266443   | 218 |
| chr2  | 134736803 | 134737020 | 218 |
| chr2  | 134640021 | 134640238 | 218 |
| chr2  | 134385617 | 134385834 | 218 |
| chr2  | 127818832 | 127819049 | 218 |
| chr19 | 60417064  | 60417281  | 218 |
| chr19 | 56459616  | 56459833  | 218 |
| chr19 | 54484881  | 54485098  | 218 |
| chr19 | 53979307  | 53979524  | 218 |
| chr19 | 52955420  | 52955637  | 218 |
| chr19 | 46770973  | 46771190  | 218 |
| chr19 | 41964781  | 41964998  | 218 |
| chr19 | 41542268  | 41542485  | 218 |
| chr19 | 39601519  | 39601736  | 218 |
| chr19 | 33453833  | 33454050  | 218 |
| chr19 | 32329242  | 32329459  | 218 |
| chr19 | 30370719  | 30370936  | 218 |
| chr19 | 26361474  | 26361691  | 218 |
| chr19 | 26277217  | 26277434  | 218 |
| chr19 | 19641242  | 19641459  | 218 |
| chr19 | 14814608  | 14814825  | 218 |
| chr18 | 65324128  | 65324345  | 218 |
| chr18 | 34992519  | 34992736  | 218 |
| chr18 | 32875865  | 32876082  | 218 |
| chr18 | 18515409  | 18515626  | 218 |
| chr18 | 13203645  | 13203862  | 218 |
| chr18 | 10434472  | 10434689  | 218 |
| chr18 | 6247054   | 6247271   | 218 |
| chr18 | 5946438   | 5946655   | 218 |
| chr18 | 4920209   | 4920426   | 218 |
| chr17 | 64686230  | 64686447  | 218 |
| chr17 | 55890319  | 55890536  | 218 |
| chr17 | 47400871  | 47401088  | 218 |
| chr16 | 72316447  | 72316664  | 218 |
| chr16 | 48664657  | 48664874  | 218 |
| chr16 | 47683367  | 47683584  | 218 |
| chr16 | 47485156  | 47485373  | 218 |
| chr16 | 39515498  | 39515715  | 218 |
| chr16 | 2700583   | 2700800   | 218 |
| chr16 | 1868674   | 1868891   | 218 |
| chr15 | 75221252  | 75221469  | 218 |
| chr15 | 66364135  | 66364352  | 218 |
| chr15 | 28710458  | 28710675  | 218 |
| chr15 | 25253669  | 25253886  | 218 |
| chr15 | 22719112  | 22719329  | 218 |
| chr15 | 22306500  | 22306717  | 218 |
| chr14 | 79842541  | 79842758  | 218 |
| chr14 | 63521973  | 63522190  | 218 |

|       |               |           |     |
|-------|---------------|-----------|-----|
| chr14 | 59389242      | 59389459  | 218 |
| chr14 | 6508479       | 6508696   | 218 |
| chr13 | 75725338      | 75725555  | 218 |
| chr13 | 73235150      | 73235367  | 218 |
| chr13 | 60435333      | 60435550  | 218 |
| chr13 | 60205802      | 60206019  | 218 |
| chr13 | 24205240      | 24205457  | 218 |
| chr13 | 22164366      | 22164583  | 218 |
| chr13 | 4011384       | 4011601   | 218 |
| chr12 | 83784580      | 83784797  | 218 |
| chr12 | 81693663      | 81693880  | 218 |
| chr12 | 68720762      | 68720979  | 218 |
| chr12 | 68217559      | 68217776  | 218 |
| chr12 | 31168119      | 31168336  | 218 |
| chr11 | 108003075     | 108003292 | 218 |
| chr11 | 106538653     | 106538870 | 218 |
| chr11 | 89819076      | 89819293  | 218 |
| chr11 | 81023666      | 81023883  | 218 |
| chr11 | 72577179      | 72577396  | 218 |
| chr11 | 49381302      | 49381519  | 218 |
| chr11 | 48607011      | 48607228  | 218 |
| chr11 | 14971884      | 14972101  | 218 |
| chr10 | 83518637      | 83518854  | 218 |
| chr10 | 80162340      | 80162557  | 218 |
| chr10 | 24511538      | 24511755  | 218 |
| chr1  | 137216668     | 137216885 | 218 |
| chr1  | 100090141     | 100090358 | 218 |
| chr1  | 81467054      | 81467271  | 218 |
| chr1  | 68742039      | 68742256  | 218 |
| chrX  | 30967868      | 30968084  | 217 |
| chr9  | 105441239     | 105441455 | 217 |
| chr9  | 98837279      | 98837495  | 217 |
| chr9  | 24604702      | 24604918  | 217 |
| chr8  | 116694632     | 116694848 | 217 |
| chr8  | 74306533      | 74306749  | 217 |
| chr8  | 436406 436622 |           | 217 |
| chr7  | 54860008      | 54860224  | 217 |
| chr7  | 46167593      | 46167809  | 217 |
| chr7  | 45697859      | 45698075  | 217 |
| chr7  | 37552444      | 37552660  | 217 |
| chr7  | 14672125      | 14672341  | 217 |
| chr7  | 8930691       | 8930907   | 217 |
| chr6  | 121696498     | 121696714 | 217 |
| chr6  | 70890783      | 70890999  | 217 |
| chr5  | 82887262      | 82887478  | 217 |
| chr5  | 69402960      | 69403176  | 217 |
| chr5  | 30144604      | 30144820  | 217 |
| chr5  | 28696050      | 28696266  | 217 |
| chr4  | 116947471     | 116947687 | 217 |
| chr4  | 107914425     | 107914641 | 217 |



|       |               |           |     |
|-------|---------------|-----------|-----|
| chr4  | 49219538      | 49219754  | 217 |
| chr4  | 5584618       | 5584834   | 217 |
| chr3  | 122234892     | 122235108 | 217 |
| chr3  | 116948016     | 116948232 | 217 |
| chr3  | 116137636     | 116137852 | 217 |
| chr3  | 115680880     | 115681096 | 217 |
| chr3  | 93135629      | 93135845  | 217 |
| chr3  | 89193217      | 89193433  | 217 |
| chr3  | 48205610      | 48205826  | 217 |
| chr3  | 35498059      | 35498275  | 217 |
| chr3  | 34094926      | 34095142  | 217 |
| chr3  | 31831299      | 31831515  | 217 |
| chr3  | 30464843      | 30465059  | 217 |
| chr29 | 51222097      | 51222313  | 217 |
| chr29 | 33808068      | 33808284  | 217 |
| chr28 | 41021650      | 41021866  | 217 |
| chr27 | 7097702       | 7097918   | 217 |
| chr26 | 43221150      | 43221366  | 217 |
| chr25 | 40425080      | 40425296  | 217 |
| chr25 | 37960327      | 37960543  | 217 |
| chr25 | 37950825      | 37951041  | 217 |
| chr25 | 36446547      | 36446763  | 217 |
| chr25 | 27759627      | 27759843  | 217 |
| chr24 | 48562671      | 48562887  | 217 |
| chr24 | 44056447      | 44056663  | 217 |
| chr23 | 28057179      | 28057395  | 217 |
| chr23 | 19487052      | 19487268  | 217 |
| chr22 | 56682266      | 56682482  | 217 |
| chr22 | 56479279      | 56479495  | 217 |
| chr22 | 30044867      | 30045083  | 217 |
| chr22 | 12294886      | 12295102  | 217 |
| chr21 | 65574006      | 65574222  | 217 |
| chr21 | 63900707      | 63900923  | 217 |
| chr21 | 18527693      | 18527909  | 217 |
| chr21 | 4302114       | 4302330   | 217 |
| chr20 | 39859714      | 39859930  | 217 |
| chr20 | 23203747      | 23203963  | 217 |
| chr20 | 11385749      | 11385965  | 217 |
| chr20 | 775828 776044 | 217       |     |
| chr20 | 709915 710131 | 217       |     |
| chr2  | 138495077     | 138495293 | 217 |
| chr2  | 136606789     | 136607005 | 217 |
| chr2  | 130907035     | 130907251 | 217 |
| chr2  | 124762317     | 124762533 | 217 |
| chr2  | 76367725      | 76367941  | 217 |
| chr2  | 24965347      | 24965563  | 217 |
| chr19 | 57036708      | 57036924  | 217 |
| chr19 | 49317614      | 49317830  | 217 |
| chr19 | 45920840      | 45921056  | 217 |
| chr19 | 38969827      | 38970043  | 217 |

|       |           |           |     |
|-------|-----------|-----------|-----|
| chr19 | 38718070  | 38718286  | 217 |
| chr19 | 32572302  | 32572518  | 217 |
| chr19 | 30816156  | 30816372  | 217 |
| chr19 | 20795451  | 20795667  | 217 |
| chr19 | 11002427  | 11002643  | 217 |
| chr18 | 65889769  | 65889985  | 217 |
| chr18 | 62443964  | 62444180  | 217 |
| chr18 | 51283510  | 51283726  | 217 |
| chr18 | 25541956  | 25542172  | 217 |
| chr18 | 23004157  | 23004373  | 217 |
| chr17 | 75113538  | 75113754  | 217 |
| chr17 | 74700830  | 74701046  | 217 |
| chr17 | 69303809  | 69304025  | 217 |
| chr17 | 63278764  | 63278980  | 217 |
| chr16 | 56105392  | 56105608  | 217 |
| chr16 | 49526141  | 49526357  | 217 |
| chr16 | 39608734  | 39608950  | 217 |
| chr15 | 83234719  | 83234935  | 217 |
| chr15 | 76735171  | 76735387  | 217 |
| chr15 | 54212352  | 54212568  | 217 |
| chr15 | 38516259  | 38516475  | 217 |
| chr15 | 37651103  | 37651319  | 217 |
| chr15 | 26770459  | 26770675  | 217 |
| chr15 | 26674711  | 26674927  | 217 |
| chr15 | 25577251  | 25577467  | 217 |
| chr14 | 67845796  | 67846012  | 217 |
| chr14 | 45082104  | 45082320  | 217 |
| chr14 | 9662833   | 9663049   | 217 |
| chr14 | 6417238   | 6417454   | 217 |
| chr14 | 4053748   | 4053964   | 217 |
| chr13 | 80291127  | 80291343  | 217 |
| chr13 | 80034806  | 80035022  | 217 |
| chr13 | 68204280  | 68204496  | 217 |
| chr13 | 62777034  | 62777250  | 217 |
| chr13 | 55133732  | 55133948  | 217 |
| chr13 | 55130030  | 55130246  | 217 |
| chr13 | 45767581  | 45767797  | 217 |
| chr12 | 84015747  | 84015963  | 217 |
| chr12 | 36190995  | 36191211  | 217 |
| chr12 | 32562446  | 32562662  | 217 |
| chr12 | 32537482  | 32537698  | 217 |
| chr11 | 109070147 | 109070363 | 217 |
| chr11 | 104516376 | 104516592 | 217 |
| chr11 | 94220686  | 94220902  | 217 |
| chr11 | 81415340  | 81415556  | 217 |
| chr11 | 80568855  | 80569071  | 217 |
| chr11 | 72738678  | 72738894  | 217 |
| chr11 | 1969680   | 1969896   | 217 |
| chr10 | 81674874  | 81675090  | 217 |
| chr10 | 80559053  | 80559269  | 217 |

|       |           |           |     |
|-------|-----------|-----------|-----|
| chr10 | 71913064  | 71913280  | 217 |
| chr10 | 60000325  | 60000541  | 217 |
| chr10 | 52232843  | 52233059  | 217 |
| chr10 | 13046465  | 13046681  | 217 |
| chr10 | 12882489  | 12882705  | 217 |
| chr1  | 101589194 | 101589410 | 217 |
| chr1  | 74026918  | 74027134  | 217 |
| chr1  | 68853467  | 68853683  | 217 |
| chr1  | 68406275  | 68406491  | 217 |
| chr9  | 107089995 | 107090210 | 216 |
| chr9  | 106787524 | 106787739 | 216 |
| chr9  | 105774115 | 105774330 | 216 |
| chr9  | 77304390  | 77304605  | 216 |
| chr8  | 102932996 | 102933211 | 216 |
| chr8  | 29194044  | 29194259  | 216 |
| chr8  | 23491485  | 23491700  | 216 |
| chr8  | 9292251   | 9292466   | 216 |
| chr7  | 39028078  | 39028293  | 216 |
| chr7  | 37394605  | 37394820  | 216 |
| chr7  | 15007437  | 15007652  | 216 |
| chr7  | 10828338  | 10828553  | 216 |
| chr7  | 3938159   | 3938374   | 216 |
| chr6  | 115743468 | 115743683 | 216 |
| chr6  | 74545923  | 74546138  | 216 |
| chr5  | 120509250 | 120509465 | 216 |
| chr5  | 113522417 | 113522632 | 216 |
| chr5  | 111424327 | 111424542 | 216 |
| chr5  | 73126630  | 73126845  | 216 |
| chr5  | 72276761  | 72276976  | 216 |
| chr4  | 121733915 | 121734130 | 216 |
| chr4  | 116375718 | 116375933 | 216 |
| chr4  | 110247412 | 110247627 | 216 |
| chr4  | 84623858  | 84624073  | 216 |
| chr4  | 77073040  | 77073255  | 216 |
| chr4  | 49763909  | 49764124  | 216 |
| chr4  | 33429928  | 33430143  | 216 |
| chr3  | 111794329 | 111794544 | 216 |
| chr3  | 95078630  | 95078845  | 216 |
| chr3  | 59940869  | 59941084  | 216 |
| chr3  | 57049416  | 57049631  | 216 |
| chr3  | 36937472  | 36937687  | 216 |
| chr3  | 35481967  | 35482182  | 216 |
| chr3  | 20100096  | 20100311  | 216 |
| chr29 | 49719316  | 49719531  | 216 |
| chr29 | 49032755  | 49032970  | 216 |
| chr29 | 48887444  | 48887659  | 216 |
| chr29 | 48613205  | 48613420  | 216 |
| chr29 | 34401586  | 34401801  | 216 |
| chr29 | 29776247  | 29776462  | 216 |
| chr29 | 18024802  | 18025017  | 216 |

|       |           |           |     |
|-------|-----------|-----------|-----|
| chr28 | 30806444  | 30806659  | 216 |
| chr28 | 11377277  | 11377492  | 216 |
| chr27 | 40797607  | 40797822  | 216 |
| chr26 | 51450018  | 51450233  | 216 |
| chr26 | 50240475  | 50240690  | 216 |
| chr26 | 43055896  | 43056111  | 216 |
| chr26 | 41414835  | 41415050  | 216 |
| chr26 | 41019911  | 41020126  | 216 |
| chr26 | 19937944  | 19938159  | 216 |
| chr26 | 18077262  | 18077477  | 216 |
| chr25 | 39392337  | 39392552  | 216 |
| chr25 | 37242385  | 37242600  | 216 |
| chr25 | 1579576   | 1579791   | 216 |
| chr25 | 1049026   | 1049241   | 216 |
| chr24 | 58012855  | 58013070  | 216 |
| chr24 | 48562102  | 48562317  | 216 |
| chr24 | 33797759  | 33797974  | 216 |
| chr23 | 10051107  | 10051322  | 216 |
| chr23 | 8883858   | 8884073   | 216 |
| chr23 | 8054214   | 8054429   | 216 |
| chr21 | 34529450  | 34529665  | 216 |
| chr21 | 33088300  | 33088515  | 216 |
| chr21 | 25295862  | 25296077  | 216 |
| chr21 | 24366312  | 24366527  | 216 |
| chr20 | 5327646   | 5327861   | 216 |
| chr20 | 4913558   | 4913773   | 216 |
| chr2  | 140361993 | 140362208 | 216 |
| chr2  | 139220931 | 139221146 | 216 |
| chr2  | 136609315 | 136609530 | 216 |
| chr2  | 128015774 | 128015989 | 216 |
| chr2  | 124323586 | 124323801 | 216 |
| chr2  | 113672612 | 113672827 | 216 |
| chr2  | 101160245 | 101160460 | 216 |
| chr2  | 101080593 | 101080808 | 216 |
| chr2  | 100014812 | 100015027 | 216 |
| chr2  | 75561418  | 75561633  | 216 |
| chr2  | 66195908  | 66196123  | 216 |
| chr19 | 63709174  | 63709389  | 216 |
| chr19 | 59461936  | 59462151  | 216 |
| chr19 | 58653888  | 58654103  | 216 |
| chr19 | 39974395  | 39974610  | 216 |
| chr19 | 38285924  | 38286139  | 216 |
| chr19 | 32582281  | 32582496  | 216 |
| chr19 | 31307458  | 31307673  | 216 |
| chr19 | 27528382  | 27528597  | 216 |
| chr19 | 23919238  | 23919453  | 216 |
| chr19 | 23066674  | 23066889  | 216 |
| chr19 | 7638073   | 7638288   | 216 |
| chr18 | 53266294  | 53266509  | 216 |
| chr18 | 50933249  | 50933464  | 216 |

|       |           |           |     |
|-------|-----------|-----------|-----|
| chr18 | 49547220  | 49547435  | 216 |
| chr18 | 25594614  | 25594829  | 216 |
| chr18 | 22130014  | 22130229  | 216 |
| chr17 | 70705499  | 70705714  | 216 |
| chr17 | 69234816  | 69235031  | 216 |
| chr17 | 64294894  | 64295109  | 216 |
| chr17 | 60987899  | 60988114  | 216 |
| chr17 | 11548147  | 11548362  | 216 |
| chr17 | 4315072   | 4315287   | 216 |
| chr16 | 69797739  | 69797954  | 216 |
| chr16 | 68550021  | 68550236  | 216 |
| chr16 | 58577707  | 58577922  | 216 |
| chr16 | 51111784  | 51111999  | 216 |
| chr16 | 46835394  | 46835609  | 216 |
| chr15 | 83159144  | 83159359  | 216 |
| chr15 | 28066979  | 28067194  | 216 |
| chr15 | 21519645  | 21519860  | 216 |
| chr14 | 61738727  | 61738942  | 216 |
| chr14 | 12204793  | 12205008  | 216 |
| chr14 | 7508254   | 7508469   | 216 |
| chr13 | 79926166  | 79926381  | 216 |
| chr13 | 76213554  | 76213769  | 216 |
| chr13 | 73943889  | 73944104  | 216 |
| chr13 | 72607873  | 72608088  | 216 |
| chr13 | 67134669  | 67134884  | 216 |
| chr13 | 61886443  | 61886658  | 216 |
| chr13 | 59404607  | 59404822  | 216 |
| chr13 | 57526765  | 57526980  | 216 |
| chr11 | 100883609 | 100883824 | 216 |
| chr11 | 99189867  | 99190082  | 216 |
| chr11 | 84525685  | 84525900  | 216 |
| chr10 | 74588376  | 74588591  | 216 |
| chr10 | 24178900  | 24179115  | 216 |
| chr10 | 20459180  | 20459395  | 216 |
| chr10 | 19598176  | 19598391  | 216 |
| chr10 | 16741675  | 16741890  | 216 |
| chr1  | 154760690 | 154760905 | 216 |
| chr1  | 137874653 | 137874868 | 216 |
| chr1  | 101593272 | 101593487 | 216 |
| chr1  | 85043728  | 85043943  | 216 |
| chrX  | 72262862  | 72263076  | 215 |
| chr9  | 43467763  | 43467977  | 215 |
| chr9  | 35464613  | 35464827  | 215 |
| chr9  | 29658172  | 29658386  | 215 |
| chr8  | 79974464  | 79974678  | 215 |
| chr8  | 63834037  | 63834251  | 215 |
| chr8  | 63739030  | 63739244  | 215 |
| chr8  | 60329336  | 60329550  | 215 |
| chr8  | 20937784  | 20937998  | 215 |
| chr7  | 50368602  | 50368816  | 215 |

|       |               |           |     |
|-------|---------------|-----------|-----|
| chr7  | 47989878      | 47990092  | 215 |
| chr7  | 43367426      | 43367640  | 215 |
| chr7  | 20877703      | 20877917  | 215 |
| chr7  | 19256563      | 19256777  | 215 |
| chr7  | 19214554      | 19214768  | 215 |
| chr7  | 10626691      | 10626905  | 215 |
| chr7  | 3970696       | 3970910   | 215 |
| chr7  | 388690 388904 | 215       |     |
| chr6  | 122084901     | 122085115 | 215 |
| chr6  | 121317349     | 121317563 | 215 |
| chr6  | 115006622     | 115006836 | 215 |
| chr6  | 2227755       | 2227969   | 215 |
| chr5  | 104043207     | 104043421 | 215 |
| chr5  | 33325970      | 33326184  | 215 |
| chr5  | 33316276      | 33316490  | 215 |
| chr5  | 29007700      | 29007914  | 215 |
| chr5  | 28847402      | 28847616  | 215 |
| chr4  | 116404547     | 116404761 | 215 |
| chr4  | 89761456      | 89761670  | 215 |
| chr3  | 121114871     | 121115085 | 215 |
| chr3  | 111647585     | 111647799 | 215 |
| chr3  | 107912025     | 107912239 | 215 |
| chr3  | 106609802     | 106610016 | 215 |
| chr3  | 106549997     | 106550211 | 215 |
| chr3  | 105152717     | 105152931 | 215 |
| chr3  | 71119005      | 71119219  | 215 |
| chr3  | 55570300      | 55570514  | 215 |
| chr3  | 35583773      | 35583987  | 215 |
| chr3  | 18619973      | 18620187  | 215 |
| chr3  | 10305886      | 10306100  | 215 |
| chr3  | 8562559       | 8562773   | 215 |
| chr29 | 50011586      | 50011800  | 215 |
| chr29 | 36503071      | 36503285  | 215 |
| chr29 | 34625857      | 34626071  | 215 |
| chr28 | 42811520      | 42811734  | 215 |
| chr28 | 33674497      | 33674711  | 215 |
| chr28 | 26867663      | 26867877  | 215 |
| chr28 | 26083747      | 26083961  | 215 |
| chr27 | 34610203      | 34610417  | 215 |
| chr26 | 45952199      | 45952413  | 215 |
| chr26 | 41834495      | 41834709  | 215 |
| chr25 | 13823964      | 13824178  | 215 |
| chr25 | 8462869       | 8463083   | 215 |
| chr24 | 820493 820707 | 215       |     |
| chr23 | 51981593      | 51981807  | 215 |
| chr23 | 51296736      | 51296950  | 215 |
| chr23 | 50796606      | 50796820  | 215 |
| chr23 | 33136187      | 33136401  | 215 |
| chr23 | 27949658      | 27949872  | 215 |
| chr23 | 27777456      | 27777670  | 215 |

|       |           |           |     |
|-------|-----------|-----------|-----|
| chr23 | 15553190  | 15553404  | 215 |
| chr23 | 14884616  | 14884830  | 215 |
| chr22 | 60149594  | 60149808  | 215 |
| chr22 | 48522332  | 48522546  | 215 |
| chr22 | 15995917  | 15996131  | 215 |
| chr22 | 7246318   | 7246532   | 215 |
| chr21 | 69002686  | 69002900  | 215 |
| chr21 | 33785314  | 33785528  | 215 |
| chr21 | 28044587  | 28044801  | 215 |
| chr21 | 24460595  | 24460809  | 215 |
| chr21 | 15250970  | 15251184  | 215 |
| chr21 | 10767328  | 10767542  | 215 |
| chr21 | 6573952   | 6574166   | 215 |
| chr20 | 74774788  | 74775002  | 215 |
| chr20 | 27314114  | 27314328  | 215 |
| chr20 | 18895403  | 18895617  | 215 |
| chr2  | 127989357 | 127989571 | 215 |
| chr2  | 126178635 | 126178849 | 215 |
| chr2  | 122840474 | 122840688 | 215 |
| chr2  | 121896457 | 121896671 | 215 |
| chr2  | 111919447 | 111919661 | 215 |
| chr2  | 94203211  | 94203425  | 215 |
| chr2  | 24730504  | 24730718  | 215 |
| chr2  | 18613894  | 18614108  | 215 |
| chr19 | 59512559  | 59512773  | 215 |
| chr19 | 59057580  | 59057794  | 215 |
| chr19 | 58434310  | 58434524  | 215 |
| chr19 | 56459221  | 56459435  | 215 |
| chr19 | 54845612  | 54845826  | 215 |
| chr19 | 54553874  | 54554088  | 215 |
| chr19 | 53059531  | 53059745  | 215 |
| chr19 | 52832123  | 52832337  | 215 |
| chr19 | 41970413  | 41970627  | 215 |
| chr19 | 41465654  | 41465868  | 215 |
| chr19 | 31955724  | 31955938  | 215 |
| chr19 | 21679880  | 21680094  | 215 |
| chr19 | 8070211   | 8070425   | 215 |
| chr18 | 65082649  | 65082863  | 215 |
| chr18 | 52880505  | 52880719  | 215 |
| chr18 | 43370590  | 43370804  | 215 |
| chr18 | 38774443  | 38774657  | 215 |
| chr18 | 25616043  | 25616257  | 215 |
| chr17 | 74562686  | 74562900  | 215 |
| chr17 | 73064282  | 73064496  | 215 |
| chr17 | 69946789  | 69947003  | 215 |
| chr17 | 69836517  | 69836731  | 215 |
| chr17 | 66790343  | 66790557  | 215 |
| chr17 | 57300201  | 57300415  | 215 |
| chr17 | 18504193  | 18504407  | 215 |
| chr16 | 46981926  | 46982140  | 215 |

|       |               |           |     |
|-------|---------------|-----------|-----|
| chr16 | 43025268      | 43025482  | 215 |
| chr16 | 2213854       | 2214068   | 215 |
| chr16 | 958020 958234 |           | 215 |
| chr15 | 84591158      | 84591372  | 215 |
| chr15 | 64297157      | 64297371  | 215 |
| chr15 | 39443084      | 39443298  | 215 |
| chr14 | 62356557      | 62356771  | 215 |
| chr13 | 73552989      | 73553203  | 215 |
| chr13 | 62778545      | 62778759  | 215 |
| chr13 | 44002348      | 44002562  | 215 |
| chr13 | 21064166      | 21064380  | 215 |
| chr12 | 83830054      | 83830268  | 215 |
| chr12 | 83285728      | 83285942  | 215 |
| chr12 | 70672627      | 70672841  | 215 |
| chr12 | 64639284      | 64639498  | 215 |
| chr12 | 36282650      | 36282864  | 215 |
| chr12 | 30767355      | 30767569  | 215 |
| chr11 | 104927585     | 104927799 | 215 |
| chr11 | 101073820     | 101074034 | 215 |
| chr11 | 94146255      | 94146469  | 215 |
| chr11 | 91010183      | 91010397  | 215 |
| chr11 | 70696376      | 70696590  | 215 |
| chr11 | 29264522      | 29264736  | 215 |
| chr11 | 5700643       | 5700857   | 215 |
| chr10 | 91107395      | 91107609  | 215 |
| chr10 | 74882750      | 74882964  | 215 |
| chr10 | 45673257      | 45673471  | 215 |
| chr10 | 44054694      | 44054908  | 215 |
| chr10 | 35893853      | 35894067  | 215 |
| chr10 | 12359051      | 12359265  | 215 |
| chr10 | 7640701       | 7640915   | 215 |
| chr1  | 82910427      | 82910641  | 215 |
| chrX  | 36109646      | 36109859  | 214 |
| chr9  | 104846449     | 104846662 | 214 |
| chr9  | 102719362     | 102719575 | 214 |
| chr9  | 99300757      | 99300970  | 214 |
| chr9  | 97645233      | 97645446  | 214 |
| chr9  | 91088695      | 91088908  | 214 |
| chr9  | 22763645      | 22763858  | 214 |
| chr9  | 11538855      | 11539068  | 214 |
| chr8  | 76778507      | 76778720  | 214 |
| chr8  | 65936366      | 65936579  | 214 |
| chr8  | 60402690      | 60402903  | 214 |
| chr8  | 60107960      | 60108173  | 214 |
| chr8  | 10361204      | 10361417  | 214 |
| chr8  | 8771528       | 8771741   | 214 |
| chr7  | 111051936     | 111052149 | 214 |
| chr7  | 80368951      | 80369164  | 214 |
| chr7  | 59498745      | 59498958  | 214 |
| chr7  | 52396306      | 52396519  | 214 |



|       |           |           |     |
|-------|-----------|-----------|-----|
| chr7  | 51416788  | 51417001  | 214 |
| chr7  | 24959722  | 24959935  | 214 |
| chr7  | 20247897  | 20248110  | 214 |
| chr7  | 17398567  | 17398780  | 214 |
| chr7  | 10405888  | 10406101  | 214 |
| chr6  | 121820557 | 121820770 | 214 |
| chr6  | 46693241  | 46693454  | 214 |
| chr5  | 122830476 | 122830689 | 214 |
| chr5  | 120228471 | 120228684 | 214 |
| chr5  | 111420204 | 111420417 | 214 |
| chr5  | 111139453 | 111139666 | 214 |
| chr5  | 81282023  | 81282236  | 214 |
| chr5  | 79219561  | 79219774  | 214 |
| chr5  | 69521674  | 69521887  | 214 |
| chr5  | 69092107  | 69092320  | 214 |
| chr5  | 67728060  | 67728273  | 214 |
| chr5  | 28747055  | 28747268  | 214 |
| chr4  | 117827962 | 117828175 | 214 |
| chr4  | 116944547 | 116944760 | 214 |
| chr4  | 116862845 | 116863058 | 214 |
| chr4  | 81160993  | 81161206  | 214 |
| chr4  | 79169707  | 79169920  | 214 |
| chr4  | 70971157  | 70971370  | 214 |
| chr4  | 67892795  | 67893008  | 214 |
| chr4  | 66633636  | 66633849  | 214 |
| chr4  | 46284412  | 46284625  | 214 |
| chr3  | 116295879 | 116296092 | 214 |
| chr3  | 115626692 | 115626905 | 214 |
| chr3  | 115499957 | 115500170 | 214 |
| chr3  | 105477471 | 105477684 | 214 |
| chr3  | 105417439 | 105417652 | 214 |
| chr3  | 105150594 | 105150807 | 214 |
| chr3  | 91188576  | 91188789  | 214 |
| chr3  | 82835888  | 82836101  | 214 |
| chr3  | 33767265  | 33767478  | 214 |
| chr3  | 33123134  | 33123347  | 214 |
| chr3  | 23036551  | 23036764  | 214 |
| chr3  | 20520925  | 20521138  | 214 |
| chr3  | 16025478  | 16025691  | 214 |
| chr29 | 51422151  | 51422364  | 214 |
| chr29 | 46653899  | 46654112  | 214 |
| chr29 | 45773602  | 45773815  | 214 |
| chr29 | 36436607  | 36436820  | 214 |
| chr29 | 32291853  | 32292066  | 214 |
| chr29 | 10043726  | 10043939  | 214 |
| chr28 | 43089278  | 43089491  | 214 |
| chr28 | 34156182  | 34156395  | 214 |
| chr26 | 51452177  | 51452390  | 214 |
| chr26 | 21808343  | 21808556  | 214 |
| chr25 | 37979298  | 37979511  | 214 |

|       |               |           |     |
|-------|---------------|-----------|-----|
| chr25 | 8472420       | 8472633   | 214 |
| chr25 | 3041352       | 3041565   | 214 |
| chr25 | 2234595       | 2234808   | 214 |
| chr24 | 54996866      | 54997079  | 214 |
| chr24 | 49800585      | 49800798  | 214 |
| chr24 | 35360392      | 35360605  | 214 |
| chr23 | 48782248      | 48782461  | 214 |
| chr23 | 27945937      | 27946150  | 214 |
| chr23 | 18000443      | 18000656  | 214 |
| chr23 | 17963930      | 17964143  | 214 |
| chr23 | 10394528      | 10394741  | 214 |
| chr23 | 9368238       | 9368451   | 214 |
| chr22 | 61466553      | 61466766  | 214 |
| chr22 | 60155858      | 60156071  | 214 |
| chr22 | 59789533      | 59789746  | 214 |
| chr22 | 56664352      | 56664565  | 214 |
| chr22 | 56092075      | 56092288  | 214 |
| chr22 | 51056408      | 51056621  | 214 |
| chr22 | 45457161      | 45457374  | 214 |
| chr21 | 65608363      | 65608576  | 214 |
| chr21 | 28865894      | 28866107  | 214 |
| chr21 | 28026508      | 28026721  | 214 |
| chr21 | 21126486      | 21126699  | 214 |
| chr21 | 20905578      | 20905791  | 214 |
| chr20 | 75734193      | 75734406  | 214 |
| chr20 | 72074829      | 72075042  | 214 |
| chr20 | 61830353      | 61830566  | 214 |
| chr20 | 879578 879791 | 214       |     |
| chr2  | 140123619     | 140123832 | 214 |
| chr2  | 127676890     | 127677103 | 214 |
| chr2  | 127011485     | 127011698 | 214 |
| chr2  | 122891136     | 122891349 | 214 |
| chr2  | 108528326     | 108528539 | 214 |
| chr2  | 101451884     | 101452097 | 214 |
| chr19 | 59038510      | 59038723  | 214 |
| chr19 | 56464308      | 56464521  | 214 |
| chr19 | 56327718      | 56327931  | 214 |
| chr19 | 56123484      | 56123697  | 214 |
| chr19 | 52043573      | 52043786  | 214 |
| chr19 | 39922309      | 39922522  | 214 |
| chr19 | 33137156      | 33137369  | 214 |
| chr19 | 32785128      | 32785341  | 214 |
| chr19 | 29703095      | 29703308  | 214 |
| chr19 | 23071629      | 23071842  | 214 |
| chr19 | 19239897      | 19240110  | 214 |
| chr18 | 64451097      | 64451310  | 214 |
| chr18 | 62738516      | 62738729  | 214 |
| chr18 | 57353651      | 57353864  | 214 |
| chr18 | 56892213      | 56892426  | 214 |
| chr18 | 45718140      | 45718353  | 214 |

|       |           |           |     |
|-------|-----------|-----------|-----|
| chr18 | 34758997  | 34759210  | 214 |
| chr18 | 22099453  | 22099666  | 214 |
| chr18 | 17875254  | 17875467  | 214 |
| chr18 | 13281302  | 13281515  | 214 |
| chr18 | 11491892  | 11492105  | 214 |
| chr17 | 70267000  | 70267213  | 214 |
| chr17 | 70050415  | 70050628  | 214 |
| chr17 | 69886049  | 69886262  | 214 |
| chr17 | 64346791  | 64347004  | 214 |
| chr17 | 47489708  | 47489921  | 214 |
| chr16 | 49477652  | 49477865  | 214 |
| chr16 | 47488193  | 47488406  | 214 |
| chr16 | 44817795  | 44818008  | 214 |
| chr16 | 44130046  | 44130259  | 214 |
| chr16 | 29365542  | 29365755  | 214 |
| chr16 | 2457354   | 2457567   | 214 |
| chr15 | 75363621  | 75363834  | 214 |
| chr15 | 64852060  | 64852273  | 214 |
| chr15 | 62757328  | 62757541  | 214 |
| chr15 | 30345334  | 30345547  | 214 |
| chr15 | 26788077  | 26788290  | 214 |
| chr15 | 14582613  | 14582826  | 214 |
| chr14 | 64246914  | 64247127  | 214 |
| chr14 | 34084421  | 34084634  | 214 |
| chr14 | 23334226  | 23334439  | 214 |
| chr14 | 12303872  | 12304085  | 214 |
| chr14 | 6535616   | 6535829   | 214 |
| chr14 | 1493032   | 1493245   | 214 |
| chr13 | 79675464  | 79675677  | 214 |
| chr13 | 76236828  | 76237041  | 214 |
| chr13 | 60183018  | 60183231  | 214 |
| chr13 | 59905406  | 59905619  | 214 |
| chr13 | 59439743  | 59439956  | 214 |
| chr13 | 55350151  | 55350364  | 214 |
| chr13 | 42457577  | 42457790  | 214 |
| chr13 | 41684756  | 41684969  | 214 |
| chr13 | 40902980  | 40903193  | 214 |
| chr13 | 34786616  | 34786829  | 214 |
| chr12 | 32552748  | 32552961  | 214 |
| chr12 | 19104853  | 19105066  | 214 |
| chr11 | 108410892 | 108411105 | 214 |
| chr11 | 97132215  | 97132428  | 214 |
| chr11 | 88912152  | 88912365  | 214 |
| chr11 | 88845719  | 88845932  | 214 |
| chr11 | 71885799  | 71886012  | 214 |
| chr10 | 57483525  | 57483738  | 214 |
| chr10 | 52939064  | 52939277  | 214 |
| chr10 | 51445303  | 51445516  | 214 |
| chr10 | 29820711  | 29820924  | 214 |
| chr10 | 17137707  | 17137920  | 214 |

|       |               |           |     |
|-------|---------------|-----------|-----|
| chr10 | 14986714      | 14986927  | 214 |
| chr10 | 10601353      | 10601566  | 214 |
| chr10 | 560827 561040 |           | 214 |
| chr1  | 73784993      | 73785206  | 214 |
| chr1  | 1662827       | 1663040   | 214 |
| chrX  | 13647610      | 13647822  | 213 |
| chr9  | 90411967      | 90412179  | 213 |
| chr9  | 19416659      | 19416871  | 213 |
| chr8  | 104145885     | 104146097 | 213 |
| chr8  | 98362902      | 98363114  | 213 |
| chr8  | 93183118      | 93183330  | 213 |
| chr8  | 28008273      | 28008485  | 213 |
| chr8  | 26888160      | 26888372  | 213 |
| chr8  | 11582942      | 11583154  | 213 |
| chr8  | 831741 831953 |           | 213 |
| chr7  | 71656127      | 71656339  | 213 |
| chr7  | 51870704      | 51870916  | 213 |
| chr7  | 43776604      | 43776816  | 213 |
| chr7  | 38796532      | 38796744  | 213 |
| chr7  | 4496278       | 4496490   | 213 |
| chr7  | 1687631       | 1687843   | 213 |
| chr6  | 122050030     | 122050242 | 213 |
| chr6  | 121908437     | 121908649 | 213 |
| chr6  | 121094481     | 121094693 | 213 |
| chr6  | 120763898     | 120764110 | 213 |
| chr6  | 101416283     | 101416495 | 213 |
| chr6  | 91874926      | 91875138  | 213 |
| chr6  | 37120852      | 37121064  | 213 |
| chr5  | 114084783     | 114084995 | 213 |
| chr5  | 112530430     | 112530642 | 213 |
| chr5  | 95943642      | 95943854  | 213 |
| chr5  | 94862574      | 94862786  | 213 |
| chr5  | 81393665      | 81393877  | 213 |
| chr5  | 72585505      | 72585717  | 213 |
| chr5  | 30855723      | 30855935  | 213 |
| chr5  | 29743309      | 29743521  | 213 |
| chr5  | 29206254      | 29206466  | 213 |
| chr5  | 28379093      | 28379305  | 213 |
| chr5  | 26682302      | 26682514  | 213 |
| chr4  | 122105264     | 122105476 | 213 |
| chr4  | 98508915      | 98509127  | 213 |
| chr4  | 70016730      | 70016942  | 213 |
| chr4  | 69680274      | 69680486  | 213 |
| chr4  | 69315972      | 69316184  | 213 |
| chr4  | 30809552      | 30809764  | 213 |
| chr4  | 24771975      | 24772187  | 213 |
| chr3  | 122390987     | 122391199 | 213 |
| chr3  | 122267824     | 122268036 | 213 |
| chr3  | 121339981     | 121340193 | 213 |
| chr3  | 117304757     | 117304969 | 213 |

|       |           |           |     |
|-------|-----------|-----------|-----|
| chr3  | 114244221 | 114244433 | 213 |
| chr3  | 108733618 | 108733830 | 213 |
| chr3  | 105844056 | 105844268 | 213 |
| chr3  | 92500794  | 92501006  | 213 |
| chr3  | 53620000  | 53620212  | 213 |
| chr3  | 35953955  | 35954167  | 213 |
| chr3  | 35580475  | 35580687  | 213 |
| chr3  | 30489222  | 30489434  | 213 |
| chr3  | 29634763  | 29634975  | 213 |
| chr3  | 29246181  | 29246393  | 213 |
| chr29 | 37004338  | 37004550  | 213 |
| chr29 | 36312322  | 36312534  | 213 |
| chr29 | 34681849  | 34682061  | 213 |
| chr29 | 31508306  | 31508518  | 213 |
| chr28 | 33713624  | 33713836  | 213 |
| chr28 | 27716500  | 27716712  | 213 |
| chr28 | 26960356  | 26960568  | 213 |
| chr27 | 5838896   | 5839108   | 213 |
| chr26 | 50344083  | 50344295  | 213 |
| chr26 | 44711691  | 44711903  | 213 |
| chr26 | 37093714  | 37093926  | 213 |
| chr26 | 33840156  | 33840368  | 213 |
| chr26 | 32327897  | 32328109  | 213 |
| chr26 | 14917114  | 14917326  | 213 |
| chr25 | 40896776  | 40896988  | 213 |
| chr25 | 38418111  | 38418323  | 213 |
| chr25 | 33520787  | 33520999  | 213 |
| chr25 | 8609019   | 8609231   | 213 |
| chr24 | 60719946  | 60720158  | 213 |
| chr24 | 58879680  | 58879892  | 213 |
| chr24 | 41573891  | 41574103  | 213 |
| chr23 | 52968534  | 52968746  | 213 |
| chr23 | 52793853  | 52794065  | 213 |
| chr23 | 52338507  | 52338719  | 213 |
| chr23 | 49778330  | 49778542  | 213 |
| chr23 | 42721467  | 42721679  | 213 |
| chr23 | 28801920  | 28802132  | 213 |
| chr23 | 18676492  | 18676704  | 213 |
| chr23 | 7695002   | 7695214   | 213 |
| chr22 | 44913231  | 44913443  | 213 |
| chr22 | 16434679  | 16434891  | 213 |
| chr21 | 67908941  | 67909153  | 213 |
| chr21 | 47867589  | 47867801  | 213 |
| chr21 | 20195994  | 20196206  | 213 |
| chr21 | 15579373  | 15579585  | 213 |
| chr21 | 2039201   | 2039413   | 213 |
| chr20 | 27305862  | 27306074  | 213 |
| chr20 | 8802096   | 8802308   | 213 |
| chr20 | 8581551   | 8581763   | 213 |
| chr20 | 3315798   | 3316010   | 213 |

|       |           |           |     |
|-------|-----------|-----------|-----|
| chr2  | 135053344 | 135053556 | 213 |
| chr2  | 130466336 | 130466548 | 213 |
| chr2  | 130114835 | 130115047 | 213 |
| chr2  | 129304417 | 129304629 | 213 |
| chr2  | 124187464 | 124187676 | 213 |
| chr2  | 110043042 | 110043254 | 213 |
| chr2  | 95252954  | 95253166  | 213 |
| chr2  | 76540677  | 76540889  | 213 |
| chr2  | 26508057  | 26508269  | 213 |
| chr2  | 21884676  | 21884888  | 213 |
| chr19 | 60830369  | 60830581  | 213 |
| chr19 | 54583644  | 54583856  | 213 |
| chr19 | 53548671  | 53548883  | 213 |
| chr19 | 53081359  | 53081571  | 213 |
| chr19 | 46301368  | 46301580  | 213 |
| chr19 | 43074172  | 43074384  | 213 |
| chr19 | 38728920  | 38729132  | 213 |
| chr19 | 38283738  | 38283950  | 213 |
| chr19 | 35272581  | 35272793  | 213 |
| chr19 | 26360753  | 26360965  | 213 |
| chr19 | 10937879  | 10938091  | 213 |
| chr19 | 10232536  | 10232748  | 213 |
| chr19 | 6627127   | 6627339   | 213 |
| chr18 | 64409212  | 64409424  | 213 |
| chr18 | 55699577  | 55699789  | 213 |
| chr18 | 33107924  | 33108136  | 213 |
| chr18 | 20794269  | 20794481  | 213 |
| chr18 | 18714951  | 18715163  | 213 |
| chr18 | 4095312   | 4095524   | 213 |
| chr17 | 72342084  | 72342296  | 213 |
| chr17 | 66828509  | 66828721  | 213 |
| chr17 | 63140193  | 63140405  | 213 |
| chr17 | 57626422  | 57626634  | 213 |
| chr17 | 49450527  | 49450739  | 213 |
| chr16 | 49365650  | 49365862  | 213 |
| chr16 | 46464805  | 46465017  | 213 |
| chr16 | 41525589  | 41525801  | 213 |
| chr16 | 41490904  | 41491116  | 213 |
| chr16 | 26242504  | 26242716  | 213 |
| chr15 | 76161965  | 76162177  | 213 |
| chr15 | 75387232  | 75387444  | 213 |
| chr15 | 74353990  | 74354202  | 213 |
| chr15 | 74221550  | 74221762  | 213 |
| chr15 | 65287609  | 65287821  | 213 |
| chr15 | 36176665  | 36176877  | 213 |
| chr15 | 26832143  | 26832355  | 213 |
| chr15 | 13541041  | 13541253  | 213 |
| chr14 | 64490876  | 64491088  | 213 |
| chr13 | 79877880  | 79878092  | 213 |
| chr13 | 77299423  | 77299635  | 213 |

|       |           |           |     |
|-------|-----------|-----------|-----|
| chr13 | 76473636  | 76473848  | 213 |
| chr13 | 73704375  | 73704587  | 213 |
| chr13 | 71489655  | 71489867  | 213 |
| chr13 | 67403941  | 67404153  | 213 |
| chr13 | 62426702  | 62426914  | 213 |
| chr13 | 59835596  | 59835808  | 213 |
| chr13 | 59024788  | 59025000  | 213 |
| chr13 | 41845430  | 41845642  | 213 |
| chr13 | 37731537  | 37731749  | 213 |
| chr12 | 82687574  | 82687786  | 213 |
| chr12 | 82437912  | 82438124  | 213 |
| chr12 | 46760462  | 46760674  | 213 |
| chr12 | 31554749  | 31554961  | 213 |
| chr12 | 9417620   | 9417832   | 213 |
| chr11 | 106281304 | 106281516 | 213 |
| chr11 | 100870758 | 100870970 | 213 |
| chr11 | 75151589  | 75151801  | 213 |
| chr11 | 62713837  | 62714049  | 213 |
| chr11 | 28760583  | 28760795  | 213 |
| chr11 | 14104761  | 14104973  | 213 |
| chr11 | 4361318   | 4361530   | 213 |
| chr11 | 2264058   | 2264270   | 213 |
| chr10 | 90931265  | 90931477  | 213 |
| chr10 | 63778836  | 63779048  | 213 |
| chr10 | 20541463  | 20541675  | 213 |
| chr10 | 17638130  | 17638342  | 213 |
| chr10 | 16748838  | 16749050  | 213 |
| chr10 | 8572495   | 8572707   | 213 |
| chr10 | 6928147   | 6928359   | 213 |
| chr1  | 156733519 | 156733731 | 213 |
| chr1  | 152267141 | 152267353 | 213 |
| chr1  | 67727653  | 67727865  | 213 |
| chr1  | 1563108   | 1563320   | 213 |
| chrX  | 87912548  | 87912759  | 212 |
| chrX  | 11031025  | 11031236  | 212 |
| chr9  | 106008494 | 106008705 | 212 |
| chr9  | 78183468  | 78183679  | 212 |
| chr8  | 116191878 | 116192089 | 212 |
| chr8  | 108786430 | 108786641 | 212 |
| chr8  | 108636859 | 108637070 | 212 |
| chr8  | 93023470  | 93023681  | 212 |
| chr8  | 92278432  | 92278643  | 212 |
| chr8  | 48403249  | 48403460  | 212 |
| chr8  | 23493674  | 23493885  | 212 |
| chr8  | 23062217  | 23062428  | 212 |
| chr8  | 7660558   | 7660769   | 212 |
| chr7  | 89469196  | 89469407  | 212 |
| chr7  | 50258757  | 50258968  | 212 |
| chr7  | 43237243  | 43237454  | 212 |
| chr7  | 6570651   | 6570862   | 212 |

|       |           |           |     |
|-------|-----------|-----------|-----|
| chr6  | 72306086  | 72306297  | 212 |
| chr5  | 123034557 | 123034768 | 212 |
| chr5  | 122713966 | 122714177 | 212 |
| chr5  | 112977412 | 112977623 | 212 |
| chr5  | 111602400 | 111602611 | 212 |
| chr5  | 110784206 | 110784417 | 212 |
| chr5  | 80322363  | 80322574  | 212 |
| chr5  | 10737070  | 10737281  | 212 |
| chr5  | 10725825  | 10726036  | 212 |
| chr4  | 123592867 | 123593078 | 212 |
| chr4  | 121718326 | 121718537 | 212 |
| chr4  | 120614885 | 120615096 | 212 |
| chr4  | 118593027 | 118593238 | 212 |
| chr4  | 106966269 | 106966480 | 212 |
| chr4  | 106115336 | 106115547 | 212 |
| chr4  | 106090324 | 106090535 | 212 |
| chr4  | 15270918  | 15271129  | 212 |
| chr3  | 126917538 | 126917749 | 212 |
| chr3  | 123676667 | 123676878 | 212 |
| chr3  | 112371022 | 112371233 | 212 |
| chr3  | 111809986 | 111810197 | 212 |
| chr3  | 111358463 | 111358674 | 212 |
| chr3  | 98654395  | 98654606  | 212 |
| chr3  | 36664348  | 36664559  | 212 |
| chr29 | 49995547  | 49995758  | 212 |
| chr29 | 48897602  | 48897813  | 212 |
| chr29 | 44692042  | 44692253  | 212 |
| chr29 | 44668778  | 44668989  | 212 |
| chr29 | 41701592  | 41701803  | 212 |
| chr29 | 31067681  | 31067892  | 212 |
| chr29 | 25947237  | 25947448  | 212 |
| chr28 | 30530594  | 30530805  | 212 |
| chr28 | 3553661   | 3553872   | 212 |
| chr27 | 38412535  | 38412746  | 212 |
| chr26 | 44390678  | 44390889  | 212 |
| chr26 | 42197490  | 42197701  | 212 |
| chr26 | 37421149  | 37421360  | 212 |
| chr26 | 22163397  | 22163608  | 212 |
| chr26 | 13865599  | 13865810  | 212 |
| chr25 | 40947082  | 40947293  | 212 |
| chr25 | 39180455  | 39180666  | 212 |
| chr25 | 35095469  | 35095680  | 212 |
| chr25 | 28334830  | 28335041  | 212 |
| chr25 | 26452352  | 26452563  | 212 |
| chr25 | 17670889  | 17671100  | 212 |
| chr25 | 3389781   | 3389992   | 212 |
| chr25 | 2078434   | 2078645   | 212 |
| chr25 | 1368540   | 1368751   | 212 |
| chr24 | 58769042  | 58769253  | 212 |
| chr24 | 57946535  | 57946746  | 212 |



|       |               |           |     |
|-------|---------------|-----------|-----|
| chr24 | 40194857      | 40195068  | 212 |
| chr24 | 31247094      | 31247305  | 212 |
| chr24 | 26538378      | 26538589  | 212 |
| chr23 | 51923672      | 51923883  | 212 |
| chr23 | 43254811      | 43255022  | 212 |
| chr23 | 30667898      | 30668109  | 212 |
| chr23 | 8326452       | 8326663   | 212 |
| chr22 | 60649236      | 60649447  | 212 |
| chr22 | 56717113      | 56717324  | 212 |
| chr22 | 56315949      | 56316160  | 212 |
| chr22 | 52572700      | 52572911  | 212 |
| chr22 | 48239642      | 48239853  | 212 |
| chr22 | 30302987      | 30303198  | 212 |
| chr22 | 7219689       | 7219900   | 212 |
| chr21 | 66330245      | 66330456  | 212 |
| chr21 | 65844576      | 65844787  | 212 |
| chr21 | 59645421      | 59645632  | 212 |
| chr21 | 33230476      | 33230687  | 212 |
| chr21 | 28907026      | 28907237  | 212 |
| chr20 | 75794691      | 75794902  | 212 |
| chr20 | 73481977      | 73482188  | 212 |
| chr20 | 64909167      | 64909378  | 212 |
| chr20 | 41951413      | 41951624  | 212 |
| chr20 | 5038704       | 5038915   | 212 |
| chr20 | 662071 662282 | 212       | 212 |
| chr2  | 136976163     | 136976374 | 212 |
| chr2  | 130281398     | 130281609 | 212 |
| chr2  | 128164708     | 128164919 | 212 |
| chr2  | 124277569     | 124277780 | 212 |
| chr2  | 108769365     | 108769576 | 212 |
| chr2  | 76118766      | 76118977  | 212 |
| chr2  | 75925420      | 75925631  | 212 |
| chr19 | 64680981      | 64681192  | 212 |
| chr19 | 60455947      | 60456158  | 212 |
| chr19 | 58699692      | 58699903  | 212 |
| chr19 | 54155001      | 54155212  | 212 |
| chr19 | 43628944      | 43629155  | 212 |
| chr19 | 43193032      | 43193243  | 212 |
| chr19 | 39349456      | 39349667  | 212 |
| chr19 | 37636795      | 37637006  | 212 |
| chr19 | 35858328      | 35858539  | 212 |
| chr19 | 31659800      | 31660011  | 212 |
| chr19 | 27348451      | 27348662  | 212 |
| chr19 | 26920967      | 26921178  | 212 |
| chr19 | 25780982      | 25781193  | 212 |
| chr19 | 21858234      | 21858445  | 212 |
| chr19 | 12323757      | 12323968  | 212 |
| chr19 | 6087784       | 6087995   | 212 |
| chr18 | 56318949      | 56319160  | 212 |
| chr18 | 55123488      | 55123699  | 212 |

|       |           |           |     |
|-------|-----------|-----------|-----|
| chr18 | 54955802  | 54956013  | 212 |
| chr18 | 11387788  | 11387999  | 212 |
| chr18 | 485579    | 485790    | 212 |
| chr17 | 74603177  | 74603388  | 212 |
| chr17 | 74391187  | 74391398  | 212 |
| chr17 | 74233705  | 74233916  | 212 |
| chr17 | 72750663  | 72750874  | 212 |
| chr17 | 67103802  | 67104013  | 212 |
| chr17 | 63433283  | 63433494  | 212 |
| chr17 | 63359164  | 63359375  | 212 |
| chr17 | 56960305  | 56960516  | 212 |
| chr16 | 54288148  | 54288359  | 212 |
| chr16 | 41490365  | 41490576  | 212 |
| chr16 | 41448470  | 41448681  | 212 |
| chr16 | 39459706  | 39459917  | 212 |
| chr16 | 38882487  | 38882698  | 212 |
| chr16 | 23962246  | 23962457  | 212 |
| chr15 | 64550589  | 64550800  | 212 |
| chr15 | 64195867  | 64196078  | 212 |
| chr15 | 55180224  | 55180435  | 212 |
| chr15 | 51611640  | 51611851  | 212 |
| chr15 | 40197562  | 40197773  | 212 |
| chr15 | 36030785  | 36030996  | 212 |
| chr15 | 32193878  | 32194089  | 212 |
| chr15 | 28670717  | 28670928  | 212 |
| chr15 | 24562529  | 24562740  | 212 |
| chr14 | 20428090  | 20428301  | 212 |
| chr14 | 6710456   | 6710667   | 212 |
| chr14 | 1958736   | 1958947   | 212 |
| chr14 | 1954924   | 1955135   | 212 |
| chr14 | 1907402   | 1907613   | 212 |
| chr14 | 856246    | 856457    | 212 |
| chr13 | 82660852  | 82661063  | 212 |
| chr13 | 74391395  | 74391606  | 212 |
| chr13 | 67768300  | 67768511  | 212 |
| chr13 | 59906407  | 59906618  | 212 |
| chr13 | 53819455  | 53819666  | 212 |
| chr13 | 46310596  | 46310807  | 212 |
| chr13 | 42613765  | 42613976  | 212 |
| chr13 | 41131977  | 41132188  | 212 |
| chr12 | 80058793  | 80059004  | 212 |
| chr12 | 36409719  | 36409930  | 212 |
| chr12 | 22982147  | 22982358  | 212 |
| chr11 | 108421319 | 108421530 | 212 |
| chr11 | 103306577 | 103306788 | 212 |
| chr11 | 84107761  | 84107972  | 212 |
| chr11 | 81610745  | 81610956  | 212 |
| chr11 | 80567772  | 80567983  | 212 |
| chr11 | 64800279  | 64800490  | 212 |
| chr11 | 52356559  | 52356770  | 212 |

|       |               |           |     |
|-------|---------------|-----------|-----|
| chr11 | 49834277      | 49834488  | 212 |
| chr11 | 28491578      | 28491789  | 212 |
| chr11 | 8885413       | 8885624   | 212 |
| chr11 | 5914373       | 5914584   | 212 |
| chr11 | 4354015       | 4354226   | 212 |
| chr11 | 4205699       | 4205910   | 212 |
| chr11 | 257973 258184 | 212       |     |
| chr10 | 103657588     | 103657799 | 212 |
| chr10 | 87014292      | 87014503  | 212 |
| chr10 | 84203531      | 84203742  | 212 |
| chr10 | 70213111      | 70213322  | 212 |
| chr1  | 153296795     | 153297006 | 212 |
| chr1  | 84399079      | 84399290  | 212 |
| chr1  | 82947641      | 82947852  | 212 |
| chr1  | 68914794      | 68915005  | 212 |
| chr1  | 68769920      | 68770131  | 212 |
| chr1  | 1820276       | 1820487   | 212 |
| chr1  | 716861 717072 | 212       |     |
| chr9  | 75091148      | 75091358  | 211 |
| chr8  | 104098199     | 104098409 | 211 |
| chr8  | 94373378      | 94373588  | 211 |
| chr8  | 85304699      | 85304909  | 211 |
| chr8  | 56913083      | 56913293  | 211 |
| chr8  | 23039380      | 23039590  | 211 |
| chr8  | 833900 834110 | 211       |     |
| chr7  | 52208313      | 52208523  | 211 |
| chr7  | 42490464      | 42490674  | 211 |
| chr7  | 17087720      | 17087930  | 211 |
| chr6  | 121821667     | 121821877 | 211 |
| chr6  | 121714407     | 121714617 | 211 |
| chr6  | 121483420     | 121483630 | 211 |
| chr6  | 120567452     | 120567662 | 211 |
| chr6  | 120327849     | 120328059 | 211 |
| chr6  | 106592085     | 106592295 | 211 |
| chr6  | 70590637      | 70590847  | 211 |
| chr5  | 121096573     | 121096783 | 211 |
| chr5  | 120551485     | 120551695 | 211 |
| chr5  | 120428049     | 120428259 | 211 |
| chr5  | 113249455     | 113249665 | 211 |
| chr5  | 111379214     | 111379424 | 211 |
| chr5  | 103693276     | 103693486 | 211 |
| chr5  | 30151315      | 30151525  | 211 |
| chr5  | 30051686      | 30051896  | 211 |
| chr5  | 28845404      | 28845614  | 211 |
| chr5  | 28691434      | 28691644  | 211 |
| chr5  | 28690090      | 28690300  | 211 |
| chr4  | 118609615     | 118609825 | 211 |
| chr4  | 107107572     | 107107782 | 211 |
| chr4  | 105165587     | 105165797 | 211 |
| chr4  | 99352964      | 99353174  | 211 |

|       |           |           |     |
|-------|-----------|-----------|-----|
| chr4  | 98794284  | 98794494  | 211 |
| chr4  | 96015079  | 96015289  | 211 |
| chr3  | 123942903 | 123943113 | 211 |
| chr3  | 121787732 | 121787942 | 211 |
| chr3  | 118150365 | 118150575 | 211 |
| chr3  | 113480602 | 113480812 | 211 |
| chr3  | 55846753  | 55846963  | 211 |
| chr3  | 35951711  | 35951921  | 211 |
| chr3  | 34008477  | 34008687  | 211 |
| chr3  | 31586526  | 31586736  | 211 |
| chr3  | 24436609  | 24436819  | 211 |
| chr3  | 4337064   | 4337274   | 211 |
| chr29 | 49790428  | 49790638  | 211 |
| chr29 | 45791539  | 45791749  | 211 |
| chr29 | 44374663  | 44374873  | 211 |
| chr29 | 41613786  | 41613996  | 211 |
| chr29 | 38862723  | 38862933  | 211 |
| chr29 | 38320352  | 38320562  | 211 |
| chr29 | 36750239  | 36750449  | 211 |
| chr29 | 36223124  | 36223334  | 211 |
| chr28 | 42392685  | 42392895  | 211 |
| chr28 | 26743931  | 26744141  | 211 |
| chr28 | 26183679  | 26183889  | 211 |
| chr28 | 4198920   | 4199130   | 211 |
| chr27 | 45418030  | 45418240  | 211 |
| chr27 | 39181765  | 39181975  | 211 |
| chr27 | 6028183   | 6028393   | 211 |
| chr26 | 48282954  | 48283164  | 211 |
| chr26 | 44387329  | 44387539  | 211 |
| chr26 | 38932827  | 38933037  | 211 |
| chr26 | 29743408  | 29743618  | 211 |
| chr26 | 25505754  | 25505964  | 211 |
| chr25 | 38305491  | 38305701  | 211 |
| chr25 | 2441424   | 2441634   | 211 |
| chr24 | 43900907  | 43901117  | 211 |
| chr24 | 43699681  | 43699891  | 211 |
| chr23 | 52824856  | 52825066  | 211 |
| chr23 | 44875531  | 44875741  | 211 |
| chr23 | 31451764  | 31451974  | 211 |
| chr23 | 30360764  | 30360974  | 211 |
| chr23 | 27761211  | 27761421  | 211 |
| chr23 | 11009791  | 11010001  | 211 |
| chr23 | 9551788   | 9551998   | 211 |
| chr22 | 59486263  | 59486473  | 211 |
| chr22 | 56431311  | 56431521  | 211 |
| chr22 | 51057034  | 51057244  | 211 |
| chr22 | 50855018  | 50855228  | 211 |
| chr22 | 10785528  | 10785738  | 211 |
| chr22 | 8226272   | 8226482   | 211 |
| chr21 | 66659471  | 66659681  | 211 |

|       |           |           |     |
|-------|-----------|-----------|-----|
| chr21 | 66417908  | 66418118  | 211 |
| chr21 | 66111374  | 66111584  | 211 |
| chr21 | 65797591  | 65797801  | 211 |
| chr21 | 65794262  | 65794472  | 211 |
| chr21 | 34995348  | 34995558  | 211 |
| chr21 | 31459603  | 31459813  | 211 |
| chr21 | 23705232  | 23705442  | 211 |
| chr21 | 20658287  | 20658497  | 211 |
| chr21 | 15534774  | 15534984  | 211 |
| chr21 | 15408067  | 15408277  | 211 |
| chr21 | 13902524  | 13902734  | 211 |
| chr20 | 75727093  | 75727303  | 211 |
| chr20 | 33679904  | 33680114  | 211 |
| chr20 | 6167819   | 6168029   | 211 |
| chr2  | 138895038 | 138895248 | 211 |
| chr2  | 132374903 | 132375113 | 211 |
| chr2  | 130431019 | 130431229 | 211 |
| chr19 | 60769222  | 60769432  | 211 |
| chr19 | 60465410  | 60465620  | 211 |
| chr19 | 60417824  | 60418034  | 211 |
| chr19 | 54810340  | 54810550  | 211 |
| chr19 | 39017519  | 39017729  | 211 |
| chr19 | 35802113  | 35802323  | 211 |
| chr19 | 31607044  | 31607254  | 211 |
| chr19 | 30416089  | 30416299  | 211 |
| chr19 | 29135783  | 29135993  | 211 |
| chr19 | 27070733  | 27070943  | 211 |
| chr19 | 19791685  | 19791895  | 211 |
| chr19 | 16048487  | 16048697  | 211 |
| chr19 | 15425382  | 15425592  | 211 |
| chr19 | 14822443  | 14822653  | 211 |
| chr19 | 12466726  | 12466936  | 211 |
| chr19 | 11081523  | 11081733  | 211 |
| chr19 | 7787840   | 7788050   | 211 |
| chr19 | 6567441   | 6567651   | 211 |
| chr18 | 62075857  | 62076067  | 211 |
| chr18 | 54293945  | 54294155  | 211 |
| chr18 | 51729630  | 51729840  | 211 |
| chr18 | 51588894  | 51589104  | 211 |
| chr18 | 51101852  | 51102062  | 211 |
| chr18 | 50853140  | 50853350  | 211 |
| chr18 | 49551648  | 49551858  | 211 |
| chr18 | 44420142  | 44420352  | 211 |
| chr18 | 17985818  | 17986028  | 211 |
| chr18 | 13149490  | 13149700  | 211 |
| chr18 | 5507550   | 5507760   | 211 |
| chr17 | 72447725  | 72447935  | 211 |
| chr17 | 69254406  | 69254616  | 211 |
| chr17 | 64079831  | 64080041  | 211 |
| chr17 | 62725369  | 62725579  | 211 |

|       |               |           |     |
|-------|---------------|-----------|-----|
| chr17 | 47253874      | 47254084  | 211 |
| chr17 | 21440628      | 21440838  | 211 |
| chr16 | 77712890      | 77713100  | 211 |
| chr16 | 75221280      | 75221490  | 211 |
| chr16 | 73766881      | 73767091  | 211 |
| chr16 | 61523371      | 61523581  | 211 |
| chr16 | 41461417      | 41461627  | 211 |
| chr16 | 265443 265653 | 211       |     |
| chr15 | 74667868      | 74668078  | 211 |
| chr15 | 54034445      | 54034655  | 211 |
| chr15 | 51668707      | 51668917  | 211 |
| chr15 | 39596503      | 39596713  | 211 |
| chr15 | 28978280      | 28978490  | 211 |
| chr15 | 26629533      | 26629743  | 211 |
| chr15 | 25698879      | 25699089  | 211 |
| chr15 | 23927249      | 23927459  | 211 |
| chr15 | 21533438      | 21533648  | 211 |
| chr14 | 59529131      | 59529341  | 211 |
| chr14 | 19481303      | 19481513  | 211 |
| chr13 | 80637250      | 80637460  | 211 |
| chr13 | 78327934      | 78328144  | 211 |
| chr13 | 75746231      | 75746441  | 211 |
| chr13 | 70033610      | 70033820  | 211 |
| chr13 | 69994977      | 69995187  | 211 |
| chr13 | 66723325      | 66723535  | 211 |
| chr13 | 60192011      | 60192221  | 211 |
| chr13 | 55477966      | 55478176  | 211 |
| chr13 | 55382017      | 55382227  | 211 |
| chr13 | 55321428      | 55321638  | 211 |
| chr13 | 41019388      | 41019598  | 211 |
| chr13 | 34941865      | 34942075  | 211 |
| chr13 | 14677647      | 14677857  | 211 |
| chr13 | 11413405      | 11413615  | 211 |
| chr12 | 82309519      | 82309729  | 211 |
| chr12 | 11301460      | 11301670  | 211 |
| chr12 | 9697407       | 9697617   | 211 |
| chr11 | 106016275     | 106016485 | 211 |
| chr11 | 105652764     | 105652974 | 211 |
| chr11 | 104375408     | 104375618 | 211 |
| chr11 | 81418259      | 81418469  | 211 |
| chr11 | 77861832      | 77862042  | 211 |
| chr11 | 72756808      | 72757018  | 211 |
| chr11 | 71593448      | 71593658  | 211 |
| chr11 | 47288123      | 47288333  | 211 |
| chr11 | 28541735      | 28541945  | 211 |
| chr11 | 14157927      | 14158137  | 211 |
| chr11 | 8857179       | 8857389   | 211 |
| chr10 | 89485592      | 89485802  | 211 |
| chr10 | 87160443      | 87160653  | 211 |
| chr10 | 80153971      | 80154181  | 211 |

|       |           |           |     |
|-------|-----------|-----------|-----|
| chr10 | 24183078  | 24183288  | 211 |
| chr10 | 16773849  | 16774059  | 211 |
| chr10 | 11039843  | 11040053  | 211 |
| chr10 | 7074184   | 7074394   | 211 |
| chr10 | 6624722   | 6624932   | 211 |
| chr10 | 6253415   | 6253625   | 211 |
| chr10 | 6069076   | 6069286   | 211 |
| chr1  | 159086283 | 159086493 | 211 |
| chr1  | 145880149 | 145880359 | 211 |
| chr1  | 74781182  | 74781392  | 211 |
| chr1  | 74776700  | 74776910  | 211 |
| chr1  | 66667584  | 66667794  | 211 |
| chrX  | 75940937  | 75941146  | 210 |
| chr9  | 106699656 | 106699865 | 210 |
| chr9  | 106441918 | 106442127 | 210 |
| chr9  | 62317551  | 62317760  | 210 |
| chr9  | 46036448  | 46036657  | 210 |
| chr8  | 30045262  | 30045471  | 210 |
| chr8  | 29841860  | 29842069  | 210 |
| chr8  | 24447164  | 24447373  | 210 |
| chr8  | 24141934  | 24142143  | 210 |
| chr8  | 20913443  | 20913652  | 210 |
| chr8  | 8626534   | 8626743   | 210 |
| chr7  | 29473708  | 29473917  | 210 |
| chr7  | 23341735  | 23341944  | 210 |
| chr7  | 19651507  | 19651716  | 210 |
| chr7  | 18752863  | 18753072  | 210 |
| chr7  | 18072605  | 18072814  | 210 |
| chr7  | 14361437  | 14361646  | 210 |
| chr7  | 13072340  | 13072549  | 210 |
| chr7  | 13049371  | 13049580  | 210 |
| chr7  | 12981028  | 12981237  | 210 |
| chr7  | 11183005  | 11183214  | 210 |
| chr6  | 90625440  | 90625649  | 210 |
| chr5  | 124822272 | 124822481 | 210 |
| chr5  | 118197789 | 118197998 | 210 |
| chr5  | 112779561 | 112779770 | 210 |
| chr5  | 112658050 | 112658259 | 210 |
| chr5  | 108468748 | 108468957 | 210 |
| chr5  | 103812095 | 103812304 | 210 |
| chr5  | 76862753  | 76862962  | 210 |
| chr5  | 76734970  | 76735179  | 210 |
| chr5  | 73007493  | 73007702  | 210 |
| chr5  | 72386550  | 72386759  | 210 |
| chr5  | 45204355  | 45204564  | 210 |
| chr5  | 37134072  | 37134281  | 210 |
| chr5  | 32866894  | 32867103  | 210 |
| chr5  | 28677051  | 28677260  | 210 |
| chr5  | 27955874  | 27956083  | 210 |
| chr4  | 123413124 | 123413333 | 210 |

|       |               |           |     |
|-------|---------------|-----------|-----|
| chr4  | 122666087     | 122666296 | 210 |
| chr4  | 122371794     | 122372003 | 210 |
| chr4  | 121557749     | 121557958 | 210 |
| chr4  | 106927853     | 106928062 | 210 |
| chr4  | 98559280      | 98559489  | 210 |
| chr4  | 95643567      | 95643776  | 210 |
| chr4  | 81961166      | 81961375  | 210 |
| chr4  | 32174733      | 32174942  | 210 |
| chr4  | 6113383       | 6113592   | 210 |
| chr4  | 5073573       | 5073782   | 210 |
| chr3  | 127872504     | 127872713 | 210 |
| chr3  | 125987903     | 125988112 | 210 |
| chr3  | 120834344     | 120834553 | 210 |
| chr3  | 117316577     | 117316786 | 210 |
| chr3  | 115114875     | 115115084 | 210 |
| chr3  | 114929432     | 114929641 | 210 |
| chr3  | 114476188     | 114476397 | 210 |
| chr3  | 111751830     | 111752039 | 210 |
| chr3  | 106558651     | 106558860 | 210 |
| chr3  | 83489623      | 83489832  | 210 |
| chr3  | 36276624      | 36276833  | 210 |
| chr3  | 35828620      | 35828829  | 210 |
| chr3  | 17552863      | 17553072  | 210 |
| chr3  | 9199213       | 9199422   | 210 |
| chr29 | 51820328      | 51820537  | 210 |
| chr29 | 38337826      | 38338035  | 210 |
| chr29 | 37570775      | 37570984  | 210 |
| chr29 | 29923913      | 29924122  | 210 |
| chr29 | 27256045      | 27256254  | 210 |
| chr29 | 17787047      | 17787256  | 210 |
| chr29 | 920685 920894 | 210       | 210 |
| chr28 | 40399120      | 40399329  | 210 |
| chr28 | 33595051      | 33595260  | 210 |
| chr28 | 26743218      | 26743427  | 210 |
| chr27 | 46650982      | 46651191  | 210 |
| chr27 | 39171694      | 39171903  | 210 |
| chr27 | 39106872      | 39107081  | 210 |
| chr26 | 49789117      | 49789326  | 210 |
| chr26 | 44304201      | 44304410  | 210 |
| chr26 | 34406926      | 34407135  | 210 |
| chr26 | 24583767      | 24583976  | 210 |
| chr26 | 24332744      | 24332953  | 210 |
| chr26 | 18265795      | 18266004  | 210 |
| chr26 | 5797800       | 5798009   | 210 |
| chr25 | 43203679      | 43203888  | 210 |
| chr25 | 39289561      | 39289770  | 210 |
| chr25 | 38242211      | 38242420  | 210 |
| chr25 | 3079188       | 3079397   | 210 |
| chr25 | 2733968       | 2734177   | 210 |
| chr24 | 51104317      | 51104526  | 210 |



|       |           |           |     |
|-------|-----------|-----------|-----|
| chr24 | 48975098  | 48975307  | 210 |
| chr24 | 45794254  | 45794463  | 210 |
| chr24 | 43558970  | 43559179  | 210 |
| chr24 | 43483482  | 43483691  | 210 |
| chr24 | 40232391  | 40232600  | 210 |
| chr24 | 38476235  | 38476444  | 210 |
| chr23 | 53030141  | 53030350  | 210 |
| chr23 | 51721012  | 51721221  | 210 |
| chr23 | 44286596  | 44286805  | 210 |
| chr23 | 31101066  | 31101275  | 210 |
| chr23 | 8873277   | 8873486   | 210 |
| chr23 | 8420031   | 8420240   | 210 |
| chr23 | 3230347   | 3230556   | 210 |
| chr22 | 58469199  | 58469408  | 210 |
| chr22 | 58299922  | 58300131  | 210 |
| chr22 | 57645839  | 57646048  | 210 |
| chr22 | 53984648  | 53984857  | 210 |
| chr22 | 32838621  | 32838830  | 210 |
| chr22 | 11743802  | 11744011  | 210 |
| chr22 | 5707210   | 5707419   | 210 |
| chr21 | 66664388  | 66664597  | 210 |
| chr21 | 65796270  | 65796479  | 210 |
| chr21 | 64172873  | 64173082  | 210 |
| chr21 | 62213860  | 62214069  | 210 |
| chr21 | 59448332  | 59448541  | 210 |
| chr21 | 31666073  | 31666282  | 210 |
| chr21 | 31010677  | 31010886  | 210 |
| chr21 | 27349222  | 27349431  | 210 |
| chr21 | 24507215  | 24507424  | 210 |
| chr21 | 20714932  | 20715141  | 210 |
| chr21 | 20235501  | 20235710  | 210 |
| chr21 | 14937219  | 14937428  | 210 |
| chr21 | 11796305  | 11796514  | 210 |
| chr21 | 2919043   | 2919252   | 210 |
| chr20 | 75660804  | 75661013  | 210 |
| chr20 | 72913189  | 72913398  | 210 |
| chr20 | 8710101   | 8710310   | 210 |
| chr20 | 2689718   | 2689927   | 210 |
| chr2  | 136990801 | 136991010 | 210 |
| chr2  | 135753031 | 135753240 | 210 |
| chr2  | 135662239 | 135662448 | 210 |
| chr2  | 134401982 | 134402191 | 210 |
| chr2  | 131686422 | 131686631 | 210 |
| chr2  | 111141795 | 111142004 | 210 |
| chr2  | 97303821  | 97304030  | 210 |
| chr2  | 25286041  | 25286250  | 210 |
| chr2  | 4930135   | 4930344   | 210 |
| chr19 | 60447240  | 60447449  | 210 |
| chr19 | 59320119  | 59320328  | 210 |
| chr19 | 58237365  | 58237574  | 210 |

|       |          |          |     |
|-------|----------|----------|-----|
| chr19 | 43124900 | 43125109 | 210 |
| chr19 | 33853569 | 33853778 | 210 |
| chr19 | 26983164 | 26983373 | 210 |
| chr19 | 19461498 | 19461707 | 210 |
| chr19 | 13460059 | 13460268 | 210 |
| chr19 | 7767038  | 7767247  | 210 |
| chr19 | 7616899  | 7617108  | 210 |
| chr18 | 62016307 | 62016516 | 210 |
| chr18 | 56999124 | 56999333 | 210 |
| chr18 | 56915768 | 56915977 | 210 |
| chr18 | 56471431 | 56471640 | 210 |
| chr18 | 53173971 | 53174180 | 210 |
| chr18 | 51414777 | 51414986 | 210 |
| chr18 | 49520077 | 49520286 | 210 |
| chr18 | 45728209 | 45728418 | 210 |
| chr18 | 42031923 | 42032132 | 210 |
| chr18 | 34048898 | 34049107 | 210 |
| chr18 | 32456229 | 32456438 | 210 |
| chr18 | 22477467 | 22477676 | 210 |
| chr18 | 22153832 | 22154041 | 210 |
| chr18 | 11146894 | 11147103 | 210 |
| chr17 | 70586910 | 70587119 | 210 |
| chr17 | 70161054 | 70161263 | 210 |
| chr17 | 61303333 | 61303542 | 210 |
| chr17 | 60585247 | 60585456 | 210 |
| chr17 | 57697267 | 57697476 | 210 |
| chr17 | 53442147 | 53442356 | 210 |
| chr17 | 49392984 | 49393193 | 210 |
| chr17 | 4155517  | 4155726  | 210 |
| chr16 | 73371764 | 73371973 | 210 |
| chr16 | 67761225 | 67761434 | 210 |
| chr16 | 51503335 | 51503544 | 210 |
| chr16 | 47657650 | 47657859 | 210 |
| chr16 | 41115023 | 41115232 | 210 |
| chr16 | 25542079 | 25542288 | 210 |
| chr16 | 3675757  | 3675966  | 210 |
| chr16 | 3222087  | 3222296  | 210 |
| chr16 | 2361305  | 2361514  | 210 |
| chr16 | 2117237  | 2117446  | 210 |
| chr15 | 83923897 | 83924106 | 210 |
| chr15 | 28716792 | 28717001 | 210 |
| chr14 | 23260685 | 23260894 | 210 |
| chr14 | 19480872 | 19481081 | 210 |
| chr14 | 12203785 | 12203994 | 210 |
| chr14 | 9666716  | 9666925  | 210 |
| chr14 | 7358812  | 7359021  | 210 |
| chr14 | 7084437  | 7084646  | 210 |
| chr14 | 1960585  | 1960794  | 210 |
| chr14 | 1929471  | 1929680  | 210 |
| chr14 | 1385071  | 1385280  | 210 |

|       |           |           |     |
|-------|-----------|-----------|-----|
| chr13 | 77751334  | 77751543  | 210 |
| chr13 | 75708998  | 75709207  | 210 |
| chr13 | 68733457  | 68733666  | 210 |
| chr13 | 60108451  | 60108660  | 210 |
| chr13 | 58633855  | 58634064  | 210 |
| chr13 | 57646863  | 57647072  | 210 |
| chr13 | 57599074  | 57599283  | 210 |
| chr13 | 55126886  | 55127095  | 210 |
| chr13 | 53710580  | 53710789  | 210 |
| chr13 | 36769341  | 36769550  | 210 |
| chr13 | 14944643  | 14944852  | 210 |
| chr12 | 83590843  | 83591052  | 210 |
| chr12 | 34098502  | 34098711  | 210 |
| chr12 | 32886452  | 32886661  | 210 |
| chr12 | 15826786  | 15826995  | 210 |
| chr11 | 106522146 | 106522355 | 210 |
| chr11 | 106252631 | 106252840 | 210 |
| chr11 | 104255289 | 104255498 | 210 |
| chr11 | 103527036 | 103527245 | 210 |
| chr11 | 65753851  | 65754060  | 210 |
| chr11 | 21867315  | 21867524  | 210 |
| chr10 | 90479771  | 90479980  | 210 |
| chr10 | 90182906  | 90183115  | 210 |
| chr10 | 87159553  | 87159762  | 210 |
| chr10 | 84201456  | 84201665  | 210 |
| chr10 | 83531854  | 83532063  | 210 |
| chr10 | 50642718  | 50642927  | 210 |
| chr10 | 32511475  | 32511684  | 210 |
| chr10 | 20419957  | 20420166  | 210 |
| chr10 | 15033727  | 15033936  | 210 |
| chr1  | 154411190 | 154411399 | 210 |
| chr1  | 153429838 | 153430047 | 210 |
| chr1  | 146754621 | 146754830 | 210 |
| chr1  | 84619610  | 84619819  | 210 |
| chr1  | 76419284  | 76419493  | 210 |
| chr1  | 55127179  | 55127388  | 210 |
| chr1  | 2681628   | 2681837   | 210 |
| chr9  | 100250487 | 100250695 | 209 |
| chr9  | 90458205  | 90458413  | 209 |
| chr9  | 56347658  | 56347866  | 209 |
| chr9  | 53372453  | 53372661  | 209 |
| chr9  | 27115239  | 27115447  | 209 |
| chr8  | 115748609 | 115748817 | 209 |
| chr8  | 109564530 | 109564738 | 209 |
| chr8  | 93911108  | 93911316  | 209 |
| chr8  | 78833162  | 78833370  | 209 |
| chr8  | 76004152  | 76004360  | 209 |
| chr8  | 72295828  | 72296036  | 209 |
| chr8  | 10364806  | 10365014  | 209 |
| chr8  | 7397466   | 7397674   | 209 |

|       |           |           |     |
|-------|-----------|-----------|-----|
| chr7  | 64639514  | 64639722  | 209 |
| chr7  | 62283264  | 62283472  | 209 |
| chr7  | 49299939  | 49300147  | 209 |
| chr7  | 46671590  | 46671798  | 209 |
| chr7  | 46225033  | 46225241  | 209 |
| chr7  | 38210327  | 38210535  | 209 |
| chr7  | 18358049  | 18358257  | 209 |
| chr7  | 7161649   | 7161857   | 209 |
| chr7  | 5148981   | 5149189   | 209 |
| chr7  | 4950202   | 4950410   | 209 |
| chr6  | 120924888 | 120925096 | 209 |
| chr6  | 120351374 | 120351582 | 209 |
| chr6  | 63161216  | 63161424  | 209 |
| chr5  | 122319585 | 122319793 | 209 |
| chr5  | 121223798 | 121224006 | 209 |
| chr5  | 117220645 | 117220853 | 209 |
| chr5  | 113502425 | 113502633 | 209 |
| chr5  | 110915438 | 110915646 | 209 |
| chr5  | 82891534  | 82891742  | 209 |
| chr5  | 76846268  | 76846476  | 209 |
| chr5  | 33517860  | 33518068  | 209 |
| chr5  | 31111305  | 31111513  | 209 |
| chr5  | 30557243  | 30557451  | 209 |
| chr5  | 28675119  | 28675327  | 209 |
| chr5  | 10041660  | 10041868  | 209 |
| chr4  | 123623245 | 123623453 | 209 |
| chr4  | 64238906  | 64239114  | 209 |
| chr4  | 33204963  | 33205171  | 209 |
| chr3  | 125361826 | 125362034 | 209 |
| chr3  | 121009498 | 121009706 | 209 |
| chr3  | 116370936 | 116371144 | 209 |
| chr3  | 115932755 | 115932963 | 209 |
| chr3  | 115480079 | 115480287 | 209 |
| chr3  | 111398200 | 111398408 | 209 |
| chr3  | 108928354 | 108928562 | 209 |
| chr3  | 106225871 | 106226079 | 209 |
| chr3  | 105911233 | 105911441 | 209 |
| chr3  | 92503931  | 92504139  | 209 |
| chr3  | 83530109  | 83530317  | 209 |
| chr3  | 48206911  | 48207119  | 209 |
| chr3  | 27919232  | 27919440  | 209 |
| chr3  | 20522266  | 20522474  | 209 |
| chr3  | 15550999  | 15551207  | 209 |
| chr29 | 37330944  | 37331152  | 209 |
| chr29 | 36710711  | 36710919  | 209 |
| chr29 | 33689666  | 33689874  | 209 |
| chr29 | 21729156  | 21729364  | 209 |
| chr29 | 17634708  | 17634916  | 209 |
| chr29 | 16160244  | 16160452  | 209 |
| chr28 | 44480809  | 44481017  | 209 |

|       |           |           |     |
|-------|-----------|-----------|-----|
| chr27 | 26674178  | 26674386  | 209 |
| chr26 | 47910633  | 47910841  | 209 |
| chr26 | 46061645  | 46061853  | 209 |
| chr26 | 44538775  | 44538983  | 209 |
| chr26 | 22343220  | 22343428  | 209 |
| chr26 | 20890044  | 20890252  | 209 |
| chr25 | 42103381  | 42103589  | 209 |
| chr25 | 39239984  | 39240192  | 209 |
| chr25 | 37565689  | 37565897  | 209 |
| chr25 | 29474273  | 29474481  | 209 |
| chr25 | 14761007  | 14761215  | 209 |
| chr25 | 3092927   | 3093135   | 209 |
| chr24 | 63436659  | 63436867  | 209 |
| chr24 | 61069641  | 61069849  | 209 |
| chr24 | 60823150  | 60823358  | 209 |
| chr24 | 49742001  | 49742209  | 209 |
| chr24 | 47856138  | 47856346  | 209 |
| chr24 | 43702907  | 43703115  | 209 |
| chr24 | 42962124  | 42962332  | 209 |
| chr24 | 40237967  | 40238175  | 209 |
| chr24 | 38491143  | 38491351  | 209 |
| chr24 | 23162438  | 23162646  | 209 |
| chr23 | 46285017  | 46285225  | 209 |
| chr23 | 38292356  | 38292564  | 209 |
| chr23 | 27391281  | 27391489  | 209 |
| chr23 | 25844429  | 25844637  | 209 |
| chr23 | 25119896  | 25120104  | 209 |
| chr23 | 19638678  | 19638886  | 209 |
| chr23 | 10339283  | 10339491  | 209 |
| chr23 | 7654962   | 7655170   | 209 |
| chr22 | 61422619  | 61422827  | 209 |
| chr22 | 55844903  | 55845111  | 209 |
| chr22 | 14967868  | 14968076  | 209 |
| chr21 | 58779741  | 58779949  | 209 |
| chr21 | 56288721  | 56288929  | 209 |
| chr21 | 34554105  | 34554313  | 209 |
| chr21 | 20186319  | 20186527  | 209 |
| chr20 | 73525876  | 73526084  | 209 |
| chr20 | 73234750  | 73234958  | 209 |
| chr20 | 70471209  | 70471417  | 209 |
| chr20 | 6759355   | 6759563   | 209 |
| chr20 | 2624242   | 2624450   | 209 |
| chr2  | 138930722 | 138930930 | 209 |
| chr2  | 134684306 | 134684514 | 209 |
| chr2  | 134530494 | 134530702 | 209 |
| chr2  | 132209969 | 132210177 | 209 |
| chr2  | 131423567 | 131423775 | 209 |
| chr2  | 130289401 | 130289609 | 209 |
| chr2  | 115247819 | 115248027 | 209 |
| chr2  | 111694014 | 111694222 | 209 |

|       |           |           |     |
|-------|-----------|-----------|-----|
| chr2  | 110183734 | 110183942 | 209 |
| chr2  | 74218269  | 74218477  | 209 |
| chr2  | 61109006  | 61109214  | 209 |
| chr19 | 61891273  | 61891481  | 209 |
| chr19 | 45820626  | 45820834  | 209 |
| chr19 | 45064812  | 45065020  | 209 |
| chr19 | 43363173  | 43363381  | 209 |
| chr19 | 38704047  | 38704255  | 209 |
| chr19 | 38121207  | 38121415  | 209 |
| chr19 | 27522319  | 27522527  | 209 |
| chr19 | 20334445  | 20334653  | 209 |
| chr19 | 20232955  | 20233163  | 209 |
| chr19 | 13541400  | 13541608  | 209 |
| chr19 | 6586301   | 6586509   | 209 |
| chr18 | 53667312  | 53667520  | 209 |
| chr18 | 53503382  | 53503590  | 209 |
| chr18 | 50059314  | 50059522  | 209 |
| chr18 | 48696562  | 48696770  | 209 |
| chr18 | 47690386  | 47690594  | 209 |
| chr18 | 33453563  | 33453771  | 209 |
| chr18 | 18702995  | 18703203  | 209 |
| chr18 | 17409380  | 17409588  | 209 |
| chr18 | 13535805  | 13536013  | 209 |
| chr18 | 11536641  | 11536849  | 209 |
| chr18 | 7116892   | 7117100   | 209 |
| chr17 | 72135173  | 72135381  | 209 |
| chr17 | 69783465  | 69783673  | 209 |
| chr17 | 68169314  | 68169522  | 209 |
| chr17 | 63673364  | 63673572  | 209 |
| chr17 | 63306669  | 63306877  | 209 |
| chr17 | 58930641  | 58930849  | 209 |
| chr17 | 15955649  | 15955857  | 209 |
| chr17 | 5418634   | 5418842   | 209 |
| chr17 | 4272332   | 4272540   | 209 |
| chr16 | 75223766  | 75223974  | 209 |
| chr16 | 74565146  | 74565354  | 209 |
| chr16 | 73766159  | 73766367  | 209 |
| chr16 | 61647830  | 61648038  | 209 |
| chr16 | 54648859  | 54649067  | 209 |
| chr16 | 47127004  | 47127212  | 209 |
| chr16 | 44923352  | 44923560  | 209 |
| chr16 | 20652870  | 20653078  | 209 |
| chr15 | 65693098  | 65693306  | 209 |
| chr15 | 29001487  | 29001695  | 209 |
| chr15 | 28283335  | 28283543  | 209 |
| chr15 | 26910171  | 26910379  | 209 |
| chr15 | 26853126  | 26853334  | 209 |
| chr15 | 26821411  | 26821619  | 209 |
| chr14 | 77335963  | 77336171  | 209 |
| chr14 | 66244318  | 66244526  | 209 |

|       |           |           |     |
|-------|-----------|-----------|-----|
| chr14 | 7757355   | 7757563   | 209 |
| chr13 | 76276513  | 76276721  | 209 |
| chr13 | 74345432  | 74345640  | 209 |
| chr13 | 69266618  | 69266826  | 209 |
| chr13 | 63293512  | 63293720  | 209 |
| chr13 | 62035676  | 62035884  | 209 |
| chr13 | 59178784  | 59178992  | 209 |
| chr13 | 56178573  | 56178781  | 209 |
| chr13 | 54401706  | 54401914  | 209 |
| chr13 | 46210281  | 46210489  | 209 |
| chr13 | 18327069  | 18327277  | 209 |
| chr13 | 11055187  | 11055395  | 209 |
| chr12 | 83603309  | 83603517  | 209 |
| chr12 | 82203682  | 82203890  | 209 |
| chr12 | 74443772  | 74443980  | 209 |
| chr12 | 61821481  | 61821689  | 209 |
| chr12 | 21566450  | 21566658  | 209 |
| chr12 | 19775513  | 19775721  | 209 |
| chr12 | 15278403  | 15278611  | 209 |
| chr11 | 105978652 | 105978860 | 209 |
| chr11 | 103634540 | 103634748 | 209 |
| chr11 | 101019815 | 101020023 | 209 |
| chr11 | 72545299  | 72545507  | 209 |
| chr11 | 66887571  | 66887779  | 209 |
| chr11 | 66557867  | 66558075  | 209 |
| chr11 | 65167839  | 65168047  | 209 |
| chr11 | 46255209  | 46255417  | 209 |
| chr11 | 5544820   | 5545028   | 209 |
| chr11 | 1753035   | 1753243   | 209 |
| chr10 | 106090614 | 106090822 | 209 |
| chr10 | 105303394 | 105303602 | 209 |
| chr10 | 90746467  | 90746675  | 209 |
| chr10 | 90321516  | 90321724  | 209 |
| chr10 | 58855053  | 58855261  | 209 |
| chr10 | 25028791  | 25028999  | 209 |
| chr10 | 24707949  | 24708157  | 209 |
| chr10 | 21851194  | 21851402  | 209 |
| chr10 | 17787842  | 17788050  | 209 |
| chr10 | 17683294  | 17683502  | 209 |
| chr10 | 16908623  | 16908831  | 209 |
| chr10 | 8365355   | 8365563   | 209 |
| chr1  | 156693490 | 156693698 | 209 |
| chr1  | 146354661 | 146354869 | 209 |
| chr1  | 137266409 | 137266617 | 209 |
| chr1  | 112144949 | 112145157 | 209 |
| chr1  | 99823582  | 99823790  | 209 |
| chr1  | 84817309  | 84817517  | 209 |
| chr1  | 68372421  | 68372629  | 209 |
| chr9  | 97730417  | 97730624  | 208 |
| chr9  | 90539836  | 90540043  | 208 |

|      |           |           |     |
|------|-----------|-----------|-----|
| chr9 | 53335978  | 53336185  | 208 |
| chr9 | 43792715  | 43792922  | 208 |
| chr9 | 35466153  | 35466360  | 208 |
| chr8 | 116660528 | 116660735 | 208 |
| chr8 | 95999390  | 95999597  | 208 |
| chr8 | 93139760  | 93139967  | 208 |
| chr8 | 93041307  | 93041514  | 208 |
| chr8 | 77349123  | 77349330  | 208 |
| chr8 | 54236369  | 54236576  | 208 |
| chr8 | 42138015  | 42138222  | 208 |
| chr7 | 51825334  | 51825541  | 208 |
| chr7 | 48835695  | 48835902  | 208 |
| chr7 | 17371432  | 17371639  | 208 |
| chr7 | 13086625  | 13086832  | 208 |
| chr7 | 4344472   | 4344679   | 208 |
| chr7 | 3952560   | 3952767   | 208 |
| chr6 | 108588529 | 108588736 | 208 |
| chr6 | 91879150  | 91879357  | 208 |
| chr6 | 72293858  | 72294065  | 208 |
| chr6 | 63468687  | 63468894  | 208 |
| chr6 | 45743049  | 45743256  | 208 |
| chr6 | 17413089  | 17413296  | 208 |
| chr5 | 125691848 | 125692055 | 208 |
| chr5 | 120508742 | 120508949 | 208 |
| chr5 | 120364695 | 120364902 | 208 |
| chr5 | 115513373 | 115513580 | 208 |
| chr5 | 113199032 | 113199239 | 208 |
| chr5 | 108559254 | 108559461 | 208 |
| chr5 | 88027865  | 88028072  | 208 |
| chr5 | 70637460  | 70637667  | 208 |
| chr5 | 60325284  | 60325491  | 208 |
| chr5 | 52199162  | 52199369  | 208 |
| chr5 | 30237113  | 30237320  | 208 |
| chr5 | 28694073  | 28694280  | 208 |
| chr5 | 17186671  | 17186878  | 208 |
| chr5 | 12941076  | 12941283  | 208 |
| chr4 | 123319972 | 123320179 | 208 |
| chr4 | 122979359 | 122979566 | 208 |
| chr4 | 119252985 | 119253192 | 208 |
| chr4 | 118025687 | 118025894 | 208 |
| chr4 | 96092728  | 96092935  | 208 |
| chr4 | 79305389  | 79305596  | 208 |
| chr4 | 72717622  | 72717829  | 208 |
| chr3 | 126965582 | 126965789 | 208 |
| chr3 | 124096622 | 124096829 | 208 |
| chr3 | 114441538 | 114441745 | 208 |
| chr3 | 112904551 | 112904758 | 208 |
| chr3 | 107911235 | 107911442 | 208 |
| chr3 | 99140814  | 99141021  | 208 |
| chr3 | 89545992  | 89546199  | 208 |



|       |               |          |     |
|-------|---------------|----------|-----|
| chr3  | 60407665      | 60407872 | 208 |
| chr3  | 27905650      | 27905857 | 208 |
| chr29 | 51809569      | 51809776 | 208 |
| chr29 | 50138158      | 50138365 | 208 |
| chr29 | 48679819      | 48680026 | 208 |
| chr29 | 44720577      | 44720784 | 208 |
| chr29 | 44623542      | 44623749 | 208 |
| chr29 | 43548361      | 43548568 | 208 |
| chr29 | 36370753      | 36370960 | 208 |
| chr29 | 26779361      | 26779568 | 208 |
| chr29 | 17456448      | 17456655 | 208 |
| chr28 | 45842954      | 45843161 | 208 |
| chr28 | 40904239      | 40904446 | 208 |
| chr28 | 26180709      | 26180916 | 208 |
| chr28 | 25312860      | 25313067 | 208 |
| chr28 | 25142956      | 25143163 | 208 |
| chr27 | 36004144      | 36004351 | 208 |
| chr27 | 35459402      | 35459609 | 208 |
| chr27 | 652306 652513 | 208      |     |
| chr26 | 51190038      | 51190245 | 208 |
| chr26 | 34909814      | 34910021 | 208 |
| chr26 | 18831945      | 18832152 | 208 |
| chr26 | 18749132      | 18749339 | 208 |
| chr25 | 43497610      | 43497817 | 208 |
| chr25 | 39190273      | 39190480 | 208 |
| chr25 | 39144313      | 39144520 | 208 |
| chr25 | 38379657      | 38379864 | 208 |
| chr25 | 35460050      | 35460257 | 208 |
| chr25 | 34299611      | 34299818 | 208 |
| chr25 | 29124653      | 29124860 | 208 |
| chr25 | 14758755      | 14758962 | 208 |
| chr25 | 3800725       | 3800932  | 208 |
| chr25 | 3005945       | 3006152  | 208 |
| chr25 | 2796109       | 2796316  | 208 |
| chr25 | 1458338       | 1458545  | 208 |
| chr24 | 65015127      | 65015334 | 208 |
| chr24 | 44426948      | 44427155 | 208 |
| chr24 | 43633613      | 43633820 | 208 |
| chr23 | 53025836      | 53026043 | 208 |
| chr23 | 18239315      | 18239522 | 208 |
| chr23 | 16063826      | 16064033 | 208 |
| chr23 | 15292394      | 15292601 | 208 |
| chr22 | 60574042      | 60574249 | 208 |
| chr22 | 60179929      | 60180136 | 208 |
| chr22 | 56176322      | 56176529 | 208 |
| chr22 | 55918518      | 55918725 | 208 |
| chr22 | 55763090      | 55763297 | 208 |
| chr22 | 50734173      | 50734380 | 208 |
| chr22 | 50718313      | 50718520 | 208 |
| chr22 | 49581404      | 49581611 | 208 |

|       |           |           |     |
|-------|-----------|-----------|-----|
| chr22 | 33590513  | 33590720  | 208 |
| chr22 | 29754691  | 29754898  | 208 |
| chr22 | 16136444  | 16136651  | 208 |
| chr22 | 13541947  | 13542154  | 208 |
| chr21 | 67774636  | 67774843  | 208 |
| chr21 | 65880374  | 65880581  | 208 |
| chr21 | 59726970  | 59727177  | 208 |
| chr21 | 58644914  | 58645121  | 208 |
| chr21 | 57828432  | 57828639  | 208 |
| chr21 | 33879266  | 33879473  | 208 |
| chr21 | 33788023  | 33788230  | 208 |
| chr21 | 32923919  | 32924126  | 208 |
| chr21 | 31498145  | 31498352  | 208 |
| chr21 | 28324858  | 28325065  | 208 |
| chr21 | 28031411  | 28031618  | 208 |
| chr21 | 25077020  | 25077227  | 208 |
| chr21 | 20197839  | 20198046  | 208 |
| chr21 | 20145862  | 20146069  | 208 |
| chr21 | 10002059  | 10002266  | 208 |
| chr21 | 7169254   | 7169461   | 208 |
| chr20 | 61683487  | 61683694  | 208 |
| chr20 | 42121158  | 42121365  | 208 |
| chr20 | 33541662  | 33541869  | 208 |
| chr20 | 29525153  | 29525360  | 208 |
| chr20 | 2398422   | 2398629   | 208 |
| chr2  | 140000521 | 140000728 | 208 |
| chr2  | 138688024 | 138688231 | 208 |
| chr2  | 136990507 | 136990714 | 208 |
| chr2  | 131160537 | 131160744 | 208 |
| chr2  | 124319233 | 124319440 | 208 |
| chr2  | 122872328 | 122872535 | 208 |
| chr2  | 122142936 | 122143143 | 208 |
| chr2  | 119409980 | 119410187 | 208 |
| chr2  | 82952049  | 82952256  | 208 |
| chr2  | 76326357  | 76326564  | 208 |
| chr2  | 75929450  | 75929657  | 208 |
| chr2  | 75762165  | 75762372  | 208 |
| chr2  | 23823842  | 23824049  | 208 |
| chr19 | 58652363  | 58652570  | 208 |
| chr19 | 54797240  | 54797447  | 208 |
| chr19 | 54772852  | 54773059  | 208 |
| chr19 | 50637214  | 50637421  | 208 |
| chr19 | 46844057  | 46844264  | 208 |
| chr19 | 43236490  | 43236697  | 208 |
| chr19 | 32565719  | 32565926  | 208 |
| chr19 | 30835280  | 30835487  | 208 |
| chr19 | 26073891  | 26074098  | 208 |
| chr19 | 24404957  | 24405164  | 208 |
| chr19 | 12617866  | 12618073  | 208 |
| chr19 | 12608018  | 12608225  | 208 |

|       |          |          |     |
|-------|----------|----------|-----|
| chr19 | 10931304 | 10931511 | 208 |
| chr18 | 62986475 | 62986682 | 208 |
| chr18 | 52655865 | 52656072 | 208 |
| chr18 | 45548692 | 45548899 | 208 |
| chr18 | 43602775 | 43602982 | 208 |
| chr18 | 36976547 | 36976754 | 208 |
| chr18 | 36940363 | 36940570 | 208 |
| chr18 | 32887132 | 32887339 | 208 |
| chr18 | 11561463 | 11561670 | 208 |
| chr18 | 9964357  | 9964564  | 208 |
| chr18 | 7641992  | 7642199  | 208 |
| chr18 | 306410   | 306617   | 208 |
| chr17 | 70398592 | 70398799 | 208 |
| chr17 | 69870445 | 69870652 | 208 |
| chr17 | 69477722 | 69477929 | 208 |
| chr17 | 64366972 | 64367179 | 208 |
| chr17 | 63310275 | 63310482 | 208 |
| chr17 | 62715963 | 62716170 | 208 |
| chr17 | 60563786 | 60563993 | 208 |
| chr17 | 57802293 | 57802500 | 208 |
| chr17 | 57699822 | 57700029 | 208 |
| chr17 | 53940140 | 53940347 | 208 |
| chr17 | 51479318 | 51479525 | 208 |
| chr17 | 48247554 | 48247761 | 208 |
| chr16 | 56111711 | 56111918 | 208 |
| chr16 | 54685956 | 54686163 | 208 |
| chr16 | 48668505 | 48668712 | 208 |
| chr16 | 47679531 | 47679738 | 208 |
| chr16 | 41444739 | 41444946 | 208 |
| chr16 | 41438516 | 41438723 | 208 |
| chr16 | 38725646 | 38725853 | 208 |
| chr16 | 38656859 | 38657066 | 208 |
| chr16 | 38559337 | 38559544 | 208 |
| chr16 | 23654336 | 23654543 | 208 |
| chr16 | 2136683  | 2136890  | 208 |
| chr15 | 75229788 | 75229995 | 208 |
| chr15 | 73699030 | 73699237 | 208 |
| chr15 | 63077582 | 63077789 | 208 |
| chr15 | 51351009 | 51351216 | 208 |
| chr15 | 29307041 | 29307248 | 208 |
| chr15 | 26641235 | 26641442 | 208 |
| chr15 | 24035193 | 24035400 | 208 |
| chr15 | 22350598 | 22350805 | 208 |
| chr15 | 22272840 | 22273047 | 208 |
| chr15 | 13616336 | 13616543 | 208 |
| chr14 | 76183077 | 76183284 | 208 |
| chr14 | 61416273 | 61416480 | 208 |
| chr14 | 26675033 | 26675240 | 208 |
| chr14 | 8225472  | 8225679  | 208 |
| chr14 | 7617132  | 7617339  | 208 |

|       |           |           |     |
|-------|-----------|-----------|-----|
| chr14 | 872657    | 872864    | 208 |
| chr13 | 79203482  | 79203689  | 208 |
| chr13 | 73711496  | 73711703  | 208 |
| chr13 | 73040239  | 73040446  | 208 |
| chr13 | 66717952  | 66718159  | 208 |
| chr13 | 63125768  | 63125975  | 208 |
| chr13 | 59203922  | 59204129  | 208 |
| chr13 | 41666148  | 41666355  | 208 |
| chr13 | 40272197  | 40272404  | 208 |
| chr13 | 25185088  | 25185295  | 208 |
| chr13 | 16097071  | 16097278  | 208 |
| chr12 | 34327958  | 34328165  | 208 |
| chr12 | 33073573  | 33073780  | 208 |
| chr12 | 32140706  | 32140913  | 208 |
| chr12 | 31070261  | 31070468  | 208 |
| chr12 | 20911231  | 20911438  | 208 |
| chr12 | 17983708  | 17983915  | 208 |
| chr12 | 15007283  | 15007490  | 208 |
| chr12 | 14256067  | 14256274  | 208 |
| chr11 | 104964784 | 104964991 | 208 |
| chr11 | 103773765 | 103773972 | 208 |
| chr11 | 101428580 | 101428787 | 208 |
| chr11 | 94195336  | 94195543  | 208 |
| chr11 | 84342633  | 84342840  | 208 |
| chr11 | 81279623  | 81279830  | 208 |
| chr11 | 52299853  | 52300060  | 208 |
| chr11 | 44767078  | 44767285  | 208 |
| chr11 | 29448954  | 29449161  | 208 |
| chr11 | 4870895   | 4871102   | 208 |
| chr10 | 91882186  | 91882393  | 208 |
| chr10 | 88890104  | 88890311  | 208 |
| chr10 | 83769873  | 83770080  | 208 |
| chr10 | 36551931  | 36552138  | 208 |
| chr10 | 28483158  | 28483365  | 208 |
| chr10 | 24508761  | 24508968  | 208 |
| chr10 | 12659977  | 12660184  | 208 |
| chr10 | 12119074  | 12119281  | 208 |
| chr10 | 7926002   | 7926209   | 208 |
| chr10 | 7344234   | 7344441   | 208 |
| chr1  | 142701100 | 142701307 | 208 |
| chr1  | 123085615 | 123085822 | 208 |
| chr1  | 114708842 | 114709049 | 208 |
| chr1  | 84568440  | 84568647  | 208 |
| chrX  | 55271757  | 55271963  | 207 |
| chrX  | 13649284  | 13649490  | 207 |
| chr9  | 107590397 | 107590603 | 207 |
| chr9  | 100246905 | 100247111 | 207 |
| chr9  | 87744565  | 87744771  | 207 |
| chr9  | 59366263  | 59366469  | 207 |
| chr9  | 41080466  | 41080672  | 207 |

|      |               |           |     |
|------|---------------|-----------|-----|
| chr9 | 19634748      | 19634954  | 207 |
| chr9 | 14571350      | 14571556  | 207 |
| chr8 | 78550957      | 78551163  | 207 |
| chr8 | 65346454      | 65346660  | 207 |
| chr8 | 63658053      | 63658259  | 207 |
| chr8 | 59296610      | 59296816  | 207 |
| chr8 | 9327910       | 9328116   | 207 |
| chr8 | 248952 249158 | 207       |     |
| chr7 | 109700352     | 109700558 | 207 |
| chr7 | 101690908     | 101691114 | 207 |
| chr7 | 65249375      | 65249581  | 207 |
| chr7 | 51367981      | 51368187  | 207 |
| chr7 | 42513967      | 42514173  | 207 |
| chr7 | 39405507      | 39405713  | 207 |
| chr7 | 37447350      | 37447556  | 207 |
| chr7 | 36838104      | 36838310  | 207 |
| chr7 | 23592175      | 23592381  | 207 |
| chr7 | 19372949      | 19373155  | 207 |
| chr7 | 19252710      | 19252916  | 207 |
| chr7 | 13254970      | 13255176  | 207 |
| chr7 | 5256229       | 5256435   | 207 |
| chr6 | 122399884     | 122400090 | 207 |
| chr6 | 121705152     | 121705358 | 207 |
| chr6 | 100110438     | 100110644 | 207 |
| chr6 | 72323854      | 72324060  | 207 |
| chr6 | 63195566      | 63195772  | 207 |
| chr6 | 63186696      | 63186902  | 207 |
| chr5 | 125490854     | 125491060 | 207 |
| chr5 | 120487048     | 120487254 | 207 |
| chr5 | 118210948     | 118211154 | 207 |
| chr5 | 112559082     | 112559288 | 207 |
| chr5 | 101220427     | 101220633 | 207 |
| chr5 | 94861801      | 94862007  | 207 |
| chr5 | 80053385      | 80053591  | 207 |
| chr5 | 76850493      | 76850699  | 207 |
| chr5 | 66253418      | 66253624  | 207 |
| chr5 | 51830430      | 51830636  | 207 |
| chr5 | 30164424      | 30164630  | 207 |
| chr5 | 29979145      | 29979351  | 207 |
| chr5 | 28806326      | 28806532  | 207 |
| chr5 | 28722868      | 28723074  | 207 |
| chr4 | 124222546     | 124222752 | 207 |
| chr4 | 122702286     | 122702492 | 207 |
| chr4 | 121217783     | 121217989 | 207 |
| chr4 | 111787833     | 111788039 | 207 |
| chr4 | 99480829      | 99481035  | 207 |
| chr4 | 99411016      | 99411222  | 207 |
| chr4 | 72725164      | 72725370  | 207 |
| chr4 | 68103391      | 68103597  | 207 |
| chr4 | 68050933      | 68051139  | 207 |

|       |           |           |     |
|-------|-----------|-----------|-----|
| chr4  | 39493272  | 39493478  | 207 |
| chr4  | 29785052  | 29785258  | 207 |
| chr4  | 29016938  | 29017144  | 207 |
| chr4  | 7541550   | 7541756   | 207 |
| chr4  | 6233175   | 6233381   | 207 |
| chr3  | 125767039 | 125767245 | 207 |
| chr3  | 115025966 | 115026172 | 207 |
| chr3  | 114241368 | 114241574 | 207 |
| chr3  | 106867787 | 106867993 | 207 |
| chr3  | 48210271  | 48210477  | 207 |
| chr3  | 11524373  | 11524579  | 207 |
| chr3  | 10698894  | 10699100  | 207 |
| chr3  | 8579877   | 8580083   | 207 |
| chr29 | 42905007  | 42905213  | 207 |
| chr29 | 35596825  | 35597031  | 207 |
| chr29 | 33286520  | 33286726  | 207 |
| chr29 | 33065836  | 33066042  | 207 |
| chr29 | 25543606  | 25543812  | 207 |
| chr28 | 41310586  | 41310792  | 207 |
| chr28 | 33975466  | 33975672  | 207 |
| chr28 | 33723899  | 33724105  | 207 |
| chr28 | 33647794  | 33648000  | 207 |
| chr27 | 46076137  | 46076343  | 207 |
| chr27 | 45254648  | 45254854  | 207 |
| chr27 | 34744243  | 34744449  | 207 |
| chr26 | 48474190  | 48474396  | 207 |
| chr26 | 44451101  | 44451307  | 207 |
| chr26 | 43475470  | 43475676  | 207 |
| chr26 | 42742377  | 42742583  | 207 |
| chr26 | 42177789  | 42177995  | 207 |
| chr26 | 35733215  | 35733421  | 207 |
| chr26 | 22020812  | 22021018  | 207 |
| chr25 | 37566515  | 37566721  | 207 |
| chr25 | 33088531  | 33088737  | 207 |
| chr25 | 31642463  | 31642669  | 207 |
| chr25 | 27145811  | 27146017  | 207 |
| chr25 | 22112169  | 22112375  | 207 |
| chr25 | 14962647  | 14962853  | 207 |
| chr25 | 8175329   | 8175535   | 207 |
| chr25 | 1511731   | 1511937   | 207 |
| chr24 | 64983201  | 64983407  | 207 |
| chr24 | 49186446  | 49186652  | 207 |
| chr24 | 48977960  | 48978166  | 207 |
| chr24 | 48787666  | 48787872  | 207 |
| chr24 | 40748352  | 40748558  | 207 |
| chr24 | 40442530  | 40442736  | 207 |
| chr24 | 34865918  | 34866124  | 207 |
| chr24 | 20683615  | 20683821  | 207 |
| chr23 | 53018875  | 53019081  | 207 |
| chr23 | 52118320  | 52118526  | 207 |

|       |               |           |     |
|-------|---------------|-----------|-----|
| chr23 | 52001144      | 52001350  | 207 |
| chr23 | 50908858      | 50909064  | 207 |
| chr23 | 48558266      | 48558472  | 207 |
| chr23 | 17577340      | 17577546  | 207 |
| chr23 | 17488565      | 17488771  | 207 |
| chr23 | 14622725      | 14622931  | 207 |
| chr23 | 13636442      | 13636648  | 207 |
| chr23 | 8493142       | 8493348   | 207 |
| chr22 | 59579026      | 59579232  | 207 |
| chr22 | 57293143      | 57293349  | 207 |
| chr22 | 44849766      | 44849972  | 207 |
| chr22 | 29770987      | 29771193  | 207 |
| chr22 | 14917571      | 14917777  | 207 |
| chr21 | 67767233      | 67767439  | 207 |
| chr21 | 66592545      | 66592751  | 207 |
| chr21 | 60428794      | 60429000  | 207 |
| chr21 | 33820027      | 33820233  | 207 |
| chr21 | 19739190      | 19739396  | 207 |
| chr21 | 19251417      | 19251623  | 207 |
| chr21 | 7607252       | 7607458   | 207 |
| chr20 | 67078901      | 67079107  | 207 |
| chr20 | 66449393      | 66449599  | 207 |
| chr20 | 19109158      | 19109364  | 207 |
| chr20 | 8710848       | 8711054   | 207 |
| chr20 | 6785119       | 6785325   | 207 |
| chr20 | 4999782       | 4999988   | 207 |
| chr20 | 561140 561346 | 207       |     |
| chr2  | 140654512     | 140654718 | 207 |
| chr2  | 139123924     | 139124130 | 207 |
| chr2  | 138490343     | 138490549 | 207 |
| chr2  | 136644443     | 136644649 | 207 |
| chr2  | 136631367     | 136631573 | 207 |
| chr2  | 136516868     | 136517074 | 207 |
| chr2  | 135081792     | 135081998 | 207 |
| chr2  | 134558517     | 134558723 | 207 |
| chr2  | 132974401     | 132974607 | 207 |
| chr2  | 129985893     | 129986099 | 207 |
| chr2  | 89370403      | 89370609  | 207 |
| chr2  | 75691632      | 75691838  | 207 |
| chr2  | 26470296      | 26470502  | 207 |
| chr19 | 60514897      | 60515103  | 207 |
| chr19 | 60360467      | 60360673  | 207 |
| chr19 | 59374000      | 59374206  | 207 |
| chr19 | 58809914      | 58810120  | 207 |
| chr19 | 58617996      | 58618202  | 207 |
| chr19 | 57741242      | 57741448  | 207 |
| chr19 | 54850137      | 54850343  | 207 |
| chr19 | 54473487      | 54473693  | 207 |
| chr19 | 54436341      | 54436547  | 207 |
| chr19 | 43050655      | 43050861  | 207 |

|       |               |          |     |
|-------|---------------|----------|-----|
| chr19 | 25531346      | 25531552 | 207 |
| chr19 | 23757806      | 23758012 | 207 |
| chr19 | 17111230      | 17111436 | 207 |
| chr19 | 7602668       | 7602874  | 207 |
| chr19 | 6576909       | 6577115  | 207 |
| chr19 | 6516600       | 6516806  | 207 |
| chr18 | 57604400      | 57604606 | 207 |
| chr18 | 51522642      | 51522848 | 207 |
| chr18 | 51000093      | 51000299 | 207 |
| chr18 | 49815212      | 49815418 | 207 |
| chr18 | 34882726      | 34882932 | 207 |
| chr18 | 11442827      | 11443033 | 207 |
| chr17 | 74357546      | 74357752 | 207 |
| chr17 | 70712657      | 70712863 | 207 |
| chr17 | 69072700      | 69072906 | 207 |
| chr17 | 64005818      | 64006024 | 207 |
| chr17 | 63405977      | 63406183 | 207 |
| chr17 | 57759592      | 57759798 | 207 |
| chr16 | 77587599      | 77587805 | 207 |
| chr16 | 70618155      | 70618361 | 207 |
| chr16 | 56758095      | 56758301 | 207 |
| chr16 | 50274662      | 50274868 | 207 |
| chr16 | 48012619      | 48012825 | 207 |
| chr16 | 46688579      | 46688785 | 207 |
| chr16 | 42865299      | 42865505 | 207 |
| chr16 | 3269825       | 3270031  | 207 |
| chr15 | 75546773      | 75546979 | 207 |
| chr15 | 73740538      | 73740744 | 207 |
| chr15 | 51667807      | 51668013 | 207 |
| chr15 | 45825679      | 45825885 | 207 |
| chr15 | 28067196      | 28067402 | 207 |
| chr15 | 27457387      | 27457593 | 207 |
| chr15 | 25035326      | 25035532 | 207 |
| chr15 | 23987123      | 23987329 | 207 |
| chr15 | 21746758      | 21746964 | 207 |
| chr15 | 21195681      | 21195887 | 207 |
| chr14 | 61738467      | 61738673 | 207 |
| chr14 | 29049847      | 29050053 | 207 |
| chr14 | 9667797       | 9668003  | 207 |
| chr14 | 5741004       | 5741210  | 207 |
| chr14 | 3558672       | 3558878  | 207 |
| chr14 | 606265 606471 | 207      | 207 |
| chr13 | 77777532      | 77777738 | 207 |
| chr13 | 75760989      | 75761195 | 207 |
| chr13 | 60737643      | 60737849 | 207 |
| chr13 | 59698515      | 59698721 | 207 |
| chr13 | 56727027      | 56727233 | 207 |
| chr13 | 53799841      | 53800047 | 207 |
| chr13 | 41928920      | 41929126 | 207 |
| chr13 | 41394659      | 41394865 | 207 |



|       |           |           |     |
|-------|-----------|-----------|-----|
| chr13 | 40317617  | 40317823  | 207 |
| chr13 | 39683367  | 39683573  | 207 |
| chr12 | 84568519  | 84568725  | 207 |
| chr12 | 84293367  | 84293573  | 207 |
| chr12 | 74238676  | 74238882  | 207 |
| chr12 | 73370850  | 73371056  | 207 |
| chr12 | 35671748  | 35671954  | 207 |
| chr12 | 33701198  | 33701404  | 207 |
| chr12 | 14669530  | 14669736  | 207 |
| chr11 | 105972625 | 105972831 | 207 |
| chr11 | 91929641  | 91929847  | 207 |
| chr11 | 91516327  | 91516533  | 207 |
| chr11 | 91476663  | 91476869  | 207 |
| chr11 | 73141690  | 73141896  | 207 |
| chr11 | 31095222  | 31095428  | 207 |
| chr11 | 30066812  | 30067018  | 207 |
| chr11 | 28796492  | 28796698  | 207 |
| chr11 | 11722932  | 11723138  | 207 |
| chr11 | 7040803   | 7041009   | 207 |
| chr11 | 4946365   | 4946571   | 207 |
| chr11 | 3152326   | 3152532   | 207 |
| chr11 | 1641646   | 1641852   | 207 |
| chr10 | 21819993  | 21820199  | 207 |
| chr10 | 18766810  | 18767016  | 207 |
| chr10 | 7924535   | 7924741   | 207 |
| chr1  | 152216684 | 152216890 | 207 |
| chr1  | 149931160 | 149931366 | 207 |
| chr1  | 149484718 | 149484924 | 207 |
| chr1  | 144283099 | 144283305 | 207 |
| chr1  | 101564228 | 101564434 | 207 |
| chr1  | 88445540  | 88445746  | 207 |
| chr1  | 86864559  | 86864765  | 207 |
| chr1  | 75044684  | 75044890  | 207 |
| chr1  | 74924426  | 74924632  | 207 |
| chr1  | 74136556  | 74136762  | 207 |
| chrX  | 80856039  | 80856244  | 206 |
| chrX  | 42818623  | 42818828  | 206 |
| chrX  | 7892885   | 7893090   | 206 |
| chrX  | 2327565   | 2327770   | 206 |
| chr9  | 53201734  | 53201939  | 206 |
| chr9  | 28646774  | 28646979  | 206 |
| chr8  | 108725135 | 108725340 | 206 |
| chr8  | 103920700 | 103920905 | 206 |
| chr8  | 73110181  | 73110386  | 206 |
| chr8  | 65203878  | 65204083  | 206 |
| chr8  | 25636622  | 25636827  | 206 |
| chr8  | 17153891  | 17154096  | 206 |
| chr7  | 71317057  | 71317262  | 206 |
| chr7  | 57010899  | 57011104  | 206 |
| chr7  | 51930684  | 51930889  | 206 |

|      |           |           |     |
|------|-----------|-----------|-----|
| chr7 | 51898463  | 51898668  | 206 |
| chr7 | 45834701  | 45834906  | 206 |
| chr7 | 43735286  | 43735491  | 206 |
| chr7 | 38669020  | 38669225  | 206 |
| chr7 | 37623285  | 37623490  | 206 |
| chr7 | 16523399  | 16523604  | 206 |
| chr7 | 13401202  | 13401407  | 206 |
| chr7 | 10603265  | 10603470  | 206 |
| chr6 | 122436327 | 122436532 | 206 |
| chr6 | 121744189 | 121744394 | 206 |
| chr6 | 121278039 | 121278244 | 206 |
| chr6 | 107500928 | 107501133 | 206 |
| chr6 | 94430921  | 94431126  | 206 |
| chr6 | 63043362  | 63043567  | 206 |
| chr6 | 59253016  | 59253221  | 206 |
| chr6 | 46686480  | 46686685  | 206 |
| chr6 | 32705067  | 32705272  | 206 |
| chr6 | 13973412  | 13973617  | 206 |
| chr5 | 112093644 | 112093849 | 206 |
| chr5 | 111714526 | 111714731 | 206 |
| chr5 | 64497557  | 64497762  | 206 |
| chr5 | 36610200  | 36610405  | 206 |
| chr5 | 28292580  | 28292785  | 206 |
| chr5 | 10116786  | 10116991  | 206 |
| chr5 | 1178076   | 1178281   | 206 |
| chr4 | 122166268 | 122166473 | 206 |
| chr4 | 121863120 | 121863325 | 206 |
| chr4 | 118013970 | 118014175 | 206 |
| chr4 | 117764875 | 117765080 | 206 |
| chr4 | 117134240 | 117134445 | 206 |
| chr4 | 101966429 | 101966634 | 206 |
| chr4 | 96005127  | 96005332  | 206 |
| chr4 | 72518220  | 72518425  | 206 |
| chr4 | 38776015  | 38776220  | 206 |
| chr4 | 8913417   | 8913622   | 206 |
| chr4 | 6110822   | 6111027   | 206 |
| chr3 | 124479619 | 124479824 | 206 |
| chr3 | 119642690 | 119642895 | 206 |
| chr3 | 119296248 | 119296453 | 206 |
| chr3 | 106550718 | 106550923 | 206 |
| chr3 | 105120445 | 105120650 | 206 |
| chr3 | 62670576  | 62670781  | 206 |
| chr3 | 62454132  | 62454337  | 206 |
| chr3 | 55889866  | 55890071  | 206 |
| chr3 | 55234481  | 55234686  | 206 |
| chr3 | 54362081  | 54362286  | 206 |
| chr3 | 30026166  | 30026371  | 206 |
| chr3 | 23867638  | 23867843  | 206 |
| chr3 | 17555325  | 17555530  | 206 |
| chr3 | 17554740  | 17554945  | 206 |

|       |               |          |     |
|-------|---------------|----------|-----|
| chr3  | 16835766      | 16835971 | 206 |
| chr3  | 4866285       | 4866490  | 206 |
| chr29 | 42480562      | 42480767 | 206 |
| chr29 | 42372613      | 42372818 | 206 |
| chr29 | 38361816      | 38362021 | 206 |
| chr29 | 36057863      | 36058068 | 206 |
| chr29 | 33576381      | 33576586 | 206 |
| chr29 | 31589354      | 31589559 | 206 |
| chr29 | 18183963      | 18184168 | 206 |
| chr29 | 6137624       | 6137829  | 206 |
| chr28 | 41302518      | 41302723 | 206 |
| chr28 | 33546633      | 33546838 | 206 |
| chr28 | 25528892      | 25529097 | 206 |
| chr27 | 22185929      | 22186134 | 206 |
| chr27 | 21420312      | 21420517 | 206 |
| chr27 | 1341601       | 1341806  | 206 |
| chr26 | 51594009      | 51594214 | 206 |
| chr26 | 49196259      | 49196464 | 206 |
| chr26 | 48745837      | 48746042 | 206 |
| chr26 | 44947133      | 44947338 | 206 |
| chr26 | 44860901      | 44861106 | 206 |
| chr26 | 44830508      | 44830713 | 206 |
| chr26 | 44529170      | 44529375 | 206 |
| chr26 | 44520299      | 44520504 | 206 |
| chr26 | 37856285      | 37856490 | 206 |
| chr26 | 25433783      | 25433988 | 206 |
| chr26 | 18800103      | 18800308 | 206 |
| chr26 | 17898252      | 17898457 | 206 |
| chr26 | 14922443      | 14922648 | 206 |
| chr25 | 40830872      | 40831077 | 206 |
| chr25 | 40415133      | 40415338 | 206 |
| chr25 | 39526642      | 39526847 | 206 |
| chr25 | 2683965       | 2684170  | 206 |
| chr25 | 853043 853248 | 206      | 206 |
| chr24 | 55546895      | 55547100 | 206 |
| chr24 | 50229198      | 50229403 | 206 |
| chr24 | 48755769      | 48755974 | 206 |
| chr24 | 43939938      | 43940143 | 206 |
| chr24 | 1595208       | 1595413  | 206 |
| chr24 | 1075116       | 1075321  | 206 |
| chr23 | 49949162      | 49949367 | 206 |
| chr23 | 49176295      | 49176500 | 206 |
| chr23 | 19325985      | 19326190 | 206 |
| chr23 | 18773219      | 18773424 | 206 |
| chr23 | 18477658      | 18477863 | 206 |
| chr23 | 13758309      | 13758514 | 206 |
| chr22 | 56438190      | 56438395 | 206 |
| chr22 | 54259706      | 54259911 | 206 |
| chr22 | 53334394      | 53334599 | 206 |
| chr22 | 50716324      | 50716529 | 206 |

|       |           |           |     |
|-------|-----------|-----------|-----|
| chr22 | 50590501  | 50590706  | 206 |
| chr22 | 47628486  | 47628691  | 206 |
| chr22 | 12069406  | 12069611  | 206 |
| chr21 | 69148548  | 69148753  | 206 |
| chr21 | 66477901  | 66478106  | 206 |
| chr21 | 60938906  | 60939111  | 206 |
| chr21 | 27807429  | 27807634  | 206 |
| chr21 | 13720811  | 13721016  | 206 |
| chr21 | 9843054   | 9843259   | 206 |
| chr21 | 6494539   | 6494744   | 206 |
| chr21 | 6469093   | 6469298   | 206 |
| chr20 | 66535894  | 66536099  | 206 |
| chr20 | 27319151  | 27319356  | 206 |
| chr20 | 5318226   | 5318431   | 206 |
| chr20 | 4269943   | 4270148   | 206 |
| chr20 | 3583042   | 3583247   | 206 |
| chr2  | 140642246 | 140642451 | 206 |
| chr2  | 138552776 | 138552981 | 206 |
| chr2  | 135048258 | 135048463 | 206 |
| chr2  | 135022481 | 135022686 | 206 |
| chr2  | 134965847 | 134966052 | 206 |
| chr2  | 132374101 | 132374306 | 206 |
| chr2  | 126966032 | 126966237 | 206 |
| chr2  | 75592701  | 75592906  | 206 |
| chr2  | 21897155  | 21897360  | 206 |
| chr19 | 63442993  | 63443198  | 206 |
| chr19 | 62734018  | 62734223  | 206 |
| chr19 | 60252718  | 60252923  | 206 |
| chr19 | 59535838  | 59536043  | 206 |
| chr19 | 59418338  | 59418543  | 206 |
| chr19 | 59277030  | 59277235  | 206 |
| chr19 | 56492367  | 56492572  | 206 |
| chr19 | 56001908  | 56002113  | 206 |
| chr19 | 54848687  | 54848892  | 206 |
| chr19 | 54760015  | 54760220  | 206 |
| chr19 | 51933576  | 51933781  | 206 |
| chr19 | 47294569  | 47294774  | 206 |
| chr19 | 47285338  | 47285543  | 206 |
| chr19 | 45223901  | 45224106  | 206 |
| chr19 | 44658754  | 44658959  | 206 |
| chr19 | 38558266  | 38558471  | 206 |
| chr19 | 34576883  | 34577088  | 206 |
| chr19 | 34392767  | 34392972  | 206 |
| chr19 | 34066132  | 34066337  | 206 |
| chr19 | 34052226  | 34052431  | 206 |
| chr19 | 30313877  | 30314082  | 206 |
| chr19 | 29691219  | 29691424  | 206 |
| chr19 | 23765469  | 23765674  | 206 |
| chr19 | 21717350  | 21717555  | 206 |
| chr19 | 21680883  | 21681088  | 206 |

|       |          |          |     |
|-------|----------|----------|-----|
| chr19 | 20390037 | 20390242 | 206 |
| chr19 | 19747126 | 19747331 | 206 |
| chr19 | 12552139 | 12552344 | 206 |
| chr19 | 12409168 | 12409373 | 206 |
| chr19 | 8468965  | 8469170  | 206 |
| chr18 | 63872489 | 63872694 | 206 |
| chr18 | 62987779 | 62987984 | 206 |
| chr18 | 54323453 | 54323658 | 206 |
| chr18 | 47490488 | 47490693 | 206 |
| chr18 | 45547459 | 45547664 | 206 |
| chr18 | 43367986 | 43368191 | 206 |
| chr18 | 39530777 | 39530982 | 206 |
| chr18 | 34642645 | 34642850 | 206 |
| chr18 | 33653410 | 33653615 | 206 |
| chr18 | 24218330 | 24218535 | 206 |
| chr18 | 11365081 | 11365286 | 206 |
| chr18 | 9471727  | 9471932  | 206 |
| chr17 | 72936416 | 72936621 | 206 |
| chr17 | 72048154 | 72048359 | 206 |
| chr17 | 70456918 | 70457123 | 206 |
| chr17 | 70423351 | 70423556 | 206 |
| chr17 | 70066129 | 70066334 | 206 |
| chr17 | 69729637 | 69729842 | 206 |
| chr17 | 66856159 | 66856364 | 206 |
| chr17 | 66444865 | 66445070 | 206 |
| chr17 | 46057298 | 46057503 | 206 |
| chr17 | 44179303 | 44179508 | 206 |
| chr16 | 69698208 | 69698413 | 206 |
| chr16 | 68747315 | 68747520 | 206 |
| chr16 | 47524217 | 47524422 | 206 |
| chr16 | 47068756 | 47068961 | 206 |
| chr16 | 44148472 | 44148677 | 206 |
| chr15 | 75217631 | 75217836 | 206 |
| chr15 | 64758277 | 64758482 | 206 |
| chr15 | 64323775 | 64323980 | 206 |
| chr15 | 51612527 | 51612732 | 206 |
| chr15 | 51318254 | 51318459 | 206 |
| chr15 | 42516678 | 42516883 | 206 |
| chr15 | 39574348 | 39574553 | 206 |
| chr15 | 27268739 | 27268944 | 206 |
| chr15 | 24850480 | 24850685 | 206 |
| chr15 | 24391311 | 24391516 | 206 |
| chr15 | 19914350 | 19914555 | 206 |
| chr14 | 80584789 | 80584994 | 206 |
| chr14 | 68004276 | 68004481 | 206 |
| chr14 | 61202620 | 61202825 | 206 |
| chr14 | 60968394 | 60968599 | 206 |
| chr14 | 60379872 | 60380077 | 206 |
| chr14 | 29056066 | 29056271 | 206 |
| chr14 | 8729393  | 8729598  | 206 |

|       |               |           |     |
|-------|---------------|-----------|-----|
| chr14 | 6067182       | 6067387   | 206 |
| chr14 | 5576363       | 5576568   | 206 |
| chr14 | 1451138       | 1451343   | 206 |
| chr13 | 79631759      | 79631964  | 206 |
| chr13 | 78098525      | 78098730  | 206 |
| chr13 | 77313038      | 77313243  | 206 |
| chr13 | 68915939      | 68916144  | 206 |
| chr13 | 67391972      | 67392177  | 206 |
| chr13 | 63507321      | 63507526  | 206 |
| chr13 | 61216006      | 61216211  | 206 |
| chr13 | 56378426      | 56378631  | 206 |
| chr13 | 55506331      | 55506536  | 206 |
| chr13 | 52079921      | 52080126  | 206 |
| chr13 | 42276012      | 42276217  | 206 |
| chr13 | 41834554      | 41834759  | 206 |
| chr12 | 84607077      | 84607282  | 206 |
| chr12 | 35760472      | 35760677  | 206 |
| chr12 | 29825207      | 29825412  | 206 |
| chr12 | 10758113      | 10758318  | 206 |
| chr11 | 108372452     | 108372657 | 206 |
| chr11 | 104697469     | 104697674 | 206 |
| chr11 | 91943891      | 91944096  | 206 |
| chr11 | 72738070      | 72738275  | 206 |
| chr11 | 49415979      | 49416184  | 206 |
| chr11 | 49012584      | 49012789  | 206 |
| chr11 | 27409733      | 27409938  | 206 |
| chr10 | 90924718      | 90924923  | 206 |
| chr10 | 89346961      | 89347166  | 206 |
| chr10 | 84995416      | 84995621  | 206 |
| chr10 | 83532071      | 83532276  | 206 |
| chr10 | 74883641      | 74883846  | 206 |
| chr10 | 44498483      | 44498688  | 206 |
| chr10 | 22858975      | 22859180  | 206 |
| chr10 | 16919466      | 16919671  | 206 |
| chr10 | 13498199      | 13498404  | 206 |
| chr10 | 4839182       | 4839387   | 206 |
| chr1  | 152229695     | 152229900 | 206 |
| chr1  | 150173722     | 150173927 | 206 |
| chr1  | 147078138     | 147078343 | 206 |
| chr1  | 132076099     | 132076304 | 206 |
| chr1  | 74535131      | 74535336  | 206 |
| chr1  | 69830246      | 69830451  | 206 |
| chr1  | 68436654      | 68436859  | 206 |
| chr1  | 1615551       | 1615756   | 206 |
| chr1  | 464022 464227 | 206       |     |
| chrX  | 50971743      | 50971947  | 205 |
| chrX  | 11009559      | 11009763  | 205 |
| chr9  | 98833790      | 98833994  | 205 |
| chr9  | 52946900      | 52947104  | 205 |
| chr8  | 108783756     | 108783960 | 205 |

|      |           |           |     |
|------|-----------|-----------|-----|
| chr8 | 95561865  | 95562069  | 205 |
| chr8 | 94326138  | 94326342  | 205 |
| chr8 | 65047113  | 65047317  | 205 |
| chr8 | 63871545  | 63871749  | 205 |
| chr8 | 61903238  | 61903442  | 205 |
| chr8 | 60129453  | 60129657  | 205 |
| chr8 | 24498345  | 24498549  | 205 |
| chr7 | 106225825 | 106226029 | 205 |
| chr7 | 50483643  | 50483847  | 205 |
| chr7 | 44492589  | 44492793  | 205 |
| chr7 | 38399114  | 38399318  | 205 |
| chr7 | 38219360  | 38219564  | 205 |
| chr7 | 32282947  | 32283151  | 205 |
| chr7 | 9331280   | 9331484   | 205 |
| chr7 | 6592743   | 6592947   | 205 |
| chr7 | 6587050   | 6587254   | 205 |
| chr7 | 3628935   | 3629139   | 205 |
| chr6 | 122170530 | 122170734 | 205 |
| chr6 | 121846534 | 121846738 | 205 |
| chr6 | 120792350 | 120792554 | 205 |
| chr6 | 120635018 | 120635222 | 205 |
| chr6 | 120483863 | 120484067 | 205 |
| chr6 | 118269938 | 118270142 | 205 |
| chr6 | 107266779 | 107266983 | 205 |
| chr6 | 94813804  | 94814008  | 205 |
| chr6 | 92060150  | 92060354  | 205 |
| chr6 | 68946991  | 68947195  | 205 |
| chr6 | 59142324  | 59142528  | 205 |
| chr6 | 22237731  | 22237935  | 205 |
| chr5 | 121637665 | 121637869 | 205 |
| chr5 | 121201087 | 121201291 | 205 |
| chr5 | 120447501 | 120447705 | 205 |
| chr5 | 118254399 | 118254603 | 205 |
| chr5 | 113468413 | 113468617 | 205 |
| chr5 | 113240953 | 113241157 | 205 |
| chr5 | 113225035 | 113225239 | 205 |
| chr5 | 112548122 | 112548326 | 205 |
| chr5 | 107806961 | 107807165 | 205 |
| chr5 | 84677524  | 84677728  | 205 |
| chr5 | 60373255  | 60373459  | 205 |
| chr5 | 60044131  | 60044335  | 205 |
| chr5 | 32858669  | 32858873  | 205 |
| chr5 | 31659794  | 31659998  | 205 |
| chr5 | 30168555  | 30168759  | 205 |
| chr4 | 124422870 | 124423074 | 205 |
| chr4 | 118051974 | 118052178 | 205 |
| chr4 | 117832079 | 117832283 | 205 |
| chr4 | 116934317 | 116934521 | 205 |
| chr4 | 115955898 | 115956102 | 205 |
| chr4 | 72726120  | 72726324  | 205 |

|       |           |           |     |
|-------|-----------|-----------|-----|
| chr4  | 47034534  | 47034738  | 205 |
| chr4  | 5566814   | 5567018   | 205 |
| chr3  | 125651983 | 125652187 | 205 |
| chr3  | 122286621 | 122286825 | 205 |
| chr3  | 120360682 | 120360886 | 205 |
| chr3  | 115078414 | 115078618 | 205 |
| chr3  | 106515196 | 106515400 | 205 |
| chr3  | 105168028 | 105168232 | 205 |
| chr3  | 104396010 | 104396214 | 205 |
| chr3  | 102720502 | 102720706 | 205 |
| chr3  | 54334736  | 54334940  | 205 |
| chr3  | 35896109  | 35896313  | 205 |
| chr3  | 33526205  | 33526409  | 205 |
| chr3  | 33483927  | 33484131  | 205 |
| chr3  | 31585218  | 31585422  | 205 |
| chr3  | 22669325  | 22669529  | 205 |
| chr3  | 16744994  | 16745198  | 205 |
| chr3  | 9179192   | 9179396   | 205 |
| chr3  | 4326706   | 4326910   | 205 |
| chr29 | 51839863  | 51840067  | 205 |
| chr29 | 50608592  | 50608796  | 205 |
| chr29 | 49241667  | 49241871  | 205 |
| chr29 | 49041625  | 49041829  | 205 |
| chr29 | 49039994  | 49040198  | 205 |
| chr29 | 45791007  | 45791211  | 205 |
| chr29 | 45073405  | 45073609  | 205 |
| chr29 | 37027108  | 37027312  | 205 |
| chr29 | 34893391  | 34893595  | 205 |
| chr29 | 31895845  | 31896049  | 205 |
| chr29 | 31542528  | 31542732  | 205 |
| chr29 | 26845699  | 26845903  | 205 |
| chr28 | 42943278  | 42943482  | 205 |
| chr28 | 38903656  | 38903860  | 205 |
| chr28 | 32856004  | 32856208  | 205 |
| chr28 | 26815088  | 26815292  | 205 |
| chr28 | 15324682  | 15324886  | 205 |
| chr27 | 38684500  | 38684704  | 205 |
| chr27 | 35835836  | 35836040  | 205 |
| chr27 | 35830845  | 35831049  | 205 |
| chr27 | 4195357   | 4195561   | 205 |
| chr26 | 48433180  | 48433384  | 205 |
| chr26 | 47998365  | 47998569  | 205 |
| chr26 | 44793051  | 44793255  | 205 |
| chr26 | 43078021  | 43078225  | 205 |
| chr26 | 40177670  | 40177874  | 205 |
| chr26 | 18150639  | 18150843  | 205 |
| chr26 | 16010245  | 16010449  | 205 |
| chr25 | 43486657  | 43486861  | 205 |
| chr25 | 37274281  | 37274485  | 205 |
| chr25 | 35575845  | 35576049  | 205 |



|       |          |          |     |
|-------|----------|----------|-----|
| chr25 | 22145633 | 22145837 | 205 |
| chr25 | 11171319 | 11171523 | 205 |
| chr25 | 4479173  | 4479377  | 205 |
| chr25 | 4343706  | 4343910  | 205 |
| chr25 | 1504738  | 1504942  | 205 |
| chr24 | 65017427 | 65017631 | 205 |
| chr24 | 61009132 | 61009336 | 205 |
| chr24 | 55534881 | 55535085 | 205 |
| chr24 | 47880511 | 47880715 | 205 |
| chr24 | 32334074 | 32334278 | 205 |
| chr24 | 26723740 | 26723944 | 205 |
| chr24 | 2860357  | 2860561  | 205 |
| chr23 | 51057318 | 51057522 | 205 |
| chr23 | 49808719 | 49808923 | 205 |
| chr23 | 45653536 | 45653740 | 205 |
| chr23 | 44428799 | 44429003 | 205 |
| chr23 | 41855537 | 41855741 | 205 |
| chr23 | 40861807 | 40862011 | 205 |
| chr23 | 31435081 | 31435285 | 205 |
| chr23 | 28536007 | 28536211 | 205 |
| chr23 | 18762766 | 18762970 | 205 |
| chr23 | 17471227 | 17471431 | 205 |
| chr23 | 15914326 | 15914530 | 205 |
| chr23 | 10962982 | 10963186 | 205 |
| chr23 | 8319099  | 8319303  | 205 |
| chr22 | 61557332 | 61557536 | 205 |
| chr22 | 60419382 | 60419586 | 205 |
| chr22 | 60166356 | 60166560 | 205 |
| chr22 | 58481729 | 58481933 | 205 |
| chr22 | 56361197 | 56361401 | 205 |
| chr22 | 55826551 | 55826755 | 205 |
| chr22 | 55340234 | 55340438 | 205 |
| chr22 | 18387902 | 18388106 | 205 |
| chr22 | 14078423 | 14078627 | 205 |
| chr22 | 12195734 | 12195938 | 205 |
| chr22 | 10751491 | 10751695 | 205 |
| chr21 | 67609073 | 67609277 | 205 |
| chr21 | 59307047 | 59307251 | 205 |
| chr21 | 34521408 | 34521612 | 205 |
| chr21 | 33226102 | 33226306 | 205 |
| chr21 | 33114279 | 33114483 | 205 |
| chr21 | 25225025 | 25225229 | 205 |
| chr21 | 24829783 | 24829987 | 205 |
| chr21 | 22550651 | 22550855 | 205 |
| chr21 | 13612637 | 13612841 | 205 |
| chr21 | 6402901  | 6403105  | 205 |
| chr20 | 74764535 | 74764739 | 205 |
| chr20 | 66531891 | 66532095 | 205 |
| chr20 | 22305042 | 22305246 | 205 |
| chr20 | 1374690  | 1374894  | 205 |

|       |           |           |     |
|-------|-----------|-----------|-----|
| chr20 | 1038394   | 1038598   | 205 |
| chr2  | 140083992 | 140084196 | 205 |
| chr2  | 137106008 | 137106212 | 205 |
| chr2  | 133715273 | 133715477 | 205 |
| chr2  | 133042036 | 133042240 | 205 |
| chr2  | 130774955 | 130775159 | 205 |
| chr2  | 126893914 | 126894118 | 205 |
| chr2  | 124976158 | 124976362 | 205 |
| chr2  | 108807664 | 108807868 | 205 |
| chr2  | 68416034  | 68416238  | 205 |
| chr2  | 21844169  | 21844373  | 205 |
| chr2  | 17892198  | 17892402  | 205 |
| chr19 | 63939317  | 63939521  | 205 |
| chr19 | 62429626  | 62429830  | 205 |
| chr19 | 61213409  | 61213613  | 205 |
| chr19 | 59375291  | 59375495  | 205 |
| chr19 | 54671739  | 54671943  | 205 |
| chr19 | 54192324  | 54192528  | 205 |
| chr19 | 45935087  | 45935291  | 205 |
| chr19 | 44670520  | 44670724  | 205 |
| chr19 | 42348176  | 42348380  | 205 |
| chr19 | 39831154  | 39831358  | 205 |
| chr19 | 38848695  | 38848899  | 205 |
| chr19 | 37588564  | 37588768  | 205 |
| chr19 | 34588407  | 34588611  | 205 |
| chr19 | 33673918  | 33674122  | 205 |
| chr19 | 33601980  | 33602184  | 205 |
| chr19 | 27937159  | 27937363  | 205 |
| chr19 | 27387813  | 27388017  | 205 |
| chr19 | 23055983  | 23056187  | 205 |
| chr19 | 22341181  | 22341385  | 205 |
| chr19 | 16768094  | 16768298  | 205 |
| chr19 | 15134279  | 15134483  | 205 |
| chr19 | 14068037  | 14068241  | 205 |
| chr18 | 64653763  | 64653967  | 205 |
| chr18 | 62700827  | 62701031  | 205 |
| chr18 | 57266006  | 57266210  | 205 |
| chr18 | 54943988  | 54944192  | 205 |
| chr18 | 49723190  | 49723394  | 205 |
| chr18 | 47772146  | 47772350  | 205 |
| chr18 | 39476783  | 39476987  | 205 |
| chr18 | 24365948  | 24366152  | 205 |
| chr18 | 15776997  | 15777201  | 205 |
| chr18 | 15434694  | 15434898  | 205 |
| chr18 | 12423679  | 12423883  | 205 |
| chr17 | 75883853  | 75884057  | 205 |
| chr17 | 74761874  | 74762078  | 205 |
| chr17 | 74549520  | 74549724  | 205 |
| chr17 | 72779109  | 72779313  | 205 |
| chr17 | 72686811  | 72687015  | 205 |

|       |               |          |     |
|-------|---------------|----------|-----|
| chr17 | 69735305      | 69735509 | 205 |
| chr17 | 68168921      | 68169125 | 205 |
| chr17 | 66808472      | 66808676 | 205 |
| chr17 | 60281545      | 60281749 | 205 |
| chr17 | 5380479       | 5380683  | 205 |
| chr16 | 74191582      | 74191786 | 205 |
| chr16 | 71666314      | 71666518 | 205 |
| chr16 | 69788882      | 69789086 | 205 |
| chr16 | 56104267      | 56104471 | 205 |
| chr16 | 48730971      | 48731175 | 205 |
| chr16 | 47688520      | 47688724 | 205 |
| chr16 | 44410082      | 44410286 | 205 |
| chr16 | 39090174      | 39090378 | 205 |
| chr16 | 38934154      | 38934358 | 205 |
| chr16 | 38798467      | 38798671 | 205 |
| chr16 | 26057845      | 26058049 | 205 |
| chr16 | 2433832       | 2434036  | 205 |
| chr16 | 168490 168694 | 205      |     |
| chr15 | 74472231      | 74472435 | 205 |
| chr15 | 73413285      | 73413489 | 205 |
| chr15 | 65705587      | 65705791 | 205 |
| chr15 | 40453930      | 40454134 | 205 |
| chr15 | 28715336      | 28715540 | 205 |
| chr15 | 26705855      | 26706059 | 205 |
| chr14 | 68377213      | 68377417 | 205 |
| chr14 | 21094426      | 21094630 | 205 |
| chr14 | 3448934       | 3449138  | 205 |
| chr14 | 1895480       | 1895684  | 205 |
| chr14 | 1447912       | 1448116  | 205 |
| chr13 | 80411658      | 80411862 | 205 |
| chr13 | 77316294      | 77316498 | 205 |
| chr13 | 71122959      | 71123163 | 205 |
| chr13 | 69871350      | 69871554 | 205 |
| chr13 | 68459737      | 68459941 | 205 |
| chr13 | 67182429      | 67182633 | 205 |
| chr13 | 66813352      | 66813556 | 205 |
| chr13 | 57510094      | 57510298 | 205 |
| chr13 | 57229311      | 57229515 | 205 |
| chr13 | 42901401      | 42901605 | 205 |
| chr13 | 40576859      | 40577063 | 205 |
| chr13 | 35378660      | 35378864 | 205 |
| chr13 | 17722037      | 17722241 | 205 |
| chr13 | 11120583      | 11120787 | 205 |
| chr12 | 83383671      | 83383875 | 205 |
| chr12 | 55615777      | 55615981 | 205 |
| chr12 | 35723390      | 35723594 | 205 |
| chr12 | 34246831      | 34247035 | 205 |
| chr12 | 34022104      | 34022308 | 205 |
| chr12 | 31510283      | 31510487 | 205 |
| chr12 | 20784717      | 20784921 | 205 |

|       |               |           |     |
|-------|---------------|-----------|-----|
| chr12 | 13894460      | 13894664  | 205 |
| chr12 | 11462605      | 11462809  | 205 |
| chr11 | 109587476     | 109587680 | 205 |
| chr11 | 108095432     | 108095636 | 205 |
| chr11 | 105605472     | 105605676 | 205 |
| chr11 | 100437352     | 100437556 | 205 |
| chr11 | 99197087      | 99197291  | 205 |
| chr11 | 95963881      | 95964085  | 205 |
| chr11 | 92611391      | 92611595  | 205 |
| chr11 | 90231060      | 90231264  | 205 |
| chr11 | 81457407      | 81457611  | 205 |
| chr11 | 75403533      | 75403737  | 205 |
| chr11 | 52302239      | 52302443  | 205 |
| chr11 | 44934158      | 44934362  | 205 |
| chr11 | 27590915      | 27591119  | 205 |
| chr11 | 14954514      | 14954718  | 205 |
| chr11 | 13169995      | 13170199  | 205 |
| chr11 | 11732146      | 11732350  | 205 |
| chr11 | 11633749      | 11633953  | 205 |
| chr11 | 942891 943095 |           | 205 |
| chr10 | 104781642     | 104781846 | 205 |
| chr10 | 90280685      | 90280889  | 205 |
| chr10 | 47479900      | 47480104  | 205 |
| chr10 | 17412253      | 17412457  | 205 |
| chr10 | 17265785      | 17265989  | 205 |
| chr1  | 152359409     | 152359613 | 205 |
| chr1  | 147662032     | 147662236 | 205 |
| chr1  | 146401046     | 146401250 | 205 |
| chr1  | 145226159     | 145226363 | 205 |
| chr1  | 132080718     | 132080922 | 205 |
| chr1  | 100081549     | 100081753 | 205 |
| chr1  | 68775326      | 68775530  | 205 |
| chrX  | 49531942      | 49532145  | 204 |
| chr9  | 105818471     | 105818674 | 204 |
| chr9  | 104895687     | 104895890 | 204 |
| chr9  | 90538365      | 90538568  | 204 |
| chr9  | 90411245      | 90411448  | 204 |
| chr9  | 67287423      | 67287626  | 204 |
| chr9  | 34450226      | 34450429  | 204 |
| chr8  | 112159699     | 112159902 | 204 |
| chr8  | 73079869      | 73080072  | 204 |
| chr8  | 61836831      | 61837034  | 204 |
| chr8  | 40304895      | 40305098  | 204 |
| chr8  | 30034484      | 30034687  | 204 |
| chr8  | 17463143      | 17463346  | 204 |
| chr7  | 94418557      | 94418760  | 204 |
| chr7  | 80880086      | 80880289  | 204 |
| chr7  | 52376685      | 52376888  | 204 |
| chr7  | 46837818      | 46838021  | 204 |
| chr7  | 46160383      | 46160586  | 204 |

|       |           |           |     |
|-------|-----------|-----------|-----|
| chr7  | 43735547  | 43735750  | 204 |
| chr7  | 38837455  | 38837658  | 204 |
| chr7  | 21094798  | 21095001  | 204 |
| chr7  | 19235530  | 19235733  | 204 |
| chr7  | 13094137  | 13094340  | 204 |
| chr7  | 10848260  | 10848463  | 204 |
| chr7  | 10610420  | 10610623  | 204 |
| chr7  | 4150871   | 4151074   | 204 |
| chr6  | 120967469 | 120967672 | 204 |
| chr6  | 120752313 | 120752516 | 204 |
| chr6  | 16758504  | 16758707  | 204 |
| chr5  | 123711816 | 123712019 | 204 |
| chr5  | 122487291 | 122487494 | 204 |
| chr5  | 122059510 | 122059713 | 204 |
| chr5  | 121390735 | 121390938 | 204 |
| chr5  | 115088167 | 115088370 | 204 |
| chr5  | 112803378 | 112803581 | 204 |
| chr5  | 75724501  | 75724704  | 204 |
| chr5  | 73637057  | 73637260  | 204 |
| chr5  | 35444912  | 35445115  | 204 |
| chr5  | 29749308  | 29749511  | 204 |
| chr5  | 26153938  | 26154141  | 204 |
| chr4  | 124264428 | 124264631 | 204 |
| chr4  | 123112782 | 123112985 | 204 |
| chr4  | 99239521  | 99239724  | 204 |
| chr4  | 79812513  | 79812716  | 204 |
| chr4  | 67286193  | 67286396  | 204 |
| chr3  | 126911973 | 126912176 | 204 |
| chr3  | 121085619 | 121085822 | 204 |
| chr3  | 114586994 | 114587197 | 204 |
| chr3  | 105482321 | 105482524 | 204 |
| chr3  | 98381399  | 98381602  | 204 |
| chr3  | 98317104  | 98317307  | 204 |
| chr3  | 34801422  | 34801625  | 204 |
| chr3  | 26146418  | 26146621  | 204 |
| chr3  | 25949345  | 25949548  | 204 |
| chr3  | 22652755  | 22652958  | 204 |
| chr3  | 13488808  | 13489011  | 204 |
| chr3  | 11540079  | 11540282  | 204 |
| chr29 | 47953000  | 47953203  | 204 |
| chr29 | 41688714  | 41688917  | 204 |
| chr29 | 37017642  | 37017845  | 204 |
| chr29 | 36099119  | 36099322  | 204 |
| chr29 | 34666799  | 34667002  | 204 |
| chr29 | 17785774  | 17785977  | 204 |
| chr28 | 45654341  | 45654544  | 204 |
| chr28 | 40400640  | 40400843  | 204 |
| chr28 | 33278027  | 33278230  | 204 |
| chr28 | 33267538  | 33267741  | 204 |
| chr28 | 27164754  | 27164957  | 204 |

|       |               |          |     |
|-------|---------------|----------|-----|
| chr28 | 26067616      | 26067819 | 204 |
| chr28 | 23555120      | 23555323 | 204 |
| chr28 | 14101824      | 14102027 | 204 |
| chr28 | 12132186      | 12132389 | 204 |
| chr28 | 7457377       | 7457580  | 204 |
| chr27 | 39916487      | 39916690 | 204 |
| chr27 | 39881796      | 39881999 | 204 |
| chr27 | 28119639      | 28119842 | 204 |
| chr27 | 26569335      | 26569538 | 204 |
| chr27 | 16581569      | 16581772 | 204 |
| chr26 | 51482499      | 51482702 | 204 |
| chr26 | 49562944      | 49563147 | 204 |
| chr26 | 48319106      | 48319309 | 204 |
| chr26 | 46481663      | 46481866 | 204 |
| chr26 | 44618835      | 44619038 | 204 |
| chr26 | 41264537      | 41264740 | 204 |
| chr26 | 37975250      | 37975453 | 204 |
| chr26 | 37776251      | 37776454 | 204 |
| chr26 | 34891000      | 34891203 | 204 |
| chr26 | 25513468      | 25513671 | 204 |
| chr26 | 20375383      | 20375586 | 204 |
| chr25 | 42786950      | 42787153 | 204 |
| chr25 | 39288351      | 39288554 | 204 |
| chr25 | 39208249      | 39208452 | 204 |
| chr25 | 38043112      | 38043315 | 204 |
| chr25 | 38039181      | 38039384 | 204 |
| chr25 | 37560089      | 37560292 | 204 |
| chr25 | 35506595      | 35506798 | 204 |
| chr25 | 35118872      | 35119075 | 204 |
| chr25 | 28061538      | 28061741 | 204 |
| chr25 | 4845420       | 4845623  | 204 |
| chr25 | 2389961       | 2390164  | 204 |
| chr25 | 944829 945032 | 204      | 204 |
| chr24 | 64569683      | 64569886 | 204 |
| chr24 | 60763460      | 60763663 | 204 |
| chr24 | 49773117      | 49773320 | 204 |
| chr24 | 46372477      | 46372680 | 204 |
| chr24 | 41159875      | 41160078 | 204 |
| chr24 | 34510838      | 34511041 | 204 |
| chr23 | 52675630      | 52675833 | 204 |
| chr23 | 51940371      | 51940574 | 204 |
| chr23 | 51056329      | 51056532 | 204 |
| chr23 | 48642487      | 48642690 | 204 |
| chr23 | 46572015      | 46572218 | 204 |
| chr23 | 44268330      | 44268533 | 204 |
| chr23 | 30366726      | 30366929 | 204 |
| chr23 | 28844643      | 28844846 | 204 |
| chr23 | 18839580      | 18839783 | 204 |
| chr23 | 15987470      | 15987673 | 204 |
| chr23 | 11018182      | 11018385 | 204 |

|       |               |           |     |
|-------|---------------|-----------|-----|
| chr23 | 10907132      | 10907335  | 204 |
| chr23 | 9676165       | 9676368   | 204 |
| chr22 | 61423962      | 61424165  | 204 |
| chr22 | 59518251      | 59518454  | 204 |
| chr22 | 57379120      | 57379323  | 204 |
| chr22 | 56189138      | 56189341  | 204 |
| chr22 | 56074476      | 56074679  | 204 |
| chr22 | 56037388      | 56037591  | 204 |
| chr22 | 55479184      | 55479387  | 204 |
| chr22 | 51107059      | 51107262  | 204 |
| chr22 | 49573970      | 49574173  | 204 |
| chr22 | 46579186      | 46579389  | 204 |
| chr22 | 30341819      | 30342022  | 204 |
| chr22 | 29910893      | 29911096  | 204 |
| chr22 | 16169562      | 16169765  | 204 |
| chr22 | 13411244      | 13411447  | 204 |
| chr22 | 5253788       | 5253991   | 204 |
| chr21 | 67958493      | 67958696  | 204 |
| chr21 | 65891446      | 65891649  | 204 |
| chr21 | 46442508      | 46442711  | 204 |
| chr21 | 33986596      | 33986799  | 204 |
| chr21 | 27992395      | 27992598  | 204 |
| chr21 | 25000203      | 25000406  | 204 |
| chr21 | 22745940      | 22746143  | 204 |
| chr21 | 13703087      | 13703290  | 204 |
| chr21 | 13108149      | 13108352  | 204 |
| chr21 | 9685840       | 9686043   | 204 |
| chr20 | 75113745      | 75113948  | 204 |
| chr20 | 74160988      | 74161191  | 204 |
| chr20 | 70810863      | 70811066  | 204 |
| chr20 | 37585202      | 37585405  | 204 |
| chr20 | 8374315       | 8374518   | 204 |
| chr20 | 7299404       | 7299607   | 204 |
| chr20 | 2179038       | 2179241   | 204 |
| chr20 | 763179 763382 |           | 204 |
| chr2  | 140090357     | 140090560 | 204 |
| chr2  | 138732556     | 138732759 | 204 |
| chr2  | 136710258     | 136710461 | 204 |
| chr2  | 135588599     | 135588802 | 204 |
| chr2  | 132453592     | 132453795 | 204 |
| chr2  | 132238195     | 132238398 | 204 |
| chr2  | 127109151     | 127109354 | 204 |
| chr2  | 126951899     | 126952102 | 204 |
| chr2  | 126727870     | 126728073 | 204 |
| chr2  | 110191767     | 110191970 | 204 |
| chr2  | 76394746      | 76394949  | 204 |
| chr2  | 43865759      | 43865962  | 204 |
| chr2  | 15379120      | 15379323  | 204 |
| chr19 | 60085714      | 60085917  | 204 |
| chr19 | 59191383      | 59191586  | 204 |

|       |          |          |     |
|-------|----------|----------|-----|
| chr19 | 58986881 | 58987084 | 204 |
| chr19 | 54919710 | 54919913 | 204 |
| chr19 | 54803562 | 54803765 | 204 |
| chr19 | 50997018 | 50997221 | 204 |
| chr19 | 49391102 | 49391305 | 204 |
| chr19 | 47346355 | 47346558 | 204 |
| chr19 | 47159669 | 47159872 | 204 |
| chr19 | 43857567 | 43857770 | 204 |
| chr19 | 39831657 | 39831860 | 204 |
| chr19 | 39411549 | 39411752 | 204 |
| chr19 | 39239774 | 39239977 | 204 |
| chr19 | 38850588 | 38850791 | 204 |
| chr19 | 38261520 | 38261723 | 204 |
| chr19 | 29641764 | 29641967 | 204 |
| chr19 | 23963199 | 23963402 | 204 |
| chr19 | 6615273  | 6615476  | 204 |
| chr19 | 6416205  | 6416408  | 204 |
| chr18 | 63030433 | 63030636 | 204 |
| chr18 | 62520859 | 62521062 | 204 |
| chr18 | 61966075 | 61966278 | 204 |
| chr18 | 55845786 | 55845989 | 204 |
| chr18 | 55289795 | 55289998 | 204 |
| chr18 | 52852233 | 52852436 | 204 |
| chr18 | 51586186 | 51586389 | 204 |
| chr18 | 48406806 | 48407009 | 204 |
| chr18 | 41074857 | 41075060 | 204 |
| chr18 | 39893997 | 39894200 | 204 |
| chr18 | 34829273 | 34829476 | 204 |
| chr18 | 32934869 | 32935072 | 204 |
| chr18 | 26544059 | 26544262 | 204 |
| chr18 | 22504553 | 22504756 | 204 |
| chr18 | 22341114 | 22341317 | 204 |
| chr18 | 13267286 | 13267489 | 204 |
| chr18 | 11338416 | 11338619 | 204 |
| chr18 | 9926876  | 9927079  | 204 |
| chr18 | 7104619  | 7104822  | 204 |
| chr18 | 4065020  | 4065223  | 204 |
| chr18 | 450111   | 450314   | 204 |
| chr17 | 74053062 | 74053265 | 204 |
| chr17 | 70509606 | 70509809 | 204 |
| chr17 | 70267577 | 70267780 | 204 |
| chr17 | 70058074 | 70058277 | 204 |
| chr17 | 70052767 | 70052970 | 204 |
| chr17 | 66802810 | 66803013 | 204 |
| chr17 | 64550889 | 64551092 | 204 |
| chr17 | 64234703 | 64234906 | 204 |
| chr17 | 54027678 | 54027881 | 204 |
| chr17 | 18506750 | 18506953 | 204 |
| chr17 | 4196463  | 4196666  | 204 |
| chr16 | 49691738 | 49691941 | 204 |



|       |               |          |     |
|-------|---------------|----------|-----|
| chr16 | 48794049      | 48794252 | 204 |
| chr16 | 48033935      | 48034138 | 204 |
| chr16 | 42930787      | 42930990 | 204 |
| chr16 | 42915875      | 42916078 | 204 |
| chr16 | 38526623      | 38526826 | 204 |
| chr16 | 23981070      | 23981273 | 204 |
| chr16 | 263843 264046 | 204      |     |
| chr15 | 75794349      | 75794552 | 204 |
| chr15 | 73745961      | 73746164 | 204 |
| chr15 | 65288717      | 65288920 | 204 |
| chr15 | 54024112      | 54024315 | 204 |
| chr15 | 32221114      | 32221317 | 204 |
| chr15 | 29990051      | 29990254 | 204 |
| chr15 | 28724482      | 28724685 | 204 |
| chr15 | 26782932      | 26783135 | 204 |
| chr15 | 25739118      | 25739321 | 204 |
| chr15 | 25484590      | 25484793 | 204 |
| chr15 | 24462058      | 24462261 | 204 |
| chr15 | 21308942      | 21309145 | 204 |
| chr14 | 61331777      | 61331980 | 204 |
| chr14 | 36741696      | 36741899 | 204 |
| chr14 | 31071027      | 31071230 | 204 |
| chr14 | 5908177       | 5908380  | 204 |
| chr14 | 1881497       | 1881700  | 204 |
| chr13 | 80398681      | 80398884 | 204 |
| chr13 | 77679690      | 77679893 | 204 |
| chr13 | 75755544      | 75755747 | 204 |
| chr13 | 75671167      | 75671370 | 204 |
| chr13 | 75444918      | 75445121 | 204 |
| chr13 | 72848012      | 72848215 | 204 |
| chr13 | 70212521      | 70212724 | 204 |
| chr13 | 67852726      | 67852929 | 204 |
| chr13 | 65349394      | 65349597 | 204 |
| chr13 | 63557874      | 63558077 | 204 |
| chr13 | 62863150      | 62863353 | 204 |
| chr13 | 61523413      | 61523616 | 204 |
| chr13 | 59000058      | 59000261 | 204 |
| chr13 | 56349370      | 56349573 | 204 |
| chr13 | 55427060      | 55427263 | 204 |
| chr13 | 54440872      | 54441075 | 204 |
| chr13 | 54212959      | 54213162 | 204 |
| chr13 | 52941955      | 52942158 | 204 |
| chr13 | 46314007      | 46314210 | 204 |
| chr13 | 42109595      | 42109798 | 204 |
| chr13 | 39625662      | 39625865 | 204 |
| chr13 | 35715644      | 35715847 | 204 |
| chr13 | 26189192      | 26189395 | 204 |
| chr12 | 83598929      | 83599132 | 204 |
| chr12 | 31970212      | 31970415 | 204 |
| chr12 | 21943246      | 21943449 | 204 |

|       |               |           |     |
|-------|---------------|-----------|-----|
| chr12 | 14897169      | 14897372  | 204 |
| chr12 | 11509518      | 11509721  | 204 |
| chr11 | 108913269     | 108913472 | 204 |
| chr11 | 99186473      | 99186676  | 204 |
| chr11 | 80262336      | 80262539  | 204 |
| chr11 | 70849834      | 70850037  | 204 |
| chr11 | 44978313      | 44978516  | 204 |
| chr11 | 30873726      | 30873929  | 204 |
| chr11 | 10530454      | 10530657  | 204 |
| chr11 | 9423972       | 9424175   | 204 |
| chr11 | 9331310       | 9331513   | 204 |
| chr11 | 5358896       | 5359099   | 204 |
| chr11 | 283645 283848 | 204       |     |
| chr10 | 104825500     | 104825703 | 204 |
| chr10 | 89009086      | 89009289  | 204 |
| chr10 | 85918481      | 85918684  | 204 |
| chr10 | 79143251      | 79143454  | 204 |
| chr10 | 66811847      | 66812050  | 204 |
| chr10 | 50772993      | 50773196  | 204 |
| chr10 | 21990519      | 21990722  | 204 |
| chr10 | 21373773      | 21373976  | 204 |
| chr10 | 17489606      | 17489809  | 204 |
| chr10 | 17000575      | 17000778  | 204 |
| chr10 | 11001719      | 11001922  | 204 |
| chr10 | 8556747       | 8556950   | 204 |
| chr1  | 159068780     | 159068983 | 204 |
| chr1  | 152034337     | 152034540 | 204 |
| chr1  | 147007497     | 147007700 | 204 |
| chr1  | 124554660     | 124554863 | 204 |
| chr1  | 120067205     | 120067408 | 204 |
| chr1  | 8717072       | 8717275   | 204 |
| chr1  | 1583732       | 1583935   | 204 |
| chrX  | 55282763      | 55282965  | 203 |
| chrX  | 52895986      | 52896188  | 203 |
| chr9  | 104866708     | 104866910 | 203 |
| chr9  | 100055188     | 100055390 | 203 |
| chr9  | 90548317      | 90548519  | 203 |
| chr9  | 12277419      | 12277621  | 203 |
| chr9  | 9361861       | 9362063   | 203 |
| chr8  | 109315626     | 109315828 | 203 |
| chr8  | 92279109      | 92279311  | 203 |
| chr8  | 77213267      | 77213469  | 203 |
| chr8  | 77207268      | 77207470  | 203 |
| chr8  | 65720473      | 65720675  | 203 |
| chr8  | 35972426      | 35972628  | 203 |
| chr8  | 24478887      | 24479089  | 203 |
| chr8  | 24404574      | 24404776  | 203 |
| chr7  | 53417145      | 53417347  | 203 |
| chr7  | 50363552      | 50363754  | 203 |
| chr7  | 43058793      | 43058995  | 203 |

|       |           |           |     |
|-------|-----------|-----------|-----|
| chr7  | 42799340  | 42799542  | 203 |
| chr7  | 19180457  | 19180659  | 203 |
| chr7  | 19178028  | 19178230  | 203 |
| chr7  | 9998825   | 9999027   | 203 |
| chr7  | 5302096   | 5302298   | 203 |
| chr6  | 122244722 | 122244924 | 203 |
| chr6  | 121795691 | 121795893 | 203 |
| chr6  | 120602181 | 120602383 | 203 |
| chr6  | 94868826  | 94869028  | 203 |
| chr6  | 59283346  | 59283548  | 203 |
| chr5  | 124891982 | 124892184 | 203 |
| chr5  | 123131028 | 123131230 | 203 |
| chr5  | 121343067 | 121343269 | 203 |
| chr5  | 117312231 | 117312433 | 203 |
| chr5  | 114339637 | 114339839 | 203 |
| chr5  | 113323175 | 113323377 | 203 |
| chr5  | 113168538 | 113168740 | 203 |
| chr5  | 113141352 | 113141554 | 203 |
| chr5  | 112683343 | 112683545 | 203 |
| chr5  | 112546724 | 112546926 | 203 |
| chr5  | 97533699  | 97533901  | 203 |
| chr5  | 81455958  | 81456160  | 203 |
| chr5  | 31665605  | 31665807  | 203 |
| chr5  | 29095128  | 29095330  | 203 |
| chr4  | 121549505 | 121549707 | 203 |
| chr4  | 98994669  | 98994871  | 203 |
| chr4  | 98878614  | 98878816  | 203 |
| chr4  | 95611108  | 95611310  | 203 |
| chr4  | 91482600  | 91482802  | 203 |
| chr4  | 67840198  | 67840400  | 203 |
| chr3  | 125203452 | 125203654 | 203 |
| chr3  | 123679152 | 123679354 | 203 |
| chr3  | 116056884 | 116057086 | 203 |
| chr3  | 113425942 | 113426144 | 203 |
| chr3  | 110148023 | 110148225 | 203 |
| chr3  | 109628960 | 109629162 | 203 |
| chr3  | 105912986 | 105913188 | 203 |
| chr3  | 104922262 | 104922464 | 203 |
| chr3  | 35852080  | 35852282  | 203 |
| chr3  | 35691136  | 35691338  | 203 |
| chr3  | 34133766  | 34133968  | 203 |
| chr3  | 33972456  | 33972658  | 203 |
| chr3  | 20432458  | 20432660  | 203 |
| chr3  | 15543689  | 15543891  | 203 |
| chr3  | 10570231  | 10570433  | 203 |
| chr29 | 50437704  | 50437906  | 203 |
| chr29 | 46892558  | 46892760  | 203 |
| chr29 | 45265047  | 45265249  | 203 |
| chr29 | 36218125  | 36218327  | 203 |
| chr29 | 17882721  | 17882923  | 203 |

|       |          |          |     |
|-------|----------|----------|-----|
| chr29 | 17880918 | 17881120 | 203 |
| chr29 | 17252768 | 17252970 | 203 |
| chr29 | 13332607 | 13332809 | 203 |
| chr28 | 42853247 | 42853449 | 203 |
| chr28 | 26058617 | 26058819 | 203 |
| chr28 | 25494144 | 25494346 | 203 |
| chr28 | 415288   | 415490   | 203 |
| chr27 | 34360854 | 34361056 | 203 |
| chr27 | 12073877 | 12074079 | 203 |
| chr27 | 1481599  | 1481801  | 203 |
| chr27 | 729712   | 729914   | 203 |
| chr26 | 49178180 | 49178382 | 203 |
| chr26 | 48831017 | 48831219 | 203 |
| chr26 | 46436656 | 46436858 | 203 |
| chr26 | 43902886 | 43903088 | 203 |
| chr26 | 43029335 | 43029537 | 203 |
| chr26 | 38128732 | 38128934 | 203 |
| chr26 | 21765856 | 21766058 | 203 |
| chr26 | 15697398 | 15697600 | 203 |
| chr25 | 39314290 | 39314492 | 203 |
| chr25 | 38407697 | 38407899 | 203 |
| chr25 | 37781380 | 37781582 | 203 |
| chr25 | 37307828 | 37308030 | 203 |
| chr25 | 35370204 | 35370406 | 203 |
| chr25 | 33160478 | 33160680 | 203 |
| chr25 | 3844152  | 3844354  | 203 |
| chr25 | 2811948  | 2812150  | 203 |
| chr24 | 64973988 | 64974190 | 203 |
| chr24 | 61087659 | 61087861 | 203 |
| chr24 | 60977507 | 60977709 | 203 |
| chr24 | 59922152 | 59922354 | 203 |
| chr24 | 51808600 | 51808802 | 203 |
| chr24 | 43663578 | 43663780 | 203 |
| chr23 | 52906887 | 52907089 | 203 |
| chr23 | 49916642 | 49916844 | 203 |
| chr23 | 48793643 | 48793845 | 203 |
| chr23 | 45854191 | 45854393 | 203 |
| chr23 | 38054004 | 38054206 | 203 |
| chr23 | 23880911 | 23881113 | 203 |
| chr23 | 16116391 | 16116593 | 203 |
| chr23 | 15993824 | 15994026 | 203 |
| chr23 | 15948030 | 15948232 | 203 |
| chr23 | 10971985 | 10972187 | 203 |
| chr22 | 60139035 | 60139237 | 203 |
| chr22 | 60028433 | 60028635 | 203 |
| chr22 | 58460529 | 58460731 | 203 |
| chr22 | 55883222 | 55883424 | 203 |
| chr22 | 54315913 | 54316115 | 203 |
| chr22 | 54053500 | 54053702 | 203 |
| chr22 | 38270565 | 38270767 | 203 |

|       |               |           |     |
|-------|---------------|-----------|-----|
| chr21 | 66369492      | 66369694  | 203 |
| chr21 | 66174827      | 66175029  | 203 |
| chr21 | 47606794      | 47606996  | 203 |
| chr21 | 34138599      | 34138801  | 203 |
| chr21 | 26828331      | 26828533  | 203 |
| chr21 | 26457102      | 26457304  | 203 |
| chr21 | 25088969      | 25089171  | 203 |
| chr21 | 22741036      | 22741238  | 203 |
| chr21 | 20155945      | 20156147  | 203 |
| chr21 | 18938537      | 18938739  | 203 |
| chr20 | 38652759      | 38652961  | 203 |
| chr20 | 16812180      | 16812382  | 203 |
| chr20 | 8720816       | 8721018   | 203 |
| chr20 | 8598758       | 8598960   | 203 |
| chr20 | 7062940       | 7063142   | 203 |
| chr20 | 647742 647944 |           | 203 |
| chr2  | 140621625     | 140621827 | 203 |
| chr2  | 140065579     | 140065781 | 203 |
| chr2  | 138950085     | 138950287 | 203 |
| chr2  | 138489778     | 138489980 | 203 |
| chr2  | 135725105     | 135725307 | 203 |
| chr2  | 134079604     | 134079806 | 203 |
| chr2  | 132212884     | 132213086 | 203 |
| chr2  | 130434353     | 130434555 | 203 |
| chr2  | 128465251     | 128465453 | 203 |
| chr2  | 115113392     | 115113594 | 203 |
| chr2  | 111691143     | 111691345 | 203 |
| chr2  | 111296609     | 111296811 | 203 |
| chr2  | 110529023     | 110529225 | 203 |
| chr2  | 75765560      | 75765762  | 203 |
| chr2  | 46135871      | 46136073  | 203 |
| chr2  | 44184301      | 44184503  | 203 |
| chr2  | 38871005      | 38871207  | 203 |
| chr2  | 33698272      | 33698474  | 203 |
| chr19 | 60030967      | 60031169  | 203 |
| chr19 | 59243015      | 59243217  | 203 |
| chr19 | 46790745      | 46790947  | 203 |
| chr19 | 46326524      | 46326726  | 203 |
| chr19 | 43219445      | 43219647  | 203 |
| chr19 | 43192793      | 43192995  | 203 |
| chr19 | 43119421      | 43119623  | 203 |
| chr19 | 42024363      | 42024565  | 203 |
| chr19 | 40250042      | 40250244  | 203 |
| chr19 | 39593842      | 39594044  | 203 |
| chr19 | 39372559      | 39372761  | 203 |
| chr19 | 33439808      | 33440010  | 203 |
| chr19 | 28780268      | 28780470  | 203 |
| chr19 | 23944367      | 23944569  | 203 |
| chr19 | 16969051      | 16969253  | 203 |
| chr19 | 15094007      | 15094209  | 203 |

|       |          |          |     |
|-------|----------|----------|-----|
| chr19 | 12611263 | 12611465 | 203 |
| chr19 | 8090093  | 8090295  | 203 |
| chr18 | 63441304 | 63441506 | 203 |
| chr18 | 56941074 | 56941276 | 203 |
| chr18 | 56590330 | 56590532 | 203 |
| chr18 | 55802037 | 55802239 | 203 |
| chr18 | 51925862 | 51926064 | 203 |
| chr18 | 47798658 | 47798860 | 203 |
| chr18 | 45933454 | 45933656 | 203 |
| chr18 | 35101302 | 35101504 | 203 |
| chr18 | 34814665 | 34814867 | 203 |
| chr18 | 23630512 | 23630714 | 203 |
| chr18 | 21997158 | 21997360 | 203 |
| chr18 | 17441197 | 17441399 | 203 |
| chr18 | 11560915 | 11561117 | 203 |
| chr18 | 11503787 | 11503989 | 203 |
| chr18 | 8188967  | 8189169  | 203 |
| chr18 | 3804283  | 3804485  | 203 |
| chr17 | 76298380 | 76298582 | 203 |
| chr17 | 72754060 | 72754262 | 203 |
| chr17 | 72694991 | 72695193 | 203 |
| chr17 | 69501607 | 69501809 | 203 |
| chr17 | 69371411 | 69371613 | 203 |
| chr17 | 68326385 | 68326587 | 203 |
| chr17 | 63156288 | 63156490 | 203 |
| chr17 | 11970969 | 11971171 | 203 |
| chr16 | 63117484 | 63117686 | 203 |
| chr16 | 47251743 | 47251945 | 203 |
| chr16 | 43871238 | 43871440 | 203 |
| chr16 | 39032261 | 39032463 | 203 |
| chr16 | 38888542 | 38888744 | 203 |
| chr16 | 38780582 | 38780784 | 203 |
| chr16 | 38533986 | 38534188 | 203 |
| chr16 | 24054897 | 24055099 | 203 |
| chr16 | 23850604 | 23850806 | 203 |
| chr16 | 3120806  | 3121008  | 203 |
| chr15 | 83169016 | 83169218 | 203 |
| chr15 | 83145055 | 83145257 | 203 |
| chr15 | 74980426 | 74980628 | 203 |
| chr15 | 74584476 | 74584678 | 203 |
| chr15 | 64317563 | 64317765 | 203 |
| chr15 | 63837905 | 63838107 | 203 |
| chr15 | 56116507 | 56116709 | 203 |
| chr15 | 56042588 | 56042790 | 203 |
| chr15 | 55682068 | 55682270 | 203 |
| chr15 | 43556485 | 43556687 | 203 |
| chr15 | 42541667 | 42541869 | 203 |
| chr15 | 32680404 | 32680606 | 203 |
| chr15 | 30073349 | 30073551 | 203 |
| chr15 | 28662687 | 28662889 | 203 |

|       |           |           |     |
|-------|-----------|-----------|-----|
| chr15 | 26726996  | 26727198  | 203 |
| chr14 | 25986480  | 25986682  | 203 |
| chr13 | 80756313  | 80756515  | 203 |
| chr13 | 80003817  | 80004019  | 203 |
| chr13 | 79665245  | 79665447  | 203 |
| chr13 | 78081553  | 78081755  | 203 |
| chr13 | 75786169  | 75786371  | 203 |
| chr13 | 72832356  | 72832558  | 203 |
| chr13 | 66695117  | 66695319  | 203 |
| chr13 | 65350300  | 65350502  | 203 |
| chr13 | 63425039  | 63425241  | 203 |
| chr13 | 60070940  | 60071142  | 203 |
| chr13 | 57186932  | 57187134  | 203 |
| chr13 | 55539162  | 55539364  | 203 |
| chr13 | 54900357  | 54900559  | 203 |
| chr13 | 54792622  | 54792824  | 203 |
| chr13 | 51981497  | 51981699  | 203 |
| chr13 | 46230396  | 46230598  | 203 |
| chr13 | 45373630  | 45373832  | 203 |
| chr13 | 41009386  | 41009588  | 203 |
| chr13 | 38253796  | 38253998  | 203 |
| chr13 | 35974133  | 35974335  | 203 |
| chr13 | 23642200  | 23642402  | 203 |
| chr13 | 11038132  | 11038334  | 203 |
| chr12 | 84032341  | 84032543  | 203 |
| chr12 | 82683725  | 82683927  | 203 |
| chr12 | 82377661  | 82377863  | 203 |
| chr12 | 75187402  | 75187604  | 203 |
| chr12 | 14726892  | 14727094  | 203 |
| chr12 | 14646301  | 14646503  | 203 |
| chr12 | 11503421  | 11503623  | 203 |
| chr12 | 11446095  | 11446297  | 203 |
| chr11 | 108410453 | 108410655 | 203 |
| chr11 | 107176432 | 107176634 | 203 |
| chr11 | 106012927 | 106013129 | 203 |
| chr11 | 105993707 | 105993909 | 203 |
| chr11 | 105643731 | 105643933 | 203 |
| chr11 | 100892801 | 100893003 | 203 |
| chr11 | 80362112  | 80362314  | 203 |
| chr11 | 77247851  | 77248053  | 203 |
| chr11 | 71102441  | 71102643  | 203 |
| chr11 | 71077760  | 71077962  | 203 |
| chr11 | 65139358  | 65139560  | 203 |
| chr11 | 49322820  | 49323022  | 203 |
| chr11 | 46628688  | 46628890  | 203 |
| chr11 | 31134327  | 31134529  | 203 |
| chr11 | 22028953  | 22029155  | 203 |
| chr11 | 13418572  | 13418774  | 203 |
| chr11 | 6428602   | 6428804   | 203 |
| chr11 | 4872659   | 4872861   | 203 |

|       |           |           |     |
|-------|-----------|-----------|-----|
| chr11 | 2279301   | 2279503   | 203 |
| chr11 | 1613014   | 1613216   | 203 |
| chr10 | 88690343  | 88690545  | 203 |
| chr10 | 88352171  | 88352373  | 203 |
| chr10 | 88294595  | 88294797  | 203 |
| chr10 | 88224637  | 88224839  | 203 |
| chr10 | 77484459  | 77484661  | 203 |
| chr10 | 74914839  | 74915041  | 203 |
| chr10 | 74861685  | 74861887  | 203 |
| chr10 | 66763231  | 66763433  | 203 |
| chr10 | 44890581  | 44890783  | 203 |
| chr10 | 21553891  | 21554093  | 203 |
| chr10 | 21123106  | 21123308  | 203 |
| chr10 | 18069722  | 18069924  | 203 |
| chr10 | 17781652  | 17781854  | 203 |
| chr10 | 12750610  | 12750812  | 203 |
| chr10 | 11110415  | 11110617  | 203 |
| chr10 | 8533123   | 8533325   | 203 |
| chr1  | 157260779 | 157260981 | 203 |
| chr1  | 152340065 | 152340267 | 203 |
| chr1  | 146418114 | 146418316 | 203 |
| chr1  | 137261358 | 137261560 | 203 |
| chr1  | 136682553 | 136682755 | 203 |
| chr1  | 81780717  | 81780919  | 203 |
| chr1  | 74916285  | 74916487  | 203 |
| chr1  | 68896135  | 68896337  | 203 |
| chr1  | 61313688  | 61313890  | 203 |
| chr1  | 5000713   | 5000915   | 203 |
| chr9  | 105509249 | 105509450 | 202 |
| chr9  | 97802996  | 97803197  | 202 |
| chr9  | 90581584  | 90581785  | 202 |
| chr9  | 89629663  | 89629864  | 202 |
| chr9  | 66531477  | 66531678  | 202 |
| chr9  | 62495812  | 62496013  | 202 |
| chr9  | 47119400  | 47119601  | 202 |
| chr9  | 6681689   | 6681890   | 202 |
| chr8  | 115781715 | 115781916 | 202 |
| chr8  | 108619641 | 108619842 | 202 |
| chr8  | 89467818  | 89468019  | 202 |
| chr8  | 80174219  | 80174420  | 202 |
| chr8  | 71879744  | 71879945  | 202 |
| chr8  | 65177518  | 65177719  | 202 |
| chr8  | 64947882  | 64948083  | 202 |
| chr8  | 56058746  | 56058947  | 202 |
| chr8  | 27424641  | 27424842  | 202 |
| chr8  | 24735229  | 24735430  | 202 |
| chr8  | 23053176  | 23053377  | 202 |
| chr8  | 10459947  | 10460148  | 202 |
| chr8  | 7782475   | 7782676   | 202 |
| chr7  | 43046082  | 43046283  | 202 |



|      |           |           |     |
|------|-----------|-----------|-----|
| chr7 | 42515129  | 42515330  | 202 |
| chr7 | 29490312  | 29490513  | 202 |
| chr7 | 21206464  | 21206665  | 202 |
| chr7 | 19929757  | 19929958  | 202 |
| chr7 | 17491924  | 17492125  | 202 |
| chr7 | 10409899  | 10410100  | 202 |
| chr6 | 122118587 | 122118788 | 202 |
| chr6 | 121758598 | 121758799 | 202 |
| chr6 | 109482263 | 109482464 | 202 |
| chr6 | 107432165 | 107432366 | 202 |
| chr6 | 107234069 | 107234270 | 202 |
| chr6 | 94983454  | 94983655  | 202 |
| chr6 | 74453135  | 74453336  | 202 |
| chr6 | 72099275  | 72099476  | 202 |
| chr5 | 118497419 | 118497620 | 202 |
| chr5 | 113482526 | 113482727 | 202 |
| chr5 | 113178362 | 113178563 | 202 |
| chr5 | 112780829 | 112781030 | 202 |
| chr5 | 94953785  | 94953986  | 202 |
| chr5 | 81558227  | 81558428  | 202 |
| chr5 | 81401951  | 81402152  | 202 |
| chr5 | 73134179  | 73134380  | 202 |
| chr5 | 60891084  | 60891285  | 202 |
| chr5 | 46572217  | 46572418  | 202 |
| chr5 | 35293958  | 35294159  | 202 |
| chr5 | 30235416  | 30235617  | 202 |
| chr5 | 30014052  | 30014253  | 202 |
| chr5 | 29912997  | 29913198  | 202 |
| chr5 | 29250184  | 29250385  | 202 |
| chr5 | 29164419  | 29164620  | 202 |
| chr5 | 28785612  | 28785813  | 202 |
| chr5 | 28776347  | 28776548  | 202 |
| chr4 | 121735969 | 121736170 | 202 |
| chr4 | 121724184 | 121724385 | 202 |
| chr4 | 121536996 | 121537197 | 202 |
| chr4 | 118023111 | 118023312 | 202 |
| chr4 | 117815548 | 117815749 | 202 |
| chr4 | 115967471 | 115967672 | 202 |
| chr4 | 105097309 | 105097510 | 202 |
| chr4 | 101655078 | 101655279 | 202 |
| chr4 | 96852892  | 96853093  | 202 |
| chr4 | 95902730  | 95902931  | 202 |
| chr4 | 71513533  | 71513734  | 202 |
| chr4 | 64721725  | 64721926  | 202 |
| chr4 | 53021386  | 53021587  | 202 |
| chr4 | 33470836  | 33471037  | 202 |
| chr3 | 127239412 | 127239613 | 202 |
| chr3 | 125717662 | 125717863 | 202 |
| chr3 | 122512518 | 122512719 | 202 |
| chr3 | 121480111 | 121480312 | 202 |

|       |               |           |     |
|-------|---------------|-----------|-----|
| chr3  | 119931431     | 119931632 | 202 |
| chr3  | 119924637     | 119924838 | 202 |
| chr3  | 118035232     | 118035433 | 202 |
| chr3  | 114298602     | 114298803 | 202 |
| chr3  | 114004007     | 114004208 | 202 |
| chr3  | 112897035     | 112897236 | 202 |
| chr3  | 112301573     | 112301774 | 202 |
| chr3  | 111790619     | 111790820 | 202 |
| chr3  | 55093938      | 55094139  | 202 |
| chr3  | 36958864      | 36959065  | 202 |
| chr3  | 35940465      | 35940666  | 202 |
| chr3  | 33965060      | 33965261  | 202 |
| chr3  | 31720025      | 31720226  | 202 |
| chr3  | 29656494      | 29656695  | 202 |
| chr3  | 18417885      | 18418086  | 202 |
| chr3  | 17131168      | 17131369  | 202 |
| chr3  | 375112 375313 | 202       | 202 |
| chr29 | 49738836      | 49739037  | 202 |
| chr29 | 48940607      | 48940808  | 202 |
| chr29 | 44680373      | 44680574  | 202 |
| chr29 | 38833892      | 38834093  | 202 |
| chr29 | 38345467      | 38345668  | 202 |
| chr29 | 37508367      | 37508568  | 202 |
| chr29 | 36262547      | 36262748  | 202 |
| chr29 | 35468361      | 35468562  | 202 |
| chr29 | 34431944      | 34432145  | 202 |
| chr29 | 34285036      | 34285237  | 202 |
| chr29 | 17839497      | 17839698  | 202 |
| chr28 | 27457113      | 27457314  | 202 |
| chr28 | 5208536       | 5208737   | 202 |
| chr27 | 40754142      | 40754343  | 202 |
| chr27 | 35842730      | 35842931  | 202 |
| chr27 | 34679573      | 34679774  | 202 |
| chr27 | 34558973      | 34559174  | 202 |
| chr27 | 29127570      | 29127771  | 202 |
| chr27 | 21495270      | 21495471  | 202 |
| chr26 | 50637402      | 50637603  | 202 |
| chr26 | 50424736      | 50424937  | 202 |
| chr26 | 49096474      | 49096675  | 202 |
| chr26 | 46862366      | 46862567  | 202 |
| chr26 | 44458088      | 44458289  | 202 |
| chr26 | 43077411      | 43077612  | 202 |
| chr26 | 14886559      | 14886760  | 202 |
| chr25 | 42196694      | 42196895  | 202 |
| chr25 | 40207951      | 40208152  | 202 |
| chr25 | 37732388      | 37732589  | 202 |
| chr25 | 33580454      | 33580655  | 202 |
| chr25 | 27326857      | 27327058  | 202 |
| chr25 | 26730247      | 26730448  | 202 |
| chr25 | 21769020      | 21769221  | 202 |

|       |           |           |     |
|-------|-----------|-----------|-----|
| chr25 | 7994609   | 7994810   | 202 |
| chr25 | 3399899   | 3400100   | 202 |
| chr24 | 49133231  | 49133432  | 202 |
| chr24 | 30874445  | 30874646  | 202 |
| chr24 | 776966    | 777167    | 202 |
| chr23 | 51935155  | 51935356  | 202 |
| chr23 | 48767874  | 48768075  | 202 |
| chr23 | 48600395  | 48600596  | 202 |
| chr23 | 35468389  | 35468590  | 202 |
| chr23 | 31102868  | 31103069  | 202 |
| chr23 | 27212514  | 27212715  | 202 |
| chr23 | 27127933  | 27128134  | 202 |
| chr23 | 18583606  | 18583807  | 202 |
| chr23 | 15806623  | 15806824  | 202 |
| chr23 | 11808572  | 11808773  | 202 |
| chr23 | 10467295  | 10467496  | 202 |
| chr23 | 8257699   | 8257900   | 202 |
| chr23 | 7896535   | 7896736   | 202 |
| chr22 | 60650724  | 60650925  | 202 |
| chr22 | 59520009  | 59520210  | 202 |
| chr22 | 57319671  | 57319872  | 202 |
| chr22 | 56295028  | 56295229  | 202 |
| chr22 | 54047413  | 54047614  | 202 |
| chr22 | 50787666  | 50787867  | 202 |
| chr22 | 50527078  | 50527279  | 202 |
| chr22 | 30234184  | 30234385  | 202 |
| chr21 | 60991816  | 60992017  | 202 |
| chr21 | 60094094  | 60094295  | 202 |
| chr21 | 57507113  | 57507314  | 202 |
| chr21 | 45706432  | 45706633  | 202 |
| chr21 | 42270950  | 42271151  | 202 |
| chr21 | 41771354  | 41771555  | 202 |
| chr21 | 25083629  | 25083830  | 202 |
| chr21 | 24872164  | 24872365  | 202 |
| chr21 | 22702374  | 22702575  | 202 |
| chr21 | 7007944   | 7008145   | 202 |
| chr20 | 75618973  | 75619174  | 202 |
| chr20 | 74230894  | 74231095  | 202 |
| chr20 | 73246333  | 73246534  | 202 |
| chr20 | 70569598  | 70569799  | 202 |
| chr20 | 65762527  | 65762728  | 202 |
| chr20 | 44248583  | 44248784  | 202 |
| chr20 | 33566213  | 33566414  | 202 |
| chr20 | 33517348  | 33517549  | 202 |
| chr20 | 3616221   | 3616422   | 202 |
| chr20 | 910577    | 910778    | 202 |
| chr2  | 139157190 | 139157391 | 202 |
| chr2  | 134968405 | 134968606 | 202 |
| chr2  | 131540006 | 131540207 | 202 |
| chr2  | 126123359 | 126123560 | 202 |

|       |           |           |     |
|-------|-----------|-----------|-----|
| chr2  | 125485695 | 125485896 | 202 |
| chr2  | 92350280  | 92350481  | 202 |
| chr2  | 92319199  | 92319400  | 202 |
| chr19 | 60279857  | 60280058  | 202 |
| chr19 | 58690675  | 58690876  | 202 |
| chr19 | 58071803  | 58072004  | 202 |
| chr19 | 56619305  | 56619506  | 202 |
| chr19 | 55910926  | 55911127  | 202 |
| chr19 | 55764938  | 55765139  | 202 |
| chr19 | 55745567  | 55745768  | 202 |
| chr19 | 55296254  | 55296455  | 202 |
| chr19 | 54870785  | 54870986  | 202 |
| chr19 | 54852494  | 54852695  | 202 |
| chr19 | 54653395  | 54653596  | 202 |
| chr19 | 47256485  | 47256686  | 202 |
| chr19 | 44874091  | 44874292  | 202 |
| chr19 | 43162152  | 43162353  | 202 |
| chr19 | 43152339  | 43152540  | 202 |
| chr19 | 43117496  | 43117697  | 202 |
| chr19 | 43058914  | 43059115  | 202 |
| chr19 | 41302075  | 41302276  | 202 |
| chr19 | 39910356  | 39910557  | 202 |
| chr19 | 38733701  | 38733902  | 202 |
| chr19 | 35794249  | 35794450  | 202 |
| chr19 | 30374398  | 30374599  | 202 |
| chr19 | 28531908  | 28532109  | 202 |
| chr19 | 27254086  | 27254287  | 202 |
| chr19 | 25268951  | 25269152  | 202 |
| chr19 | 15629921  | 15630122  | 202 |
| chr18 | 65614839  | 65615040  | 202 |
| chr18 | 64267443  | 64267644  | 202 |
| chr18 | 63022087  | 63022288  | 202 |
| chr18 | 56912395  | 56912596  | 202 |
| chr18 | 56591239  | 56591440  | 202 |
| chr18 | 53173717  | 53173918  | 202 |
| chr18 | 53120766  | 53120967  | 202 |
| chr18 | 48199802  | 48200003  | 202 |
| chr18 | 43471845  | 43472046  | 202 |
| chr18 | 39904329  | 39904530  | 202 |
| chr18 | 31720636  | 31720837  | 202 |
| chr18 | 23978379  | 23978580  | 202 |
| chr18 | 22401666  | 22401867  | 202 |
| chr18 | 11469323  | 11469524  | 202 |
| chr18 | 10304023  | 10304224  | 202 |
| chr18 | 7923339   | 7923540   | 202 |
| chr17 | 75723044  | 75723245  | 202 |
| chr17 | 73972161  | 73972362  | 202 |
| chr17 | 73245037  | 73245238  | 202 |
| chr17 | 72767476  | 72767677  | 202 |
| chr17 | 72701074  | 72701275  | 202 |

|       |          |          |     |
|-------|----------|----------|-----|
| chr17 | 70544977 | 70545178 | 202 |
| chr17 | 70130472 | 70130673 | 202 |
| chr17 | 69252196 | 69252397 | 202 |
| chr17 | 66666995 | 66667196 | 202 |
| chr17 | 64305216 | 64305417 | 202 |
| chr17 | 63767256 | 63767457 | 202 |
| chr17 | 62275709 | 62275910 | 202 |
| chr17 | 57848029 | 57848230 | 202 |
| chr17 | 57523174 | 57523375 | 202 |
| chr17 | 49576532 | 49576733 | 202 |
| chr17 | 49388041 | 49388242 | 202 |
| chr17 | 37640482 | 37640683 | 202 |
| chr16 | 75131226 | 75131427 | 202 |
| chr16 | 67485617 | 67485818 | 202 |
| chr16 | 61913318 | 61913519 | 202 |
| chr16 | 46998108 | 46998309 | 202 |
| chr16 | 46817851 | 46818052 | 202 |
| chr16 | 44793667 | 44793868 | 202 |
| chr16 | 43892965 | 43893166 | 202 |
| chr16 | 29735514 | 29735715 | 202 |
| chr16 | 1557425  | 1557626  | 202 |
| chr15 | 81054183 | 81054384 | 202 |
| chr15 | 75360149 | 75360350 | 202 |
| chr15 | 75308610 | 75308811 | 202 |
| chr15 | 74566005 | 74566206 | 202 |
| chr15 | 66215934 | 66216135 | 202 |
| chr15 | 52808004 | 52808205 | 202 |
| chr15 | 38246312 | 38246513 | 202 |
| chr15 | 36664097 | 36664298 | 202 |
| chr15 | 35391134 | 35391335 | 202 |
| chr15 | 31762930 | 31763131 | 202 |
| chr15 | 29791149 | 29791350 | 202 |
| chr15 | 28067507 | 28067708 | 202 |
| chr15 | 18342992 | 18343193 | 202 |
| chr14 | 21788303 | 21788504 | 202 |
| chr14 | 19949603 | 19949804 | 202 |
| chr14 | 13409447 | 13409648 | 202 |
| chr14 | 12192937 | 12193138 | 202 |
| chr14 | 7628184  | 7628385  | 202 |
| chr14 | 7085878  | 7086079  | 202 |
| chr14 | 1852851  | 1853052  | 202 |
| chr13 | 75629924 | 75630125 | 202 |
| chr13 | 75250353 | 75250554 | 202 |
| chr13 | 69906728 | 69906929 | 202 |
| chr13 | 69026445 | 69026646 | 202 |
| chr13 | 68660535 | 68660736 | 202 |
| chr13 | 63392168 | 63392369 | 202 |
| chr13 | 61196409 | 61196610 | 202 |
| chr13 | 60951886 | 60952087 | 202 |
| chr13 | 60430825 | 60431026 | 202 |

|       |           |           |     |
|-------|-----------|-----------|-----|
| chr13 | 60405678  | 60405879  | 202 |
| chr13 | 57625827  | 57626028  | 202 |
| chr13 | 56129243  | 56129444  | 202 |
| chr13 | 53791840  | 53792041  | 202 |
| chr13 | 53119150  | 53119351  | 202 |
| chr13 | 42393897  | 42394098  | 202 |
| chr13 | 41194694  | 41194895  | 202 |
| chr13 | 40896810  | 40897011  | 202 |
| chr13 | 15765897  | 15766098  | 202 |
| chr13 | 10975080  | 10975281  | 202 |
| chr12 | 84407178  | 84407379  | 202 |
| chr12 | 83604074  | 83604275  | 202 |
| chr12 | 83598204  | 83598405  | 202 |
| chr12 | 33715083  | 33715284  | 202 |
| chr12 | 33501509  | 33501710  | 202 |
| chr12 | 31192063  | 31192264  | 202 |
| chr11 | 109682305 | 109682506 | 202 |
| chr11 | 108349097 | 108349298 | 202 |
| chr11 | 104878601 | 104878802 | 202 |
| chr11 | 100374401 | 100374602 | 202 |
| chr11 | 98958038  | 98958239  | 202 |
| chr11 | 98355618  | 98355819  | 202 |
| chr11 | 96383615  | 96383816  | 202 |
| chr11 | 91789243  | 91789444  | 202 |
| chr11 | 90390786  | 90390987  | 202 |
| chr11 | 84377534  | 84377735  | 202 |
| chr11 | 81487704  | 81487905  | 202 |
| chr11 | 75129336  | 75129537  | 202 |
| chr11 | 28764382  | 28764583  | 202 |
| chr11 | 25611088  | 25611289  | 202 |
| chr10 | 104893544 | 104893745 | 202 |
| chr10 | 102975728 | 102975929 | 202 |
| chr10 | 94264043  | 94264244  | 202 |
| chr10 | 88337701  | 88337902  | 202 |
| chr10 | 86516837  | 86517038  | 202 |
| chr10 | 76421617  | 76421818  | 202 |
| chr10 | 74924959  | 74925160  | 202 |
| chr10 | 59537928  | 59538129  | 202 |
| chr10 | 57346947  | 57347148  | 202 |
| chr10 | 48905719  | 48905920  | 202 |
| chr10 | 21138794  | 21138995  | 202 |
| chr10 | 20821901  | 20822102  | 202 |
| chr10 | 17732079  | 17732280  | 202 |
| chr10 | 17187897  | 17188098  | 202 |
| chr10 | 7682671   | 7682872   | 202 |
| chr10 | 5340791   | 5340992   | 202 |
| chr10 | 5063368   | 5063569   | 202 |
| chr1  | 146951458 | 146951659 | 202 |
| chr1  | 144794180 | 144794381 | 202 |
| chr1  | 141487161 | 141487362 | 202 |

|      |           |           |     |
|------|-----------|-----------|-----|
| chr1 | 133439913 | 133440114 | 202 |
| chr1 | 133337382 | 133337583 | 202 |
| chr1 | 75053641  | 75053842  | 202 |
| chr1 | 73152354  | 73152555  | 202 |
| chrX | 49819944  | 49820144  | 201 |
| chrX | 33516645  | 33516845  | 201 |
| chr9 | 107570682 | 107570882 | 201 |
| chr9 | 104524953 | 104525153 | 201 |
| chr9 | 104514463 | 104514663 | 201 |
| chr9 | 98847715  | 98847915  | 201 |
| chr9 | 77562194  | 77562394  | 201 |
| chr9 | 62595266  | 62595466  | 201 |
| chr9 | 47012205  | 47012405  | 201 |
| chr9 | 35458461  | 35458661  | 201 |
| chr8 | 111151863 | 111152063 | 201 |
| chr8 | 109836602 | 109836802 | 201 |
| chr8 | 99337807  | 99338007  | 201 |
| chr8 | 66188097  | 66188297  | 201 |
| chr8 | 65147106  | 65147306  | 201 |
| chr8 | 24753124  | 24753324  | 201 |
| chr7 | 94380887  | 94381087  | 201 |
| chr7 | 70804412  | 70804612  | 201 |
| chr7 | 70727038  | 70727238  | 201 |
| chr7 | 60972325  | 60972525  | 201 |
| chr7 | 54960110  | 54960310  | 201 |
| chr7 | 46127311  | 46127511  | 201 |
| chr7 | 45830031  | 45830231  | 201 |
| chr7 | 39030817  | 39031017  | 201 |
| chr7 | 38184490  | 38184690  | 201 |
| chr7 | 19254455  | 19254655  | 201 |
| chr7 | 19065253  | 19065453  | 201 |
| chr7 | 17088470  | 17088670  | 201 |
| chr7 | 5195176   | 5195376   | 201 |
| chr7 | 3936304   | 3936504   | 201 |
| chr7 | 3528192   | 3528392   | 201 |
| chr6 | 121060548 | 121060748 | 201 |
| chr6 | 120640292 | 120640492 | 201 |
| chr6 | 119400945 | 119401145 | 201 |
| chr6 | 109075356 | 109075556 | 201 |
| chr5 | 125781193 | 125781393 | 201 |
| chr5 | 125443599 | 125443799 | 201 |
| chr5 | 124819815 | 124820015 | 201 |
| chr5 | 124681053 | 124681253 | 201 |
| chr5 | 122271188 | 122271388 | 201 |
| chr5 | 122141928 | 122142128 | 201 |
| chr5 | 121630732 | 121630932 | 201 |
| chr5 | 120853049 | 120853249 | 201 |
| chr5 | 118479383 | 118479583 | 201 |
| chr5 | 115462266 | 115462466 | 201 |
| chr5 | 115158291 | 115158491 | 201 |

|       |           |           |     |
|-------|-----------|-----------|-----|
| chr5  | 113497012 | 113497212 | 201 |
| chr5  | 112193507 | 112193707 | 201 |
| chr5  | 111691061 | 111691261 | 201 |
| chr5  | 73110247  | 73110447  | 201 |
| chr5  | 60972732  | 60972932  | 201 |
| chr5  | 30515314  | 30515514  | 201 |
| chr5  | 30071382  | 30071582  | 201 |
| chr5  | 28976185  | 28976385  | 201 |
| chr5  | 28836512  | 28836712  | 201 |
| chr4  | 122979655 | 122979855 | 201 |
| chr4  | 122638326 | 122638526 | 201 |
| chr4  | 121269492 | 121269692 | 201 |
| chr4  | 110077129 | 110077329 | 201 |
| chr4  | 95070345  | 95070545  | 201 |
| chr4  | 67833488  | 67833688  | 201 |
| chr4  | 67699573  | 67699773  | 201 |
| chr4  | 64417066  | 64417266  | 201 |
| chr4  | 34962635  | 34962835  | 201 |
| chr4  | 32181065  | 32181265  | 201 |
| chr3  | 125683953 | 125684153 | 201 |
| chr3  | 116434928 | 116435128 | 201 |
| chr3  | 114679518 | 114679718 | 201 |
| chr3  | 111911392 | 111911592 | 201 |
| chr3  | 110214888 | 110215088 | 201 |
| chr3  | 109419658 | 109419858 | 201 |
| chr3  | 106526147 | 106526347 | 201 |
| chr3  | 106092134 | 106092334 | 201 |
| chr3  | 99108511  | 99108711  | 201 |
| chr3  | 98374576  | 98374776  | 201 |
| chr3  | 88600460  | 88600660  | 201 |
| chr3  | 36846772  | 36846972  | 201 |
| chr3  | 35845302  | 35845502  | 201 |
| chr3  | 31683654  | 31683854  | 201 |
| chr3  | 20468372  | 20468572  | 201 |
| chr3  | 16933784  | 16933984  | 201 |
| chr29 | 51849693  | 51849893  | 201 |
| chr29 | 49639343  | 49639543  | 201 |
| chr29 | 49528216  | 49528416  | 201 |
| chr29 | 49105793  | 49105993  | 201 |
| chr29 | 48263049  | 48263249  | 201 |
| chr29 | 46189283  | 46189483  | 201 |
| chr29 | 36372934  | 36373134  | 201 |
| chr29 | 34437336  | 34437536  | 201 |
| chr29 | 33078114  | 33078314  | 201 |
| chr29 | 31975698  | 31975898  | 201 |
| chr29 | 30495338  | 30495538  | 201 |
| chr29 | 29779883  | 29780083  | 201 |
| chr29 | 29774368  | 29774568  | 201 |
| chr29 | 26770286  | 26770486  | 201 |
| chr29 | 17715867  | 17716067  | 201 |



|       |          |          |     |
|-------|----------|----------|-----|
| chr28 | 40613494 | 40613694 | 201 |
| chr28 | 34135593 | 34135793 | 201 |
| chr28 | 34090691 | 34090891 | 201 |
| chr28 | 33722837 | 33723037 | 201 |
| chr28 | 33647339 | 33647539 | 201 |
| chr28 | 26618096 | 26618296 | 201 |
| chr28 | 7104381  | 7104581  | 201 |
| chr28 | 5366205  | 5366405  | 201 |
| chr27 | 39149779 | 39149979 | 201 |
| chr27 | 26821667 | 26821867 | 201 |
| chr27 | 5837434  | 5837634  | 201 |
| chr27 | 635663   | 635863   | 201 |
| chr26 | 48616028 | 48616228 | 201 |
| chr26 | 47730003 | 47730203 | 201 |
| chr26 | 44094543 | 44094743 | 201 |
| chr26 | 34389575 | 34389775 | 201 |
| chr26 | 31159251 | 31159451 | 201 |
| chr26 | 20242278 | 20242478 | 201 |
| chr26 | 7004891  | 7005091  | 201 |
| chr26 | 7003491  | 7003691  | 201 |
| chr25 | 39351306 | 39351506 | 201 |
| chr25 | 37804153 | 37804353 | 201 |
| chr25 | 33317349 | 33317549 | 201 |
| chr25 | 27273526 | 27273726 | 201 |
| chr25 | 11041273 | 11041473 | 201 |
| chr25 | 10529689 | 10529889 | 201 |
| chr25 | 2973626  | 2973826  | 201 |
| chr25 | 1403709  | 1403909  | 201 |
| chr25 | 1362612  | 1362812  | 201 |
| chr24 | 62382009 | 62382209 | 201 |
| chr24 | 60565604 | 60565804 | 201 |
| chr24 | 60500682 | 60500882 | 201 |
| chr24 | 58808756 | 58808956 | 201 |
| chr24 | 51555294 | 51555494 | 201 |
| chr24 | 48594685 | 48594885 | 201 |
| chr24 | 42773380 | 42773580 | 201 |
| chr24 | 40607034 | 40607234 | 201 |
| chr24 | 34024026 | 34024226 | 201 |
| chr24 | 1771840  | 1772040  | 201 |
| chr23 | 51260188 | 51260388 | 201 |
| chr23 | 50024518 | 50024718 | 201 |
| chr23 | 49714163 | 49714363 | 201 |
| chr23 | 46506801 | 46507001 | 201 |
| chr23 | 42793601 | 42793801 | 201 |
| chr23 | 31156238 | 31156438 | 201 |
| chr23 | 28062357 | 28062557 | 201 |
| chr23 | 27178604 | 27178804 | 201 |
| chr23 | 24787872 | 24788072 | 201 |
| chr23 | 20121072 | 20121272 | 201 |
| chr23 | 18641148 | 18641348 | 201 |

|       |           |           |     |
|-------|-----------|-----------|-----|
| chr23 | 11475519  | 11475719  | 201 |
| chr23 | 11057785  | 11057985  | 201 |
| chr22 | 59493538  | 59493738  | 201 |
| chr22 | 52907174  | 52907374  | 201 |
| chr22 | 50886969  | 50887169  | 201 |
| chr22 | 48425398  | 48425598  | 201 |
| chr22 | 34226302  | 34226502  | 201 |
| chr22 | 30010684  | 30010884  | 201 |
| chr22 | 20117864  | 20118064  | 201 |
| chr22 | 8231172   | 8231372   | 201 |
| chr22 | 7267789   | 7267989   | 201 |
| chr22 | 6779808   | 6780008   | 201 |
| chr22 | 561878    | 562078    | 201 |
| chr21 | 69053345  | 69053545  | 201 |
| chr21 | 65644115  | 65644315  | 201 |
| chr21 | 61365737  | 61365937  | 201 |
| chr21 | 61028043  | 61028243  | 201 |
| chr21 | 59679584  | 59679784  | 201 |
| chr21 | 58727866  | 58728066  | 201 |
| chr21 | 47651201  | 47651401  | 201 |
| chr21 | 47297234  | 47297434  | 201 |
| chr21 | 34013361  | 34013561  | 201 |
| chr21 | 25658064  | 25658264  | 201 |
| chr21 | 25615443  | 25615643  | 201 |
| chr21 | 19991147  | 19991347  | 201 |
| chr21 | 9478979   | 9479179   | 201 |
| chr21 | 3872163   | 3872363   | 201 |
| chr20 | 72937019  | 72937219  | 201 |
| chr20 | 44422950  | 44423150  | 201 |
| chr20 | 4443269   | 4443469   | 201 |
| chr20 | 2709347   | 2709547   | 201 |
| chr2  | 139611125 | 139611325 | 201 |
| chr2  | 135675528 | 135675728 | 201 |
| chr2  | 134965399 | 134965599 | 201 |
| chr2  | 133179982 | 133180182 | 201 |
| chr2  | 132415574 | 132415774 | 201 |
| chr2  | 131835888 | 131836088 | 201 |
| chr2  | 126033845 | 126034045 | 201 |
| chr2  | 123762013 | 123762213 | 201 |
| chr2  | 122997805 | 122998005 | 201 |
| chr2  | 111226734 | 111226934 | 201 |
| chr2  | 76373111  | 76373311  | 201 |
| chr2  | 4929250   | 4929450   | 201 |
| chr19 | 61589766  | 61589966  | 201 |
| chr19 | 60689458  | 60689658  | 201 |
| chr19 | 58190489  | 58190689  | 201 |
| chr19 | 54393467  | 54393667  | 201 |
| chr19 | 53971180  | 53971380  | 201 |
| chr19 | 47267739  | 47267939  | 201 |
| chr19 | 39049094  | 39049294  | 201 |

|       |               |          |     |
|-------|---------------|----------|-----|
| chr19 | 37634266      | 37634466 | 201 |
| chr19 | 34595550      | 34595750 | 201 |
| chr19 | 33592555      | 33592755 | 201 |
| chr19 | 31891806      | 31892006 | 201 |
| chr19 | 28222138      | 28222338 | 201 |
| chr19 | 28214705      | 28214905 | 201 |
| chr19 | 25478760      | 25478960 | 201 |
| chr19 | 23421506      | 23421706 | 201 |
| chr19 | 23040798      | 23040998 | 201 |
| chr19 | 22361569      | 22361769 | 201 |
| chr19 | 17082168      | 17082368 | 201 |
| chr19 | 16181069      | 16181269 | 201 |
| chr19 | 13555122      | 13555322 | 201 |
| chr19 | 13407353      | 13407553 | 201 |
| chr19 | 10992762      | 10992962 | 201 |
| chr18 | 62739494      | 62739694 | 201 |
| chr18 | 56831321      | 56831521 | 201 |
| chr18 | 52699951      | 52700151 | 201 |
| chr18 | 50189545      | 50189745 | 201 |
| chr18 | 12530438      | 12530638 | 201 |
| chr18 | 11943171      | 11943371 | 201 |
| chr18 | 10474330      | 10474530 | 201 |
| chr18 | 9786766       | 9786966  | 201 |
| chr18 | 8120471       | 8120671  | 201 |
| chr18 | 8079580       | 8079780  | 201 |
| chr18 | 5521182       | 5521382  | 201 |
| chr18 | 378824 379024 |          | 201 |
| chr17 | 73988777      | 73988977 | 201 |
| chr17 | 68402156      | 68402356 | 201 |
| chr17 | 58807196      | 58807396 | 201 |
| chr17 | 57781073      | 57781273 | 201 |
| chr17 | 55656474      | 55656674 | 201 |
| chr17 | 48219986      | 48220186 | 201 |
| chr17 | 19141146      | 19141346 | 201 |
| chr17 | 4204586       | 4204786  | 201 |
| chr16 | 77611308      | 77611508 | 201 |
| chr16 | 72046246      | 72046446 | 201 |
| chr16 | 72019414      | 72019614 | 201 |
| chr16 | 66369789      | 66369989 | 201 |
| chr16 | 59085262      | 59085462 | 201 |
| chr16 | 47362685      | 47362885 | 201 |
| chr16 | 47165203      | 47165403 | 201 |
| chr16 | 47023596      | 47023796 | 201 |
| chr16 | 46523536      | 46523736 | 201 |
| chr16 | 44427887      | 44428087 | 201 |
| chr16 | 44066863      | 44067063 | 201 |
| chr16 | 40493731      | 40493931 | 201 |
| chr16 | 2719925       | 2720125  | 201 |
| chr16 | 2434300       | 2434500  | 201 |
| chr16 | 2278373       | 2278573  | 201 |

|       |          |          |     |
|-------|----------|----------|-----|
| chr16 | 2237082  | 2237282  | 201 |
| chr16 | 946598   | 946798   | 201 |
| chr16 | 202772   | 202972   | 201 |
| chr15 | 81381351 | 81381551 | 201 |
| chr15 | 81381007 | 81381207 | 201 |
| chr15 | 81309761 | 81309961 | 201 |
| chr15 | 75432255 | 75432455 | 201 |
| chr15 | 74135994 | 74136194 | 201 |
| chr15 | 64561415 | 64561615 | 201 |
| chr15 | 56126237 | 56126437 | 201 |
| chr15 | 51563533 | 51563733 | 201 |
| chr15 | 36886766 | 36886966 | 201 |
| chr15 | 34197708 | 34197908 | 201 |
| chr15 | 32291320 | 32291520 | 201 |
| chr15 | 30359537 | 30359737 | 201 |
| chr15 | 29883989 | 29884189 | 201 |
| chr15 | 29053944 | 29054144 | 201 |
| chr15 | 27091955 | 27092155 | 201 |
| chr15 | 25228023 | 25228223 | 201 |
| chr15 | 24004862 | 24005062 | 201 |
| chr15 | 21322922 | 21323122 | 201 |
| chr15 | 20483735 | 20483935 | 201 |
| chr15 | 20029261 | 20029461 | 201 |
| chr14 | 79732932 | 79733132 | 201 |
| chr14 | 67960252 | 67960452 | 201 |
| chr14 | 64373992 | 64374192 | 201 |
| chr14 | 39982454 | 39982654 | 201 |
| chr14 | 34526590 | 34526790 | 201 |
| chr14 | 8179667  | 8179867  | 201 |
| chr14 | 7615233  | 7615433  | 201 |
| chr14 | 6982428  | 6982628  | 201 |
| chr13 | 79994390 | 79994590 | 201 |
| chr13 | 77620750 | 77620950 | 201 |
| chr13 | 77554920 | 77555120 | 201 |
| chr13 | 76239811 | 76240011 | 201 |
| chr13 | 74030124 | 74030324 | 201 |
| chr13 | 70239501 | 70239701 | 201 |
| chr13 | 68287277 | 68287477 | 201 |
| chr13 | 66960906 | 66961106 | 201 |
| chr13 | 65070325 | 65070525 | 201 |
| chr13 | 62442847 | 62443047 | 201 |
| chr13 | 60210869 | 60211069 | 201 |
| chr13 | 60088193 | 60088393 | 201 |
| chr13 | 59108034 | 59108234 | 201 |
| chr13 | 56933767 | 56933967 | 201 |
| chr13 | 56475920 | 56476120 | 201 |
| chr13 | 55968561 | 55968761 | 201 |
| chr13 | 54923414 | 54923614 | 201 |
| chr13 | 43640737 | 43640937 | 201 |
| chr13 | 41642979 | 41643179 | 201 |

|       |               |           |     |
|-------|---------------|-----------|-----|
| chr13 | 41186866      | 41187066  | 201 |
| chr13 | 41038786      | 41038986  | 201 |
| chr13 | 40832039      | 40832239  | 201 |
| chr13 | 29296238      | 29296438  | 201 |
| chr13 | 26300167      | 26300367  | 201 |
| chr13 | 25927102      | 25927302  | 201 |
| chr13 | 17734374      | 17734574  | 201 |
| chr13 | 11225482      | 11225682  | 201 |
| chr13 | 10415517      | 10415717  | 201 |
| chr12 | 84588499      | 84588699  | 201 |
| chr12 | 75298604      | 75298804  | 201 |
| chr12 | 73773681      | 73773881  | 201 |
| chr12 | 34366720      | 34366920  | 201 |
| chr12 | 33748863      | 33749063  | 201 |
| chr12 | 33037368      | 33037568  | 201 |
| chr12 | 32947450      | 32947650  | 201 |
| chr12 | 32236961      | 32237161  | 201 |
| chr12 | 32027083      | 32027283  | 201 |
| chr12 | 30492055      | 30492255  | 201 |
| chr12 | 14931273      | 14931473  | 201 |
| chr12 | 13614644      | 13614844  | 201 |
| chr12 | 12019306      | 12019506  | 201 |
| chr12 | 9447124       | 9447324   | 201 |
| chr11 | 109315083     | 109315283 | 201 |
| chr11 | 108390827     | 108391027 | 201 |
| chr11 | 108366970     | 108367170 | 201 |
| chr11 | 107638866     | 107639066 | 201 |
| chr11 | 106300974     | 106301174 | 201 |
| chr11 | 103749899     | 103750099 | 201 |
| chr11 | 100264215     | 100264415 | 201 |
| chr11 | 99189614      | 99189814  | 201 |
| chr11 | 92623737      | 92623937  | 201 |
| chr11 | 71099868      | 71100068  | 201 |
| chr11 | 65693160      | 65693360  | 201 |
| chr11 | 51090099      | 51090299  | 201 |
| chr11 | 49343999      | 49344199  | 201 |
| chr11 | 47905864      | 47906064  | 201 |
| chr11 | 46148392      | 46148592  | 201 |
| chr11 | 45281530      | 45281730  | 201 |
| chr11 | 32810034      | 32810234  | 201 |
| chr11 | 30798053      | 30798253  | 201 |
| chr11 | 29951663      | 29951863  | 201 |
| chr11 | 13142245      | 13142445  | 201 |
| chr11 | 5675816       | 5676016   | 201 |
| chr11 | 3691344       | 3691544   | 201 |
| chr11 | 937788 937988 | 201       |     |
| chr10 | 104869136     | 104869336 | 201 |
| chr10 | 103068795     | 103068995 | 201 |
| chr10 | 90331976      | 90332176  | 201 |
| chr10 | 88197323      | 88197523  | 201 |

|       |               |           |     |
|-------|---------------|-----------|-----|
| chr10 | 83426842      | 83427042  | 201 |
| chr10 | 72465405      | 72465605  | 201 |
| chr10 | 52665398      | 52665598  | 201 |
| chr10 | 45524108      | 45524308  | 201 |
| chr10 | 22470258      | 22470458  | 201 |
| chr10 | 21409639      | 21409839  | 201 |
| chr10 | 17275290      | 17275490  | 201 |
| chr10 | 16905704      | 16905904  | 201 |
| chr10 | 14123826      | 14124026  | 201 |
| chr10 | 12876916      | 12877116  | 201 |
| chr10 | 12125094      | 12125294  | 201 |
| chr1  | 147903820     | 147904020 | 201 |
| chr1  | 137877580     | 137877780 | 201 |
| chr1  | 114233319     | 114233519 | 201 |
| chr1  | 87365591      | 87365791  | 201 |
| chr1  | 82580984      | 82581184  | 201 |
| chr1  | 74893525      | 74893725  | 201 |
| chr1  | 73779236      | 73779436  | 201 |
| chr1  | 73143144      | 73143344  | 201 |
| chr1  | 73138050      | 73138250  | 201 |
| chr1  | 68456227      | 68456427  | 201 |
| chr1  | 68455655      | 68455855  | 201 |
| chr1  | 53788722      | 53788922  | 201 |
| chr1  | 166750 166950 | 201       |     |
| chr9  | 100406313     | 100406512 | 200 |
| chr9  | 99998883      | 99999082  | 200 |
| chr9  | 91026190      | 91026389  | 200 |
| chr9  | 90794147      | 90794346  | 200 |
| chr9  | 90704398      | 90704597  | 200 |
| chr9  | 90405941      | 90406140  | 200 |
| chr9  | 88655631      | 88655830  | 200 |
| chr9  | 75094252      | 75094451  | 200 |
| chr9  | 55349528      | 55349727  | 200 |
| chr9  | 52948429      | 52948628  | 200 |
| chr9  | 45096643      | 45096842  | 200 |
| chr9  | 10986204      | 10986403  | 200 |
| chr8  | 115802557     | 115802756 | 200 |
| chr8  | 108703552     | 108703751 | 200 |
| chr8  | 108636551     | 108636750 | 200 |
| chr8  | 102201971     | 102202170 | 200 |
| chr8  | 72270712      | 72270911  | 200 |
| chr8  | 72179536      | 72179735  | 200 |
| chr8  | 65305389      | 65305588  | 200 |
| chr8  | 61166037      | 61166236  | 200 |
| chr8  | 45761178      | 45761377  | 200 |
| chr8  | 45733963      | 45734162  | 200 |
| chr8  | 42398835      | 42399034  | 200 |
| chr8  | 9393268       | 9393467   | 200 |
| chr8  | 8722251       | 8722450   | 200 |
| chr8  | 8576869       | 8577068   | 200 |

|      |           |           |     |
|------|-----------|-----------|-----|
| chr8 | 7843787   | 7843986   | 200 |
| chr7 | 94422034  | 94422233  | 200 |
| chr7 | 94419585  | 94419784  | 200 |
| chr7 | 84493948  | 84494147  | 200 |
| chr7 | 71808809  | 71809008  | 200 |
| chr7 | 51849428  | 51849627  | 200 |
| chr7 | 50346820  | 50347019  | 200 |
| chr7 | 46198036  | 46198235  | 200 |
| chr7 | 44075054  | 44075253  | 200 |
| chr7 | 37557357  | 37557556  | 200 |
| chr7 | 37396994  | 37397193  | 200 |
| chr7 | 18420937  | 18421136  | 200 |
| chr7 | 17482431  | 17482630  | 200 |
| chr7 | 14238614  | 14238813  | 200 |
| chr7 | 4493491   | 4493690   | 200 |
| chr6 | 121903535 | 121903734 | 200 |
| chr6 | 118651324 | 118651523 | 200 |
| chr6 | 106794914 | 106795113 | 200 |
| chr6 | 101611755 | 101611954 | 200 |
| chr6 | 92072088  | 92072287  | 200 |
| chr6 | 72304327  | 72304526  | 200 |
| chr6 | 22236756  | 22236955  | 200 |
| chr6 | 18471356  | 18471555  | 200 |
| chr6 | 16244852  | 16245051  | 200 |
| chr6 | 14204575  | 14204774  | 200 |
| chr5 | 124712631 | 124712830 | 200 |
| chr5 | 123601119 | 123601318 | 200 |
| chr5 | 123158183 | 123158382 | 200 |
| chr5 | 122769390 | 122769589 | 200 |
| chr5 | 122715336 | 122715535 | 200 |
| chr5 | 115612299 | 115612498 | 200 |
| chr5 | 113572569 | 113572768 | 200 |
| chr5 | 113234162 | 113234361 | 200 |
| chr5 | 113061701 | 113061900 | 200 |
| chr5 | 112400129 | 112400328 | 200 |
| chr5 | 112167819 | 112168018 | 200 |
| chr5 | 108621283 | 108621482 | 200 |
| chr5 | 84677040  | 84677239  | 200 |
| chr5 | 79227510  | 79227709  | 200 |
| chr5 | 79189371  | 79189570  | 200 |
| chr5 | 78902388  | 78902587  | 200 |
| chr5 | 60474025  | 60474224  | 200 |
| chr5 | 43654259  | 43654458  | 200 |
| chr5 | 32904103  | 32904302  | 200 |
| chr5 | 29932433  | 29932632  | 200 |
| chr5 | 29796670  | 29796869  | 200 |
| chr5 | 28876941  | 28877140  | 200 |
| chr5 | 23514450  | 23514649  | 200 |
| chr4 | 124363393 | 124363592 | 200 |
| chr4 | 122186865 | 122187064 | 200 |

|       |           |           |     |
|-------|-----------|-----------|-----|
| chr4  | 121528044 | 121528243 | 200 |
| chr4  | 117833193 | 117833392 | 200 |
| chr4  | 113660364 | 113660563 | 200 |
| chr4  | 99741433  | 99741632  | 200 |
| chr4  | 90995878  | 90996077  | 200 |
| chr4  | 77369760  | 77369959  | 200 |
| chr4  | 68093811  | 68094010  | 200 |
| chr4  | 64280925  | 64281124  | 200 |
| chr4  | 33749885  | 33750084  | 200 |
| chr4  | 26381020  | 26381219  | 200 |
| chr4  | 13322623  | 13322822  | 200 |
| chr4  | 8987531   | 8987730   | 200 |
| chr3  | 127861654 | 127861853 | 200 |
| chr3  | 121495831 | 121496030 | 200 |
| chr3  | 116203672 | 116203871 | 200 |
| chr3  | 116147355 | 116147554 | 200 |
| chr3  | 115964287 | 115964486 | 200 |
| chr3  | 115094274 | 115094473 | 200 |
| chr3  | 114472460 | 114472659 | 200 |
| chr3  | 110096697 | 110096896 | 200 |
| chr3  | 105595845 | 105596044 | 200 |
| chr3  | 105445789 | 105445988 | 200 |
| chr3  | 91113839  | 91114038  | 200 |
| chr3  | 55906979  | 55907178  | 200 |
| chr3  | 36839372  | 36839571  | 200 |
| chr3  | 36030564  | 36030763  | 200 |
| chr3  | 36017630  | 36017829  | 200 |
| chr3  | 35482389  | 35482588  | 200 |
| chr3  | 34801709  | 34801908  | 200 |
| chr3  | 22508286  | 22508485  | 200 |
| chr3  | 21897300  | 21897499  | 200 |
| chr29 | 50554277  | 50554476  | 200 |
| chr29 | 44464529  | 44464728  | 200 |
| chr29 | 38086327  | 38086526  | 200 |
| chr29 | 37070679  | 37070878  | 200 |
| chr29 | 35194284  | 35194483  | 200 |
| chr29 | 34840100  | 34840299  | 200 |
| chr29 | 34839598  | 34839797  | 200 |
| chr29 | 31973125  | 31973324  | 200 |
| chr29 | 12464420  | 12464619  | 200 |
| chr28 | 43580854  | 43581053  | 200 |
| chr28 | 40743127  | 40743326  | 200 |
| chr28 | 34017885  | 34018084  | 200 |
| chr28 | 33816531  | 33816730  | 200 |
| chr28 | 27001925  | 27002124  | 200 |
| chr28 | 25361529  | 25361728  | 200 |
| chr28 | 23944102  | 23944301  | 200 |
| chr28 | 15354830  | 15355029  | 200 |
| chr28 | 12335138  | 12335337  | 200 |
| chr28 | 7577696   | 7577895   | 200 |



|       |          |          |     |
|-------|----------|----------|-----|
| chr28 | 430402   | 430601   | 200 |
| chr27 | 48051229 | 48051428 | 200 |
| chr27 | 46114539 | 46114738 | 200 |
| chr27 | 45439600 | 45439799 | 200 |
| chr27 | 38297200 | 38297399 | 200 |
| chr27 | 28123216 | 28123415 | 200 |
| chr27 | 26771104 | 26771303 | 200 |
| chr26 | 51534159 | 51534358 | 200 |
| chr26 | 48943153 | 48943352 | 200 |
| chr26 | 45818567 | 45818766 | 200 |
| chr26 | 43956865 | 43957064 | 200 |
| chr26 | 41461909 | 41462108 | 200 |
| chr26 | 38261551 | 38261750 | 200 |
| chr26 | 34965258 | 34965457 | 200 |
| chr26 | 19877627 | 19877826 | 200 |
| chr26 | 19835841 | 19836040 | 200 |
| chr26 | 15007410 | 15007609 | 200 |
| chr25 | 39207871 | 39208070 | 200 |
| chr25 | 38405304 | 38405503 | 200 |
| chr25 | 38383206 | 38383405 | 200 |
| chr25 | 36138263 | 36138462 | 200 |
| chr25 | 35551653 | 35551852 | 200 |
| chr25 | 29118775 | 29118974 | 200 |
| chr25 | 26709623 | 26709822 | 200 |
| chr25 | 20262414 | 20262613 | 200 |
| chr25 | 4830432  | 4830631  | 200 |
| chr25 | 4645889  | 4646088  | 200 |
| chr25 | 3062769  | 3062968  | 200 |
| chr25 | 1976780  | 1976979  | 200 |
| chr24 | 60837545 | 60837744 | 200 |
| chr24 | 58627697 | 58627896 | 200 |
| chr24 | 49251852 | 49252051 | 200 |
| chr24 | 48950417 | 48950616 | 200 |
| chr24 | 43629976 | 43630175 | 200 |
| chr24 | 34972291 | 34972490 | 200 |
| chr24 | 1362327  | 1362526  | 200 |
| chr24 | 1209899  | 1210098  | 200 |
| chr23 | 48692848 | 48693047 | 200 |
| chr23 | 46546590 | 46546789 | 200 |
| chr23 | 31440172 | 31440371 | 200 |
| chr23 | 20056955 | 20057154 | 200 |
| chr23 | 19340324 | 19340523 | 200 |
| chr23 | 16099327 | 16099526 | 200 |
| chr23 | 11039620 | 11039819 | 200 |
| chr23 | 8460323  | 8460522  | 200 |
| chr23 | 7016496  | 7016695  | 200 |
| chr23 | 6793237  | 6793436  | 200 |
| chr22 | 59792788 | 59792987 | 200 |
| chr22 | 58268747 | 58268946 | 200 |
| chr22 | 56454398 | 56454597 | 200 |

|       |               |           |     |
|-------|---------------|-----------|-----|
| chr22 | 56451737      | 56451936  | 200 |
| chr22 | 56164409      | 56164608  | 200 |
| chr22 | 51060621      | 51060820  | 200 |
| chr22 | 39486360      | 39486559  | 200 |
| chr22 | 30339790      | 30339989  | 200 |
| chr22 | 10756967      | 10757166  | 200 |
| chr21 | 66618266      | 66618465  | 200 |
| chr21 | 65812010      | 65812209  | 200 |
| chr21 | 65612032      | 65612231  | 200 |
| chr21 | 64483126      | 64483325  | 200 |
| chr21 | 64361535      | 64361734  | 200 |
| chr21 | 63909015      | 63909214  | 200 |
| chr21 | 60769814      | 60770013  | 200 |
| chr21 | 56302360      | 56302559  | 200 |
| chr21 | 48710559      | 48710758  | 200 |
| chr21 | 39978485      | 39978684  | 200 |
| chr21 | 32959269      | 32959468  | 200 |
| chr21 | 30066236      | 30066435  | 200 |
| chr21 | 25979622      | 25979821  | 200 |
| chr21 | 19254347      | 19254546  | 200 |
| chr21 | 11857675      | 11857874  | 200 |
| chr20 | 73175434      | 73175633  | 200 |
| chr20 | 42347766      | 42347965  | 200 |
| chr20 | 38433427      | 38433626  | 200 |
| chr20 | 22302080      | 22302279  | 200 |
| chr20 | 1609509       | 1609708   | 200 |
| chr20 | 939181 939380 | 200       |     |
| chr2  | 138614144     | 138614343 | 200 |
| chr2  | 135087621     | 135087820 | 200 |
| chr2  | 134948606     | 134948805 | 200 |
| chr2  | 134689516     | 134689715 | 200 |
| chr2  | 132208926     | 132209125 | 200 |
| chr2  | 132089481     | 132089680 | 200 |
| chr2  | 131025389     | 131025588 | 200 |
| chr2  | 127996957     | 127997156 | 200 |
| chr2  | 124959696     | 124959895 | 200 |
| chr2  | 119550477     | 119550676 | 200 |
| chr2  | 112313839     | 112314038 | 200 |
| chr2  | 111850676     | 111850875 | 200 |
| chr2  | 111745433     | 111745632 | 200 |
| chr2  | 110116197     | 110116396 | 200 |
| chr2  | 75982123      | 75982322  | 200 |
| chr2  | 74940419      | 74940618  | 200 |
| chr2  | 54403995      | 54404194  | 200 |
| chr2  | 37360767      | 37360966  | 200 |
| chr2  | 21885447      | 21885646  | 200 |
| chr19 | 61793427      | 61793626  | 200 |
| chr19 | 59356220      | 59356419  | 200 |
| chr19 | 58992624      | 58992823  | 200 |
| chr19 | 58354740      | 58354939  | 200 |

|       |          |          |     |
|-------|----------|----------|-----|
| chr19 | 56074753 | 56074952 | 200 |
| chr19 | 56067495 | 56067694 | 200 |
| chr19 | 55809037 | 55809236 | 200 |
| chr19 | 54513463 | 54513662 | 200 |
| chr19 | 54463335 | 54463534 | 200 |
| chr19 | 51851482 | 51851681 | 200 |
| chr19 | 46309153 | 46309352 | 200 |
| chr19 | 45931292 | 45931491 | 200 |
| chr19 | 45774071 | 45774270 | 200 |
| chr19 | 44075932 | 44076131 | 200 |
| chr19 | 40480131 | 40480330 | 200 |
| chr19 | 33464275 | 33464474 | 200 |
| chr19 | 31057416 | 31057615 | 200 |
| chr19 | 26348555 | 26348754 | 200 |
| chr19 | 25777438 | 25777637 | 200 |
| chr19 | 24046114 | 24046313 | 200 |
| chr19 | 23085397 | 23085596 | 200 |
| chr19 | 22568880 | 22569079 | 200 |
| chr19 | 21787208 | 21787407 | 200 |
| chr19 | 21746282 | 21746481 | 200 |
| chr19 | 19365420 | 19365619 | 200 |
| chr19 | 19327043 | 19327242 | 200 |
| chr19 | 19250056 | 19250255 | 200 |
| chr19 | 18362299 | 18362498 | 200 |
| chr19 | 12295117 | 12295316 | 200 |
| chr19 | 7644345  | 7644544  | 200 |
| chr19 | 7607641  | 7607840  | 200 |
| chr18 | 58679690 | 58679889 | 200 |
| chr18 | 56740232 | 56740431 | 200 |
| chr18 | 55582269 | 55582468 | 200 |
| chr18 | 55443688 | 55443887 | 200 |
| chr18 | 49818569 | 49818768 | 200 |
| chr18 | 45291632 | 45291831 | 200 |
| chr18 | 43183791 | 43183990 | 200 |
| chr18 | 38803047 | 38803246 | 200 |
| chr18 | 37007046 | 37007245 | 200 |
| chr18 | 34885202 | 34885401 | 200 |
| chr18 | 33184689 | 33184888 | 200 |
| chr18 | 14031055 | 14031254 | 200 |
| chr18 | 13555956 | 13556155 | 200 |
| chr18 | 12439695 | 12439894 | 200 |
| chr18 | 11476539 | 11476738 | 200 |
| chr18 | 11152415 | 11152614 | 200 |
| chr18 | 10740380 | 10740579 | 200 |
| chr18 | 5975396  | 5975595  | 200 |
| chr17 | 74418374 | 74418573 | 200 |
| chr17 | 73168487 | 73168686 | 200 |
| chr17 | 70722997 | 70723196 | 200 |
| chr17 | 69471244 | 69471443 | 200 |
| chr17 | 68958703 | 68958902 | 200 |

|       |               |          |     |
|-------|---------------|----------|-----|
| chr17 | 66847641      | 66847840 | 200 |
| chr17 | 66526629      | 66526828 | 200 |
| chr17 | 63386596      | 63386795 | 200 |
| chr17 | 49165924      | 49166123 | 200 |
| chr17 | 47083947      | 47084146 | 200 |
| chr16 | 68550774      | 68550973 | 200 |
| chr16 | 67516567      | 67516766 | 200 |
| chr16 | 61939227      | 61939426 | 200 |
| chr16 | 57540180      | 57540379 | 200 |
| chr16 | 51494216      | 51494415 | 200 |
| chr16 | 48795237      | 48795436 | 200 |
| chr16 | 48304204      | 48304403 | 200 |
| chr16 | 47449743      | 47449942 | 200 |
| chr16 | 47430576      | 47430775 | 200 |
| chr16 | 46833126      | 46833325 | 200 |
| chr16 | 46801657      | 46801856 | 200 |
| chr16 | 43381549      | 43381748 | 200 |
| chr16 | 43364886      | 43365085 | 200 |
| chr16 | 37847866      | 37848065 | 200 |
| chr16 | 23642290      | 23642489 | 200 |
| chr16 | 3749509       | 3749708  | 200 |
| chr16 | 3122987       | 3123186  | 200 |
| chr16 | 3107107       | 3107306  | 200 |
| chr16 | 2906974       | 2907173  | 200 |
| chr16 | 2190981       | 2191180  | 200 |
| chr16 | 440533 440732 | 200      |     |
| chr16 | 376444 376643 | 200      |     |
| chr15 | 75458148      | 75458347 | 200 |
| chr15 | 55216855      | 55217054 | 200 |
| chr15 | 51720119      | 51720318 | 200 |
| chr15 | 51711549      | 51711748 | 200 |
| chr15 | 50165054      | 50165253 | 200 |
| chr15 | 38582965      | 38583164 | 200 |
| chr15 | 32668008      | 32668207 | 200 |
| chr15 | 29683676      | 29683875 | 200 |
| chr15 | 24651683      | 24651882 | 200 |
| chr14 | 61300899      | 61301098 | 200 |
| chr14 | 32872758      | 32872957 | 200 |
| chr14 | 26015867      | 26016066 | 200 |
| chr14 | 9198152       | 9198351  | 200 |
| chr14 | 6357759       | 6357958  | 200 |
| chr13 | 84245053      | 84245252 | 200 |
| chr13 | 80607691      | 80607890 | 200 |
| chr13 | 80053622      | 80053821 | 200 |
| chr13 | 79678556      | 79678755 | 200 |
| chr13 | 75703160      | 75703359 | 200 |
| chr13 | 75196735      | 75196934 | 200 |
| chr13 | 73603607      | 73603806 | 200 |
| chr13 | 73565003      | 73565202 | 200 |
| chr13 | 59990577      | 59990776 | 200 |

|       |           |           |     |
|-------|-----------|-----------|-----|
| chr13 | 59340602  | 59340801  | 200 |
| chr13 | 59054649  | 59054848  | 200 |
| chr13 | 57446749  | 57446948  | 200 |
| chr13 | 56111771  | 56111970  | 200 |
| chr13 | 54869494  | 54869693  | 200 |
| chr13 | 54867920  | 54868119  | 200 |
| chr13 | 54501211  | 54501410  | 200 |
| chr13 | 46374054  | 46374253  | 200 |
| chr13 | 42251624  | 42251823  | 200 |
| chr13 | 40345278  | 40345477  | 200 |
| chr13 | 38864006  | 38864205  | 200 |
| chr13 | 35547141  | 35547340  | 200 |
| chr13 | 29052222  | 29052421  | 200 |
| chr13 | 15128207  | 15128406  | 200 |
| chr13 | 11370936  | 11371135  | 200 |
| chr12 | 84206398  | 84206597  | 200 |
| chr12 | 74475363  | 74475562  | 200 |
| chr12 | 73784509  | 73784708  | 200 |
| chr12 | 49428929  | 49429128  | 200 |
| chr12 | 34081737  | 34081936  | 200 |
| chr12 | 30476114  | 30476313  | 200 |
| chr12 | 15812091  | 15812290  | 200 |
| chr12 | 11227175  | 11227374  | 200 |
| chr11 | 109542800 | 109542999 | 200 |
| chr11 | 107639228 | 107639427 | 200 |
| chr11 | 107214357 | 107214556 | 200 |
| chr11 | 106248494 | 106248693 | 200 |
| chr11 | 105996011 | 105996210 | 200 |
| chr11 | 104656771 | 104656970 | 200 |
| chr11 | 104381153 | 104381352 | 200 |
| chr11 | 103780831 | 103781030 | 200 |
| chr11 | 99241374  | 99241573  | 200 |
| chr11 | 93752236  | 93752435  | 200 |
| chr11 | 87904129  | 87904328  | 200 |
| chr11 | 84959891  | 84960090  | 200 |
| chr11 | 82478932  | 82479131  | 200 |
| chr11 | 73185701  | 73185900  | 200 |
| chr11 | 73176637  | 73176836  | 200 |
| chr11 | 70686022  | 70686221  | 200 |
| chr11 | 27600794  | 27600993  | 200 |
| chr11 | 22047204  | 22047403  | 200 |
| chr11 | 21834796  | 21834995  | 200 |
| chr11 | 7911051   | 7911250   | 200 |
| chr11 | 3888035   | 3888234   | 200 |
| chr11 | 2554334   | 2554533   | 200 |
| chr11 | 2285600   | 2285799   | 200 |
| chr11 | 1530226   | 1530425   | 200 |
| chr10 | 88161964  | 88162163  | 200 |
| chr10 | 83869114  | 83869313  | 200 |
| chr10 | 81674297  | 81674496  | 200 |

|       |           |           |     |
|-------|-----------|-----------|-----|
| chr10 | 76164259  | 76164458  | 200 |
| chr10 | 74857779  | 74857978  | 200 |
| chr10 | 74123289  | 74123488  | 200 |
| chr10 | 70194451  | 70194650  | 200 |
| chr10 | 51424214  | 51424413  | 200 |
| chr10 | 43842476  | 43842675  | 200 |
| chr10 | 36827746  | 36827945  | 200 |
| chr10 | 35813721  | 35813920  | 200 |
| chr10 | 29539739  | 29539938  | 200 |
| chr10 | 21849254  | 21849453  | 200 |
| chr10 | 20950848  | 20951047  | 200 |
| chr10 | 19997547  | 19997746  | 200 |
| chr10 | 17668012  | 17668211  | 200 |
| chr10 | 17484658  | 17484857  | 200 |
| chr10 | 16984930  | 16985129  | 200 |
| chr10 | 15933409  | 15933608  | 200 |
| chr10 | 5230761   | 5230960   | 200 |
| chr10 | 3255786   | 3255985   | 200 |
| chr1  | 161068810 | 161069009 | 200 |
| chr1  | 136907908 | 136908107 | 200 |
| chr1  | 123123242 | 123123441 | 200 |
| chr1  | 123107398 | 123107597 | 200 |
| chr1  | 99147680  | 99147879  | 200 |
| chr1  | 71742272  | 71742471  | 200 |
| chr1  | 68846293  | 68846492  | 200 |
| chr1  | 68843359  | 68843558  | 200 |
| chr1  | 8943538   | 8943737   | 200 |
| chr1  | 3064915   | 3065114   | 200 |
| chr4  | 5115422   | 5115943   | 522 |
| chr19 | 54449451  | 54449848  | 398 |
| chr18 | 54954777  | 54955155  | 379 |
| chr14 | 20760794  | 20761161  | 368 |
| chr16 | 39513742  | 39514059  | 318 |
| chr11 | 104971584 | 104971891 | 308 |
| chr16 | 67432141  | 67432444  | 304 |
| chr19 | 20348850  | 20349149  | 300 |
| chr19 | 39208222  | 39208517  | 296 |
| chr13 | 11408190  | 11408483  | 294 |
| chr19 | 47220963  | 47221231  | 269 |
| chr19 | 7771682   | 7771946   | 265 |
| chr18 | 12447562  | 12447928  | 367 |
| chr2  | 135691916 | 135692250 | 335 |
| chr3  | 126966674 | 126966990 | 317 |
| chr4  | 72316414  | 72316714  | 301 |
| chr23 | 46041799  | 46042074  | 276 |
| chr17 | 63109764  | 63110036  | 273 |
| chr12 | 20779036  | 20779308  | 273 |
| chr10 | 71869240  | 71869448  | 209 |
| chr17 | 70517548  | 70517892  | 345 |
| chr28 | 27112528  | 27112841  | 314 |

|       |           |           |     |
|-------|-----------|-----------|-----|
| chr8  | 73522206  | 73522503  | 298 |
| chr19 | 14087221  | 14087494  | 274 |
| chr18 | 48012332  | 48012584  | 253 |
| chr18 | 24304473  | 24304707  | 235 |
| chr18 | 33699971  | 33700200  | 230 |
| chr15 | 29425902  | 29426129  | 228 |
| chr26 | 45309818  | 45310042  | 225 |
| chr14 | 30832925  | 30833149  | 225 |
| chr3  | 126946557 | 126946779 | 223 |
| chr16 | 47274495  | 47274717  | 223 |
| chr13 | 63668258  | 63668480  | 223 |
| chr17 | 70019870  | 70020090  | 221 |
| chr3  | 33635530  | 33635749  | 220 |
| chr4  | 72801916  | 72802134  | 219 |
| chr17 | 63409039  | 63409255  | 217 |
| chr13 | 79687505  | 79687719  | 215 |
| chr19 | 27531329  | 27531542  | 214 |
| chr17 | 56011703  | 56011916  | 214 |
| chr23 | 13691773  | 13691985  | 213 |
| chr21 | 29199231  | 29199443  | 213 |
| chr11 | 93772019  | 93772230  | 212 |
| chr17 | 69721150  | 69721360  | 211 |
| chr7  | 51851191  | 51851400  | 210 |
| chr2  | 76029203  | 76029412  | 210 |
| chr13 | 53508860  | 53509068  | 209 |
| chr10 | 58752793  | 58753001  | 209 |
| chr4  | 118689654 | 118689861 | 208 |
| chr4  | 71619849  | 71620055  | 207 |
| chr15 | 29438362  | 29438568  | 207 |
| chr10 | 17282121  | 17282327  | 207 |
| chr18 | 26398522  | 26398727  | 206 |
| chr9  | 90303326  | 90303530  | 205 |
| chr18 | 58676039  | 58676243  | 205 |
| chr18 | 24341786  | 24341990  | 205 |
| chr27 | 31450654  | 31450857  | 204 |
| chr19 | 39860675  | 39860878  | 204 |
| chr15 | 25525218  | 25525421  | 204 |
| chr26 | 43265754  | 43265956  | 203 |
| chr26 | 43035210  | 43035412  | 203 |
| chr25 | 4707886   | 4708088   | 203 |
| chr19 | 13489532  | 13489733  | 202 |
| chr15 | 81066841  | 81067042  | 202 |
| chr15 | 36262235  | 36262436  | 202 |
| chr9  | 100211909 | 100212109 | 201 |
| chr4  | 124442354 | 124442554 | 201 |
| chr24 | 33952497  | 33952697  | 201 |
| chr14 | 1582495   | 1582695   | 201 |
| chr8  | 23940893  | 23941092  | 200 |
| chr5  | 80283653  | 80283852  | 200 |
| chr23 | 18644236  | 18644435  | 200 |

|       |               |           |     |
|-------|---------------|-----------|-----|
| chr22 | 51095012      | 51095211  | 200 |
| chr21 | 64501047      | 64501246  | 200 |
| chr18 | 24328454      | 24328653  | 200 |
| chr4  | 124149473     | 124149703 | 231 |
| chr14 | 42556375      | 42556584  | 210 |
| chr7  | 51332962      | 51333166  | 205 |
| chr8  | 5839010       | 5839209   | 200 |
| chr13 | 53797314      | 53797860  | 547 |
| chr9  | 46032313      | 46032707  | 395 |
| chr13 | 42667420      | 42667808  | 389 |
| chr2  | 130753229     | 130753612 | 384 |
| chr14 | 19432495      | 19432872  | 378 |
| chr25 | 37849854      | 37850222  | 369 |
| chr25 | 33287503      | 33287870  | 368 |
| chr16 | 19556390      | 19556756  | 367 |
| chr3  | 123635238     | 123635601 | 364 |
| chr16 | 46965105      | 46965463  | 359 |
| chr26 | 41451032      | 41451389  | 358 |
| chr15 | 28672587      | 28672935  | 349 |
| chr9  | 91904939      | 91905277  | 339 |
| chr4  | 77568751      | 77569088  | 338 |
| chr4  | 5514452       | 5514789   | 338 |
| chr23 | 10522728      | 10523065  | 338 |
| chr18 | 54670215      | 54670551  | 337 |
| chr3  | 127360845     | 127361177 | 333 |
| chr26 | 14922963      | 14923295  | 333 |
| chr2  | 74002034      | 74002362  | 329 |
| chr2  | 134456287     | 134456611 | 325 |
| chr23 | 42711002      | 42711323  | 322 |
| chr17 | 66871584      | 66871902  | 319 |
| chr1  | 145826654     | 145826969 | 316 |
| chr20 | 60495177      | 60495491  | 315 |
| chr7  | 52227425      | 52227738  | 314 |
| chr3  | 115481929     | 115482242 | 314 |
| chr19 | 58101374      | 58101687  | 314 |
| chr19 | 19288060      | 19288372  | 313 |
| chr19 | 46328898      | 46329208  | 311 |
| chr12 | 82023367      | 82023677  | 311 |
| chr2  | 136632033     | 136632341 | 309 |
| chr1  | 74711727      | 74712035  | 309 |
| chr28 | 34015110      | 34015415  | 306 |
| chr26 | 21968822      | 21969127  | 306 |
| chr18 | 12121980      | 12122283  | 304 |
| chr13 | 62355062      | 62355365  | 304 |
| chr2  | 3866304       | 3866606   | 303 |
| chr19 | 21773822      | 21774123  | 302 |
| chr3  | 412606 412905 | 300       |     |
| chr5  | 121323181     | 121323478 | 298 |
| chr28 | 4886465       | 4886761   | 297 |
| chr21 | 66477236      | 66477532  | 297 |



|       |           |           |     |
|-------|-----------|-----------|-----|
| chr17 | 31528291  | 31528587  | 297 |
| chr13 | 77199604  | 77199898  | 295 |
| chr11 | 44936141  | 44936434  | 294 |
| chr22 | 59599200  | 59599489  | 290 |
| chr2  | 111950562 | 111950850 | 289 |
| chr1  | 144123857 | 144124145 | 289 |
| chr15 | 22348984  | 22349271  | 288 |
| chr10 | 12153795  | 12154082  | 288 |
| chr29 | 37247813  | 37248099  | 287 |
| chr5  | 10222289  | 10222570  | 282 |
| chr10 | 90698342  | 90698623  | 282 |
| chr18 | 32998116  | 32998396  | 281 |
| chr7  | 44017207  | 44017484  | 278 |
| chr3  | 30428965  | 30429242  | 278 |
| chr14 | 1155022   | 1155299   | 278 |
| chr13 | 65941658  | 65941932  | 275 |
| chr10 | 13057013  | 13057286  | 274 |
| chr18 | 42956541  | 42956813  | 273 |
| chr26 | 37622092  | 37622362  | 271 |
| chr10 | 17260655  | 17260924  | 270 |
| chr17 | 70011373  | 70011641  | 269 |
| chr17 | 70008126  | 70008393  | 268 |
| chr13 | 39822391  | 39822658  | 268 |
| chr10 | 16739756  | 16740023  | 268 |
| chr12 | 83939135  | 83939398  | 264 |
| chr3  | 105369939 | 105370201 | 263 |
| chr3  | 121122497 | 121122757 | 261 |
| chr13 | 56112930  | 56113190  | 261 |
| chr8  | 5766689   | 5766948   | 260 |
| chr7  | 44948279  | 44948537  | 259 |
| chr7  | 18464429  | 18464687  | 259 |
| chr19 | 56592286  | 56592544  | 259 |
| chr22 | 60047691  | 60047947  | 257 |
| chr13 | 70063901  | 70064157  | 257 |
| chr23 | 48643290  | 48643545  | 256 |
| chr16 | 25937050  | 25937305  | 256 |
| chr3  | 56654087  | 56654340  | 254 |
| chr17 | 63181535  | 63181788  | 254 |
| chr12 | 82521444  | 82521696  | 253 |
| chr2  | 108717257 | 108717508 | 252 |
| chr4  | 118696904 | 118697154 | 251 |
| chr28 | 33809825  | 33810074  | 250 |
| chr25 | 39408690  | 39408936  | 247 |
| chr18 | 11768015  | 11768260  | 246 |
| chr13 | 43419575  | 43419818  | 244 |
| chr1  | 69466409  | 69466652  | 244 |
| chr17 | 67323973  | 67324213  | 241 |
| chr8  | 104791884 | 104792122 | 239 |
| chr29 | 27299780  | 27300018  | 239 |
| chr25 | 11264320  | 11264558  | 239 |

|       |               |           |     |
|-------|---------------|-----------|-----|
| chr22 | 60451886      | 60452124  | 239 |
| chr22 | 59995788      | 59996026  | 239 |
| chr10 | 35827442      | 35827680  | 239 |
| chr7  | 71659073      | 71659309  | 237 |
| chr17 | 70050081      | 70050316  | 236 |
| chr3  | 10577078      | 10577311  | 234 |
| chr14 | 61490490      | 61490718  | 229 |
| chr29 | 25972814      | 25973037  | 224 |
| chr3  | 23038476      | 23038696  | 221 |
| chr18 | 11066686      | 11066902  | 217 |
| chr21 | 30081766      | 30081981  | 216 |
| chr17 | 74042034      | 74042244  | 211 |
| chr3  | 106571362     | 106571565 | 204 |
| chr19 | 29769514      | 29769886  | 373 |
| chr18 | 54970037      | 54970394  | 358 |
| chr3  | 116509530     | 116509879 | 350 |
| chr13 | 75558435      | 75558783  | 349 |
| chr18 | 45293357      | 45293704  | 348 |
| chr23 | 8463293       | 8463639   | 347 |
| chr16 | 22454989      | 22455329  | 341 |
| chr29 | 41818654      | 41818982  | 329 |
| chr9  | 90236924      | 90237235  | 312 |
| chr15 | 45509940      | 45510251  | 312 |
| chr7  | 10167044      | 10167336  | 293 |
| chr3  | 18225124      | 18225415  | 292 |
| chr13 | 6794384       | 6794675   | 292 |
| chr11 | 103635452     | 103635742 | 291 |
| chr22 | 59240601      | 59240886  | 286 |
| chr29 | 36959121      | 36959402  | 282 |
| chr17 | 41488915      | 41489195  | 281 |
| chr9  | 52423731      | 52424005  | 275 |
| chr8  | 7622328       | 7622601   | 274 |
| chr26 | 50509167      | 50509440  | 274 |
| chr18 | 22337626      | 22337899  | 274 |
| chr16 | 926272 926544 | 273       |     |
| chr9  | 106447190     | 106447461 | 272 |
| chr8  | 65236253      | 65236523  | 271 |
| chr5  | 113177001     | 113177271 | 271 |
| chr4  | 12018173      | 12018443  | 271 |
| chr26 | 45975102      | 45975370  | 269 |
| chr3  | 36845445      | 36845709  | 265 |
| chr25 | 1509450       | 1509714   | 265 |
| chr25 | 664767 665029 | 263       |     |
| chr19 | 54708595      | 54708857  | 263 |
| chr2  | 124312099     | 124312359 | 261 |
| chr24 | 40195336      | 40195595  | 260 |
| chr18 | 11796229      | 11796488  | 260 |
| chr12 | 21718661      | 21718920  | 260 |
| chr7  | 37613566      | 37613823  | 258 |
| chr1  | 82993125      | 82993380  | 256 |

|       |               |           |     |
|-------|---------------|-----------|-----|
| chr19 | 58696452      | 58696706  | 255 |
| chr18 | 11690889      | 11691142  | 254 |
| chr27 | 14743380      | 14743632  | 253 |
| chr7  | 13085100      | 13085351  | 252 |
| chr19 | 19838899      | 19839150  | 252 |
| chr4  | 107677544     | 107677794 | 251 |
| chr23 | 10349027      | 10349277  | 251 |
| chr5  | 60373473      | 60373722  | 250 |
| chr2  | 130900552     | 130900801 | 250 |
| chr1  | 123118737     | 123118985 | 249 |
| chr2  | 130381800     | 130382047 | 248 |
| chr17 | 56088387      | 56088634  | 248 |
| chr4  | 120192376     | 120192622 | 247 |
| chr18 | 24309345      | 24309591  | 247 |
| chr16 | 47033040      | 47033286  | 247 |
| chr5  | 109881956     | 109882201 | 246 |
| chr1  | 154412279     | 154412523 | 245 |
| chr28 | 34178073      | 34178316  | 244 |
| chr8  | 108790633     | 108790874 | 242 |
| chrX  | 11020299      | 11020539  | 241 |
| chr21 | 34484224      | 34484464  | 241 |
| chr7  | 504464 504703 | 240       |     |
| chr29 | 36952743      | 36952981  | 239 |
| chr15 | 54200251      | 54200489  | 239 |
| chr29 | 41704391      | 41704628  | 238 |
| chr23 | 48765486      | 48765723  | 238 |
| chr8  | 72315737      | 72315973  | 237 |
| chr8  | 7782237       | 7782473   | 237 |
| chr7  | 9337538       | 9337773   | 236 |
| chr17 | 59156634      | 59156869  | 236 |
| chr11 | 104652543     | 104652778 | 236 |
| chr11 | 84322495      | 84322730  | 236 |
| chr5  | 118443588     | 118443822 | 235 |
| chr5  | 32936150      | 32936384  | 235 |
| chr3  | 22519919      | 22520153  | 235 |
| chr28 | 23145931      | 23146165  | 235 |
| chr25 | 43566745      | 43566979  | 235 |
| chr19 | 43970469      | 43970703  | 235 |
| chr18 | 47994783      | 47995017  | 235 |
| chr4  | 68923169      | 68923401  | 233 |
| chr2  | 6582805       | 6583037   | 233 |
| chr16 | 39509943      | 39510175  | 233 |
| chr11 | 7559934       | 7560166   | 233 |
| chr10 | 86509717      | 86509949  | 233 |
| chr10 | 23752228      | 23752460  | 233 |
| chr7  | 14169333      | 14169563  | 231 |
| chr29 | 44506143      | 44506373  | 231 |
| chr16 | 2205271       | 2205501   | 231 |
| chr1  | 82868494      | 82868724  | 231 |
| chr5  | 30205730      | 30205959  | 230 |

|       |           |           |     |
|-------|-----------|-----------|-----|
| chr3  | 121238617 | 121238846 | 230 |
| chr25 | 37384482  | 37384711  | 230 |
| chr10 | 99597116  | 99597345  | 230 |
| chr18 | 11936982  | 11937210  | 229 |
| chr7  | 6620052   | 6620279   | 228 |
| chr15 | 74660437  | 74660664  | 228 |
| chr15 | 24428624  | 24428851  | 228 |
| chr3  | 117293164 | 117293390 | 227 |
| chr25 | 37808427  | 37808653  | 227 |
| chr13 | 22898167  | 22898393  | 227 |
| chr11 | 66555382  | 66555608  | 227 |
| chr29 | 48889676  | 48889901  | 226 |
| chr17 | 60521609  | 60521834  | 226 |
| chr15 | 26774360  | 26774585  | 226 |
| chr13 | 77334333  | 77334558  | 226 |
| chr12 | 34110049  | 34110274  | 226 |
| chr11 | 91604437  | 91604662  | 226 |
| chr5  | 36608788  | 36609012  | 225 |
| chr2  | 93542394  | 93542618  | 225 |
| chr18 | 10334823  | 10335047  | 225 |
| chr13 | 66720255  | 66720479  | 225 |
| chr11 | 98314945  | 98315169  | 225 |
| chr10 | 70152198  | 70152422  | 225 |
| chr3  | 122357493 | 122357716 | 224 |
| chr27 | 35425819  | 35426042  | 224 |
| chr21 | 65883278  | 65883501  | 224 |
| chr2  | 134943441 | 134943664 | 224 |
| chr2  | 123016916 | 123017139 | 224 |
| chr19 | 59372688  | 59372911  | 224 |
| chr18 | 58861885  | 58862108  | 224 |
| chr15 | 31970744  | 31970967  | 224 |
| chr15 | 24004559  | 24004782  | 224 |
| chr12 | 33046360  | 33046583  | 224 |
| chr10 | 17273382  | 17273605  | 224 |
| chr1  | 119738535 | 119738758 | 224 |
| chr1  | 74778033  | 74778256  | 224 |
| chr3  | 119167924 | 119168146 | 223 |
| chr23 | 20862233  | 20862455  | 223 |
| chr19 | 51904798  | 51905020  | 223 |
| chr19 | 16777818  | 16778040  | 223 |
| chr17 | 69840646  | 69840868  | 223 |
| chr11 | 4813014   | 4813236   | 223 |
| chr7  | 42657435  | 42657656  | 222 |
| chr5  | 111739176 | 111739397 | 222 |
| chr5  | 12940290  | 12940511  | 222 |
| chr19 | 33093690  | 33093911  | 222 |
| chr19 | 27205458  | 27205679  | 222 |
| chr16 | 68896851  | 68897072  | 222 |
| chr13 | 75800028  | 75800249  | 222 |
| chr11 | 106234685 | 106234906 | 222 |

|       |           |           |     |
|-------|-----------|-----------|-----|
| chr9  | 106536565 | 106536785 | 221 |
| chr8  | 72178645  | 72178865  | 221 |
| chr5  | 30503289  | 30503509  | 221 |
| chr3  | 88608144  | 88608364  | 221 |
| chr25 | 3802125   | 3802345   | 221 |
| chr21 | 23698684  | 23698904  | 221 |
| chr2  | 115019632 | 115019852 | 221 |
| chr19 | 39163509  | 39163729  | 221 |
| chr15 | 63877102  | 63877322  | 221 |
| chr13 | 63458694  | 63458914  | 221 |
| chr12 | 85350652  | 85350872  | 221 |
| chr23 | 17500659  | 17500878  | 220 |
| chr19 | 47373823  | 47374042  | 220 |
| chr16 | 49365221  | 49365440  | 220 |
| chr14 | 7829558   | 7829777   | 220 |
| chr13 | 67394732  | 67394951  | 220 |
| chr1  | 114271209 | 114271428 | 220 |
| chr5  | 117583826 | 117584044 | 219 |
| chr5  | 28896733  | 28896951  | 219 |
| chr27 | 40724433  | 40724651  | 219 |
| chr27 | 38672416  | 38672634  | 219 |
| chr23 | 11780619  | 11780837  | 219 |
| chr22 | 12308238  | 12308456  | 219 |
| chr2  | 74009270  | 74009488  | 219 |
| chr19 | 20391377  | 20391595  | 219 |
| chr18 | 10681345  | 10681563  | 219 |
| chr13 | 54498708  | 54498926  | 219 |
| chr4  | 68039788  | 68040005  | 218 |
| chr4  | 11147474  | 11147691  | 218 |
| chr25 | 38165244  | 38165461  | 218 |
| chr25 | 4747065   | 4747282   | 218 |
| chr21 | 31046433  | 31046650  | 218 |
| chr20 | 74018684  | 74018901  | 218 |
| chr16 | 44803230  | 44803447  | 218 |
| chr14 | 1916967   | 1917184   | 218 |
| chr11 | 98437082  | 98437299  | 218 |
| chr8  | 7617903   | 7618119   | 217 |
| chr5  | 117842928 | 117843144 | 217 |
| chr3  | 105684128 | 105684344 | 217 |
| chr27 | 11613941  | 11614157  | 217 |
| chr25 | 42207168  | 42207384  | 217 |
| chr23 | 9450044   | 9450260   | 217 |
| chr2  | 140086786 | 140087002 | 217 |
| chr2  | 136634955 | 136635171 | 217 |
| chr2  | 99342442  | 99342658  | 217 |
| chr18 | 63460780  | 63460996  | 217 |
| chr10 | 18764036  | 18764252  | 217 |
| chr3  | 25246113  | 25246328  | 216 |
| chr24 | 35382825  | 35383040  | 216 |
| chr23 | 8482304   | 8482519   | 216 |

|       |               |           |     |
|-------|---------------|-----------|-----|
| chr23 | 8081544       | 8081759   | 216 |
| chr22 | 50781968      | 50782183  | 216 |
| chr19 | 29814478      | 29814693  | 216 |
| chr17 | 62135206      | 62135421  | 216 |
| chr13 | 55374232      | 55374447  | 216 |
| chr10 | 83874098      | 83874313  | 216 |
| chr5  | 122794103     | 122794317 | 215 |
| chr5  | 101457625     | 101457839 | 215 |
| chr5  | 28694874      | 28695088  | 215 |
| chr3  | 111219706     | 111219920 | 215 |
| chr3  | 15420220      | 15420434  | 215 |
| chr23 | 51611299      | 51611513  | 215 |
| chr22 | 16557625      | 16557839  | 215 |
| chr18 | 54860791      | 54861005  | 215 |
| chr16 | 48395081      | 48395295  | 215 |
| chr13 | 39955599      | 39955813  | 215 |
| chr7  | 71680288      | 71680501  | 214 |
| chr7  | 38254619      | 38254832  | 214 |
| chr7  | 15600768      | 15600981  | 214 |
| chr3  | 23624180      | 23624393  | 214 |
| chr25 | 284298 284511 | 214       |     |
| chr23 | 28781001      | 28781214  | 214 |
| chr22 | 50595277      | 50595490  | 214 |
| chr21 | 20835761      | 20835974  | 214 |
| chr11 | 28326646      | 28326859  | 214 |
| chr9  | 75100629      | 75100841  | 213 |
| chr5  | 78722241      | 78722453  | 213 |
| chr3  | 29267666      | 29267878  | 213 |
| chr29 | 43148654      | 43148866  | 213 |
| chr25 | 29268802      | 29269014  | 213 |
| chr23 | 52663373      | 52663585  | 213 |
| chr22 | 48063404      | 48063616  | 213 |
| chr20 | 499358 499570 | 213       |     |
| chr19 | 27384804      | 27385016  | 213 |
| chr17 | 64063188      | 64063400  | 213 |
| chr17 | 47400322      | 47400534  | 213 |
| chr15 | 25262065      | 25262277  | 213 |
| chr13 | 2969071       | 2969283   | 213 |
| chr12 | 9639585       | 9639797   | 213 |
| chr11 | 9309374       | 9309586   | 213 |
| chr9  | 12682073      | 12682284  | 212 |
| chr7  | 14164027      | 14164238  | 212 |
| chr4  | 70482629      | 70482840  | 212 |
| chr3  | 125550150     | 125550361 | 212 |
| chr29 | 49109093      | 49109304  | 212 |
| chr29 | 31627203      | 31627414  | 212 |
| chr25 | 33482543      | 33482754  | 212 |
| chr25 | 3006492       | 3006703   | 212 |
| chr24 | 20398026      | 20398237  | 212 |
| chr19 | 18389647      | 18389858  | 212 |

|       |           |           |     |
|-------|-----------|-----------|-----|
| chr18 | 11344007  | 11344218  | 212 |
| chr17 | 64334197  | 64334408  | 212 |
| chr16 | 3359041   | 3359252   | 212 |
| chr15 | 7227148   | 7227359   | 212 |
| chr13 | 58632387  | 58632598  | 212 |
| chr10 | 85159826  | 85160037  | 212 |
| chr1  | 143830499 | 143830710 | 212 |
| chr7  | 2538546   | 2538756   | 211 |
| chr3  | 13455851  | 13456061  | 211 |
| chr26 | 18187111  | 18187321  | 211 |
| chr24 | 51378167  | 51378377  | 211 |
| chr24 | 1604942   | 1605152   | 211 |
| chr23 | 46393370  | 46393580  | 211 |
| chr21 | 24496328  | 24496538  | 211 |
| chr19 | 30935029  | 30935239  | 211 |
| chr19 | 30820135  | 30820345  | 211 |
| chr11 | 98907680  | 98907890  | 211 |
| chr4  | 95585713  | 95585922  | 210 |
| chr29 | 25516284  | 25516493  | 210 |
| chr28 | 43266809  | 43267018  | 210 |
| chr23 | 27118042  | 27118251  | 210 |
| chr21 | 65808738  | 65808947  | 210 |
| chr18 | 11034450  | 11034659  | 210 |
| chr15 | 28714687  | 28714896  | 210 |
| chr15 | 21510301  | 21510510  | 210 |
| chr13 | 75830881  | 75831090  | 210 |
| chr13 | 58473255  | 58473464  | 210 |
| chr11 | 48745552  | 48745761  | 210 |
| chr29 | 46925065  | 46925273  | 209 |
| chr29 | 44378643  | 44378851  | 209 |
| chr29 | 43000197  | 43000405  | 209 |
| chr29 | 34583768  | 34583976  | 209 |
| chr25 | 8736629   | 8736837   | 209 |
| chr25 | 3184587   | 3184795   | 209 |
| chr22 | 59411878  | 59412086  | 209 |
| chr20 | 5327084   | 5327292   | 209 |
| chr19 | 27348195  | 27348403  | 209 |
| chr19 | 10901712  | 10901920  | 209 |
| chr19 | 7639529   | 7639737   | 209 |
| chr18 | 11522055  | 11522263  | 209 |
| chr13 | 57577873  | 57578081  | 209 |
| chr11 | 100739472 | 100739680 | 209 |
| chr5  | 118456206 | 118456413 | 208 |
| chr3  | 86669427  | 86669634  | 208 |
| chr3  | 4684062   | 4684269   | 208 |
| chr3  | 4343298   | 4343505   | 208 |
| chr25 | 37200640  | 37200847  | 208 |
| chr24 | 42714259  | 42714466  | 208 |
| chr21 | 57020481  | 57020688  | 208 |
| chr20 | 23833737  | 23833944  | 208 |

|       |           |           |     |
|-------|-----------|-----------|-----|
| chr19 | 30175464  | 30175671  | 208 |
| chr19 | 29183610  | 29183817  | 208 |
| chr18 | 12386165  | 12386372  | 208 |
| chr17 | 63164175  | 63164382  | 208 |
| chr13 | 58969841  | 58970048  | 208 |
| chr13 | 41606452  | 41606659  | 208 |
| chr12 | 30760977  | 30761184  | 208 |
| chr11 | 74854122  | 74854329  | 208 |
| chr11 | 11706956  | 11707163  | 208 |
| chr5  | 113139555 | 113139761 | 207 |
| chr5  | 30395319  | 30395525  | 207 |
| chr3  | 121488607 | 121488813 | 207 |
| chr23 | 48366863  | 48367069  | 207 |
| chr22 | 18357000  | 18357206  | 207 |
| chr21 | 25299543  | 25299749  | 207 |
| chr2  | 139165332 | 139165538 | 207 |
| chr2  | 124458118 | 124458324 | 207 |
| chr19 | 14350735  | 14350941  | 207 |
| chr18 | 49472268  | 49472474  | 207 |
| chr17 | 69491760  | 69491966  | 207 |
| chr16 | 64540511  | 64540717  | 207 |
| chr15 | 28601167  | 28601373  | 207 |
| chr13 | 75982164  | 75982370  | 207 |
| chr13 | 57588246  | 57588452  | 207 |
| chr12 | 83928575  | 83928781  | 207 |
| chr10 | 53000015  | 53000221  | 207 |
| chr1  | 148756573 | 148756779 | 207 |
| chr1  | 82902148  | 82902354  | 207 |
| chr8  | 80176925  | 80177130  | 206 |
| chr6  | 121841892 | 121842097 | 206 |
| chr5  | 10537664  | 10537869  | 206 |
| chr4  | 110120700 | 110120905 | 206 |
| chr3  | 123641056 | 123641261 | 206 |
| chr29 | 46219691  | 46219896  | 206 |
| chr28 | 25089992  | 25090197  | 206 |
| chr27 | 46976964  | 46977169  | 206 |
| chr27 | 26762004  | 26762209  | 206 |
| chr26 | 34498210  | 34498415  | 206 |
| chr23 | 11372646  | 11372851  | 206 |
| chr23 | 11026064  | 11026269  | 206 |
| chr22 | 12181599  | 12181804  | 206 |
| chr20 | 71360812  | 71361017  | 206 |
| chr2  | 128466537 | 128466742 | 206 |
| chr19 | 23145006  | 23145211  | 206 |
| chr16 | 49371798  | 49372003  | 206 |
| chr16 | 47611389  | 47611594  | 206 |
| chr16 | 38807979  | 38808184  | 206 |
| chr16 | 27896069  | 27896274  | 206 |
| chr16 | 2260445   | 2260650   | 206 |
| chr14 | 7643041   | 7643246   | 206 |



|       |           |           |     |
|-------|-----------|-----------|-----|
| chr13 | 54426799  | 54427004  | 206 |
| chr12 | 85333332  | 85333537  | 206 |
| chr11 | 2313623   | 2313828   | 206 |
| chr10 | 19501798  | 19502003  | 206 |
| chr9  | 98817538  | 98817742  | 205 |
| chr6  | 69321928  | 69322132  | 205 |
| chr5  | 32836898  | 32837102  | 205 |
| chr23 | 49494668  | 49494872  | 205 |
| chr23 | 44430259  | 44430463  | 205 |
| chr23 | 27148222  | 27148426  | 205 |
| chr23 | 17471728  | 17471932  | 205 |
| chr23 | 13606101  | 13606305  | 205 |
| chr23 | 8574737   | 8574941   | 205 |
| chr21 | 60724258  | 60724462  | 205 |
| chr21 | 26555530  | 26555734  | 205 |
| chr20 | 19049814  | 19050018  | 205 |
| chr19 | 59107309  | 59107513  | 205 |
| chr19 | 23159875  | 23160079  | 205 |
| chr19 | 21707800  | 21708004  | 205 |
| chr19 | 10954406  | 10954610  | 205 |
| chr19 | 7786694   | 7786898   | 205 |
| chr15 | 81386084  | 81386288  | 205 |
| chr15 | 64766422  | 64766626  | 205 |
| chr15 | 22266726  | 22266930  | 205 |
| chr12 | 20779640  | 20779844  | 205 |
| chr11 | 75113241  | 75113445  | 205 |
| chr11 | 46063819  | 46064023  | 205 |
| chr10 | 17779664  | 17779868  | 205 |
| chr8  | 108773405 | 108773608 | 204 |
| chr8  | 7770936   | 7771139   | 204 |
| chr7  | 42190796  | 42190999  | 204 |
| chr7  | 5157918   | 5158121   | 204 |
| chr3  | 22500429  | 22500632  | 204 |
| chr23 | 49931535  | 49931738  | 204 |
| chr23 | 10509194  | 10509397  | 204 |
| chr20 | 7676566   | 7676769   | 204 |
| chr2  | 115121720 | 115121923 | 204 |
| chr19 | 52422161  | 52422364  | 204 |
| chr19 | 38119749  | 38119952  | 204 |
| chr19 | 37988127  | 37988330  | 204 |
| chr19 | 35279761  | 35279964  | 204 |
| chr19 | 19137357  | 19137560  | 204 |
| chr17 | 74091393  | 74091596  | 204 |
| chr17 | 63108476  | 63108679  | 204 |
| chr16 | 54683811  | 54684014  | 204 |
| chr16 | 39526592  | 39526795  | 204 |
| chr15 | 75338809  | 75339012  | 204 |
| chr15 | 25592593  | 25592796  | 204 |
| chr14 | 66257614  | 66257817  | 204 |
| chr13 | 77583127  | 77583330  | 204 |

|       |           |           |     |
|-------|-----------|-----------|-----|
| chr13 | 41231083  | 41231286  | 204 |
| chr13 | 11414576  | 11414779  | 204 |
| chr13 | 6920473   | 6920676   | 204 |
| chr10 | 89416417  | 89416620  | 204 |
| chr1  | 84819748  | 84819951  | 204 |
| chr1  | 81474735  | 81474938  | 204 |
| chr1  | 50454348  | 50454551  | 204 |
| chr8  | 80143849  | 80144051  | 203 |
| chr7  | 43697706  | 43697908  | 203 |
| chr7  | 30073963  | 30074165  | 203 |
| chr7  | 17963328  | 17963530  | 203 |
| chr7  | 3540955   | 3541157   | 203 |
| chr5  | 112583436 | 112583638 | 203 |
| chr5  | 29956325  | 29956527  | 203 |
| chr5  | 10067154  | 10067356  | 203 |
| chr4  | 98757204  | 98757406  | 203 |
| chr4  | 29056291  | 29056493  | 203 |
| chr3  | 111791035 | 111791237 | 203 |
| chr3  | 29348306  | 29348508  | 203 |
| chr3  | 15701641  | 15701843  | 203 |
| chr25 | 14373953  | 14374155  | 203 |
| chr24 | 1099402   | 1099604   | 203 |
| chr23 | 28564237  | 28564439  | 203 |
| chr23 | 19770594  | 19770796  | 203 |
| chr23 | 7255736   | 7255938   | 203 |
| chr22 | 13859698  | 13859900  | 203 |
| chr21 | 33515429  | 33515631  | 203 |
| chr21 | 26564795  | 26564997  | 203 |
| chr21 | 20031191  | 20031393  | 203 |
| chr20 | 75671152  | 75671354  | 203 |
| chr2  | 139327597 | 139327799 | 203 |
| chr2  | 110553913 | 110554115 | 203 |
| chr2  | 34118612  | 34118814  | 203 |
| chr19 | 41369929  | 41370131  | 203 |
| chr19 | 29760545  | 29760747  | 203 |
| chr18 | 53506587  | 53506789  | 203 |
| chr18 | 12593833  | 12594035  | 203 |
| chr18 | 11714649  | 11714851  | 203 |
| chr16 | 68781969  | 68782171  | 203 |
| chr16 | 47118127  | 47118329  | 203 |
| chr16 | 25990807  | 25991009  | 203 |
| chr15 | 21465111  | 21465313  | 203 |
| chr14 | 40094126  | 40094328  | 203 |
| chr13 | 67392800  | 67393002  | 203 |
| chr13 | 62243574  | 62243776  | 203 |
| chr11 | 104694408 | 104694610 | 203 |
| chr11 | 46171769  | 46171971  | 203 |
| chr11 | 28747620  | 28747822  | 203 |
| chrX  | 11007725  | 11007926  | 202 |
| chr9  | 106455082 | 106455283 | 202 |

|       |               |           |     |
|-------|---------------|-----------|-----|
| chr9  | 105000560     | 105000761 | 202 |
| chr8  | 7644226       | 7644427   | 202 |
| chr7  | 8843832       | 8844033   | 202 |
| chr5  | 83347700      | 83347901  | 202 |
| chr3  | 123304386     | 123304587 | 202 |
| chr29 | 12613937      | 12614138  | 202 |
| chr28 | 43579525      | 43579726  | 202 |
| chr26 | 45667001      | 45667202  | 202 |
| chr26 | 43246429      | 43246630  | 202 |
| chr26 | 32540914      | 32541115  | 202 |
| chr26 | 21966826      | 21967027  | 202 |
| chr23 | 27396782      | 27396983  | 202 |
| chr23 | 20454063      | 20454264  | 202 |
| chr23 | 16096436      | 16096637  | 202 |
| chr23 | 11048116      | 11048317  | 202 |
| chr22 | 30044314      | 30044515  | 202 |
| chr21 | 59432358      | 59432559  | 202 |
| chr21 | 27994484      | 27994685  | 202 |
| chr19 | 46142316      | 46142517  | 202 |
| chr19 | 46141300      | 46141501  | 202 |
| chr19 | 29543685      | 29543886  | 202 |
| chr19 | 12305705      | 12305906  | 202 |
| chr17 | 73438918      | 73439119  | 202 |
| chr17 | 67950504      | 67950705  | 202 |
| chr16 | 44765356      | 44765557  | 202 |
| chr15 | 30054254      | 30054455  | 202 |
| chr15 | 28276306      | 28276507  | 202 |
| chr15 | 14580607      | 14580808  | 202 |
| chr13 | 55331543      | 55331744  | 202 |
| chr12 | 84322132      | 84322333  | 202 |
| chr12 | 84145366      | 84145567  | 202 |
| chr11 | 106011131     | 106011332 | 202 |
| chr11 | 49406677      | 49406878  | 202 |
| chr11 | 14170307      | 14170508  | 202 |
| chr11 | 2556700       | 2556901   | 202 |
| chr11 | 768801 769002 |           | 202 |
| chr1  | 123102794     | 123102995 | 202 |
| chr8  | 116753089     | 116753289 | 201 |
| chr8  | 60415886      | 60416086  | 201 |
| chr7  | 17346912      | 17347112  | 201 |
| chr5  | 120250338     | 120250538 | 201 |
| chr5  | 112591689     | 112591889 | 201 |
| chr5  | 111125356     | 111125556 | 201 |
| chr5  | 28729522      | 28729722  | 201 |
| chr3  | 118065065     | 118065265 | 201 |
| chr3  | 105172640     | 105172840 | 201 |
| chr27 | 46967281      | 46967481  | 201 |
| chr27 | 39859627      | 39859827  | 201 |
| chr27 | 15768607      | 15768807  | 201 |
| chr26 | 44788732      | 44788932  | 201 |

|       |               |           |     |
|-------|---------------|-----------|-----|
| chr23 | 18808239      | 18808439  | 201 |
| chr22 | 51291513      | 51291713  | 201 |
| chr22 | 46588176      | 46588376  | 201 |
| chr22 | 16421864      | 16422064  | 201 |
| chr21 | 20627554      | 20627754  | 201 |
| chr21 | 20214455      | 20214655  | 201 |
| chr21 | 9518454       | 9518654   | 201 |
| chr20 | 18987119      | 18987319  | 201 |
| chr20 | 653915 654115 | 201       | 201 |
| chr19 | 60570701      | 60570901  | 201 |
| chr19 | 20324285      | 20324485  | 201 |
| chr18 | 55583475      | 55583675  | 201 |
| chr18 | 23500346      | 23500546  | 201 |
| chr17 | 56074121      | 56074321  | 201 |
| chr16 | 59071445      | 59071645  | 201 |
| chr14 | 58448233      | 58448433  | 201 |
| chr13 | 78684072      | 78684272  | 201 |
| chr13 | 77663152      | 77663352  | 201 |
| chr13 | 75534226      | 75534426  | 201 |
| chr12 | 84681389      | 84681589  | 201 |
| chr12 | 32174734      | 32174934  | 201 |
| chr11 | 105977508     | 105977708 | 201 |
| chr11 | 104971300     | 104971500 | 201 |
| chr11 | 9560613       | 9560813   | 201 |
| chr10 | 90307233      | 90307433  | 201 |
| chr10 | 88368005      | 88368205  | 201 |
| chrX  | 62118725      | 62118924  | 200 |
| chr8  | 24668049      | 24668248  | 200 |
| chr8  | 24215417      | 24215616  | 200 |
| chr5  | 118386026     | 118386225 | 200 |
| chr5  | 113503568     | 113503767 | 200 |
| chr5  | 50540752      | 50540951  | 200 |
| chr4  | 121416524     | 121416723 | 200 |
| chr4  | 121266115     | 121266314 | 200 |
| chr4  | 68020067      | 68020266  | 200 |
| chr3  | 115644378     | 115644577 | 200 |
| chr29 | 51748930      | 51749129  | 200 |
| chr29 | 30770912      | 30771111  | 200 |
| chr27 | 16698734      | 16698933  | 200 |
| chr23 | 19799545      | 19799744  | 200 |
| chr21 | 33792696      | 33792895  | 200 |
| chr2  | 132409741     | 132409940 | 200 |
| chr19 | 58367621      | 58367820  | 200 |
| chr19 | 54493461      | 54493660  | 200 |
| chr19 | 27265566      | 27265765  | 200 |
| chr18 | 52102204      | 52102403  | 200 |
| chr18 | 34934952      | 34935151  | 200 |
| chr18 | 33179292      | 33179491  | 200 |
| chr17 | 73442175      | 73442374  | 200 |
| chr16 | 39810410      | 39810609  | 200 |

|       |               |           |     |
|-------|---------------|-----------|-----|
| chr15 | 81592170      | 81592369  | 200 |
| chr15 | 22201304      | 22201503  | 200 |
| chr15 | 21163135      | 21163334  | 200 |
| chr13 | 77365582      | 77365781  | 200 |
| chr13 | 66021830      | 66022029  | 200 |
| chr13 | 60028301      | 60028500  | 200 |
| chr13 | 37691025      | 37691224  | 200 |
| chr13 | 12525140      | 12525339  | 200 |
| chr11 | 103472892     | 103473091 | 200 |
| chr11 | 90420408      | 90420607  | 200 |
| chr11 | 84642369      | 84642568  | 200 |
| chr10 | 99926334      | 99926533  | 200 |
| chr10 | 36912341      | 36912540  | 200 |
| chr10 | 25863413      | 25863612  | 200 |
| chr10 | 12744586      | 12744785  | 200 |
| chr1  | 153296372     | 153296571 | 200 |
| chr1  | 138634572     | 138634771 | 200 |
| chr1  | 119685432     | 119685631 | 200 |
| chr3  | 22548863      | 22549103  | 241 |
| chr21 | 1956308       | 1956526   | 219 |
| chr4  | 124312330     | 124312530 | 201 |
| chr29 | 38392286      | 38392485  | 200 |
| chr13 | 64036875      | 64037191  | 317 |
| chr23 | 9725939       | 9726248   | 310 |
| chr5  | 123681857     | 123682152 | 296 |
| chr8  | 23898304      | 23898663  | 360 |
| chr18 | 49927919      | 49928166  | 248 |
| chr24 | 65002190      | 65002432  | 243 |
| chr19 | 13480360      | 13480587  | 228 |
| chr27 | 26637574      | 26637794  | 221 |
| chr16 | 48822628      | 48822843  | 216 |
| chr15 | 341815 342029 | 215       |     |
| chr9  | 90478670      | 90478882  | 213 |
| chr5  | 29989242      | 29989449  | 208 |
| chr2  | 134918076     | 134918282 | 207 |
| chr3  | 105746052     | 105746255 | 204 |
| chr18 | 19366245      | 19366447  | 203 |
| chr18 | 50834428      | 50834629  | 202 |
| chr19 | 58476918      | 58477117  | 200 |
| chr11 | 74429888      | 74430087  | 200 |
| chr14 | 27151275      | 27151515  | 241 |
| chrX  | 85926028      | 85926272  | 245 |
| chr18 | 51213796      | 51214002  | 207 |
| chr1  | 72358702      | 72358906  | 205 |
| chr13 | 138151 138354 | 204       |     |
| chr19 | 42551627      | 42551827  | 201 |
| chr16 | 46662625      | 46662825  | 201 |
| chr8  | 73524825      | 73525024  | 200 |
| chr23 | 8461636       | 8462122   | 487 |
| chr17 | 66440541      | 66441020  | 480 |

|       |           |           |     |
|-------|-----------|-----------|-----|
| chr23 | 46019415  | 46019881  | 467 |
| chr3  | 18613055  | 18613447  | 393 |
| chr13 | 67103769  | 67104159  | 391 |
| chr26 | 14939973  | 14940354  | 382 |
| chr3  | 109388525 | 109388900 | 376 |
| chr10 | 15086214  | 15086589  | 376 |
| chr12 | 31544621  | 31544995  | 375 |
| chr8  | 103918016 | 103918388 | 373 |
| chr19 | 39841043  | 39841415  | 373 |
| chr25 | 3354751   | 3355117   | 367 |
| chr29 | 41706542  | 41706906  | 365 |
| chr10 | 12126316  | 12126679  | 364 |
| chr18 | 46760934  | 46761296  | 363 |
| chr18 | 49840990  | 49841349  | 360 |
| chr5  | 81557404  | 81557759  | 356 |
| chr12 | 5274713   | 5275066   | 354 |
| chr13 | 6922564   | 6922916   | 353 |
| chr26 | 22225243  | 22225593  | 351 |
| chr3  | 108764645 | 108764994 | 350 |
| chr2  | 114185556 | 114185905 | 350 |
| chr18 | 7112991   | 7113339   | 349 |
| chr26 | 21785786  | 21786133  | 348 |
| chr26 | 5875800   | 5876147   | 348 |
| chr12 | 33389401  | 33389747  | 347 |
| chr5  | 120121437 | 120121780 | 344 |
| chr20 | 74923324  | 74923666  | 343 |
| chr13 | 69924040  | 69924381  | 342 |
| chr20 | 44418665  | 44419005  | 341 |
| chr4  | 116691891 | 116692230 | 340 |
| chr23 | 18418423  | 18418757  | 335 |
| chr29 | 37419381  | 37419714  | 334 |
| chr19 | 38912729  | 38913060  | 332 |
| chr15 | 29187484  | 29187815  | 332 |
| chr20 | 39787042  | 39787372  | 331 |
| chr17 | 67617779  | 67618109  | 331 |
| chr16 | 48059234  | 48059564  | 331 |
| chr19 | 17668128  | 17668456  | 329 |
| chr19 | 15863372  | 15863700  | 329 |
| chr8  | 93386708  | 93387034  | 327 |
| chr5  | 60362770  | 60363095  | 326 |
| chr7  | 51685756  | 51686080  | 325 |
| chr21 | 65679054  | 65679374  | 321 |
| chr8  | 55106772  | 55107091  | 320 |
| chr22 | 56350356  | 56350675  | 320 |
| chr9  | 52817240  | 52817558  | 319 |
| chr3  | 127692435 | 127692753 | 319 |
| chr3  | 20761120  | 20761437  | 318 |
| chr18 | 11492389  | 11492706  | 318 |
| chr5  | 60919008  | 60919324  | 317 |
| chr20 | 44343347  | 44343663  | 317 |

|       |           |           |     |
|-------|-----------|-----------|-----|
| chr16 | 49315371  | 49315684  | 314 |
| chr12 | 33065608  | 33065921  | 314 |
| chr22 | 17877544  | 17877855  | 312 |
| chr13 | 43540963  | 43541274  | 312 |
| chr5  | 123713390 | 123713700 | 311 |
| chr2  | 132497503 | 132497813 | 311 |
| chr15 | 78215349  | 78215659  | 311 |
| chr15 | 74970820  | 74971130  | 311 |
| chr21 | 34587709  | 34588018  | 310 |
| chr29 | 41676695  | 41677003  | 309 |
| chr8  | 47773188  | 47773494  | 307 |
| chr27 | 17895831  | 17896137  | 307 |
| chr5  | 80707013  | 80707318  | 306 |
| chr9  | 90291129  | 90291433  | 305 |
| chr20 | 1942999   | 1943303   | 305 |
| chr19 | 15157826  | 15158130  | 305 |
| chr8  | 74019318  | 74019621  | 304 |
| chr25 | 37371305  | 37371608  | 304 |
| chr15 | 64983000  | 64983303  | 304 |
| chr8  | 5378120   | 5378422   | 303 |
| chr3  | 106558222 | 106558523 | 302 |
| chr19 | 25422755  | 25423056  | 302 |
| chr15 | 80854386  | 80854687  | 302 |
| chr19 | 26002662  | 26002962  | 301 |
| chr6  | 121895111 | 121895410 | 300 |
| chr24 | 51566308  | 51566607  | 300 |
| chr21 | 69010378  | 69010677  | 300 |
| chr19 | 54657714  | 54658013  | 300 |
| chr19 | 25779846  | 25780144  | 299 |
| chr21 | 19239188  | 19239485  | 298 |
| chr18 | 65635588  | 65635885  | 298 |
| chr18 | 13140464  | 13140761  | 298 |
| chr9  | 102513783 | 102514079 | 297 |
| chr29 | 17819256  | 17819552  | 297 |
| chr19 | 38331092  | 38331388  | 297 |
| chr8  | 64486430  | 64486725  | 296 |
| chr28 | 40405028  | 40405323  | 296 |
| chr19 | 21582125  | 21582420  | 296 |
| chr17 | 65980323  | 65980618  | 296 |
| chr17 | 53986417  | 53986712  | 296 |
| chr13 | 75624244  | 75624539  | 296 |
| chr13 | 37160555  | 37160850  | 296 |
| chr13 | 29295798  | 29296093  | 296 |
| chr8  | 73735282  | 73735576  | 295 |
| chr24 | 15033152  | 15033446  | 295 |
| chr20 | 4907569   | 4907863   | 295 |
| chr17 | 63405131  | 63405424  | 294 |
| chr1  | 146682012 | 146682305 | 294 |
| chr2  | 140624866 | 140625158 | 293 |
| chr18 | 11660593  | 11660884  | 292 |

|       |               |           |     |
|-------|---------------|-----------|-----|
| chr16 | 71113132      | 71113423  | 292 |
| chr12 | 83553990      | 83554281  | 292 |
| chr26 | 34394869      | 34395159  | 291 |
| chr25 | 39362373      | 39362663  | 291 |
| chr18 | 13199198      | 13199488  | 291 |
| chr13 | 52674065      | 52674355  | 291 |
| chr10 | 74860567      | 74860857  | 291 |
| chr20 | 75064930      | 75065219  | 290 |
| chr24 | 787914 788202 | 289       |     |
| chr18 | 33223319      | 33223607  | 289 |
| chr19 | 58853046      | 58853333  | 288 |
| chr9  | 100312079     | 100312365 | 287 |
| chr25 | 29366993      | 29367279  | 287 |
| chr13 | 58475484      | 58475770  | 287 |
| chr6  | 121022291     | 121022576 | 286 |
| chr29 | 48849519      | 48849804  | 286 |
| chr25 | 17029371      | 17029656  | 286 |
| chr15 | 29919778      | 29920063  | 286 |
| chr25 | 36661639      | 36661923  | 285 |
| chr21 | 27379379      | 27379663  | 285 |
| chr13 | 52655408      | 52655692  | 285 |
| chr3  | 111361156     | 111361439 | 284 |
| chr16 | 71139044      | 71139327  | 284 |
| chr5  | 114967242     | 114967524 | 283 |
| chr23 | 15088423      | 15088705  | 283 |
| chr18 | 11190310      | 11190592  | 283 |
| chr8  | 114966766     | 114967047 | 282 |
| chr7  | 17324629      | 17324909  | 281 |
| chr29 | 48789868      | 48790148  | 281 |
| chr28 | 34344944      | 34345224  | 281 |
| chr25 | 2087026       | 2087306   | 281 |
| chr23 | 28118646      | 28118925  | 280 |
| chr21 | 64437579      | 64437858  | 280 |
| chr18 | 43587239      | 43587518  | 280 |
| chr16 | 45906351      | 45906630  | 280 |
| chr5  | 111626321     | 111626599 | 279 |
| chr20 | 4906948       | 4907226   | 279 |
| chr17 | 68808738      | 68809016  | 279 |
| chr12 | 68416539      | 68416817  | 279 |
| chr9  | 36074886      | 36075162  | 277 |
| chr27 | 45266663      | 45266939  | 277 |
| chr24 | 62457808      | 62458084  | 277 |
| chr22 | 10622360      | 10622636  | 277 |
| chr8  | 7982940       | 7983215   | 276 |
| chr5  | 28744146      | 28744421  | 276 |
| chr23 | 18673752      | 18674027  | 276 |
| chr17 | 63528384      | 63528659  | 276 |
| chr17 | 63458954      | 63459229  | 276 |
| chr15 | 24582113      | 24582388  | 276 |
| chr5  | 81477862      | 81478136  | 275 |



|       |               |           |     |
|-------|---------------|-----------|-----|
| chr27 | 31075486      | 31075760  | 275 |
| chr22 | 59962025      | 59962299  | 275 |
| chr11 | 31094016      | 31094290  | 275 |
| chr8  | 80149592      | 80149865  | 274 |
| chr28 | 33663536      | 33663809  | 274 |
| chr18 | 49948309      | 49948582  | 274 |
| chr18 | 10914529      | 10914802  | 274 |
| chr13 | 63168840      | 63169113  | 274 |
| chr20 | 73018262      | 73018534  | 273 |
| chr17 | 70356218      | 70356490  | 273 |
| chr5  | 28889740      | 28890011  | 272 |
| chr22 | 17581775      | 17582046  | 272 |
| chr15 | 75770883      | 75771154  | 272 |
| chr10 | 59654674      | 59654945  | 272 |
| chr27 | 718083 718353 | 271       |     |
| chr26 | 35002023      | 35002293  | 271 |
| chr23 | 8465141       | 8465411   | 271 |
| chr19 | 7605389       | 7605659   | 271 |
| chr18 | 52120379      | 52120649  | 271 |
| chr14 | 76305772      | 76306042  | 271 |
| chr11 | 89502445      | 89502715  | 271 |
| chr10 | 87164285      | 87164555  | 271 |
| chr1  | 83114801      | 83115071  | 271 |
| chr7  | 5251683       | 5251952   | 270 |
| chr6  | 119510978     | 119511247 | 270 |
| chr29 | 44724586      | 44724855  | 270 |
| chr23 | 16040883      | 16041152  | 270 |
| chr15 | 38451853      | 38452122  | 270 |
| chr29 | 44700869      | 44701137  | 269 |
| chr13 | 59997522      | 59997790  | 269 |
| chr10 | 88043045      | 88043313  | 269 |
| chr7  | 65684659      | 65684926  | 268 |
| chr7  | 44769152      | 44769419  | 268 |
| chr4  | 123009163     | 123009430 | 268 |
| chr3  | 115099815     | 115100082 | 268 |
| chr20 | 72734158      | 72734425  | 268 |
| chr19 | 16992125      | 16992392  | 268 |
| chr16 | 71876449      | 71876716  | 268 |
| chr15 | 53942252      | 53942519  | 268 |
| chr1  | 82507889      | 82508156  | 268 |
| chr7  | 44443474      | 44443740  | 267 |
| chr3  | 121540090     | 121540355 | 266 |
| chr29 | 36473294      | 36473559  | 266 |
| chr11 | 69038695      | 69038960  | 266 |
| chr10 | 17340476      | 17340741  | 266 |
| chr9  | 34929989      | 34930253  | 265 |
| chr25 | 3423285       | 3423549   | 265 |
| chr23 | 10420087      | 10420351  | 265 |
| chr19 | 36661626      | 36661890  | 265 |
| chr16 | 2437834       | 2438098   | 265 |

|       |           |           |     |
|-------|-----------|-----------|-----|
| chr14 | 3412869   | 3413133   | 265 |
| chr29 | 43546104  | 43546367  | 264 |
| chr19 | 46659055  | 46659318  | 264 |
| chr11 | 81082189  | 81082452  | 264 |
| chr1  | 74178565  | 74178828  | 264 |
| chr25 | 39177902  | 39178164  | 263 |
| chrX  | 72258728  | 72258989  | 262 |
| chr7  | 37500888  | 37501149  | 262 |
| chr28 | 33723518  | 33723779  | 262 |
| chr19 | 39012866  | 39013127  | 262 |
| chr17 | 62041774  | 62042035  | 262 |
| chr16 | 38797187  | 38797448  | 262 |
| chr13 | 54022182  | 54022443  | 262 |
| chr13 | 14956983  | 14957244  | 262 |
| chr23 | 15889459  | 15889719  | 261 |
| chr23 | 10501118  | 10501378  | 261 |
| chr19 | 37626874  | 37627134  | 261 |
| chr18 | 53027839  | 53028099  | 261 |
| chr18 | 50665670  | 50665930  | 261 |
| chr18 | 22766003  | 22766263  | 261 |
| chr17 | 47096145  | 47096405  | 261 |
| chr12 | 31013846  | 31014106  | 261 |
| chr11 | 25740624  | 25740884  | 261 |
| chr9  | 106484037 | 106484296 | 260 |
| chr21 | 33090414  | 33090673  | 260 |
| chr19 | 38308394  | 38308653  | 260 |
| chr19 | 36355864  | 36356123  | 260 |
| chr18 | 11440651  | 11440910  | 260 |
| chr17 | 67232706  | 67232965  | 260 |
| chr12 | 83403520  | 83403779  | 260 |
| chr9  | 106216208 | 106216466 | 259 |
| chr7  | 18836652  | 18836910  | 259 |
| chr3  | 116000110 | 116000368 | 259 |
| chr3  | 31683899  | 31684157  | 259 |
| chr18 | 11128515  | 11128773  | 259 |
| chr13 | 65737414  | 65737672  | 259 |
| chr26 | 44350856  | 44351113  | 258 |
| chr25 | 37200863  | 37201120  | 258 |
| chr22 | 10348297  | 10348554  | 258 |
| chr16 | 68763002  | 68763259  | 258 |
| chr16 | 2439092   | 2439349   | 258 |
| chr15 | 75380031  | 75380288  | 258 |
| chr13 | 63286499  | 63286756  | 258 |
| chr9  | 65835116  | 65835372  | 257 |
| chr8  | 112477271 | 112477527 | 257 |
| chr5  | 125558312 | 125558568 | 257 |
| chr5  | 30930115  | 30930371  | 257 |
| chr26 | 46368950  | 46369206  | 257 |
| chr22 | 60514009  | 60514265  | 257 |
| chr19 | 46863213  | 46863469  | 257 |

|       |           |           |     |
|-------|-----------|-----------|-----|
| chr18 | 12010246  | 12010502  | 257 |
| chr16 | 2132196   | 2132452   | 257 |
| chr6  | 61950544  | 61950799  | 256 |
| chr3  | 123653601 | 123653856 | 256 |
| chr3  | 105400325 | 105400580 | 256 |
| chr19 | 54480072  | 54480327  | 256 |
| chr19 | 41509072  | 41509327  | 256 |
| chr18 | 53494445  | 53494700  | 256 |
| chr18 | 47693332  | 47693587  | 256 |
| chr17 | 63764153  | 63764408  | 256 |
| chr8  | 74349048  | 74349302  | 255 |
| chr7  | 44638708  | 44638962  | 255 |
| chr7  | 19882271  | 19882525  | 255 |
| chr26 | 34671691  | 34671945  | 255 |
| chr24 | 20837533  | 20837787  | 255 |
| chr21 | 26471584  | 26471838  | 255 |
| chr2  | 111352292 | 111352546 | 255 |
| chr15 | 21527865  | 21528119  | 255 |
| chr12 | 70672354  | 70672608  | 255 |
| chr11 | 95260829  | 95261083  | 255 |
| chr10 | 21120600  | 21120854  | 255 |
| chr20 | 42348145  | 42348398  | 254 |
| chr17 | 69751945  | 69752198  | 254 |
| chr17 | 67599946  | 67600199  | 254 |
| chr13 | 58358474  | 58358727  | 254 |
| chr13 | 54765289  | 54765542  | 254 |
| chr12 | 35587898  | 35588151  | 254 |
| chr12 | 32919120  | 32919373  | 254 |
| chr9  | 106355121 | 106355373 | 253 |
| chr9  | 34927517  | 34927769  | 253 |
| chr5  | 122301396 | 122301648 | 253 |
| chr3  | 124616148 | 124616400 | 253 |
| chr3  | 83878275  | 83878527  | 253 |
| chr3  | 29972574  | 29972826  | 253 |
| chr25 | 3419547   | 3419799   | 253 |
| chr24 | 41464241  | 41464493  | 253 |
| chr22 | 36607884  | 36608136  | 253 |
| chr21 | 18750031  | 18750283  | 253 |
| chr17 | 70104493  | 70104745  | 253 |
| chr17 | 64122979  | 64123231  | 253 |
| chr13 | 76392999  | 76393251  | 253 |
| chr12 | 84295842  | 84296094  | 253 |
| chr1  | 146739777 | 146740029 | 253 |
| chr9  | 90321382  | 90321633  | 252 |
| chr5  | 121726256 | 121726507 | 252 |
| chr18 | 11827771  | 11828022  | 252 |
| chr14 | 63309589  | 63309840  | 252 |
| chr11 | 5154801   | 5155052   | 252 |
| chr1  | 74777731  | 74777982  | 252 |
| chr7  | 4148964   | 4149214   | 251 |

|       |           |           |     |
|-------|-----------|-----------|-----|
| chr6  | 94853463  | 94853713  | 251 |
| chr6  | 26201017  | 26201267  | 251 |
| chr3  | 14148744  | 14148994  | 251 |
| chr22 | 17289628  | 17289878  | 251 |
| chr19 | 16733227  | 16733477  | 251 |
| chr18 | 22710051  | 22710301  | 251 |
| chr17 | 75045754  | 75046004  | 251 |
| chr16 | 2220547   | 2220797   | 251 |
| chr12 | 29306750  | 29307000  | 251 |
| chr6  | 16848671  | 16848920  | 250 |
| chr4  | 52524991  | 52525240  | 250 |
| chr29 | 49896544  | 49896793  | 250 |
| chr22 | 13998920  | 13999169  | 250 |
| chr21 | 26562891  | 26563140  | 250 |
| chr2  | 115056619 | 115056868 | 250 |
| chr15 | 61074132  | 61074381  | 250 |
| chr13 | 59864488  | 59864737  | 250 |
| chr13 | 44920377  | 44920626  | 250 |
| chr10 | 8538891   | 8539140   | 250 |
| chr5  | 60317102  | 60317350  | 249 |
| chr4  | 33407472  | 33407720  | 249 |
| chr3  | 55874966  | 55875214  | 249 |
| chr3  | 34007044  | 34007292  | 249 |
| chr26 | 44175382  | 44175630  | 249 |
| chr25 | 14321613  | 14321861  | 249 |
| chr22 | 33360480  | 33360728  | 249 |
| chr21 | 34471730  | 34471978  | 249 |
| chr2  | 123011653 | 123011901 | 249 |
| chr18 | 25047359  | 25047607  | 249 |
| chr17 | 74997548  | 74997796  | 249 |
| chr17 | 65956526  | 65956774  | 249 |
| chr16 | 23805773  | 23806021  | 249 |
| chr15 | 64764127  | 64764375  | 249 |
| chr13 | 56507374  | 56507622  | 249 |
| chr13 | 41091754  | 41092002  | 249 |
| chr12 | 82415524  | 82415772  | 249 |
| chr11 | 70844849  | 70845097  | 249 |
| chr5  | 119160791 | 119161038 | 248 |
| chr5  | 117309505 | 117309752 | 248 |
| chr28 | 26842701  | 26842948  | 248 |
| chr19 | 12118991  | 12119238  | 248 |
| chr18 | 46084873  | 46085120  | 248 |
| chr13 | 61150078  | 61150325  | 248 |
| chr11 | 66548501  | 66548748  | 248 |
| chr11 | 1580844   | 1581091   | 248 |
| chr9  | 90421894  | 90422140  | 247 |
| chr8  | 1519656   | 1519902   | 247 |
| chr4  | 118628534 | 118628780 | 247 |
| chr4  | 99374817  | 99375063  | 247 |
| chr26 | 48927651  | 48927897  | 247 |

|       |               |           |     |
|-------|---------------|-----------|-----|
| chr22 | 12193469      | 12193715  | 247 |
| chr19 | 65145042      | 65145288  | 247 |
| chr10 | 36321398      | 36321644  | 247 |
| chr9  | 89636601      | 89636846  | 246 |
| chr8  | 95045202      | 95045447  | 246 |
| chr3  | 29303931      | 29304176  | 246 |
| chr20 | 75753670      | 75753915  | 246 |
| chr19 | 59105530      | 59105775  | 246 |
| chr19 | 57029632      | 57029877  | 246 |
| chr19 | 7137768       | 7138013   | 246 |
| chr15 | 20069550      | 20069795  | 246 |
| chr14 | 8177301       | 8177546   | 246 |
| chr14 | 7683389       | 7683634   | 246 |
| chr11 | 106379137     | 106379382 | 246 |
| chr11 | 72740137      | 72740382  | 246 |
| chr10 | 70149316      | 70149561  | 246 |
| chr6  | 122177627     | 122177871 | 245 |
| chr5  | 28803882      | 28804126  | 245 |
| chr4  | 104695205     | 104695449 | 245 |
| chr27 | 40786463      | 40786707  | 245 |
| chr23 | 7061961       | 7062205   | 245 |
| chr20 | 33541270      | 33541514  | 245 |
| chr19 | 54186603      | 54186847  | 245 |
| chr16 | 47120981      | 47121225  | 245 |
| chr15 | 75306962      | 75307206  | 245 |
| chr14 | 21767010      | 21767254  | 245 |
| chr9  | 106785748     | 106785991 | 244 |
| chr8  | 1067499       | 1067742   | 244 |
| chr6  | 106928636     | 106928879 | 244 |
| chr5  | 28825825      | 28826068  | 244 |
| chr3  | 124288840     | 124289083 | 244 |
| chr3  | 116498011     | 116498254 | 244 |
| chr27 | 11590372      | 11590615  | 244 |
| chr23 | 52855107      | 52855350  | 244 |
| chr22 | 56272914      | 56273157  | 244 |
| chr20 | 768803 769046 |           | 244 |
| chr18 | 63514604      | 63514847  | 244 |
| chr16 | 74061266      | 74061509  | 244 |
| chr16 | 47389804      | 47390047  | 244 |
| chr15 | 29103633      | 29103876  | 244 |
| chr15 | 21501515      | 21501758  | 244 |
| chr14 | 7184469       | 7184712   | 244 |
| chr13 | 17753754      | 17753997  | 244 |
| chr10 | 61471026      | 61471269  | 244 |
| chr10 | 20987907      | 20988150  | 244 |
| chr9  | 105903931     | 105904173 | 243 |
| chr8  | 5768652       | 5768894   | 243 |
| chr6  | 92306958      | 92307200  | 243 |
| chr5  | 29187336      | 29187578  | 243 |
| chr4  | 123492582     | 123492824 | 243 |

|       |               |           |     |
|-------|---------------|-----------|-----|
| chr4  | 95775545      | 95775787  | 243 |
| chr27 | 6127618       | 6127860   | 243 |
| chr26 | 37478877      | 37479119  | 243 |
| chr25 | 35425435      | 35425677  | 243 |
| chr23 | 27406084      | 27406326  | 243 |
| chr22 | 50602303      | 50602545  | 243 |
| chr22 | 48831721      | 48831963  | 243 |
| chr22 | 29665614      | 29665856  | 243 |
| chr20 | 859814 860056 | 243       | 243 |
| chr18 | 43373788      | 43374030  | 243 |
| chr16 | 65520531      | 65520773  | 243 |
| chr16 | 1417958       | 1418200   | 243 |
| chr15 | 21388947      | 21389189  | 243 |
| chr14 | 26477795      | 26478037  | 243 |
| chr11 | 1964371       | 1964613   | 243 |
| chr10 | 75450277      | 75450519  | 243 |
| chr1  | 147277086     | 147277328 | 243 |
| chr9  | 90973249      | 90973490  | 242 |
| chr6  | 73622898      | 73623139  | 242 |
| chr5  | 115496712     | 115496953 | 242 |
| chr5  | 80746063      | 80746304  | 242 |
| chr5  | 30189395      | 30189636  | 242 |
| chr4  | 107489465     | 107489706 | 242 |
| chr27 | 46077475      | 46077716  | 242 |
| chr21 | 65799874      | 65800115  | 242 |
| chr2  | 133034602     | 133034843 | 242 |
| chr2  | 108727563     | 108727804 | 242 |
| chr19 | 26956164      | 26956405  | 242 |
| chr18 | 40277943      | 40278184  | 242 |
| chr18 | 39348613      | 39348854  | 242 |
| chr16 | 47139207      | 47139448  | 242 |
| chr15 | 81058008      | 81058249  | 242 |
| chr14 | 61285142      | 61285383  | 242 |
| chr13 | 40498019      | 40498260  | 242 |
| chr11 | 106032818     | 106033059 | 242 |
| chr7  | 19908538      | 19908778  | 241 |
| chr6  | 119071963     | 119072203 | 241 |
| chr6  | 114894774     | 114895014 | 241 |
| chr4  | 79102171      | 79102411  | 241 |
| chr3  | 125459197     | 125459437 | 241 |
| chr28 | 34059237      | 34059477  | 241 |
| chr20 | 33611662      | 33611902  | 241 |
| chr2  | 74782636      | 74782876  | 241 |
| chr19 | 58405477      | 58405717  | 241 |
| chr19 | 27374297      | 27374537  | 241 |
| chr18 | 3645369       | 3645609   | 241 |
| chr17 | 70178068      | 70178308  | 241 |
| chr14 | 26486447      | 26486687  | 241 |
| chr7  | 10306661      | 10306900  | 240 |
| chr3  | 123248476     | 123248715 | 240 |

|       |               |           |     |
|-------|---------------|-----------|-----|
| chr3  | 36721433      | 36721672  | 240 |
| chr26 | 47018739      | 47018978  | 240 |
| chr19 | 21872335      | 21872574  | 240 |
| chr18 | 1545240       | 1545479   | 240 |
| chr16 | 42898813      | 42899052  | 240 |
| chr15 | 29957605      | 29957844  | 240 |
| chr15 | 24651357      | 24651596  | 240 |
| chr11 | 74442180      | 74442419  | 240 |
| chr11 | 9436180       | 9436419   | 240 |
| chr9  | 90818106      | 90818344  | 239 |
| chr7  | 45818093      | 45818331  | 239 |
| chr5  | 113155211     | 113155449 | 239 |
| chr5  | 28379467      | 28379705  | 239 |
| chr28 | 33980782      | 33981020  | 239 |
| chr28 | 27068739      | 27068977  | 239 |
| chr25 | 2539739       | 2539977   | 239 |
| chr23 | 26996262      | 26996500  | 239 |
| chr22 | 44865701      | 44865939  | 239 |
| chr21 | 7799720       | 7799958   | 239 |
| chr2  | 130155332     | 130155570 | 239 |
| chr2  | 127843520     | 127843758 | 239 |
| chr16 | 44873361      | 44873599  | 239 |
| chr15 | 22615013      | 22615251  | 239 |
| chr13 | 68922108      | 68922346  | 239 |
| chr13 | 46211272      | 46211510  | 239 |
| chr11 | 89895728      | 89895966  | 239 |
| chr11 | 77938411      | 77938649  | 239 |
| chr10 | 74692570      | 74692808  | 239 |
| chr1  | 146243380     | 146243618 | 239 |
| chr9  | 90660086      | 90660323  | 238 |
| chr8  | 9330249       | 9330486   | 238 |
| chr27 | 46986860      | 46987097  | 238 |
| chr21 | 45708320      | 45708557  | 238 |
| chr17 | 72950509      | 72950746  | 238 |
| chr16 | 47216517      | 47216754  | 238 |
| chr16 | 963303 963540 |           | 238 |
| chr15 | 64166933      | 64167170  | 238 |
| chr13 | 63398461      | 63398698  | 238 |
| chr12 | 35631936      | 35632173  | 238 |
| chr11 | 28642073      | 28642310  | 238 |
| chr9  | 62313470      | 62313706  | 237 |
| chr8  | 63806125      | 63806361  | 237 |
| chr7  | 4022893       | 4023129   | 237 |
| chr5  | 68971853      | 68972089  | 237 |
| chr26 | 15002716      | 15002952  | 237 |
| chr24 | 40775852      | 40776088  | 237 |
| chr21 | 67972781      | 67973017  | 237 |
| chr18 | 22766358      | 22766594  | 237 |
| chr15 | 39615777      | 39616013  | 237 |
| chr12 | 14713087      | 14713323  | 237 |

|       |               |           |     |
|-------|---------------|-----------|-----|
| chr11 | 104597147     | 104597383 | 237 |
| chr11 | 50671403      | 50671639  | 237 |
| chr8  | 110125252     | 110125487 | 236 |
| chr7  | 13083180      | 13083415  | 236 |
| chr5  | 76218921      | 76219156  | 236 |
| chr4  | 122984560     | 122984795 | 236 |
| chr3  | 111926017     | 111926252 | 236 |
| chr3  | 31658290      | 31658525  | 236 |
| chr23 | 44462011      | 44462246  | 236 |
| chr23 | 33512431      | 33512666  | 236 |
| chr19 | 46061780      | 46062015  | 236 |
| chr18 | 41818977      | 41819212  | 236 |
| chr18 | 33818954      | 33819189  | 236 |
| chr16 | 44104420      | 44104655  | 236 |
| chr16 | 962594 962829 |           | 236 |
| chr13 | 75317651      | 75317886  | 236 |
| chr13 | 62018205      | 62018440  | 236 |
| chr13 | 53796879      | 53797114  | 236 |
| chr11 | 106391705     | 106391940 | 236 |
| chr11 | 76260805      | 76261040  | 236 |
| chr10 | 5040387       | 5040622   | 236 |
| chr9  | 35977336      | 35977570  | 235 |
| chr8  | 104097315     | 104097549 | 235 |
| chr8  | 65226395      | 65226629  | 235 |
| chr7  | 44654423      | 44654657  | 235 |
| chr7  | 9623517       | 9623751   | 235 |
| chr6  | 109617978     | 109618212 | 235 |
| chr5  | 296074 296308 |           | 235 |
| chr4  | 84619847      | 84620081  | 235 |
| chr3  | 33924105      | 33924339  | 235 |
| chr3  | 33811616      | 33811850  | 235 |
| chr3  | 13458330      | 13458564  | 235 |
| chr29 | 36350290      | 36350524  | 235 |
| chr29 | 35092316      | 35092550  | 235 |
| chr27 | 15773801      | 15774035  | 235 |
| chr26 | 37539023      | 37539257  | 235 |
| chr25 | 39418399      | 39418633  | 235 |
| chr25 | 36474859      | 36475093  | 235 |
| chr25 | 34298098      | 34298332  | 235 |
| chr25 | 33383998      | 33384232  | 235 |
| chr21 | 28326802      | 28327036  | 235 |
| chr2  | 138553248     | 138553482 | 235 |
| chr2  | 113597092     | 113597326 | 235 |
| chr18 | 32804059      | 32804293  | 235 |
| chr16 | 44298378      | 44298612  | 235 |
| chr15 | 35605346      | 35605580  | 235 |
| chr13 | 52941318      | 52941552  | 235 |
| chr11 | 99688833      | 99689067  | 235 |
| chr10 | 62477387      | 62477621  | 235 |
| chr10 | 10782667      | 10782901  | 235 |



|       |               |           |     |
|-------|---------------|-----------|-----|
| chr8  | 73187671      | 73187904  | 234 |
| chr7  | 37444531      | 37444764  | 234 |
| chr7  | 13486385      | 13486618  | 234 |
| chr6  | 70887456      | 70887689  | 234 |
| chr5  | 123438218     | 123438451 | 234 |
| chr5  | 111205355     | 111205588 | 234 |
| chr5  | 51815313      | 51815546  | 234 |
| chr3  | 124617002     | 124617235 | 234 |
| chr3  | 119246148     | 119246381 | 234 |
| chr3  | 119167173     | 119167406 | 234 |
| chr3  | 31734837      | 31735070  | 234 |
| chr29 | 33338959      | 33339192  | 234 |
| chr27 | 35397840      | 35398073  | 234 |
| chr26 | 44199989      | 44200222  | 234 |
| chr23 | 52875779      | 52876012  | 234 |
| chr19 | 53023674      | 53023907  | 234 |
| chr19 | 28228194      | 28228427  | 234 |
| chr19 | 15666936      | 15667169  | 234 |
| chr18 | 55778751      | 55778984  | 234 |
| chr18 | 12606098      | 12606331  | 234 |
| chr17 | 69737383      | 69737616  | 234 |
| chr15 | 30410083      | 30410316  | 234 |
| chr15 | 22324470      | 22324703  | 234 |
| chr13 | 80410829      | 80411062  | 234 |
| chr11 | 28809660      | 28809893  | 234 |
| chr1  | 152218219     | 152218452 | 234 |
| chr1  | 84793686      | 84793919  | 234 |
| chr8  | 87918373      | 87918605  | 233 |
| chr5  | 124996917     | 124997149 | 233 |
| chr3  | 127820268     | 127820500 | 233 |
| chr3  | 23720139      | 23720371  | 233 |
| chr26 | 42228262      | 42228494  | 233 |
| chr19 | 48694979      | 48695211  | 233 |
| chr19 | 46698999      | 46699231  | 233 |
| chr19 | 38359569      | 38359801  | 233 |
| chr18 | 54313767      | 54313999  | 233 |
| chr18 | 49961157      | 49961389  | 233 |
| chr18 | 33011542      | 33011774  | 233 |
| chr16 | 48079097      | 48079329  | 233 |
| chr14 | 856869 857101 | 233       |     |
| chr13 | 79677816      | 79678048  | 233 |
| chr13 | 53214682      | 53214914  | 233 |
| chr11 | 28842035      | 28842267  | 233 |
| chr10 | 36826675      | 36826907  | 233 |
| chr1  | 73635739      | 73635971  | 233 |
| chr7  | 37344921      | 37345152  | 232 |
| chr5  | 121405935     | 121406166 | 232 |
| chr3  | 113597151     | 113597382 | 232 |
| chr29 | 31409699      | 31409930  | 232 |
| chr29 | 27756806      | 27757037  | 232 |

|       |           |           |     |
|-------|-----------|-----------|-----|
| chr29 | 26729914  | 26730145  | 232 |
| chr26 | 20181379  | 20181610  | 232 |
| chr25 | 26451418  | 26451649  | 232 |
| chr23 | 27215673  | 27215904  | 232 |
| chr22 | 30574866  | 30575097  | 232 |
| chr21 | 58810208  | 58810439  | 232 |
| chr20 | 8724234   | 8724465   | 232 |
| chr19 | 56955756  | 56955987  | 232 |
| chr19 | 47160839  | 47161070  | 232 |
| chr19 | 13539440  | 13539671  | 232 |
| chr19 | 9174021   | 9174252   | 232 |
| chr18 | 62751734  | 62751965  | 232 |
| chr18 | 43096719  | 43096950  | 232 |
| chr16 | 77524069  | 77524300  | 232 |
| chr16 | 67553023  | 67553254  | 232 |
| chr16 | 2128008   | 2128239   | 232 |
| chr13 | 68503335  | 68503566  | 232 |
| chr13 | 60022473  | 60022704  | 232 |
| chr12 | 29724610  | 29724841  | 232 |
| chr11 | 103756175 | 103756406 | 232 |
| chr11 | 103746486 | 103746717 | 232 |
| chr11 | 56771759  | 56771990  | 232 |
| chr10 | 8709696   | 8709927   | 232 |
| chr1  | 82820337  | 82820568  | 232 |
| chr8  | 108840229 | 108840459 | 231 |
| chr8  | 7397686   | 7397916   | 231 |
| chr7  | 46853706  | 46853936  | 231 |
| chr7  | 38171608  | 38171838  | 231 |
| chr7  | 6525469   | 6525699   | 231 |
| chr7  | 3018017   | 3018247   | 231 |
| chr5  | 121658475 | 121658705 | 231 |
| chr23 | 19565776  | 19566006  | 231 |
| chr2  | 138814007 | 138814237 | 231 |
| chr18 | 10996215  | 10996445  | 231 |
| chr17 | 56189783  | 56190013  | 231 |
| chr16 | 26523163  | 26523393  | 231 |
| chr12 | 64746585  | 64746815  | 231 |
| chr10 | 90668929  | 90669159  | 231 |
| chr1  | 74742557  | 74742787  | 231 |
| chr7  | 81020788  | 81021017  | 230 |
| chr7  | 2435951   | 2436180   | 230 |
| chr6  | 120571781 | 120572010 | 230 |
| chr5  | 17172268  | 17172497  | 230 |
| chr4  | 95606997  | 95607226  | 230 |
| chr3  | 56856474  | 56856703  | 230 |
| chr3  | 55119979  | 55120208  | 230 |
| chr25 | 34576468  | 34576697  | 230 |
| chr25 | 4344185   | 4344414   | 230 |
| chr24 | 51572826  | 51573055  | 230 |
| chr24 | 40270871  | 40271100  | 230 |

|       |               |           |     |
|-------|---------------|-----------|-----|
| chr21 | 67991599      | 67991828  | 230 |
| chr20 | 927580 927809 | 230       |     |
| chr2  | 134898526     | 134898755 | 230 |
| chr19 | 59205658      | 59205887  | 230 |
| chr19 | 43014476      | 43014705  | 230 |
| chr19 | 30819902      | 30820131  | 230 |
| chr19 | 18375104      | 18375333  | 230 |
| chr19 | 7864812       | 7865041   | 230 |
| chr19 | 6510712       | 6510941   | 230 |
| chr18 | 18734013      | 18734242  | 230 |
| chr18 | 7570346       | 7570575   | 230 |
| chr17 | 58864775      | 58865004  | 230 |
| chr16 | 40922950      | 40923179  | 230 |
| chr12 | 84192334      | 84192563  | 230 |
| chr12 | 83944133      | 83944362  | 230 |
| chr12 | 34472750      | 34472979  | 230 |
| chr12 | 13597122      | 13597351  | 230 |
| chr11 | 96126475      | 96126704  | 230 |
| chr1  | 664093 664322 | 230       |     |
| chr9  | 21987623      | 21987851  | 229 |
| chr8  | 28514330      | 28514558  | 229 |
| chr7  | 46170905      | 46171133  | 229 |
| chr7  | 42469352      | 42469580  | 229 |
| chr6  | 46498541      | 46498769  | 229 |
| chr5  | 81616611      | 81616839  | 229 |
| chr4  | 124118558     | 124118786 | 229 |
| chr4  | 121230440     | 121230668 | 229 |
| chr3  | 27864955      | 27865183  | 229 |
| chr29 | 36950850      | 36951078  | 229 |
| chr28 | 27054246      | 27054474  | 229 |
| chr27 | 36413522      | 36413750  | 229 |
| chr26 | 48992560      | 48992788  | 229 |
| chr25 | 41544242      | 41544470  | 229 |
| chr25 | 18120813      | 18121041  | 229 |
| chr23 | 18798086      | 18798314  | 229 |
| chr23 | 8249884       | 8250112   | 229 |
| chr22 | 50586865      | 50587093  | 229 |
| chr21 | 4280566       | 4280794   | 229 |
| chr2  | 21390044      | 21390272  | 229 |
| chr19 | 65254429      | 65254657  | 229 |
| chr19 | 65225294      | 65225522  | 229 |
| chr19 | 62986651      | 62986879  | 229 |
| chr19 | 54450241      | 54450469  | 229 |
| chr19 | 44102653      | 44102881  | 229 |
| chr19 | 25998792      | 25999020  | 229 |
| chr19 | 23969325      | 23969553  | 229 |
| chr16 | 47132869      | 47133097  | 229 |
| chr16 | 655848 656076 | 229       |     |
| chr15 | 22252385      | 22252613  | 229 |
| chr13 | 40848720      | 40848948  | 229 |

|       |               |           |     |
|-------|---------------|-----------|-----|
| chr1  | 151961797     | 151962025 | 229 |
| chr1  | 109225370     | 109225598 | 229 |
| chr1  | 74770586      | 74770814  | 229 |
| chr9  | 14579157      | 14579384  | 228 |
| chr5  | 123000536     | 123000763 | 228 |
| chr5  | 30610076      | 30610303  | 228 |
| chr5  | 28783625      | 28783852  | 228 |
| chr4  | 110178841     | 110179068 | 228 |
| chr4  | 8845844       | 8846071   | 228 |
| chr3  | 113271842     | 113272069 | 228 |
| chr3  | 104903897     | 104904124 | 228 |
| chr28 | 23533632      | 23533859  | 228 |
| chr23 | 27783955      | 27784182  | 228 |
| chr23 | 15115386      | 15115613  | 228 |
| chr22 | 59995125      | 59995352  | 228 |
| chr22 | 43917186      | 43917413  | 228 |
| chr21 | 59537524      | 59537751  | 228 |
| chr20 | 75194352      | 75194579  | 228 |
| chr20 | 771308 771535 | 228       |     |
| chr18 | 56750364      | 56750591  | 228 |
| chr18 | 51076287      | 51076514  | 228 |
| chr18 | 24122854      | 24123081  | 228 |
| chr18 | 23610312      | 23610539  | 228 |
| chr18 | 364200 364427 | 228       |     |
| chr15 | 64203216      | 64203443  | 228 |
| chr15 | 22363267      | 22363494  | 228 |
| chr13 | 49829079      | 49829306  | 228 |
| chr12 | 33656665      | 33656892  | 228 |
| chr12 | 12240473      | 12240700  | 228 |
| chr11 | 21614452      | 21614679  | 228 |
| chr10 | 16795180      | 16795407  | 228 |
| chr10 | 16696661      | 16696888  | 228 |
| chr9  | 19269256      | 19269482  | 227 |
| chr8  | 40331852      | 40332078  | 227 |
| chr7  | 42767357      | 42767583  | 227 |
| chr5  | 114088751     | 114088977 | 227 |
| chr5  | 112964726     | 112964952 | 227 |
| chr5  | 67339809      | 67340035  | 227 |
| chr4  | 33429465      | 33429691  | 227 |
| chr29 | 48902426      | 48902652  | 227 |
| chr26 | 24290560      | 24290786  | 227 |
| chr24 | 43696808      | 43697034  | 227 |
| chr22 | 61184005      | 61184231  | 227 |
| chr21 | 68990398      | 68990624  | 227 |
| chr21 | 66547942      | 66548168  | 227 |
| chr21 | 47628519      | 47628745  | 227 |
| chr21 | 26605665      | 26605891  | 227 |
| chr21 | 25053987      | 25054213  | 227 |
| chr20 | 73274637      | 73274863  | 227 |
| chr2  | 75765212      | 75765438  | 227 |

|       |           |           |     |
|-------|-----------|-----------|-----|
| chr2  | 72854638  | 72854864  | 227 |
| chr19 | 64350773  | 64350999  | 227 |
| chr19 | 34798847  | 34799073  | 227 |
| chr19 | 18393195  | 18393421  | 227 |
| chr18 | 39967524  | 39967750  | 227 |
| chr18 | 11475728  | 11475954  | 227 |
| chr18 | 11388233  | 11388459  | 227 |
| chr17 | 67962020  | 67962246  | 227 |
| chr13 | 57892171  | 57892397  | 227 |
| chr12 | 82930532  | 82930758  | 227 |
| chr12 | 34255900  | 34256126  | 227 |
| chr10 | 90434150  | 90434376  | 227 |
| chr10 | 36605962  | 36606188  | 227 |
| chr8  | 11303034  | 11303259  | 226 |
| chr5  | 122278997 | 122279222 | 226 |
| chr4  | 104694827 | 104695052 | 226 |
| chr4  | 66895323  | 66895548  | 226 |
| chr3  | 29597218  | 29597443  | 226 |
| chr29 | 43533389  | 43533614  | 226 |
| chr29 | 41425674  | 41425899  | 226 |
| chr29 | 36988338  | 36988563  | 226 |
| chr28 | 26978977  | 26979202  | 226 |
| chr26 | 20885683  | 20885908  | 226 |
| chr24 | 61111264  | 61111489  | 226 |
| chr23 | 10523665  | 10523890  | 226 |
| chr22 | 30456599  | 30456824  | 226 |
| chr21 | 66165414  | 66165639  | 226 |
| chr21 | 64432106  | 64432331  | 226 |
| chr21 | 60806374  | 60806599  | 226 |
| chr2  | 66196178  | 66196403  | 226 |
| chr19 | 64766317  | 64766542  | 226 |
| chr19 | 45277532  | 45277757  | 226 |
| chr19 | 39376331  | 39376556  | 226 |
| chr18 | 62469105  | 62469330  | 226 |
| chr18 | 50863448  | 50863673  | 226 |
| chr15 | 31340744  | 31340969  | 226 |
| chr14 | 31032539  | 31032764  | 226 |
| chr13 | 11775571  | 11775796  | 226 |
| chr11 | 70702875  | 70703100  | 226 |
| chr11 | 8992796   | 8993021   | 226 |
| chr10 | 13630345  | 13630570  | 226 |
| chr10 | 12943437  | 12943662  | 226 |
| chr10 | 7875539   | 7875764   | 226 |
| chr1  | 74327571  | 74327796  | 226 |
| chrX  | 76763250  | 76763474  | 225 |
| chr6  | 107672444 | 107672668 | 225 |
| chr4  | 121036227 | 121036451 | 225 |
| chr29 | 44561006  | 44561230  | 225 |
| chr28 | 26791964  | 26792188  | 225 |
| chr25 | 35355072  | 35355296  | 225 |

|       |           |           |     |
|-------|-----------|-----------|-----|
| chr24 | 64960749  | 64960973  | 225 |
| chr24 | 43001276  | 43001500  | 225 |
| chr22 | 14922724  | 14922948  | 225 |
| chr21 | 47724569  | 47724793  | 225 |
| chr21 | 27404146  | 27404370  | 225 |
| chr20 | 73304607  | 73304831  | 225 |
| chr2  | 132180700 | 132180924 | 225 |
| chr2  | 126710119 | 126710343 | 225 |
| chr19 | 54191288  | 54191512  | 225 |
| chr19 | 39972674  | 39972898  | 225 |
| chr18 | 54823843  | 54824067  | 225 |
| chr18 | 51191103  | 51191327  | 225 |
| chr18 | 14631681  | 14631905  | 225 |
| chr18 | 678165    | 678389    | 225 |
| chr16 | 46413094  | 46413318  | 225 |
| chr13 | 77089694  | 77089918  | 225 |
| chr13 | 73436916  | 73437140  | 225 |
| chr13 | 18361032  | 18361256  | 225 |
| chr11 | 68253551  | 68253775  | 225 |
| chr11 | 30801613  | 30801837  | 225 |
| chr10 | 20984351  | 20984575  | 225 |
| chr7  | 5693701   | 5693924   | 224 |
| chr6  | 106982580 | 106982803 | 224 |
| chr5  | 111797836 | 111798059 | 224 |
| chr5  | 32854651  | 32854874  | 224 |
| chr5  | 30022142  | 30022365  | 224 |
| chr5  | 28485138  | 28485361  | 224 |
| chr4  | 118706661 | 118706884 | 224 |
| chr3  | 127822353 | 127822576 | 224 |
| chr3  | 121019891 | 121020114 | 224 |
| chr3  | 111504113 | 111504336 | 224 |
| chr29 | 49087163  | 49087386  | 224 |
| chr29 | 43115420  | 43115643  | 224 |
| chr25 | 38337098  | 38337321  | 224 |
| chr24 | 60969844  | 60970067  | 224 |
| chr23 | 49934912  | 49935135  | 224 |
| chr23 | 16046558  | 16046781  | 224 |
| chr23 | 15092560  | 15092783  | 224 |
| chr2  | 111266957 | 111267180 | 224 |
| chr19 | 54786717  | 54786940  | 224 |
| chr18 | 4018994   | 4019217   | 224 |
| chr17 | 72940392  | 72940615  | 224 |
| chr17 | 72703713  | 72703936  | 224 |
| chr17 | 70019302  | 70019525  | 224 |
| chr17 | 67940399  | 67940622  | 224 |
| chr16 | 47033480  | 47033703  | 224 |
| chr14 | 20945790  | 20946013  | 224 |
| chr13 | 70957660  | 70957883  | 224 |
| chr13 | 53939183  | 53939406  | 224 |
| chr13 | 14342583  | 14342806  | 224 |

|       |           |           |     |
|-------|-----------|-----------|-----|
| chr12 | 82579660  | 82579883  | 224 |
| chr12 | 37023794  | 37024017  | 224 |
| chr11 | 92683212  | 92683435  | 224 |
| chr1  | 119752283 | 119752506 | 224 |
| chr1  | 75100748  | 75100971  | 224 |
| chrX  | 40426175  | 40426397  | 223 |
| chr7  | 62392405  | 62392627  | 223 |
| chr7  | 29486826  | 29487048  | 223 |
| chr7  | 4522532   | 4522754   | 223 |
| chr5  | 62075819  | 62076041  | 223 |
| chr5  | 28785157  | 28785379  | 223 |
| chr3  | 124074251 | 124074473 | 223 |
| chr3  | 118024887 | 118025109 | 223 |
| chr3  | 106580238 | 106580460 | 223 |
| chr3  | 105317407 | 105317629 | 223 |
| chr28 | 41245392  | 41245614  | 223 |
| chr26 | 51669828  | 51670050  | 223 |
| chr26 | 38936722  | 38936944  | 223 |
| chr25 | 27603381  | 27603603  | 223 |
| chr25 | 1339242   | 1339464   | 223 |
| chr24 | 49789852  | 49790074  | 223 |
| chr24 | 49773869  | 49774091  | 223 |
| chr23 | 27761955  | 27762177  | 223 |
| chr23 | 26488246  | 26488468  | 223 |
| chr23 | 8239169   | 8239391   | 223 |
| chr22 | 6649651   | 6649873   | 223 |
| chr21 | 59747062  | 59747284  | 223 |
| chr21 | 30169385  | 30169607  | 223 |
| chr2  | 74454437  | 74454659  | 223 |
| chr18 | 51184286  | 51184508  | 223 |
| chr18 | 41055049  | 41055271  | 223 |
| chr18 | 35341223  | 35341445  | 223 |
| chr18 | 12344003  | 12344225  | 223 |
| chr16 | 68059258  | 68059480  | 223 |
| chr16 | 47197237  | 47197459  | 223 |
| chr16 | 2470669   | 2470891   | 223 |
| chr15 | 28731072  | 28731294  | 223 |
| chr15 | 24561941  | 24562163  | 223 |
| chr14 | 7829166   | 7829388   | 223 |
| chr13 | 77156490  | 77156712  | 223 |
| chr11 | 47360368  | 47360590  | 223 |
| chr11 | 47359061  | 47359283  | 223 |
| chr10 | 14968010  | 14968232  | 223 |
| chr1  | 146740348 | 146740570 | 223 |
| chr7  | 10605918  | 10606139  | 222 |
| chr4  | 79273203  | 79273424  | 222 |
| chr4  | 78922323  | 78922544  | 222 |
| chr3  | 35792459  | 35792680  | 222 |
| chr29 | 50314261  | 50314482  | 222 |
| chr29 | 39066575  | 39066796  | 222 |

|       |           |           |     |
|-------|-----------|-----------|-----|
| chr27 | 34970579  | 34970800  | 222 |
| chr25 | 27757310  | 27757531  | 222 |
| chr24 | 37638048  | 37638269  | 222 |
| chr23 | 26336433  | 26336654  | 222 |
| chr21 | 68016246  | 68016467  | 222 |
| chr21 | 33235705  | 33235926  | 222 |
| chr21 | 20668294  | 20668515  | 222 |
| chr20 | 19814578  | 19814799  | 222 |
| chr2  | 75684379  | 75684600  | 222 |
| chr19 | 54771751  | 54771972  | 222 |
| chr19 | 44990917  | 44991138  | 222 |
| chr19 | 30375051  | 30375272  | 222 |
| chr17 | 75558555  | 75558776  | 222 |
| chr17 | 58835951  | 58836172  | 222 |
| chr16 | 61266505  | 61266726  | 222 |
| chr16 | 2067025   | 2067246   | 222 |
| chr15 | 78006903  | 78007124  | 222 |
| chr15 | 75512238  | 75512459  | 222 |
| chr13 | 11055778  | 11055999  | 222 |
| chr12 | 34393829  | 34394050  | 222 |
| chr10 | 81693342  | 81693563  | 222 |
| chr1  | 145713406 | 145713627 | 222 |
| chr9  | 89591361  | 89591581  | 221 |
| chr7  | 16339696  | 16339916  | 221 |
| chr5  | 52584396  | 52584616  | 221 |
| chr4  | 92165996  | 92166216  | 221 |
| chr3  | 125580460 | 125580680 | 221 |
| chr3  | 111635232 | 111635452 | 221 |
| chr3  | 104477886 | 104478106 | 221 |
| chr3  | 29634535  | 29634755  | 221 |
| chr3  | 15389213  | 15389433  | 221 |
| chr29 | 43020372  | 43020592  | 221 |
| chr29 | 34595677  | 34595897  | 221 |
| chr29 | 30855588  | 30855808  | 221 |
| chr27 | 34873219  | 34873439  | 221 |
| chr24 | 61102789  | 61103009  | 221 |
| chr23 | 27903900  | 27904120  | 221 |
| chr22 | 46489355  | 46489575  | 221 |
| chr22 | 7096625   | 7096845   | 221 |
| chr21 | 66356595  | 66356815  | 221 |
| chr21 | 31513653  | 31513873  | 221 |
| chr2  | 72850487  | 72850707  | 221 |
| chr19 | 38948133  | 38948353  | 221 |
| chr19 | 26945782  | 26946002  | 221 |
| chr19 | 26360359  | 26360579  | 221 |
| chr19 | 25424221  | 25424441  | 221 |
| chr19 | 17344687  | 17344907  | 221 |
| chr18 | 55200474  | 55200694  | 221 |
| chr18 | 54567125  | 54567345  | 221 |
| chr18 | 44052597  | 44052817  | 221 |



|       |               |           |     |
|-------|---------------|-----------|-----|
| chr18 | 33106141      | 33106361  | 221 |
| chr18 | 6283572       | 6283792   | 221 |
| chr18 | 5980440       | 5980660   | 221 |
| chr18 | 685490 685710 | 221       |     |
| chr17 | 75534838      | 75535058  | 221 |
| chr17 | 47970292      | 47970512  | 221 |
| chr15 | 64652705      | 64652925  | 221 |
| chr13 | 72115168      | 72115388  | 221 |
| chr13 | 70036873      | 70037093  | 221 |
| chr13 | 56054378      | 56054598  | 221 |
| chr11 | 84830536      | 84830756  | 221 |
| chr11 | 7051514       | 7051734   | 221 |
| chr11 | 1968264       | 1968484   | 221 |
| chr10 | 17709010      | 17709230  | 221 |
| chr1  | 112146190     | 112146410 | 221 |
| chr9  | 106442430     | 106442649 | 220 |
| chr9  | 105462322     | 105462541 | 220 |
| chr8  | 62981986      | 62982205  | 220 |
| chr7  | 5692127       | 5692346   | 220 |
| chr7  | 2896974       | 2897193   | 220 |
| chr6  | 107094453     | 107094672 | 220 |
| chr5  | 110725563     | 110725782 | 220 |
| chr4  | 68085610      | 68085829  | 220 |
| chr3  | 121837962     | 121838181 | 220 |
| chr3  | 98736674      | 98736893  | 220 |
| chr3  | 25815969      | 25816188  | 220 |
| chr29 | 37019059      | 37019278  | 220 |
| chr28 | 27236966      | 27237185  | 220 |
| chr28 | 11379593      | 11379812  | 220 |
| chr28 | 2798079       | 2798298   | 220 |
| chr27 | 26469945      | 26470164  | 220 |
| chr26 | 44480042      | 44480261  | 220 |
| chr26 | 33872754      | 33872973  | 220 |
| chr26 | 18819330      | 18819549  | 220 |
| chr25 | 27405067      | 27405286  | 220 |
| chr25 | 14623560      | 14623779  | 220 |
| chr24 | 59038020      | 59038239  | 220 |
| chr23 | 18670713      | 18670932  | 220 |
| chr23 | 17472780      | 17472999  | 220 |
| chr22 | 12484302      | 12484521  | 220 |
| chr21 | 1917748       | 1917967   | 220 |
| chr20 | 4903540       | 4903759   | 220 |
| chr2  | 140627015     | 140627234 | 220 |
| chr2  | 111827600     | 111827819 | 220 |
| chr19 | 52836380      | 52836599  | 220 |
| chr19 | 32817761      | 32817980  | 220 |
| chr18 | 62675448      | 62675667  | 220 |
| chr18 | 54203219      | 54203438  | 220 |
| chr18 | 22154719      | 22154938  | 220 |
| chr17 | 63035818      | 63036037  | 220 |

|       |           |           |     |
|-------|-----------|-----------|-----|
| chr17 | 21447627  | 21447846  | 220 |
| chr16 | 73353262  | 73353481  | 220 |
| chr15 | 81342774  | 81342993  | 220 |
| chr14 | 3992910   | 3993129   | 220 |
| chr13 | 77815664  | 77815883  | 220 |
| chr13 | 75601327  | 75601546  | 220 |
| chr13 | 73101995  | 73102214  | 220 |
| chr13 | 60963589  | 60963808  | 220 |
| chr13 | 56566943  | 56567162  | 220 |
| chr13 | 41367798  | 41368017  | 220 |
| chr12 | 82615115  | 82615334  | 220 |
| chr12 | 37022707  | 37022926  | 220 |
| chr11 | 77798805  | 77799024  | 220 |
| chr11 | 70865863  | 70866082  | 220 |
| chr11 | 47545040  | 47545259  | 220 |
| chr11 | 11732776  | 11732995  | 220 |
| chr11 | 1591738   | 1591957   | 220 |
| chr10 | 88398983  | 88399202  | 220 |
| chr1  | 141779450 | 141779669 | 220 |
| chr1  | 96150764  | 96150983  | 220 |
| chr9  | 99996713  | 99996931  | 219 |
| chr7  | 94009362  | 94009580  | 219 |
| chr7  | 52255606  | 52255824  | 219 |
| chr7  | 46116546  | 46116764  | 219 |
| chr7  | 4840274   | 4840492   | 219 |
| chr5  | 125692997 | 125693215 | 219 |
| chr5  | 100131971 | 100132189 | 219 |
| chr5  | 60890166  | 60890384  | 219 |
| chr5  | 28351273  | 28351491  | 219 |
| chr5  | 20183889  | 20184107  | 219 |
| chr4  | 98809103  | 98809321  | 219 |
| chr4  | 67947332  | 67947550  | 219 |
| chr3  | 121476946 | 121477164 | 219 |
| chr3  | 38688467  | 38688685  | 219 |
| chr3  | 16932116  | 16932334  | 219 |
| chr29 | 48285381  | 48285599  | 219 |
| chr28 | 25132677  | 25132895  | 219 |
| chr28 | 1230378   | 1230596   | 219 |
| chr25 | 38861662  | 38861880  | 219 |
| chr25 | 37849345  | 37849563  | 219 |
| chr25 | 12084763  | 12084981  | 219 |
| chr24 | 43681801  | 43682019  | 219 |
| chr24 | 42823696  | 42823914  | 219 |
| chr23 | 13671170  | 13671388  | 219 |
| chr23 | 13660945  | 13661163  | 219 |
| chr22 | 54389500  | 54389718  | 219 |
| chr22 | 50614573  | 50614791  | 219 |
| chr21 | 56290630  | 56290848  | 219 |
| chr21 | 33236548  | 33236766  | 219 |
| chr21 | 24233149  | 24233367  | 219 |

|       |               |           |     |
|-------|---------------|-----------|-----|
| chr20 | 8003588       | 8003806   | 219 |
| chr20 | 5119973       | 5120191   | 219 |
| chr2  | 134337405     | 134337623 | 219 |
| chr2  | 130443467     | 130443685 | 219 |
| chr2  | 73118632      | 73118850  | 219 |
| chr19 | 61013302      | 61013520  | 219 |
| chr19 | 40441965      | 40442183  | 219 |
| chr19 | 7602019       | 7602237   | 219 |
| chr18 | 56412495      | 56412713  | 219 |
| chr18 | 49752989      | 49753207  | 219 |
| chr18 | 43462539      | 43462757  | 219 |
| chr18 | 22334161      | 22334379  | 219 |
| chr18 | 662985 663203 |           | 219 |
| chr17 | 31323698      | 31323916  | 219 |
| chr16 | 47573040      | 47573258  | 219 |
| chr16 | 47531440      | 47531658  | 219 |
| chr16 | 44114284      | 44114502  | 219 |
| chr16 | 39595431      | 39595649  | 219 |
| chr16 | 38840176      | 38840394  | 219 |
| chr16 | 26499878      | 26500096  | 219 |
| chr15 | 52314265      | 52314483  | 219 |
| chr14 | 30829444      | 30829662  | 219 |
| chr13 | 60175491      | 60175709  | 219 |
| chr13 | 40974908      | 40975126  | 219 |
| chr11 | 50203479      | 50203697  | 219 |
| chr10 | 89420518      | 89420736  | 219 |
| chr10 | 20926320      | 20926538  | 219 |
| chr1  | 147329951     | 147330169 | 219 |
| chr9  | 105993757     | 105993974 | 218 |
| chr9  | 105860755     | 105860972 | 218 |
| chr9  | 66156601      | 66156818  | 218 |
| chr8  | 108766545     | 108766762 | 218 |
| chr8  | 72532269      | 72532486  | 218 |
| chr7  | 51730599      | 51730816  | 218 |
| chr7  | 44888822      | 44889039  | 218 |
| chr7  | 4343396       | 4343613   | 218 |
| chr5  | 125519511     | 125519728 | 218 |
| chr5  | 122130101     | 122130318 | 218 |
| chr5  | 114098924     | 114099141 | 218 |
| chr5  | 60384448      | 60384665  | 218 |
| chr3  | 113104517     | 113104734 | 218 |
| chr3  | 33971458      | 33971675  | 218 |
| chr3  | 30008532      | 30008749  | 218 |
| chr29 | 44728813      | 44729030  | 218 |
| chr28 | 40404109      | 40404326  | 218 |
| chr27 | 38698897      | 38699114  | 218 |
| chr26 | 43090354      | 43090571  | 218 |
| chr26 | 42224021      | 42224238  | 218 |
| chr26 | 18136680      | 18136897  | 218 |
| chr25 | 37314684      | 37314901  | 218 |

|       |           |           |     |
|-------|-----------|-----------|-----|
| chr24 | 50994466  | 50994683  | 218 |
| chr22 | 52708814  | 52709031  | 218 |
| chr22 | 16196734  | 16196951  | 218 |
| chr2  | 138665329 | 138665546 | 218 |
| chr2  | 132322286 | 132322503 | 218 |
| chr2  | 123356953 | 123357170 | 218 |
| chr2  | 75912493  | 75912710  | 218 |
| chr2  | 5040626   | 5040843   | 218 |
| chr18 | 62403369  | 62403586  | 218 |
| chr18 | 51520916  | 51521133  | 218 |
| chr18 | 35340974  | 35341191  | 218 |
| chr18 | 21957827  | 21958044  | 218 |
| chr18 | 11750077  | 11750294  | 218 |
| chr18 | 677410    | 677627    | 218 |
| chr17 | 75056825  | 75057042  | 218 |
| chr17 | 72741006  | 72741223  | 218 |
| chr16 | 47063102  | 47063319  | 218 |
| chr16 | 45912745  | 45912962  | 218 |
| chr16 | 2267142   | 2267359   | 218 |
| chr13 | 60933967  | 60934184  | 218 |
| chr13 | 59935773  | 59935990  | 218 |
| chr13 | 59190663  | 59190880  | 218 |
| chr12 | 34255129  | 34255346  | 218 |
| chr11 | 100929100 | 100929317 | 218 |
| chr11 | 70919439  | 70919656  | 218 |
| chr10 | 81735141  | 81735358  | 218 |
| chr10 | 79490407  | 79490624  | 218 |
| chr1  | 123104821 | 123105038 | 218 |
| chr1  | 1672369   | 1672586   | 218 |
| chrX  | 74879085  | 74879301  | 217 |
| chr9  | 50719433  | 50719649  | 217 |
| chr8  | 108693142 | 108693358 | 217 |
| chr8  | 90796862  | 90797078  | 217 |
| chr8  | 54243284  | 54243500  | 217 |
| chr7  | 19937394  | 19937610  | 217 |
| chr7  | 15603657  | 15603873  | 217 |
| chr7  | 5068011   | 5068227   | 217 |
| chr7  | 4934206   | 4934422   | 217 |
| chr6  | 119070659 | 119070875 | 217 |
| chr5  | 30306981  | 30307197  | 217 |
| chr5  | 28800674  | 28800890  | 217 |
| chr4  | 10471102  | 10471318  | 217 |
| chr3  | 108796920 | 108797136 | 217 |
| chr3  | 20496529  | 20496745  | 217 |
| chr29 | 48326953  | 48327169  | 217 |
| chr29 | 35150541  | 35150757  | 217 |
| chr29 | 34583454  | 34583670  | 217 |
| chr29 | 17724569  | 17724785  | 217 |
| chr28 | 33817032  | 33817248  | 217 |
| chr28 | 26452384  | 26452600  | 217 |

|       |           |           |     |
|-------|-----------|-----------|-----|
| chr27 | 40765331  | 40765547  | 217 |
| chr26 | 44446666  | 44446882  | 217 |
| chr26 | 20245397  | 20245613  | 217 |
| chr24 | 44061647  | 44061863  | 217 |
| chr24 | 33120371  | 33120587  | 217 |
| chr23 | 44156811  | 44157027  | 217 |
| chr23 | 27948074  | 27948290  | 217 |
| chr23 | 10630079  | 10630295  | 217 |
| chr23 | 9017892   | 9018108   | 217 |
| chr23 | 8763988   | 8764204   | 217 |
| chr21 | 64357173  | 64357389  | 217 |
| chr21 | 60442473  | 60442689  | 217 |
| chr21 | 57731777  | 57731993  | 217 |
| chr2  | 127021492 | 127021708 | 217 |
| chr2  | 124425063 | 124425279 | 217 |
| chr2  | 116504203 | 116504419 | 217 |
| chr19 | 58649815  | 58650031  | 217 |
| chr19 | 54491146  | 54491362  | 217 |
| chr19 | 38263714  | 38263930  | 217 |
| chr19 | 22565937  | 22566153  | 217 |
| chr19 | 17855100  | 17855316  | 217 |
| chr19 | 12356530  | 12356746  | 217 |
| chr18 | 4062952   | 4063168   | 217 |
| chr17 | 46152074  | 46152290  | 217 |
| chr16 | 3251926   | 3252142   | 217 |
| chr15 | 81031511  | 81031727  | 217 |
| chr15 | 22153063  | 22153279  | 217 |
| chr14 | 61307894  | 61308110  | 217 |
| chr13 | 82958827  | 82959043  | 217 |
| chr13 | 77703029  | 77703245  | 217 |
| chr13 | 77467774  | 77467990  | 217 |
| chr13 | 77273637  | 77273853  | 217 |
| chr13 | 76582973  | 76583189  | 217 |
| chr13 | 62370757  | 62370973  | 217 |
| chr13 | 59679726  | 59679942  | 217 |
| chr13 | 23035924  | 23036140  | 217 |
| chr13 | 22919960  | 22920176  | 217 |
| chr12 | 30614923  | 30615139  | 217 |
| chr11 | 104899225 | 104899441 | 217 |
| chr10 | 90532278  | 90532494  | 217 |
| chr10 | 9562751   | 9562967   | 217 |
| chr1  | 98967851  | 98968067  | 217 |
| chr8  | 66668753  | 66668968  | 216 |
| chr8  | 25227785  | 25228000  | 216 |
| chr7  | 38255496  | 38255711  | 216 |
| chr6  | 118799989 | 118800204 | 216 |
| chr4  | 122637644 | 122637859 | 216 |
| chr4  | 68146264  | 68146479  | 216 |
| chr4  | 29713579  | 29713794  | 216 |
| chr3  | 105711293 | 105711508 | 216 |

|       |               |           |     |
|-------|---------------|-----------|-----|
| chr29 | 48870141      | 48870356  | 216 |
| chr29 | 45796397      | 45796612  | 216 |
| chr29 | 44416850      | 44417065  | 216 |
| chr29 | 35448978      | 35449193  | 216 |
| chr28 | 43930233      | 43930448  | 216 |
| chr26 | 18162946      | 18163161  | 216 |
| chr25 | 39181130      | 39181345  | 216 |
| chr25 | 33316460      | 33316675  | 216 |
| chr25 | 4331508       | 4331723   | 216 |
| chr25 | 2799375       | 2799590   | 216 |
| chr24 | 60915356      | 60915571  | 216 |
| chr23 | 27848643      | 27848858  | 216 |
| chr23 | 19353774      | 19353989  | 216 |
| chr23 | 13644458      | 13644673  | 216 |
| chr23 | 8491937       | 8492152   | 216 |
| chr21 | 24809688      | 24809903  | 216 |
| chr21 | 20838069      | 20838284  | 216 |
| chr20 | 5044389       | 5044604   | 216 |
| chr20 | 712025 712240 | 216       |     |
| chr2  | 140655473     | 140655688 | 216 |
| chr2  | 131730405     | 131730620 | 216 |
| chr19 | 63751931      | 63752146  | 216 |
| chr19 | 60390332      | 60390547  | 216 |
| chr19 | 57058360      | 57058575  | 216 |
| chr19 | 56517037      | 56517252  | 216 |
| chr19 | 55778795      | 55779010  | 216 |
| chr19 | 24043328      | 24043543  | 216 |
| chr19 | 21319540      | 21319755  | 216 |
| chr19 | 20367984      | 20368199  | 216 |
| chr18 | 54199239      | 54199454  | 216 |
| chr18 | 53506054      | 53506269  | 216 |
| chr18 | 45042286      | 45042501  | 216 |
| chr18 | 33575137      | 33575352  | 216 |
| chr18 | 12782034      | 12782249  | 216 |
| chr17 | 76297668      | 76297883  | 216 |
| chr17 | 64125855      | 64126070  | 216 |
| chr17 | 60544860      | 60545075  | 216 |
| chr17 | 35859209      | 35859424  | 216 |
| chr16 | 48832920      | 48833135  | 216 |
| chr16 | 46970421      | 46970636  | 216 |
| chr16 | 44648398      | 44648613  | 216 |
| chr16 | 23644740      | 23644955  | 216 |
| chr15 | 27456608      | 27456823  | 216 |
| chr14 | 36743851      | 36744066  | 216 |
| chr14 | 21684063      | 21684278  | 216 |
| chr14 | 13408536      | 13408751  | 216 |
| chr14 | 12304279      | 12304494  | 216 |
| chr14 | 3153654       | 3153869   | 216 |
| chr13 | 66893951      | 66894166  | 216 |
| chr13 | 57583406      | 57583621  | 216 |

|       |           |           |     |
|-------|-----------|-----------|-----|
| chr13 | 55109179  | 55109394  | 216 |
| chr12 | 52446019  | 52446234  | 216 |
| chr11 | 105658508 | 105658723 | 216 |
| chr11 | 103538001 | 103538216 | 216 |
| chr11 | 70801086  | 70801301  | 216 |
| chr10 | 86495285  | 86495500  | 216 |
| chr10 | 81619631  | 81619846  | 216 |
| chr1  | 148033103 | 148033318 | 216 |
| chr1  | 129867886 | 129868101 | 216 |
| chr1  | 113625603 | 113625818 | 216 |
| chr1  | 111321297 | 111321512 | 216 |
| chrX  | 44938762  | 44938976  | 215 |
| chr8  | 108721951 | 108722165 | 215 |
| chr8  | 73493411  | 73493625  | 215 |
| chr8  | 24479520  | 24479734  | 215 |
| chr8  | 9328878   | 9329092   | 215 |
| chr7  | 50887349  | 50887563  | 215 |
| chr7  | 50343830  | 50344044  | 215 |
| chr7  | 43233760  | 43233974  | 215 |
| chr5  | 121375707 | 121375921 | 215 |
| chr4  | 117760412 | 117760626 | 215 |
| chr3  | 115011915 | 115012129 | 215 |
| chr3  | 112549466 | 112549680 | 215 |
| chr29 | 49113051  | 49113265  | 215 |
| chr29 | 36820058  | 36820272  | 215 |
| chr29 | 36520743  | 36520957  | 215 |
| chr29 | 31545355  | 31545569  | 215 |
| chr26 | 21298380  | 21298594  | 215 |
| chr26 | 18191634  | 18191848  | 215 |
| chr25 | 39166491  | 39166705  | 215 |
| chr24 | 60040594  | 60040808  | 215 |
| chr24 | 50982396  | 50982610  | 215 |
| chr24 | 44075991  | 44076205  | 215 |
| chr24 | 42890359  | 42890573  | 215 |
| chr24 | 20769371  | 20769585  | 215 |
| chr24 | 1432556   | 1432770   | 215 |
| chr23 | 52776033  | 52776247  | 215 |
| chr23 | 51653482  | 51653696  | 215 |
| chr23 | 18622505  | 18622719  | 215 |
| chr23 | 17423288  | 17423502  | 215 |
| chr22 | 10949030  | 10949244  | 215 |
| chr21 | 61045131  | 61045345  | 215 |
| chr21 | 57974380  | 57974594  | 215 |
| chr21 | 30836518  | 30836732  | 215 |
| chr21 | 27068717  | 27068931  | 215 |
| chr20 | 5266546   | 5266760   | 215 |
| chr2  | 111347282 | 111347496 | 215 |
| chr19 | 56575220  | 56575434  | 215 |
| chr19 | 39060069  | 39060283  | 215 |
| chr18 | 64330110  | 64330324  | 215 |

|       |               |           |     |
|-------|---------------|-----------|-----|
| chr18 | 5654623       | 5654837   | 215 |
| chr16 | 38953275      | 38953489  | 215 |
| chr16 | 3643973       | 3644187   | 215 |
| chr15 | 53394606      | 53394820  | 215 |
| chr15 | 25056991      | 25057205  | 215 |
| chr13 | 75706595      | 75706809  | 215 |
| chr13 | 70046678      | 70046892  | 215 |
| chr13 | 64755337      | 64755551  | 215 |
| chr13 | 42386748      | 42386962  | 215 |
| chr13 | 38868528      | 38868742  | 215 |
| chr12 | 31985291      | 31985505  | 215 |
| chr11 | 38884158      | 38884372  | 215 |
| chr10 | 28366015      | 28366229  | 215 |
| chr10 | 22003340      | 22003554  | 215 |
| chr10 | 21565099      | 21565313  | 215 |
| chr10 | 17319514      | 17319728  | 215 |
| chr8  | 47122500      | 47122713  | 214 |
| chr7  | 44949304      | 44949517  | 214 |
| chr7  | 14239968      | 14240181  | 214 |
| chr6  | 113486420     | 113486633 | 214 |
| chr5  | 120398119     | 120398332 | 214 |
| chr5  | 113167839     | 113168052 | 214 |
| chr5  | 28824068      | 28824281  | 214 |
| chr4  | 121388075     | 121388288 | 214 |
| chr4  | 116472018     | 116472231 | 214 |
| chr4  | 84256412      | 84256625  | 214 |
| chr3  | 115625266     | 115625479 | 214 |
| chr29 | 48886595      | 48886808  | 214 |
| chr29 | 41729646      | 41729859  | 214 |
| chr29 | 31778229      | 31778442  | 214 |
| chr27 | 39162850      | 39163063  | 214 |
| chr27 | 656737 656950 | 214       |     |
| chr26 | 22811676      | 22811889  | 214 |
| chr26 | 20938837      | 20939050  | 214 |
| chr26 | 20233407      | 20233620  | 214 |
| chr25 | 33266611      | 33266824  | 214 |
| chr25 | 27604429      | 27604642  | 214 |
| chr25 | 22546582      | 22546795  | 214 |
| chr24 | 51860798      | 51861011  | 214 |
| chr22 | 39784040      | 39784253  | 214 |
| chr21 | 59312585      | 59312798  | 214 |
| chr2  | 134745372     | 134745585 | 214 |
| chr19 | 60427159      | 60427372  | 214 |
| chr19 | 43106505      | 43106718  | 214 |
| chr19 | 39834580      | 39834793  | 214 |
| chr18 | 50028868      | 50029081  | 214 |
| chr18 | 12344511      | 12344724  | 214 |
| chr17 | 63163245      | 63163458  | 214 |
| chr17 | 61306237      | 61306450  | 214 |
| chr17 | 47357659      | 47357872  | 214 |



|       |           |           |     |
|-------|-----------|-----------|-----|
| chr16 | 60182142  | 60182355  | 214 |
| chr16 | 47041784  | 47041997  | 214 |
| chr16 | 39587430  | 39587643  | 214 |
| chr16 | 39458518  | 39458731  | 214 |
| chr14 | 66259555  | 66259768  | 214 |
| chr14 | 58731621  | 58731834  | 214 |
| chr13 | 40873951  | 40874164  | 214 |
| chr12 | 58508802  | 58509015  | 214 |
| chr11 | 106009619 | 106009832 | 214 |
| chr11 | 5758756   | 5758969   | 214 |
| chr10 | 81636217  | 81636430  | 214 |
| chr10 | 6928485   | 6928698   | 214 |
| chr1  | 123086426 | 123086639 | 214 |
| chr9  | 105813139 | 105813351 | 213 |
| chr9  | 104896062 | 104896274 | 213 |
| chr9  | 102703568 | 102703780 | 213 |
| chr9  | 44303936  | 44304148  | 213 |
| chr8  | 73328822  | 73329034  | 213 |
| chr8  | 63943265  | 63943477  | 213 |
| chr6  | 120956994 | 120957206 | 213 |
| chr6  | 1643091   | 1643303   | 213 |
| chr5  | 102851359 | 102851571 | 213 |
| chr4  | 32697095  | 32697307  | 213 |
| chr4  | 5227790   | 5228002   | 213 |
| chr3  | 116388553 | 116388765 | 213 |
| chr3  | 115422853 | 115423065 | 213 |
| chr3  | 111676292 | 111676504 | 213 |
| chr3  | 22685942  | 22686154  | 213 |
| chr28 | 33598454  | 33598666  | 213 |
| chr26 | 20732903  | 20733115  | 213 |
| chr24 | 60767703  | 60767915  | 213 |
| chr24 | 44244097  | 44244309  | 213 |
| chr22 | 10806976  | 10807188  | 213 |
| chr21 | 45130720  | 45130932  | 213 |
| chr21 | 28905638  | 28905850  | 213 |
| chr21 | 19705347  | 19705559  | 213 |
| chr20 | 3640110   | 3640322   | 213 |
| chr2  | 108813789 | 108814001 | 213 |
| chr2  | 31209377  | 31209589  | 213 |
| chr2  | 26980685  | 26980897  | 213 |
| chr2  | 21997441  | 21997653  | 213 |
| chr19 | 63550150  | 63550362  | 213 |
| chr19 | 42514410  | 42514622  | 213 |
| chr19 | 41373605  | 41373817  | 213 |
| chr19 | 24367105  | 24367317  | 213 |
| chr19 | 21748300  | 21748512  | 213 |
| chr19 | 10990601  | 10990813  | 213 |
| chr18 | 51215774  | 51215986  | 213 |
| chr18 | 50010600  | 50010812  | 213 |
| chr18 | 22714494  | 22714706  | 213 |

|       |           |           |     |
|-------|-----------|-----------|-----|
| chr17 | 75527970  | 75528182  | 213 |
| chr17 | 57620582  | 57620794  | 213 |
| chr16 | 48277216  | 48277428  | 213 |
| chr16 | 47881810  | 47882022  | 213 |
| chr16 | 19138992  | 19139204  | 213 |
| chr15 | 56679817  | 56680029  | 213 |
| chr15 | 54527521  | 54527733  | 213 |
| chr14 | 66248902  | 66249114  | 213 |
| chr14 | 24084435  | 24084647  | 213 |
| chr14 | 16718361  | 16718573  | 213 |
| chr14 | 1755099   | 1755311   | 213 |
| chr13 | 66491957  | 66492169  | 213 |
| chr13 | 53919188  | 53919400  | 213 |
| chr13 | 53753064  | 53753276  | 213 |
| chr12 | 70924493  | 70924705  | 213 |
| chr11 | 30083669  | 30083881  | 213 |
| chr10 | 25273456  | 25273668  | 213 |
| chr10 | 12798104  | 12798316  | 213 |
| chr1  | 147243361 | 147243573 | 213 |
| chr9  | 98831395  | 98831606  | 212 |
| chr9  | 72674957  | 72675168  | 212 |
| chr8  | 104069328 | 104069539 | 212 |
| chr8  | 74152842  | 74153053  | 212 |
| chr8  | 73717176  | 73717387  | 212 |
| chr8  | 60323730  | 60323941  | 212 |
| chr8  | 25949545  | 25949756  | 212 |
| chr7  | 85415376  | 85415587  | 212 |
| chr7  | 51485733  | 51485944  | 212 |
| chr7  | 48820091  | 48820302  | 212 |
| chr7  | 43364065  | 43364276  | 212 |
| chr6  | 109421998 | 109422209 | 212 |
| chr6  | 46328468  | 46328679  | 212 |
| chr5  | 115313487 | 115313698 | 212 |
| chr4  | 68237481  | 68237692  | 212 |
| chr3  | 116592247 | 116592458 | 212 |
| chr3  | 106582554 | 106582765 | 212 |
| chr3  | 99312430  | 99312641  | 212 |
| chr3  | 22522974  | 22523185  | 212 |
| chr3  | 18221844  | 18222055  | 212 |
| chr3  | 10570435  | 10570646  | 212 |
| chr29 | 51660286  | 51660497  | 212 |
| chr29 | 37255924  | 37256135  | 212 |
| chr29 | 34650772  | 34650983  | 212 |
| chr28 | 27296748  | 27296959  | 212 |
| chr27 | 15530025  | 15530236  | 212 |
| chr26 | 18172524  | 18172735  | 212 |
| chr25 | 40884239  | 40884450  | 212 |
| chr25 | 38547440  | 38547651  | 212 |
| chr24 | 2520435   | 2520646   | 212 |
| chr23 | 13669452  | 13669663  | 212 |

|       |           |           |     |
|-------|-----------|-----------|-----|
| chr21 | 64483798  | 64484009  | 212 |
| chr21 | 64431293  | 64431504  | 212 |
| chr21 | 60728655  | 60728866  | 212 |
| chr21 | 20151904  | 20152115  | 212 |
| chr20 | 75751866  | 75752077  | 212 |
| chr2  | 139322671 | 139322882 | 212 |
| chr2  | 130970675 | 130970886 | 212 |
| chr2  | 95108071  | 95108282  | 212 |
| chr19 | 56843493  | 56843704  | 212 |
| chr19 | 12601201  | 12601412  | 212 |
| chr18 | 47672133  | 47672344  | 212 |
| chr18 | 33431994  | 33432205  | 212 |
| chr18 | 13576644  | 13576855  | 212 |
| chr17 | 72939007  | 72939218  | 212 |
| chr17 | 63342955  | 63343166  | 212 |
| chr16 | 60495567  | 60495778  | 212 |
| chr16 | 1038038   | 1038249   | 212 |
| chr15 | 75688484  | 75688695  | 212 |
| chr15 | 64482158  | 64482369  | 212 |
| chr15 | 32989287  | 32989498  | 212 |
| chr14 | 66260304  | 66260515  | 212 |
| chr14 | 61489137  | 61489348  | 212 |
| chr14 | 7757673   | 7757884   | 212 |
| chr13 | 62777466  | 62777677  | 212 |
| chr13 | 60690793  | 60691004  | 212 |
| chr13 | 29059326  | 29059537  | 212 |
| chr13 | 17766553  | 17766764  | 212 |
| chr12 | 36460836  | 36461047  | 212 |
| chr12 | 20787153  | 20787364  | 212 |
| chr11 | 106403510 | 106403721 | 212 |
| chr11 | 106043909 | 106044120 | 212 |
| chr11 | 104287064 | 104287275 | 212 |
| chr11 | 100276732 | 100276943 | 212 |
| chr1  | 123122159 | 123122370 | 212 |
| chr1  | 118792413 | 118792624 | 212 |
| chr1  | 1774819   | 1775030   | 212 |
| chr9  | 73508841  | 73509051  | 211 |
| chr7  | 18469284  | 18469494  | 211 |
| chr6  | 121790666 | 121790876 | 211 |
| chr6  | 121670288 | 121670498 | 211 |
| chr5  | 113309653 | 113309863 | 211 |
| chr5  | 35467124  | 35467334  | 211 |
| chr5  | 30566899  | 30567109  | 211 |
| chr4  | 123208214 | 123208424 | 211 |
| chr4  | 121446206 | 121446416 | 211 |
| chr3  | 116288334 | 116288544 | 211 |
| chr3  | 2527233   | 2527443   | 211 |
| chr28 | 32885597  | 32885807  | 211 |
| chr26 | 21965448  | 21965658  | 211 |
| chr26 | 21763787  | 21763997  | 211 |

|       |           |           |     |
|-------|-----------|-----------|-----|
| chr25 | 43683135  | 43683345  | 211 |
| chr25 | 42671196  | 42671406  | 211 |
| chr25 | 4611257   | 4611467   | 211 |
| chr25 | 2682379   | 2682589   | 211 |
| chr25 | 1964086   | 1964296   | 211 |
| chr24 | 50890118  | 50890328  | 211 |
| chr24 | 40807168  | 40807378  | 211 |
| chr24 | 2352774   | 2352984   | 211 |
| chr23 | 51674098  | 51674308  | 211 |
| chr23 | 46024187  | 46024397  | 211 |
| chr23 | 28058695  | 28058905  | 211 |
| chr23 | 27905222  | 27905432  | 211 |
| chr23 | 18117184  | 18117394  | 211 |
| chr22 | 59139057  | 59139267  | 211 |
| chr22 | 50773796  | 50774006  | 211 |
| chr22 | 15046102  | 15046312  | 211 |
| chr21 | 65623823  | 65624033  | 211 |
| chr21 | 16036019  | 16036229  | 211 |
| chr20 | 33688666  | 33688876  | 211 |
| chr2  | 132271574 | 132271784 | 211 |
| chr2  | 132248807 | 132249017 | 211 |
| chr2  | 110533981 | 110534191 | 211 |
| chr2  | 49577326  | 49577536  | 211 |
| chr19 | 60910228  | 60910438  | 211 |
| chr19 | 60759353  | 60759563  | 211 |
| chr19 | 54464066  | 54464276  | 211 |
| chr19 | 47180345  | 47180555  | 211 |
| chr19 | 20364540  | 20364750  | 211 |
| chr19 | 15279518  | 15279728  | 211 |
| chr18 | 62940382  | 62940592  | 211 |
| chr18 | 51163535  | 51163745  | 211 |
| chr18 | 49448954  | 49449164  | 211 |
| chr18 | 9853744   | 9853954   | 211 |
| chr17 | 68483918  | 68484128  | 211 |
| chr17 | 66708836  | 66709046  | 211 |
| chr16 | 72121698  | 72121908  | 211 |
| chr16 | 47250145  | 47250355  | 211 |
| chr16 | 44300062  | 44300272  | 211 |
| chr15 | 45586832  | 45587042  | 211 |
| chr15 | 28593786  | 28593996  | 211 |
| chr14 | 63510873  | 63511083  | 211 |
| chr13 | 25224066  | 25224276  | 211 |
| chr12 | 82398863  | 82399073  | 211 |
| chr11 | 109637158 | 109637368 | 211 |
| chr11 | 103375546 | 103375756 | 211 |
| chr11 | 75127735  | 75127945  | 211 |
| chr11 | 74842335  | 74842545  | 211 |
| chr1  | 153292059 | 153292269 | 211 |
| chr1  | 84687655  | 84687865  | 211 |
| chr1  | 73731043  | 73731253  | 211 |

|       |           |           |     |
|-------|-----------|-----------|-----|
| chr9  | 52829241  | 52829450  | 210 |
| chr8  | 63797700  | 63797909  | 210 |
| chr8  | 7428494   | 7428703   | 210 |
| chr8  | 7427161   | 7427370   | 210 |
| chr7  | 52385671  | 52385880  | 210 |
| chr7  | 42013907  | 42014116  | 210 |
| chr7  | 4339971   | 4340180   | 210 |
| chr5  | 121248743 | 121248952 | 210 |
| chr5  | 112789111 | 112789320 | 210 |
| chr5  | 84676264  | 84676473  | 210 |
| chr5  | 71668716  | 71668925  | 210 |
| chr5  | 28785872  | 28786081  | 210 |
| chr4  | 121406289 | 121406498 | 210 |
| chr3  | 109761229 | 109761438 | 210 |
| chr3  | 51910893  | 51911102  | 210 |
| chr3  | 35474056  | 35474265  | 210 |
| chr29 | 51995858  | 51996067  | 210 |
| chr29 | 38860586  | 38860795  | 210 |
| chr29 | 27743144  | 27743353  | 210 |
| chr27 | 15159553  | 15159762  | 210 |
| chr26 | 48656166  | 48656375  | 210 |
| chr26 | 31903333  | 31903542  | 210 |
| chr26 | 21776411  | 21776620  | 210 |
| chr25 | 3890397   | 3890606   | 210 |
| chr24 | 44176492  | 44176701  | 210 |
| chr23 | 27943609  | 27943818  | 210 |
| chr23 | 9416454   | 9416663   | 210 |
| chr23 | 8809046   | 8809255   | 210 |
| chr22 | 60191665  | 60191874  | 210 |
| chr22 | 56553980  | 56554189  | 210 |
| chr22 | 44915148  | 44915357  | 210 |
| chr21 | 4280355   | 4280564   | 210 |
| chr20 | 16815124  | 16815333  | 210 |
| chr2  | 138485028 | 138485237 | 210 |
| chr2  | 134936453 | 134936662 | 210 |
| chr2  | 111272582 | 111272791 | 210 |
| chr2  | 92313607  | 92313816  | 210 |
| chr19 | 64026908  | 64027117  | 210 |
| chr19 | 56493340  | 56493549  | 210 |
| chr19 | 38566546  | 38566755  | 210 |
| chr19 | 33122633  | 33122842  | 210 |
| chr19 | 20391099  | 20391308  | 210 |
| chr18 | 58821282  | 58821491  | 210 |
| chr18 | 54181745  | 54181954  | 210 |
| chr18 | 17455818  | 17456027  | 210 |
| chr17 | 64066248  | 64066457  | 210 |
| chr17 | 62021433  | 62021642  | 210 |
| chr17 | 54552094  | 54552303  | 210 |
| chr16 | 76026986  | 76027195  | 210 |
| chr16 | 71112145  | 71112354  | 210 |

|       |           |           |     |
|-------|-----------|-----------|-----|
| chr16 | 70492670  | 70492879  | 210 |
| chr16 | 46642727  | 46642936  | 210 |
| chr15 | 32686505  | 32686714  | 210 |
| chr15 | 28575589  | 28575798  | 210 |
| chr15 | 25554292  | 25554501  | 210 |
| chr15 | 24662422  | 24662631  | 210 |
| chr14 | 7472556   | 7472765   | 210 |
| chr13 | 66984070  | 66984279  | 210 |
| chr13 | 61554184  | 61554393  | 210 |
| chr13 | 56067212  | 56067421  | 210 |
| chr13 | 55281479  | 55281688  | 210 |
| chr13 | 46366676  | 46366885  | 210 |
| chr13 | 42459011  | 42459220  | 210 |
| chr13 | 42455673  | 42455882  | 210 |
| chr12 | 82139594  | 82139803  | 210 |
| chr12 | 37093142  | 37093351  | 210 |
| chr11 | 85866059  | 85866268  | 210 |
| chr11 | 5676768   | 5676977   | 210 |
| chr11 | 3155645   | 3155854   | 210 |
| chr10 | 90558465  | 90558674  | 210 |
| chr10 | 90023886  | 90024095  | 210 |
| chr10 | 47390613  | 47390822  | 210 |
| chr10 | 21429060  | 21429269  | 210 |
| chr10 | 17330750  | 17330959  | 210 |
| chr1  | 75097491  | 75097700  | 210 |
| chr1  | 74587908  | 74588117  | 210 |
| chr1  | 68329879  | 68330088  | 210 |
| chr9  | 99301748  | 99301956  | 209 |
| chr9  | 91987103  | 91987311  | 209 |
| chr8  | 90197661  | 90197869  | 209 |
| chr8  | 65177912  | 65178120  | 209 |
| chr8  | 63935495  | 63935703  | 209 |
| chr8  | 7536210   | 7536418   | 209 |
| chr7  | 89471356  | 89471564  | 209 |
| chr7  | 42344067  | 42344275  | 209 |
| chr7  | 38163742  | 38163950  | 209 |
| chr7  | 4718538   | 4718746   | 209 |
| chr5  | 121247207 | 121247415 | 209 |
| chr5  | 113940098 | 113940306 | 209 |
| chr5  | 111830701 | 111830909 | 209 |
| chr5  | 81556249  | 81556457  | 209 |
| chr5  | 30476964  | 30477172  | 209 |
| chr5  | 30285965  | 30286173  | 209 |
| chr4  | 124365631 | 124365839 | 209 |
| chr3  | 116163232 | 116163440 | 209 |
| chr3  | 15397003  | 15397211  | 209 |
| chr29 | 46528514  | 46528722  | 209 |
| chr29 | 41656692  | 41656900  | 209 |
| chr29 | 29655725  | 29655933  | 209 |
| chr29 | 26522332  | 26522540  | 209 |

|       |           |           |     |
|-------|-----------|-----------|-----|
| chr29 | 25549158  | 25549366  | 209 |
| chr28 | 33978753  | 33978961  | 209 |
| chr28 | 25439445  | 25439653  | 209 |
| chr27 | 26576029  | 26576237  | 209 |
| chr27 | 15599382  | 15599590  | 209 |
| chr26 | 50665348  | 50665556  | 209 |
| chr26 | 31514123  | 31514331  | 209 |
| chr26 | 14903846  | 14904054  | 209 |
| chr25 | 36446931  | 36447139  | 209 |
| chr25 | 35483236  | 35483444  | 209 |
| chr25 | 34126501  | 34126709  | 209 |
| chr25 | 28052465  | 28052673  | 209 |
| chr24 | 60074082  | 60074290  | 209 |
| chr24 | 43925018  | 43925226  | 209 |
| chr23 | 15085866  | 15086074  | 209 |
| chr23 | 11932824  | 11933032  | 209 |
| chr22 | 46403904  | 46404112  | 209 |
| chr22 | 16349761  | 16349969  | 209 |
| chr21 | 32843107  | 32843315  | 209 |
| chr2  | 139864230 | 139864438 | 209 |
| chr2  | 132334670 | 132334878 | 209 |
| chr2  | 125905120 | 125905328 | 209 |
| chr2  | 110043359 | 110043567 | 209 |
| chr2  | 99034892  | 99035100  | 209 |
| chr19 | 37953877  | 37954085  | 209 |
| chr19 | 30462499  | 30462707  | 209 |
| chr19 | 16846777  | 16846985  | 209 |
| chr19 | 16339851  | 16340059  | 209 |
| chr19 | 14927483  | 14927691  | 209 |
| chr18 | 56623962  | 56624170  | 209 |
| chr18 | 55746261  | 55746469  | 209 |
| chr18 | 51277787  | 51277995  | 209 |
| chr18 | 45821360  | 45821568  | 209 |
| chr18 | 26084297  | 26084505  | 209 |
| chr17 | 74380344  | 74380552  | 209 |
| chr17 | 63190105  | 63190313  | 209 |
| chr17 | 48592159  | 48592367  | 209 |
| chr16 | 70304306  | 70304514  | 209 |
| chr16 | 57590350  | 57590558  | 209 |
| chr16 | 44117190  | 44117398  | 209 |
| chr15 | 81375989  | 81376197  | 209 |
| chr15 | 76433921  | 76434129  | 209 |
| chr15 | 65633416  | 65633624  | 209 |
| chr15 | 51638629  | 51638837  | 209 |
| chr15 | 38303355  | 38303563  | 209 |
| chr15 | 25581929  | 25582137  | 209 |
| chr14 | 59528121  | 59528329  | 209 |
| chr13 | 77335284  | 77335492  | 209 |
| chr13 | 76111383  | 76111591  | 209 |
| chr13 | 68897672  | 68897880  | 209 |

|       |           |           |     |
|-------|-----------|-----------|-----|
| chr13 | 59722434  | 59722642  | 209 |
| chr13 | 59352712  | 59352920  | 209 |
| chr13 | 38787241  | 38787449  | 209 |
| chr12 | 82416879  | 82417087  | 209 |
| chr11 | 107545292 | 107545500 | 209 |
| chr11 | 48654948  | 48655156  | 209 |
| chr11 | 28555175  | 28555383  | 209 |
| chr11 | 2758062   | 2758270   | 209 |
| chr11 | 2564862   | 2565070   | 209 |
| chr10 | 66897678  | 66897886  | 209 |
| chr10 | 17656008  | 17656216  | 209 |
| chr10 | 17033073  | 17033281  | 209 |
| chr10 | 4961762   | 4961970   | 209 |
| chr1  | 130451325 | 130451533 | 209 |
| chr1  | 118837954 | 118838162 | 209 |
| chr1  | 82910767  | 82910975  | 209 |
| chr1  | 76415256  | 76415464  | 209 |
| chr9  | 106425782 | 106425989 | 208 |
| chr9  | 105466799 | 105467006 | 208 |
| chr9  | 89866358  | 89866565  | 208 |
| chr9  | 26676922  | 26677129  | 208 |
| chr8  | 77684687  | 77684894  | 208 |
| chr8  | 74328591  | 74328798  | 208 |
| chr7  | 44763851  | 44764058  | 208 |
| chr7  | 15104957  | 15105164  | 208 |
| chr7  | 6632044   | 6632251   | 208 |
| chr6  | 107135756 | 107135963 | 208 |
| chr6  | 5856013   | 5856220   | 208 |
| chr5  | 124372533 | 124372740 | 208 |
| chr5  | 121211247 | 121211454 | 208 |
| chr5  | 113253738 | 113253945 | 208 |
| chr5  | 53011032  | 53011239  | 208 |
| chr5  | 28551289  | 28551496  | 208 |
| chr5  | 12282598  | 12282805  | 208 |
| chr4  | 121474060 | 121474267 | 208 |
| chr4  | 117619495 | 117619702 | 208 |
| chr4  | 95838820  | 95839027  | 208 |
| chr4  | 79810793  | 79811000  | 208 |
| chr4  | 68113999  | 68114206  | 208 |
| chr4  | 16796716  | 16796923  | 208 |
| chr3  | 111808123 | 111808330 | 208 |
| chr3  | 111683630 | 111683837 | 208 |
| chr3  | 108142004 | 108142211 | 208 |
| chr3  | 98167555  | 98167762  | 208 |
| chr3  | 97136954  | 97137161  | 208 |
| chr3  | 8760540   | 8760747   | 208 |
| chr29 | 49794726  | 49794933  | 208 |
| chr29 | 49494916  | 49495123  | 208 |
| chr29 | 49178653  | 49178860  | 208 |
| chr29 | 38323416  | 38323623  | 208 |



|       |           |           |     |
|-------|-----------|-----------|-----|
| chr29 | 34899643  | 34899850  | 208 |
| chr29 | 26589502  | 26589709  | 208 |
| chr28 | 12324764  | 12324971  | 208 |
| chr28 | 5033047   | 5033254   | 208 |
| chr26 | 19953346  | 19953553  | 208 |
| chr25 | 38095121  | 38095328  | 208 |
| chr25 | 37240525  | 37240732  | 208 |
| chr24 | 46937620  | 46937827  | 208 |
| chr24 | 40513856  | 40514063  | 208 |
| chr24 | 33489702  | 33489909  | 208 |
| chr24 | 2552709   | 2552916   | 208 |
| chr23 | 49856142  | 49856349  | 208 |
| chr23 | 18246729  | 18246936  | 208 |
| chr23 | 14787372  | 14787579  | 208 |
| chr23 | 13643385  | 13643592  | 208 |
| chr23 | 9429991   | 9430198   | 208 |
| chr23 | 8509661   | 8509868   | 208 |
| chr23 | 8208003   | 8208210   | 208 |
| chr22 | 60369799  | 60370006  | 208 |
| chr22 | 56317840  | 56318047  | 208 |
| chr22 | 56060902  | 56061109  | 208 |
| chr22 | 52862272  | 52862479  | 208 |
| chr22 | 49580929  | 49581136  | 208 |
| chr22 | 30199282  | 30199489  | 208 |
| chr22 | 13410383  | 13410590  | 208 |
| chr21 | 34984430  | 34984637  | 208 |
| chr21 | 28913696  | 28913903  | 208 |
| chr20 | 3203044   | 3203251   | 208 |
| chr20 | 615385    | 615592    | 208 |
| chr2  | 138661409 | 138661616 | 208 |
| chr2  | 124292828 | 124293035 | 208 |
| chr2  | 111403587 | 111403794 | 208 |
| chr2  | 75886289  | 75886496  | 208 |
| chr2  | 75240208  | 75240415  | 208 |
| chr2  | 24967828  | 24968035  | 208 |
| chr2  | 22178917  | 22179124  | 208 |
| chr19 | 53144524  | 53144731  | 208 |
| chr19 | 48755303  | 48755510  | 208 |
| chr19 | 38266577  | 38266784  | 208 |
| chr19 | 31391464  | 31391671  | 208 |
| chr19 | 11019202  | 11019409  | 208 |
| chr18 | 64315021  | 64315228  | 208 |
| chr18 | 45341342  | 45341549  | 208 |
| chr18 | 43377491  | 43377698  | 208 |
| chr18 | 33225499  | 33225706  | 208 |
| chr18 | 23204693  | 23204900  | 208 |
| chr18 | 11431408  | 11431615  | 208 |
| chr17 | 68760147  | 68760354  | 208 |
| chr17 | 64276441  | 64276648  | 208 |
| chr17 | 64147172  | 64147379  | 208 |

|       |           |           |     |
|-------|-----------|-----------|-----|
| chr17 | 64111389  | 64111596  | 208 |
| chr17 | 57782578  | 57782785  | 208 |
| chr17 | 49443487  | 49443694  | 208 |
| chr17 | 47771138  | 47771345  | 208 |
| chr16 | 75680472  | 75680679  | 208 |
| chr16 | 52569673  | 52569880  | 208 |
| chr16 | 49358548  | 49358755  | 208 |
| chr16 | 47993655  | 47993862  | 208 |
| chr15 | 81620675  | 81620882  | 208 |
| chr15 | 33832879  | 33833086  | 208 |
| chr15 | 32450930  | 32451137  | 208 |
| chr15 | 29979887  | 29980094  | 208 |
| chr15 | 29841005  | 29841212  | 208 |
| chr15 | 25330586  | 25330793  | 208 |
| chr15 | 21499071  | 21499278  | 208 |
| chr13 | 73302244  | 73302451  | 208 |
| chr13 | 63649108  | 63649315  | 208 |
| chr13 | 59692249  | 59692456  | 208 |
| chr13 | 53801147  | 53801354  | 208 |
| chr13 | 34942567  | 34942774  | 208 |
| chr13 | 11080578  | 11080785  | 208 |
| chr12 | 84675069  | 84675276  | 208 |
| chr12 | 82348330  | 82348537  | 208 |
| chr12 | 34266549  | 34266756  | 208 |
| chr11 | 89672775  | 89672982  | 208 |
| chr11 | 49006717  | 49006924  | 208 |
| chr11 | 34069515  | 34069722  | 208 |
| chr11 | 31673549  | 31673756  | 208 |
| chr11 | 4301277   | 4301484   | 208 |
| chr10 | 88132840  | 88133047  | 208 |
| chr10 | 70653381  | 70653588  | 208 |
| chr10 | 53058159  | 53058366  | 208 |
| chr10 | 16775055  | 16775262  | 208 |
| chr1  | 128585416 | 128585623 | 208 |
| chr1  | 1702096   | 1702303   | 208 |
| chr9  | 89662903  | 89663109  | 207 |
| chr8  | 94375946  | 94376152  | 207 |
| chr8  | 5375053   | 5375259   | 207 |
| chr7  | 58201225  | 58201431  | 207 |
| chr7  | 45746059  | 45746265  | 207 |
| chr7  | 44558937  | 44559143  | 207 |
| chr6  | 73794360  | 73794566  | 207 |
| chr5  | 121235026 | 121235232 | 207 |
| chr5  | 120045152 | 120045358 | 207 |
| chr5  | 80241188  | 80241394  | 207 |
| chr5  | 30284145  | 30284351  | 207 |
| chr5  | 28827878  | 28828084  | 207 |
| chr5  | 10636195  | 10636401  | 207 |
| chr4  | 65396101  | 65396307  | 207 |
| chr4  | 57689337  | 57689543  | 207 |

|       |           |           |     |
|-------|-----------|-----------|-----|
| chr3  | 33663407  | 33663613  | 207 |
| chr3  | 29304680  | 29304886  | 207 |
| chr3  | 20579883  | 20580089  | 207 |
| chr3  | 10299678  | 10299884  | 207 |
| chr3  | 429425    | 429631    | 207 |
| chr29 | 49580593  | 49580799  | 207 |
| chr29 | 44705920  | 44706126  | 207 |
| chr29 | 42397470  | 42397676  | 207 |
| chr29 | 33927965  | 33928171  | 207 |
| chr28 | 42588061  | 42588267  | 207 |
| chr28 | 40370919  | 40371125  | 207 |
| chr27 | 39878932  | 39879138  | 207 |
| chr27 | 38624118  | 38624324  | 207 |
| chr26 | 43093640  | 43093846  | 207 |
| chr26 | 34964705  | 34964911  | 207 |
| chr25 | 39327090  | 39327296  | 207 |
| chr25 | 37502981  | 37503187  | 207 |
| chr25 | 37252653  | 37252859  | 207 |
| chr25 | 36701813  | 36702019  | 207 |
| chr25 | 34533298  | 34533504  | 207 |
| chr25 | 17747431  | 17747637  | 207 |
| chr25 | 16974172  | 16974378  | 207 |
| chr24 | 60909420  | 60909626  | 207 |
| chr24 | 55941780  | 55941986  | 207 |
| chr24 | 43327368  | 43327574  | 207 |
| chr24 | 29709858  | 29710064  | 207 |
| chr24 | 2633597   | 2633803   | 207 |
| chr23 | 51671663  | 51671869  | 207 |
| chr23 | 17957181  | 17957387  | 207 |
| chr23 | 15949142  | 15949348  | 207 |
| chr23 | 10579690  | 10579896  | 207 |
| chr23 | 2560788   | 2560994   | 207 |
| chr22 | 60543753  | 60543959  | 207 |
| chr22 | 50606040  | 50606246  | 207 |
| chr22 | 29670945  | 29671151  | 207 |
| chr22 | 7271027   | 7271233   | 207 |
| chr21 | 64491021  | 64491227  | 207 |
| chr21 | 47612983  | 47613189  | 207 |
| chr21 | 25100812  | 25101018  | 207 |
| chr2  | 138692176 | 138692382 | 207 |
| chr2  | 136685698 | 136685904 | 207 |
| chr2  | 134661753 | 134661959 | 207 |
| chr2  | 133864497 | 133864703 | 207 |
| chr2  | 131257904 | 131258110 | 207 |
| chr2  | 121894733 | 121894939 | 207 |
| chr2  | 111300083 | 111300289 | 207 |
| chr2  | 99341136  | 99341342  | 207 |
| chr19 | 63507831  | 63508037  | 207 |
| chr19 | 61954928  | 61955134  | 207 |
| chr19 | 56772514  | 56772720  | 207 |

|       |           |           |     |
|-------|-----------|-----------|-----|
| chr19 | 54432292  | 54432498  | 207 |
| chr19 | 52834744  | 52834950  | 207 |
| chr19 | 51688932  | 51689138  | 207 |
| chr19 | 46663313  | 46663519  | 207 |
| chr19 | 40873269  | 40873475  | 207 |
| chr19 | 39829527  | 39829733  | 207 |
| chr19 | 38963743  | 38963949  | 207 |
| chr19 | 37958907  | 37959113  | 207 |
| chr19 | 35797818  | 35798024  | 207 |
| chr19 | 10955991  | 10956197  | 207 |
| chr18 | 64466169  | 64466375  | 207 |
| chr18 | 64319432  | 64319638  | 207 |
| chr18 | 62008094  | 62008300  | 207 |
| chr17 | 72704834  | 72705040  | 207 |
| chr17 | 55477098  | 55477304  | 207 |
| chr16 | 72123123  | 72123329  | 207 |
| chr16 | 61138367  | 61138573  | 207 |
| chr16 | 47078393  | 47078599  | 207 |
| chr16 | 41446889  | 41447095  | 207 |
| chr16 | 41072710  | 41072916  | 207 |
| chr16 | 39602545  | 39602751  | 207 |
| chr16 | 20399021  | 20399227  | 207 |
| chr16 | 17695559  | 17695765  | 207 |
| chr16 | 1865021   | 1865227   | 207 |
| chr15 | 64475456  | 64475662  | 207 |
| chr15 | 37674202  | 37674408  | 207 |
| chr15 | 22190253  | 22190459  | 207 |
| chr14 | 60956144  | 60956350  | 207 |
| chr13 | 77303274  | 77303480  | 207 |
| chr13 | 66096488  | 66096694  | 207 |
| chr13 | 63432329  | 63432535  | 207 |
| chr13 | 59709216  | 59709422  | 207 |
| chr13 | 58754204  | 58754410  | 207 |
| chr13 | 58603199  | 58603405  | 207 |
| chr13 | 57465887  | 57466093  | 207 |
| chr13 | 46431029  | 46431235  | 207 |
| chr13 | 42299776  | 42299982  | 207 |
| chr13 | 40990285  | 40990491  | 207 |
| chr13 | 38360754  | 38360960  | 207 |
| chr12 | 82212971  | 82213177  | 207 |
| chr12 | 20028881  | 20029087  | 207 |
| chr11 | 106320529 | 106320735 | 207 |
| chr11 | 104377004 | 104377210 | 207 |
| chr11 | 84367184  | 84367390  | 207 |
| chr11 | 25646436  | 25646642  | 207 |
| chr11 | 829824    | 830030    | 207 |
| chr10 | 88357661  | 88357867  | 207 |
| chr10 | 71889769  | 71889975  | 207 |
| chr10 | 70212758  | 70212964  | 207 |
| chr10 | 8740894   | 8741100   | 207 |

|       |               |           |     |
|-------|---------------|-----------|-----|
| chr10 | 3514160       | 3514366   | 207 |
| chr1  | 128582978     | 128583184 | 207 |
| chr9  | 45107964      | 45108169  | 206 |
| chr9  | 14572162      | 14572367  | 206 |
| chr8  | 93075290      | 93075495  | 206 |
| chr8  | 73786137      | 73786342  | 206 |
| chr8  | 28511743      | 28511948  | 206 |
| chr7  | 15476004      | 15476209  | 206 |
| chr7  | 3929188       | 3929393   | 206 |
| chr5  | 121632275     | 121632480 | 206 |
| chr5  | 118163659     | 118163864 | 206 |
| chr5  | 114122860     | 114123065 | 206 |
| chr5  | 79994761      | 79994966  | 206 |
| chr4  | 97085306      | 97085511  | 206 |
| chr3  | 126036595     | 126036800 | 206 |
| chr3  | 123655462     | 123655667 | 206 |
| chr3  | 123362515     | 123362720 | 206 |
| chr3  | 122245523     | 122245728 | 206 |
| chr3  | 115986163     | 115986368 | 206 |
| chr3  | 113476481     | 113476686 | 206 |
| chr3  | 111337191     | 111337396 | 206 |
| chr3  | 106523650     | 106523855 | 206 |
| chr3  | 97902957      | 97903162  | 206 |
| chr29 | 49409705      | 49409910  | 206 |
| chr29 | 37957159      | 37957364  | 206 |
| chr29 | 35014587      | 35014792  | 206 |
| chr29 | 14872929      | 14873134  | 206 |
| chr28 | 41055014      | 41055219  | 206 |
| chr28 | 25184468      | 25184673  | 206 |
| chr27 | 35000539      | 35000744  | 206 |
| chr27 | 844220 844425 | 206       |     |
| chr26 | 48679940      | 48680145  | 206 |
| chr26 | 47930678      | 47930883  | 206 |
| chr26 | 42167020      | 42167225  | 206 |
| chr25 | 41653684      | 41653889  | 206 |
| chr25 | 38843886      | 38844091  | 206 |
| chr25 | 10627222      | 10627427  | 206 |
| chr24 | 60509684      | 60509889  | 206 |
| chr24 | 48911701      | 48911906  | 206 |
| chr24 | 27093951      | 27094156  | 206 |
| chr24 | 1398138       | 1398343   | 206 |
| chr23 | 49848364      | 49848569  | 206 |
| chr23 | 27873420      | 27873625  | 206 |
| chr23 | 16078158      | 16078363  | 206 |
| chr23 | 15855142      | 15855347  | 206 |
| chr23 | 8326033       | 8326238   | 206 |
| chr23 | 8073436       | 8073641   | 206 |
| chr22 | 60494541      | 60494746  | 206 |
| chr22 | 59871680      | 59871885  | 206 |
| chr22 | 50728739      | 50728944  | 206 |

|       |               |           |     |
|-------|---------------|-----------|-----|
| chr22 | 18337961      | 18338166  | 206 |
| chr22 | 14016326      | 14016531  | 206 |
| chr21 | 69053700      | 69053905  | 206 |
| chr20 | 67519384      | 67519589  | 206 |
| chr20 | 38850370      | 38850575  | 206 |
| chr20 | 33686822      | 33687027  | 206 |
| chr20 | 3417319       | 3417524   | 206 |
| chr2  | 138568621     | 138568826 | 206 |
| chr2  | 131298143     | 131298348 | 206 |
| chr2  | 111276075     | 111276280 | 206 |
| chr19 | 65241417      | 65241622  | 206 |
| chr19 | 57986822      | 57987027  | 206 |
| chr19 | 57058591      | 57058796  | 206 |
| chr19 | 56526588      | 56526793  | 206 |
| chr19 | 55982316      | 55982521  | 206 |
| chr19 | 43234906      | 43235111  | 206 |
| chr19 | 41544957      | 41545162  | 206 |
| chr19 | 35106933      | 35107138  | 206 |
| chr19 | 30364436      | 30364641  | 206 |
| chr19 | 23962980      | 23963185  | 206 |
| chr19 | 21202609      | 21202814  | 206 |
| chr19 | 19838129      | 19838334  | 206 |
| chr18 | 59510757      | 59510962  | 206 |
| chr18 | 22107690      | 22107895  | 206 |
| chr18 | 11335324      | 11335529  | 206 |
| chr18 | 6971118       | 6971323   | 206 |
| chr18 | 445736 445941 |           | 206 |
| chr17 | 73156315      | 73156520  | 206 |
| chr17 | 41481932      | 41482137  | 206 |
| chr16 | 45948737      | 45948942  | 206 |
| chr16 | 45908091      | 45908296  | 206 |
| chr16 | 39475030      | 39475235  | 206 |
| chr16 | 3732240       | 3732445   | 206 |
| chr15 | 77937042      | 77937247  | 206 |
| chr15 | 74609371      | 74609576  | 206 |
| chr15 | 63091490      | 63091695  | 206 |
| chr14 | 31004568      | 31004773  | 206 |
| chr14 | 8734035       | 8734240   | 206 |
| chr14 | 7511285       | 7511490   | 206 |
| chr13 | 80621756      | 80621961  | 206 |
| chr13 | 79922599      | 79922804  | 206 |
| chr13 | 71435206      | 71435411  | 206 |
| chr13 | 59711637      | 59711842  | 206 |
| chr13 | 55036080      | 55036285  | 206 |
| chr13 | 53967838      | 53968043  | 206 |
| chr13 | 17651939      | 17652144  | 206 |
| chr12 | 82657674      | 82657879  | 206 |
| chr12 | 82020126      | 82020331  | 206 |
| chr12 | 35371463      | 35371668  | 206 |
| chr11 | 104316352     | 104316557 | 206 |

|       |           |           |     |
|-------|-----------|-----------|-----|
| chr11 | 96130529  | 96130734  | 206 |
| chr11 | 81325889  | 81326094  | 206 |
| chr11 | 72587807  | 72588012  | 206 |
| chr11 | 70571229  | 70571434  | 206 |
| chr11 | 49337692  | 49337897  | 206 |
| chr11 | 10524855  | 10525060  | 206 |
| chr10 | 88085997  | 88086202  | 206 |
| chr10 | 36841779  | 36841984  | 206 |
| chr10 | 20844703  | 20844908  | 206 |
| chr10 | 13603038  | 13603243  | 206 |
| chr10 | 8531831   | 8532036   | 206 |
| chr1  | 148256139 | 148256344 | 206 |
| chrX  | 11013536  | 11013740  | 205 |
| chr8  | 108772002 | 108772206 | 205 |
| chr8  | 106150645 | 106150849 | 205 |
| chr8  | 82097825  | 82098029  | 205 |
| chr8  | 29351106  | 29351310  | 205 |
| chr7  | 52285842  | 52286046  | 205 |
| chr7  | 21198395  | 21198599  | 205 |
| chr5  | 124757144 | 124757348 | 205 |
| chr5  | 121654964 | 121655168 | 205 |
| chr5  | 113194440 | 113194644 | 205 |
| chr5  | 38698820  | 38699024  | 205 |
| chr5  | 30665551  | 30665755  | 205 |
| chr5  | 7222383   | 7222587   | 205 |
| chr4  | 123094537 | 123094741 | 205 |
| chr3  | 125700079 | 125700283 | 205 |
| chr3  | 115405663 | 115405867 | 205 |
| chr3  | 89545426  | 89545630  | 205 |
| chr3  | 83137062  | 83137266  | 205 |
| chr3  | 25807829  | 25808033  | 205 |
| chr3  | 15440625  | 15440829  | 205 |
| chr3  | 15393716  | 15393920  | 205 |
| chr3  | 9404325   | 9404529   | 205 |
| chr29 | 49599541  | 49599745  | 205 |
| chr29 | 49515048  | 49515252  | 205 |
| chr29 | 37064638  | 37064842  | 205 |
| chr29 | 31625539  | 31625743  | 205 |
| chr29 | 26782544  | 26782748  | 205 |
| chr29 | 17986026  | 17986230  | 205 |
| chr28 | 33646565  | 33646769  | 205 |
| chr28 | 26450838  | 26451042  | 205 |
| chr28 | 26443113  | 26443317  | 205 |
| chr28 | 6755875   | 6756079   | 205 |
| chr27 | 38483656  | 38483860  | 205 |
| chr26 | 51221501  | 51221705  | 205 |
| chr26 | 50769076  | 50769280  | 205 |
| chr26 | 23174763  | 23174967  | 205 |
| chr26 | 21815863  | 21816067  | 205 |
| chr25 | 37653579  | 37653783  | 205 |

|       |               |           |     |
|-------|---------------|-----------|-----|
| chr25 | 37417093      | 37417297  | 205 |
| chr25 | 35358305      | 35358509  | 205 |
| chr25 | 27952130      | 27952334  | 205 |
| chr24 | 60755943      | 60756147  | 205 |
| chr24 | 35335398      | 35335602  | 205 |
| chr24 | 20547243      | 20547447  | 205 |
| chr24 | 1984637       | 1984841   | 205 |
| chr23 | 48552326      | 48552530  | 205 |
| chr23 | 15909737      | 15909941  | 205 |
| chr23 | 15828027      | 15828231  | 205 |
| chr23 | 11041166      | 11041370  | 205 |
| chr23 | 9785682       | 9785886   | 205 |
| chr22 | 57720409      | 57720613  | 205 |
| chr22 | 56471075      | 56471279  | 205 |
| chr22 | 48362712      | 48362916  | 205 |
| chr22 | 13732214      | 13732418  | 205 |
| chr22 | 7529291       | 7529495   | 205 |
| chr22 | 830921 831125 | 205       | 205 |
| chr21 | 64280986      | 64281190  | 205 |
| chr21 | 59728253      | 59728457  | 205 |
| chr21 | 28190163      | 28190367  | 205 |
| chr21 | 20843722      | 20843926  | 205 |
| chr21 | 20035719      | 20035923  | 205 |
| chr2  | 140705032     | 140705236 | 205 |
| chr2  | 138895521     | 138895725 | 205 |
| chr2  | 138648085     | 138648289 | 205 |
| chr2  | 136770925     | 136771129 | 205 |
| chr2  | 134506078     | 134506282 | 205 |
| chr2  | 125910431     | 125910635 | 205 |
| chr19 | 63484123      | 63484327  | 205 |
| chr19 | 59533792      | 59533996  | 205 |
| chr19 | 59101466      | 59101670  | 205 |
| chr19 | 56506807      | 56507011  | 205 |
| chr19 | 53050397      | 53050601  | 205 |
| chr19 | 46876755      | 46876959  | 205 |
| chr19 | 37951031      | 37951235  | 205 |
| chr19 | 31502259      | 31502463  | 205 |
| chr19 | 20404354      | 20404558  | 205 |
| chr19 | 10990827      | 10991031  | 205 |
| chr18 | 62957165      | 62957369  | 205 |
| chr18 | 62388231      | 62388435  | 205 |
| chr18 | 52761058      | 52761262  | 205 |
| chr18 | 47830924      | 47831128  | 205 |
| chr18 | 23935795      | 23935999  | 205 |
| chr17 | 67387104      | 67387308  | 205 |
| chr17 | 63410892      | 63411096  | 205 |
| chr17 | 60185860      | 60186064  | 205 |
| chr17 | 21441242      | 21441446  | 205 |
| chr17 | 18376936      | 18377140  | 205 |
| chr16 | 51087950      | 51088154  | 205 |



|       |           |           |     |
|-------|-----------|-----------|-----|
| chr16 | 43573653  | 43573857  | 205 |
| chr16 | 2125215   | 2125419   | 205 |
| chr15 | 73820301  | 73820505  | 205 |
| chr15 | 25450863  | 25451067  | 205 |
| chr14 | 80590922  | 80591126  | 205 |
| chr14 | 63511401  | 63511605  | 205 |
| chr14 | 59521451  | 59521655  | 205 |
| chr14 | 19481690  | 19481894  | 205 |
| chr13 | 77793122  | 77793326  | 205 |
| chr13 | 75655914  | 75656118  | 205 |
| chr13 | 66824719  | 66824923  | 205 |
| chr13 | 63579347  | 63579551  | 205 |
| chr13 | 58926944  | 58927148  | 205 |
| chr13 | 53508640  | 53508844  | 205 |
| chr13 | 43952439  | 43952643  | 205 |
| chr13 | 40919146  | 40919350  | 205 |
| chr13 | 35922019  | 35922223  | 205 |
| chr13 | 23868168  | 23868372  | 205 |
| chr12 | 33102252  | 33102456  | 205 |
| chr12 | 22120828  | 22121032  | 205 |
| chr11 | 107352502 | 107352706 | 205 |
| chr11 | 84531159  | 84531363  | 205 |
| chr11 | 80452704  | 80452908  | 205 |
| chr11 | 40253880  | 40254084  | 205 |
| chr10 | 70149630  | 70149834  | 205 |
| chr10 | 45674855  | 45675059  | 205 |
| chr10 | 24182715  | 24182919  | 205 |
| chr10 | 21112390  | 21112594  | 205 |
| chr10 | 16773225  | 16773429  | 205 |
| chr10 | 15201463  | 15201667  | 205 |
| chr10 | 13036336  | 13036540  | 205 |
| chr1  | 2724048   | 2724252   | 205 |
| chr1  | 1547322   | 1547526   | 205 |
| chr9  | 90318991  | 90319194  | 204 |
| chr9  | 74293122  | 74293325  | 204 |
| chr8  | 93368051  | 93368254  | 204 |
| chr8  | 85445458  | 85445661  | 204 |
| chr8  | 65843836  | 65844039  | 204 |
| chr8  | 10299153  | 10299356  | 204 |
| chr7  | 37594092  | 37594295  | 204 |
| chr7  | 37343557  | 37343760  | 204 |
| chr7  | 18829521  | 18829724  | 204 |
| chr7  | 15358933  | 15359136  | 204 |
| chr7  | 2964799   | 2965002   | 204 |
| chr6  | 122153000 | 122153203 | 204 |
| chr6  | 121738405 | 121738608 | 204 |
| chr6  | 59517290  | 59517493  | 204 |
| chr5  | 118448193 | 118448396 | 204 |
| chr5  | 112433375 | 112433578 | 204 |
| chr5  | 111542216 | 111542419 | 204 |

|       |               |           |     |
|-------|---------------|-----------|-----|
| chr5  | 111238235     | 111238438 | 204 |
| chr5  | 104117953     | 104118156 | 204 |
| chr5  | 76718005      | 76718208  | 204 |
| chr5  | 30464411      | 30464614  | 204 |
| chr4  | 122883456     | 122883659 | 204 |
| chr4  | 118609174     | 118609377 | 204 |
| chr4  | 106685028     | 106685231 | 204 |
| chr4  | 95625599      | 95625802  | 204 |
| chr4  | 81963425      | 81963628  | 204 |
| chr4  | 77476706      | 77476909  | 204 |
| chr4  | 74076929      | 74077132  | 204 |
| chr4  | 69680552      | 69680755  | 204 |
| chr4  | 5117011       | 5117214   | 204 |
| chr3  | 123224552     | 123224755 | 204 |
| chr3  | 117962991     | 117963194 | 204 |
| chr3  | 116952147     | 116952350 | 204 |
| chr3  | 116016966     | 116017169 | 204 |
| chr3  | 114677790     | 114677993 | 204 |
| chr3  | 105480064     | 105480267 | 204 |
| chr3  | 89746139      | 89746342  | 204 |
| chr3  | 84340627      | 84340830  | 204 |
| chr3  | 31671626      | 31671829  | 204 |
| chr3  | 22659069      | 22659272  | 204 |
| chr3  | 15944294      | 15944497  | 204 |
| chr27 | 39143905      | 39144108  | 204 |
| chr27 | 31139394      | 31139597  | 204 |
| chr27 | 6200933       | 6201136   | 204 |
| chr27 | 1499356       | 1499559   | 204 |
| chr26 | 48510967      | 48511170  | 204 |
| chr26 | 21966480      | 21966683  | 204 |
| chr26 | 21965924      | 21966127  | 204 |
| chr25 | 42586484      | 42586687  | 204 |
| chr25 | 35845659      | 35845862  | 204 |
| chr25 | 28968277      | 28968480  | 204 |
| chr24 | 51262533      | 51262736  | 204 |
| chr24 | 20895794      | 20895997  | 204 |
| chr23 | 52812562      | 52812765  | 204 |
| chr23 | 49742243      | 49742446  | 204 |
| chr23 | 31667820      | 31668023  | 204 |
| chr22 | 60410135      | 60410338  | 204 |
| chr22 | 50448979      | 50449182  | 204 |
| chr21 | 26564567      | 26564770  | 204 |
| chr21 | 22722614      | 22722817  | 204 |
| chr21 | 20186751      | 20186954  | 204 |
| chr21 | 19977982      | 19978185  | 204 |
| chr20 | 72078894      | 72079097  | 204 |
| chr20 | 35926914      | 35927117  | 204 |
| chr20 | 766086 766289 | 204       | 204 |
| chr2  | 133041258     | 133041461 | 204 |
| chr2  | 125896110     | 125896313 | 204 |

|       |           |           |     |
|-------|-----------|-----------|-----|
| chr2  | 111300415 | 111300618 | 204 |
| chr2  | 111221120 | 111221323 | 204 |
| chr2  | 92315650  | 92315853  | 204 |
| chr2  | 5956603   | 5956806   | 204 |
| chr19 | 59440129  | 59440332  | 204 |
| chr19 | 59072037  | 59072240  | 204 |
| chr19 | 53168298  | 53168501  | 204 |
| chr19 | 45212771  | 45212974  | 204 |
| chr19 | 42243728  | 42243931  | 204 |
| chr19 | 25826483  | 25826686  | 204 |
| chr19 | 19442514  | 19442717  | 204 |
| chr19 | 18909753  | 18909956  | 204 |
| chr19 | 7766783   | 7766986   | 204 |
| chr18 | 64322480  | 64322683  | 204 |
| chr18 | 54665153  | 54665356  | 204 |
| chr18 | 43771686  | 43771889  | 204 |
| chr18 | 23494898  | 23495101  | 204 |
| chr18 | 13182393  | 13182596  | 204 |
| chr18 | 11648968  | 11649171  | 204 |
| chr17 | 70255256  | 70255459  | 204 |
| chr17 | 59131167  | 59131370  | 204 |
| chr16 | 43656917  | 43657120  | 204 |
| chr16 | 38706341  | 38706544  | 204 |
| chr16 | 26244183  | 26244386  | 204 |
| chr16 | 1543201   | 1543404   | 204 |
| chr15 | 73698692  | 73698895  | 204 |
| chr15 | 64490267  | 64490470  | 204 |
| chr15 | 28873560  | 28873763  | 204 |
| chr15 | 26887454  | 26887657  | 204 |
| chr15 | 22756096  | 22756299  | 204 |
| chr13 | 75553218  | 75553421  | 204 |
| chr13 | 72771366  | 72771569  | 204 |
| chr13 | 70708826  | 70709029  | 204 |
| chr13 | 37650202  | 37650405  | 204 |
| chr13 | 36766133  | 36766336  | 204 |
| chr13 | 23423533  | 23423736  | 204 |
| chr13 | 3060836   | 3061039   | 204 |
| chr12 | 82558622  | 82558825  | 204 |
| chr12 | 77021987  | 77022190  | 204 |
| chr12 | 11312385  | 11312588  | 204 |
| chr12 | 9121826   | 9122029   | 204 |
| chr11 | 108430781 | 108430984 | 204 |
| chr11 | 105019928 | 105020131 | 204 |
| chr11 | 102856876 | 102857079 | 204 |
| chr11 | 101848454 | 101848657 | 204 |
| chr11 | 88975594  | 88975797  | 204 |
| chr11 | 77571460  | 77571663  | 204 |
| chr11 | 74211079  | 74211282  | 204 |
| chr11 | 72727964  | 72728167  | 204 |
| chr11 | 70678204  | 70678407  | 204 |

|       |           |           |     |
|-------|-----------|-----------|-----|
| chr11 | 70658940  | 70659143  | 204 |
| chr11 | 66715029  | 66715232  | 204 |
| chr11 | 47882323  | 47882526  | 204 |
| chr11 | 38883293  | 38883496  | 204 |
| chr10 | 81734925  | 81735128  | 204 |
| chr10 | 20455874  | 20456077  | 204 |
| chr10 | 16872261  | 16872464  | 204 |
| chr1  | 146343531 | 146343734 | 204 |
| chr1  | 145890691 | 145890894 | 204 |
| chr1  | 144886140 | 144886343 | 204 |
| chr1  | 136398840 | 136399043 | 204 |
| chr1  | 123462762 | 123462965 | 204 |
| chr1  | 84398736  | 84398939  | 204 |
| chr1  | 1722034   | 1722237   | 204 |
| chr1  | 1519623   | 1519826   | 204 |
| chr9  | 90177287  | 90177489  | 203 |
| chr9  | 51603488  | 51603690  | 203 |
| chr9  | 12690197  | 12690399  | 203 |
| chr9  | 12245407  | 12245609  | 203 |
| chr8  | 65756518  | 65756720  | 203 |
| chr8  | 7709859   | 7710061   | 203 |
| chr7  | 96598242  | 96598444  | 203 |
| chr7  | 51916824  | 51917026  | 203 |
| chr7  | 45706594  | 45706796  | 203 |
| chr7  | 37875306  | 37875508  | 203 |
| chr7  | 24557057  | 24557259  | 203 |
| chr6  | 121784929 | 121785131 | 203 |
| chr6  | 119358377 | 119358579 | 203 |
| chr6  | 63160161  | 63160363  | 203 |
| chr5  | 121810327 | 121810529 | 203 |
| chr5  | 120486390 | 120486592 | 203 |
| chr5  | 103793586 | 103793788 | 203 |
| chr5  | 30288311  | 30288513  | 203 |
| chr4  | 118012371 | 118012573 | 203 |
| chr4  | 117133648 | 117133850 | 203 |
| chr4  | 106087406 | 106087608 | 203 |
| chr4  | 97719530  | 97719732  | 203 |
| chr4  | 95053996  | 95054198  | 203 |
| chr4  | 33857313  | 33857515  | 203 |
| chr3  | 119684637 | 119684839 | 203 |
| chr3  | 119353919 | 119354121 | 203 |
| chr3  | 116419271 | 116419473 | 203 |
| chr3  | 111653696 | 111653898 | 203 |
| chr3  | 104562734 | 104562936 | 203 |
| chr3  | 54807851  | 54808053  | 203 |
| chr3  | 36885696  | 36885898  | 203 |
| chr3  | 33662885  | 33663087  | 203 |
| chr3  | 30420088  | 30420290  | 203 |
| chr3  | 4522237   | 4522439   | 203 |
| chr29 | 50283679  | 50283881  | 203 |

|       |               |           |     |
|-------|---------------|-----------|-----|
| chr29 | 48700438      | 48700640  | 203 |
| chr29 | 46261133      | 46261335  | 203 |
| chr29 | 37005067      | 37005269  | 203 |
| chr29 | 31777000      | 31777202  | 203 |
| chr29 | 31521882      | 31522084  | 203 |
| chr28 | 41838140      | 41838342  | 203 |
| chr28 | 34023028      | 34023230  | 203 |
| chr28 | 12329066      | 12329268  | 203 |
| chr28 | 7033946       | 7034148   | 203 |
| chr27 | 35930161      | 35930363  | 203 |
| chr26 | 48466701      | 48466903  | 203 |
| chr26 | 48465834      | 48466036  | 203 |
| chr26 | 44489269      | 44489471  | 203 |
| chr26 | 22241385      | 22241587  | 203 |
| chr26 | 20044009      | 20044211  | 203 |
| chr26 | 18791429      | 18791631  | 203 |
| chr25 | 21430945      | 21431147  | 203 |
| chr24 | 59663088      | 59663290  | 203 |
| chr24 | 40358273      | 40358475  | 203 |
| chr23 | 44879210      | 44879412  | 203 |
| chr23 | 31129281      | 31129483  | 203 |
| chr23 | 31072832      | 31073034  | 203 |
| chr23 | 28000022      | 28000224  | 203 |
| chr23 | 25163513      | 25163715  | 203 |
| chr23 | 16768710      | 16768912  | 203 |
| chr22 | 55820503      | 55820705  | 203 |
| chr22 | 54197850      | 54198052  | 203 |
| chr21 | 64519533      | 64519735  | 203 |
| chr21 | 60172846      | 60173048  | 203 |
| chr21 | 33001476      | 33001678  | 203 |
| chr21 | 32964049      | 32964251  | 203 |
| chr21 | 23692396      | 23692598  | 203 |
| chr21 | 19430562      | 19430764  | 203 |
| chr20 | 65907836      | 65908038  | 203 |
| chr20 | 712781 712983 | 203       |     |
| chr2  | 139436726     | 139436928 | 203 |
| chr2  | 131671746     | 131671948 | 203 |
| chr2  | 131480036     | 131480238 | 203 |
| chr2  | 130118902     | 130119104 | 203 |
| chr2  | 127277007     | 127277209 | 203 |
| chr2  | 111816417     | 111816619 | 203 |
| chr2  | 76539808      | 76540010  | 203 |
| chr19 | 61177778      | 61177980  | 203 |
| chr19 | 59096016      | 59096218  | 203 |
| chr19 | 58333773      | 58333975  | 203 |
| chr19 | 56546866      | 56547068  | 203 |
| chr19 | 56481273      | 56481475  | 203 |
| chr19 | 47157729      | 47157931  | 203 |
| chr19 | 46885816      | 46886018  | 203 |
| chr19 | 42386926      | 42387128  | 203 |

|       |           |           |     |
|-------|-----------|-----------|-----|
| chr19 | 40892821  | 40893023  | 203 |
| chr19 | 39676539  | 39676741  | 203 |
| chr19 | 39060663  | 39060865  | 203 |
| chr19 | 34557352  | 34557554  | 203 |
| chr19 | 24691143  | 24691345  | 203 |
| chr19 | 6656251   | 6656453   | 203 |
| chr18 | 59707274  | 59707476  | 203 |
| chr18 | 57612992  | 57613194  | 203 |
| chr18 | 52677165  | 52677367  | 203 |
| chr18 | 49936948  | 49937150  | 203 |
| chr18 | 49486882  | 49487084  | 203 |
| chr18 | 46086229  | 46086431  | 203 |
| chr18 | 43464465  | 43464667  | 203 |
| chr18 | 21960053  | 21960255  | 203 |
| chr18 | 20246785  | 20246987  | 203 |
| chr18 | 11165956  | 11166158  | 203 |
| chr17 | 70281598  | 70281800  | 203 |
| chr17 | 70236569  | 70236771  | 203 |
| chr17 | 69298555  | 69298757  | 203 |
| chr17 | 68732785  | 68732987  | 203 |
| chr17 | 62506029  | 62506231  | 203 |
| chr17 | 58897671  | 58897873  | 203 |
| chr17 | 57844055  | 57844257  | 203 |
| chr17 | 48282633  | 48282835  | 203 |
| chr16 | 55013784  | 55013986  | 203 |
| chr16 | 1620113   | 1620315   | 203 |
| chr15 | 81370814  | 81371016  | 203 |
| chr15 | 74538419  | 74538621  | 203 |
| chr15 | 29746842  | 29747044  | 203 |
| chr15 | 28891918  | 28892120  | 203 |
| chr14 | 61204419  | 61204621  | 203 |
| chr14 | 26705457  | 26705659  | 203 |
| chr14 | 21172366  | 21172568  | 203 |
| chr14 | 14797355  | 14797557  | 203 |
| chr14 | 7408803   | 7409005   | 203 |
| chr13 | 77701038  | 77701240  | 203 |
| chr13 | 61192294  | 61192496  | 203 |
| chr13 | 57578986  | 57579188  | 203 |
| chr13 | 55003320  | 55003522  | 203 |
| chr13 | 52929259  | 52929461  | 203 |
| chr13 | 45374167  | 45374369  | 203 |
| chr13 | 42395657  | 42395859  | 203 |
| chr13 | 41679446  | 41679648  | 203 |
| chr13 | 28788098  | 28788300  | 203 |
| chr12 | 67988624  | 67988826  | 203 |
| chr12 | 22050097  | 22050299  | 203 |
| chr12 | 20790581  | 20790783  | 203 |
| chr12 | 11446320  | 11446522  | 203 |
| chr11 | 104341857 | 104342059 | 203 |
| chr11 | 85334033  | 85334235  | 203 |

|       |           |           |     |
|-------|-----------|-----------|-----|
| chr11 | 75076136  | 75076338  | 203 |
| chr11 | 74549705  | 74549907  | 203 |
| chr11 | 70842588  | 70842790  | 203 |
| chr11 | 1580211   | 1580413   | 203 |
| chr10 | 81896665  | 81896867  | 203 |
| chr10 | 67015143  | 67015345  | 203 |
| chr10 | 44736513  | 44736715  | 203 |
| chr10 | 35888698  | 35888900  | 203 |
| chr10 | 24616019  | 24616221  | 203 |
| chr1  | 146177779 | 146177981 | 203 |
| chr1  | 82908614  | 82908816  | 203 |
| chr1  | 82417062  | 82417264  | 203 |
| chr1  | 72913716  | 72913918  | 203 |
| chr1  | 72534873  | 72535075  | 203 |
| chr1  | 2541534   | 2541736   | 203 |
| chr1  | 1798433   | 1798635   | 203 |
| chr9  | 106522203 | 106522404 | 202 |
| chr9  | 106428215 | 106428416 | 202 |
| chr9  | 87766605  | 87766806  | 202 |
| chr8  | 73478984  | 73479185  | 202 |
| chr8  | 72311163  | 72311364  | 202 |
| chr8  | 65871913  | 65872114  | 202 |
| chr8  | 40330377  | 40330578  | 202 |
| chr8  | 24333961  | 24334162  | 202 |
| chr8  | 7707310   | 7707511   | 202 |
| chr7  | 70611627  | 70611828  | 202 |
| chr7  | 65083861  | 65084062  | 202 |
| chr7  | 64918224  | 64918425  | 202 |
| chr7  | 52275196  | 52275397  | 202 |
| chr7  | 51159602  | 51159803  | 202 |
| chr7  | 18764749  | 18764950  | 202 |
| chr7  | 14371334  | 14371535  | 202 |
| chr7  | 14240767  | 14240968  | 202 |
| chr6  | 120825197 | 120825398 | 202 |
| chr6  | 103399865 | 103400066 | 202 |
| chr6  | 63705872  | 63706073  | 202 |
| chr5  | 113265006 | 113265207 | 202 |
| chr5  | 113204408 | 113204609 | 202 |
| chr5  | 60377389  | 60377590  | 202 |
| chr5  | 30412772  | 30412973  | 202 |
| chr5  | 30318699  | 30318900  | 202 |
| chr5  | 30083756  | 30083957  | 202 |
| chr5  | 28702508  | 28702709  | 202 |
| chr4  | 121550671 | 121550872 | 202 |
| chr4  | 118684322 | 118684523 | 202 |
| chr4  | 67908417  | 67908618  | 202 |
| chr4  | 64277669  | 64277870  | 202 |
| chr4  | 12299849  | 12300050  | 202 |
| chr3  | 125659775 | 125659976 | 202 |
| chr3  | 116433041 | 116433242 | 202 |

|       |           |           |     |
|-------|-----------|-----------|-----|
| chr3  | 116206306 | 116206507 | 202 |
| chr3  | 115763197 | 115763398 | 202 |
| chr3  | 115050111 | 115050312 | 202 |
| chr3  | 111660887 | 111661088 | 202 |
| chr3  | 105706224 | 105706425 | 202 |
| chr3  | 105473157 | 105473358 | 202 |
| chr3  | 20422406  | 20422607  | 202 |
| chr3  | 18221481  | 18221682  | 202 |
| chr29 | 50008288  | 50008489  | 202 |
| chr29 | 41743331  | 41743532  | 202 |
| chr29 | 41645363  | 41645564  | 202 |
| chr29 | 36281241  | 36281442  | 202 |
| chr28 | 11723605  | 11723806  | 202 |
| chr27 | 36035625  | 36035826  | 202 |
| chr27 | 35939573  | 35939774  | 202 |
| chr27 | 35406921  | 35407122  | 202 |
| chr27 | 27708877  | 27709078  | 202 |
| chr26 | 37983750  | 37983951  | 202 |
| chr26 | 35342900  | 35343101  | 202 |
| chr26 | 34311475  | 34311676  | 202 |
| chr26 | 33231067  | 33231268  | 202 |
| chr26 | 23801336  | 23801537  | 202 |
| chr26 | 23073677  | 23073878  | 202 |
| chr26 | 21765604  | 21765805  | 202 |
| chr25 | 8749463   | 8749664   | 202 |
| chr25 | 3275391   | 3275592   | 202 |
| chr24 | 44447062  | 44447263  | 202 |
| chr24 | 44175696  | 44175897  | 202 |
| chr24 | 35423933  | 35424134  | 202 |
| chr24 | 32246424  | 32246625  | 202 |
| chr24 | 2944473   | 2944674   | 202 |
| chr23 | 53261056  | 53261257  | 202 |
| chr23 | 44281332  | 44281533  | 202 |
| chr23 | 15160663  | 15160864  | 202 |
| chr23 | 10350384  | 10350585  | 202 |
| chr23 | 8190679   | 8190880   | 202 |
| chr22 | 57968679  | 57968880  | 202 |
| chr22 | 57618652  | 57618853  | 202 |
| chr22 | 55389119  | 55389320  | 202 |
| chr22 | 54253787  | 54253988  | 202 |
| chr22 | 53978573  | 53978774  | 202 |
| chr22 | 48839265  | 48839466  | 202 |
| chr22 | 29883015  | 29883216  | 202 |
| chr21 | 59434255  | 59434456  | 202 |
| chr21 | 48705586  | 48705787  | 202 |
| chr21 | 34955967  | 34956168  | 202 |
| chr21 | 20695787  | 20695988  | 202 |
| chr21 | 18490693  | 18490894  | 202 |
| chr20 | 75795178  | 75795379  | 202 |
| chr2  | 138436030 | 138436231 | 202 |



|       |           |           |     |
|-------|-----------|-----------|-----|
| chr2  | 136734410 | 136734611 | 202 |
| chr2  | 132496886 | 132497087 | 202 |
| chr2  | 130974074 | 130974275 | 202 |
| chr2  | 125952910 | 125953111 | 202 |
| chr2  | 124979820 | 124980021 | 202 |
| chr2  | 89368936  | 89369137  | 202 |
| chr19 | 60191029  | 60191230  | 202 |
| chr19 | 56121981  | 56122182  | 202 |
| chr19 | 45062010  | 45062211  | 202 |
| chr19 | 41370864  | 41371065  | 202 |
| chr19 | 39922555  | 39922756  | 202 |
| chr19 | 36436809  | 36437010  | 202 |
| chr19 | 33433947  | 33434148  | 202 |
| chr19 | 30826340  | 30826541  | 202 |
| chr19 | 28992030  | 28992231  | 202 |
| chr19 | 21701038  | 21701239  | 202 |
| chr19 | 21318093  | 21318294  | 202 |
| chr18 | 49450725  | 49450926  | 202 |
| chr18 | 25546589  | 25546790  | 202 |
| chr18 | 11306352  | 11306553  | 202 |
| chr18 | 11175006  | 11175207  | 202 |
| chr17 | 74700324  | 74700525  | 202 |
| chr17 | 69923583  | 69923784  | 202 |
| chr17 | 68998944  | 68999145  | 202 |
| chr16 | 71132293  | 71132494  | 202 |
| chr16 | 68747656  | 68747857  | 202 |
| chr16 | 59063599  | 59063800  | 202 |
| chr16 | 54654986  | 54655187  | 202 |
| chr16 | 47108970  | 47109171  | 202 |
| chr16 | 44827627  | 44827828  | 202 |
| chr16 | 41437064  | 41437265  | 202 |
| chr16 | 34687056  | 34687257  | 202 |
| chr15 | 54270841  | 54271042  | 202 |
| chr15 | 41257900  | 41258101  | 202 |
| chr15 | 39999654  | 39999855  | 202 |
| chr15 | 39594709  | 39594910  | 202 |
| chr15 | 31958149  | 31958350  | 202 |
| chr15 | 30079551  | 30079752  | 202 |
| chr15 | 24659459  | 24659660  | 202 |
| chr14 | 10299255  | 10299456  | 202 |
| chr13 | 82663214  | 82663415  | 202 |
| chr13 | 68300560  | 68300761  | 202 |
| chr13 | 67103320  | 67103521  | 202 |
| chr13 | 62778169  | 62778370  | 202 |
| chr13 | 62435045  | 62435246  | 202 |
| chr13 | 60439487  | 60439688  | 202 |
| chr13 | 58986439  | 58986640  | 202 |
| chr13 | 55949347  | 55949548  | 202 |
| chr13 | 42401808  | 42402009  | 202 |
| chr13 | 38759819  | 38760020  | 202 |

|       |           |           |     |
|-------|-----------|-----------|-----|
| chr13 | 23634713  | 23634914  | 202 |
| chr13 | 19144370  | 19144571  | 202 |
| chr13 | 17314506  | 17314707  | 202 |
| chr12 | 61893598  | 61893799  | 202 |
| chr12 | 36190726  | 36190927  | 202 |
| chr12 | 25695459  | 25695660  | 202 |
| chr11 | 110099368 | 110099569 | 202 |
| chr11 | 108119214 | 108119415 | 202 |
| chr11 | 104600412 | 104600613 | 202 |
| chr11 | 100415453 | 100415654 | 202 |
| chr11 | 89846915  | 89847116  | 202 |
| chr11 | 70949462  | 70949663  | 202 |
| chr11 | 70859368  | 70859569  | 202 |
| chr11 | 33347737  | 33347938  | 202 |
| chr11 | 5913400   | 5913601   | 202 |
| chr10 | 70163651  | 70163852  | 202 |
| chr10 | 33925491  | 33925692  | 202 |
| chr10 | 21127778  | 21127979  | 202 |
| chr10 | 3517675   | 3517876   | 202 |
| chr1  | 110534526 | 110534727 | 202 |
| chr1  | 99816265  | 99816466  | 202 |
| chr1  | 75089430  | 75089631  | 202 |
| chr9  | 105738483 | 105738683 | 201 |
| chr9  | 100917437 | 100917637 | 201 |
| chr9  | 63425613  | 63425813  | 201 |
| chr8  | 114248877 | 114249077 | 201 |
| chr8  | 108757246 | 108757446 | 201 |
| chr8  | 108756023 | 108756223 | 201 |
| chr8  | 24398226  | 24398426  | 201 |
| chr8  | 23936399  | 23936599  | 201 |
| chr7  | 80959309  | 80959509  | 201 |
| chr7  | 61090224  | 61090424  | 201 |
| chr7  | 43762816  | 43763016  | 201 |
| chr7  | 23341341  | 23341541  | 201 |
| chr7  | 19232628  | 19232828  | 201 |
| chr7  | 14713484  | 14713684  | 201 |
| chr6  | 121888743 | 121888943 | 201 |
| chr6  | 121814865 | 121815065 | 201 |
| chr6  | 121020080 | 121020280 | 201 |
| chr6  | 94522992  | 94523192  | 201 |
| chr5  | 123653144 | 123653344 | 201 |
| chr5  | 122820985 | 122821185 | 201 |
| chr5  | 120113661 | 120113861 | 201 |
| chr5  | 113441971 | 113442171 | 201 |
| chr5  | 81593315  | 81593515  | 201 |
| chr5  | 79224119  | 79224319  | 201 |
| chr5  | 30527464  | 30527664  | 201 |
| chr5  | 30160228  | 30160428  | 201 |
| chr5  | 28896044  | 28896244  | 201 |
| chr4  | 123094946 | 123095146 | 201 |

|       |           |           |     |
|-------|-----------|-----------|-----|
| chr4  | 121287547 | 121287747 | 201 |
| chr4  | 95622942  | 95623142  | 201 |
| chr4  | 5549202   | 5549402   | 201 |
| chr3  | 122040167 | 122040367 | 201 |
| chr3  | 115755144 | 115755344 | 201 |
| chr3  | 115412610 | 115412810 | 201 |
| chr3  | 105958772 | 105958972 | 201 |
| chr3  | 105593914 | 105594114 | 201 |
| chr3  | 105161723 | 105161923 | 201 |
| chr3  | 105160868 | 105161068 | 201 |
| chr3  | 35986301  | 35986501  | 201 |
| chr3  | 31639164  | 31639364  | 201 |
| chr3  | 18335332  | 18335532  | 201 |
| chr3  | 15947469  | 15947669  | 201 |
| chr3  | 10587258  | 10587458  | 201 |
| chr29 | 51967654  | 51967854  | 201 |
| chr29 | 50395493  | 50395693  | 201 |
| chr29 | 42399668  | 42399868  | 201 |
| chr29 | 38353342  | 38353542  | 201 |
| chr28 | 42931537  | 42931737  | 201 |
| chr28 | 38925138  | 38925338  | 201 |
| chr28 | 38895436  | 38895636  | 201 |
| chr28 | 26146198  | 26146398  | 201 |
| chr27 | 36377244  | 36377444  | 201 |
| chr27 | 35433267  | 35433467  | 201 |
| chr26 | 51199889  | 51200089  | 201 |
| chr26 | 48463044  | 48463244  | 201 |
| chr26 | 44888107  | 44888307  | 201 |
| chr25 | 36489265  | 36489465  | 201 |
| chr25 | 33185616  | 33185816  | 201 |
| chr25 | 10928928  | 10929128  | 201 |
| chr24 | 60735833  | 60736033  | 201 |
| chr24 | 36879344  | 36879544  | 201 |
| chr24 | 35351511  | 35351711  | 201 |
| chr23 | 52807004  | 52807204  | 201 |
| chr23 | 51287735  | 51287935  | 201 |
| chr23 | 49967664  | 49967864  | 201 |
| chr23 | 38500185  | 38500385  | 201 |
| chr23 | 31672123  | 31672323  | 201 |
| chr23 | 27906168  | 27906368  | 201 |
| chr23 | 7598511   | 7598711   | 201 |
| chr22 | 59986843  | 59987043  | 201 |
| chr22 | 59134812  | 59135012  | 201 |
| chr22 | 56437831  | 56438031  | 201 |
| chr22 | 30107962  | 30108162  | 201 |
| chr22 | 12967740  | 12967940  | 201 |
| chr22 | 12210211  | 12210411  | 201 |
| chr21 | 69104944  | 69105144  | 201 |
| chr21 | 64520399  | 64520599  | 201 |
| chr21 | 56517050  | 56517250  | 201 |

|       |           |           |     |
|-------|-----------|-----------|-----|
| chr21 | 26606134  | 26606334  | 201 |
| chr21 | 13981331  | 13981531  | 201 |
| chr20 | 1354594   | 1354794   | 201 |
| chr2  | 137660681 | 137660881 | 201 |
| chr19 | 60247420  | 60247620  | 201 |
| chr19 | 58813827  | 58814027  | 201 |
| chr19 | 58673002  | 58673202  | 201 |
| chr19 | 55756345  | 55756545  | 201 |
| chr19 | 54796956  | 54797156  | 201 |
| chr19 | 54482459  | 54482659  | 201 |
| chr19 | 46097279  | 46097479  | 201 |
| chr19 | 34025441  | 34025641  | 201 |
| chr19 | 33613944  | 33614144  | 201 |
| chr19 | 29846261  | 29846461  | 201 |
| chr19 | 6418728   | 6418928   | 201 |
| chr18 | 62347219  | 62347419  | 201 |
| chr18 | 55471267  | 55471467  | 201 |
| chr18 | 51713735  | 51713935  | 201 |
| chr18 | 51225744  | 51225944  | 201 |
| chr18 | 49966153  | 49966353  | 201 |
| chr18 | 49726709  | 49726909  | 201 |
| chr18 | 46051275  | 46051475  | 201 |
| chr18 | 39264419  | 39264619  | 201 |
| chr18 | 33212681  | 33212881  | 201 |
| chr18 | 24648031  | 24648231  | 201 |
| chr18 | 24267494  | 24267694  | 201 |
| chr18 | 12477868  | 12478068  | 201 |
| chr18 | 11749864  | 11750064  | 201 |
| chr18 | 11479151  | 11479351  | 201 |
| chr18 | 9473958   | 9474158   | 201 |
| chr18 | 6950857   | 6951057   | 201 |
| chr18 | 4045844   | 4046044   | 201 |
| chr17 | 76176432  | 76176632  | 201 |
| chr17 | 60884636  | 60884836  | 201 |
| chr17 | 58976300  | 58976500  | 201 |
| chr17 | 47899569  | 47899769  | 201 |
| chr17 | 19694438  | 19694638  | 201 |
| chr16 | 77703774  | 77703974  | 201 |
| chr16 | 59877535  | 59877735  | 201 |
| chr16 | 47952035  | 47952235  | 201 |
| chr16 | 47262150  | 47262350  | 201 |
| chr16 | 44149738  | 44149938  | 201 |
| chr16 | 38727101  | 38727301  | 201 |
| chr16 | 38545668  | 38545868  | 201 |
| chr16 | 34183063  | 34183263  | 201 |
| chr16 | 3768108   | 3768308   | 201 |
| chr15 | 75463958  | 75464158  | 201 |
| chr15 | 64193764  | 64193964  | 201 |
| chr15 | 62728651  | 62728851  | 201 |
| chr15 | 62538282  | 62538482  | 201 |

|       |           |           |     |
|-------|-----------|-----------|-----|
| chr15 | 39663657  | 39663857  | 201 |
| chr15 | 29229244  | 29229444  | 201 |
| chr15 | 28595506  | 28595706  | 201 |
| chr15 | 24040255  | 24040455  | 201 |
| chr14 | 14798364  | 14798564  | 201 |
| chr14 | 9241547   | 9241747   | 201 |
| chr14 | 1573793   | 1573993   | 201 |
| chr13 | 80111632  | 80111832  | 201 |
| chr13 | 80068814  | 80069014  | 201 |
| chr13 | 77549514  | 77549714  | 201 |
| chr13 | 66678104  | 66678304  | 201 |
| chr13 | 62451882  | 62452082  | 201 |
| chr13 | 61223634  | 61223834  | 201 |
| chr13 | 55366930  | 55367130  | 201 |
| chr13 | 42262372  | 42262572  | 201 |
| chr13 | 40717741  | 40717941  | 201 |
| chr12 | 35609712  | 35609912  | 201 |
| chr12 | 20079227  | 20079427  | 201 |
| chr12 | 9641776   | 9641976   | 201 |
| chr11 | 106388617 | 106388817 | 201 |
| chr11 | 103811153 | 103811353 | 201 |
| chr11 | 103755405 | 103755605 | 201 |
| chr11 | 101004502 | 101004702 | 201 |
| chr11 | 100935566 | 100935766 | 201 |
| chr11 | 90204076  | 90204276  | 201 |
| chr11 | 70781637  | 70781837  | 201 |
| chr11 | 48662935  | 48663135  | 201 |
| chr11 | 30924094  | 30924294  | 201 |
| chr11 | 9916783   | 9916983   | 201 |
| chr11 | 3693113   | 3693313   | 201 |
| chr11 | 2000997   | 2001197   | 201 |
| chr11 | 1534283   | 1534483   | 201 |
| chr11 | 1531715   | 1531915   | 201 |
| chr10 | 83916161  | 83916361  | 201 |
| chr10 | 81735592  | 81735792  | 201 |
| chr10 | 20460372  | 20460572  | 201 |
| chr10 | 12783303  | 12783503  | 201 |
| chr10 | 12732505  | 12732705  | 201 |
| chr10 | 9205196   | 9205396   | 201 |
| chr1  | 153812249 | 153812449 | 201 |
| chr1  | 150191573 | 150191773 | 201 |
| chr1  | 91768335  | 91768535  | 201 |
| chr1  | 84406804  | 84407004  | 201 |
| chr1  | 78593336  | 78593536  | 201 |
| chr1  | 74852318  | 74852518  | 201 |
| chr1  | 1560581   | 1560781   | 201 |
| chrX  | 84031724  | 84031923  | 200 |
| chr9  | 104893301 | 104893500 | 200 |
| chr9  | 90813626  | 90813825  | 200 |
| chr9  | 90293669  | 90293868  | 200 |

|       |               |           |     |
|-------|---------------|-----------|-----|
| chr9  | 67100602      | 67100801  | 200 |
| chr9  | 41690587      | 41690786  | 200 |
| chr8  | 115832659     | 115832858 | 200 |
| chr8  | 89508652      | 89508851  | 200 |
| chr8  | 65917577      | 65917776  | 200 |
| chr8  | 65792770      | 65792969  | 200 |
| chr8  | 44144644      | 44144843  | 200 |
| chr8  | 24681383      | 24681582  | 200 |
| chr8  | 24457596      | 24457795  | 200 |
| chr8  | 9295903       | 9296102   | 200 |
| chr7  | 53386386      | 53386585  | 200 |
| chr7  | 43730233      | 43730432  | 200 |
| chr7  | 37548933      | 37549132  | 200 |
| chr7  | 37483848      | 37484047  | 200 |
| chr7  | 15399338      | 15399537  | 200 |
| chr7  | 14822654      | 14822853  | 200 |
| chr7  | 5307482       | 5307681   | 200 |
| chr7  | 5224015       | 5224214   | 200 |
| chr7  | 958678 958877 | 200       |     |
| chr6  | 122388225     | 122388424 | 200 |
| chr6  | 120905514     | 120905713 | 200 |
| chr6  | 100658186     | 100658385 | 200 |
| chr6  | 72323078      | 72323277  | 200 |
| chr5  | 122485186     | 122485385 | 200 |
| chr5  | 118200140     | 118200339 | 200 |
| chr5  | 112744531     | 112744730 | 200 |
| chr5  | 80002743      | 80002942  | 200 |
| chr5  | 60164508      | 60164707  | 200 |
| chr5  | 41325241      | 41325440  | 200 |
| chr5  | 32907503      | 32907702  | 200 |
| chr5  | 30514355      | 30514554  | 200 |
| chr5  | 9570360       | 9570559   | 200 |
| chr4  | 121568637     | 121568836 | 200 |
| chr4  | 104679637     | 104679836 | 200 |
| chr4  | 99275304      | 99275503  | 200 |
| chr4  | 72359523      | 72359722  | 200 |
| chr4  | 68019091      | 68019290  | 200 |
| chr4  | 14670619      | 14670818  | 200 |
| chr4  | 7542587       | 7542786   | 200 |
| chr3  | 118161038     | 118161237 | 200 |
| chr3  | 110216910     | 110217109 | 200 |
| chr3  | 106803630     | 106803829 | 200 |
| chr3  | 100169012     | 100169211 | 200 |
| chr3  | 55850002      | 55850201  | 200 |
| chr3  | 35807722      | 35807921  | 200 |
| chr3  | 34793574      | 34793773  | 200 |
| chr3  | 31529545      | 31529744  | 200 |
| chr3  | 26151471      | 26151670  | 200 |
| chr29 | 51777416      | 51777615  | 200 |
| chr29 | 41640368      | 41640567  | 200 |

|       |           |           |     |
|-------|-----------|-----------|-----|
| chr29 | 41634438  | 41634637  | 200 |
| chr29 | 32418733  | 32418932  | 200 |
| chr28 | 36050057  | 36050256  | 200 |
| chr28 | 33600766  | 33600965  | 200 |
| chr28 | 26789490  | 26789689  | 200 |
| chr28 | 25520856  | 25521055  | 200 |
| chr26 | 18176425  | 18176624  | 200 |
| chr25 | 33493508  | 33493707  | 200 |
| chr25 | 29121628  | 29121827  | 200 |
| chr25 | 28577282  | 28577481  | 200 |
| chr25 | 1942954   | 1943153   | 200 |
| chr25 | 1504413   | 1504612   | 200 |
| chr24 | 60582487  | 60582686  | 200 |
| chr24 | 59442242  | 59442441  | 200 |
| chr24 | 52838874  | 52839073  | 200 |
| chr24 | 47678485  | 47678684  | 200 |
| chr24 | 21957459  | 21957658  | 200 |
| chr23 | 51683844  | 51684043  | 200 |
| chr23 | 29077709  | 29077908  | 200 |
| chr23 | 14687538  | 14687737  | 200 |
| chr23 | 10472424  | 10472623  | 200 |
| chr23 | 8304319   | 8304518   | 200 |
| chr22 | 59623492  | 59623691  | 200 |
| chr22 | 59505437  | 59505636  | 200 |
| chr22 | 56586907  | 56587106  | 200 |
| chr22 | 56468775  | 56468974  | 200 |
| chr22 | 55900171  | 55900370  | 200 |
| chr22 | 55678656  | 55678855  | 200 |
| chr22 | 54069553  | 54069752  | 200 |
| chr22 | 29805421  | 29805620  | 200 |
| chr22 | 15969437  | 15969636  | 200 |
| chr21 | 67968466  | 67968665  | 200 |
| chr21 | 67631696  | 67631895  | 200 |
| chr21 | 59433583  | 59433782  | 200 |
| chr21 | 33570670  | 33570869  | 200 |
| chr21 | 29200487  | 29200686  | 200 |
| chr21 | 1774127   | 1774326   | 200 |
| chr20 | 18986220  | 18986419  | 200 |
| chr20 | 6762541   | 6762740   | 200 |
| chr20 | 6737439   | 6737638   | 200 |
| chr2  | 135650293 | 135650492 | 200 |
| chr2  | 135593630 | 135593829 | 200 |
| chr2  | 131468374 | 131468573 | 200 |
| chr2  | 131196229 | 131196428 | 200 |
| chr2  | 94041260  | 94041459  | 200 |
| chr2  | 75777345  | 75777544  | 200 |
| chr19 | 63928310  | 63928509  | 200 |
| chr19 | 58964507  | 58964706  | 200 |
| chr19 | 56632959  | 56633158  | 200 |
| chr19 | 56106665  | 56106864  | 200 |

|       |          |          |     |
|-------|----------|----------|-----|
| chr19 | 55899738 | 55899937 | 200 |
| chr19 | 54641877 | 54642076 | 200 |
| chr19 | 54449881 | 54450080 | 200 |
| chr19 | 54270020 | 54270219 | 200 |
| chr19 | 44639063 | 44639262 | 200 |
| chr19 | 39849239 | 39849438 | 200 |
| chr19 | 38726575 | 38726774 | 200 |
| chr19 | 34572762 | 34572961 | 200 |
| chr19 | 28778750 | 28778949 | 200 |
| chr19 | 27935157 | 27935356 | 200 |
| chr19 | 25279247 | 25279446 | 200 |
| chr19 | 24691874 | 24692073 | 200 |
| chr19 | 19142190 | 19142389 | 200 |
| chr19 | 15273918 | 15274117 | 200 |
| chr19 | 6253381  | 6253580  | 200 |
| chr18 | 55829892 | 55830091 | 200 |
| chr18 | 54328906 | 54329105 | 200 |
| chr18 | 51713515 | 51713714 | 200 |
| chr18 | 40296288 | 40296487 | 200 |
| chr18 | 37022926 | 37023125 | 200 |
| chr18 | 25472858 | 25473057 | 200 |
| chr18 | 22903601 | 22903800 | 200 |
| chr18 | 11813628 | 11813827 | 200 |
| chr18 | 11456623 | 11456822 | 200 |
| chr18 | 9862189  | 9862388  | 200 |
| chr17 | 75010635 | 75010834 | 200 |
| chr17 | 72048854 | 72049053 | 200 |
| chr17 | 69380998 | 69381197 | 200 |
| chr17 | 68816583 | 68816782 | 200 |
| chr17 | 64068091 | 64068290 | 200 |
| chr17 | 44248871 | 44249070 | 200 |
| chr16 | 71883361 | 71883560 | 200 |
| chr16 | 47132238 | 47132437 | 200 |
| chr16 | 42645010 | 42645209 | 200 |
| chr16 | 41470134 | 41470333 | 200 |
| chr16 | 38652264 | 38652463 | 200 |
| chr16 | 32741887 | 32742086 | 200 |
| chr16 | 3760392  | 3760591  | 200 |
| chr16 | 2130369  | 2130568  | 200 |
| chr15 | 81601026 | 81601225 | 200 |
| chr15 | 75412006 | 75412205 | 200 |
| chr15 | 63693989 | 63694188 | 200 |
| chr15 | 53258305 | 53258504 | 200 |
| chr15 | 37581445 | 37581644 | 200 |
| chr15 | 28588718 | 28588917 | 200 |
| chr15 | 26751238 | 26751437 | 200 |
| chr15 | 26638876 | 26639075 | 200 |
| chr15 | 19915428 | 19915627 | 200 |
| chr14 | 61744985 | 61745184 | 200 |
| chr14 | 42074379 | 42074578 | 200 |



|       |           |           |     |
|-------|-----------|-----------|-----|
| chr14 | 36735381  | 36735580  | 200 |
| chr14 | 1621874   | 1622073   | 200 |
| chr13 | 77836346  | 77836545  | 200 |
| chr13 | 74416386  | 74416585  | 200 |
| chr13 | 69958343  | 69958542  | 200 |
| chr13 | 67137022  | 67137221  | 200 |
| chr13 | 66981230  | 66981429  | 200 |
| chr13 | 66124116  | 66124315  | 200 |
| chr13 | 55989385  | 55989584  | 200 |
| chr13 | 55362546  | 55362745  | 200 |
| chr13 | 55357613  | 55357812  | 200 |
| chr13 | 54761231  | 54761430  | 200 |
| chr12 | 56370562  | 56370761  | 200 |
| chr12 | 34256998  | 34257197  | 200 |
| chr12 | 17193144  | 17193343  | 200 |
| chr11 | 104917902 | 104918101 | 200 |
| chr11 | 102858505 | 102858704 | 200 |
| chr11 | 102843313 | 102843512 | 200 |
| chr11 | 92119741  | 92119940  | 200 |
| chr11 | 84246906  | 84247105  | 200 |
| chr11 | 75058762  | 75058961  | 200 |
| chr11 | 66560547  | 66560746  | 200 |
| chr10 | 89236490  | 89236689  | 200 |
| chr10 | 63830244  | 63830443  | 200 |
| chr10 | 53259722  | 53259921  | 200 |
| chr10 | 25909486  | 25909685  | 200 |
| chr10 | 25848825  | 25849024  | 200 |
| chr10 | 20478969  | 20479168  | 200 |
| chr10 | 19891202  | 19891401  | 200 |
| chr10 | 16861167  | 16861366  | 200 |
| chr10 | 16724879  | 16725078  | 200 |
| chr1  | 147106053 | 147106252 | 200 |
| chr1  | 146979154 | 146979353 | 200 |
| chr1  | 136178386 | 136178585 | 200 |
| chr1  | 132659394 | 132659593 | 200 |
| chr1  | 123098591 | 123098790 | 200 |
| chr1  | 77995914  | 77996113  | 200 |
| chr1  | 74737037  | 74737236  | 200 |
| chr1  | 69470907  | 69471106  | 200 |
| chr1  | 50453884  | 50454083  | 200 |
