# Supplementary material for: Genomic architecture of histone 3 lysine 27 trimethylation during late ovine skeletal muscle development
Source: PubMed Central journal article supplement — Anim Genet. 2014 Mar 27;45(3):427–38. doi: 10.1111/age.12145 (PMC4286725; doi:10.1111/age.12145), 2014-03-27
Supplement: age-45-427-s13.pdf [file age-45-427-s13.pdf]

**Table S4** DAVID functional analysis of RefSeq genes with promoters enriched with H3K27me3

Functional analysis of autosomal RefSeq genes containing H3K27me3 promoter enrichment was performed using DAVID (Huang da *et al.* 2009) for the fetal and lamb samples (2,654 and 3,319 genes, respectively). For Functional Annotation Clustering an Enrichment Score ( $-\log_{10}$  (mean p-values for cluster terms))  $\geq 1.3$  containing  $\geq 5$  genes for each term was considered significant. KEGG pathway and PFAM enrichments were separately determined. Terms with P-values  $\leq 0.05$  after Benjamini-Hochberg correction and containing  $\geq 10$  genes were considered significant.

**A. Foetal DAVID clusters**

| Category                                    | Term                               | Count | %    | P-value  | Genes                                                                                                                                                                                                                                                                                                                                             | List Total | Pop Hits | Benjamini P-value |
|---------------------------------------------|------------------------------------|-------|------|----------|---------------------------------------------------------------------------------------------------------------------------------------------------------------------------------------------------------------------------------------------------------------------------------------------------------------------------------------------------|------------|----------|-------------------|
| <b>Annotation Cluster 1</b>                 |                                    |       |      |          |                                                                                                                                                                                                                                                                                                                                                   |            |          |                   |
| <b>Enrichment Score: 20.919341115171484</b> |                                    |       |      |          |                                                                                                                                                                                                                                                                                                                                                   |            |          |                   |
| SP_PIR_KEY WORDS                            | Homeobox                           | 50    | 1.95 | 1.68E-24 | HNF1B, CDX1, CDX2, PAX6, PAX3, HOXD10, CRX, HOXC6, POU5F1, HOXC4, ALX4, PITX1, PITX2, SATB1, NANOG, EMX2, HHEX, MSX1, HOXC11, HOXC13, SIX1, UNCX, IRX3, ONECUT1, MEIS1, OTP, MSX2, DBX2, MEIS2, LHX3, HOXA10, LHX4, LHX5, POU3F2, POU3F1, LHX9, NKX2-5, DBX1, NKX2-3, ISL1, DLX3, HOXB4, ZFH4, DLX1, MEOX2, LASS4, HOXB7, DLX5, HOXB6, DLX4, HOPX | 979        | 78       | 3.78E-22          |
| INTERPRO                                    | IPR001356:Homeobox                 | 47    | 1.83 | 6.23E-23 | IRX3, CDX1, HNF1B, ONECUT1, PAX6, PAX3, MEIS1, HOXD10, OTP, CRX, HOXC6, MSX2, DBX2, POU5F1, HOXC4, LHX3, LHX4, HOXA10, LHX5, POU3F2, POU3F1, ALX4, NKX2-5, LHX9, PITX1, DBX1, NKX2-3, PITX2, SATB1, NANOG, EMX2, ISL1, DLX3, HOXB4, HHEX, DLX1, MSX1, HOXC11, MEOX2, LASS4, HOXB7, HOXC13, DLX5, DLX4, HOXB6, SIX1, HOPX, UNCX                    | 1185       | 75       | 1.01E-19          |
| SMART                                       | SM00389:HOX                        | 47    | 1.83 | 1.26E-20 | IRX3, CDX1, HNF1B, ONECUT1, PAX6, PAX3, MEIS1, HOXD10, OTP, CRX, HOXC6, MSX2, DBX2, POU5F1, HOXC4, LHX3, LHX4, HOXA10, LHX5, POU3F2, POU3F1, ALX4, NKX2-5, LHX9, PITX1, DBX1, NKX2-3, PITX2, SATB1, NANOG, EMX2, ISL1, DLX3, HOXB4, HHEX, DLX1, MSX1, HOXC11, MEOX2, LASS4, HOXB7, HOXC13, DLX5, DLX4, HOXB6, SIX1, HOPX, UNCX                    | 649        | 75       | 3.39E-18          |
| INTERPRO                                    | IPR017970:Homeobox, conserved site | 40    | 1.56 | 3.33E-20 | IRX3, CDX1, HNF1B, PAX6, PAX3, HOXD10, OTP, CRX, MSX2, DBX2, POU5F1, HOXC4, LHX3, LHX4, HOXA10, LHX5, POU3F2, POU3F1, ALX4, LHX9, NKX2-5, PITX1, DBX1, NKX2-3, PITX2, NANOG, EMX2, ISL1, DLX3, HOXB4, HHEX, DLX1, MSX1, MEOX2, LASS4, HOXB7, HOXC13, DLX5, HOXB6, SIX1, HOPX                                                                      | 1185       | 62       | 2.70E-17          |
| INTERPRO                                    | IPR012287:Homeodomain-related      | 45    | 1.75 | 5.75E-20 | IRX3, CDX1, HNF1B, ONECUT1, PAX6, PAX3, MEIS1, HOXD10, OTP, CRX, HOXC6, MSX2, DBX2, POU5F1, HOXC4, LHX3, LHX4, HOXA10, LHX5, POU3F2, POU3F1, ALX4, MYB, NKX2-5, LHX9, PITX1, DBX1, NKX2-3, PITX2, SATB1, NANOG, EMX2, DLX3, HOXB4, HHEX, HOXC11, MSX1, MEOX2, HOXB7, HOXC13, DLX5, DLX4, HOXB6, SIX1, HOPX, UNCX                                  | 1185       | 78       | 3.11E-17          |

**Annotation Cluster 2**

**Enrichment Score: 15.30920632284991**

|               |                                                       |    |      |          |                                                                                                                                                                                                                                                                                                                                                                                                                                                                                                                                                                                                                                                                                                    |      |     |          |
|---------------|-------------------------------------------------------|----|------|----------|----------------------------------------------------------------------------------------------------------------------------------------------------------------------------------------------------------------------------------------------------------------------------------------------------------------------------------------------------------------------------------------------------------------------------------------------------------------------------------------------------------------------------------------------------------------------------------------------------------------------------------------------------------------------------------------------------|------|-----|----------|
| GOTERM_MF_FAT | GO:0022836~gated channel activity                     | 75 | 2.92 | 2.93E-17 | KCNH1, KCNC1, GRIK1, GLRA1, KCNAB1, GRIK2, GRIK3, GABRB1, GRIN3B, KCNJ10, KCNJ12, KCNIP3, SHKBP1, KCNQ3, GRIN2C, CHRNA5, CHRNA7, KCNG3, CHRNA3, CHRNA2, KCNMA1, KCND2, CACNG2, CNGA3, CLIC5, LOC100139857, KCNH2, KCNH5, SCN1B, KCNA2, KCNA1, KCNA4, KCNA6, CACNB3, CACNB4, KCNA5, KCNS2, KCNE1, SCNN1G, HTR3A, HTR3B, SCN5A, GABRQ, GABRP, KCNE4, GABRD, GABRA2, GLRB, CACNA2D1, GABRA4, LOC100138074, GABRA5, LOC783386, ITPR3, KCNK1, KCNK2, ITPR1, KCNV1, KCTD8, ACCN1, KCNN4, KCNJ9, KCNN1, GRIA2, KCNN2, CHRNB4, CACNA1G, KCNF1, SCN4B, CHRNB2, CHRND, CACNA1E, CACNA1D, CACNA1A, CLCN5                                                                                                      | 1232 | 204 | 6.57E-15 |
| GOTERM_MF_FAT | GO:0005216~ion channel activity                       | 87 | 3.39 | 6.42E-16 | KCNK17, KCNH1, KCNC1, GRIK1, GLRA1, KCNAB1, GRIK2, GRIK3, GABRB1, KCNJ10, GRIN3B, KCNJ12, KCNIP3, SHKBP1, KCNQ3, GRIN2C, KCNK6, CHRNA5, CHRNA7, ANO4, KCNG3, CHRNA3, CHRNA2, KCNMA1, TRPM6, KCND2, CFTR, CACNG2, CNGA3, CATSPER4, SLC26A8, CLIC5, LOC100139857, CATSPER1, KCNH2, KCNH5, SCN1B, KCNA2, KCNA1, KCNA4, KCNA6, CACNB3, KCNA5, CACNB4, FXYD7, KCNS2, TTYH1, KCNE1, SCNN1G, HTR3A, SCN5A, HTR3B, GABRQ, KCNE4, GABRP, GABRD, GABRA2, CACNA2D1, GLRB, GABRA4, LOC100138074, GABRA5, LOC783386, ITPR3, KCNK1, KCNK2, ITPR1, KCNV1, KCNK4, KCTD8, ACCN1, KCNN4, KCNJ9, GRIA2, KCNN1, KCNN2, CHRNB4, CACNA1G, KCNF1, SCN4B, CHRNB2, CHRND, CACNA1E, LOC505697, CACNA1D, CACNA1A, CLCN5       | 1232 | 268 | 1.19E-13 |
| GOTERM_MF_FAT | GO:0022803~passive transmembrane transporter activity | 88 | 3.43 | 1.07E-15 | KCNK17, KCNH1, KCNC1, GRIK1, GLRA1, KCNAB1, GRIK2, GRIK3, GABRB1, GJA1, KCNJ10, GRIN3B, KCNJ12, KCNIP3, SHKBP1, KCNQ3, GRIN2C, KCNK6, CHRNA5, CHRNA7, ANO4, KCNG3, CHRNA3, CHRNA2, KCNMA1, TRPM6, KCND2, CFTR, CACNG2, CNGA3, CATSPER4, SLC26A8, CLIC5, LOC100139857, CATSPER1, KCNH2, KCNH5, SCN1B, KCNA2, KCNA1, KCNA4, KCNA6, CACNB3, KCNA5, CACNB4, FXYD7, KCNS2, TTYH1, KCNE1, SCNN1G, HTR3A, SCN5A, HTR3B, GABRQ, KCNE4, GABRP, GABRD, GABRA2, CACNA2D1, GLRB, GABRA4, LOC100138074, GABRA5, LOC783386, ITPR3, KCNK1, KCNK2, ITPR1, KCNV1, KCNK4, KCTD8, ACCN1, KCNN4, KCNJ9, GRIA2, KCNN1, KCNN2, CHRNB4, CACNA1G, KCNF1, SCN4B, CHRNB2, CHRND, CACNA1E, LOC505697, CACNA1D, CACNA1A, CLCN5 | 1232 | 275 | 1.66E-13 |
| GOTERM_MF_FAT | GO:0015267~channel activity                           | 88 | 3.43 | 1.07E-15 | KCNK17, KCNH1, KCNC1, GRIK1, GLRA1, KCNAB1, GRIK2, GRIK3, GABRB1, GJA1, KCNJ10, GRIN3B, KCNJ12, KCNIP3, SHKBP1, KCNQ3, GRIN2C, KCNK6, CHRNA5, CHRNA7, ANO4, KCNG3, CHRNA3, CHRNA2, KCNMA1, TRPM6, KCND2, CFTR, CACNG2, CNGA3, CATSPER4, SLC26A8, CLIC5, LOC100139857, CATSPER1, KCNH2, KCNH5, SCN1B, KCNA2, KCNA1, KCNA4, KCNA6, CACNB3, KCNA5, CACNB4, FXYD7, KCNS2, TTYH1, KCNE1, SCNN1G, HTR3A, SCN5A, HTR3B, GABRQ, KCNE4, GABRP, GABRD, GABRA2, CACNA2D1, GLRB, GABRA4, LOC100138074, GABRA5, LOC783386, ITPR3, KCNK1, KCNK2, ITPR1, KCNV1, KCNK4, KCTD8, ACCN1, KCNN4, KCNJ9, GRIA2, KCNN1,                                                                                                  | 1232 | 275 | 1.66E-13 |

|                                             |                                                       |     |      |          |                                                                                                                                                                                                                                                                                                                                                                                                                                                                                                                                                                                                                                                                                                                                                                                                                                                                                                                                                                                                                                                                                                                                                                                                                                                                                                                                                                                           |      |     |          |
|---------------------------------------------|-------------------------------------------------------|-----|------|----------|-------------------------------------------------------------------------------------------------------------------------------------------------------------------------------------------------------------------------------------------------------------------------------------------------------------------------------------------------------------------------------------------------------------------------------------------------------------------------------------------------------------------------------------------------------------------------------------------------------------------------------------------------------------------------------------------------------------------------------------------------------------------------------------------------------------------------------------------------------------------------------------------------------------------------------------------------------------------------------------------------------------------------------------------------------------------------------------------------------------------------------------------------------------------------------------------------------------------------------------------------------------------------------------------------------------------------------------------------------------------------------------------|------|-----|----------|
|                                             |                                                       |     |      |          | KCNN2, CHRN4, CACNA1G, KCNF1, SCN4B, CHRN2, CHRND, CACNA1E, LOC505697, CACNA1D, CACNA1A, CLCN5                                                                                                                                                                                                                                                                                                                                                                                                                                                                                                                                                                                                                                                                                                                                                                                                                                                                                                                                                                                                                                                                                                                                                                                                                                                                                            |      |     |          |
| GOTERM_MF_FAT                               | GO:0022838~substrate specific channel activity        | 87  | 3.39 | 1.33E-15 | KCNK17, KCNH1, KCNC1, GRIK1, GLRA1, KCNAB1, GRIK2, GRIK3, GABRB1, KCNJ10, GRIN3B, KCNJ12, KCNIP3, SHKBP1, KCNQ3, GRIN2C, KCNK6, CHRNA5, CHRNA7, ANO4, KCNG3, CHRNA3, CHRNA2, KCNMA1, TRPM6, KCND2, CFTR, CACNG2, CNGA3, CATSPER4, SLC26A8, CLIC5, LOC100139857, CATSPER1, KCNH2, KCNH5, SCN1B, KCNA2, KCNA1, KCNA4, KCNA6, CACNB3, KCNA5, CACNB4, FXYD7, KCNS2, TTYH1, KCNE1, SCNN1G, HTR3A, SCN5A, HTR3B, GABRQ, KCNE4, GABRP, GABRD, GABRA2, CACNA2D1, GLRB, GABRA4, LOC100138074, GABRA5, LOC783386, ITPR3, KCNK1, KCNK2, ITPR1, KCNV1, KCNK4, KCTD8, ACCN1, KCNN4, KCNJ9, GRIA2, KCNN1, KCNN2, CHRN4, CACNA1G, KCNF1, SCN4B, CHRN2, CHRND, CACNA1E, LOC505697, CACNA1D, CACNA1A, CLCN5                                                                                                                                                                                                                                                                                                                                                                                                                                                                                                                                                                                                                                                                                                | 1232 | 271 | 1.71E-13 |
| <b>Annotation Cluster 3</b>                 |                                                       |     |      |          |                                                                                                                                                                                                                                                                                                                                                                                                                                                                                                                                                                                                                                                                                                                                                                                                                                                                                                                                                                                                                                                                                                                                                                                                                                                                                                                                                                                           |      |     |          |
| <b>Enrichment Score: 11.350857115105626</b> |                                                       |     |      |          |                                                                                                                                                                                                                                                                                                                                                                                                                                                                                                                                                                                                                                                                                                                                                                                                                                                                                                                                                                                                                                                                                                                                                                                                                                                                                                                                                                                           |      |     |          |
| GOTERM_BP_FAT                               | GO:0006355~regulation of transcription, DNA-dependent | 193 | 7.52 | 3.27E-13 | CDX1, CDX2, FST, RORB, RORA, HOXD10, PGR, FOXF1, CREB3L3, TWIST2, PITX1, PITX2, PHOX2A, RARG, EMX1, EMX2, BARHL2, RXRG, EOMES, MSX1, HES5, UNCX, LOC783396, OTP, FOXH1, LIF, T, AHRR, LHX3, LHX4, HOXA10, LHX5, LOC789268, LHX9, NKX2-5, NKX2-3, BMP4, KLF5, BMP3, NTF3, ESRRG, DLX3, SHOX2, NR1H3, DLX1, DMRTC2, LOC789959, DLX6, ETS1, DLX5, DLX4, HOPX, CRYM, KLF4, KCNH1, HNF1B, FOXA2, ELF5, LOC783703, GLI1, YBX2, KCNIP3, LOC785085, ZNF540, MKX, FOXB1, NR2F2, MYB, BHLHE41, NR2F1, AR, TBX15, NDUFA13, TLE4, INHBA, LOC539166, FOXC2, KCNH2, KCNH5, LOC522736, ZBTB16, MYCL1, STAT4, LOC787194, TLX2, SIM1, MLLT3, LOC615643, LMX1B, TBX5, TBX4, MYF5, MEOX2, NEUROD1, LOC654400, NR5A2, FOXE3, NR5A1, MYOD1, CBX2, NR2E1, GDNF, LOC782183, TGFB1, HOXC6, ATOH1, GATA5, HOXC4, GATA3, SATB1, SATB2, HES6, PKIA, AHR, HHEX, SIX1, TFAP2A, TFAP2C, NFE2L3, LOC527381, ONECUT1, SOX2, MEIS1, LIN28B, DBX2, VDR, MEIS3, MEIS2, HOXA7, OVOL1, DBX1, TAF1, EPAS1, GSX2, RFX4, MAFB, FOXA1, GSX1, HOXB4, GCM2, HOXB2, ATF3, HOXB7, LASS4, EBF2, HOXB6, PAX6, DMRTA2, PAX3, CRX, FEV, LBH, HEY1, POU5F1, SOX18, PDE8A, ALX4, ALX3, EGR1, NANOG, OTX2, ESR1, MIXL1, ADRB2, HOXC11, HOXC13, NRL, CUX2, CUX1, MAPRE3, IRX3, SBNO2, ABLIM3, LOC618065, MSX2, HAND1, POU2F3, POU3F4, POU3F2, NFATC4, POU3F1, EPO, CEBPA, FOXL2, FOXL1, VSX2, ISL1, ID2, IRF5, ID1, IRF6, IRF8, HEYL, SP7, F2R | 1230 | 845 | 9.95E-10 |
| GOTERM_BP_FAT                               | GO:0051252~regulation of RNA metabolic process        | 194 | 7.55 | 9.67E-13 | CDX1, CDX2, FST, RORB, RORA, HOXD10, PGR, FOXF1, CREB3L3, PITX1, TWIST2, PITX2, PHOX2A, RARG, EMX1, EMX2, BARHL2, RXRG, EOMES, MSX1, HES5, UNCX, LOC783396, OTP, FOXH1, LIF, T, AHRR, LHX3, LHX4, HOXA10, LHX5, LOC789268, LHX9, NKX2-5, NKX2-3, BMP4, KLF5, BMP3, NTF3, ESRRG, DLX3, SHOX2, NR1H3, DLX1, DMRTC2, LOC789959, DLX6, ETS1, DLX5, DLX4, HOPX, CRYM, KLF4, KCNH1, HNF1B, FOXA2, ELF5, LOC783703, GLI1, YBX2, KCNIP3,                                                                                                                                                                                                                                                                                                                                                                                                                                                                                                                                                                                                                                                                                                                                                                                                                                                                                                                                                          | 1230 | 860 | 9.80E-10 |

|               |                                        |     |      |          |                                                                                                                                                                                                                                                                                                                                                                                                                                                                                                                                                                                                                                                                                                                                                                                                                                                                                                                                                                                                                                                                                                                                                                                                                                                                                                                                                                                                                                                                                                                                                                                                                                                                                                                            |      |      |          |
|---------------|----------------------------------------|-----|------|----------|----------------------------------------------------------------------------------------------------------------------------------------------------------------------------------------------------------------------------------------------------------------------------------------------------------------------------------------------------------------------------------------------------------------------------------------------------------------------------------------------------------------------------------------------------------------------------------------------------------------------------------------------------------------------------------------------------------------------------------------------------------------------------------------------------------------------------------------------------------------------------------------------------------------------------------------------------------------------------------------------------------------------------------------------------------------------------------------------------------------------------------------------------------------------------------------------------------------------------------------------------------------------------------------------------------------------------------------------------------------------------------------------------------------------------------------------------------------------------------------------------------------------------------------------------------------------------------------------------------------------------------------------------------------------------------------------------------------------------|------|------|----------|
|               |                                        |     |      |          | LOC785085, ZNF540, MKX, FOXB1, NR2F2, MYB, BHLHE41, NR2F1, AR, TBX15, NDUFA13, TLE4, INHBA, LOC539166, FOXC2, KCNH2, KCNH5, LOC522736, ZBTB16, MYCL1, STAT4, LOC787194, TLX2, SIM1, MLLT3, LOC615643, LMX1B, TBX5, TBX4, MYF5, MEOX2, NEUROD1, LOC654400, NR5A2, FOXE3, NR5A1, MYOD1, CBX2, NR2E1, GDNF, LOC782183, TGFB1, HOXC6, ATOH1, GATA5, HOXC4, GATA3, SATB1, SATB2, HES6, PKIA, AHR, HHEX, SIX1, TFAP2A, TFAP2C, NFE2L3, LOC527381, ONECUT1, SOX2, MEIS1, LIN28B, DBX2, VDR, MEIS3, MEIS2, HOXA7, OVOL1, DBX1, TAF1, EPAS1, GSX2, RFX4, MAFB, FOXA1, GSX1, HOXB4, GCM2, HOXB2, ATF3, HOXB7, LASS4, EBF2, HOXB6, PAX6, DMRTA2, PAX3, CRX, FEV, LBH, HEY1, POU5F1, SOX18, PDE8A, ALX4, ALX3, EGR1, NANOG, OTX2, ESR1, MIXL1, ADRB2, HOXC11, HOXC13, NRL, CUX2, CUX1, MAPRE3, CALCR, IRX3, SBNO2, ABLIM3, LOC618065, MSX2, HAND1, POU2F3, POU3F4, POU3F2, NFATC4, POU3F1, EPO, CEBPA, FOXL2, FOXL1, VSX2, ISL1, ID2, IRF5, ID1, IRF6, IRF8, HEYL, SP7, F2R                                                                                                                                                                                                                                                                                                                                                                                                                                                                                                                                                                                                                                                                                                                                                            |      |      |          |
| GOTERM_BP_FAT | GO:0045449~regulation of transcription | 236 | 9.19 | 2.80E-10 | CDX1, CDX2, GDF6, FST, RORB, PDLIM1, RORA, HOXD10, PGR, FOXF1, CREB3L3, PITX1, TWIST2, PITX2, TWIST1, PHOX2A, RARG, EMX1, EMX2, BARHL2, RXRG, EOMES, MSX1, HES5, ECOP, PRDM6, UNCX, LOC783396, OTP, FOXH1, LIF, T, TCF21, AHRR, LHX3, HOXA10, LHX4, LHX5, LOC789268, NKX2-5, LHX9, NKX2-3, KLF5, BMP4, BMP3, IKZF3, NTF3, ESRRG, SHOX2, DLX3, NR1I3, DLX1, DMRTC2, ETS1, LOC789959, DLX6, DLX5, DLX4, HOPX, CRYM, KLF4, TCF15, KCNH1, HNF1B, FOXA2, ELF5, LOC783703, KCNIP3, GLI1, YBX2, FERD3L, LOC785085, LOC789450, ZNF540, MKX, FOXB1, BHLHE41, MYB, NR2F2, NR2F1, AR, TBX15, TLE4, NDUFA13, INHBA, LOC539166, FOXC2, KCNH2, KCNH5, LOC281370, LOC522736, ZBTB16, SEC14L2, MYCL1, STAT4, LOC787194, ACTL6B, TLX2, SIM1, LOC615643, MLLT3, LMX1B, TBX5, MYF5, TBX4, SNAI2, MEOX2, NEUROD1, NR5A2, LOC654400, ZNF572, FOXE3, NR5A1, MYOD1, LMO3, CBX2, GDNF, NR2E1, LOC782183, TGFB1, HOXC6, ATOH1, OLIG3, GATA5, GATA3, HOXC4, OLIG1, ATOH7, SATB1, SATB2, MLXIPL, HES6, PKIA, AHR, PTHLH, ASCL2, ASCL1, HHEX, SIX1, TFAP2A, RIPK2, TFAP2C, NFE2L3, ASCL4, LOC527381, ONECUT1, LOC781206, SOX2, MEIS1, LIN28B, DBX2, VDR, MEIS3, MEIS2, HOXA7, OVOL1, DBX1, TAF1, RFX4, EPAS1, GSX2, MAFB, FOXA1, GSX1, NEUROG1, NEUROG3, FEZF2, HOXB4, GCM2, HOXB2, ATF3, HOXB7, LASS4, EBF2, HOXB6, EAF2, BMI1, HR, PAX6, PAX5, DMRTA2, PAX3, PAX1, FEV, CRX, LBH, HEY1, PAX9, LOC509704, POU5F1, PAX8, SOX18, PDE8A, ALX4, ALX3, EGR1, NANOG, EGR4, OTX2, ESR1, PCGF1, MIXL1, ADRB2, HOXC11, HOXC13, NRL, LOC617563, CUX2, CUX1, MAPRE3, IRX3, SBNO2, ABLIM3, TRIB3, LOC618065, MSX2, HAND1, POU2F3, POU3F4, PYCARD, NFATC4, POU3F2, POU3F1, EPO, CEBPA, INSM1, FOXL2, FOXL1, ISL1, VSX2, ID2, IRF5, ID1, IRF6, IRF8, HEYL, SP7, F2R | 1230 | 1166 | 1.70E-07 |

|                                             |                            |    |      |          |                                                               |     |     |          |
|---------------------------------------------|----------------------------|----|------|----------|---------------------------------------------------------------|-----|-----|----------|
| <b>Annotation Cluster 4</b>                 |                            |    |      |          |                                                               |     |     |          |
| <b>Enrichment Score: 10.944754470318188</b> |                            |    |      |          |                                                               |     |     |          |
| SP_PIR_KEY                                  | g-protein coupled receptor | 62 | 2.41 | 2.90E-13 | CASR, TACR3, F2RL1, LHCGR, VIPR1, S1PR2, AGTR1, EDNRB, S1PR3, | 979 | 177 | 1.87E-11 |

|          |                                            |    |     |          |                                                                                                                                                                                                                                                                                                                                                                                                |      |     |          |
|----------|--------------------------------------------|----|-----|----------|------------------------------------------------------------------------------------------------------------------------------------------------------------------------------------------------------------------------------------------------------------------------------------------------------------------------------------------------------------------------------------------------|------|-----|----------|
| WORDS    |                                            |    |     |          | PTGIR, CXCR4, LTB4R, CXCR7, GALR2, LOC781367, MC5R, LPHN1, C5AR1, PTGER3, CCKBR, PTGER4, HTR4, PROKR2, PROKR1, MRGPRF, CRHR1, SSTR2, GRM3, ADRB2, ADRB1, PTGDR, NK1R, TSHR, CALCR, DRD1, PRLHR, GPRC5C, ADORA2B, ADCYAP1R1, FFAR2, OPRK1, NPY2R, PTH1R, GPR6, OXTR, BDKRB2, GPR4, ADRB3, HCRTR1, ADRA2A, FZD3, PTGFR, FZD6, FZD10, AVPR1B, ADRA1B, MC4R, AVPR1A, UTS2R, GHSR, F2R, HTR2A       |      |     |          |
| INTERPRO | IPR000276:7TM GPCR, rhodopsin-like         | 54 | 2.1 | 6.25E-11 | MCHR1, GPR162, TACR3, F2RL1, LHCGR, S1PR2, AGTR1, EDNRB, S1PR3, PTGIR, HTR1A, CXCR4, LTB4R, CXCR7, GALR2, LOC781367, MC5R, PTGER3, C5AR1, CCKBR, PTGER4, HTR4, PROKR2, PROKR1, MRGPRF, SSTR2, ADRB2, ADRB1, PTGDR, NK1R, TSHR, DRD1, PRLHR, ADORA2B, FFAR2, OPRK1, NPY2R, GPR6, OXTR, BDKRB2, GPR4, ADRB3, HCRTR1, ADRA2A, PTGFR, GPR37, AVPR1B, ADRA1B, MC4R, AVPR1A, UTS2R, GHSR, F2R, HTR2A | 1185 | 164 | 2.53E-08 |
| INTERPRO | IPR017452:GPCR, rhodopsin-like superfamily | 54 | 2.1 | 8.08E-11 | MCHR1, GPR162, TACR3, F2RL1, LHCGR, S1PR2, AGTR1, EDNRB, S1PR3, PTGIR, HTR1A, CXCR4, LTB4R, CXCR7, GALR2, LOC781367, MC5R, PTGER3, C5AR1, CCKBR, PTGER4, HTR4, PROKR2, PROKR1, MRGPRF, SSTR2, ADRB2, ADRB1, PTGDR, NK1R, TSHR, DRD1, PRLHR, ADORA2B, FFAR2, OPRK1, NPY2R, GPR6, OXTR, BDKRB2, GPR4, ADRB3, HCRTR1, ADRA2A, PTGFR, GPR37, AVPR1B, ADRA1B, MC4R, AVPR1A, UTS2R, GHSR, F2R, HTR2A | 1185 | 165 | 2.62E-08 |

**Annotation Cluster 5**

**Enrichment Score: 8.164708874769264**

|               |                                                            |    |      |          |                                                                                                                                                                                                                                                                                     |      |    |          |
|---------------|------------------------------------------------------------|----|------|----------|-------------------------------------------------------------------------------------------------------------------------------------------------------------------------------------------------------------------------------------------------------------------------------------|------|----|----------|
| GOTERM_MF_FAT | GO:0015276~ligand-gated ion channel activity               | 35 | 1.36 | 2.10E-09 | GRIK1, GLRA1, GRIK2, GRIK3, GABRB1, KCNJ10, GRIN3B, KCNJ12, GRIN2C, CHRNA5, CHRNA7, SCNN1G, HTR3A, HTR3B, GABRQ, CHRNA3, CHRNA2, GABRP, GABRD, GLRB, GABRA2, LOC100138074, GABRA4, GABRA5, LOC783386, CNGA3, ITPR3, ITPR1, ACCN1, KCNJ9, GRIA2, LOC100139857, CHRNB4, CHRND, CHRNB2 | 1232 | 88 | 1.71E-07 |
| GOTERM_MF_FAT | GO:0022834~ligand-gated channel activity                   | 35 | 1.36 | 2.10E-09 | GRIK1, GLRA1, GRIK2, GRIK3, GABRB1, KCNJ10, GRIN3B, KCNJ12, GRIN2C, CHRNA5, CHRNA7, SCNN1G, HTR3A, HTR3B, GABRQ, CHRNA3, CHRNA2, GABRP, GABRD, GLRB, GABRA2, LOC100138074, GABRA4, GABRA5, LOC783386, CNGA3, ITPR3, ITPR1, ACCN1, KCNJ9, GRIA2, LOC100139857, CHRNB4, CHRND, CHRNB2 | 1232 | 88 | 1.71E-07 |
| GOTERM_MF_FAT | GO:0005230~extracellular ligand-gated ion channel activity | 26 | 1.01 | 7.26E-08 | GLRA1, GRIK1, GRIK2, GABRB1, GRIK3, GRIN3B, GRIN2C, CHRNA5, CHRNA7, HTR3A, HTR3B, GABRQ, CHRNA3, GABRP, CHRNA2, GABRD, GLRB, GABRA2, LOC100138074, GABRA4, GABRA5, LOC783386, GRIA2, CHRNB4, CHRND, CHRNB2                                                                          | 1232 | 61 | 4.65E-06 |

**Annotation Cluster 6**

**Enrichment Score: 7.457119967464377**

|               |                            |    |      |          |                                                                                                                                                                                                                                                                                                                                                                                                                                    |      |     |          |
|---------------|----------------------------|----|------|----------|------------------------------------------------------------------------------------------------------------------------------------------------------------------------------------------------------------------------------------------------------------------------------------------------------------------------------------------------------------------------------------------------------------------------------------|------|-----|----------|
| GOTERM_BP_FAT | GO:0050801~ion homeostasis | 56 | 2.18 | 3.45E-10 | CASR, JPH2, GLRA1, EDN2, SLC9A3, SNCA, EDN1, LOC785842, CKB, AGTR1, EDNRB, LOC531957, APOE, AQP11, HMOX1, LTF, CHRNA7, MT3, FTL, KCNMA1, PRKCA, PTGER3, LOC786683, CCKBR, LOC783224, SLC34A1, CACNG2, PRKCB, RHCG, LOC100139857, LOC525947, CALCR, PTH1R, GPR6, TAC1, CLDN11, KCNA5, CACNB4, ATP6V1B1, CCL28, SYPL2, FKBP1B, CD9, VDR, KCNE1, GAL3ST1, GLRB, UPK3A, LOC783993, AFG3L2, TNNI3, ITPR1, KDR, CHRNB4, CACNA1G, CHRNB2, | 1230 | 168 | 1.75E-07 |
|---------------|----------------------------|----|------|----------|------------------------------------------------------------------------------------------------------------------------------------------------------------------------------------------------------------------------------------------------------------------------------------------------------------------------------------------------------------------------------------------------------------------------------------|------|-----|----------|

|               |                                          |    |      |          |                                                                                                                                                                                                                                                                                                                                                                                                                                                                                                          |      |     |            |
|---------------|------------------------------------------|----|------|----------|----------------------------------------------------------------------------------------------------------------------------------------------------------------------------------------------------------------------------------------------------------------------------------------------------------------------------------------------------------------------------------------------------------------------------------------------------------------------------------------------------------|------|-----|------------|
|               |                                          |    |      |          | SCARA5, CACNA1A, F2R                                                                                                                                                                                                                                                                                                                                                                                                                                                                                     |      |     |            |
| GOTERM_BP_FAT | GO:0006873~cellular ion homeostasis      | 49 | 1.91 | 1.36E-08 | CASR, JPH2, GLRA1, EDN2, SNCA, EDN1, LOC785842, CKB, AGTR1, LOC531957, APOE, AQP11, LTF, CHRNA7, MT3, FTL, KCNMA1, PRKCA, PTGER3, LOC786683, CCKBR, LOC783224, CACNG2, PRKCB, RHCG, LOC100139857, LOC525947, CALCR, PTH1R, GPR6, TAC1, CACNB4, CLDN11, KCNA5, FKBP1B, CCL28, SYPL2, CD9, VDR, KCNE1, GAL3ST1, GLRB, LOC783993, AFG3L2, TNNI3, ITPR1, CHRNB4, CACNA1G, CHRNB2, SCARA5, CACNA1A, F2R                                                                                                       | 1230 | 151 | 3.17E-06   |
| GOTERM_BP_FAT | GO:0048878~chemical homeostasis          | 63 | 2.45 | 1.40E-08 | CASR, JPH2, GLRA1, EDN2, SLC9A3, EDN1, SNCA, LOC785842, CKB, EDNRB, AGTR1, LOC531957, SLC2A4, AQP11, APOE, HMOX1, LTF, CHRNA7, MT3, FTL, KCNMA1, PRKCA, PTGER3, LOC786683, CCKBR, LOC783224, SLC34A1, CACNG2, PRKCB, PTHLH, G6PC, RHCG, LOC100139857, LOC525947, CALCR, PTH1R, GPR6, TAC1, KCNA5, CLDN11, CACNB4, ATP6V1B1, SYPL2, CCL28, FKBP1B, CD9, VDR, KCNE1, GAL3ST1, LPL, GLRB, EPAS1, FOXA1, UPK3A, LOC783993, TNNI3, AFG3L2, ITPR1, KDR, CHRNB4, CACNA1G, CHRNB2, CACNA1E, SCARA5, CACNA1A, F2R | 1230 | 218 | 3.04E-06   |
| GOTERM_BP_FAT | GO:0055082~cellular chemical homeostasis | 49 | 1.91 | 2.17E-08 | CASR, JPH2, GLRA1, EDN2, SNCA, EDN1, LOC785842, CKB, AGTR1, LOC531957, APOE, AQP11, LTF, CHRNA7, MT3, FTL, KCNMA1, PRKCA, PTGER3, LOC786683, CCKBR, LOC783224, CACNG2, PRKCB, RHCG, LOC100139857, LOC525947, CALCR, PTH1R, GPR6, TAC1, CACNB4, CLDN11, KCNA5, FKBP1B, CCL28, SYPL2, CD9, VDR, KCNE1, GAL3ST1, GLRB, LOC783993, AFG3L2, TNNI3, ITPR1, CHRNB4, CACNA1G, CHRNB2, SCARA5, CACNA1A, F2R                                                                                                       | 1230 | 153 | 3.89E-06   |
| GOTERM_BP_FAT | GO:0019725~cellular homeostasis          | 53 | 2.06 | 3.64E-05 | CASR, JPH2, GLRA1, PDIA2, EDN2, SNCA, EDN1, LOC785842, LOC539389, CKB, AGTR1, LOC531957, APOE, AQP11, LTF, CHRNA7, MT3, FTL, KCNMA1, PRKCA, PTGER3, AIFM3, LOC786683, CCKBR, LOC783224, CACNG2, PRKCB, RHCG, LOC100139857, LOC525947, CALCR, PTH1R, GPR6, TAC1, CLDN11, KCNA5, CACNB4, FKBP1B, CCL28, SYPL2, CD9, VDR, KCNE1, GAL3ST1, GLRB, LOC783993, AFG3L2, TNNI3, ITPR1, KCNN4, CHRNB4, CACNA1G, CHRNB2, SCARA5, CACNA1A, F2R                                                                       | 1230 | 215 | 0.00156039 |

**Annotation Cluster 7**

**Enrichment Score: 7.3651838608178215**

|               |                                               |    |      |          |                                                                                                                                                                                                                                                                                                            |      |     |          |
|---------------|-----------------------------------------------|----|------|----------|------------------------------------------------------------------------------------------------------------------------------------------------------------------------------------------------------------------------------------------------------------------------------------------------------------|------|-----|----------|
| GOTERM_MF_FAT | GO:0022832~voltage-gated channel activity     | 40 | 1.56 | 3.23E-08 | KCNH1, KCNC1, SCN1B, KCNAB1, KCNA2, KCNA1, KCNA4, CACNB3, KCNJ10, KCNA6, CACNB4, KCNA5, KCNJ12, KCNIP3, SHKBP1, KCNS2, KCNQ3, KCNE1, KCNG3, SCN5A, KCNE4, KCNMA1, CACNA2D1, KCND2, CACNG2, KCNK1, KCNK2, KCNV1, KCTD8, KCNJ9, CLIC5, CACNA1G, KCNF1, SCN4B, CACNA1E, KCNH2, CACNA1D, CACNA1A, KCNH5, CLCN5 | 1232 | 119 | 2.23E-06 |
| GOTERM_MF_FAT | GO:0005244~voltage-gated ion channel activity | 40 | 1.56 | 3.23E-08 | KCNH1, KCNC1, SCN1B, KCNAB1, KCNA2, KCNA1, KCNA4, CACNB3, KCNJ10, KCNA6, CACNB4, KCNA5, KCNJ12, KCNIP3, SHKBP1, KCNS2, KCNQ3, KCNE1, KCNG3, SCN5A, KCNE4, KCNMA1, CACNA2D1, KCND2, CACNG2, KCNK1, KCNK2, KCNV1, KCTD8, KCNJ9, CLIC5, CACNA1G, KCNF1, SCN4B, CACNA1E, KCNH2, CACNA1D, CACNA1A, KCNH5, CLCN5 | 1232 | 119 | 2.23E-06 |

|                                            |                                                                  |    |      |          |                                                                                                                                                                                                                                                                                                                                           |      |     |          |
|--------------------------------------------|------------------------------------------------------------------|----|------|----------|-------------------------------------------------------------------------------------------------------------------------------------------------------------------------------------------------------------------------------------------------------------------------------------------------------------------------------------------|------|-----|----------|
| GOTERM_MF_FAT                              | GO:0022843~voltage-gated cation channel activity                 | 34 | 1.32 | 7.68E-08 | KCNH1, KCNC1, KCNAB1, KCNA2, KCNA1, KCNA4, CACNB3, KCNJ10, KCNA6, CACNB4, KCNA5, KCNJ12, SHKBP1, KCNS2, KCNQ3, KCNE1, KCNG3, SCN5A, KCNE4, KCNMA1, CACNA2D1, KCND2, CACNG2, KCNK2, KCNV1, KCTD8, KCNJ9, CACNA1G, KCNF1, CACNA1E, KCNH2, CACNA1D, CACNA1A, KCNH5                                                                           | 1232 | 95  | 4.59E-06 |
| <b>Annotation Cluster 8</b>                |                                                                  |    |      |          |                                                                                                                                                                                                                                                                                                                                           |      |     |          |
| <b>Enrichment Score: 6.898048750641291</b> |                                                                  |    |      |          |                                                                                                                                                                                                                                                                                                                                           |      |     |          |
| GOTERM_BP_FAT                              | GO:0055065~metal ion homeostasis                                 | 30 | 1.17 | 6.91E-09 | CALCR, CASR, JPH2, EDN2, EDN1, PTH1R, GPR6, TAC1, CACNB4, SYPL2, CCL28, FKBP1B, AGTR1, VDR, APOE, CHRNA7, MT3, PRKCA, KCNMA1, LOC786683, PTGER3, CCKBR, UPK3A, TNNI3, ITPR1, KDR, PRKCB, LOC100139857, CACNA1A, F2R                                                                                                                       | 1230 | 68  | 2.63E-06 |
| GOTERM_BP_FAT                              | GO:0055080~cation homeostasis                                    | 41 | 1.6  | 1.31E-08 | CALCR, CASR, JPH2, EDN2, SLC9A3, PTH1R, EDN1, GPR6, LOC785842, TAC1, CACNB4, ATP6V1B1, FKBP1B, CCL28, SYPL2, VDR, AGTR1, EDNRB, LOC531957, APOE, AQP11, HMOX1, LTF, CHRNA7, FTL, MT3, PRKCA, KCNMA1, PTGER3, LOC786683, CCKBR, LOC783224, LOC783993, UPK3A, TNNI3, ITPR1, PRKCB, KDR, RHCG, LOC100139857, LOC525947, SCARA5, CACNA1A, F2R | 1230 | 115 | 3.32E-06 |
| GOTERM_BP_FAT                              | GO:0006875~cellular metal ion homeostasis                        | 28 | 1.09 | 4.49E-08 | CALCR, CASR, JPH2, EDN2, EDN1, PTH1R, GPR6, TAC1, CACNB4, SYPL2, CCL28, FKBP1B, AGTR1, VDR, APOE, CHRNA7, MT3, PRKCA, KCNMA1, LOC786683, PTGER3, CCKBR, TNNI3, ITPR1, PRKCB, LOC100139857, CACNA1A, F2R                                                                                                                                   | 1230 | 65  | 7.19E-06 |
| GOTERM_BP_FAT                              | GO:0055074~calcium ion homeostasis                               | 27 | 1.05 | 6.32E-08 | CALCR, CASR, JPH2, EDN2, EDN1, PTH1R, GPR6, TAC1, CACNB4, SYPL2, CCL28, FKBP1B, AGTR1, VDR, APOE, CHRNA7, PRKCA, LOC786683, PTGER3, CCKBR, TNNI3, ITPR1, KDR, PRKCB, LOC100139857, CACNA1A, F2R                                                                                                                                           | 1230 | 62  | 9.15E-06 |
| GOTERM_BP_FAT                              | GO:0006874~cellular calcium ion homeostasis                      | 26 | 1.01 | 1.32E-07 | CALCR, CASR, JPH2, EDN2, EDN1, PTH1R, GPR6, TAC1, CACNB4, SYPL2, CCL28, FKBP1B, AGTR1, VDR, APOE, CHRNA7, PRKCA, LOC786683, PTGER3, CCKBR, TNNI3, ITPR1, PRKCB, LOC100139857, CACNA1A, F2R                                                                                                                                                | 1230 | 60  | 1.74E-05 |
| GOTERM_BP_FAT                              | GO:0030003~cellular cation homeostasis                           | 34 | 1.32 | 7.48E-07 | CALCR, CASR, JPH2, EDN2, EDN1, PTH1R, GPR6, LOC785842, TAC1, CACNB4, FKBP1B, SYPL2, CCL28, AGTR1, VDR, LOC531957, APOE, AQP11, LTF, CHRNA7, FTL, MT3, PRKCA, KCNMA1, PTGER3, LOC786683, CCKBR, LOC783224, LOC783993, TNNI3, ITPR1, PRKCB, LOC100139857, LOC525947, SCARA5, CACNA1A, F2R                                                   | 1230 | 99  | 8.12E-05 |
| GOTERM_BP_FAT                              | GO:0055066~di-, tri-valent inorganic cation homeostasis          | 33 | 1.29 | 8.43E-07 | CALCR, CASR, JPH2, EDN2, EDN1, PTH1R, GPR6, LOC785842, TAC1, CACNB4, FKBP1B, SYPL2, CCL28, AGTR1, VDR, LOC531957, APOE, HMOX1, LTF, CHRNA7, FTL, PRKCA, LOC786683, PTGER3, CCKBR, LOC783224, LOC783993, TNNI3, ITPR1, KDR, PRKCB, LOC100139857, LOC525947, SCARA5, CACNA1A, F2R                                                           | 1230 | 95  | 8.84E-05 |
| GOTERM_BP_FAT                              | GO:0030005~cellular di-, tri-valent inorganic cation homeostasis | 31 | 1.21 | 3.07E-06 | CALCR, CASR, JPH2, EDN2, EDN1, PTH1R, GPR6, LOC785842, TAC1, CACNB4, SYPL2, CCL28, FKBP1B, AGTR1, VDR, LOC531957, APOE, LTF, CHRNA7, FTL, PRKCA, LOC786683, PTGER3, CCKBR, LOC783224, LOC783993, TNNI3, ITPR1, PRKCB, LOC100139857, LOC525947, SCARA5, CACNA1A, F2R                                                                       | 1230 | 91  | 2.17E-04 |
| <b>Annotation Cluster 9</b>                |                                                                  |    |      |          |                                                                                                                                                                                                                                                                                                                                           |      |     |          |
| <b>Enrichment Score: 6.866826564798346</b> |                                                                  |    |      |          |                                                                                                                                                                                                                                                                                                                                           |      |     |          |

|                                            |                                                                   |    |      |          |                                                                                                                                                                                                                                              |      |     |            |
|--------------------------------------------|-------------------------------------------------------------------|----|------|----------|----------------------------------------------------------------------------------------------------------------------------------------------------------------------------------------------------------------------------------------------|------|-----|------------|
| GOTERM_MF_FAT                              | GO:0001653~peptide receptor activity                              | 31 | 1.21 | 7.94E-08 | GPR83, PRLHR, TACR3, NPY2R, OPRK1, F2RL1, OXTR, BDKRB2, HCRTR2, EDNRB, AGTR1, HCRTR1, CXCR4, GALR2, MC5R, XCR1, C5AR1, CCKBR, PROKR2, NPR1, PROKR1, NPR3, NTSR1, SSTR2, NK1R, AVPR1B, MC4R, AVPR1A, UTS2R, F2R, OPRD1                        | 1232 | 82  | 4.45E-06   |
| GOTERM_MF_FAT                              | GO:0008528~peptide receptor activity, G-protein coupled           | 31 | 1.21 | 7.94E-08 | GPR83, PRLHR, TACR3, NPY2R, OPRK1, F2RL1, OXTR, BDKRB2, HCRTR2, EDNRB, AGTR1, HCRTR1, CXCR4, GALR2, MC5R, XCR1, C5AR1, CCKBR, PROKR2, NPR1, PROKR1, NPR3, NTSR1, SSTR2, NK1R, AVPR1B, MC4R, AVPR1A, UTS2R, F2R, OPRD1                        | 1232 | 82  | 4.45E-06   |
| GOTERM_MF_FAT                              | GO:0042277~peptide binding                                        | 34 | 1.32 | 3.98E-07 | GPR83, CALCR, PRLHR, TACR3, NPY2R, CRHBP, OPRK1, F2RL1, OXTR, BDKRB2, HCRTR2, EDNRB, AGTR1, HCRTR1, CXCR4, GALR2, MC5R, XCR1, KDEL1, C5AR1, CCKBR, PROKR2, NPR1, PROKR1, NPR3, NTSR1, SSTR2, NK1R, AVPR1B, MC4R, AVPR1A, UTS2R, F2R, OPRD1   | 1232 | 101 | 1.98E-05   |
| <b>Annotation Cluster 10</b>               |                                                                   |    |      |          |                                                                                                                                                                                                                                              |      |     |            |
| <b>Enrichment Score: 5.593557646836122</b> |                                                                   |    |      |          |                                                                                                                                                                                                                                              |      |     |            |
| GOTERM_MF_FAT                              | GO:0005267~potassium channel activity                             | 33 | 1.29 | 1.17E-07 | KCNK17, KCNH1, KCNC1, KCNAB1, KCNA2, KCNA1, KCNA4, KCNJ10, KCNA6, KCNA5, KCNJ12, KCNIP3, SHKBP1, KCNS2, KCNQ3, KCNK6, KCNE1, KCNG3, KCNE4, KCNMA1, KCND2, KCNK1, KCNK2, KCNV1, KCNK4, KCTD8, KCNN4, KCNN1, KCNJ9, KCNN2, KCNF1, KCNH2, KCNH5 | 1232 | 92  | 6.15E-06   |
| GOTERM_MF_FAT                              | GO:0005249~voltage-gated potassium channel activity               | 25 | 0.97 | 1.02E-05 | KCNH1, KCNC1, KCNAB1, KCNA2, KCNA1, KCNA4, KCNJ10, KCNA6, KCNA5, KCNJ12, SHKBP1, KCNQ3, KCNS2, KCNE1, KCNG3, KCNE4, KCNMA1, KCND2, KCNK2, KCNV1, KCTD8, KCNJ9, KCNF1, KCNH2, KCNH5                                                           | 1232 | 72  | 4.82E-04   |
| GOTERM_BP_FAT                              | GO:0006813~potassium ion transport                                | 32 | 1.25 | 1.39E-05 | KCNK17, KCNH1, KCNC1, KCNAB1, KCNA2, KCNA1, KCNA4, KCNJ10, KCNA6, KCNA5, KCNJ12, KCNIP3, SHKBP1, KCNQ3, KCNS2, KCNK6, KCNE1, KCNG3, KCNE4, KCNMA1, KCND2, KCNK1, KCNK2, KCNV1, KCNK4, KCTD8, KCNN1, KCNJ9, KCNN2, KCNF1, KCNH2, KCNH5        | 1230 | 102 | 7.17E-04   |
| <b>Annotation Cluster 11</b>               |                                                                   |    |      |          |                                                                                                                                                                                                                                              |      |     |            |
| <b>Enrichment Score: 5.185949619099902</b> |                                                                   |    |      |          |                                                                                                                                                                                                                                              |      |     |            |
| INTERPRO                                   | IPR006201:Neurotransmitter-gated ion-channel                      | 15 | 0.58 | 2.28E-06 | GABRD, GABRA2, GLRB, GLRA1, GABRA4, LOC100138074, GABRB1, GABRA5, CHRNA5, CHRN4, CHRN2, CHRND, CHRNA7, CHRNA3, GABRP                                                                                                                         | 1185 | 28  | 4.62E-04   |
| INTERPRO                                   | IPR006202:Neurotransmitter-gated ion-channel ligand-binding       | 15 | 0.58 | 2.28E-06 | GABRD, GABRA2, GLRB, GLRA1, GABRA4, LOC100138074, GABRB1, GABRA5, CHRNA5, CHRN4, CHRN2, CHRND, CHRNA7, CHRNA3, GABRP                                                                                                                         | 1185 | 28  | 4.62E-04   |
| INTERPRO                                   | IPR006029:Neurotransmitter-gated ion-channel transmembrane region | 14 | 0.55 | 5.29E-06 | GABRD, GABRA2, GLRB, GLRA1, GABRA4, GABRB1, GABRA5, CHRNA5, CHRN4, CHRN2, CHRND, CHRNA7, CHRNA3, GABRP                                                                                                                                       | 1185 | 26  | 9.53E-04   |
| INTERPRO                                   | IPR018000:Neurotransmitter-gated ion-channel, conserved site      | 14 | 0.55 | 5.29E-06 | GABRD, GABRA2, GLRB, GLRA1, GABRA4, GABRB1, GABRA5, CHRNA5, CHRN4, CHRN2, CHRND, CHRNA7, CHRNA3, GABRP                                                                                                                                       | 1185 | 26  | 9.53E-04   |
| SP_PIR_KEY_WORDS                           | postsynaptic cell membrane                                        | 18 | 0.7  | 7.35E-06 | GABRD, GABRA2, GLRB, GLRA1, GABRA4, GRIK1, GABRB1, CABP1, GABRA5, CAMK2N1, GRIA2, CHRNA5, CHRN4, CHRN2, CHRND, CHRNA7, CHRNA3, GABRP                                                                                                         | 979  | 41  | 1.44E-04   |
| PIR_SUPERFAMILY                            | PIRSF002443:acetylcholine receptor                                | 12 | 0.47 | 7.16E-05 | GLRB, GABRA2, GABRA4, GLRA1, GABRB1, GABRA5, CHRNA5, CHRN4, CHRND, CHRNA7, CHRNA3, GABRP                                                                                                                                                     | 556  | 22  | 0.01935007 |



| <b>Annotation Cluster 12</b>               |                                                                  |    |      |          |                                                                                                                                                                                                                                       |      |     |            |  |
|--------------------------------------------|------------------------------------------------------------------|----|------|----------|---------------------------------------------------------------------------------------------------------------------------------------------------------------------------------------------------------------------------------------|------|-----|------------|--|
| <b>Enrichment Score: 4.866990506119727</b> |                                                                  |    |      |          |                                                                                                                                                                                                                                       |      |     |            |  |
| GOTERM_BP_FAT                              | GO:0048666~neuron development                                    | 34 | 1.32 | 9.69E-07 | CCK, UCHL1, PAX6, GJA1, GDNF, HOXD10, LIF, EFHD1, ATOH1, SLC1A3, CXCR4, GALR2, LHX4, NEFL, LOC506110, NTF3, KIF5C, STXBP1, NTNG2, ISL1, AFG3L2, THY1, LEP, EPHA4, FEZF2, RND1, S100B, CLIC5, DLX5, CHRN2, NGFR, CACNA1A, GAP43, GFRA3 | 1230 | 100 | 9.82E-05   |  |
| GOTERM_BP_FAT                              | GO:0048667~cell morphogenesis involved in neuron differentiation | 25 | 0.97 | 1.66E-06 | CCK, UCHL1, PAX6, ATOH1, SLC1A3, CXCR4, LHX4, NEFL, LOC506110, NTF3, KIF5C, STXBP1, NTNG2, AFG3L2, ISL1, EPHA4, FEZF2, S100B, CLIC5, DLX5, CHRN2, NGFR, GAP43, CACNA1A, GFRA3                                                         | 1230 | 63  | 1.48E-04   |  |
| GOTERM_BP_FAT                              | GO:0048812~neuron projection morphogenesis                       | 24 | 0.93 | 1.71E-06 | LOC506110, CCK, NTF3, KIF5C, UCHL1, PAX6, STXBP1, NTNG2, GJA1, ISL1, AFG3L2, EPHA4, FEZF2, ATOH1, S100B, CXCR4, DLX5, LHX4, CHRN2, NGFR, NEFL, CACNA1A, GAP43, GFRA3                                                                  | 1230 | 59  | 1.44E-04   |  |
| GOTERM_BP_FAT                              | GO:0031175~neuron projection development                         | 27 | 1.05 | 2.74E-06 | CCK, UCHL1, PAX6, GJA1, GDNF, EFHD1, ATOH1, CXCR4, GALR2, LHX4, NEFL, LOC506110, NTF3, KIF5C, STXBP1, NTNG2, ISL1, AFG3L2, EPHA4, FEZF2, S100B, DLX5, CHRN2, NGFR, GAP43, CACNA1A, GFRA3                                              | 1230 | 73  | 2.03E-04   |  |
| GOTERM_BP_FAT                              | GO:0007409~axonogenesis                                          | 22 | 0.86 | 9.83E-06 | LOC506110, CCK, NTF3, KIF5C, UCHL1, PAX6, STXBP1, NTNG2, ISL1, AFG3L2, EPHA4, FEZF2, ATOH1, S100B, CXCR4, DLX5, LHX4, CHRN2, NGFR, NEFL, GAP43, GFRA3                                                                                 | 1230 | 56  | 5.25E-04   |  |
| GOTERM_BP_FAT                              | GO:0048858~cell projection morphogenesis                         | 24 | 0.93 | 1.16E-05 | LOC506110, CCK, NTF3, KIF5C, UCHL1, PAX6, STXBP1, NTNG2, GJA1, ISL1, AFG3L2, EPHA4, FEZF2, ATOH1, S100B, CXCR4, DLX5, LHX4, CHRN2, NGFR, NEFL, CACNA1A, GAP43, GFRA3                                                                  | 1230 | 65  | 6.07E-04   |  |
| GOTERM_BP_FAT                              | GO:0000904~cell morphogenesis involved in differentiation        | 26 | 1.01 | 2.10E-05 | CCK, UCHL1, PAX6, CRYGB, ATOH1, SLC1A3, CXCR4, LHX4, NEFL, LOC506110, NTF3, KIF5C, STXBP1, NTNG2, AFG3L2, ISL1, EPHA4, FEZF2, S100B, CLIC5, DLX5, CHRN2, NGFR, GAP43, CACNA1A, GFRA3                                                  | 1230 | 76  | 9.97E-04   |  |
| GOTERM_BP_FAT                              | GO:0032990~cell part morphogenesis                               | 24 | 0.93 | 5.84E-05 | LOC506110, CCK, NTF3, KIF5C, UCHL1, PAX6, STXBP1, NTNG2, GJA1, ISL1, AFG3L2, EPHA4, FEZF2, ATOH1, S100B, CXCR4, DLX5, LHX4, CHRN2, NGFR, NEFL, CACNA1A, GAP43, GFRA3                                                                  | 1230 | 71  | 0.00211325 |  |
| GOTERM_BP_FAT                              | GO:0000902~cell morphogenesis                                    | 30 | 1.17 | 2.11E-04 | CCK, UCHL1, PAX6, GJA1, CRYGB, ATOH1, SLC1A3, CXCR4, LHX4, NEFL, LOC506110, NTF3, PDPN, KIF5C, STXBP1, NTNG2, UPK3A, ISL1, AFG3L2, EPHA4, FEZF2, S100B, DLX5, CLIC5, MAP7, CHRN2, NGFR, CACNA1A, GAP43, GFRA3                         | 1230 | 106 | 0.00587529 |  |
| GOTERM_BP_FAT                              | GO:0032989~cellular component morphogenesis                      | 32 | 1.25 | 9.66E-04 | CCK, UCHL1, PAX6, GJA1, CD9, CRYGB, ATOH1, SLC1A3, CXCR4, LHX4, NEFL, LOC506110, ACTA1, NTF3, PDPN, KIF5C, STXBP1, NTNG2, UPK3A, ISL1, AFG3L2, EPHA4, FEZF2, S100B, DLX5, CLIC5, MAP7, CHRN2, NGFR, CACNA1A, GAP43, GFRA3             | 1230 | 126 | 0.02201727 |  |

| <b>Annotation Cluster 13</b>               |                            |    |      |          |                                                                                                                                                                                                 |      |     |            |  |
|--------------------------------------------|----------------------------|----|------|----------|-------------------------------------------------------------------------------------------------------------------------------------------------------------------------------------------------|------|-----|------------|--|
| <b>Enrichment Score: 4.820705305913005</b> |                            |    |      |          |                                                                                                                                                                                                 |      |     |            |  |
| INTERPRO                                   | IPR000742:EGF-like, type 3 | 27 | 1.05 | 7.05E-06 | PEAR1, PTGS2, LTBP2, NELL2, BCAN, DLK2, DLK1, PROZ, ACAN, TGFA, MRCL, NRG1, THBS2, THBS4, TMEFF2, TNXB, ADAM23, EFEMP1, NTNG2, EGFLAM, THBD, DLL4, MGC139448, VCAN, WIF1, AREG, VLDLR           | 1185 | 82  | 0.00114324 |  |
| INTERPRO                                   | IPR006210:EGF-like         | 28 | 1.09 | 7.41E-06 | PEAR1, PTGS2, LTBP2, NELL2, ITGB5, BCAN, DLK2, DLK1, CSPG5, RSPO3, PROZ, TGFA, MRCL, NRG1, THBS2, THBS4, TMEFF2, TNXB, ADAM23, NTNG2, EGFLAM, THBD, DLL4, MGC139448, VCAN, WIF1, CLEC14A, VLDLR | 1185 | 87  | 0.00109271 |  |
| INTERPRO                                   | IPR013032:EGF-like region, | 33 | 1.29 | 1.17E-05 | PEAR1, PTGS2, LTBP2, NELL2, ITGB5, BCAN, SPOCK1, DLK2, DLK1,                                                                                                                                    | 1185 | 114 | 0.001454   |  |

|                                            |                                                                                                         |    |      |          |                                                                                                                                                                                                                                                                                                                                                                                                                    |      |     |            |
|--------------------------------------------|---------------------------------------------------------------------------------------------------------|----|------|----------|--------------------------------------------------------------------------------------------------------------------------------------------------------------------------------------------------------------------------------------------------------------------------------------------------------------------------------------------------------------------------------------------------------------------|------|-----|------------|
|                                            | conserved site                                                                                          |    |      |          | ITGB7, PROZ, ACAN, TGFA, MRCL, NRG1, THBS2, THBS4, TMEFF2, TNXB, ADAM23, EFEMP1, NTNG2, LAMA4, THBD, EGFLAM, MGC139448, DLL4, VCAN, WIF1, AREG, NGFR, CLEC14A, VLDLR                                                                                                                                                                                                                                               |      |     | 29         |
| SMART                                      | SM00181:EGF                                                                                             | 28 | 1.09 | 8.55E-05 | PEAR1, PTGS2, LTBP2, NELL2, ITGB5, BCAN, DLK2, DLK1, CSPG5, RSPO3, PROZ, TGFA, MRCL, NRG1, THBS2, THBS4, TMEFF2, TNXB, ADAM23, NTNG2, EGFLAM, THBD, DLL4, MGC139448, VCAN, WIF1, CLEC14A, VLDLR                                                                                                                                                                                                                    | 649  | 87  | 0.00573284 |
| <b>Annotation Cluster 14</b>               |                                                                                                         |    |      |          |                                                                                                                                                                                                                                                                                                                                                                                                                    |      |     |            |
| <b>Enrichment Score: 4.785654654970917</b> |                                                                                                         |    |      |          |                                                                                                                                                                                                                                                                                                                                                                                                                    |      |     |            |
| GOTERM_BP_FAT                              | GO:0051173~positive regulation of nitrogen compound metabolic process                                   | 61 | 2.38 | 1.68E-06 | MYOD1, CDX1, HNF1B, PDGFA, GDF6, PAX6, PAX3, GDNF, TGFB1, HOXD10, CRX, GLI1, ATOH1, GATA5, APOE, GATA3, EGR1, AR, RARG, RXRG, PRKCG, CD40, AHR, INHBA, ADRB2, HES5, GHRH, SIX1, MAPRE3, LOC281370, ADORA2B, ABLIM3, SOX2, FOXH1, LIF, T, MEIS2, HAND1, LOC510369, PTX3, NKX2-5, EPO, NKX2-3, BMP4, KLF5, BMP3, FOXL2, NTF3, EPAS1, FOXA1, MYF5, GSX1, ISL1, IRF6, ETS1, NEUROD1, EAF2, LOC654400, KLF4, F2R, NR5A1 | 1230 | 236 | 1.46E-04   |
| GOTERM_BP_FAT                              | GO:0045935~positive regulation of nucleobase, nucleoside, nucleotide and nucleic acid metabolic process | 59 | 2.3  | 2.85E-06 | MYOD1, CDX1, HNF1B, PDGFA, GDF6, PAX6, PAX3, GDNF, TGFB1, HOXD10, CRX, GLI1, ATOH1, GATA5, APOE, GATA3, EGR1, AR, RARG, RXRG, PRKCG, CD40, AHR, INHBA, ADRB2, HES5, GHRH, SIX1, MAPRE3, LOC281370, ADORA2B, ABLIM3, SOX2, LIF, FOXH1, T, MEIS2, HAND1, NKX2-5, EPO, NKX2-3, BMP4, KLF5, BMP3, FOXL2, NTF3, EPAS1, FOXA1, MYF5, GSX1, ISL1, IRF6, ETS1, NEUROD1, EAF2, LOC654400, KLF4, F2R, NR5A1                  | 1230 | 229 | 2.07E-04   |
| GOTERM_BP_FAT                              | GO:0045944~positive regulation of transcription from RNA polymerase II promoter                         | 42 | 1.64 | 6.78E-06 | MYOD1, CDX1, HNF1B, ABLIM3, SOX2, PAX6, PAX3, GDNF, HOXD10, GLI1, CRX, LIF, FOXH1, T, ATOH1, MEIS2, HAND1, GATA3, NKX2-5, NKX2-3, BMP4, BMP3, AR, FOXL2, RARG, NTF3, EPAS1, MYF5, FOXA1, GSX1, RXRG, ISL1, AHR, INHBA, ADRB2, HES5, ETS1, SIX1, NEUROD1, LOC654400, KLF4, NR5A1                                                                                                                                    | 1230 | 147 | 4.12E-04   |
| GOTERM_BP_FAT                              | GO:0010628~positive regulation of gene expression                                                       | 55 | 2.14 | 8.15E-06 | MYOD1, CDX1, HNF1B, GDF6, PAX6, PAX3, GDNF, HOXD10, TGFB1, GLI1, CRX, ATOH1, GATA5, GATA3, EGR1, AR, RARG, RXRG, AHR, INHBA, ADRB2, TNFSF13B, HES5, SIX1, MAPRE3, LOC281370, ABLIM3, SOX2, LIF, FOXH1, T, MEIS2, HAND1, NKX2-5, EPO, NKX2-3, BMP4, KLF5, BMP3, FOXL2, NTF3, EPAS1, FOXA1, MYF5, GSX1, ISL1, CDH13, IRF6, ETS1, NEUROD1, EAF2, LOC654400, KLF4, F2R, NR5A1                                          | 1230 | 215 | 4.77E-04   |
| GOTERM_BP_FAT                              | GO:0045941~positive regulation of transcription                                                         | 53 | 2.06 | 8.85E-06 | MYOD1, CDX1, HNF1B, GDF6, PAX6, PAX3, GDNF, HOXD10, TGFB1, GLI1, CRX, ATOH1, GATA5, GATA3, EGR1, AR, RARG, RXRG, AHR, INHBA, ADRB2, HES5, SIX1, MAPRE3, LOC281370, ABLIM3, SOX2, LIF, FOXH1, T, MEIS2, HAND1, NKX2-5, EPO, NKX2-3, BMP4, KLF5, BMP3, FOXL2, EPAS1, NTF3, FOXA1, MYF5, GSX1, ISL1, IRF6, ETS1, NEUROD1, EAF2, LOC654400, KLF4, F2R, NR5A1                                                           | 1230 | 205 | 4.89E-04   |
| GOTERM_BP_FAT                              | GO:0045893~positive regulation of transcription, DNA-dependent                                          | 46 | 1.79 | 1.52E-05 | MYOD1, CDX1, HNF1B, ABLIM3, SOX2, PAX6, PAX3, GDNF, HOXD10, TGFB1, GLI1, CRX, FOXH1, LIF, T, ATOH1, MEIS2, HAND1, GATA3, NKX2-5, NKX2-3, EPO, BMP4, BMP3, FOXL2, AR, RARG, NTF3, EPAS1, MYF5, FOXA1, GSX1, RXRG, ISL1, AHR, INHBA, ADRB2, HES5, ETS1, SIX1, NEUROD1, LOC654400, MAPRE3, KLF4, F2R, NR5A1                                                                                                           | 1230 | 172 | 7.70E-04   |
| GOTERM_BP                                  | GO:0051254~positive                                                                                     | 46 | 1.79 | 1.52E-05 | MYOD1, CDX1, HNF1B, ABLIM3, SOX2, PAX6, PAX3, GDNF, HOXD10,                                                                                                                                                                                                                                                                                                                                                        | 1230 | 172 | 7.70E-04   |

|               |                                                                      |    |      |          |                                                                                                                                                                                                                                                                                                                                                                                                                                                                        |      |     |            |
|---------------|----------------------------------------------------------------------|----|------|----------|------------------------------------------------------------------------------------------------------------------------------------------------------------------------------------------------------------------------------------------------------------------------------------------------------------------------------------------------------------------------------------------------------------------------------------------------------------------------|------|-----|------------|
| _FAT          | regulation of RNA metabolic process                                  |    |      |          | TGFB1, GLI1, CRX, FOXH1, LIF, T, ATOH1, MEIS2, HAND1, GATA3, NKX2-5, NKX2-3, EPO, BMP4, BMP3, FOXL2, AR, RARG, NTF3, EPAS1, MYF5, FOXA1, GSX1, RXRG, ISL1, AHR, INHBA, ADRB2, HES5, ETS1, SIX1, NEUROD1, LOC654400, MAPRE3, KLF4, F2R, NR5A1                                                                                                                                                                                                                           |      |     |            |
| GOTERM_BP_FAT | GO:0010604~positive regulation of macromolecule metabolic process    | 69 | 2.69 | 4.30E-05 | MYOD1, CDX1, HNF1B, PDGFA, GDF6, SNCA, PAX6, GJA1, PAX3, GDNF, TGFB1, HOXD10, CRX, GLI1, AGTR1, ATOH1, GATA5, APOE, GATA3, SYK, EGR1, PRKCA, AR, RARG, RXRG, PRKCG, CD40, AHR, INHBA, CARD11, CCND1, ADRB2, TNFSF13B, HES5, CCND2, SIX1, MAPRE3, LOC281370, FGFR3, ABLIM3, SOX2, FOXH1, LIF, T, MEIS2, HAND1, NKX2-5, EPO, NKX2-3, BMP4, KLF5, BMP3, FOXL2, NTF3, EPAS1, FOXA1, MYF5, GSX1, ISL1, CDH13, S100B, IRF6, ETS1, NEUROD1, EAF2, LOC654400, KLF4, F2R, NR5A1 | 1230 | 305 | 0.00176503 |
| GOTERM_BP_FAT | GO:0031328~positive regulation of cellular biosynthetic process      | 60 | 2.34 | 5.72E-05 | MYOD1, CDX1, HNF1B, PDGFA, GDF6, PAX6, PAX3, GDNF, TGFB1, HOXD10, CRX, GLI1, ATOH1, GATA5, APOE, GATA3, SYK, EGR1, AR, RARG, RXRG, AHR, CARD11, INHBA, ADRB2, HES5, GHRH, SIX1, MAPRE3, LOC281370, ADORA2B, ABLIM3, SOX2, FOXH1, LIF, T, MEIS2, HAND1, PTX3, NKX2-5, EPO, NKX2-3, BMP4, KLF5, BMP3, FOXL2, NTF3, EPAS1, FOXA1, MYF5, GSX1, ISL1, IRF6, ETS1, NEUROD1, EAF2, LOC654400, KLF4, F2R, NR5A1                                                                | 1230 | 257 | 0.00217396 |
| GOTERM_BP_FAT | GO:0009891~positive regulation of biosynthetic process               | 60 | 2.34 | 8.11E-05 | MYOD1, CDX1, HNF1B, PDGFA, GDF6, PAX6, PAX3, GDNF, TGFB1, HOXD10, CRX, GLI1, ATOH1, GATA5, APOE, GATA3, SYK, EGR1, AR, RARG, RXRG, AHR, CARD11, INHBA, ADRB2, HES5, GHRH, SIX1, MAPRE3, LOC281370, ADORA2B, ABLIM3, SOX2, FOXH1, LIF, T, MEIS2, HAND1, PTX3, NKX2-5, EPO, NKX2-3, BMP4, KLF5, BMP3, FOXL2, NTF3, EPAS1, FOXA1, MYF5, GSX1, ISL1, IRF6, ETS1, NEUROD1, EAF2, LOC654400, KLF4, F2R, NR5A1                                                                | 1230 | 260 | 0.00280008 |
| GOTERM_BP_FAT | GO:0010557~positive regulation of macromolecule biosynthetic process | 56 | 2.18 | 2.11E-04 | MYOD1, CDX1, HNF1B, PDGFA, GDF6, PAX6, PAX3, GDNF, TGFB1, HOXD10, GLI1, CRX, ATOH1, GATA5, GATA3, SYK, EGR1, AR, RARG, RXRG, AHR, CARD11, INHBA, ADRB2, HES5, SIX1, MAPRE3, LOC281370, ABLIM3, SOX2, LIF, FOXH1, T, MEIS2, HAND1, NKX2-5, EPO, NKX2-3, BMP4, KLF5, BMP3, FOXL2, NTF3, EPAS1, FOXA1, MYF5, GSX1, ISL1, IRF6, ETS1, NEUROD1, EAF2, LOC654400, KLF4, F2R, NR5A1                                                                                           | 1230 | 246 | 0.00591941 |

#### Annotation Cluster 15

Enrichment Score: 4.73282584958233

|                  |                                  |    |      |          |                                                                                                                                 |      |    |            |
|------------------|----------------------------------|----|------|----------|---------------------------------------------------------------------------------------------------------------------------------|------|----|------------|
| SP_PIR_KEY_WORDS | potassium channel                | 13 | 0.51 | 1.30E-06 | KCNH1, KCNMA1, KCNC1, KCNA2, KCNA4, KCNA5, KCNK1, KCNV1, KCNIP3, KCNQ3, KCNE1, KCNF1, KCNE4                                     | 979  | 20 | 2.93E-05   |
| SP_PIR_KEY_WORDS | potassium transport              | 16 | 0.62 | 1.57E-05 | KCNH1, KCNMA1, KCNC1, KCNAB1, KCNA2, KCNA4, KCNJ10, KCNA5, KCNK1, KCNJ12, KCNV1, KCNIP3, KCNQ3, KCNE1, KCNF1, KCNE4             | 979  | 35 | 2.83E-04   |
| GOTERM_MF_FAT    | GO:0030955~potassium ion binding | 18 | 0.7  | 6.16E-05 | KCNMA1, KCNH1, KCNC1, KCNAB1, KCNA2, KCNA4, KCNJ10, KCNA5, KCNK1, KCNJ12, GMPR, KCNV1, KCNIP3, KCNQ3, PKLR, KCNE1, KCNF1, KCNE4 | 1232 | 47 | 0.00250756 |
| SP_PIR_KEY_WORDS | potassium                        | 17 | 0.66 | 9.26E-05 | KCNMA1, KCNH1, KCNC1, KCNAB1, KCNA2, KCNA4, KCNJ10, KCNA5, KCNK1, KCNJ12, GMPR, KCNV1, KCNIP3, KCNQ3, KCNE1, KCNF1, KCNE4       | 979  | 44 | 0.00134315 |

#### Annotation Cluster 16

Enrichment Score: 4.617880851622108

|                                            |                                                                                             |    |      |          |                                                                                                                                                                                                                                                 |      |     |            |
|--------------------------------------------|---------------------------------------------------------------------------------------------|----|------|----------|-------------------------------------------------------------------------------------------------------------------------------------------------------------------------------------------------------------------------------------------------|------|-----|------------|
| GOTERM_BP_FAT                              | GO:0001944~vasculature development                                                          | 37 | 1.44 | 4.98E-06 | FGFR2, FGF18, CDX2, PDGFA, EDN1, GJA1, CDH2, GJA4, SHH, T, TCF21, HEY1, HAND1, APOE, CXCR4, TGFA, SOX18, LOX, ADRA2B, NR2F2, ANGPT2, NKX2-5, BMP4, KLF5, EPAS1, PDPN, ITGA4, TNNT3, KDR, THY1, CDH13, PROK2, LAMA4, MEOX2, DLL4, COL1A2, COL1A1 | 1230 | 121 | 3.22E-04   |
| GOTERM_BP_FAT                              | GO:0001568~blood vessel development                                                         | 35 | 1.36 | 1.93E-05 | FGFR2, FGF18, CDX2, PDGFA, EDN1, GJA1, CDH2, GJA4, SHH, T, HEY1, HAND1, APOE, CXCR4, TGFA, SOX18, LOX, ADRA2B, NR2F2, ANGPT2, NKX2-5, KLF5, BMP4, EPAS1, ITGA4, TNNT3, KDR, THY1, CDH13, PROK2, LAMA4, MEOX2, DLL4, COL1A2, COL1A1              | 1230 | 118 | 9.47E-04   |
| GOTERM_BP_FAT                              | GO:0048514~blood vessel morphogenesis                                                       | 29 | 1.13 | 1.46E-04 | FGFR2, FGF18, PDGFA, EDN1, GJA1, CDH2, SHH, T, HEY1, HAND1, APOE, CXCR4, TGFA, SOX18, ADRA2B, NR2F2, ANGPT2, NKX2-5, KLF5, BMP4, EPAS1, ITGA4, TNNT3, KDR, THY1, CDH13, PROK2, MEOX2, DLL4                                                      | 1230 | 99  | 0.00442632 |
| <b>Annotation Cluster 17</b>               |                                                                                             |    |      |          |                                                                                                                                                                                                                                                 |      |     |            |
| <b>Enrichment Score: 4.485258720861838</b> |                                                                                             |    |      |          |                                                                                                                                                                                                                                                 |      |     |            |
| GOTERM_BP_FAT                              | GO:0019935~cyclic-nucleotide-mediated signaling                                             | 14 | 0.55 | 2.16E-06 | CALCR, PTGER3, ADORA2B, PTH1R, ADRB3, GNAL, S1PR3, UCN3, SSTR2, ADRB2, ADRB1, APOE, GHRH, TSHR                                                                                                                                                  | 1230 | 23  | 1.73E-04   |
| GOTERM_BP_FAT                              | GO:0007188~G-protein signaling, coupled to cAMP nucleotide second messenger                 | 13 | 0.51 | 4.61E-06 | CALCR, PTGER3, ADORA2B, PTH1R, ADRB3, GNAL, S1PR3, UCN3, SSTR2, ADRB2, ADRB1, GHRH, TSHR                                                                                                                                                        | 1230 | 21  | 3.12E-04   |
| GOTERM_BP_FAT                              | GO:0007187~G-protein signaling, coupled to cyclic nucleotide second messenger               | 13 | 0.51 | 4.61E-06 | CALCR, PTGER3, ADORA2B, PTH1R, ADRB3, GNAL, S1PR3, UCN3, SSTR2, ADRB2, ADRB1, GHRH, TSHR                                                                                                                                                        | 1230 | 21  | 3.12E-04   |
| GOTERM_BP_FAT                              | GO:0010578~regulation of adenylate cyclase activity involved in G-protein signaling         | 10 | 0.39 | 8.39E-06 | CALCR, ADRB3, GNAL, ADRB2, UCN3, ADRB1, ADORA2B, GHRH, PTH1R, TSHR                                                                                                                                                                              | 1230 | 13  | 4.73E-04   |
| GOTERM_BP_FAT                              | GO:0010579~positive regulation of adenylate cyclase activity by G-protein signaling pathway | 10 | 0.39 | 8.39E-06 | CALCR, ADRB3, GNAL, ADRB2, UCN3, ADRB1, ADORA2B, GHRH, PTH1R, TSHR                                                                                                                                                                              | 1230 | 13  | 4.73E-04   |
| GOTERM_BP_FAT                              | GO:0007189~activation of adenylate cyclase activity by G-protein signaling pathway          | 10 | 0.39 | 8.39E-06 | CALCR, ADRB3, GNAL, ADRB2, UCN3, ADRB1, ADORA2B, GHRH, PTH1R, TSHR                                                                                                                                                                              | 1230 | 13  | 4.73E-04   |
| GOTERM_BP_FAT                              | GO:0019933~cAMP-mediated signaling                                                          | 13 | 0.51 | 8.86E-06 | CALCR, PTGER3, ADORA2B, PTH1R, ADRB3, GNAL, S1PR3, UCN3, SSTR2, ADRB2, ADRB1, GHRH, TSHR                                                                                                                                                        | 1230 | 22  | 4.81E-04   |
| GOTERM_BP_FAT                              | GO:0007190~activation of adenylate cyclase activity                                         | 10 | 0.39 | 2.06E-05 | CALCR, ADRB3, GNAL, ADRB2, UCN3, ADRB1, ADORA2B, GHRH, PTH1R, TSHR                                                                                                                                                                              | 1230 | 14  | 9.93E-04   |
| GOTERM_BP_FAT                              | GO:0019932~second-messenger-mediated signaling                                              | 19 | 0.74 | 3.03E-05 | CALCR, CASR, PTGER3, ADORA2B, EDN2, EDN1, PTH1R, AGTR1, ADRB3, GNAL, S1PR3, ADRB2, SSTR2, UCN3, ADRB1, APOE, GHRH, CA8, TSHR                                                                                                                    | 1230 | 47  | 0.00135329 |
| GOTERM_BP_FAT                              | GO:0045761~regulation of adenylate cyclase activity                                         | 12 | 0.47 | 3.52E-05 | CALCR, ADRB3, S1PR3, GNAL, SSTR2, ADRB2, UCN3, ADRB1, ADORA2B, GHRH, PTH1R, TSHR                                                                                                                                                                | 1230 | 21  | 0.00154954 |
| GOTERM_BP_FAT                              | GO:0030814~regulation of cAMP metabolic process                                             | 14 | 0.55 | 3.57E-05 | CALCR, ADORA2B, PTH1R, EDN1, ADRB3, GNAL, S1PR3, UCN3, SSTR2, ADRB2, ADRB1, PDE2A, GHRH, TSHR                                                                                                                                                   | 1230 | 28  | 0.00154877 |
| GOTERM_BP_FAT                              | GO:0045762~positive regulation of adenylate                                                 | 10 | 0.39 | 4.51E-05 | CALCR, ADRB3, GNAL, ADRB2, UCN3, ADRB1, ADORA2B, GHRH, PTH1R, TSHR                                                                                                                                                                              | 1230 | 15  | 0.00180172 |

|               |                                                                 |    |      |          |                                                                                                      |      |    |            |  |
|---------------|-----------------------------------------------------------------|----|------|----------|------------------------------------------------------------------------------------------------------|------|----|------------|--|
|               | cyclase activity                                                |    |      |          |                                                                                                      |      |    |            |  |
| GOTERM_BP_FAT | GO:0030817~regulation of cAMP biosynthetic process              | 13 | 0.51 | 4.74E-05 | CALCR, ADORA2B, PTH1R, EDN1, ADRB3, GNAL, S1PR3, UCN3, SSSTR2, ADRB2, ADRB1, GHRH, TSHR              | 1230 | 25 | 0.00187247 |  |
| GOTERM_BP_FAT | GO:0030808~regulation of nucleotide biosynthetic process        | 14 | 0.55 | 8.69E-05 | CALCR, ADORA2B, PTH1R, EDN1, ADRB3, GNAL, S1PR3, UCN3, SSSTR2, ADRB2, ADRB1, APOE, GHRH, TSHR        | 1230 | 30 | 0.00296599 |  |
| GOTERM_BP_FAT | GO:0030802~regulation of cyclic nucleotide biosynthetic process | 14 | 0.55 | 8.69E-05 | CALCR, ADORA2B, PTH1R, EDN1, ADRB3, GNAL, S1PR3, UCN3, SSSTR2, ADRB2, ADRB1, APOE, GHRH, TSHR        | 1230 | 30 | 0.00296599 |  |
| GOTERM_BP_FAT | GO:0031281~positive regulation of cyclase activity              | 10 | 0.39 | 9.02E-05 | CALCR, ADRB3, GNAL, ADRB2, UCN3, ADRB1, ADORA2B, GHRH, PTH1R, TSHR                                   | 1230 | 16 | 0.00304439 |  |
| GOTERM_BP_FAT | GO:0030799~regulation of cyclic nucleotide metabolic process    | 15 | 0.58 | 9.17E-05 | CALCR, ADORA2B, PTH1R, EDN1, ADRB3, GNAL, S1PR3, UCN3, SSSTR2, ADRB2, ADRB1, PDE2A, APOE, GHRH, TSHR | 1230 | 34 | 0.00306094 |  |
| GOTERM_BP_FAT | GO:0006140~regulation of nucleotide metabolic process           | 15 | 0.58 | 1.33E-04 | CALCR, ADORA2B, PTH1R, EDN1, ADRB3, GNAL, S1PR3, UCN3, SSSTR2, ADRB2, ADRB1, PDE2A, APOE, GHRH, TSHR | 1230 | 35 | 0.00408921 |  |
| GOTERM_BP_FAT | GO:0031279~regulation of cyclase activity                       | 12 | 0.47 | 1.66E-04 | CALCR, ADRB3, S1PR3, GNAL, SSSTR2, ADRB2, UCN3, ADRB1, ADORA2B, GHRH, PTH1R, TSHR                    | 1230 | 24 | 0.00494752 |  |
| GOTERM_BP_FAT | GO:0051349~positive regulation of lyase activity                | 10 | 0.39 | 2.94E-04 | CALCR, ADRB3, GNAL, ADRB2, UCN3, ADRB1, ADORA2B, GHRH, PTH1R, TSHR                                   | 1230 | 18 | 0.00782491 |  |
| GOTERM_BP_FAT | GO:0051339~regulation of lyase activity                         | 12 | 0.47 | 3.94E-04 | CALCR, ADRB3, S1PR3, GNAL, SSSTR2, ADRB2, UCN3, ADRB1, ADORA2B, GHRH, PTH1R, TSHR                    | 1230 | 26 | 0.01018527 |  |

#### Annotation Cluster 18

Enrichment Score: 4.3624918520918605

|          |                                                           |    |      |          |                                                                       |      |    |            |
|----------|-----------------------------------------------------------|----|------|----------|-----------------------------------------------------------------------|------|----|------------|
| INTERPRO | IPR001839:Transforming growth factor beta                 | 11 | 0.43 | 1.02E-05 | INHBB, BMP4, INHBA, BMP3, BMP2, FOXJ1, GDF6, GDF10, BMP7, GDNF, TGFB1 | 1185 | 17 | 0.00137741 |
| SMART    | SM00204:TGFB                                              | 11 | 0.43 | 3.52E-05 | INHBB, BMP4, INHBA, BMP3, BMP2, FOXJ1, GDF6, GDF10, BMP7, GDNF, TGFB1 | 649  | 17 | 0.00315406 |
| INTERPRO | IPR015615:Transforming growth factor-beta-related         | 10 | 0.39 | 4.72E-05 | INHBB, BMP4, INHBA, BMP3, BMP2, FOXJ1, GDF6, GDF10, BMP7, TGFB1       | 1185 | 16 | 0.00477384 |
| INTERPRO | IPR017948:Transforming growth factor beta, conserved site | 9  | 0.35 | 2.09E-04 | INHBB, BMP4, INHBA, BMP3, BMP2, FOXJ1, GDF6, GDF10, TGFB1             | 1185 | 15 | 0.01682853 |

#### Annotation Cluster 19

Enrichment Score: 4.182775871040769

|               |                                      |    |      |          |                                                                                                                                                      |      |    |            |
|---------------|--------------------------------------|----|------|----------|------------------------------------------------------------------------------------------------------------------------------------------------------|------|----|------------|
| GOTERM_MF_FAT | GO:0005539~glycosaminoglycan binding | 21 | 0.82 | 1.75E-05 | BMP4, HAPLN2, LPL, HAPLN1, HAPLN4, HAPLN3, TNXB, CXCL5, PGLYRP1, TLR2, BCAN, PF4, LYVE1, EGFLAM, APOE, CRISPLD2, RSPO3, ACAN, PTN, VCAN, THBS2       | 1232 | 56 | 7.47E-04   |
| GOTERM_MF_FAT | GO:0001871~pattern binding           | 22 | 0.86 | 1.27E-04 | HAPLN2, BMP4, LPL, HAPLN1, HAPLN4, HAPLN3, TNXB, CXCL5, PGLYRP1, TLR2, BCAN, PF4, LYVE1, EGFLAM, APOE, CRISPLD2, RSPO3, ACAN, PTN, VCAN, PTX3, THBS2 | 1232 | 68 | 0.00436983 |
| GOTERM_MF_FAT | GO:0030247~polysaccharide binding    | 22 | 0.86 | 1.27E-04 | HAPLN2, BMP4, LPL, HAPLN1, HAPLN4, HAPLN3, TNXB, CXCL5, PGLYRP1, TLR2, BCAN, PF4, LYVE1, EGFLAM, APOE, CRISPLD2, RSPO3, ACAN, PTN, VCAN, PTX3, THBS2 | 1232 | 68 | 0.00436983 |

#### Annotation Cluster 20

| <b>Enrichment Score: 4.044949671500718</b>  |                                                     |    |      |          |                                                                                                                                                                                       |      |    |          |    |
|---------------------------------------------|-----------------------------------------------------|----|------|----------|---------------------------------------------------------------------------------------------------------------------------------------------------------------------------------------|------|----|----------|----|
| INTERPRO                                    | IPR000742:EGF-like, type 3                          | 27 | 1.05 | 7.05E-06 | PEAR1, PTGS2, LTBP2, NELL2, BCAN, DLK2, DLK1, PROZ, ACAN, TGFA, MRCL, NRG1, THBS2, THBS4, TMEFF2, TNXB, ADAM23, EFEMP1, NTNG2, EGFLAM, THBD, DLL4, MGC139448, VCAN, WIF1, AREG, VLDLR | 1185 | 82 | 0.001143 | 24 |
| INTERPRO                                    | IPR006209:EGF                                       | 20 | 0.78 | 1.72E-05 | TMEFF2, PTGS2, LTBP2, NTNG2, BCAN, DLK2, DLK1, THBD, EGFLAM, DLL4, PROZ, ACAN, TGFA, VCAN, WIF1, AREG, NRG1, THBS2, VLDLR, THBS4                                                      | 1185 | 53 | 0.001988 | 83 |
| SP_PIR_KEY WORDS                            | egf-like domain                                     | 21 | 0.82 | 0.006049 | TMEFF2, TNXB, LTBP2, NELL2, EFEMP1, BCAN, DLK2, DLK1, THBD, EGFLAM, DLL4, PROZ, ACAN, TGFA, VCAN, WIF1, AREG, NRG1, THBS2, VLDLR, THBS4                                               | 979  | 84 | 0.075049 | 02 |
| <b>Annotation Cluster 21</b>                |                                                     |    |      |          |                                                                                                                                                                                       |      |    |          |    |
| <b>Enrichment Score: 3.9489232478152796</b> |                                                     |    |      |          |                                                                                                                                                                                       |      |    |          |    |
| GOTERM_BP_FAT                               | GO:0060541~respiratory system development           | 19 | 0.74 | 5.80E-05 | LOC790682, FGFR2, BMP4, FGF18, FGFR4, EPAS1, PDPN, PDGFA, FOXA1, SOX2, GLI1, KDR, PTHLH, TCF21, PDGFRA, HOPX, LOX, CUX1, LOC654400                                                    | 1230 | 49 | 0.002150 | 96 |
| GOTERM_BP_FAT                               | GO:0030324~lung development                         | 18 | 0.7  | 1.57E-04 | LOC790682, FGFR2, BMP4, FGF18, FGFR4, EPAS1, PDPN, PDGFA, FOXA1, GLI1, KDR, PTHLH, TCF21, PDGFRA, HOPX, LOX, CUX1, LOC654400                                                          | 1230 | 48 | 0.004705 | 36 |
| GOTERM_BP_FAT                               | GO:0030323~respiratory tube development             | 18 | 0.7  | 1.57E-04 | LOC790682, FGFR2, BMP4, FGF18, FGFR4, EPAS1, PDPN, PDGFA, FOXA1, GLI1, KDR, PTHLH, TCF21, PDGFRA, HOPX, LOX, CUX1, LOC654400                                                          | 1230 | 48 | 0.004705 | 36 |
| <b>Annotation Cluster 22</b>                |                                                     |    |      |          |                                                                                                                                                                                       |      |    |          |    |
| <b>Enrichment Score: 3.926639528548549</b>  |                                                     |    |      |          |                                                                                                                                                                                       |      |    |          |    |
| GOTERM_BP_FAT                               | GO:0051960~regulation of nervous system development | 21 | 0.82 | 6.52E-05 | IRX3, DTX1, FOXA1, SOX2, PAX6, ISL1, GLI1, THY1, METRN, DLX1, ATOH1, HES5, LOC787355, SIX1, LHX5, CHRNB2, GHSR, NKX2-5, NEFL, CACNA1A, MT3                                            | 1230 | 58 | 0.002303 | 38 |
| GOTERM_BP_FAT                               | GO:0045664~regulation of neuron differentiation     | 16 | 0.62 | 9.23E-05 | IRX3, DTX1, SOX2, FOXA1, PAX6, ISL1, THY1, ATOH1, METRN, HES5, LOC787355, SIX1, CHRNB2, NKX2-5, NEFL, CACNA1A                                                                         | 1230 | 38 | 0.003047 | 18 |
| GOTERM_BP_FAT                               | GO:0050767~regulation of neurogenesis               | 18 | 0.7  | 2.76E-04 | IRX3, DTX1, SOX2, FOXA1, PAX6, ISL1, THY1, DLX1, ATOH1, METRN, HES5, LOC787355, SIX1, CHRNB2, NKX2-5, NEFL, CACNA1A, MT3                                                              | 1230 | 50 | 0.007466 | 13 |
| <b>Annotation Cluster 23</b>                |                                                     |    |      |          |                                                                                                                                                                                       |      |    |          |    |
| <b>Enrichment Score: 3.242013610386458</b>  |                                                     |    |      |          |                                                                                                                                                                                       |      |    |          |    |
| GOTERM_BP_FAT                               | GO:0003018~vascular process in circulatory system   | 13 | 0.51 | 5.73E-04 | CASR, ADORA2B, EDN2, EDN1, LOC784945, ADRB3, CALCB, EDNRB, ECE2, ADRB2, ADRB1, APOE, NPPC                                                                                             | 1230 | 31 | 0.013846 | 37 |
| GOTERM_BP_FAT                               | GO:0035150~regulation of tube size                  | 13 | 0.51 | 5.73E-04 | CASR, ADORA2B, EDN2, EDN1, LOC784945, ADRB3, CALCB, EDNRB, ECE2, ADRB2, ADRB1, APOE, NPPC                                                                                             | 1230 | 31 | 0.013846 | 37 |
| GOTERM_BP_FAT                               | GO:0050880~regulation of blood vessel size          | 13 | 0.51 | 5.73E-04 | CASR, ADORA2B, EDN2, EDN1, LOC784945, ADRB3, CALCB, EDNRB, ECE2, ADRB2, ADRB1, APOE, NPPC                                                                                             | 1230 | 31 | 0.013846 | 37 |
| <b>Annotation Cluster 24</b>                |                                                     |    |      |          |                                                                                                                                                                                       |      |    |          |    |
| <b>Enrichment Score: 3.204477505607967</b>  |                                                     |    |      |          |                                                                                                                                                                                       |      |    |          |    |
| GOTERM_MF_FAT                               | GO:0005540~hyaluronic acid binding                  | 8  | 0.31 | 3.13E-04 | HAPLN2, HAPLN1, HAPLN4, LYVE1, HAPLN3, ACAN, BCAN, VCAN                                                                                                                               | 1232 | 12 | 0.009616 | 5  |
| INTERPRO                                    | IPR000538:Link                                      | 7  | 0.27 | 6.04E-04 | HAPLN2, HAPLN1, LYVE1, HAPLN3, ACAN, BCAN, VCAN                                                                                                                                       | 1185 | 10 | 0.038443 | 92 |
| SMART                                       | SM00445:LINK                                        | 7  | 0.27 | 0.001289 | HAPLN2, HAPLN1, LYVE1, HAPLN3, ACAN, BCAN, VCAN                                                                                                                                       | 649  | 10 | 0.067056 | 13 |

| <b>Annotation Cluster 25</b>                |                                         |    |      |          |                                                                                                                                                                                                                                                                                                                                                     |      |     |          |    |
|---------------------------------------------|-----------------------------------------|----|------|----------|-----------------------------------------------------------------------------------------------------------------------------------------------------------------------------------------------------------------------------------------------------------------------------------------------------------------------------------------------------|------|-----|----------|----|
| <b>Enrichment Score: 3.091617934927488</b>  |                                         |    |      |          |                                                                                                                                                                                                                                                                                                                                                     |      |     |          |    |
| SP_PIR_KEY<br>WORDS                         | chloride channel                        | 11 | 0.43 | 8.68E-05 | GLRB, GABRA2, GABRA4, GLRA1, CLIC5, GABRB1, TTYH1, GABRA5, CFTR, ANO4, GABRP                                                                                                                                                                                                                                                                        | 979  | 20  | 0.001345 | 85 |
| GOTERM_CC<br>_FAT                           | GO:0034707~chloride channel complex     | 11 | 0.43 | 1.03E-04 | GLRB, GABRA2, GABRA4, GLRA1, CLIC5, GABRB1, TTYH1, GABRA5, CFTR, ANO4, GABRP                                                                                                                                                                                                                                                                        | 947  | 20  | 0.002201 | 22 |
| SP_PIR_KEY<br>WORDS                         | chloride                                | 11 | 0.43 | 3.68E-04 | GLRB, GABRA2, GABRA4, GLRA1, CLIC5, GABRB1, TTYH1, GABRA5, CFTR, ANO4, GABRP                                                                                                                                                                                                                                                                        | 979  | 23  | 0.005009 | 42 |
| GOTERM_MF<br>_FAT                           | GO:0031404~chloride ion binding         | 11 | 0.43 | 5.60E-04 | GLRB, GABRA2, GABRA4, GLRA1, CLIC5, GABRB1, TTYH1, GABRA5, CFTR, ANO4, GABRP                                                                                                                                                                                                                                                                        | 1232 | 24  | 0.016592 | 93 |
| GOTERM_MF<br>_FAT                           | GO:0043168~anion binding                | 12 | 0.47 | 0.001469 | GLRB, GABRA2, G6PC, GABRA4, GLRA1, CLIC5, GABRB1, TTYH1, GABRA5, CFTR, ANO4, GABRP                                                                                                                                                                                                                                                                  | 1232 | 31  | 0.039126 | 34 |
| GOTERM_MF<br>_FAT                           | GO:0005254~chloride channel activity    | 13 | 0.51 | 0.005657 | GABRA2, GLRB, GLRA1, GABRA4, GABRB1, GABRA5, CFTR, SLC26A8, CLIC5, TTYH1, ANO4, CLCN5, GABRP                                                                                                                                                                                                                                                        | 1232 | 41  | 0.109097 | 4  |
| GOTERM_MF<br>_FAT                           | GO:0005253~anion channel activity       | 13 | 0.51 | 0.014868 | GABRA2, GLRB, GLRA1, GABRA4, GABRB1, GABRA5, CFTR, SLC26A8, CLIC5, TTYH1, ANO4, CLCN5, GABRP                                                                                                                                                                                                                                                        | 1232 | 46  | 0.227489 | 22 |
| <b>Annotation Cluster 26</b>                |                                         |    |      |          |                                                                                                                                                                                                                                                                                                                                                     |      |     |          |    |
| <b>Enrichment Score: 2.917937282913537</b>  |                                         |    |      |          |                                                                                                                                                                                                                                                                                                                                                     |      |     |          |    |
| GOTERM_BP<br>_FAT                           | GO:0040012~regulation of locomotion     | 23 | 0.9  | 3.39E-04 | PRKCA, ICAM1, LOC785455, HS3ST5, PDGFB, PDGFA, MMP9, EDN2, SNCA, F2RL1, PAX6, ITGB3, THY1, KDR, CDH13, LAMA4, APOE, CXCR4, DLL4, CXCL16, TSHR, SST, F2R                                                                                                                                                                                             | 1230 | 74  | 0.008939 | 06 |
| GOTERM_BP<br>_FAT                           | GO:0030334~regulation of cell migration | 19 | 0.74 | 0.001891 | ICAM1, LOC785455, PDGFB, PDGFA, MMP9, EDN2, F2RL1, PAX6, ITGB3, THY1, KDR, CDH13, LAMA4, APOE, CXCR4, DLL4, CXCL16, SST, F2R                                                                                                                                                                                                                        | 1230 | 63  | 0.039196 | 9  |
| GOTERM_BP<br>_FAT                           | GO:0051270~regulation of cell motion    | 20 | 0.78 | 0.002747 | ICAM1, LOC785455, PDGFB, PDPN, PDGFA, MMP9, EDN2, F2RL1, PAX6, ITGB3, THY1, KDR, CDH13, LAMA4, APOE, CXCR4, DLL4, CXCL16, SST, F2R                                                                                                                                                                                                                  | 1230 | 70  | 0.052878 | 23 |
| <b>Annotation Cluster 27</b>                |                                         |    |      |          |                                                                                                                                                                                                                                                                                                                                                     |      |     |          |    |
| <b>Enrichment Score: 2.7331708488118642</b> |                                         |    |      |          |                                                                                                                                                                                                                                                                                                                                                     |      |     |          |    |
| INTERPRO                                    | IPR018933:Netrin module, non-TIMP type  | 7  | 0.27 | 6.04E-04 | SFRP5, SFRP1, C3, SFRP2, SFRP4, FRZB, PCOLCE2                                                                                                                                                                                                                                                                                                       | 1185 | 10  | 0.038443 | 92 |
| SMART                                       | SM00643:C345C                           | 7  | 0.27 | 0.001289 | SFRP5, SFRP1, C3, SFRP2, SFRP4, FRZB, PCOLCE2                                                                                                                                                                                                                                                                                                       | 649  | 10  | 0.067056 | 13 |
| INTERPRO                                    | IPR001134:Netrin domain                 | 7  | 0.27 | 0.008111 | SFRP5, SFRP1, C3, SFRP2, SFRP4, FRZB, PCOLCE2                                                                                                                                                                                                                                                                                                       | 1185 | 15  | 0.259335 | 3  |
| <b>Annotation Cluster 28</b>                |                                         |    |      |          |                                                                                                                                                                                                                                                                                                                                                     |      |     |          |    |
| <b>Enrichment Score: 2.6807933708202594</b> |                                         |    |      |          |                                                                                                                                                                                                                                                                                                                                                     |      |     |          |    |
| GOTERM_CC<br>_FAT                           | GO:0005624~membrane fraction            | 45 | 1.75 | 9.91E-04 | GAL3ST4, JPH2, GLRA1, PTGS2, SNCB, SNCA, ACSBG2, ATP6V1B1, APLP1, ADRB3, SLC2A4, RASGRP4, PTGES, HMOX1, RASGRP2, HSD17B6, CHRNA7, NT5E, SNAP25, PRKCA, LOC790682, MOGAT1, GLRB, STX1A, CYP1A1, CCKBR, CPNE6, ITGA3, ITPR3, CAMK2N1, BCL2L11, ITPR1, SLC17A7, CD38, SSTR2, ADRB2, G6PC, ADRB1, SLC17A6, DGAT1, CLIC5, HSD11B2, SLC13A3, VAMP1, GRB14 | 947  | 204 | 0.016411 | 53 |
| GOTERM_CC<br>_FAT                           | GO:0005626~insoluble fraction           | 45 | 1.75 | 0.002221 | GAL3ST4, JPH2, GLRA1, PTGS2, SNCB, SNCA, ACSBG2, ATP6V1B1, APLP1, ADRB3, SLC2A4, RASGRP4, PTGES, HMOX1, RASGRP2, HSD17B6, CHRNA7, NT5E, SNAP25, PRKCA, LOC790682, MOGAT1,                                                                                                                                                                           | 947  | 212 | 0.029006 | 43 |

|                                             |                                                   |    |      |          |                                                                                                                                                                                                                                                                                                                                                                        |      |     |            |
|---------------------------------------------|---------------------------------------------------|----|------|----------|------------------------------------------------------------------------------------------------------------------------------------------------------------------------------------------------------------------------------------------------------------------------------------------------------------------------------------------------------------------------|------|-----|------------|
|                                             |                                                   |    |      |          | GLRB, STX1A, CYP1A1, CCKBR, CPNE6, ITGA3, ITPR3, CAMK2N1, BCL2L11, ITPR1, SLC17A7, CD38, SSTR2, ADRB2, G6PC, ADRB1, SLC17A6, DGAT1, CLIC5, HSD11B2, SLC13A3, VAMP1, GRB14                                                                                                                                                                                              |      |     |            |
| GOTERM_CC_FAT                               | GO:0000267~cell fraction                          | 48 | 1.87 | 0.004123 | GAL3ST4, JPH2, GLRA1, PTGS2, SNCB, SNCA, ACSBG2, ATP6V1B1, APLP1, PCSK2, ADRB3, SLC2A4, RASGRP4, PTGES, HMOX1, RASGRP2, HSD17B6, CHRNA7, NT5E, SNAP25, PRKCA, LOC790682, MOGAT1, GLRB, STX1A, CYP1A1, CCKBR, CPNE6, ITGA3, ITPR3, PKIA, CAMK2N1, BCL2L11, ITPR1, SLC17A7, CD38, SSTR2, ADRB2, G6PC, ADRB1, SLC17A6, DGAT1, TPPP, CLIC5, HSD11B2, SLC13A3, VAMP1, GRB14 | 947  | 237 | 0.05151334 |
| <b>Annotation Cluster 29</b>                |                                                   |    |      |          |                                                                                                                                                                                                                                                                                                                                                                        |      |     |            |
| <b>Enrichment Score: 2.6115526569903538</b> |                                                   |    |      |          |                                                                                                                                                                                                                                                                                                                                                                        |      |     |            |
| GOTERM_CC_FAT                               | GO:0005923~tight junction                         | 15 | 0.58 | 6.56E-04 | PRKCZ, CLDN7, F11R, PARD3, OCLN, CLDN9, CLDN4, CLDN3, CLDN6, CLDN5, CLDN10, CLDN11, CLDN23, CLDN1, LOC536606                                                                                                                                                                                                                                                           | 947  | 41  | 0.01193367 |
| GOTERM_CC_FAT                               | GO:0070160~occluding junction                     | 15 | 0.58 | 6.56E-04 | PRKCZ, CLDN7, F11R, PARD3, OCLN, CLDN9, CLDN4, CLDN3, CLDN6, CLDN5, CLDN10, CLDN11, CLDN23, CLDN1, LOC536606                                                                                                                                                                                                                                                           | 947  | 41  | 0.01193367 |
| GOTERM_CC_FAT                               | GO:0016327~apicolateral plasma membrane           | 16 | 0.62 | 0.006345 | PRKCZ, F11R, CLDN7, PARD3, OCLN, CLDN9, CLDN4, CLDN3, CLDN6, CLDN5, CLDN10, CLDN11, CLDN23, FZD6, CLDN1, LOC536606                                                                                                                                                                                                                                                     | 947  | 56  | 0.06074852 |
| GOTERM_CC_FAT                               | GO:0043296~apical junction complex                | 15 | 0.58 | 0.013095 | PRKCZ, CLDN7, F11R, PARD3, OCLN, CLDN9, CLDN4, CLDN3, CLDN6, CLDN5, CLDN10, CLDN11, CLDN23, CLDN1, LOC536606                                                                                                                                                                                                                                                           | 947  | 55  | 0.11354025 |
| <b>Annotation Cluster 30</b>                |                                                   |    |      |          |                                                                                                                                                                                                                                                                                                                                                                        |      |     |            |
| <b>Enrichment Score: 2.5848272376399577</b> |                                                   |    |      |          |                                                                                                                                                                                                                                                                                                                                                                        |      |     |            |
| GOTERM_MF_FAT                               | GO:0004955~prostaglandin receptor activity        | 6  | 0.23 | 0.001636 | PTGER3, PTGER4, PTGDR, LOC781367, PTGFR, HPGD                                                                                                                                                                                                                                                                                                                          | 1232 | 8   | 0.04106147 |
| GOTERM_MF_FAT                               | GO:0004953~icosanoid receptor activity            | 6  | 0.23 | 0.003279 | PTGER3, PTGER4, PTGDR, LOC781367, PTGFR, HPGD                                                                                                                                                                                                                                                                                                                          | 1232 | 9   | 0.0726901  |
| GOTERM_MF_FAT                               | GO:0004954~prostanoid receptor activity           | 6  | 0.23 | 0.003279 | PTGER3, PTGER4, PTGDR, LOC781367, PTGFR, HPGD                                                                                                                                                                                                                                                                                                                          | 1232 | 9   | 0.0726901  |
| <b>Annotation Cluster 31</b>                |                                                   |    |      |          |                                                                                                                                                                                                                                                                                                                                                                        |      |     |            |
| <b>Enrichment Score: 2.530668426882812</b>  |                                                   |    |      |          |                                                                                                                                                                                                                                                                                                                                                                        |      |     |            |
| INTERPRO                                    | IPR000008:C2 calcium-dependent membrane targeting | 15 | 0.58 | 0.001805 | PRKCA, CPNE8, CPNE9, SYT1, SYT5, CPNE6, PRKCH, PRKCG, RPH3A, RIMS2, PRKCB, CADPS, DOC2A, CADPS2, SYT13                                                                                                                                                                                                                                                                 | 1185 | 47  | 0.0902185  |
| INTERPRO                                    | IPR018029:C2 membrane targeting protein           | 13 | 0.51 | 0.002181 | CPNE8, PRKCA, CPNE9, SYT1, SYT5, CPNE6, PRKCH, PRKCG, RIMS2, RPH3A, PRKCB, DOC2A, SYT13                                                                                                                                                                                                                                                                                | 1185 | 38  | 0.1047829  |
| SMART                                       | SM00239:C2                                        | 15 | 0.58 | 0.006497 | PRKCA, CPNE8, CPNE9, SYT1, SYT5, CPNE6, PRKCH, PRKCG, RPH3A, RIMS2, PRKCB, CADPS, DOC2A, CADPS2, SYT13                                                                                                                                                                                                                                                                 | 649  | 47  | 0.17700694 |
| <b>Annotation Cluster 32</b>                |                                                   |    |      |          |                                                                                                                                                                                                                                                                                                                                                                        |      |     |            |
| <b>Enrichment Score: 2.4996825403757463</b> |                                                   |    |      |          |                                                                                                                                                                                                                                                                                                                                                                        |      |     |            |
| GOTERM_BP_FAT                               | GO:0009914~hormone transport                      | 10 | 0.39 | 4.90E-04 | LEP, CPLX3, HNF1B, LY6E, GHRH, EDN1, MC4R, GHSR, FKBP1B, CRYM                                                                                                                                                                                                                                                                                                          | 1230 | 19  | 0.01195716 |
| GOTERM_BP_FAT                               | GO:0030072~peptide hormone secretion              | 8  | 0.31 | 0.002373 | LEP, CPLX3, HNF1B, GHRH, EDN1, MC4R, GHSR, FKBP1B                                                                                                                                                                                                                                                                                                                      | 1230 | 15  | 0.04703487 |
| GOTERM_BP_FAT                               | GO:0002790~peptide secretion                      | 8  | 0.31 | 0.003714 | LEP, CPLX3, HNF1B, GHRH, EDN1, MC4R, GHSR, FKBP1B                                                                                                                                                                                                                                                                                                                      | 1230 | 16  | 0.06748301 |
| GOTERM_BP_FAT                               | GO:0046879~hormone                                | 8  | 0.31 | 0.00556  | LEP, CPLX3, HNF1B, GHRH, EDN1, MC4R, GHSR, FKBP1B                                                                                                                                                                                                                                                                                                                      | 1230 | 17  | 0.090895   |



|                                             |                                                                                                         |    |      |          |                                                                                                                                                                                                                                                                            |      |     |            |    |
|---------------------------------------------|---------------------------------------------------------------------------------------------------------|----|------|----------|----------------------------------------------------------------------------------------------------------------------------------------------------------------------------------------------------------------------------------------------------------------------------|------|-----|------------|----|
| _FAT                                        | secretion                                                                                               |    |      | 1        |                                                                                                                                                                                                                                                                            |      |     |            | 33 |
| GOTERM_BP_FAT                               | GO:0015833~peptide transport                                                                            | 9  | 0.35 | 0.013213 | LEP, CPLX3, HNF1B, GHRH, TAP1, EDN1, MC4R, GHSR, FKBP1B                                                                                                                                                                                                                    | 1230 | 24  | 0.17374625 |    |
| <b>Annotation Cluster 33</b>                |                                                                                                         |    |      |          |                                                                                                                                                                                                                                                                            |      |     |            |    |
| <b>Enrichment Score: 2.445141953693394</b>  |                                                                                                         |    |      |          |                                                                                                                                                                                                                                                                            |      |     |            |    |
| GOTERM_CC_FAT                               | GO:0034704~calcium channel complex                                                                      | 8  | 0.31 | 0.001197 | CACNA2D1, CACNA1G, CACNA1E, CACNB3, CACNB4, FKBP1B, CACNA1D, CACNA1A                                                                                                                                                                                                       | 947  | 14  | 0.01823067 |    |
| GOTERM_CC_FAT                               | GO:0005891~voltage-gated calcium channel complex                                                        | 7  | 0.27 | 0.004521 | CACNA2D1, CACNA1G, CACNA1E, CACNB3, CACNB4, CACNA1D, CACNA1A                                                                                                                                                                                                               | 947  | 13  | 0.05135959 |    |
| GOTERM_MF_FAT                               | GO:0005245~voltage-gated calcium channel activity                                                       | 8  | 0.31 | 0.008535 | CACNA2D1, CACNA1G, CACNA1E, CACNB3, CACNG2, CACNB4, CACNA1D, CACNA1A                                                                                                                                                                                                       | 1232 | 19  | 0.15075884 |    |
| <b>Annotation Cluster 34</b>                |                                                                                                         |    |      |          |                                                                                                                                                                                                                                                                            |      |     |            |    |
| <b>Enrichment Score: 2.4403597803093837</b> |                                                                                                         |    |      |          |                                                                                                                                                                                                                                                                            |      |     |            |    |
| GOTERM_BP_FAT                               | GO:0000122~negative regulation of transcription from RNA polymerase II promoter                         | 28 | 1.09 | 4.08E-05 | CDX2, FST, SOX2, CBX2, PAX3, KCNIP3, FOXH1, VDR, HAND1, OVOL1, NR2F2, NKX2-5, NR2F1, EGR1, SATB1, NANOG, RARG, FOXA1, TLE4, PKIA, DLX1, MSX1, ID2, HES5, ID1, HOPX, CUX1, CRYM                                                                                             | 1230 | 88  | 0.0017222  |    |
| GOTERM_BP_FAT                               | GO:0045892~negative regulation of transcription, DNA-dependent                                          | 32 | 1.25 | 3.95E-04 | SBNO2, CDX2, SOX2, FST, CBX2, PAX3, ZBTB16, KCNIP3, FOXH1, VDR, HAND1, OVOL1, NR2F2, NKX2-5, TWIST2, NR2F1, EGR1, SATB1, NANOG, RARG, FOXA1, NDUFA13, TLE4, PKIA, DLX1, MSX1, ID2, HES5, ID1, HOPX, CUX1, CRYM                                                             | 1230 | 120 | 0.01014472 |    |
| GOTERM_BP_FAT                               | GO:0051253~negative regulation of RNA metabolic process                                                 | 32 | 1.25 | 4.62E-04 | SBNO2, CDX2, SOX2, FST, CBX2, PAX3, ZBTB16, KCNIP3, FOXH1, VDR, HAND1, OVOL1, NR2F2, NKX2-5, TWIST2, NR2F1, EGR1, SATB1, NANOG, RARG, FOXA1, NDUFA13, TLE4, PKIA, DLX1, MSX1, ID2, HES5, ID1, HOPX, CUX1, CRYM                                                             | 1230 | 121 | 0.01136371 |    |
| GOTERM_BP_FAT                               | GO:0016481~negative regulation of transcription                                                         | 35 | 1.36 | 0.004429 | SBNO2, CDX2, SOX2, FST, HR, CBX2, PAX3, ZBTB16, KCNIP3, FOXH1, VDR, HAND1, OVOL1, NR2F2, NKX2-5, TWIST2, NR2F1, EGR1, SATB1, NANOG, RARG, FOXA1, NDUFA13, TLE4, PKIA, NR1I3, DLX1, MSX1, HES5, ID2, ID1, PRDM6, HOPX, CUX1, CRYM                                           | 1230 | 155 | 0.07678628 |    |
| GOTERM_BP_FAT                               | GO:0009890~negative regulation of biosynthetic process                                                  | 41 | 1.6  | 0.007296 | SBNO2, CDX2, PDGFA, SOX2, EDN1, FST, HR, CBX2, PAX3, ZBTB16, ITGB3, KCNIP3, FOXH1, VDR, HAND1, APOE, OVOL1, NR2F2, NKX2-5, TWIST2, NR2F1, EGR1, SATB1, NANOG, RARG, FOXA1, NDUFA13, TLE4, PKIA, INHBB, NR1I3, DLX1, MSX1, HES5, ID2, ID1, PRDM6, HOPX, CUX1, CACNA1A, CRYM | 1230 | 195 | 0.10953606 |    |
| GOTERM_BP_FAT                               | GO:0045934~negative regulation of nucleobase, nucleoside, nucleotide and nucleic acid metabolic process | 36 | 1.4  | 0.00753  | SBNO2, CDX2, SOX2, EDN1, FST, HR, CBX2, PAX3, ZBTB16, KCNIP3, FOXH1, VDR, HAND1, OVOL1, NR2F2, NKX2-5, TWIST2, NR2F1, EGR1, SATB1, NANOG, RARG, FOXA1, NDUFA13, TLE4, PKIA, NR1I3, DLX1, MSX1, HES5, ID2, ID1, PRDM6, HOPX, CUX1, CRYM                                     | 1230 | 166 | 0.11231033 |    |
| GOTERM_BP_FAT                               | GO:0051172~negative regulation of nitrogen compound metabolic process                                   | 36 | 1.4  | 0.009099 | SBNO2, CDX2, SOX2, EDN1, FST, HR, CBX2, PAX3, ZBTB16, KCNIP3, FOXH1, VDR, HAND1, OVOL1, NR2F2, NKX2-5, TWIST2, NR2F1, EGR1, SATB1, NANOG, RARG, FOXA1, NDUFA13, TLE4, PKIA, NR1I3, DLX1, MSX1, HES5, ID2, ID1, PRDM6, HOPX, CUX1, CRYM                                     | 1230 | 168 | 0.13163592 |    |
| GOTERM_BP_FAT                               | GO:0010629~negative regulation of gene expression                                                       | 36 | 1.4  | 0.010929 | SBNO2, CDX2, SOX2, FST, HR, CBX2, PAX3, ZBTB16, KCNIP3, FOXH1, VDR, HAND1, OVOL1, NR2F2, NKX2-5, TWIST2, NR2F1, EGR1, BMP4, SATB1, NANOG, RARG, FOXA1, NDUFA13, TLE4, PKIA, NR1I3, DLX1,                                                                                   | 1230 | 170 | 0.15182825 |    |

|                                             |                                                                      |    |      |          |                                                                                                                                                                                                                                                                                        |      |     |            |
|---------------------------------------------|----------------------------------------------------------------------|----|------|----------|----------------------------------------------------------------------------------------------------------------------------------------------------------------------------------------------------------------------------------------------------------------------------------------|------|-----|------------|
|                                             |                                                                      |    |      |          | MSX1, HES5, ID2, ID1, PRDM6, HOPX, CUX1, CRYM                                                                                                                                                                                                                                          |      |     |            |
| GOTERM_BP_FAT                               | GO:0031327~negative regulation of cellular biosynthetic process      | 39 | 1.52 | 0.012117 | SBNO2, CDX2, PDGFA, SOX2, EDN1, FST, HR, CBX2, PAX3, ZBTB16, KCNIP3, FOXH1, VDR, HAND1, OVOL1, NR2F2, NKX2-5, TWIST2, NR2F1, EGR1, SATB1, NANOG, RARG, FOXA1, NDUFA13, TLE4, PKIA, INHBB, NR1I3, DLX1, MSX1, HES5, ID2, ID1, PRDM6, HOPX, CUX1, CACNA1A, CRYM                          | 1230 | 189 | 0.1625937  |
| GOTERM_BP_FAT                               | GO:0010558~negative regulation of macromolecule biosynthetic process | 38 | 1.48 | 0.015519 | SBNO2, CDX2, SOX2, EDN1, FST, HR, CBX2, PAX3, ZBTB16, ITGB3, KCNIP3, FOXH1, VDR, HAND1, OVOL1, NR2F2, NKX2-5, TWIST2, NR2F1, EGR1, SATB1, NANOG, RARG, FOXA1, NDUFA13, TLE4, PKIA, INHBB, NR1I3, DLX1, MSX1, HES5, ID2, ID1, PRDM6, HOPX, CUX1, CRYM                                   | 1230 | 186 | 0.19527054 |
| GOTERM_BP_FAT                               | GO:0010605~negative regulation of macromolecule metabolic process    | 43 | 1.67 | 0.042241 | SBNO2, CDX2, SOX2, EDN1, SNCA, FST, HR, CBX2, PAX3, ZBTB16, ITGB3, BDKRB2, KCNIP3, FOXH1, VDR, HAND1, OVOL1, NR2F2, NKX2-5, TWIST2, NR2F1, PRKCA, EGR1, BMP4, SATB1, NANOG, RARG, FOXA1, NDUFA13, TLE4, PRKCG, PKIA, INHBB, NR1I3, DLX1, MSX1, HES5, ID2, ID1, PRDM6, HOPX, CUX1, CRYM | 1230 | 231 | 0.40241949 |
| <b>Annotation Cluster 35</b>                |                                                                      |    |      |          |                                                                                                                                                                                                                                                                                        |      |     |            |
| <b>Enrichment Score: 2.423278225785902</b>  |                                                                      |    |      |          |                                                                                                                                                                                                                                                                                        |      |     |            |
| GOTERM_BP_FAT                               | GO:0048534~hemopoietic or lymphoid organ development                 | 30 | 1.17 | 0.002131 | BMI1, CALCR, CD8A, SFXN1, CACNB4, ZBTB16, TGFB1, BCL11A, HOXA9, NKX2-5, NKX2-3, SYK, EPO, EGR1, BMP4, SATB1, EPAS1, CD3D, IL7, OSTM1, BCL2L11, KDR, CARD11, HOXB7, ID2, SIX1, IRF8, CD79A, KLF1, TSHR                                                                                  | 1230 | 121 | 0.04318329 |
| GOTERM_BP_FAT                               | GO:0002520~immune system development                                 | 31 | 1.21 | 0.003758 | BMI1, CALCR, NBN, CD8A, SFXN1, CACNB4, ZBTB16, TGFB1, BCL11A, HOXA9, NKX2-5, NKX2-3, SYK, EPO, EGR1, BMP4, SATB1, EPAS1, CD3D, IL7, OSTM1, BCL2L11, KDR, CARD11, HOXB7, ID2, SIX1, IRF8, CD79A, KLF1, TSHR                                                                             | 1230 | 131 | 0.0678627  |
| GOTERM_BP_FAT                               | GO:0030097~hemopoiesis                                               | 26 | 1.01 | 0.006708 | BMI1, CALCR, CD8A, SFXN1, ZBTB16, BCL11A, HOXA9, NKX2-5, NKX2-3, SYK, EPO, BMP4, EGR1, SATB1, EPAS1, CD3D, IL7, OSTM1, KDR, CARD11, HOXB7, ID2, IRF8, CD79A, TSHR, KLF1                                                                                                                | 1230 | 108 | 0.10423526 |
| <b>Annotation Cluster 36</b>                |                                                                      |    |      |          |                                                                                                                                                                                                                                                                                        |      |     |            |
| <b>Enrichment Score: 2.3775176637788813</b> |                                                                      |    |      |          |                                                                                                                                                                                                                                                                                        |      |     |            |
| GOTERM_BP_FAT                               | GO:0035094~response to nicotine                                      | 6  | 0.23 | 8.73E-04 | HMOX1, CHRNA5, CHRN4, CHRNA7, CHRN2, CHRNA3                                                                                                                                                                                                                                            | 1230 | 7   | 0.02008395 |
| GOTERM_BP_FAT                               | GO:0043279~response to alkaloid                                      | 8  | 0.31 | 0.005561 | GNAL, SLC6A3, HMOX1, CHRNA5, CHRN4, CHRNA7, CHRN2, CHRNA3                                                                                                                                                                                                                              | 1230 | 17  | 0.09089533 |
| GOTERM_BP_FAT                               | GO:0014070~response to organic cyclic substance                      | 8  | 0.31 | 0.015176 | GNAL, SLC6A3, HMOX1, CHRNA5, CHRN4, CHRNA7, CHRN2, CHRNA3                                                                                                                                                                                                                              | 1230 | 20  | 0.19456145 |
| <b>Annotation Cluster 37</b>                |                                                                      |    |      |          |                                                                                                                                                                                                                                                                                        |      |     |            |
| <b>Enrichment Score: 2.3665924788187938</b> |                                                                      |    |      |          |                                                                                                                                                                                                                                                                                        |      |     |            |
| INTERPRO                                    | IPR017974:Claudin, conserved site                                    | 8  | 0.31 | 0.00147  | CLDN7, TMEM37, CLDN4, CLDN3, CLDN5, CLDN1, CLDN10, CLDN11                                                                                                                                                                                                                              | 1185 | 15  | 0.07644617 |
| INTERPRO                                    | IPR006187:Claudin                                                    | 7  | 0.27 | 0.003495 | CLDN7, CLDN4, CLDN3, CLDN5, CLDN1, CLDN10, CLDN11                                                                                                                                                                                                                                      | 1185 | 13  | 0.13879584 |
| SP_PIR_KEY_WORDS                            | Tight junction                                                       | 8  | 0.31 | 0.015473 | CLDN7, F11R, CLDN4, CLDN3, CLDN5, CLDN1, CLDN10, CLDN11                                                                                                                                                                                                                                | 979  | 21  | 0.1573057  |
| <b>Annotation Cluster 38</b>                |                                                                      |    |      |          |                                                                                                                                                                                                                                                                                        |      |     |            |

| <b>Enrichment Score: 2.341104912387001</b>  |                                                         |    |      |          |                                                                                                                                                                    |      |    |            |  |
|---------------------------------------------|---------------------------------------------------------|----|------|----------|--------------------------------------------------------------------------------------------------------------------------------------------------------------------|------|----|------------|--|
| GOTERM_BP_FAT                               | GO:0007517~muscle organ development                     | 23 | 0.9  | 0.002998 | MYOD1, FOXL2, ACTA1, MYF5, PAX3, CACNG2, CACNB4, AFG3L2, TNNI3, HOXD10, LIF, MSX1, LY6E, MEOX2, HAND1, SIX1, PDGFRB, NR2F2, LOC654400, NKX2-5, PITX1, TCF15, SNTA1 | 1230 | 86 | 0.0568651  |  |
| GOTERM_BP_FAT                               | GO:0060537~muscle tissue development                    | 19 | 0.74 | 0.004695 | MYOD1, FOXL2, ACTA1, MYF5, CACNG2, CACNB4, TNNI3, AFG3L2, HOXD10, LY6E, MEOX2, HAND1, SIX1, PDGFRB, NR2F2, LOC654400, NKX2-5, PITX1, SNTA1                         | 1230 | 68 | 0.07942401 |  |
| GOTERM_BP_FAT                               | GO:0014706~striated muscle tissue development           | 18 | 0.7  | 0.006733 | MYOD1, FOXL2, ACTA1, MYF5, CACNG2, CACNB4, TNNI3, AFG3L2, HOXD10, LY6E, MEOX2, HAND1, SIX1, NR2F2, LOC654400, NKX2-5, PITX1, SNTA1                                 | 1230 | 65 | 0.10407571 |  |
| <b>Annotation Cluster 39</b>                |                                                         |    |      |          |                                                                                                                                                                    |      |    |            |  |
| <b>Enrichment Score: 2.2168492736382124</b> |                                                         |    |      |          |                                                                                                                                                                    |      |    |            |  |
| INTERPRO                                    | IPR017983:GPCR, family 2, secretin-like, conserved site | 7  | 0.27 | 0.003495 | CALCR, CRHR1, GPR133, ADCYAP1R1, PTH1R, VIPR1, LPHN1                                                                                                               | 1185 | 13 | 0.13879584 |  |
| INTERPRO                                    | IPR001879:GPCR, family 2, extracellular region          | 6  | 0.23 | 0.00511  | CALCR, CRHR1, ADCYAP1R1, PTH1R, VIPR1, LPHN1                                                                                                                       | 1185 | 10 | 0.18759658 |  |
| INTERPRO                                    | IPR000832:GPCR, family 2, secretin-like                 | 7  | 0.27 | 0.008111 | CALCR, CRHR1, GPR133, ADCYAP1R1, PTH1R, VIPR1, LPHN1                                                                                                               | 1185 | 15 | 0.2593353  |  |
| SMART                                       | SM00008:HormR                                           | 6  | 0.23 | 0.009369 | CALCR, CRHR1, ADCYAP1R1, PTH1R, VIPR1, LPHN1                                                                                                                       | 649  | 10 | 0.22370124 |  |
| <b>Annotation Cluster 40</b>                |                                                         |    |      |          |                                                                                                                                                                    |      |    |            |  |
| <b>Enrichment Score: 2.16928042552493</b>   |                                                         |    |      |          |                                                                                                                                                                    |      |    |            |  |
| GOTERM_BP_FAT                               | GO:0051969~regulation of transmission of nerve impulse  | 12 | 0.47 | 0.006422 | CPLX3, SLC1A3, GLRA1, S100B, SNCA, EDN1, ACTN1, CHRNA7, CHRN2, CSPG5, GDNF, CACNA1A                                                                                | 1230 | 35 | 0.10104076 |  |
| GOTERM_BP_FAT                               | GO:0031644~regulation of neurological system process    | 12 | 0.47 | 0.006422 | CPLX3, SLC1A3, GLRA1, S100B, SNCA, EDN1, ACTN1, CHRNA7, CHRN2, CSPG5, GDNF, CACNA1A                                                                                | 1230 | 35 | 0.10104076 |  |
| GOTERM_BP_FAT                               | GO:0050804~regulation of synaptic transmission          | 11 | 0.43 | 0.00753  | CPLX3, SLC1A3, S100B, SNCA, EDN1, ACTN1, CHRNA7, CHRN2, CSPG5, GDNF, CACNA1A                                                                                       | 1230 | 31 | 0.11176634 |  |
| <b>Annotation Cluster 41</b>                |                                                         |    |      |          |                                                                                                                                                                    |      |    |            |  |
| <b>Enrichment Score: 2.0252985361375844</b> |                                                         |    |      |          |                                                                                                                                                                    |      |    |            |  |
| GOTERM_BP_FAT                               | GO:0048736~appendage development                        | 14 | 0.55 | 0.003662 | RARG, CRABP2, ZBTB16, GREM1, HOXD10, MSX2, MSX1, HOXC11, MEOX2, DLX5, KIAA1715, HOXA9, NR2F2, PITX1                                                                | 1230 | 42 | 0.06696789 |  |
| GOTERM_BP_FAT                               | GO:0060173~limb development                             | 14 | 0.55 | 0.003662 | RARG, CRABP2, ZBTB16, GREM1, HOXD10, MSX2, MSX1, HOXC11, MEOX2, DLX5, KIAA1715, HOXA9, NR2F2, PITX1                                                                | 1230 | 42 | 0.06696789 |  |
| GOTERM_BP_FAT                               | GO:0030326~embryonic limb morphogenesis                 | 11 | 0.43 | 0.015048 | MSX2, RARG, HOXC11, MSX1, DLX5, CRABP2, KIAA1715, HOXA9, ZBTB16, GREM1, HOXD10                                                                                     | 1230 | 34 | 0.1938876  |  |
| GOTERM_BP_FAT                               | GO:0035113~embryonic appendage morphogenesis            | 11 | 0.43 | 0.015048 | MSX2, RARG, HOXC11, MSX1, DLX5, CRABP2, KIAA1715, HOXA9, ZBTB16, GREM1, HOXD10                                                                                     | 1230 | 34 | 0.1938876  |  |
| GOTERM_BP_FAT                               | GO:0035107~appendage morphogenesis                      | 12 | 0.47 | 0.015238 | MSX2, RARG, HOXC11, MSX1, DLX5, CRABP2, KIAA1715, HOXA9, ZBTB16, GREM1, PITX1, HOXD10                                                                              | 1230 | 39 | 0.19446767 |  |
| GOTERM_BP_FAT                               | GO:0035108~limb morphogenesis                           | 12 | 0.47 | 0.015238 | MSX2, RARG, HOXC11, MSX1, DLX5, CRABP2, KIAA1715, HOXA9, ZBTB16, GREM1, PITX1, HOXD10                                                                              | 1230 | 39 | 0.19446767 |  |
| <b>Annotation Cluster 42</b>                |                                                         |    |      |          |                                                                                                                                                                    |      |    |            |  |
| <b>Enrichment Score: 2.0088843539861765</b> |                                                         |    |      |          |                                                                                                                                                                    |      |    |            |  |

|               |                                 |    |      |          |                                                                                                                                                                                          |      |     |            |
|---------------|---------------------------------|----|------|----------|------------------------------------------------------------------------------------------------------------------------------------------------------------------------------------------|------|-----|------------|
| GOTERM_BP_FAT | GO:0016477~cell migration       | 27 | 1.05 | 0.007074 | CCK, PDGFB, EDN2, PAX6, GJA1, PF4, CDH2, PAX3, GDNF, EDNRB, ATOH1, CXCR4, NR2F2, NKX2-3, NR2F1, PRKCA, ICAM1, LOC786683, EMX2, ITGA3, ITGA4, ISL1, KDR, CDH13, CD34, SIX1, GFRA3         | 1230 | 114 | 0.10744591 |
| GOTERM_BP_FAT | GO:0048870~cell motility        | 28 | 1.09 | 0.01153  | CCK, PDGFB, EDN2, PAX6, GJA1, PF4, CDH2, PAX3, GDNF, EDNRB, ATOH1, CXCR4, CHRNA7, NR2F2, NKX2-3, NR2F1, PRKCA, ICAM1, LOC786683, EMX2, ITGA3, ITGA4, ISL1, KDR, CDH13, CD34, SIX1, GFRA3 | 1230 | 124 | 0.15809418 |
| GOTERM_BP_FAT | GO:0051674~localization of cell | 28 | 1.09 | 0.01153  | CCK, PDGFB, EDN2, PAX6, GJA1, PF4, CDH2, PAX3, GDNF, EDNRB, ATOH1, CXCR4, CHRNA7, NR2F2, NKX2-3, NR2F1, PRKCA, ICAM1, LOC786683, EMX2, ITGA3, ITGA4, ISL1, KDR, CDH13, CD34, SIX1, GFRA3 | 1230 | 124 | 0.15809418 |

#### Annotation Cluster 43

Enrichment Score: 1.9615645059690543

|               |                                                                   |   |      |          |                                             |      |    |            |
|---------------|-------------------------------------------------------------------|---|------|----------|---------------------------------------------|------|----|------------|
| GOTERM_BP_FAT | GO:0035095~behavioral response to nicotine                        | 5 | 0.19 | 0.004519 | CHRNA5, CHRN4, CHRNA7, CHRN2, CHRNA3        | 1230 | 6  | 0.07784201 |
| INTERPRO      | IPR002394:Nicotinic acetylcholine receptor, N-terminal            | 6 | 0.23 | 0.00511  | CHRNA5, CHRN4, CHRND, CHRNA7, CHRN2, CHRNA3 | 1185 | 10 | 0.18759658 |
| GOTERM_CC_FAT | GO:0005892~nicotinic acetylcholine-gated receptor-channel complex | 5 | 0.19 | 0.015029 | CHRNA5, CHRN4, CHRNA7, CHRN2, CHRNA3        | 947  | 8  | 0.12648241 |
| GOTERM_MF_FAT | GO:0015464~acetylcholine receptor activity                        | 6 | 0.23 | 0.021179 | CHRM1, CHRNA5, CHRN4, CHRNA7, CHRN2, CHRNA3 | 1232 | 13 | 0.28572928 |
| GOTERM_MF_FAT | GO:0042166~acetylcholine binding                                  | 6 | 0.23 | 0.021179 | CHRM1, CHRNA5, CHRN4, CHRNA7, CHRN2, CHRNA3 | 1232 | 13 | 0.28572928 |

#### Annotation Cluster 44

Enrichment Score: 1.9498434880037865

|               |                                                                    |   |      |          |                                       |      |    |            |
|---------------|--------------------------------------------------------------------|---|------|----------|---------------------------------------|------|----|------------|
| GOTERM_BP_FAT | GO:0031128~developmental induction                                 | 6 | 0.23 | 0.007268 | BMP4, FGFR4, HOXC11, SIX1, SOX2, GDNF | 1230 | 10 | 0.10967667 |
| GOTERM_BP_FAT | GO:0045168~cell-cell signaling involved in cell fate specification | 6 | 0.23 | 0.007268 | BMP4, FGFR4, HOXC11, SIX1, SOX2, GDNF | 1230 | 10 | 0.10967667 |
| GOTERM_BP_FAT | GO:0001759~induction of an organ                                   | 5 | 0.19 | 0.026773 | BMP4, FGFR4, HOXC11, SIX1, GDNF       | 1230 | 9  | 0.29622025 |

#### Annotation Cluster 45

Enrichment Score: 1.9181553165038465

|               |                                            |   |      |          |                                                    |      |    |            |
|---------------|--------------------------------------------|---|------|----------|----------------------------------------------------|------|----|------------|
| GOTERM_BP_FAT | GO:0006584~catecholamine metabolic process | 8 | 0.31 | 0.011188 | LY6E, SNCB, EPAS1, PNMT, GATA3, SLC6A3, SNCA, GCH1 | 1230 | 19 | 0.15445048 |
| GOTERM_BP_FAT | GO:0009712~catechol metabolic process      | 8 | 0.31 | 0.011188 | LY6E, SNCB, EPAS1, PNMT, GATA3, SLC6A3, SNCA, GCH1 | 1230 | 19 | 0.15445048 |
| GOTERM_BP_FAT | GO:0034311~diol metabolic process          | 8 | 0.31 | 0.011188 | LY6E, SNCB, EPAS1, PNMT, GATA3, SLC6A3, SNCA, GCH1 | 1230 | 19 | 0.15445048 |
| GOTERM_BP_FAT | GO:0018958~phenol metabolic process        | 8 | 0.31 | 0.015176 | LY6E, SNCB, EPAS1, PNMT, GATA3, SLC6A3, SNCA, GCH1 | 1230 | 20 | 0.19456145 |

#### Annotation Cluster 46

| <b>Enrichment Score: 1.9037186225978304</b> |                                                               |    |      |          |                                                                                                                                                                                                                                                                                                                                                                                  |      |     |            |  |
|---------------------------------------------|---------------------------------------------------------------|----|------|----------|----------------------------------------------------------------------------------------------------------------------------------------------------------------------------------------------------------------------------------------------------------------------------------------------------------------------------------------------------------------------------------|------|-----|------------|--|
| INTERPRO                                    | IPR001781:Zinc finger, LIM-type                               | 13 | 0.51 | 0.008163 | LMO1, LIMS2, LMO2, LMO3, ABLIM3, PDLIM3, PDLIM1, ISL1, LHX3, LHX4, LHX5, LHX9, TES                                                                                                                                                                                                                                                                                               | 1185 | 44  | 0.25579161 |  |
| SP_PIR_KEY WORDS                            | LIM domain                                                    | 13 | 0.51 | 0.010301 | LMO1, LIMS2, LMO2, LMO3, ABLIM3, PDLIM3, PDLIM1, ISL1, LHX3, LHX4, LHX5, LHX9, TES                                                                                                                                                                                                                                                                                               | 979  | 44  | 0.11539998 |  |
| SMART                                       | SM00132:LIM                                                   | 13 | 0.51 | 0.023127 | LMO1, LIMS2, LMO2, LMO3, ABLIM3, PDLIM3, PDLIM1, ISL1, LHX3, LHX4, LHX5, LHX9, TES                                                                                                                                                                                                                                                                                               | 649  | 44  | 0.4081574  |  |
| <b>Annotation Cluster 47</b>                |                                                               |    |      |          |                                                                                                                                                                                                                                                                                                                                                                                  |      |     |            |  |
| <b>Enrichment Score: 1.7564192382686643</b> |                                                               |    |      |          |                                                                                                                                                                                                                                                                                                                                                                                  |      |     |            |  |
| UP_SEQ_FEATURE                              | metal ion-binding site:Calcium 3                              | 6  | 0.23 | 0.00608  | PRKCA, SYT1, MMP9, PRKCG, COLEC12, PRKCB                                                                                                                                                                                                                                                                                                                                         | 677  | 11  | 0.59915998 |  |
| UP_SEQ_FEATURE                              | metal ion-binding site:Calcium 1; via carbonyl oxygen         | 6  | 0.23 | 0.013802 | PRKCA, SYT1, CABP1, PRKCG, COLEC12, PRKCB                                                                                                                                                                                                                                                                                                                                        | 677  | 13  | 0.76126924 |  |
| UP_SEQ_FEATURE                              | metal ion-binding site:Calcium 2; via carbonyl oxygen         | 7  | 0.27 | 0.019999 | PRKCA, SYT1, MMP9, CABP1, PRKCG, COLEC12, PRKCB                                                                                                                                                                                                                                                                                                                                  | 677  | 19  | 0.81092347 |  |
| UP_SEQ_FEATURE                              | metal ion-binding site:Calcium 1                              | 7  | 0.27 | 0.019999 | PRKCA, SYT1, MMP9, CABP1, PRKCG, COLEC12, PRKCB                                                                                                                                                                                                                                                                                                                                  | 677  | 19  | 0.81092347 |  |
| UP_SEQ_FEATURE                              | metal ion-binding site:Calcium 2                              | 7  | 0.27 | 0.049211 | PRKCA, SYT1, MMP9, CABP1, PRKCG, COLEC12, PRKCB                                                                                                                                                                                                                                                                                                                                  | 677  | 23  | 0.93757382 |  |
| <b>Annotation Cluster 48</b>                |                                                               |    |      |          |                                                                                                                                                                                                                                                                                                                                                                                  |      |     |            |  |
| <b>Enrichment Score: 1.740367314416787</b>  |                                                               |    |      |          |                                                                                                                                                                                                                                                                                                                                                                                  |      |     |            |  |
| GOTERM_MF_FAT                               | GO:0008066~glutamate receptor activity                        | 7  | 0.27 | 0.0134   | GRM3, GRIK1, GRIA2, GRIN2C, GRIK2, GRIK3, GRIN3B                                                                                                                                                                                                                                                                                                                                 | 1232 | 16  | 0.21474289 |  |
| GOTERM_MF_FAT                               | GO:0004970~ionotropic glutamate receptor activity             | 6  | 0.23 | 0.021179 | GRIK1, GRIA2, GRIN2C, GRIK2, GRIK3, GRIN3B                                                                                                                                                                                                                                                                                                                                       | 1232 | 13  | 0.28572928 |  |
| GOTERM_MF_FAT                               | GO:0005234~extracellular-glutamate-gated ion channel activity | 6  | 0.23 | 0.021179 | GRIK1, GRIA2, GRIN2C, GRIK2, GRIK3, GRIN3B                                                                                                                                                                                                                                                                                                                                       | 1232 | 13  | 0.28572928 |  |
| <b>Annotation Cluster 49</b>                |                                                               |    |      |          |                                                                                                                                                                                                                                                                                                                                                                                  |      |     |            |  |
| <b>Enrichment Score: 1.7402310335516</b>    |                                                               |    |      |          |                                                                                                                                                                                                                                                                                                                                                                                  |      |     |            |  |
| GOTERM_CC_FAT                               | GO:0031410~cytoplasmic vesicle                                | 52 | 2.02 | 0.0054   | SYT1, SYT5, SYT7, CSPG5, AP1S3, SLC2A8, PACSIN1, AP1S1, SLC2A4, SMAGP, NECAP1, RAB6B, MT3, SCAMP5, SEC23A, SVOP, STX1A, STXBP2, RPH3A, CHGA, DOC2A, RHCG, CLIC5, NRSN2, VAMP1, CHGB, CALCR, HCRT, RAB3B, AP1M2, CLU, RHBG, POMC, SYPL2, GCH1, PCSK2, PCSK1, ECE2, CRISPLD2, ECRG4, EHD1, GABRA2, NTF3, SYT10, LOC614124, ITPR3, ITPR1, SYNGR3, SLC17A7, SLC17A6, SLC18A2, ATP8A1 | 947  | 265 | 0.05611726 |  |
| GOTERM_CC_FAT                               | GO:0031982~vesicle                                            | 53 | 2.06 | 0.006176 | SYT1, SYT5, SYT7, CSPG5, AP1S3, SLC2A8, PACSIN1, AP1S1, SLC2A4, SMAGP, NECAP1, RAB6B, MT3, SCAMP5, SEC23A, SVOP, STX1A, ACTN1, STXBP2, RPH3A, CHGA, DOC2A, RHCG, CLIC5, NRSN2, VAMP1, CHGB, CALCR, HCRT, RAB3B, AP1M2, CLU, RHBG, POMC, SYPL2, GCH1, PCSK2, PCSK1, ECE2, CRISPLD2, ECRG4, EHD1, GABRA2, NTF3, SYT10, LOC614124, ITPR3, ITPR1, SYNGR3, SLC17A7, SLC17A6,          | 947  | 273 | 0.06068273 |  |

|                                             |                                                                       |    |      |          |                                                                                                                                                                                                                                                                                              |      |     |            |
|---------------------------------------------|-----------------------------------------------------------------------|----|------|----------|----------------------------------------------------------------------------------------------------------------------------------------------------------------------------------------------------------------------------------------------------------------------------------------------|------|-----|------------|
|                                             |                                                                       |    |      |          | SLC18A2, ATP8A1                                                                                                                                                                                                                                                                              |      |     |            |
| GOTERM_CC_FAT                               | GO:0031988~membrane-bounded vesicle                                   | 40 | 1.56 | 0.054814 | CALCR, SYT1, HCRT, RAB3B, SYT5, CLU, CSPG5, SYT7, POMC, SYPL2, PCSK2, AP1S3, PCSK1, ECE2, AP1S1, PACSIN1, SLC2A4, CRISPLD2, ECRG4, NECAP1, RAB6B, EHD1, MT3, SEC23A, STX1A, GABRA2, NTF3, SYT10, LOC614124, ACTN1, STXBP2, RPH3A, ITPR1, SYNGR3, SLC17A7, CHGA, SLC17A6, DOC2A, CLIC5, NRSN2 | 947  | 223 | 0.34051525 |
| GOTERM_CC_FAT                               | GO:0016023~cytoplasmic membrane-bounded vesicle                       | 39 | 1.52 | 0.059857 | CALCR, SYT1, HCRT, RAB3B, SYT5, CLU, CSPG5, SYT7, POMC, SYPL2, PCSK2, AP1S3, PCSK1, ECE2, AP1S1, PACSIN1, SLC2A4, CRISPLD2, ECRG4, NECAP1, RAB6B, EHD1, MT3, SEC23A, STX1A, GABRA2, NTF3, SYT10, LOC614124, STXBP2, RPH3A, ITPR1, SYNGR3, SLC17A7, CHGA, SLC17A6, DOC2A, CLIC5, NRSN2        | 947  | 218 | 0.35010321 |
| <b>Annotation Cluster 50</b>                |                                                                       |    |      |          |                                                                                                                                                                                                                                                                                              |      |     |            |
| <b>Enrichment Score: 1.7332749274686088</b> |                                                                       |    |      |          |                                                                                                                                                                                                                                                                                              |      |     |            |
| GOTERM_MF_FAT                               | GO:0019992~diacylglycerol binding                                     | 8  | 0.31 | 0.004189 | PRKCA, PRKCZ, STAC, RASGRP4, RASGRP2, PRKCH, PRKCG, PRKCB                                                                                                                                                                                                                                    | 1232 | 17  | 0.08375019 |
| INTERPRO                                    | IPR002219:Protein kinase C-like, phorbol ester/diacylglycerol binding | 8  | 0.31 | 0.027856 | PRKCA, PRKCZ, STAC, RASGRP4, RASGRP2, PRKCH, PRKCG, PRKCB                                                                                                                                                                                                                                    | 1185 | 24  | 0.54006735 |
| SMART                                       | SM00109:C1                                                            | 8  | 0.31 | 0.054096 | PRKCA, PRKCZ, STAC, RASGRP4, RASGRP2, PRKCH, PRKCG, PRKCB                                                                                                                                                                                                                                    | 649  | 24  | 0.50953013 |
| <b>Annotation Cluster 51</b>                |                                                                       |    |      |          |                                                                                                                                                                                                                                                                                              |      |     |            |
| <b>Enrichment Score: 1.6967001364469438</b> |                                                                       |    |      |          |                                                                                                                                                                                                                                                                                              |      |     |            |
| INTERPRO                                    | IPR006028:Gamma-aminobutyric acid A receptor                          | 7  | 0.27 | 0.008111 | GABRD, GABRA2, GABRA4, GLRA1, GABRB1, GABRA5, GABRP                                                                                                                                                                                                                                          | 1185 | 15  | 0.2593353  |
| GOTERM_MF_FAT                               | GO:0004890~GABA-A receptor activity                                   | 7  | 0.27 | 0.024597 | GABRD, GABRA2, GABRA4, GABRB1, GABRA5, GABRQ, GABRP                                                                                                                                                                                                                                          | 1232 | 18  | 0.31936396 |
| GOTERM_MF_FAT                               | GO:0016917~GABA receptor activity                                     | 7  | 0.27 | 0.040735 | GABRD, GABRA2, GABRA4, GABRB1, GABRA5, GABRQ, GABRP                                                                                                                                                                                                                                          | 1232 | 20  | 0.44134881 |
| <b>Annotation Cluster 52</b>                |                                                                       |    |      |          |                                                                                                                                                                                                                                                                                              |      |     |            |
| <b>Enrichment Score: 1.6428664369212744</b> |                                                                       |    |      |          |                                                                                                                                                                                                                                                                                              |      |     |            |
| GOTERM_BP_FAT                               | GO:0014032~neural crest cell development                              | 6  | 0.23 | 0.011806 | EDNRB, EDN1, CYP26A1, PAX3, ISL1, GDNF                                                                                                                                                                                                                                                       | 1230 | 11  | 0.16085654 |
| GOTERM_BP_FAT                               | GO:0014033~neural crest cell differentiation                          | 6  | 0.23 | 0.011806 | EDNRB, EDN1, CYP26A1, PAX3, ISL1, GDNF                                                                                                                                                                                                                                                       | 1230 | 11  | 0.16085654 |
| GOTERM_BP_FAT                               | GO:0048762~mesenchymal cell differentiation                           | 7  | 0.27 | 0.02317  | FGFR2, EDNRB, EDN1, CYP26A1, PAX3, ISL1, GDNF                                                                                                                                                                                                                                                | 1230 | 17  | 0.26560973 |
| GOTERM_BP_FAT                               | GO:0060485~mesenchyme development                                     | 7  | 0.27 | 0.030747 | FGFR2, EDNRB, EDN1, CYP26A1, PAX3, ISL1, GDNF                                                                                                                                                                                                                                                | 1230 | 18  | 0.32799498 |
| GOTERM_BP_FAT                               | GO:0014031~mesenchymal cell development                               | 6  | 0.23 | 0.061482 | EDNRB, EDN1, CYP26A1, PAX3, ISL1, GDNF                                                                                                                                                                                                                                                       | 1230 | 16  | 0.50818194 |
| <b>Annotation Cluster 53</b>                |                                                                       |    |      |          |                                                                                                                                                                                                                                                                                              |      |     |            |
| <b>Enrichment Score: 1.6384553272075517</b> |                                                                       |    |      |          |                                                                                                                                                                                                                                                                                              |      |     |            |
| PIR_SUPERFAMILY                             | PIRSF002504:cadherin                                                  | 6  | 0.23 | 9.51E-04 | CDH13, CDH18, CDH1, CDH2, CDH3, CDH6                                                                                                                                                                                                                                                         | 556  | 7   | 0.15906683 |

|                |                                       |   |      |          |                                                   |      |    |            |
|----------------|---------------------------------------|---|------|----------|---------------------------------------------------|------|----|------------|
| UP_SEQ_FEATURE | domain:Cadherin 5                     | 6 | 0.23 | 0.009407 | CDH13, CDH18, CDH1, CDH2, CDH3, CDH6              | 677  | 12 | 0.67151376 |
| UP_SEQ_FEATURE | domain:Cadherin 3                     | 6 | 0.23 | 0.013802 | CDH13, CDH18, CDH1, CDH2, CDH3, CDH6              | 677  | 13 | 0.76126924 |
| UP_SEQ_FEATURE | domain:Cadherin 4                     | 6 | 0.23 | 0.013802 | CDH13, CDH18, CDH1, CDH2, CDH3, CDH6              | 677  | 13 | 0.76126924 |
| INTERPRO       | IPR000233:Cadherin cytoplasmic region | 5 | 0.19 | 0.043159 | CDH18, CDH1, CDH2, CDH3, CDH6                     | 1185 | 11 | 0.67310252 |
| INTERPRO       | IPR002126:Cadherin                    | 8 | 0.31 | 0.060465 | CDH8, CDH13, PCDH1, CDH18, CDH1, CDH2, CDH3, CDH6 | 1185 | 28 | 0.76430086 |
| UP_SEQ_FEATURE | domain:Cadherin 1                     | 5 | 0.19 | 0.060578 | CDH13, CDH18, CDH1, CDH2, CDH6                    | 677  | 13 | 0.95595874 |
| UP_SEQ_FEATURE | domain:Cadherin 2                     | 5 | 0.19 | 0.060578 | CDH13, CDH18, CDH1, CDH2, CDH6                    | 677  | 13 | 0.95595874 |
| SMART          | SM00112:CA                            | 8 | 0.31 | 0.109891 | CDH8, CDH13, PCDH1, CDH18, CDH1, CDH2, CDH3, CDH6 | 649  | 28 | 0.67319112 |

#### Annotation Cluster 54

Enrichment Score: 1.5804046649145007

|          |                                                          |    |      |          |                                                            |      |    |            |
|----------|----------------------------------------------------------|----|------|----------|------------------------------------------------------------|------|----|------------|
| INTERPRO | IPR001723:Steroid hormone receptor                       | 10 | 0.39 | 0.013741 | PGR, VDR, AR, NR1I3, RARG, ESR1, RXRG, NR2F2, NR2F1, NR5A1 | 1185 | 31 | 0.35599042 |
| INTERPRO | IPR008946:Nuclear hormone receptor, ligand-binding       | 10 | 0.39 | 0.016985 | PGR, VDR, AR, NR1I3, RARG, ESR1, RXRG, NR2F2, NR2F1, NR5A1 | 1185 | 32 | 0.40802158 |
| INTERPRO | IPR000536:Nuclear hormone receptor, ligand-binding, core | 10 | 0.39 | 0.020755 | PGR, VDR, AR, NR1I3, RARG, ESR1, RXRG, NR2F2, NR2F1, NR5A1 | 1185 | 33 | 0.45528602 |
| INTERPRO | IPR001628:Zinc finger, nuclear hormone receptor-type     | 9  | 0.35 | 0.026725 | PGR, VDR, NR1I3, RARG, ESR1, RXRG, NR2F2, NR2F1, NR5A1     | 1185 | 29 | 0.53118346 |
| SMART    | SM00430:HOLI                                             | 10 | 0.39 | 0.046163 | PGR, VDR, AR, NR1I3, RARG, ESR1, RXRG, NR2F2, NR2F1, NR5A1 | 649  | 33 | 0.4878492  |
| SMART    | SM00399:ZnF_C4                                           | 9  | 0.35 | 0.055098 | PGR, VDR, NR1I3, RARG, ESR1, RXRG, NR2F2, NR2F1, NR5A1     | 649  | 29 | 0.49991422 |

#### Annotation Cluster 55

Enrichment Score: 1.5651599525612845

|          |                                                                      |    |      |          |                                                                                |      |    |            |
|----------|----------------------------------------------------------------------|----|------|----------|--------------------------------------------------------------------------------|------|----|------------|
| INTERPRO | IPR000152:EGF-type aspartate/asparagine hydroxylation conserved site | 12 | 0.47 | 0.010409 | THBD, LTBP2, DLL4, EFEMP1, NELL2, PROZ, ACAN, VCAN, DLK2, DLK1, CLEC14A, VLDLR | 1185 | 40 | 0.29781893 |
| INTERPRO | IPR001881:EGF-like calcium-binding                                   | 11 | 0.43 | 0.01616  | THBD, LTBP2, DLL4, EFEMP1, NELL2, ACAN, VCAN, DLK2, DLK1, VLDLR, THBS4         | 1185 | 37 | 0.39841002 |
| SMART    | SM00179:EGF_CA                                                       | 11 | 0.43 | 0.038749 | THBD, LTBP2, DLL4, EFEMP1, NELL2, ACAN, VCAN, DLK2, DLK1, VLDLR, THBS4         | 649  | 37 | 0.48543127 |
| INTERPRO | IPR018097:EGF-like calcium-binding, conserved site                   | 9  | 0.35 | 0.084193 | THBD, LTBP2, EFEMP1, NELL2, ACAN, VCAN, DLK2, VLDLR, THBS4                     | 1185 | 36 | 0.84317834 |





| Category                                                           | Term                               | Count | %     | P-value  | Genes                                                                                                                                                                                                                                                                                                                                                                                                                         | Total | Hits | Total | ment | P-value  |
|--------------------------------------------------------------------|------------------------------------|-------|-------|----------|-------------------------------------------------------------------------------------------------------------------------------------------------------------------------------------------------------------------------------------------------------------------------------------------------------------------------------------------------------------------------------------------------------------------------------|-------|------|-------|------|----------|
| <b>Annotation Cluster 1 (Enrichment Score: 18.34445733208664)</b>  |                                    |       |       |          |                                                                                                                                                                                                                                                                                                                                                                                                                               |       |      |       |      |          |
| SP_PIR_KEYWORDS                                                    | Homeobox                           | 47    | 1.814 | 2.55E-21 | IRX3, HNF1B, CDX2, ONECUT1, PAX6, PAX3, HOXD10, OTP, CRX, HOXC6, MSX2, DBX2, MEIS2, POU5F1, HOXC4, LHX3, LHX4, HOXA10, LHX5, POU3F2, POU3F1, ALX4, NKX2-5, LHX9, PITX1, DBX1, PITX2, NKX2-3, NANOG, EMX2, ISL1, HOXB3, DLX3, HOXB4, HHEX, DLX1, ZFHX4, MSX1, HOXC11, MEOX2, HOXB7, HOXC13, DLX5, DLX4, HOXB6, SIX1, HOPX, UNCX                                                                                                | 985   | 78   | 7349  | 4.5  | 3.87E-19 |
| INTERPRO                                                           | IPR001356:Homeobox                 | 44    | 1.698 | 1.06E-19 | IRX3, HNF1B, ONECUT1, PAX6, PAX3, HOXD10, OTP, CRX, HOXC6, MSX2, DBX2, POU5F1, HOXC4, LHX3, LHX4, HOXA10, LHX5, POU3F2, POU3F1, ALX4, NKX2-5, LHX9, PITX1, DBX1, NKX2-3, PITX2, NANOG, EMX2, ISL1, HOXB3, DLX3, HOXB4, HHEX, DLX1, HOXC11, MSX1, MEOX2, HOXB7, HOXC13, DLX5, DLX4, HOXB6, SIX1, HOPX, UNCX                                                                                                                    | 1200  | 75   | 9171  | 4.48 | 1.68E-16 |
| INTERPRO                                                           | IPR017970:Homeobox, conserved site | 39    | 1.505 | 5.85E-19 | IRX3, HNF1B, PAX6, PAX3, HOXD10, OTP, CRX, MSX2, DBX2, POU5F1, HOXC4, LHX3, LHX4, HOXA10, LHX5, POU3F2, POU3F1, ALX4, LHX9, NKX2-5, PITX1, DBX1, NKX2-3, PITX2, NANOG, EMX2, ISL1, HOXB3, DLX3, HOXB4, HHEX, DLX1, MSX1, MEOX2, HOXB7, HOXC13, DLX5, HOXB6, SIX1, HOPX                                                                                                                                                        | 1200  | 62   | 9171  | 4.81 | 4.63E-16 |
| INTERPRO                                                           | IPR012287:Homeodomain-related      | 43    | 1.66  | 6.71E-18 | IRX3, HNF1B, ONECUT1, PAX6, PAX3, HOXD10, OTP, CRX, HOXC6, MSX2, DBX2, POU5F1, HOXC4, LHX3, LHX4, HOXA10, LHX5, POU3F2, POU3F1, ALX4, MYB, NKX2-5, LHX9, PITX1, DBX1, NKX2-3, PITX2, NANOG, EMX2, HOXB3, DLX3, HOXB4, HHEX, HOXC11, MSX1, MEOX2, HOXB7, HOXC13, DLX5, DLX4, HOXB6, SIX1, HOPX, UNCX                                                                                                                           | 1200  | 78   | 9171  | 4.21 | 3.54E-15 |
| SMART                                                              | SM00389:HOX                        | 44    | 1.698 | 1.79E-17 | IRX3, HNF1B, ONECUT1, PAX6, PAX3, HOXD10, OTP, CRX, HOXC6, MSX2, DBX2, POU5F1, HOXC4, LHX3, LHX4, HOXA10, LHX5, POU3F2, POU3F1, ALX4, NKX2-5, LHX9, PITX1, DBX1, NKX2-3, PITX2, NANOG, EMX2, ISL1, HOXB3, DLX3, HOXB4, HHEX, DLX1, HOXC11, MSX1, MEOX2, HOXB7, HOXC13, DLX5, DLX4, HOXB6, SIX1, HOPX, UNCX                                                                                                                    | 661   | 75   | 4364  | 3.87 | 4.86E-15 |
| <b>Annotation Cluster 2 (Enrichment Score: 15.307083113782918)</b> |                                    |       |       |          |                                                                                                                                                                                                                                                                                                                                                                                                                               |       |      |       |      |          |
| GOTERM_MF_FAT                                                      | GO:0022836~gated channel activity  | 76    | 2.933 | 1.56E-17 | KCNH1, KCNC1, GRIK1, GLRA1, KCNAB1, GRIK2, GABRB2, SCN3B, GRIK3, GABRB1, GRIN3B, KCNJ10, KCNJ12, KCNJ11, KCNIP3, SHKBP1, KCNQ3, MGC139528, GRIN2C, CHRNA5, CHRNA7, KCNQ2, KCNG3, FGF2, CHRNA3, CHRNA2, KCNMA1, KCND2, CACNG2, CNGA3, KCNT1, LOC100139857, KCNH2, KCNH5, KCNA2, KCNA1, KCNA4, KCNA6, CACNB4, KCNA5, KCNS2, KCNE1, HTR3A, SCN5A, SCNN1A, GABRP, GABRD, GABRA2, GLRB, CACNA2D1, GABRA4, LOC100138074, LOC783386, | 1248  | 204  | 9249  | 2.76 | 3.48E-15 |

|               |                                                |    |       |          |                                                                                                                                                                                                                                                                                                                                                                                                                                                                                                                                                                                                                                                                                                      |      |     |      |      |          |
|---------------|------------------------------------------------|----|-------|----------|------------------------------------------------------------------------------------------------------------------------------------------------------------------------------------------------------------------------------------------------------------------------------------------------------------------------------------------------------------------------------------------------------------------------------------------------------------------------------------------------------------------------------------------------------------------------------------------------------------------------------------------------------------------------------------------------------|------|-----|------|------|----------|
|               |                                                |    |       |          | ITPR3, KCNK1, KCNK2, KCNV1, KCTD8, ACCN1, KCNN4, KCNJ9, KCNN1, GRIA2, KCNJ8, KCNN2, CHRNB4, CACNA1G, KCNF1, SCN4B, CHRNB2, CHRND, CACNA1E, CACNA1D, CACNA1A, CHRNG, KCTD12                                                                                                                                                                                                                                                                                                                                                                                                                                                                                                                           |      |     |      |      |          |
| GOTERM_MF_FAT | GO:0005216~ion channel activity                | 88 | 3.396 | 3.96E-16 | KCNK17, KCNHI, KCNC1, GRIK1, GLRA1, KCNAB1, SCN3B, GRIK2, GABRB2, GRIK3, GABRB1, GRIN3B, KCNJ10, KCNJ12, KCNJ11, KCNIP3, SHKBP1, MGC139528, KCNQ3, GRIN2C, CHRNA5, CHRNA7, ANO4, KCNQ2, KCNG3, FGF2, CHRNA3, CHRNA2, KCNMA1, TRPM6, KCND2, CFTR, CACNG2, CNGA3, CATSPER4, KCNT1, SLC26A8, LOC100139857, KCNH2, KCNH5, KCNA2, KCNA1, KCNA4, KCNA6, KCNA5, CACNB4, FXYD6, FXYD7, KCNS2, TTYH1, KCNE1, HTR3A, SCN5A, SCNN1A, GABRP, GABRD, GABRA2, GLRB, CACNA2D1, TRPC3, GABRA4, LOC100138074, LOC783386, ITPR3, KCNK1, KCNK2, KCNV1, KCNK4, KCTD8, ACCN1, KCNN4, KCNJ9, GRIA2, KCNN1, KCNJ8, KCNN2, CHRNB4, CACNA1G, KCNF1, SCN4B, CHRNB2, CHRND, CACNA1E, LOC505697, CACNA1D, CACNA1A, CHRNG, KCTD12 | 1248 | 268 | 9249 | 2.43 | 7.92E-14 |
| GOTERM_MF_FAT | GO:0022838~substrate specific channel activity | 88 | 3.396 | 8.27E-16 | KCNK17, KCNHI, KCNC1, GRIK1, GLRA1, KCNAB1, SCN3B, GRIK2, GABRB2, GRIK3, GABRB1, GRIN3B, KCNJ10, KCNJ12, KCNJ11, KCNIP3, SHKBP1, MGC139528, KCNQ3, GRIN2C, CHRNA5, CHRNA7, ANO4, KCNQ2, KCNG3, FGF2, CHRNA3, CHRNA2, KCNMA1, TRPM6, KCND2, CFTR, CACNG2, CNGA3, CATSPER4, KCNT1, SLC26A8, LOC100139857, KCNH2, KCNH5, KCNA2, KCNA1, KCNA4, KCNA6, KCNA5, CACNB4, FXYD6, FXYD7, KCNS2, TTYH1, KCNE1, HTR3A, SCN5A, SCNN1A, GABRP, GABRD, GABRA2, GLRB, CACNA2D1, TRPC3, GABRA4, LOC100138074, LOC783386, ITPR3, KCNK1, KCNK2, KCNV1, KCNK4, KCTD8, ACCN1, KCNN4, KCNJ9, GRIA2, KCNN1, KCNJ8, KCNN2, CHRNB4, CACNA1G, KCNF1, SCN4B, CHRNB2, CHRND, CACNA1E, LOC505697, CACNA1D, CACNA1A, CHRNG, KCTD12 | 1248 | 271 | 9249 | 2.41 | 1.15E-13 |
| GOTERM_MF_FAT | GO:0015267~channel activity                    | 88 | 3.396 | 2.39E-15 | KCNK17, KCNHI, KCNC1, GRIK1, GLRA1, KCNAB1, SCN3B, GRIK2, GABRB2, GRIK3, GABRB1, GRIN3B, KCNJ10, KCNJ12, KCNJ11, KCNIP3, SHKBP1, MGC139528, KCNQ3, GRIN2C, CHRNA5, CHRNA7, ANO4, KCNQ2, KCNG3, FGF2, CHRNA3, CHRNA2, KCNMA1, TRPM6, KCND2, CFTR, CACNG2, CNGA3, CATSPER4, KCNT1, SLC26A8, LOC100139857, KCNH2, KCNH5, KCNA2, KCNA1, KCNA4, KCNA6, KCNA5, CACNB4, FXYD6, FXYD7, KCNS2, TTYH1, KCNE1, HTR3A, SCN5A, SCNN1A, GABRP, GABRD, GABRA2, GLRB, CACNA2D1, TRPC3, GABRA4, LOC100138074, LOC783386, ITPR3, KCNK1, KCNK2, KCNV1, KCNK4, KCTD8, ACCN1,                                                                                                                                             | 1248 | 275 | 9249 | 2.37 | 2.97E-13 |

|                                                                    |                                                       |     |       |          |                                                                                                                                                                                                                                                                                                                                                                                                                                                                                                                                                                                                                                                                                                                                                                                                                                                                                                                                                                                                                                                                                                                                                                                                                                                                                                                                            |      |     |      |      |          |
|--------------------------------------------------------------------|-------------------------------------------------------|-----|-------|----------|--------------------------------------------------------------------------------------------------------------------------------------------------------------------------------------------------------------------------------------------------------------------------------------------------------------------------------------------------------------------------------------------------------------------------------------------------------------------------------------------------------------------------------------------------------------------------------------------------------------------------------------------------------------------------------------------------------------------------------------------------------------------------------------------------------------------------------------------------------------------------------------------------------------------------------------------------------------------------------------------------------------------------------------------------------------------------------------------------------------------------------------------------------------------------------------------------------------------------------------------------------------------------------------------------------------------------------------------|------|-----|------|------|----------|
|                                                                    |                                                       |     |       |          | KCNN4, KCNJ9, GRIA2, KCNN1, KCNJ8, KCNN2, CHRN4, CACNA1G, KCNF1, SCN4B, CHRN2, CHRND, CACNA1E, LOC505697, CACNA1D, CACNA1A, CHRNG, KCTD12                                                                                                                                                                                                                                                                                                                                                                                                                                                                                                                                                                                                                                                                                                                                                                                                                                                                                                                                                                                                                                                                                                                                                                                                  |      |     |      |      |          |
| GOTERM_MF_FAT                                                      | GO:0022803~passive transmembrane transporter activity | 88  | 3.396 | 2.39E-15 | KCNK17, KCNH1, KCNC1, GRIK1, GLRA1, KCNAB1, SCN3B, GRIK2, GABRB2, GRIK3, GABRB1, GRIN3B, KCNJ10, KCNJ12, KCNJ11, KCNIP3, SHKBP1, MGC139528, KCNQ3, GRIN2C, CHRNA5, CHRNA7, ANO4, KCNQ2, KCNG3, FGF2, CHRNA3, CHRNA2, KCNMA1, TRPM6, KCND2, CFTR, CACNG2, CNGA3, CATSPER4, KCNT1, SLC26A8, LOC100139857, KCNH2, KCNH5, KCNA2, KCNA1, KCNA4, KCNA6, KCNA5, CACNB4, FXYP6, FXYP7, KCNS2, TTYH1, KCNE1, HTR3A, SCN5A, SCNN1A, GABRP, GABRD, GABRA2, GLRB, CACNA2D1, TRPC3, GABRA4, LOC100138074, LOC783386, ITPR3, KCNK1, KCNK2, KCNV1, KCNK4, KCTD8, ACCN1, KCNN4, KCNJ9, GRIA2, KCNN1, KCNJ8, KCNN2, CHRN4, CACNA1G, KCNF1, SCN4B, CHRN2, CHRND, CACNA1E, LOC505697, CACNA1D, CACNA1A, CHRNG, KCTD12                                                                                                                                                                                                                                                                                                                                                                                                                                                                                                                                                                                                                                         | 1248 | 275 | 9249 | 2.37 | 2.97E-13 |
| <b>Annotation Cluster 3 (Enrichment Score: 11.642818517677654)</b> |                                                       |     |       |          |                                                                                                                                                                                                                                                                                                                                                                                                                                                                                                                                                                                                                                                                                                                                                                                                                                                                                                                                                                                                                                                                                                                                                                                                                                                                                                                                            |      |     |      |      |          |
| GOTERM_MF_FAT                                                      | GO:0030528~transcription regulator activity           | 185 | 7.14  | 2.58E-20 | MYOD1, CDX2, ARNT2, RORC, RORB, NR2E1, LOC782183, HOXD10, TAF7L, HOXC6, PGR, ATOH1, OLIG3, GATA5, GATA3, FOXF1, HOXC4, GATA4, OLIG1, ATOH7, PITX1, TWIST2, PITX2, TWIST1, PHOX2A, SATB2, RARG, EMX1, LOC787396, BARHL2, EMX2, EOMES, RXRG, MLXIPL, HES6, AHR, ASCL2, ASCL1, HHEX, MSX1, HES5, SIX1, TFAP2A, TFAP2C, NFE2L3, ASCL4, UNCX, EID1, LOC527381, LOC781206, ONECUT1, SOX2, LOC783396, OTP, FOXH1, TCF21, DBX2, T, VDR, AHRR, MEIS3, MEIS2, HOXA7, LHX3, LHX4, HOXA10, LHX5, HOXA9, NKX2-5, LHX9, DBX1, NKX2-3, KLF5, DMBX1, GSX2, MAFB, FOXA1, ESRG, NEUROG1, NEUROG3, SHOX2, HOXB3, DLX3, HOXB4, LOC784735, NR1I3, DLX1, ATF3, HOXB2, DMRTC2, HOXB7, LOC789959, DLX6, DLX5, EBF2, DLX4, HOXB6, HOPX, CRYM, KLF4, TCF15, HNF1B, FOXA2, ELF5, LOC783703, HR, PAX6, DMRTA2, PAX3, FEV, KCNIP3, GLI1, CRX, FERD3L, LBH, HEY1, LOC509704, POU5F1, MKX, SOX18, FOXB1, MYB, NR2F2, ALX4, ALX3, NR2F1, EGR1, SSBP4, AR, NANOG, TBX15, ZNF287, OTX2, ESR1, TLE4, MIXL1, HOXC11, NRL, HOXC13, FOXC2, LOC617563, CUX2, CUX1, ZNF483, LOC522736, IRX3, SBNO2, TRIB3, LOC618065, MSX2, STAT4, HAND1, LOC787194, POU2F3, BCL11A, NFATC4, POU3F2, POU3F1, TLX2, SIM1, LOC615643, CEBPA, MAF, MYF6, FOXL2, FOXL1, LMX1B, TBX5, MYF5, TBX4, VSX2, ISL1, ID2, IRF5, MEOX2, ID1, IRF6, IRF8, HEYL, NEUROD1, SP7, ID3, LOC654400, NR5A2, FOXE3, PBX4 | 1248 | 715 | 9249 | 1.92 | 7.65E-18 |

|               |                                                       |     |       |          |                                                                                                                                                                                                                                                                                                                                                                                                                                                                                                                                                                                                                                                                                                                                                                                                                                                                                                                                                                                                                                                                                                                                                                                                                                                                                                                              |      |     |      |      |          |
|---------------|-------------------------------------------------------|-----|-------|----------|------------------------------------------------------------------------------------------------------------------------------------------------------------------------------------------------------------------------------------------------------------------------------------------------------------------------------------------------------------------------------------------------------------------------------------------------------------------------------------------------------------------------------------------------------------------------------------------------------------------------------------------------------------------------------------------------------------------------------------------------------------------------------------------------------------------------------------------------------------------------------------------------------------------------------------------------------------------------------------------------------------------------------------------------------------------------------------------------------------------------------------------------------------------------------------------------------------------------------------------------------------------------------------------------------------------------------|------|-----|------|------|----------|
| GOTERM_BP_FAT | GO:0006355~regulation of transcription, DNA-dependent | 187 | 7.217 | 4.13E-11 | MYOD1, CDX2, ARNT2, FST, RORC, CBX2, RORB, GDNF, NR2E1, IL10, LOC782183, HOXD10, HOXC6, PGR, ATOH1, GATA5, GATA3, FOXF1, HOXC4, GATA4, ZNF180, PITX1, TWIST2, PITX2, PHOX2A, SATB2, RARG, EMX1, LOC787396, BARHL2, EMX2, EOMES, RXRG, HES6, AHR, HHEX, MSX1, HES5, SIX1, TFAP2A, ZNF383, TFAP2C, NFE2L3, UNCX, LOC527381, ONECUT1, SOX2, LOC783396, LIN28B, OTP, LIF, FOXH1, VDR, T, DBX2, AHRR, MEIS3, MEIS2, HOXA7, OVOL1, LHX3, LHX4, HOXA10, LHX5, LOC789268, NKX2-5, LHX9, DBX1, NKX2-3, KLF5, DMBX1, BMP4, BMP3, RFX4, GSX2, NTF3, MAFB, FOXA1, GSX1, ESRRG, SHOX2, HOXB3, DLX3, HOXB4, NR1I3, GCM2, DLX1, ATF3, HOXB2, DMRTC2, HOXB7, LOC789959, DLX6, DLX5, EBF2, DLX4, HOXB6, HOPX, CRYM, KLF4, KCNH1, HNF1B, FOXA2, ELF5, LOC783703, PAX6, DMRTA2, PAX3, FEV, KCNIP3, GLI1, CRX, LBH, HEY1, POU5F1, MKX, SOX18, FOXB1, MYB, ALX4, NR2F2, ALX3, FGF2, NR2F1, EGR1, AR, NANOG, TBX15, ZNF287, OTX2, ESR1, TLE4, NDUFA13, MIXL1, INHBA, HOXC11, NRL, HOXC13, FOXC2, CUX2, KCNH2, CUX1, ZNF483, KCNH5, LOC522736, IRX3, SBNO2, ABLIM3, LOC618065, MSX2, STAT4, HAND1, LOC787194, POU2F3, PER1, NFATC4, POU3F2, POU3F1, TLX2, SIM1, LOC615643, EPO, CEBPA, MAF, MYF6, FOXL2, FOXL1, LMX1B, TBX5, MYF5, TBX4, VSX2, ISL1, ID2, IRF5, MEOX2, ID1, IRF6, IRF8, HEYL, NEUROD1, SP7, ID3, LOC654400, NR5A2, FOXE3, PBX4, F2R | 1242 | 845 | 8785 | 1.57 | 4.11E-08 |
| GOTERM_BP_FAT | GO:0051252~regulation of RNA metabolic process        | 188 | 7.256 | 1.06E-10 | MYOD1, CDX2, ARNT2, FST, RORC, CBX2, RORB, GDNF, NR2E1, IL10, LOC782183, HOXD10, HOXC6, PGR, ATOH1, GATA5, GATA3, FOXF1, HOXC4, GATA4, ZNF180, PITX1, TWIST2, PITX2, PHOX2A, SATB2, RARG, EMX1, LOC787396, BARHL2, EMX2, EOMES, RXRG, HES6, AHR, HHEX, MSX1, HES5, SIX1, TFAP2A, ZNF383, TFAP2C, NFE2L3, UNCX, LOC527381, ONECUT1, SOX2, LOC783396, LIN28B, OTP, LIF, FOXH1, VDR, T, DBX2, AHRR, MEIS3, MEIS2, HOXA7, OVOL1, LHX3, LHX4, HOXA10, LHX5, LOC789268, NKX2-5, LHX9, DBX1, NKX2-3, KLF5, DMBX1, BMP4, BMP3, RFX4, GSX2, NTF3, MAFB, FOXA1, GSX1, ESRRG, SHOX2, HOXB3, DLX3, HOXB4, NR1I3, GCM2, DLX1, ATF3, HOXB2, DMRTC2, HOXB7, LOC789959, DLX6, DLX5, EBF2, DLX4, HOXB6, HOPX, CRYM, KLF4, KCNH1, HNF1B, FOXA2, ELF5, LOC783703, PAX6, DMRTA2, PAX3, FEV, KCNIP3, GLI1, CRX, LBH, HEY1, POU5F1, MKX, SOX18, FOXB1, MYB, ALX4, NR2F2, ALX3, FGF2, NR2F1, EGR1, AR, NANOG, TBX15, ZNF287, OTX2, ESR1, TLE4, NDUFA13, MIXL1, INHBA, HOXC11,                                                                                                                                                                                                                                                                                                                                                                       | 1242 | 860 | 8785 | 1.55 | 7.90E-08 |

|                                                                   |                                        |     |       |          |                                                                                                                                                                                                                                                                                                                                                                                                                                                                                                                                                                                                                                                                                                                                                                                                                                                                                                                                                                                                                                                                                                                                                                                                                                                                                                                                                                                                                                                                                                                                                                                                               |      |      |      |      |          |
|-------------------------------------------------------------------|----------------------------------------|-----|-------|----------|---------------------------------------------------------------------------------------------------------------------------------------------------------------------------------------------------------------------------------------------------------------------------------------------------------------------------------------------------------------------------------------------------------------------------------------------------------------------------------------------------------------------------------------------------------------------------------------------------------------------------------------------------------------------------------------------------------------------------------------------------------------------------------------------------------------------------------------------------------------------------------------------------------------------------------------------------------------------------------------------------------------------------------------------------------------------------------------------------------------------------------------------------------------------------------------------------------------------------------------------------------------------------------------------------------------------------------------------------------------------------------------------------------------------------------------------------------------------------------------------------------------------------------------------------------------------------------------------------------------|------|------|------|------|----------|
|                                                                   |                                        |     |       |          | NRL, HOXC13, FOXC2, CUX2, KCNH2, CUX1, ZNF483, KCNH5, CALCR, LOC522736, IRX3, SBNO2, ABLIM3, LOC618065, MSX2, STAT4, HAND1, LOC787194, POU2F3, PER1, NFATC4, POU3F2, POU3F1, TLX2, SIM1, LOC615643, EPO, CEBPA, MAF, MYF6, FOXL2, FOXL1, LMX1B, TBX5, MYF5, TBX4, VSX2, ISL1, ID2, IRF5, MEOX2, ID1, IRF6, IRF8, HEYL, NEUROD1, SP7, ID3, LOC654400, NR5A2, FOXE3, PBX4, F2R                                                                                                                                                                                                                                                                                                                                                                                                                                                                                                                                                                                                                                                                                                                                                                                                                                                                                                                                                                                                                                                                                                                                                                                                                                  |      |      |      |      |          |
| GOTERM_BP_FAT                                                     | GO:0045449~regulation of transcription | 224 | 8.645 | 2.38E-07 | CDX2, GDF6, FST, RORC, RORB, HOXD10, PGR, FOXF1, PITX1, TWIST2, PITX2, TWIST1, PHOX2A, RARG, EMX1, EMX2, BARHL2, RXRG, EOMES, MSX1, HES5, ECOP, PRDM6, ZNF383, UNCX, LOC783396, OTP, FOXH1, LIF, T, TCF21, AHRR, LHX3, LHX4, HOXA10, LHX5, LOC789268, NKX2-5, LHX9, NKX2-3, KLF5, DMBX1, BMP4, BMP3, IKZF3, NTF3, ESRRG, SHOX2, DLX3, NR1I3, DLX1, DMRTC2, LOC789959, DLX6, DLX5, DLX4, HOPX, CRYM, KLF4, TCF15, KCNH1, HNF1B, FOXA2, ELF5, LOC783703, KCNIP3, GLI1, FERD3L, LOC789450, MKX, FOXB1, MYB, NR2F2, FGF2, NR2F1, AR, TBX15, ZNF287, TLE3, TLE4, NDUFA13, INHBA, FOXC2, KCNH2, ZNF483, KCNH5, LOC522736, SEC14L2, STAT4, LOC787194, PER1, ACTL6B, TLX2, SIM1, LOC615643, MYF6, LMX1B, TBX5, MYF5, TBX4, MEOX2, NEUROD1, LOC654400, NR5A2, FOXE3, PBX4, MYOD1, LMO3, ARNT2, CBX2, NR2E1, GDNF, IL10, LOC782183, HOXC6, ATOH1, OLIG3, GATA5, GATA3, HOXC4, GATA4, OLIG1, ATOH7, ZNF180, SATB2, LOC787396, MLXIPL, HES6, AHR, PTHLH, ASCL2, ASCL1, HHEX, SIX1, TFAP2A, TFAP2C, NFE2L3, ASCL4, LOC527381, ONECUT1, LOC781206, SOX2, LIN28B, DBX2, VDR, MEIS3, MEIS2, HOXA7, OVOL1, DBX1, GSX2, RFX4, MAFB, FOXA1, GSX1, NEUROG1, NEUROG3, HOXB3, FEZF2, HOXB4, GCM2, HOXB2, ATF3, HOXB7, EBF2, HOXB6, BMI1, HR, PAX6, PAX5, DMRTA2, PAX3, PAX1, FEV, CRX, LBH, HEY1, PAX9, LOC509704, POU5F1, PAX8, SOX18, ALX4, ALX3, EGR1, NANOG, EGR4, OTX2, ESR1, MIXL1, HOXC11, HOXC13, NRL, LOC617563, CUX2, CUX1, IRX3, SBNO2, ABLIM3, TRIB3, LOC618065, MSX2, HAND1, POU2F3, PYCARD, NFATC4, POU3F2, POU3F1, EPO, CEBPA, INSM1, MAF, FOXL2, FOXL1, ISL1, VSX2, ID2, IRF5, ID1, IRF6, IRF8, HEYL, SP7, ID3, F2R | 1242 | 1166 | 8785 | 1.36 | 3.10E-05 |
| <b>Annotation Cluster 4 (Enrichment Score: 10.40242929598037)</b> |                                        |     |       |          |                                                                                                                                                                                                                                                                                                                                                                                                                                                                                                                                                                                                                                                                                                                                                                                                                                                                                                                                                                                                                                                                                                                                                                                                                                                                                                                                                                                                                                                                                                                                                                                                               |      |      |      |      |          |
| SP_PIR_KEYWORDS                                                   | g-protein coupled receptor             | 60  | 2.316 | 4.73E-12 | F2RL2, GPR84, F2RL3, CASR, TACR3, F2RL1, LHCGR, VIPR1, GHRHR, EDNRA, EDNRB, S1PR3, S1PR1, LTB4R, GALR2, LOC781367, MC5R, EBI2, LPHN1, C5AR1, PTGER3, GPR92, CCKBR, PTGER4, HTR4, PROKR2, PROKR1, MRGPRF, CRHR1, SSTR2, GRM3, ADRB1, PTGDR, NK1R,                                                                                                                                                                                                                                                                                                                                                                                                                                                                                                                                                                                                                                                                                                                                                                                                                                                                                                                                                                                                                                                                                                                                                                                                                                                                                                                                                              | 985  | 177  | 7349 | 2.53 | 1.80E-10 |

|          |                                            |    |       |          |                                                                                                                                                                                                                                                                                                                                                                                                 |      |     |      |      |          |
|----------|--------------------------------------------|----|-------|----------|-------------------------------------------------------------------------------------------------------------------------------------------------------------------------------------------------------------------------------------------------------------------------------------------------------------------------------------------------------------------------------------------------|------|-----|------|------|----------|
|          |                                            |    |       |          | TSHR, CALCR, DRD1, PRLHR, GPRC5C, ADORA2B, OPRK1, NPY2R, ADCYAP1R1, PTH1R, GPR6, OXTR, BDKRB2, GPR4, ADRB3, HCRTR1, ADRA2A, PTGFR, FZD6, FZD10, AVPR1B, ADRA1B, AVPR1A, UTS2R, GHRSR, F2R, HTR2A                                                                                                                                                                                                |      |     |      |      |          |
| INTERPRO | IPR000276:7TM GPCR, rhodopsin-like         | 54 | 2.084 | 1.01E-10 | F2RL2, F2RL3, MCHR1, GPR84, GPR162, GPR85, TACR3, F2RL1, LHCGR, EDNRA, EDNRB, S1PR3, S1PR1, HTR1A, LTB4R, GALR2, LOC781367, MC5R, EBI2, PTGER3, C5AR1, GPR92, CCKBR, PTGER4, HTR4, PROKR2, PROKR1, MRGPRF, SSTR2, ADRB1, PTGDR, NK1R, TSHR, DRD1, PRLHR, ADORA2B, OPRK1, NPY2R, GPR6, OXTR, BDKRB2, GPR4, ADRB3, HCRTR1, ADRA2A, PTGFR, GPR37, AVPR1B, ADRA1B, AVPR1A, UTS2R, GHRSR, HTR2A, F2R | 1200 | 164 | 9171 | 2.52 | 3.99E-08 |
| INTERPRO | IPR017452:GPCR, rhodopsin-like superfamily | 54 | 2.084 | 1.30E-10 | F2RL2, F2RL3, MCHR1, GPR84, GPR162, GPR85, TACR3, F2RL1, LHCGR, EDNRA, EDNRB, S1PR3, S1PR1, HTR1A, LTB4R, GALR2, LOC781367, MC5R, EBI2, PTGER3, C5AR1, GPR92, CCKBR, PTGER4, HTR4, PROKR2, PROKR1, MRGPRF, SSTR2, ADRB1, PTGDR, NK1R, TSHR, DRD1, PRLHR, ADORA2B, OPRK1, NPY2R, GPR6, OXTR, BDKRB2, GPR4, ADRB3, HCRTR1, ADRA2A, PTGFR, GPR37, AVPR1B, ADRA1B, AVPR1A, UTS2R, GHRSR, HTR2A, F2R | 1200 | 165 | 9171 | 2.5  | 4.12E-08 |

**Annotation Cluster 5 (Enrichment Score: 8.146215146623781)**

|               |                                                  |    |       |          |                                                                                                                                                                                                                                                                                                                   |      |     |      |      |          |
|---------------|--------------------------------------------------|----|-------|----------|-------------------------------------------------------------------------------------------------------------------------------------------------------------------------------------------------------------------------------------------------------------------------------------------------------------------|------|-----|------|------|----------|
| GOTERM_MF_FAT | GO:0022843~voltage-gated cation channel activity | 37 | 1.428 | 1.89E-09 | KCNH1, KCNC1, KCNAB1, KCNA2, KCNA1, KCNA4, KCNJ10, KCNA6, CACNB4, KCNA5, KCNJ12, KCNJ11, SHKBP1, KCNS2, KCNQ3, KCNE1, KCNQ2, KCNG3, SCN5A, FGF2, KCNMA1, CACNA2D1, KCND2, CACNG2, KCNK2, KCNV1, KCTD8, KCNJ9, KCNJ8, CACNA1G, KCNF1, CACNA1E, KCNH2, CACNA1D, CACNA1A, KCTD12, KCNH5                              | 1248 | 95  | 9249 | 2.89 | 1.41E-07 |
| GOTERM_MF_FAT | GO:0022832~voltage-gated channel activity        | 41 | 1.582 | 1.39E-08 | KCNH1, KCNC1, KCNAB1, SCN3B, KCNA2, KCNA1, KCNA4, KCNA6, KCNJ10, CACNB4, KCNA5, KCNJ12, KCNJ11, KCNIP3, SHKBP1, KCNS2, KCNQ3, KCNE1, KCNQ2, KCNG3, SCN5A, FGF2, KCNMA1, CACNA2D1, KCND2, CACNG2, KCNK1, KCNK2, KCNV1, KCTD8, KCNJ9, KCNJ8, CACNA1G, KCNF1, SCN4B, CACNA1E, KCNH2, CACNA1D, CACNA1A, KCNH5, KCTD12 | 1248 | 119 | 9249 | 2.55 | 8.83E-07 |
| GOTERM_MF_FAT | GO:0005244~voltage-gated ion channel activity    | 41 | 1.582 | 1.39E-08 | KCNH1, KCNC1, KCNAB1, SCN3B, KCNA2, KCNA1, KCNA4, KCNA6, KCNJ10, CACNB4, KCNA5, KCNJ12, KCNJ11, KCNIP3, SHKBP1, KCNS2, KCNQ3, KCNE1, KCNQ2, KCNG3, SCN5A, FGF2, KCNMA1, CACNA2D1, KCND2, CACNG2, KCNK1, KCNK2, KCNV1, KCTD8, KCNJ9, KCNJ8, CACNA1G, KCNF1, SCN4B, CACNA1E, KCNH2, CACNA1D, CACNA1A, KCNH5, KCTD12 | 1248 | 119 | 9249 | 2.55 | 8.83E-07 |

**Annotation Cluster 6 (Enrichment Score: 7.458505989675213)**

|                                                                   |                                                             |    |       |          |                                                                                                                                                                                                                                                                              |      |     |      |      |          |
|-------------------------------------------------------------------|-------------------------------------------------------------|----|-------|----------|------------------------------------------------------------------------------------------------------------------------------------------------------------------------------------------------------------------------------------------------------------------------------|------|-----|------|------|----------|
| GOTERM_MF_FAT                                                     | GO:0005267~potassium channel activity                       | 36 | 1.389 | 2.81E-09 | KCNK17, KCNH1, KCNC1, KCNAB1, KCNA2, KCNA1, KCNA4, KCNJ10, KCNA6, KCNA5, KCNJ12, KCNJ11, KCNIP3, SHKBP1, KCNS2, KCNQ3, KCNE1, KCNQ2, KCNG3, KCNMA1, KCND2, KCNK1, KCNK2, KCNV1, KCNK4, KCTD8, KCNN4, KCNT1, KCNN1, KCNJ9, KCNJ8, KCNN2, KCNF1, KCNH2, KCTD12, KCNH5          | 1248 | 92  | 9249 | 2.9  | 1.93E-07 |
| GOTERM_BP_FAT                                                     | GO:0006813~potassium ion transport                          | 37 | 1.428 | 5.83E-08 | KCNK17, KCNH1, KCNC1, ATP1B1, KCNAB1, ATP1B2, KCNA2, KCNA1, KCNA4, KCNJ10, KCNA6, KCNA5, KCNJ12, KCNJ11, KCNIP3, SHKBP1, KCNS2, KCNQ3, KCNE1, KCNQ2, KCNG3, KCNMA1, KCND2, KCNK1, KCNK2, KCNV1, KCNK4, KCTD8, KCNT1, KCNN1, KCNJ9, KCNJ8, KCNN2, KCNF1, KCNH2, KCTD12, KCNH5 | 1242 | 102 | 8785 | 2.57 | 1.02E-05 |
| GOTERM_MF_FAT                                                     | GO:0005249~voltage-gated potassium channel activity         | 28 | 1.081 | 2.57E-07 | KCNH1, KCNC1, KCNAB1, KCNA2, KCNA1, KCNA4, KCNJ10, KCNA6, KCNA5, KCNJ12, KCNJ11, SHKBP1, KCNQ3, KCNS2, KCNE1, KCNG3, KCNQ2, KCNMA1, KCND2, KCNK2, KCNV1, KCTD8, KCNT1, KCNN1, KCNJ9, KCNJ8, KCNF1, KCNH2, KCTD12, KCNH5                                                      | 1248 | 72  | 9249 | 2.88 | 1.20E-05 |
| <b>Annotation Cluster 7 (Enrichment Score: 6.738373191455444)</b> |                                                             |    |       |          |                                                                                                                                                                                                                                                                              |      |     |      |      |          |
| GOTERM_MF_FAT                                                     | GO:0008528~peptide receptor activity, G-protein coupled     | 31 | 1.196 | 1.06E-07 | GPR83, F2RL2, F2RL3, PRLHR, TACR3, NPY2R, OPRK1, F2RL1, OXTR, BDKRB2, EDNRA, HCRTR2, EDNRB, HCRTR1, GALR2, MC5R, C5AR1, CCKBR, PROKR2, NPR1, PROKR1, NPR3, NTSR1, SSTR5, SSTR2, NK1R, AVPR1B, AVPR1A, UTS2R, F2R, OPRD1                                                      | 1248 | 82  | 9249 | 2.8  | 5.27E-06 |
| GOTERM_MF_FAT                                                     | GO:0001653~peptide receptor activity                        | 31 | 1.196 | 1.06E-07 | GPR83, F2RL2, F2RL3, PRLHR, TACR3, NPY2R, OPRK1, F2RL1, OXTR, BDKRB2, EDNRA, HCRTR2, EDNRB, HCRTR1, GALR2, MC5R, C5AR1, CCKBR, PROKR2, NPR1, PROKR1, NPR3, NTSR1, SSTR5, SSTR2, NK1R, AVPR1B, AVPR1A, UTS2R, F2R, OPRD1                                                      | 1248 | 82  | 9249 | 2.8  | 5.27E-06 |
| GOTERM_MF_FAT                                                     | GO:0042277~peptide binding                                  | 34 | 1.312 | 5.38E-07 | GPR83, F2RL2, CALCR, F2RL3, PRLHR, TACR3, NPY2R, CRHBP, OPRK1, F2RL1, OXTR, BDKRB2, EDNRA, HCRTR2, EDNRB, HCRTR1, GALR2, MC5R, KDELRL1, C5AR1, CCKBR, PROKR2, NPR1, PROKR1, NPR3, NTSR1, SSTR5, SSTR2, NK1R, AVPR1B, AVPR1A, UTS2R, F2R, OPRD1                               | 1248 | 101 | 9249 | 2.49 | 2.28E-05 |
| <b>Annotation Cluster 8 (Enrichment Score: 6.578741050689114)</b> |                                                             |    |       |          |                                                                                                                                                                                                                                                                              |      |     |      |      |          |
| INTERPRO                                                          | IPR006201:Neurotransmitter-gated ion-channel                | 17 | 0.656 | 4.30E-08 | GABRD, GABRA2, GLRB, GLRA1, GABRA4, LOC100138074, GABRB2, GABRB1, MGC139528, CHRNA5, CHRN4, CHRNA7, CHRN2, CHRND, CHRNA3, CHRNG, GABRP                                                                                                                                       | 1200 | 28  | 9171 | 4.64 | 9.73E-06 |
| INTERPRO                                                          | IPR006202:Neurotransmitter-gated ion-channel ligand-binding | 17 | 0.656 | 4.30E-08 | GABRD, GABRA2, GLRB, GLRA1, GABRA4, LOC100138074, GABRB2, GABRB1, MGC139528, CHRNA5, CHRN4, CHRNA7, CHRN2, CHRND, CHRNA3, CHRNG, GABRP                                                                                                                                       | 1200 | 28  | 9171 | 4.64 | 9.73E-06 |
| INTERPRO                                                          | IPR006029:Neurotransmitter-gated ion-channel                | 16 | 0.618 | 9.66E-08 | GABRD, GABRA2, GLRB, GLRA1, GABRA4, GABRB2, GABRB1, MGC139528, CHRNA5, CHRN4, CHRN2, CHRND, CHRNA7, CHRNA3, CHRNG, GABRP                                                                                                                                                     | 1200 | 26  | 9171 | 4.7  | 1.91E-05 |

|                                                                    |                                                              |    |       |          |                                                                                                                                                                                                                                                                                      |      |     |      |      |           |  |
|--------------------------------------------------------------------|--------------------------------------------------------------|----|-------|----------|--------------------------------------------------------------------------------------------------------------------------------------------------------------------------------------------------------------------------------------------------------------------------------------|------|-----|------|------|-----------|--|
|                                                                    | transmembrane region                                         |    |       |          |                                                                                                                                                                                                                                                                                      |      |     |      |      |           |  |
| INTERPRO                                                           | IPR018000:Neurotransmitter-gated ion-channel, conserved site | 16 | 0.618 | 9.66E-08 | GABRD, GABRA2, GLRB, GLRA1, GABRA4, GABRB2, GABRB1, MGC139528, CHRNA5, CHRNA3, CHRNB4, CHRNA7, CHRND, CHRNG, GABRP                                                                                                                                                                   | 1200 | 26  | 9171 | 4.7  | 1.91E-05  |  |
| PIR_SUPERFAMILY                                                    | PIRSF002443:acetylcholine receptor                           | 12 | 0.463 | 7.40E-05 | GLRB, GABRA2, GABRA4, GLRA1, GABRB1, CHRNA5, CHRNA3, CHRNA7, CHRND, CHRNG, GABRP, CHRNA7                                                                                                                                                                                             | 558  | 22  | 3890 | 3.8  | 0.0192872 |  |
| <b>Annotation Cluster 9 (Enrichment Score: 5.931891644140119)</b>  |                                                              |    |       |          |                                                                                                                                                                                                                                                                                      |      |     |      |      |           |  |
| INTERPRO                                                           | IPR000742:EGF-like, type 3                                   | 32 | 1.235 | 1.29E-08 | PTGS2, LTBP2, PTGS1, NELL2, BTC, BCAN, DLK2, DLK1, ACAN, TGFA, MRCL, NRG1, THBS1, THBS2, THBS4, TMEFF2, TNXB, EGFL7, ADAM23, EFEMP2, EFEMP1, NTNG2, FBLN1, THBD, EGFLAM, MGC139448, DLL4, FBLN5, VCAN, WIF1, ADAM12, VLDLR                                                           | 1200 | 82  | 9171 | 2.98 | 3.39E-06  |  |
| INTERPRO                                                           | IPR006210:EGF-like                                           | 29 | 1.119 | 2.92E-06 | PTGS2, LTBP2, NELL2, BTC, BCAN, DLK2, DLK1, CSPG5, RSPO3, TGFA, MRCL, NRG1, THBS1, THBS2, THBS4, TMEFF2, TNXB, EGFL7, ADAM23, EFEMP2, NTNG2, FBLN1, THBD, EGFLAM, DLL4, MGC139448, VCAN, WIF1, VLDLR                                                                                 | 1200 | 87  | 9171 | 2.55 | 3.85E-04  |  |
| SMART                                                              | SM00181:EGF                                                  | 29 | 1.119 | 4.27E-05 | PTGS2, LTBP2, NELL2, BTC, BCAN, DLK2, DLK1, CSPG5, RSPO3, TGFA, MRCL, NRG1, THBS1, THBS2, THBS4, TMEFF2, TNXB, EGFL7, ADAM23, EFEMP2, NTNG2, FBLN1, THBD, EGFLAM, DLL4, MGC139448, VCAN, WIF1, VLDLR                                                                                 | 661  | 87  | 4364 | 2.2  | 0.0038627 |  |
| <b>Annotation Cluster 10 (Enrichment Score: 5.481954390503736)</b> |                                                              |    |       |          |                                                                                                                                                                                                                                                                                      |      |     |      |      |           |  |
| GOTERM_BP_FAT                                                      | GO:0007517~muscle organ development                          | 32 | 1.235 | 2.81E-07 | MYOD1, RBP4, MYL2, ELN, PAX3, CACNB4, CXADR, HOXD10, LIF, LY6E, HAND1, PAK1, NR2F2, COL11A1, NKX2-5, PITX1, MYF6, FOXL2, ACTA1, CRYAB, MYF5, CACNG2, AFG3L2, TNNI3, HOMER1, MSX1, MEOX2, TAGLN, SIX1, PDGFRB, LOC654400, TCF15                                                       | 1242 | 86  | 8785 | 2.63 | 3.23E-05  |  |
| GOTERM_BP_FAT                                                      | GO:0060537~muscle tissue development                         | 25 | 0.965 | 9.35E-06 | MYOD1, RBP4, MYL2, ELN, CACNB4, CXADR, HOXD10, HAND1, LY6E, PAK1, NR2F2, COL11A1, NKX2-5, PITX1, FOXL2, ACTA1, MYF5, CACNG2, AFG3L2, TNNI3, HOMER1, MEOX2, SIX1, PDGFRB, LOC654400                                                                                                   | 1242 | 68  | 8785 | 2.6  | 6.07E-04  |  |
| GOTERM_BP_FAT                                                      | GO:0014706~striated muscle tissue development                | 24 | 0.926 | 1.36E-05 | RBP4, MYOD1, FOXL2, ACTA1, MYL2, MYF5, ELN, CACNG2, CACNB4, CXADR, AFG3L2, HOMER1, TNNI3, HOXD10, LY6E, MEOX2, HAND1, SIX1, PAK1, NR2F2, LOC654400, COL11A1, NKX2-5, PITX1                                                                                                           | 1242 | 65  | 8785 | 2.61 | 7.83E-04  |  |
| <b>Annotation Cluster 11 (Enrichment Score: 5.330322960380449)</b> |                                                              |    |       |          |                                                                                                                                                                                                                                                                                      |      |     |      |      |           |  |
| GOTERM_BP_FAT                                                      | GO:0050801~ion homeostasis                                   | 50 | 1.93  | 2.70E-07 | CASR, JPH2, GLRA1, SLC9A3, EDN2, SNCA, EDN1, CKB, EDNRB, APOE, LTF, CHRNA7, MT3, KCNMA1, PRKCA, PTGER3, LOC786683, CCKBR, LOC783224, CACNG2, PRKCB, RHCG, LOC100139857, LOC525947, CALCR, PTH1R, GPR6, TAC1, CACNB4, CLDN11, KCNA5, ATP6V1B1, FKBP1B, CCL28, SYPL2, VDR, CD9, KCNE1, | 1242 | 168 | 8785 | 2.11 | 3.37E-05  |  |



|                                                                    |                                          |    |       |          |                                                                                                                                                                                                                                                                                                                                                                                                                          |      |     |      |      |           |
|--------------------------------------------------------------------|------------------------------------------|----|-------|----------|--------------------------------------------------------------------------------------------------------------------------------------------------------------------------------------------------------------------------------------------------------------------------------------------------------------------------------------------------------------------------------------------------------------------------|------|-----|------|------|-----------|
|                                                                    |                                          |    |       |          | GAL3ST1, GLRB, UPK3A, AFG3L2, TNNI3, KDR, CACNA1G, CHRN4, CHRN2, CACNA1A, CHRNG, F2R                                                                                                                                                                                                                                                                                                                                     |      |     |      |      |           |
| GOTERM_BP_FAT                                                      | GO:0006873~cellular ion homeostasis      | 45 | 1.737 | 1.13E-06 | CALCR, CASR, JPH2, GLRA1, EDN2, PTH1R, EDN1, SNCA, GPR6, TAC1, CACNB4, KCNA5, CLDN11, FKBP1B, CCL28, SYPL2, CKB, CD9, VDR, APOE, KCNE1, LTF, CHRNA7, GAL3ST1, MT3, PRKCA, KCNMA1, GLRB, PTGER3, LOC786683, CCKBR, LOC783224, CACNG2, TNNI3, AFG3L2, PRKCB, RHCG, LOC100139857, CHRN4, CACNA1G, LOC525947, CHRN2, CACNA1A, F2R, CHRNG                                                                                     | 1242 | 151 | 8785 | 2.11 | 1.12E-04  |
| GOTERM_BP_FAT                                                      | GO:0055082~cellular chemical homeostasis | 45 | 1.737 | 1.67E-06 | CALCR, CASR, JPH2, GLRA1, EDN2, PTH1R, EDN1, SNCA, GPR6, TAC1, CACNB4, KCNA5, CLDN11, FKBP1B, CCL28, SYPL2, CKB, CD9, VDR, APOE, KCNE1, LTF, CHRNA7, GAL3ST1, MT3, PRKCA, KCNMA1, GLRB, PTGER3, LOC786683, CCKBR, LOC783224, CACNG2, TNNI3, AFG3L2, PRKCB, RHCG, LOC100139857, CHRN4, CACNA1G, LOC525947, CHRN2, CACNA1A, F2R, CHRNG                                                                                     | 1242 | 153 | 8785 | 2.08 | 1.51E-04  |
| GOTERM_BP_FAT                                                      | GO:0048878~chemical homeostasis          | 57 | 2.2   | 3.59E-06 | CASR, JPH2, GLRA1, EDN2, SLC9A3, SNCA, EDN1, CKB, EDNRB, SLC2A4, APOE, LTF, CHRNA7, MT3, KCNMA1, PRKCA, AVP, PTGER3, LOC786683, CCKBR, LOC783224, CACNG2, PRKCB, PTHLH, RHCG, LOC100139857, LOC525947, CALCR, RBP4, PTH1R, GPR6, TAC1, CLDN11, KCNA5, CACNB4, ATP6V1B1, CCL28, SYPL2, FKBP1B, CD9, VDR, KCNE1, GAL3ST1, LPL, GLRB, FOXA1, UPK3A, AFG3L2, TNNI3, KDR, CHRN4, CACNA1G, CHRN2, CACNA1E, CACNA1A, F2R, CHRNG | 1242 | 218 | 8785 | 1.85 | 2.82E-04  |
| GOTERM_BP_FAT                                                      | GO:0019725~cellular homeostasis          | 48 | 1.853 | 0.001223 | CALCR, CASR, JPH2, GLRA1, EDN2, PTH1R, EDN1, SNCA, GPR6, TAC1, CACNB4, CLDN11, KCNA5, FKBP1B, CCL28, SYPL2, CKB, CD9, VDR, APOE, KCNE1, LTF, CHRNA7, GAL3ST1, MT3, PRKCA, KCNMA1, GLRB, PTGER3, LOC786683, AIFM3, CCKBR, LOC783224, CACNG2, TNNI3, AFG3L2, PRKCB, KCNN4, RHCG, LOC100139857, TXNDC6, CHRN4, CACNA1G, LOC525947, CHRN2, CACNA1A, F2R, CHRNG                                                               | 1242 | 215 | 8785 | 1.58 | 0.0257706 |
| <b>Annotation Cluster 12 (Enrichment Score: 5.209817423404222)</b> |                                          |    |       |          |                                                                                                                                                                                                                                                                                                                                                                                                                          |      |     |      |      |           |
| SP_PIR_KEYWORDS                                                    | potassium transport                      | 18 | 0.695 | 5.28E-07 | KCNMA1, KCNHI, KCNC1, KCNAB1, ATP1B2, KCNA2, KCNA4, KCNJ10, KCNA5, KCNK1, KCNJ12, KCNJ11, KCNV1, KCNIP3, KCNQ3, KCNJ8, KCNE1, KCNF1                                                                                                                                                                                                                                                                                      | 985  | 35  | 7349 | 3.84 | 1.09E-05  |
| GOTERM_MF_FAT                                                      | GO:0030955~potassium ion binding         | 19 | 0.733 | 1.82E-05 | KCNMA1, KCNHI, KCNC1, KCNAB1, ATP1B2, KCNA2, KCNA4, KCNJ10, KCNA5, KCNK1, KCNJ12, KCNJ11, KCNV1, KCNIP3, KCNQ3, KCNJ8, PKLR, KCNE1, KCNF1                                                                                                                                                                                                                                                                                | 1248 | 47  | 9249 | 3    | 6.01E-04  |
| SP_PIR_KEYWORDS                                                    | potassium                                | 18 | 0.695 | 2.44E-05 | KCNMA1, KCNHI, KCNC1, KCNAB1, ATP1B2, KCNA2, KCNA4, KCNJ10, KCNA5, KCNK1, KCNJ12, KCNJ11, KCNV1, KCNIP3, KCNQ3, KCNJ8, KCNE1, KCNF1                                                                                                                                                                                                                                                                                      | 985  | 44  | 7349 | 3.05 | 3.96E-04  |
| <b>Annotation Cluster 13 (Enrichment Score: 5.015326164240715)</b> |                                          |    |       |          |                                                                                                                                                                                                                                                                                                                                                                                                                          |      |     |      |      |           |
| GOTERM_BP_FAT                                                      | GO:0055065~metal ion homeostasis         | 28 | 1.081 | 1.69E-07 | CALCR, CASR, JPH2, EDN2, EDN1, PTH1R, GPR6, TAC1, CACNB4, SYPL2, CCL28, FKBP1B, VDR, APOE, CHRNA7,                                                                                                                                                                                                                                                                                                                       | 1242 | 68  | 8785 | 2.91 | 2.53E-05  |

|                                                                    |                                                                  |    |       |          |                                                                                                                                                                                                                                                                 |      |     |      |      |           |  |
|--------------------------------------------------------------------|------------------------------------------------------------------|----|-------|----------|-----------------------------------------------------------------------------------------------------------------------------------------------------------------------------------------------------------------------------------------------------------------|------|-----|------|------|-----------|--|
|                                                                    |                                                                  |    |       |          | MT3, PRKCA, KCNMA1, LOC786683, PTGER3, CCKBR, UPK3A, TNNI3, KDR, PRKCB, LOC100139857, CACNA1A, F2R                                                                                                                                                              |      |     |      |      |           |  |
| GOTERM_BP_FAT                                                      | GO:0006875~cellular metal ion homeostasis                        | 26 | 1.003 | 9.85E-07 | CALCR, CASR, JPH2, EDN2, EDN1, PTH1R, GPR6, TAC1, CACNB4, SYPL2, CCL28, FKBP1B, VDR, APOE, CHRNA7, MT3, PRKCA, KCNMA1, LOC786683, PTGER3, CCKBR, TNNI3, PRKCB, LOC100139857, CACNA1A, F2R                                                                       | 1242 | 65  | 8785 | 2.83 | 1.01E-04  |  |
| GOTERM_BP_FAT                                                      | GO:0055074~calcium ion homeostasis                               | 25 | 0.965 | 1.41E-06 | CALCR, CASR, JPH2, EDN2, EDN1, PTH1R, GPR6, TAC1, CACNB4, SYPL2, CCL28, FKBP1B, VDR, APOE, CHRNA7, PRKCA, LOC786683, PTGER3, CCKBR, TNNI3, PRKCB, KDR, LOC100139857, CACNA1A, F2R                                                                               | 1242 | 62  | 8785 | 2.85 | 1.32E-04  |  |
| GOTERM_BP_FAT                                                      | GO:0006874~cellular calcium ion homeostasis                      | 24 | 0.926 | 2.85E-06 | PRKCA, CALCR, CASR, JPH2, LOC786683, PTGER3, CCKBR, EDN2, EDN1, PTH1R, GPR6, TAC1, CACNB4, TNNI3, SYPL2, CCL28, FKBP1B, PRKCB, VDR, APOE, LOC100139857, CHRNA7, CACNA1A, F2R                                                                                    | 1242 | 60  | 8785 | 2.83 | 2.36E-04  |  |
| GOTERM_BP_FAT                                                      | GO:0055080~cation homeostasis                                    | 35 | 1.351 | 1.30E-05 | CALCR, CASR, JPH2, SLC9A3, EDN2, EDN1, PTH1R, GPR6, TAC1, CACNB4, ATP6V1B1, FKBP1B, SYPL2, CCL28, VDR, EDNRB, APOE, LTF, CHRNA7, MT3, PRKCA, KCNMA1, PTGER3, LOC786683, CCKBR, LOC783224, UPK3A, TNNI3, KDR, PRKCB, RHCG, LOC100139857, LOC525947, CACNA1A, F2R | 1242 | 115 | 8785 | 2.15 | 7.62E-04  |  |
| GOTERM_BP_FAT                                                      | GO:0030003~cellular cation homeostasis                           | 29 | 1.119 | 1.73E-04 | CALCR, CASR, JPH2, EDN2, EDN1, PTH1R, GPR6, TAC1, CACNB4, SYPL2, CCL28, FKBP1B, VDR, APOE, LTF, CHRNA7, MT3, PRKCA, KCNMA1, LOC786683, PTGER3, CCKBR, LOC783224, TNNI3, PRKCB, LOC100139857, LOC525947, CACNA1A, F2R                                            | 1242 | 99  | 8785 | 2.07 | 0.00565   |  |
| GOTERM_BP_FAT                                                      | GO:0055066~di-, tri-valent inorganic cation homeostasis          | 28 | 1.081 | 2.05E-04 | CALCR, CASR, JPH2, EDN2, EDN1, PTH1R, GPR6, TAC1, CACNB4, SYPL2, CCL28, FKBP1B, VDR, APOE, LTF, CHRNA7, PRKCA, LOC786683, PTGER3, CCKBR, LOC783224, TNNI3, KDR, PRKCB, LOC100139857, LOC525947, CACNA1A, F2R                                                    | 1242 | 95  | 8785 | 2.08 | 0.0061701 |  |
| GOTERM_BP_FAT                                                      | GO:0030005~cellular di-, tri-valent inorganic cation homeostasis | 27 | 1.042 | 2.44E-04 | CALCR, CASR, JPH2, EDN2, EDN1, PTH1R, GPR6, TAC1, CACNB4, SYPL2, CCL28, FKBP1B, VDR, APOE, LTF, CHRNA7, PRKCA, LOC786683, PTGER3, CCKBR, LOC783224, TNNI3, PRKCB, LOC100139857, LOC525947, CACNA1A, F2R                                                         | 1242 | 91  | 8785 | 2.1  | 0.0067769 |  |
| <b>Annotation Cluster 14 (Enrichment Score: 4.993558707825291)</b> |                                                                  |    |       |          |                                                                                                                                                                                                                                                                 |      |     |      |      |           |  |
| GOTERM_MF_FAT                                                      | GO:0005539~glycosaminoglycan binding                             | 24 | 0.926 | 2.92E-07 | HAPLN2, BMP4, LPL, HAPLN1, HAPLN4, HAPLN3, TNXB, CXCL5, PGLYRP1, TLR2, BCAN, PF4, EGFLAM, CD44, APOE, CRISPLD2, RSPO3, ACAN, PTN, ADAMTS1, VCAN, THBS1, THBS2, FGF2                                                                                             | 1248 | 56  | 9249 | 3.18 | 1.30E-05  |  |
| GOTERM_MF_FAT                                                      | GO:0001871~pattern binding                                       | 25 | 0.965 | 4.14E-06 | CXCL5, PGLYRP1, TLR2, BCAN, PF4, CD44, APOE, CRISPLD2, RSPO3, ACAN, PTN, PTX3, THBS1, THBS2, FGF2, BMP4, HAPLN2, LPL, HAPLN1, HAPLN4, TNXB, HAPLN3, EGFLAM, ADAMTS1, VCAN                                                                                       | 1248 | 68  | 9249 | 2.72 | 1.47E-04  |  |
| GOTERM_MF_FAT                                                      | GO:0030247~polysaccharide binding                                | 25 | 0.965 | 4.14E-06 | CXCL5, PGLYRP1, TLR2, BCAN, PF4, CD44, APOE,                                                                                                                                                                                                                    | 1248 | 68  | 9249 | 2.72 | 1.47E-04  |  |

|                                                                    |                                                     |    |       |          |                                                                                                                                                                                                                                                        |      |     |      |      |           |  |
|--------------------------------------------------------------------|-----------------------------------------------------|----|-------|----------|--------------------------------------------------------------------------------------------------------------------------------------------------------------------------------------------------------------------------------------------------------|------|-----|------|------|-----------|--|
|                                                                    | carbohydrate binding                                |    |       | 06       | CRISPLD2, RSPO3, ACAN, PTN, PTX3, THBS1, THBS2, FGF2, BMP4, HAPLN2, LPL, HAPLN1, HAPLN4, TNXB, HAPLN3, EGFLAM, ADAMTS1, VCAN                                                                                                                           |      |     |      |      |           |  |
| GOTERM_MF_FAT                                                      | GO:0030246~carbohydrate binding                     | 34 | 1.312 | 0.002119 | CXCL5, GALNT6, TLR2, PGLYRP1, BCAN, PF4, CD44, CRISPLD2, APOE, RSPO3, UPK1A, ACAN, PTN, THBS1, PTX3, THBS2, FGF2, GALNT13, LPHN1, BMP4, HAPLN2, HAPLN1, LPL, HAPLN4, HAPLN3, TNXB, LGALS12, COLEC12, EGFLAM, IGF2R, GFPT2, ADAMTS1, VCAN, LOC782210    | 1248 | 148 | 9249 | 1.7  | 0.0472992 |  |
| <b>Annotation Cluster 15 (Enrichment Score: 4.955433603646678)</b> |                                                     |    |       |          |                                                                                                                                                                                                                                                        |      |     |      |      |           |  |
| GOTERM_BP_FAT                                                      | GO:0001944~vasculature development                  | 38 | 1.467 | 2.27E-06 | FGFR2, FGF18, CDX2, PDGFA, EDN1, CDH2, GJA4, MMP2, SHH, T, TCF21, S1PR1, HEY1, HAND1, APOE, TGFA, SOX18, LOX, ADRA2B, THBS1, NR2F2, FGF2, ANGPT2, NKX2-5, BMP4, KLF5, PDPN, ITGA4, TNNI3, KDR, THY1, PROK2, CXCL17, MEOX2, DLL4, ECSCR, COL1A2, COL1A1 | 1242 | 121 | 8785 | 2.22 | 1.99E-04  |  |
| GOTERM_BP_FAT                                                      | GO:0001568~blood vessel development                 | 36 | 1.389 | 9.01E-06 | FGFR2, FGF18, CDX2, PDGFA, EDN1, CDH2, GJA4, MMP2, SHH, T, S1PR1, HEY1, HAND1, APOE, TGFA, SOX18, LOX, ADRA2B, THBS1, NR2F2, ANGPT2, NKX2-5, FGF2, BMP4, KLF5, ITGA4, TNNI3, KDR, THY1, PROK2, CXCL17, MEOX2, DLL4, ECSCR, COL1A2, COL1A1              | 1242 | 118 | 8785 | 2.16 | 5.98E-04  |  |
| GOTERM_BP_FAT                                                      | GO:0048514~blood vessel morphogenesis               | 30 | 1.158 | 6.67E-05 | FGFR2, FGF18, PDGFA, EDN1, CDH2, SHH, T, S1PR1, HEY1, HAND1, APOE, TGFA, SOX18, ADRA2B, THBS1, NR2F2, ANGPT2, NKX2-5, FGF2, KLF5, BMP4, ITGA4, TNNI3, KDR, THY1, PROK2, CXCL17, MEOX2, DLL4, ECSCR                                                     | 1242 | 99  | 8785 | 2.14 | 0.0026518 |  |
| <b>Annotation Cluster 16 (Enrichment Score: 4.829513614204084)</b> |                                                     |    |       |          |                                                                                                                                                                                                                                                        |      |     |      |      |           |  |
| GOTERM_BP_FAT                                                      | GO:0060284~regulation of cell development           | 24 | 0.926 | 3.97E-06 | BMP4, IRX3, DTX1, EDN1, FOXA1, SOX2, PAX6, ISL1, THY1, METRN, DLX1, ATOH1, ITGB1BP3, HES5, LOC787355, SIX1, CHRN2, SEMA4D, IGFBP3, NKX2-5, FGF2, NEFL, CACNA1A, MT3                                                                                    | 1242 | 61  | 8785 | 2.78 | 2.96E-04  |  |
| GOTERM_BP_FAT                                                      | GO:0051960~regulation of nervous system development | 23 | 0.888 | 5.73E-06 | IRX3, DTX1, FOXA1, SOX2, PAX6, ISL1, GLI1, THY1, METRN, DLX1, ATOH1, HES5, LOC787355, SIX1, LHX5, CHRN2, SEMA4D, GHSR, NKX2-5, FGF2, NEFL, CACNA1A, MT3                                                                                                | 1242 | 58  | 8785 | 2.8  | 4.07E-04  |  |
| GOTERM_BP_FAT                                                      | GO:0045664~regulation of neuron differentiation     | 17 | 0.656 | 2.35E-05 | IRX3, DTX1, SOX2, FOXA1, PAX6, ISL1, THY1, ATOH1, METRN, HES5, LOC787355, SIX1, CHRN2, SEMA4D, NKX2-5, NEFL, CACNA1A                                                                                                                                   | 1242 | 38  | 8785 | 3.16 | 0.0012328 |  |
| GOTERM_BP_FAT                                                      | GO:0050767~regulation of neurogenesis               | 19 | 0.733 | 8.99E-05 | IRX3, DTX1, SOX2, FOXA1, PAX6, ISL1, THY1, DLX1, ATOH1, METRN, HES5, LOC787355, SIX1, CHRN2, SEMA4D, NKX2-5, NEFL, CACNA1A, MT3                                                                                                                        | 1242 | 50  | 8785 | 2.69 | 0.0034355 |  |
| <b>Annotation Cluster 17 (Enrichment Score: 3.974148908748379)</b> |                                                     |    |       |          |                                                                                                                                                                                                                                                        |      |     |      |      |           |  |
| GOTERM_BP_FAT                                                      | GO:0019935~cyclic-nucleotide-mediated signaling     | 13 | 0.502 | 1.79E-05 | CALCR, PTGER3, ADORA2B, PTH1R, ADRB3, GNAL, S1PR3, UCN3, SSTR2, S1PR1, ADRB1, APOE, TSHR                                                                                                                                                               | 1242 | 23  | 8785 | 4    | 9.90E-04  |  |

|                                                                     |                                                                               |    |       |          |                                                                                                                              |      |    |      |      |           |
|---------------------------------------------------------------------|-------------------------------------------------------------------------------|----|-------|----------|------------------------------------------------------------------------------------------------------------------------------|------|----|------|------|-----------|
| GOTERM_BP_FAT                                                       | GO:0007188~G-protein signaling, coupled to cAMP nucleotide second messenger   | 12 | 0.463 | 3.86E-05 | CALCR, ADRB3, S1PR3, GNAL, SSTR2, UCN3, PTGER3, ADRB1, S1PR1, ADORA2B, PTH1R, TSHR                                           | 1242 | 21 | 8785 | 4.04 | 0.0017197 |
| GOTERM_BP_FAT                                                       | GO:0007187~G-protein signaling, coupled to cyclic nucleotide second messenger | 12 | 0.463 | 3.86E-05 | CALCR, ADRB3, S1PR3, GNAL, SSTR2, UCN3, PTGER3, ADRB1, S1PR1, ADORA2B, PTH1R, TSHR                                           | 1242 | 21 | 8785 | 4.04 | 0.0017197 |
| GOTERM_BP_FAT                                                       | GO:0030814~regulation of cAMP metabolic process                               | 14 | 0.54  | 3.96E-05 | CALCR, AVP, ADORA2B, PTH1R, EDN1, ADRB3, GNAL, S1PR3, UCN3, SSTR2, ADRB1, S1PR1, PDE2A, TSHR                                 | 1242 | 28 | 8785 | 3.54 | 0.0017392 |
| GOTERM_BP_FAT                                                       | GO:0030817~regulation of cAMP biosynthetic process                            | 13 | 0.502 | 5.24E-05 | CALCR, AVP, ADORA2B, PTH1R, EDN1, ADRB3, GNAL, S1PR3, UCN3, SSTR2, S1PR1, ADRB1, TSHR                                        | 1242 | 25 | 8785 | 3.68 | 0.0021696 |
| GOTERM_BP_FAT                                                       | GO:0019933~cAMP-mediated signaling                                            | 12 | 0.463 | 6.74E-05 | CALCR, ADRB3, S1PR3, GNAL, SSTR2, UCN3, PTGER3, ADRB1, S1PR1, ADORA2B, PTH1R, TSHR                                           | 1242 | 22 | 8785 | 3.86 | 0.0026452 |
| GOTERM_BP_FAT                                                       | GO:0030808~regulation of nucleotide biosynthetic process                      | 14 | 0.54  | 9.63E-05 | CALCR, AVP, ADORA2B, PTH1R, EDN1, ADRB3, GNAL, S1PR3, UCN3, SSTR2, S1PR1, ADRB1, APOE, TSHR                                  | 1242 | 30 | 8785 | 3.3  | 0.0035886 |
| GOTERM_BP_FAT                                                       | GO:0030802~regulation of cyclic nucleotide biosynthetic process               | 14 | 0.54  | 9.63E-05 | CALCR, AVP, ADORA2B, PTH1R, EDN1, ADRB3, GNAL, S1PR3, UCN3, SSTR2, S1PR1, ADRB1, APOE, TSHR                                  | 1242 | 30 | 8785 | 3.3  | 0.0035886 |
| GOTERM_BP_FAT                                                       | GO:0030799~regulation of cyclic nucleotide metabolic process                  | 15 | 0.579 | 1.02E-04 | CALCR, AVP, ADORA2B, PTH1R, EDN1, ADRB3, GNAL, S1PR3, UCN3, SSTR2, ADRB1, S1PR1, PDE2A, APOE, TSHR                           | 1242 | 34 | 8785 | 3.12 | 0.00376   |
| GOTERM_BP_FAT                                                       | GO:0006140~regulation of nucleotide metabolic process                         | 15 | 0.579 | 1.48E-04 | CALCR, AVP, ADORA2B, PTH1R, EDN1, ADRB3, GNAL, S1PR3, UCN3, SSTR2, ADRB1, S1PR1, PDE2A, APOE, TSHR                           | 1242 | 35 | 8785 | 3.03 | 0.0049109 |
| GOTERM_BP_FAT                                                       | GO:0045761~regulation of adenylate cyclase activity                           | 11 | 0.425 | 2.44E-04 | CALCR, ADRB3, S1PR3, GNAL, SSTR2, UCN3, ADRB1, S1PR1, ADORA2B, PTH1R, TSHR                                                   | 1242 | 21 | 8785 | 3.71 | 0.0068402 |
| GOTERM_BP_FAT                                                       | GO:0031279~regulation of cyclase activity                                     | 11 | 0.425 | 9.05E-04 | CALCR, ADRB3, S1PR3, GNAL, SSTR2, UCN3, ADRB1, S1PR1, ADORA2B, PTH1R, TSHR                                                   | 1242 | 24 | 8785 | 3.24 | 0.0202877 |
| GOTERM_BP_FAT                                                       | GO:0051339~regulation of lyase activity                                       | 11 | 0.425 | 0.001877 | CALCR, ADRB3, S1PR3, GNAL, SSTR2, UCN3, ADRB1, S1PR1, ADORA2B, PTH1R, TSHR                                                   | 1242 | 26 | 8785 | 2.99 | 0.0377037 |
| <b>Annotation Cluster 18 (Enrichment Score: 3.8949901859251477)</b> |                                                                               |    |       |          |                                                                                                                              |      |    |      |      |           |
| GOTERM_BP_FAT                                                       | GO:0060541~respiratory system development                                     | 19 | 0.733 | 6.61E-05 | FGFR2, BMP4, FGF18, RBP4, FGFR4, PDPN, PDGFA, FOXA1, SOX2, GLI1, KDR, PTHLH, TCF21, PDGFRA, HOPX, LOX, CUX1, LOC654400, FGF2 | 1242 | 49 | 8785 | 2.74 | 0.0026662 |
| GOTERM_BP_FAT                                                       | GO:0030324~lung development                                                   | 18 | 0.695 | 1.77E-04 | FGFR2, BMP4, FGF18, RBP4, FGFR4, PDPN, PDGFA, FOXA1, GLI1, KDR, PTHLH, TCF21, PDGFRA, HOPX, LOX,                             | 1242 | 48 | 8785 | 2.65 | 0.0056604 |

|                                                                    |                                                                  |    |       |          |                                                                                                                                                                                           |      |     |      |      |           |  |
|--------------------------------------------------------------------|------------------------------------------------------------------|----|-------|----------|-------------------------------------------------------------------------------------------------------------------------------------------------------------------------------------------|------|-----|------|------|-----------|--|
|                                                                    |                                                                  |    |       |          | CUX1, LOC654400, FGF2                                                                                                                                                                     |      |     |      |      |           |  |
| GOTERM_BP_FAT                                                      | GO:0030323~respiratory tube development                          | 18 | 0.695 | 1.77E-04 | FGFR2, BMP4, FGF18, RBP4, FGFR4, PDPN, PDGFA, FOXA1, GLI1, KDR, PTHLH, TCF21, PDGFRA, HOPX, LOX, CUX1, LOC654400, FGF2                                                                    | 1242 | 48  | 8785 | 2.65 | 0.0056604 |  |
| <b>Annotation Cluster 19 (Enrichment Score: 3.839982027242997)</b> |                                                                  |    |       |          |                                                                                                                                                                                           |      |     |      |      |           |  |
| GOTERM_BP_FAT                                                      | GO:0050880~regulation of blood vessel size                       | 14 | 0.54  | 1.45E-04 | CASR, AVP, ADORA2B, EDN2, EDN1, LOC784945, ADRB3, CALCB, EDNRB, ECE2, ADRB1, APOE, NPPC, NPPB                                                                                             | 1242 | 31  | 8785 | 3.19 | 0.0048948 |  |
| GOTERM_BP_FAT                                                      | GO:0003018~vascular process in circulatory system                | 14 | 0.54  | 1.45E-04 | CASR, AVP, ADORA2B, EDN2, EDN1, LOC784945, ADRB3, CALCB, EDNRB, ECE2, ADRB1, APOE, NPPC, NPPB                                                                                             | 1242 | 31  | 8785 | 3.19 | 0.0048948 |  |
| GOTERM_BP_FAT                                                      | GO:0035150~regulation of tube size                               | 14 | 0.54  | 1.45E-04 | CASR, AVP, ADORA2B, EDN2, EDN1, LOC784945, ADRB3, CALCB, EDNRB, ECE2, ADRB1, APOE, NPPC, NPPB                                                                                             | 1242 | 31  | 8785 | 3.19 | 0.0048948 |  |
| <b>Annotation Cluster 20 (Enrichment Score: 3.812964832939763)</b> |                                                                  |    |       |          |                                                                                                                                                                                           |      |     |      |      |           |  |
| GOTERM_BP_FAT                                                      | GO:0031175~neuron projection development                         | 27 | 1.042 | 3.30E-06 | CCK, ATL1, UCHL1, PAX6, GDNF, EFHD1, ATOH1, GALR2, LHX4, PAK1, NEFL, LOC506110, STMN3, NTF3, KIF5C, NTNG2, AFG3L2, ISL1, EPHA4, FEZF2, DLX5, EFNA5, CHRNB2, NGFR, GAP43, CACNA1A, GFRA3   | 1242 | 73  | 8785 | 2.62 | 2.66E-04  |  |
| GOTERM_BP_FAT                                                      | GO:0048667~cell morphogenesis involved in neuron differentiation | 23 | 0.888 | 2.65E-05 | LOC506110, CCK, NTF3, ATL1, KIF5C, UCHL1, PAX6, NTNG2, ISL1, AFG3L2, EPHA4, FEZF2, ATOH1, DLX5, LHX4, CHRNB2, EFNA5, NGFR, NEFL, CACNA1A, GAP43, GRK1, GFRA3                              | 1242 | 63  | 8785 | 2.58 | 0.001297  |  |
| GOTERM_BP_FAT                                                      | GO:0048812~neuron projection morphogenesis                       | 22 | 0.849 | 2.90E-05 | LOC506110, CCK, NTF3, ATL1, KIF5C, UCHL1, PAX6, NTNG2, ISL1, AFG3L2, EPHA4, FEZF2, ATOH1, DLX5, LHX4, CHRNB2, EFNA5, NGFR, NEFL, CACNA1A, GAP43, GFRA3                                    | 1242 | 59  | 8785 | 2.64 | 0.001394  |  |
| GOTERM_BP_FAT                                                      | GO:0007409~axonogenesis                                          | 21 | 0.81  | 4.22E-05 | LOC506110, CCK, NTF3, ATL1, KIF5C, UCHL1, PAX6, NTNG2, ISL1, AFG3L2, EPHA4, FEZF2, ATOH1, DLX5, LHX4, CHRNB2, EFNA5, NGFR, NEFL, GAP43, GFRA3                                             | 1242 | 56  | 8785 | 2.65 | 0.0018261 |  |
| GOTERM_BP_FAT                                                      | GO:0048858~cell projection morphogenesis                         | 22 | 0.849 | 1.46E-04 | LOC506110, CCK, NTF3, ATL1, KIF5C, UCHL1, PAX6, NTNG2, ISL1, AFG3L2, EPHA4, FEZF2, ATOH1, DLX5, LHX4, CHRNB2, EFNA5, NGFR, NEFL, CACNA1A, GAP43, GFRA3                                    | 1242 | 65  | 8785 | 2.39 | 0.0048781 |  |
| GOTERM_BP_FAT                                                      | GO:0000904~cell morphogenesis involved in differentiation        | 24 | 0.926 | 2.17E-04 | LOC506110, CCK, NTF3, ATL1, KIF5C, UCHL1, PAX6, NTNG2, ISL1, AFG3L2, CRYGB, EPHA4, FEZF2, ATOH1, DLX5, LHX4, CHRNB2, EFNA5, NGFR, NEFL, CACNA1A, GAP43, GRK1, GFRA3                       | 1242 | 76  | 8785 | 2.23 | 0.0061493 |  |
| GOTERM_BP_FAT                                                      | GO:0032990~cell part morphogenesis                               | 22 | 0.849 | 5.66E-04 | LOC506110, CCK, NTF3, ATL1, KIF5C, UCHL1, PAX6, NTNG2, ISL1, AFG3L2, EPHA4, FEZF2, ATOH1, DLX5, LHX4, CHRNB2, EFNA5, NGFR, NEFL, CACNA1A, GAP43, GFRA3                                    | 1242 | 71  | 8785 | 2.19 | 0.013768  |  |
| GOTERM_BP_FAT                                                      | GO:0000902~cell morphogenesis                                    | 27 | 1.042 | 0.002874 | SHROOM1, CCK, ATL1, UCHL1, PAX6, CRYGB, ATOH1, LHX4, NEFL, LOC506110, NTF3, PDPN, KIF5C, NTNG2, UPK3A, ISL1, AFG3L2, EPHA4, FEZF2, DLX5, EFNA5, CHRNB2, NGFR, GAP43, CACNA1A, GFRA3, GRK1 | 1242 | 106 | 8785 | 1.8  | 0.0532913 |  |

|                                                                     |                                                                                                         |    |       |          |                                                                                                                                                                                                                                                                                                                                                                                     |      |     |      |      |           |
|---------------------------------------------------------------------|---------------------------------------------------------------------------------------------------------|----|-------|----------|-------------------------------------------------------------------------------------------------------------------------------------------------------------------------------------------------------------------------------------------------------------------------------------------------------------------------------------------------------------------------------------|------|-----|------|------|-----------|
| GOTERM_BP_FAT                                                       | GO:0032989~cellular component morphogenesis                                                             | 29 | 1.119 | 0.008786 | SHROOM1, CCK, AT1L1, UCHL1, PAX6, CRYGB, CD9, ATOH1, LHX4, NEFL, LOC506110, ACTA1, NTF3, PDPN, KIF5C, NTNG2, UPK3A, ISL1, AFG3L2, EPHA4, FEZF2, DLX5, EFNA5, CHRNA2, NGFR, GAP43, CACNA1A, GFRA3, GRK1                                                                                                                                                                              | 1242 | 126 | 8785 | 1.63 | 0.1314796 |
| <b>Annotation Cluster 21 (Enrichment Score: 3.7562939604877776)</b> |                                                                                                         |    |       |          |                                                                                                                                                                                                                                                                                                                                                                                     |      |     |      |      |           |
| GOTERM_BP_FAT                                                       | GO:0051173~positive regulation of nitrogen compound metabolic process                                   | 58 | 2.239 | 2.17E-05 | MYOD1, HNF1B, PDGFA, GDF6, PAX6, PAX3, GDNF, HOXD10, IL10, GLI1, CRX, ATOH1, GATA5, APOE, GATA3, GATA4, FGF2, EGR1, AR, AVP, RARG, RXRG, PRKCG, CD40, AHR, INHBA, HES5, SIX1, ADORA2B, ABLIM3, SOX2, LIF, FOXH1, T, MEIS2, HAND1, LOC510369, PTX3, NKX2-5, EPO, NKX2-3, MYF6, BMP4, MAF, KLF5, IL3, BMP3, FOXL2, NTF3, FOXA1, MYF5, GSX1, ISL1, IRF6, NEUROD1, LOC654400, KLF4, F2R | 1242 | 236 | 8785 | 1.74 | 0.0011796 |
| GOTERM_BP_FAT                                                       | GO:0045935~positive regulation of nucleobase, nucleoside, nucleotide and nucleic acid metabolic process | 56 | 2.161 | 3.57E-05 | MYOD1, HNF1B, PDGFA, GDF6, PAX6, PAX3, GDNF, HOXD10, IL10, GLI1, CRX, ATOH1, GATA5, APOE, GATA3, GATA4, FGF2, EGR1, AVP, AR, RARG, RXRG, PRKCG, CD40, AHR, INHBA, HES5, SIX1, ADORA2B, ABLIM3, SOX2, LIF, FOXH1, T, MEIS2, HAND1, NKX2-5, EPO, NKX2-3, MYF6, BMP4, MAF, KLF5, IL3, BMP3, FOXL2, NTF3, FOXA1, MYF5, GSX1, ISL1, IRF6, NEUROD1, LOC654400, KLF4, F2R                  | 1242 | 229 | 8785 | 1.73 | 0.0016394 |
| GOTERM_BP_FAT                                                       | GO:0045944~positive regulation of transcription from RNA polymerase II promoter                         | 40 | 1.544 | 4.92E-05 | MYOD1, HNF1B, ABLIM3, SOX2, PAX6, PAX3, GDNF, HOXD10, GLI1, CRX, LIF, FOXH1, T, ATOH1, MEIS2, HAND1, GATA3, GATA4, NKX2-5, FGF2, NKX2-3, MAF, BMP4, BMP3, AR, FOXL2, RARG, NTF3, MYF5, FOXA1, GSX1, RXRG, ISL1, AHR, INHBA, HES5, SIX1, NEUROD1, LOC654400, KLF4                                                                                                                    | 1242 | 147 | 8785 | 1.92 | 0.002068  |
| GOTERM_BP_FAT                                                       | GO:0010628~positive regulation of gene expression                                                       | 51 | 1.968 | 1.88E-04 | MYOD1, HNF1B, GDF6, PAX6, PAX3, GDNF, HOXD10, IL10, GLI1, CRX, ATOH1, GATA5, GATA3, GATA4, FGF2, EGR1, AR, RARG, RXRG, AHR, INHBA, TNFSF13B, HES5, SIX1, ABLIM3, SOX2, LIF, FOXH1, T, MEIS2, HAND1, NKX2-5, EPO, NKX2-3, MYF6, BMP4, KLF5, MAF, BMP3, IL3, FOXL2, NTF3, MYF5, FOXA1, GSX1, ISL1, IRF6, NEUROD1, LOC654400, KLF4, F2R                                                | 1242 | 215 | 8785 | 1.68 | 0.0058298 |
| GOTERM_BP_FAT                                                       | GO:0045893~positive regulation of transcription, DNA-dependent                                          | 43 | 1.66  | 1.98E-04 | MYOD1, HNF1B, ABLIM3, SOX2, PAX6, PAX3, GDNF, HOXD10, IL10, GLI1, CRX, FOXH1, LIF, T, ATOH1, MEIS2, HAND1, GATA3, GATA4, NKX2-5, FGF2, NKX2-3, EPO, BMP4, MAF, BMP3, FOXL2, AR, RARG, NTF3, MYF5, FOXA1, GSX1, RXRG, ISL1, AHR, INHBA, HES5, SIX1, NEUROD1, LOC654400, KLF4, F2R                                                                                                    | 1242 | 172 | 8785 | 1.77 | 0.006012  |
| GOTERM_BP_FAT                                                       | GO:0051254~positive regulation of RNA metabolic process                                                 | 43 | 1.66  | 1.98E-04 | MYOD1, HNF1B, ABLIM3, SOX2, PAX6, PAX3, GDNF, HOXD10, IL10, GLI1, CRX, FOXH1, LIF, T, ATOH1, MEIS2, HAND1, GATA3, GATA4, NKX2-5, FGF2, NKX2-3, EPO, BMP4, MAF, BMP3, FOXL2, AR, RARG, NTF3, MYF5, FOXA1, GSX1, RXRG, ISL1, AHR, INHBA, HES5, SIX1,                                                                                                                                  | 1242 | 172 | 8785 | 1.77 | 0.006012  |

|                                                                   |                                                                      |    |       |          |                                                                                                                                                                                                                                                                                                                                                                                                                             |      |     |      |      |           |
|-------------------------------------------------------------------|----------------------------------------------------------------------|----|-------|----------|-----------------------------------------------------------------------------------------------------------------------------------------------------------------------------------------------------------------------------------------------------------------------------------------------------------------------------------------------------------------------------------------------------------------------------|------|-----|------|------|-----------|
|                                                                   |                                                                      |    |       |          | NEUROD1, LOC654400, KLF4, F2R                                                                                                                                                                                                                                                                                                                                                                                               |      |     |      |      |           |
| GOTERM_BP_FAT                                                     | GO:0045941~positive regulation of transcription                      | 49 | 1.891 | 2.11E-04 | MYOD1, HNF1B, GDF6, PAX6, PAX3, GDNF, HOXD10, IL10, GLI1, CRX, ATOH1, GATA5, GATA3, GATA4, FGF2, EGR1, AR, RARG, RXRG, AHR, INHBA, HES5, SIX1, ABLIM3, SOX2, LIF, FOXH1, T, MEIS2, HAND1, NKX2-5, EPO, NKX2-3, BMP4, KLF5, MAF, MYF6, BMP3, FOXL2, NTF3, MYF5, FOXA1, GSX1, ISL1, IRF6, NEUROD1, LOC654400, KLF4, F2R                                                                                                       | 1242 | 205 | 8785 | 1.69 | 0.0061749 |
| GOTERM_BP_FAT                                                     | GO:0031328~positive regulation of cellular biosynthetic process      | 58 | 2.239 | 2.64E-04 | MYOD1, HNF1B, PDGFA, GDF6, PAX6, PAX3, GDNF, HOXD10, IL10, GLI1, CRX, ATOH1, GATA5, APOE, GATA3, GATA4, FGF2, SYK, EGR1, AR, AVP, RARG, RXRG, AHR, CARD11, INHBA, HES5, SIX1, ADORA2B, ABLIM3, SOX2, LIF, FOXH1, T, MEIS2, HAND1, THBS1, PTX3, NKX2-5, EPO, NKX2-3, MYF6, BMP4, MAF, KLF5, IL3, BMP3, FOXL2, NTF3, FOXA1, MYF5, GSX1, ISL1, IRF6, NEUROD1, LOC654400, KLF4, F2R                                             | 1242 | 257 | 8785 | 1.6  | 0.0071965 |
| GOTERM_BP_FAT                                                     | GO:0009891~positive regulation of biosynthetic process               | 58 | 2.239 | 3.61E-04 | MYOD1, HNF1B, PDGFA, GDF6, PAX6, PAX3, GDNF, HOXD10, IL10, GLI1, CRX, ATOH1, GATA5, APOE, GATA3, GATA4, FGF2, SYK, EGR1, AR, AVP, RARG, RXRG, AHR, CARD11, INHBA, HES5, SIX1, ADORA2B, ABLIM3, SOX2, LIF, FOXH1, T, MEIS2, HAND1, THBS1, PTX3, NKX2-5, EPO, NKX2-3, MYF6, BMP4, MAF, KLF5, IL3, BMP3, FOXL2, NTF3, FOXA1, MYF5, GSX1, ISL1, IRF6, NEUROD1, LOC654400, KLF4, F2R                                             | 1242 | 260 | 8785 | 1.58 | 0.0094996 |
| GOTERM_BP_FAT                                                     | GO:0010557~positive regulation of macromolecule biosynthetic process | 54 | 2.084 | 8.81E-04 | MYOD1, HNF1B, PDGFA, GDF6, PAX6, PAX3, GDNF, HOXD10, IL10, GLI1, CRX, ATOH1, GATA5, GATA3, GATA4, FGF2, SYK, EGR1, AR, RARG, RXRG, AHR, CARD11, INHBA, HES5, SIX1, ABLIM3, SOX2, LIF, FOXH1, T, MEIS2, HAND1, THBS1, NKX2-5, EPO, NKX2-3, MYF6, BMP4, MAF, KLF5, IL3, BMP3, FOXL2, NTF3, FOXA1, MYF5, GSX1, ISL1, IRF6, NEUROD1, LOC654400, KLF4, F2R                                                                       | 1242 | 246 | 8785 | 1.55 | 0.0200386 |
| GOTERM_BP_FAT                                                     | GO:0010604~positive regulation of macromolecule metabolic process    | 64 | 2.47  | 9.64E-04 | MYOD1, HNF1B, PDGFA, GDF6, SNCA, PAX6, PAX3, GDNF, HOXD10, IL10, CRX, GLI1, ATOH1, GATA5, APOE, GATA3, GATA4, FGF2, SYK, EGR1, PRKCA, AR, RARG, RXRG, PRKCG, CD40, AHR, CARD11, INHBA, CCND1, TNFSF13B, HES5, CCND2, SIX1, IL12A, FGFR3, ABLIM3, SOX2, FOXH1, LIF, T, MEIS2, HAND1, THBS1, NKX2-5, EPO, NKX2-3, MYF6, BMP4, MAF, KLF5, IL3, BMP3, FOXL2, NTF3, FOXA1, MYF5, GSX1, ISL1, IRF6, NEUROD1, LOC654400, KLF4, F2R | 1242 | 305 | 8785 | 1.48 | 0.0214245 |
| <b>Annotation Cluster 22 (nrichment Score: 3.472267495762944)</b> |                                                                      |    |       |          |                                                                                                                                                                                                                                                                                                                                                                                                                             |      |     |      |      |           |
| UP_SEQ_FEATURE                                                    | region of interest:Tail                                              | 14 | 0.54  | 5.94E-05 | KRT6C, INA, VIM, BFSP1, KRT81, KRT73, DES, KRT80, KRT5, KRT7, KRT8, NEFL, KRT83, KRT71                                                                                                                                                                                                                                                                                                                                      | 682  | 33  | 5635 | 3.51 | 0.0108648 |
| UP_SEQ_FEATURE                                                    | region of interest:Linker 1                                          | 13 | 0.502 | 6.47E-05 | INA, VIM, BFSP1, KRT81, KRT73, DES, KRT80, KRT5, KRT7, KRT8, NEFL, KRT71, KRT83                                                                                                                                                                                                                                                                                                                                             | 682  | 29  | 5635 | 3.7  | 0.0096874 |

|                                                                     |                                                         |    |       |          |                                                                                                                                       |      |    |      |      |           |
|---------------------------------------------------------------------|---------------------------------------------------------|----|-------|----------|---------------------------------------------------------------------------------------------------------------------------------------|------|----|------|------|-----------|
| UP_SEQ_FEATURE                                                      | region of interest:Coil 1A                              | 13 | 0.502 | 6.47E-05 | INA, VIM, BFSP1, KRT81, KRT73, DES, KRT80, KRT5, KRT7, KRT8, NEFL, KRT71, KRT83                                                       | 682  | 29 | 5635 | 3.7  | 0.0096874 |
| UP_SEQ_FEATURE                                                      | region of interest:Coil 1B                              | 13 | 0.502 | 6.47E-05 | INA, VIM, BFSP1, KRT81, KRT73, DES, KRT80, KRT5, KRT7, KRT8, NEFL, KRT71, KRT83                                                       | 682  | 29 | 5635 | 3.7  | 0.0096874 |
| UP_SEQ_FEATURE                                                      | region of interest:Rod                                  | 14 | 0.54  | 8.56E-05 | KRT6C, INA, VIM, BFSP1, KRT81, KRT73, DES, KRT80, KRT5, KRT7, KRT8, NEFL, KRT83, KRT71                                                | 682  | 34 | 5635 | 3.4  | 0.0117489 |
| UP_SEQ_FEATURE                                                      | region of interest:Head                                 | 13 | 0.502 | 9.61E-05 | INA, VIM, BFSP1, KRT81, KRT73, DES, KRT80, KRT5, KRT7, KRT8, NEFL, KRT71, KRT83                                                       | 682  | 30 | 5635 | 3.58 | 0.0121635 |
| UP_SEQ_FEATURE                                                      | region of interest:Linker 12                            | 12 | 0.463 | 2.28E-04 | KRT73, KRT81, DES, KRT80, KRT5, KRT7, VIM, KRT8, BFSP1, NEFL, KRT83, KRT71                                                            | 682  | 28 | 5635 | 3.54 | 0.0265851 |
| UP_SEQ_FEATURE                                                      | region of interest:Coil 2                               | 12 | 0.463 | 2.28E-04 | KRT73, INA, KRT81, KRT6C, KRT80, KRT5, KRT7, VIM, KRT8, BFSP1, KRT83, KRT71                                                           | 682  | 28 | 5635 | 3.54 | 0.0265851 |
| SP_PIR_KEYWORDS                                                     | Intermediate filament                                   | 16 | 0.618 | 0.00257  | KRT6C, INA, VIM, BFSP1, KRT81, KRT73, KRT82, DES, KRT80, KRT5, LOC787355, KRT7, KRT8, NEFL, KRT83, KRT71                              | 985  | 52 | 7349 | 2.3  | 0.0281508 |
| INTERPRO                                                            | IPR016044:Filament                                      | 15 | 0.579 | 0.003841 | KRT6C, INA, VIM, KRT81, KRT73, KRT82, DES, KRT80, KRT5, LOC787355, KRT7, KRT8, NEFL, KRT83, KRT71                                     | 1200 | 50 | 9171 | 2.29 | 0.144702  |
| INTERPRO                                                            | IPR018039:Intermediate filament protein, conserved site | 15 | 0.579 | 0.005641 | KRT6C, INA, VIM, BFSP1, KRT81, KRT73, KRT82, DES, KRT80, KRT5, KRT7, KRT8, NEFL, KRT83, KRT71                                         | 1200 | 52 | 9171 | 2.2  | 0.1881158 |
| INTERPRO                                                            | IPR001664:Intermediate filament protein                 | 15 | 0.579 | 0.005641 | KRT6C, INA, VIM, KRT81, KRT73, KRT82, DES, KRT80, KRT5, LOC787355, KRT7, KRT8, NEFL, KRT83, KRT71                                     | 1200 | 52 | 9171 | 2.2  | 0.1881158 |
| <b>Annotation Cluster 23 (nrchment Score: 3.430368409876335)</b>    |                                                         |    |       |          |                                                                                                                                       |      |    |      |      |           |
| GOTERM_CC_FAT                                                       | GO:0005923~tight junction                               | 17 | 0.656 | 7.01E-05 | PRKCZ, CLDN7, F11R, LOC526866, CLDN9, CLDN4, CLDN3, CLDN6, CLDN5, CLDN10, MPP7, CLDN11, CXADR, AMOTL2, CLDN23, CLDN1, LOC536606       | 984  | 41 | 6966 | 2.94 | 0.0012711 |
| GOTERM_CC_FAT                                                       | GO:0070160~occluding junction                           | 17 | 0.656 | 7.01E-05 | PRKCZ, CLDN7, F11R, LOC526866, CLDN9, CLDN4, CLDN3, CLDN6, CLDN5, CLDN10, MPP7, CLDN11, CXADR, AMOTL2, CLDN23, CLDN1, LOC536606       | 984  | 41 | 6966 | 2.94 | 0.0012711 |
| GOTERM_CC_FAT                                                       | GO:0016327~apical lateral plasma membrane               | 18 | 0.695 | 0.001316 | PRKCZ, F11R, CLDN7, LOC526866, CLDN9, CLDN4, CLDN3, CLDN6, CLDN5, CLDN10, MPP7, CLDN11, CXADR, AMOTL2, CLDN23, FZD6, CLDN1, LOC536606 | 984  | 56 | 6966 | 2.28 | 0.0175488 |
| GOTERM_CC_FAT                                                       | GO:0043296~apical junction complex                      | 17 | 0.656 | 0.002939 | PRKCZ, CLDN7, F11R, LOC526866, CLDN9, CLDN4, CLDN3, CLDN6, CLDN5, CLDN10, MPP7, CLDN11, CXADR, AMOTL2, CLDN23, CLDN1, LOC536606       | 984  | 55 | 6966 | 2.19 | 0.0309329 |
| <b>Annotation Cluster 24 (Enrichment Score: 3.4291217609225852)</b> |                                                         |    |       |          |                                                                                                                                       |      |    |      |      |           |
| INTERPRO                                                            | IPR001839:Transforming growth factor beta               | 10 | 0.386 | 9.82E-05 | INHBB, BMP4, INHBA, BMP3, BMP2, FOXJ1, GDF6, GDF10, BMP7, GDNF                                                                        | 1200 | 17 | 9171 | 4.5  | 0.0086069 |
| SMART                                                               | SM00204:TGFB                                            | 10 | 0.386 | 3.04E-04 | INHBB, BMP4, INHBA, BMP3, BMP2, FOXJ1, GDF6, GDF10, BMP7, GDNF                                                                        | 661  | 17 | 4364 | 3.88 | 0.0204796 |
| INTERPRO                                                            | IPR015615:Transforming growth factor-beta-related       | 9  | 0.347 | 4.05E-04 | INHBB, BMP4, INHBA, BMP3, BMP2, FOXJ1, GDF6, GDF10, BMP7                                                                              | 1200 | 16 | 9171 | 4.3  | 0.0264108 |
| INTERPRO                                                            | IPR017948:Transforming growth factor-beta-related       | 8  | 0.309 | 0.0015   | INHBB, BMP4, INHBA, BMP3, BMP2, FOXJ1, GDF6, GDF10                                                                                    | 1200 | 15 | 9171 | 4.08 | 0.073327  |



|                                                                     |                                                                               |    |       |          |                                                                                                     |      |    |      |      |  |           |
|---------------------------------------------------------------------|-------------------------------------------------------------------------------|----|-------|----------|-----------------------------------------------------------------------------------------------------|------|----|------|------|--|-----------|
|                                                                     | ming growth factor<br>beta, conserved site                                    |    |       | 85       |                                                                                                     |      |    |      |      |  | 5         |
| <b>Annotation Cluster 25 (Enrichment Score: 3.219967997045056)</b>  |                                                                               |    |       |          |                                                                                                     |      |    |      |      |  |           |
| INTERPRO                                                            | IPR001881:EGF-like<br>calcium-binding                                         | 15 | 0.579 | 1.29E-04 | LTBP2, EGFL7, EFEMP2, NELL2, EFEMP1, DLK2, DLK1, FBLN1, THBD, FBLN5, DLL4, ACAN, VCAN, VLDLR, THBS4 | 1200 | 37 | 9171 | 3.1  |  | 0.0096649 |
| SMART                                                               | SM00179:EGF_CA                                                                | 15 | 0.579 | 5.89E-04 | LTBP2, EGFL7, EFEMP2, NELL2, EFEMP1, DLK2, DLK1, FBLN1, THBD, FBLN5, DLL4, ACAN, VCAN, VLDLR, THBS4 | 661  | 37 | 4364 | 2.68 |  | 0.0263648 |
| INTERPRO                                                            | IPR000152:EGF-type<br>aspartate/asparagine<br>hydroxylation<br>conserved site | 14 | 0.54  | 0.001206 | LTBP2, EGFL7, EFEMP2, NELL2, EFEMP1, DLK2, DLK1, FBLN1, THBD, FBLN5, DLL4, ACAN, VCAN, VLDLR        | 1200 | 40 | 9171 | 2.67 |  | 0.0659851 |
| INTERPRO                                                            | IPR018097:EGF-like<br>calcium-binding,<br>conserved site                      | 13 | 0.502 | 0.001441 | LTBP2, EGFL7, EFEMP2, NELL2, EFEMP1, DLK2, FBLN1, THBD, FBLN5, ACAN, VCAN, THBS4, VLDLR             | 1200 | 36 | 9171 | 2.76 |  | 0.0710547 |
| <b>Annotation Cluster 26 (Enrichment Score: 3.1680872789756704)</b> |                                                                               |    |       |          |                                                                                                     |      |    |      |      |  |           |
| GOTERM_MF_FAT                                                       | GO:0005540~hyaluronic acid binding                                            | 8  | 0.309 | 3.39E-04 | HAPLN2, HAPLN1, HAPLN4, HAPLN3, CD44, ACAN, BCAN, VCAN                                              | 1248 | 12 | 9249 | 4.94 |  | 0.0094092 |
| INTERPRO                                                            | IPR000538:Link                                                                | 7  | 0.27  | 6.47E-04 | HAPLN2, HAPLN1, HAPLN3, CD44, ACAN, BCAN, VCAN                                                      | 1200 | 10 | 9171 | 5.35 |  | 0.037285  |
| SMART                                                               | SM00445:LINK                                                                  | 7  | 0.27  | 0.001425 | HAPLN2, HAPLN1, HAPLN3, CD44, ACAN, BCAN, VCAN                                                      | 661  | 10 | 4364 | 4.62 |  | 0.0473166 |
| <b>Annotation Cluster 27 (Enrichment Score: 2.9449835820864276)</b> |                                                                               |    |       |          |                                                                                                     |      |    |      |      |  |           |
| INTERPRO                                                            | IPR018933:Netrin<br>module, non-TIMP<br>type                                  | 7  | 0.27  | 6.47E-04 | SFRP5, SFRP1, C3, SFRP2, SFRP4, NTN4, FRZB                                                          | 1200 | 10 | 9171 | 5.35 |  | 0.037285  |
| SMART                                                               | SM00643:C345C                                                                 | 7  | 0.27  | 0.001425 | SFRP5, SFRP1, C3, SFRP2, SFRP4, NTN4, FRZB                                                          | 661  | 10 | 4364 | 4.62 |  | 0.0473166 |
| INTERPRO                                                            | IPR001134:Netrin<br>domain                                                    | 8  | 0.309 | 0.001585 | SFRP5, SFRP1, C3, SFRP2, SFRP4, NTN4, TIMP4, FRZB                                                   | 1200 | 15 | 9171 | 4.08 |  | 0.0733275 |
| <b>Annotation Cluster 28 (Enrichment Score: 2.792203888069219)</b>  |                                                                               |    |       |          |                                                                                                     |      |    |      |      |  |           |
| GOTERM_BP_FAT                                                       | GO:0031128~developmental induction                                            | 7  | 0.27  | 9.90E-04 | BMP4, FGFR4, HOXC11, SIX1, SOX2, FGF2, GDNF                                                         | 1242 | 10 | 8785 | 4.95 |  | 0.0216789 |
| GOTERM_BP_FAT                                                       | GO:0045168~cell-cell signaling<br>involved in cell fate<br>specification      | 7  | 0.27  | 9.90E-04 | BMP4, FGFR4, HOXC11, SIX1, SOX2, FGF2, GDNF                                                         | 1242 | 10 | 8785 | 4.95 |  | 0.0216789 |
| GOTERM_BP_FAT                                                       | GO:0001759~induction of an organ                                              | 6  | 0.232 | 0.004286 | BMP4, FGFR4, HOXC11, SIX1, FGF2, GDNF                                                               | 1242 | 9  | 8785 | 4.72 |  | 0.0748089 |
| <b>Annotation Cluster 29 (Enrichment Score: 2.725693780645293)</b>  |                                                                               |    |       |          |                                                                                                     |      |    |      |      |  |           |
| GOTERM_BP_FAT                                                       | GO:0010579~positive regulation of<br>adenylate cyclase                        | 8  | 0.309 | 8.68E-04 | CALCR, ADRB3, GNAL, UCN3, ADRB1, ADORA2B, PTH1R, TSHR                                               | 1242 | 13 | 8785 | 4.35 |  | 0.0200546 |

|                                                                     |                                                                                     |    |       |          |                                                                                                                                                                                                                                                                                                                                                             |      |     |      |      |           |  |
|---------------------------------------------------------------------|-------------------------------------------------------------------------------------|----|-------|----------|-------------------------------------------------------------------------------------------------------------------------------------------------------------------------------------------------------------------------------------------------------------------------------------------------------------------------------------------------------------|------|-----|------|------|-----------|--|
|                                                                     | activity by G-protein signaling pathway                                             |    |       |          |                                                                                                                                                                                                                                                                                                                                                             |      |     |      |      |           |  |
| GOTERM_BP_FAT                                                       | GO:0010578~regulation of adenylate cyclase activity involved in G-protein signaling | 8  | 0.309 | 8.68E-04 | CALCR, ADRB3, GNAL, UCN3, ADRB1, ADORA2B, PTH1R, TSHR                                                                                                                                                                                                                                                                                                       | 1242 | 13  | 8785 | 4.35 | 0.0200546 |  |
| GOTERM_BP_FAT                                                       | GO:0007189~activation of adenylate cyclase activity by G-protein signaling pathway  | 8  | 0.309 | 8.68E-04 | CALCR, ADRB3, GNAL, UCN3, ADRB1, ADORA2B, PTH1R, TSHR                                                                                                                                                                                                                                                                                                       | 1242 | 13  | 8785 | 4.35 | 0.0200546 |  |
| GOTERM_BP_FAT                                                       | GO:0007190~activation of adenylate cyclase activity                                 | 8  | 0.309 | 0.001525 | CALCR, ADRB3, GNAL, UCN3, ADRB1, ADORA2B, PTH1R, TSHR                                                                                                                                                                                                                                                                                                       | 1242 | 14  | 8785 | 4.04 | 0.0313741 |  |
| GOTERM_BP_FAT                                                       | GO:0045762~positive regulation of adenylate cyclase activity                        | 8  | 0.309 | 0.002513 | CALCR, ADRB3, GNAL, UCN3, ADRB1, ADORA2B, PTH1R, TSHR                                                                                                                                                                                                                                                                                                       | 1242 | 15  | 8785 | 3.77 | 0.0479386 |  |
| GOTERM_BP_FAT                                                       | GO:0031281~positive regulation of cyclase activity                                  | 8  | 0.309 | 0.003928 | CALCR, ADRB3, GNAL, UCN3, ADRB1, ADORA2B, PTH1R, TSHR                                                                                                                                                                                                                                                                                                       | 1242 | 16  | 8785 | 3.54 | 0.0700058 |  |
| GOTERM_BP_FAT                                                       | GO:0051349~positive regulation of lyase activity                                    | 8  | 0.309 | 0.008458 | CALCR, ADRB3, GNAL, UCN3, ADRB1, ADORA2B, PTH1R, TSHR                                                                                                                                                                                                                                                                                                       | 1242 | 18  | 8785 | 3.14 | 0.1294646 |  |
| <b>Annotation Cluster 30 (Enrichment Score: 2.6733643244411827)</b> |                                                                                     |    |       |          |                                                                                                                                                                                                                                                                                                                                                             |      |     |      |      |           |  |
| GOTERM_MF_FAT                                                       | GO:0015370~solute: sodium symporter activity                                        | 14 | 0.54  | 0.001609 | SLC6A2, SLC6A20, SLC6A12, SLC6A3, SLC6A13, SLC10A4, LOC529341, LOC785907, SLC6A7, SLC6A5, SLC6A6, SLC13A3, SLC5A7, SLC1A1                                                                                                                                                                                                                                   | 1248 | 40  | 9249 | 2.59 | 0.0380362 |  |
| GOTERM_MF_FAT                                                       | GO:0015294~solute: cation symporter activity                                        | 16 | 0.618 | 0.002247 | SLC6A2, SLC6A20, SLC6A3, SLC6A12, SLC6A13, SLC10A4, LOC529341, SLC17A7, LOC785907, SLC2A6, SLC6A7, SLC6A5, SLC6A6, SLC13A3, SLC5A7, SLC1A1                                                                                                                                                                                                                  | 1248 | 51  | 9249 | 2.33 | 0.0477195 |  |
| GOTERM_MF_FAT                                                       | GO:0015293~symporter activity                                                       | 19 | 0.733 | 0.00264  | SLC6A2, SLC6A20, SLC6A3, SLC6A12, SLC6A13, SLC10A4, LOC529341, SLC34A2, SLC17A7, LOC785907, SLC2A6, SLC17A6, SLC6A7, SLC6A5, SLC6A6, SLC13A3, SLC5A7, SLC1A1, SLC5A11                                                                                                                                                                                       | 1248 | 67  | 9249 | 2.1  | 0.0533085 |  |
| <b>Annotation Cluster 31 (Enrichment Score: 2.5882128098656034)</b> |                                                                                     |    |       |          |                                                                                                                                                                                                                                                                                                                                                             |      |     |      |      |           |  |
| GOTERM_CC_FAT                                                       | GO:0005626~insoluble fraction                                                       | 47 | 1.814 | 0.001522 | ARHGDIG, GAL3ST4, JPH2, GLRA1, PTGS2, SNCB, ATL1, SNCA, PTGS1, ACSBG2, ATP6V1B1, PCDHGA2, APLP1, ADRB3, DES, SLC2A4, RASGRP4, PTGES, CHRNA7, NT5E, SNAP25, PRKCA, MOGAT1, GLRB, STX1A, CYP1A1, CCKBR, CRYAB, CPNE6, ITGA3, HOMER1, ITPR3, CAMK2N1, SLC17A7, CD38, SSTR2, ADRB1, SLC17A6, DGAT1, LYNX1, DGAT2, ITGA5, IGF2R, HSD11B2, SLC13A3, STEAP2, GRB14 | 984  | 212 | 6966 | 1.57 | 0.0195588 |  |
| GOTERM_CC_FAT                                                       | GO:0005624~memb                                                                     | 45 | 1.737 | 0.0021   | ARHGDIG, GAL3ST4, JPH2, GLRA1, PTGS2, SNCB, ATL1,                                                                                                                                                                                                                                                                                                           | 984  | 204 | 6966 | 1.56 | 0.024224  |  |

|                                                                     |                                                                                 |    |       |          |                                                                                                                                                                                                                                                                                                                                                                            |      |     |      |      |           |
|---------------------------------------------------------------------|---------------------------------------------------------------------------------|----|-------|----------|----------------------------------------------------------------------------------------------------------------------------------------------------------------------------------------------------------------------------------------------------------------------------------------------------------------------------------------------------------------------------|------|-----|------|------|-----------|
|                                                                     | rane fraction                                                                   |    |       | 59       | SNCA, PTGS1, ACSBG2, ATP6V1B1, PCDHGA2, APLP1, ADRB3, SLC2A4, RASGRP4, PTGES, CHRNA7, NT5E, SNAP25, PRKCA, GLRB, STX1A, MOGAT1, CYP1A1, CCKBR, CPNE6, ITGA3, HOMER1, ITPR3, CAMK2N1, SLC17A7, CD38, SSTR2, ADRB1, SLC17A6, DGAT1, LYNX1, DGAT2, ITGA5, IGF2R, HSD11B2, SLC13A3, STEAP2, GRB14                                                                              |      |     |      |      | 6         |
| GOTERM_CC_FAT                                                       | GO:0000267~cell fraction                                                        | 49 | 1.891 | 0.00523  | JPH2, GLRA1, PTGS2, SNCB, ATL1, SNCA, PTGS1, PCDHGA2, DES, SLC2A4, PTGES, CHRNA7, NT5E, PRKCA, STX1A, CCKBR, CYP1A1, CRYAB, CD38, SSTR2, ADRB1, DGAT1, LYNX1, DGAT2, IGF2R, HSD11B2, STEAP2, GRB14, CRYBA4, ARHGDIG, GAL3ST4, ACSBG2, ATP6V1B1, APLP1, PCSK2, ADRB3, RASGRP4, SNAP25, GLRB, MOGAT1, CPNE6, ITGA3, ITPR3, HOMER1, CAMK2N1, SLC17A7, SLC17A6, ITGA5, SLC13A3 | 984  | 237 | 6966 | 1.46 | 0.0501409 |
| <b>Annotation Cluster 32 (Enrichment Score: 2.4239382492006647)</b> |                                                                                 |    |       |          |                                                                                                                                                                                                                                                                                                                                                                            |      |     |      |      |           |
| GOTERM_BP_FAT                                                       | GO:0000122~negative regulation of transcription from RNA polymerase II promoter | 27 | 1.042 | 1.34E-04 | CDX2, SOX2, FST, CBX2, PAX3, KCNIP3, FOXH1, VDR, HAND1, OVOL1, NR2F2, NKX2-5, NR2F1, EGR1, NANOG, RARG, FOXA1, TLE4, DLX1, MSX1, ID2, HES5, ID1, HOPX, ID3, CUX1, CRYM                                                                                                                                                                                                     | 1242 | 88  | 8785 | 2.17 | 0.0046387 |
| GOTERM_BP_FAT                                                       | GO:0045892~negative regulation of transcription, DNA-dependent                  | 31 | 1.196 | 0.001029 | SBNO2, CDX2, SOX2, FST, CBX2, PAX3, KCNIP3, FOXH1, VDR, HAND1, OVOL1, NR2F2, NKX2-5, FGF2, TWIST2, NR2F1, EGR1, NANOG, RARG, FOXA1, NDUFA13, TLE4, DLX1, MSX1, ID2, HES5, ID1, HOPX, ID3, CUX1, CRYM                                                                                                                                                                       | 1242 | 120 | 8785 | 1.83 | 0.0223516 |
| GOTERM_BP_FAT                                                       | GO:0051253~negative regulation of RNA metabolic process                         | 31 | 1.196 | 0.001187 | SBNO2, CDX2, SOX2, FST, CBX2, PAX3, KCNIP3, FOXH1, VDR, HAND1, OVOL1, NR2F2, NKX2-5, FGF2, TWIST2, NR2F1, EGR1, NANOG, RARG, FOXA1, NDUFA13, TLE4, DLX1, MSX1, ID2, HES5, ID1, HOPX, ID3, CUX1, CRYM                                                                                                                                                                       | 1242 | 121 | 8785 | 1.81 | 0.0252073 |
| GOTERM_BP_FAT                                                       | GO:0009890~negative regulation of biosynthetic process                          | 42 | 1.621 | 0.005061 | SBNO2, CDX2, PDGFA, SOX2, EDN1, FST, HR, CBX2, PAX3, ITGB3, IL10, KCNIP3, FOXH1, VDR, HAND1, APOE, OVOL1, NR2F2, NKX2-5, FGF2, TWIST2, NR2F1, EGR1, MYF6, NANOG, RARG, FOXA1, NDUFA13, TLE4, INHBB, NR1I3, DLX1, MSX1, HES5, ID2, ID1, PRDM6, HOPX, ID3, CUX1, CACNA1A, CRYM                                                                                               | 1242 | 195 | 8785 | 1.52 | 0.0852951 |
| GOTERM_BP_FAT                                                       | GO:0016481~negative regulation of transcription                                 | 35 | 1.351 | 0.005164 | SBNO2, CDX2, SOX2, FST, HR, CBX2, PAX3, KCNIP3, FOXH1, VDR, HAND1, OVOL1, NR2F2, NKX2-5, FGF2, TWIST2, NR2F1, EGR1, MYF6, NANOG, RARG, FOXA1, NDUFA13, TLE4, NR1I3, DLX1, MSX1, ID2, HES5, ID1, PRDM6, HOPX, ID3, CUX1, CRYM                                                                                                                                               | 1242 | 155 | 8785 | 1.6  | 0.0864671 |
| GOTERM_BP_FAT                                                       | GO:0051172~negative regulation of nitrogen compound metabolic process           | 37 | 1.428 | 0.006065 | SBNO2, CDX2, SOX2, EDN1, FST, HR, CBX2, PAX3, IL10, KCNIP3, FOXH1, VDR, HAND1, OVOL1, NR2F2, NKX2-5, FGF2, TWIST2, NR2F1, EGR1, MYF6, NANOG, RARG, FOXA1, NDUFA13, TLE4, NR1I3, DLX1, MSX1, HES5, ID2, ID1, PRDM6, HOPX, ID3, CUX1, CRYM                                                                                                                                   | 1242 | 168 | 8785 | 1.56 | 0.0980976 |
| GOTERM_BP_FAT                                                       | GO:0010629~negati                                                               | 37 | 1.428 | 0.0073   | SBNO2, CDX2, SOX2, FST, HR, CBX2, PAX3, KCNIP3,                                                                                                                                                                                                                                                                                                                            | 1242 | 170 | 8785 | 1.54 | 0.116088  |

|                                                                     |                                                                                                         |    |       |          |                                                                                                                                                                                                                                                                                                       |      |     |      |      |           |
|---------------------------------------------------------------------|---------------------------------------------------------------------------------------------------------|----|-------|----------|-------------------------------------------------------------------------------------------------------------------------------------------------------------------------------------------------------------------------------------------------------------------------------------------------------|------|-----|------|------|-----------|
|                                                                     | ve regulation of gene expression                                                                        |    |       | 68       | FOXH1, VDR, HAND1, CLP1, OVOL1, NR2F2, NKX2-5, FGF2, TWIST2, NR2F1, EGR1, MYF6, BMP4, NANOG, RARG, FOXA1, NDUFA13, TLE4, NR1I3, DLX1, MSX1, HES5, ID2, ID1, PRDM6, HOPX, ID3, CUX1, CRYM                                                                                                              |      |     |      |      | 7         |
| GOTERM_BP_FAT                                                       | GO:0031327~negative regulation of cellular biosynthetic process                                         | 40 | 1.544 | 0.008479 | SBNO2, CDX2, PDGFA, SOX2, EDN1, FST, HR, CBX2, PAX3, IL10, KCNIP3, FOXH1, VDR, HAND1, OVOL1, NR2F2, NKX2-5, FGF2, TWIST2, NR2F1, EGR1, MYF6, NANOG, RARG, FOXA1, NDUFA13, TLE4, INHBB, NR1I3, DLX1, MSX1, HES5, ID2, ID1, PRDM6, HOPX, ID3, CUX1, CACNA1A, CRYM                                       | 1242 | 189 | 8785 | 1.5  | 0.1290984 |
| GOTERM_BP_FAT                                                       | GO:0045934~negative regulation of nucleobase, nucleoside, nucleotide and nucleic acid metabolic process | 36 | 1.389 | 0.008738 | SBNO2, CDX2, SOX2, EDN1, FST, HR, CBX2, PAX3, KCNIP3, FOXH1, VDR, HAND1, OVOL1, NR2F2, NKX2-5, FGF2, TWIST2, NR2F1, EGR1, MYF6, NANOG, RARG, FOXA1, NDUFA13, TLE4, NR1I3, DLX1, MSX1, HES5, ID2, ID1, PRDM6, HOPX, ID3, CUX1, CRYM                                                                    | 1242 | 166 | 8785 | 1.53 | 0.131456  |
| GOTERM_BP_FAT                                                       | GO:0010558~negative regulation of macromolecule biosynthetic process                                    | 39 | 1.505 | 0.010911 | SBNO2, CDX2, SOX2, EDN1, FST, HR, CBX2, PAX3, ITGB3, IL10, KCNIP3, FOXH1, VDR, HAND1, OVOL1, NR2F2, NKX2-5, FGF2, TWIST2, NR2F1, EGR1, MYF6, NANOG, RARG, FOXA1, NDUFA13, TLE4, INHBB, NR1I3, DLX1, MSX1, HES5, ID2, ID1, PRDM6, HOPX, ID3, CUX1, CRYM                                                | 1242 | 186 | 8785 | 1.48 | 0.1561622 |
| GOTERM_BP_FAT                                                       | GO:0010605~negative regulation of macromolecule metabolic process                                       | 46 | 1.775 | 0.014067 | SBNO2, CDX2, SOX2, EDN1, SNCA, FST, HR, CBX2, PAX3, ITGB3, BDKRB2, IL10, KCNIP3, FOXH1, VDR, HAND1, CLP1, OVOL1, THBS1, NR2F2, FGF2, NKX2-5, TWIST2, NR2F1, PRKCA, EGR1, MYF6, BMP4, NANOG, RARG, FOXA1, NDUFA13, TLE4, PRKCG, INHBB, NR1I3, DLX1, MSX1, HES5, ID2, ID1, PRDM6, HOPX, ID3, CUX1, CRYM | 1242 | 231 | 8785 | 1.41 | 0.1873273 |
| <b>Annotation Cluster 33 (Enrichment Score: 2.3897317034736862)</b> |                                                                                                         |    |       |          |                                                                                                                                                                                                                                                                                                       |      |     |      |      |           |
| GOTERM_MF_FAT                                                       | GO:0004955~prostaglandin receptor activity                                                              | 6  | 0.232 | 0.001737 | PTGER3, PTGER4, PTGDR, LOC781367, PTGFR, HPGD                                                                                                                                                                                                                                                         | 1248 | 8   | 9249 | 5.56 | 0.039953  |
| GOTERM_MF_FAT                                                       | GO:0004954~prostanoid receptor activity                                                                 | 6  | 0.232 | 0.003476 | PTGER3, PTGER4, PTGDR, LOC781367, PTGFR, HPGD                                                                                                                                                                                                                                                         | 1248 | 9   | 9249 | 4.94 | 0.063883  |
| GOTERM_MF_FAT                                                       | GO:0004953~icosanoid receptor activity                                                                  | 6  | 0.232 | 0.003476 | PTGER3, PTGER4, PTGDR, LOC781367, PTGFR, HPGD                                                                                                                                                                                                                                                         | 1248 | 9   | 9249 | 4.94 | 0.063883  |
| INTERPRO                                                            | IPR008365:Prostanoid receptor                                                                           | 5  | 0.193 | 0.013151 | PTGER3, PTGER4, PTGDR, LOC781367, PTGFR                                                                                                                                                                                                                                                               | 1200 | 8   | 9171 | 4.78 | 0.3371227 |
| <b>Annotation Cluster 34 (Enrichment Score: 2.3602060755250664)</b> |                                                                                                         |    |       |          |                                                                                                                                                                                                                                                                                                       |      |     |      |      |           |
| GOTERM_BP_FAT                                                       | GO:0060043~regulation of cardiac muscle cell proliferation                                              | 5  | 0.193 | 0.001759 | FGFR2, RBP4, GATA4, CXADR, FGF2                                                                                                                                                                                                                                                                       | 1242 | 5   | 8785 | 7.07 | 0.0358677 |
| GOTERM_BP_FAT                                                       | GO:0055024~regulation of cardiac muscle tissue                                                          | 5  | 0.193 | 0.001759 | FGFR2, RBP4, GATA4, CXADR, FGF2                                                                                                                                                                                                                                                                       | 1242 | 5   | 8785 | 7.07 | 0.0358677 |

|                                                                     |                                                       |    |       |          |                                                                                                                                         |      |    |      |      |           |  |
|---------------------------------------------------------------------|-------------------------------------------------------|----|-------|----------|-----------------------------------------------------------------------------------------------------------------------------------------|------|----|------|------|-----------|--|
|                                                                     | development                                           |    |       |          |                                                                                                                                         |      |    |      |      |           |  |
| GOTERM_BP_FAT                                                       | GO:0055021~regulation of cardiac muscle growth        | 5  | 0.193 | 0.001759 | FGFR2, RBP4, GATA4, CXADR, FGF2                                                                                                         | 1242 | 5  | 8785 | 7.07 | 0.0358677 |  |
| GOTERM_BP_FAT                                                       | GO:0060420~regulation of heart growth                 | 5  | 0.193 | 0.001759 | FGFR2, RBP4, GATA4, CXADR, FGF2                                                                                                         | 1242 | 5  | 8785 | 7.07 | 0.0358677 |  |
| GOTERM_BP_FAT                                                       | GO:0046620~regulation of organ growth                 | 6  | 0.232 | 0.165023 | FGFR2, RBP4, IL7, GATA4, CXADR, FGF2                                                                                                    | 1242 | 21 | 8785 | 2.02 | 0.8152474 |  |
| <b>Annotation Cluster 35 (Enrichment Score: 2.3302773758897715)</b> |                                                       |    |       |          |                                                                                                                                         |      |    |      |      |           |  |
| SP_PIR_KEYWORDS                                                     | chloride channel                                      | 10 | 0.386 | 5.60E-04 | GLRB, GABRA2, GABRA4, GLRA1, GABRB2, GABRB1, TTYH1, CFTR, ANO4, GABRP                                                                   | 985  | 20 | 7349 | 3.73 | 0.0072589 |  |
| GOTERM_CC_FAT                                                       | GO:0034707~chloride channel complex                   | 10 | 0.386 | 8.30E-04 | GLRB, GABRA2, GABRA4, GLRA1, GABRB2, GABRB1, TTYH1, CFTR, ANO4, GABRP                                                                   | 984  | 20 | 6966 | 3.54 | 0.0119863 |  |
| SP_PIR_KEYWORDS                                                     | chloride                                              | 10 | 0.386 | 0.001873 | GLRB, GABRA2, GABRA4, GLRA1, GABRB2, GABRB1, TTYH1, CFTR, ANO4, GABRP                                                                   | 985  | 23 | 7349 | 3.24 | 0.0211036 |  |
| GOTERM_MF_FAT                                                       | GO:0031404~chloride ion binding                       | 10 | 0.386 | 0.002788 | GLRB, GABRA2, GABRA4, GLRA1, GABRB2, GABRB1, TTYH1, CFTR, ANO4, GABRP                                                                   | 1248 | 24 | 9249 | 3.09 | 0.0537797 |  |
| GOTERM_MF_FAT                                                       | GO:0043168~anion binding                              | 11 | 0.425 | 0.00579  | GLRB, GABRA2, GABRA4, GLRA1, GABRB2, GABRB1, TTYH1, CFTR, ANO4, GABRP, SLC34A2                                                          | 1248 | 31 | 9249 | 2.63 | 0.0964745 |  |
| GOTERM_MF_FAT                                                       | GO:0005254~chloride channel activity                  | 11 | 0.425 | 0.041983 | GLRB, GABRA2, GABRA4, SLC26A8, GLRA1, GABRB2, GABRB1, TTYH1, CFTR, ANO4, GABRP                                                          | 1248 | 41 | 9249 | 1.99 | 0.4206927 |  |
| GOTERM_MF_FAT                                                       | GO:0005253~anion channel activity                     | 11 | 0.425 | 0.082574 | GLRB, GABRA2, GABRA4, SLC26A8, GLRA1, GABRB2, GABRB1, TTYH1, CFTR, ANO4, GABRP                                                          | 1248 | 46 | 9249 | 1.77 | 0.5905327 |  |
| <b>Annotation Cluster 36 (Enrichment Score: 2.3069362445435933)</b> |                                                       |    |       |          |                                                                                                                                         |      |    |      |      |           |  |
| GOTERM_CC_FAT                                                       | GO:0008021~synaptic vesicle                           | 14 | 0.54  | 0.001878 | SYT1, GABRA2, RAB3B, STX1A, SYT4, SYT10, SYT5, SYT7, SYPL2, SLC17A7, DOC2A, SLC17A6, SYT17, MT3                                         | 984  | 39 | 6966 | 2.54 | 0.0224833 |  |
| GOTERM_CC_FAT                                                       | GO:0030136~clathrin-coated vesicle                    | 17 | 0.656 | 0.00435  | SYT1, GABRA2, RAB3B, STX1A, SYT4, SYT10, SYT5, SYT7, SYPL2, SLC17A7, DOC2A, SLC17A6, SLC2A4, IGF2R, STEAP2, SYT17, MT3                  | 984  | 57 | 6966 | 2.11 | 0.043009  |  |
| GOTERM_CC_FAT                                                       | GO:0030135~coated vesicle                             | 19 | 0.733 | 0.014692 | SEC23A, SYT1, GABRA2, RAB3B, STX1A, SYT4, SYT10, SYT5, SYT7, SYPL2, SLC17A7, PACSIN1, DOC2A, SLC17A6, SLC2A4, IGF2R, STEAP2, SYT17, MT3 | 984  | 75 | 6966 | 1.79 | 0.1256873 |  |
| <b>Annotation Cluster 37 (Enrichment Score: 2.2941644208137317)</b> |                                                       |    |       |          |                                                                                                                                         |      |    |      |      |           |  |
| UP_SEQ_FEATURE                                                      | metal ion-binding site:Calcium 3                      | 7  | 0.27  | 8.23E-04 | PRKCA, SYT1, MMP9, PRKCG, COLEC12, MMP2, PRKCB                                                                                          | 682  | 11 | 5635 | 5.26 | 0.0868779 |  |
| UP_SEQ_FEATURE                                                      | metal ion-binding site:Calcium 3; via carbonyl oxygen | 6  | 0.232 | 0.003798 | PRKCA, SYT1, MMP9, PRKCG, MMP2, PRKCB                                                                                                   | 682  | 10 | 5635 | 4.96 | 0.2822968 |  |
| UP_SEQ_FEATURE                                                      | metal ion-binding site:Calcium 2; via carbonyl oxygen | 8  | 0.309 | 0.004961 | PRKCA, SYT1, MMP9, CABP1, PRKCG, COLEC12, MMP2, PRKCB                                                                                   | 682  | 19 | 5635 | 3.48 | 0.3375233 |  |
| UP_SEQ_FEATURE                                                      | metal ion-binding site:Calcium 1                      | 8  | 0.309 | 0.004961 | PRKCA, SYT1, MMP9, CABP1, PRKCG, COLEC12, MMP2, PRKCB                                                                                   | 682  | 19 | 5635 | 3.48 | 0.3375233 |  |
| UP_SEQ_FEATURE                                                      | metal ion-binding site:Calcium 1; via                 | 6  | 0.232 | 0.014231 | PRKCA, SYT1, CABP1, PRKCG, COLEC12, PRKCB                                                                                               | 682  | 13 | 5635 | 3.81 | 0.5986362 |  |

|                                                                     |                                                                   |    |       |              |                                                                                                                                      |      |    |      |      |               |  |  |  |
|---------------------------------------------------------------------|-------------------------------------------------------------------|----|-------|--------------|--------------------------------------------------------------------------------------------------------------------------------------|------|----|------|------|---------------|--|--|--|
|                                                                     | carbonyl oxygen                                                   |    |       |              |                                                                                                                                      |      |    |      |      |               |  |  |  |
| UP_SEQ_FEATURE                                                      | metal ion-binding site:Calcium 2                                  | 8  | 0.309 | 0.0156<br>94 | PRKCA, SYT1, MMP9, CABP1, PRKCG, COLEC12, MMP2, PRKCB                                                                                | 682  | 23 | 5635 | 2.87 | 0.594773<br>1 |  |  |  |
| <b>Annotation Cluster 38 (Enrichment Score: 2.272973668053311)</b>  |                                                                   |    |       |              |                                                                                                                                      |      |    |      |      |               |  |  |  |
| INTERPRO                                                            | IPR017981:GPCR, family 2-like                                     | 9  | 0.347 | 0.0024<br>49 | CALCR, CRHR1, FZD10, GPR133, ADCYAP1R1, PTH1R, VIPR1, GHRHR, LPHN1, FZD6                                                             | 1200 | 20 | 9171 | 3.44 | 0.107954<br>1 |  |  |  |
| INTERPRO                                                            | IPR017983:GPCR, family 2, secretin-like, conserved site           | 7  | 0.27  | 0.0037<br>29 | CALCR, CRHR1, GPR133, ADCYAP1R1, PTH1R, VIPR1, GHRHR, LPHN1                                                                          | 1200 | 13 | 9171 | 4.12 | 0.147793<br>9 |  |  |  |
| INTERPRO                                                            | IPR001879:GPCR, family 2, extracellular region                    | 6  | 0.232 | 0.0054<br>02 | CALCR, CRHR1, ADCYAP1R1, PTH1R, VIPR1, GHRHR, LPHN1                                                                                  | 1200 | 10 | 9171 | 4.59 | 0.188828<br>5 |  |  |  |
| INTERPRO                                                            | IPR000832:GPCR, family 2, secretin-like                           | 7  | 0.27  | 0.0086<br>28 | CALCR, CRHR1, GPR133, ADCYAP1R1, PTH1R, VIPR1, GHRHR, LPHN1                                                                          | 1200 | 15 | 9171 | 3.57 | 0.244312<br>4 |  |  |  |
| SMART                                                               | SM00008:HormR                                                     | 6  | 0.232 | 0.0101<br>41 | CALCR, CRHR1, ADCYAP1R1, PTH1R, VIPR1, GHRHR, LPHN1                                                                                  | 661  | 10 | 4364 | 3.96 | 0.242132<br>6 |  |  |  |
| <b>Annotation Cluster 39 (Enrichment Score: 2.100866112550209)</b>  |                                                                   |    |       |              |                                                                                                                                      |      |    |      |      |               |  |  |  |
| GOTERM_BP_FAT                                                       | GO:0040012~regulation of locomotion                               | 21 | 0.81  | 0.0025<br>56 | PRKCA, ICAM1, HS3ST5, PDGFB, PDGFA, MMP9, EDN2, SNCA, F2RL1, PAX6, ITGB3, THY1, KDR, APOE, DLL4, CXCL16, THBS1, SST, FGF2, TSHR, F2R | 1242 | 74 | 8785 | 2.01 | 0.048120<br>3 |  |  |  |
| GOTERM_BP_FAT                                                       | GO:0030334~regulation of cell migration                           | 17 | 0.656 | 0.0123<br>45 | ICAM1, PDGFB, PDGFA, EDN2, MMP9, F2RL1, PAX6, ITGB3, THY1, KDR, APOE, DLL4, CXCL16, THBS1, SST, FGF2, F2R                            | 1242 | 63 | 8785 | 1.91 | 0.171666<br>7 |  |  |  |
| GOTERM_BP_FAT                                                       | GO:0051270~regulation of cell motion                              | 18 | 0.695 | 0.0157<br>9  | ICAM1, PDGFB, PDPN, PDGFA, MMP9, EDN2, F2RL1, PAX6, ITGB3, THY1, KDR, APOE, DLL4, CXCL16, THBS1, SST, FGF2, F2R                      | 1242 | 70 | 8785 | 1.82 | 0.206983<br>4 |  |  |  |
| <b>Annotation Cluster 40 (Enrichment Score: 2.0628037826401338)</b> |                                                                   |    |       |              |                                                                                                                                      |      |    |      |      |               |  |  |  |
| GOTERM_CC_FAT                                                       | GO:0005892~nicotinic acetylcholine-gated receptor-channel complex | 6  | 0.232 | 0.0021<br>41 | CHRNA5, CHRNB4, CHRNA7, CHRNB2, CHRNA3, CHRNG                                                                                        | 984  | 8  | 6966 | 5.31 | 0.024786<br>2 |  |  |  |
| GOTERM_BP_FAT                                                       | GO:0035095~behavioral response to nicotine                        | 5  | 0.193 | 0.0046<br>86 | CHRNA5, CHRNB4, CHRNA7, CHRNB2, CHRNA3                                                                                               | 1242 | 6  | 8785 | 5.89 | 0.080585<br>7 |  |  |  |
| GOTERM_BP_FAT                                                       | GO:0035094~response to nicotine                                   | 5  | 0.193 | 0.0097<br>16 | CHRNA5, CHRNB4, CHRNA7, CHRNB2, CHRNA3                                                                                               | 1242 | 7  | 8785 | 5.05 | 0.142286<br>2 |  |  |  |
| GOTERM_MF_FAT                                                       | GO:0042166~acetylcholine binding                                  | 6  | 0.232 | 0.0223<br>11 | CHRM1, CHRNA5, CHRNB4, CHRNA7, CHRNB2, CHRNA3                                                                                        | 1248 | 13 | 9249 | 3.42 | 0.266036<br>9 |  |  |  |
| GOTERM_MF_FAT                                                       | GO:0015464~acetylcholine receptor activity                        | 6  | 0.232 | 0.0223<br>11 | CHRM1, CHRNA5, CHRNB4, CHRNA7, CHRNB2, CHRNA3                                                                                        | 1248 | 13 | 9249 | 3.42 | 0.266036<br>9 |  |  |  |
| <b>Annotation Cluster 41 (Enrichment Score: 2.024283509815954)</b>  |                                                                   |    |       |              |                                                                                                                                      |      |    |      |      |               |  |  |  |
| INTERPRO                                                            | IPR000008:C2 calcium-dependent                                    | 14 | 0.54  | 0.0058<br>84 | PRKCA, CPNE9, SYT1, ABR, SYT4, SYT5, CPNE6, PRKCH, PRKCG, PRKCB, CADPS, DOC2A, CADPS2, SYT13                                         | 1200 | 47 | 9171 | 2.28 | 0.191384<br>5 |  |  |  |

|                                                                     |                                                         |    |       |              |                                                                                                                                                                                           |      |     |      |      |               |  |
|---------------------------------------------------------------------|---------------------------------------------------------|----|-------|--------------|-------------------------------------------------------------------------------------------------------------------------------------------------------------------------------------------|------|-----|------|------|---------------|--|
|                                                                     | membrane targeting                                      |    |       |              |                                                                                                                                                                                           |      |     |      |      |               |  |
| INTERPRO                                                            | IPR018029:C2<br>membrane targeting protein              | 12 | 0.463 | 0.0075<br>84 | PRKCA, CPNE9, SYT1, DOC2A, ABR, SYT4, SYT5, CPNE6, PRKCH, SYT13, PRKCG, PRKCB                                                                                                             | 1200 | 38  | 9171 | 2.41 | 0.230612<br>8 |  |
| SMART                                                               | SM00239:C2                                              | 14 | 0.54  | 0.0189<br>49 | PRKCA, CPNE9, SYT1, ABR, SYT4, SYT5, CPNE6, PRKCH, PRKCG, PRKCB, CADPS, DOC2A, CADPS2, SYT13                                                                                              | 661  | 47  | 4364 | 1.97 | 0.351854<br>9 |  |
| <b>Annotation Cluster 42 (Enrichment Score: 1.955320557934815)</b>  |                                                         |    |       |              |                                                                                                                                                                                           |      |     |      |      |               |  |
| GOTERM_BP_FAT                                                       | GO:0016477~cell migration                               | 27 | 1.042 | 0.0080<br>2  | CCK, CCL2, PDGFB, EDN2, PAX6, PF4, ITGB2, CDH2, PAX3, GDNF, EDNRB, ATOH1, NR2F2, NKX2-3, NR2F1, PRKCA, ICAM1, LOC786683, EMX2, ITGA3, ITGA4, ISL1, KDR, ITGA5, SIX1, IL12A, GFRA3         | 1242 | 114 | 8785 | 1.68 | 0.123799<br>8 |  |
| GOTERM_BP_FAT                                                       | GO:0048870~cell motility                                | 28 | 1.081 | 0.0130<br>29 | CCK, CCL2, PDGFB, EDN2, PAX6, PF4, ITGB2, CDH2, PAX3, GDNF, EDNRB, ATOH1, CHRNA7, NR2F2, NKX2-3, NR2F1, PRKCA, ICAM1, LOC786683, EMX2, ITGA3, ITGA4, ISL1, KDR, ITGA5, SIX1, IL12A, GFRA3 | 1242 | 124 | 8785 | 1.6  | 0.178691<br>8 |  |
| GOTERM_BP_FAT                                                       | GO:0051674~localization of cell                         | 28 | 1.081 | 0.0130<br>29 | CCK, CCL2, PDGFB, EDN2, PAX6, PF4, ITGB2, CDH2, PAX3, GDNF, EDNRB, ATOH1, CHRNA7, NR2F2, NKX2-3, NR2F1, PRKCA, ICAM1, LOC786683, EMX2, ITGA3, ITGA4, ISL1, KDR, ITGA5, SIX1, IL12A, GFRA3 | 1242 | 124 | 8785 | 1.6  | 0.178691<br>8 |  |
| <b>Annotation Cluster 43 (Enrichment Score: 1.9481348860230916)</b> |                                                         |    |       |              |                                                                                                                                                                                           |      |     |      |      |               |  |
| SP_PIR_KEYWORDS                                                     | Sodium transport                                        | 13 | 0.502 | 0.0037<br>71 | ATP1B2, SCN3B, SLC38A11, SLC34A2, SLC17A7, ACCN1, SLC17A6, SLC5A8, SCN4B, SLC5A7, SCNN1A, SCN5A, SLC5A11                                                                                  | 985  | 39  | 7349 | 2.49 | 0.036684<br>1 |  |
| SP_PIR_KEYWORDS                                                     | Sodium                                                  | 10 | 0.386 | 0.0171<br>76 | SLC17A7, ACCN1, SLC17A6, ATP1B2, SCN3B, SCN4B, SLC38A11, SCNN1A, SLC5A11, SLC34A2                                                                                                         | 985  | 31  | 7349 | 2.41 | 0.133528<br>5 |  |
| GOTERM_MF_FAT                                                       | GO:0031402~sodium ion binding                           | 10 | 0.386 | 0.0220<br>89 | SLC17A7, ACCN1, SLC17A6, ATP1B2, SCN3B, SCN4B, SLC38A11, SCNN1A, SLC5A11, SLC34A2                                                                                                         | 1248 | 32  | 9249 | 2.32 | 0.267264<br>8 |  |
| <b>Annotation Cluster 44 (Enrichment Score: 1.7882114924855212)</b> |                                                         |    |       |              |                                                                                                                                                                                           |      |     |      |      |               |  |
| INTERPRO                                                            | IPR016054:Ly-6 antigen / uPA receptor -like             | 6  | 0.232 | 0.0054<br>02 | LYPD1, LYNX1, LYPD3, LY6E, LY6H, PLAUR                                                                                                                                                    | 1200 | 10  | 9171 | 4.59 | 0.188828<br>5 |  |
| SMART                                                               | SM00134:LU                                              | 6  | 0.232 | 0.0101<br>41 | LYPD1, LYNX1, LYPD3, LY6E, LY6H, PLAUR                                                                                                                                                    | 661  | 10  | 4364 | 3.96 | 0.242132<br>6 |  |
| INTERPRO                                                            | IPR001526:CD59 antigen                                  | 5  | 0.193 | 0.0788<br>33 | LYNX1, LYPD3, LY6E, LY6H, PLAUR                                                                                                                                                           | 1200 | 13  | 9171 | 2.94 | 0.831657<br>9 |  |
| <b>Annotation Cluster 45 (Enrichment Score: 1.764761298343279)</b>  |                                                         |    |       |              |                                                                                                                                                                                           |      |     |      |      |               |  |
| GOTERM_MF_FAT                                                       | GO:0015269~calcium-activated potassium channel activity | 5  | 0.193 | 0.0146<br>64 | KCNMA1, KCNN4, KCNT1, KCNN1, KCNN2                                                                                                                                                        | 1248 | 8   | 9249 | 4.63 | 0.206201<br>1 |  |
| GOTERM_MF_FAT                                                       | GO:0005227~calcium activated cation channel activity    | 5  | 0.193 | 0.0146<br>64 | KCNMA1, KCNN4, KCNT1, KCNN1, KCNN2                                                                                                                                                        | 1248 | 8   | 9249 | 4.63 | 0.206201<br>1 |  |
| GOTERM_MF_FAT                                                       | GO:0022839~ion gated channel                            | 5  | 0.193 | 0.0236<br>15 | KCNMA1, KCNN4, KCNT1, KCNN1, KCNN2                                                                                                                                                        | 1248 | 9   | 9249 | 4.12 | 0.275755<br>7 |  |

|                                                                     |                                                                       |    |       |          |                                                                       |      |    |      |      |           |  |  |
|---------------------------------------------------------------------|-----------------------------------------------------------------------|----|-------|----------|-----------------------------------------------------------------------|------|----|------|------|-----------|--|--|
|                                                                     | activity                                                              |    |       |          |                                                                       |      |    |      |      |           |  |  |
| <b>Annotation Cluster 46 (Enrichment Score: 1.753544591040803)</b>  |                                                                       |    |       |          |                                                                       |      |    |      |      |           |  |  |
| SP_PIR_KEYWORDS                                                     | mitogen                                                               | 10 | 0.386 | 0.002646 | IL3, PDGFB, PDGFA, BTC, PTN, TGFA, IGF2, PDGFD, FGF2, FGF4            | 985  | 24 | 7349 | 3.11 | 0.0282983 |  |  |
| GOTERM_BP_FAT                                                       | GO:0051781~positive regulation of cell division                       | 8  | 0.309 | 0.02728  | PDGFB, PDGFA, BTC, PTN, IGF2, PDGFD, FGF2, FGF4                       | 1242 | 22 | 8785 | 2.57 | 0.3061909 |  |  |
| GOTERM_BP_FAT                                                       | GO:0051302~regulation of cell division                                | 8  | 0.309 | 0.076013 | PDGFB, PDGFA, BTC, PTN, IGF2, PDGFD, FGF2, FGF4                       | 1242 | 27 | 8785 | 2.1  | 0.585687  |  |  |
| <b>Annotation Cluster 47 (Enrichment Score: 1.716403497626699)</b>  |                                                                       |    |       |          |                                                                       |      |    |      |      |           |  |  |
| GOTERM_MF_FAT                                                       | GO:0008066~glutamate receptor activity                                | 7  | 0.27  | 0.014248 | GRM3, GRIK1, GRIA2, GRIN2C, GRIK2, GRIK3, GRIN3B                      | 1248 | 16 | 9249 | 3.24 | 0.2041334 |  |  |
| GOTERM_MF_FAT                                                       | GO:0005234~extracellular-glutamate-gated ion channel activity         | 6  | 0.232 | 0.022311 | GRIK1, GRIA2, GRIN2C, GRIK2, GRIK3, GRIN3B                            | 1248 | 13 | 9249 | 3.42 | 0.2660369 |  |  |
| GOTERM_MF_FAT                                                       | GO:0004970~ionotropic glutamate receptor activity                     | 6  | 0.232 | 0.022311 | GRIK1, GRIA2, GRIN2C, GRIK2, GRIK3, GRIN3B                            | 1248 | 13 | 9249 | 3.42 | 0.2660369 |  |  |
| <b>Annotation Cluster 48 (Enrichment Score: 1.701389683116179)</b>  |                                                                       |    |       |          |                                                                       |      |    |      |      |           |  |  |
| GOTERM_MF_FAT                                                       | GO:0019992~diacylglycerol binding                                     | 8  | 0.309 | 0.00451  | PRKCA, PRKCZ, STAC, RASGRP4, CHN1, PRKCH, PRKCG, PRKCB                | 1248 | 17 | 9249 | 3.49 | 0.0789049 |  |  |
| INTERPRO                                                            | IPR002219:Protein kinase C-like, phorbol ester/diacylglycerol binding | 8  | 0.309 | 0.029639 | PRKCA, PRKCZ, STAC, RASGRP4, CHN1, PRKCH, PRKCG, PRKCB                | 1200 | 24 | 9171 | 2.55 | 0.5363778 |  |  |
| SMART                                                               | SM00109:C1                                                            | 8  | 0.309 | 0.058857 | PRKCA, PRKCZ, STAC, RASGRP4, CHN1, PRKCH, PRKCG, PRKCB                | 661  | 24 | 4364 | 2.2  | 0.6211288 |  |  |
| <b>Annotation Cluster 49 (Enrichment Score: 1.6796217389327168)</b> |                                                                       |    |       |          |                                                                       |      |    |      |      |           |  |  |
| GOTERM_BP_FAT                                                       | GO:0051272~positive regulation of cell motion                         | 11 | 0.425 | 0.016053 | ICAM1, PDGFA, PDPN, EDN2, MMP9, CXCL16, F2RL1, THBS1, FGF2, KDR, F2R  | 1242 | 34 | 8785 | 2.29 | 0.2082649 |  |  |
| GOTERM_BP_FAT                                                       | GO:0030335~positive regulation of cell migration                      | 10 | 0.386 | 0.023796 | ICAM1, PDGFA, EDN2, MMP9, CXCL16, F2RL1, THBS1, FGF2, KDR, F2R        | 1242 | 31 | 8785 | 2.28 | 0.2789064 |  |  |
| GOTERM_BP_FAT                                                       | GO:0040017~positive regulation of locomotion                          | 11 | 0.425 | 0.023937 | PRKCA, ICAM1, PDGFA, EDN2, MMP9, CXCL16, F2RL1, THBS1, FGF2, KDR, F2R | 1242 | 36 | 8785 | 2.16 | 0.2792515 |  |  |
| <b>Annotation Cluster 50 (Enrichment Score: 1.6250860261477884)</b> |                                                                       |    |       |          |                                                                       |      |    |      |      |           |  |  |
| GOTERM_BP_FAT                                                       | GO:0014032~neural crest cell development                              | 6  | 0.232 | 0.012301 | EDNRB, EDN1, CYP26A1, PAX3, ISL1, GDNF                                | 1242 | 11 | 8785 | 3.86 | 0.1719062 |  |  |
| GOTERM_BP_FAT                                                       | GO:0014033~neural crest cell                                          | 6  | 0.232 | 0.012301 | EDNRB, EDN1, CYP26A1, PAX3, ISL1, GDNF                                | 1242 | 11 | 8785 | 3.86 | 0.1719062 |  |  |



|                                                                     |                                                                         |   |       |          |                                                                |      |    |      |      |           |  |
|---------------------------------------------------------------------|-------------------------------------------------------------------------|---|-------|----------|----------------------------------------------------------------|------|----|------|------|-----------|--|
|                                                                     | differentiation                                                         |   |       |          |                                                                |      |    |      |      |           |  |
| GOTERM_BP_FAT                                                       | GO:0048762~mesenchymal cell differentiation                             | 7 | 0.27  | 0.024219 | FGFR2, EDNRB, EDN1, CYP26A1, PAX3, ISL1, GDNF                  | 1242 | 17 | 8785 | 2.91 | 0.2809924 |  |
| GOTERM_BP_FAT                                                       | GO:0060485~mesenchyme development                                       | 7 | 0.27  | 0.0321   | FGFR2, EDNRB, EDN1, CYP26A1, PAX3, ISL1, GDNF                  | 1242 | 18 | 8785 | 2.75 | 0.3429976 |  |
| GOTERM_BP_FAT                                                       | GO:0014031~mesenchymal cell development                                 | 6 | 0.232 | 0.063681 | EDNRB, EDN1, CYP26A1, PAX3, ISL1, GDNF                         | 1242 | 16 | 8785 | 2.65 | 0.53317   |  |
| <b>Annotation Cluster 51 (Enrichment Score: 1.5966423782468115)</b> |                                                                         |   |       |          |                                                                |      |    |      |      |           |  |
| INTERPRO                                                            | IPR006028:Gamma-aminobutyric acid A receptor                            | 8 | 0.309 | 0.001585 | GABRD, GABRA2, MGC139528, GABRA4, GLRA1, GABRB2, GABRB1, GABRP | 1200 | 15 | 9171 | 4.08 | 0.0733275 |  |
| GOTERM_MF_FAT                                                       | GO:0004890~GABA-A receptor activity                                     | 6 | 0.232 | 0.084089 | GABRD, GABRA2, GABRA4, GABRB2, GABRB1, GABRP                   | 1248 | 18 | 9249 | 2.47 | 0.5890752 |  |
| GOTERM_MF_FAT                                                       | GO:0016917~GABA receptor activity                                       | 6 | 0.232 | 0.12168  | GABRD, GABRA2, GABRA4, GABRB2, GABRB1, GABRP                   | 1248 | 20 | 9249 | 2.22 | 0.7114917 |  |
| <b>Annotation Cluster 52 (Enrichment Score: 1.5695517976033782)</b> |                                                                         |   |       |          |                                                                |      |    |      |      |           |  |
| GOTERM_BP_FAT                                                       | GO:0010975~regulation of neuron projection development                  | 7 | 0.27  | 0.008543 | METR1, LOC787355, CHRNA1, SEMA4D, NEFL, CACNA1A, THY1          | 1242 | 14 | 8785 | 3.54 | 0.1293668 |  |
| GOTERM_BP_FAT                                                       | GO:0010769~regulation of cell morphogenesis involved in differentiation | 7 | 0.27  | 0.024219 | METR1, LOC787355, CHRNA1, SEMA4D, NEFL, CACNA1A, THY1          | 1242 | 17 | 8785 | 2.91 | 0.2809924 |  |
| GOTERM_BP_FAT                                                       | GO:0050770~regulation of axonogenesis                                   | 6 | 0.232 | 0.026883 | METR1, LOC787355, SEMA4D, NEFL, CACNA1A, THY1                  | 1242 | 13 | 8785 | 3.26 | 0.3035598 |  |
| GOTERM_BP_FAT                                                       | GO:0031344~regulation of cell projection organization                   | 7 | 0.27  | 0.094736 | METR1, LOC787355, CHRNA1, SEMA4D, NEFL, CACNA1A, THY1          | 1242 | 23 | 8785 | 2.15 | 0.6567843 |  |
| <b>Annotation Cluster 53 (Enrichment Score: 1.5628272430017303)</b> |                                                                         |   |       |          |                                                                |      |    |      |      |           |  |
| UP_SEQ_FEATURE                                                      | domain:Ig-like C2-type 3                                                | 6 | 0.232 | 0.009706 | NCAM1, ICAM1, OPCML, PTPRF, ICAM3, NTM                         | 682  | 12 | 5635 | 4.13 | 0.5045429 |  |
| UP_SEQ_FEATURE                                                      | domain:Ig-like C2-type 1                                                | 7 | 0.27  | 0.0416   | NCAM1, ICAM1, OPCML, PTPRF, ICAM3, CXADR, NTM                  | 682  | 22 | 5635 | 2.63 | 0.8737499 |  |
| UP_SEQ_FEATURE                                                      | domain:Ig-like C2-type 2                                                | 7 | 0.27  | 0.050743 | NCAM1, ICAM1, OPCML, PTPRF, ICAM3, CXADR, NTM                  | 682  | 23 | 5635 | 2.51 | 0.9088691 |  |
| <b>Annotation Cluster 54 (Enrichment Score: 1.5469850867397477)</b> |                                                                         |   |       |          |                                                                |      |    |      |      |           |  |
| GOTERM_BP_FAT                                                       | GO:0030888~regulation of B cell proliferation                           | 7 | 0.27  | 0.012564 | CARD11, CD38, TNFSF13B, IL7, CHRNA1, CD40, IL10                | 1242 | 15 | 8785 | 3.3  | 0.1736475 |  |
| GOTERM_BP_FAT                                                       | GO:0030890~positive regulation of B cell                                | 6 | 0.232 | 0.018672 | CARD11, CD38, TNFSF13B, IL7, CHRNA1, CD40                      | 1242 | 12 | 8785 | 3.54 | 0.2313301 |  |

|                                                                     |                                                           |    |       |          |                                                                                                                      |      |    |      |      |           |  |  |  |
|---------------------------------------------------------------------|-----------------------------------------------------------|----|-------|----------|----------------------------------------------------------------------------------------------------------------------|------|----|------|------|-----------|--|--|--|
|                                                                     | proliferation                                             |    |       |          |                                                                                                                      |      |    |      |      |           |  |  |  |
| GOTERM_BP_FAT                                                       | GO:0050871~positive regulation of B cell activation       | 7  | 0.27  | 0.052405 | CARD11, CD38, TNFSF13B, IL7, CHRN2, CD40, SYK                                                                        | 1242 | 20 | 8785 | 2.48 | 0.4743577 |  |  |  |
| GOTERM_BP_FAT                                                       | GO:0050864~regulation of B cell activation                | 8  | 0.309 | 0.052768 | CARD11, CD38, TNFSF13B, IL7, CHRN2, CD40, IL10, SYK                                                                  | 1242 | 25 | 8785 | 2.26 | 0.4754092 |  |  |  |
| <b>Annotation Cluster 55 (Enrichment Score: 1.5448623143153664)</b> |                                                           |    |       |          |                                                                                                                      |      |    |      |      |           |  |  |  |
| INTERPRO                                                            | IPR001723: Steroid hormone receptor                       | 10 | 0.386 | 0.014861 | PGR, VDR, AR, NR1I3, RARG, ESR1, RXRG, RORC, NR2F2, NR2F1                                                            | 1200 | 31 | 9171 | 2.47 | 0.3607657 |  |  |  |
| INTERPRO                                                            | IPR008946: Nuclear hormone receptor, ligand-binding       | 10 | 0.386 | 0.018342 | PGR, VDR, AR, NR1I3, RARG, ESR1, RXRG, RORC, NR2F2, NR2F1                                                            | 1200 | 32 | 9171 | 2.39 | 0.4132558 |  |  |  |
| INTERPRO                                                            | IPR000536: Nuclear hormone receptor, ligand-binding, core | 10 | 0.386 | 0.02238  | PGR, VDR, AR, NR1I3, RARG, ESR1, RXRG, RORC, NR2F2, NR2F1                                                            | 1200 | 33 | 9171 | 2.32 | 0.4553786 |  |  |  |
| INTERPRO                                                            | IPR001628: Zinc finger, nuclear hormone receptor-type     | 9  | 0.347 | 0.028605 | PGR, VDR, NR1I3, RARG, ESR1, RXRG, RORC, NR2F2, NR2F1                                                                | 1200 | 29 | 9171 | 2.37 | 0.5293442 |  |  |  |
| SMART                                                               | SM00430: HOLI                                             | 10 | 0.386 | 0.051068 | PGR, VDR, AR, NR1I3, RARG, ESR1, RXRG, RORC, NR2F2, NR2F1                                                            | 661  | 33 | 4364 | 2    | 0.6134568 |  |  |  |
| SMART                                                               | SM00399: ZnF_C4                                           | 9  | 0.347 | 0.060377 | PGR, VDR, NR1I3, RARG, ESR1, RXRG, RORC, NR2F2, NR2F1                                                                | 661  | 29 | 4364 | 2.05 | 0.6097889 |  |  |  |
| <b>Annotation Cluster 56 (Enrichment Score: 1.509208226524016)</b>  |                                                           |    |       |          |                                                                                                                      |      |    |      |      |           |  |  |  |
| GOTERM_BP_FAT                                                       | GO:0055008~cardiac muscle tissue morphogenesis            | 6  | 0.232 | 0.026883 | LY6E, HAND1, MYL2, TNNT3, COL11A1, NKX2-5                                                                            | 1242 | 13 | 8785 | 3.26 | 0.3035598 |  |  |  |
| GOTERM_BP_FAT                                                       | GO:0060415~muscle tissue morphogenesis                    | 6  | 0.232 | 0.026883 | LY6E, HAND1, MYL2, TNNT3, COL11A1, NKX2-5                                                                            | 1242 | 13 | 8785 | 3.26 | 0.3035598 |  |  |  |
| GOTERM_BP_FAT                                                       | GO:0055010~ventricular cardiac muscle morphogenesis       | 5  | 0.193 | 0.04106  | LY6E, HAND1, MYL2, TNNT3, COL11A1                                                                                    | 1242 | 10 | 8785 | 3.54 | 0.4052682 |  |  |  |
| <b>Annotation Cluster 57 (Enrichment Score: 1.4625363071650401)</b> |                                                           |    |       |          |                                                                                                                      |      |    |      |      |           |  |  |  |
| GOTERM_CC_FAT                                                       | GO:0030173~integral to Golgi membrane                     | 11 | 0.425 | 0.001853 | ST6GALNAC5, ST6GAL2, ST8SIA6, ST8SIA4, ST8SIA1, ST8SIA3, ST8SIA2, STEAP2, CUX1, LFNG, B4GALNT1                       | 984  | 26 | 6966 | 3    | 0.0229503 |  |  |  |
| GOTERM_CC_FAT                                                       | GO:0031228~intrinsic to Golgi membrane                    | 11 | 0.425 | 0.001853 | ST6GALNAC5, ST6GAL2, ST8SIA6, ST8SIA4, ST8SIA1, ST8SIA3, ST8SIA2, STEAP2, CUX1, LFNG, B4GALNT1                       | 984  | 26 | 6966 | 3    | 0.0229503 |  |  |  |
| GOTERM_CC_FAT                                                       | GO:0031301~integral to organelle membrane                 | 14 | 0.54  | 0.119241 | GABRA2, ST6GAL2, ST8SIA1, ST8SIA3, ST8SIA2, ST6GALNAC5, ST8SIA6, ST8SIA4, ASPHD1, CUX1, STEAP2, LFNG, UPK2, B4GALNT1 | 984  | 65 | 6966 | 1.52 | 0.5545208 |  |  |  |
| GOTERM_CC_FAT                                                       | GO:0031300~intrinsic to organelle                         | 14 | 0.54  | 0.269814 | GABRA2, ST6GAL2, ST8SIA1, ST8SIA3, ST8SIA2, ST6GALNAC5, ST8SIA6, ST8SIA4, ASPHD1, CUX1,                              | 984  | 76 | 6966 | 1.3  | 0.8226285 |  |  |  |

|                                                                     |                                                                      |    |       |          |                                                                                                                                                                       |      |     |      |      |           |  |
|---------------------------------------------------------------------|----------------------------------------------------------------------|----|-------|----------|-----------------------------------------------------------------------------------------------------------------------------------------------------------------------|------|-----|------|------|-----------|--|
|                                                                     | membrane                                                             |    |       |          | STEAP2, LFNG, UPK2, B4GALNT1                                                                                                                                          |      |     |      |      |           |  |
| GOTERM_CC_FAT                                                       | GO:000139~Golgi membrane                                             | 14 | 0.54  | 0.440565 | SEC23A, ST6GAL2, ST8SIA1, ST8SIA3, ST8SIA2, CSPG5, ST6GALNAC5, ST8SIA6, ST8SIA4, CUX1, STEAP2, LFNG, B4GALNT1, SCAMP5                                                 | 984  | 86  | 6966 | 1.15 | 0.9398679 |  |
| <b>Annotation Cluster 58 (Enrichment Score: 1.452032896505212)</b>  |                                                                      |    |       |          |                                                                                                                                                                       |      |     |      |      |           |  |
| GOTERM_BP_FAT                                                       | GO:0042327~positive regulation of phosphorylation                    | 14 | 0.54  | 0.007609 | PRKCA, BMP4, IL3, FGFR3, GDF6, LIF, CCND1, CCND2, IL12A, THBS1, FGF2, EPO, SYK, GRK1                                                                                  | 1242 | 45  | 8785 | 2.2  | 0.1184309 |  |
| GOTERM_BP_FAT                                                       | GO:0010562~positive regulation of phosphorus metabolic process       | 14 | 0.54  | 0.007609 | PRKCA, BMP4, IL3, FGFR3, GDF6, LIF, CCND1, CCND2, IL12A, THBS1, FGF2, EPO, SYK, GRK1                                                                                  | 1242 | 45  | 8785 | 2.2  | 0.1184309 |  |
| GOTERM_BP_FAT                                                       | GO:0045937~positive regulation of phosphate metabolic process        | 14 | 0.54  | 0.007609 | PRKCA, BMP4, IL3, FGFR3, GDF6, LIF, CCND1, CCND2, IL12A, THBS1, FGF2, EPO, SYK, GRK1                                                                                  | 1242 | 45  | 8785 | 2.2  | 0.1184309 |  |
| GOTERM_BP_FAT                                                       | GO:0001934~positive regulation of protein amino acid phosphorylation | 12 | 0.463 | 0.023616 | PRKCA, BMP4, LIF, IL3, CCND1, FGFR3, CCND2, GDF6, IL12A, FGF2, SYK, EPO                                                                                               | 1242 | 41  | 8785 | 2.07 | 0.2781762 |  |
| GOTERM_BP_FAT                                                       | GO:0031401~positive regulation of protein modification process       | 12 | 0.463 | 0.096424 | PRKCA, BMP4, LIF, IL3, CCND1, FGFR3, CCND2, GDF6, IL12A, FGF2, SYK, EPO                                                                                               | 1242 | 51  | 8785 | 1.66 | 0.6622812 |  |
| GOTERM_BP_FAT                                                       | GO:0032270~positive regulation of cellular protein metabolic process | 14 | 0.54  | 0.224624 | PRKCA, BMP4, IL3, FGFR3, GDF6, LIF, CCND1, CCND2, APOE, IL12A, THBS1, FGF2, EPO, SYK                                                                                  | 1242 | 73  | 8785 | 1.36 | 0.8958213 |  |
| GOTERM_BP_FAT                                                       | GO:0051247~positive regulation of protein metabolic process          | 14 | 0.54  | 0.304027 | PRKCA, BMP4, IL3, FGFR3, GDF6, LIF, CCND1, CCND2, APOE, IL12A, THBS1, FGF2, EPO, SYK                                                                                  | 1242 | 78  | 8785 | 1.27 | 0.9501607 |  |
| <b>Annotation Cluster 59 (Enrichment Score: 1.4187896000374836)</b> |                                                                      |    |       |          |                                                                                                                                                                       |      |     |      |      |           |  |
| GOTERM_BP_FAT                                                       | GO:0030097~hemopoiesis                                               | 24 | 0.926 | 0.026563 | EGR1, BMI1, CALCR, BMP4, CD3D, CD8A, IL7, RORC, OSTM1, KDR, HOXB3, CARD11, HOXB7, ID2, IRF8, BCL11A, IL12A, HOXA9, KLF1, TSHR, NKX2-5, NKX2-3, EPO, SYK               | 1242 | 108 | 8785 | 1.57 | 0.3016294 |  |
| GOTERM_BP_FAT                                                       | GO:0048534~hemopoietic or lymphoid organ development                 | 26 | 1.003 | 0.030247 | BMI1, CALCR, CD8A, RORC, CACNB4, BCL11A, HOXA9, NKX2-5, NKX2-3, SYK, EPO, EGR1, BMP4, CD3D, IL7, OSTM1, KDR, HOXB3, CARD11, HOXB7, ID2, SIX1, IRF8, IL12A, TSHR, KLF1 | 1242 | 121 | 8785 | 1.52 | 0.3277696 |  |
| GOTERM_BP_FAT                                                       | GO:0002520~immune system development                                 | 26 | 1.003 | 0.068971 | BMI1, CALCR, CD8A, RORC, CACNB4, BCL11A, HOXA9, NKX2-5, NKX2-3, SYK, EPO, EGR1, BMP4, CD3D, IL7, OSTM1, KDR, HOXB3, CARD11, HOXB7, ID2, SIX1, IRF8, IL12A, TSHR, KLF1 | 1242 | 131 | 8785 | 1.4  | 0.5545108 |  |

| <b>Annotation Cluster 60 (Enrichment Score: 1.3532214068948132)</b> |                                           |    |       |          |                                                                                                   |      |    |      |      |           |
|---------------------------------------------------------------------|-------------------------------------------|----|-------|----------|---------------------------------------------------------------------------------------------------|------|----|------|------|-----------|
| INTERPRO                                                            | IPR003961:Fibronectin, type III           | 14 | 0.54  | 0.022563 | PHYHIPL, PHYHIP, TNXB, PTPRF, PTPRZ1, NCAM1, FSD1, EPHB6, FNDC5, EGFLAM, MYOM2, TRIM9, EPOR, EBI3 | 1200 | 55 | 9171 | 1.95 | 0.452552  |
| INTERPRO                                                            | IPR008957:Fibronectin, type III-like fold | 13 | 0.502 | 0.061832 | TNXB, PTPRF, PTPRZ1, NCAM1, FSD1, EPHB6, FNDC5, EGFLAM, MYOM2, TRIM9, TGM1, EPOR, EBI3            | 1200 | 57 | 9171 | 1.74 | 0.7689722 |
| SMART                                                               | SM00060:FN3                               | 14 | 0.54  | 0.062478 | PHYHIPL, PHYHIP, TNXB, PTPRF, PTPRZ1, NCAM1, FSD1, EPHB6, FNDC5, EGFLAM, MYOM2, TRIM9, EPOR, EBI3 | 661  | 55 | 4364 | 1.68 | 0.5841396 |

### C. Foetal Pfam

| Term                             | Count | %        | P-value  | Genes                                                                                                                                                                                                                                                                                                                                                                            | List Total | Pop Hits | Pop Total | Fold Enrichment | Benjamini P-value |
|----------------------------------|-------|----------|----------|----------------------------------------------------------------------------------------------------------------------------------------------------------------------------------------------------------------------------------------------------------------------------------------------------------------------------------------------------------------------------------|------------|----------|-----------|-----------------|-------------------|
| PF00046:Homeobox                 | 47    | 1.830218 | 9.58E-23 | IRX3, CDX1, HNF1B, ONECUT1, PAX6, PAX3, MEIS1, HOXD10, OTP, CRX, HOXC6, MSX2, DBX2, POU5F1, HOXC4, LHX3, LHX4, HOXA10, LHX5, POU3F2, POU3F1, ALX4, NKX2-5, LHX9, PITX1, DBX1, NKX2-3, PITX2, SATB1, NANOG, EMX2, ISL1, DLX3, HOXB4, HHEX, DLX1, MSX1, HOXC11, MEOX2, LASS4, HOXB7, HOXC13, DLX5, DLX4, HOXB6, SIX1, HOPX, UNCX                                                   | 1168       | 75       | 8945      | 4.799258        | 1.41E-19          |
| PF00046:Homeobox domain          | 38    | 1.479751 | 3.65E-20 | CDX1, HNF1B, ONECUT1, MEIS1, HOXD10, CRX, OTP, MSX2, HOXC6, DBX2, POU5F1, HOXC4, LHX3, LHX4, HOXA10, LHX5, POU3F2, POU3F1, ALX4, LHX9, NKX2-5, PITX1, DBX1, PITX2, NANOG, ISL1, HOXB4, HHEX, DLX1, HOXC11, MSX1, MEOX2, LASS4, HOXB7, HOXC13, DLX5, DLX4, HOXB6, SIX1                                                                                                            | 1168       | 56       | 8945      | 5.196765        | 2.68E-17          |
| PF00001:7tm_1                    | 52    | 2.024922 | 5.97E-10 | MCHR1, GPR162, TACR3, F2RL1, LHCGR, S1PR2, AGTR1, EDNRB, S1PR3, HTR1A, CXCR4, LTB4R, CXCR7, GALR2, LOC781367, MC5R, PTGER3, C5AR1, CCKBR, PTGER4, HTR4, PROKR2, PROKR1, MRGPRF, ADRB2, SSTR2, ADRB1, PTGDR, NK1R, TSHR, DRD1, PRLHR, ADORA2B, FFAR2, NPY2R, GPR6, OXTR, BDKRB2, GPR4, HCRTR1, ADRB3, ADRA2A, PTGFR, GPR37, AVPR1B, ADRA1B, MC4R, AVPR1A, UTS2R, GHSR, HTR2A, F2R | 1168       | 162      | 8945      | 2.458249        | 2.92E-07          |
| PF00001:7 transmembrane receptor | 44    | 1.713396 | 1.44E-09 | MCHR1, DRD1, PRLHR, ADORA2B, TACR3, OPRK1, LHCGR, GPR6, OXTR, BDKRB2, GPR4, ADRB3, EDNRB, S1PR3, AGTR1, HCRTR1, PTGIR, HTR1A, LTB4R, CXCR4, CXCR7, GALR2, ADRA2A, MC5R, LOC781367, C5AR1, PTGER3, CCKBR, PTGER4, HTR4, PROKR2, PROKR1, MRGPRF, PTGFR, SSTR2, ADRB2, ADRB1, AVPR1B, NK1R, ADRA1B, MC4R, UTS2R, TSHR, HTR2A                                                        | 1168       | 128      | 8945      | 2.632572        | 5.29E-07          |
| PF02931:Neur_c han_LBD           | 15    | 0.584112 | 1.47E-06 | GABRD, GABRA2, GLRB, GLRA1, GABRA4, LOC100138074, GABRB1, GABRA5, CHRNA5, CHRNB4, CHRNB2, CHRND, CHRNA7, CHRNA3, GABRP                                                                                                                                                                                                                                                           | 1168       | 27       | 8945      | 4.254661        | 4.31E-04          |
| PF00520:Ion_trans                | 17    | 0.661994 | 2.26E-06 | KCNH1, KCNMA1, KCNC1, KCNA2, KCNA4, KCNA5, CNGA3, ITPR3, ITPR1, KCNV1, KCNQ3, KCNF1, CACNA1E, KCNH2, CACNA1D, SCN5A, CACNA1A                                                                                                                                                                                                                                                     | 1168       | 35       | 8945      | 3.71979         | 5.53E-04          |
| PF02932:Neur_c han_membr         | 14    | 0.545171 | 3.38E-06 | GABRD, GABRA2, GLRB, GLRA1, GABRA4, GABRB1, GABRA5, CHRNA5, CHRNB4, CHRNB2, CHRND, CHRNA7, CHRNA3, GABRP                                                                                                                                                                                                                                                                         | 1168       | 25       | 8945      | 4.288699        | 7.07E-04          |
| PF00010:HLH                      | 19    | 0.739875 | 3.80E-06 | MYOD1, EPAS1, MYF5, HES6, AHR, ASCL2, TCF21, AHRR, ATOH1, HEY1, ID2, HAND1, HES5, ID1, EBF2, HEYL, NEUROD1, BHLHE41, TCF15                                                                                                                                                                                                                                                       | 1168       | 44       | 8945      | 3.307032        | 6.96E-04          |
| PF00019:TGF_beta                 | 11    | 0.428349 | 1.12E-05 | INHBB, BMP4, INHBA, BMP3, BMP2, FOXJ1, GDF6, GDF10, BMP7, GDNF, TGFB1                                                                                                                                                                                                                                                                                                            | 1168       | 17       | 8945      | 4.955429        | 0.001826          |
| PF00008:EGF                      | 20    | 0.778816 | 2.00E-05 | TMEFF2, PTGS2, LTBP2, NTNG2, BCAN, DLK2, DLK1, THBD, EGFLAM, DLL4, PROZ, ACAN, TGFA, VCAN, WIF1, AREG, NRG1, THBS2, VLDLR, THBS4                                                                                                                                                                                                                                                 | 1168       | 53       | 8945      | 2.889959        | 0.002923          |

|                                                                  |    |          |          |                                                                                                                                   |      |    |      |          |          |
|------------------------------------------------------------------|----|----------|----------|-----------------------------------------------------------------------------------------------------------------------------------|------|----|------|----------|----------|
| PF02932:Neurotransmitter-gated ion-channel transmembrane region  | 13 | 0.506231 | 2.32E-05 | GABRA2, GLRB, GLRA1, GABRA4, GABRB1, GABRA5, CHRNB4, CHRNA5, CHRNB2, CHRND, CHRNA7, CHRNA3, GABRP                                 | 1168 | 25 | 8945 | 3.982363 | 0.003096 |
| PF02931:Neurotransmitter-gated ion-channel ligand binding domain | 13 | 0.506231 | 3.81E-05 | GABRA2, GLRB, GLRA1, GABRA4, GABRB1, GABRA5, CHRNB4, CHRNA5, CHRNB2, CHRND, CHRNA7, CHRNA3, GABRP                                 | 1168 | 26 | 8945 | 3.829195 | 0.004644 |
| PF01391:Collagen                                                 | 16 | 0.623053 | 4.86E-04 | COL4A3, CTHRC1, COL21A1, COL13A1, COL2A1, COLEC12, C1QA, EMID1, COL27A1, COL1A2, COL12A1, COL1A1, COL11A2, COL8A1, SCARA5, COL8A2 | 1168 | 46 | 8945 | 2.663788 | 0.049631 |

#### D. Lamb Pfam

| Term                             | Count | %        | P-value  | Genes                                                                                                                                                                                                                                                                                                                                                                                   | List Total | Pop Hits | Pop Total | Fold Enrichment | Benjamini P-value |
|----------------------------------|-------|----------|----------|-----------------------------------------------------------------------------------------------------------------------------------------------------------------------------------------------------------------------------------------------------------------------------------------------------------------------------------------------------------------------------------------|------------|----------|-----------|-----------------|-------------------|
| PF00046:Homeobox                 | 44    | 1.698186 | 1.43E-19 | IRX3, HNF1B, ONECUT1, PAX6, PAX3, HOXD10, OTP, CRX, HOXC6, MSX2, DBX2, POU5F1, HOXC4, LHX3, LHX4, HOXA10, LHX5, POU3F2, POU3F1, ALX4, NKX2-5, LHX9, PITX1, DBX1, NKX2-3, PITX2, NANOG, EMX2, ISL1, HOXB3, DLX3, HOXB4, HHEX, DLX1, HOXC11, MSX1, MEOX2, HOXB7, HOXC13, DLX5, DLX4, HOXB6, SIX1, HOPX, UNCX                                                                              | 1180       | 75       | 8945      | 4.447232        | 2.09E-16          |
| PF00046:Homeobox domain          | 35    | 1.35083  | 8.16E-17 | HNF1B, ONECUT1, HOXD10, CRX, OTP, MSX2, HOXC6, DBX2, POU5F1, HOXC4, LHX3, LHX4, HOXA10, LHX5, POU3F2, POU3F1, ALX4, LHX9, NKX2-5, PITX1, DBX1, PITX2, NANOG, ISL1, HOXB4, HHEX, DLX1, HOXC11, MSX1, MEOX2, HOXB7, HOXC13, DLX5, HOXB6, SIX1, DLX4                                                                                                                                       | 1180       | 56       | 8945      | 4.737818        | 8.08E-14          |
| PF00001:7tm_1                    | 53    | 2.045542 | 2.67E-10 | F2RL2, F2RL3, MCHR1, GPR84, GPR162, GPR85, TACR3, F2RL1, LHCGR, EDNRA, EDNRB, S1PR3, S1PR1, HTR1A, LTB4R, GALR2, LOC781367, MC5R, EBI2, PTGER3, C5AR1, GPR92, CCKBR, PTGER4, HTR4, PROKR2, PROKR1, MRGPRF, SSTR2, ADRB1, PTGDR, NK1R, TSHR, DRD1, PRLHR, ADORA2B, NPY2R, GPR6, OXTR, BDKRB2, GPR4, ADRB3, HCRTR1, ADRA2A, PTGFR, GPR37, AVPR1B, ADRA1B, AVPR1A, UTS2R, GHSR, HTR2A, F2R | 1180       | 162      | 8945      | 2.480043        | 1.30E-07          |
| PF00001:7 transmembrane receptor | 44    | 1.698186 | 1.99E-09 | F2RL2, MCHR1, GPR84, DRD1, PRLHR, ADORA2B, TACR3, OPRK1, LHCGR, GPR6, OXTR, BDKRB2, GPR4, EDNRA, ADRB3, S1PR3, EDNRB, HCRTR1, HTR1A, S1PR1, LTB4R, GALR2, ADRA2A, MC5R, LOC781367, EBI2, C5AR1, PTGER3, GPR92, CCKBR, PTGER4, HTR4, PROKR2, PROKR1, MRGPRF, PTGFR, SSTR2, ADRB1, AVPR1B, NK1R, ADRA1B, UTS2R, TSHR, HTR2A                                                               | 1180       | 128      | 8945      | 2.6058          | 7.23E-07          |
| PF02931:Neur_c han_LBD           | 17    | 0.656117 | 2.36E-08 | GABRD, GABRA2, GLRB, GLRA1, GABRA4, LOC100138074, GABRB2, GABRB1, MGC139528, CHRNA5, CHRNB4, CHRNA7, CHRNB2, CHRND, CHRNA3, CHRNG, GABRP                                                                                                                                                                                                                                                | 1180       | 27       | 8945      | 4.772913        | 6.86E-06          |

|                                                                  |    |          |          |                                                                                                                                                                                                                                |      |    |      |          |          |
|------------------------------------------------------------------|----|----------|----------|--------------------------------------------------------------------------------------------------------------------------------------------------------------------------------------------------------------------------------|------|----|------|----------|----------|
| PF02932:Neur_chan_memb                                           | 16 | 0.617522 | 5.19E-08 | GABRD, GABRA2, GLRB, GLRA1, GABRA4, GABRB2, GABRB1, MGC139528, CHRNA5, CHRN4, CHRN2, CHRND, CHRNA7, CHRNA3, CHRNG, GABRP                                                                                                       | 1180 | 25 | 8945 | 4.851525 | 1.26E-05 |
| PF02932:Neurotransmitter-gated ion-channel transmembrane region  | 15 | 0.578927 | 4.79E-07 | GABRA2, GLRB, GLRA1, GABRA4, GABRB2, GABRB1, MGC139528, CHRNA5, CHRN4, CHRN2, CHRND, CHRNA7, CHRNA3, CHRNG, GABRP                                                                                                              | 1180 | 25 | 8945 | 4.548305 | 9.97E-05 |
| PF02931:Neurotransmitter-gated ion-channel ligand binding domain | 15 | 0.578927 | 9.13E-07 | GABRA2, GLRB, GLRA1, GABRA4, GABRB2, GABRB1, MGC139528, CHRNA5, CHRN4, CHRN2, CHRND, CHRNA7, CHRNA3, CHRNG, GABRP                                                                                                              | 1180 | 26 | 8945 | 4.37337  | 1.66E-04 |
| PF00520:Ion_trans                                                | 17 | 0.656117 | 2.59E-06 | KCNH1, KCNMA1, KCNC1, TRPC3, KCNA2, KCNA4, KCNA5, CNGA3, ITPR3, KCNV1, KCNQ3, KCNF1, CACNA1E, KCNH2, CACNA1D, SCN5A, CACNA1A                                                                                                   | 1180 | 35 | 8945 | 3.681961 | 4.20E-04 |
| PF00010:HLH                                                      | 19 | 0.733308 | 4.41E-06 | MYF6, MYOD1, MYF5, HES6, AHR, ASCL2, TCF21, AHRR, ATOH1, HEY1, ID2, HAND1, HES5, ID1, EBF2, HEYL, NEUROD1, ID3, TCF15                                                                                                          | 1180 | 44 | 8945 | 3.273401 | 6.41E-04 |
| PF00008:EGF                                                      | 21 | 0.810498 | 5.75E-06 | TMEFF2, LTBP2, PTGS2, PTGS1, BTC, NTNG2, BCAN, DLK2, DLK1, THBD, EGFLAM, DLL4, ACAN, TGFA, VCAN, WIF1, NRG1, THBS1, THBS2, VLDLR, THBS4                                                                                        | 1180 | 53 | 8945 | 3.003598 | 7.61E-04 |
| PF07686:V-set                                                    | 27 | 1.042069 | 2.64E-05 | CADM3, CD8A, CADM1, CD8B, SCN3B, LOC786246, BCAN, CXADR, PDCD1, LOC790208, ACAN, IGLL1, ESAM, LOC786219, KIRREL3, LRRC4, HAPLN2, F11R, LOC782991, HAPLN1, HAPLN3, MPZ, MXRA8, LOC529709, VSTM2L, SCN4B, MGC151567, VCAN, TREM1 | 1180 | 86 | 8945 | 2.379927 | 0.003204 |
| PF01391:Collagen                                                 | 18 | 0.694712 | 3.94E-05 | COL4A3, CTHRC1, COL21A1, COL13A1, COL2A1, COLEC12, C1QC, C1QA, C1QTNF3, EMID1, COL27A1, COL1A2, COL12A1, COL1A1, COL11A2, COL8A1, COL11A1, COL8A2                                                                              | 1180 | 46 | 8945 | 2.966286 | 0.004406 |
| PF07686:Immunoglobulin V-set domain                              | 21 | 0.810498 | 4.78E-05 | LRRC4, LOC782991, MPZ, CADM1, CD8A, SCN3B, CD8B, LOC786246, BCAN, CXADR, PDCD1, LOC790208, LOC529709, VSTM2L, ACAN, SCN4B, IGLL1, VCAN, ESAM, MGC151567, LOC786219, NTM, KIRREL3                                               | 1180 | 60 | 8945 | 2.653178 | 0.00496  |
| PF00822:PMP-22/EMP/MP20/Claudin family                           | 10 | 0.385951 | 5.58E-05 | CLDN7, CLDN4, CLDN3, CLDN5, CLDN1, CLDN10, CACNG2, CLDN11, NKG7, LIM2                                                                                                                                                          | 1180 | 16 | 8945 | 4.737818 | 0.005403 |
| PF00019:TGF_beta                                                 | 10 | 0.385951 | 1.05E-04 | INHBB, BMP4, INHBA, BMP3, BMP2, FOXJ1, GDF6, GDF10, BMP7, GDNF                                                                                                                                                                 | 1180 | 17 | 8945 | 4.459123 | 0.009487 |
| PF00520:Ion transport protein                                    | 12 | 0.463142 | 1.51E-04 | KCNH1, KCNMA1, KCNC1, TRPC3, KCNA2, KCNA4, KCNF1, KCNA5, CNGA3, ITPR3, CACNA1D, CACNA1A                                                                                                                                        | 1180 | 25 | 8945 | 3.638644 | 0.012156 |
| PF00010:Helix-loop-helix DNA-binding domain                      | 12 | 0.463142 | 2.31E-04 | MYF6, ASCL2, MYOD1, TCF21, ATOH1, HES5, HAND1, HEY1, ID1, NEUROD1, TWIST2, AHR                                                                                                                                                 | 1180 | 26 | 8945 | 3.498696 | 0.017554 |
| PF01391:Collagen triple helix repeat                             | 15 | 0.578927 | 2.69E-04 | COL4A3, COL21A1, COL13A1, COL2A1, COLEC12, C1QC, C1QA, EMID1, COL1A2, COL12A1, COL1A1, COL11A2, COL8A1, COL11A1, COL8A2                                                                                                        | 1180 | 39 | 8945 | 2.91558  | 0.01939  |

### E. Foetal KEGG Pathway

| Term                                                        | Count | %    | P-value  | Genes                                                                                                                                                                                                                                                                                                                                                                                                                                                                                                                                                                                                                                                                                                                                  | List Total | Pop Hits | Pop Total | Fold Enrichment | Benjamini P-value |
|-------------------------------------------------------------|-------|------|----------|----------------------------------------------------------------------------------------------------------------------------------------------------------------------------------------------------------------------------------------------------------------------------------------------------------------------------------------------------------------------------------------------------------------------------------------------------------------------------------------------------------------------------------------------------------------------------------------------------------------------------------------------------------------------------------------------------------------------------------------|------------|----------|-----------|-----------------|-------------------|
| bta04080:Neuro active ligand-receptor interaction           | 99    | 3.86 | 1.90E-25 | GRIK1, GRIK2, LOC790124, GABRB1, GRIK3, LHCGR, F2RL1, GRIN3B, VIPR1, S1PR2, AGTR1, S1PR3, PTGIR, HTR1B, HTR1A, GALR1, LTB4R, GRIN2C, GALR3, GALR2, LOC781367, C5AR1, HTR4, NTSR1, NTSR2, CRHR1, CRHR2, SSTR2, SSTR1, HTR7, HTR6, GPR50, GLP1R, DRD1, PRLHR, ADORA2B, ADORA2A, ADCYAP1R1, PTH1R, BDKRB2, LOC541212, HCRTR2, ADRB3, HCRTR1, ADRA2A, ADRA2B, GABRQ, GABRP, GABRD, GABRA2, GABRA4, PTH2R, GABRA5, P2RX2, AVPR1B, AVPR1A, ADRA1B, UTS2R, GHSR, ADRA1D, MTNR1A, GPR83, MCHR1, TACR3, GLRA1, EDNRB, MC5R, HTR5A, PTGER3, CCKBR, PTGER4, GRM1, GRM3, ADRB2, LOC523484, ADRB1, CHRM1, GRM7, PTGDR, GIPR, GRM6, NK1R, TSHR, CALCR, PARD3, NPY2R, OPRK1, OXTR, GCGR, HRH3, GLRB, PTGFR, LEP, GRIA2, MC4R, NMBR, F2R, OPRD1, HTR2A | 709        | 239      | 4940      | 2.886144        | 3.43E-23          |
| bta04020:Calcium signaling pathway                          | 62    | 2.41 | 1.12E-13 | SLC8A3, ADCY3, ADCY4, GNAI4, ADCY1, TACR3, ADCY8, LHCGR, LOC515280, ITPKA, AGTR1, ATP2B2, EDNRB, GRIN2C, CHRNA7, HTR5A, PRKCA, PTGER3, CCKBR, HTR4, PRKCG, NTSR1, GRM1, PRKCB, CD38, GNAL, ADRB2, LOC523484, ADRB1, HTR7, CHRM1, HTR6, NK1R, PDGFRA, PDGFRB, DRD1, ADORA2B, ERBB3, ADORA2A, OXTR, BDKRB2, ADRB3, PTK2B, CAMK2B, CALML5, SLC8A2, SPHK1, PTGFR, ITPR3, ITPR1, ATP2A3, AVPR1B, P2RX2, CACNA1G, AVPR1A, ADRA1B, CACNA1E, CACNA1D, ADRA1D, CACNA1A, F2R, HTR2A                                                                                                                                                                                                                                                              | 709        | 164      | 4940      | 2.634078        | 1.01E-11          |
| bta05412:Arrhythmic right ventricular cardiomyopathy (ARVC) | 26    | 1.01 | 1.19E-06 | ITGB4, GJA1, ITGB5, CACNB3, CDH2, ITGB3, CACNB4, ITGB8, ITGB7, TCF7, CACNA2D1, CACNG8, CACNG6, LEF1, ACTN1, CACNG4, ITGA3, ITGA4, CACNG2, CACNA2D2, ITGA9, ITGA6, PKP2, ITGA7, DSP, CACNA1D                                                                                                                                                                                                                                                                                                                                                                                                                                                                                                                                            | 709        | 65       | 4940      | 2.787024        | 7.12E-05          |
| bta04916:Melanogenesis                                      | 31    | 1.21 | 2.71E-06 | WNT5A, ADCY3, ADCY4, ADCY1, ADCY8, ADCY5, POMC, WNT2, EDNRB, WNT1, WNT3, CREB3L1, CAMK2B, CALML5, CREB3L3, WNT6, PRKCA, TCF7, WNT10B, GNAO1, LEF1, PRKCG, FZD3, FZD5, WNT2B, PRKCB, FZD6, FZD10, WNT7B, WNT11, WNT7A                                                                                                                                                                                                                                                                                                                                                                                                                                                                                                                   | 709        | 89       | 4940      | 2.426903        | 1.22E-04          |
| bta05414:Dilated cardiomyopathy                             | 28    | 1.09 | 3.65E-06 | ADCY3, ADCY4, ADCY1, ADCY8, ADCY5, ITGB4, ITGB5, CACNB3, ITGB3, CACNB4, TGFB1, ITGB8, ITGB7, CACNA2D1, ACTC1, CACNG8, CACNG6, CACNG4, ITGA3, ITGA4, CACNG2, TNNT3, CACNA2D2, ITGA9, ADRB1, ITGA6, ITGA7, CACNA1D                                                                                                                                                                                                                                                                                                                                                                                                                                                                                                                       | 709        | 77       | 4940      | 2.533658        | 1.32E-04          |



|                                               |    |      |            |                                                                                                                                                                                                                                                                                                                                                                                                                                                                             |     |     |      |          |          |
|-----------------------------------------------|----|------|------------|-----------------------------------------------------------------------------------------------------------------------------------------------------------------------------------------------------------------------------------------------------------------------------------------------------------------------------------------------------------------------------------------------------------------------------------------------------------------------------|-----|-----|------|----------|----------|
| bta04514:Cell adhesion molecules (CAMs)       | 37 | 1.44 | 3.63E-05   | CLDN7, CADM3, OCLN, CLDN9, CLDN4, CD8A, CADM1, CLDN3, CLDN6, CLDN5, CLDN10, CDH1, CDH2, CLDN11, CDH3, CDH4, LOC790208, ALCAM, ITGB8, ITGB7, ESAM, NEGR1, F11R, ICAM1, MPZ, PTPRM, PTPRF, NRXN2, CD40, ITGA4, CLDN23, ITGA9, ITGA6, CD34, CLDN1, VCAN, JAM2, JAM3                                                                                                                                                                                                            | 709 | 129 | 4940 | 1.998447 | 0.001088 |
| bta05217:Basal cell carcinoma                 | 20 | 0.78 | 7.19E-05   | WNT5A, BMP4, TCF7, BMP2, WNT10B, LEF1, FZD3, FZD5, SHH, WNT2B, GLI1, FZD6, WNT2, WNT1, FZD10, WNT7B, WNT3, WNT11, WNT6, WNT7A                                                                                                                                                                                                                                                                                                                                               | 709 | 53  | 4940 | 2.629268 | 0.001848 |
| bta04950:Maturity onset diabetes of the young | 12 | 0.47 | 7.57E-05   | HHEX, HNF1B, ONECUT1, FOXA2, PKLR, PAX6, NEUROD1, PDX1, NEUROG3, NR5A2, NKX2-2, NKX6-1                                                                                                                                                                                                                                                                                                                                                                                      | 709 | 22  | 4940 | 3.800487 | 0.001701 |
| bta05410:Hyper trophic cardiomyopathy (HCM)   | 23 | 0.9  | 2.97E-04   | ACTC1, CACNA2D1, CACNG8, PRKAG2, CACNG6, ITGB4, CACNG4, ITGB5, CACNB3, ITGA3, CACNB4, ITGB3, ITGA4, CACNG2, TNNT3, CACNA2D2, TGFB1, ITGA9, ITGA6, ITGB8, ITGB7, ITGA7, CACNA1D                                                                                                                                                                                                                                                                                              | 709 | 72  | 4940 | 2.225748 | 0.005933 |
| bta05200:Pathways in cancer                   | 66 | 2.57 | 3.41E-04   | FGF18, PDGFB, PTGS2, PDGFA, MMP9, FGF11, FGF10, TGFB1, SHH, GLI1, ACVR1C, WNT2, WNT1, WNT3, CDKN2A, CDKN2B, PAX8, TGFA, WNT6, FGF4, PRKCA, WNT10B, AR, RXRG, FGF23, LEF1, PRKCG, FGF20, PRKCB, VEGFC, CCND1, LAMC3, PDGFRA, PDGFRB, WNT11, FGFR2, WNT5A, DCC, FGFR3, EGLN3, CDH1, ZBTB16, LOC100138788, STAT4, NKX3-1, LOC100138045, PIK3R3, TRAF5, BMP4, CEBPA, TCF7, BMP2, EPAS1, FZD3, ITGA3, MAPK10, FZD5, FZD6, WNT2B, CBLC, WNT7B, RASSF5, LAMA4, FZD10, ITGA6, WNT7A | 709 | 303 | 4940 | 1.517686 | 0.006117 |
| bta04310:Wnt signaling pathway                | 36 | 1.4  | 6.55E-04   | WNT5A, NKD1, LOC515280, WNT2, WNT1, WNT3, CAMK2B, NFATC4, SOX17, WNT6, FOSL1, PRKCA, TCF7, WNT10B, VANGL1, LEF1, FZD3, PRKCG, MAPK10, FZD5, WNT2B, PRKCB, FZD6, DKK2, SFRP5, WNT7B, FZD10, CCND1, DKK1, SFRP1, CCND2, SFRP2, SFRP4, WIF1, WNT11, WNT7A                                                                                                                                                                                                                      | 709 | 142 | 4940 | 1.766424 | 0.010668 |
| bta04270:Vascular smooth muscle contraction   | 29 | 1.13 | 7.02E-04   | ADCY3, ADCY4, KCNMB4, ADCY1, ADORA2B, ADCY8, ADORA2A, ADCY5, AGTR1, PTGIR, GUCY1A2, CALML5, RAMP1, PRKCA, KCNMA1, RAMP3, RAMP2, PLA2G10, PRKCH, NPR1, PRKCG, ITPR3, ITPR1, PRKCB, AVPR1B, AVPR1A, ADRA1B, CACNA1D, ADRA1D                                                                                                                                                                                                                                                   | 709 | 106 | 4940 | 1.906219 | 0.010481 |
| bta04540:Gap junction                         | 23 | 0.9  | 0.00121279 | PRKCA, ADCY3, ADCY4, ADCY1, DRD1, PDGFB, ADCY8, PDGFA, ADCY5, GJA1, PRKCG, ITPR3, GRM1, ITPR1, PRKCB, ADRB1, PDGFRA, GUCY1A2, TUBA4A, PDGFRB, TUBB3, TUBB4, HTR2A                                                                                                                                                                                                                                                                                                           | 709 | 79  | 4940 | 2.02853  | 0.016662 |
| bta04512:ECM-receptor interaction             | 22 | 0.86 | 0.00144248 | TNXB, ITGB4, ITGB5, ITGA3, COL2A1, ITGB3, ITGA4, COL5A3, ITGA9, LAMA4, GP5, ITGA6, ITGB8, LAMC3, ITGB7, ITGA7, COL1A2, LOC100138045, COL1A1, COL11A2, THBS2, THBS4                                                                                                                                                                                                                                                                                                          | 709 | 75  | 4940 | 2.043818 | 0.018388 |

|                                               |    |      |            |                                                                                                                                                                                                            |     |     |      |          |          |
|-----------------------------------------------|----|------|------------|------------------------------------------------------------------------------------------------------------------------------------------------------------------------------------------------------------|-----|-----|------|----------|----------|
| bta04670:Leukocyte transendothelial migration | 29 | 1.13 | 0.00176118 | CLDN7, CLDN9, OCLN, CLDN4, CLDN3, MMP9, CLDN6, CLDN5, CLDN10, CLDN11, CXCR4, PTK2B, RAPGEF4, ESAM, PIK3R3, PRKCA, F11R, ICAM1, ACTN1, PRKCG, ITGA4, CLDN23, THY1, PRKCB, RASSF5, MAPK13, CLDN1, JAM2, JAM3 | 709 | 112 | 4940 | 1.8041   | 0.020931 |
| bta04340:Hedgehog signaling pathway           | 16 | 0.62 | 0.00261339 | WNT5A, BMP4, BMP2, WNT10B, SHH, WNT2B, GLI1, WNT2, WNT1, WNT7B, WNT3, WNT11, BMP7, WNT6, WNT7A, IHH                                                                                                        | 709 | 49  | 4940 | 2.275122 | 0.02901  |

## F. Lamb KEGG Pathway

| Term                                                        | Count | %           | P-value  | Genes                                                                                                                                                                                                                                                                                                                                                                                                                                                                                                                                                                                                                                                                                                                                       | List Total | Pop Hits | Pop Total | Fold Enrichment | Benjamini P-value |
|-------------------------------------------------------------|-------|-------------|----------|---------------------------------------------------------------------------------------------------------------------------------------------------------------------------------------------------------------------------------------------------------------------------------------------------------------------------------------------------------------------------------------------------------------------------------------------------------------------------------------------------------------------------------------------------------------------------------------------------------------------------------------------------------------------------------------------------------------------------------------------|------------|----------|-----------|-----------------|-------------------|
| bta04080:Neuroactive ligand-receptor interaction            | 98    | 3.782323427 | 5.44E-26 | F2RL2, F2RL3, GRIK1, GRIK2, LOC790124, GABRB2, GABRB1, GRIK3, LHCGR, F2RL1, GRIN3B, VIPR1, GHRHR, S1PR3, HTR1B, HTR1A, S1PR1, GALR1, LTB4R, GRIN2C, GALR3, GALR2, LOC781367, C5AR1, HTR4, NTSR1, NTSR2, CRHR1, SSTR5, CRHR2, SSTR2, SSTR1, HTR7, HTR6, GPR50, GLP1R, DRD1, PRLHR, ADORA2B, ADORA2A, ADCYAP1R1, PTH1R, LOC789065, BDKRB2, LOC541212, HCRTR2, ADRB3, HCRTR1, ADRA2A, ADRA2B, GABRP, GABRD, GABRA2, GABRA4, PTH2R, P2RX2, AVPR1B, AVPR1A, ADRA1B, UTS2R, GHSR, ADRA1D, MTNR1A, GPR83, MCHR1, TACR3, GLRA1, EDNRA, EDNRB, MC5R, HTR5A, PTGER3, CCKBR, PTGER4, GRM1, GRM3, LOC523484, ADRB1, CHRM1, GRM7, GIPR, PTGDR, GRM6, NK1R, TSHR, CALCR, NPY2R, OPRK1, OXTR, GCGR, HRH3, GLRB, PTGFR, LEP, GRIA2, NMBR, F2R, OPRD1, HTR2A | 685        | 239      | 4940      | 2.957090065     | 9.42E-24          |
| bta04020:Calcium signaling pathway                          | 58    | 2.238517947 | 4.50E-12 | SLC8A3, ADCY3, ADCY4, GNA14, ADCY1, TACR3, ADCY8, LHCGR, EDNRA, ATP2B2, EDNRB, GRIN2C, CHRNA7, HTR5A, PRKCA, PTGER3, CCKBR, HTR4, PRKCG, NTSR1, GRM1, PRKCB, CD38, GNAL, LOC523484, ADRB1, HTR7, CHRM1, NK1R, HTR6, PDGFRA, PDGFRB, DRD1, ADORA2B, ERBB3, ADORA2A, OXTR, BDKRB2, ADRB3, PTK2B, CAMK2B, CALML5, SLC8A2, SPHK1, PTGFR, ITPR3, ATP2A3, P2RX2, AVPR1B, AVPR1A, CACNA1G, ADRA1B, CACNA1E, CACNA1D, ADRA1D, CACNA1A, F2R, HTR2A                                                                                                                                                                                                                                                                                                   | 685        | 164      | 4940      | 2.550471782     | 3.89E-10          |
| bta05414:Dilated cardiomyopathy                             | 27    | 1.042068699 | 6.40E-06 | ADCY3, ADCY4, ADCY1, MYL2, ADCY8, ADCY5, ITGB4, ITGB3, CACNB4, DES, ITGB8, ITGB7, CACNA2D1, ACTC1, CACNG8, CACNG6, CACNG4, ITGA3, ITGA4, CACNG2, TNNT3, CACNA2D2, ITGA9, ADRB1, ITGA5, ITGA7, CACNA1D                                                                                                                                                                                                                                                                                                                                                                                                                                                                                                                                       | 685        | 77       | 4940      | 2.5287705       | 3.69E-04          |
| bta05412:Arrhythmic right ventricular cardiomyopathy (ARVC) | 23    | 0.887688151 | 3.16E-05 | TCF7, CACNA2D1, CACNG8, CACNG6, ITGB4, CACNG4, LEF1, ITGA3, CDH2, CACNB4, ITGB3, ITGA4, CACNG2, CACNA2D2, ITGA9, DES, ITGA5, ITGB8, PKP2, ITGB7, ITGA7, DSP, CACNA1D                                                                                                                                                                                                                                                                                                                                                                                                                                                                                                                                                                        | 685        | 65       | 4940      | 2.551824818     | 0.001366788       |

|                                               |    |                 |                 |                                                                                                                                                                                                                                                                                                                                                                                                                                       |     |     |      |                 |                 |
|-----------------------------------------------|----|-----------------|-----------------|---------------------------------------------------------------------------------------------------------------------------------------------------------------------------------------------------------------------------------------------------------------------------------------------------------------------------------------------------------------------------------------------------------------------------------------|-----|-----|------|-----------------|-----------------|
| bta04916:Melano genesis                       | 28 | 1.080663<br>836 | 3.91E-05        | WNT5A, ADCY3, ADCY4, ADCY1, ADCY8, ADCY5, POMC, WNT2, EDNRB, WNT1, WNT3, CREB3L1, CAMK2B, CALML5, WNT6, PRKCA, TCF7, WNT10B, GNAO1, LEF1, PRKCG, FZD7, WNT2B, PRKCB, FZD6, FZD10, WNT7B, WNT7A                                                                                                                                                                                                                                        | 685 | 89  | 4940 | 2.268842<br>779 | 0.00135033<br>7 |
| bta04950:Maturity onset diabetes of the young | 12 | 0.463141<br>644 | 5.46E-05        | HHEX, HNF1B, ONECUT1, FOXA2, PKLR, PAX6, NEUROD1, PDX1, NEUROG3, NR5A2, NKX2-2, NKX6-1                                                                                                                                                                                                                                                                                                                                                | 685 | 22  | 4940 | 3.933642<br>999 | 0.00157247<br>4 |
| bta04514:Cell adhesion molecules (CAMs)       | 35 | 1.350829<br>795 | 1.03E-04        | CLDN7, CADM3, CLDN9, CLDN4, CD8A, CADM1, CD8B, CLDN3, CLDN6, CLDN5, CLDN10, CDH1, ITGB2, CDH2, CLDN11, CDH3, CDH4, PDCD1, LOC790208, ITGB8, ITGB7, CNTNAP1, ESAM, NEGR1, F11R, ICAM1, MPZ, PTPRF, ICAM3, CD40, ITGA4, CLDN23, NCAM1, ITGA9, CLDN1, VCAN                                                                                                                                                                               | 685 | 129 | 4940 | 1.956657<br>047 | 0.00253211<br>3 |
| bta05217:Basal cell carcinoma                 | 19 | 0.733307<br>603 | 1.57E-04        | WNT5A, BMP4, TCF7, BMP2, WNT10B, LEF1, FZD7, SHH, WNT2B, GLI1, FZD6, WNT2, WNT1, FZD10, WNT7B, WNT3, PTCH2, WNT6, WNT7A                                                                                                                                                                                                                                                                                                               | 685 | 53  | 4940 | 2.585318<br>827 | 0.00338722<br>2 |
| bta04360:Axon guidance                        | 31 | 1.196449<br>247 | 2.68E-04        | DCC, PLXNC1, EFNA2, ABLIM3, EFNA3, LRRC4C, EPHB3, PAK6, EPHB6, ROBO1, SEMA3F, SEMA3D, SEMA3B, NFATC4, UNC5C, PAK1, NGEF, EFN3, NTN4, DPYSL5, EPHA1, NTN1, SLIT2, EPHA3, EPHA4, SEMA4F, EPHA8, MGC139448, SRGAP3, EFNA5, SEMA4D                                                                                                                                                                                                        | 685 | 114 | 4940 | 1.961070<br>56  | 0.00513278<br>3 |
| bta04512:ECM-receptor interaction             | 23 | 0.887688<br>151 | 3.43E-04        | TNXB, ITGB4, ITGA3, COL2A1, ITGB3, ITGA4, COL5A3, ITGA9, GP5, CD44, ITGB8, LAMC3, ITGA5, ITGB7, ITGA7, COL1A2, LOC100138045, COL1A1, COL11A2, THBS1, COL11A1, THBS2, THBS4                                                                                                                                                                                                                                                            | 685 | 75  | 4940 | 2.211581<br>509 | 0.00592310<br>2 |
| bta05410:Hypertrophic cardiomyopathy (HCM)    | 22 | 0.849093<br>014 | 5.07E-04        | CACNA2D1, ACTC1, MYL2, CACNG8, PRKAG2, CACNG6, ITGB4, CACNG4, ITGA3, CACNB4, ITGB3, ITGA4, CACNG2, TNNT3, CACNA2D2, ITGA9, DES, ITGA5, ITGB8, ITGB7, ITGA7, CACNA1D                                                                                                                                                                                                                                                                   | 685 | 72  | 4940 | 2.203568<br>532 | 0.00794322      |
| bta04270:Vascular smooth muscle contraction   | 28 | 1.080663<br>836 | 9.27E-04        | ADCY3, ADCY4, KCNMB4, ADCY1, ADORA2B, ADCY8, ADORA2A, ADCY5, MRV11, EDNRA, GUCY1A2, CALML5, RAMP1, PRKCA, KCNMA1, RAMP3, RAMP2, PLA2G10, PRKCH, NPR1, PRKCG, ITPR3, PRKCB, AVPR1B, AVPR1A, ADRA1B, CACNA1D, ADRA1D                                                                                                                                                                                                                    | 685 | 106 | 4940 | 1.904971<br>767 | 0.01328622<br>3 |
| bta05200:Pathways in cancer                   | 62 | 2.392898<br>495 | 0.001158<br>814 | FGF6, FGF18, PTGS2, PDGFB, PDGFA, MMP9, ARNT2, FGF11, FGF10, FGF12, MMP2, SHH, GLI1, ACVR1C, WNT2, WNT1, WNT3, CDKN2A, CDKN2B, PAX8, TGFA, WNT6, FGF2, FGF4, PRKCA, WNT10B, AR, RXRG, FGF23, LEF1, PRKCG, FGF20, PRKCB, DAPK1, CCND1, LAMC3, PDGFRA, PDGFRB, FGFR2, WNT5A, DCC, FGFR3, CDH1, STAT4, NKX3-1, LOC100138045, PIK3R3, BMP4, CEBPA, TCF7, BMP2, ITGA3, MAPK10, FZD7, FZD6, WNT2B, CBLC, WNT7B, RASSF5, FZD10, PTCH2, WNT7A | 685 | 303 | 4940 | 1.475657<br>055 | 0.01531164<br>5 |
| bta04340:Hedgehog signaling pathway           | 16 | 0.617522<br>192 | 0.001844<br>064 | WNT5A, BMP4, BMP2, WNT10B, SHH, WNT2B, GLI1, WNT2, WNT1, WNT7B, WNT3, PTCH2, BMP7, WNT6, WNT7A, IHH                                                                                                                                                                                                                                                                                                                                   | 685 | 49  | 4940 | 2.354833<br>904 | 0.02255025<br>9 |
| bta04540:Gap junction                         | 22 | 0.849093<br>014 | 0.001890<br>374 | PRKCA, ADCY3, ADCY4, ADCY1, DRD1, PDGFB, ADCY8, PDGFA, ADCY5, PRKCG, ITPR3, GRM1, PRKCB, ADRB1, PDGFRA, GUCY1A2, TUBA4A, PDGFRB, PDGFD, TUBB3, TUBB4, HTR2A                                                                                                                                                                                                                                                                           | 685 | 79  | 4940 | 2.008315<br>624 | 0.02158654<br>8 |

|                                               |    |             |             |                                                                                                                                                                                                                                                                                        |     |     |      |             |             |
|-----------------------------------------------|----|-------------|-------------|----------------------------------------------------------------------------------------------------------------------------------------------------------------------------------------------------------------------------------------------------------------------------------------|-----|-----|------|-------------|-------------|
| bta04810:Regulation of actin cytoskeleton     | 41 | 1.582400618 | 0.003563494 | FGF6, FGFR2, FGF18, FGFR4, FGFR3, MYL2, PDGFB, PDGFA, ITGB4, FGF11, FGF10, ITGB2, ITGB3, BDKRB2, FGF12, INSR, PAK6, PFN3, GSN, ITGB8, ITGB7, PDGFD, PAK1, PIK3R3, FGF2, FGF4, ARHGAP4, FGF23, ITGA3, ITGA4, FGF20, ITGA9, ITGA5, CHRM1, SCIN, ITGA7, CYFIP2, PDGFRA, PDGFRB, CD14, F2R | 685 | 190 | 4940 | 1.55620438  | 0.037863638 |
| bta04350:TGF-beta signaling pathway           | 21 | 0.810497877 | 0.004439467 | BMP4, NOG, BMP2, FOXJ1, GDF7, GDF6, NODAL, FST, ACVR1C, INHBB, INHBA, ID2, CDKN2B, INHBE, ID1, ID3, BMP7, THBS1, THBS2, THBS4, PITX2                                                                                                                                                   | 685 | 79  | 4940 | 1.91702855  | 0.044268907 |
| bta04670:Leukocyte transendothelial migration | 27 | 1.042068699 | 0.004632428 | CLDN7, CLDN9, MYL2, CLDN4, CLDN3, MMP9, CLDN6, CLDN5, CLDN10, ITGB2, CLDN11, MMP2, PTK2B, ESAM, PIK3R3, PRKCA, ICAM1, F11R, NCF1, PRKCG, ITGA4, CLDN23, THY1, PRKCB, RASSF5, MAPK13, CLDN1                                                                                             | 685 | 112 | 4940 | 1.738529718 | 0.043645124 |
| bta04310:Wnt signaling pathway                | 32 | 1.235044384 | 0.005616818 | WNT5A, NKD1, WNT2, WNT1, WNT3, CAMK2B, NFATC4, SOX17, WNT6, FOSL1, PRKCA, TCF7, WNT10B, LEF1, PRKCG, MAPK10, FZD7, WNT2B, PRKCB, FZD6, SFRP5, DKK2, FZD10, CCND1, WNT7B, DKK1, SFRP1, SFRP2, CCND2, SFRP4, WIF1, WNT7A                                                                 | 685 | 142 | 4940 | 1.625167061 | 0.049993807 |
