# Supplementary material for: Genomic architecture of histone 3 lysine 27 trimethylation during late ovine skeletal muscle development
Source: PubMed Central journal article supplement — Anim Genet. 2014 Mar 27;45(3):427–38. doi: 10.1111/age.12145 (PMC4286725; doi:10.1111/age.12145), 2014-03-27
Supplement: age-45-427-s14.pdf [file age-45-427-s14.pdf]

**Table S5** Gene promoters with differential H3K27me3 read counts in the foetal and lamb developmental states

RefSeq autosomal genes with differences in H3K27me3 read density within their promoters in the fetal and lamb states were identified using CLCBIO (n=3/ group;  $P^{\text{adj}} < 0.05$ ). Also included are details of the DAVID Functional Annotation Clustering (Enrichment Score  $\geq 1.0$ ) and GO analyses ( $P \leq 0.05$ ) (CLCBIO).

**A. Diff Modified Genes**

| Feature ID  | Fold change | t-test: fetus vs lamb normalized values - P-value | t-test: fetus vs lamb normalized values - FDR p-value correction | fetus - Normalized means | lamb - Normalized means |
|-------------|-------------|---------------------------------------------------|------------------------------------------------------------------|--------------------------|-------------------------|
| EPN3        | -16.9246    | 1.27E-06                                          | 0.005665                                                         | 2.369444                 | 0.14                    |
| MCM6        | -18.95      | 1.05E-06                                          | 0.005665                                                         | 1.895                    | 0.1                     |
| MDN1        | -18.7057    | 1.38E-06                                          | 0.005665                                                         | 2.753889                 | 0.147222                |
| APOH        | 89.56667    | 3.18E-06                                          | 0.009778                                                         | 0.1                      | 8.956667                |
| DCDC1       | -35.55      | 5.43E-06                                          | 0.012524                                                         | 3.555                    | 0.1                     |
| ECHS1       | -10.95      | 6.11E-06                                          | 0.012524                                                         | 1.095                    | 0.1                     |
| ELAC2       | 9.40617     | 1.91E-05                                          | 0.028989                                                         | 0.216111                 | 2.032778                |
| FAM78B      | -44.7285    | 1.68E-05                                          | 0.028989                                                         | 7.231111                 | 0.161667                |
| PRR15       | -2.61053    | 2.12E-05                                          | 0.028989                                                         | 165.2828                 | 63.31389                |
| PPP1R32     | 107.4444    | 2.75E-05                                          | 0.033751                                                         | 0.1                      | 10.74444                |
| CDKL3       | -81.9611    | 3.64E-05                                          | 0.040023                                                         | 8.196111                 | 0.1                     |
| OLFML2B     | 282.8833    | 3.91E-05                                          | 0.040023                                                         | 0.1                      | 28.28833                |
| MACROD2     | -42.6278    | 4.26E-05                                          | 0.040316                                                         | 4.262778                 | 0.1                     |
| TPST2       | -6.76485    | 5.42E-05                                          | 0.047592                                                         | 3.164444                 | 0.467778                |
| BTBD17      | 11.01035    | 6.08E-05                                          | 0.049802                                                         | 1.502778                 | 16.54611                |
| CRYAB       | 19.9979     | 7.49E-05                                          | 0.054165                                                         | 0.793889                 | 15.87611                |
| RARG        | -12.9321    | 7.45E-05                                          | 0.054165                                                         | 63.71222                 | 4.926667                |
| CCDC94      | 65.92222    | 0.000106                                          | 0.066359                                                         | 0.1                      | 6.592222                |
| KCTD1       | -7.53069    | 0.0001                                            | 0.066359                                                         | 55.13722                 | 7.321667                |
| S100A4      | 113.5167    | 0.000108                                          | 0.066359                                                         | 0.1                      | 11.35167                |
| BHLHE40     | -166.933    | 0.000123                                          | 0.071827                                                         | 16.69333                 | 0.1                     |
| IRX5        | 1.654697    | 0.000147                                          | 0.072074                                                         | 51.73722                 | 85.60944                |
| PLEKHA3     | -18.2833    | 0.000145                                          | 0.072074                                                         | 1.828333                 | 0.1                     |
| SEMA3B      | 21.47372    | 0.000144                                          | 0.072074                                                         | 0.856111                 | 18.38389                |
| STARD5      | -8.3258     | 0.00014                                           | 0.072074                                                         | 4.500556                 | 0.540556                |
| C15H11orf57 | -18.0167    | 0.000171                                          | 0.072127                                                         | 1.801667                 | 0.1                     |
| CDH18       | -78.2778    | 0.000182                                          | 0.072127                                                         | 7.827778                 | 0.1                     |
| METTL21C    | 21.5852     | 0.000193                                          | 0.072127                                                         | 0.397778                 | 8.586111                |
| PEX14       | -11.0222    | 0.00019                                           | 0.072127                                                         | 1.102222                 | 0.1                     |

|          |          |          |          |          |          |
|----------|----------|----------|----------|----------|----------|
| PSAPL1   | 11.27884 | 0.000176 | 0.072127 | 1.362778 | 15.37056 |
| RIN1     | -26.7969 | 0.000154 | 0.072127 | 17.52222 | 0.653889 |
| SCN5A    | 1.466453 | 0.000166 | 0.072127 | 61.29833 | 89.89111 |
| SLC5A2   | -22.6473 | 0.000194 | 0.072127 | 3.46     | 0.152778 |
| HHEX     | -1.78305 | 0.000219 | 0.076874 | 102.8272 | 57.66944 |
| ZNF483   | 30.88965 | 0.000214 | 0.076874 | 0.568889 | 17.57278 |
| FAM83D   | -31.6941 | 0.000246 | 0.077433 | 2.993333 | 0.094444 |
| FUT1     | 1.796303 | 0.000245 | 0.077433 | 15.92778 | 28.61111 |
| PPP1R13L | -116.383 | 0.000241 | 0.077433 | 11.63833 | 0.1      |
| TRIM25   | -22.793  | 0.000234 | 0.077433 | 7.952222 | 0.348889 |
| EML6     | -4.32379 | 0.000255 | 0.078216 | 23.39889 | 5.411667 |
| SIRPA    | 174.1611 | 0.000263 | 0.078776 | 0.1      | 17.41611 |
| INSM1    | -2.53575 | 0.000277 | 0.080947 | 28.21444 | 11.12667 |
| RASL11B  | -3.35574 | 0.000292 | 0.08169  | 8.542222 | 2.545556 |
| SYNE2    | -30.7768 | 0.000288 | 0.08169  | 5.745    | 0.186667 |
| AQP1     | 150.3222 | 0.000319 | 0.082421 | 0.1      | 15.03222 |
| CBY1     | 40.9     | 0.000362 | 0.082421 | 0.1      | 4.09     |
| CDH8     | -2.52089 | 0.00031  | 0.082421 | 50.98222 | 20.22389 |
| IGLON5   | 2.469834 | 0.000352 | 0.082421 | 13.04833 | 32.22722 |
| LIN28A   | 1.847622 | 0.000305 | 0.082421 | 36.62667 | 67.67222 |
| MLXIPL   | 2.186318 | 0.000351 | 0.082421 | 14.51222 | 31.72833 |
| NMBR     | 3.088122 | 0.000354 | 0.082421 | 17.77833 | 54.90167 |
| PCGF1    | -139.067 | 0.000351 | 0.082421 | 13.90667 | 0.1      |
| PTGES    | -1.95523 | 0.000362 | 0.082421 | 47.34056 | 24.21222 |
| RAB11A   | -6.89002 | 0.000338 | 0.082421 | 1.879444 | 0.272778 |
| CACNB4   | 2.035516 | 0.000376 | 0.082462 | 36.25889 | 73.80556 |
| ITGB5    | -5.52423 | 0.00037  | 0.082462 | 15.83    | 2.865556 |
| GPR84    | 9.776915 | 0.000416 | 0.083053 | 1.573889 | 15.38778 |
| HEATR8   | 2.527242 | 0.000439 | 0.083053 | 4.292778 | 10.84889 |
| IPO11    | -15.6889 | 0.000411 | 0.083053 | 1.568889 | 0.1      |
| LIMCH1   | 10.68645 | 0.000415 | 0.083053 | 0.561667 | 6.002222 |
| MARCKS   | 36.96044 | 0.000421 | 0.083053 | 0.351111 | 12.97722 |
| PPP1R1A  | 6.961028 | 0.000432 | 0.083053 | 1.297222 | 9.03     |
| PRDM1    | -16.0719 | 0.000413 | 0.083053 | 38.34944 | 2.386111 |
| SCRT1    | 3.668676 | 0.000436 | 0.083053 | 17.14333 | 62.89333 |
| TMEM180  | -6.39825 | 0.000431 | 0.083053 | 3.650556 | 0.570556 |
| DBNDD2   | -11.2378 | 0.000469 | 0.084832 | 25.285   | 2.25     |
| GNG2     | 19.37931 | 0.000462 | 0.084832 | 0.354444 | 6.868889 |
| NEK6     | 41.36111 | 0.000466 | 0.084832 | 0.1      | 4.136111 |
| FAM78A   | -13.3556 | 0.000491 | 0.086177 | 20.55278 | 1.538889 |
| HPCA     | 4.174969 | 0.000485 | 0.086177 | 24.90278 | 103.9683 |

|         |          |          |          |          |          |
|---------|----------|----------|----------|----------|----------|
| PDK4    | 76.67222 | 0.000511 | 0.088519 | 0.1      | 7.667222 |
| LRRC10B | 1.968779 | 0.000525 | 0.089649 | 26.95833 | 53.075   |
| GALNTL6 | -2.38554 | 0.00054  | 0.090362 | 48.75778 | 20.43889 |
| LIN7C   | 47.93333 | 0.000544 | 0.090362 | 0.1      | 4.793333 |
| EMILIN2 | 3.681276 | 0.00062  | 0.101564 | 10.66056 | 39.24444 |
| MC4R    | -1.79966 | 0.000641 | 0.102257 | 14.28333 | 7.936667 |
| RASGRP2 | -27.5442 | 0.000639 | 0.102257 | 38.24056 | 1.388333 |
| 37316   | -44.3648 | 0.000659 | 0.102499 | 3.918889 | 0.088333 |
| RHOF    | -170.994 | 0.000655 | 0.102499 | 17.09944 | 0.1      |
| AFAP1L2 | -11.2039 | 0.000724 | 0.104998 | 7.693333 | 0.686667 |
| ARID3A  | -14.9326 | 0.000712 | 0.104998 | 17.22222 | 1.153333 |
| GABRA5  | -10.772  | 0.000726 | 0.104998 | 48.905   | 4.54     |
| GUCA2B  | 11.37561 | 0.000718 | 0.104998 | 0.792778 | 9.018333 |
| NPAS2   | -31.5268 | 0.000735 | 0.104998 | 5.885    | 0.186667 |
| NUAK2   | -4.12579 | 0.000743 | 0.104998 | 12.62722 | 3.060556 |
| PXMP4   | 6.02109  | 0.00073  | 0.104998 | 4.241111 | 25.53611 |
| RAPGEF4 | -12.9519 | 0.000726 | 0.104998 | 8.972778 | 0.692778 |

## B. DAVID Cluster Analysis

| Category                                    | Term                                                              | Count | %        | P-value  | Genes                                                                                                                                  | List Total | Pop Hits | Pop Total | Fold Enrichment | Benjamini P-value |
|---------------------------------------------|-------------------------------------------------------------------|-------|----------|----------|----------------------------------------------------------------------------------------------------------------------------------------|------------|----------|-----------|-----------------|-------------------|
| <b>Annotation Cluster 1</b>                 |                                                                   |       |          |          |                                                                                                                                        |            |          |           |                 |                   |
| <b>Enrichment Score: 3.127263706769486</b>  |                                                                   |       |          |          |                                                                                                                                        |            |          |           |                 |                   |
| GOTERM_CC_FAT                               | GO:0005886~plasma membrane                                        | 16    | 20.77922 | 5.30E-05 | GPR84, CRYAB, GABRA5, ITGB5, LIN7C, CACNB4, AQP1, CDH8, CDH18, RASGRP2, MC4R, RAB11A, MARCKS, GNG2, RHOF, SCN5A                        | 32         | 1186     | 6966      | 2.936762        | 0.005236          |
| SP_PIR_KEY WORDS                            | cell membrane                                                     | 10    | 12.98701 | 8.22E-04 | GPR84, CDH18, GABRA5, RASGRP2, MC4R, LIN7C, RAB11A, MARCKS, GNG2, RHOF                                                                 | 41         | 475      | 7349      | 3.773556        | 0.084946          |
| SP_PIR_KEY WORDS                            | membrane                                                          | 19    | 24.67532 | 0.009529 | TPST2, GPR84, SLC5A2, GABRA5, ITGB5, LIN7C, AQP1, SIRPA, CDH8, TMEM180, PTGES, CDH18, PXMP4, RASGRP2, MC4R, RAB11A, MARCKS, GNG2, RHOF | 41         | 1963     | 7349      | 1.734913        | 0.291556          |
| <b>Annotation Cluster 2</b>                 |                                                                   |       |          |          |                                                                                                                                        |            |          |           |                 |                   |
| <b>Enrichment Score: 1.3881714905758415</b> |                                                                   |       |          |          |                                                                                                                                        |            |          |           |                 |                   |
| GOTERM_BP_FAT                               | GO:0003001~generation of a signal involved in cell-cell signaling | 3     | 3.896104 | 0.010418 | MC4R, LIN7C, CACNB4                                                                                                                    | 36         | 39       | 8785      | 18.77137        | 0.95943           |
| GOTERM_BP_FAT                               | GO:0046903~secretion                                              | 3     | 3.896104 | 0.081067 | MC4R, LIN7C, CACNB4                                                                                                                    | 36         | 119      | 8785      | 6.151961        | 0.97517           |
| GOTERM_BP_FAT                               | GO:0007267~cell-cell signaling                                    | 3     | 3.896104 | 0.081067 | MC4R, LIN7C, CACNB4                                                                                                                    | 36         | 119      | 8785      | 6.151961        | 0.97517           |
| <b>Annotation Cluster 3</b>                 |                                                                   |       |          |          |                                                                                                                                        |            |          |           |                 |                   |
| <b>Enrichment Score: 1.0175944387326201</b> |                                                                   |       |          |          |                                                                                                                                        |            |          |           |                 |                   |
| GOTERM_CC_FAT                               | GO:0030054~cell junction                                          | 4     | 5.194805 | 0.059586 | GABRA5, RASGRP2, LIN7C, SCN5A                                                                                                          | 32         | 202      | 6966      | 4.310644        | 0.7814            |
| SP_PIR_KEY WORDS                            | synapse                                                           | 3     | 3.896104 | 0.061032 | GABRA5, RASGRP2, LIN7C                                                                                                                 | 41         | 74       | 7349      | 7.266645        | 0.572649          |
| GOTERM_CC_FAT                               | GO:0045202~synapse                                                | 3     | 3.896104 | 0.13545  | GABRA5, RASGRP2, LIN7C                                                                                                                 | 32         | 145      | 6966      | 4.503879        | 0.798306          |
| SP_PIR_KEY WORDS                            | cell junction                                                     | 3     | 3.896104 | 0.17264  | GABRA5, RASGRP2, LIN7C                                                                                                                 | 41         | 138      | 7349      | 3.896607        | 0.818344          |

### C. DAVID GO Biological Process

| Term                                                              | Count | %        | P-Value  | Genes                                                              | List Total | Pop Hits | Pop Total | Fold Enrichment | Benjamini P-value |
|-------------------------------------------------------------------|-------|----------|----------|--------------------------------------------------------------------|------------|----------|-----------|-----------------|-------------------|
| GO:0003001~generation of a signal involved in cell-cell signaling | 3     | 3.896104 | 0.010418 | MC4R, LIN7C, CACNB4                                                | 36         | 39       | 8785      | 18.77137        | 0.95943           |
| GO:0007610~behavior                                               | 4     | 5.194805 | 0.028304 | NPAS2, GABRA5, MC4R, CACNB4                                        | 36         | 167      | 8785      | 5.844977        | 0.987636          |
| GO:0007264~small GTPase mediated signal transduction              | 4     | 5.194805 | 0.029626 | RASL11B, RASGRP2, RAB11A, RHOF                                     | 36         | 170      | 8785      | 5.74183         | 0.953465          |
| GO:0045449~regulation of transcription                            | 10    | 12.98701 | 0.035174 | INSM1, HHEX, NPAS2, RARG, MLXIPL, PEX14, CBY1, ZNF483, PCGF1, MCM6 | 36         | 1166     | 8785      | 2.092863        | 0.935382          |
| GO:0007242~intracellular signaling cascade                        | 6     | 7.792208 | 0.045668 | RASL11B, RARG, RASGRP2, RAB11A, RHOF, DCDC1                        | 36         | 498      | 8785      | 2.940094        | 0.942772          |
| GO:0007517~muscle organ development                               | 3     | 3.896104 | 0.045751 | CRYAB, CBY1, CACNB4                                                | 36         | 86       | 8785      | 8.512597        | 0.908222          |
| GO:0007214~gamma-aminobutyric acid signaling pathway              | 2     | 2.597403 | 0.046804 | GABRA5, CACNB4                                                     | 36         | 12       | 8785      | 40.6713         | 0.876981          |

### D. DAVID GO Cellular Component

| Term                             | Count | %        | P-Value  | Genes                                                                                                           | List Total | Pop Hits | Pop Total | Fold Enrichment | Benjamini P-value |
|----------------------------------|-------|----------|----------|-----------------------------------------------------------------------------------------------------------------|------------|----------|-----------|-----------------|-------------------|
| GO:0005886~plasma membrane       | 16    | 20.77922 | 5.30E-05 | GPR84, CRYAB, GABRA5, ITGB5, LIN7C, CACNB4, AQP1, CDH8, CDH18, RASGRP2, MC4R, RAB11A, MARCKS, GNG2, RHOF, SCN5A | 32         | 1186     | 6966      | 2.936762        | 0.005236          |
| GO:0044459~plasma membrane part  | 9     | 11.68831 | 0.010978 | GABRA5, RASGRP2, LIN7C, ITGB5, GNG2, CACNB4, AQP1, SCN5A, RHOF                                                  | 32         | 715      | 6966      | 2.740122        | 0.420979          |
| GO:0019898~extrinsic to membrane | 4     | 5.194805 | 0.028806 | RASGRP2, LIN7C, RAB11A, GNG2                                                                                    | 32         | 151      | 6966      | 5.766556        | 0.618845          |
